# Supplementary material for: Cancer risk assessment of premalignant breast tissues from patients with BRCA mutations by genome profiling
Source: PubMed Central journal article supplement — NPJ Breast Cancer. 2024 Oct 4;10:87. doi: 10.1038/s41523-024-00693-9 (PMC11452615; doi:10.1038/s41523-024-00693-9), 2024-10-04

chr1:12,725,371-12,725,680  
p36.31 p36.21 p36.11 p35.1 p34.2 p33 p32.2 p31.3 p31.1 p22.3 p21.3 p21.1 p13.2 p11.2 q12 q21.1 q21.3 q23.2 q24.2 q25.2 q31.1 q31.3 q32.2 q41 q42.13 q43 q44

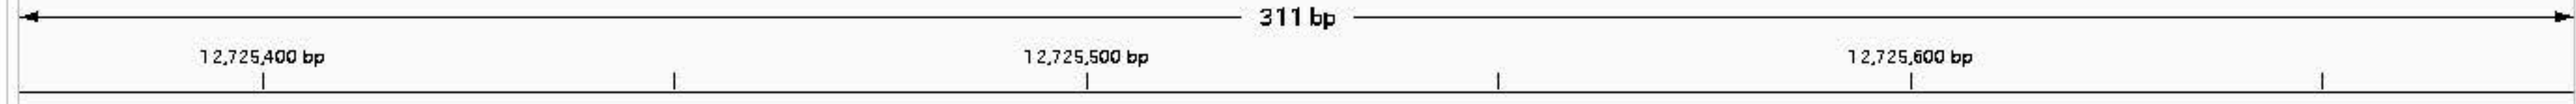

SL\_0015\_LN\_44\_WES\_uniq\_mut. ba  
overage  
SL\_0015\_LN\_44\_WES\_uniq\_mut. ba

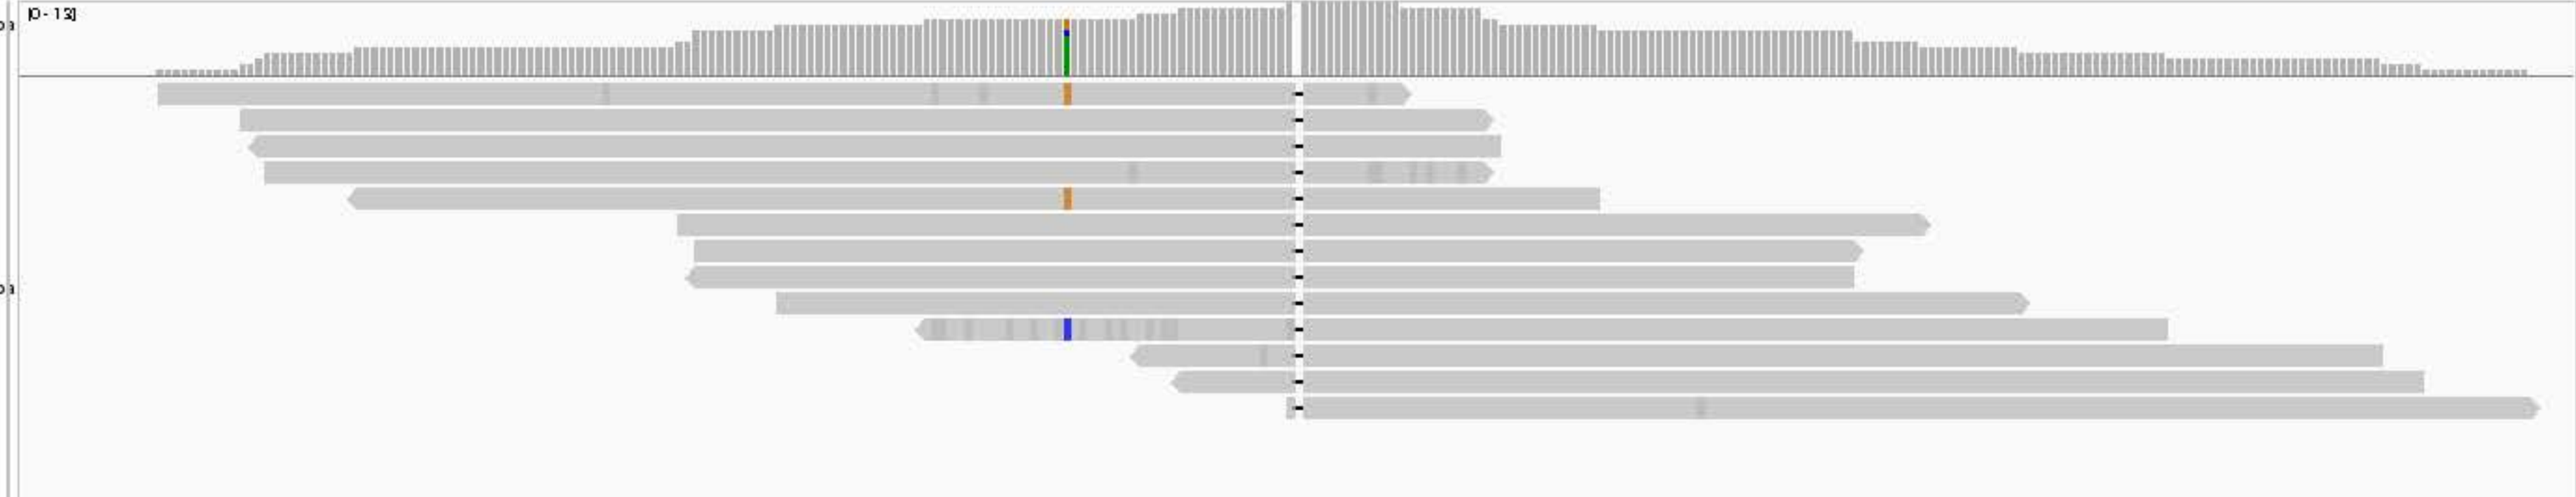

Sequence →  
Refseq Genes

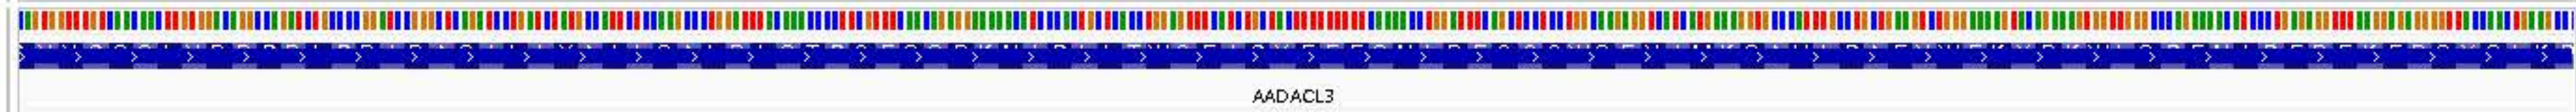

chr2:69,466,105-69,466,414  
p25.2 p24.3 p24.1 p23.2 p22.2 p21 p16.2 p15 p13.3 p12 p11.2 q11.1 q12.1 q13 q14.2 q21.1 q22.1 q22.3 q24.1 q24.3 q31.1 q31.3 q32.2 q33.1 q33.3 q35 q36.2 q37.1 q37.3

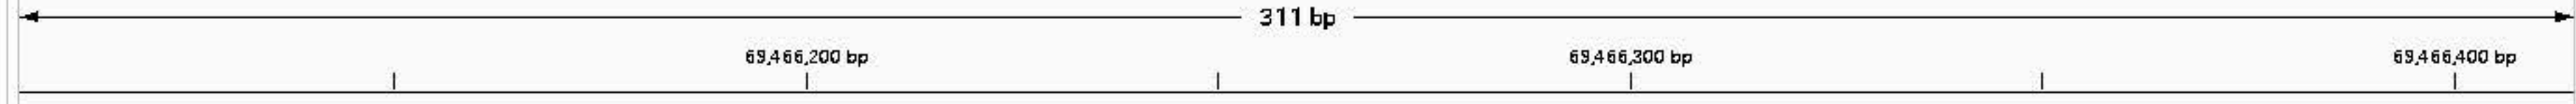

SL\_0004\_RN\_61\_WES\_uniq\_mut.ba  
overage

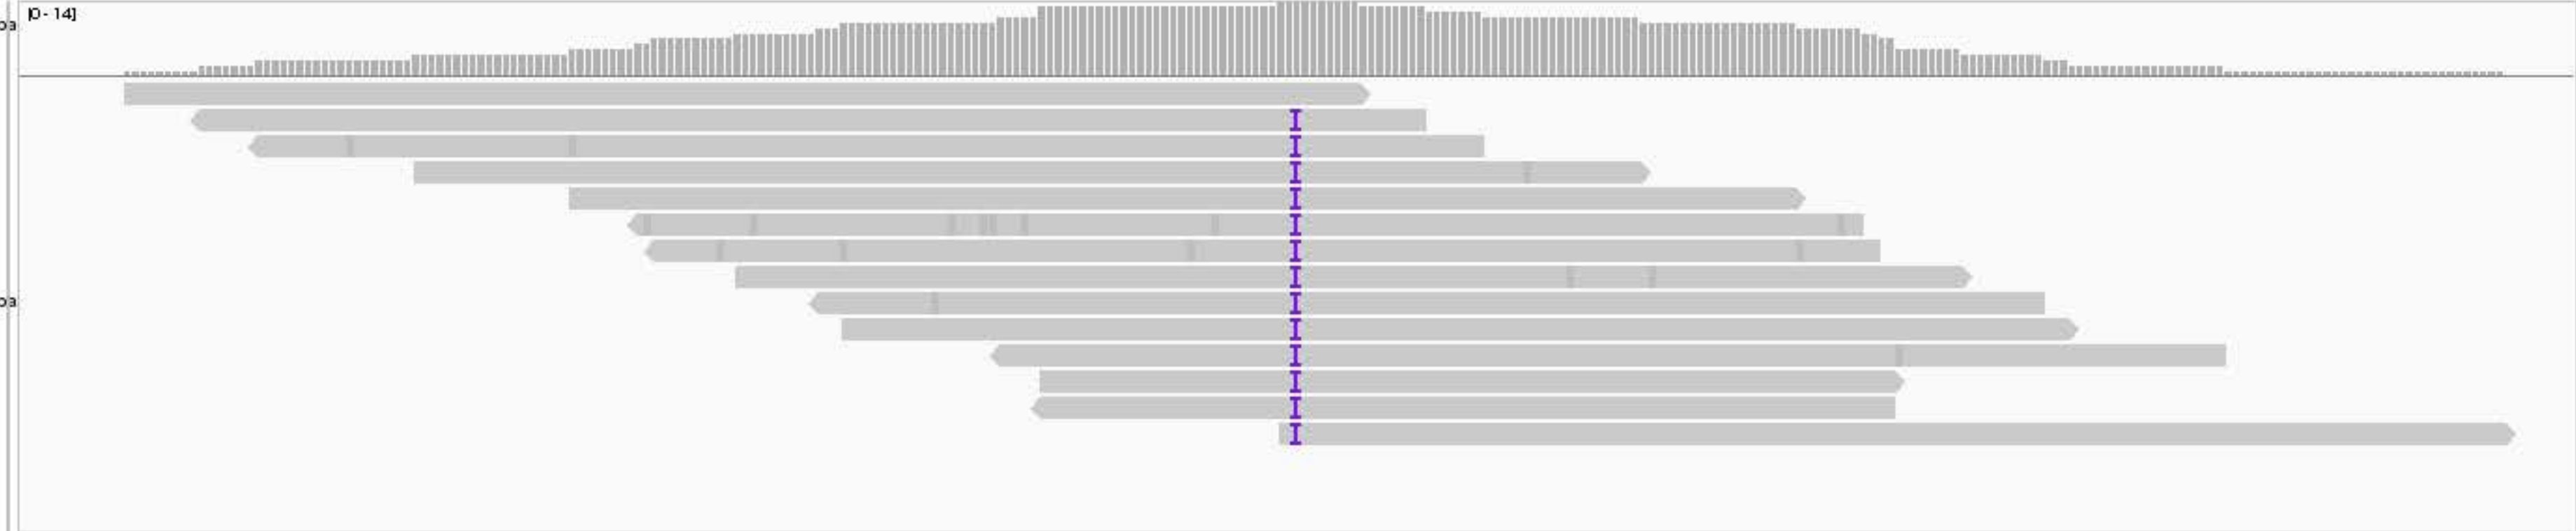

SL\_0004\_RN\_61\_WES\_uniq\_mut.ba

Sequence

PAIAFVDPESLGDTAPQTF AQFQNKRGGQVTKAQEPSVEPPAFPVAGGLKGPPRCSEDEE ESEM L LPRSGSCDL M

Refseq Genes

AAK1

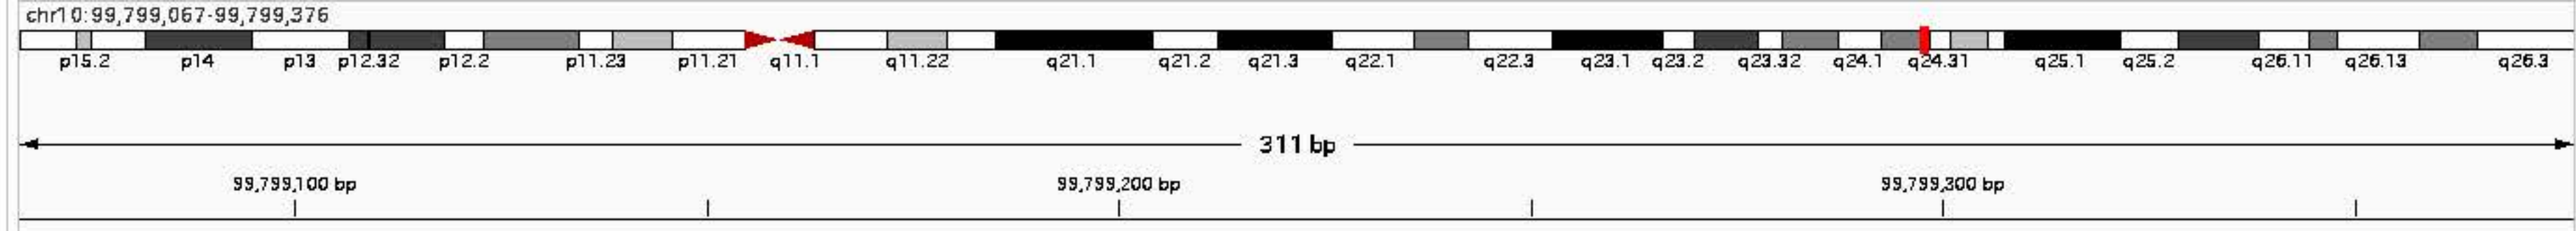

SL\_0007\_RN\_2\_WES\_uniq\_mut.bar  
verage

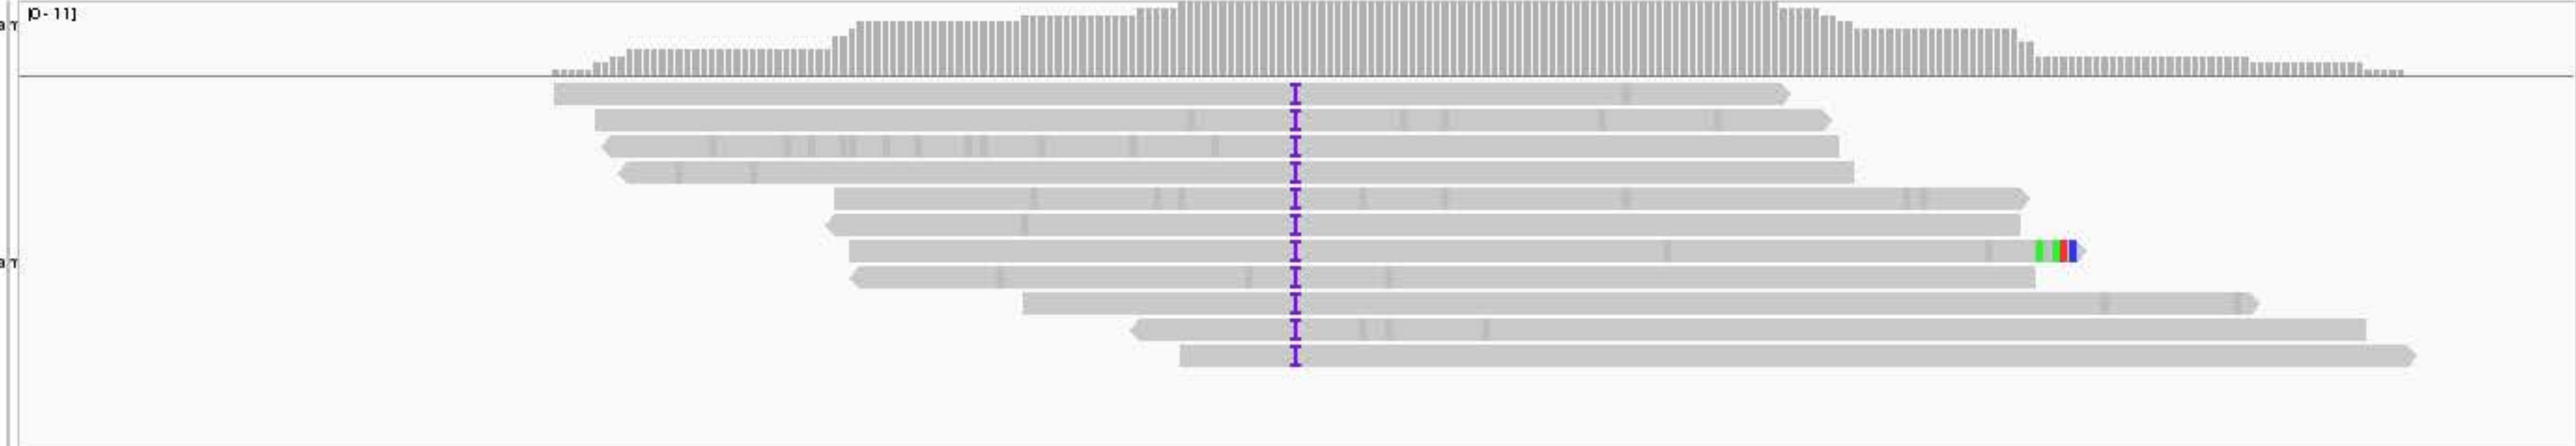

SL\_0007\_RN\_2\_WES\_uniq\_mut.bar

Sequence →

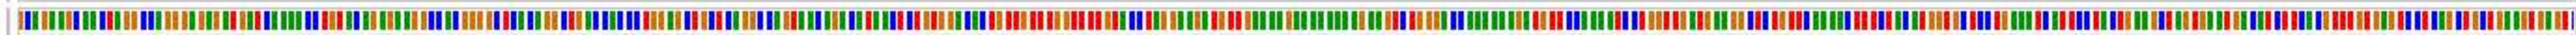

Refseq Genes

EDVEK K K K K S G T K K D V P K S W L M K A L F K T F Y M V L L K S F L L K L V N D I F T F V S P Q L L K

ABCC2



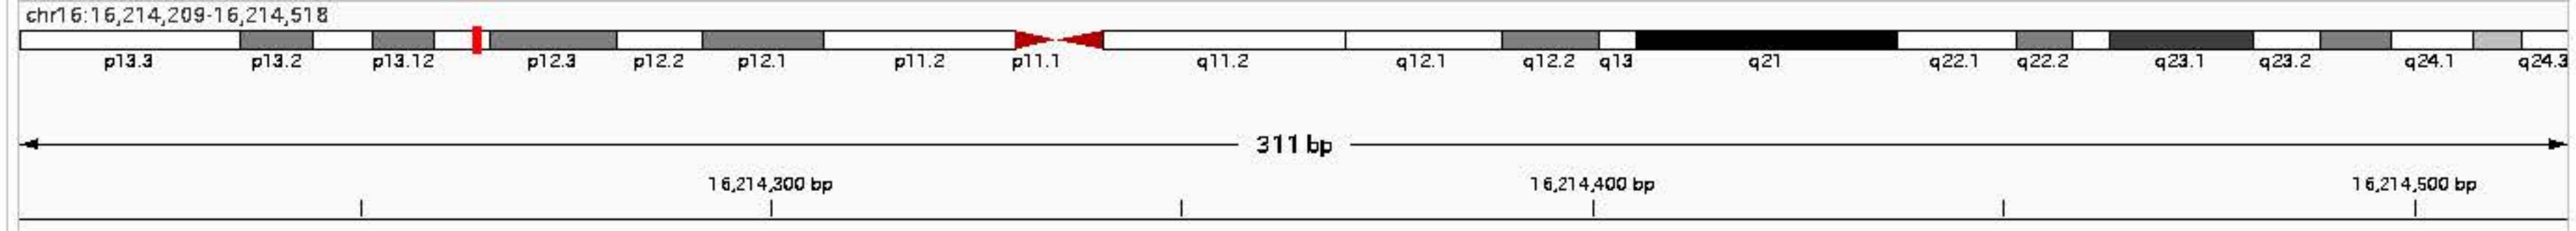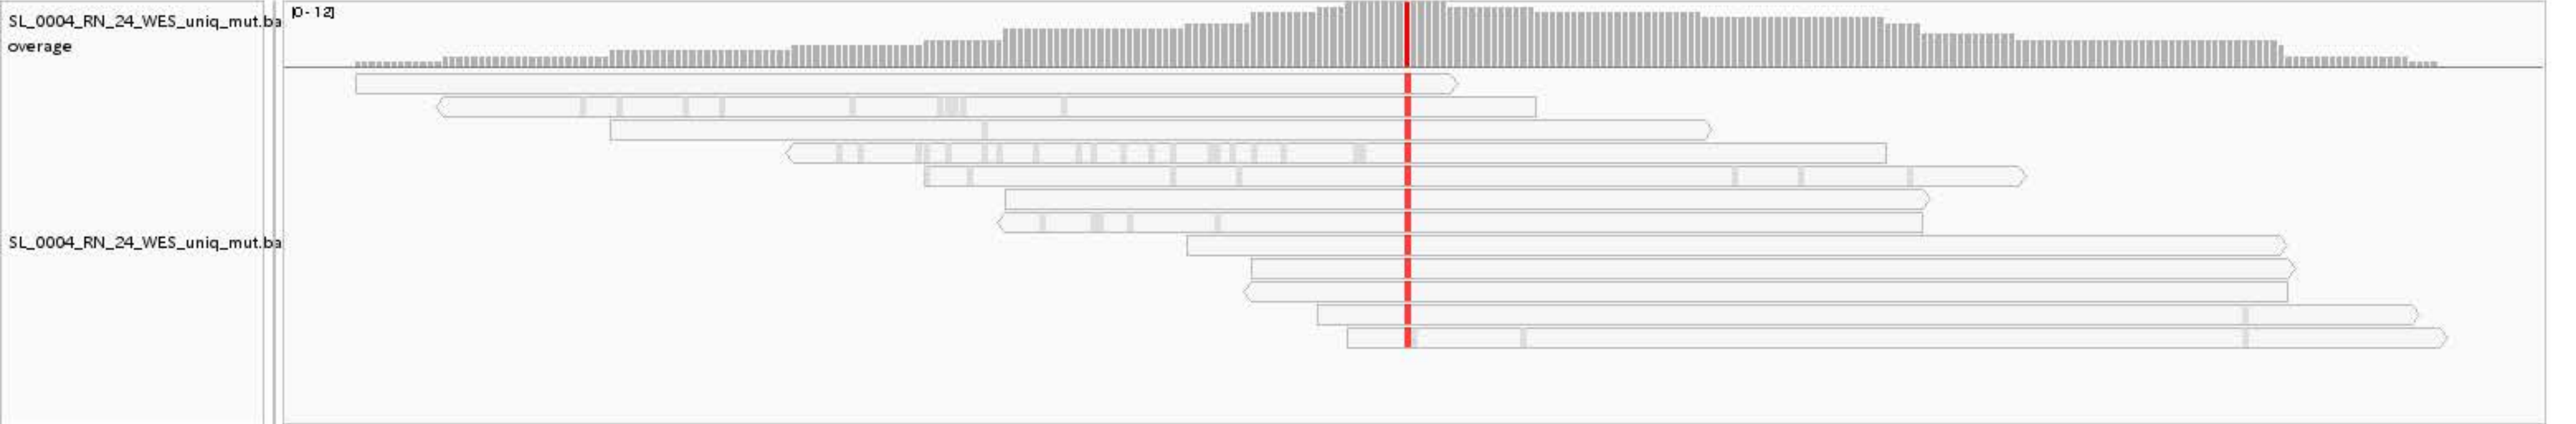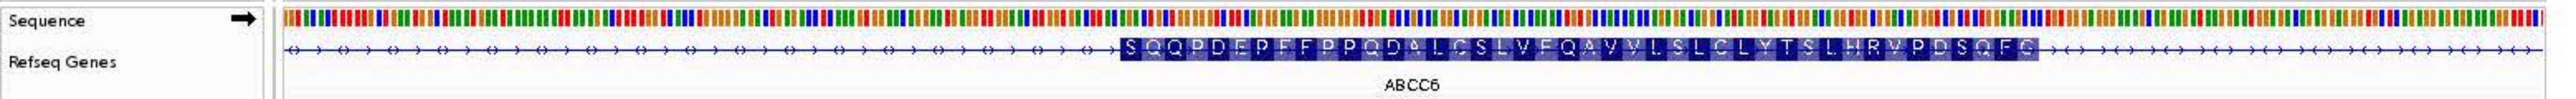



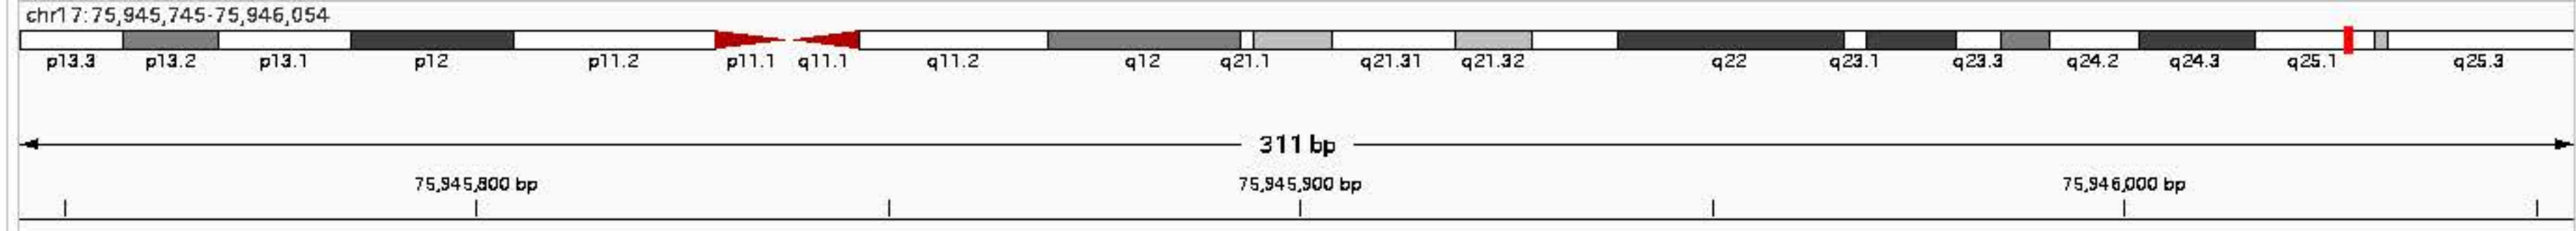

SL\_0004\_RN\_66\_WES\_uniq\_mut.ba  
coverage

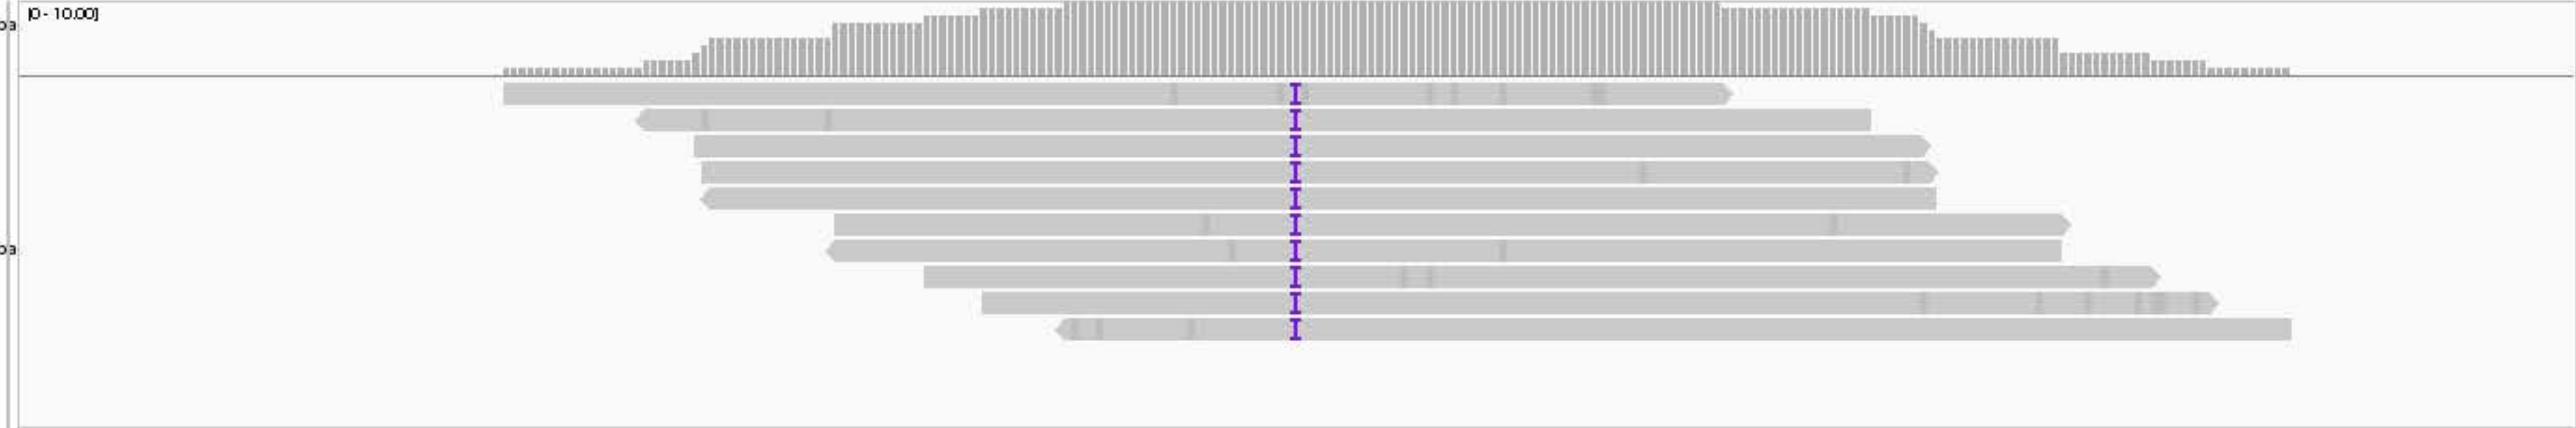

Sequence  
Refseq Genes

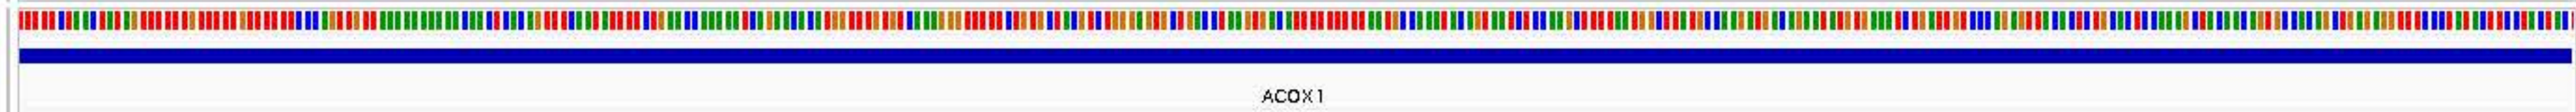

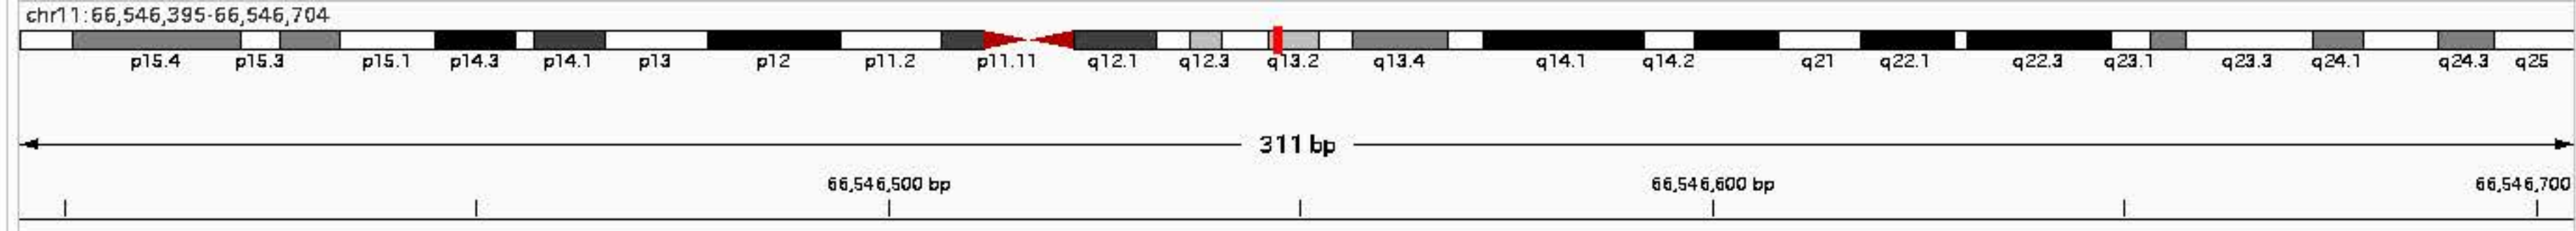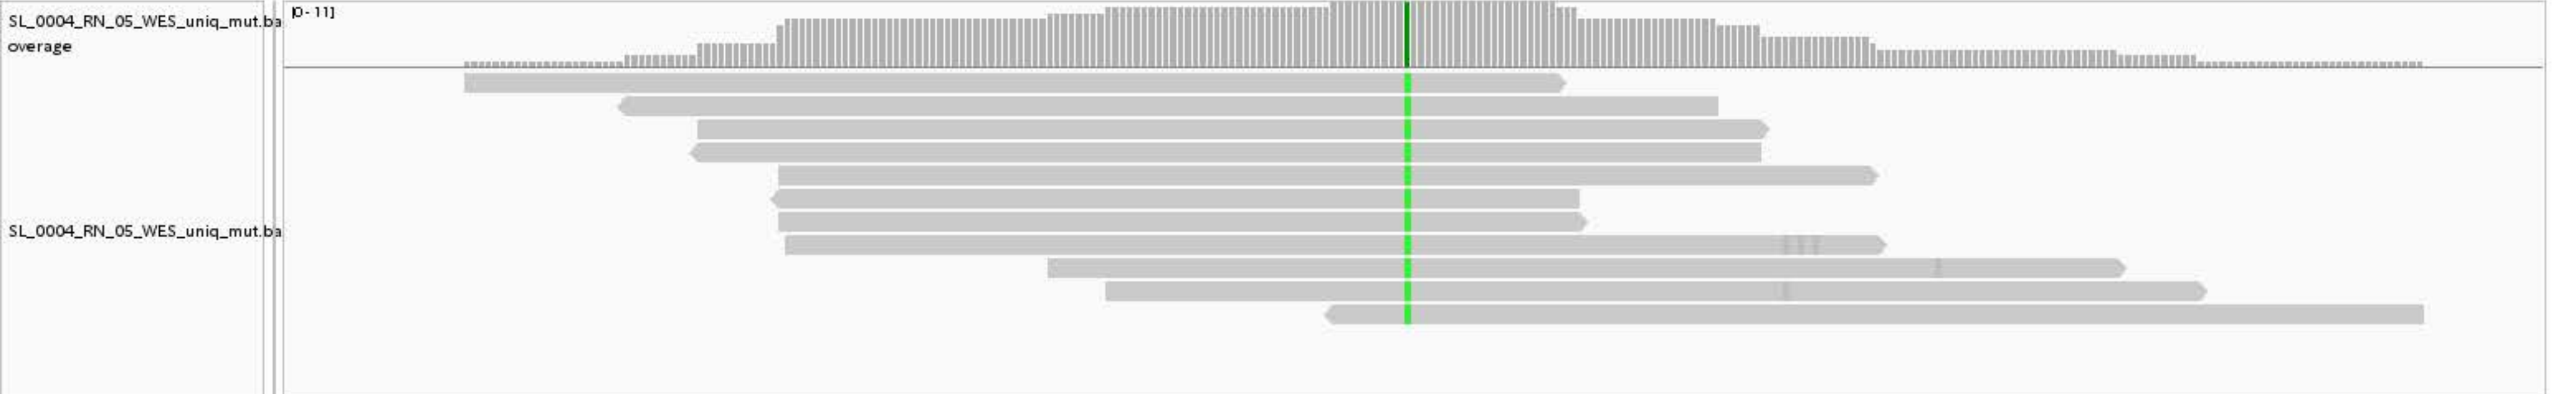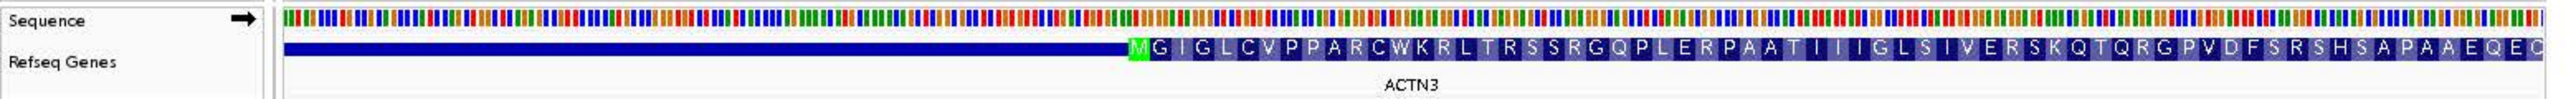

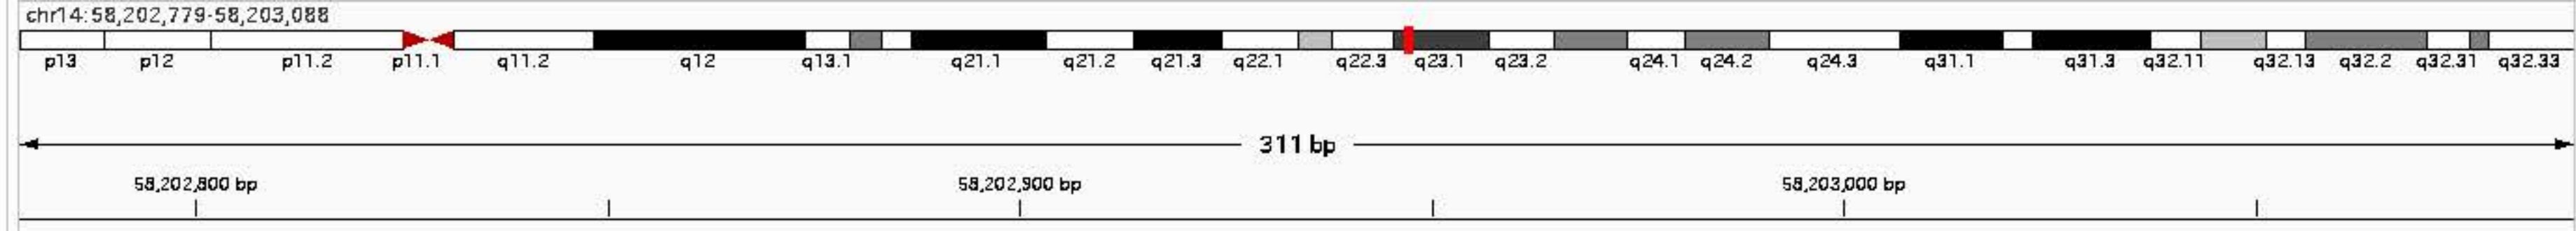

SL\_0002\_LN\_1\_WES\_uniq\_mut.ba  
verage

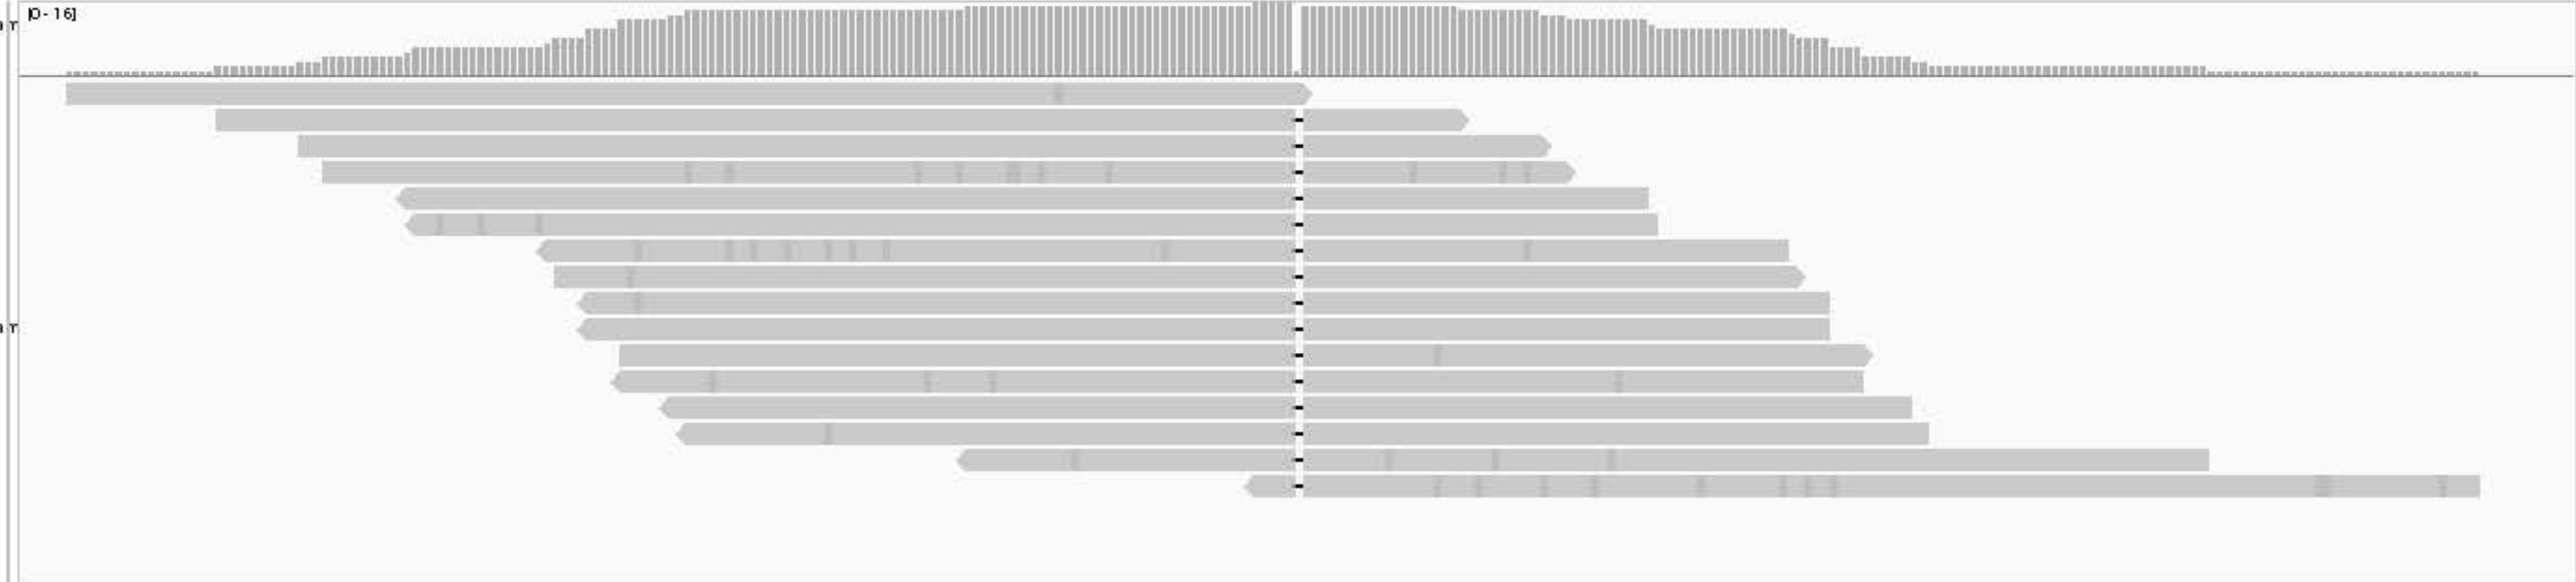

SL\_0002\_LN\_1\_WES\_uniq\_mut.ba r

Sequence →

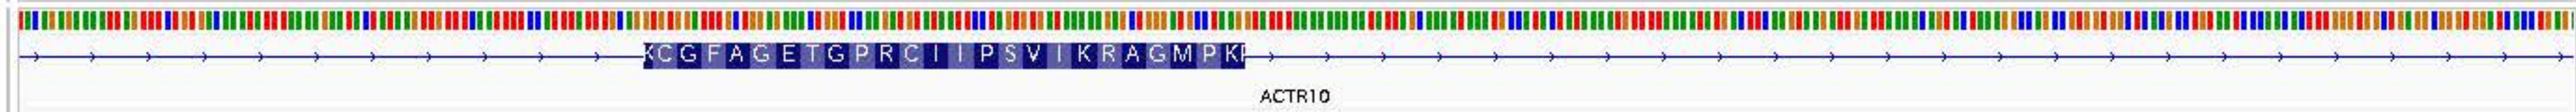

Refseq Genes



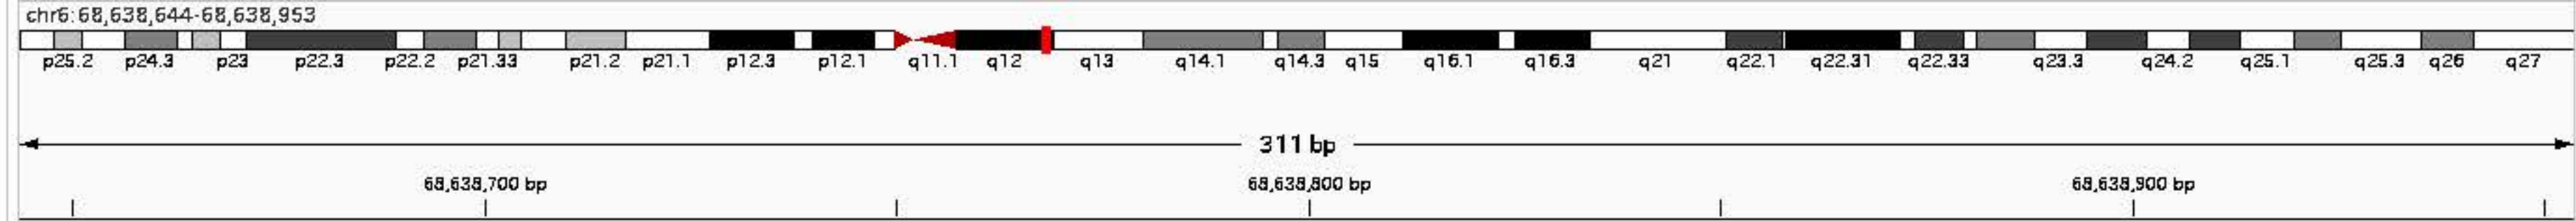

SL\_0004\_RN\_19\_WES\_uniq\_mut.ba  
overage

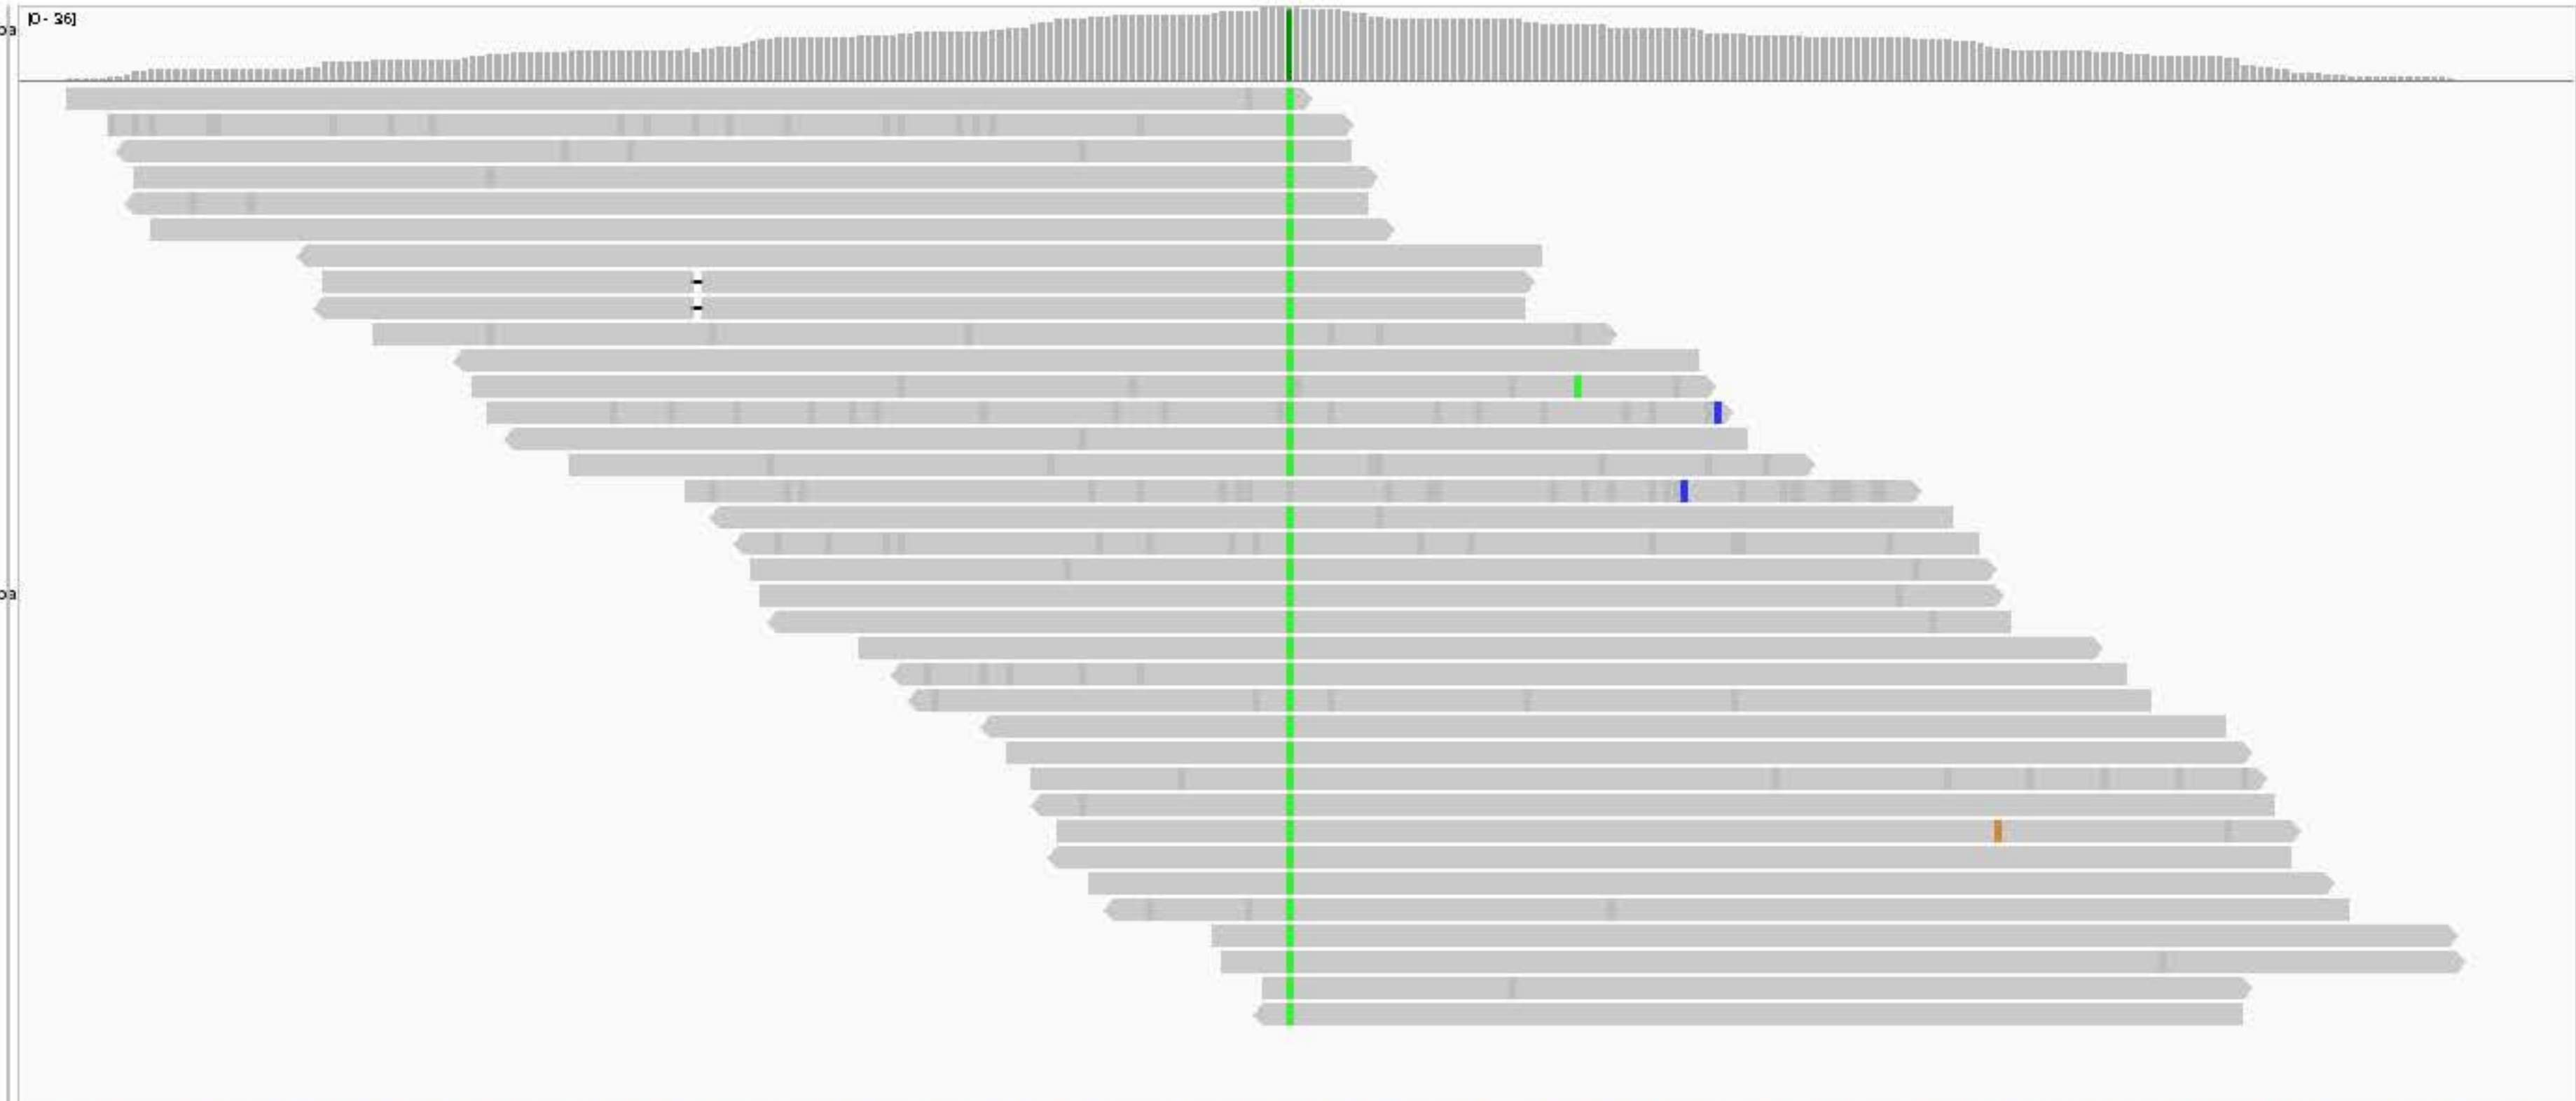

SL\_0004\_RN\_19\_WES\_uniq\_mut.ba

Sequence →  
Refseq Genes

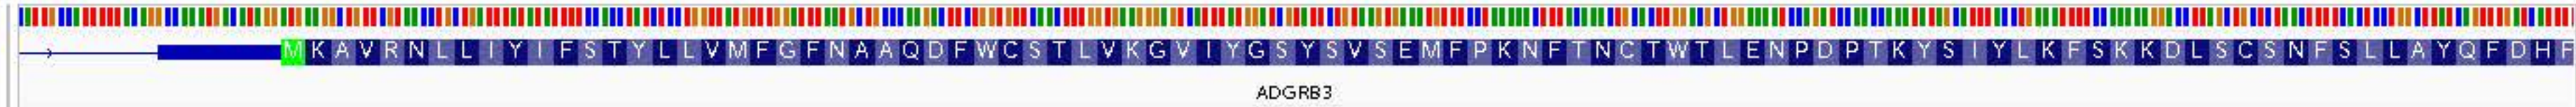

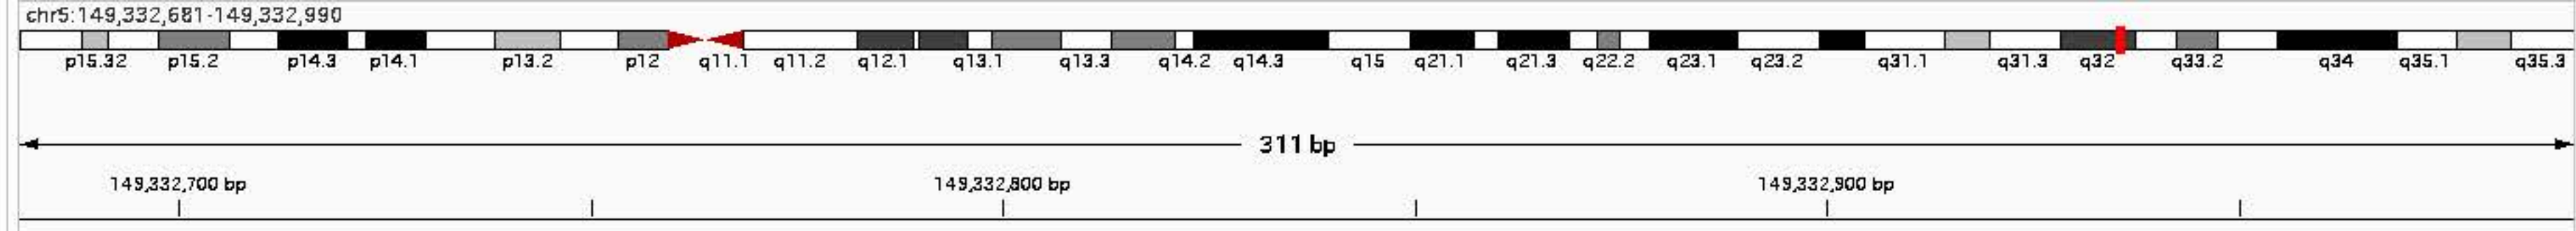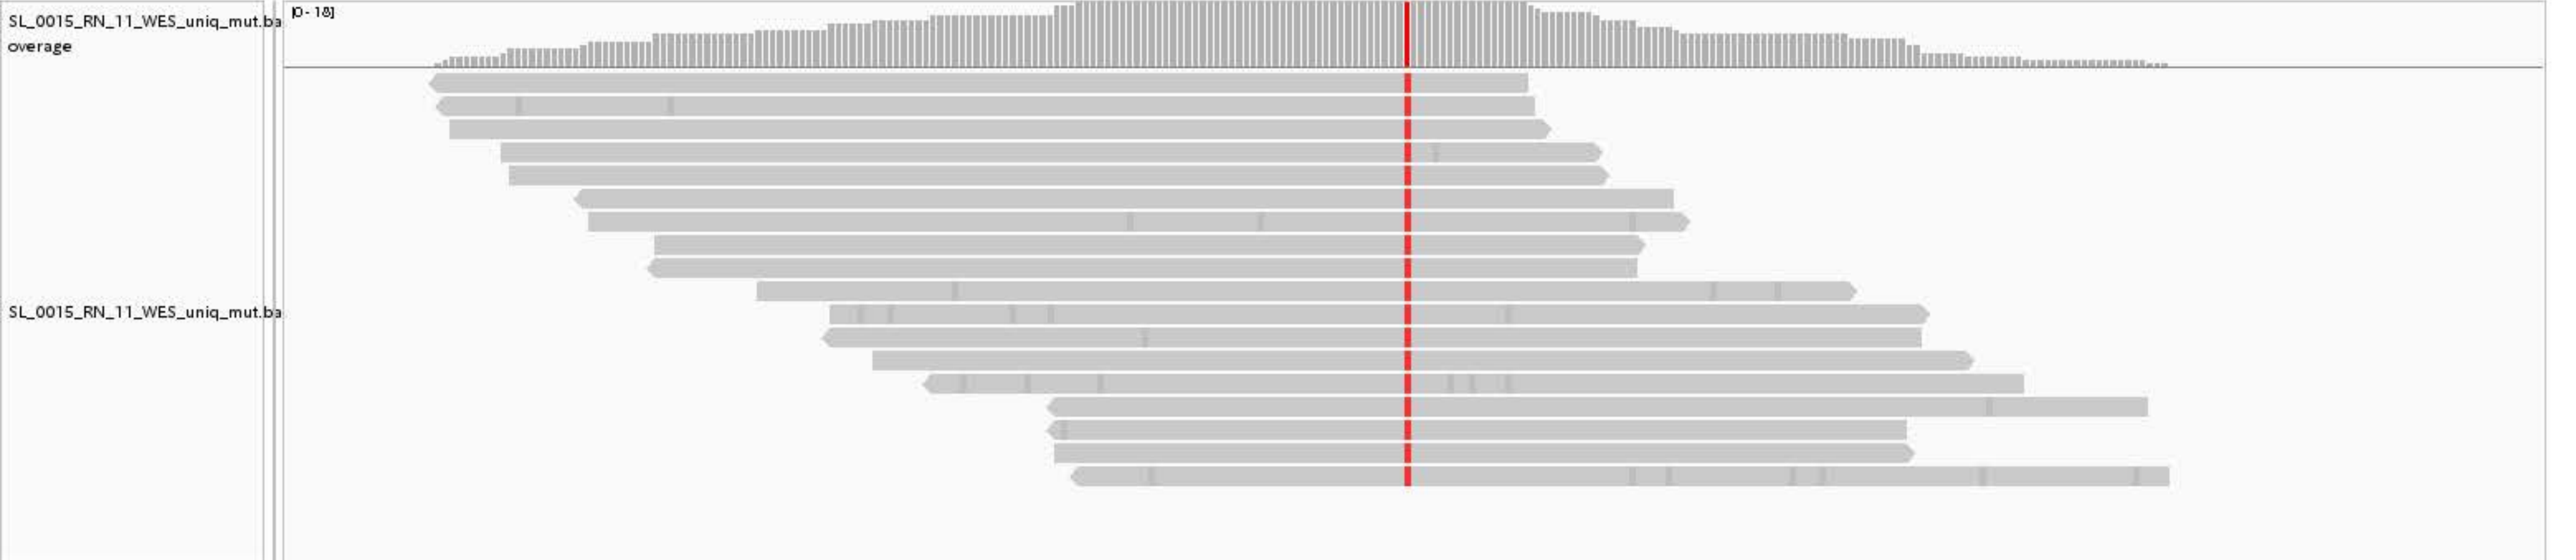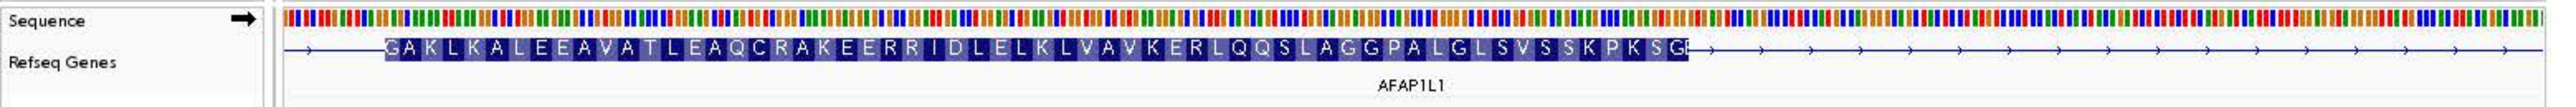

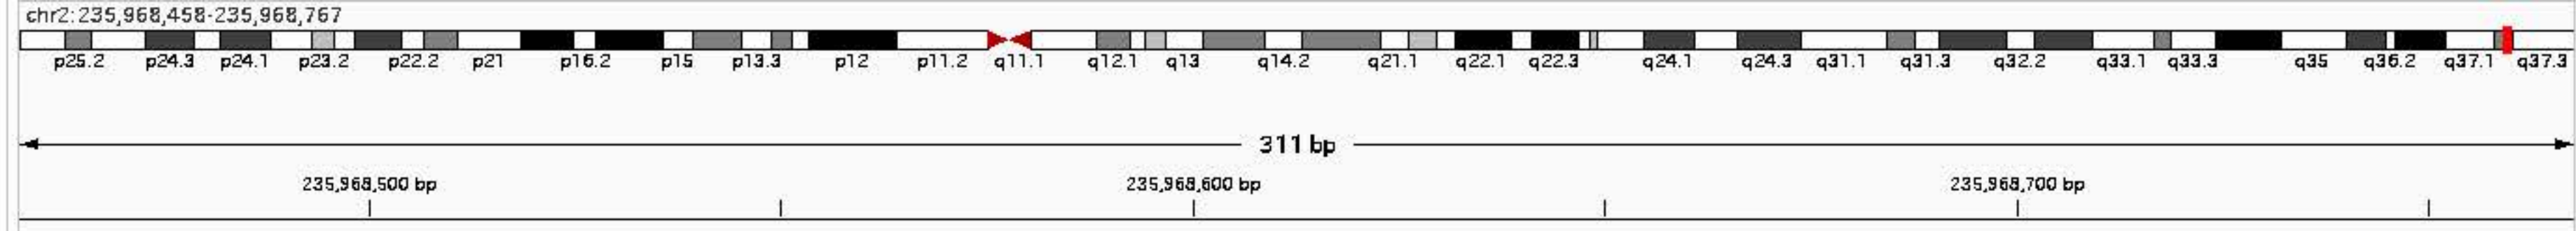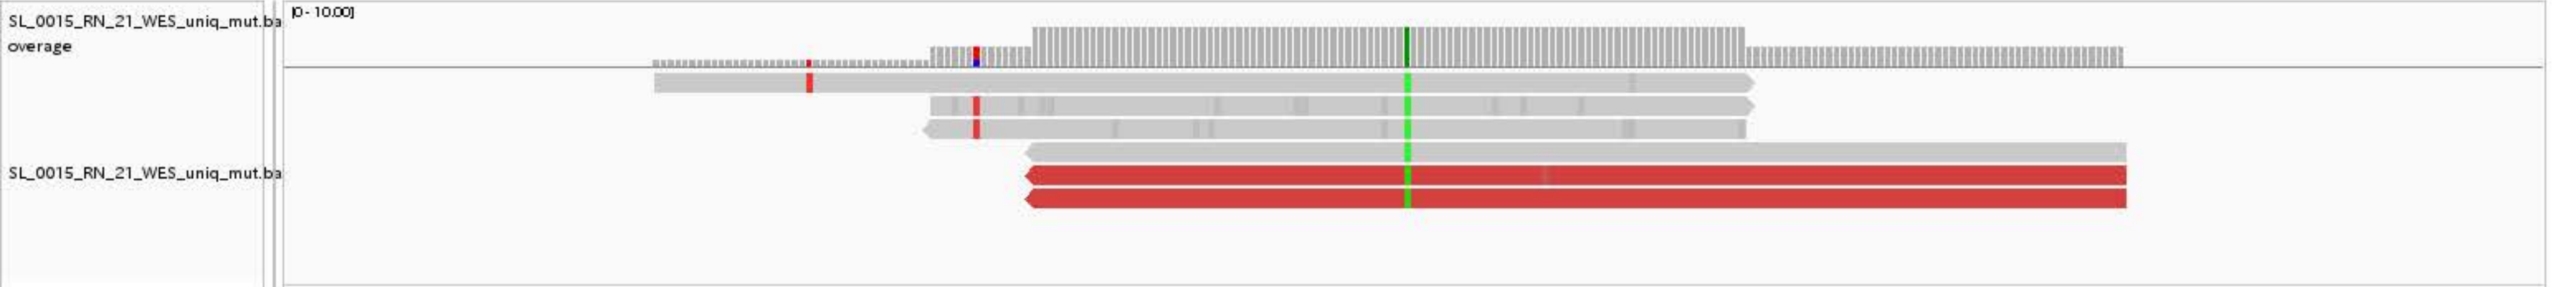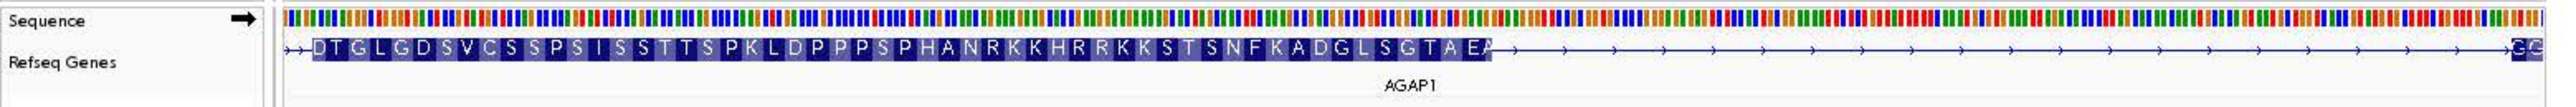



chr7:151,086,675-151,086,984

p22.2 p21.3 p21.2 p15.3 p15.1 p14.2 p13 p12.2 p11.2 q11.1 q11.22 q11.23 q21.11 q21.12 q21.2 q22.1 q22.3 q31.1 q31.2 q31.32 q32.1 q33 q34 q35 q36.1 q36.3

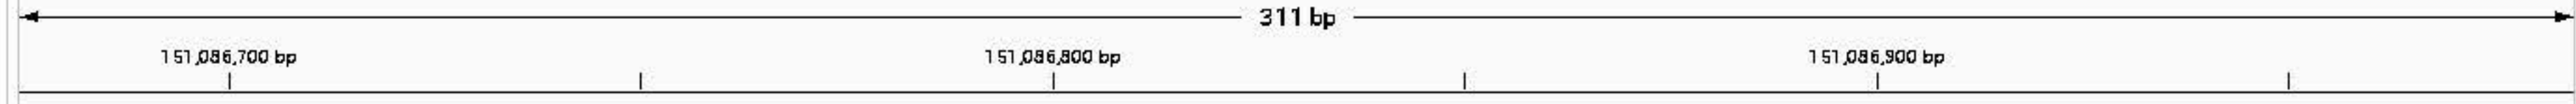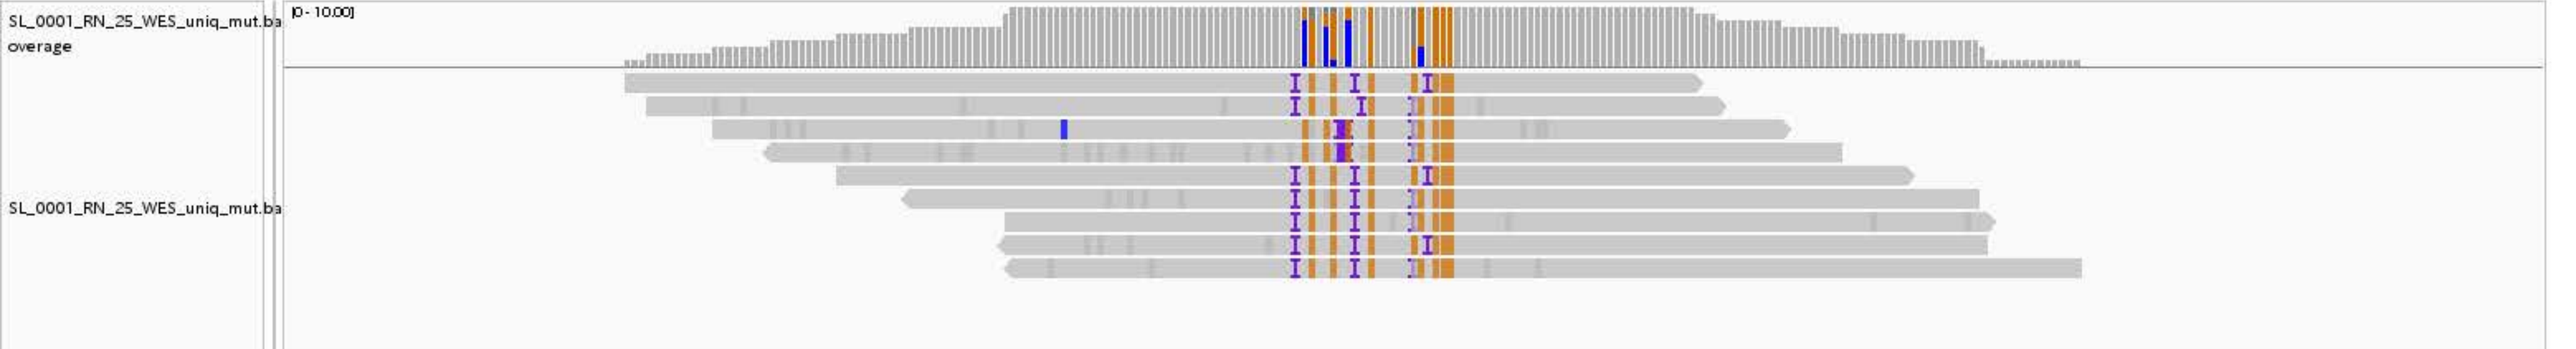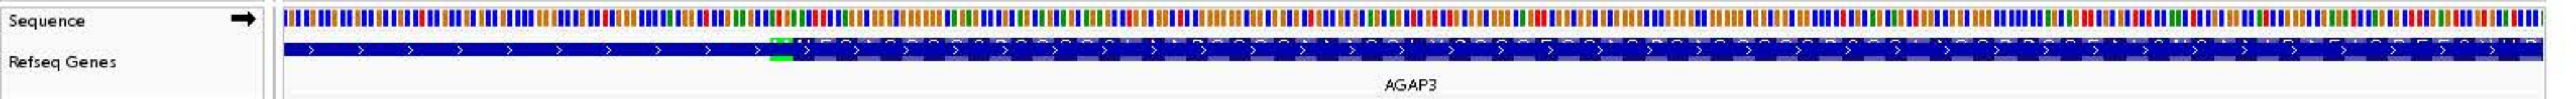

AGAP3

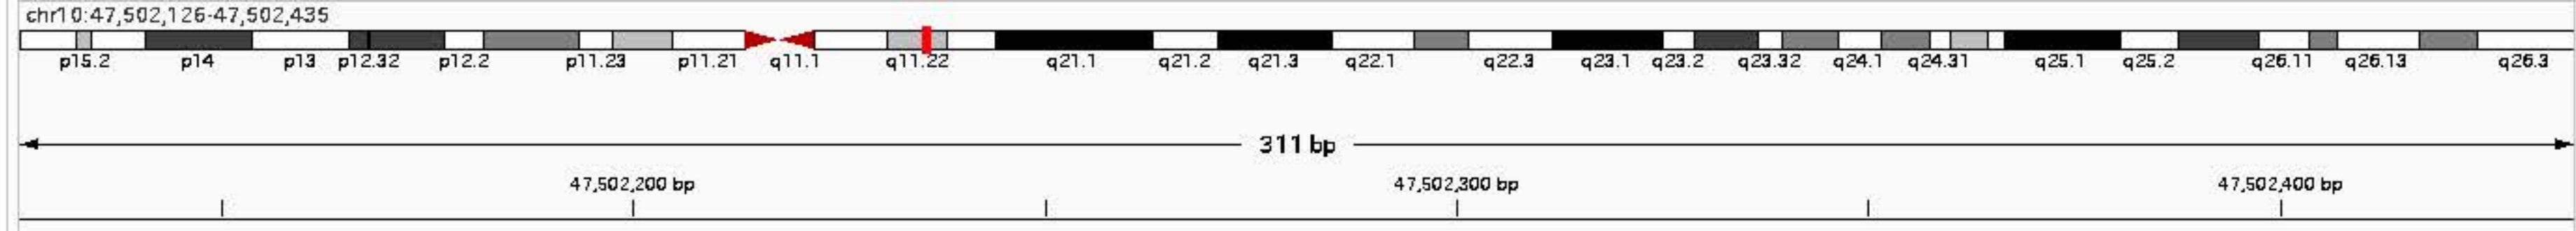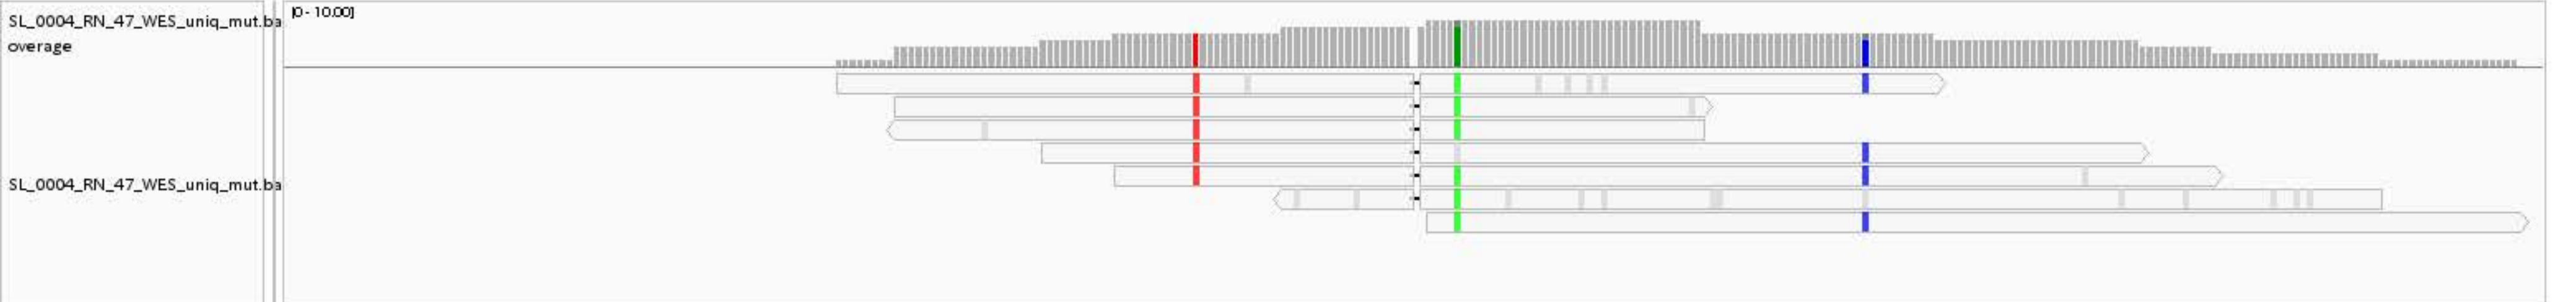

Sequence →

Refseq Genes

RQTGTPMEPWSTWGTLLQELVVNGKRCA LHLATCGDGEGCTENVEERSGHALLLIATQLDEDTTARLLQQGLSLETCPALFLKEEYKSRIW

ANXAS

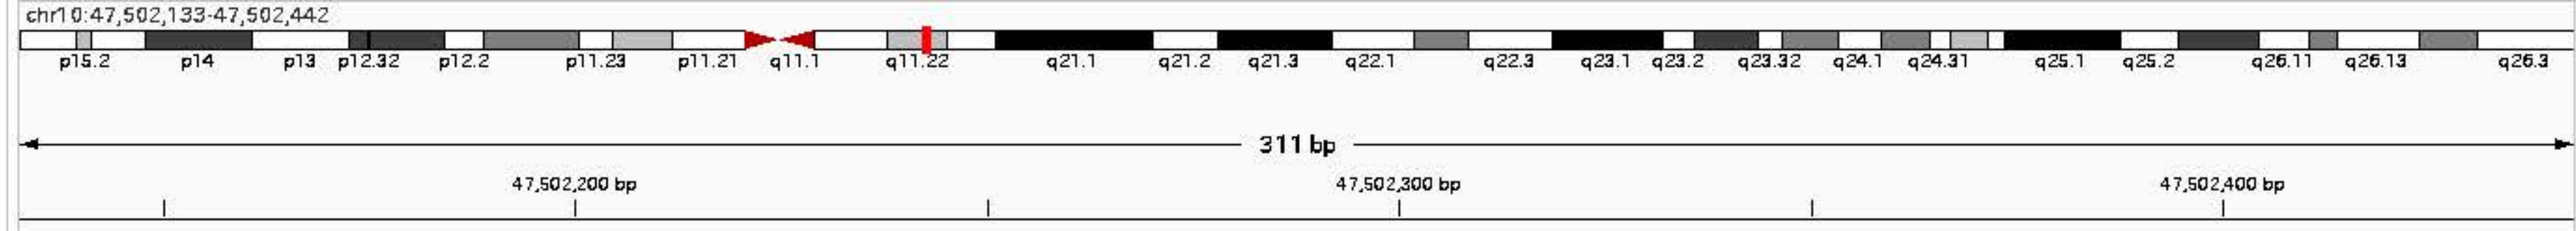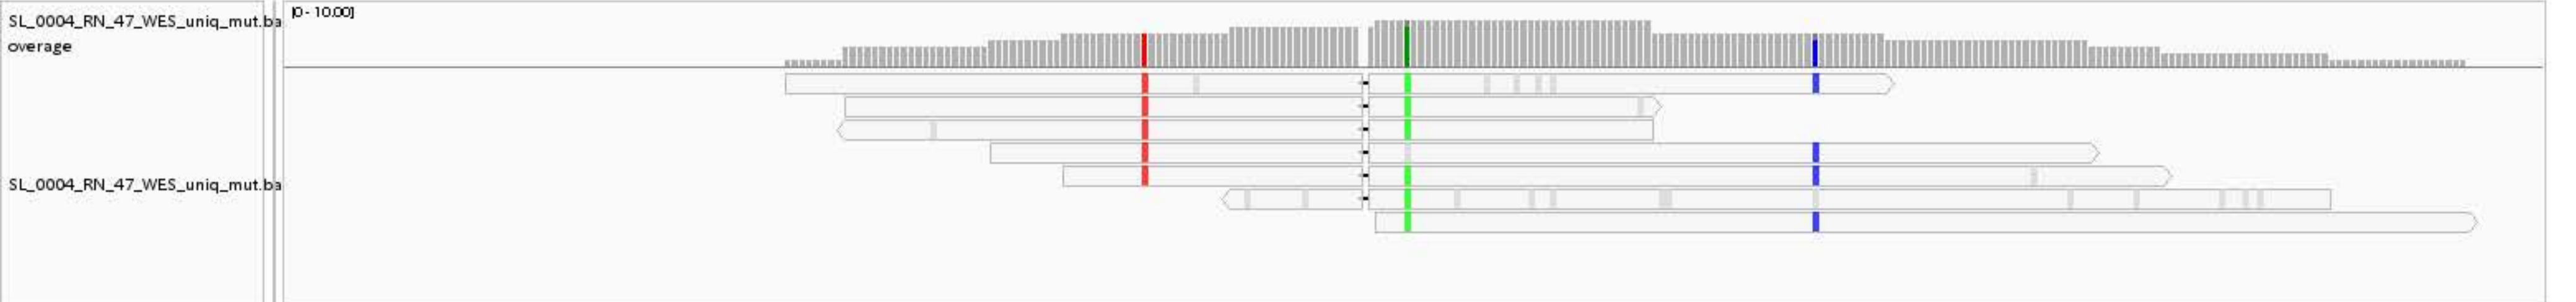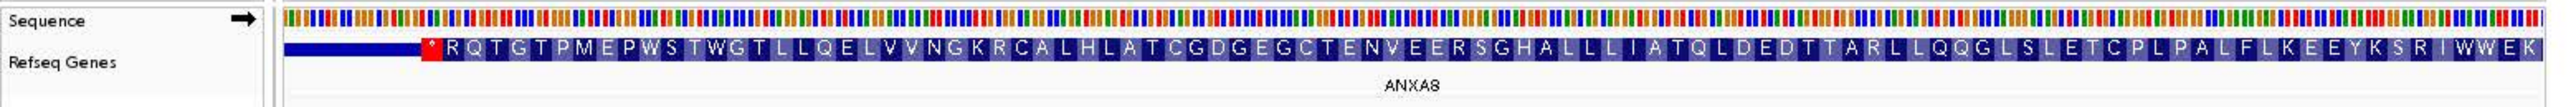



chr20:34,295,289-34,295,598

p13 p12.3 p12.2 p12.1 p11.23 p11.22 p11.21 p11.1 q11.1 q11.21 q11.22 q11.23 q12 q13.11 q13.12 q13.13 q13.2 q13.31 q13.33

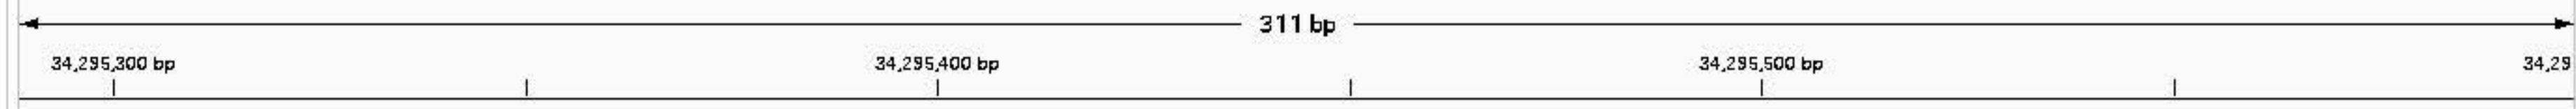

SL\_0015\_RN\_21\_WES\_uniq\_mut.ba  
coverage

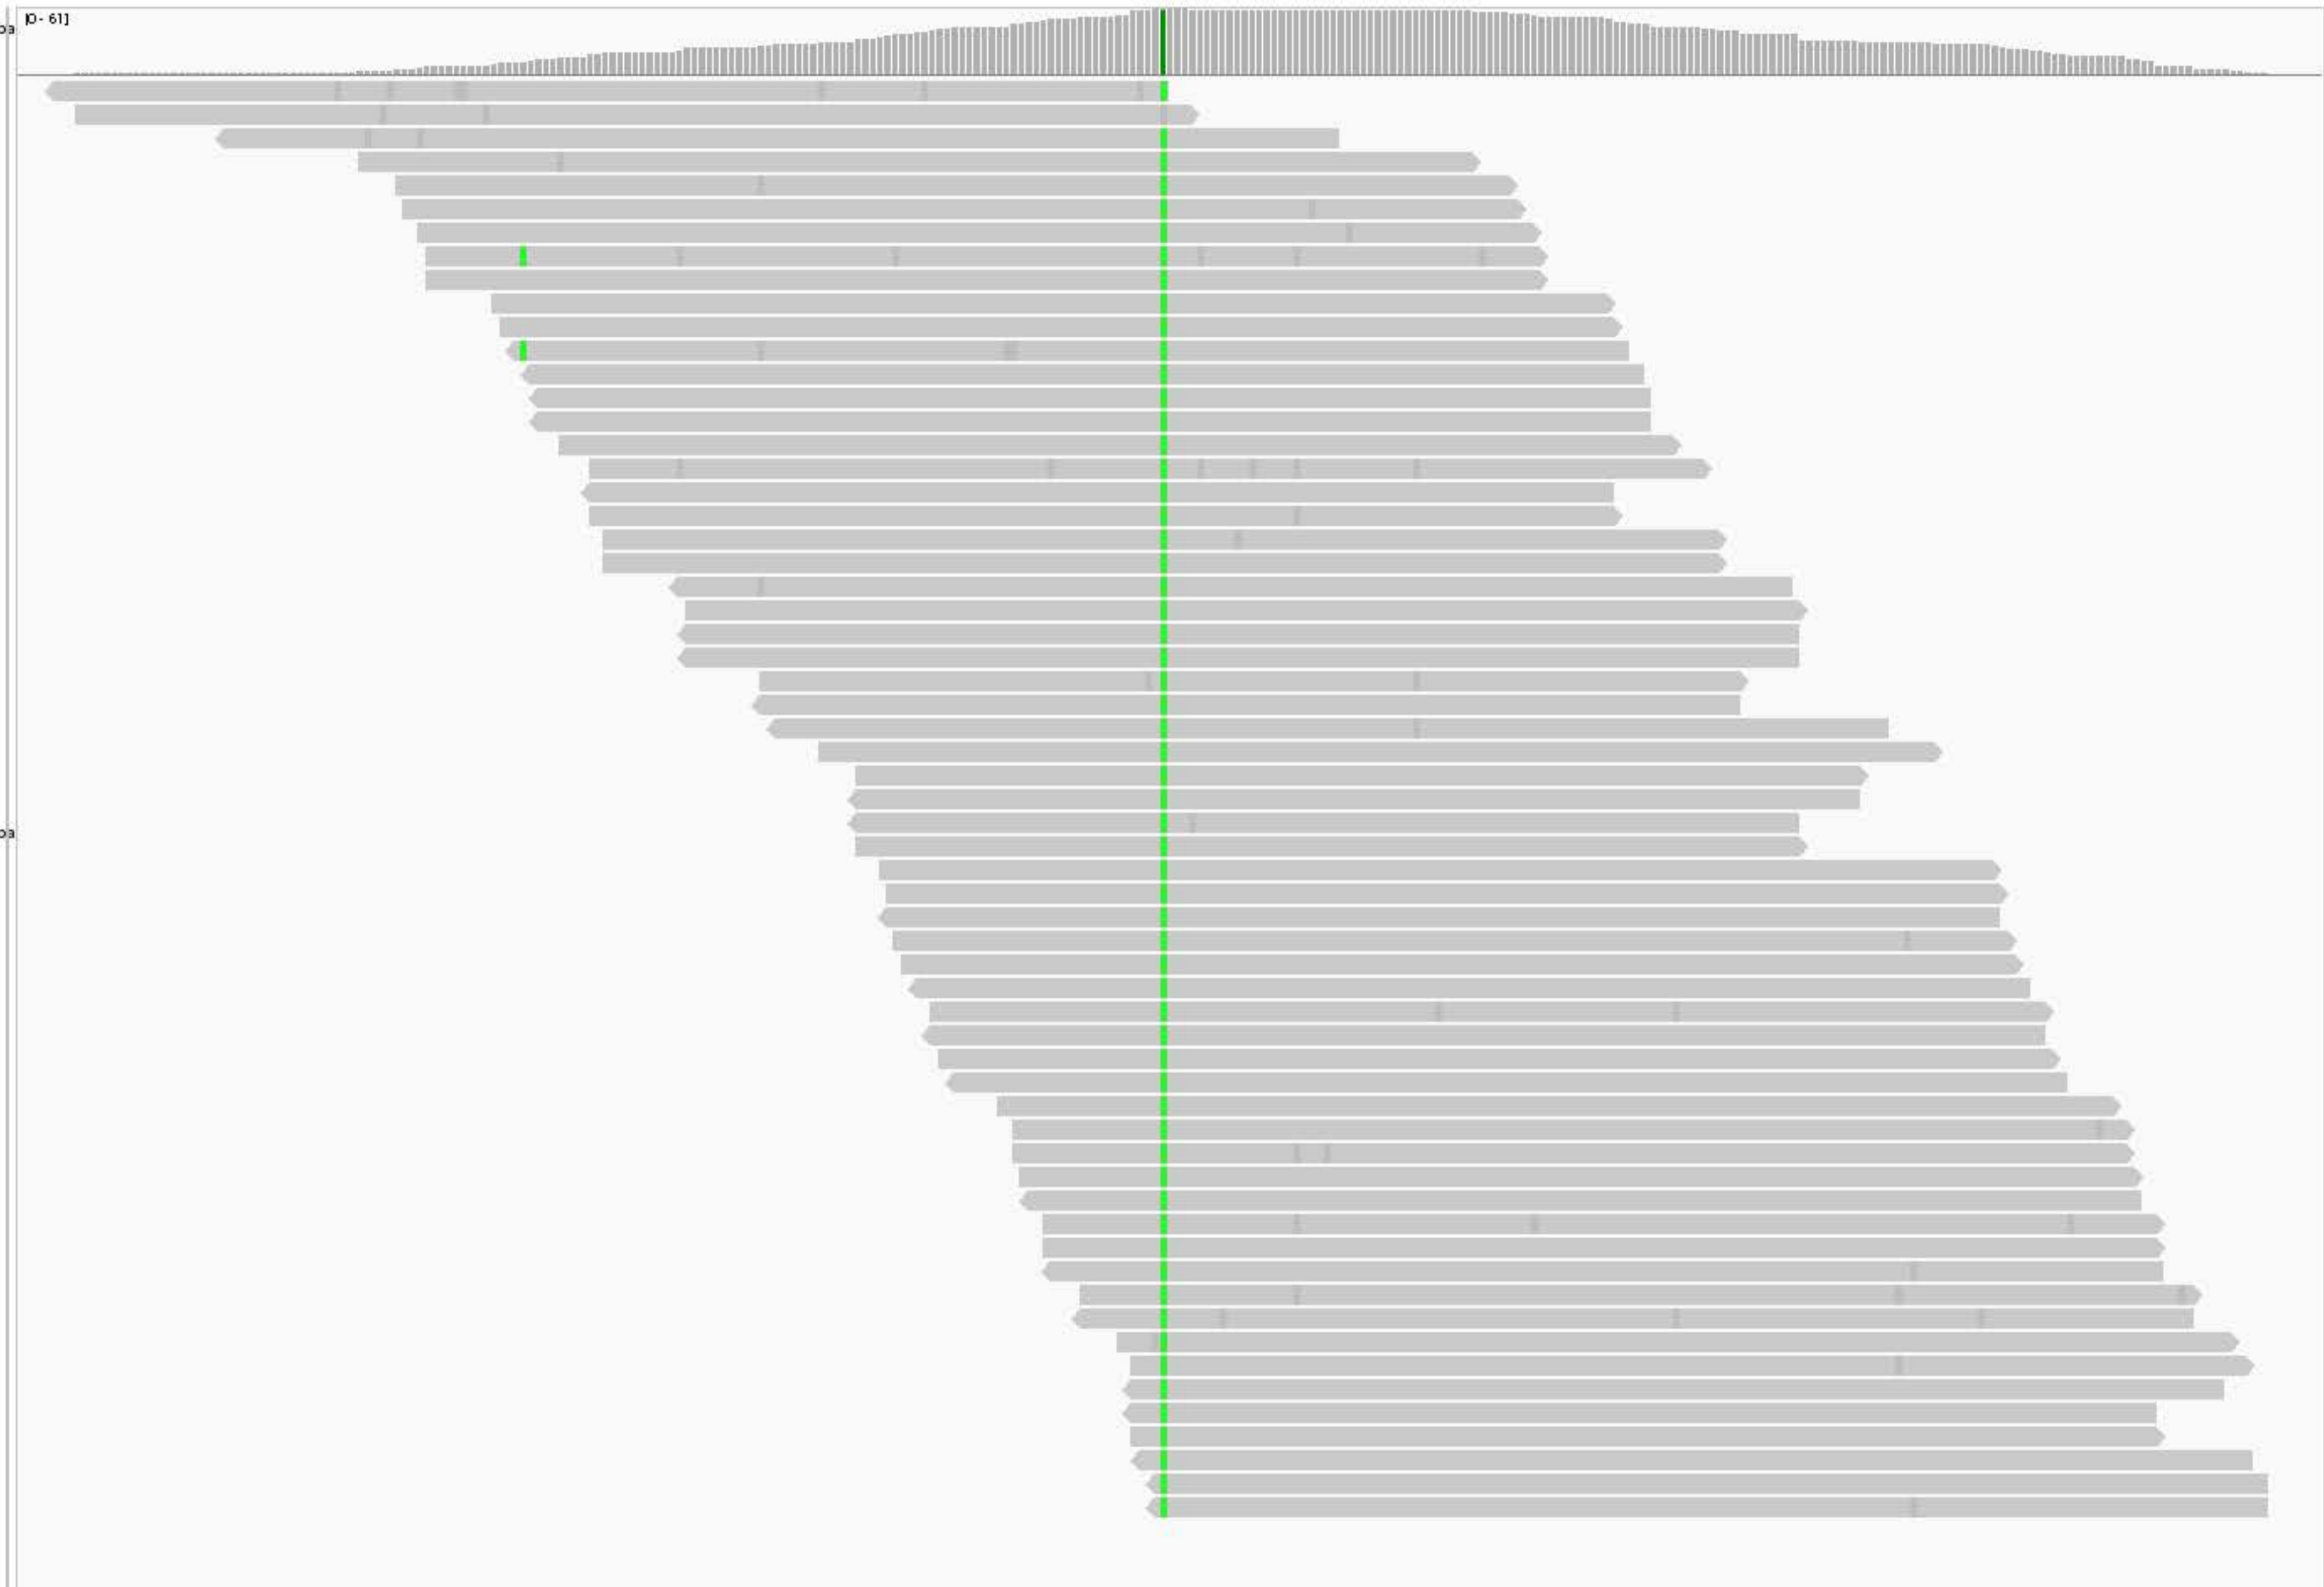

SL\_0015\_RN\_21\_WES\_uniq\_mut.ba

Sequence

Refseq Genes

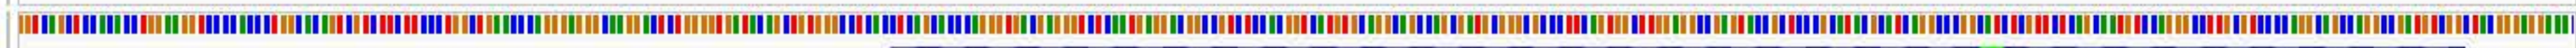

EAGLTVLVEILVATEVVTMHLCCGAI RAGKLPKSASYRERMRLGPM

AHCY

chr7:17,339,983-17,340,292  
p22.2 p21.3 p21.2 p15.3 p15.1 p14.2 p13 p12.2 p11.2 q11.1 q11.22 q11.23 q21.11 q21.12 q21.2 q22.1 q22.3 q31.1 q31.2 q31.32 q32.1 q33 q34 q35 q36.1 q36.3

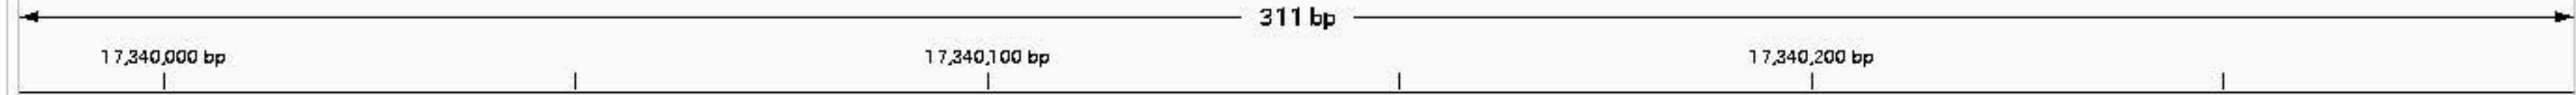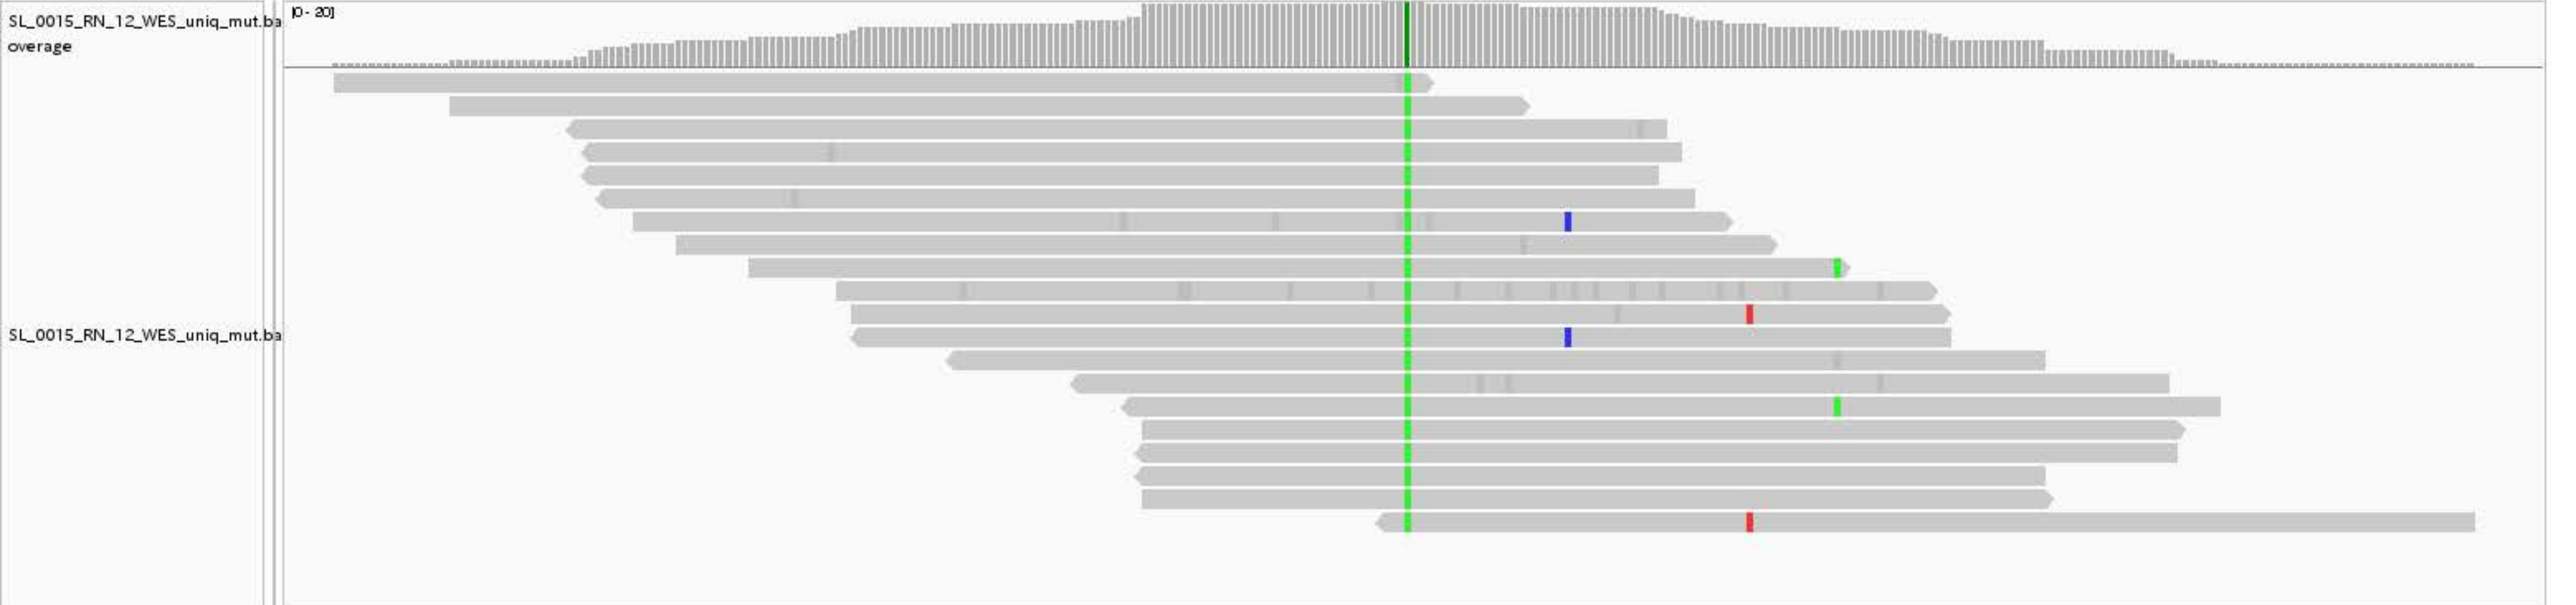

Sequence →  
Refseq Genes  
PMGSFEPSPYPTTSSLEDFVTCLQLPENQKHGLNPQSAIITPQTCYAGAVSMYQCQPEPQHTHVGGMQYNPVLPGQQAFLNKI  
AHR

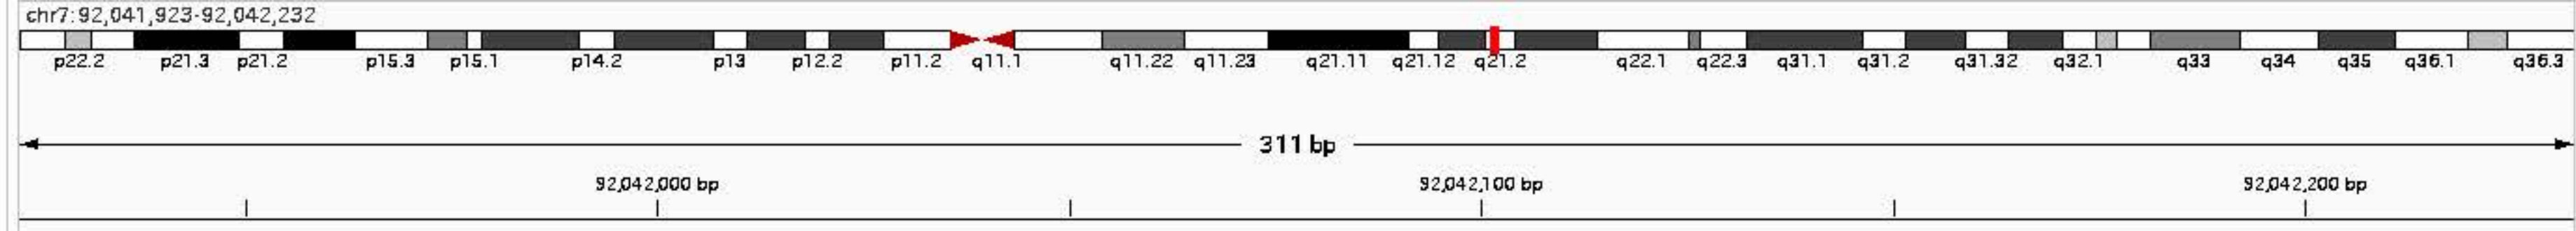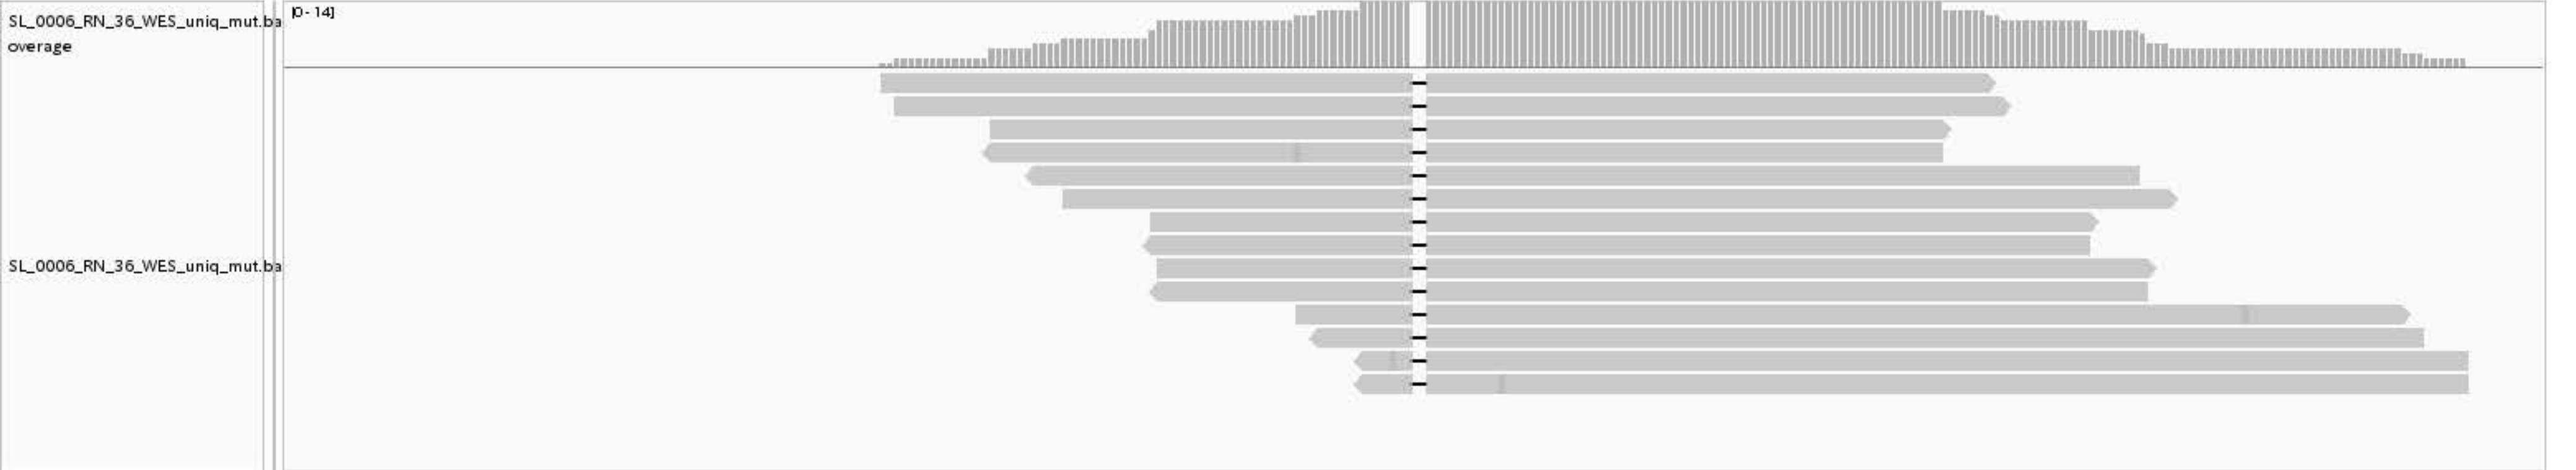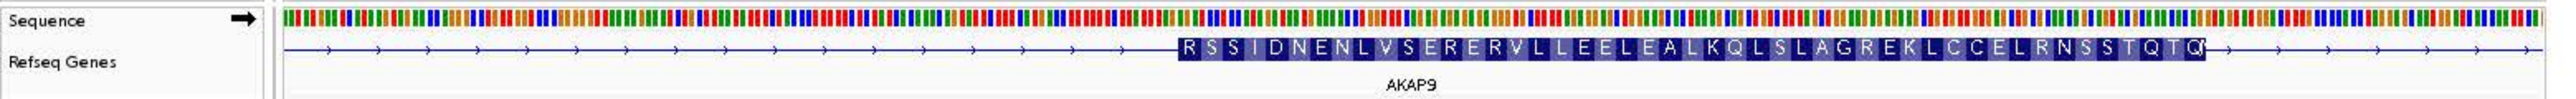



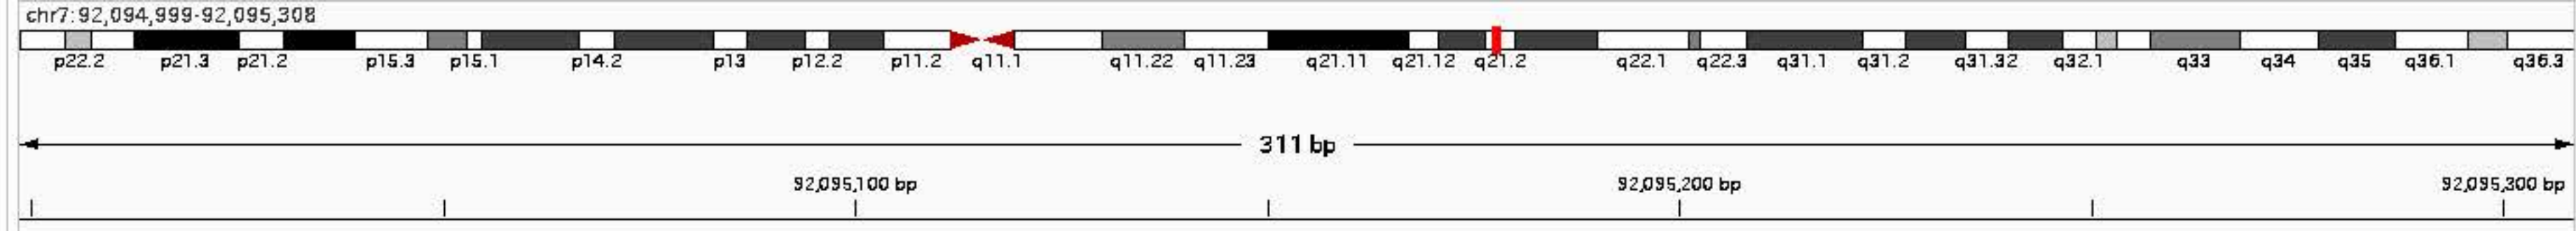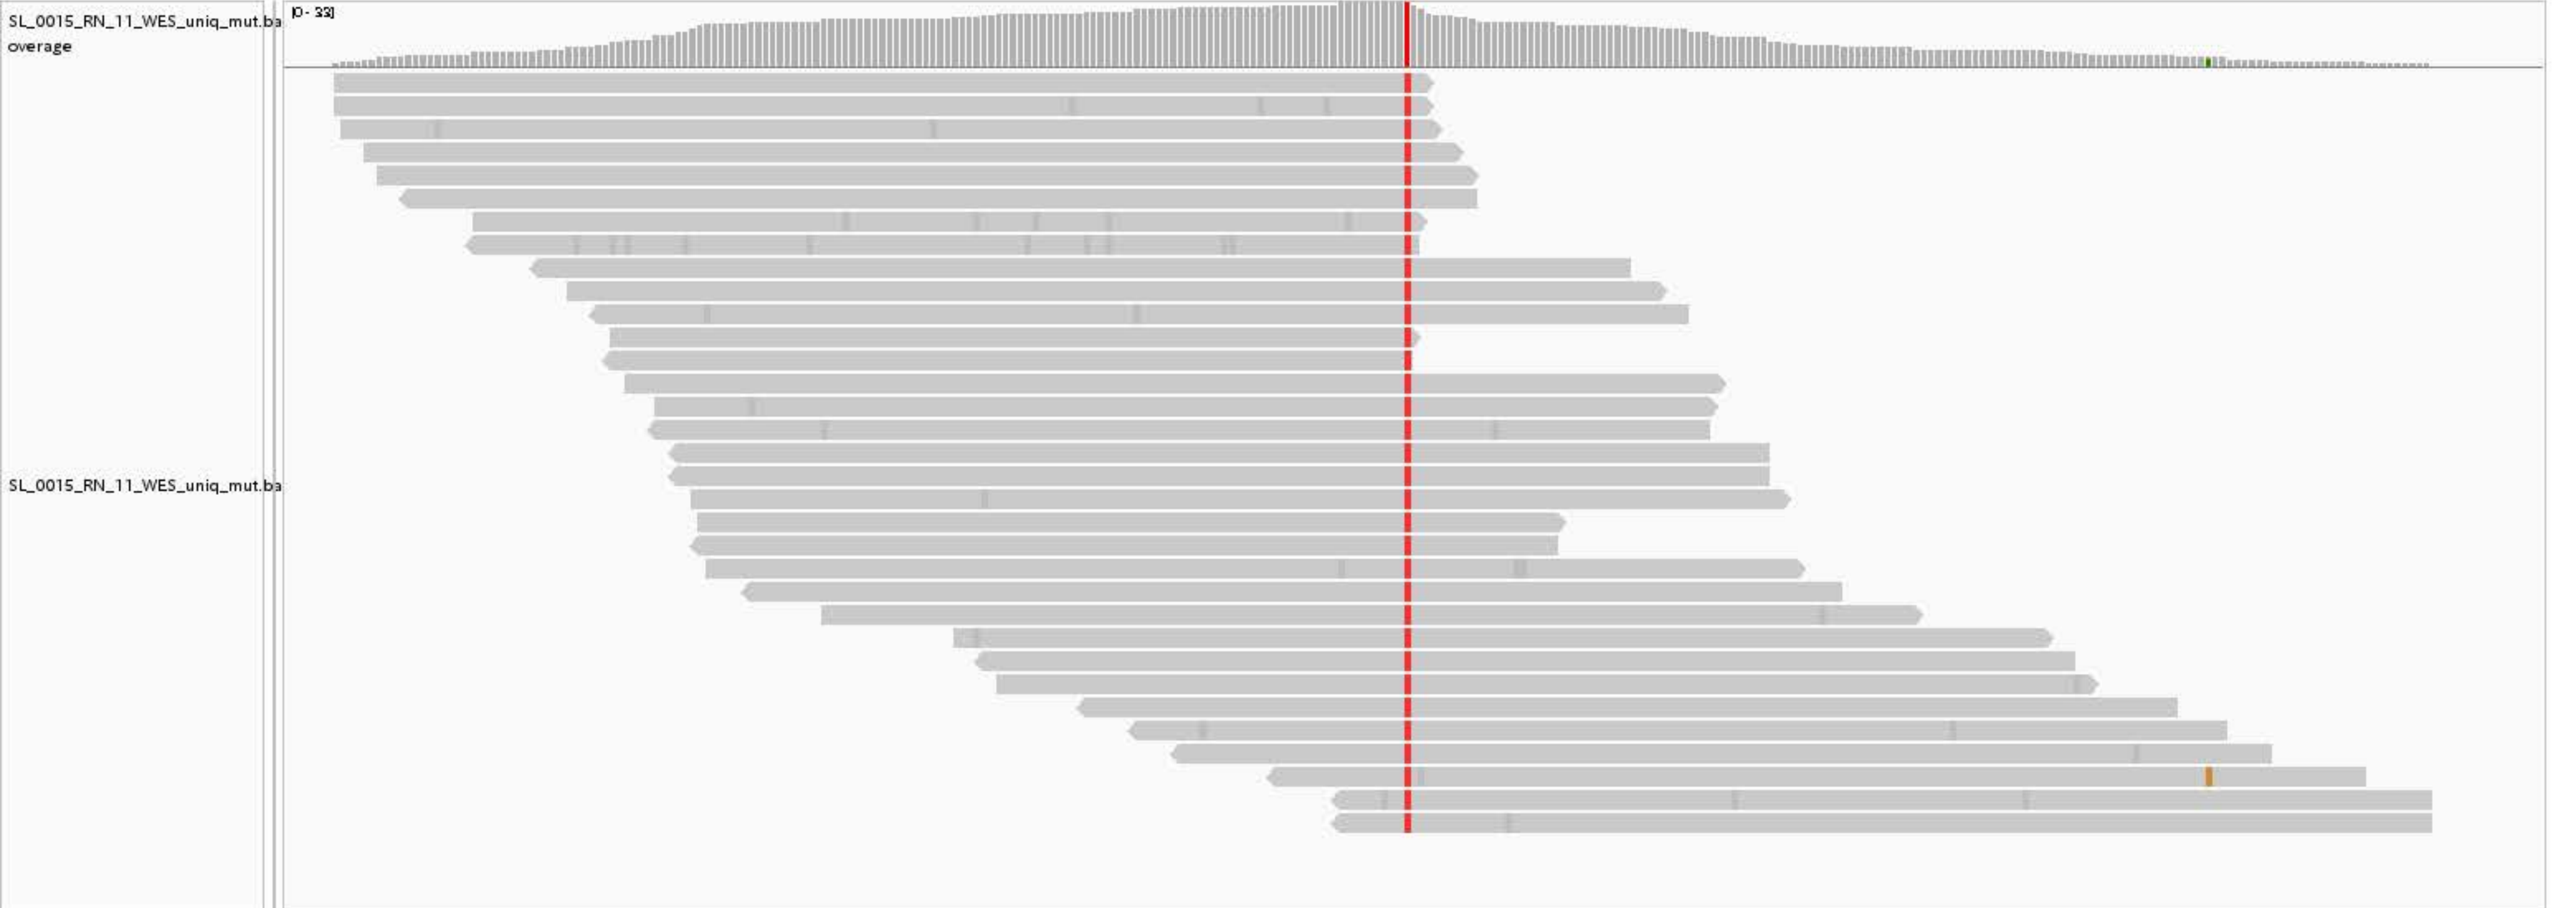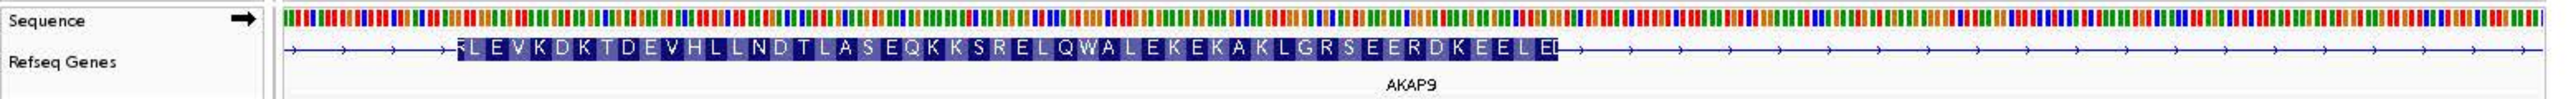

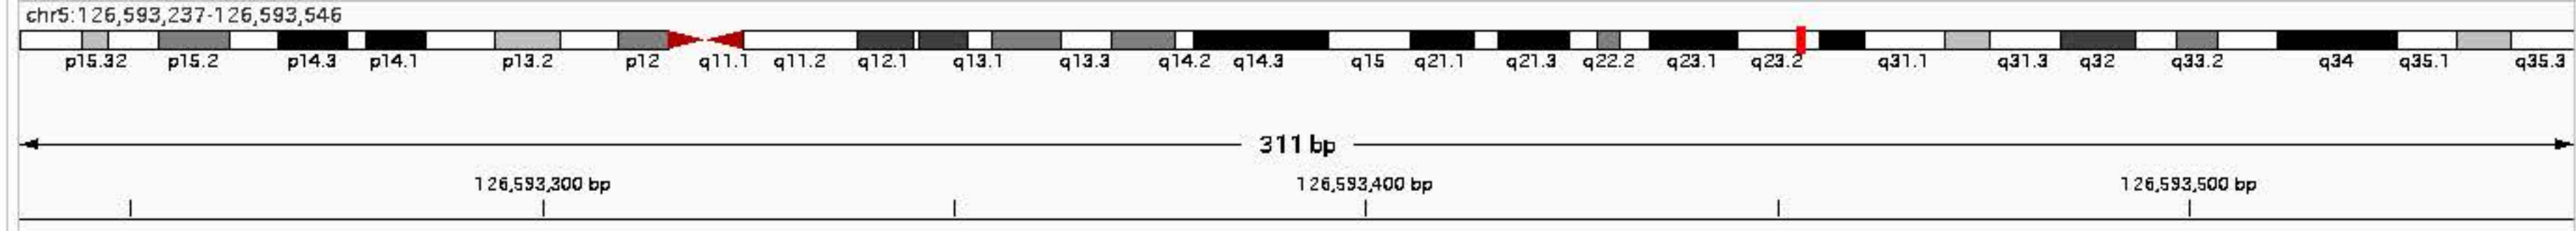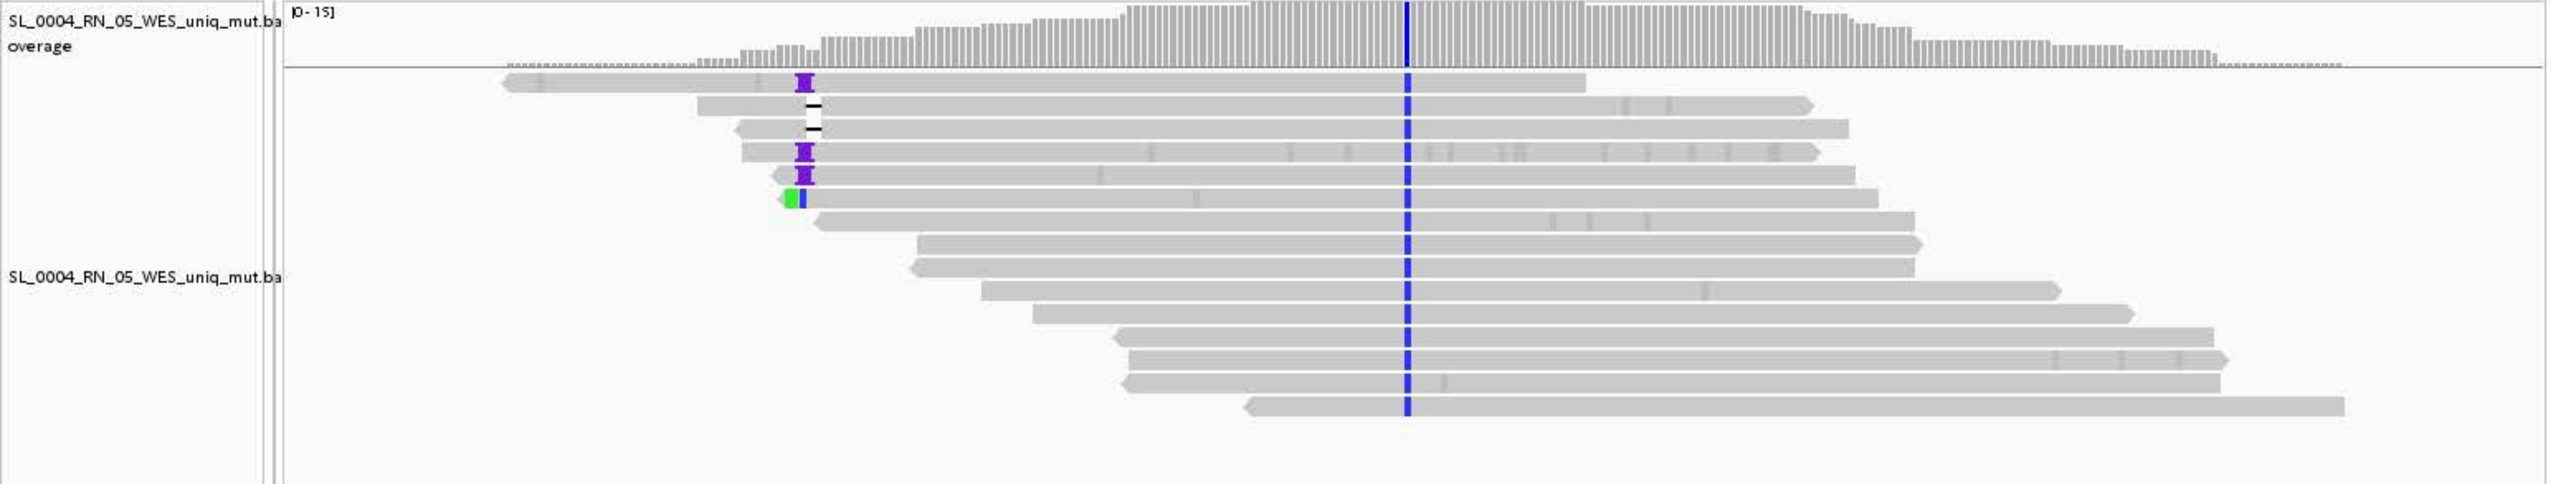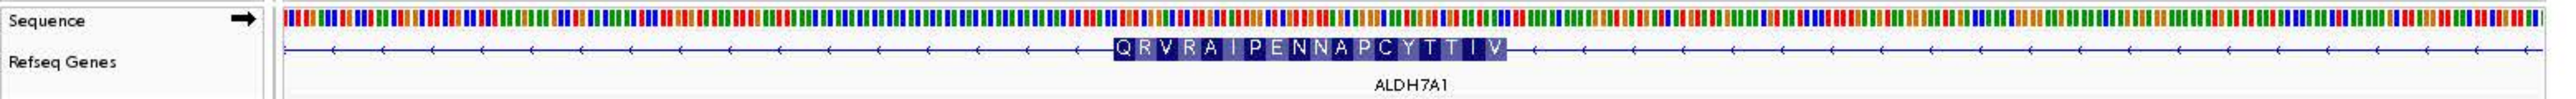

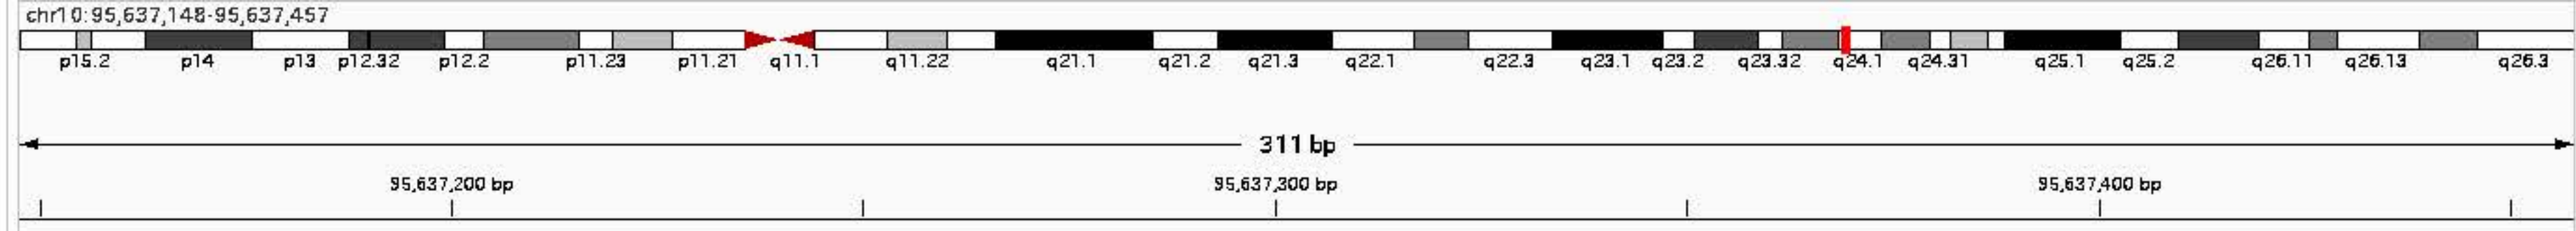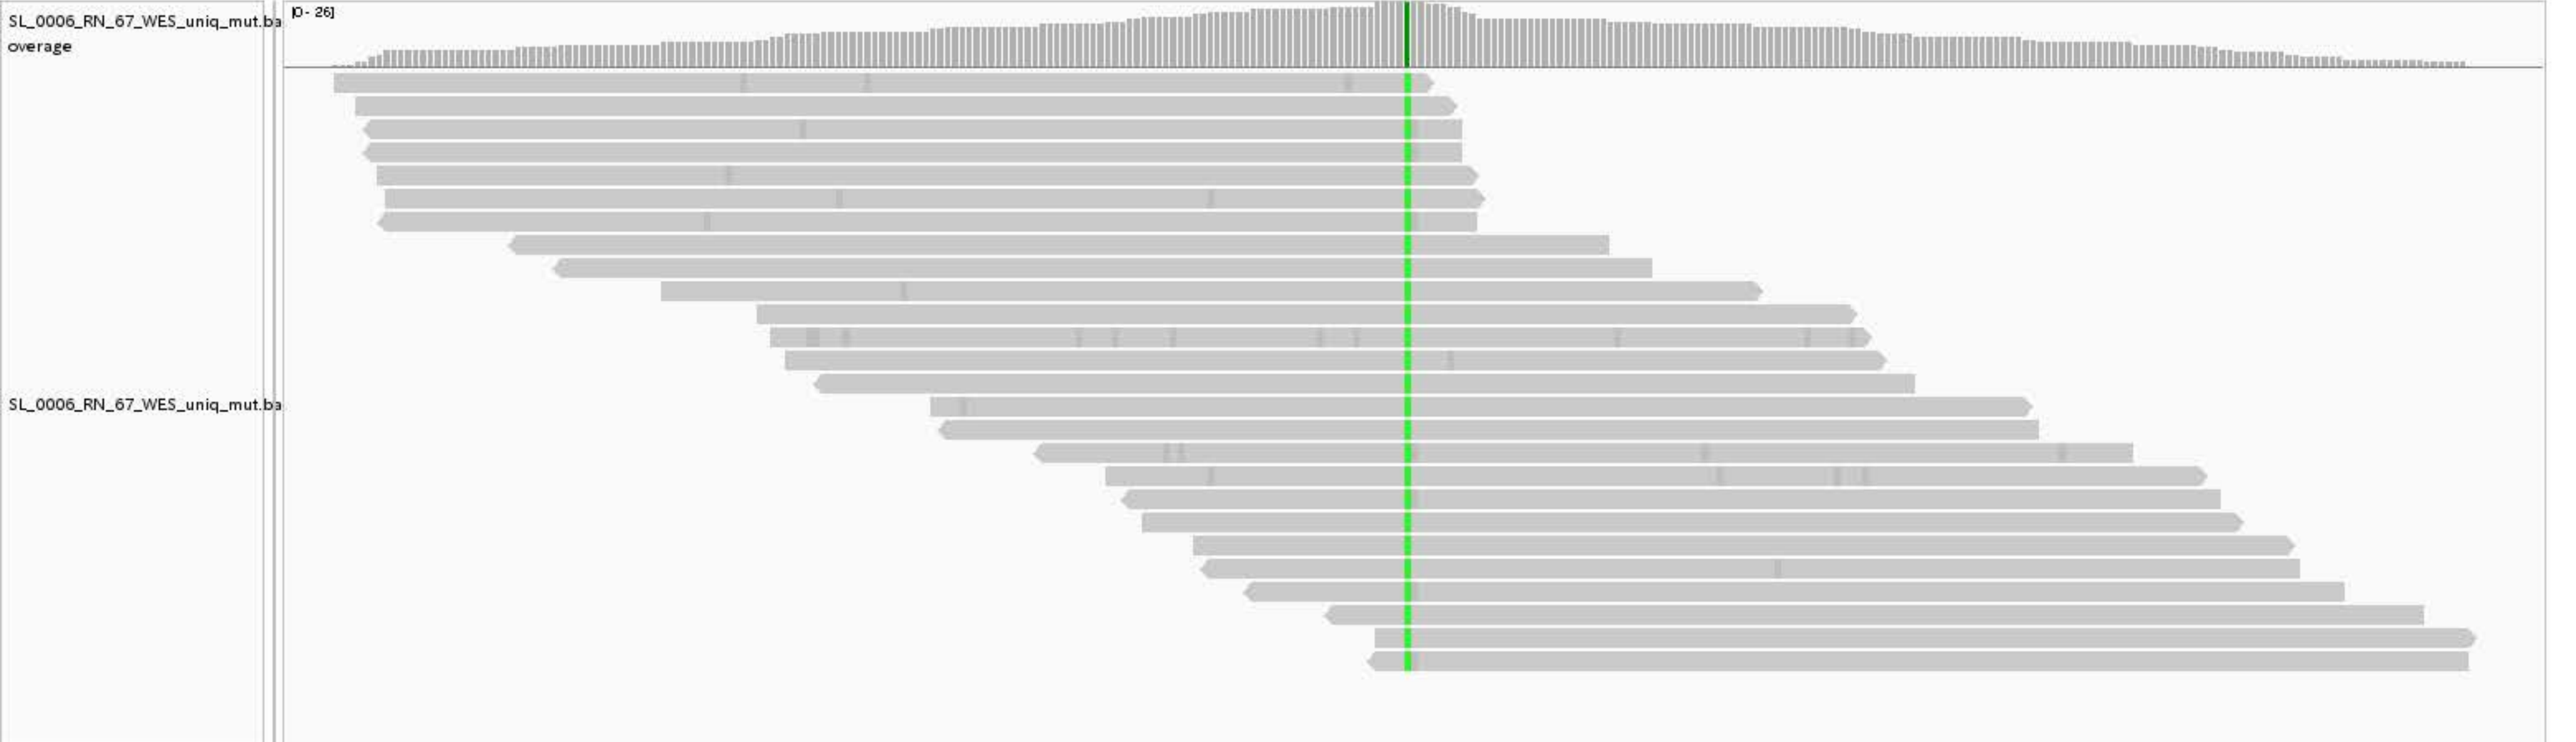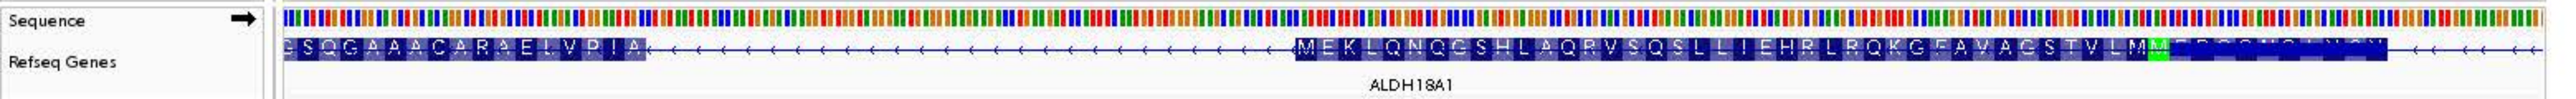



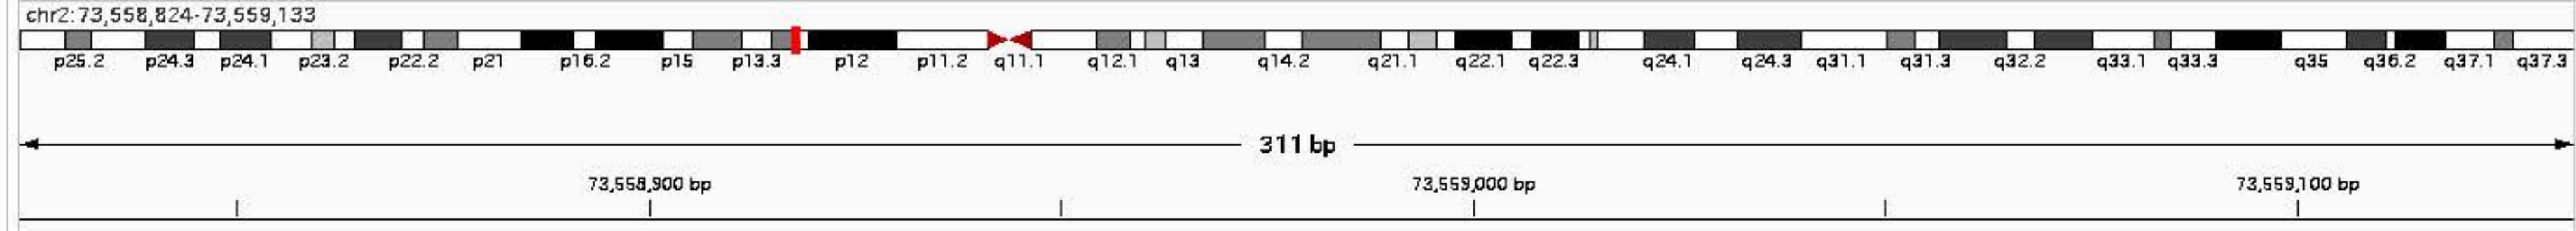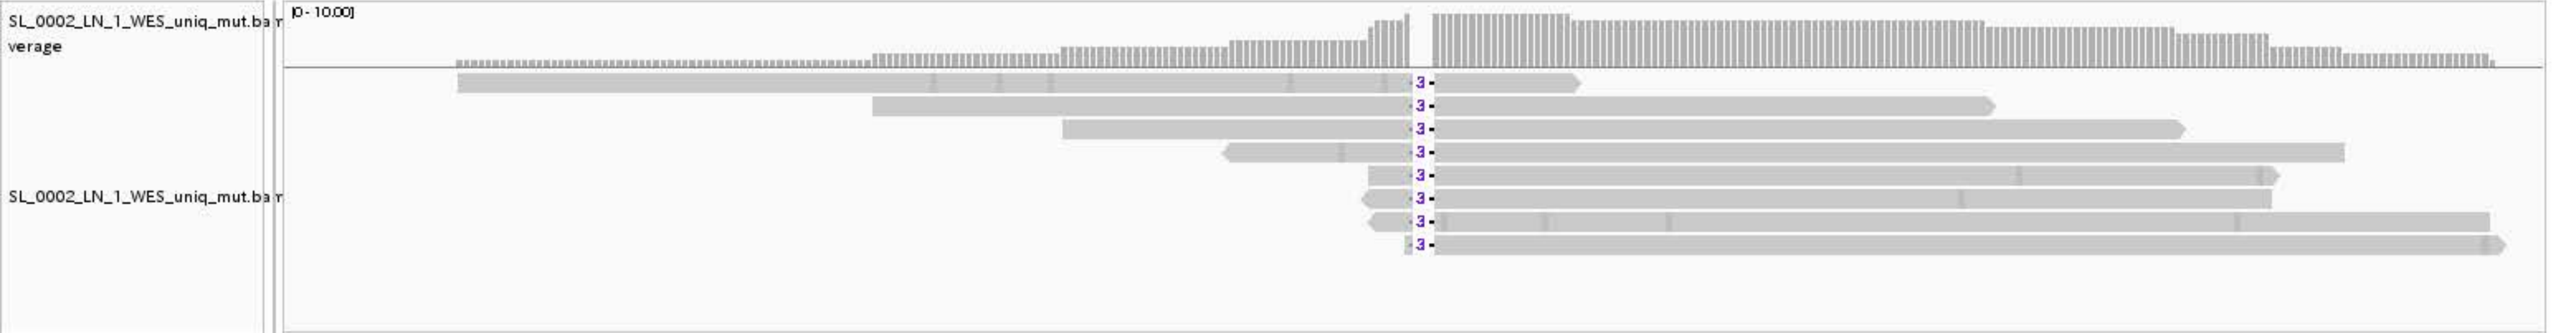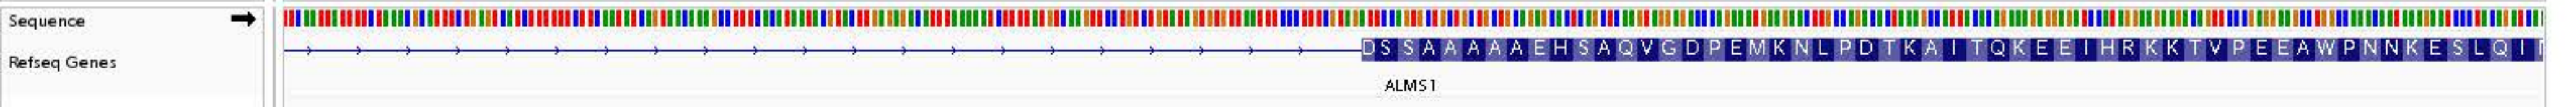

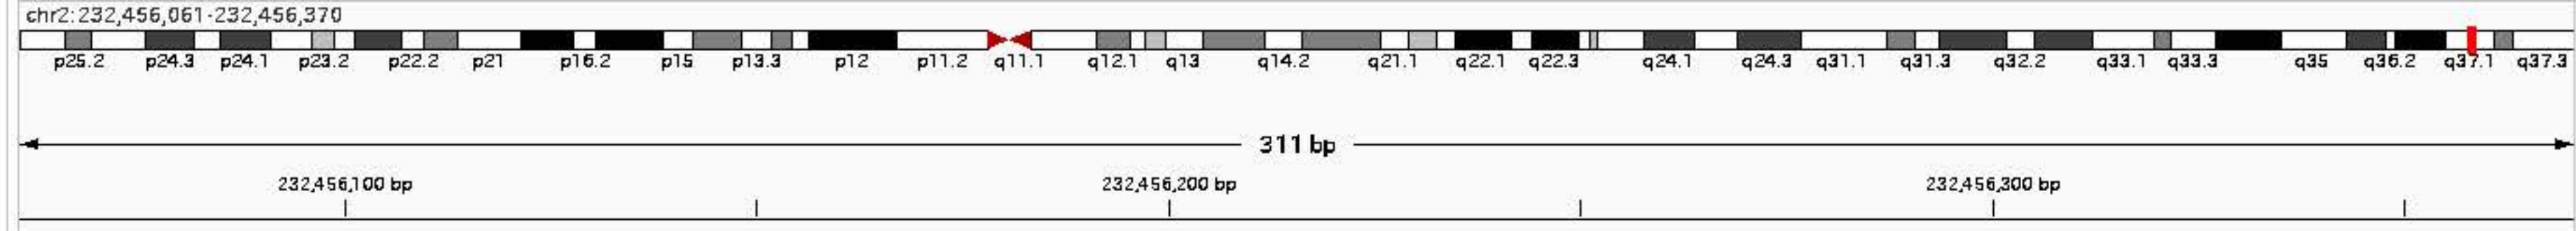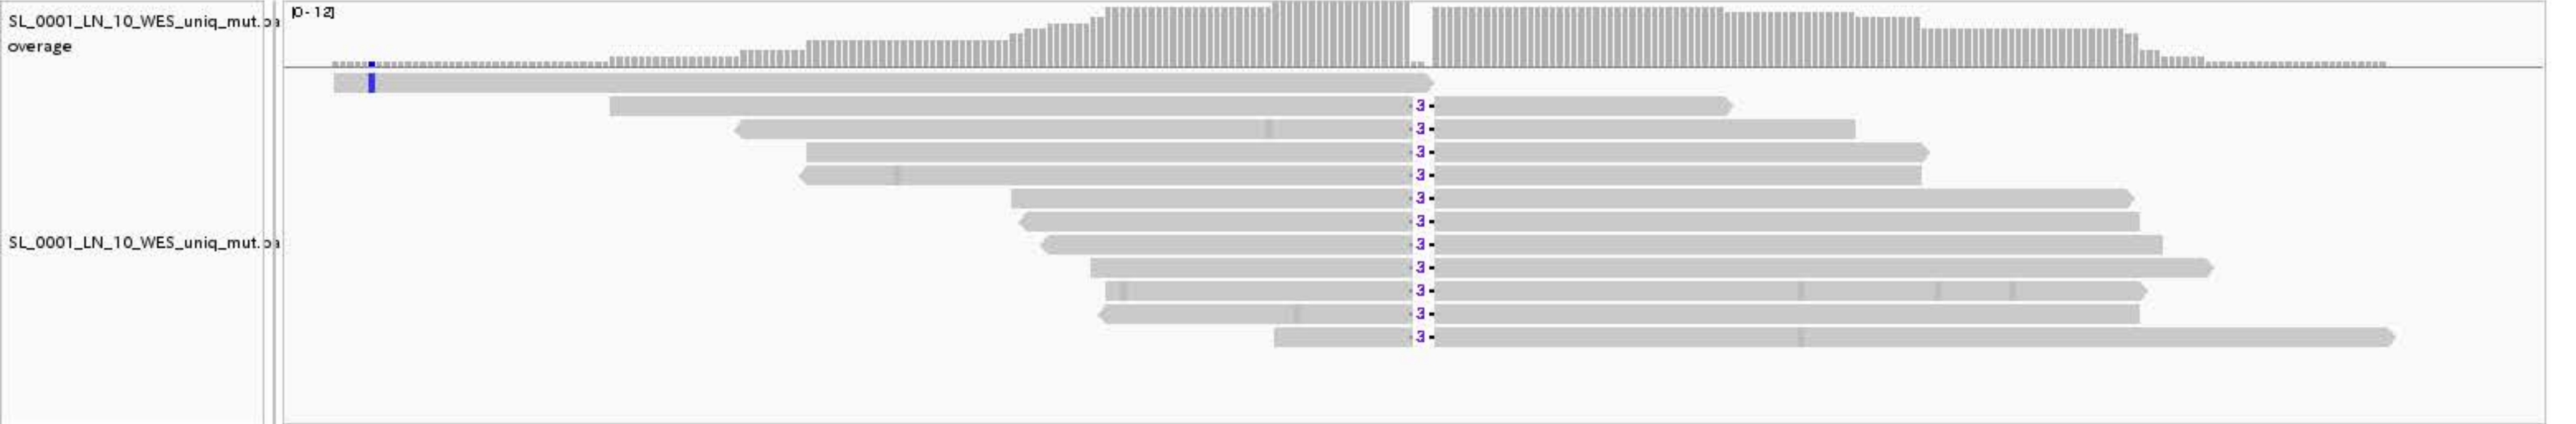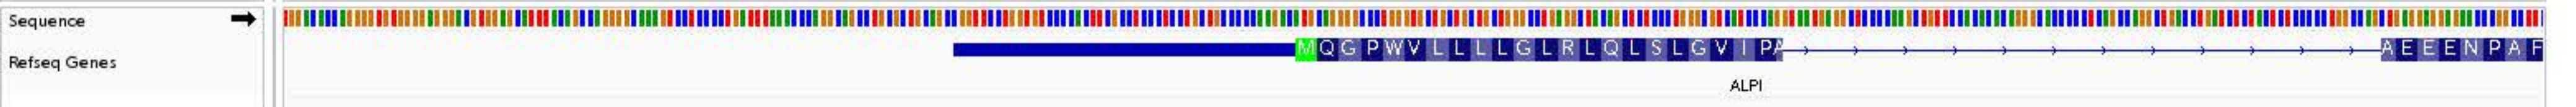

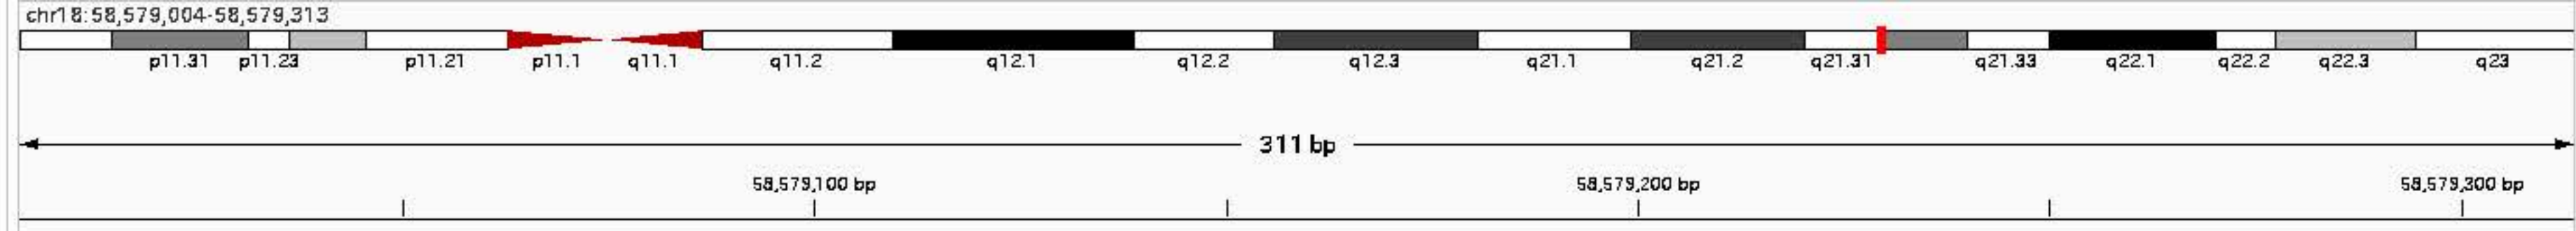

SL\_0015\_RN\_10\_WES\_uniq\_mut.ba  
coverage

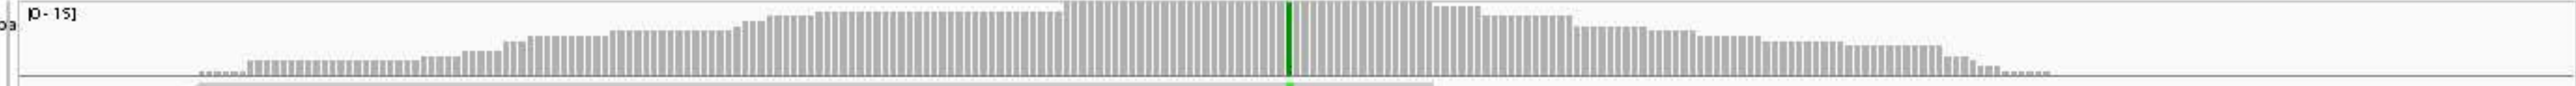

SL\_0015\_RN\_10\_WES\_uniq\_mut.ba

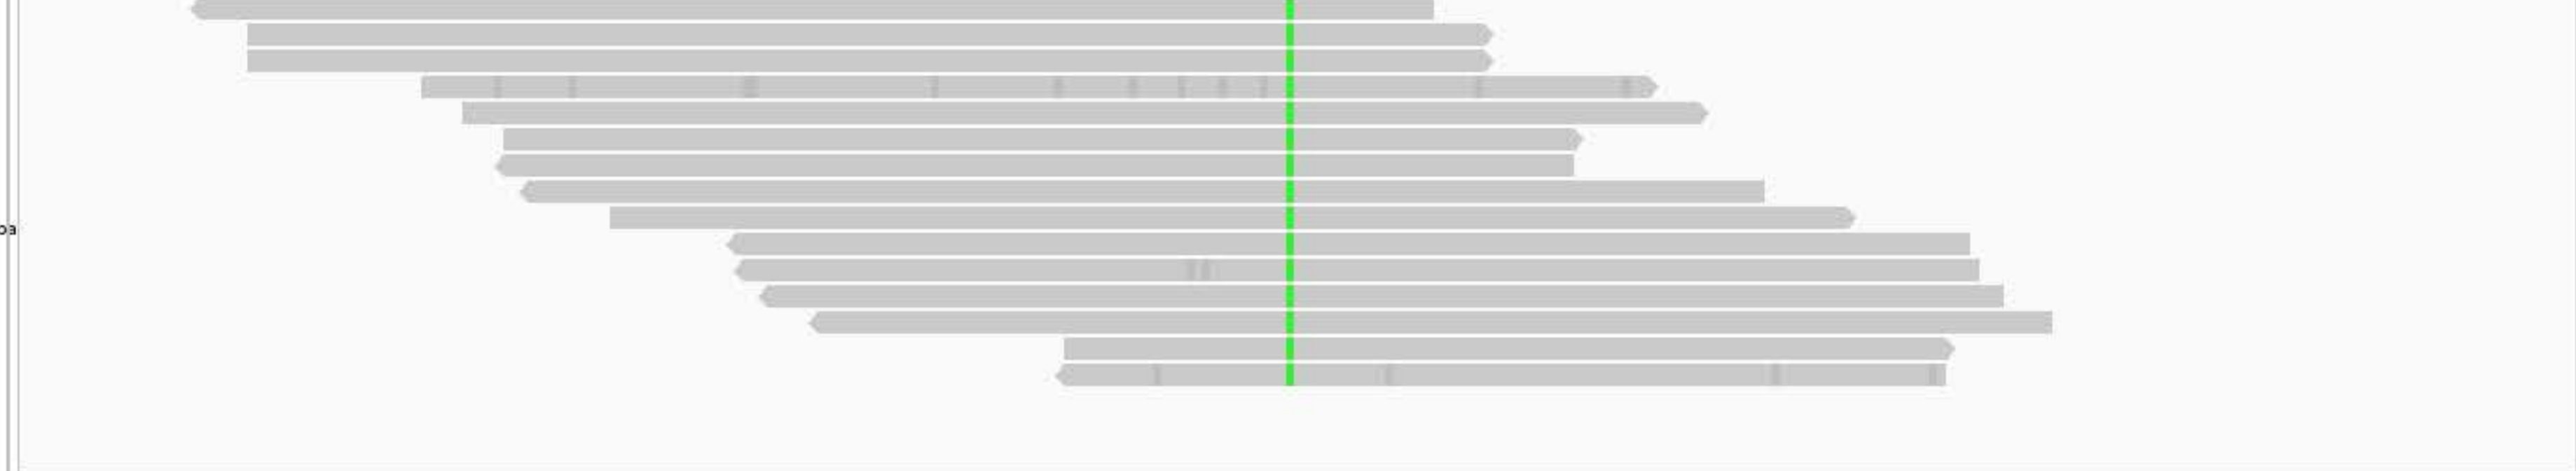

Sequence →

Refseq Genes

TAAATTHSTERKDSQTLPPPEASEKASCLHLLTGETT SERLNANPKKPNGKMG PQRVRA SKRSGR KSWLDKGGVRKDAATEWCQSMG SNESEGSLLKMETERVSED

ALPK2



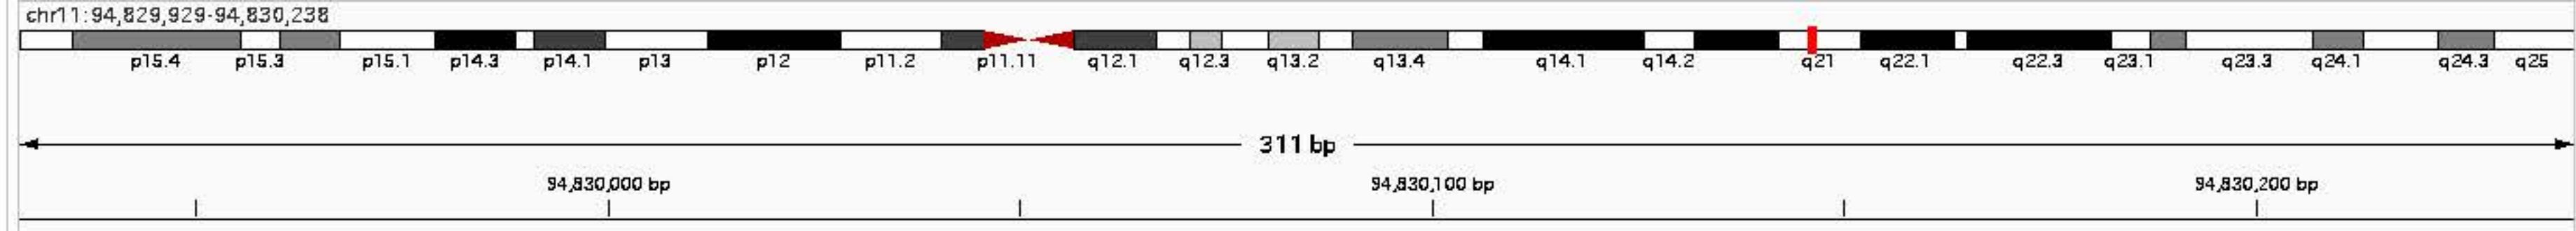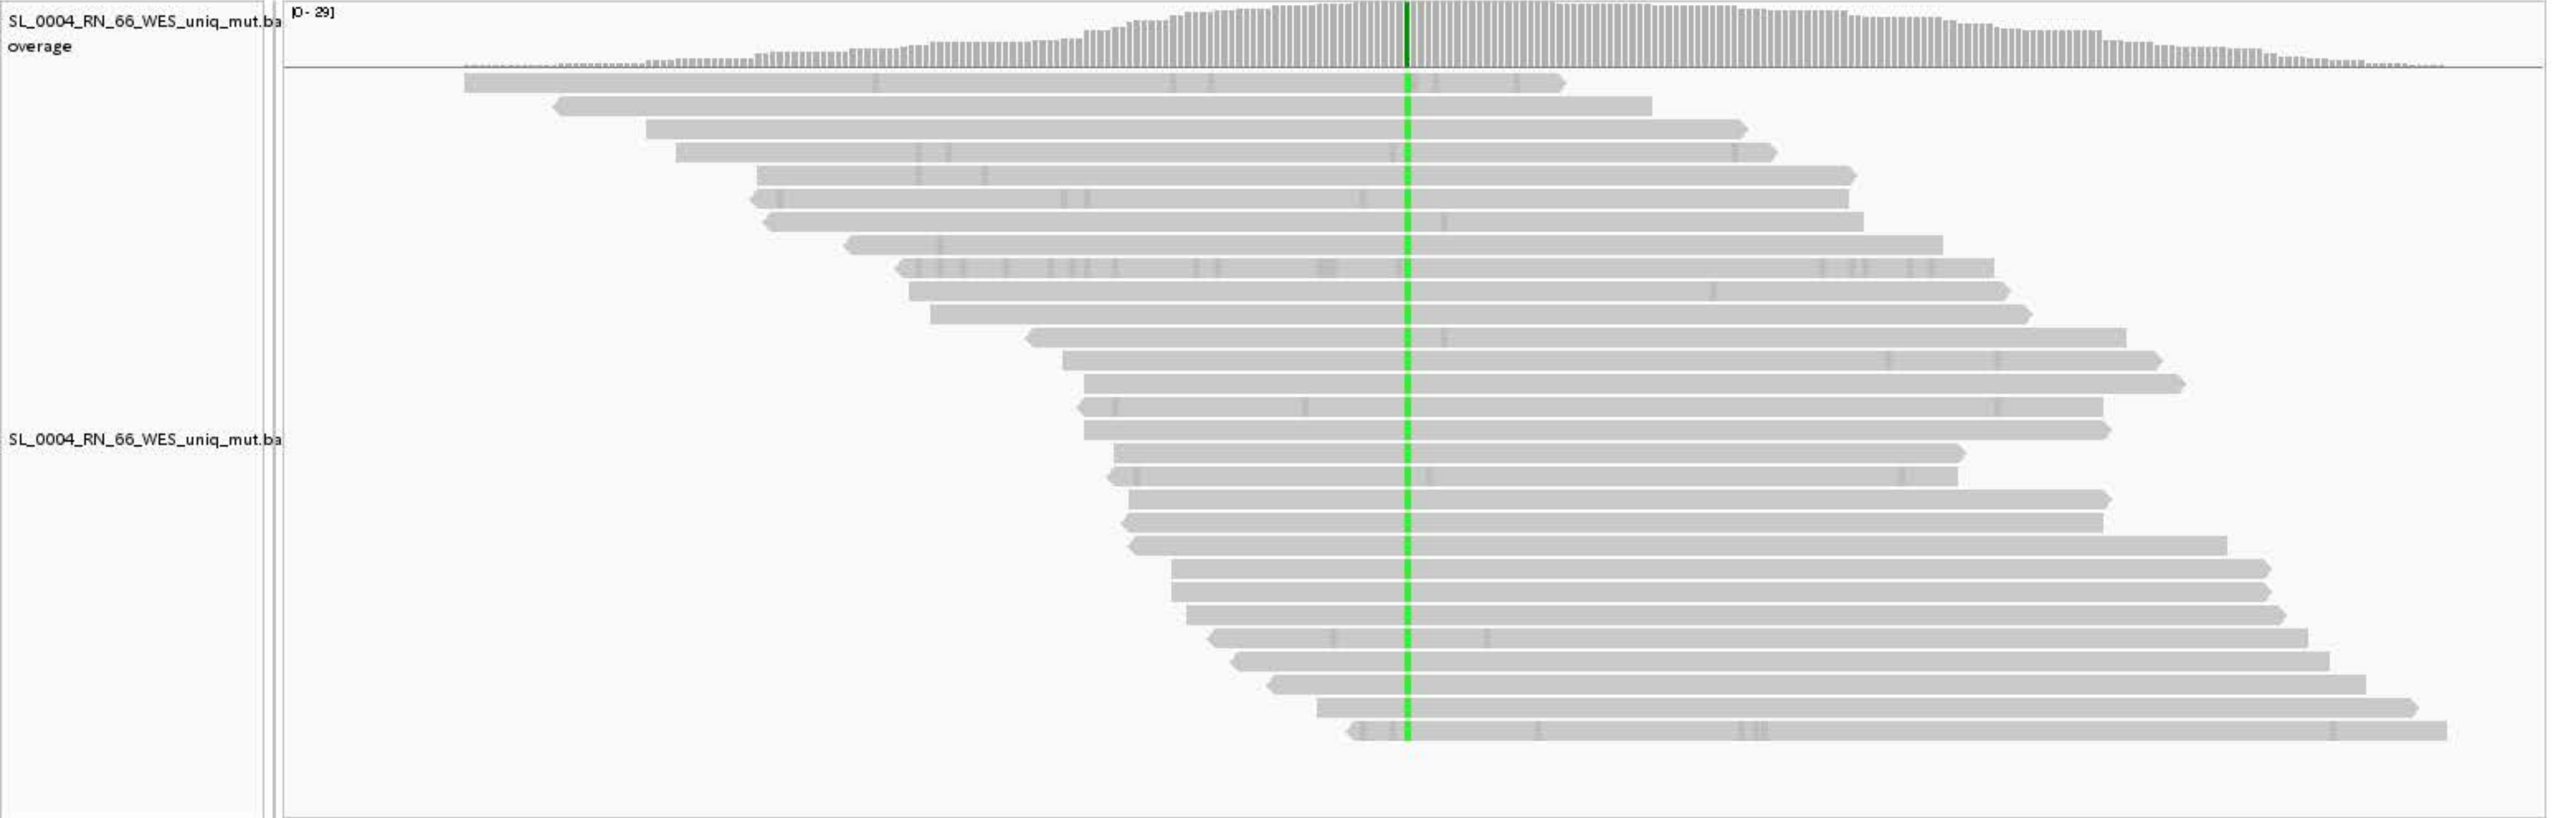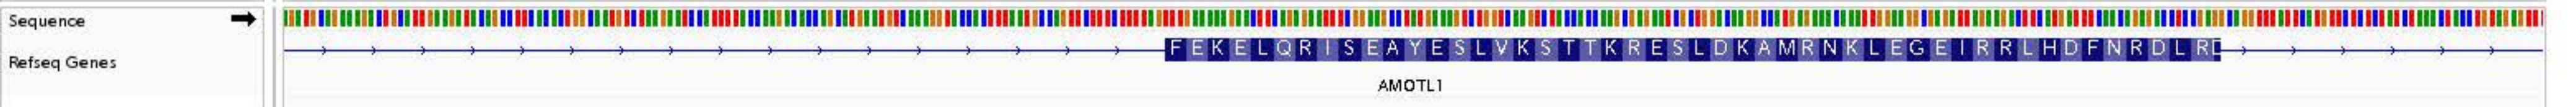

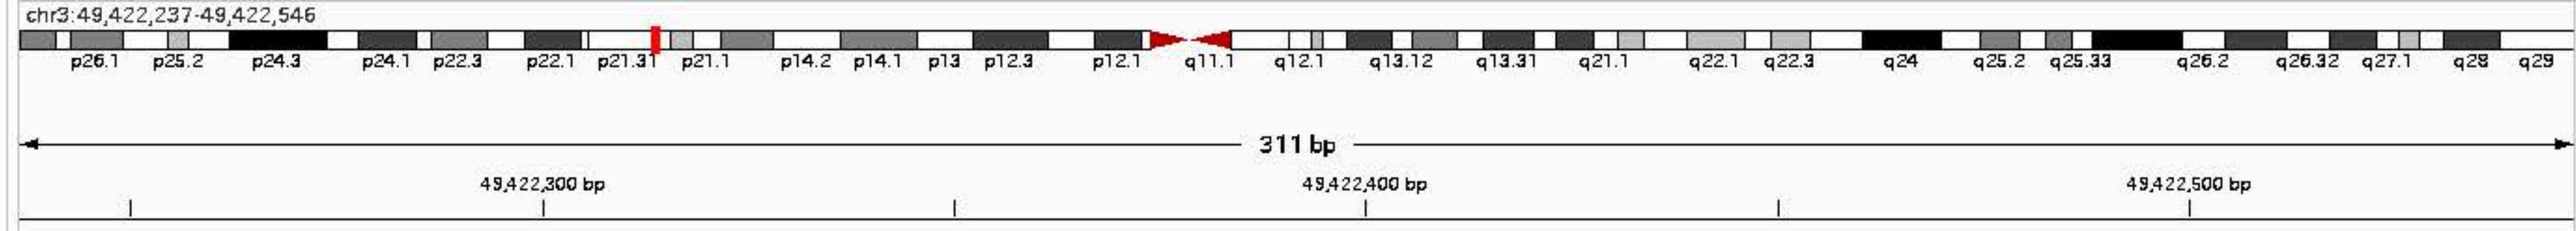

SL\_0006\_RN\_59\_WES\_uniq\_mut.ba  
coverage

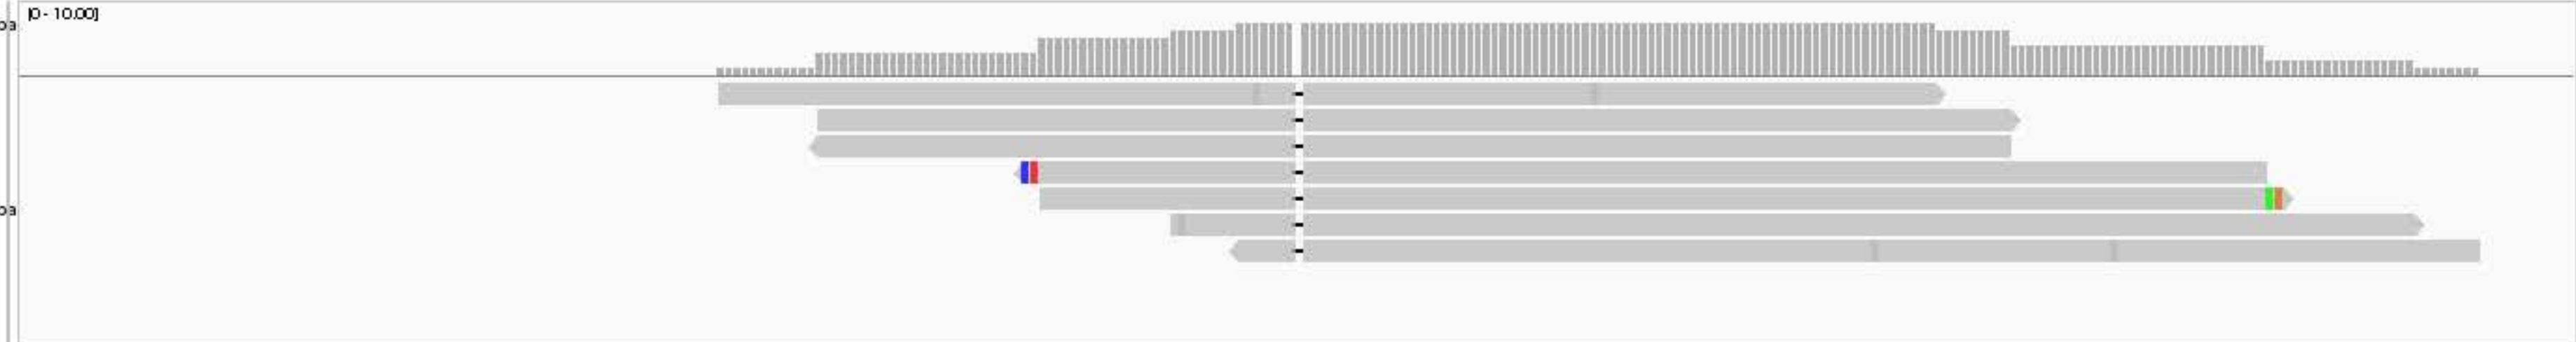

SL\_0006\_RN\_59\_WES\_uniq\_mut.ba

Sequence

Refseq Genes

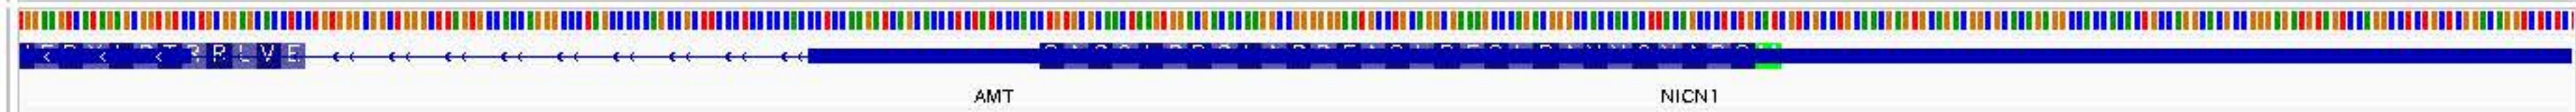

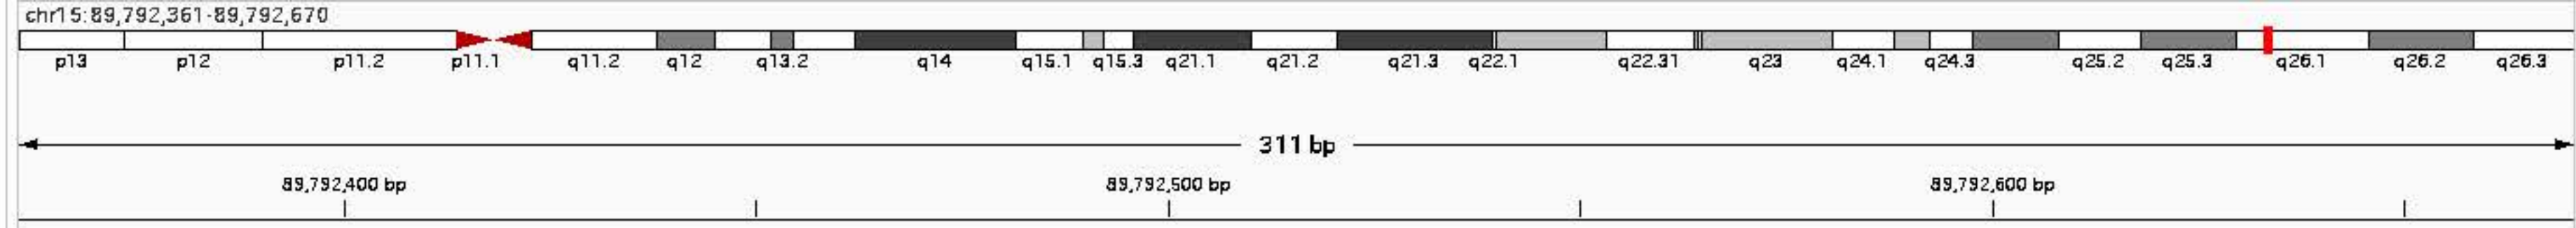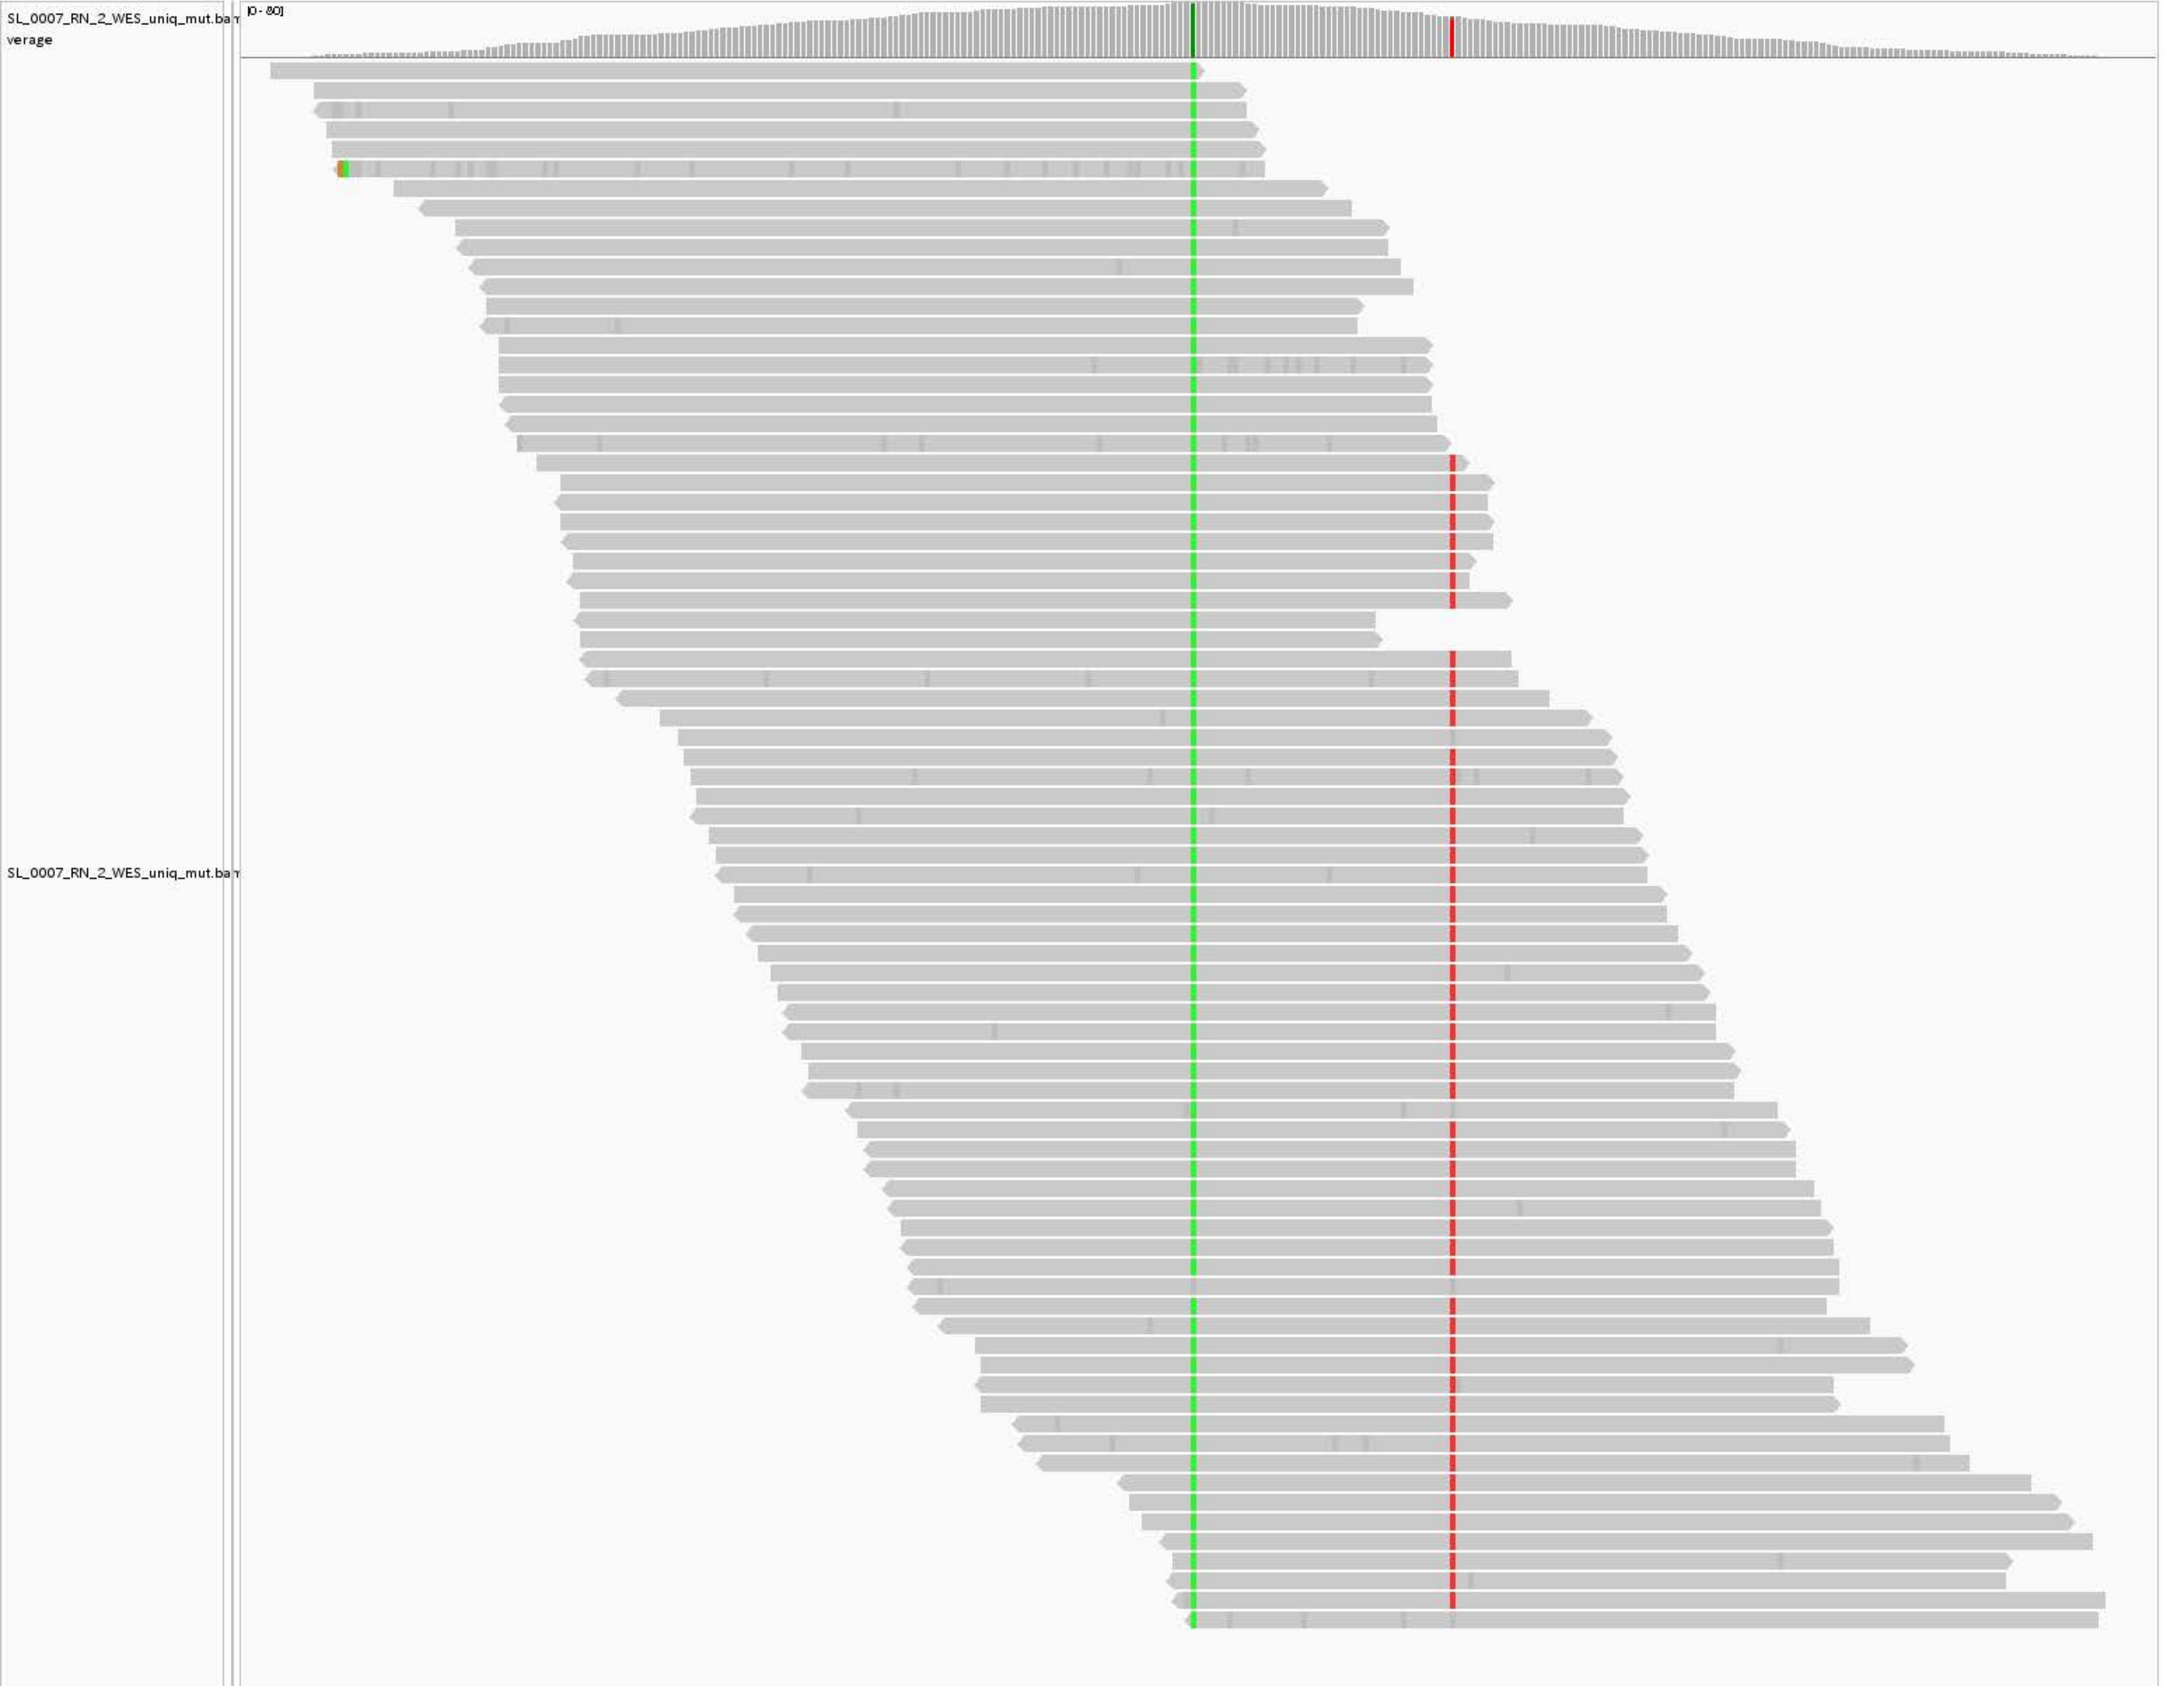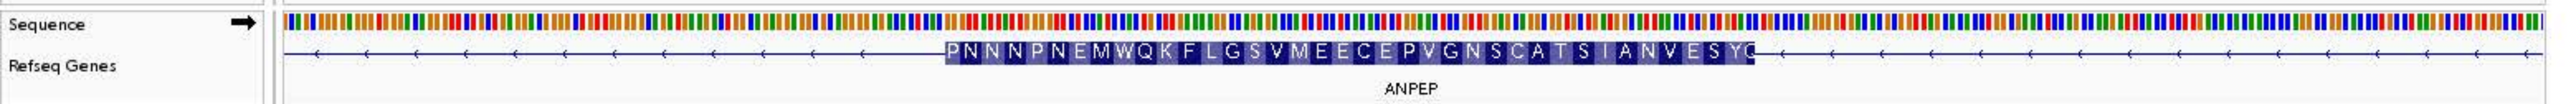



chr15:60,351,105-60,351,414

p13 p12 p11.2 p11.1 q11.2 q12 q13.2 q14 q15.1 q15.3 q21.1 q21.2 q21.3 q22.1 q22.31 q23 q24.1 q24.3 q25.2 q25.3 q26.1 q26.2 q26.3

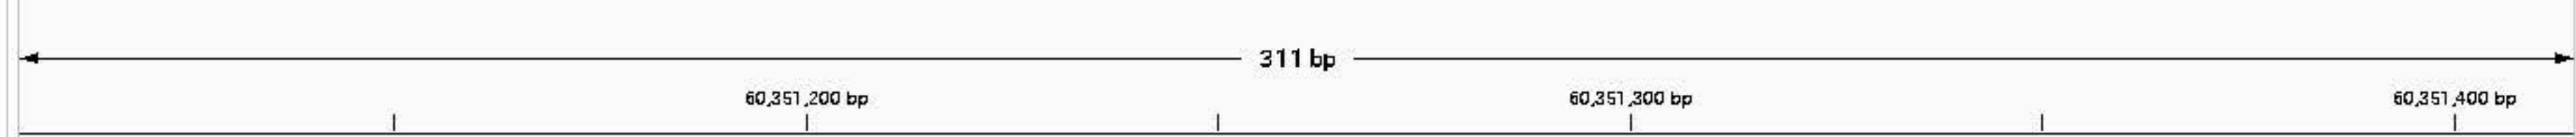

SL\_0010\_RN\_34\_WES\_uniq\_mut.ba  
coverage

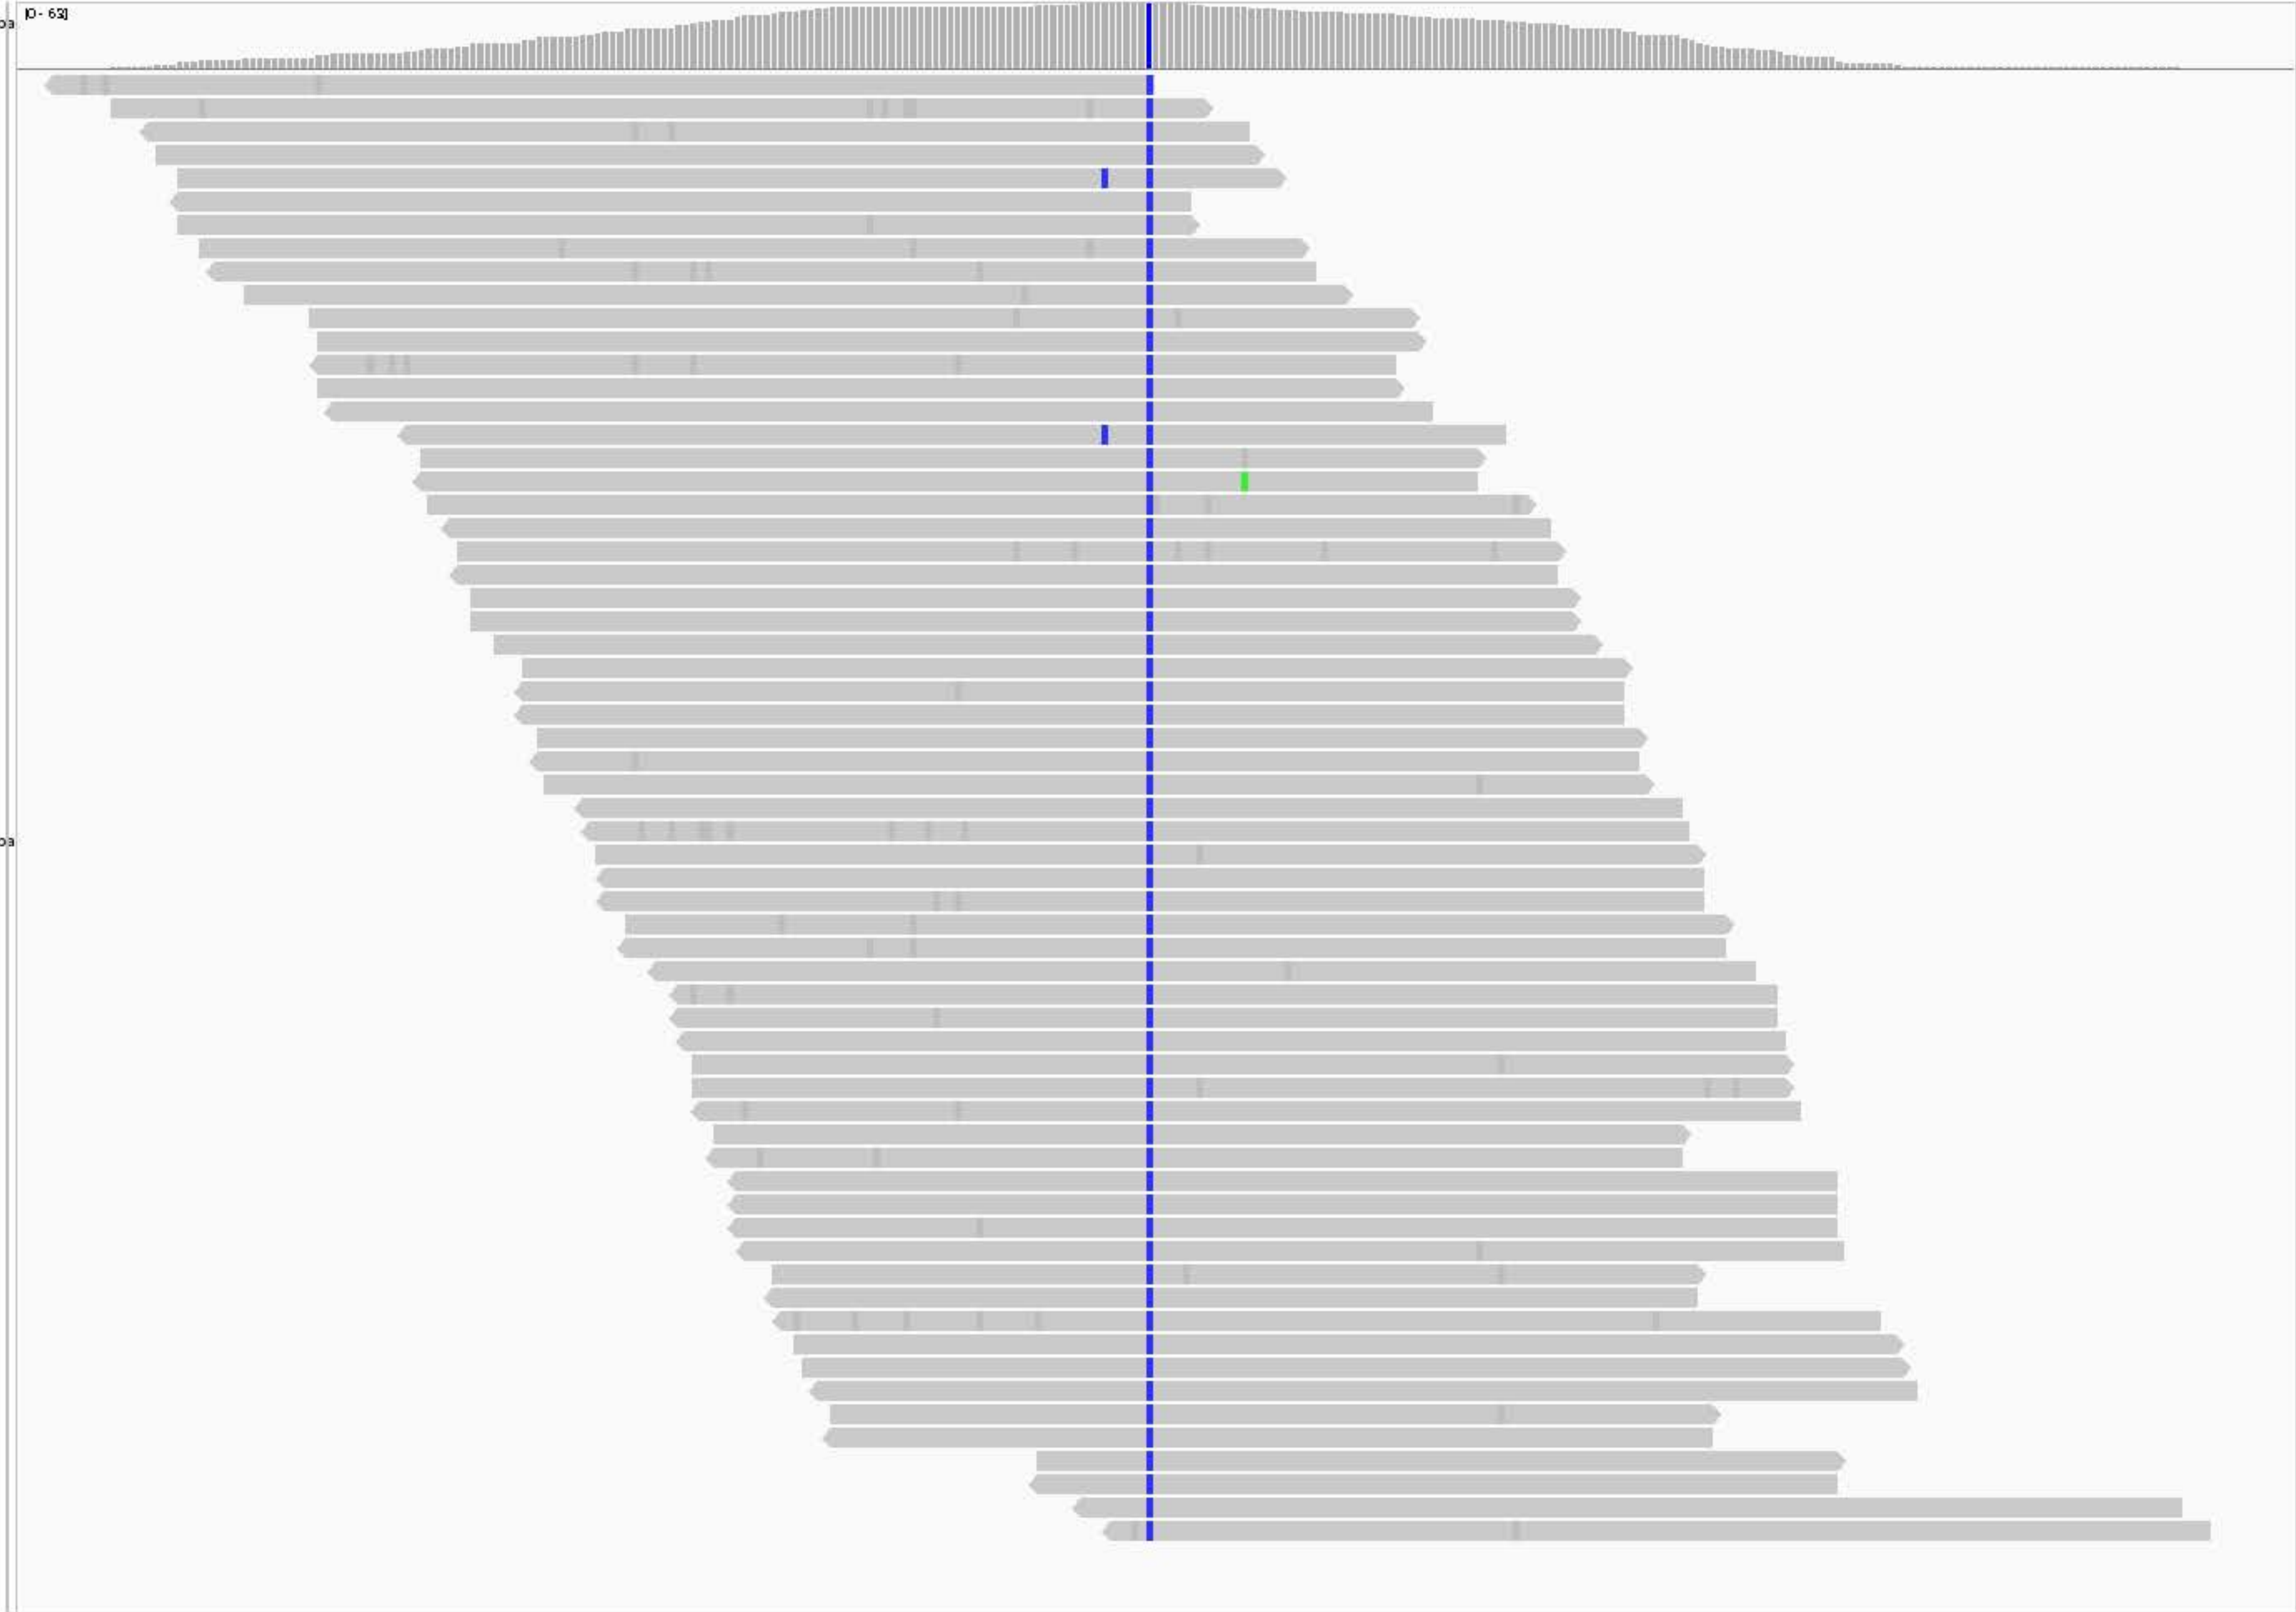

SL\_0010\_RN\_34\_WES\_uniq\_mut.ba

Sequence

Refseq Genes

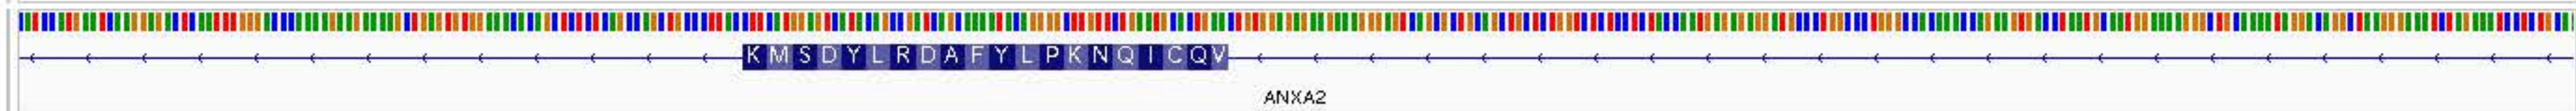

ANXA2

chr2:21,002,987-21,003,296  
p25.2 p24.3 p24.1 p23.2 p22.2 p21 p16.2 p15 p13.3 p12 p11.2 q11.1 q12.1 q13 q14.2 q21.1 q22.1 q22.3 q24.1 q24.3 q31.1 q31.3 q32.2 q33.1 q33.3 q35 q36.2 q37.1 q37.3

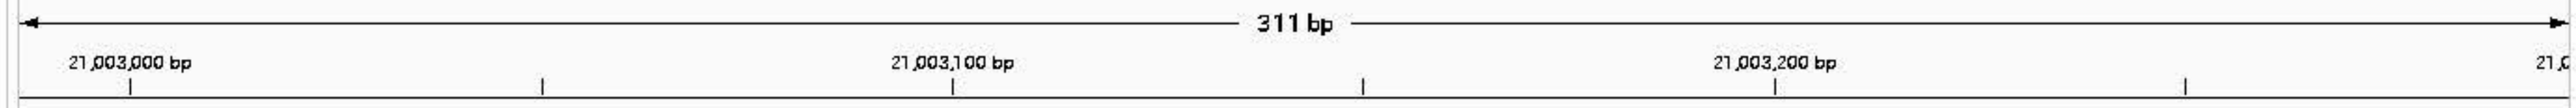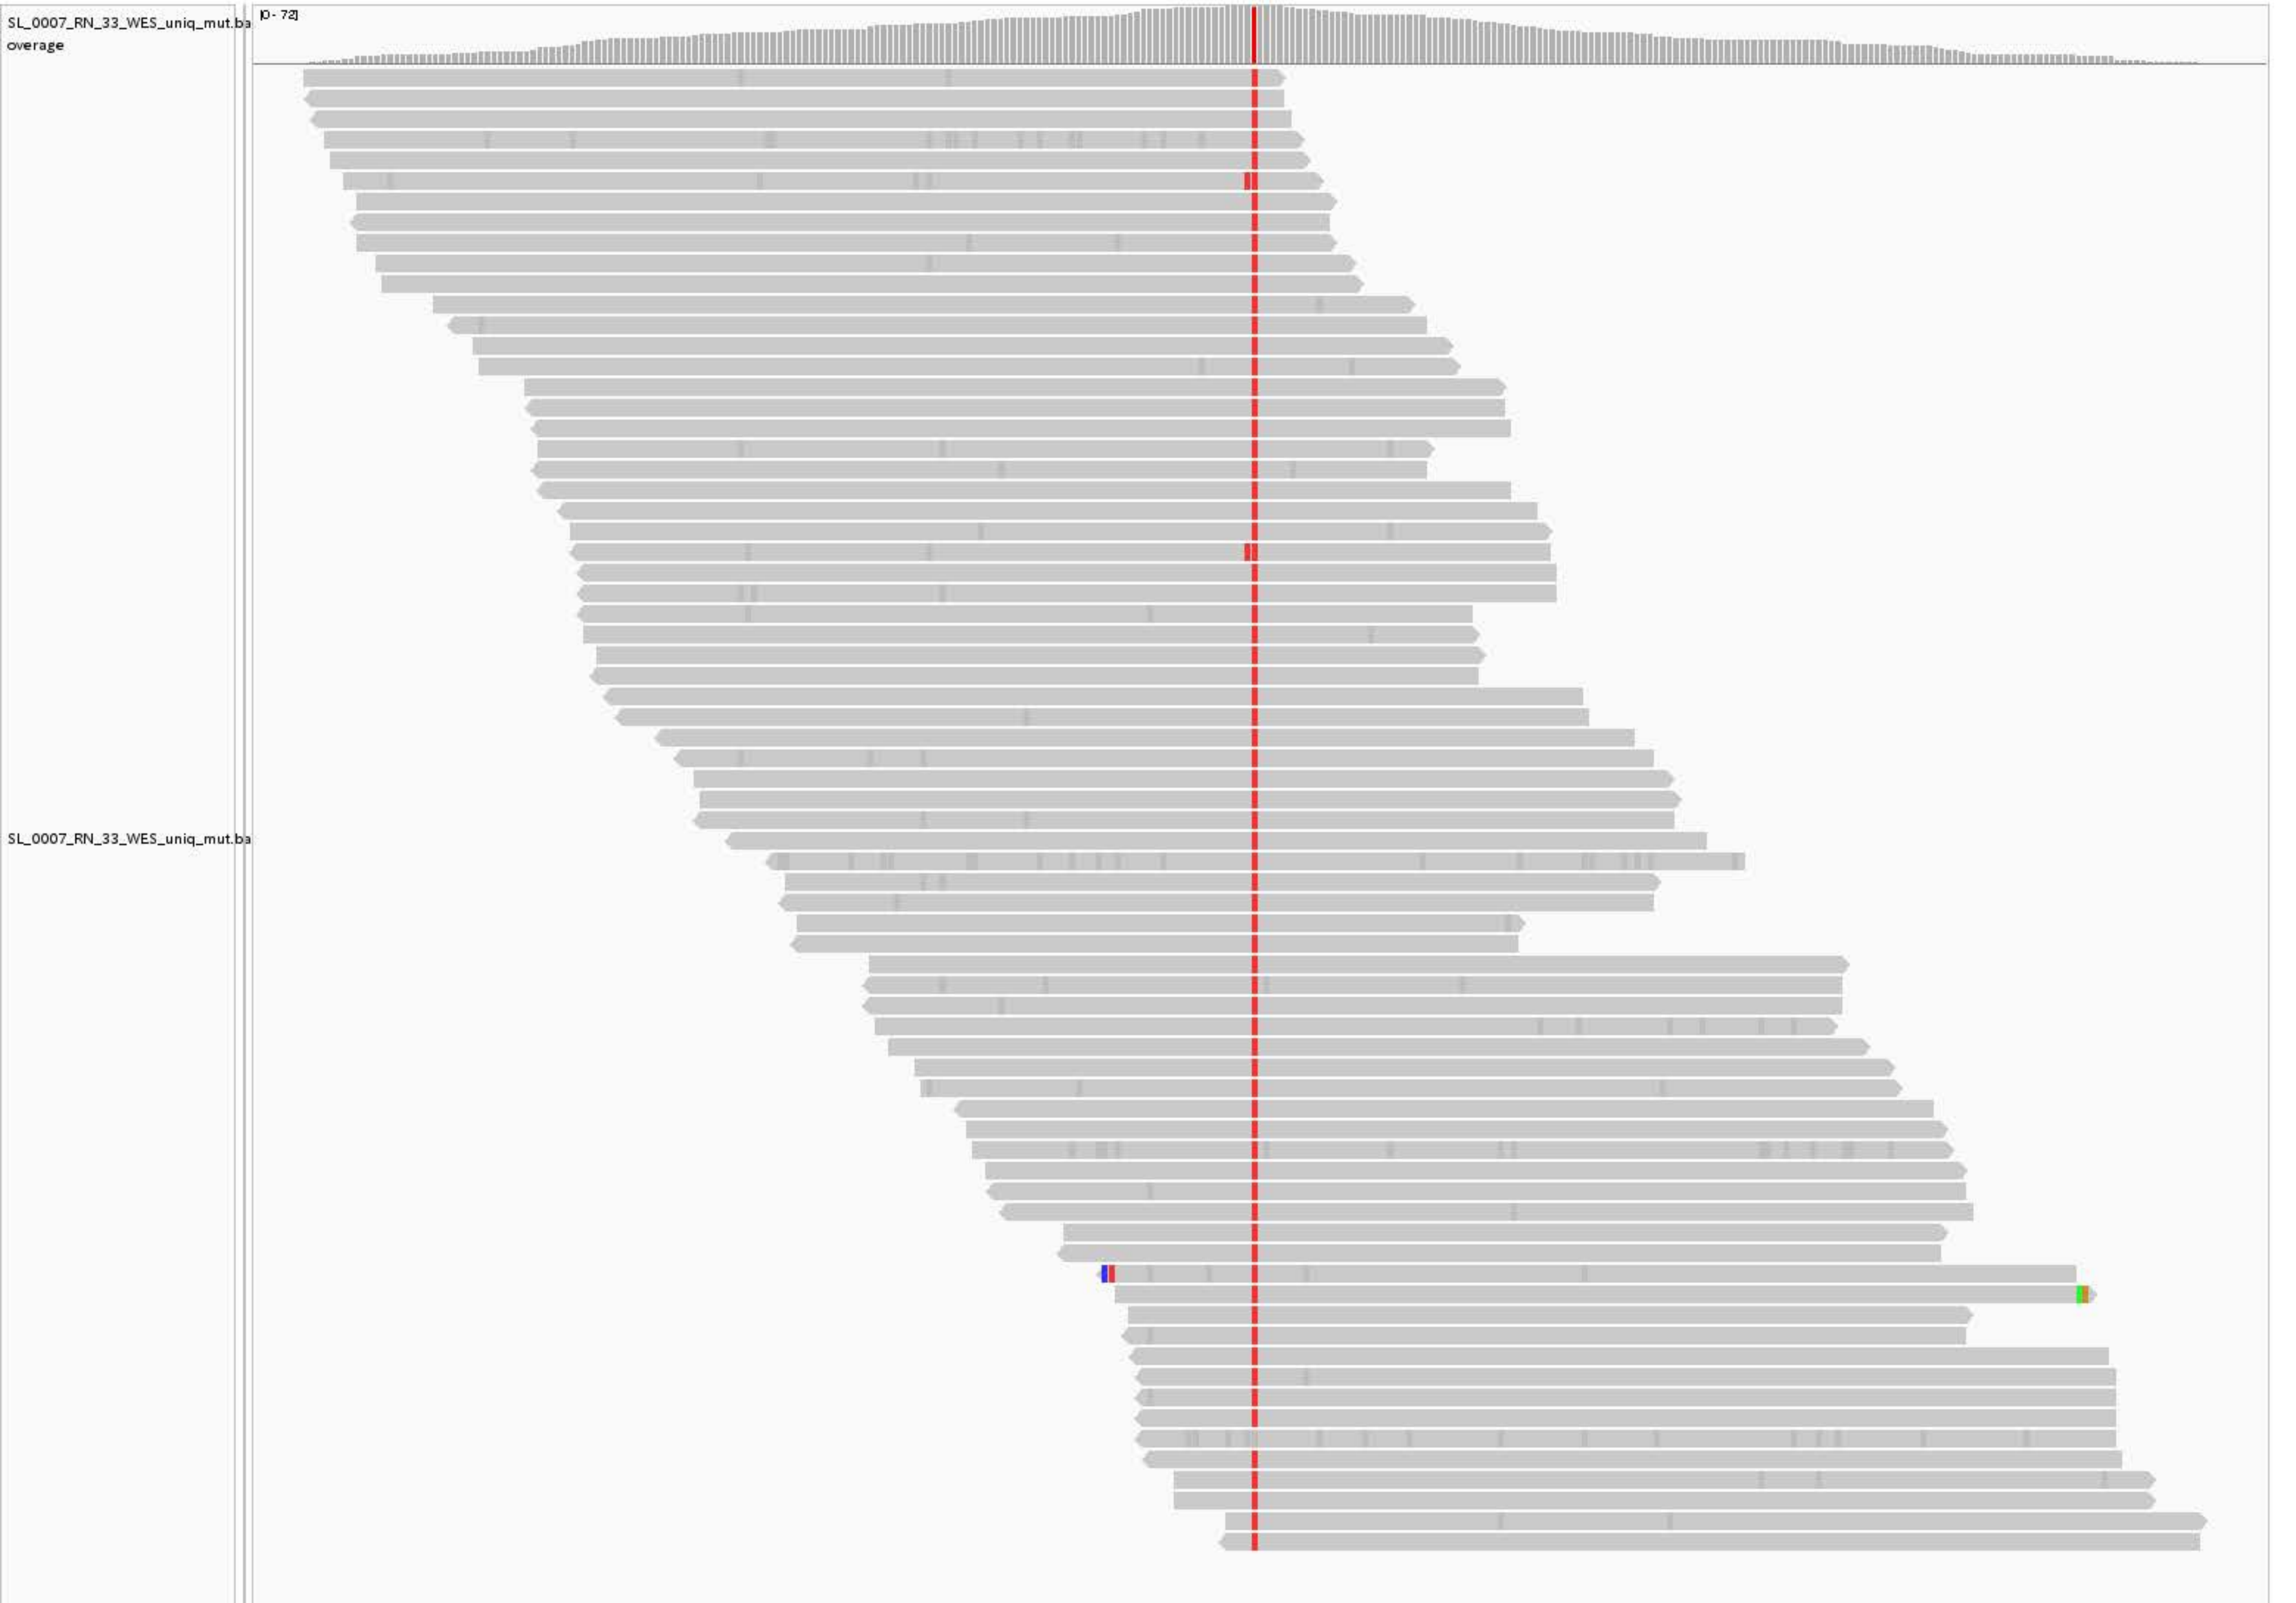

Sequence →  
Refseq Genes

KWEQYTGTTGSAAKQFRVDIDDIQR IAGQYVWEANNQLNRR LKSSVERLTLGTHEWHYKNVYDYLVGTAKPVNDKLS TLLGSA AEEEWNVKIQTEEDSERVRL

APOB

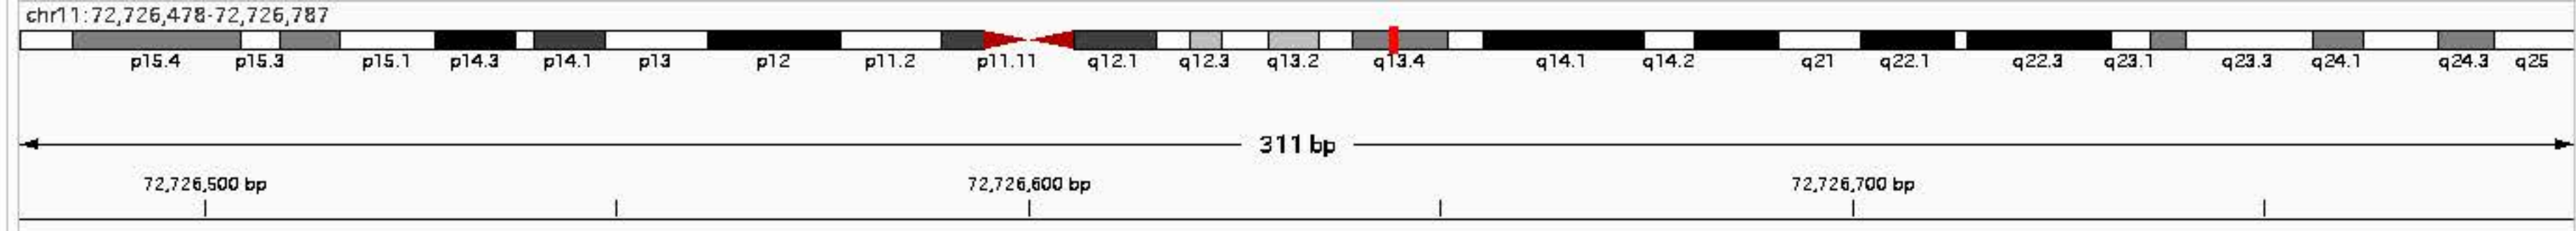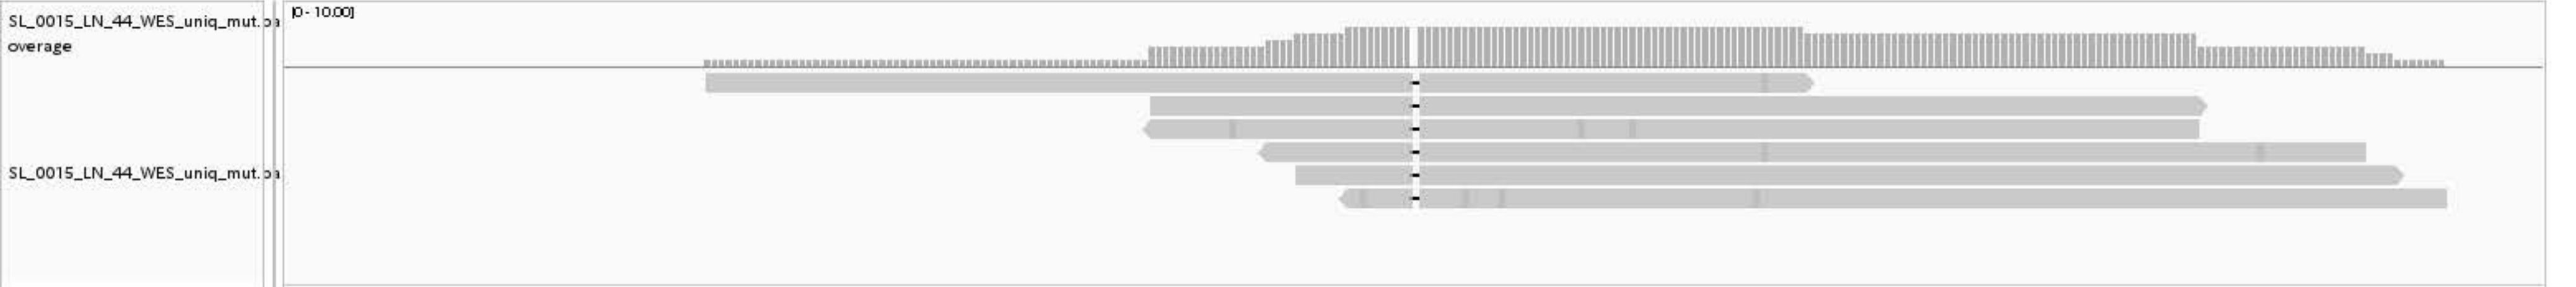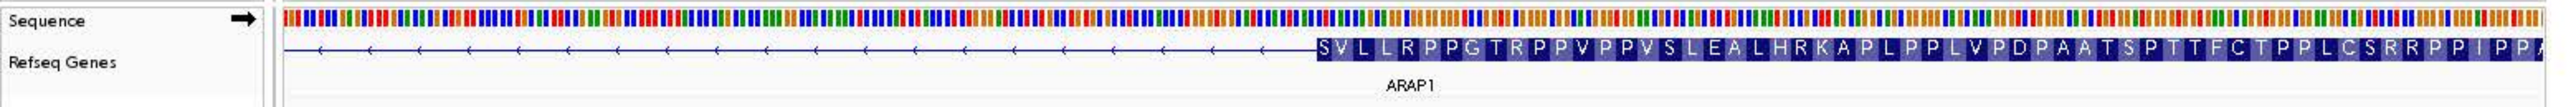



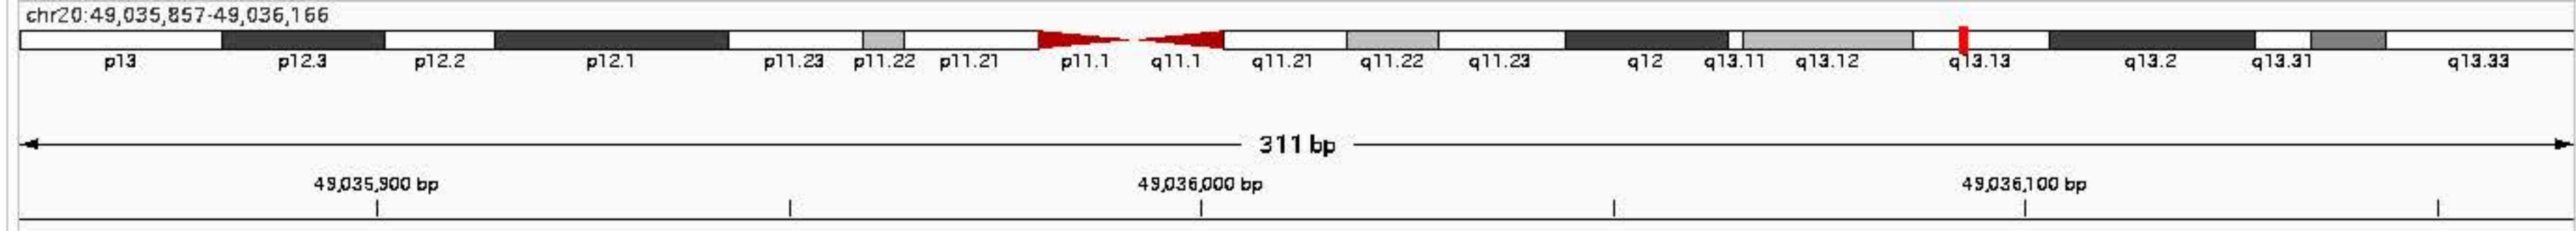

SL\_0004\_RN\_47\_WES\_uniq\_mut.ba  
coverage

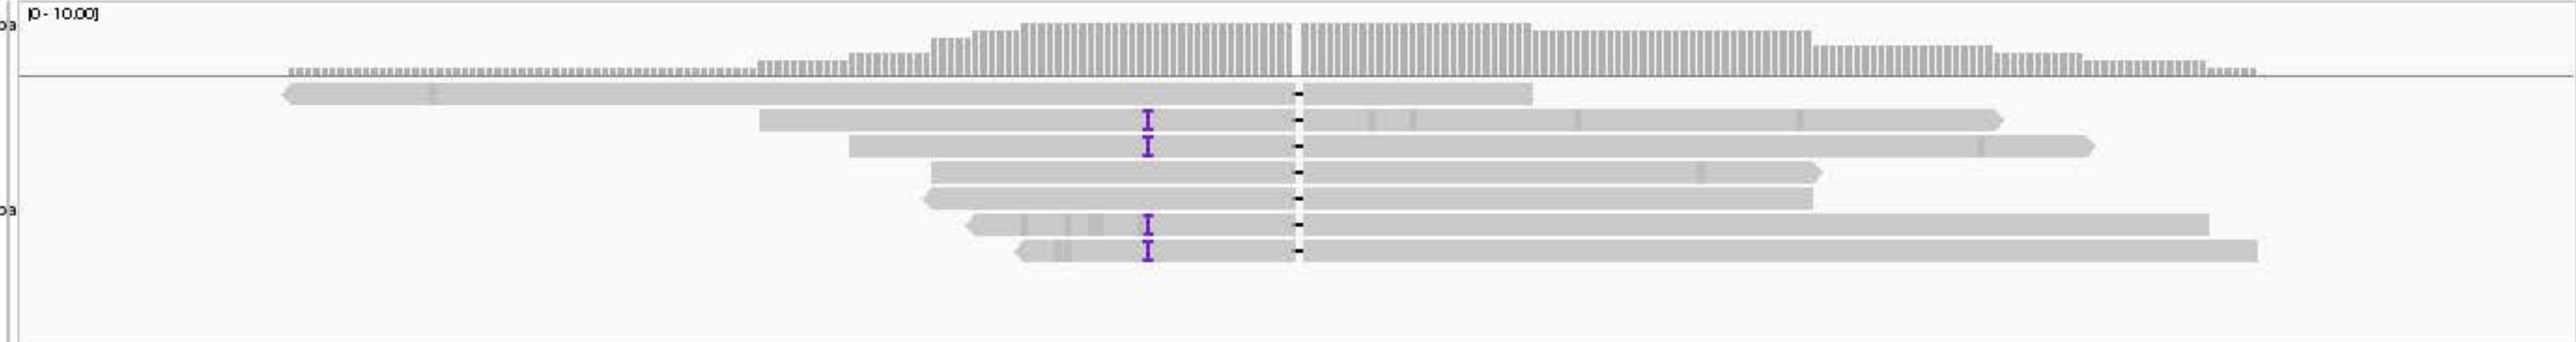

SL\_0004\_RN\_47\_WES\_uniq\_mut.ba

Sequence

Refseq Genes

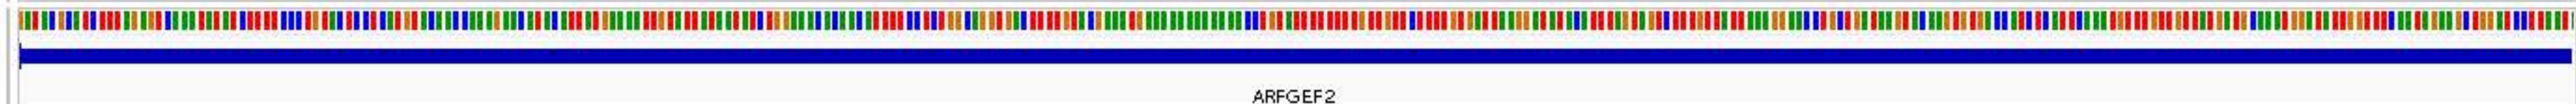

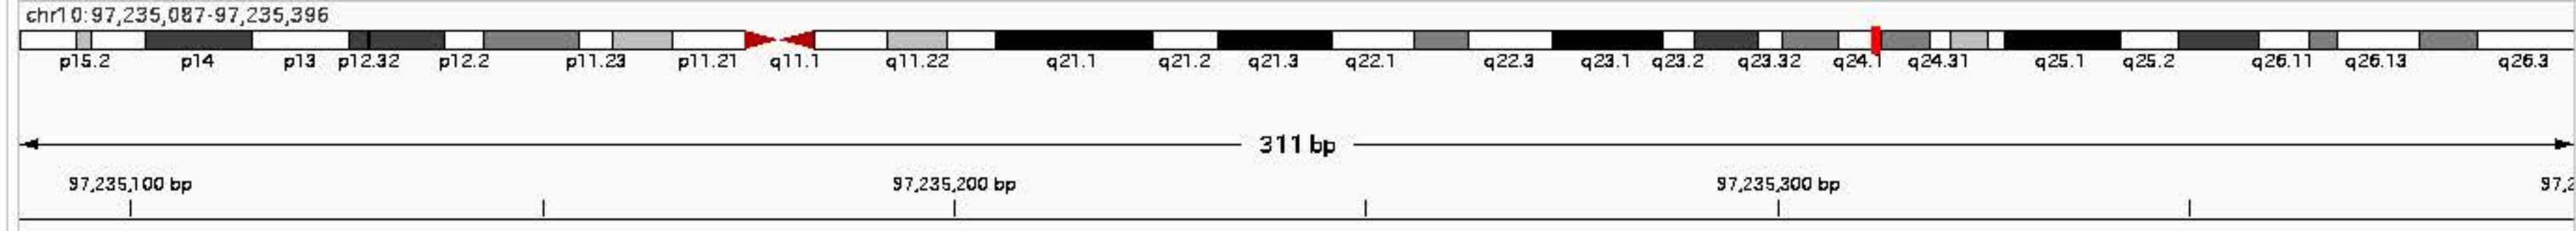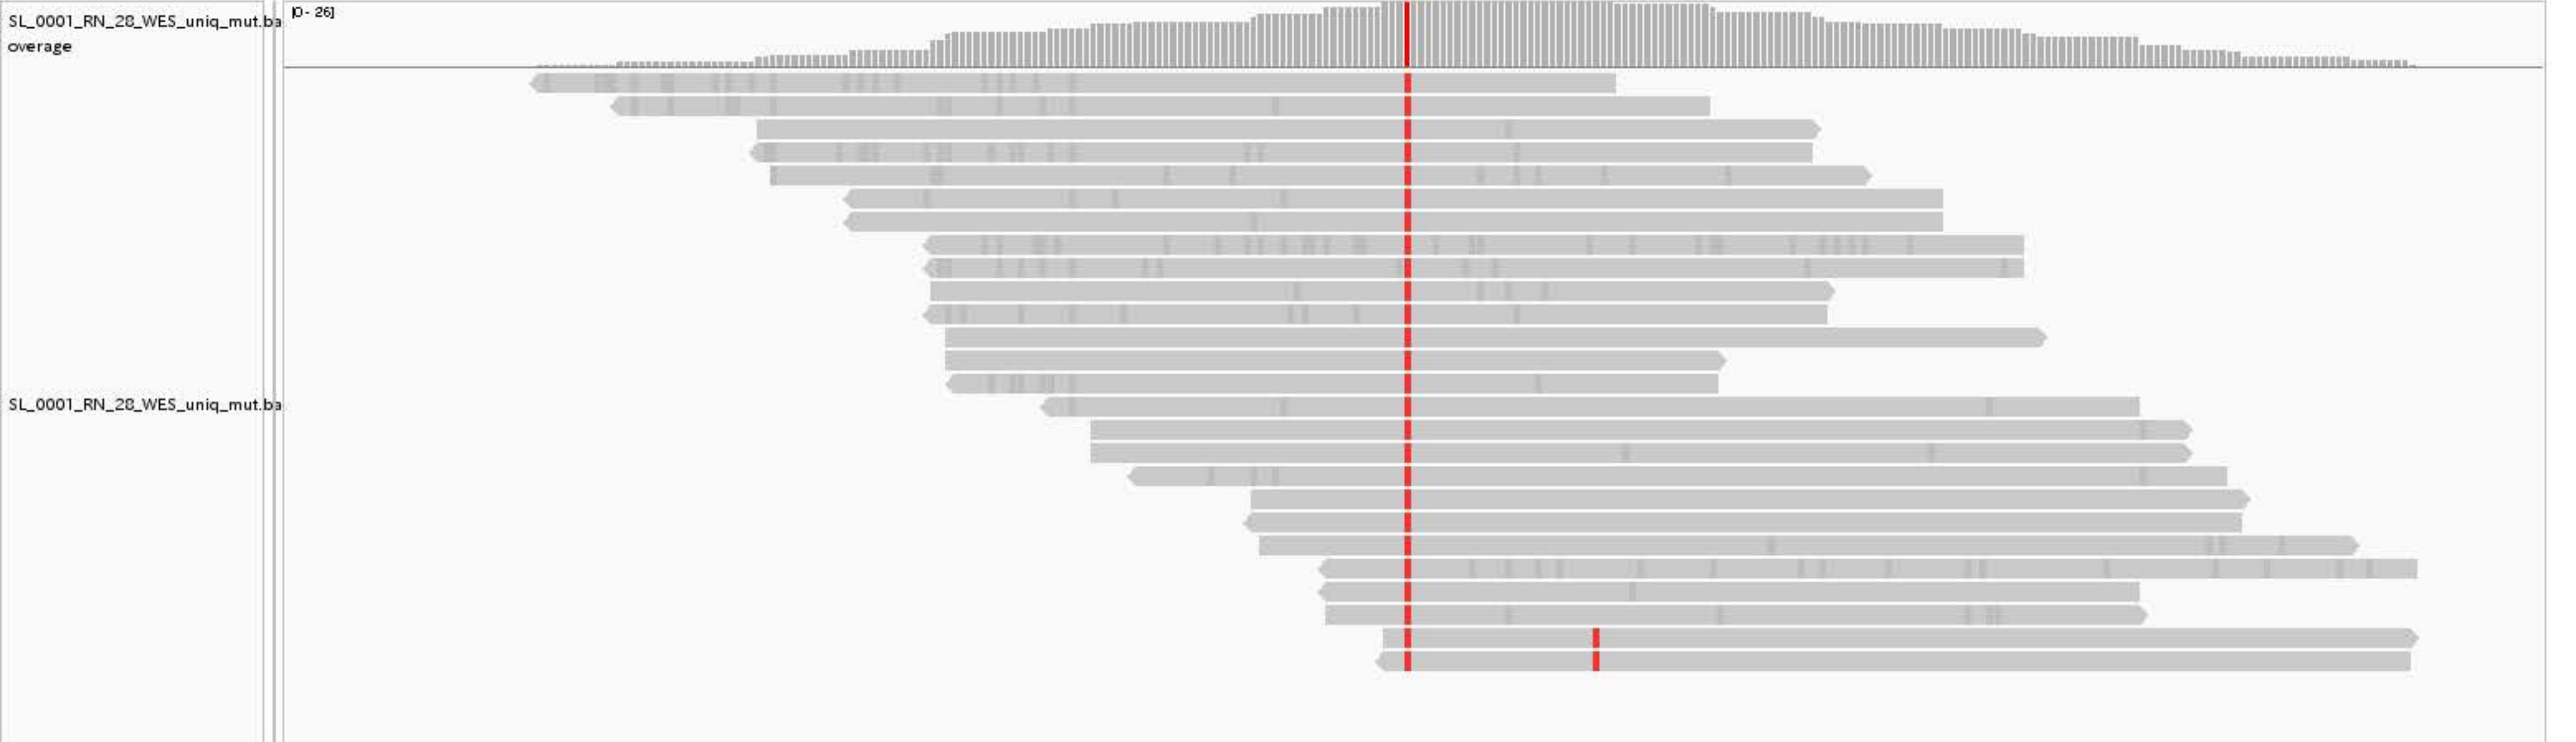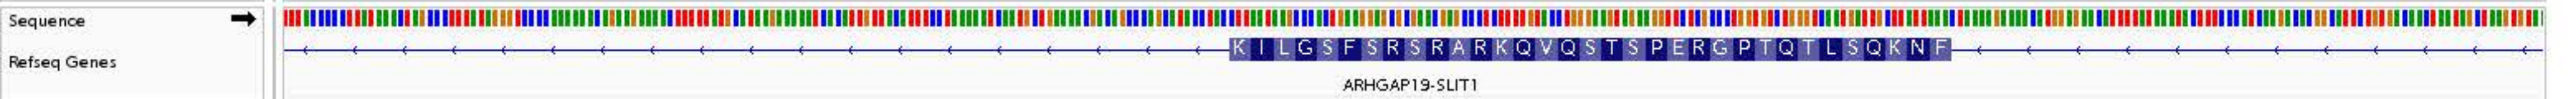

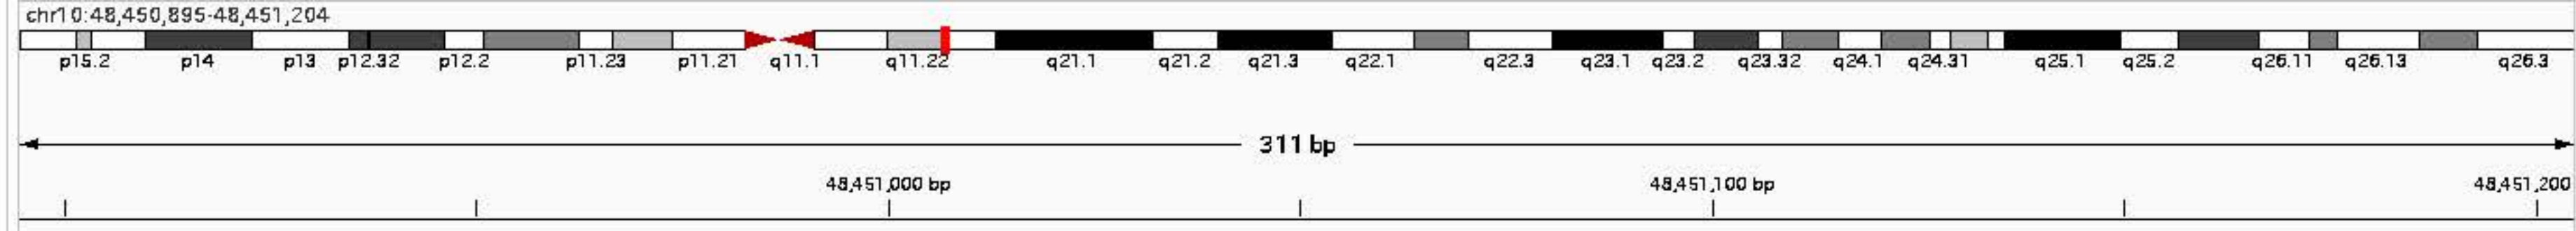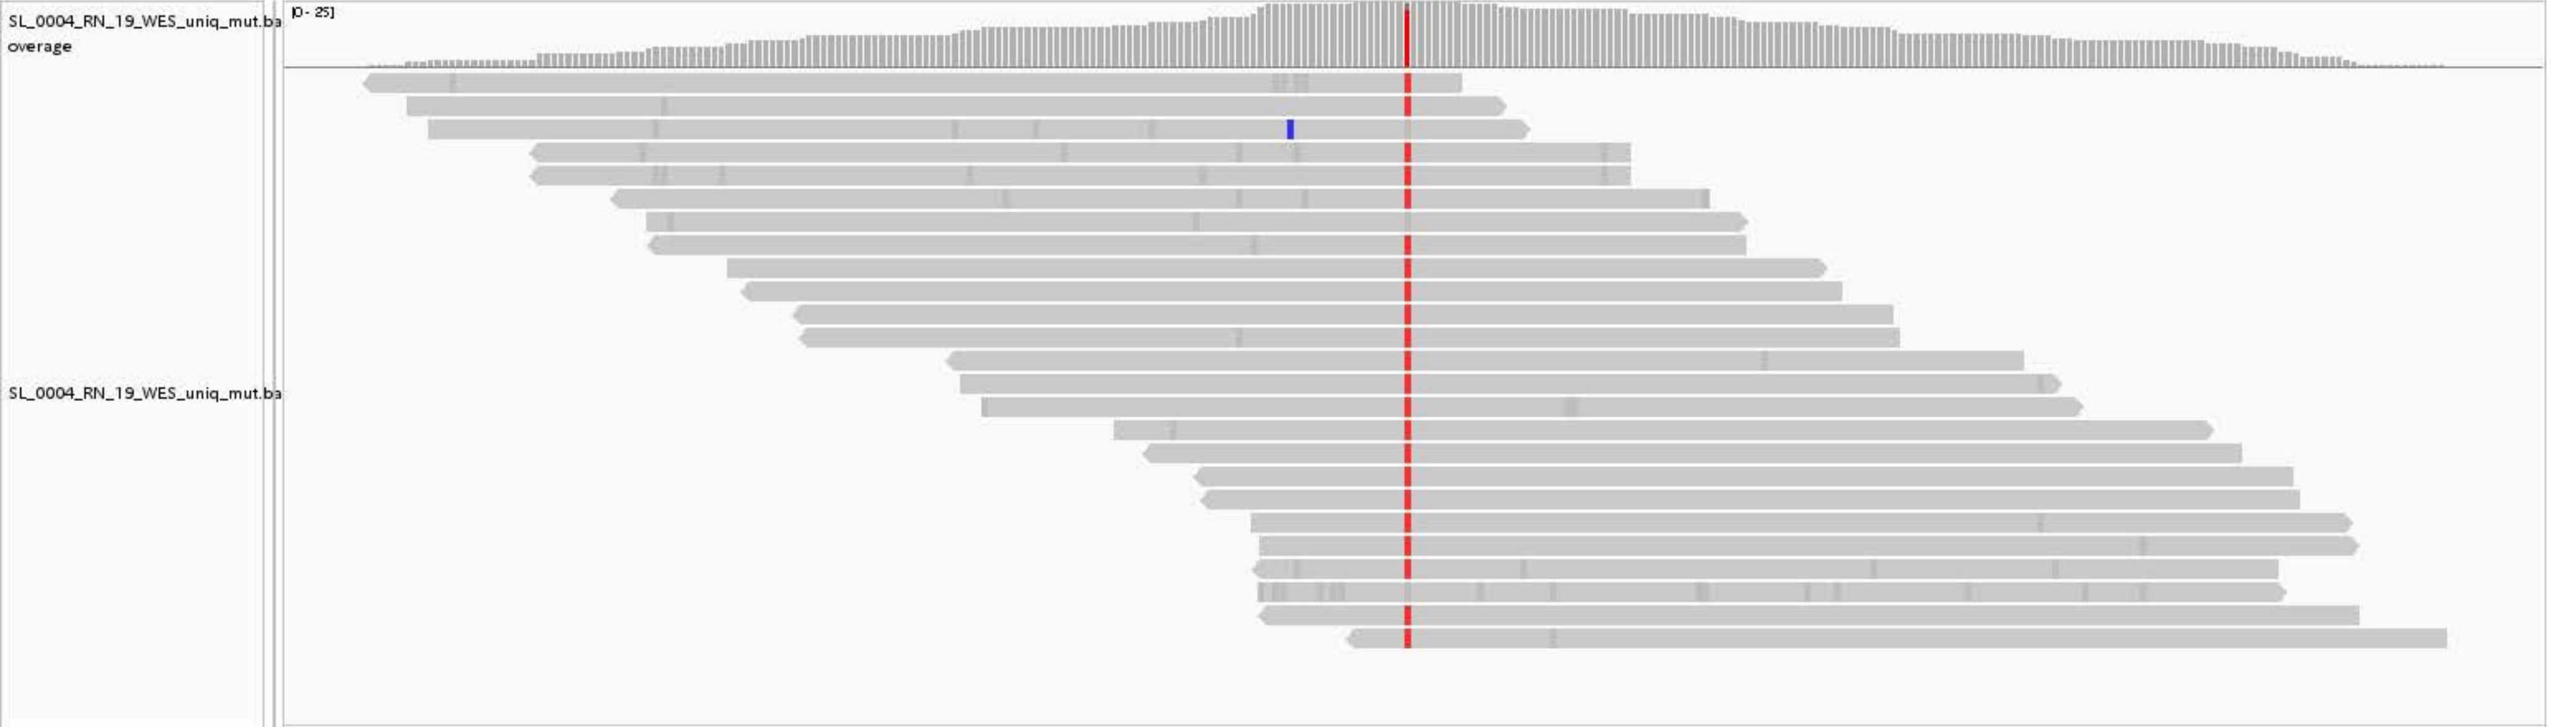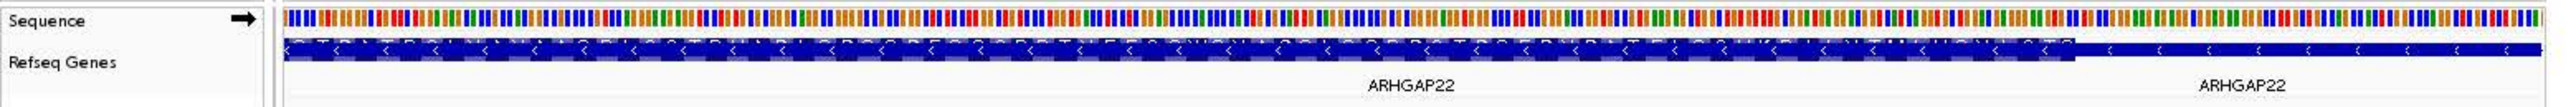



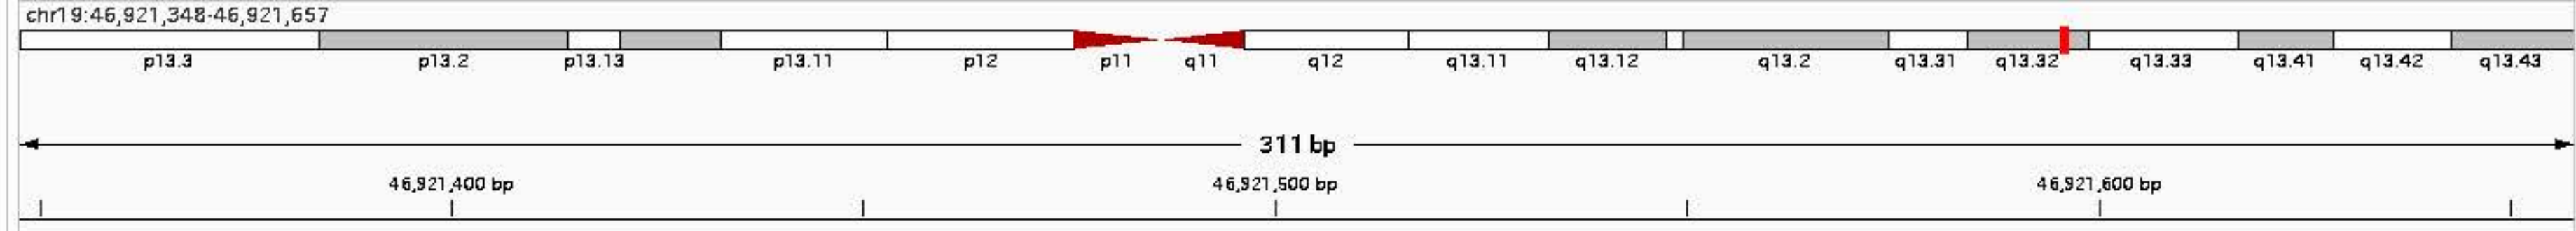

SL\_0002\_LN\_1\_WES\_uniq\_mut.ba  
verage

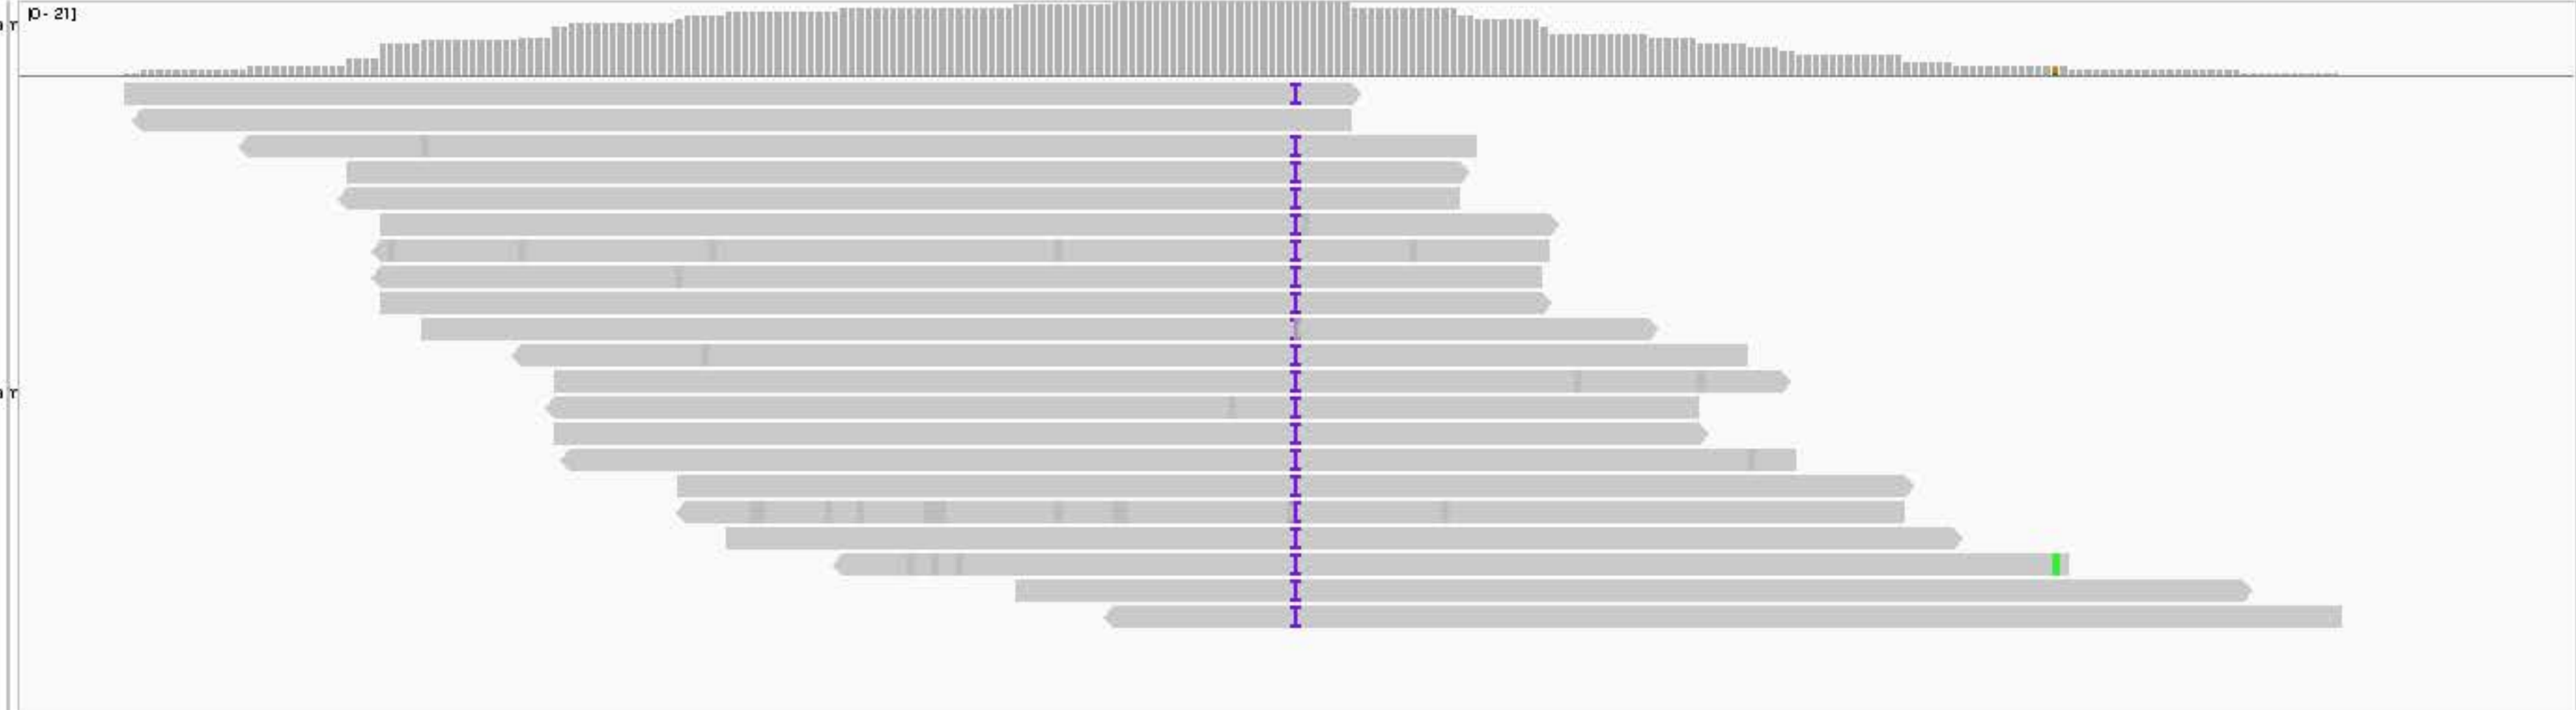

Sequence →  
Refseq Genes

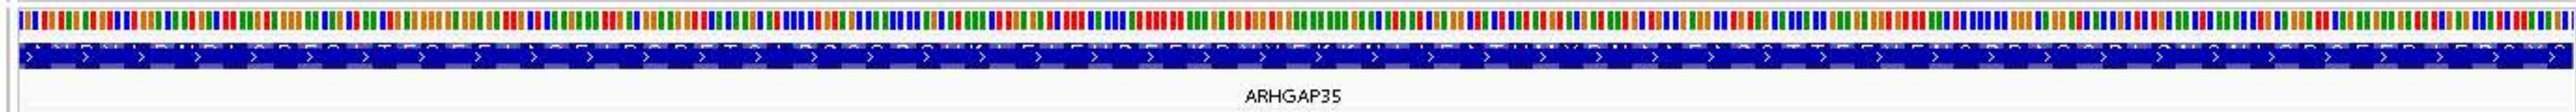

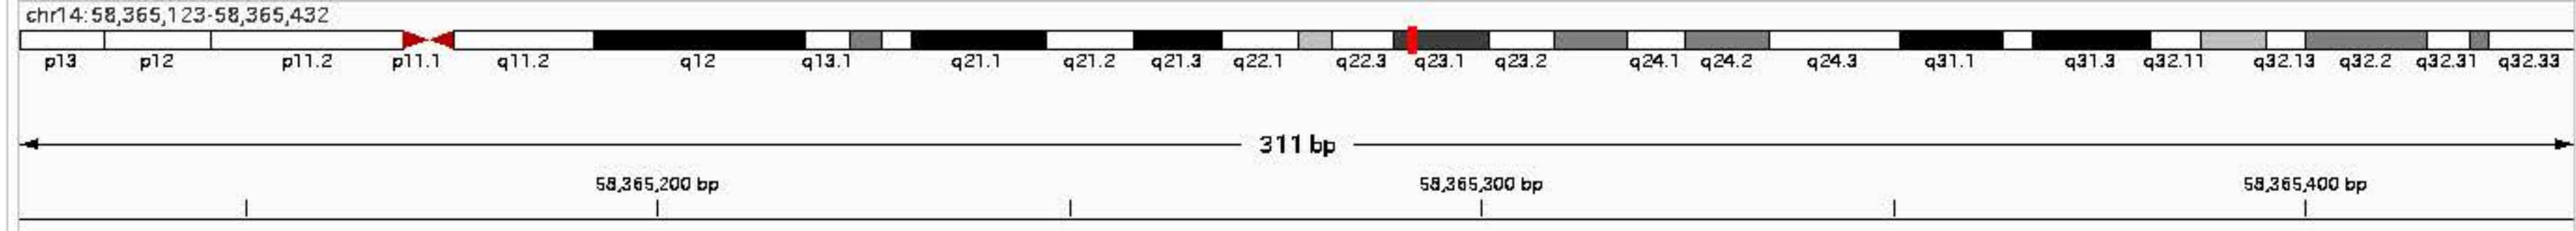

SL\_0015\_RN\_21\_WES\_uniq\_mut.ba  
coverage

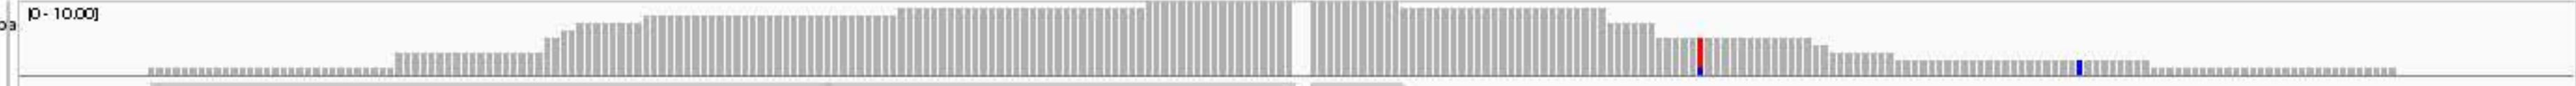

SL\_0015\_RN\_21\_WES\_uniq\_mut.ba

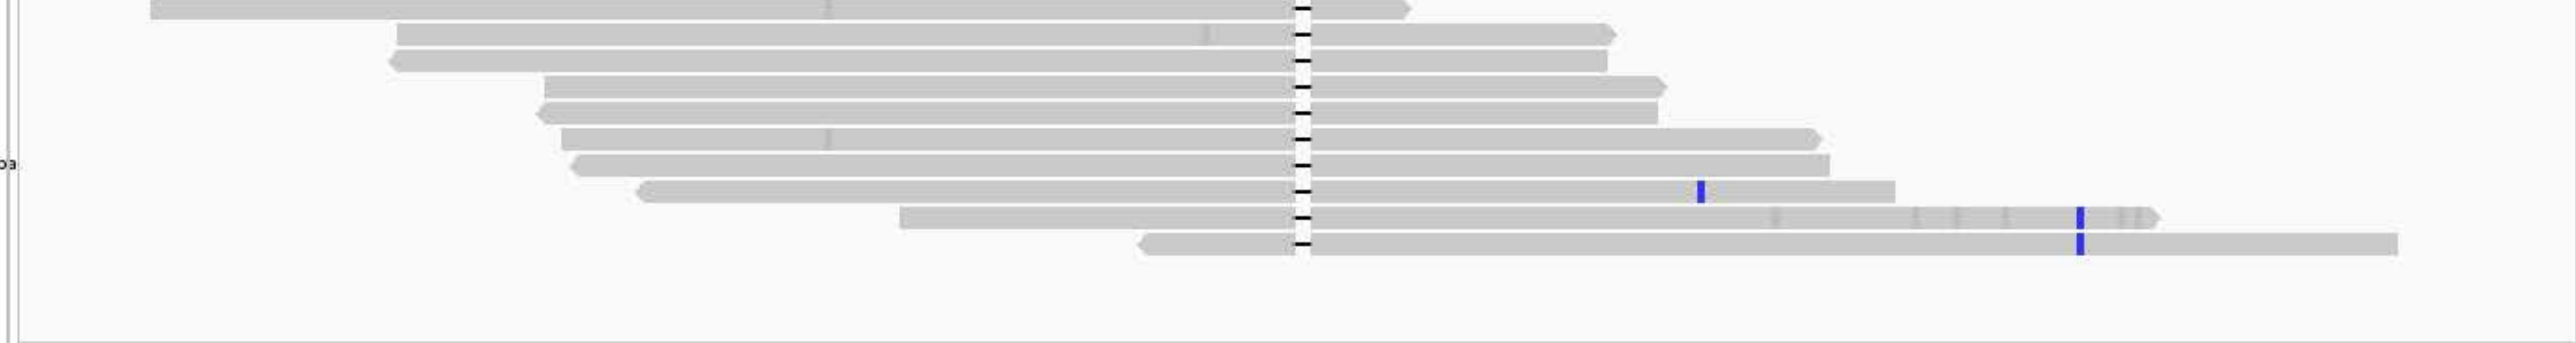

Sequence

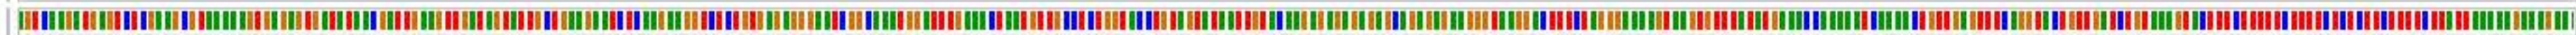

Refseq Genes

SQDESRSVKSESDITIEVDSIAEESQEGLCERESANGFETNVASGTCSTIVQERESREKGGKDFLGKS

ARID4A

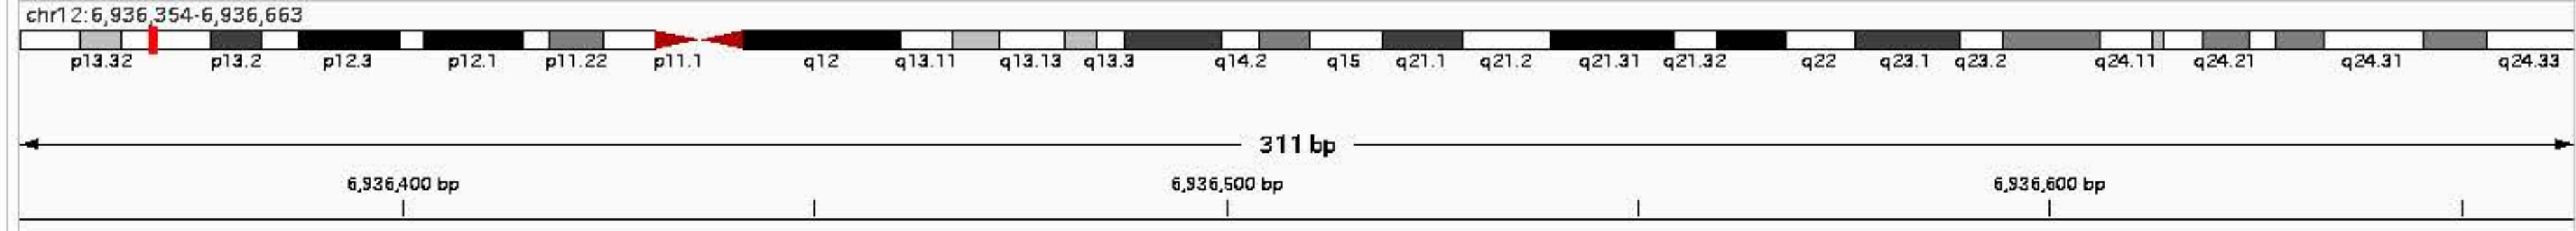

SL\_0003\_LN\_51\_WES\_uniq\_mut.  
coverage

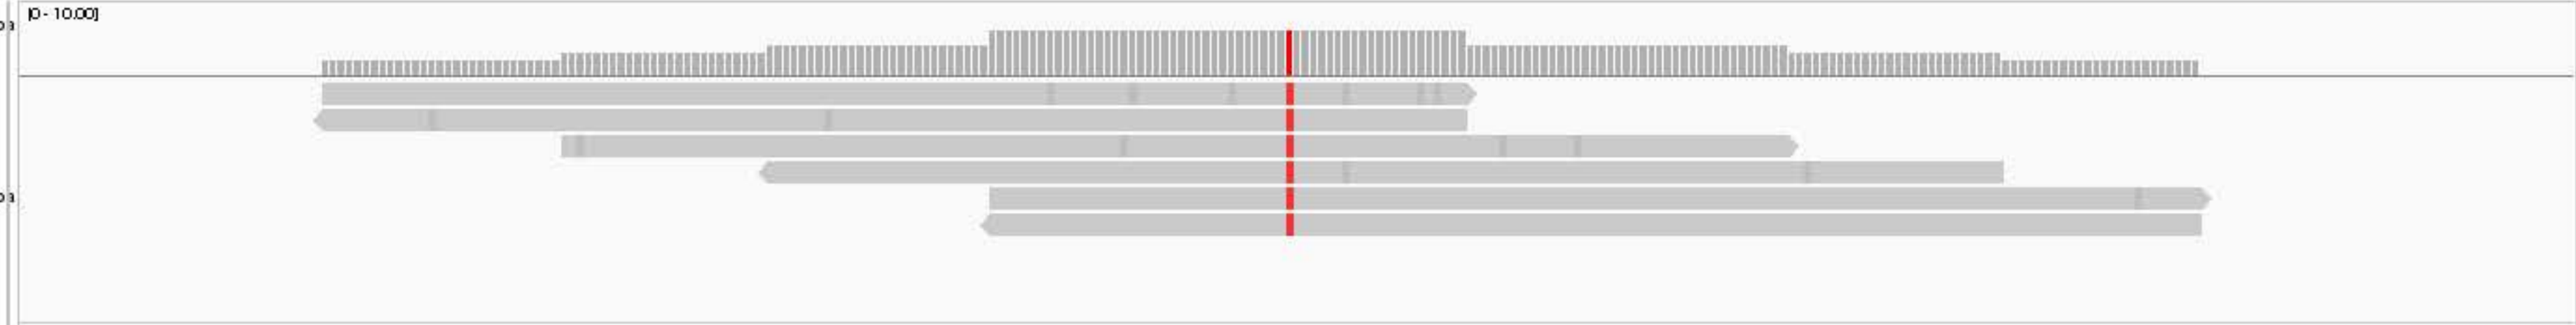

SL\_0003\_LN\_51\_WES\_uniq\_mut.

Sequence →  
Refseq Genes

SSSAPAPPMRFPYSSSSSSSAAASSSSSSSSSSASPFPA SQALPSYPHSFPPTSLSVSNQPPKYTQP SLPSQAVWSQGPPPPPYGRL LANSNAHPGPFPS

ATN1



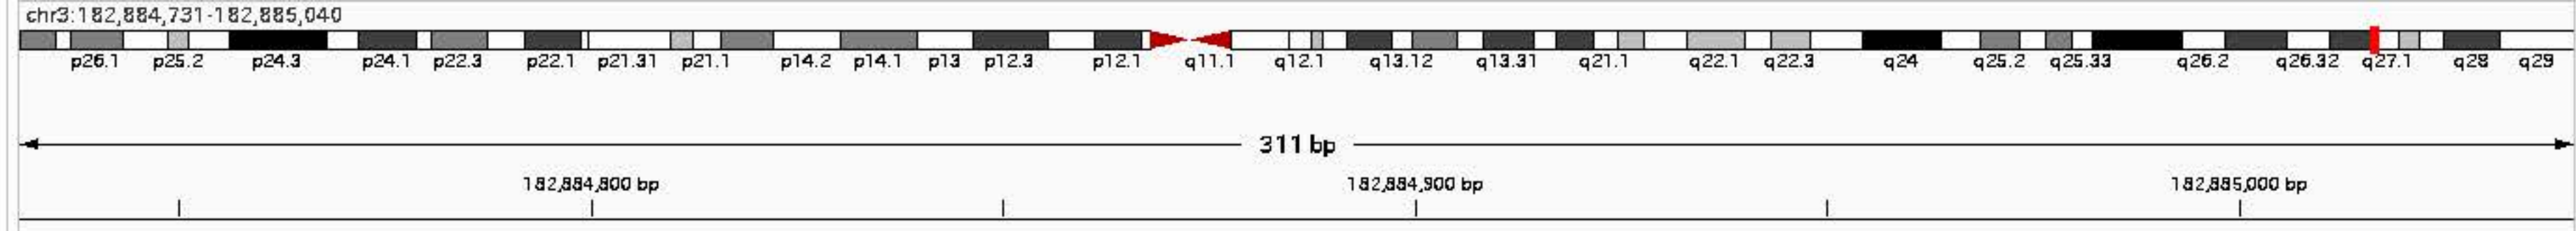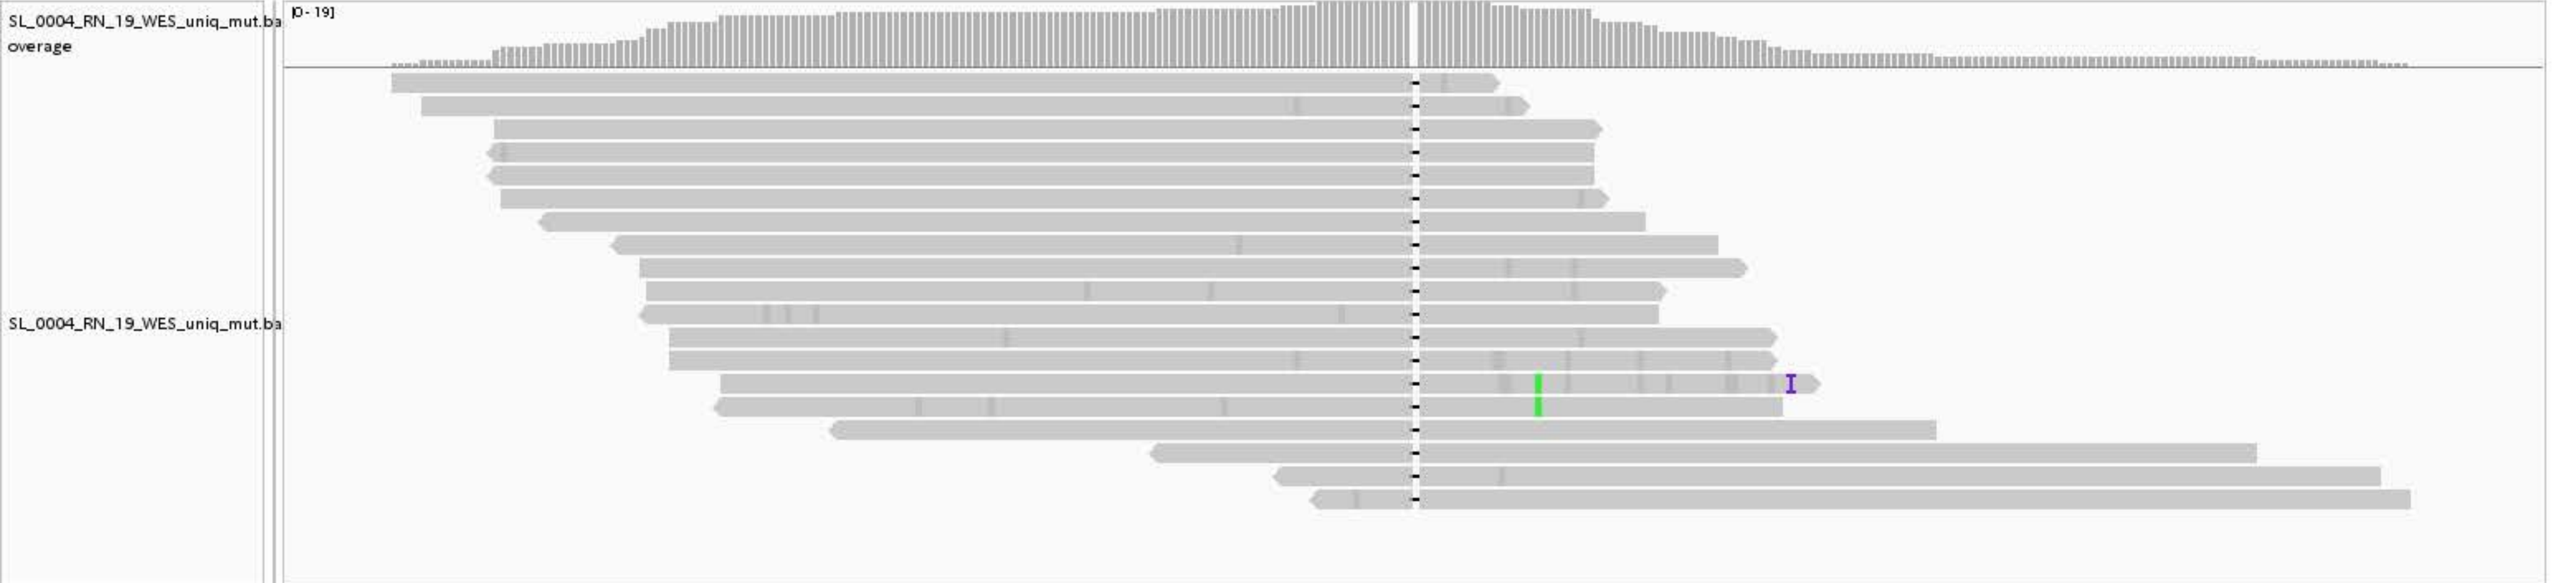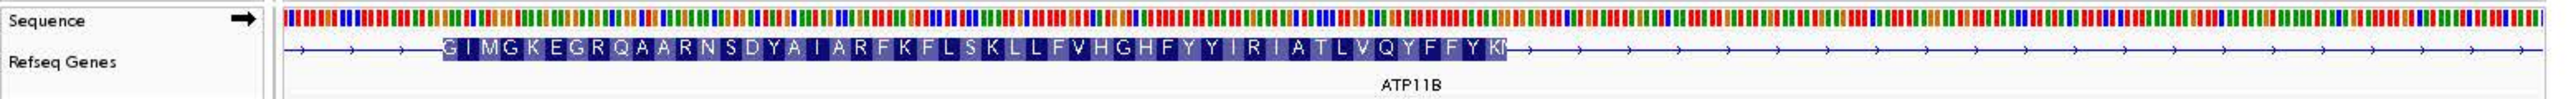

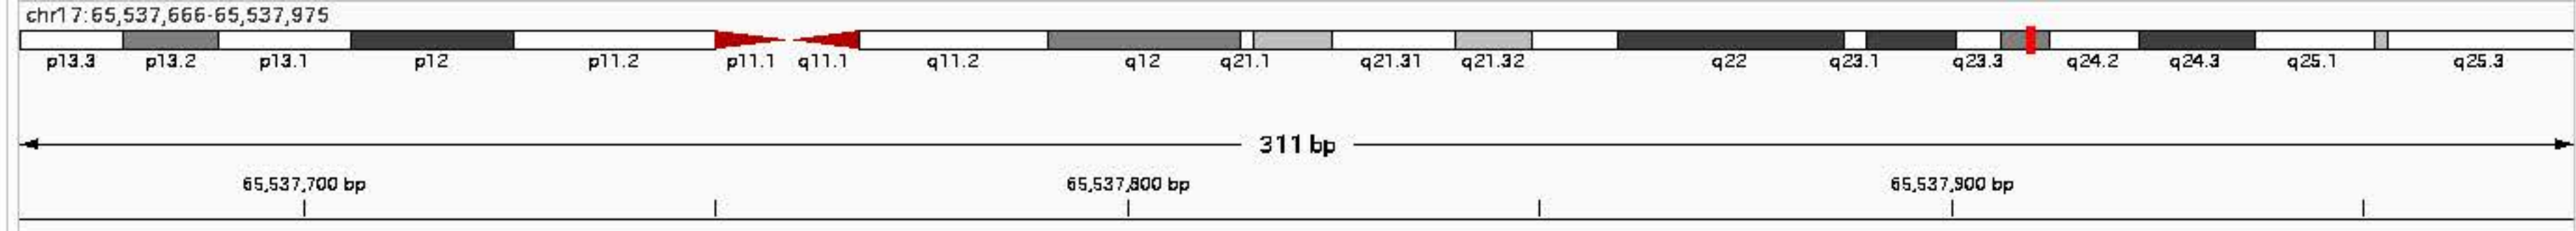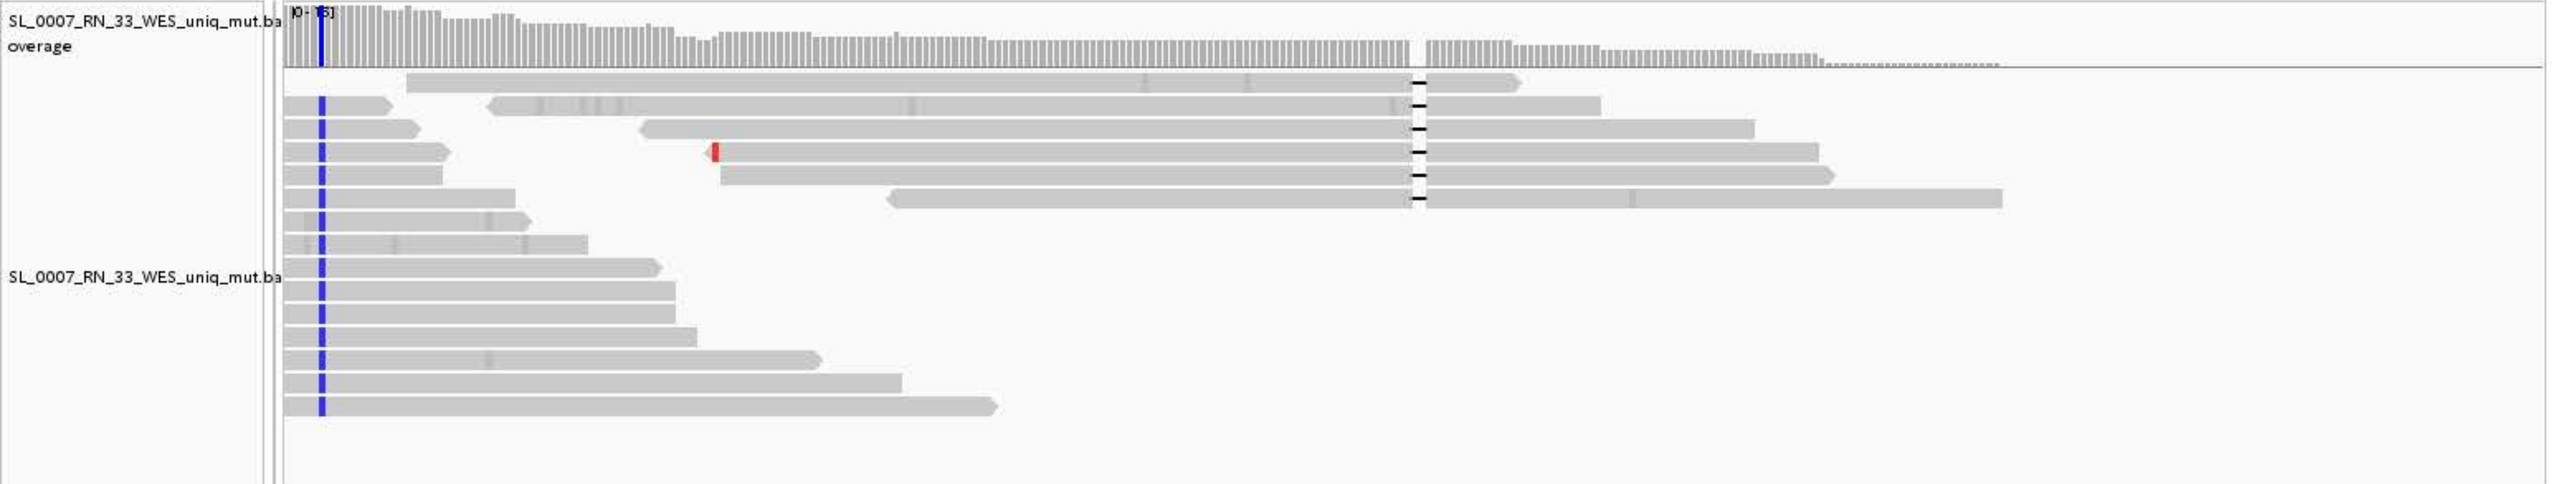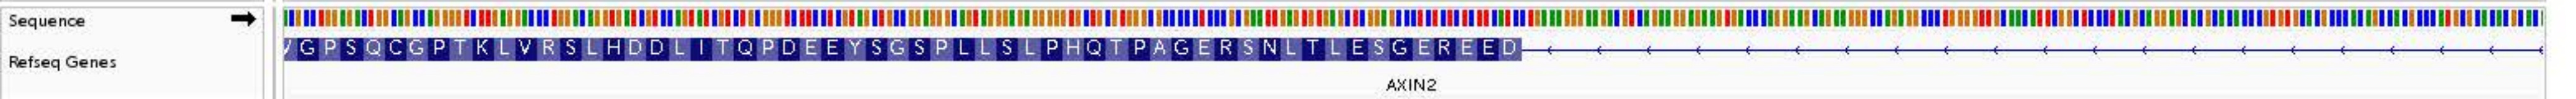

chr5: 71,470,251-71,470,560

p15.32 p15.2 p14.3 p14.1 p13.2 p12 q11.1 q11.2 q12.1 q13.1 q13.3 q14.2 q14.3 q15 q21.1 q21.3 q22.2 q23.1 q23.2 q31.1 q31.3 q32 q33.2 q34 q35.1 q35.3

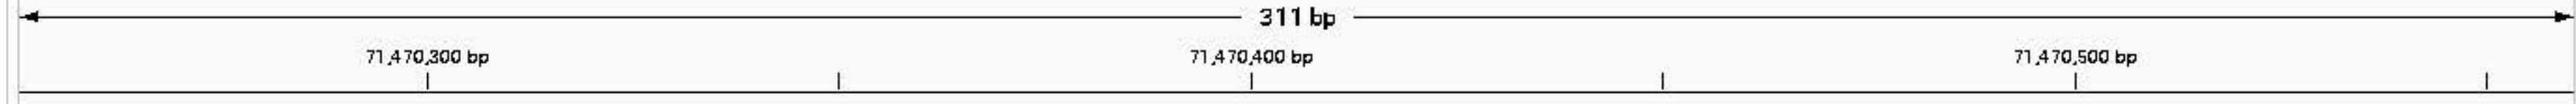

SL\_0015\_LN\_44\_WES\_uniq\_mut. coverage

SL\_0015\_LN\_44\_WES\_uniq\_mut.

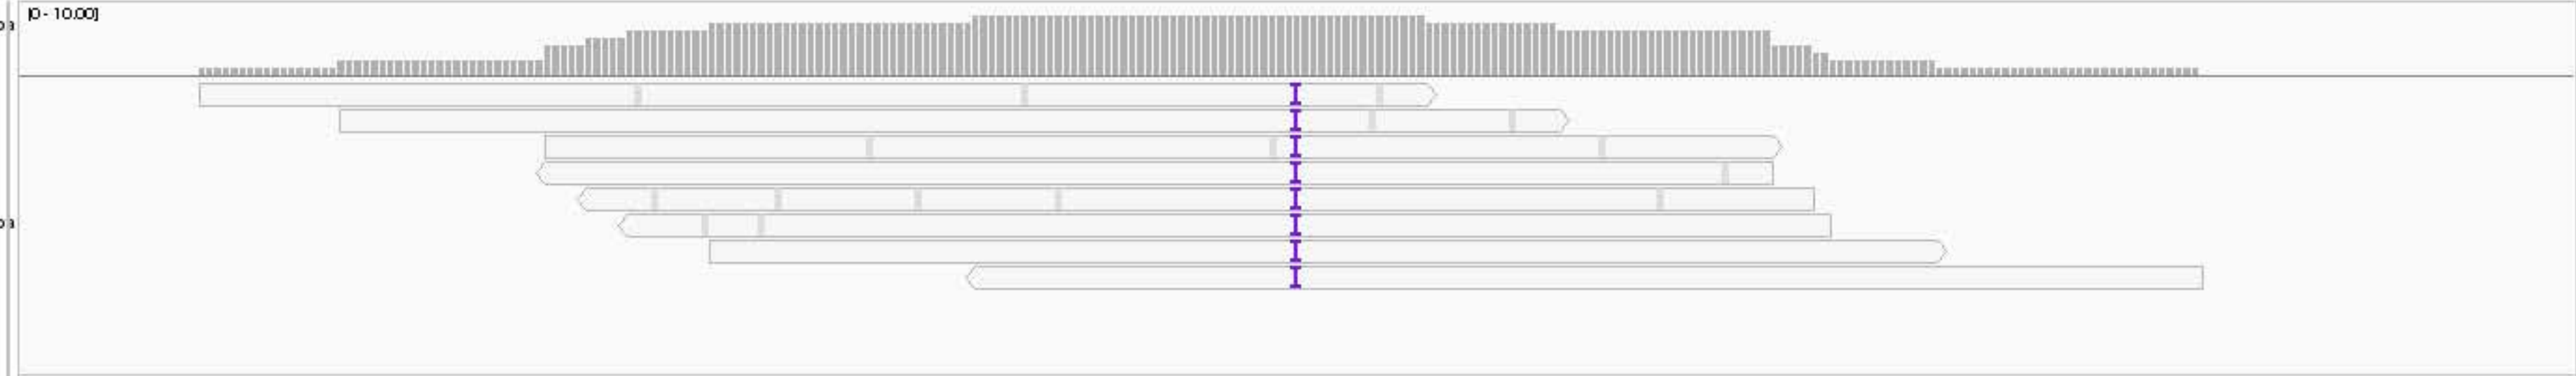

Sequence

Refseq Genes

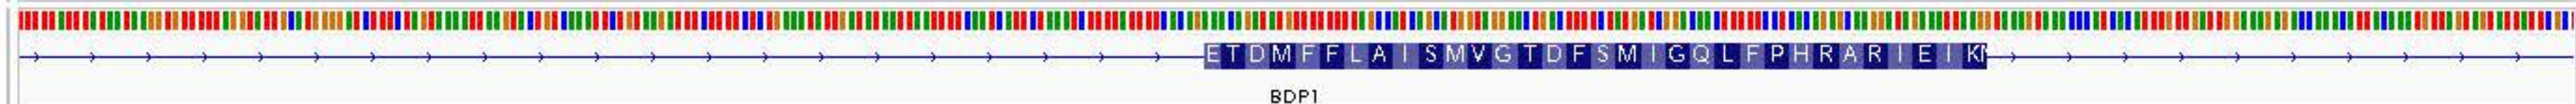



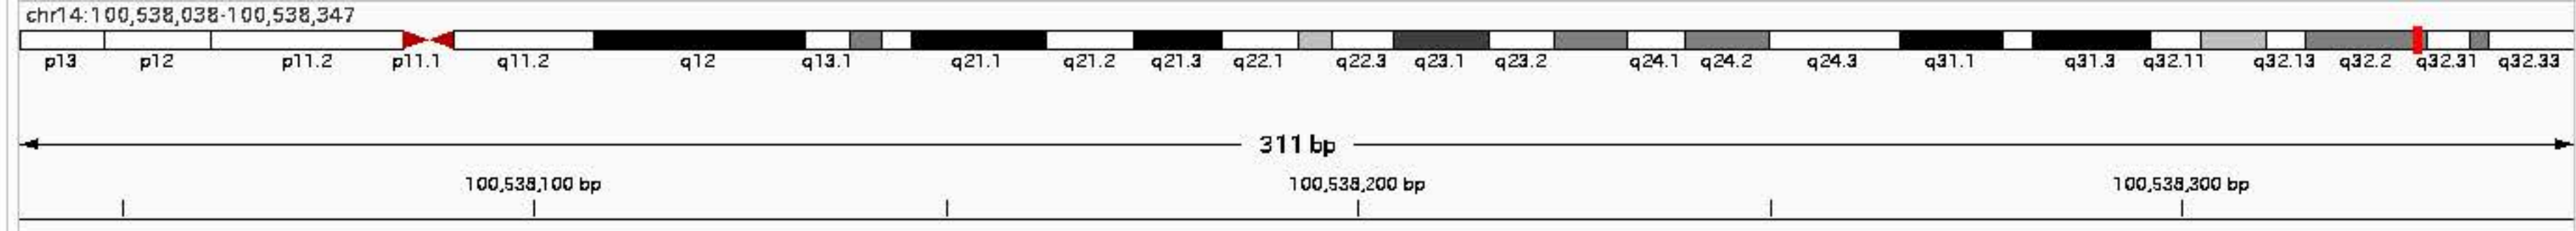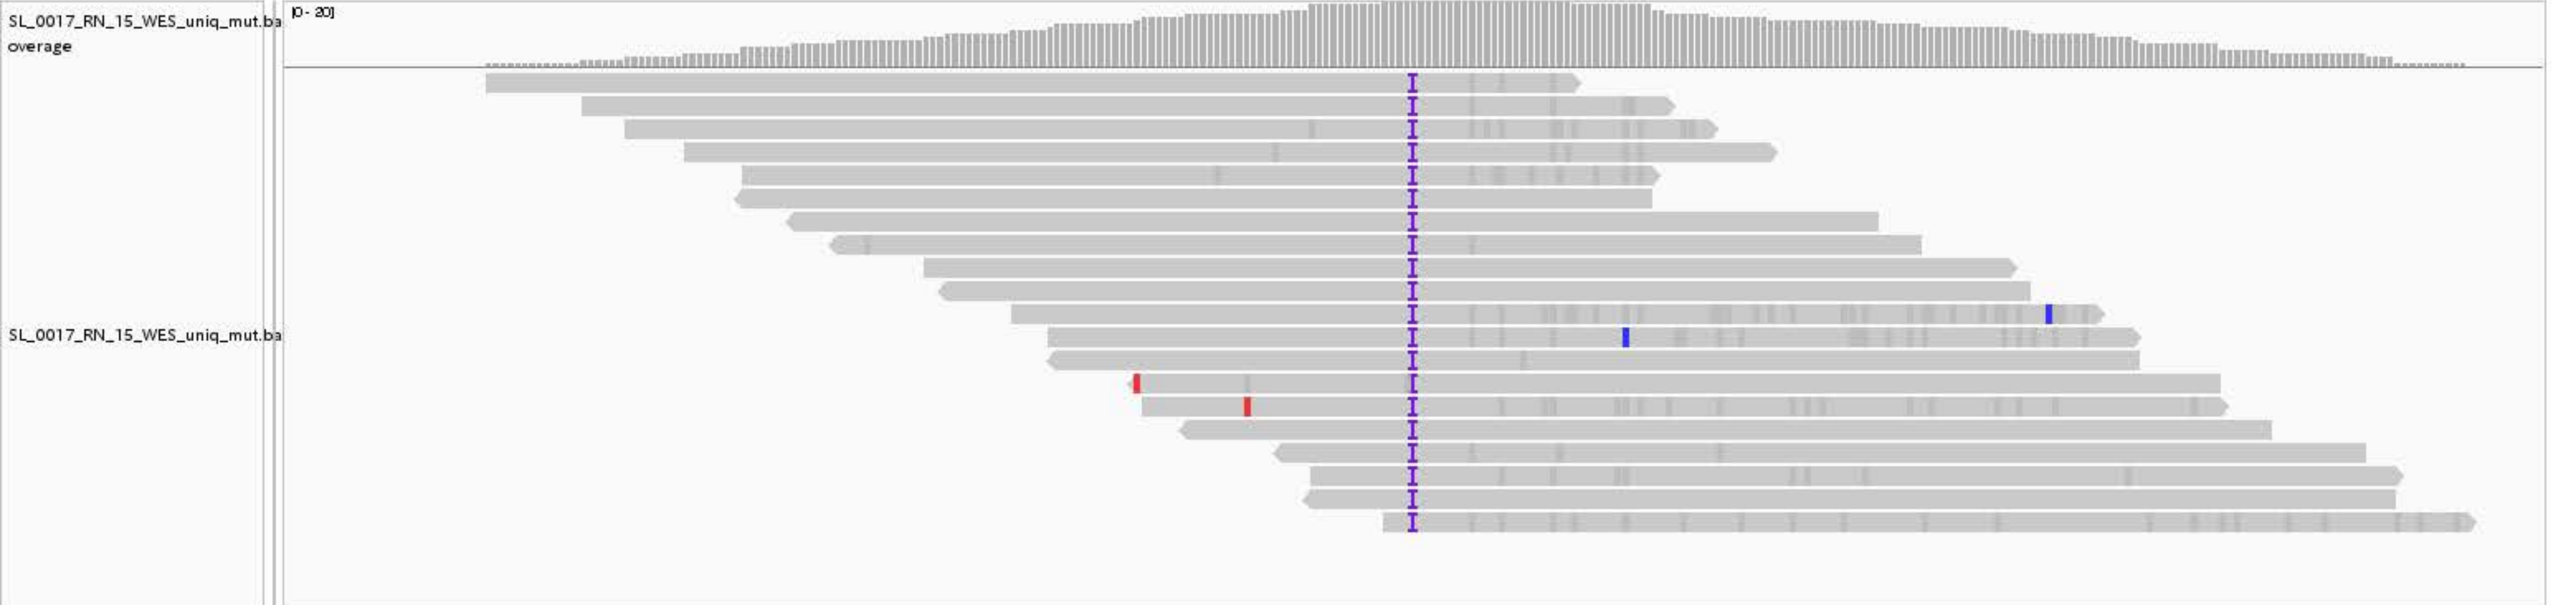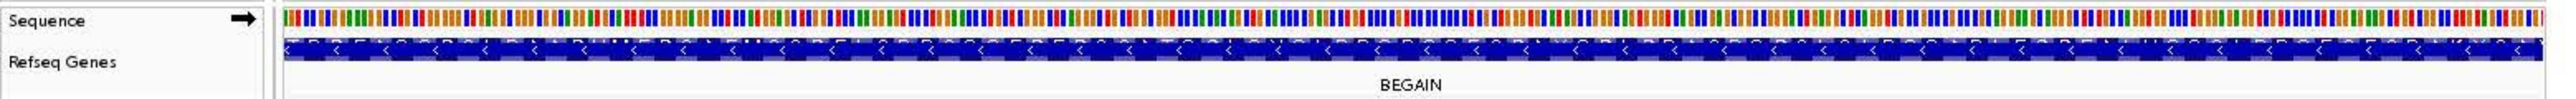

chr15:90,749,389-90,749,698

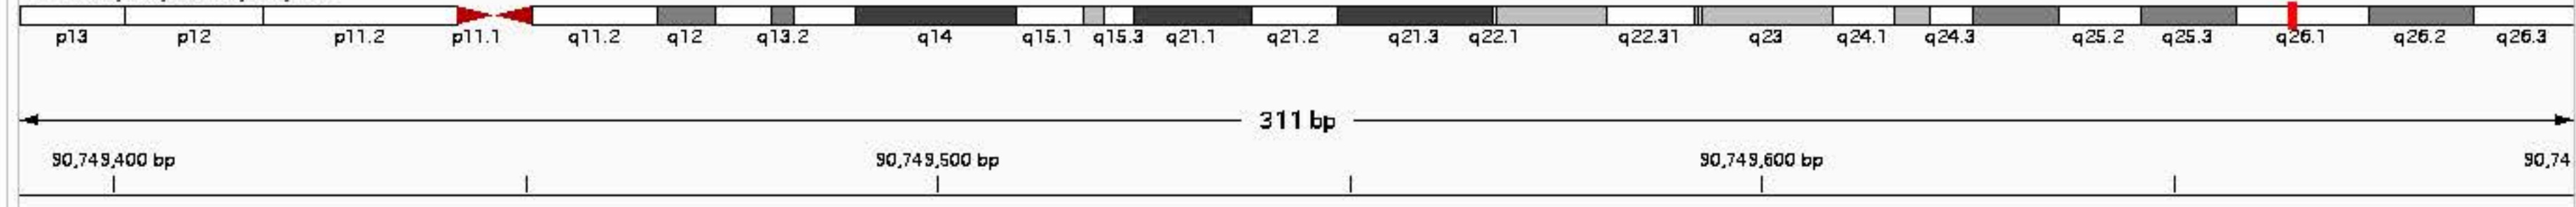

SL\_0001\_RN\_25\_WES\_uniq\_mut.ba  
coverage

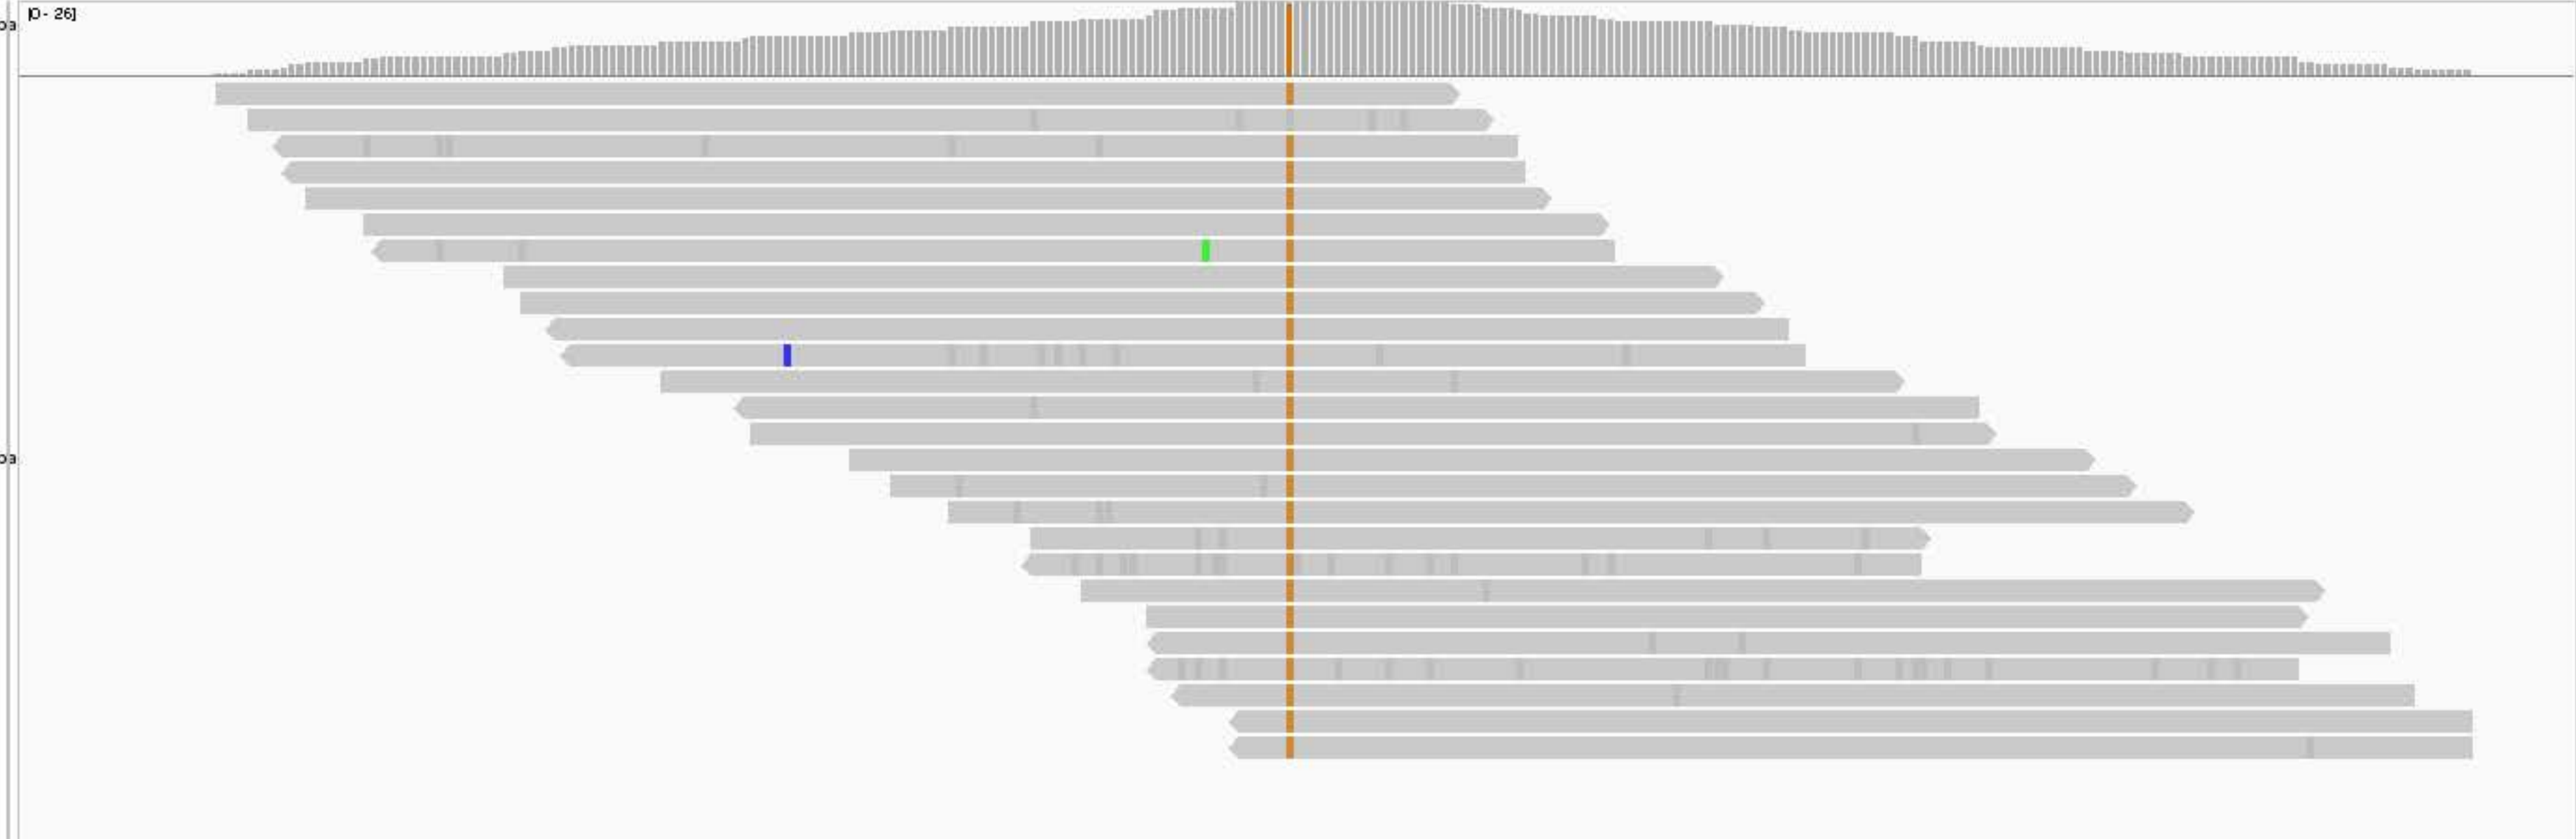

Sequence →  
Refseq Genes

TSSDNNVSVTNVSVAKTPVLRNKDYNVTEDFSFSEPLPNTTNQQRVKDFFKNAPAGQETQRGGSKSLLPDFLQTPKEVVCTTQNTPTVKKSRDTALKKLEFSS  
BLM



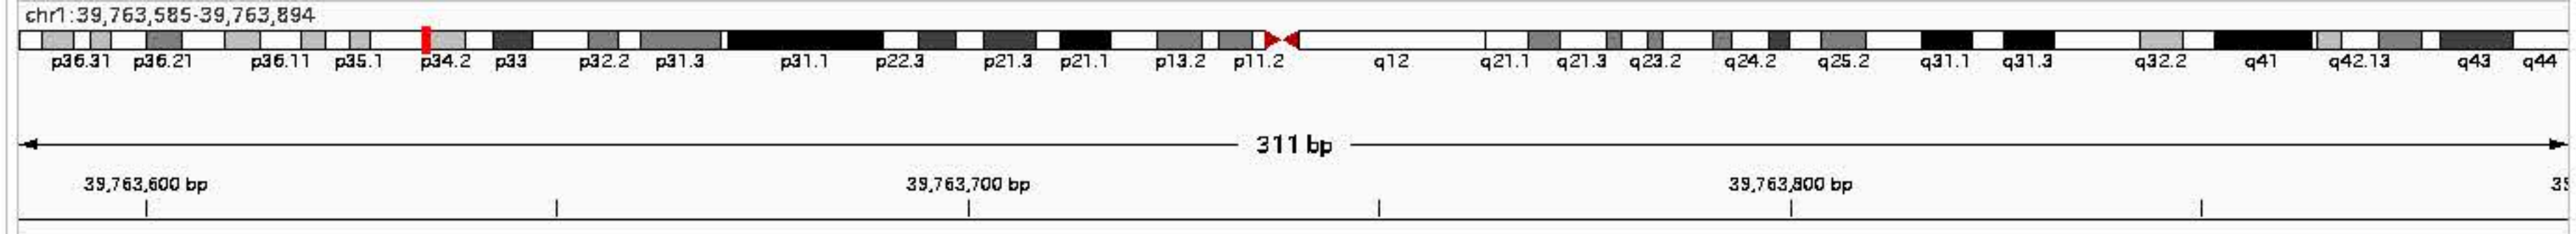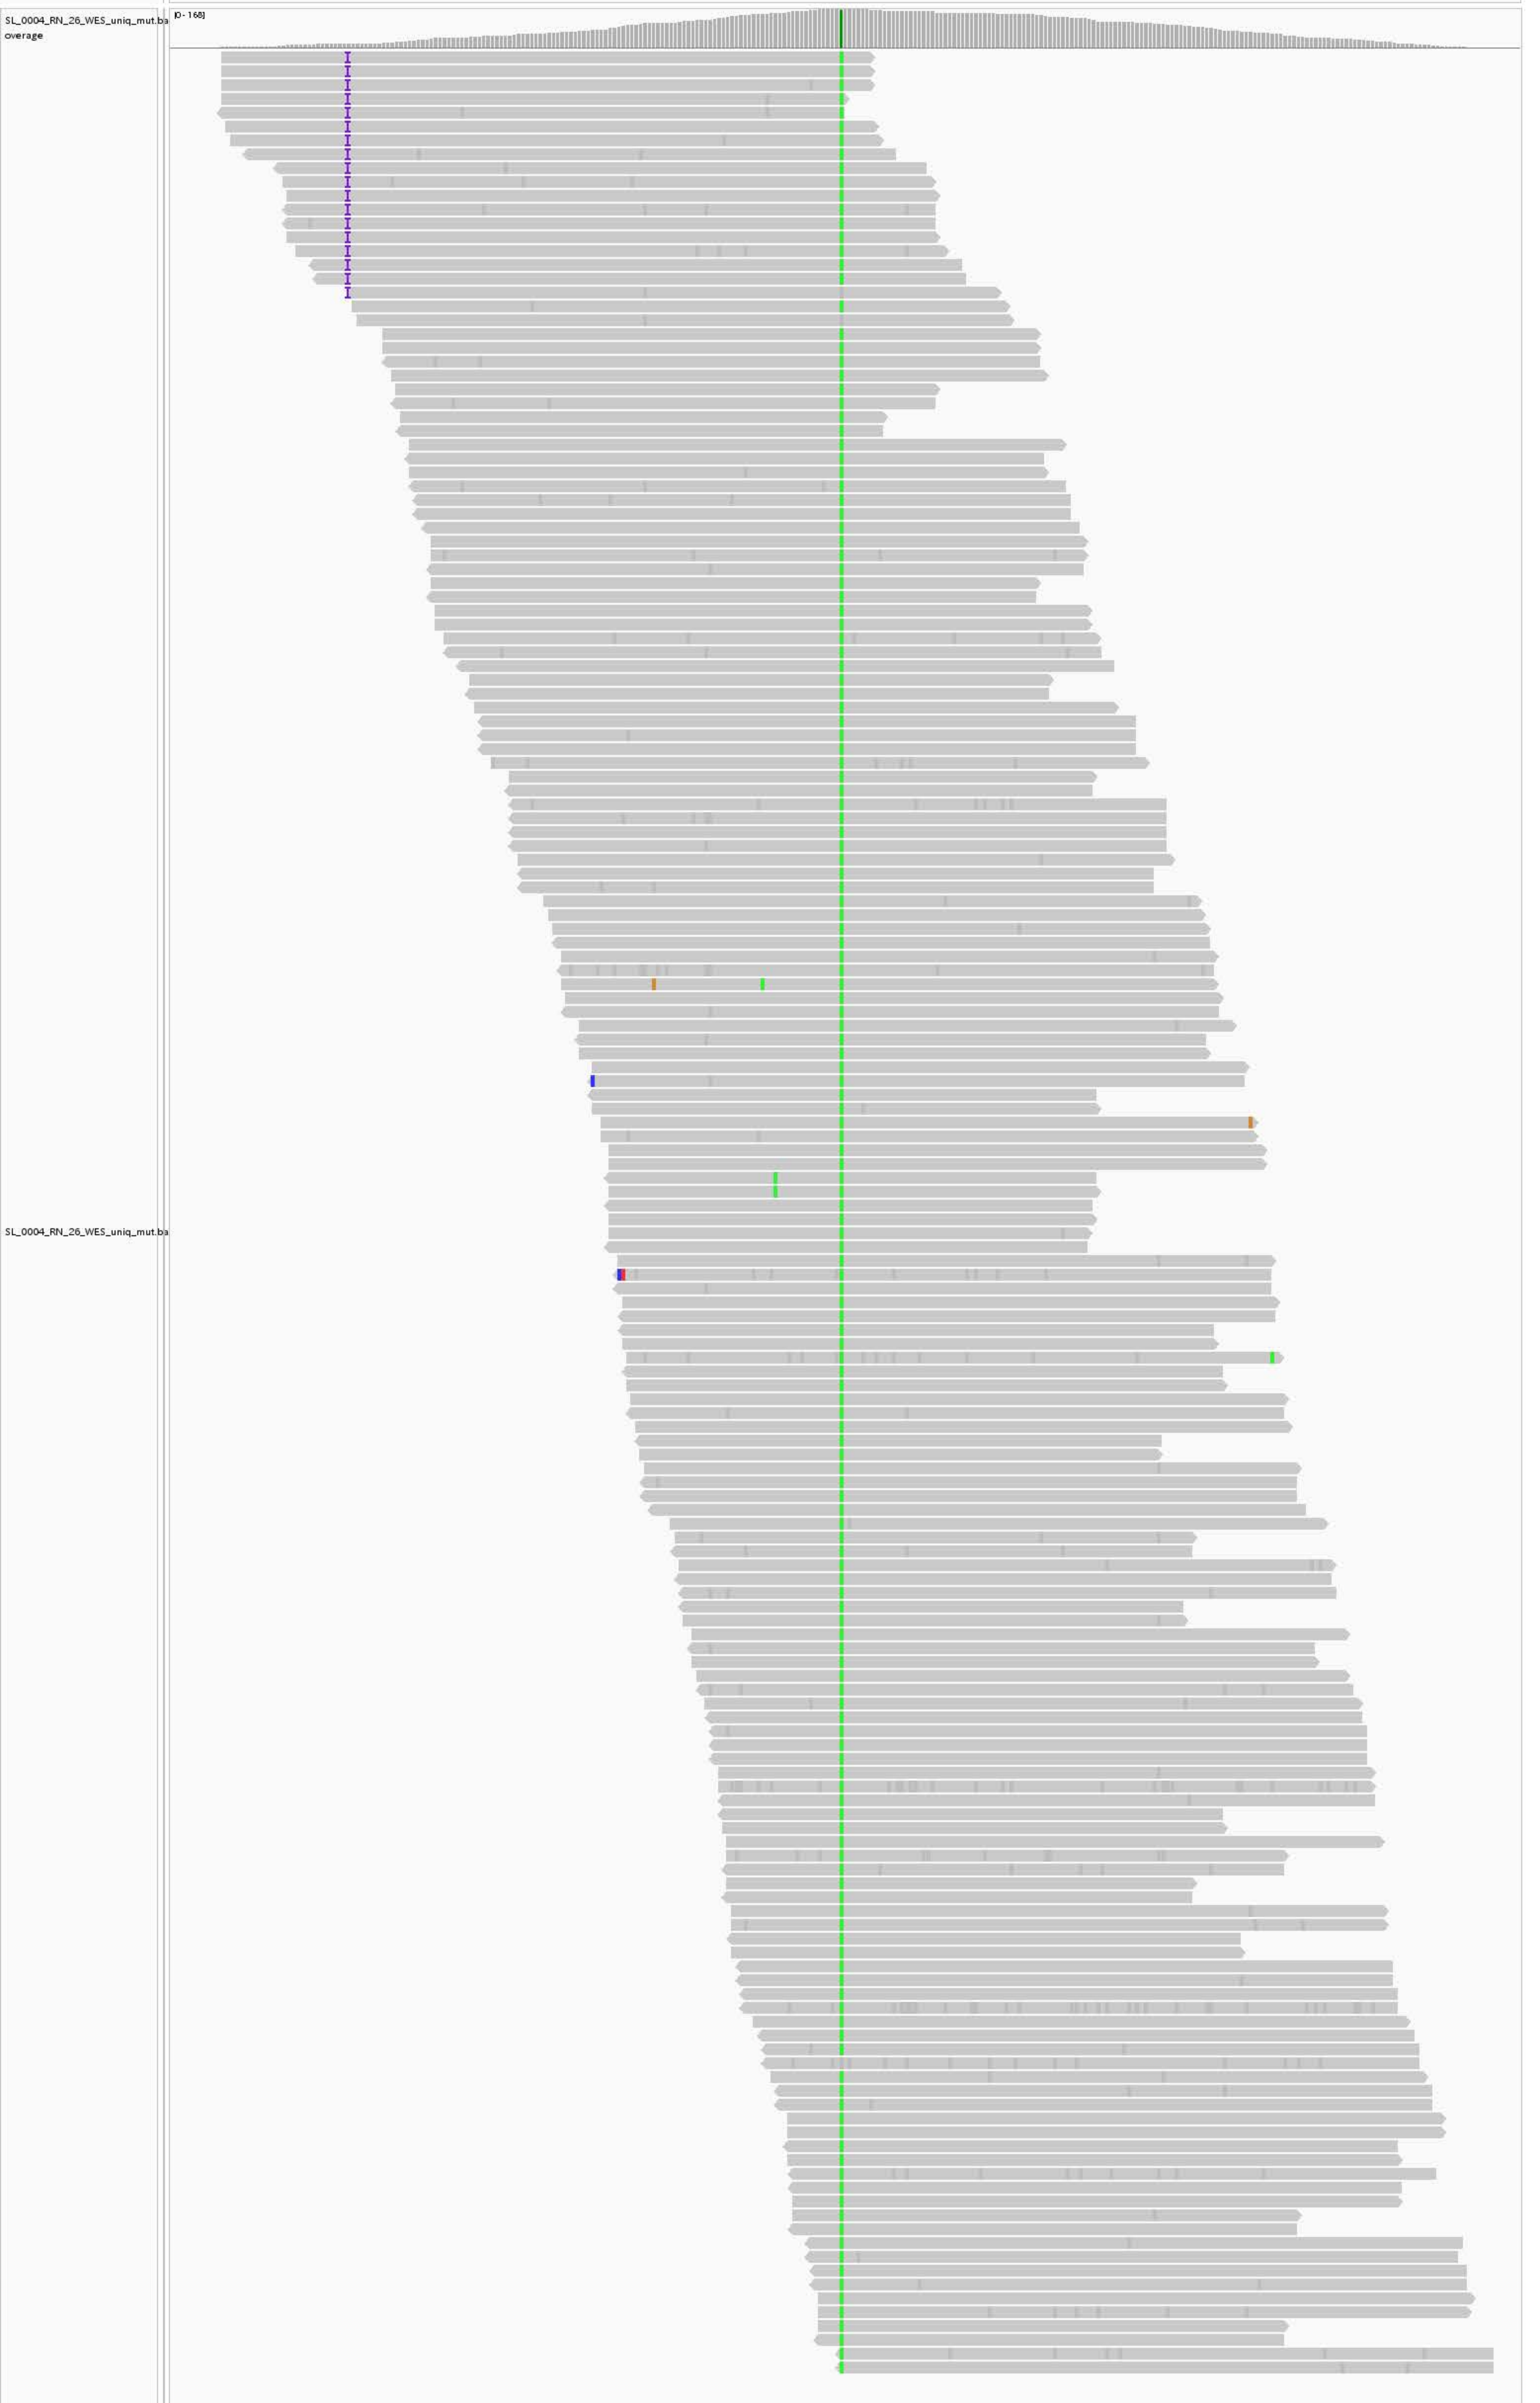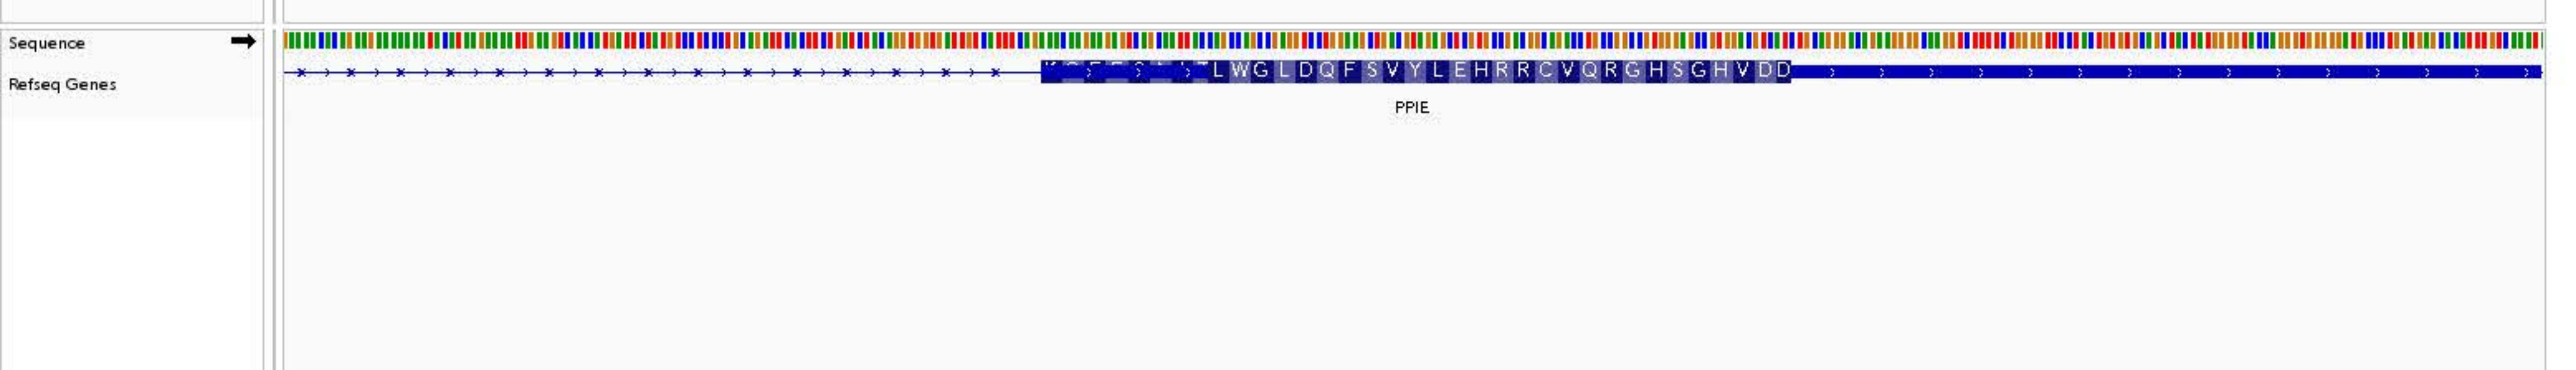



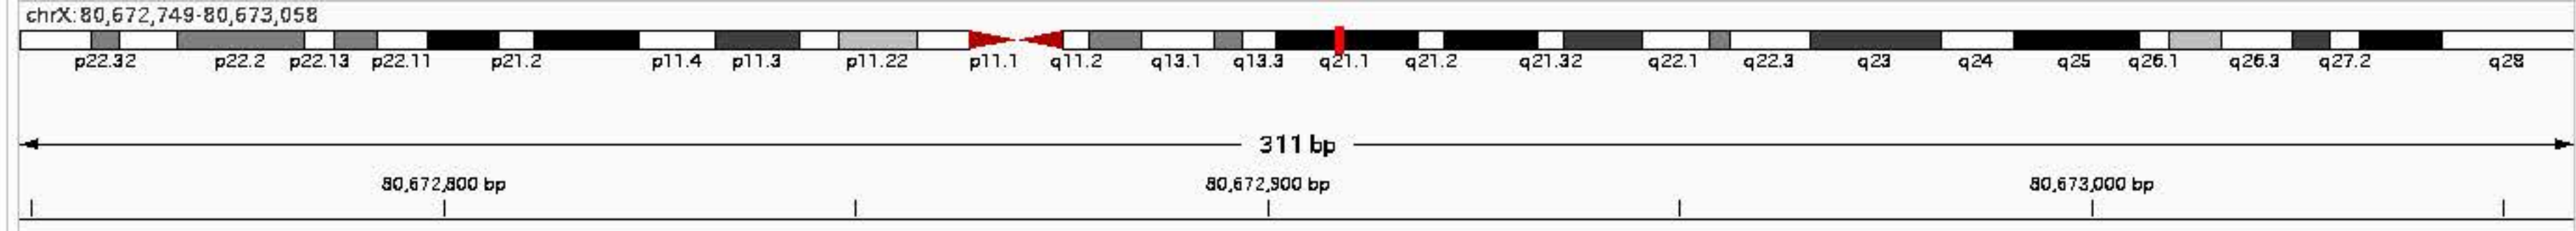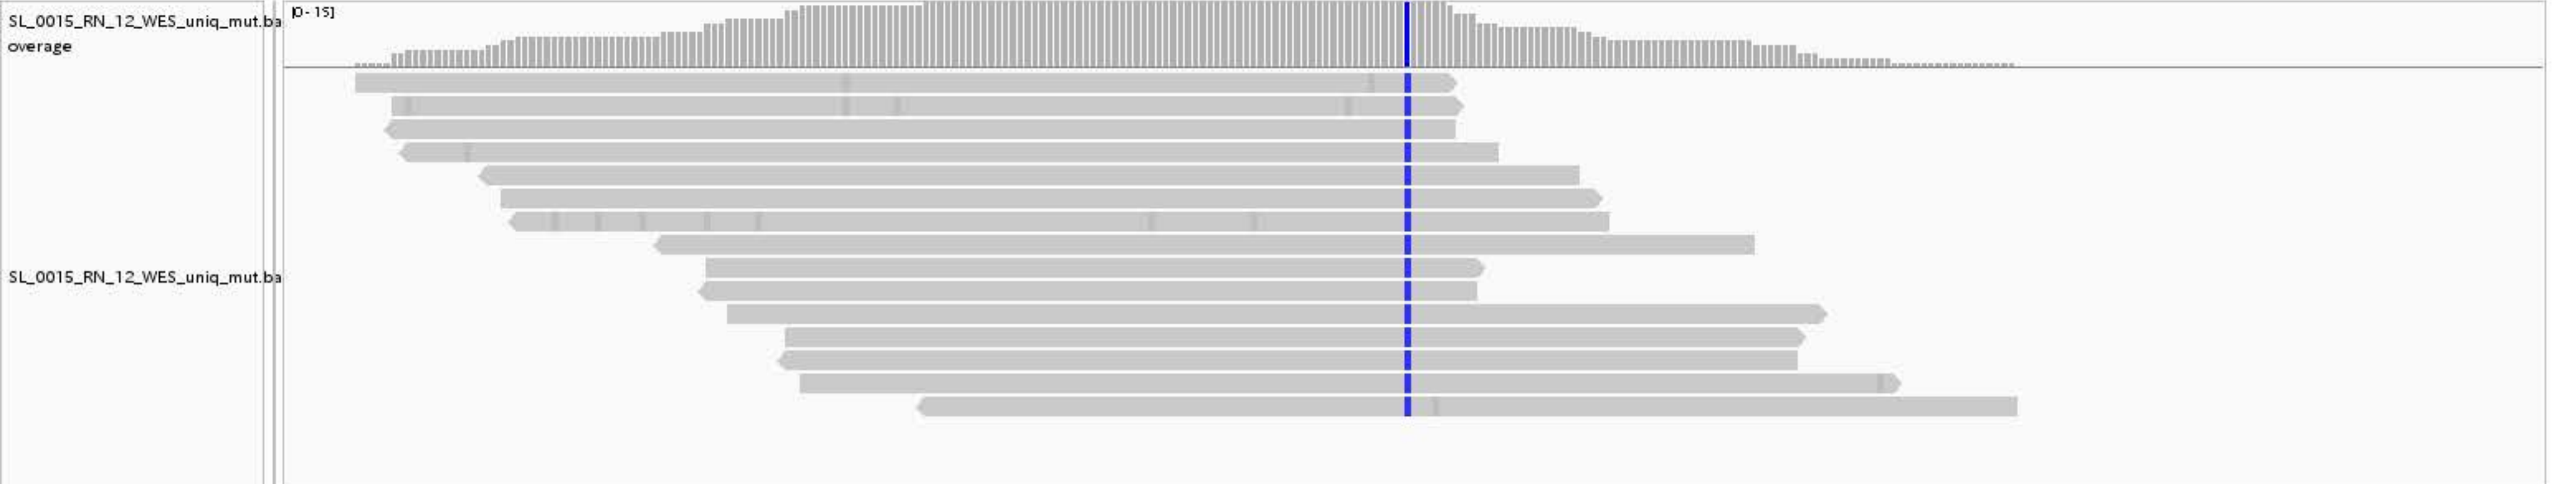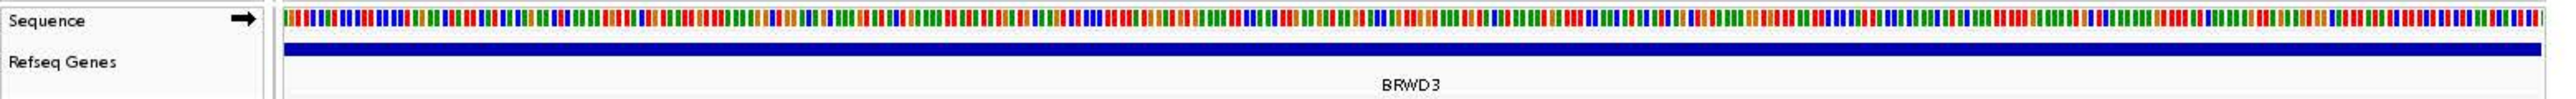

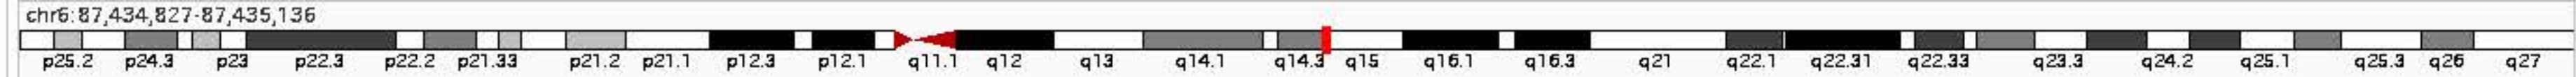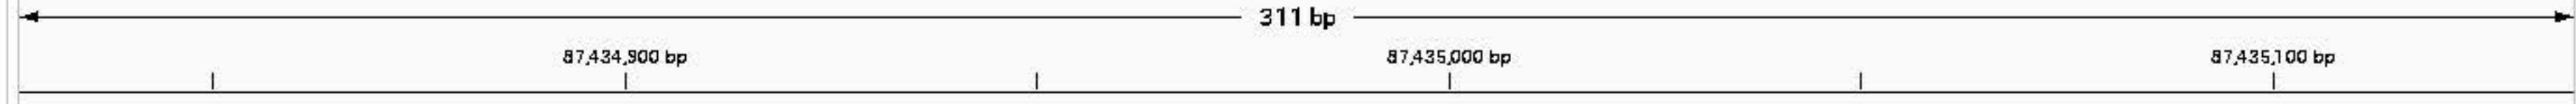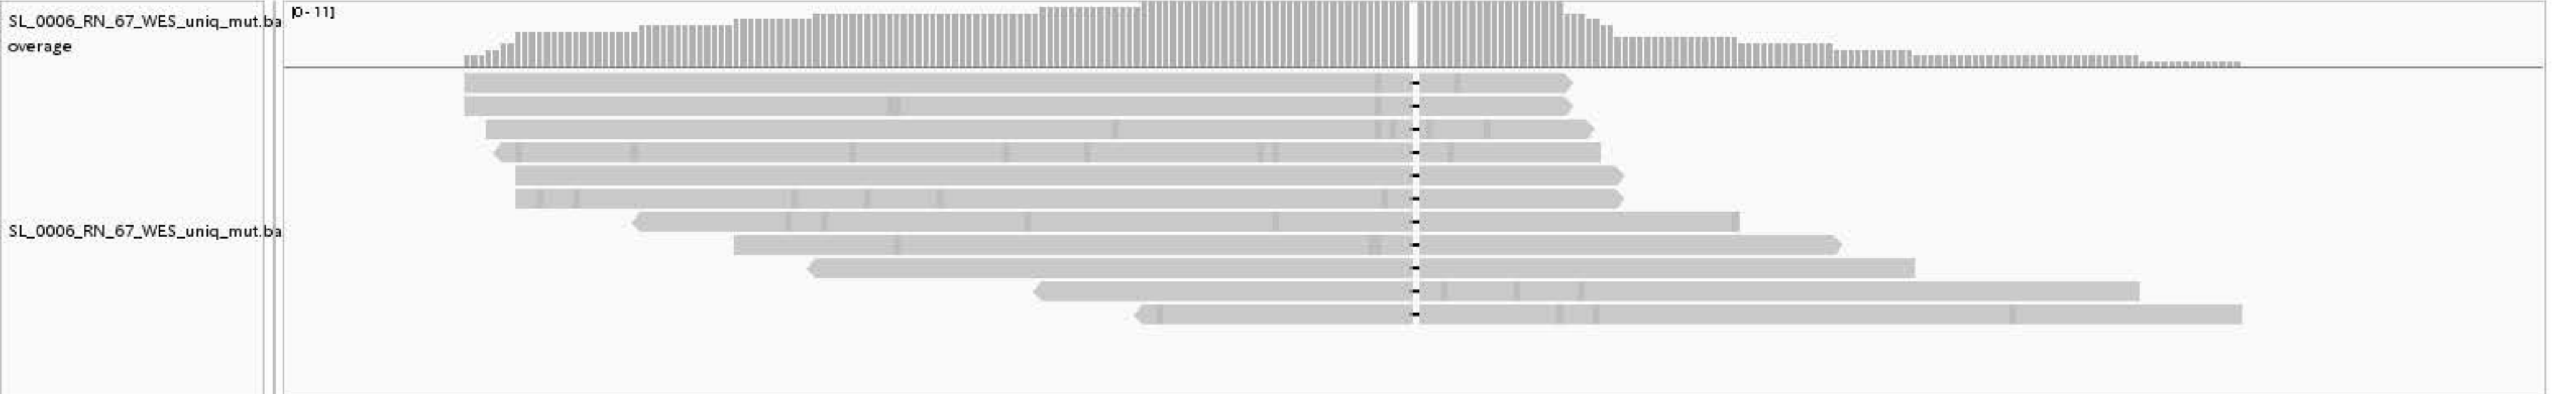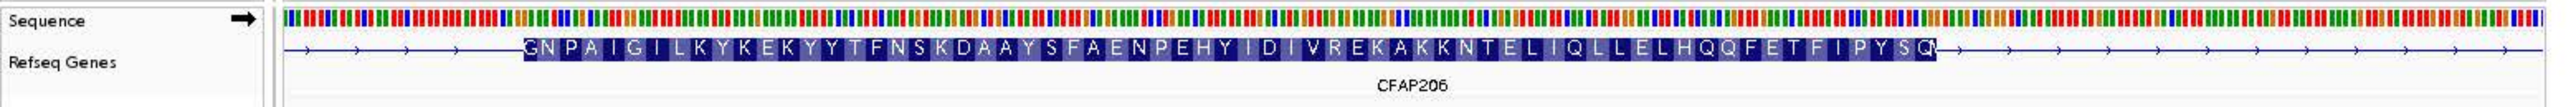

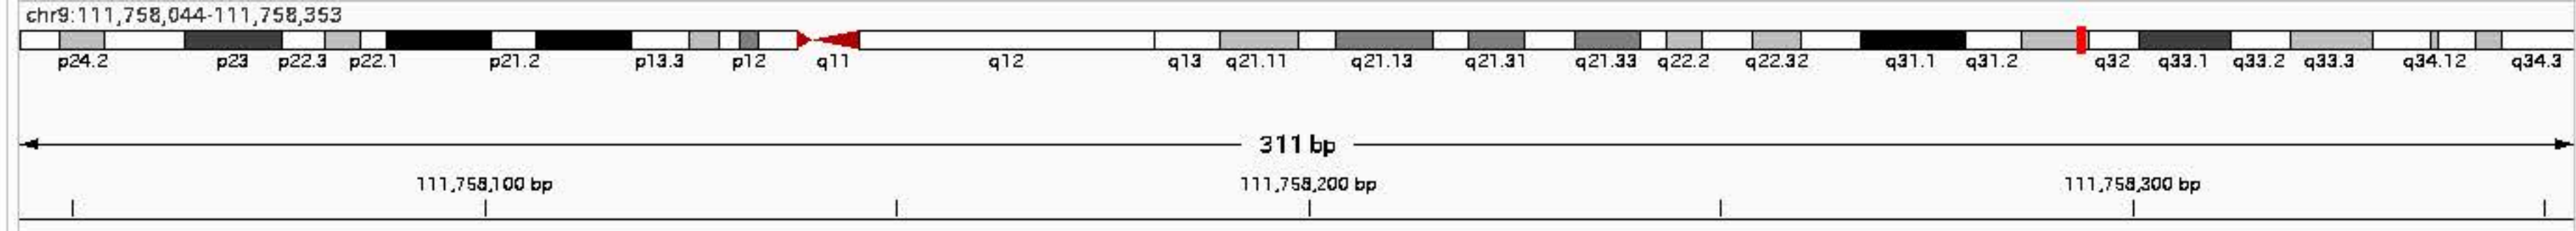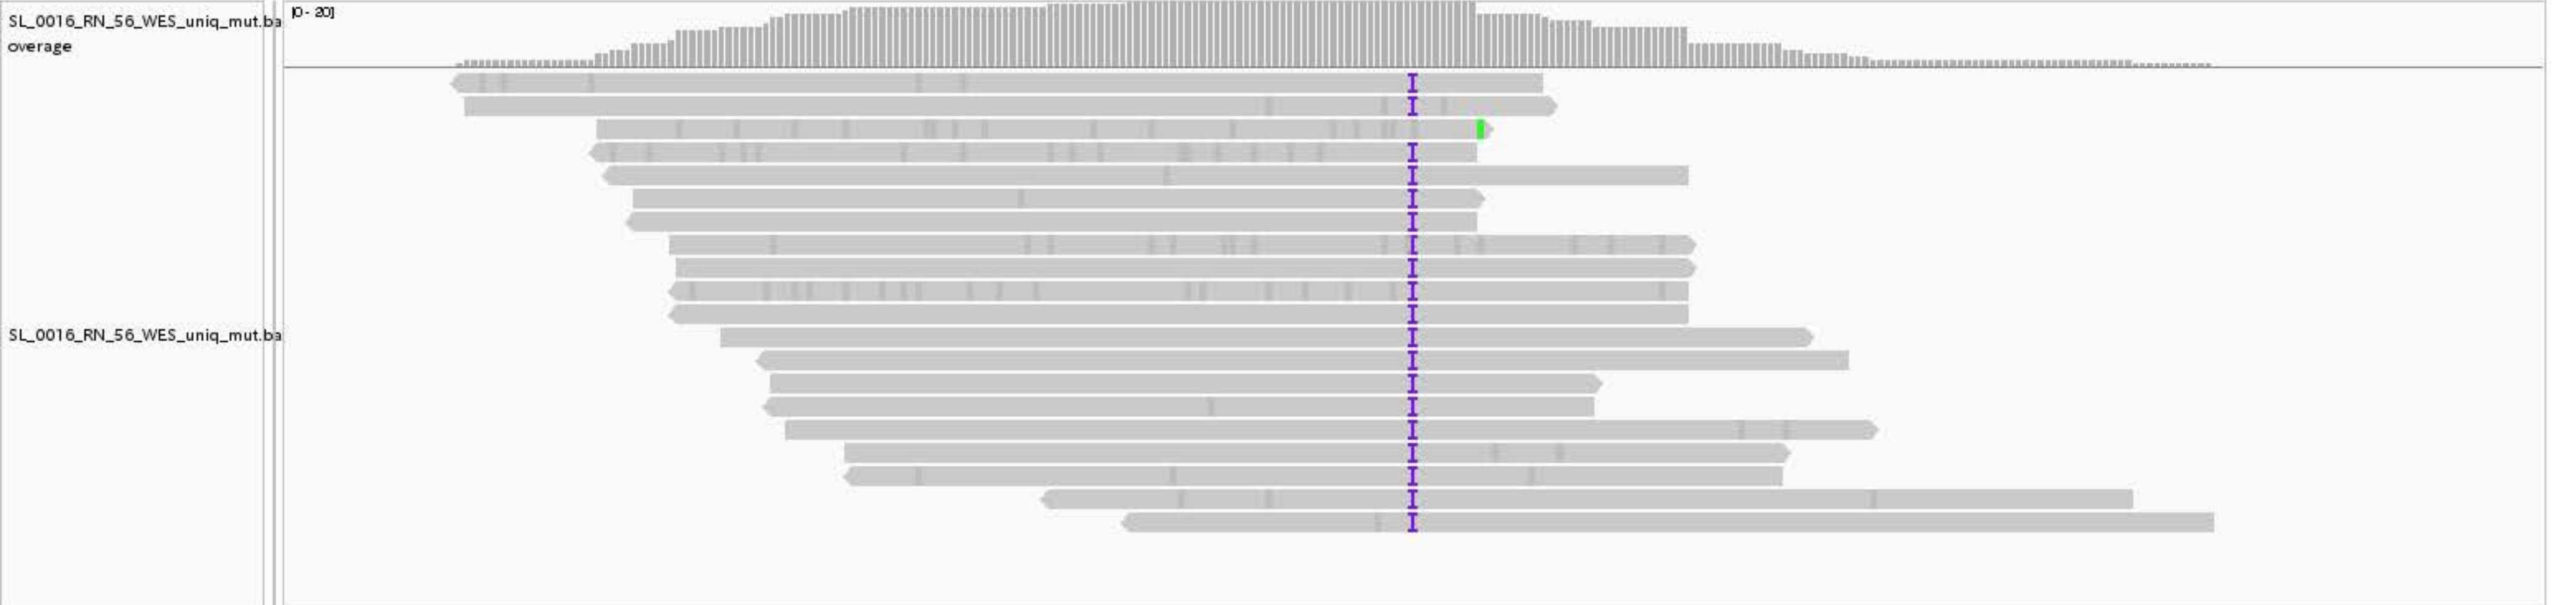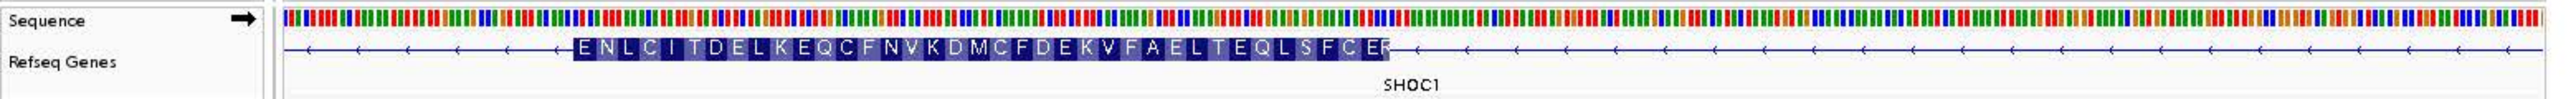



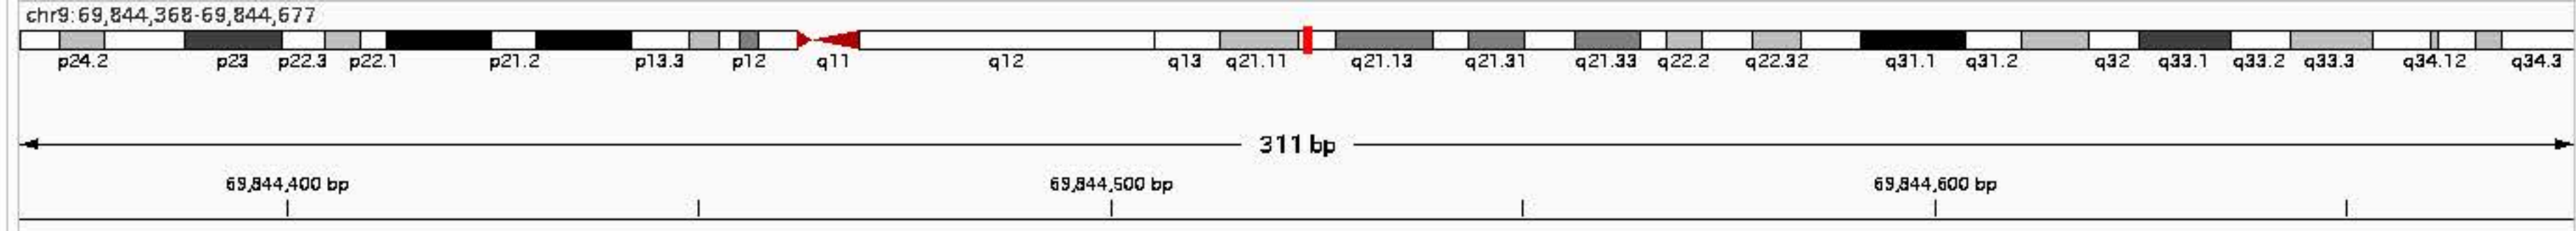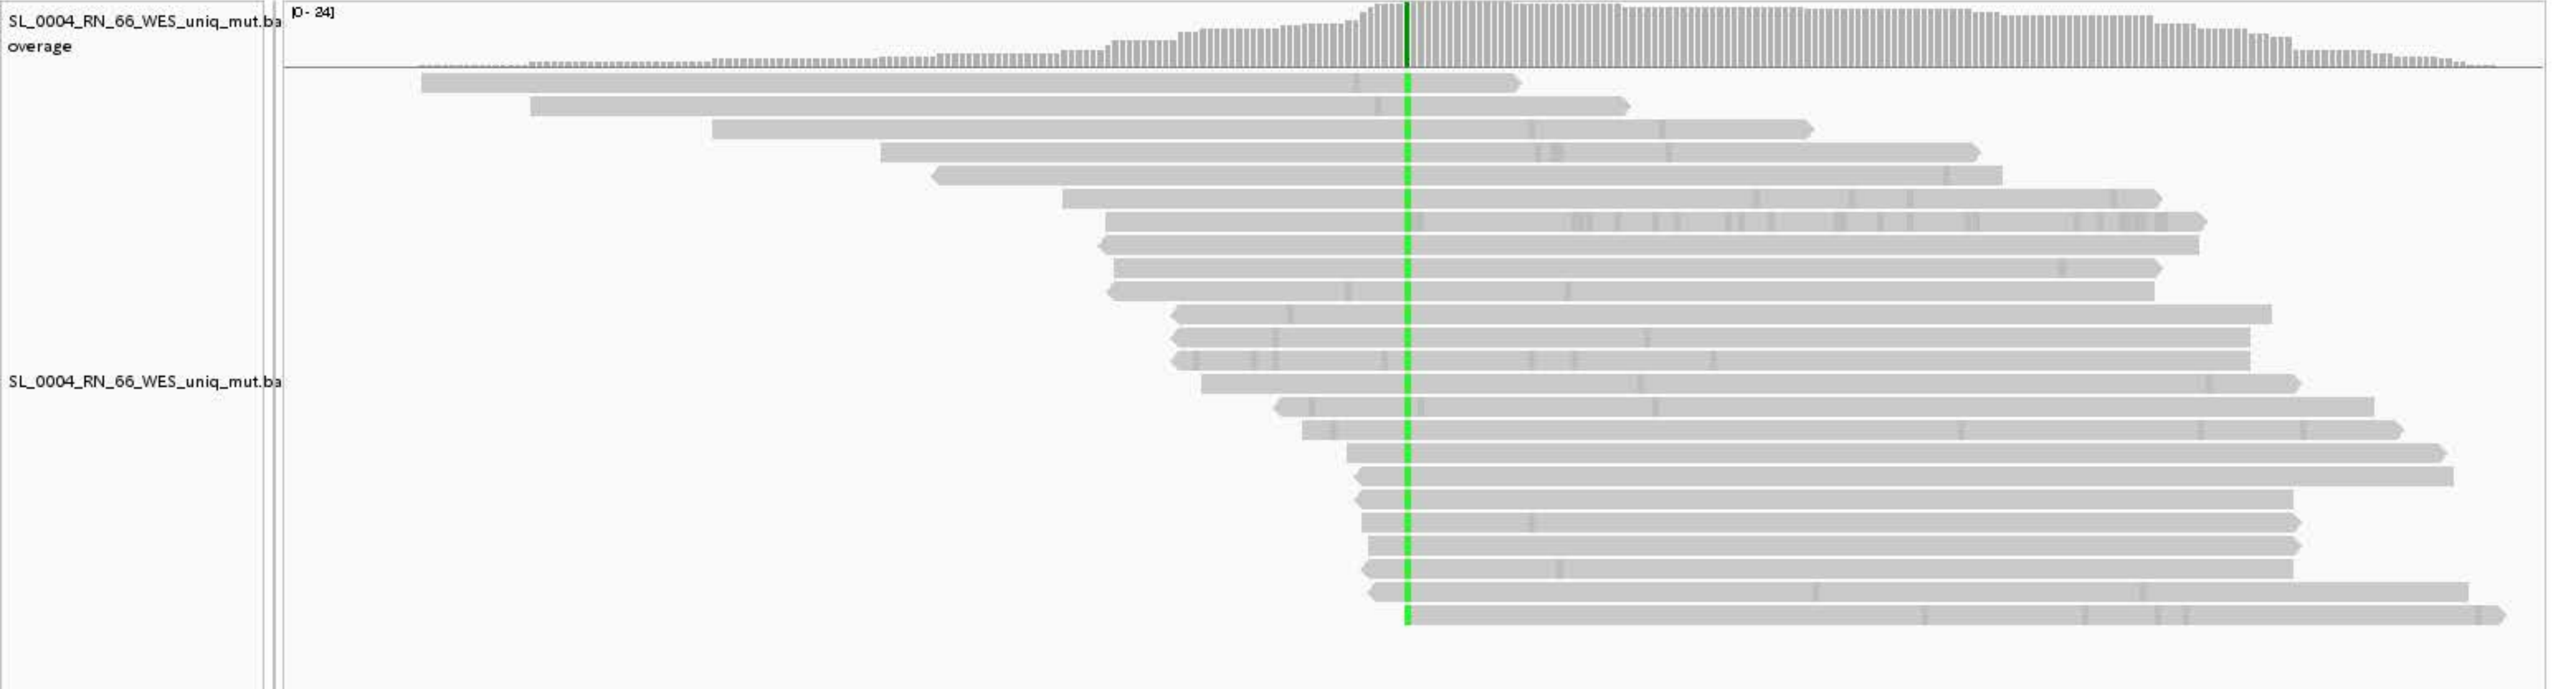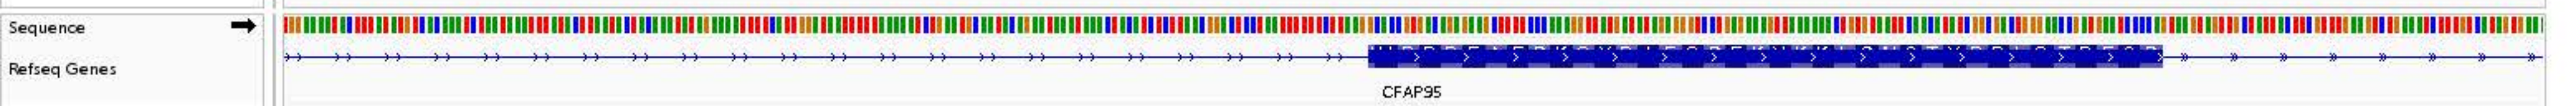

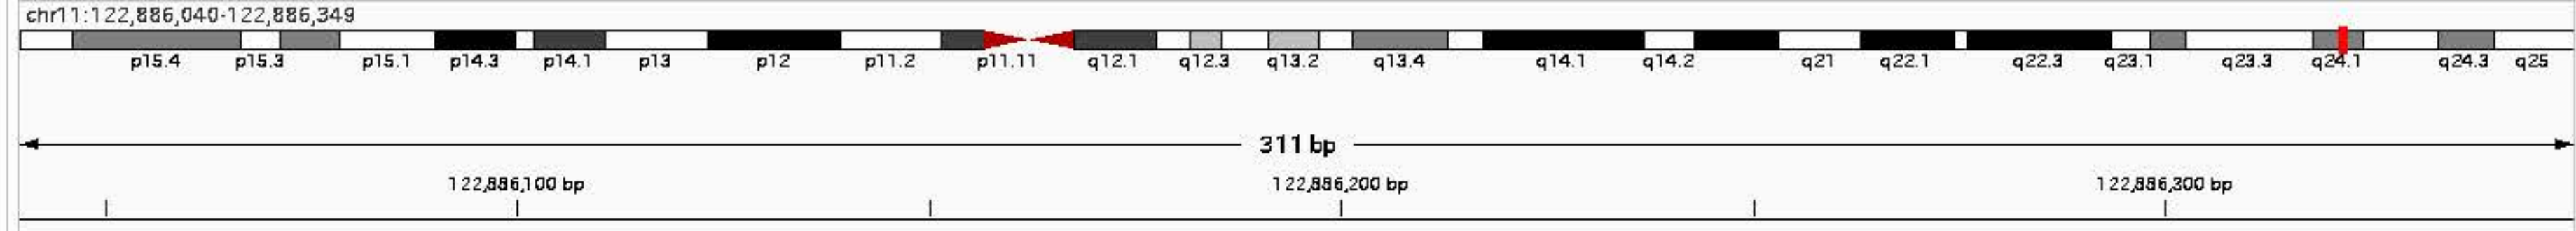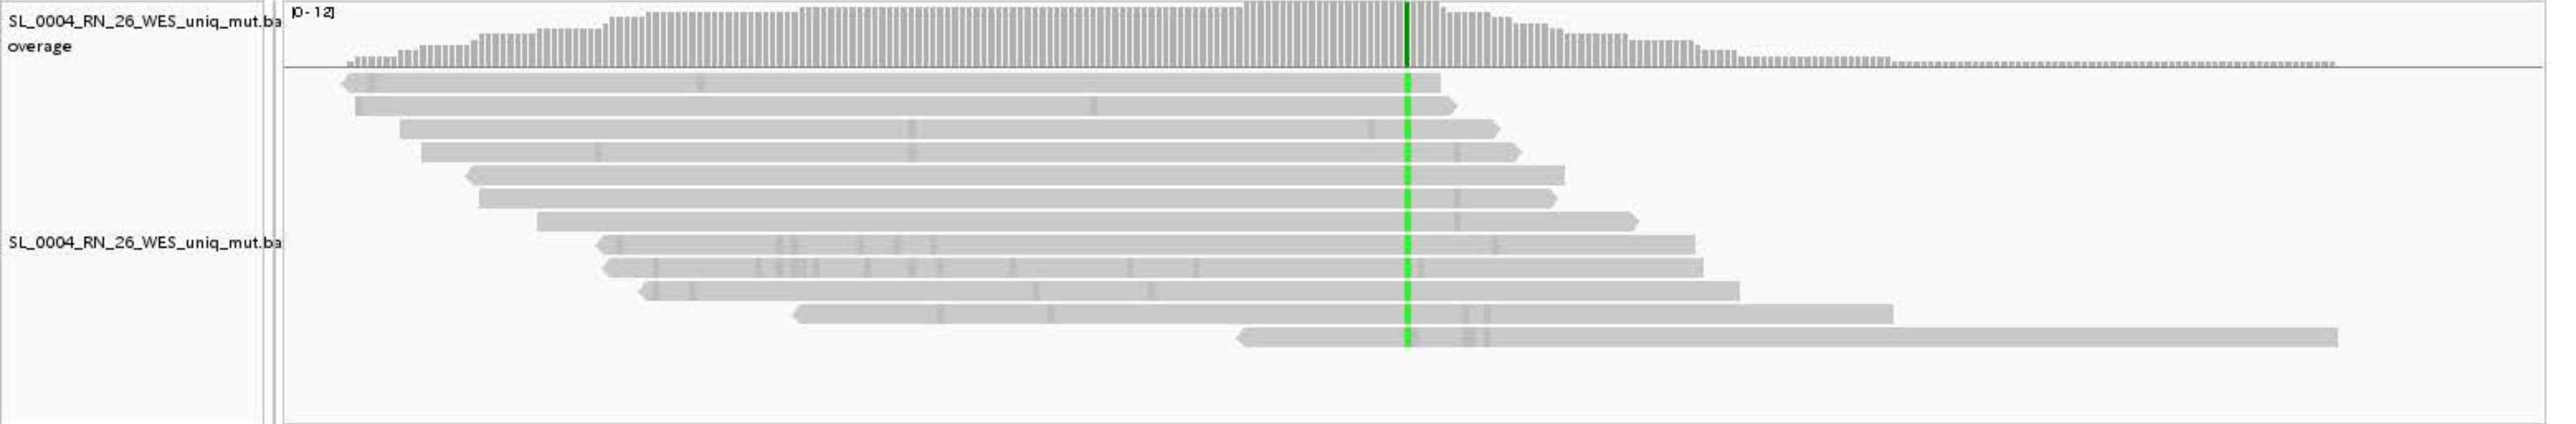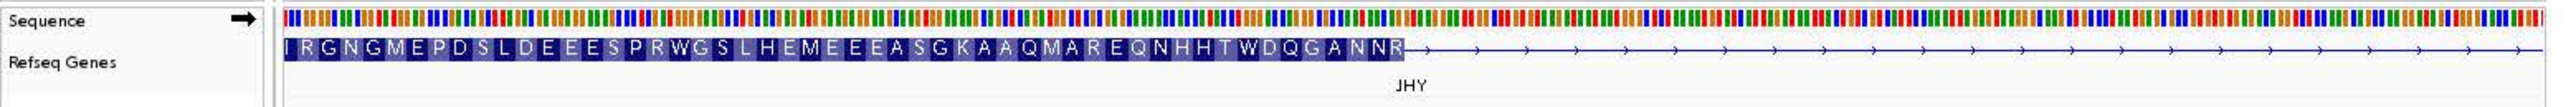

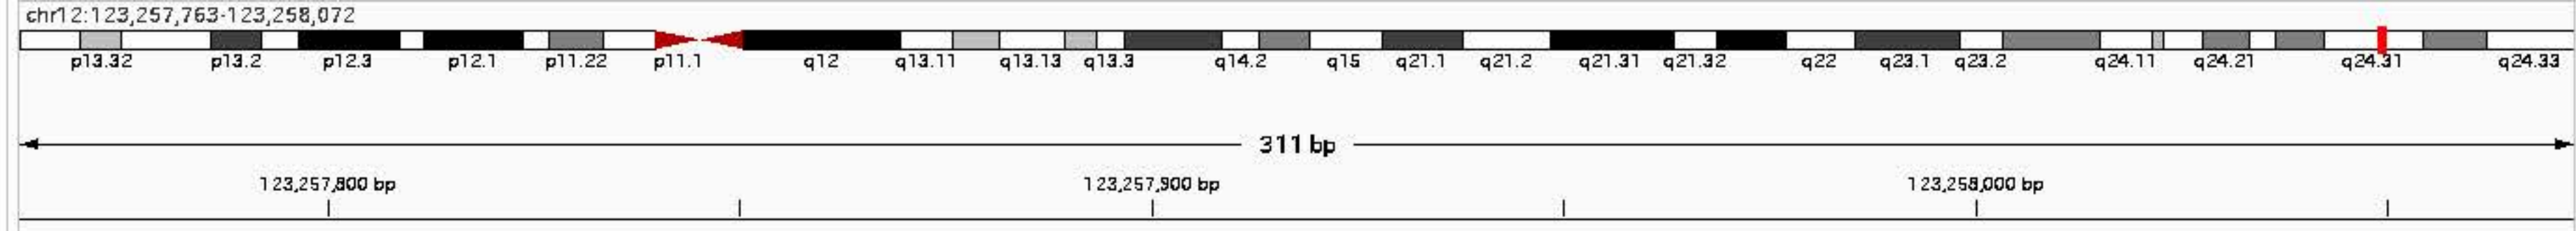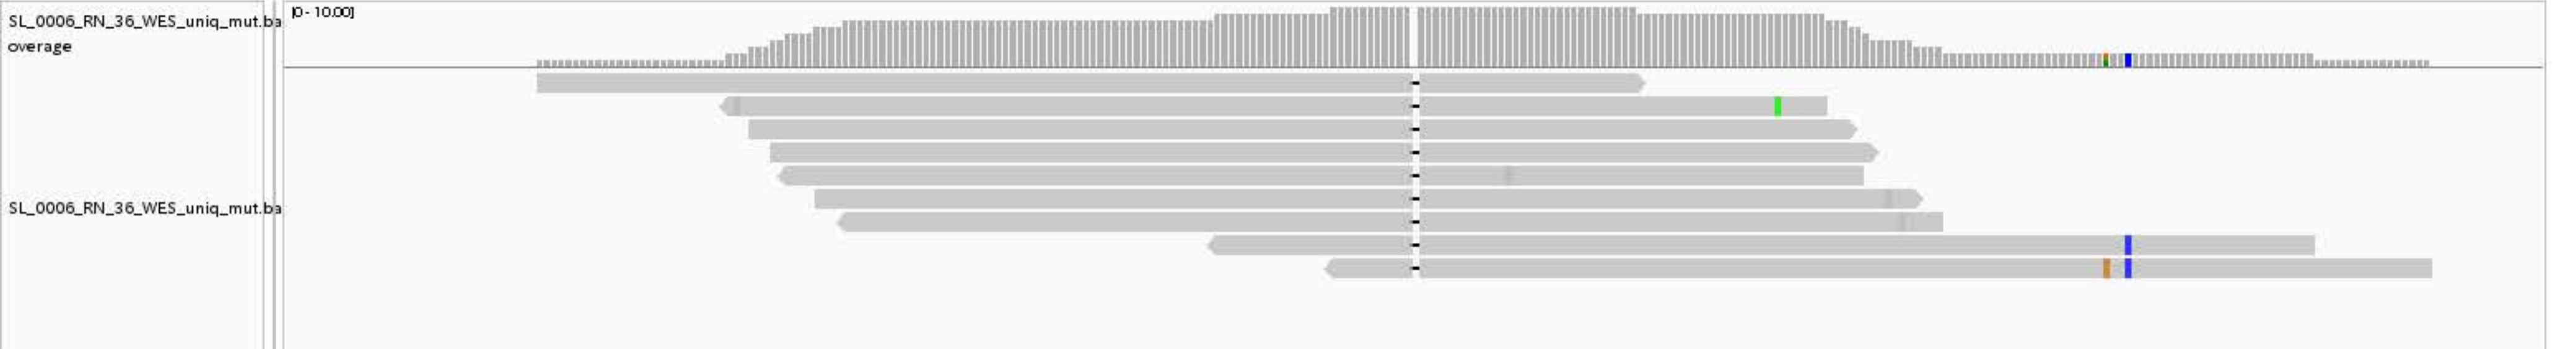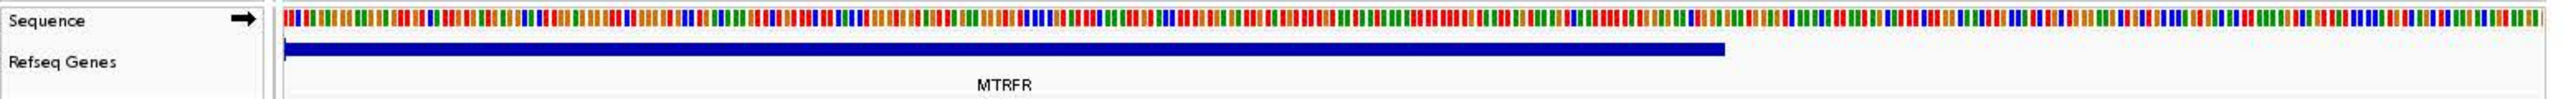



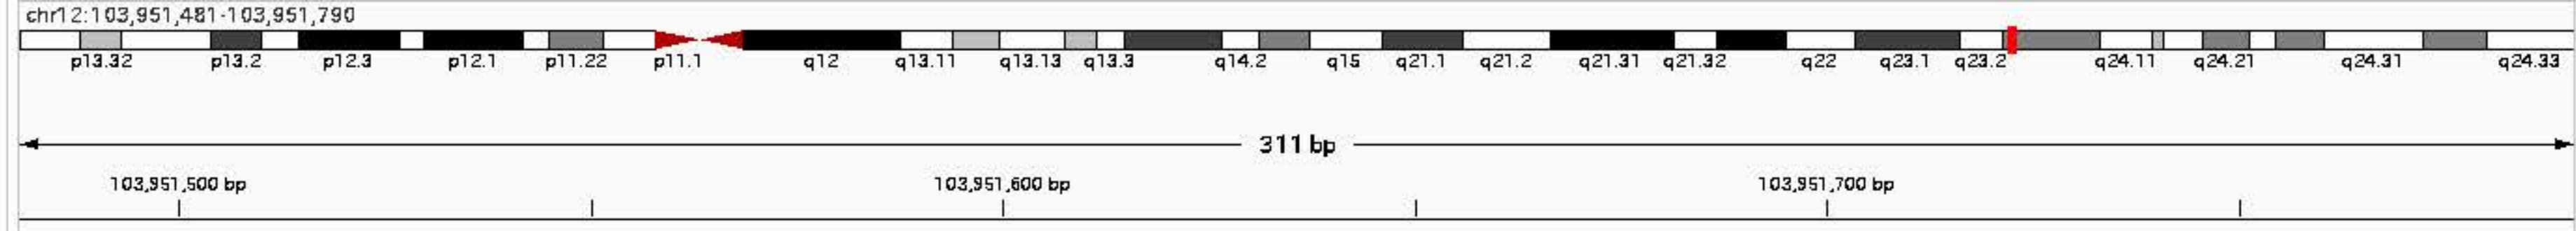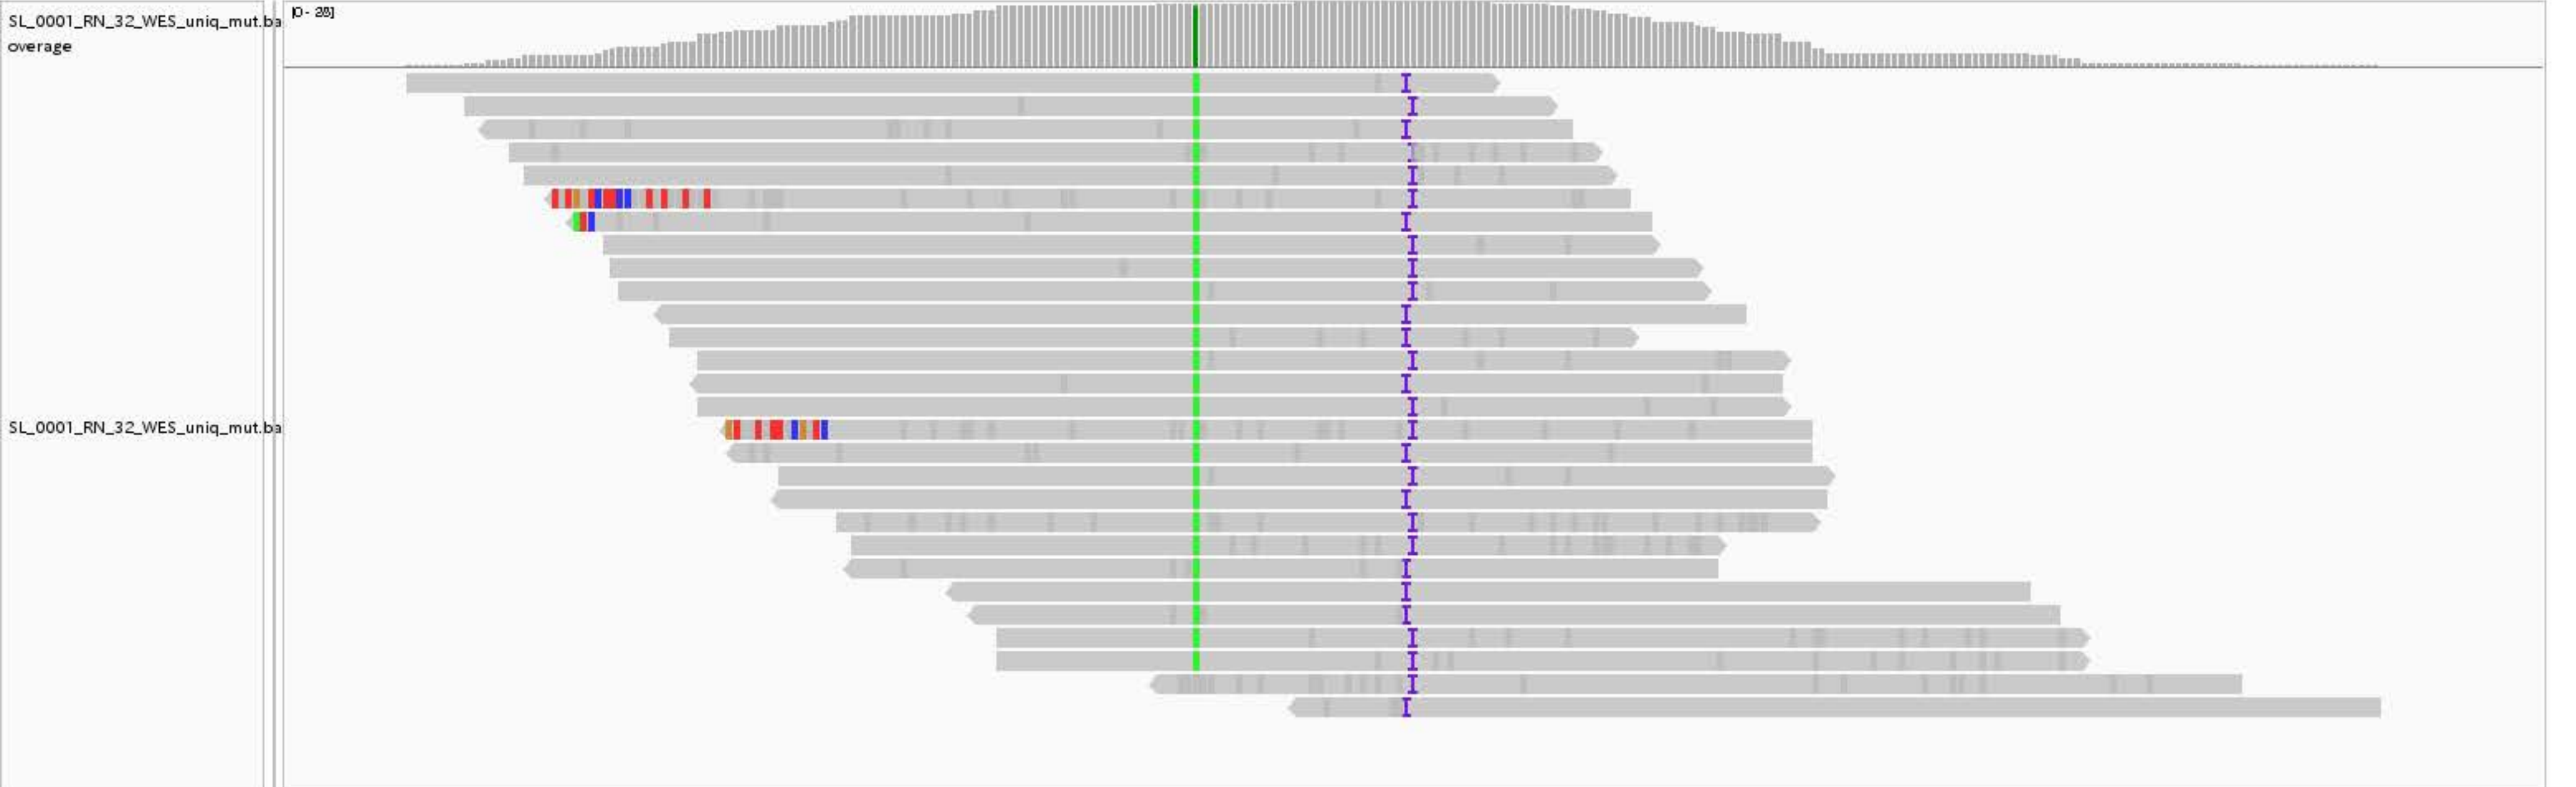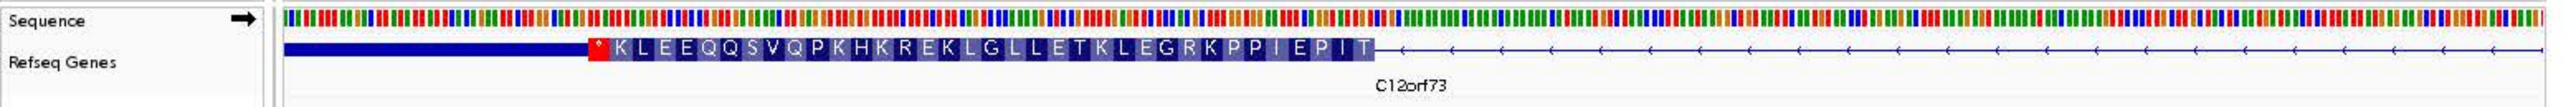

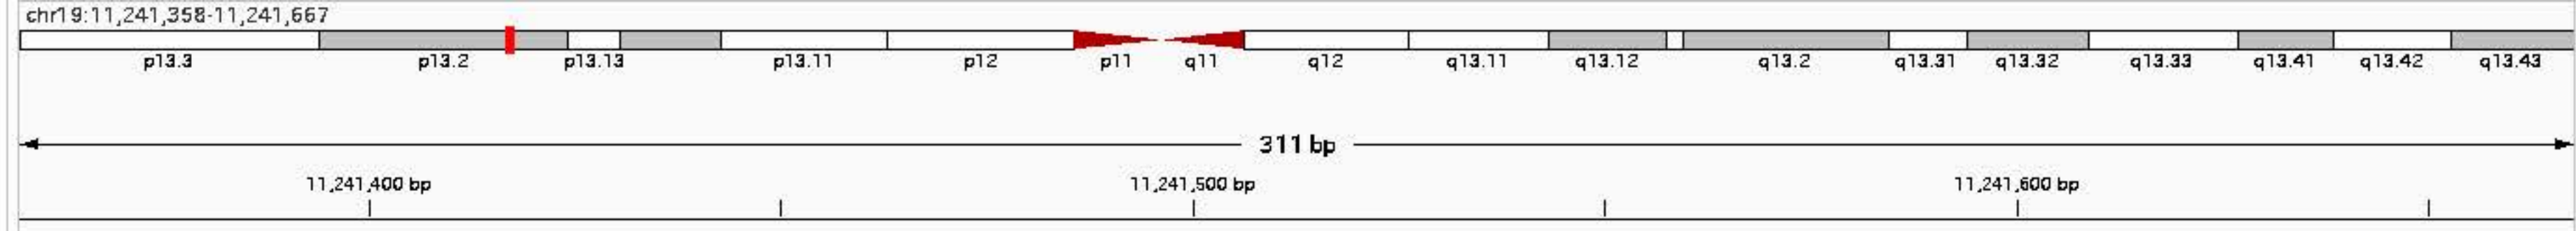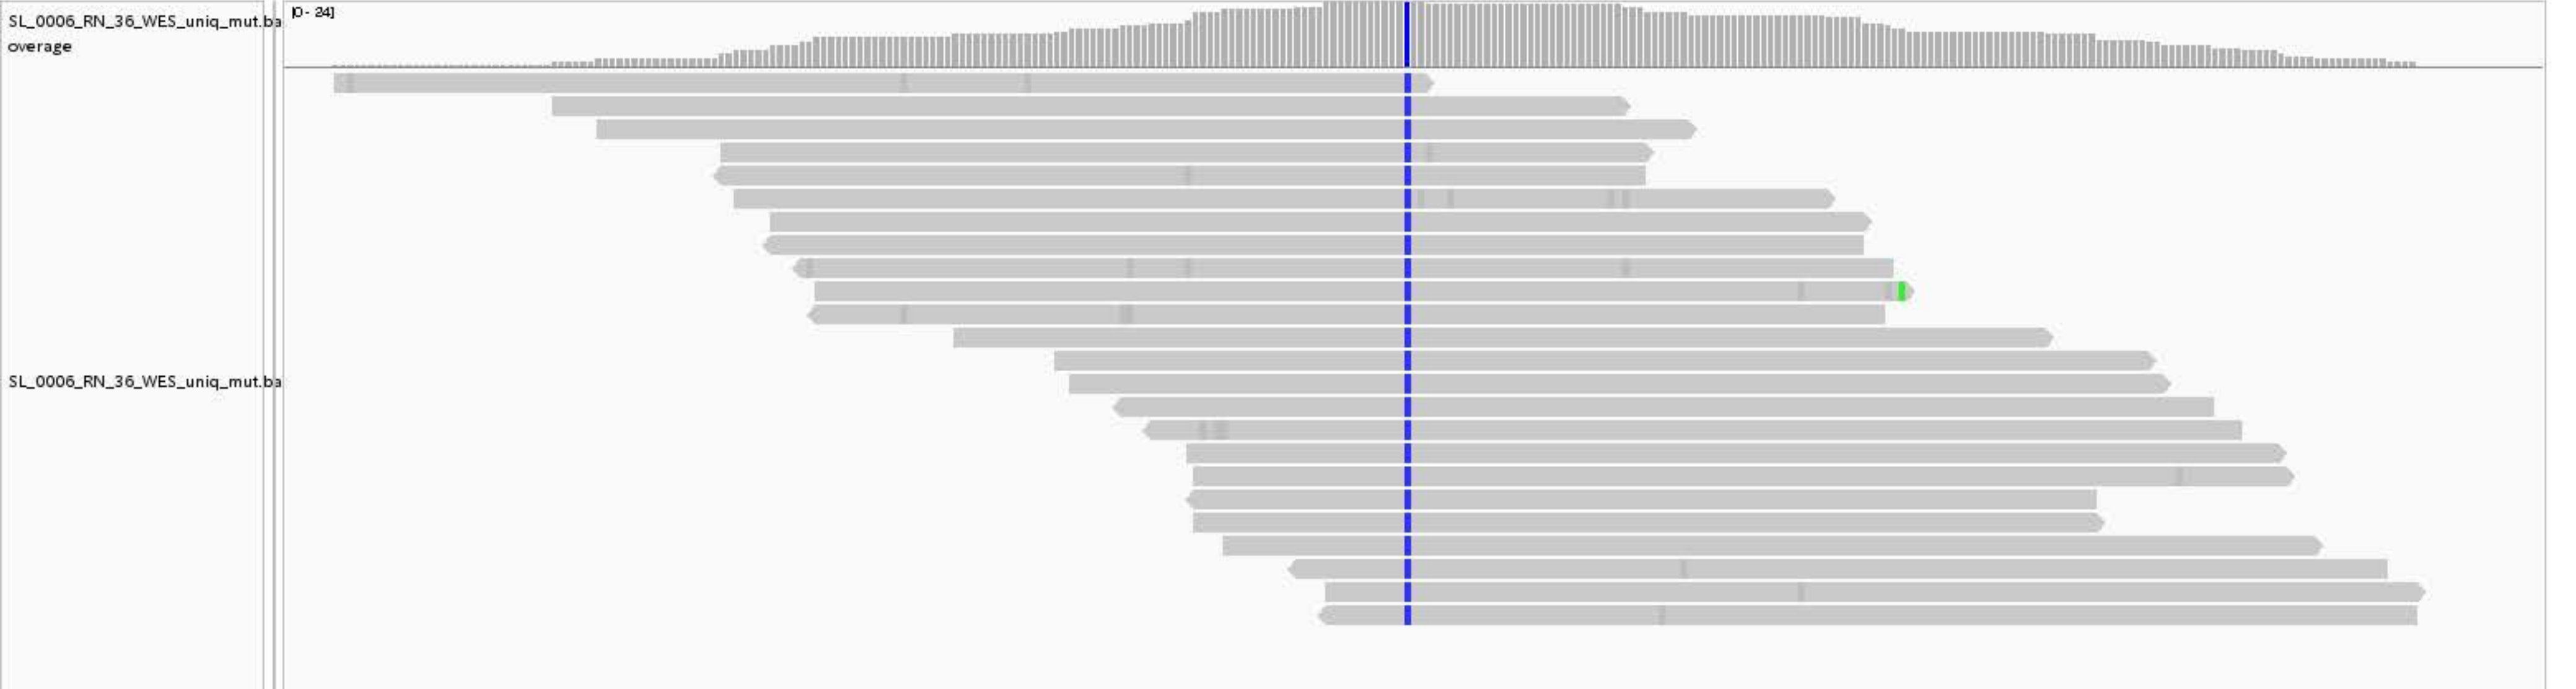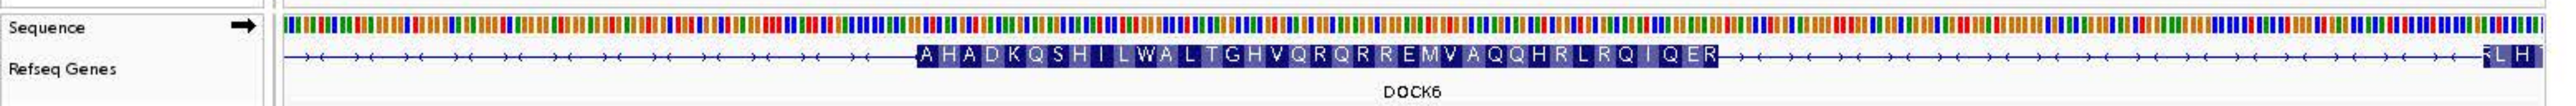

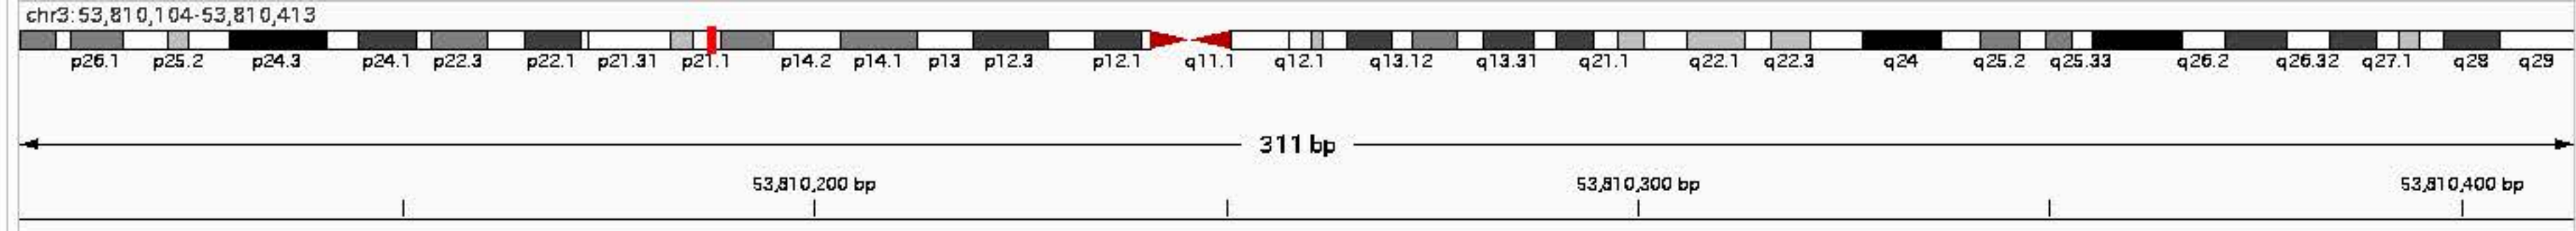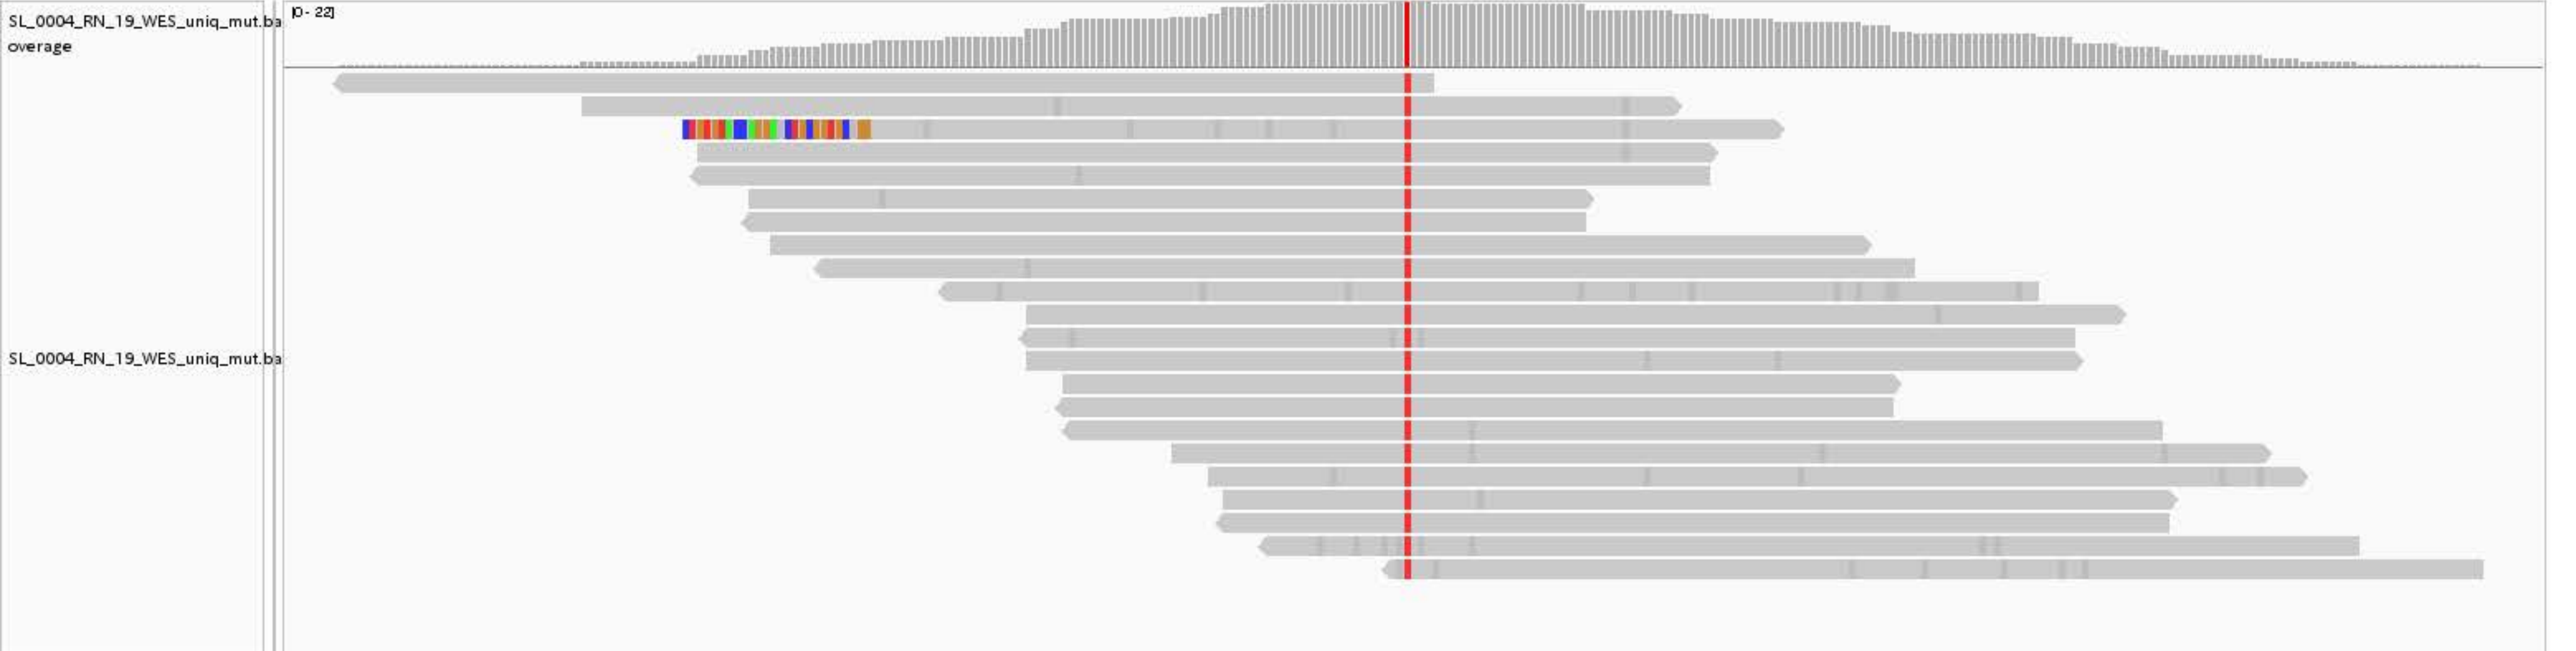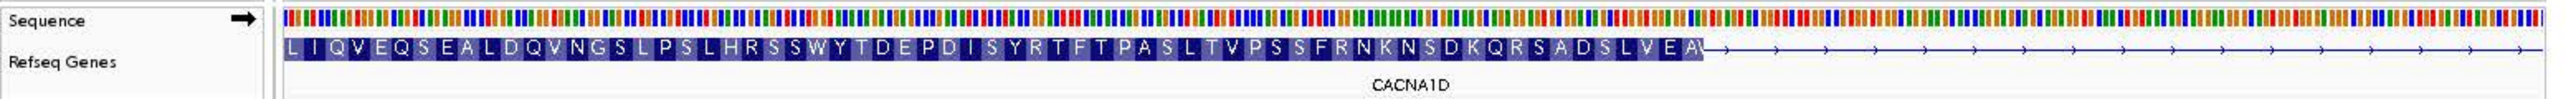



chr5:111,483,901-111,484,210

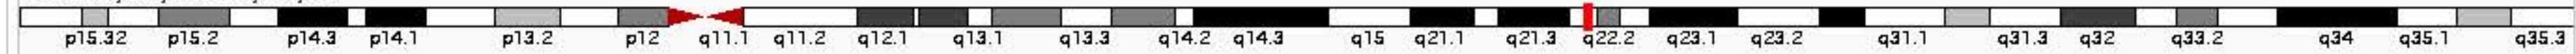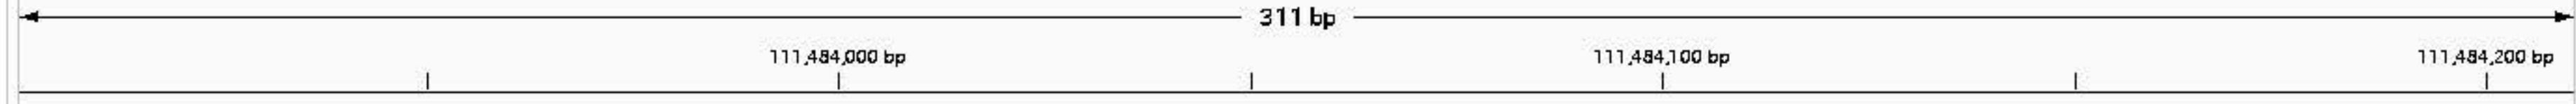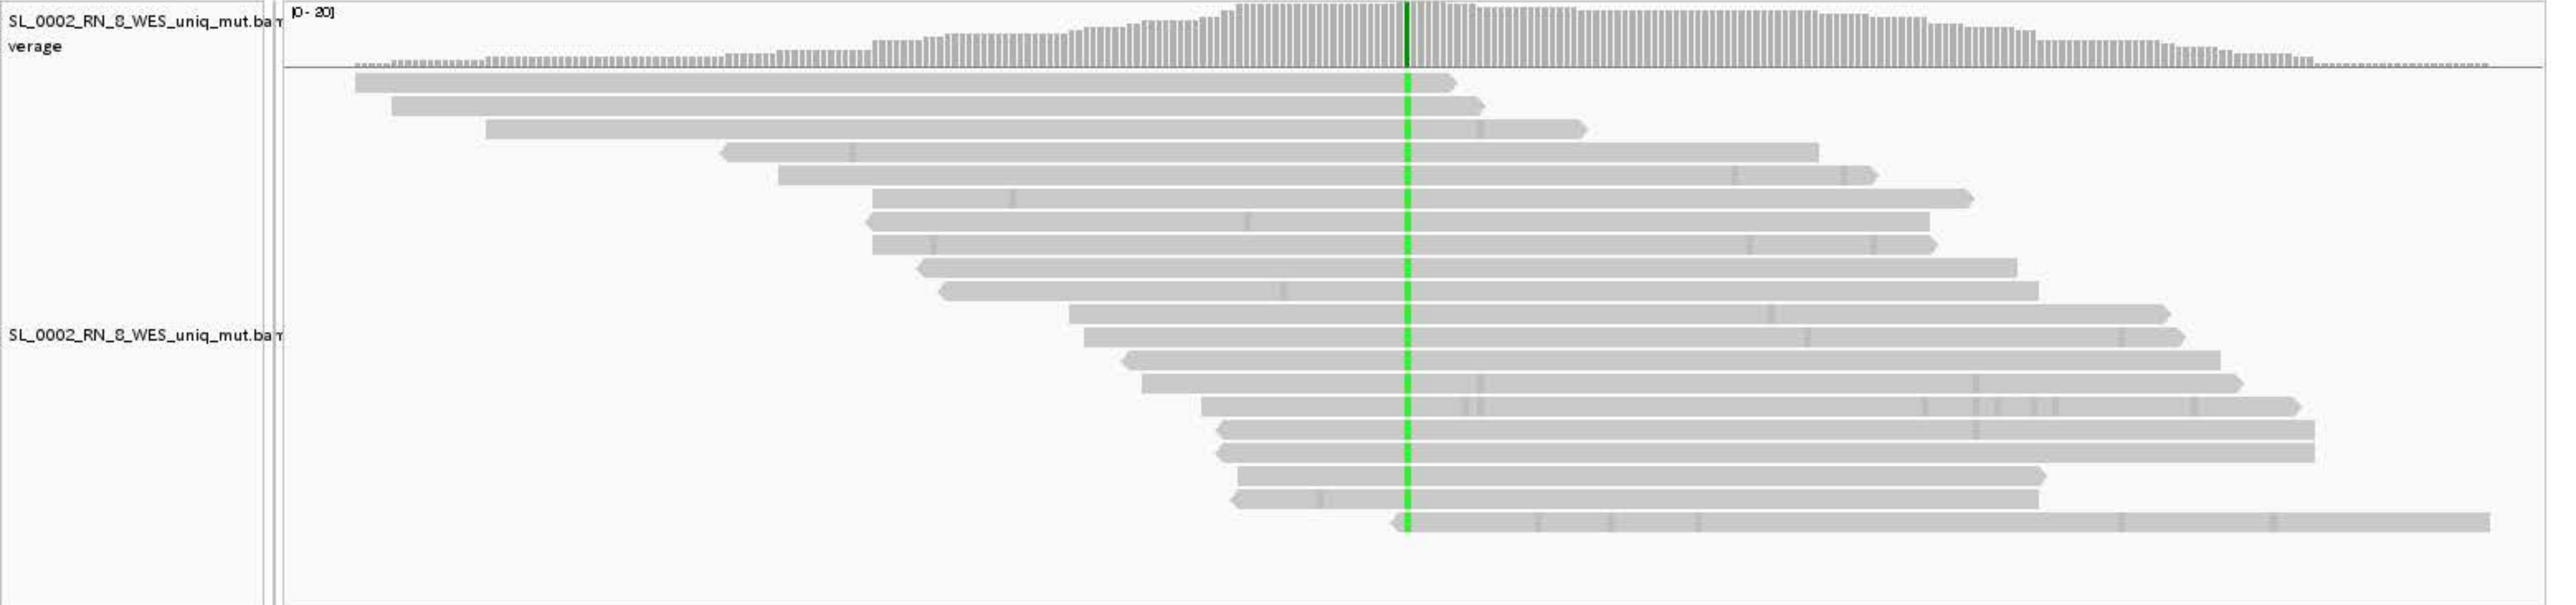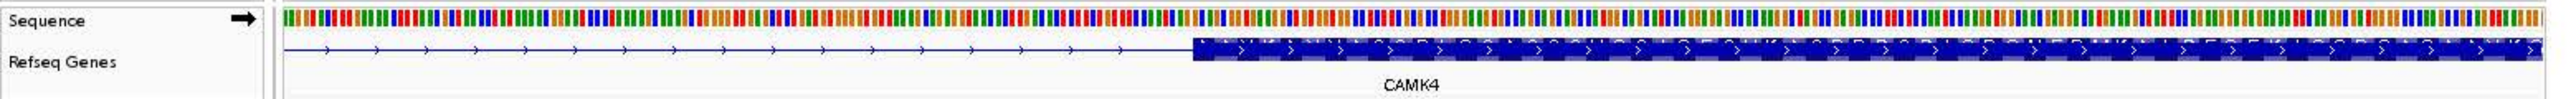

CAMK4

chr1:10,639,641-10,639,950  
p36.31 p36.21 p36.11 p35.1 p34.2 p33 p32.2 p31.3 p31.1 p22.3 p21.3 p21.1 p13.2 p11.2 q12 q21.1 q21.3 q23.2 q24.2 q25.2 q31.1 q31.3 q32.2 q41 q42.13 q43 q44

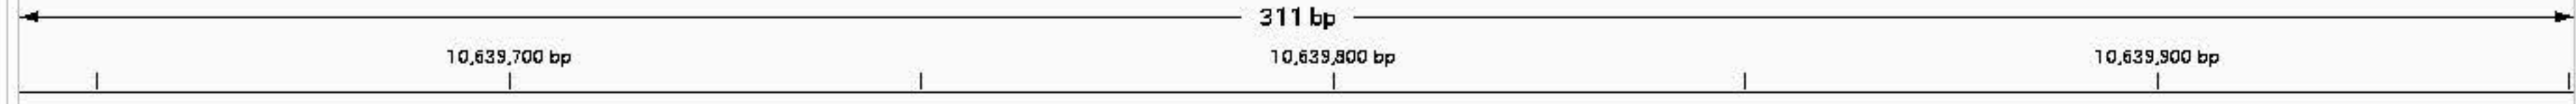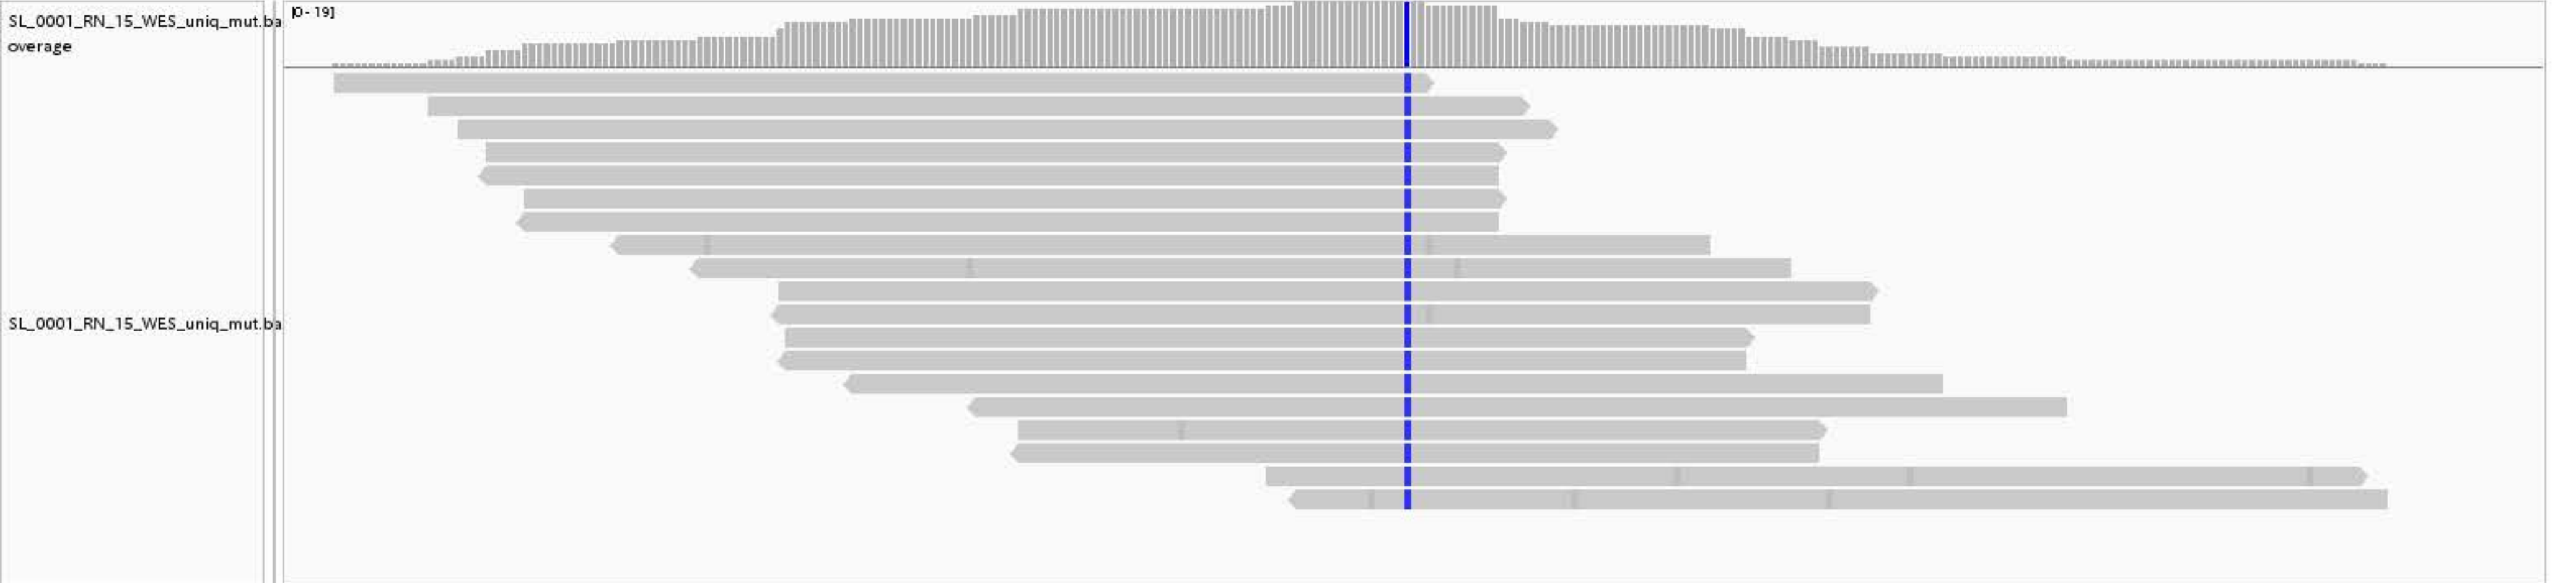

Sequence →  
Refseq Genes  
SDTCRFRRCRLCHFHTSTGSPFCDAFHCSLSAKFRKFDDLVLNDVRDHHQAHKYMHTRGCFKYGCNERTCHYHTVKLSFQCAADKCD EYLD FRRRFGELMMGEDL  
CASZ1

chr3:180,614,625-180,614,934  
p26.1 p25.2 p24.3 p24.1 p22.3 p22.1 p21.31 p21.1 p14.2 p14.1 p13 p12.3 p12.1 q11.1 q12.1 q13.12 q13.31 q21.1 q22.1 q22.3 q24 q25.2 q25.33 q26.2 q26.32 q27.1 q28 q29

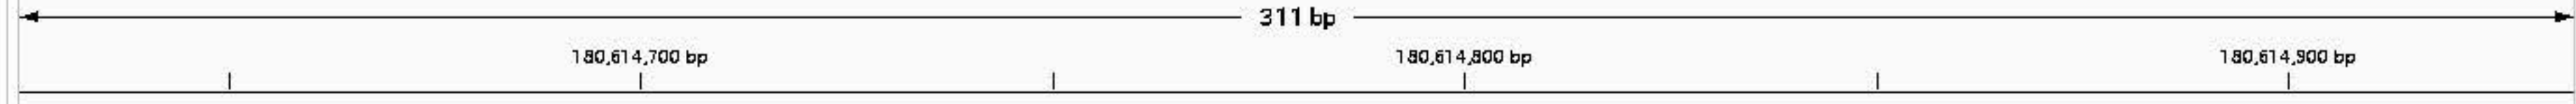

SL\_0017\_RN\_15\_WES\_uniq\_mut.ba  
overage

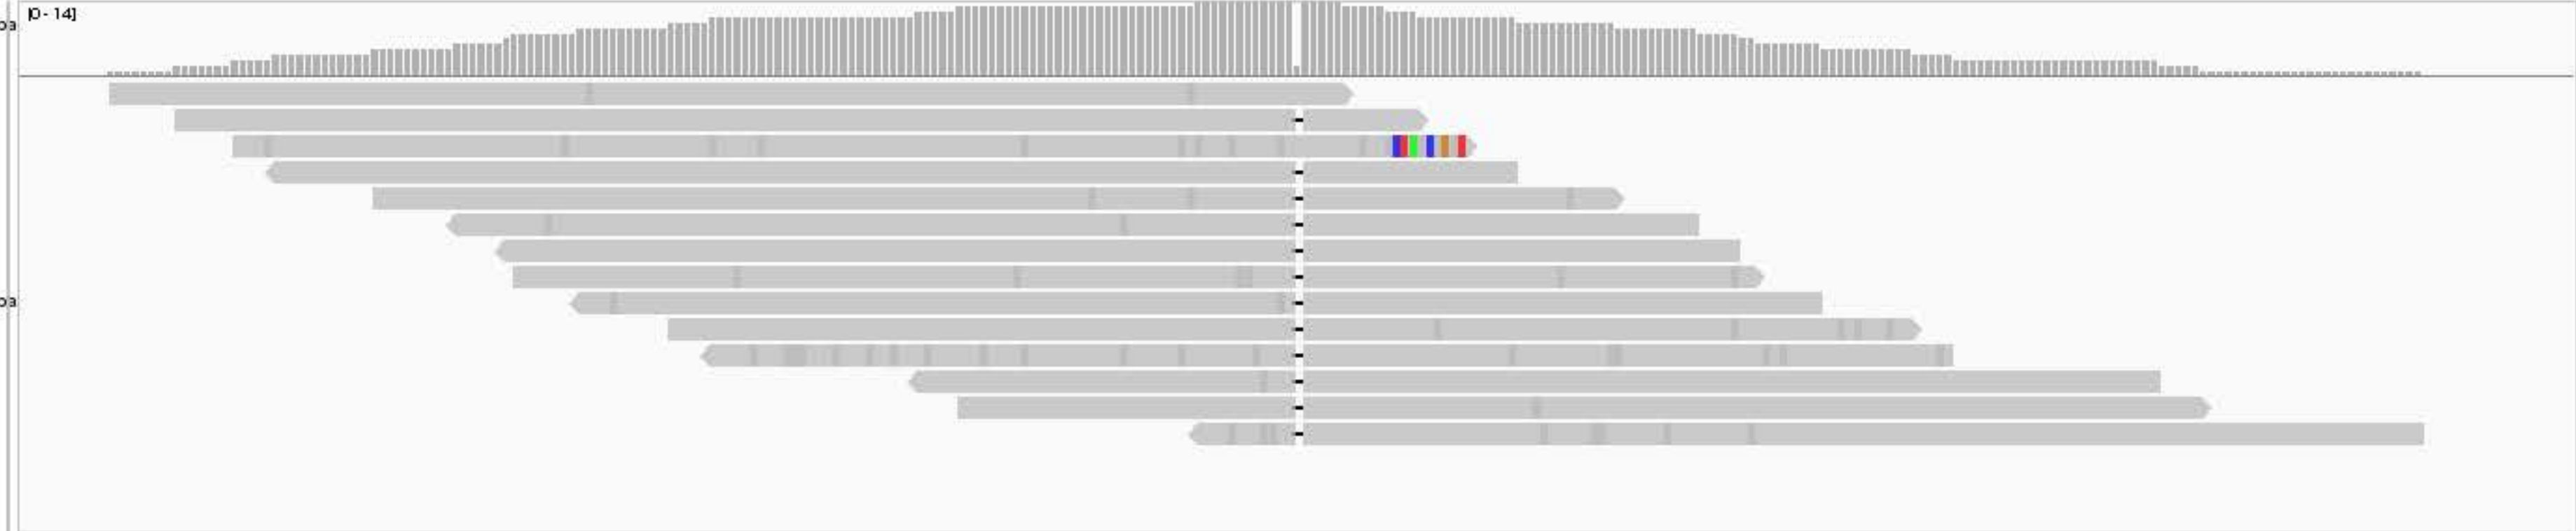

SL\_0017\_RN\_15\_WES\_uniq\_mut.ba

Sequence

Refseq Genes

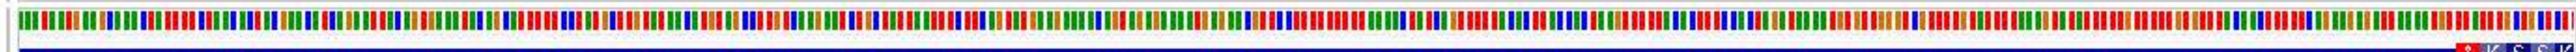

TTC14



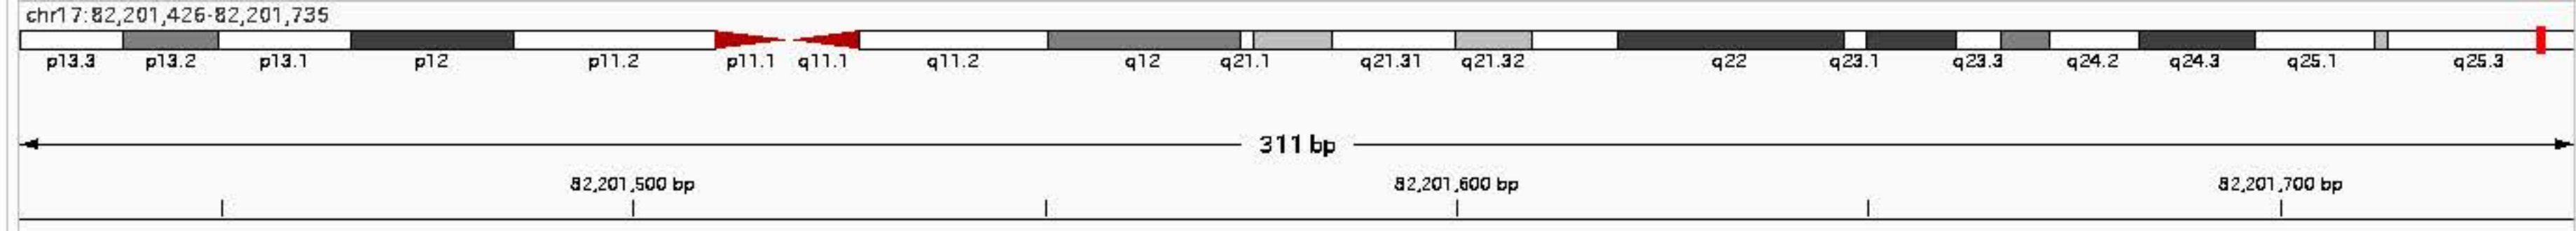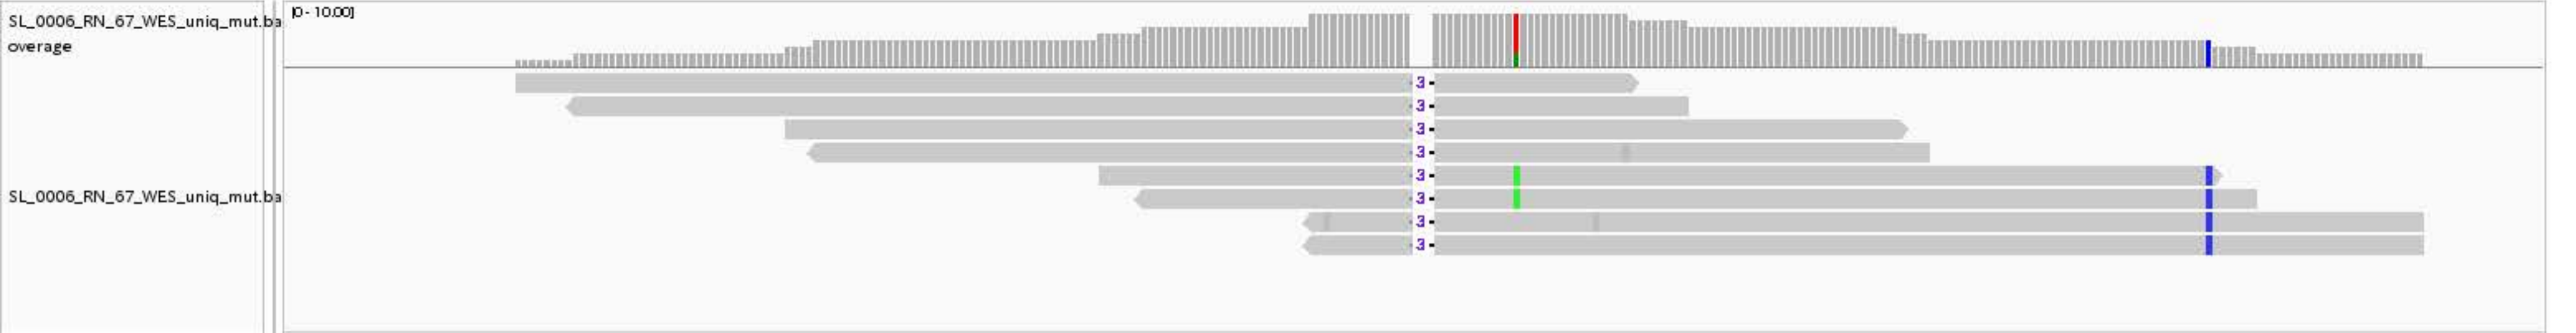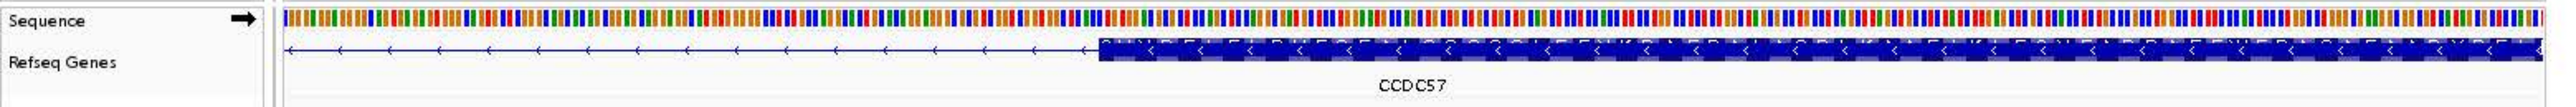

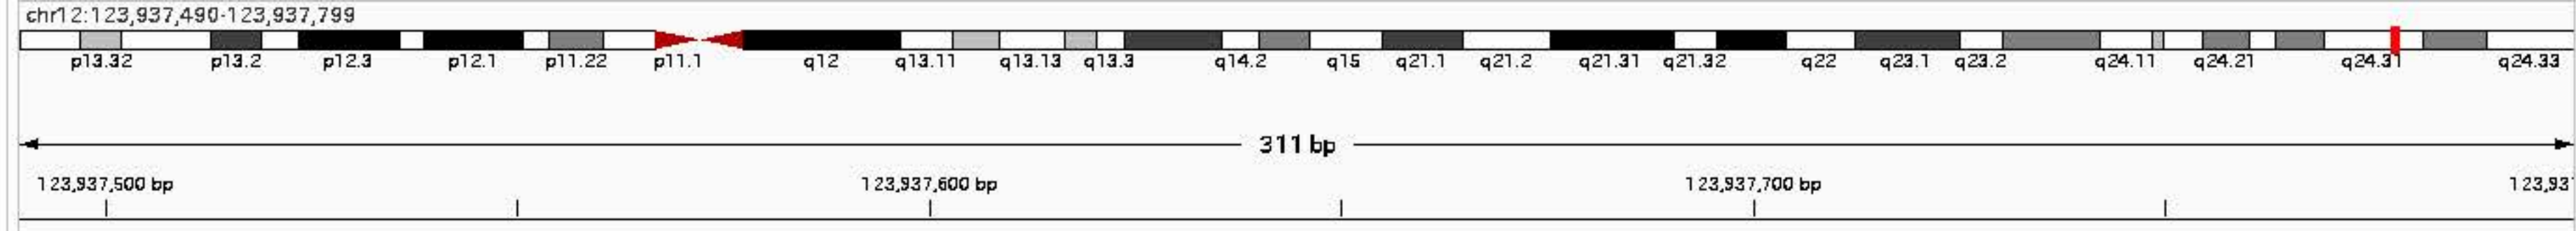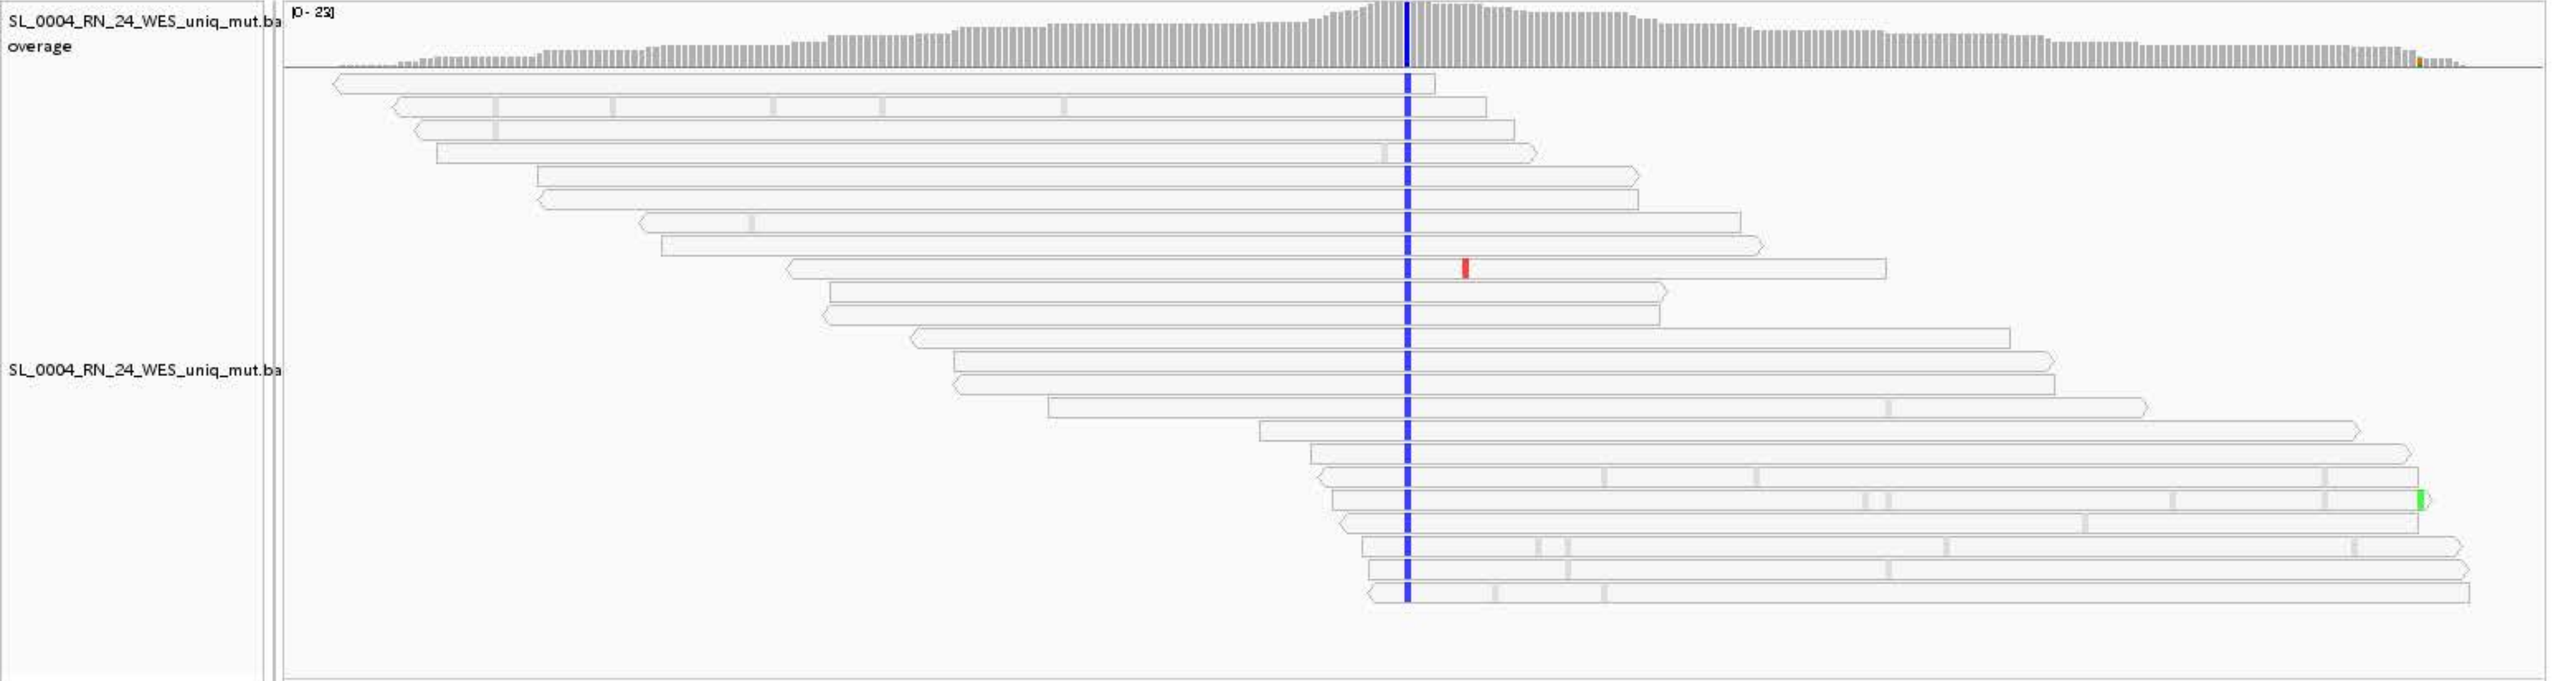

Sequence →

Refseq Genes

SALVPSGSPSADSTGSSSMLKKKAHLQSTLYAITSARQELESSLLTLKHSKAKLEELYKKEREKITNELVTIMANKQELEKLLLEANENEKVKLQAELEECRK

CCDC92

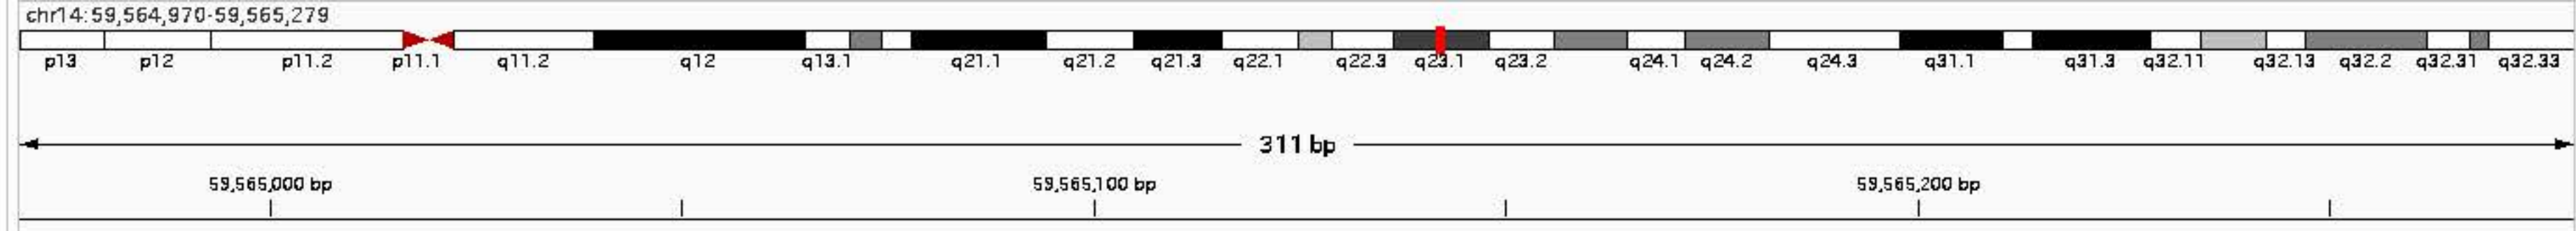

SL\_0001\_LN\_4\_WES\_uniq\_mut.ba  
verage

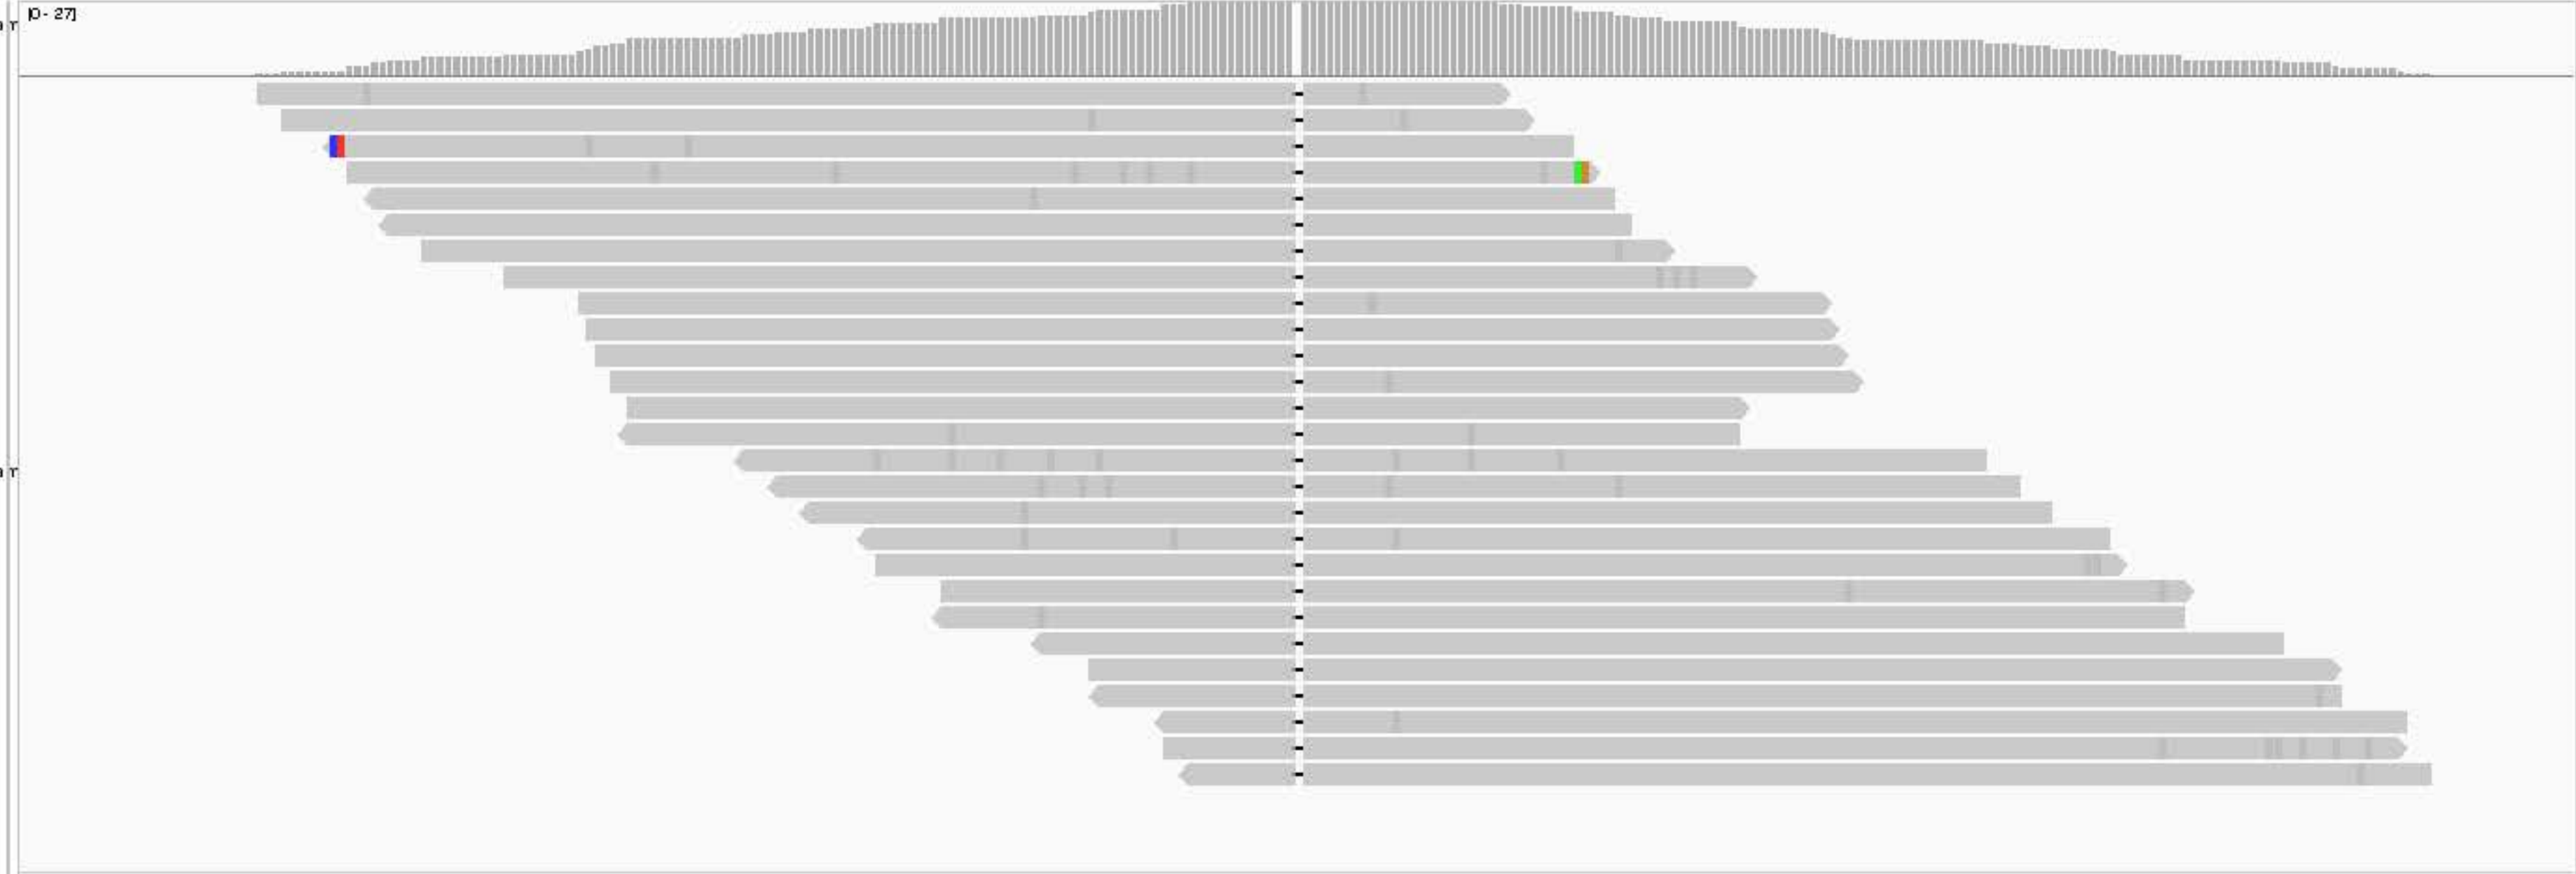

Sequence →  
Refseq Genes

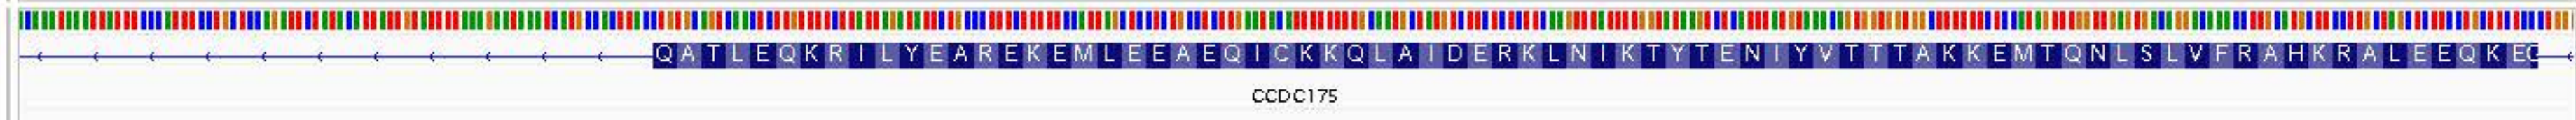



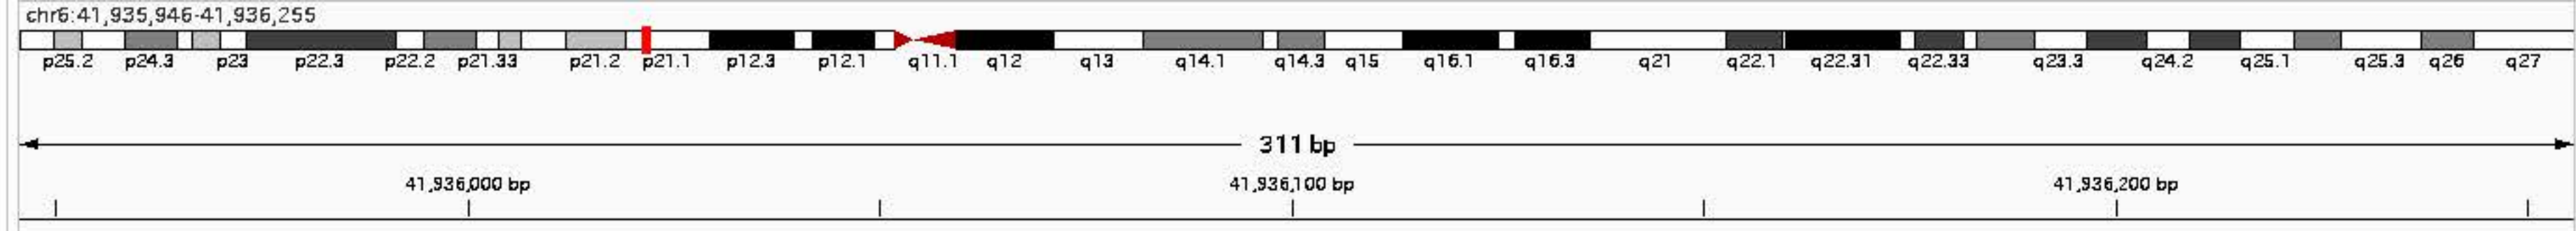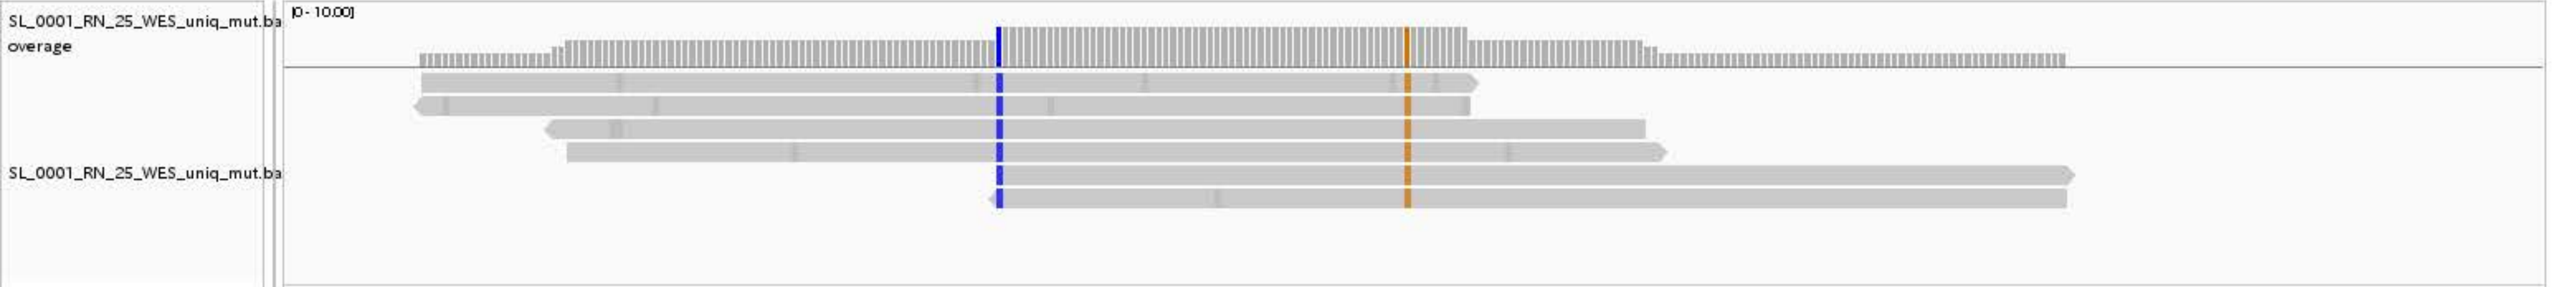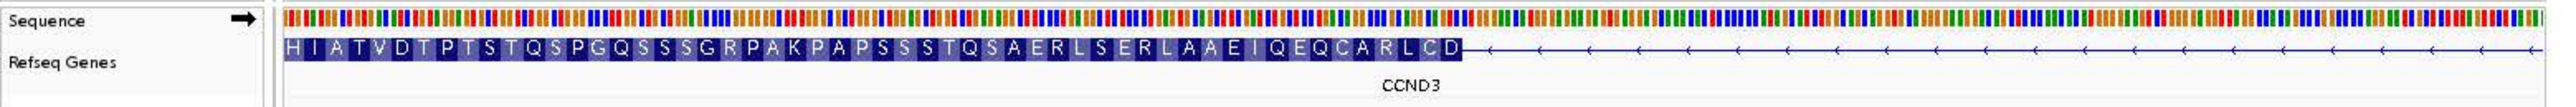

chr4: 77,160,669-77,160,978  
p16.2 p15.33 p15.31 p15.1 p14 p13 p11 q12 q13.1 q13.2 q21.1 q21.22 q22.1 q22.3 q24 q25 q26 q27 q28.2 q28.3 q31.1 q31.22 q32.1 q32.3 q34.1 q34.3 q35.2

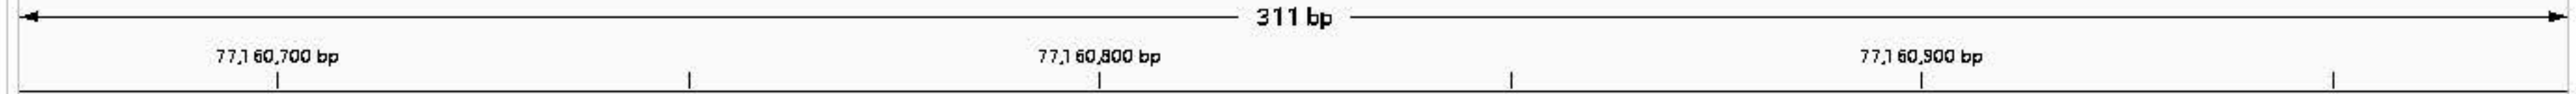

SL\_0003\_LN\_27\_WES\_uniq\_mut. coverage

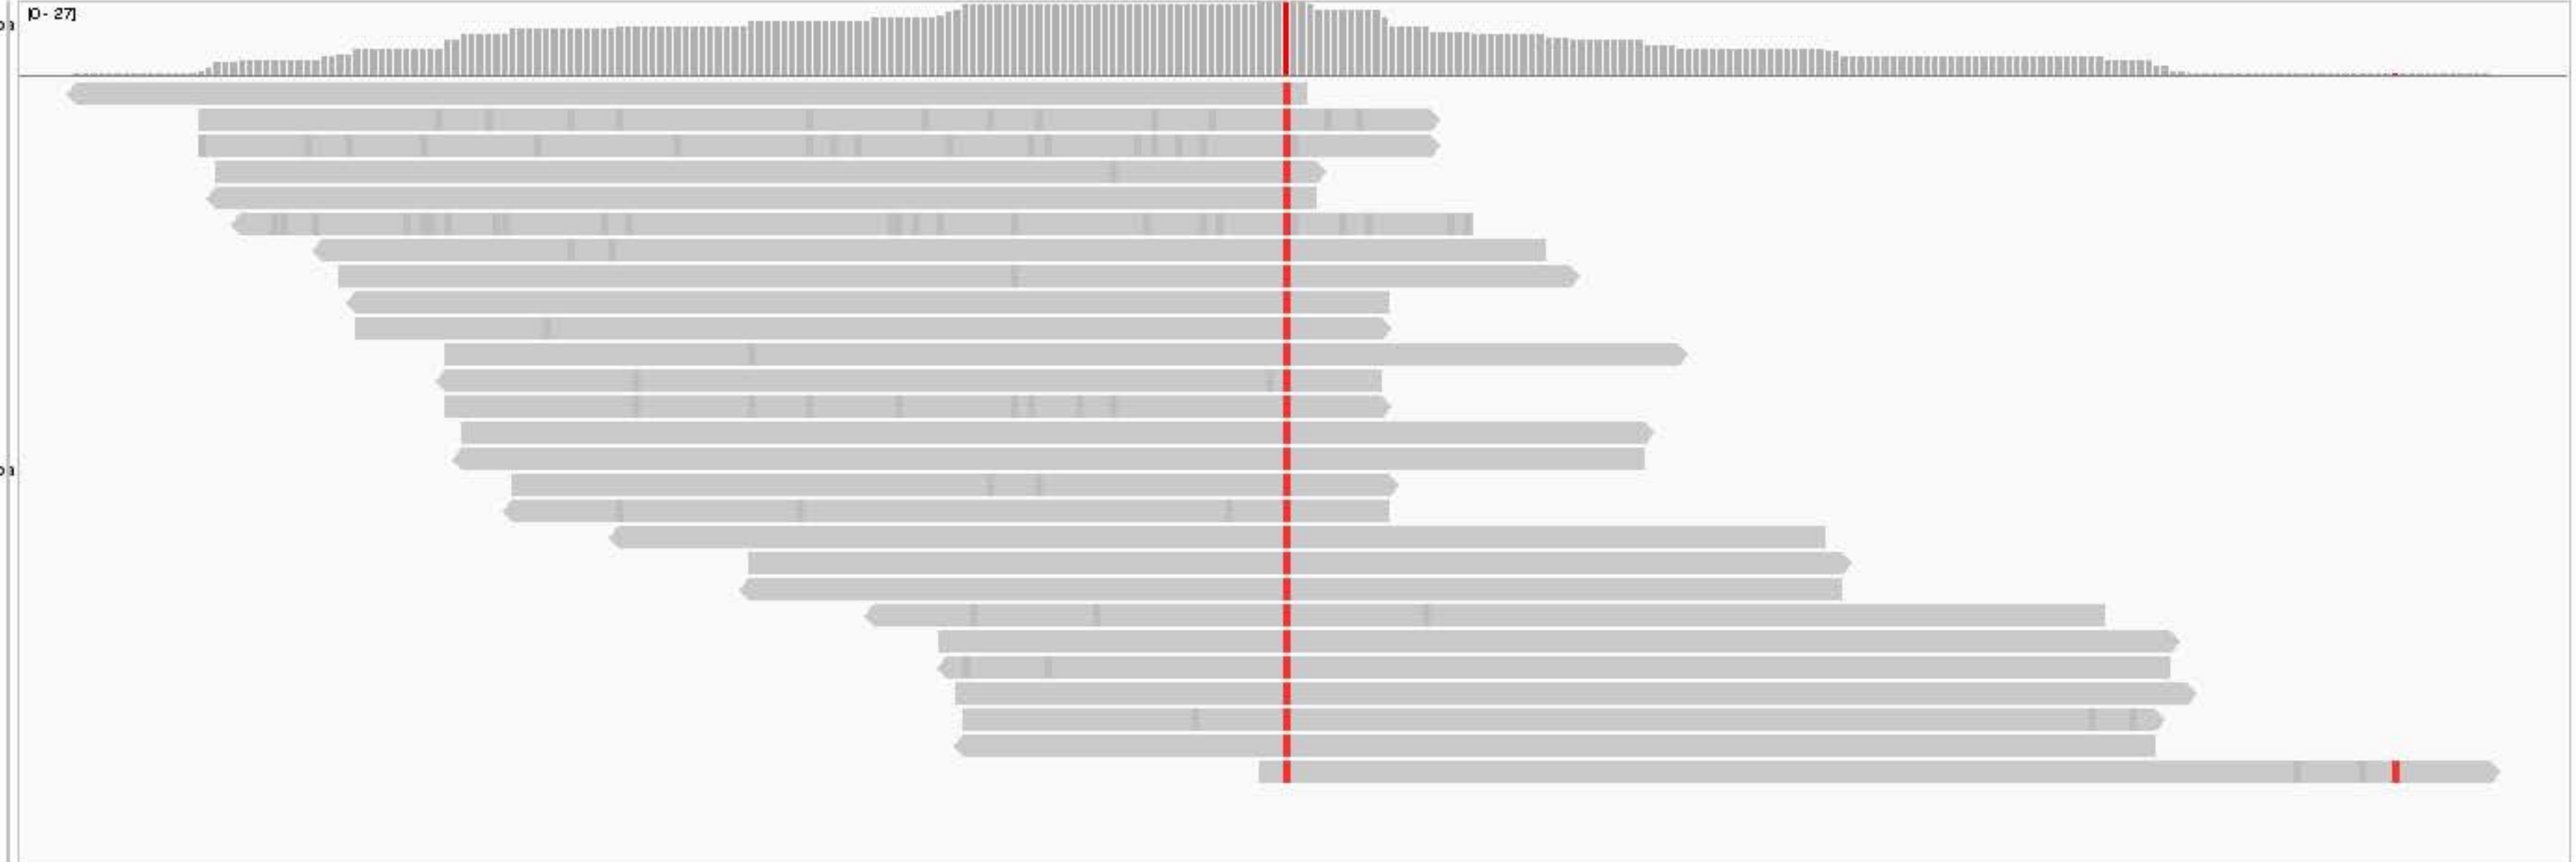

Sequence Refseq Genes

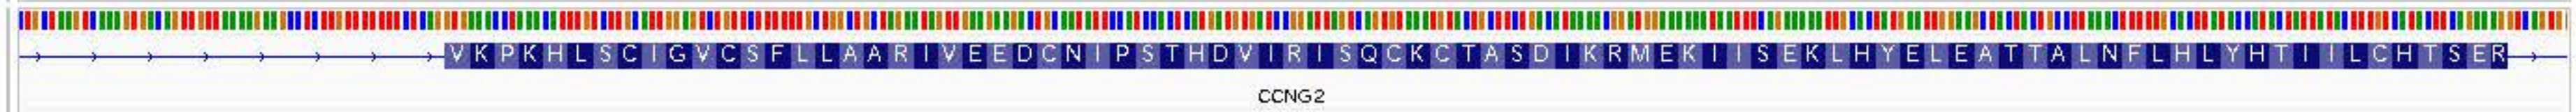

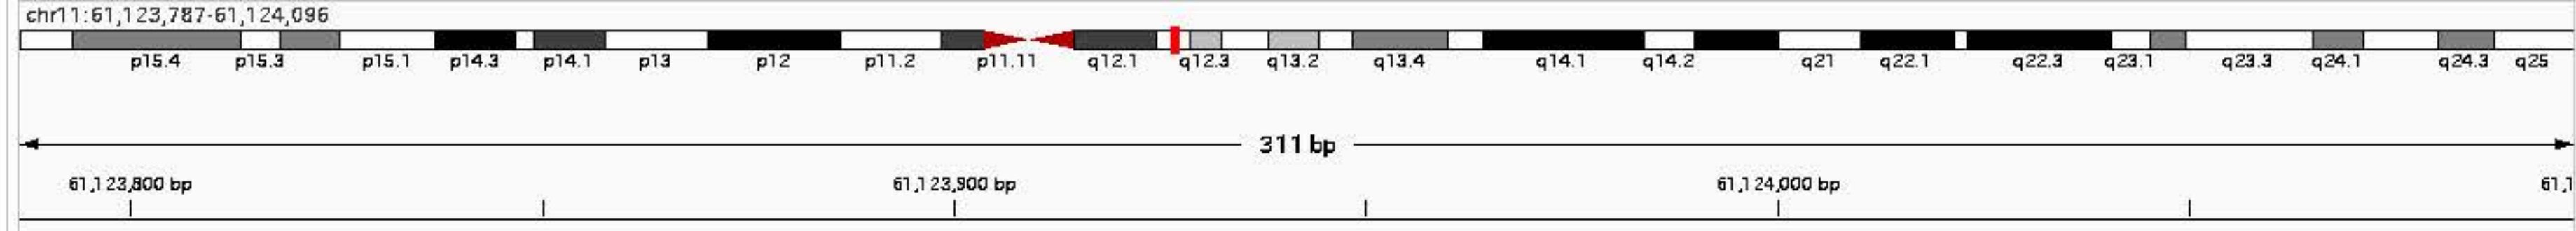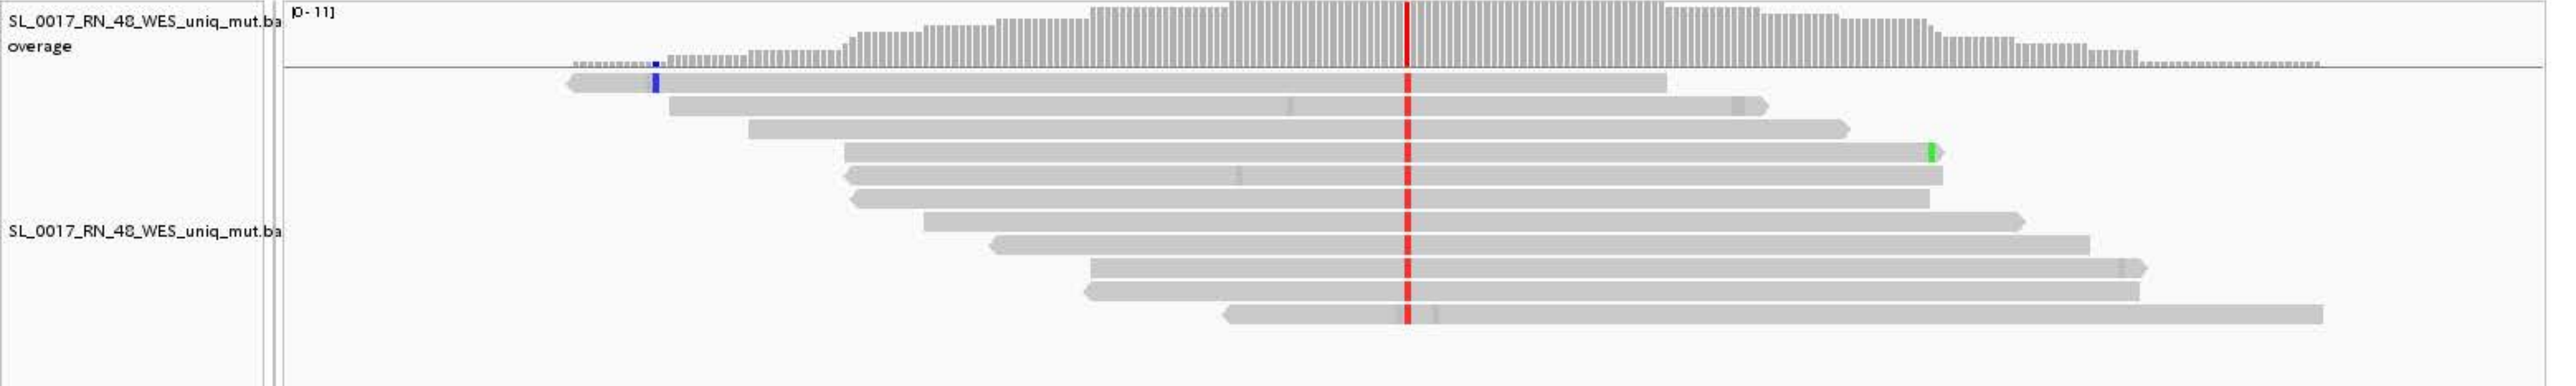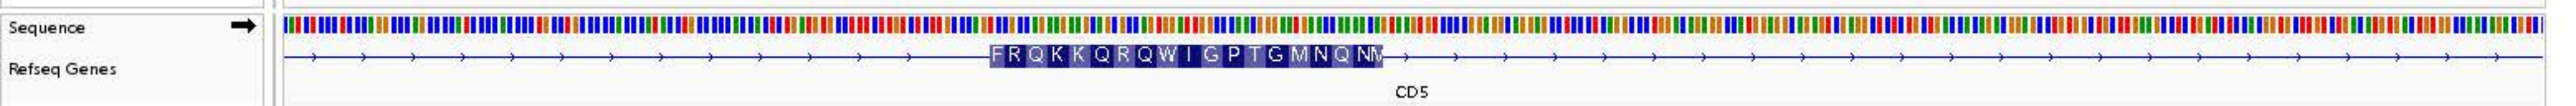



chr7:48,925,271-48,925,580  
p22.2 p21.3 p21.2 p15.3 p15.1 p14.2 p13 p12.2 p11.2 q11.1 q11.22 q11.23 q21.11 q21.12 q21.2 q22.1 q22.3 q31.1 q31.2 q31.32 q32.1 q33 q34 q35 q36.1 q36.3

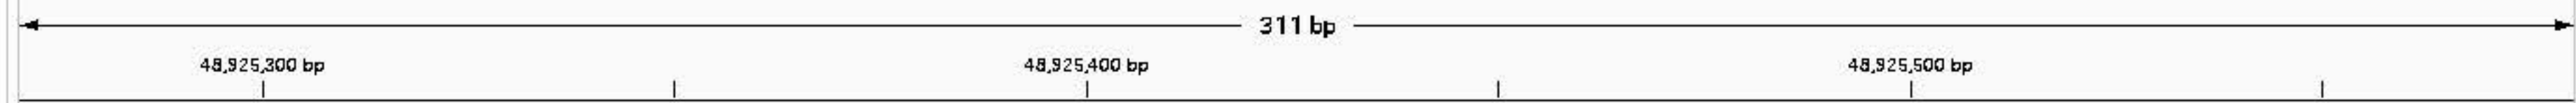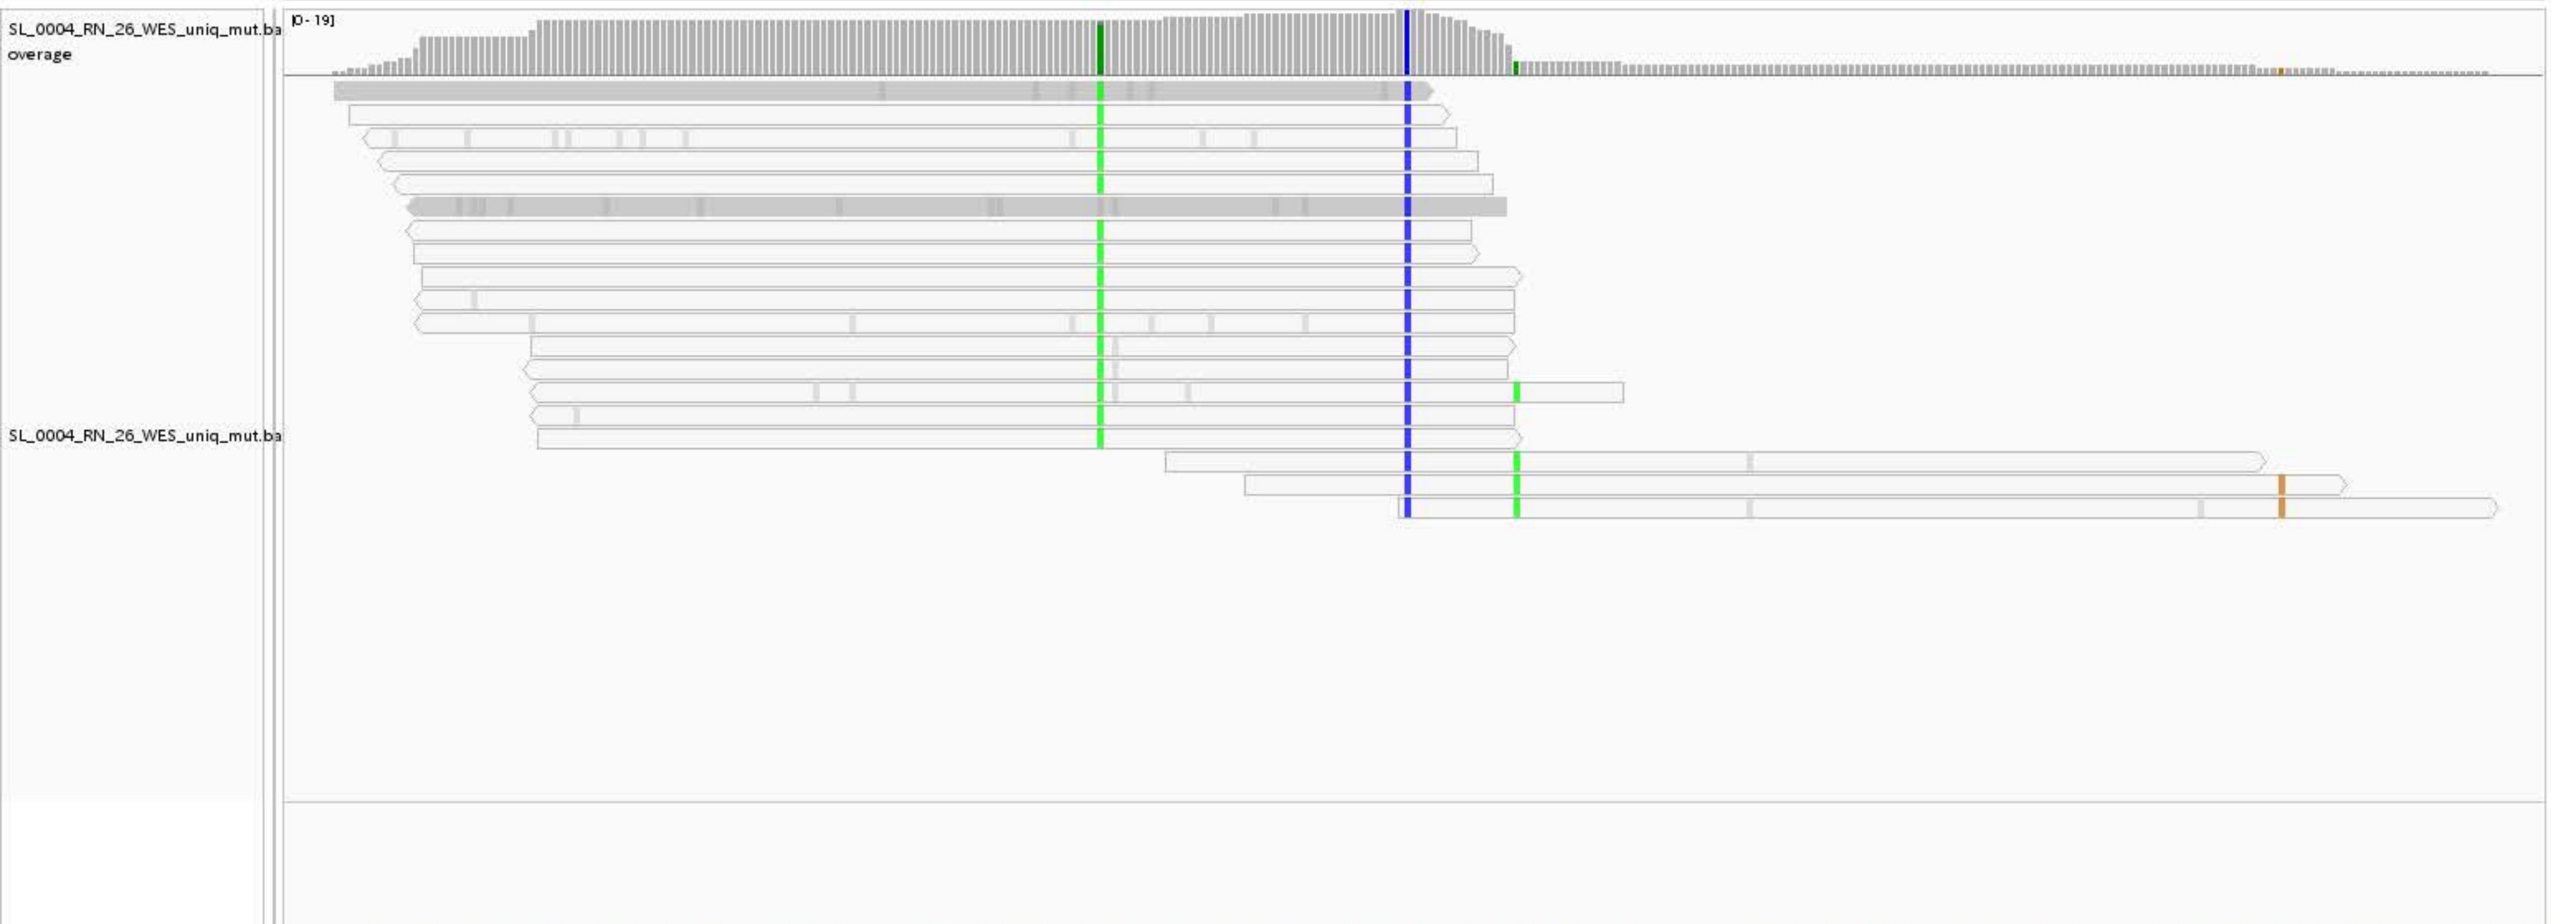

Sequence →  
Refseq Genes  
PHSRARLESGYHQHSPETYIQYFKNHNVTTIIRLNKRMYDAKRFTDAGFDHDLFFADGSTPTDAIVKRFLDICENAEGAIAVHCKAGLGRGTGLIACYIMKHY  
CDC14C

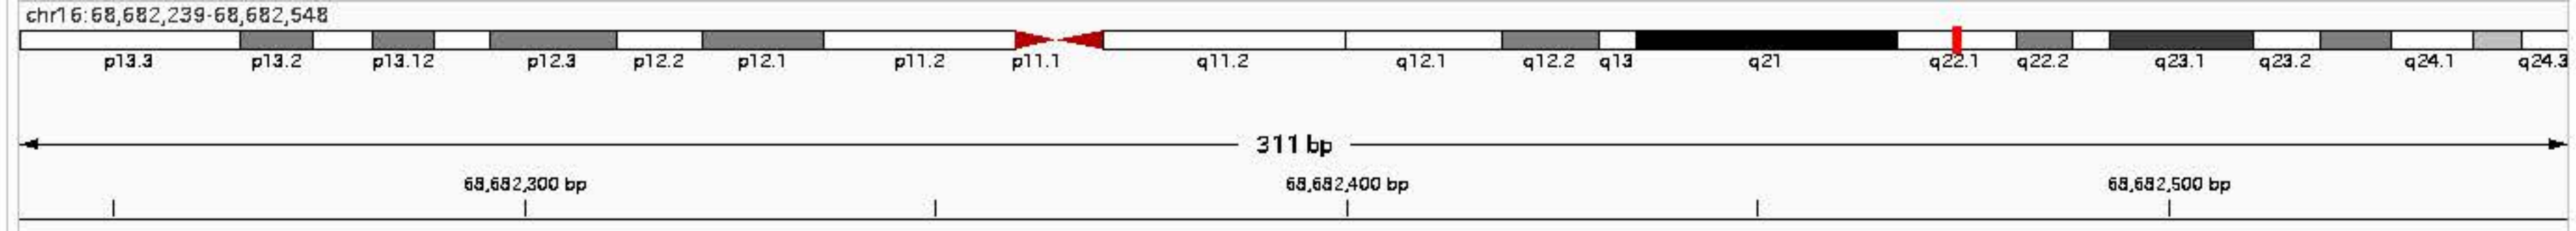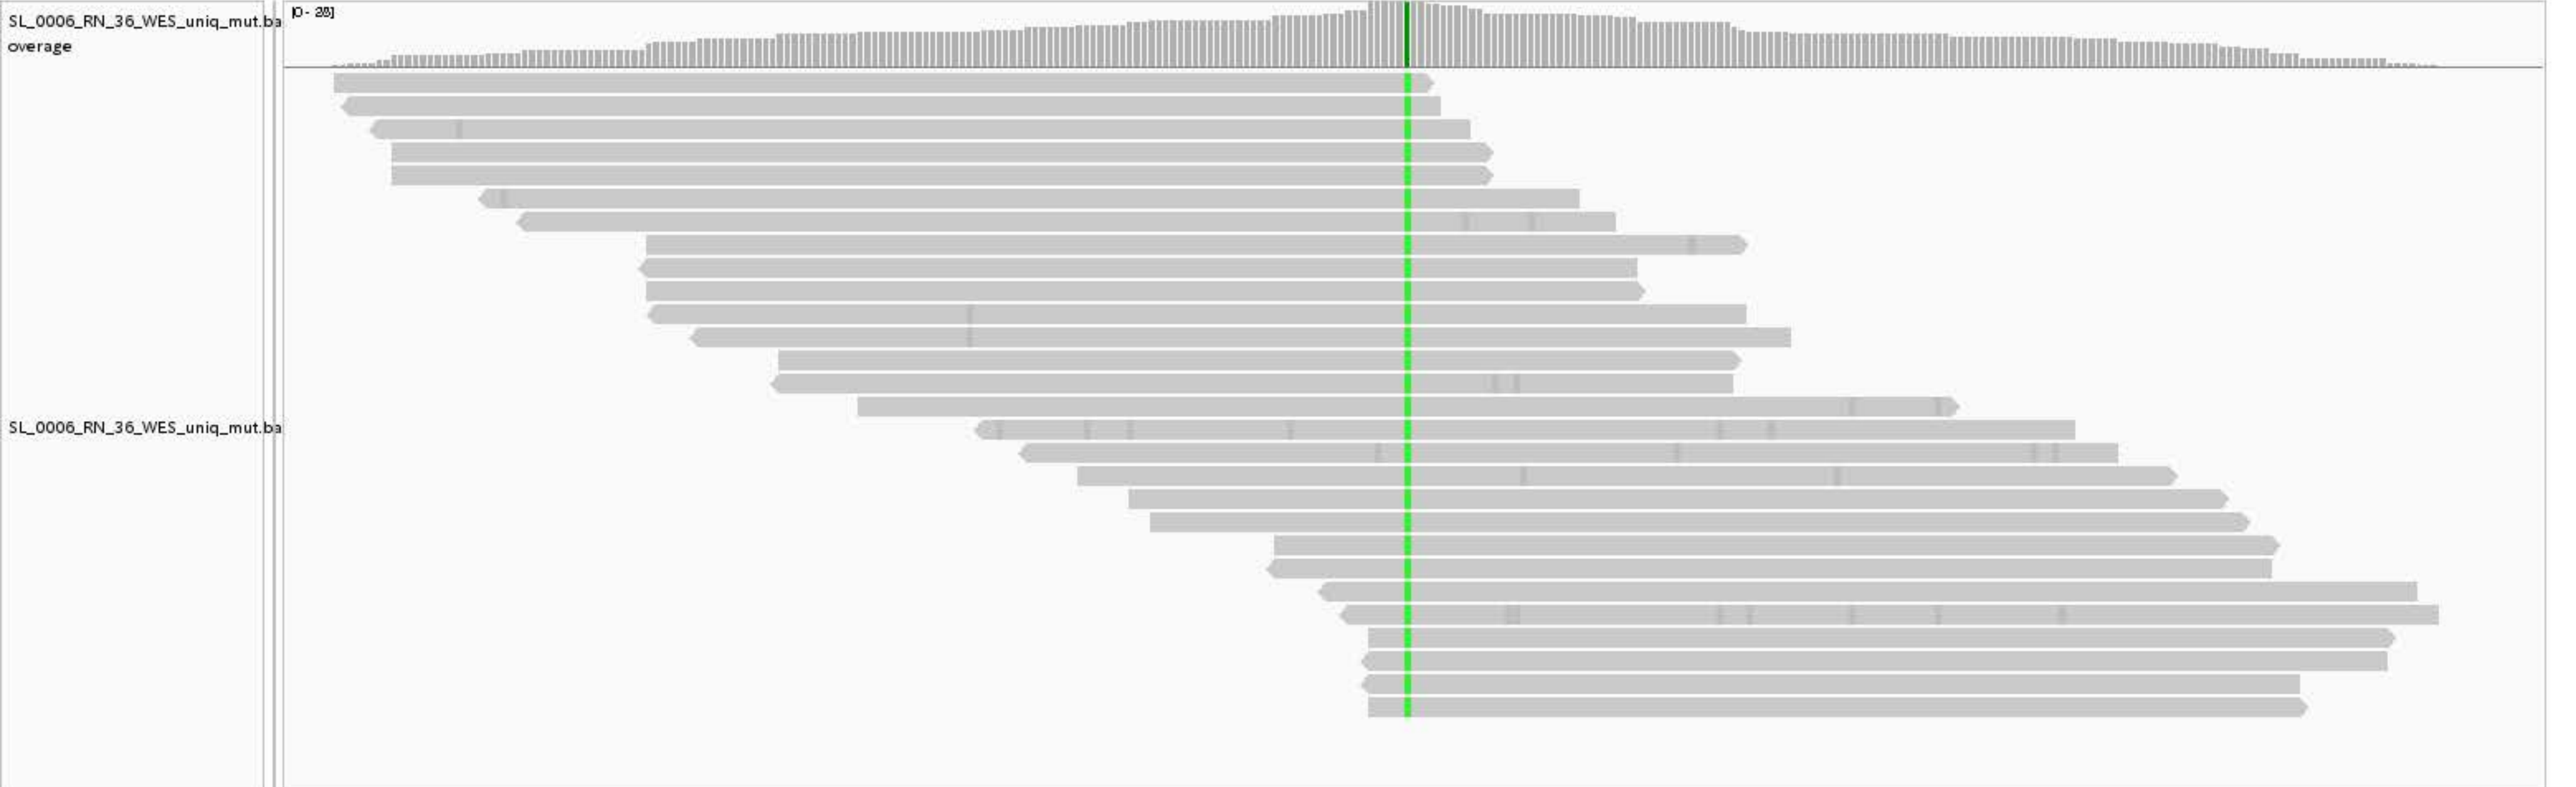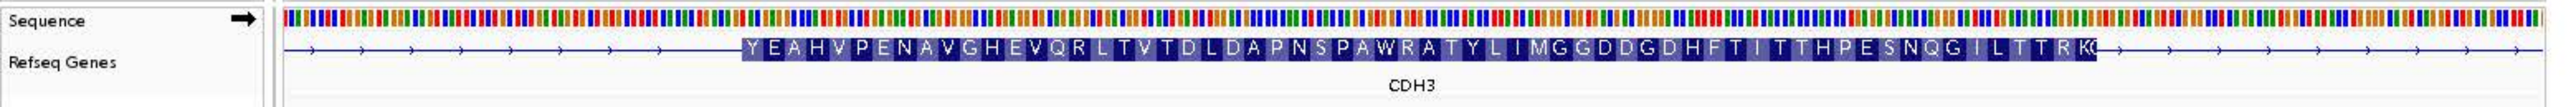

chr17:39,462,745-39,463,054

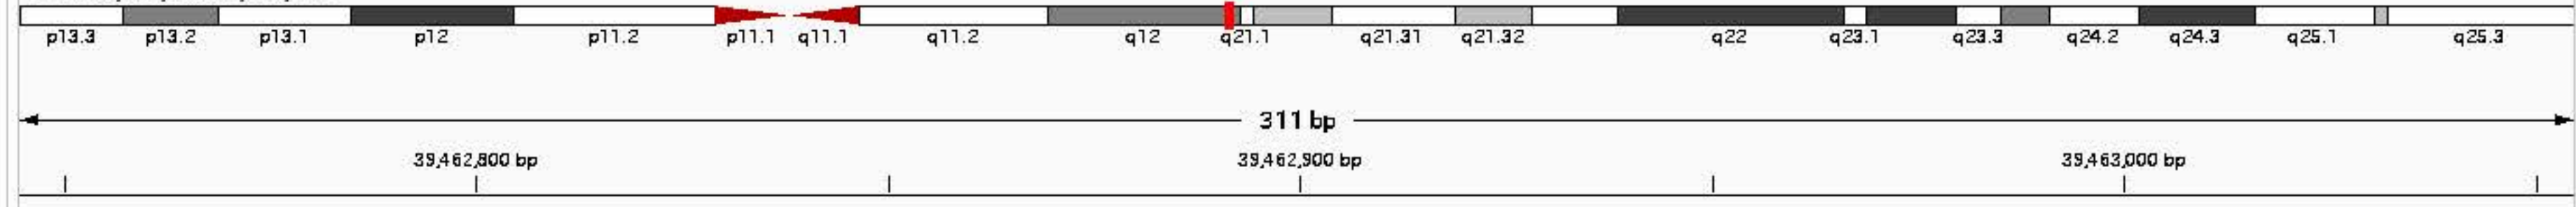

SL\_0006\_RN\_67\_WES\_uniq\_mut.ba  
coverage

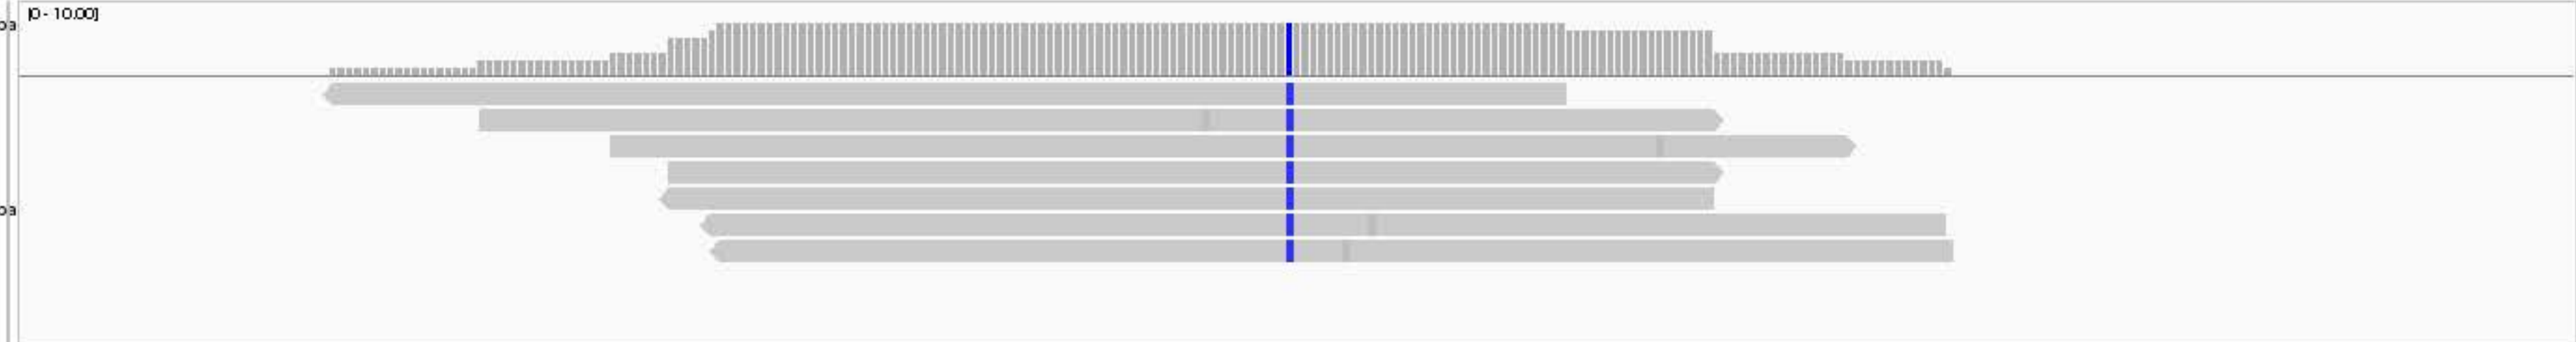

SL\_0006\_RN\_67\_WES\_uniq\_mut.ba

Sequence

Refseq Genes

Sequence: RKWSDSSKQDDSPSGASYGQDYDLSPSRSHHTSSNYDSYKKSPGSTSRRQSVSPPYKEPSAYQSSTRSPSPYSRRQRSVSPYSRRRSSSYERSGSYSGRSPSPYC

CDK12



chr4:183,446,638-183,446,947

p16.2 p15.33 p15.31 p15.1 p14 p13 p11 q12 q13.1 q13.2 q21.1 q21.22 q22.1 q22.3 q24 q25 q26 q27 q28.2 q28.3 q31.1 q31.22 q32.1 q32.3 q34.1 q34.3 q35.2

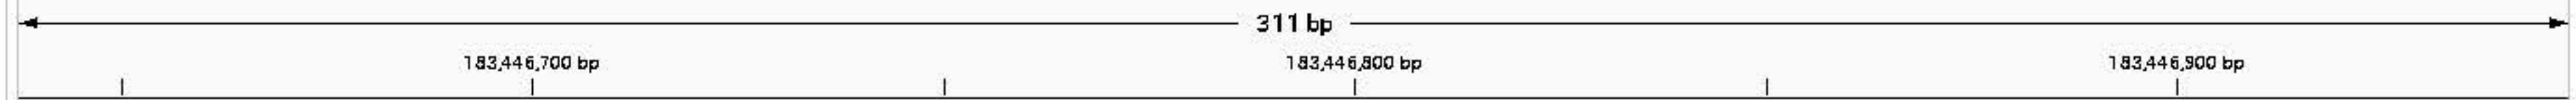

SL\_0015\_LN\_39\_WES\_uniq\_mut. coverage

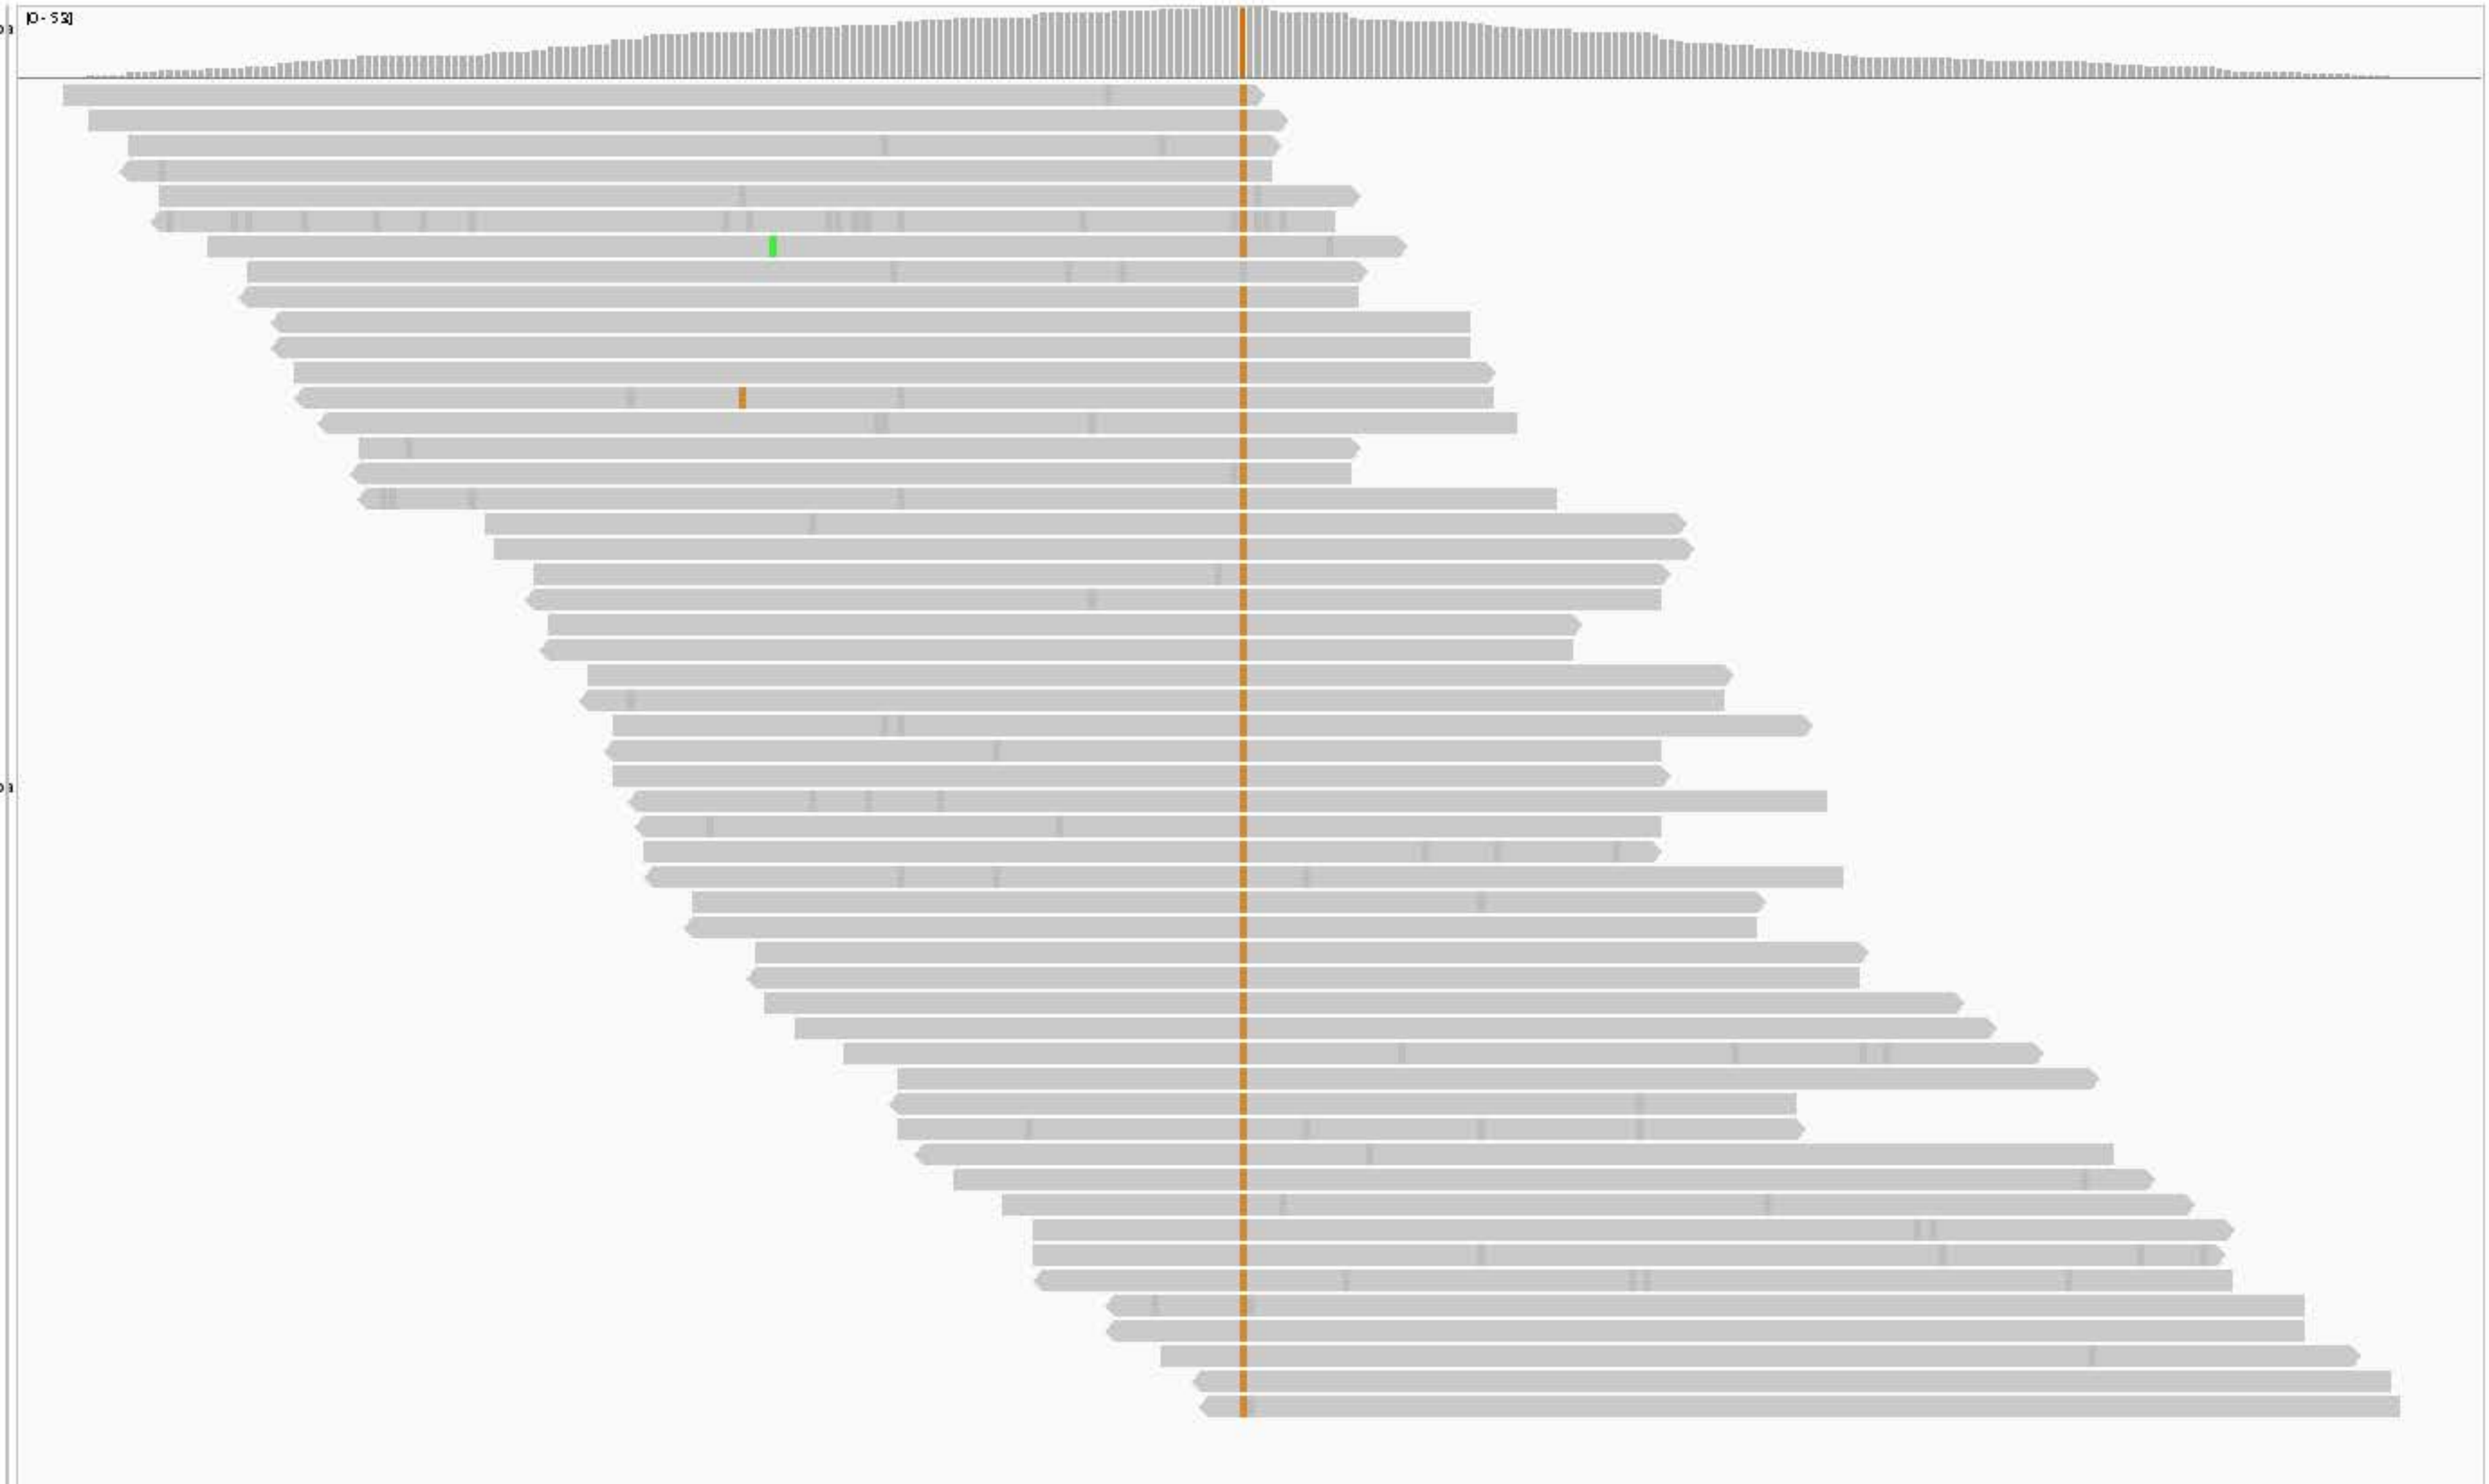

SL\_0015\_LN\_39\_WES\_uniq\_mut.

Sequence Refseq Genes

L T S K T S S E A S V S S S V A K N S S S S G T S L L T P K S S S S T N T S L L T S K S T S Q V A A S L L A S K S S S Q T S G S L V S K S T S L A S V S Q L A S K S S S Q T S T S Q L P S K S T S Q S S E S S

CDKN2AIP

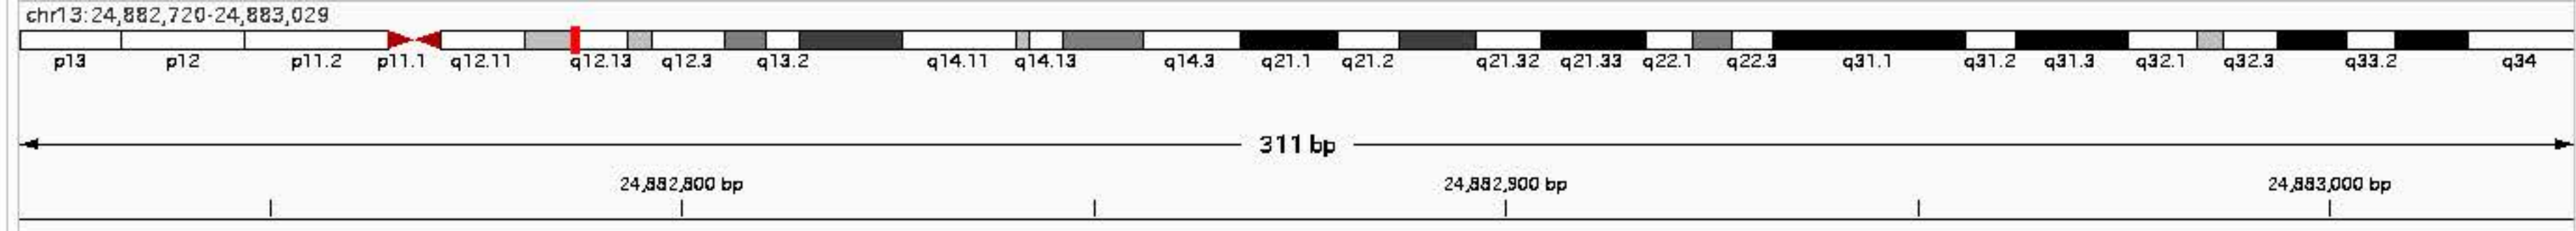

SL\_0006\_RN\_36\_WES\_uniq\_mut.ba  
coverage

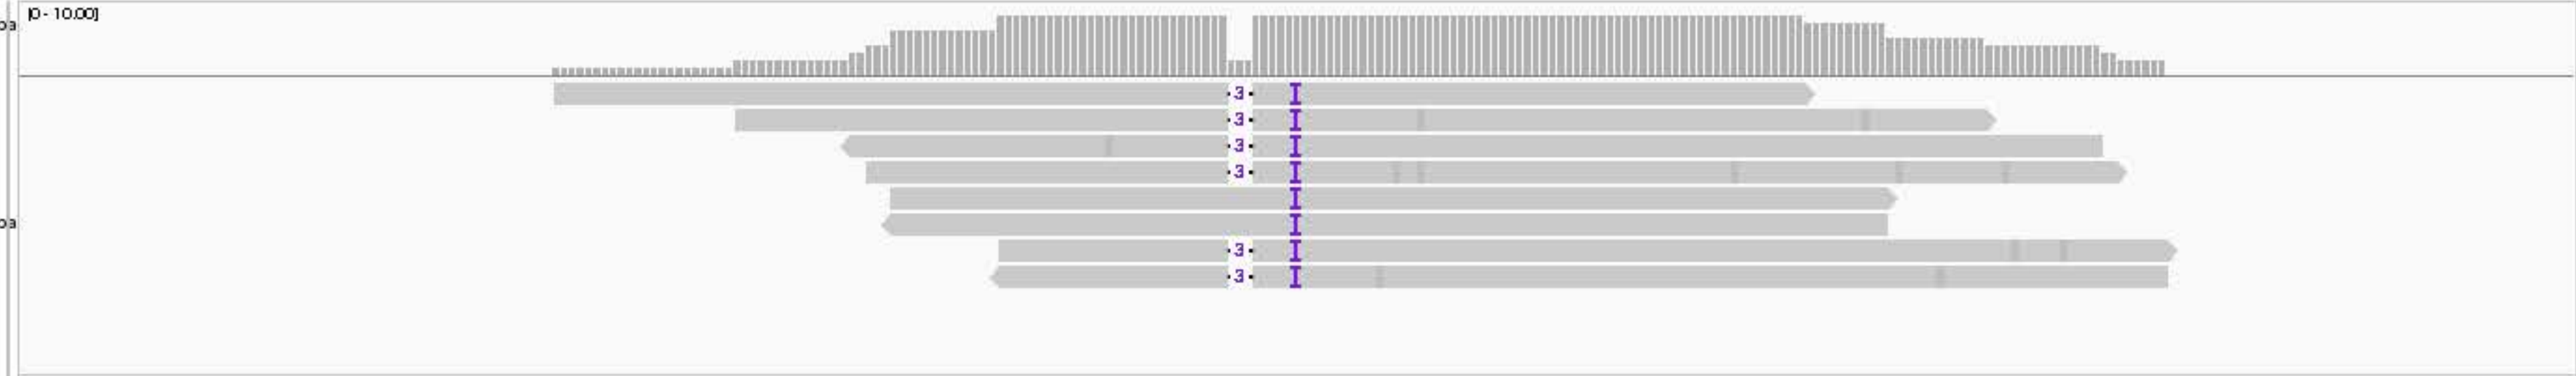

SL\_0006\_RN\_36\_WES\_uniq\_mut.ba

Sequence →

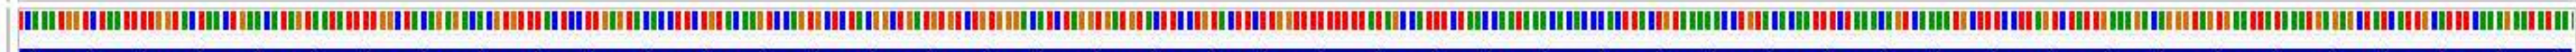

Refseq Genes

RNF17

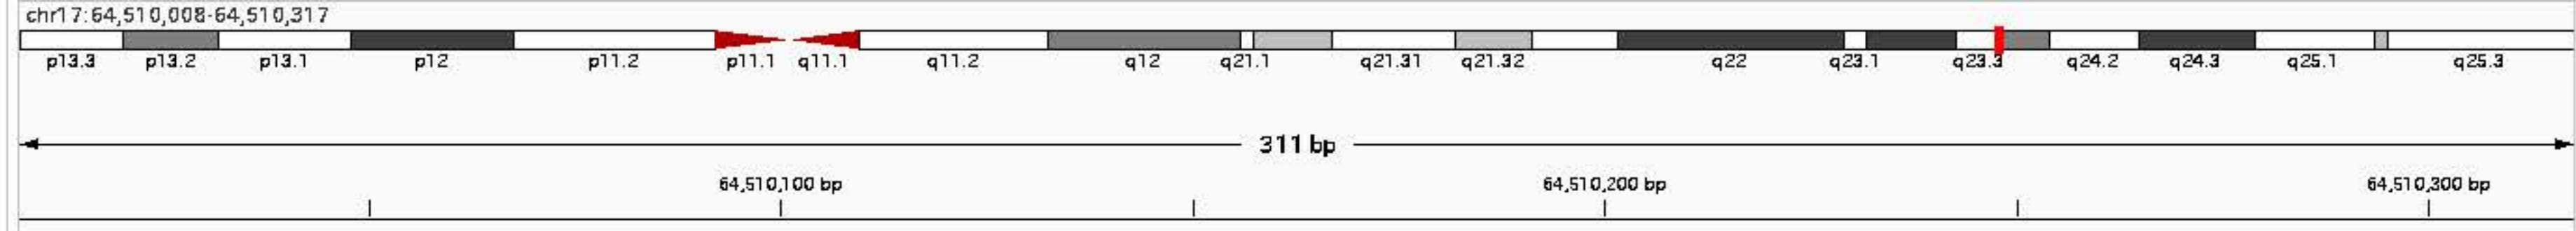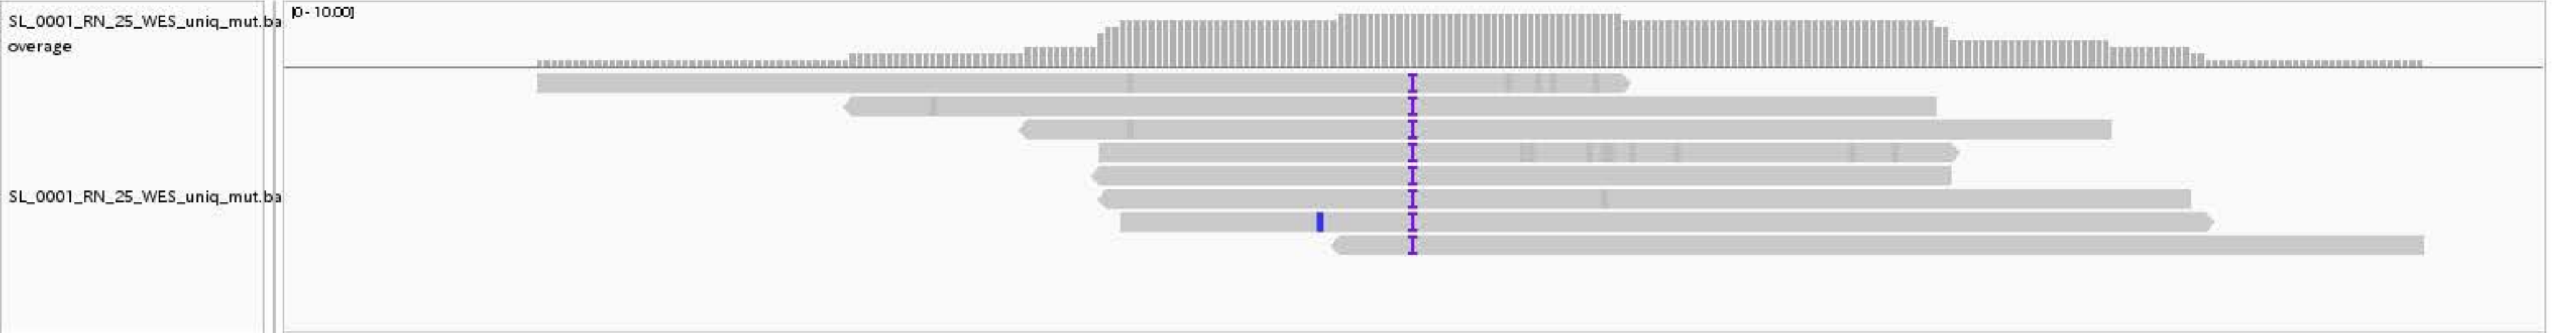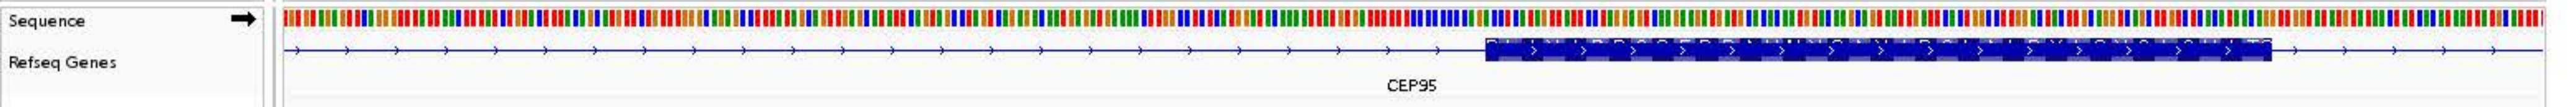



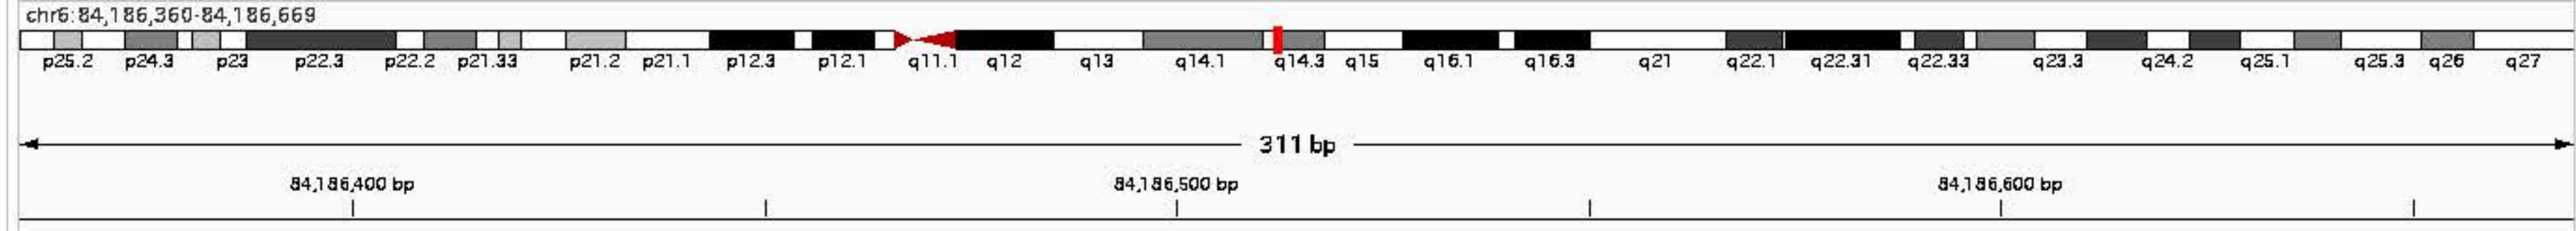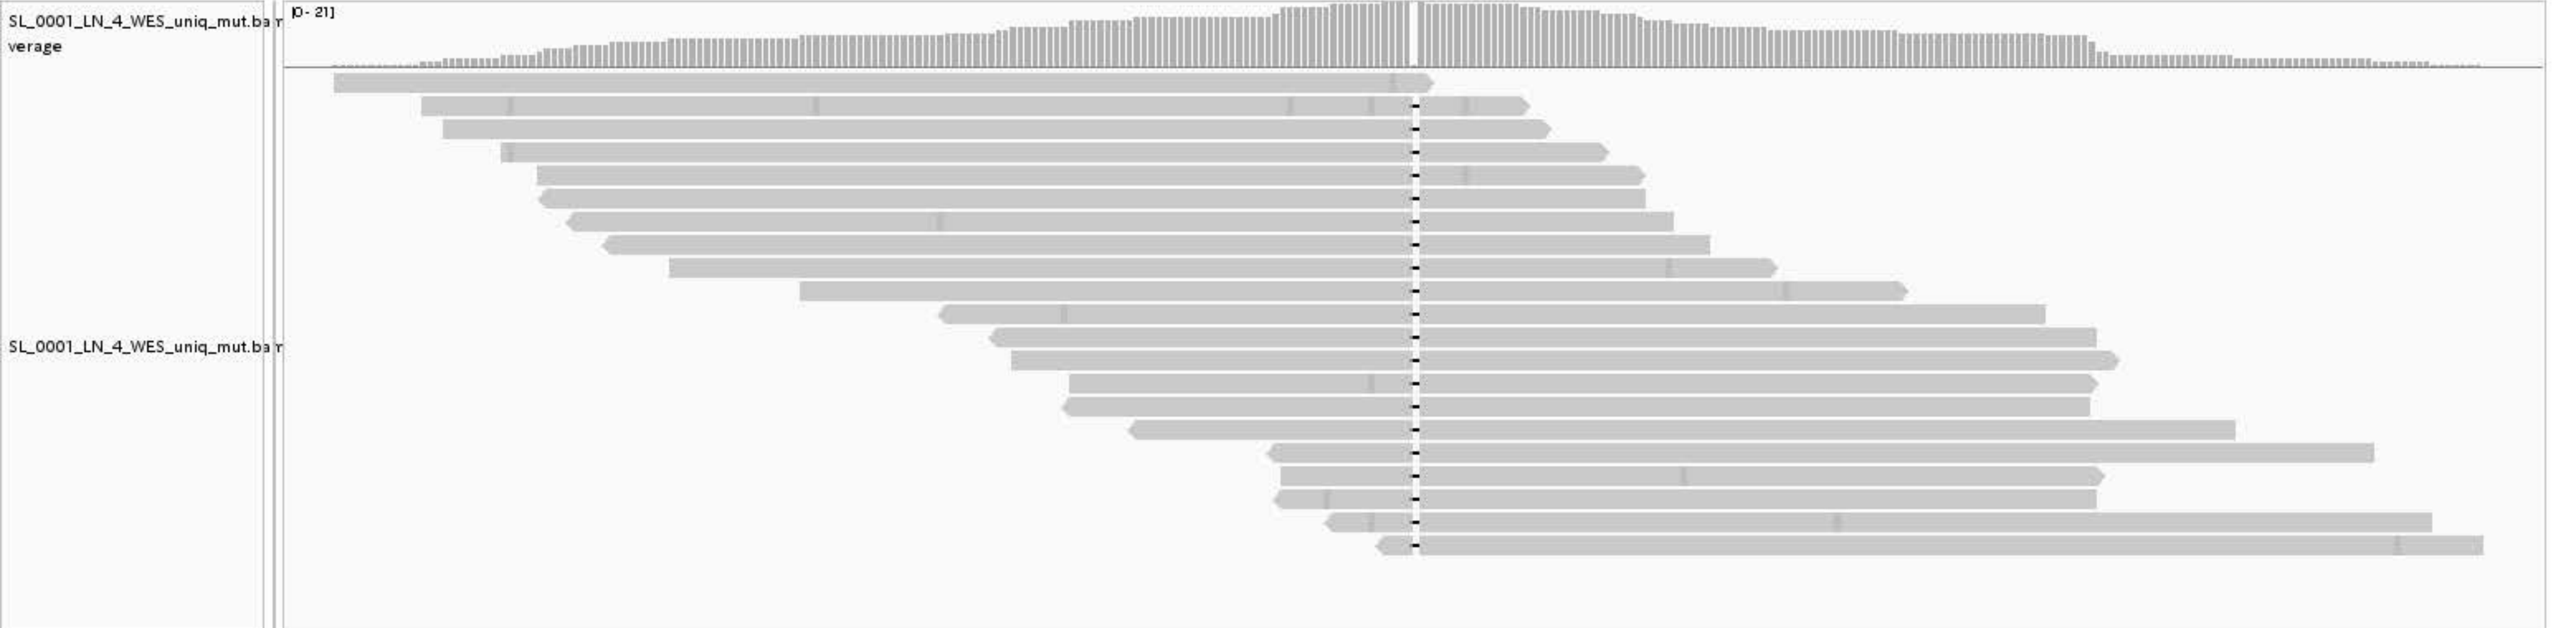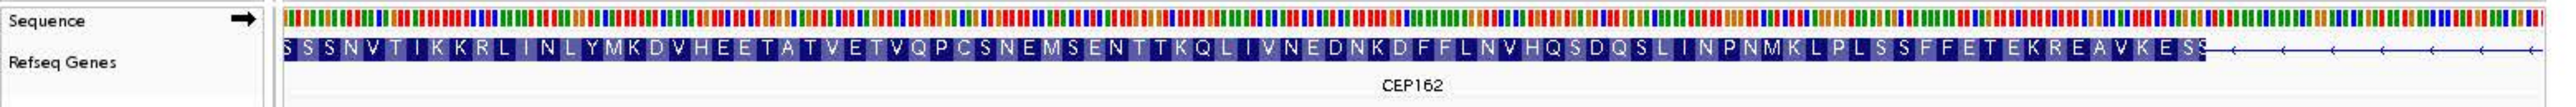

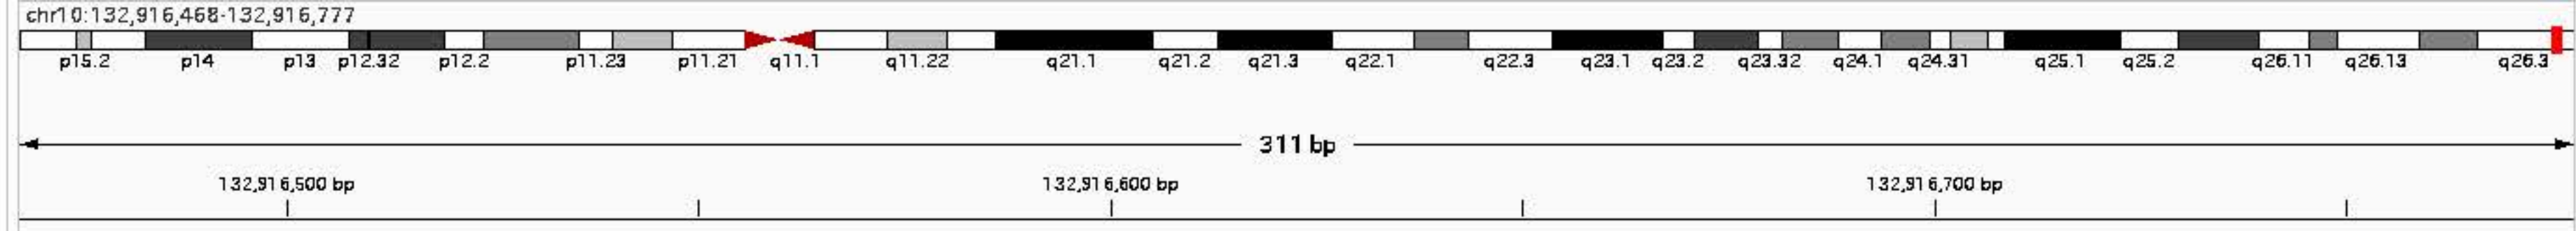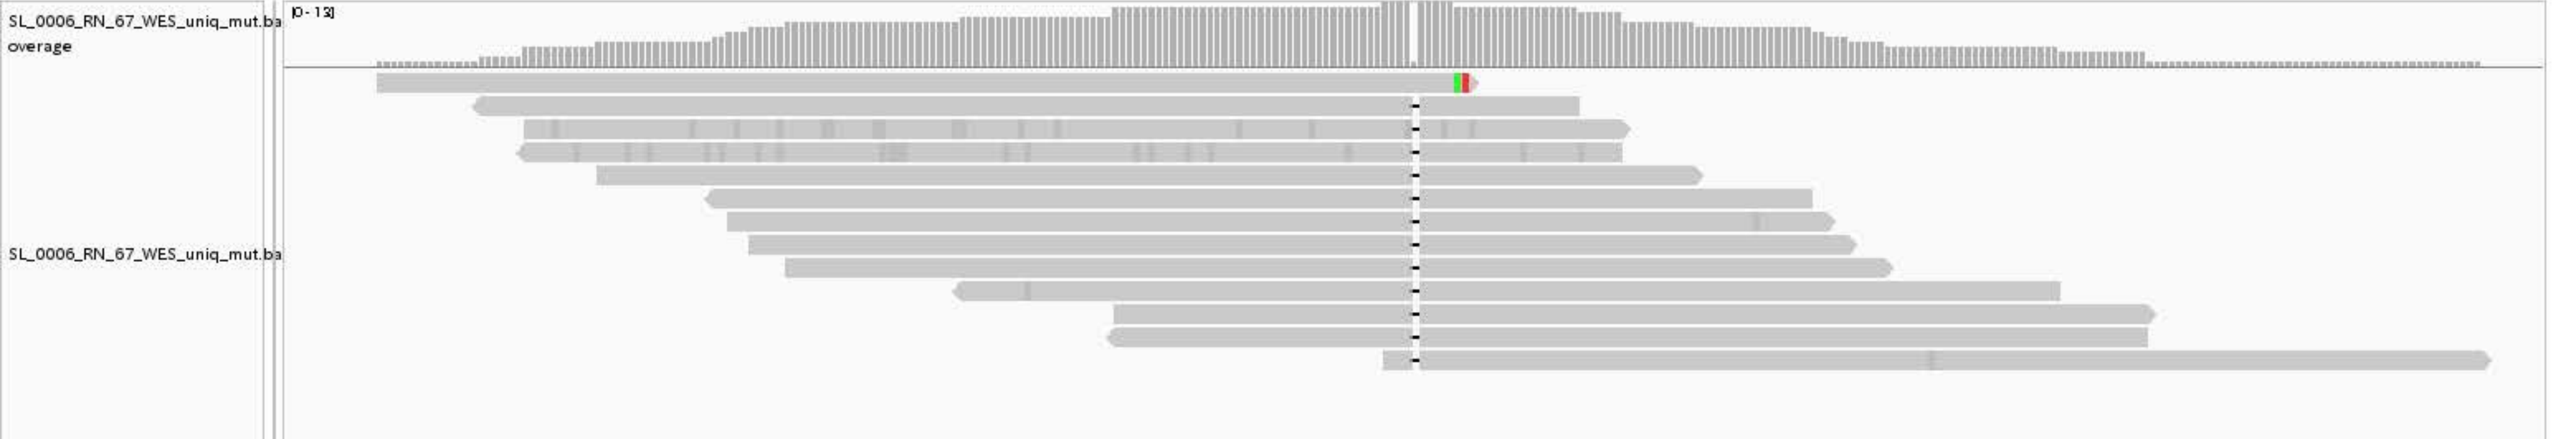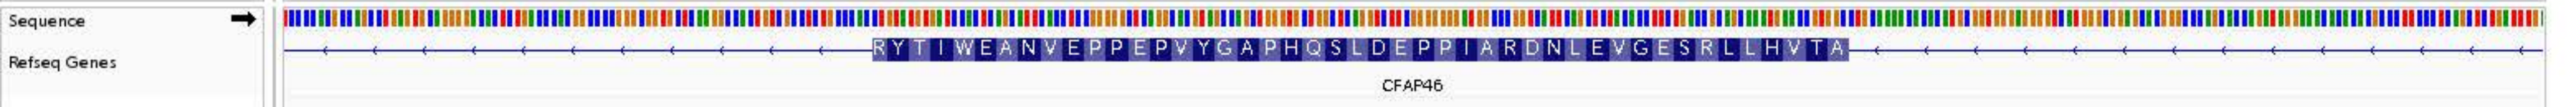

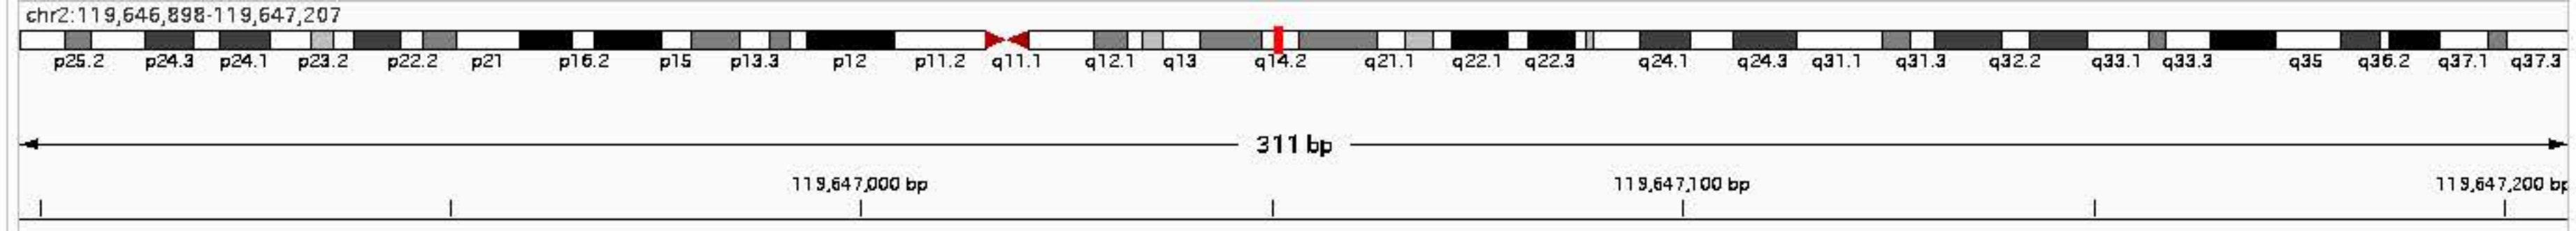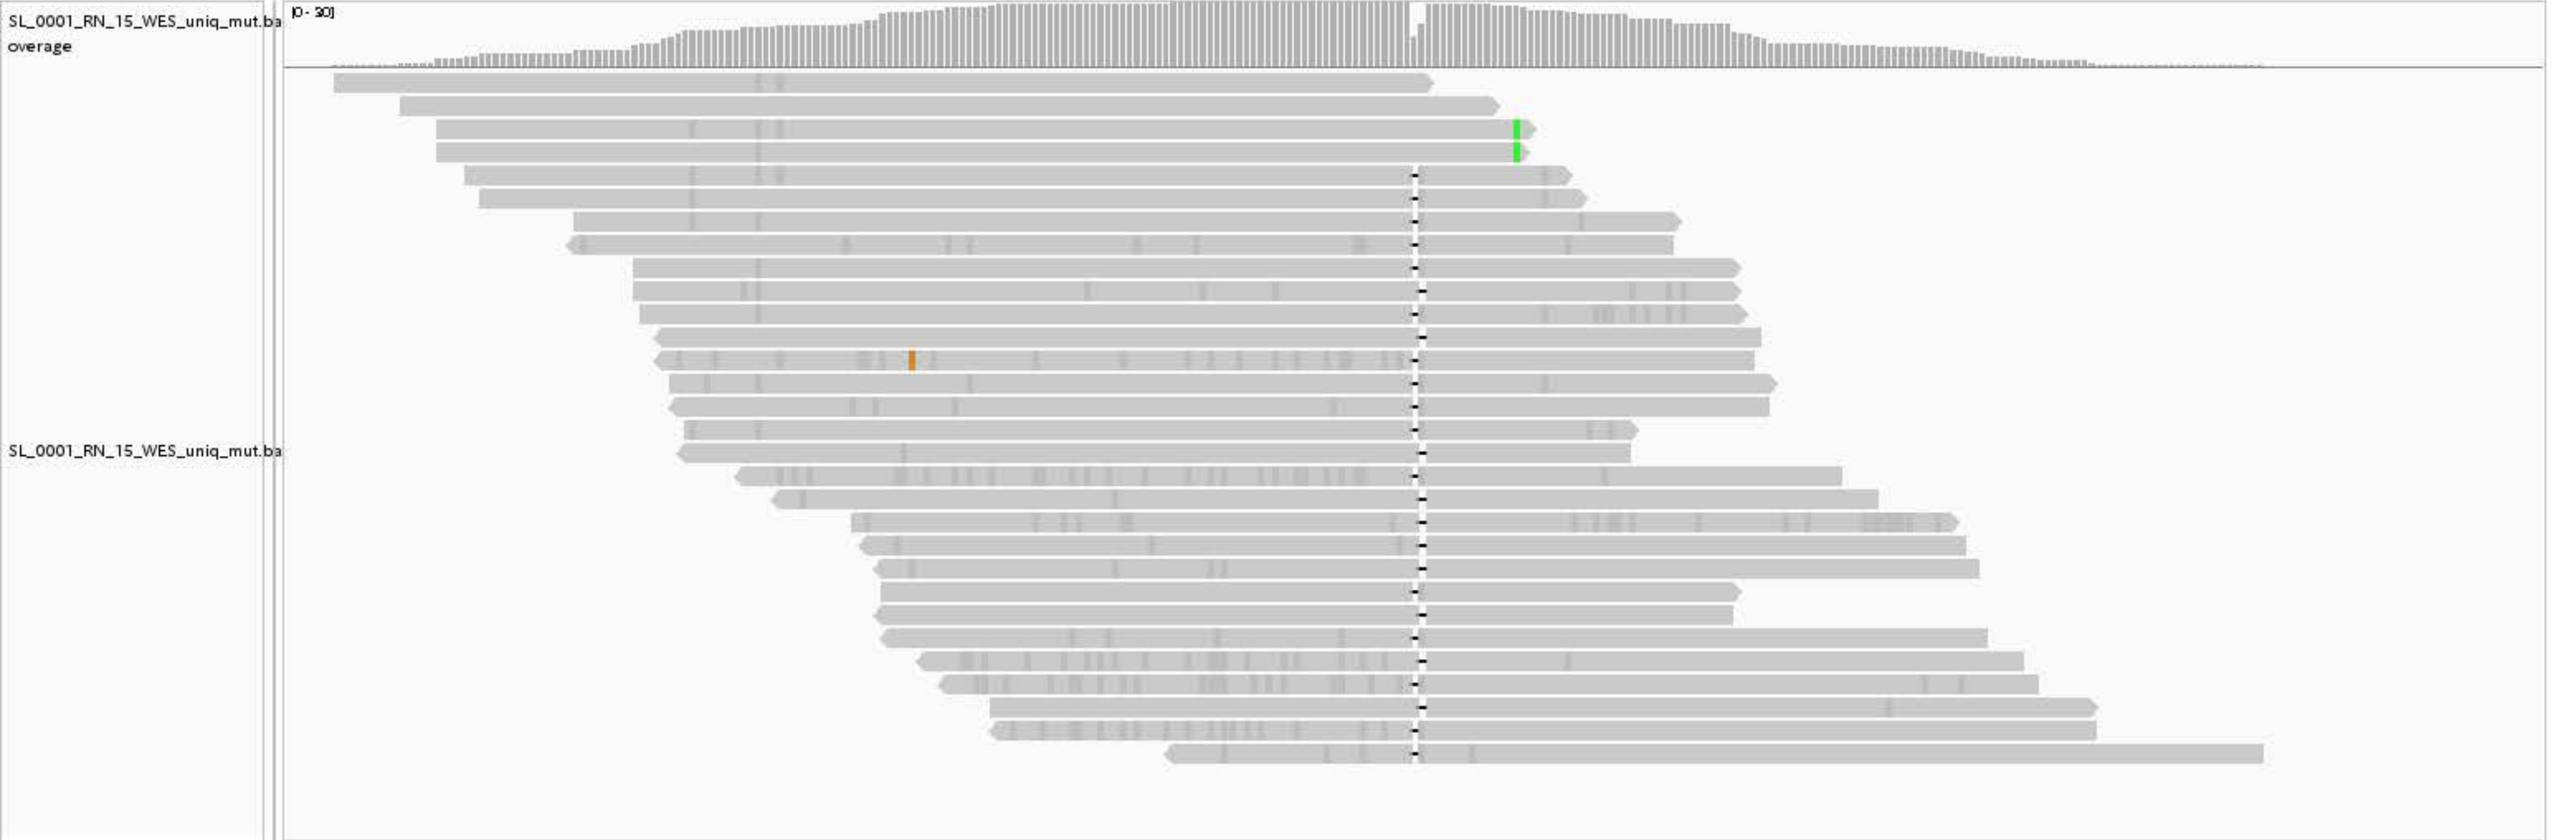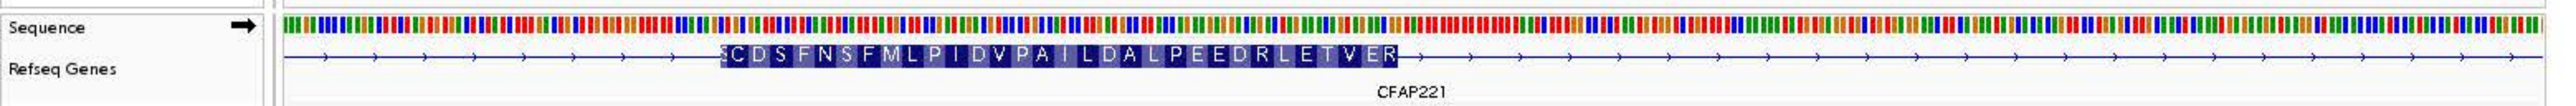



chr19:19,545,464-19,545,773

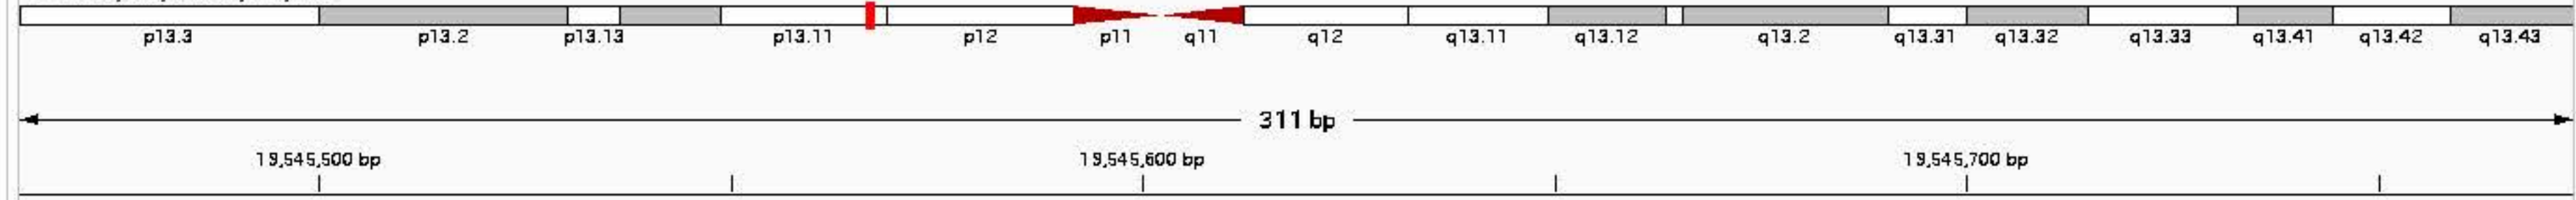

SL\_0001\_RN\_37\_WES\_uniq\_mut.ba  
coverage

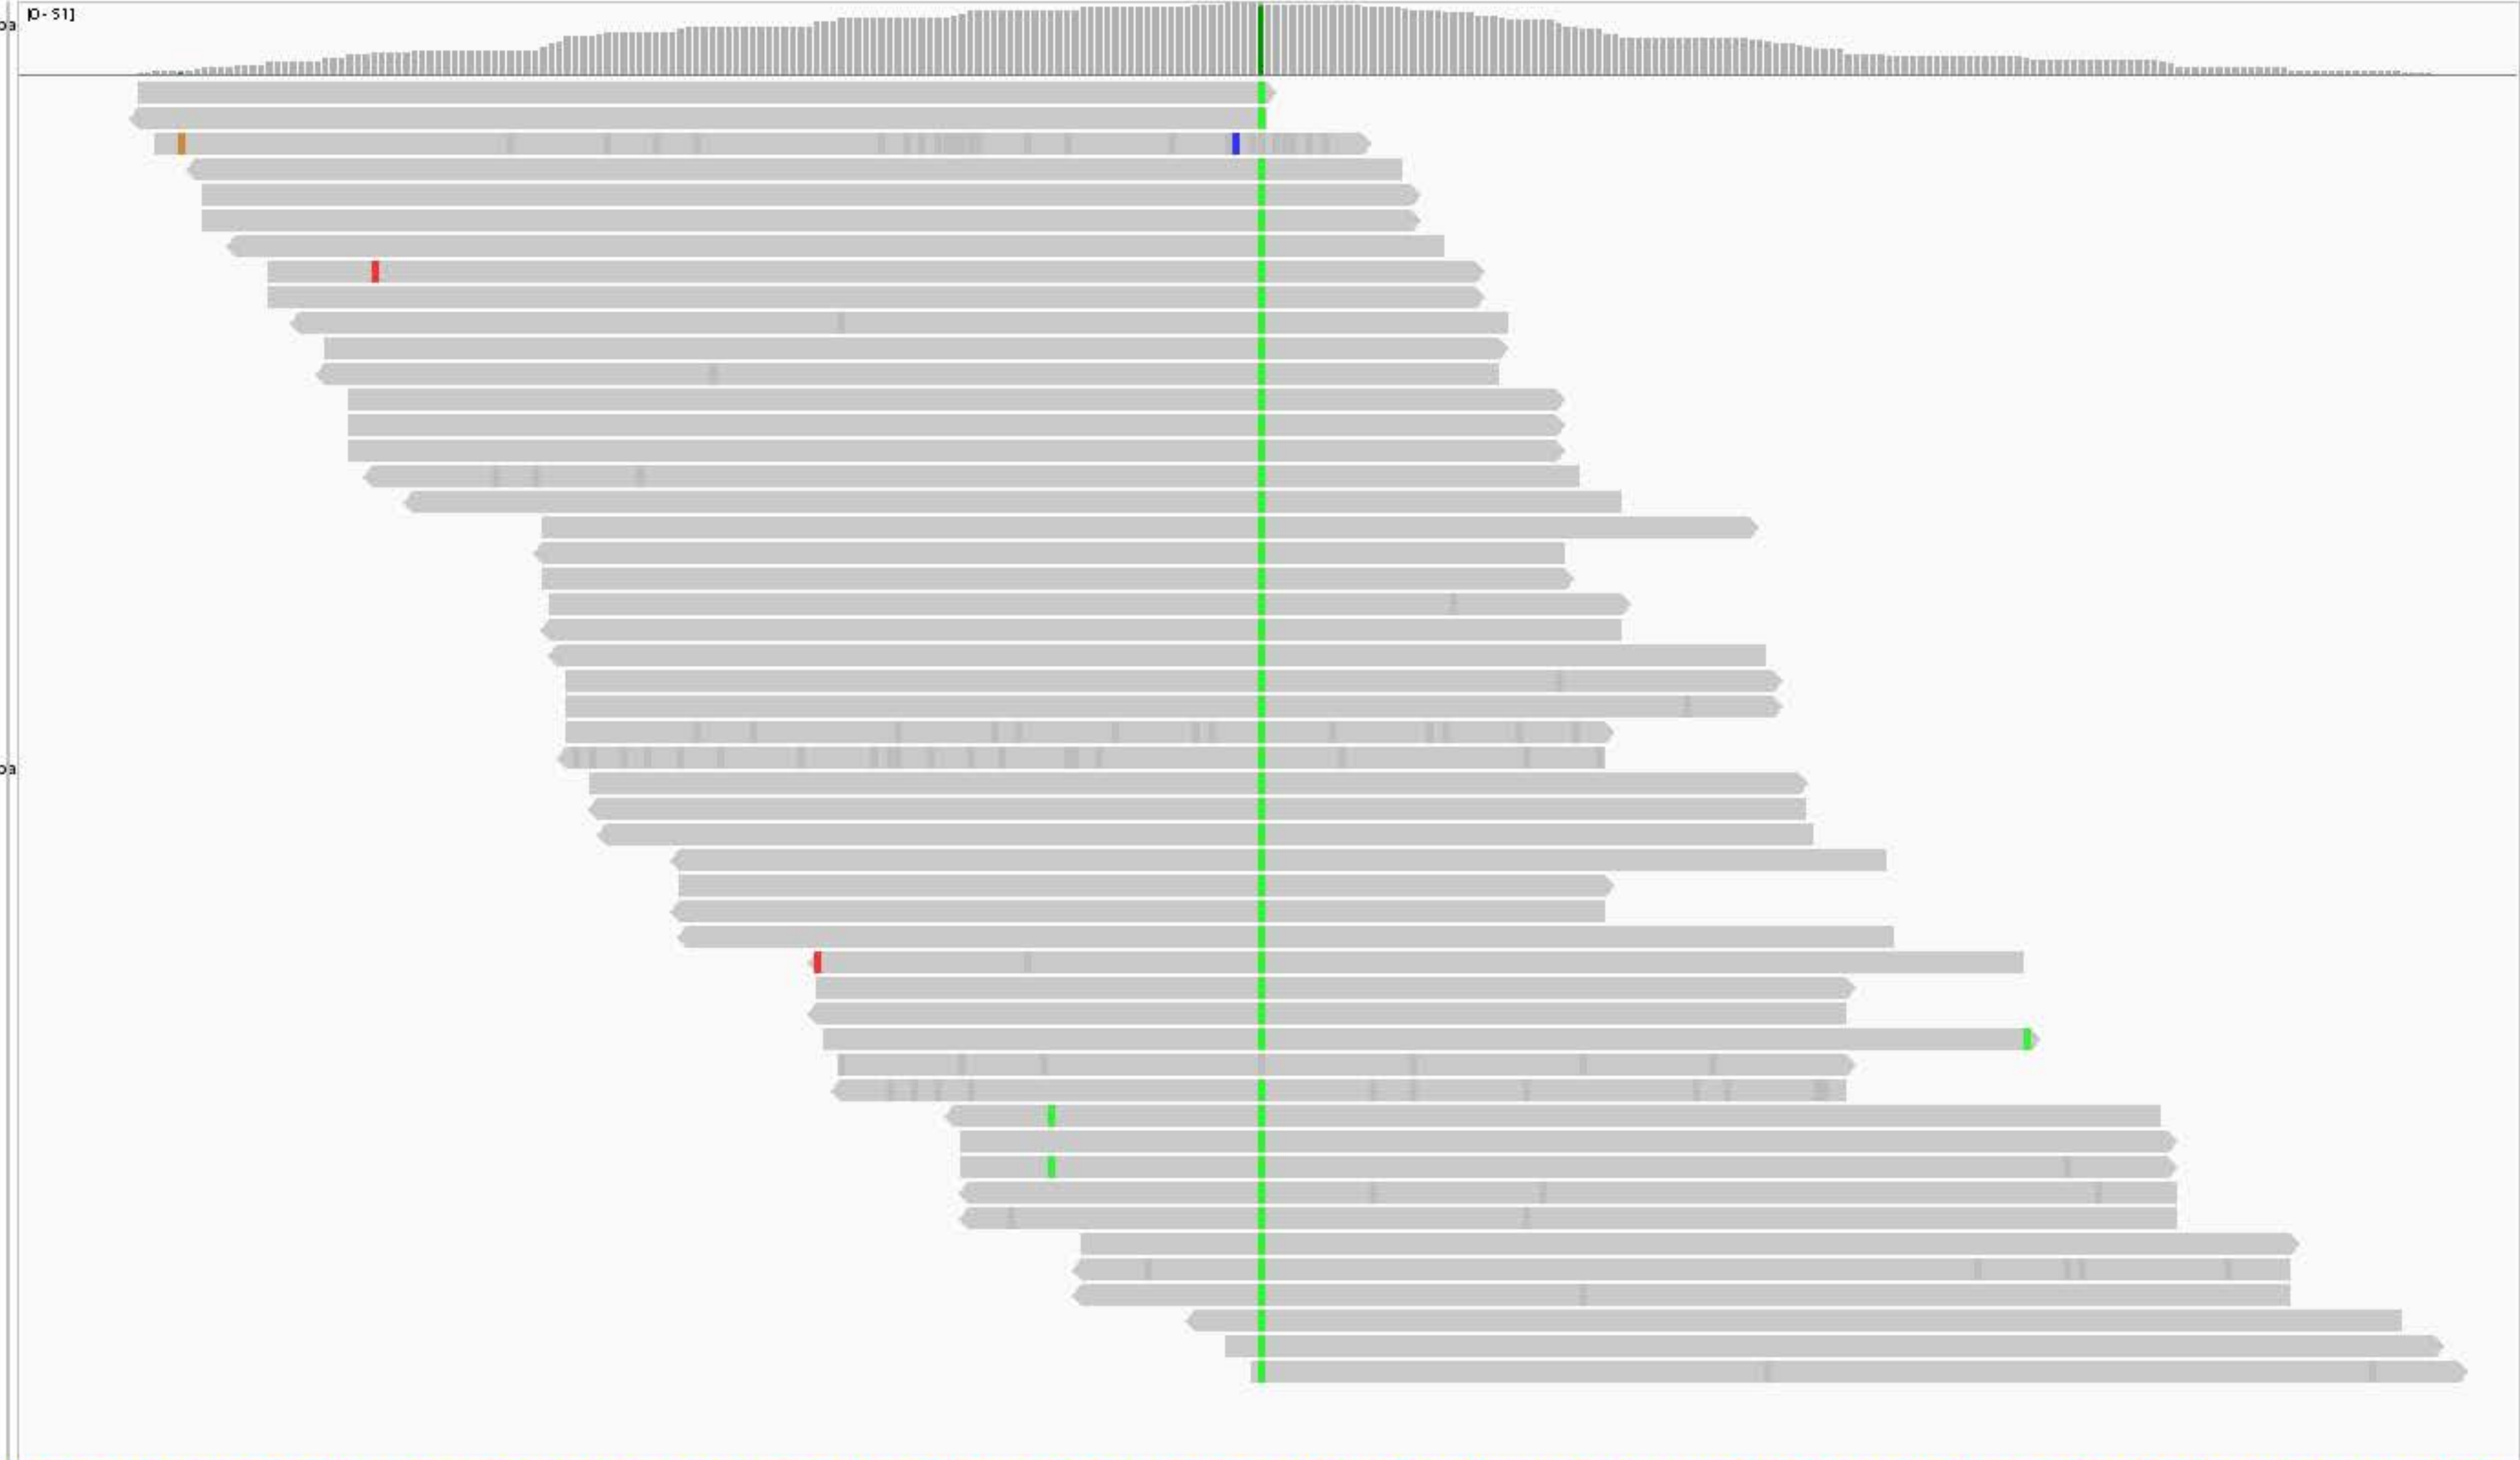

SL\_0001\_RN\_37\_WES\_uniq\_mut.ba

Sequence →  
Refseq Genes

DARSVRDPERPGTSAACVEFKCSGMLFDQRQVDRTLVTIMPQGSCRRVAVNGLLRDYLTRHPPPVAEDPAAFMSMLAPLDPLGHNYGVYTVTQDSPRLAKEIA  
CILP2

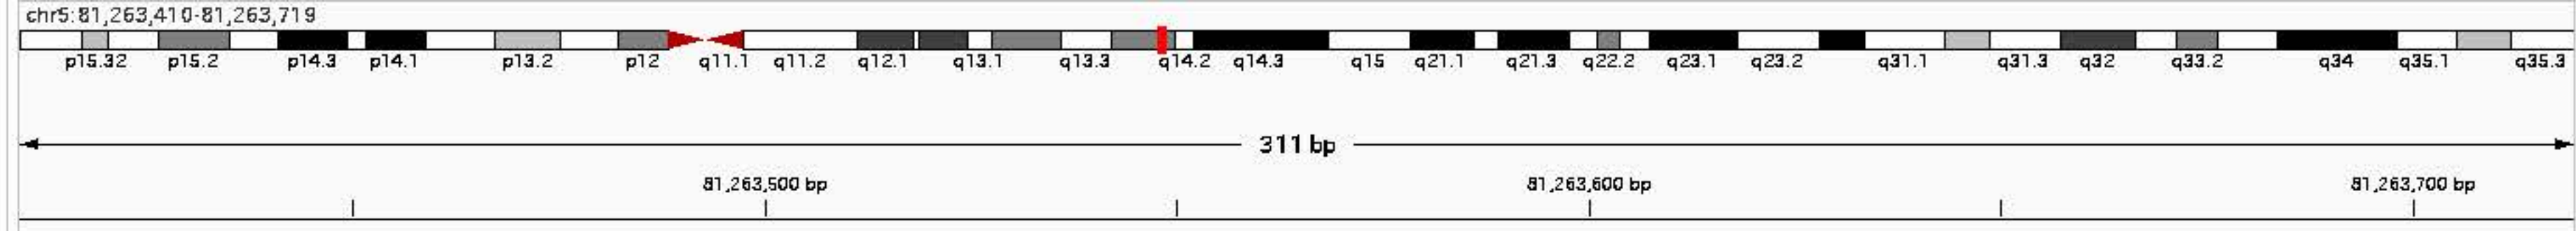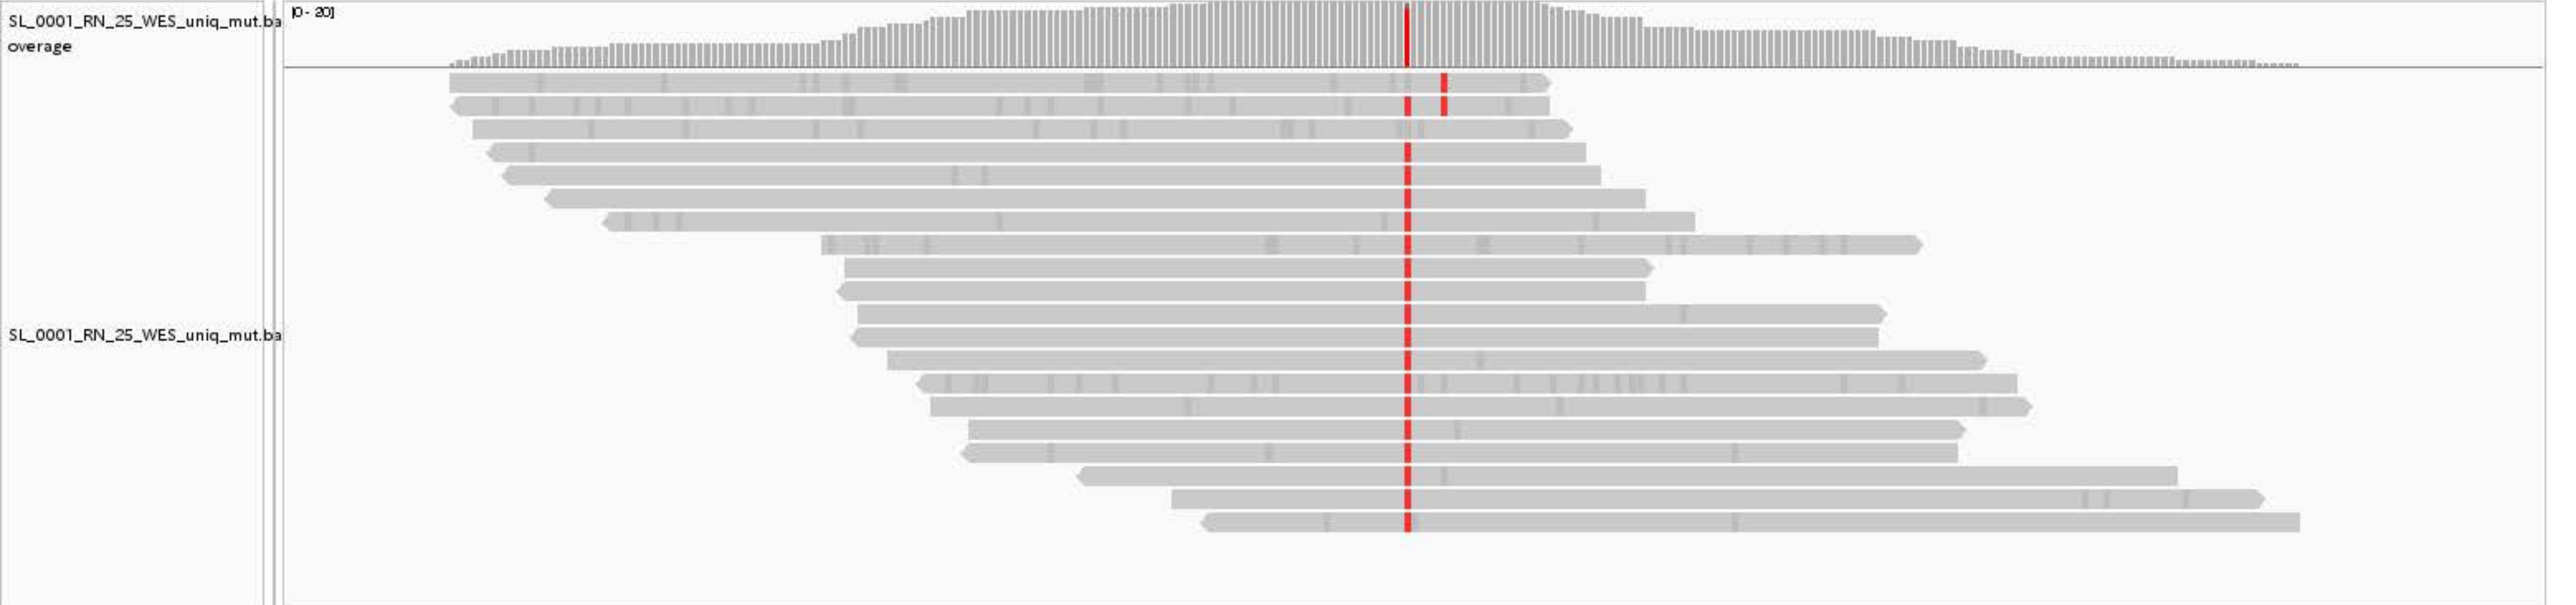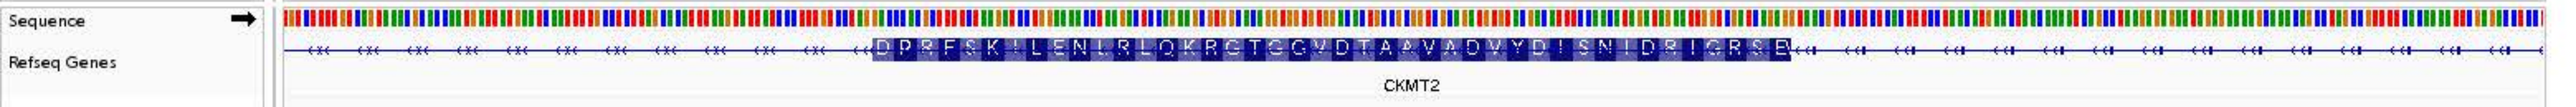

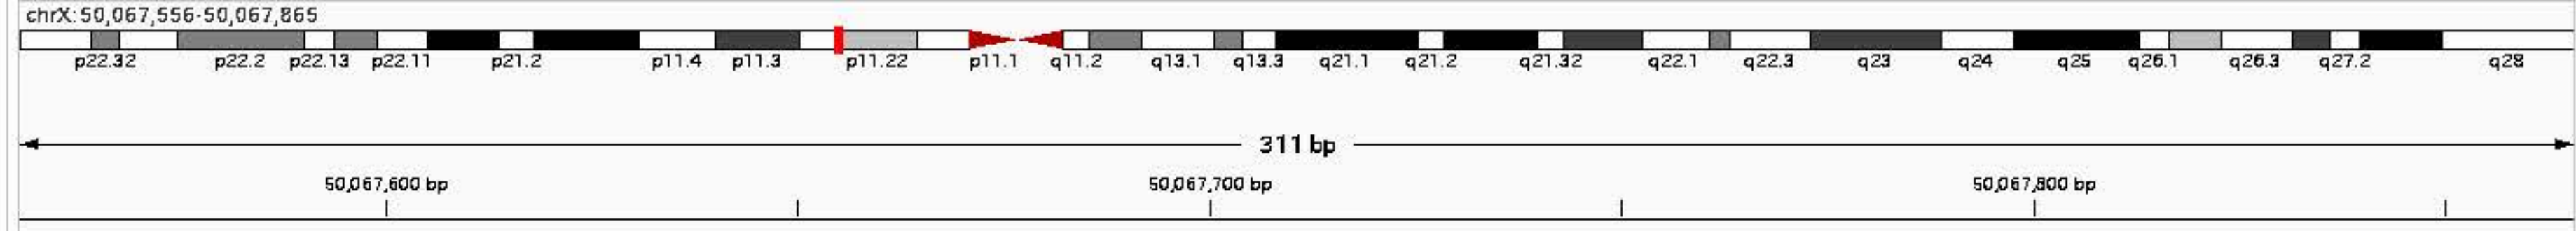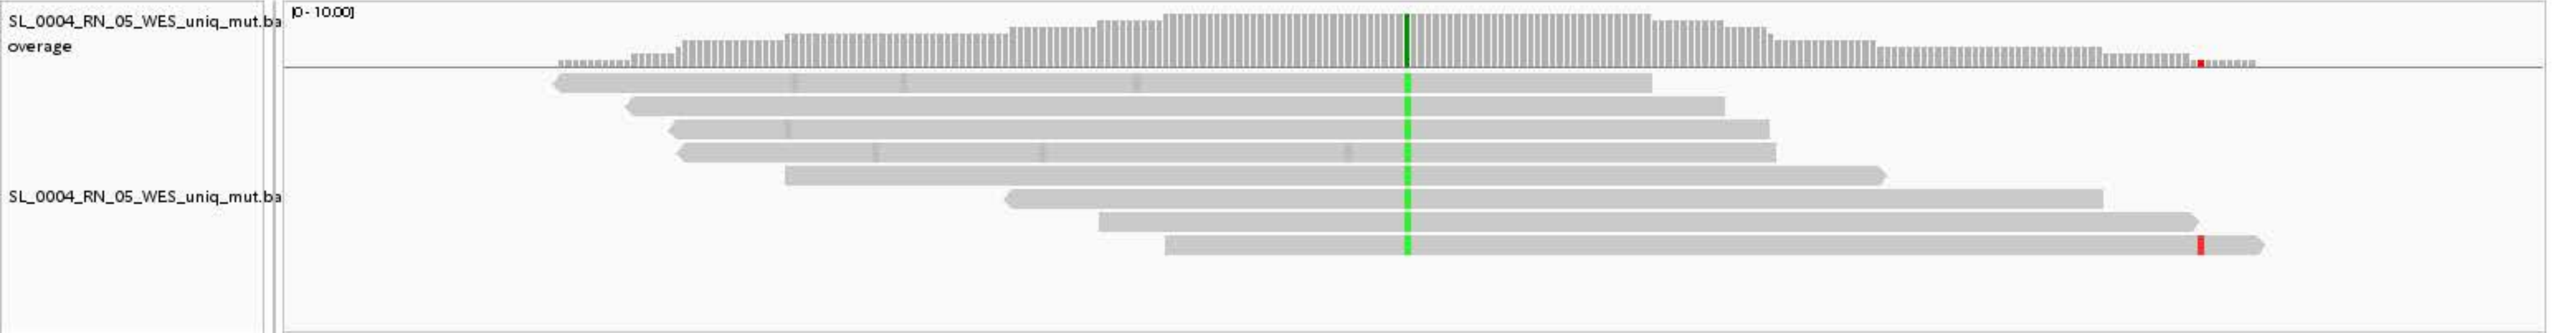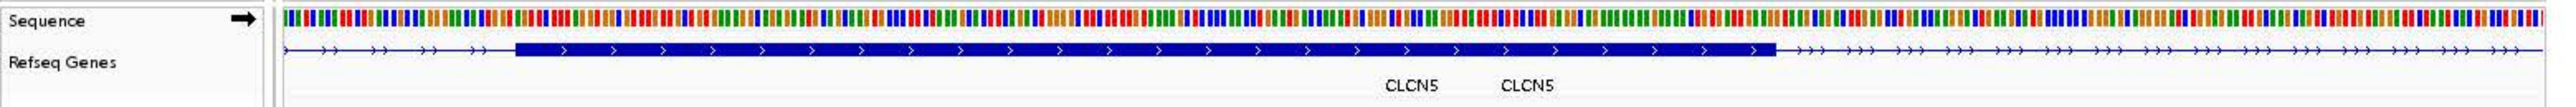



chr21:36,460,607-36,460,916

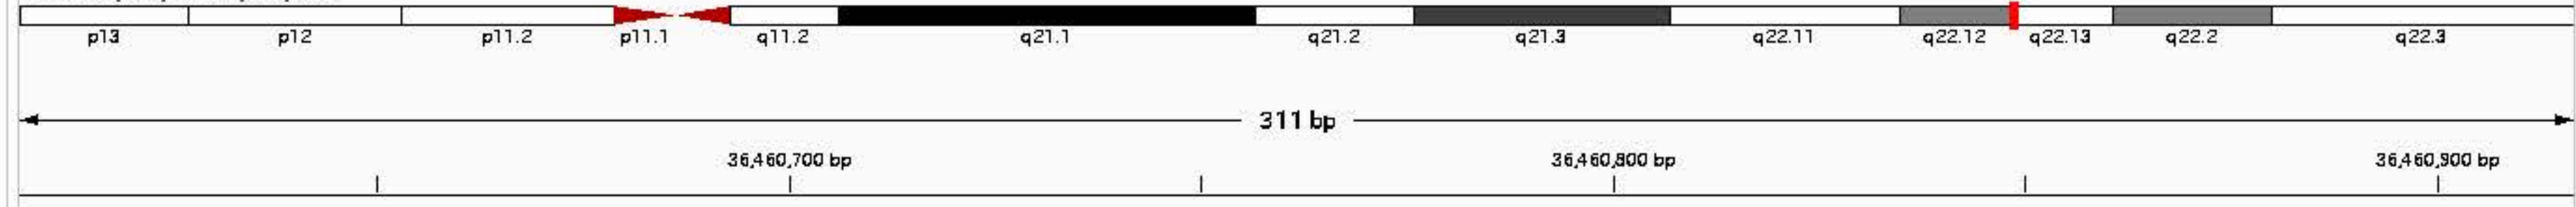

SL\_0015\_LN\_46\_WES\_uniq\_mut. coverage

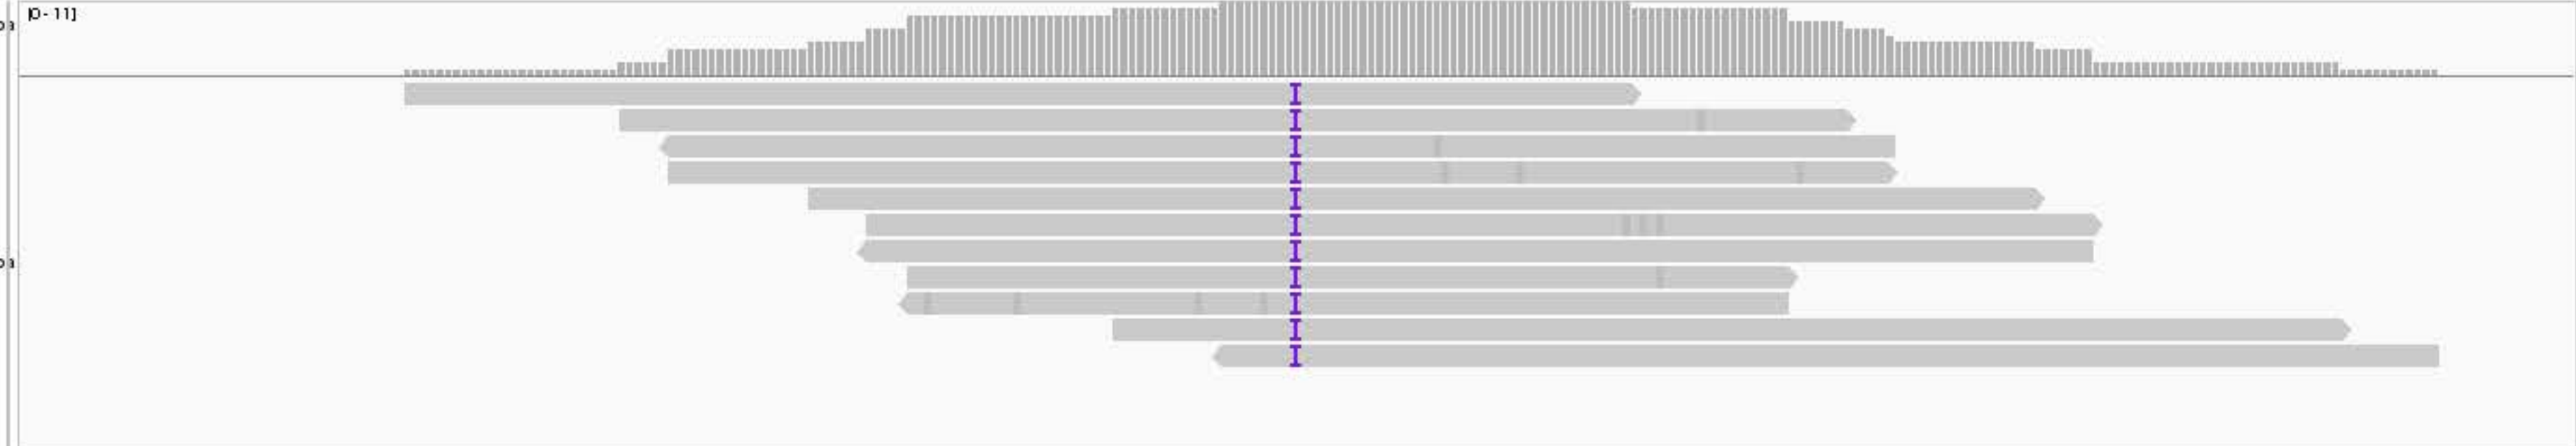

SL\_0015\_LN\_46\_WES\_uniq\_mut.

Sequence

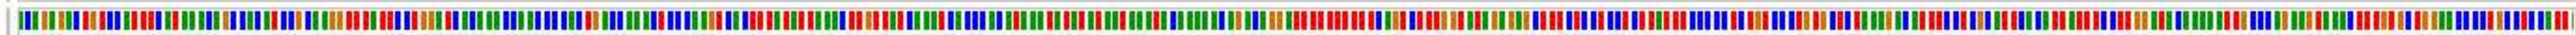

Refseq Genes

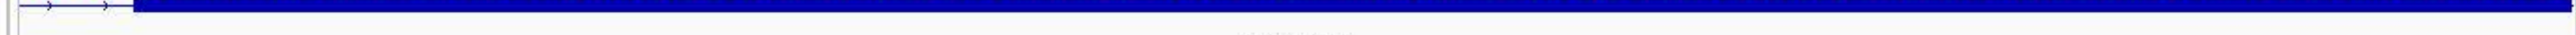

CLDN14-AS1

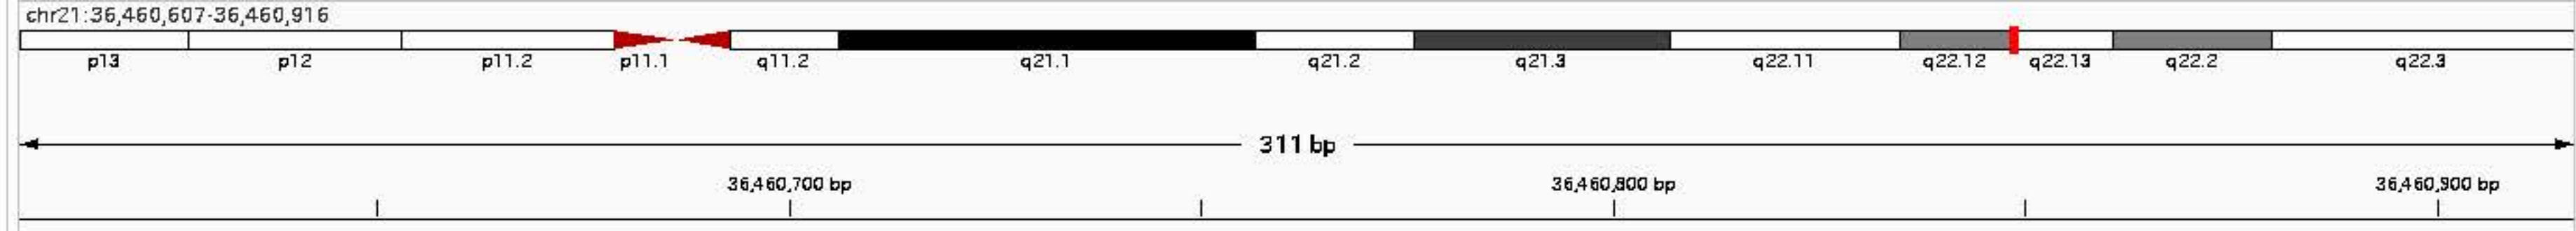

SL\_0015\_RN\_21\_WES\_uniq\_mut.ba  
coverage

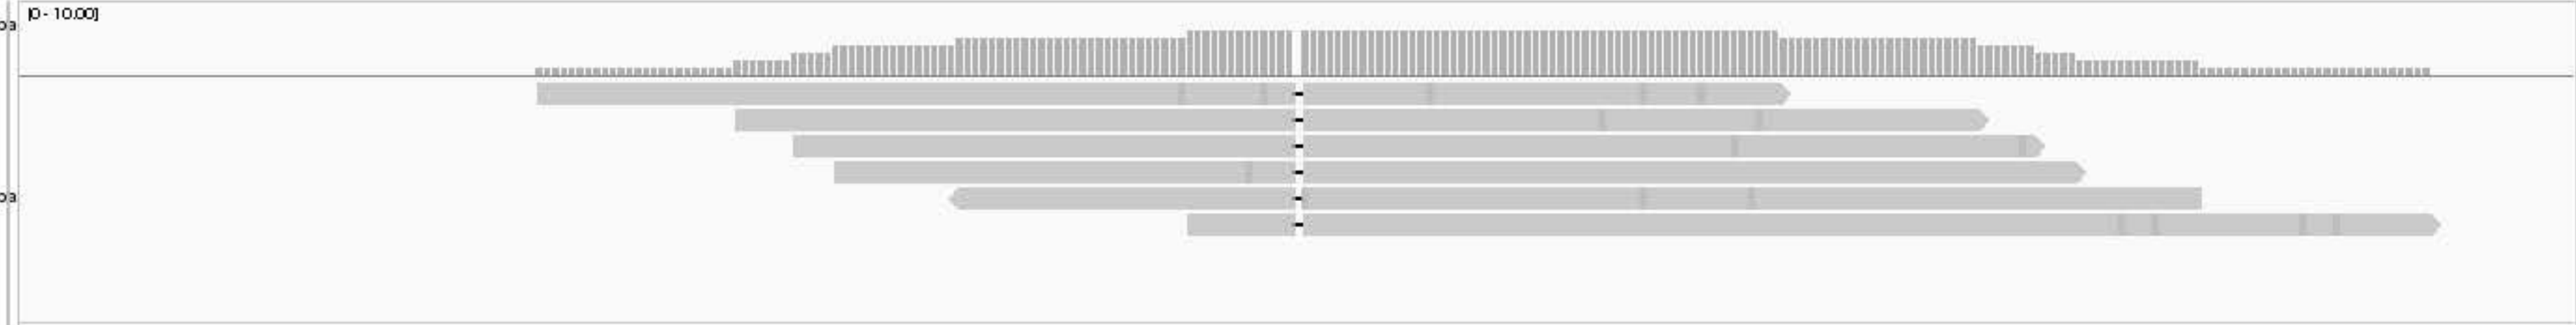

SL\_0015\_RN\_21\_WES\_uniq\_mut.ba

Sequence →



Refseq Genes

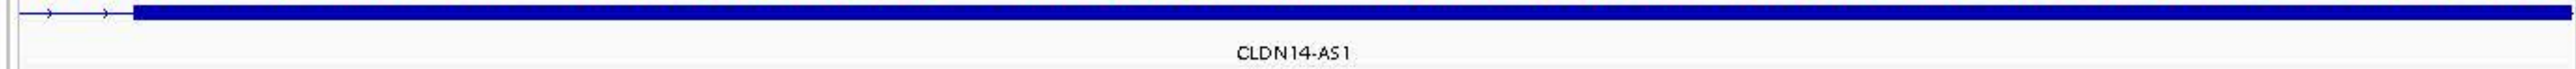

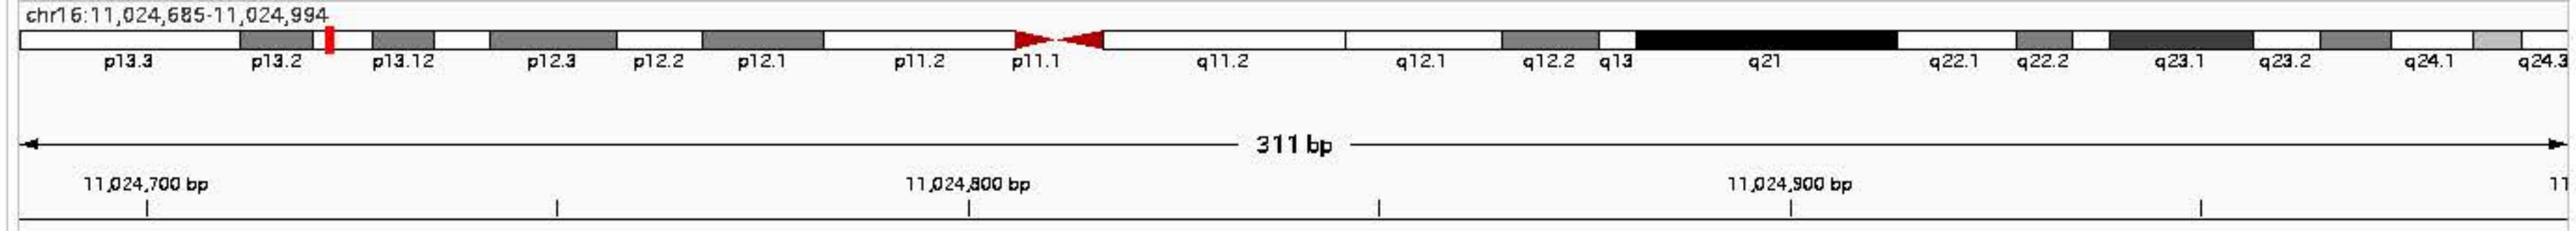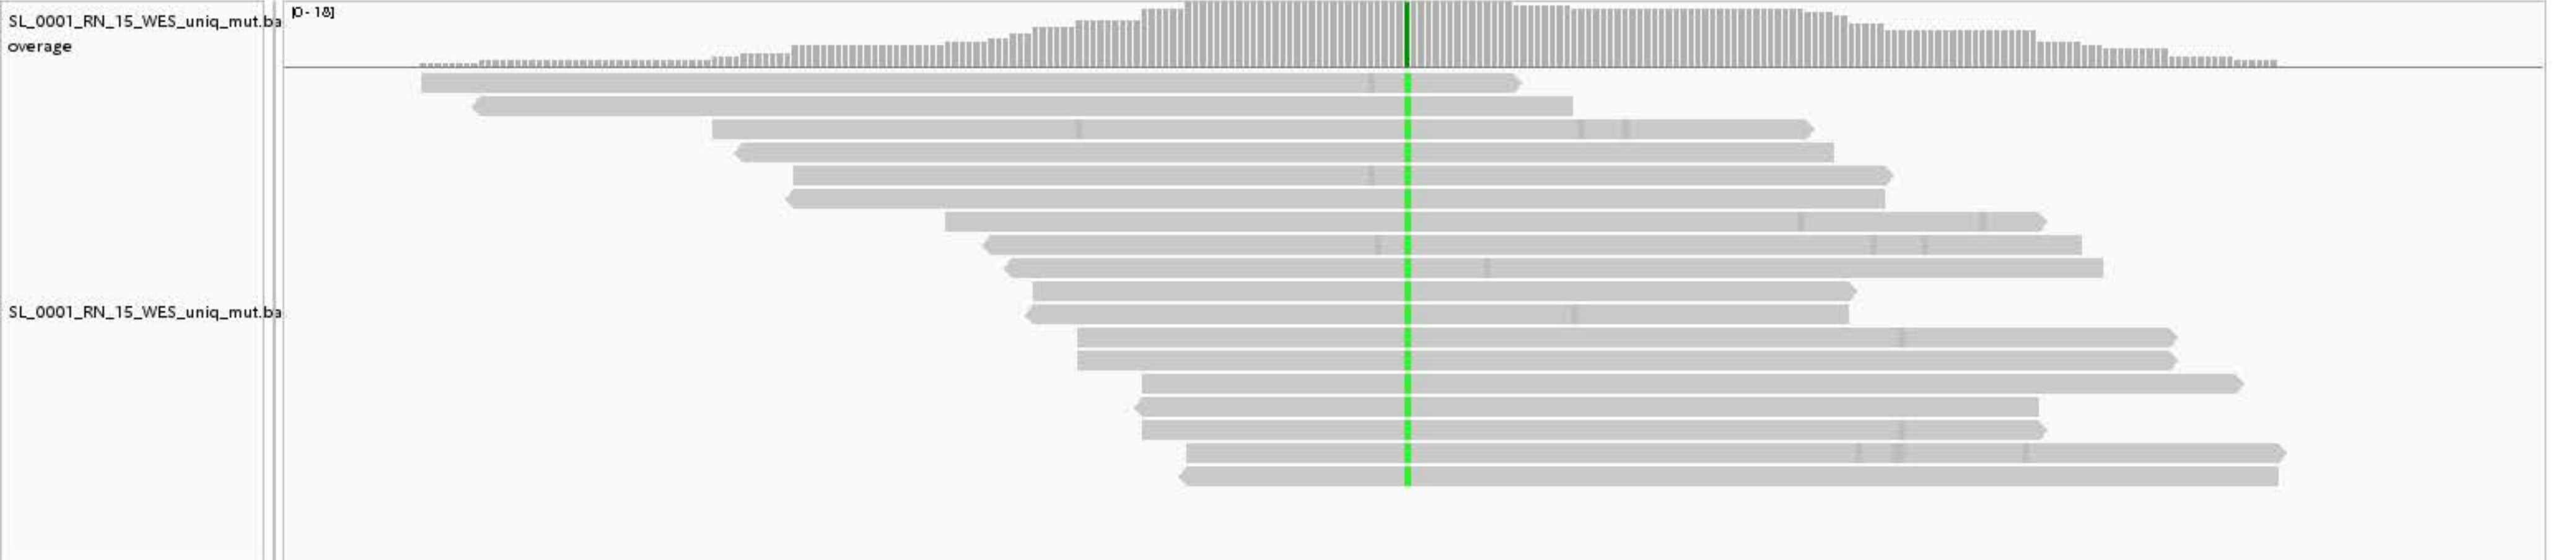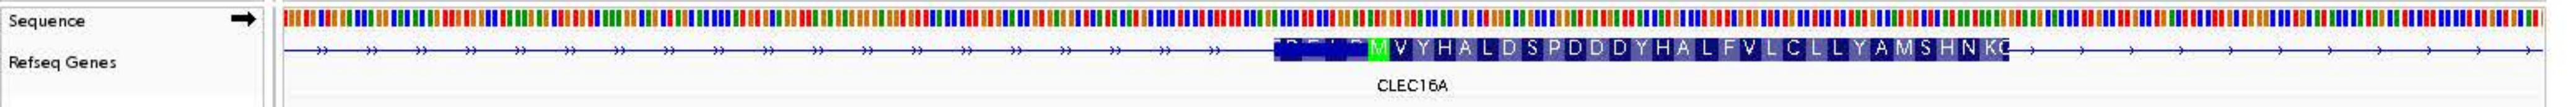



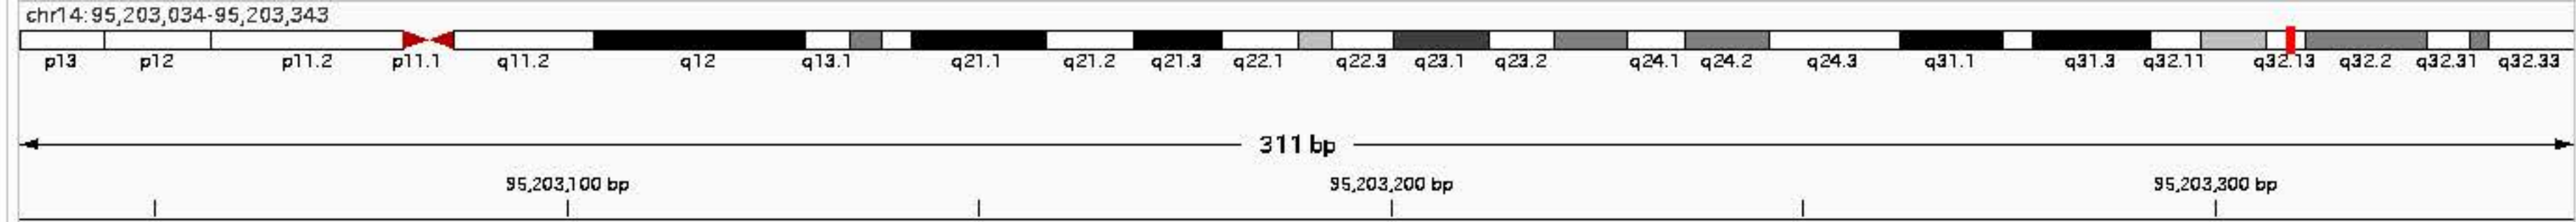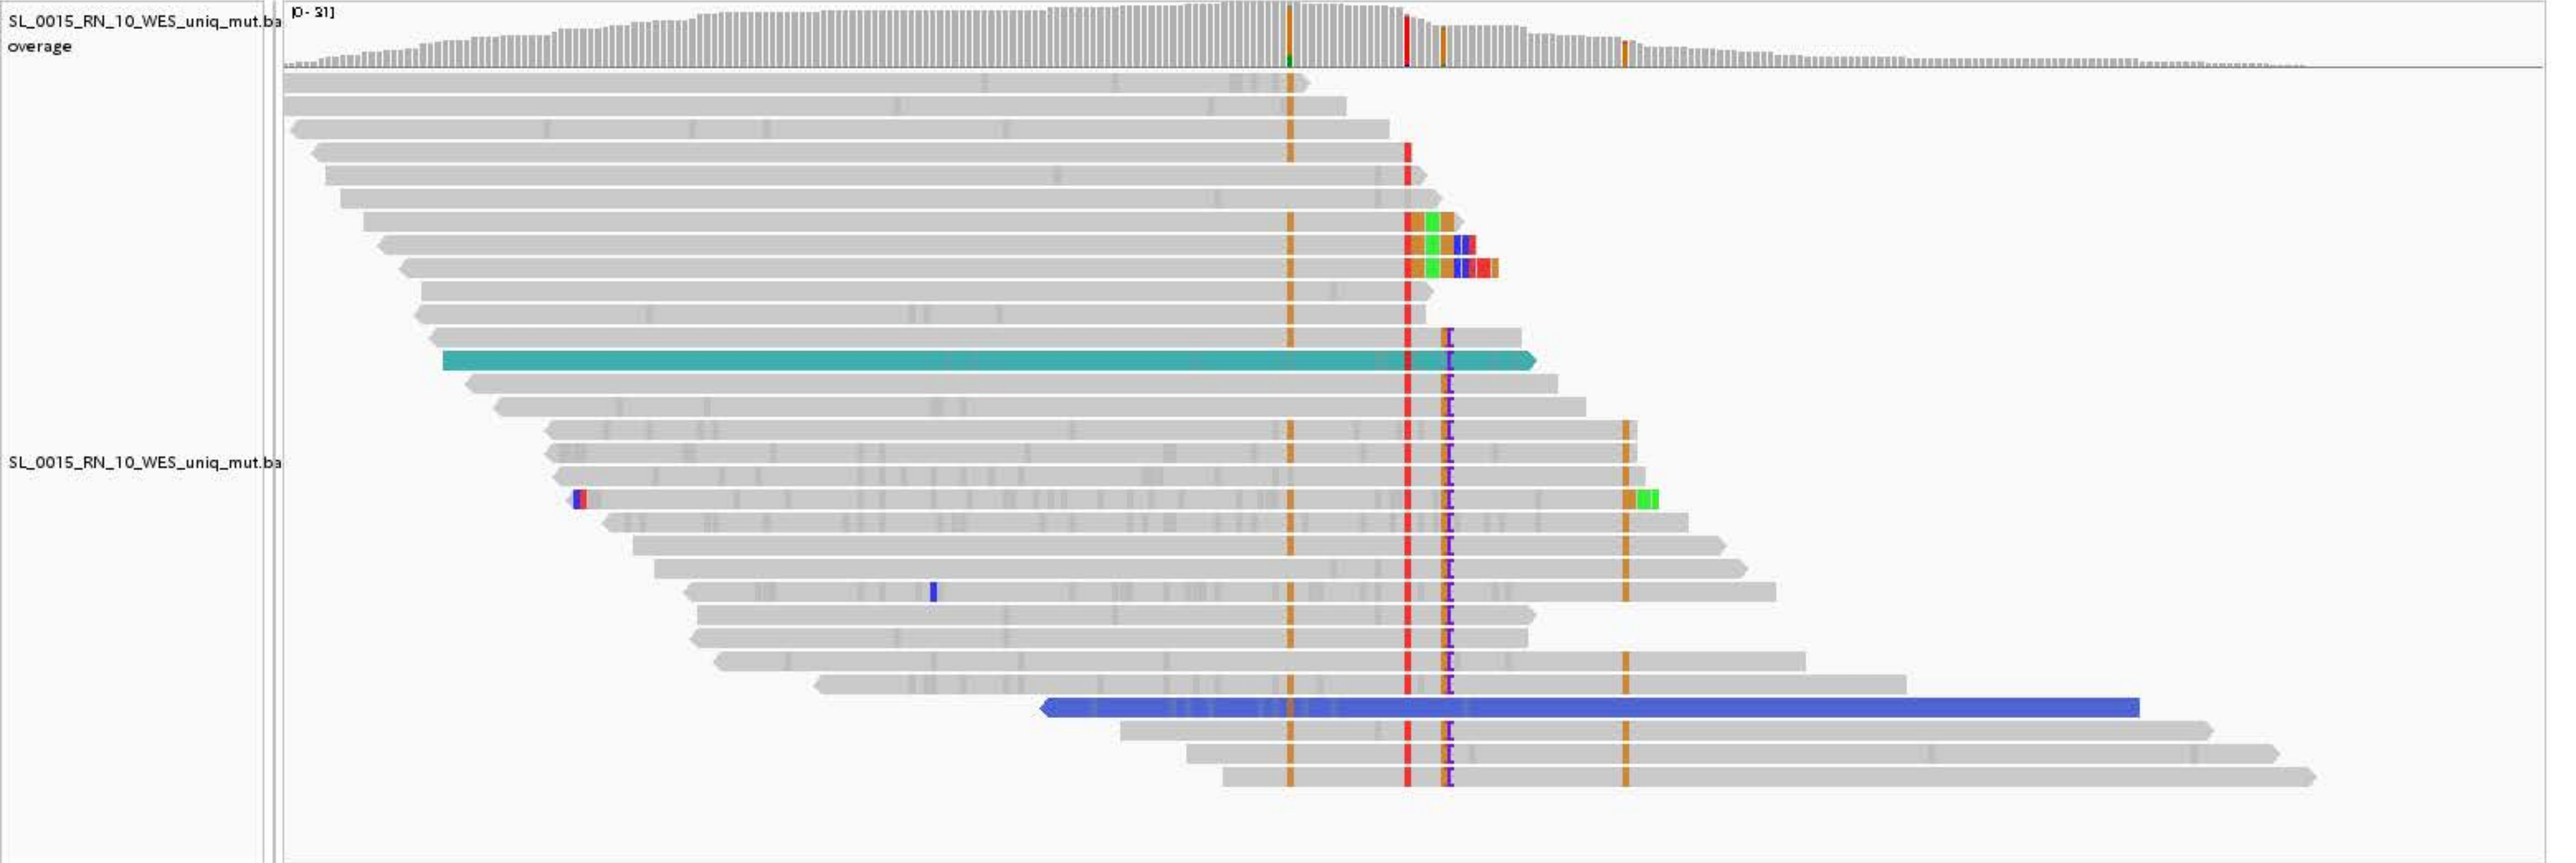

Sequence →

Refseq Genes

E E R S D L D P M Y G E P E E L D M E E N K L D E P D E V Y A E L V A A L P V E Y H P F Y F L D H P I V S V K S L P P S P K F D L G E E S H S G L T E L S V C S S P P S S S L E E G V G Q L D D D E G E E E Y H

CLMN

chr11:100,061,070-100,061,379

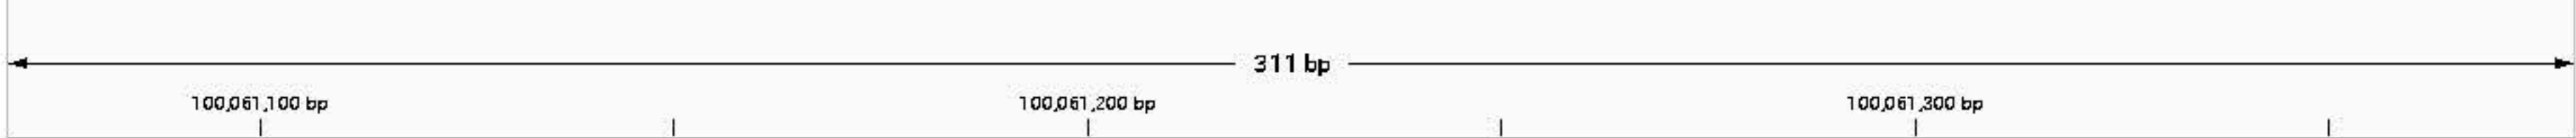

SL\_0004\_RN\_26\_WES\_uniq\_mut.ba  
coverage

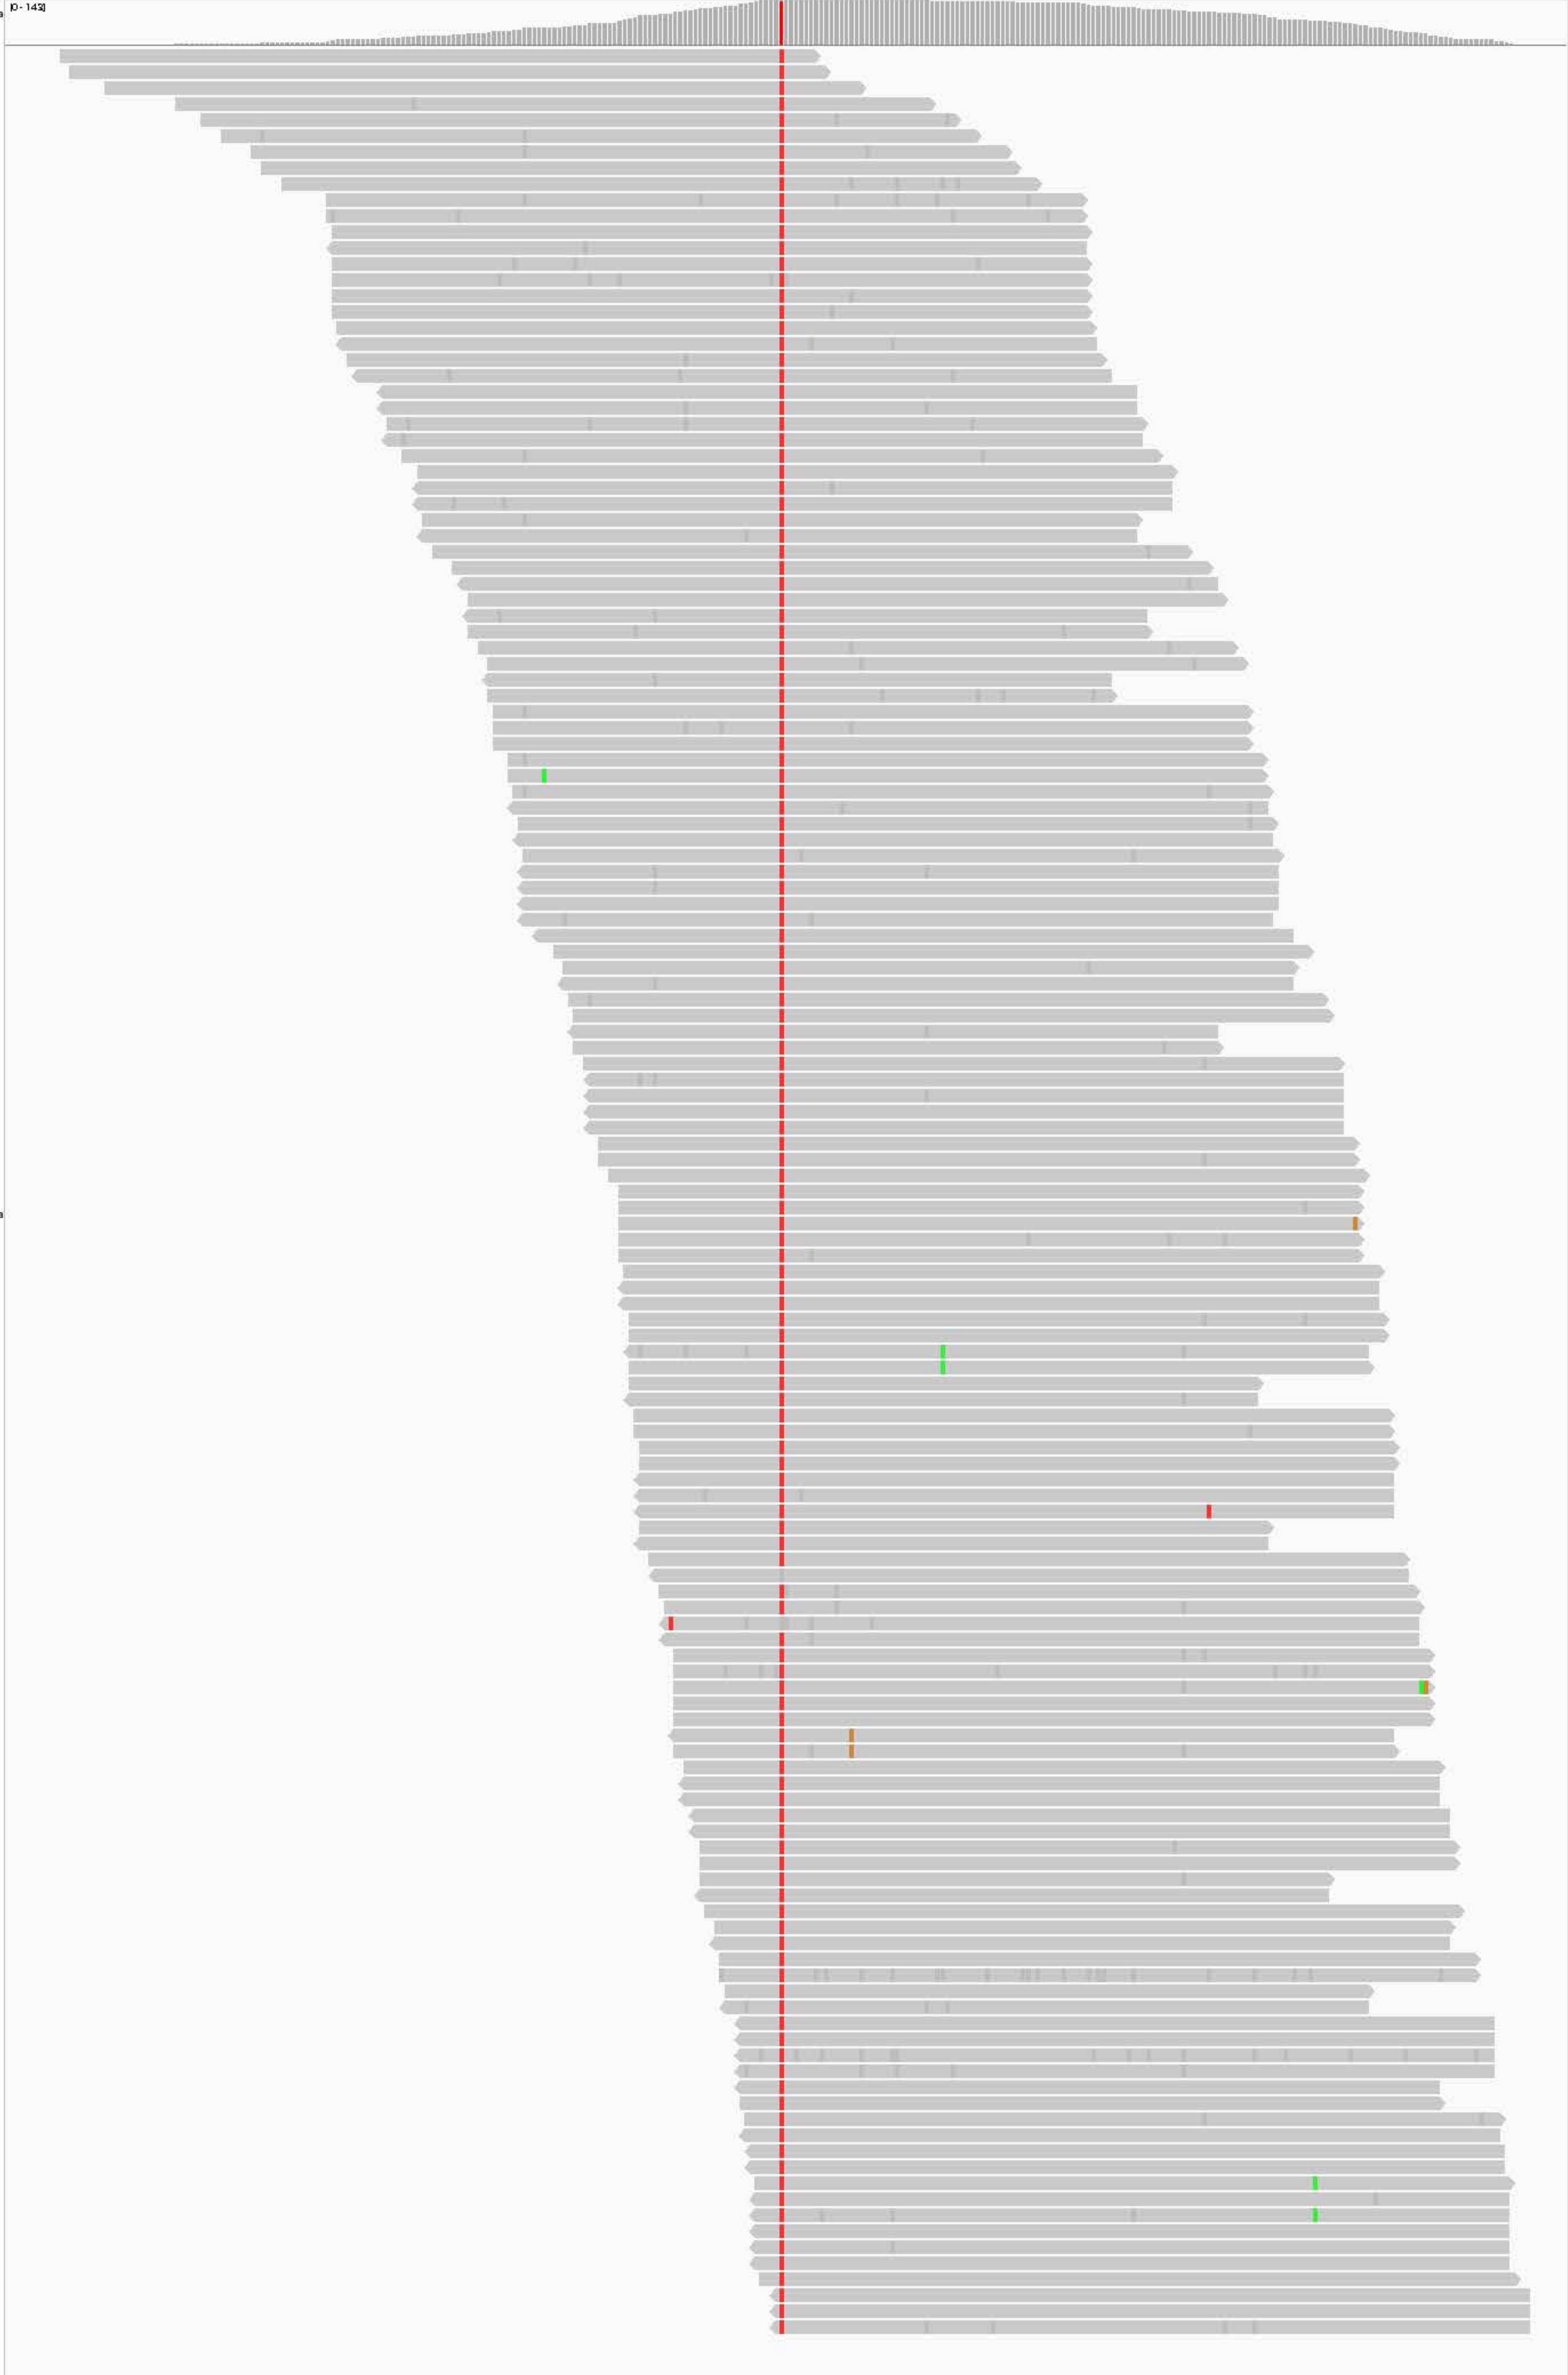

SL\_0004\_RN\_26\_WES\_uniq\_mut.ba

Sequence →

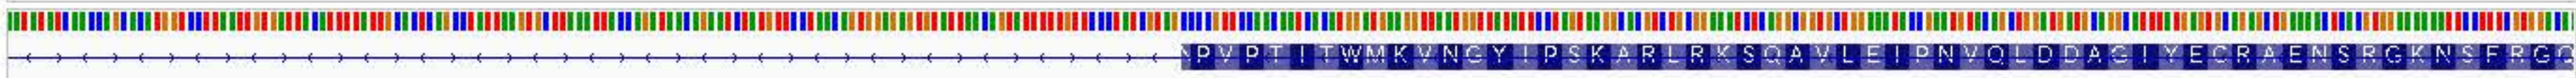

Refseq Genes

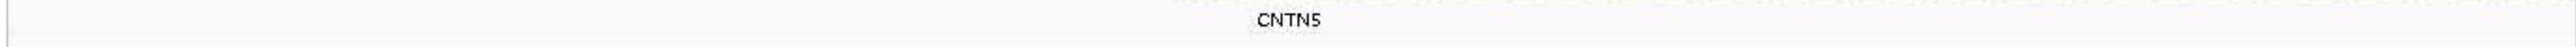

CNTNS



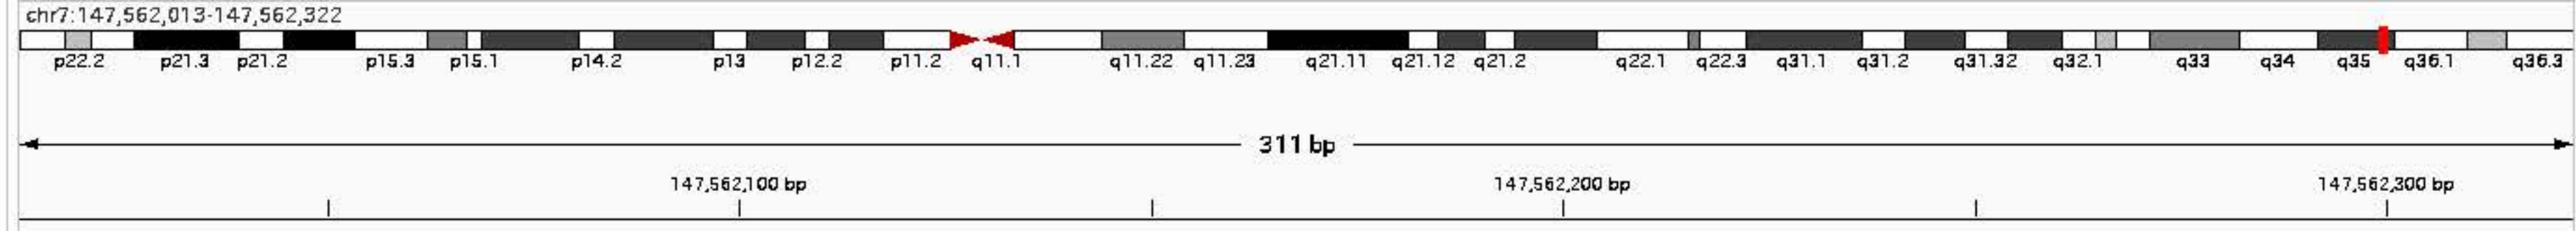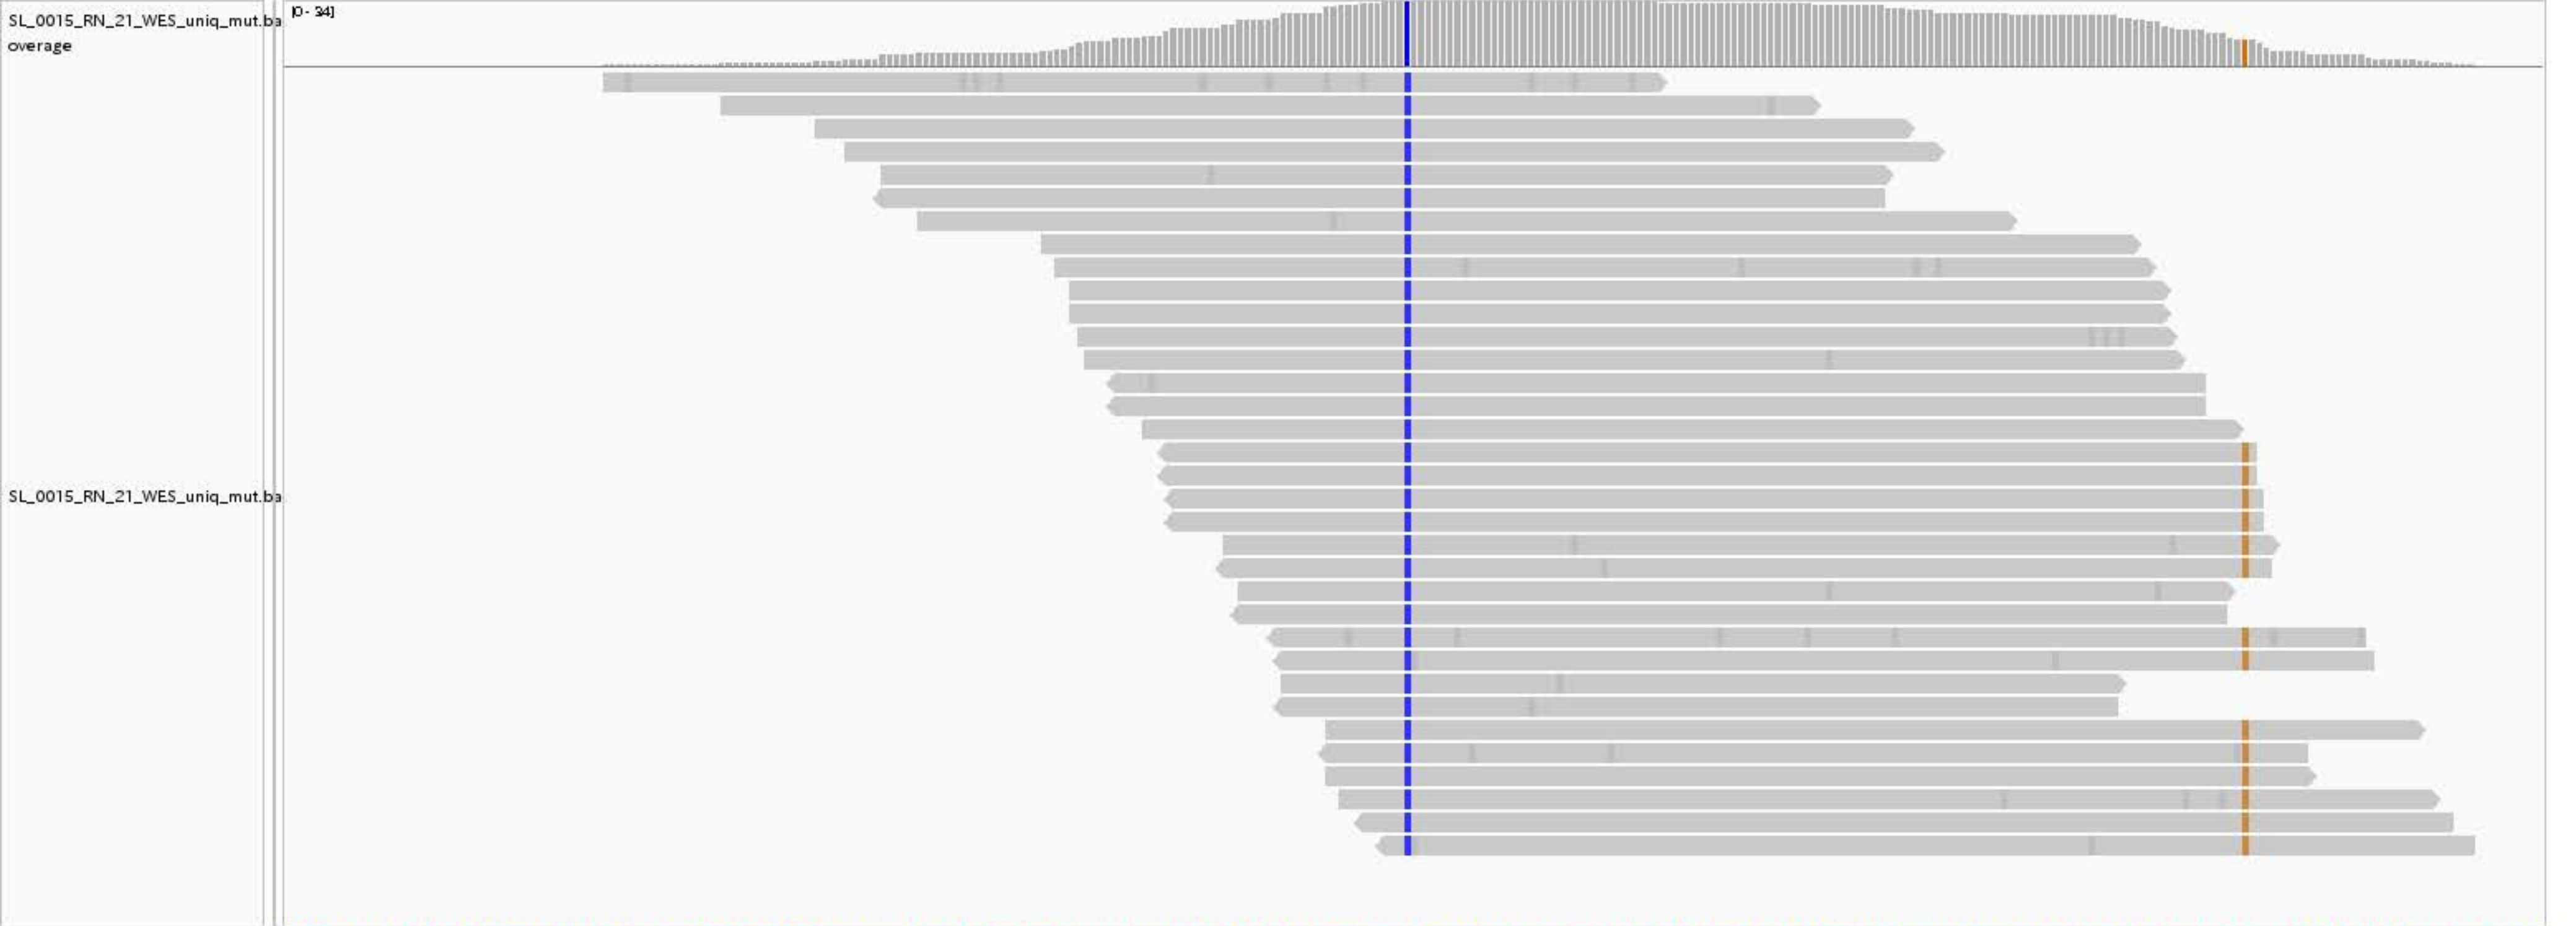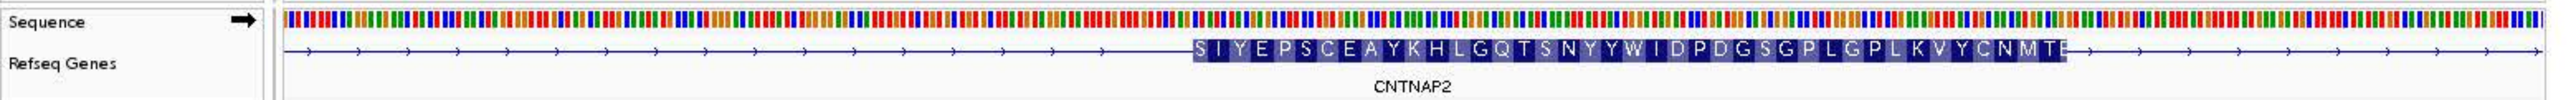



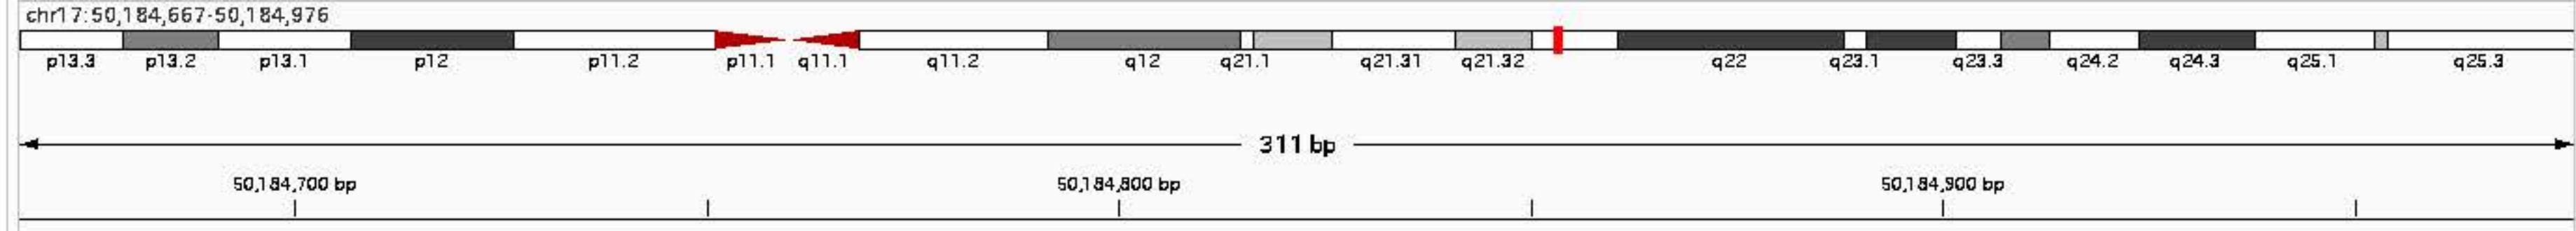

SL\_0010\_RN\_34\_WES\_uniq\_mut.ba  
overage

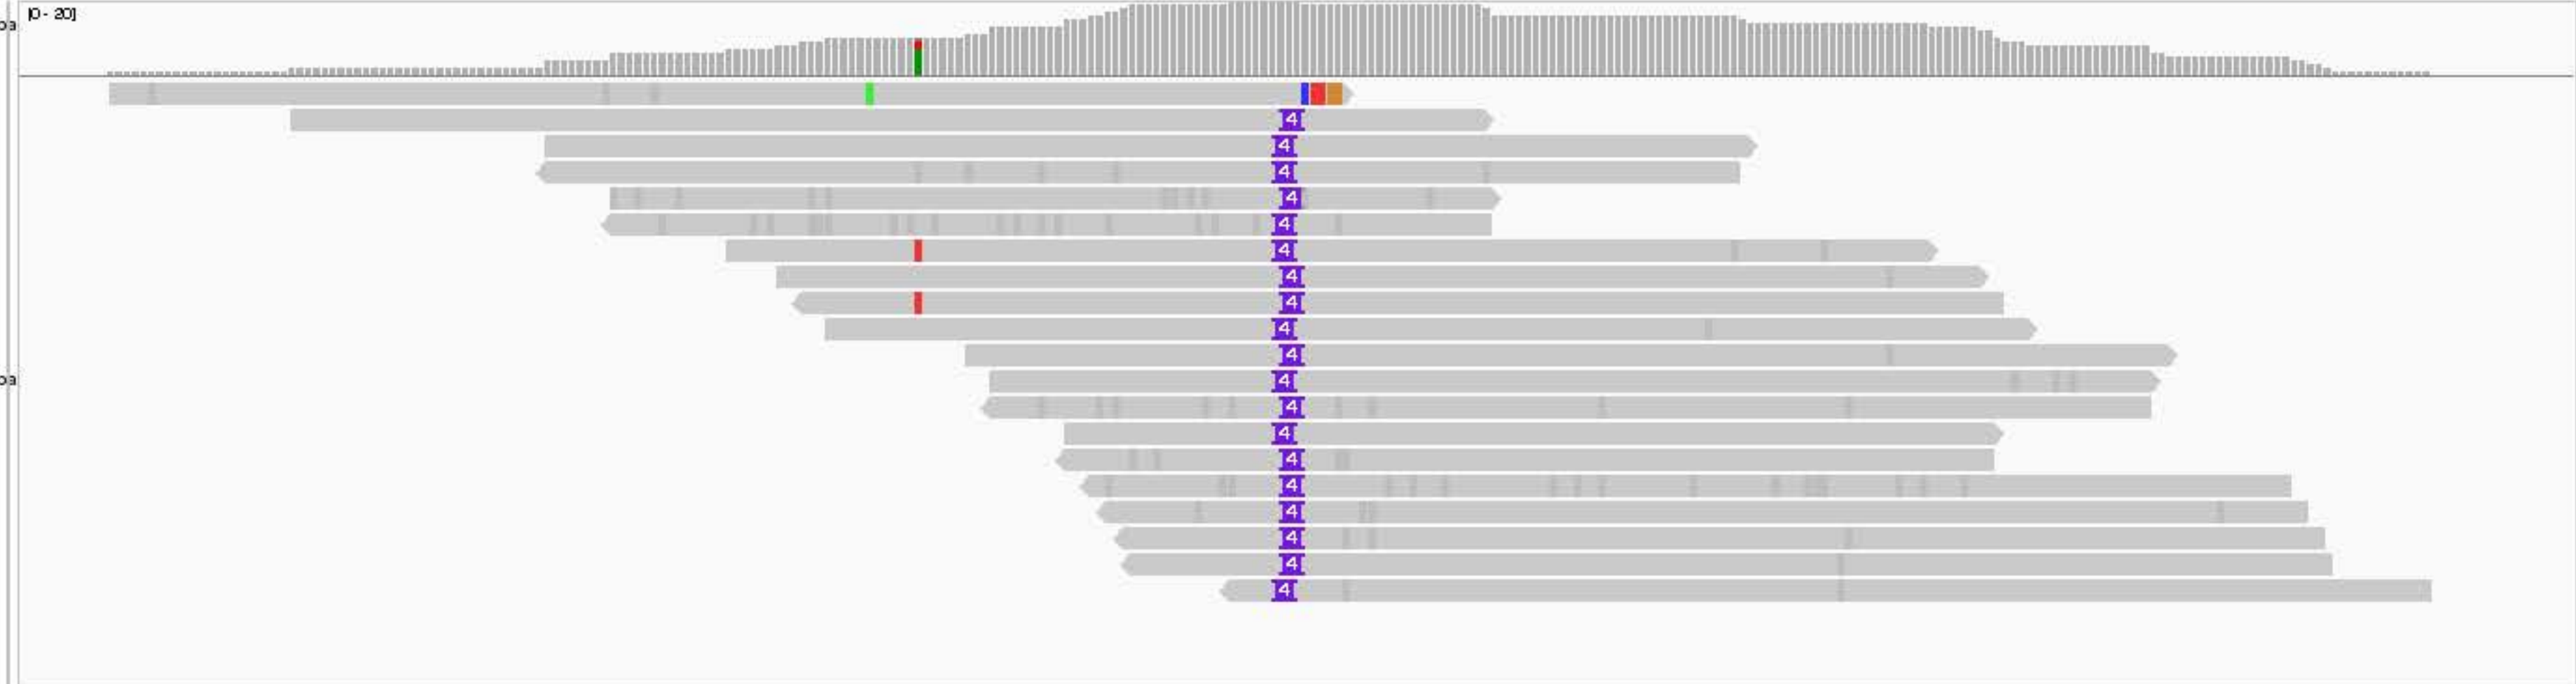

SL\_0010\_RN\_34\_WES\_uniq\_mut.ba

Sequence →

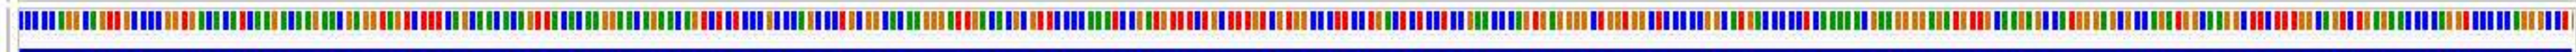

Refseq Genes

COL1A1

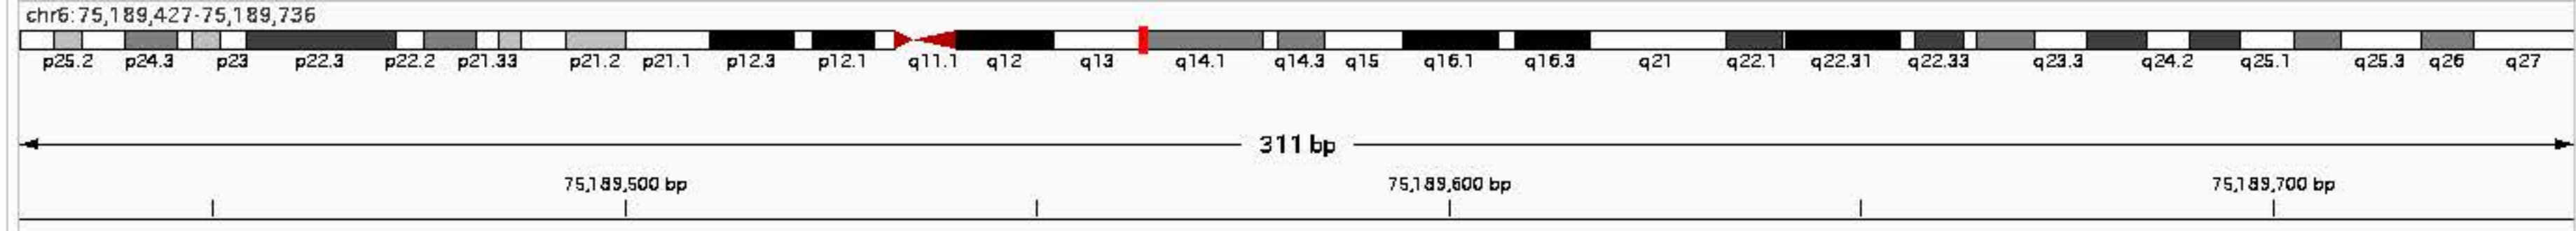

SL\_0015\_LN\_44\_WES\_uniq\_mut. coverage

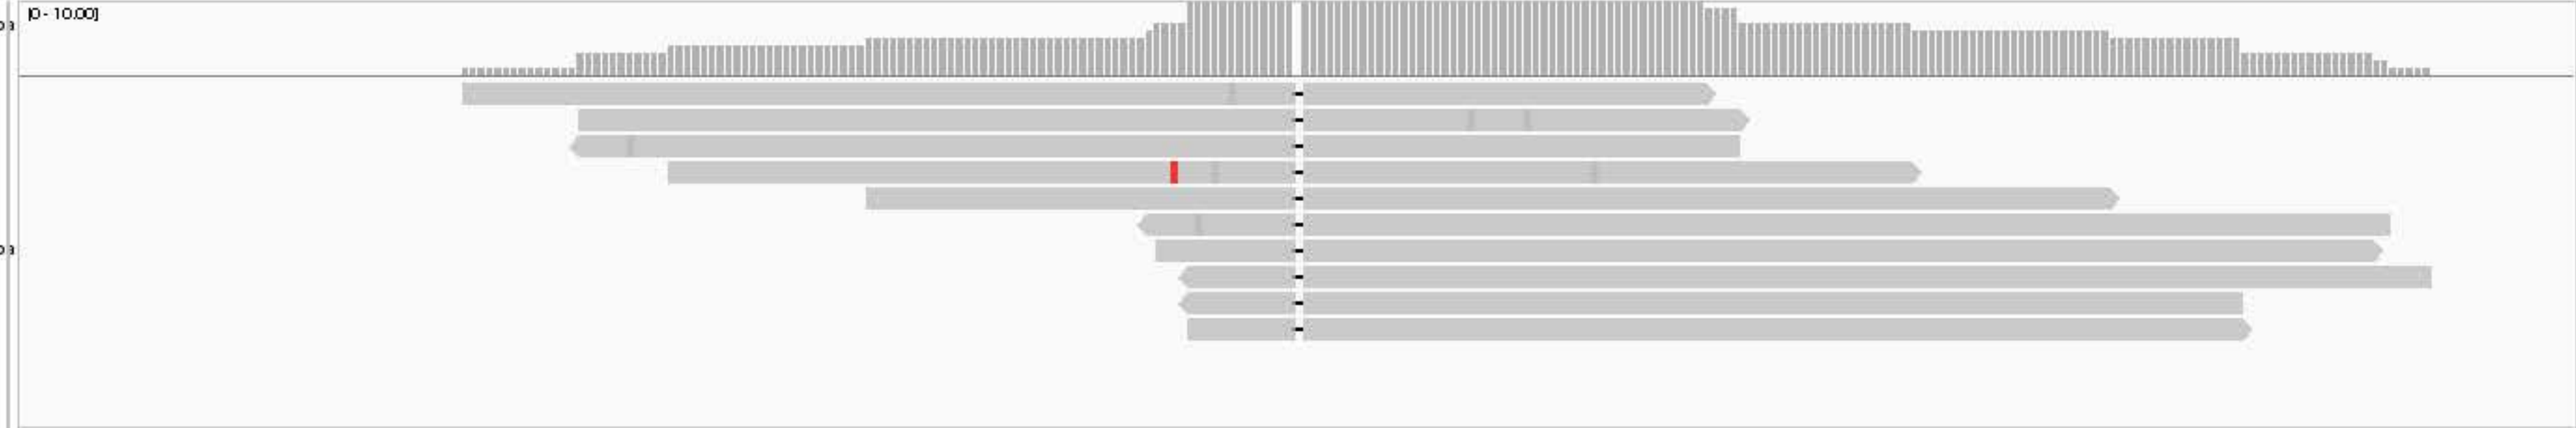

SL\_0015\_LN\_44\_WES\_uniq\_mut.

Sequence

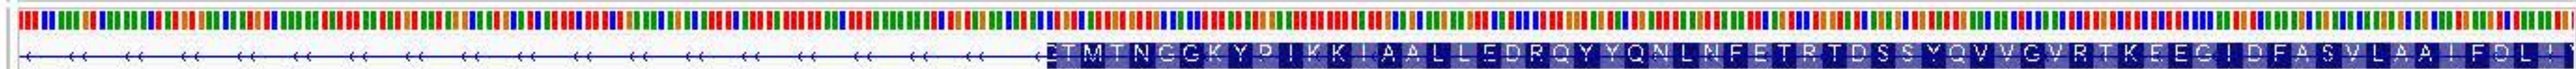

Refseq Genes

COL12A1

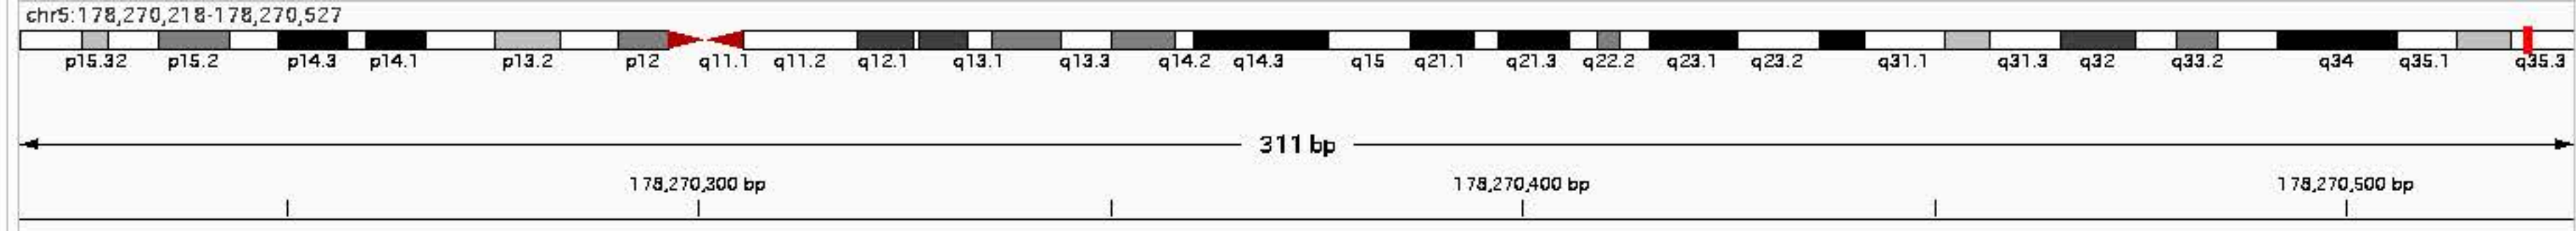

SL\_0015\_LN\_46\_WES\_uniq\_mut. coverage

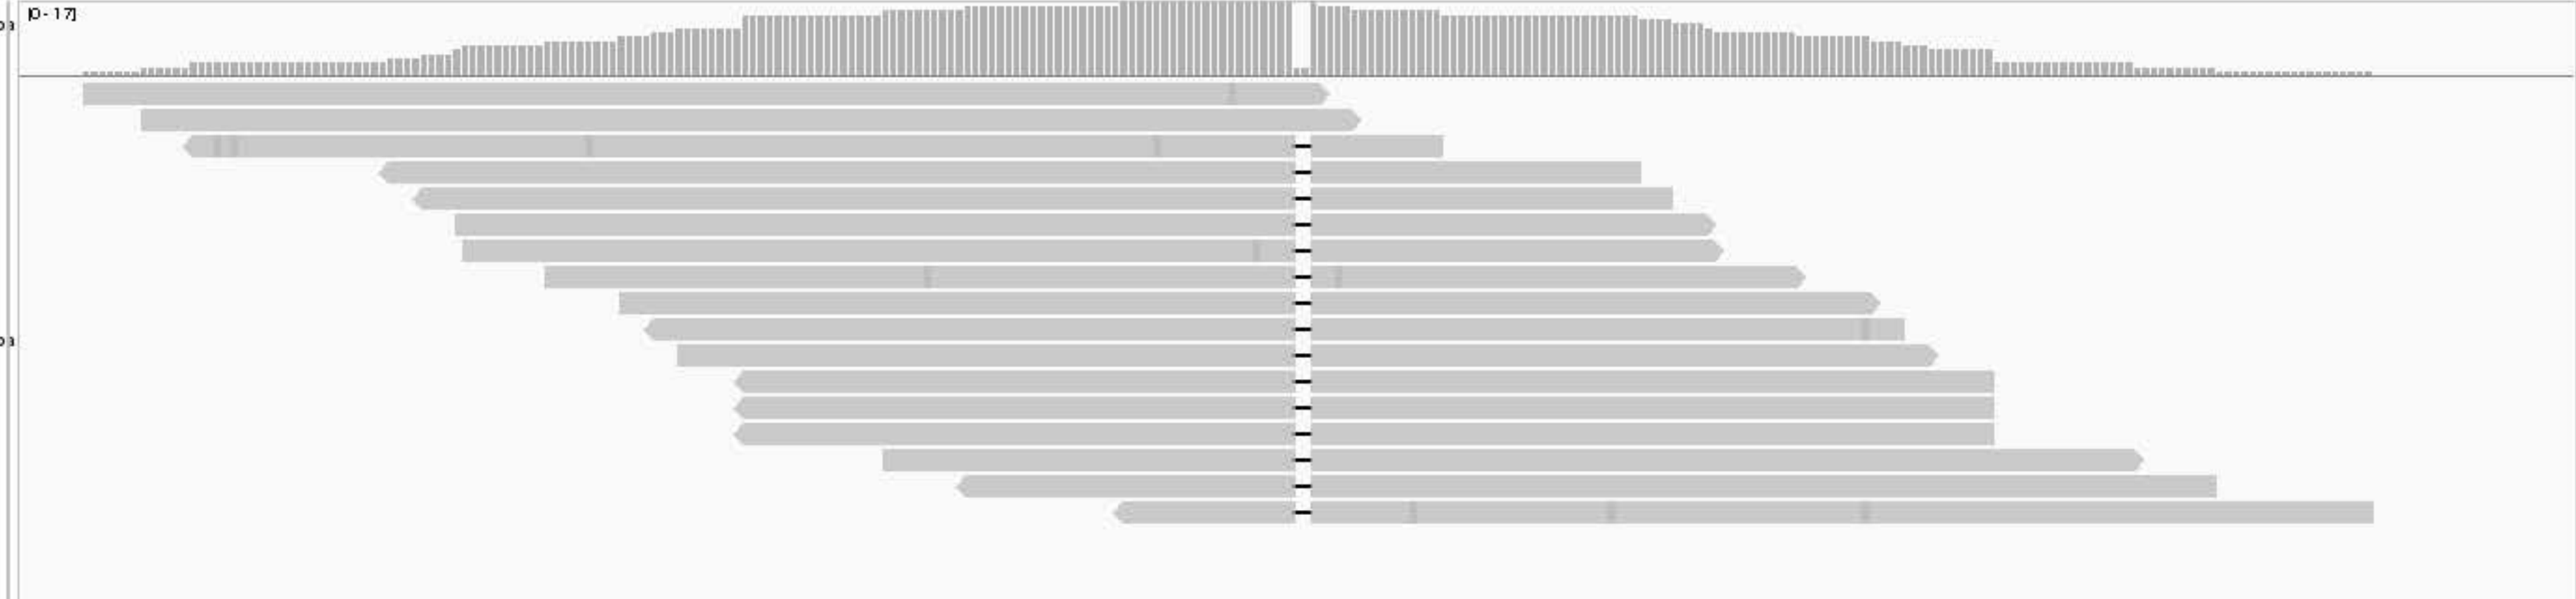

SL\_0015\_LN\_46\_WES\_uniq\_mut.

Sequence

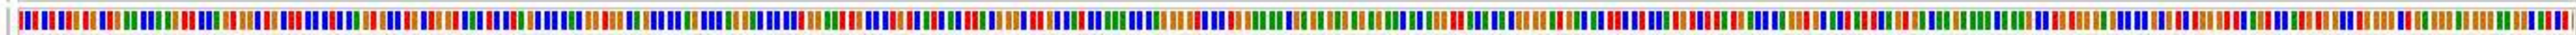

Refseq Genes

PKGDLGLPG  
COL23A1



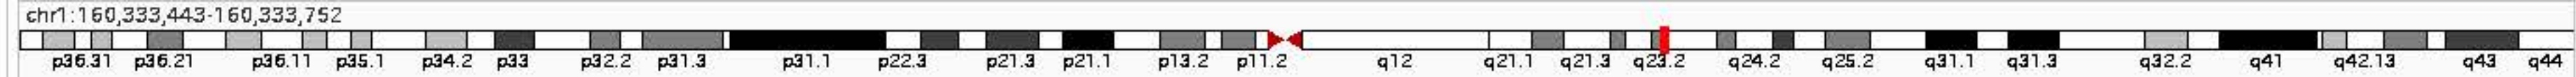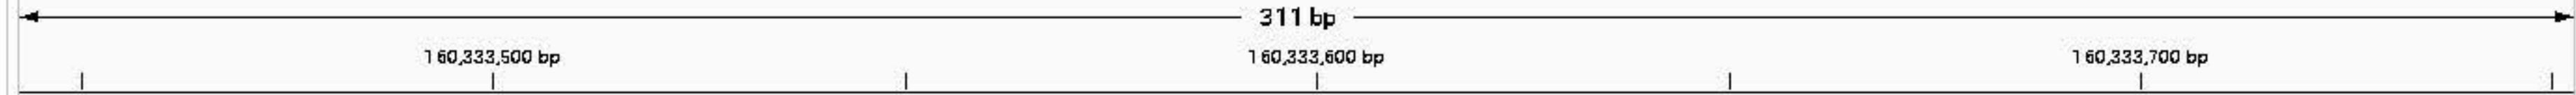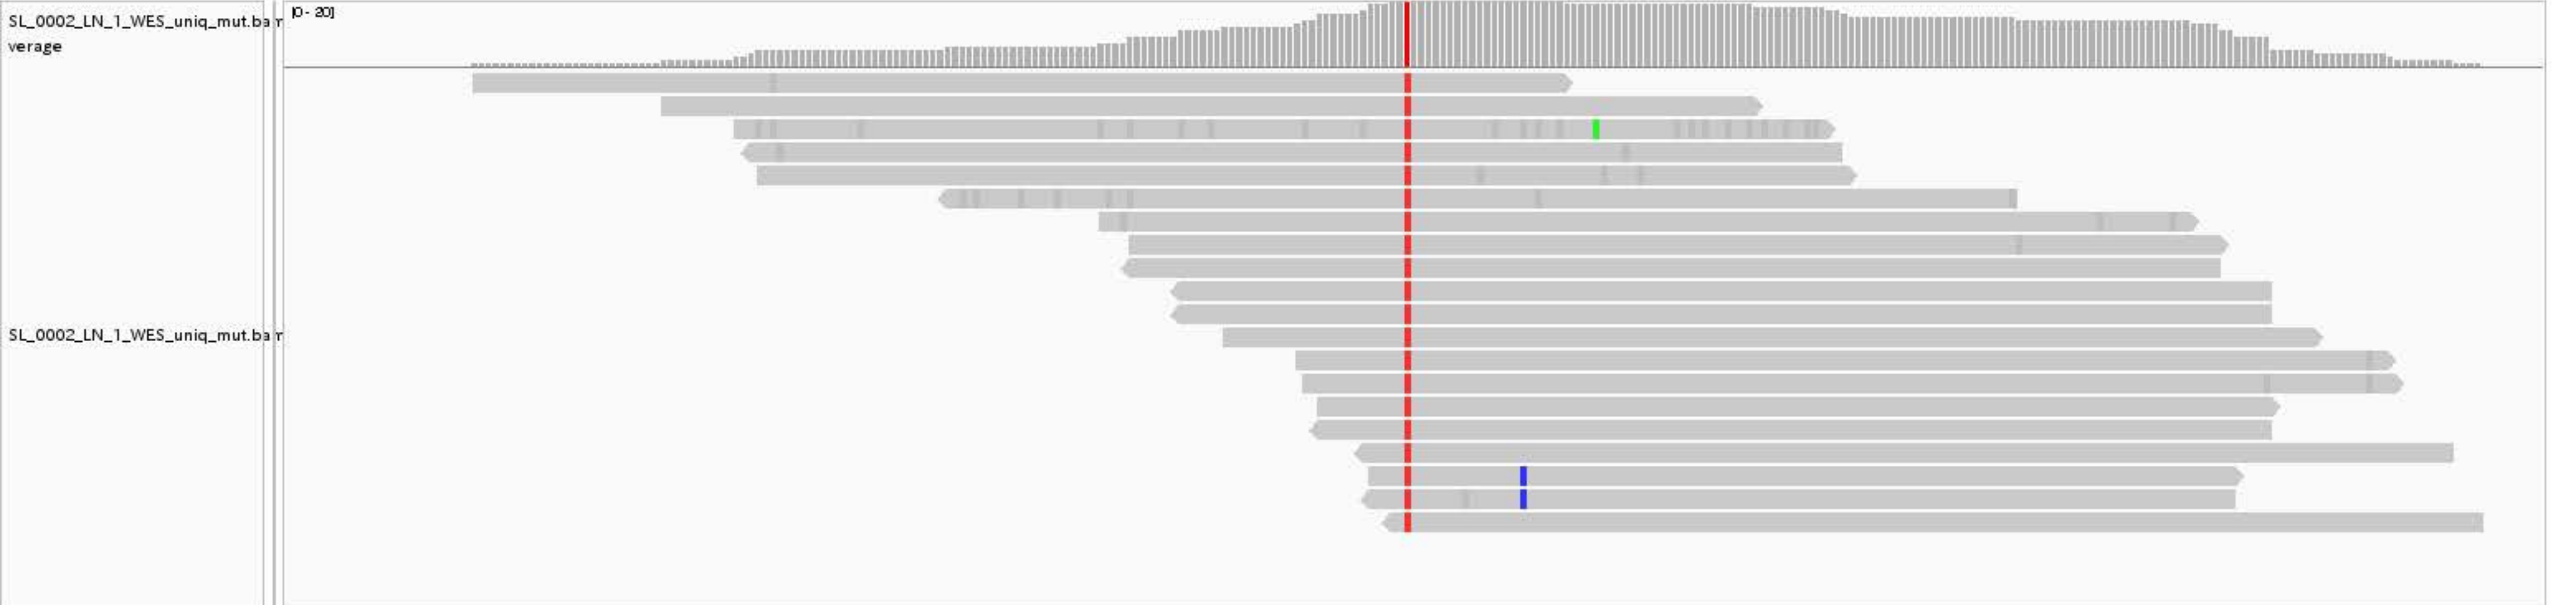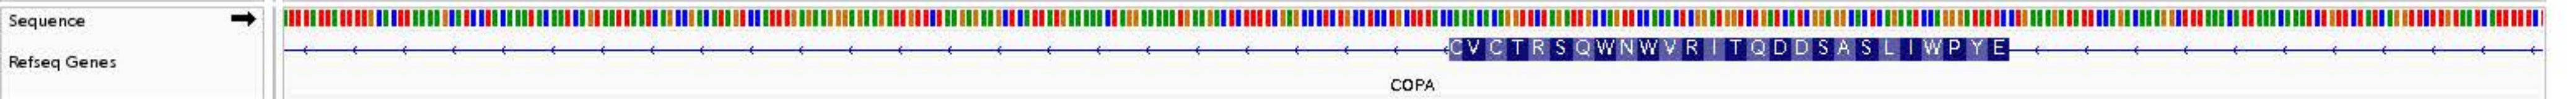

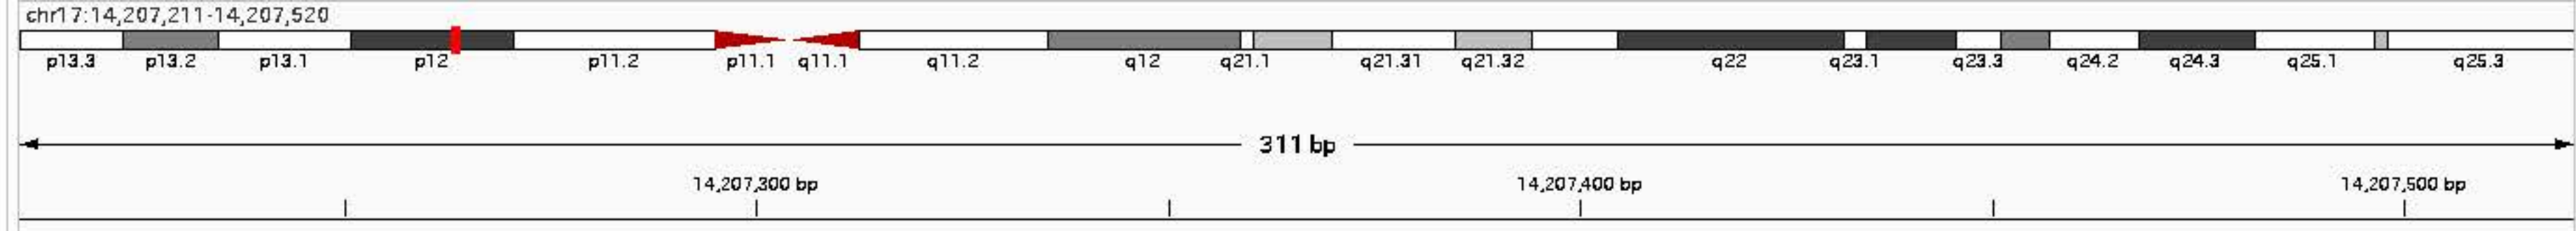

SL\_0015\_LN\_46\_WES\_uniq\_mut. coverage

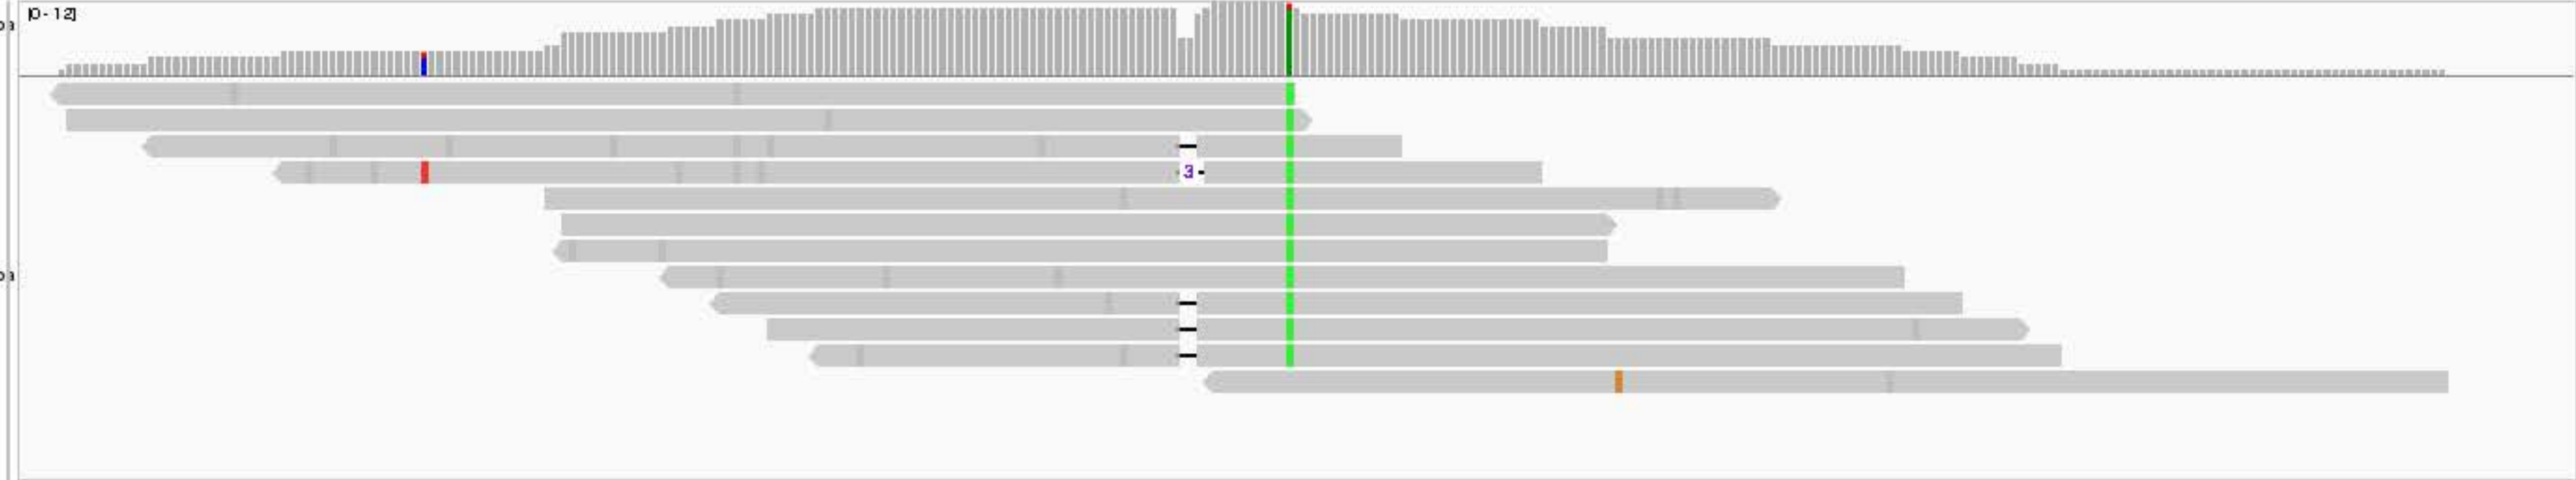

SL\_0015\_LN\_46\_WES\_uniq\_mut. coverage

Sequence

Refseq Genes

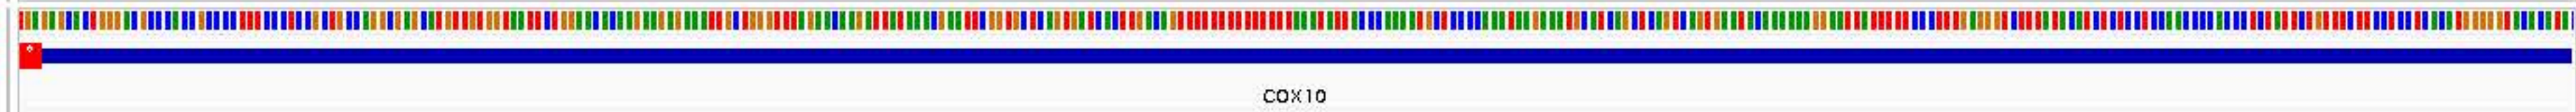

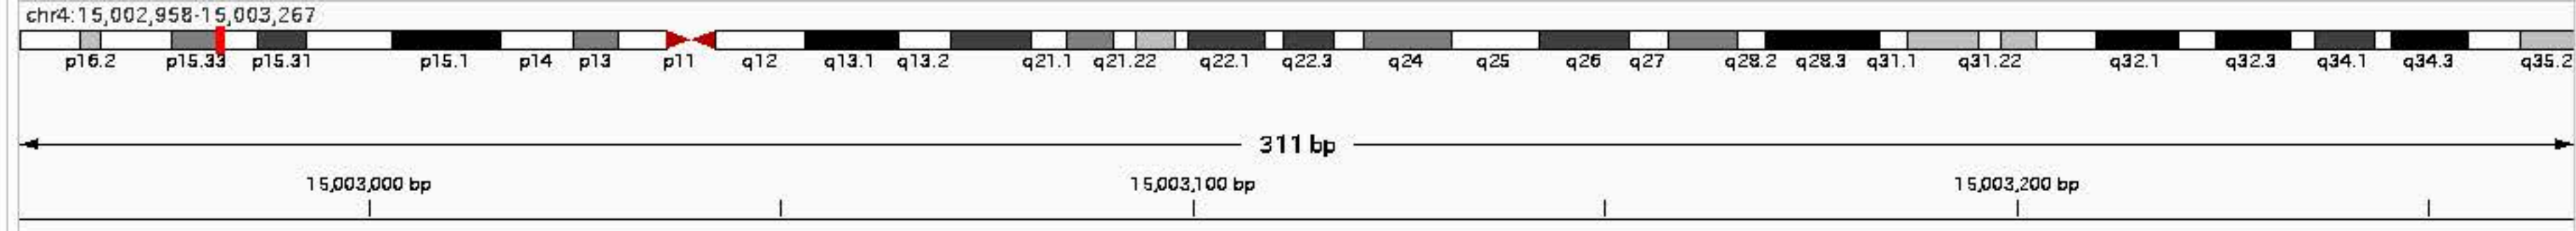

SL\_0015\_LN\_44\_WES\_uniq\_mut. coverage

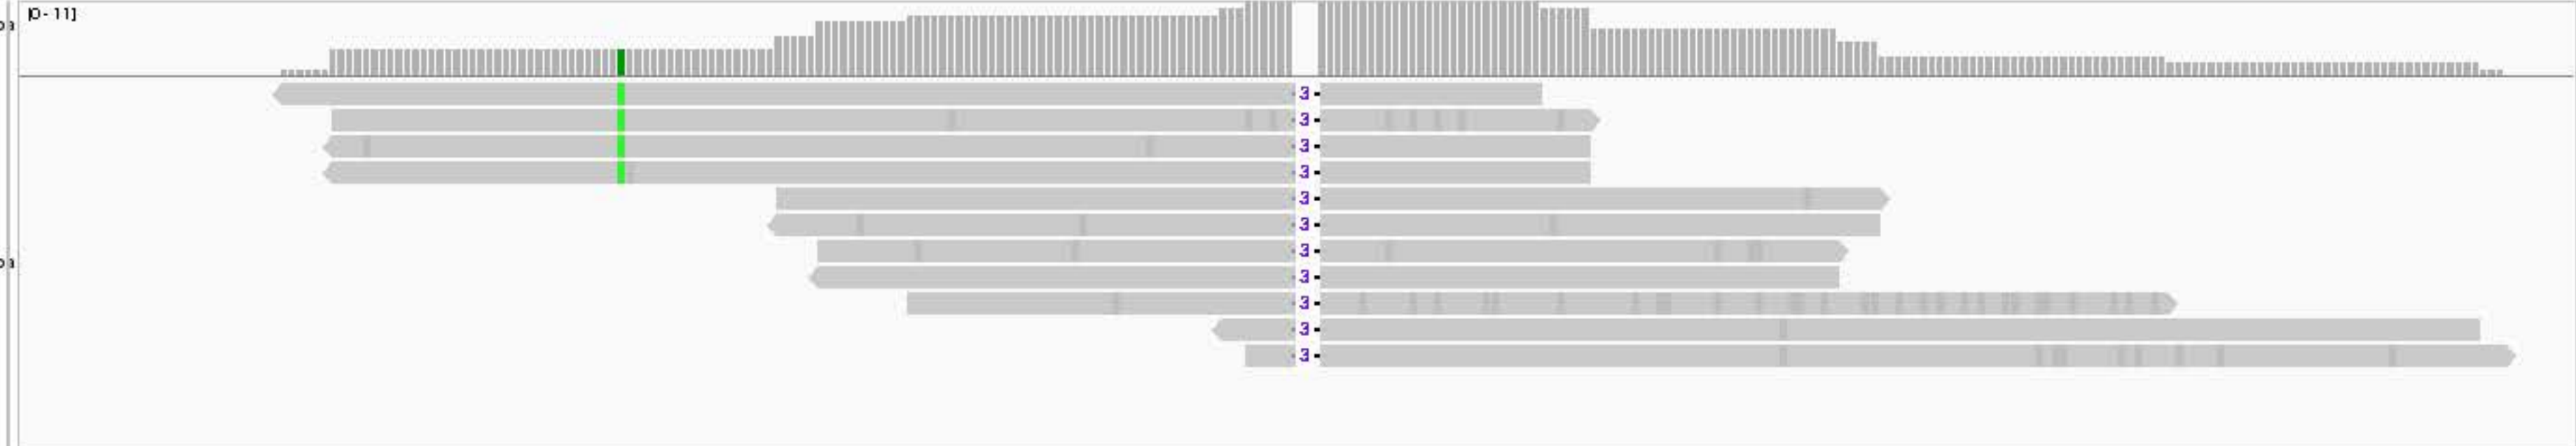

SL\_0015\_LN\_44\_WES\_uniq\_mut.

Sequence

Refseq Genes

ELLGLTQQPARPLSGAAATEKLPDHHGGGTIAGVTHLLPSQDFKPSLHHPSSSSASSCCCRRTSSPQDFSQRQQQLSSQKRKEFSPPHLPHPPDSKPPP

CPEB2



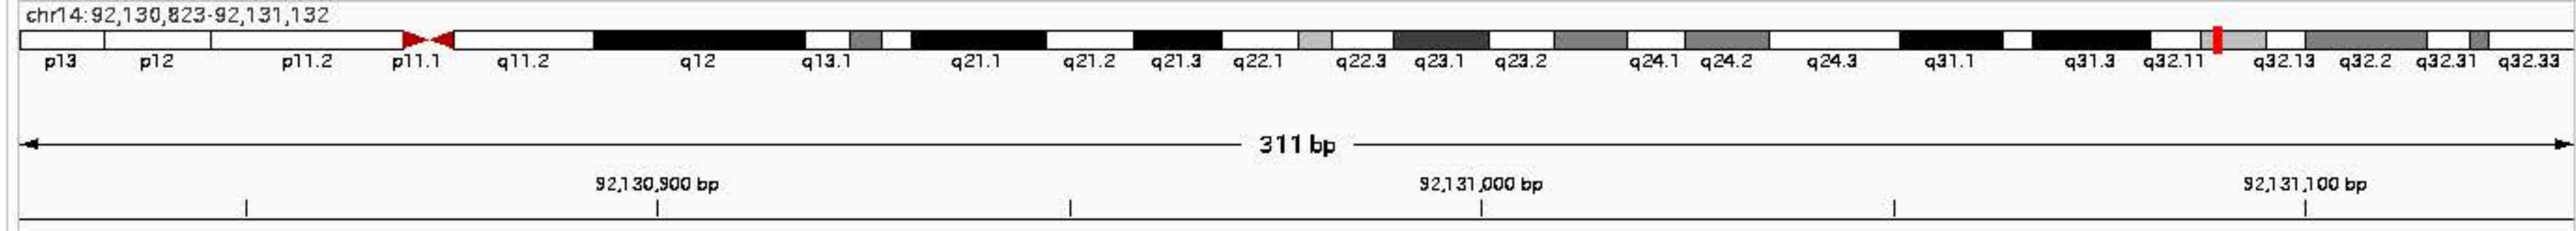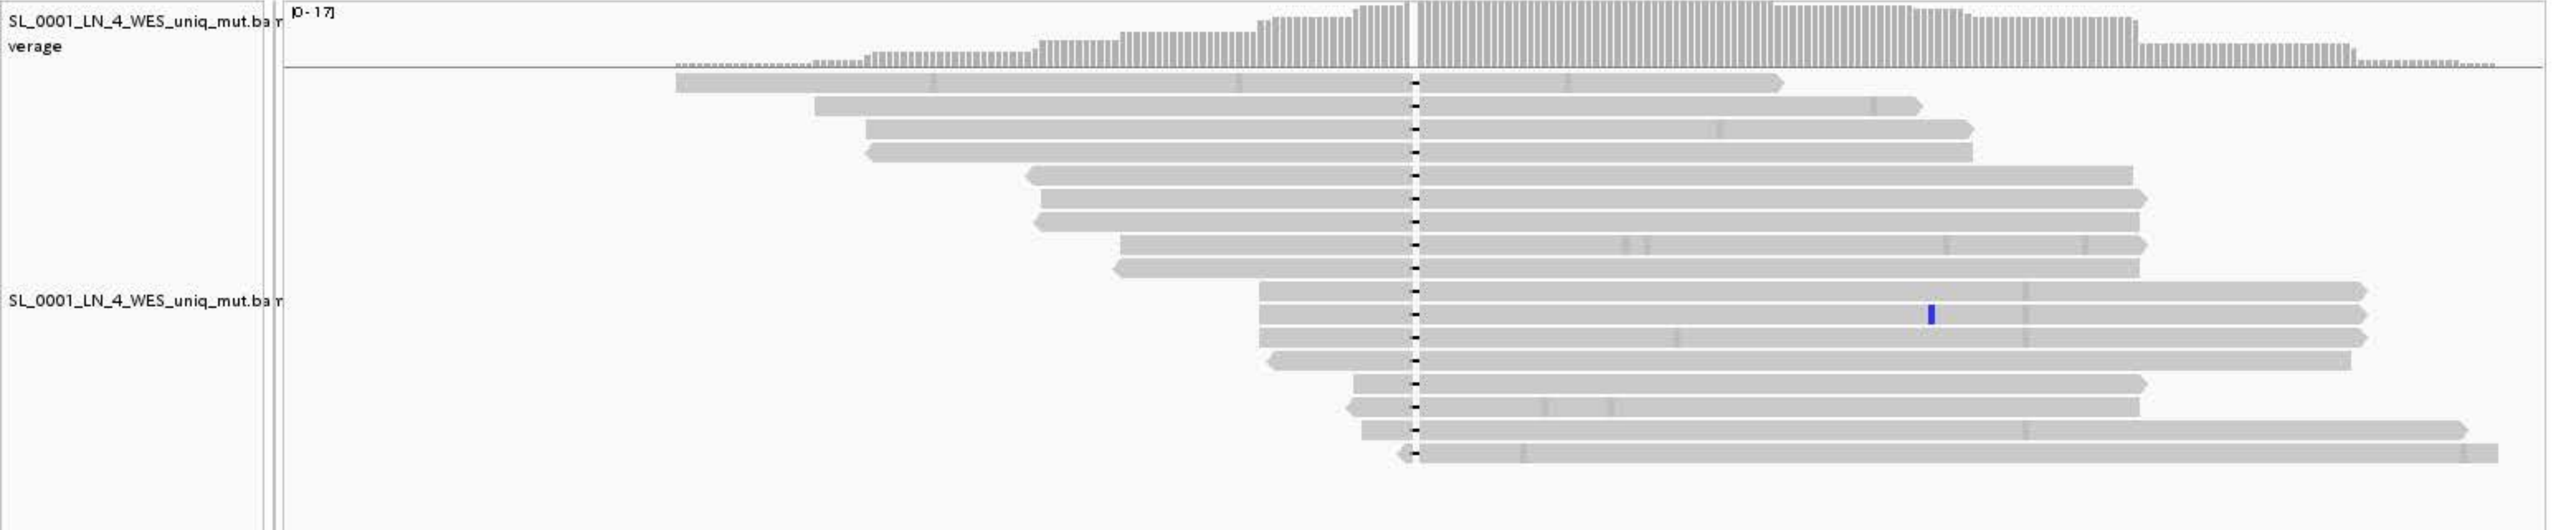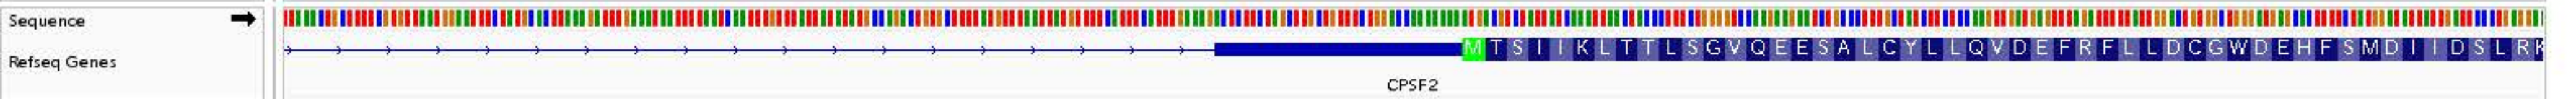

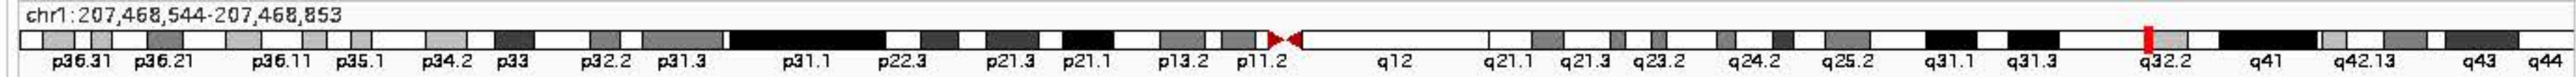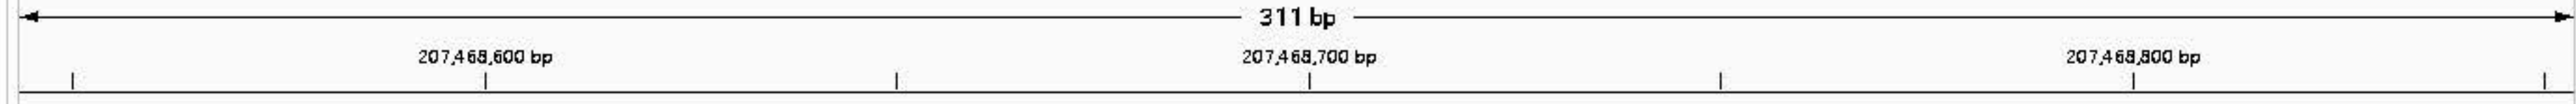

SL\_0003\_LN\_51\_WES\_uniq\_mut. coverage

SL\_0003\_LN\_51\_WES\_uniq\_mut. coverage

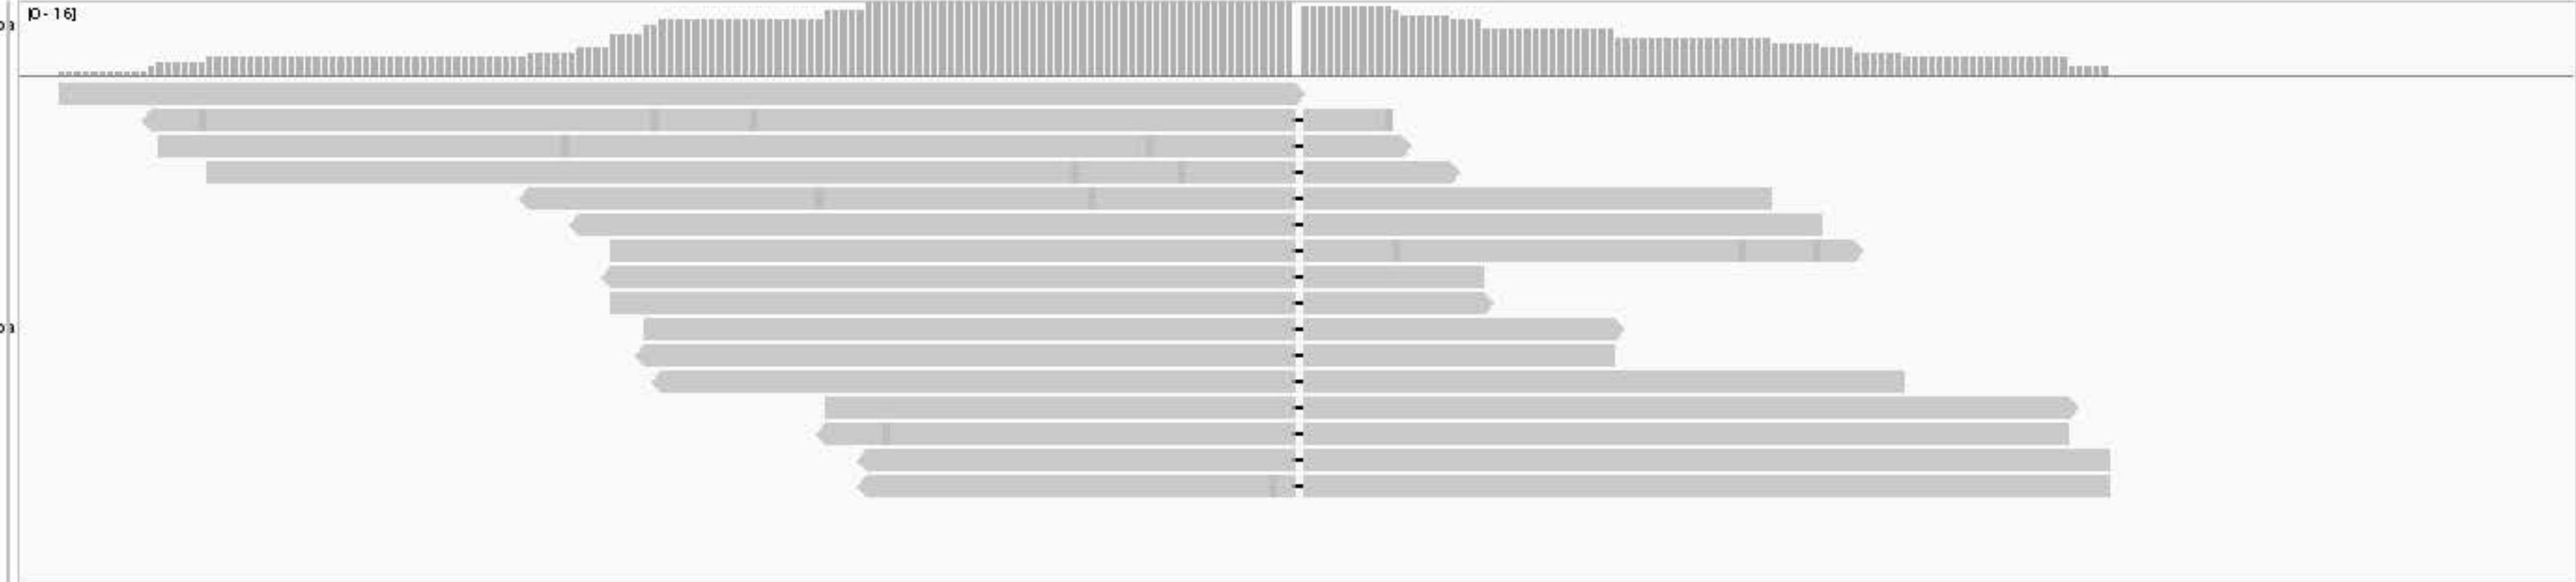

Sequence

Refseq Genes

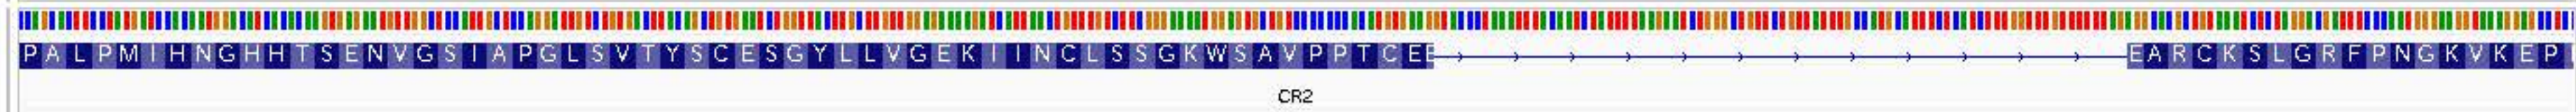

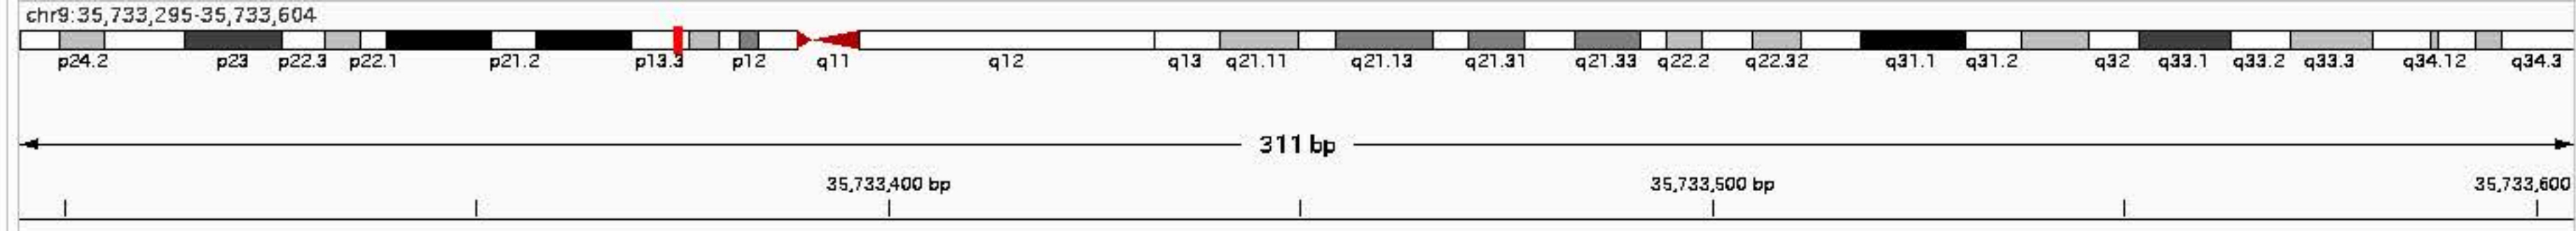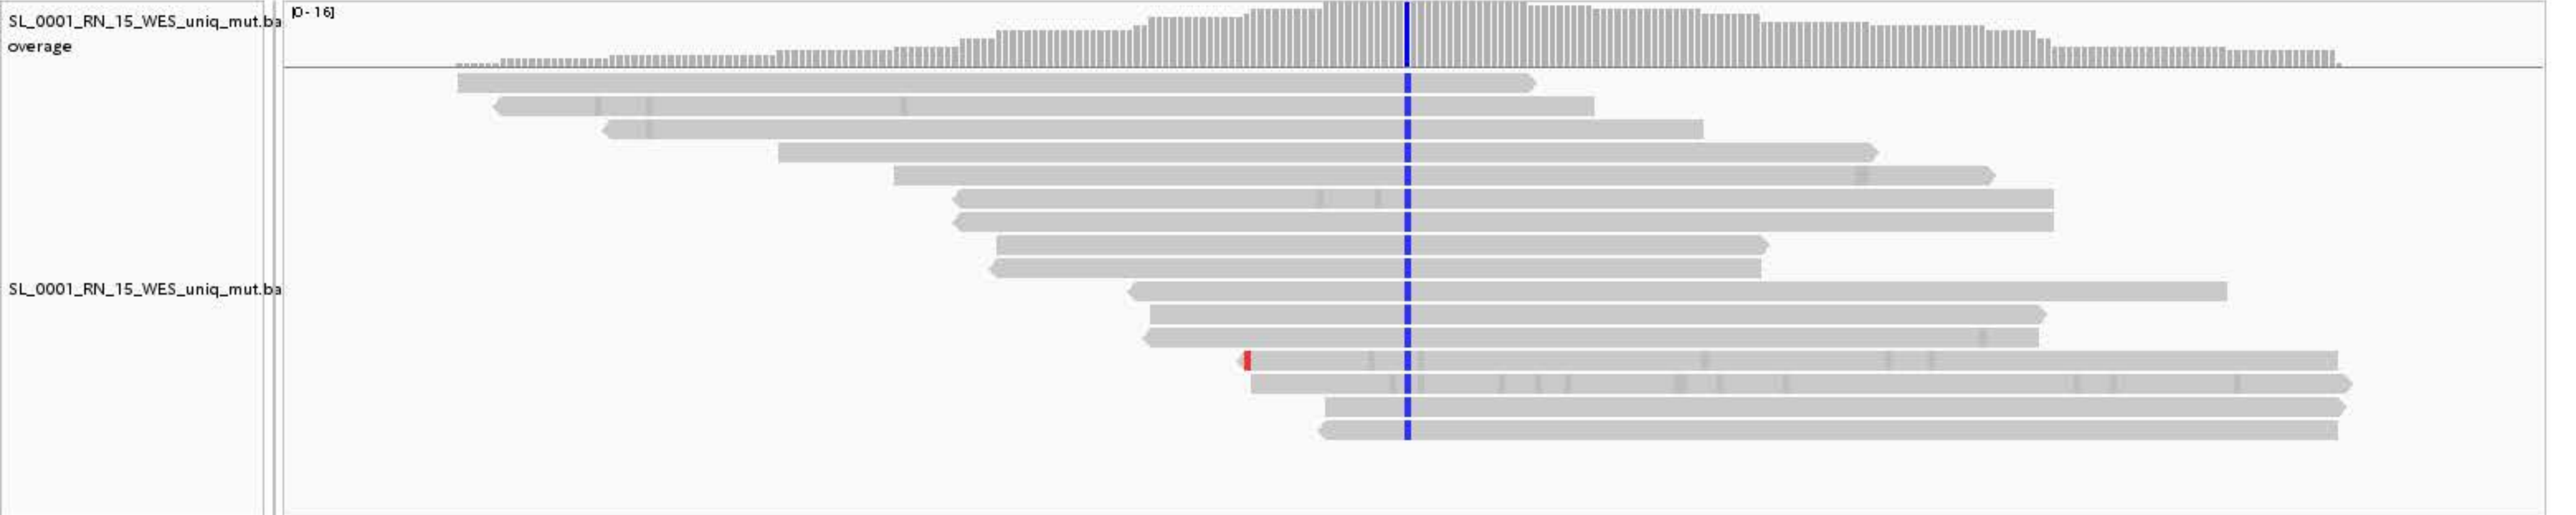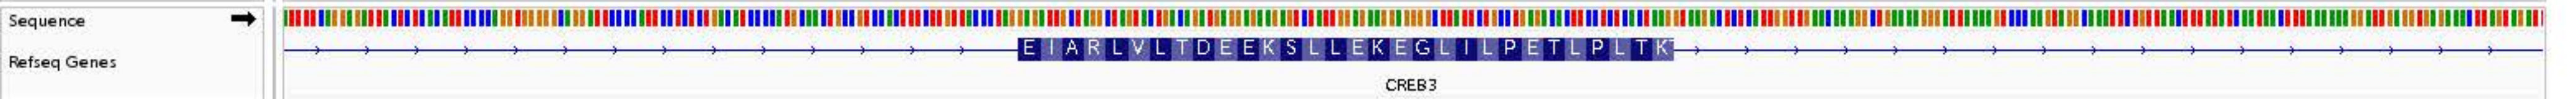



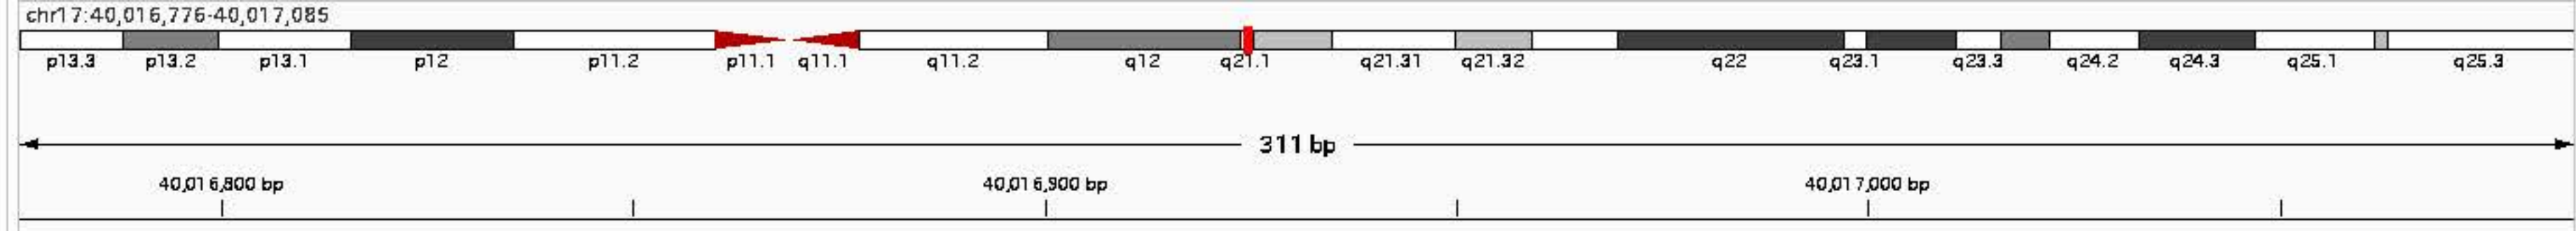

SL\_0007\_RN\_2\_WES\_uniq\_mut.ba  
verage

SL\_0007\_RN\_2\_WES\_uniq\_mut.ba

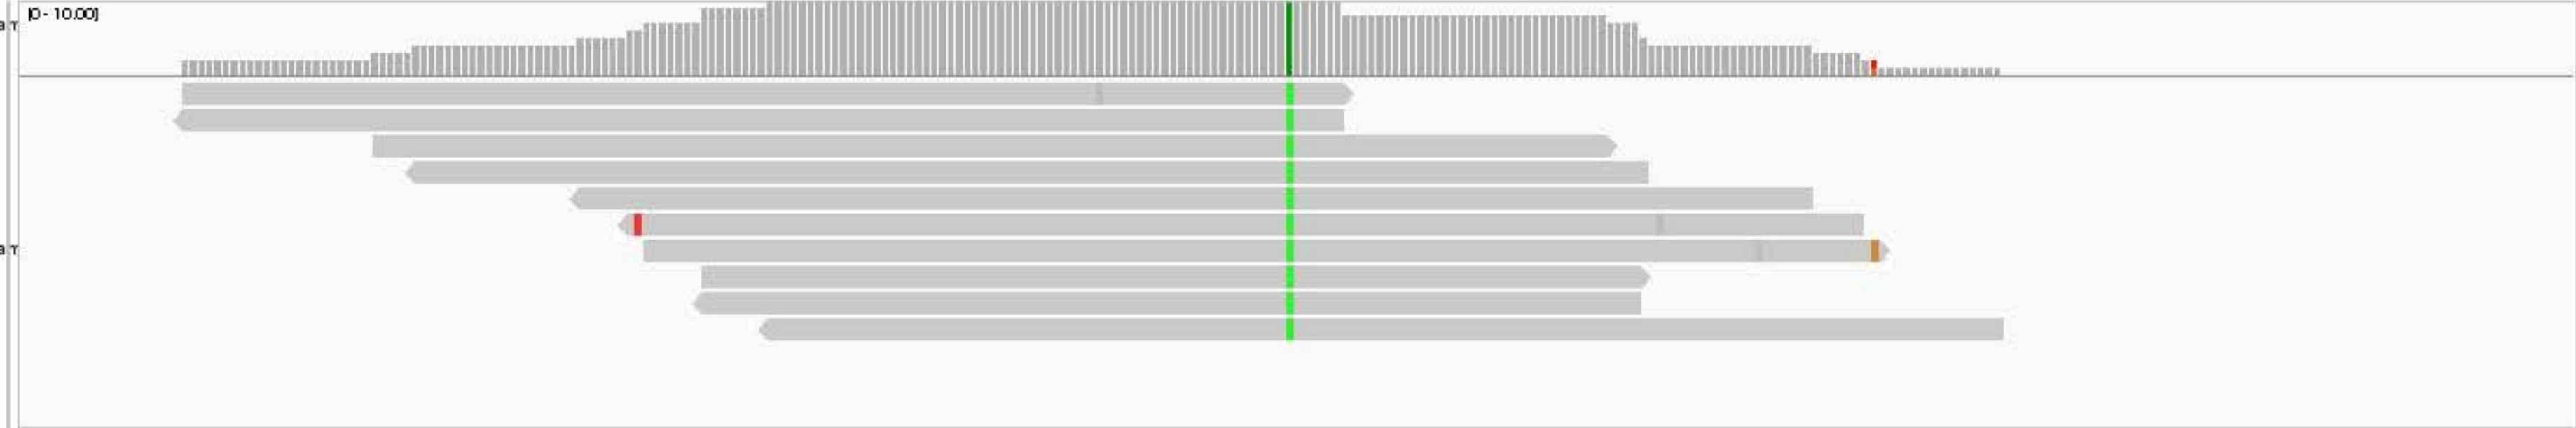

Sequence →

Refseq Genes

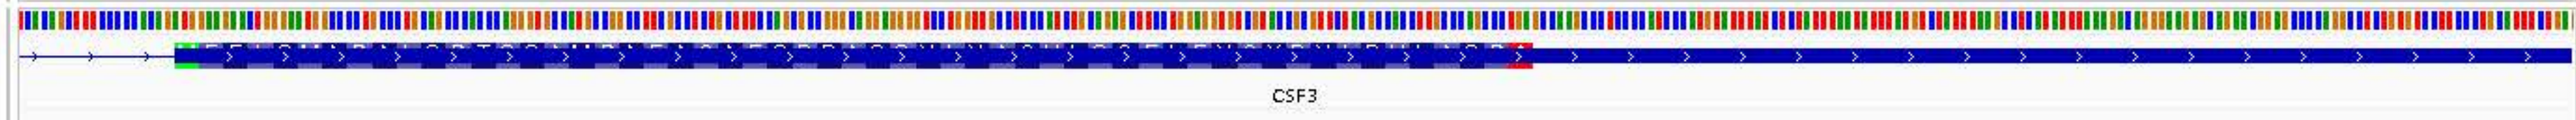

chrX:120,974,006-120,974,315  
p22.32 p22.2 p22.13 p22.11 p21.2 p11.4 p11.3 p11.22 p11.1 q11.2 q13.1 q13.3 q21.1 q21.2 q21.32 q22.1 q22.3 q23 q24 q25 q26.1 q26.3 q27.2 q28

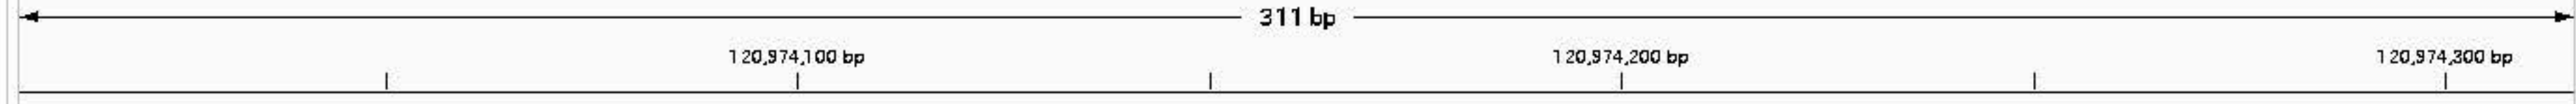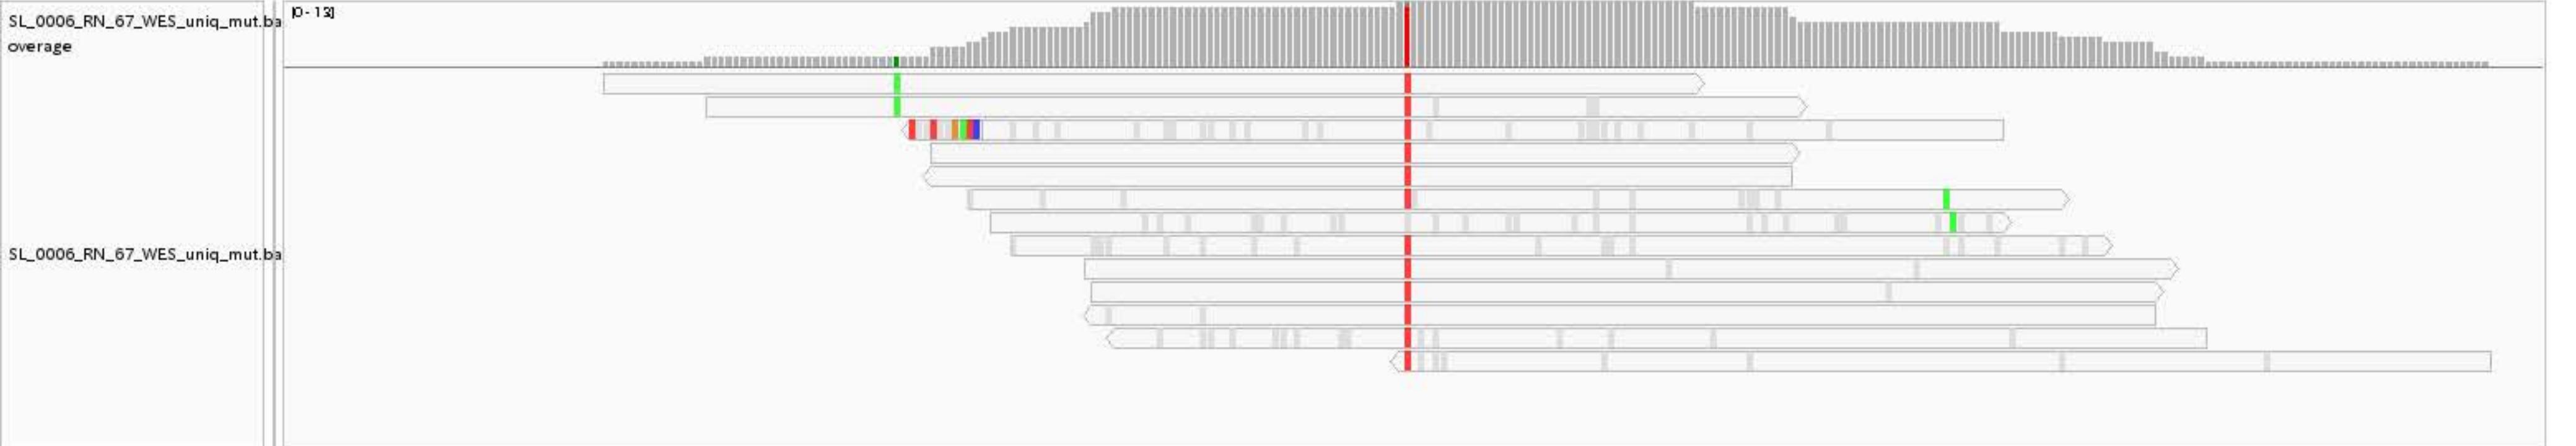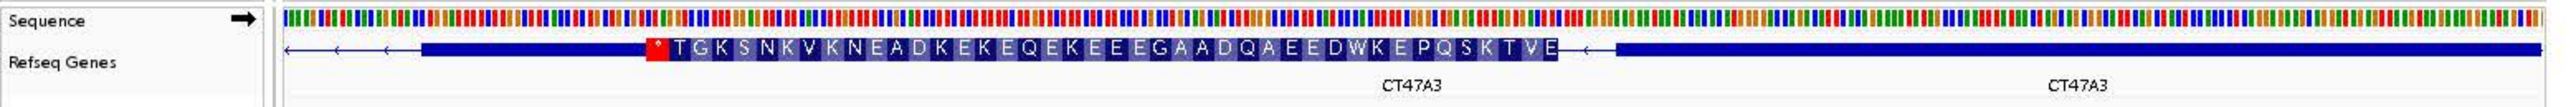

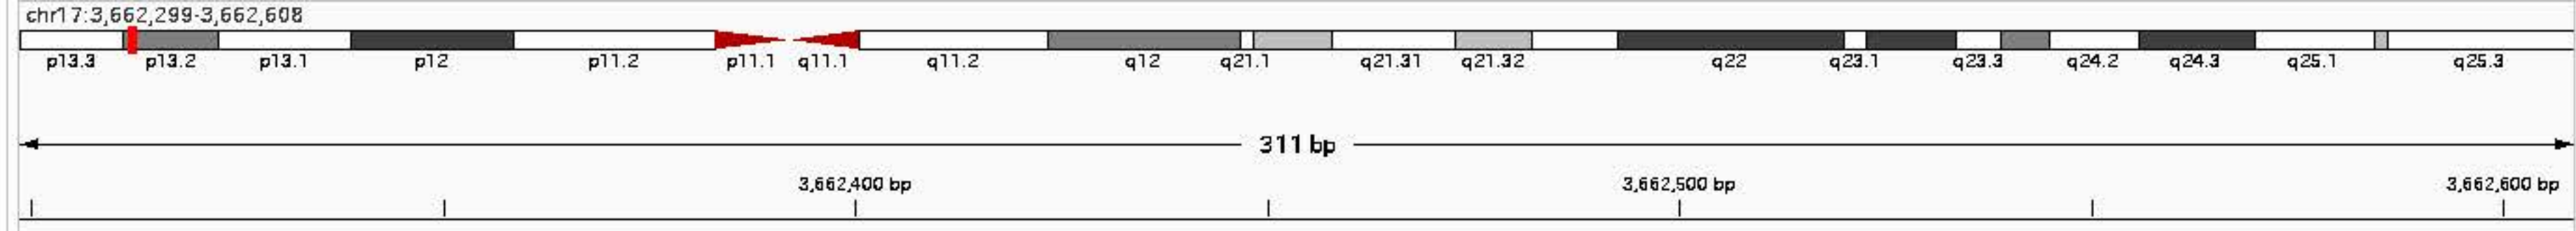

SL\_0006\_RN\_67\_WES\_uniq\_mut.ba  
coverage

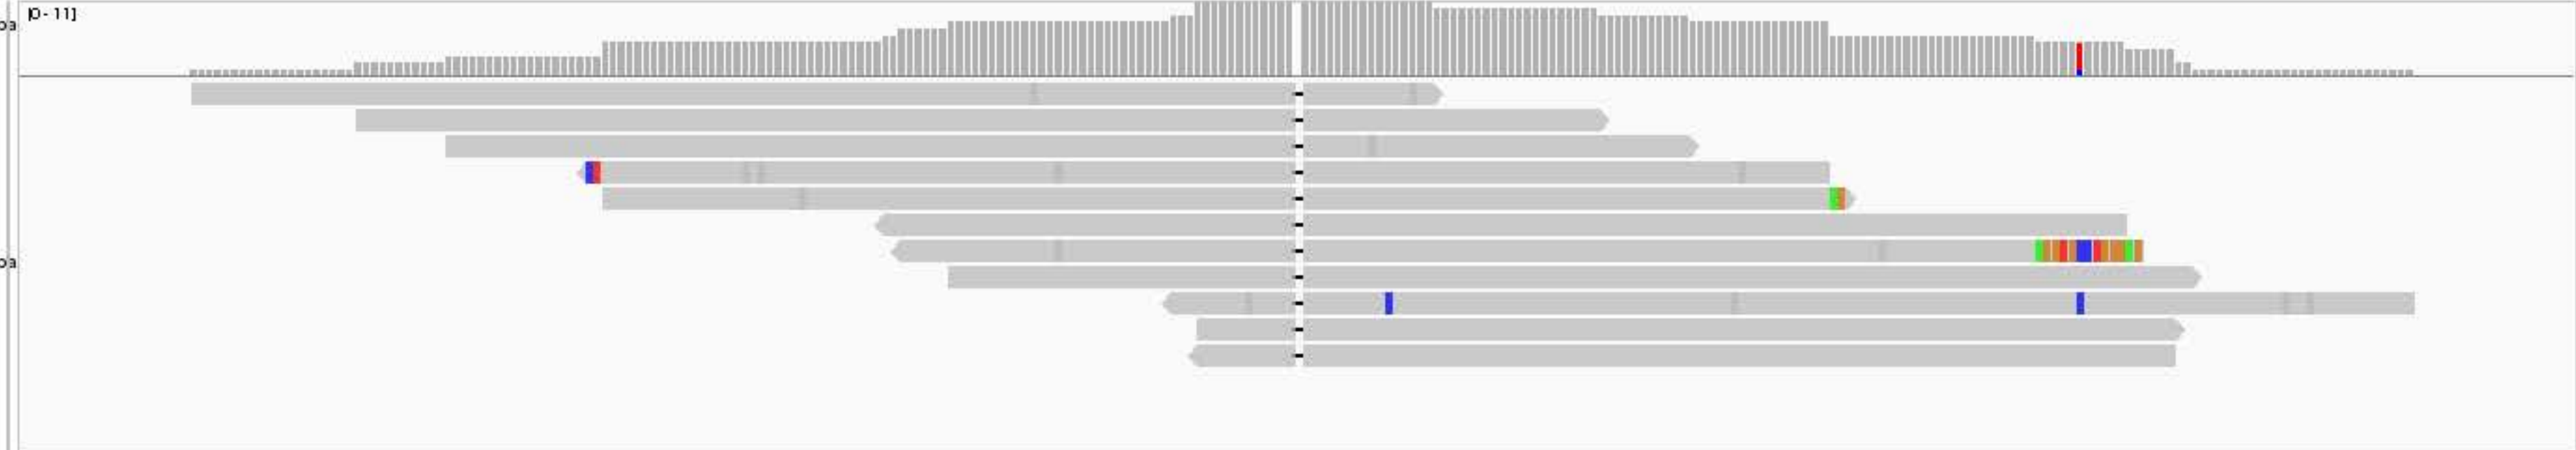

SL\_0006\_RN\_67\_WES\_uniq\_mut.ba

Sequence

Refseq Genes

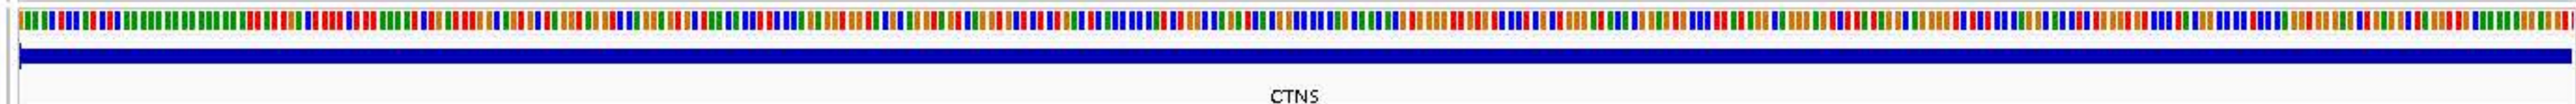



chr18: 53,402,686-53,402,995

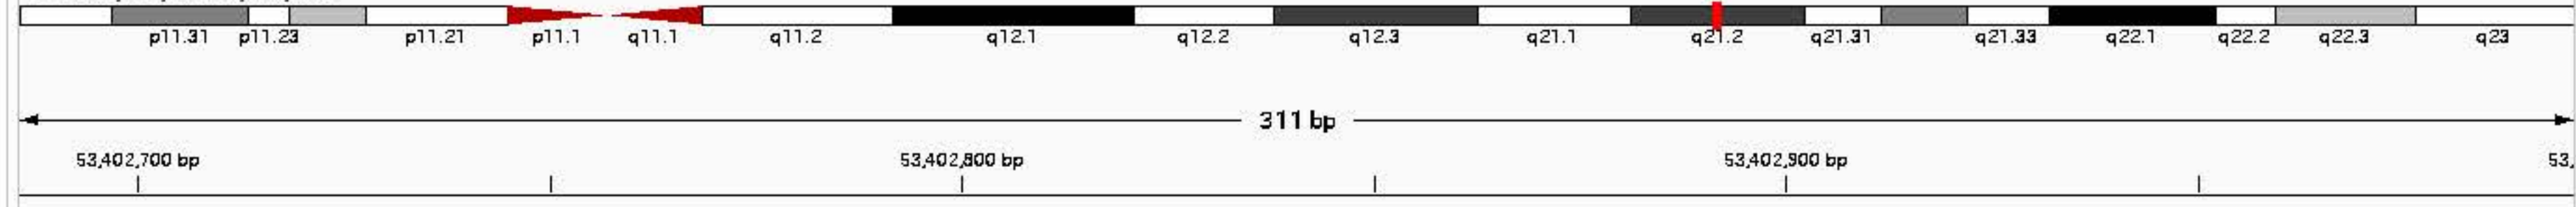

SL\_0001\_RN\_31\_WES\_uniq\_mut.ba  
coverage

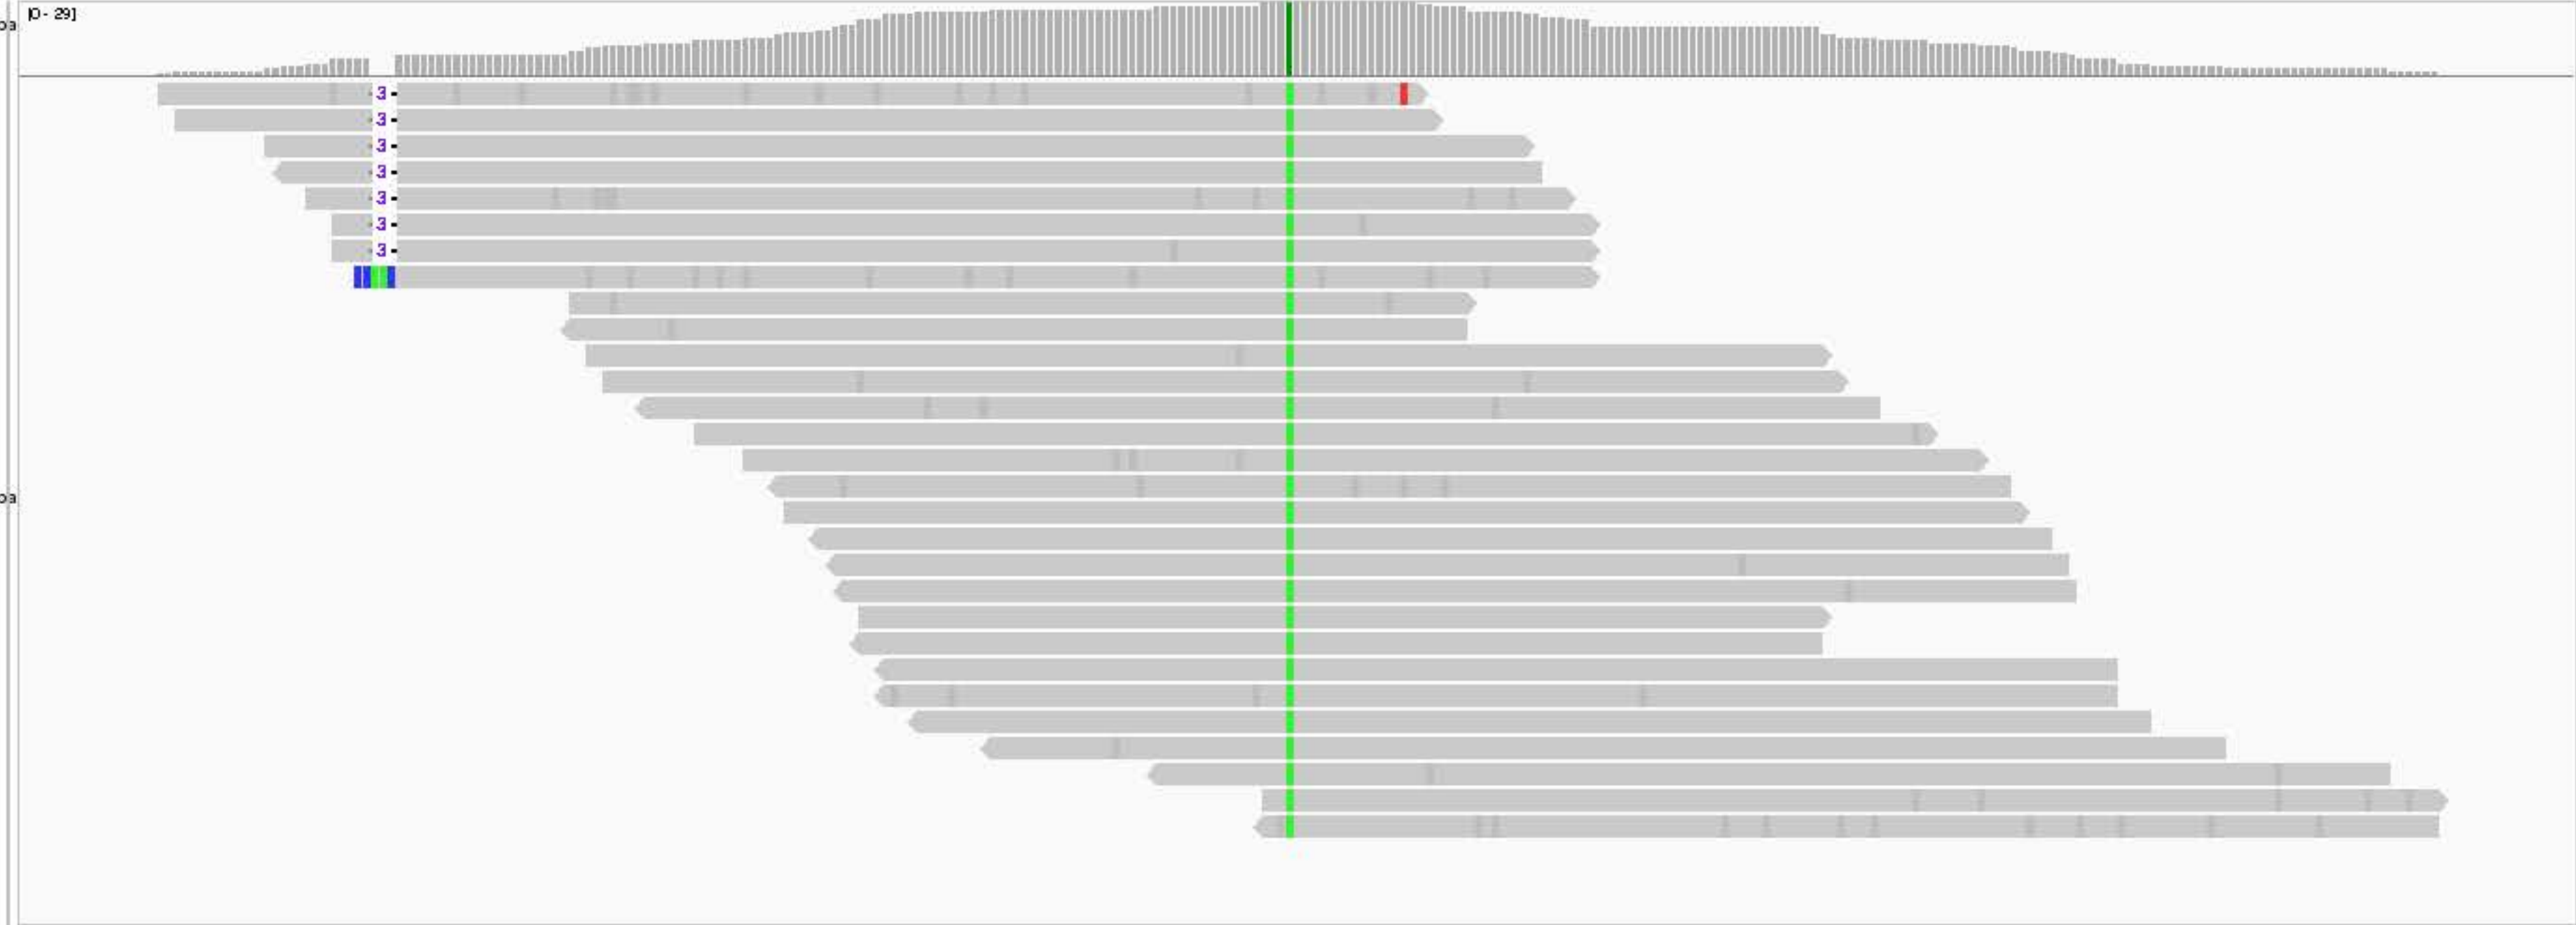

SL\_0001\_RN\_31\_WES\_uniq\_mut.ba

Sequence

Refseq Genes

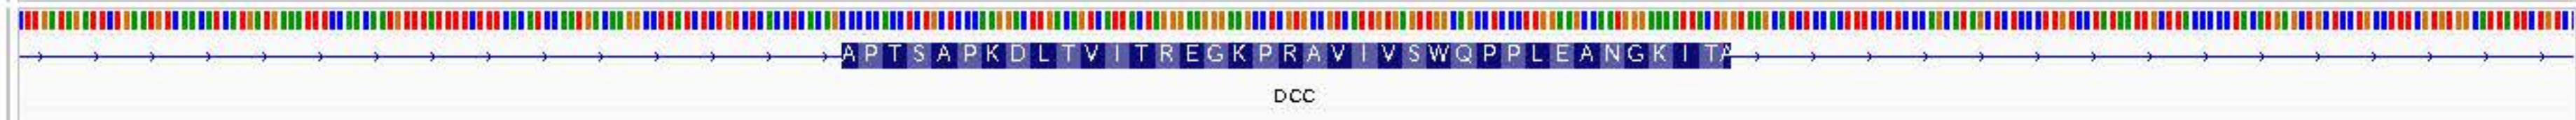

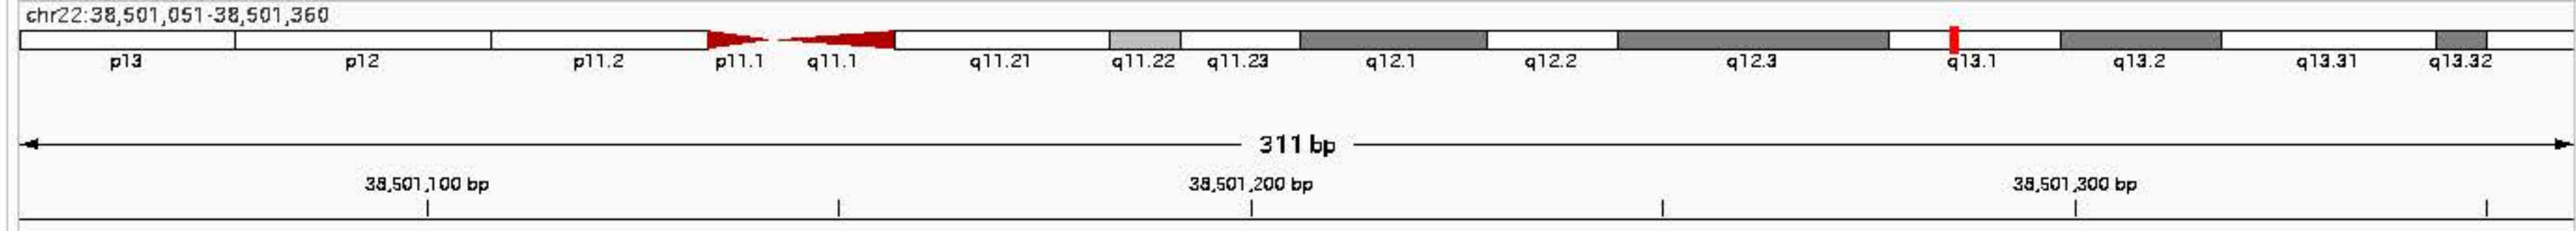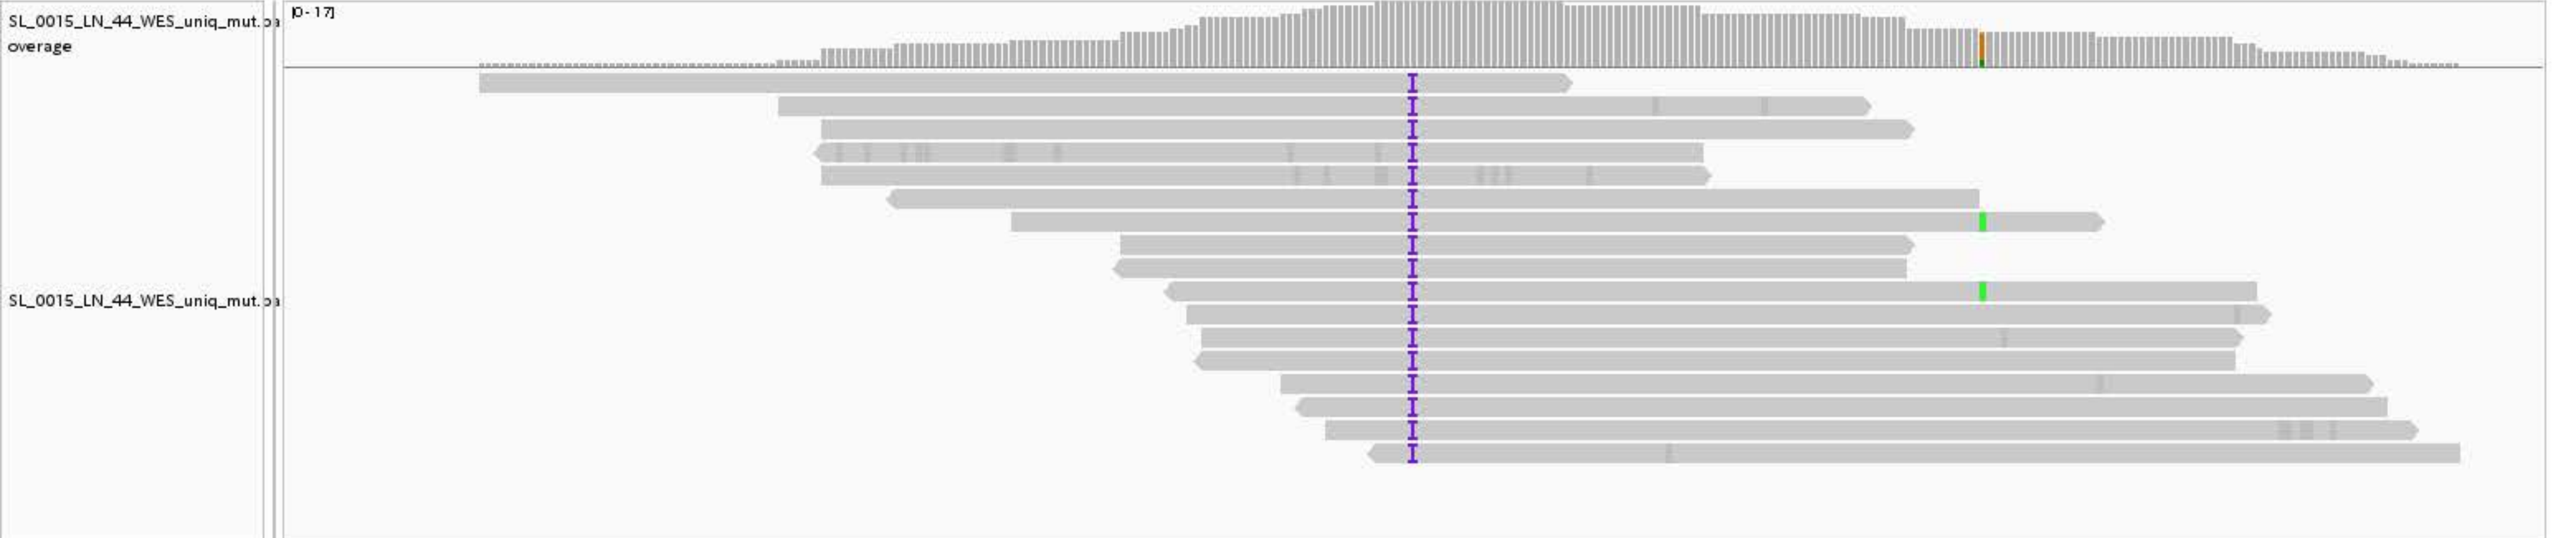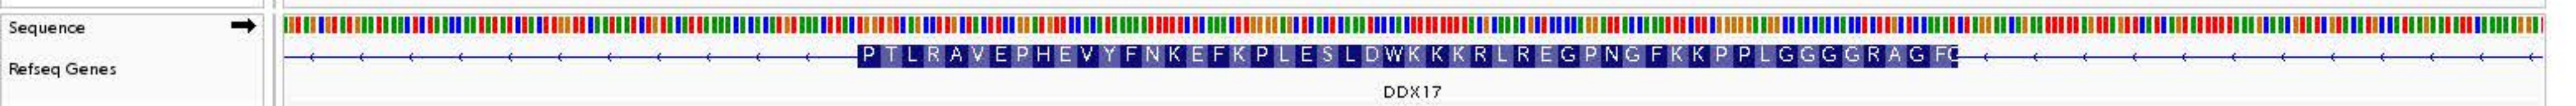

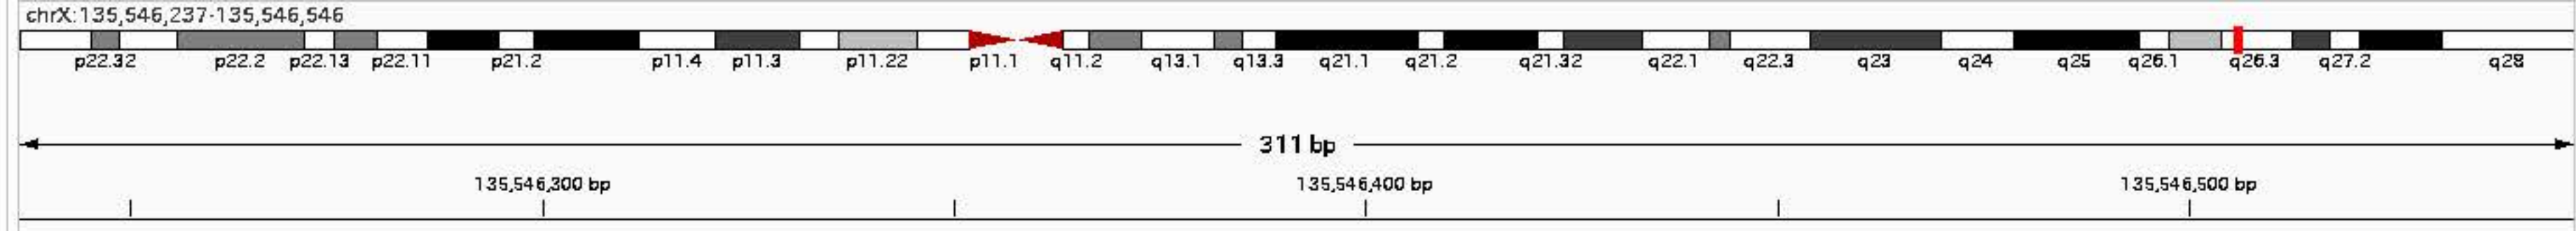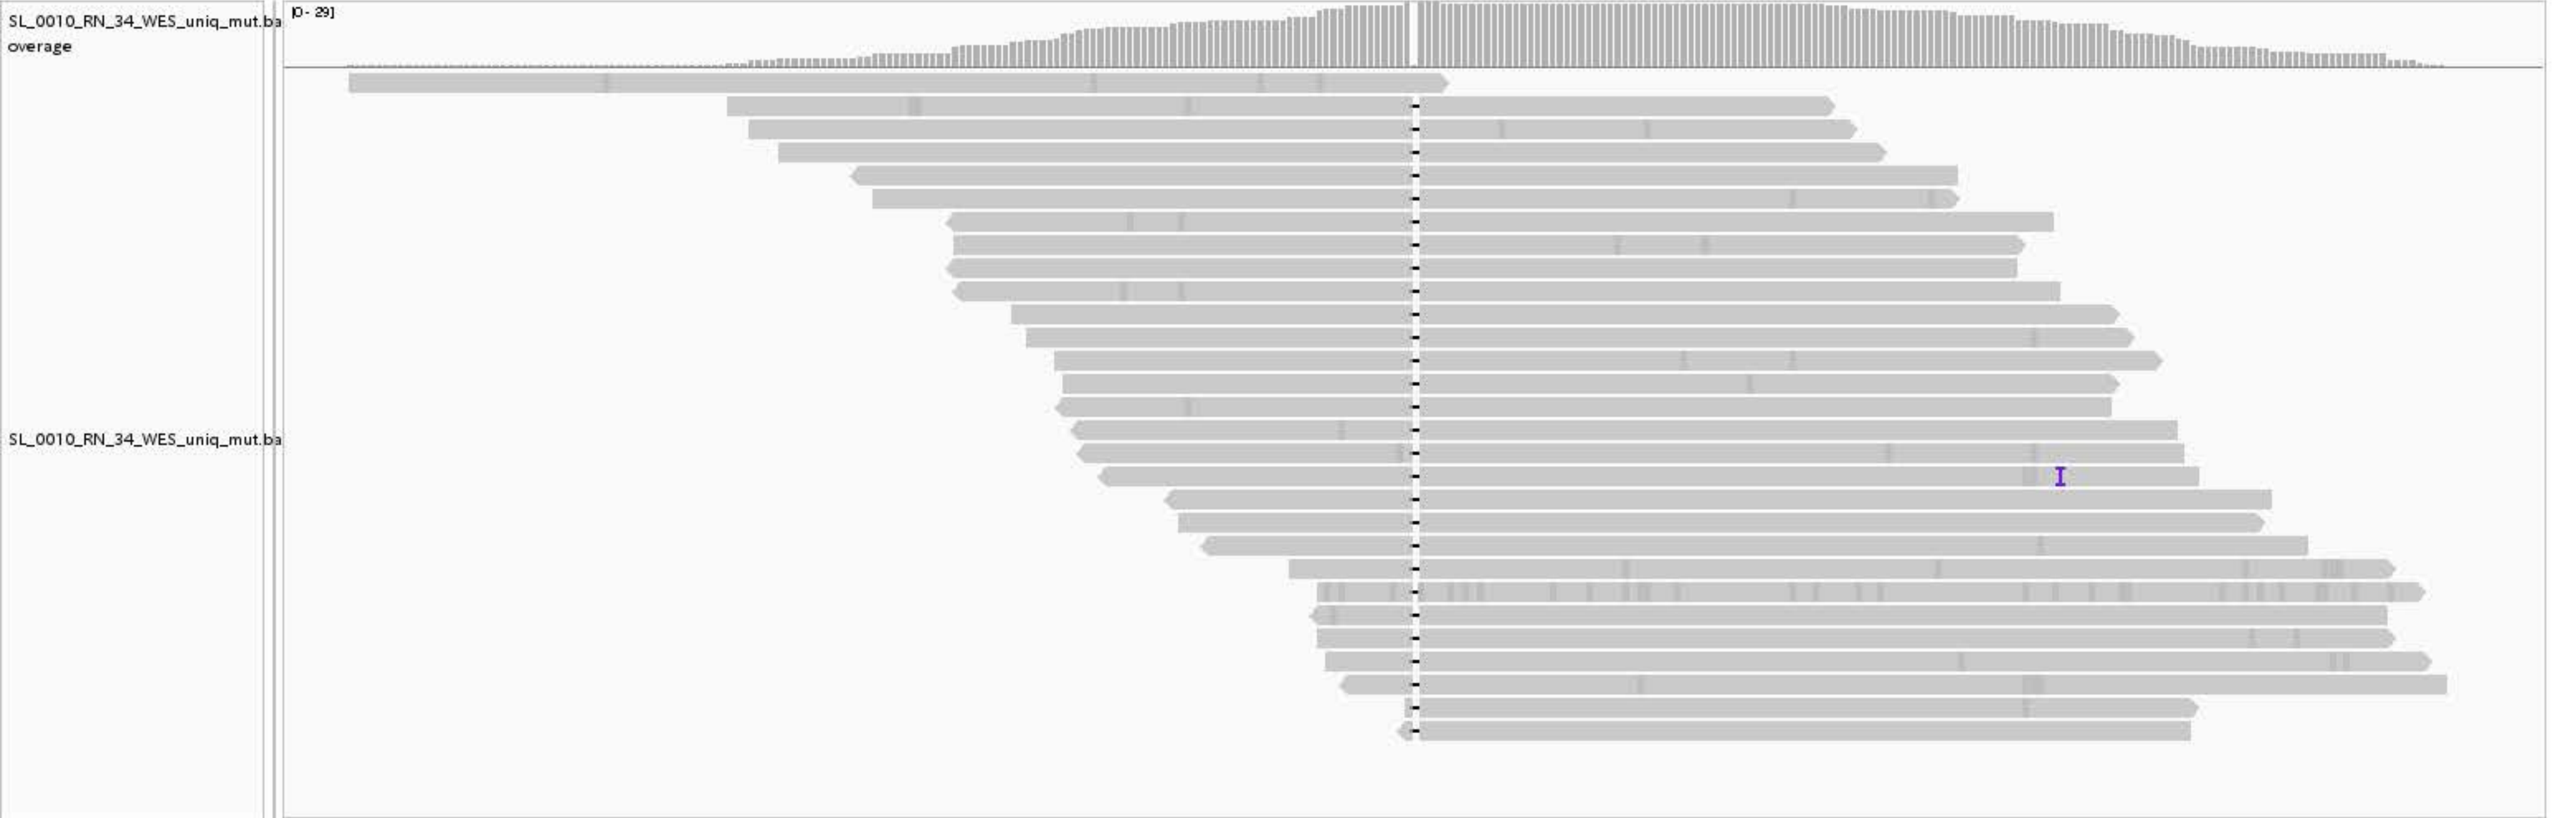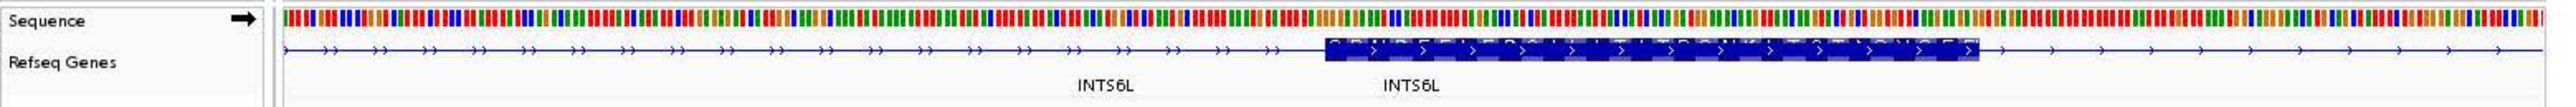



chr17:37,633,243-37,633,552

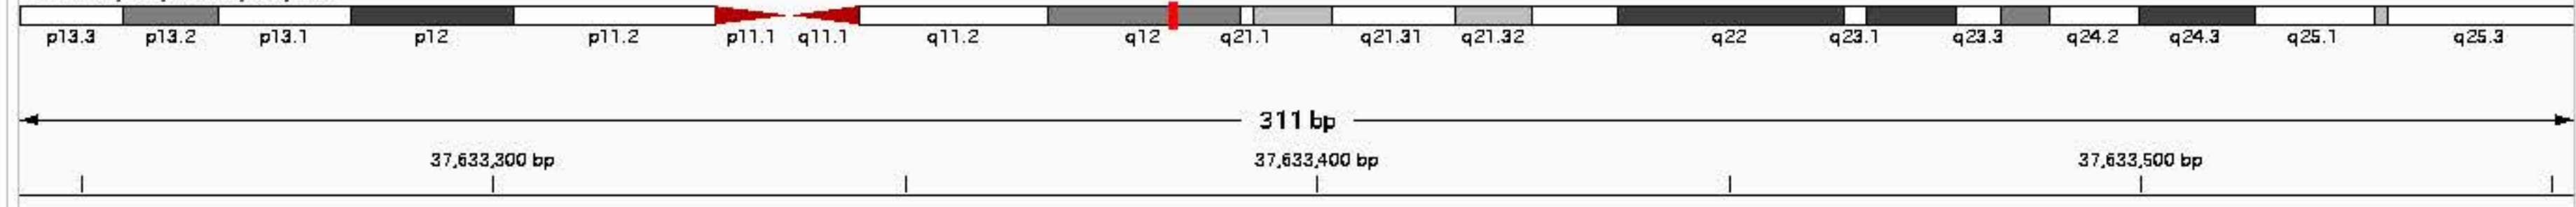

SL\_0004\_RN\_24\_WES\_uniq\_mut.ba  
coverage

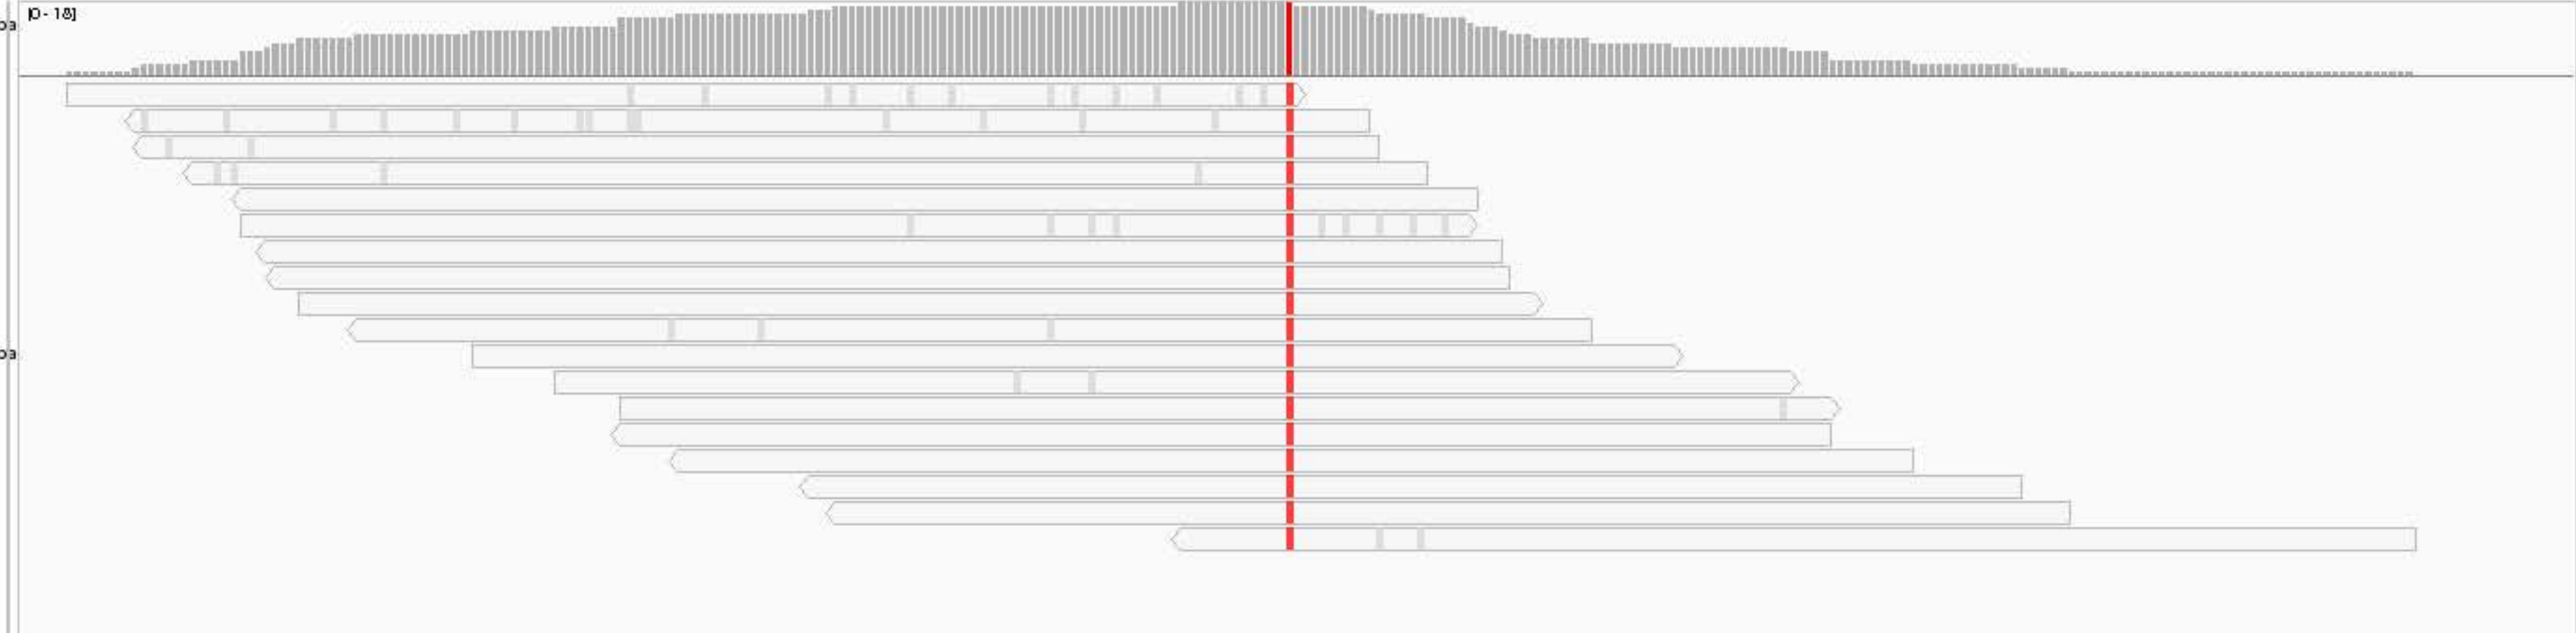

SL\_0004\_RN\_24\_WES\_uniq\_mut.ba

Sequence

Refseq Genes

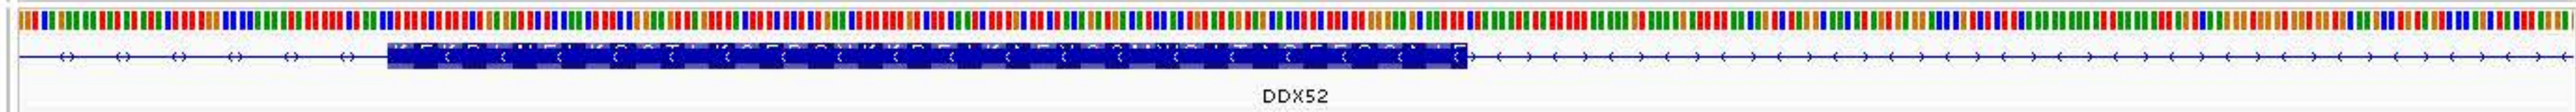

DDX52

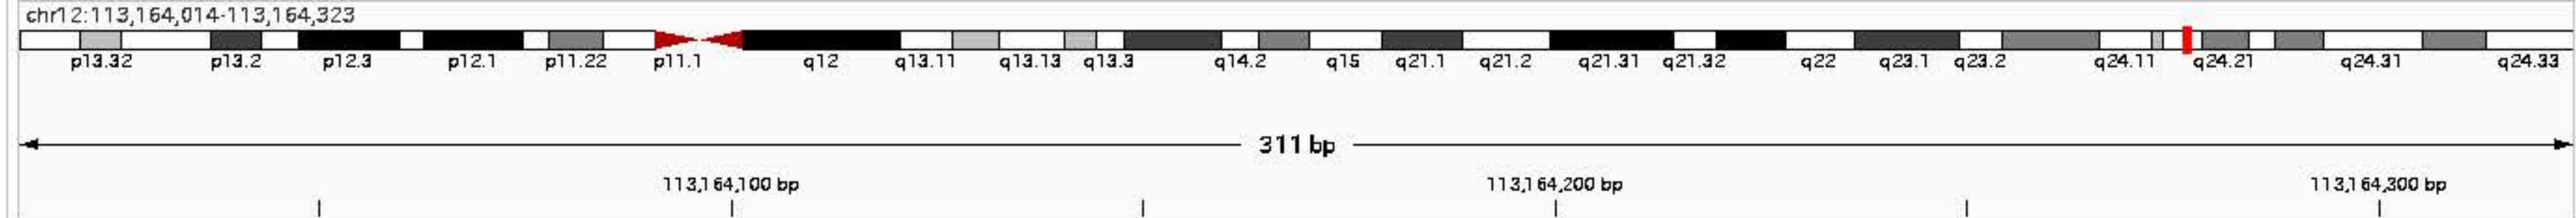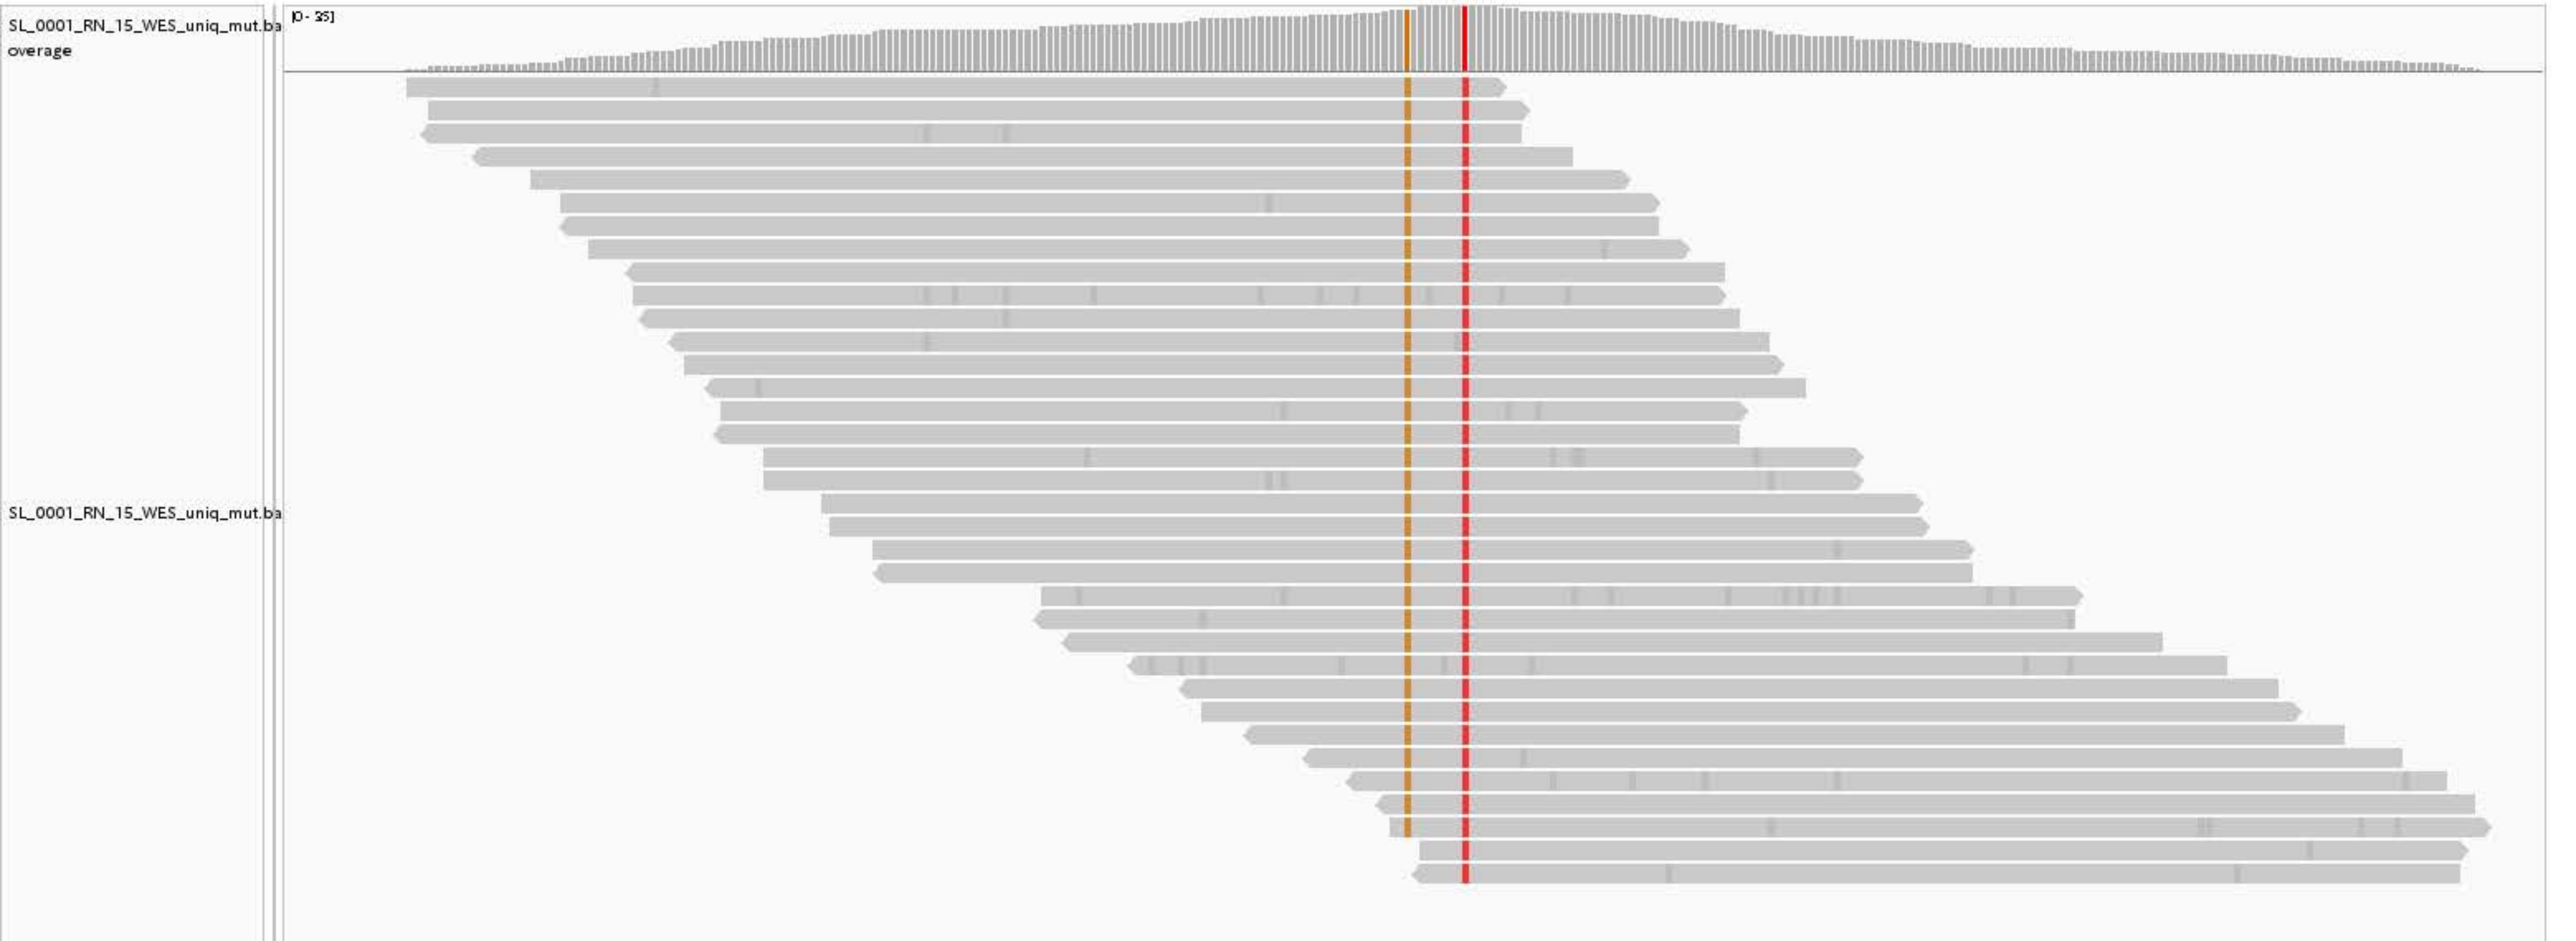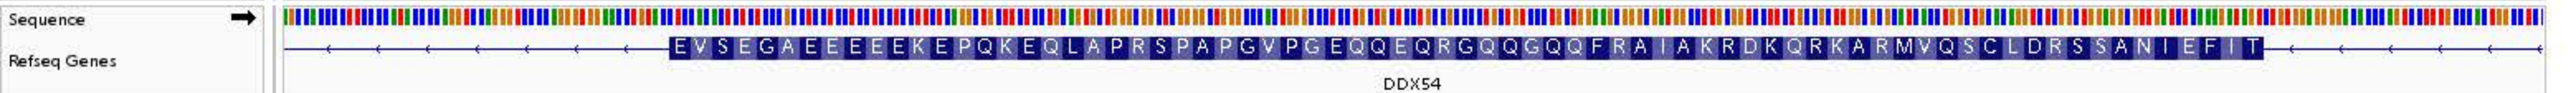

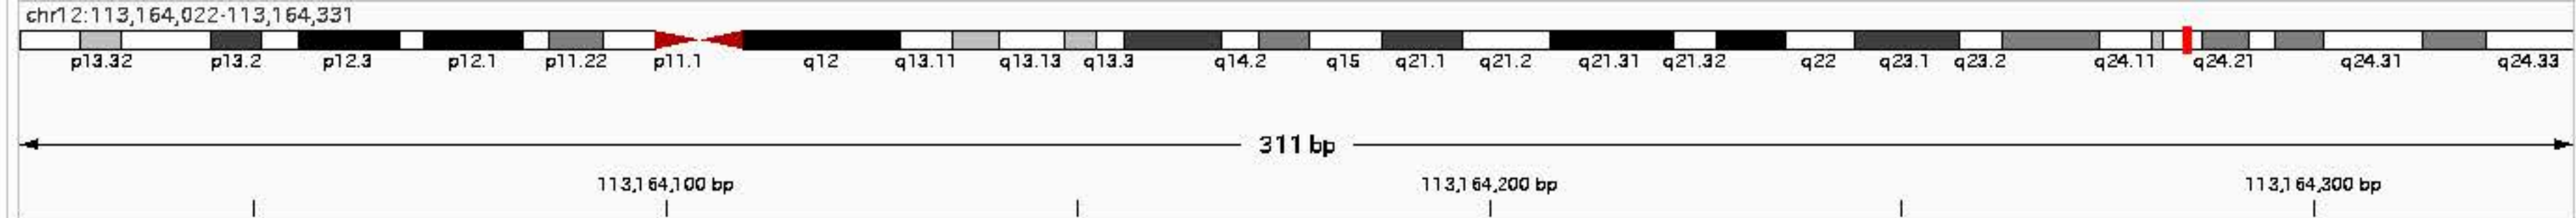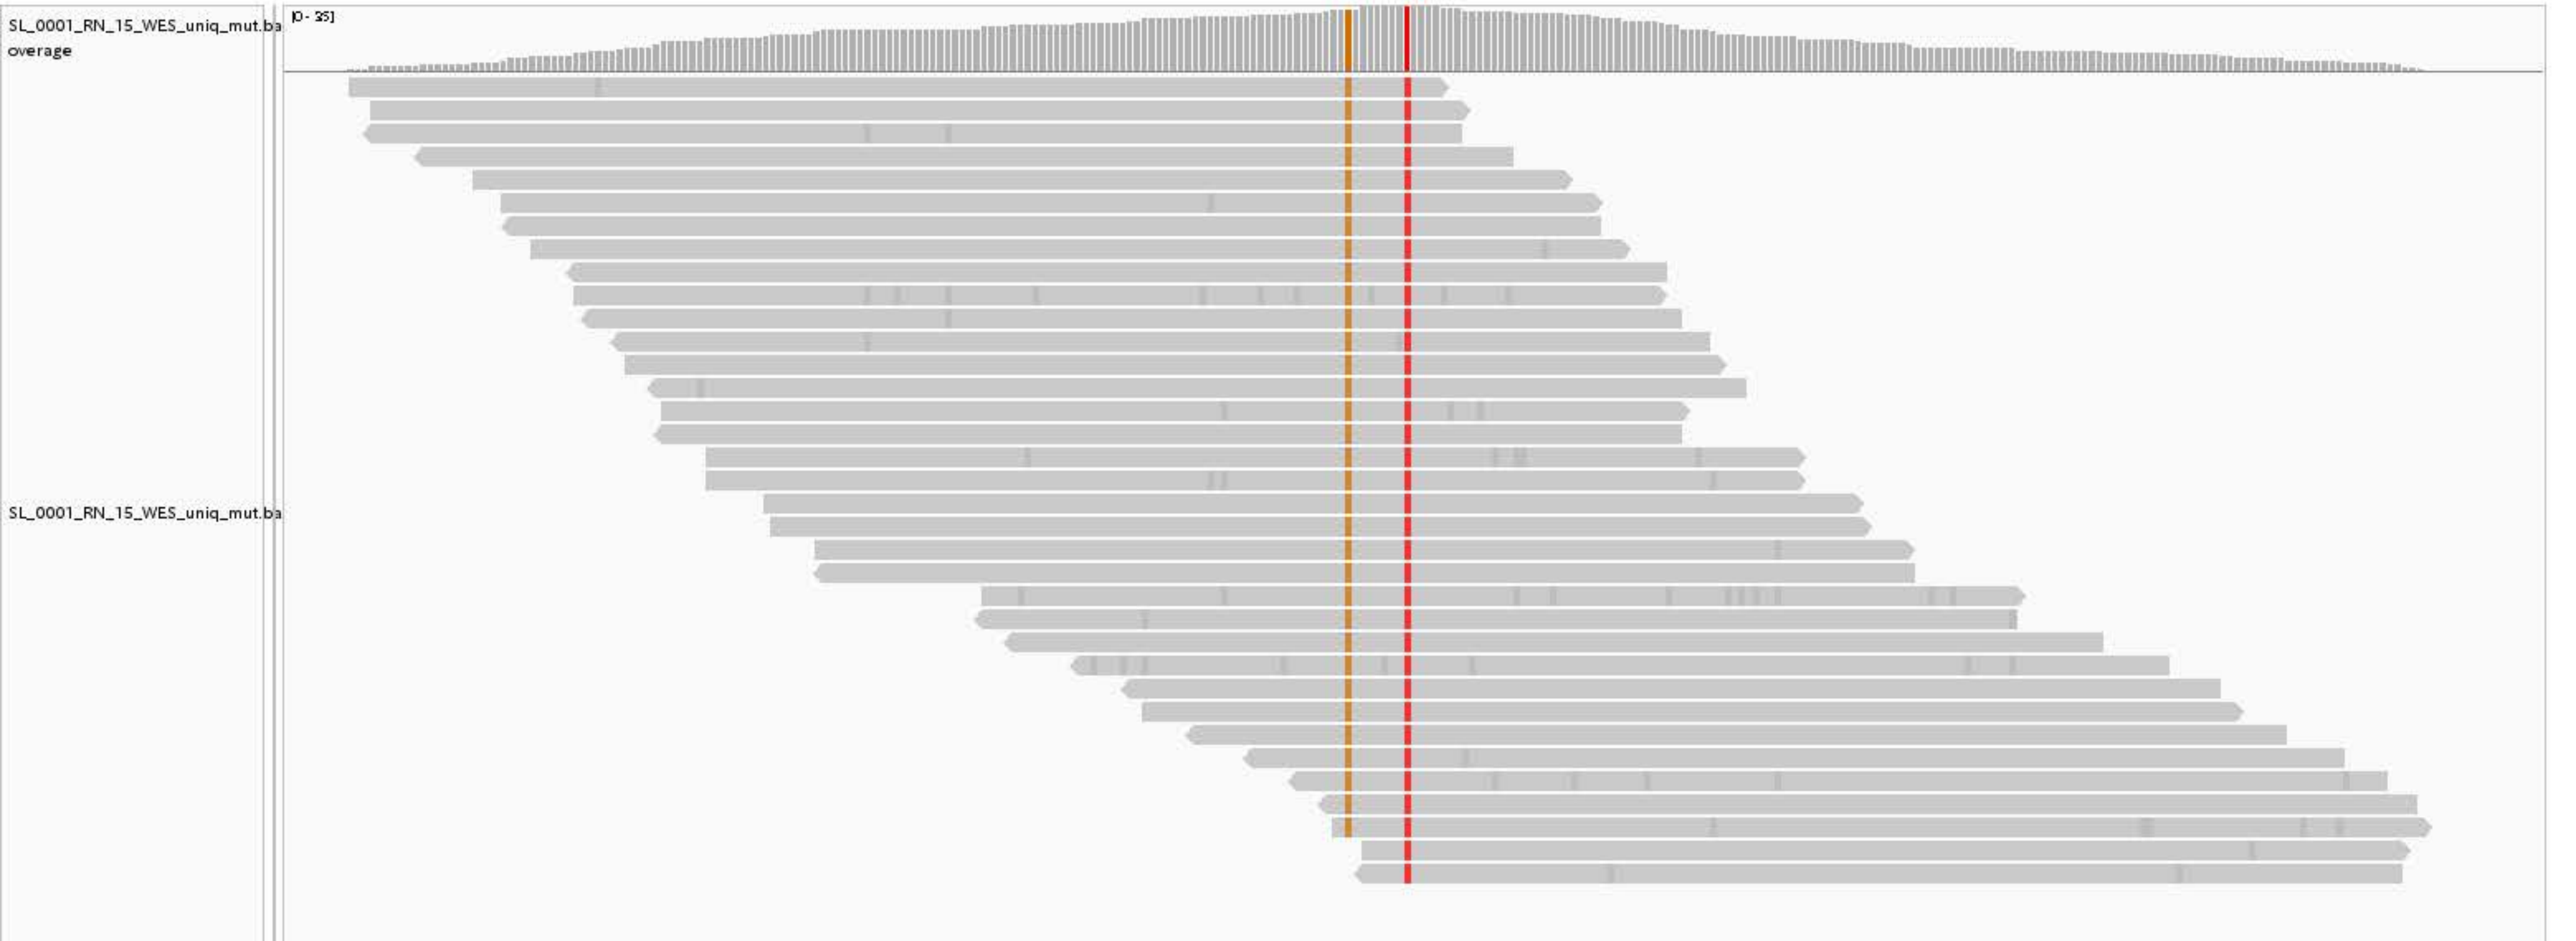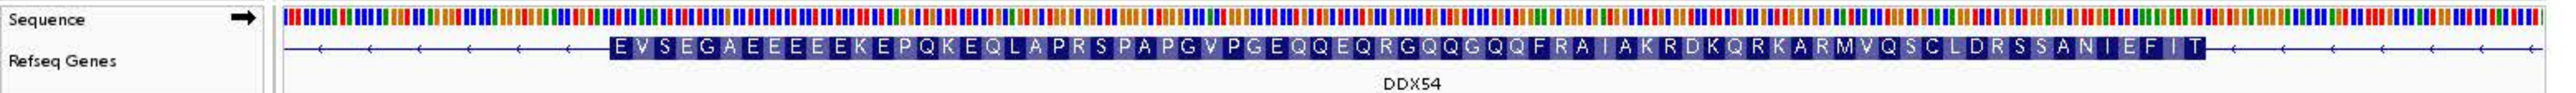



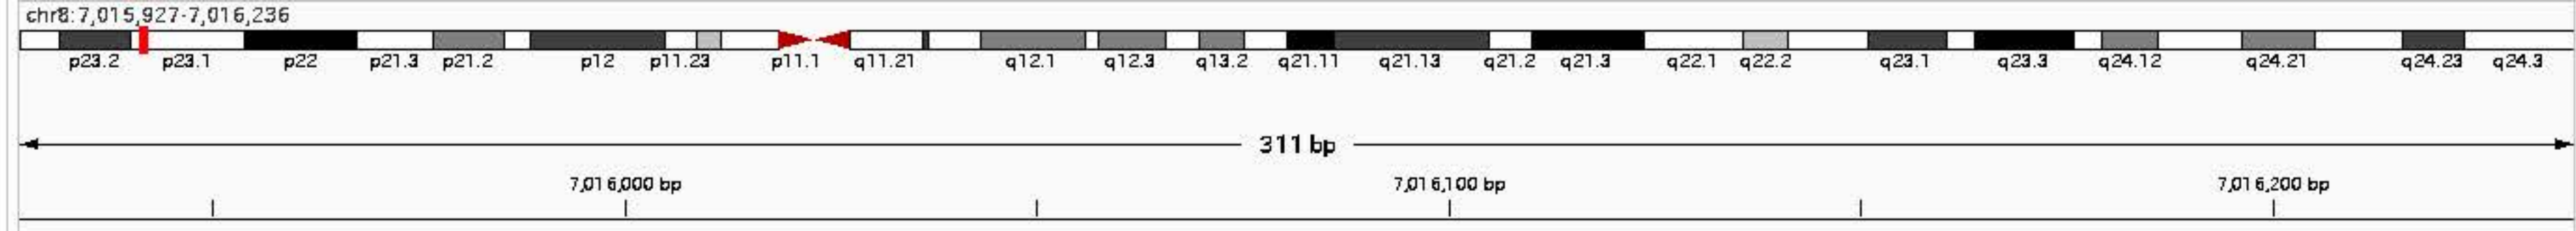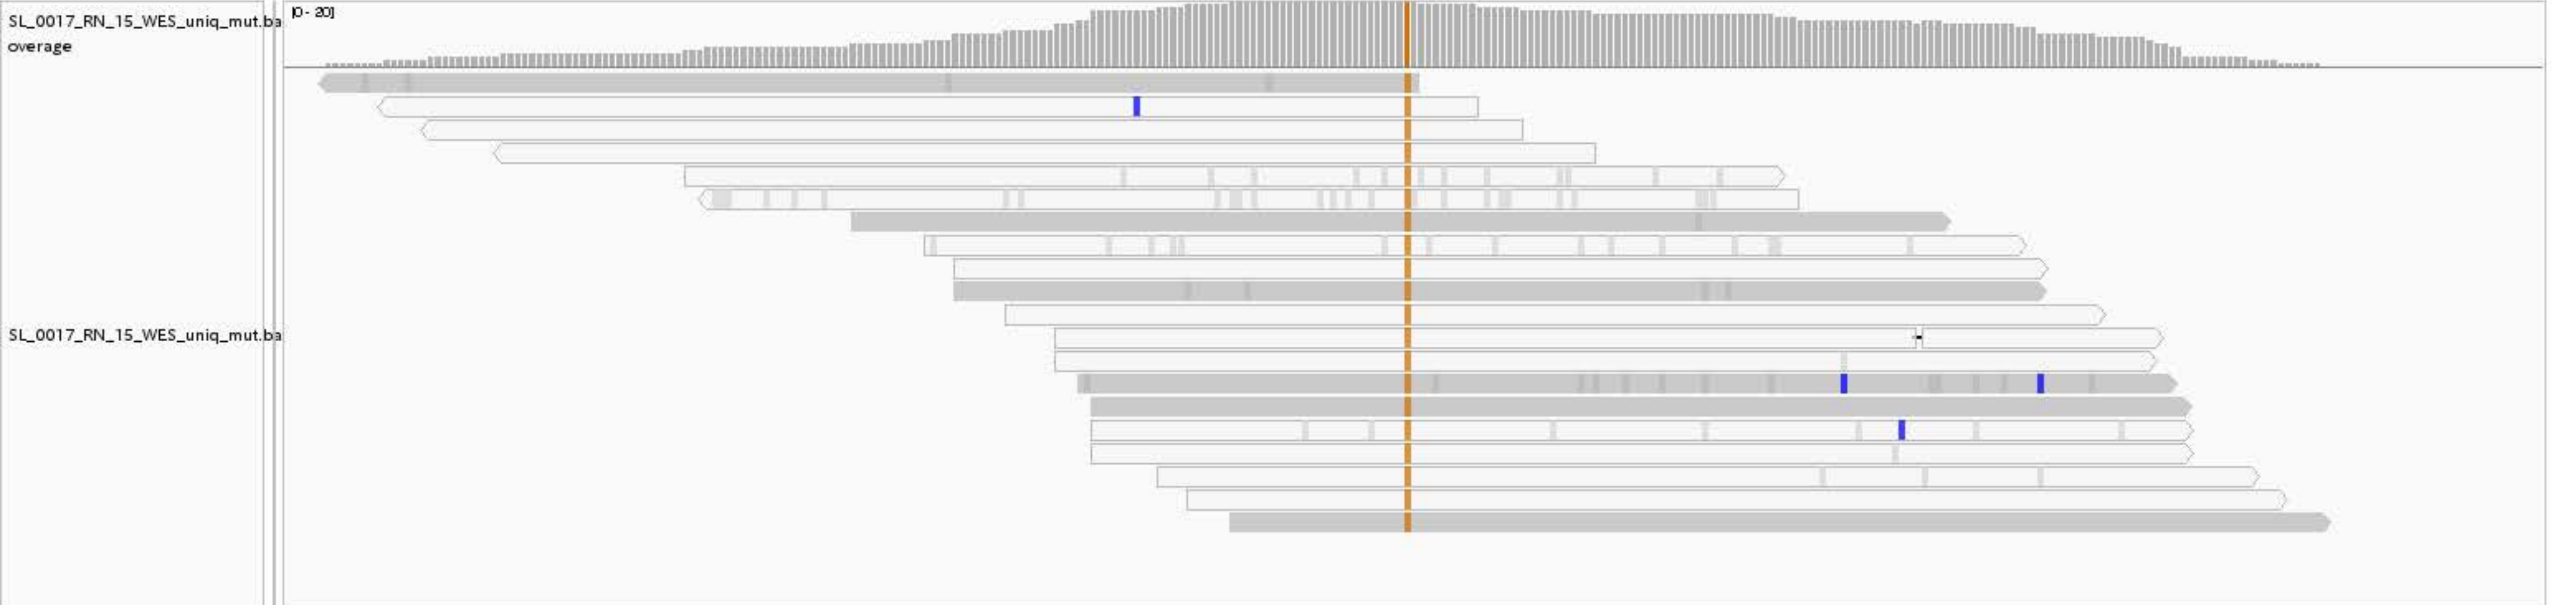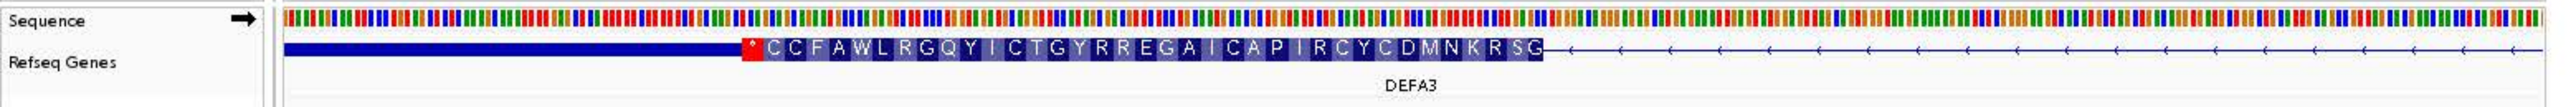

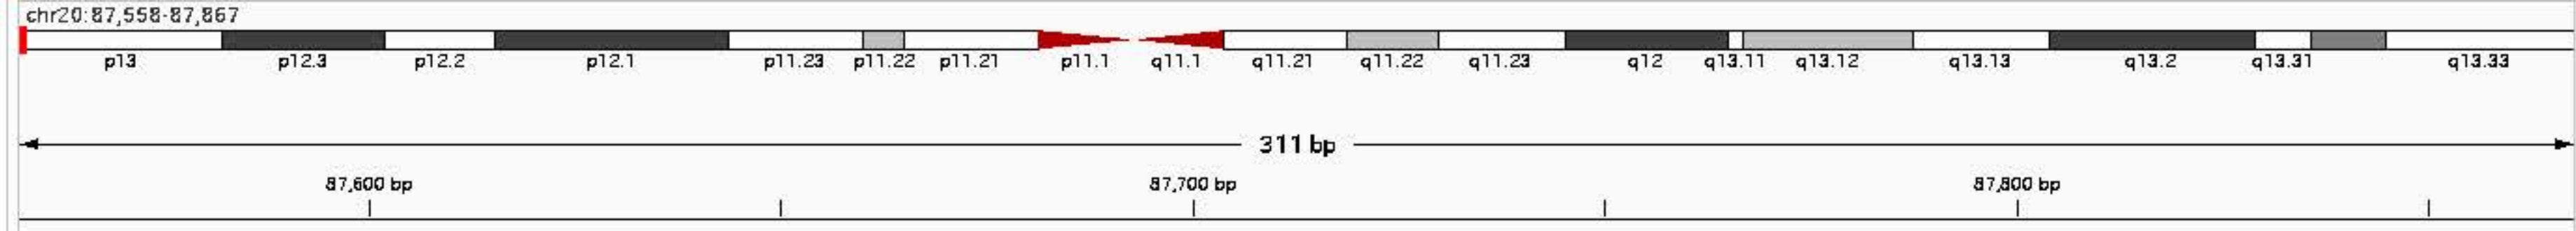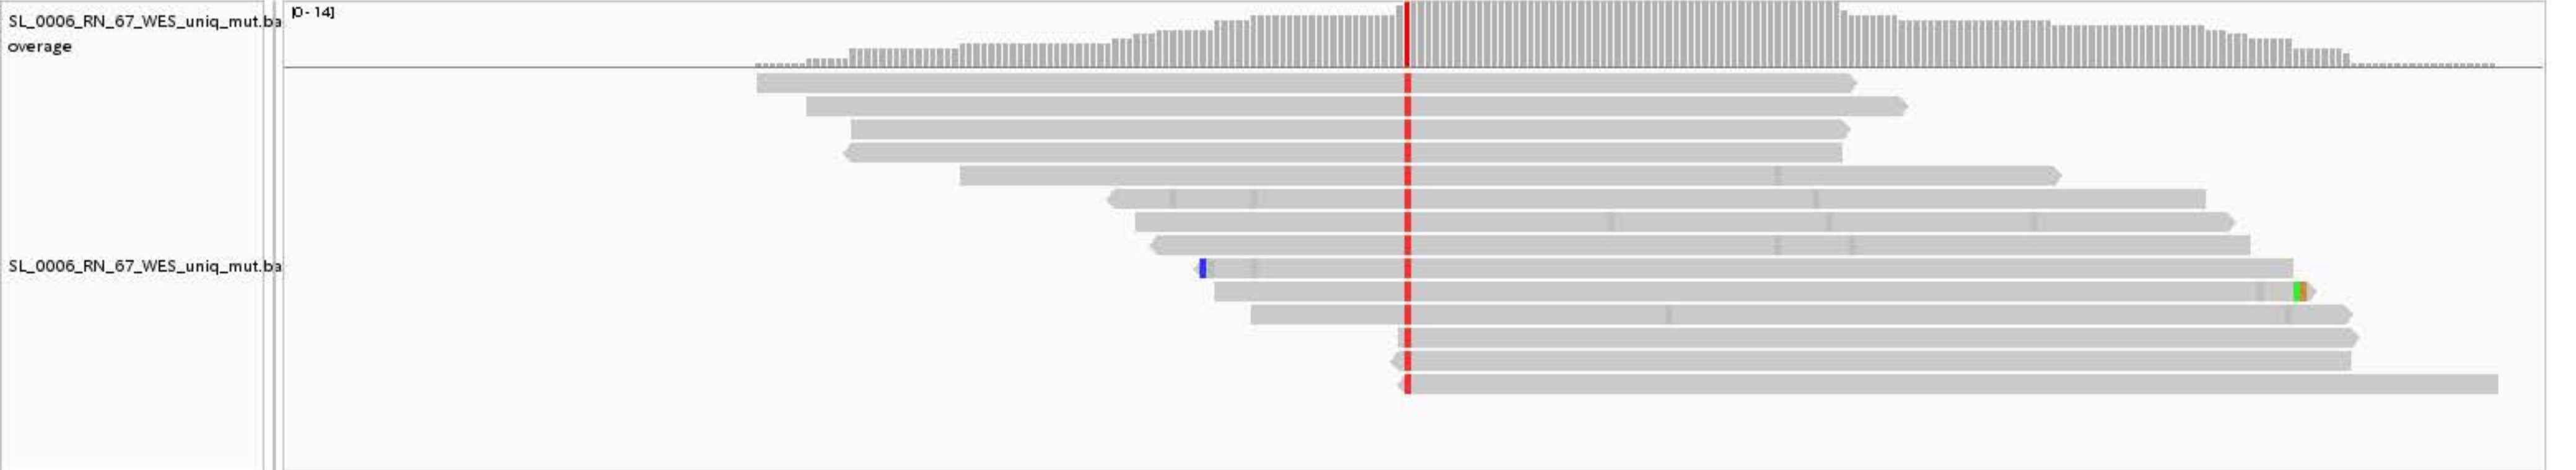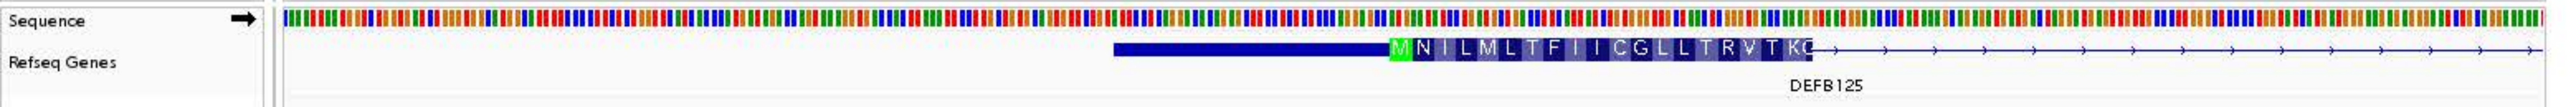

chr1: 54,849,879-54,850,188

p36.31 p36.21 p36.11 p35.1 p34.2 p33 p32.2 p31.3 p31.1 p22.3 p21.3 p21.1 p13.2 p11.2 q12 q21.1 q21.3 q23.2 q24.2 q25.2 q31.1 q31.3 q32.2 q41 q42.13 q43 q44

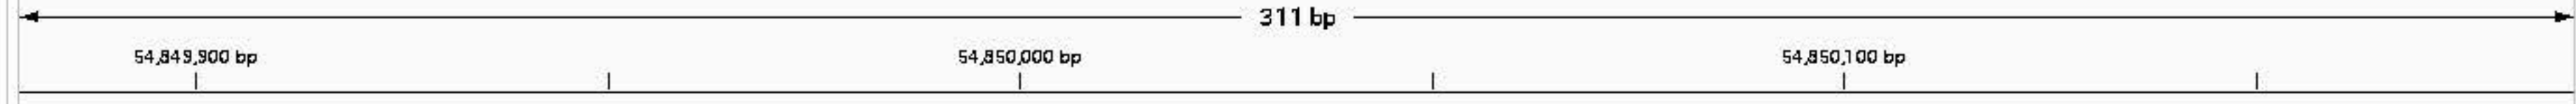

SL\_0004\_RN\_47\_WES\_uniq\_mut.ba  
coverage

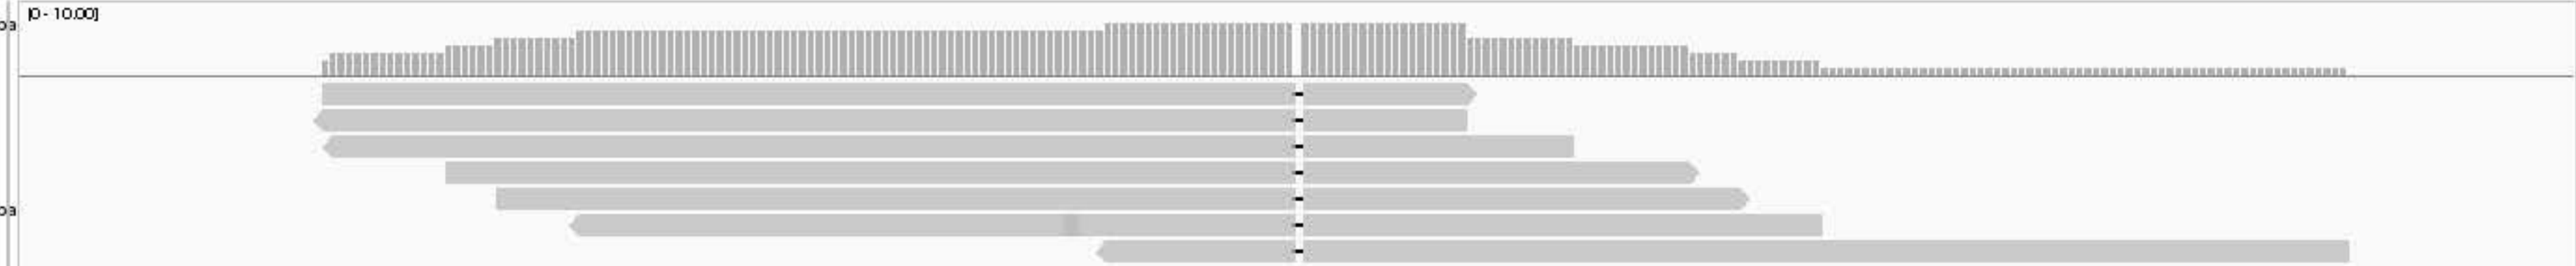

Sequence  
Refseq Genes

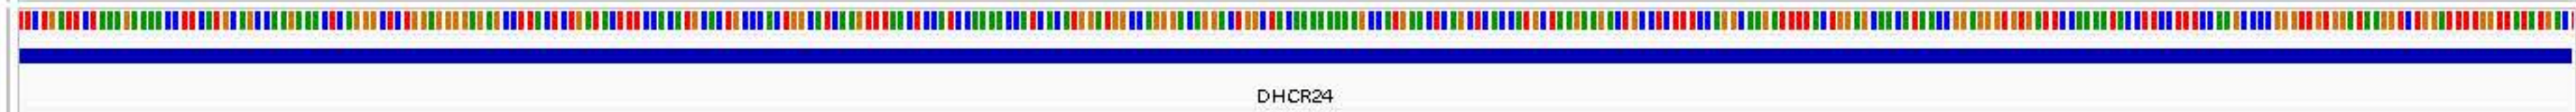



chr5:141,514,993-141,515,302

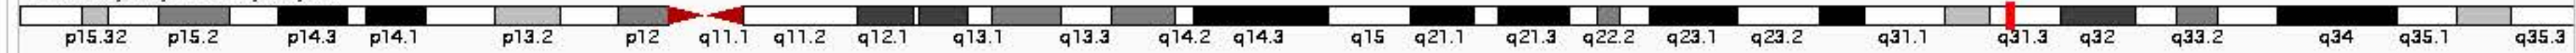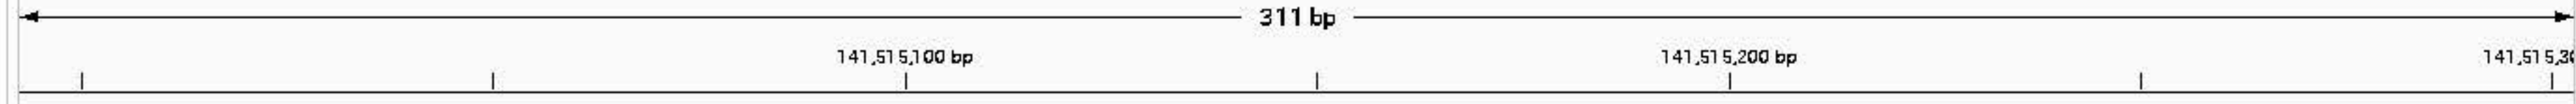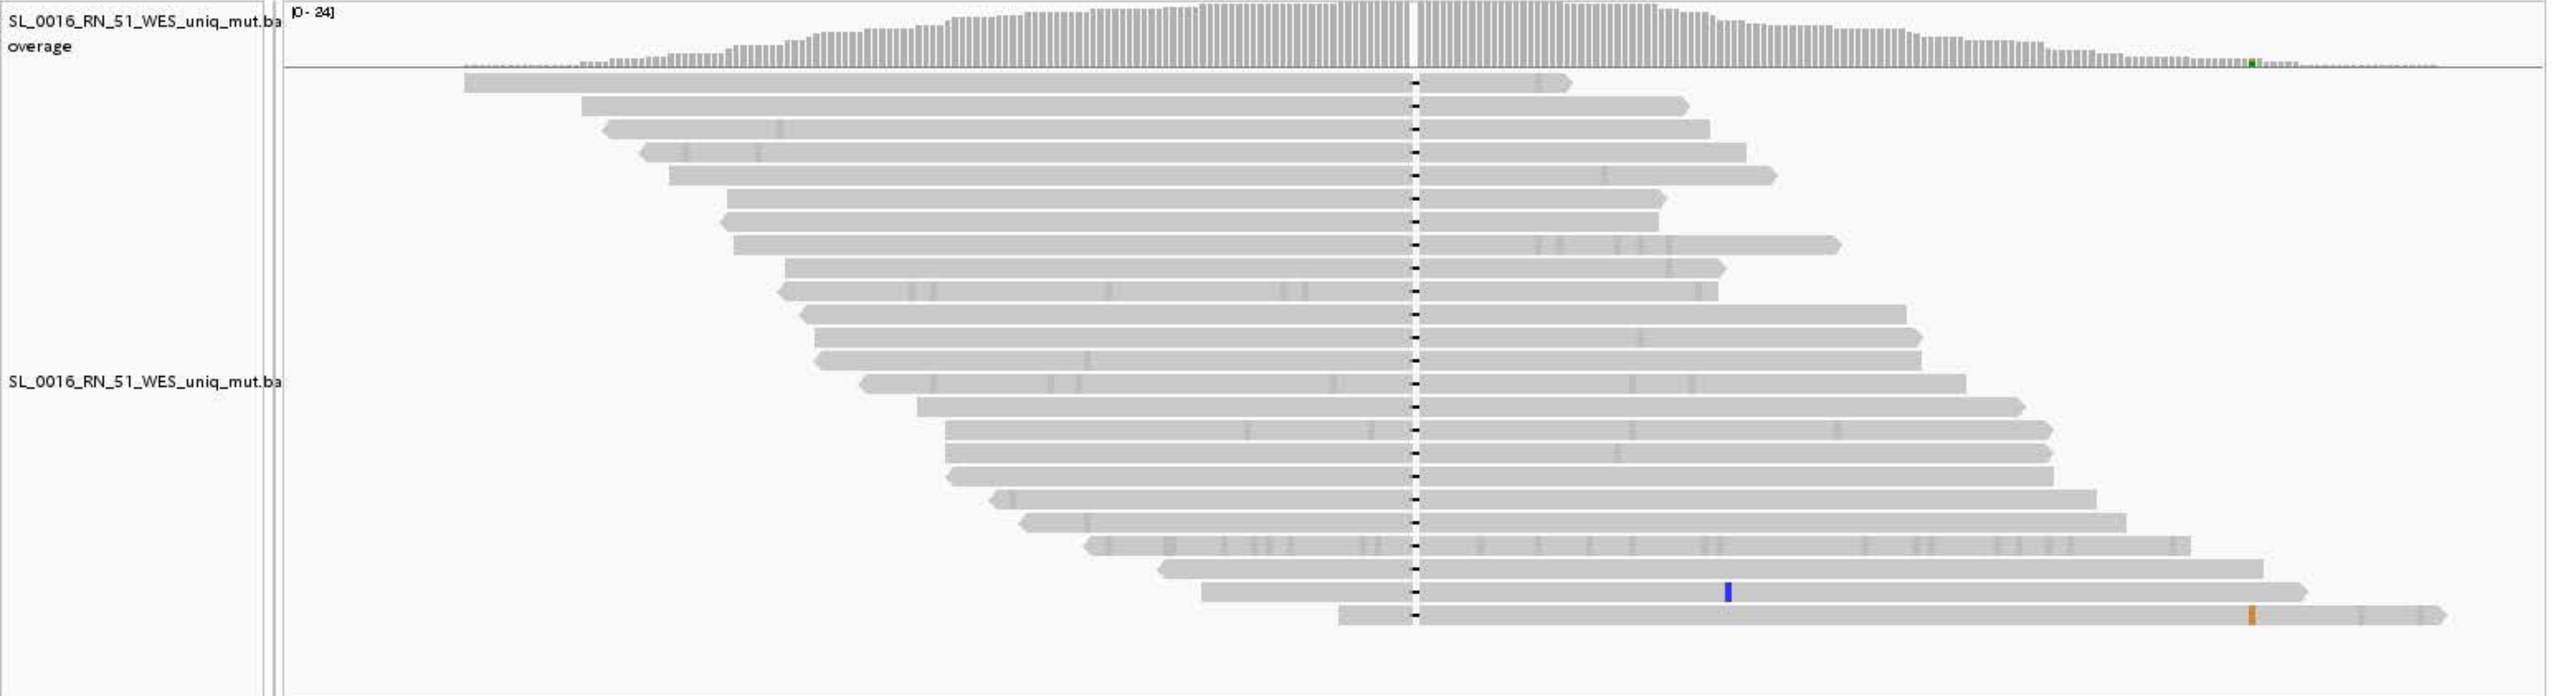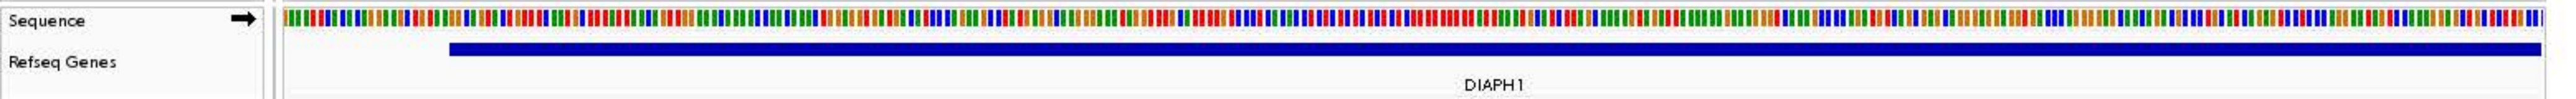

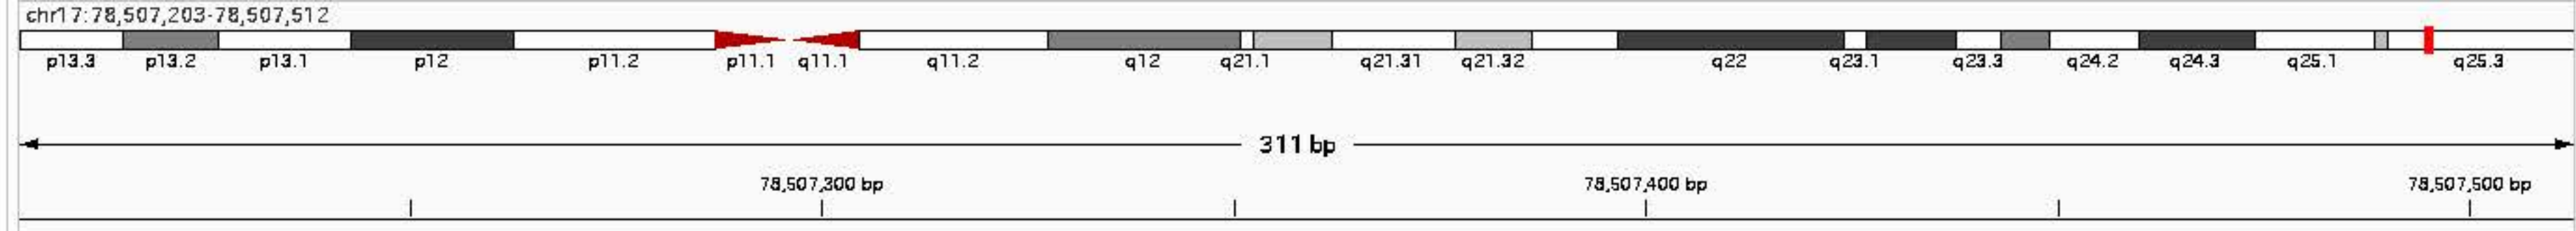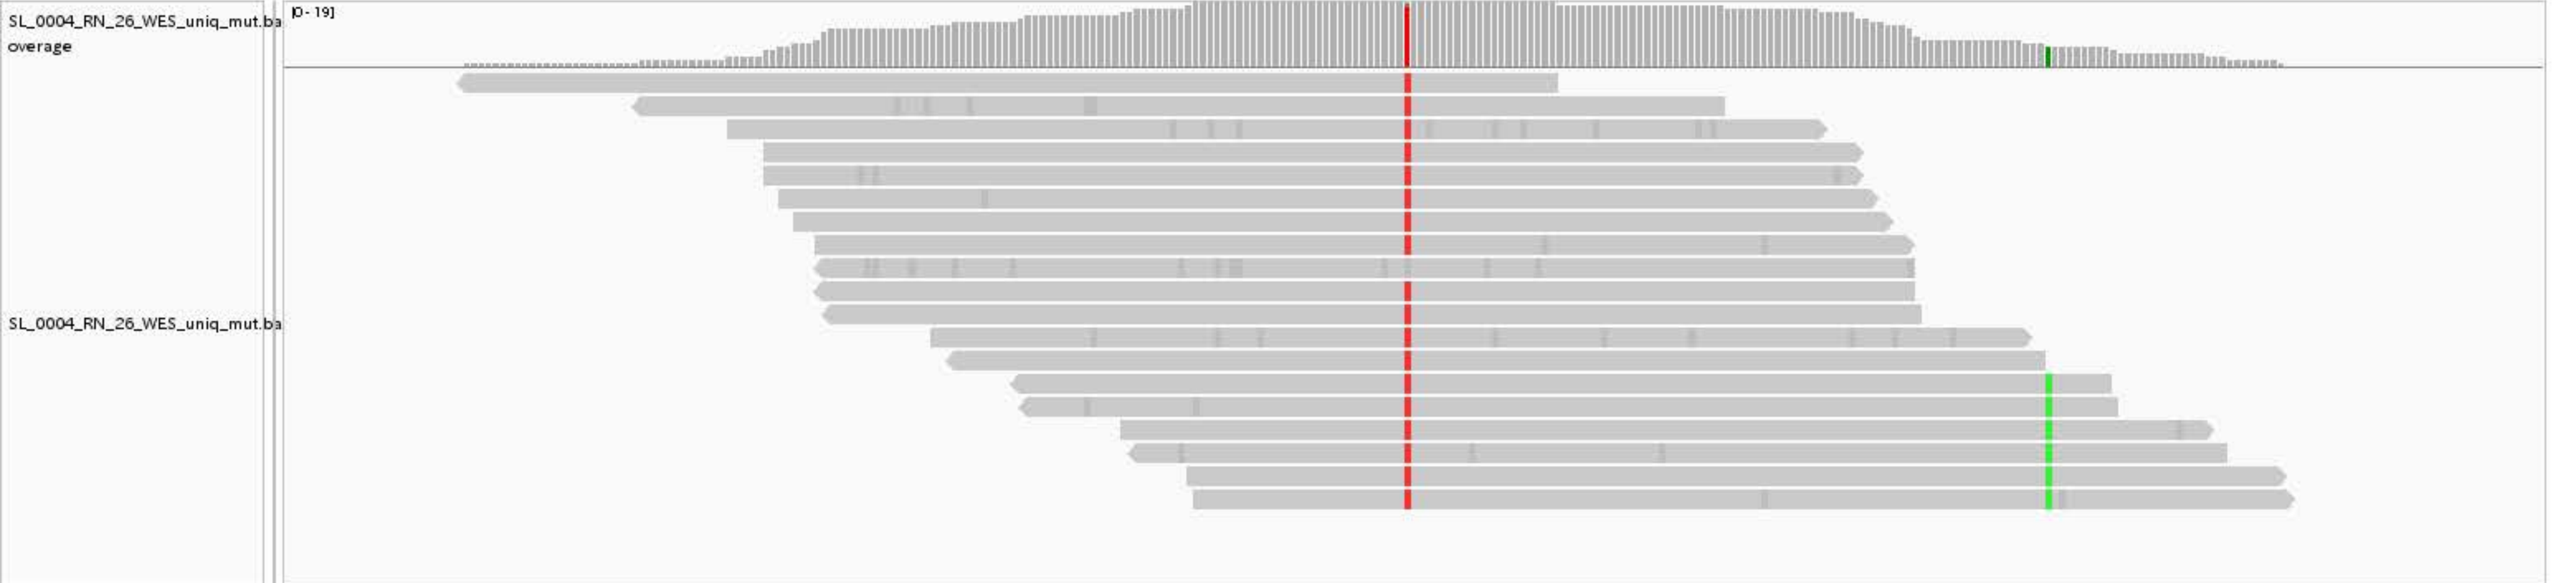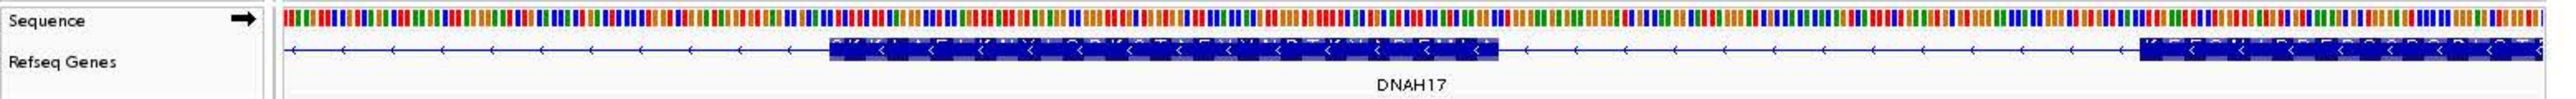

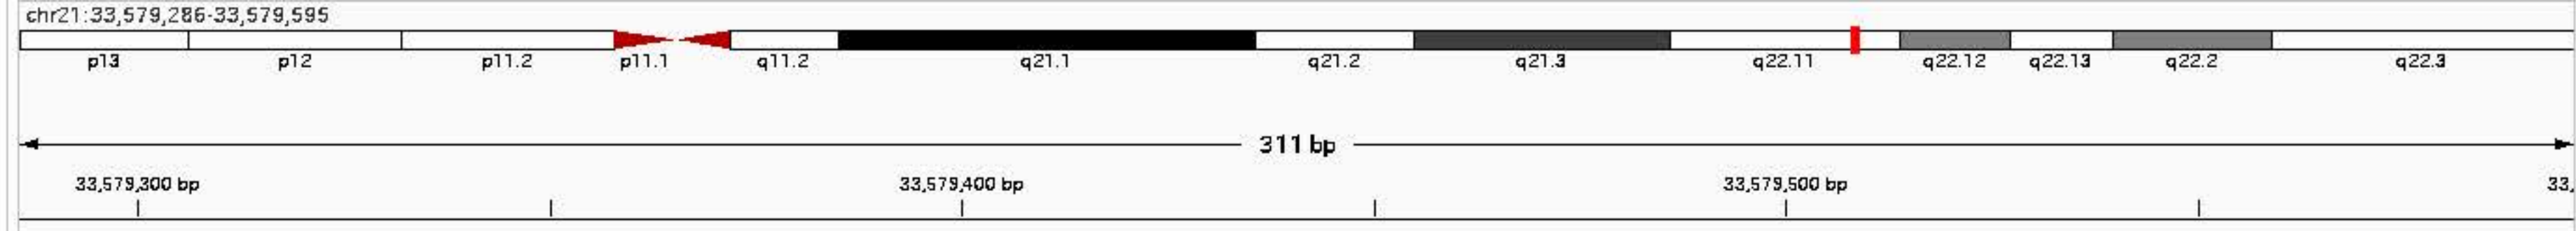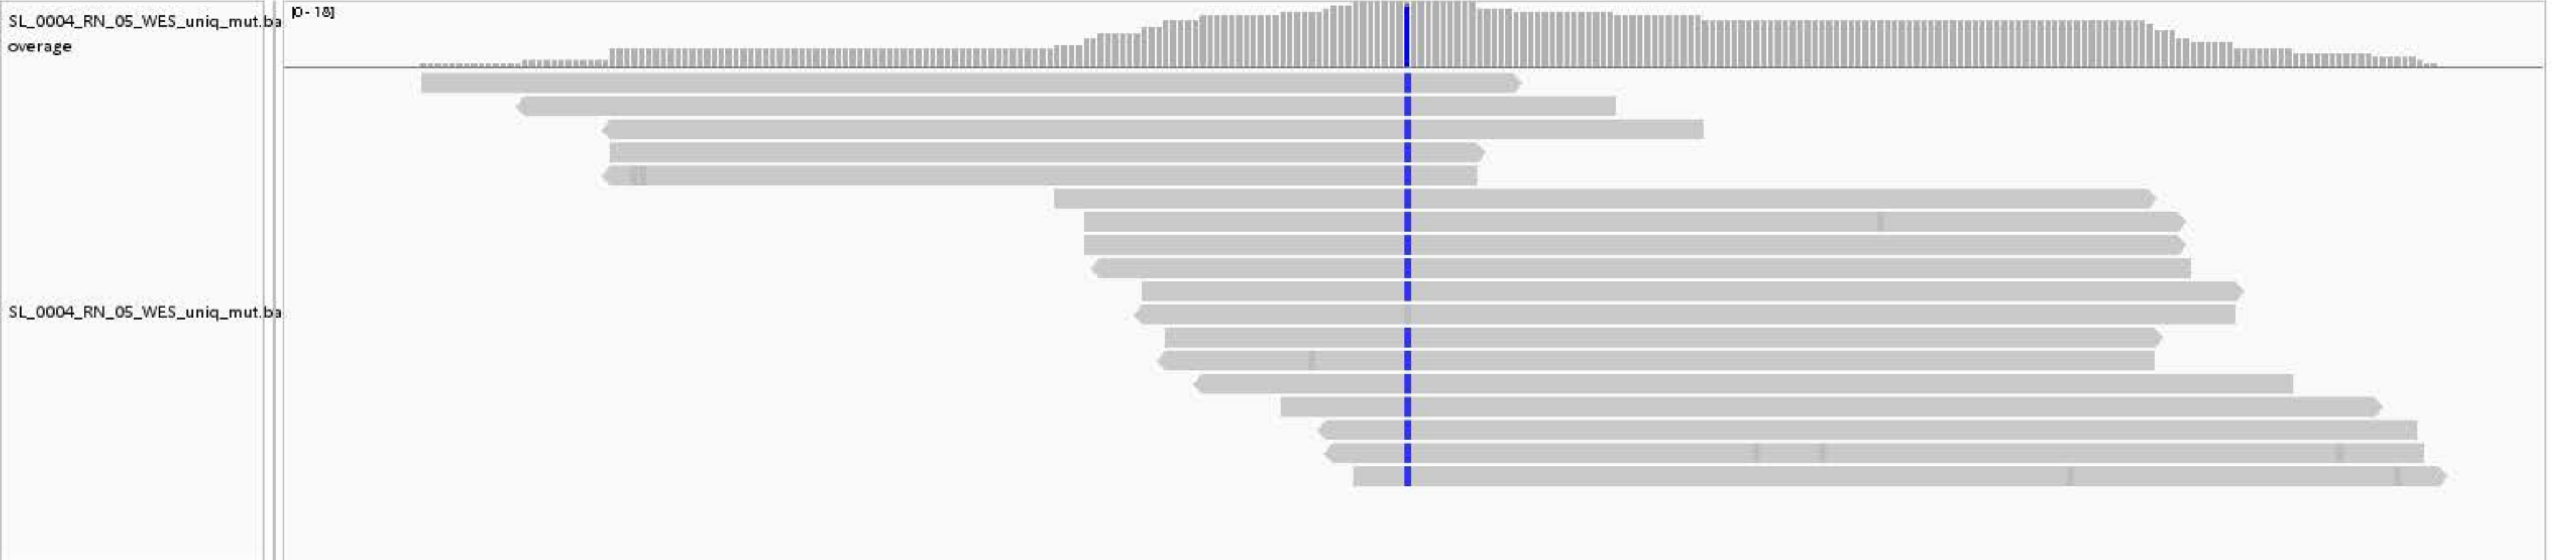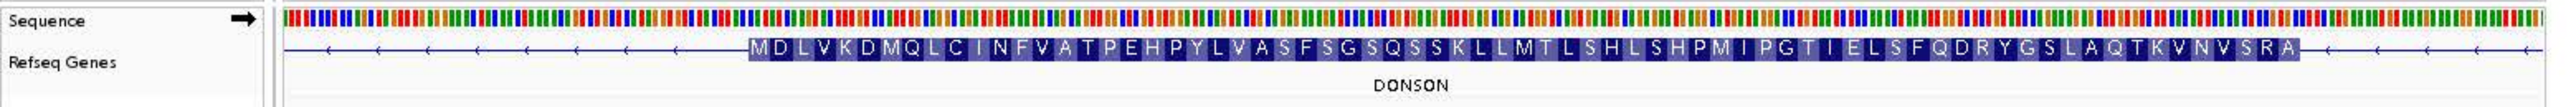



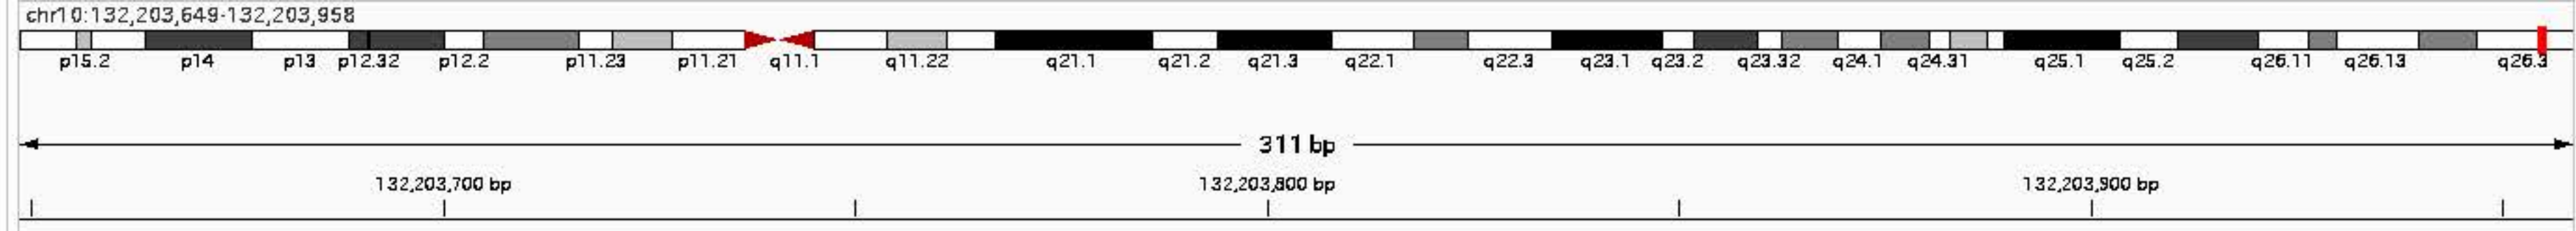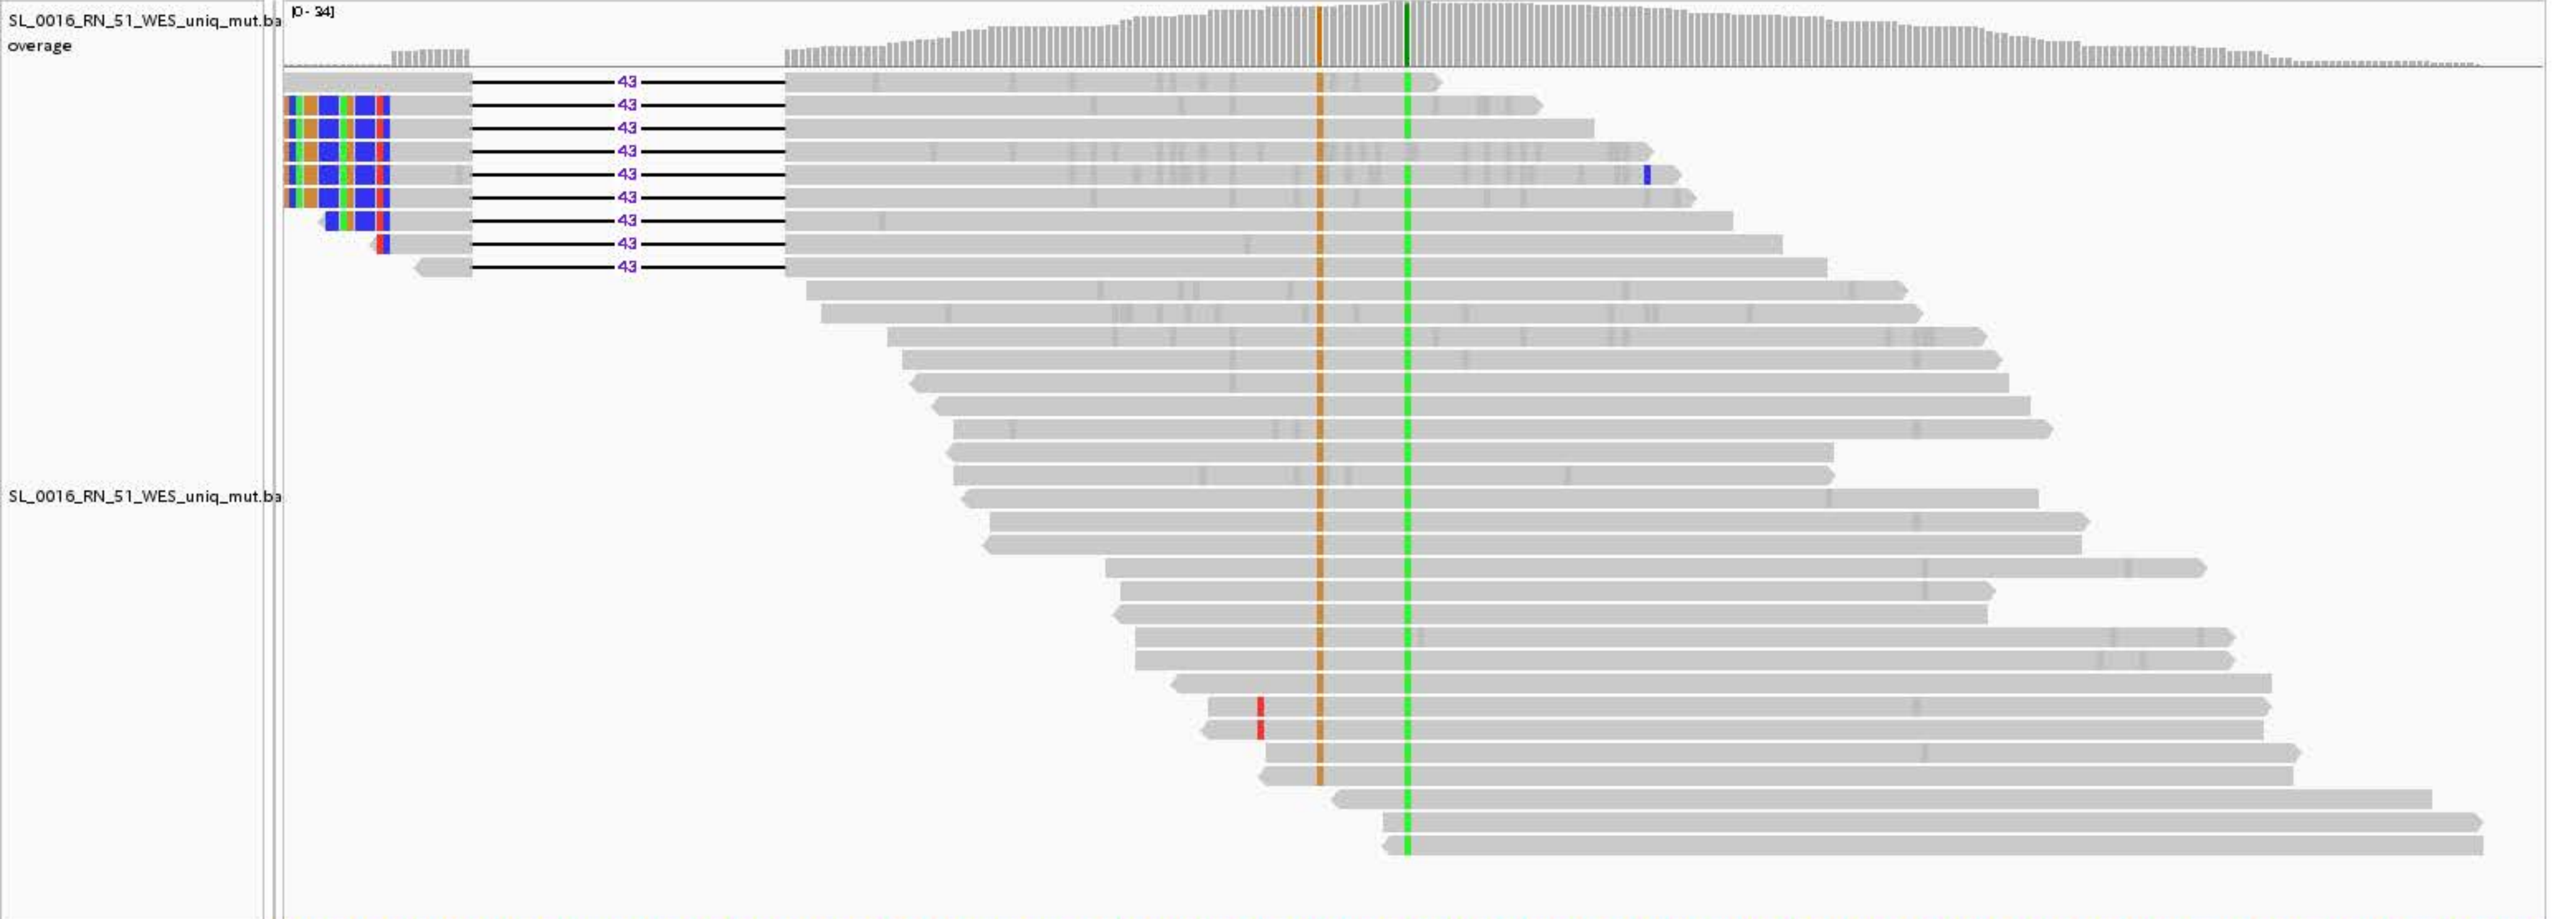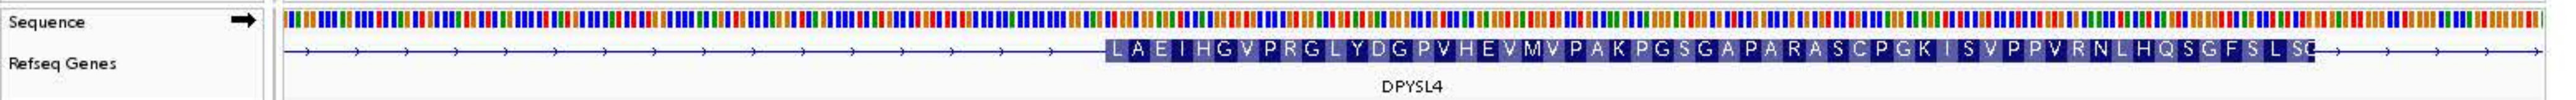

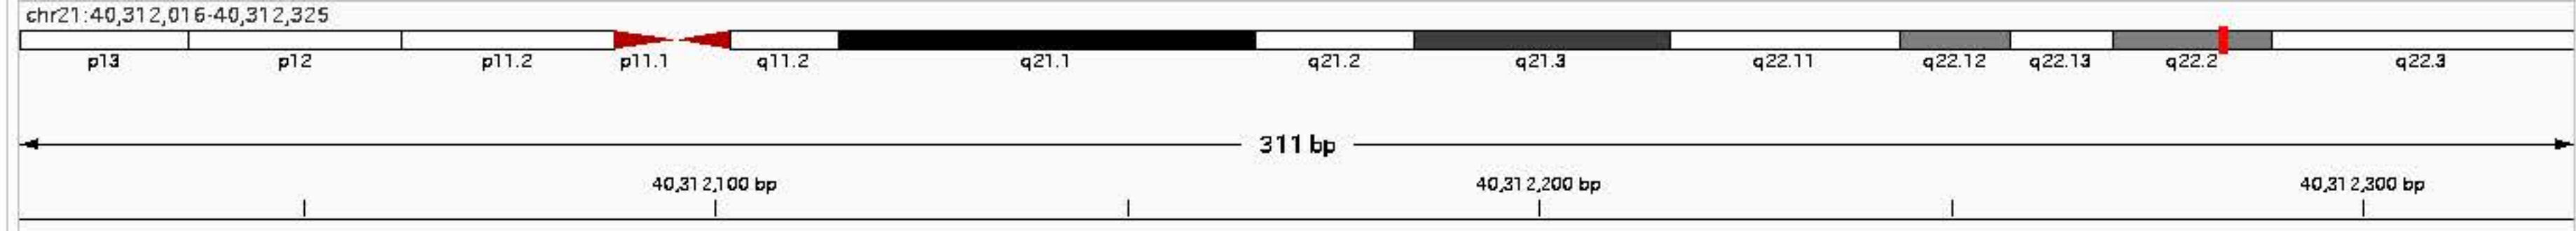

SL\_0015\_LN\_46\_WES\_uniq\_mut. coverage

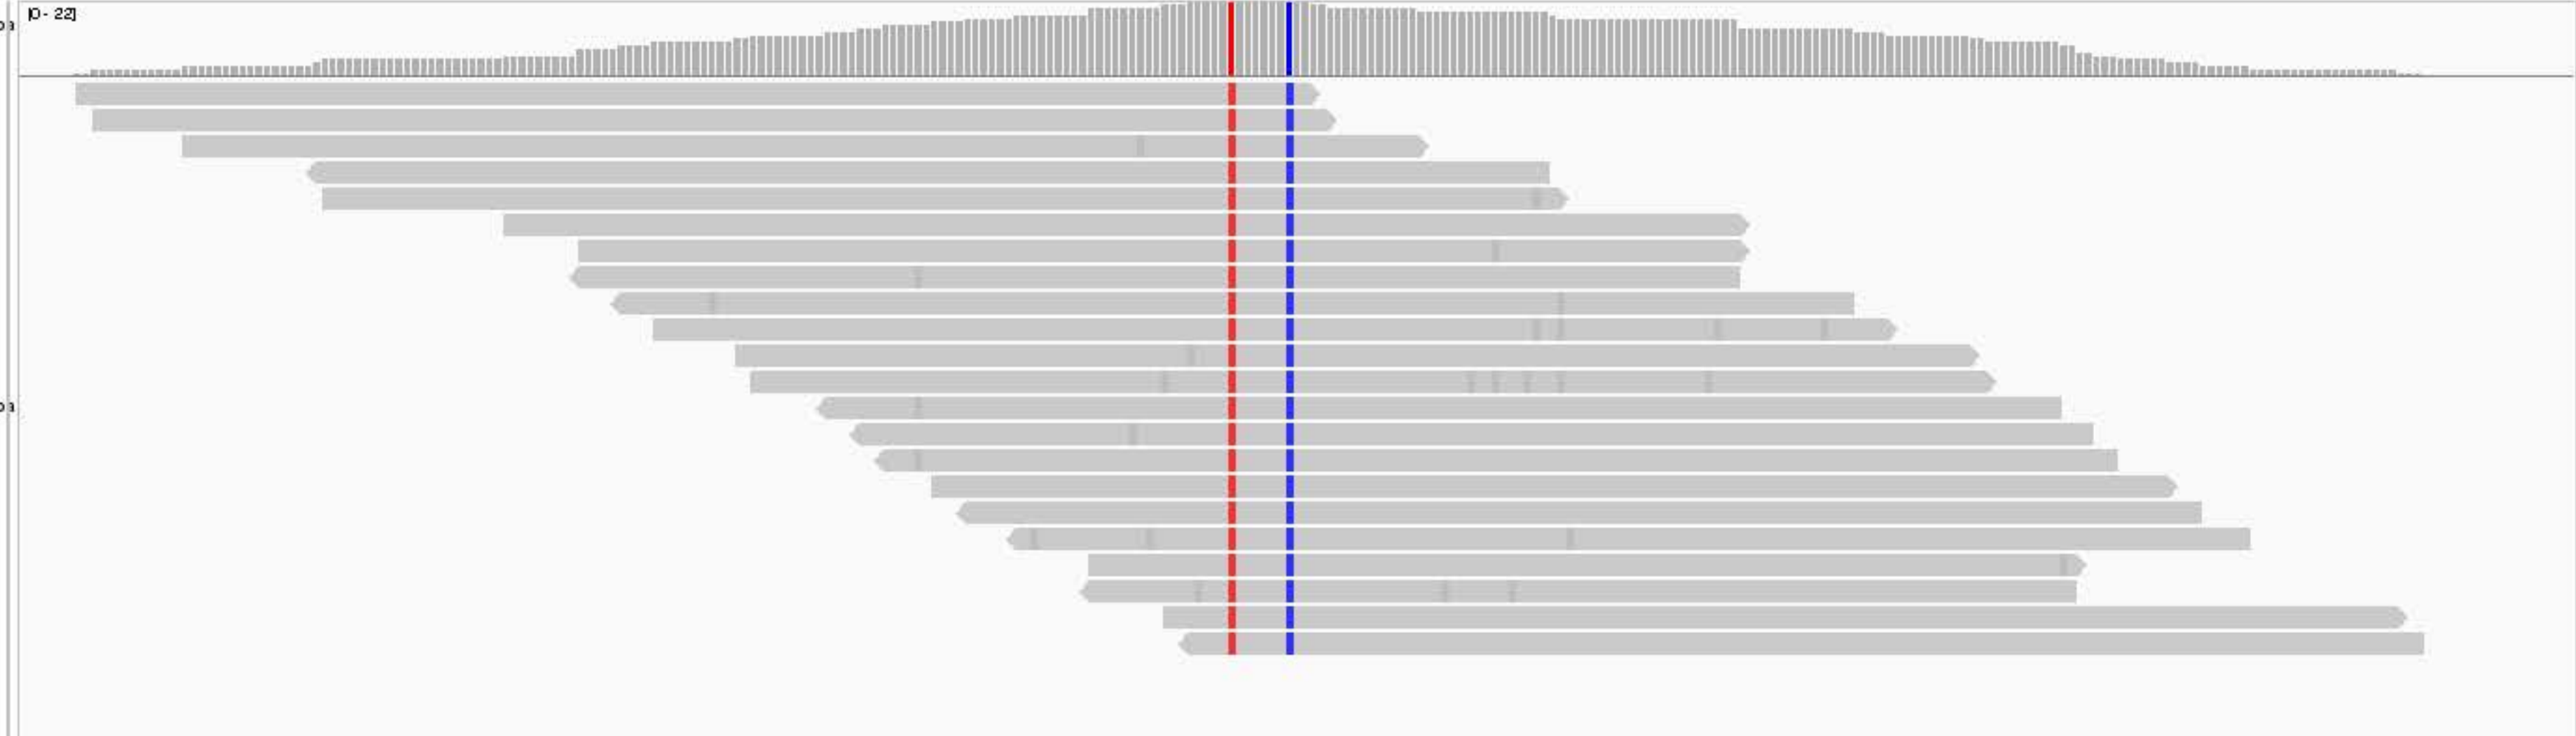

Sequence

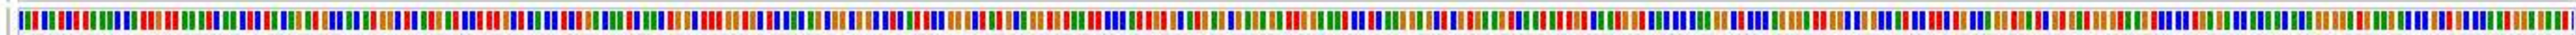

Refseq Genes

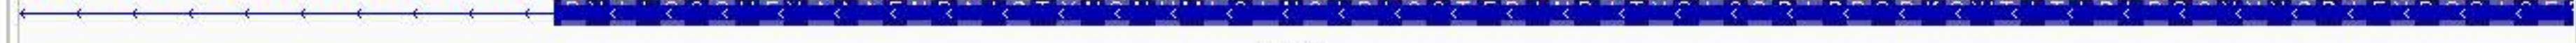

DSCAM



chr6:20,402,287-20,402,596  
p25.2 p24.3 p23 p22.3 p22.2 p21.33 p21.2 p21.1 p12.3 p12.1 q11.1 q12 q13 q14.1 q14.3 q15 q16.1 q16.3 q21 q22.1 q22.31 q22.33 q23.3 q24.2 q25.1 q25.3 q26 q27

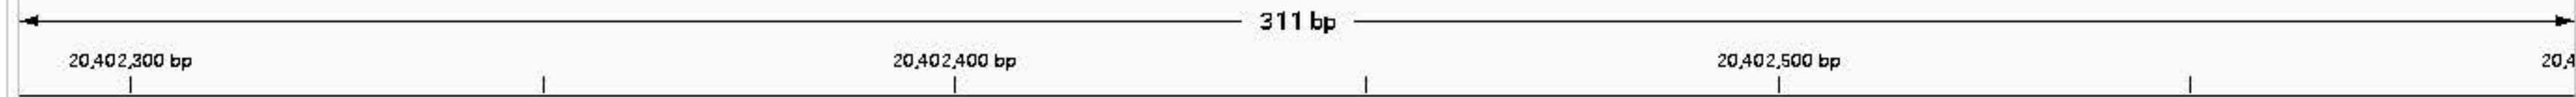

SL\_0002\_LN\_1\_WES\_uniq\_mut.ba  
verage

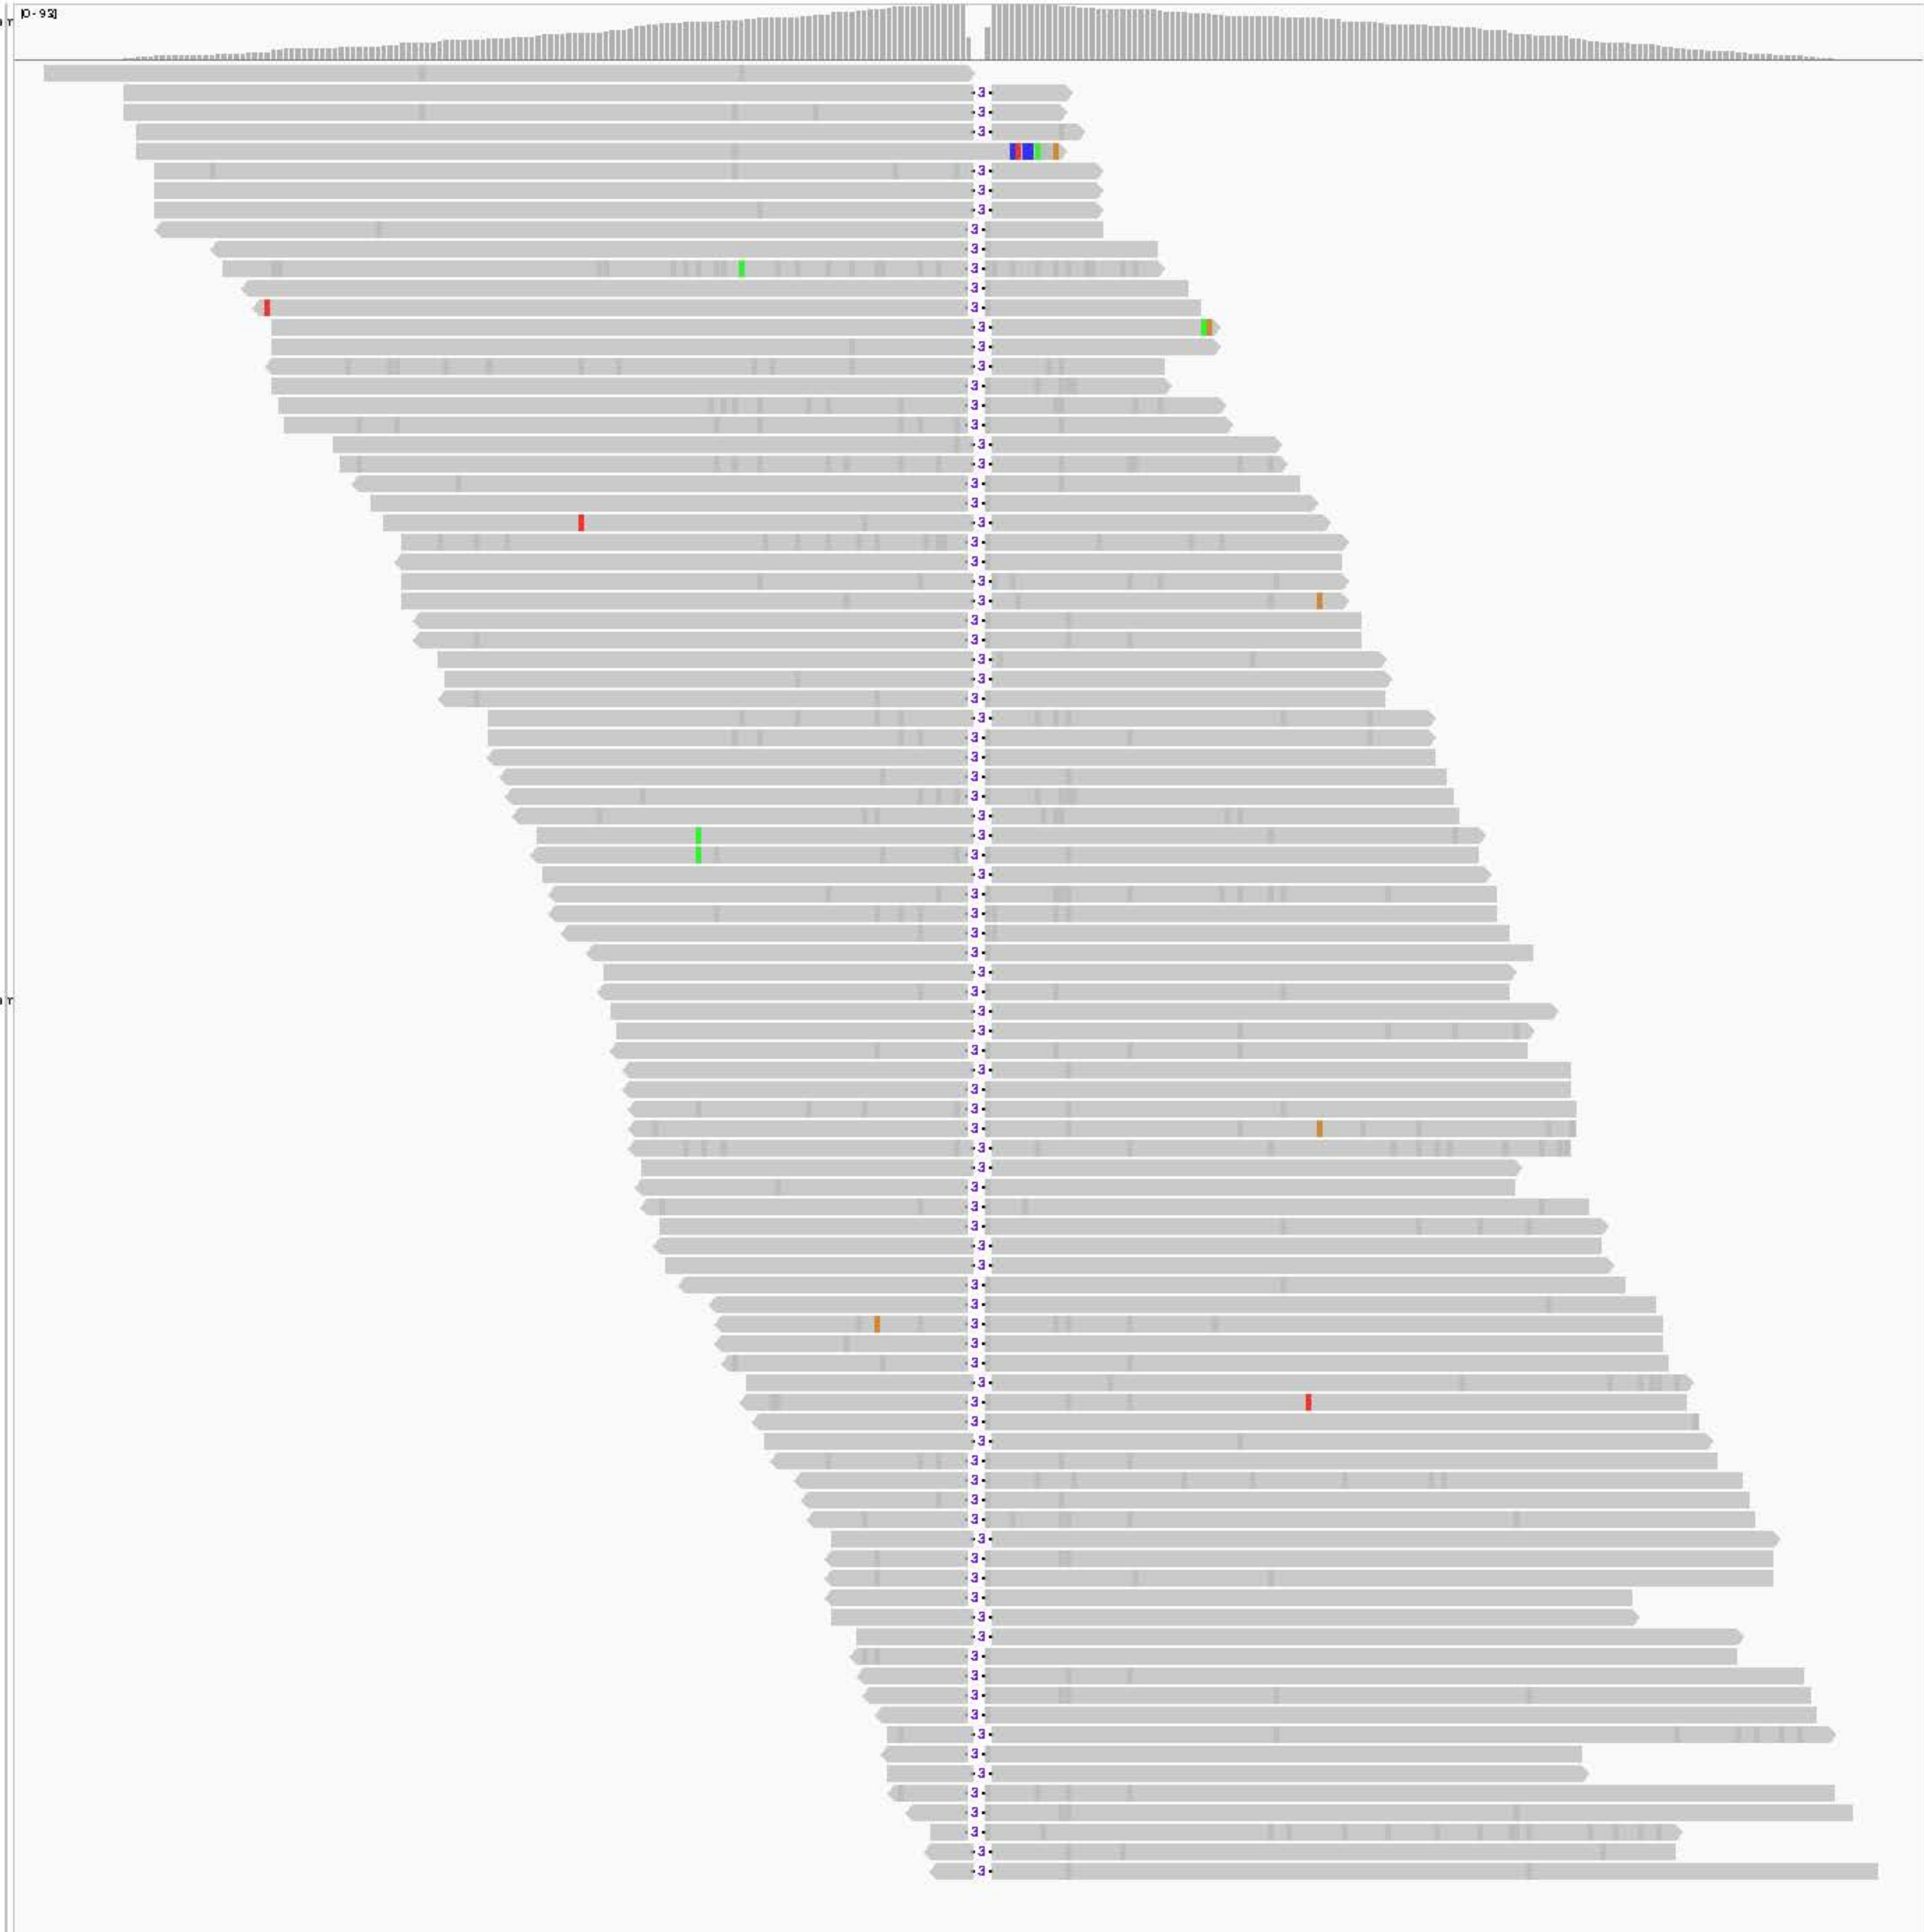

SL\_0002\_LN\_1\_WES\_uniq\_mut.ba

Sequence →  
Refseq Genes

GEAAAVVAAAAAASMDKRALLASPGFAAAAAAAGAYIQILTTNTSITSCSSSLQSGAVAAGPLLPSAPGAEQTAGSLLYTPHGPSSRAGLLQQPPALGR  
E2F3



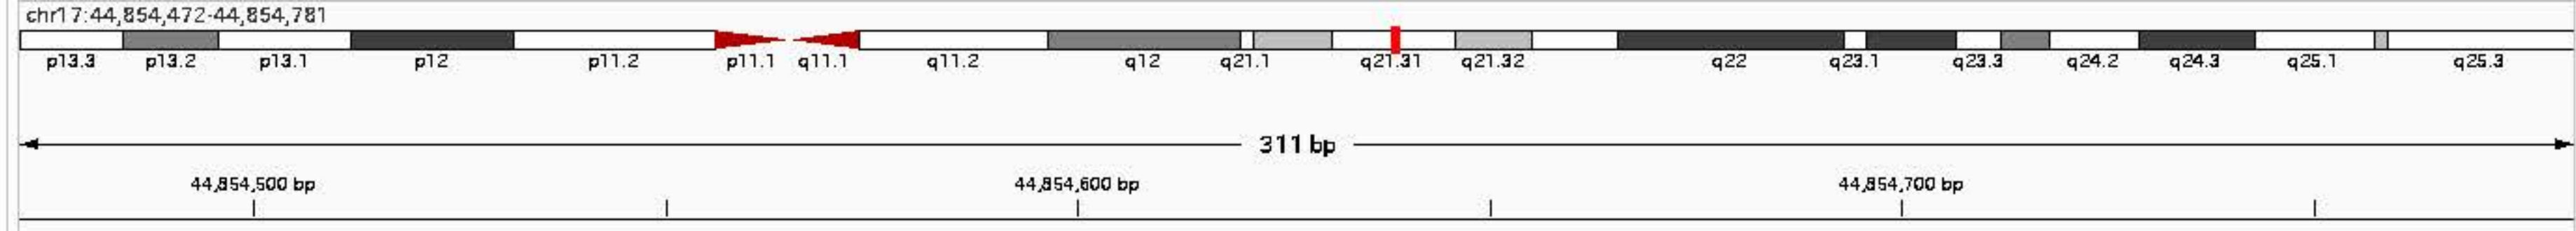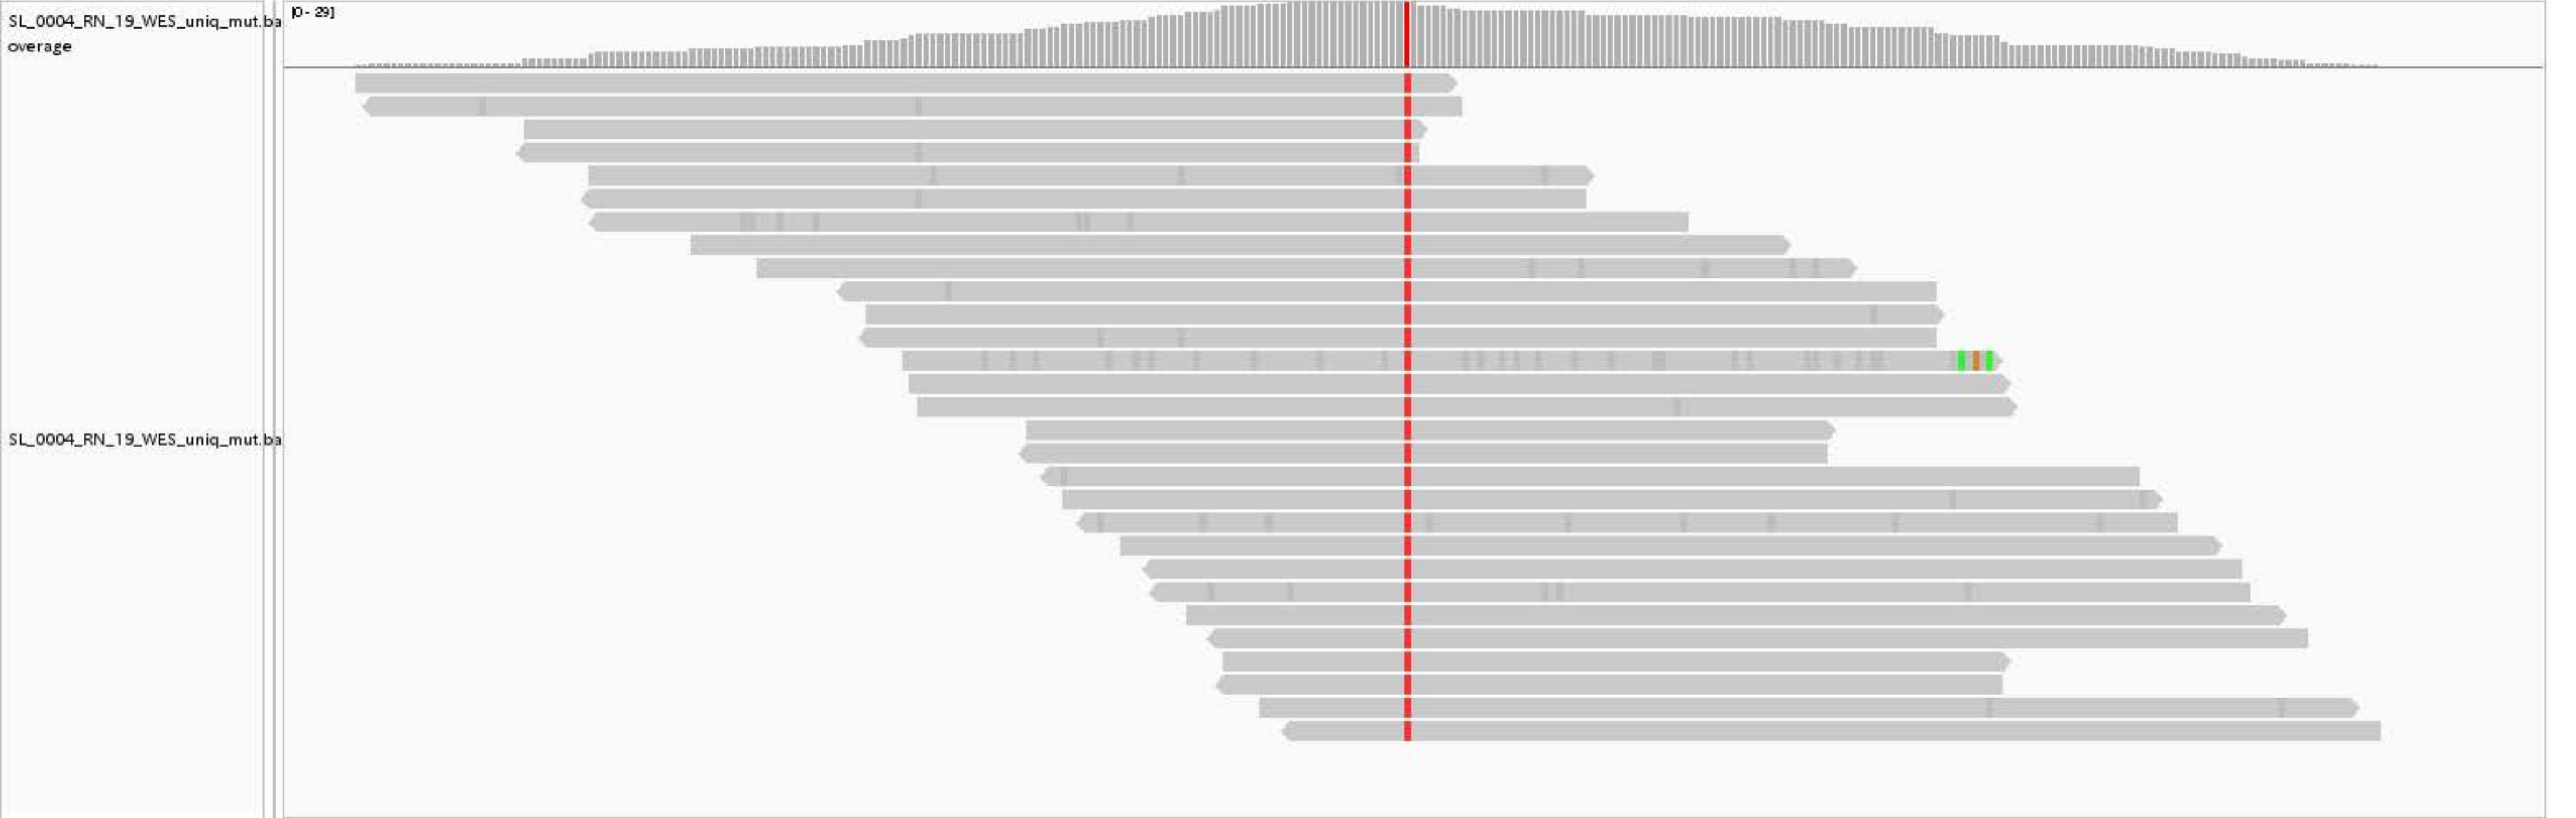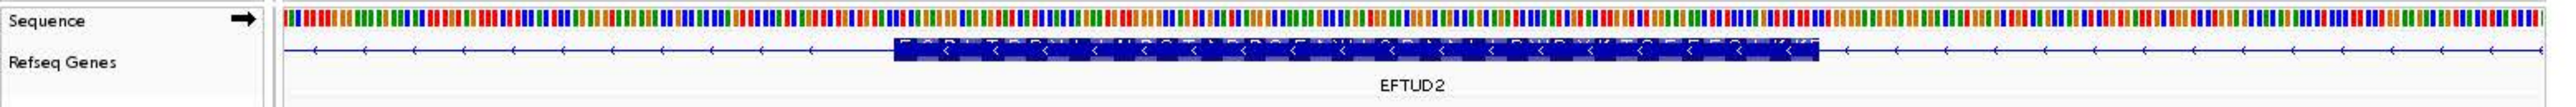

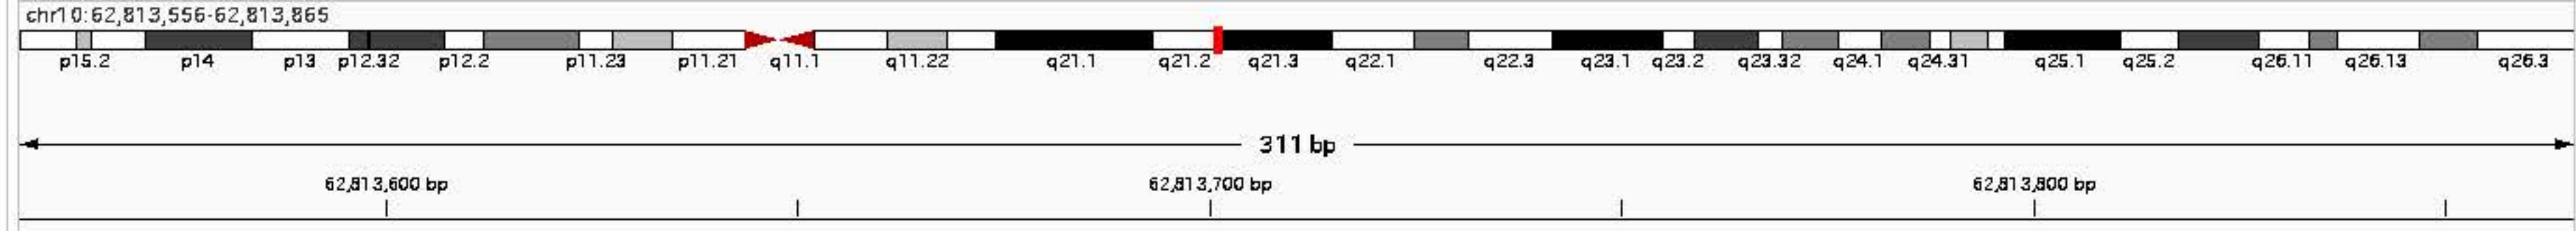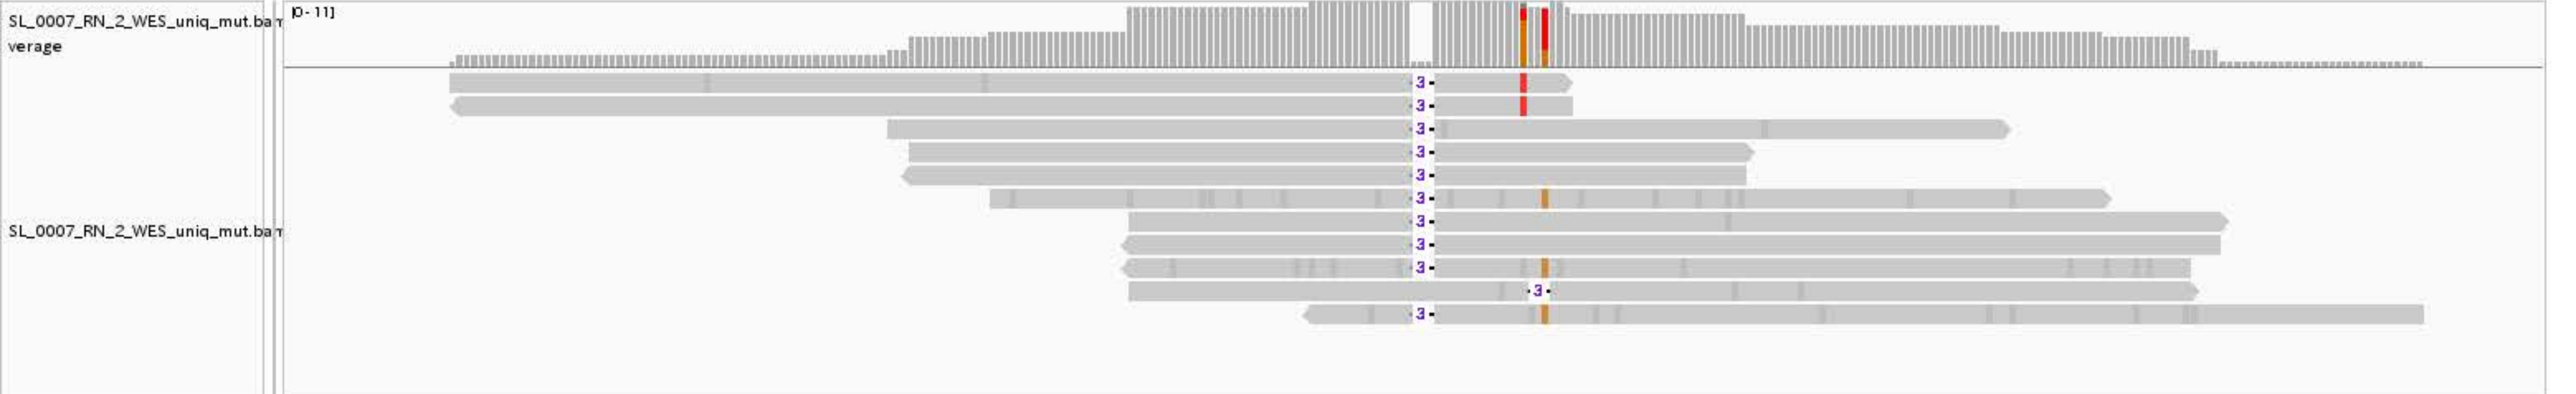

Sequence →

Refseq Genes

I H R T L E D S R S F R R D C G E A P C P Y P R E H V P T K S P R N P Y K R P R L I P R L P L H H P N Y A A A A A A A A A S S S G P L R P G E S G G S A G P G T V G A S P G G L T F N R I T S L P T L P P P V

EGR2

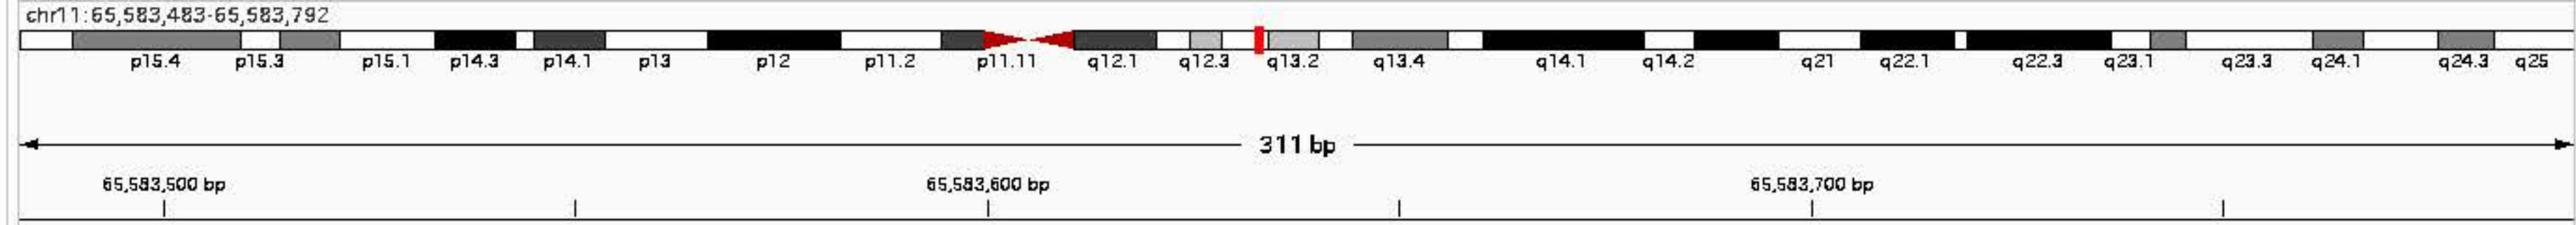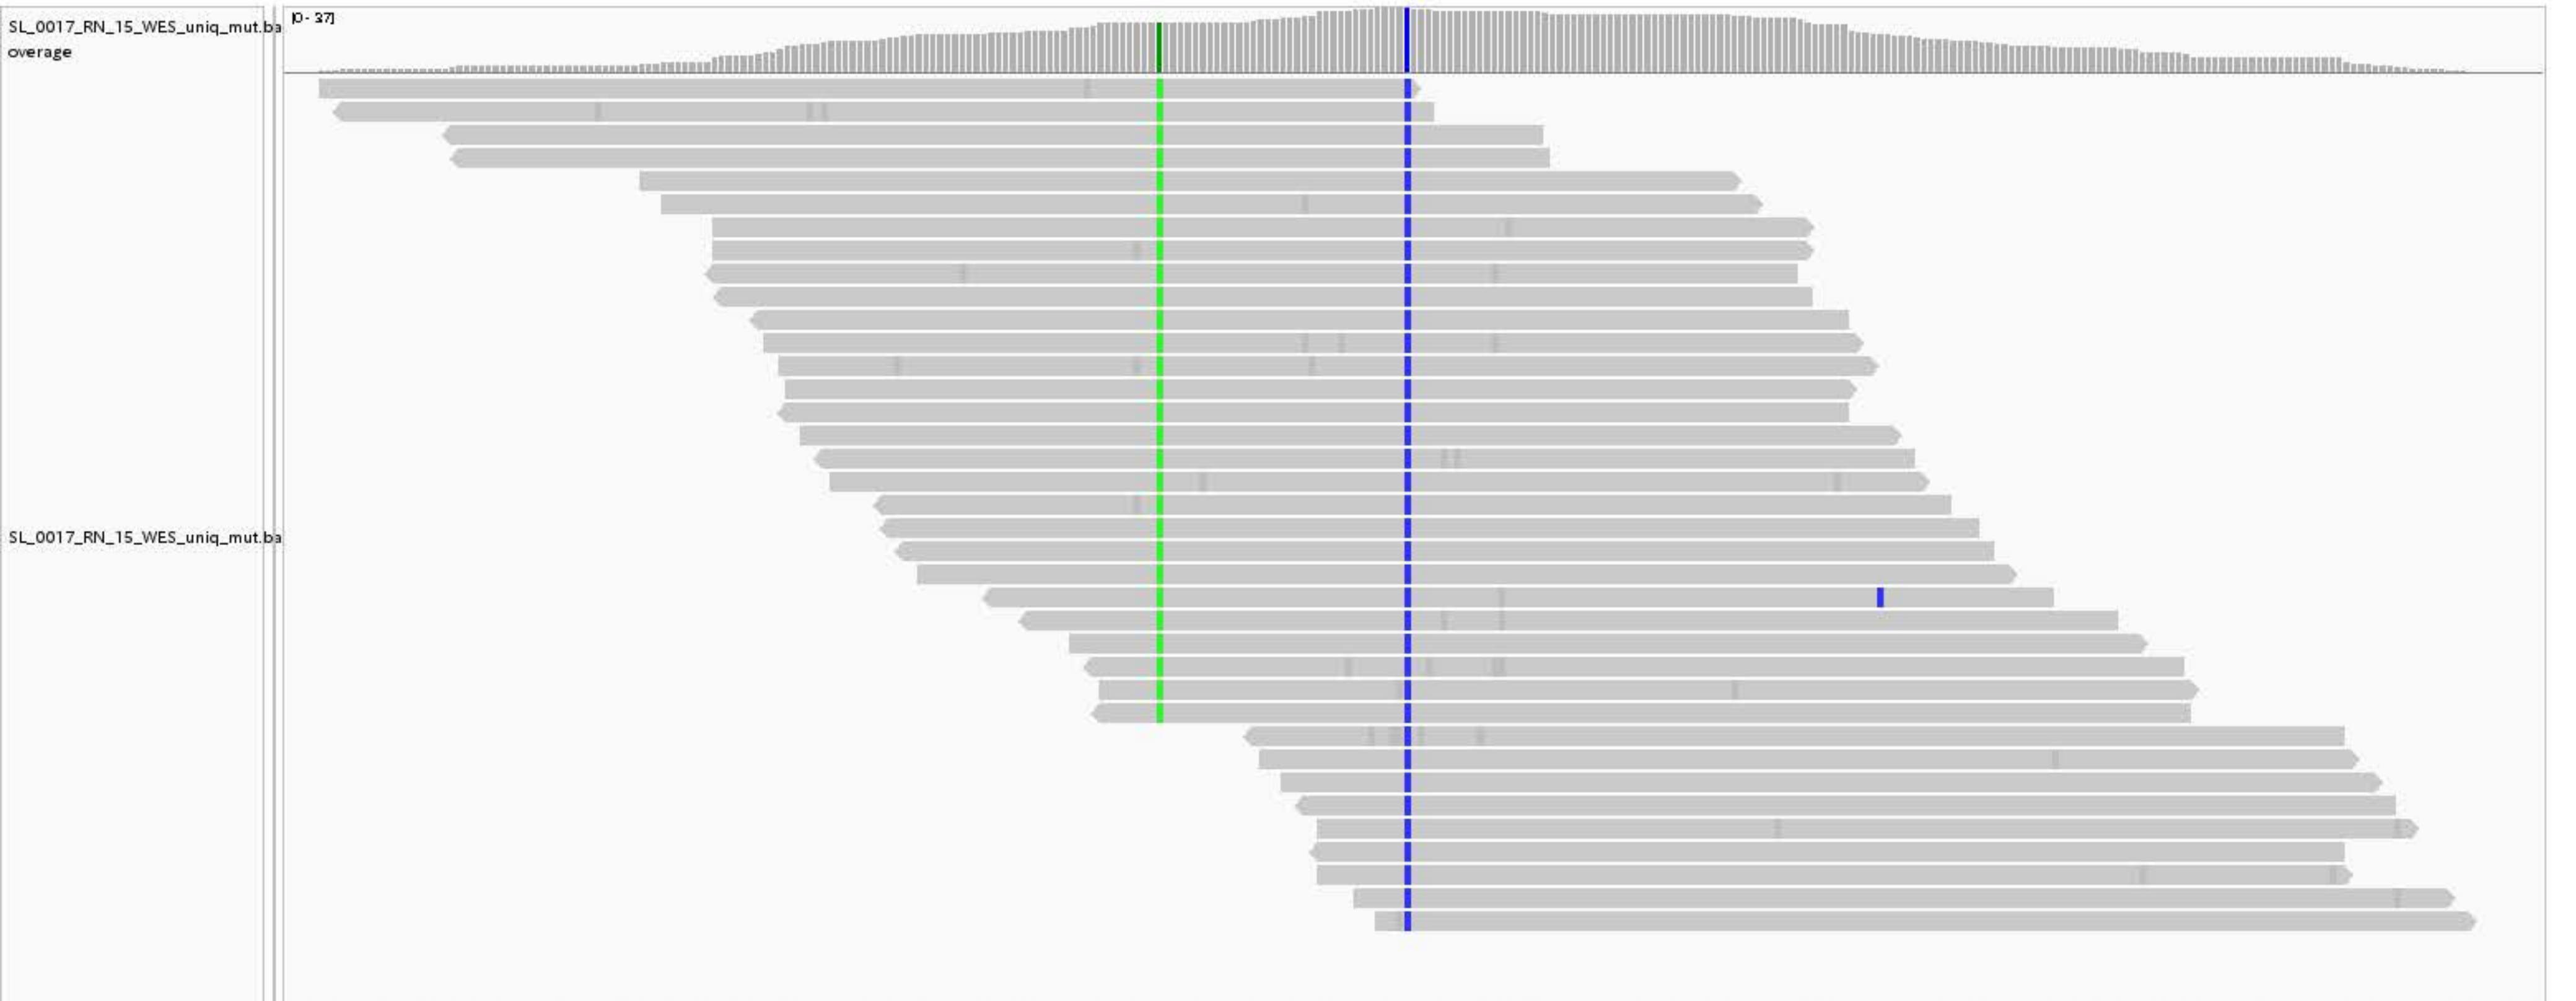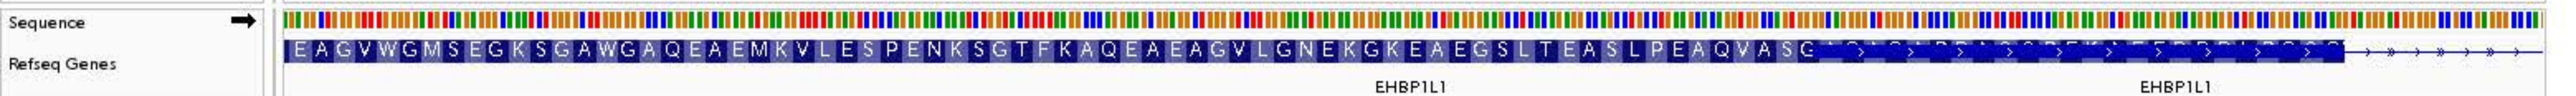



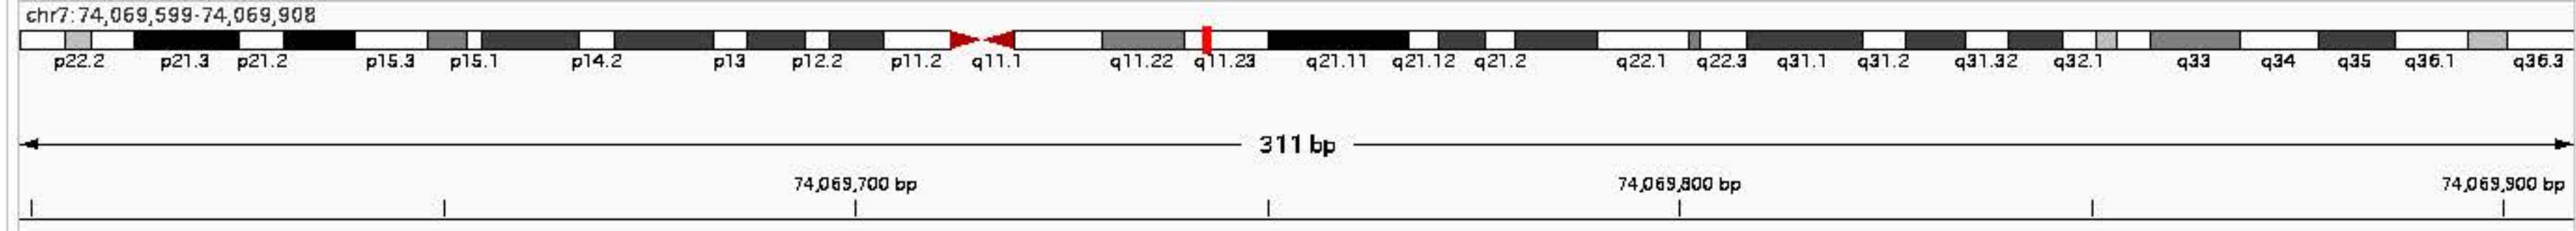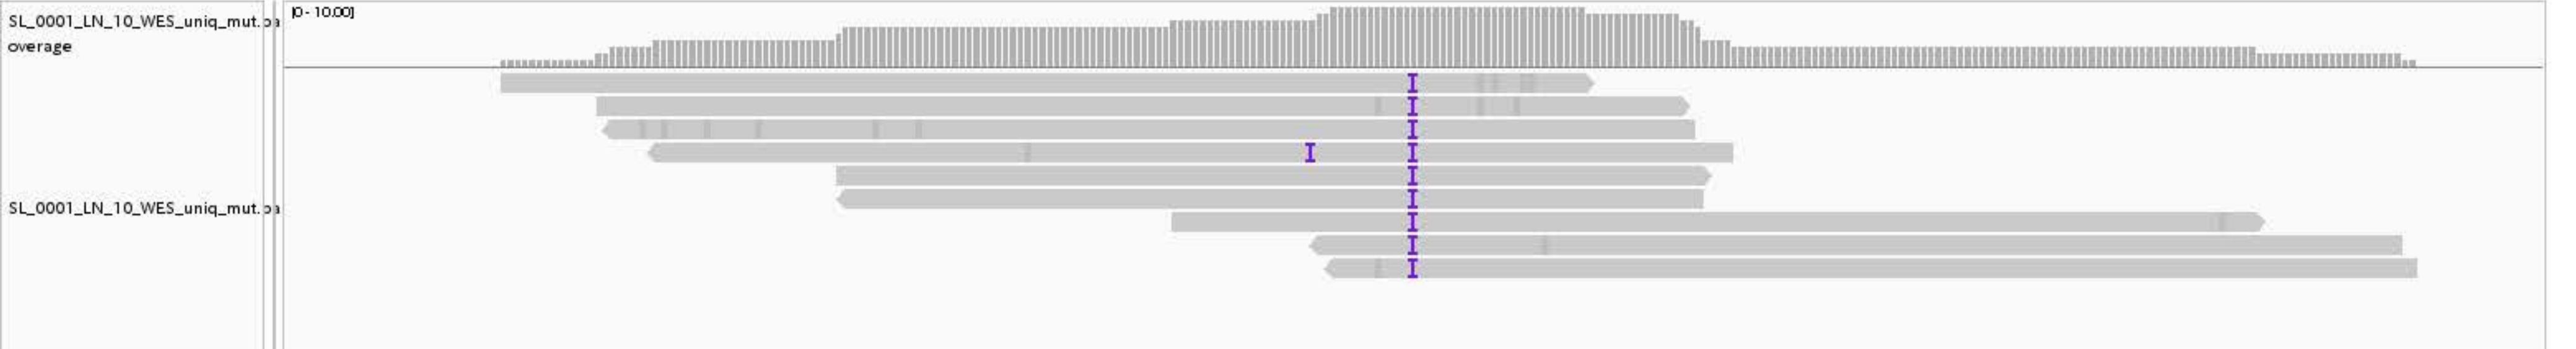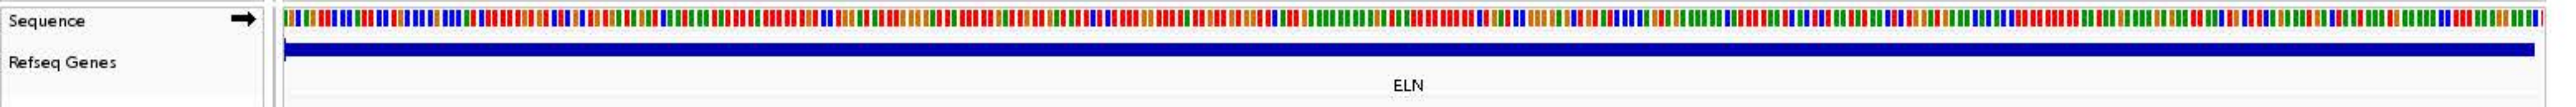

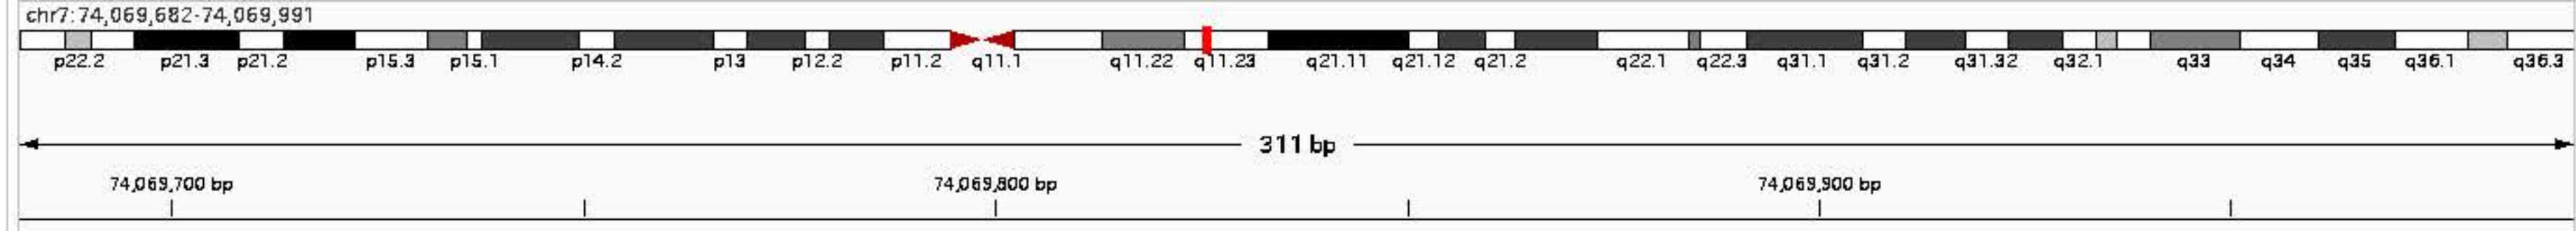

SL\_0015\_LN\_44\_WES\_uniq\_mut.  
coverage

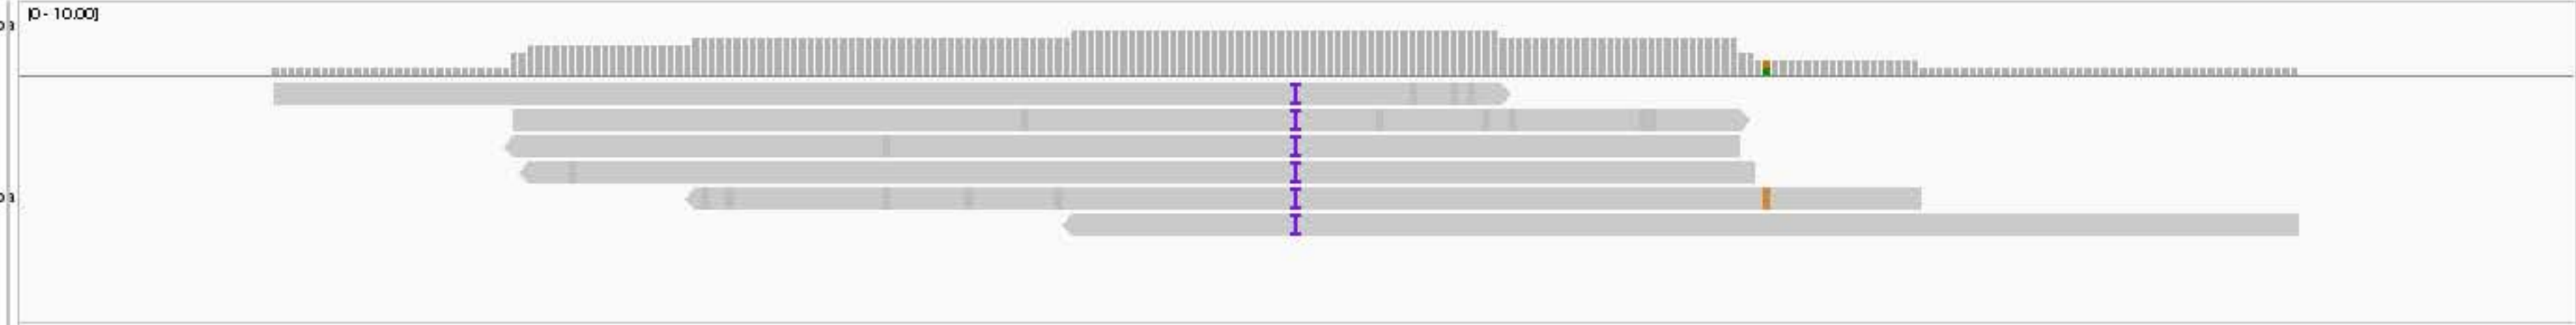

Sequence →  
Refseq Genes

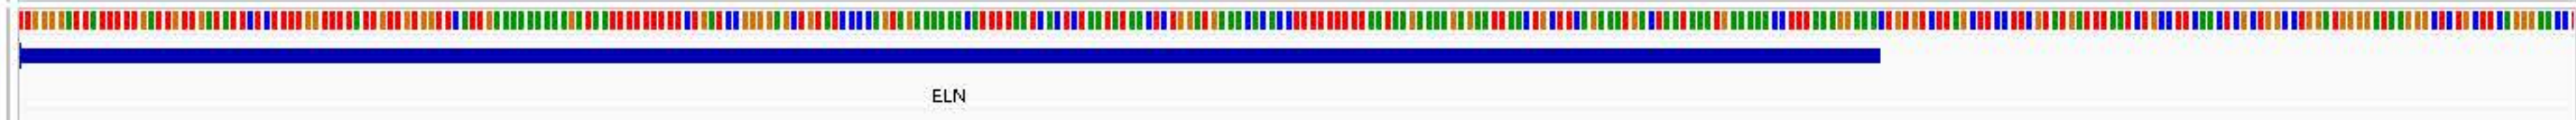

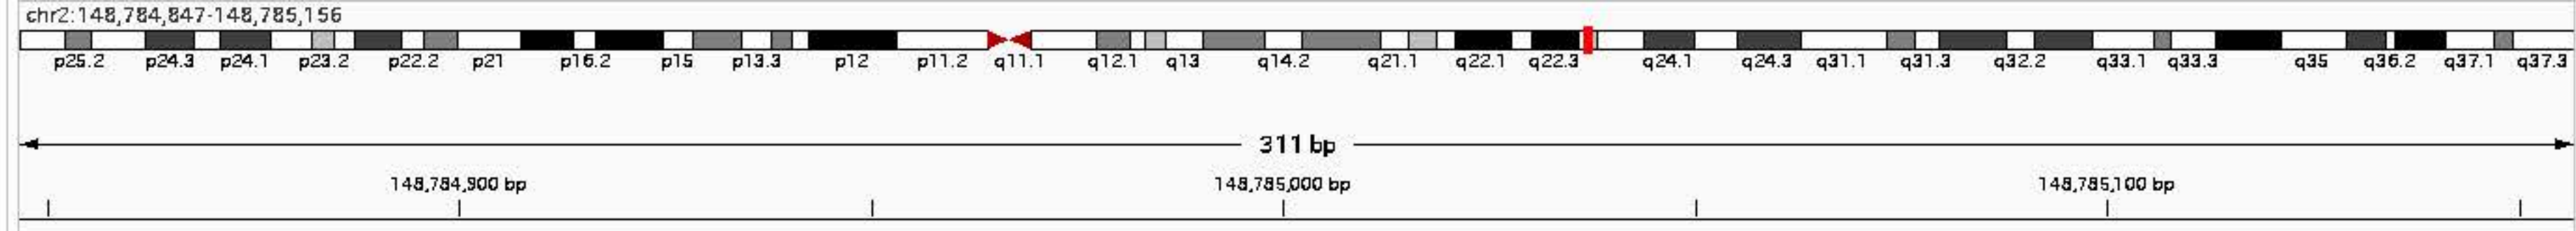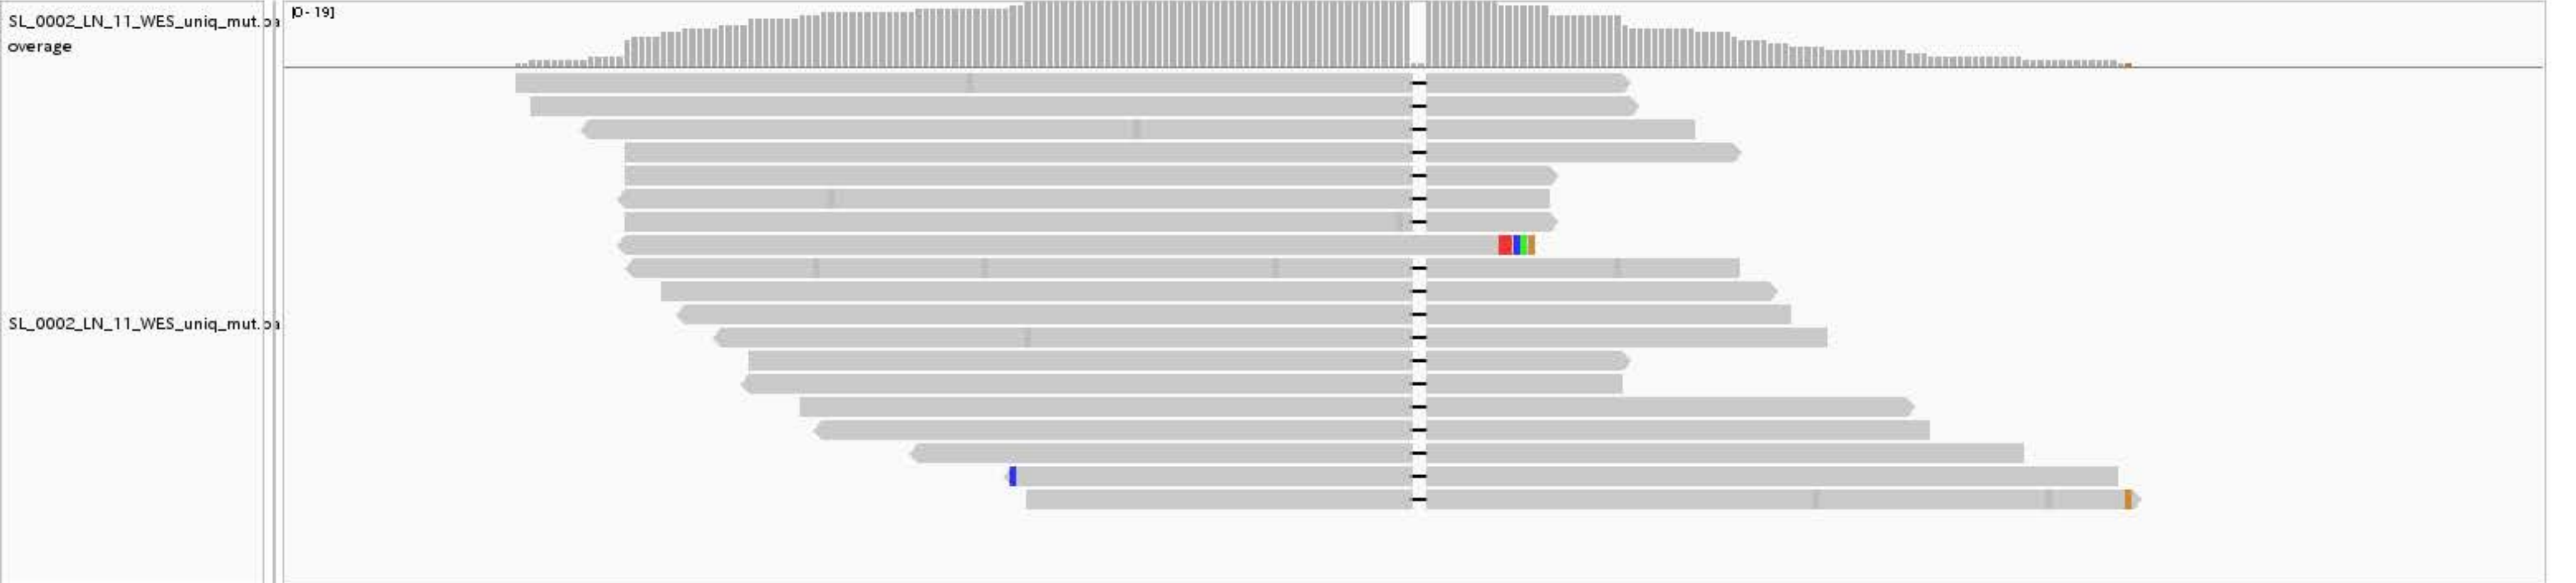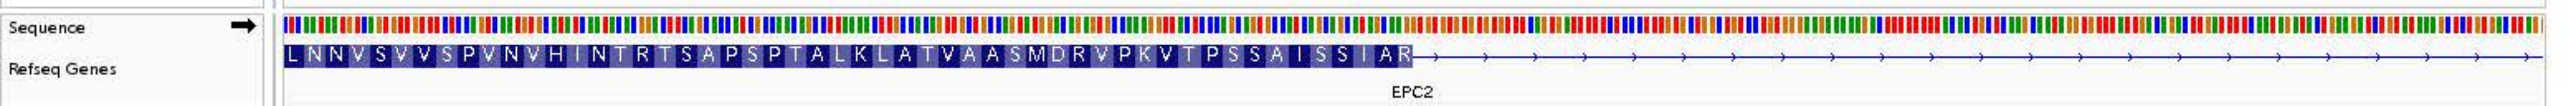



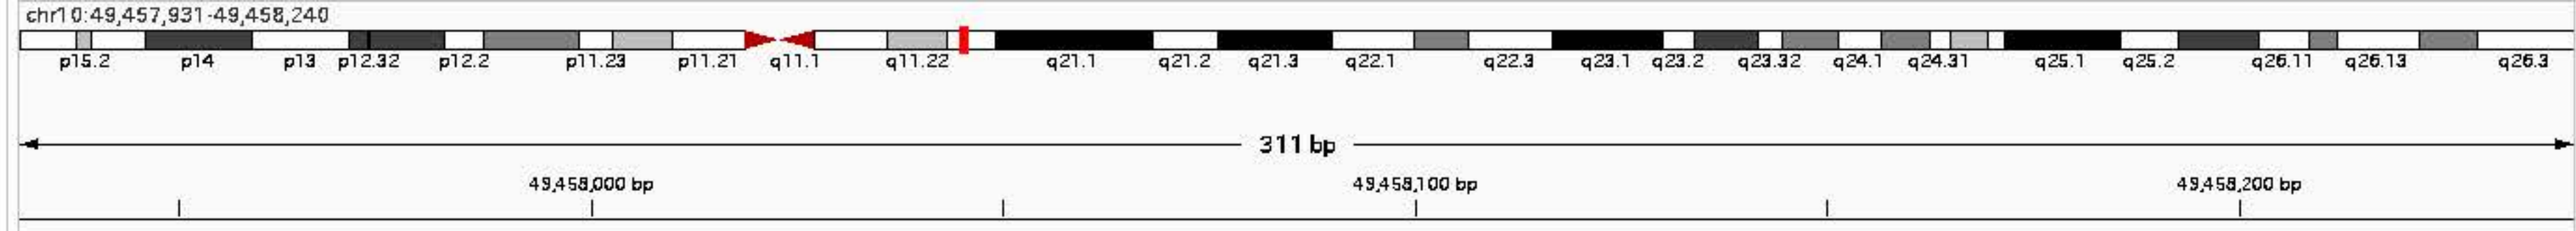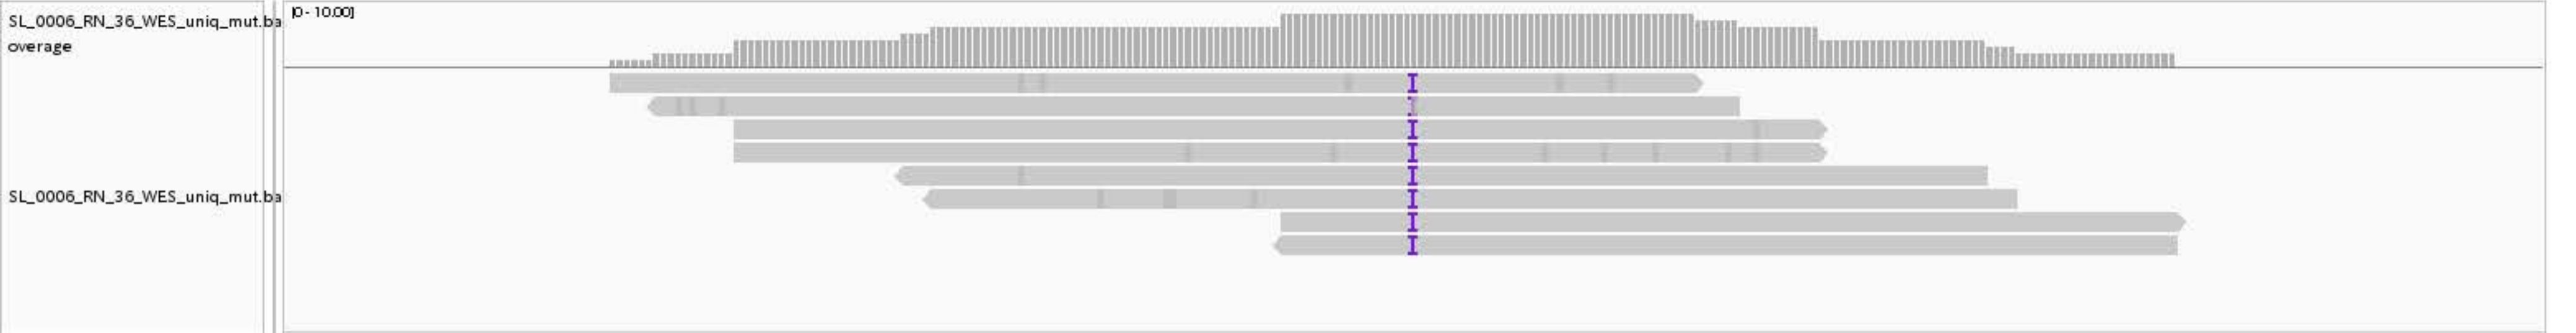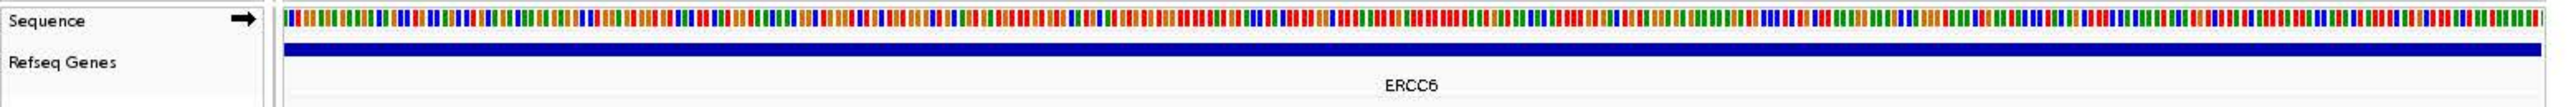

chr19:41,443,946-41,444,255

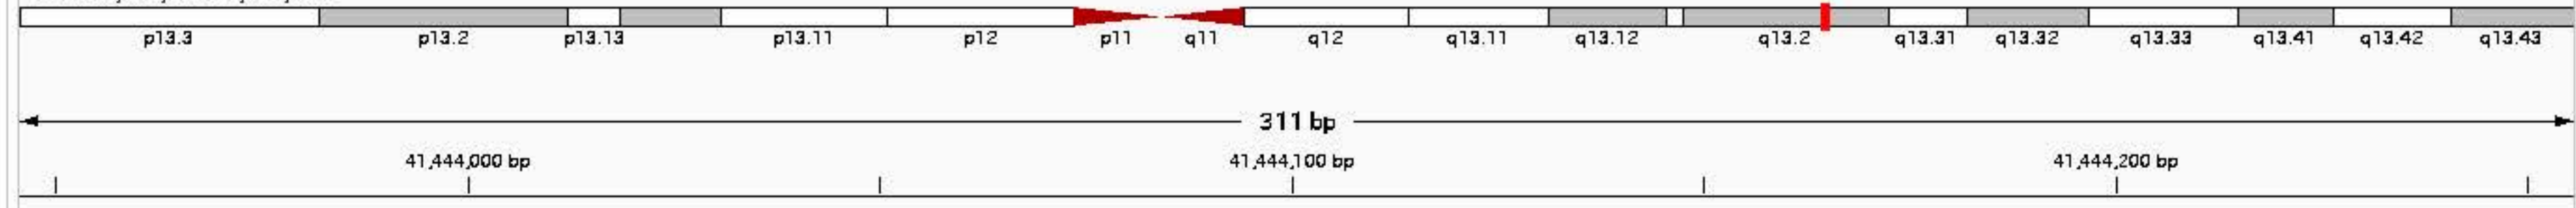

SL\_0007\_RN\_33\_WES\_uniq\_mut.ba  
coverage

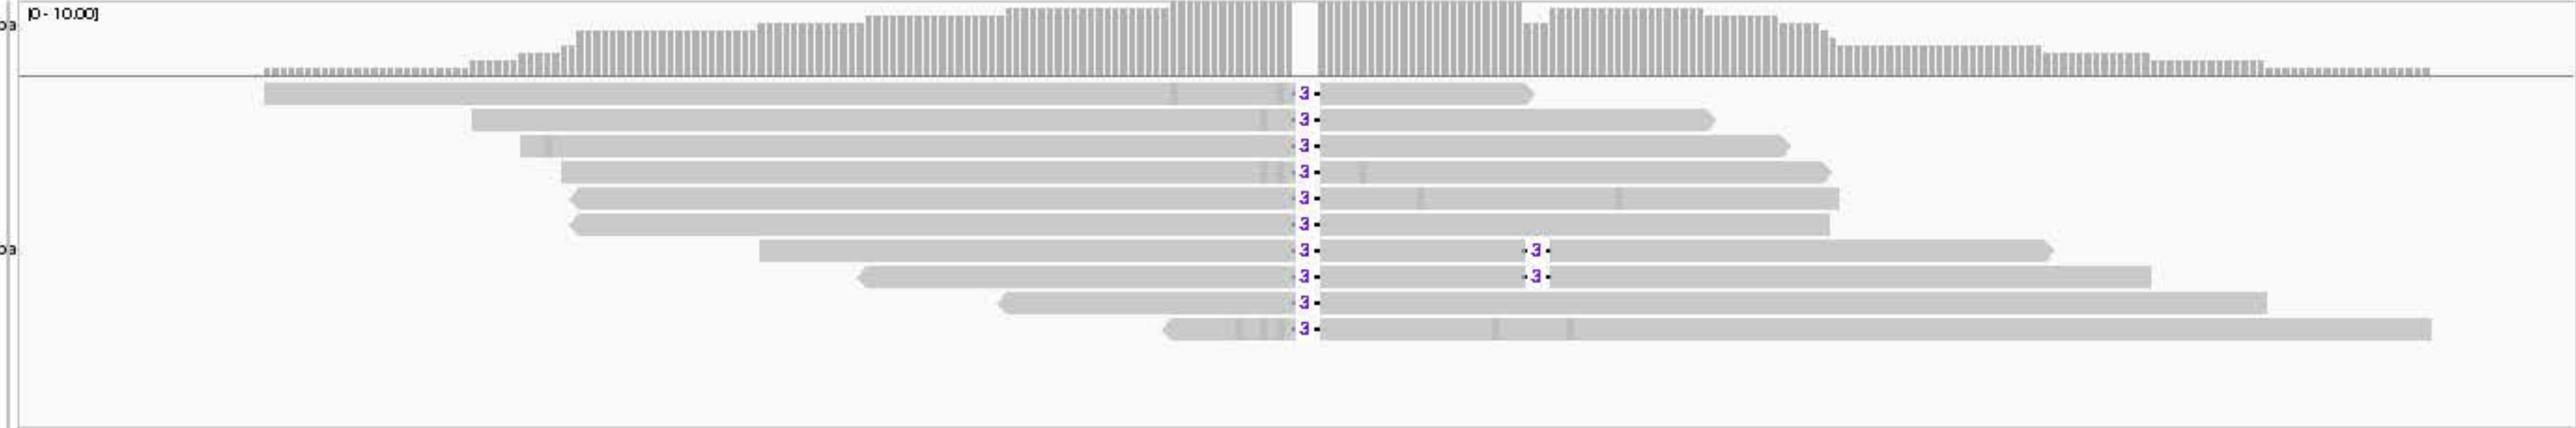

Sequence  
Refseq Genes

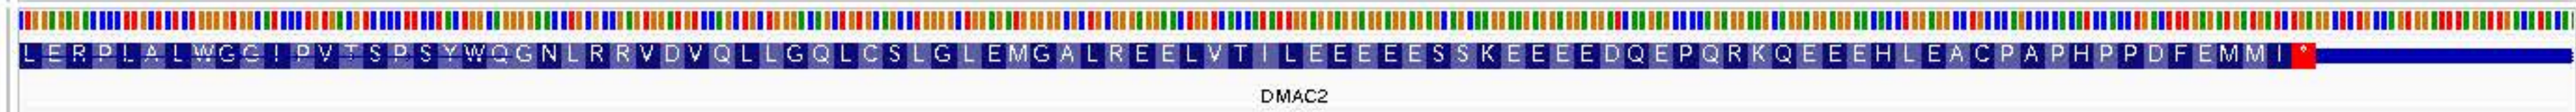

chr19:53,049,932-53,050,241

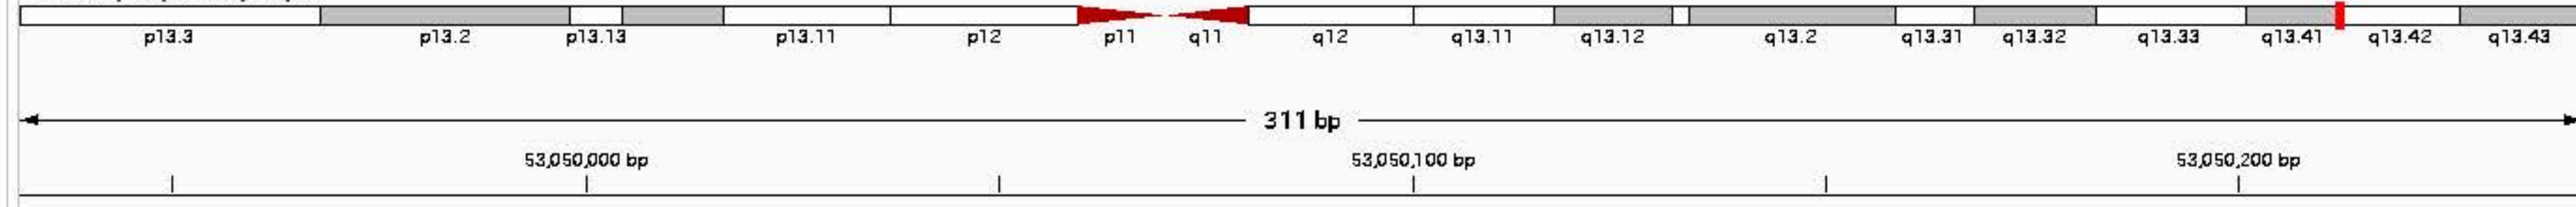

SL\_0004\_RN\_19\_WES\_uniq\_mut.ba  
coverage

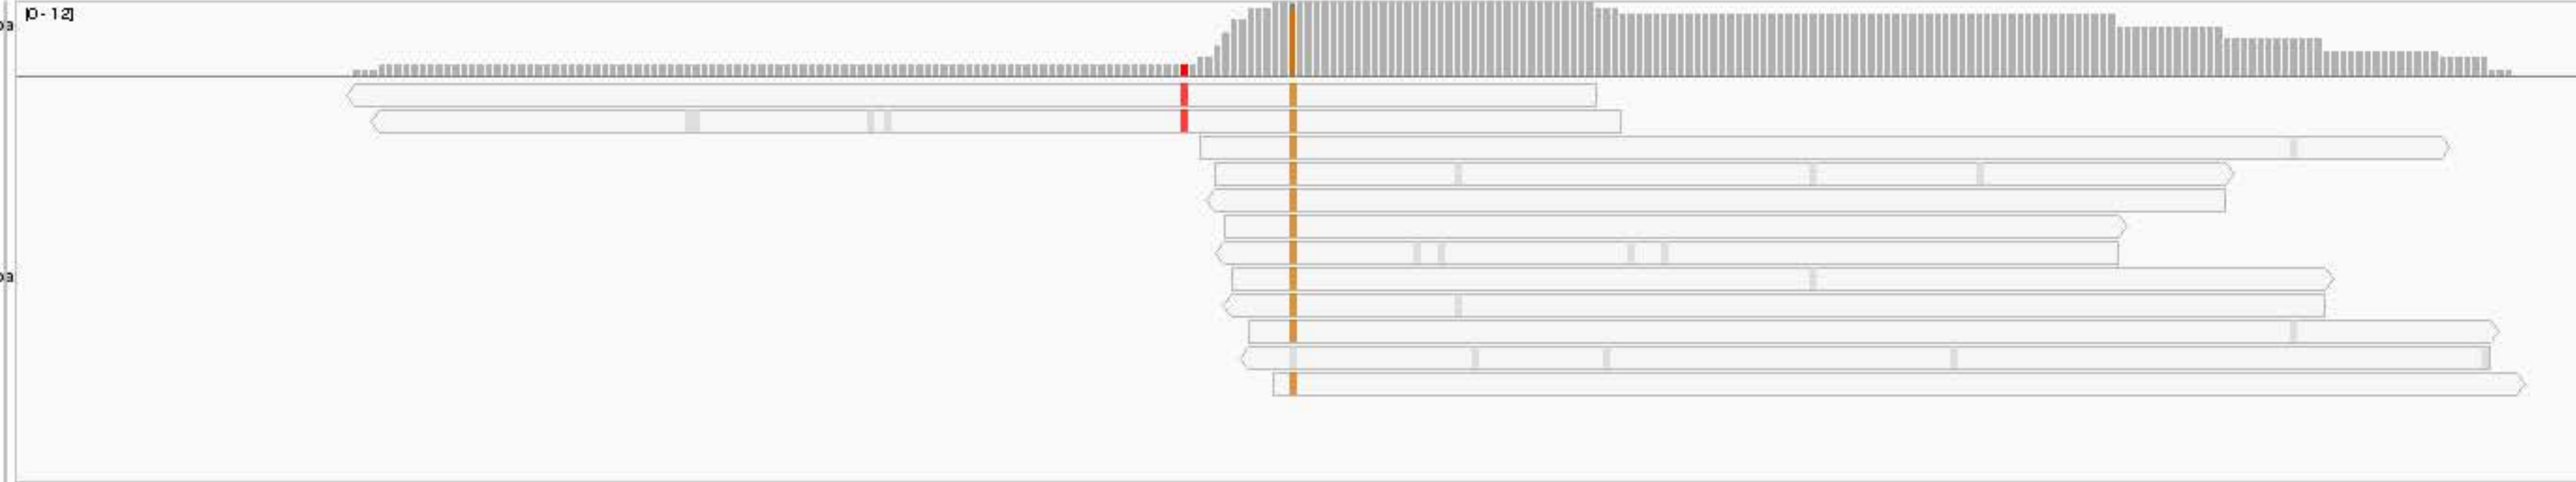

SL\_0004\_RN\_19\_WES\_uniq\_mut.ba

Sequence

Refseq Genes

I P A G W K S Q L H K W F D S H I P R W A C T P P G Y V F L C G P Q K N K L P F D G S P K I T Y S T P P V A N L Y T C I N N I Q H T G E C A V G L L G P R G I G V T I Y N T T Q P R Q K R A L G L I L A G M G

ERVV-2



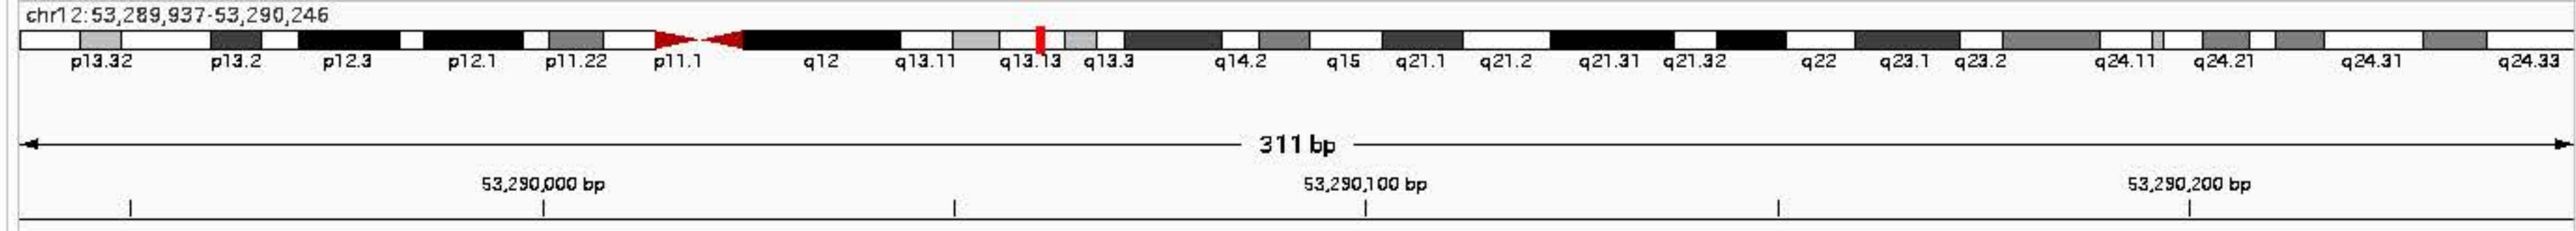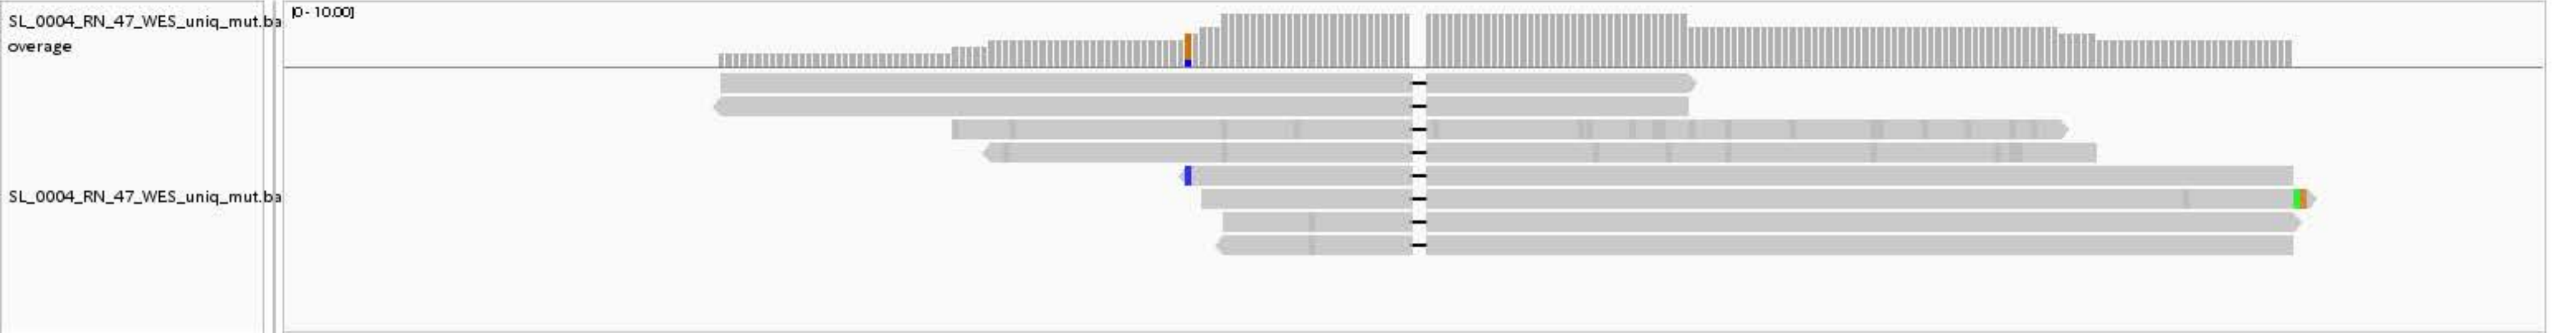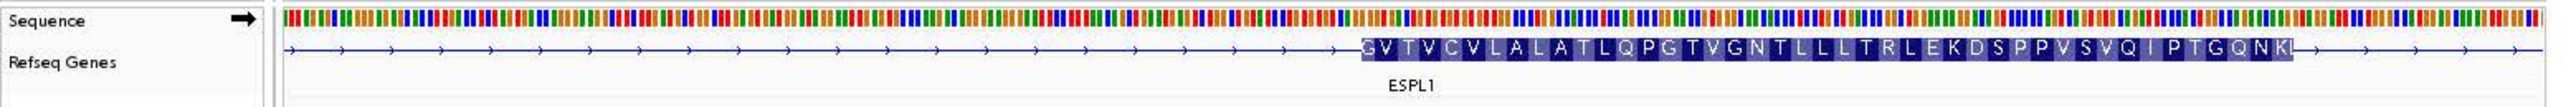

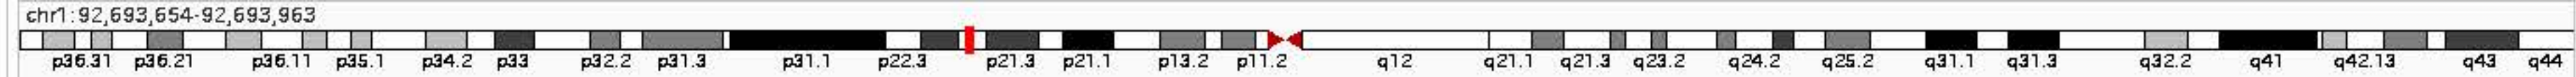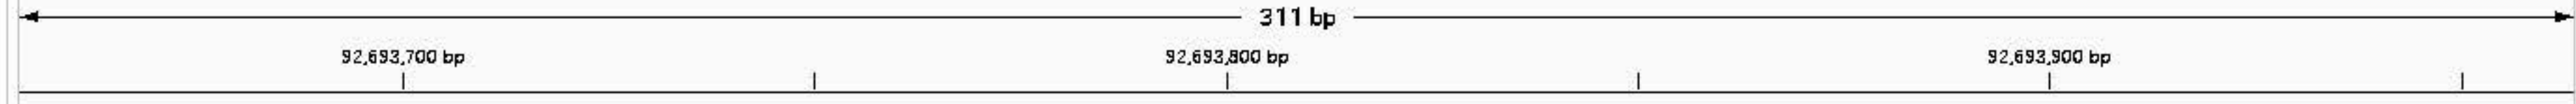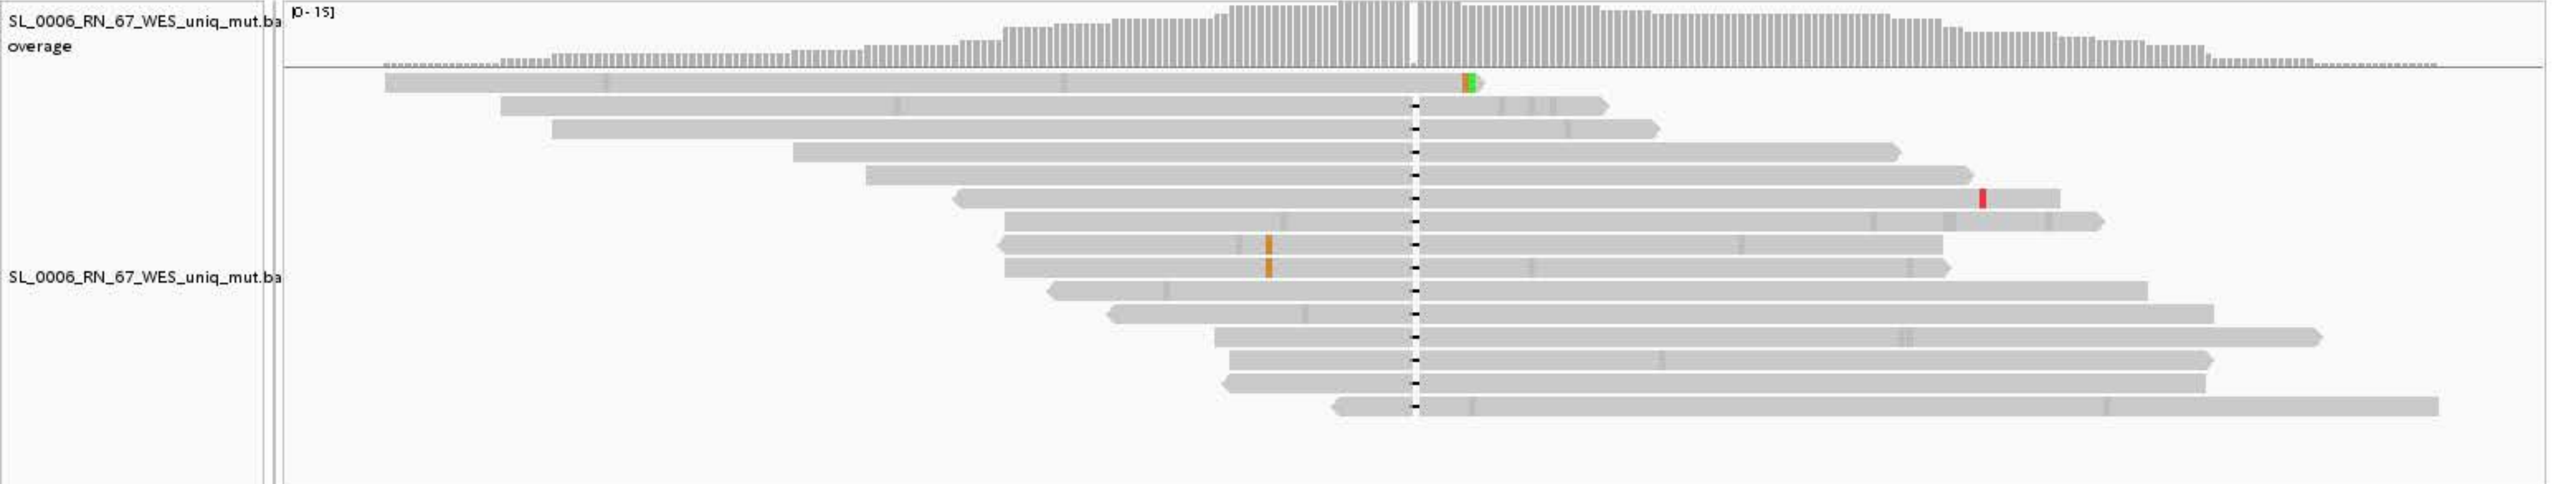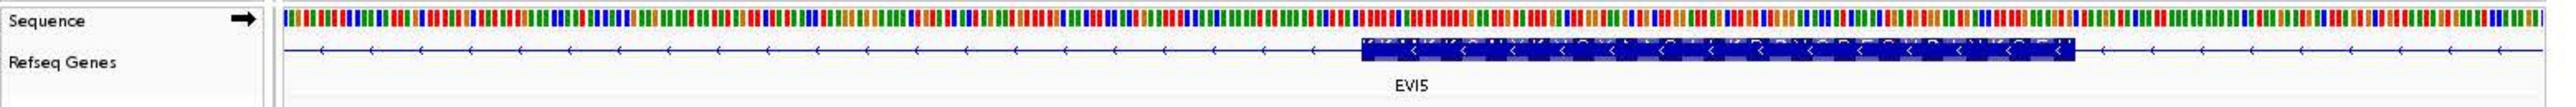

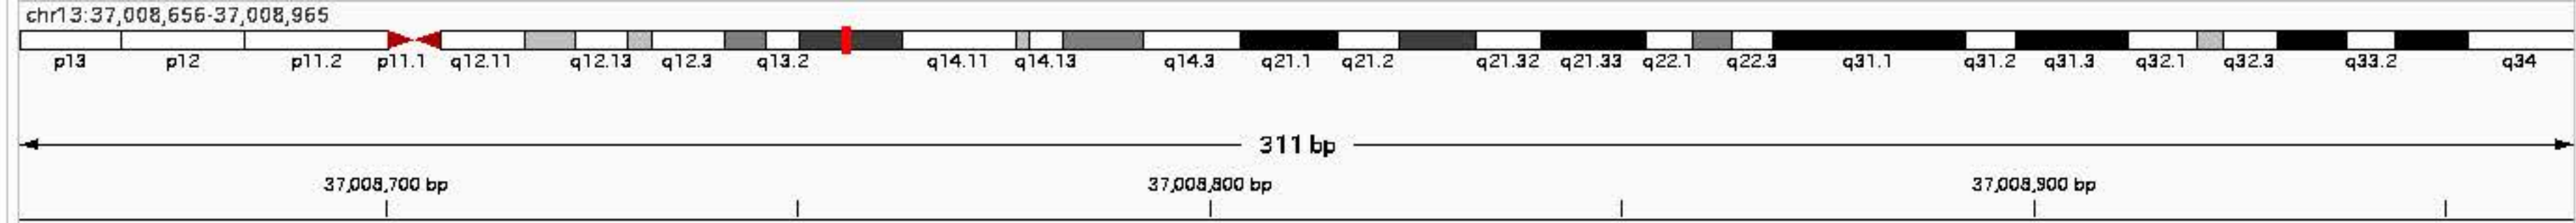

SL\_0015\_RN\_10\_WES\_uniq\_mut.ba  
coverage

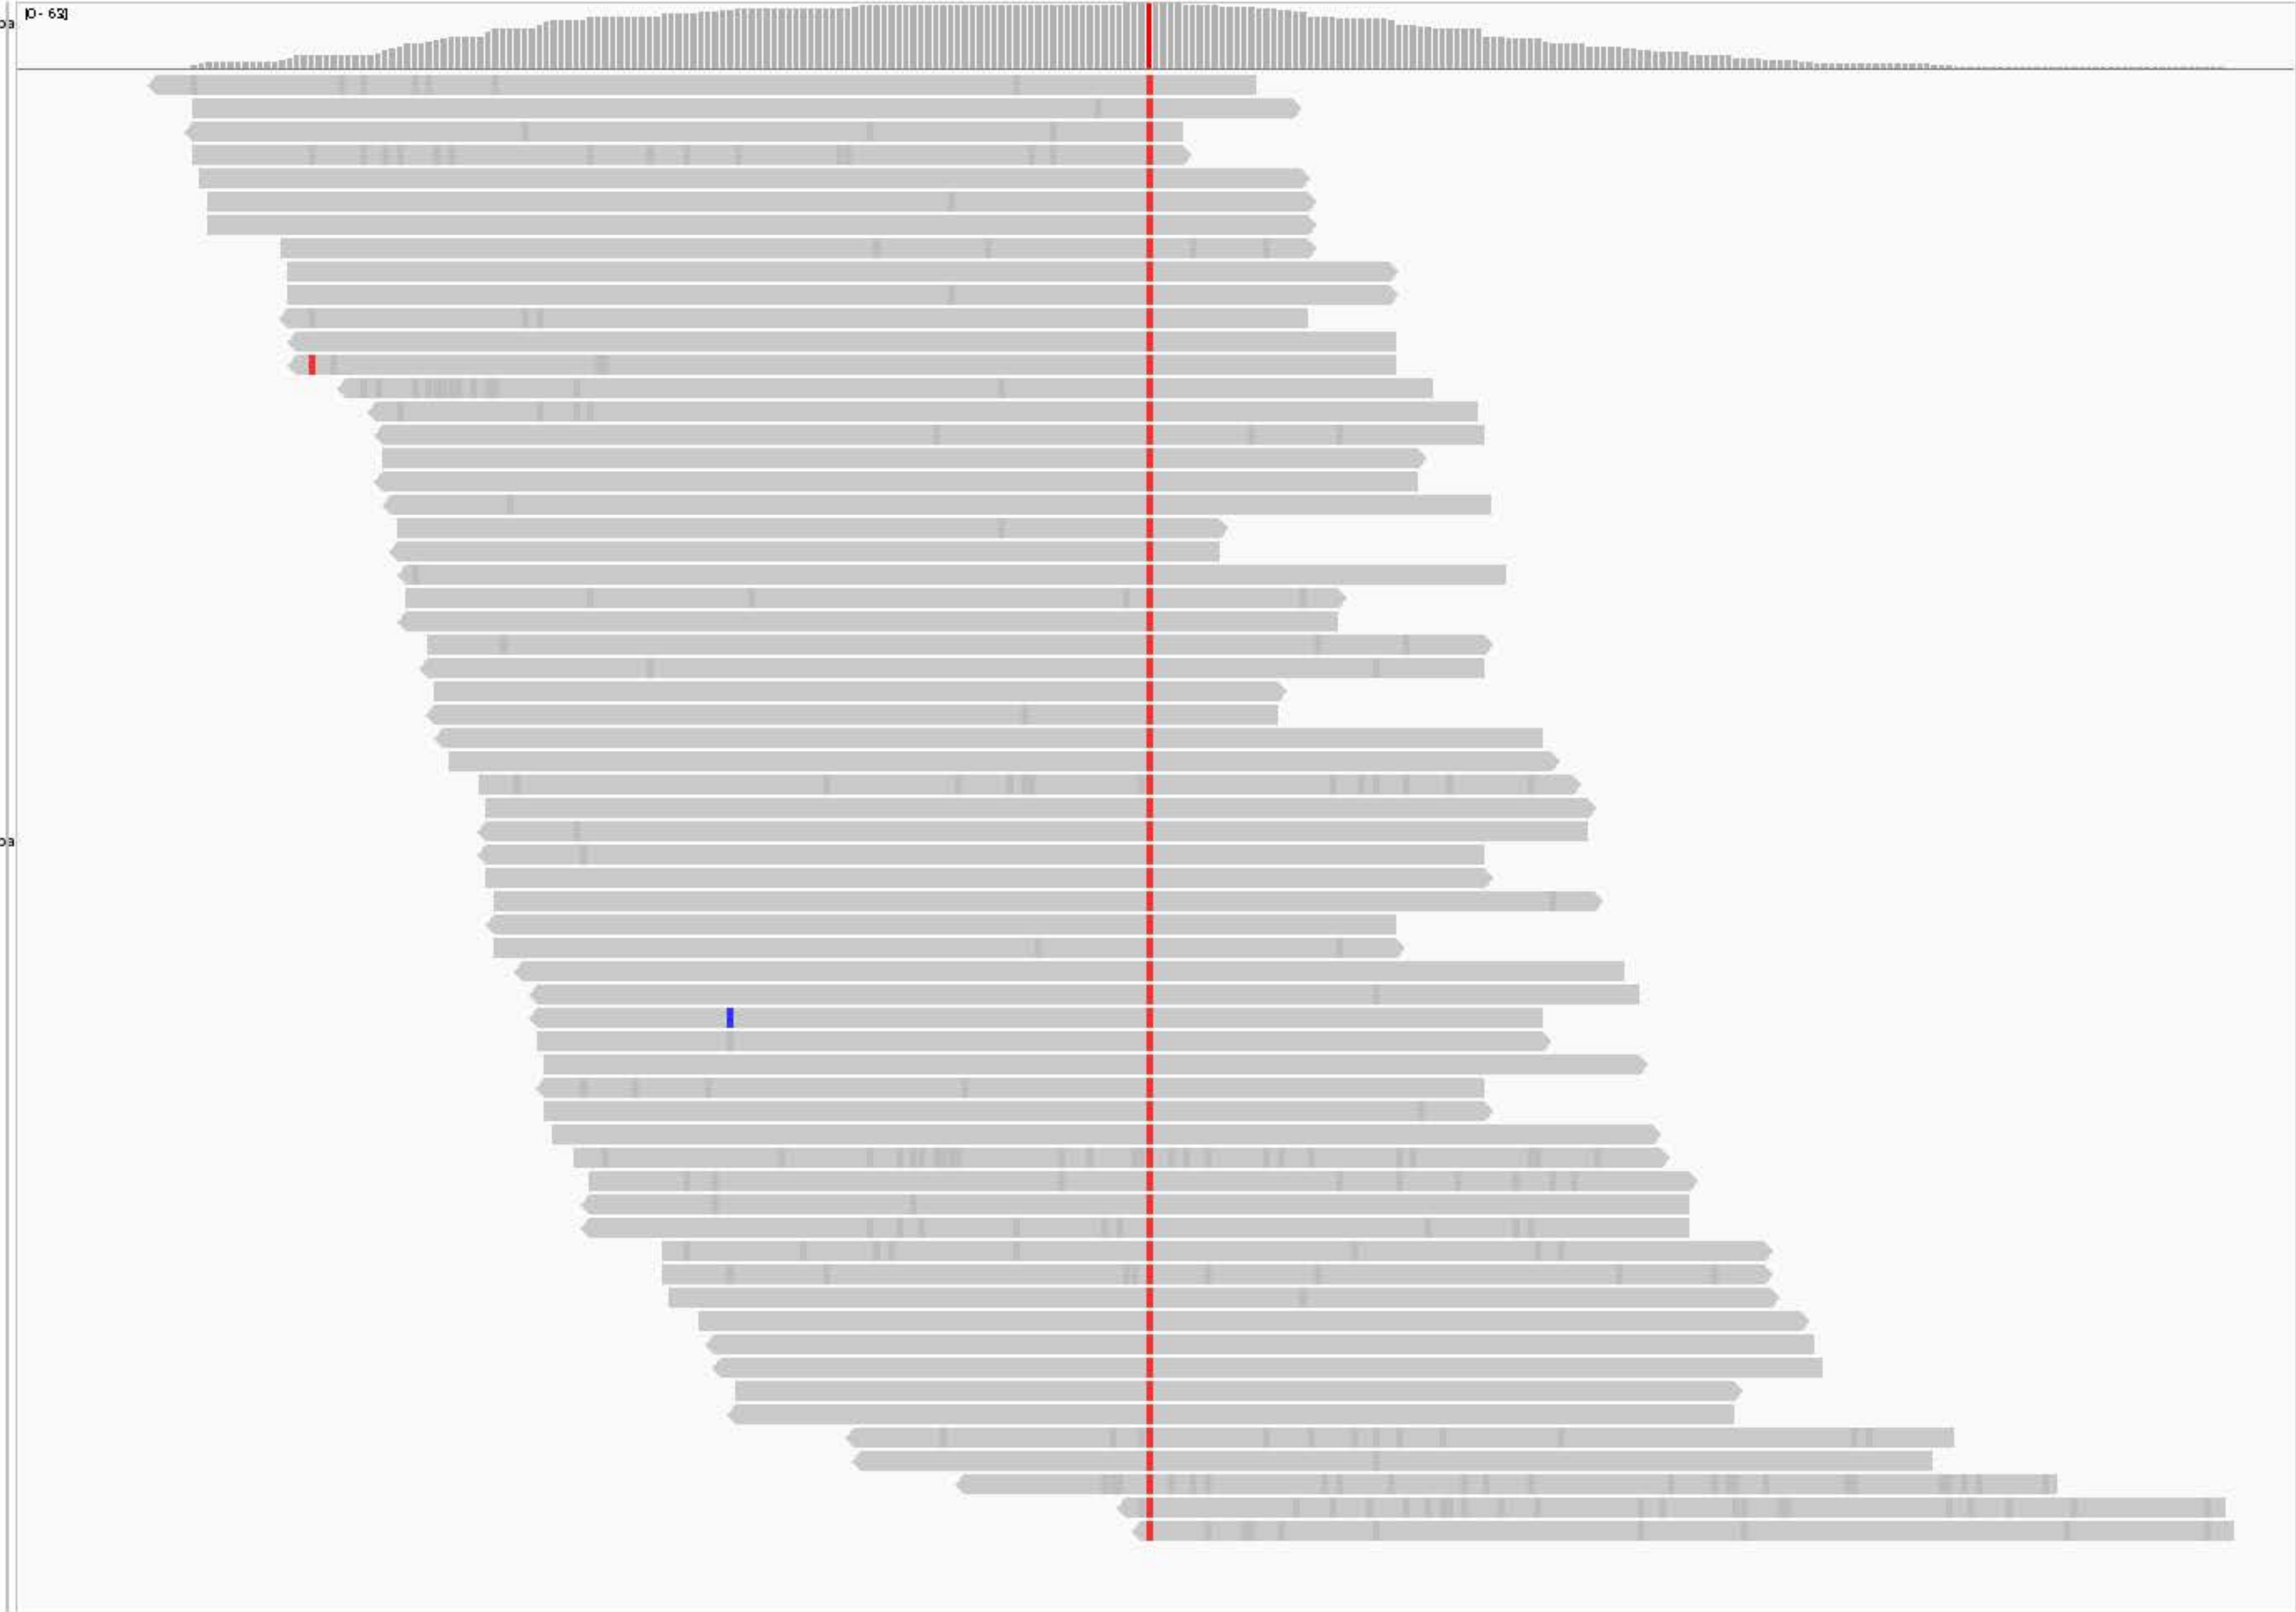

SL\_0015\_RN\_10\_WES\_uniq\_mut.ba

Sequence →  
Refseq Genes

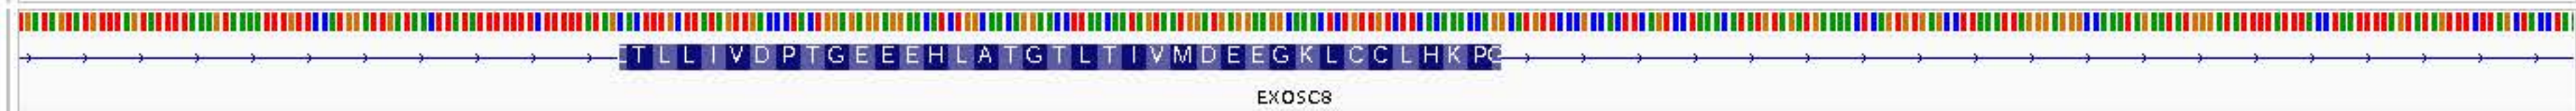



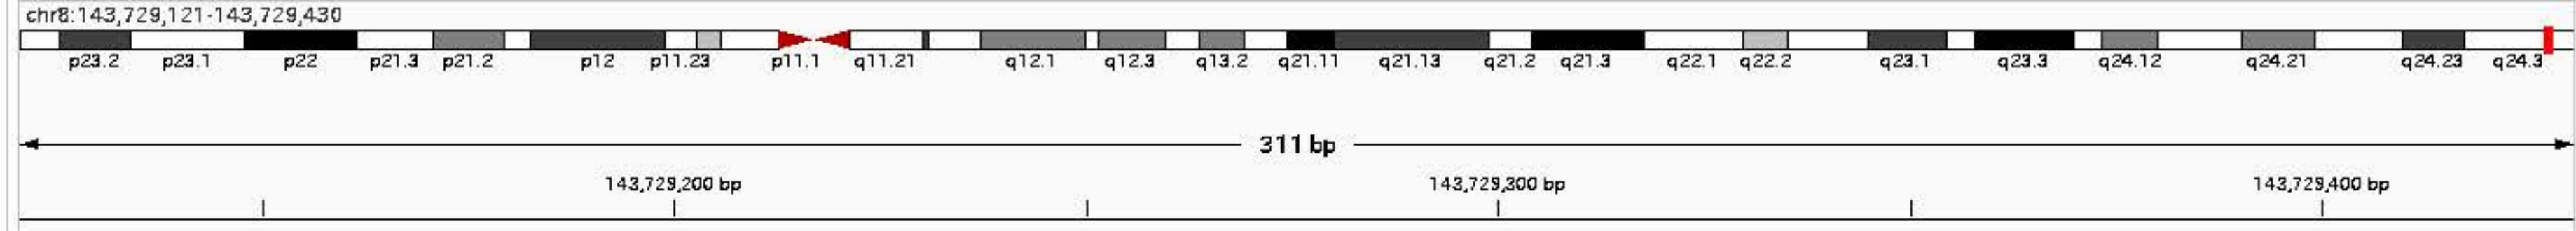

SL\_0015\_LN\_46\_WES\_uniq\_mut. coverage

SL\_0015\_LN\_46\_WES\_uniq\_mut.

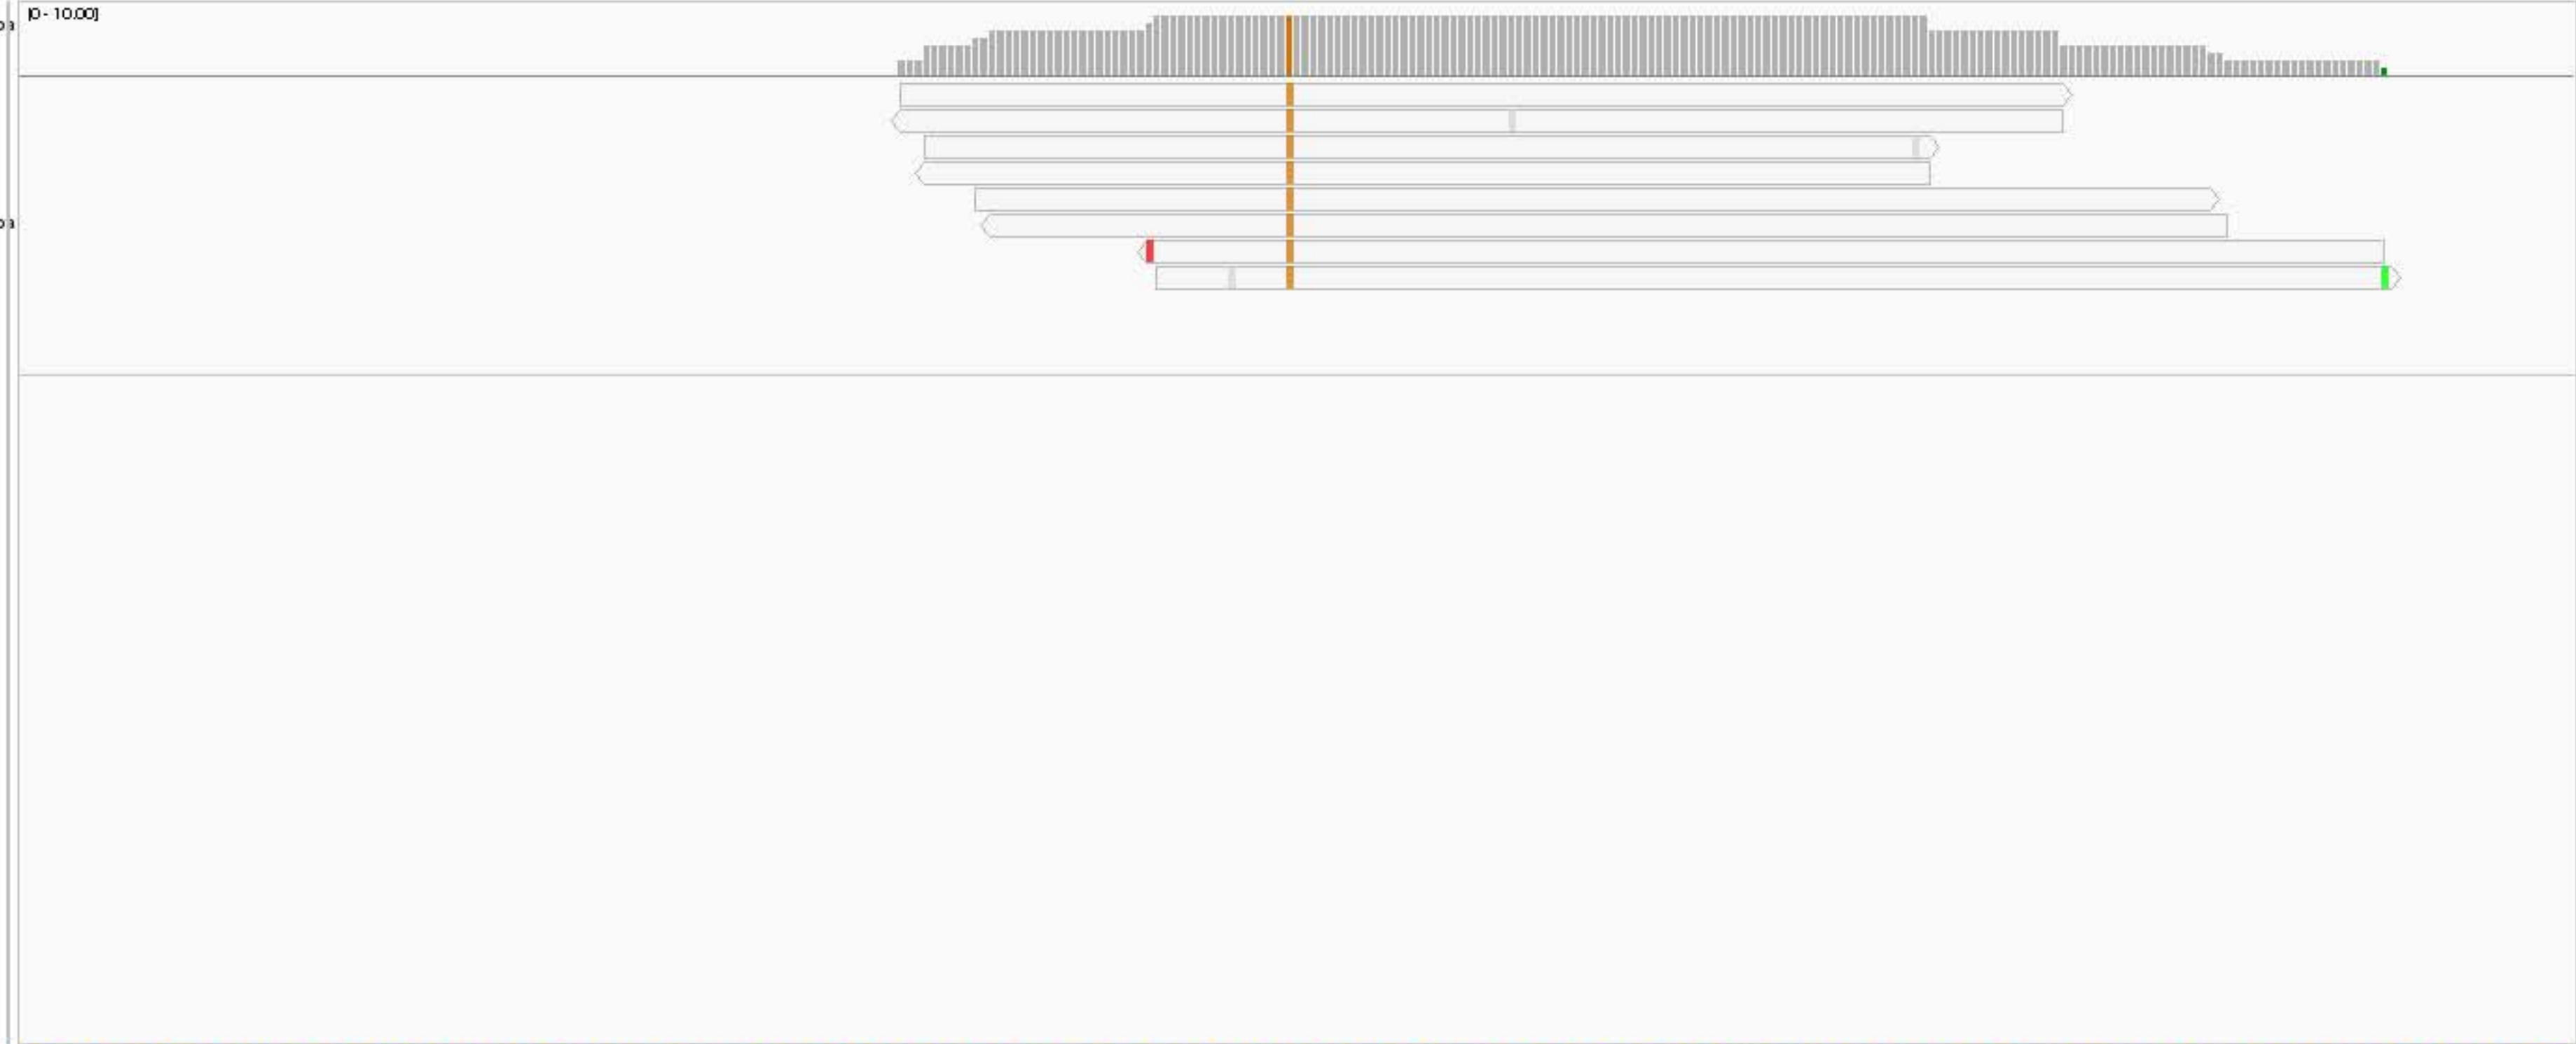

Sequence

Refseq Genes

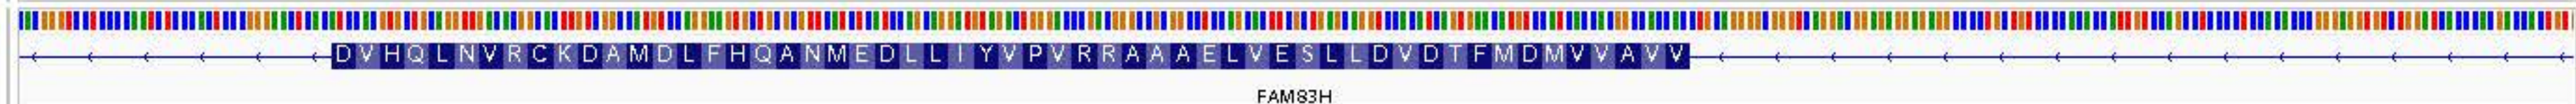

FAM83H

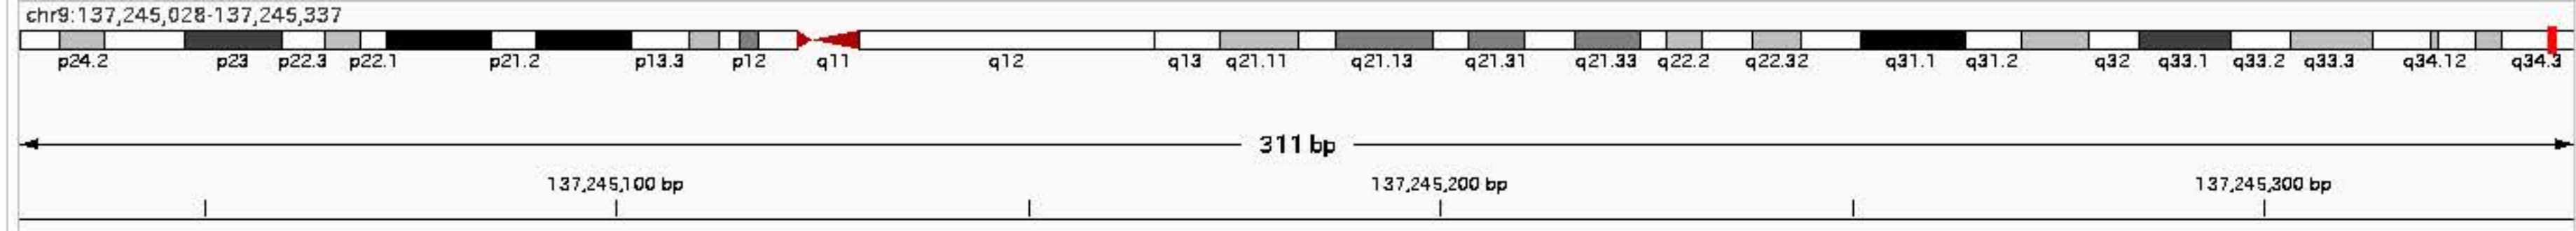

SL\_0002\_LN\_1\_WES\_uniq\_mut.ba  
verage

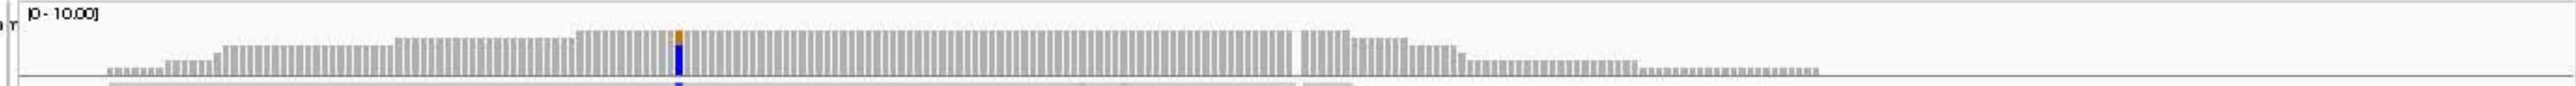

SL\_0002\_LN\_1\_WES\_uniq\_mut.ba r

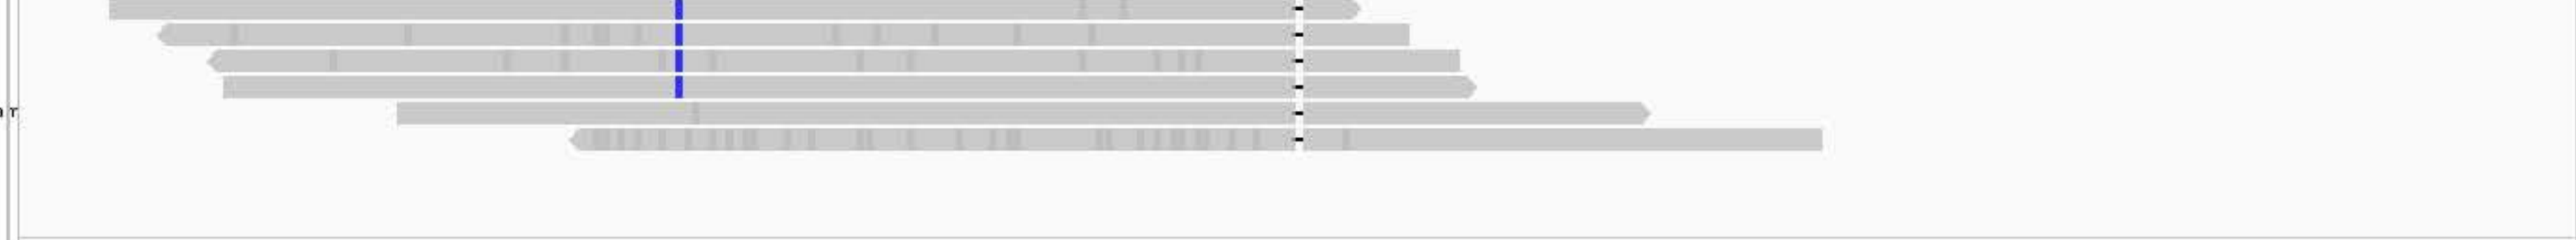

Sequence →

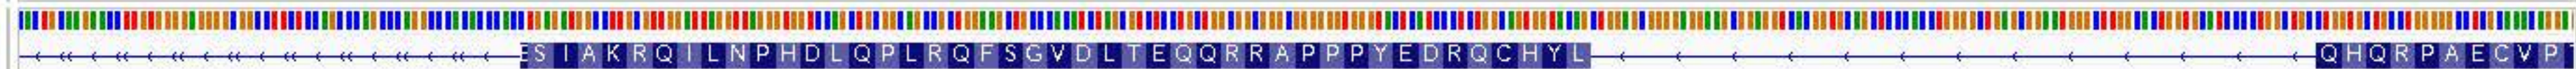

Refseq Genes

chr15:52,608,717-52,609,026

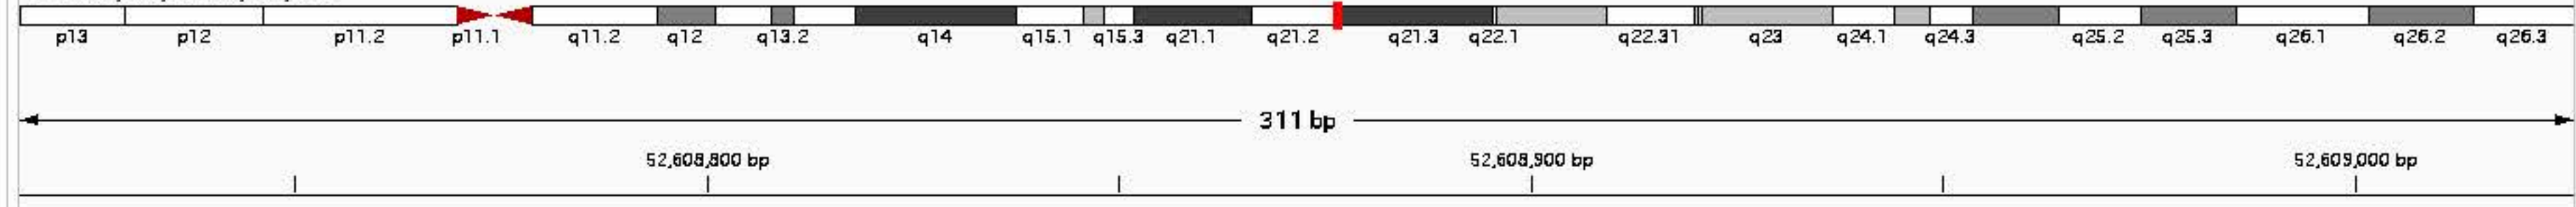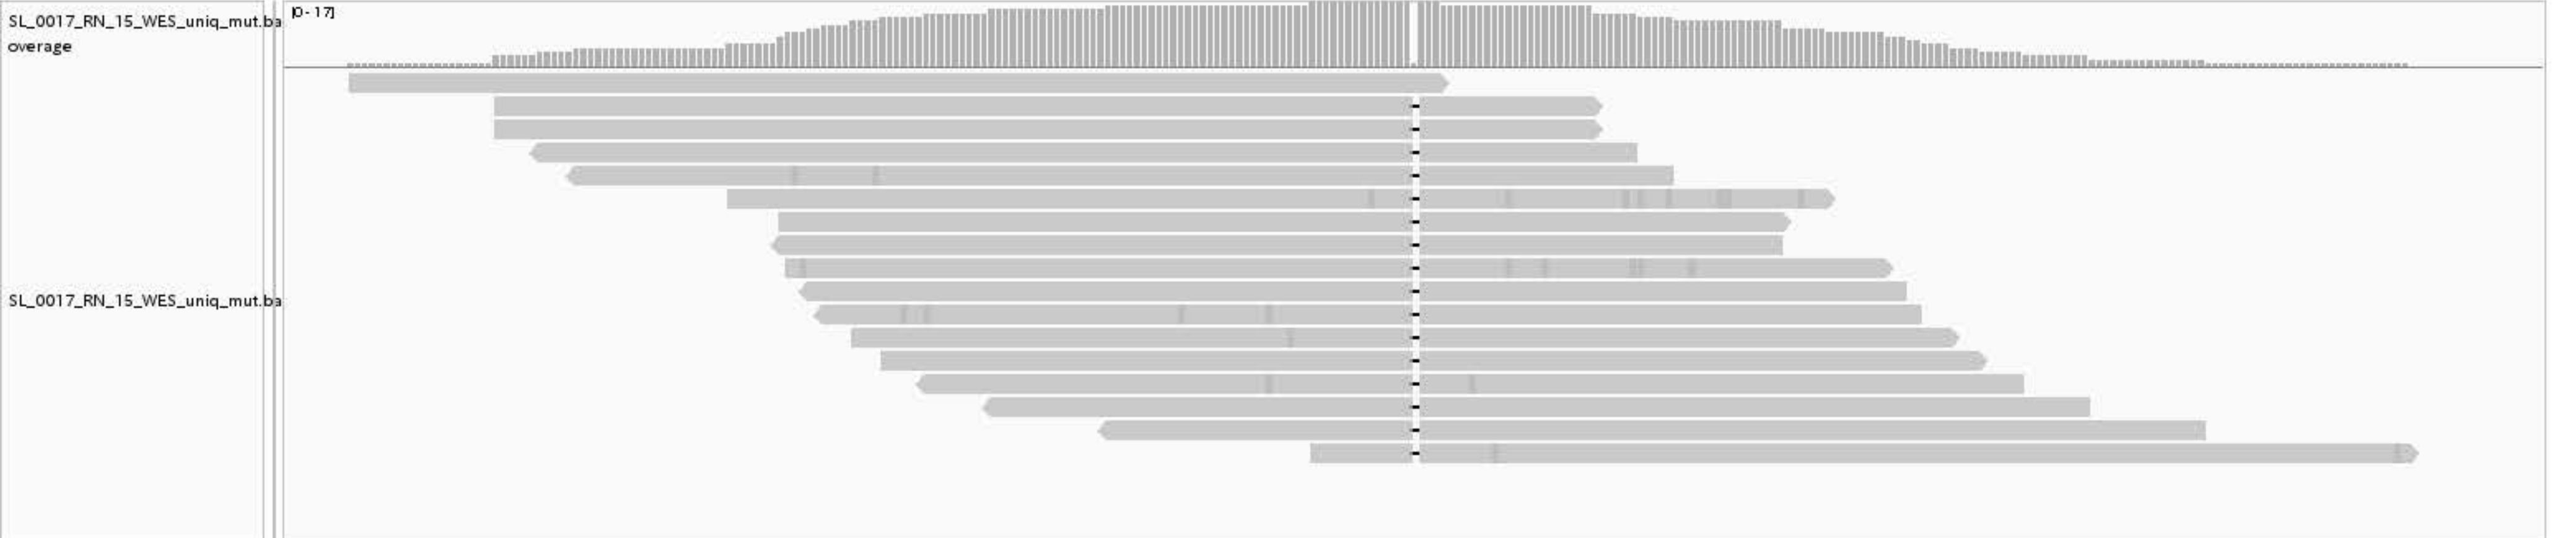

Sequence →  
Refseq Genes

ENDKNLYNEISNLQTNQECTKPRKSDKNSSMSEYKNLYESMELVTVKIKSDNKKSDDSQLNGFFKPNYNENIIEKEYKNTCIQKDITTCNSYQKDIGNSMEQE

FAM214A



chr2:206,771,847-206,772,156  
p25.2 p24.3 p24.1 p23.2 p22.2 p21 p16.2 p15 p13.3 p12 p11.2 q11.1 q12.1 q13 q14.2 q21.1 q22.1 q22.3 q24.1 q24.3 q31.1 q31.3 q32.2 q33.1 q33.3 q35 q36.2 q37.1 q37.3

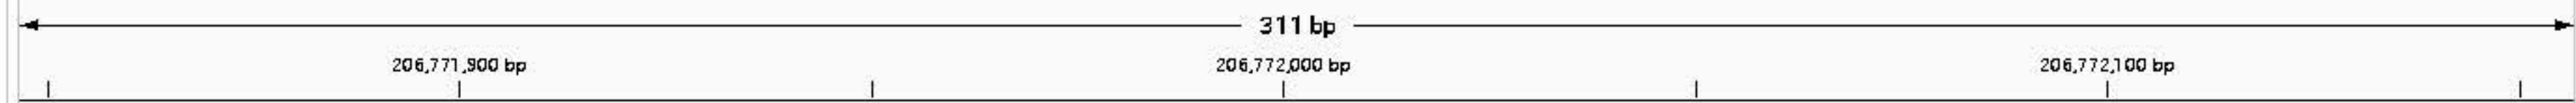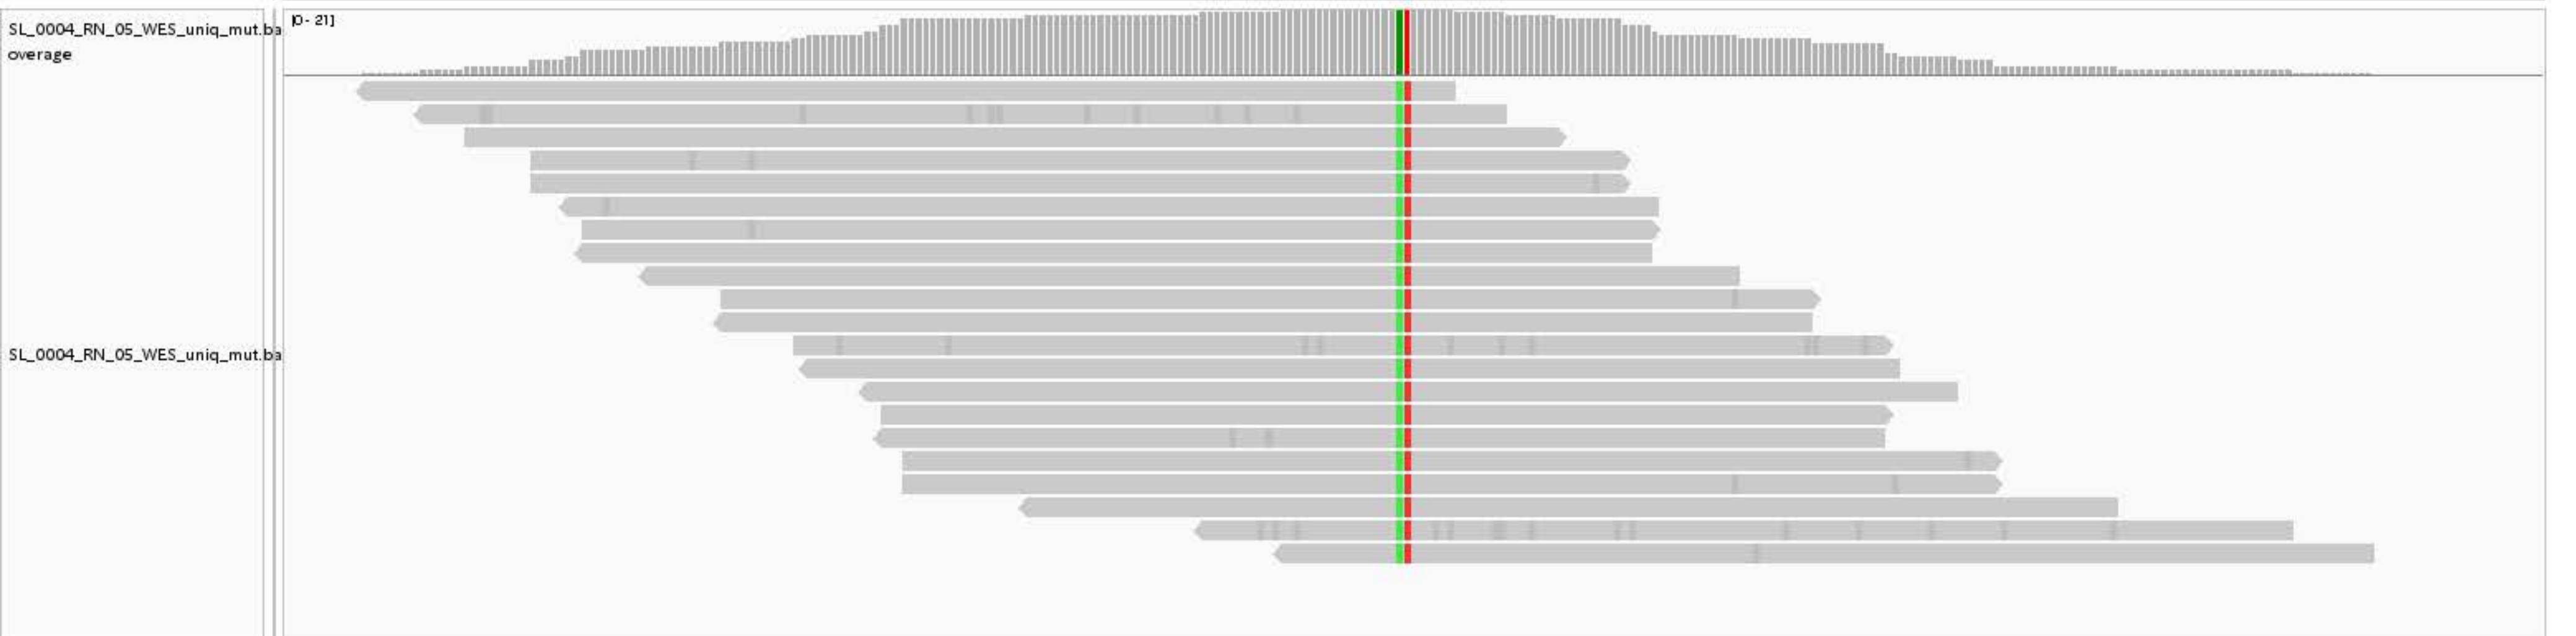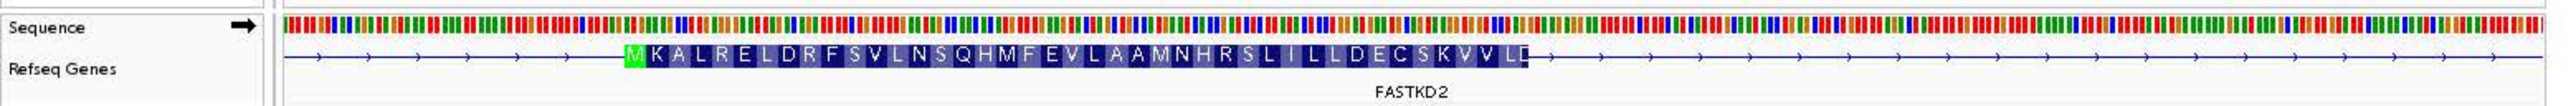

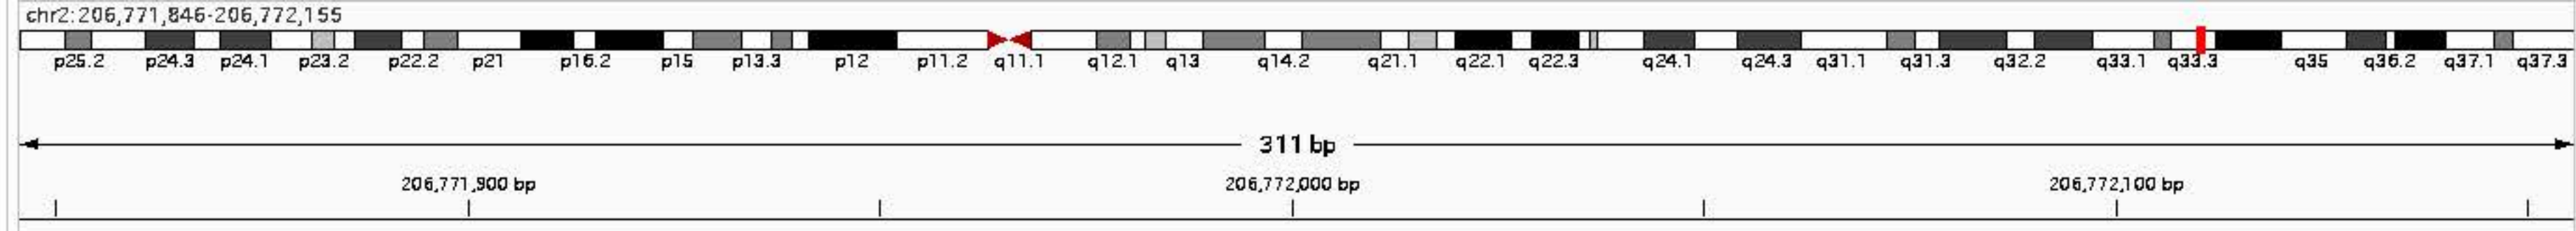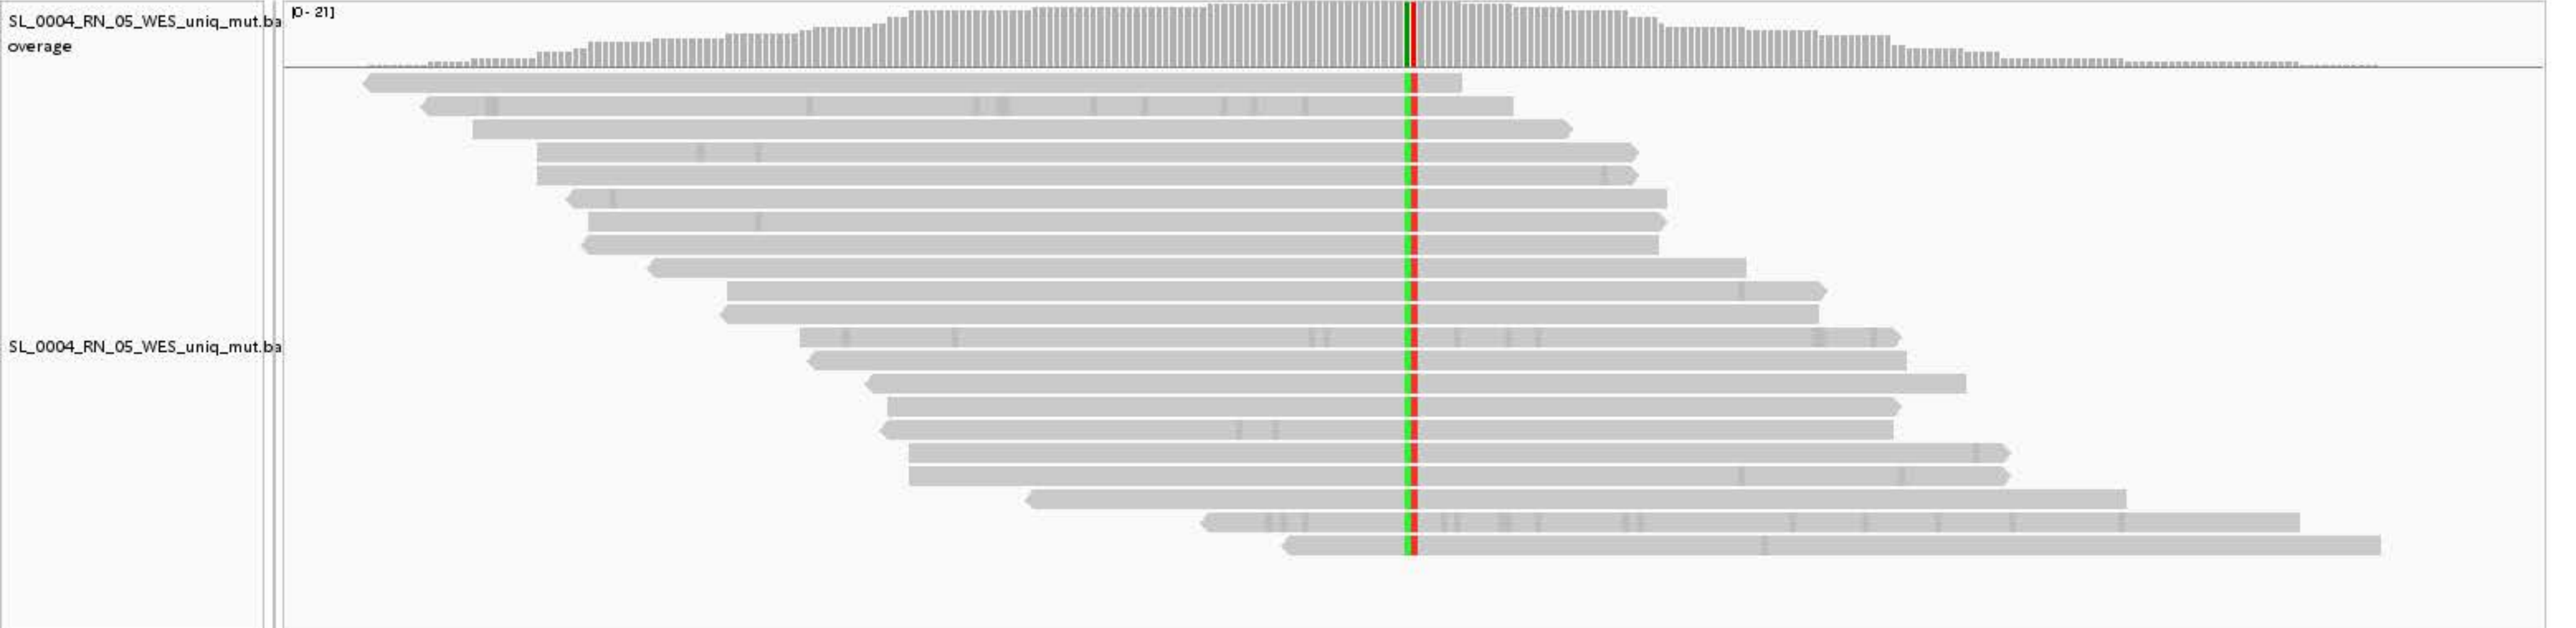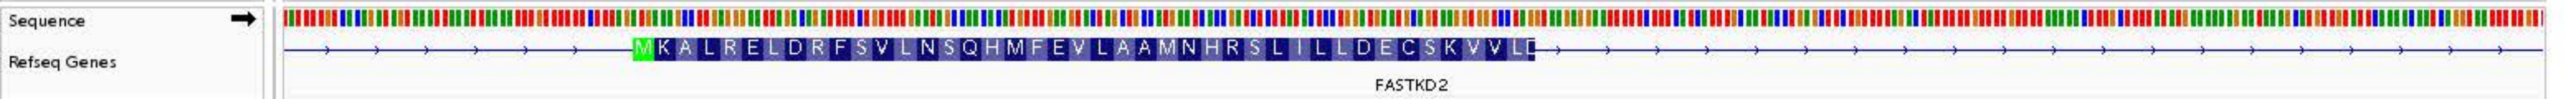

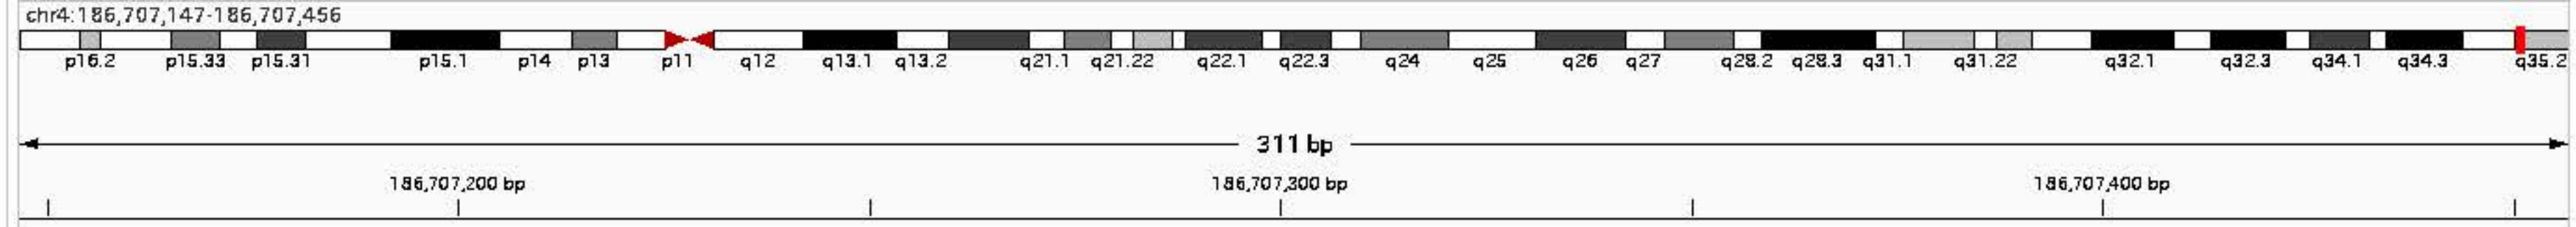

SL\_0015\_RN\_10\_WES\_uniq\_mut.ba  
coverage

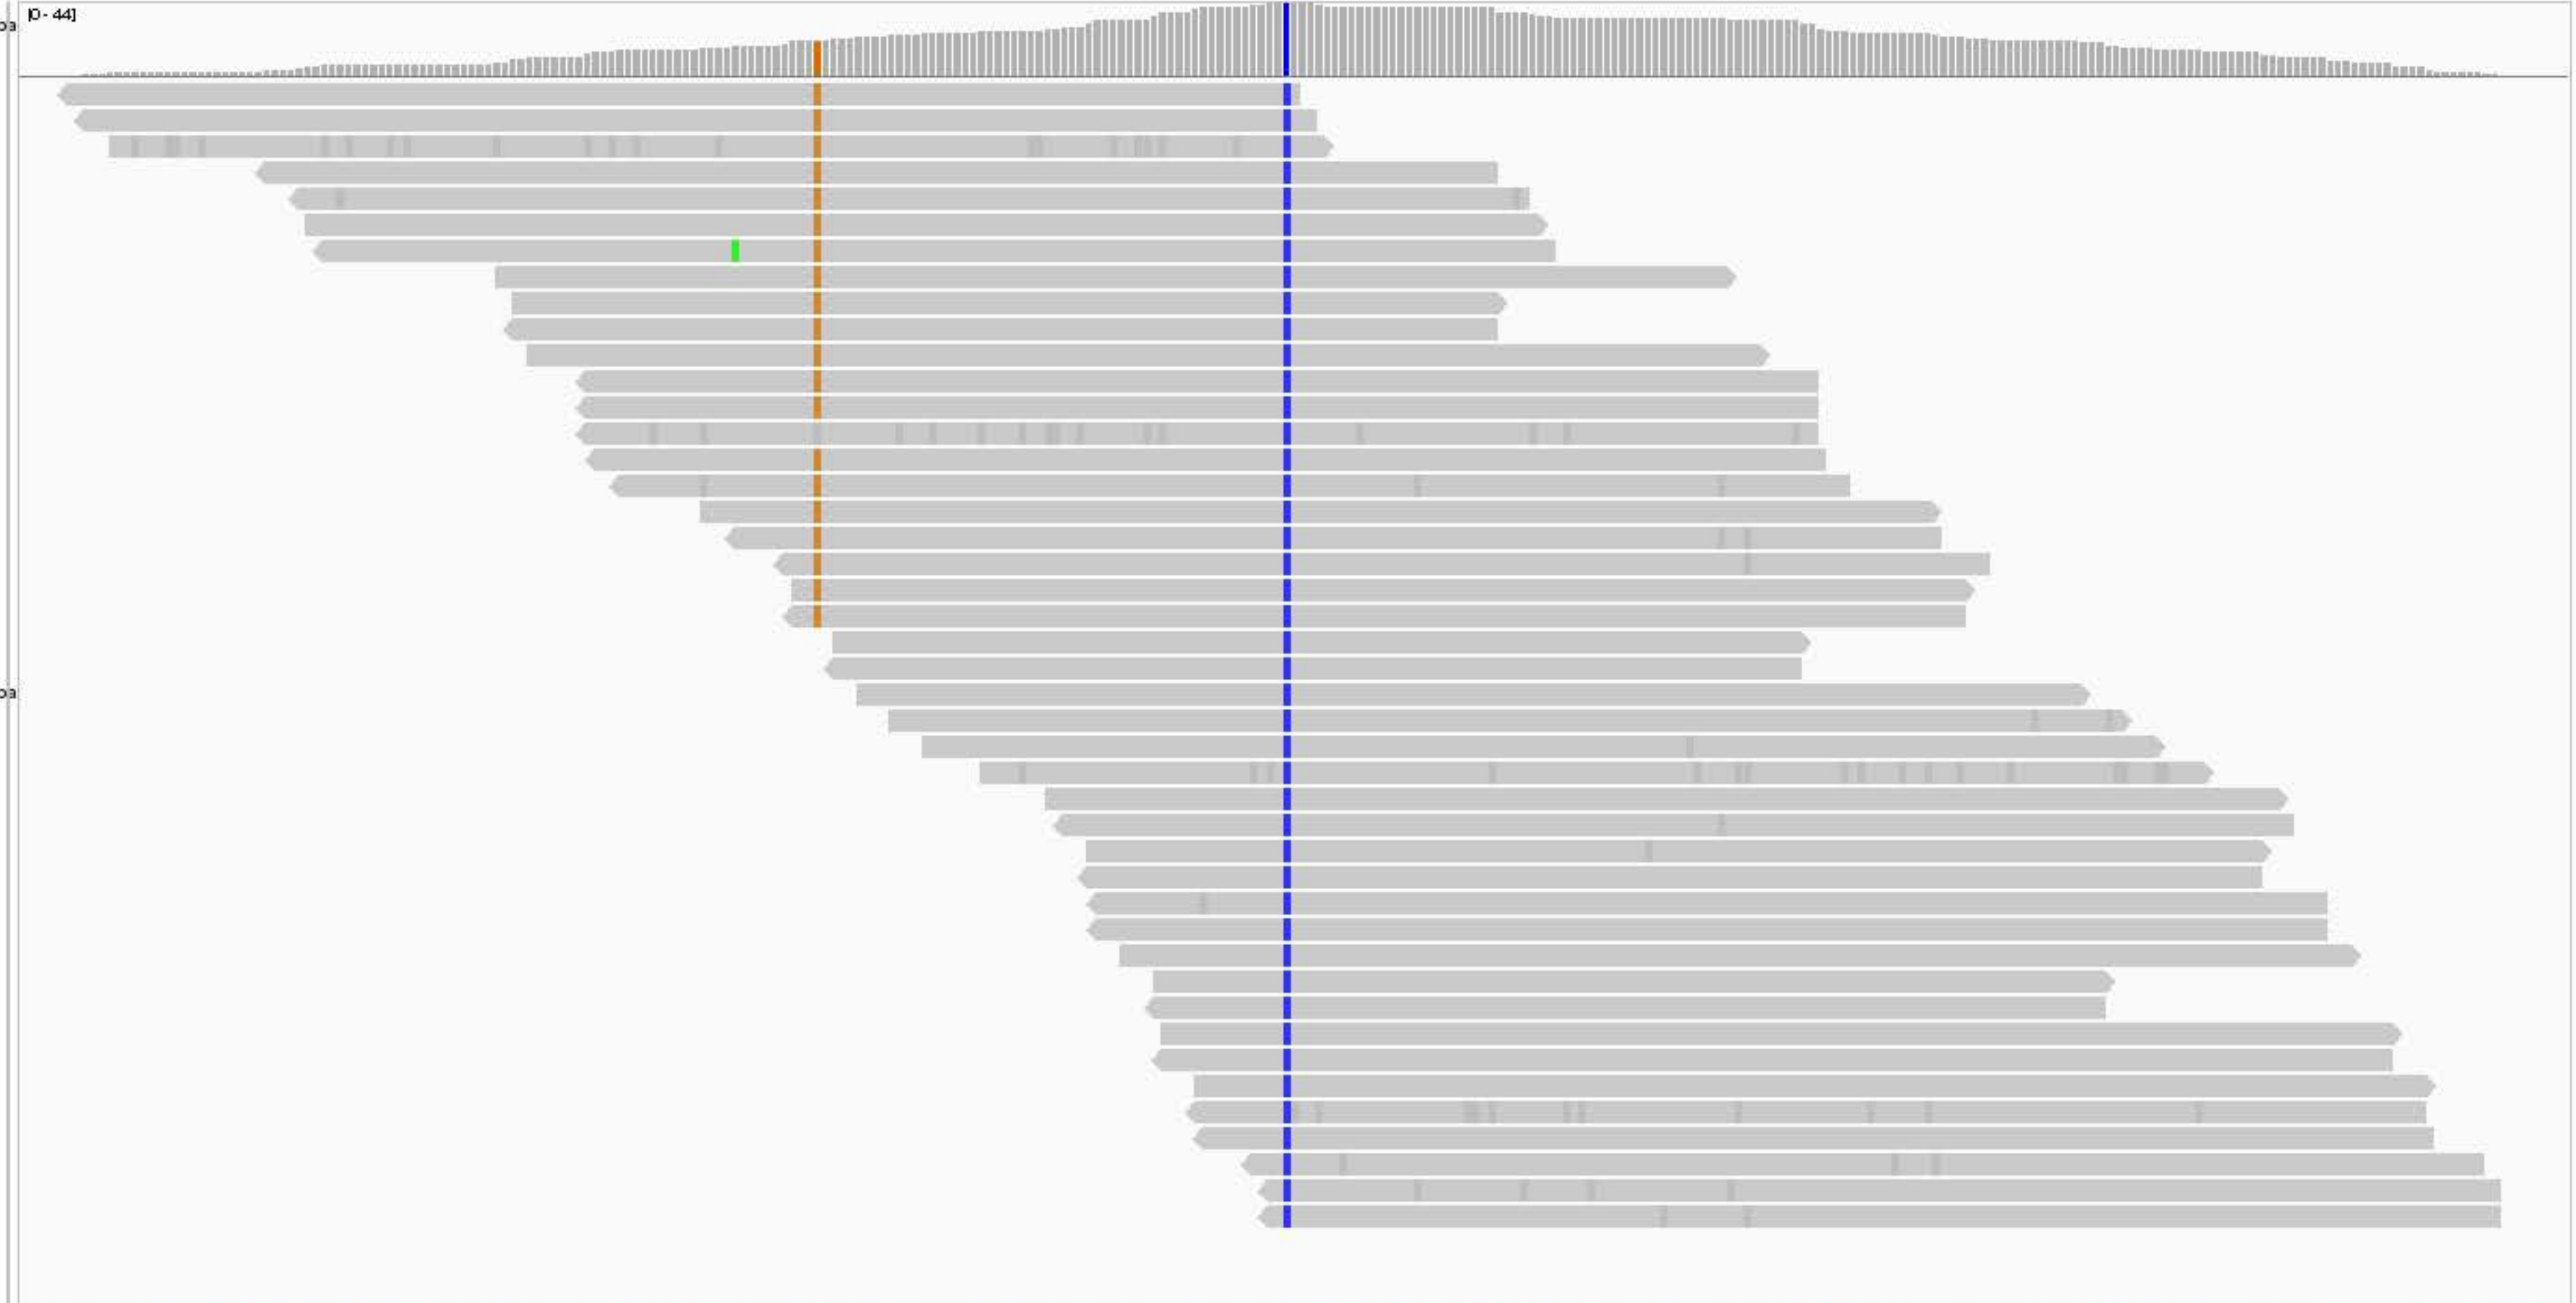

SL\_0015\_RN\_10\_WES\_uniq\_mut.ba

Sequence →  
Refseq Genes

L S H E H Q L E R D L P R A I N V V G T V S D I S F T D T D T V I S Y T V H G N P G L D K D T A E V Q I I E S H V E K D E S V E V F Y S E Q L F E P P N D N A D V V V V H L L R W A A K Q P I G L D Y V T I N  
 FAT1



chr5:151,505,603-151,505,912

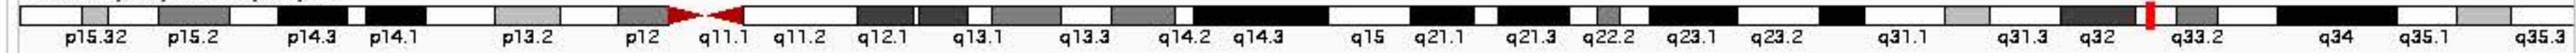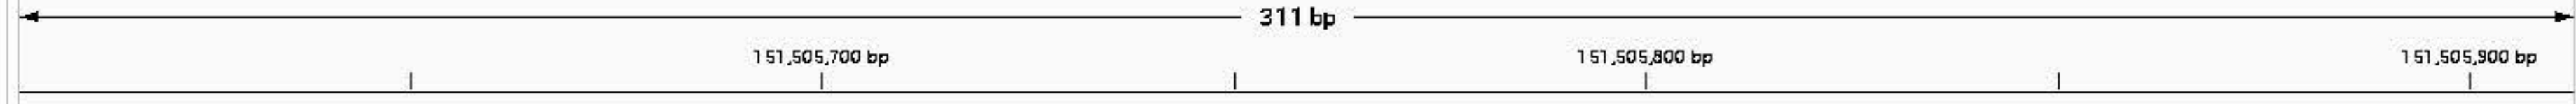

SL\_0006\_RN\_59\_WES\_uniq\_mut.ba  
coverage

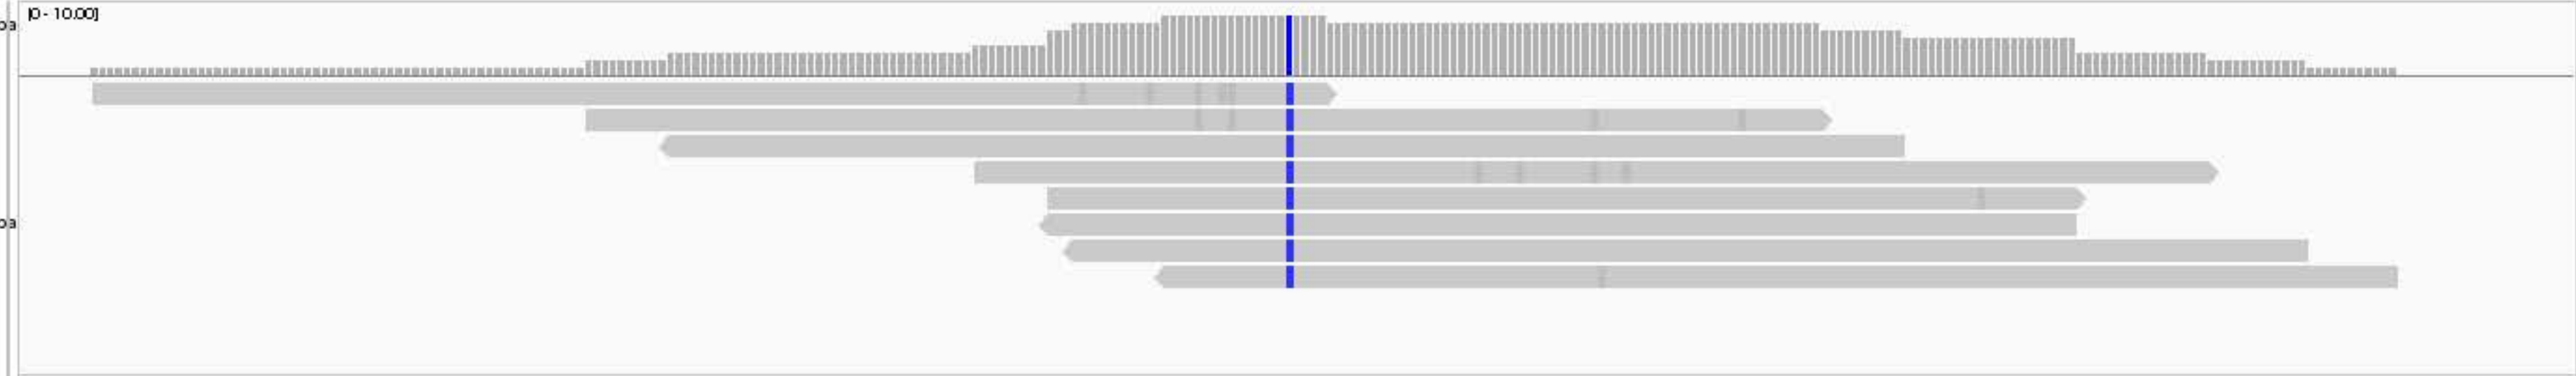

Sequence  
Refseq Genes

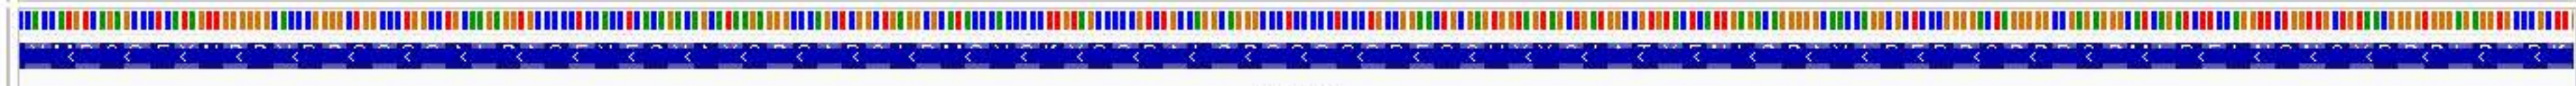

SLC36A1

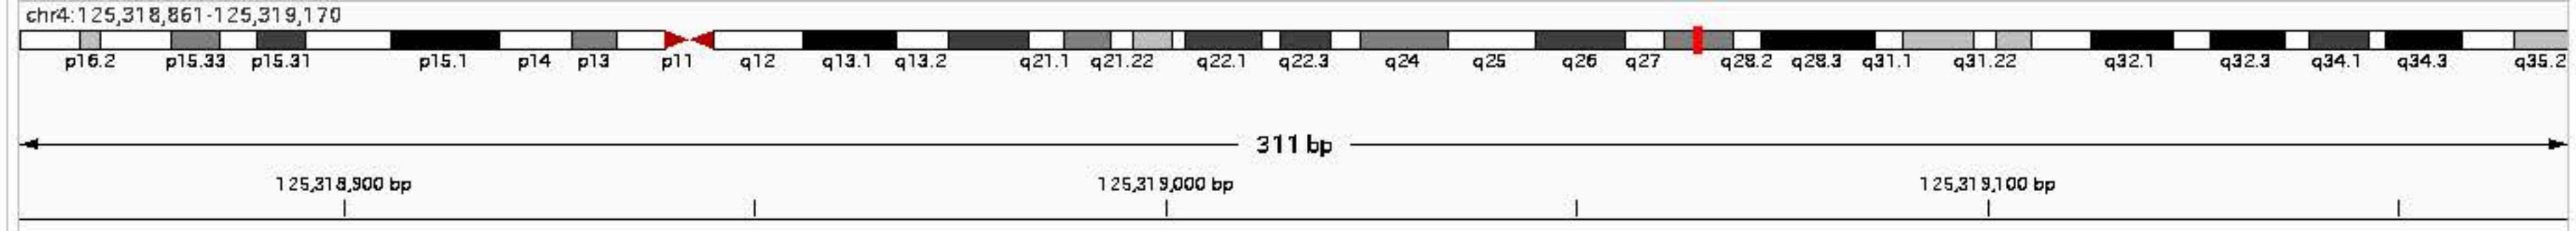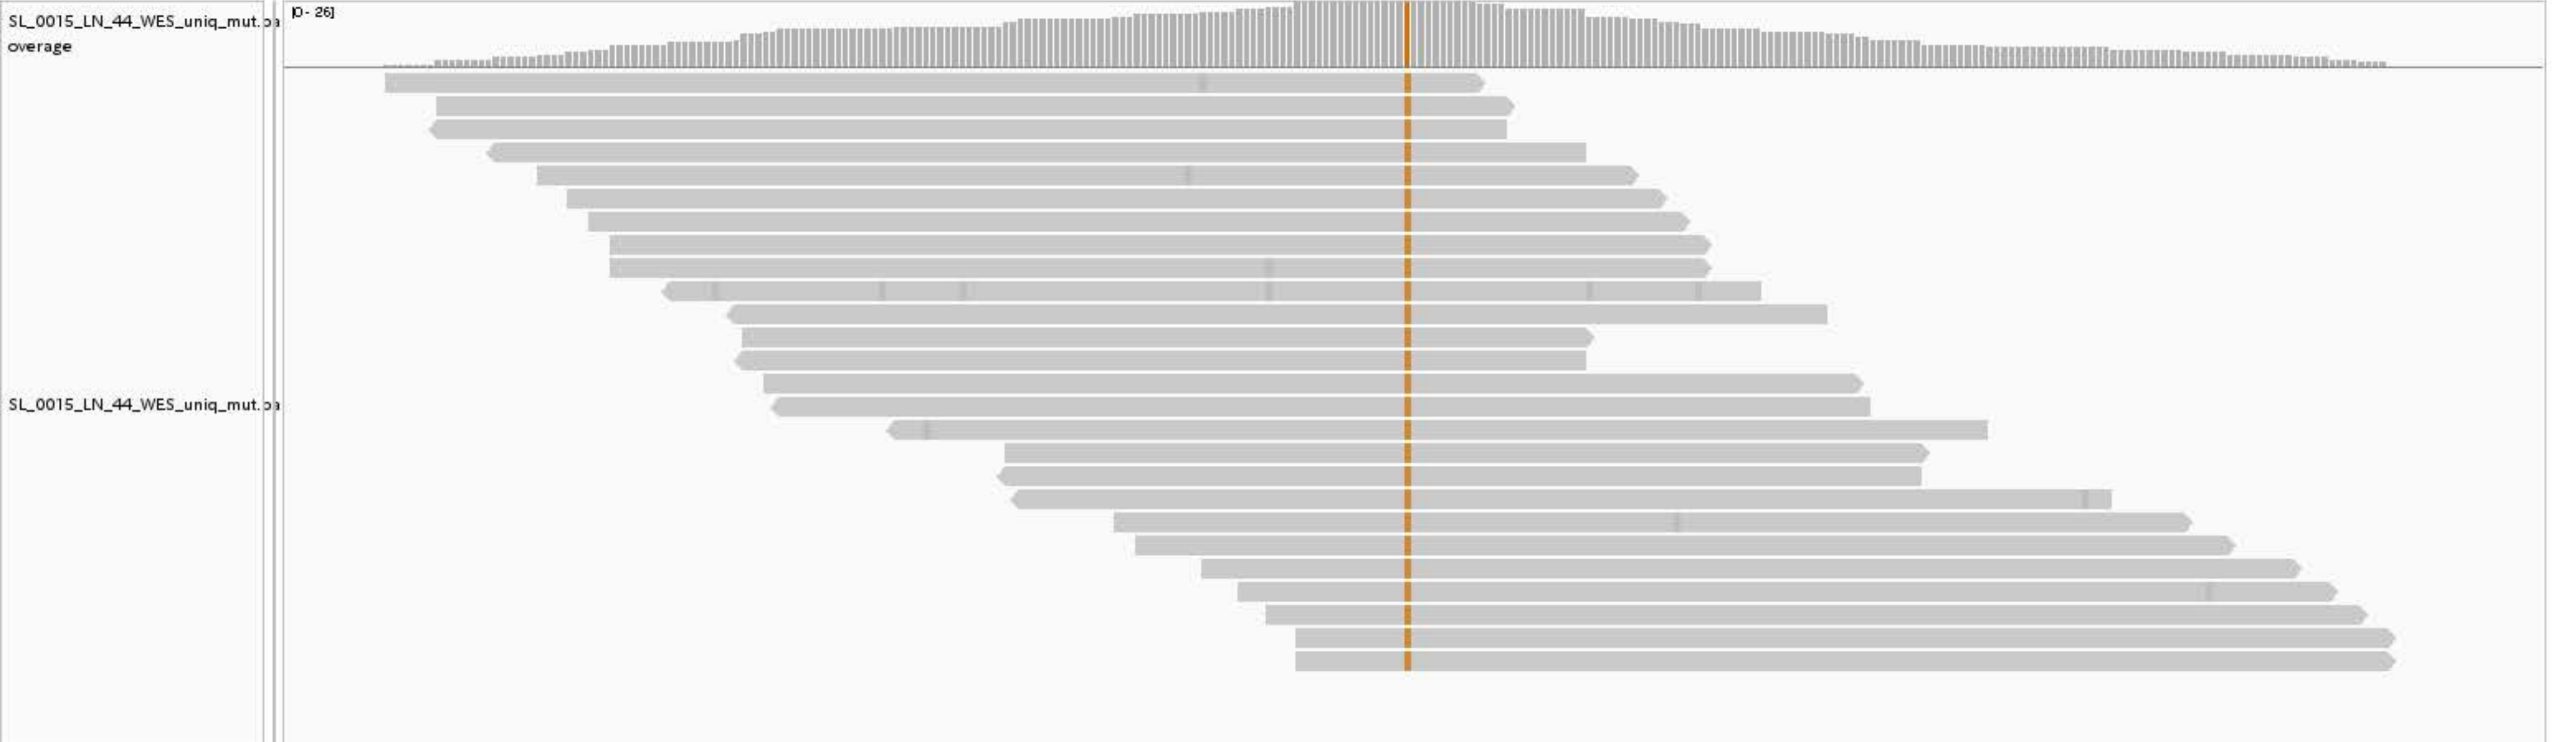

Sequence →

Refseq Genes

ASTMDLNSNISYLITTDGQKGMFAINQVTGQLTTANVIDREEQSFYQLKVVASGGTVTGDTMVNITVKDLNDNSPHFLQAIESVNVVENWQAGHSIFQAKAVDP

FAT4

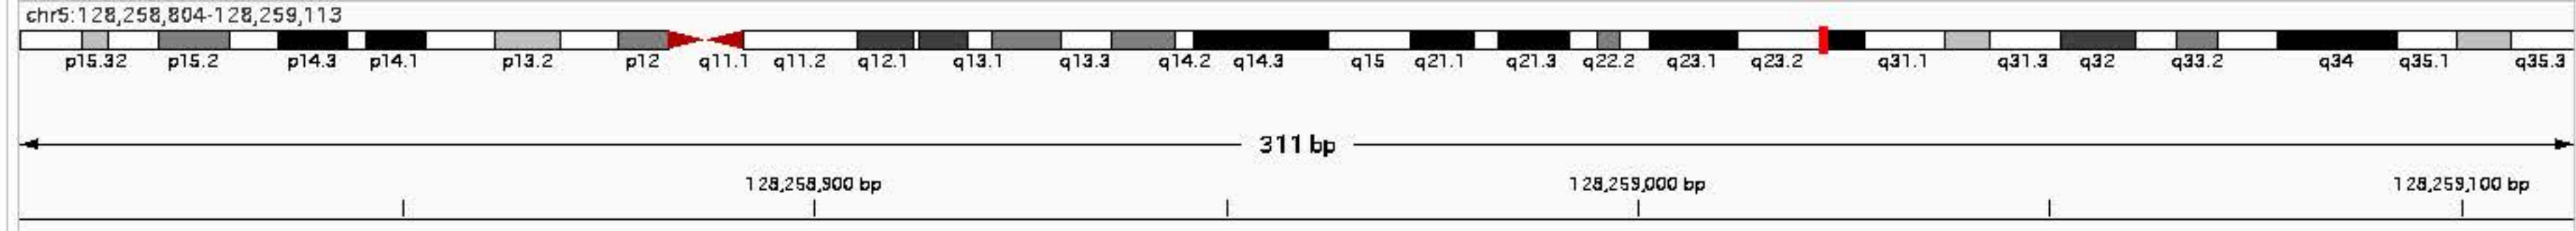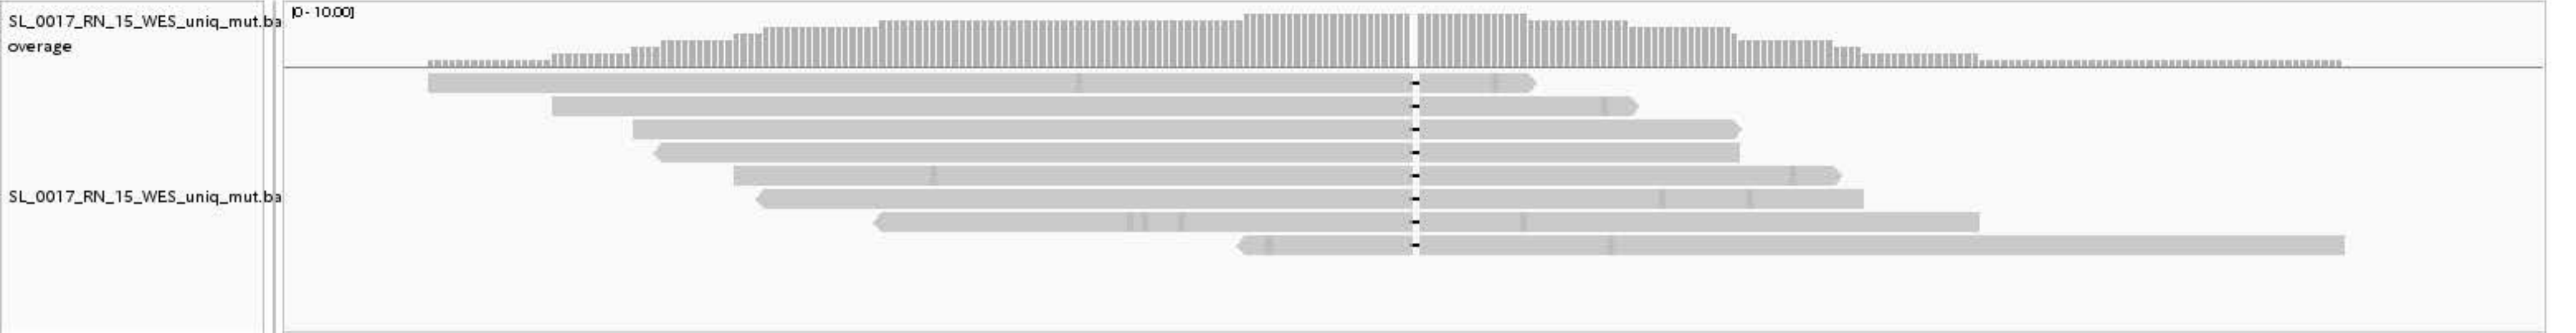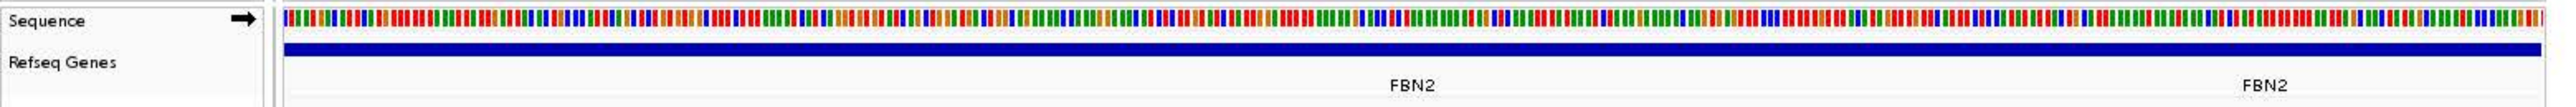



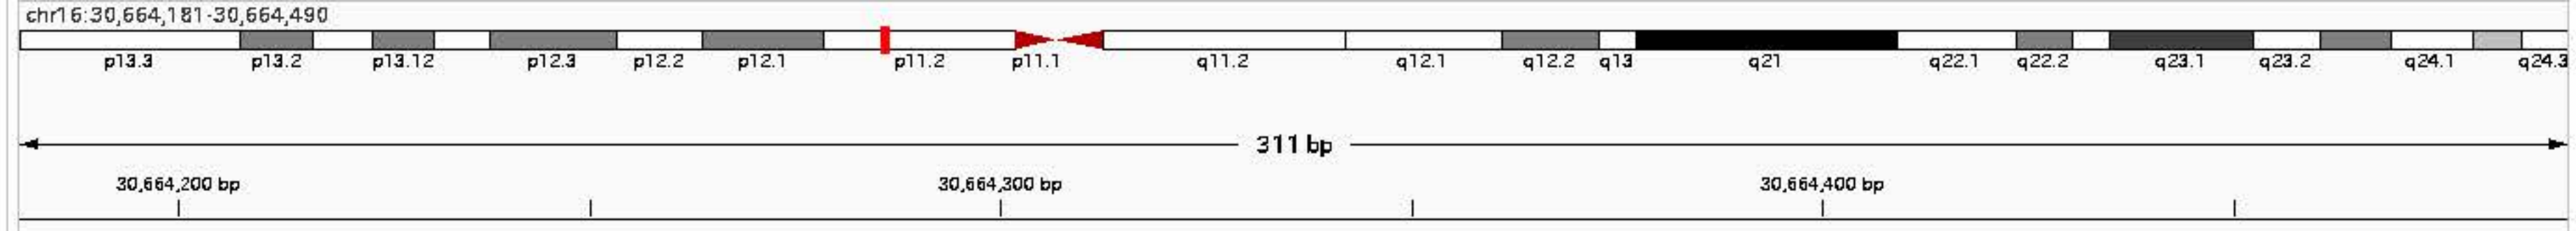

SL\_0007\_RN\_2\_WES\_uniq\_mut.ba  
verage

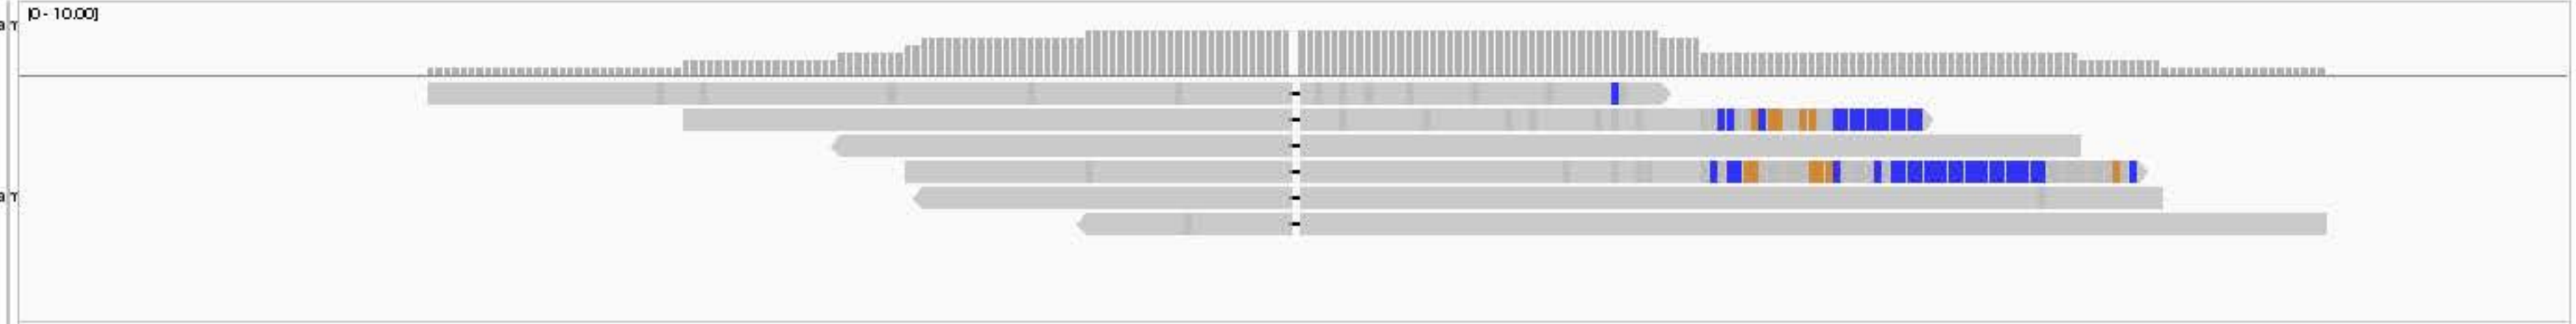

SL\_0007\_RN\_2\_WES\_uniq\_mut.ba

Sequence →

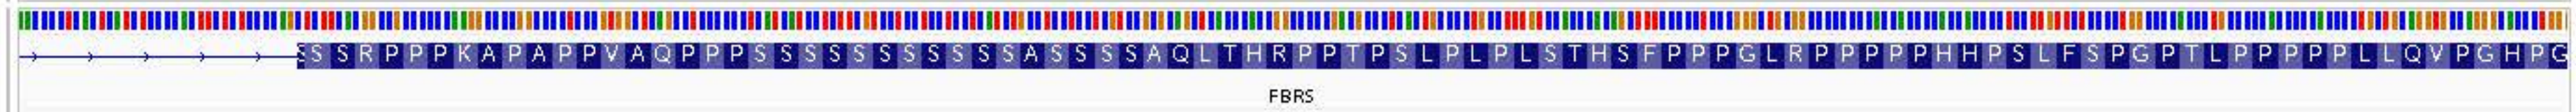

Refseq Genes

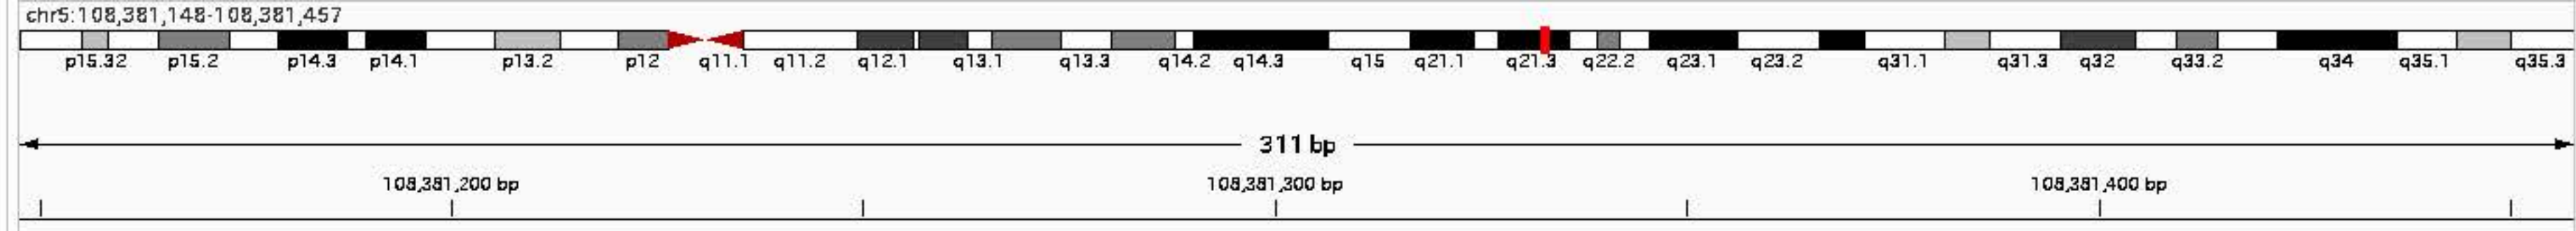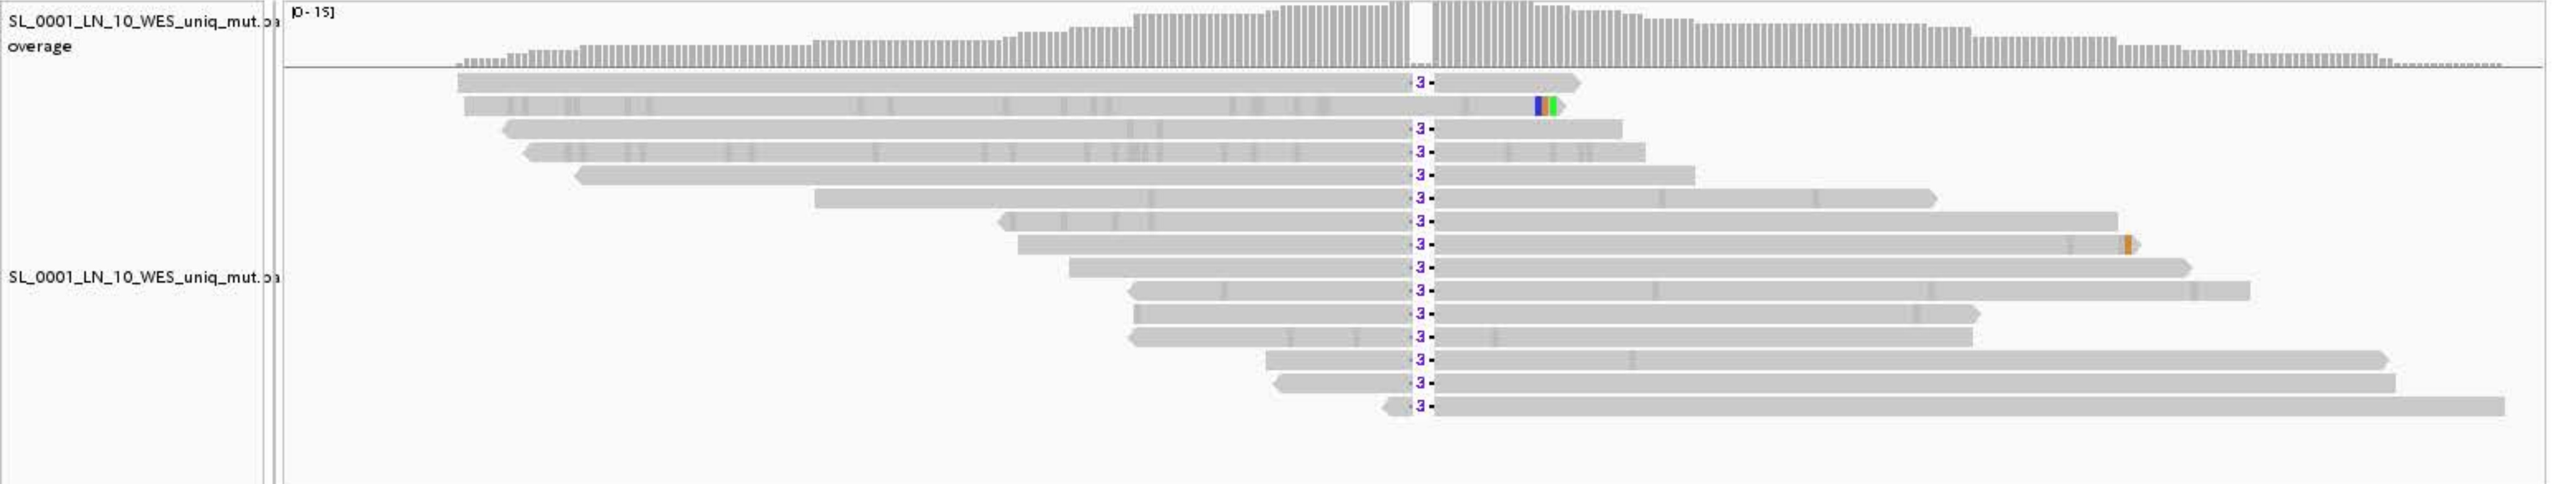

Sequence →

Refseq Genes

GRFLQVAAPPGLFRVPGLSALFLSRGQQEWAAAAALGLEKCCSAPSSASAAAAAAAASSLLFRRAAACDEAALAAYRRALHQSSSAAYAGDRPPPSLPPE

FBXL17

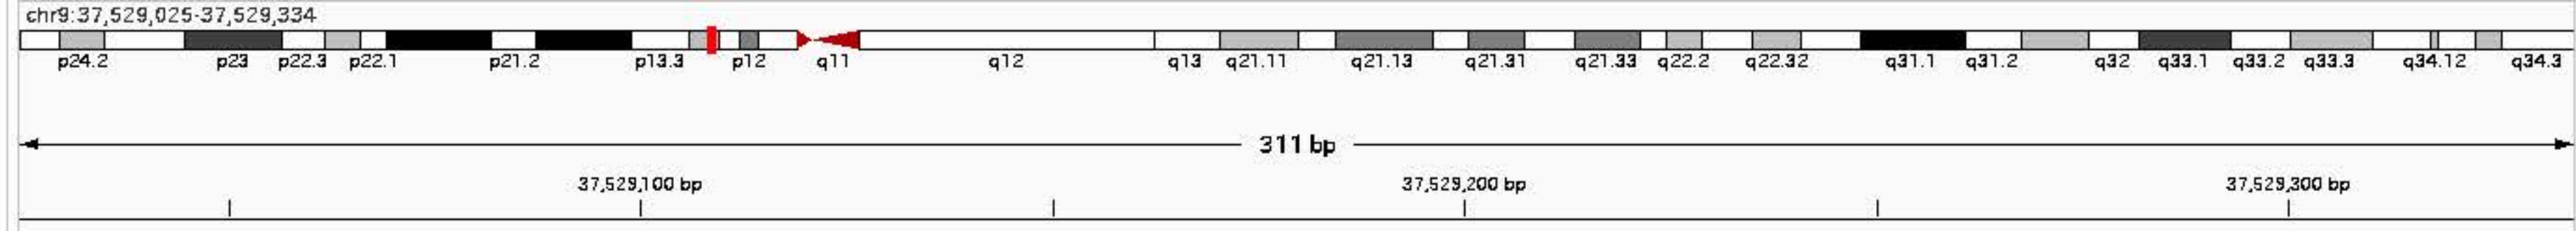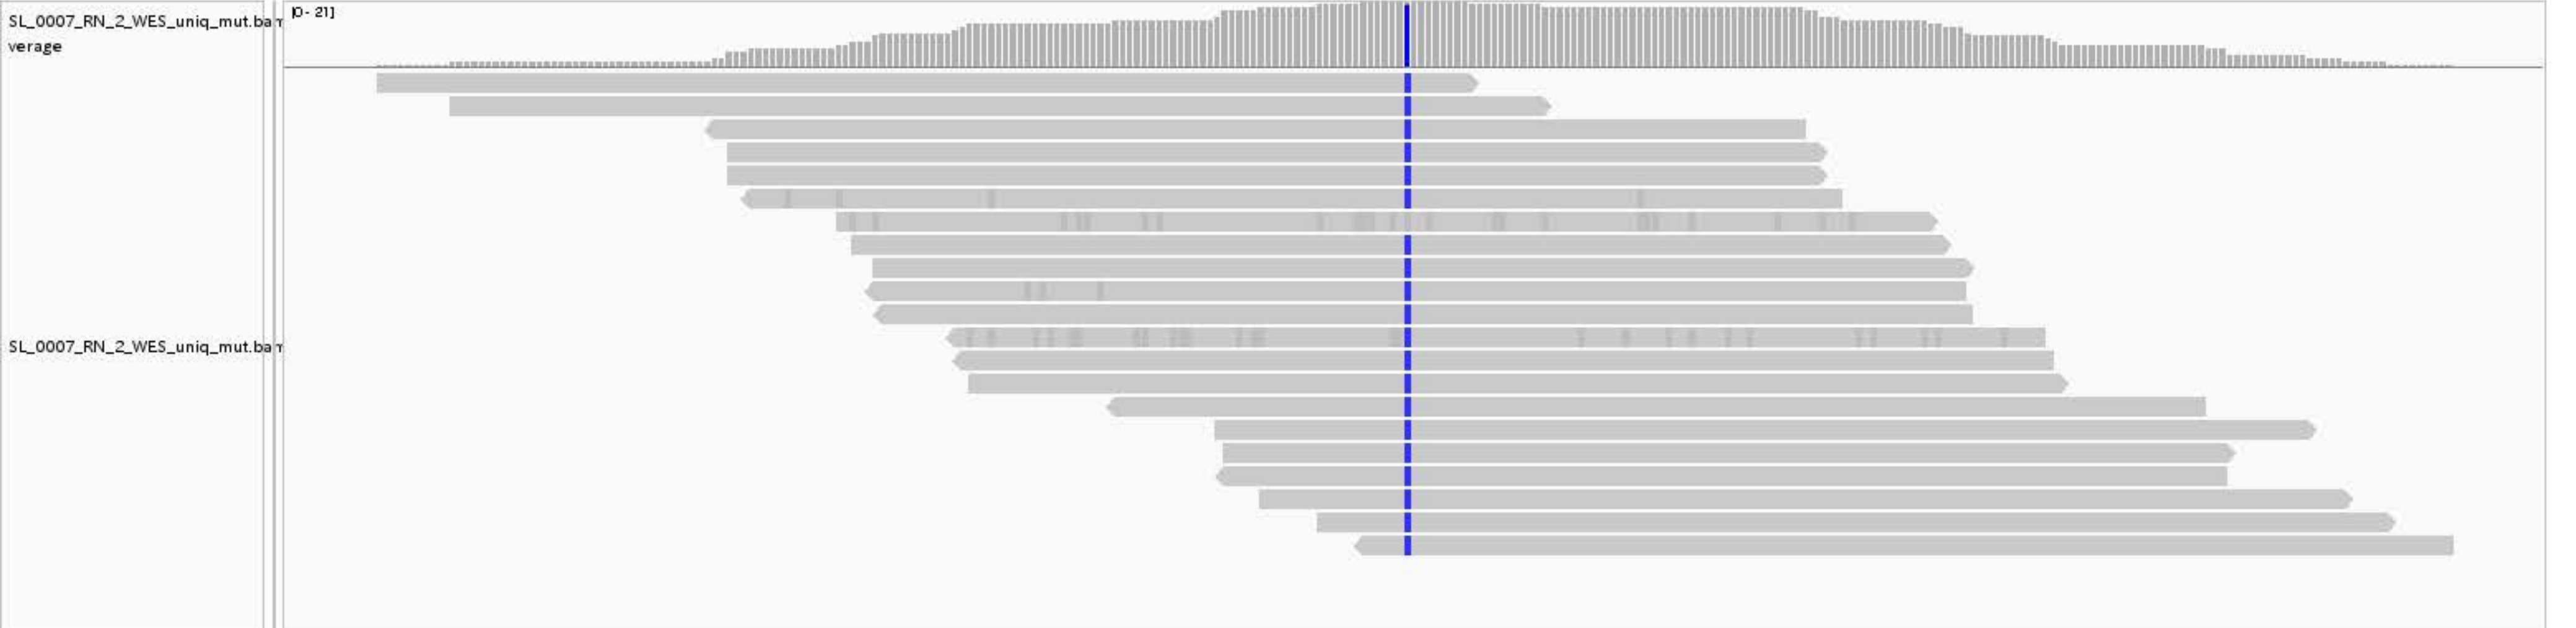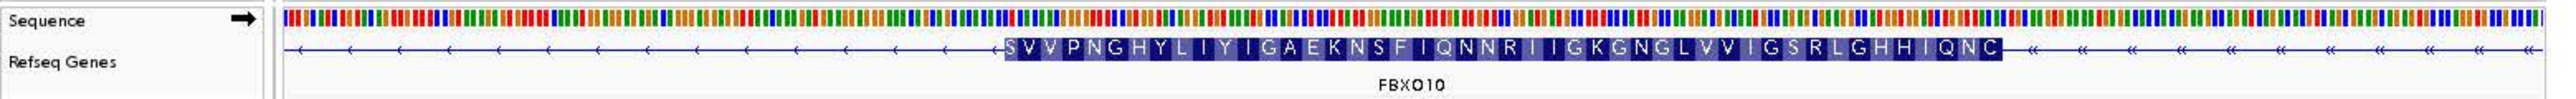



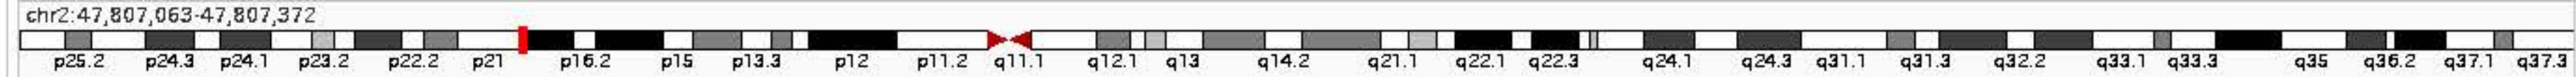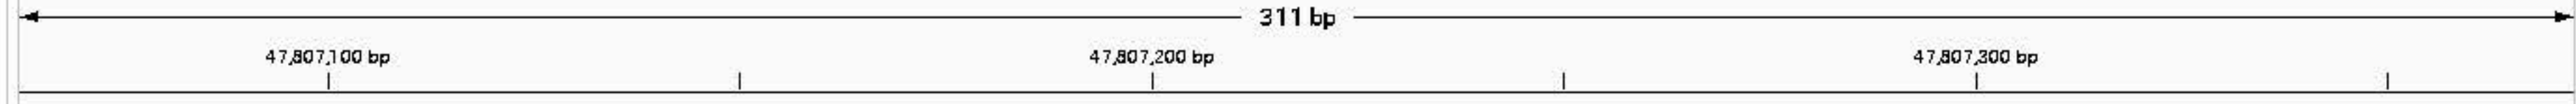

SL\_0001\_LN\_10\_WES\_uniq\_mut. coverage

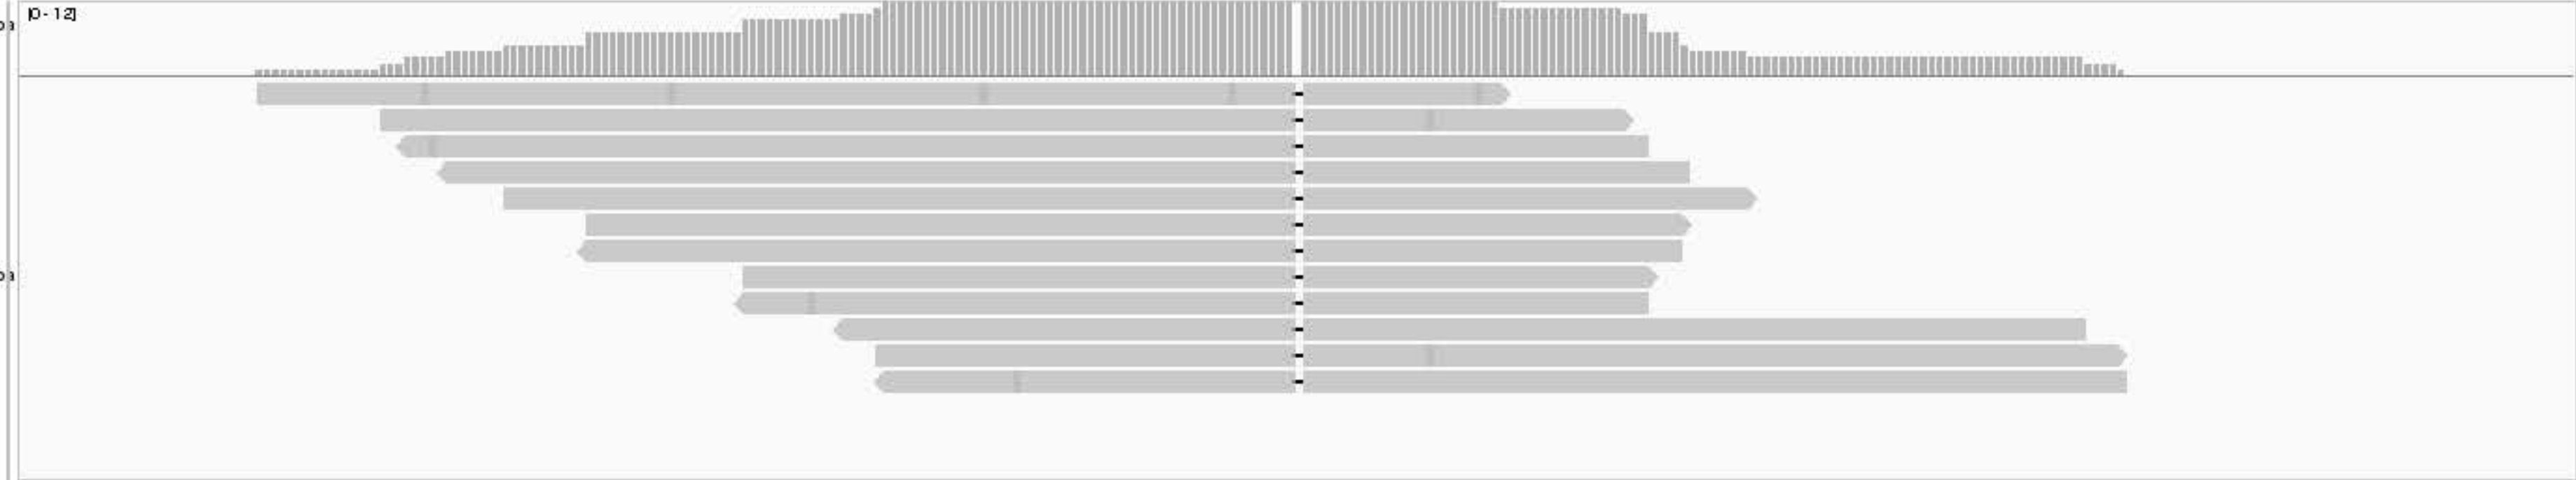

SL\_0001\_LN\_10\_WES\_uniq\_mut. coverage

Sequence

Refseq Genes

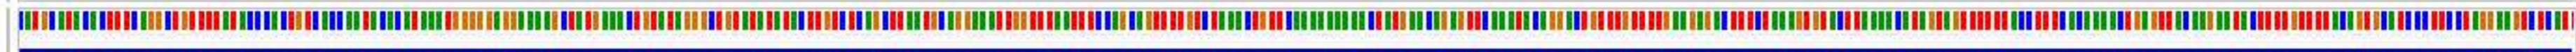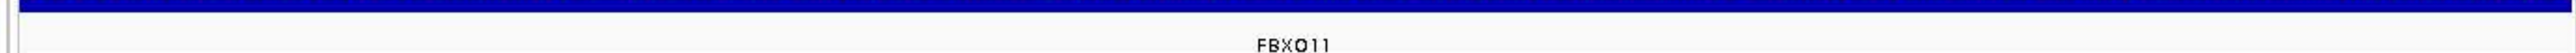

FBXO11

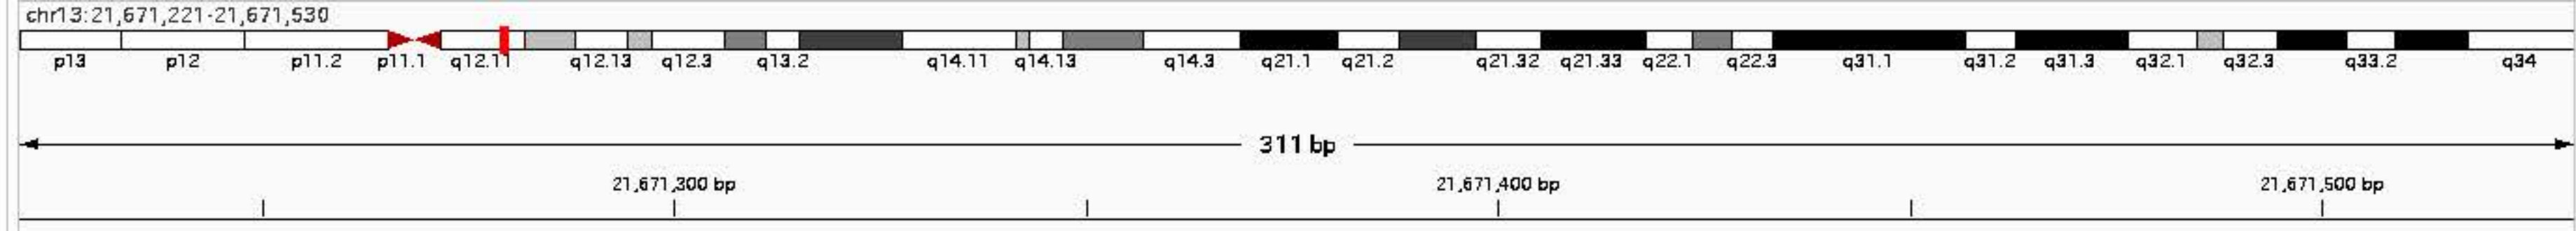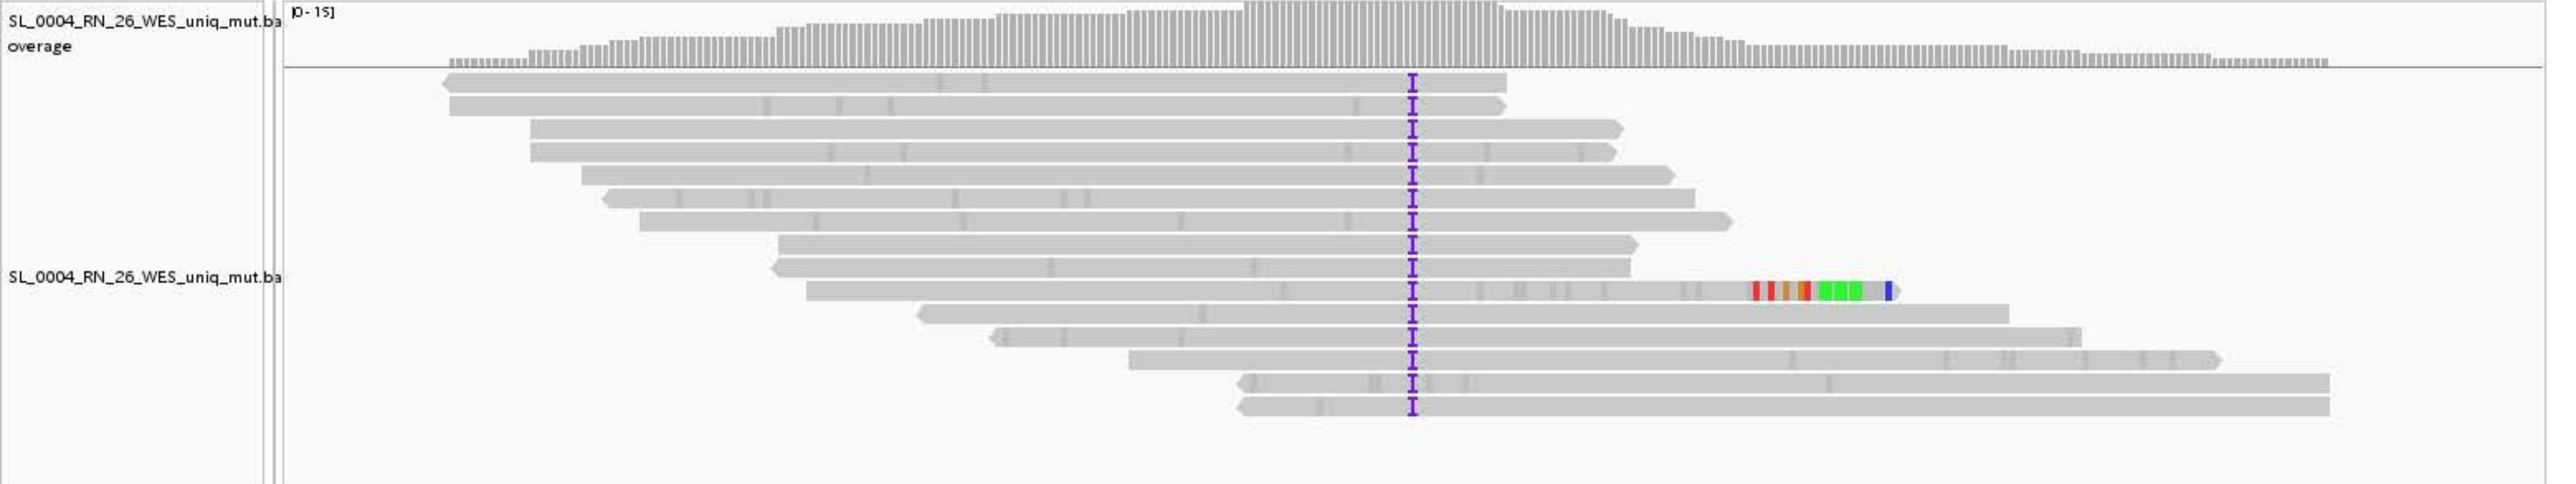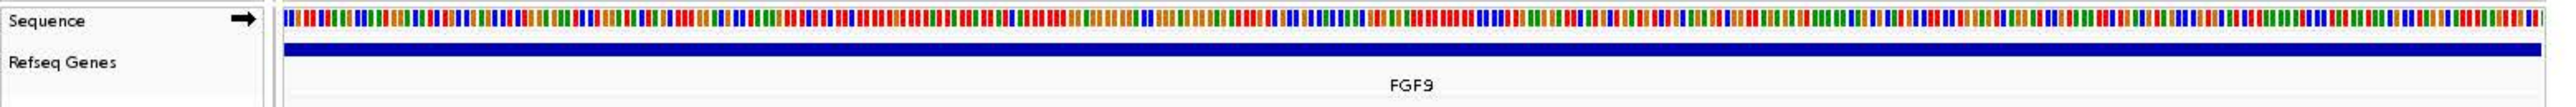

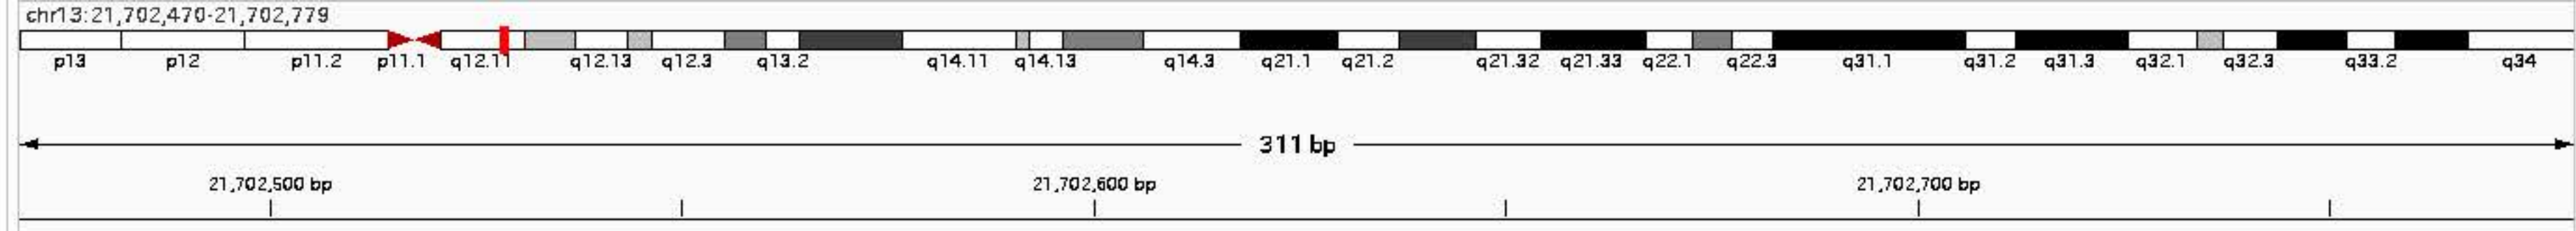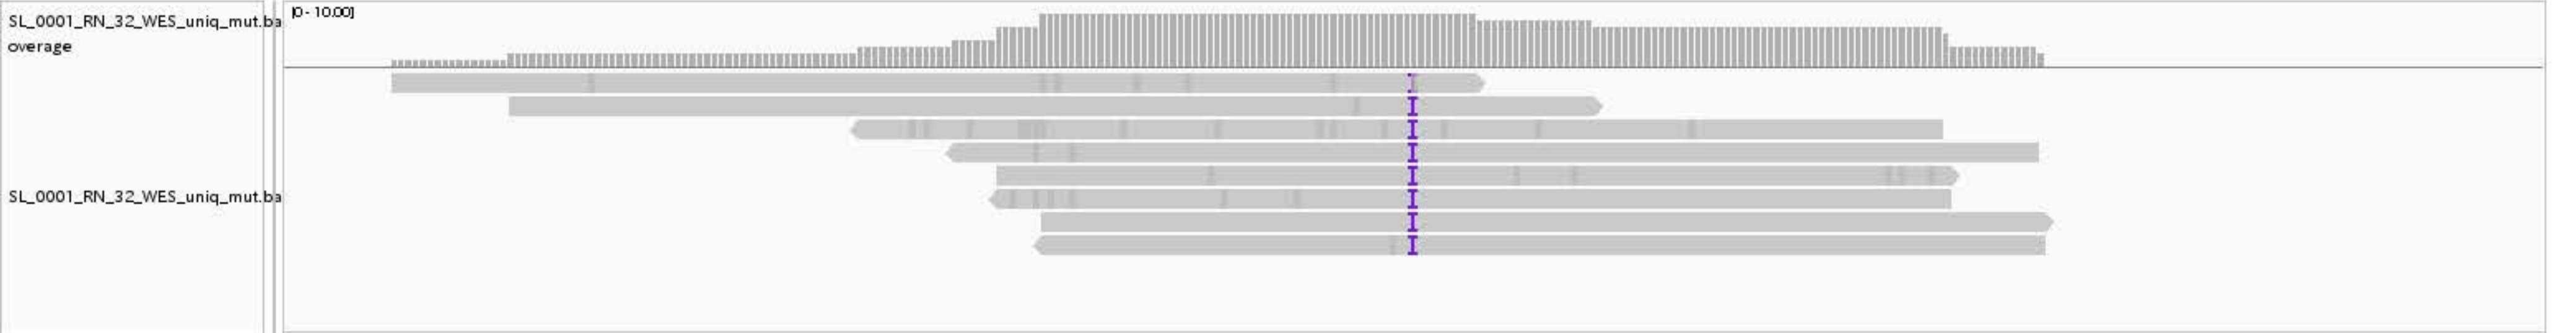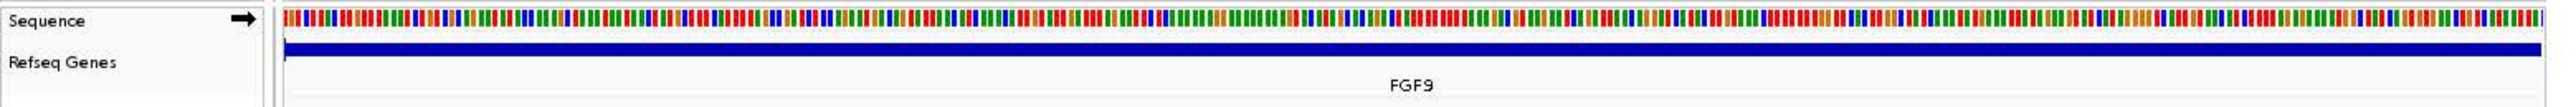



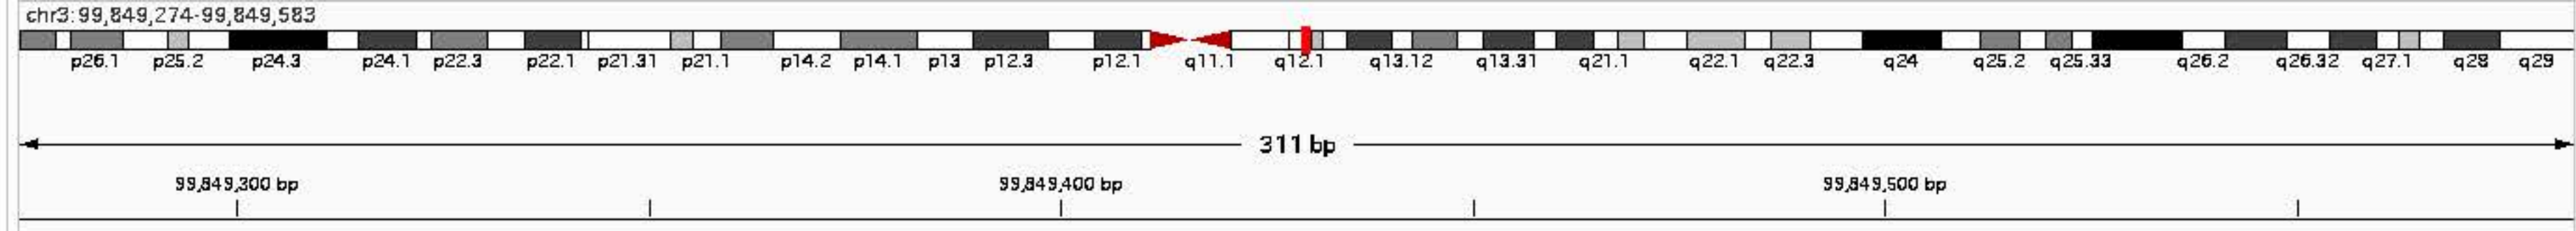

SL\_0015\_LN\_46\_WES\_uniq\_mut. coverage

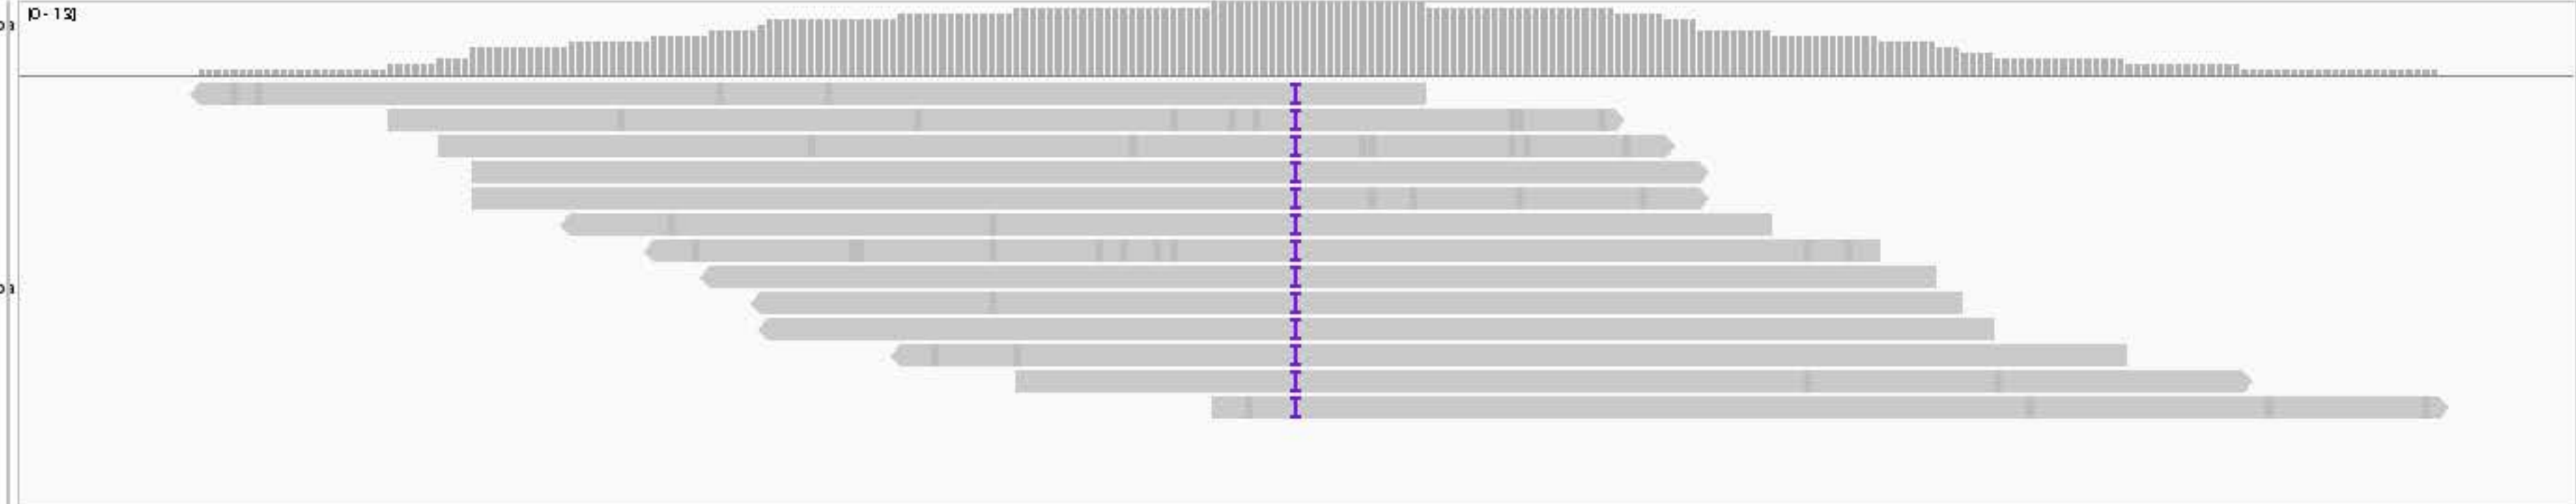

Sequence Refseq Genes

QVEKSFVQPDSIRRGNLS PRLSKSFHRYRELEKTLNEIERGLDRNRNEQQNLKKQLVSHDGQLHCILD ETAMYEH I KEKLADVERS LHGSKAEEEQ L RKFLWQE

CMSS1

chr1:154,989,419-154,989,728  
p36.31 p36.21 p36.11 p35.1 p34.2 p33 p32.2 p31.3 p31.1 p22.3 p21.3 p21.1 p13.2 p11.2 q12 q21.1 q21.3 q23.2 q24.2 q25.2 q31.1 q31.3 q32.2 q41 q42.13 q43 q44

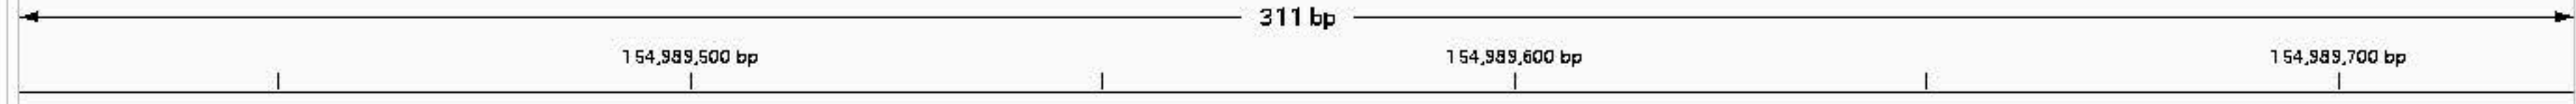

SL\_0006\_RN\_67\_WES\_uniq\_mut.ba  
overage  
SL\_0006\_RN\_67\_WES\_uniq\_mut.ba

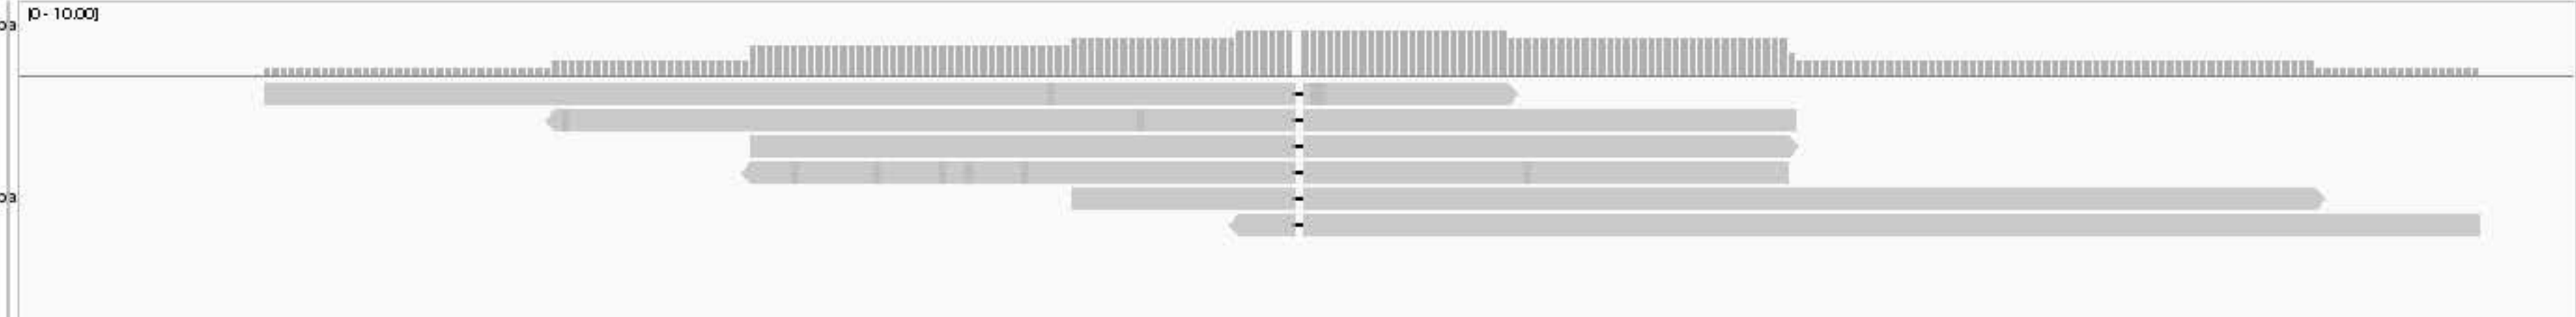

Sequence  
Refseq Genes

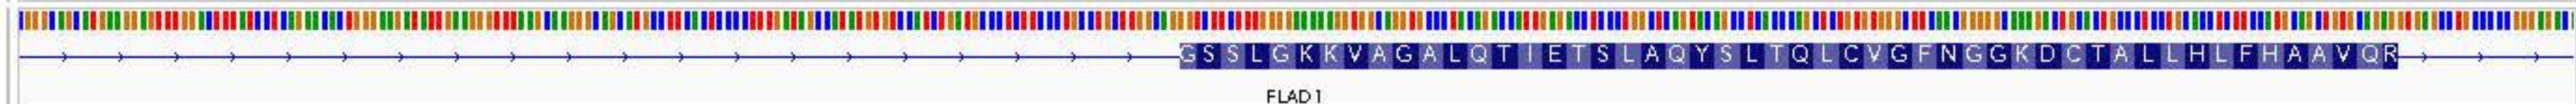

chr17:28,537,898-28,538,207

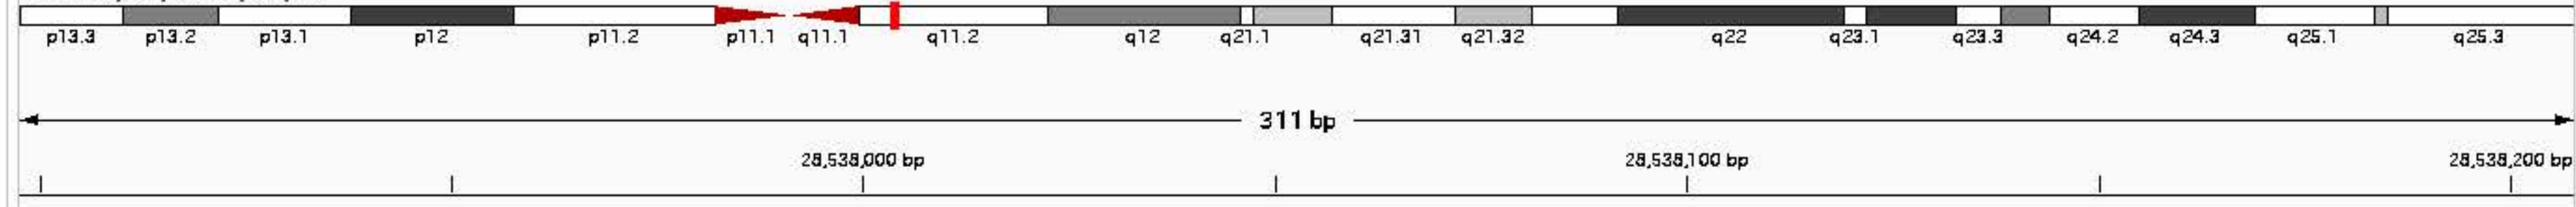

SL\_0017\_RN\_15\_WES\_uniq\_mut.ba  
coverage

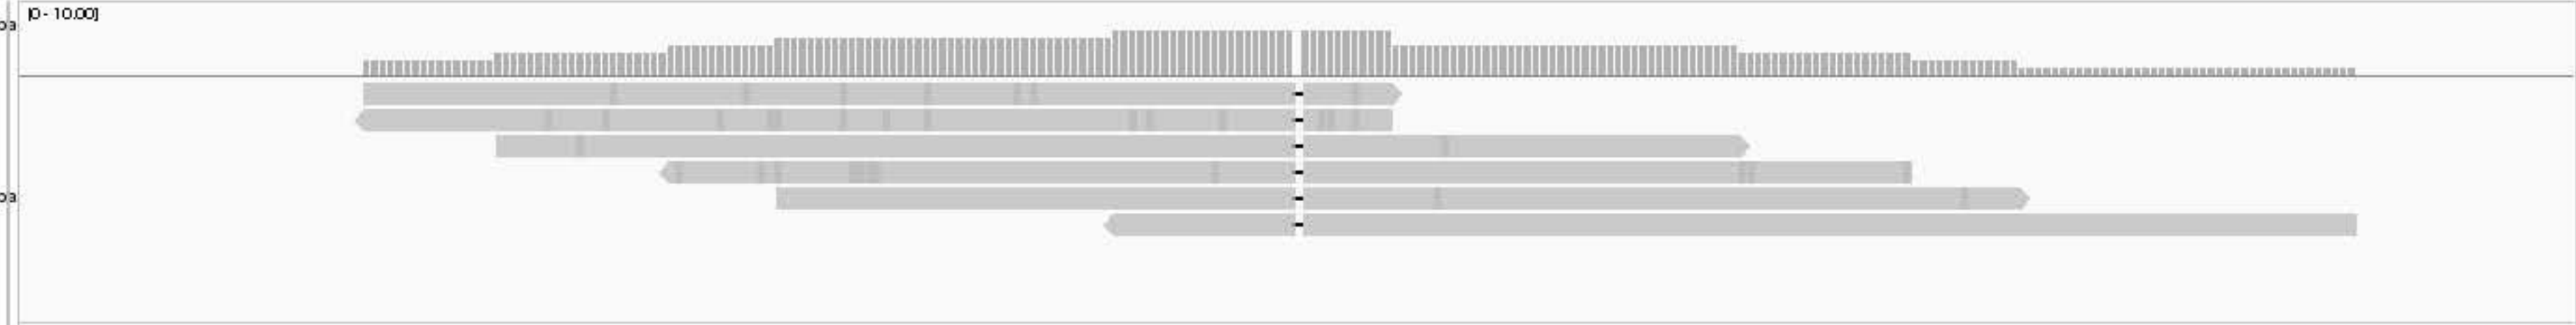

SL\_0017\_RN\_15\_WES\_uniq\_mut.ba

Sequence

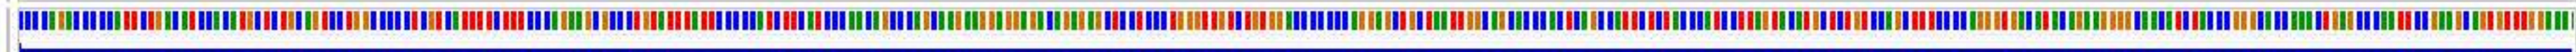

Refseq Genes

FOXN1



chr2:185,793,680-185,793,989  
p25.2 p24.3 p24.1 p23.2 p22.2 p21 p16.2 p15 p13.3 p12 p11.2 q11.1 q12.1 q13 q14.2 q21.1 q22.1 q22.3 q24.1 q24.3 q31.1 q31.3 q32.2 q33.1 q33.3 q35 q36.2 q37.1 q37.3

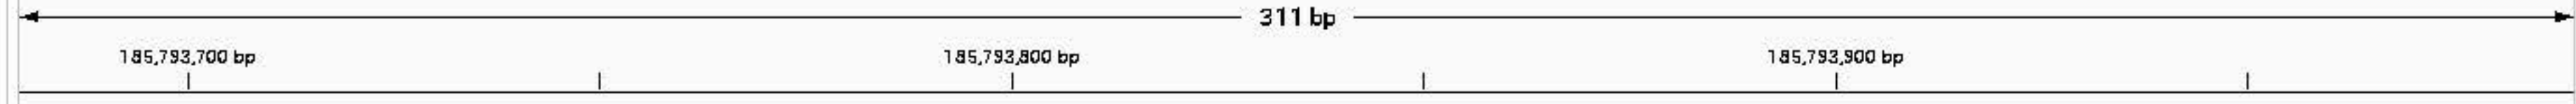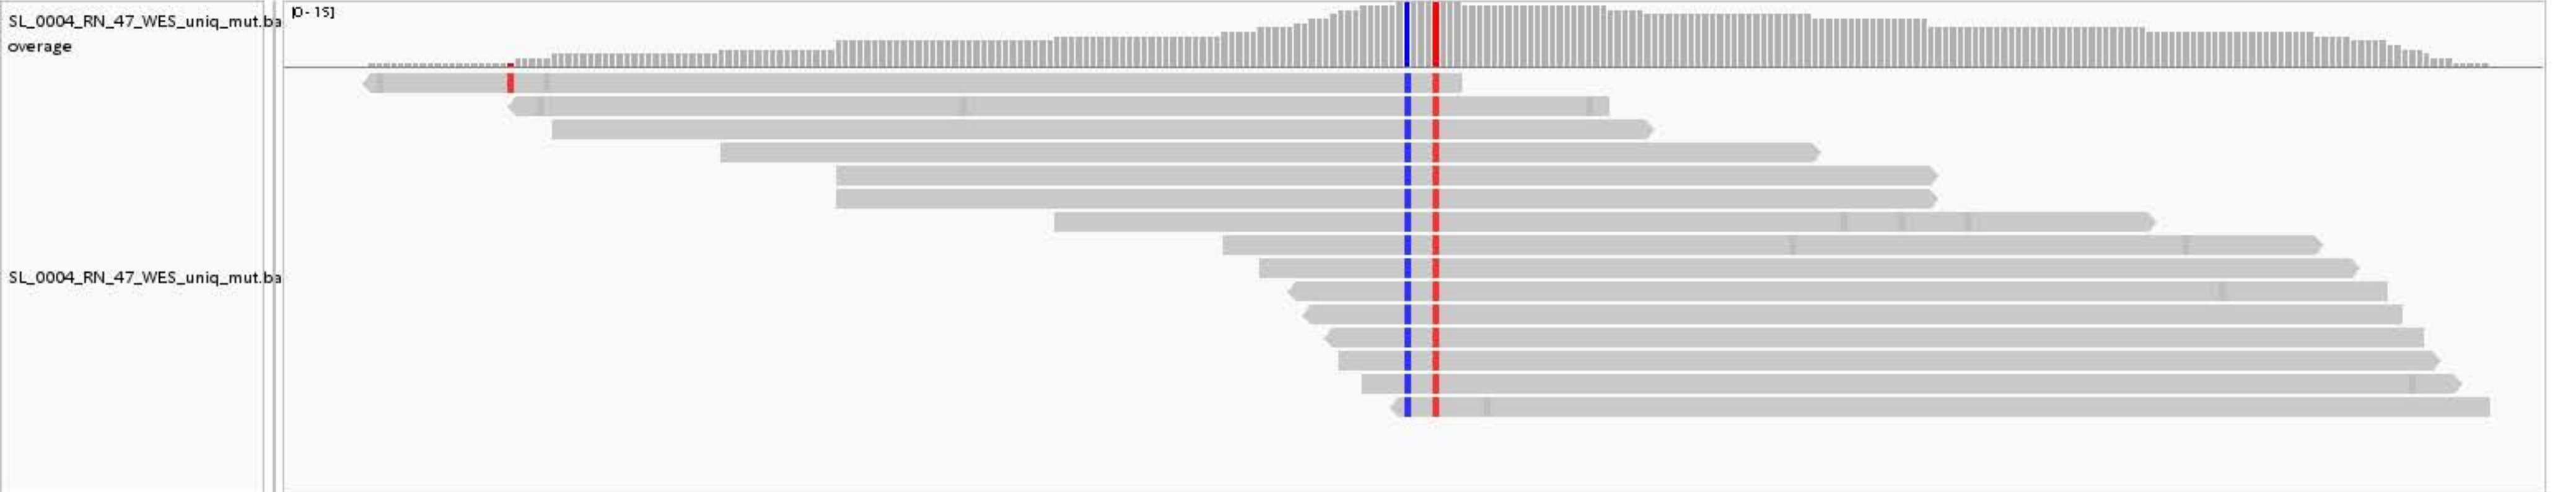

Sequence →  
Refseq Genes  
SARLPLTFCDTFPKIDCQQPLKGSKTERKTERFSYSRNQKSAYADDNQITVVEKEDTQKSATDSC EENANFITKTIKRLLESFATERIDSLITLAFQSKESF  
FSIP2

chr2:199,846,020-199,846,329  
p25.2 p24.3 p24.1 p23.2 p22.2 p21 p16.2 p15 p13.3 p12 p11.2 q11.1 q12.1 q13 q14.2 q21.1 q22.1 q22.3 q24.1 q24.3 q31.1 q31.3 q32.2 q33.1 q33.3 q35 q36.2 q37.1 q37.3

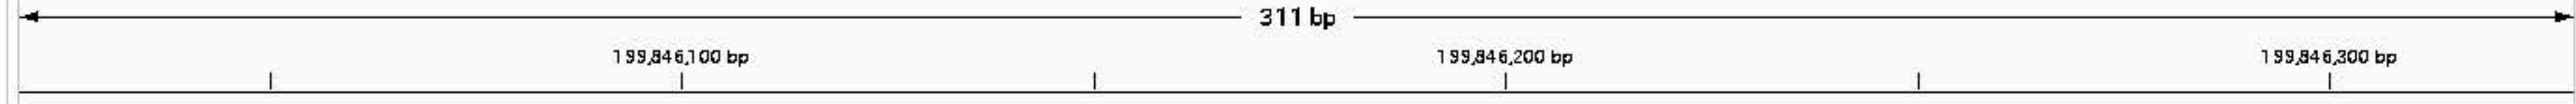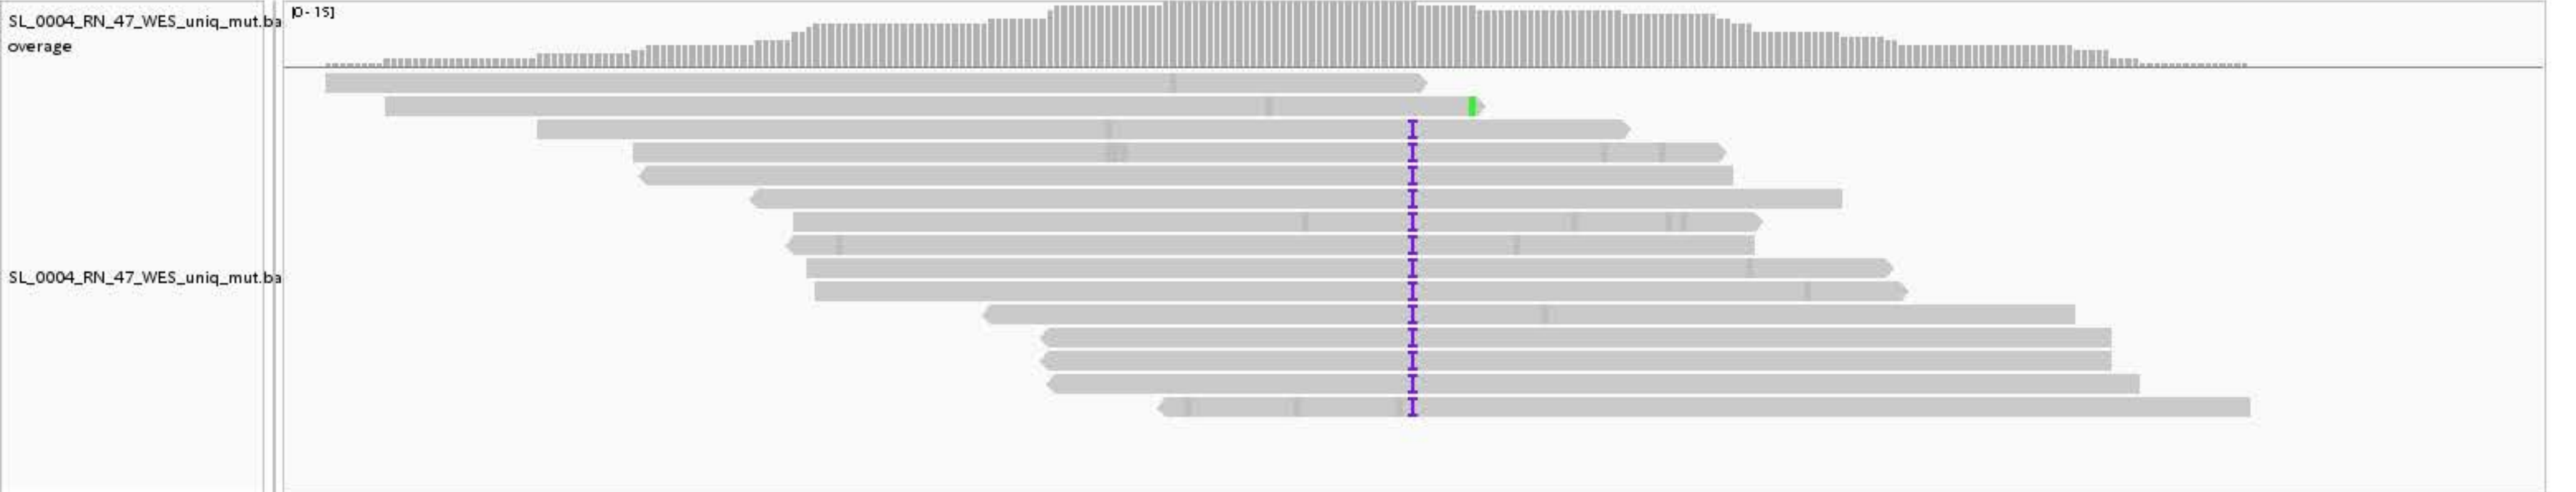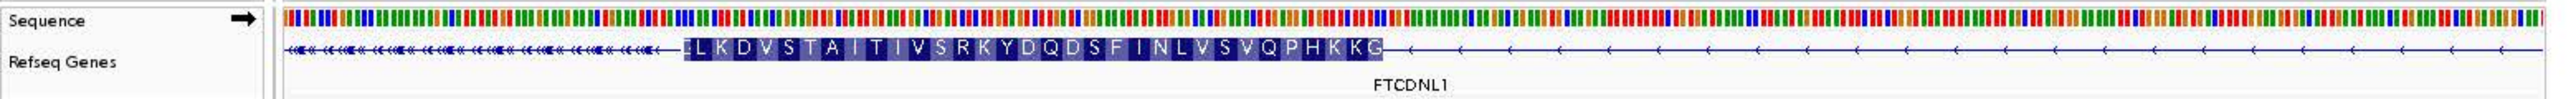

chrX:154,535,140-154,535,449

p22.32 p22.2 p22.13 p22.11 p21.2 p11.4 p11.3 p11.22 p11.1 q11.2 q13.1 q13.3 q21.1 q21.2 q21.32 q22.1 q22.3 q23 q24 q25 q26.1 q26.3 q27.2 q28

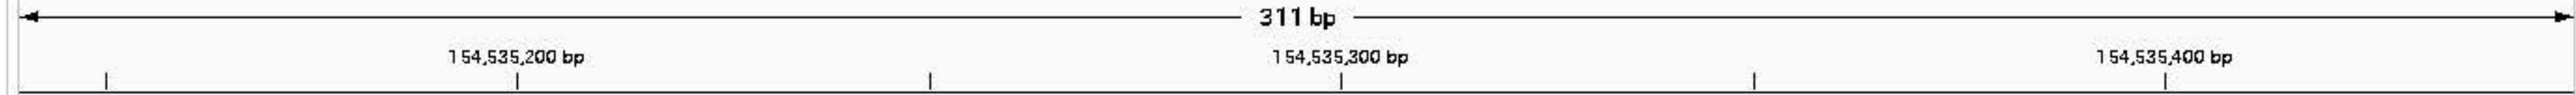

SL\_0001\_RN\_15\_WES\_uniq\_mut.ba  
coverage

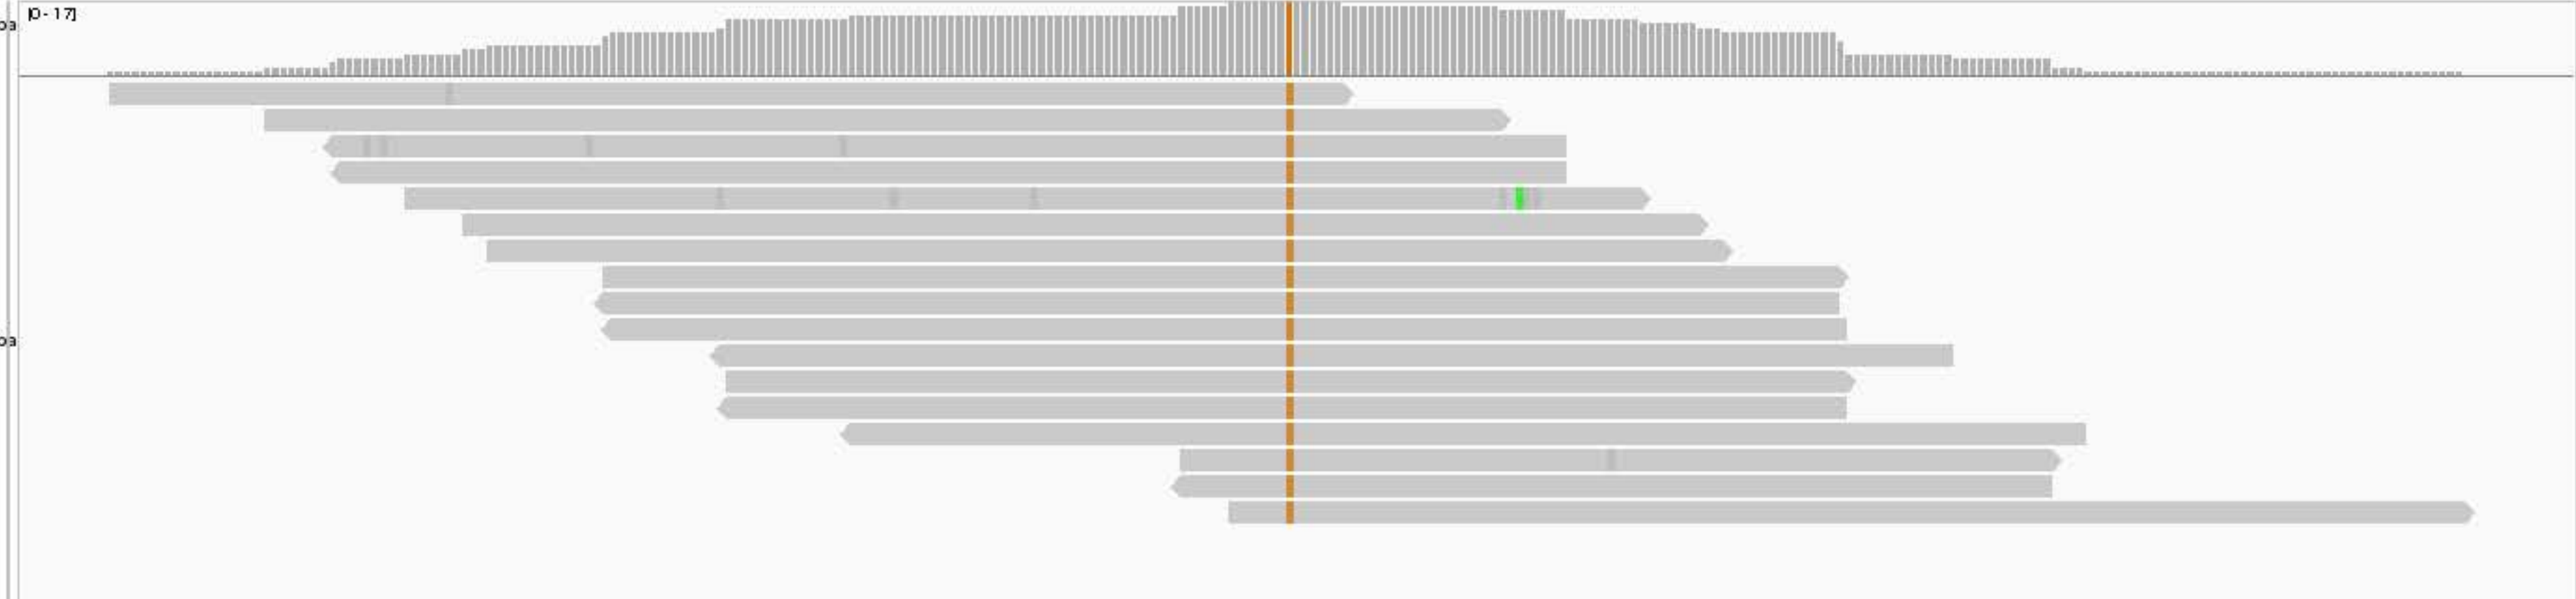

Sequence  
Refseq Genes

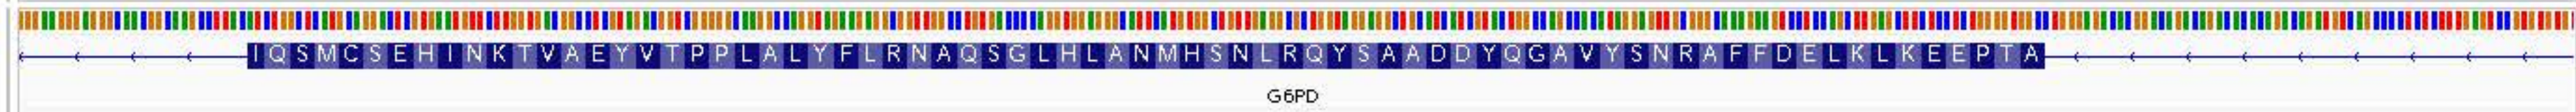



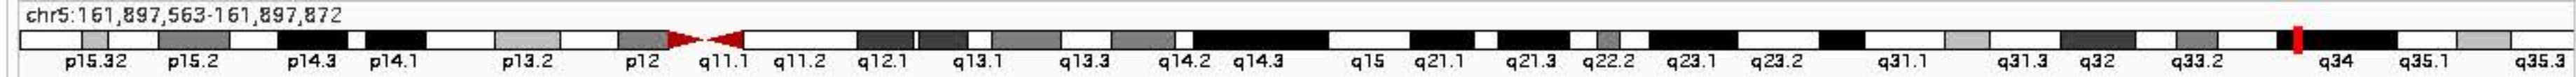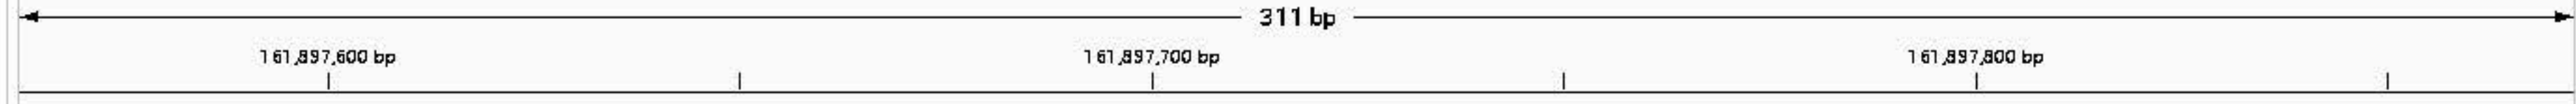

SL\_0015\_RN\_12\_WES\_uniq\_mut.ba  
overage

SL\_0015\_RN\_12\_WES\_uniq\_mut.ba

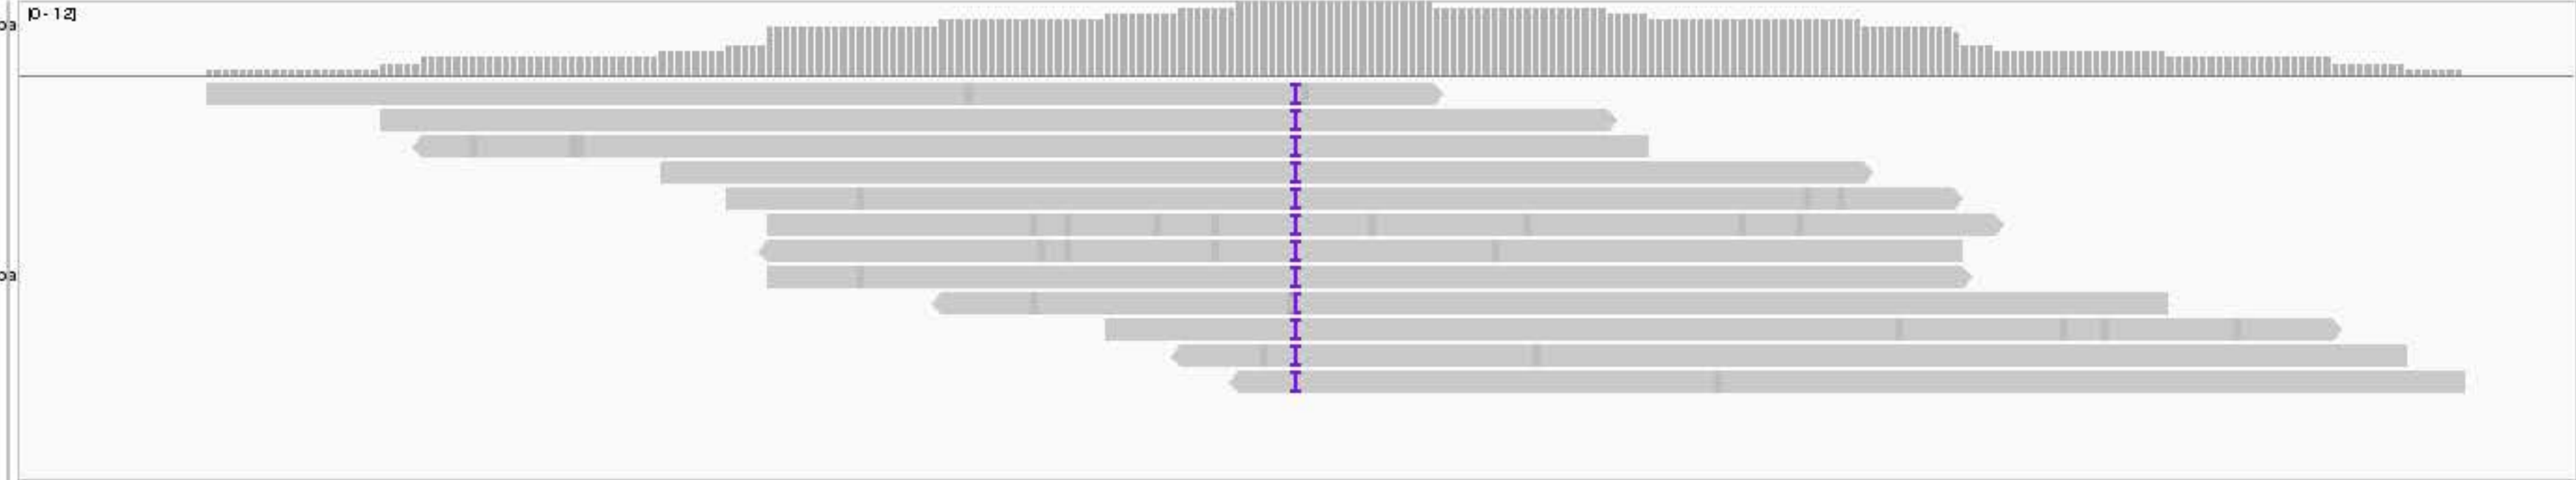

Sequence →

Refseq Genes

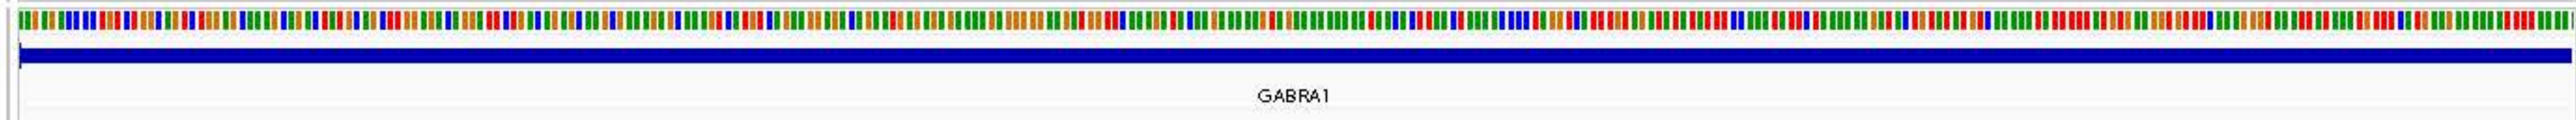

chrX:49,584,459-49,584,768

p22.32 p22.2 p22.13 p22.11 p21.2 p11.4 p11.3 p11.22 p11.1 q11.2 q13.1 q13.3 q21.1 q21.2 q21.32 q22.1 q22.3 q23 q24 q25 q26.1 q26.3 q27.2 q28

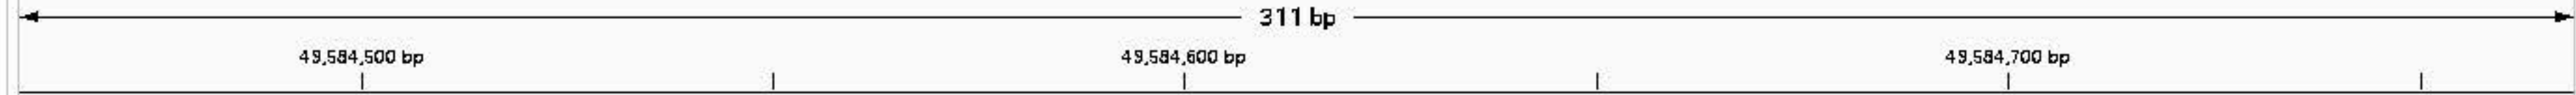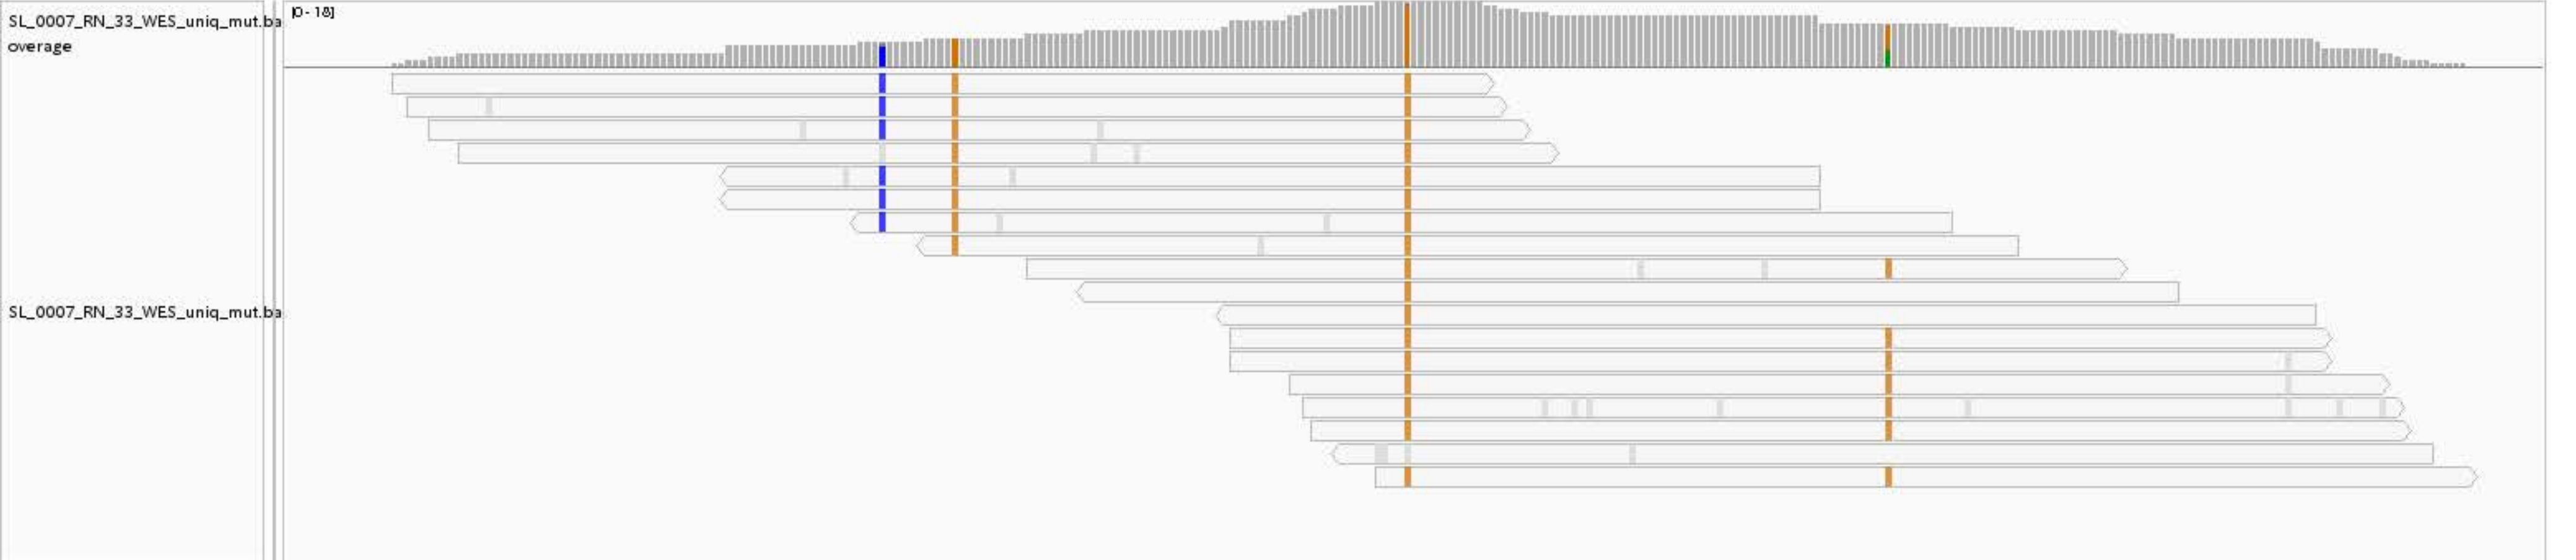

Sequence →

Refseq Genes

GPKPEAHSQEQGHPQTGCECEDGPDGQEMDPPNPEEVKTPEEC

GAGE12H

chr22:30,555,486-30,555,795

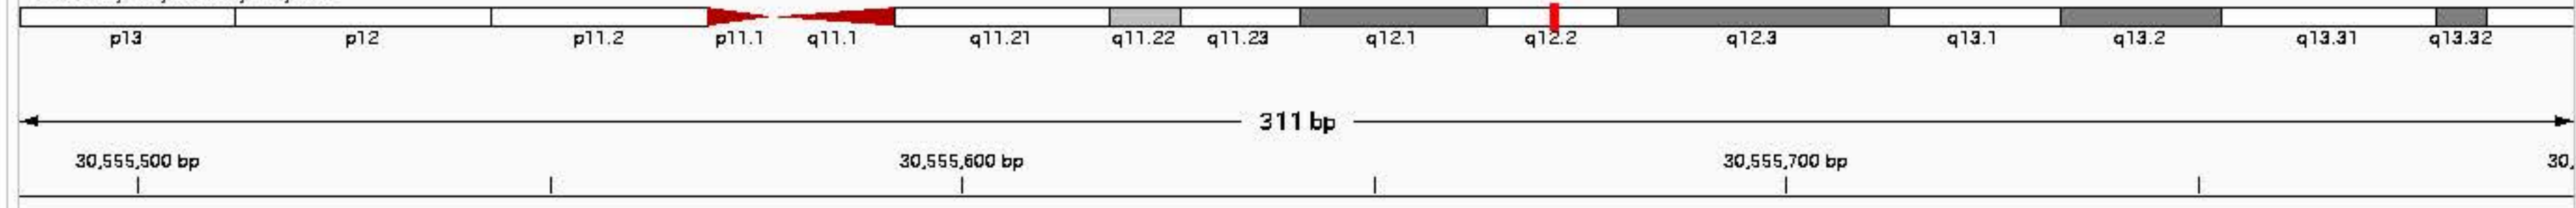

SL\_0007\_RN\_33\_WES\_uniq\_mut.ba  
coverage

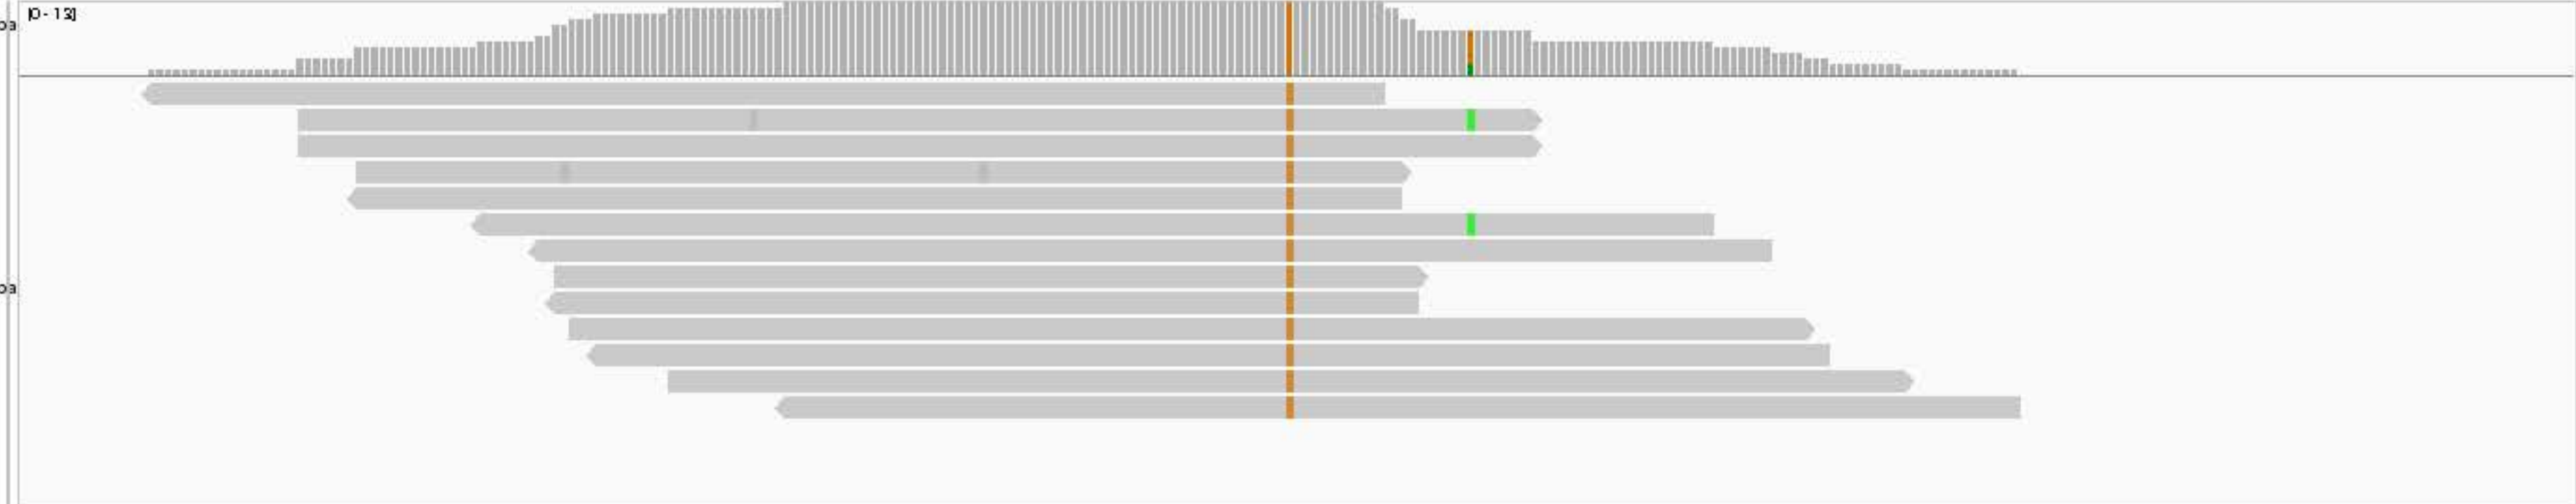

Sequence  
Refseq Genes

FRREVELIHEQVQPSSPDLNDYGLDFLLNRLYHANFGNPDYRDPDQLFETLKDGLKWTLPVVPGFYHFSSEFLRAPDRLVTIFIANTPVLGRVEDYHF  
GAL3ST1



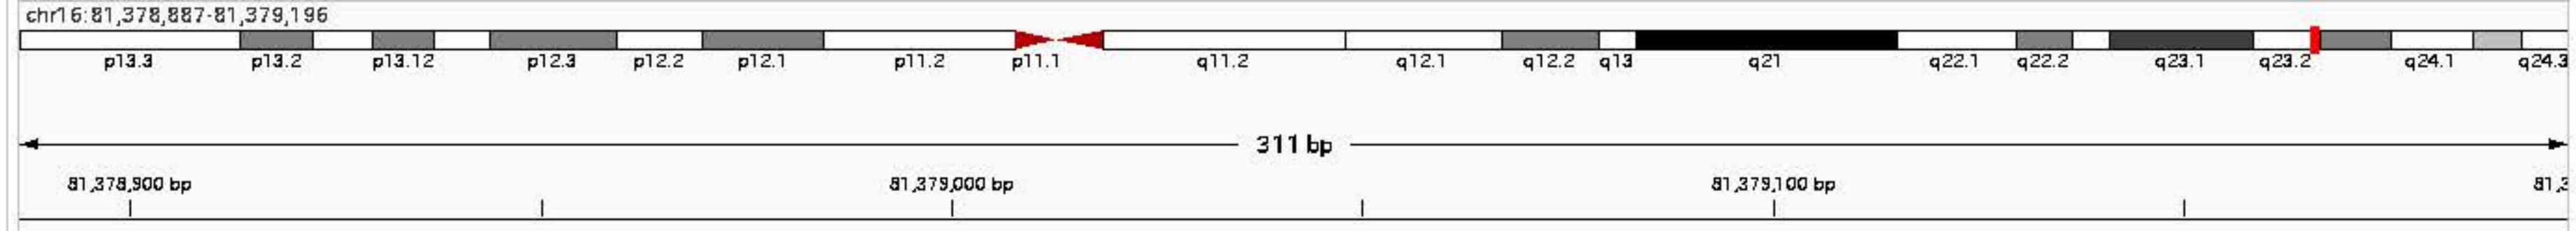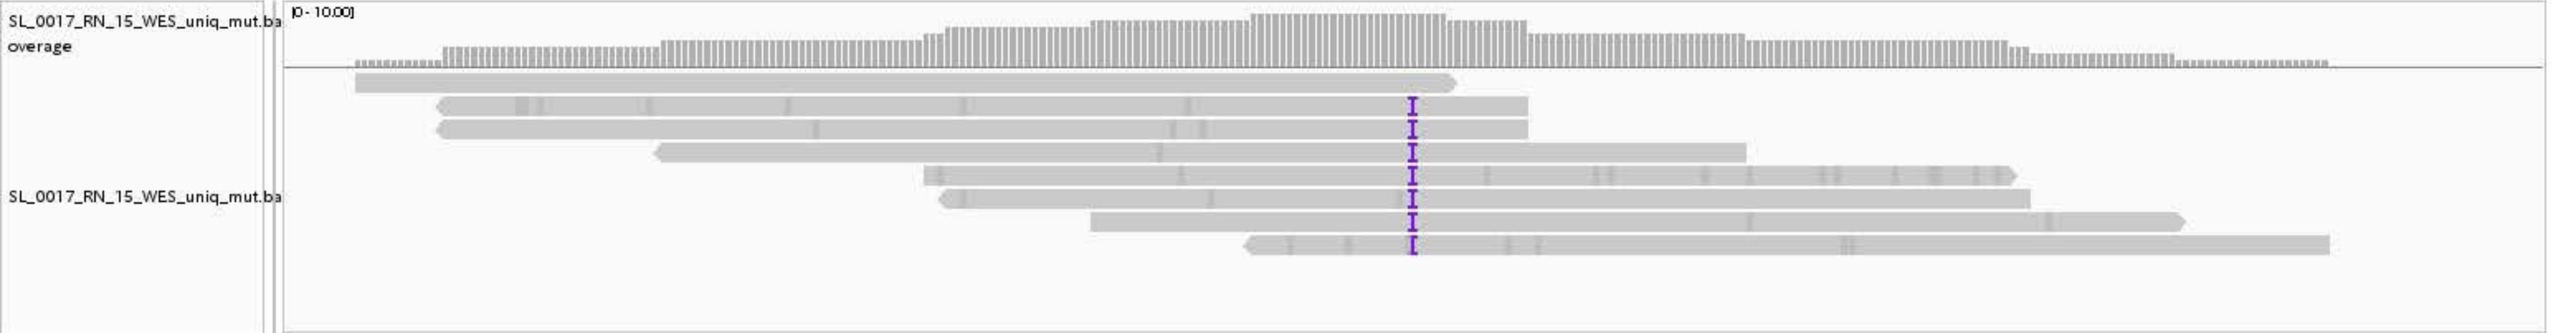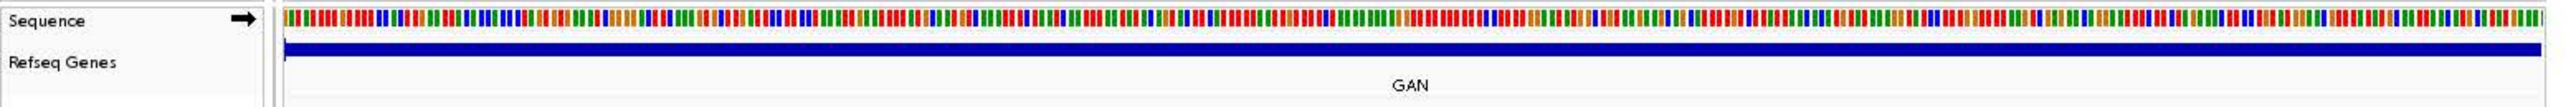

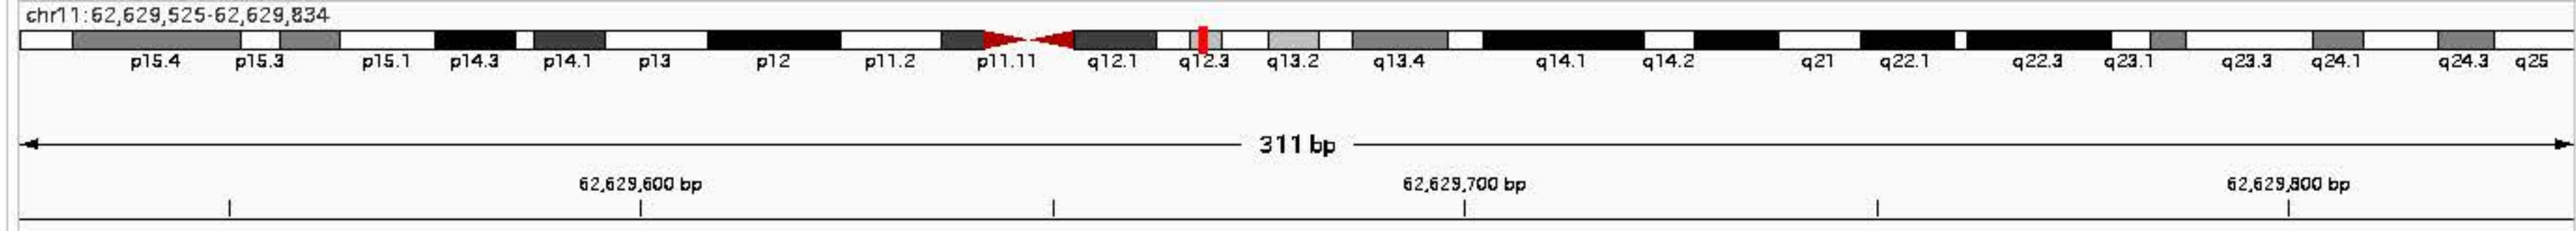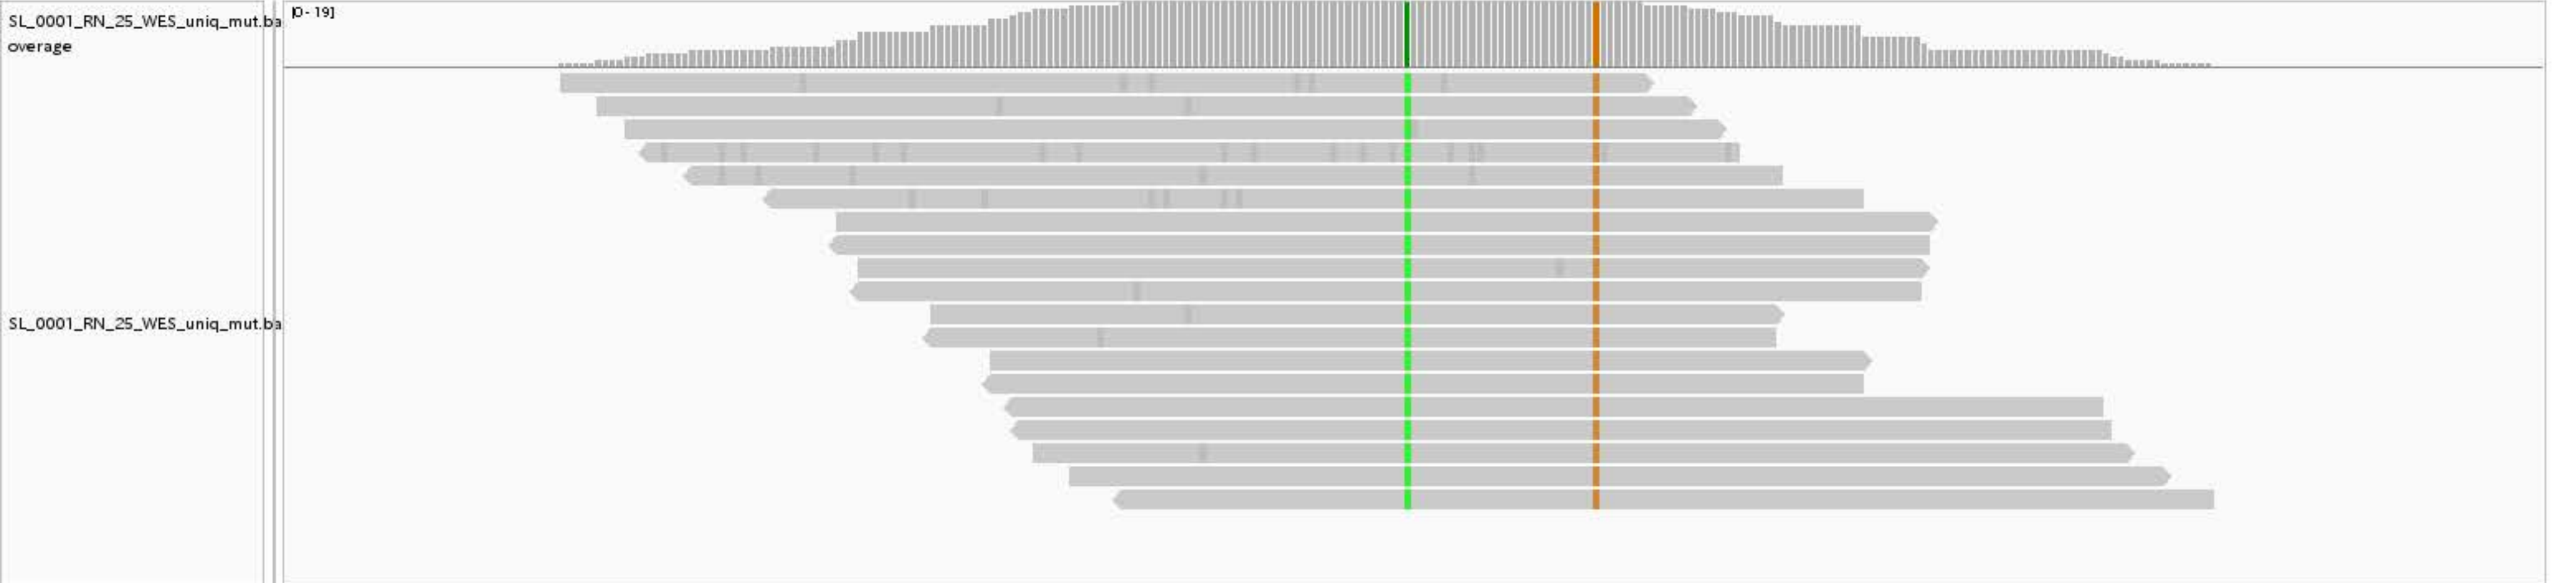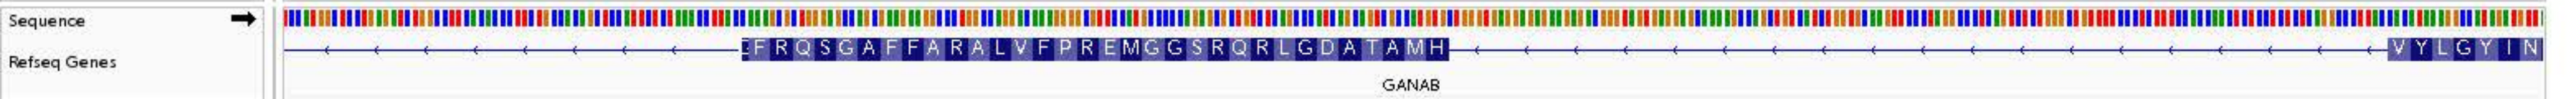

chrX: 70,429,803-70,430,112

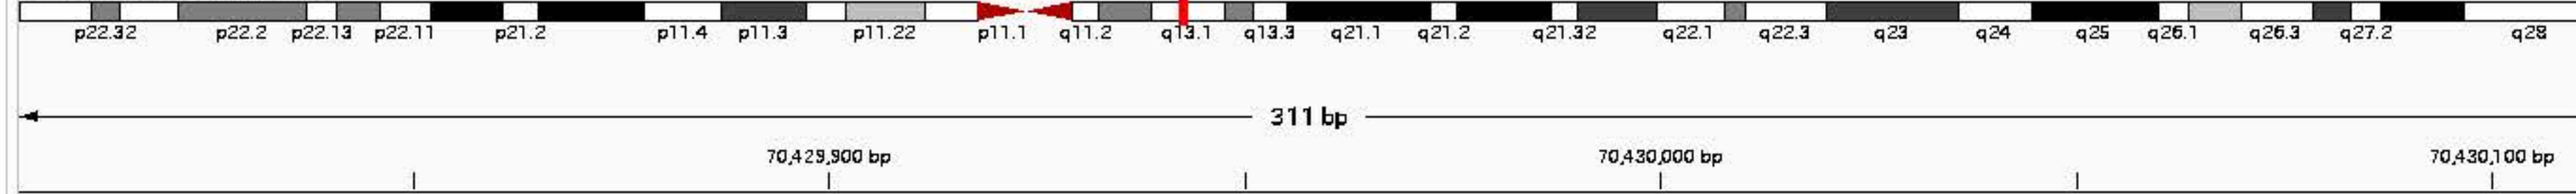

SL\_0004\_RN\_24\_WES\_uniq\_mut.ba  
overage

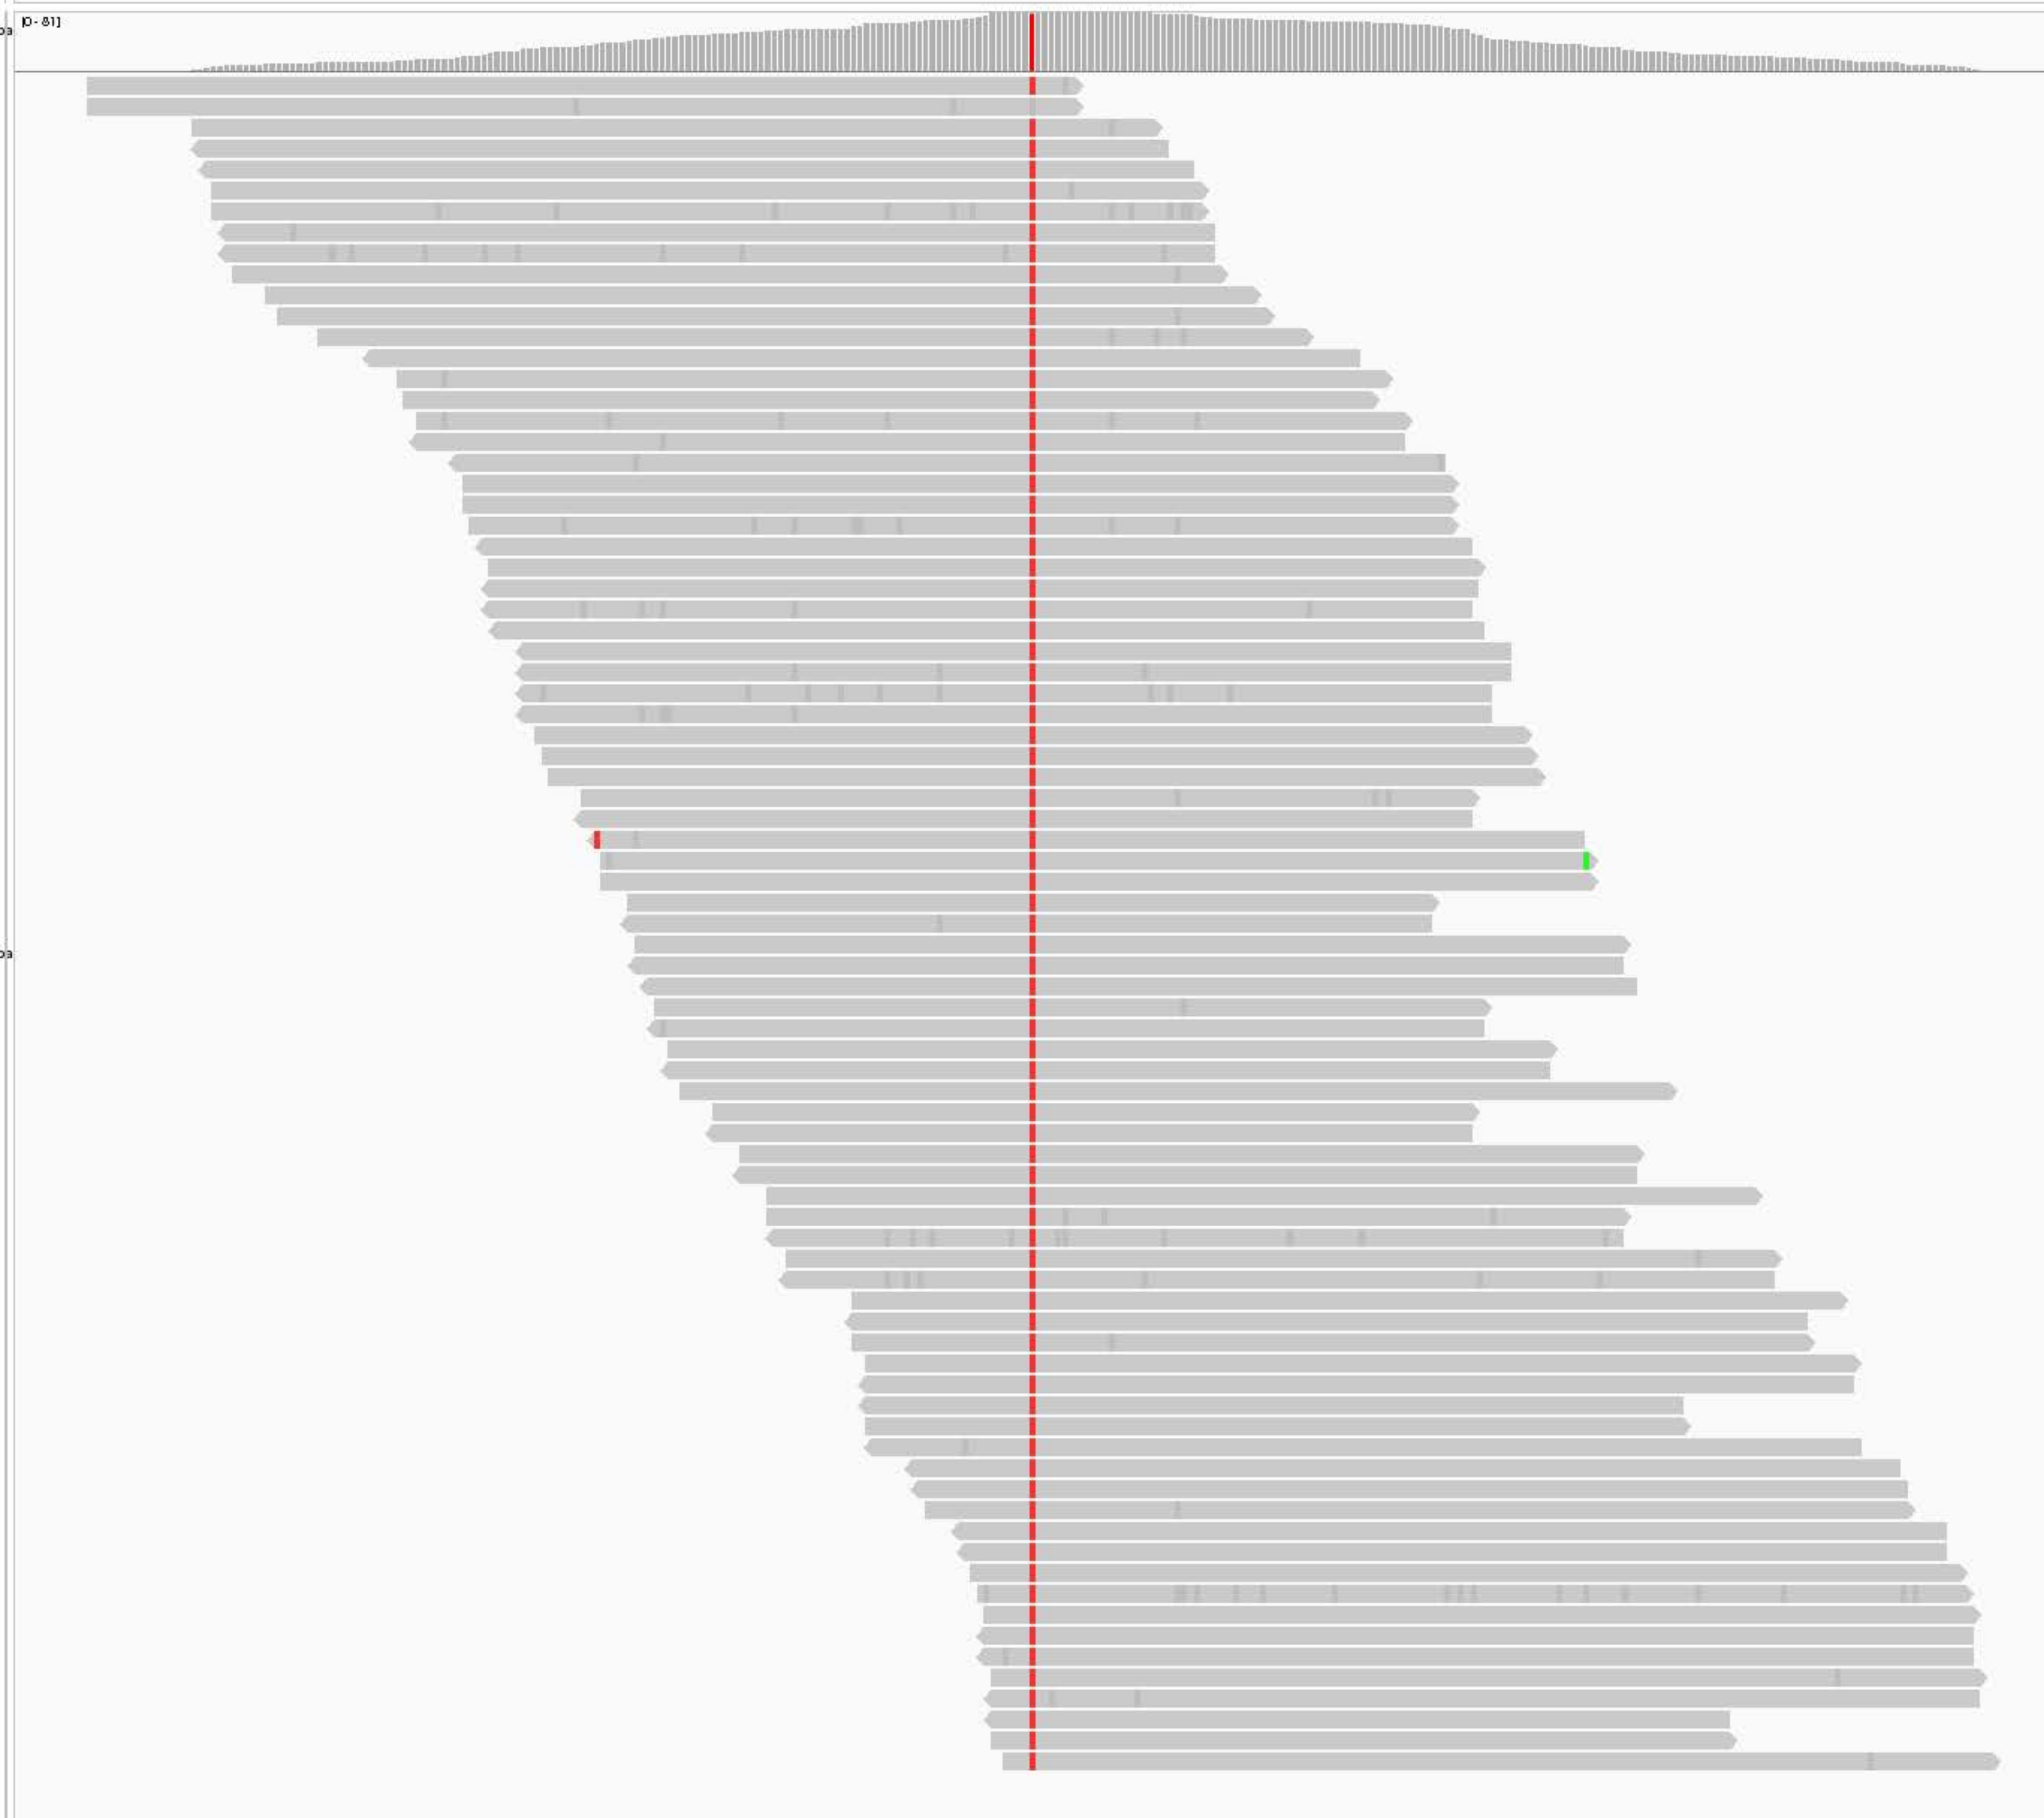

SL\_0004\_RN\_24\_WES\_uniq\_mut.ba

Sequence →

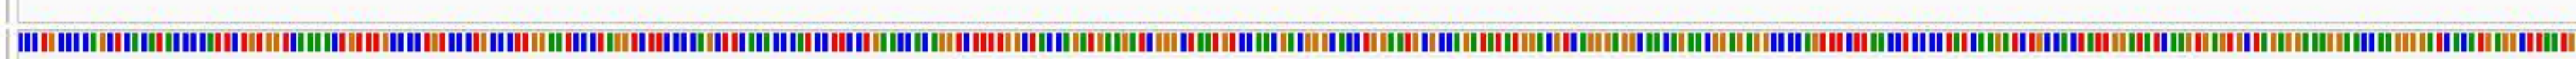

Refseq Genes

GDPD2



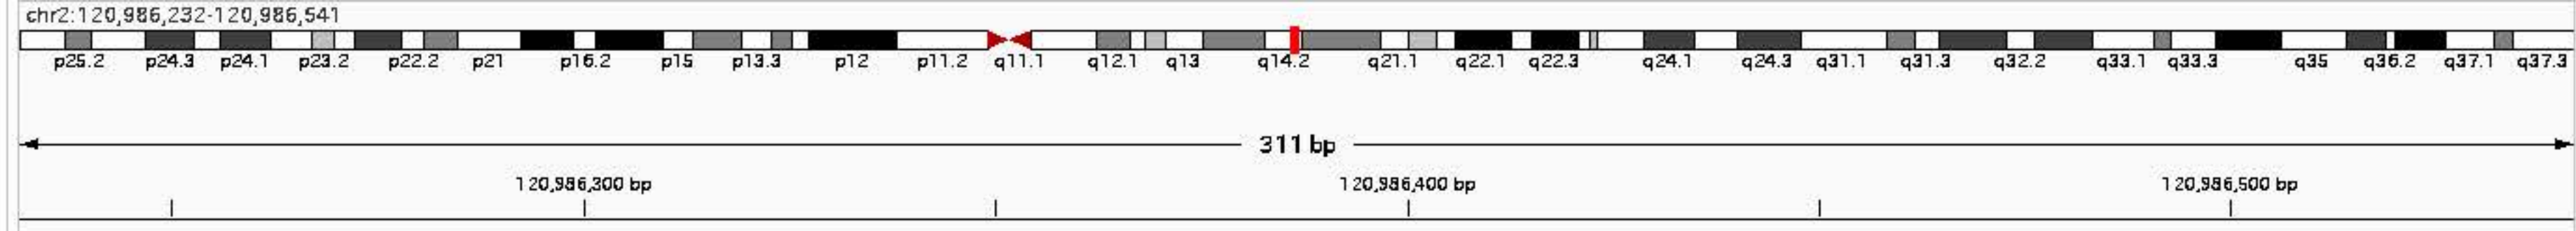

SL\_0015\_LN\_44\_WES\_uniq\_mut. coverage

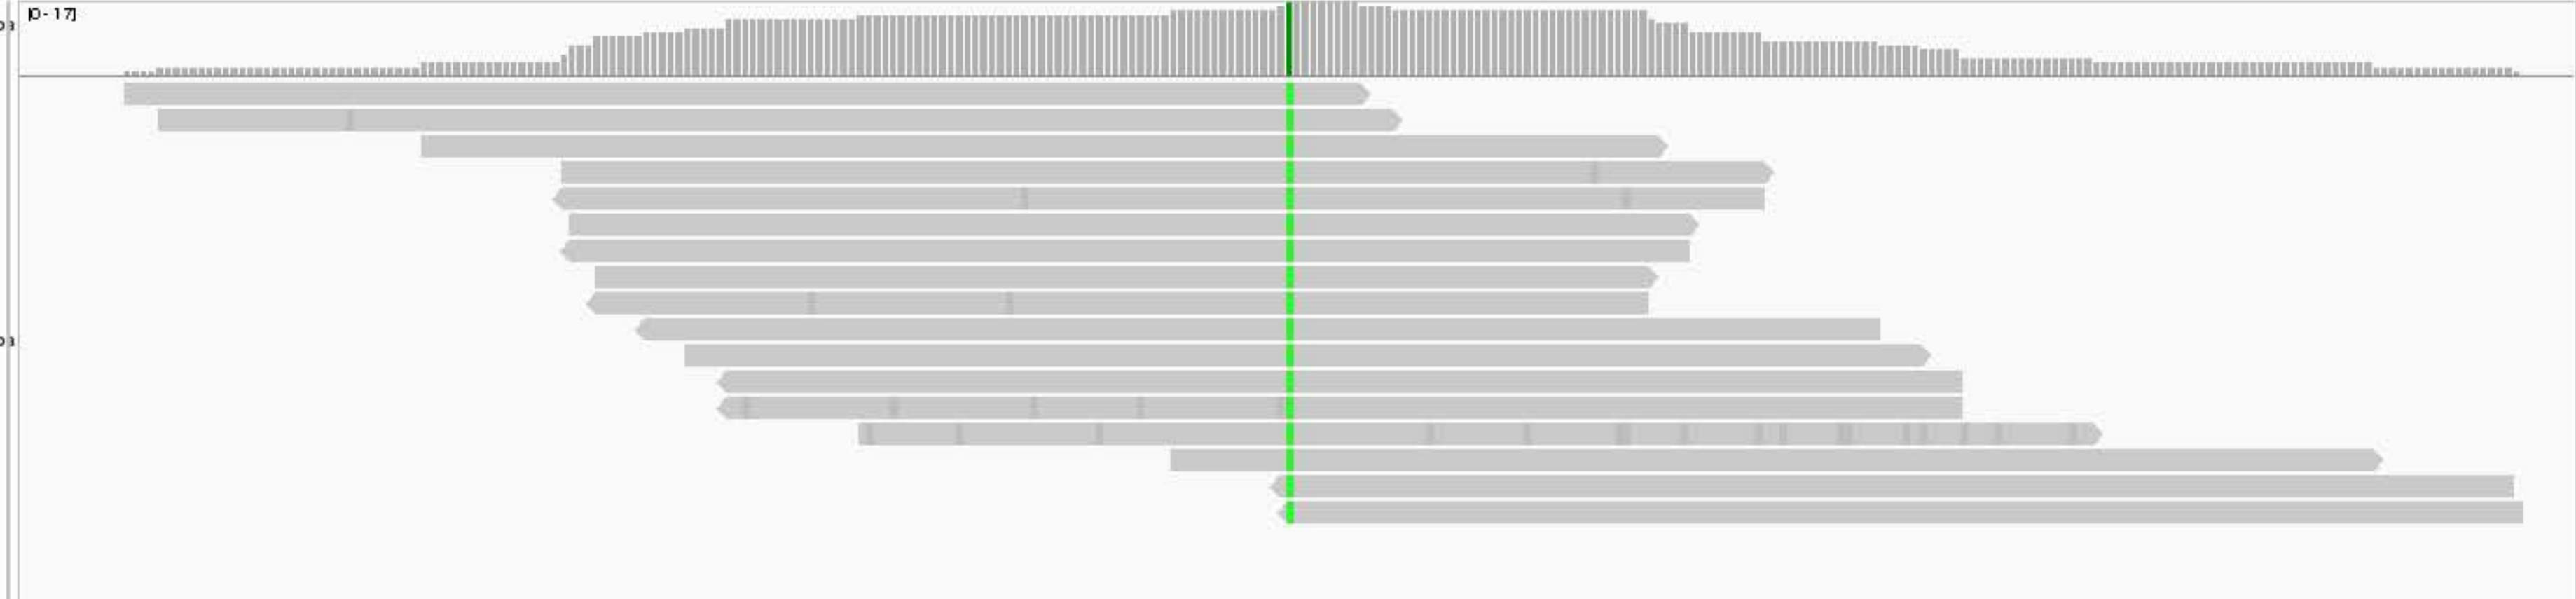

SL\_0015\_LN\_44\_WES\_uniq\_mut.

Sequence

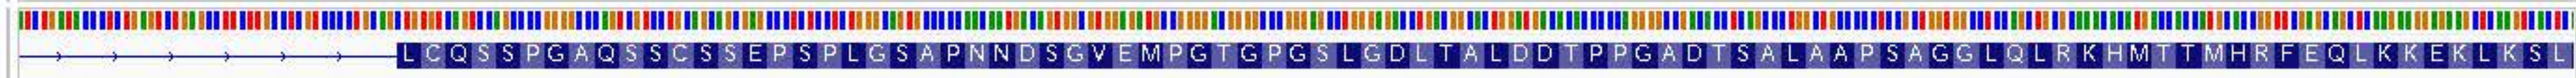

Refseq Genes

GLI2

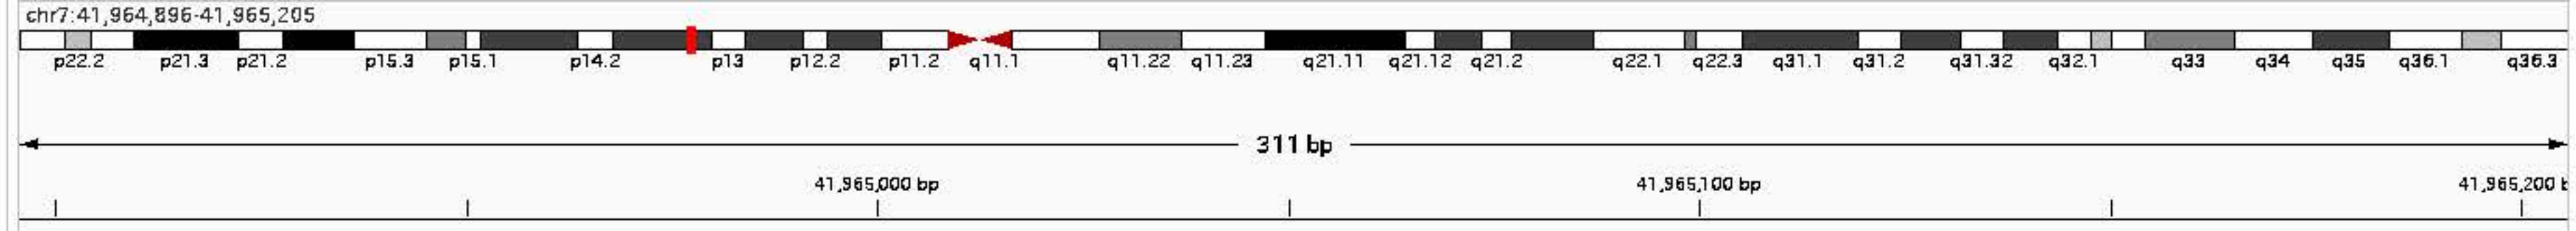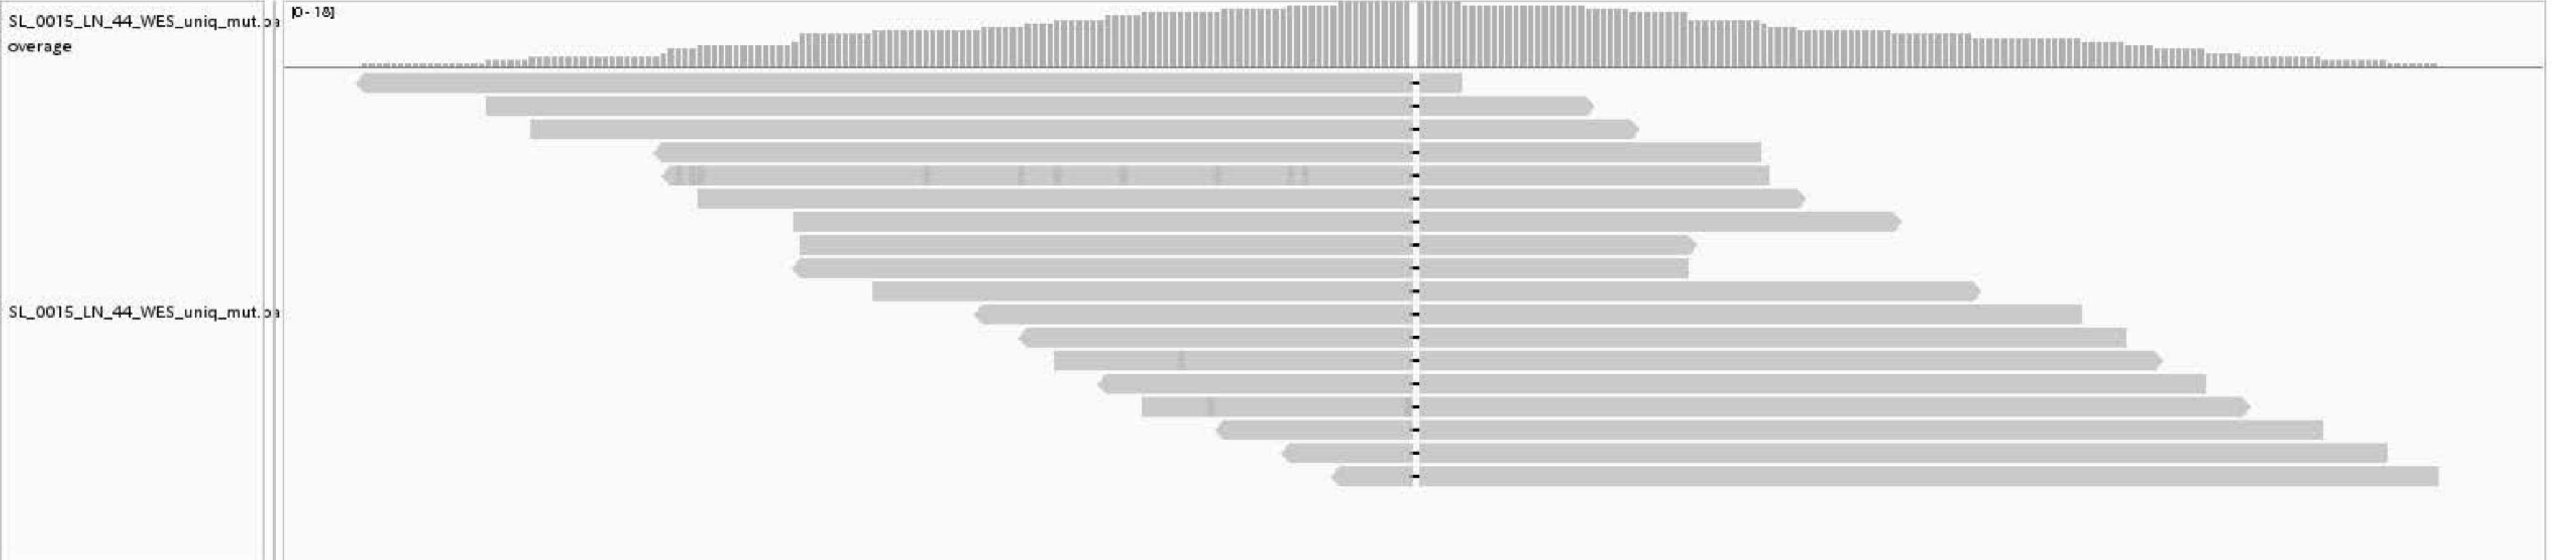

Sequence Refseq Genes

SGGFSACPQYGRVVALSSPQSGMGHAGPLCSEPGQYINIHSTASIQGLMQQGPRGAGPHQMSDGLLQHALYGQGVDPQNMGNVMSGASENPAVPLGFNLQGG

GLI3

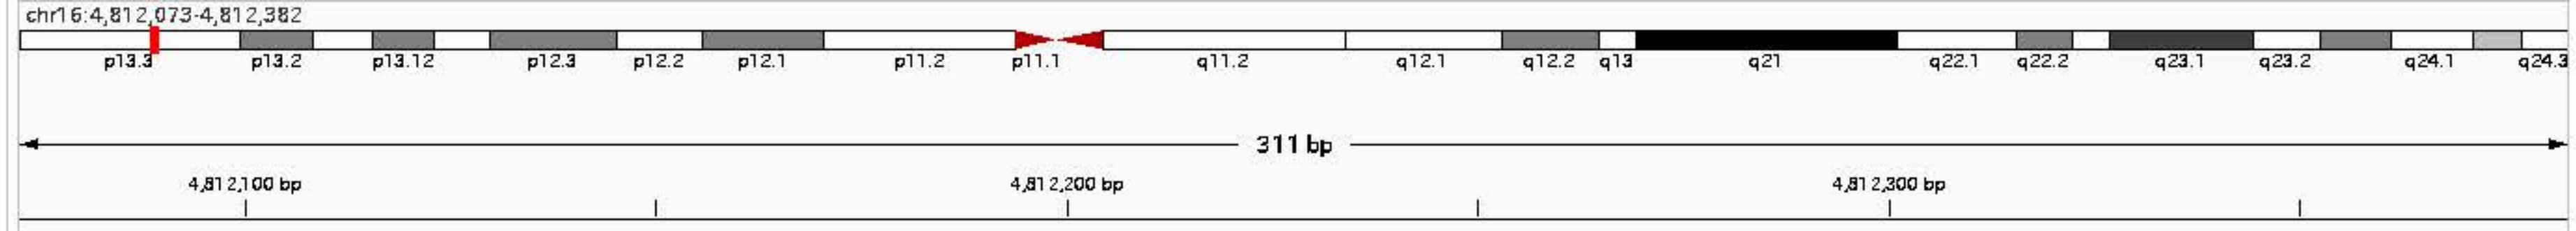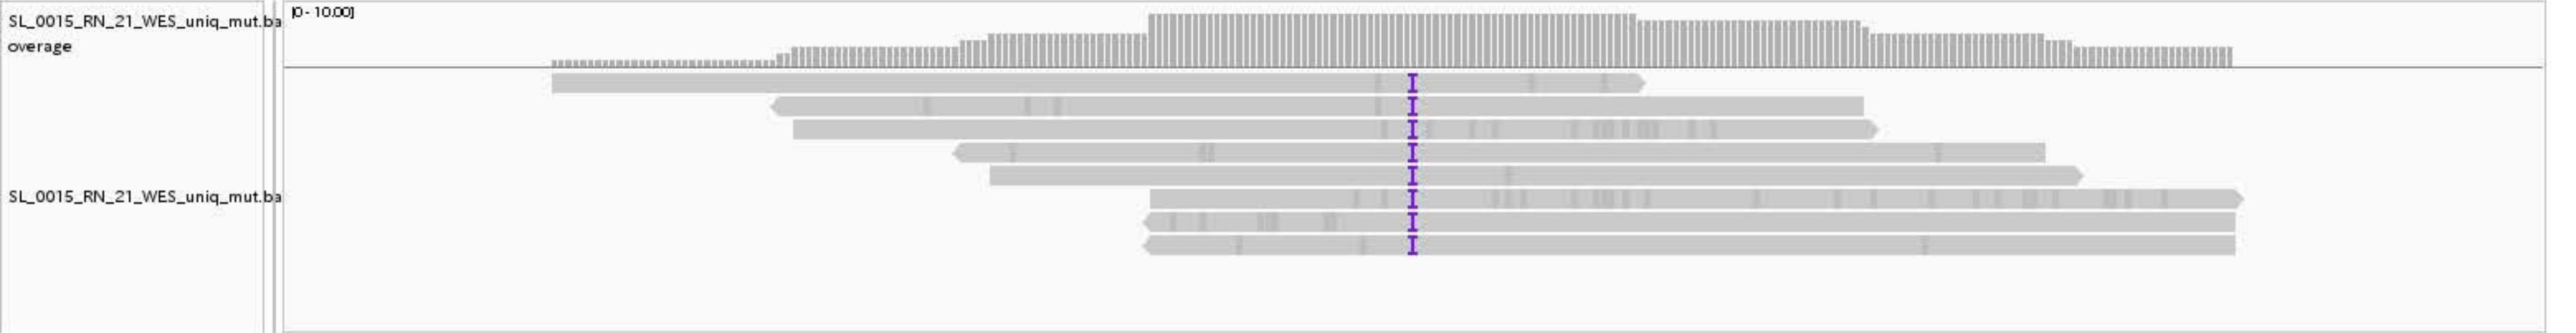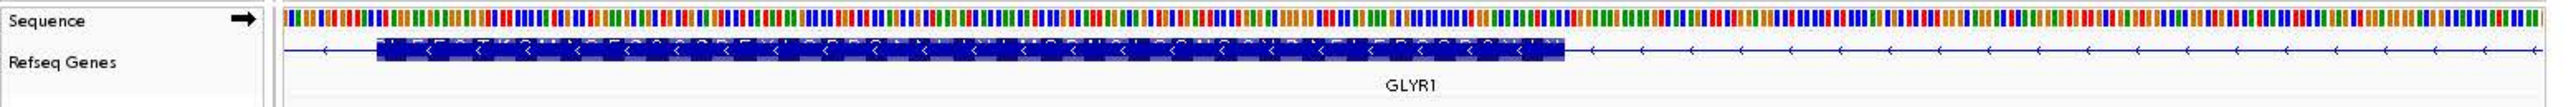



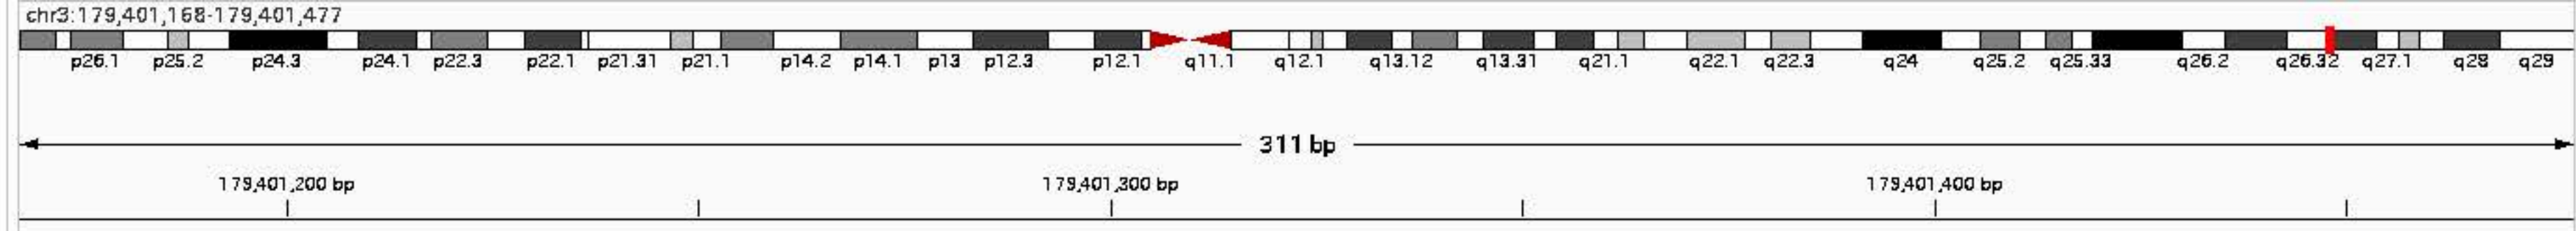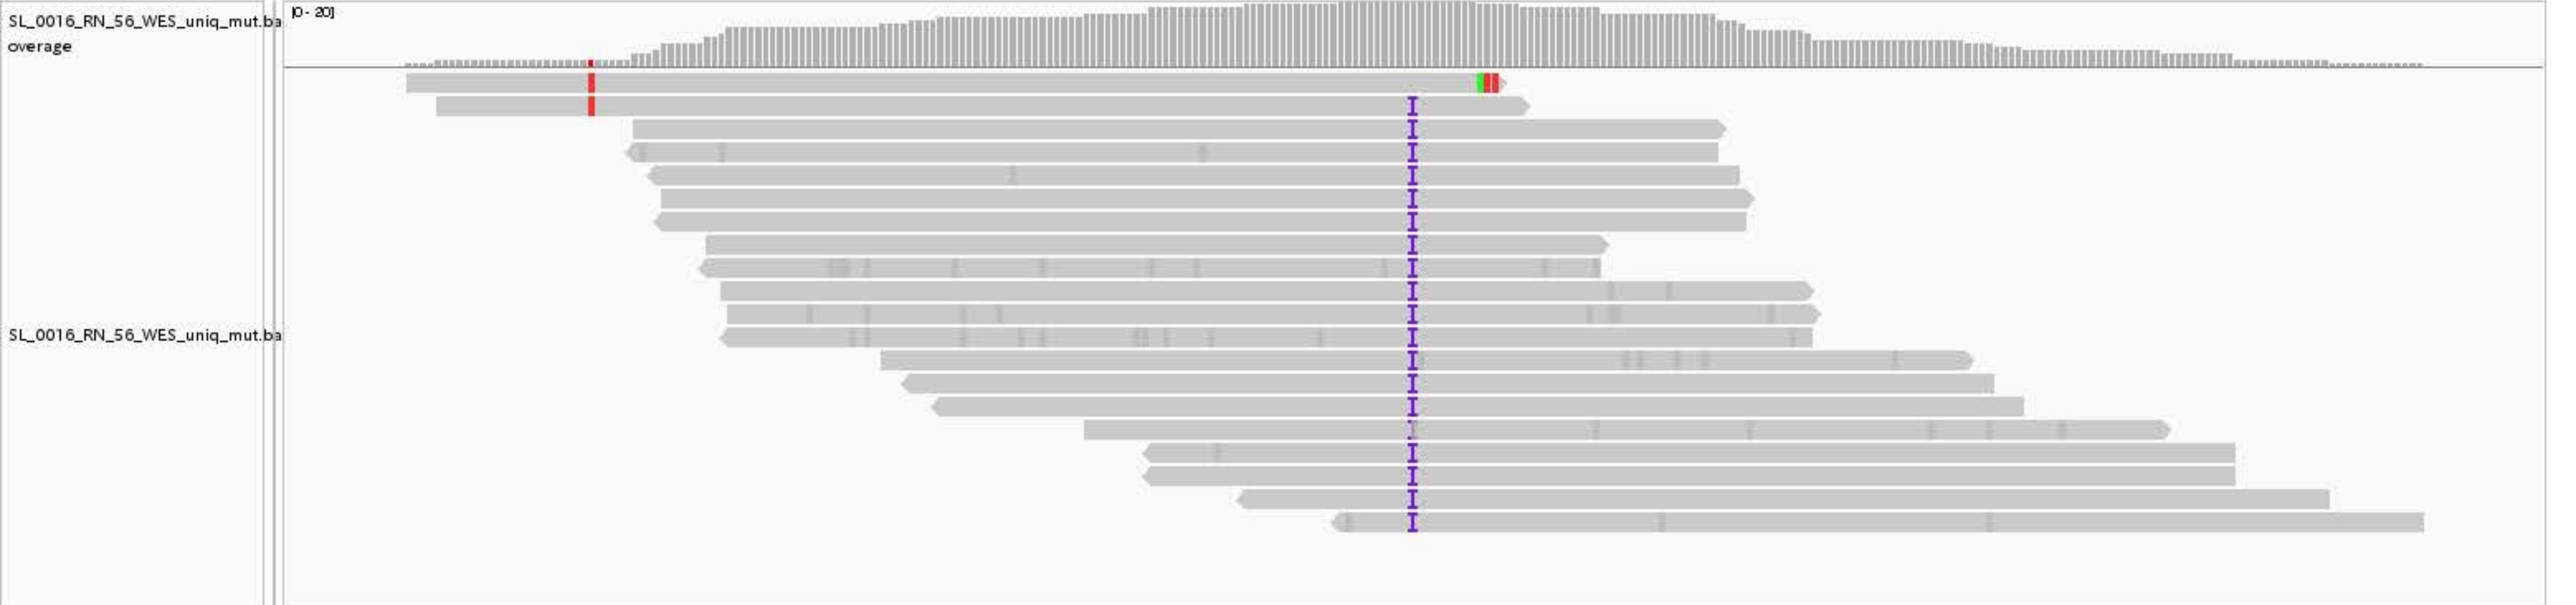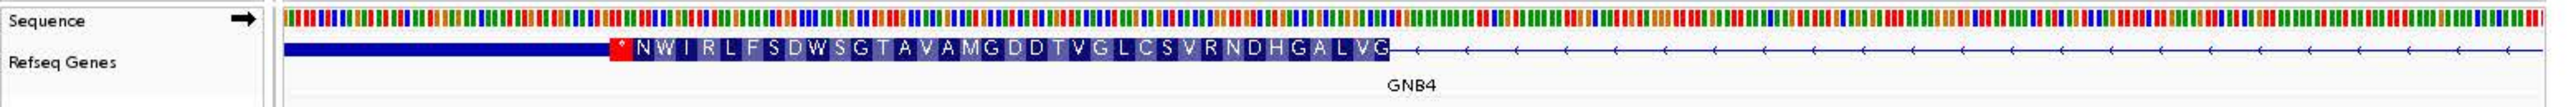

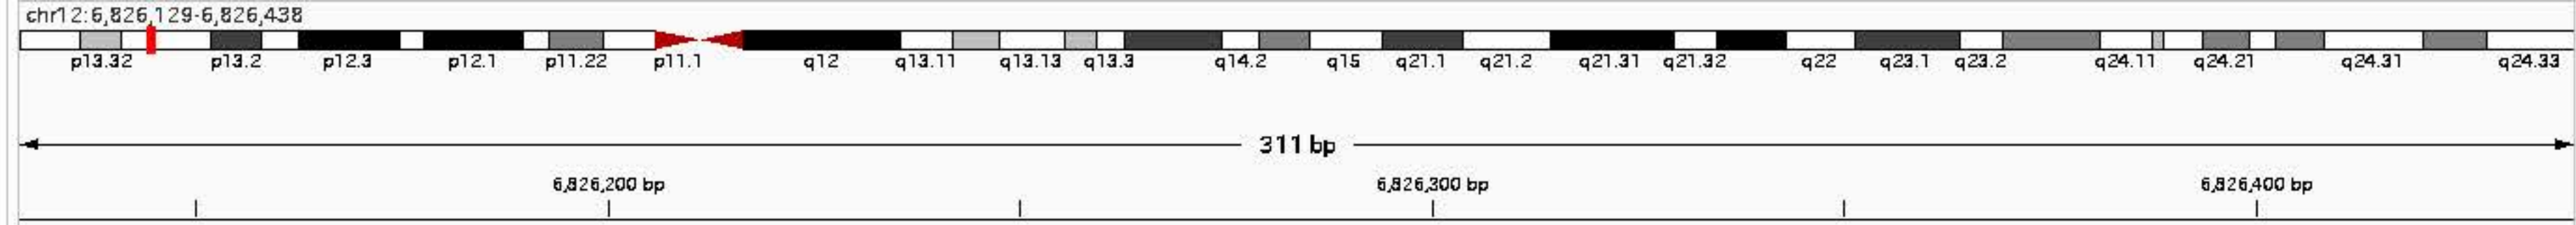

SL\_0015\_LN\_44\_WES\_uniq\_mut. coverage

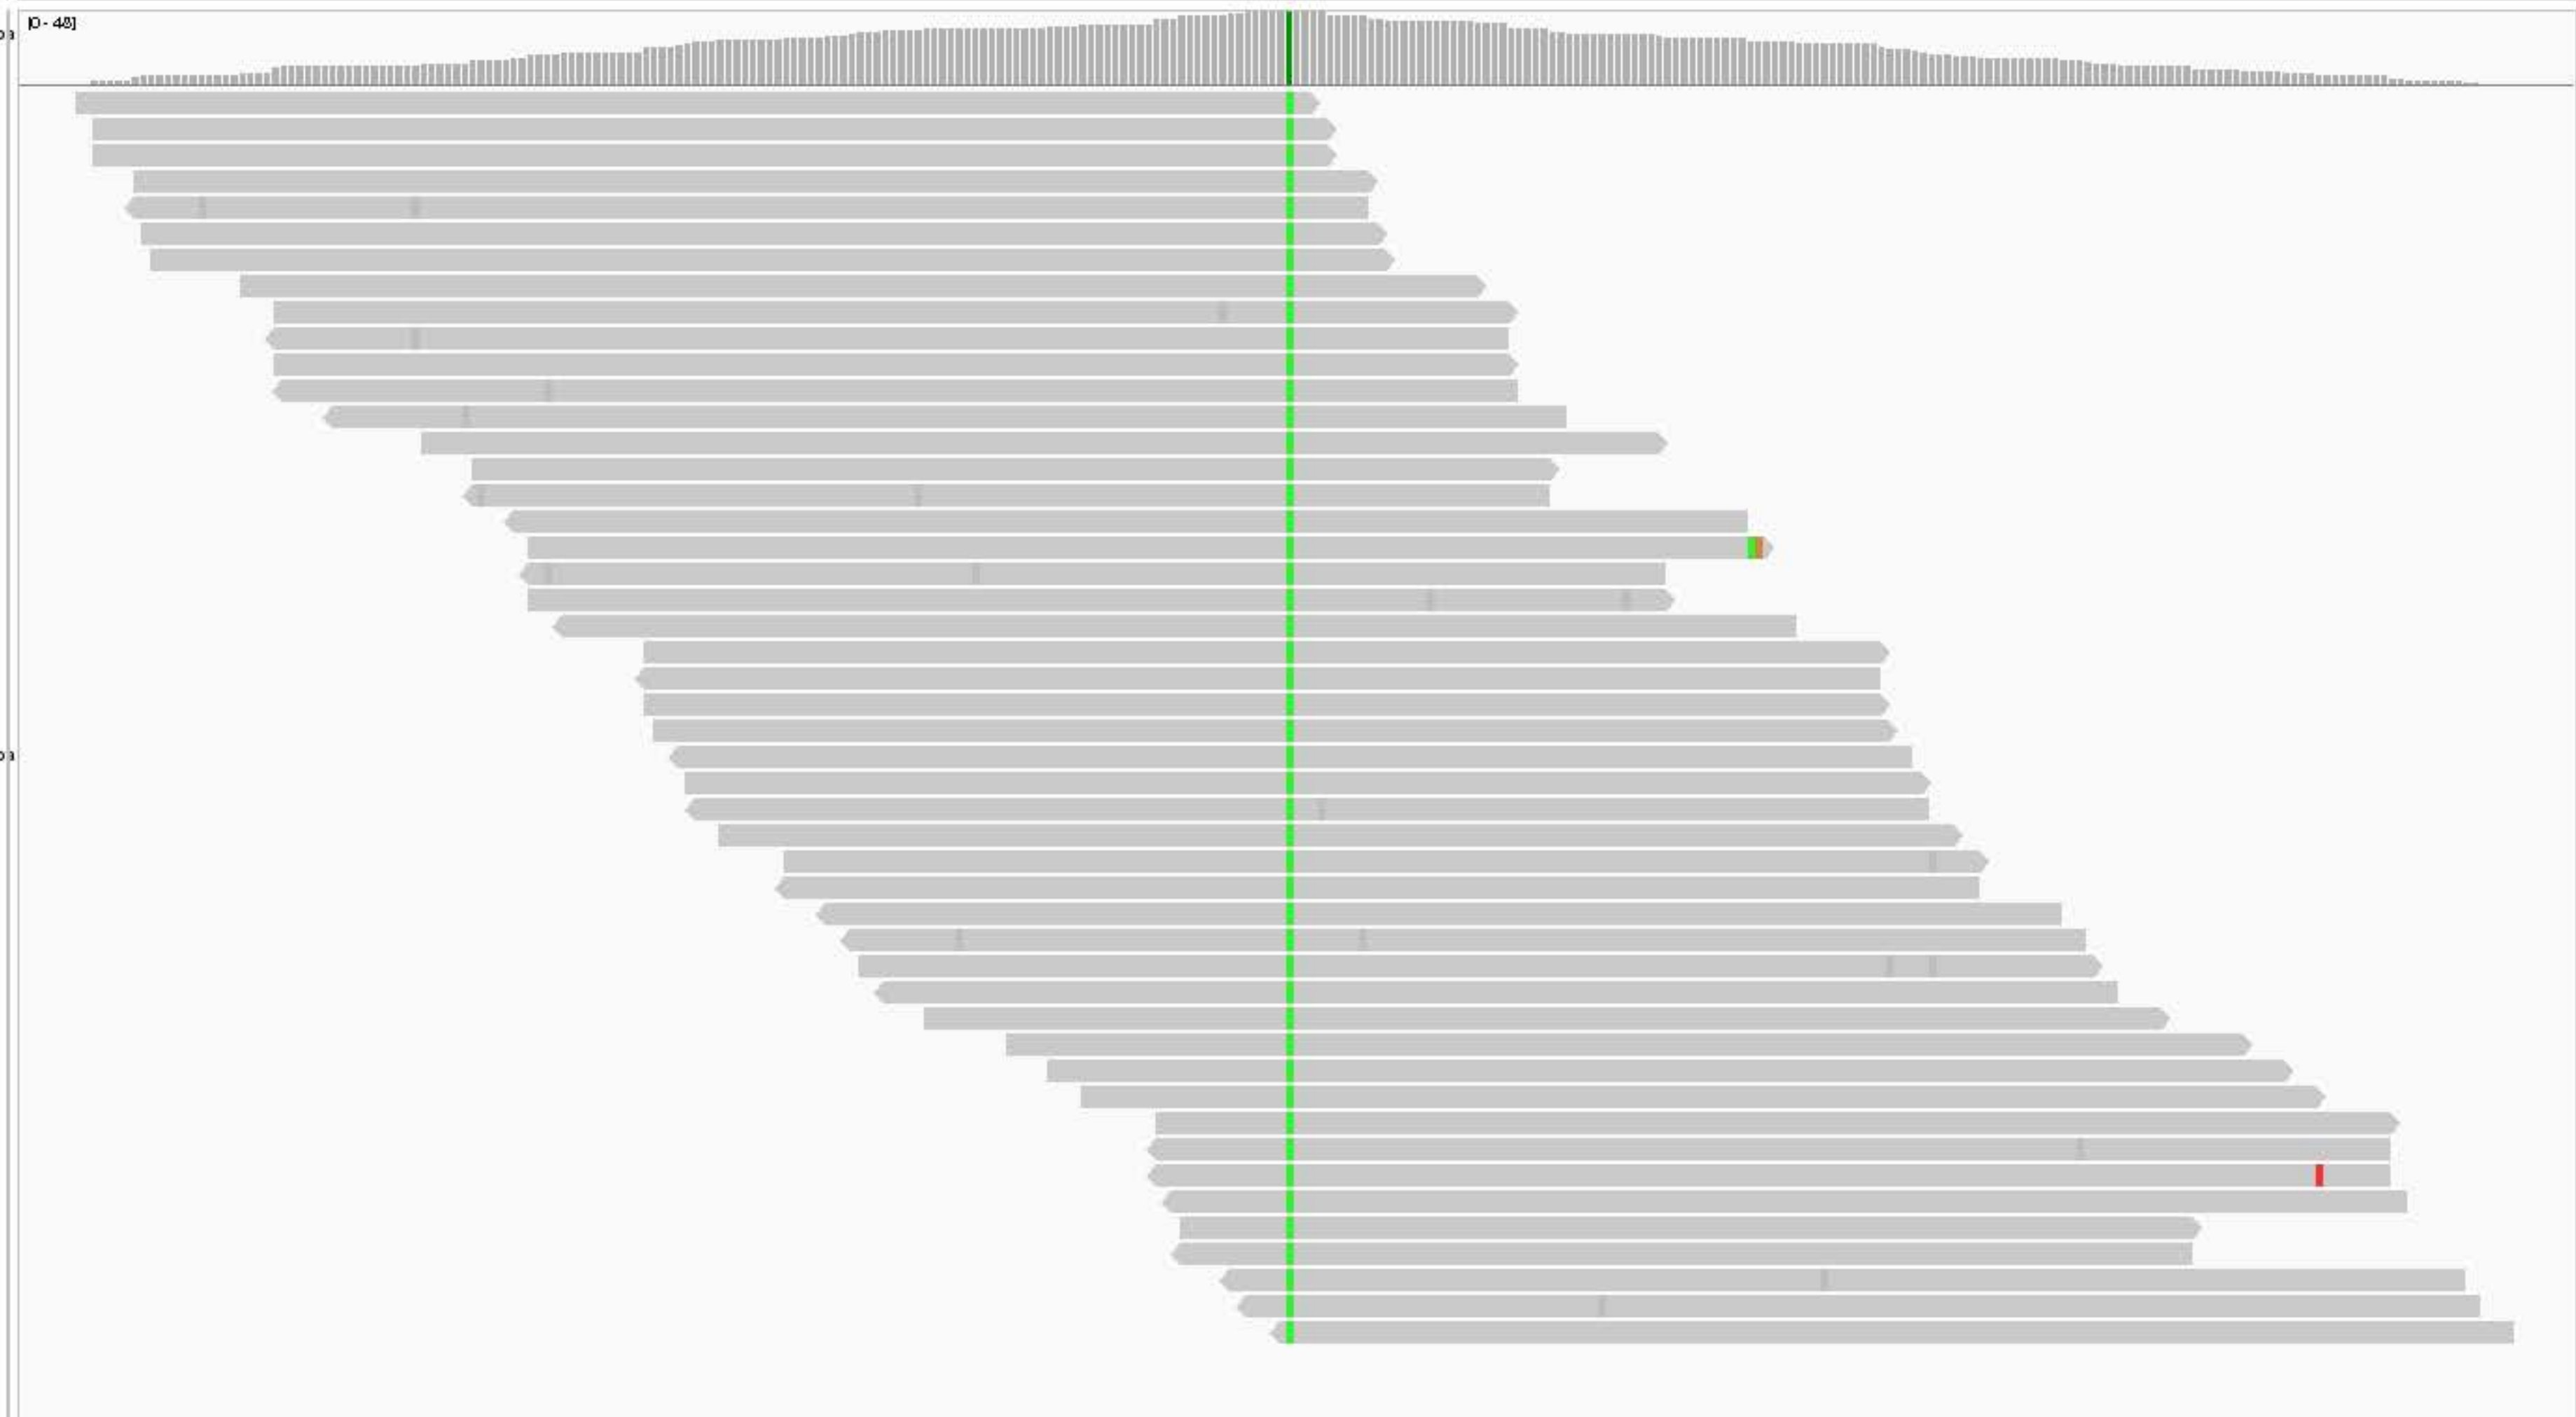

SL\_0015\_LN\_44\_WES\_uniq\_mut.

Sequence →

Refseq Genes

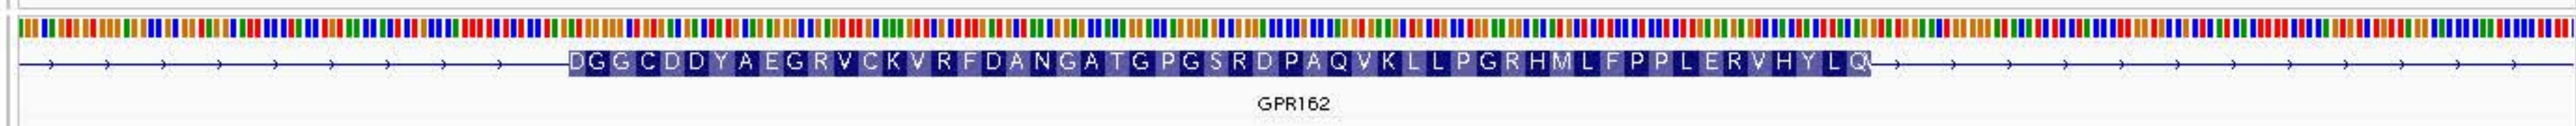

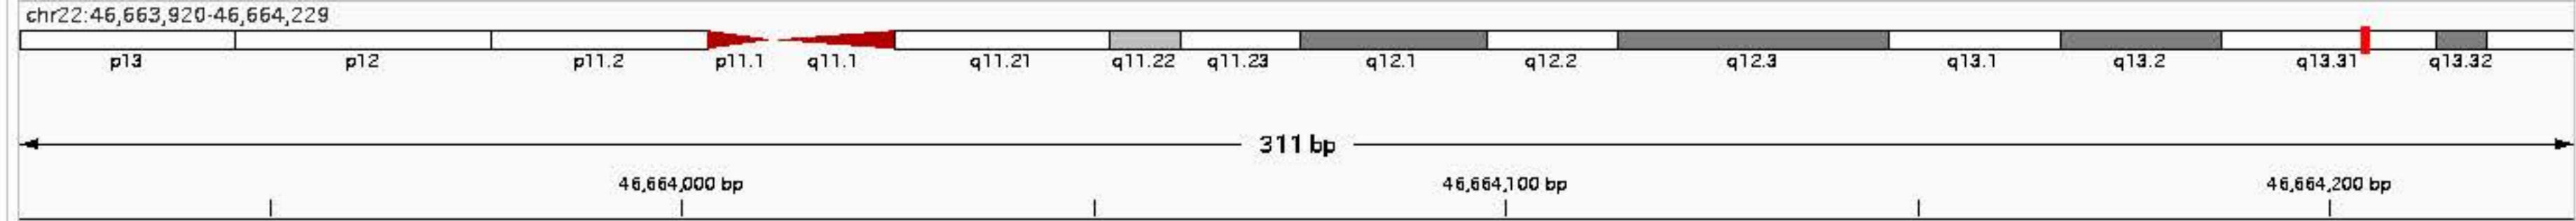

SL\_0015\_LN\_44\_WES\_uniq\_mut.  
coverage

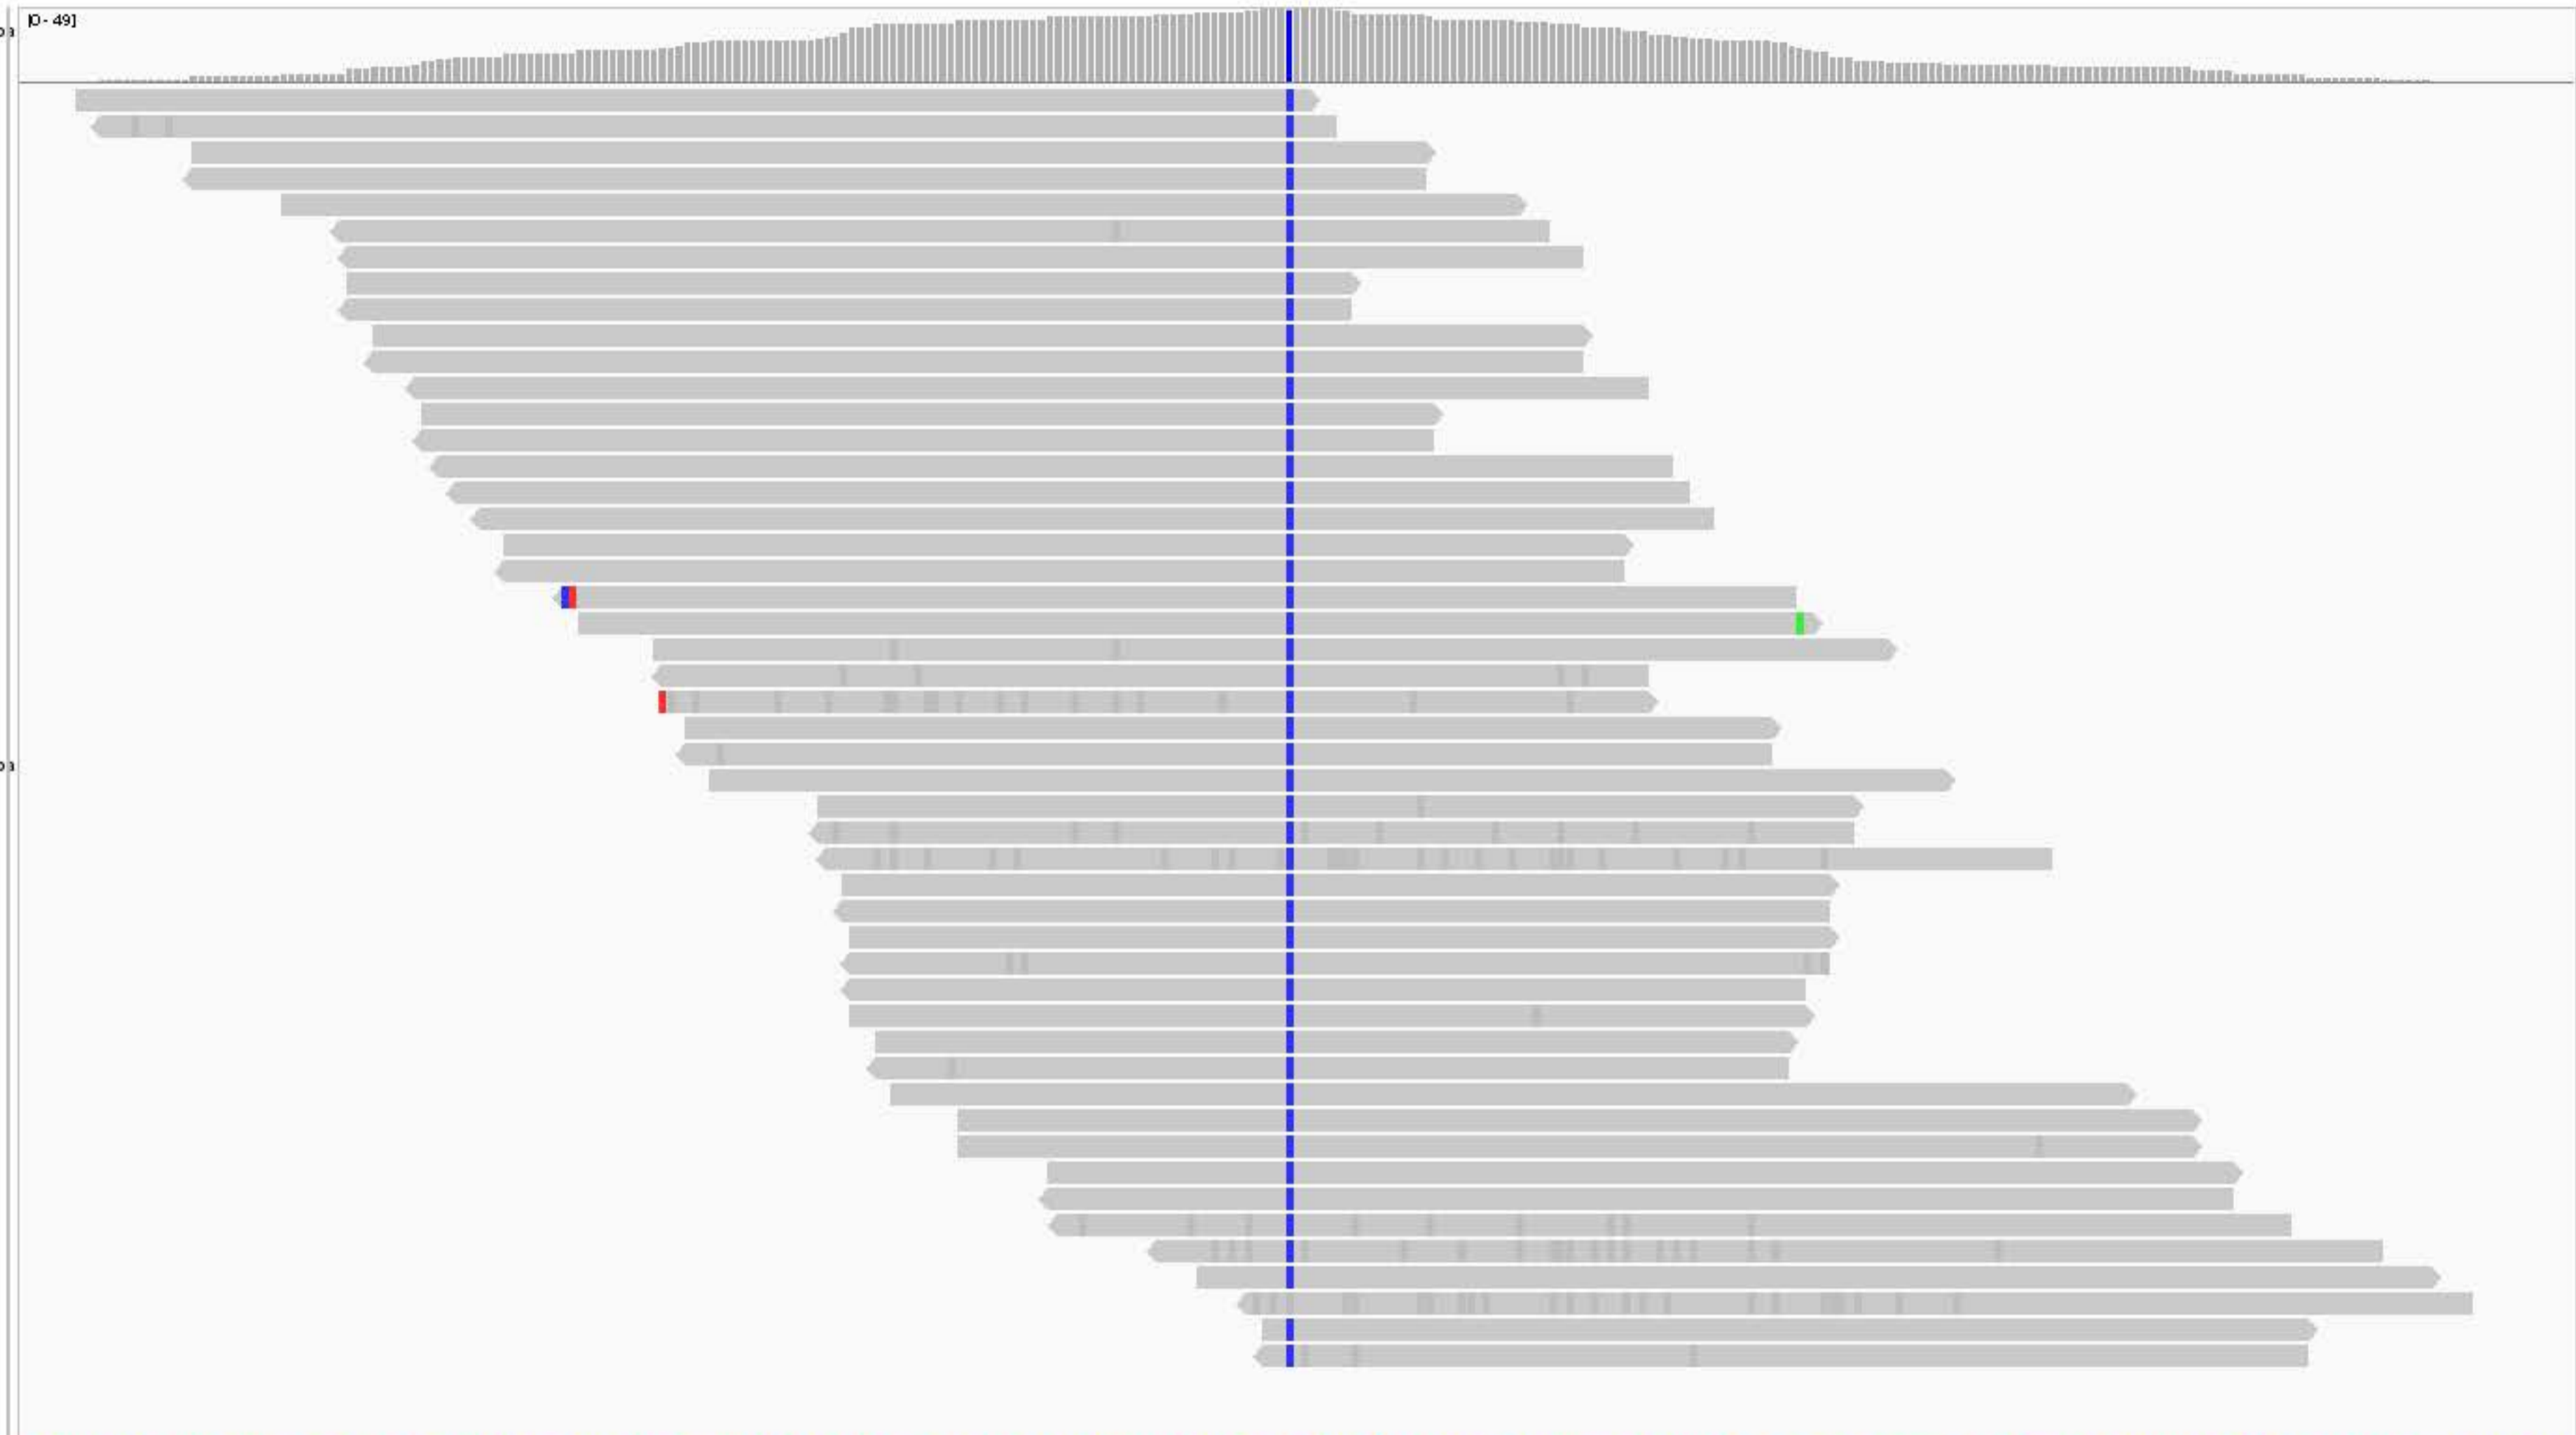

SL\_0015\_LN\_44\_WES\_uniq\_mut.

Sequence →  
Refseq Genes

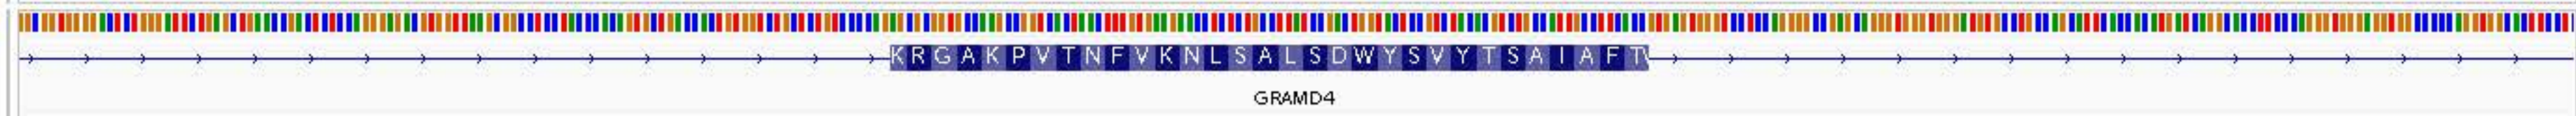



chr4:3,035,231-3,035,540

p16.2 p15.33 p15.31 p15.1 p14 p13 p11 q12 q13.1 q13.2 q21.1 q21.22 q22.1 q22.3 q24 q25 q26 q27 q28.2 q28.3 q31.1 q31.22 q32.1 q32.3 q34.1 q34.3 q35.2

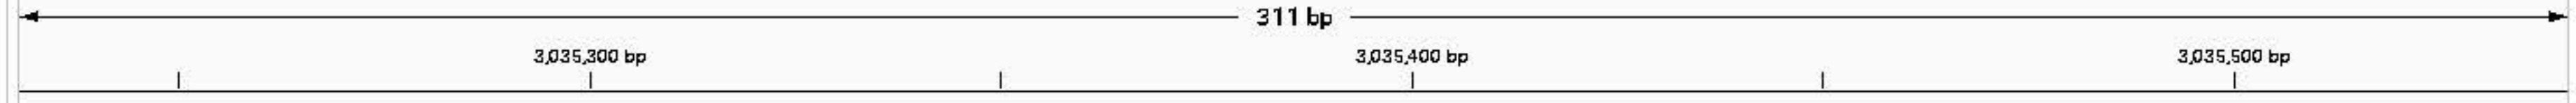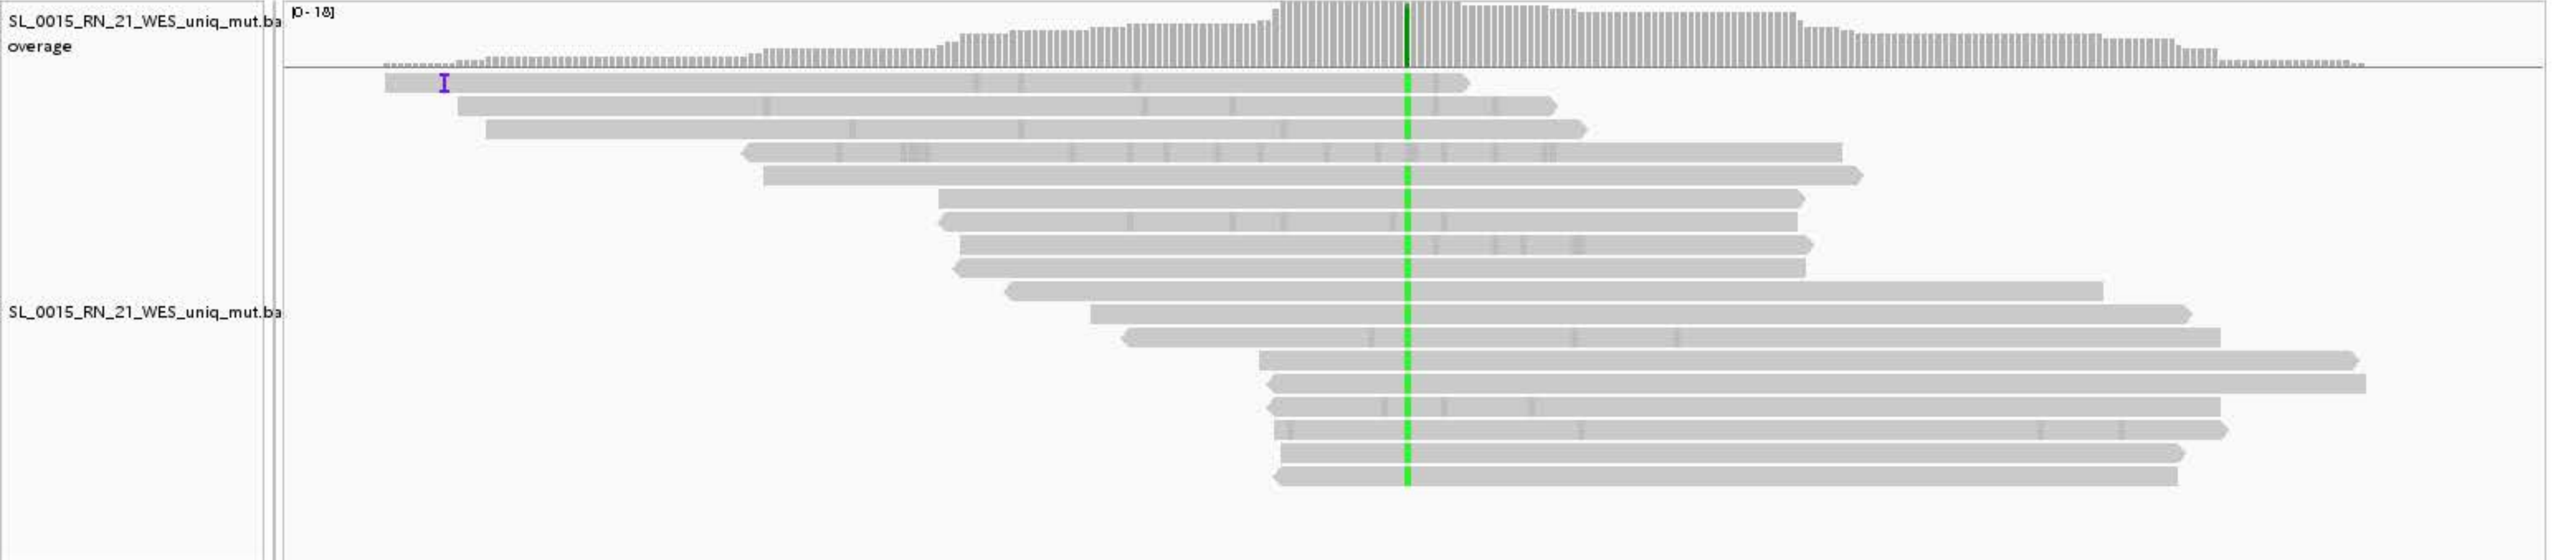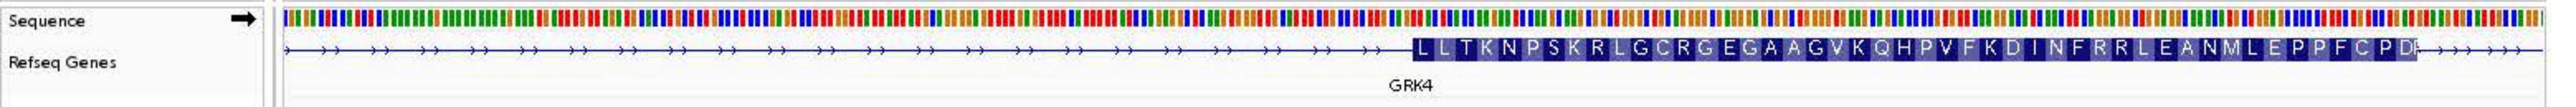

chr9:121,332,569-121,332,878

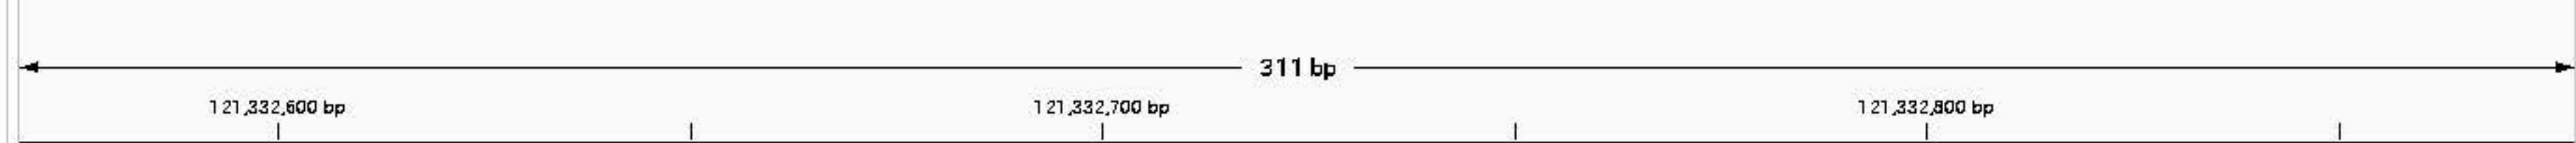

SL\_0002\_RN\_8\_WES\_uniq\_mut\_ba  
verage

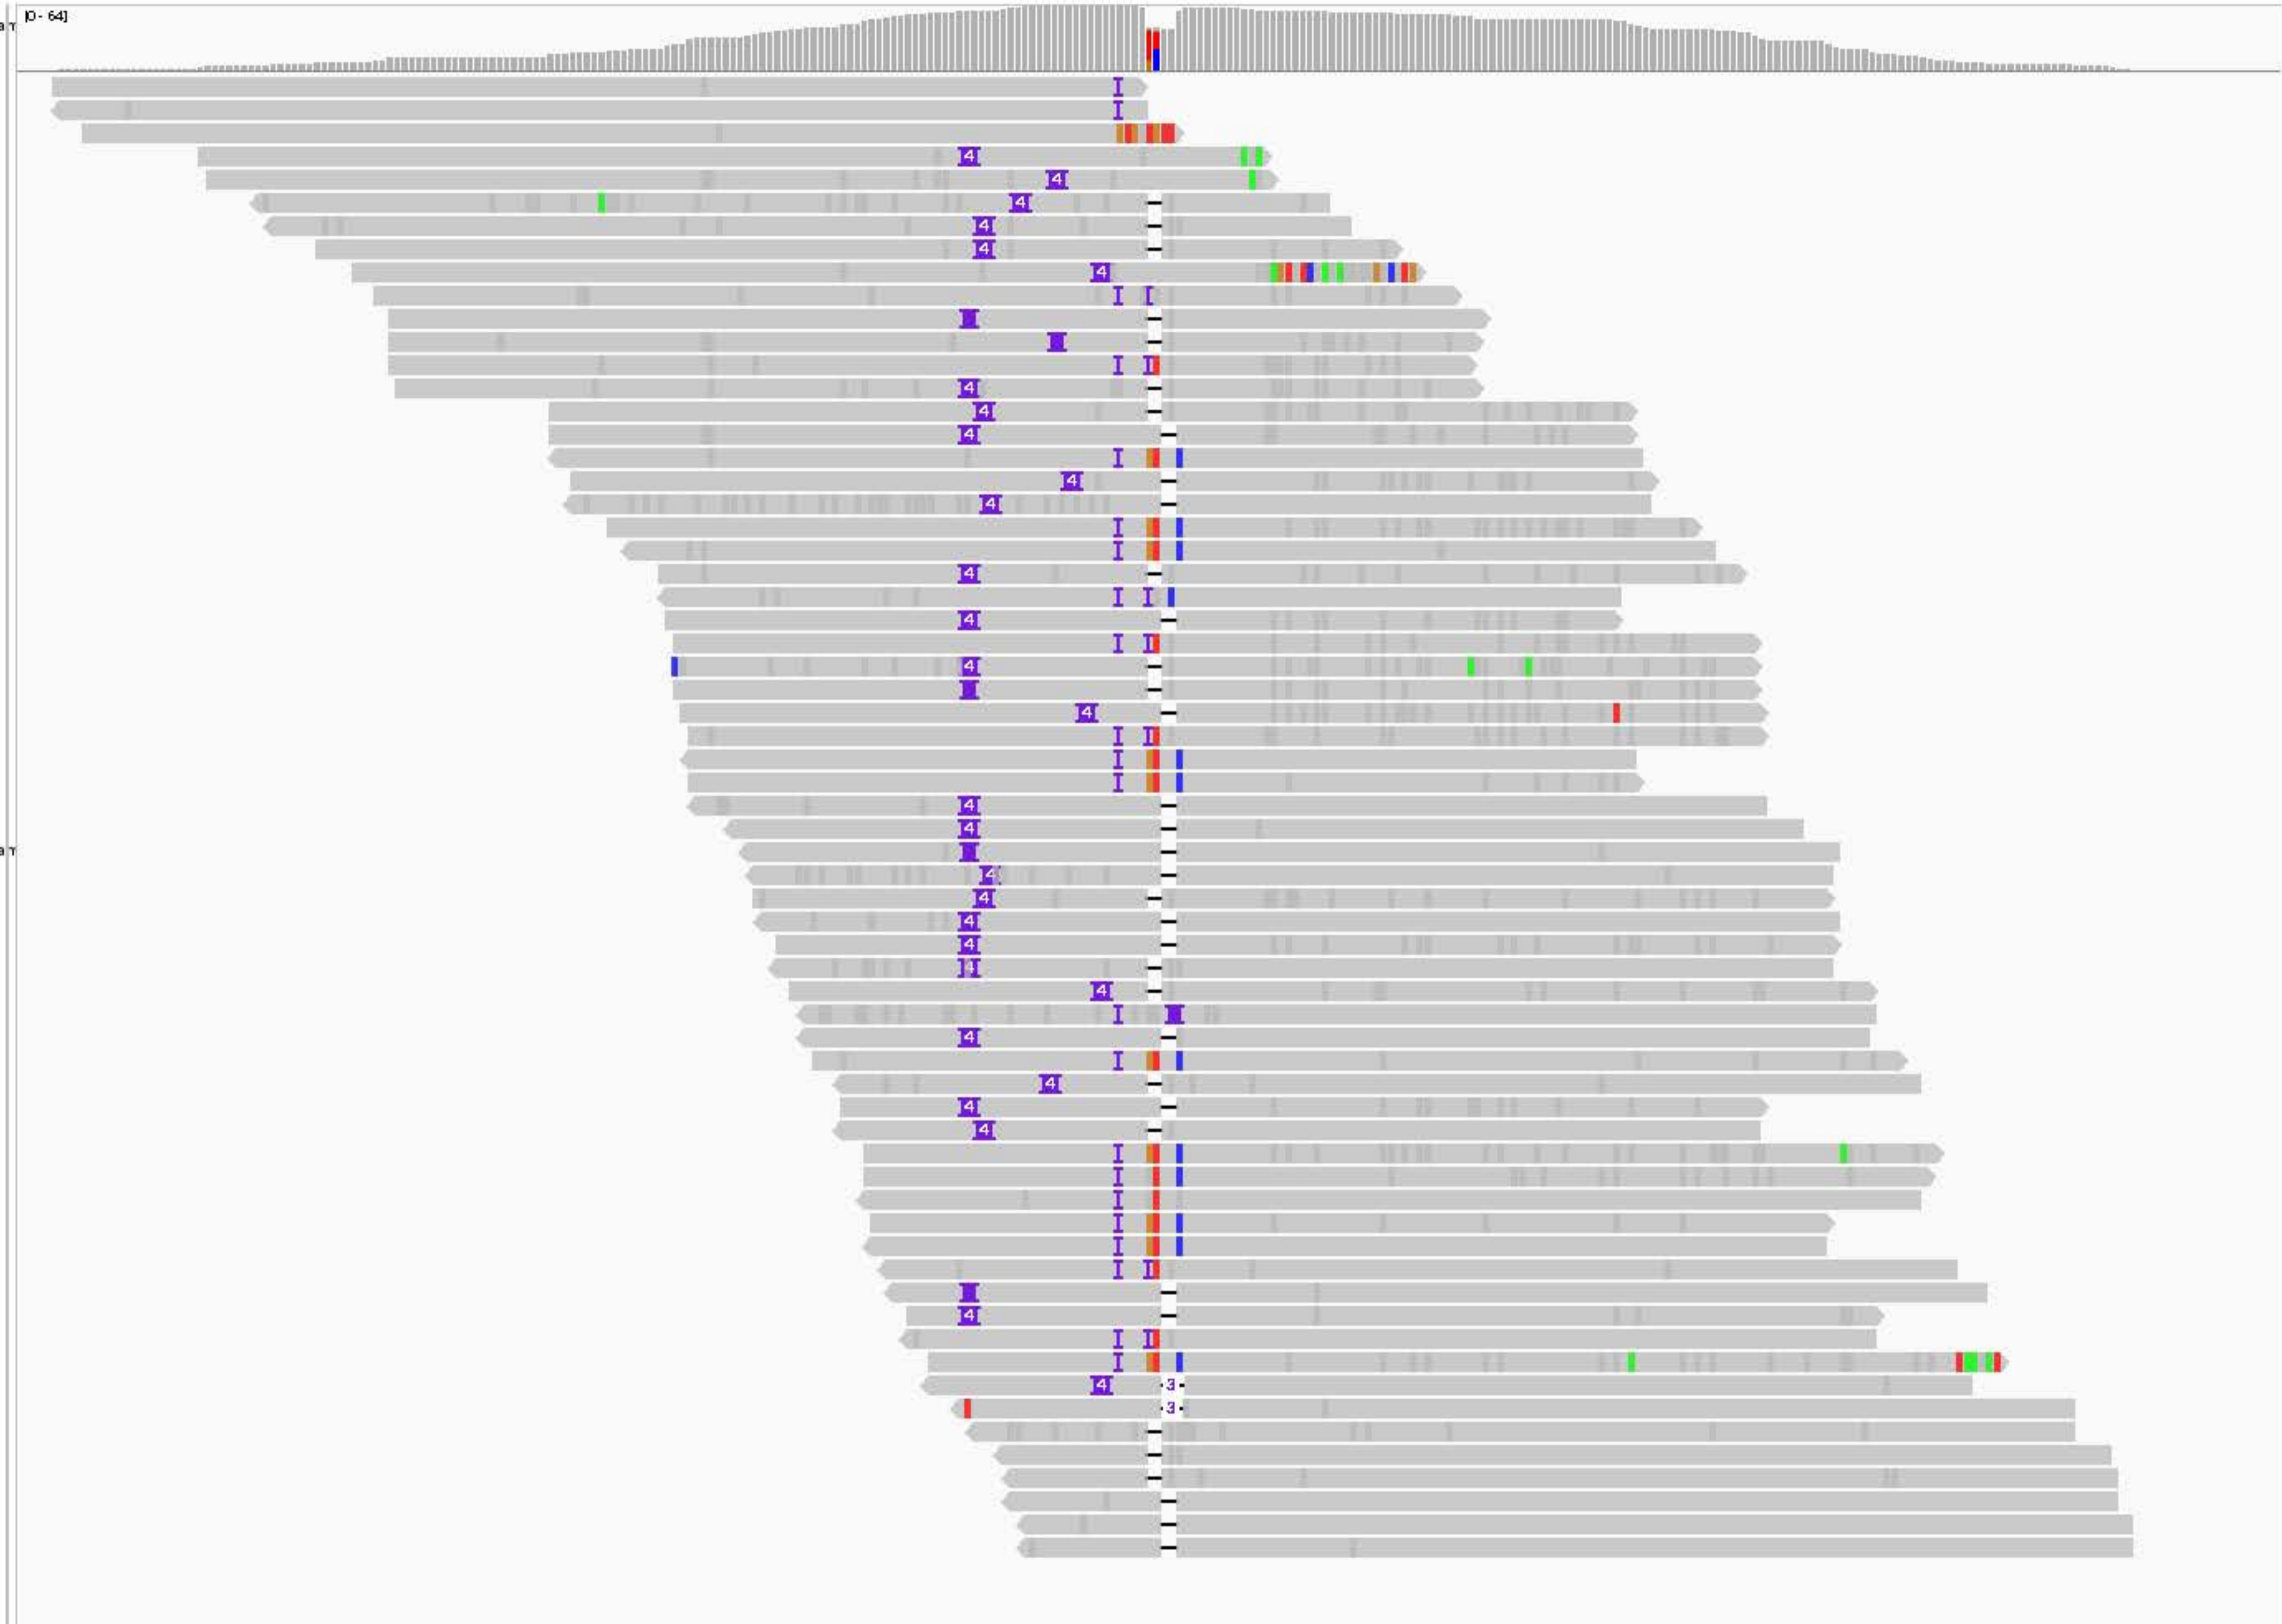

SL\_0002\_RN\_8\_WES\_uniq\_mut\_ba

Sequence →  
Refseq Genes

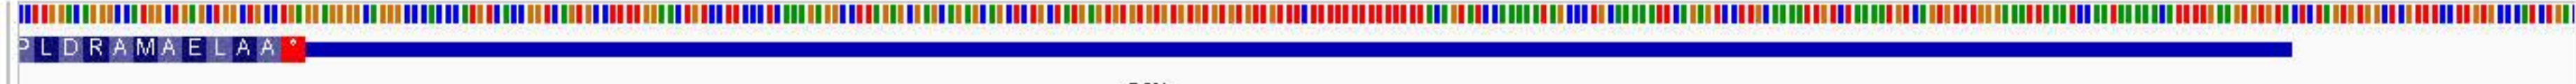

GSN

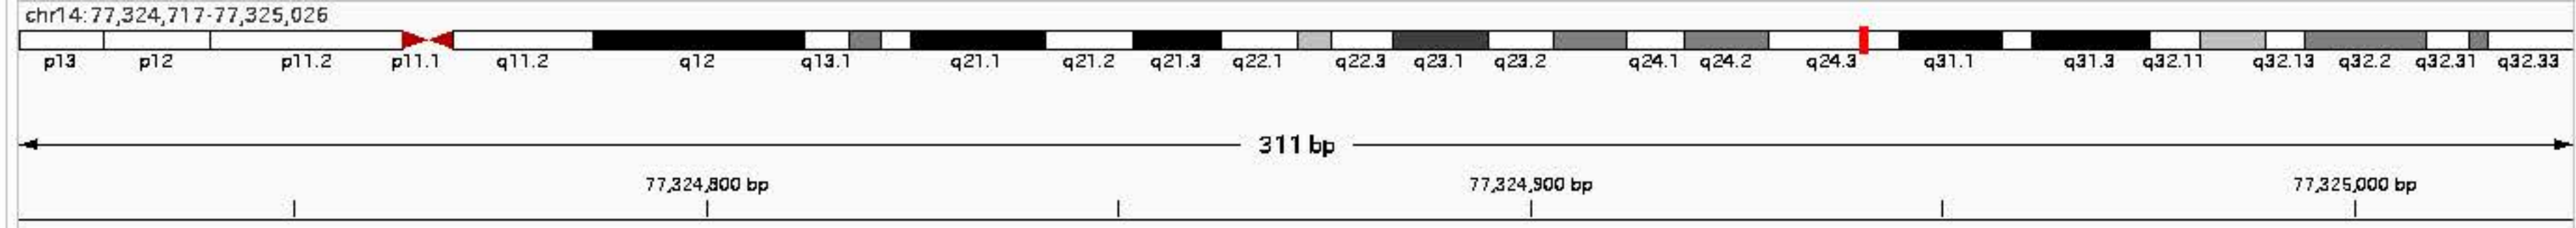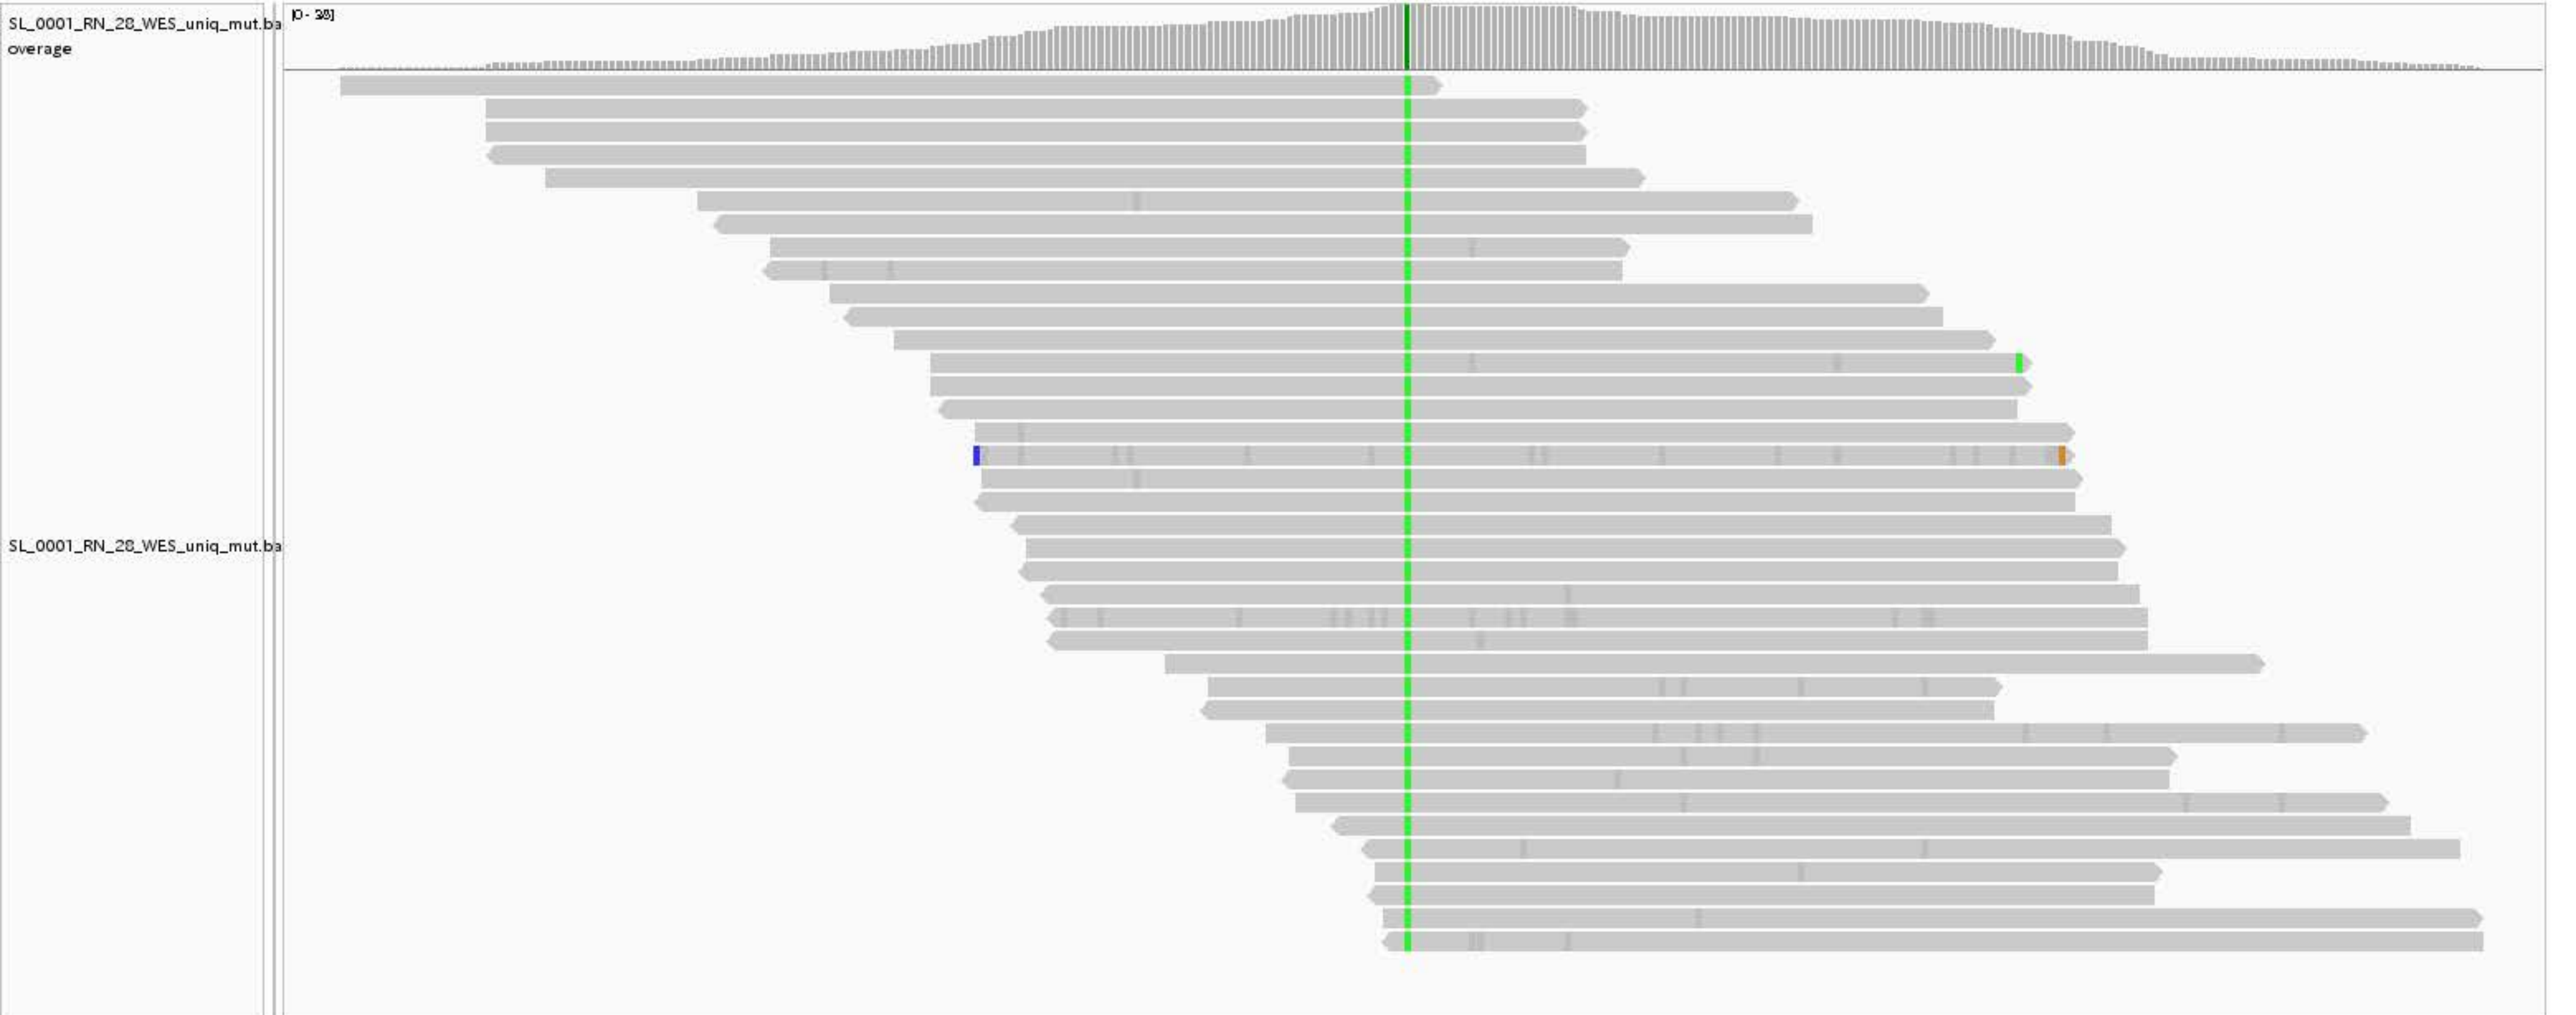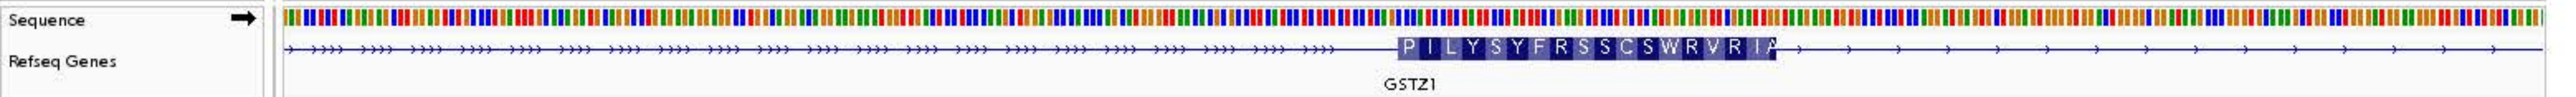



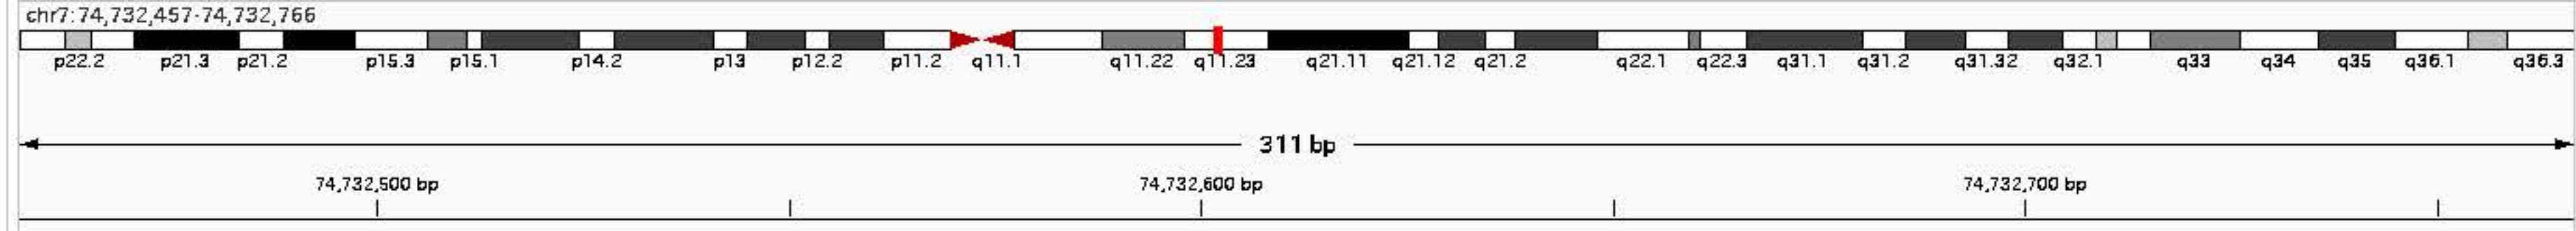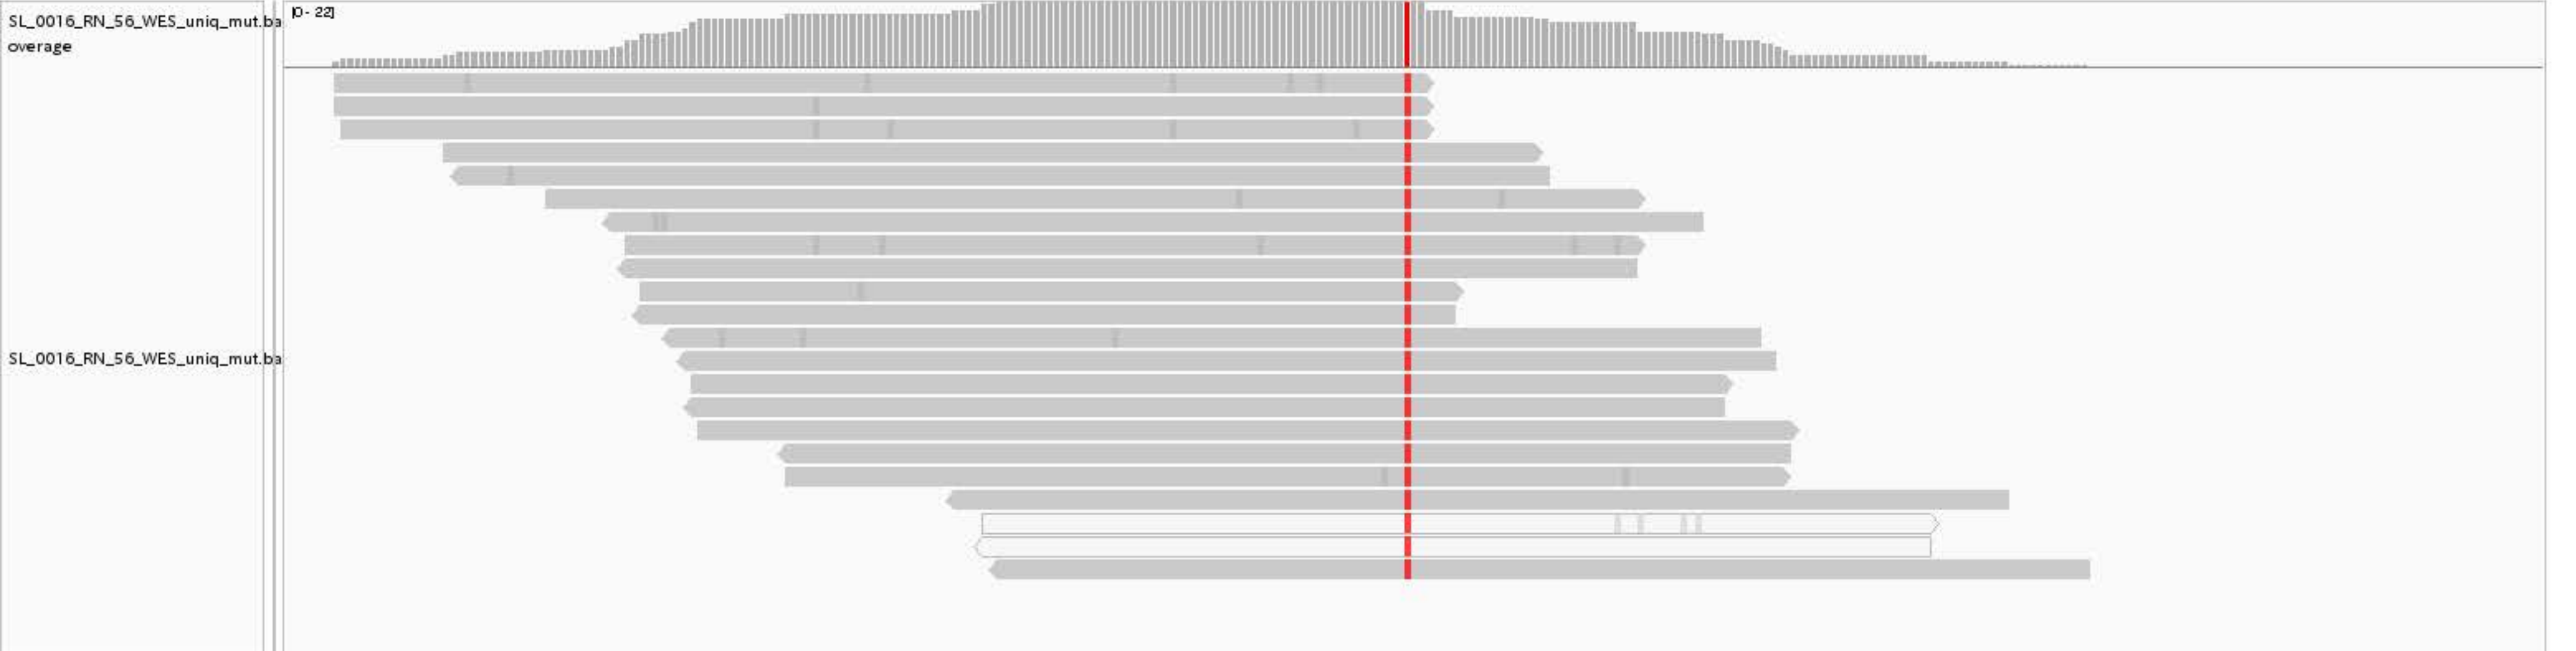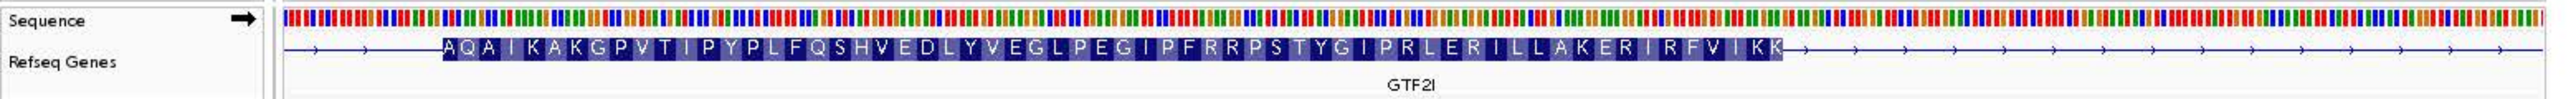

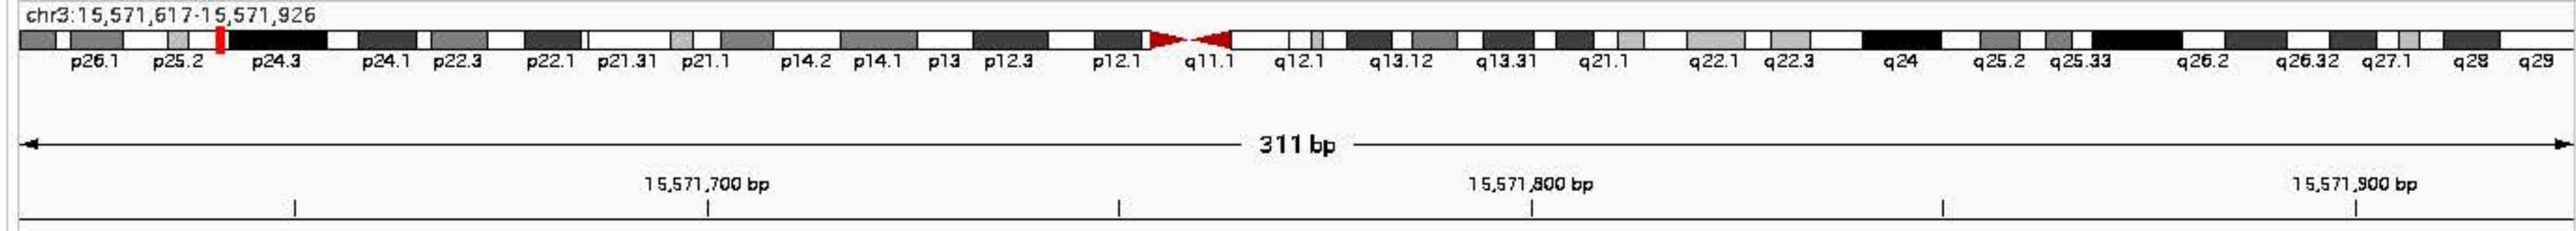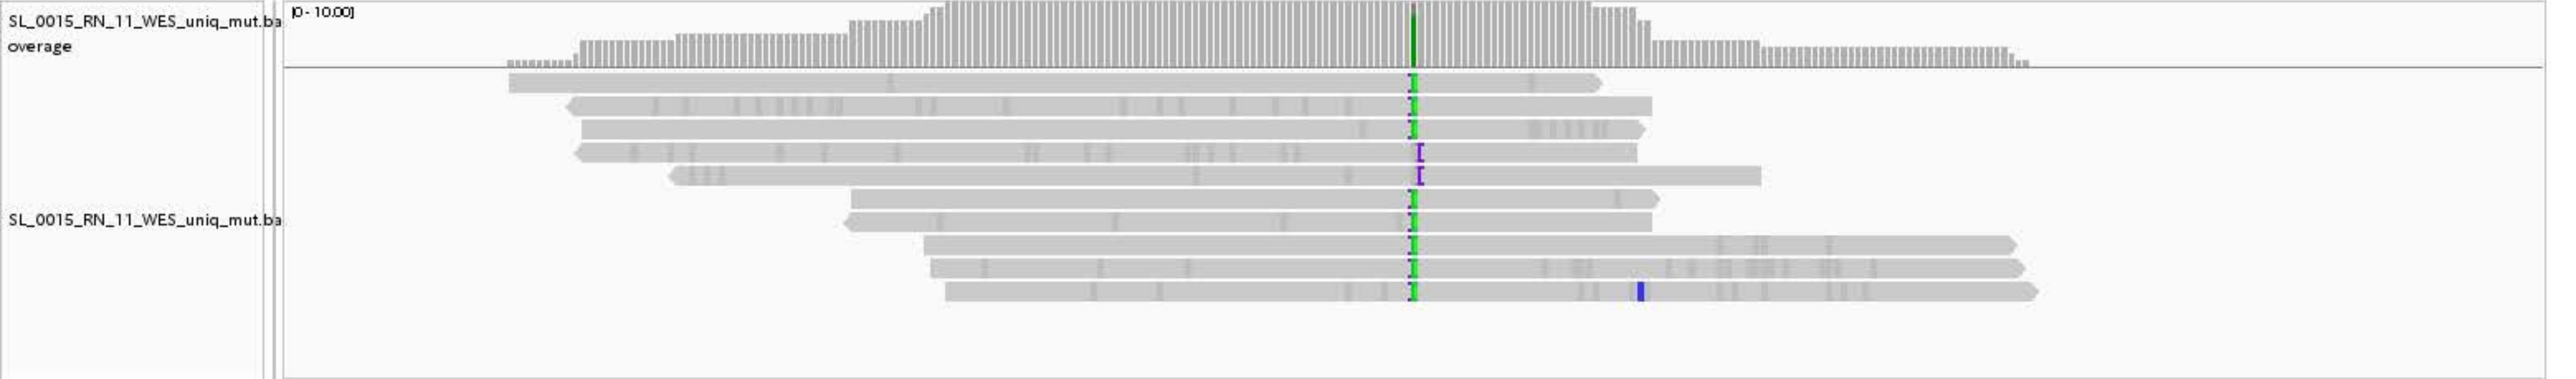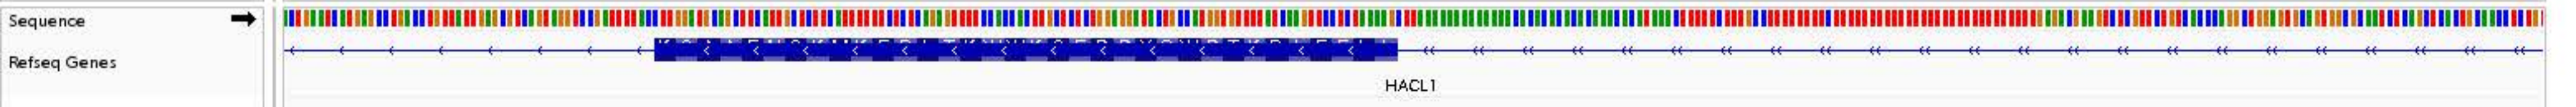

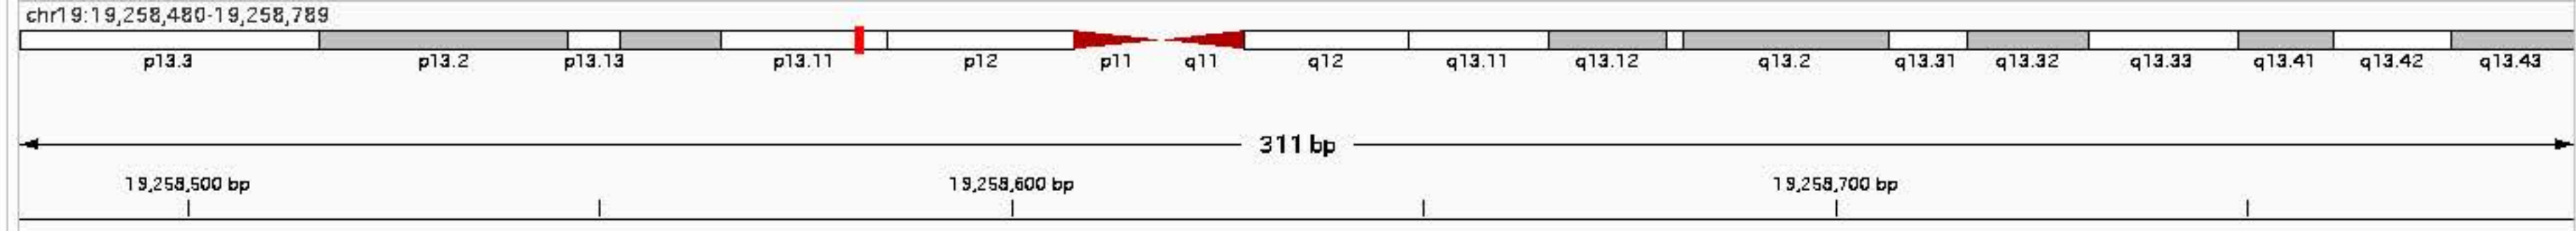

SL\_0015\_LN\_44\_WES\_uniq\_mut. ba  
coverage

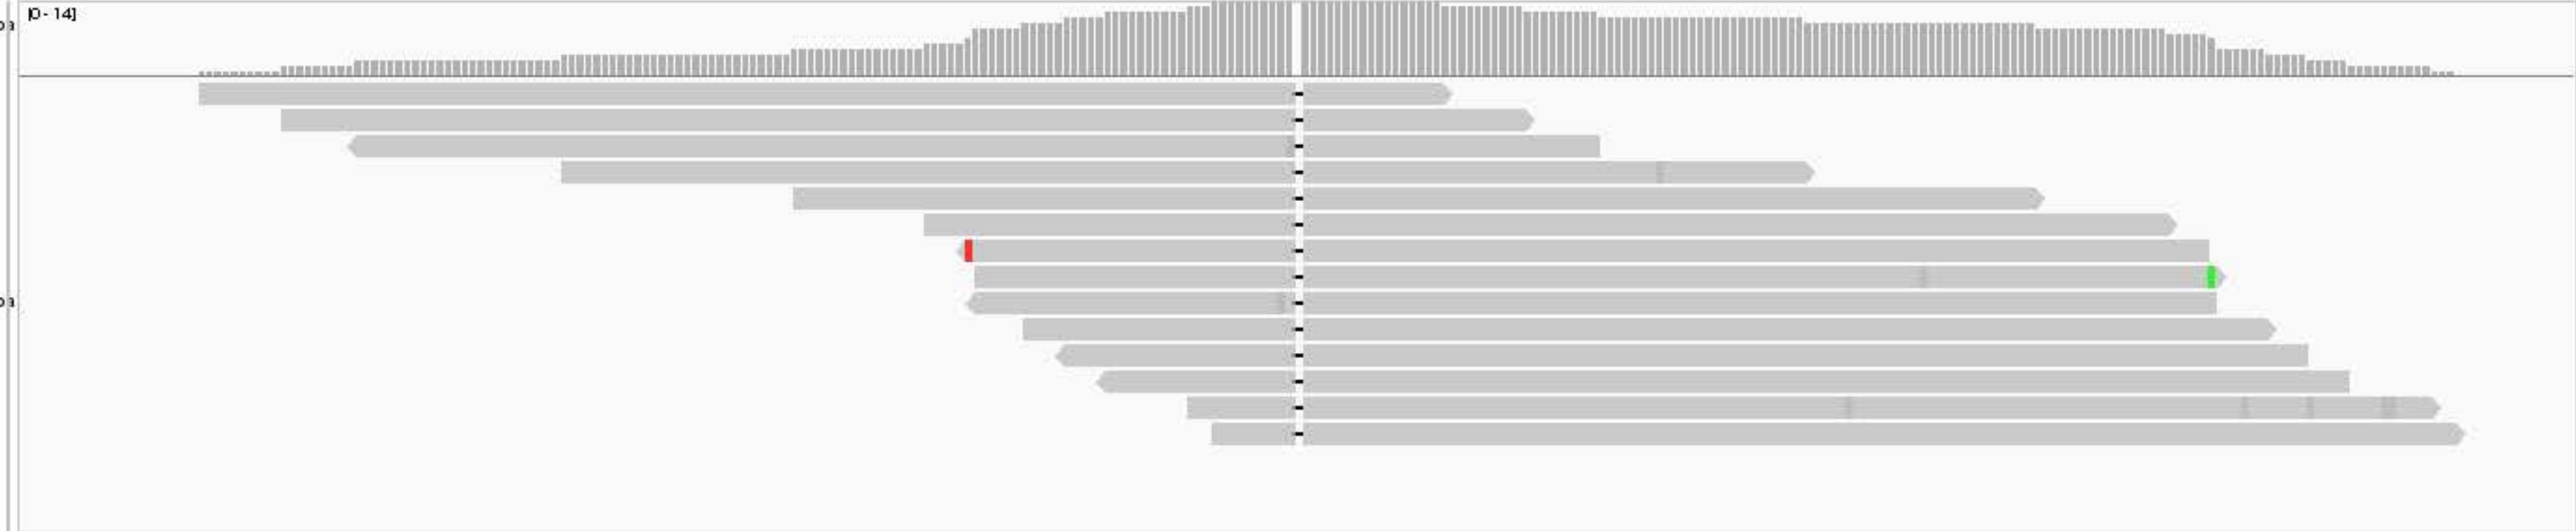

SL\_0015\_LN\_44\_WES\_uniq\_mut. ba

Sequence →

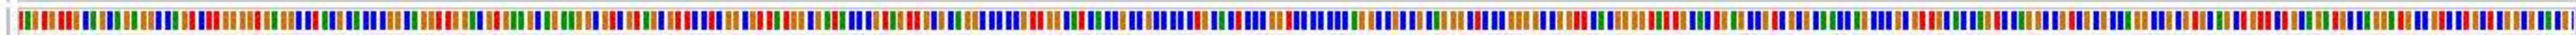

Refseq Genes

HAPLN4



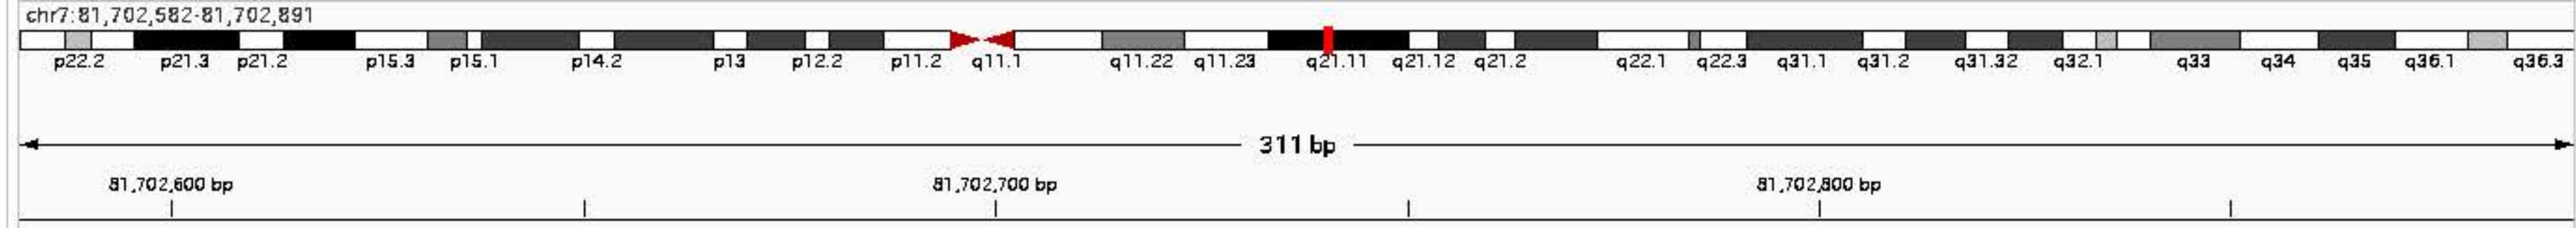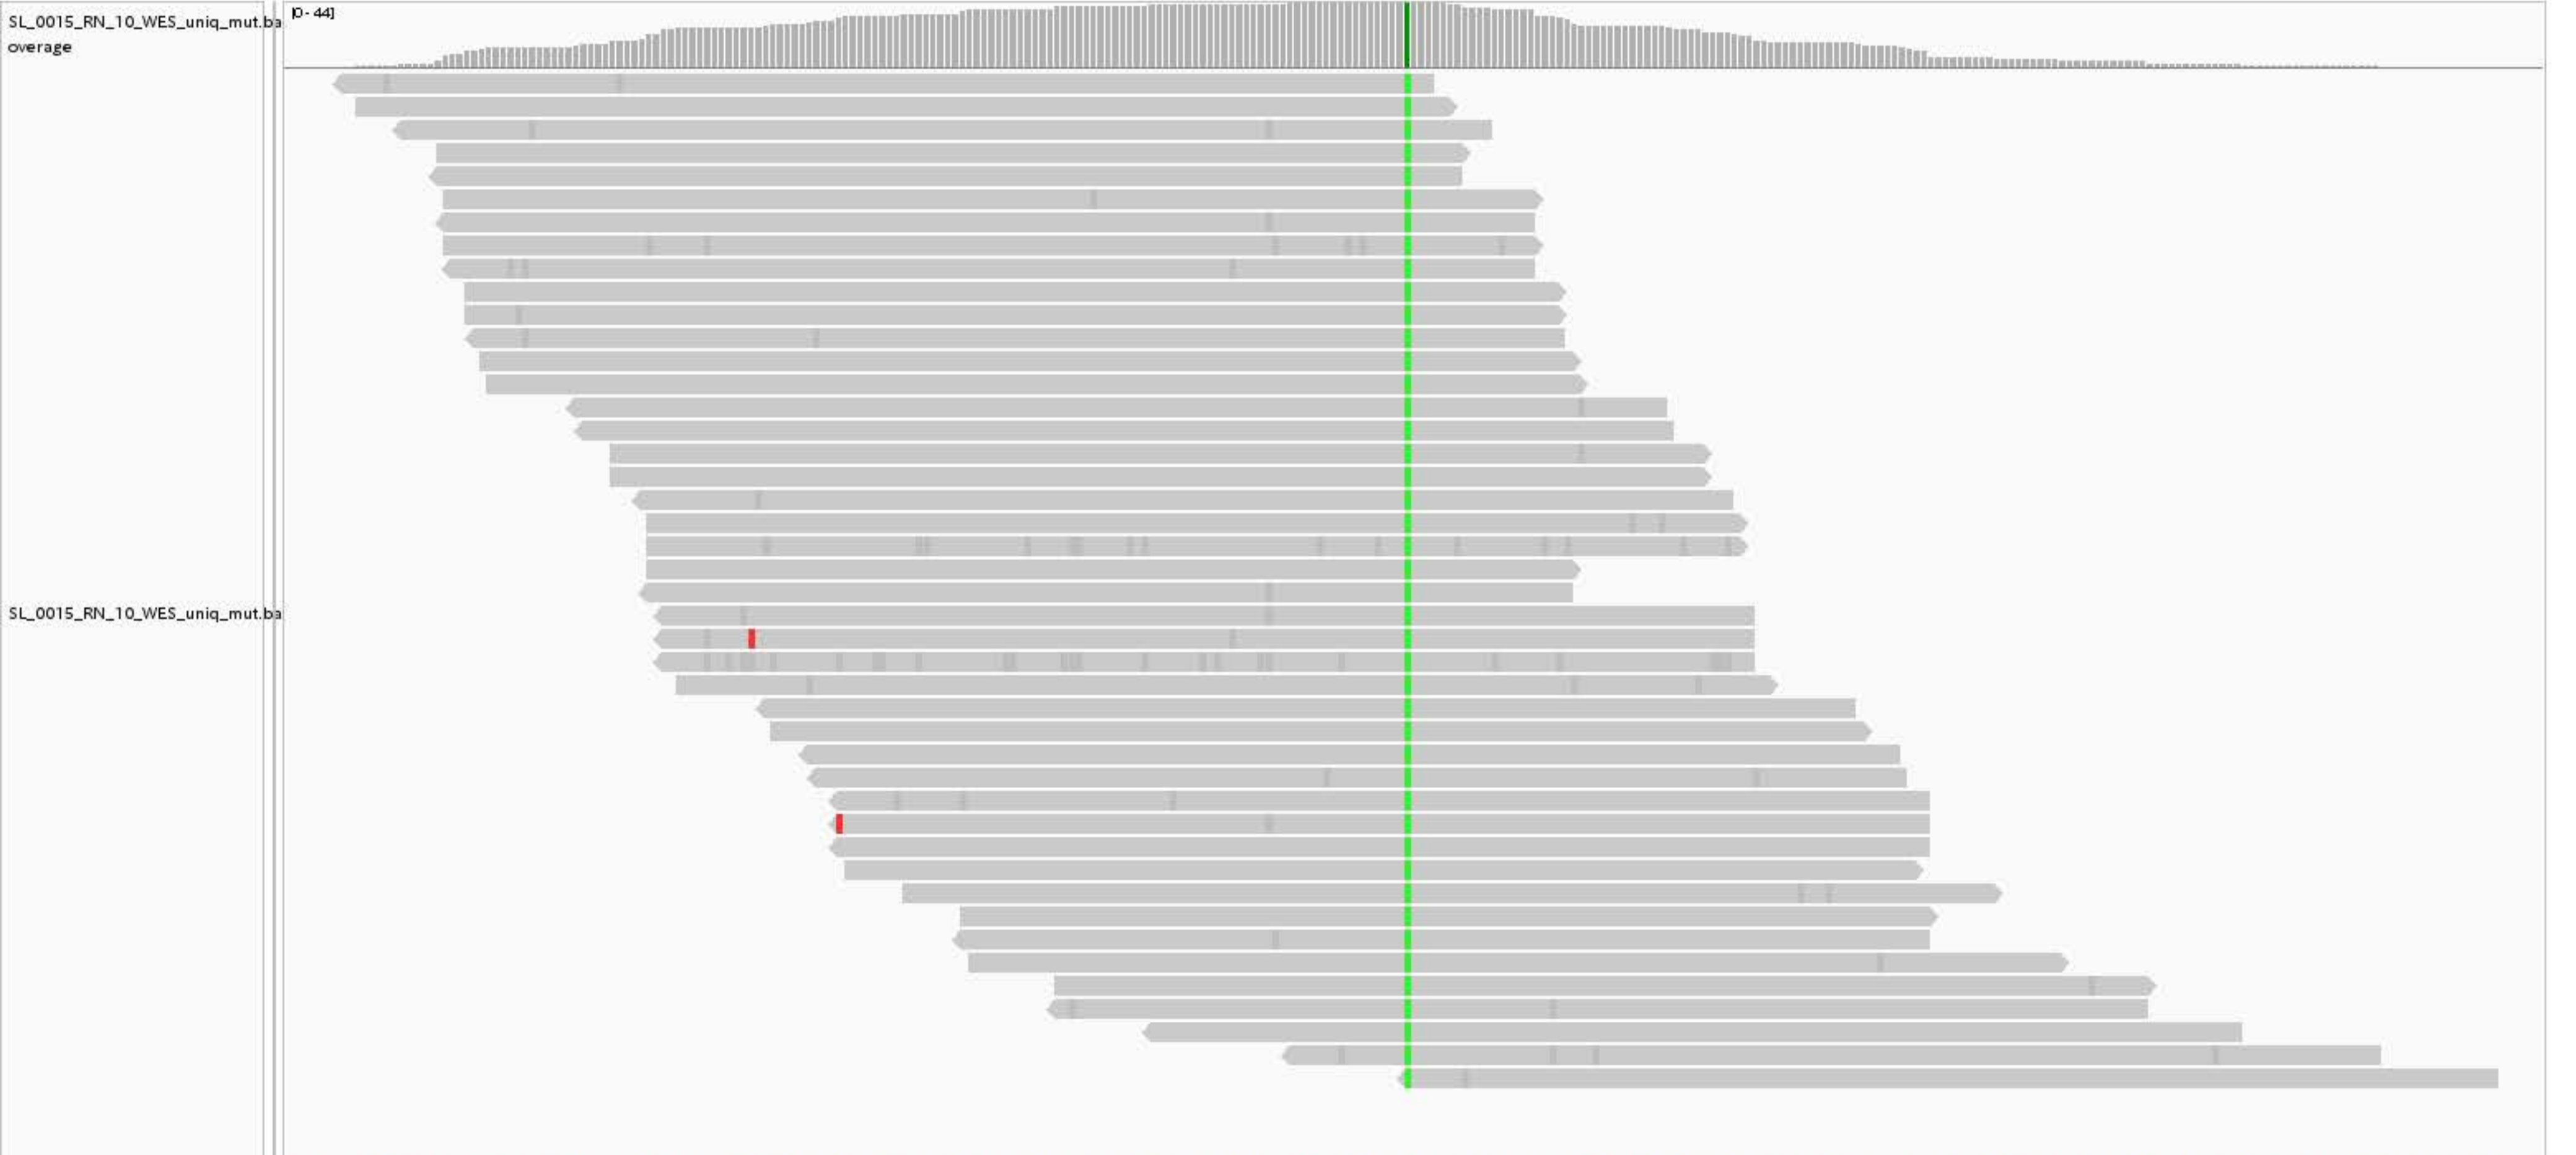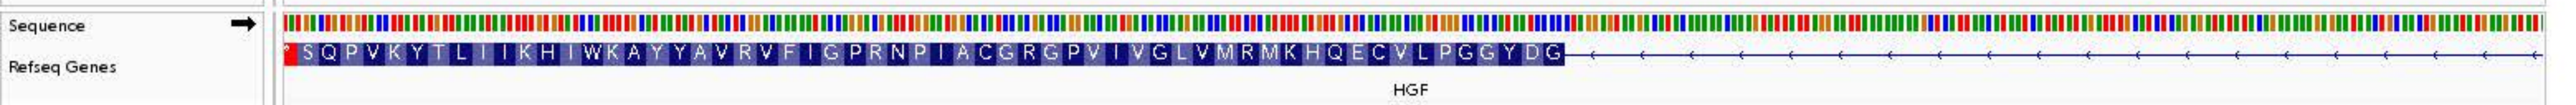

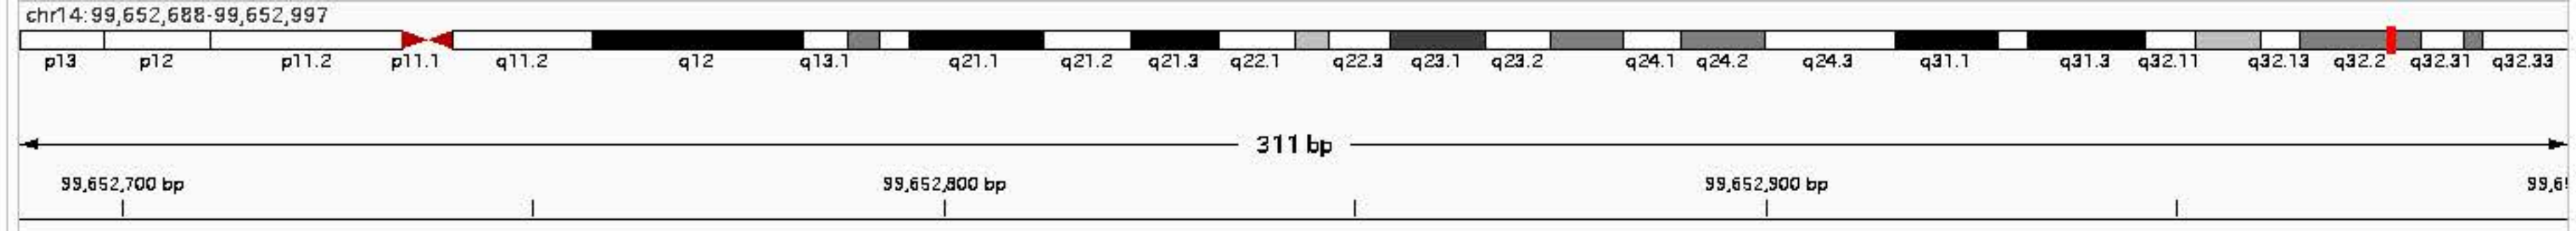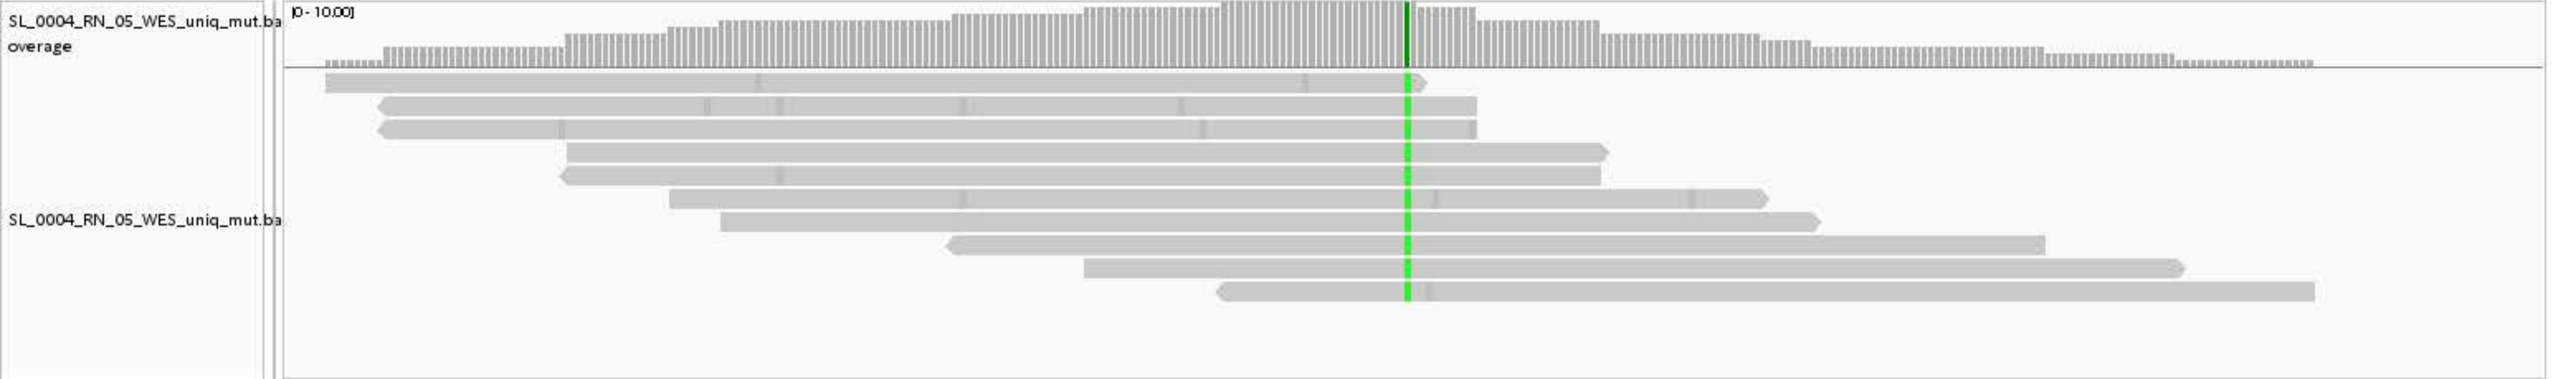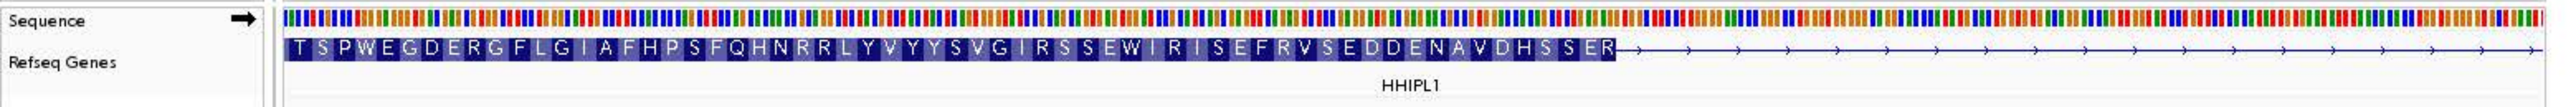



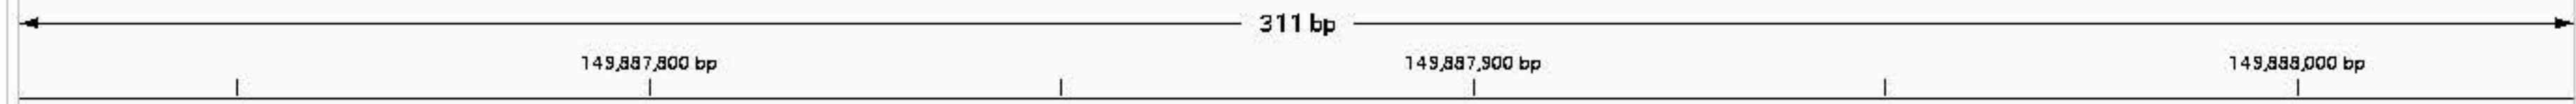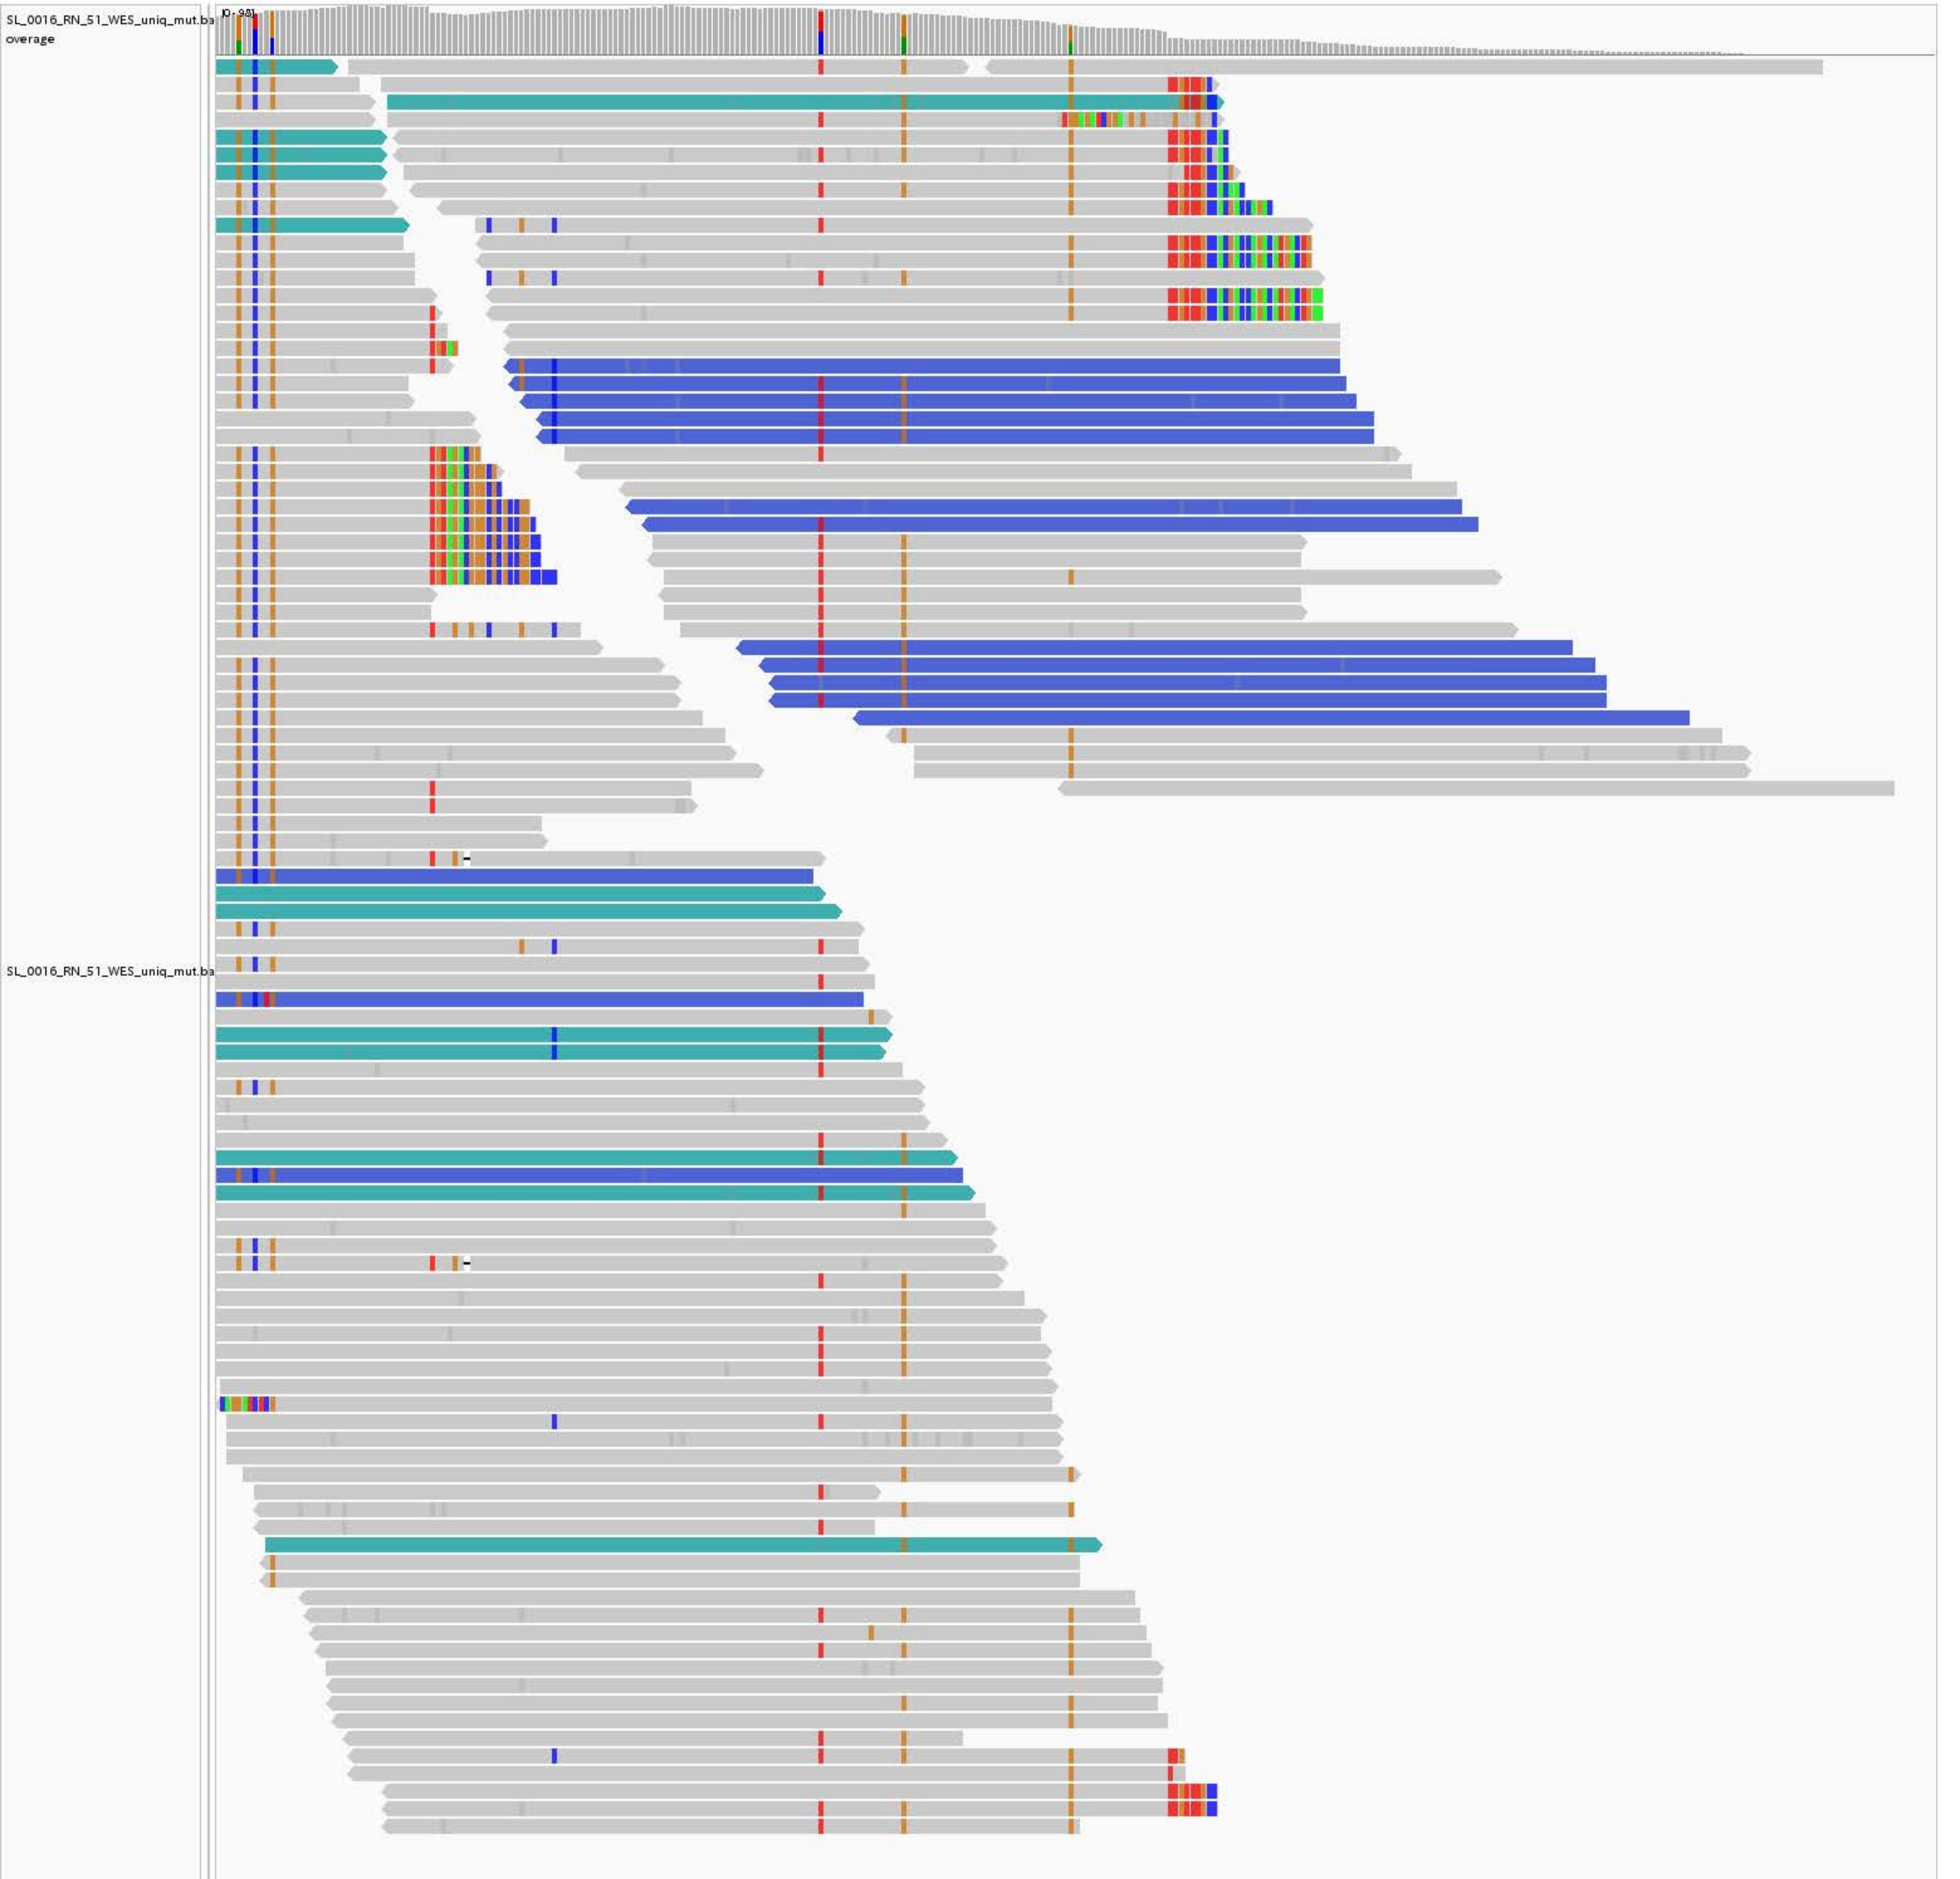

Sequence →  
Refseq Genes  
L I E A T L Y E L V A A L Y V P A G A G V R E A Y N G K R L L R H V R G V P F Q L G A R S S R S K A K A R A K G G Q K G R G S M  
H2AC21



chr6: 29,724,126-29,724,435  
p25.2 p24.3 p23 p22.3 p22.2 p21.33 p21.2 p21.1 p12.3 p12.1 q11.1 q12 q13 q14.1 q14.3 q15 q16.1 q16.3 q21 q22.1 q22.31 q22.33 q23.3 q24.2 q25.1 q25.3 q26 q27

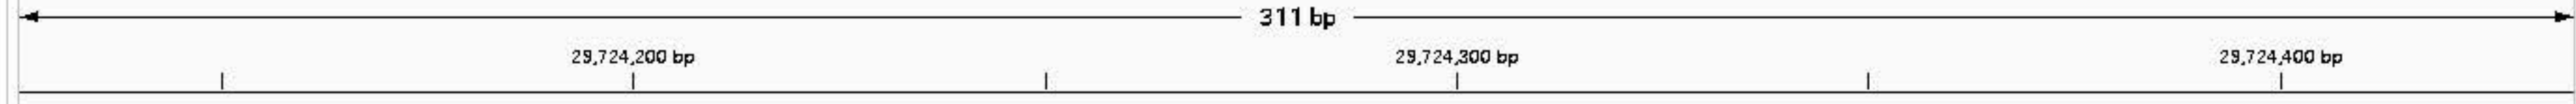

SL\_0016\_RN\_51\_WES\_uniq\_mut.ba  
overage  
SL\_0016\_RN\_51\_WES\_uniq\_mut.ba

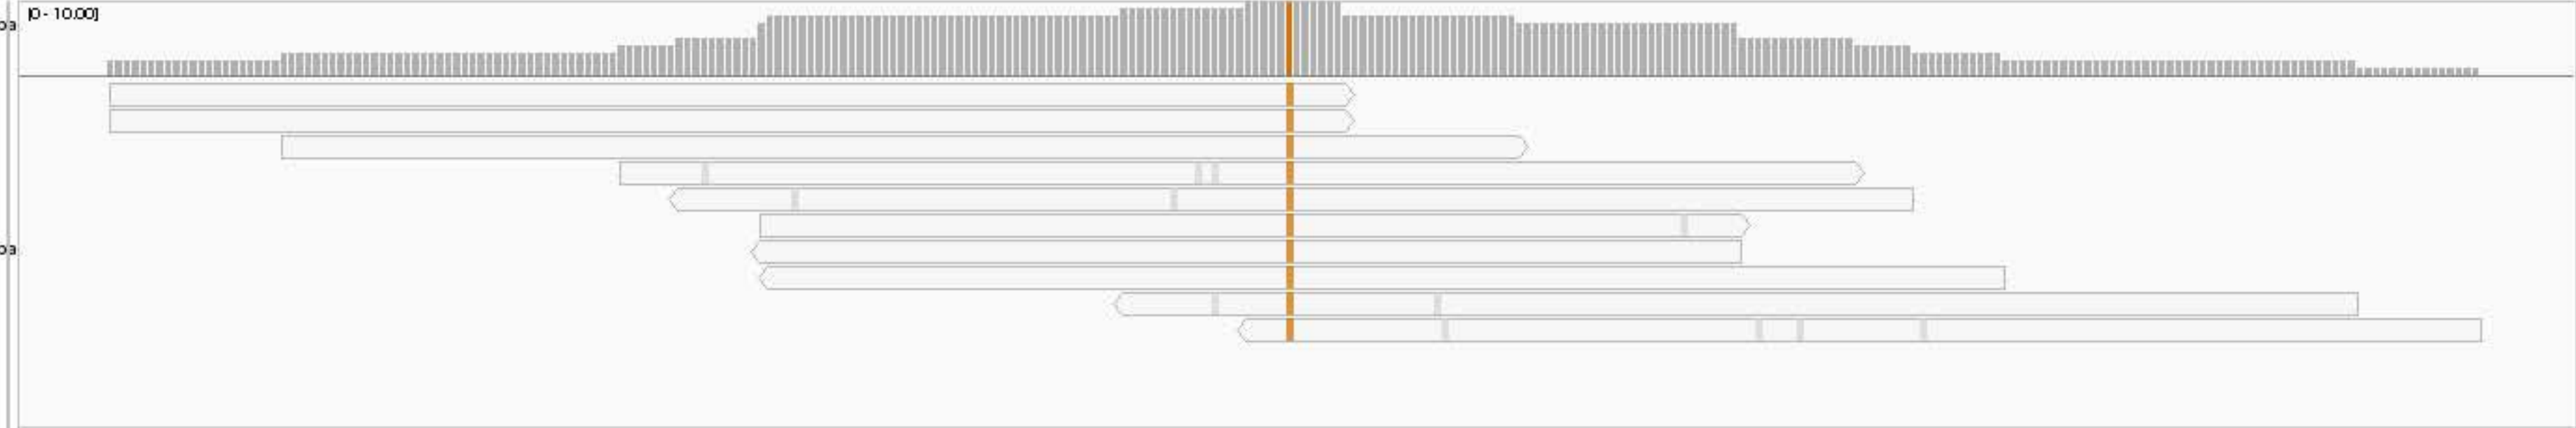

Sequence  
Refseq Genes

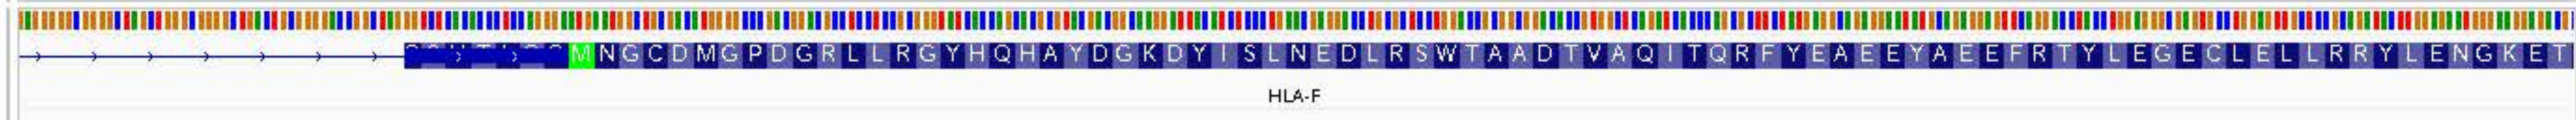

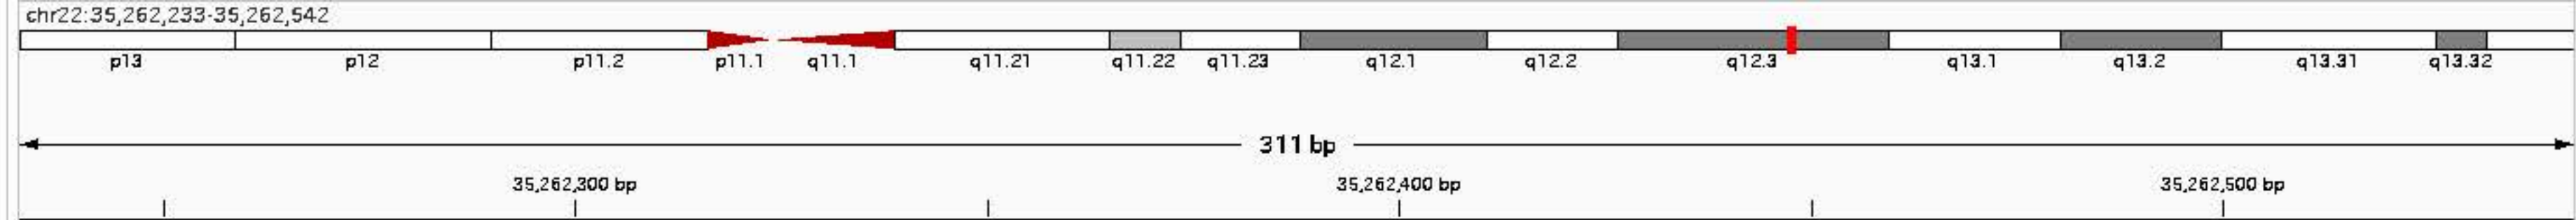

SL\_0015\_RN\_21\_WES\_uniq\_mut.ba  
coverage

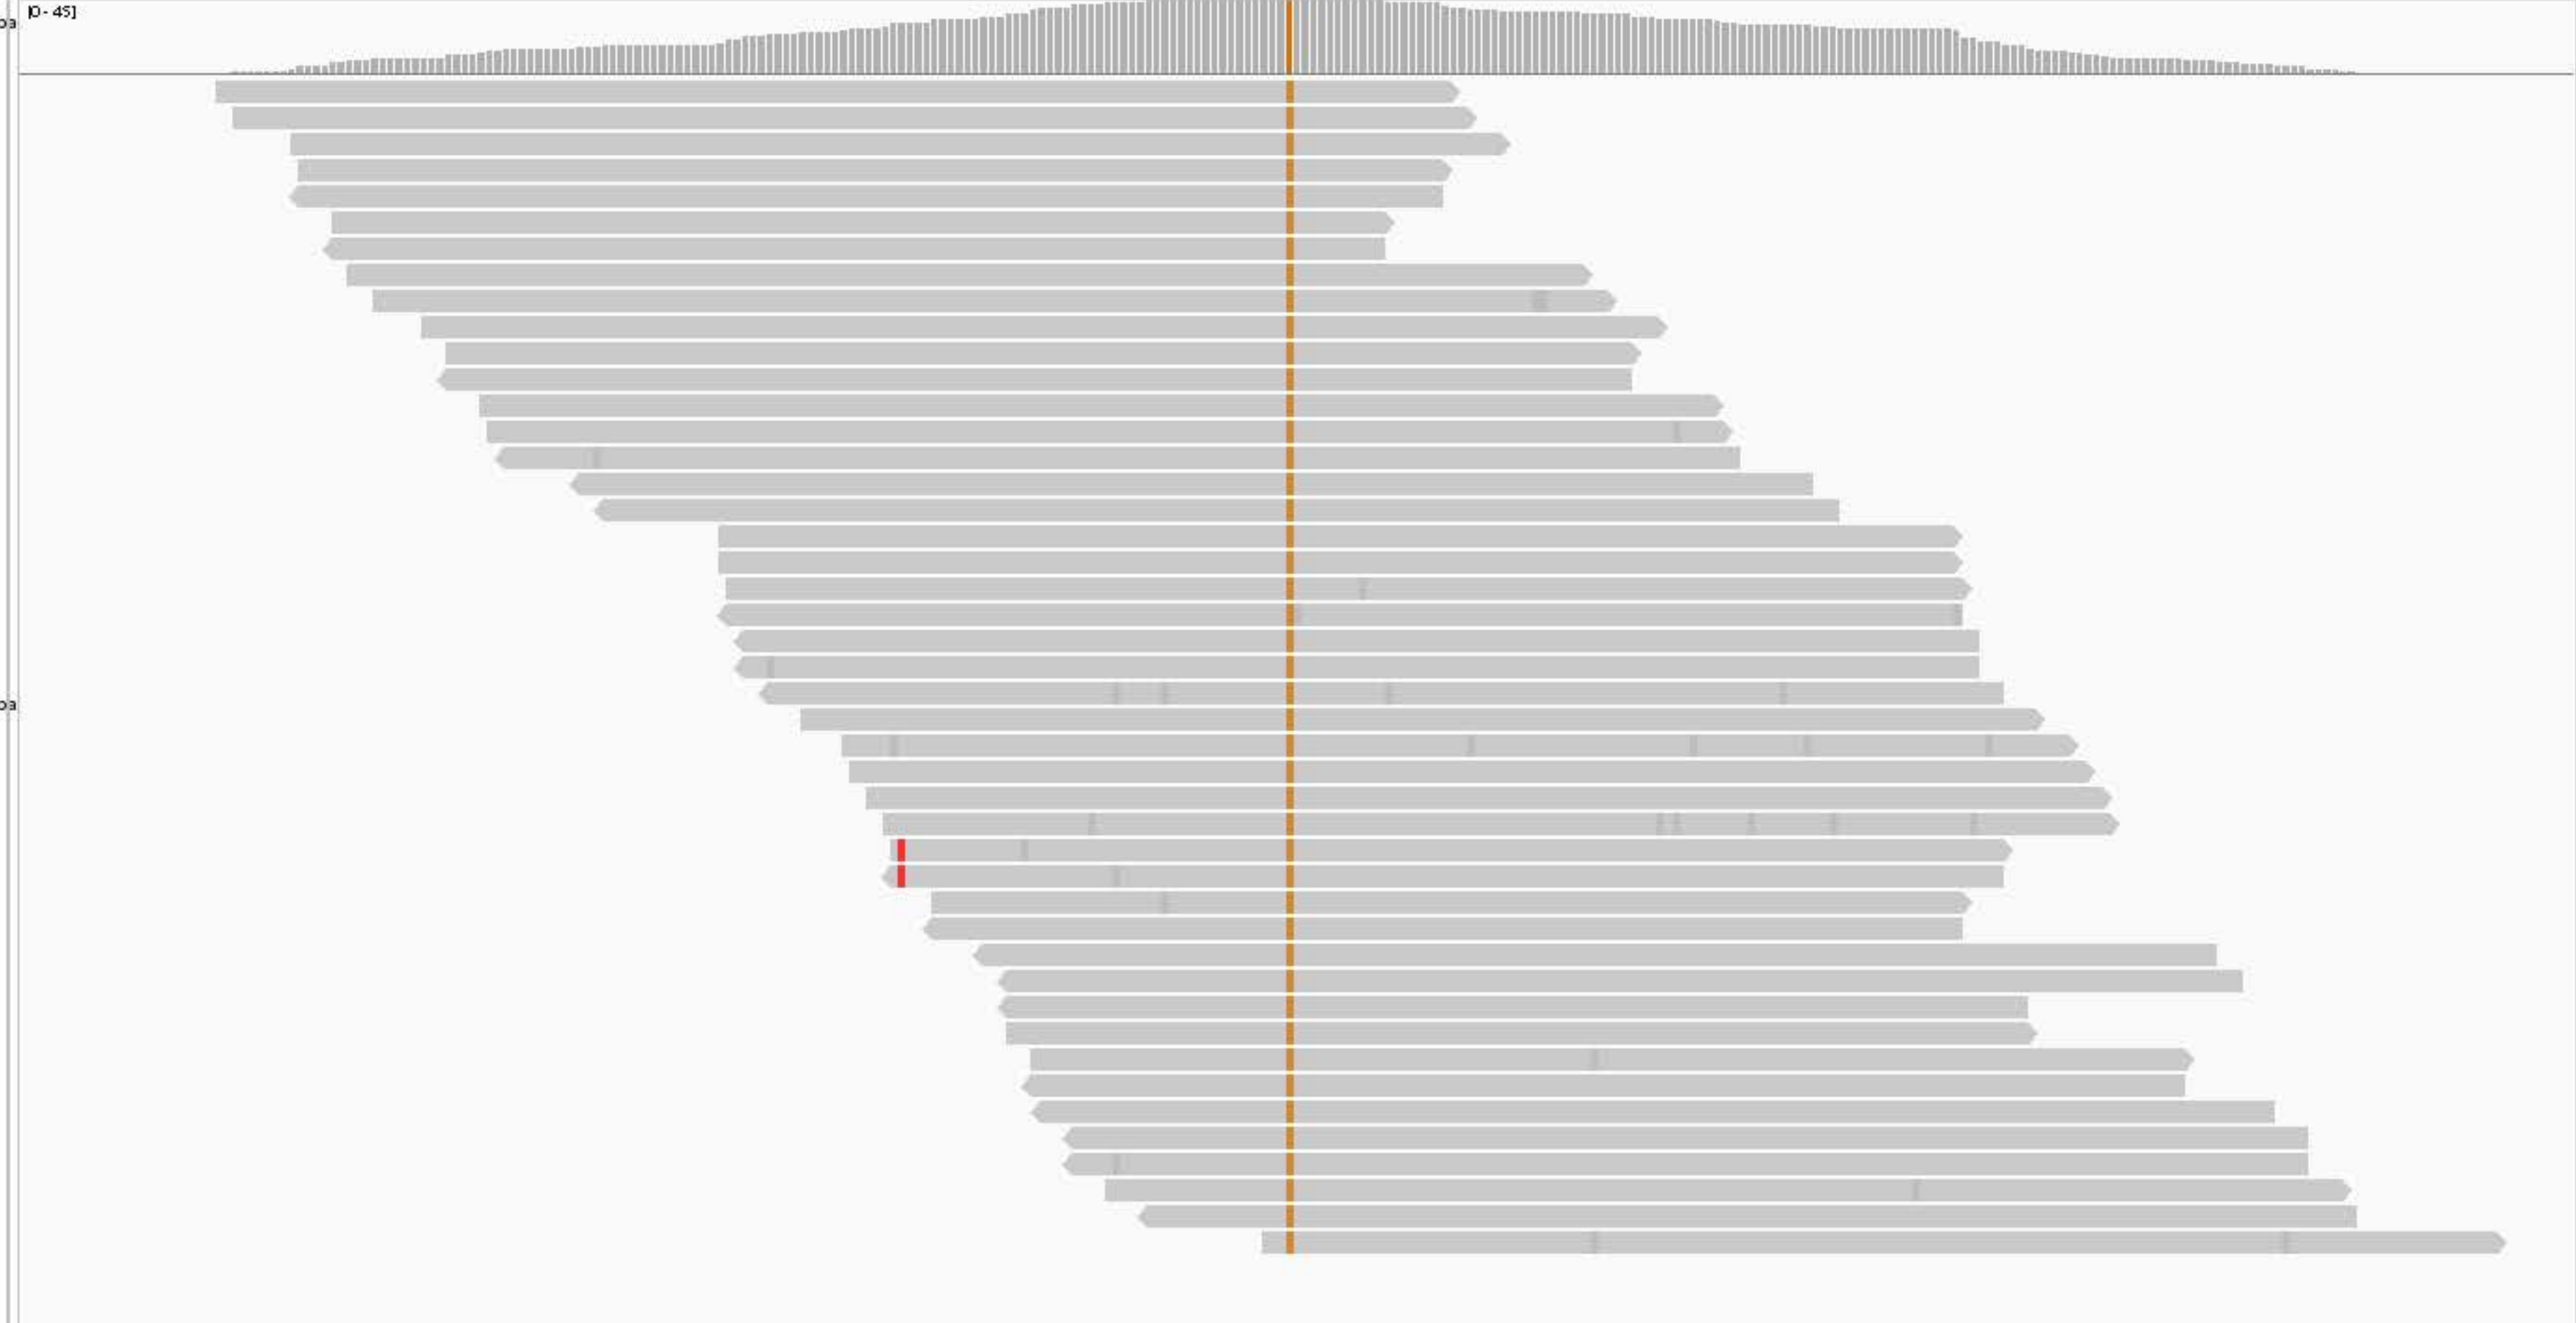

SL\_0015\_RN\_21\_WES\_uniq\_mut.ba

Sequence →  
Refseq Genes

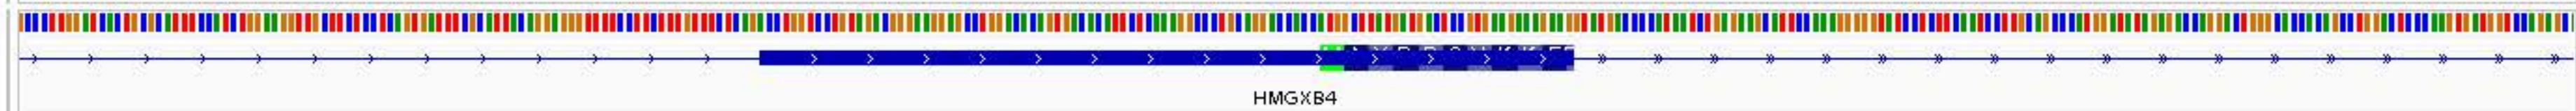

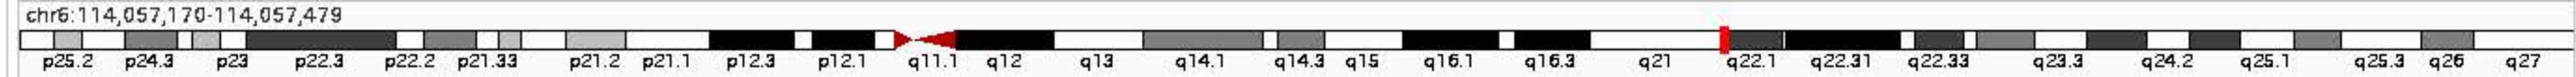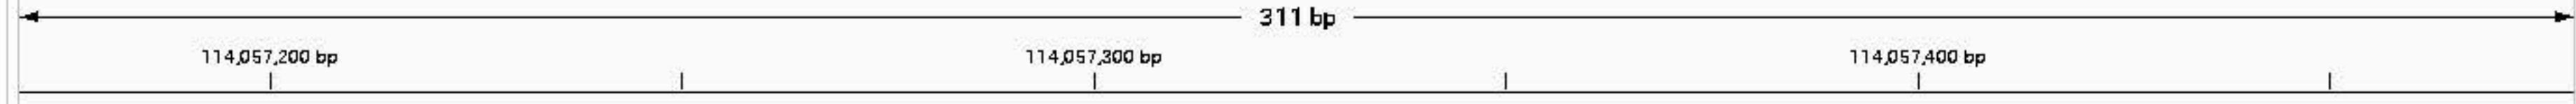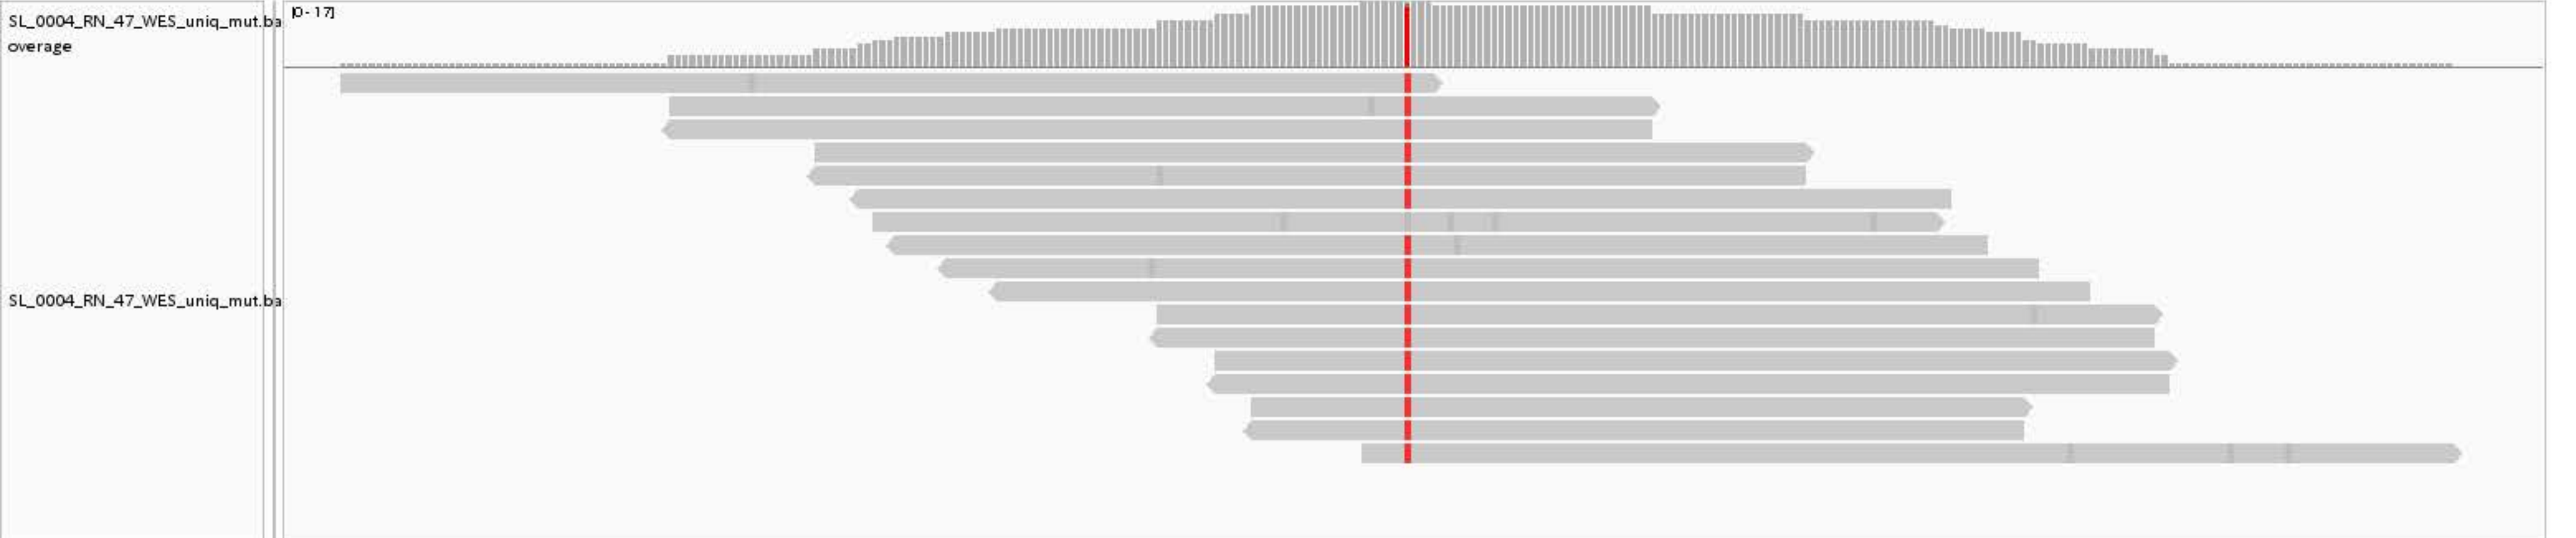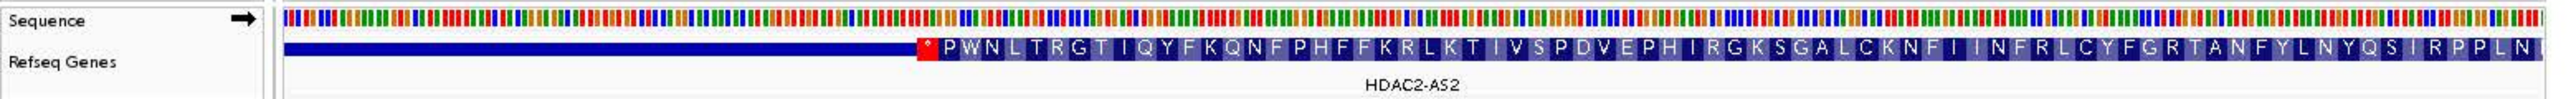



chr5:5,466,240-5,466,549

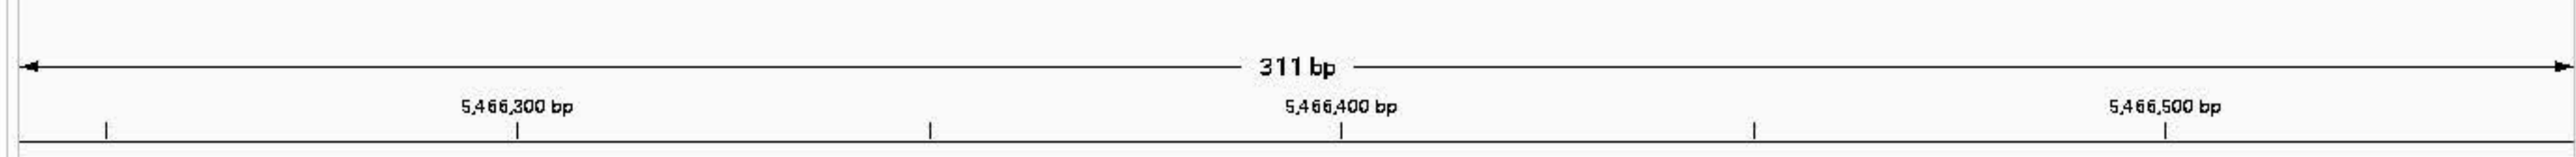

SL\_0007\_RN\_2\_WES\_uniq\_mut.ba  
verage

SL\_0007\_RN\_2\_WES\_uniq\_mut.ba

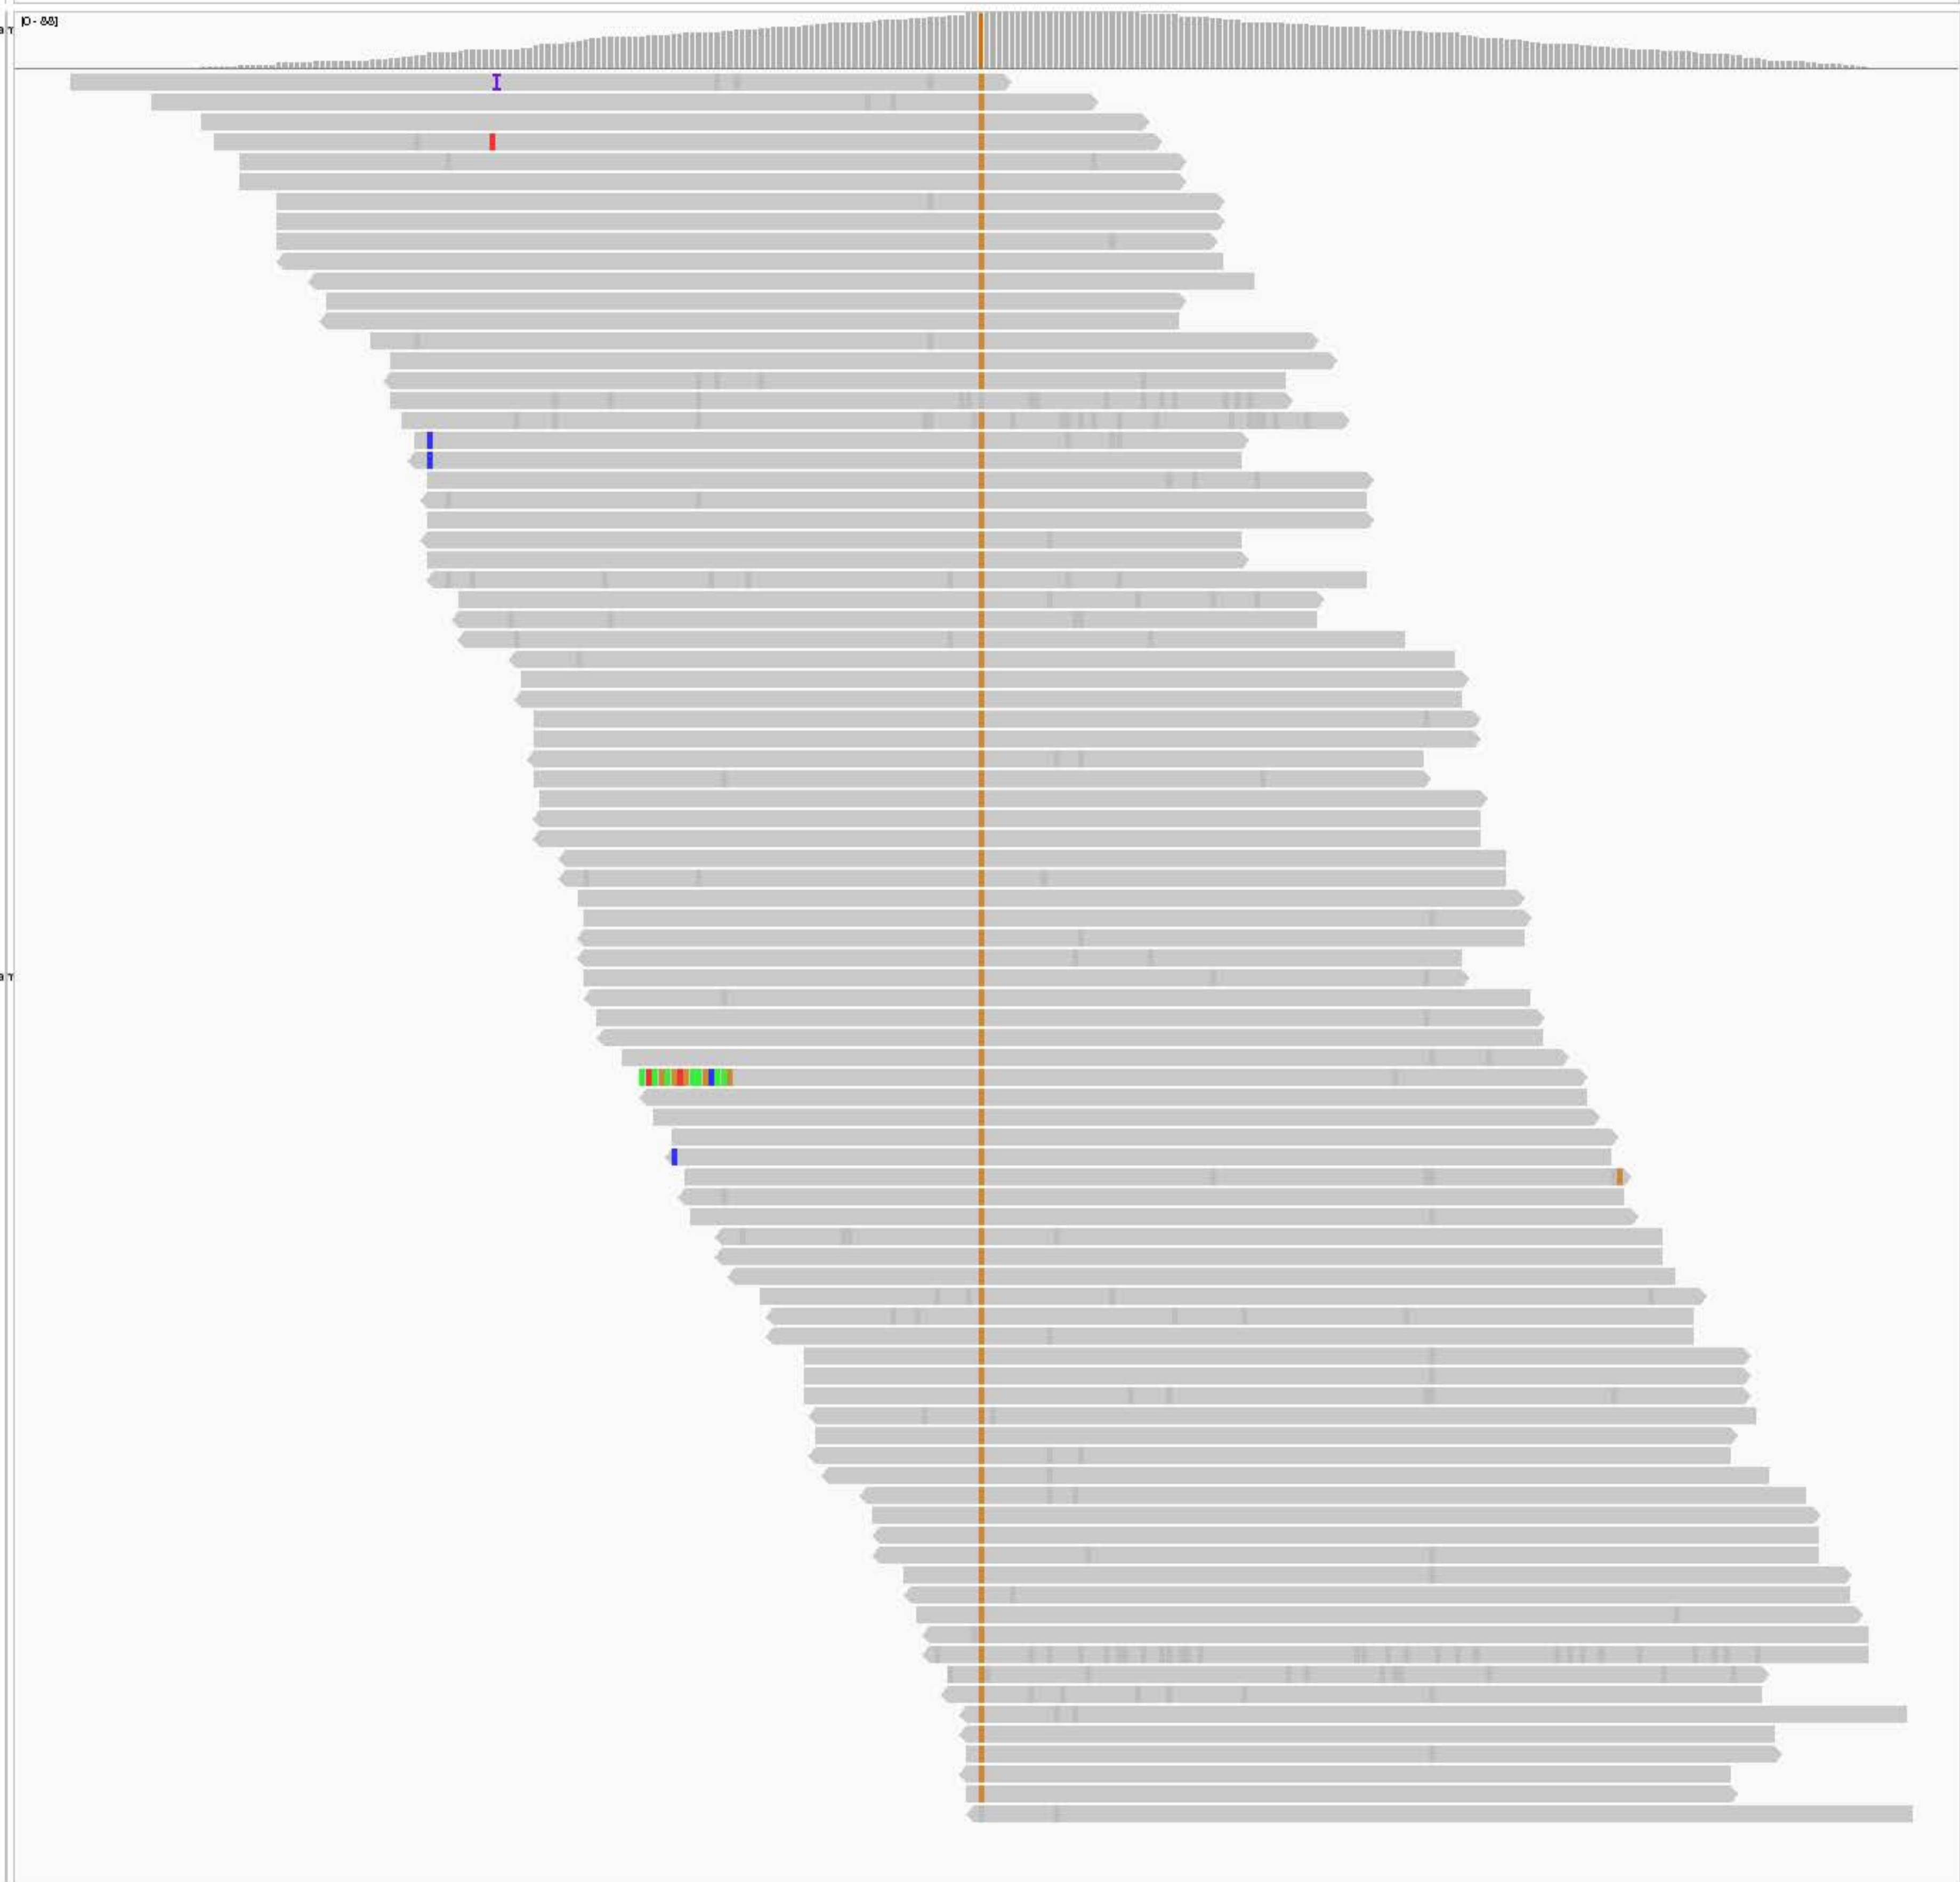

Sequence

Refseq Genes

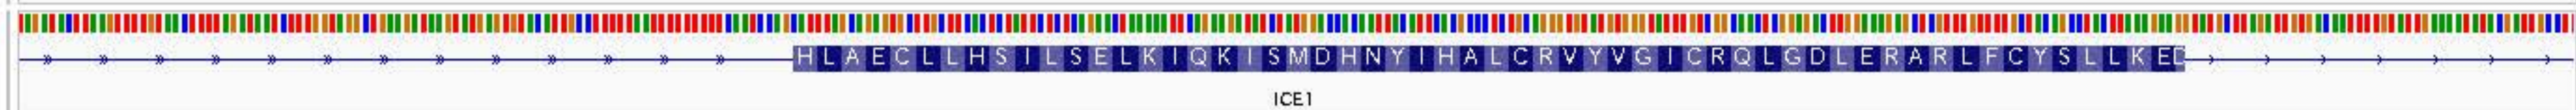

ICE1

chr10:89,418,051-89,418,360

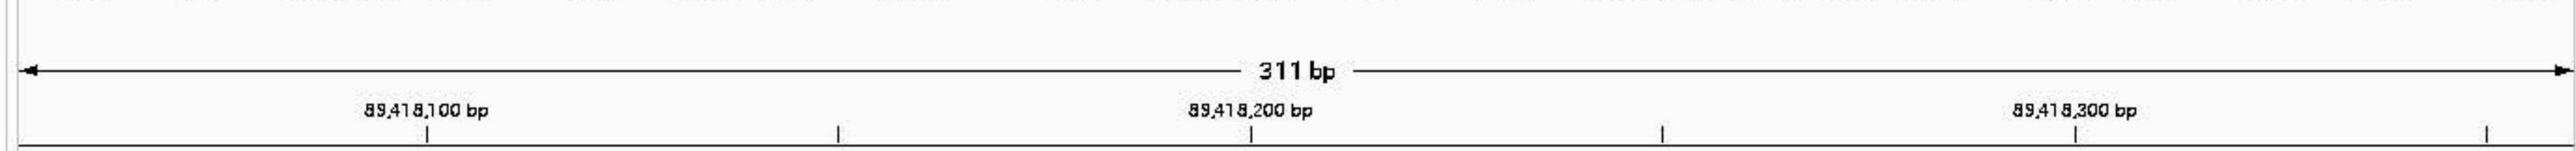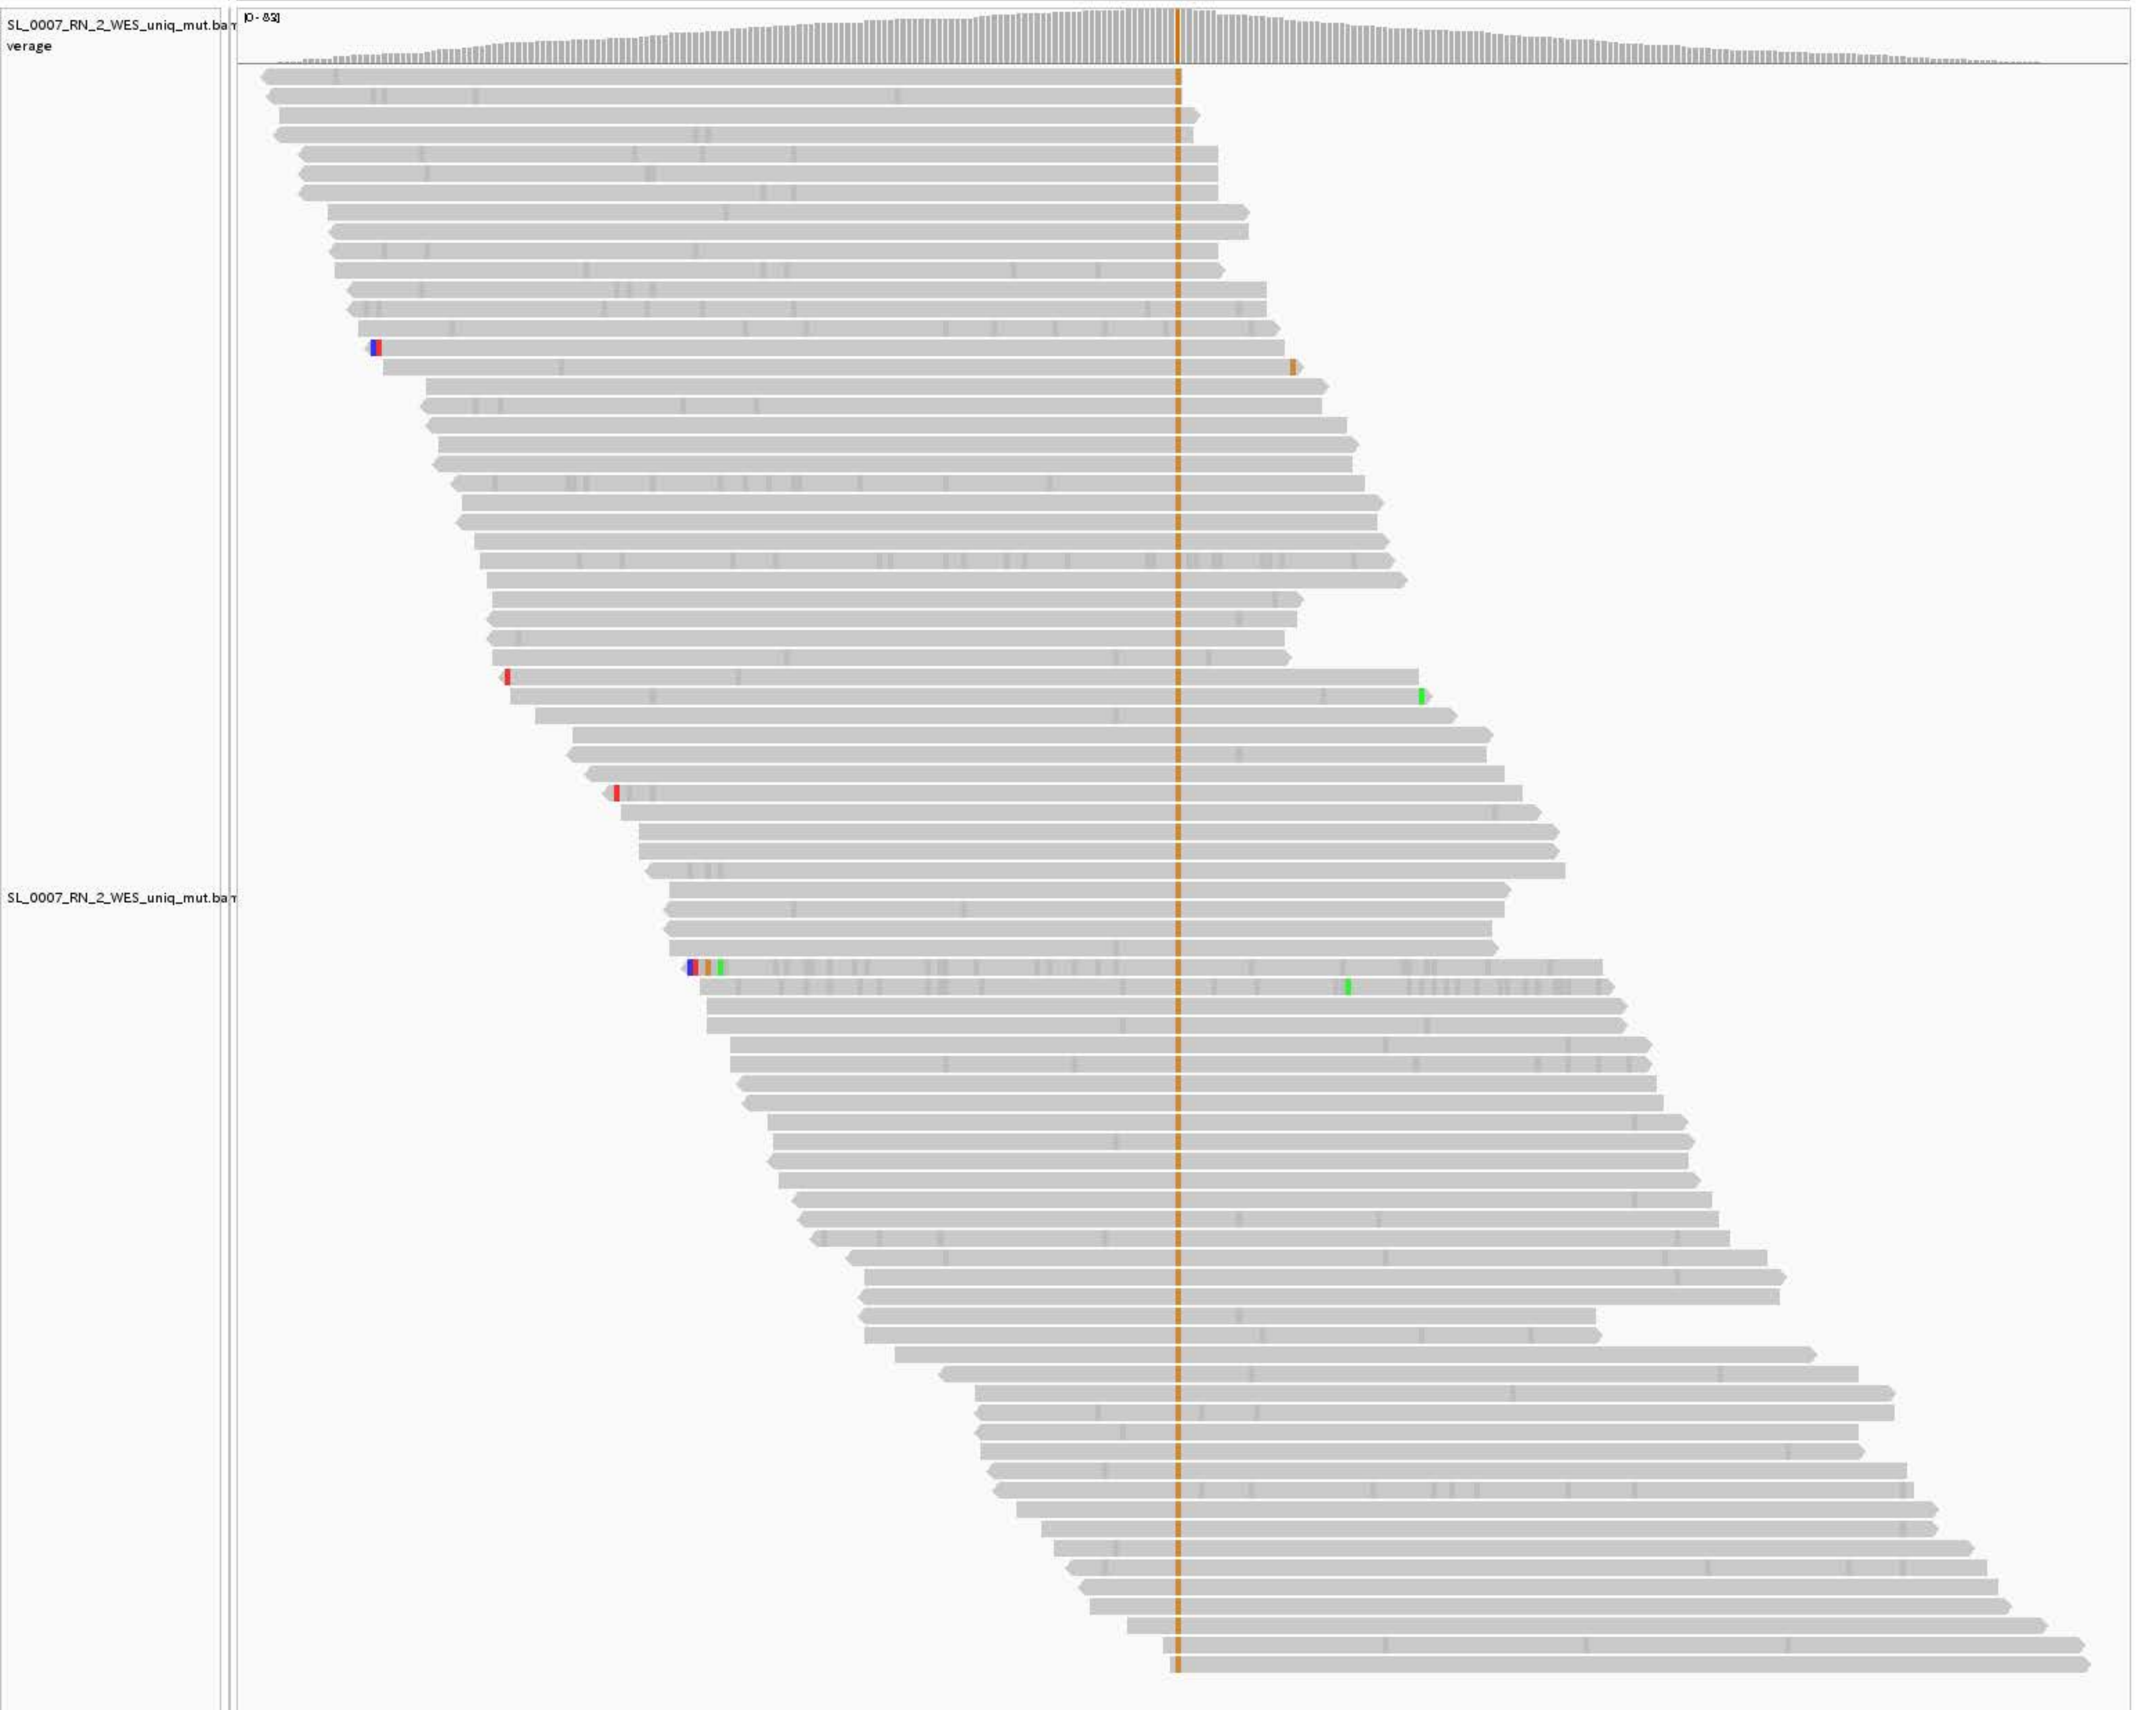

Sequence → LHHQMGLCYRAQMIQIKKATHNRPKGKDKLKVDELISSAIFHFKAAMERDSMFAYTDLANMYAEGGQYSNAEDIFRKALRLENITDDHKHQIHYHYGRFQE

XR\_001747541.1

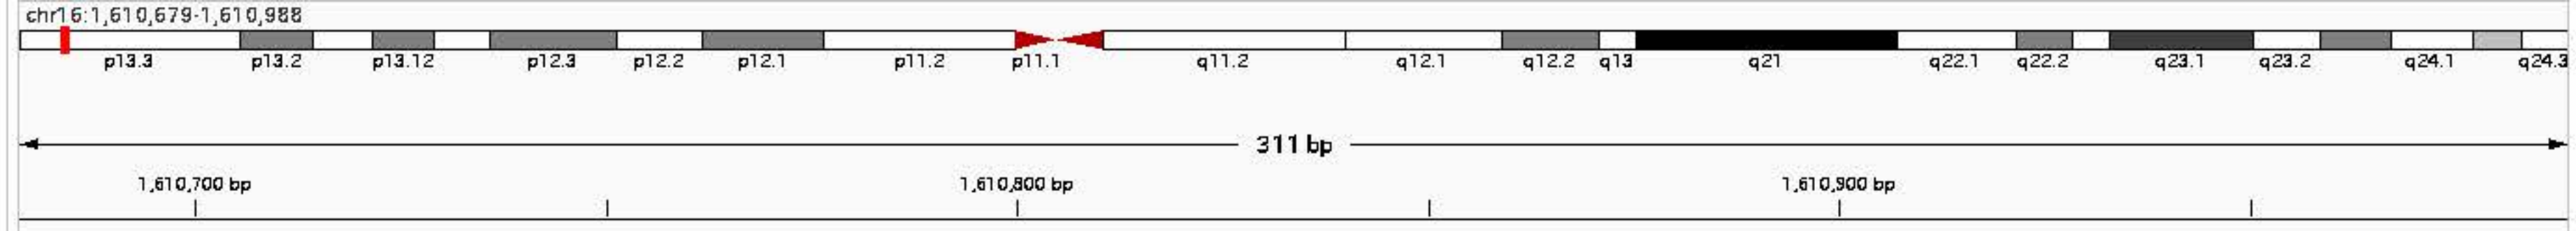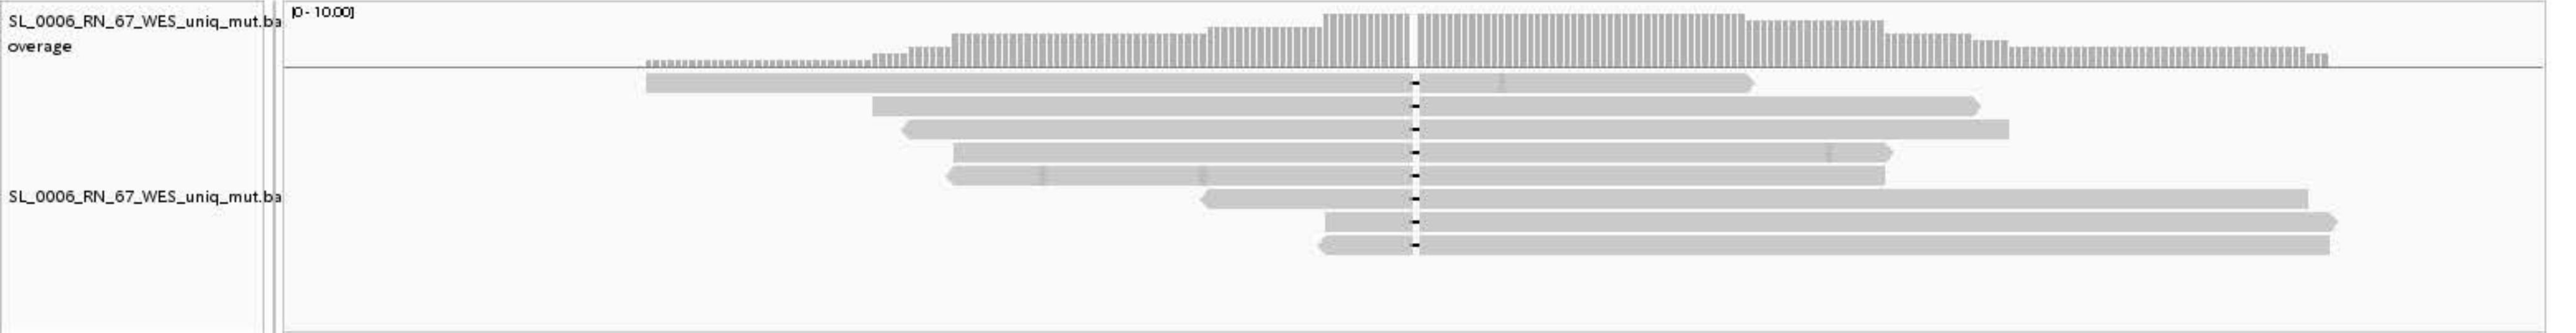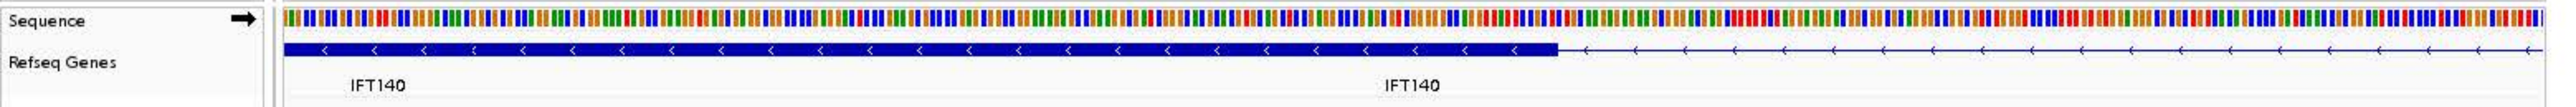



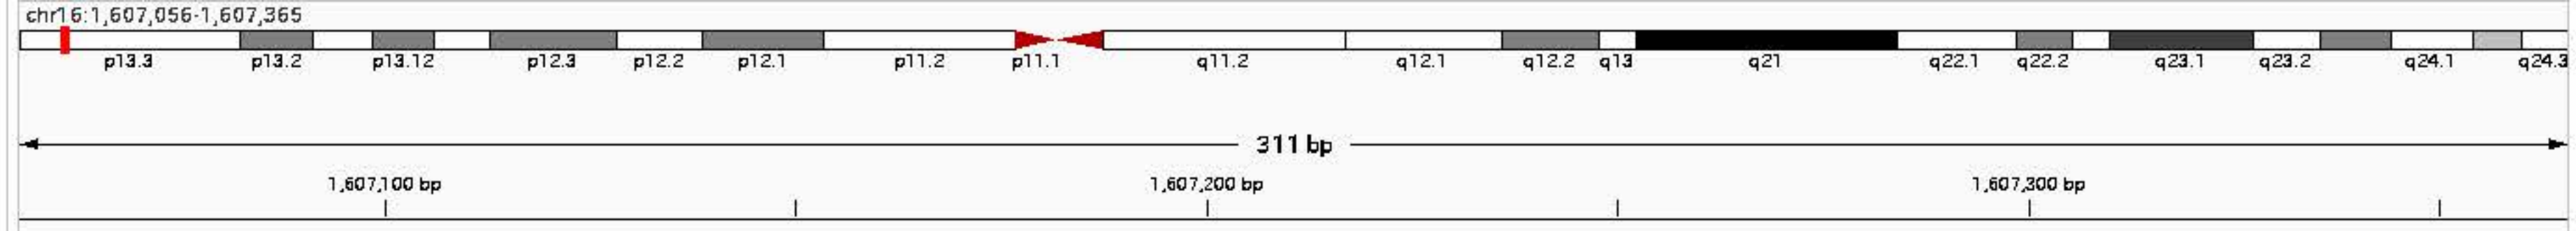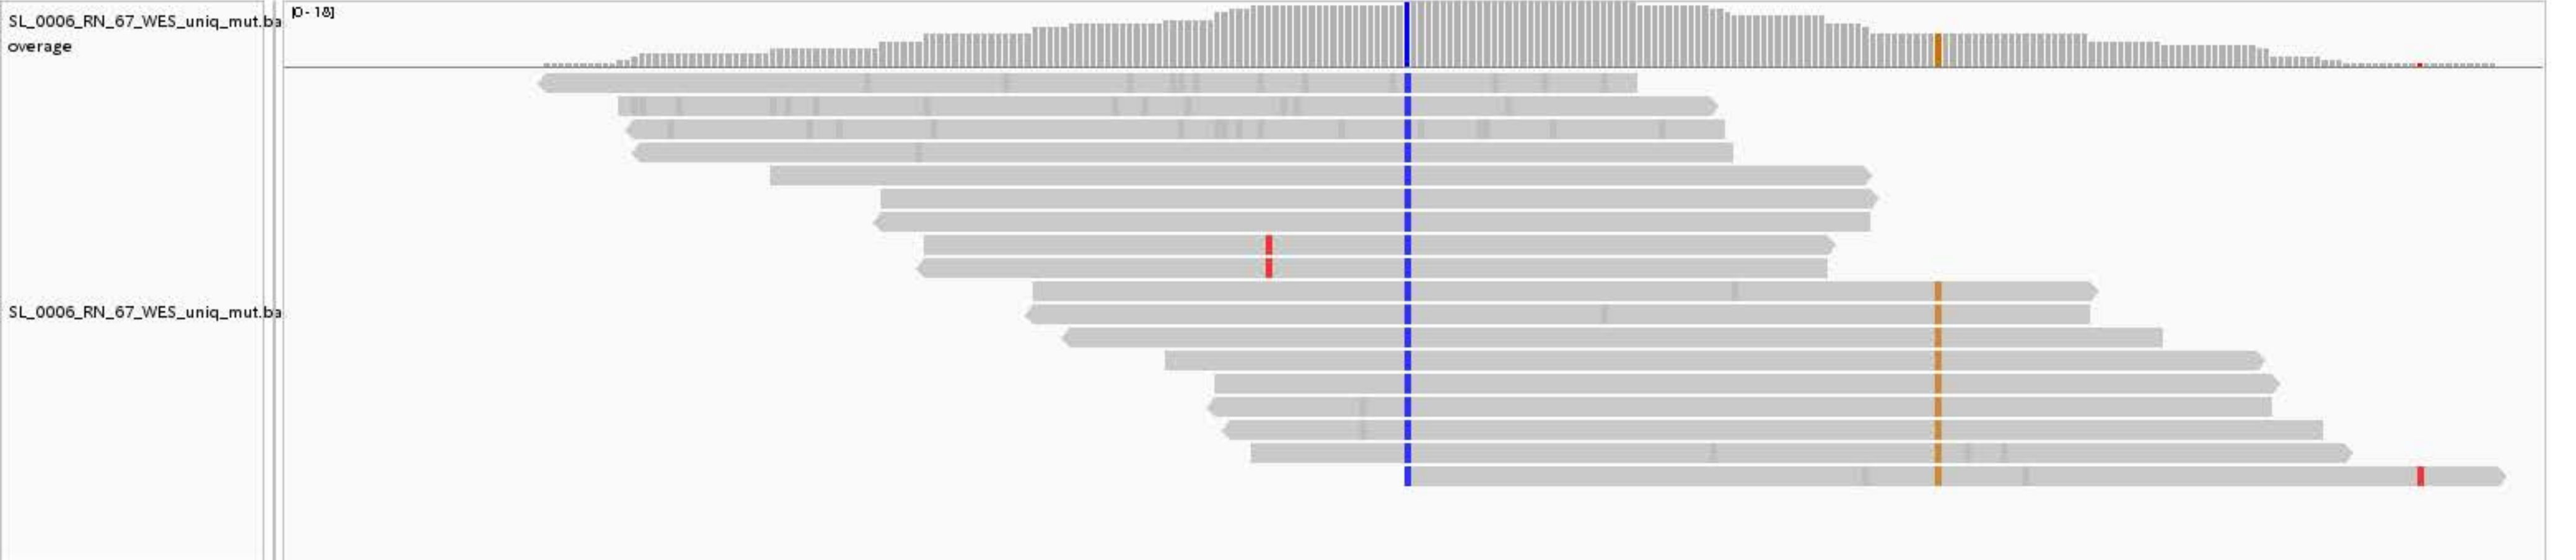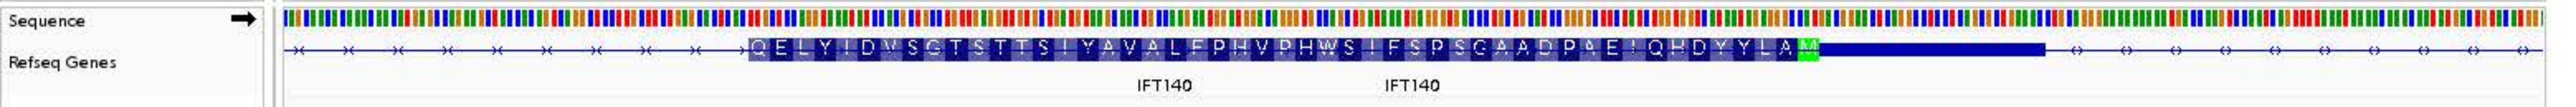

chr15:98,964,049-98,964,358

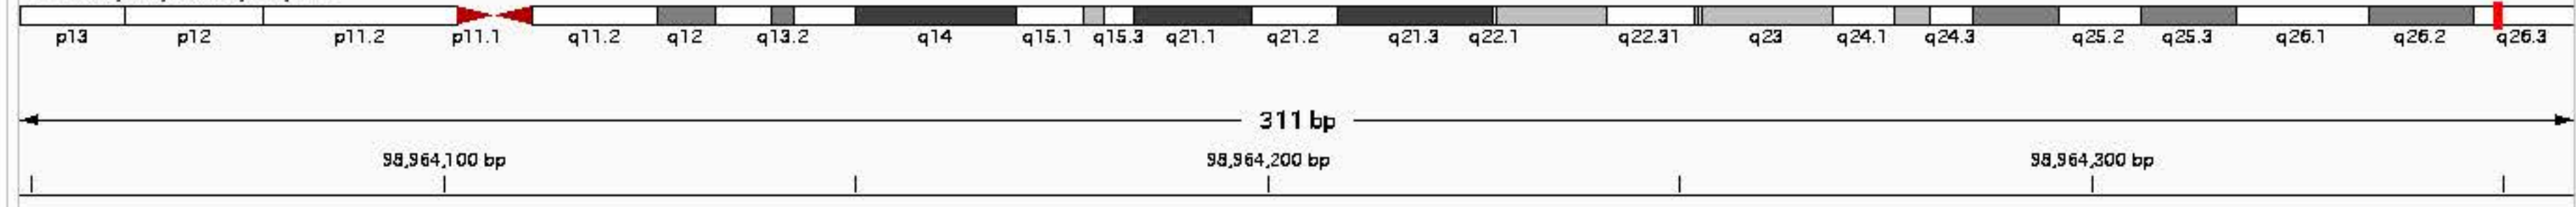

SL\_0017\_RN\_15\_WES\_uniq\_mut.ba  
coverage

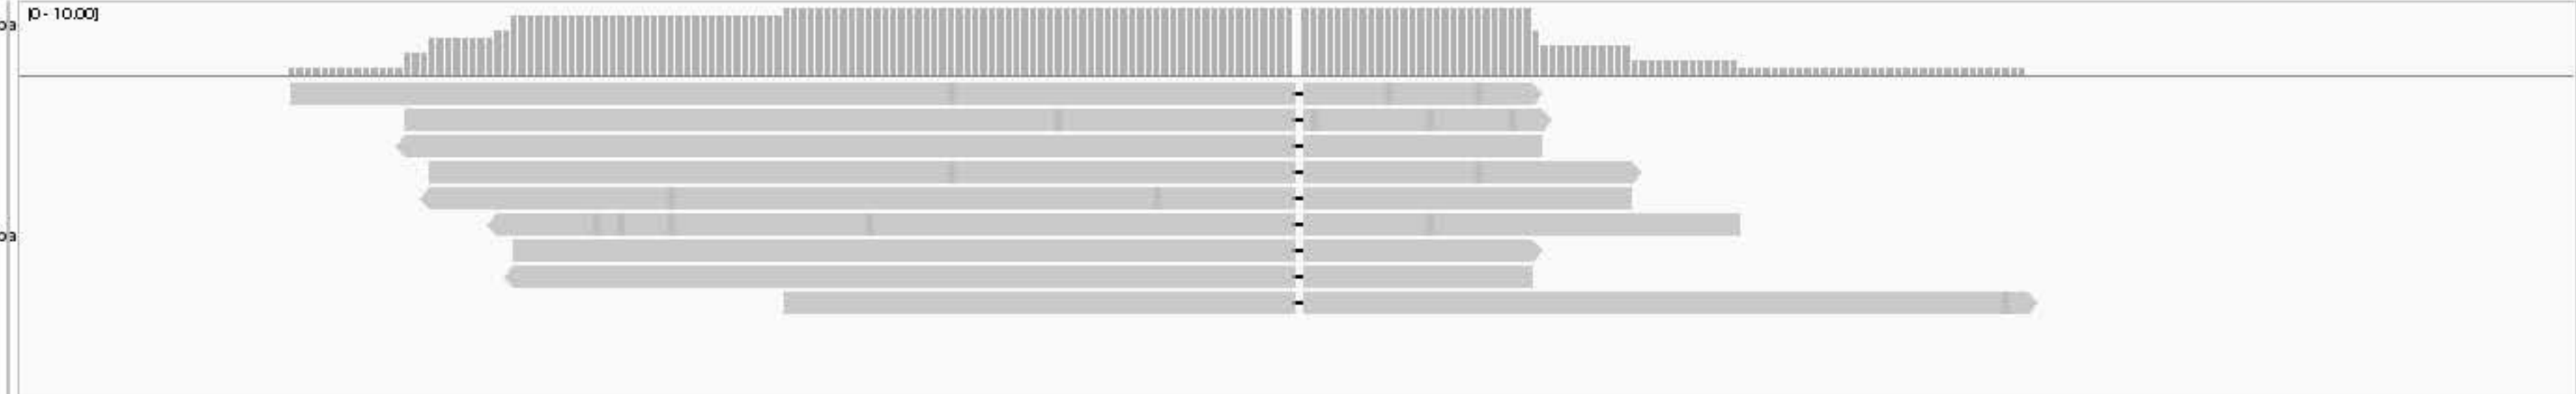

Sequence →  
Refseq Genes

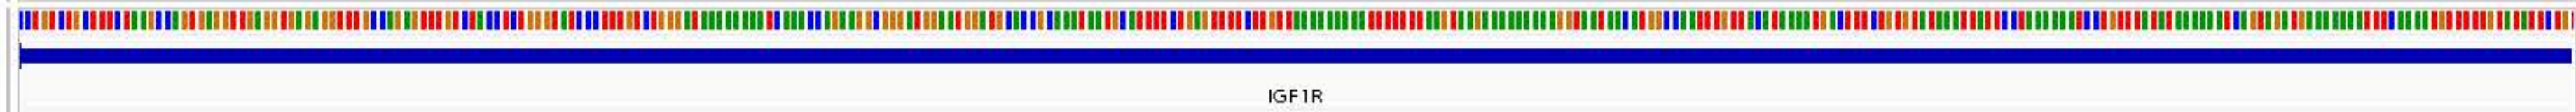

IGF1R

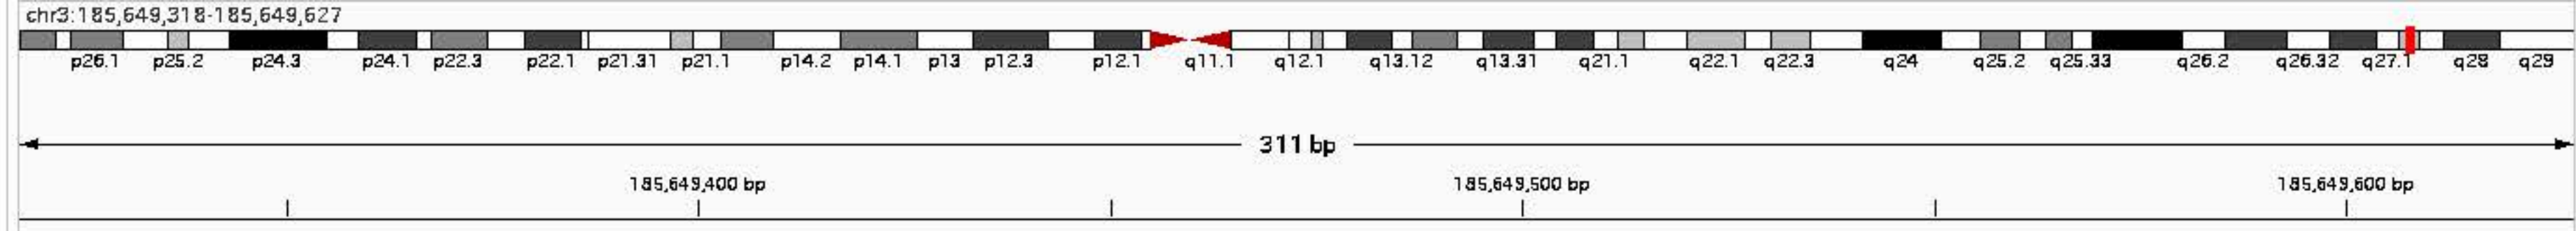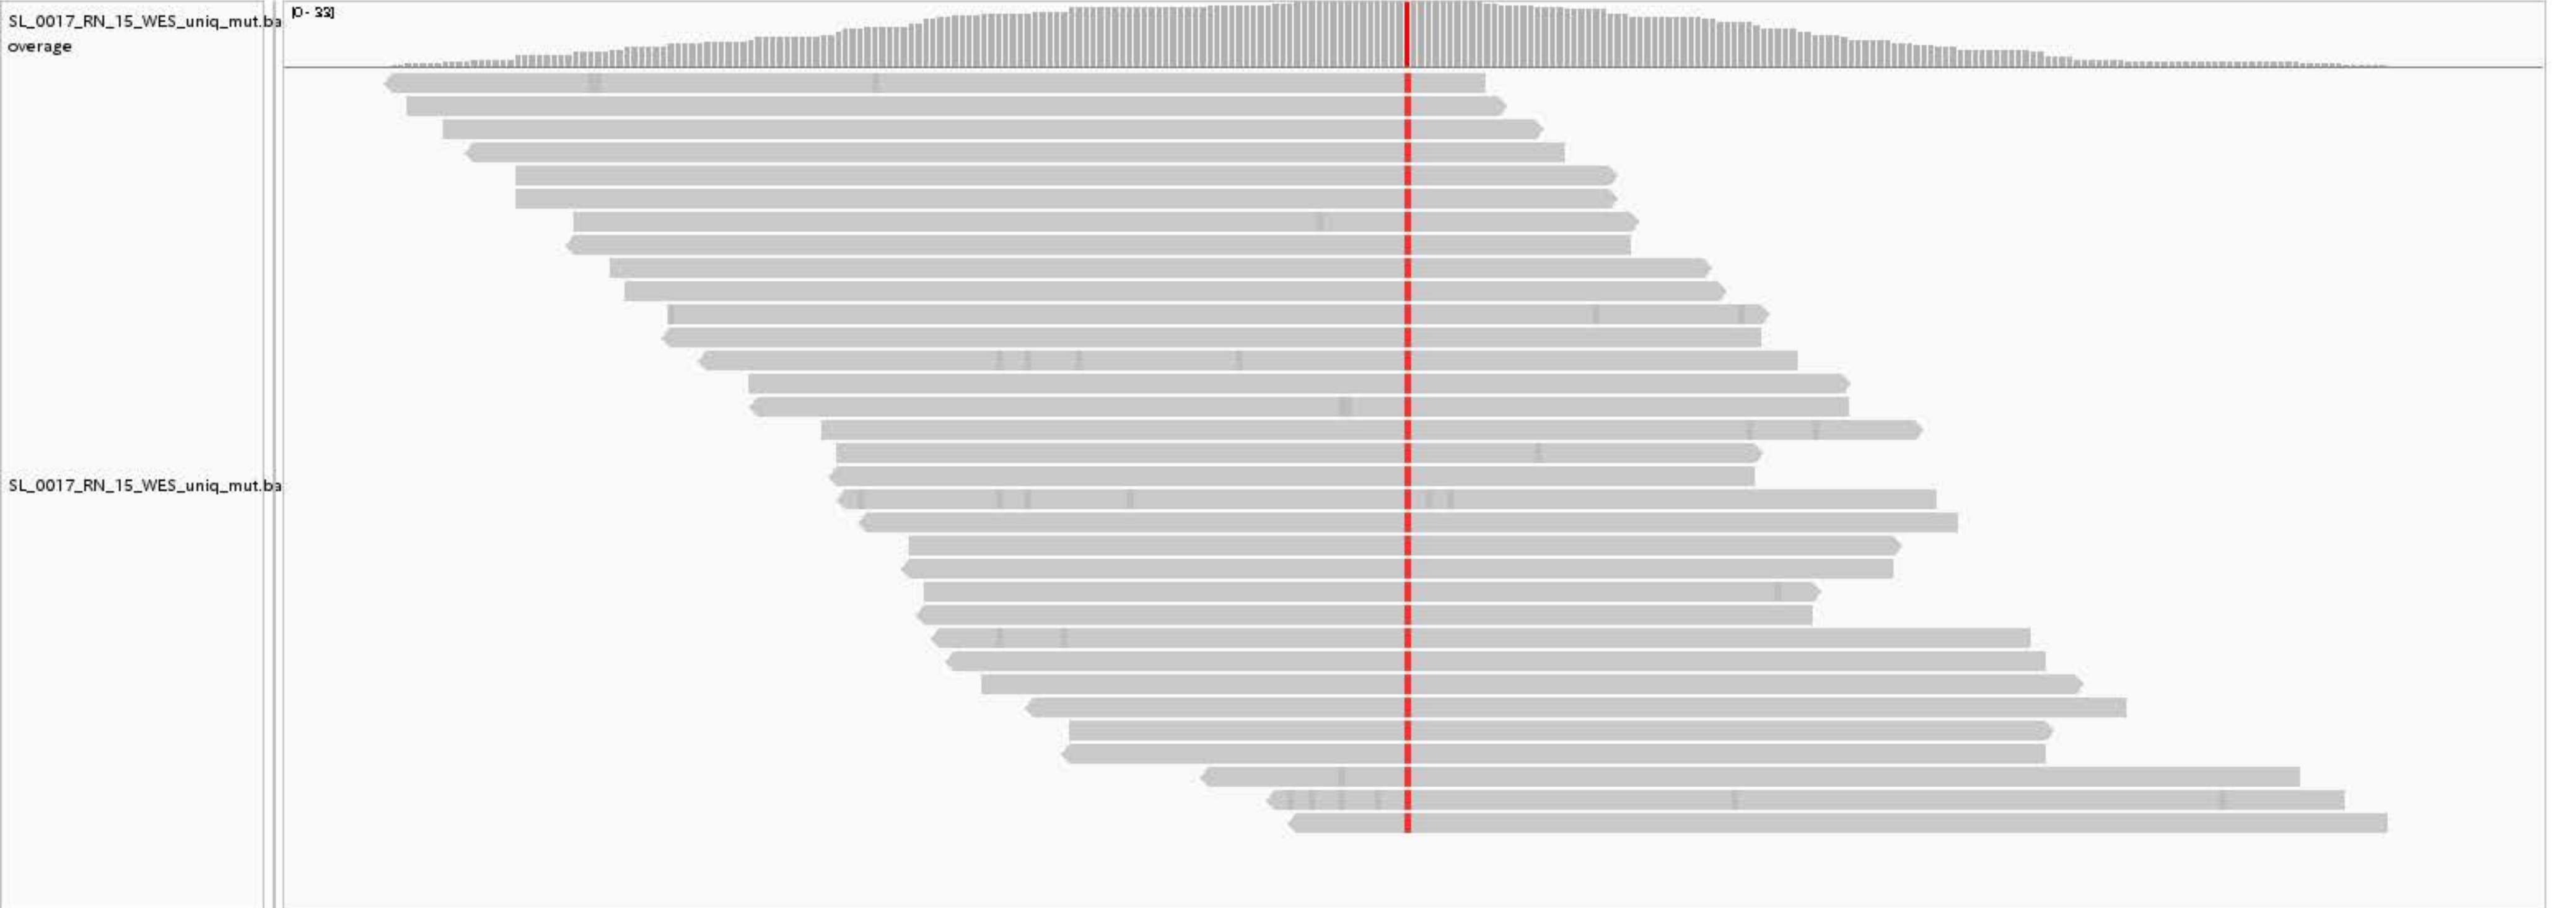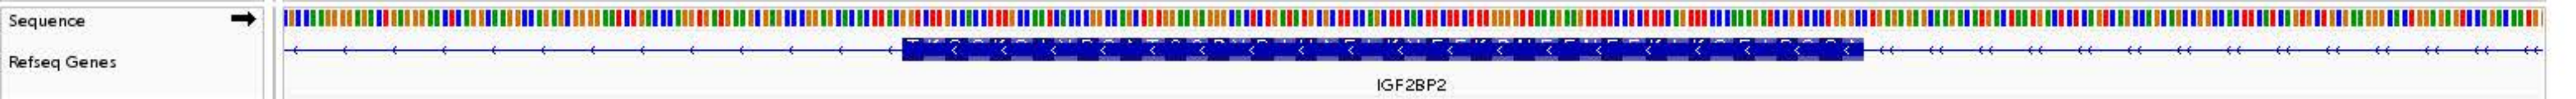



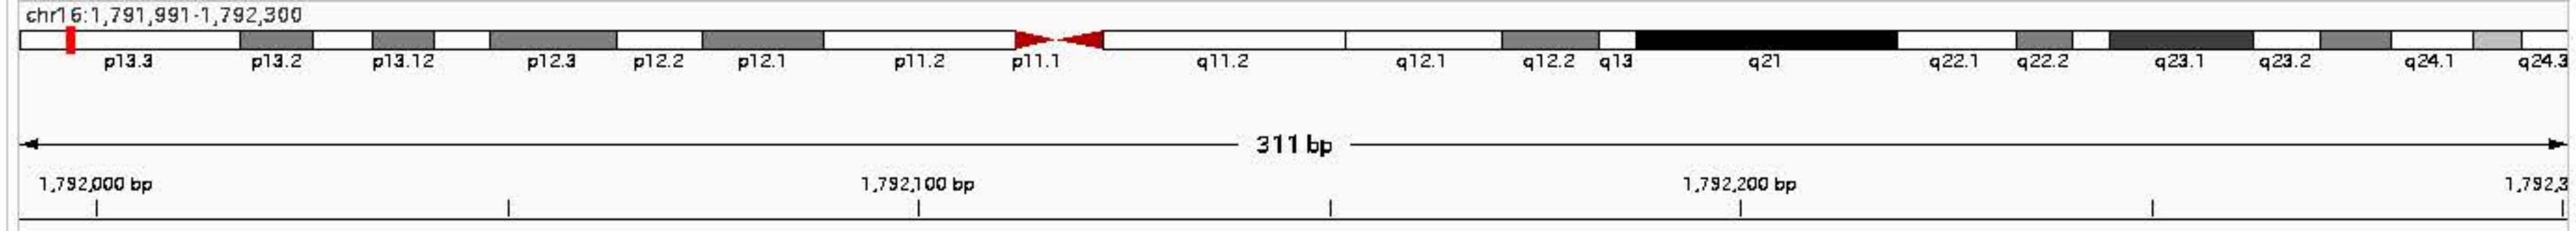

SL\_0015\_LN\_46\_WES\_uniq\_mut. ba  
coverage

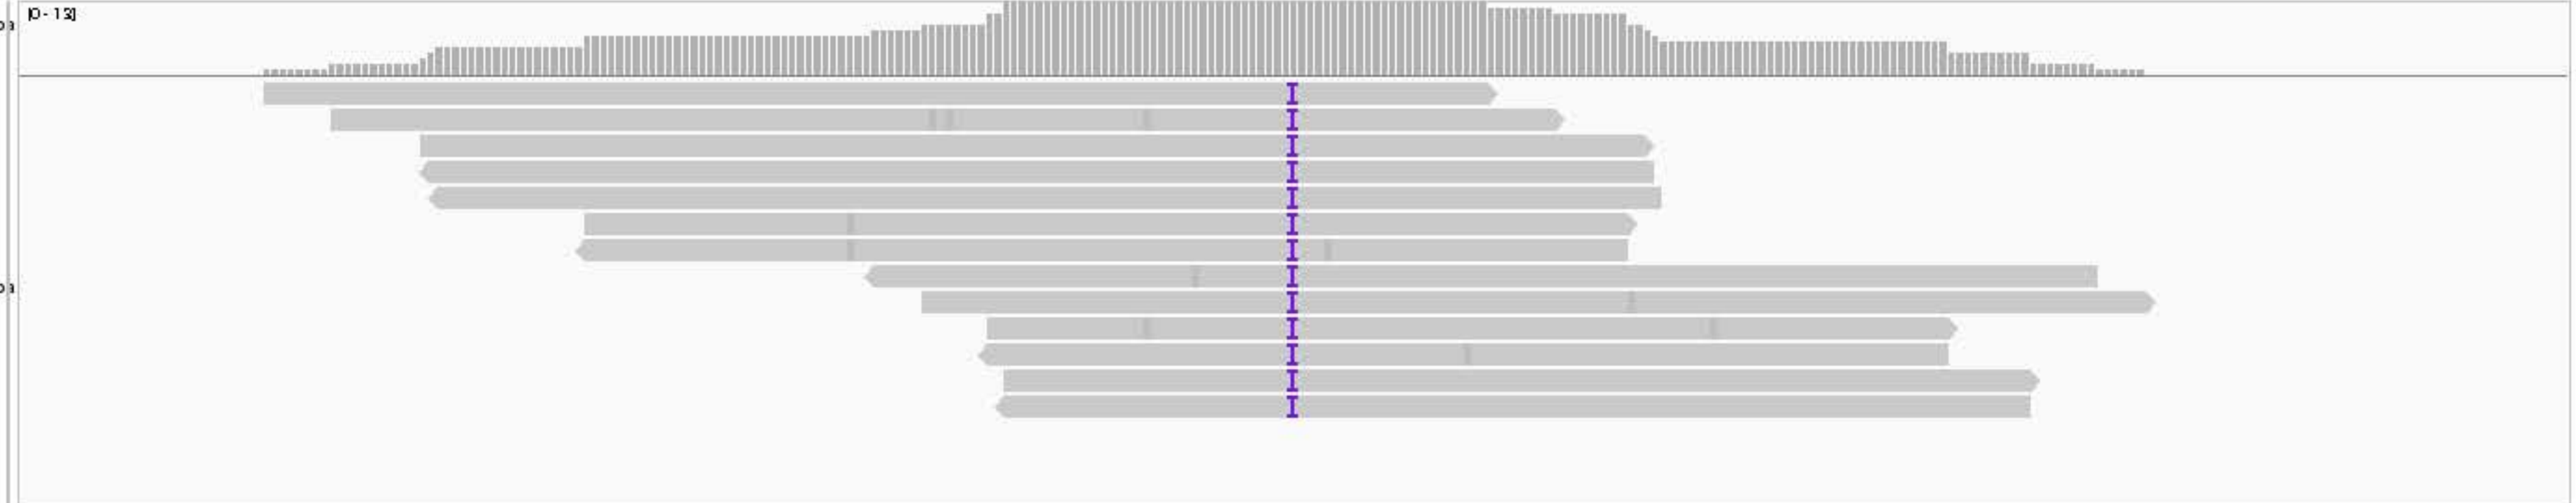

SL\_0015\_LN\_46\_WES\_uniq\_mut. ba

Sequence →  
Refseq Genes

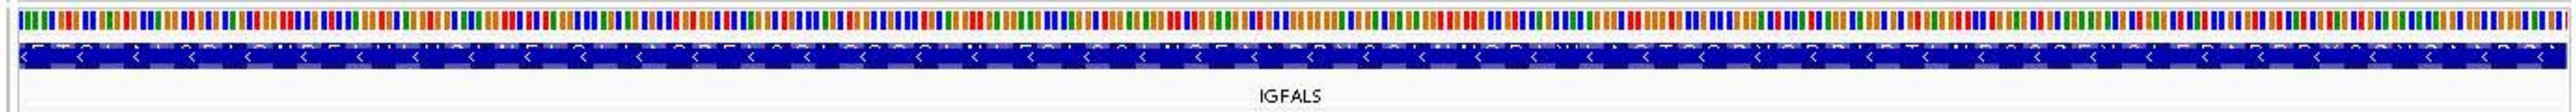

chr3: 57,102,935-57,103,244

p26.1 p25.2 p24.3 p24.1 p22.3 p22.1 p21.31 p21.1 p14.2 p14.1 p13 p12.3 p12.1 q11.1 q12.1 q13.12 q13.31 q21.1 q22.1 q22.3 q24 q25.2 q25.33 q26.2 q26.32 q27.1 q28 q29

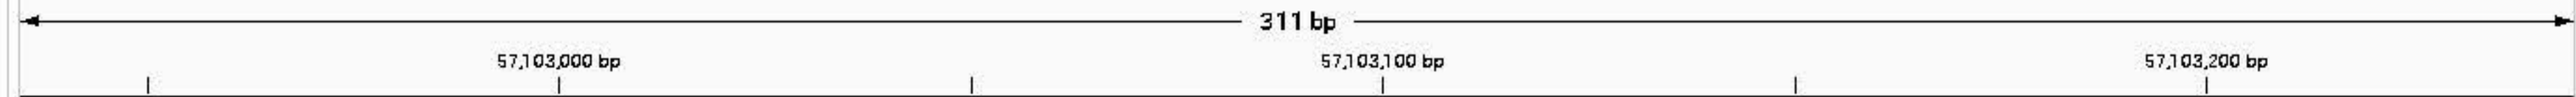

SL\_0007\_RN\_33\_WES\_uniq\_mut.ba  
overage

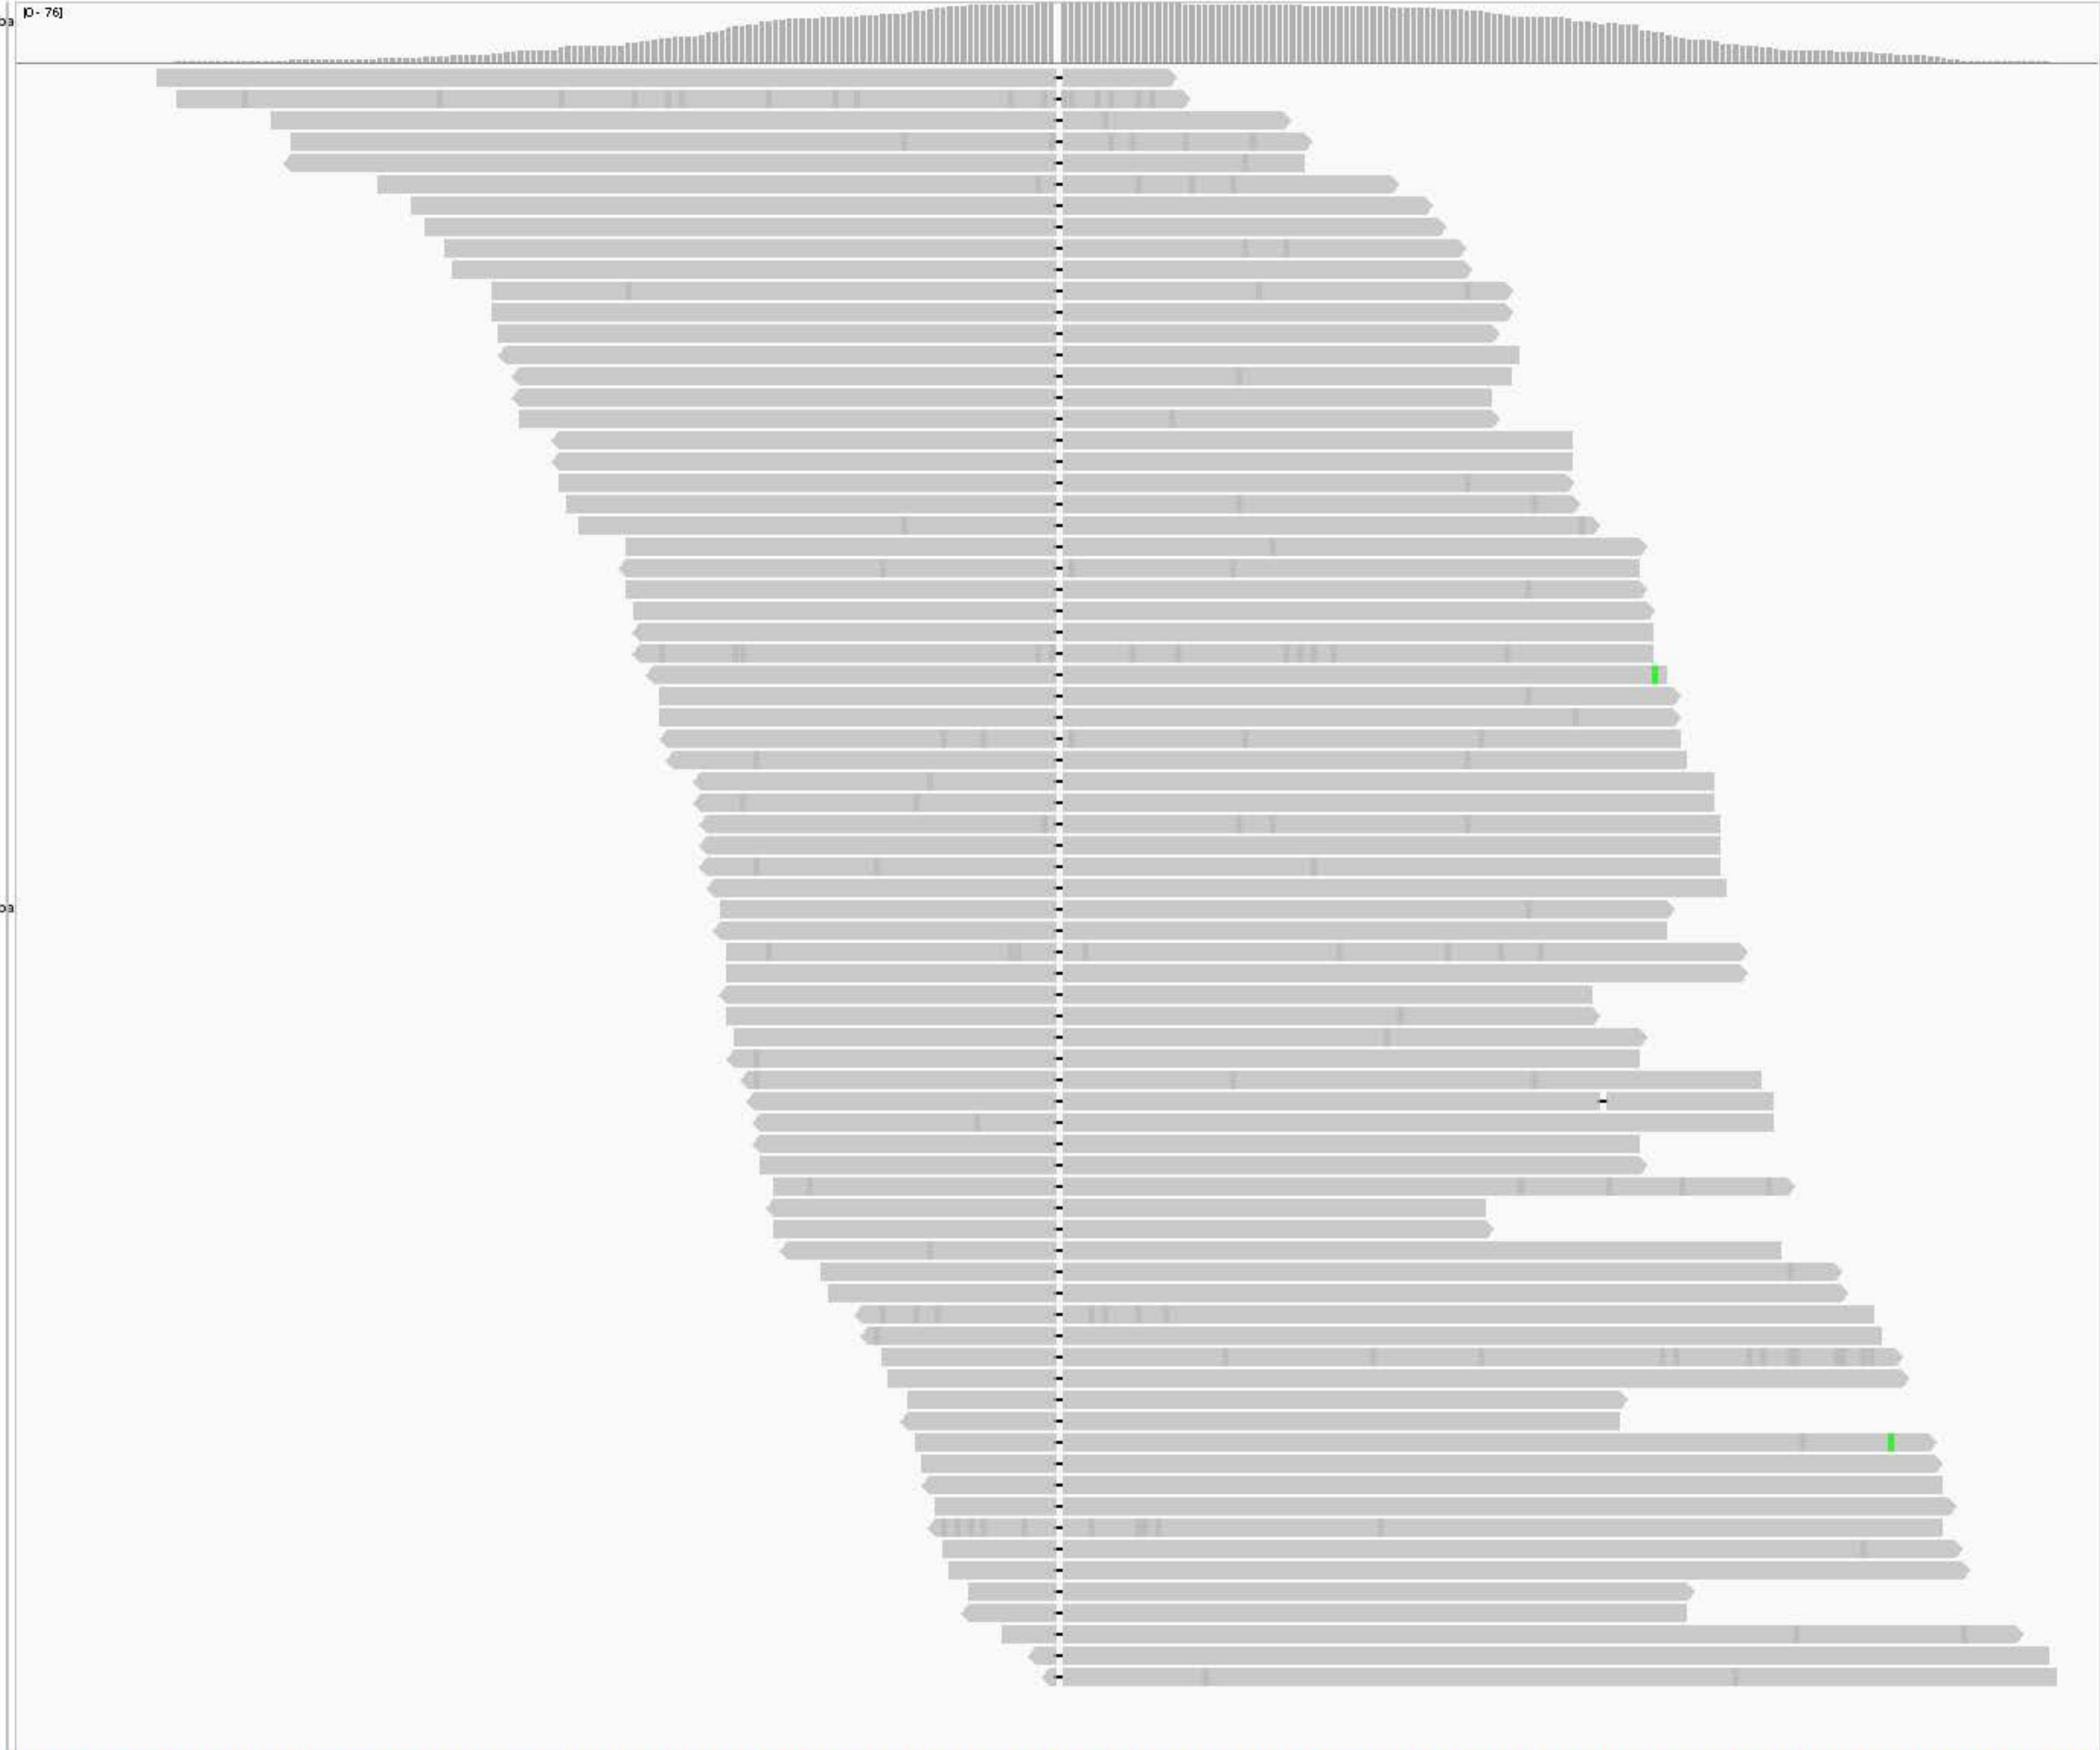

SL\_0007\_RN\_33\_WES\_uniq\_mut.ba

Sequence →

Refseq Genes

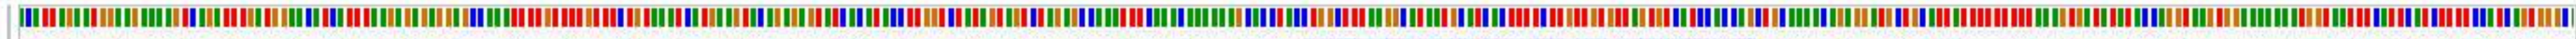

VPKLAYHMKRTTNTDDL

IL17RD

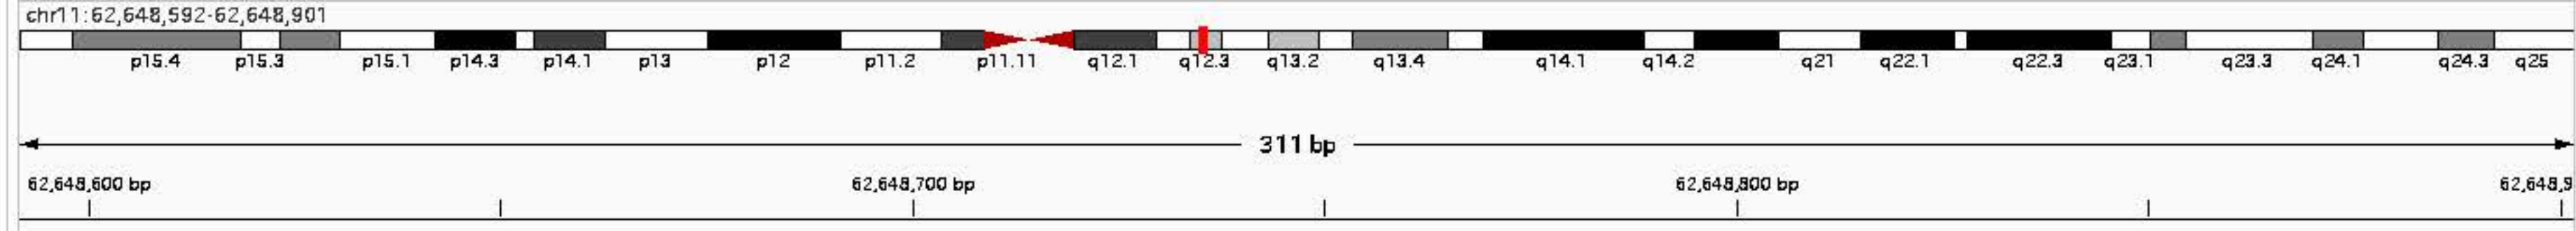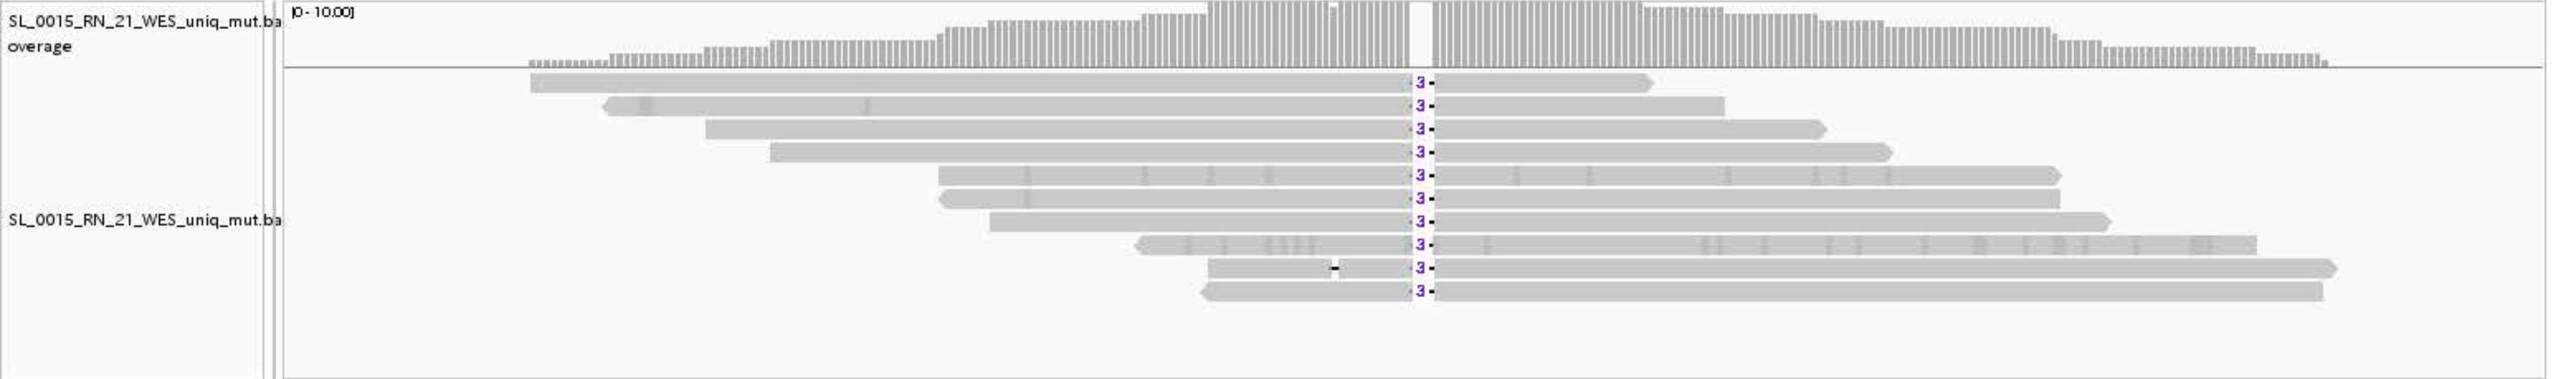

Sequence →

Refseq Genes

FRKRELRLTEGCLGVHNLADLFPVLRPPPPGLVGEPSGGRHHVLKQLHLLLLQILRDCAERVTDVPVALGQTTIVSAPMATDVLFLQLLRYAGAGSAQSVL

INTS5



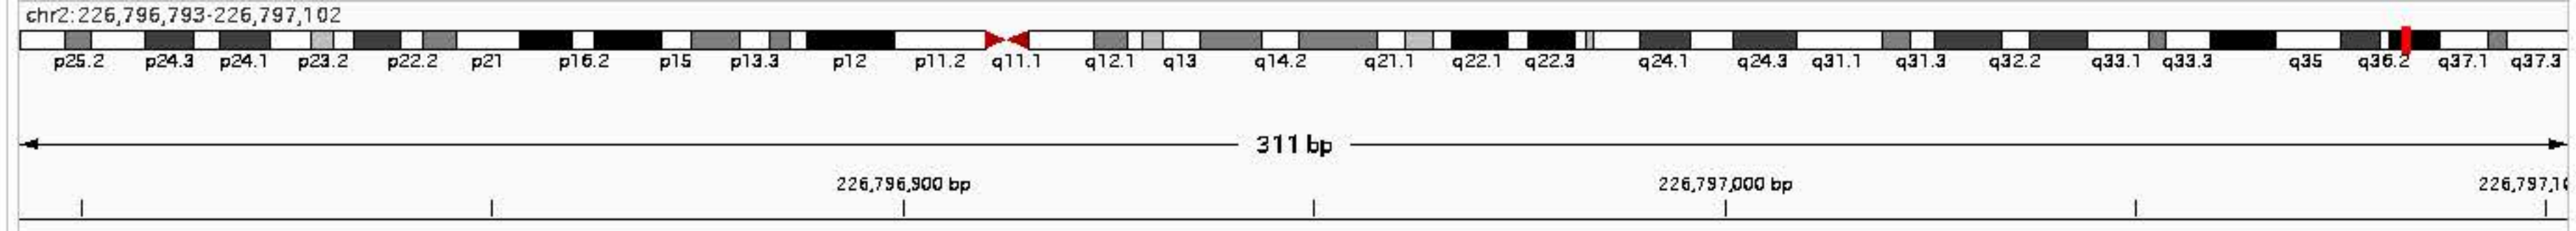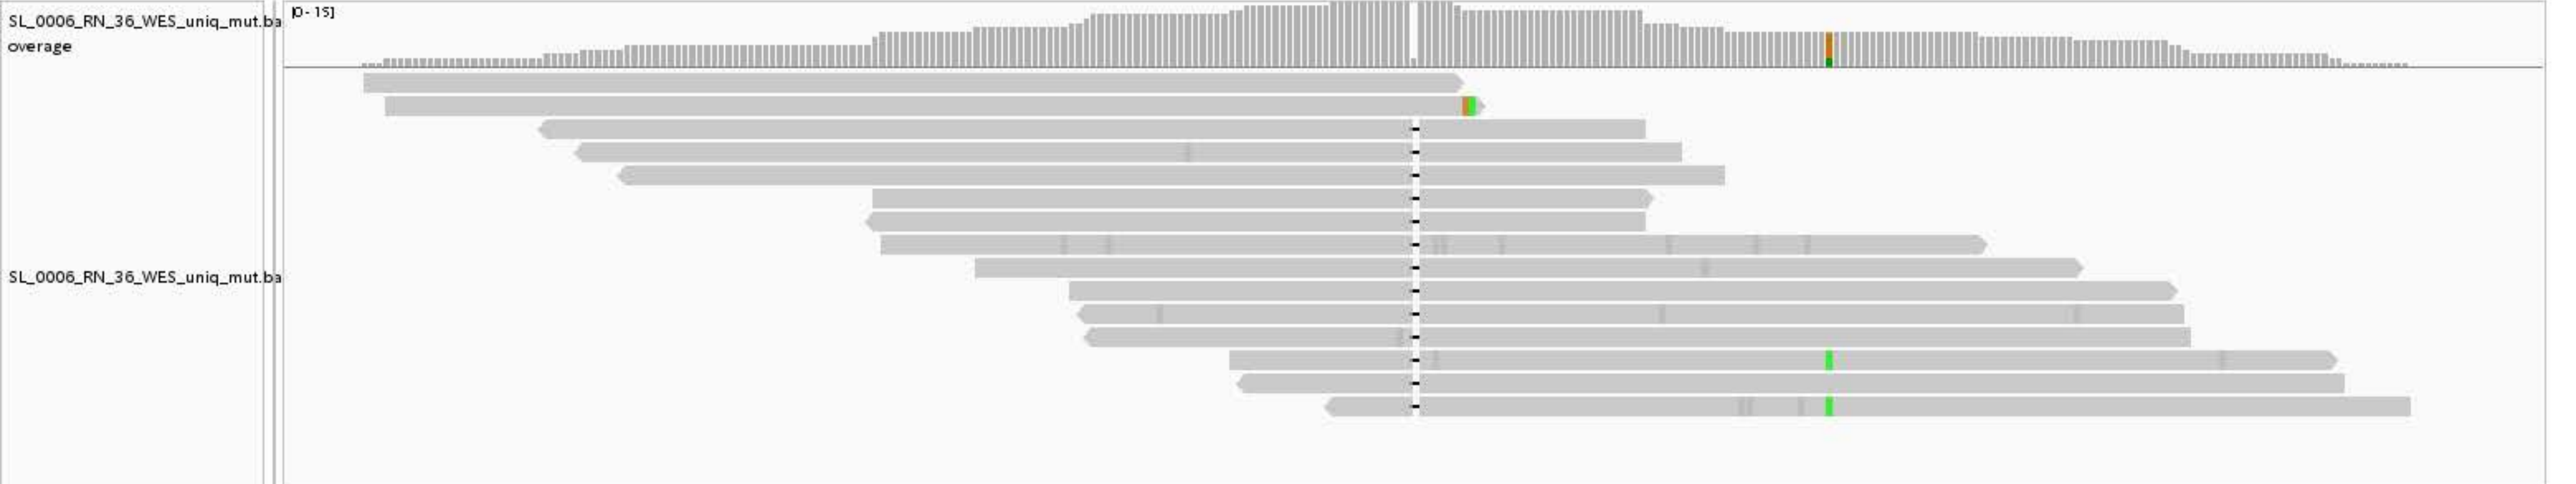

Sequence →

Refseq Genes

P N I I Q Q P A S V S K P S M P M Y D G S G K R G S P V P A V G P S M P M Y G D D T H L T S S D P R H H G G R R E L P H M E L G E E P Y S R T P V F A S H R H G P L R G G S G G G P P Y A P M M E T Y E E I S A

IRS1

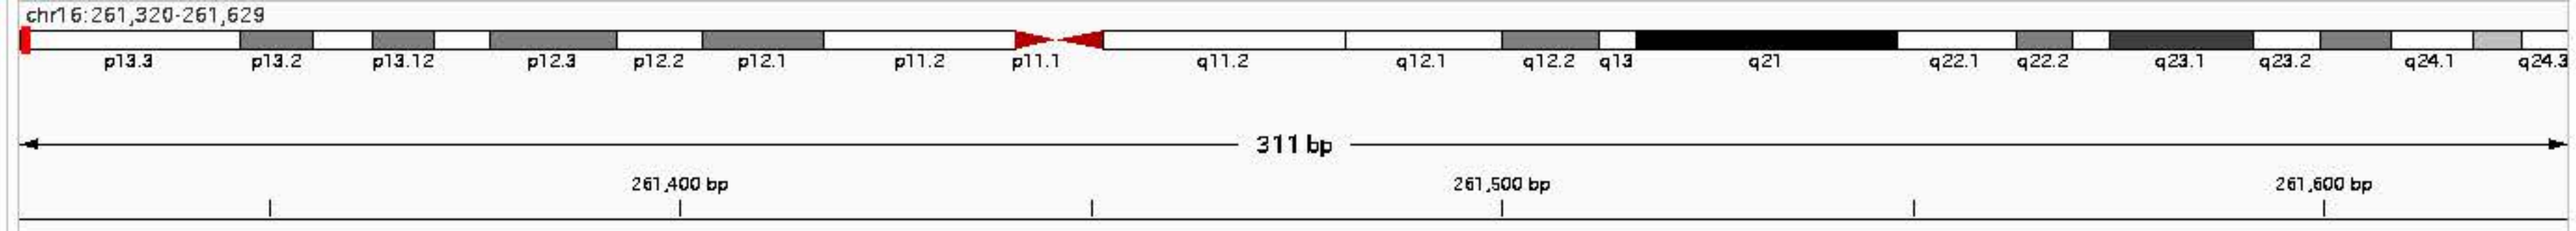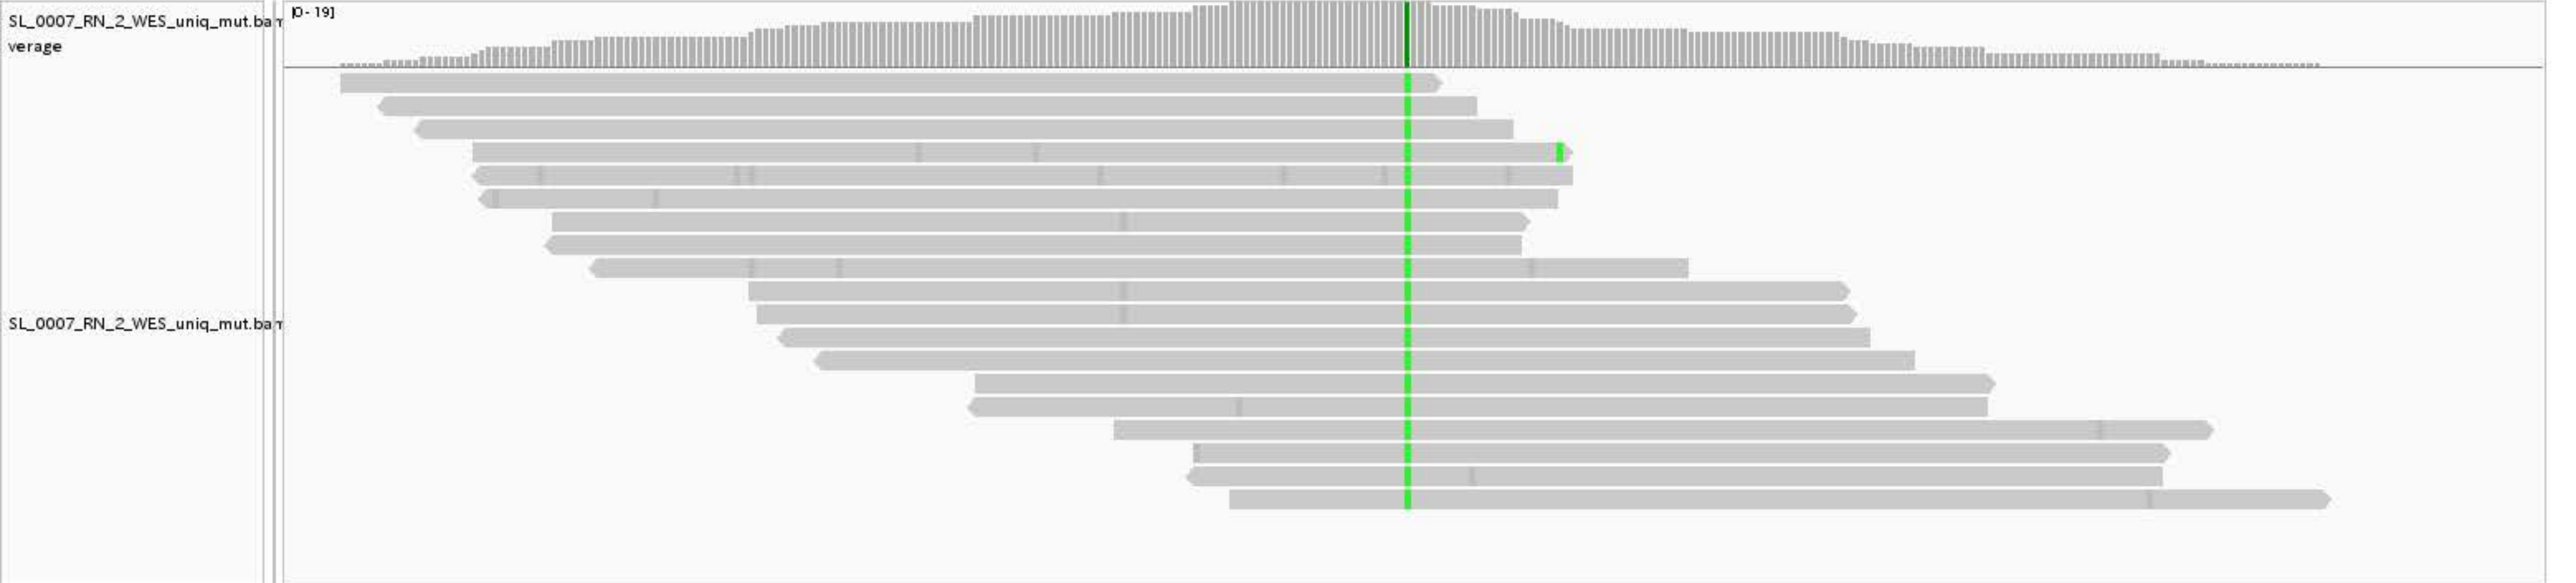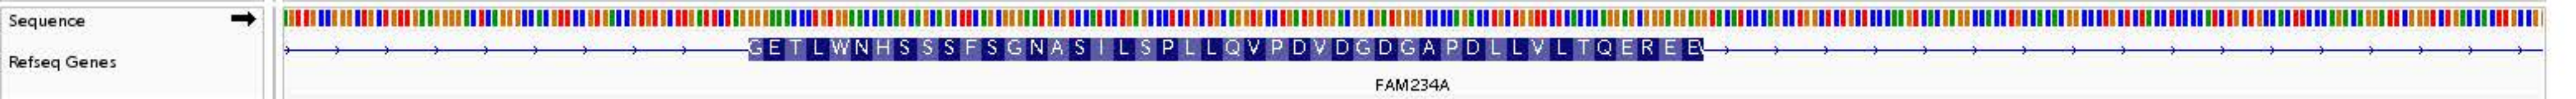

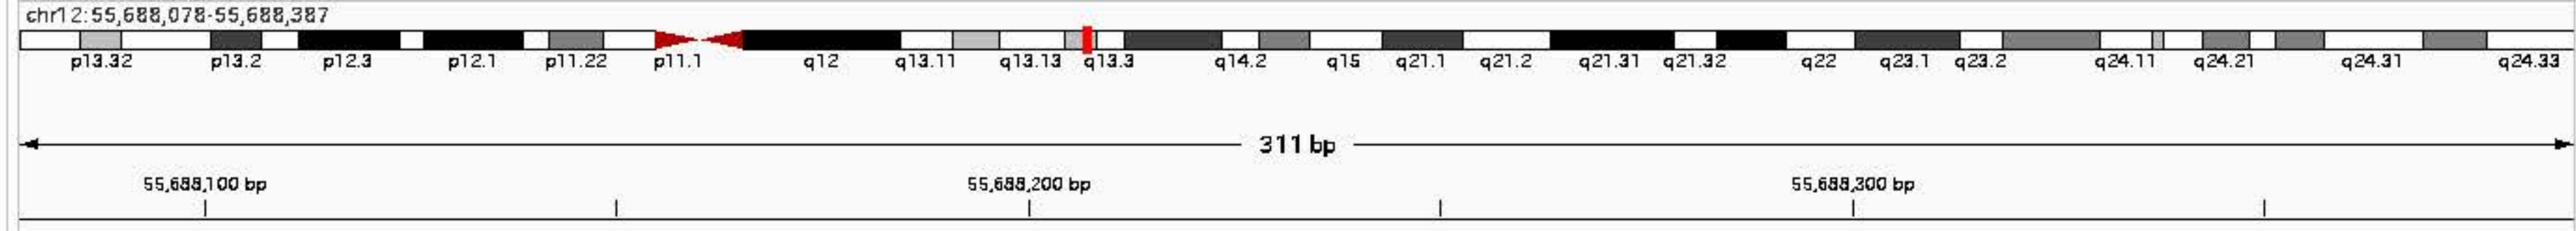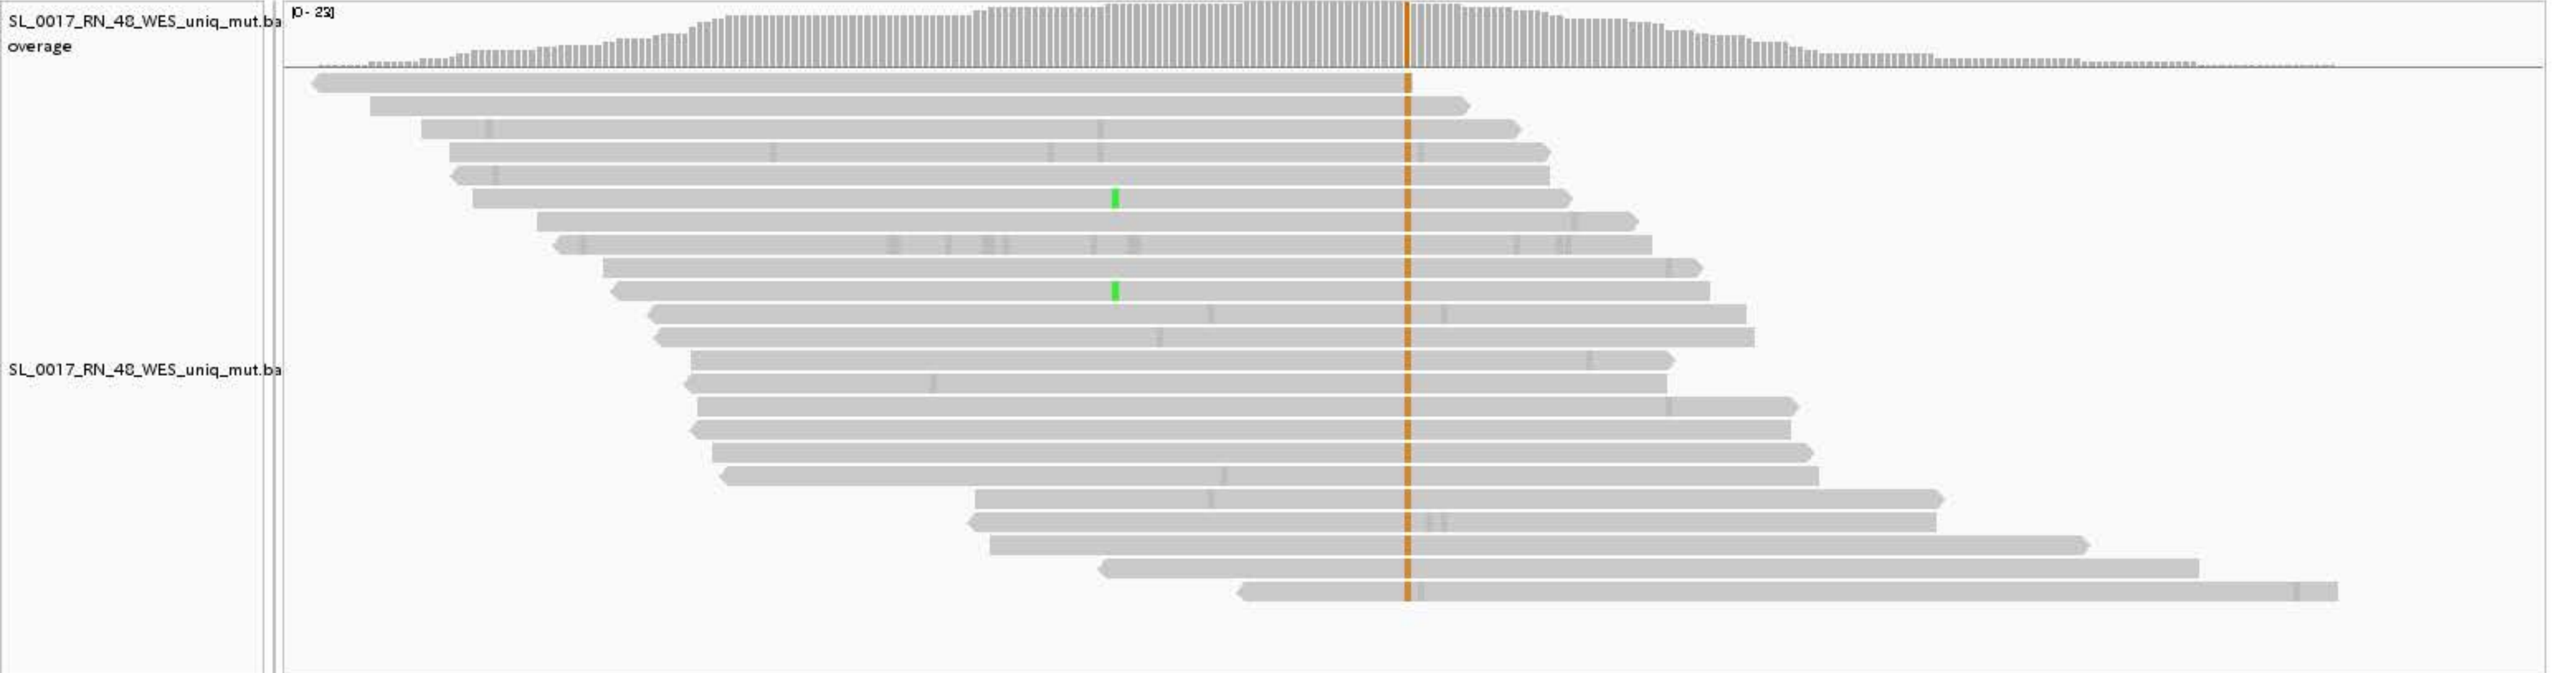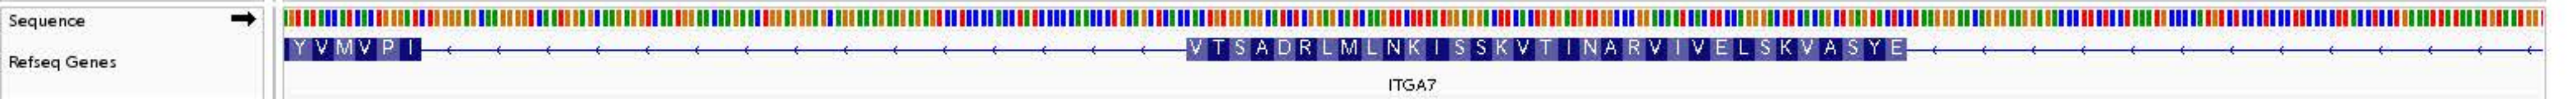



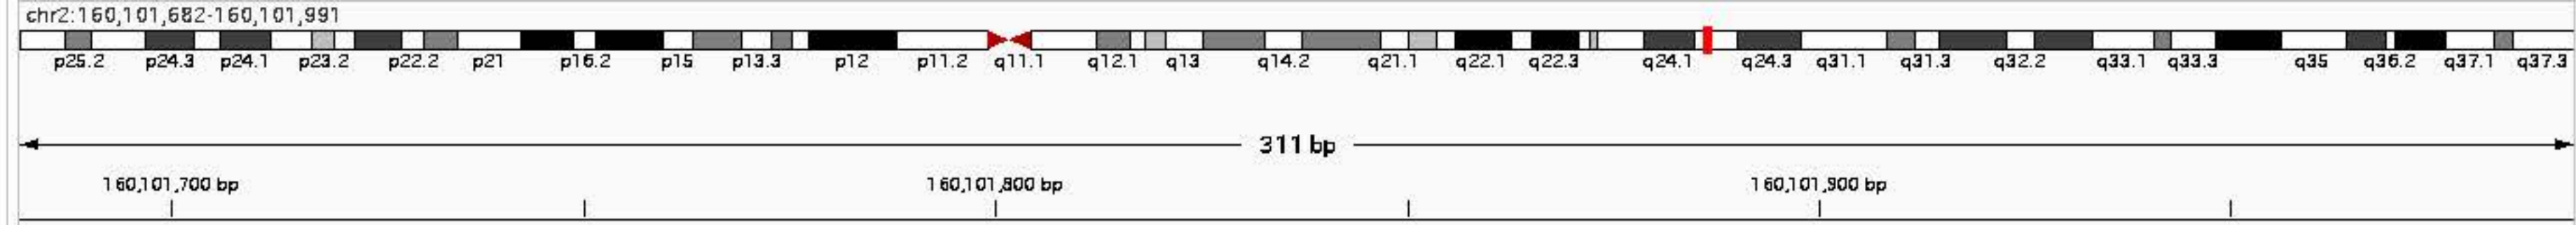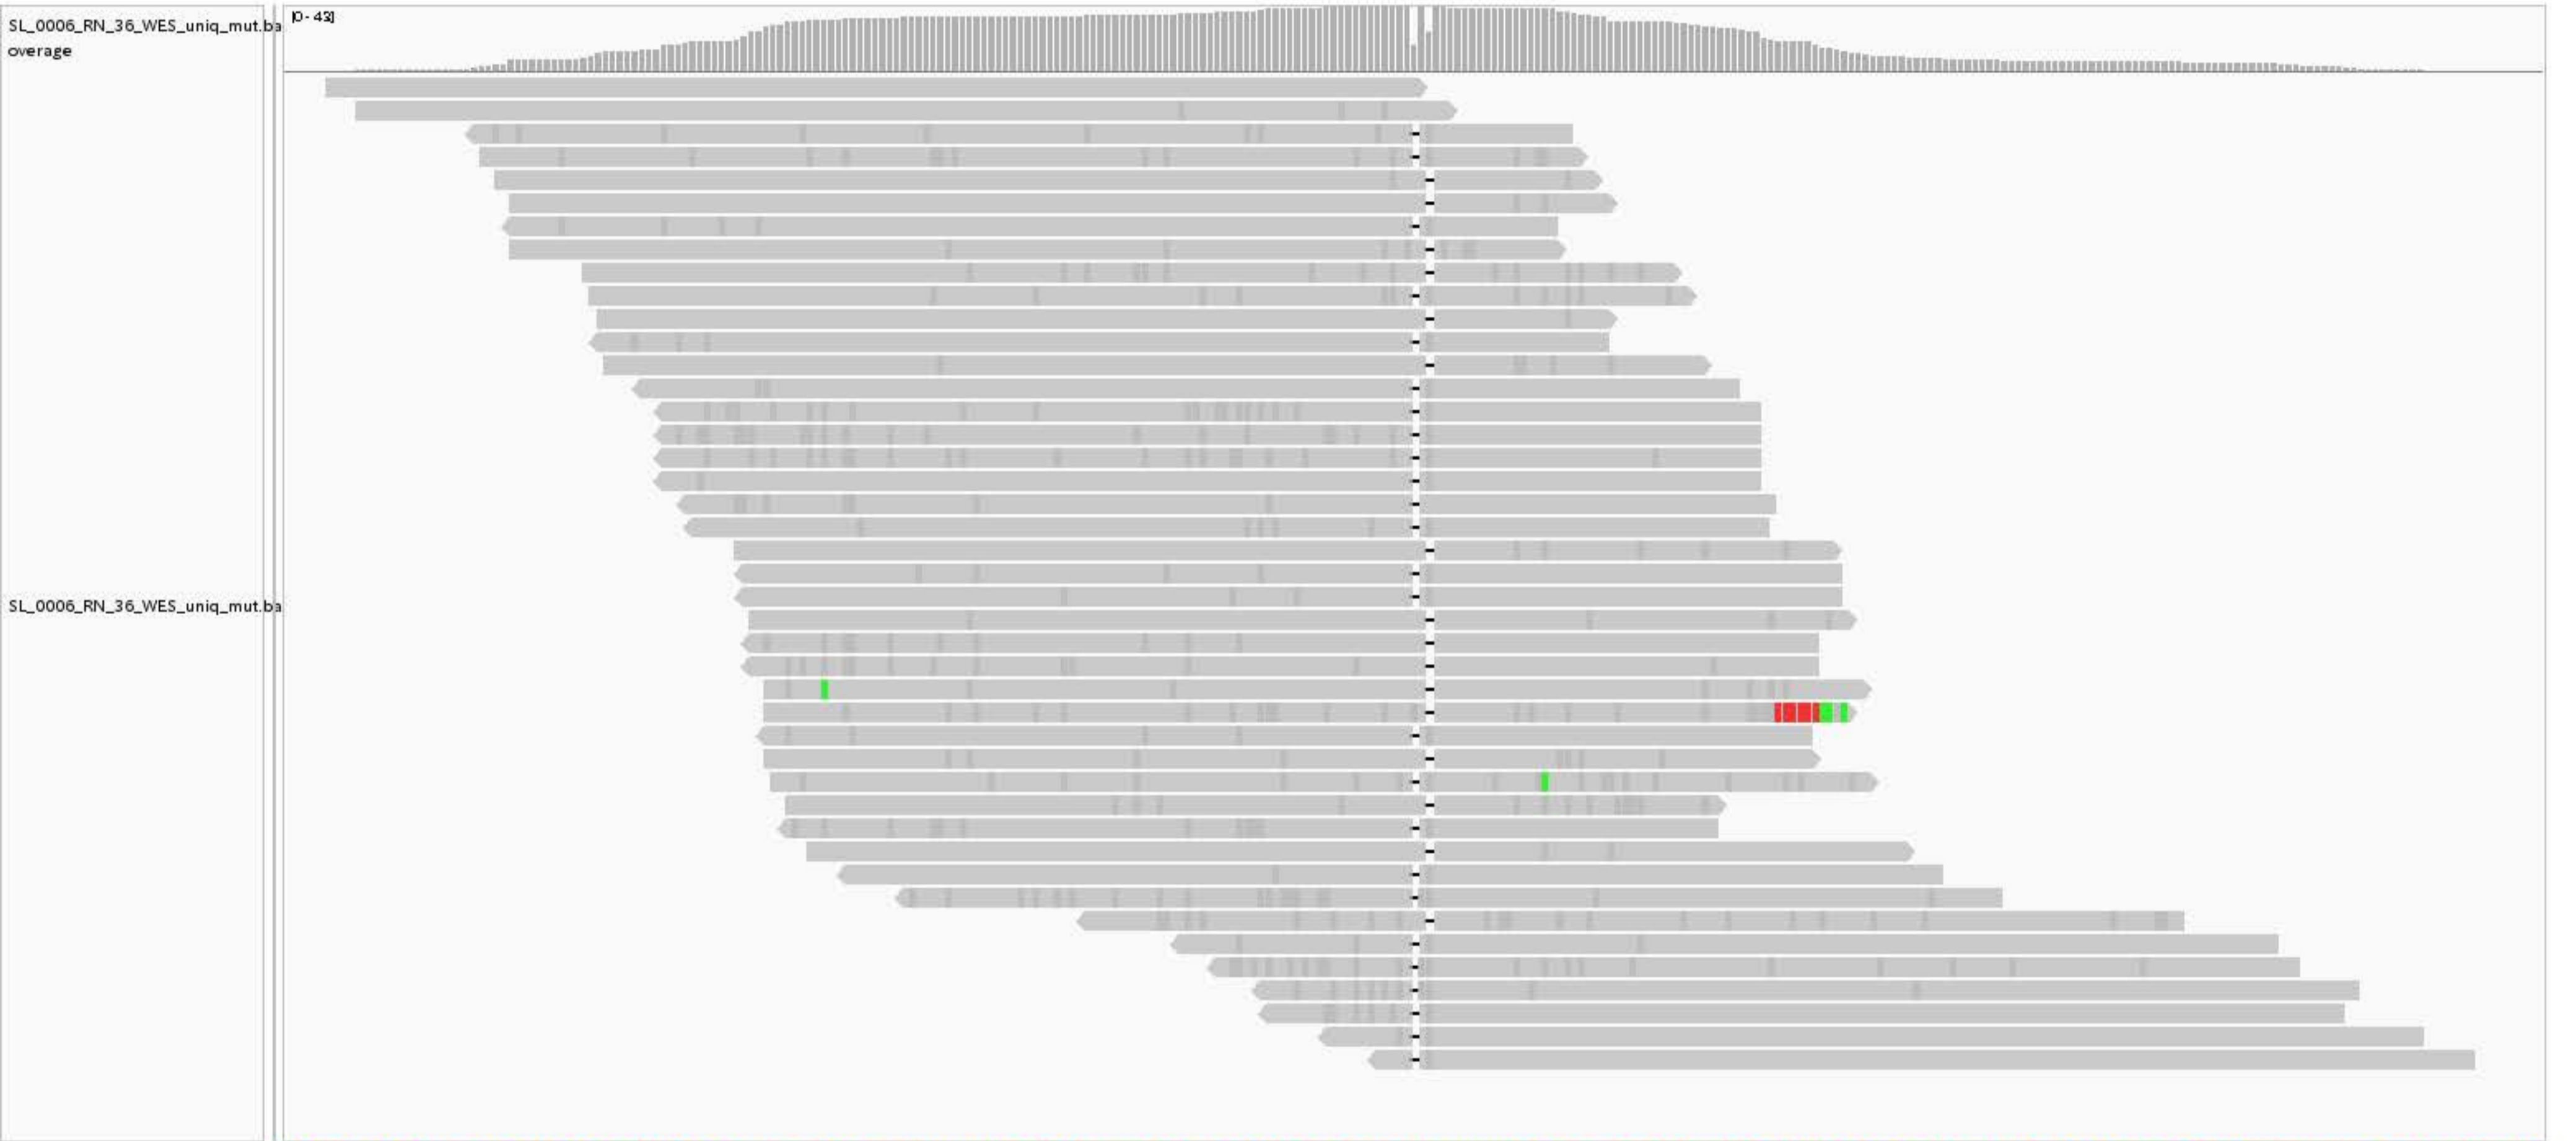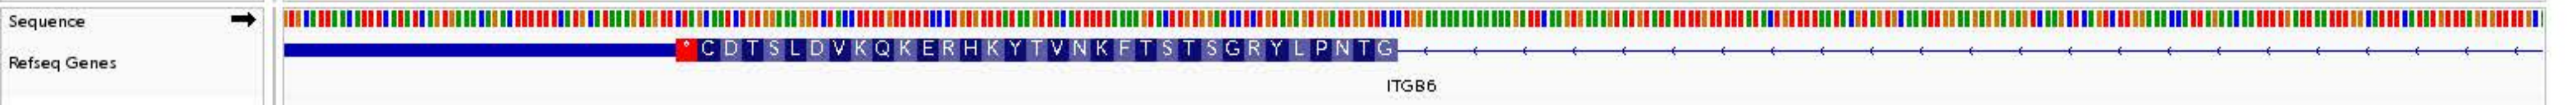

chr19:2,097,204-2,097,513

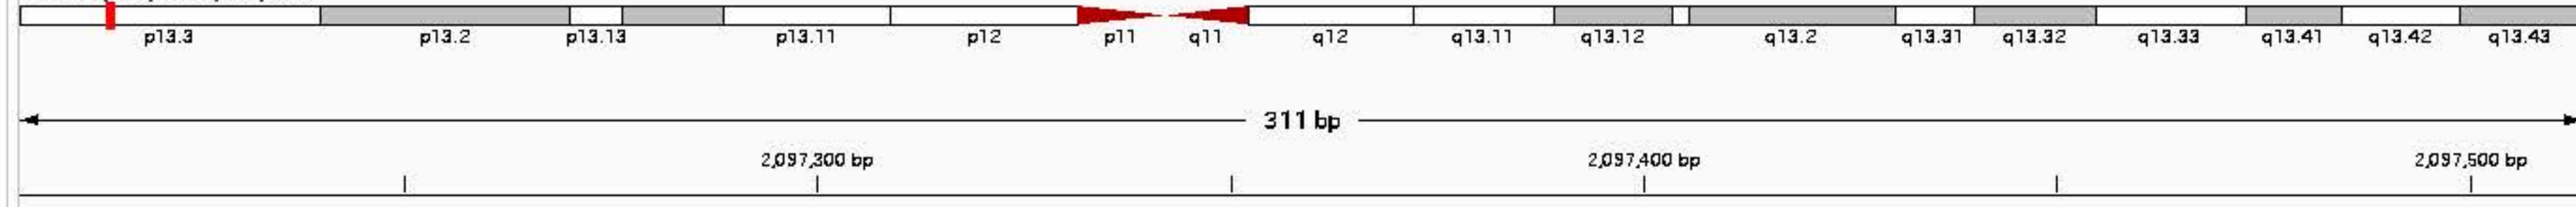

SL\_0017\_RN\_15\_WES\_uniq\_mut.ba  
coverage

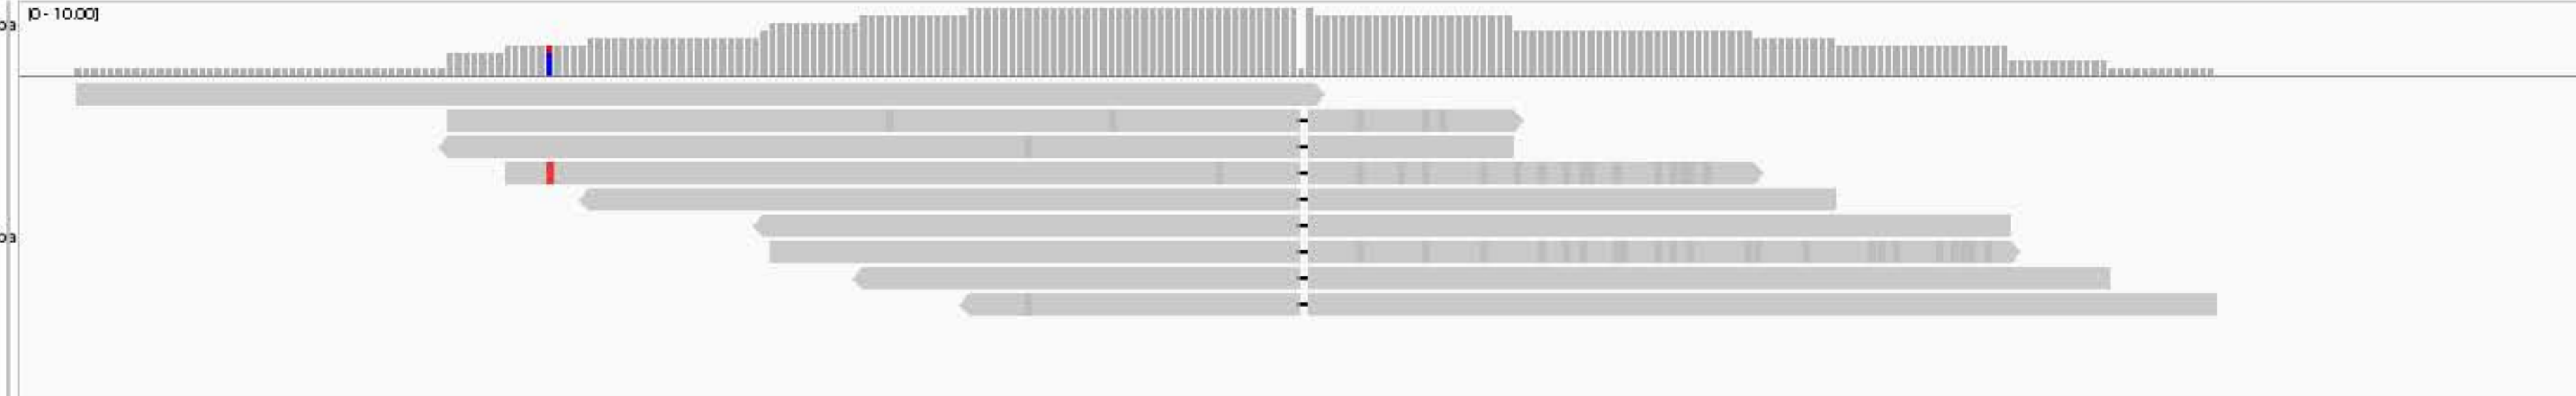

SL\_0017\_RN\_15\_WES\_uniq\_mut.ba

Sequence

Refseq Genes

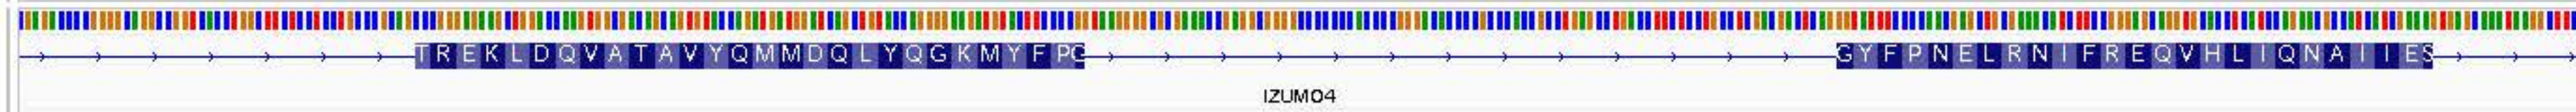

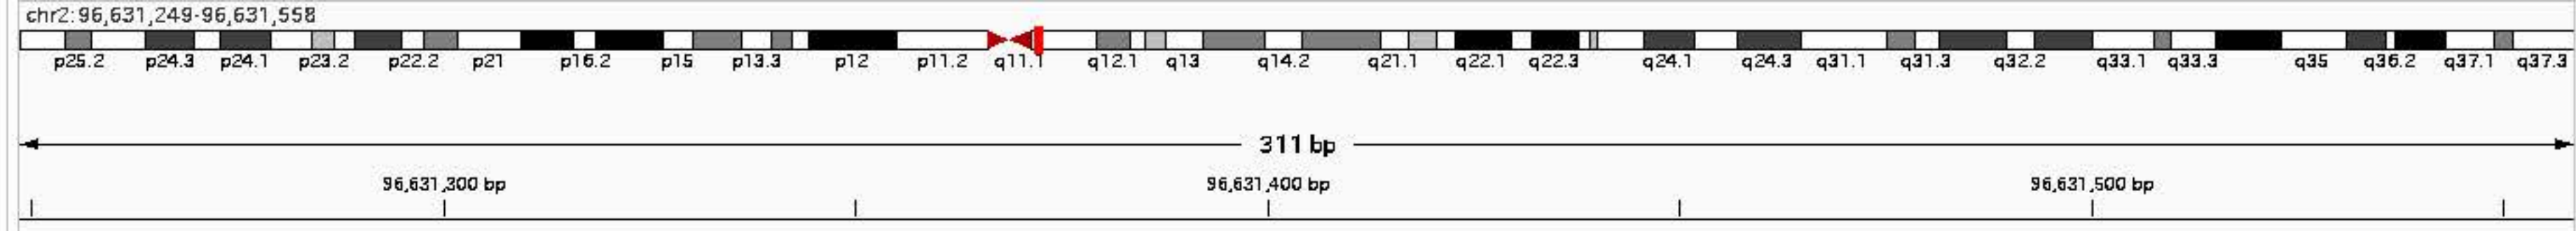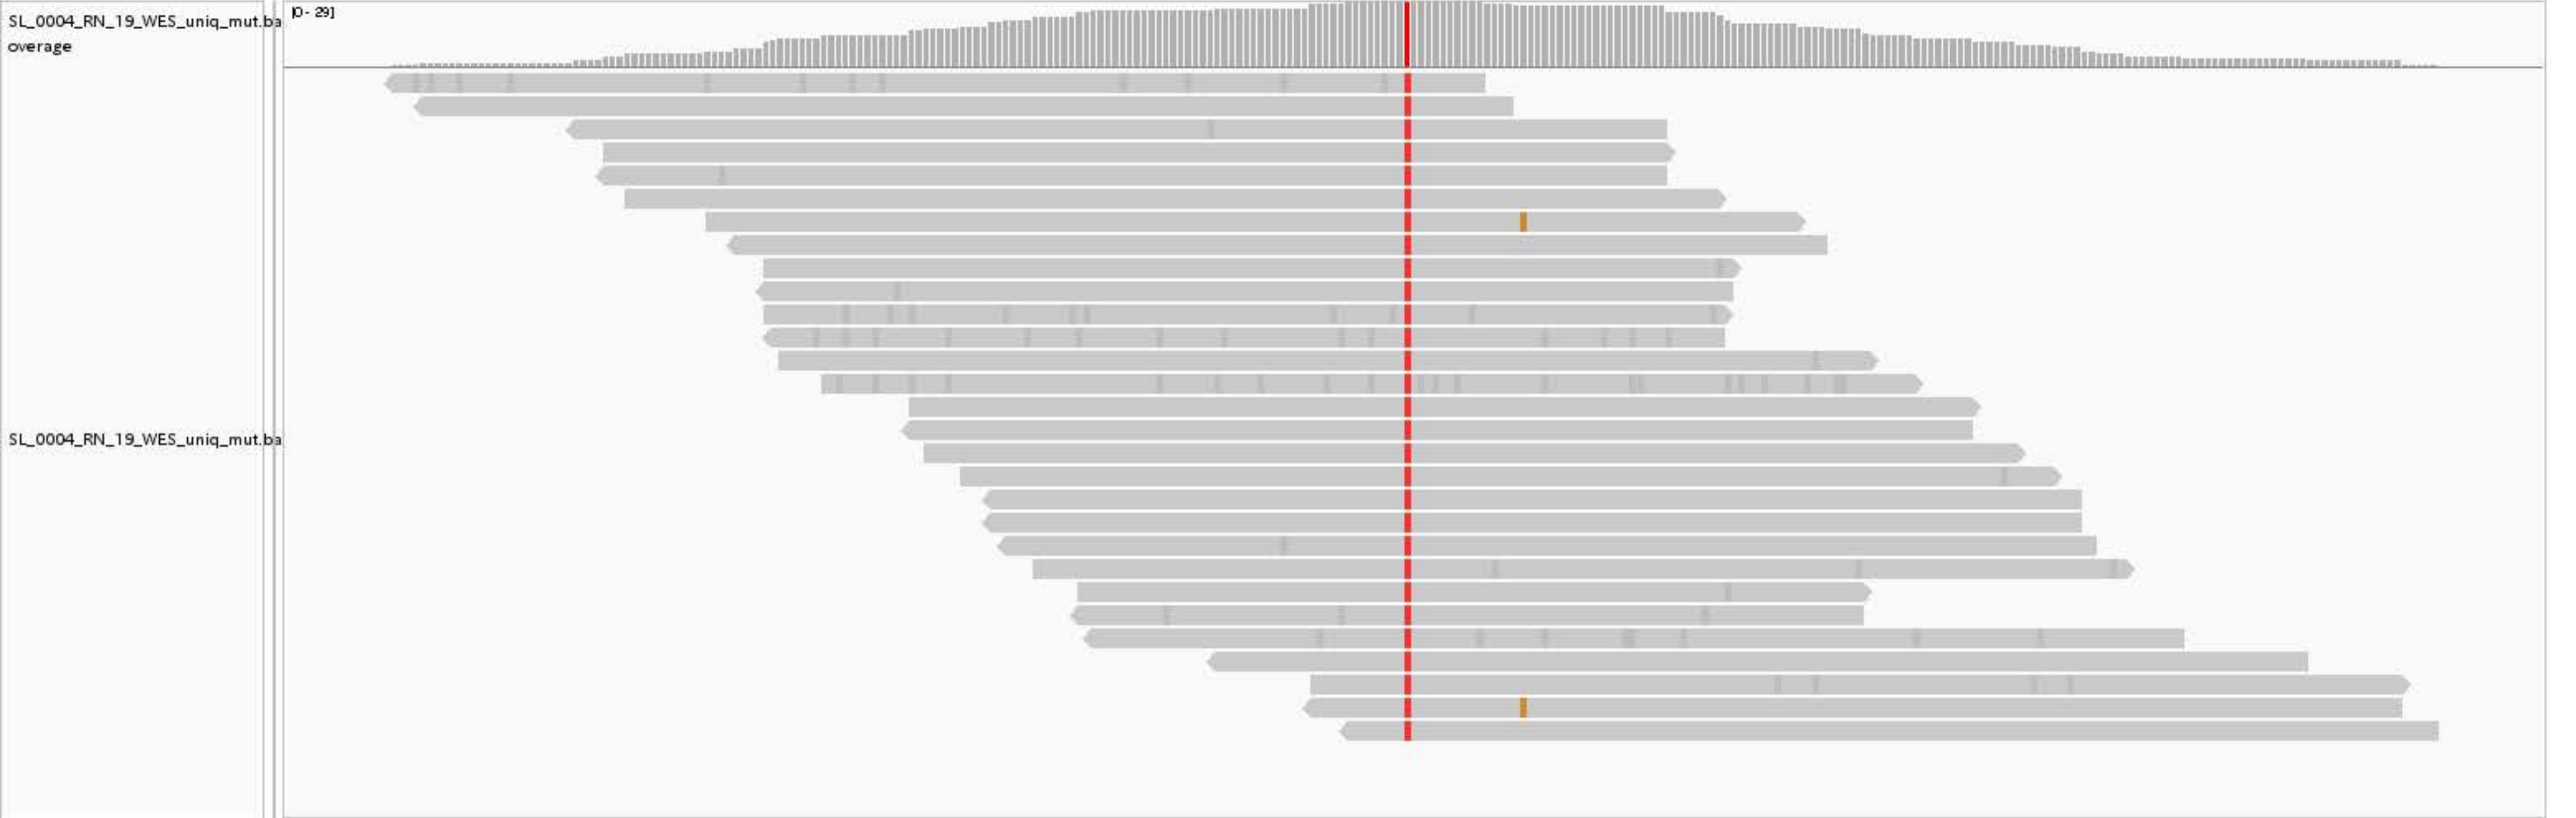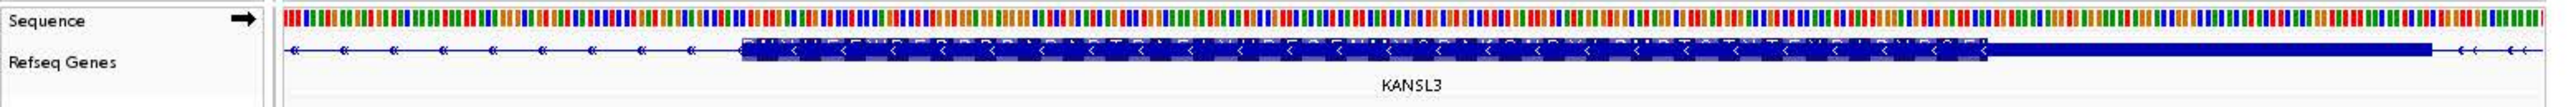



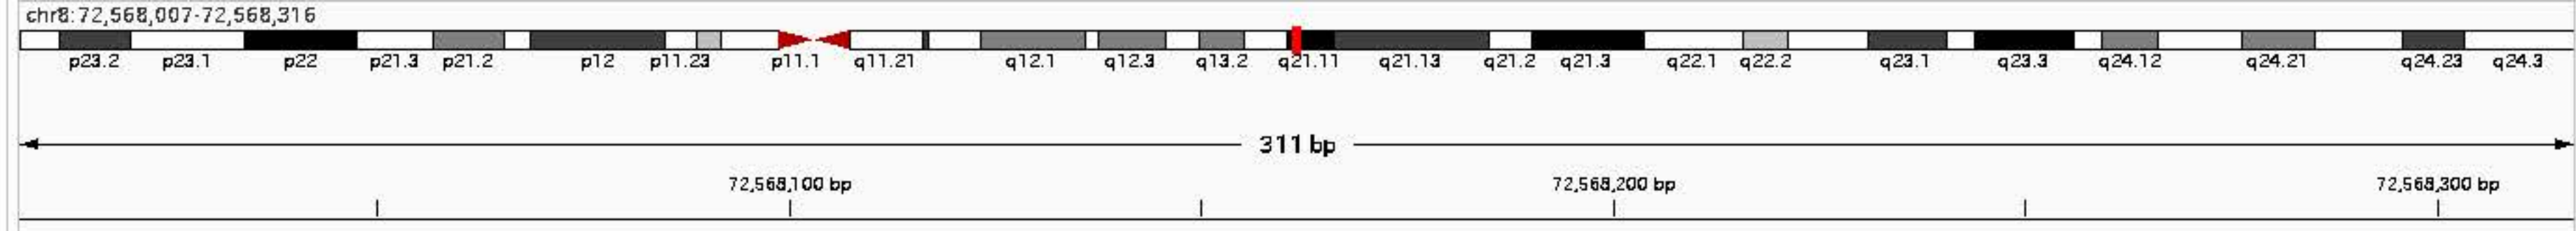

SL\_0006\_RN\_67\_WES\_uniq\_mut.ba  
overage

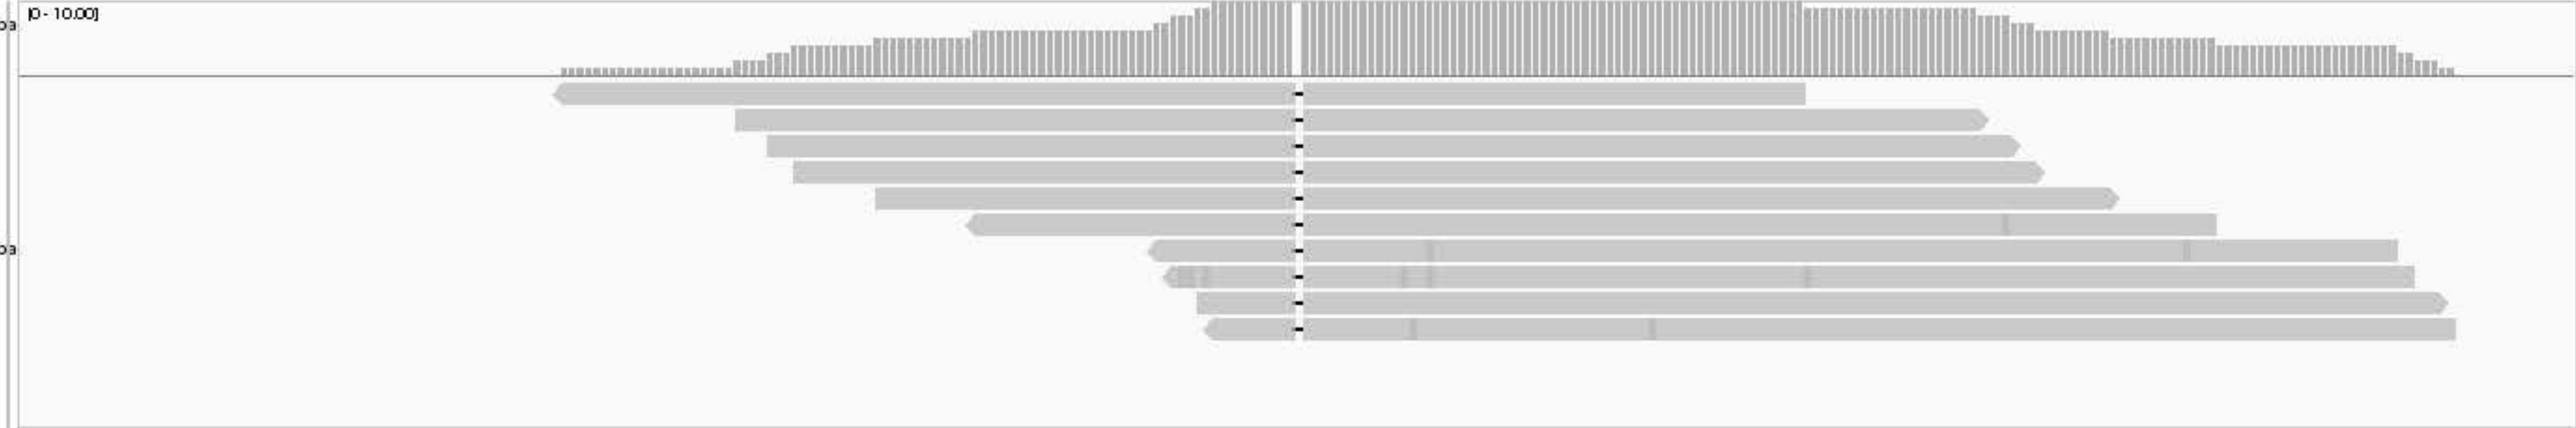

SL\_0006\_RN\_67\_WES\_uniq\_mut.ba

Sequence

Refseq Genes

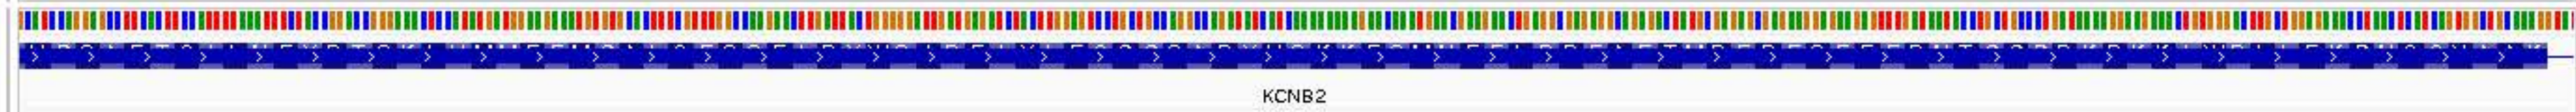

chr1:215,083,175-215,083,484

p36.31 p36.21 p36.11 p35.1 p34.2 p33 p32.2 p31.3 p31.1 p22.3 p21.3 p21.1 p13.2 p11.2 q12 q21.1 q21.3 q23.2 q24.2 q25.2 q31.1 q31.3 q32.2 q41 q42.13 q43 q44

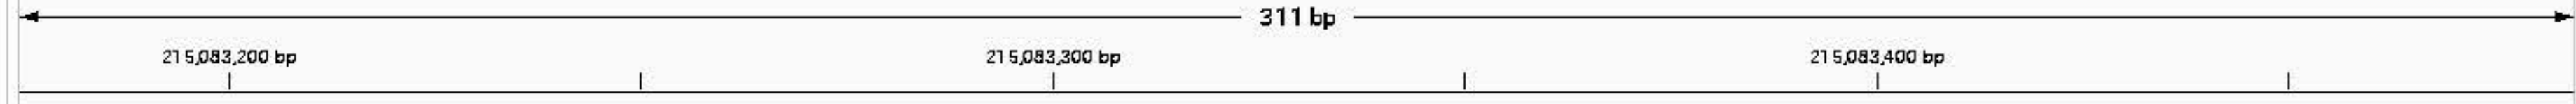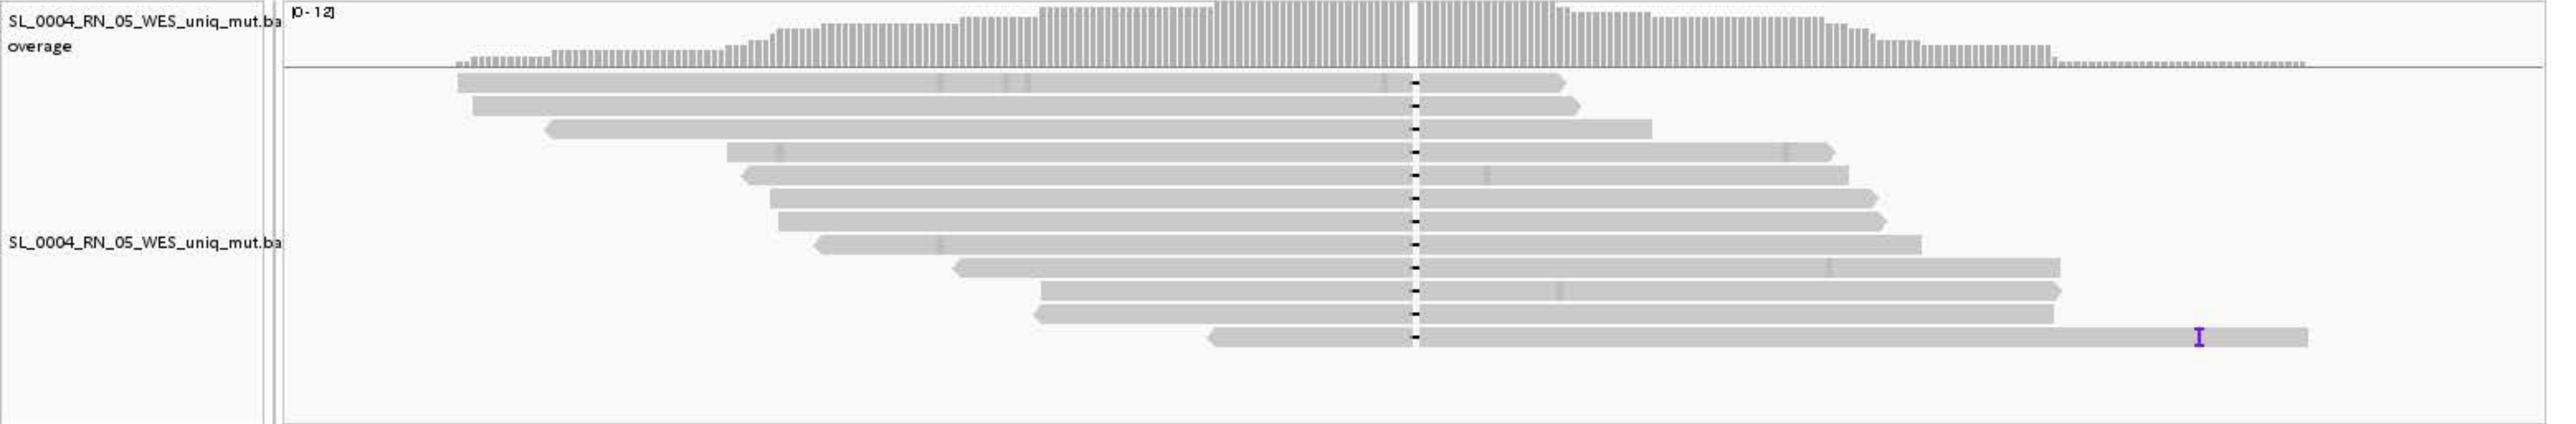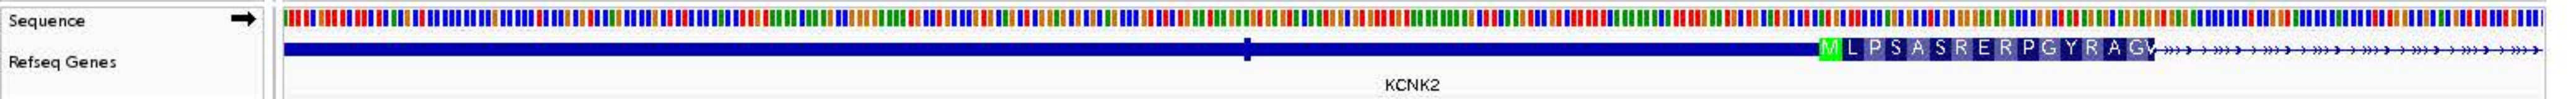

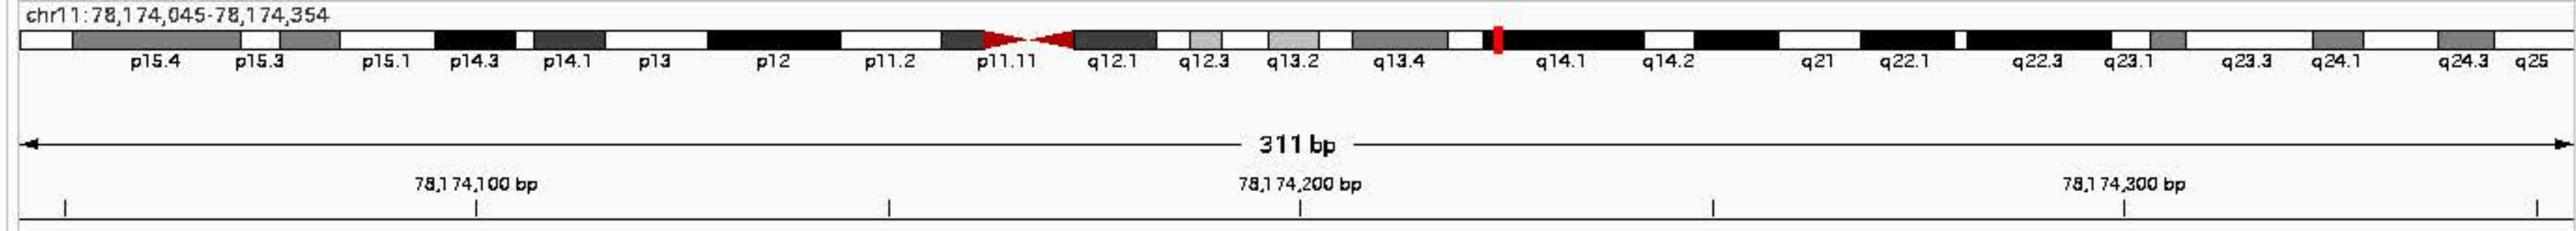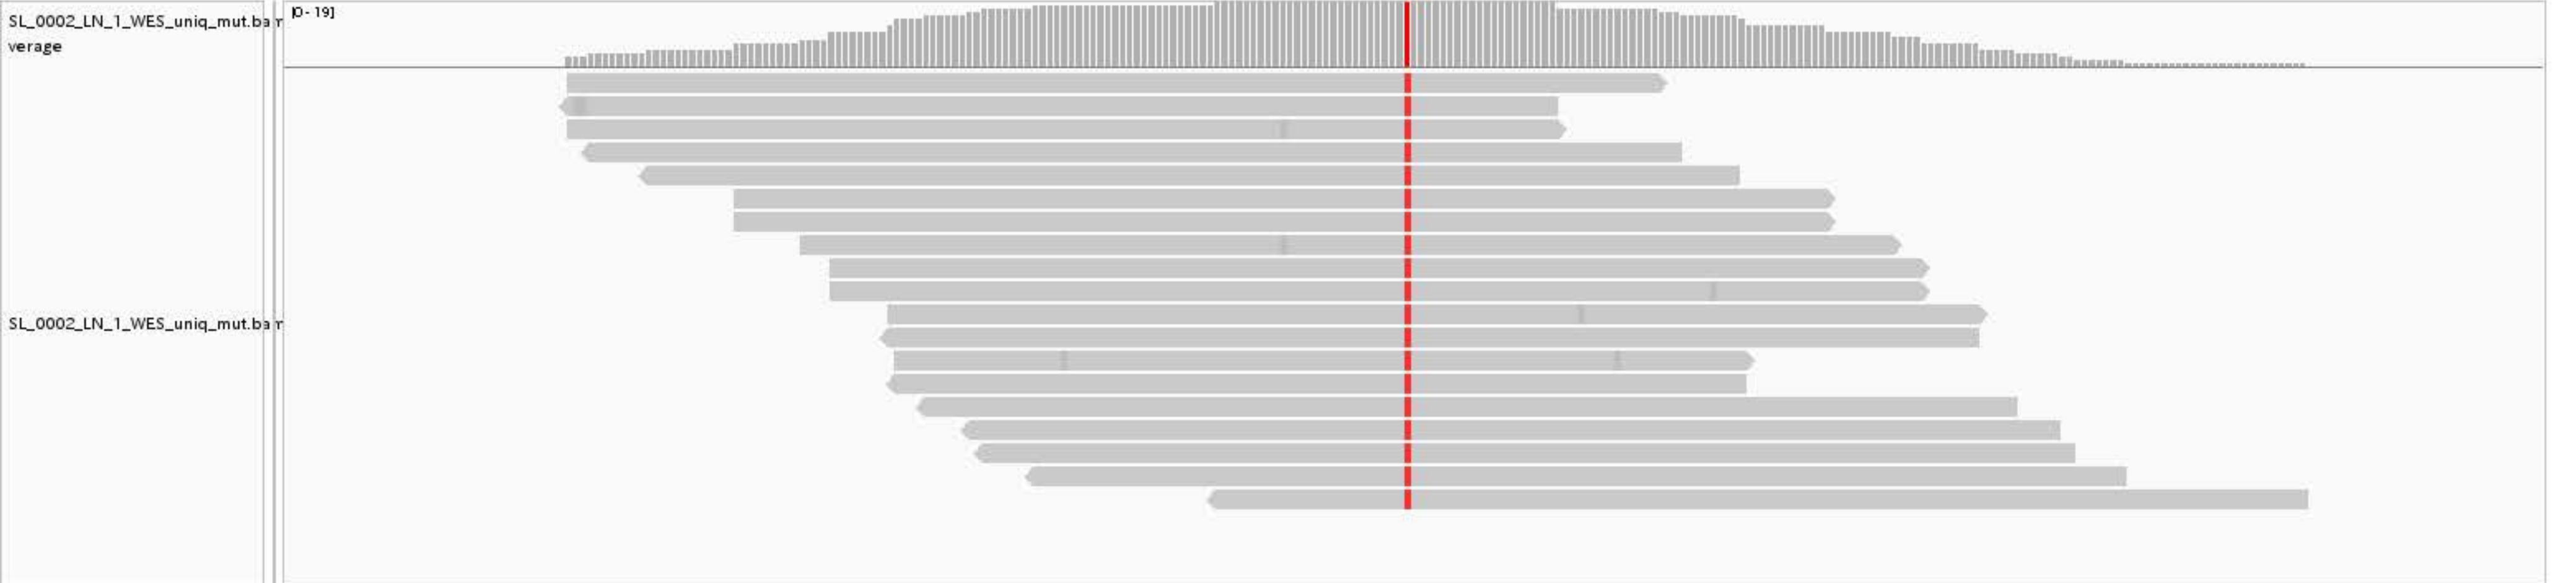

Sequence →

Refseq Genes

NGNSCYFLKSGLLKFLCSTSFINANFVEMSSSLSYIQPAERVTFHVTTQVRQNLTINLMANKEAKSLEVEKEQLAEILPQVQYFDAERRLLGMEQFDEPLDL

KCTD21



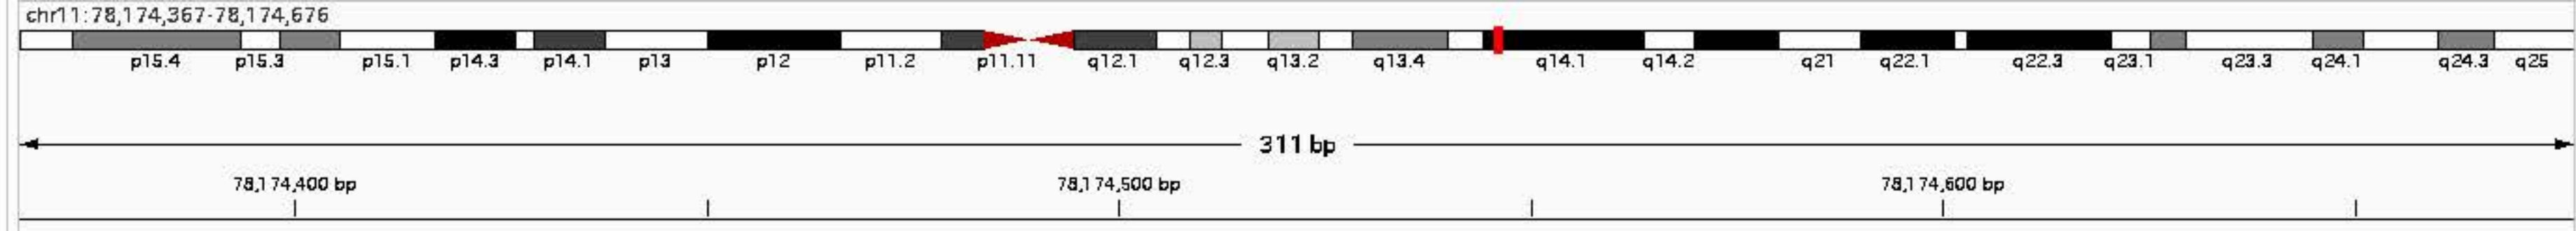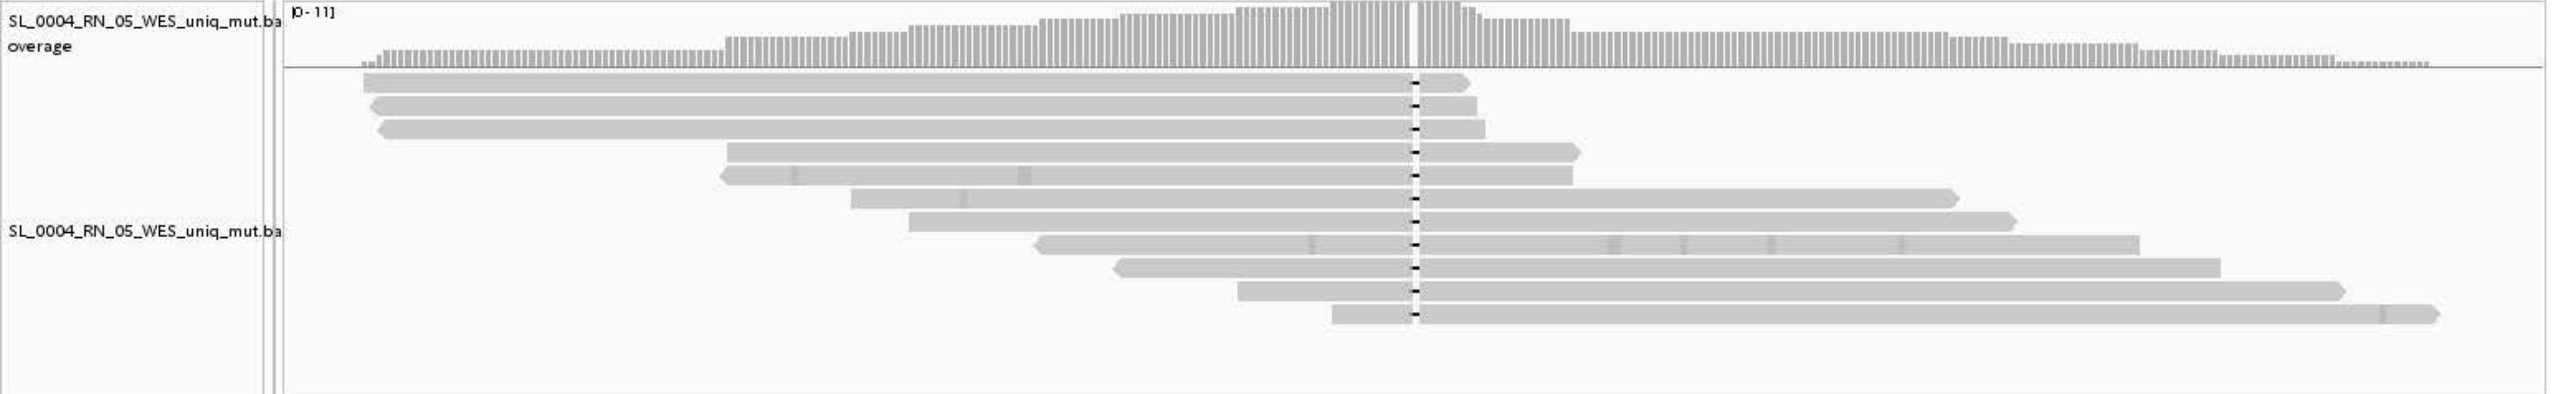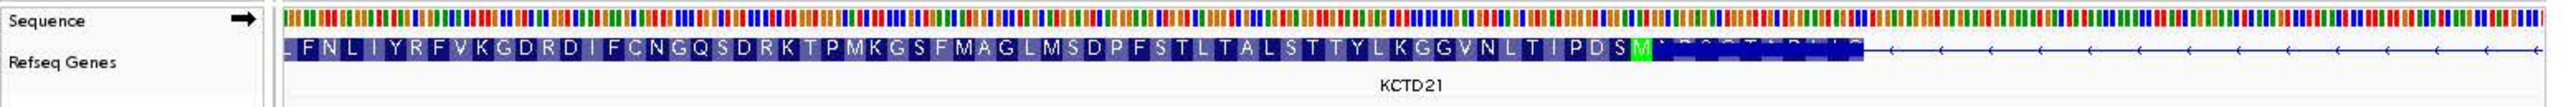

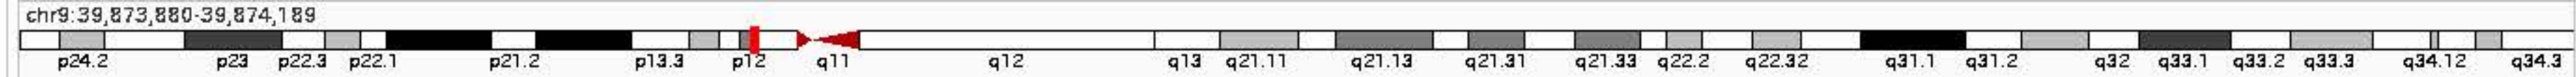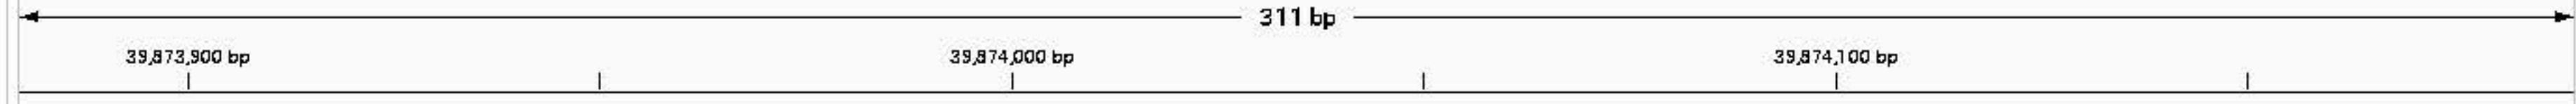

SL\_0004\_RN\_61\_WES\_uniq\_mut.ba  
coverage

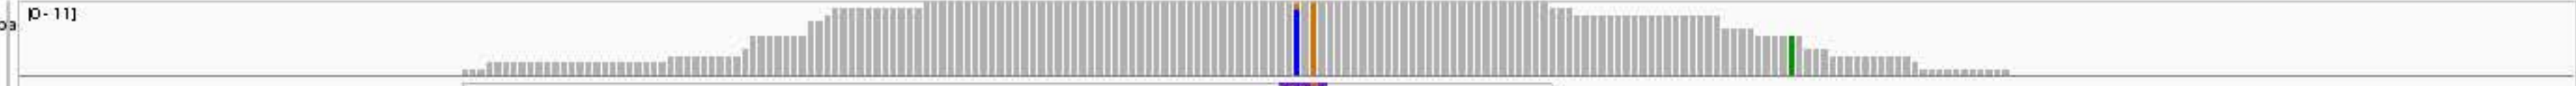

SL\_0004\_RN\_61\_WES\_uniq\_mut.ba

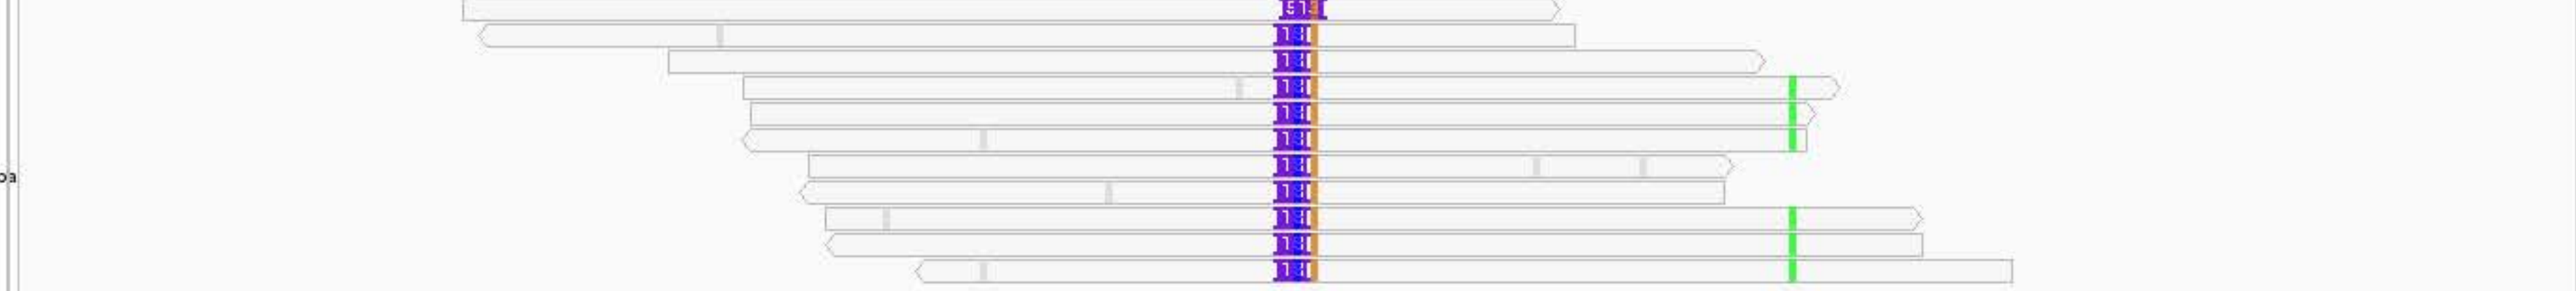

Sequence

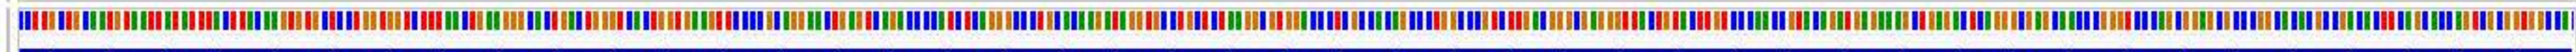

Refseq Genes

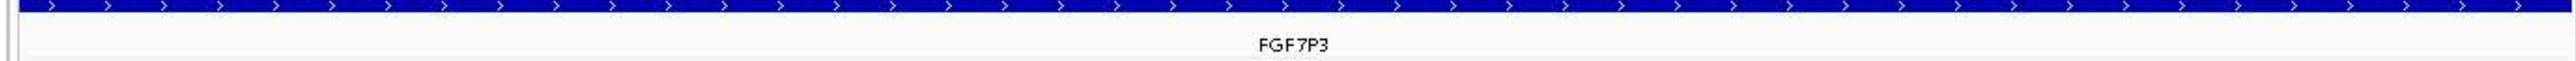

FGF7P3

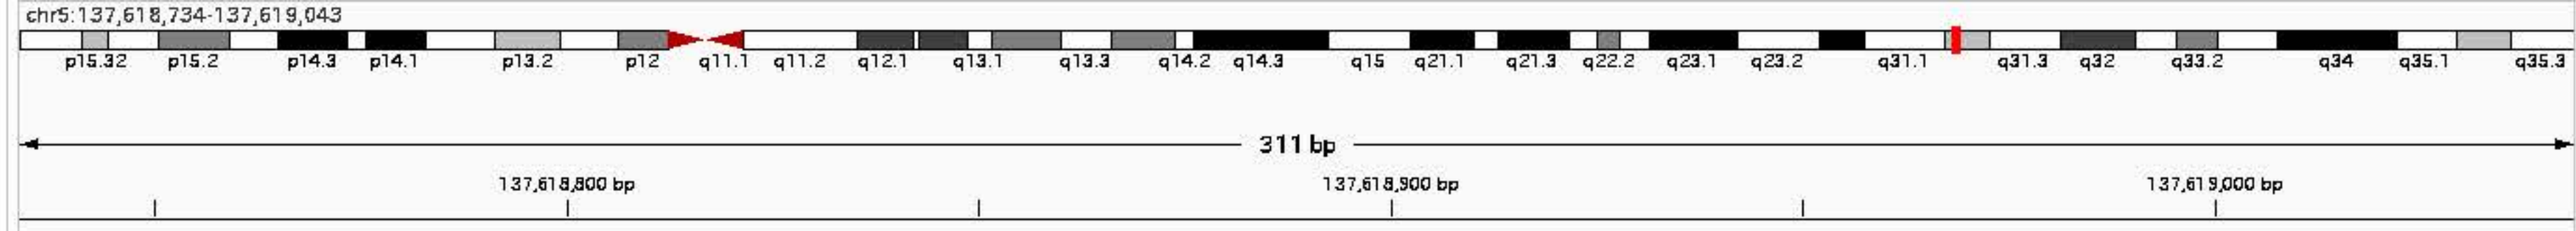

SL\_0015\_LN\_44\_WES\_uniq\_mut. coverage

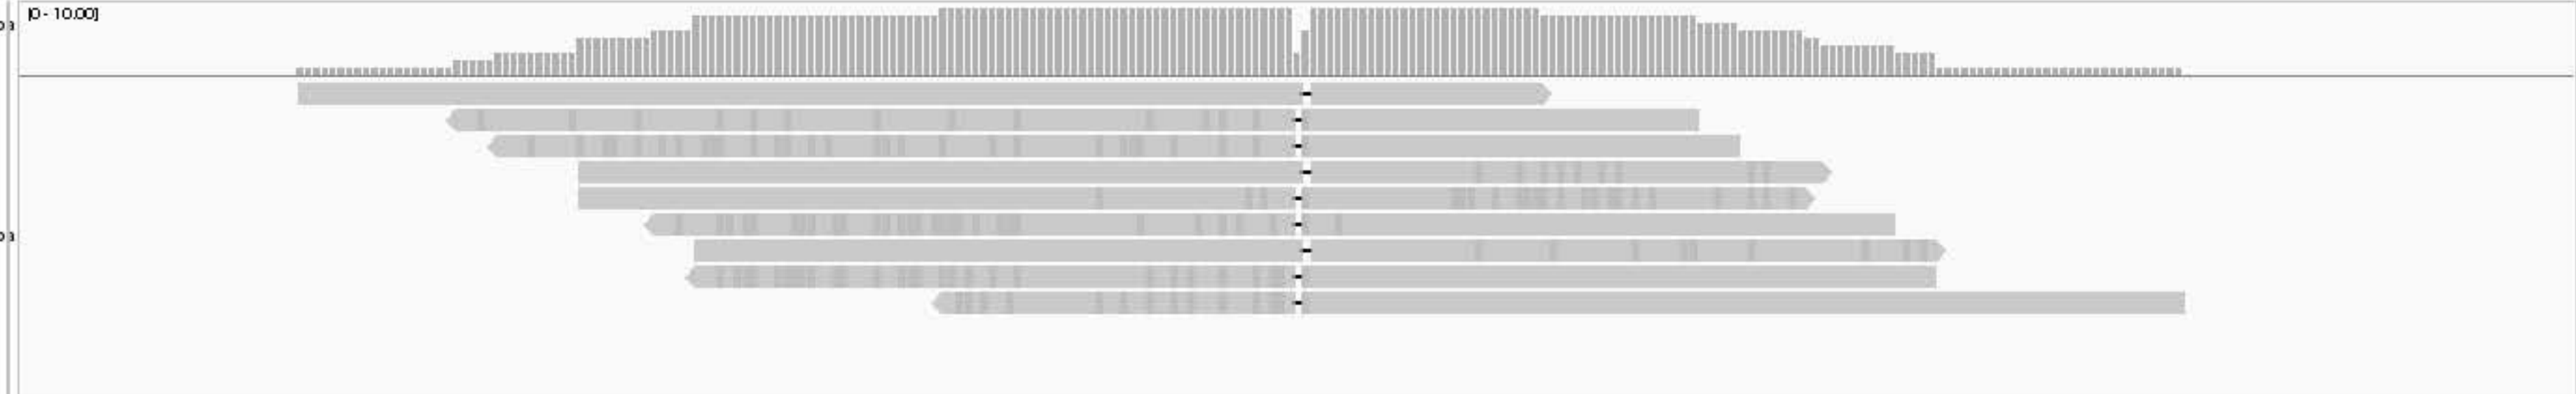

SL\_0015\_LN\_44\_WES\_uniq\_mut.

Sequence

Refseq Genes

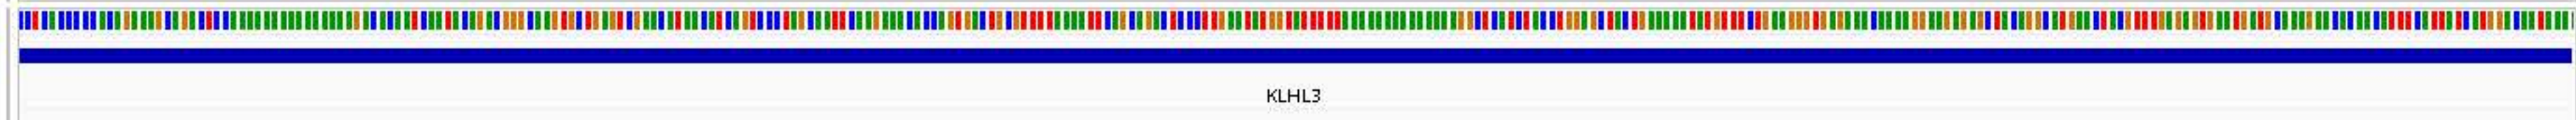



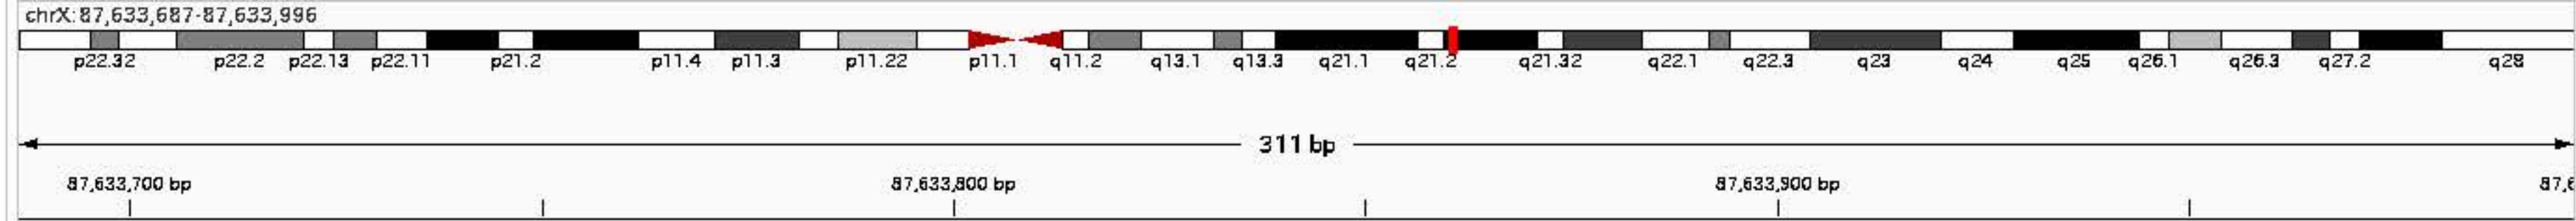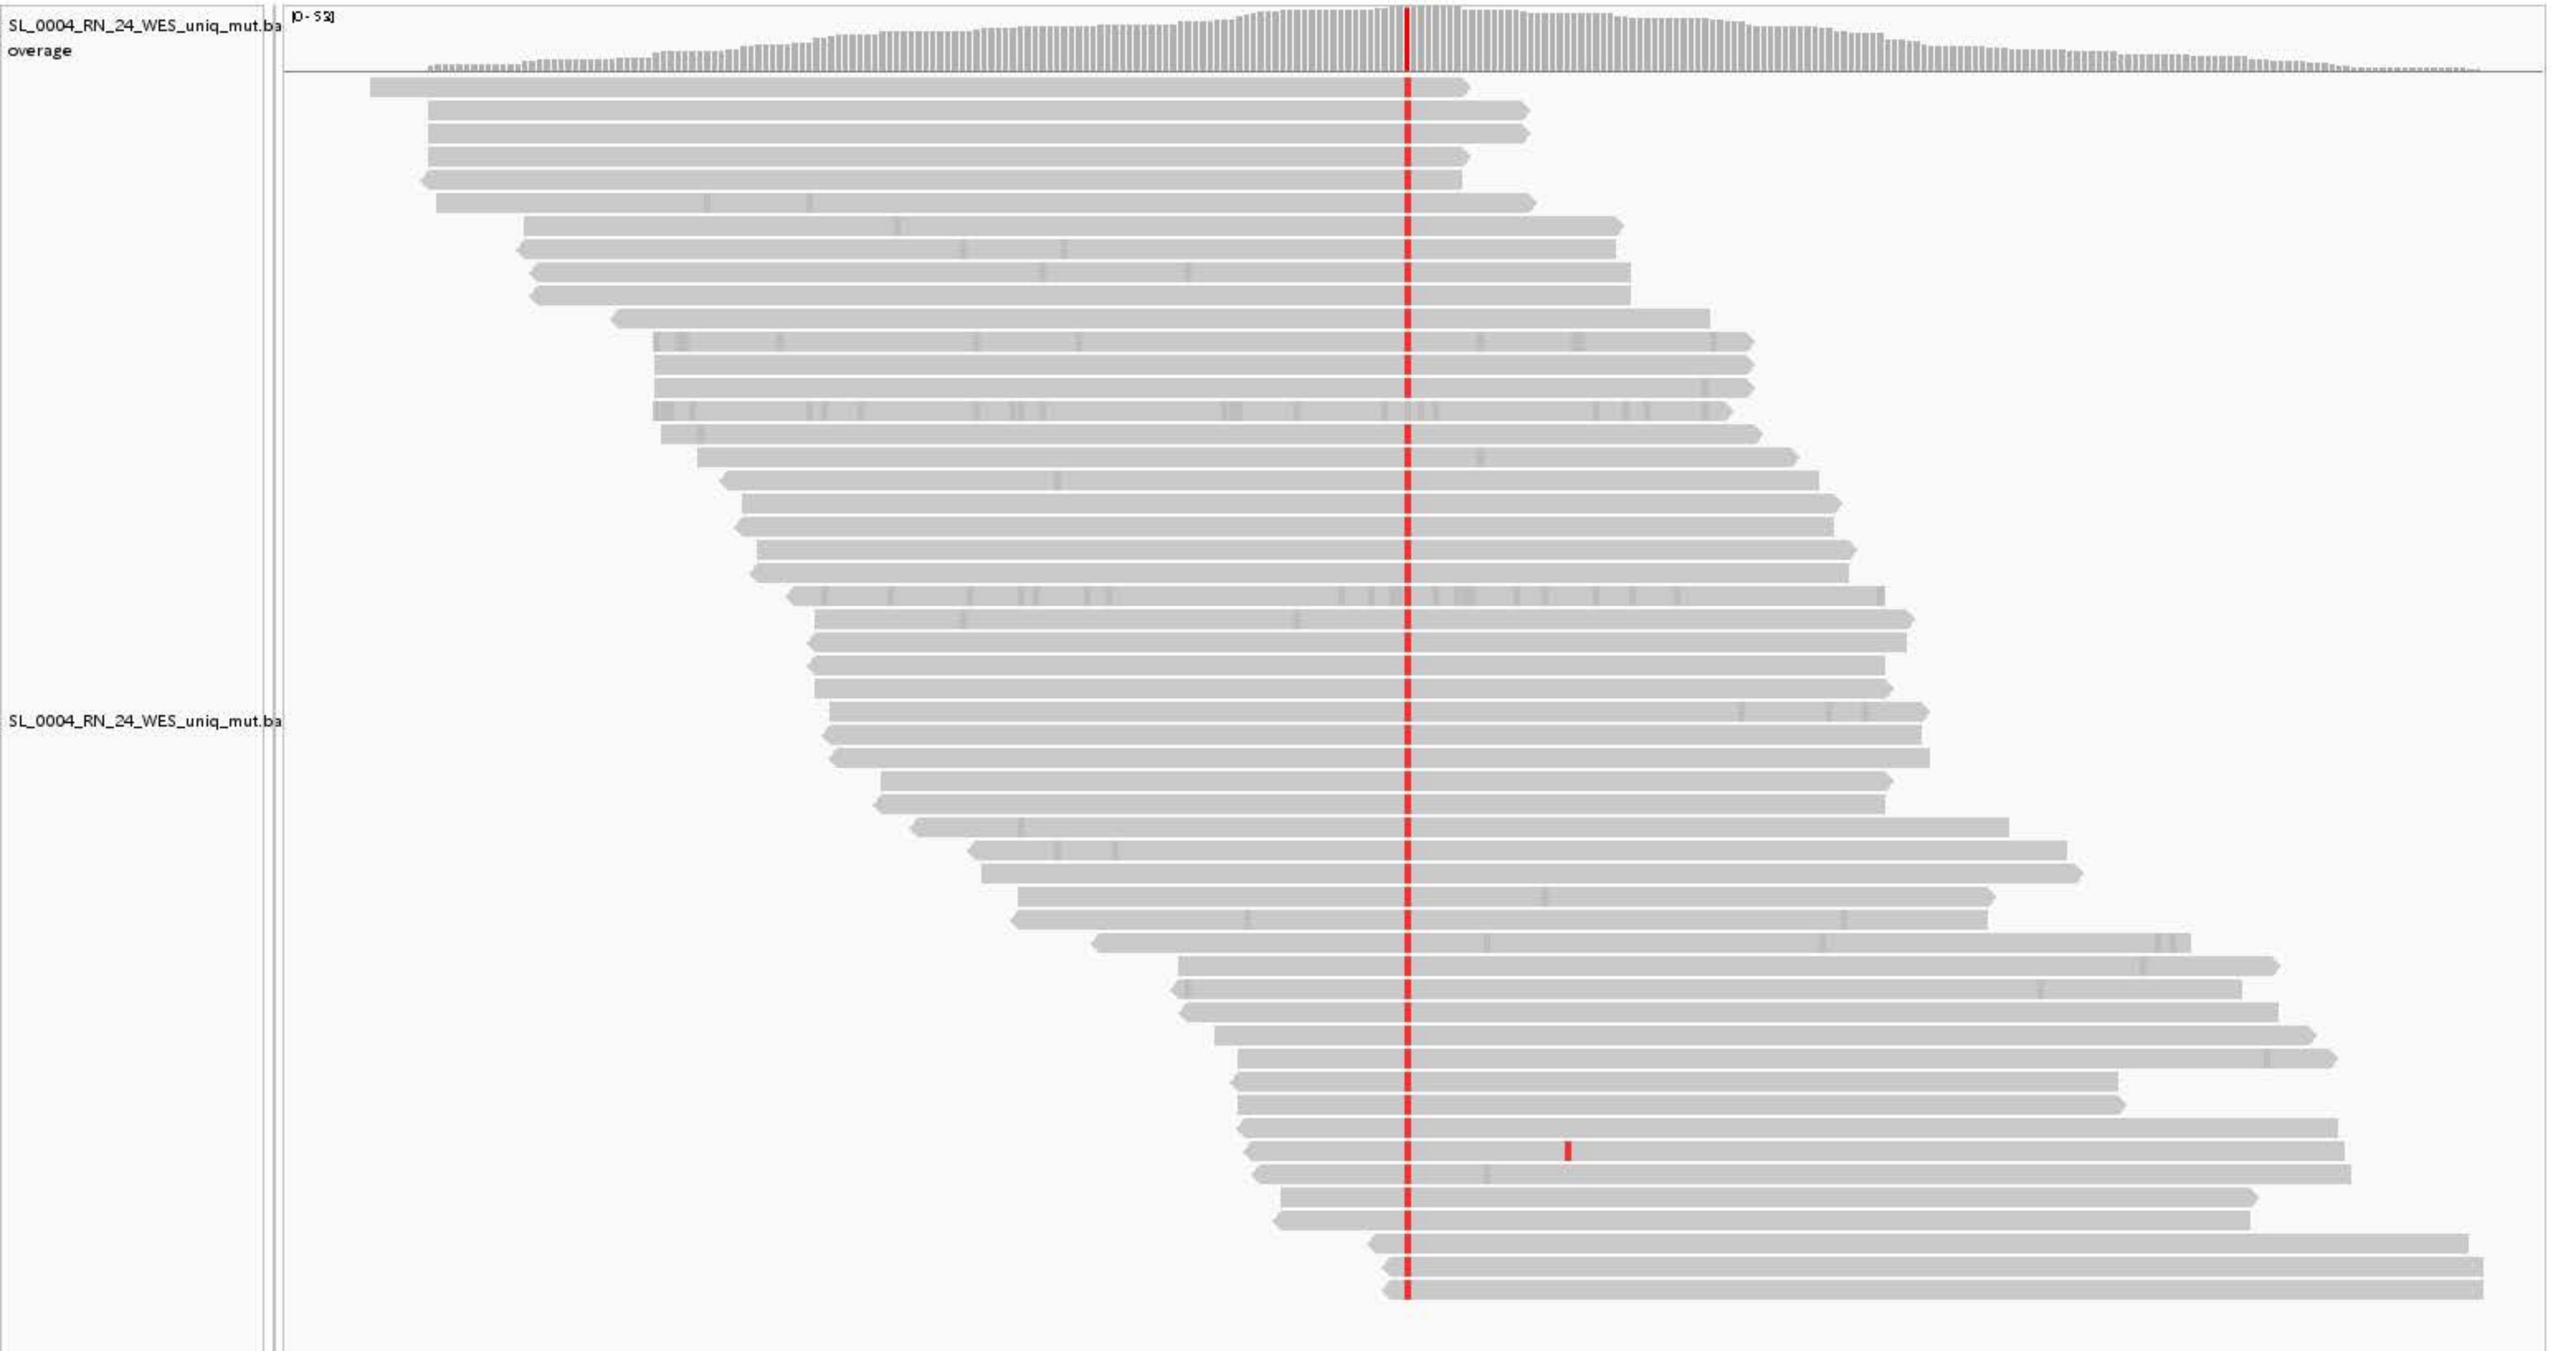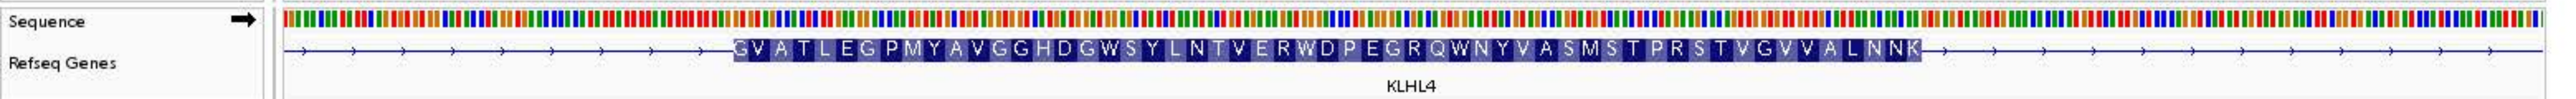

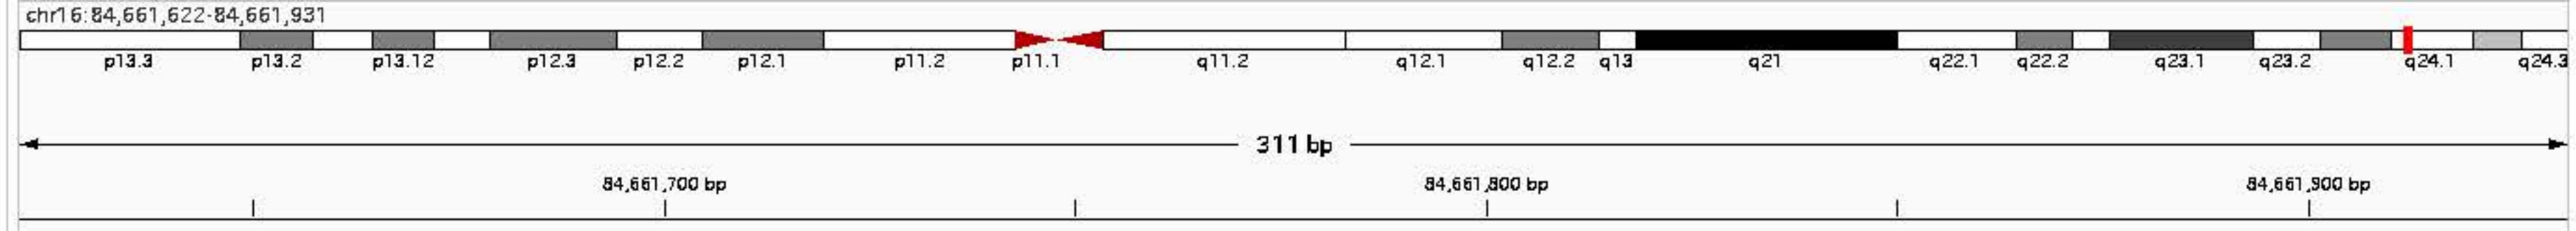

SL\_0007\_RN\_33\_WES\_uniq\_mut.ba  
coverage

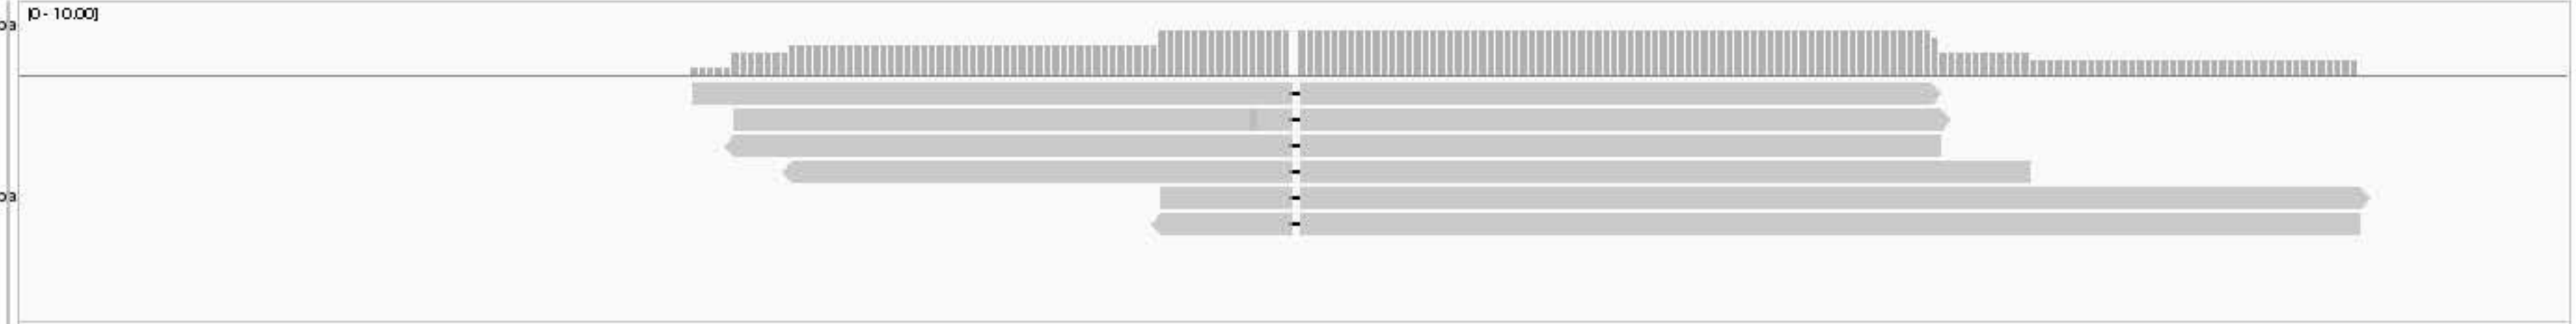

SL\_0007\_RN\_33\_WES\_uniq\_mut.ba

Sequence →  
Refseq Genes

YISGGHDYQIGPYRKNLLCYDHRTDVWEERRPMTTARGWHSMCSLGDSIYSIGGSDDNIESMERFDVLGVEAYS PQC�QWTRVAPLLHANSESGVAVWEGRIYI

KLHL36

chr19:35,721,614-35,721,923

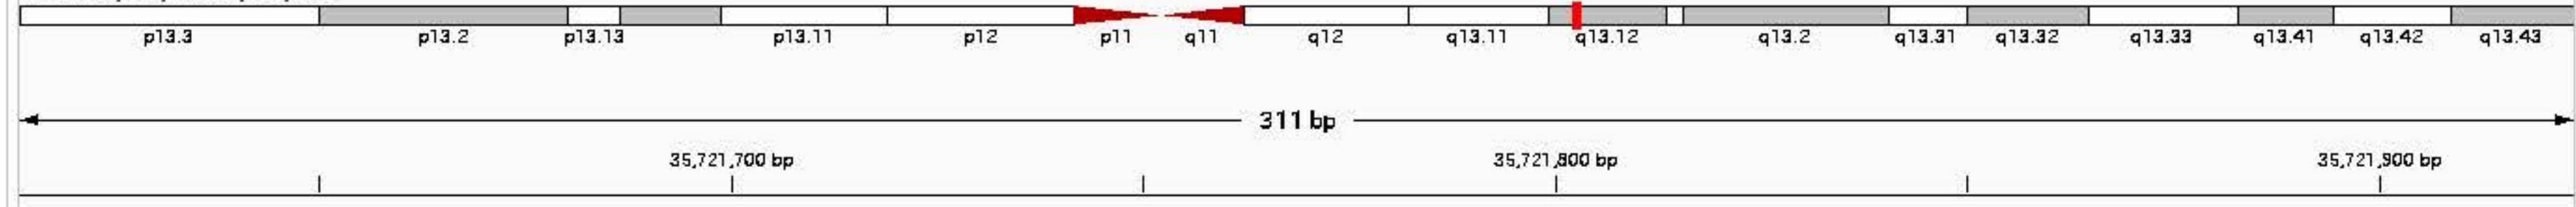

SL\_0004\_RN\_26\_WES\_uniq\_mut.ba  
coverage

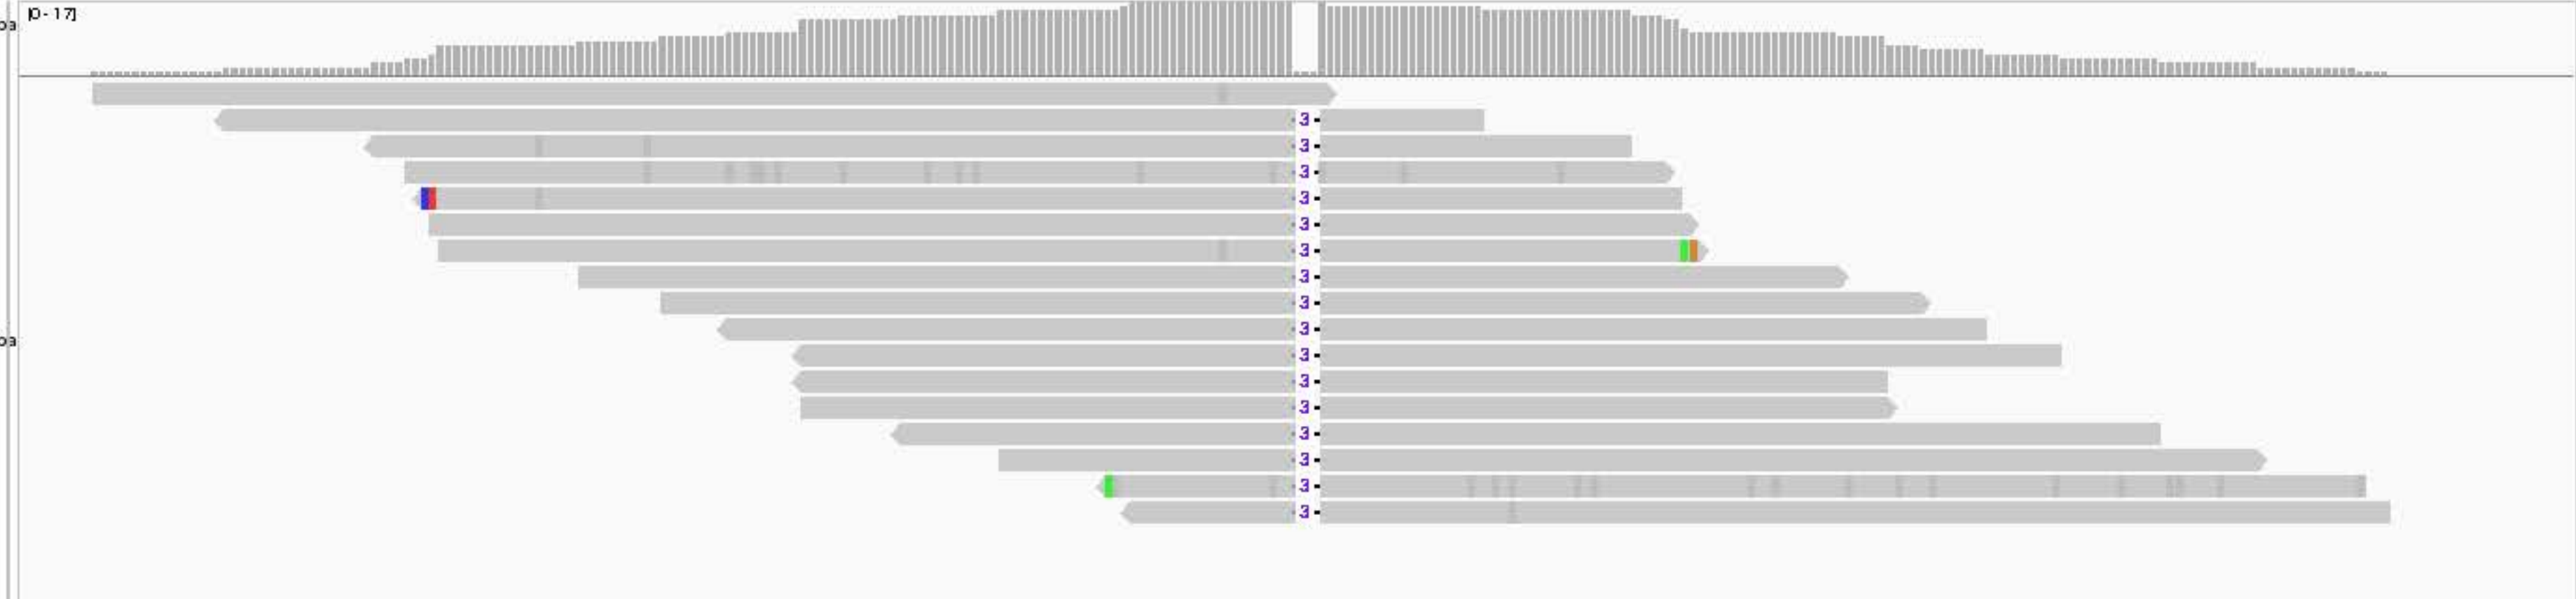

SL\_0004\_RN\_26\_WES\_uniq\_mut.ba

Sequence →

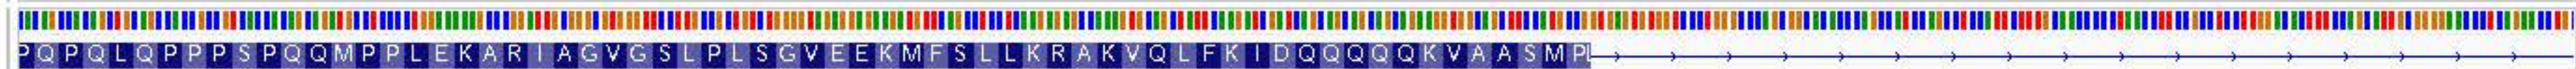

Refseq Genes

KMT2B



chr7:152,148,128-152,148,437

p22.2 p21.3 p21.2 p15.3 p15.1 p14.2 p13 p12.2 p11.2 q11.1 q11.22 q11.23 q21.11 q21.12 q21.2 q22.1 q22.3 q31.1 q31.2 q31.32 q32.1 q33 q34 q35 q36.1 q36.3

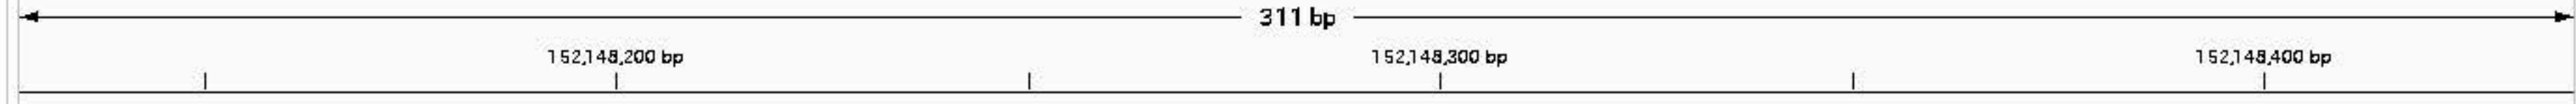

SL\_0001\_LN\_10\_WES\_uniq\_mut.  
coverage

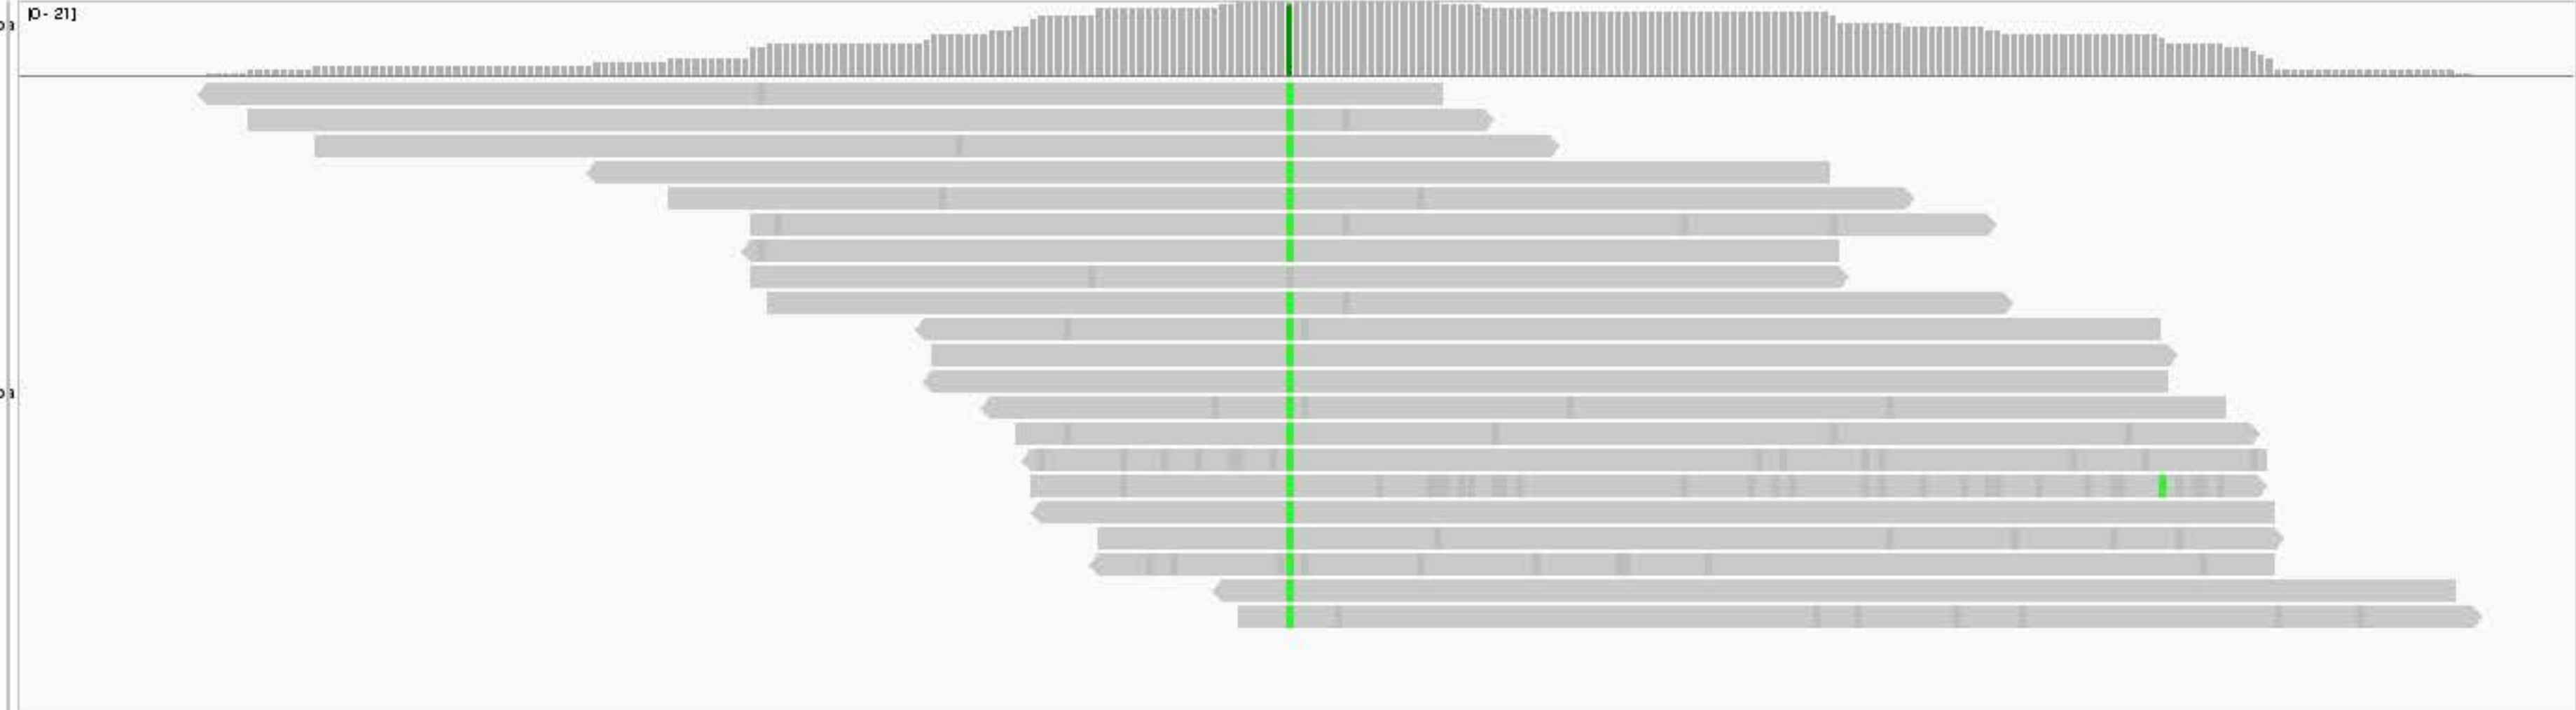

SL\_0001\_LN\_10\_WES\_uniq\_mut.  
aa

Sequence

Refseq Genes

CLYRCRRNAYRTSWYLRSAEYGVPLAKPSHFAQMQLLQGITHFILSGVRFTHDREGRQVISAIQRVEDRQVYVRRFVAFYSLEQEHIGKPKHMPCLMTKDK

KMT2C

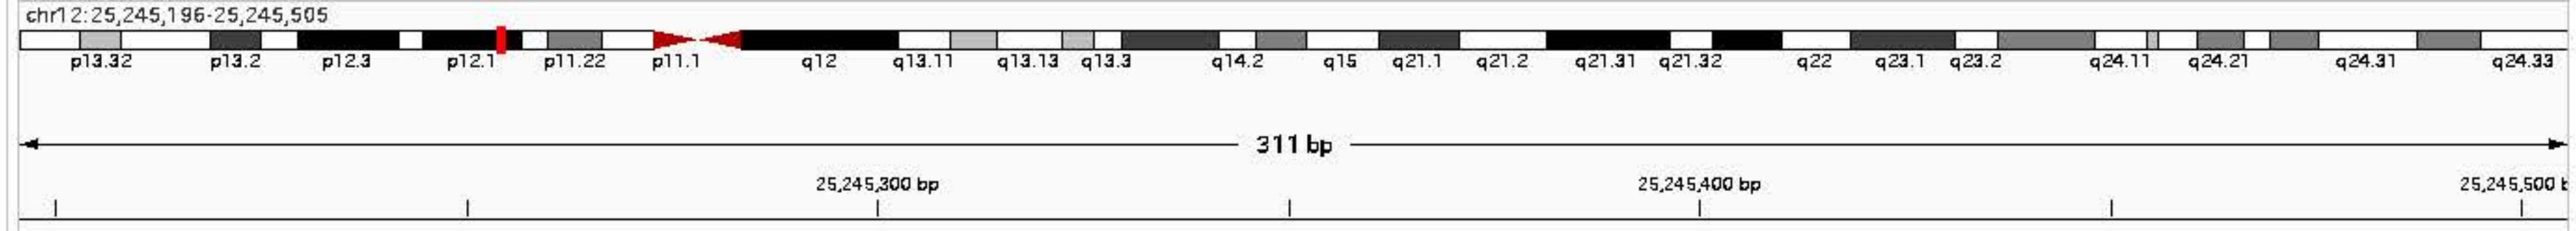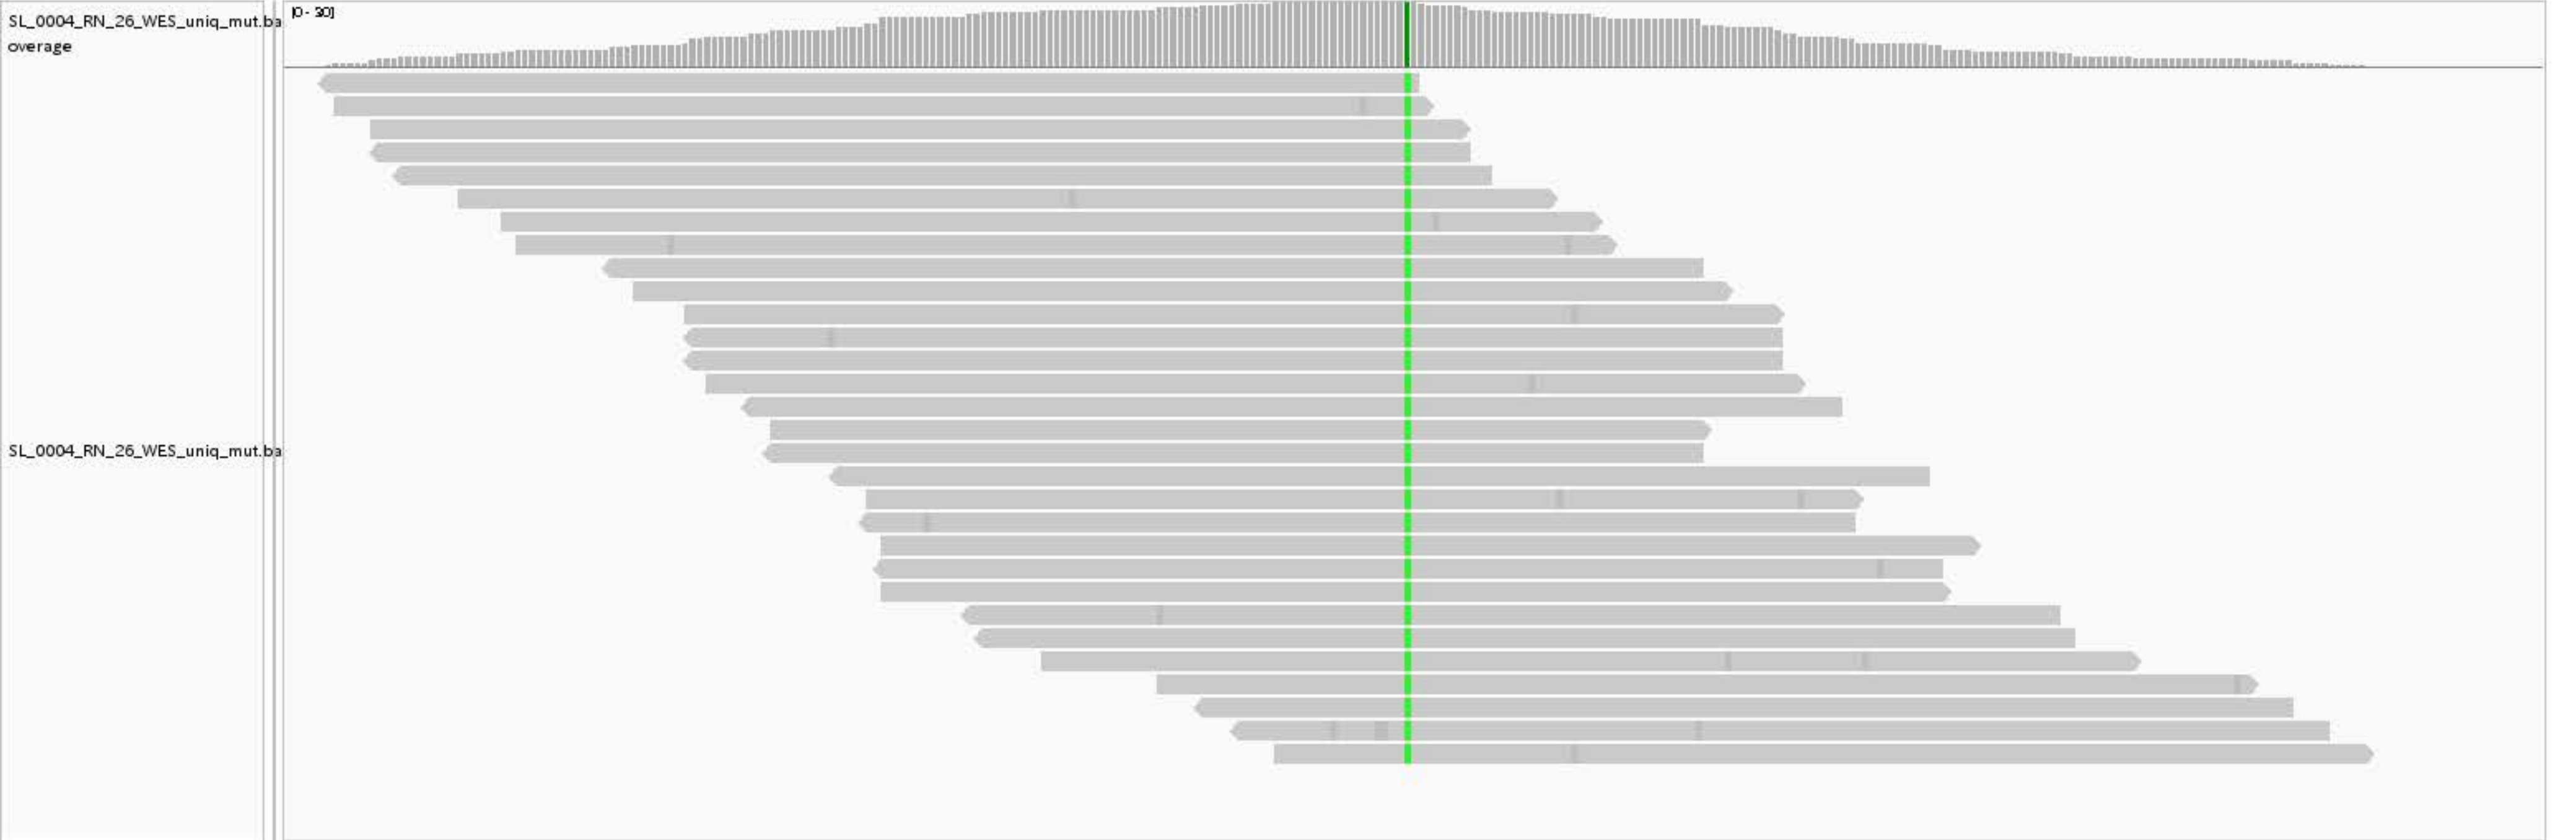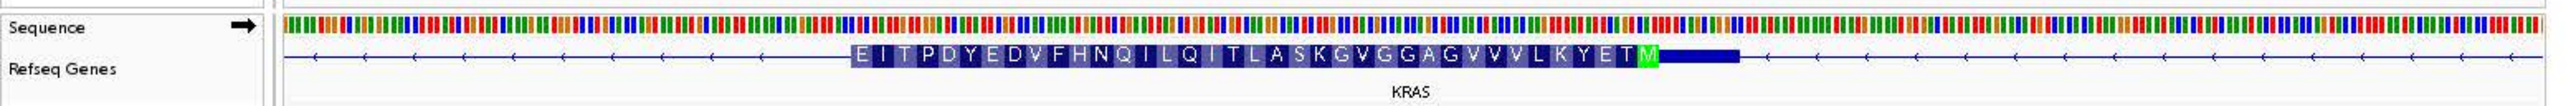



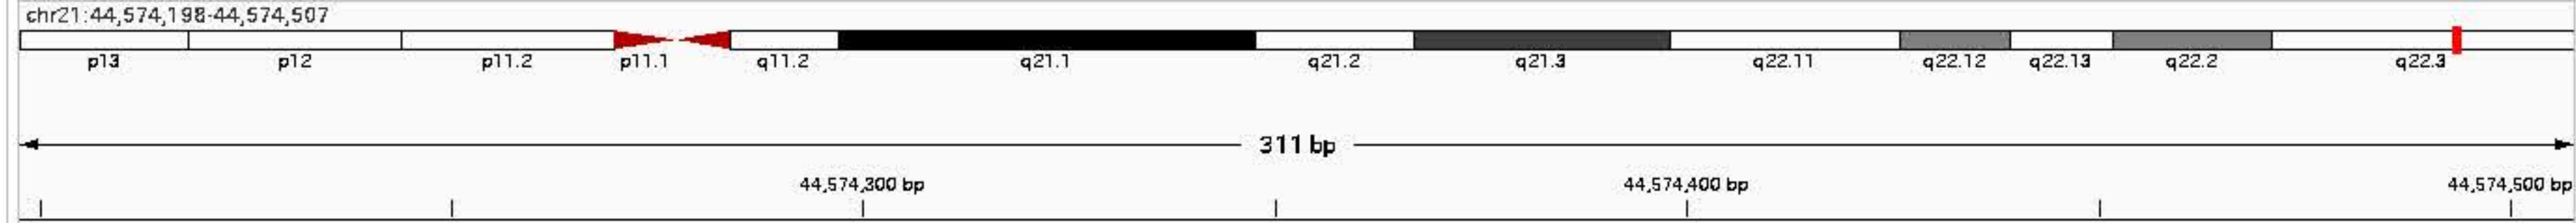

SL\_0007\_RN\_33\_WES\_uniq\_mut.ba  
coverage

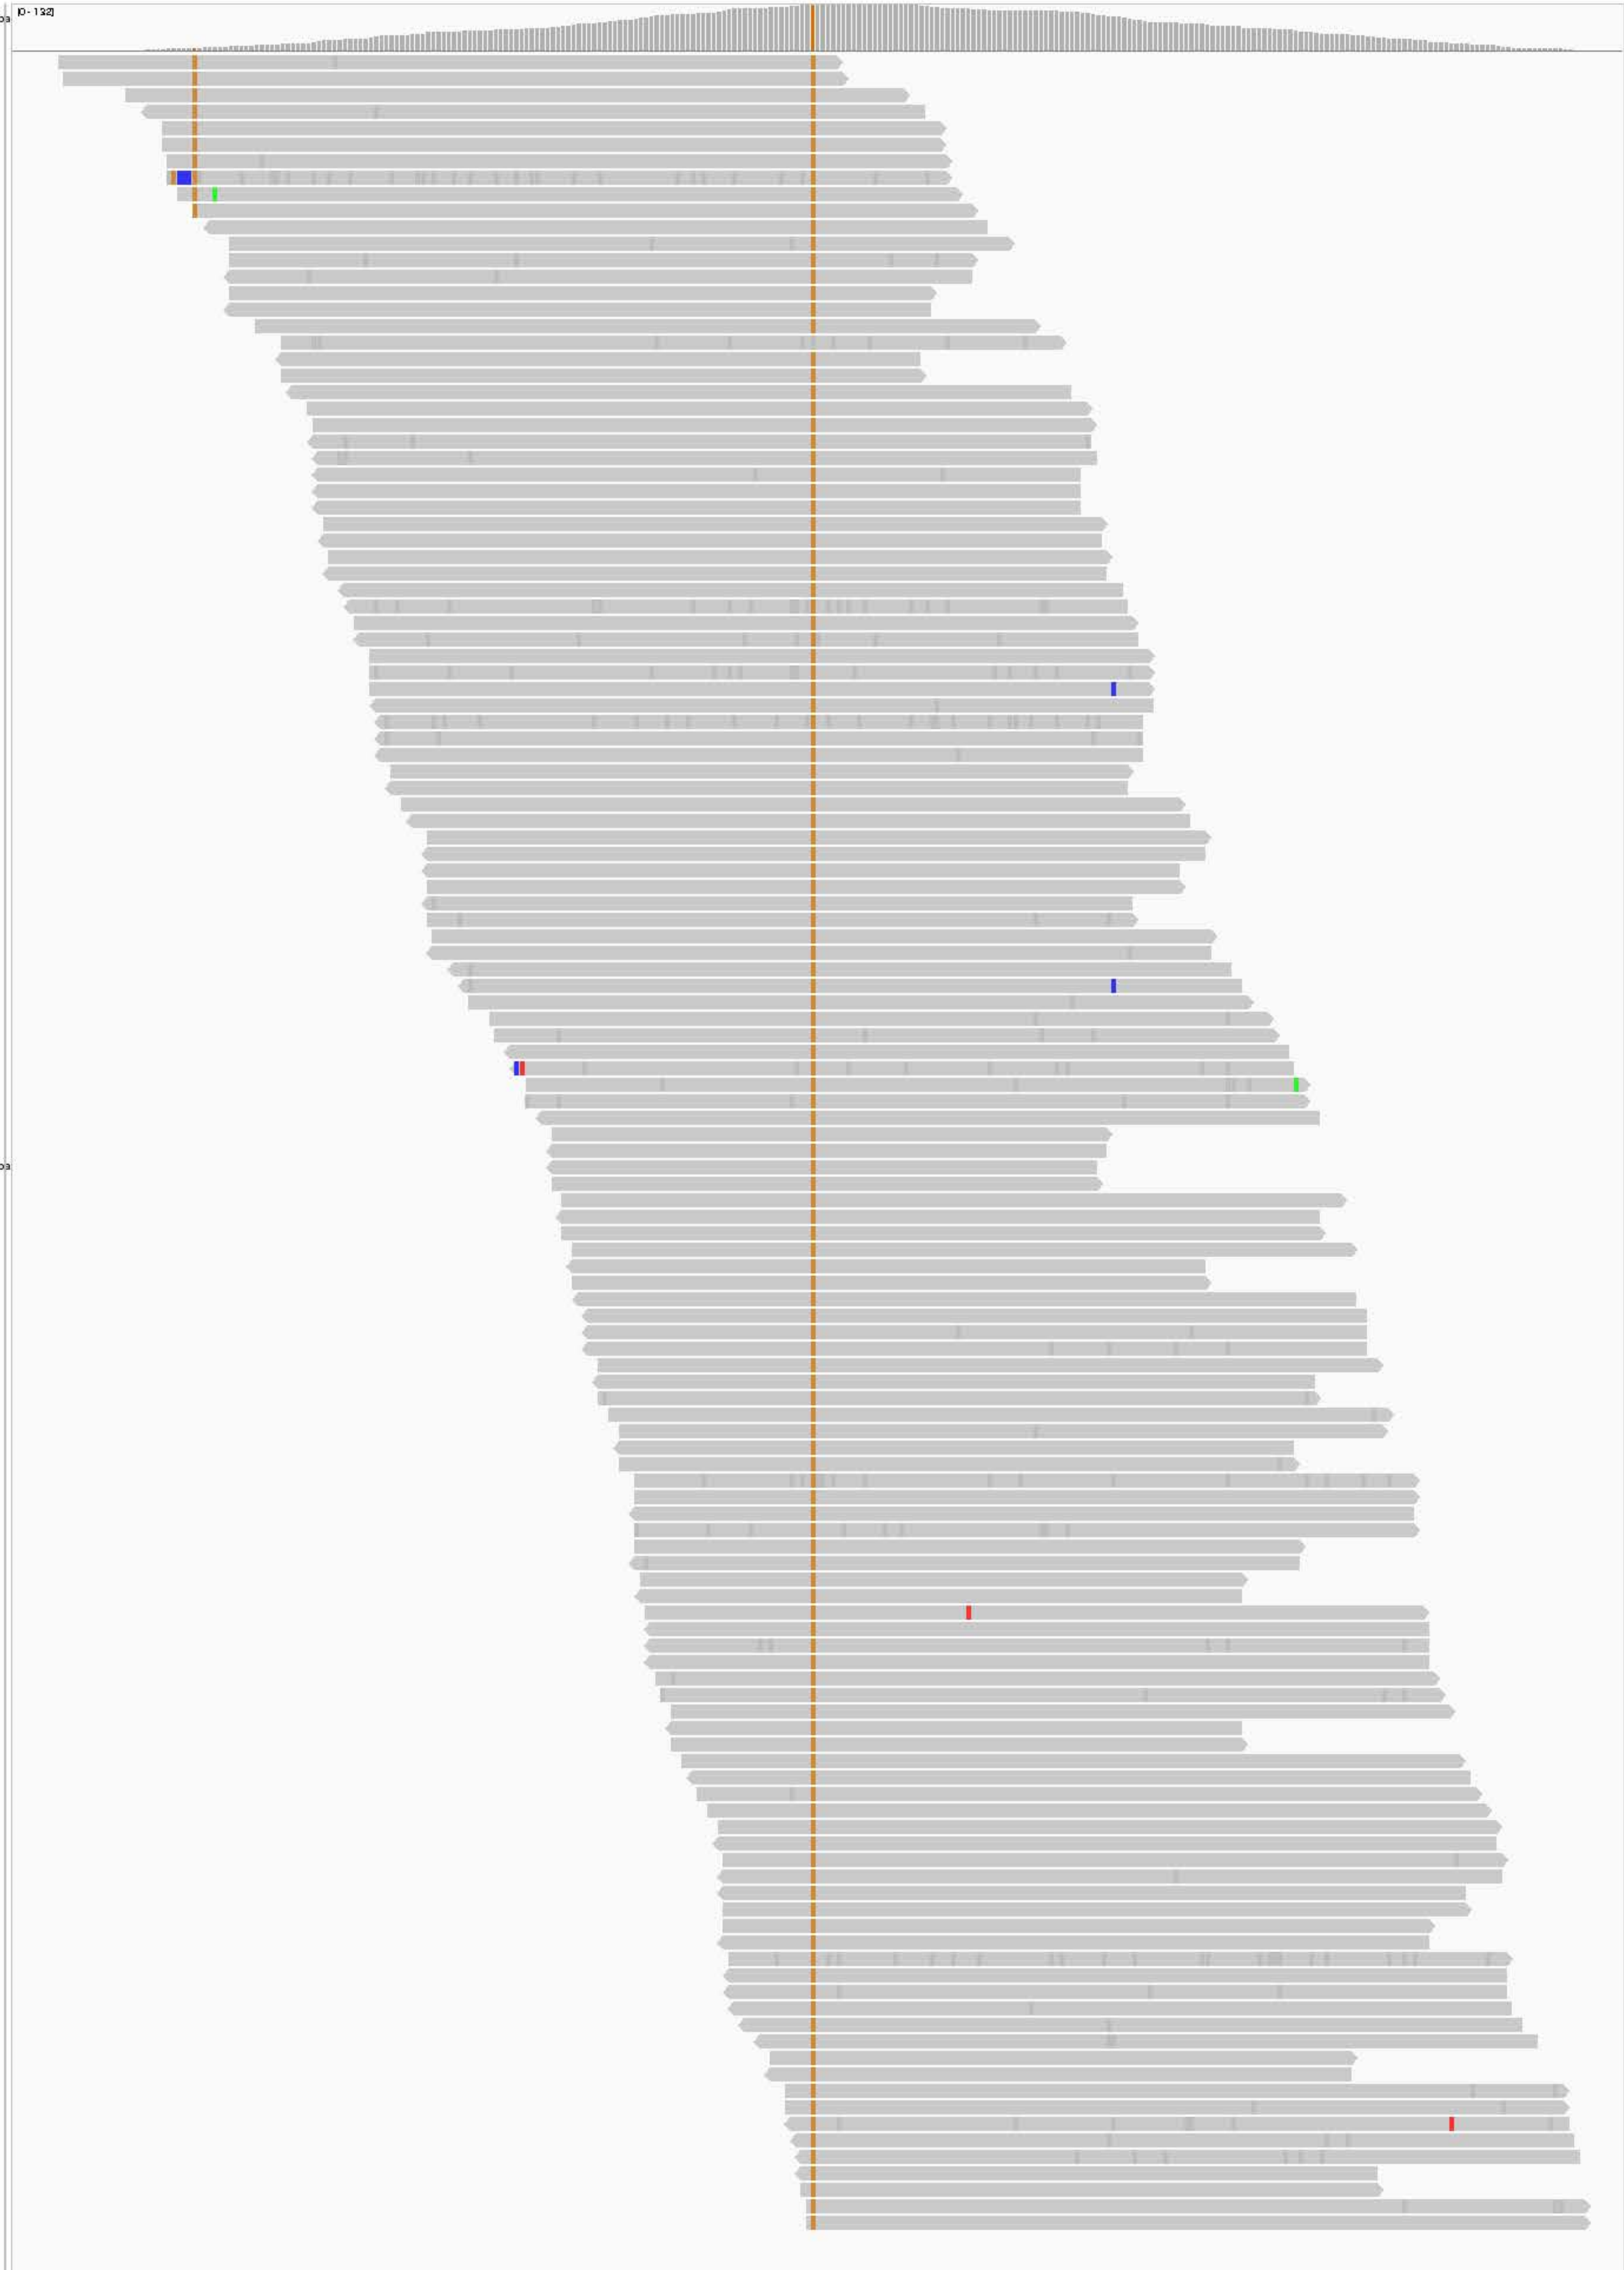

SL\_0007\_RN\_33\_WES\_uniq\_mut.ba

Sequence →  
Refseq Genes

TSSPCQQACCVPICGKPVCSGISSSCCQQSSCVSCVSSPCQAVCEPSPCQSGCISCTPSCQQSSCQPACCTSSSCQQACCVPVCGCKTVCKPVCSSEDSISC

TSPEAR



chr2:20,037,212-20,037,521  
p25.2 p24.3 p24.1 p23.2 p22.2 p21 p16.2 p15 p13.3 p12 p11.2 q11.1 q12.1 q13 q14.2 q21.1 q22.1 q22.3 q24.1 q24.3 q31.1 q31.3 q32.2 q33.1 q33.3 q35 q36.2 q37.1 q37.3

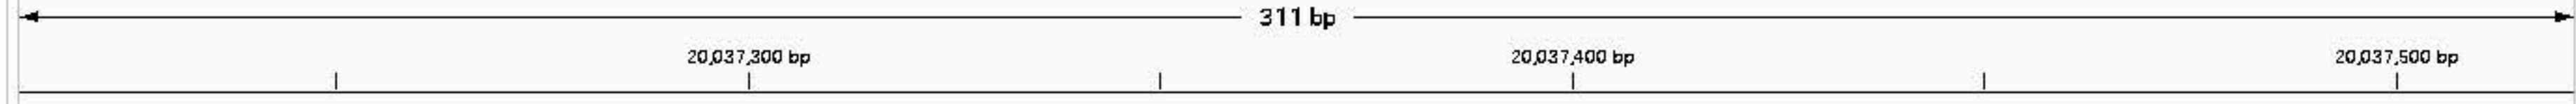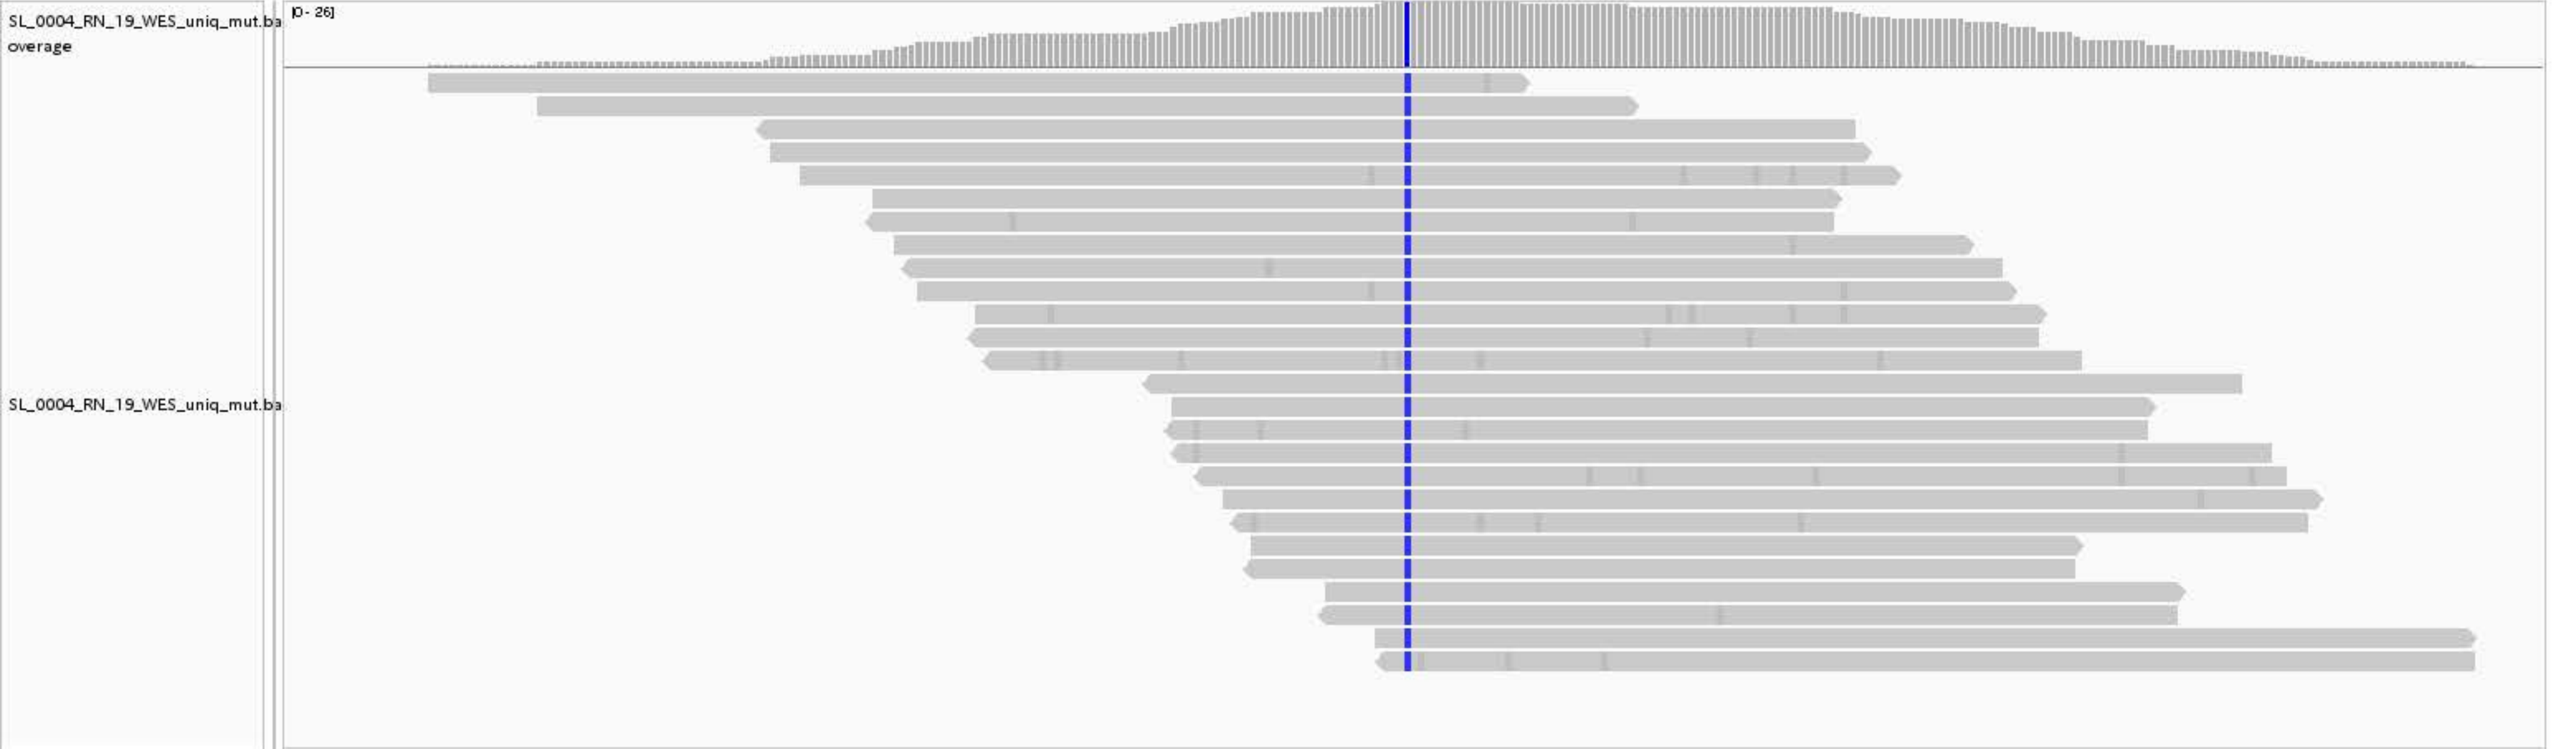

Sequence →  
Refseq Genes  
LQDLYEKIRPLYTLSSIAVLCSLVFDLRYCFFPILWGVQY  
LAPTM4A

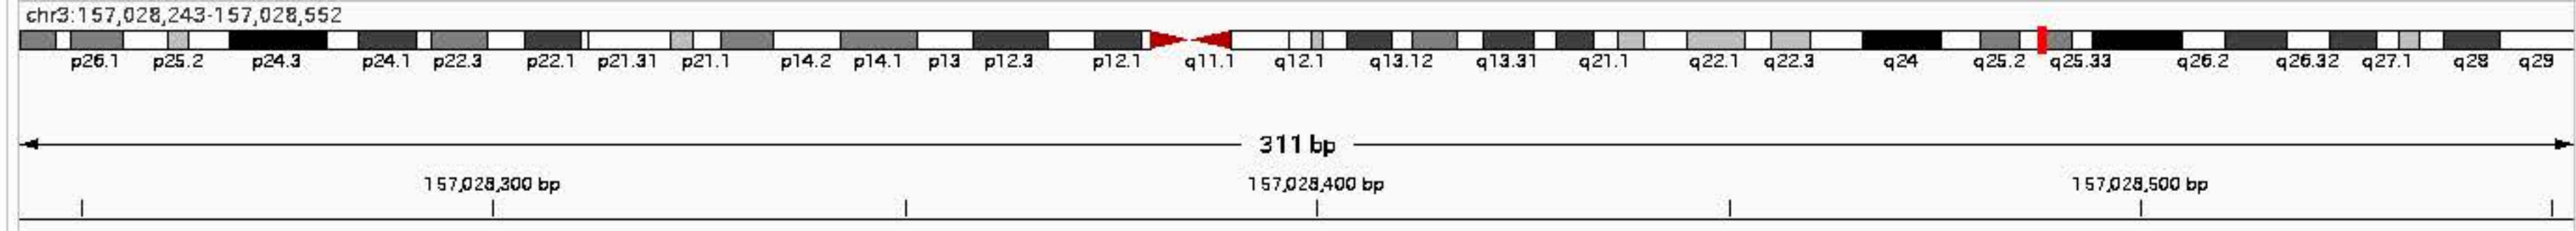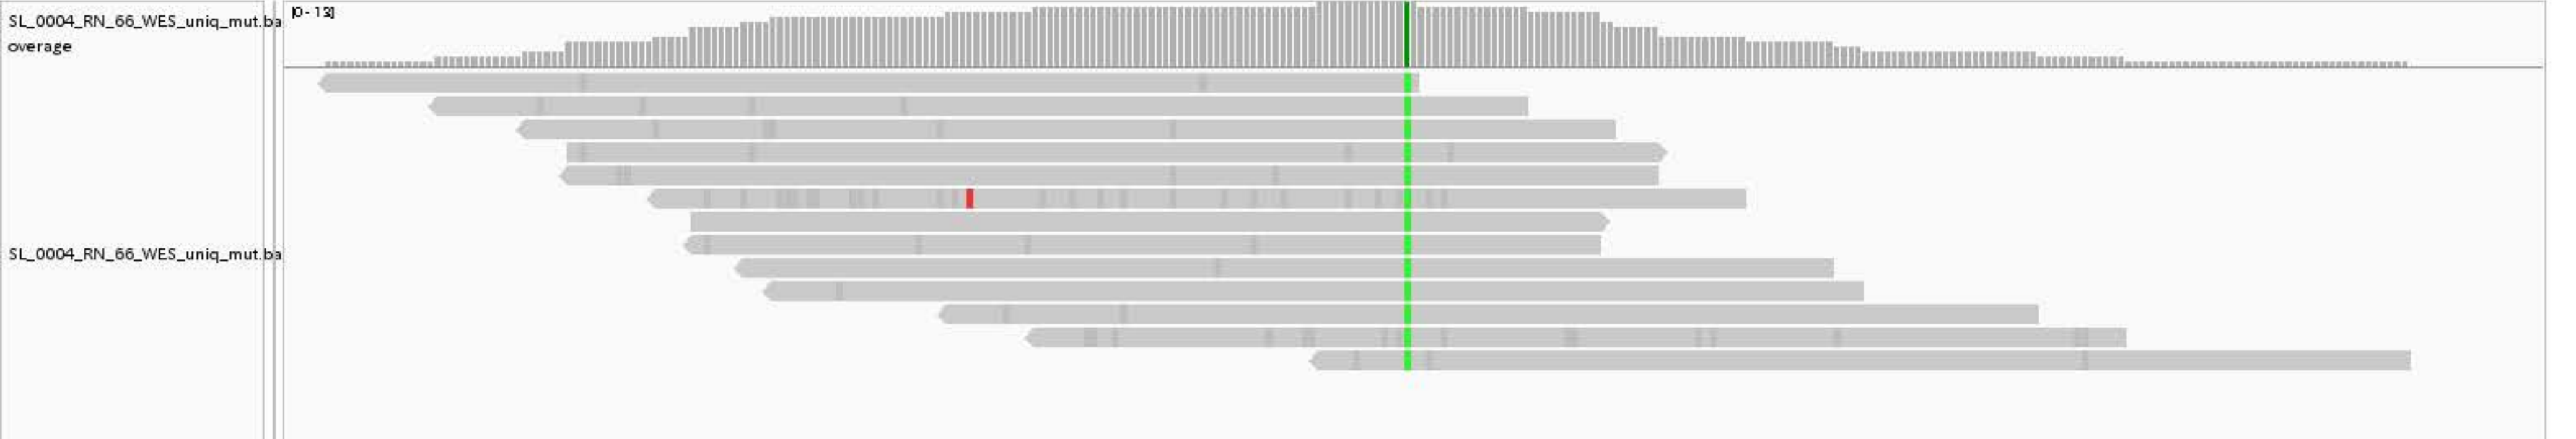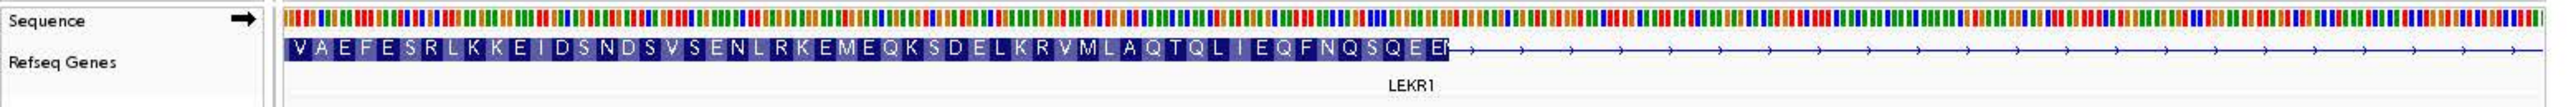

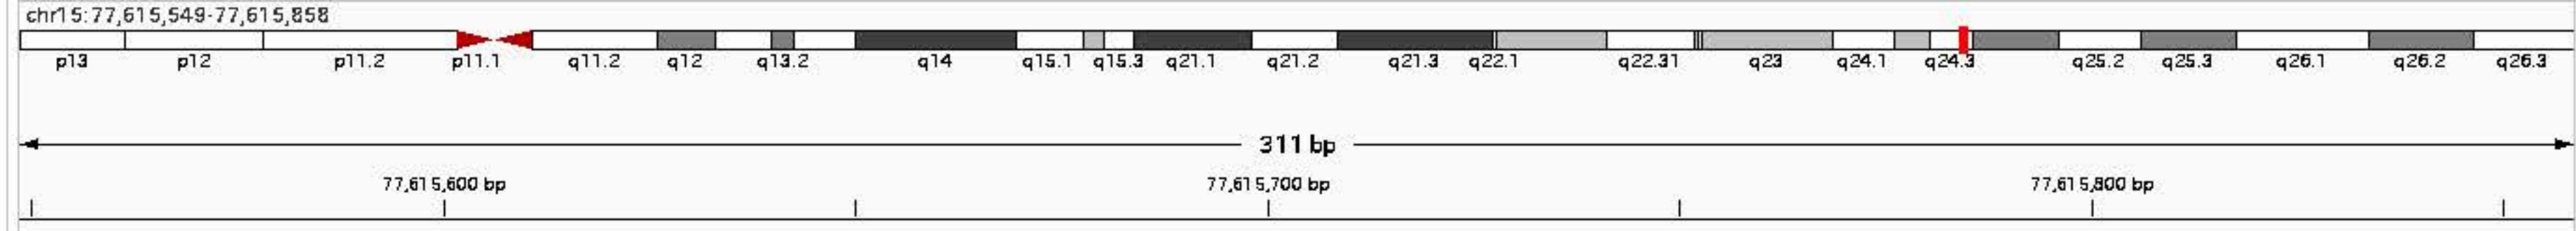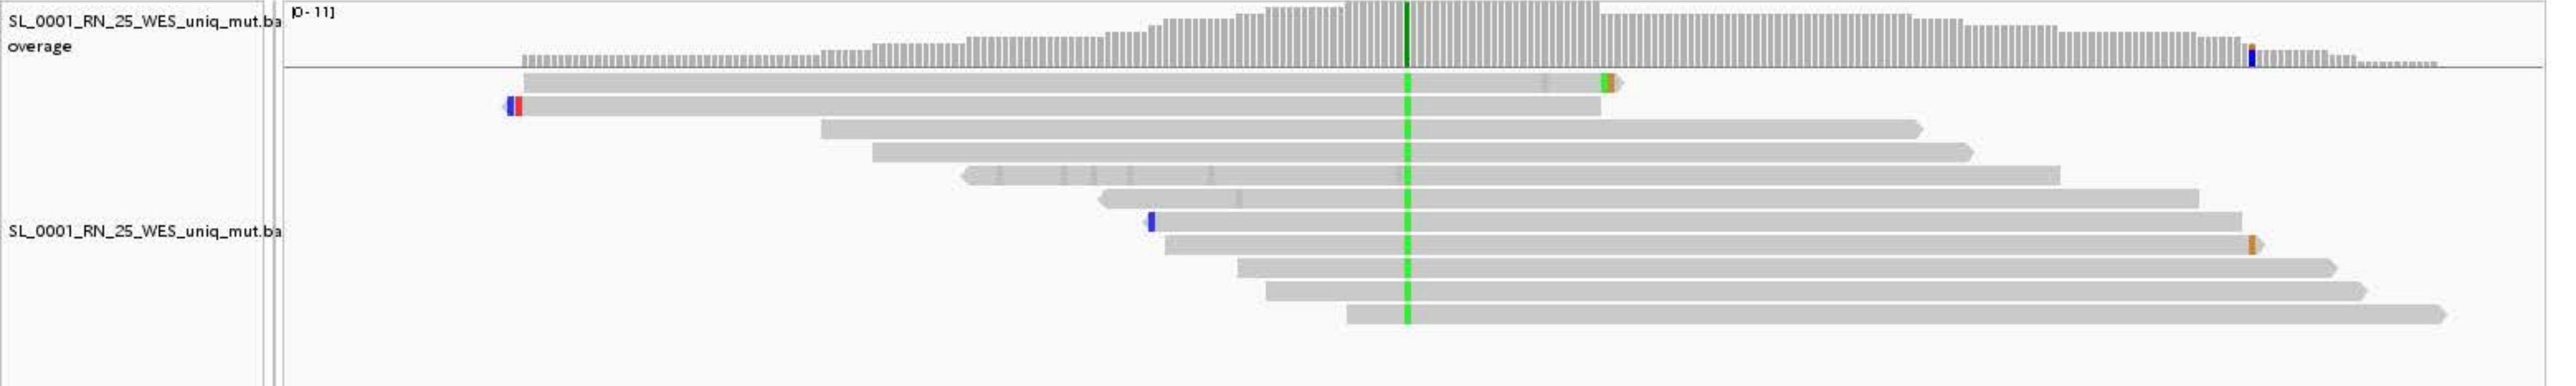

Sequence →

Refseq Genes

FLNNFAGPEVASVINENLELEELHPFSAFEDQNLTKIRNKGLDLLRTETPIGEPVAVFRKRHCLVARDQASCECRPPCGTASGSLVSGLVLLLI PQWCALLPS

XR\_001751806.1



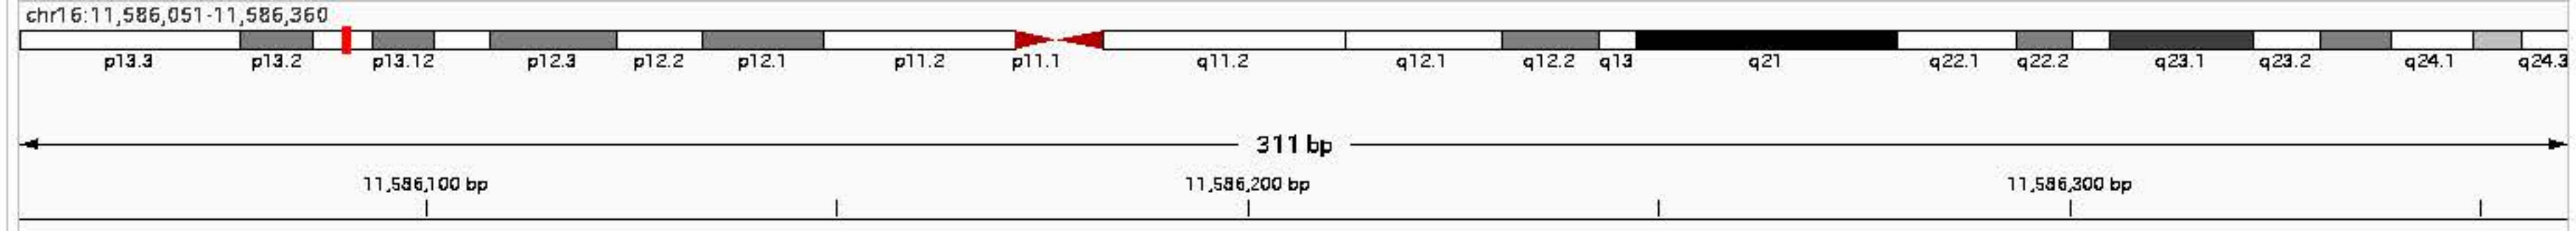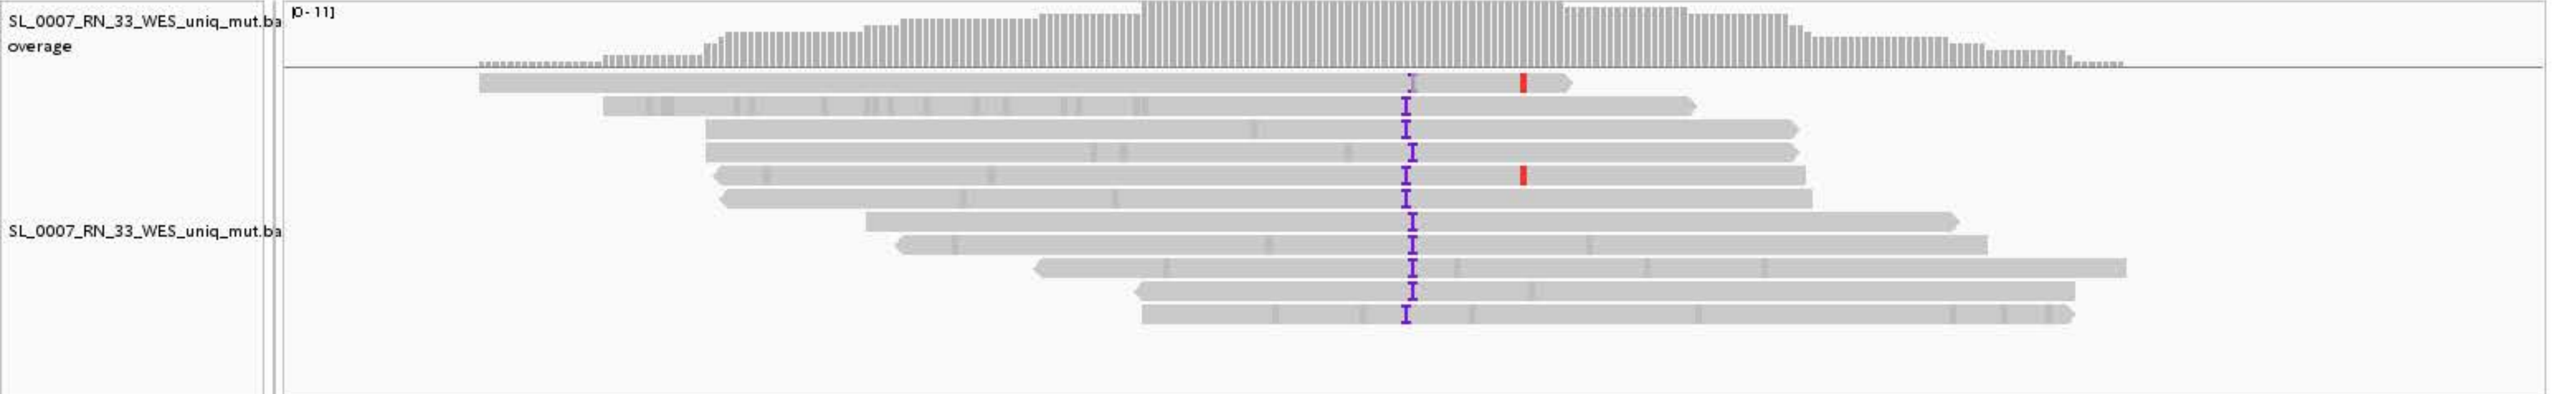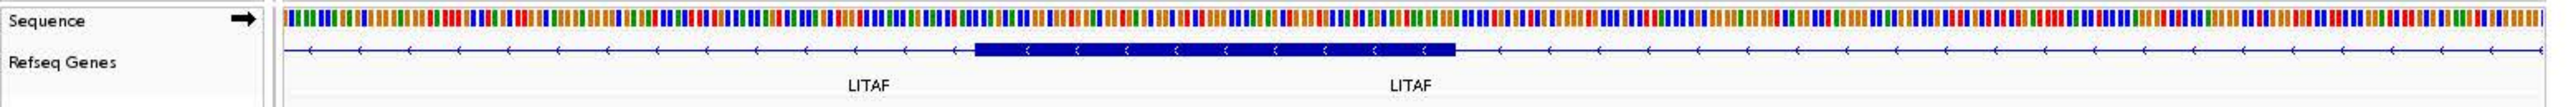

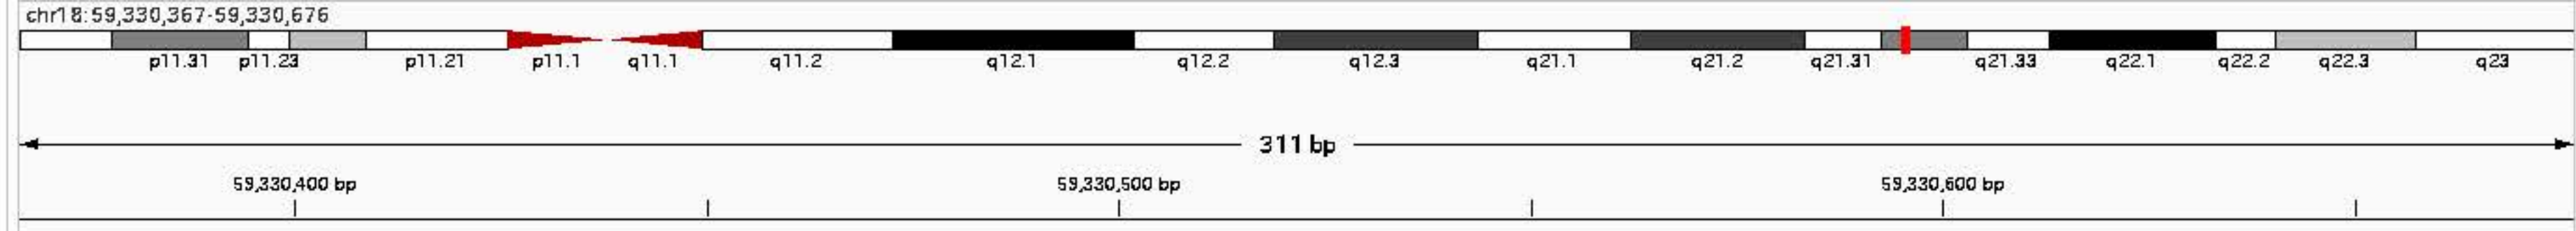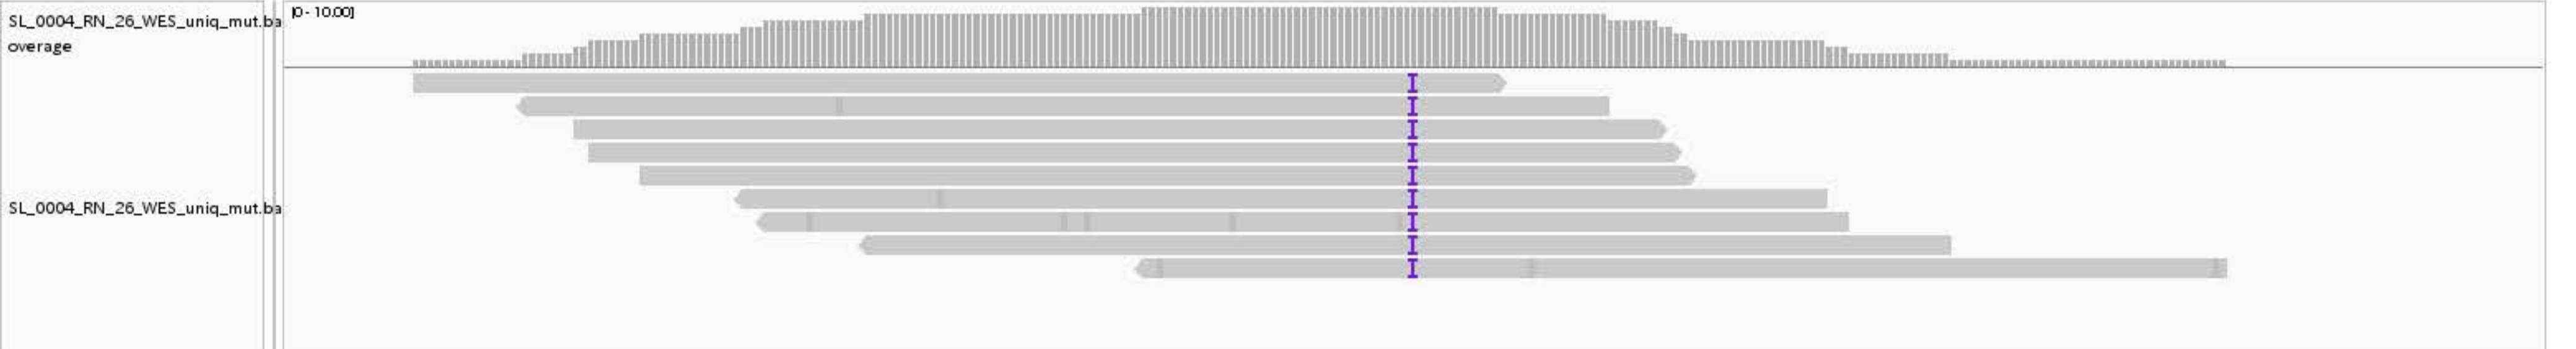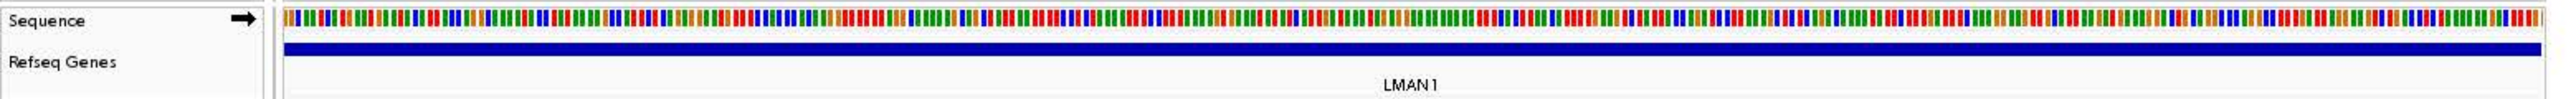

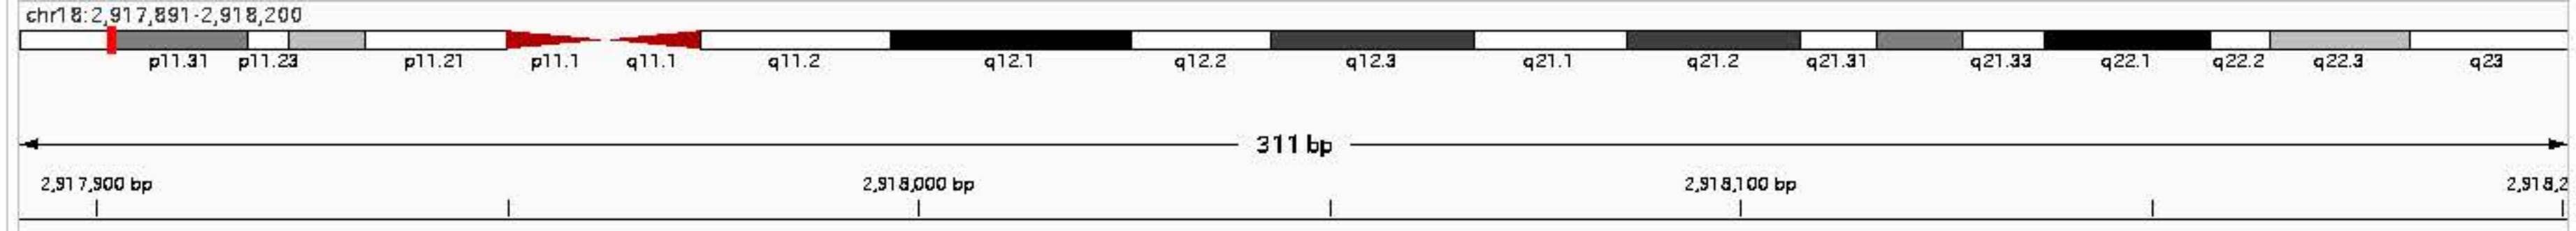

SL\_0001\_LN\_10\_WES\_uniq\_mut.  
coverage

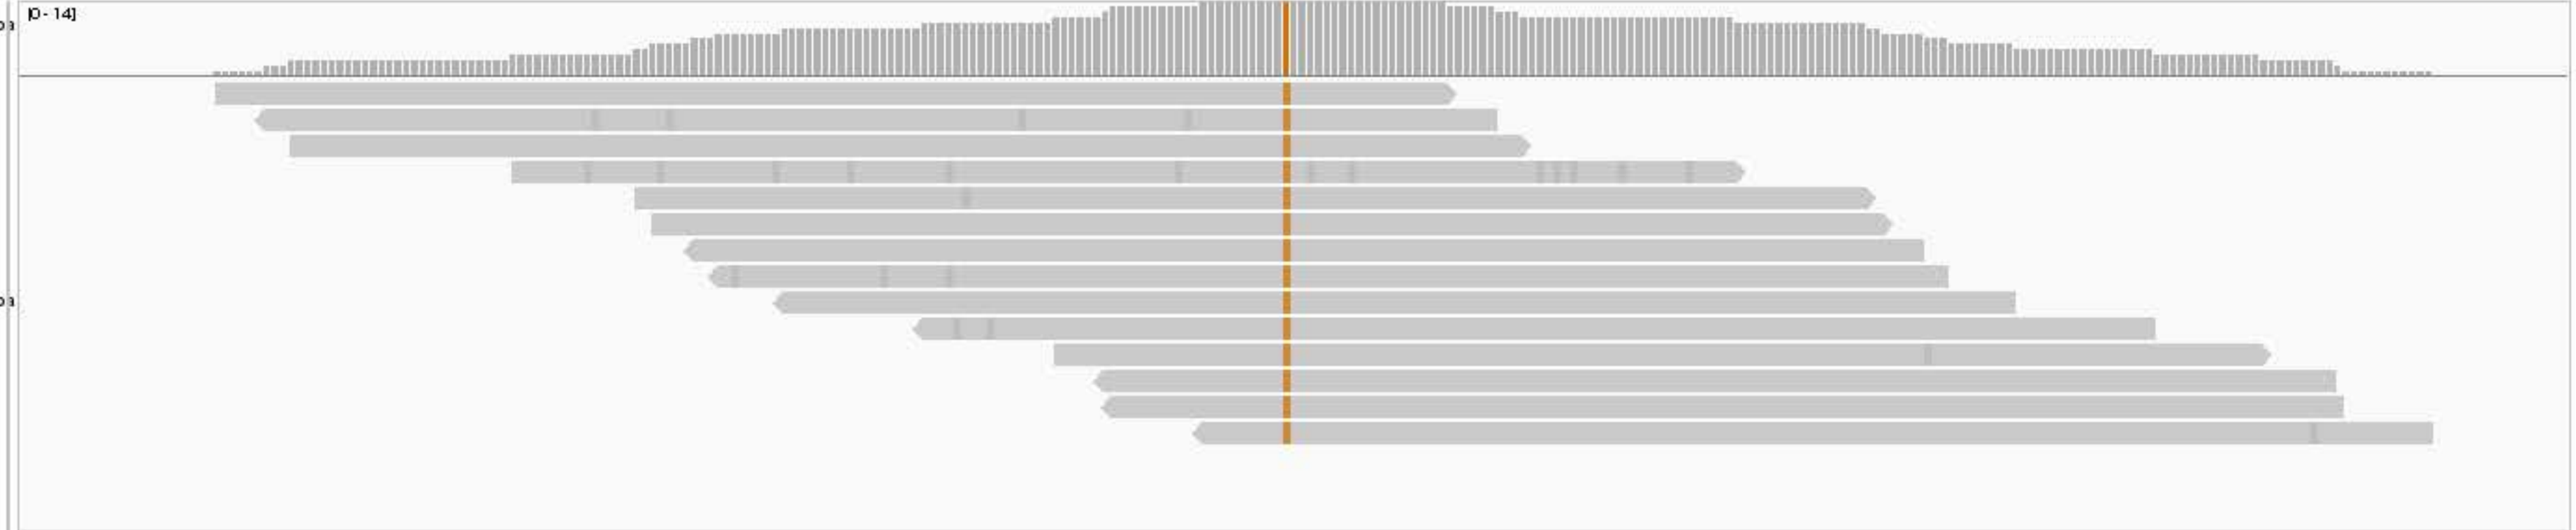

SL\_0001\_LN\_10\_WES\_uniq\_mut.

Sequence

Refseq Genes

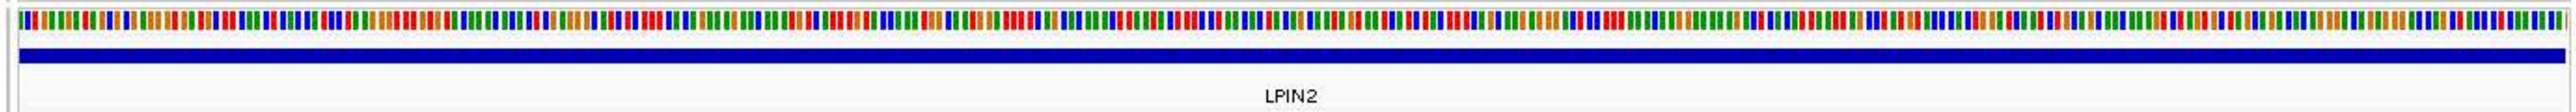



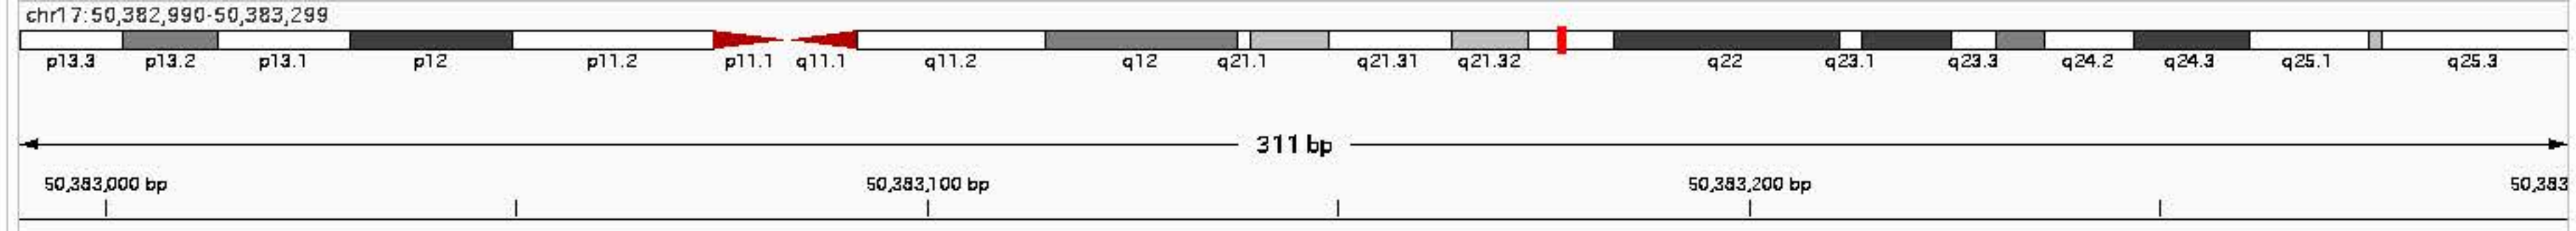

SL\_0007\_RN\_2\_WES\_uniq\_mut.ba  
verage

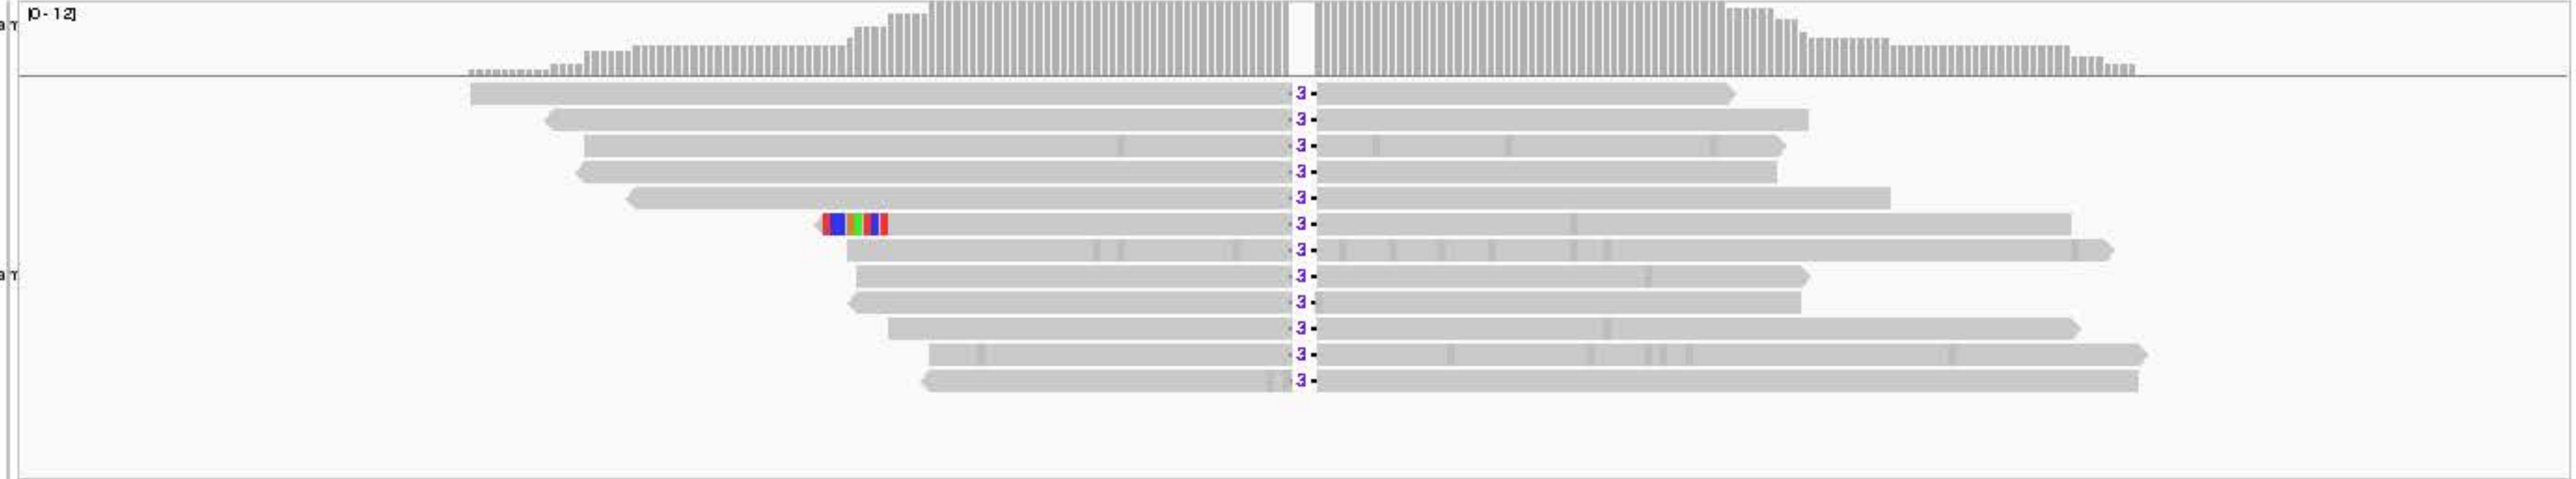

SL\_0007\_RN\_2\_WES\_uniq\_mut.ba

Sequence →

Refseq Genes

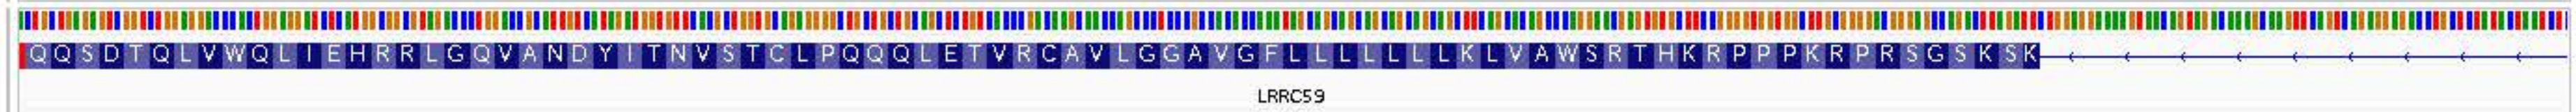

chr1:235,833,517-235,833,826

p36.31 p36.21 p36.11 p35.1 p34.2 p33 p32.2 p31.3 p31.1 p22.3 p21.3 p21.1 p13.2 p11.2 q12 q21.1 q21.3 q23.2 q24.2 q25.2 q31.1 q31.3 q32.2 q41 q42.13 q43 q44

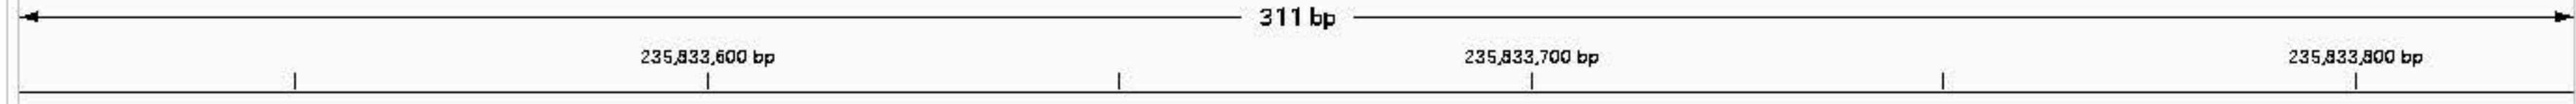

SL\_0015\_LN\_46\_WES\_uniq\_mut.  
coverage

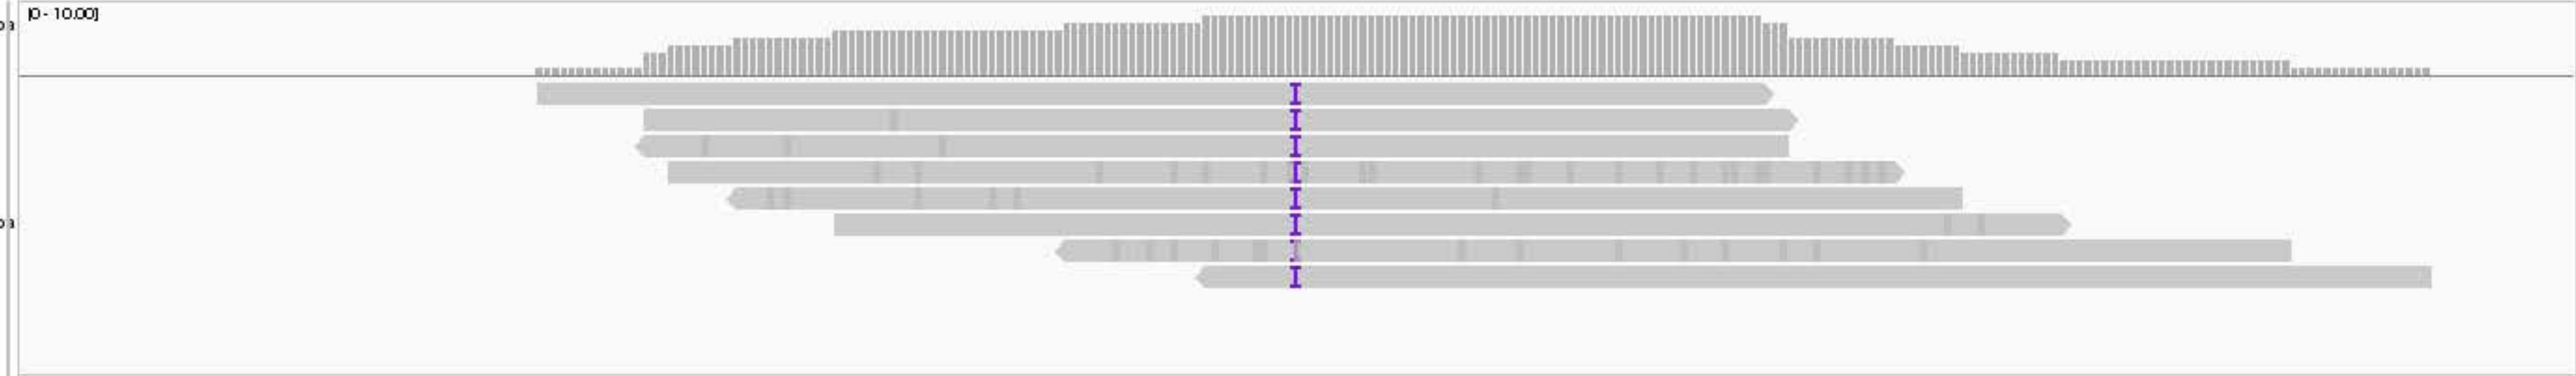

SL\_0015\_LN\_46\_WES\_uniq\_mut.  
coverage

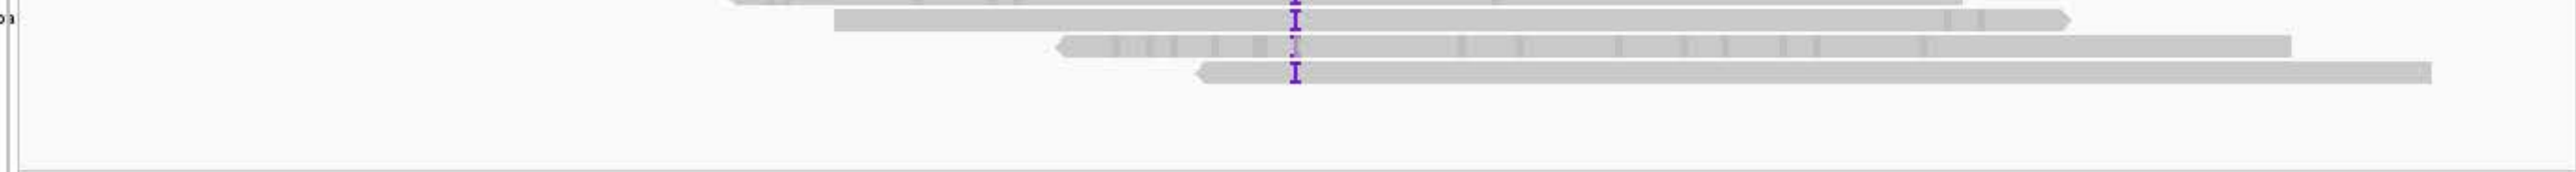

Sequence

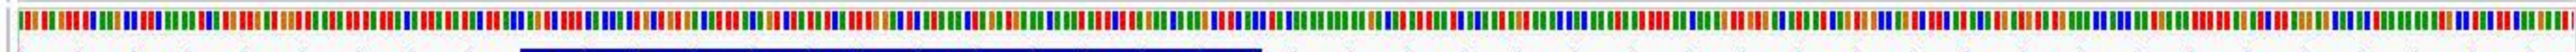

Refseq Genes

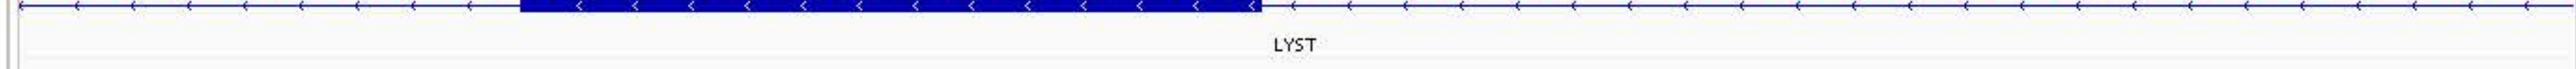

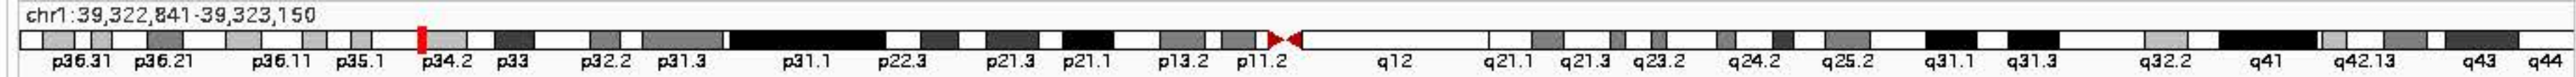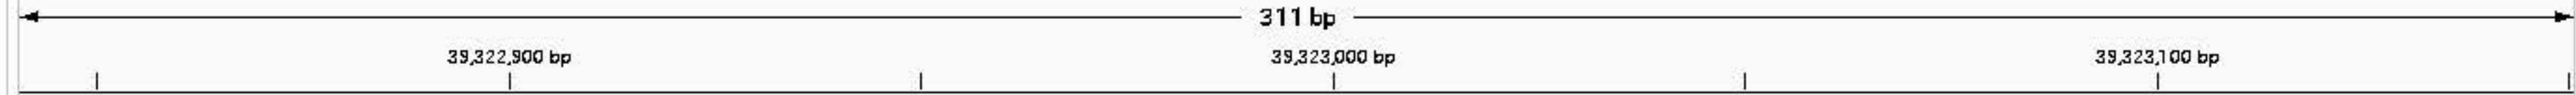

SL\_0004\_RN\_47\_WES\_uniq\_mut.ba  
overage

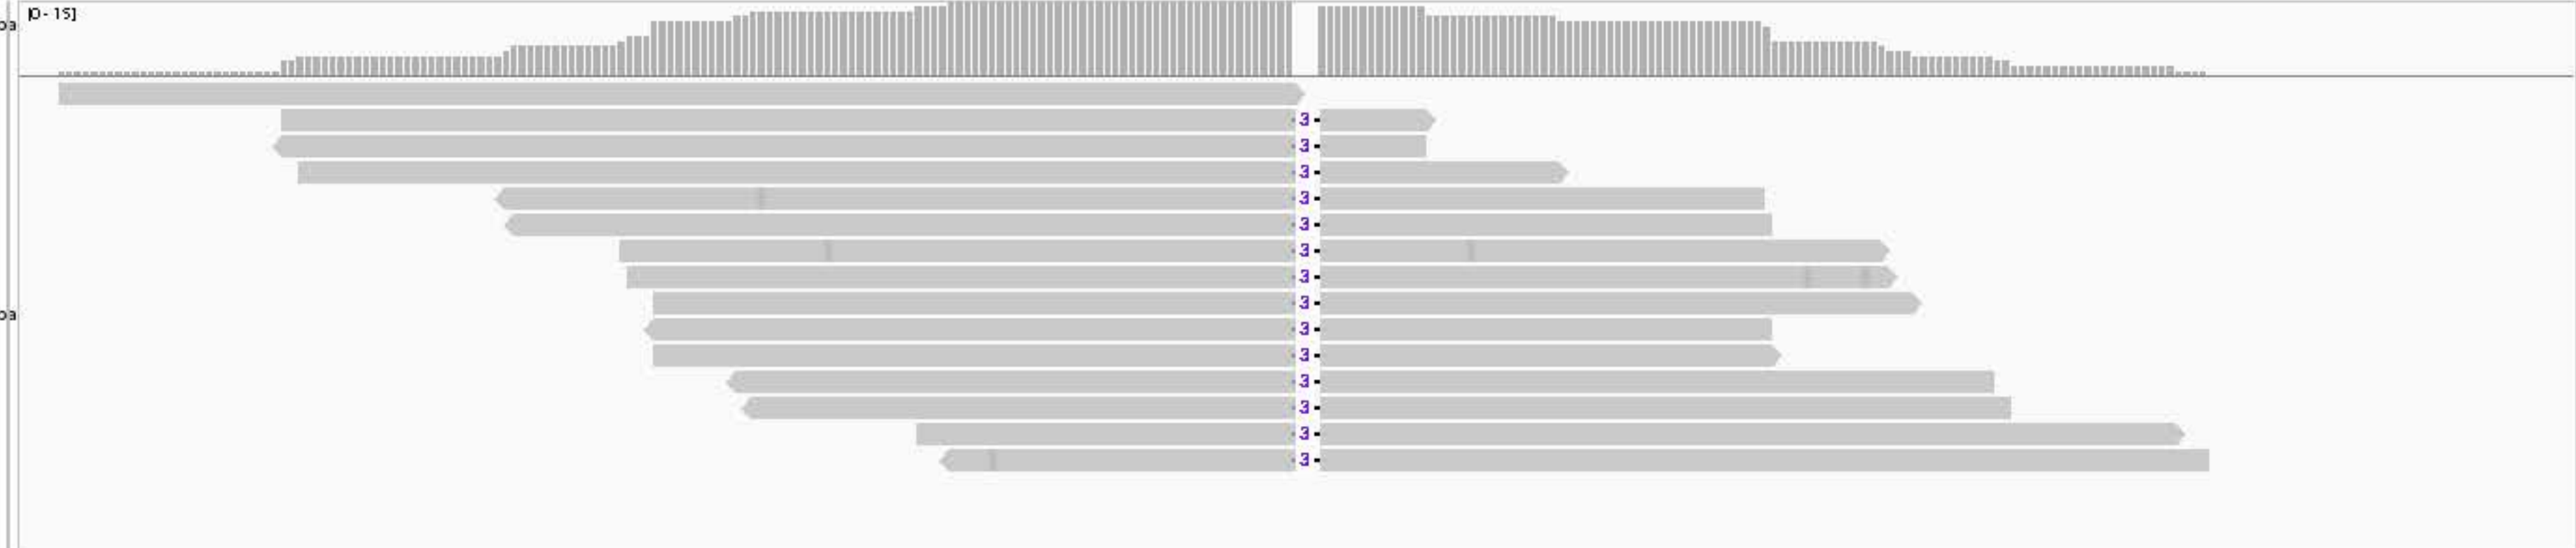

SL\_0004\_RN\_47\_WES\_uniq\_mut.ba

Sequence →

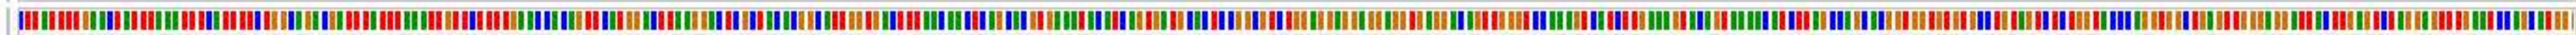

Refseq Genes

MACF1



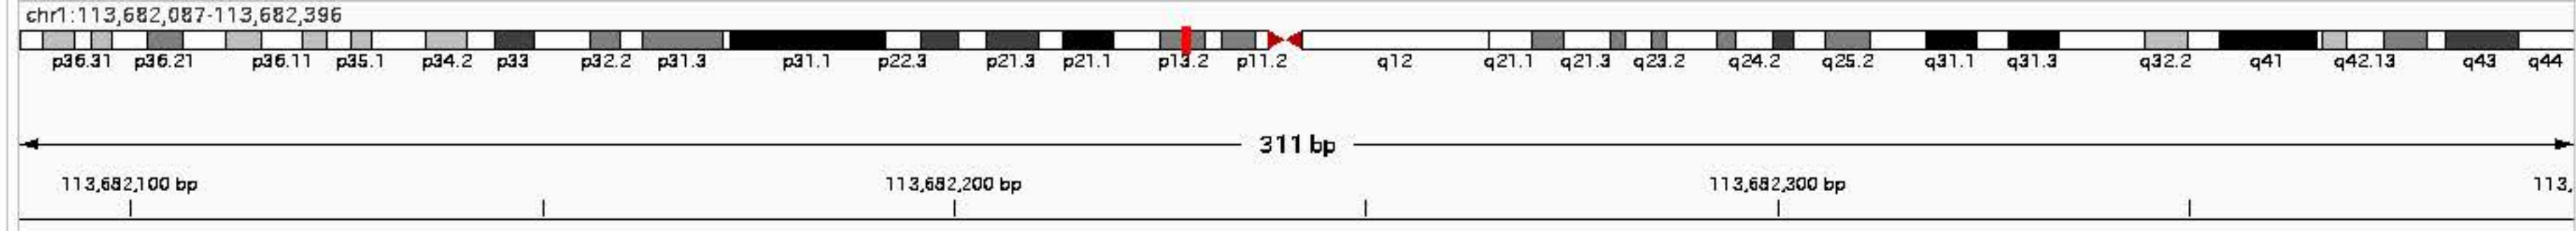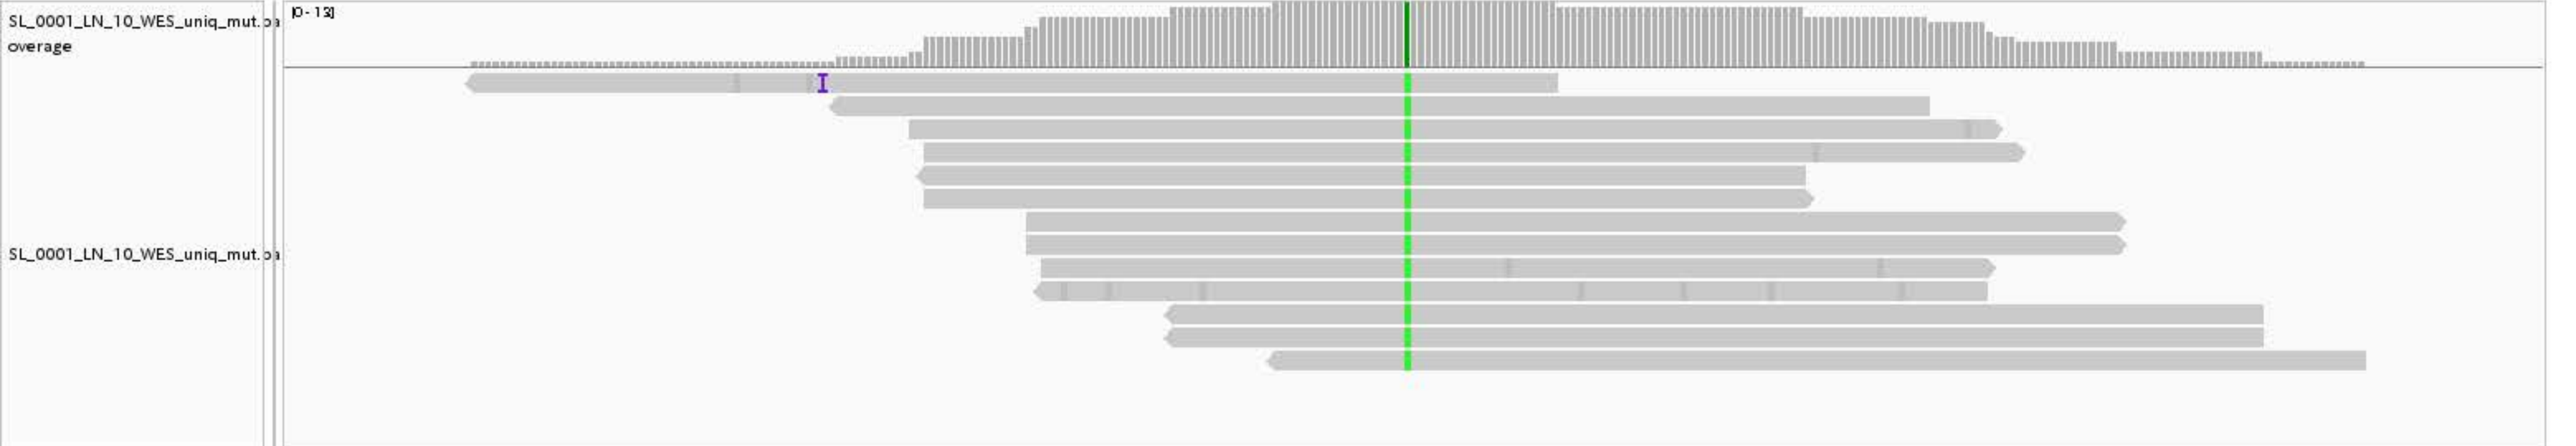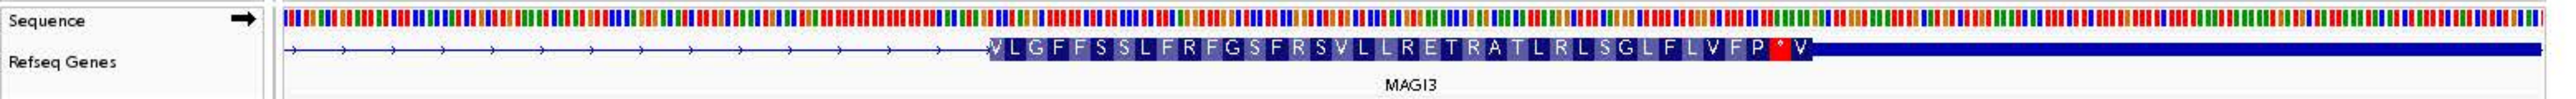

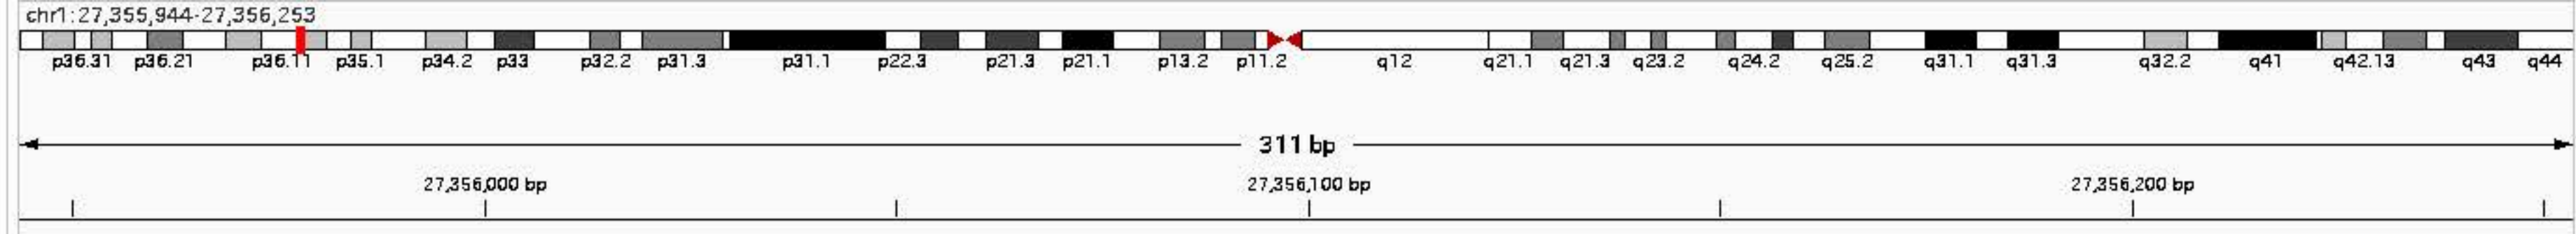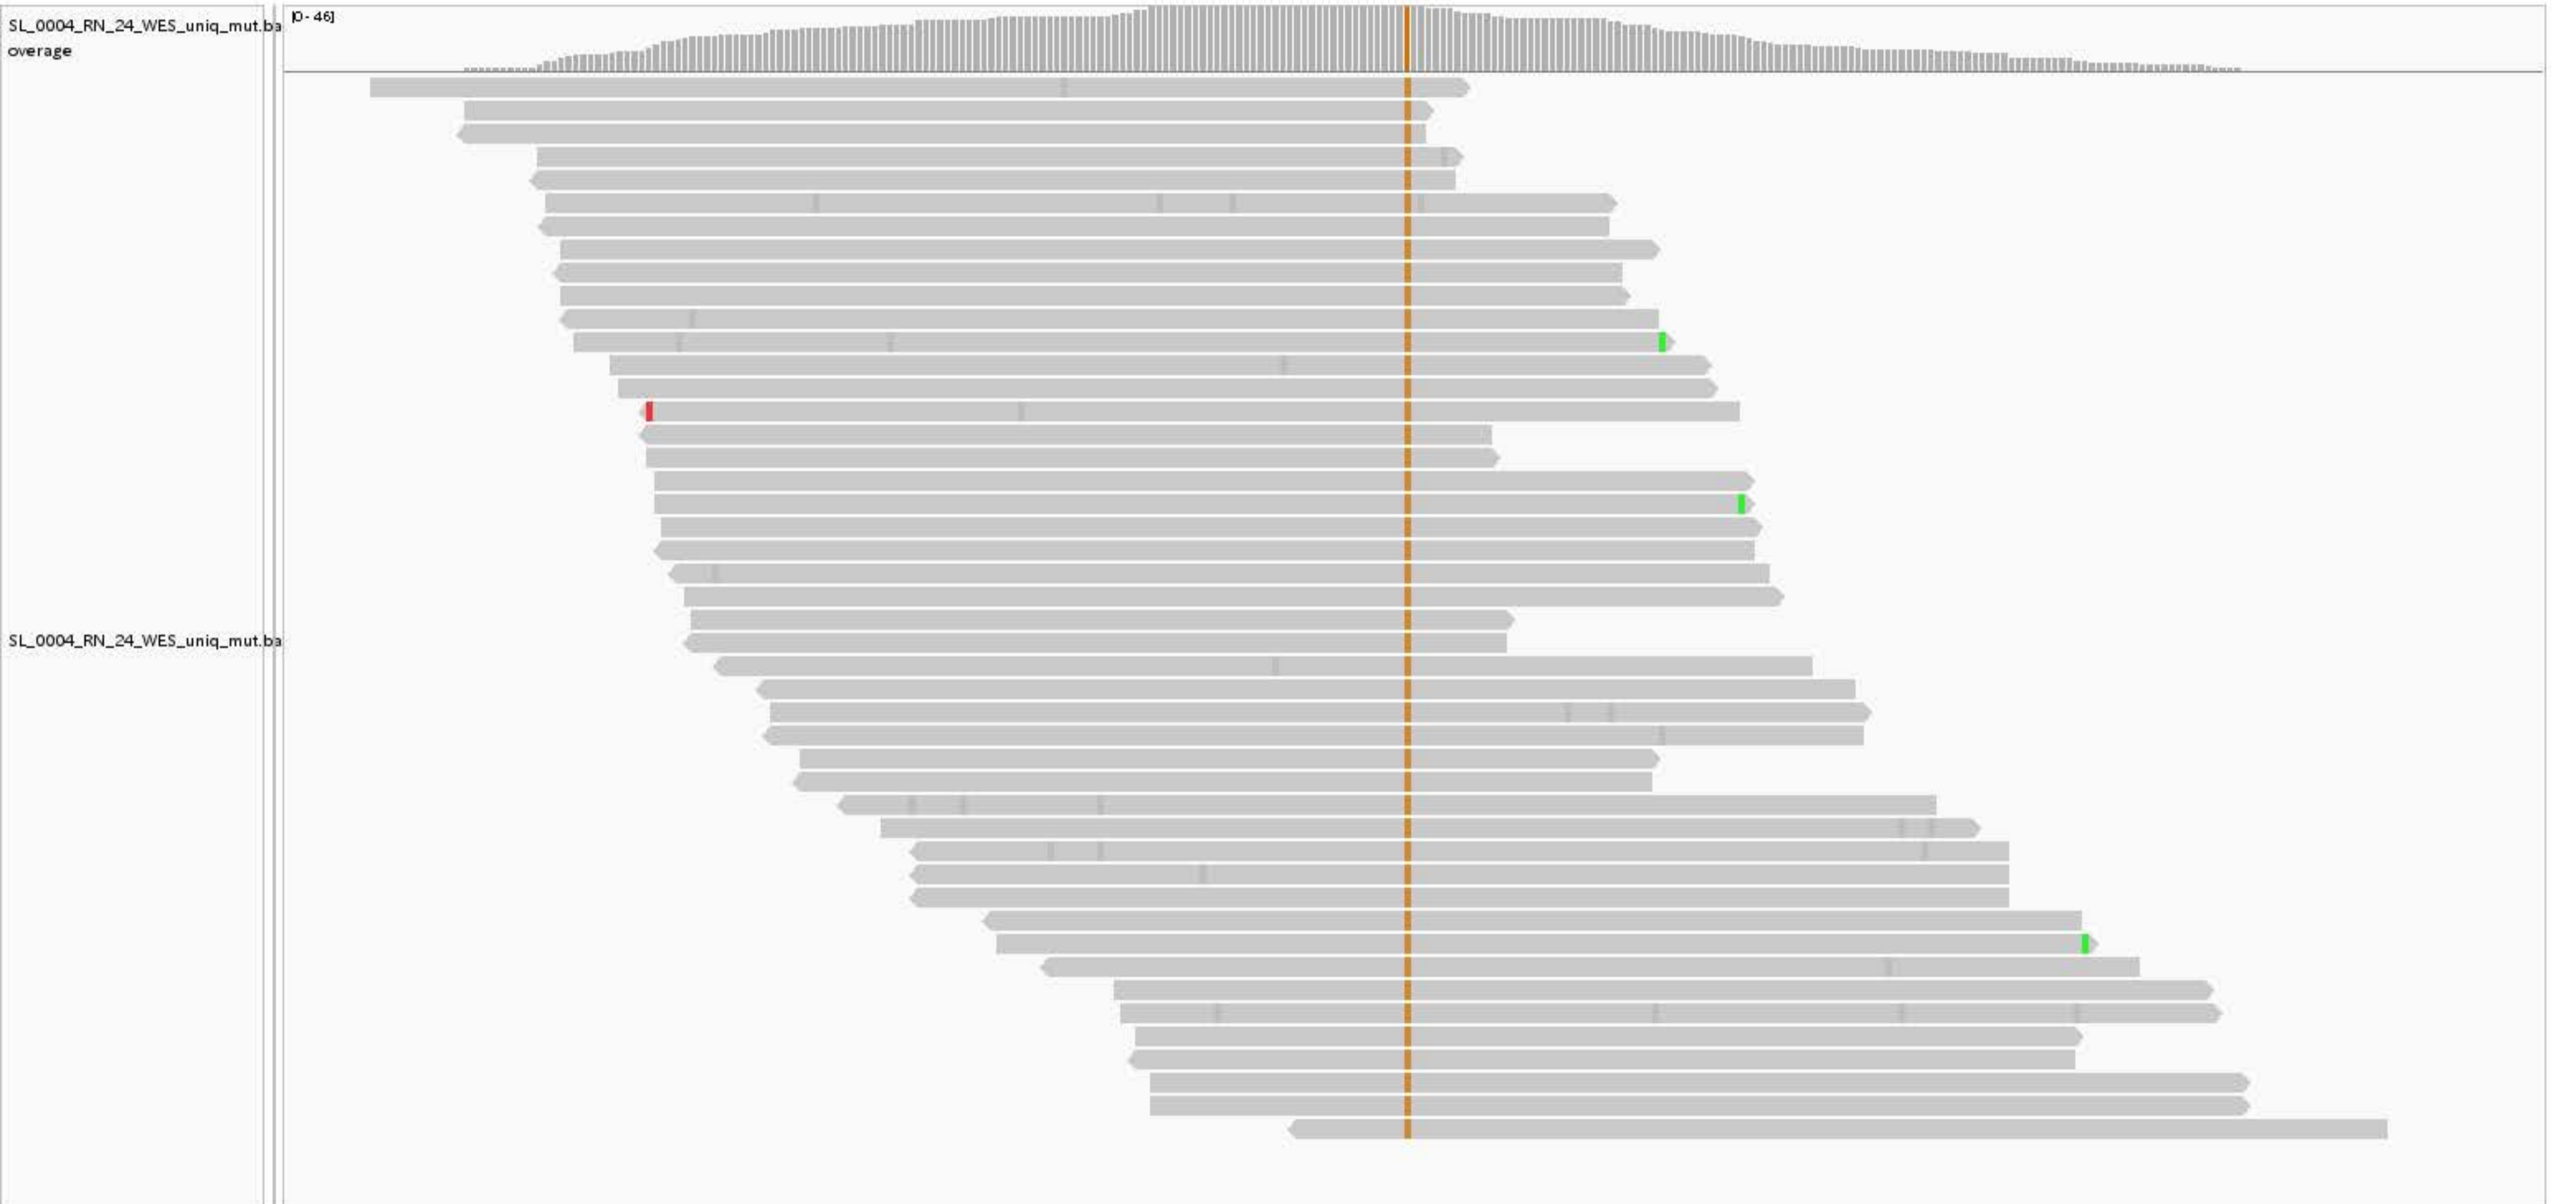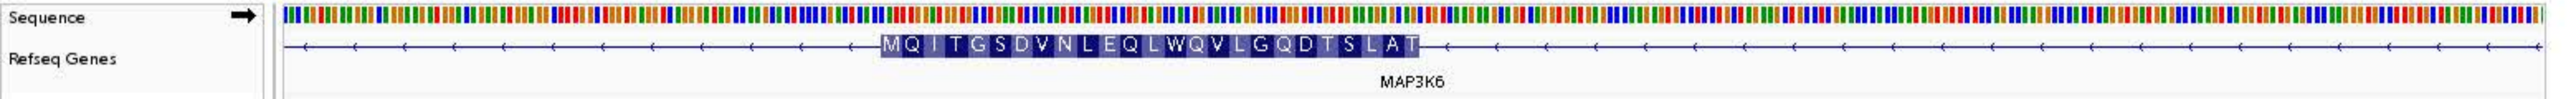

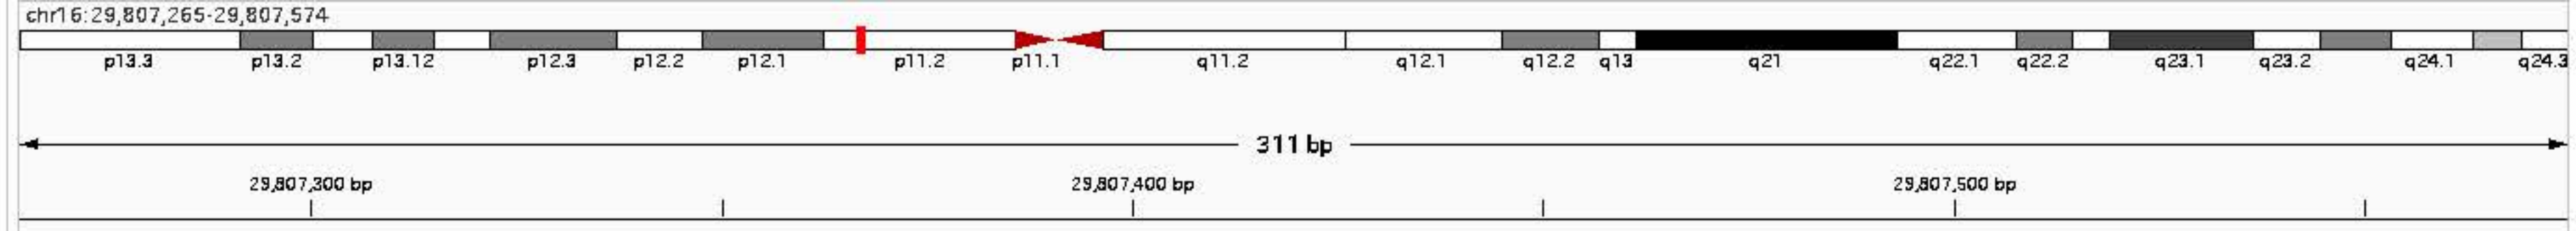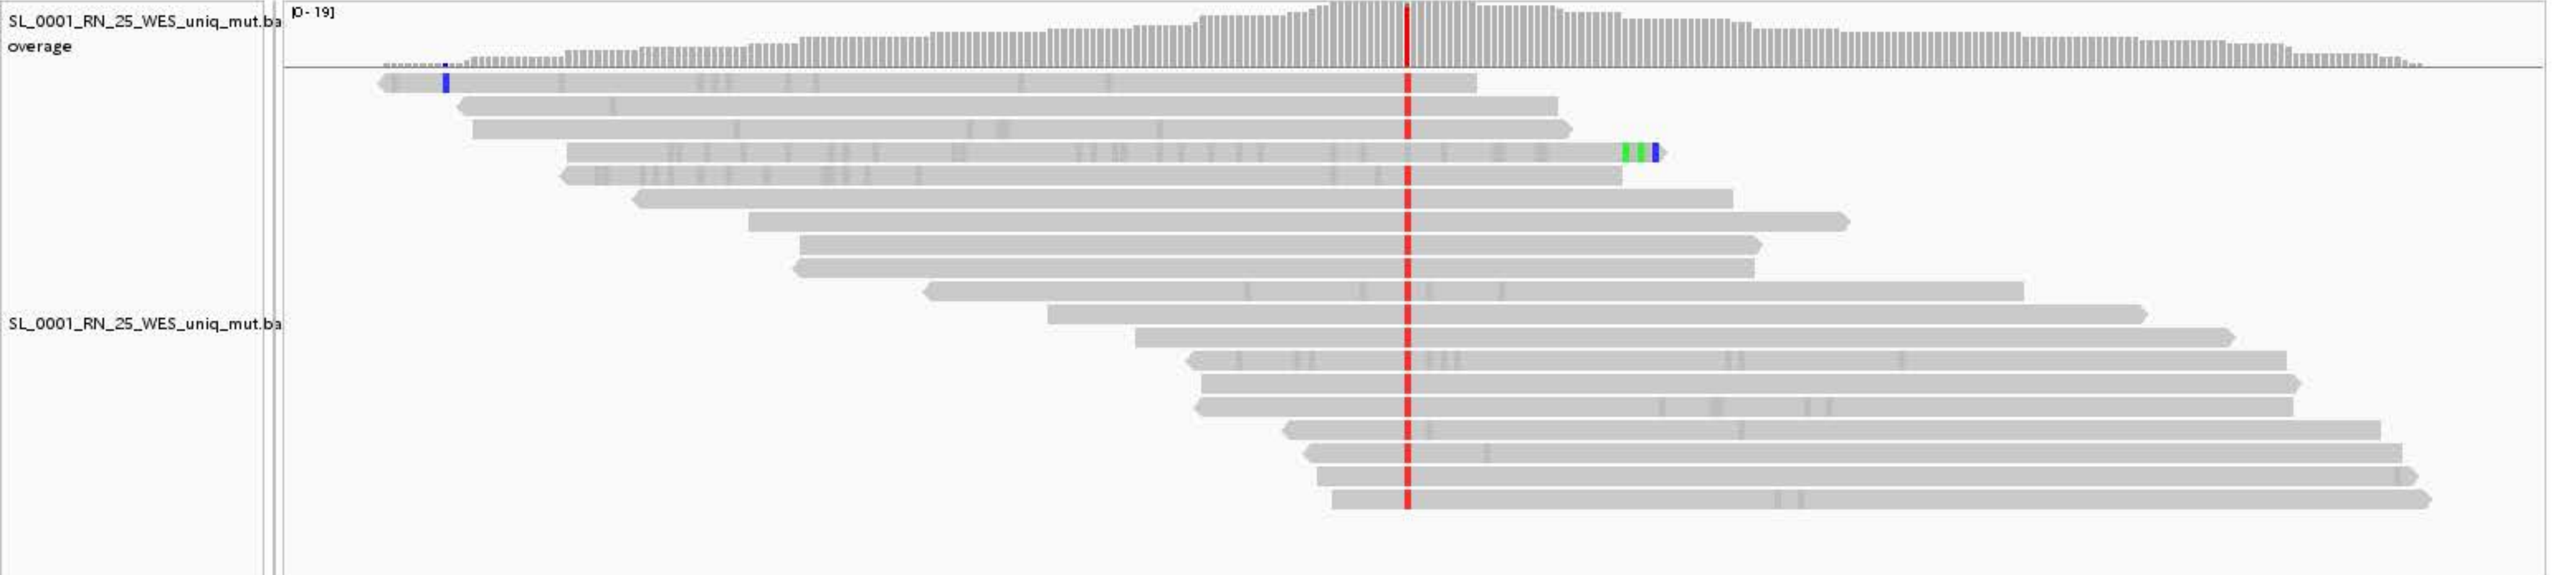

Sequence →

Refseq Genes

ATAVVAPTSTMAVAPVASALEKKTKSKGPYLCALCAKEFKNGYNLRRHEA IHTGAKAGRVPSCAMKMPTMVPLSLLSVPQLSGAGCGGGEAGAGGGAAAVAAC

MAZ



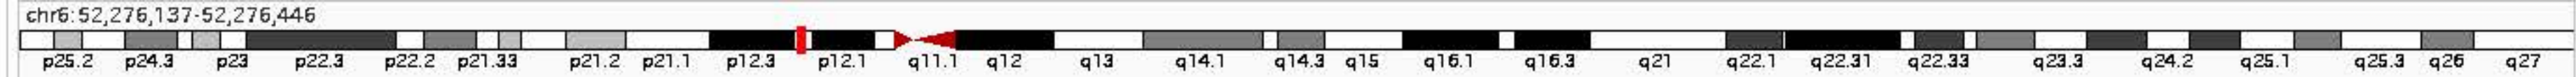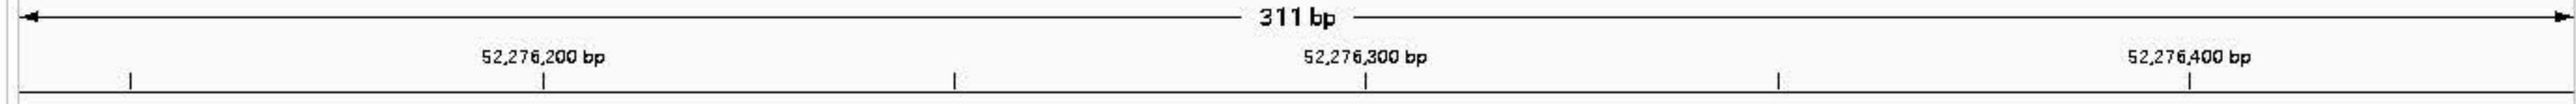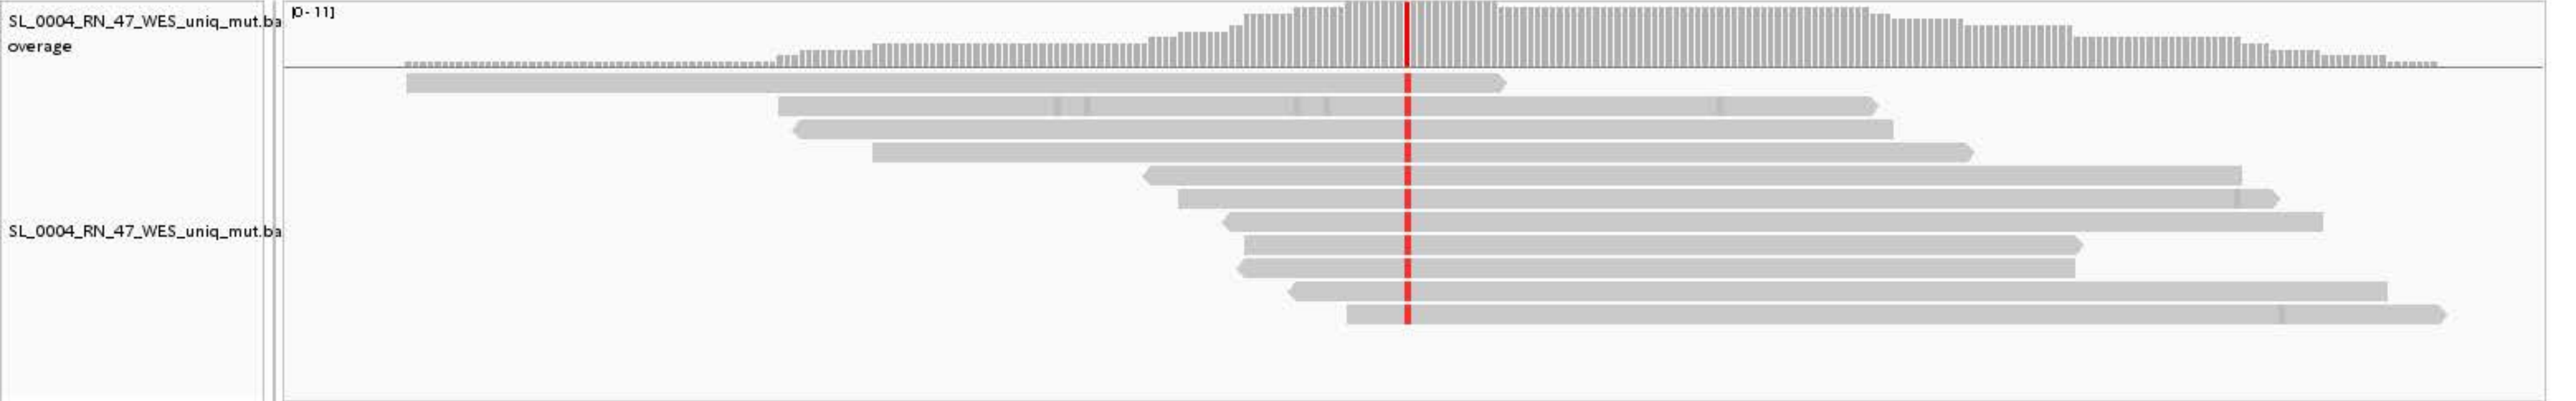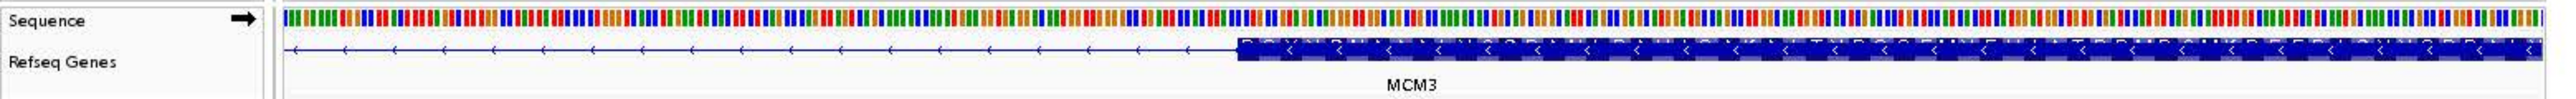

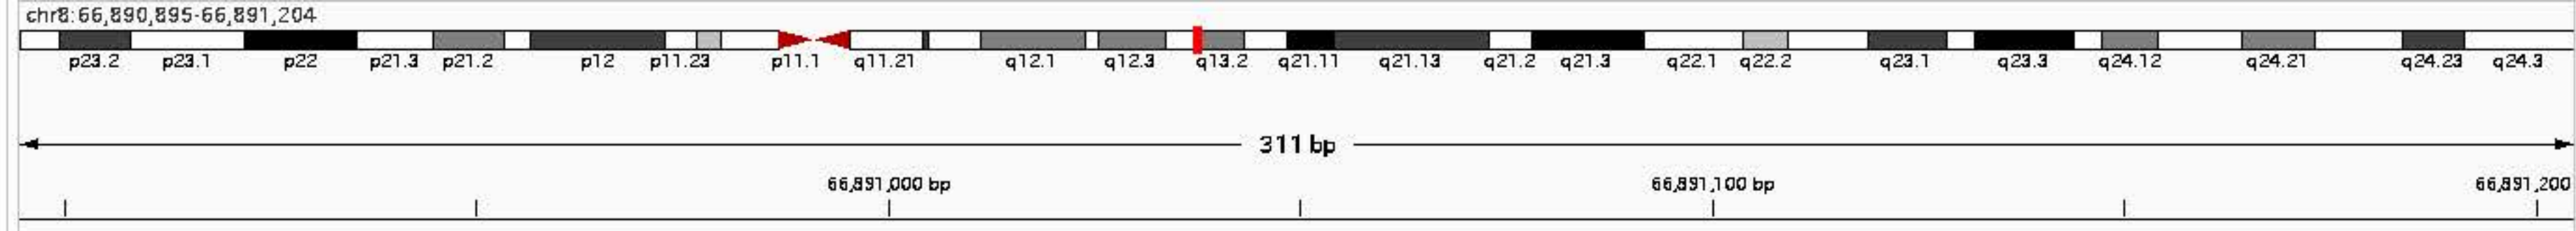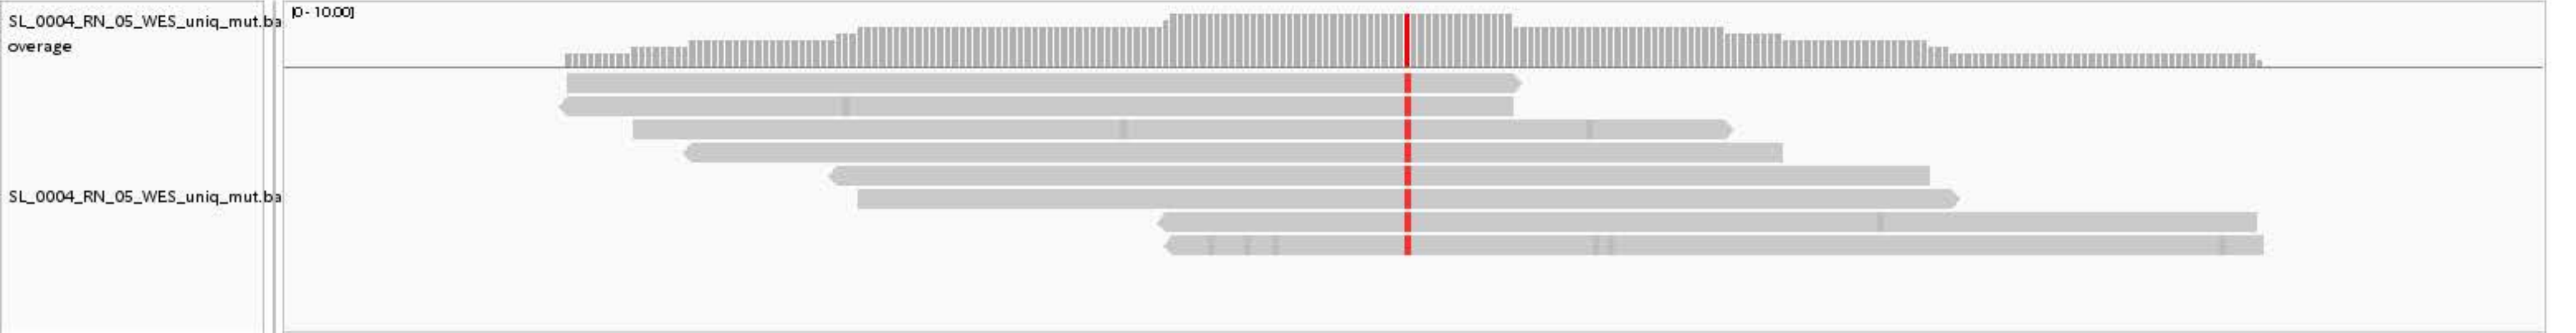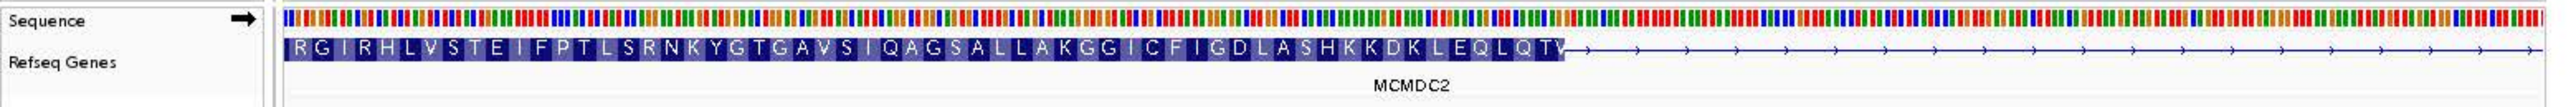

chr6: 89,652,071-89,652,380  
p25.2 p24.3 p23 p22.3 p22.2 p21.33 p21.2 p21.1 p12.3 p12.1 q11.1 q12 q13 q14.1 q14.3 q15 q16.1 q16.3 q21 q22.1 q22.31 q22.33 q23.3 q24.2 q25.1 q25.3 q26 q27

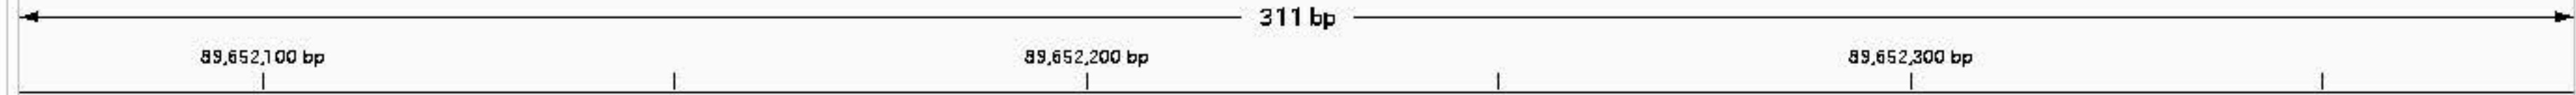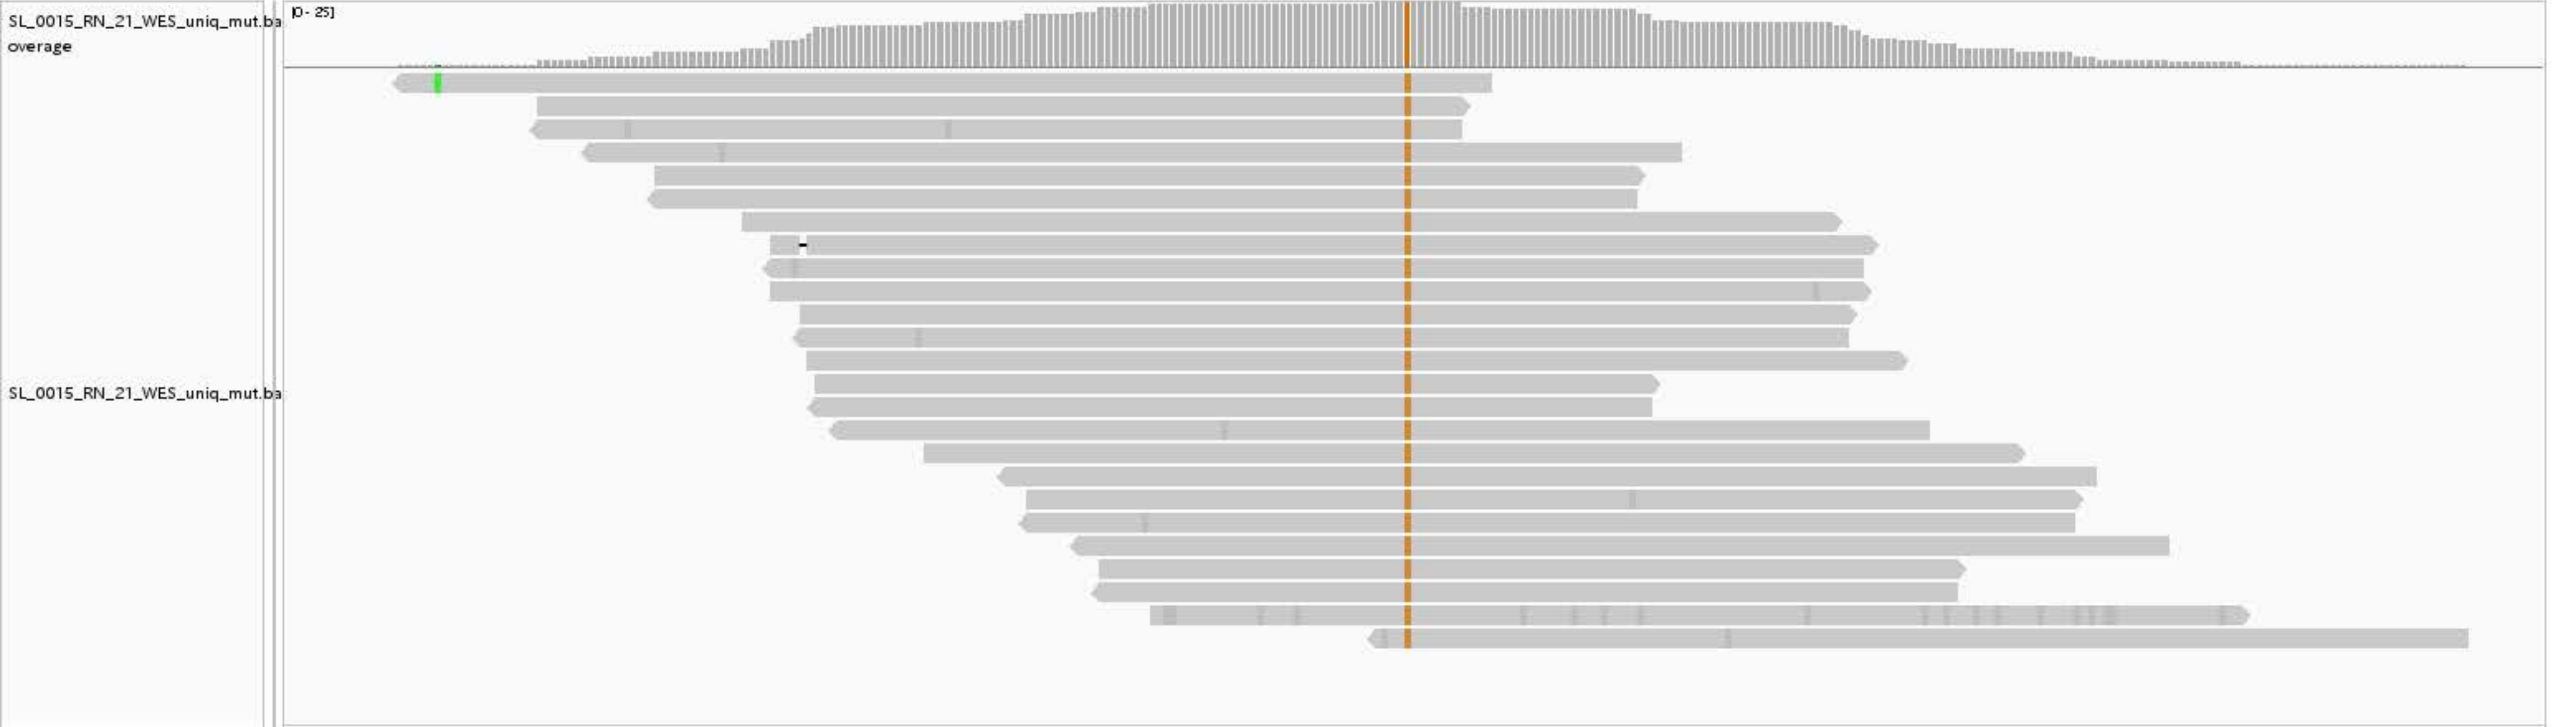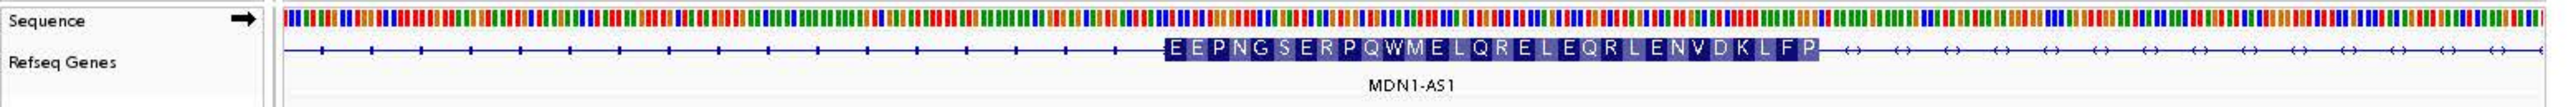



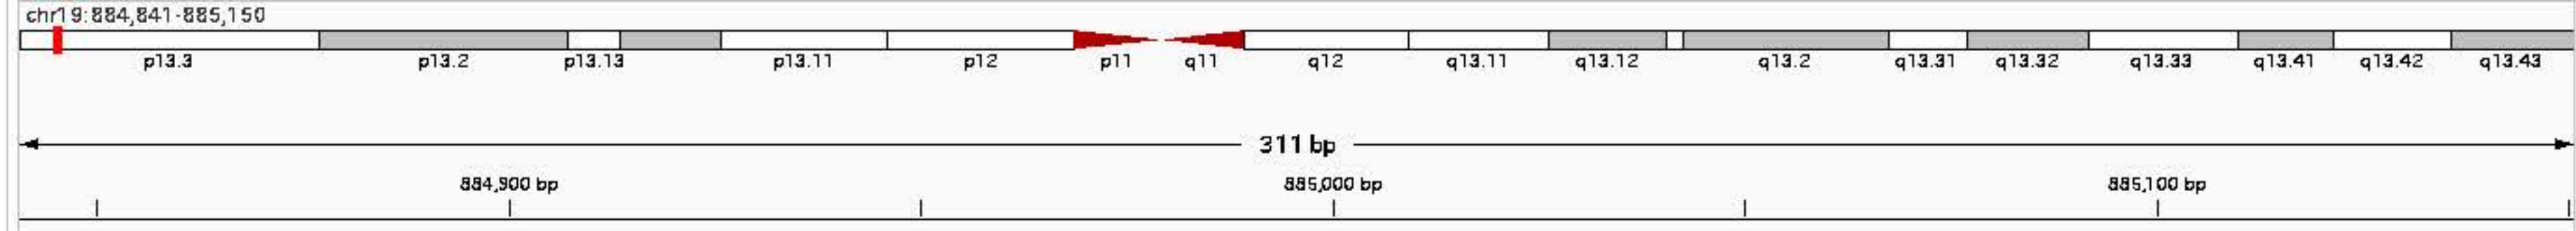

SL\_0001\_LN\_10\_WES\_uniq\_mut. coverage

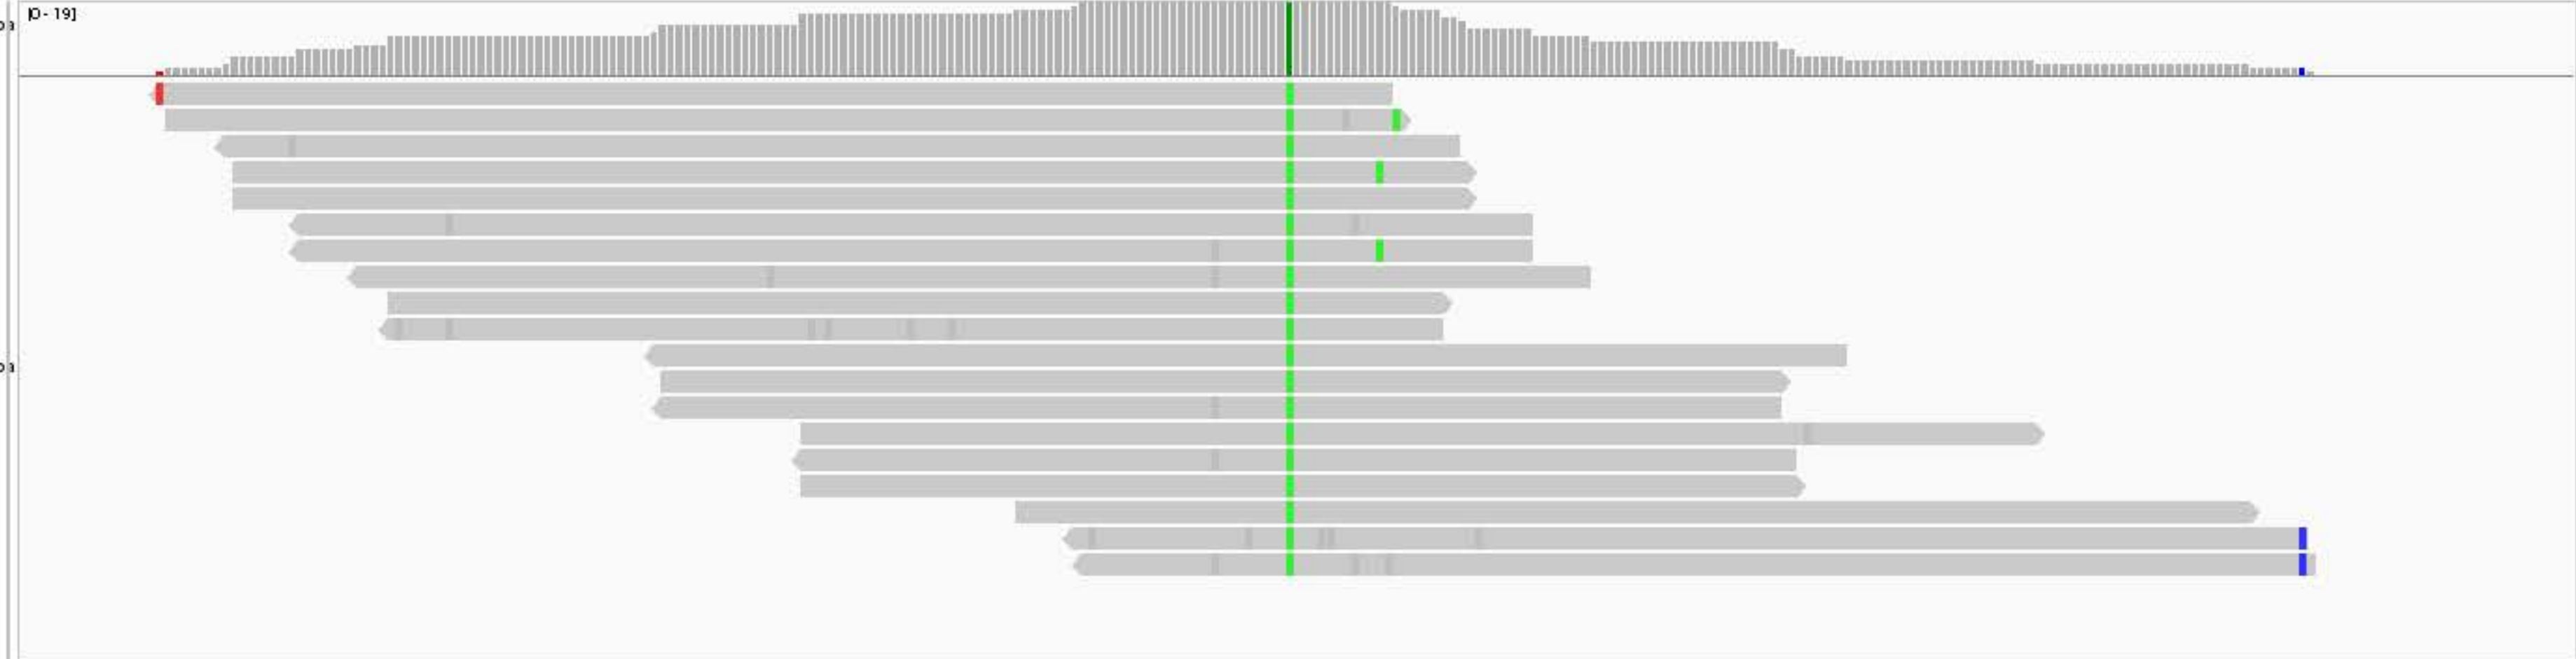

Sequence Refseq Genes

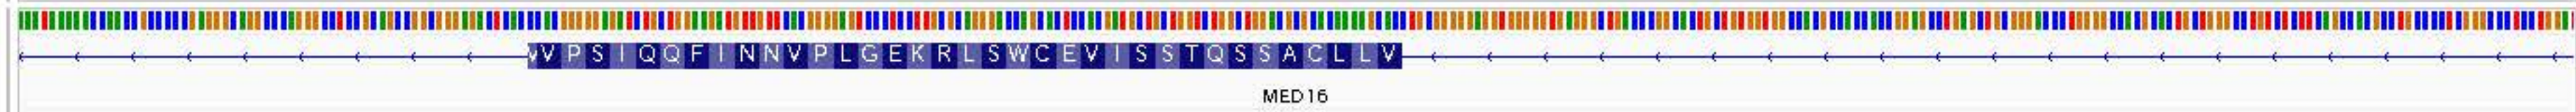

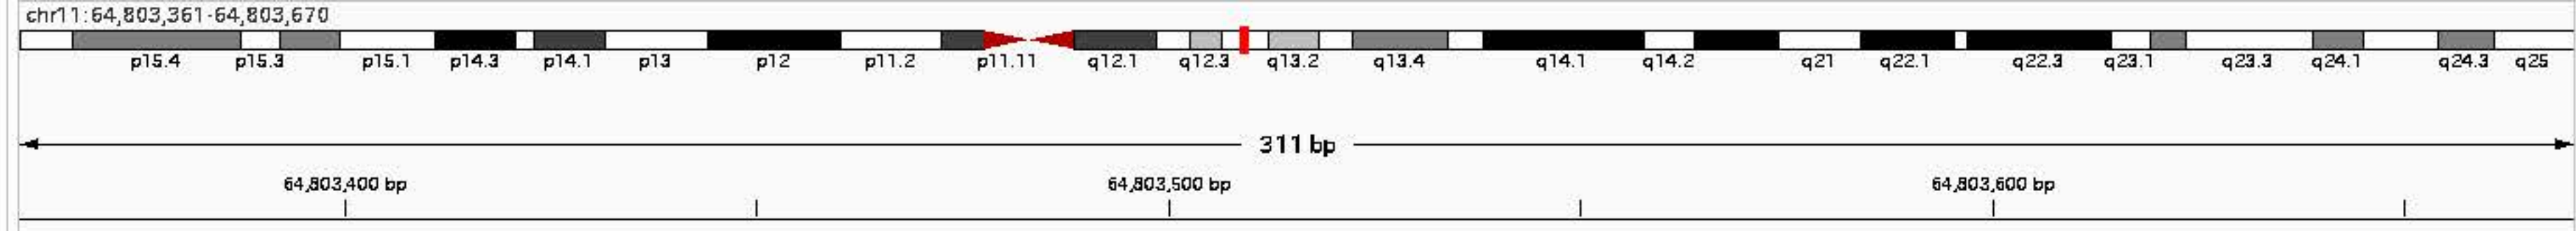

SL\_0007\_RN\_2\_WES\_uniq\_mut.ba  
verage

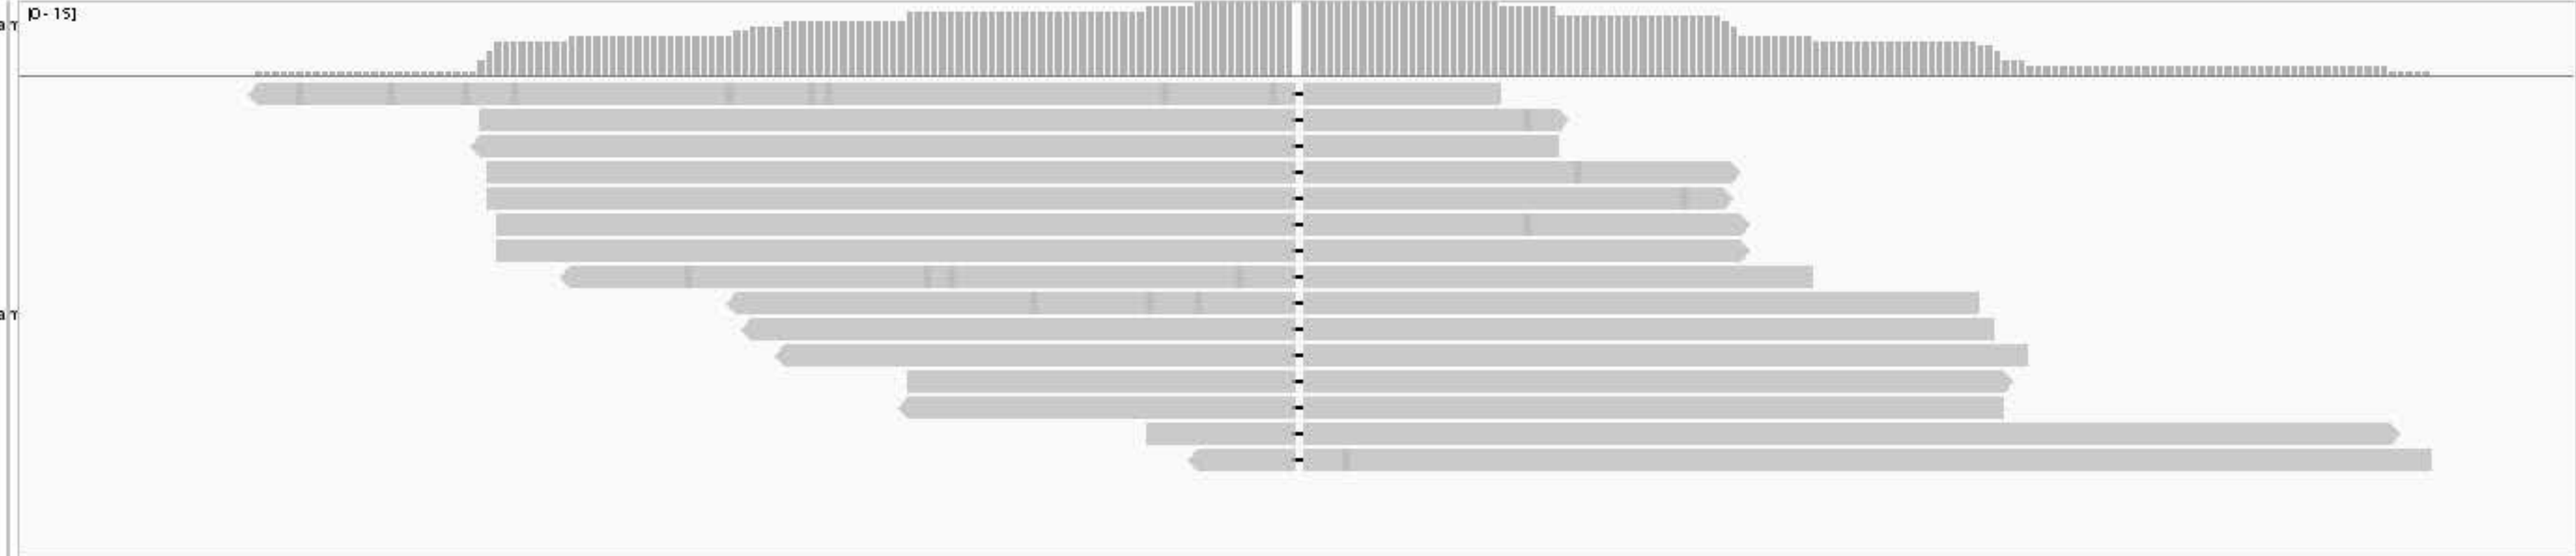

SL\_0007\_RN\_2\_WES\_uniq\_mut.ba

Sequence →  
Refseq Genes

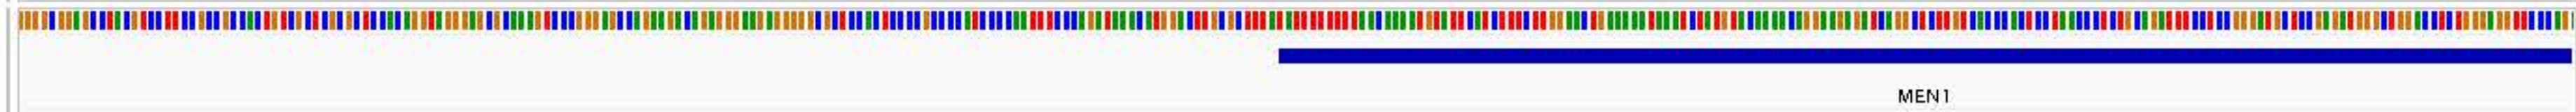

MEN1

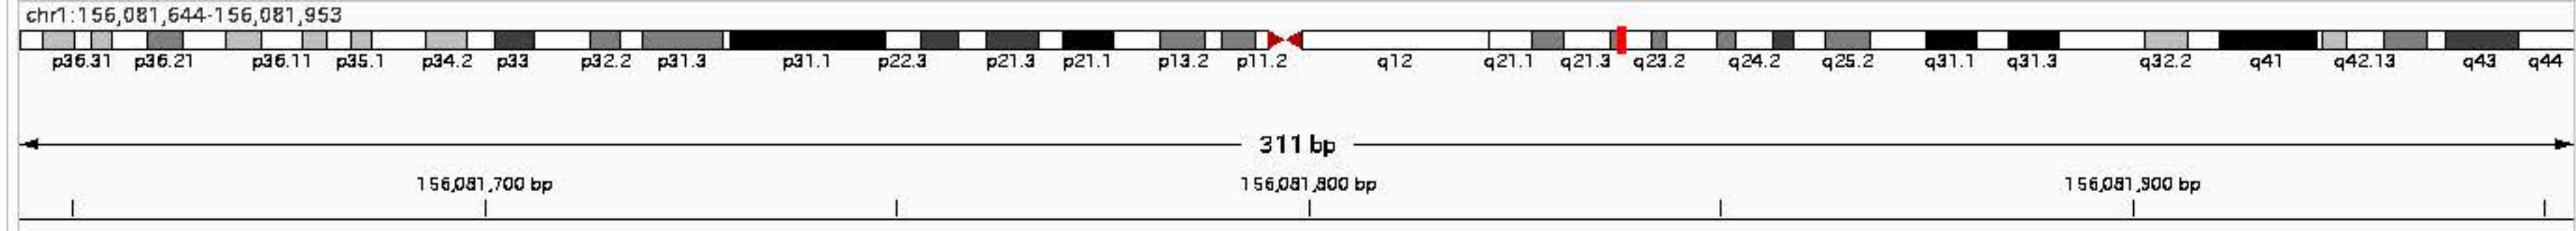

SL\_0002\_LN\_62\_WES\_uniq\_mut. coverage

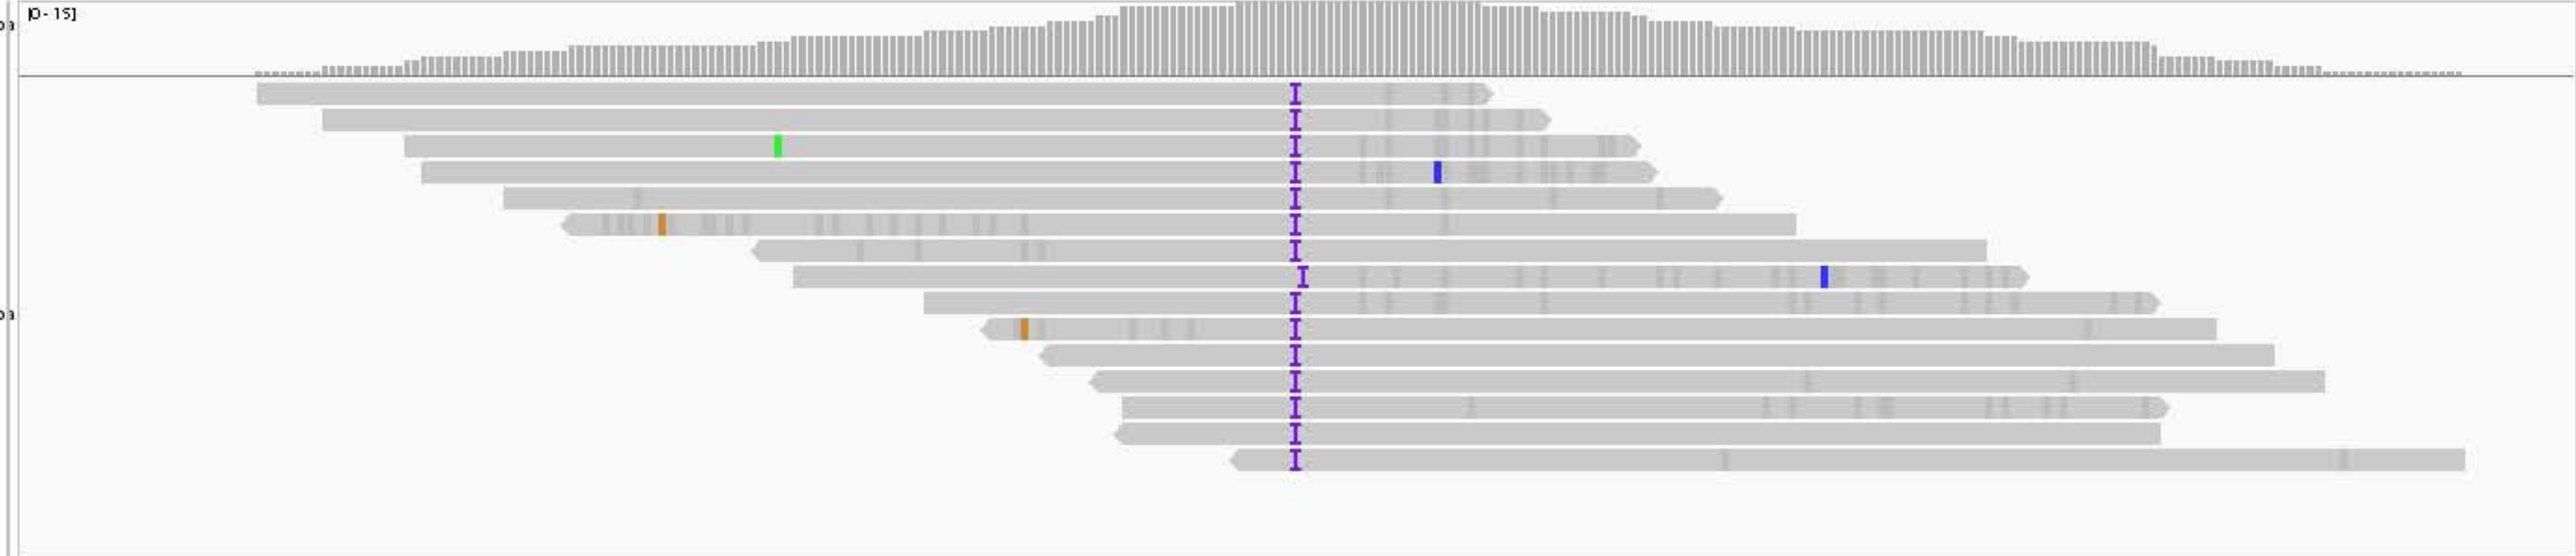

SL\_0002\_LN\_62\_WES\_uniq\_mut.

Sequence

Refseq Genes

L A C L K A D S A G K P A T P P Q P T Q A A P A A T P A A P P A A P P P P A P Q P P A A P Q A P A G G G G G G D E G A T P A P P E G L G L L C L Q D L A L Q L A R E D E L L G R D K A S G G F C G L E G F

MEX3A



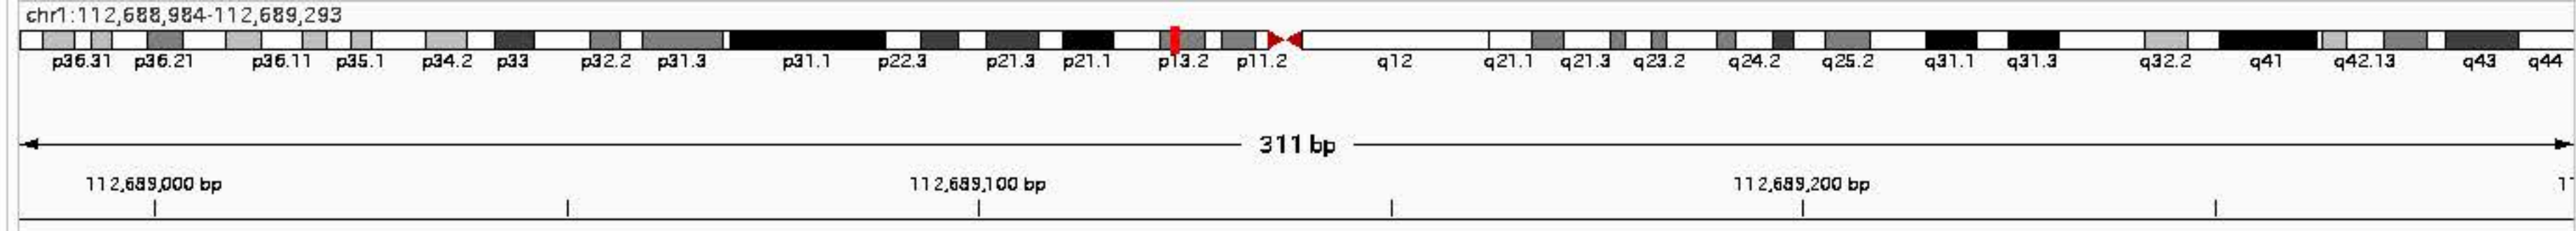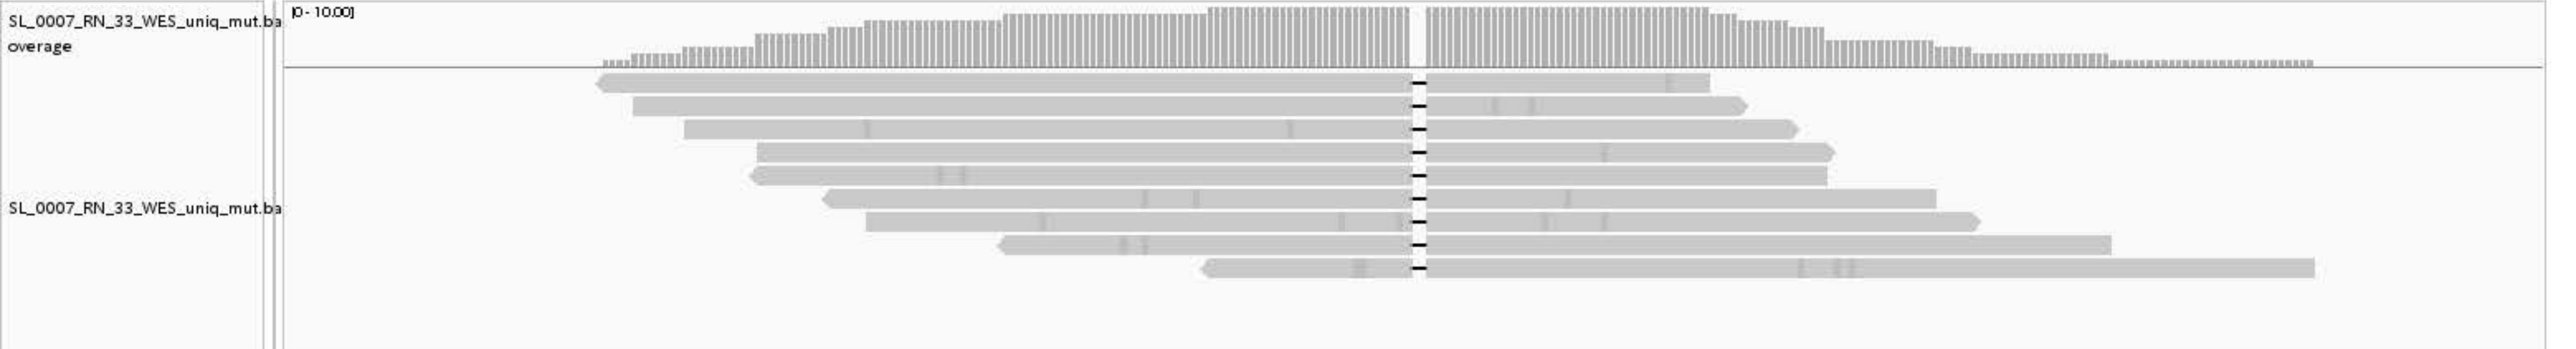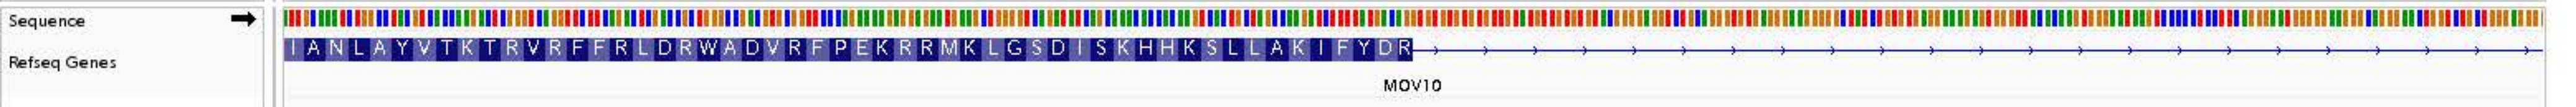

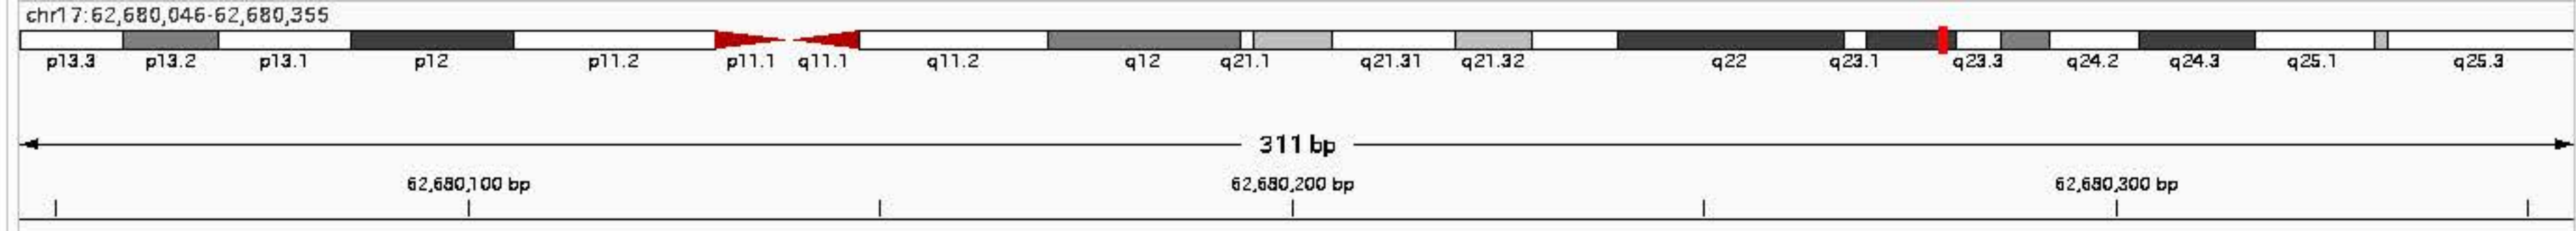

SL\_0001\_LN\_10\_WES\_uniq\_mut.  
coverage

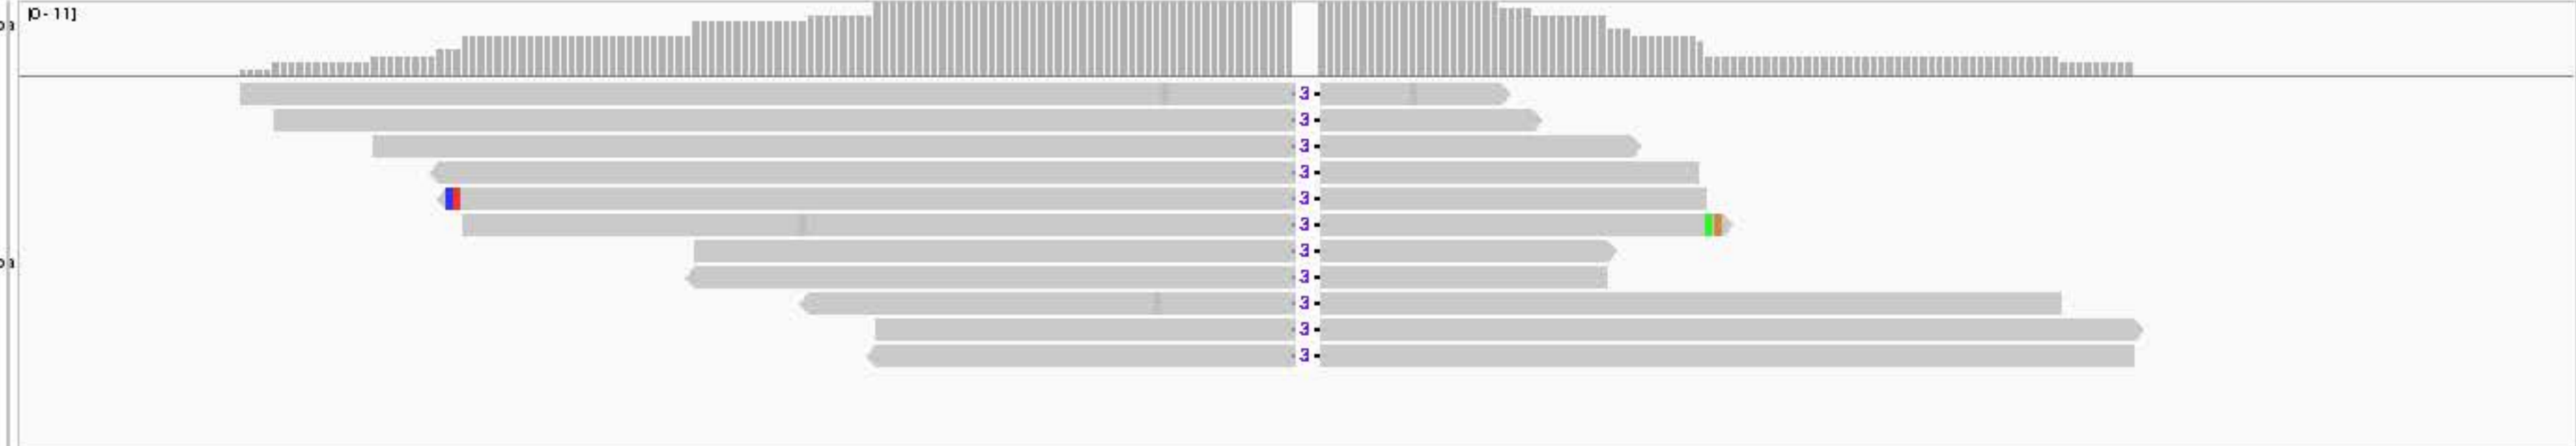

Sequence  
Refseq Genes

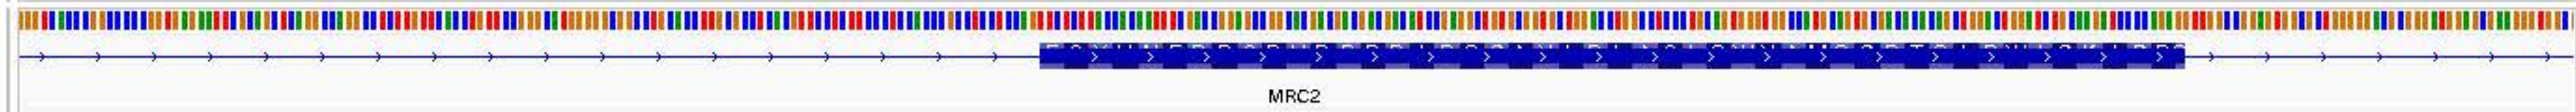

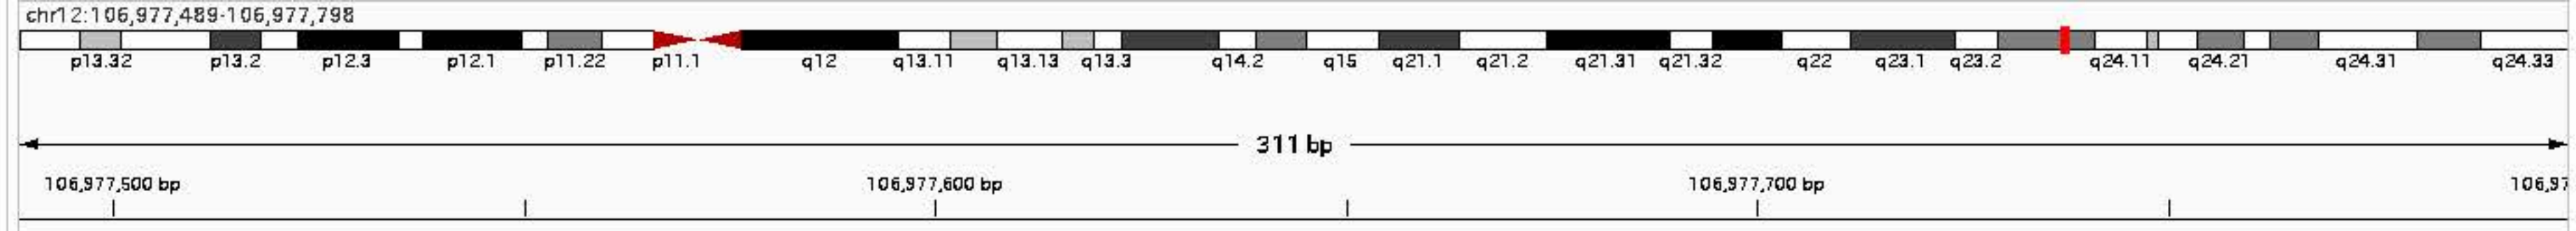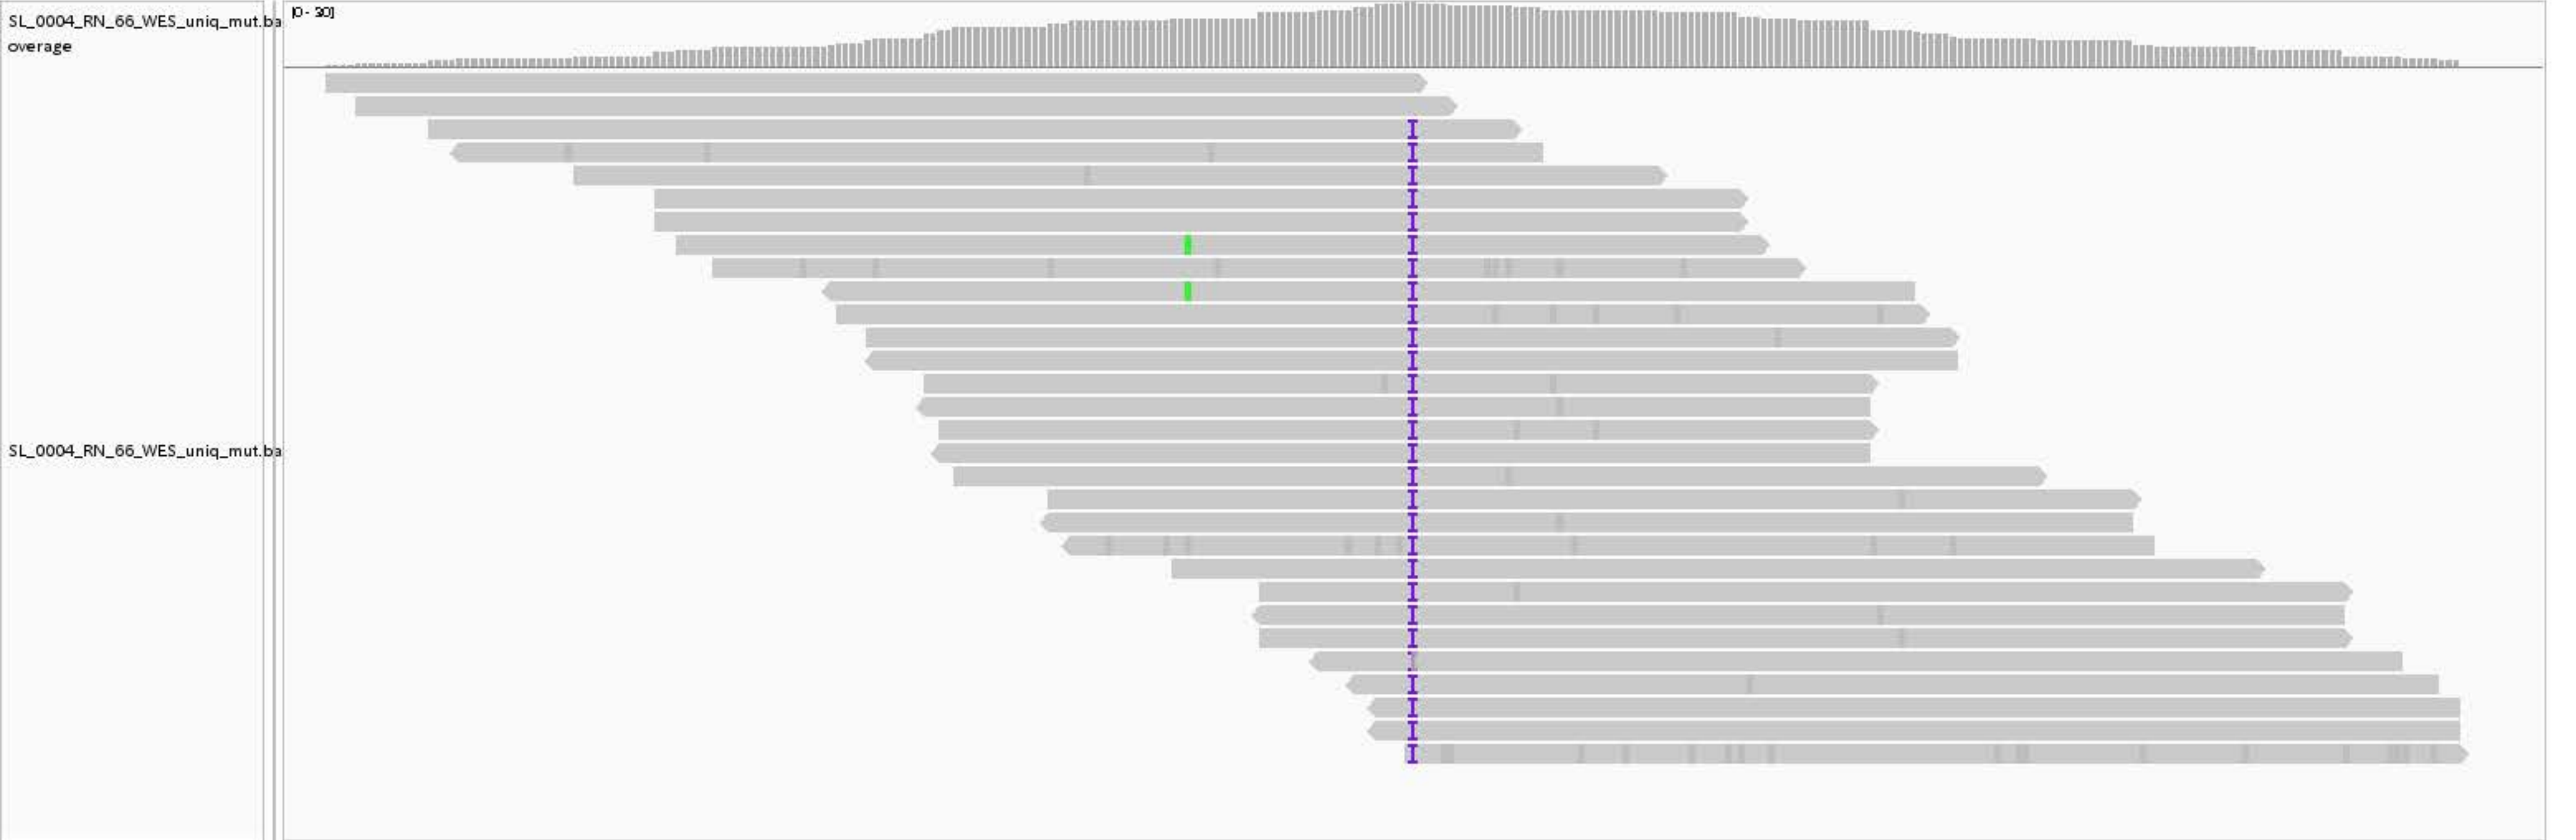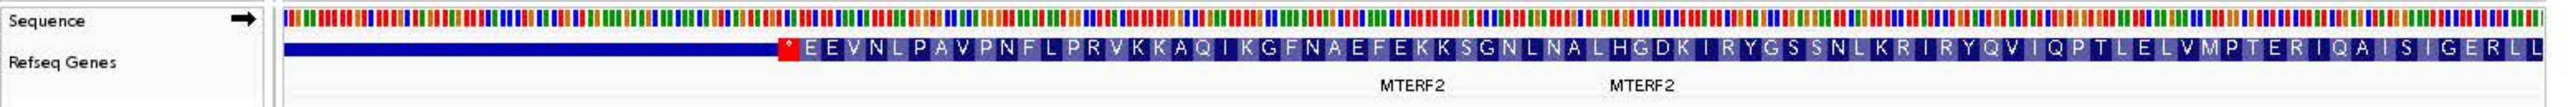



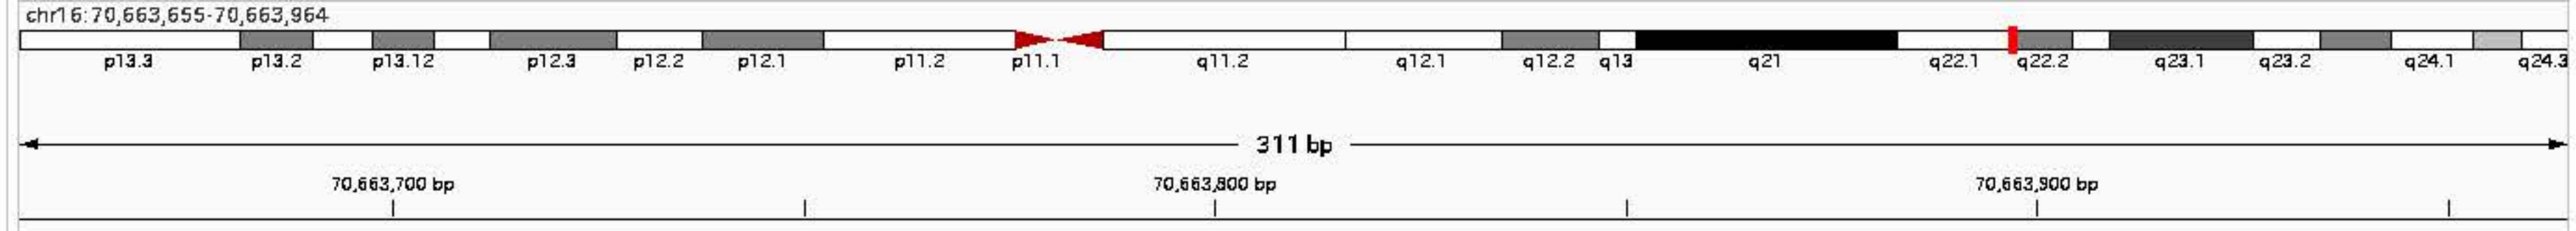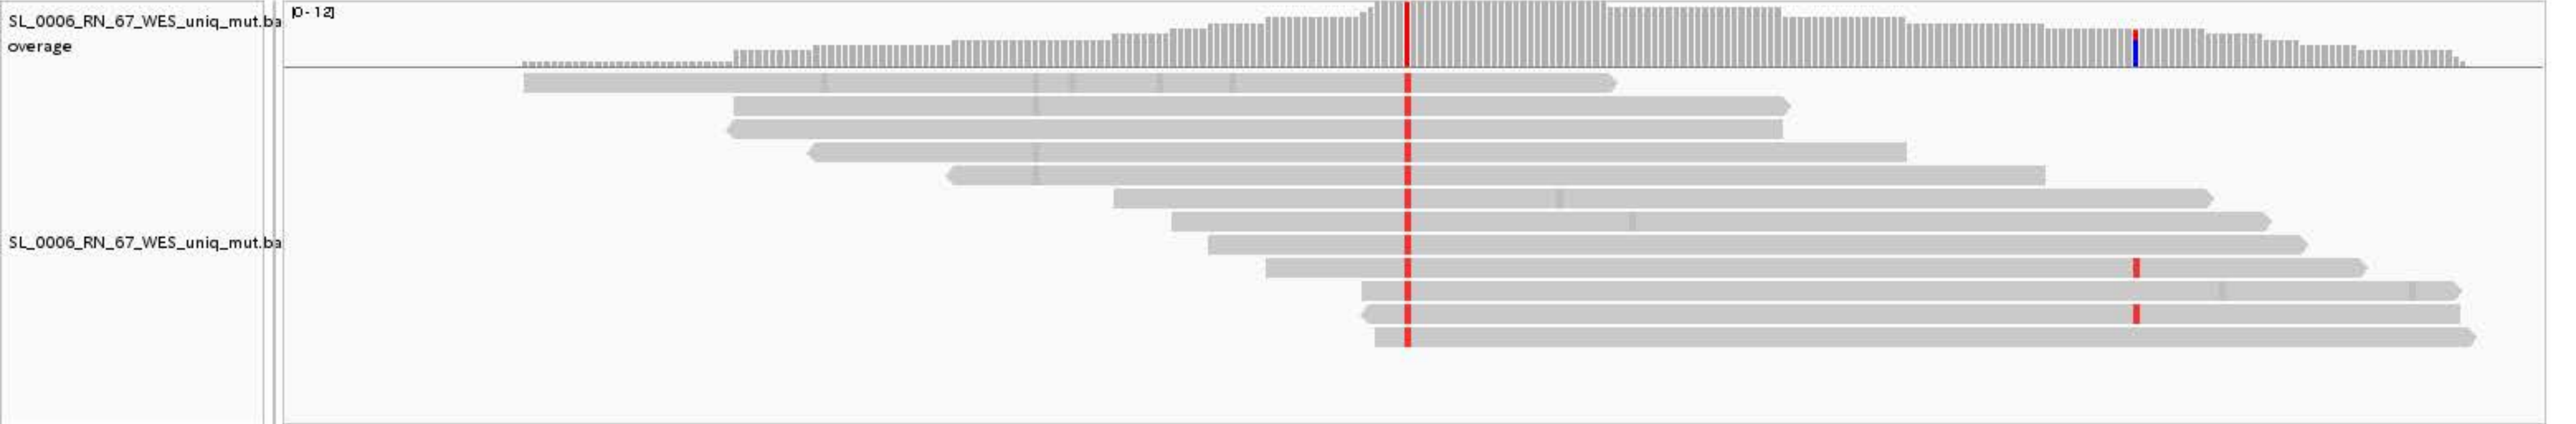

Sequence →

Refseq Genes

L I R P A S R D N T V T R R L R V G R R I A V L M D E A P P D S T A A P P P T P T E E T P T A S L A T P F P F Q G E G L A H A G A V L E G L K E V L S H R N A A L Q Q Q E D E A G A G P Y G A

MTSS2





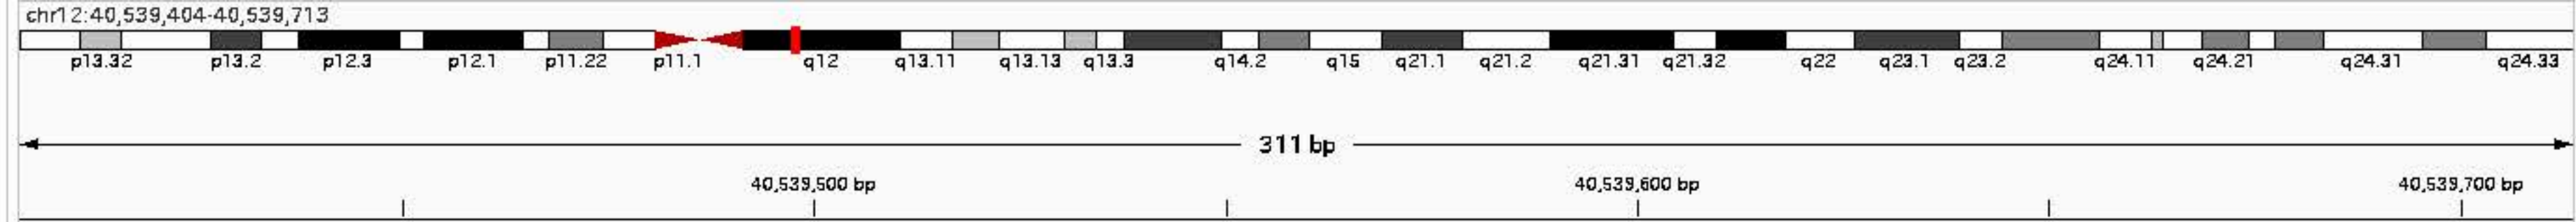

SL\_0007\_RN\_33\_WES\_uniq\_mut.ba  
coverage

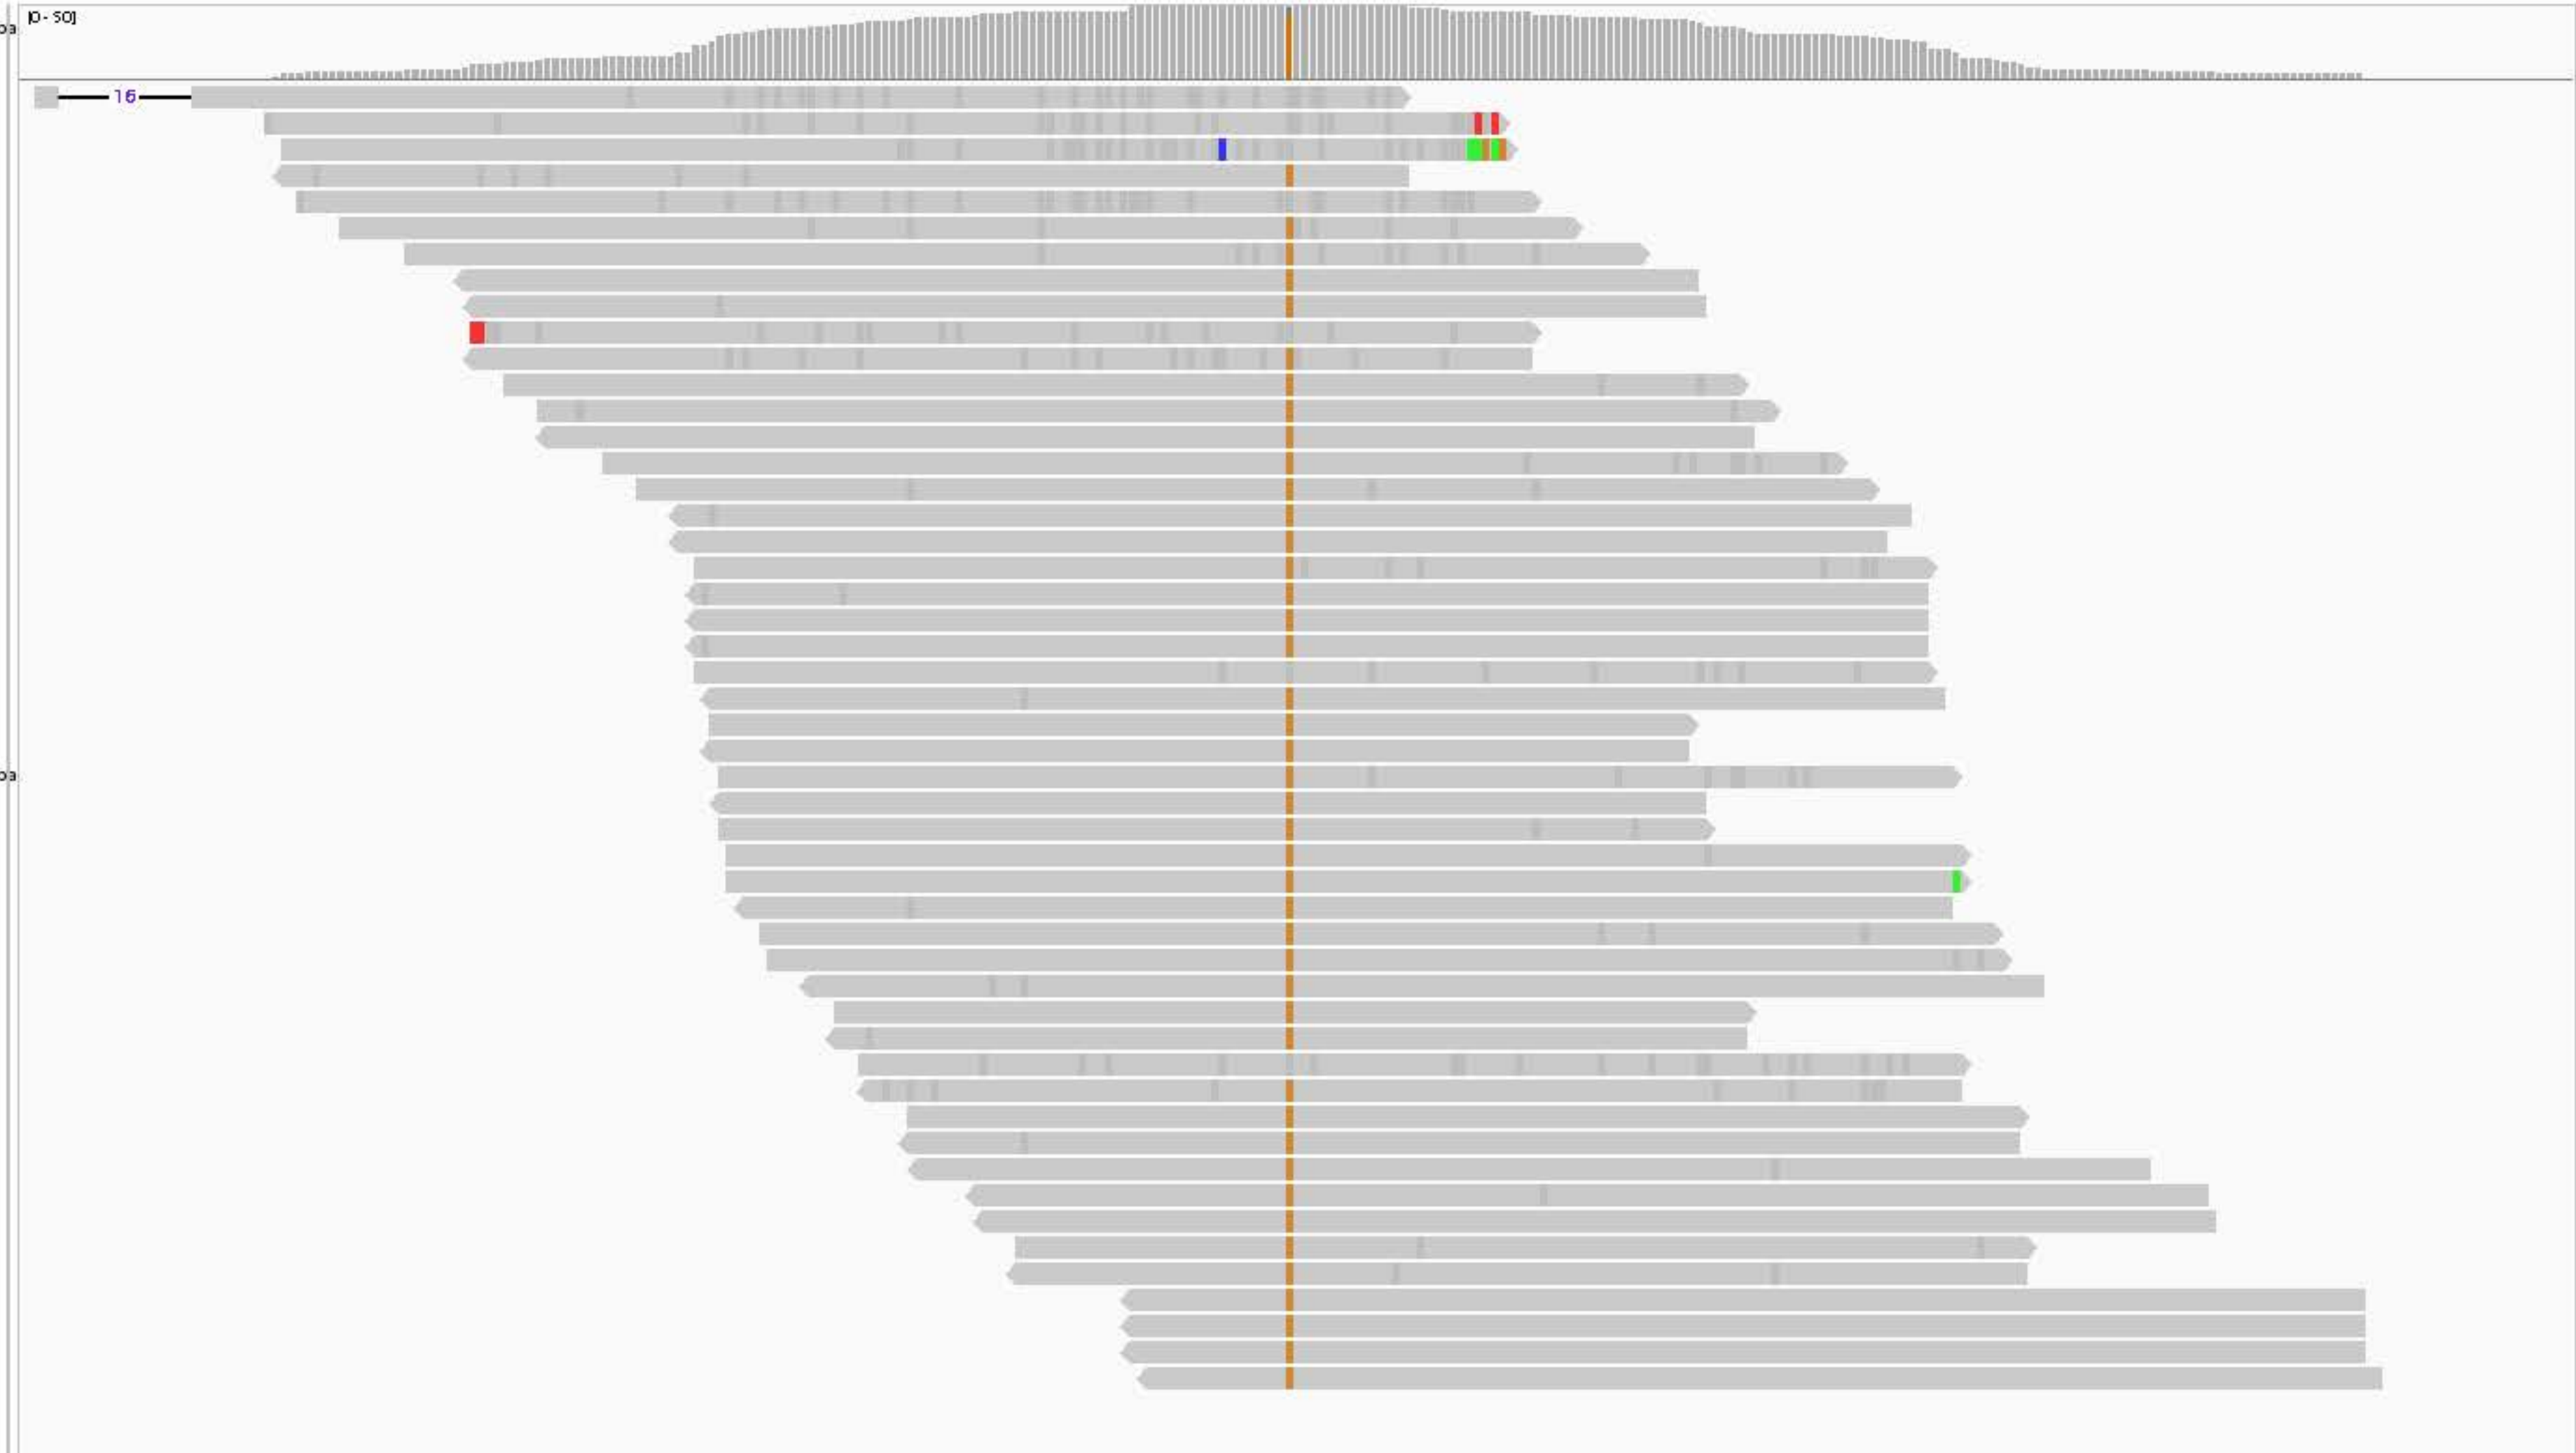

SL\_0007\_RN\_33\_WES\_uniq\_mut.ba

Sequence →  
Refseq Genes

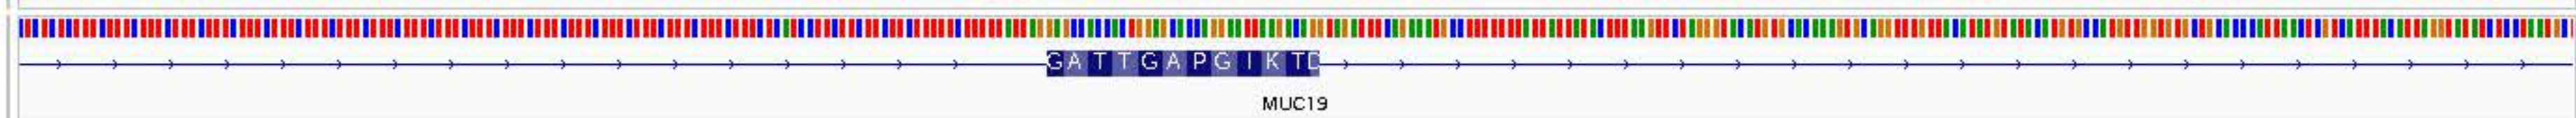



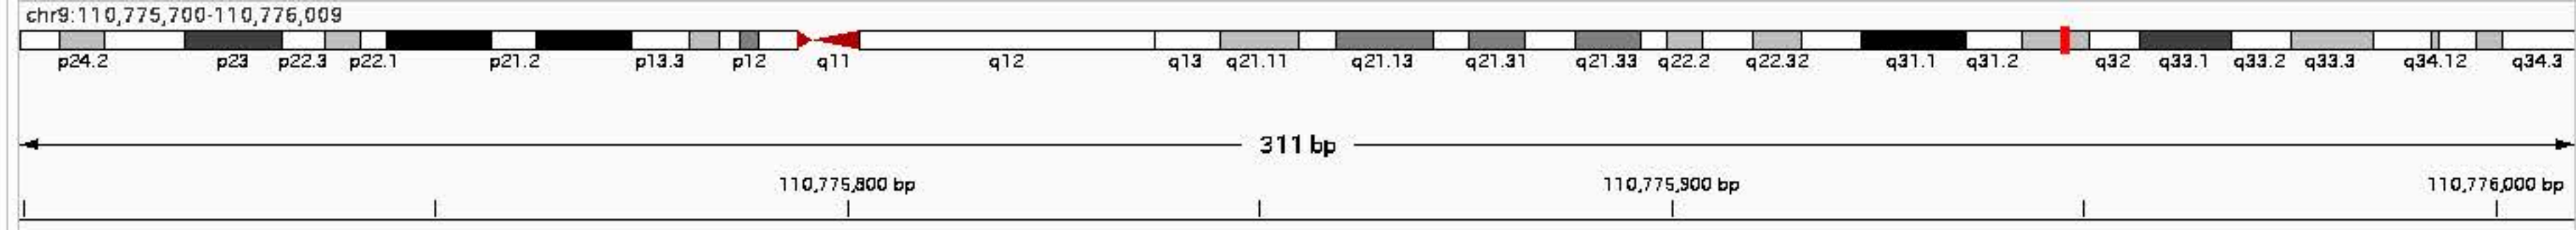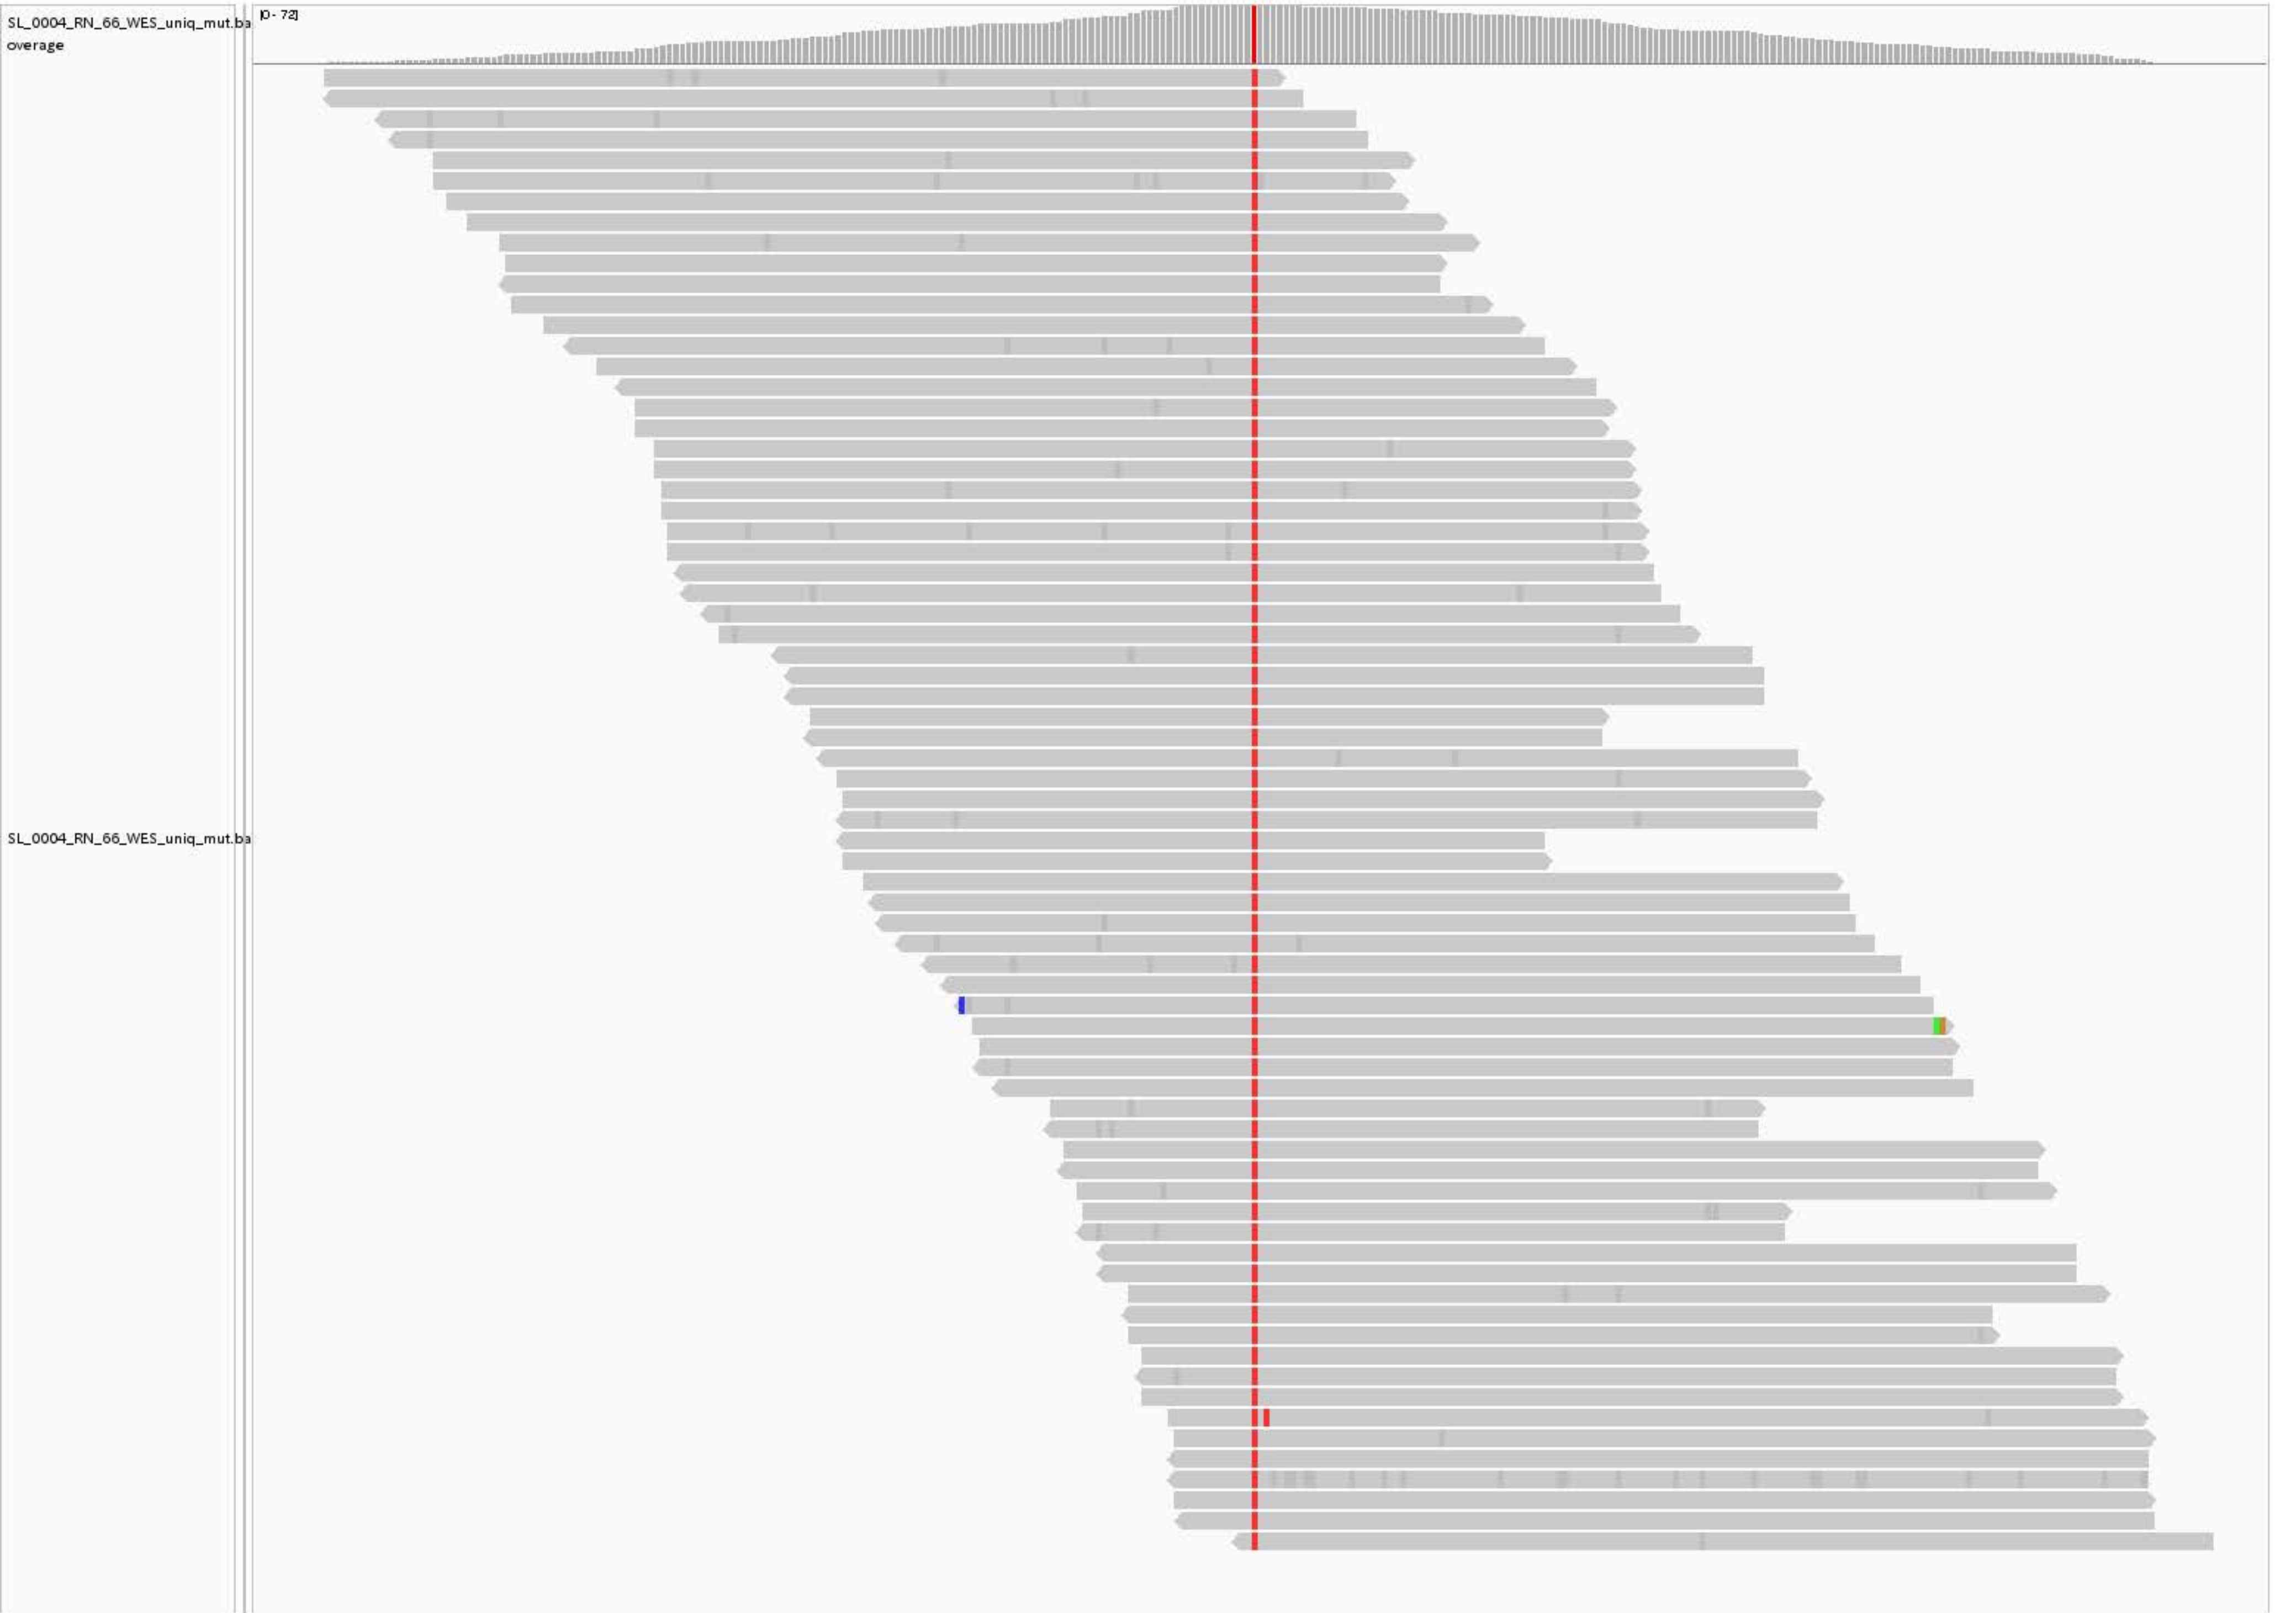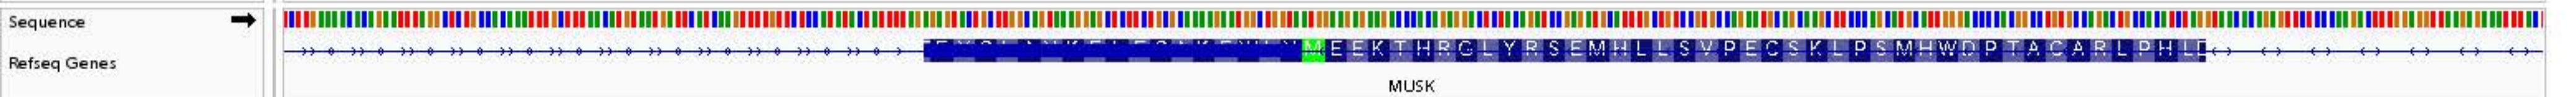

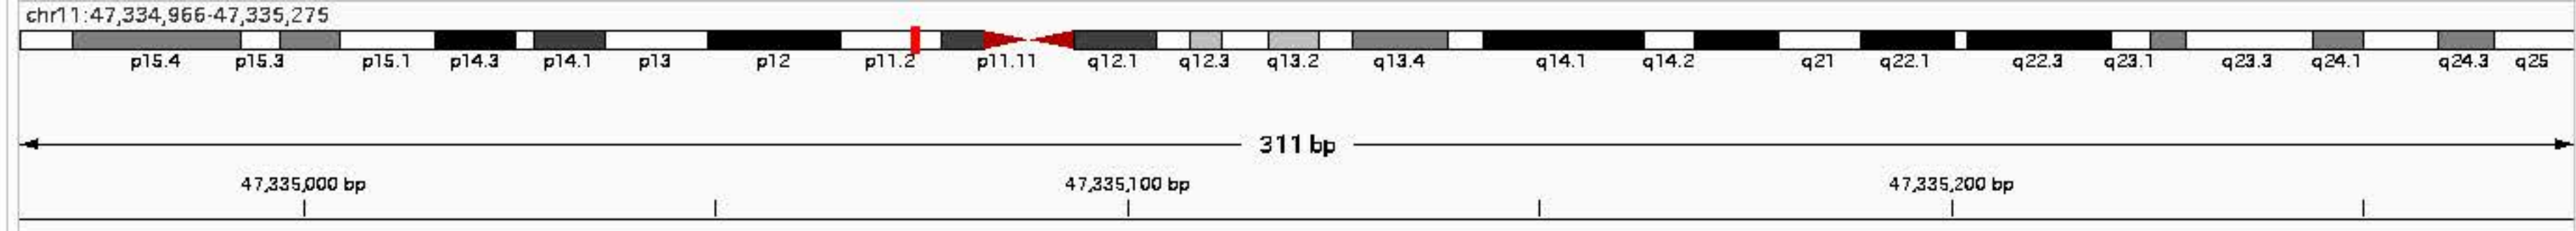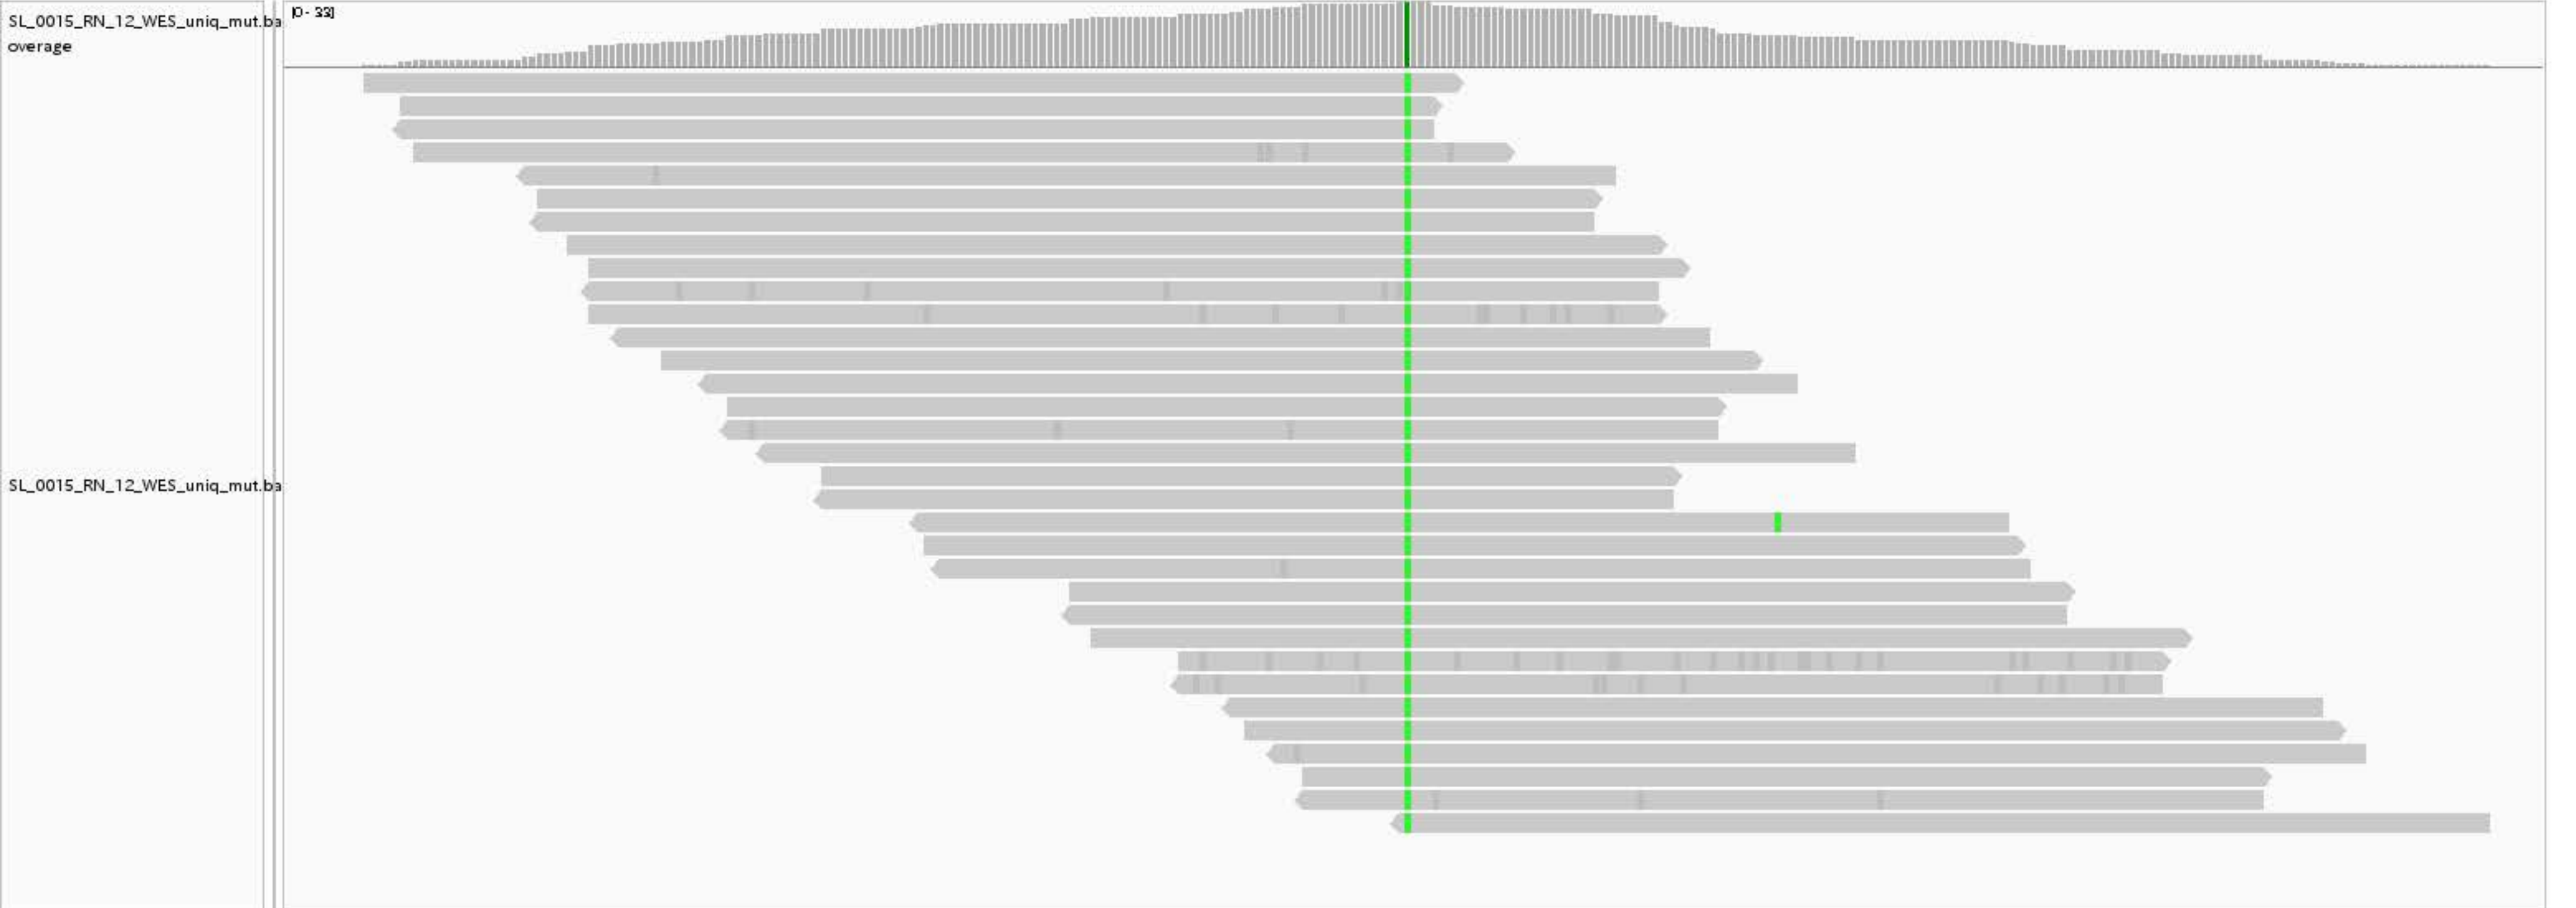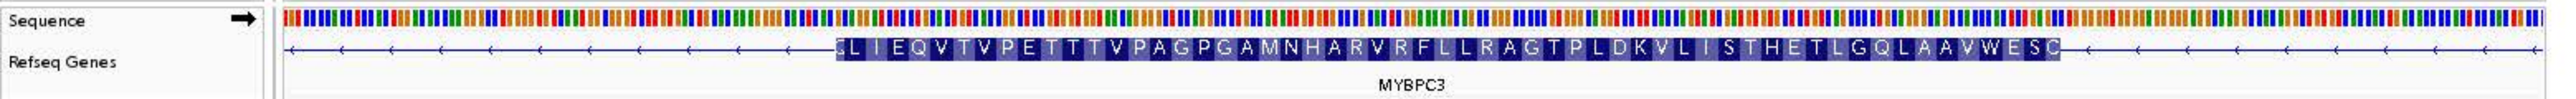

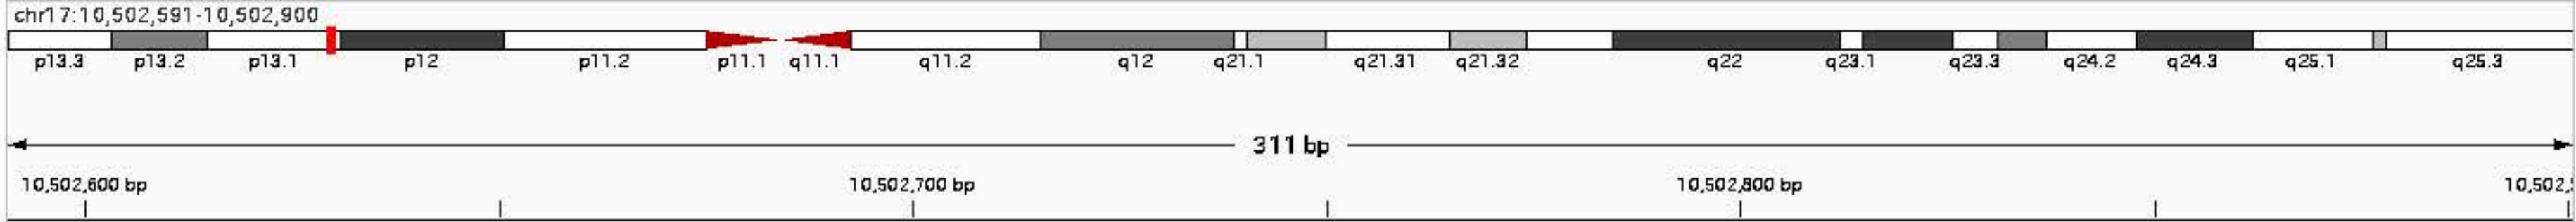

SL\_0007\_RN\_33\_WES\_uniq\_mut.ba  
coverage

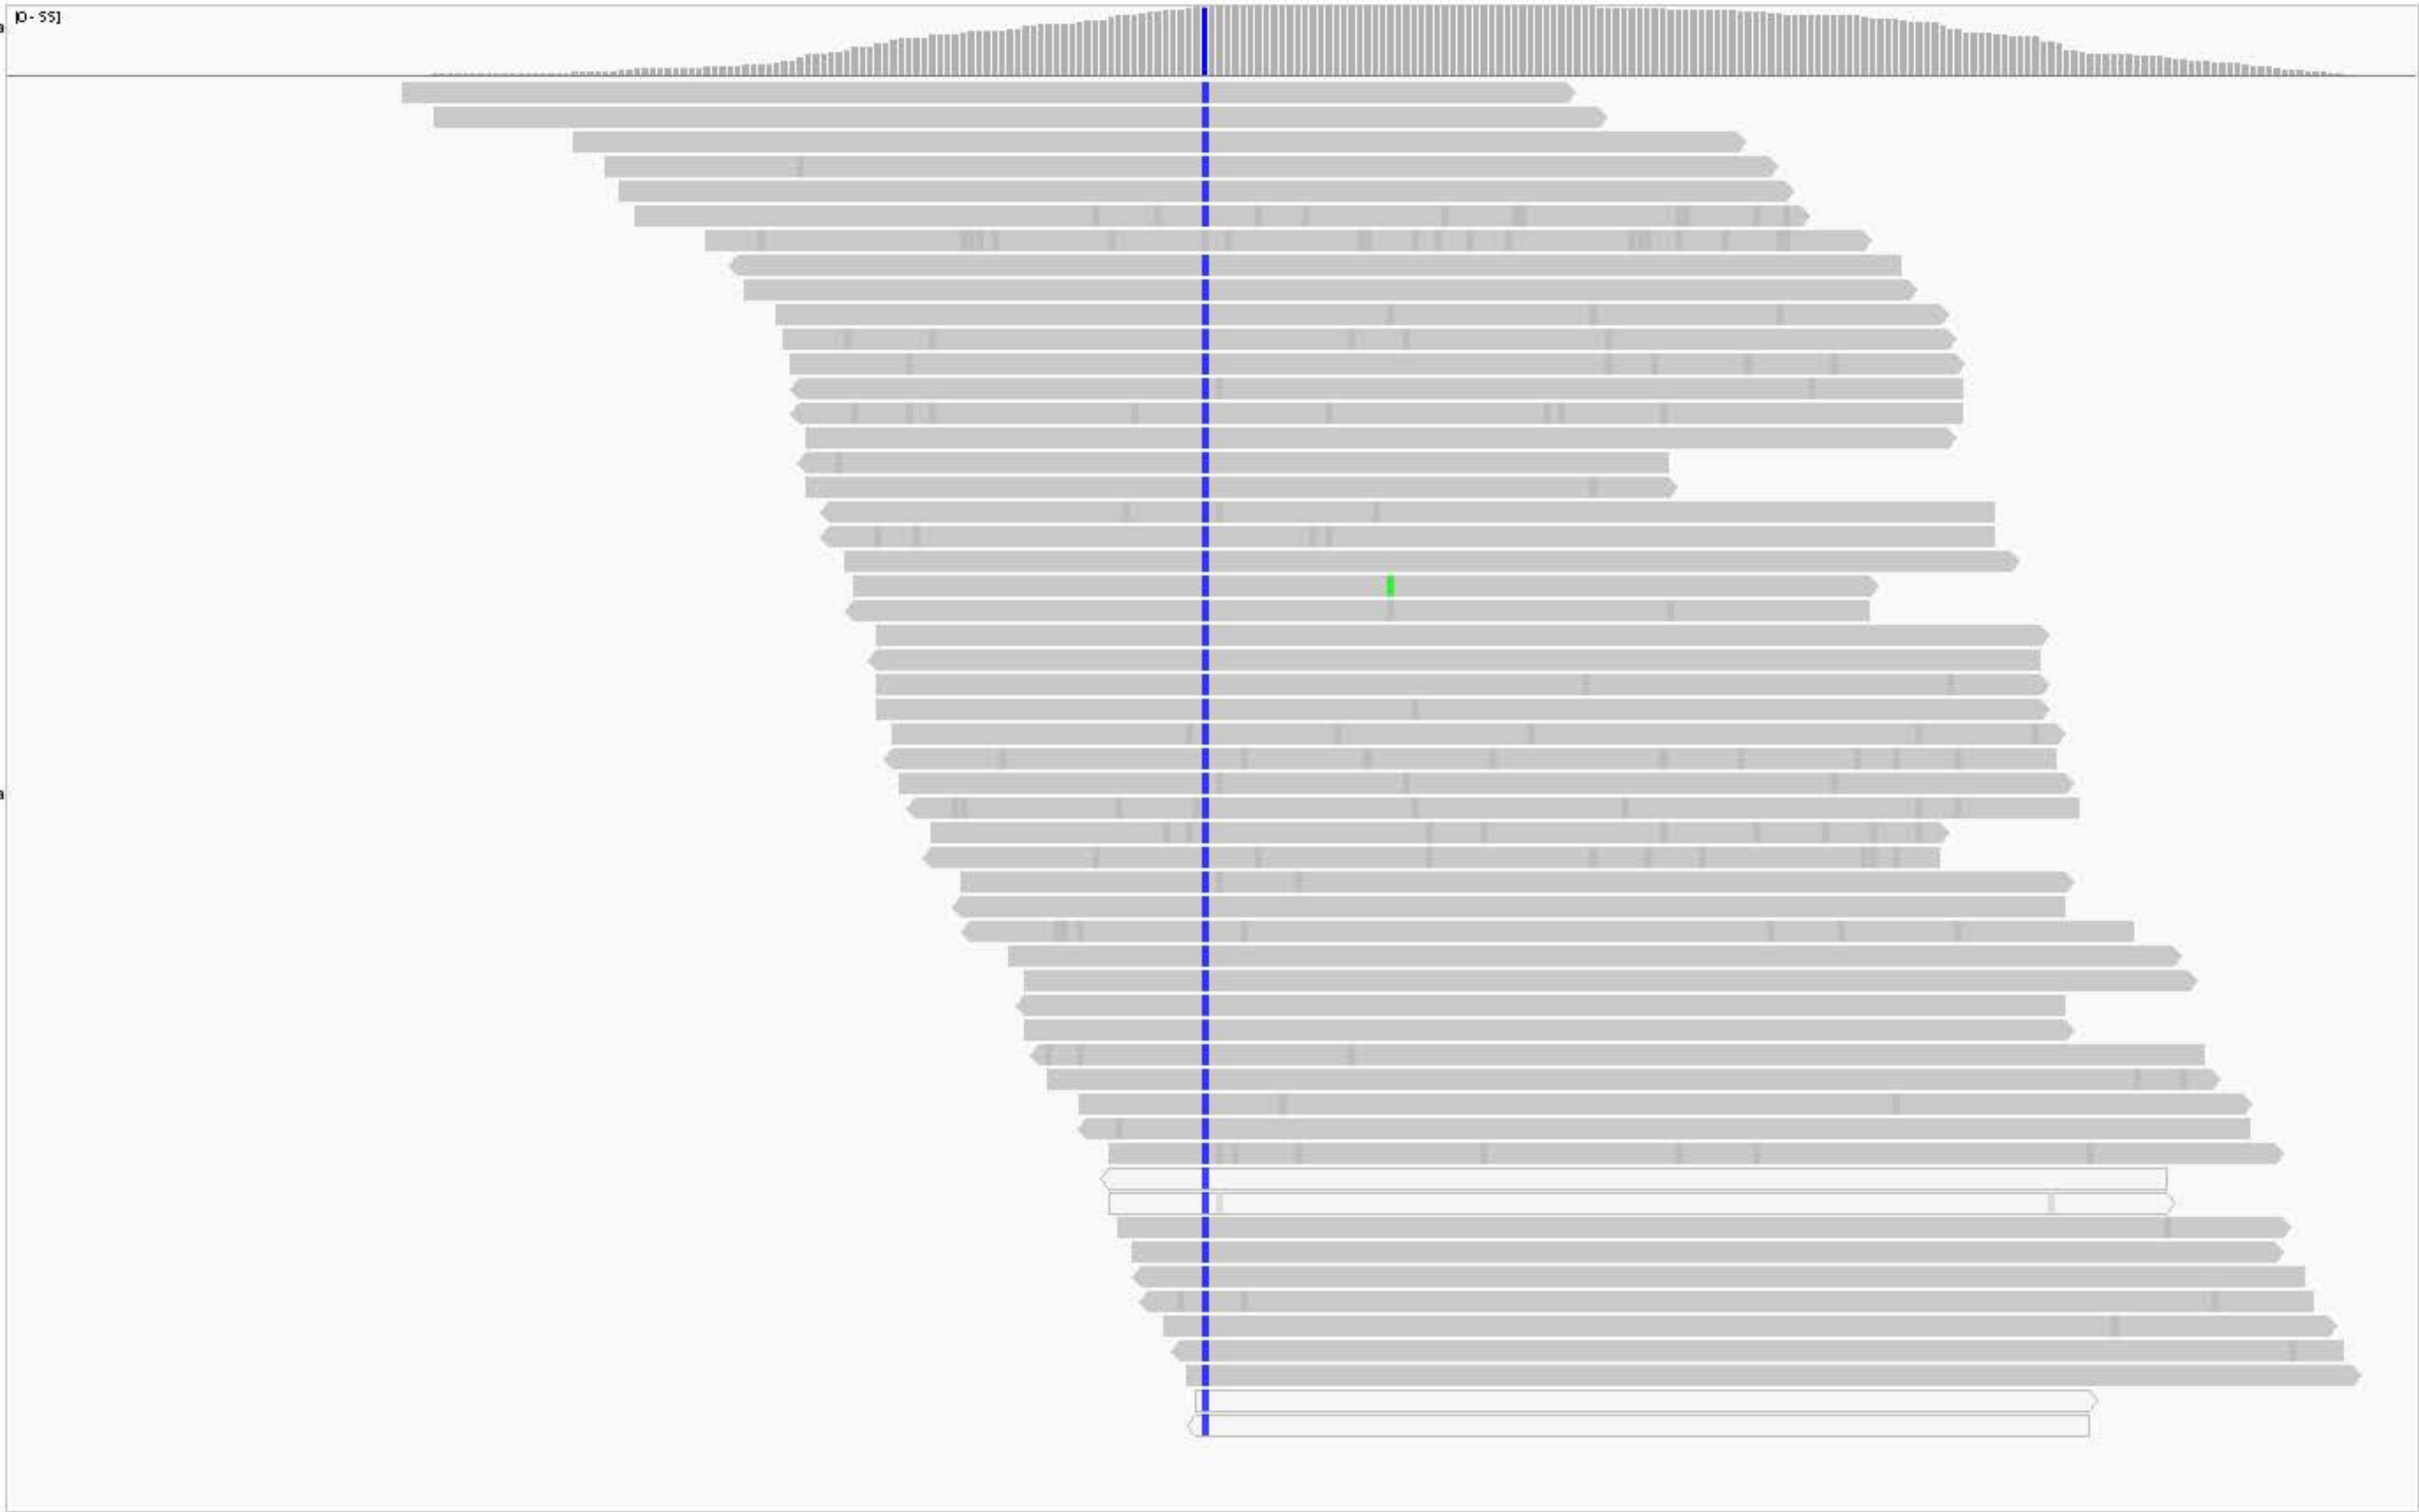

SL\_0007\_RN\_33\_WES\_uniq\_mut.ba

Sequence →  
Refseq Genes

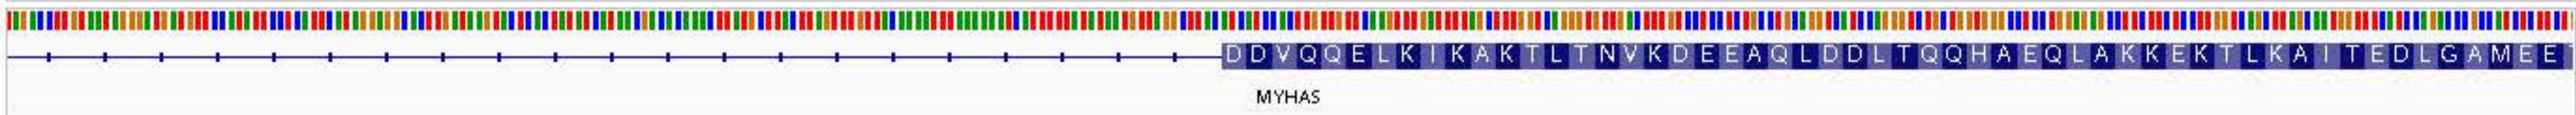



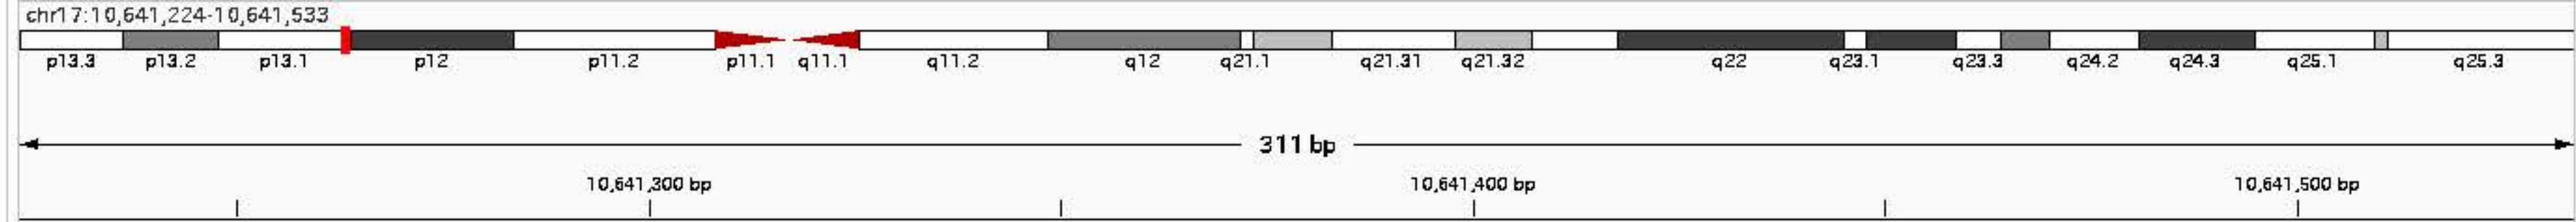

SL\_0002\_RN\_8\_WES\_uniq\_mut.ba  
verage

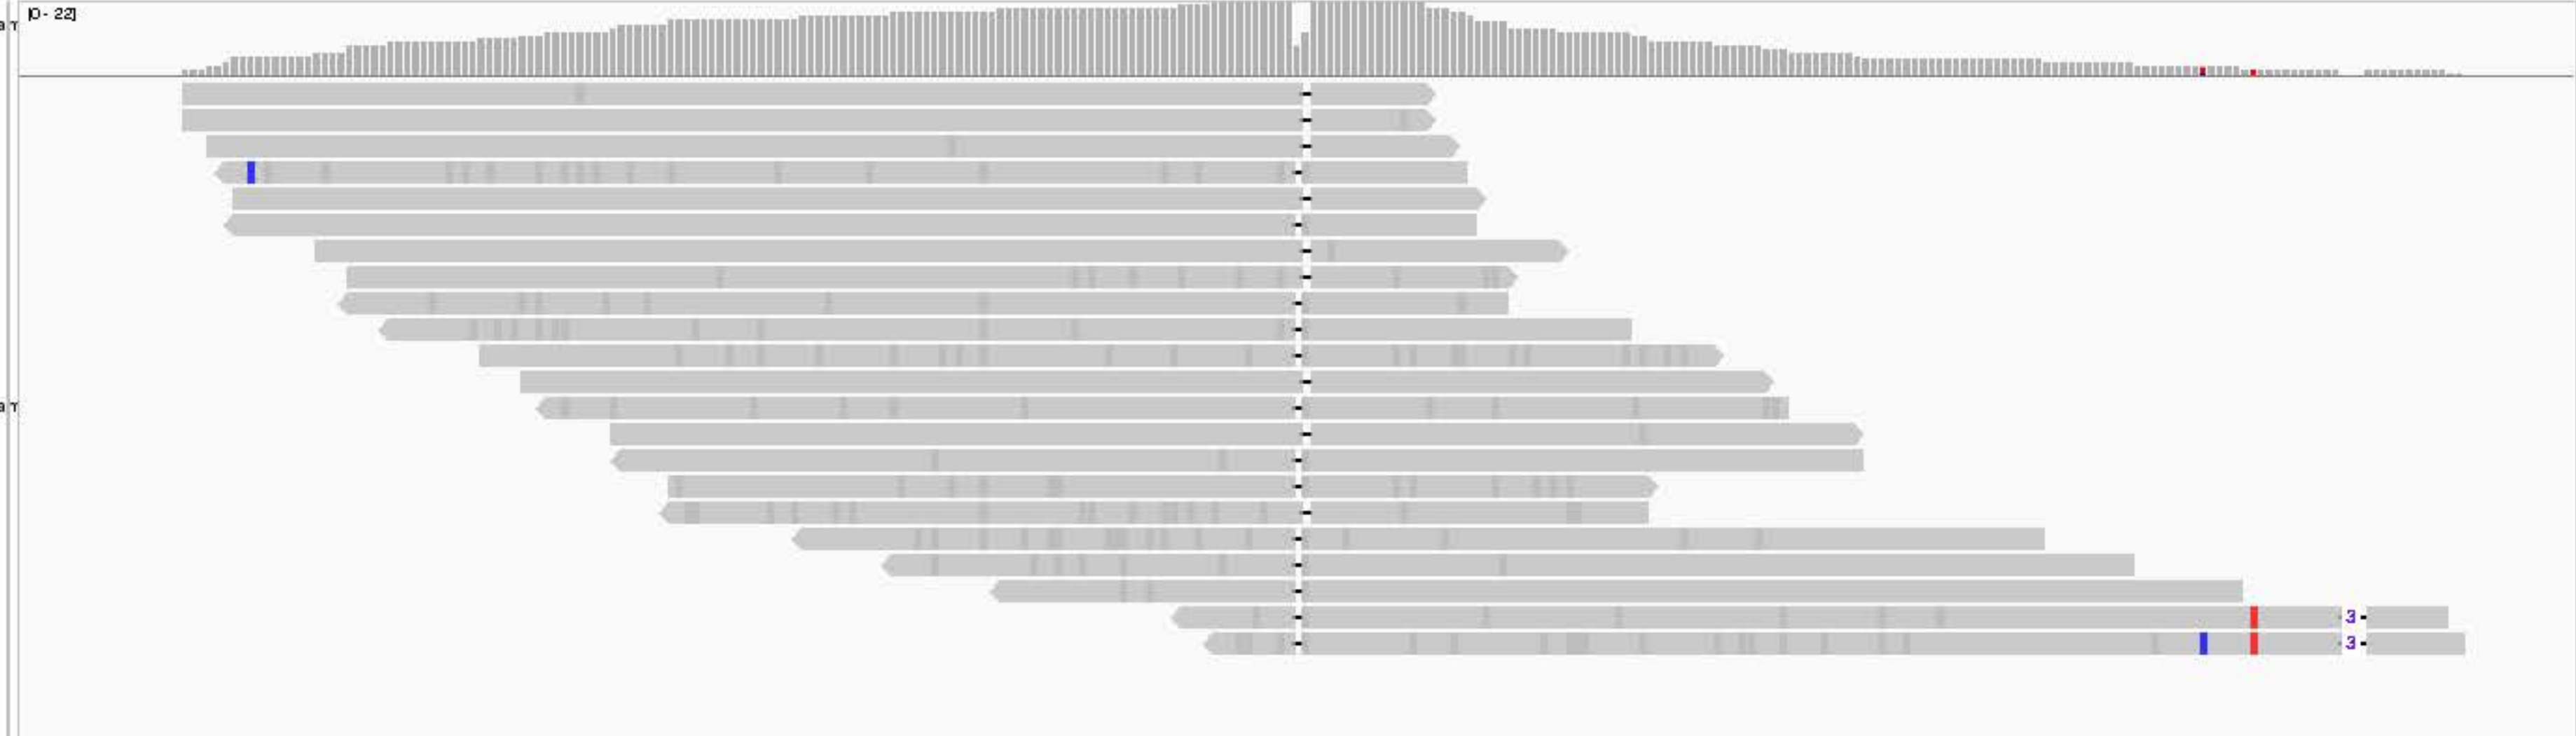

Sequence →  
Refseq Genes

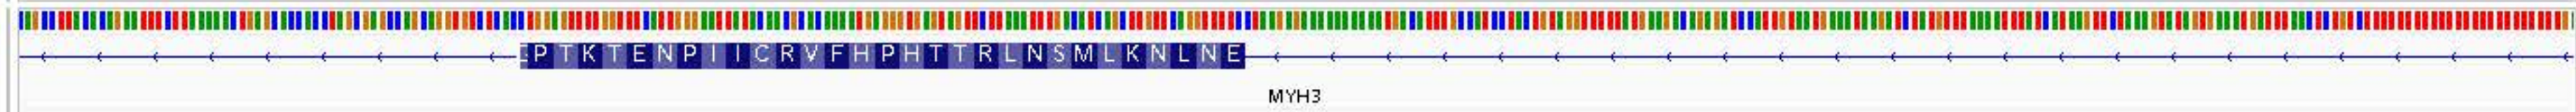

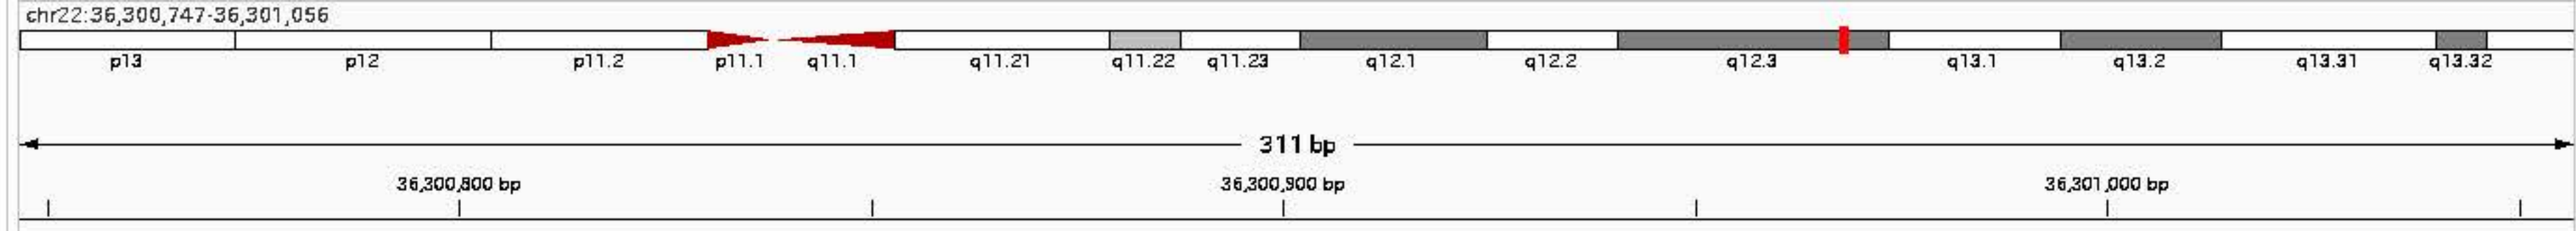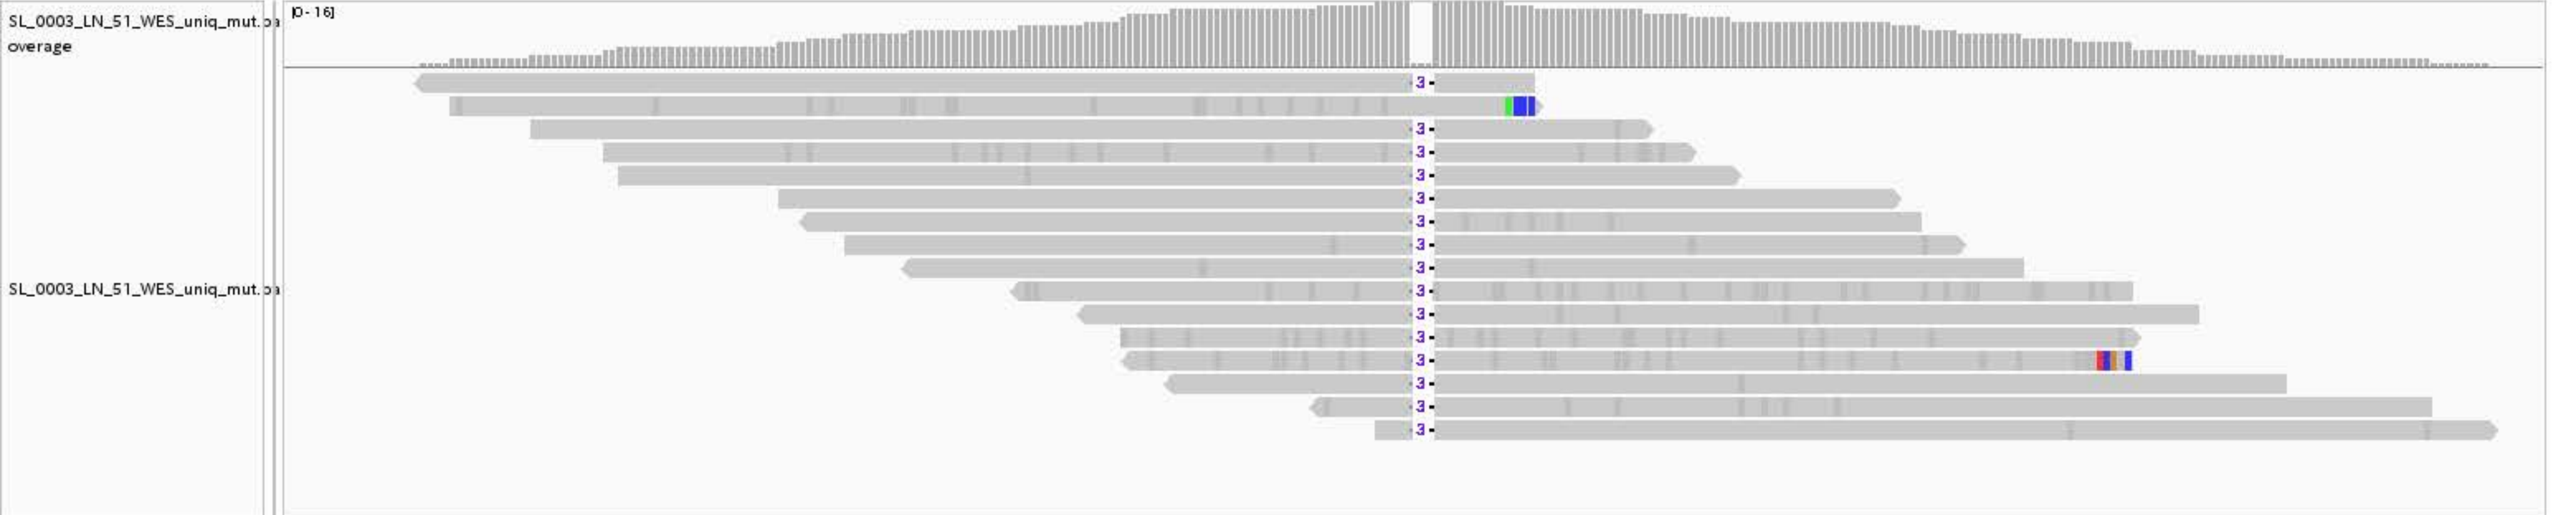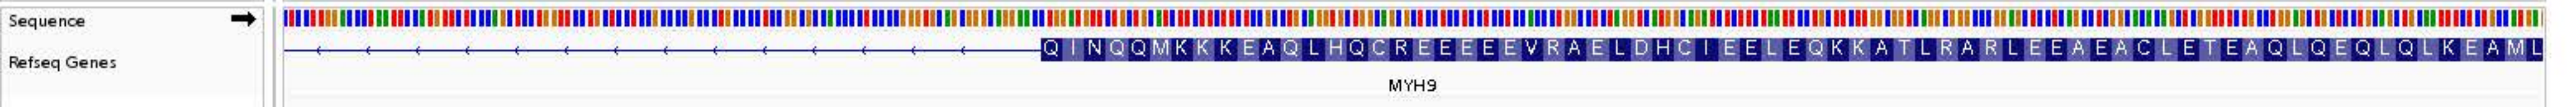

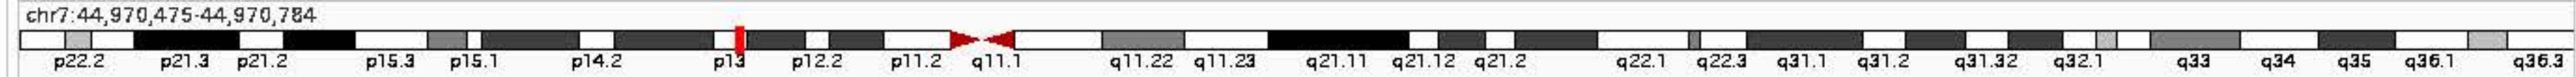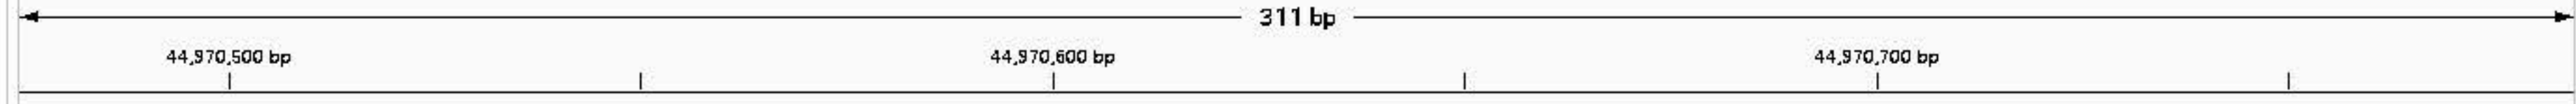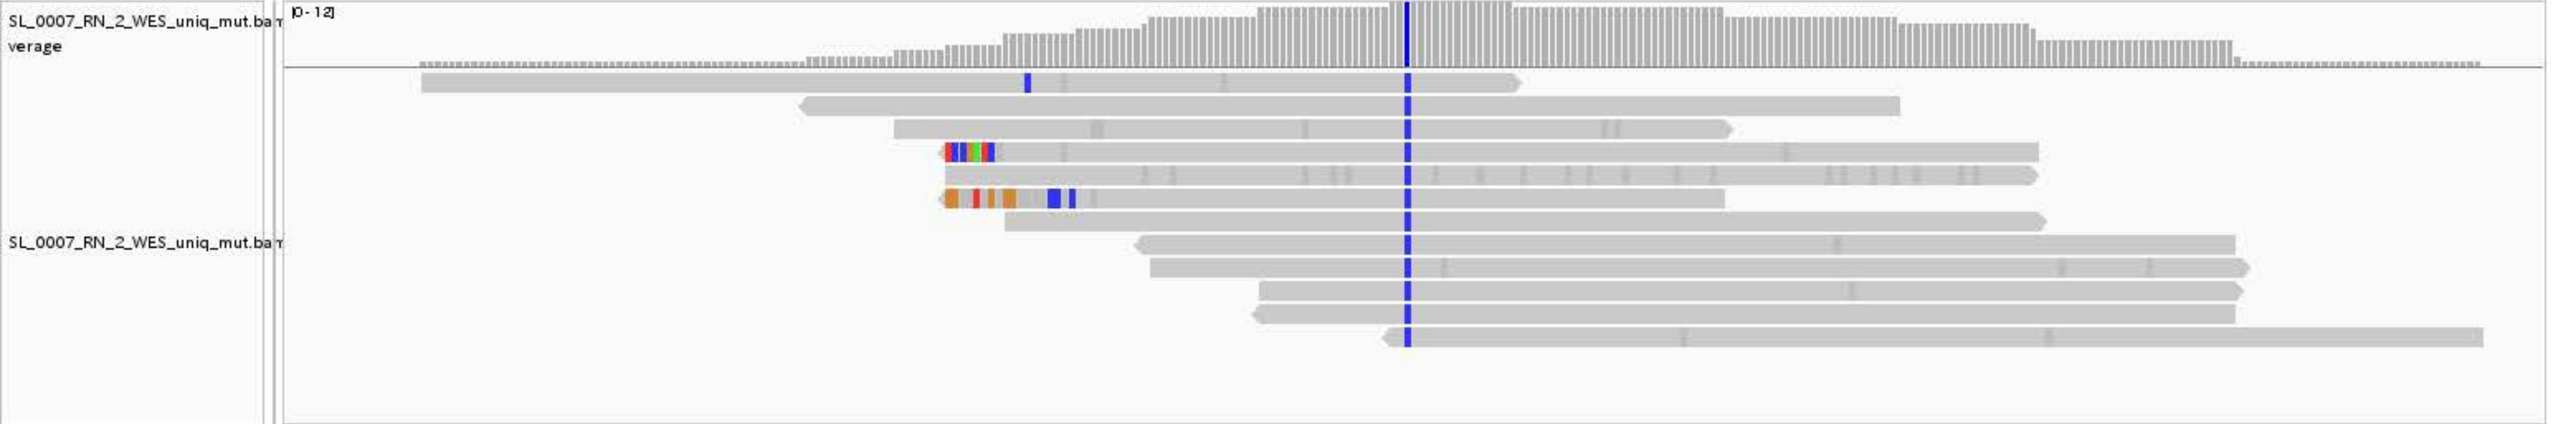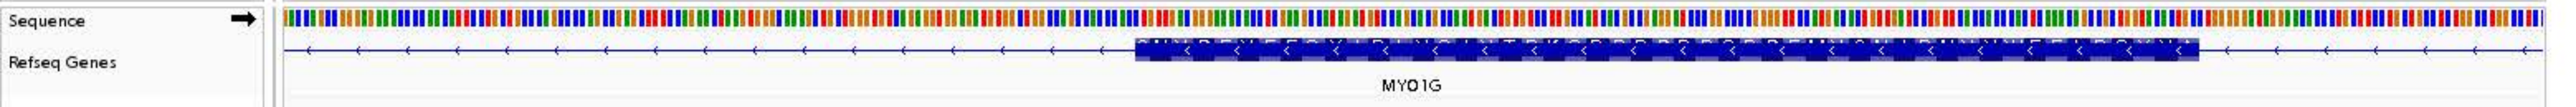



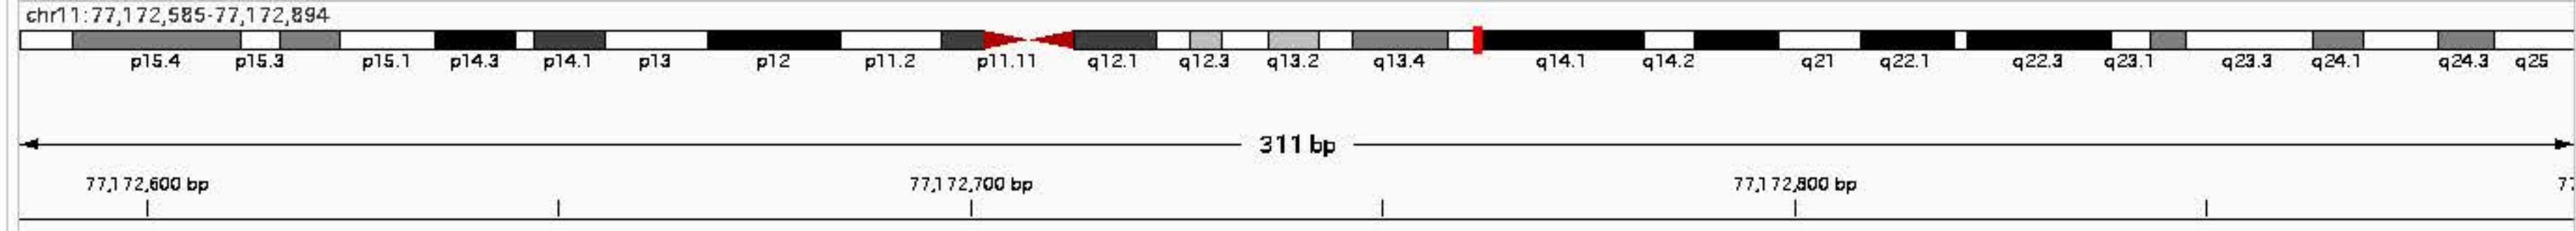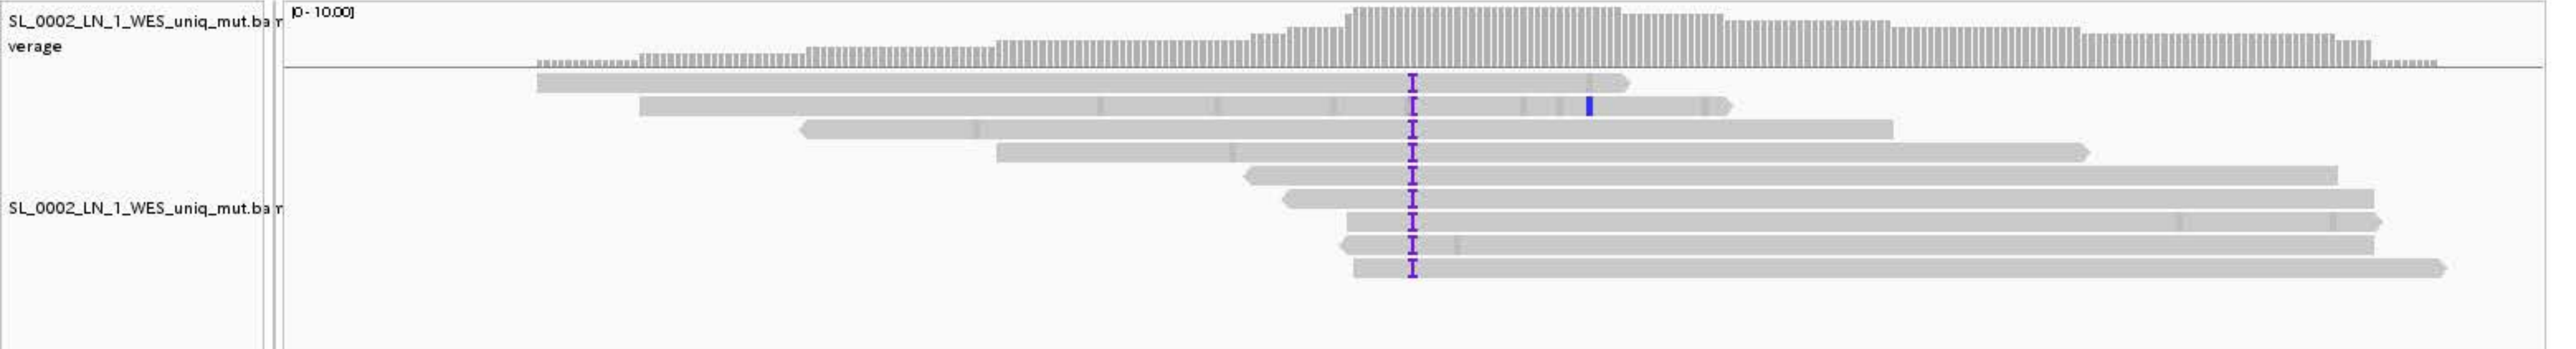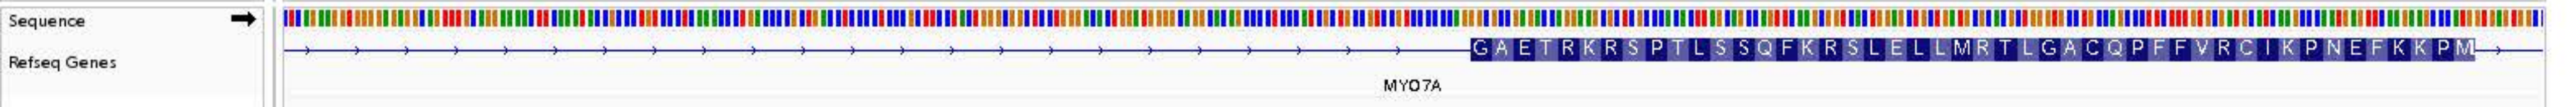

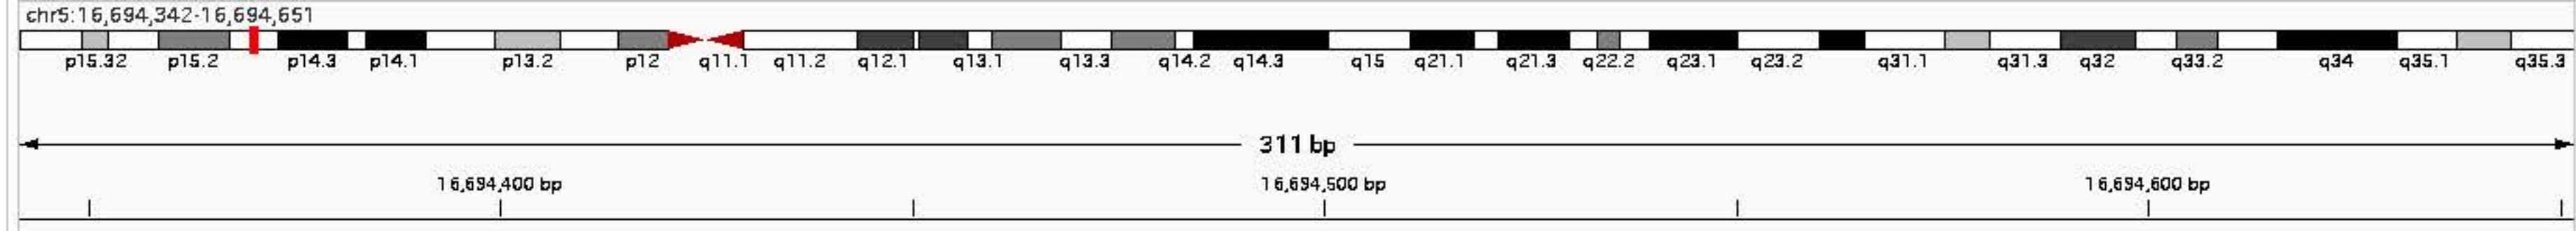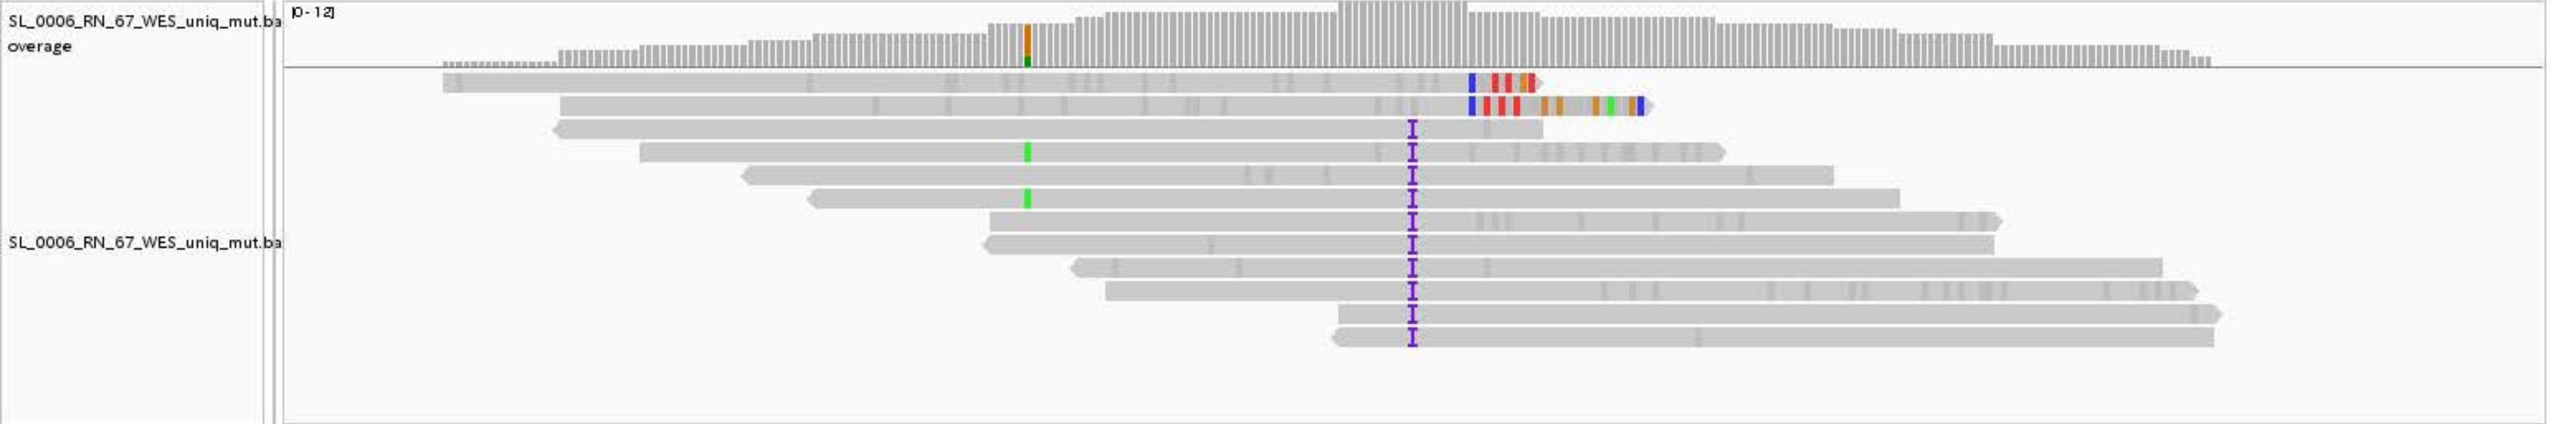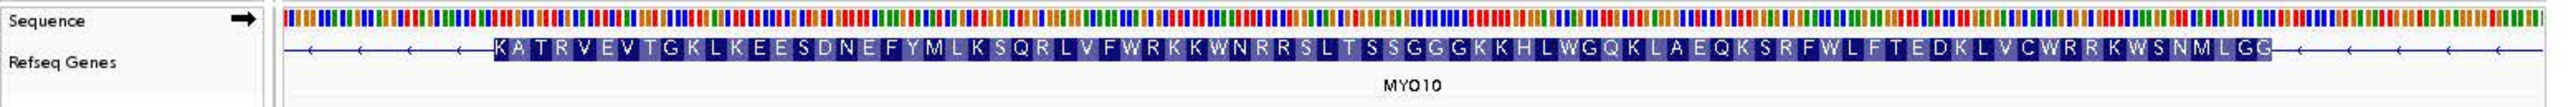

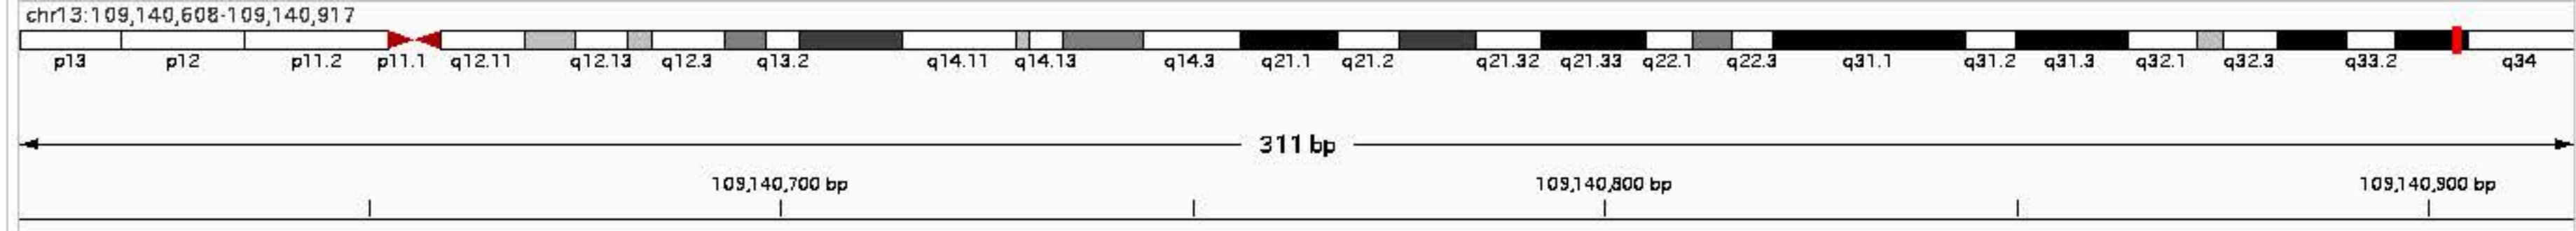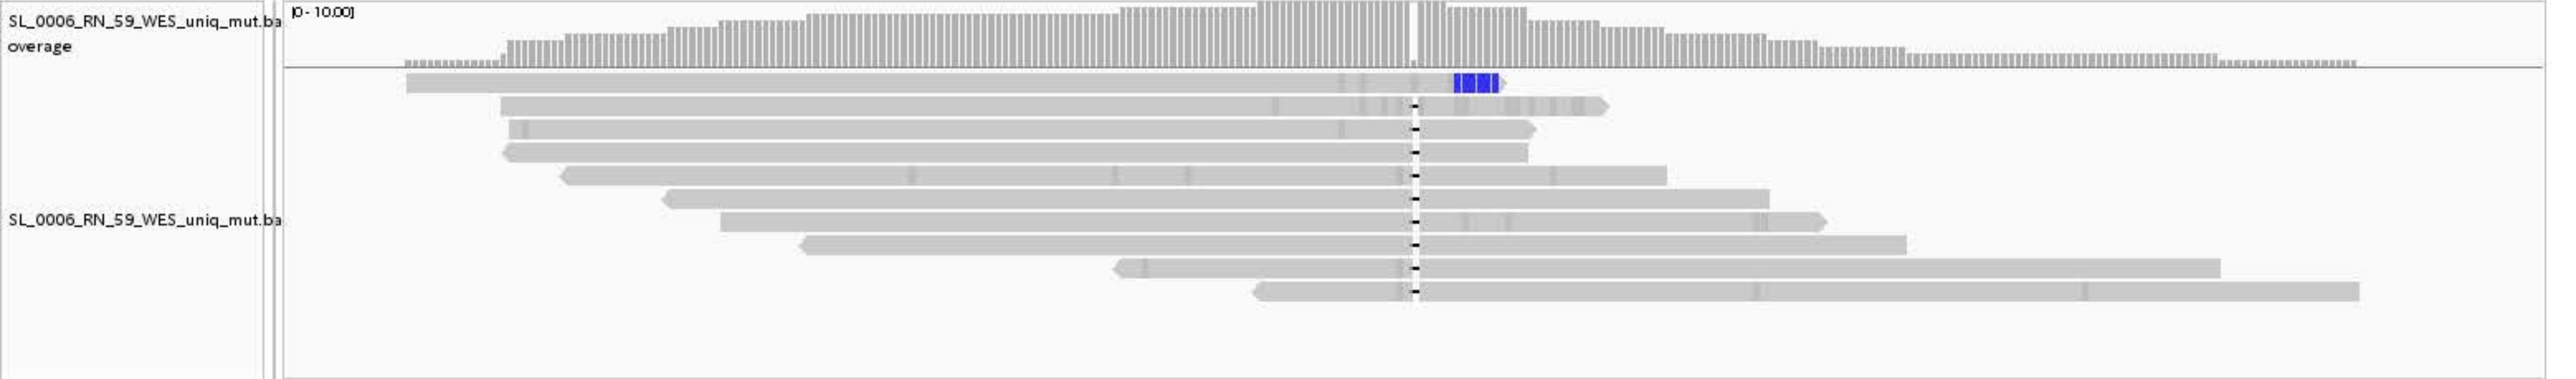

Sequence →

Refseq Genes

GPGAGSFLFHGASPPLLHRAPEDEAAGPPGDACDIPPPFPNLLPHRPPLLVFPPTPVTCSPASDESPLTPLEVKKLPVLETNLKYPVQPEGSSPLSPQYSKSSQ

MYO16



chr19:45,914,143-45,914,452

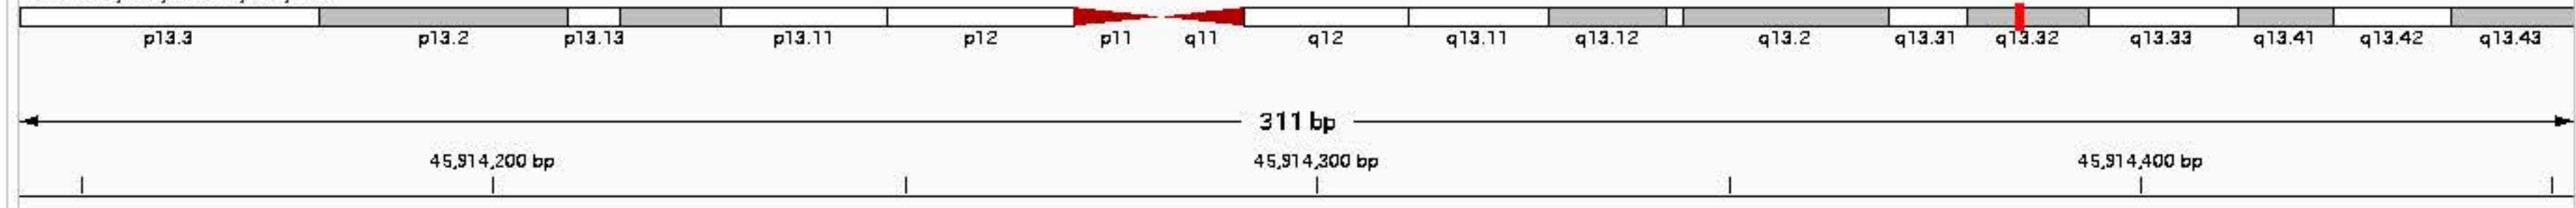

SL\_0004\_RN\_05\_WES\_uniq\_mut.ba  
coverage

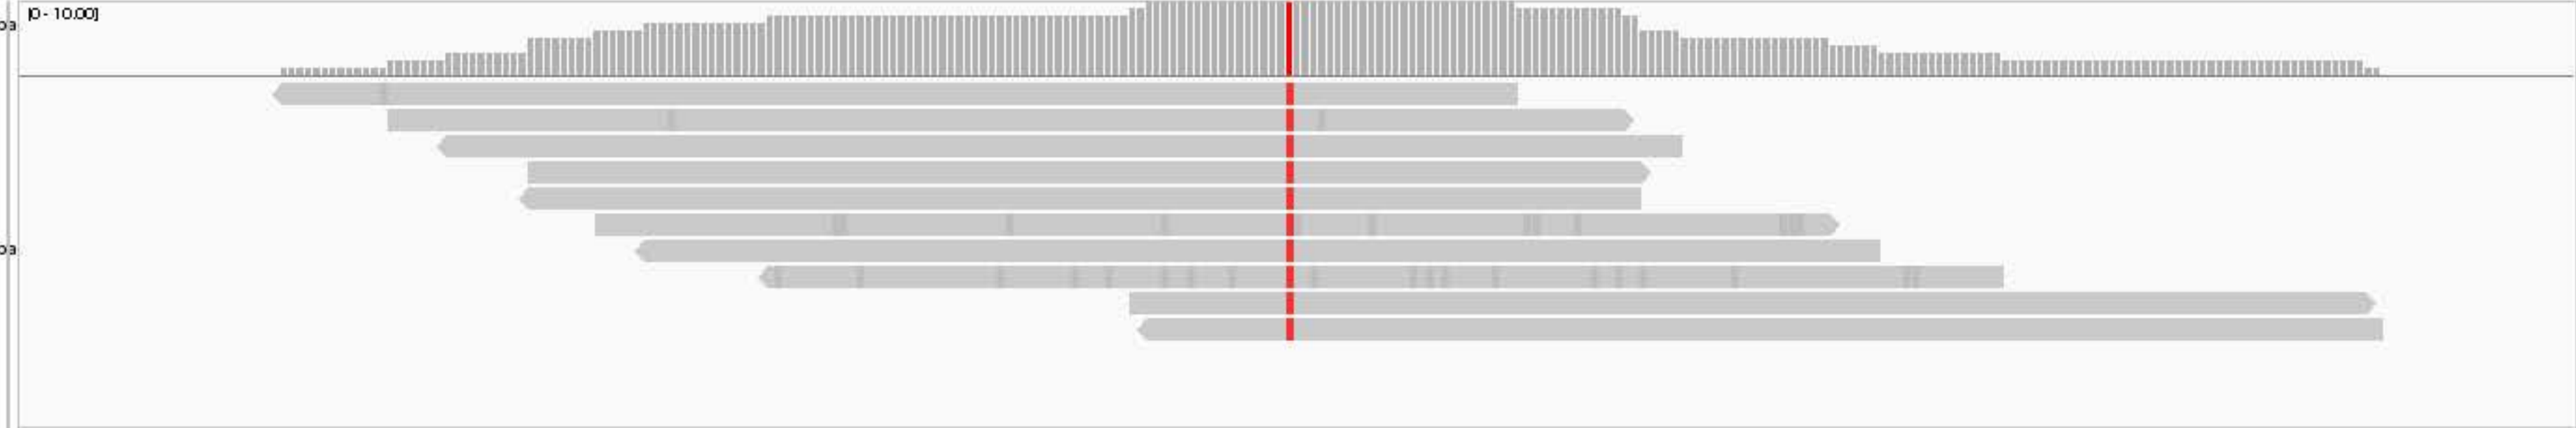

Sequence  
Refseq Genes

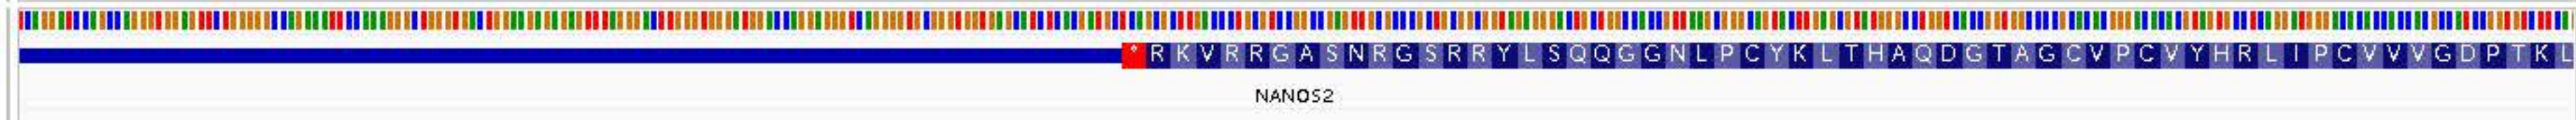

chr1:149,552,753-149,553,062

p36.31 p36.21 p36.11 p35.1 p34.2 p33 p32.2 p31.3 p31.1 p22.3 p21.3 p21.1 p13.2 p11.2 q12 q21.1 q21.3 q23.2 q24.2 q25.2 q31.1 q31.3 q32.2 q41 q42.13 q43 q44

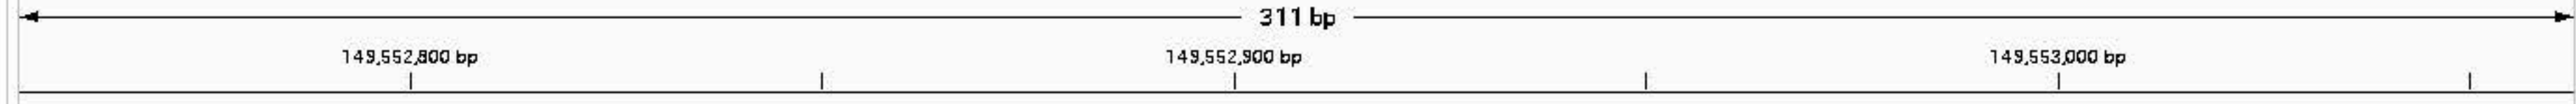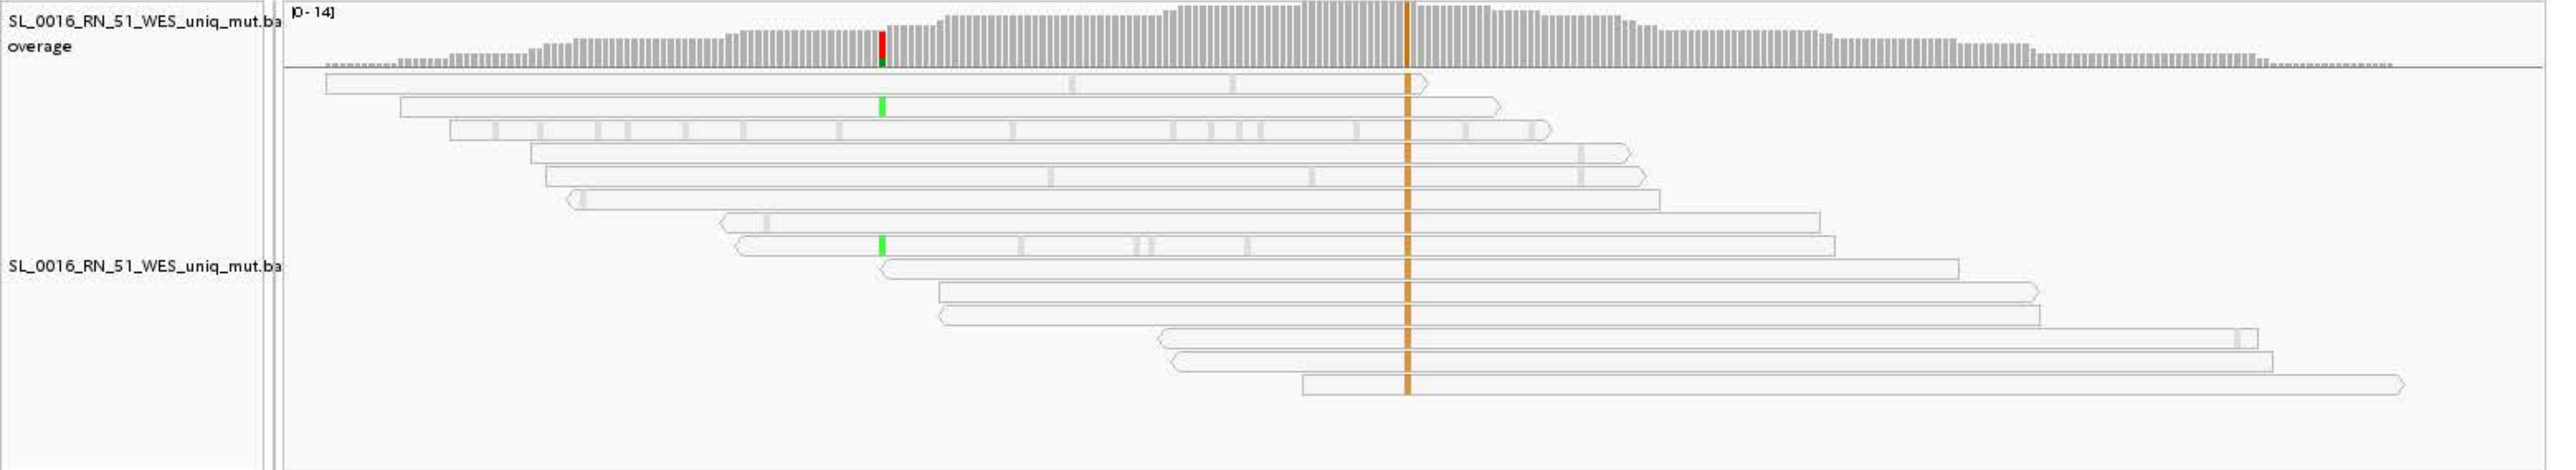

Sequence Refseq Genes

LSRELLEVVVEPEVLQDSLDRCYSTPSSCLEQPDSQPYGSSFYALEEKHVGFSLDVGE

NBPF19

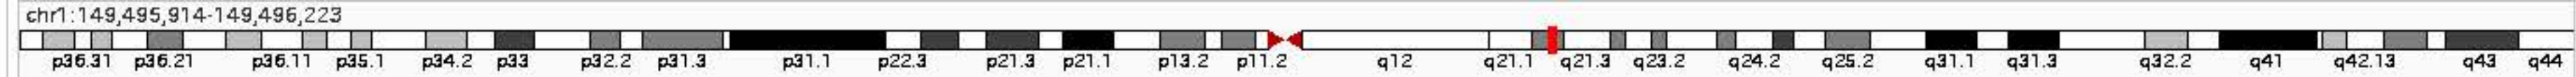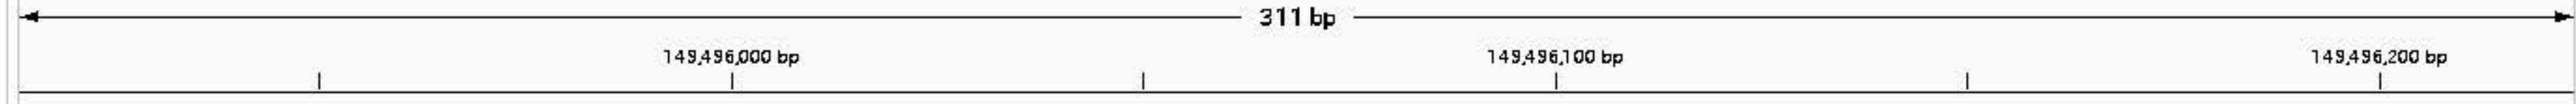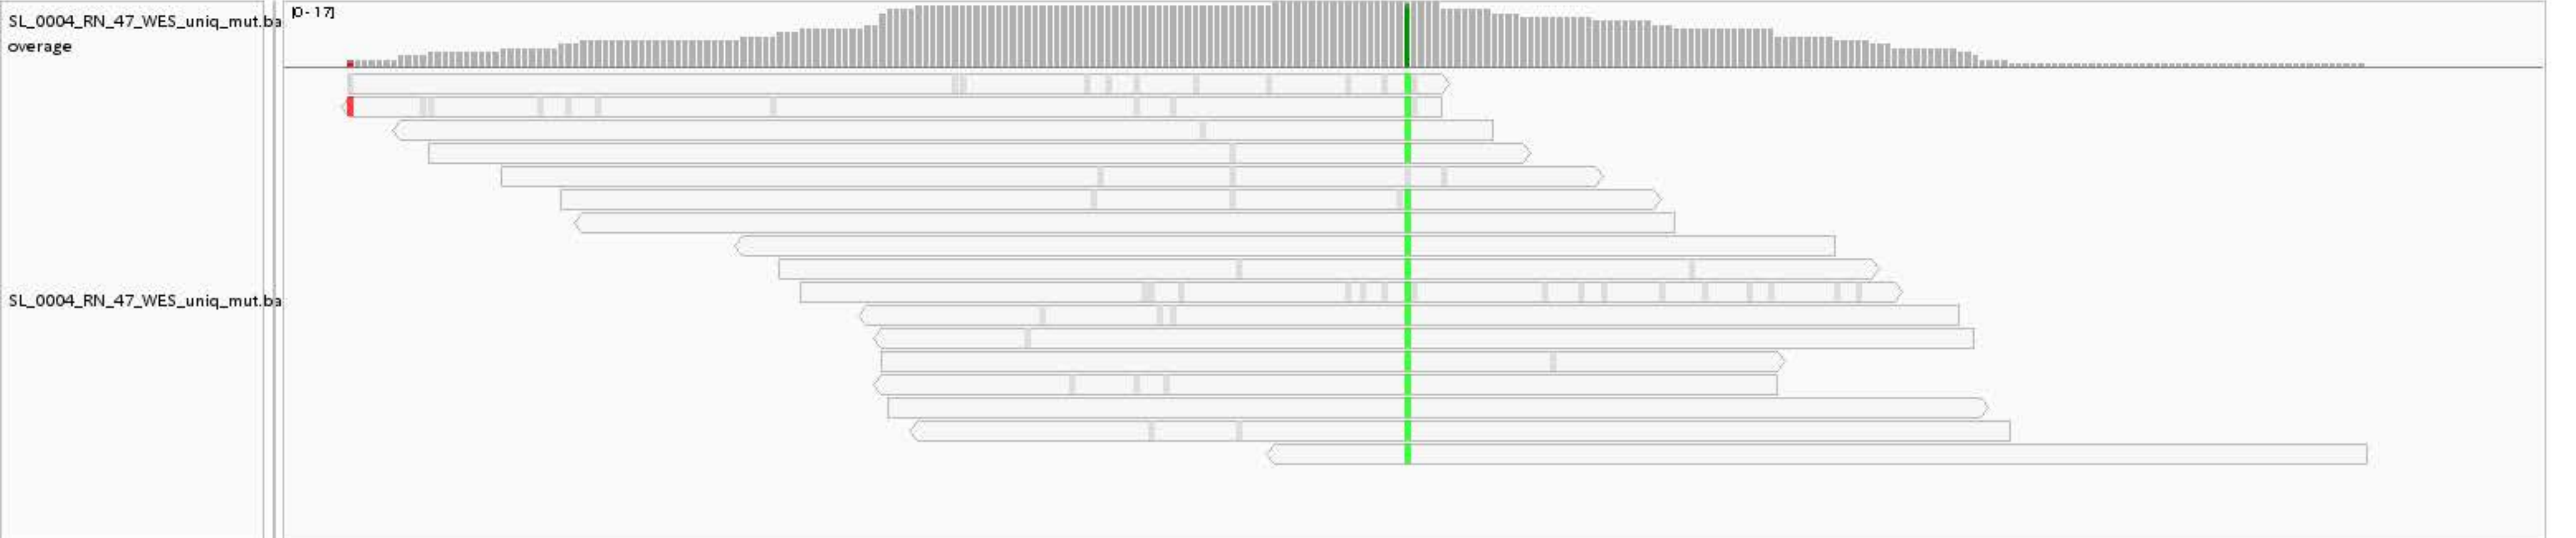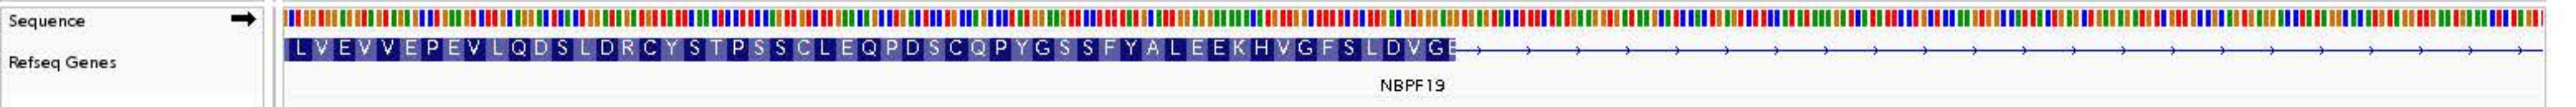



chr1:149,510,191-149,510,500

p36.31 p36.21 p36.11 p35.1 p34.2 p33 p32.2 p31.3 p31.1 p22.3 p21.3 p21.1 p13.2 p11.2 q12 q21.1 q21.3 q23.2 q24.2 q25.2 q31.1 q31.3 q32.2 q41 q42.13 q43 q44

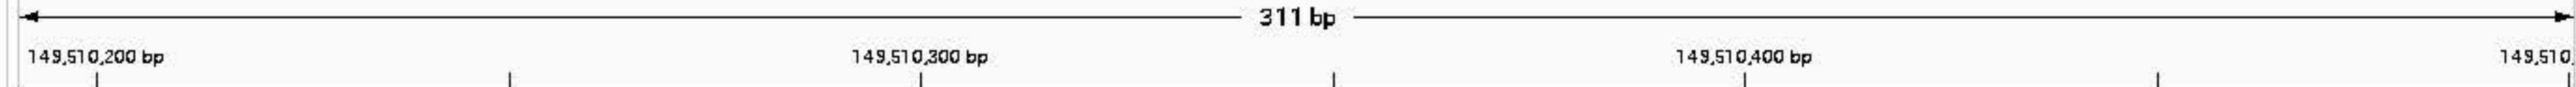

SL\_0004\_RN\_26\_WES\_uniq\_mut.ba  
coverage

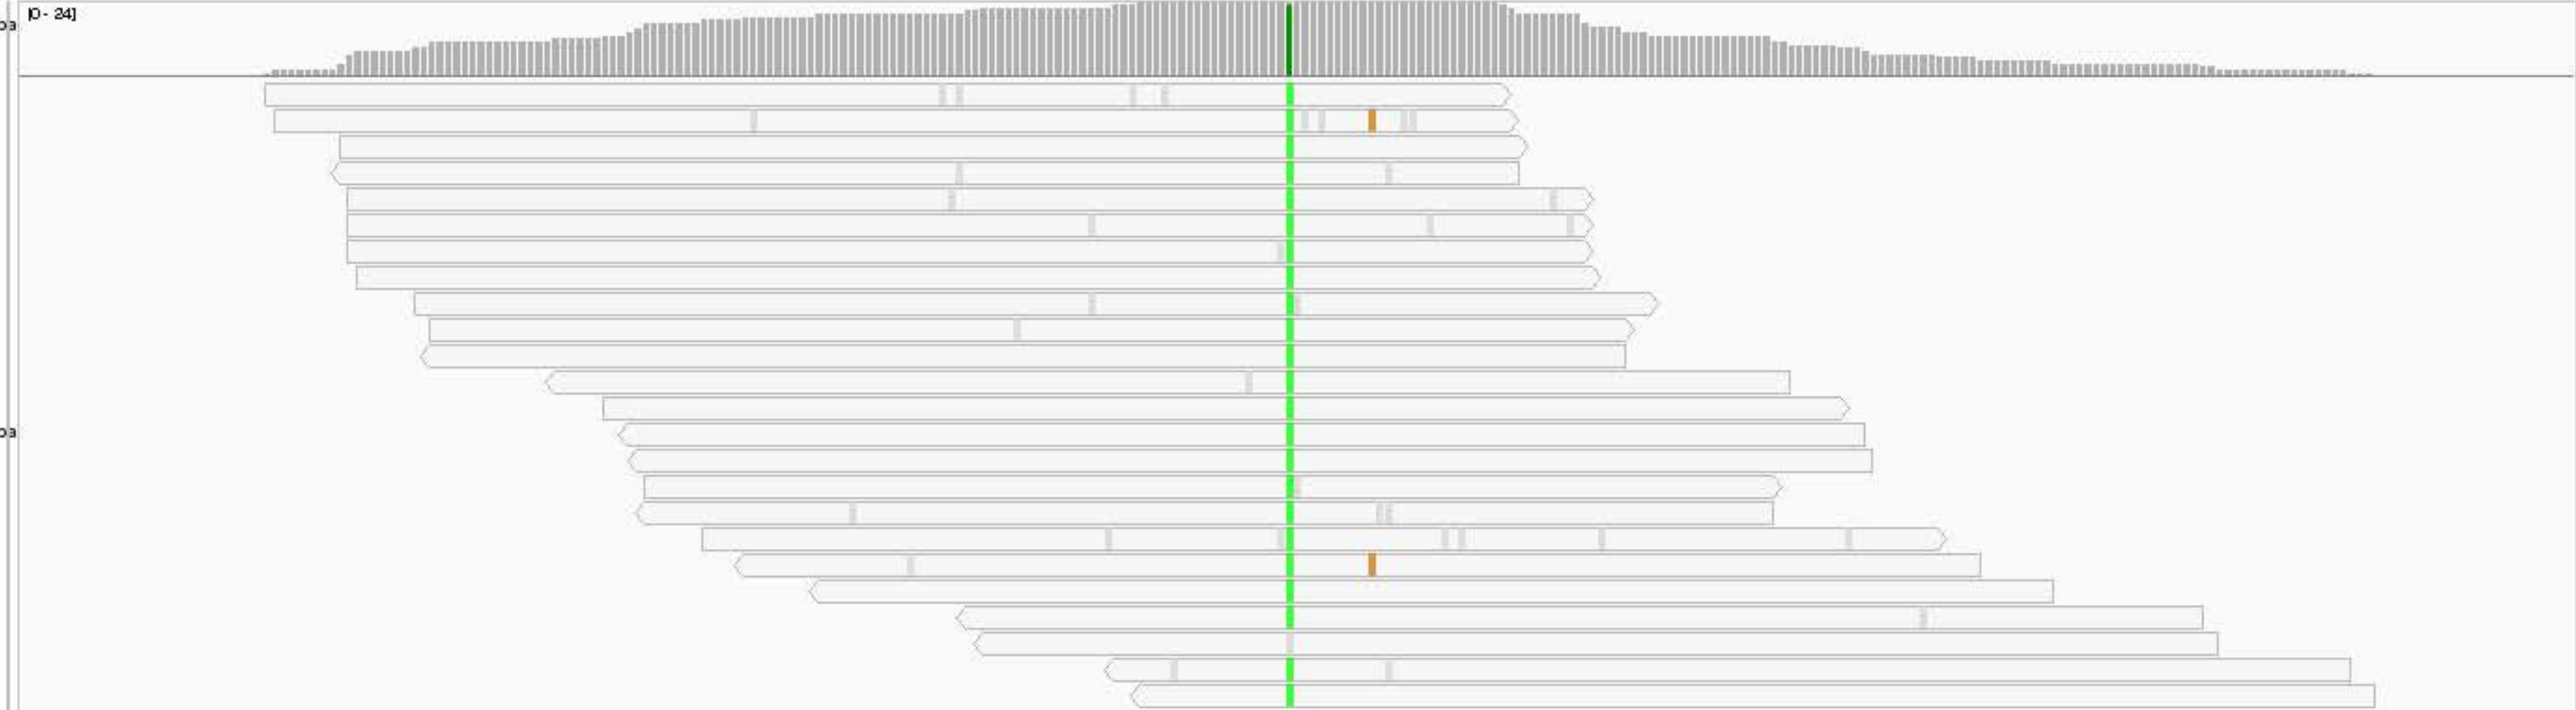

SL\_0004\_RN\_26\_WES\_uniq\_mut.ba

Sequence

Refseq Genes

LVEVVEPEVLQDSLDRCYSTPSSCLEQPDSCQPYGSSFYALEEKHVGFSLDVGE

NBPF19

chr19:39,196,853-39,197,162

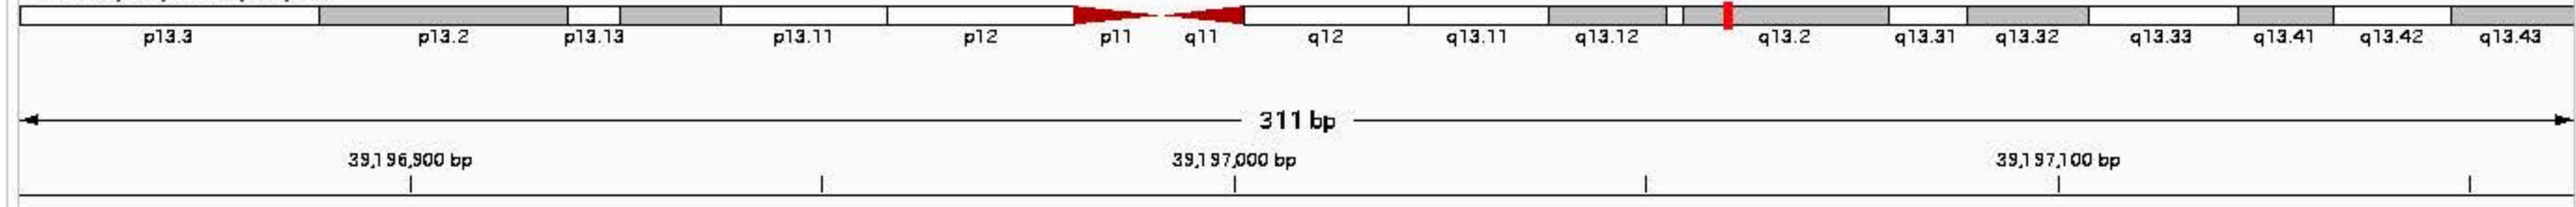

SL\_0006\_RN\_59\_WES\_uniq\_mut.ba  
coverage

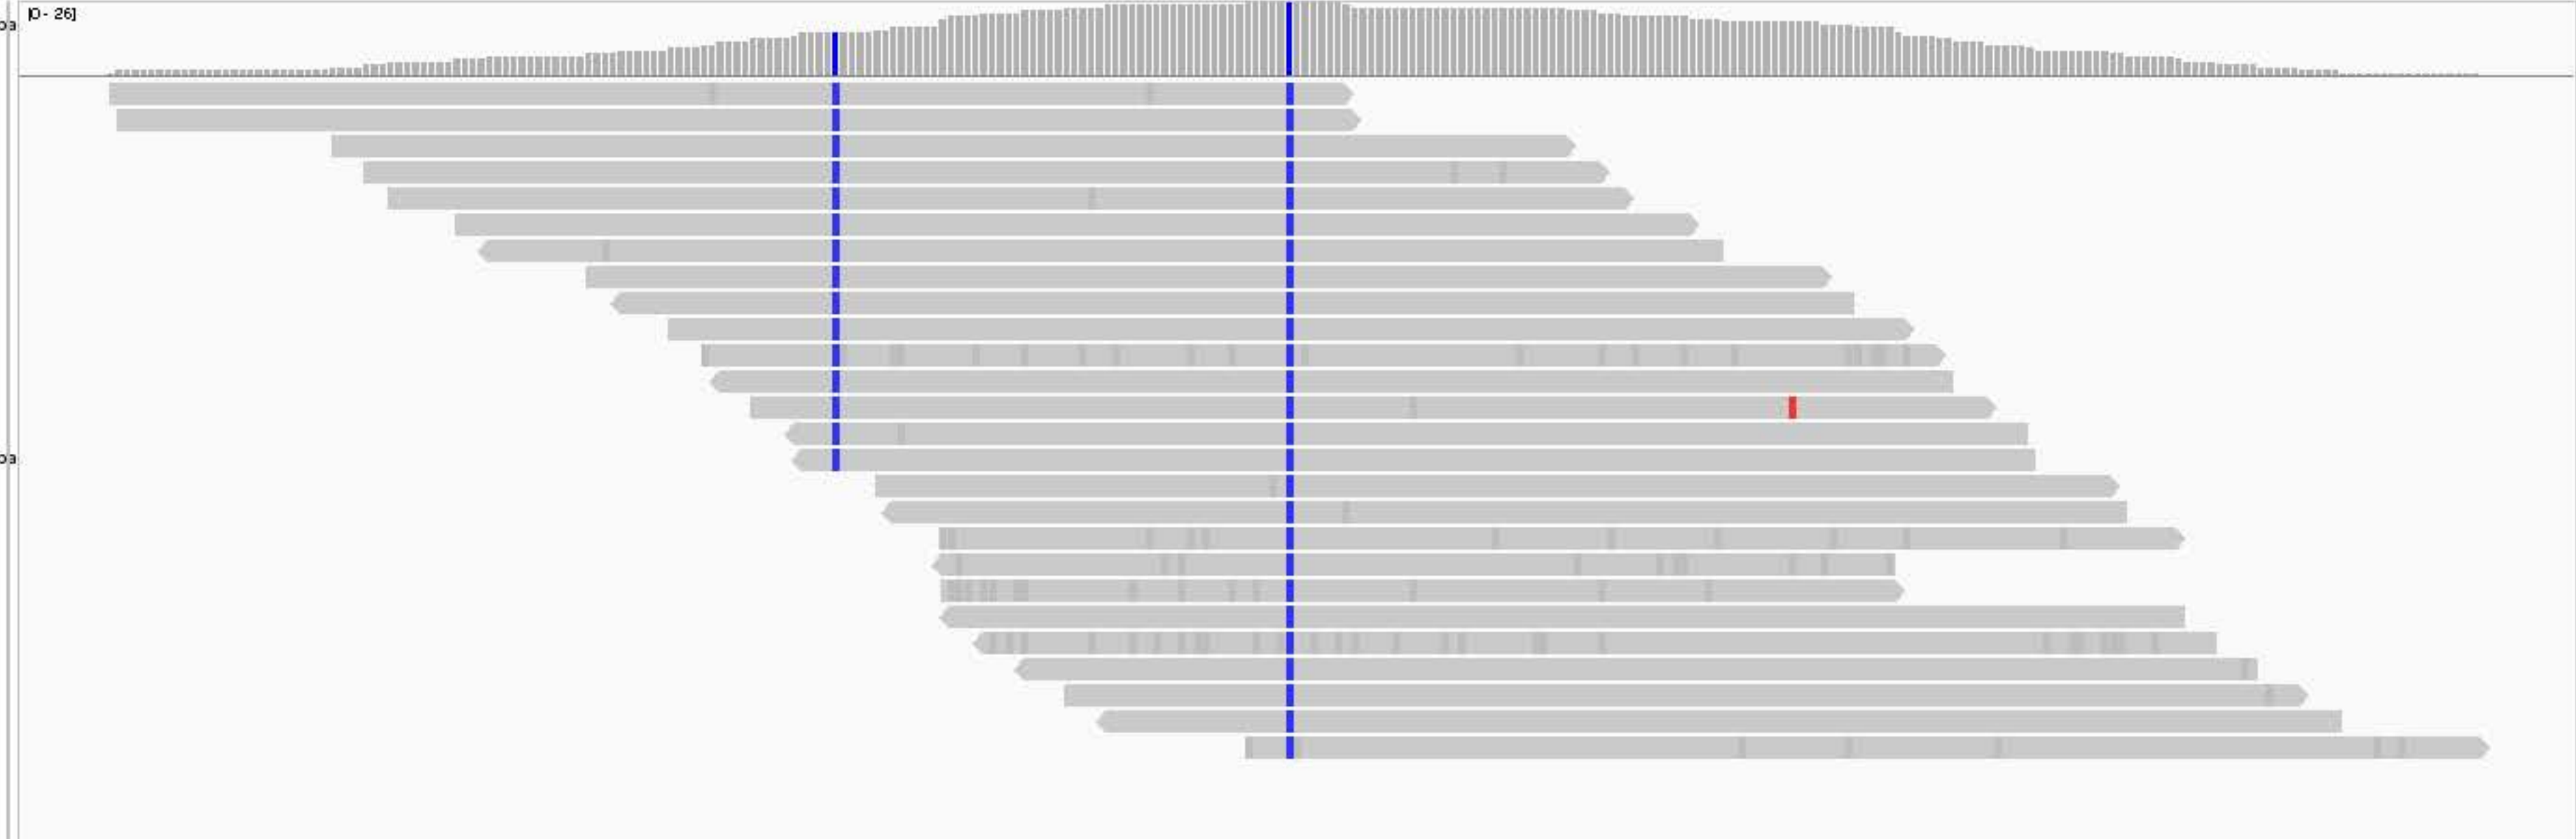

Sequence →  
Refseq Genes

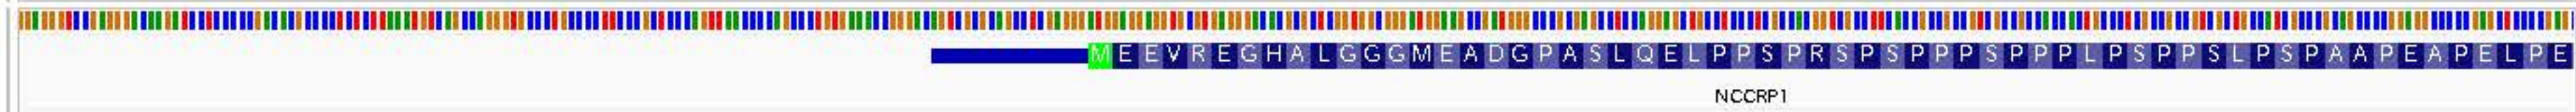

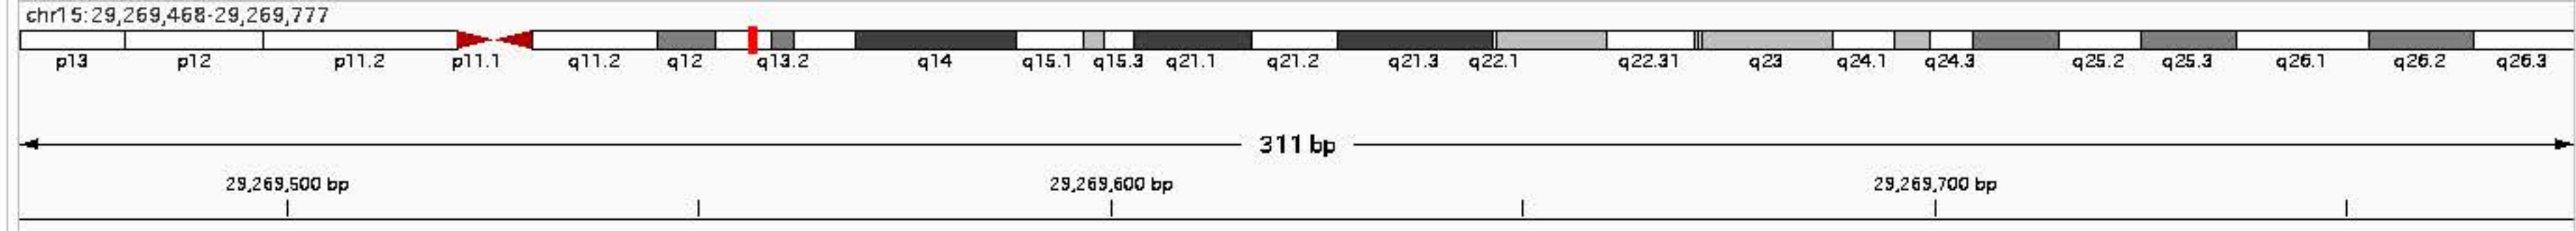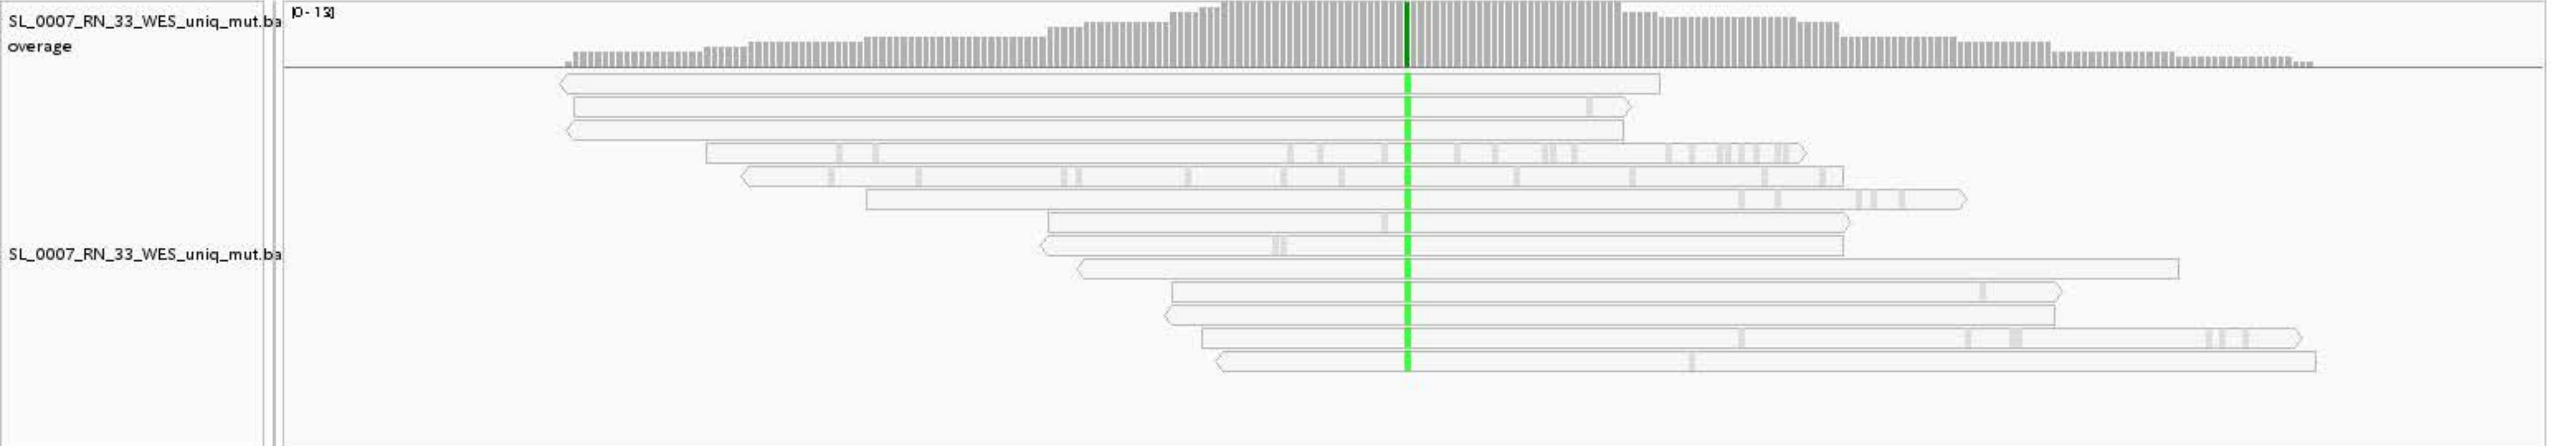

Sequence →

Refseq Genes

PGVAPAAQARRAGQPSPGQSGQSGGPGRSTSPAEEAFGDRLVRADEGARSAAGPNGSHSWDRDREAQGGSRGRNRPKQLM

FAM189A1



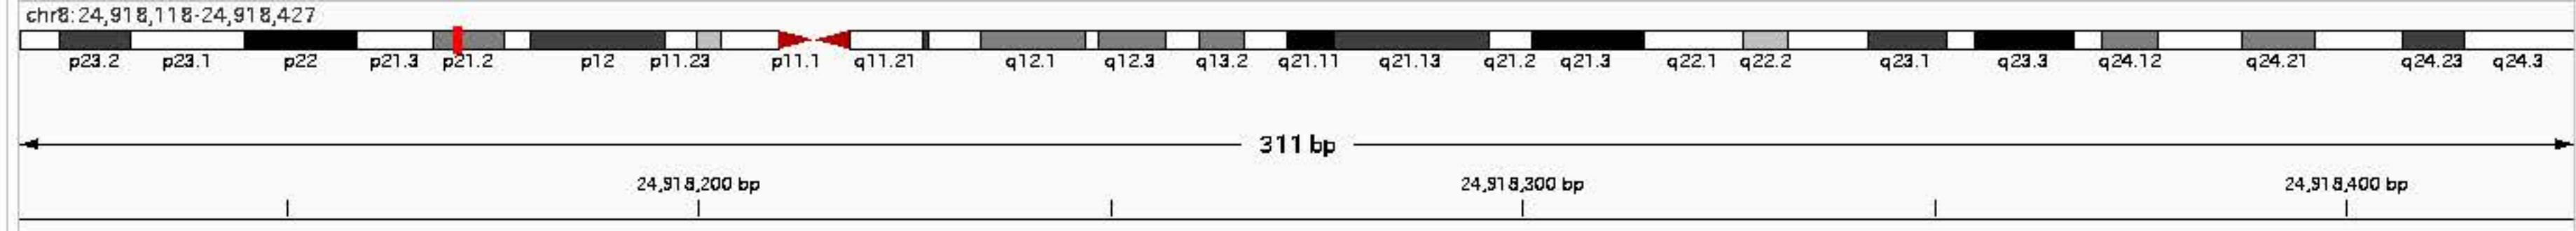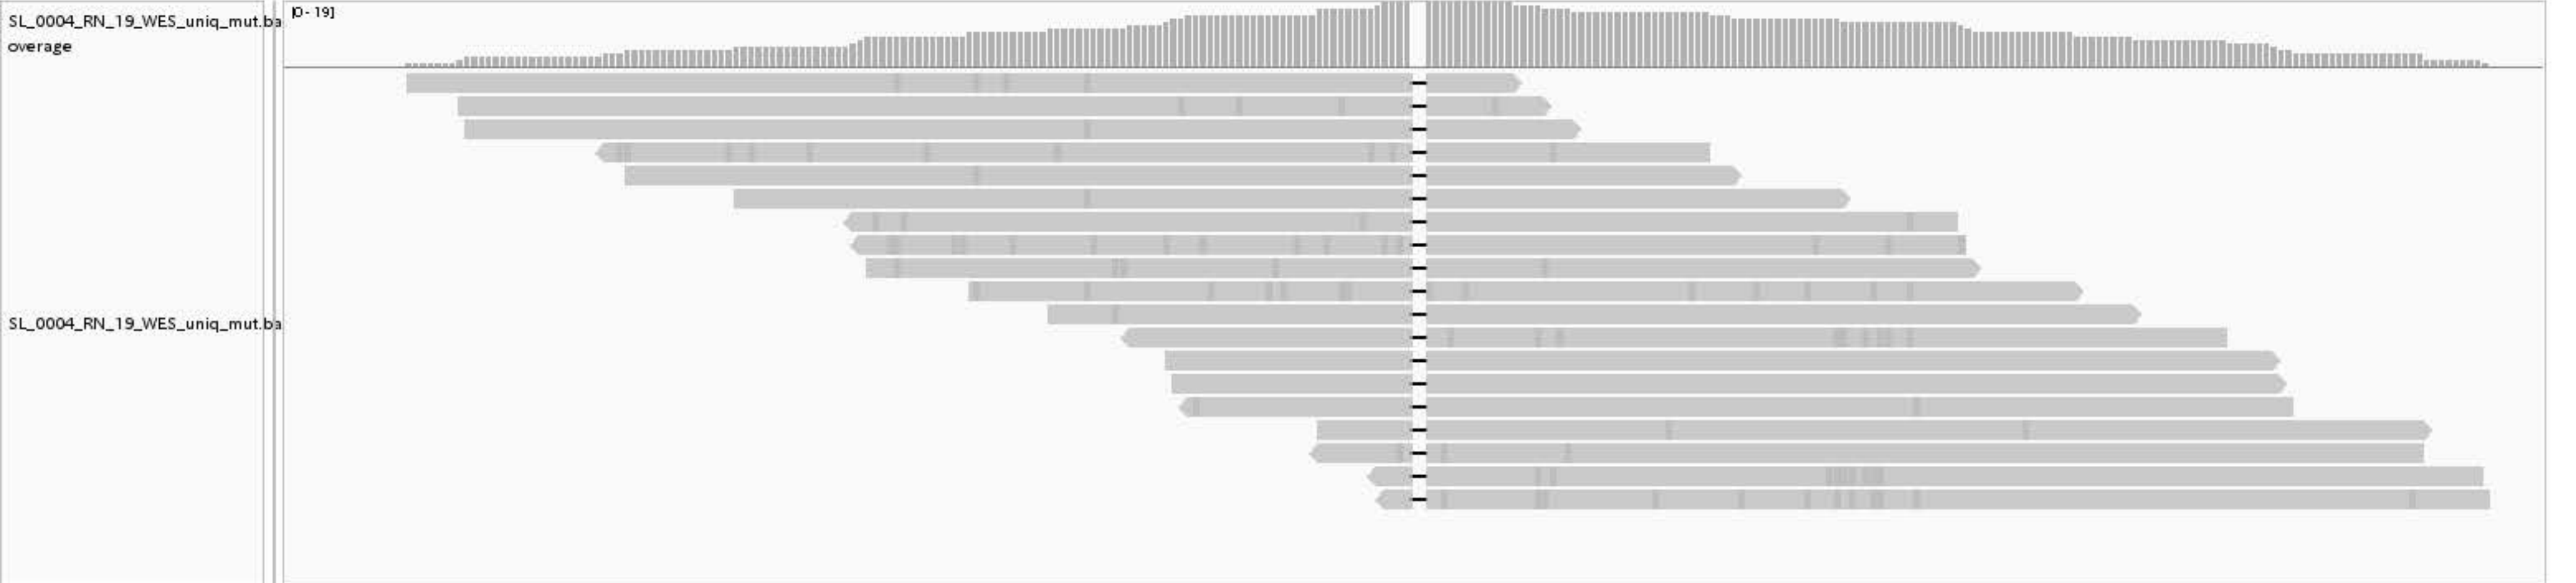

Sequence →

Refseq Genes

VHLEKETKEEGKPLQQEKEKEKAGGEGGSEEEGSDKGA KGSRKEDIAVNGEVEGKEEVEQETKEKGS GREEEKGVVTNGLDLSPADEKKG GDKSEEKVVVTKT

NEFM

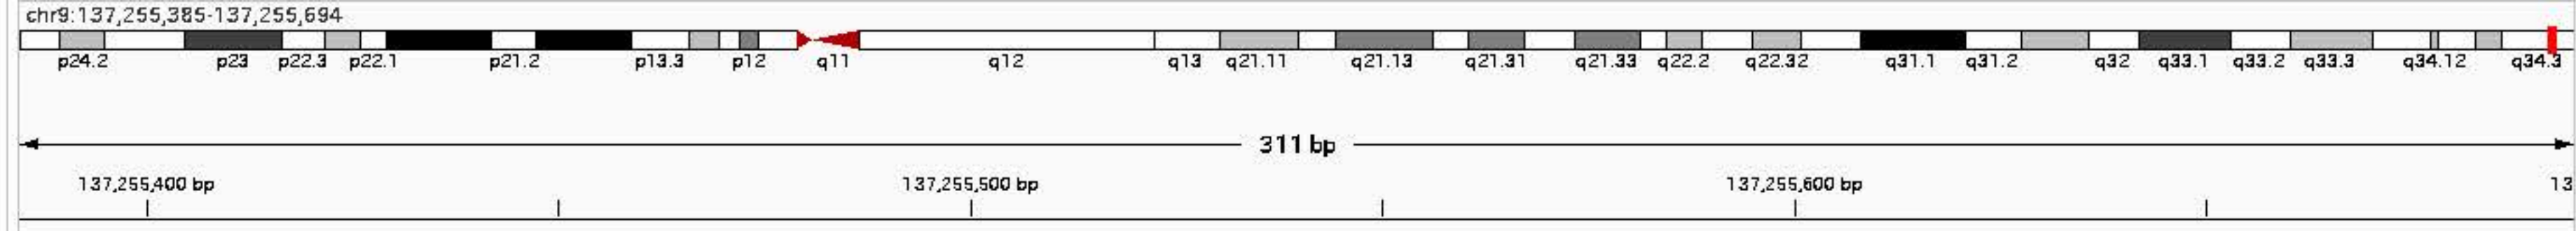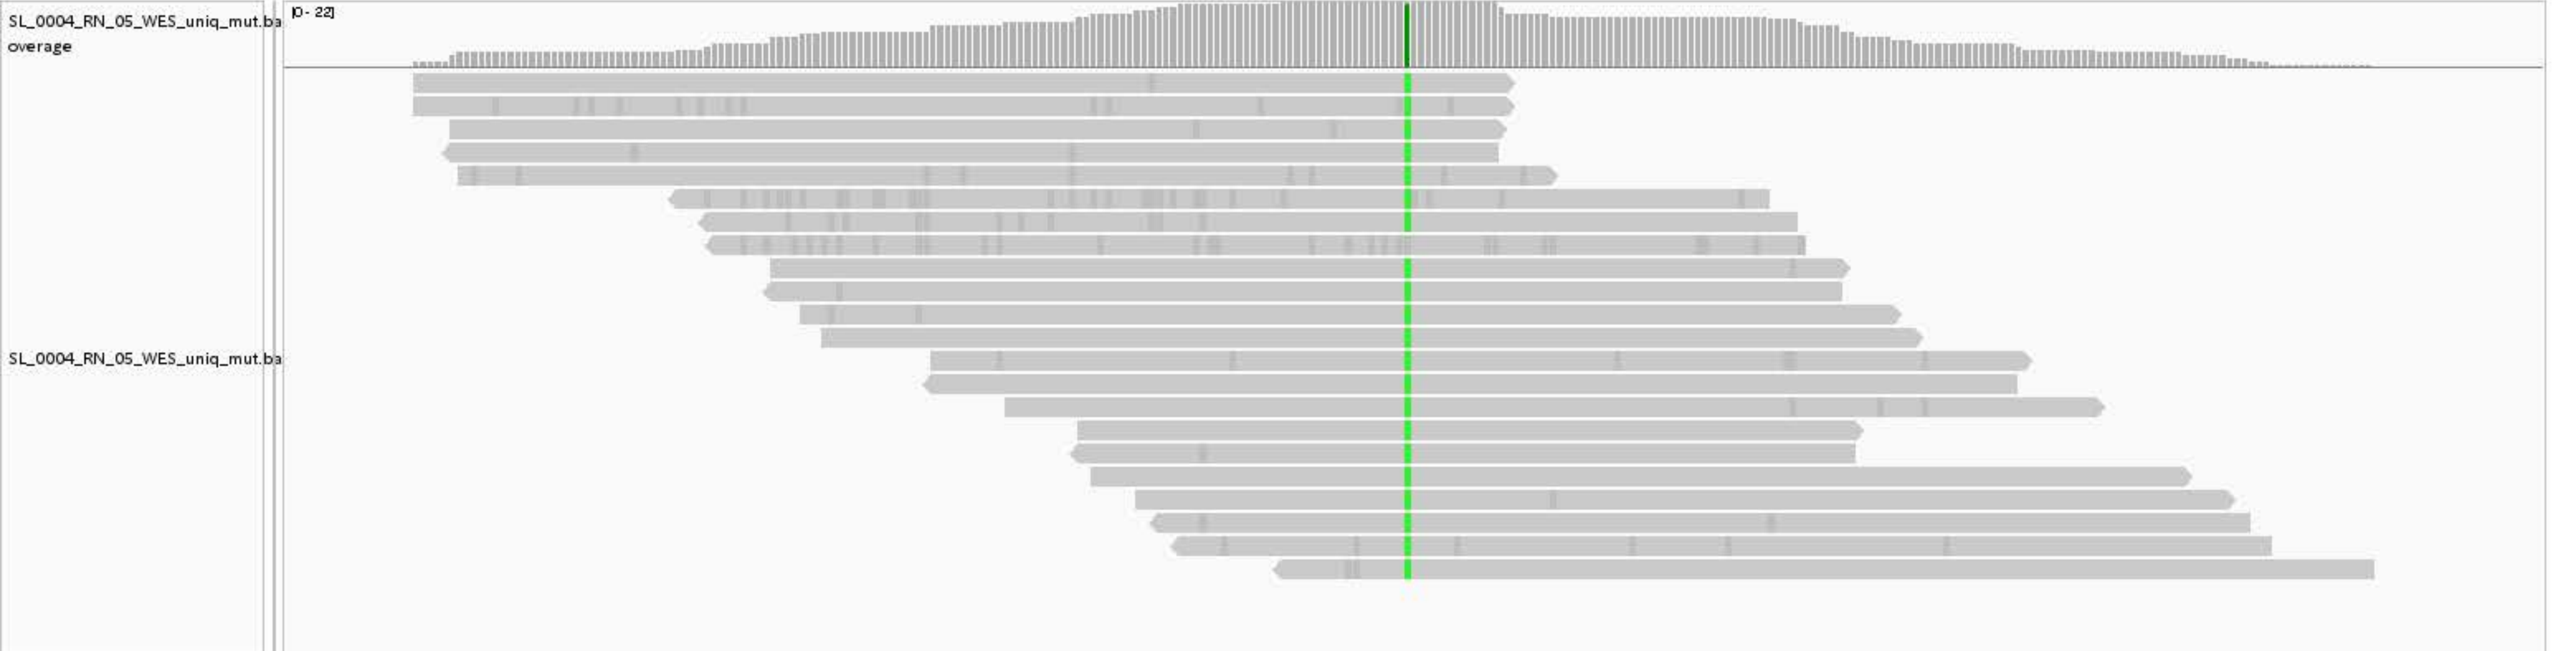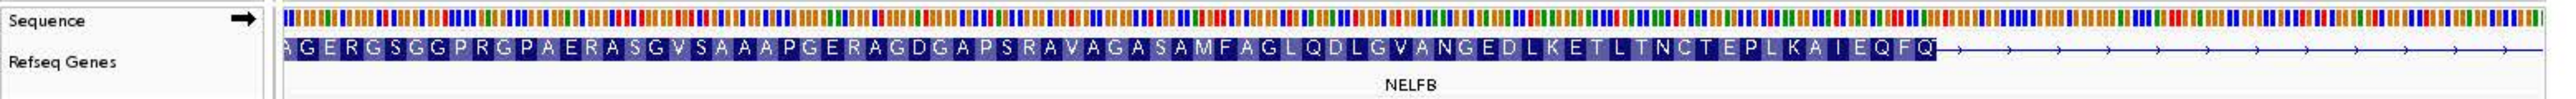

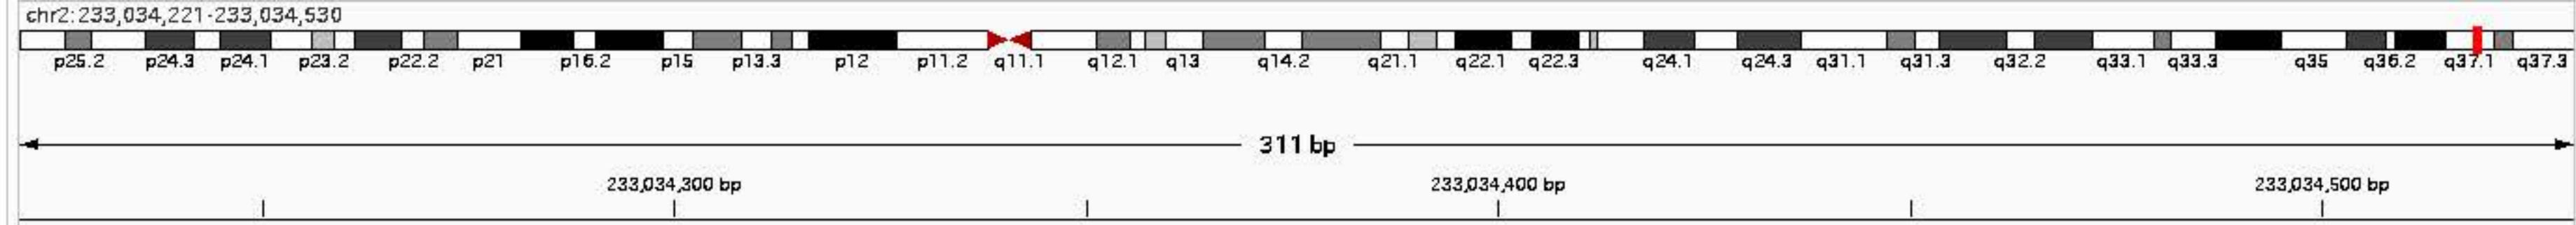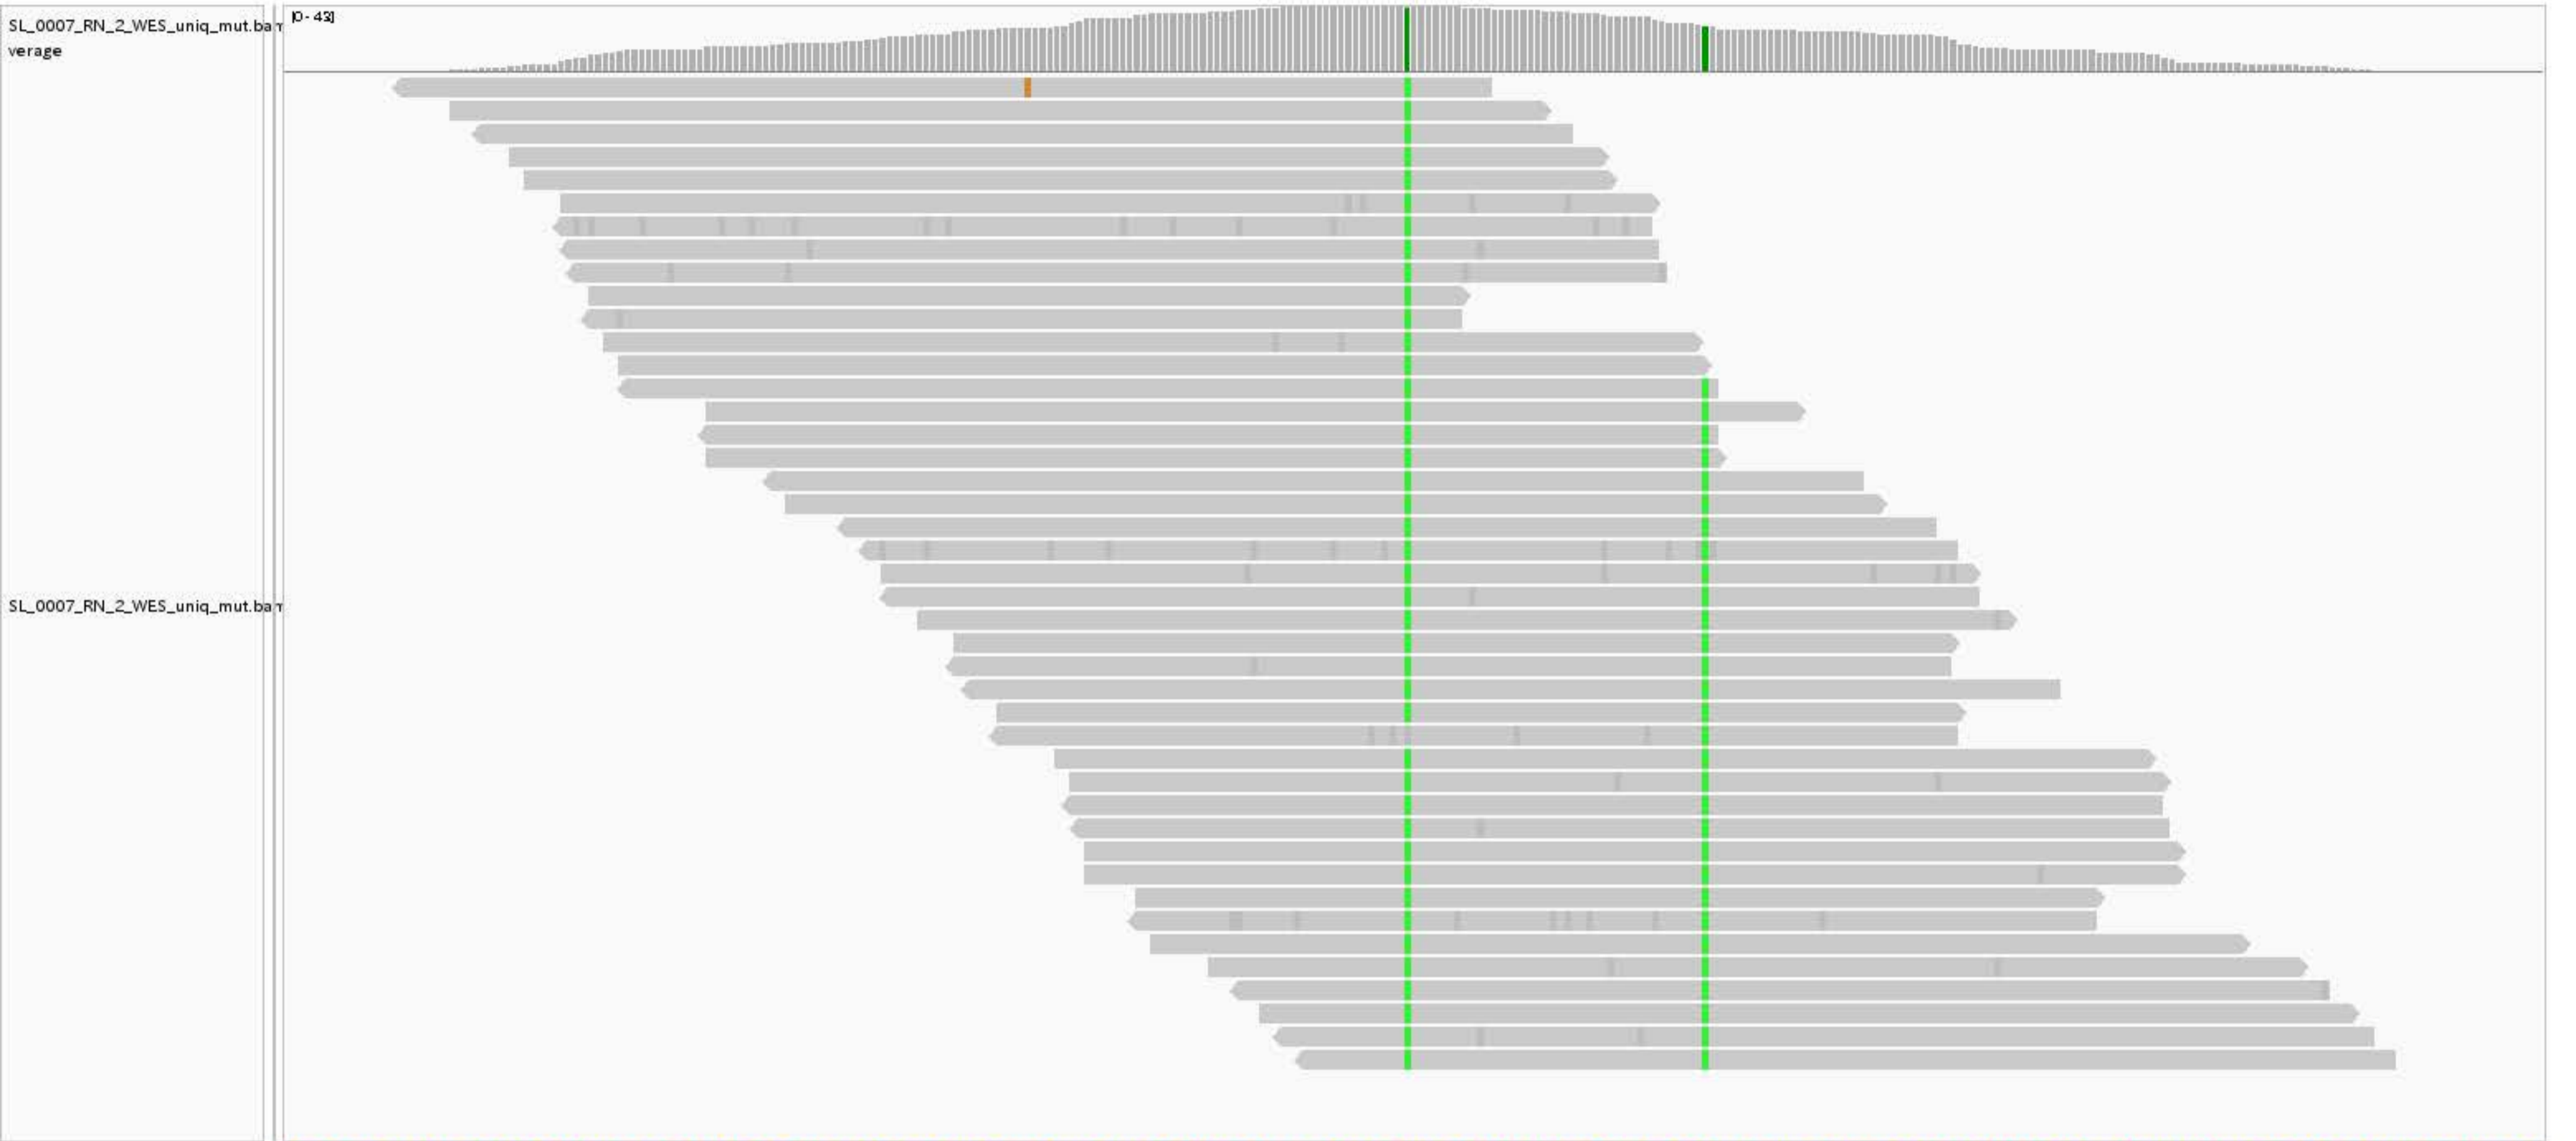

Sequence →

Refseq Genes

IAIPGQVTEQQQLQTRANVTRLCQVTSTDHGRTWSSPRDLTDA AIGPAYREWSTFAVGPGHCLQLHDRARSLVVPAYAYRKLHPIQRPIPSAFCFLSHDHGRTV

NEU2



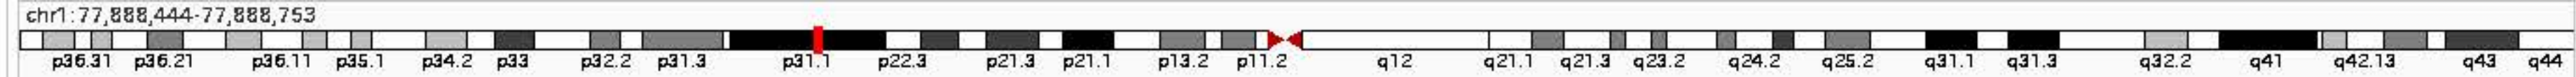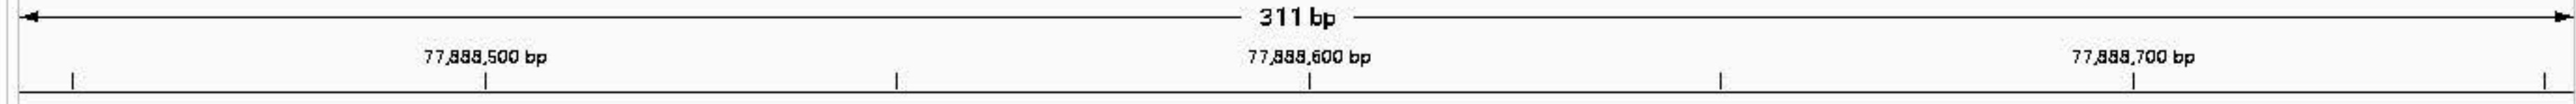

SL\_0001\_LN\_4\_WES\_uniq\_mut.ba  
verage

SL\_0001\_LN\_4\_WES\_uniq\_mut.ba r

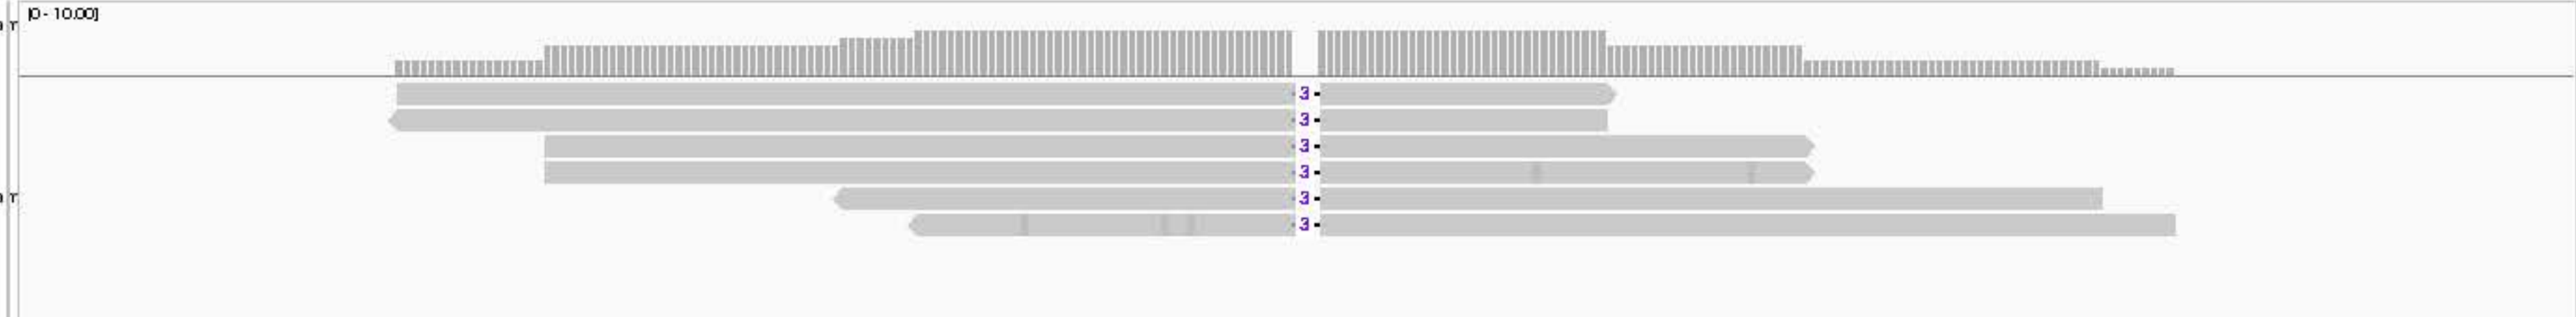

Sequence

Refseq Genes

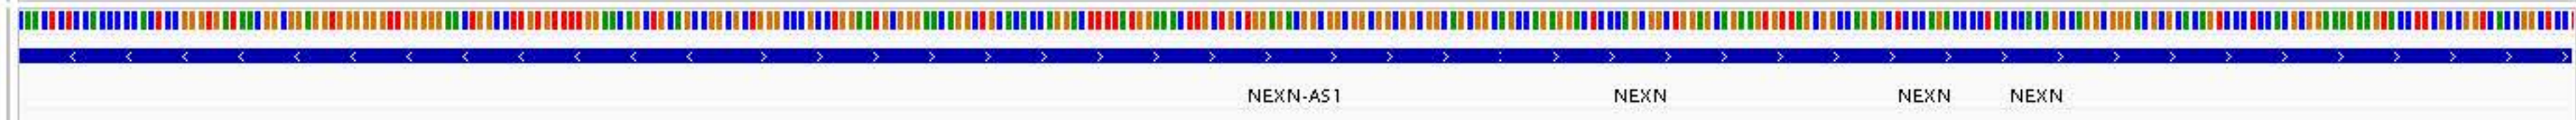

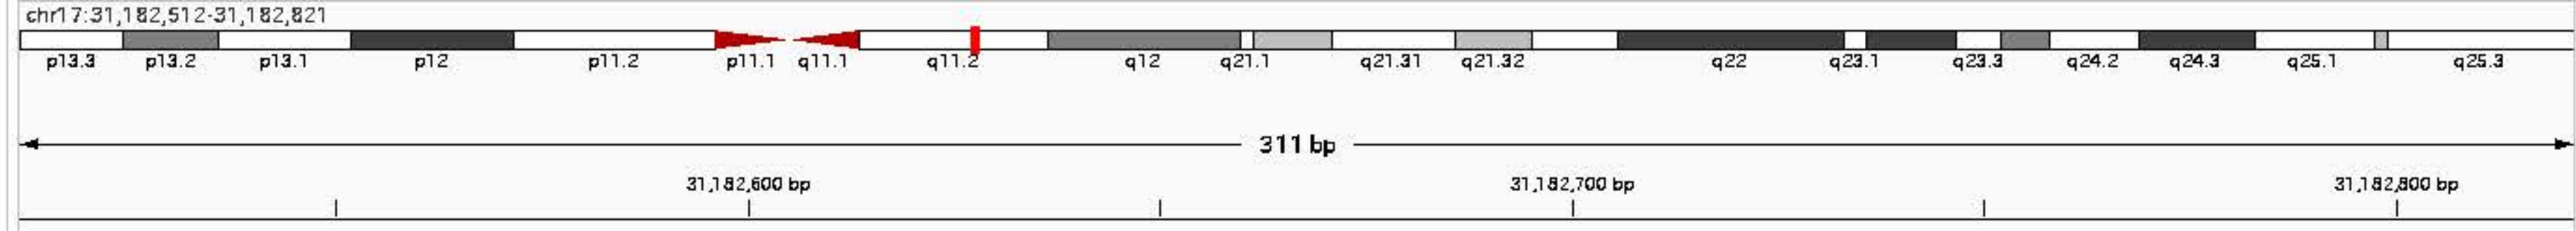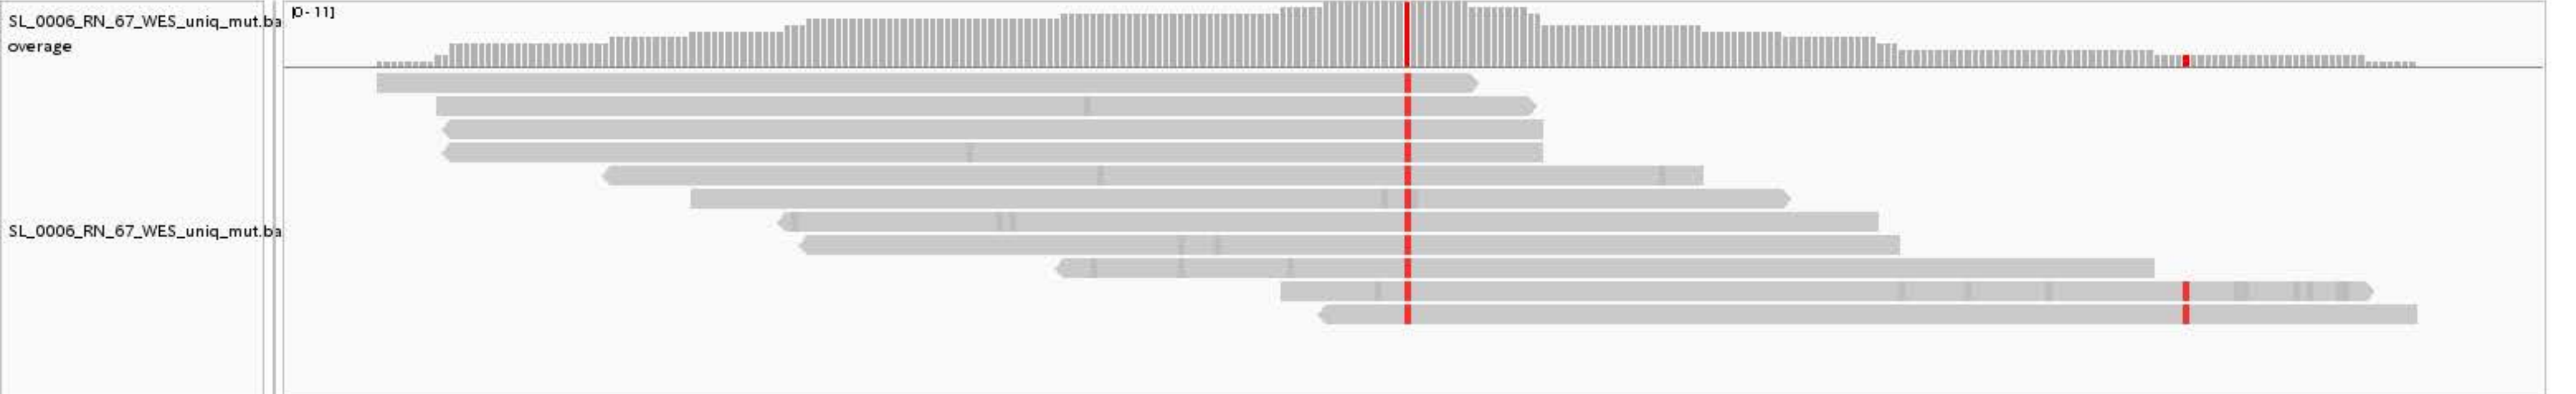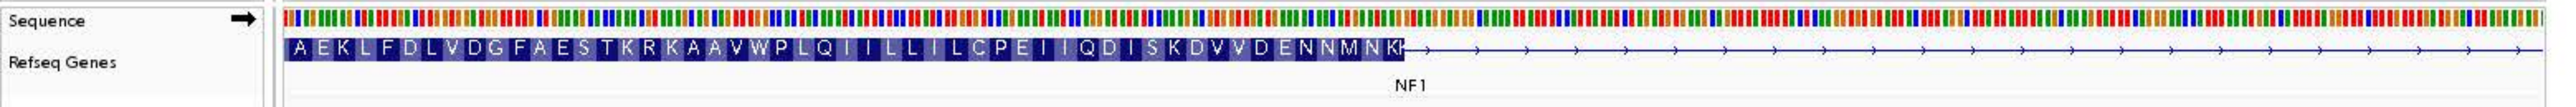

chr5:157,473,210-157,473,519

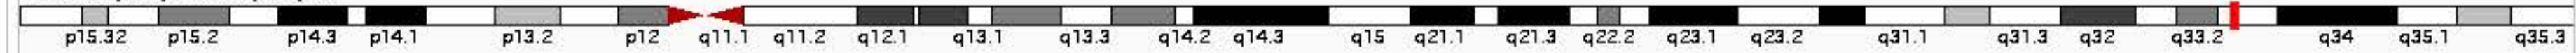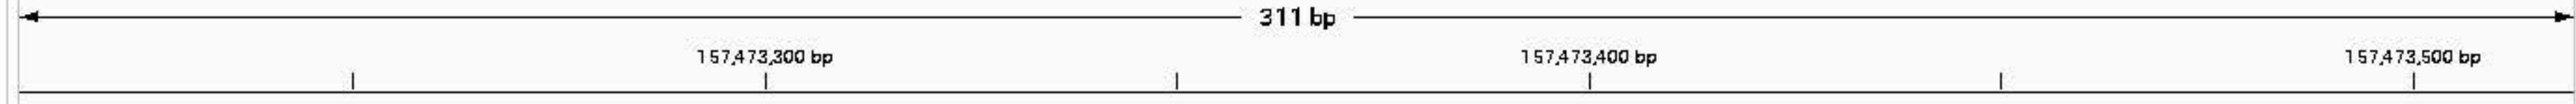

SL\_0017\_RN\_15\_WES\_uniq\_mut.ba  
coverage

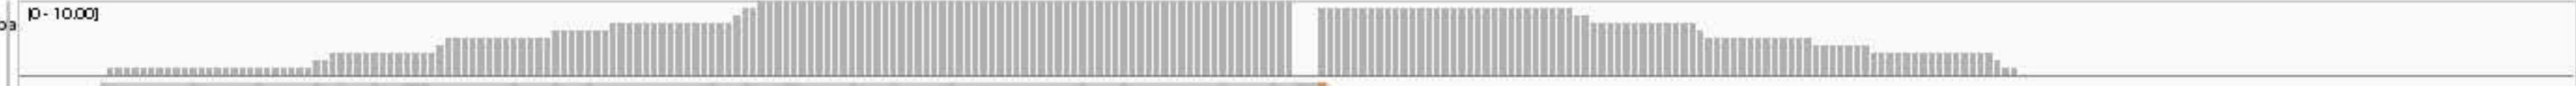

SL\_0017\_RN\_15\_WES\_uniq\_mut.ba

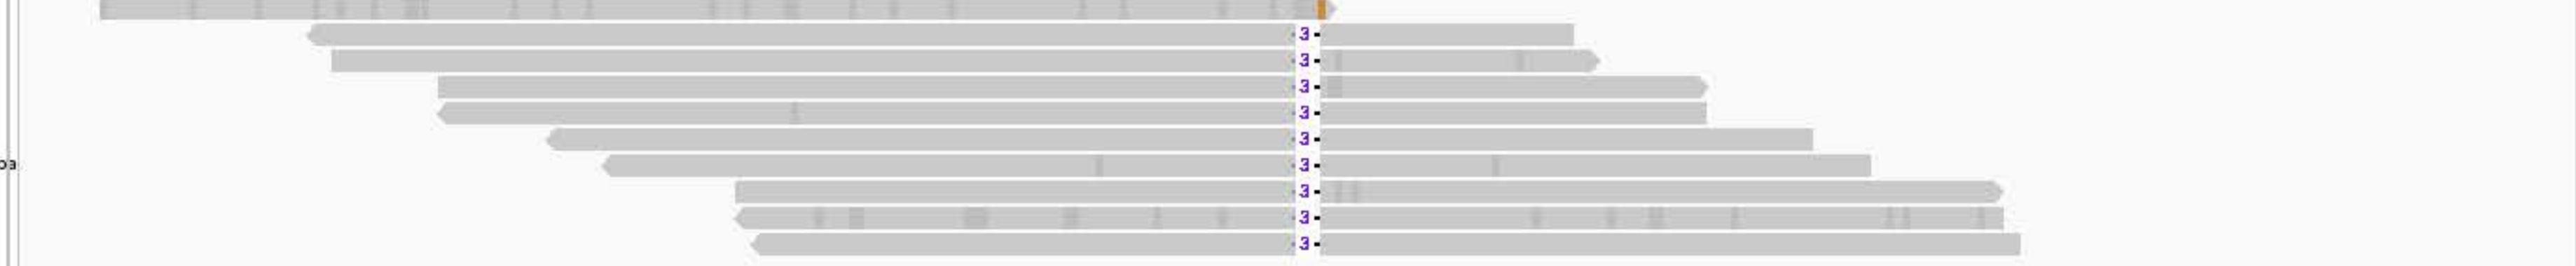

Sequence

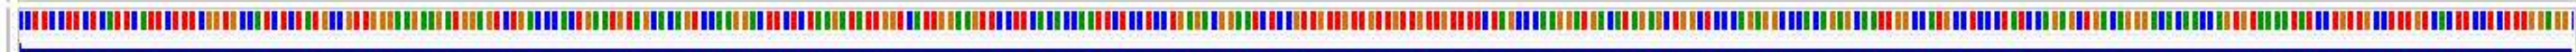

Refseq Genes

NIPAL4



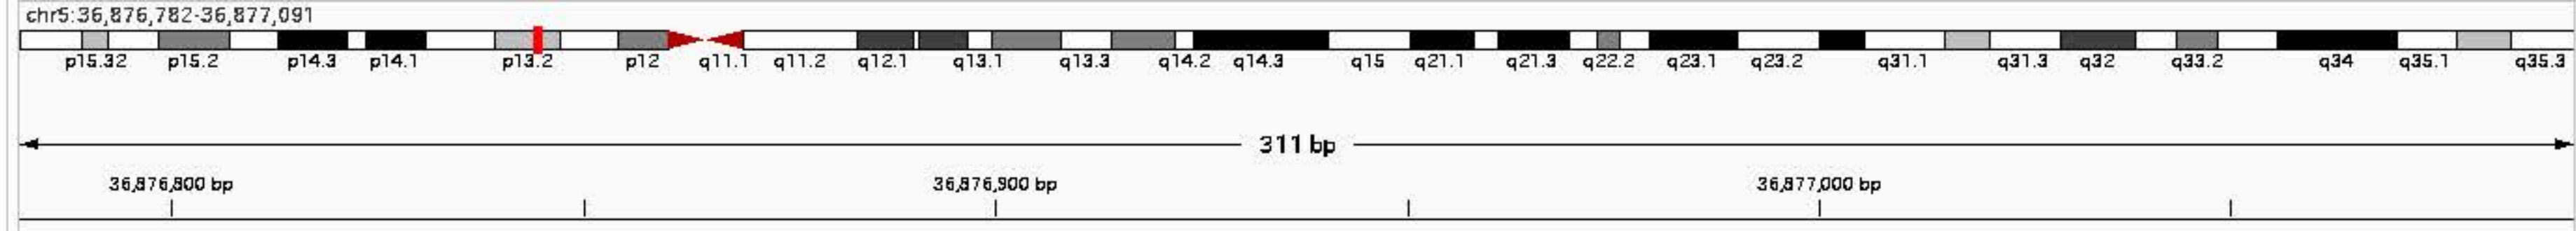

SL\_0001\_RN\_28\_WES\_uniq\_mut.ba  
coverage

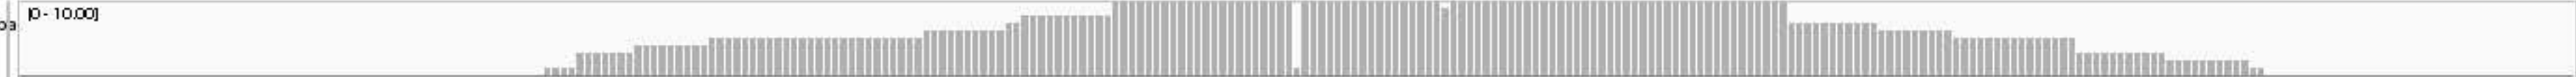

SL\_0001\_RN\_28\_WES\_uniq\_mut.ba

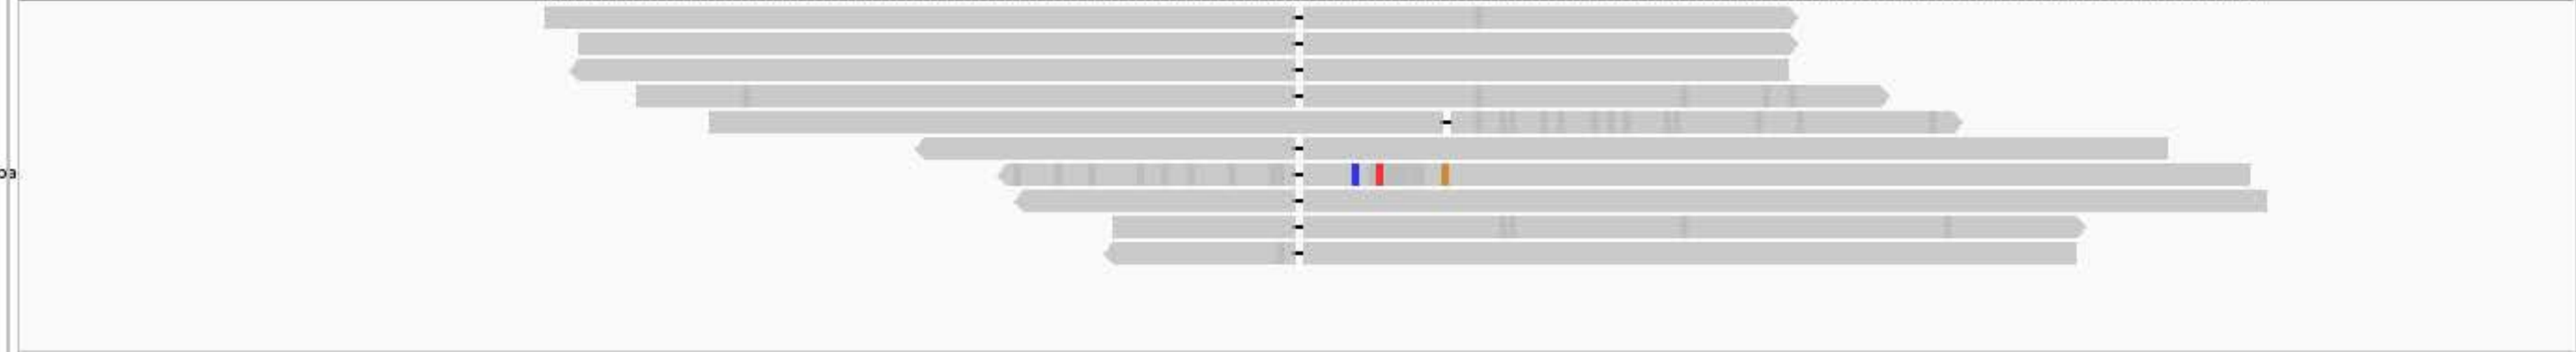

Sequence

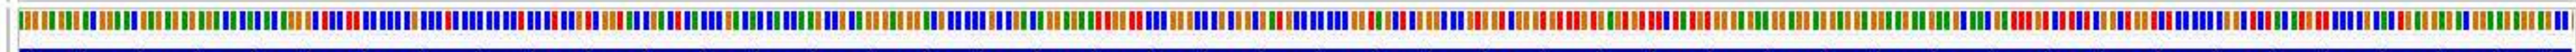

Refseq Genes

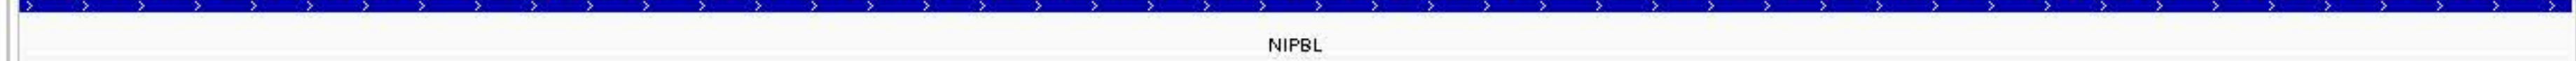

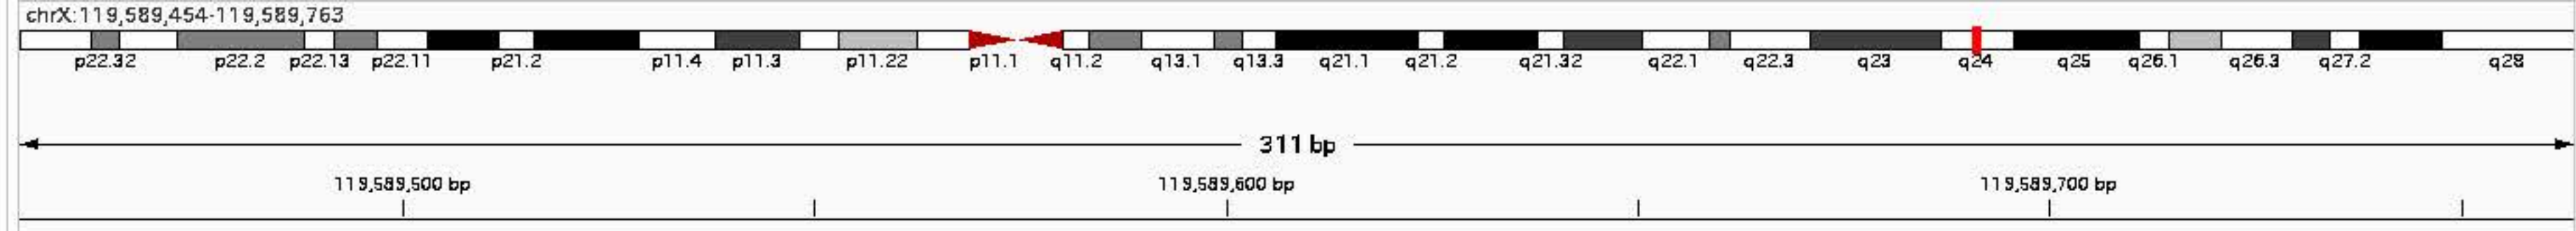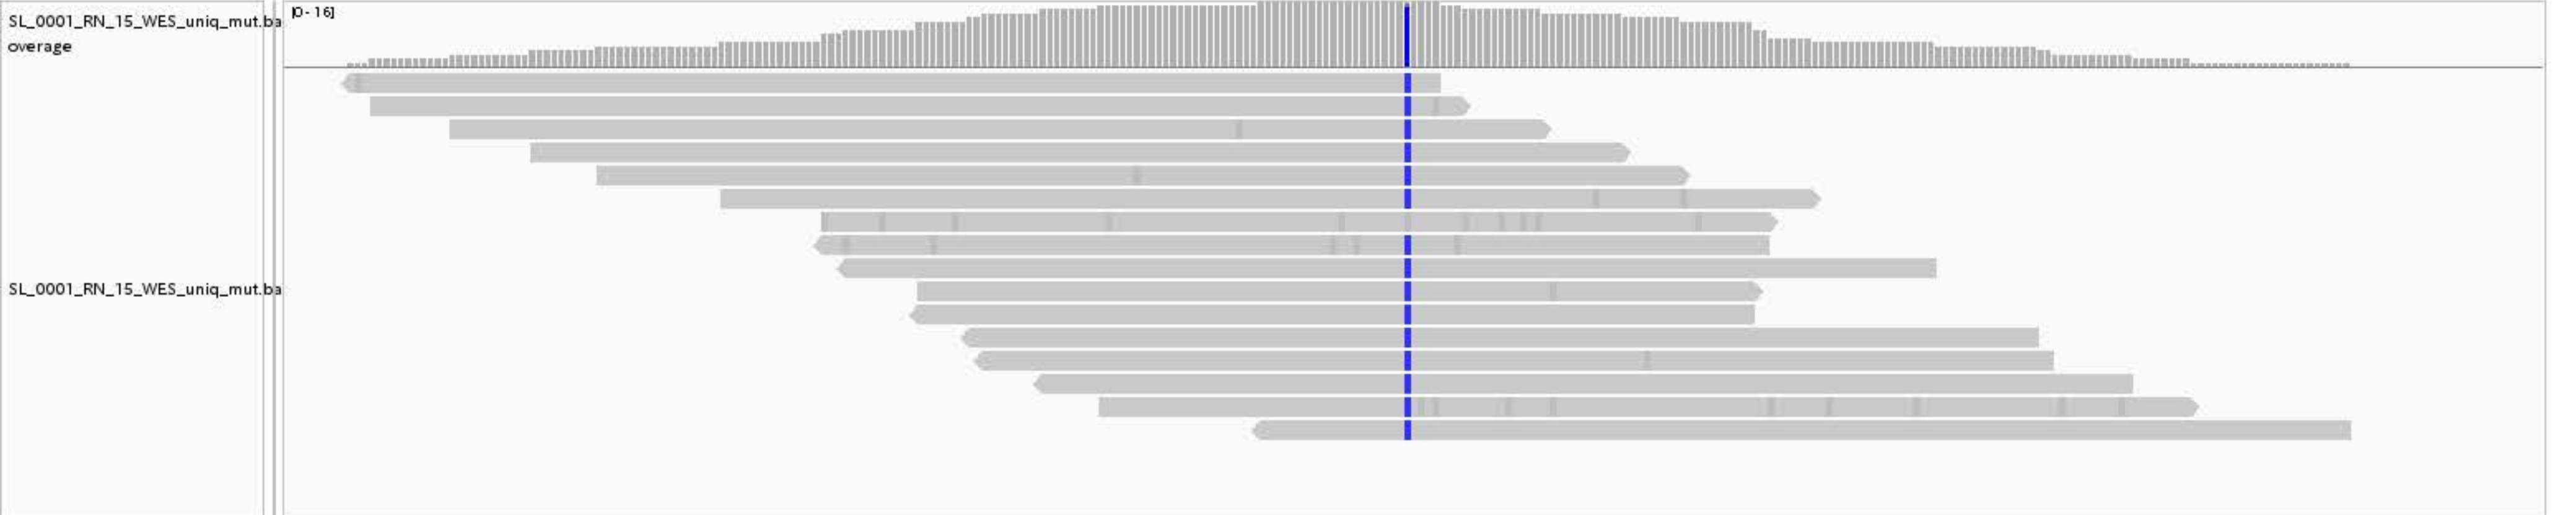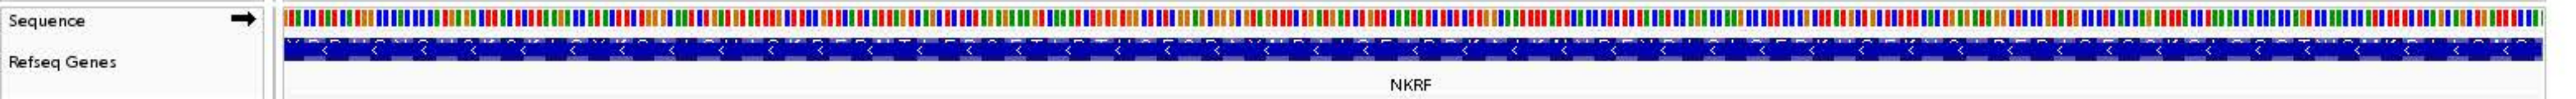

chr20:32,453,598-32,453,907

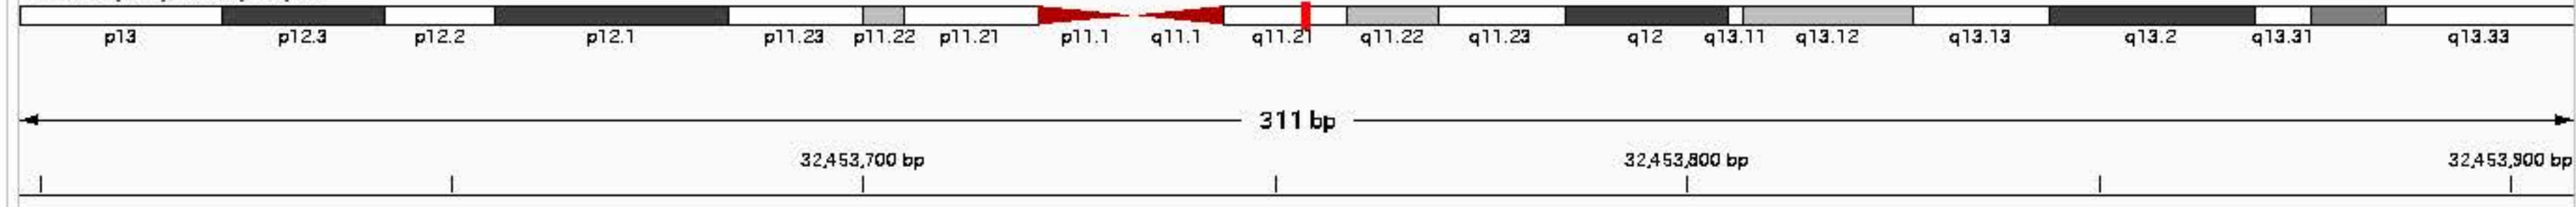

SL\_0001\_LN\_10\_WES\_uniq\_mut. coverage

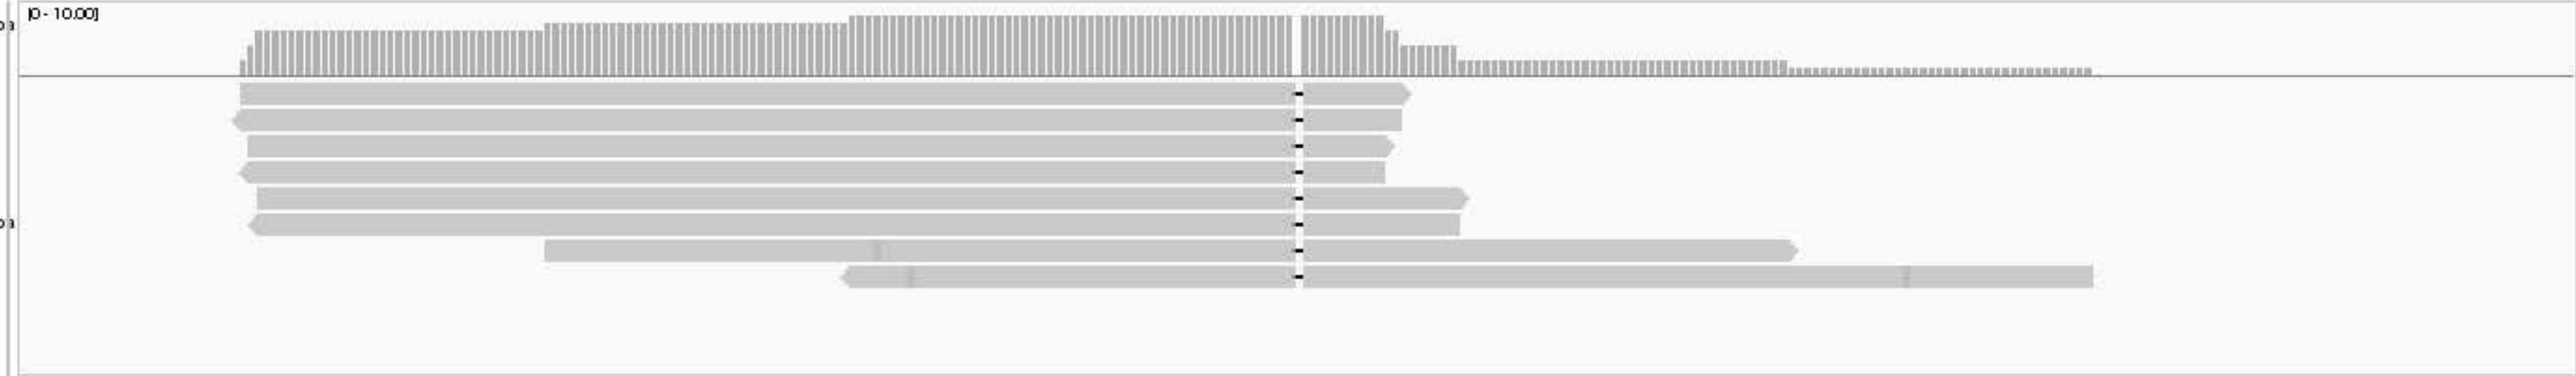

Sequence

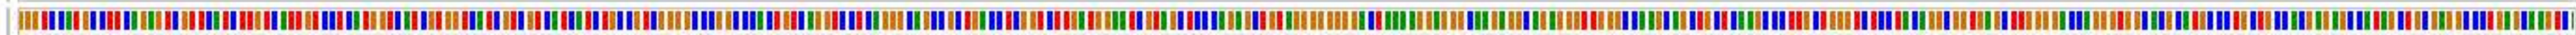

Refseq Genes

NOL4L



chr1:119,916,324-119,916,633

p36.31 p36.21 p36.11 p35.1 p34.2 p33 p32.2 p31.3 p31.1 p22.3 p21.3 p21.1 p13.2 p11.2 q12 q21.1 q21.3 q23.2 q24.2 q25.2 q31.1 q31.3 q32.2 q41 q42.13 q43 q44

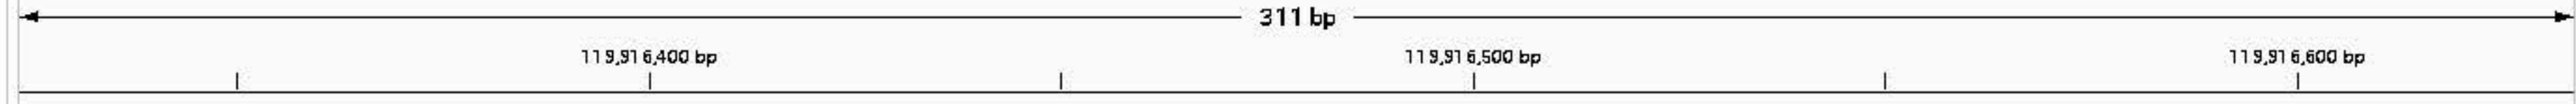

SL\_0004\_RN\_47\_WES\_uniq\_mut.ba  
coverage

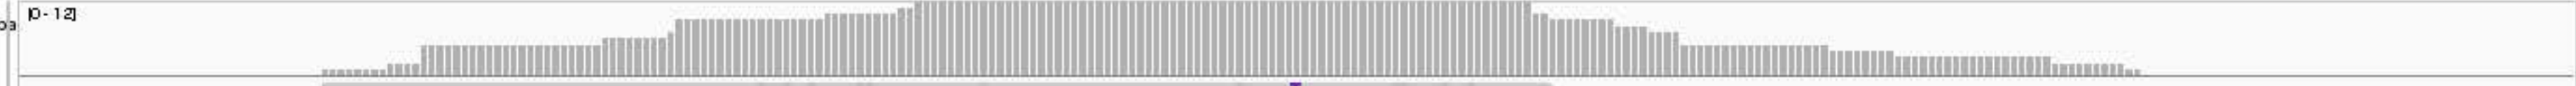

SL\_0004\_RN\_47\_WES\_uniq\_mut.ba

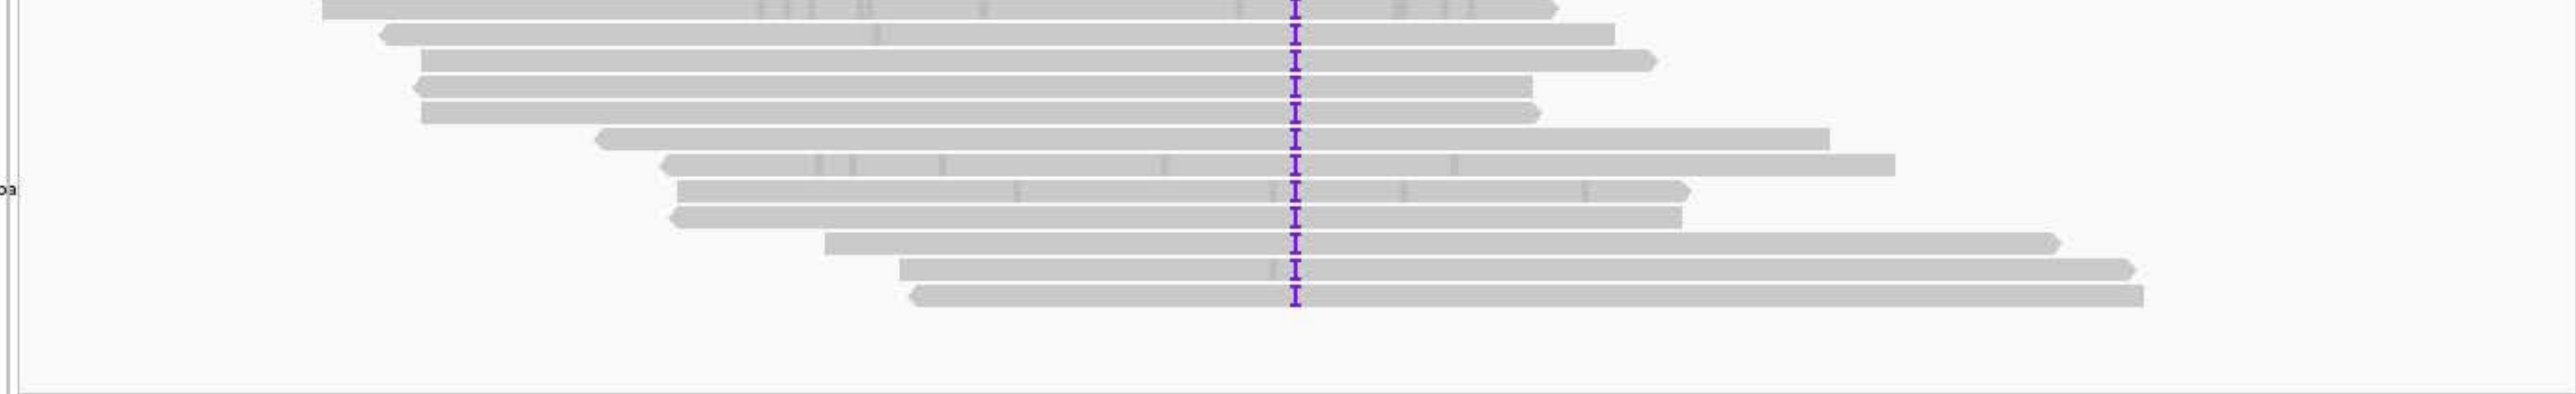

Sequence

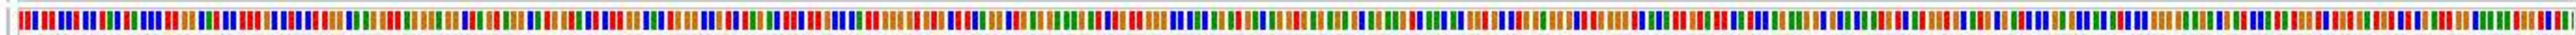

Refseq Genes

NOTCH2

chr14: 77,406,686-77,406,995

p13 p12 p11.2 p11.1 q11.2 q12 q13.1 q21.1 q21.2 q21.3 q22.1 q22.3 q23.1 q23.2 q24.1 q24.2 q24.3 q31.1 q31.3 q32.11 q32.13 q32.2 q32.31 q32.33

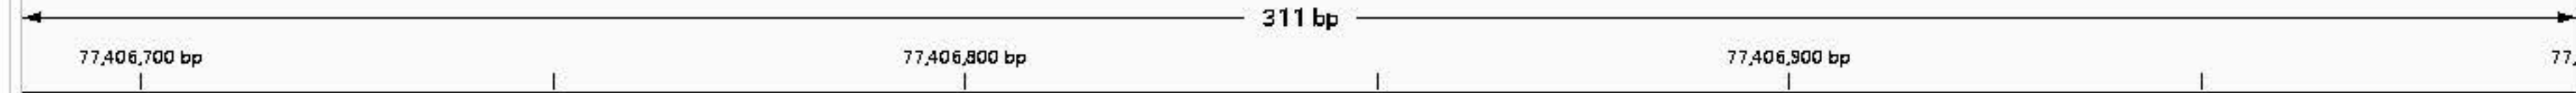

SL\_0015\_LN\_39\_WES\_uniq\_mut.  
coverage

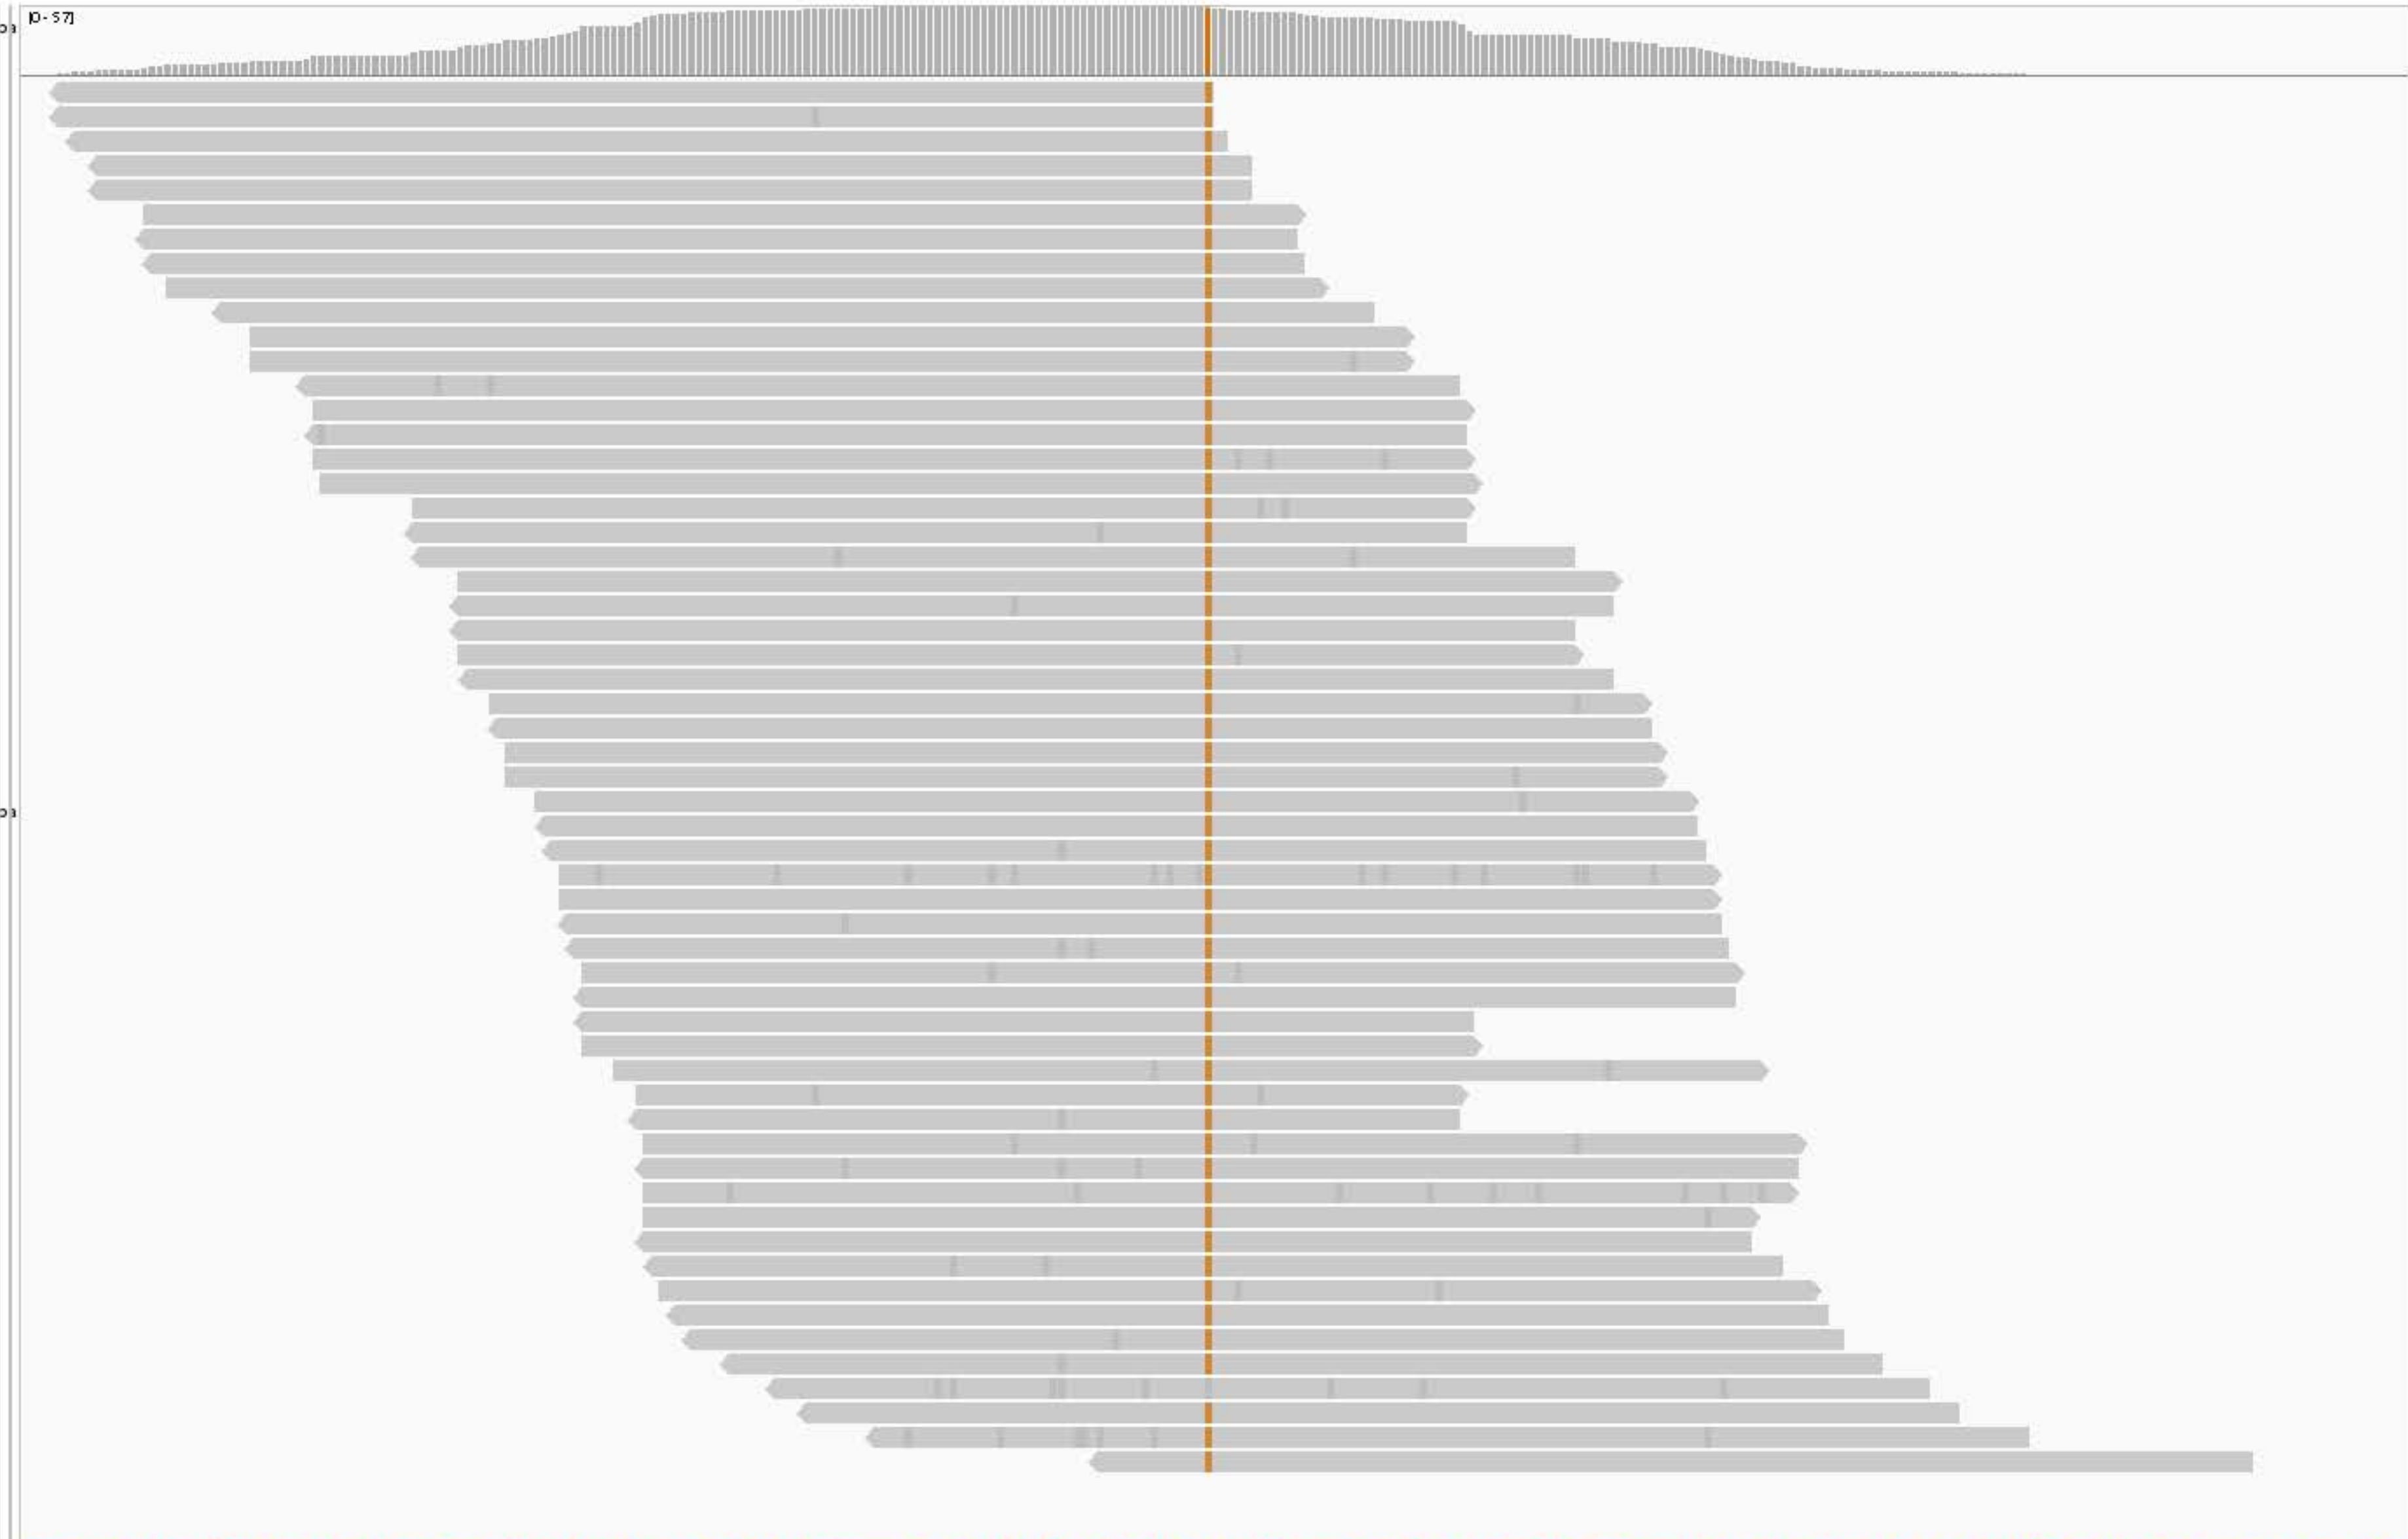

SL\_0015\_LN\_39\_WES\_uniq\_mut.

Sequence

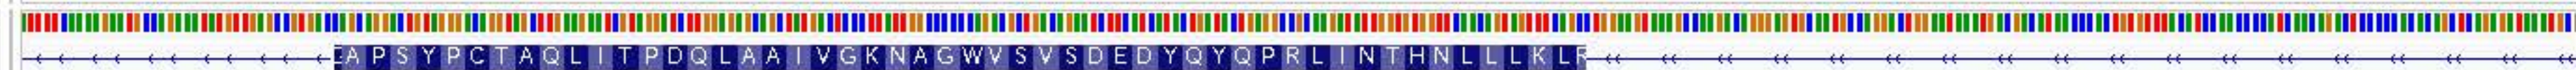

Refseq Genes

A P S Y P C T A Q L I T P D Q L A A I V G K N A G W V S V S D E D Y Q Y Q P R L I N T H N L L L K L F

NOXRED1

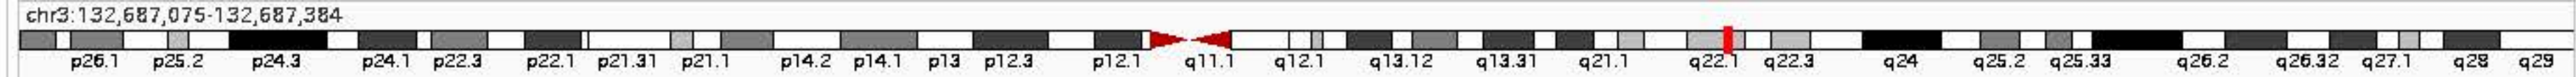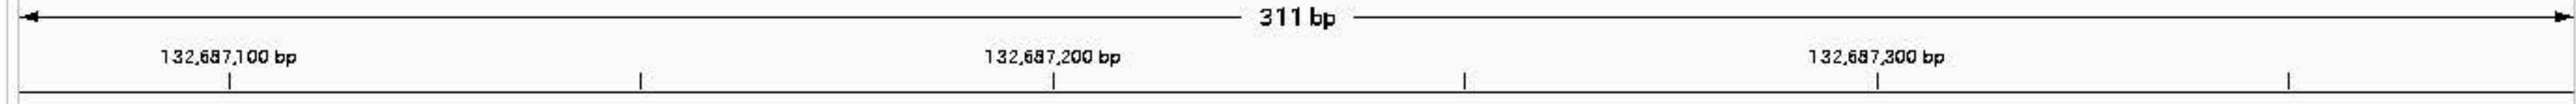

SL\_0003\_LN\_51\_WES\_uniq\_mut. ba  
coverage

SL\_0003\_LN\_51\_WES\_uniq\_mut. ba

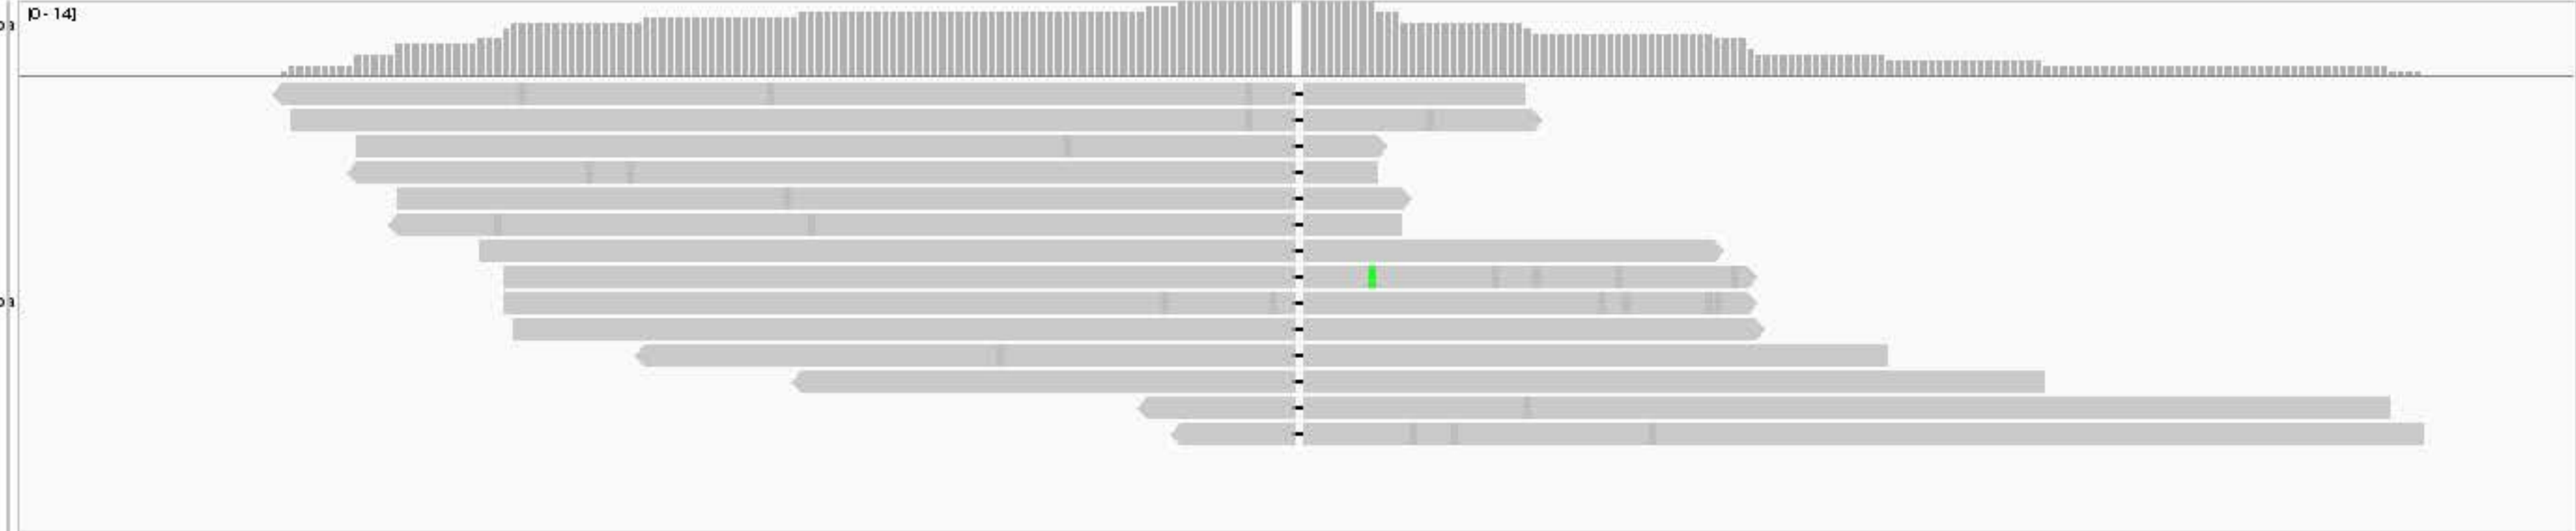

Sequence →

Refseq Genes

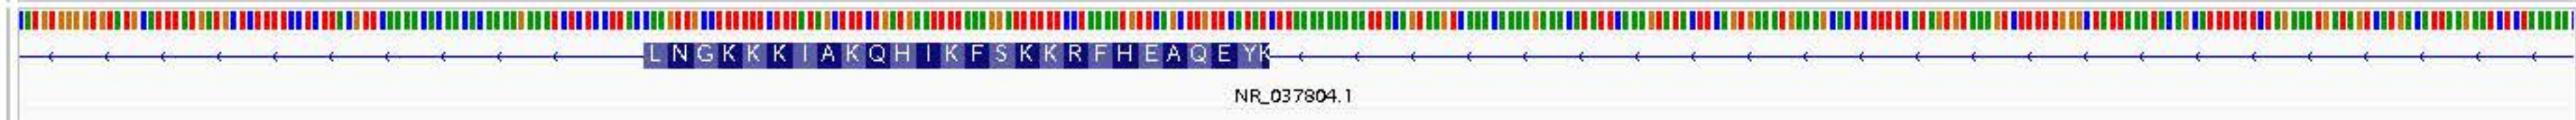



chr1:114,706,464-114,706,773  
p36.31 p36.21 p36.11 p35.1 p34.2 p33 p32.2 p31.3 p31.1 p22.3 p21.3 p21.1 p13.2 p11.2 q12 q21.1 q21.3 q23.2 q24.2 q25.2 q31.1 q31.3 q32.2 q41 q42.13 q43 q44

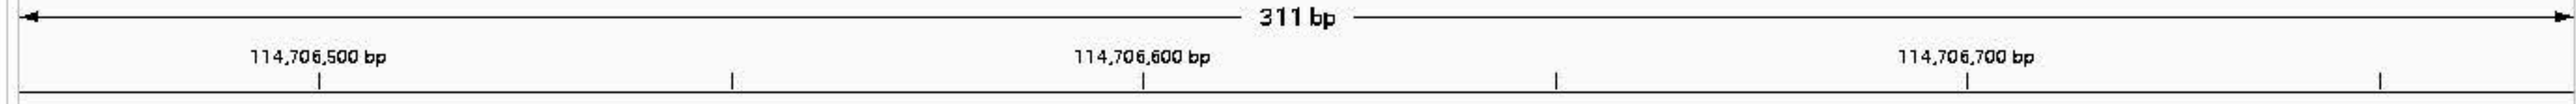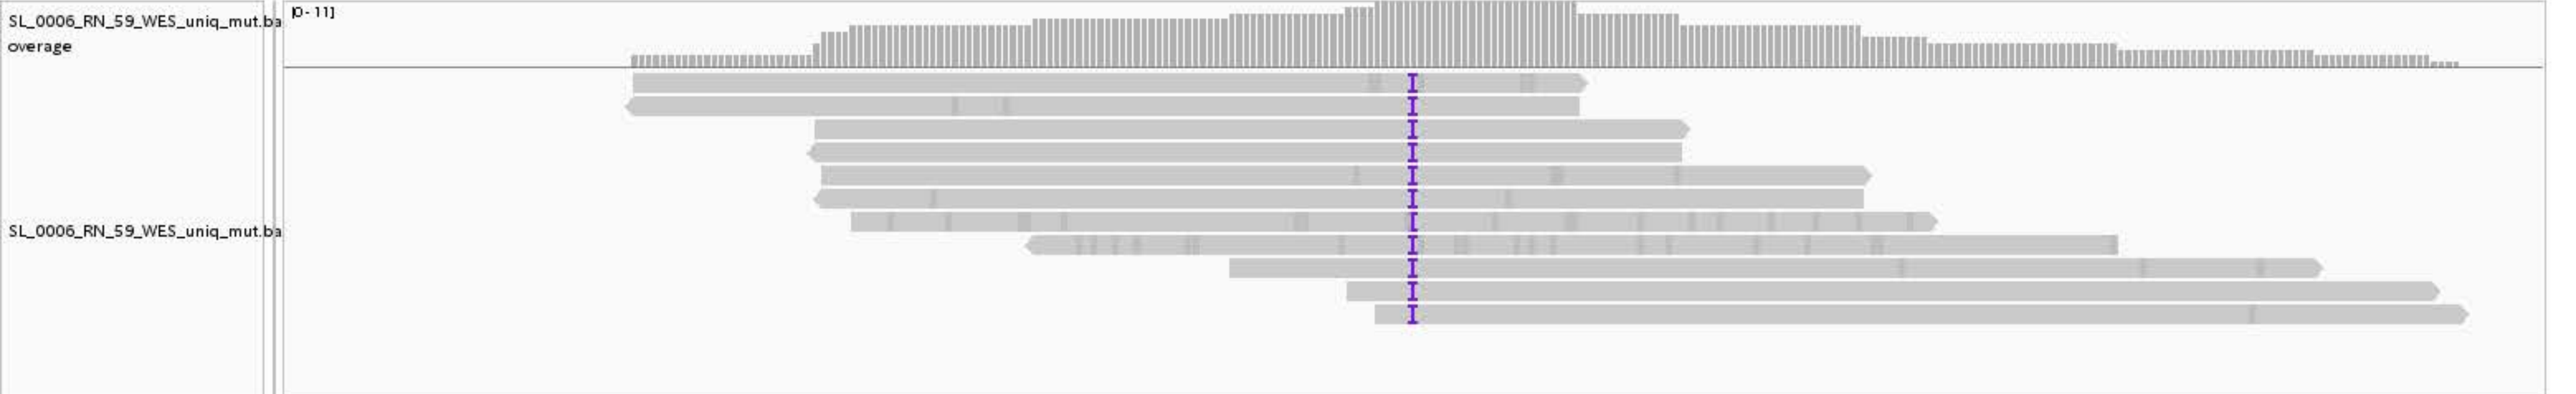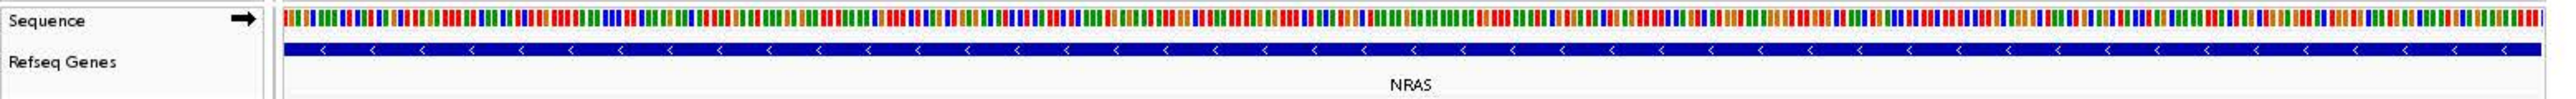

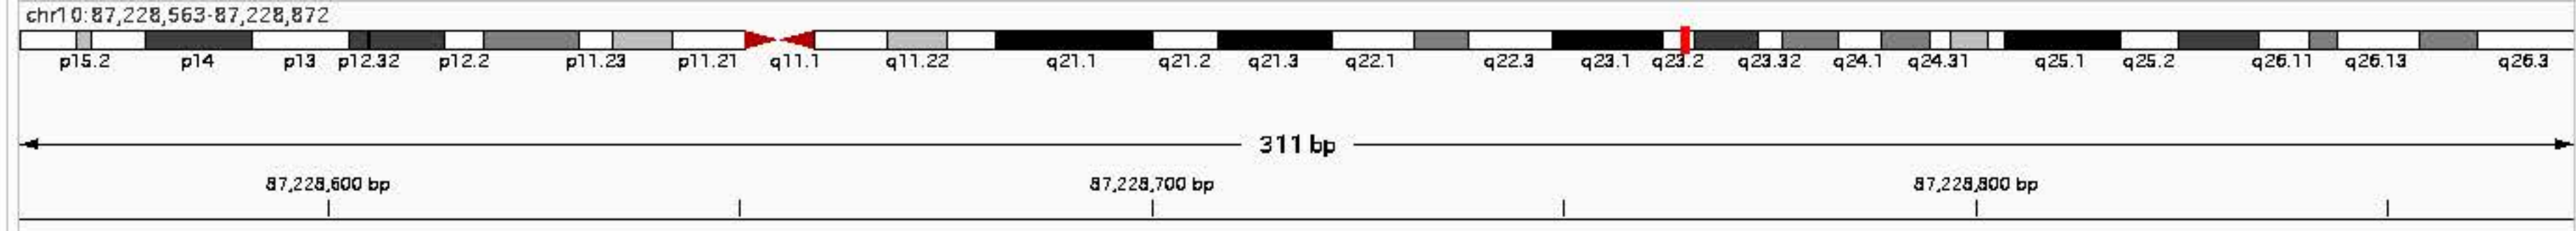

SL\_0001\_LN\_10\_WES\_uniq\_mut.  
coverage

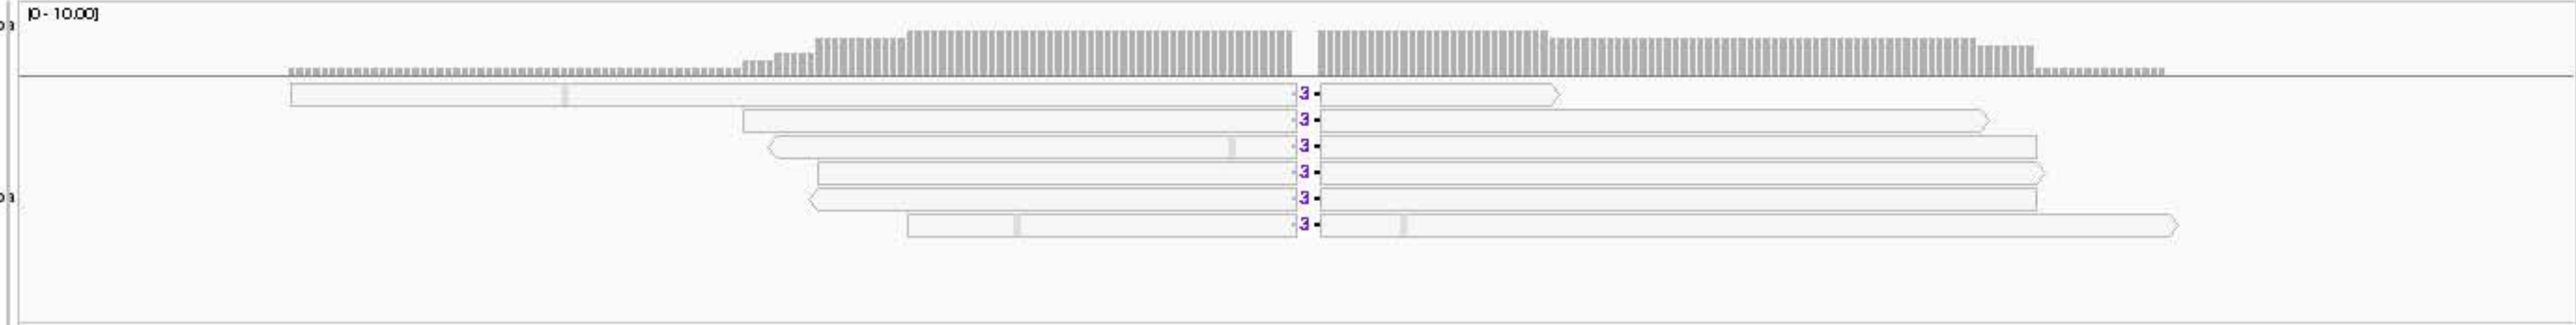

SL\_0001\_LN\_10\_WES\_uniq\_mut.

Sequence

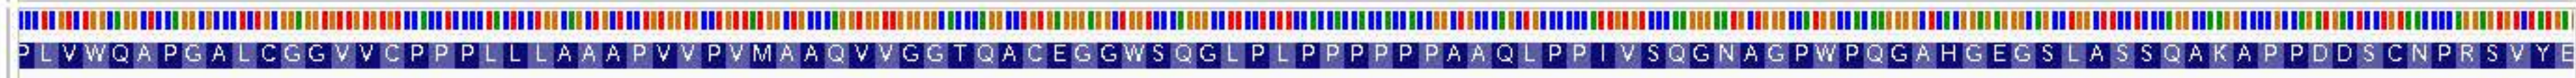

Refseq Genes

NUTM2A

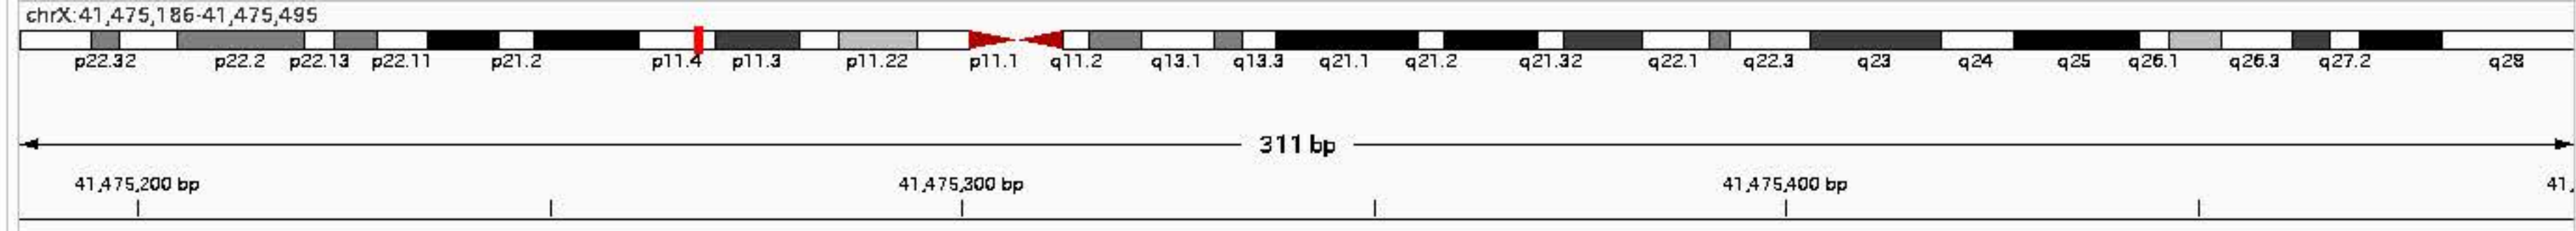

SL\_0007\_RN\_2\_WES\_uniq\_mut.ba  
verage

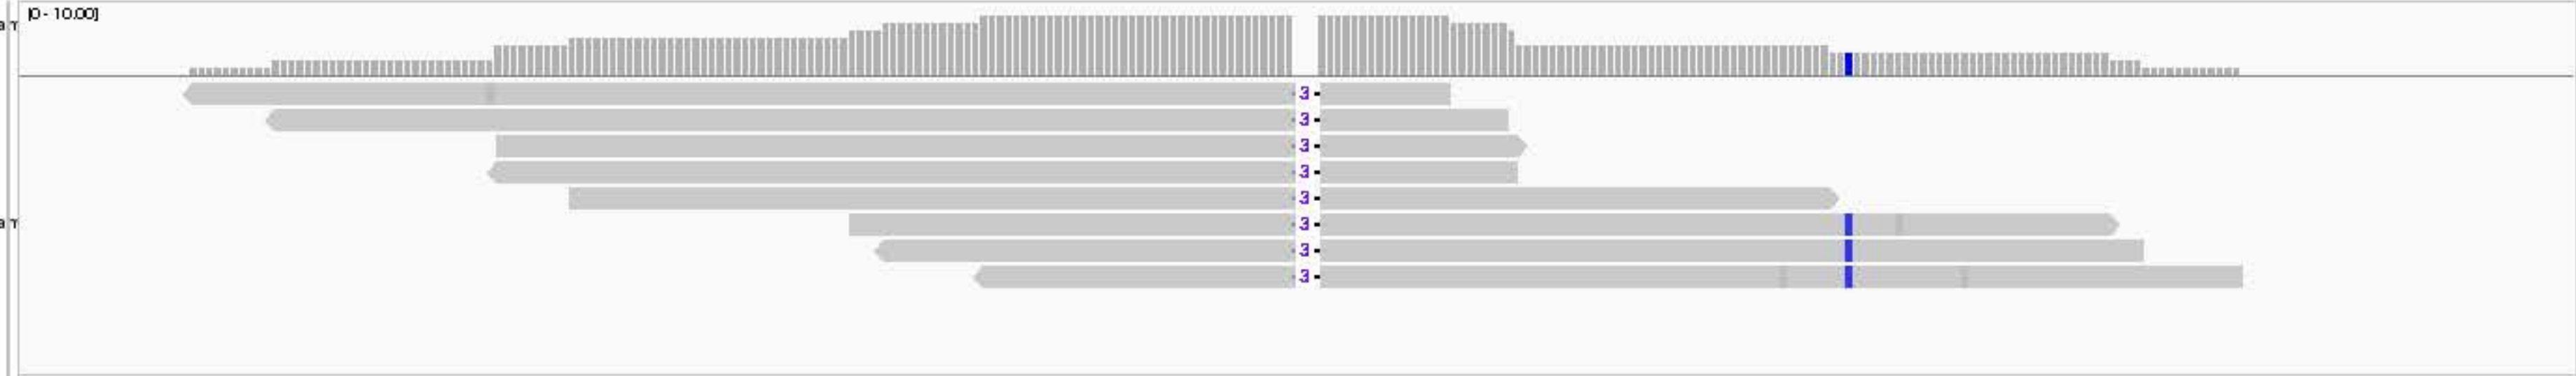

SL\_0007\_RN\_2\_WES\_uniq\_mut.ba

Sequence →

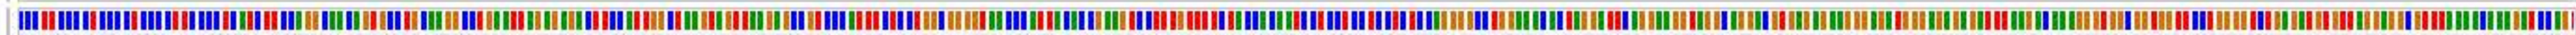

Refseq Genes

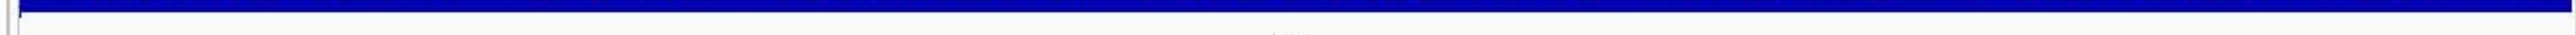



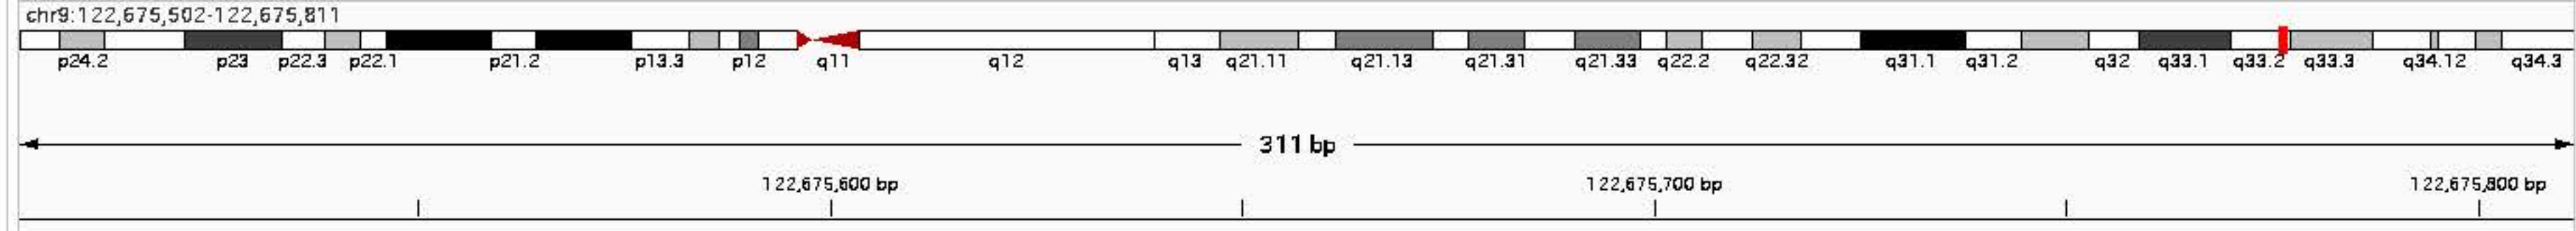

SL\_0003\_LN\_51\_WES\_uniq\_mut. coverage

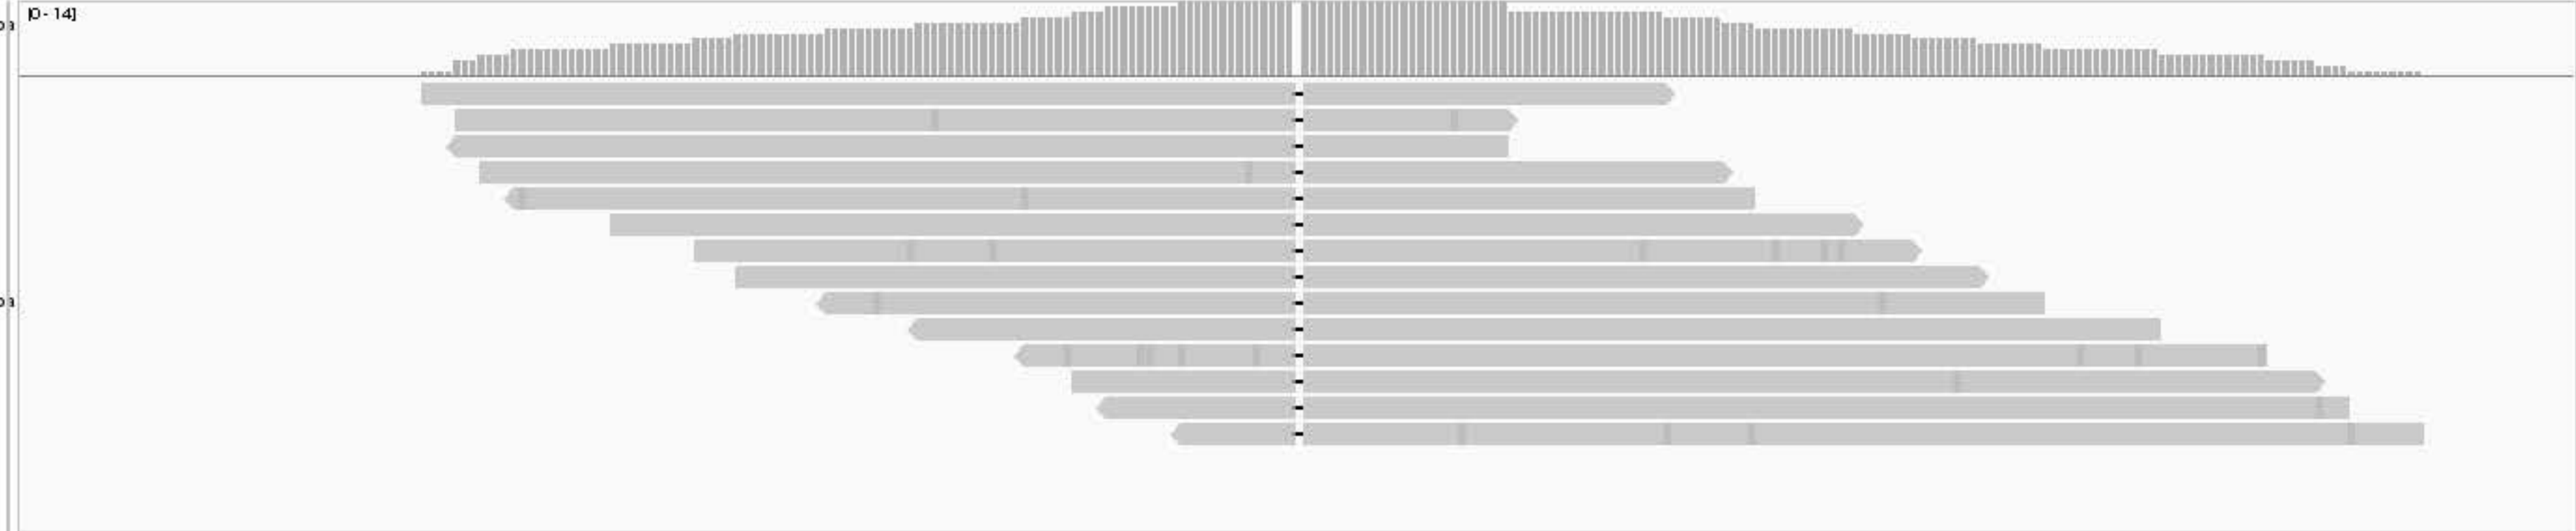

Sequence Refseq Genes

A I C N P F H Y V T V M N R R C C V L L L A F P I T F S Y F H S L L H V L L V N R L T F C T S N V I H H F F C D V N P V L K L S C S S T F V N E I V A M T E G L A S V M A P F V C I I I S Y L R I L I A V L K

OR1L3

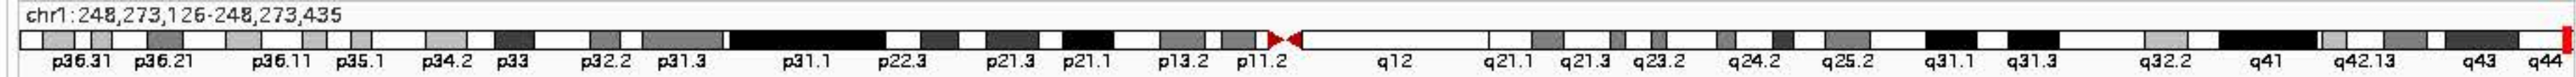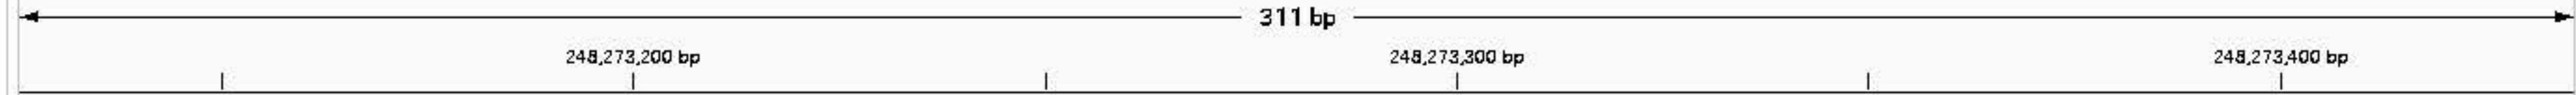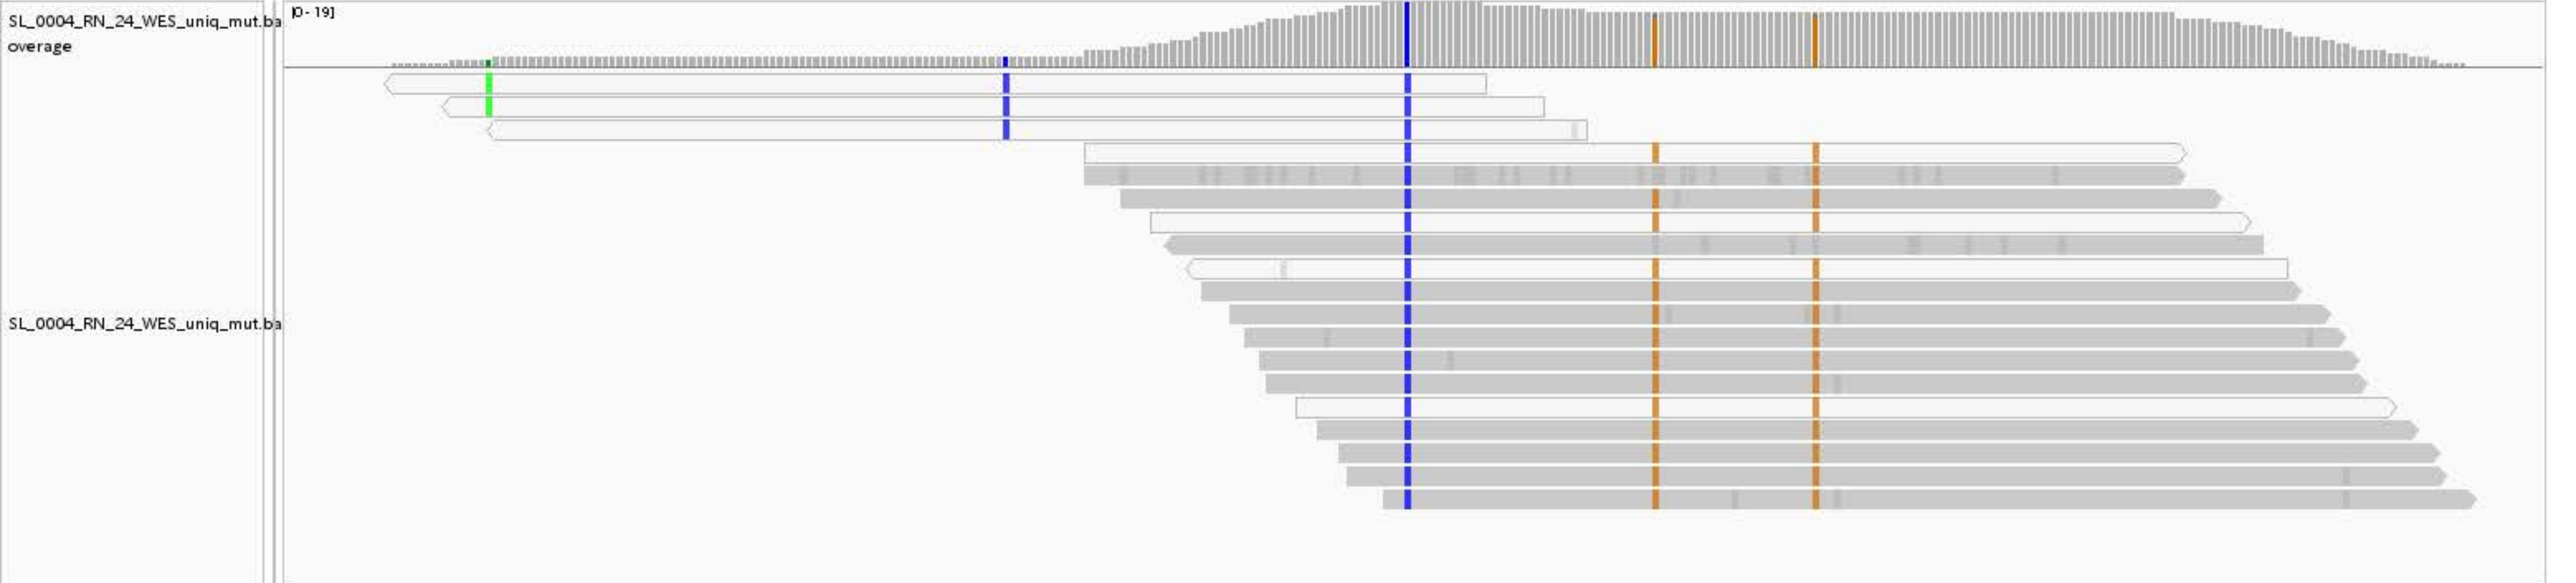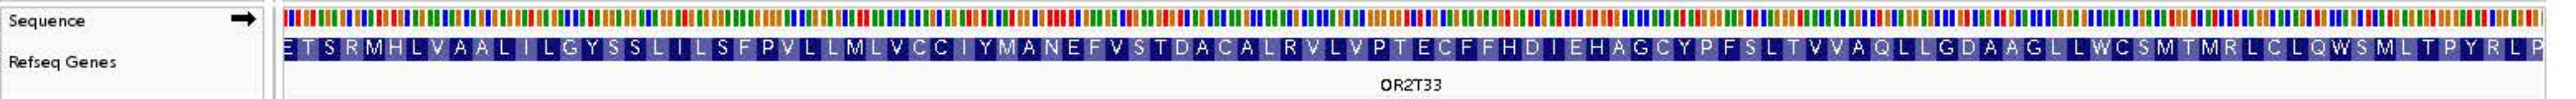

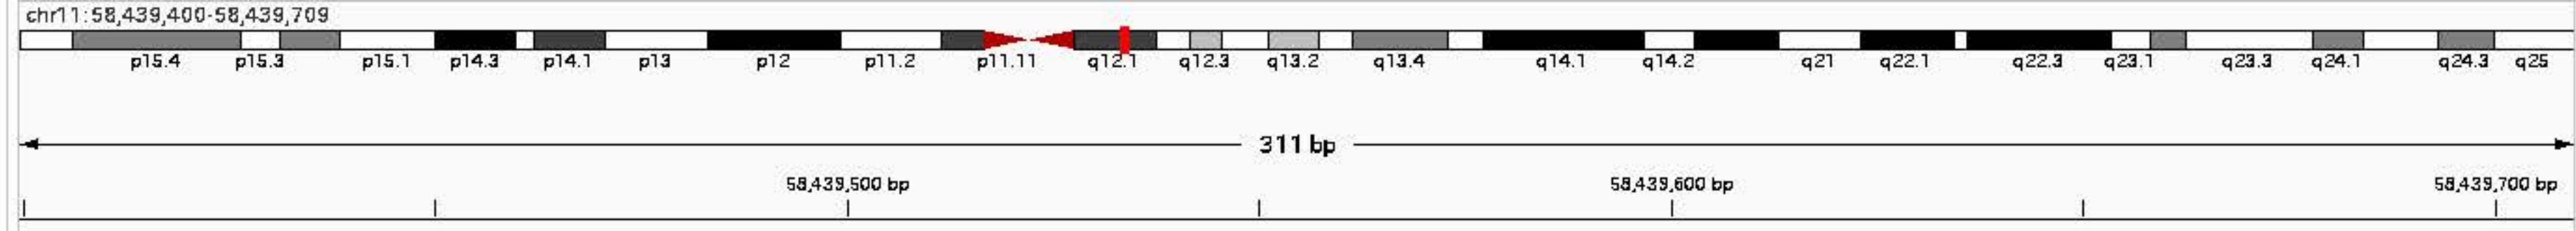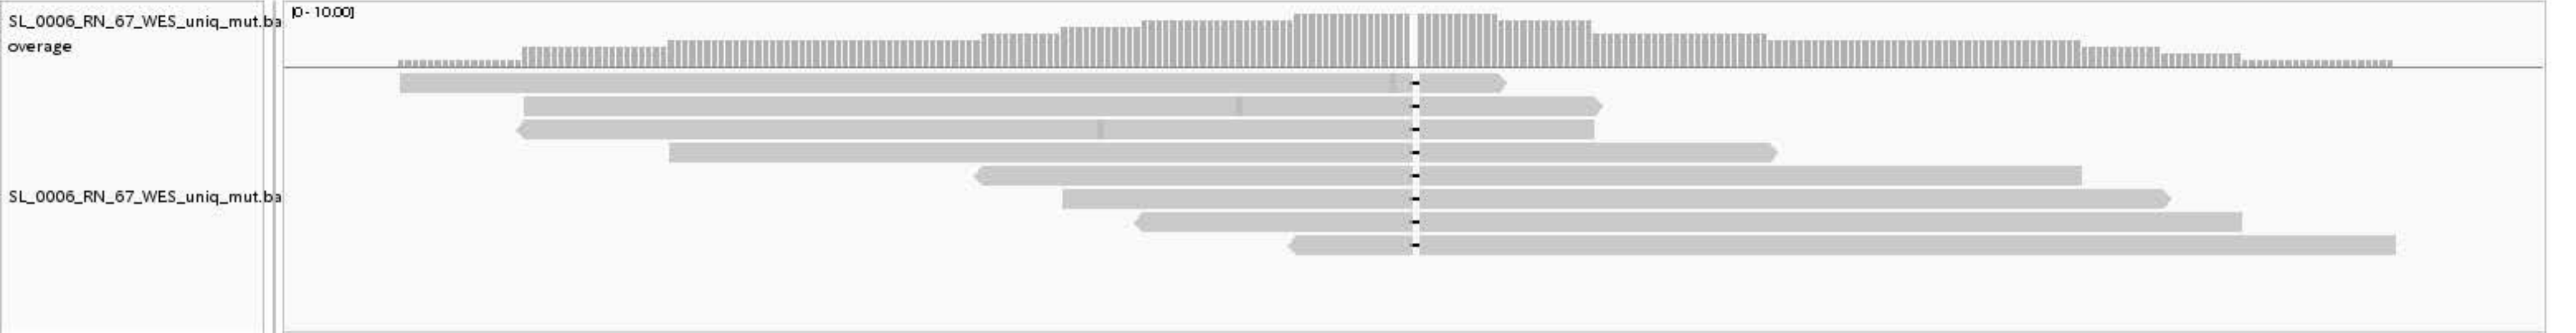

Sequence →

Refseq Genes

GYFISVATLHSACTSFQKQRGEP SRMKMITIFIFLYSILIVLISFLDNFGVVFFIVMESIYNDSCSLTLLPPADCFFHEVVNSRCFSLRFTNGTHISANLFGCI

OR5B12



chr11:55,795,542-55,795,851

p15.4 p15.3 p15.1 p14.3 p14.1 p13 p12 p11.2 p11.1 q12.1 q12.3 q13.2 q13.4 q14.1 q14.2 q21 q22.1 q22.3 q23.1 q23.3 q24.1 q24.3 q25

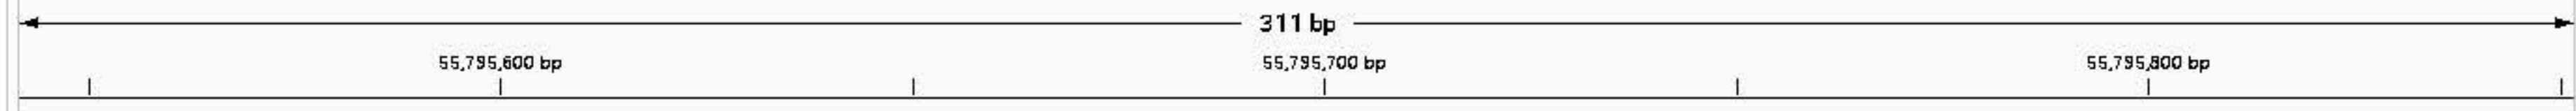

SL\_0007\_RN\_2\_WES\_uniq\_mut.ba  
verage

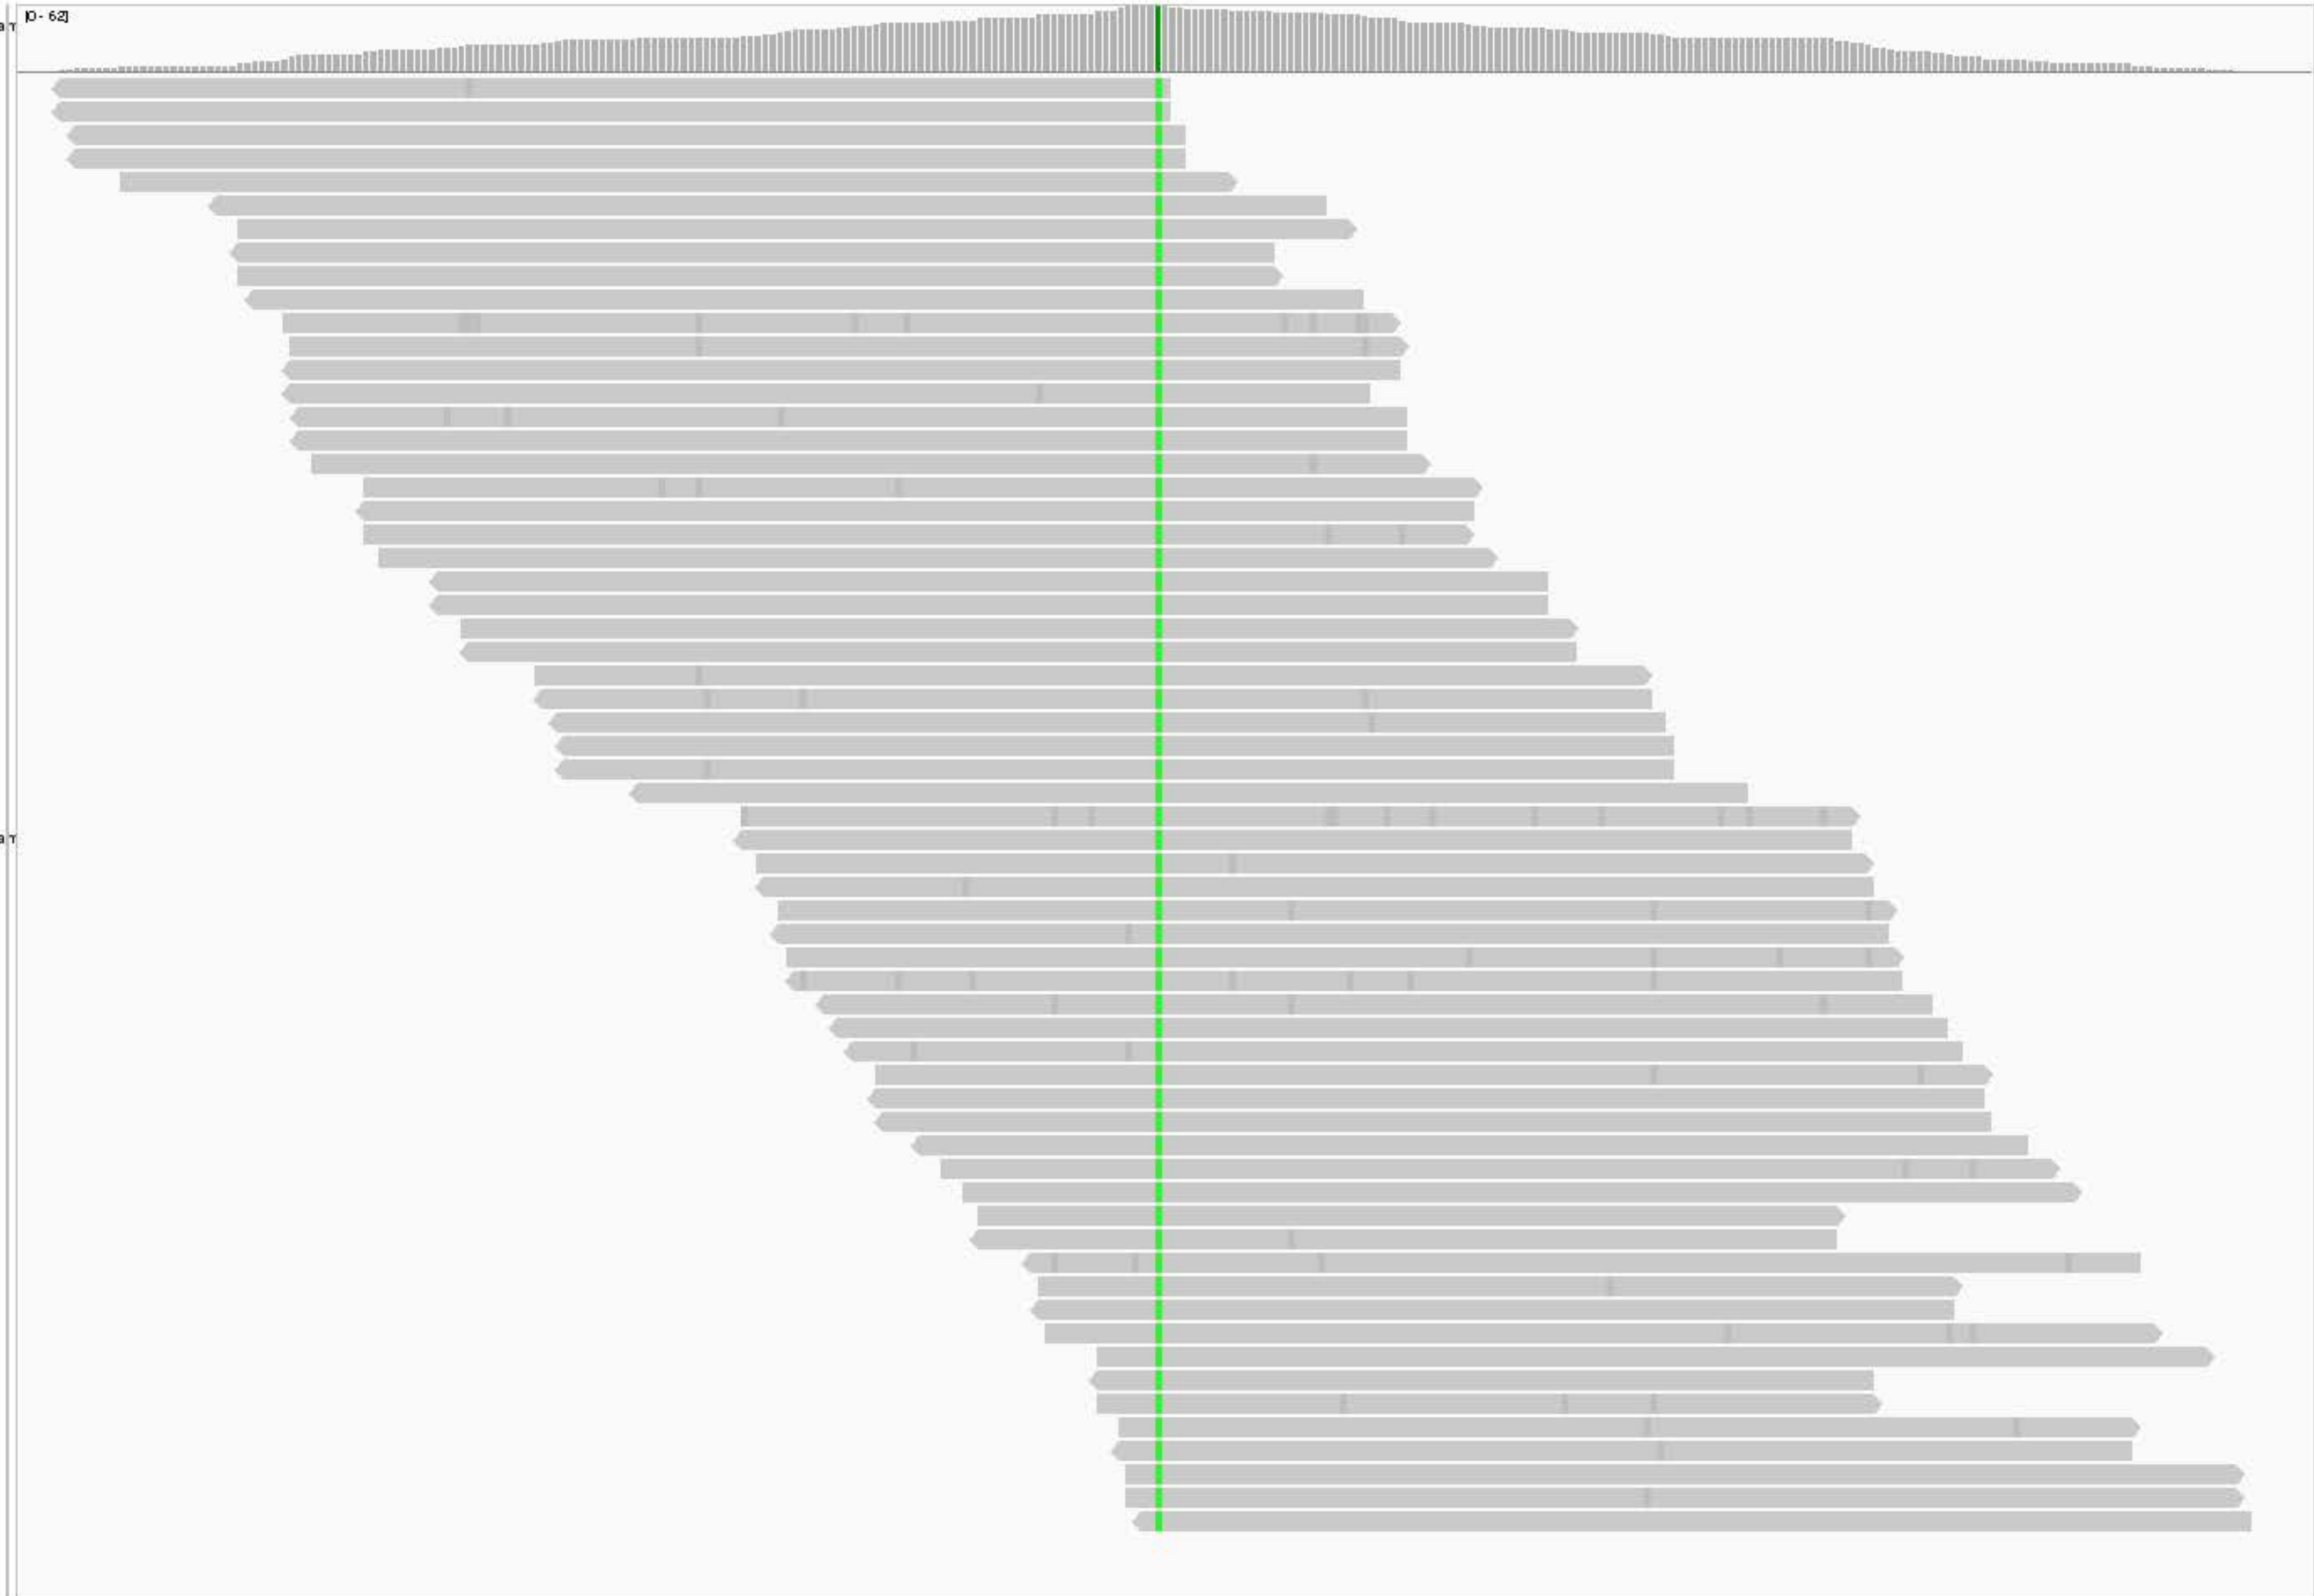

SL\_0007\_RN\_2\_WES\_uniq\_mut.ba

Sequence →

Refseq Genes

MMVLRNLSMEPTFALLGFTDYPKLIPLFLVFLLMYVITVVGNLGMIITIKINPKFHTPMYFFLSHLSFVDFCYSSIVTPKLLLENLVMADKSIIFYFS

OR5D14

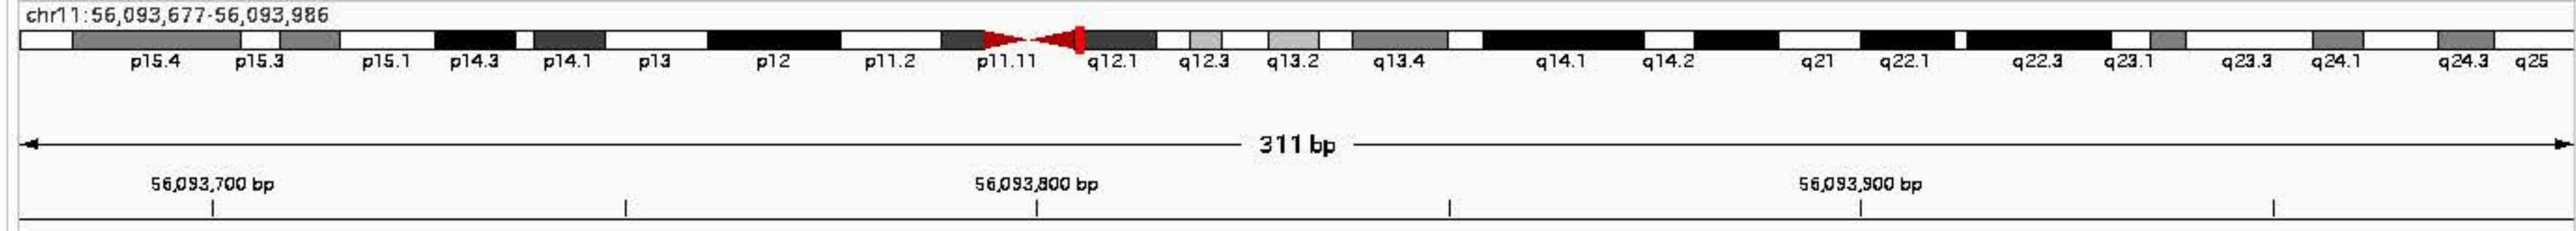

SL\_0015\_LN\_46\_WES\_uniq\_mut. coverage

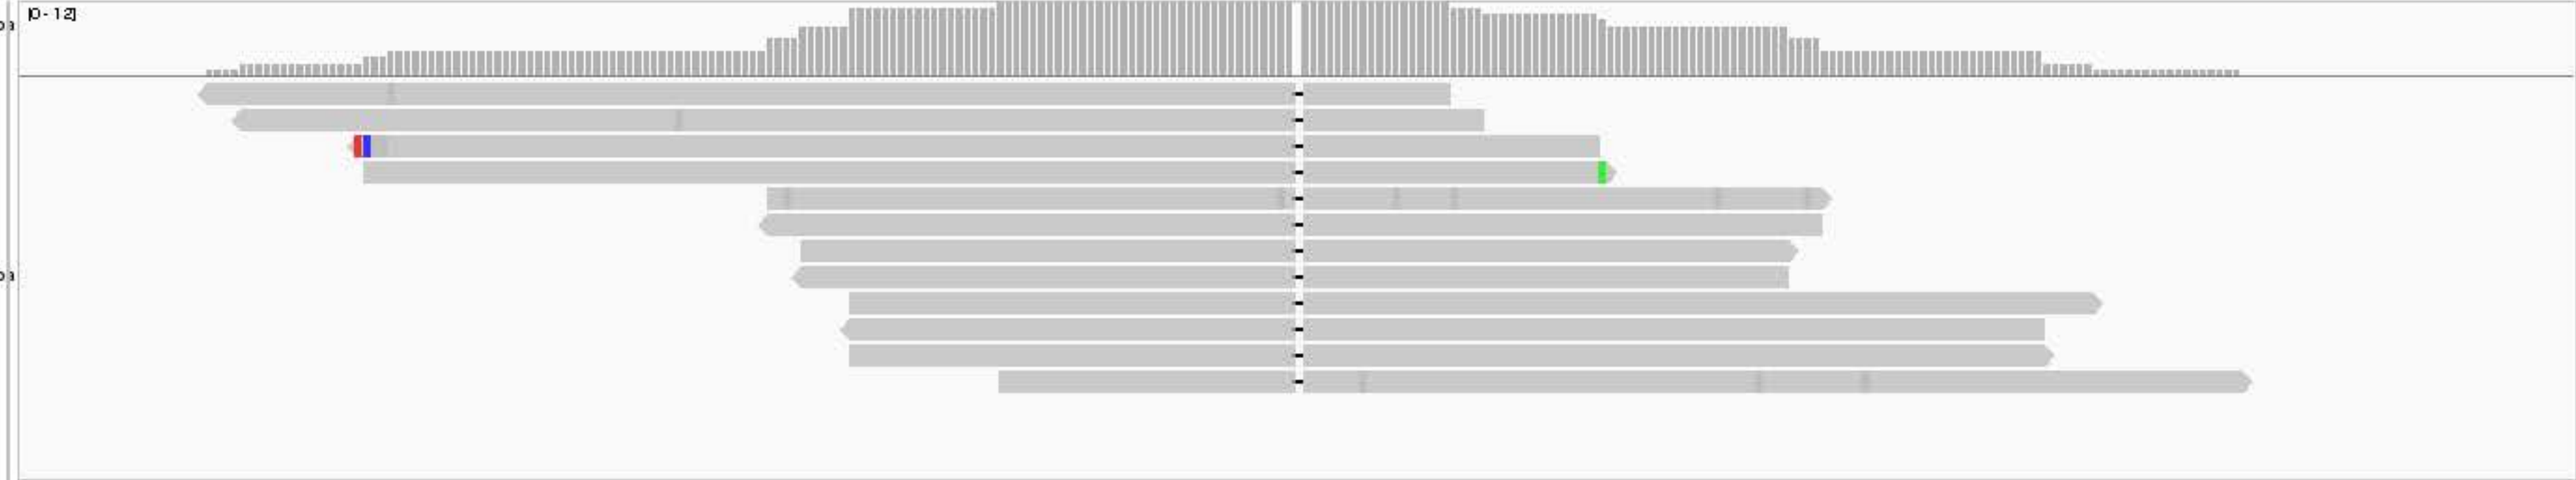

SL\_0015\_LN\_46\_WES\_uniq\_mut. coverage

Sequence

Refseq Genes

I A I C N P L L Y S V V M S Q K V S N W L G V M P Y V I G F T S S L I S V W V I S S L A F C D S S I N H F F C D T T A L L A L S C V D T F G T E M V S F V L A G F T L L S S L L I I T V T Y I I I S A I L R

OR812

chr9:104,598,744-104,599,053

p24.2 p23 p22.3 p22.1 p21.2 p13.3 p12 q11 q12 q13 q21.11 q21.13 q21.31 q21.33 q22.2 q22.32 q31.1 q31.2 q32 q33.1 q33.2 q33.3 q34.12 q34.3

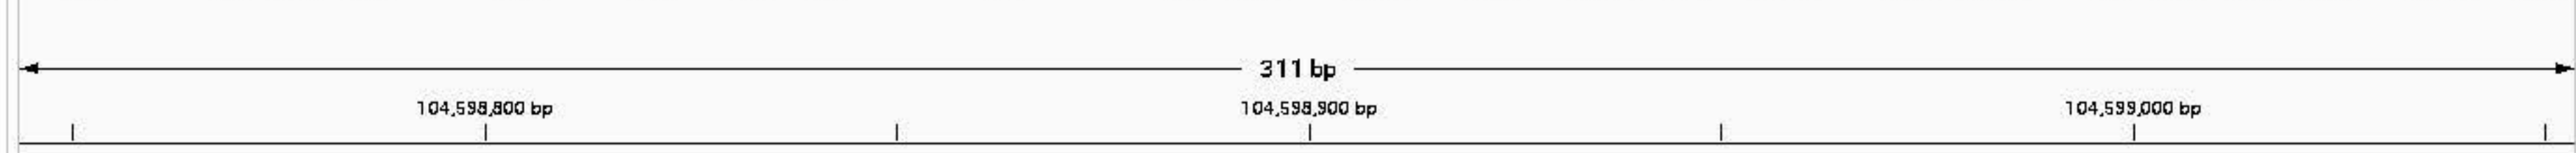

SL\_0004\_RN\_26\_WES\_uniq\_mut.ba  
coverage

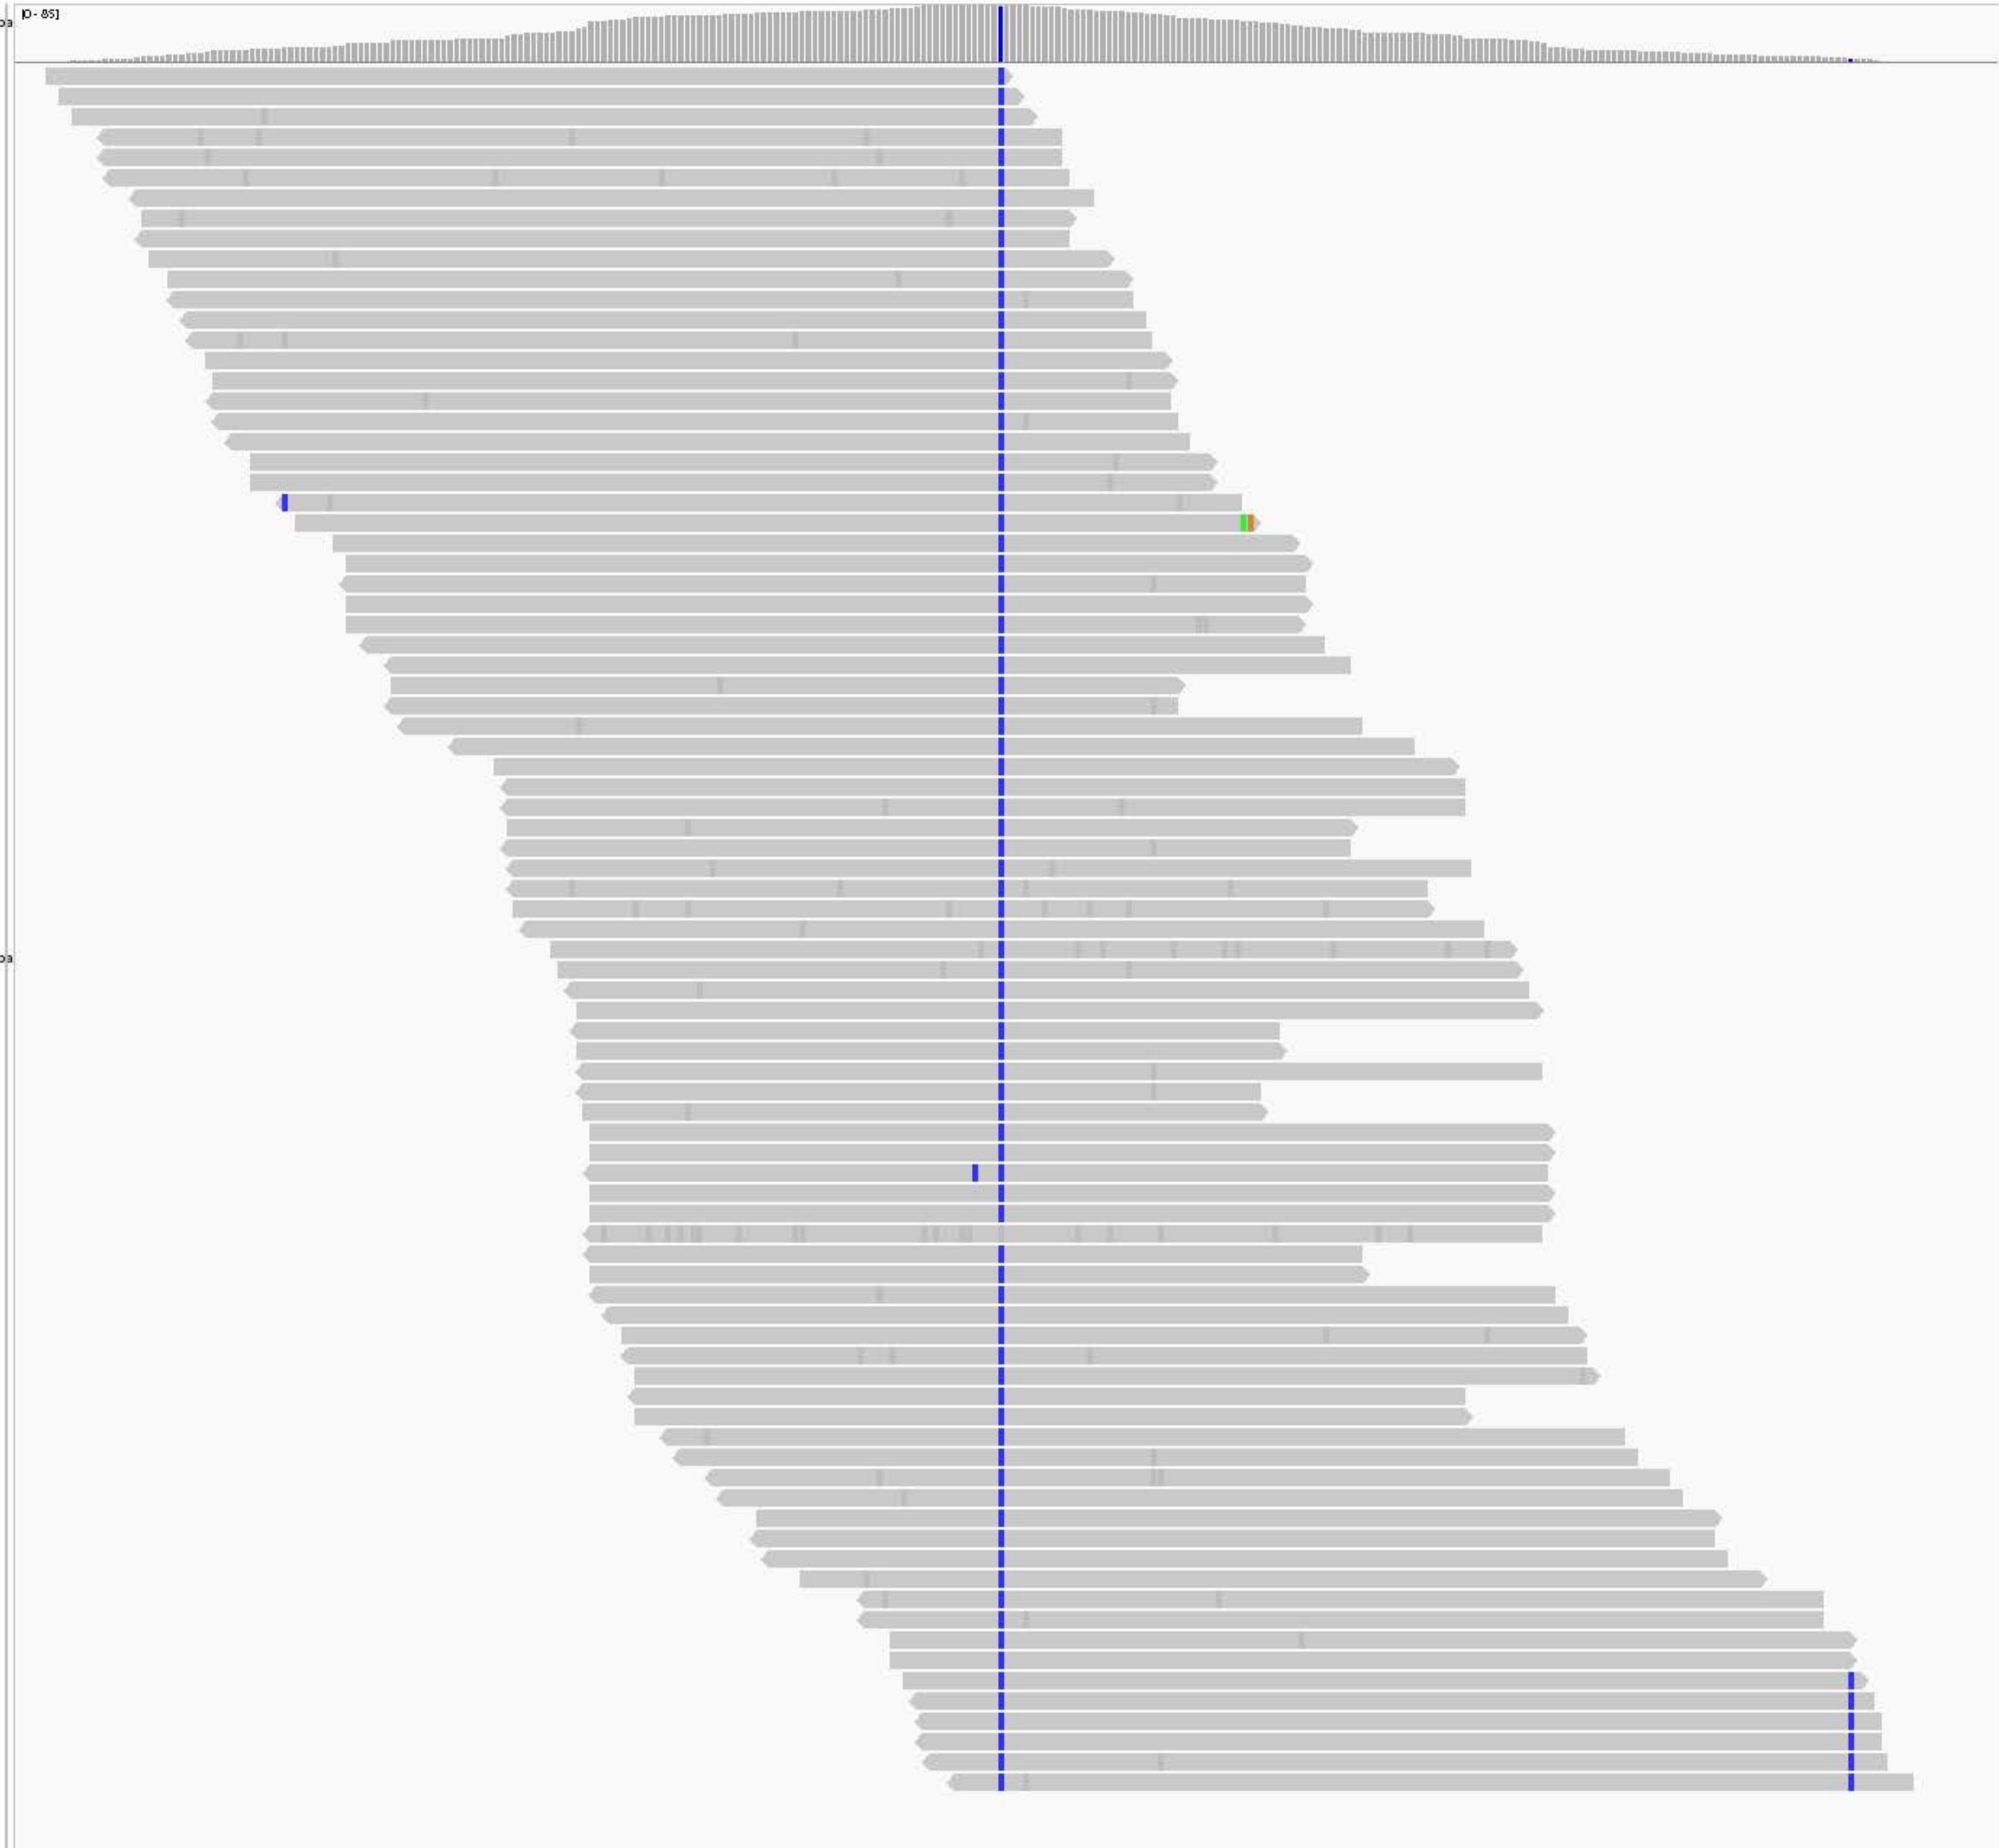

SL\_0004\_RN\_26\_WES\_uniq\_mut.ba

Sequence →

Refseq Genes

L I I L T Y S V I I L L L P T L L F L T T T V L L I F E N G S I D A C A L K M V A L I E C T F H N I I N N R C F P L Q V V F V T Q V A S N V A G I I W S G A A M P V Y A D K S M I I P Y R L P N C I A V Y R D

OR13C5



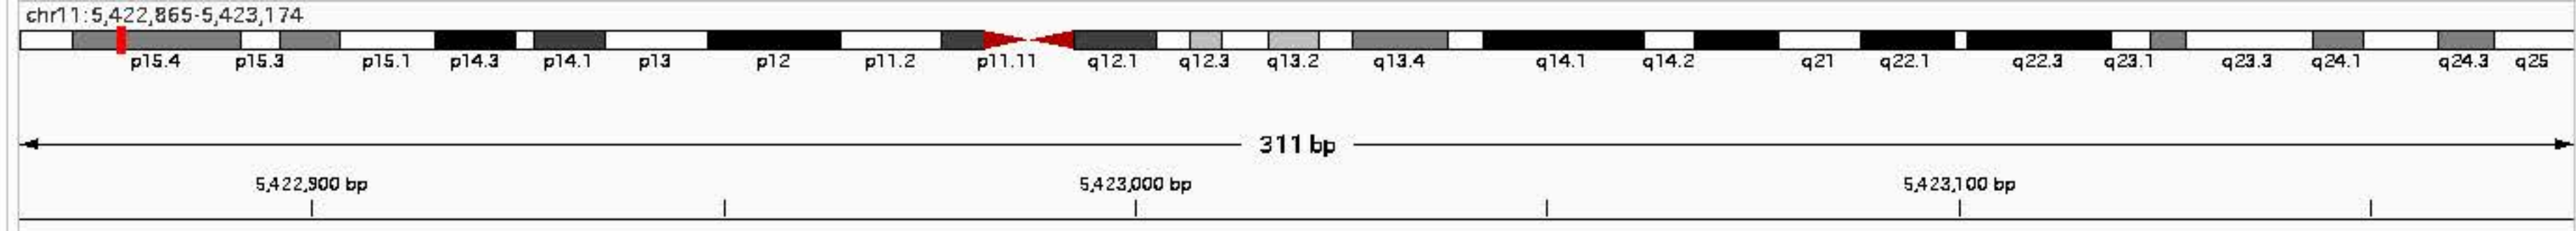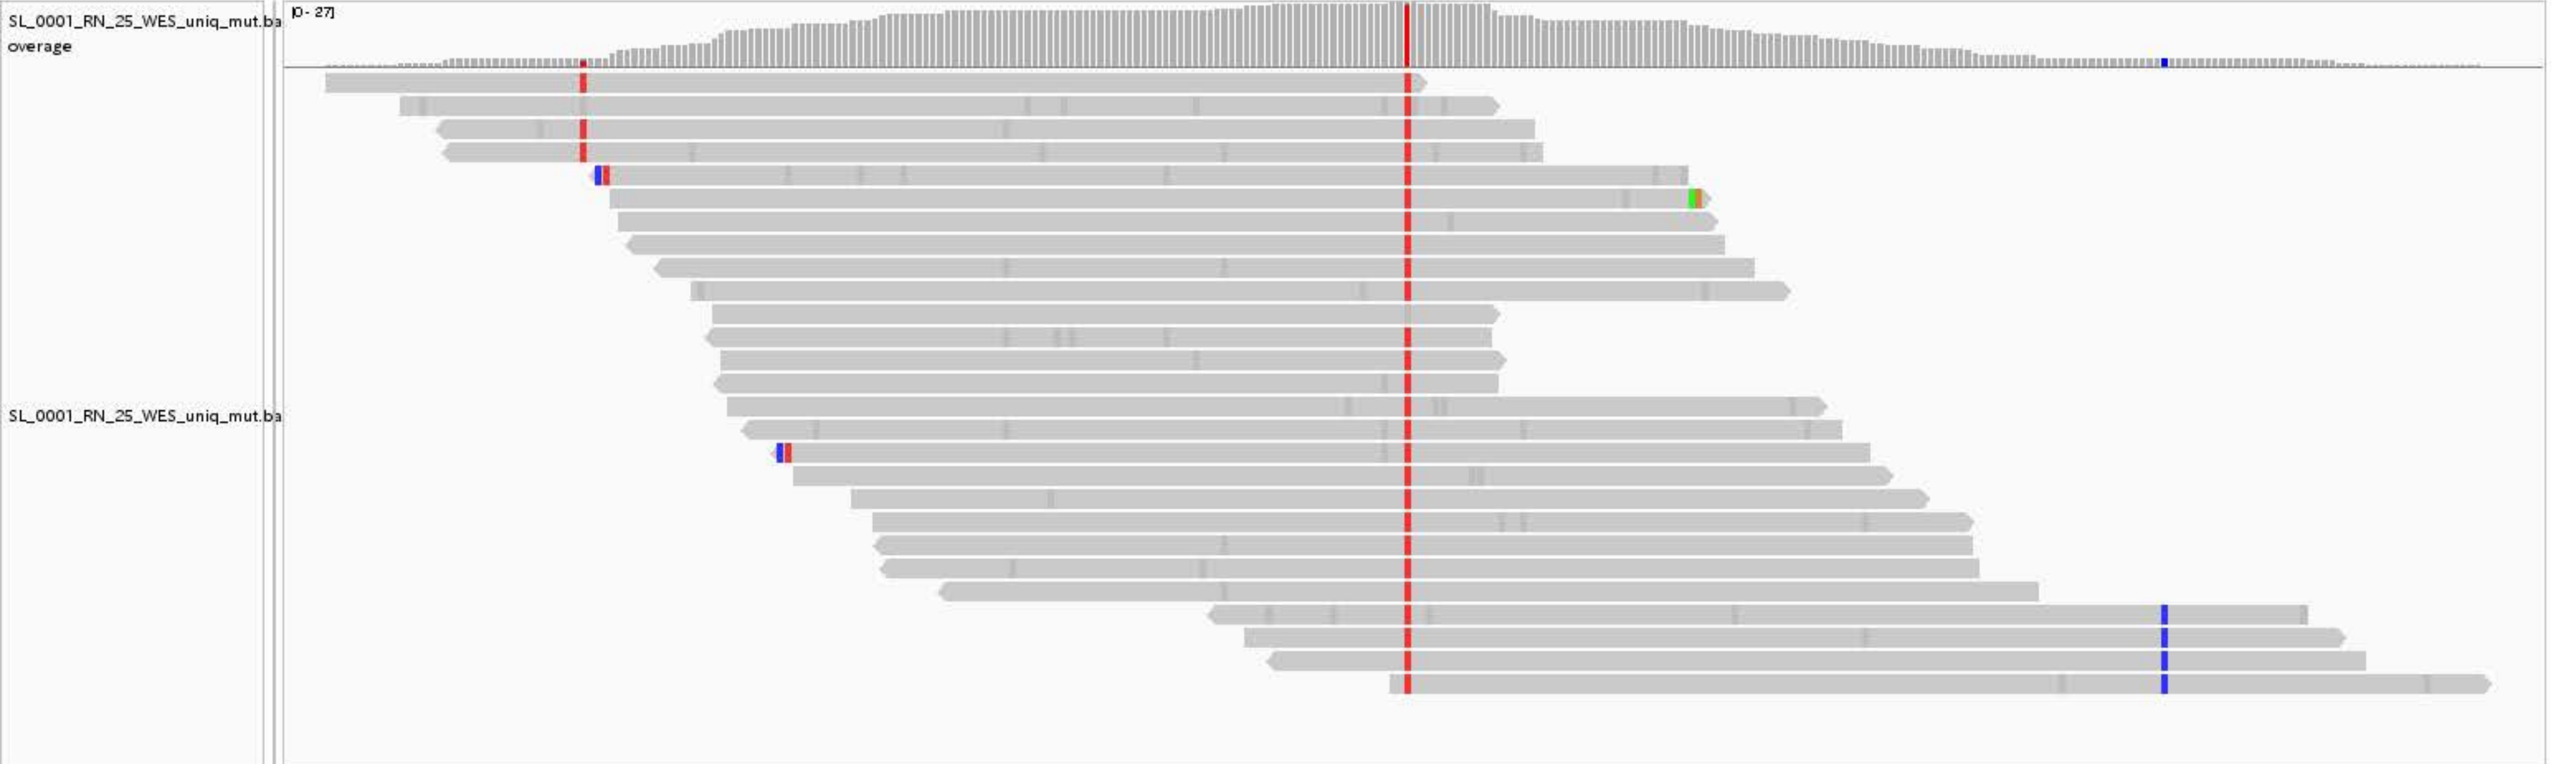

Sequence →

Refseq Genes

L I L K N I L G T A T W A E R L R A L N N C L S H I L A V L V L Y I P M V G V S M T H R F A K H A S P L V H V I M A N I Y L L A P P V M N P I I Y S V K N K Q I Q W G M L N F L S L K N M H S R

OR51B5

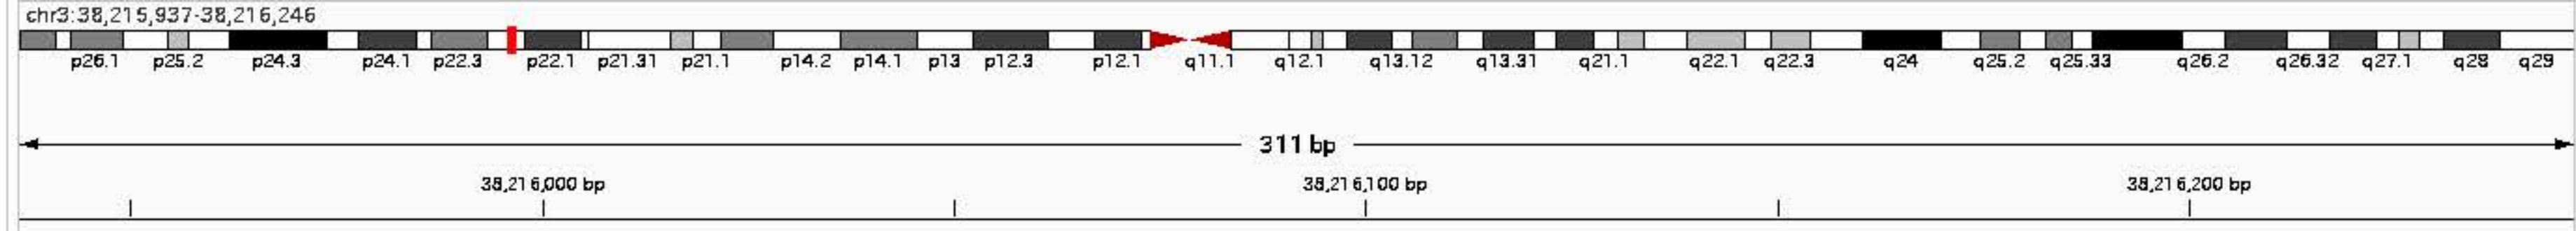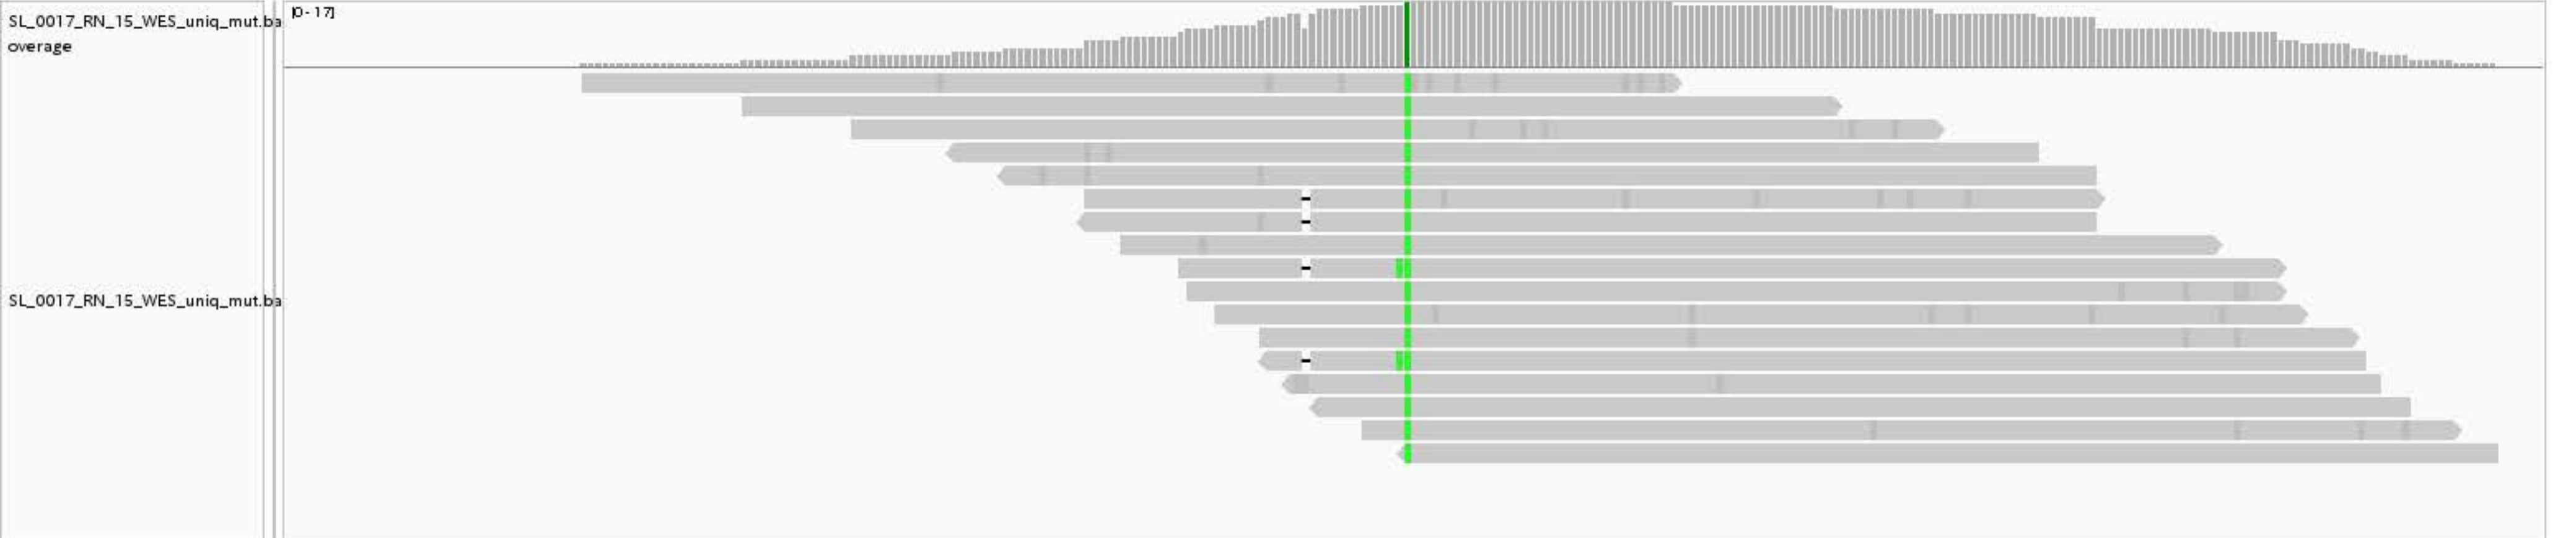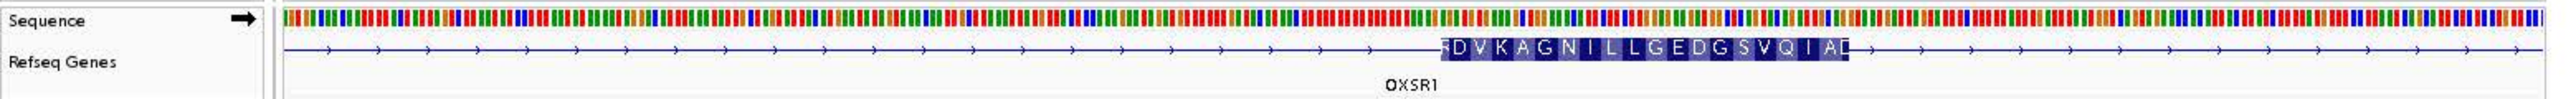

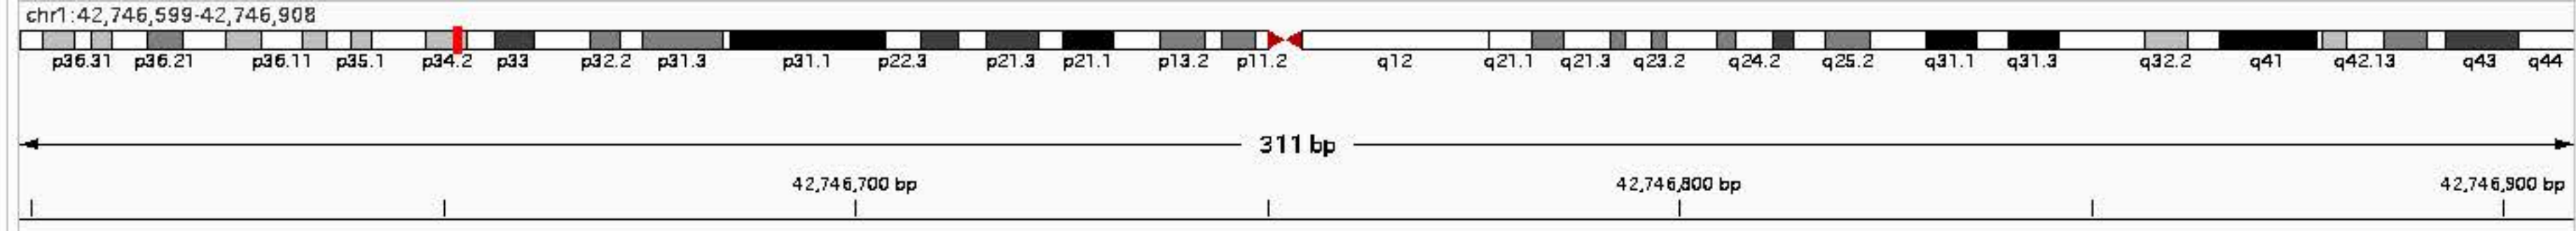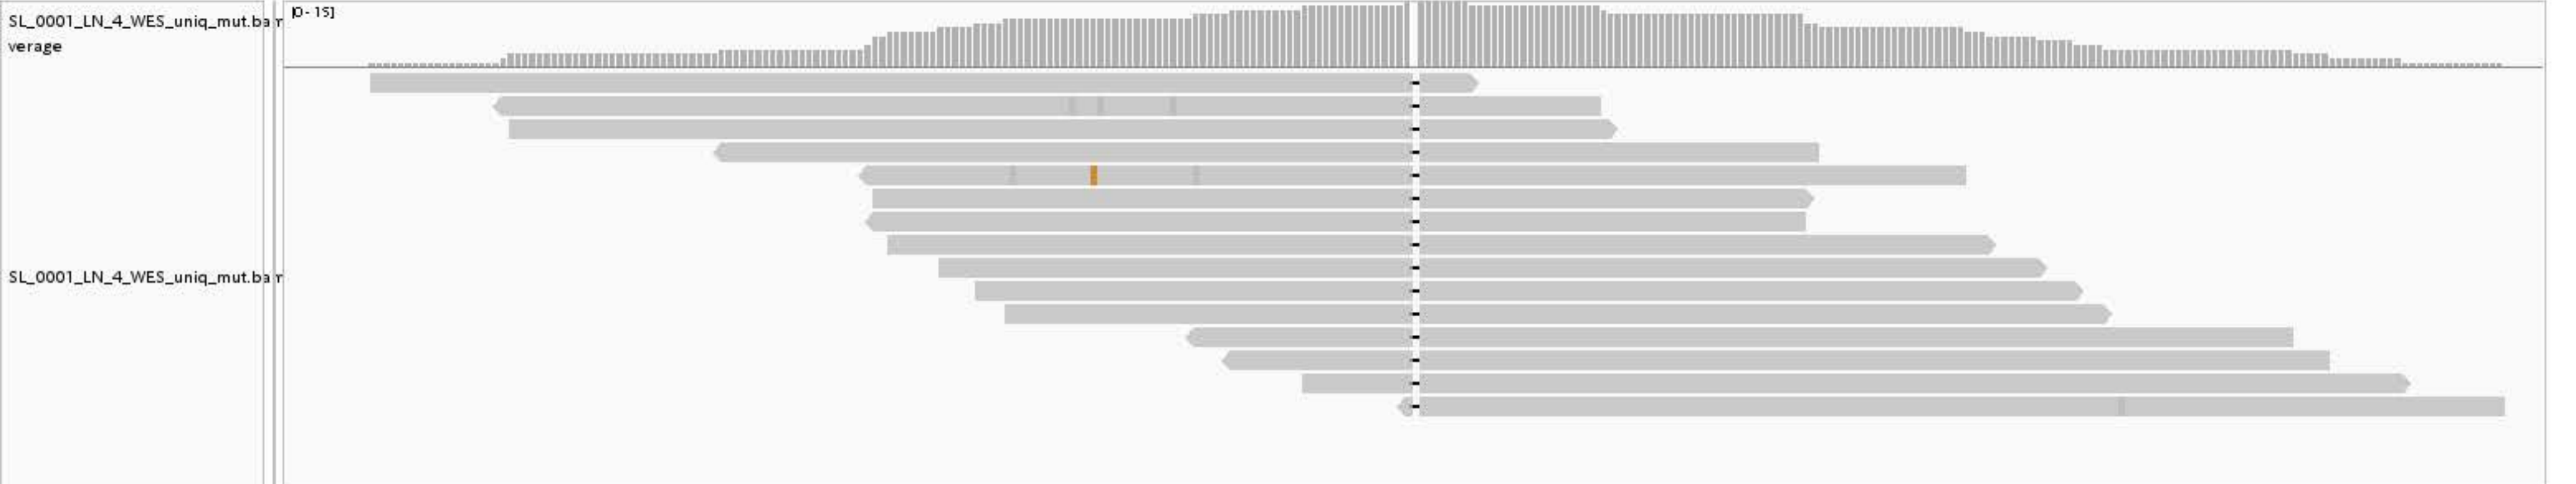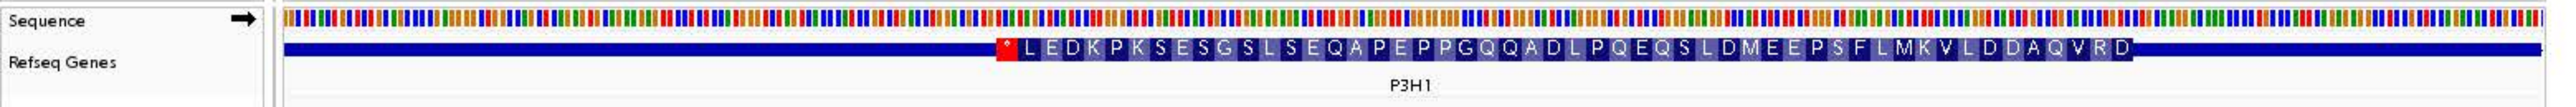



chr1:17,238,468-17,238,777

p36.31 p36.21 p36.11 p35.1 p34.2 p33 p32.2 p31.3 p31.1 p22.3 p21.3 p21.1 p13.2 p11.2 q12 q21.1 q21.3 q23.2 q24.2 q25.2 q31.1 q31.3 q32.2 q41 q42.13 q43 q44

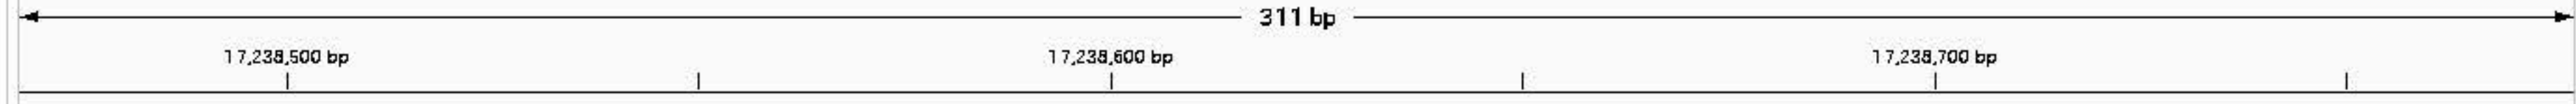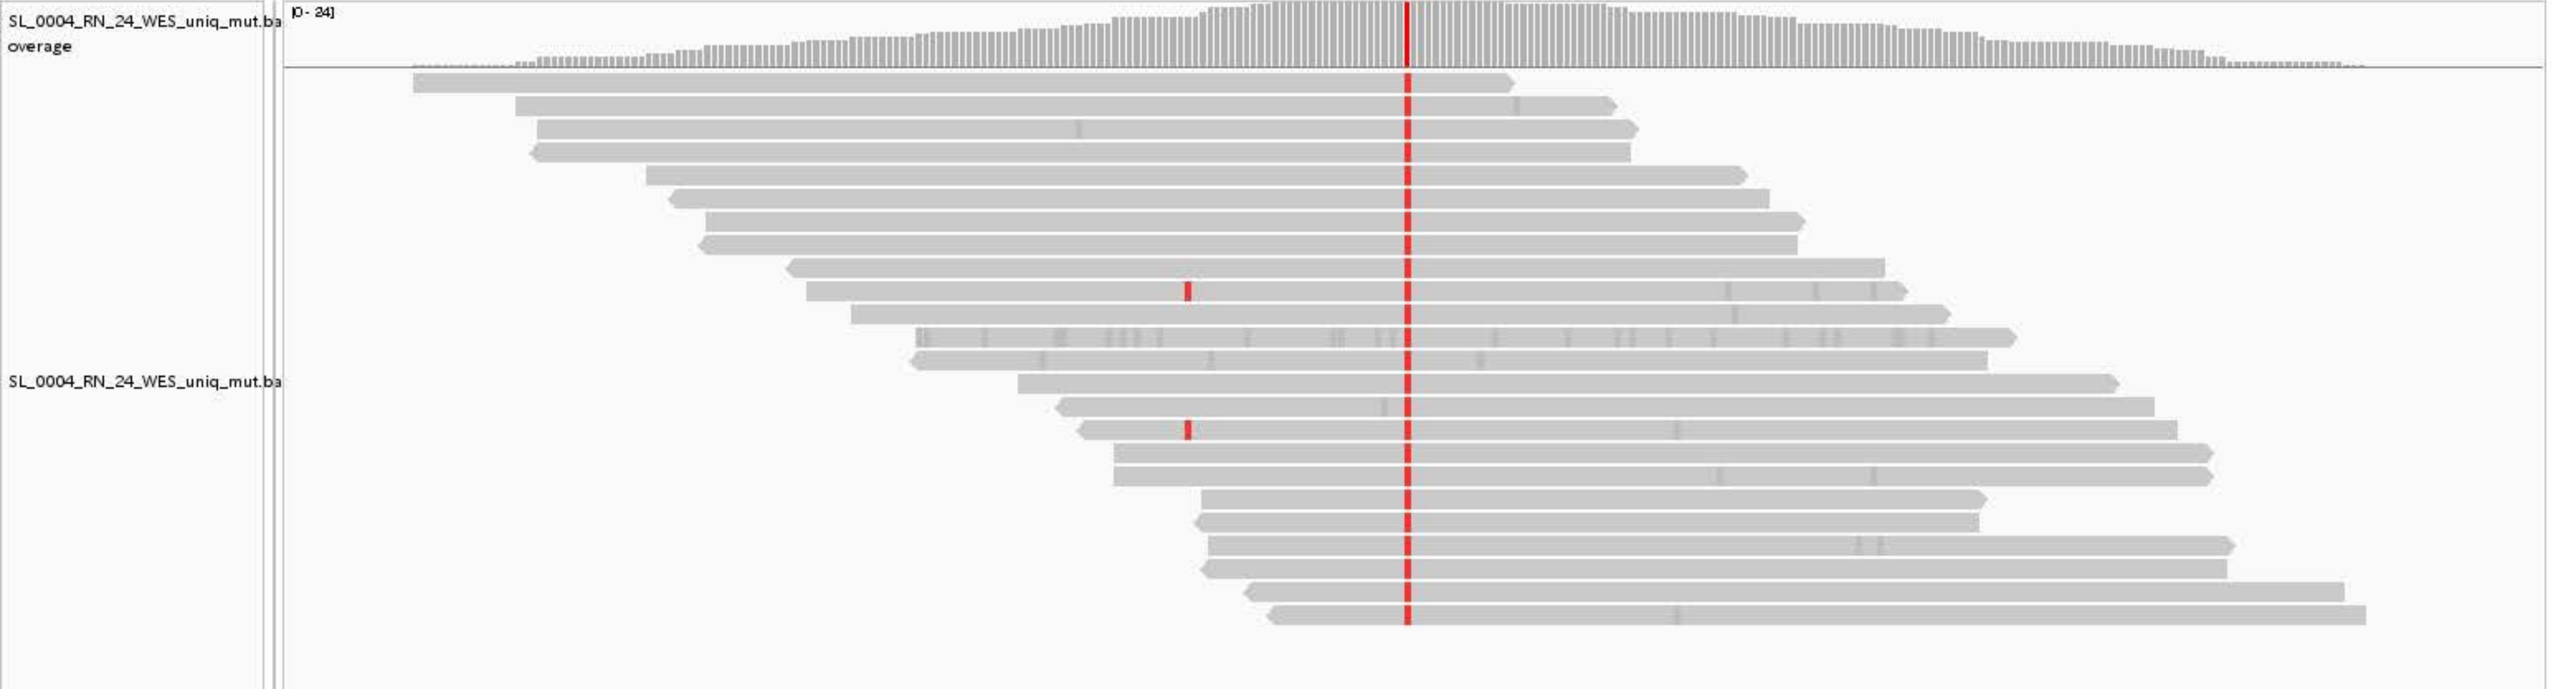

Sequence Refseq Genes

GFRLLASPSACLKLFQEKKEEGYGEEAAQFDC

PADI1

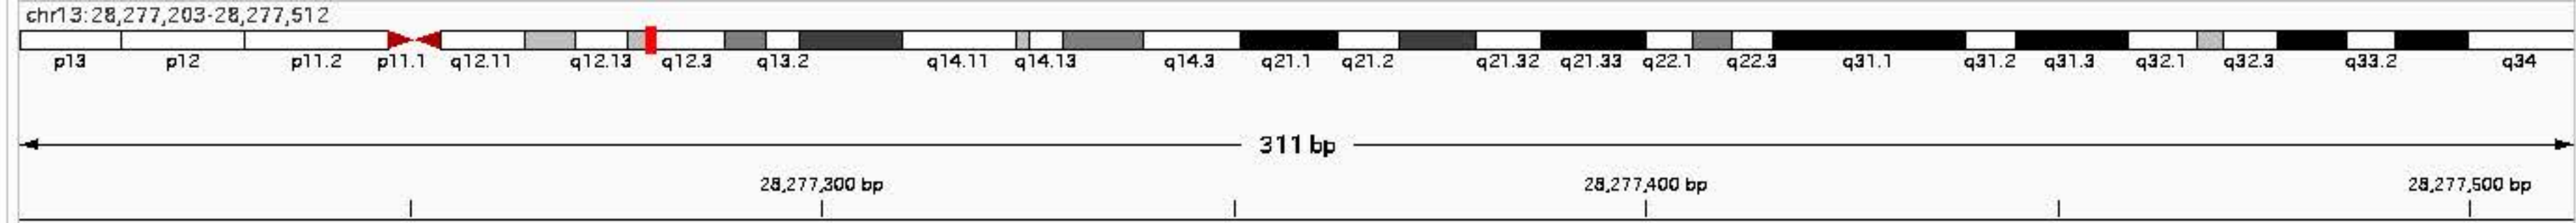

SL\_0004\_RN\_26\_WES\_uniq\_mut.ba  
 overage

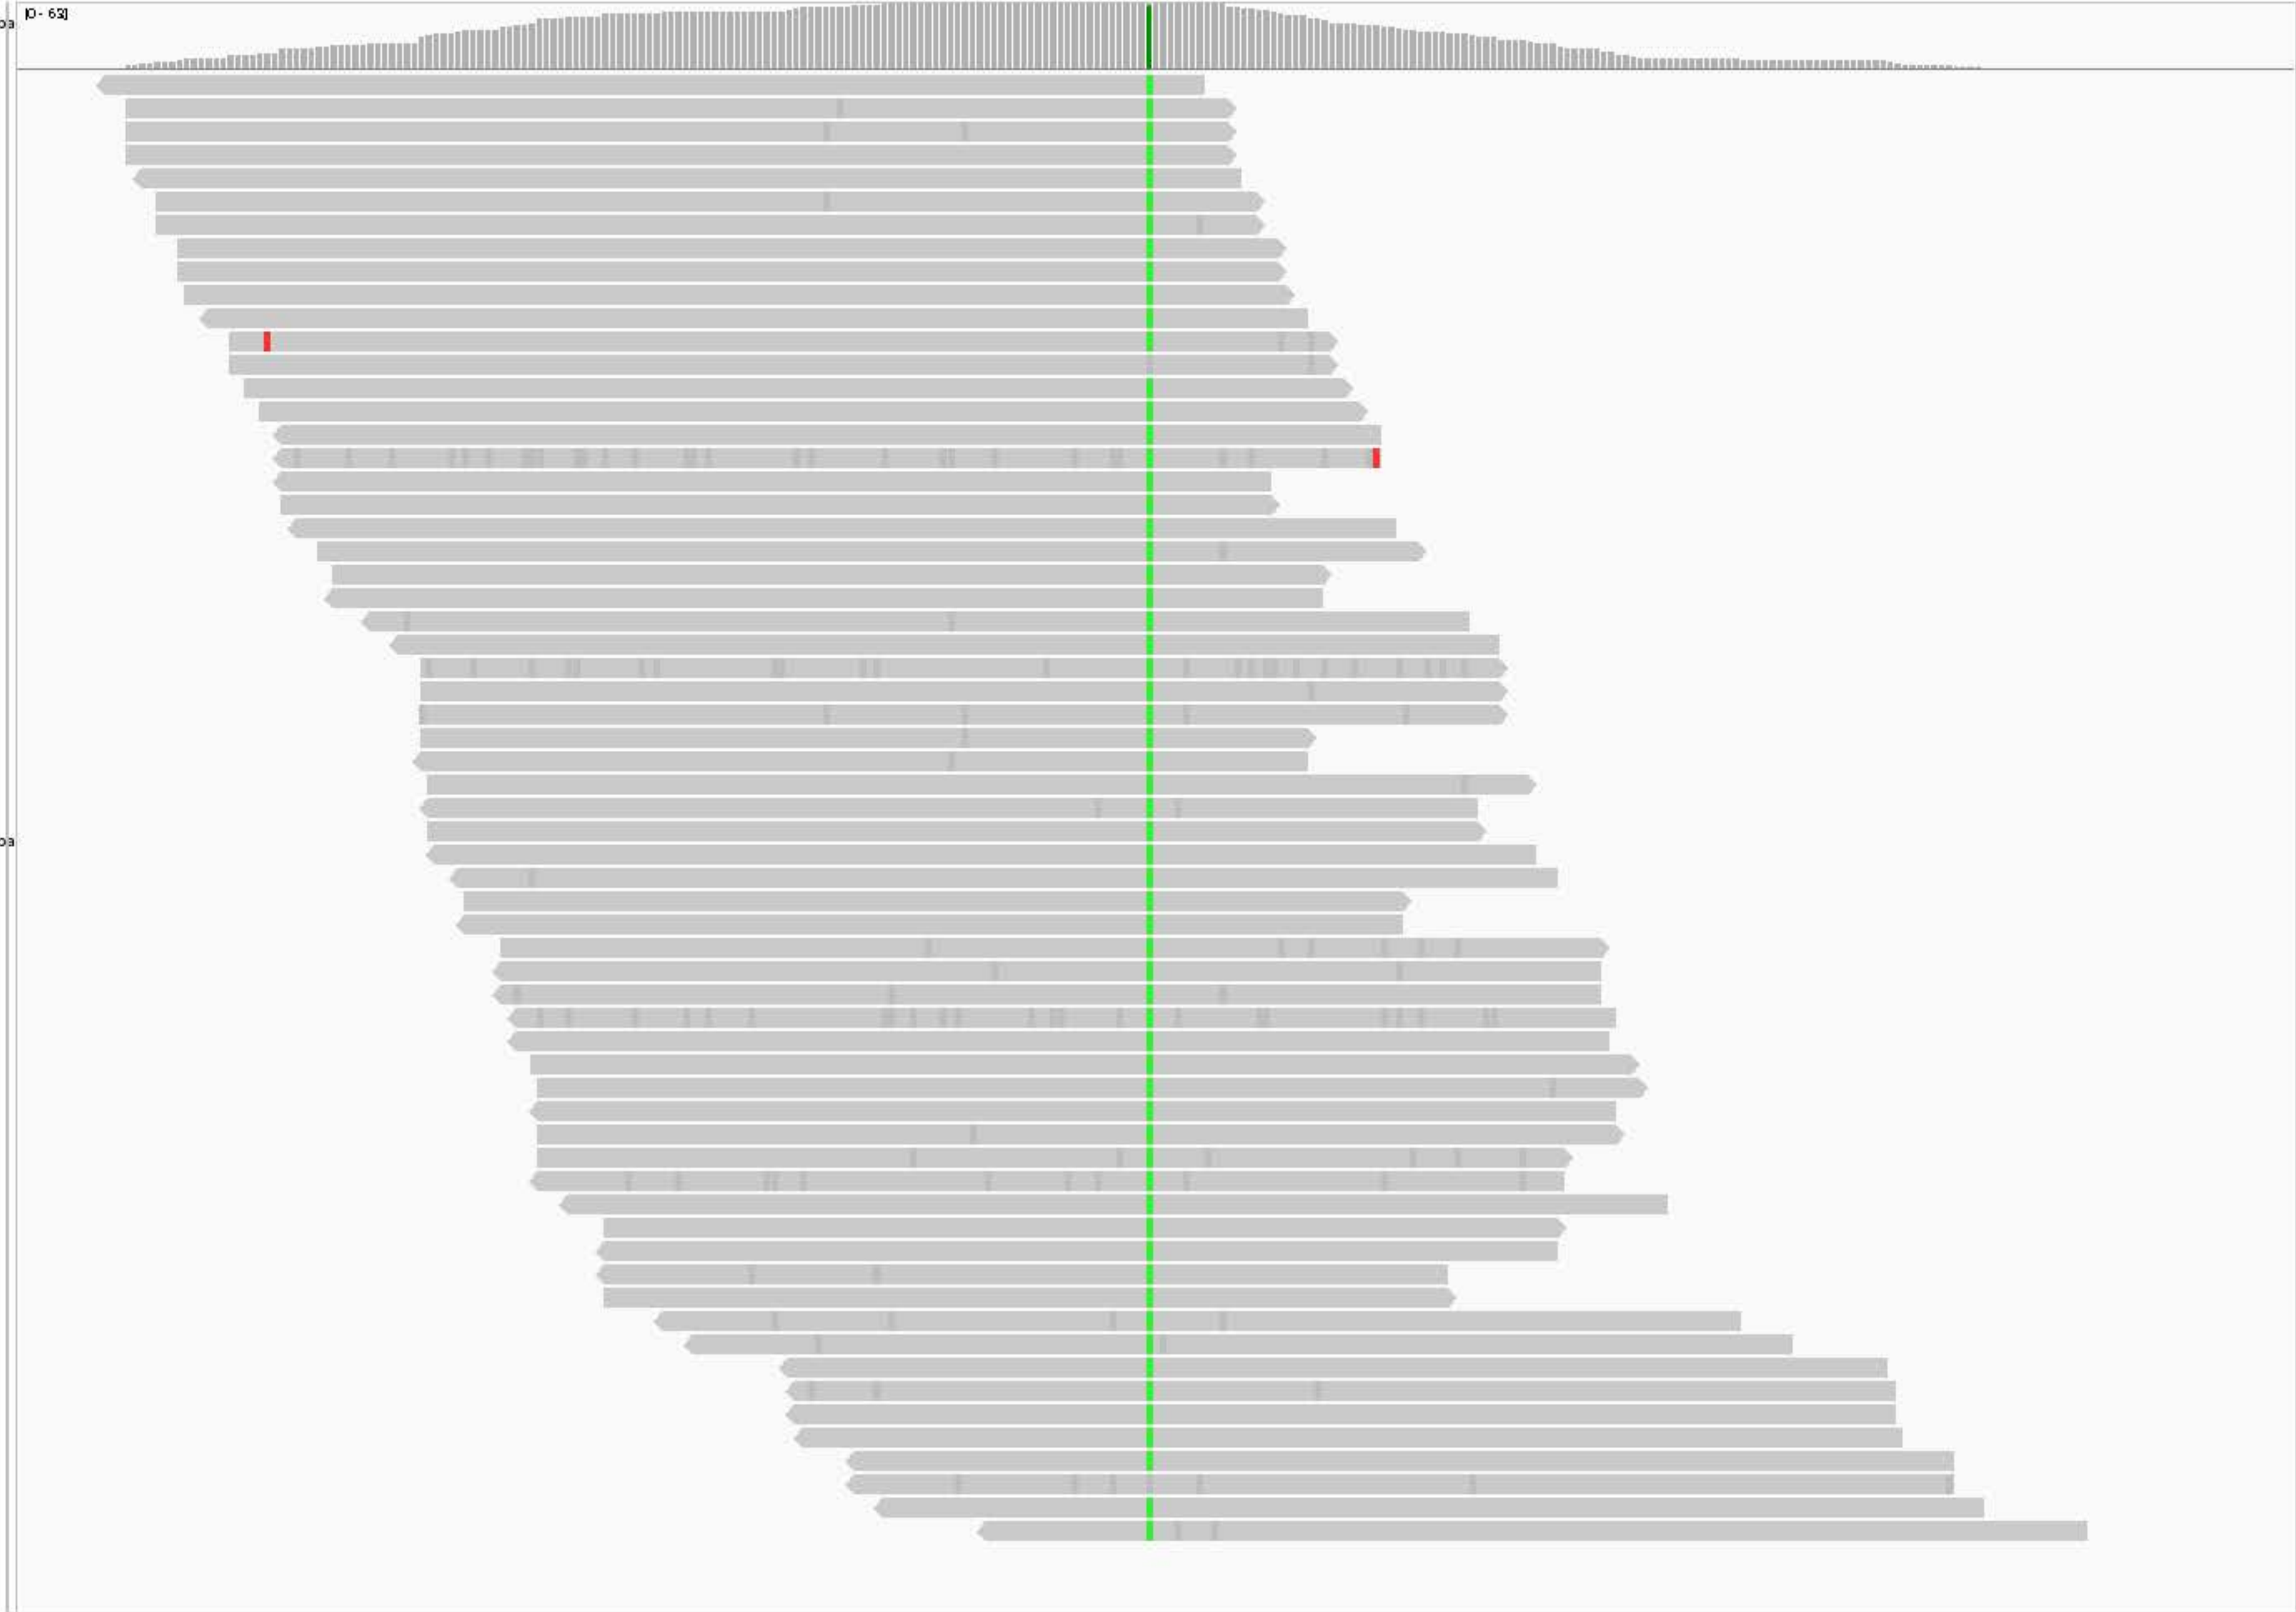

SL\_0004\_RN\_26\_WES\_uniq\_mut.ba

Sequence →  
 Refseq Genes

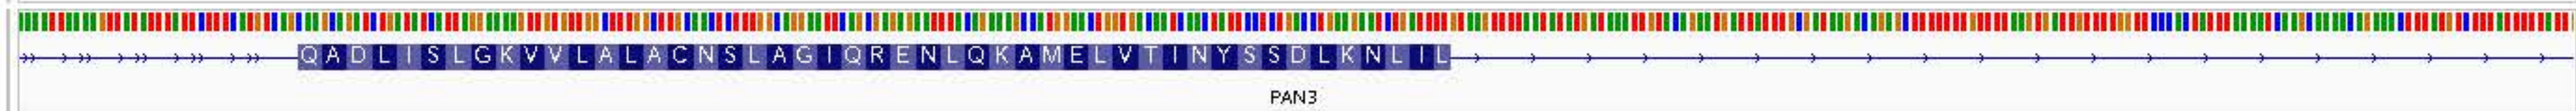

PAN3

chr22:44,132,854-44,133,163

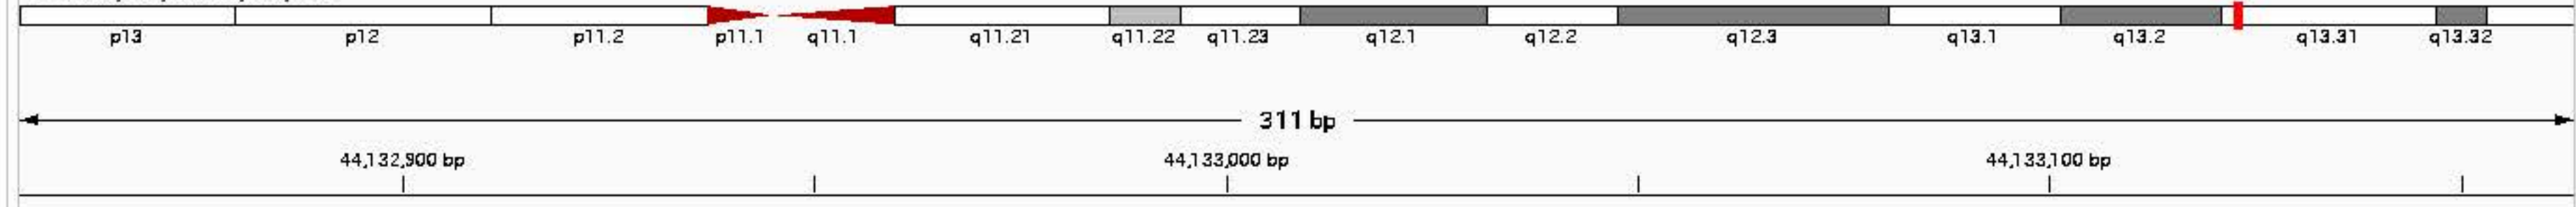

SL\_0006\_RN\_59\_WES\_uniq\_mut.ba  
coverage

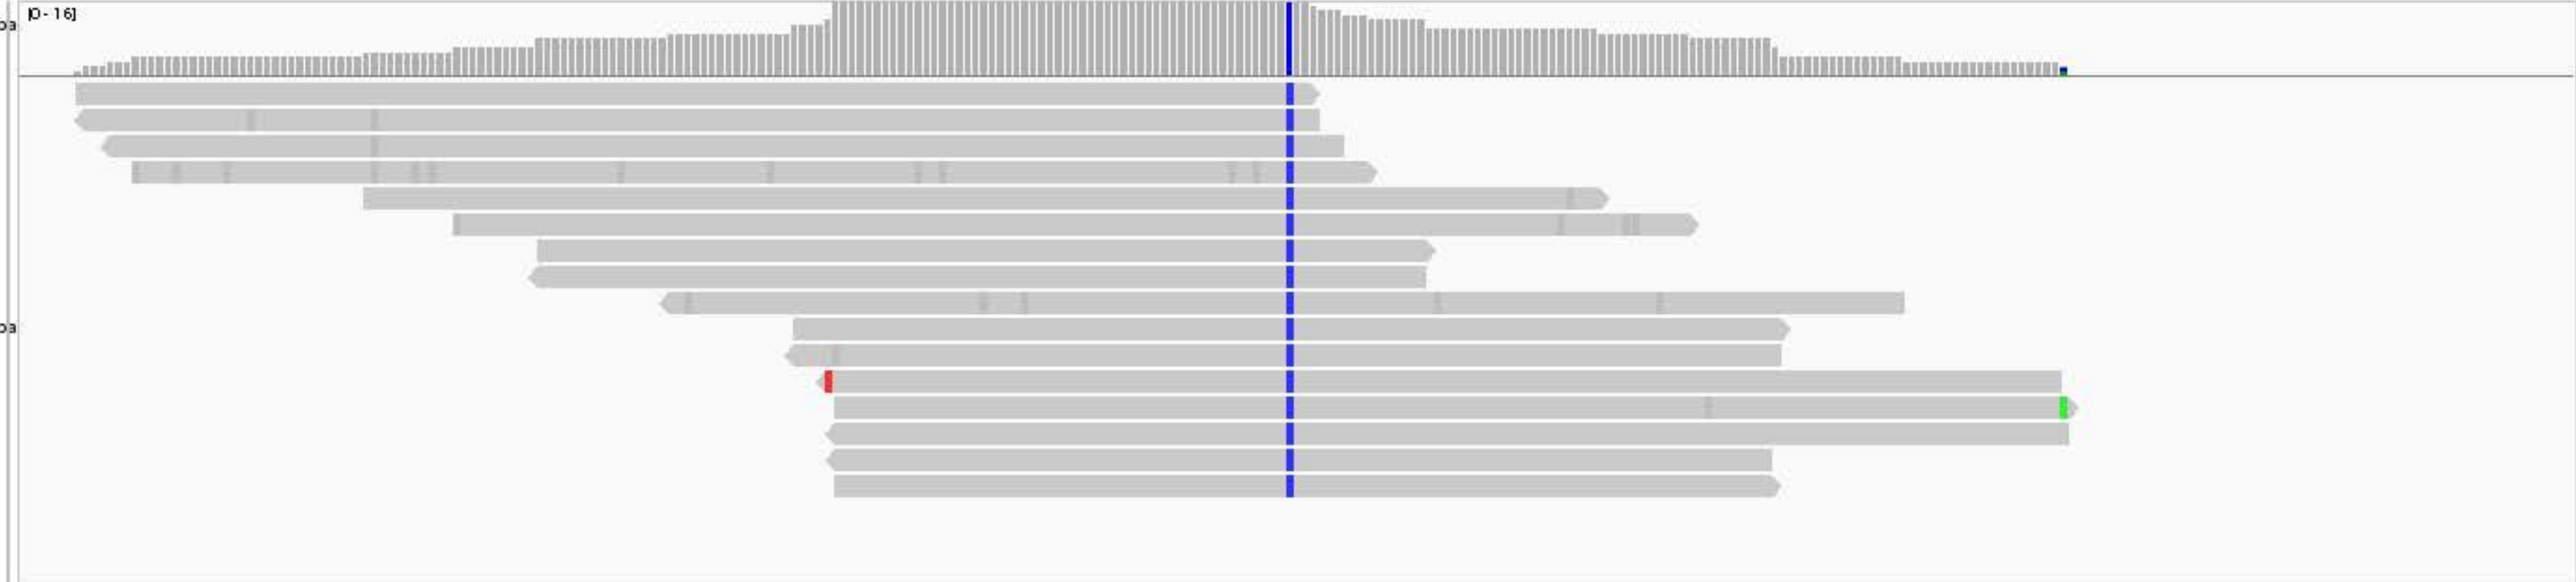

SL\_0006\_RN\_59\_WES\_uniq\_mut.ba

Sequence

Refseq Genes

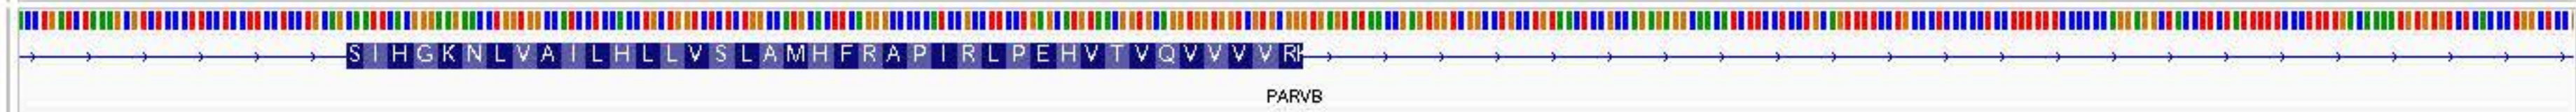



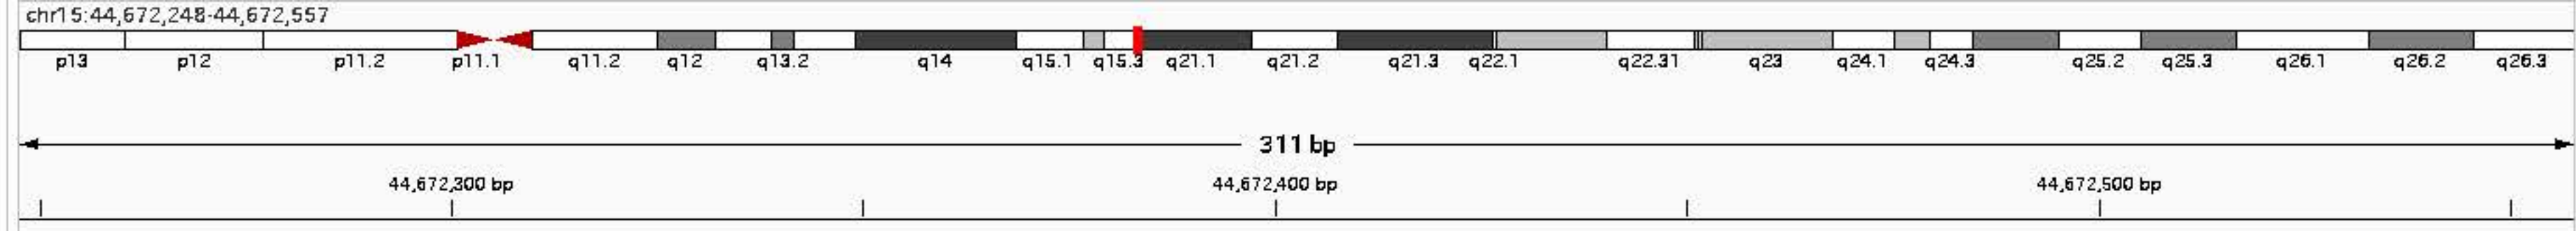

SL\_0002\_LN\_1\_WES\_uniq\_mut.ba  
verage

SL\_0002\_LN\_1\_WES\_uniq\_mut.ba r

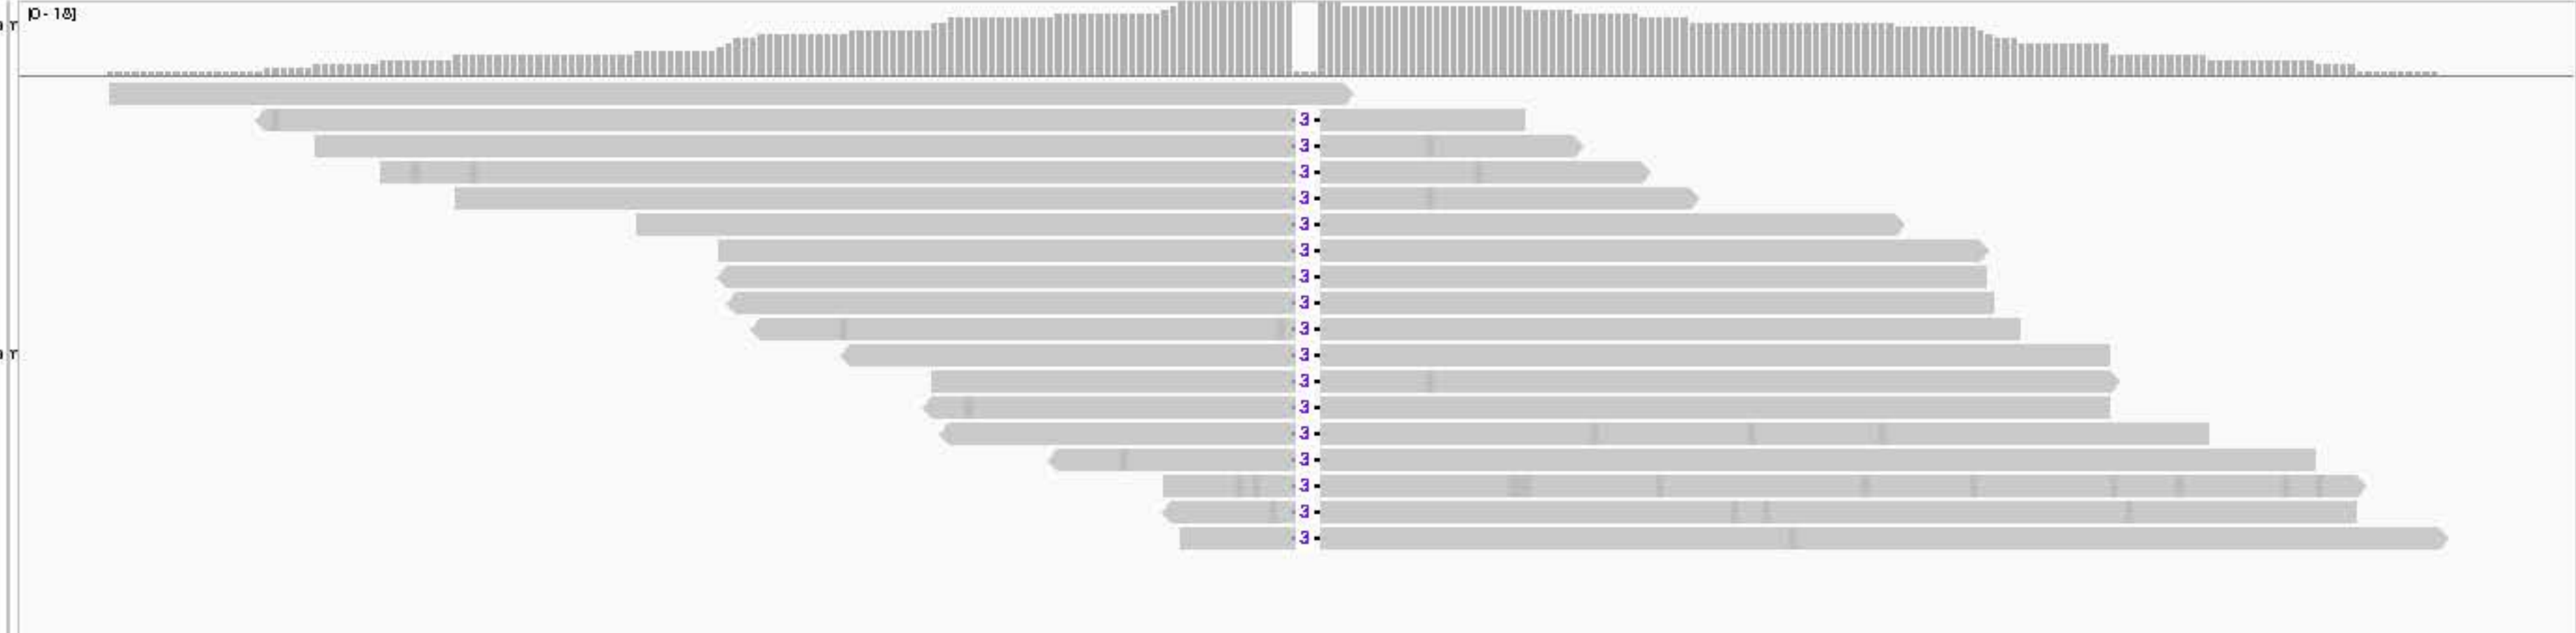

Sequence →

Refseq Genes

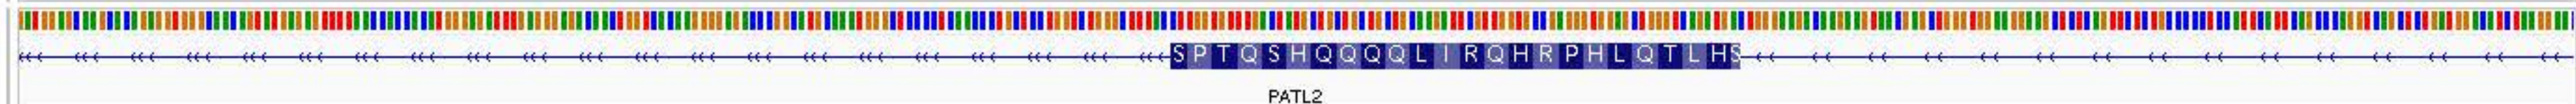

chr13:67,227,722-67,228,031

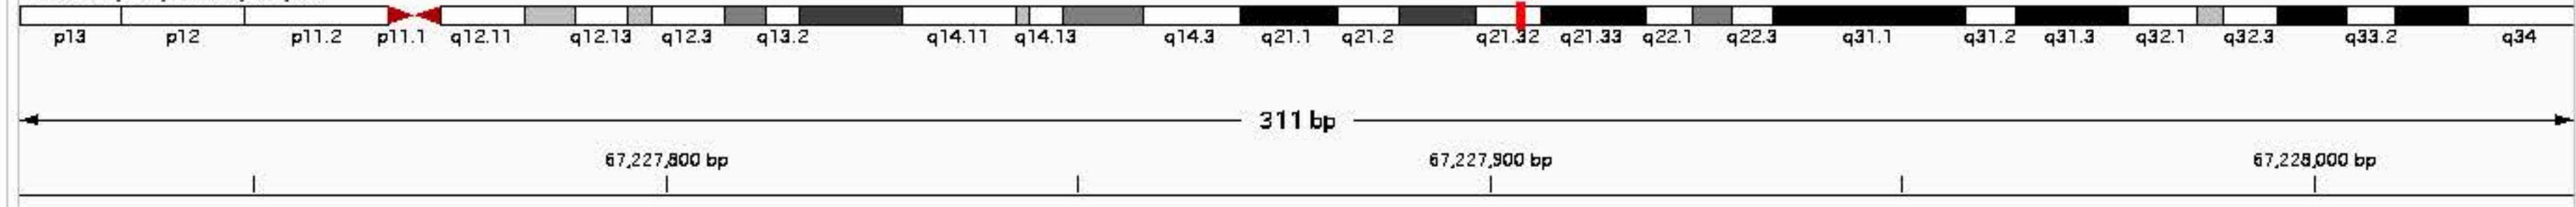

SL\_0007\_RN\_2\_WES\_uniq\_mut.ba  
verage

SL\_0007\_RN\_2\_WES\_uniq\_mut.ba r

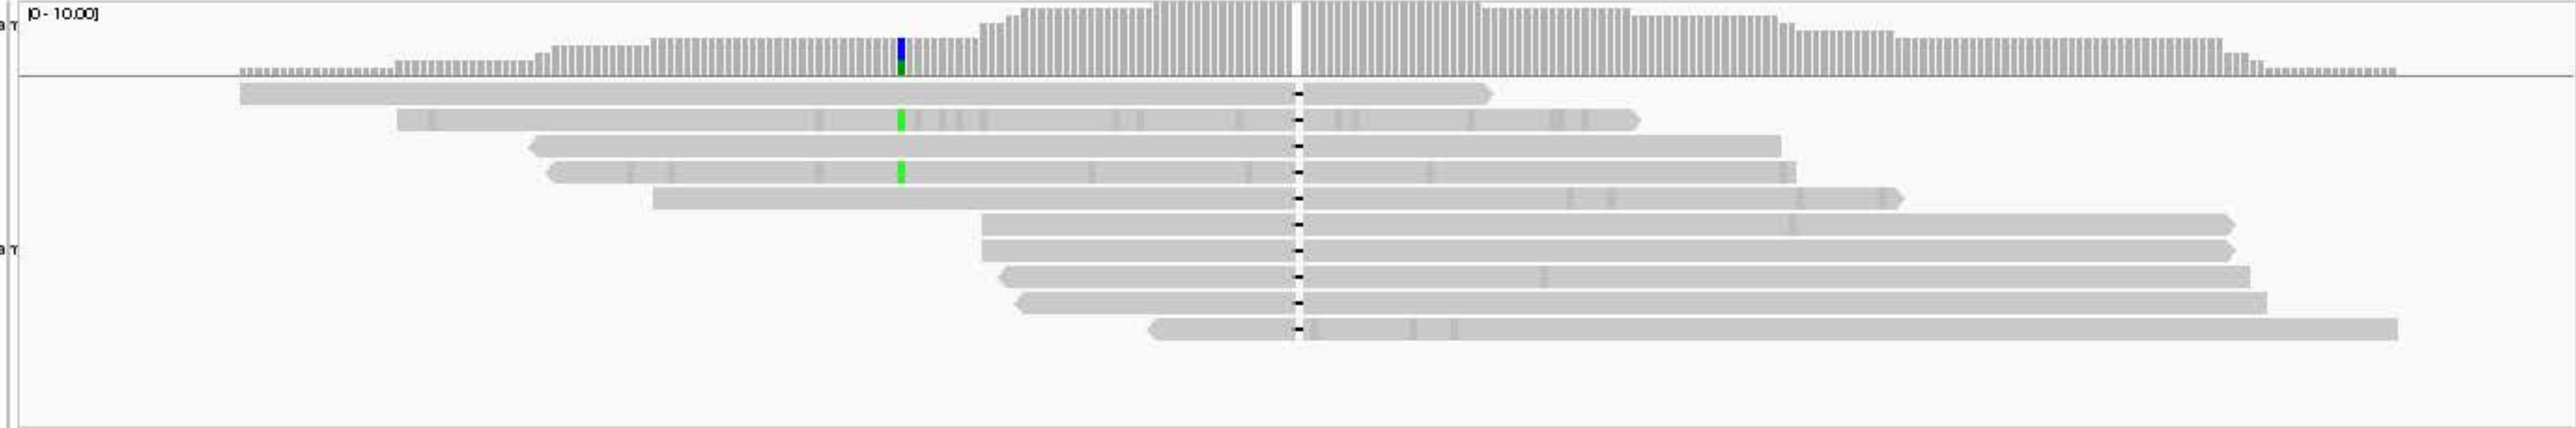

Sequence →

Refseq Genes

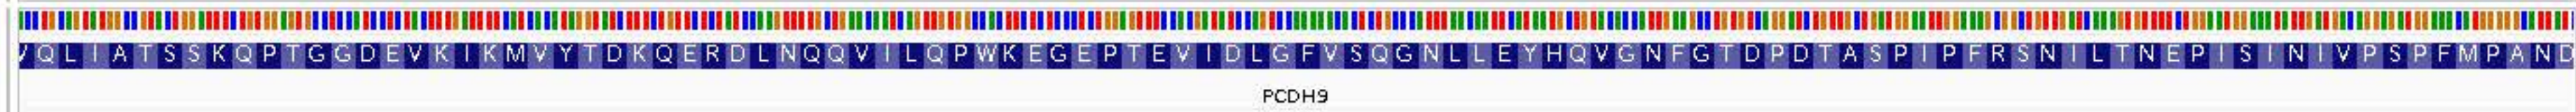



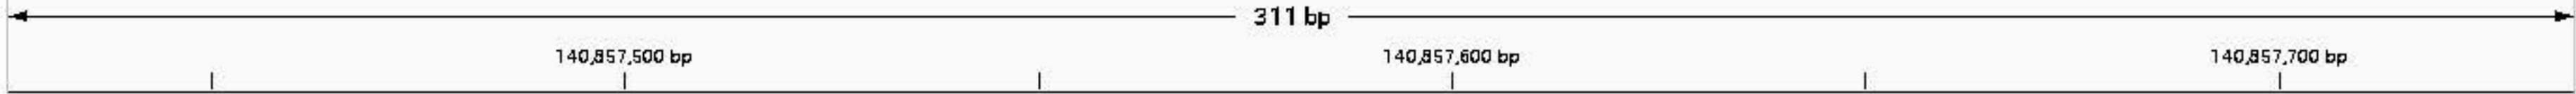

SL\_0007\_RN\_33\_WES\_uniq\_mut.ba  
overage

D-109]

SL\_0007\_RN\_33\_WES\_uniq\_mut.ba

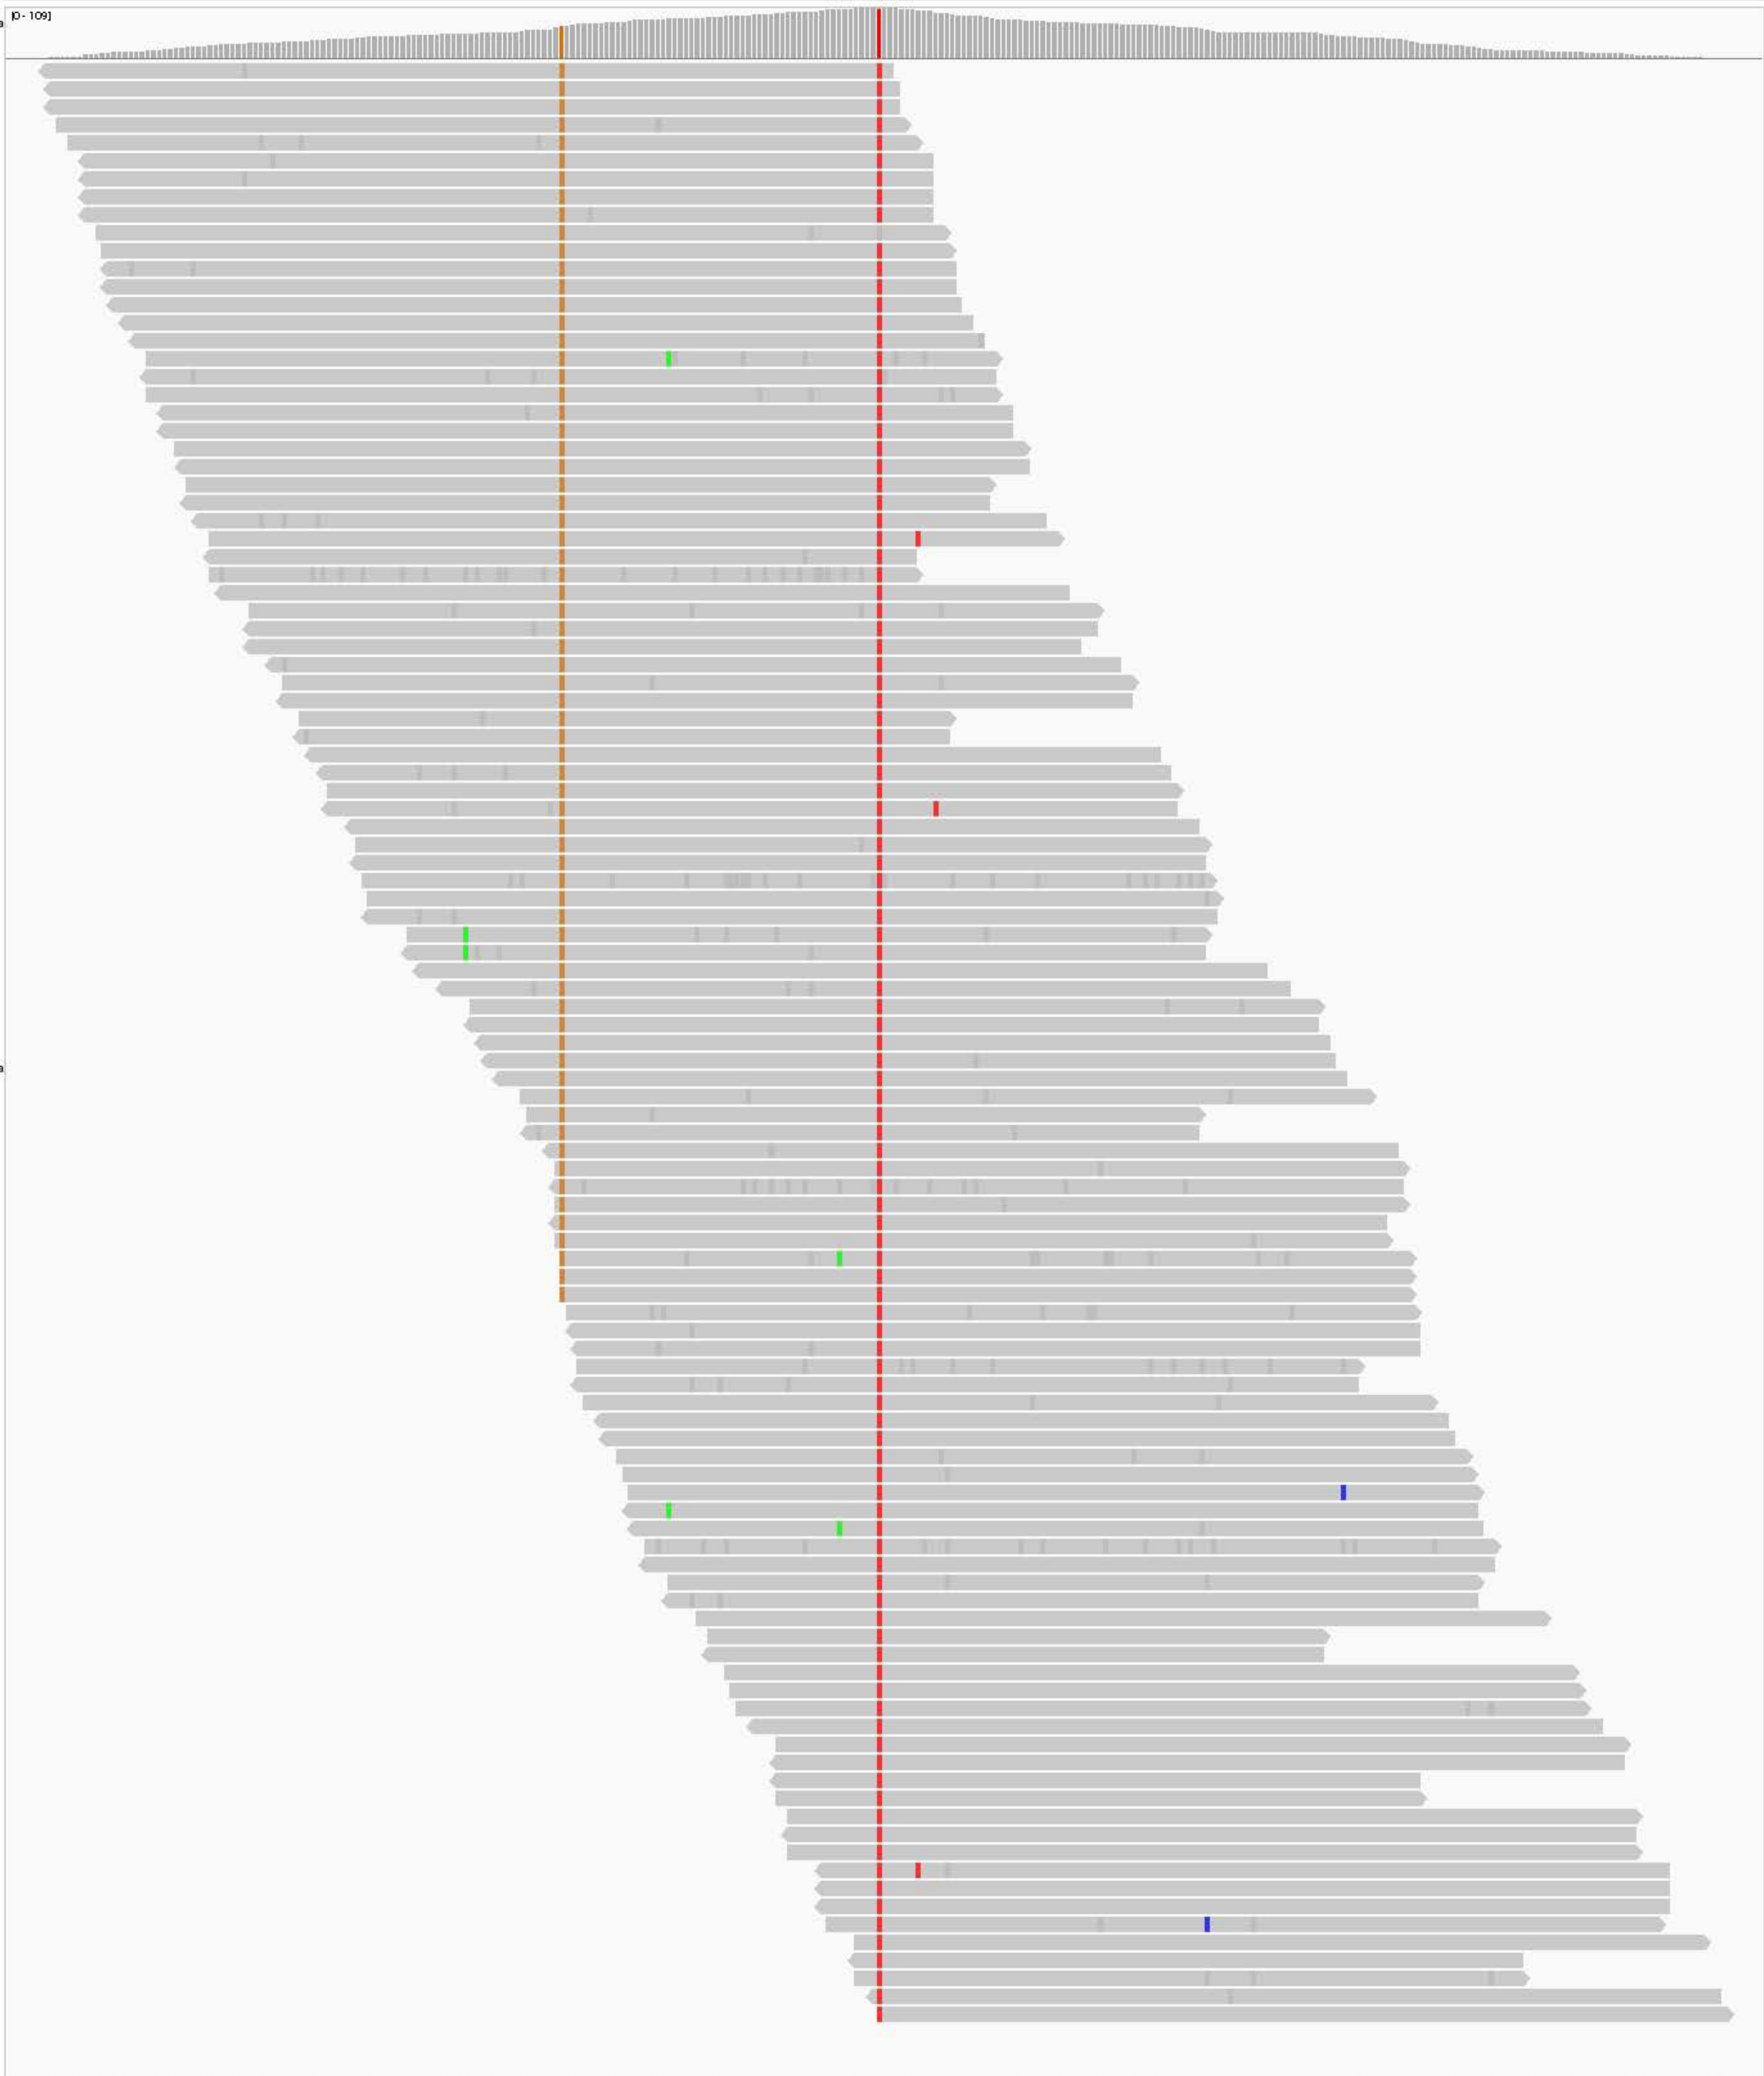

Sequence →

Refseq Genes

TVFVKEKNPPGCHIFTVSAWDADAQENALVSYSLVERRRLGERSLSSYVSVHAESGKVYALQPLDHEELELLQFQVSARDGGVPPLGSNLTLQVFVLDENDNAP

PCDH1



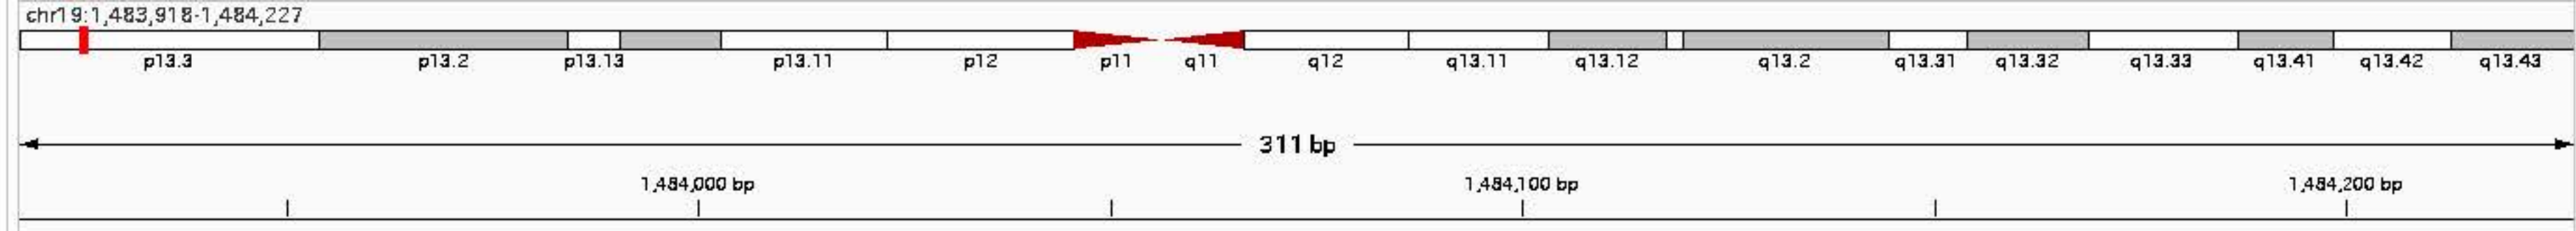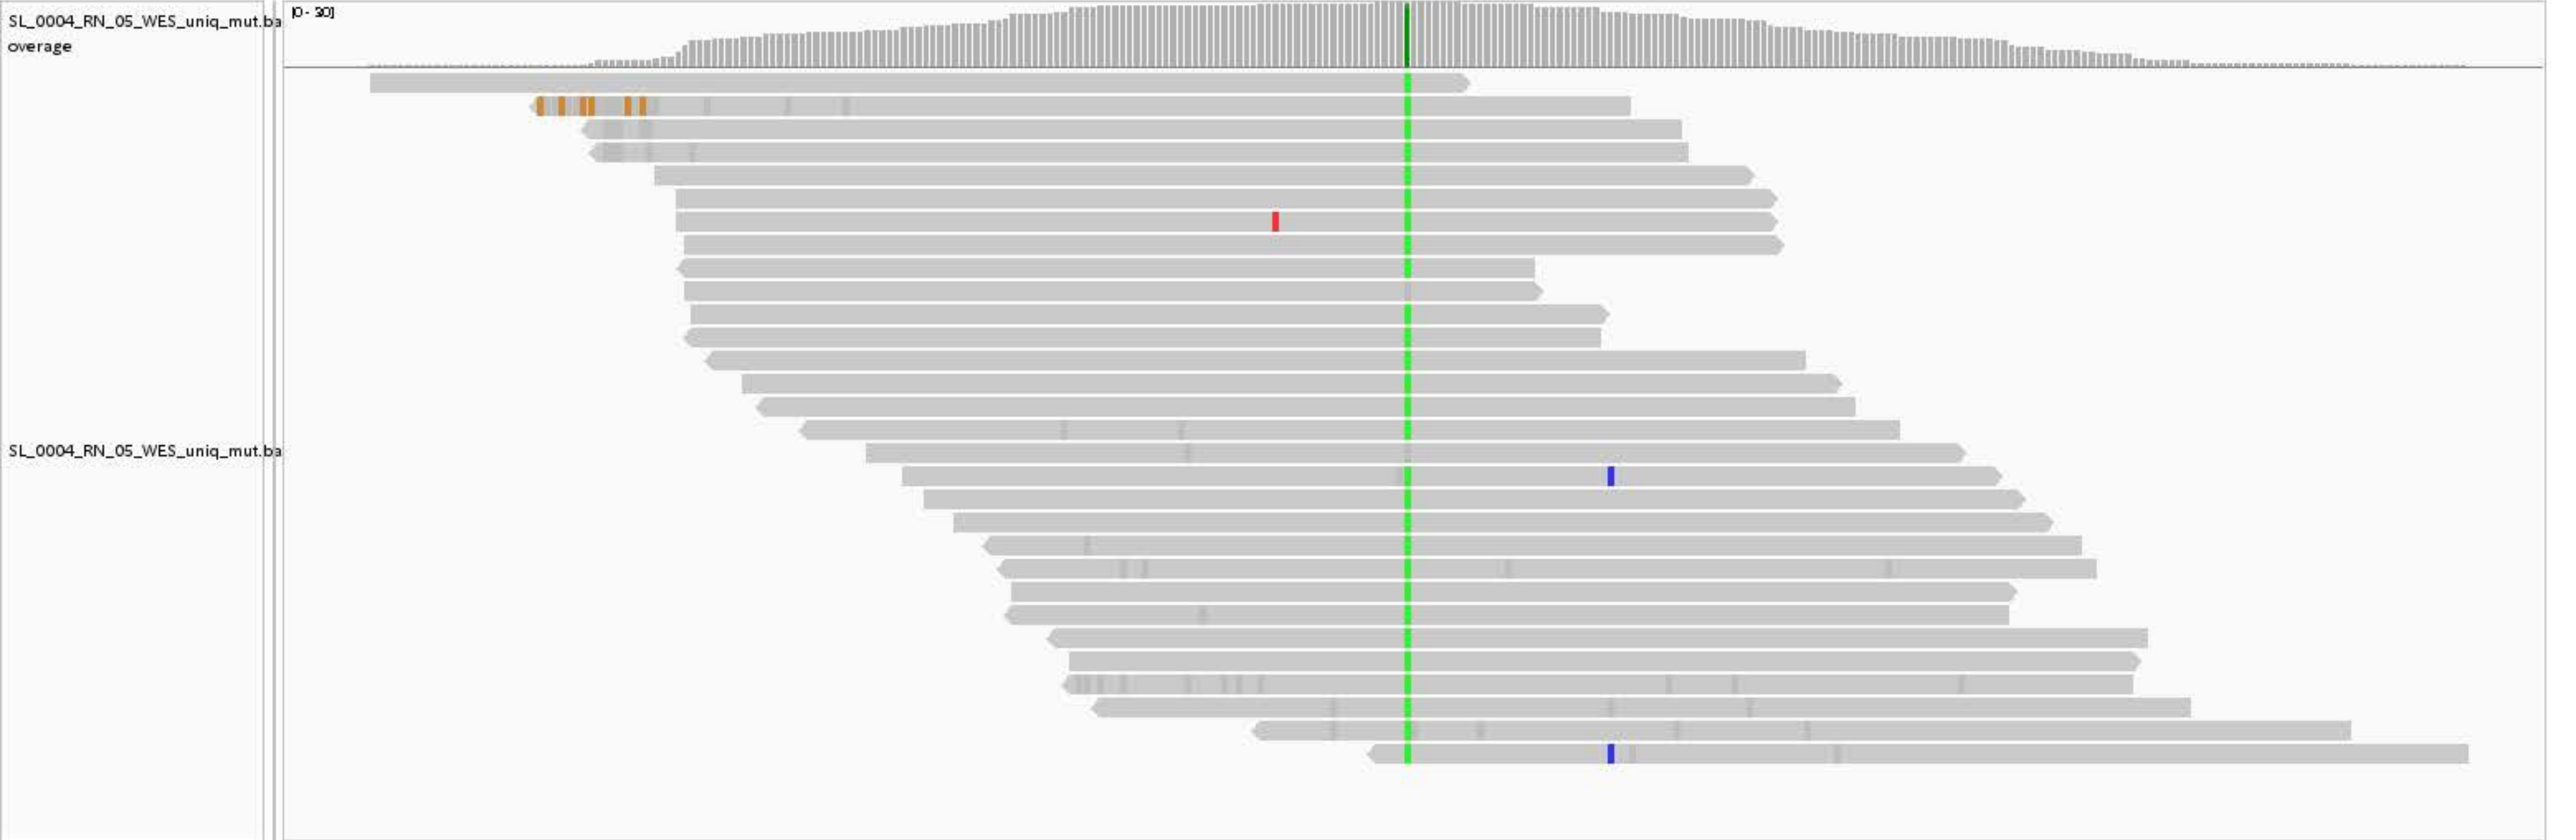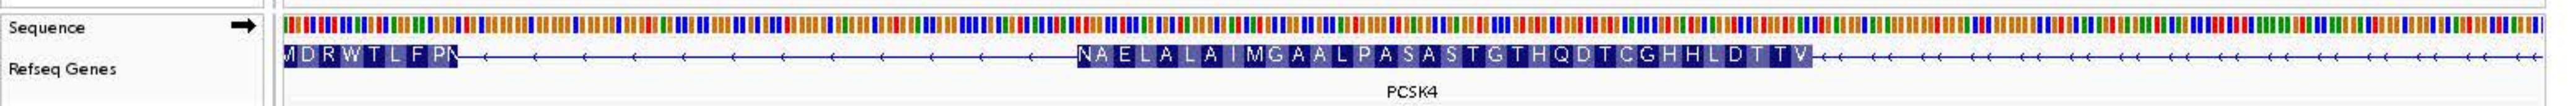

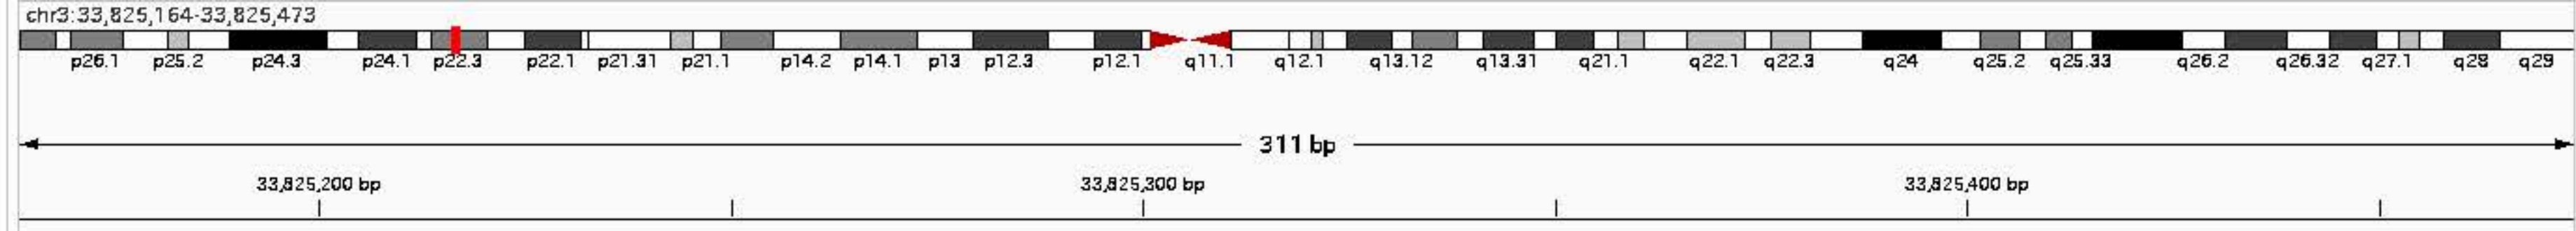

SL\_0015\_LN\_44\_WES\_uniq\_mut. coverage

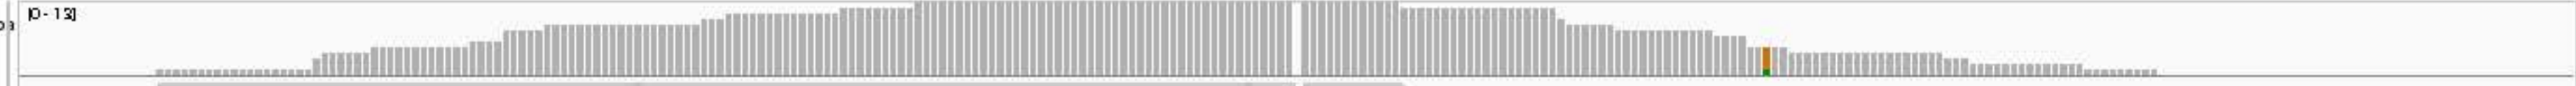

SL\_0015\_LN\_44\_WES\_uniq\_mut. ba

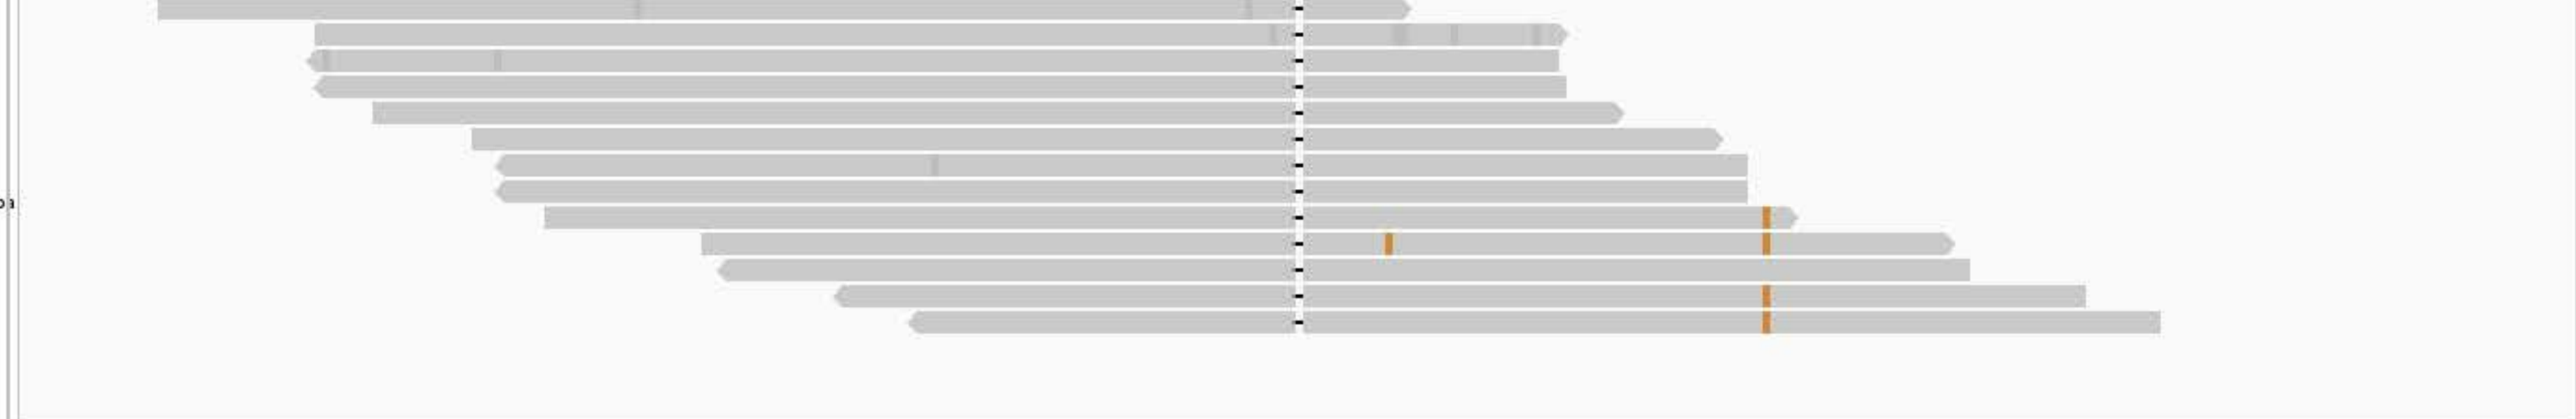

Sequence

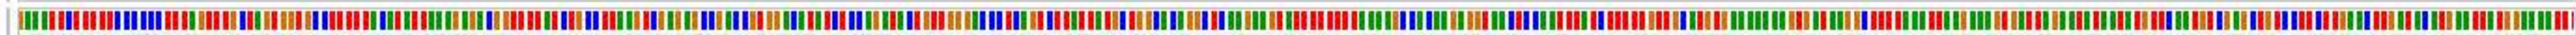

Refseq Genes

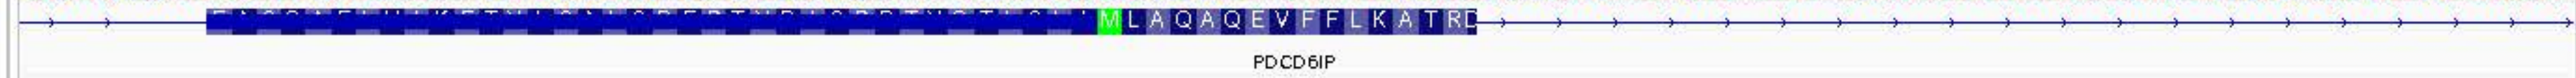

chr4: 54,274,383-54,274,692

p16.2 p15.33 p15.31 p15.1 p14 p13 p11 q12 q13.1 q13.2 q21.1 q21.22 q22.1 q22.3 q24 q25 q26 q27 q28.2 q28.3 q31.1 q31.22 q32.1 q32.3 q34.1 q34.3 q35.2

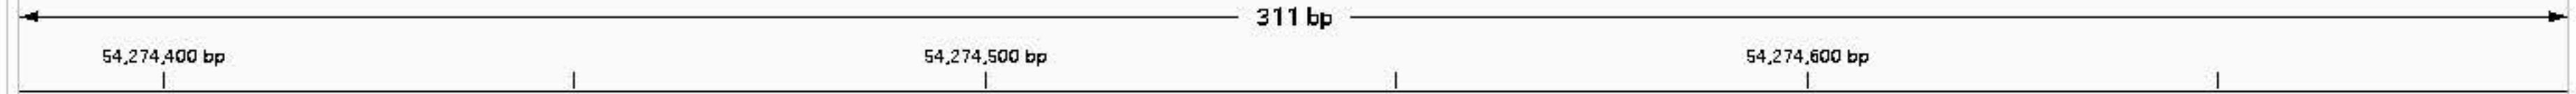

SL\_0001\_LN\_10\_WES\_uniq\_mut. coverage

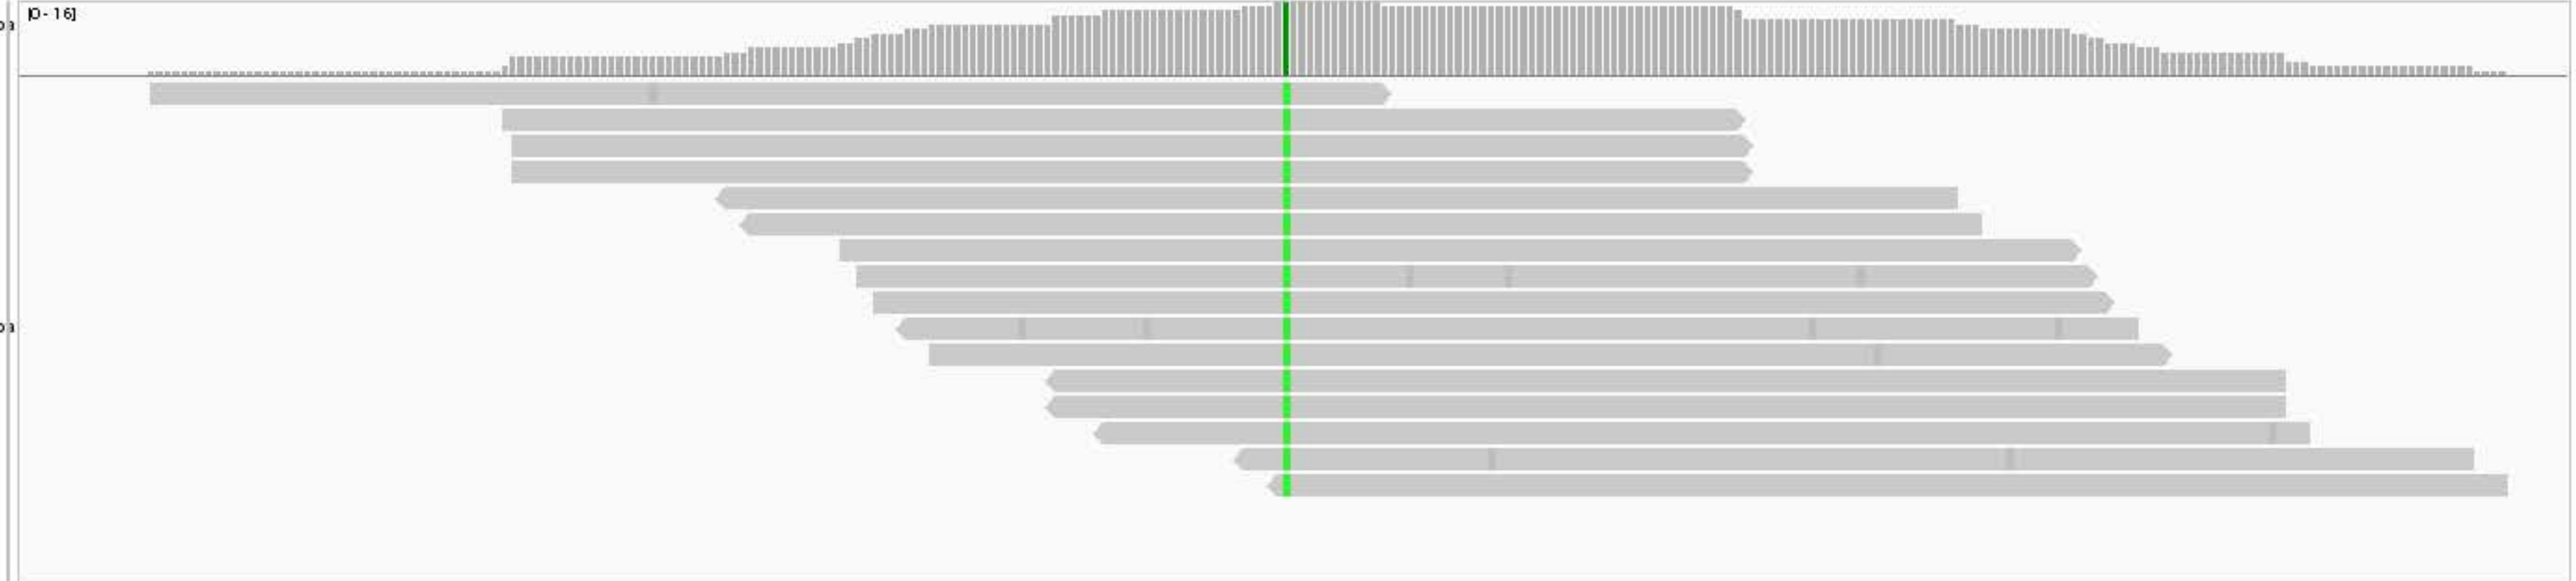

SL\_0001\_LN\_10\_WES\_uniq\_mut.

Sequence

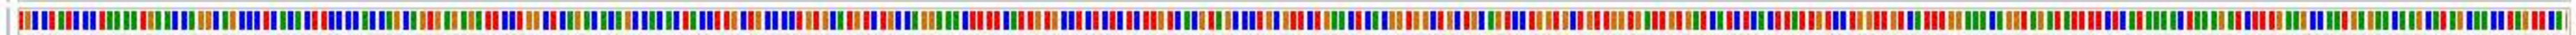

Refseq Genes

TLRSELTVA AAVLVLLVIVITSLIVLVVIWKQ

PDGFRA



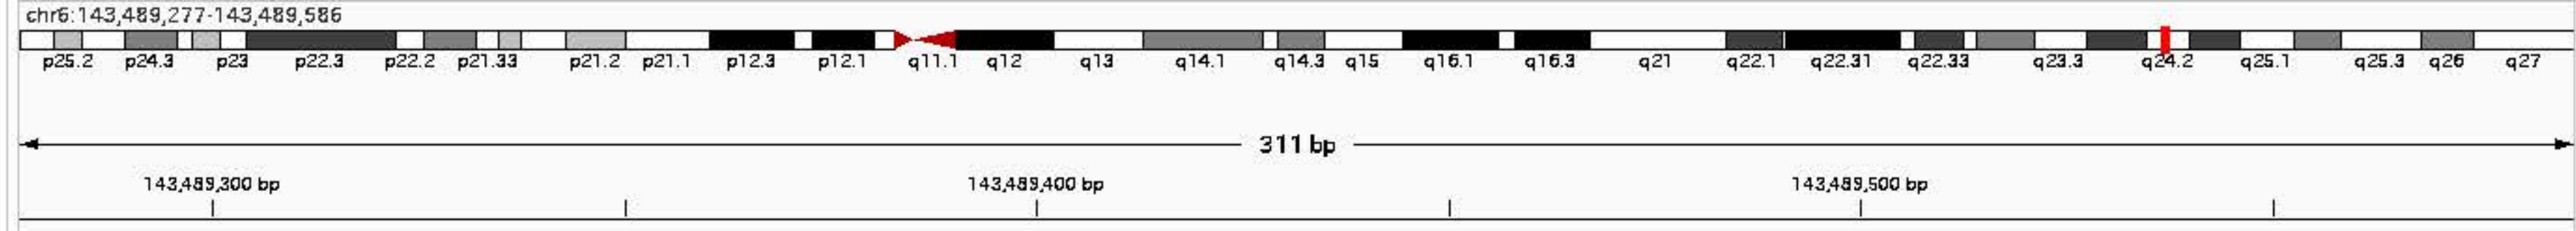

SL\_0006\_RN\_36\_WES\_uniq\_mut.ba  
overage

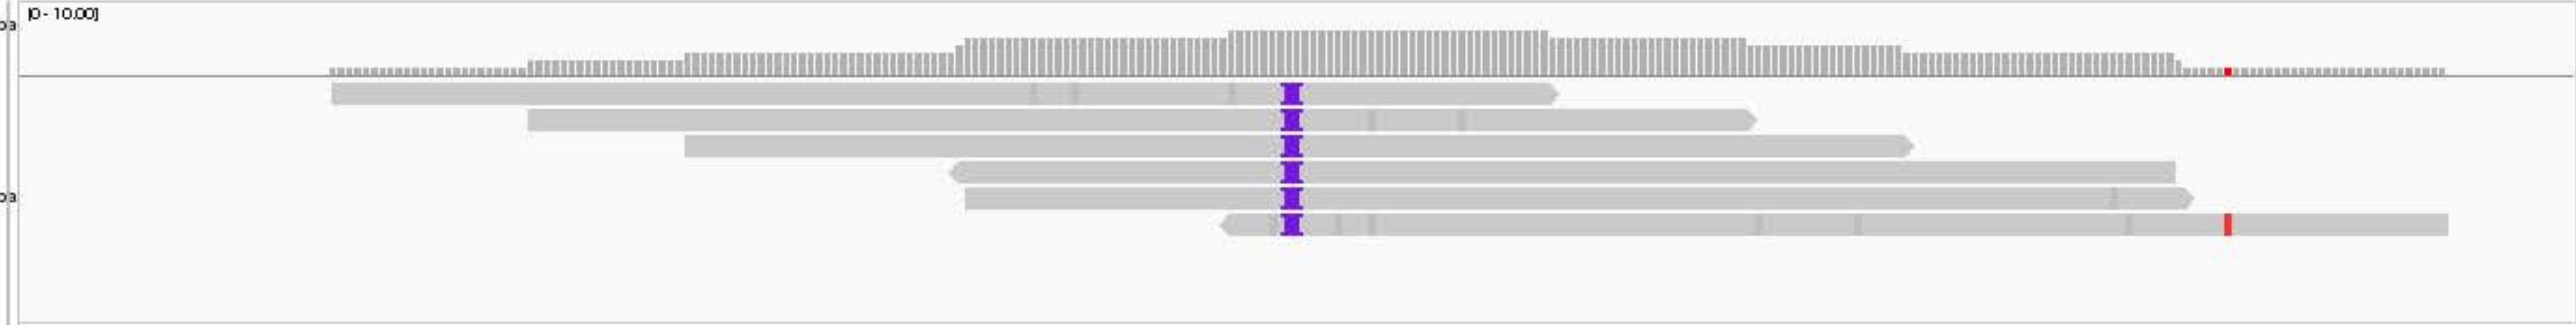

SL\_0006\_RN\_36\_WES\_uniq\_mut.ba

Sequence →

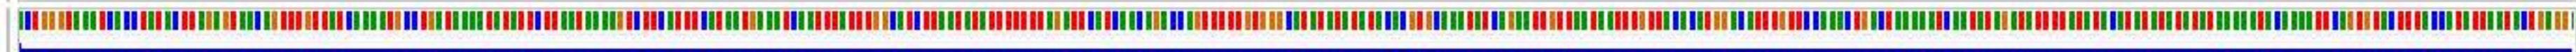

Refseq Genes

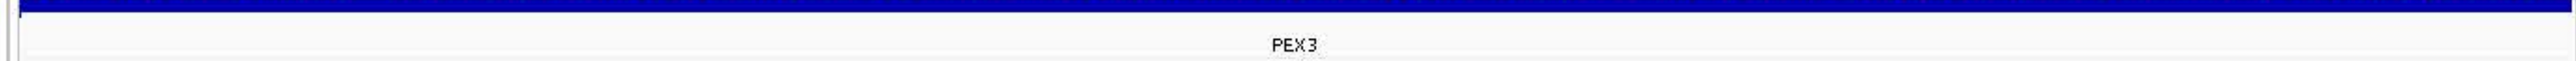

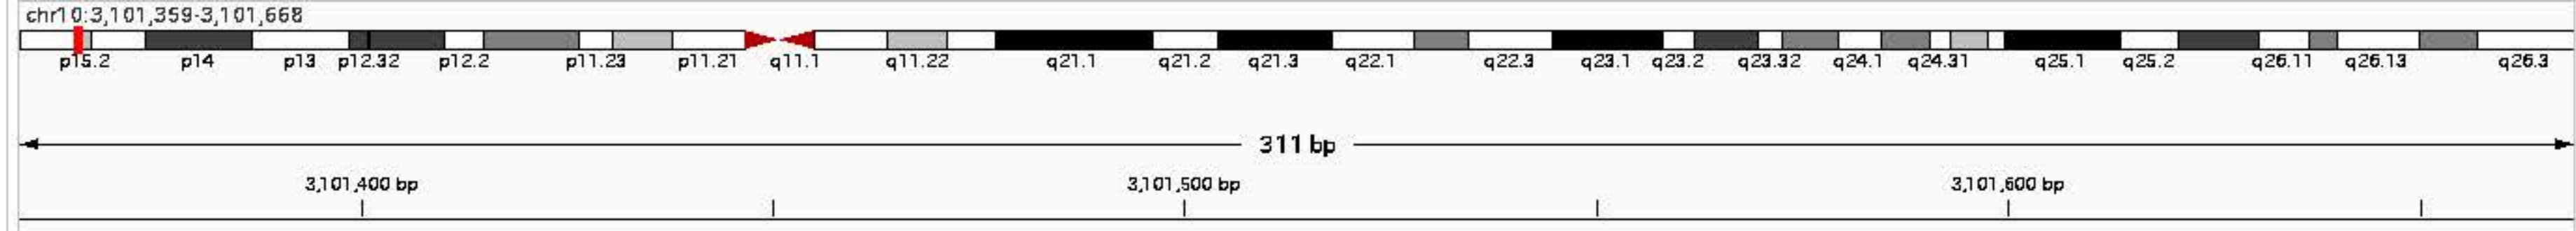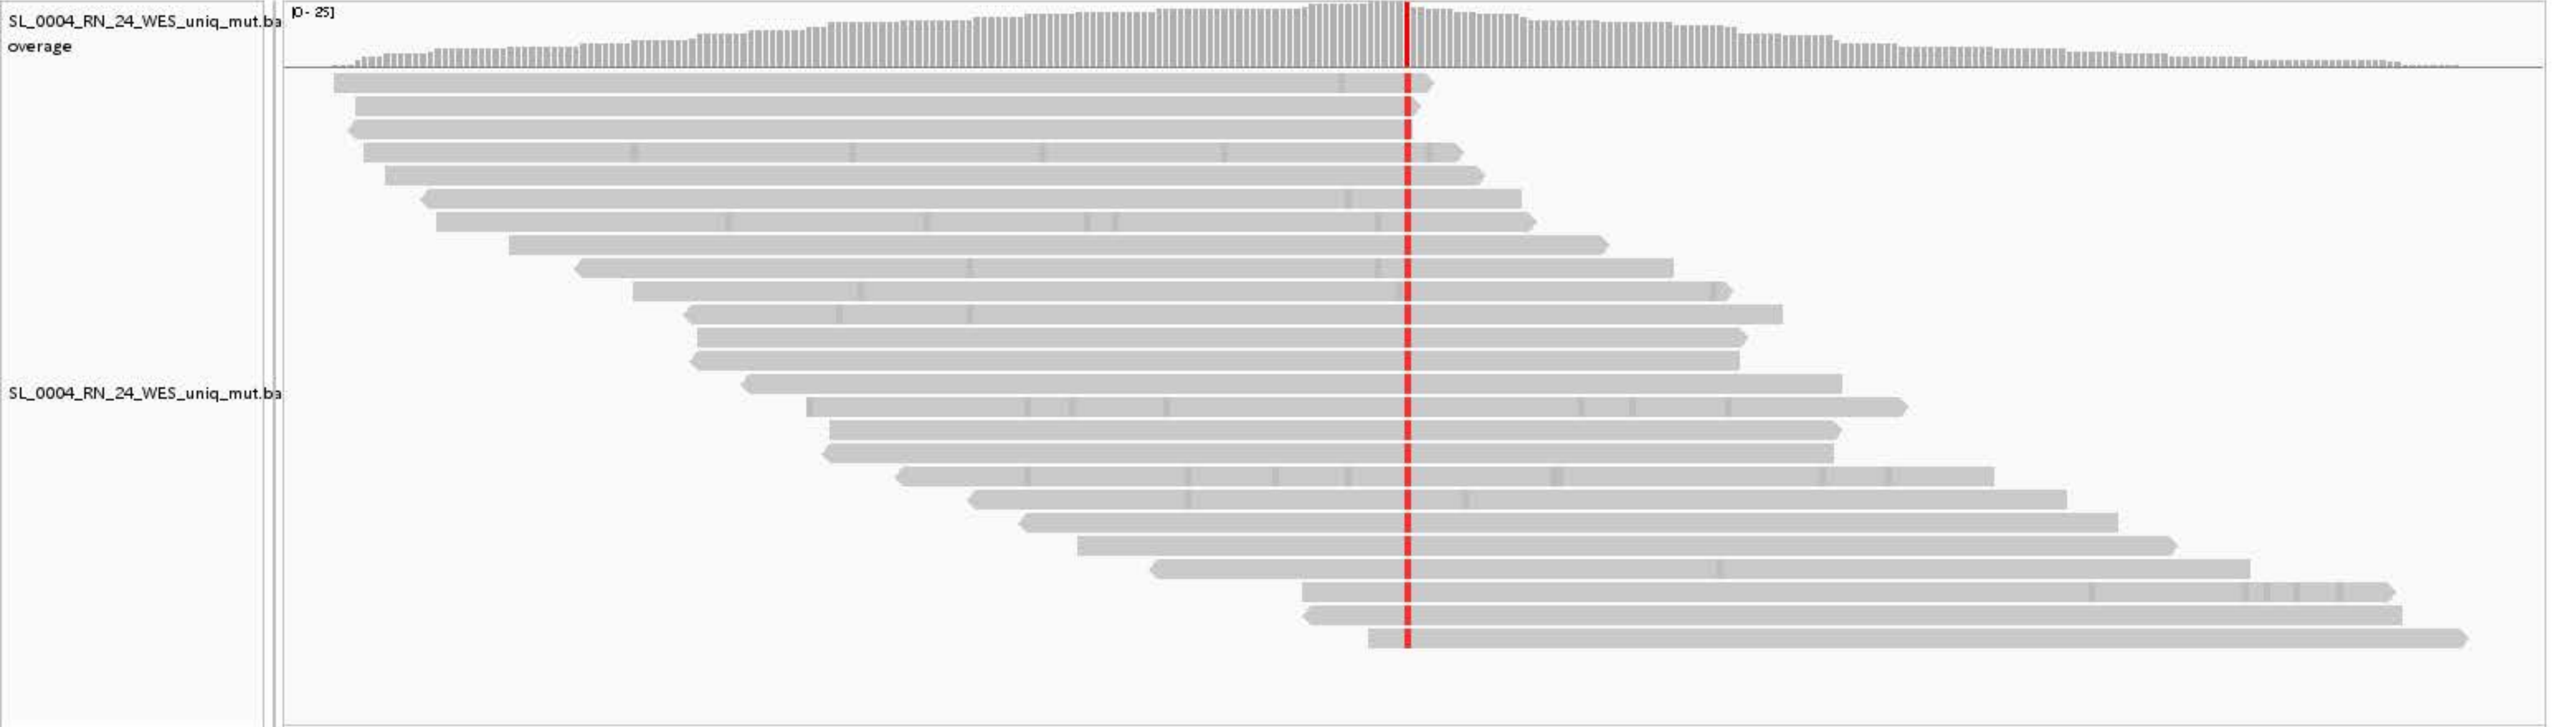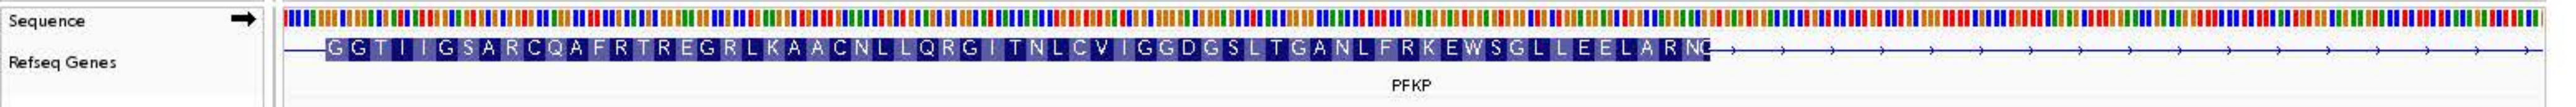

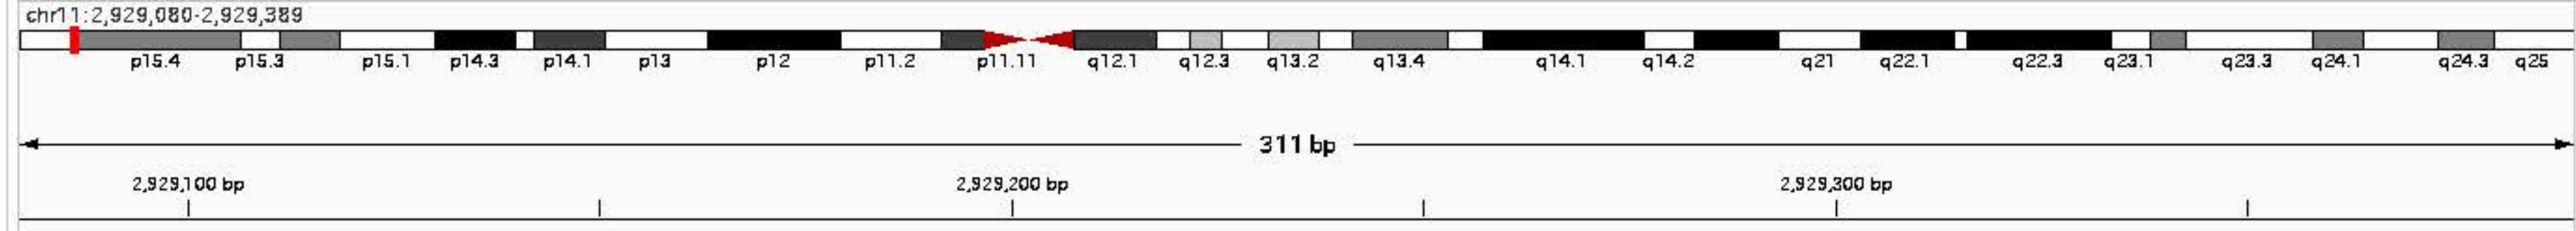

SL\_0006\_RN\_36\_WES\_uniq\_mut.ba  
coverage

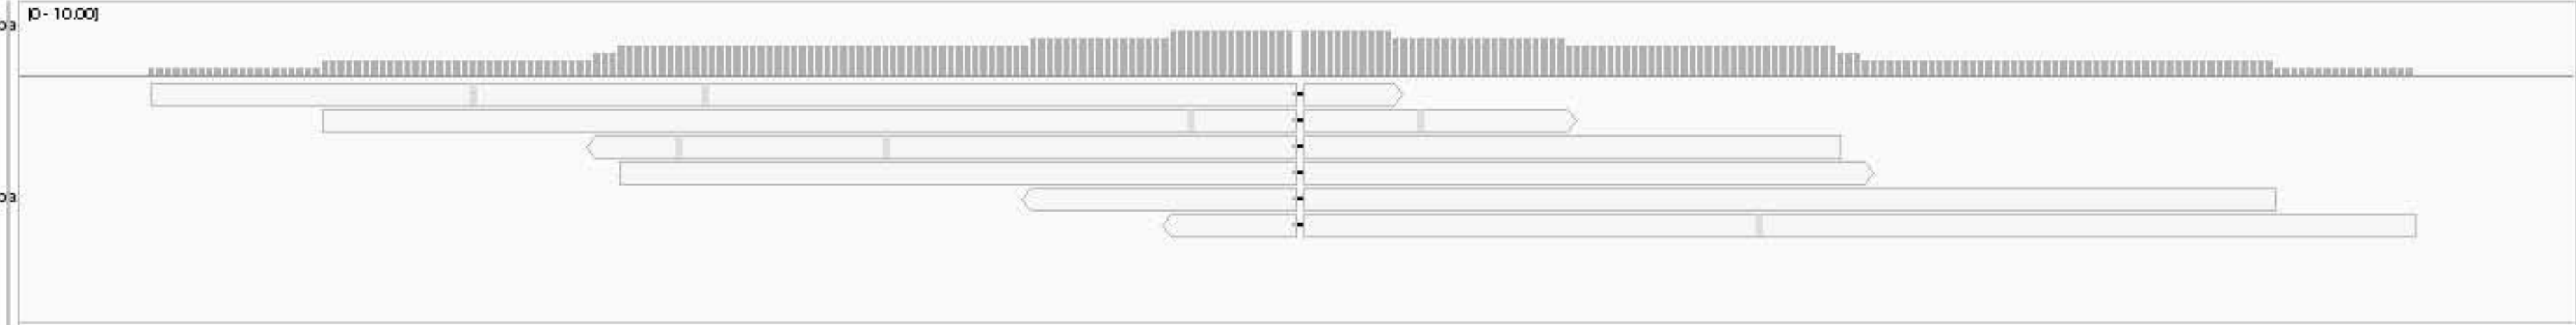

SL\_0006\_RN\_36\_WES\_uniq\_mut.ba

Sequence →

A I A A N W C S E G A C R F D I E K H D T T V I T F Y V Y K G T R E V C D V K L I S H F R L E K P R A R P S A P F L S L R D S T L V G R K K K W L Q F L S D S R K E L E G E R L V E D P S K M

Refseq Genes

PHLDA2



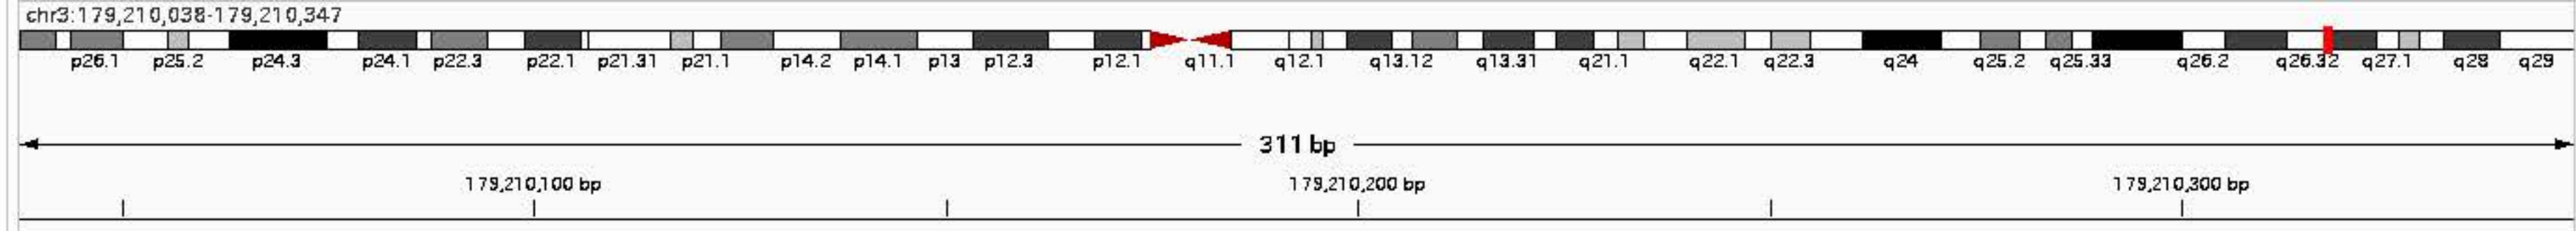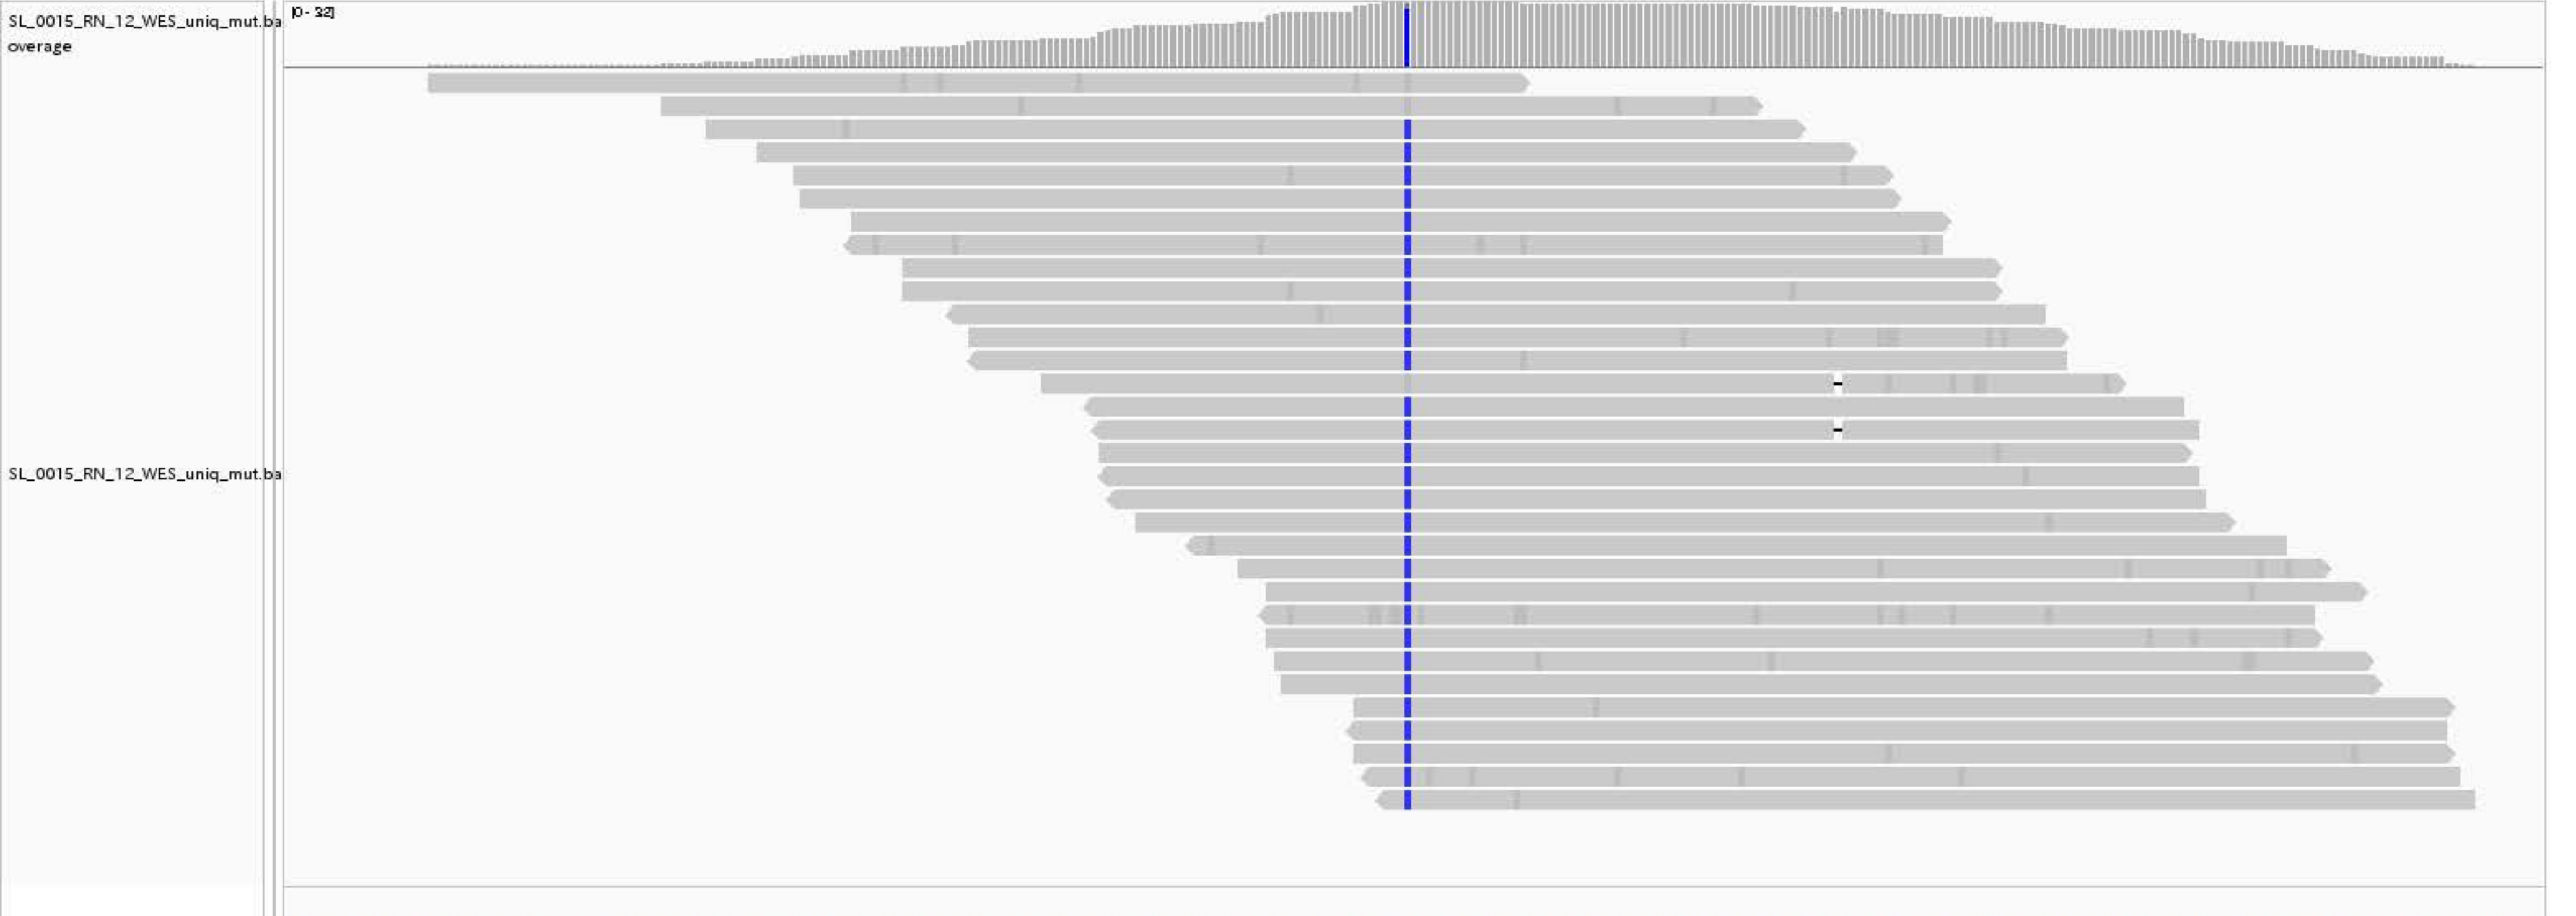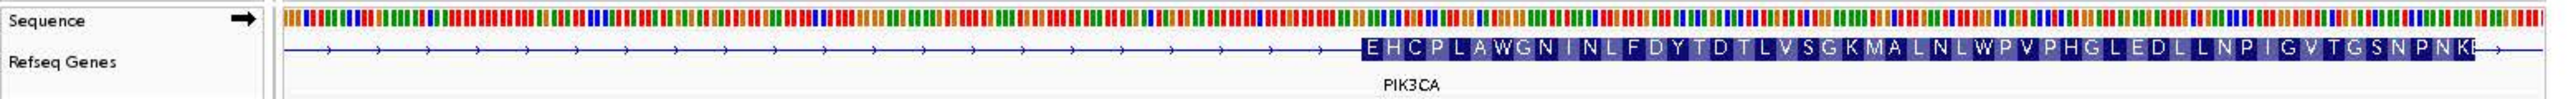

chr3:179,218,153-179,218,462

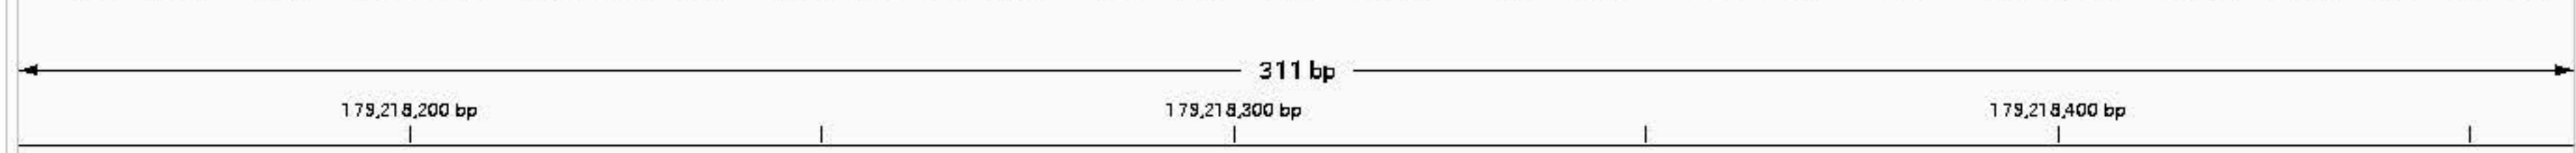

SL\_0004\_RN\_66\_WES\_uniq\_mut.ba  
verage

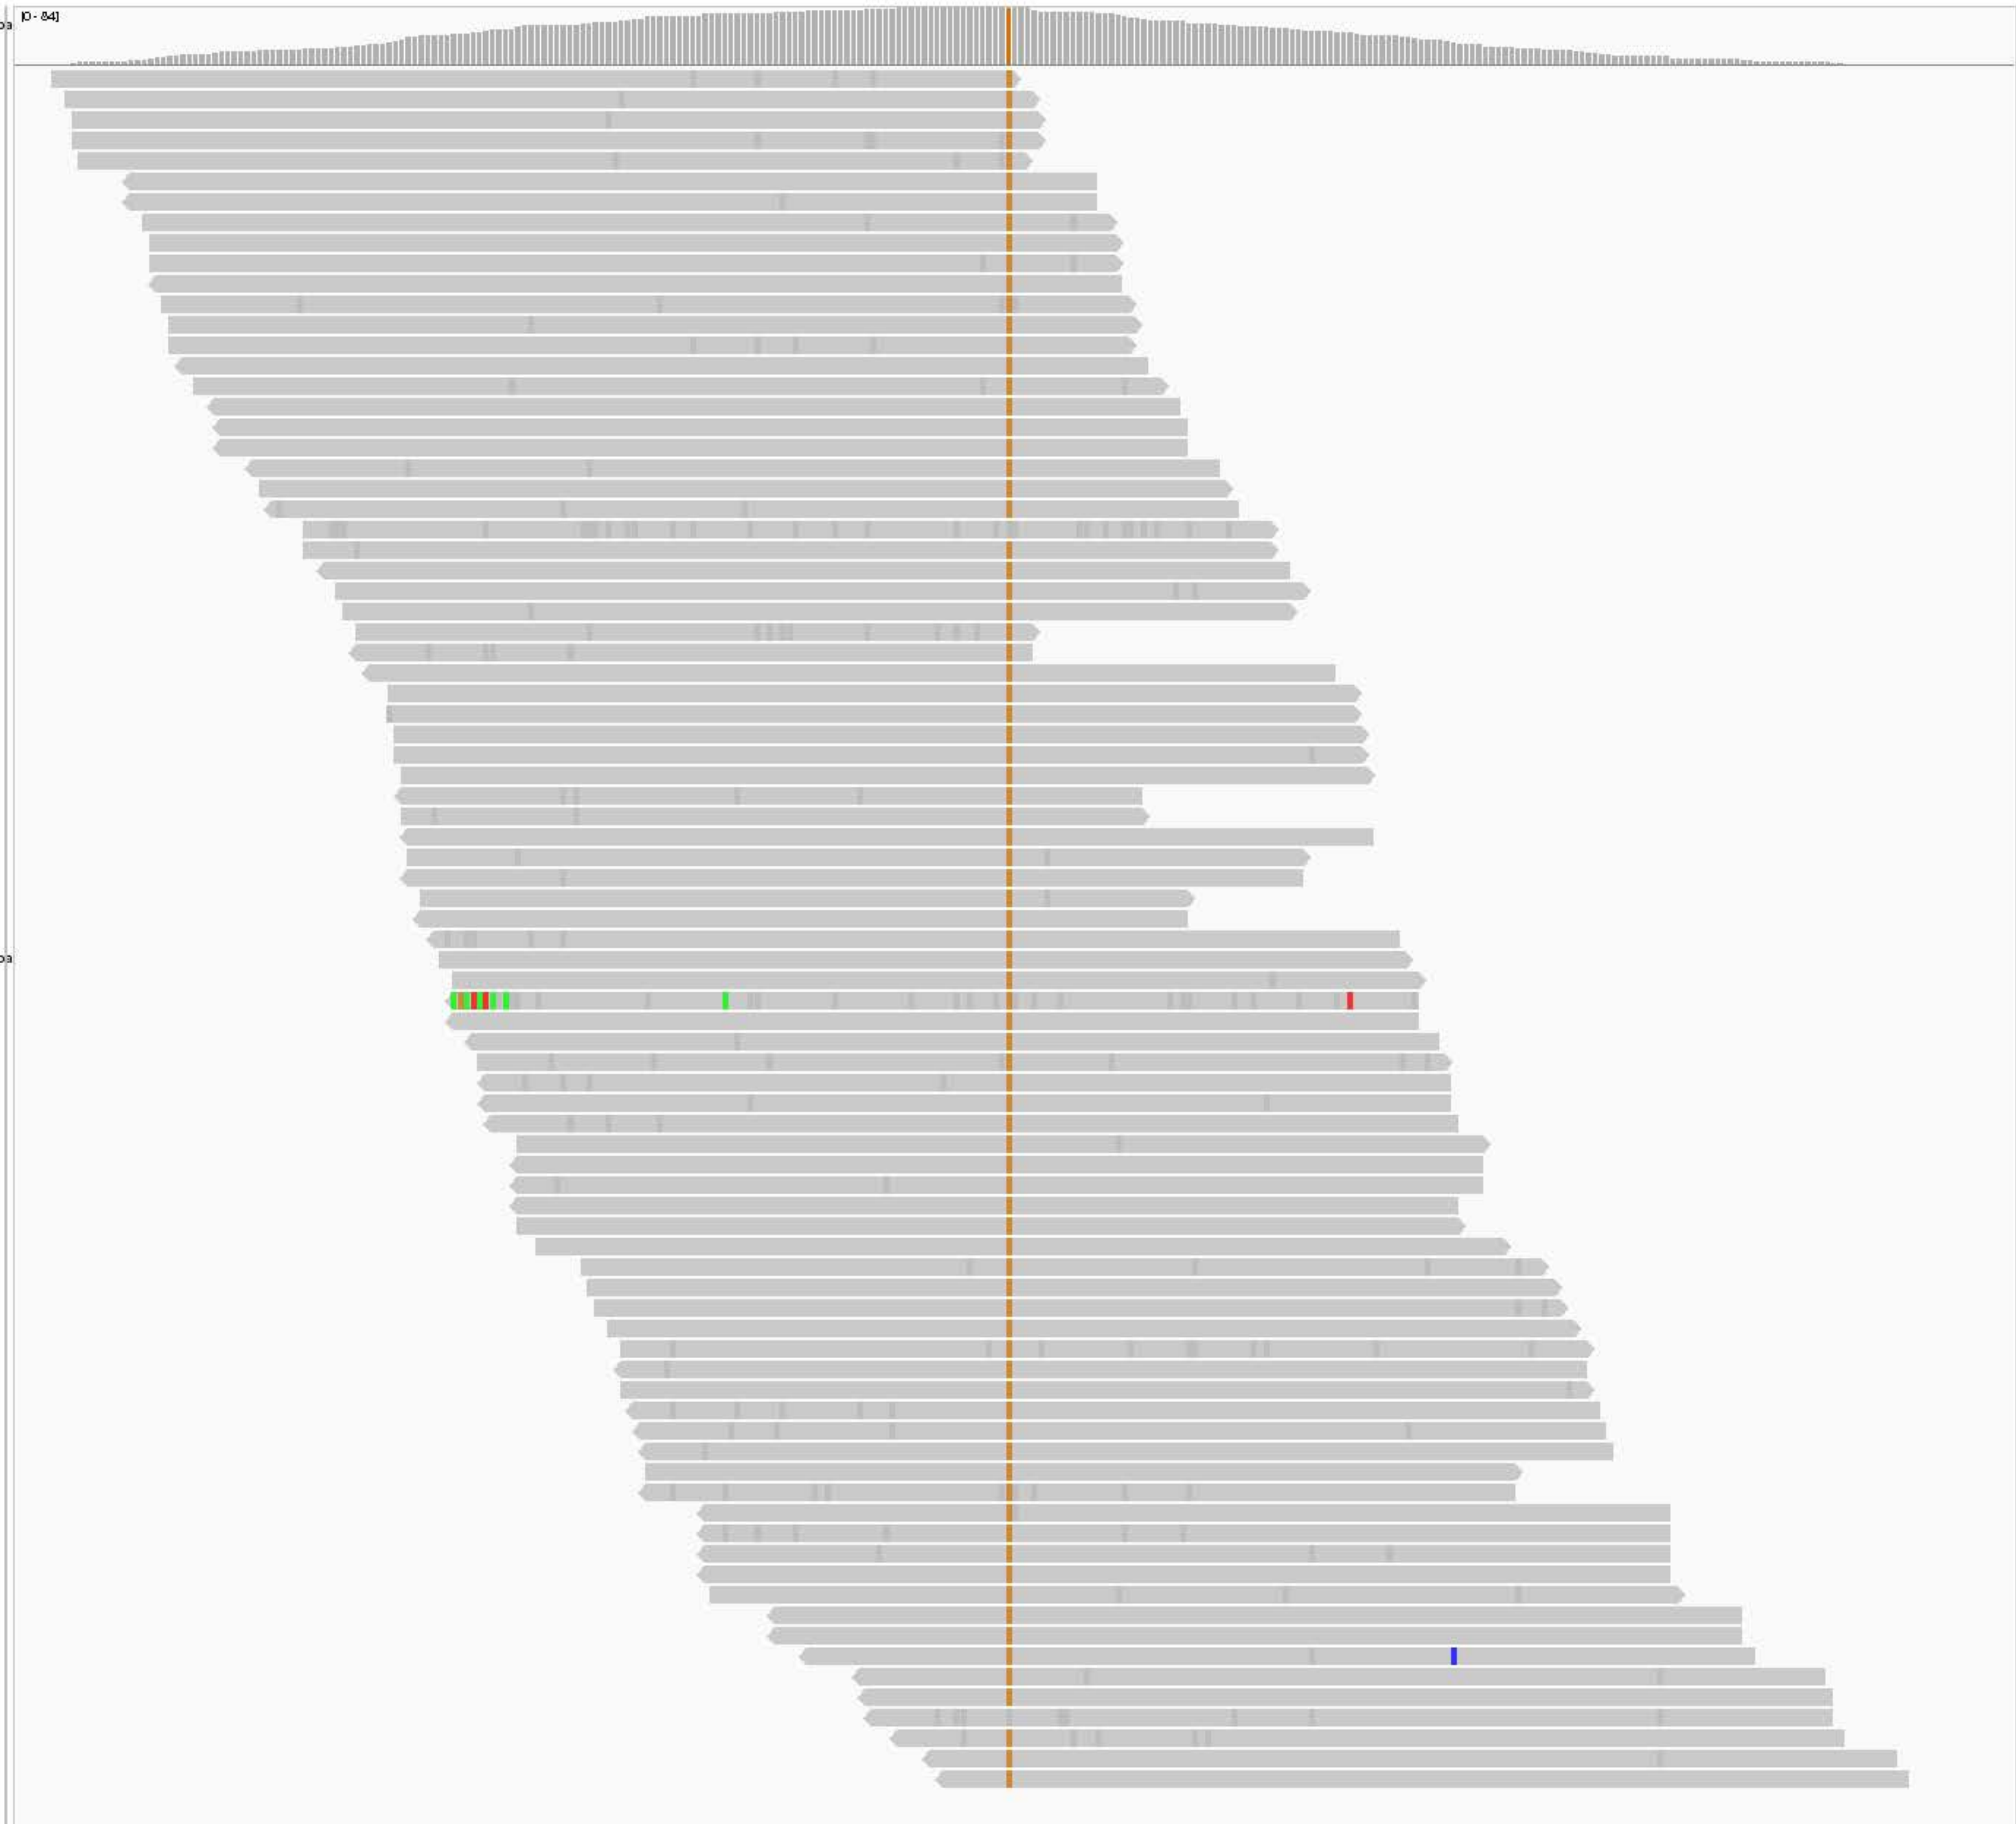

SL\_0004\_RN\_66\_WES\_uniq\_mut.ba

Sequence →  
Refseq Genes

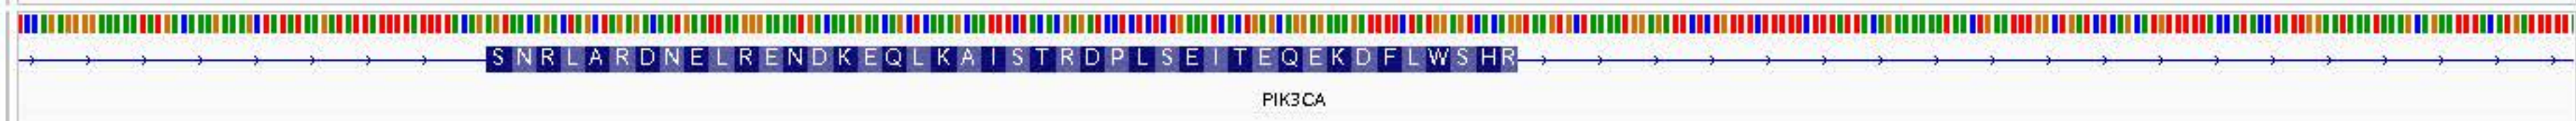

PIK3CA

chr3:179,218,152-179,218,461

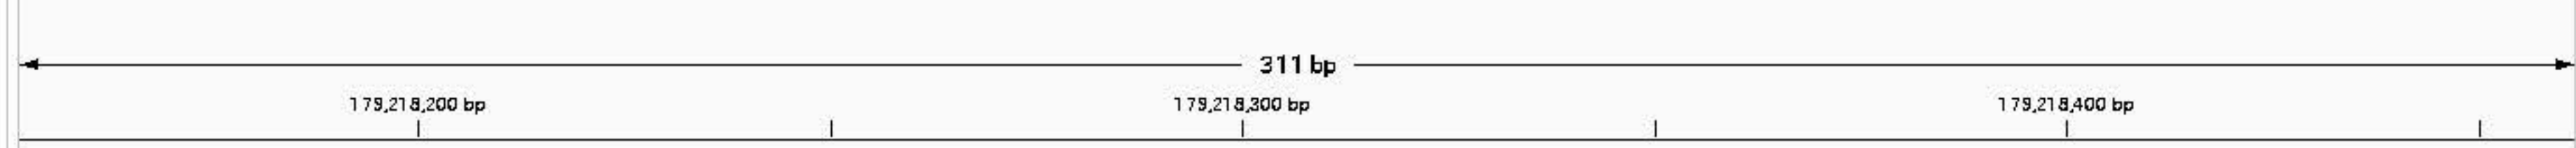

SL\_0007\_RN\_2\_WES\_uniq\_mut.ba  
verage

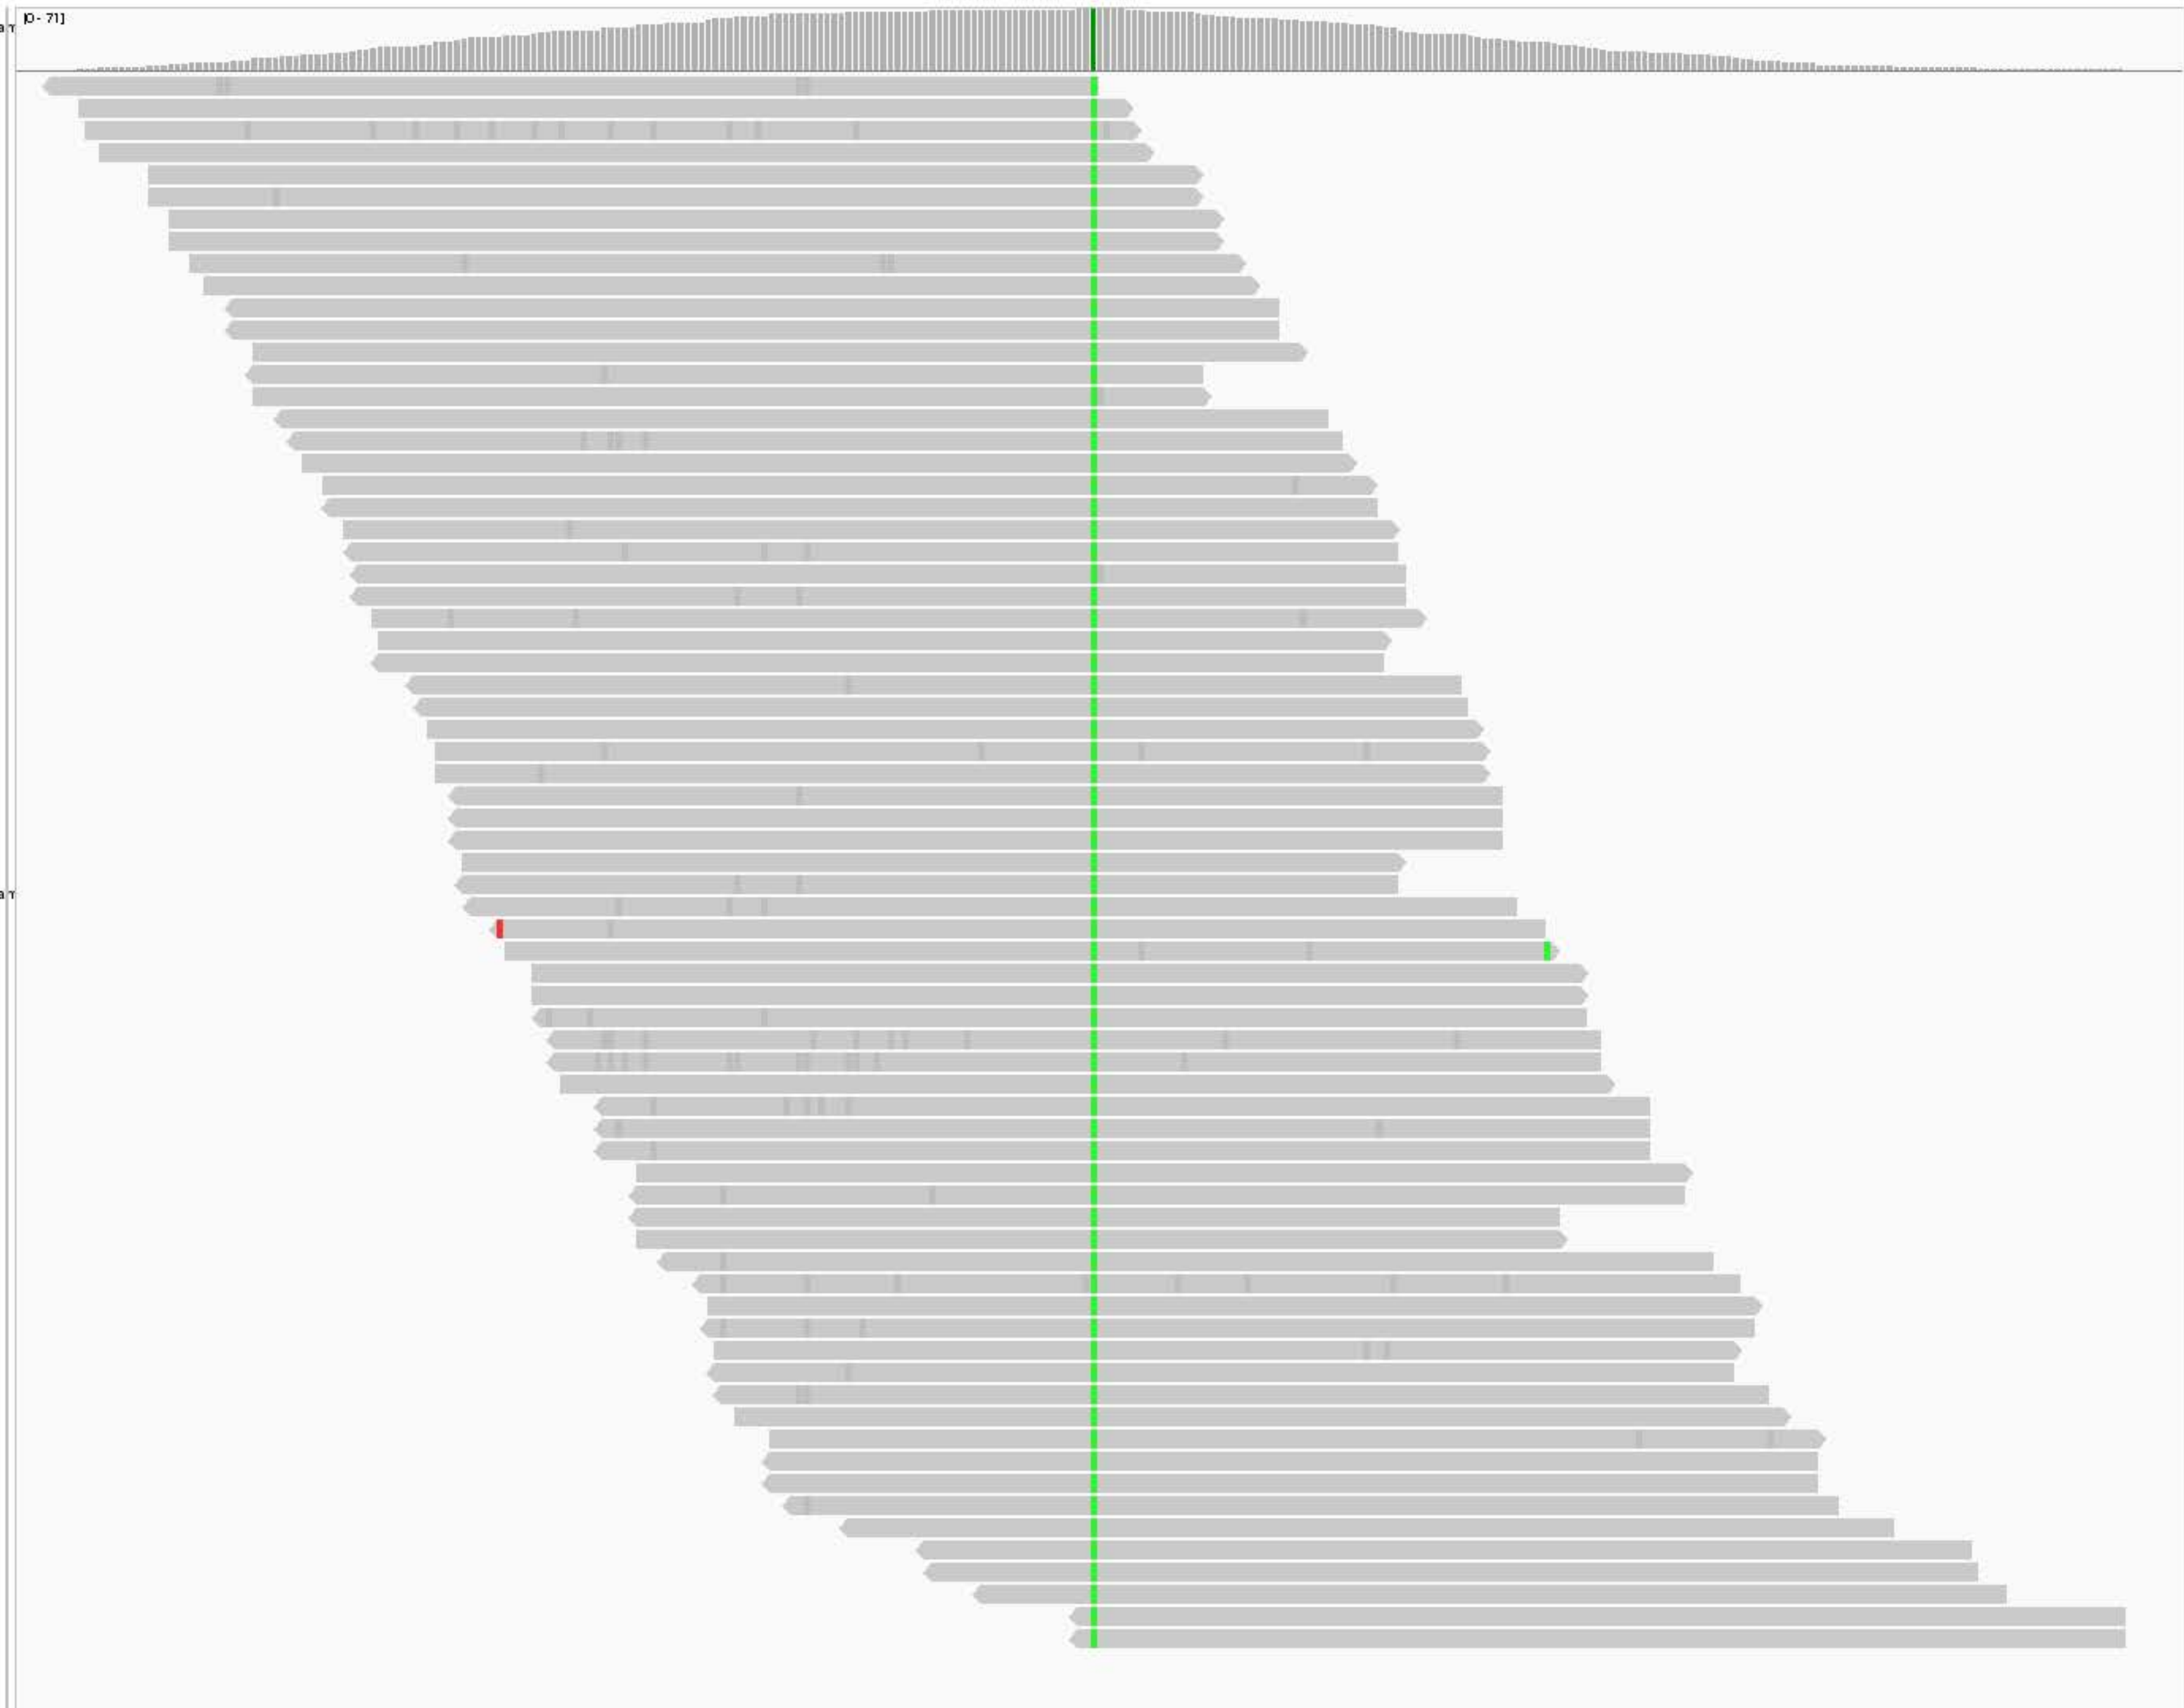

SL\_0007\_RN\_2\_WES\_uniq\_mut.ba

Sequence

Refseq Genes

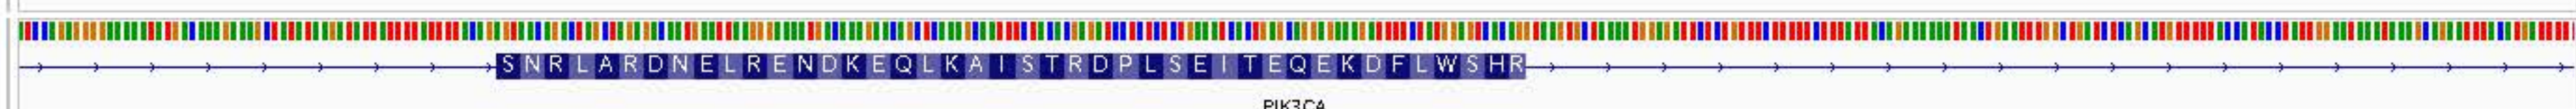

PIK3CA



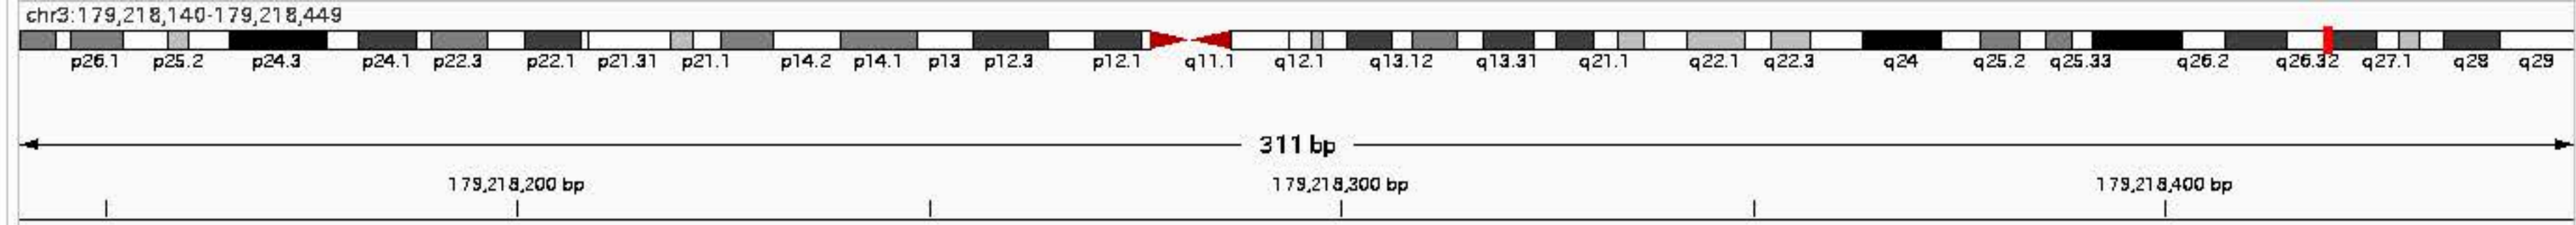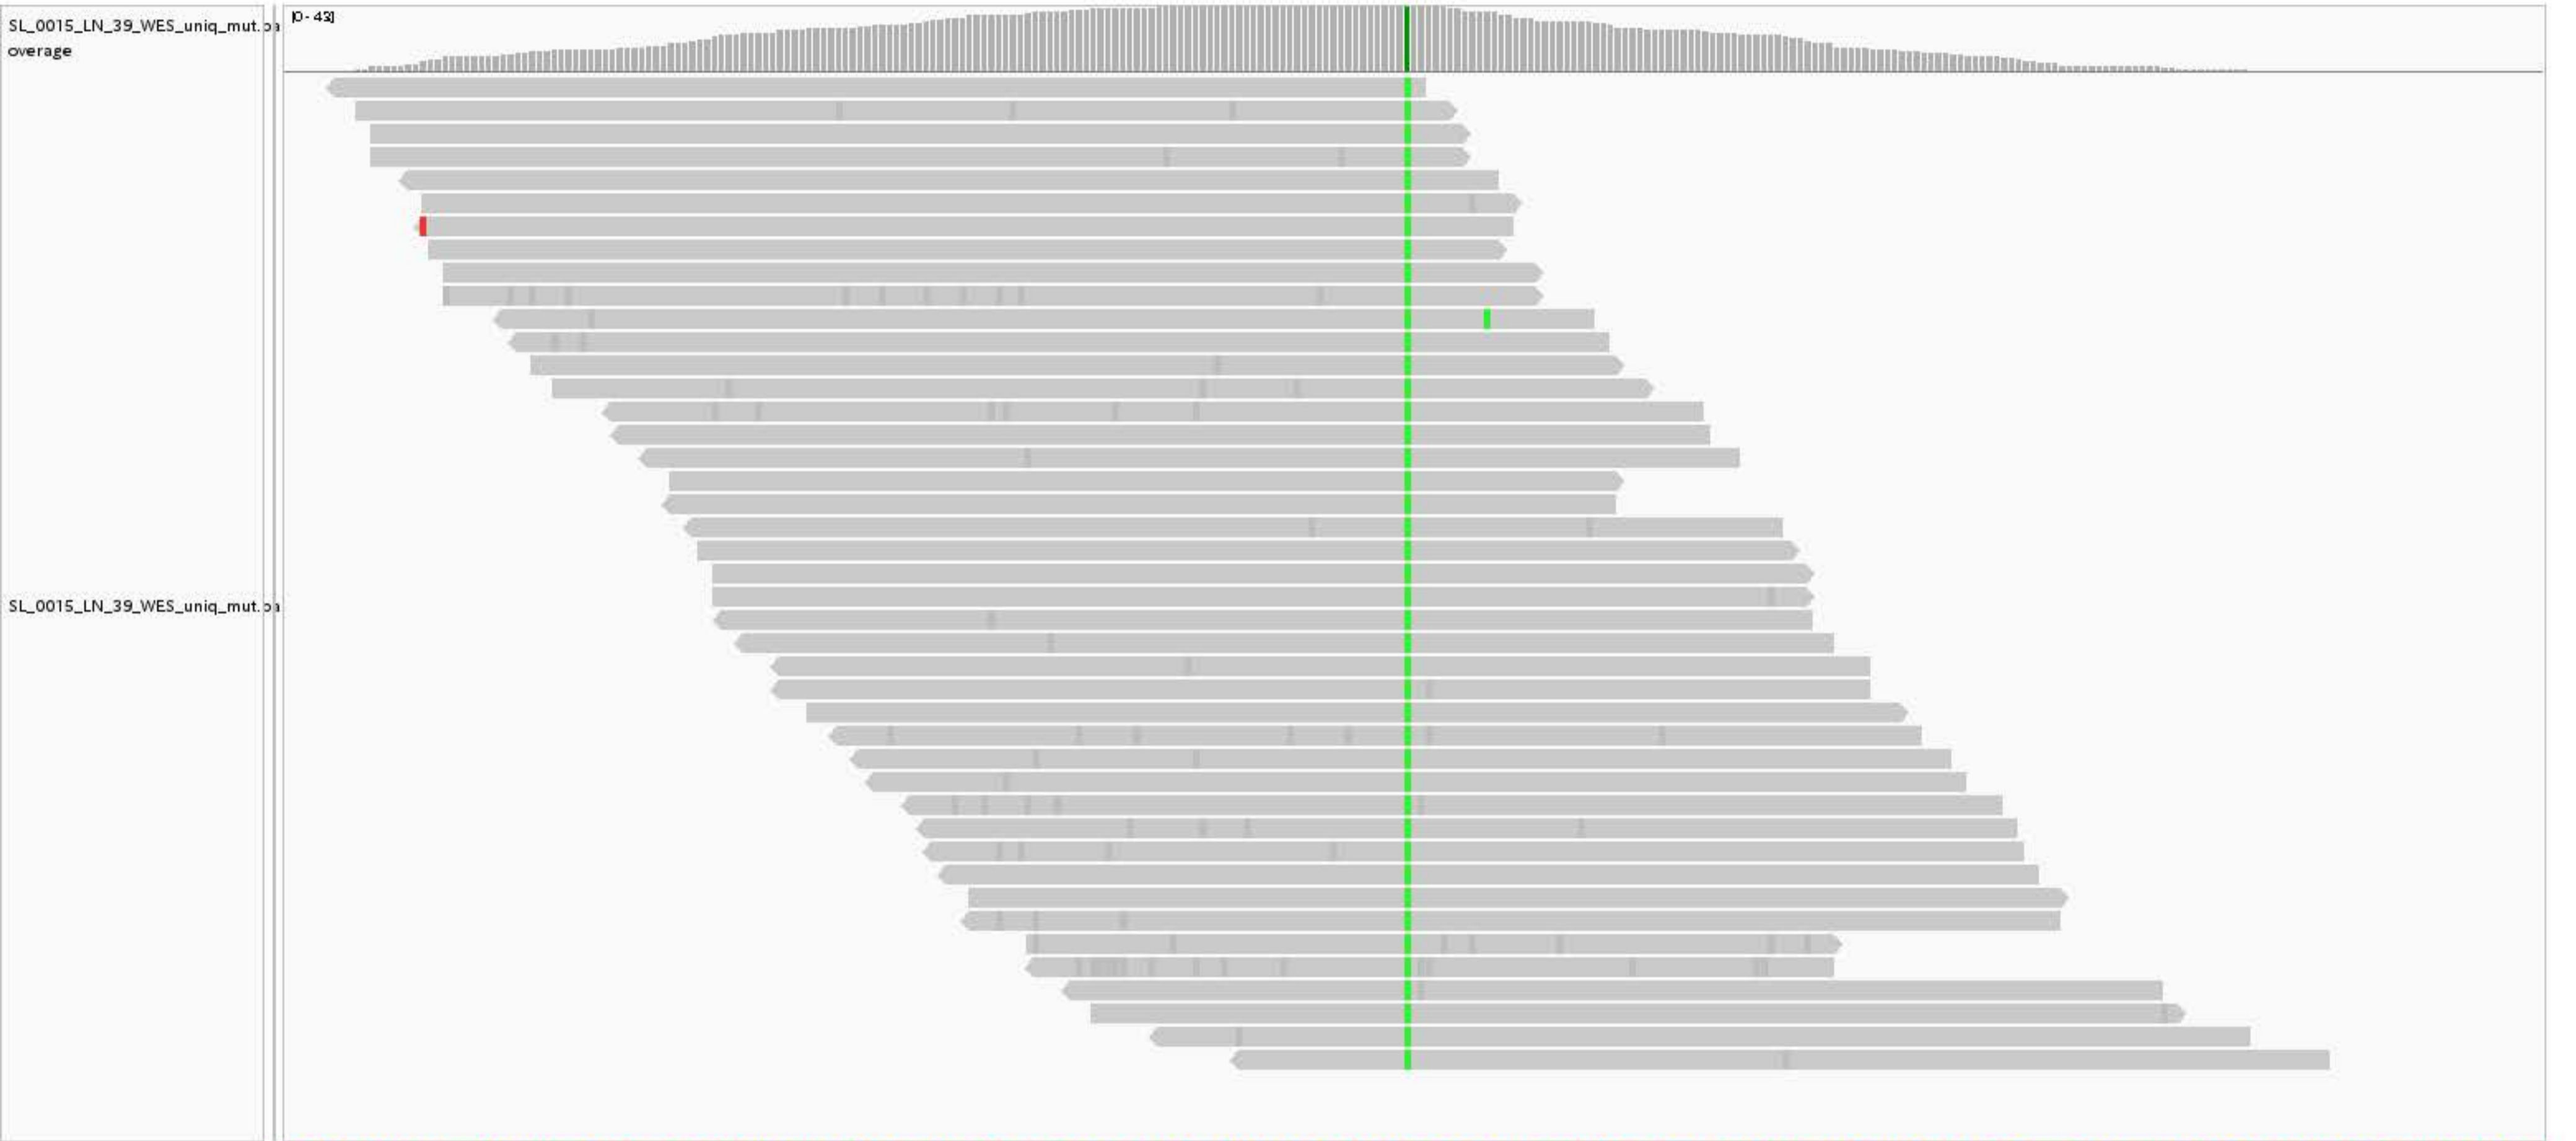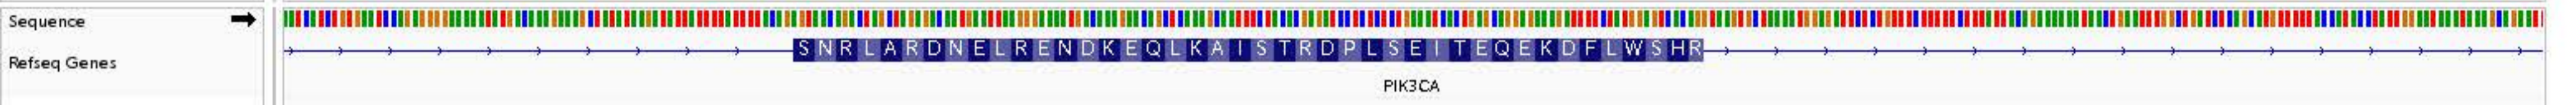

chr3:179,199,002-179,199,311

p26.1 p25.2 p24.3 p24.1 p22.3 p22.1 p21.31 p21.1 p14.2 p14.1 p13 p12.3 p12.1 q11.1 q12.1 q13.12 q13.31 q21.1 q22.1 q22.3 q24 q25.2 q25.33 q26.2 q26.32 q27.1 q28 q29

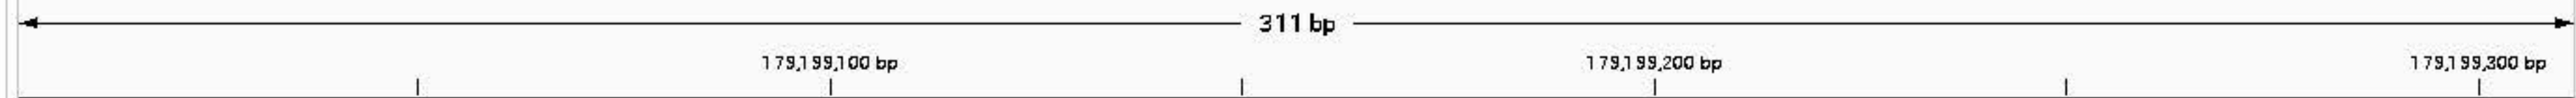

SL\_0015\_LN\_44\_WES\_uniq\_mut. coverage

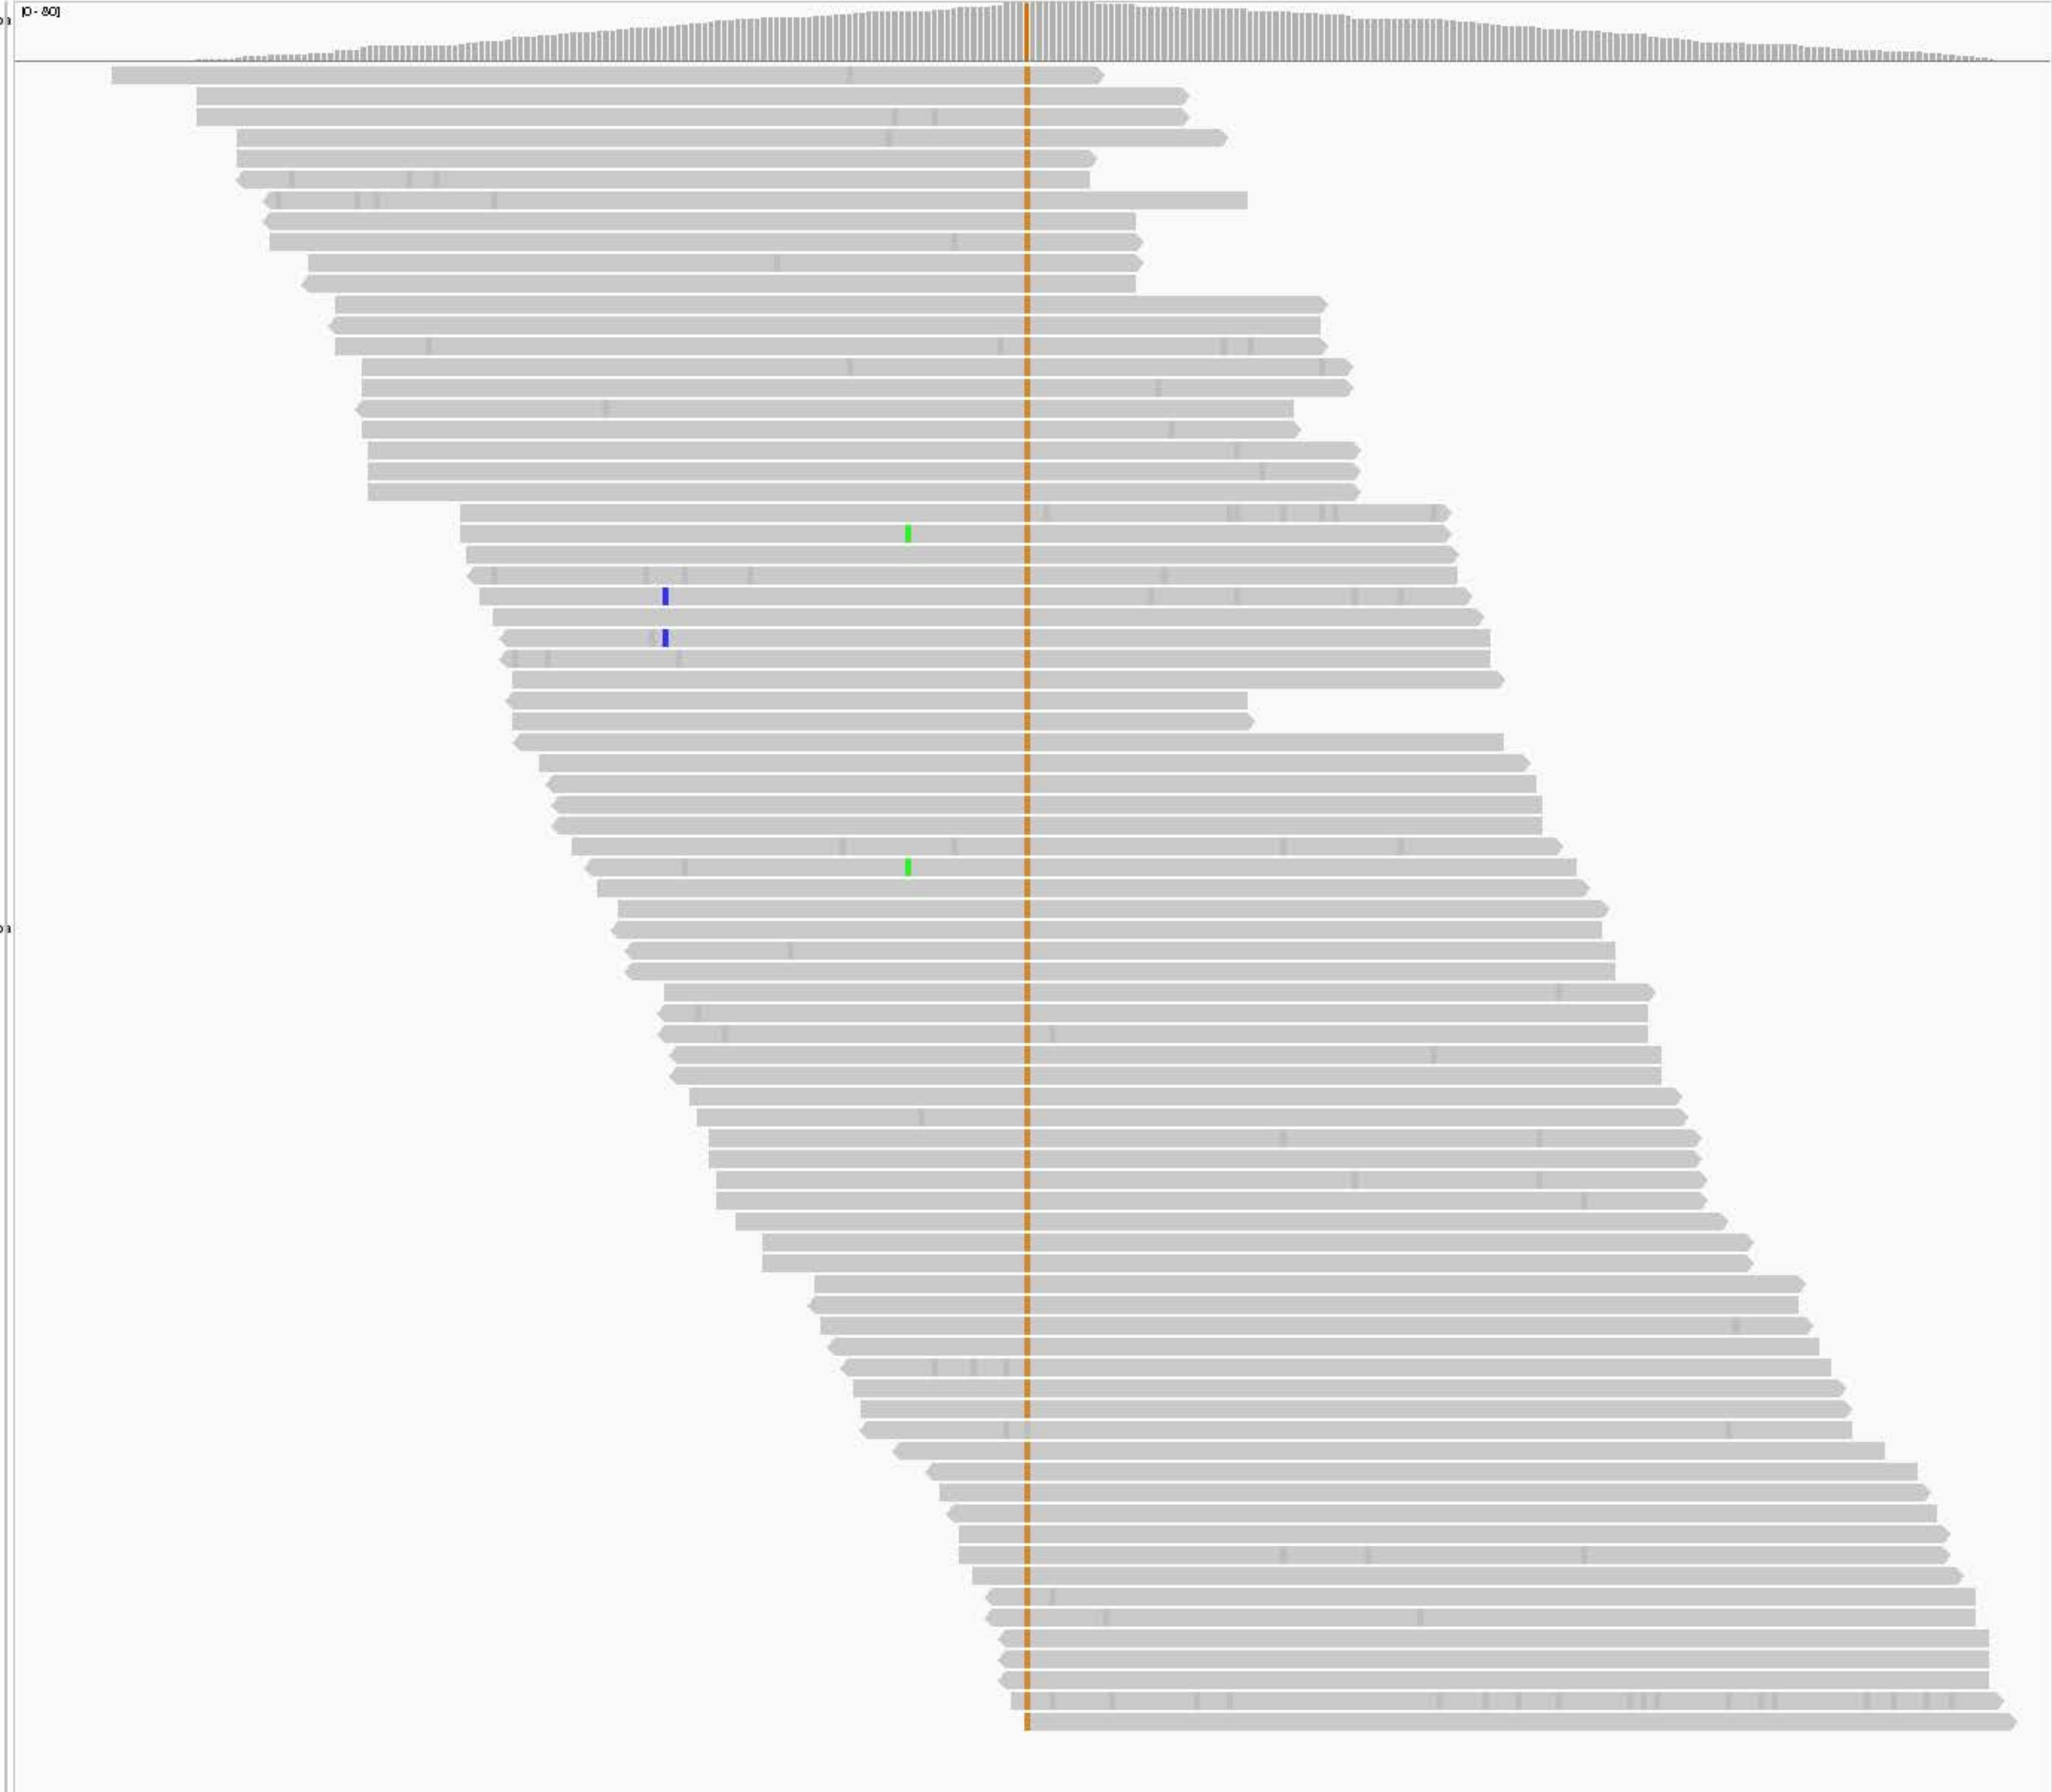

SL\_0015\_LN\_44\_WES\_uniq\_mut.

Sequence

Refseq Genes

QLLQDESSYIFVSVTQEAEREEFFDETRRLCDLRLFQPFLLKVIPEVGNREEKLNREIC

PIK3CA

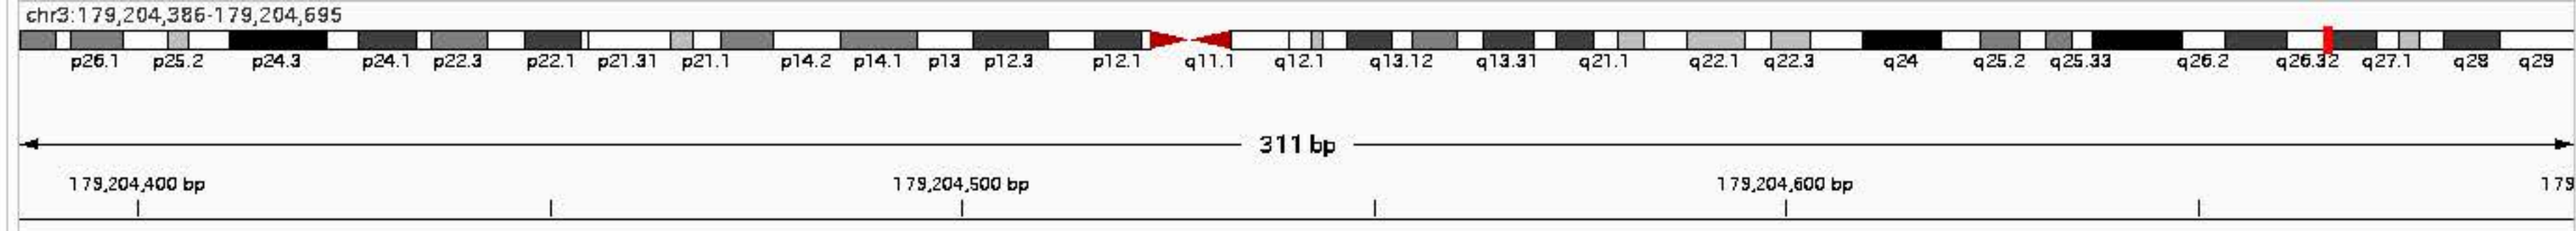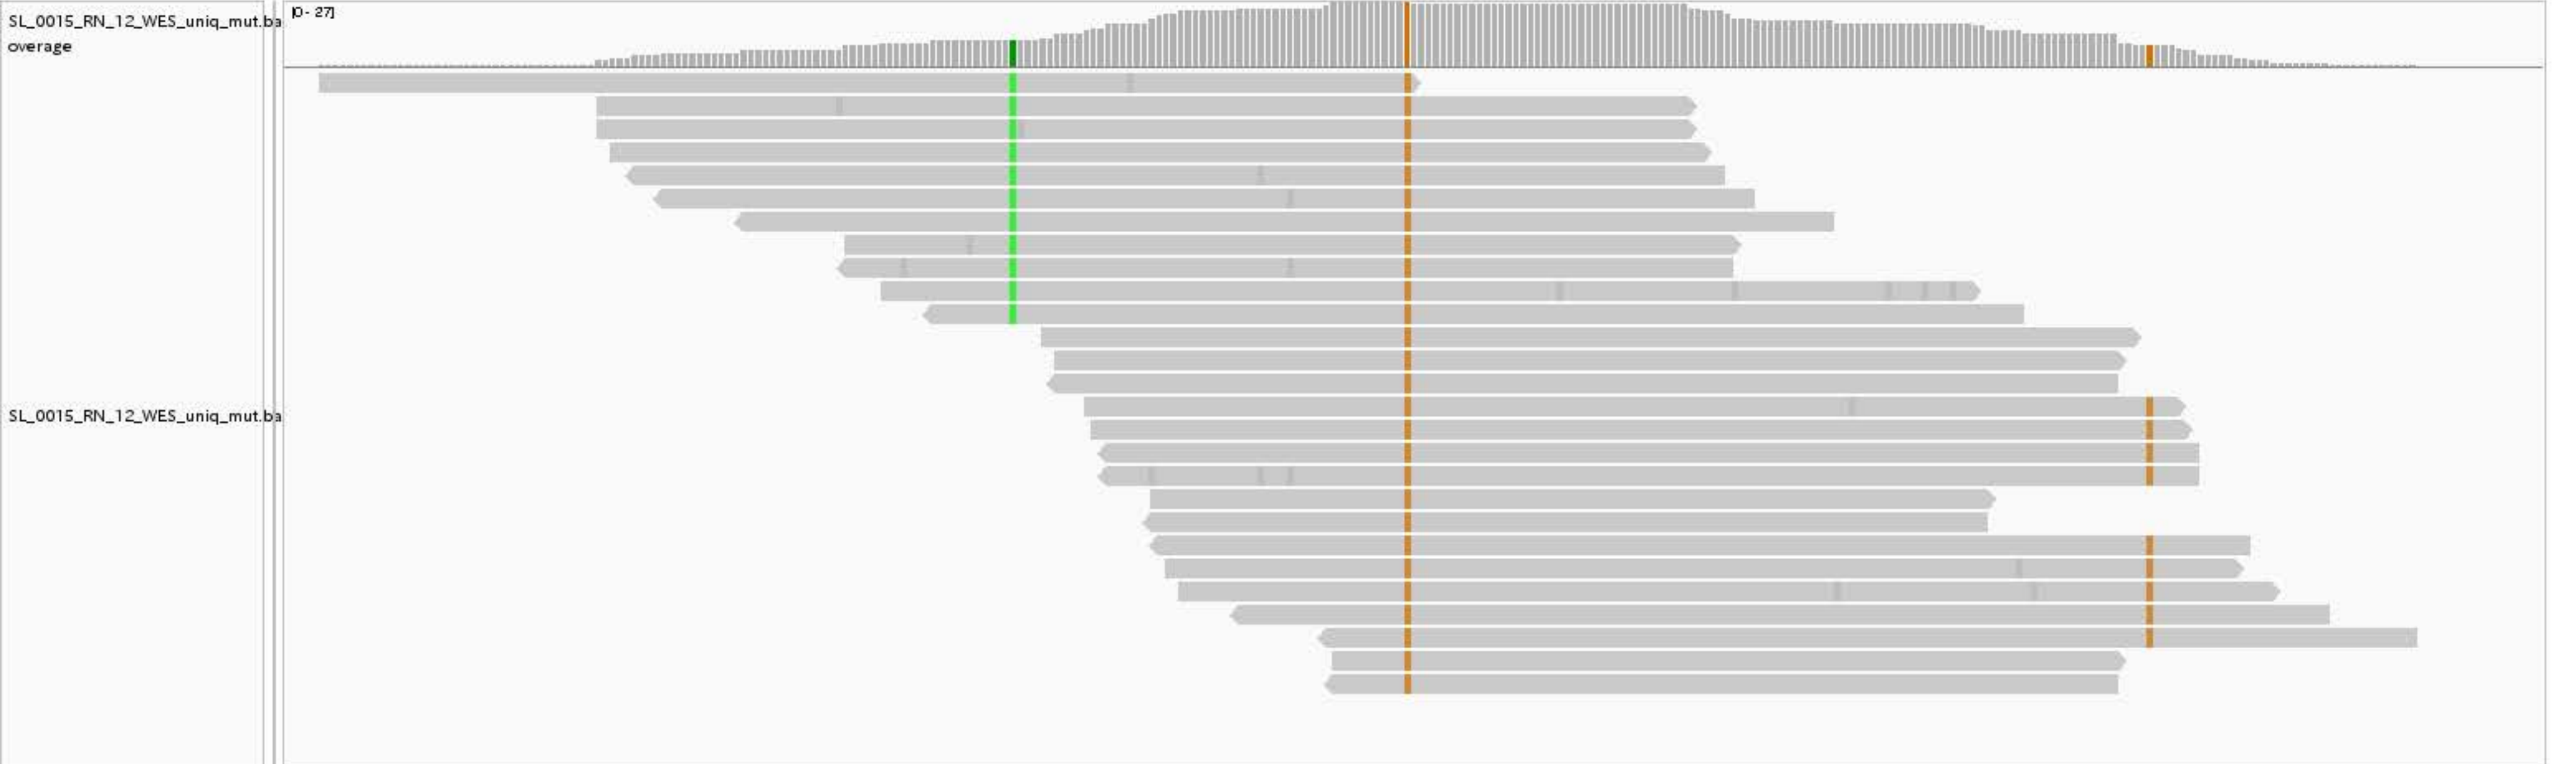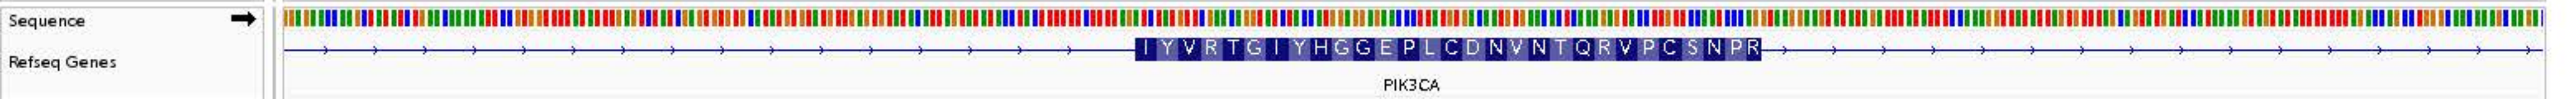



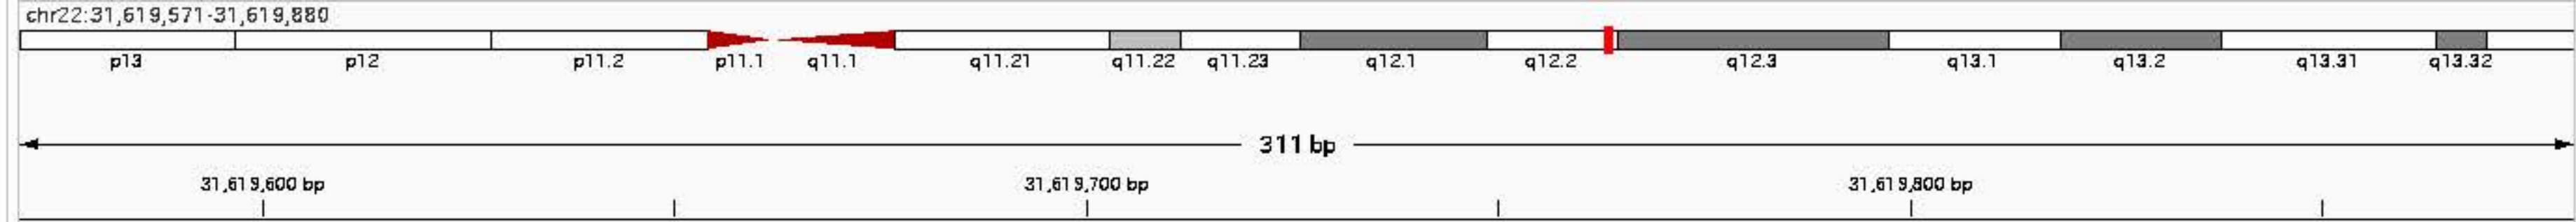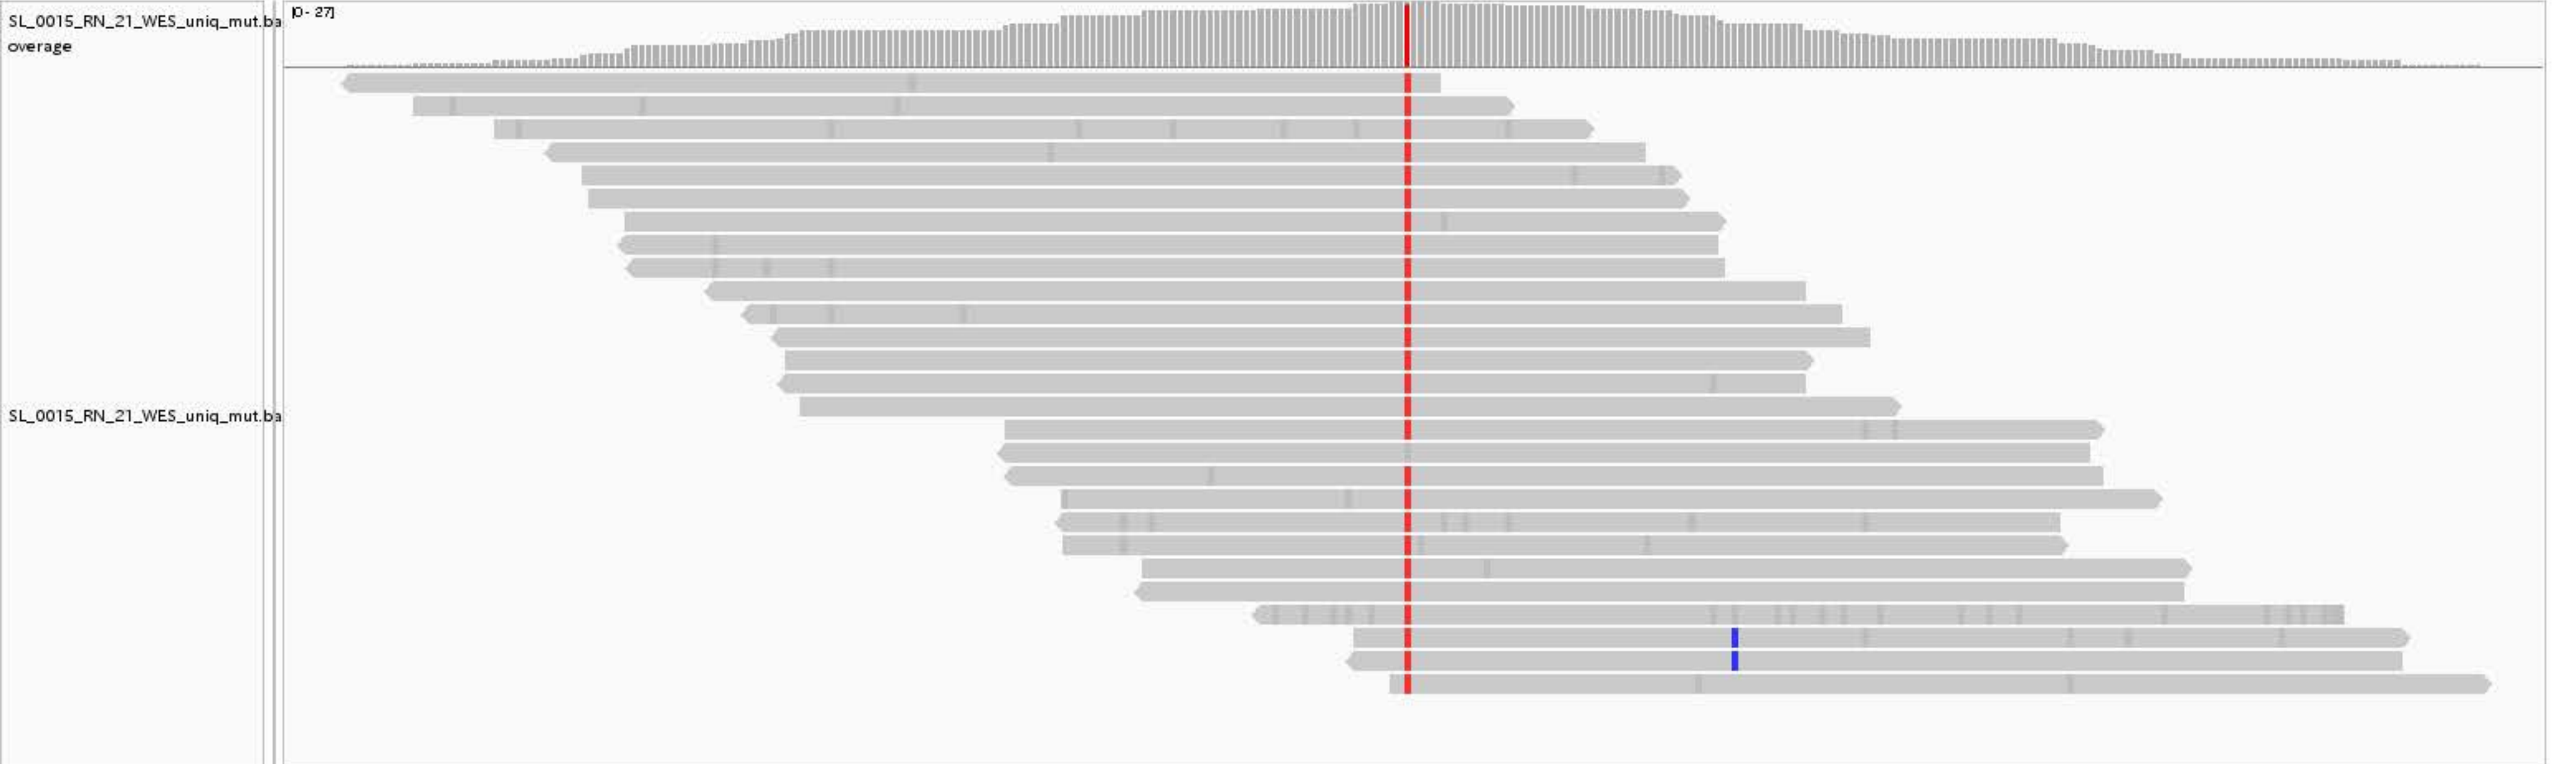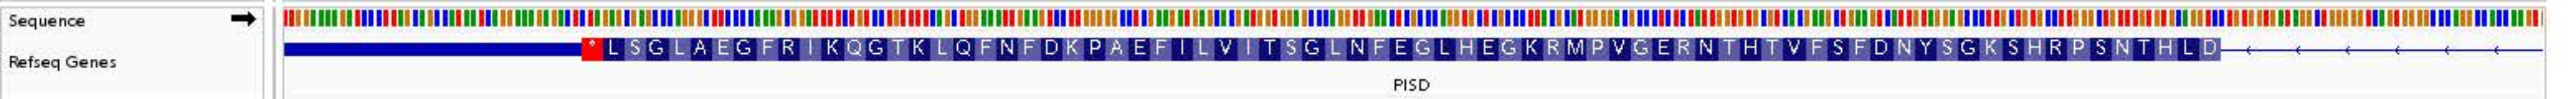

chr12:18,687,936-18,688,245  
p13.32 p13.2 p12.3 p12.1 p11.22 p11.1 q12 q13.11 q13.13 q13.3 q14.2 q15 q21.1 q21.2 q21.31 q21.32 q22 q23.1 q23.2 q24.11 q24.21 q24.31 q24.33

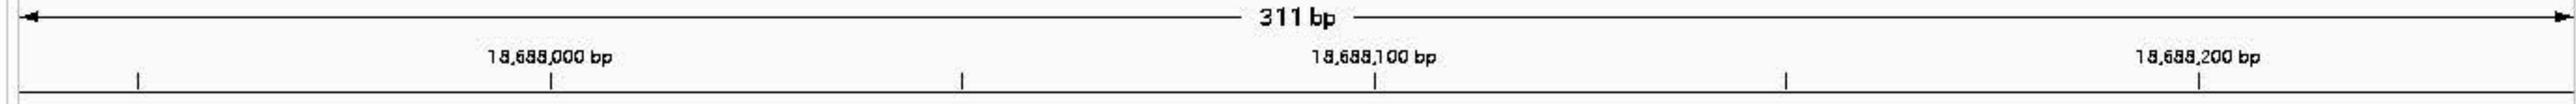

SL\_0017\_RN\_15\_WES\_uniq\_mut.ba  
overage

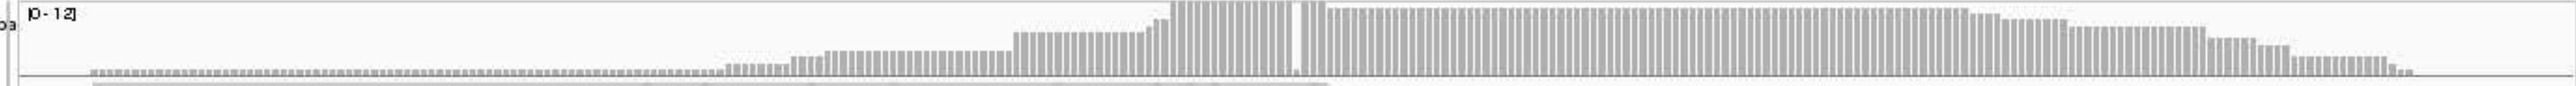

SL\_0017\_RN\_15\_WES\_uniq\_mut.ba

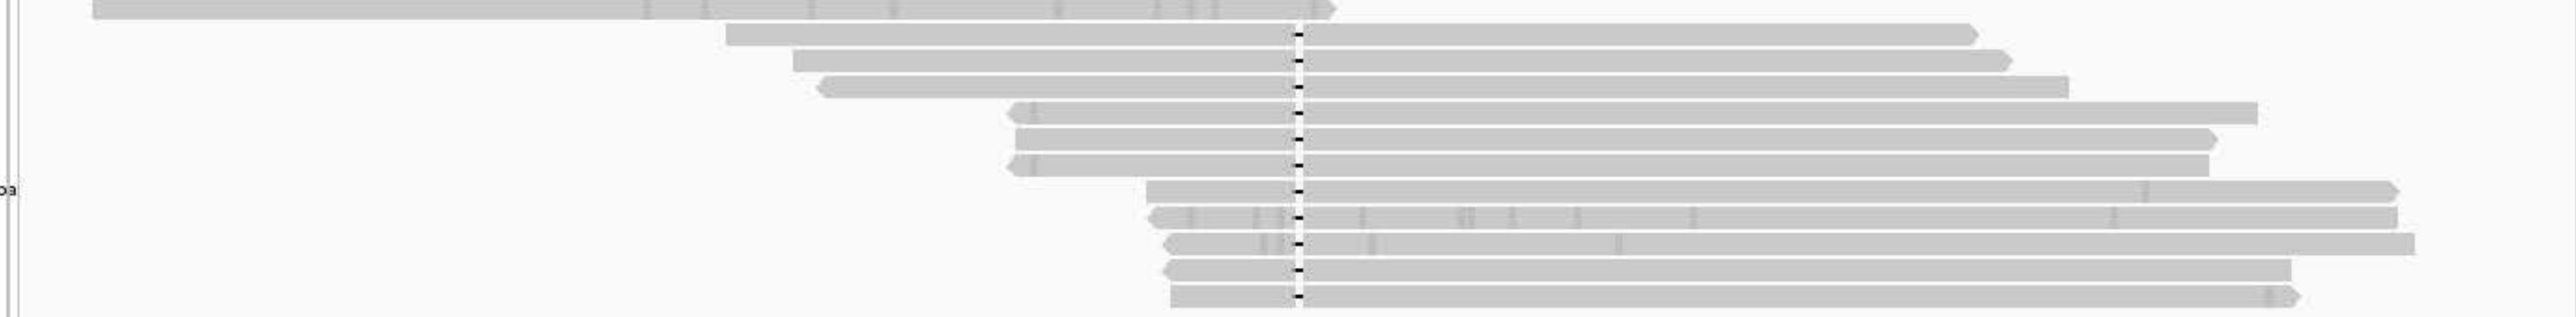

Sequence

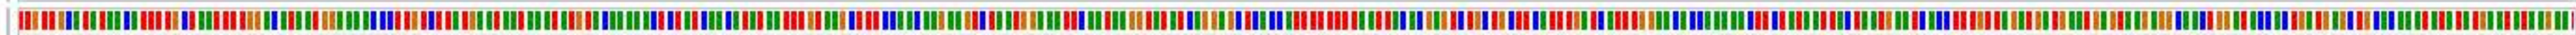

Refseq Genes

INKKIVRTQQKMQDNPVGFVEIIVLSDGKNSSSHTLPLQICSL  
PIK3C2G

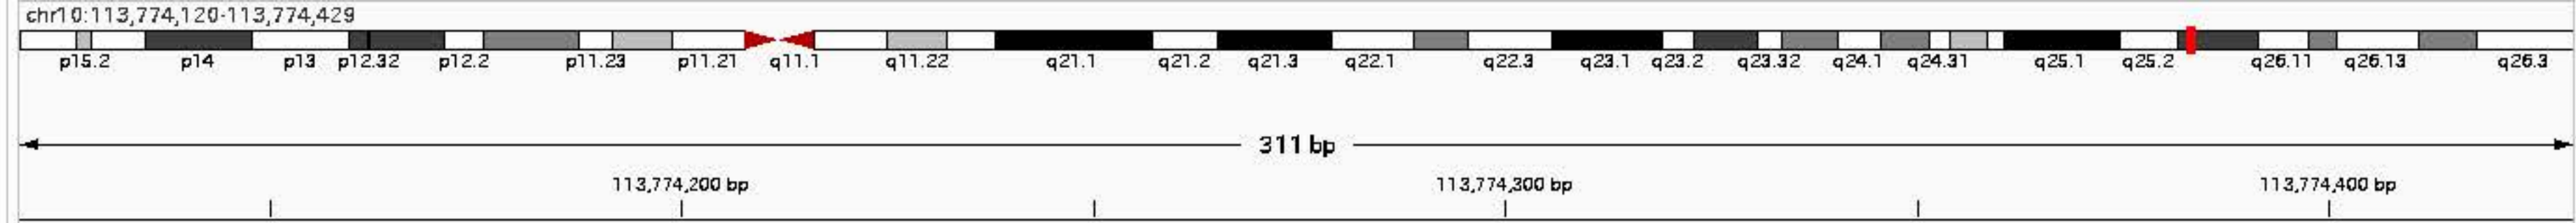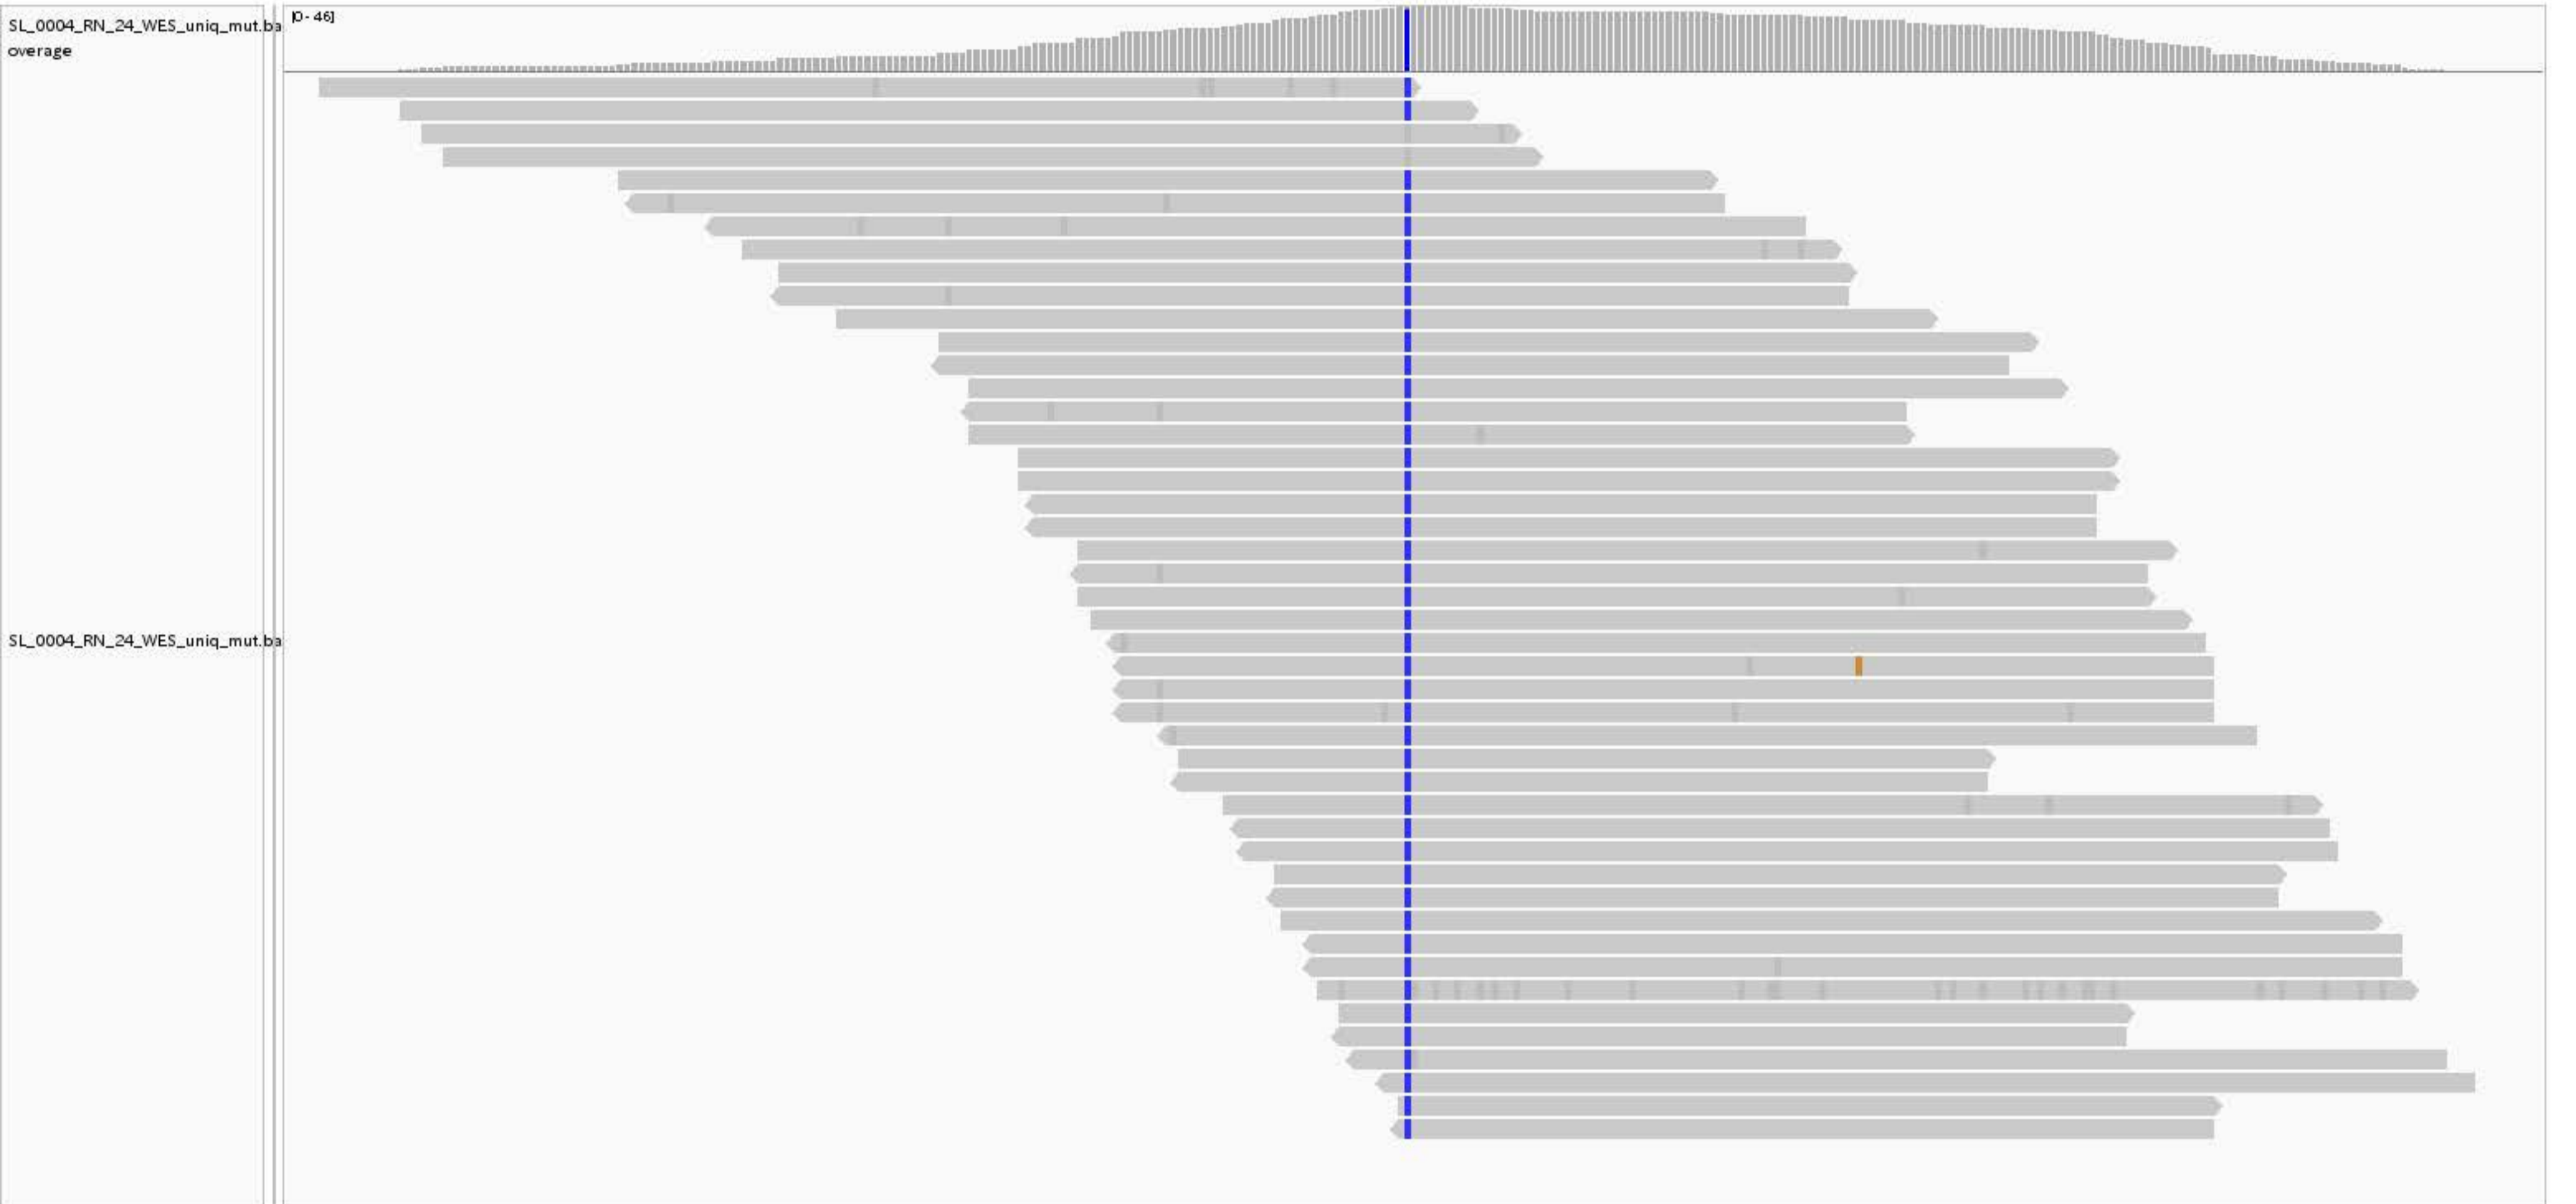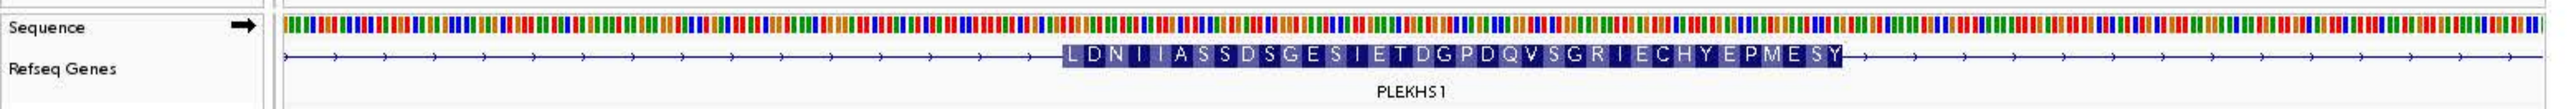



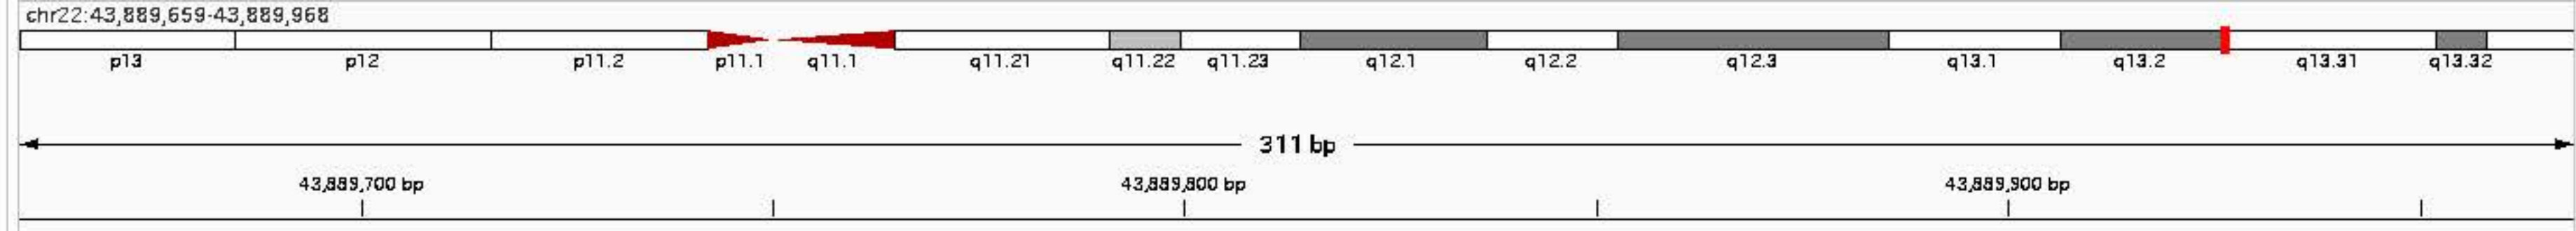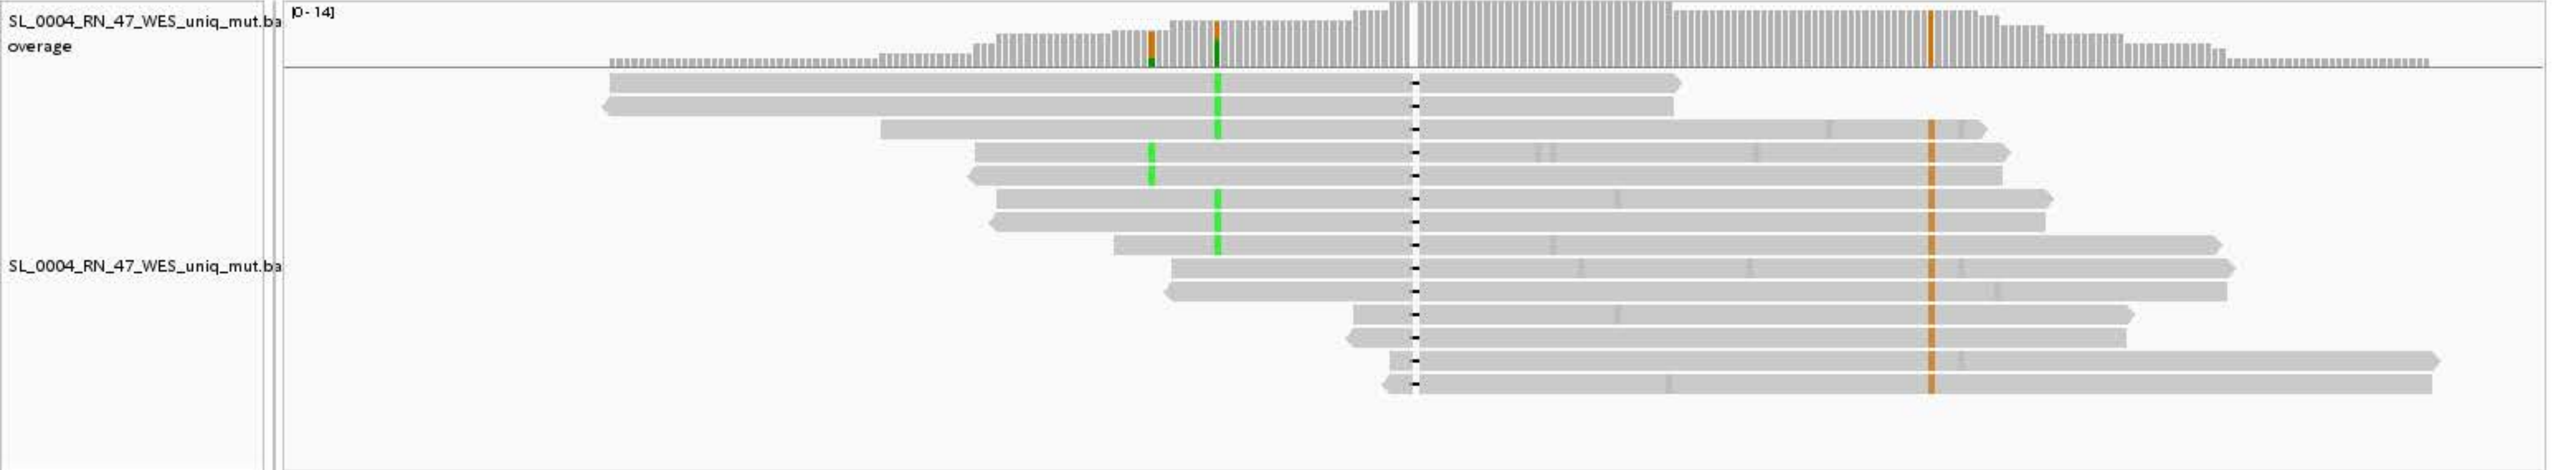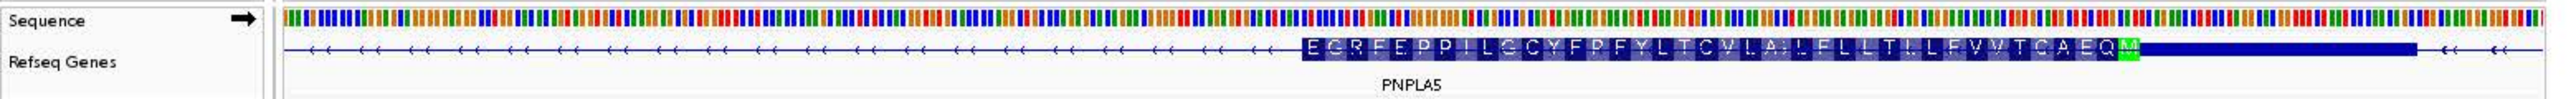

chr15:21,431,616-21,431,925

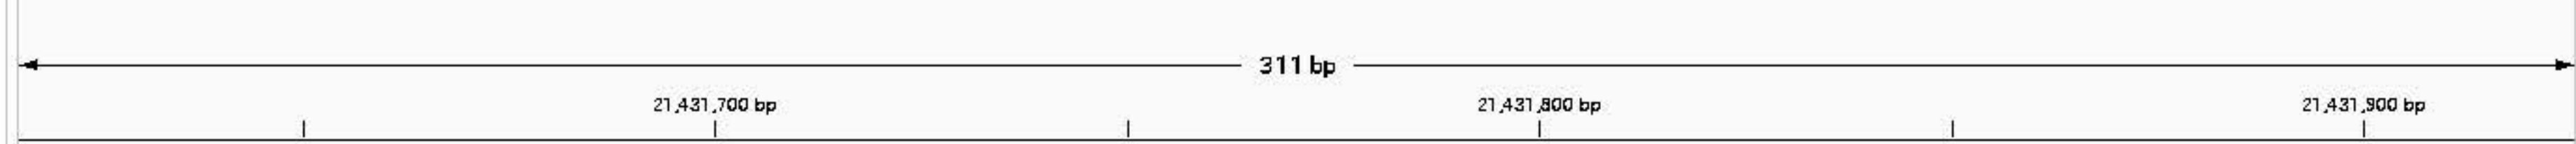

SL\_0004\_RN\_26\_WES\_uniq\_mut.ba  
coverage

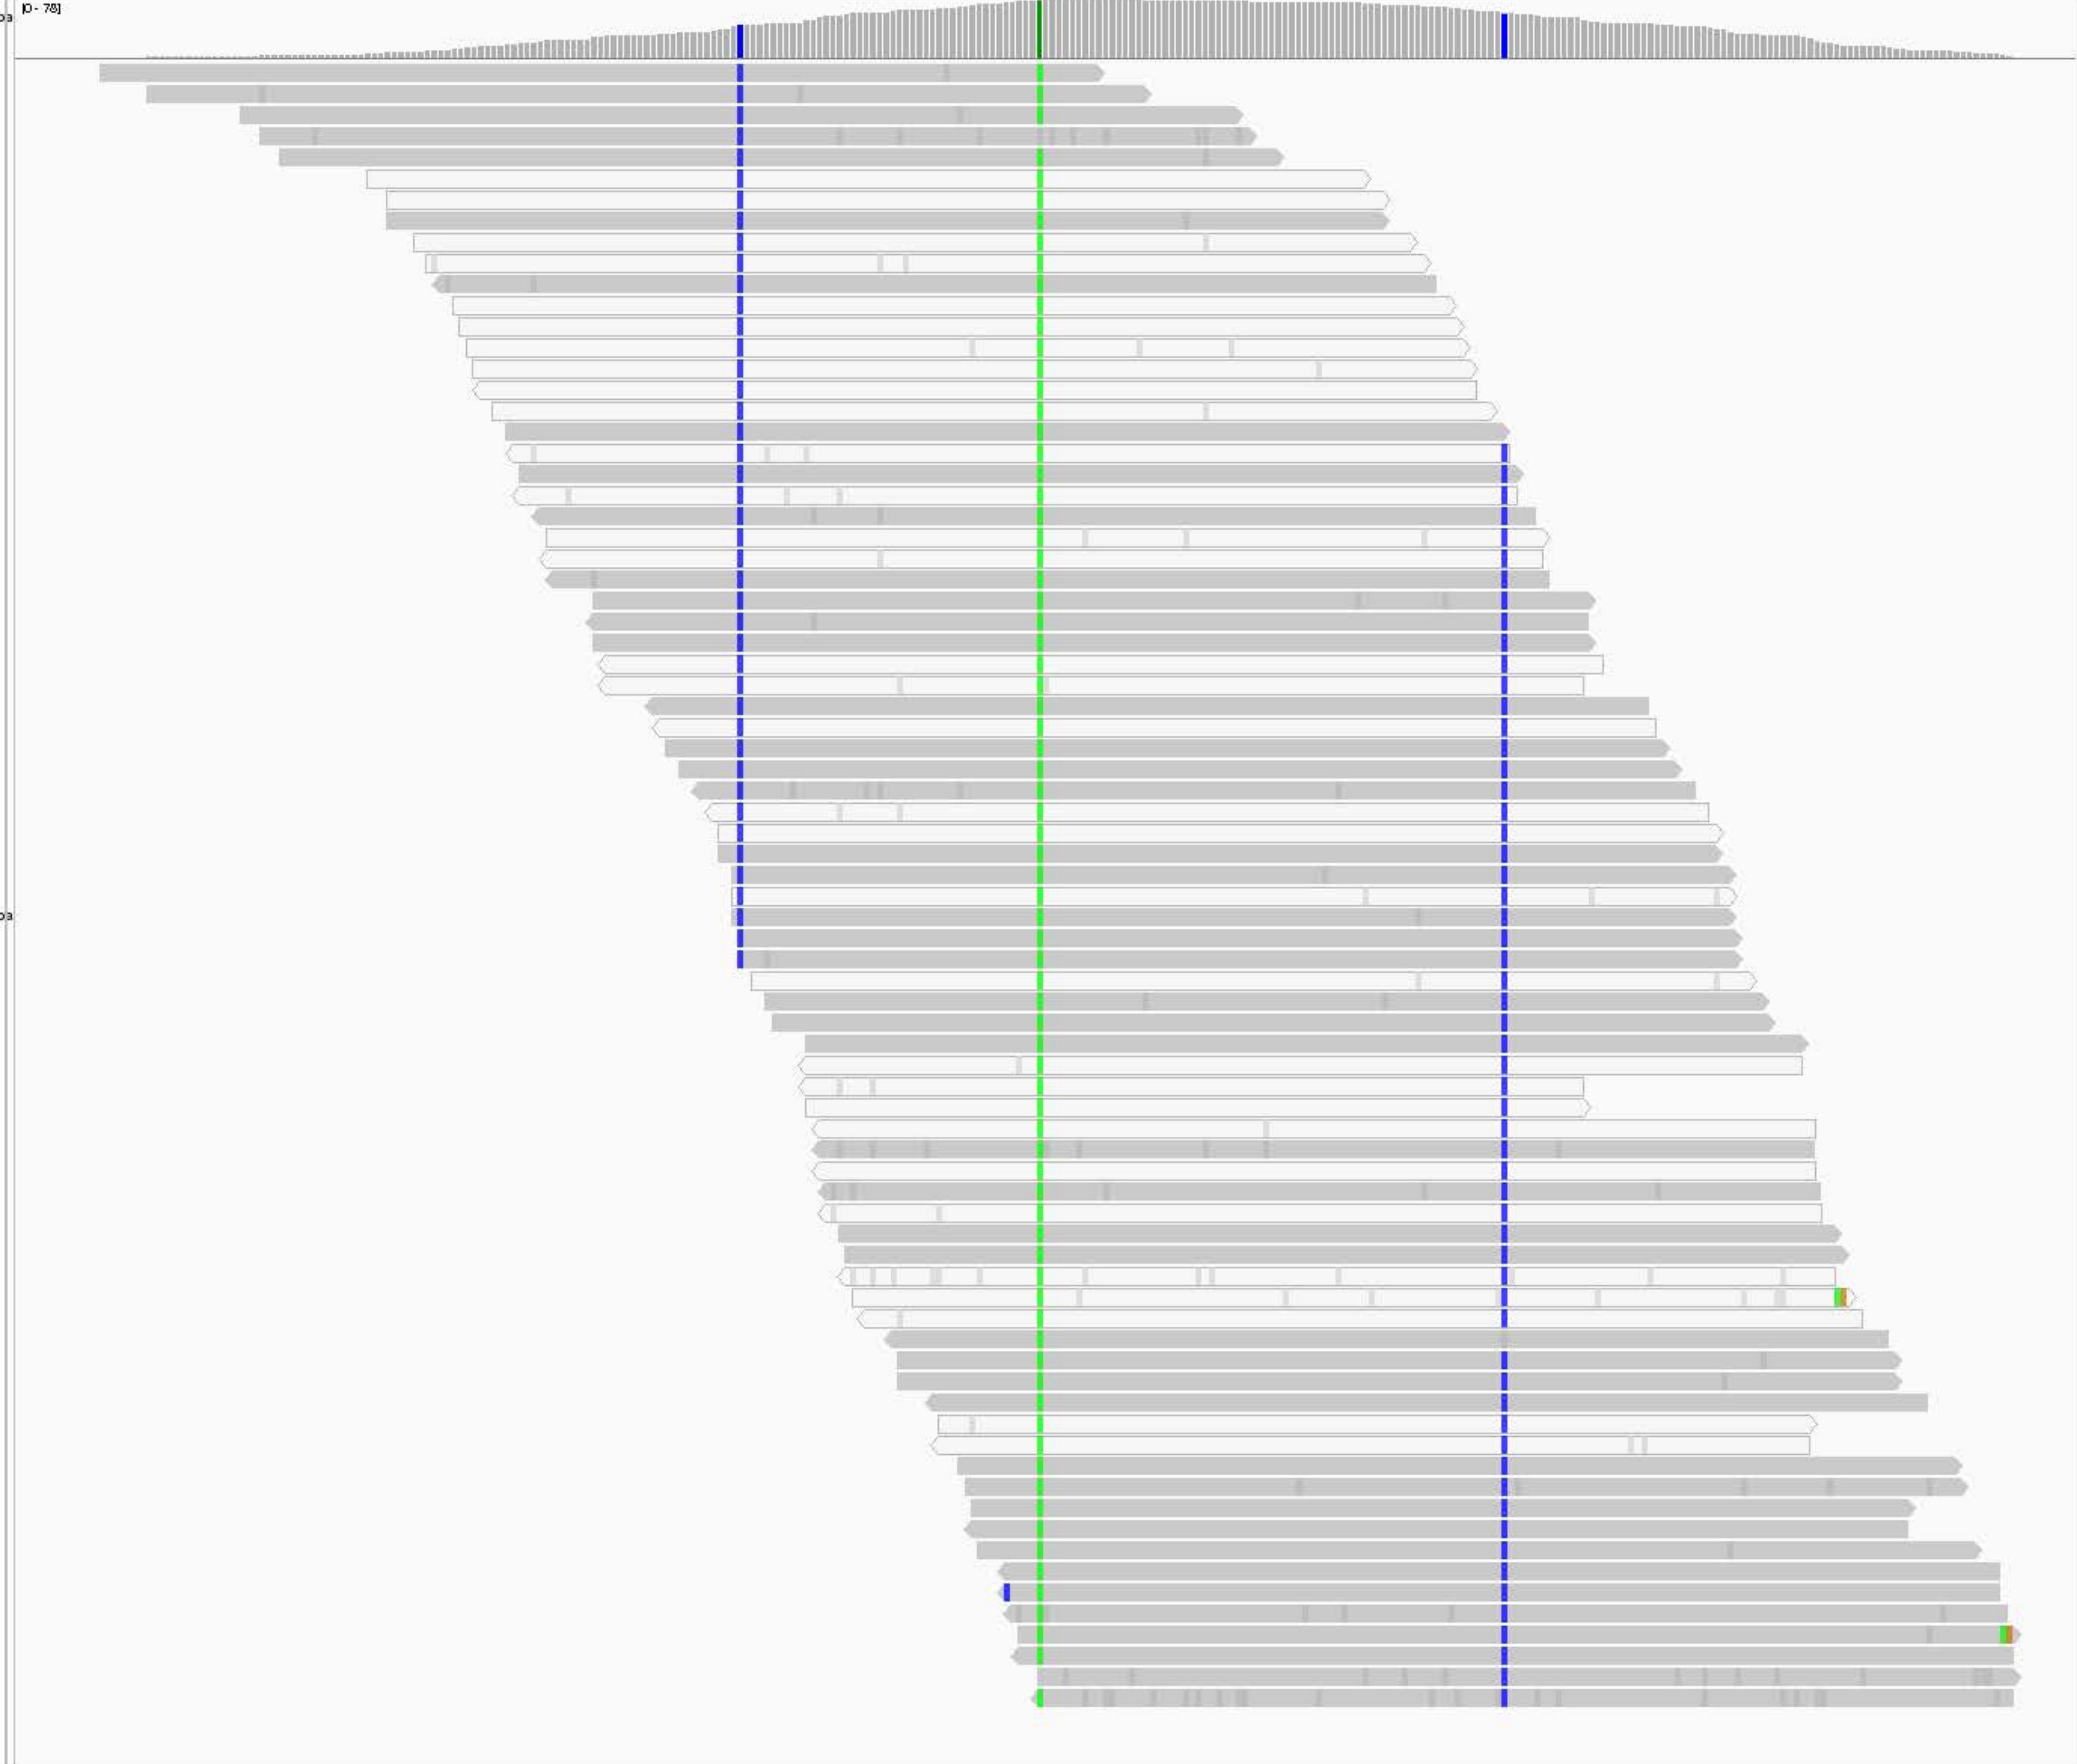

SL\_0004\_RN\_26\_WES\_uniq\_mut.ba

Sequence  
Refseq Genes

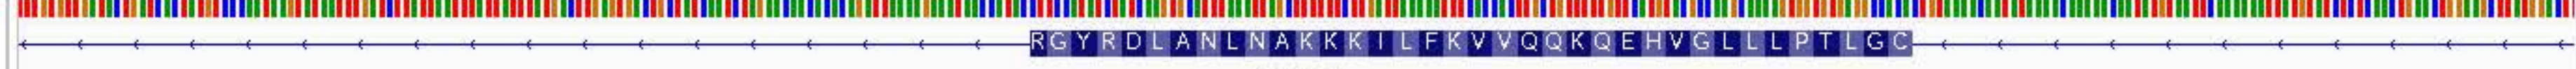

POTEB3

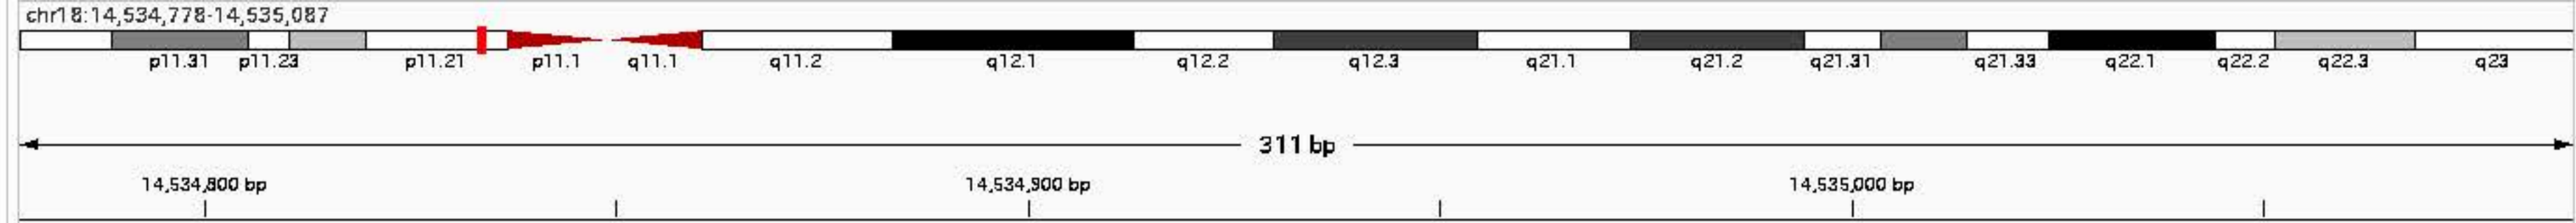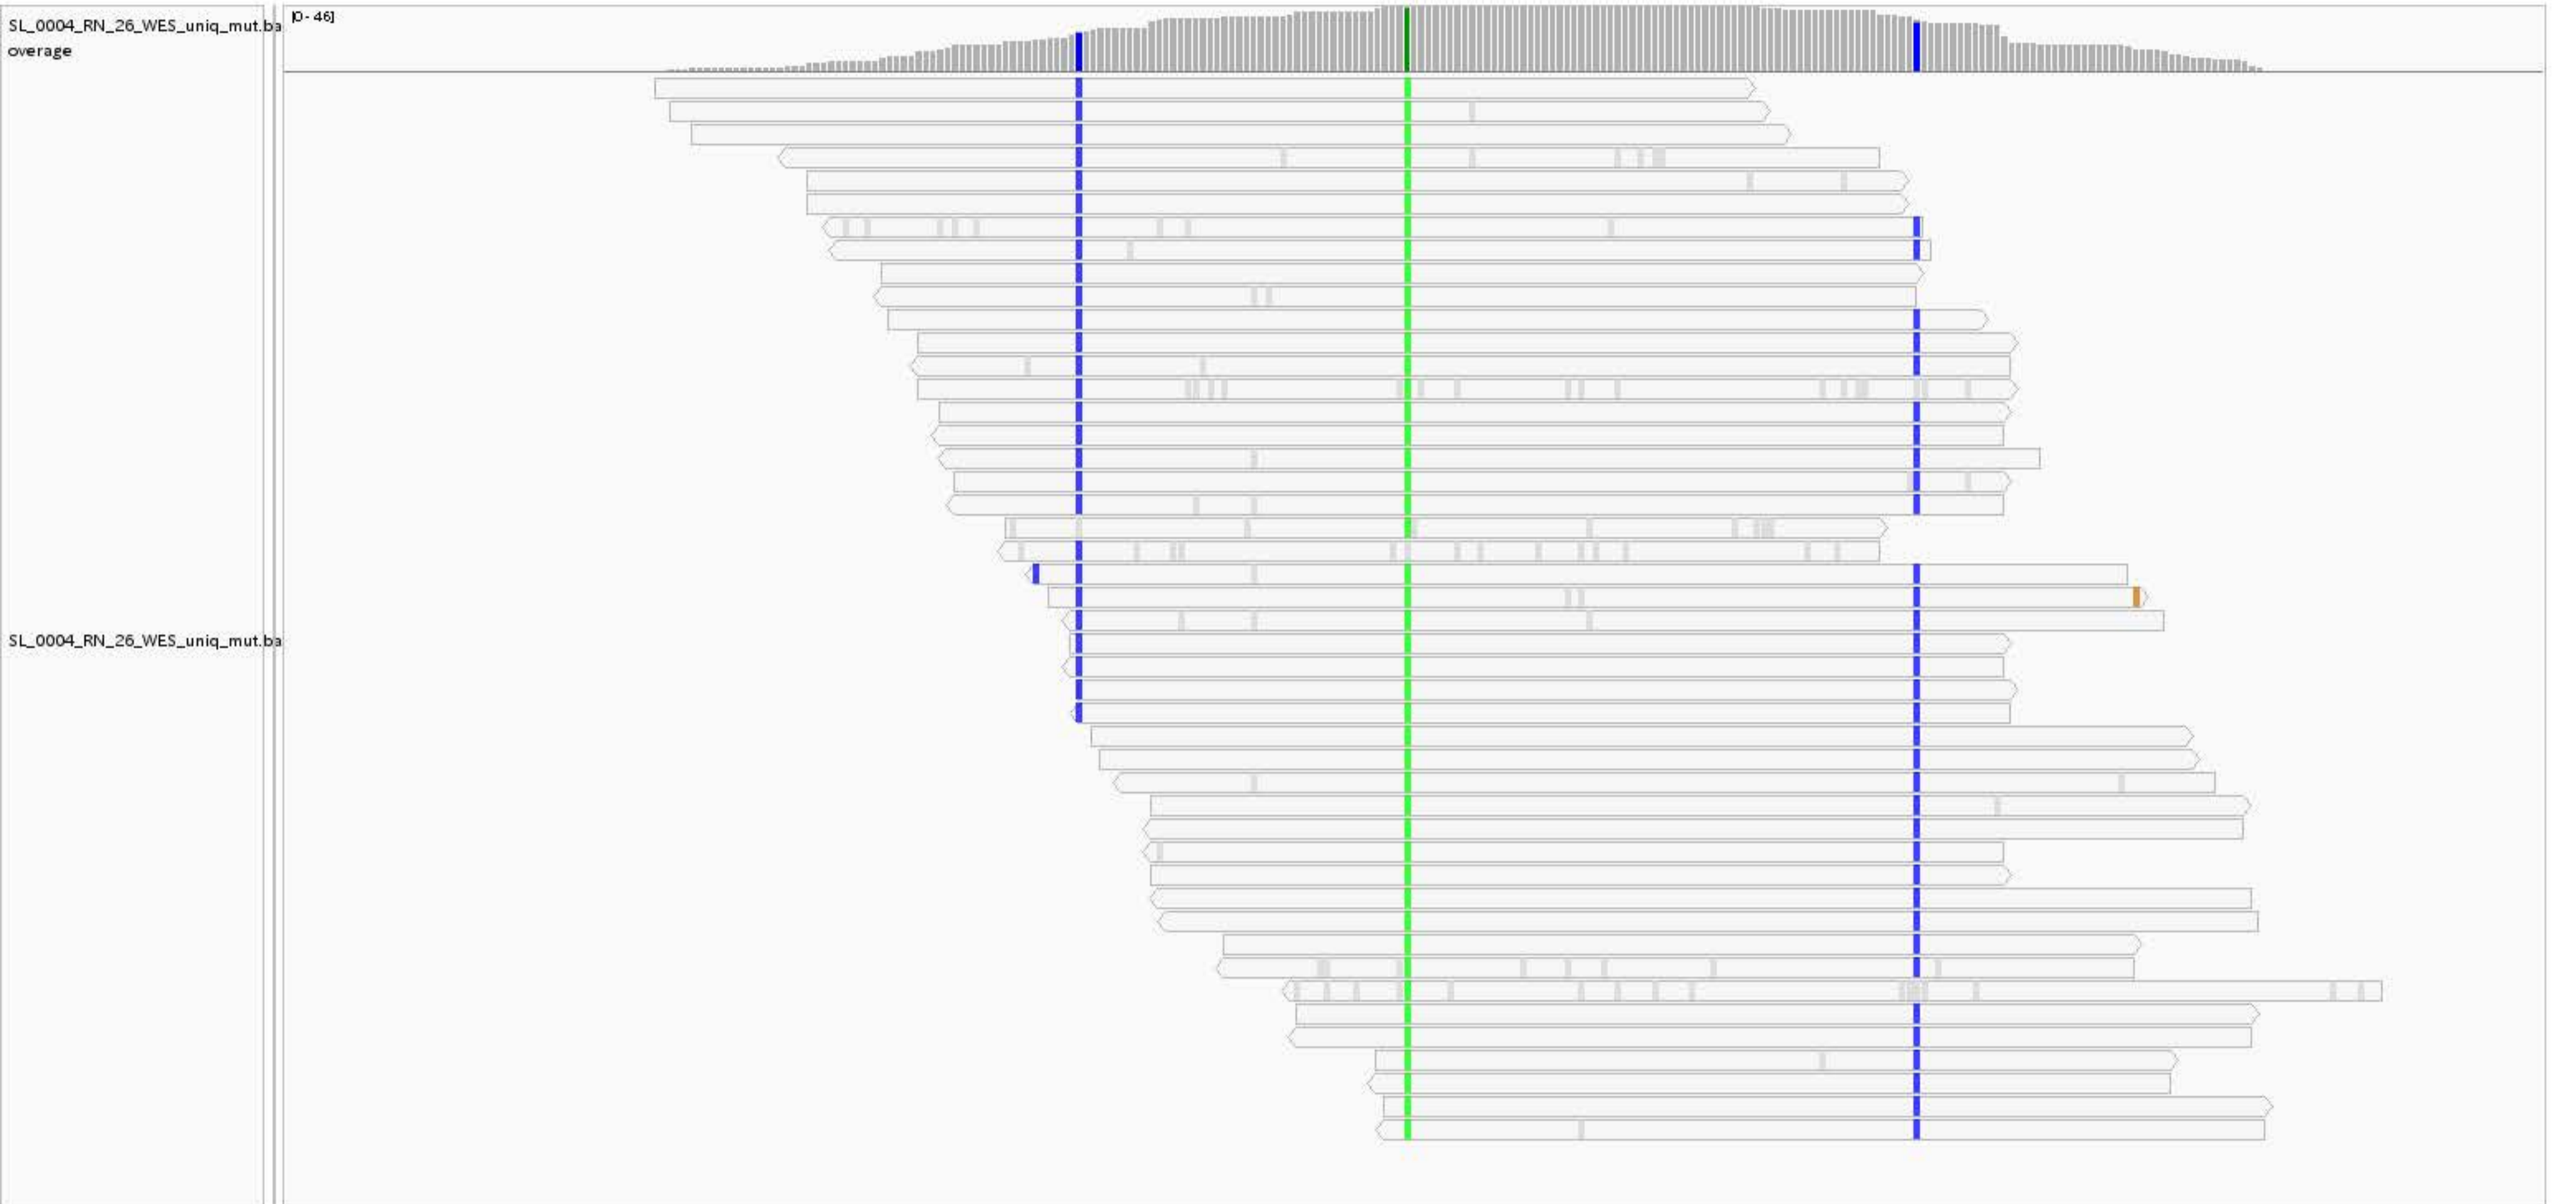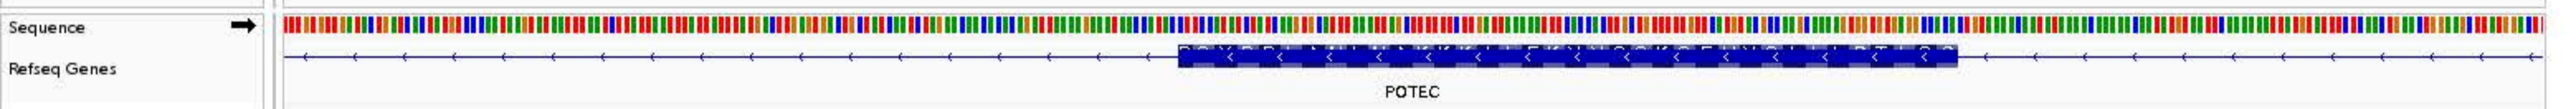



chr22:15,690,413-15,690,722

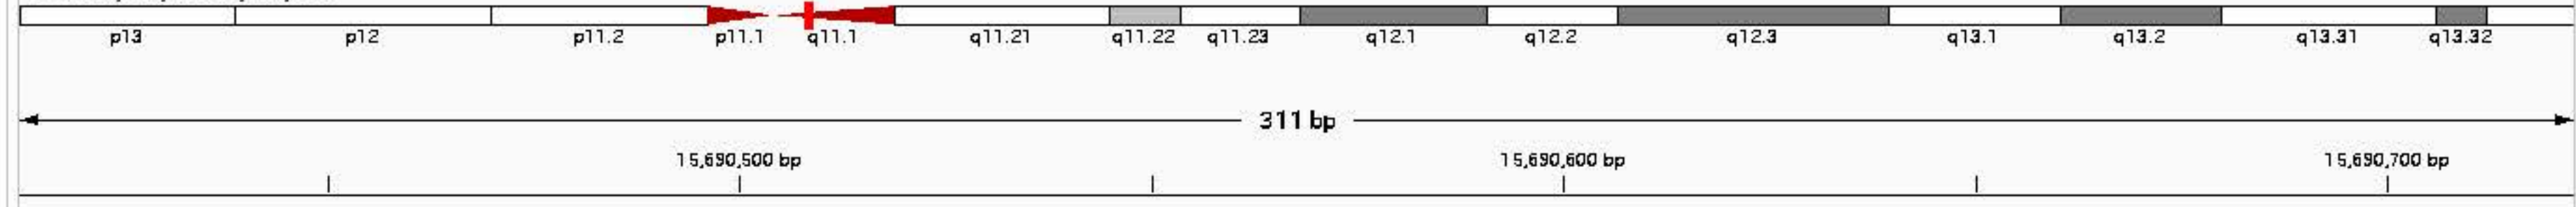

SL\_0007\_RN\_33\_WES\_uniq\_mut.ba  
coverage

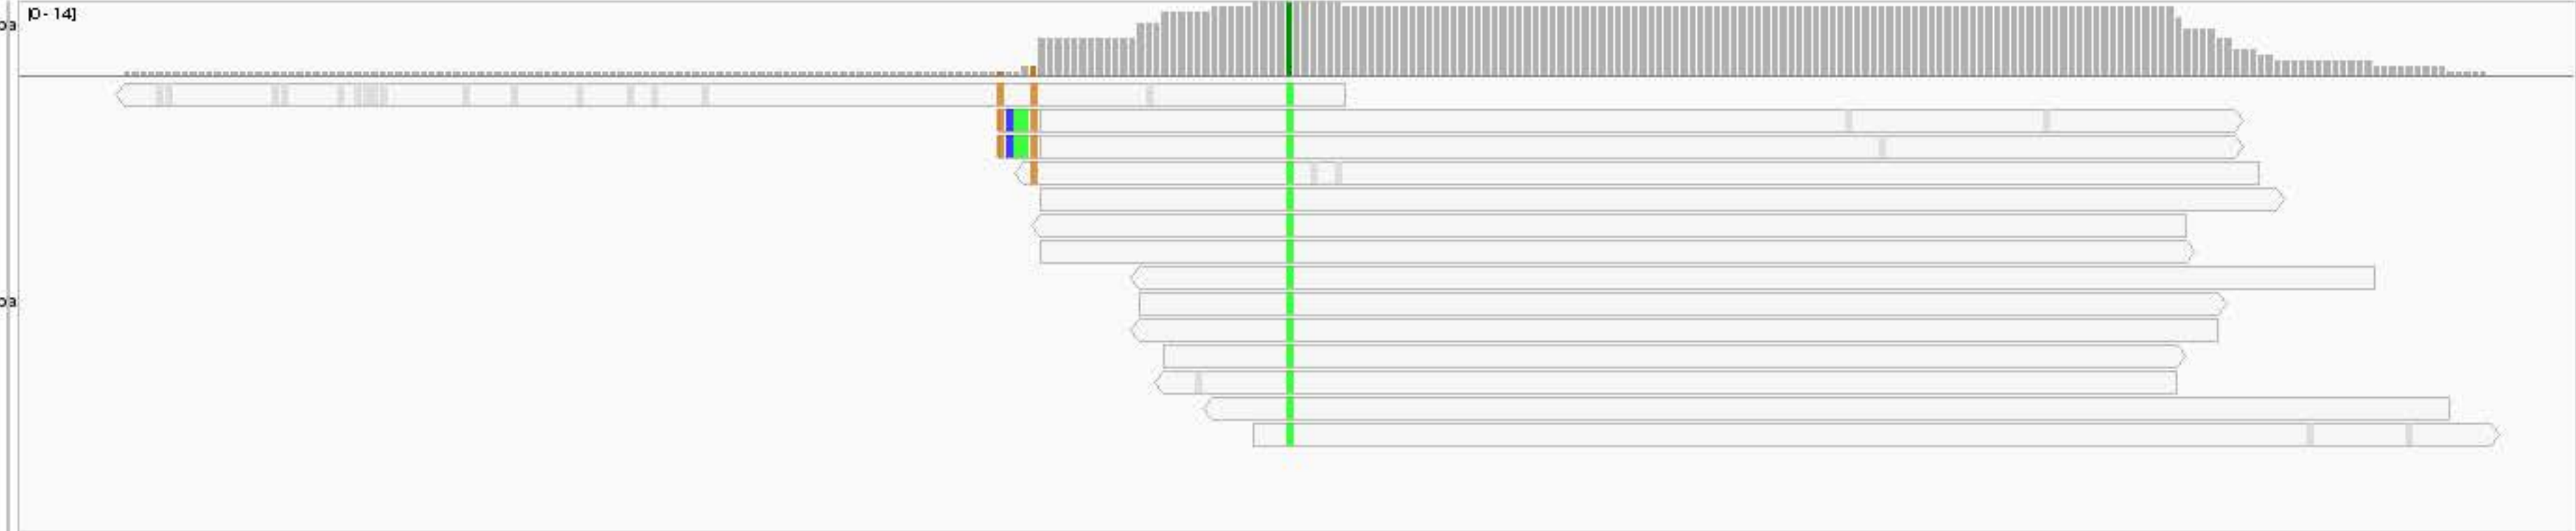

SL\_0007\_RN\_33\_WES\_uniq\_mut.ba

Sequence

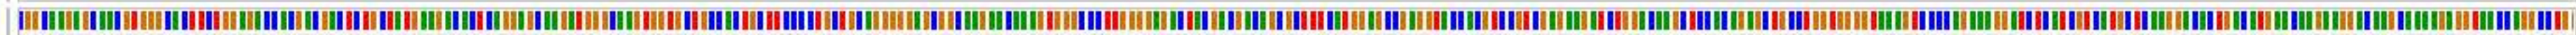

Refseq Genes

GKSNVGTSGDHDDSAMKTLRSKMGKWCCHCFPCCRGSGKNKVGPGDYDDSAFMEPRYHVRREDLDKLRRAAWWGKVPRKDLIVMLKDTDMNKKDKQKR

POTEH

chr7:113,879,477-113,879,786

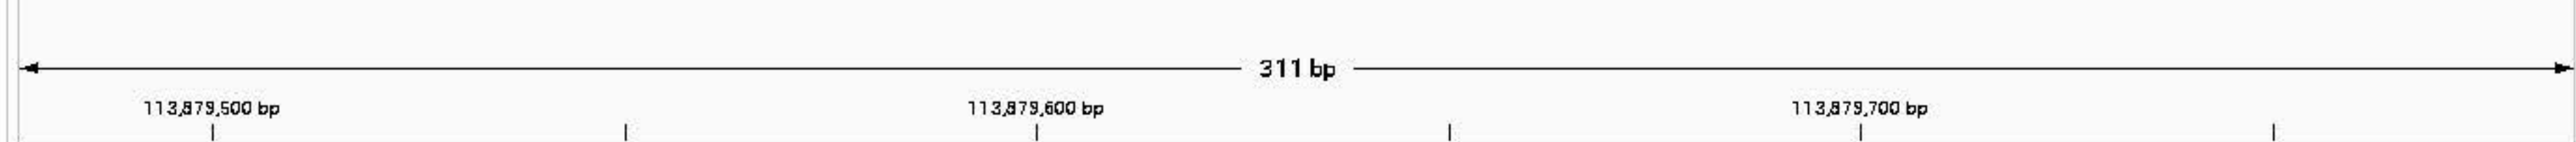

SL\_0015\_RN\_10\_WES\_uniq\_mut.ba  
coverage

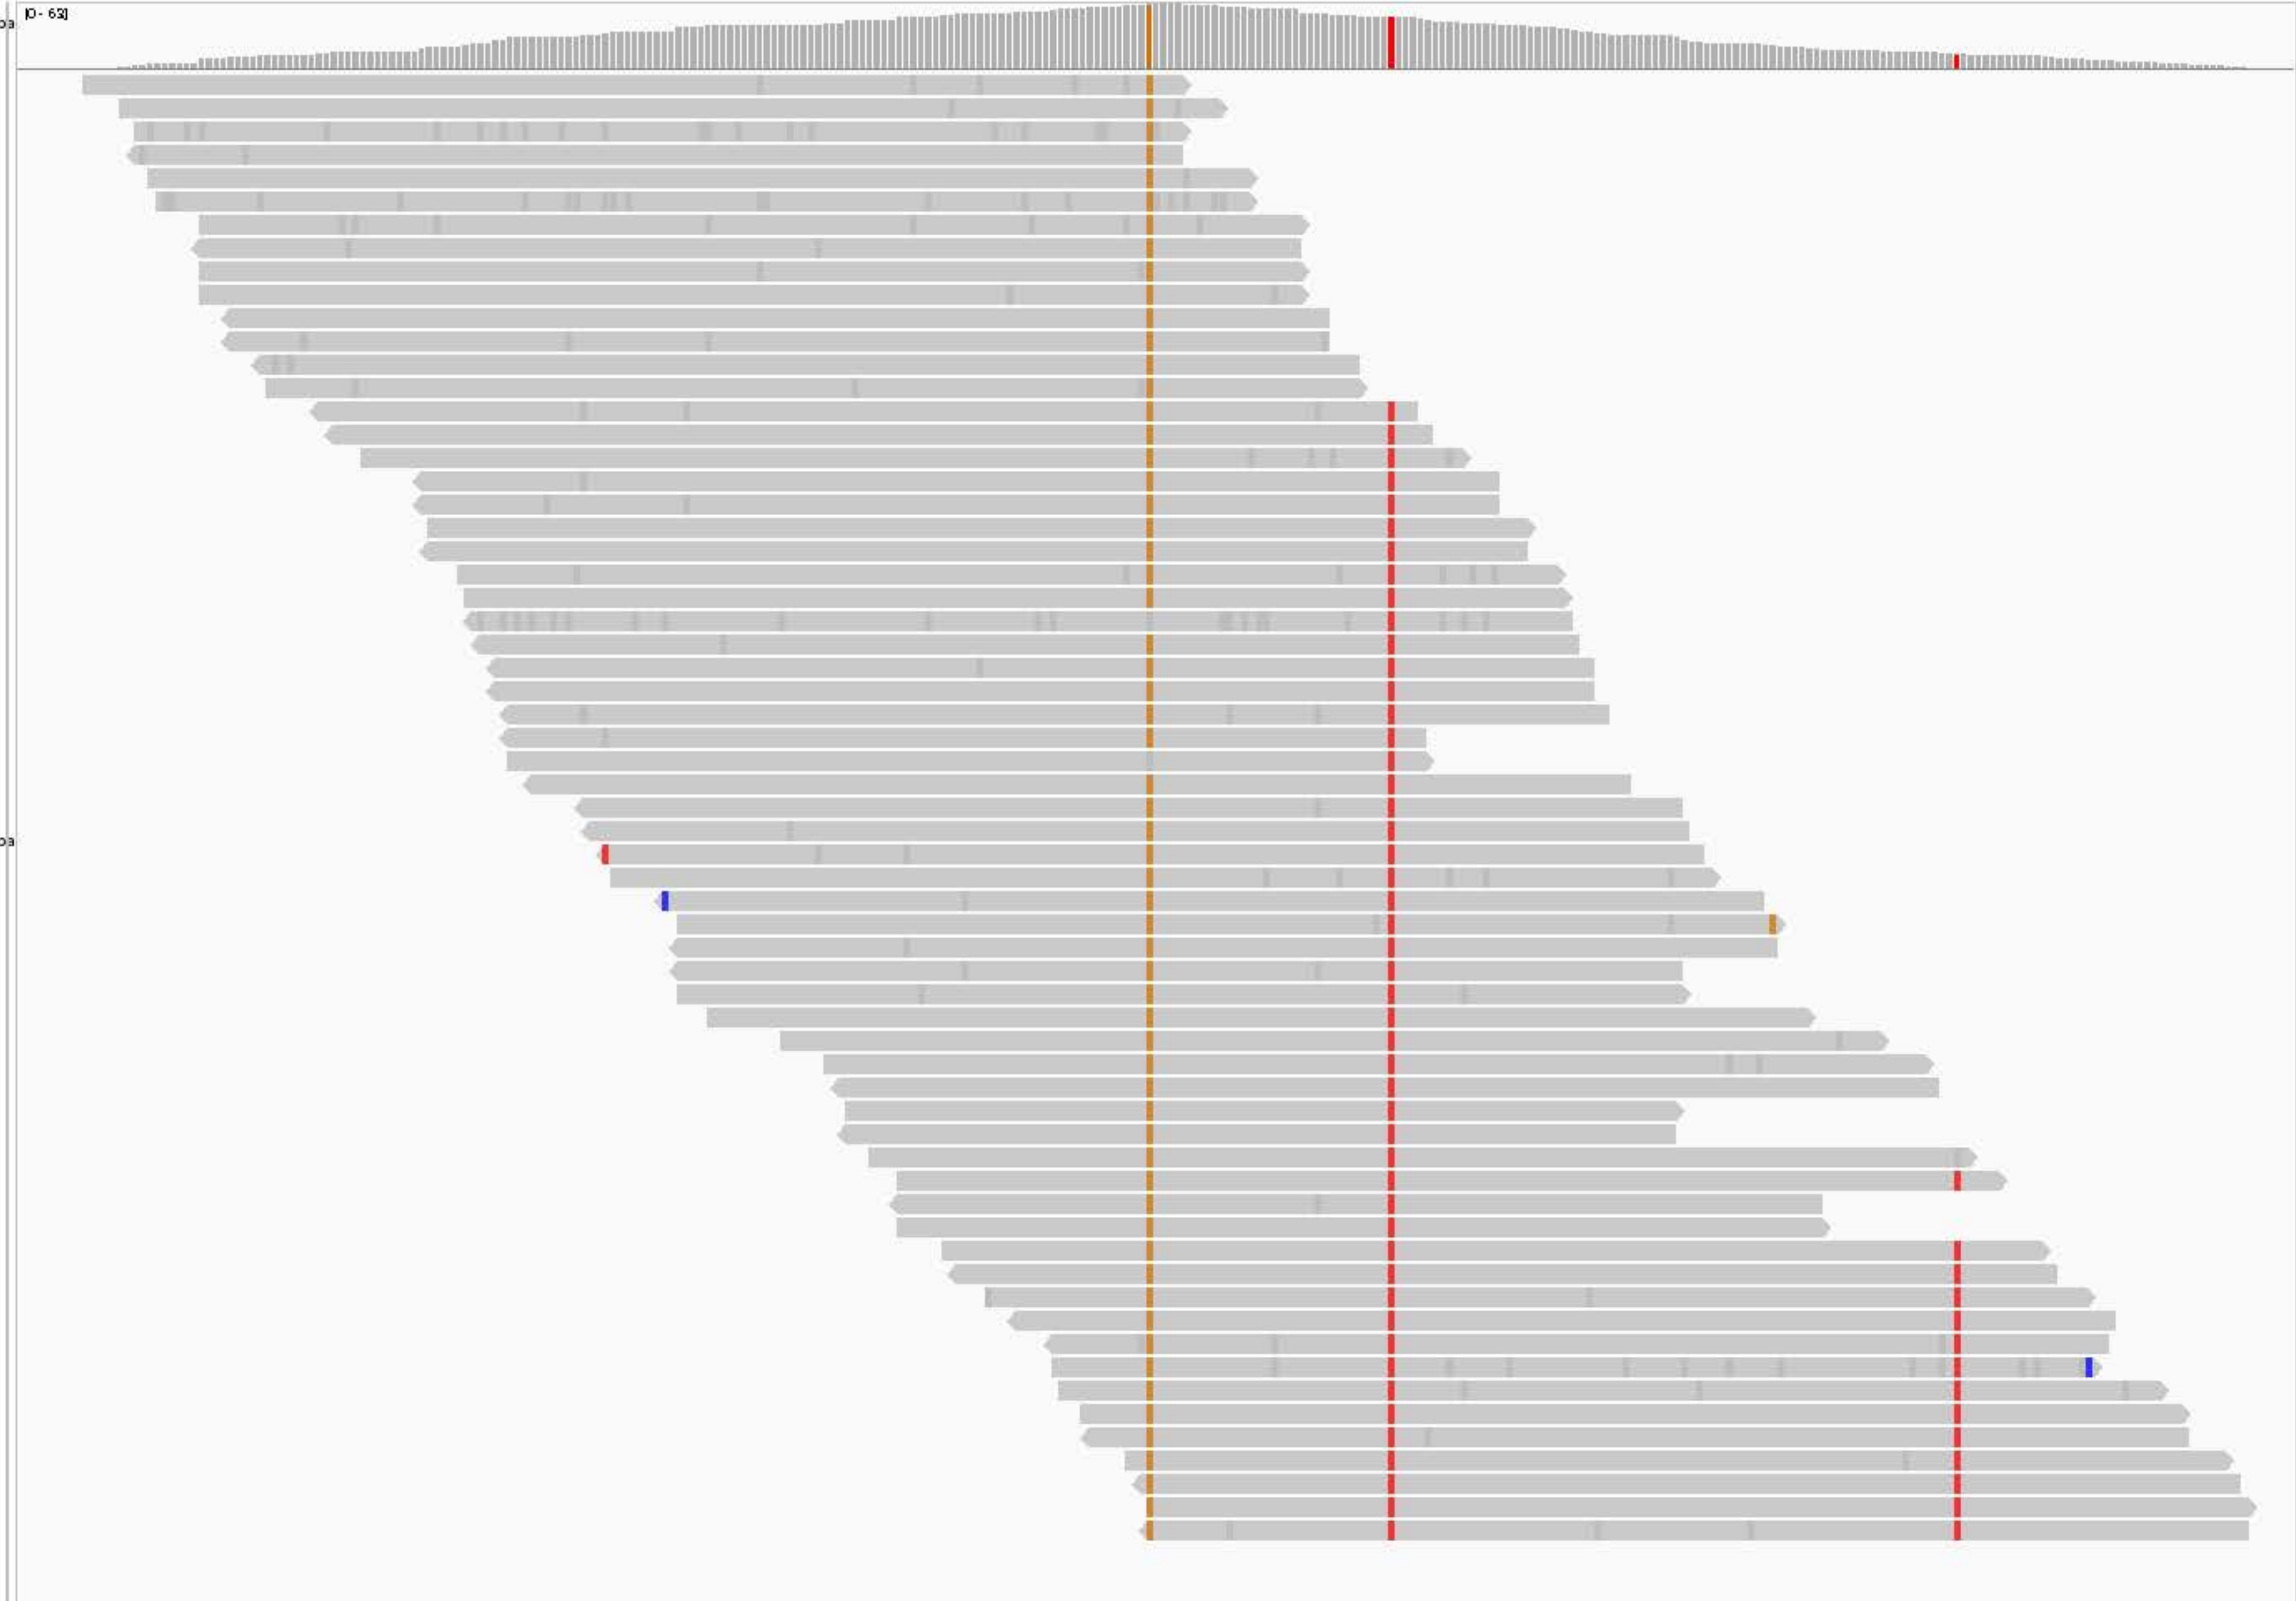

SL\_0015\_RN\_10\_WES\_uniq\_mut.ba

Sequence  
Refseq Genes

L I T Q F N K R Q K E N V G L Y I R Q E E D D K G N G Y D E K S S G E E T S E K L C A S T D S H F D R R L C G L D K V E I N K A G G E H K K N L N G A M L Q D S S P C P I Q V T G N G H A P N A N D D L V E

PPP1R3A

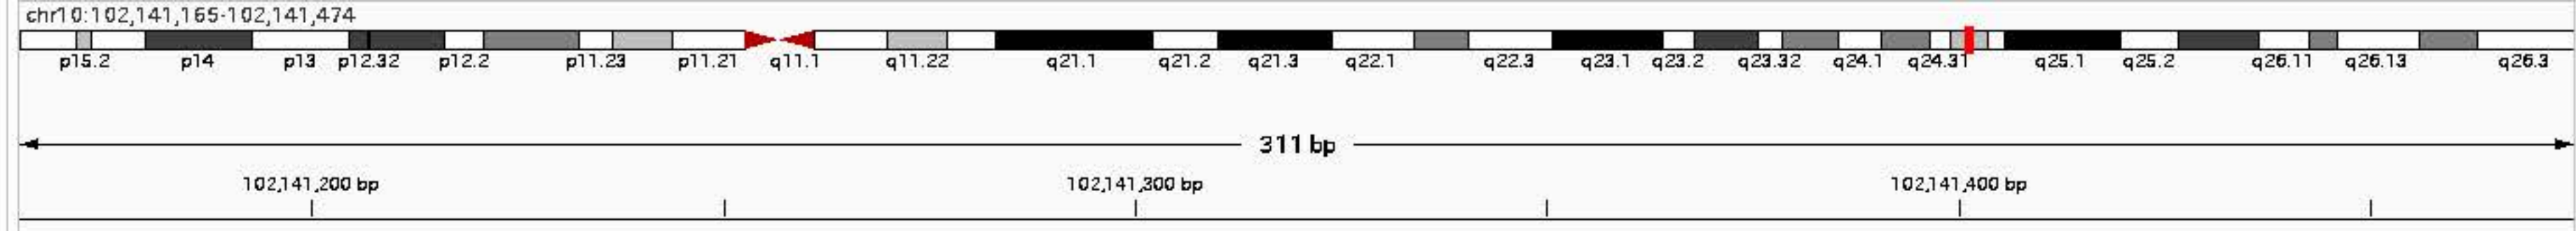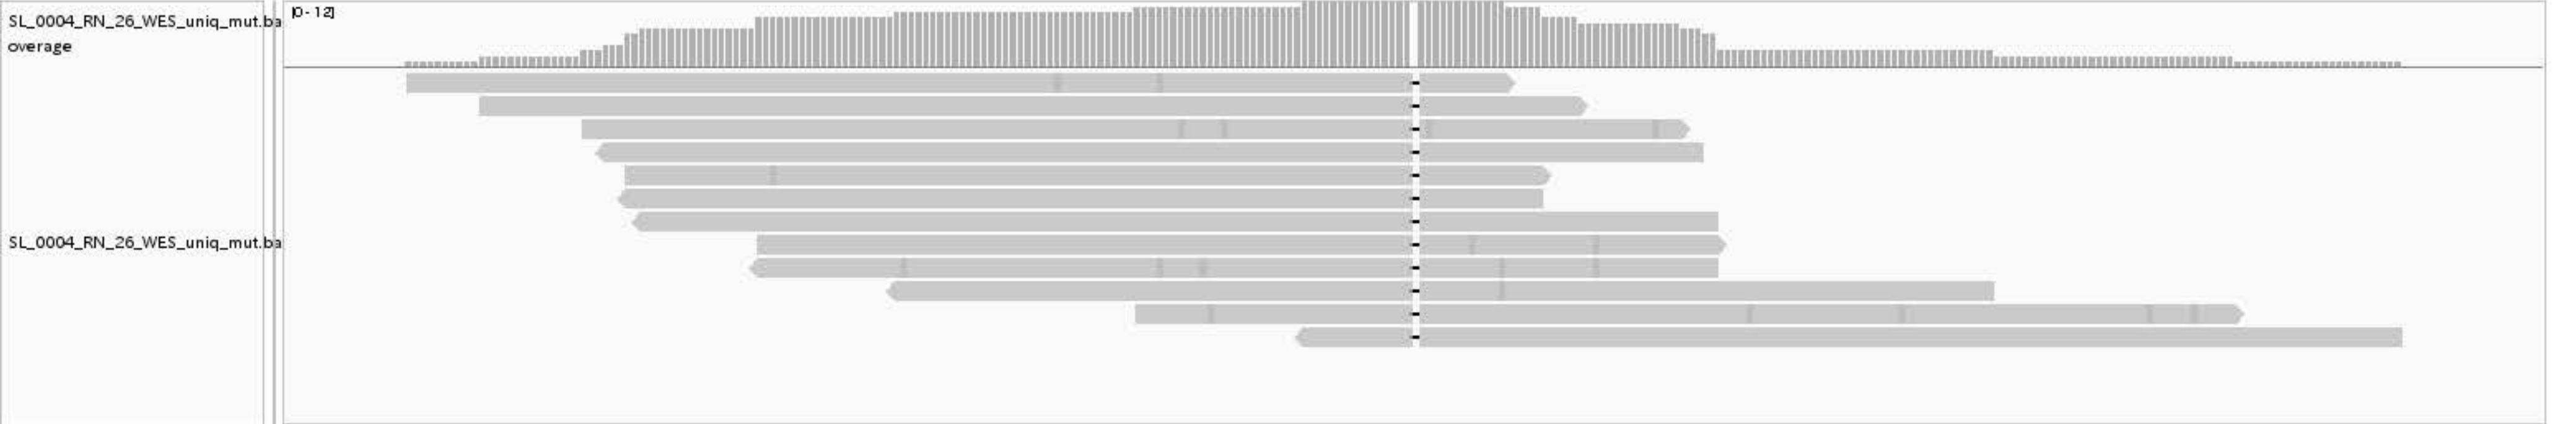

Sequence →

Refseq Genes

LGMPPSLPPPLQPPSLPLSMGPVLPDPFTHYAPLPSWPCYPHVSPSGYPCLPPPPTVPLVSGTPGAYAVPPTCSVPWAPPPAPVSPYSSTCTYGPLGWGPGPQ

PPRC1



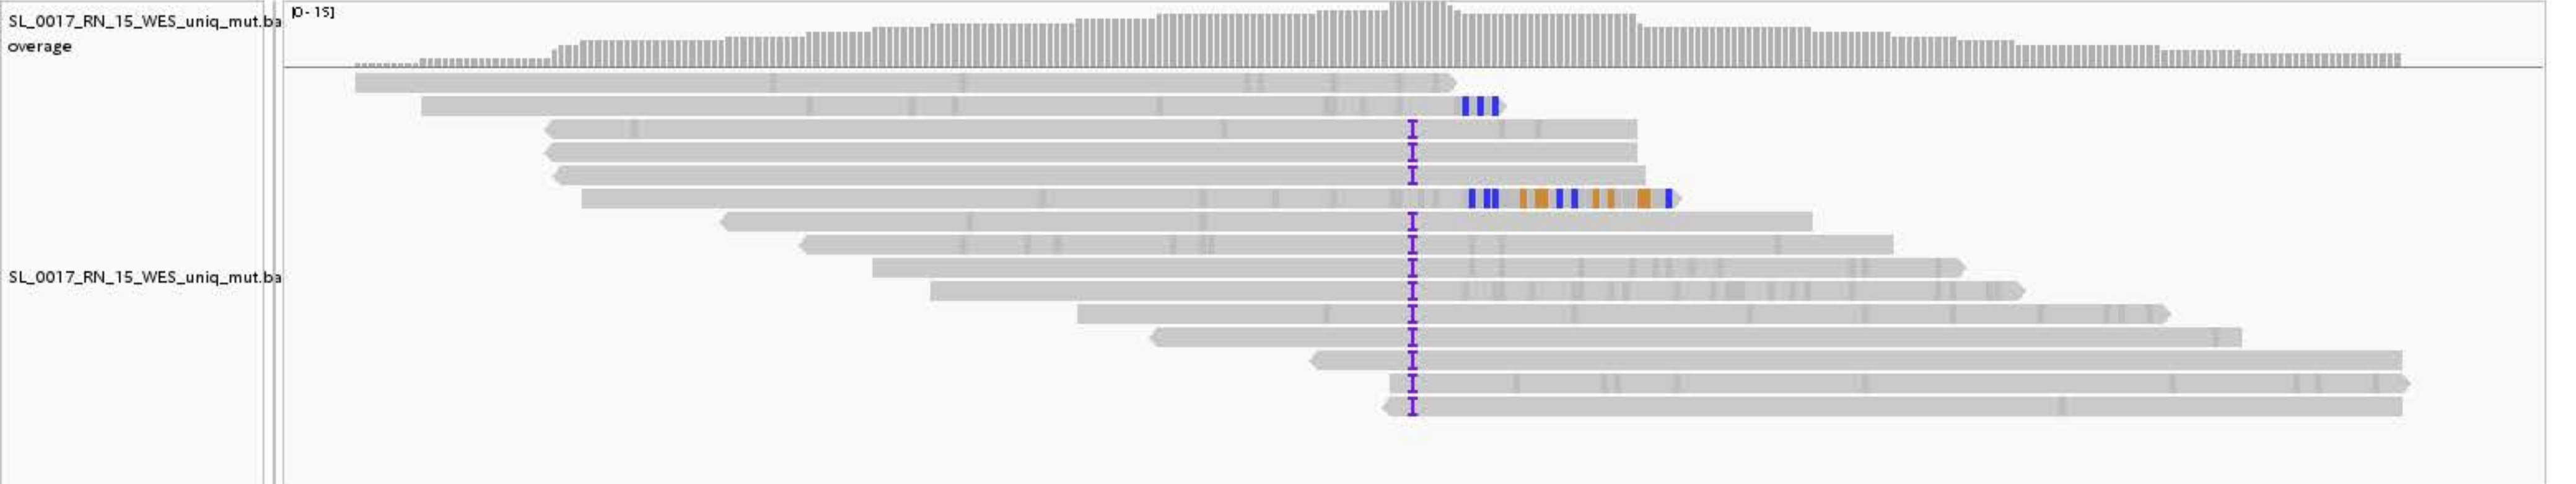

Sequence →

Refseq Genes

LGMPPSLPPPLQPPSLPLSMGPVLPDPFTHYAPLPSWPCYPHVSPSGYPCLPPPPTVPLVSGTPGAYAVPPTCSVPWAPPPAPVSPYSSTCTYGPLGWGPGPQ

PPRC1

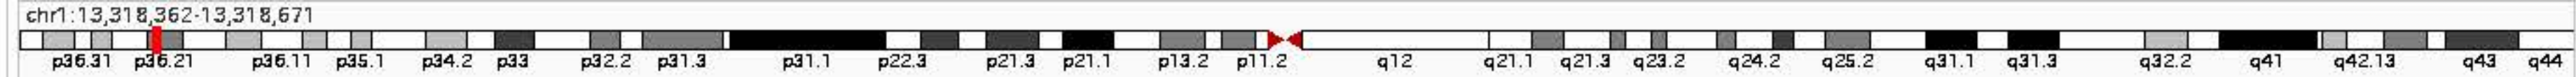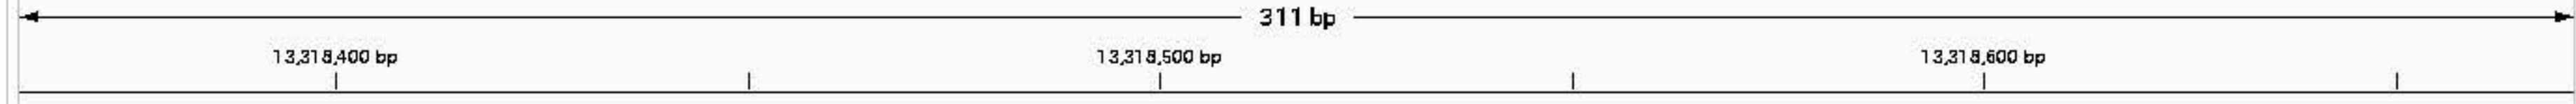

SL\_0004\_RN\_26\_WES\_uniq\_mut.ba  
overage

SL\_0004\_RN\_26\_WES\_uniq\_mut.ba

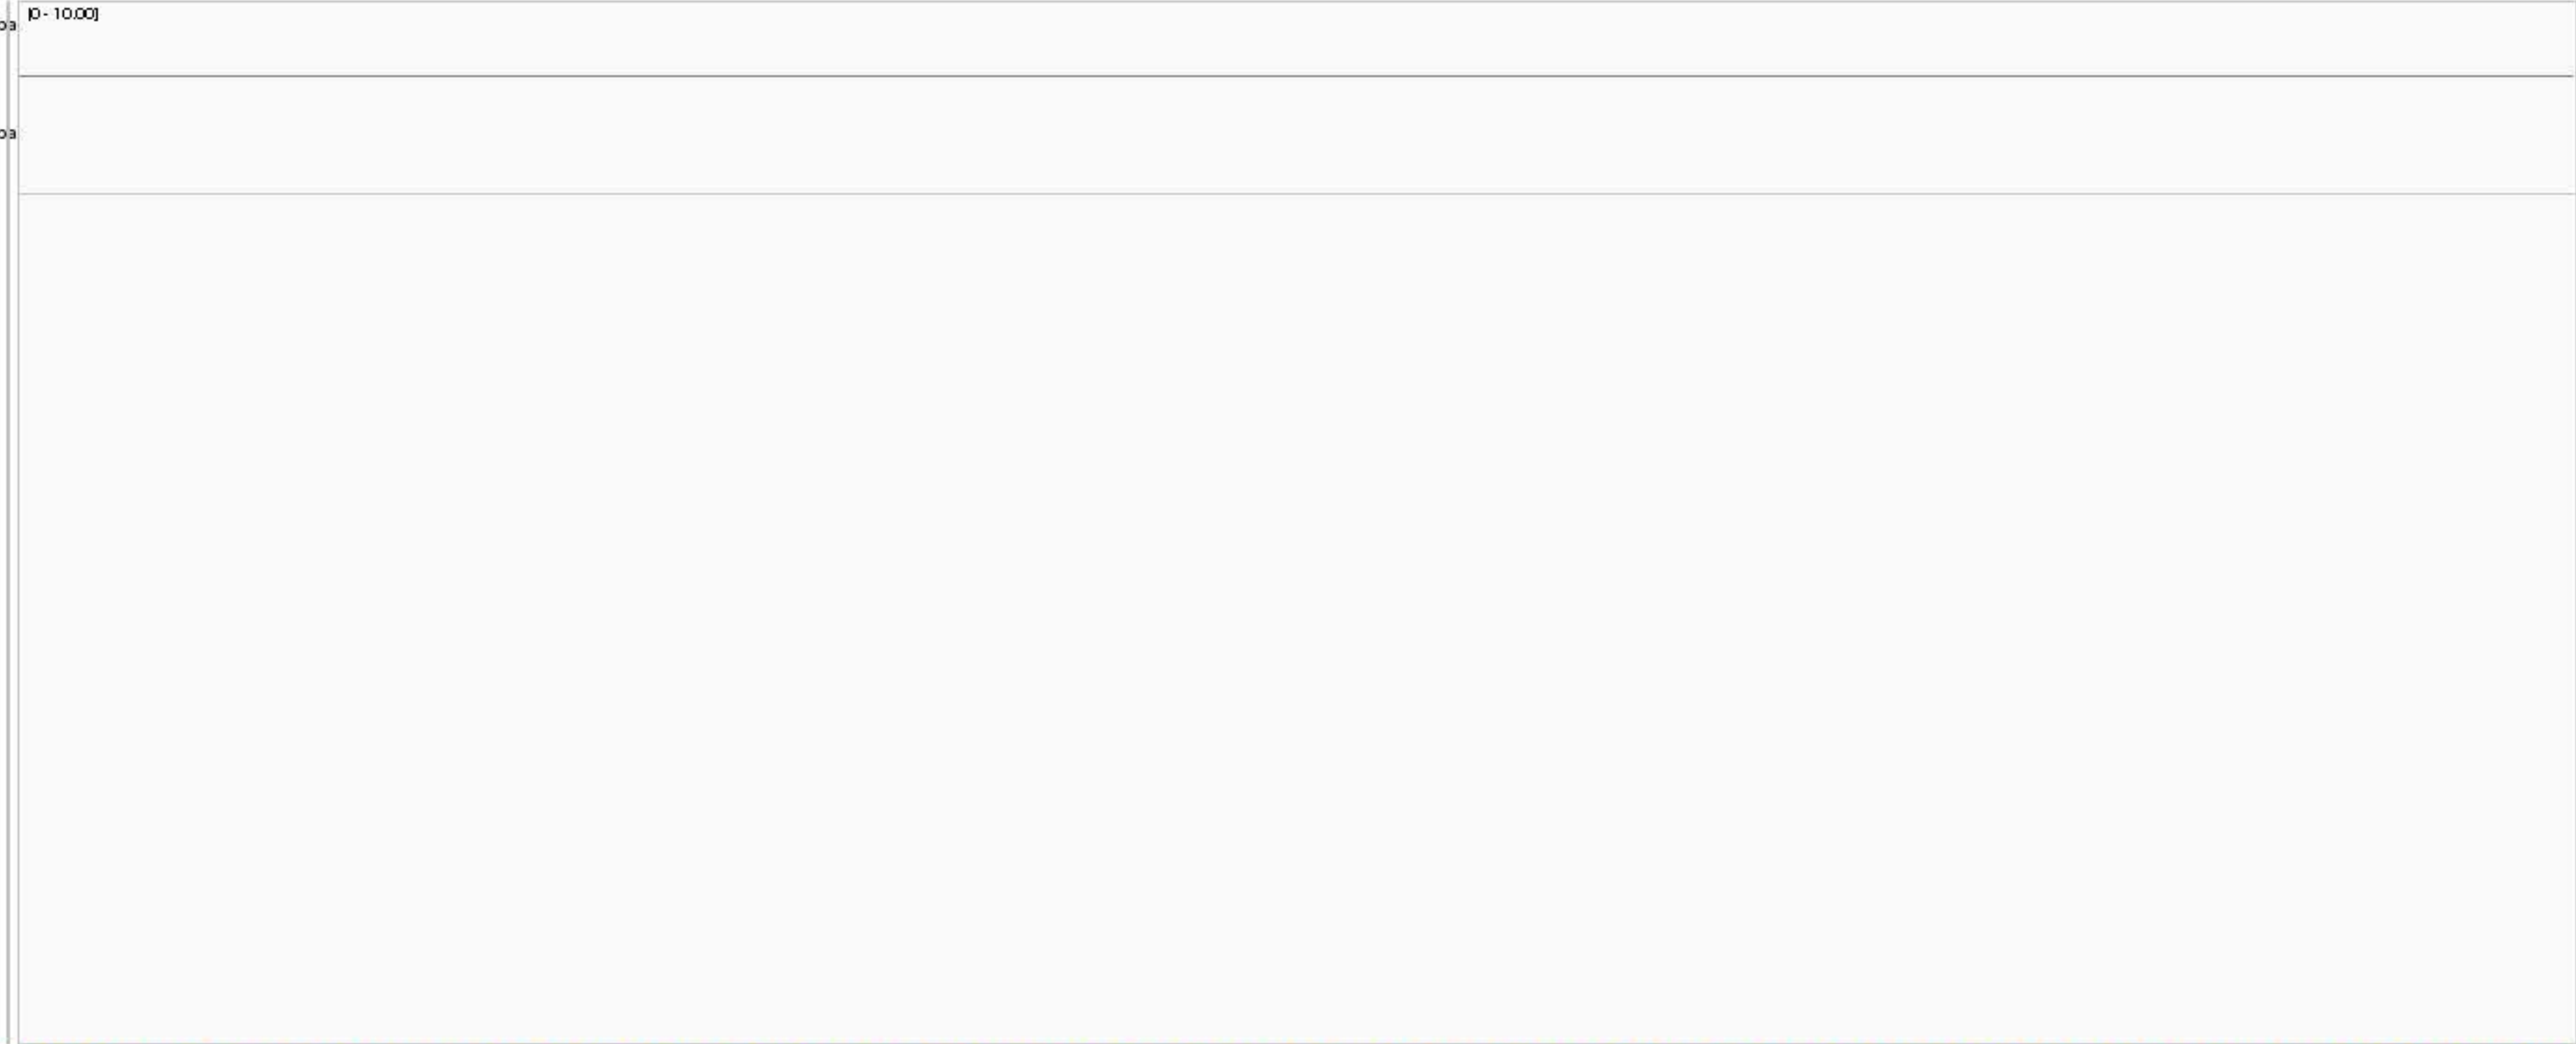

Sequence →

Refseq Genes

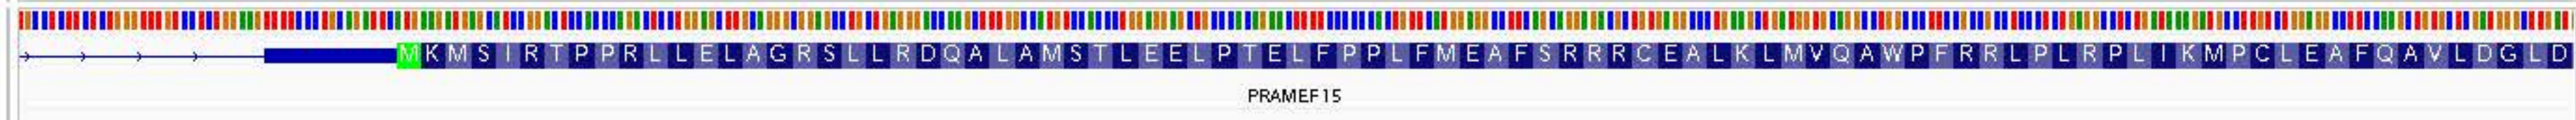

chr1:13,321,570-13,321,879  
p36.31 p36.21 p36.11 p35.1 p34.2 p33 p32.2 p31.3 p31.1 p22.3 p21.3 p21.1 p13.2 p11.2 q12 q21.1 q21.3 q23.2 q24.2 q25.2 q31.1 q31.3 q32.2 q41 q42.13 q43 q44

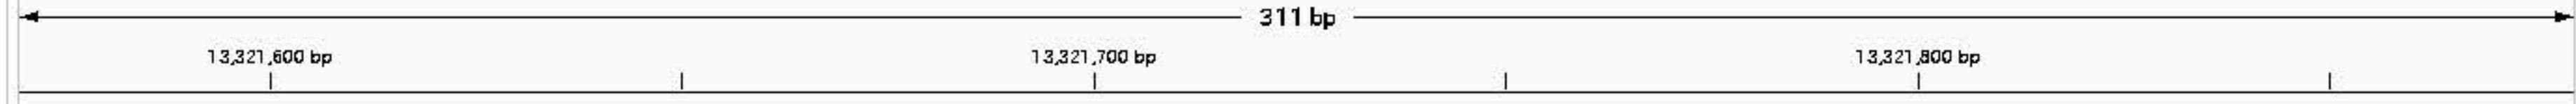

SL\_0004\_RN\_05\_WES\_uniq\_mut.ba  
overage  
SL\_0004\_RN\_05\_WES\_uniq\_mut.ba

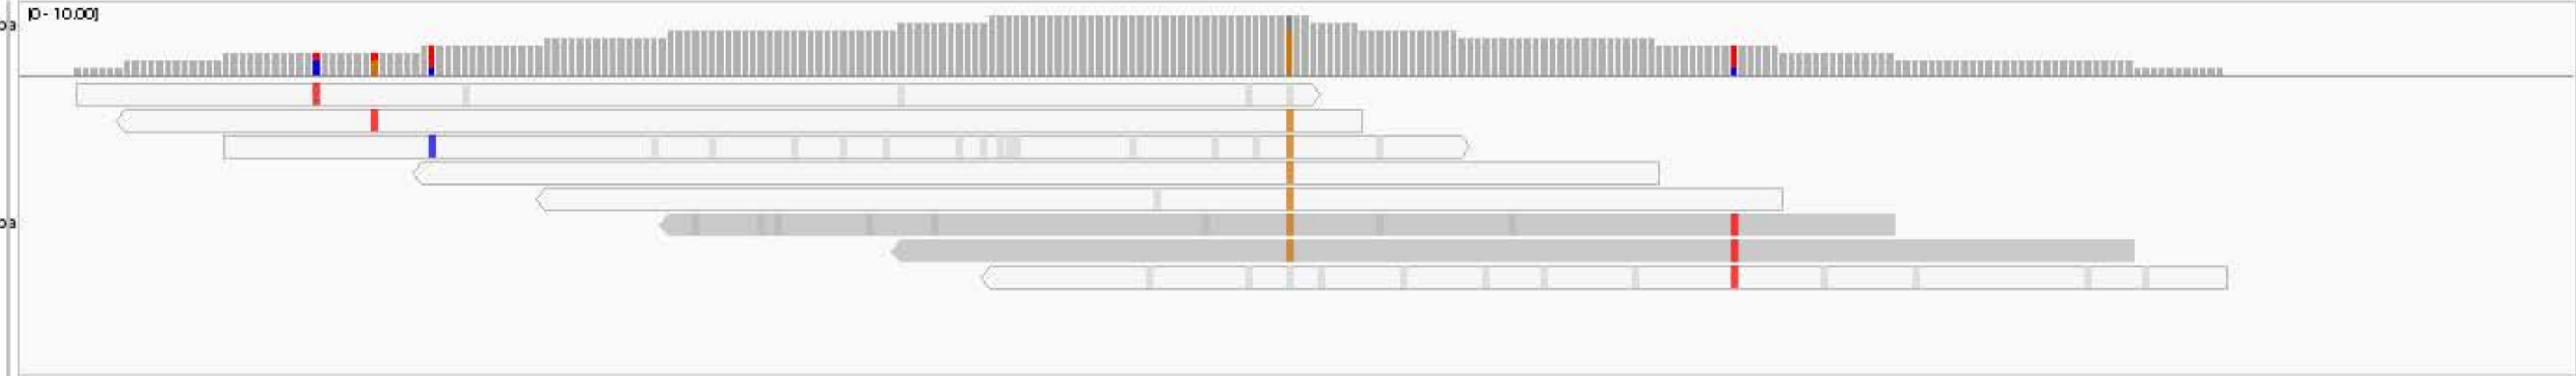

Sequence  
Refseq Genes

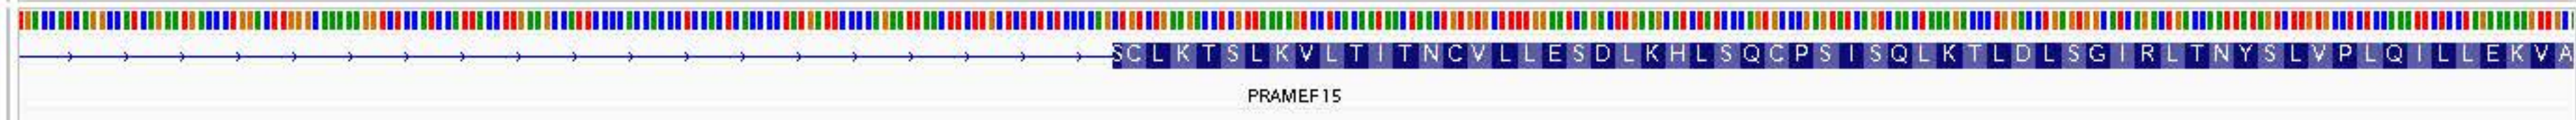



chr1:3,385,053-3,385,362

p36.31 p36.21 p36.11 p35.1 p34.2 p33 p32.2 p31.3 p31.1 p22.3 p21.3 p21.1 p13.2 p11.2 q12 q21.1 q21.3 q23.2 q24.2 q25.2 q31.1 q31.3 q32.2 q41 q42.13 q43 q44

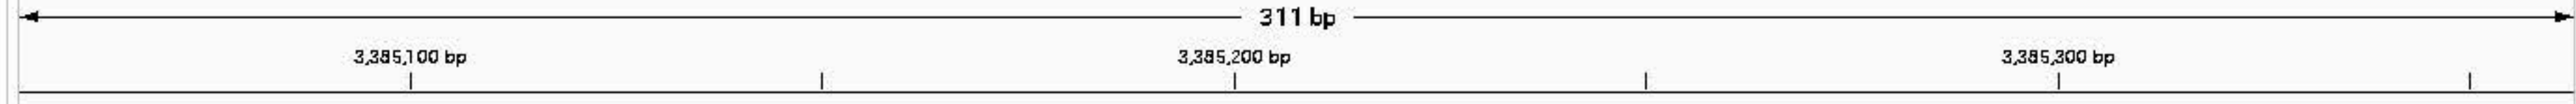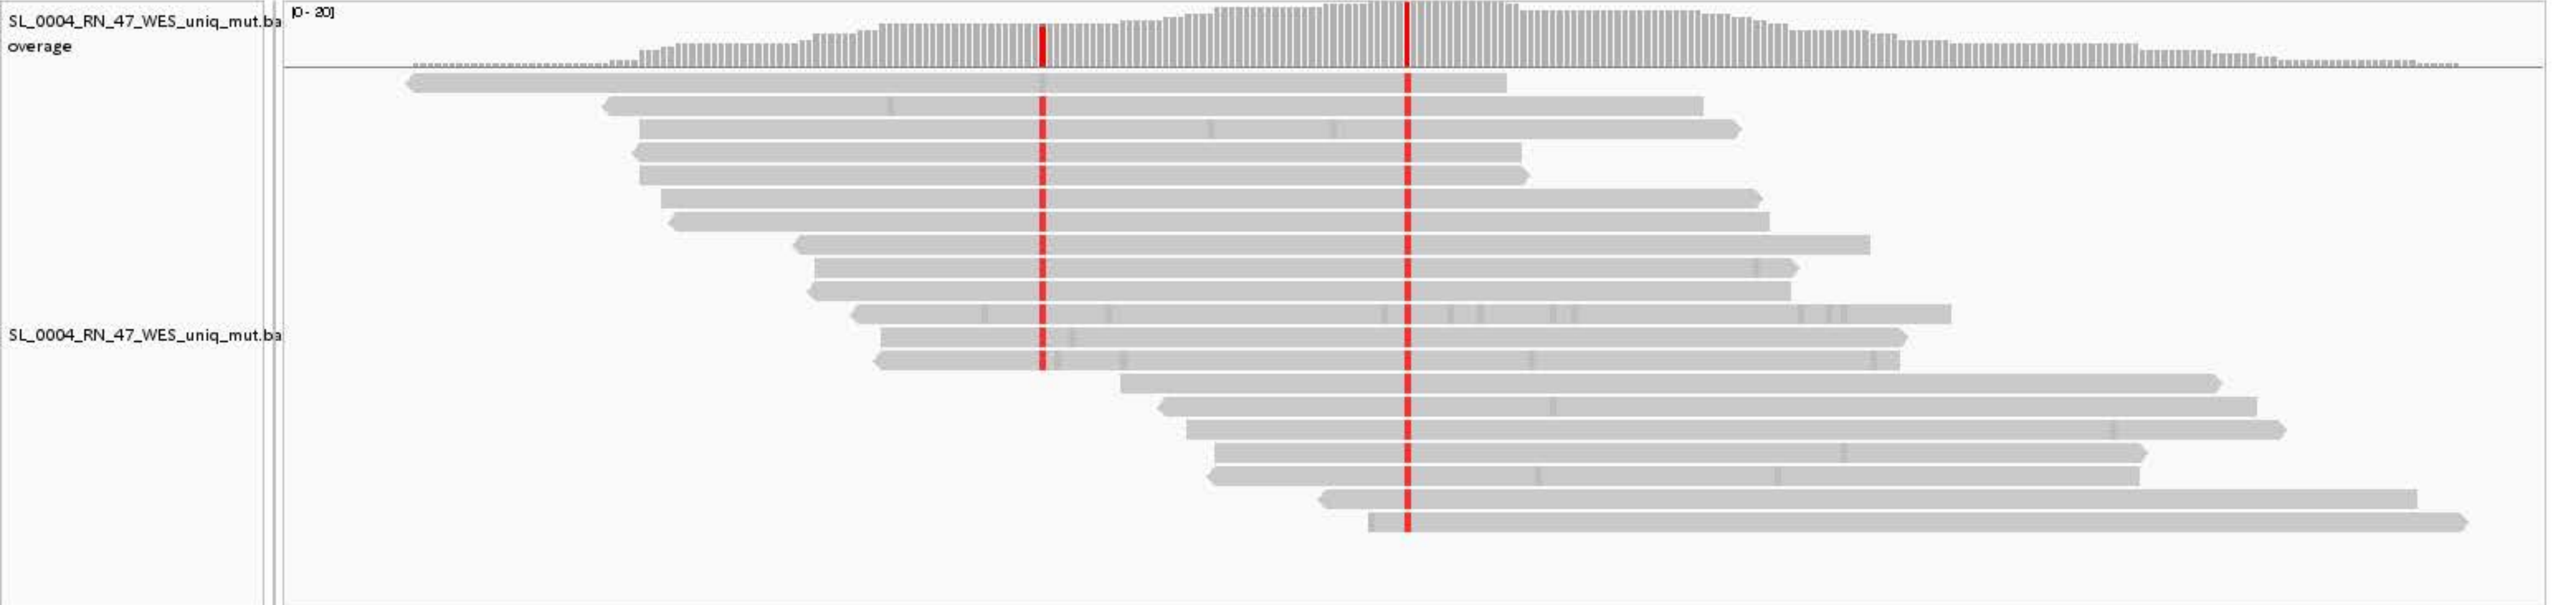

Sequence →

Refseq Genes

ISEDLGSEKFCVDANQAGAGSWLKYIRVACSCDDQNLTMCISEQ

PRDM16

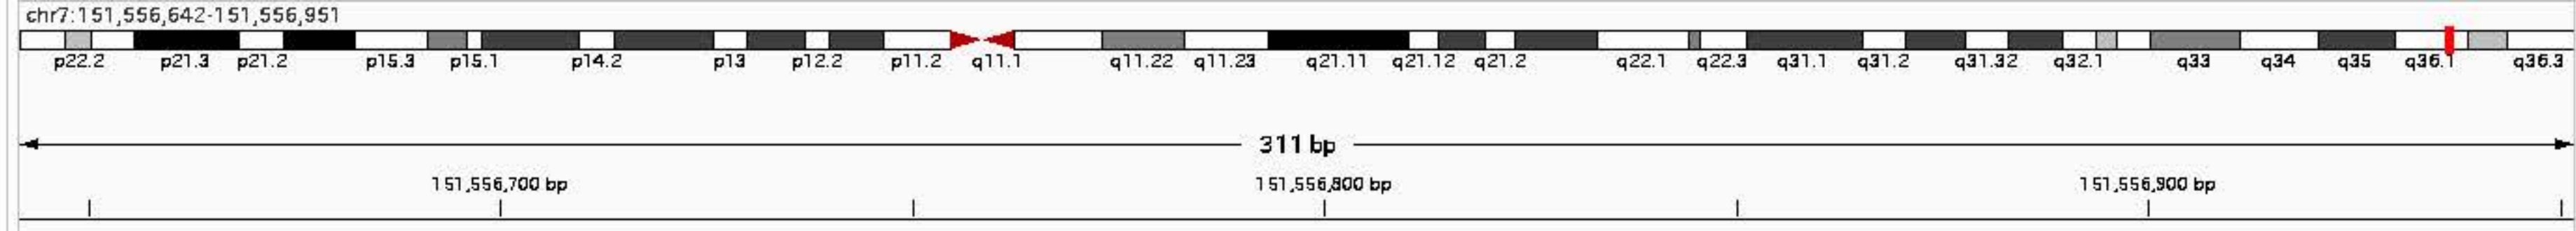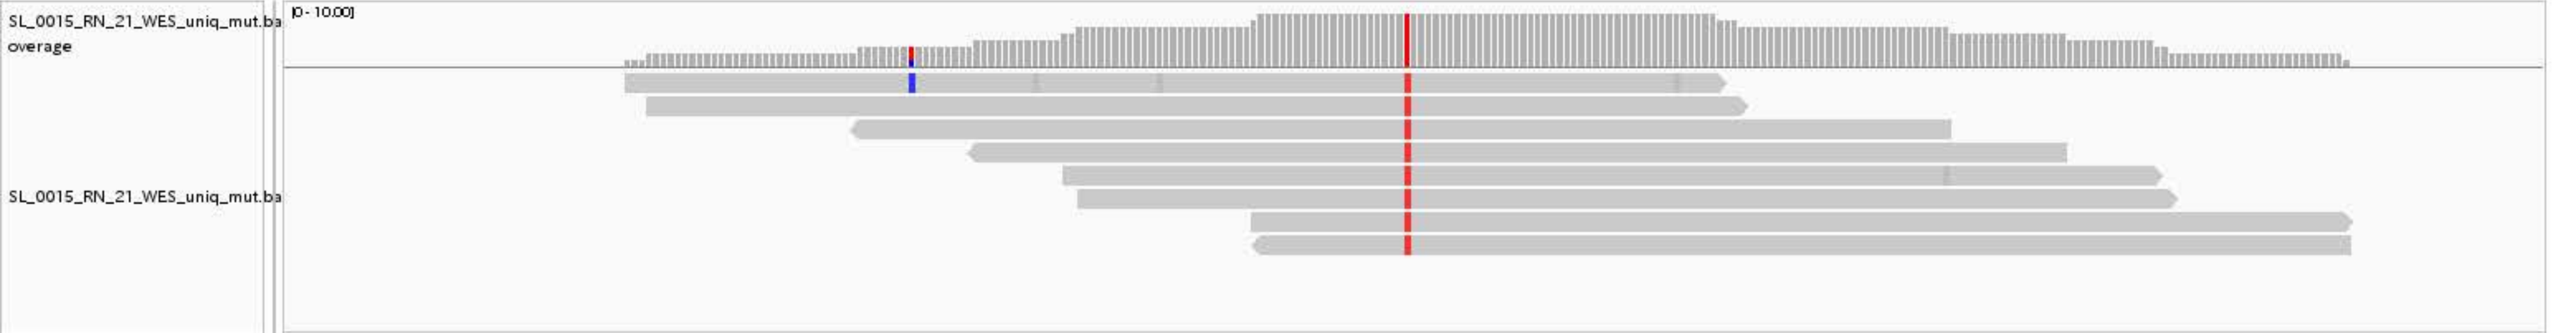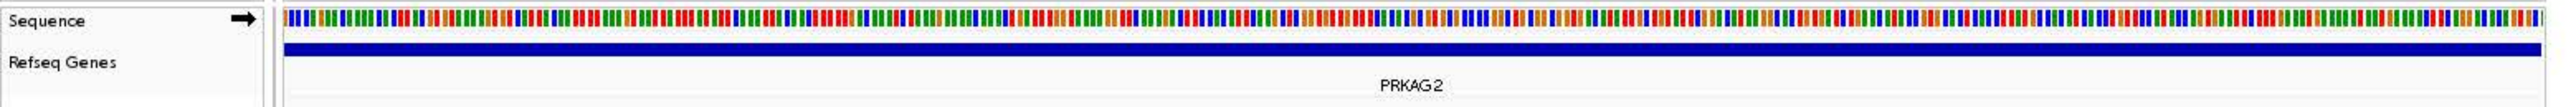

chr4:15,968,517-15,968,826

p16.2 p15.33 p15.31 p15.1 p14 p13 p11 q12 q13.1 q13.2 q21.1 q21.22 q22.1 q22.3 q24 q25 q26 q27 q28.2 q28.3 q31.1 q31.22 q32.1 q32.3 q34.1 q34.3 q35.2

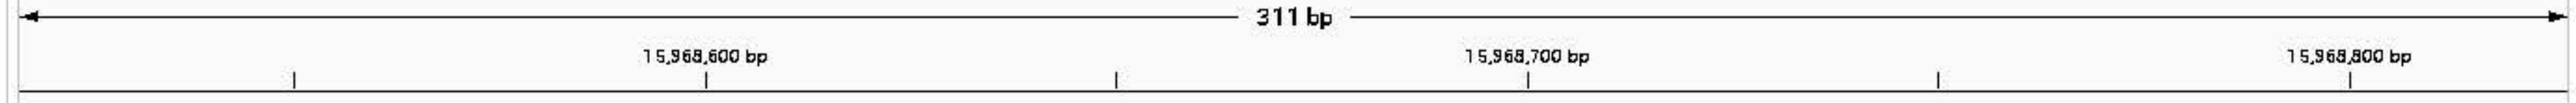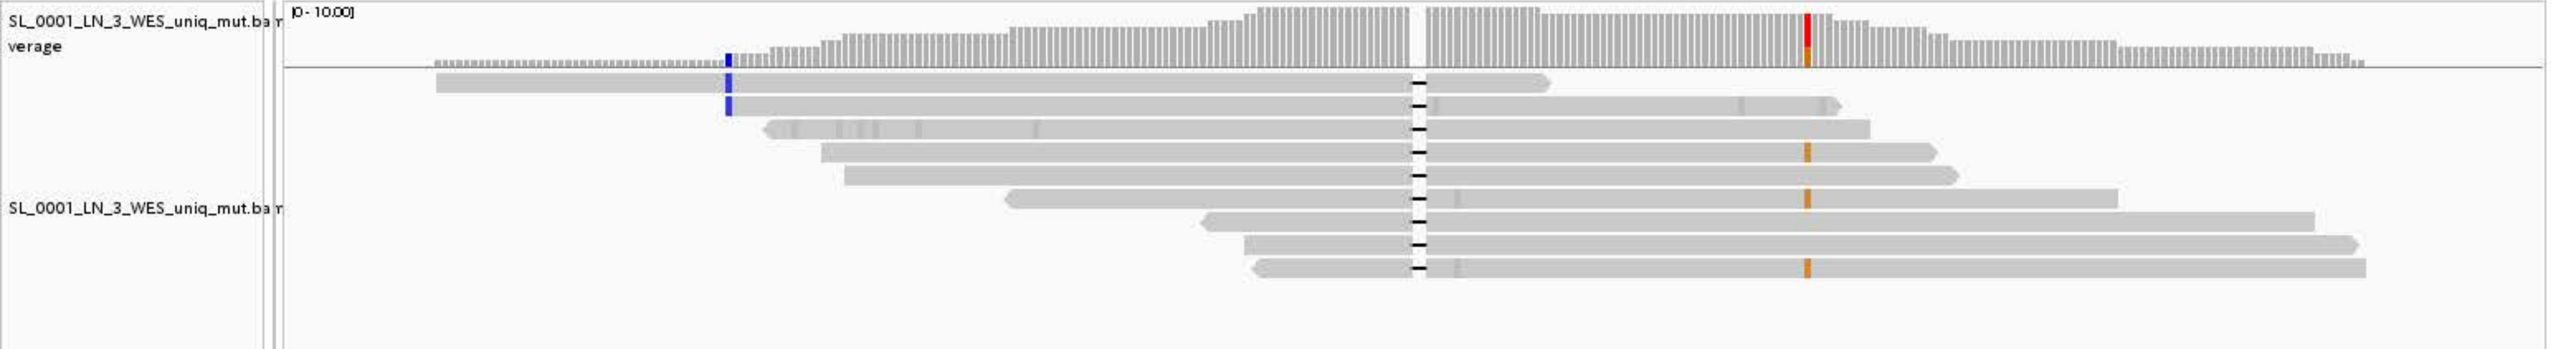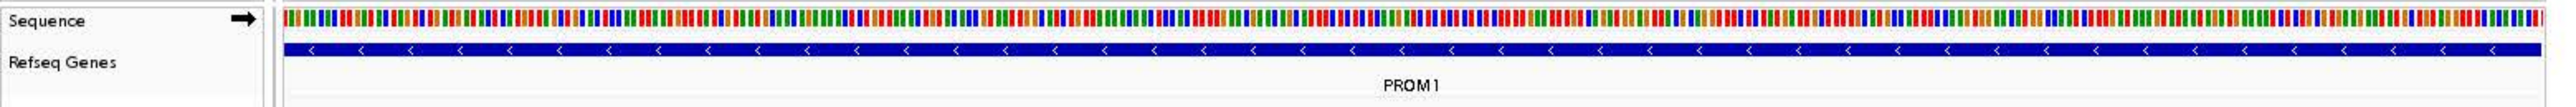



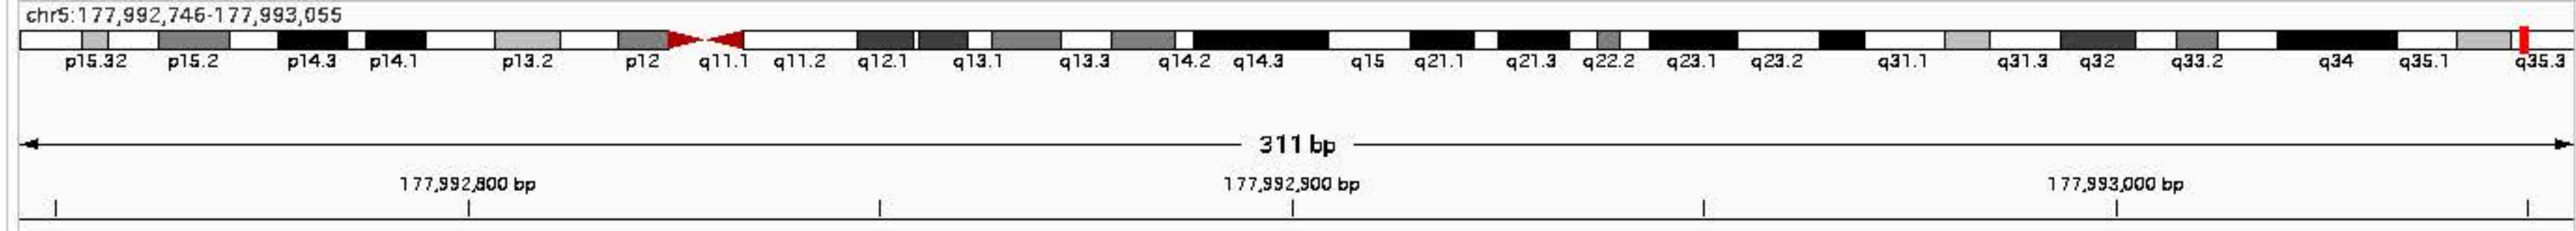

SL\_0001\_LN\_3\_WES\_uniq\_mut.ba  
verage

SL\_0001\_LN\_3\_WES\_uniq\_mut.ba

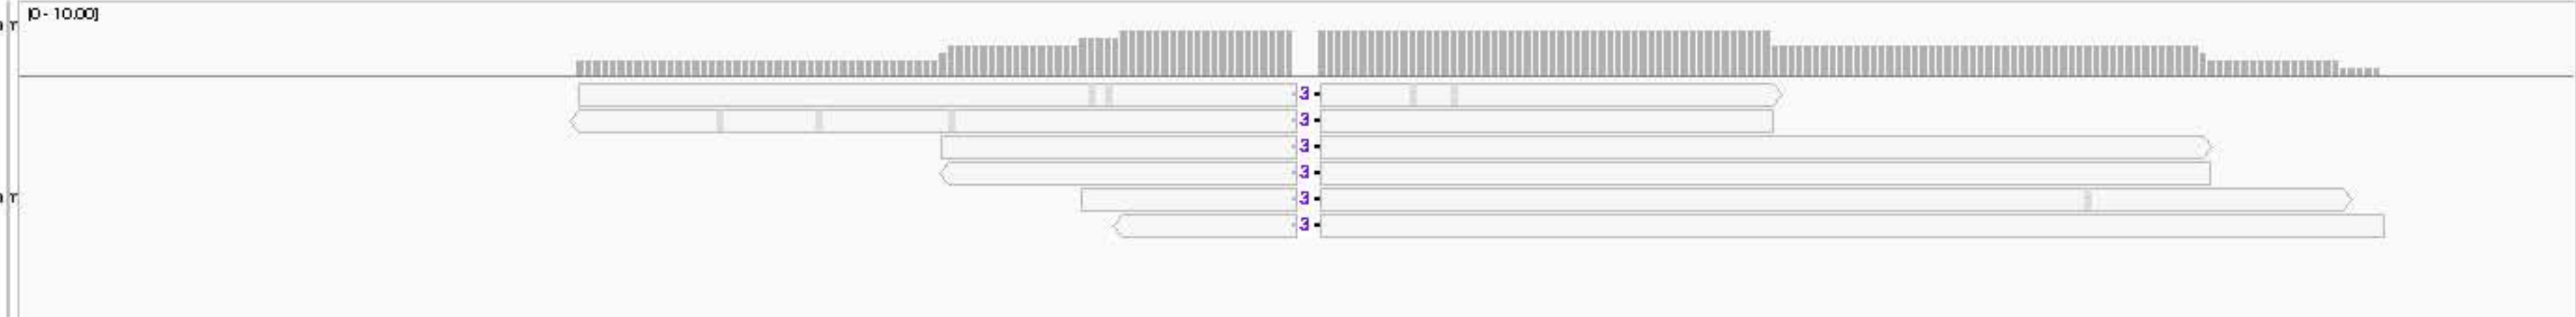

Sequence →

Refseq Genes

LMPPPPCPLHGAPAPHLTPYWDESQHSLAFAGGTSPQSPLAHSYPHPFCTVPPPPAAYSYPCHATSEPLFSSFAAPSLHALPQLLSREQKRQKARRNQFWV ←

PROP1

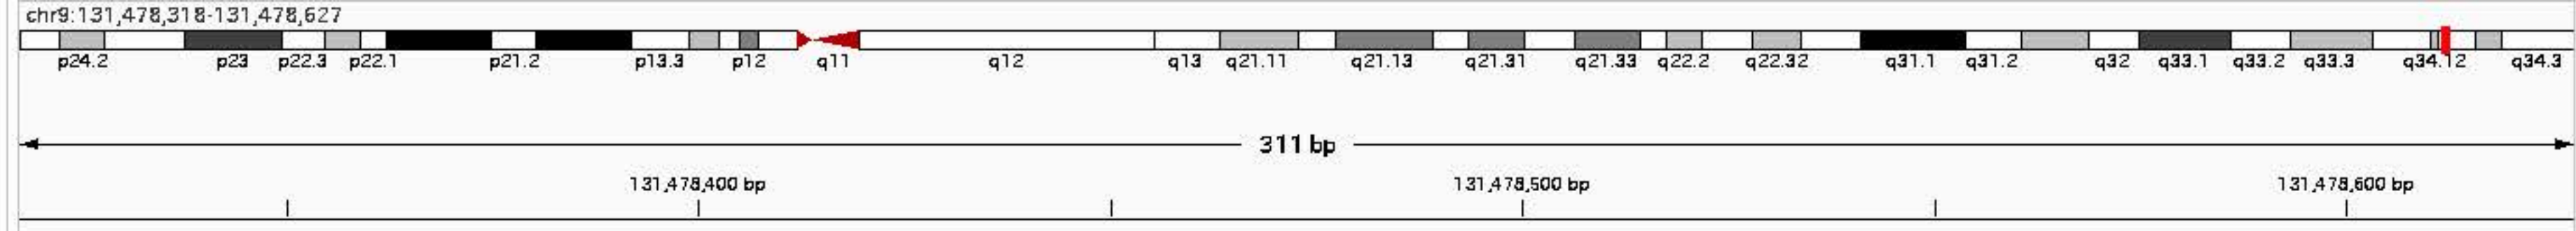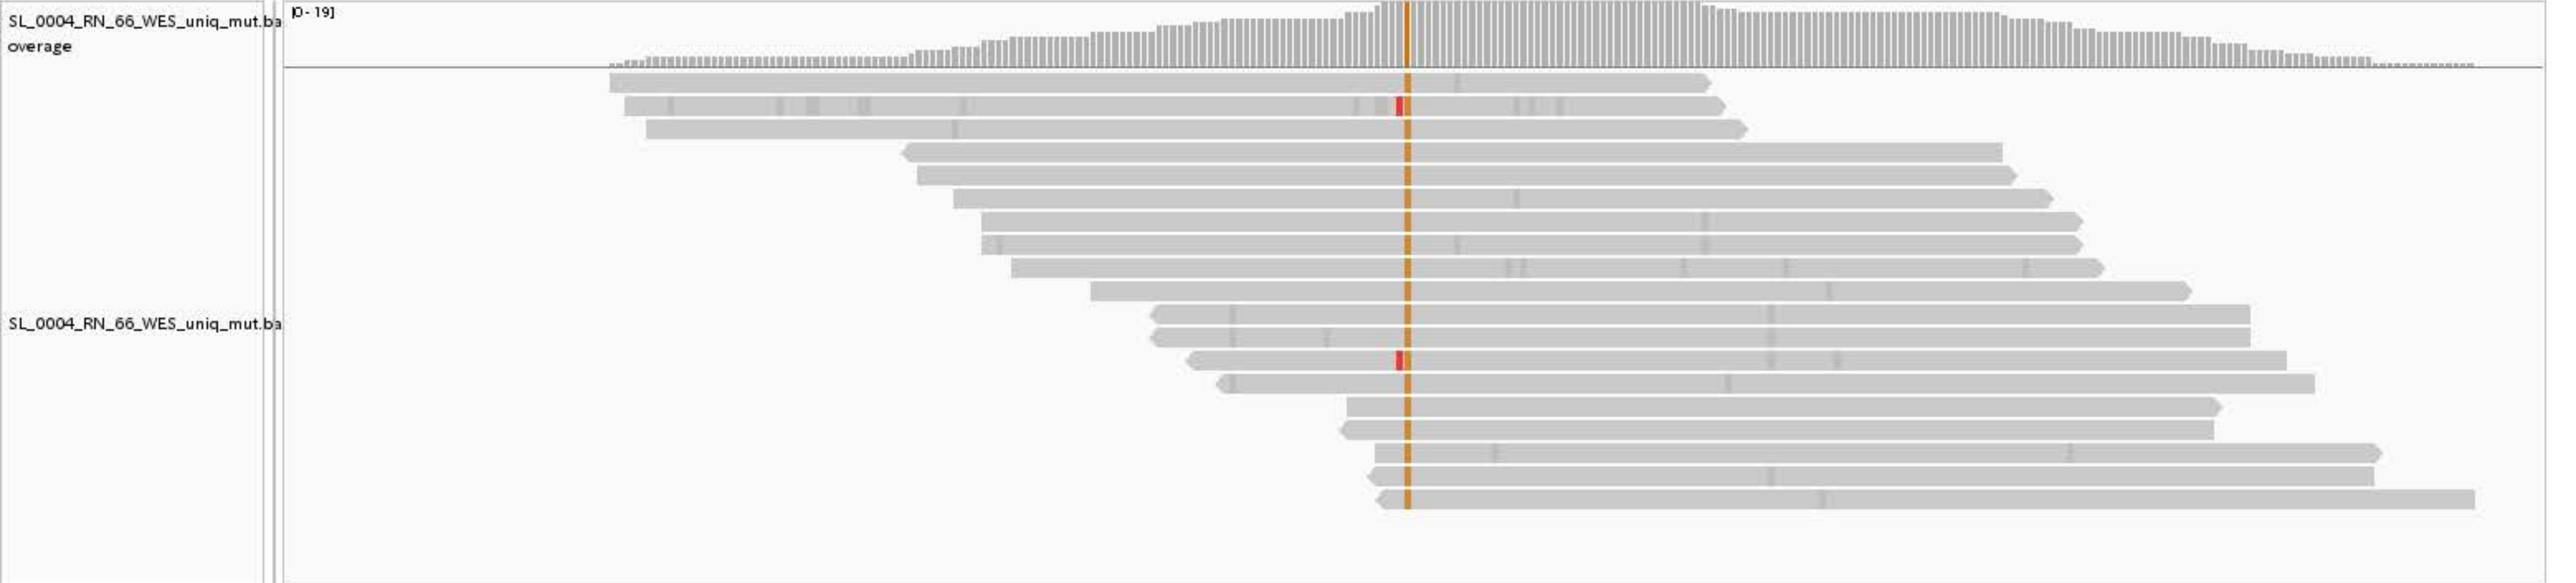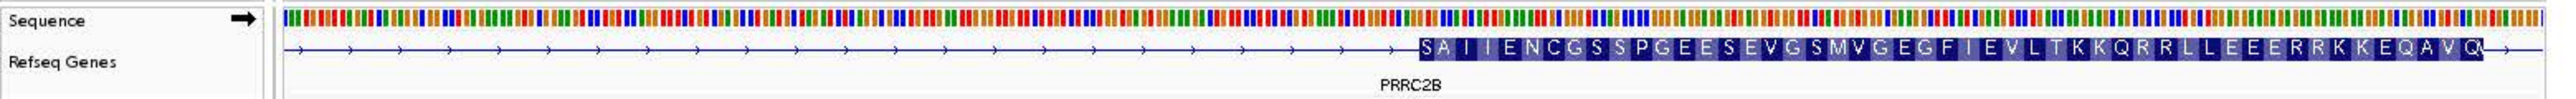

chr1:170,664,114-170,664,423

p36.31 p36.21 p36.11 p35.1 p34.2 p33 p32.2 p31.3 p31.1 p22.3 p21.3 p21.1 p13.2 p11.2 q12 q21.1 q21.3 q23.2 q24.2 q25.2 q31.1 q31.3 q32.2 q41 q42.13 q43 q44

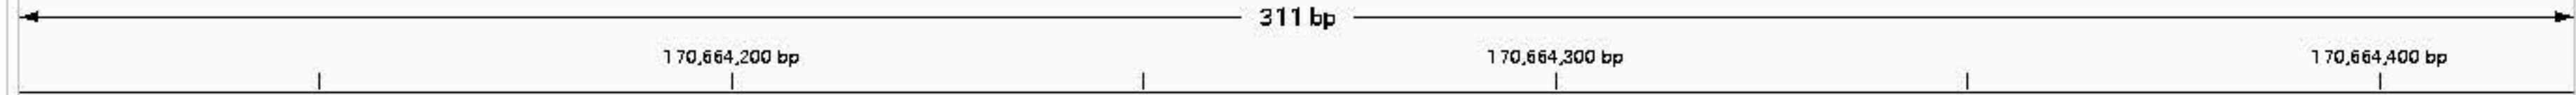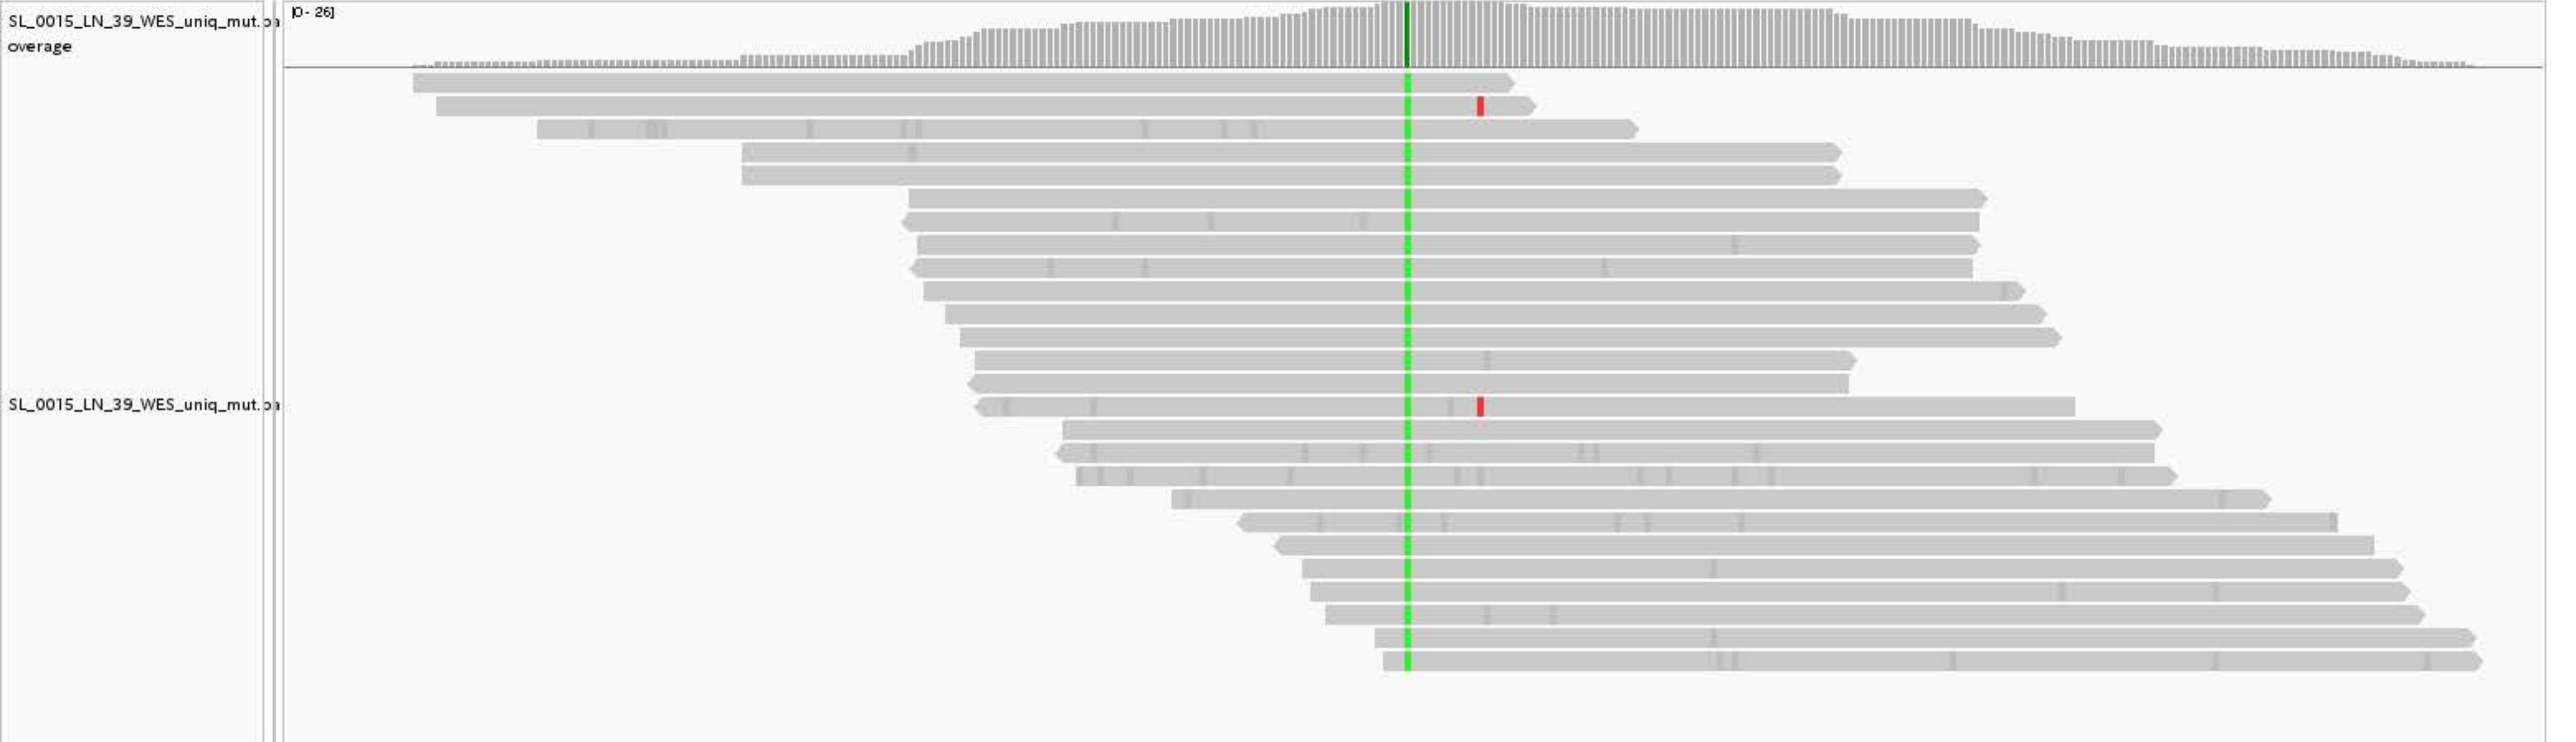

Sequence →

Refseq Genes

MTSSYGHVLERQPALGGRLDSPGNLDTLQAKKNFSVSHLLDLEEAGDMVAQAADENVGEAGRSLLSP

PRRX1



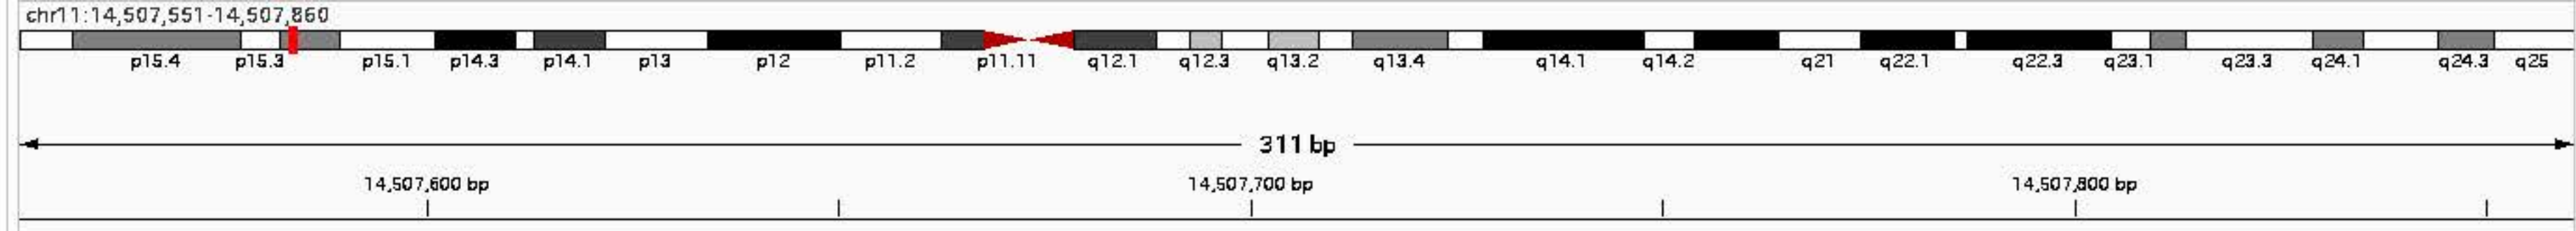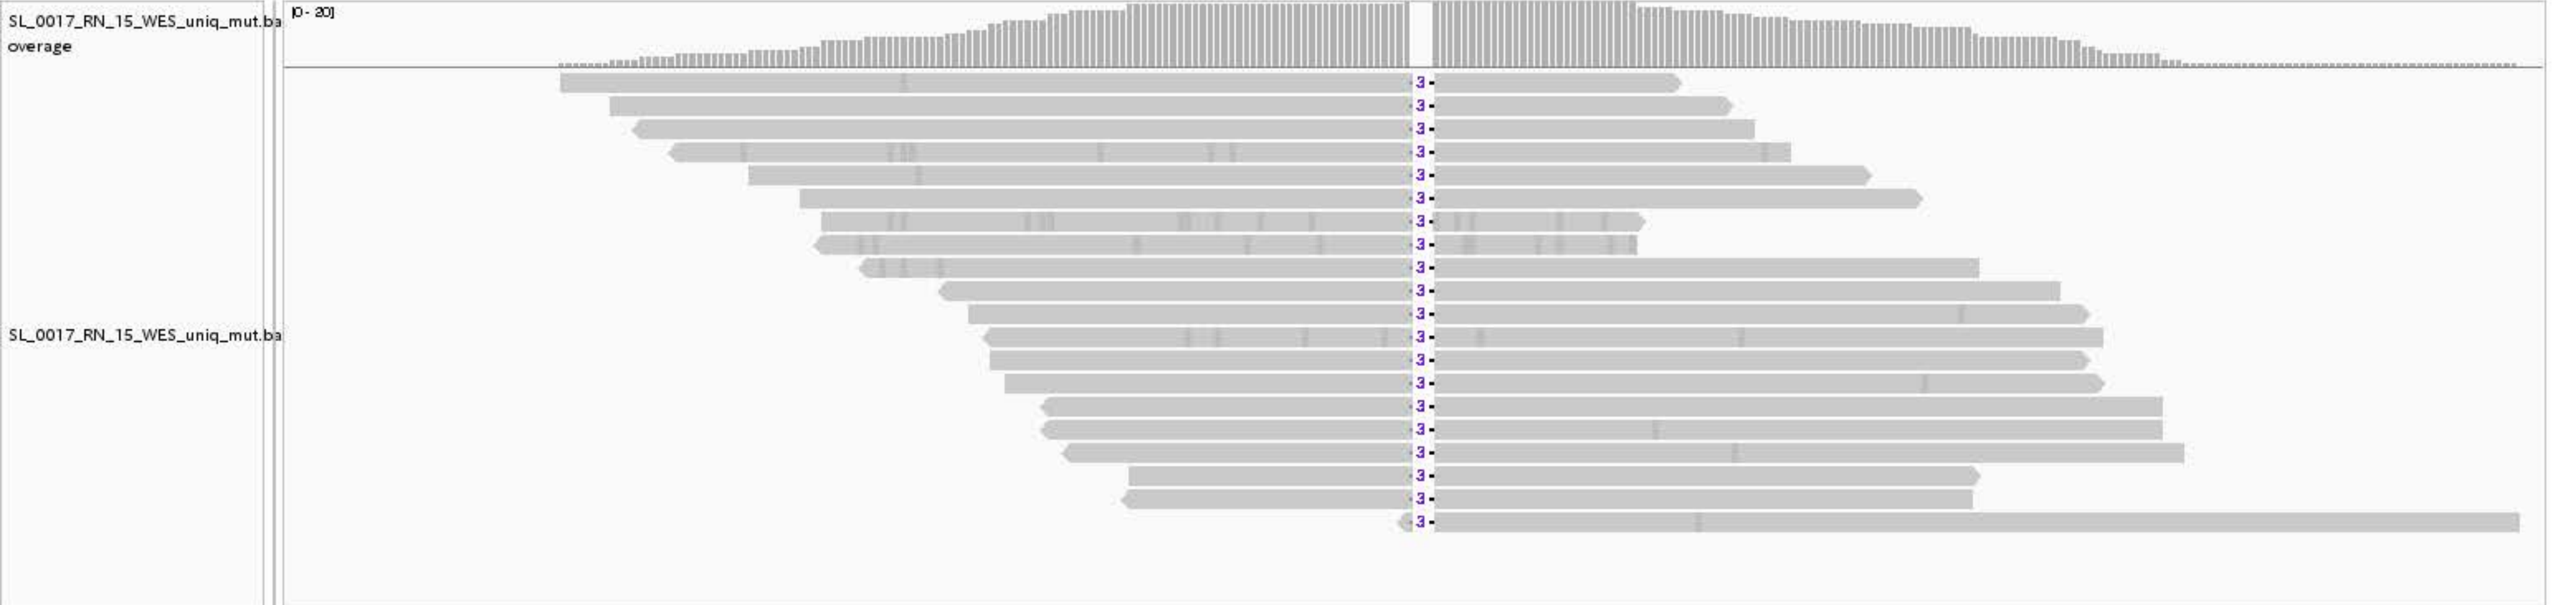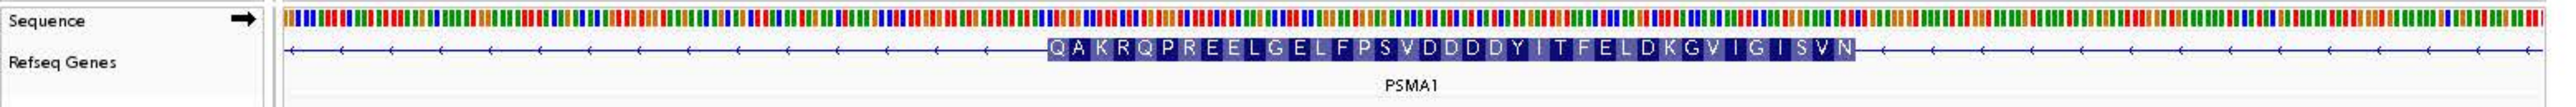

chr7:42,926,416-42,926,725

p22.2 p21.3 p21.2 p15.3 p15.1 p14.2 p13 p12.2 p11.2 q11.1 q11.22 q11.23 q21.11 q21.12 q21.2 q22.1 q22.3 q31.1 q31.2 q31.32 q32.1 q33 q34 q35 q36.1 q36.3

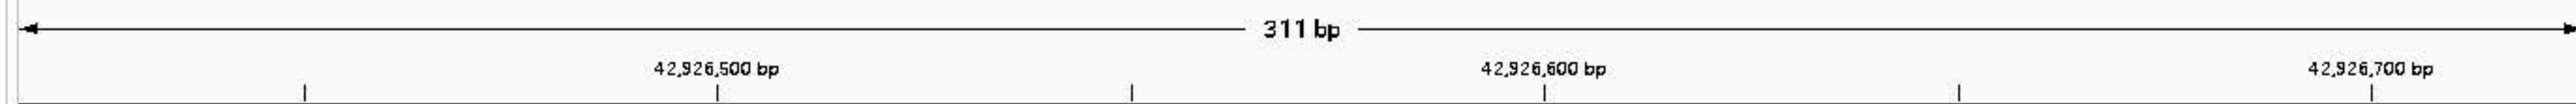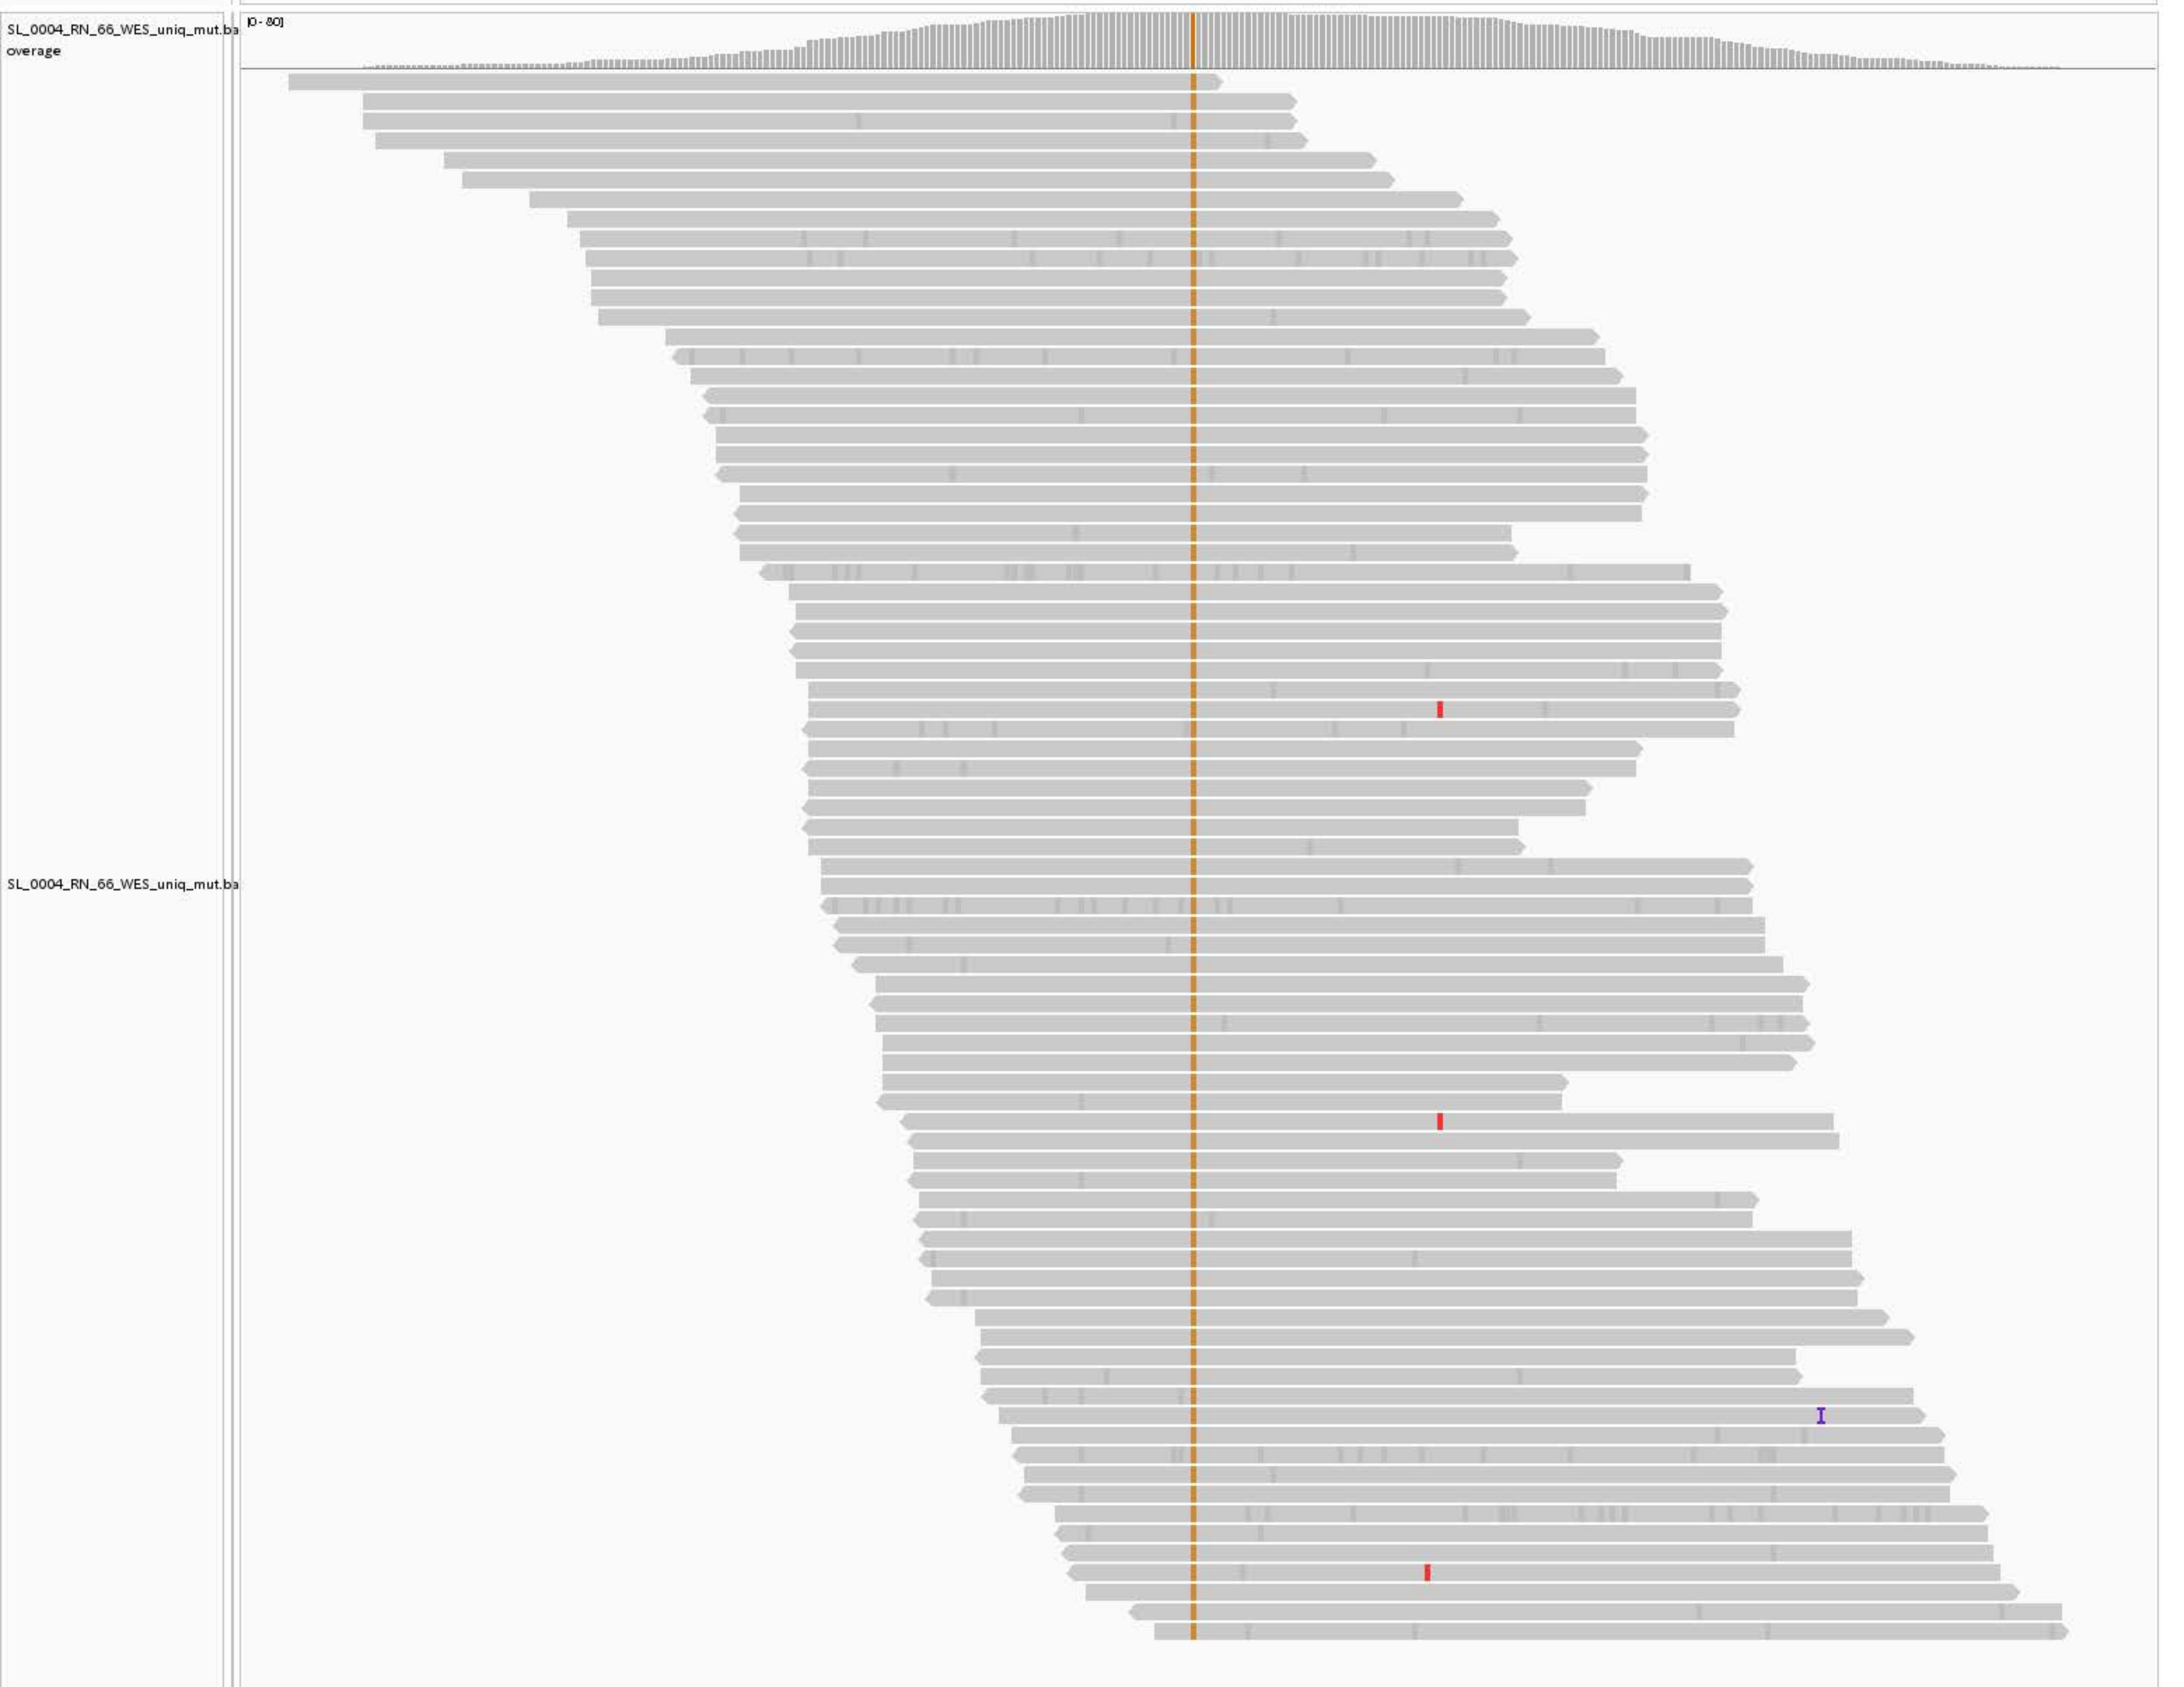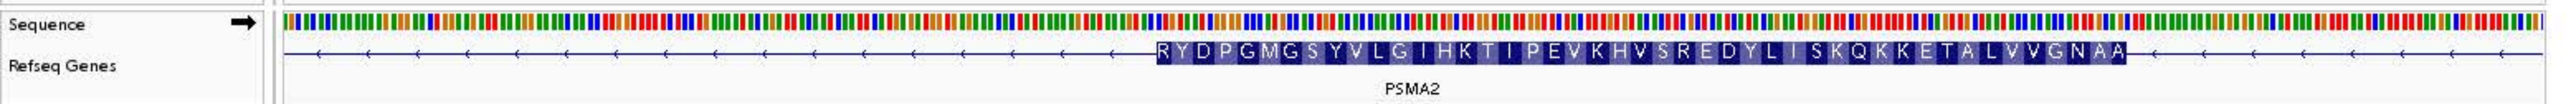

chr4: 86,701,323-86,701,632

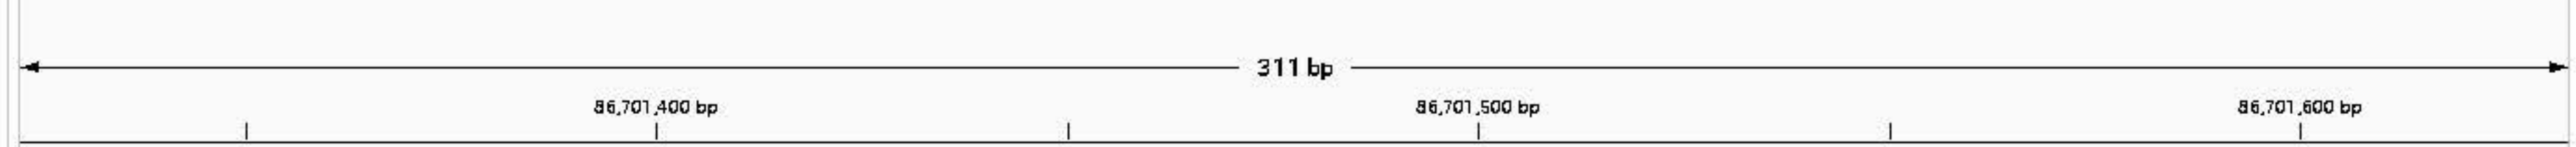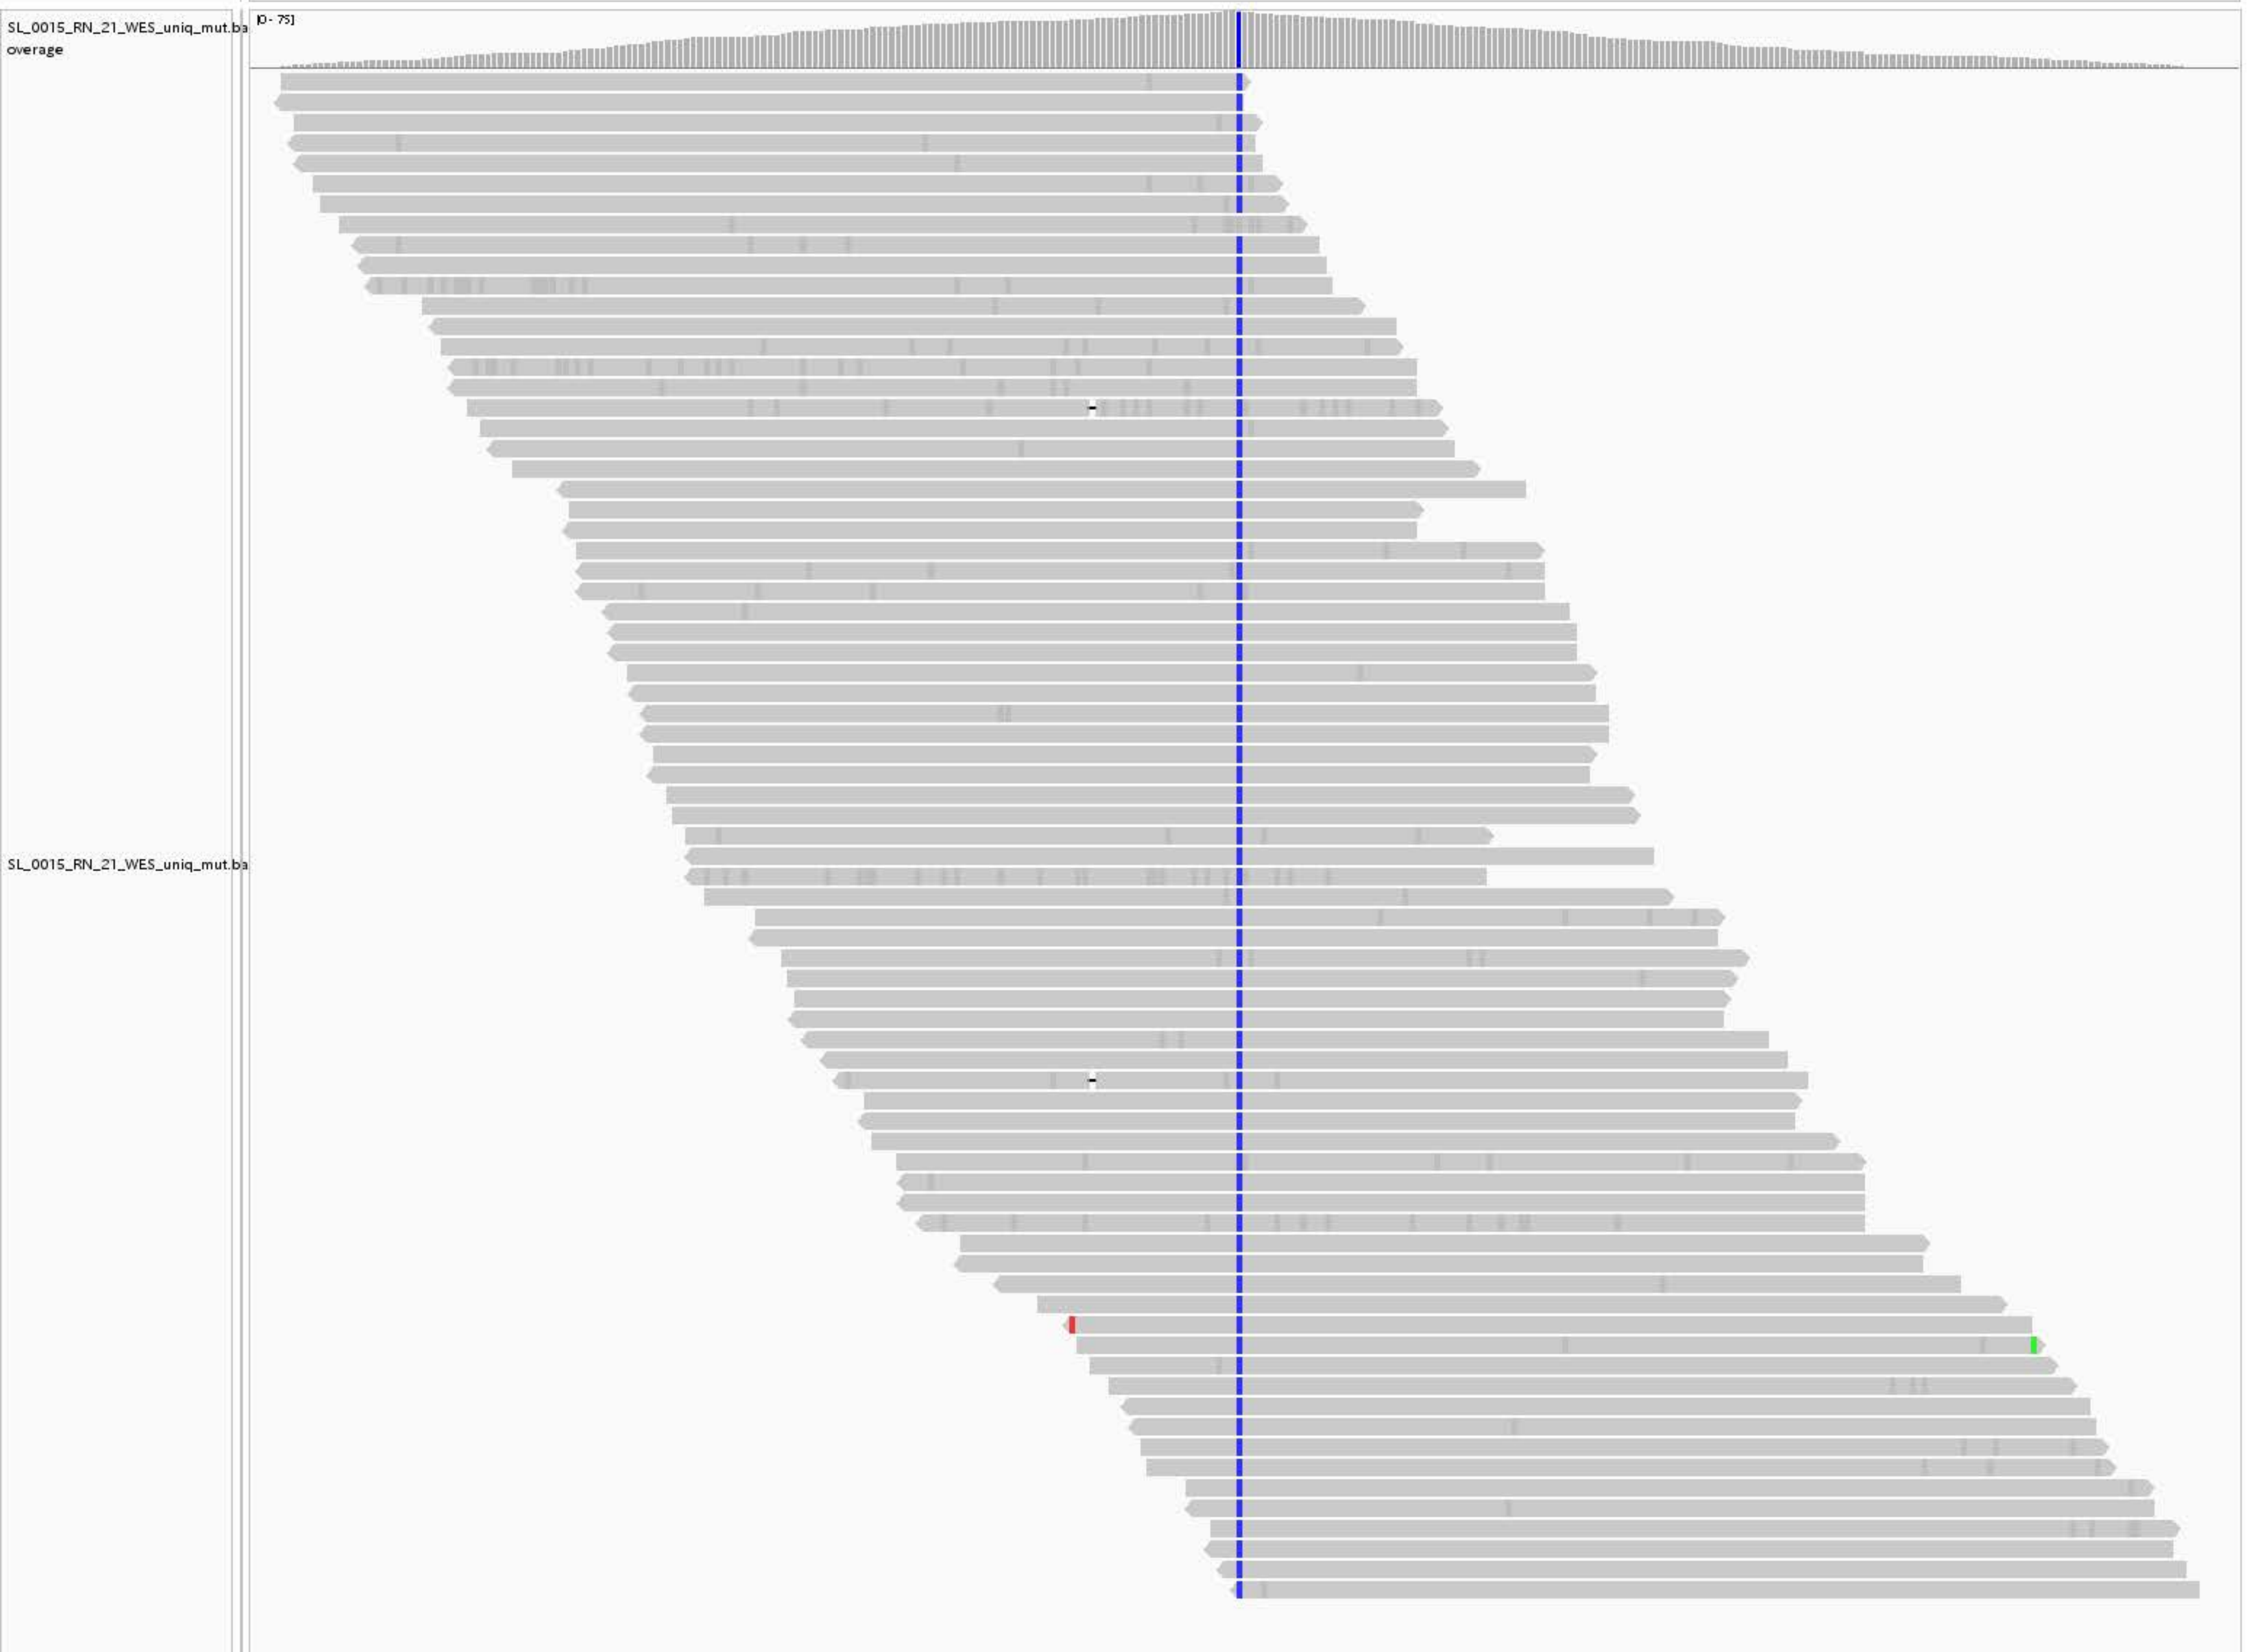

Sequence Refseq Genes

SMGFLSIKDTQDENYFKDILSDNSGREDSSENTFSPYQFKTSGPEKKPIPGIDVLSKKKIWASSMDLLCTADRFSSGETATYRRCHPEAVTVRTSTTPRKKEA

PTPN13



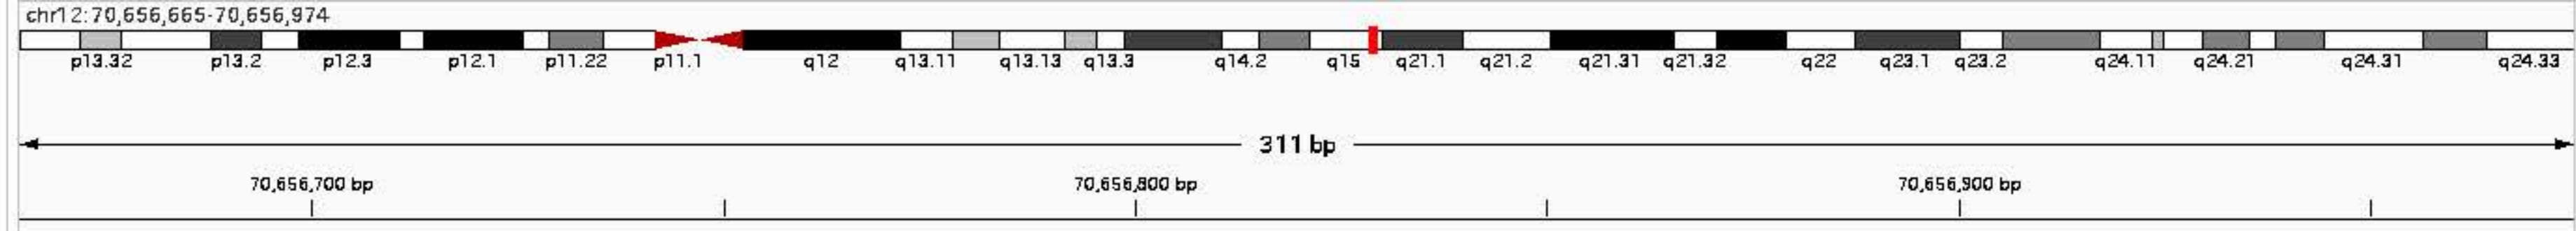

SL\_0015\_LN\_46\_WES\_uniq\_mut. coverage

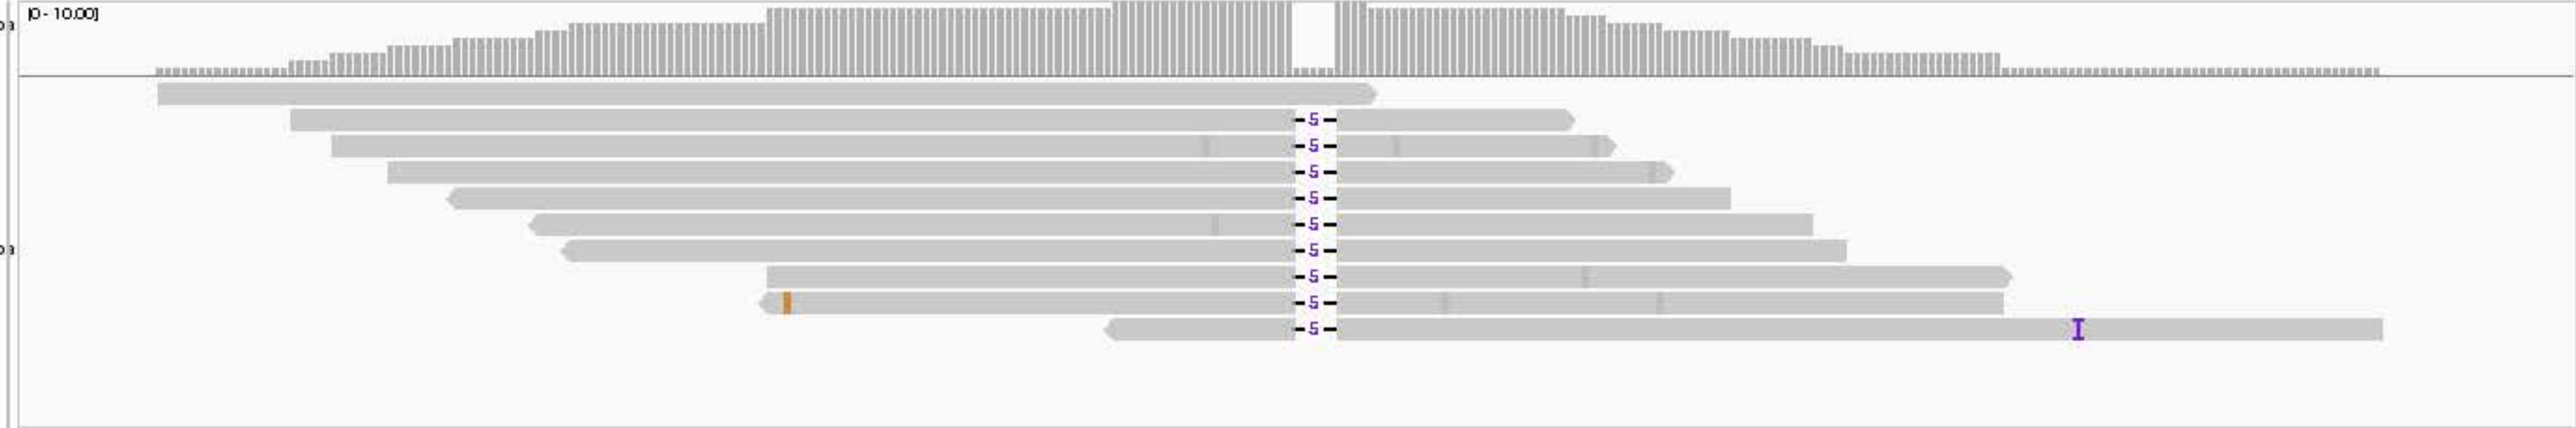

SL\_0015\_LN\_46\_WES\_uniq\_mut.

Sequence

Refseq Genes

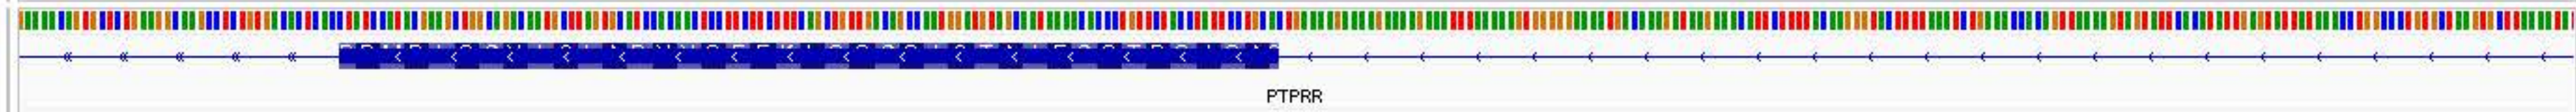

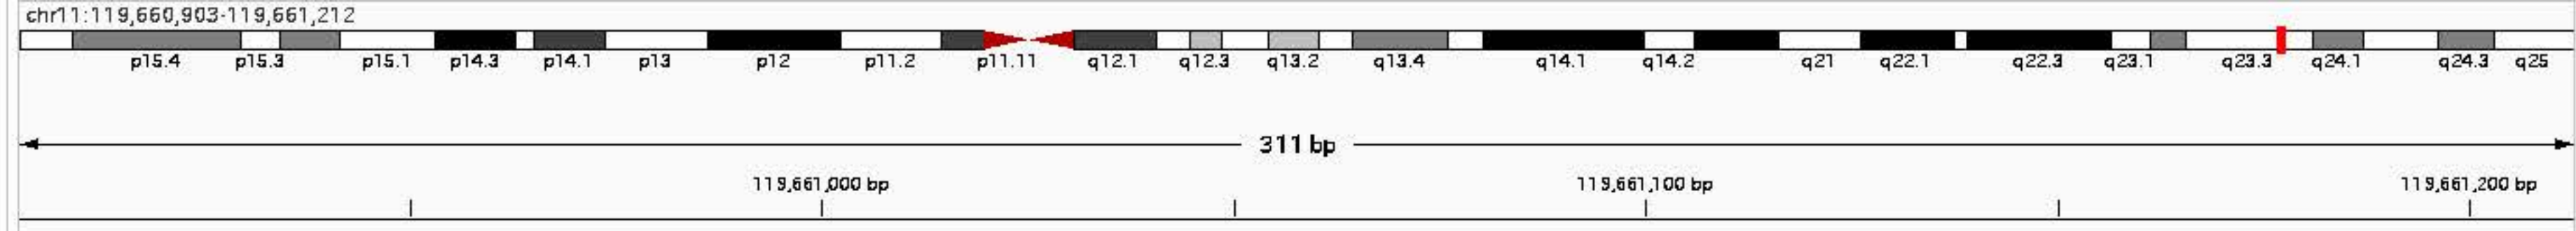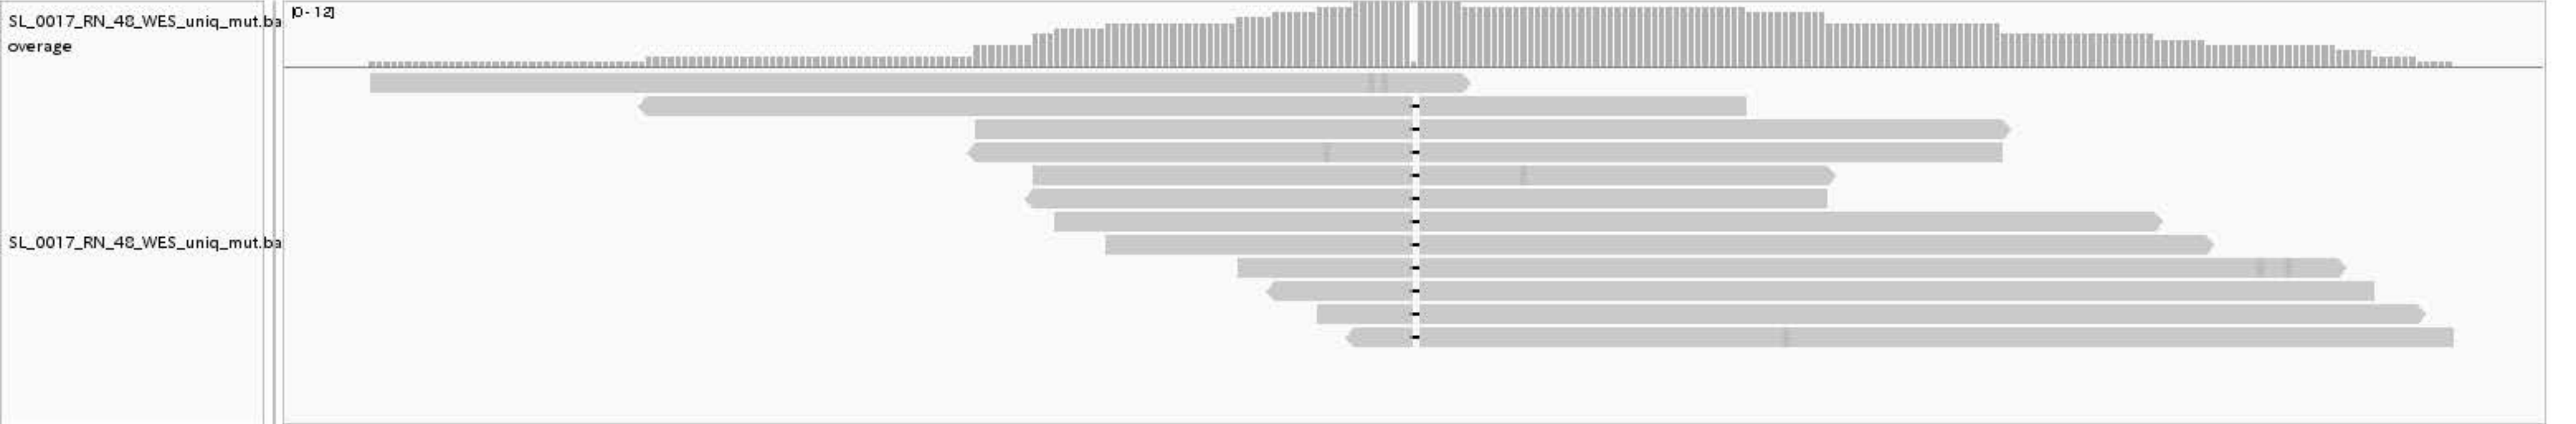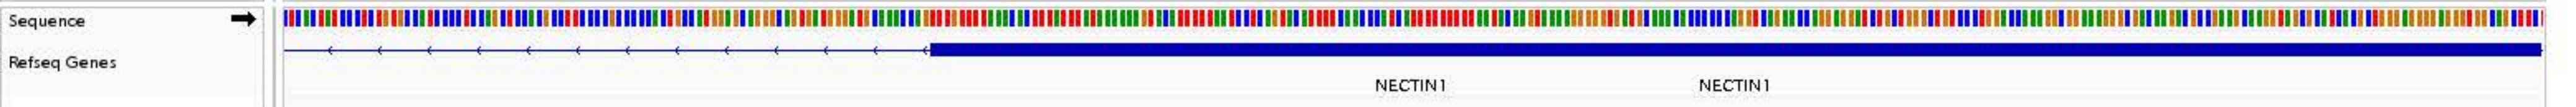

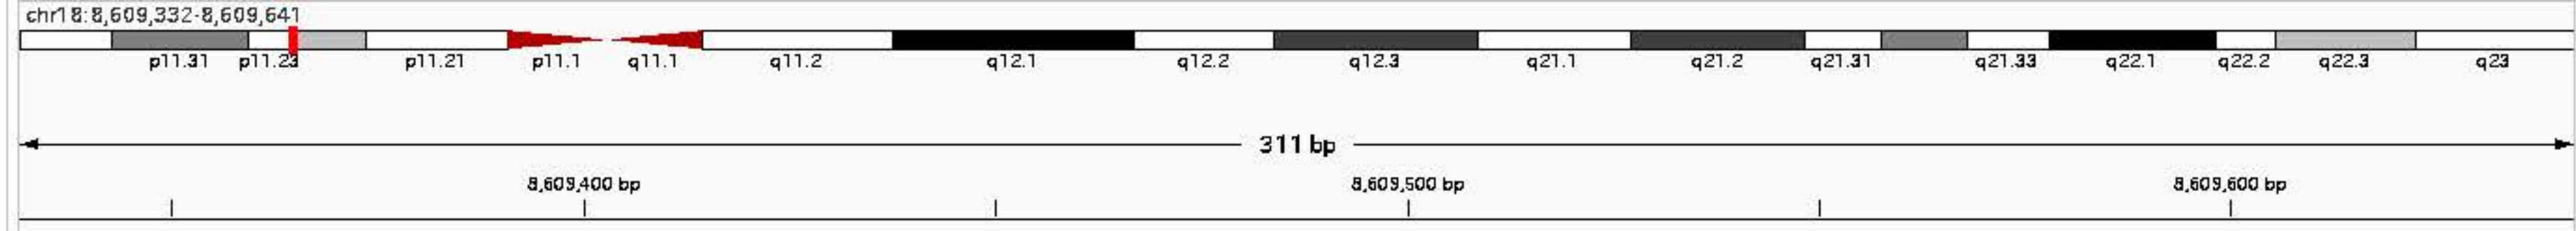

SL\_0001\_LN\_3\_WES\_uniq\_mut.ba  
verage

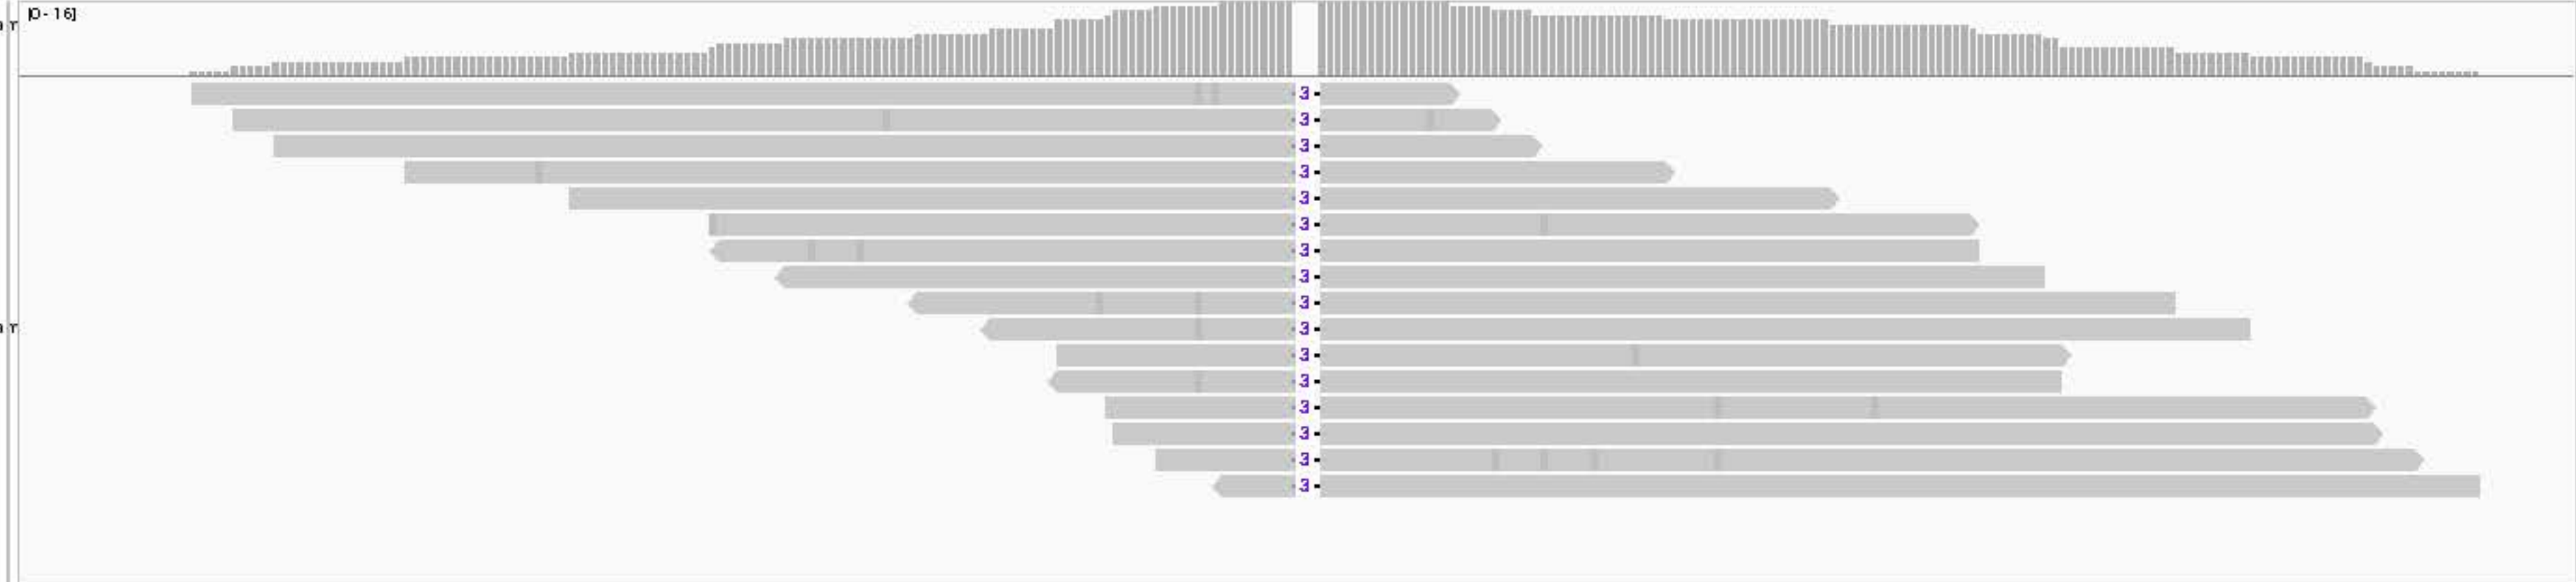

SL\_0001\_LN\_3\_WES\_uniq\_mut.ba r

Sequence →  
Refseq Genes

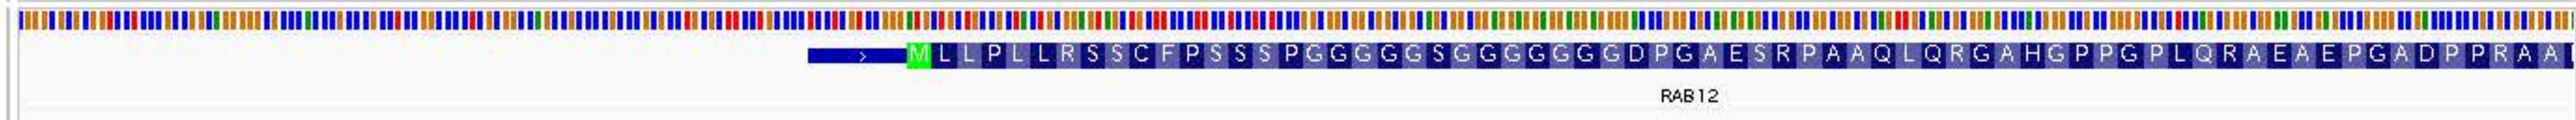



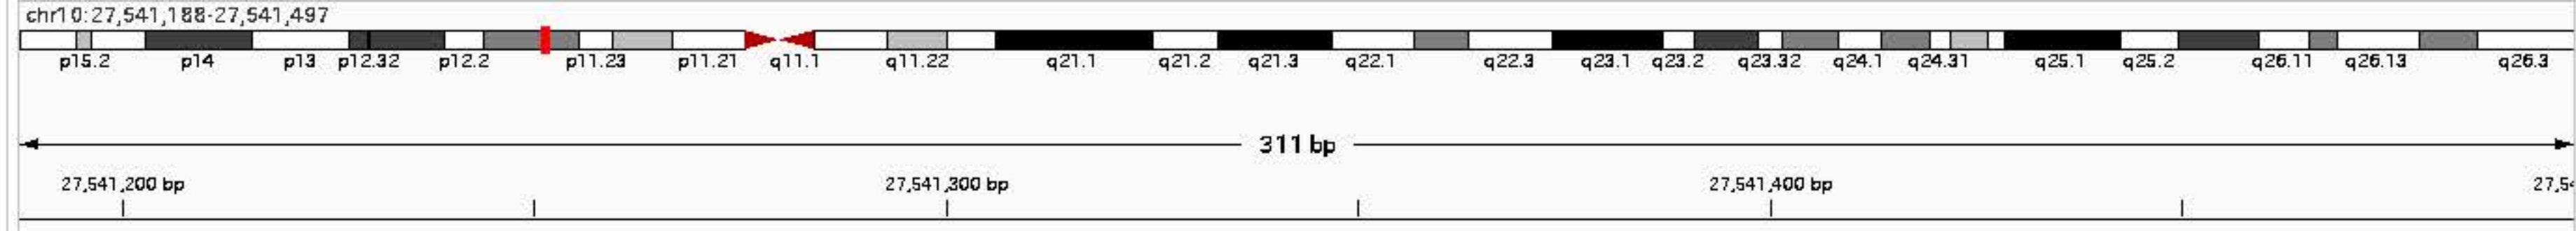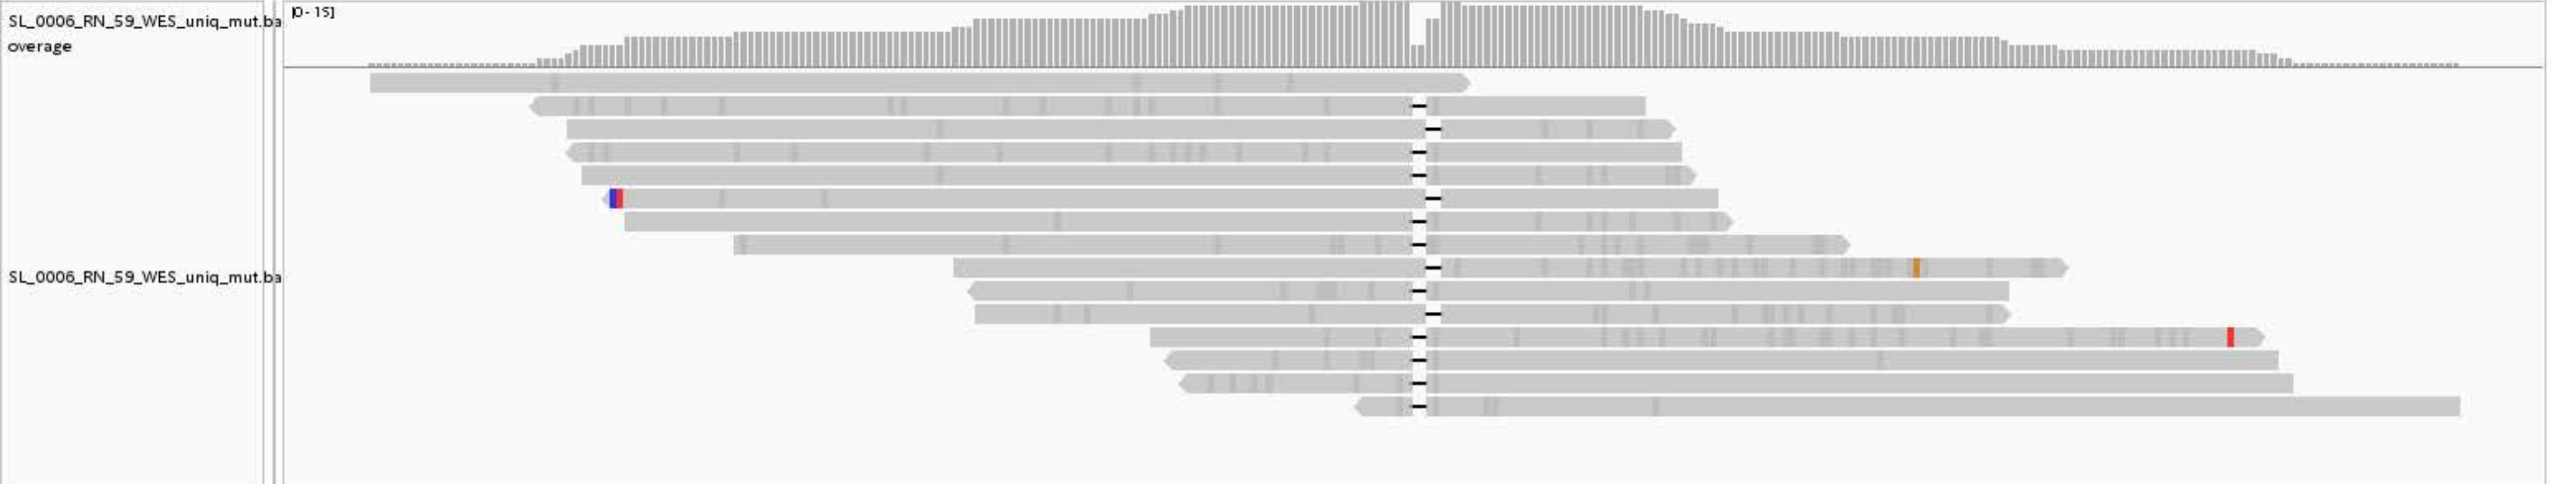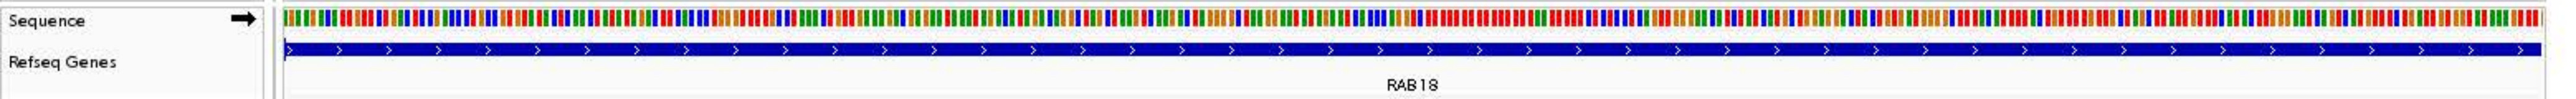

chr12:120,098,699-120,099,008

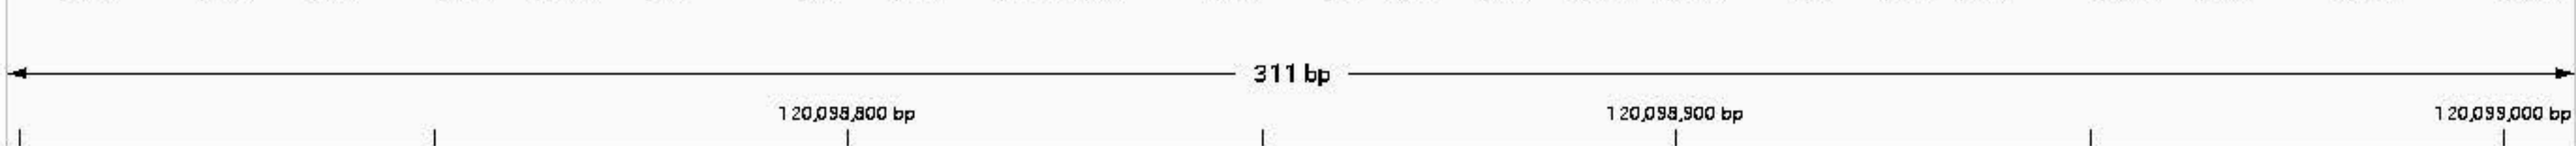

SL\_0007\_RN\_33\_WES\_uniq\_mut.ba  
overage

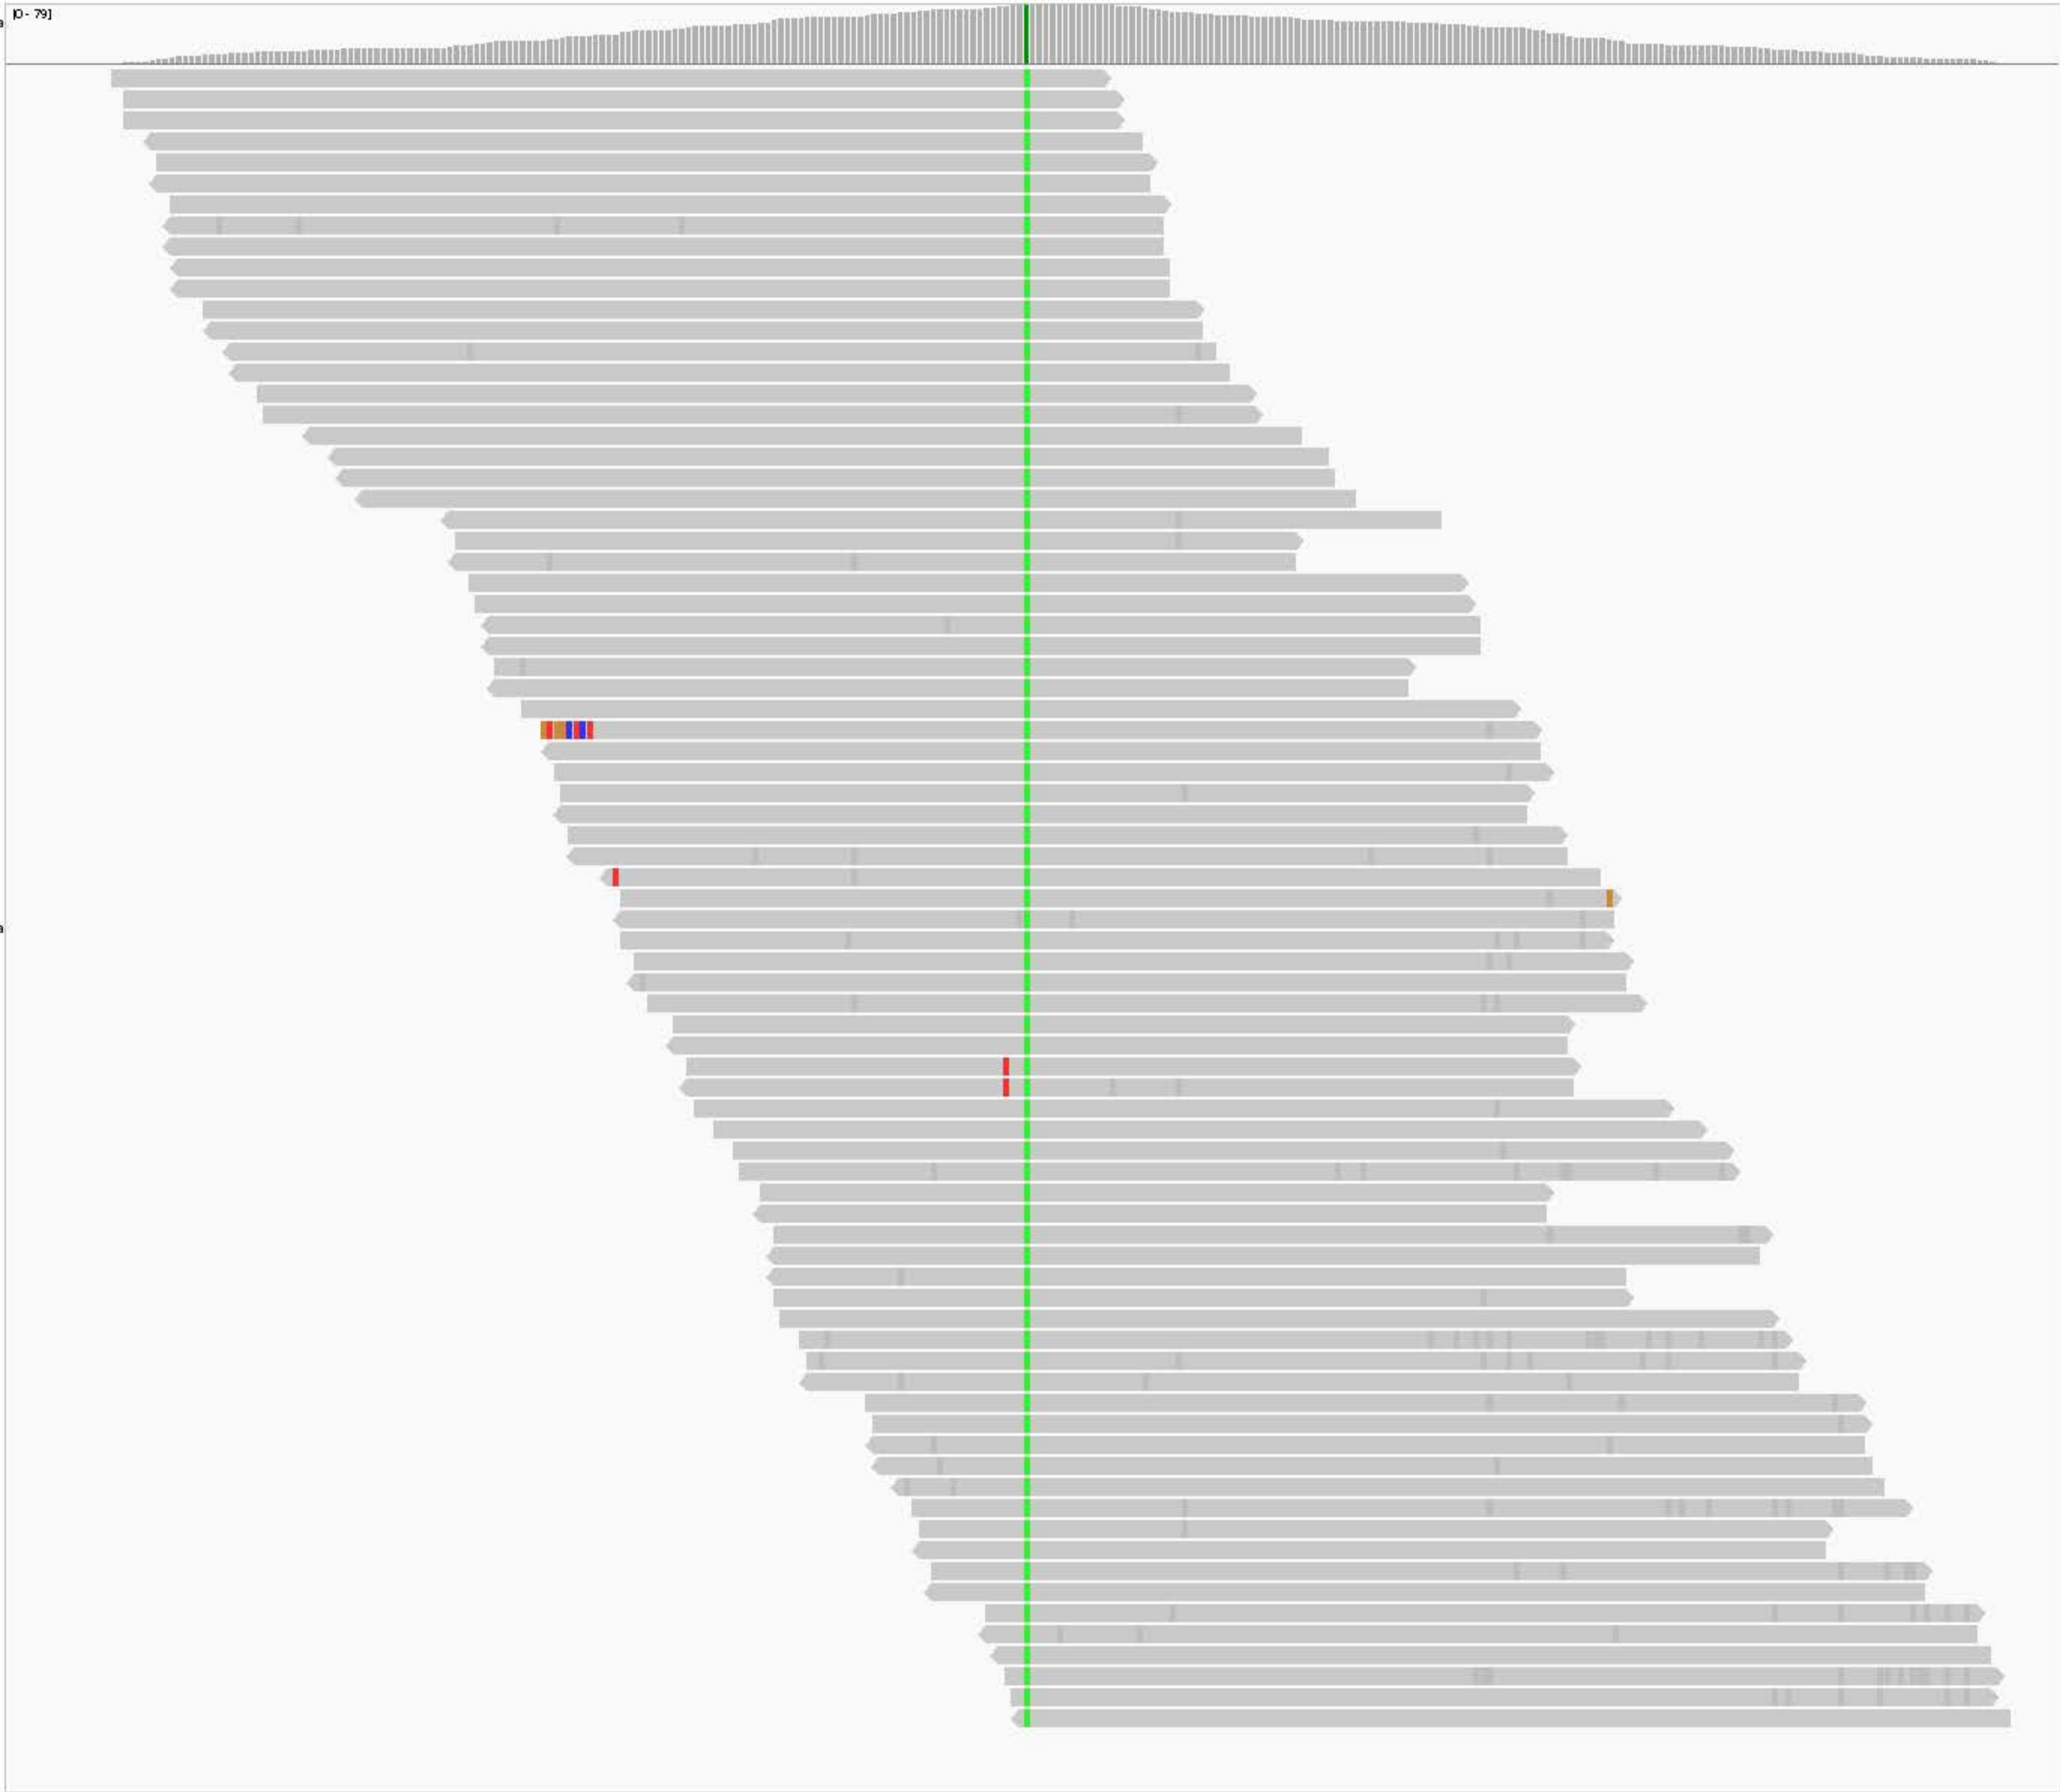

SL\_0007\_RN\_33\_WES\_uniq\_mut.ba

Sequence →

Refseq Genes

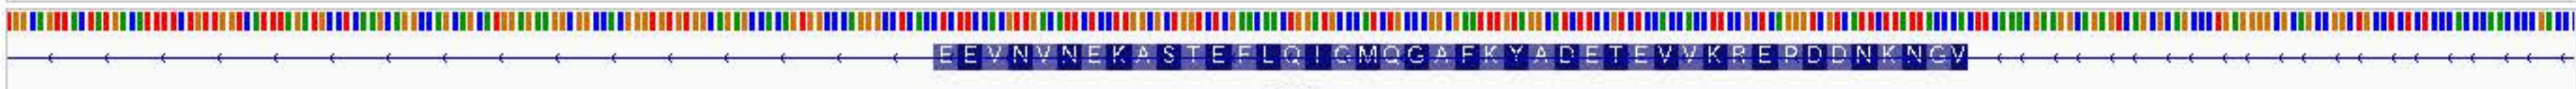

RAB35

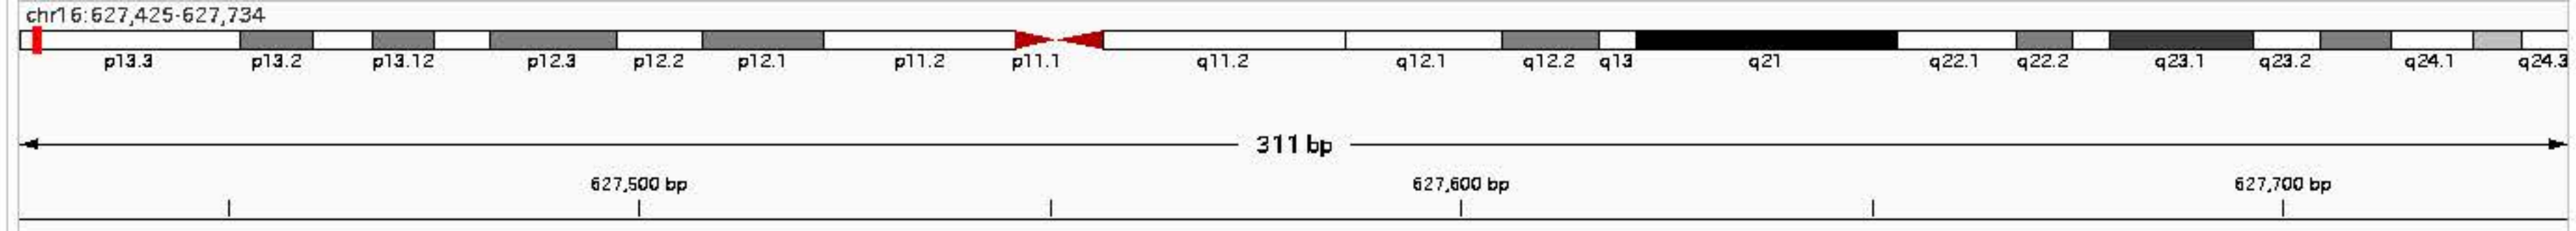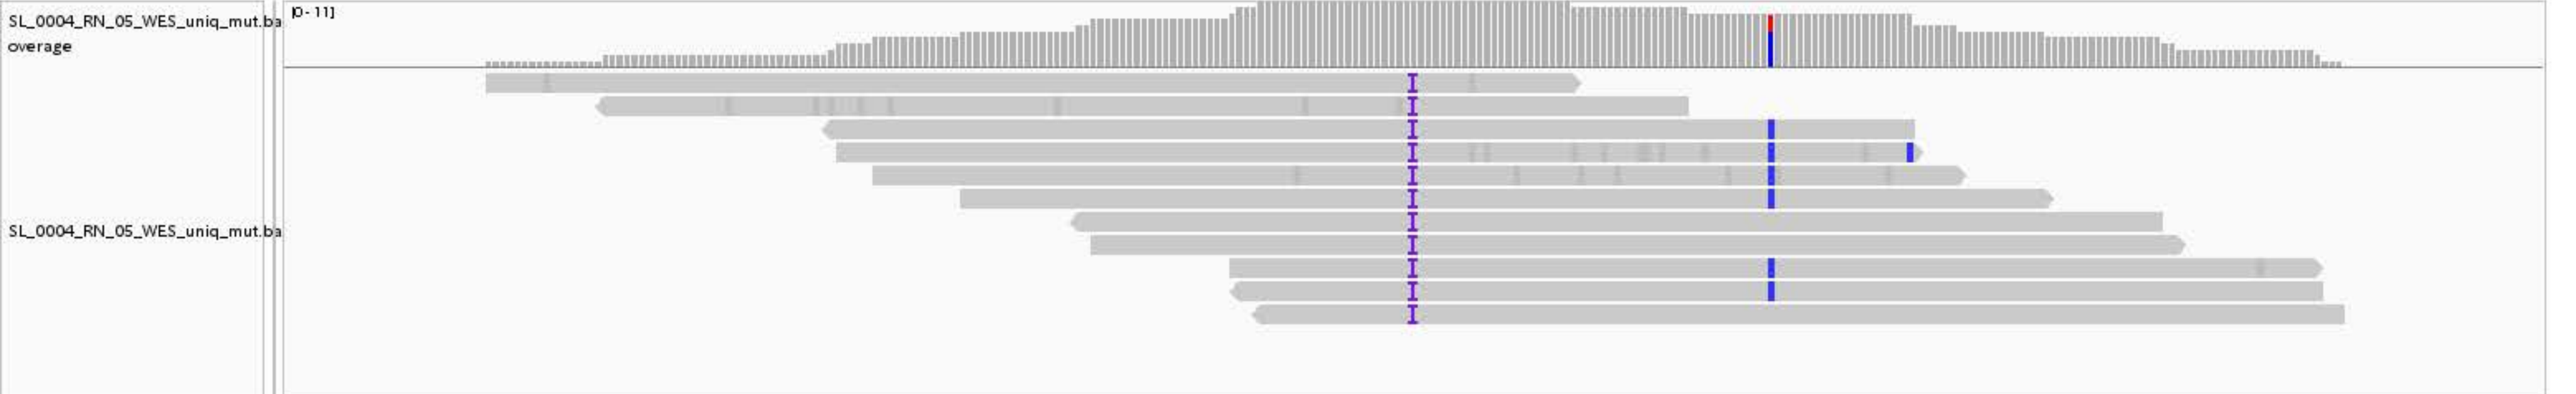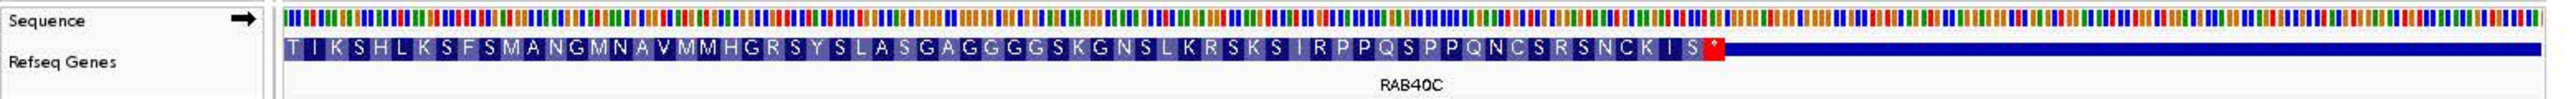



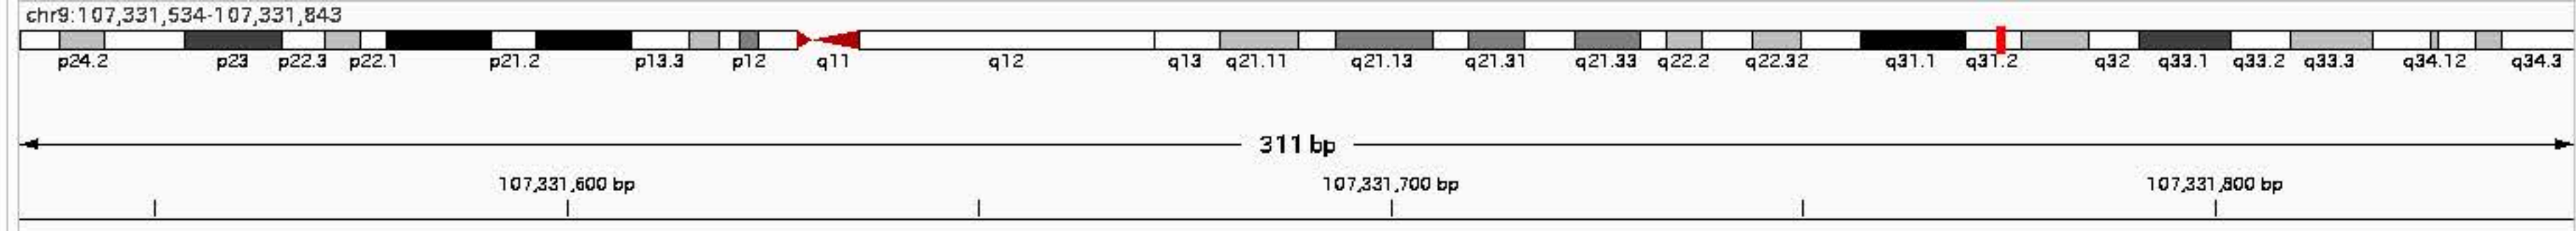

SL\_0007\_RN\_2\_WES\_uniq\_mut.ba  
verage

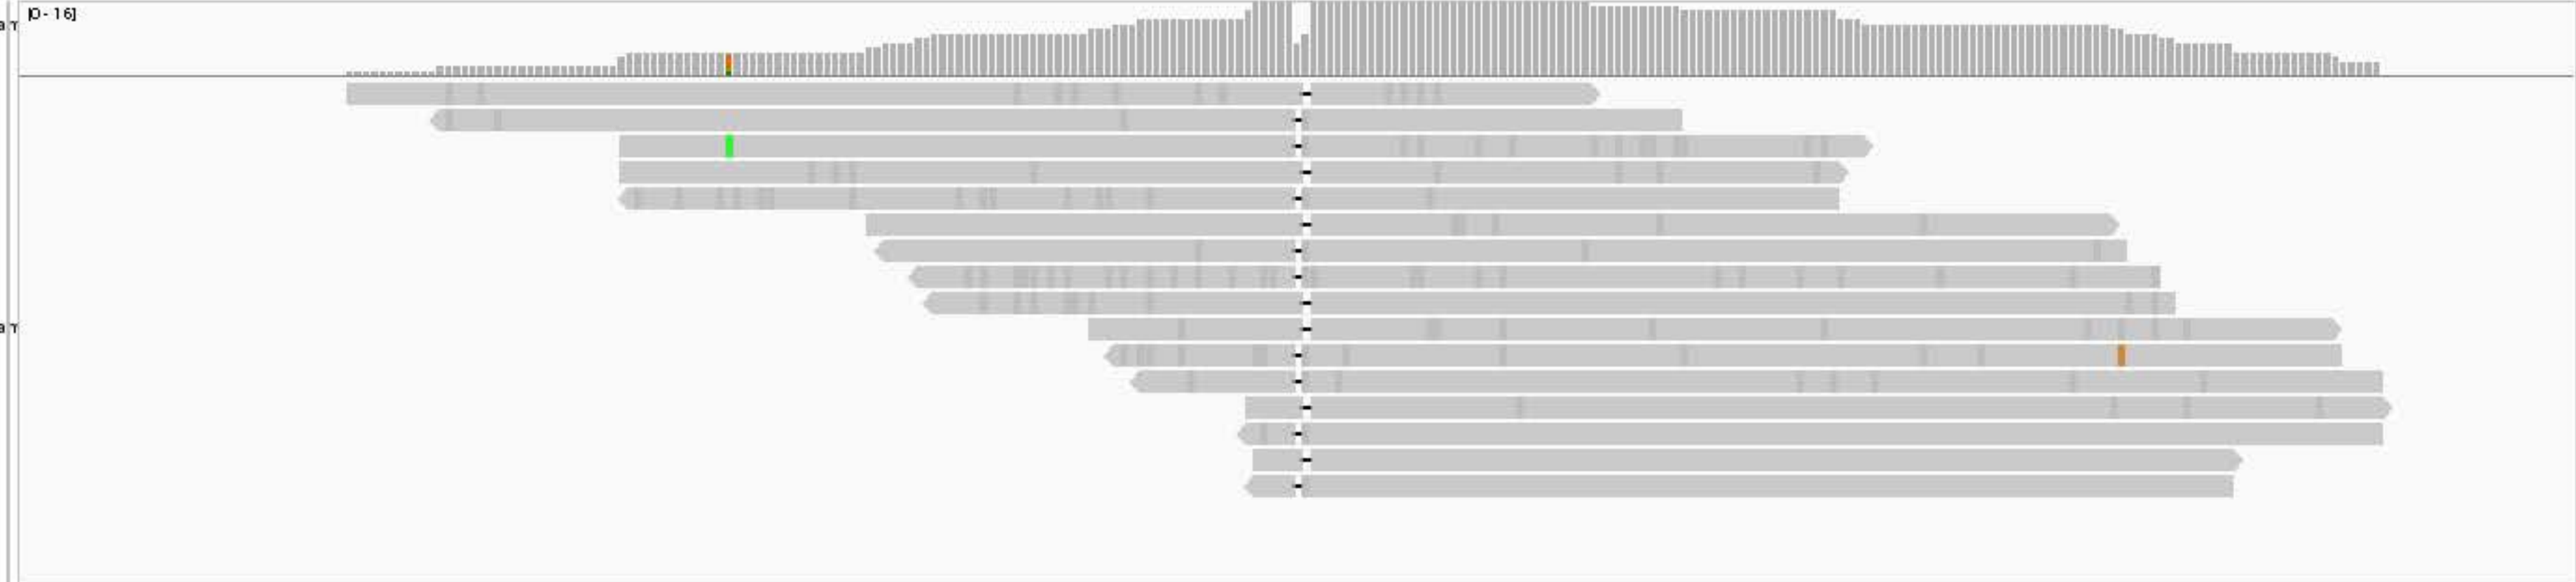

SL\_0007\_RN\_2\_WES\_uniq\_mut.ba

Sequence →

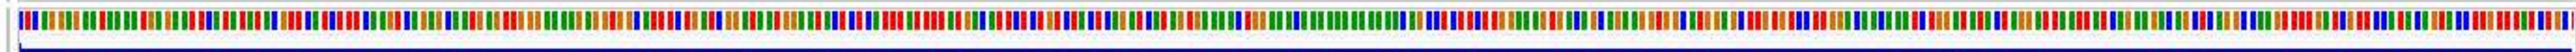

Refseq Genes

RAD23B

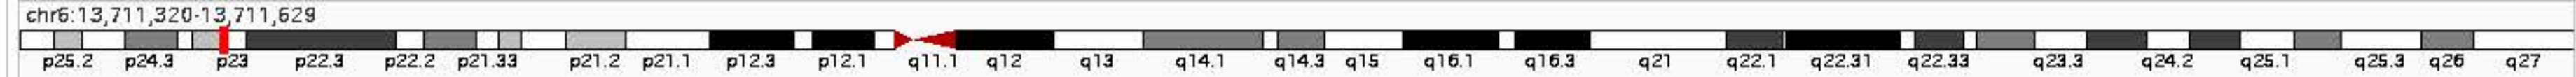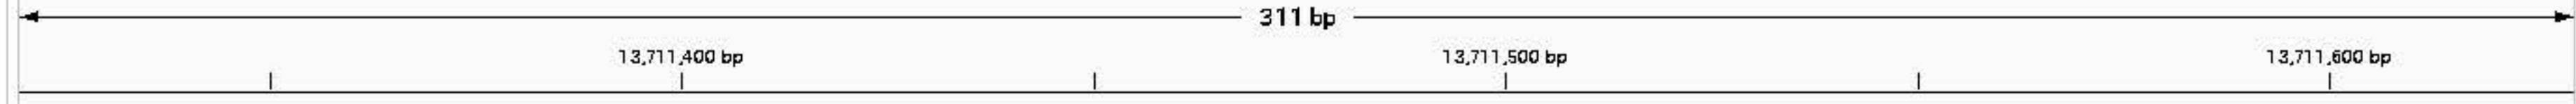

SL\_0015\_LN\_44\_WES\_uniq\_mut. coverage

SL\_0015\_LN\_44\_WES\_uniq\_mut.

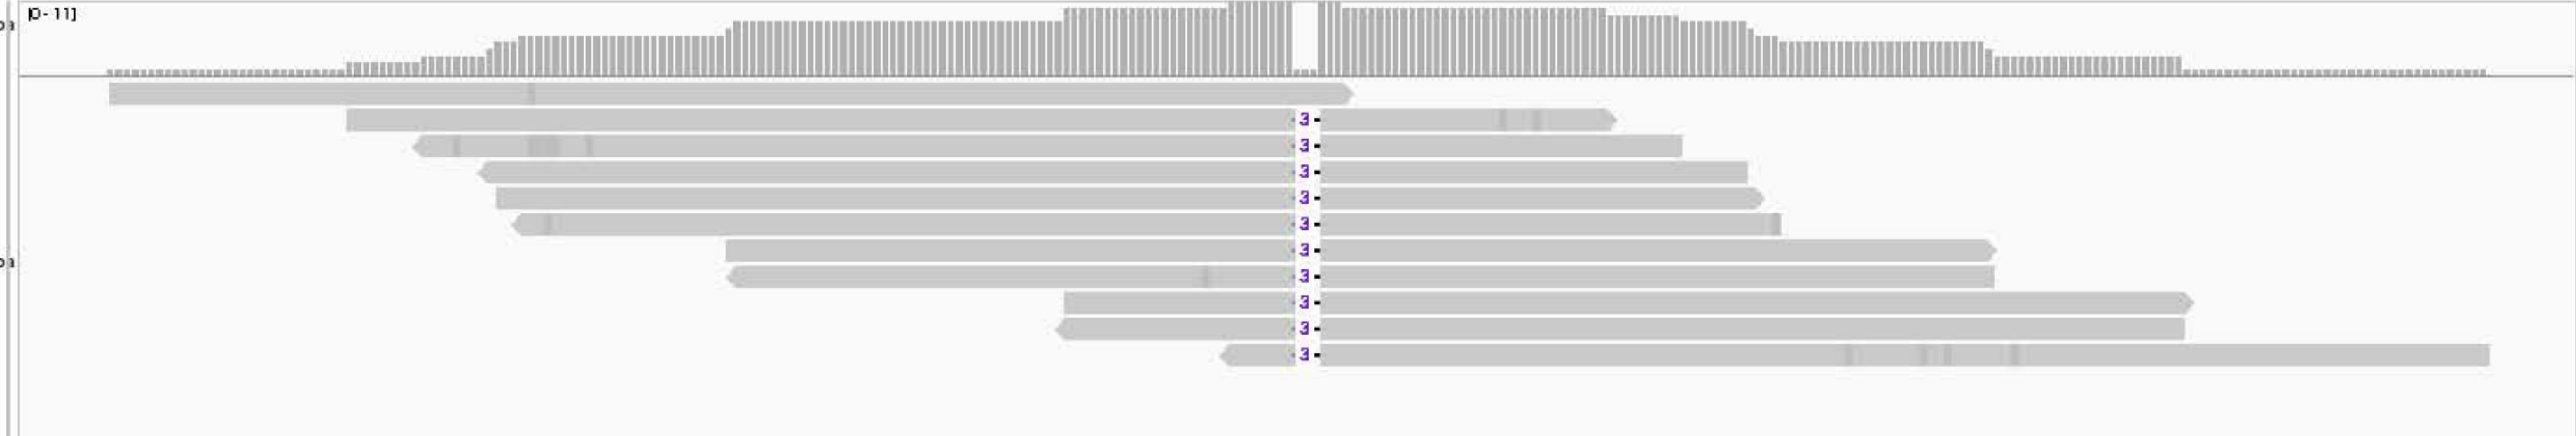

Sequence

Refseq Genes

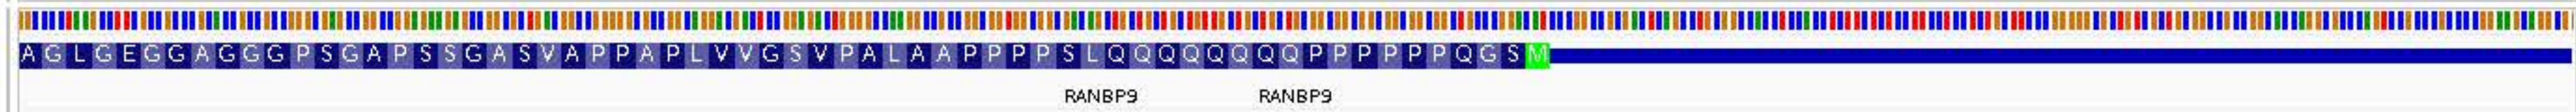

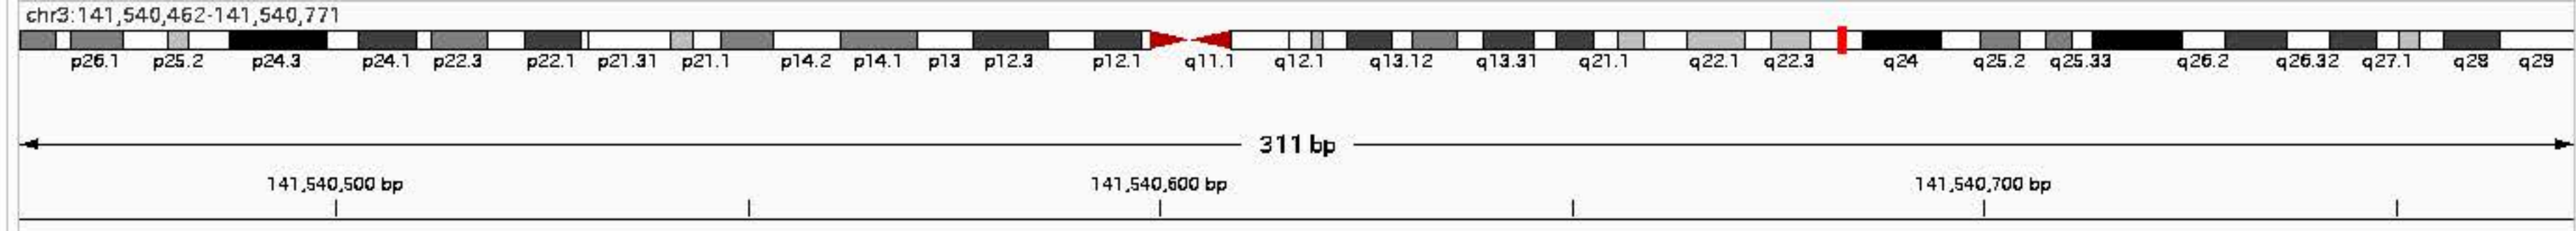

SL\_0015\_LN\_46\_WES\_uniq\_mut. coverage

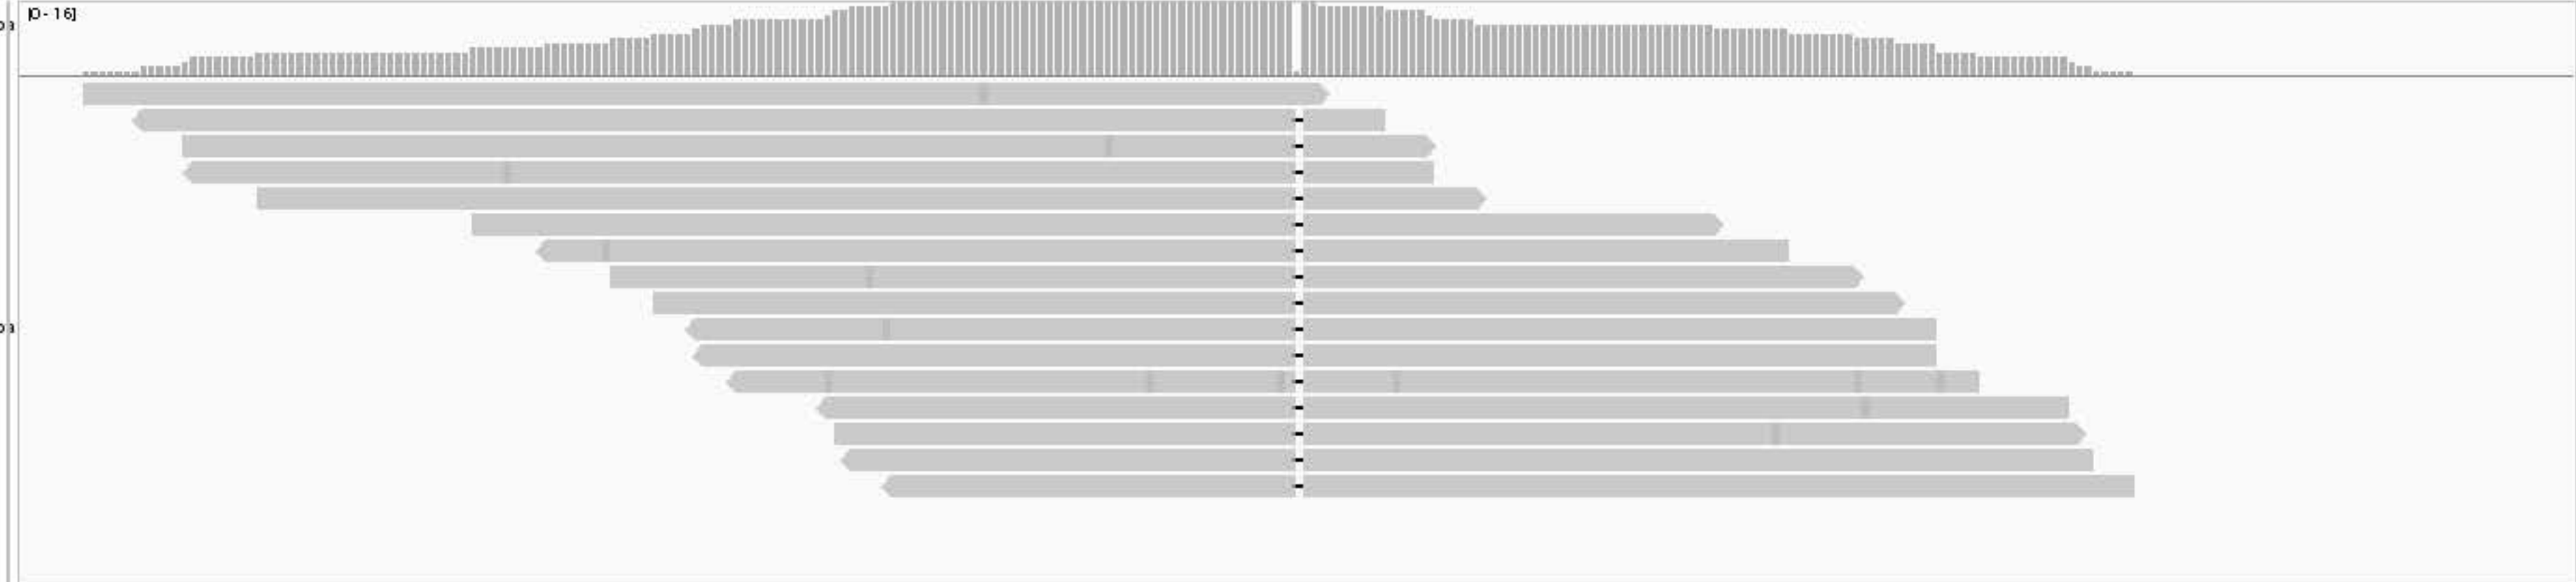

Sequence Refseq Genes

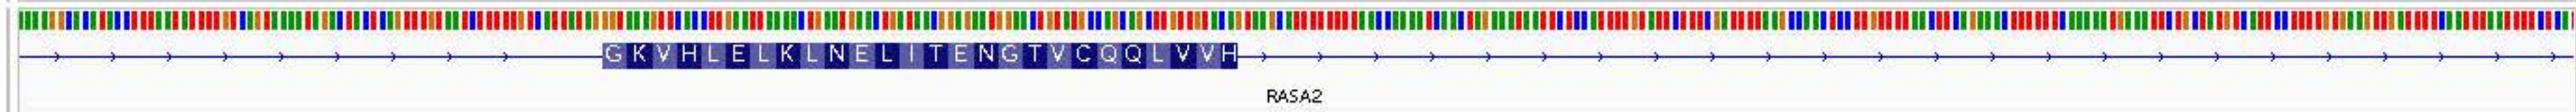



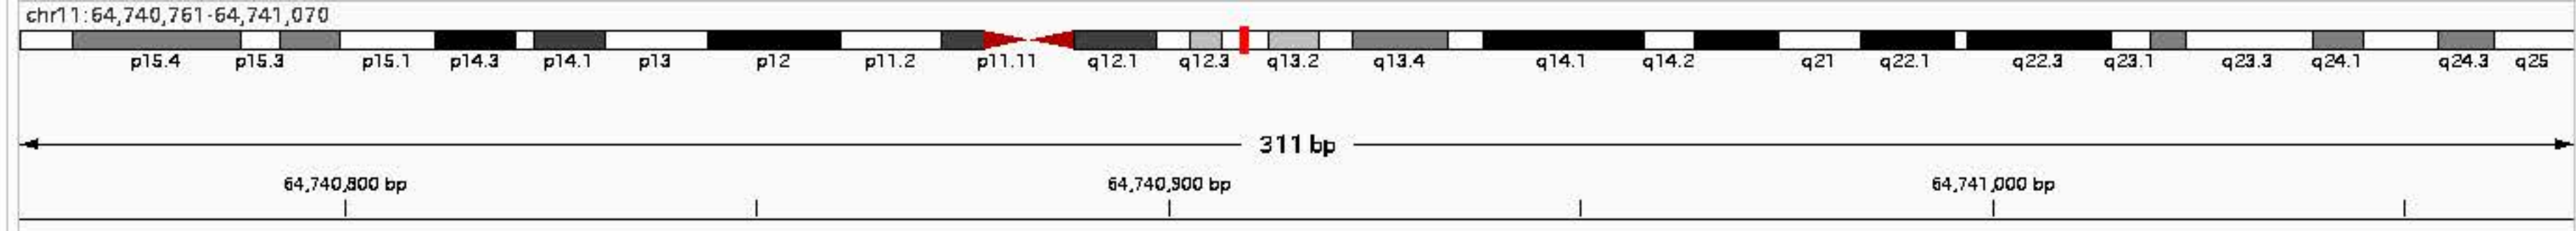

SL\_0006\_RN\_36\_WES\_uniq\_mut.ba  
coverage

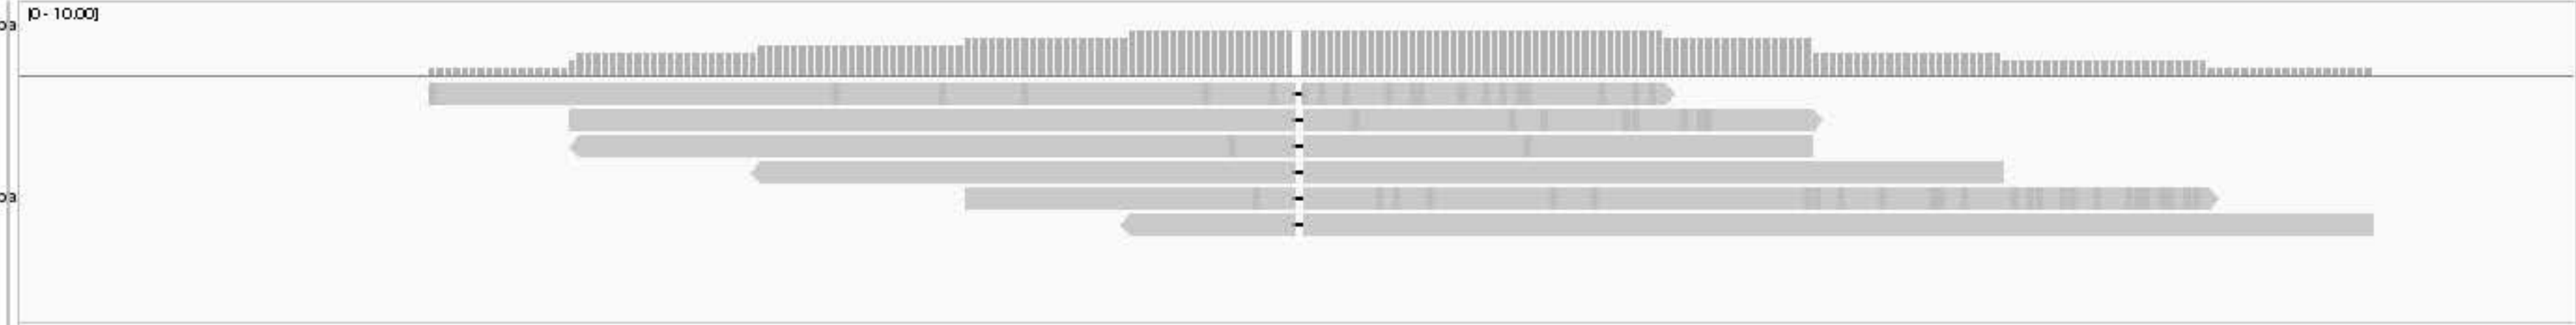

SL\_0006\_RN\_36\_WES\_uniq\_mut.ba

Sequence →  
Refseq Genes

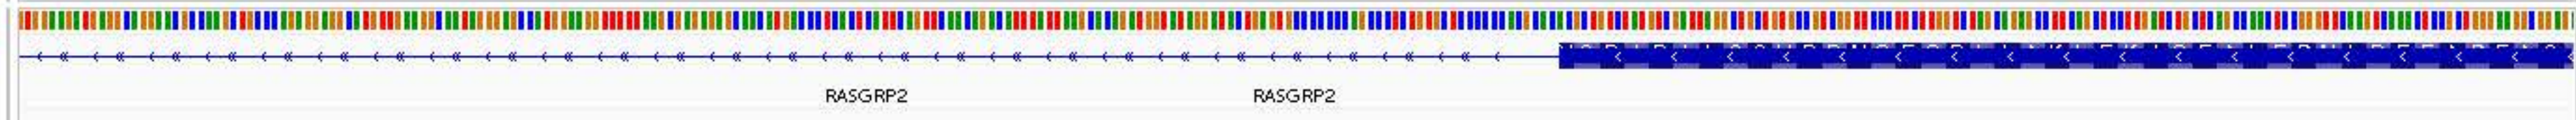

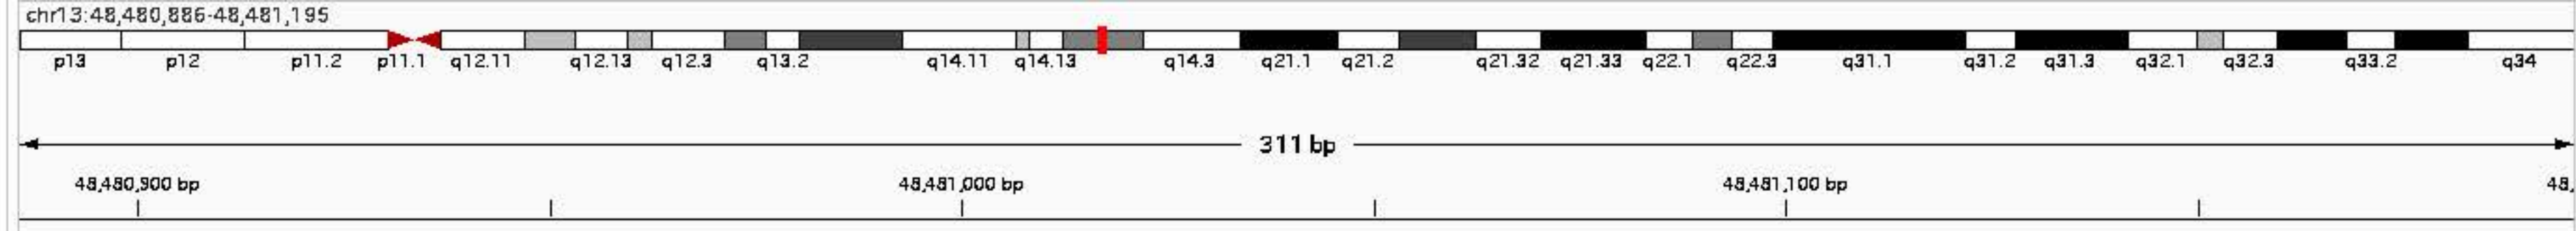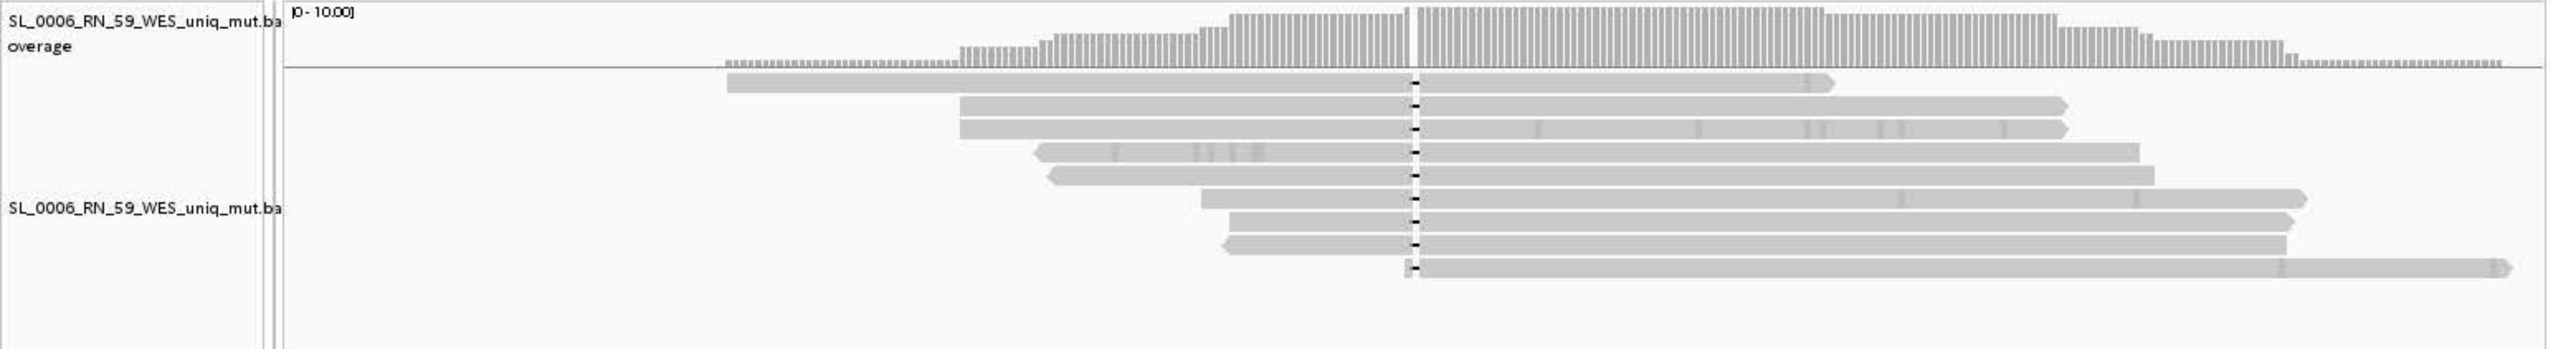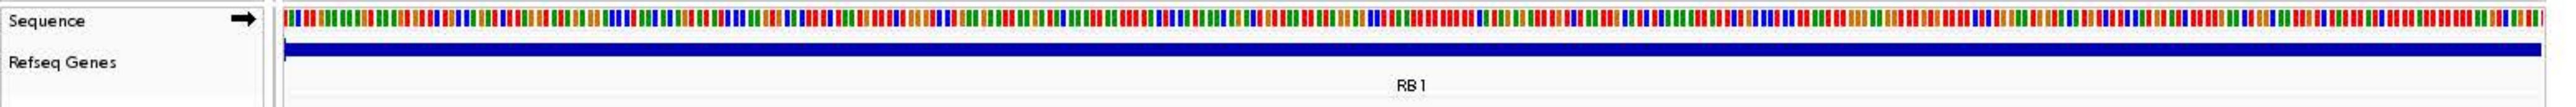

chr2:86,214,704-86,215,013

p25.2 p24.3 p24.1 p23.2 p22.2 p21 p16.2 p15 p13.3 p12 p11.2 q11.1 q12.1 q13 q14.2 q21.1 q22.1 q22.3 q24.1 q24.3 q31.1 q31.3 q32.2 q33.1 q33.3 q35 q36.2 q37.1 q37.3

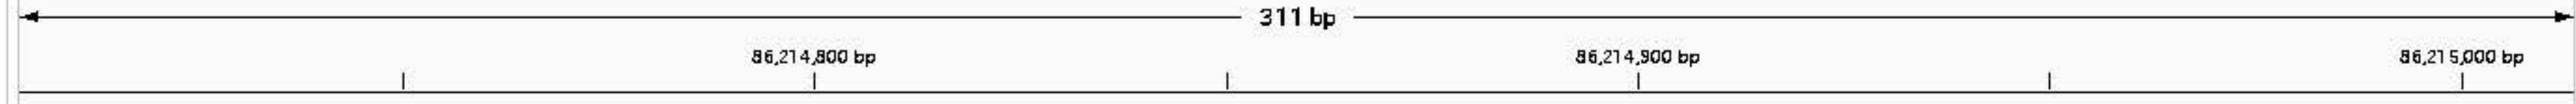

SL\_0001\_LN\_10\_WES\_uniq\_mut.  
coverage

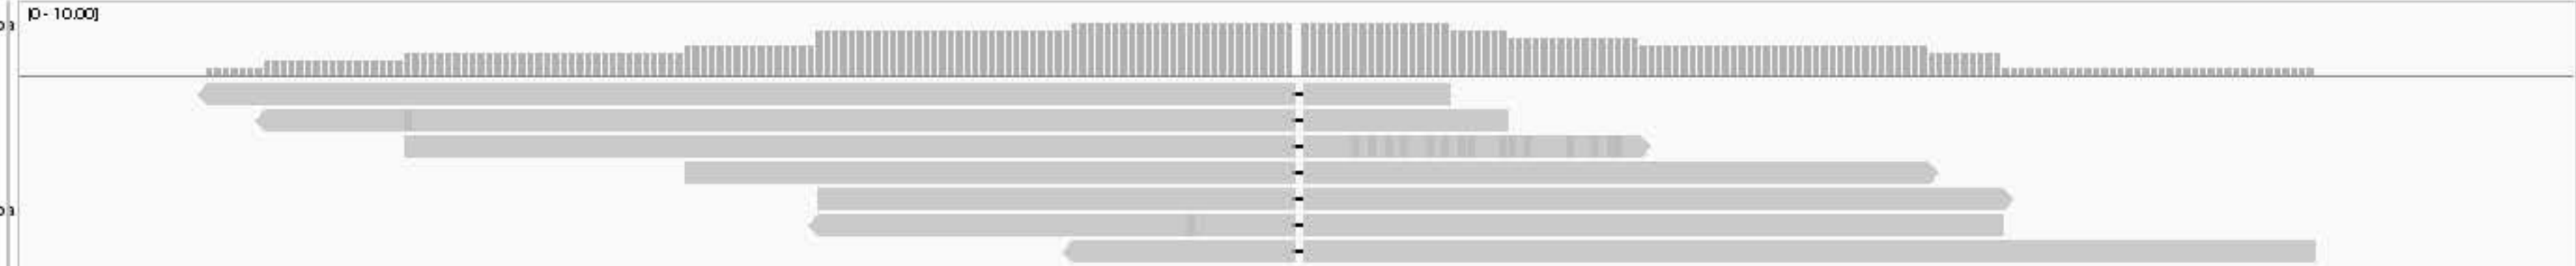

SL\_0001\_LN\_10\_WES\_uniq\_mut.

Sequence

Refseq Genes

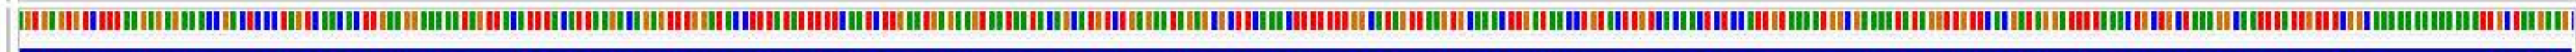

REEP1



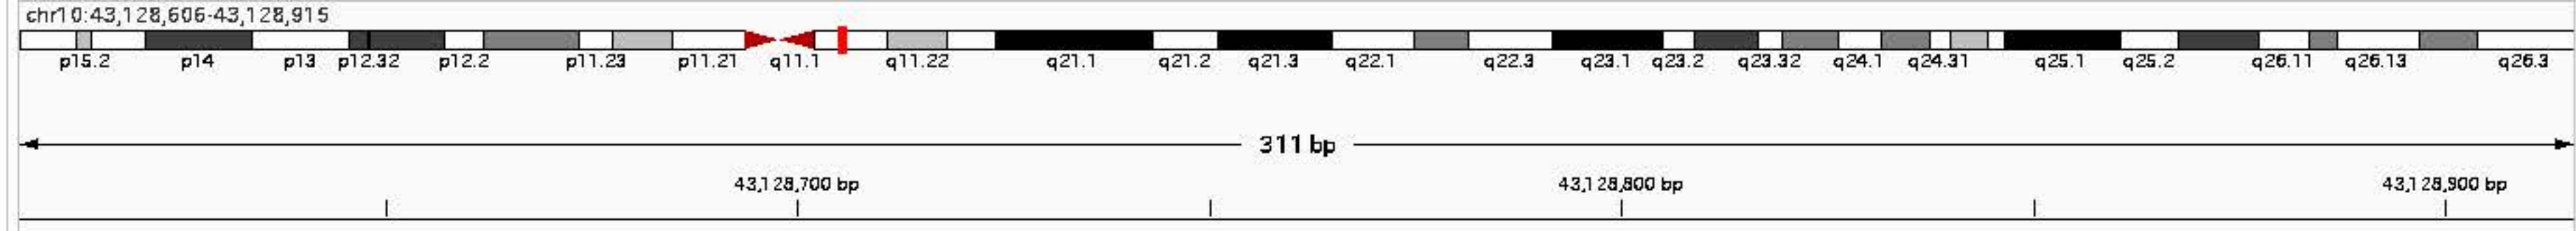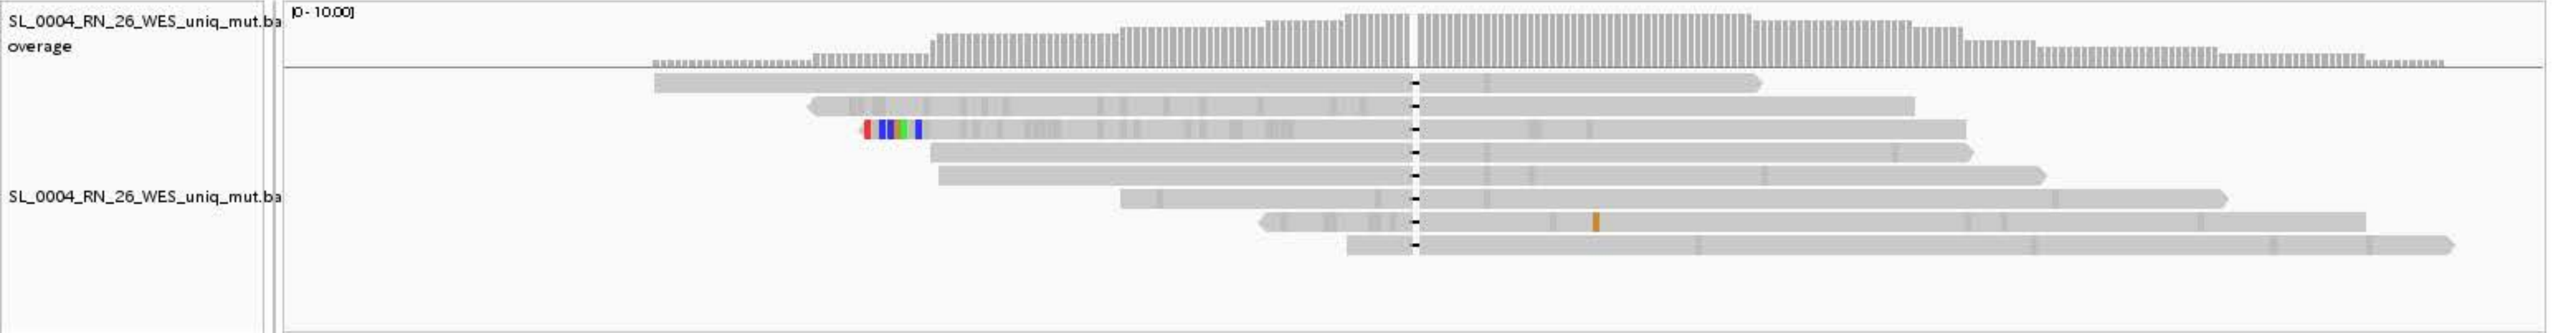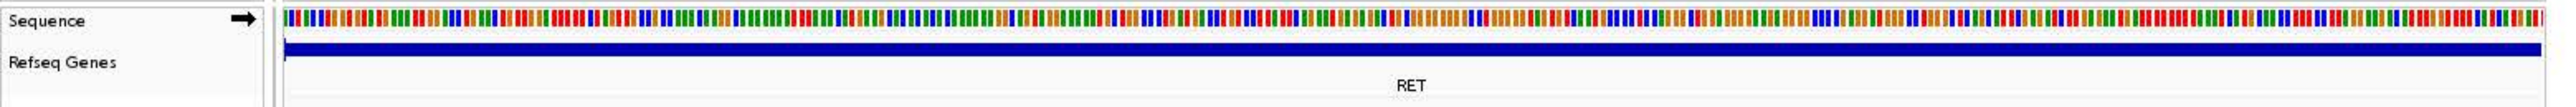

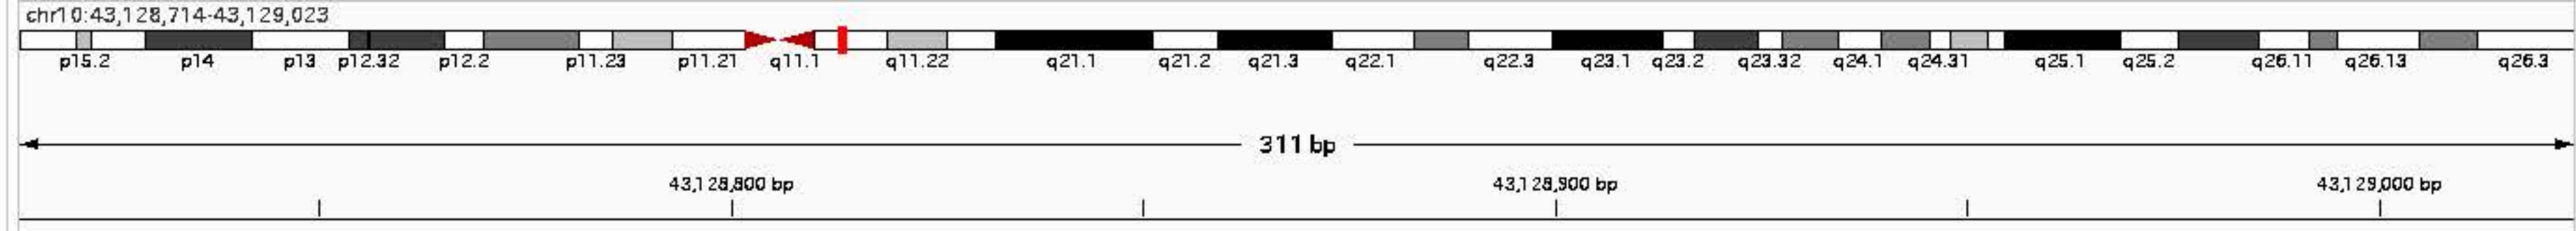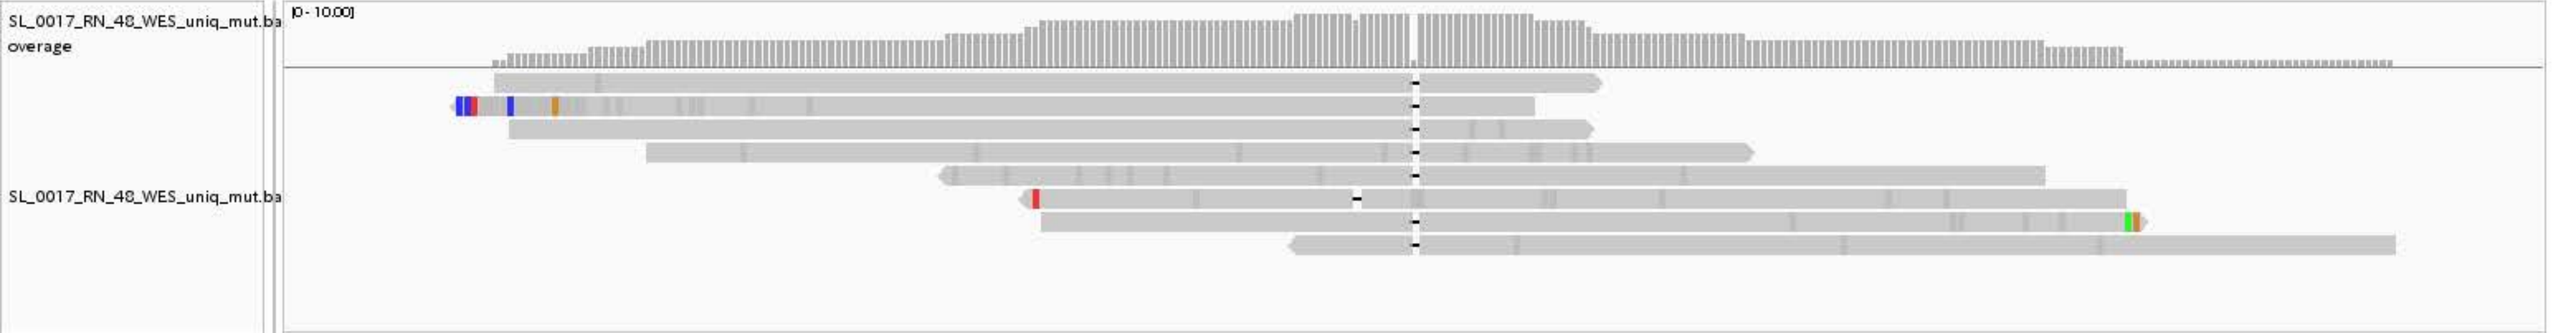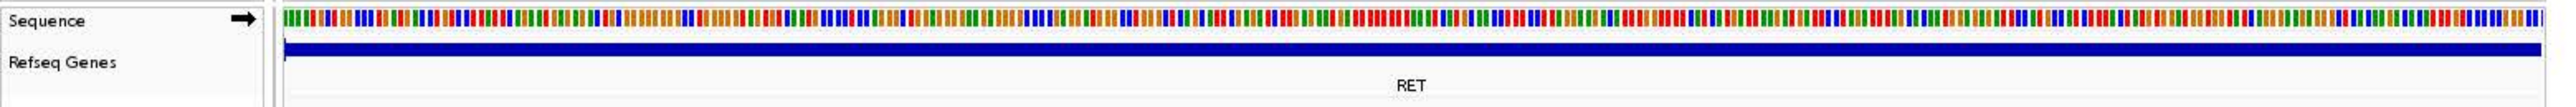

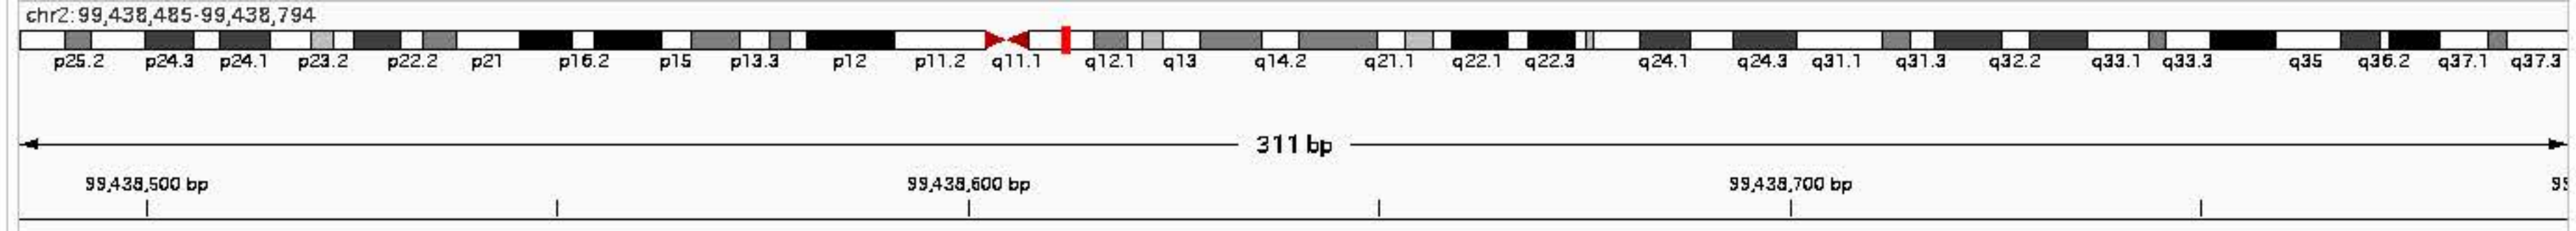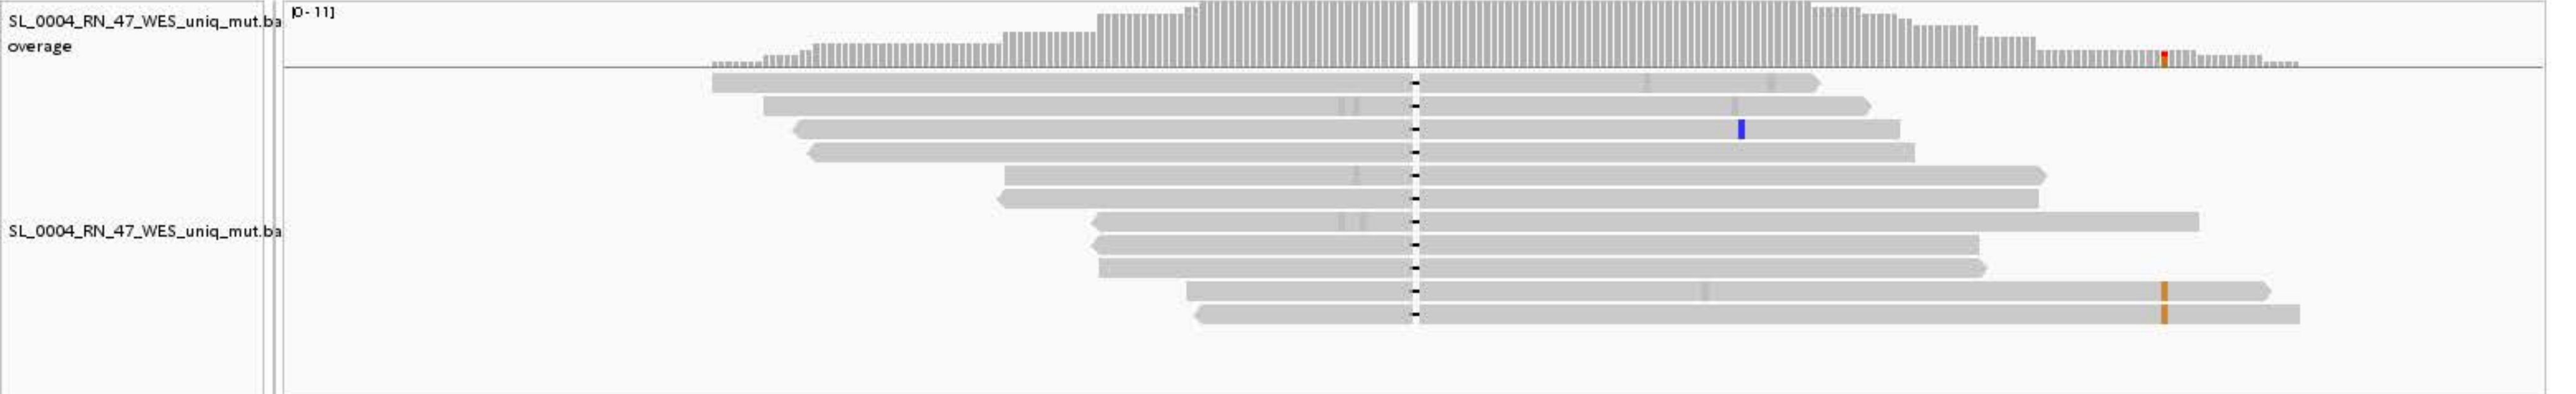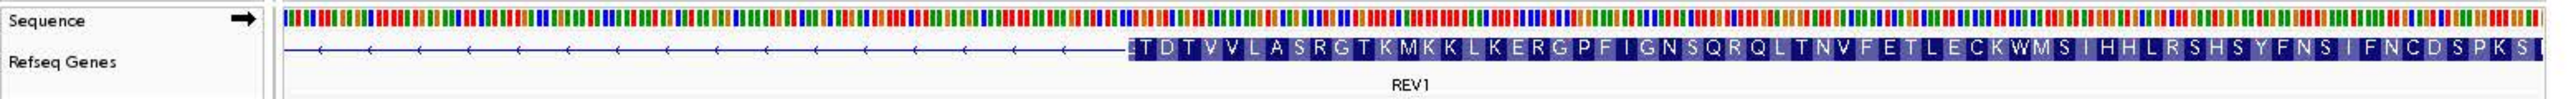



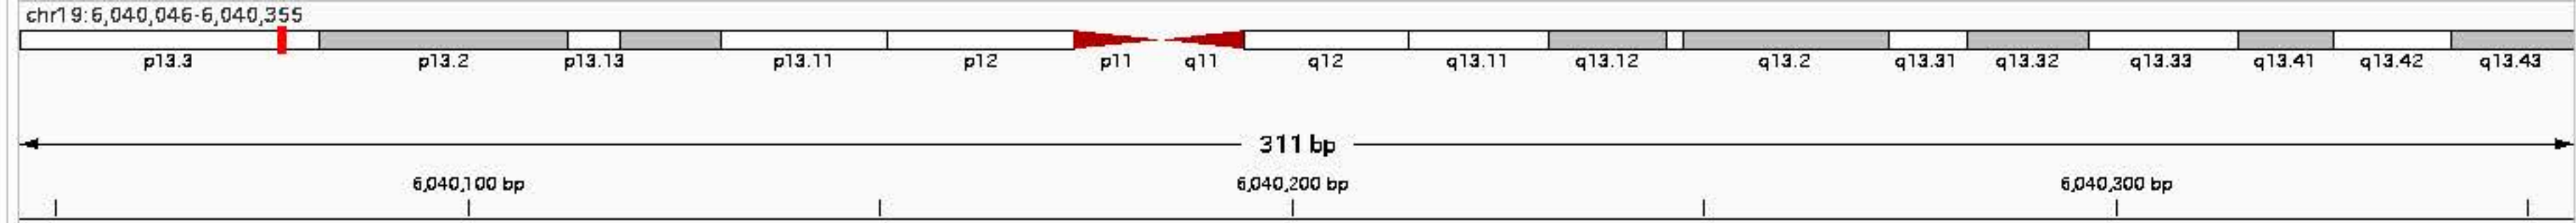

SL\_0004\_RN\_66\_WES\_uniq\_mut.ba  
coverage

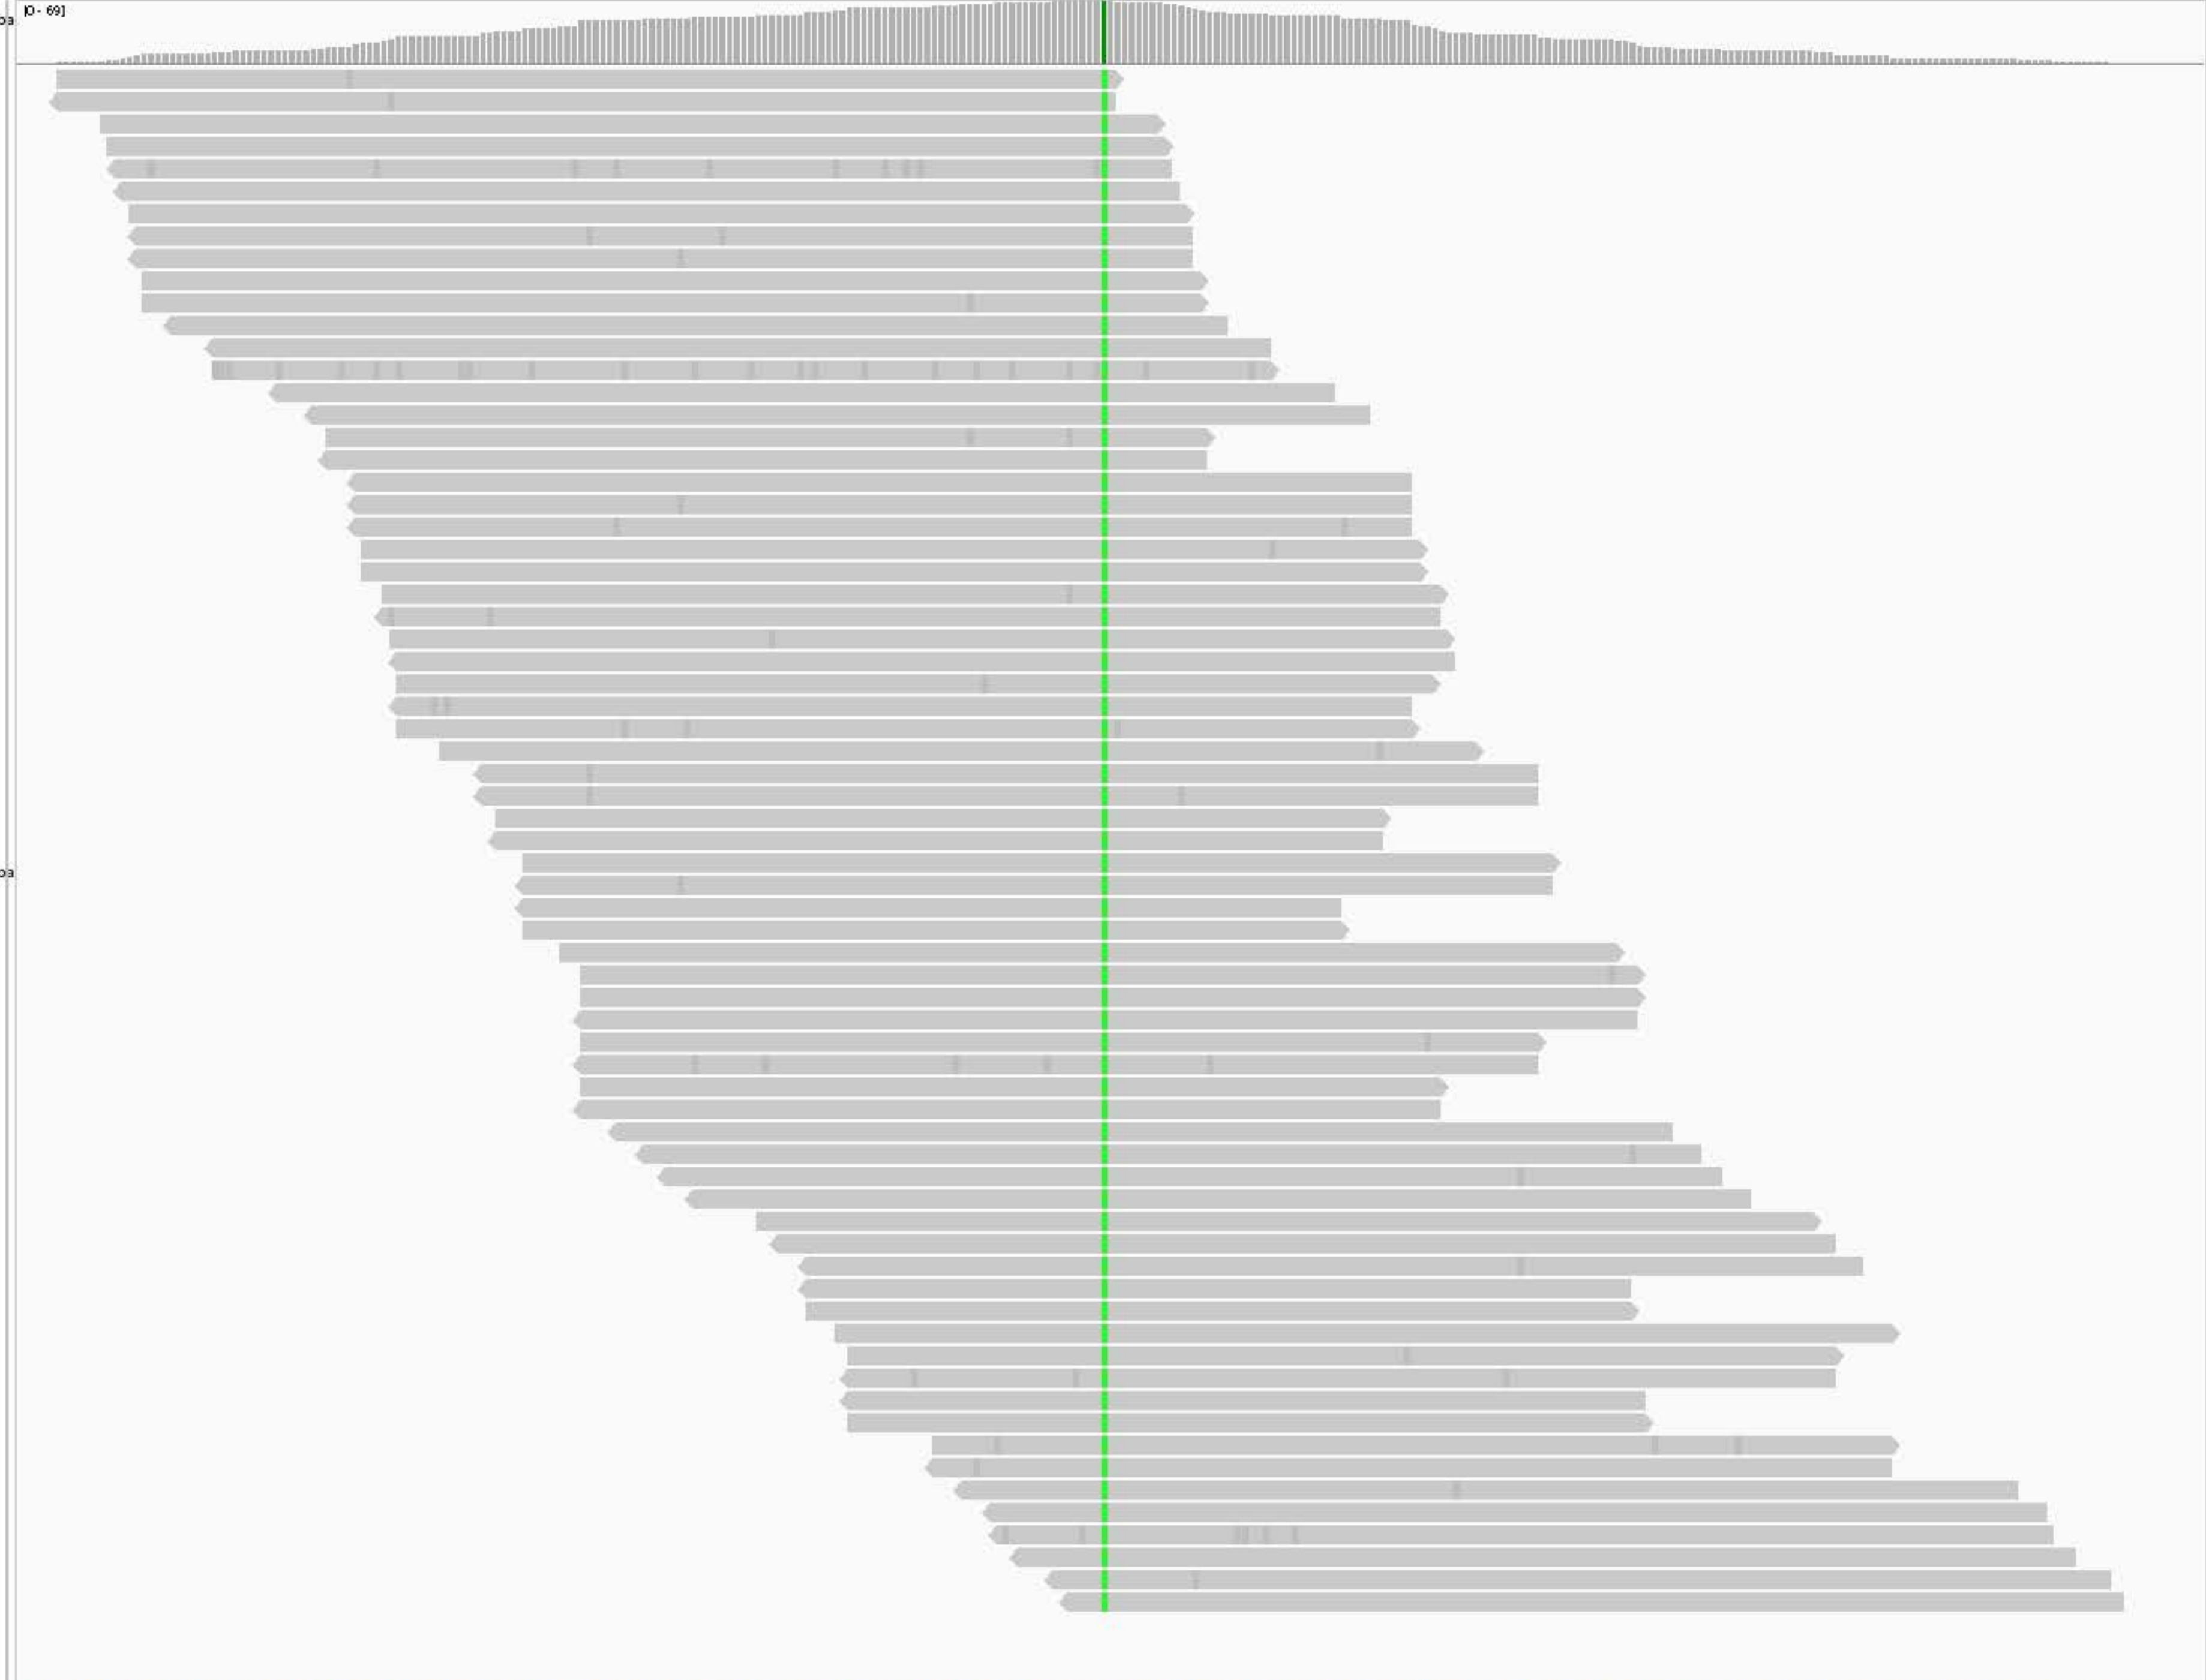

Sequence →

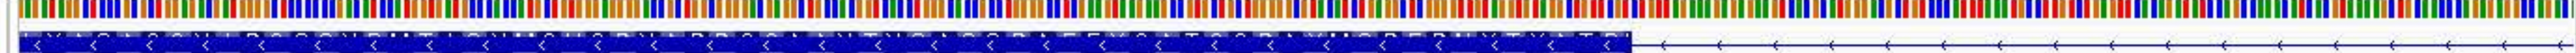

Refseq Genes

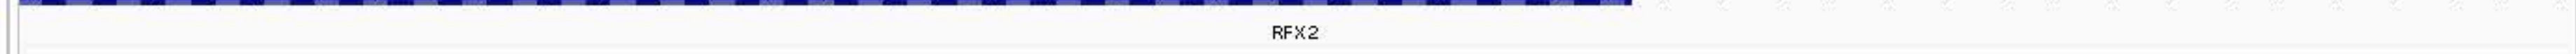

RFX2

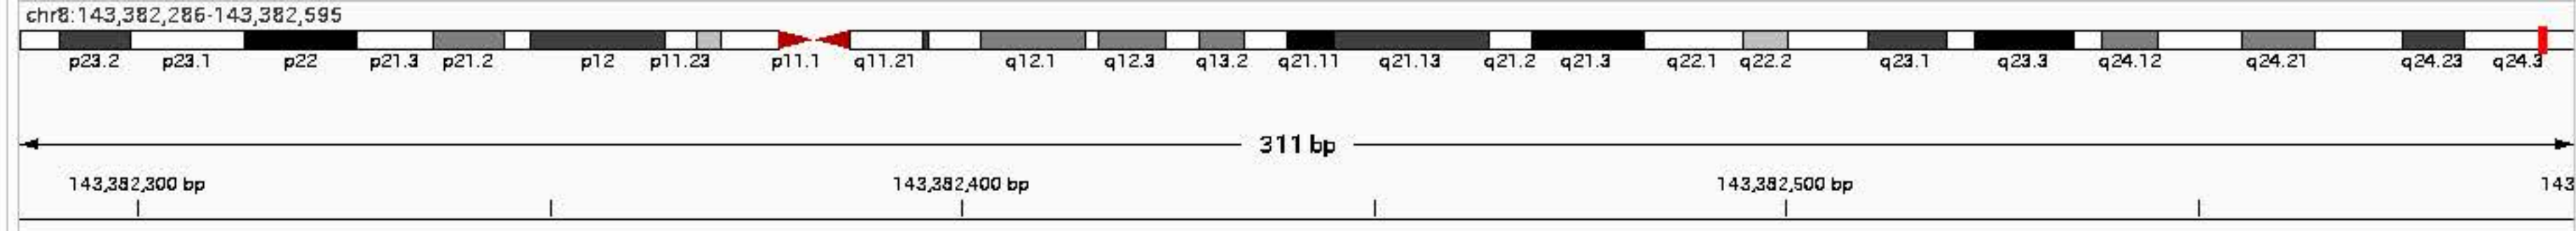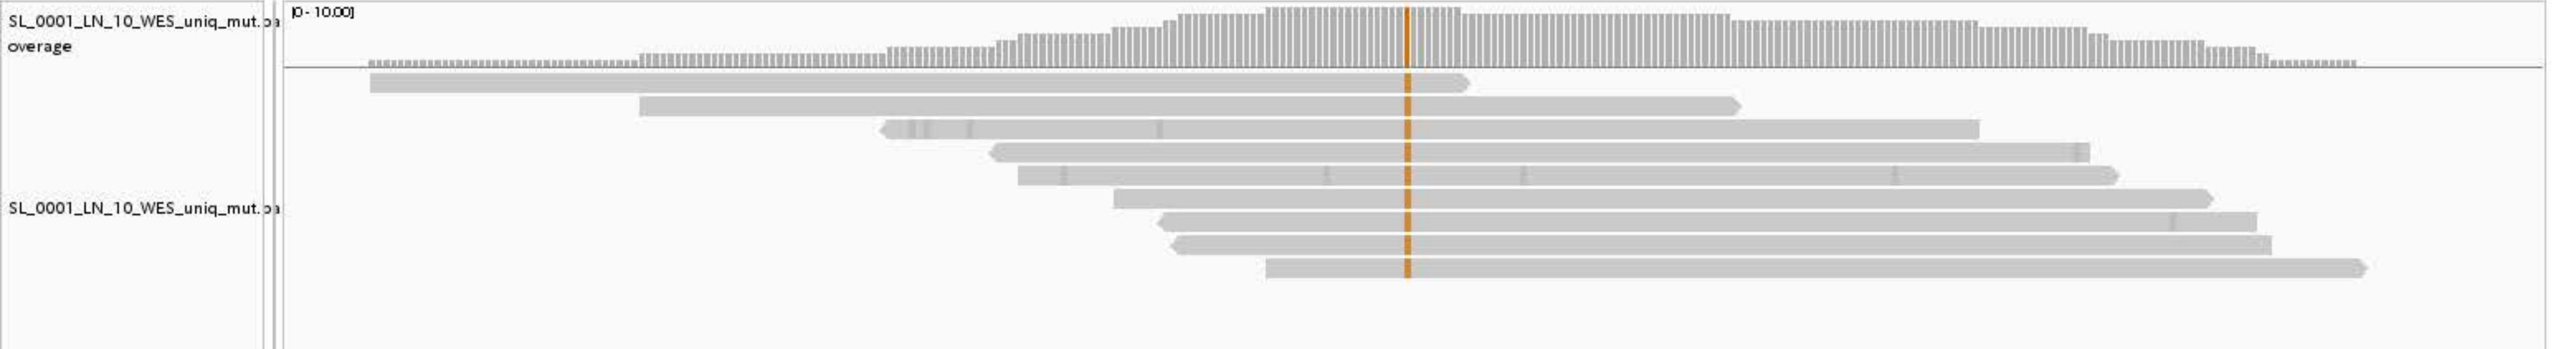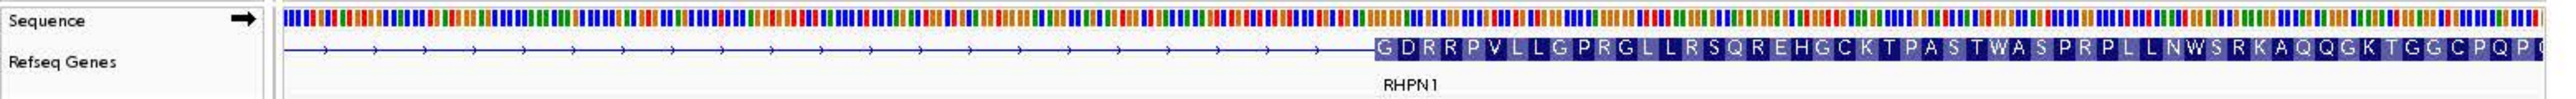

chr4:153,710,289-153,710,598

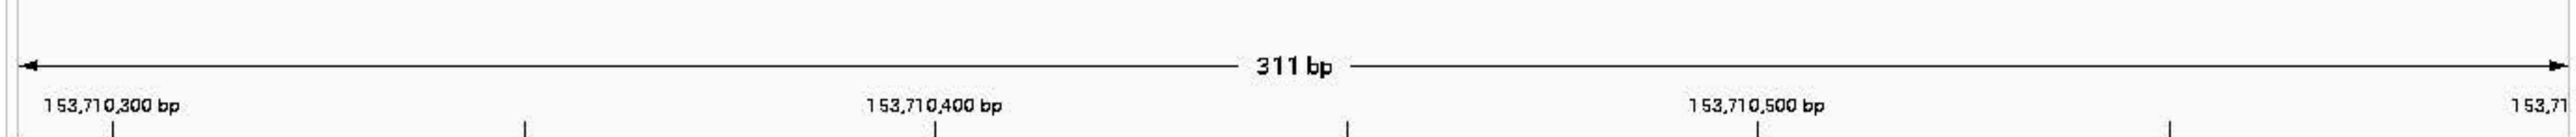

SL\_0004\_RN\_24\_WES\_uniq\_mut.ba  
coverage

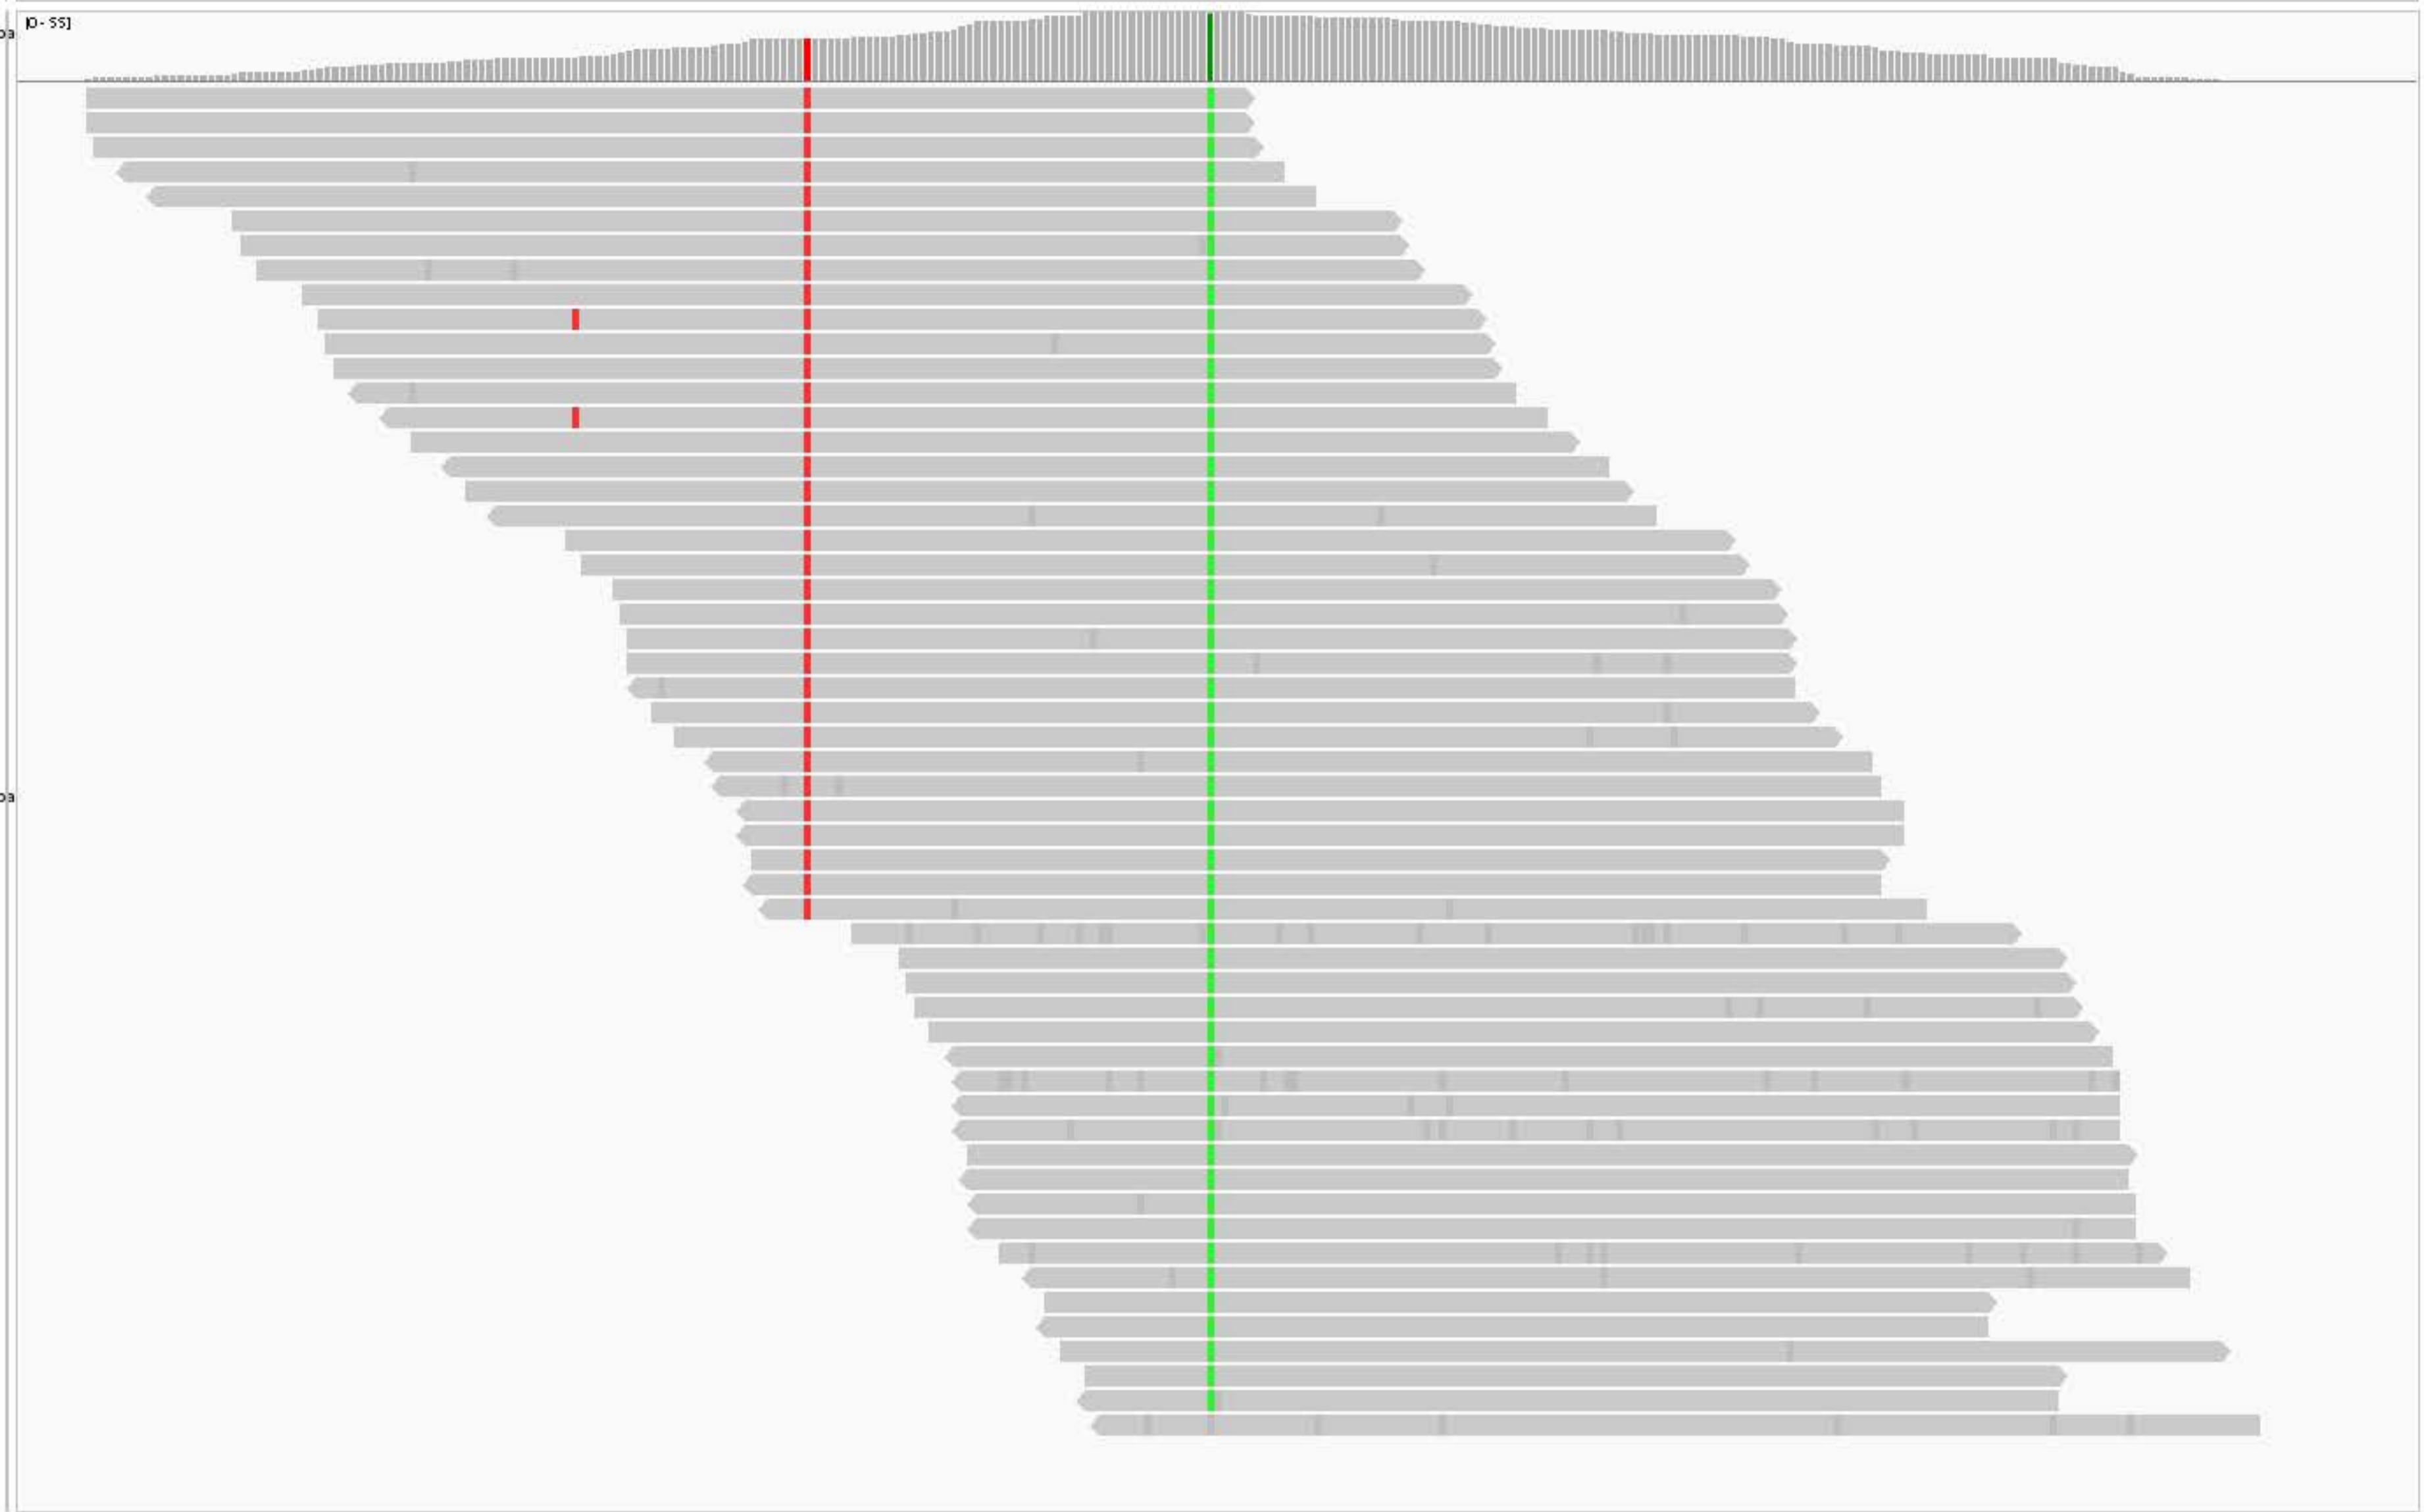

SL\_0004\_RN\_24\_WES\_uniq\_mut.ba

Sequence

Refseq Genes

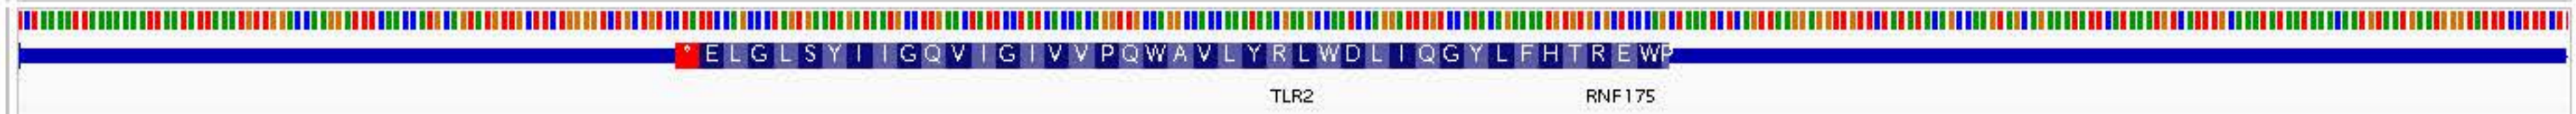

TLR2

RNF175



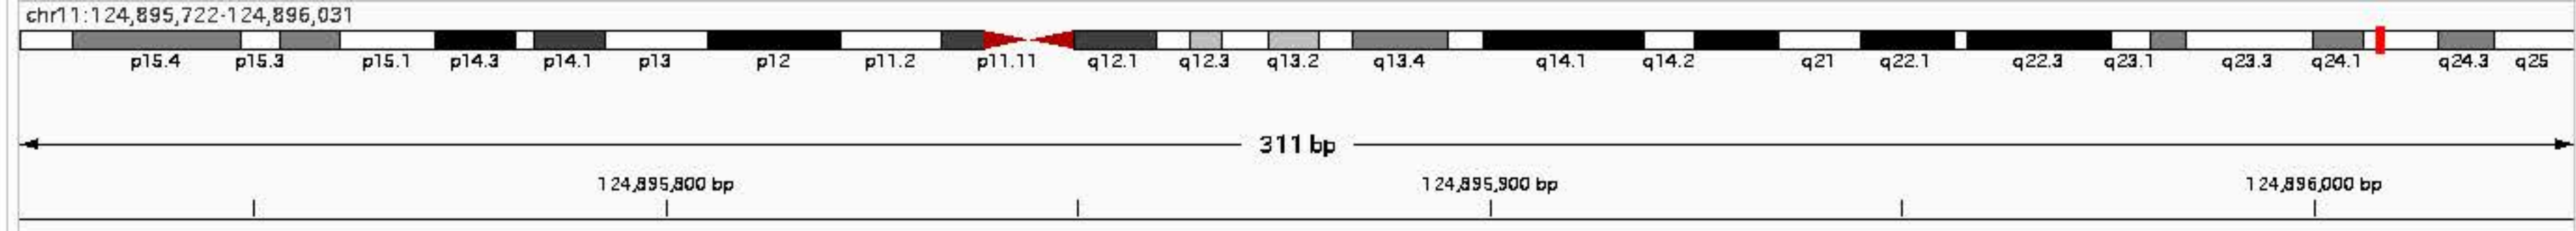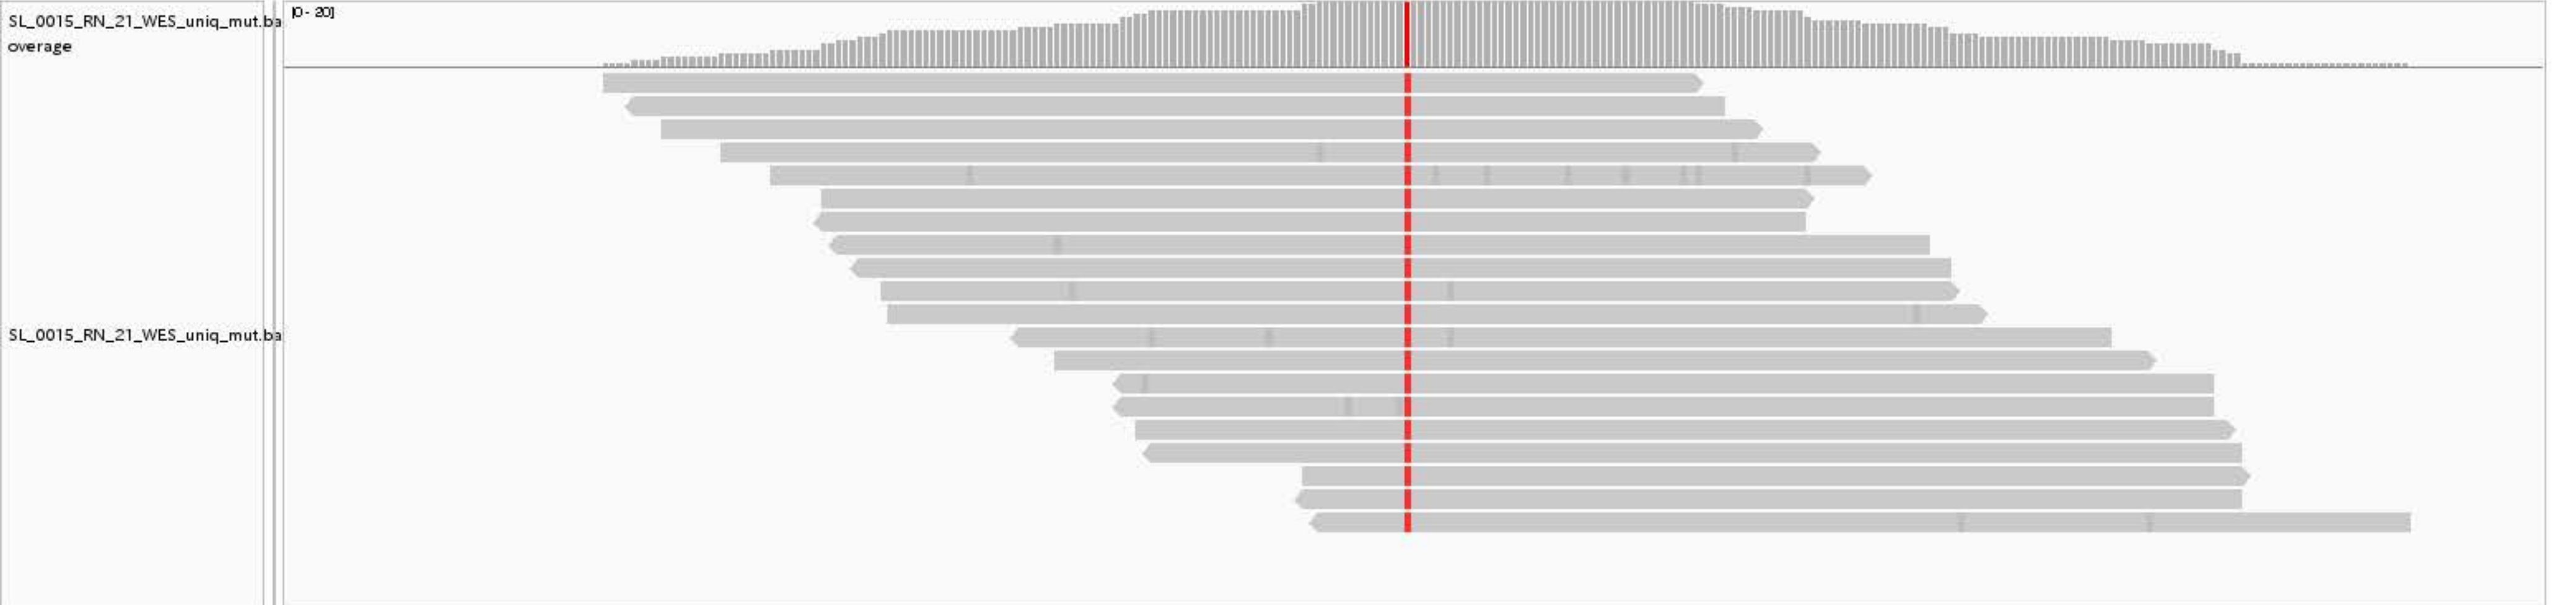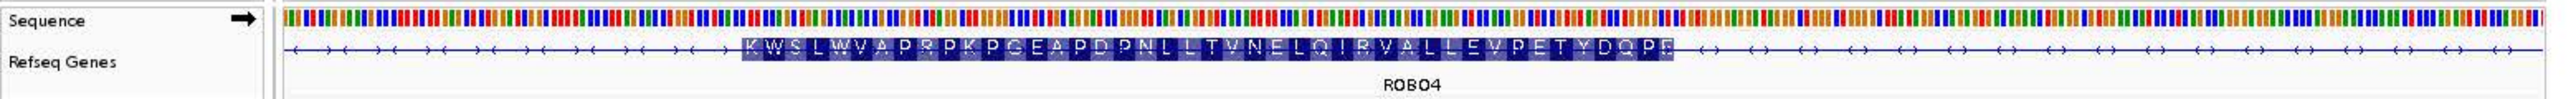

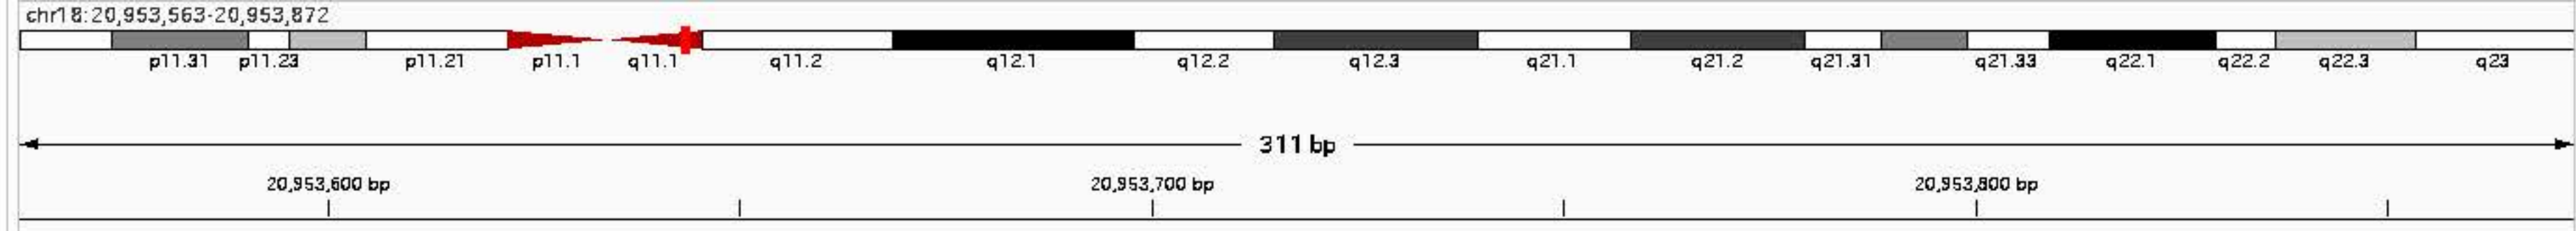

SL\_0001\_LN\_10\_WES\_uniq\_mut. coverage

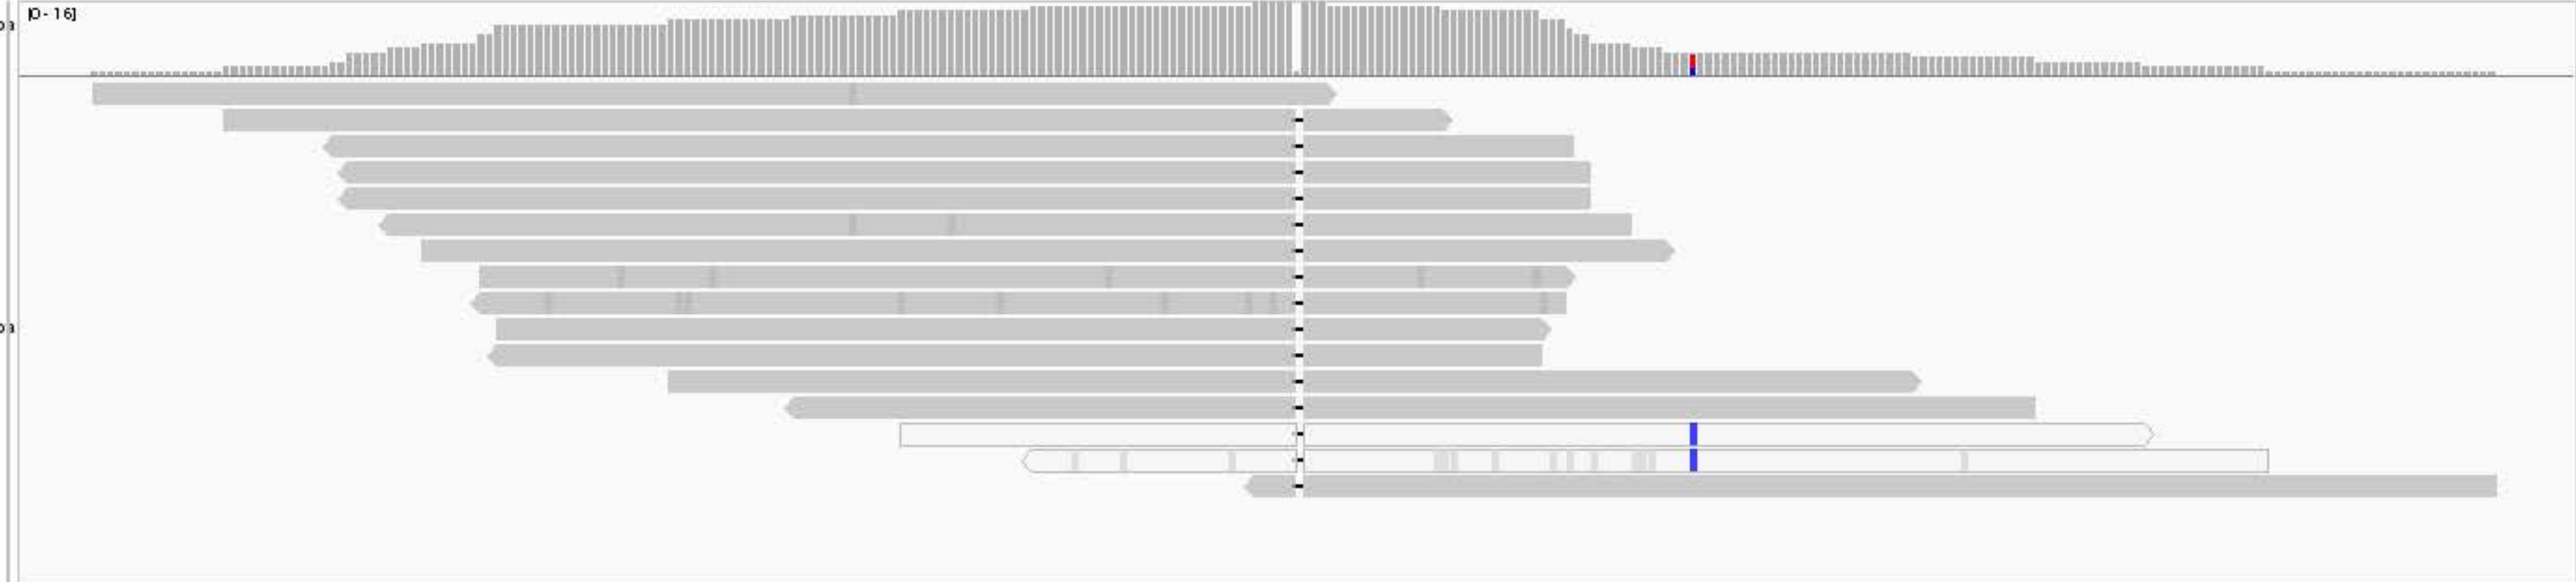

SL\_0001\_LN\_10\_WES\_uniq\_mut. coverage

Sequence

Refseq Genes

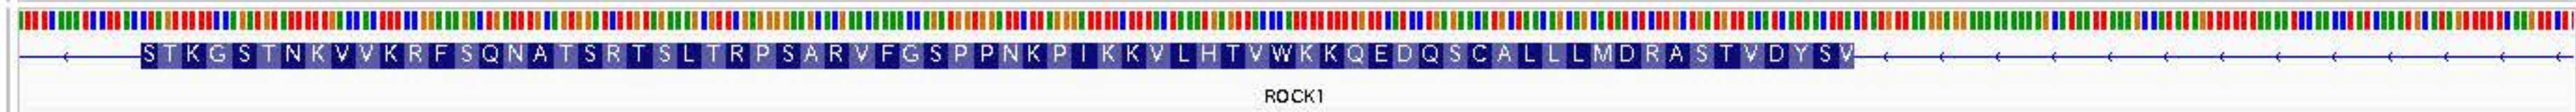

Supplement: 41523_2024_693_MOESM6_ESM.pdf [file 41523_2024_693_MOESM6_ESM.pdf]
