# Supplementary material for: Cancer risk assessment of premalignant breast tissues from patients with BRCA mutations by genome profiling
Source: PubMed Central journal article supplement — NPJ Breast Cancer. 2024 Oct 4;10:87. doi: 10.1038/s41523-024-00693-9 (PMC11452615; doi:10.1038/s41523-024-00693-9), 2024-10-04

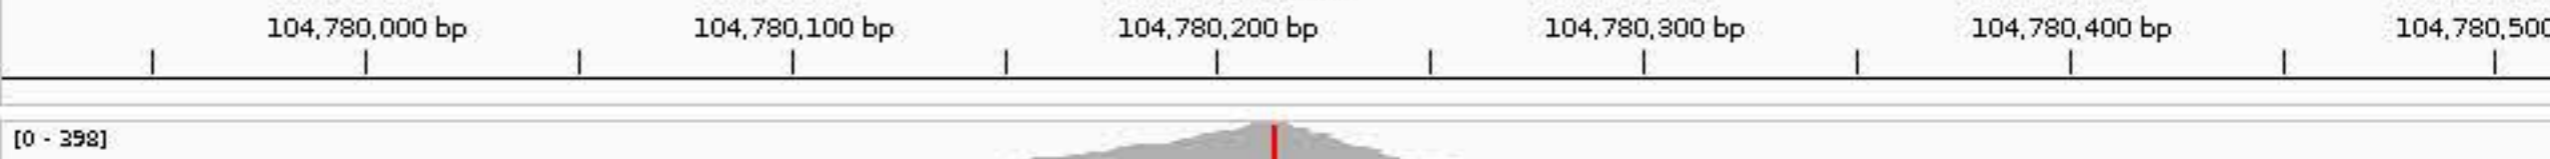

SL\_0009-LT\_3-B\_mut.bam Coverage

SL\_0009-LT\_3-B\_mut.bam

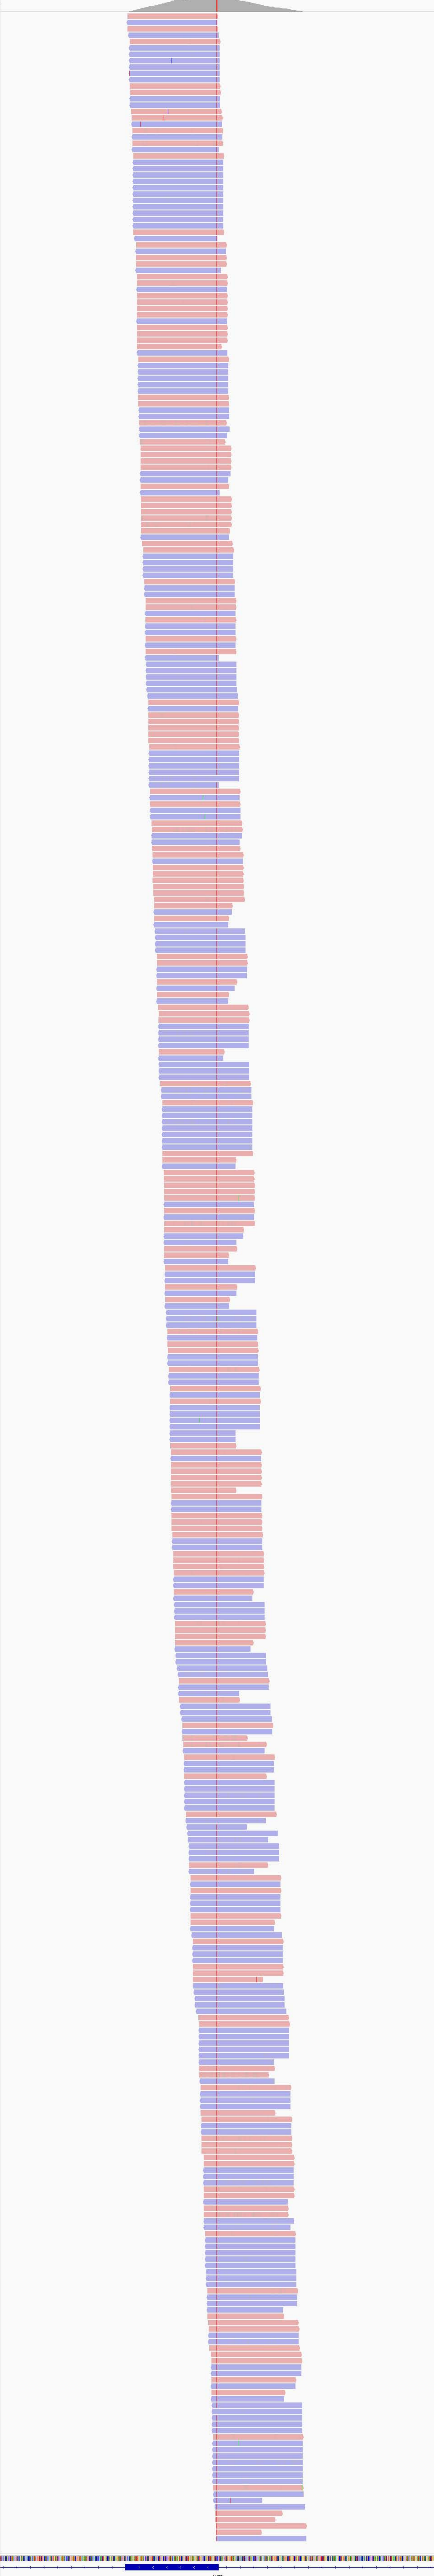

Sequence

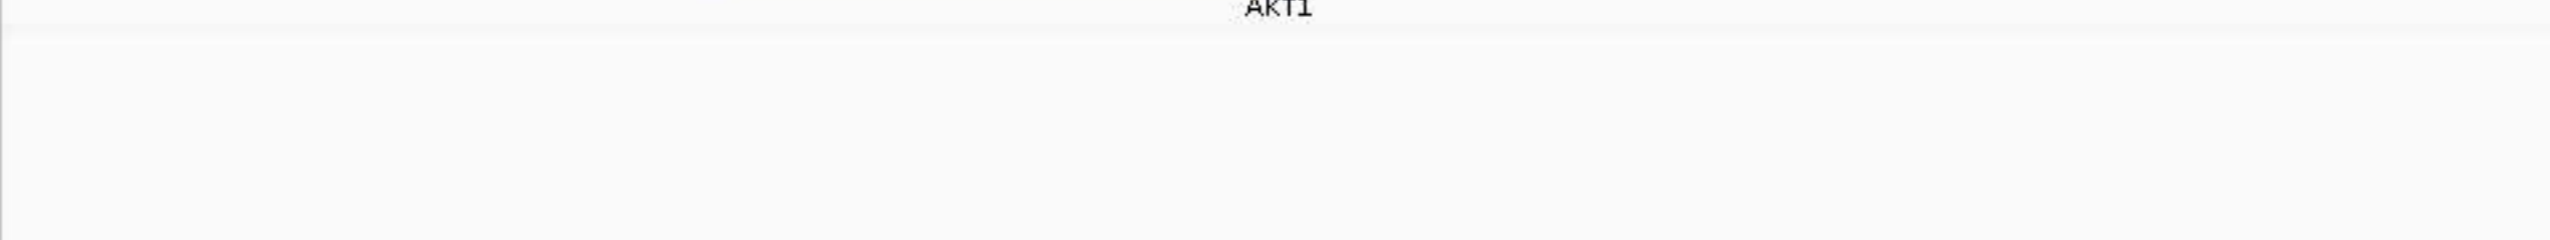



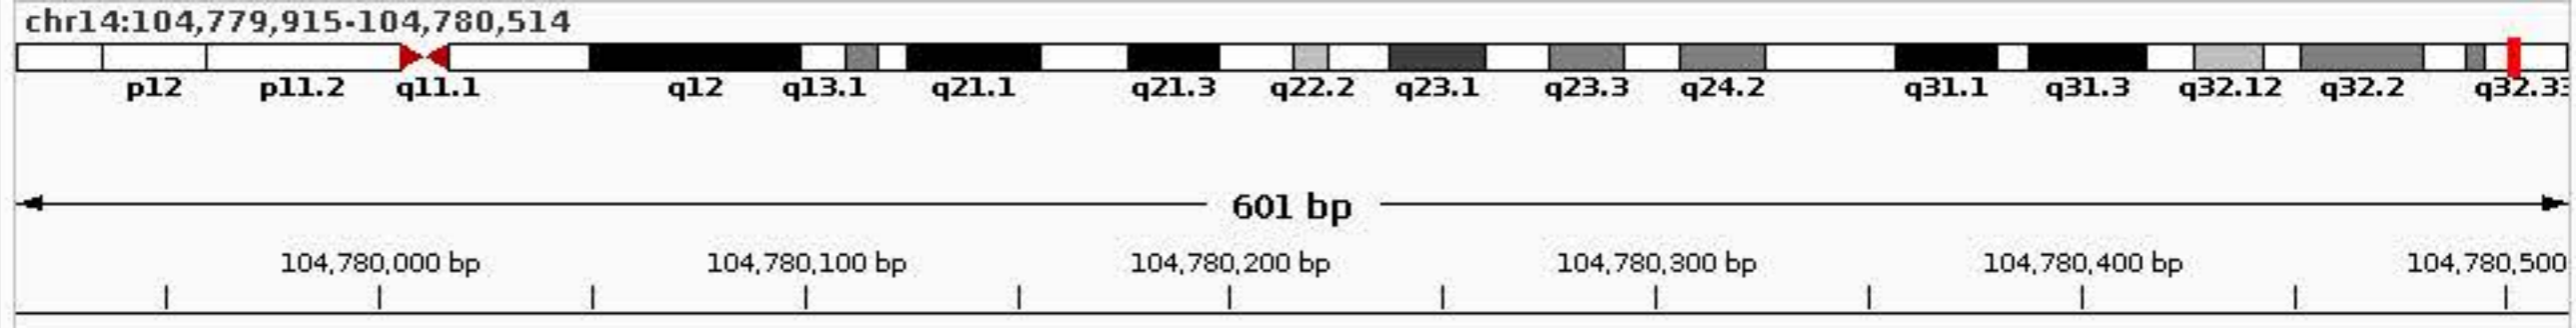

SL\_0009-LT\_9-B\_mut.bam Coverage

SL\_0009-LT\_9-B\_mut.bam

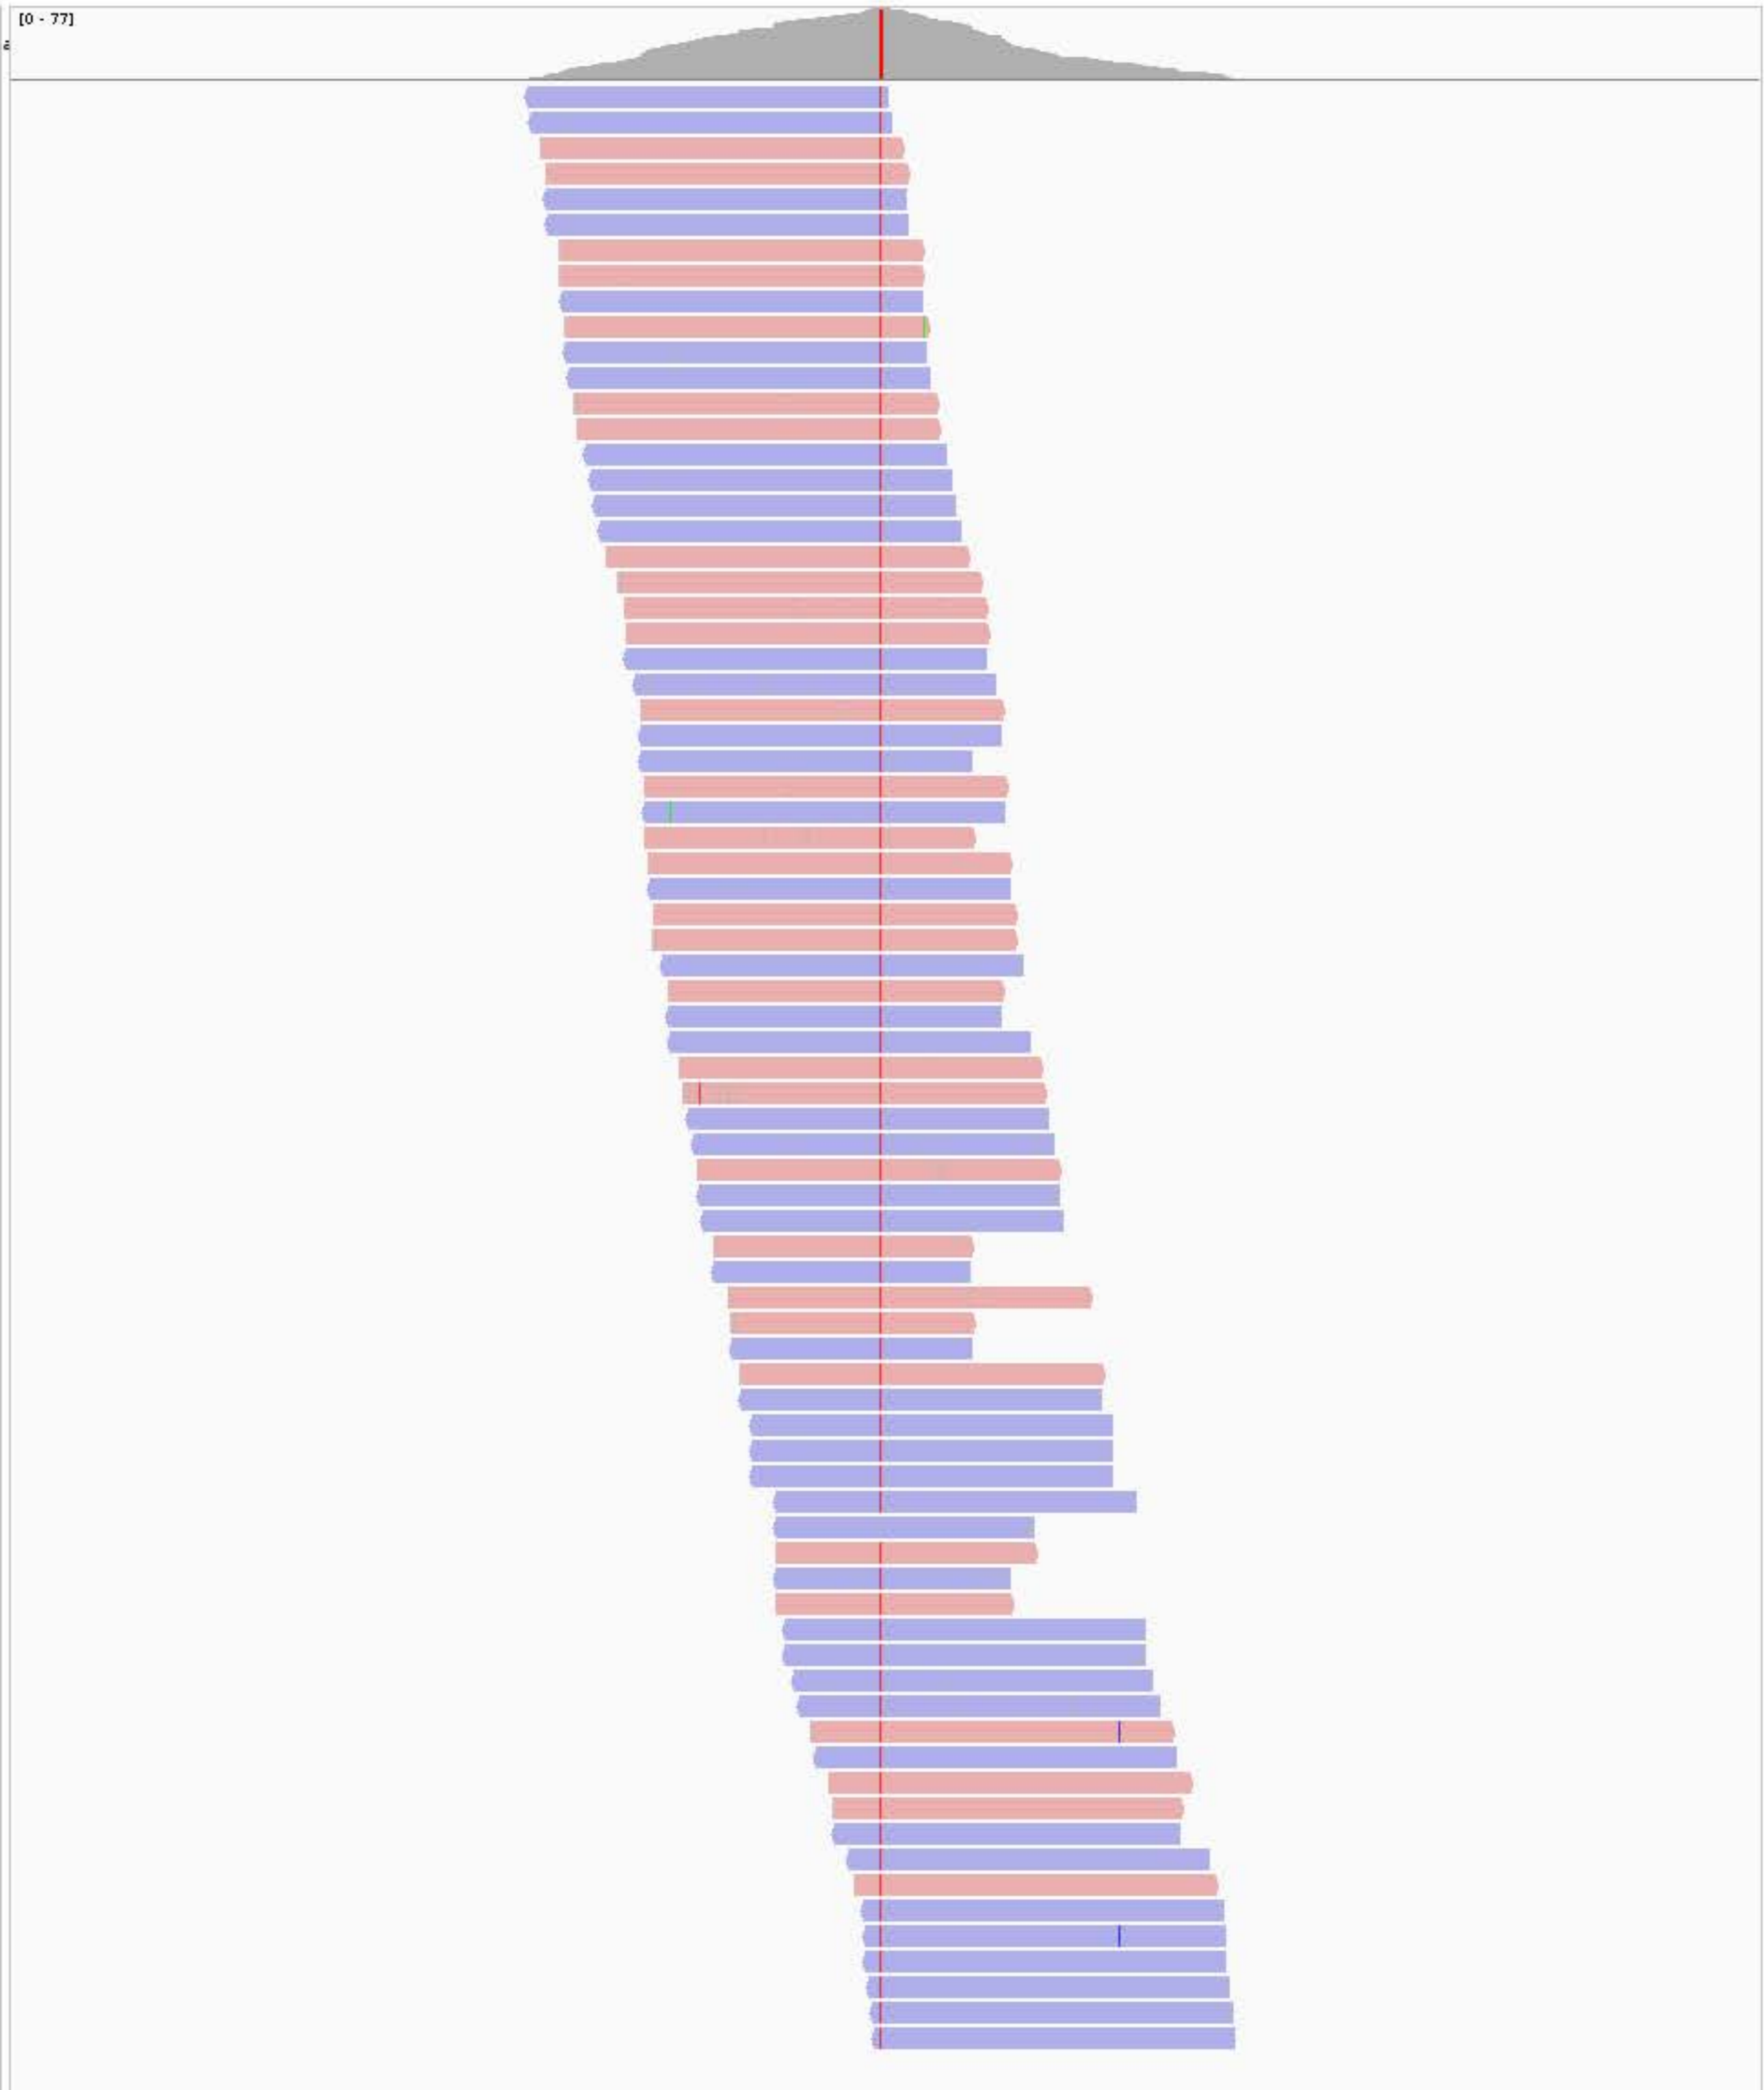

Sequence →

Refseq Genes

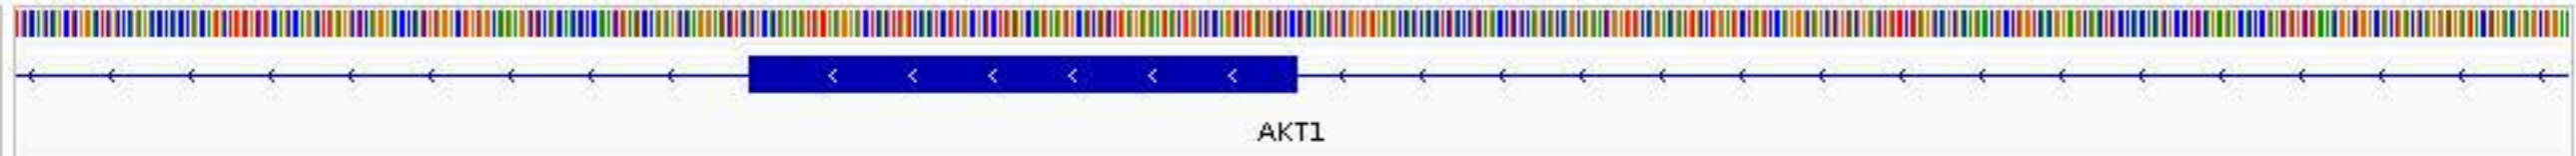

chr19:46,921,203-46,921,802

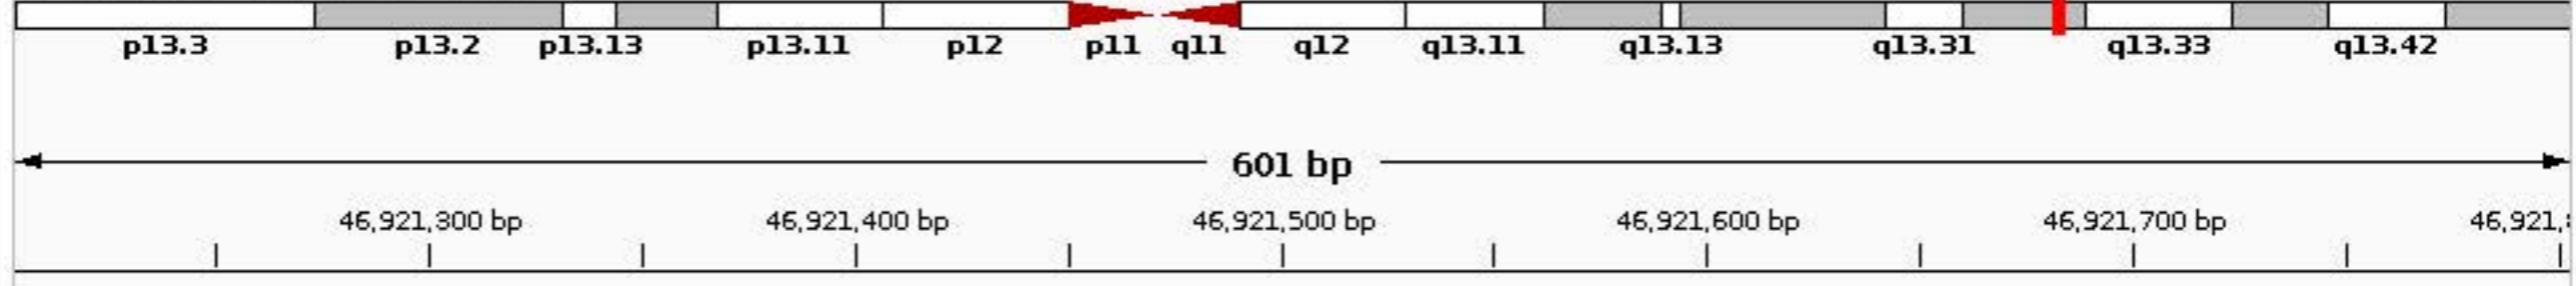

SL\_0011-LT\_6-B\_mut.bam Coverage

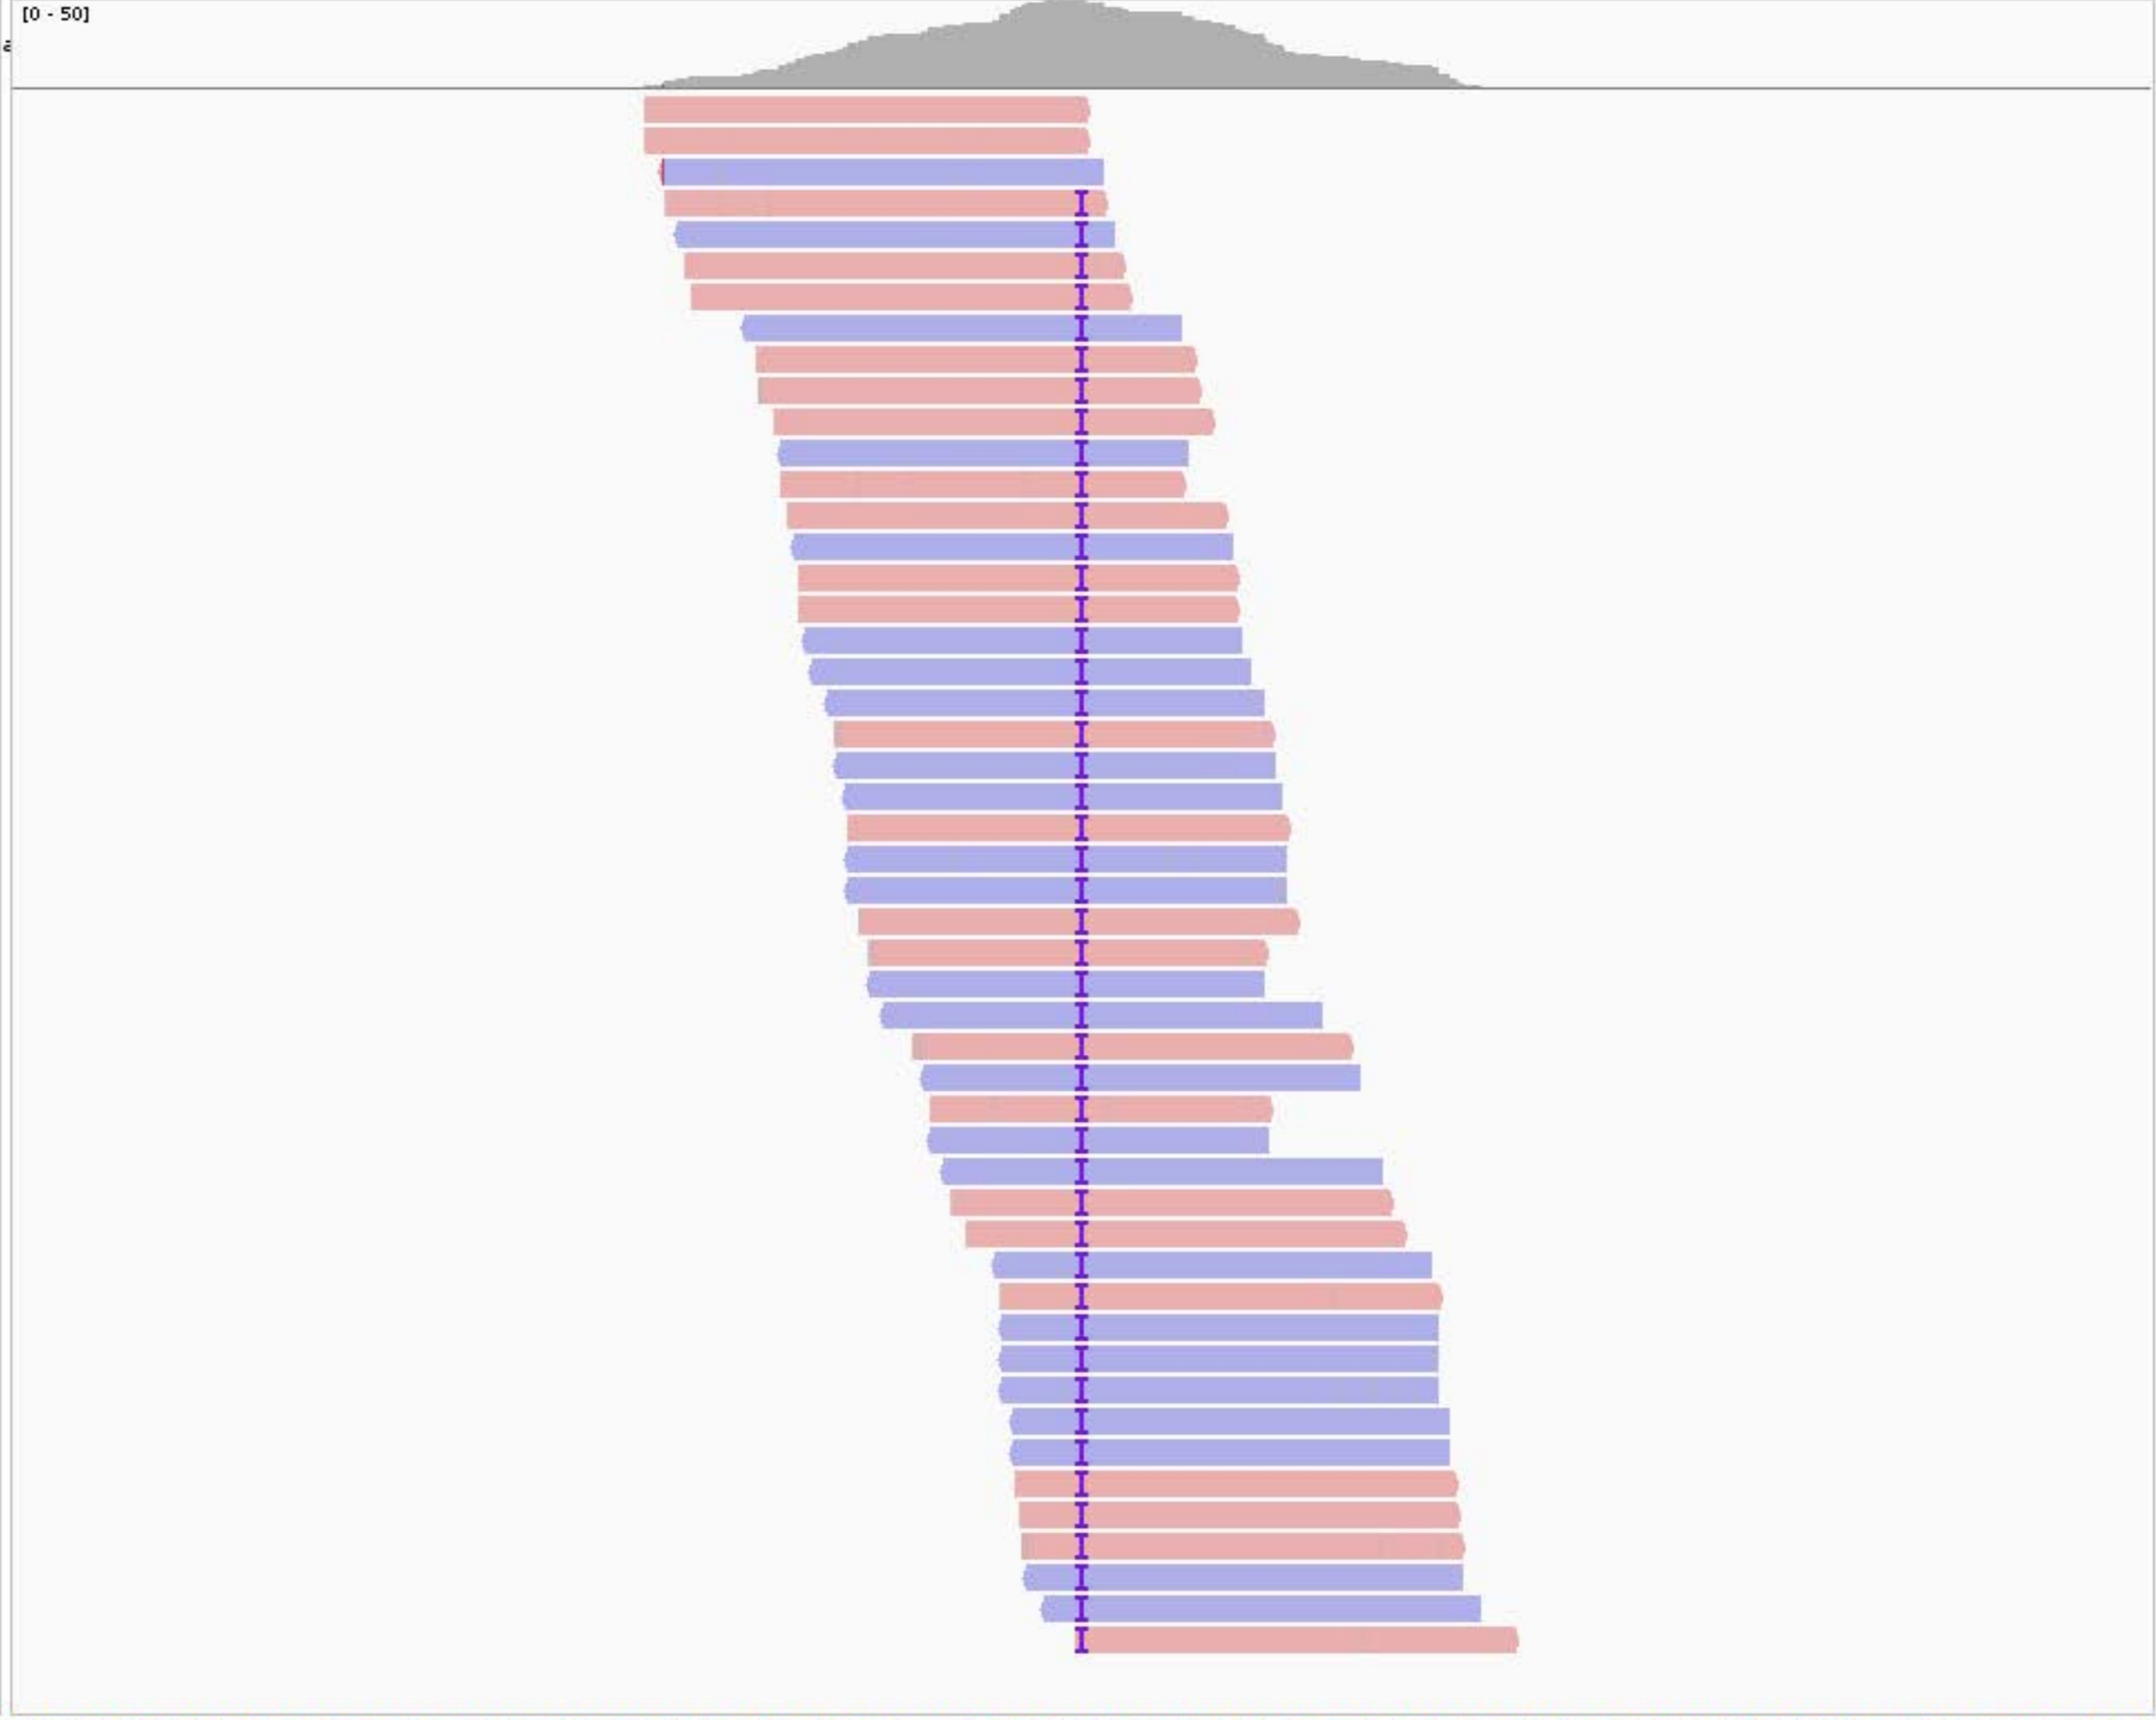

SL\_0011-LT\_6-B\_mut.bam

Sequence

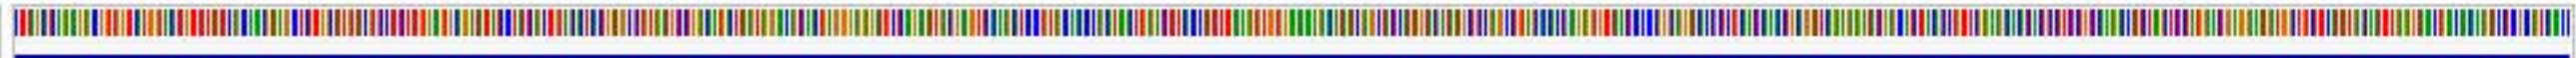

Refseq Genes

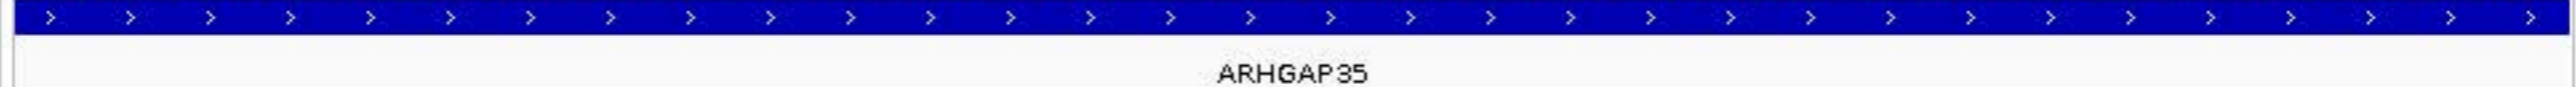

ARHGAP35

chr19:46,921,540-46,922,139

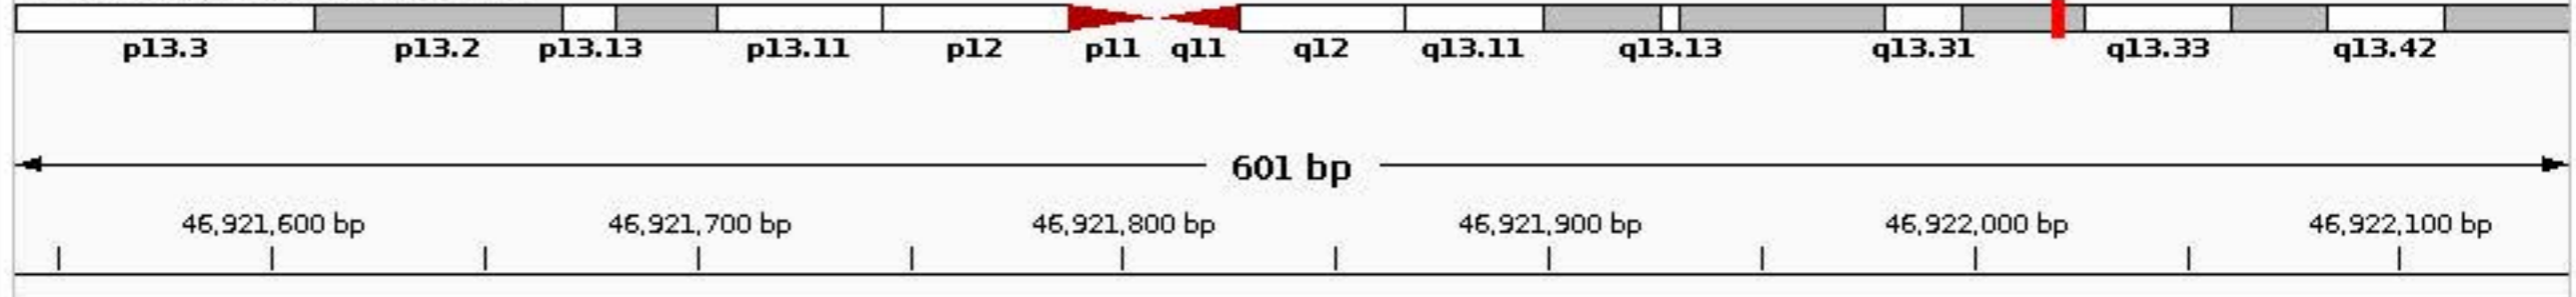

SL\_1010-N6-B\_mut.bam Coverage

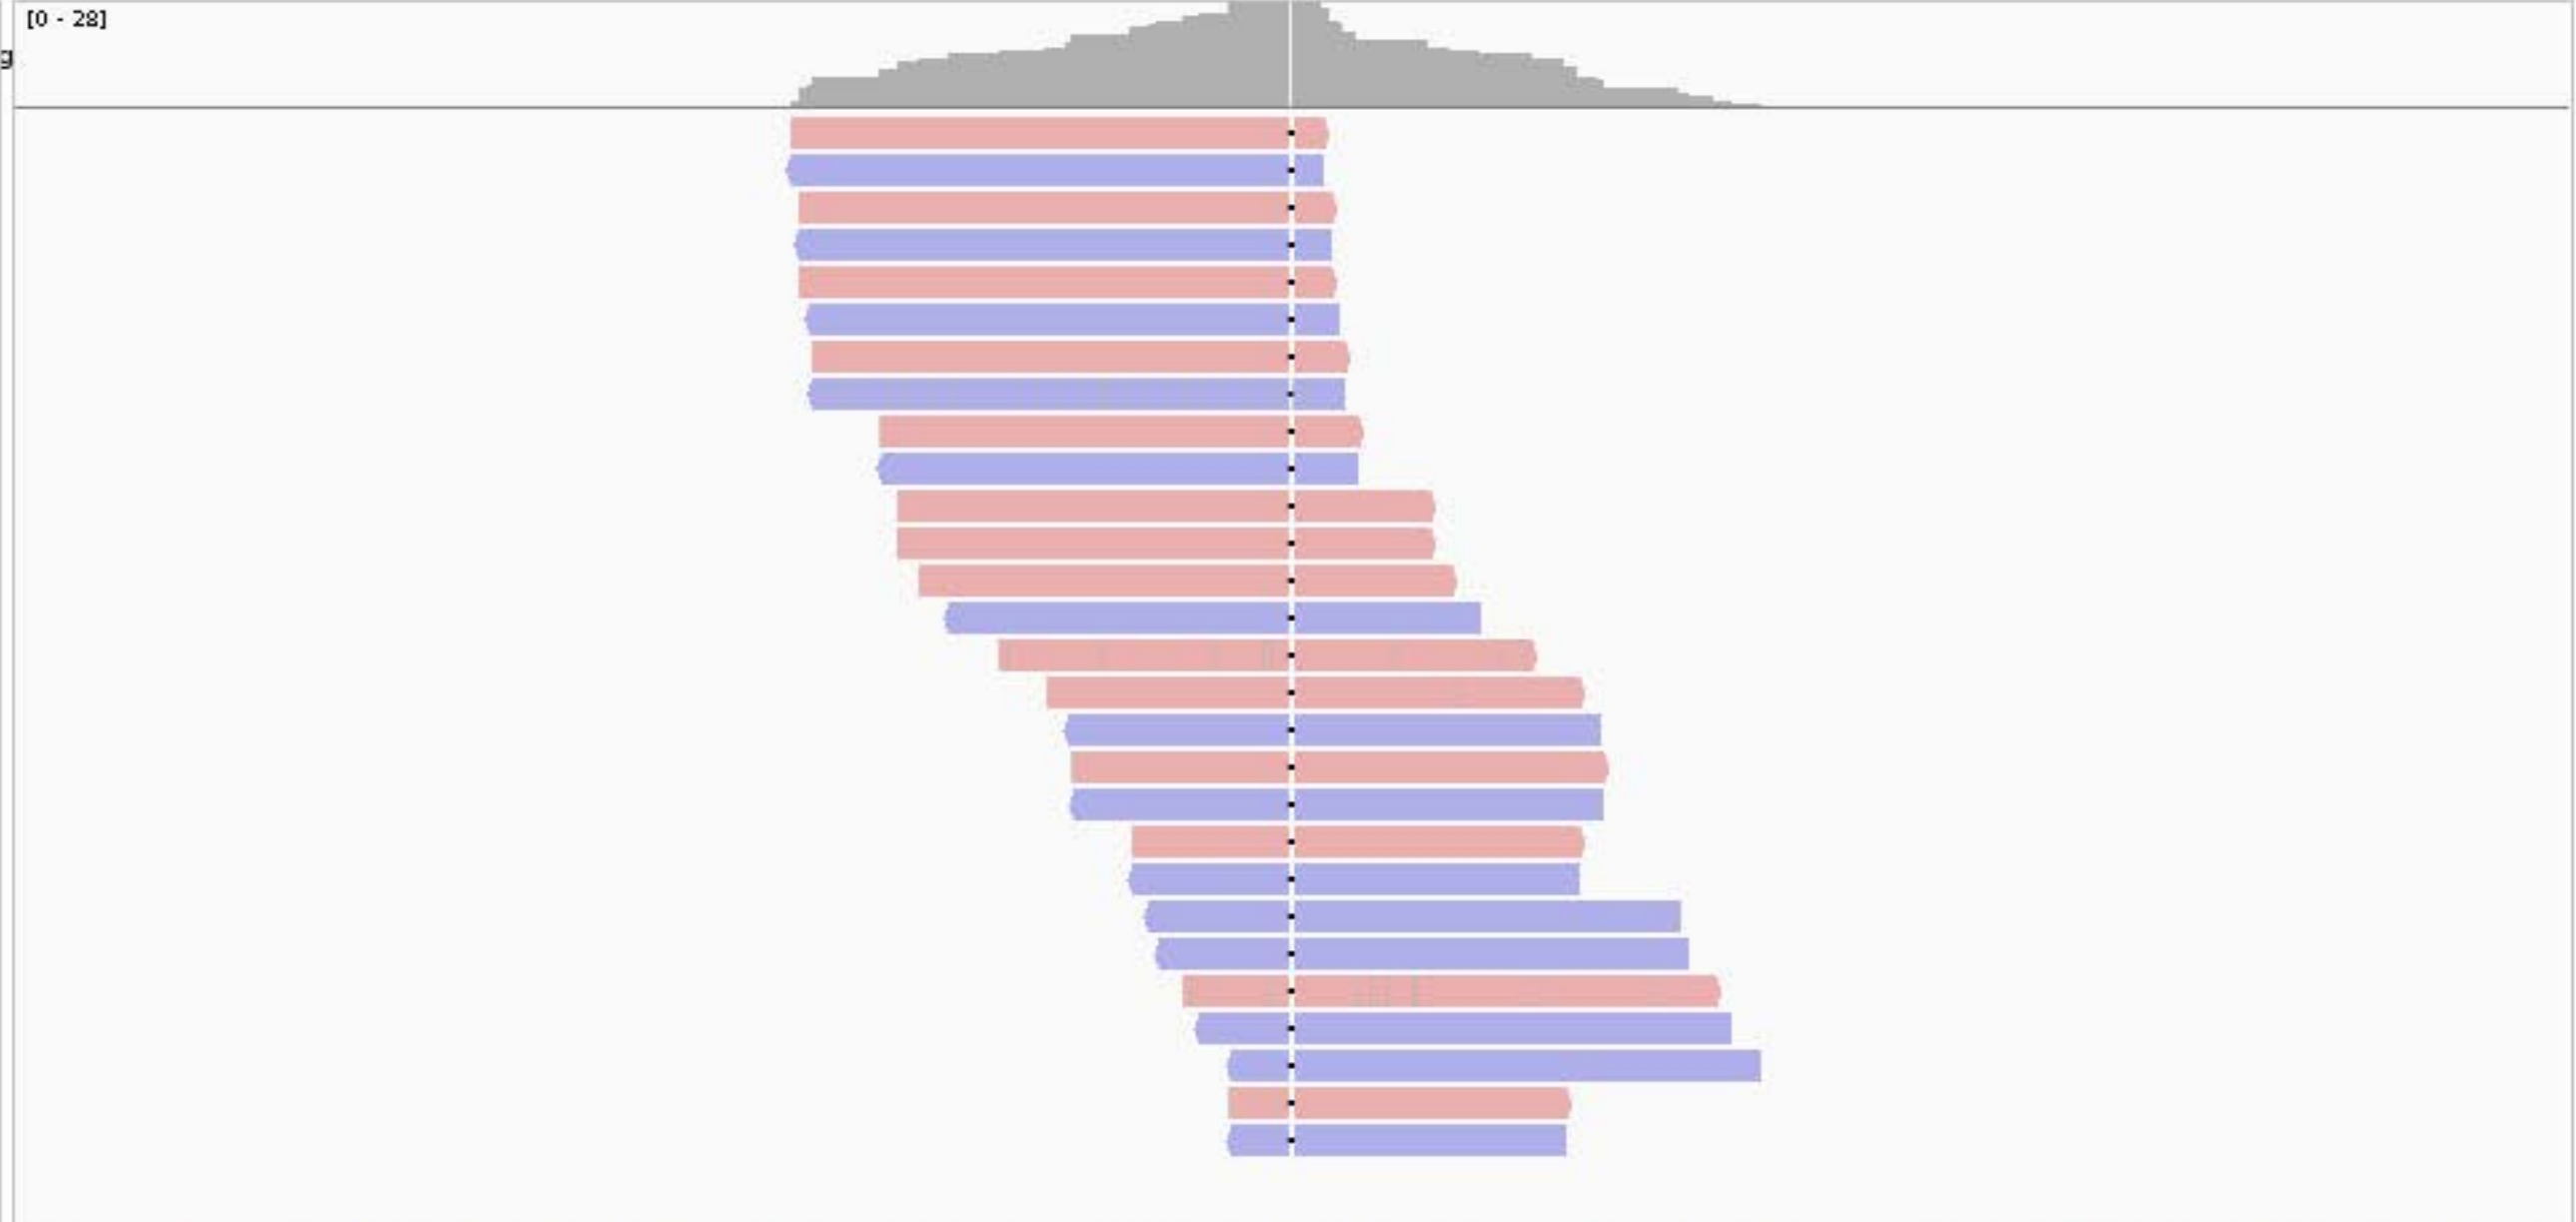

SL\_1010-N6-B\_mut.bam

Sequence

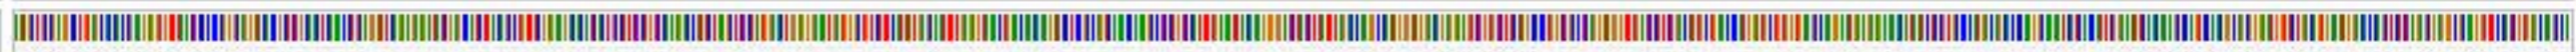

Refseq Genes

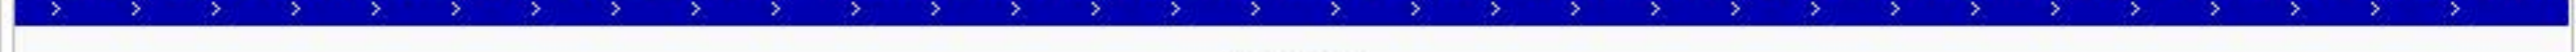

ARHGAP35



chr19:46,919,465-46,920,064

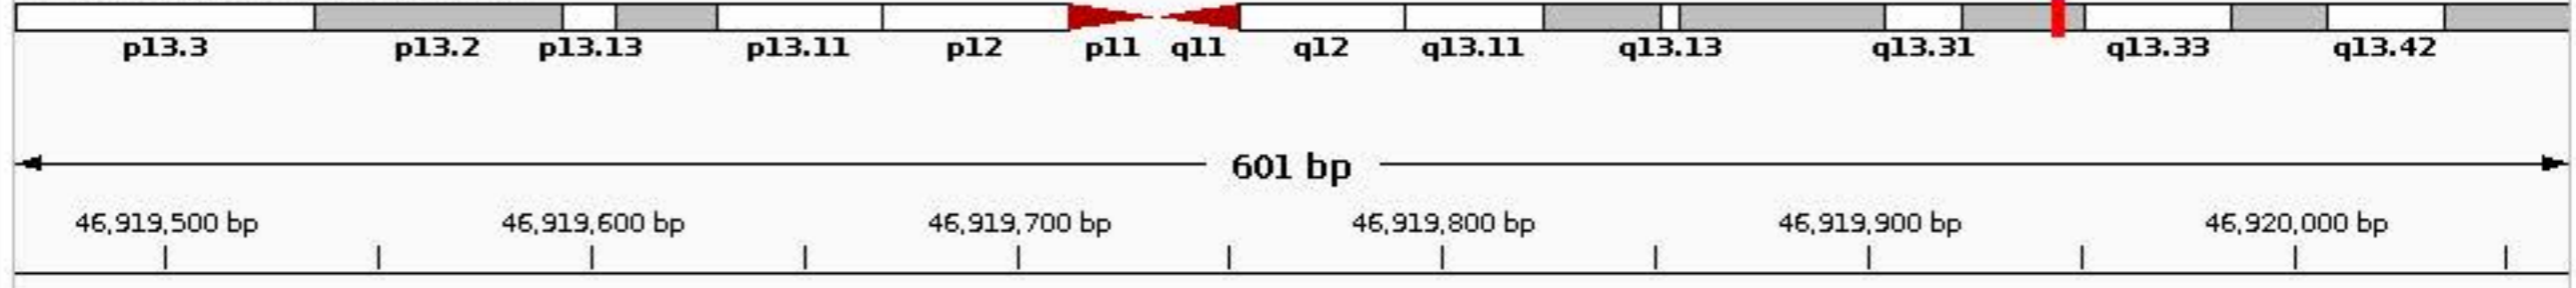

SL\_0006\_RN\_4-B\_mut.bam Cover

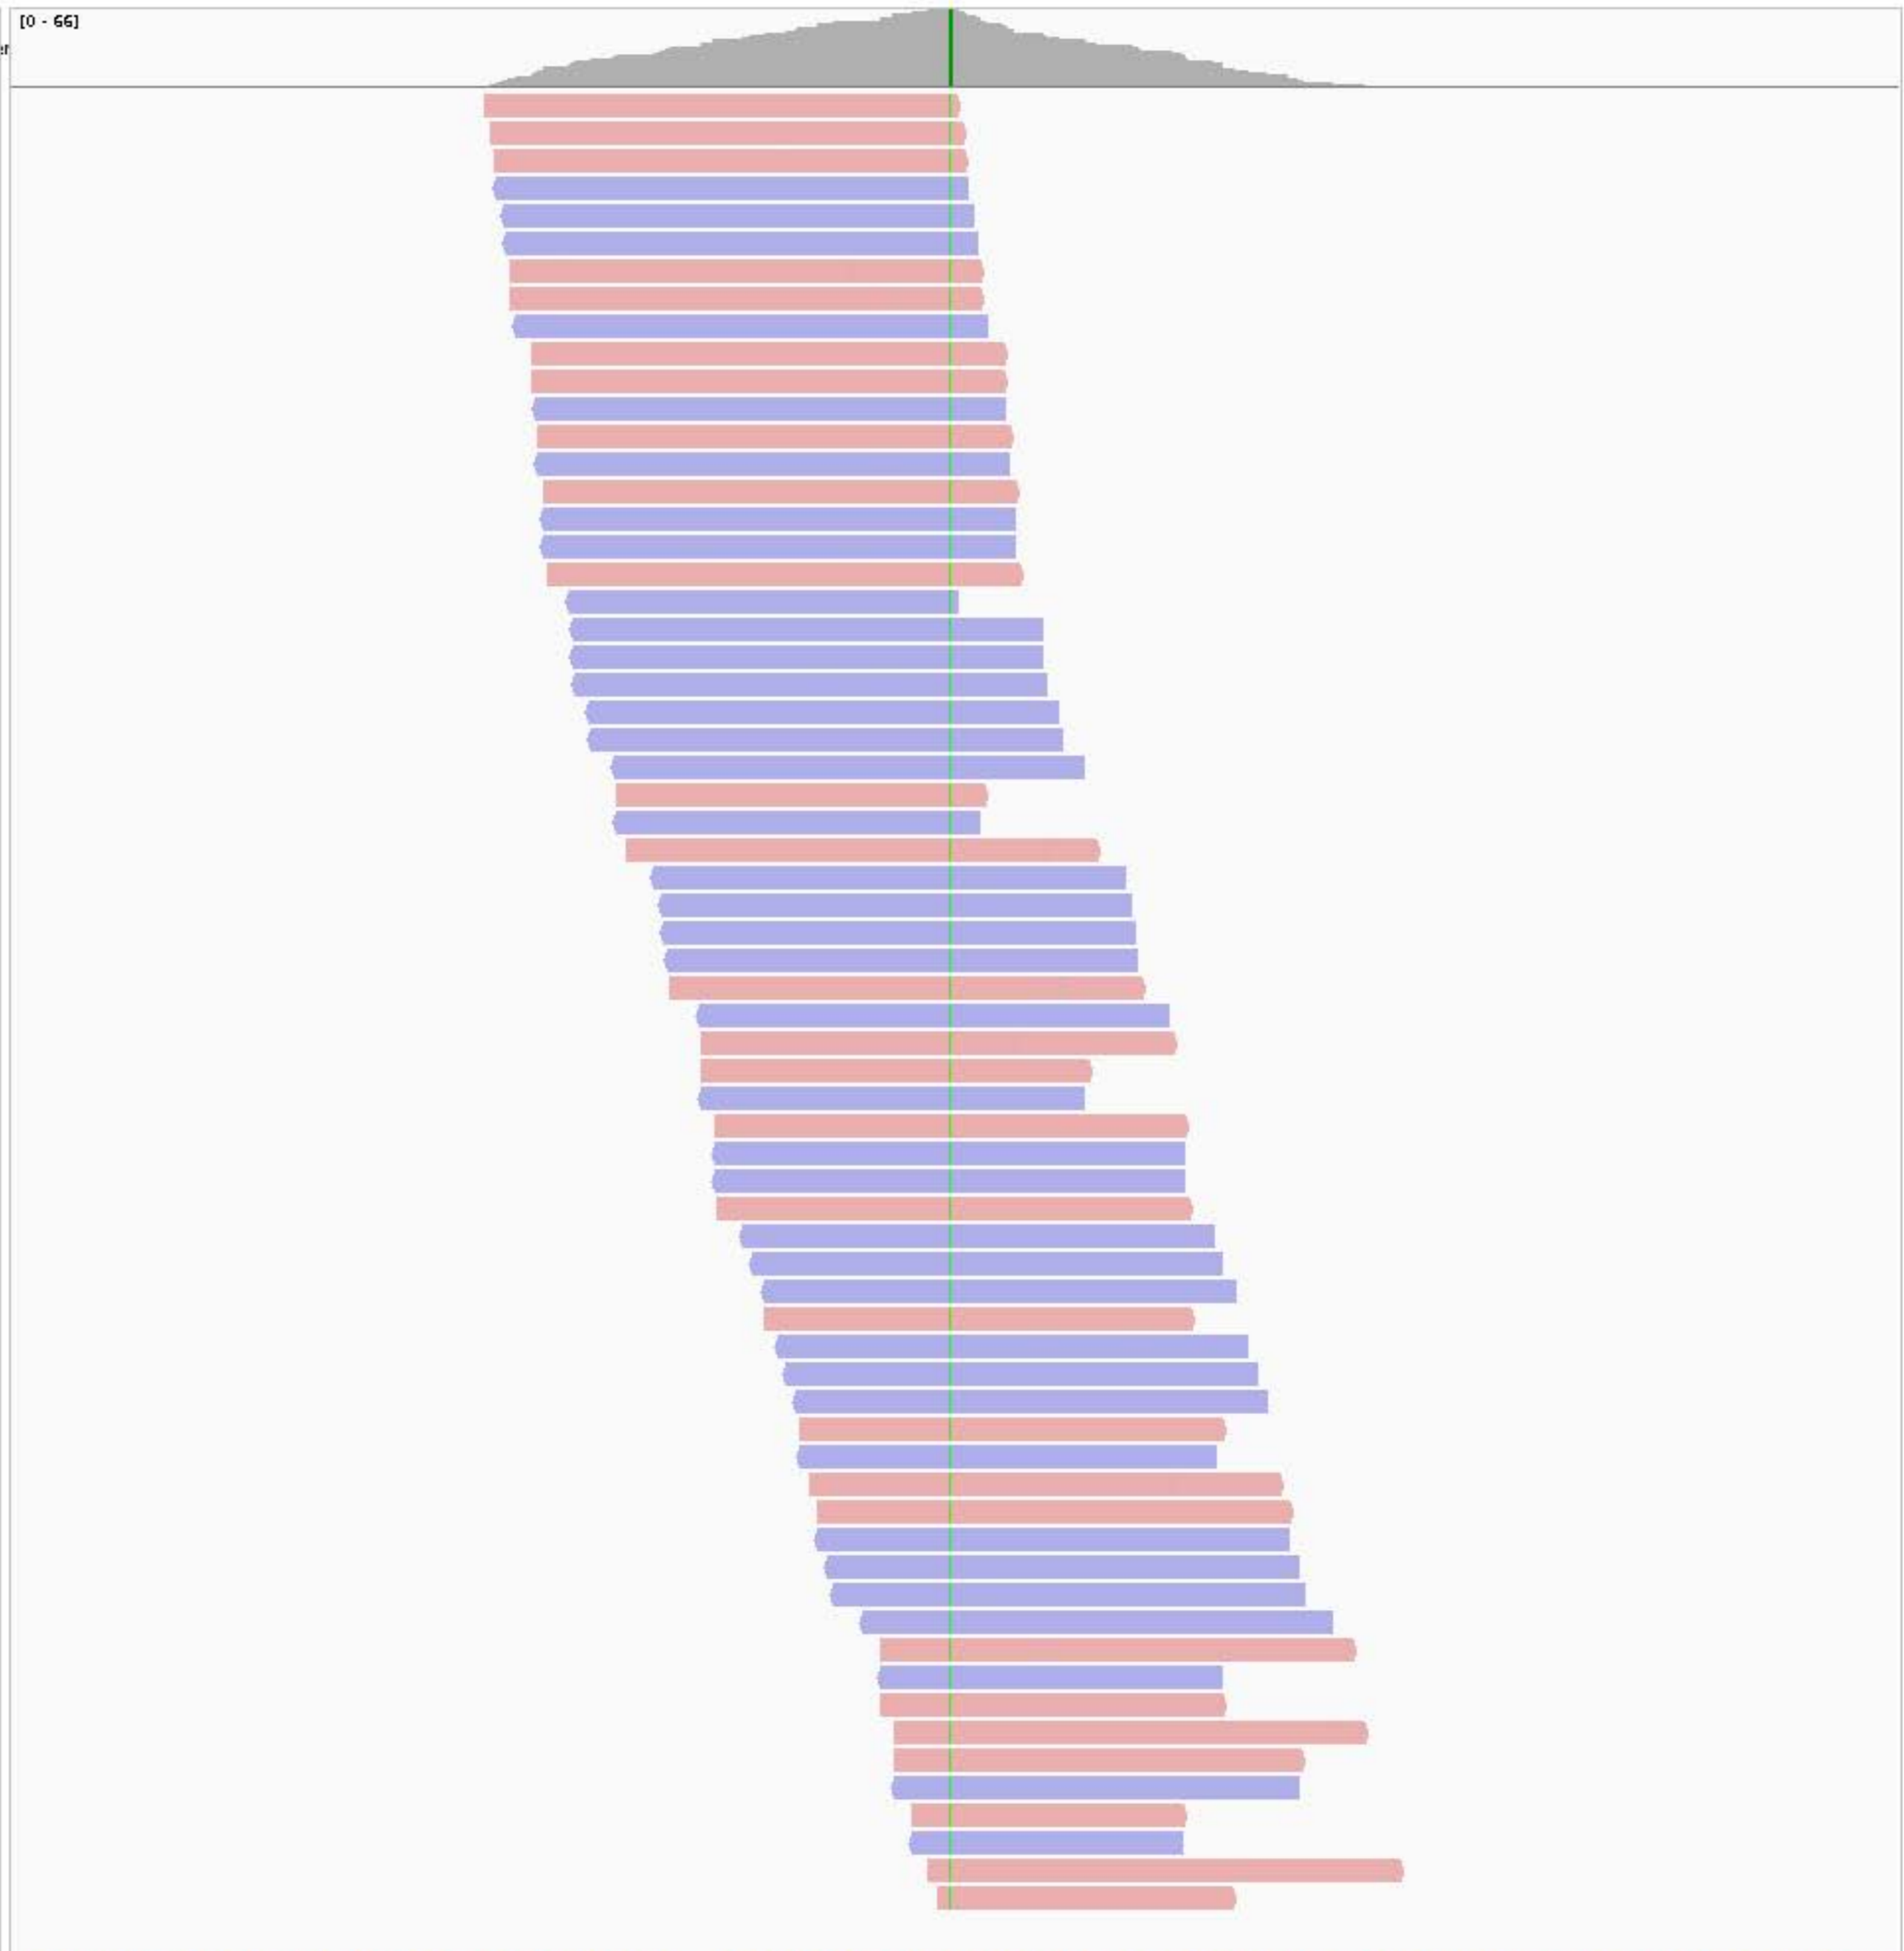

SL\_0006\_RN\_4-B\_mut.bam

Sequence →  
Refseq Genes

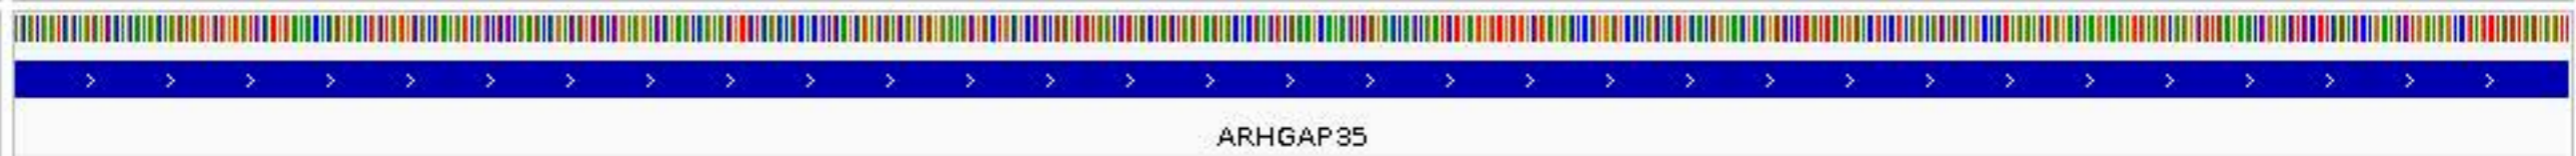

ARHGAP35

chr19:46,919,109-46,919,708

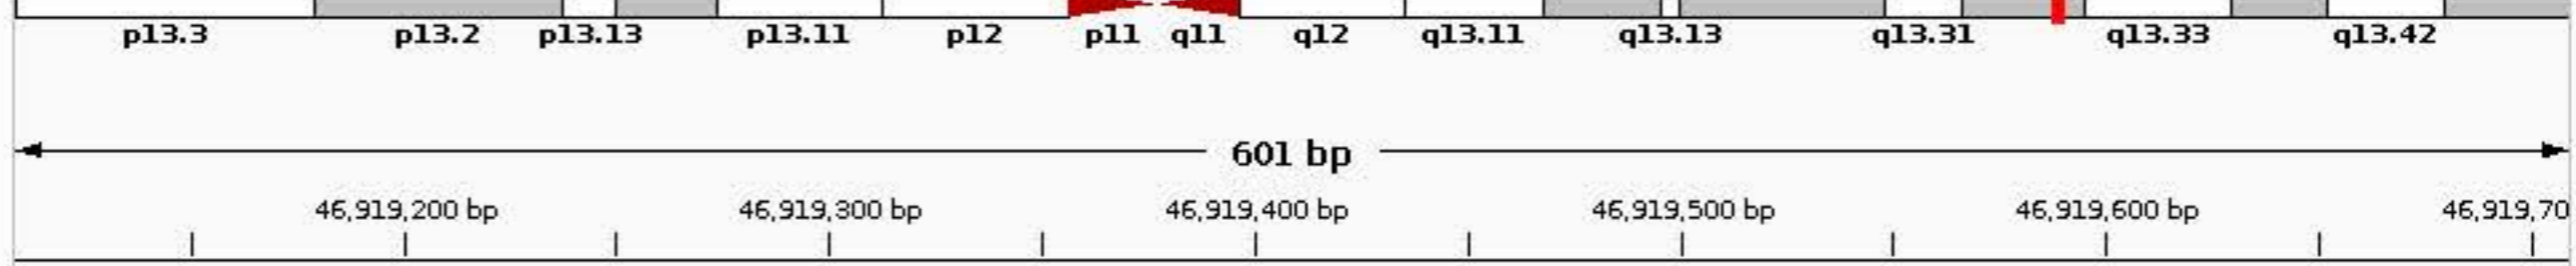

SL\_0003\_R\_FFPE-B\_mut.bam Coverage

SL\_0003\_R\_FFPE-B\_mut.bam

Sequence →

Refseq Genes

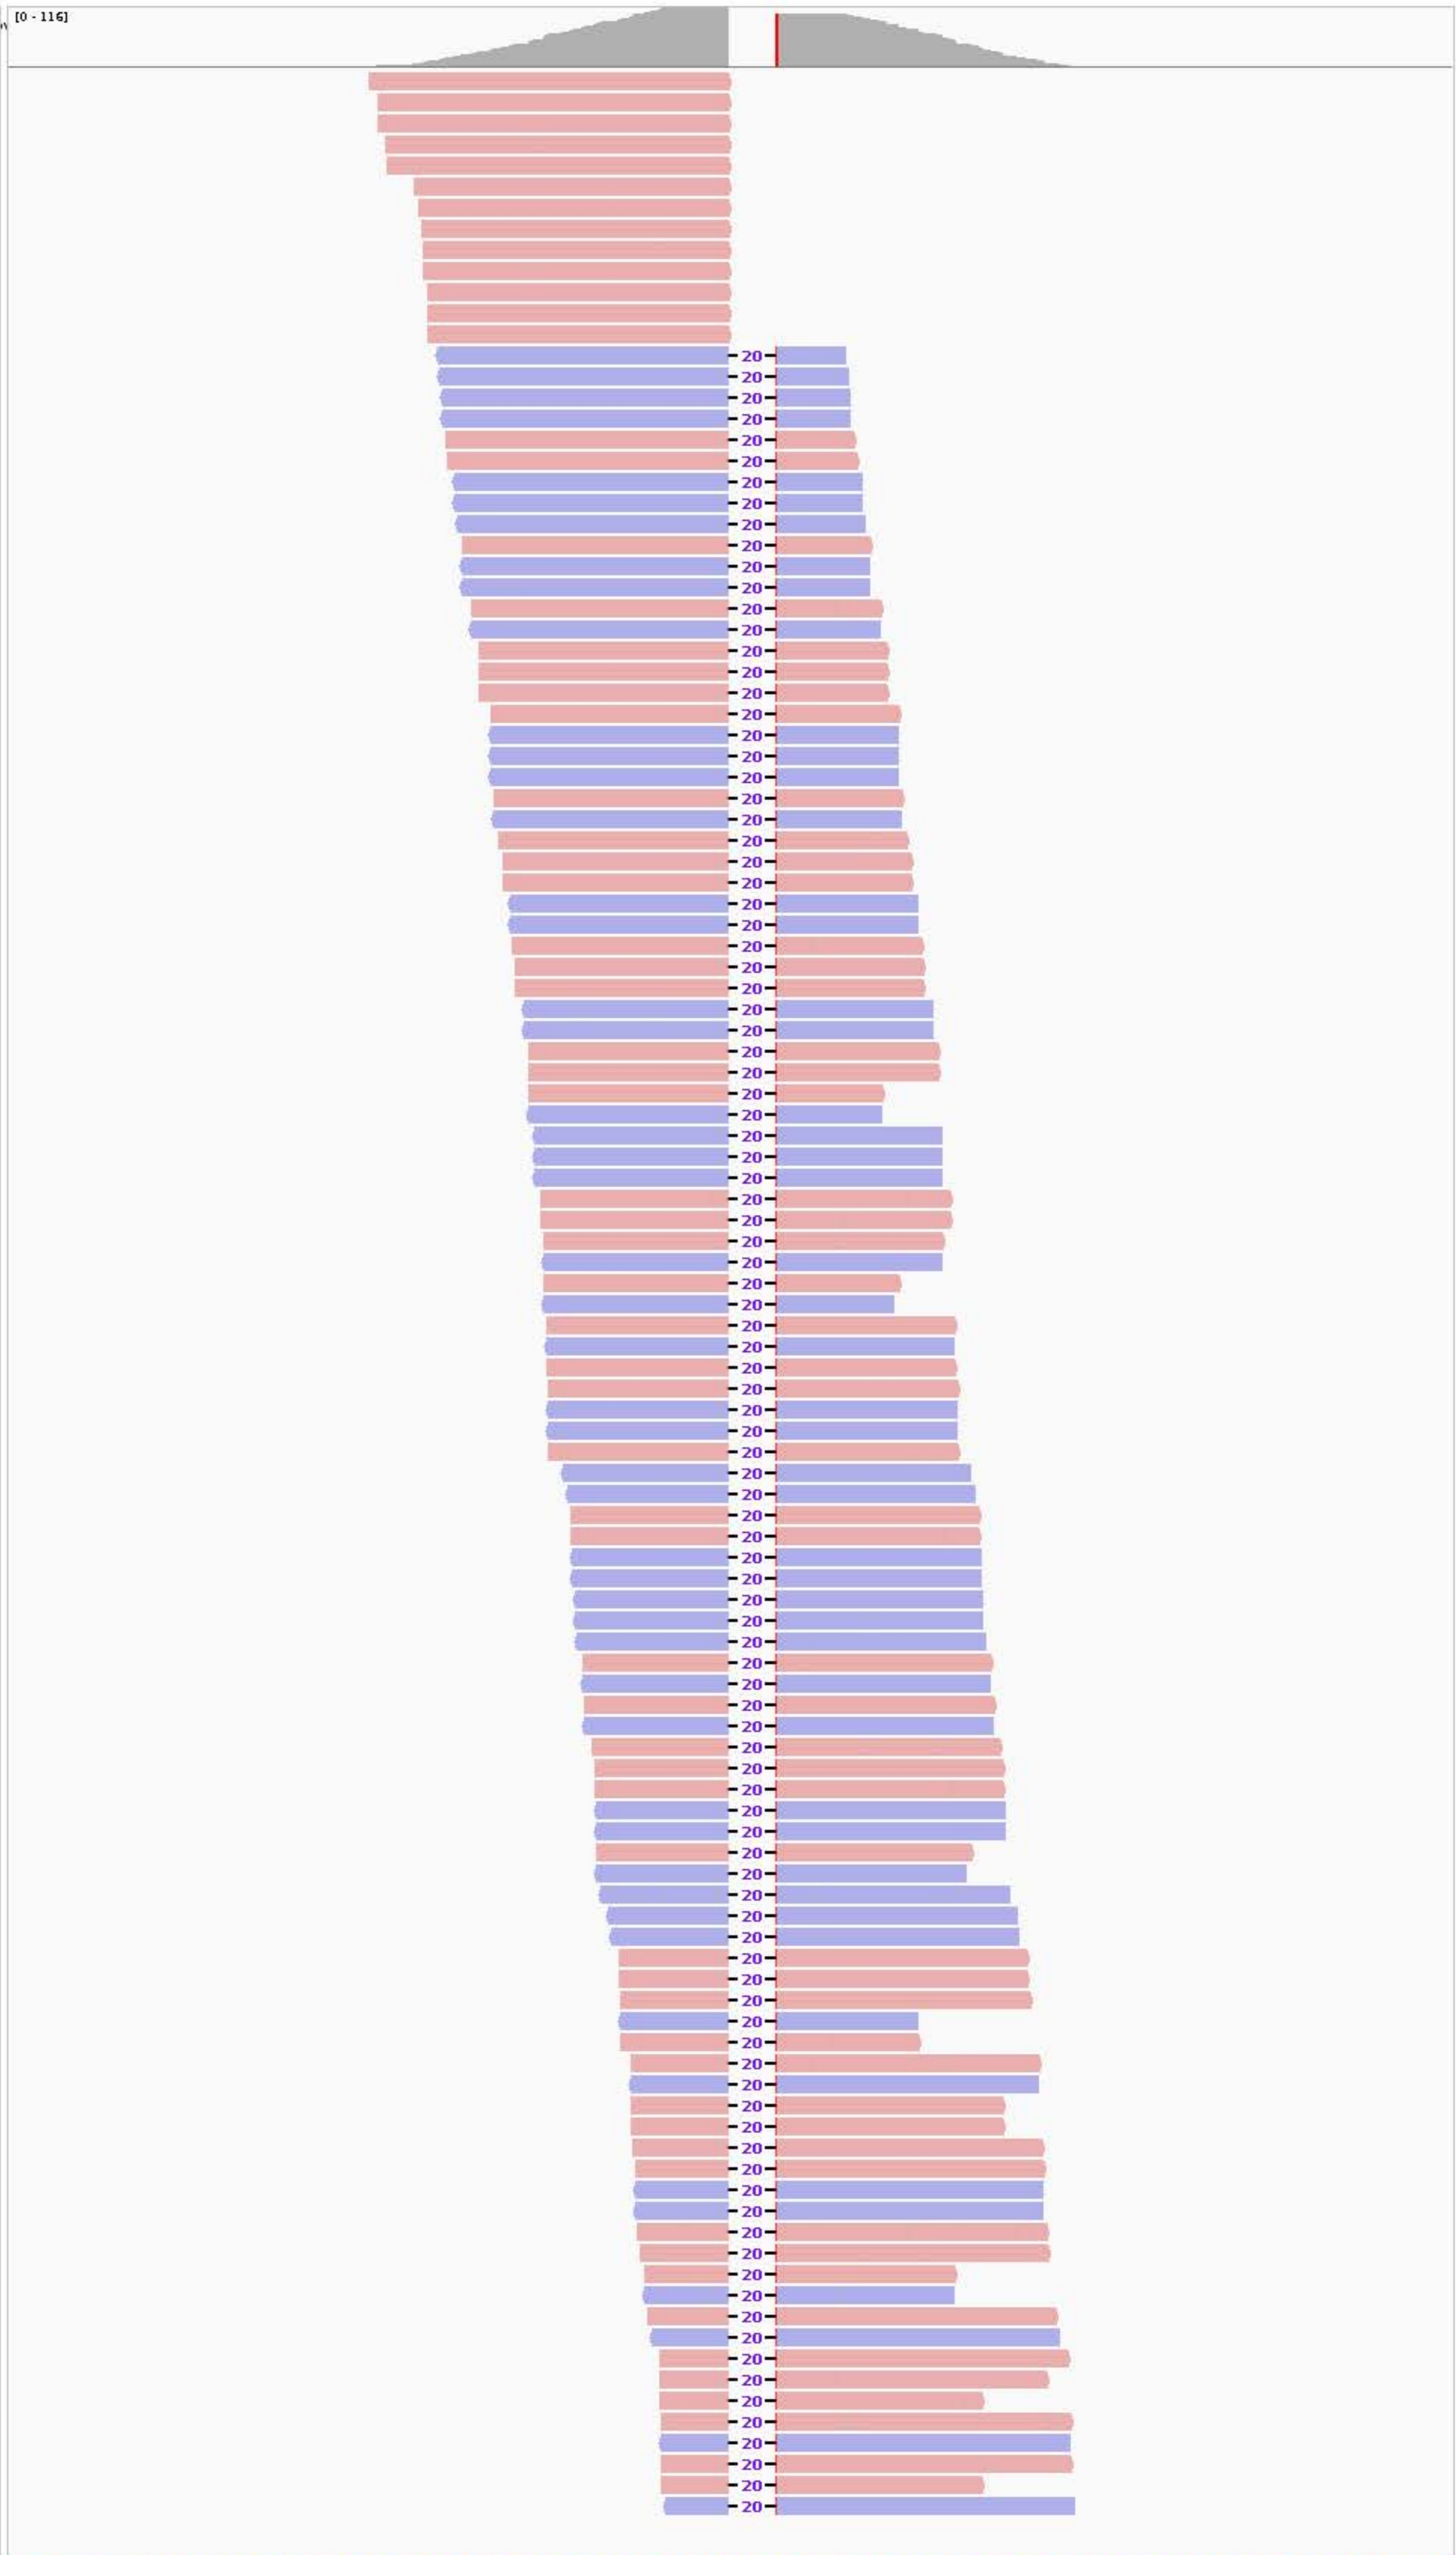

ARHGAP35



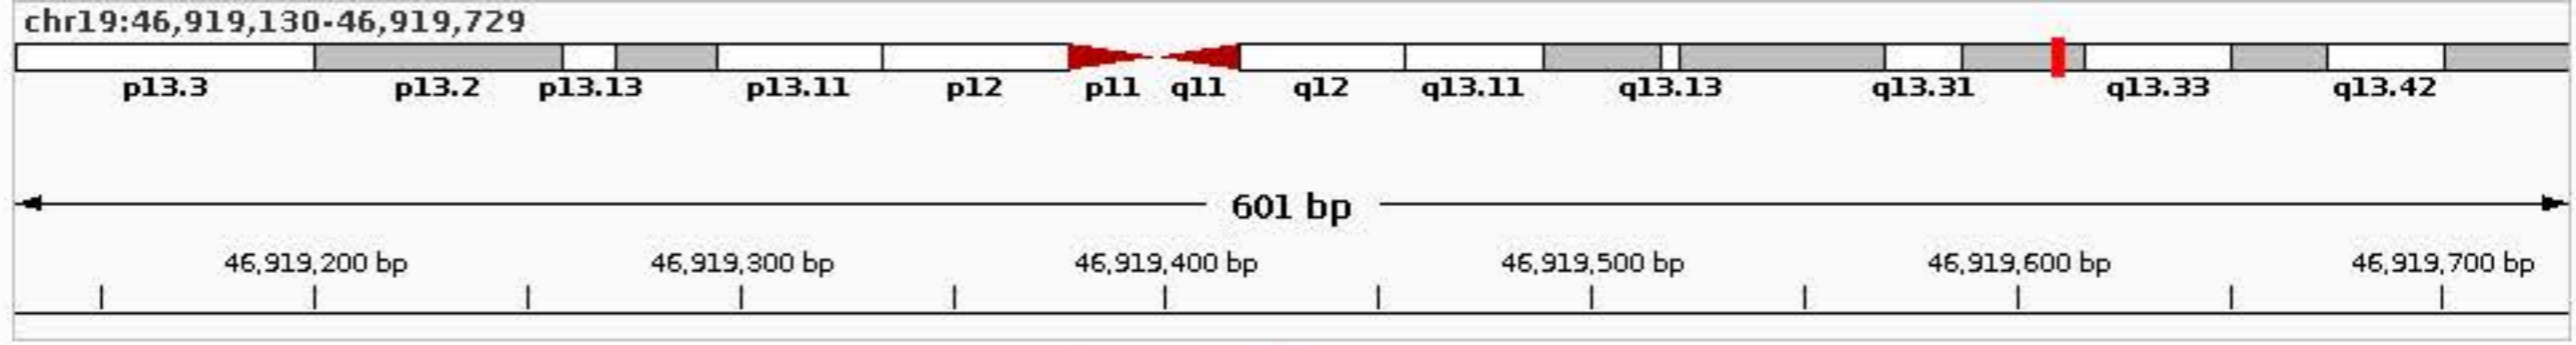

SL\_0003\_R\_FFPE-B\_mut.bam Coverage

SL\_0003\_R\_FFPE-B\_mut.bam

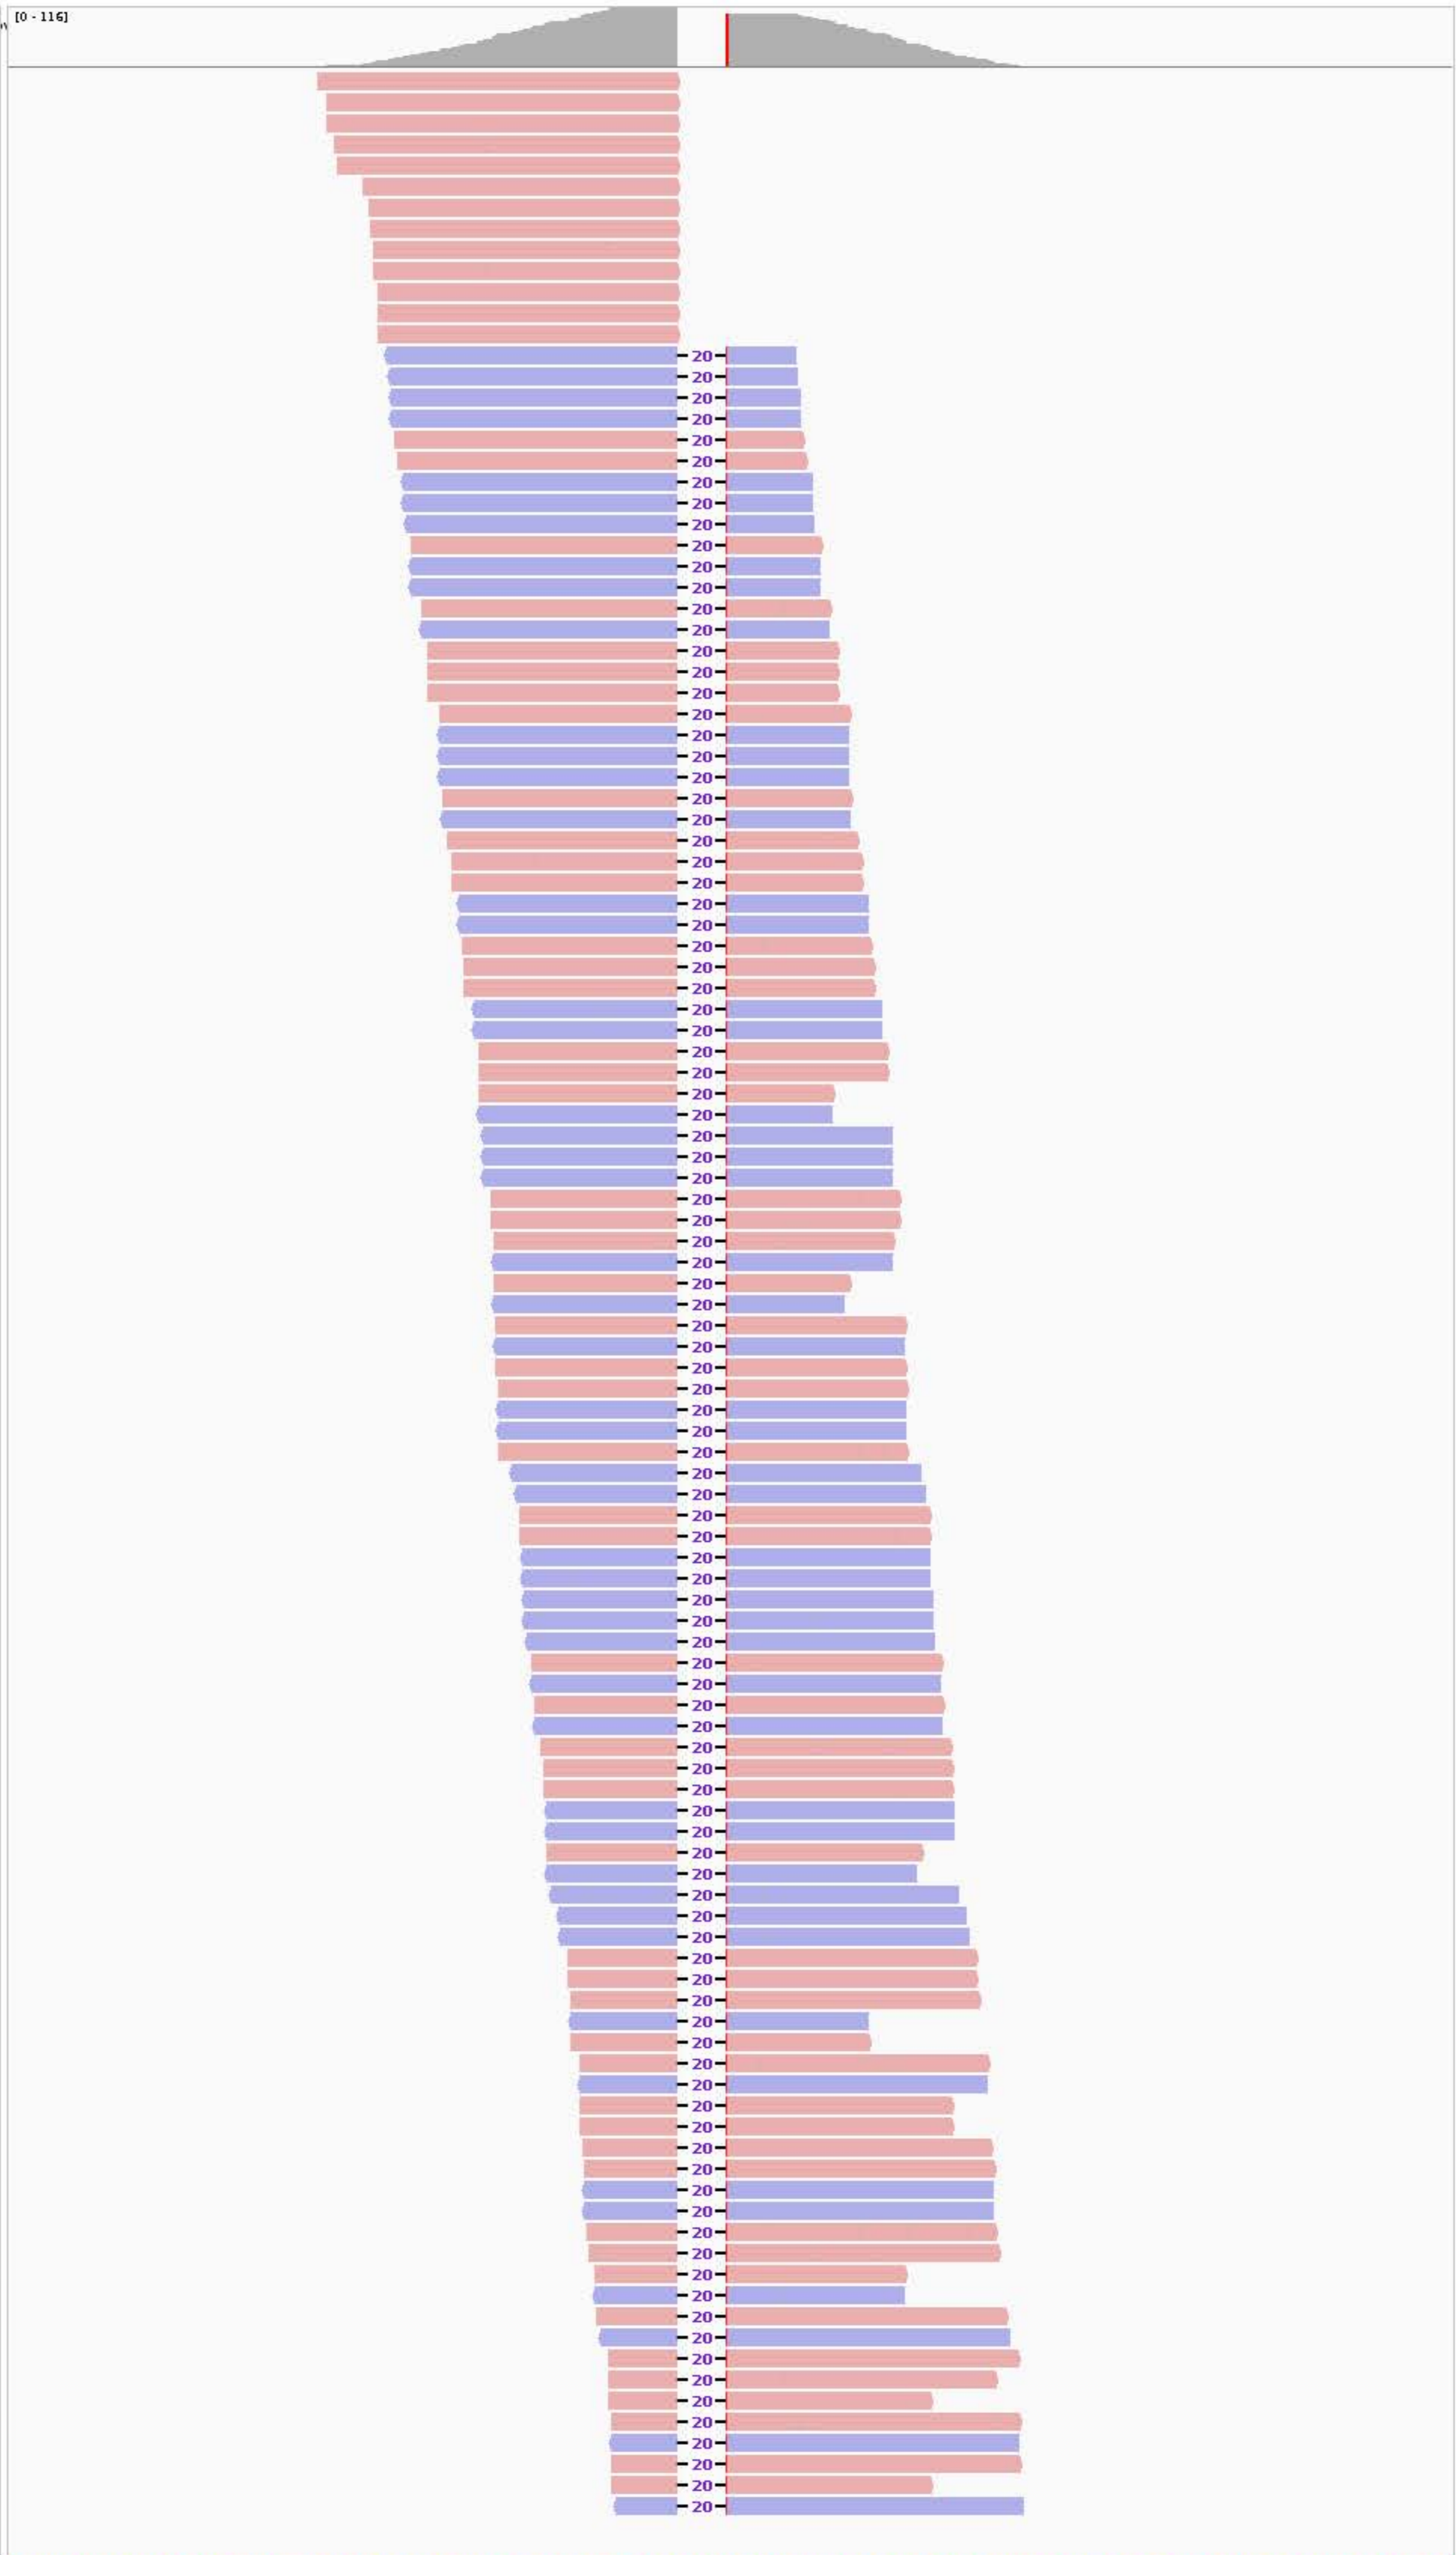

Sequence

Refseq Genes

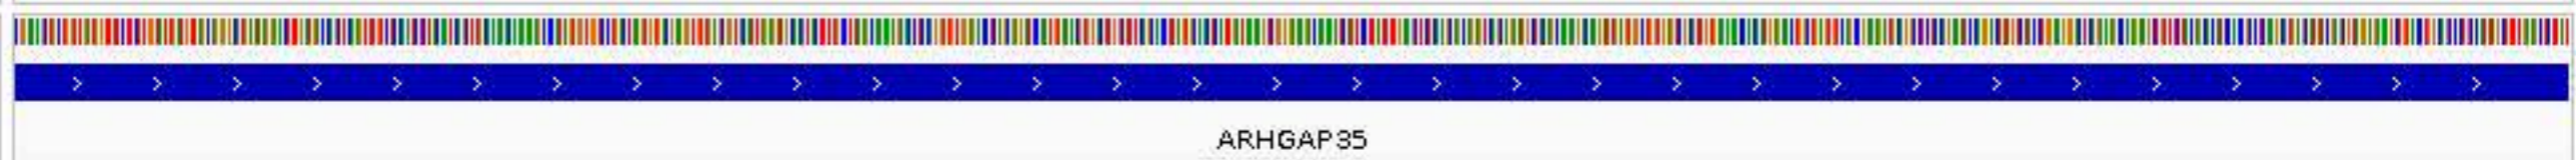

ARHGAP35

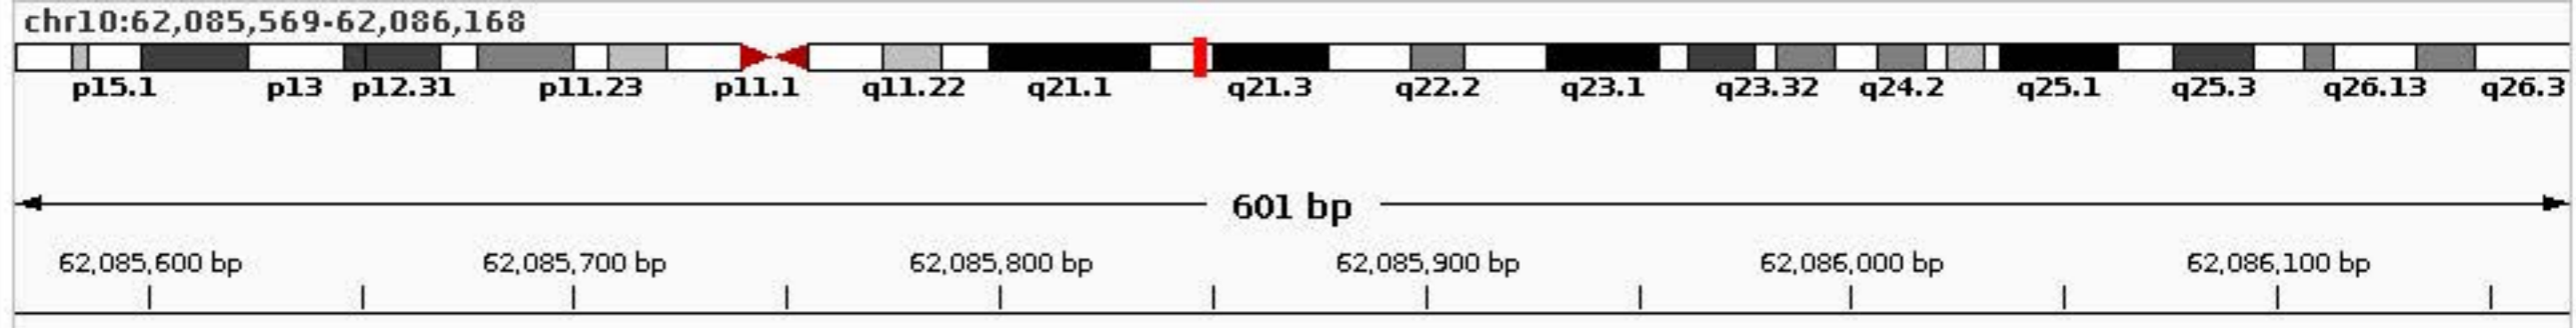

SL\_0002\_R\_FFPE\_57-B\_mut.bam  
range

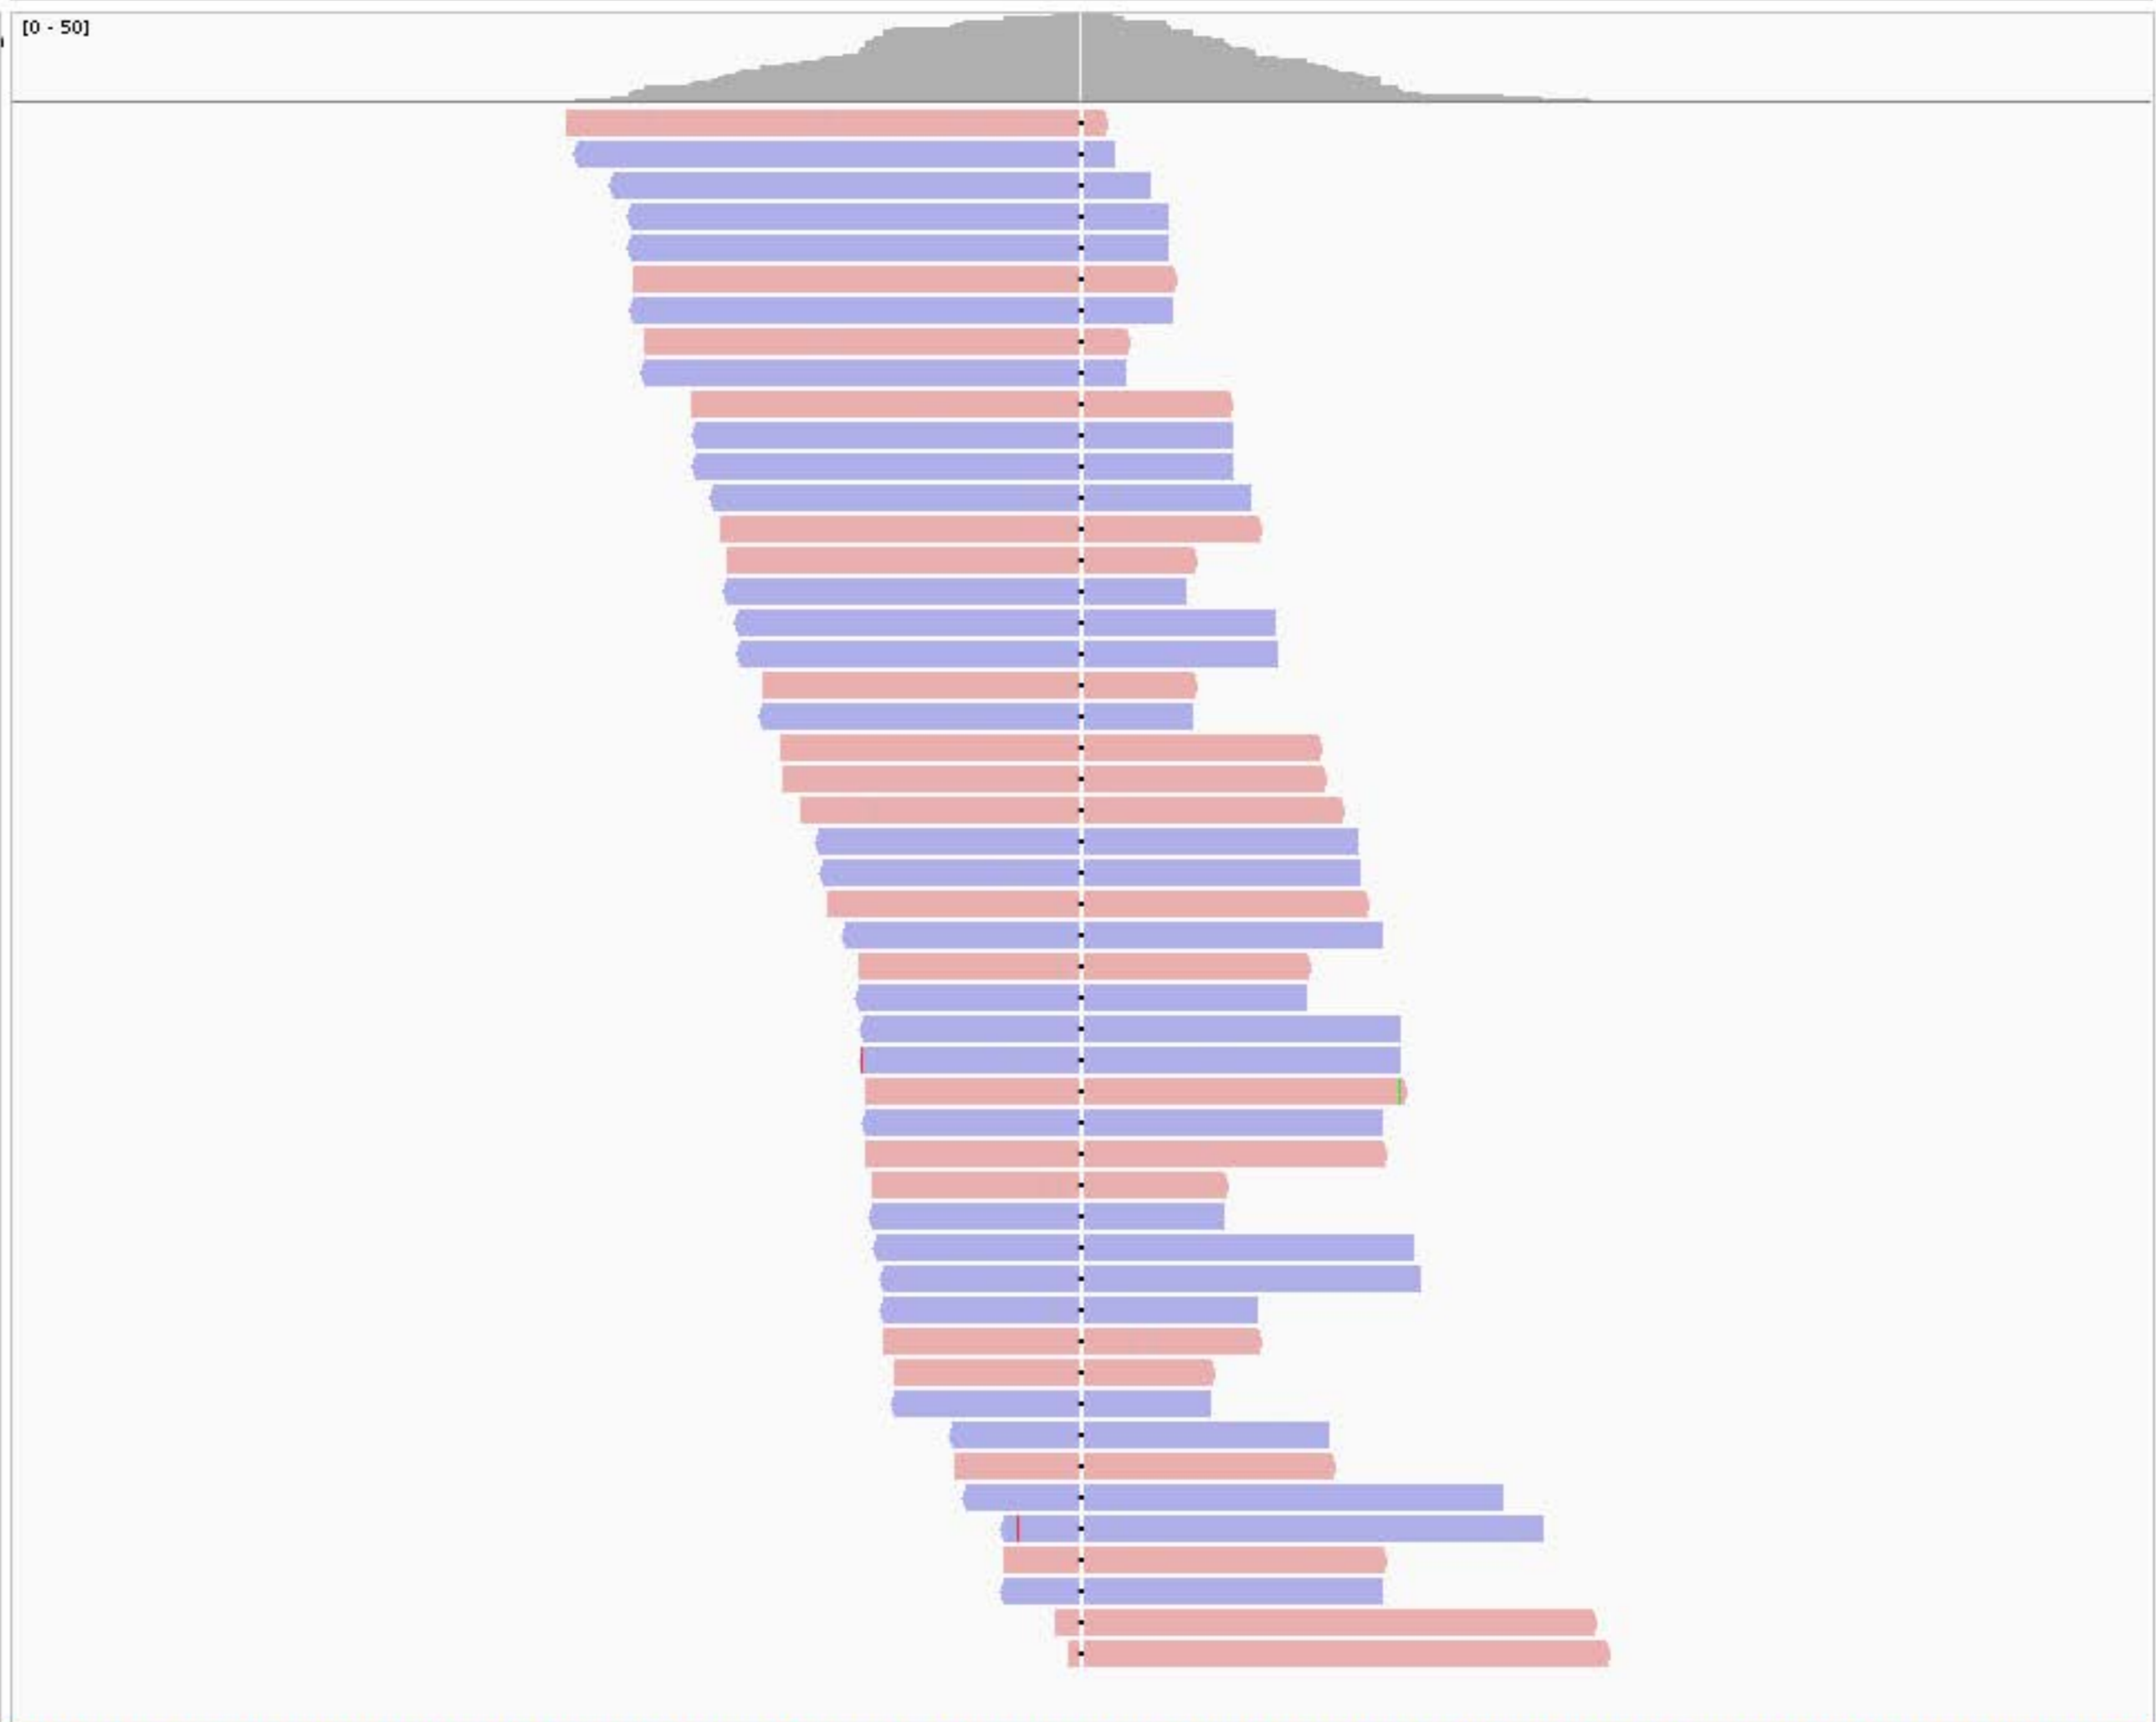

SL\_0002\_R\_FFPE\_57-B\_mut.ba  
m

Sequence →

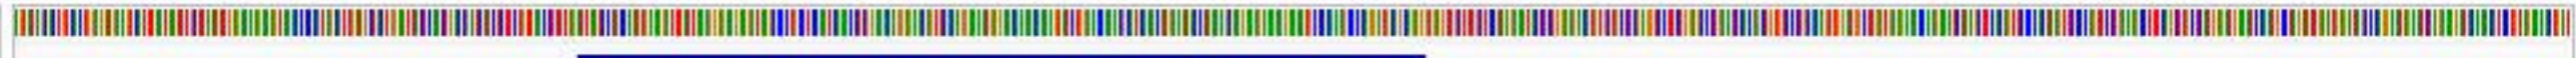

Refseq Genes

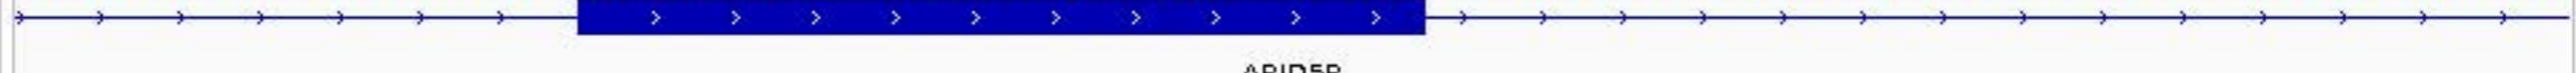

ARID5B



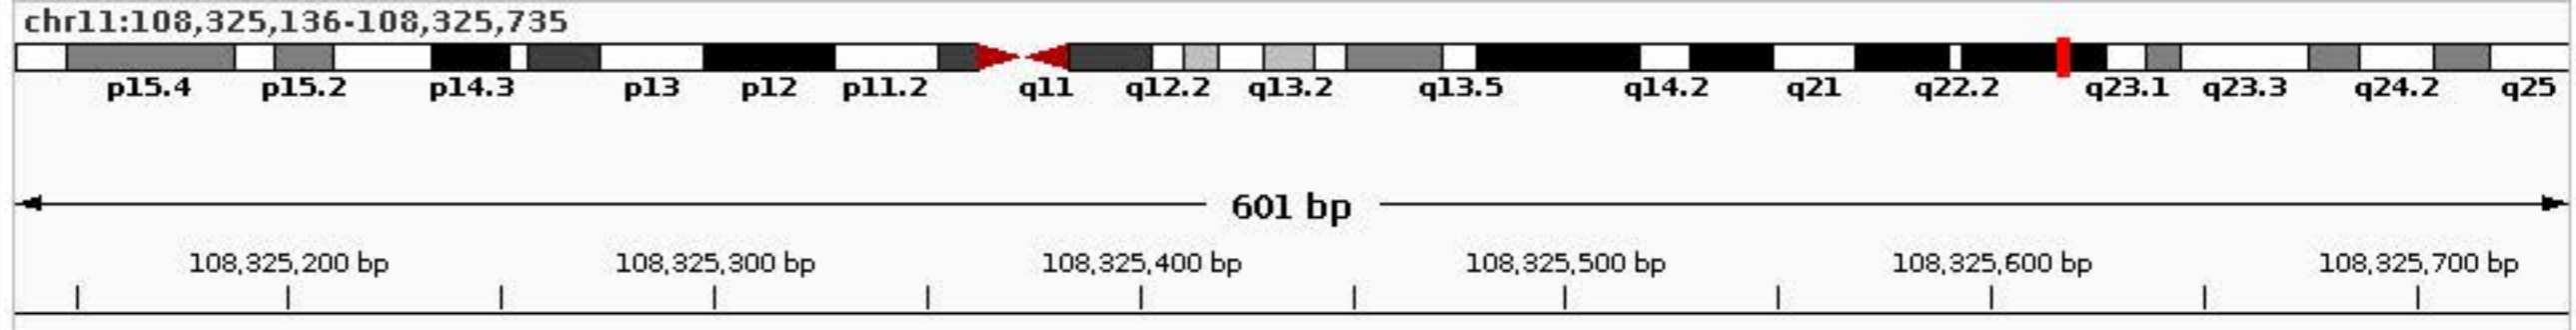

SL\_0011-LT\_2-B\_mut.bam Coverage

SL\_0011-LT\_2-B\_mut.bam

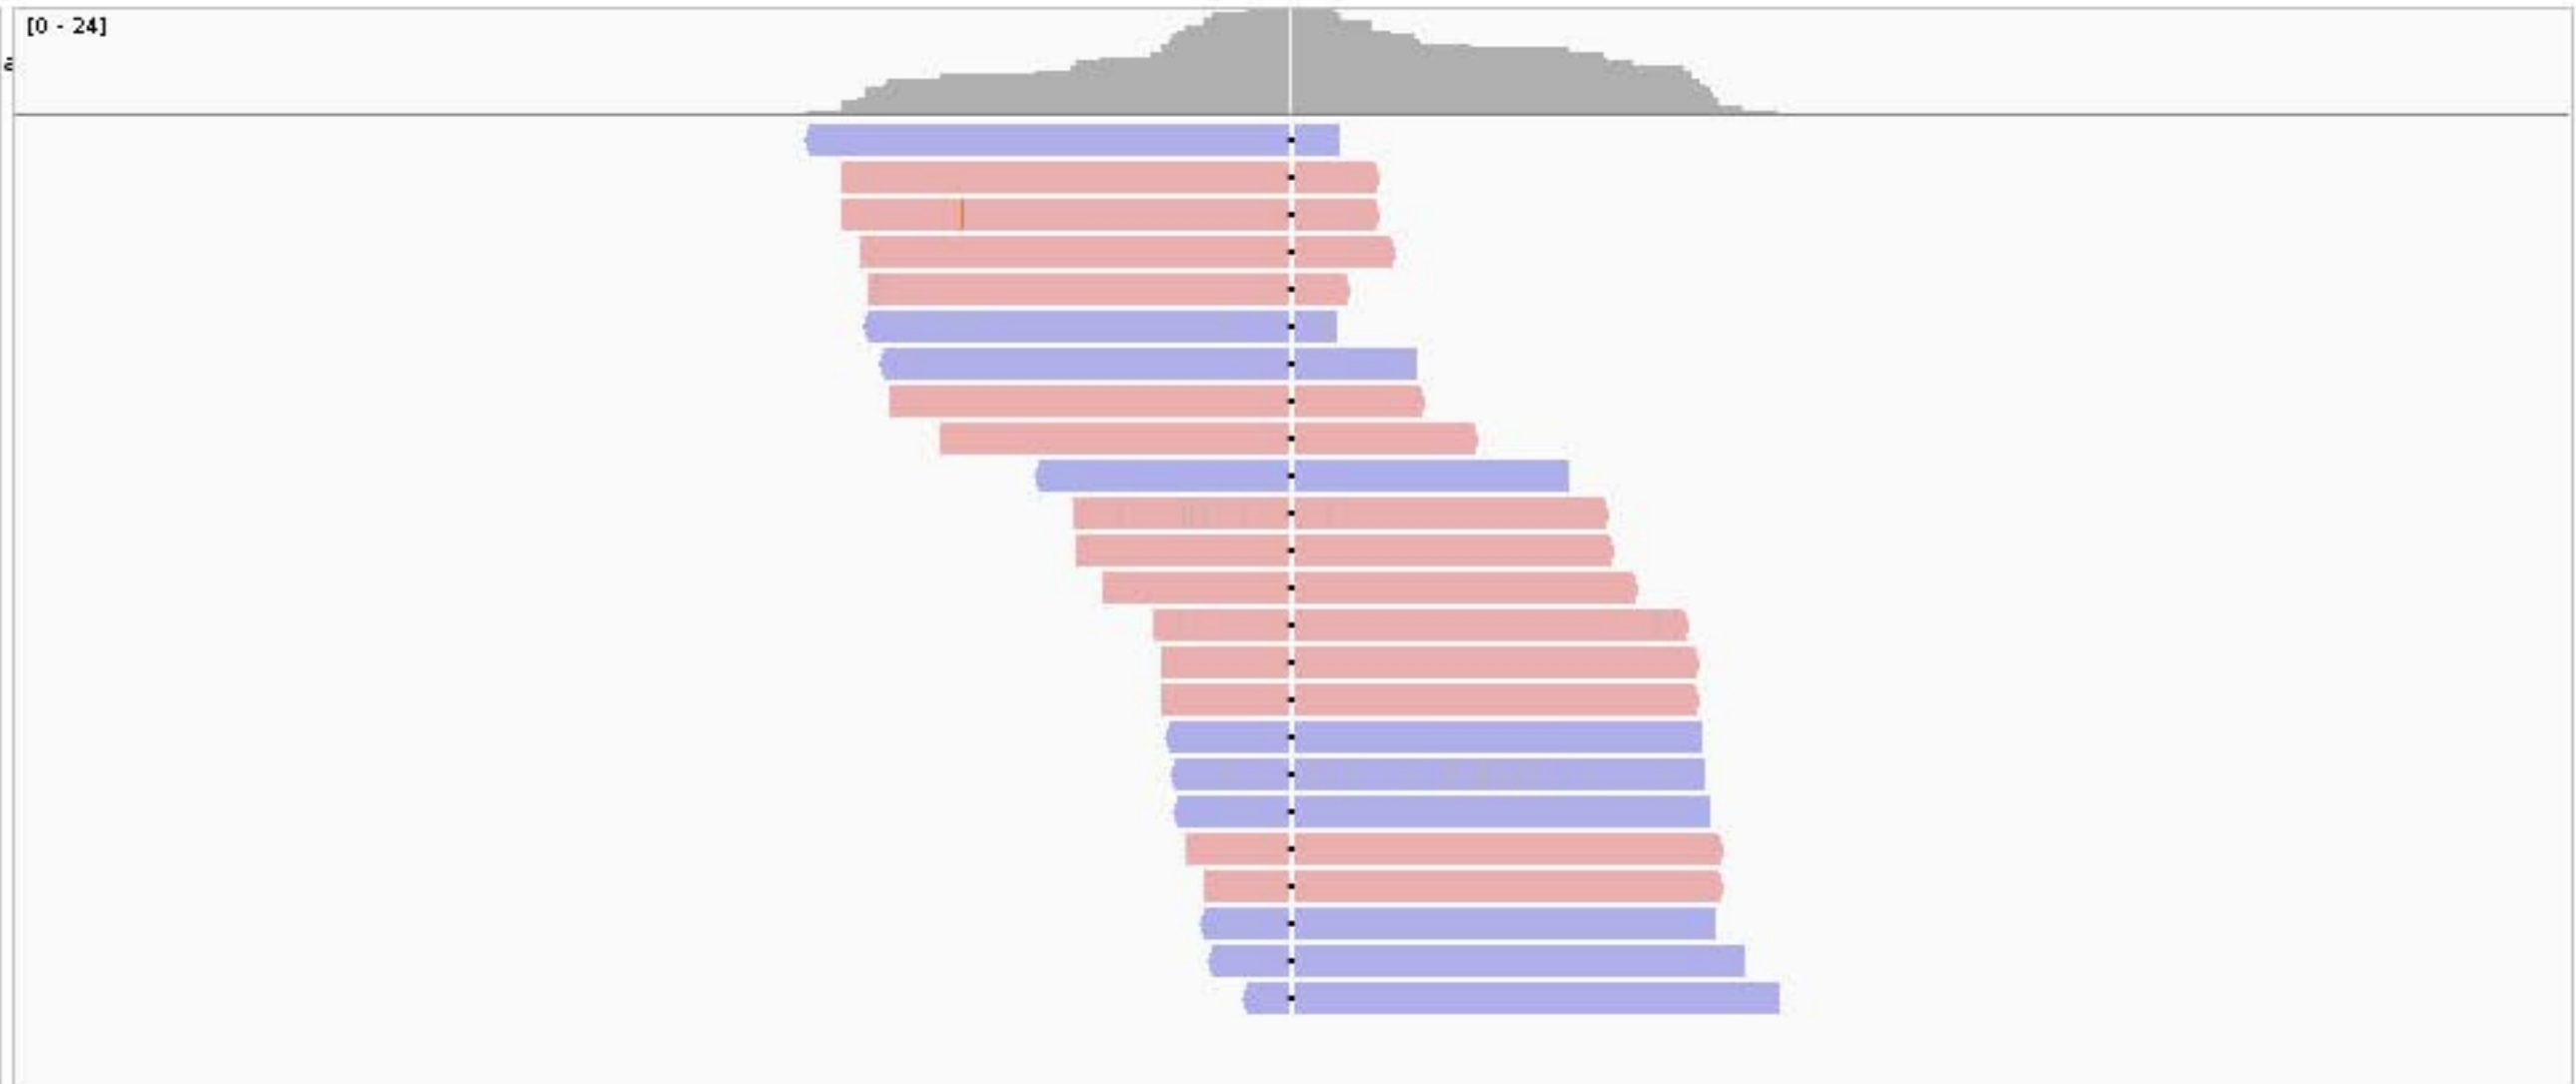

Sequence

Refseq Genes

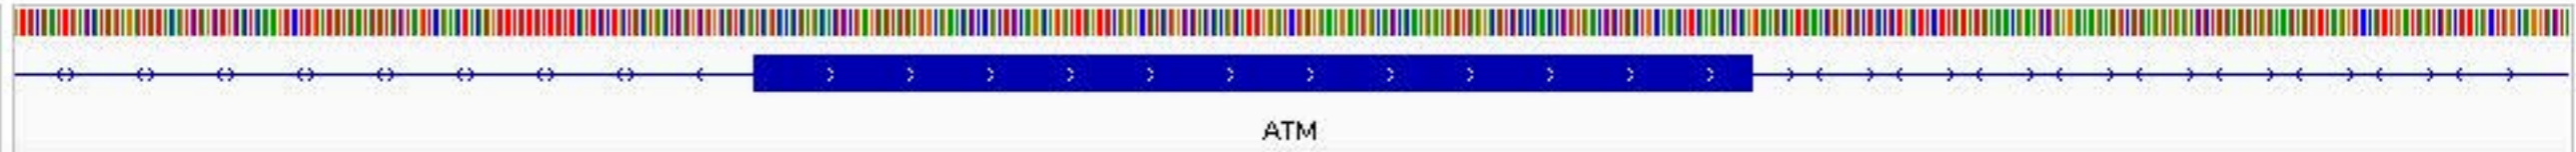

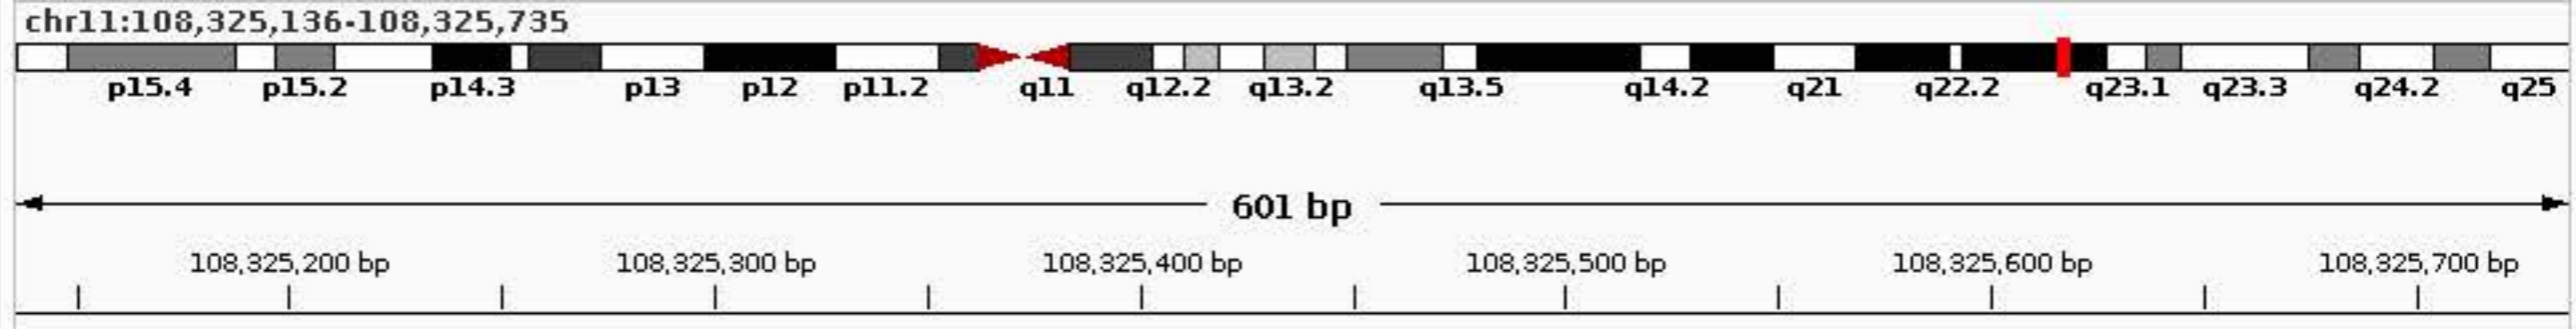

SL\_0011-LT\_11-B\_mut.bam Cov

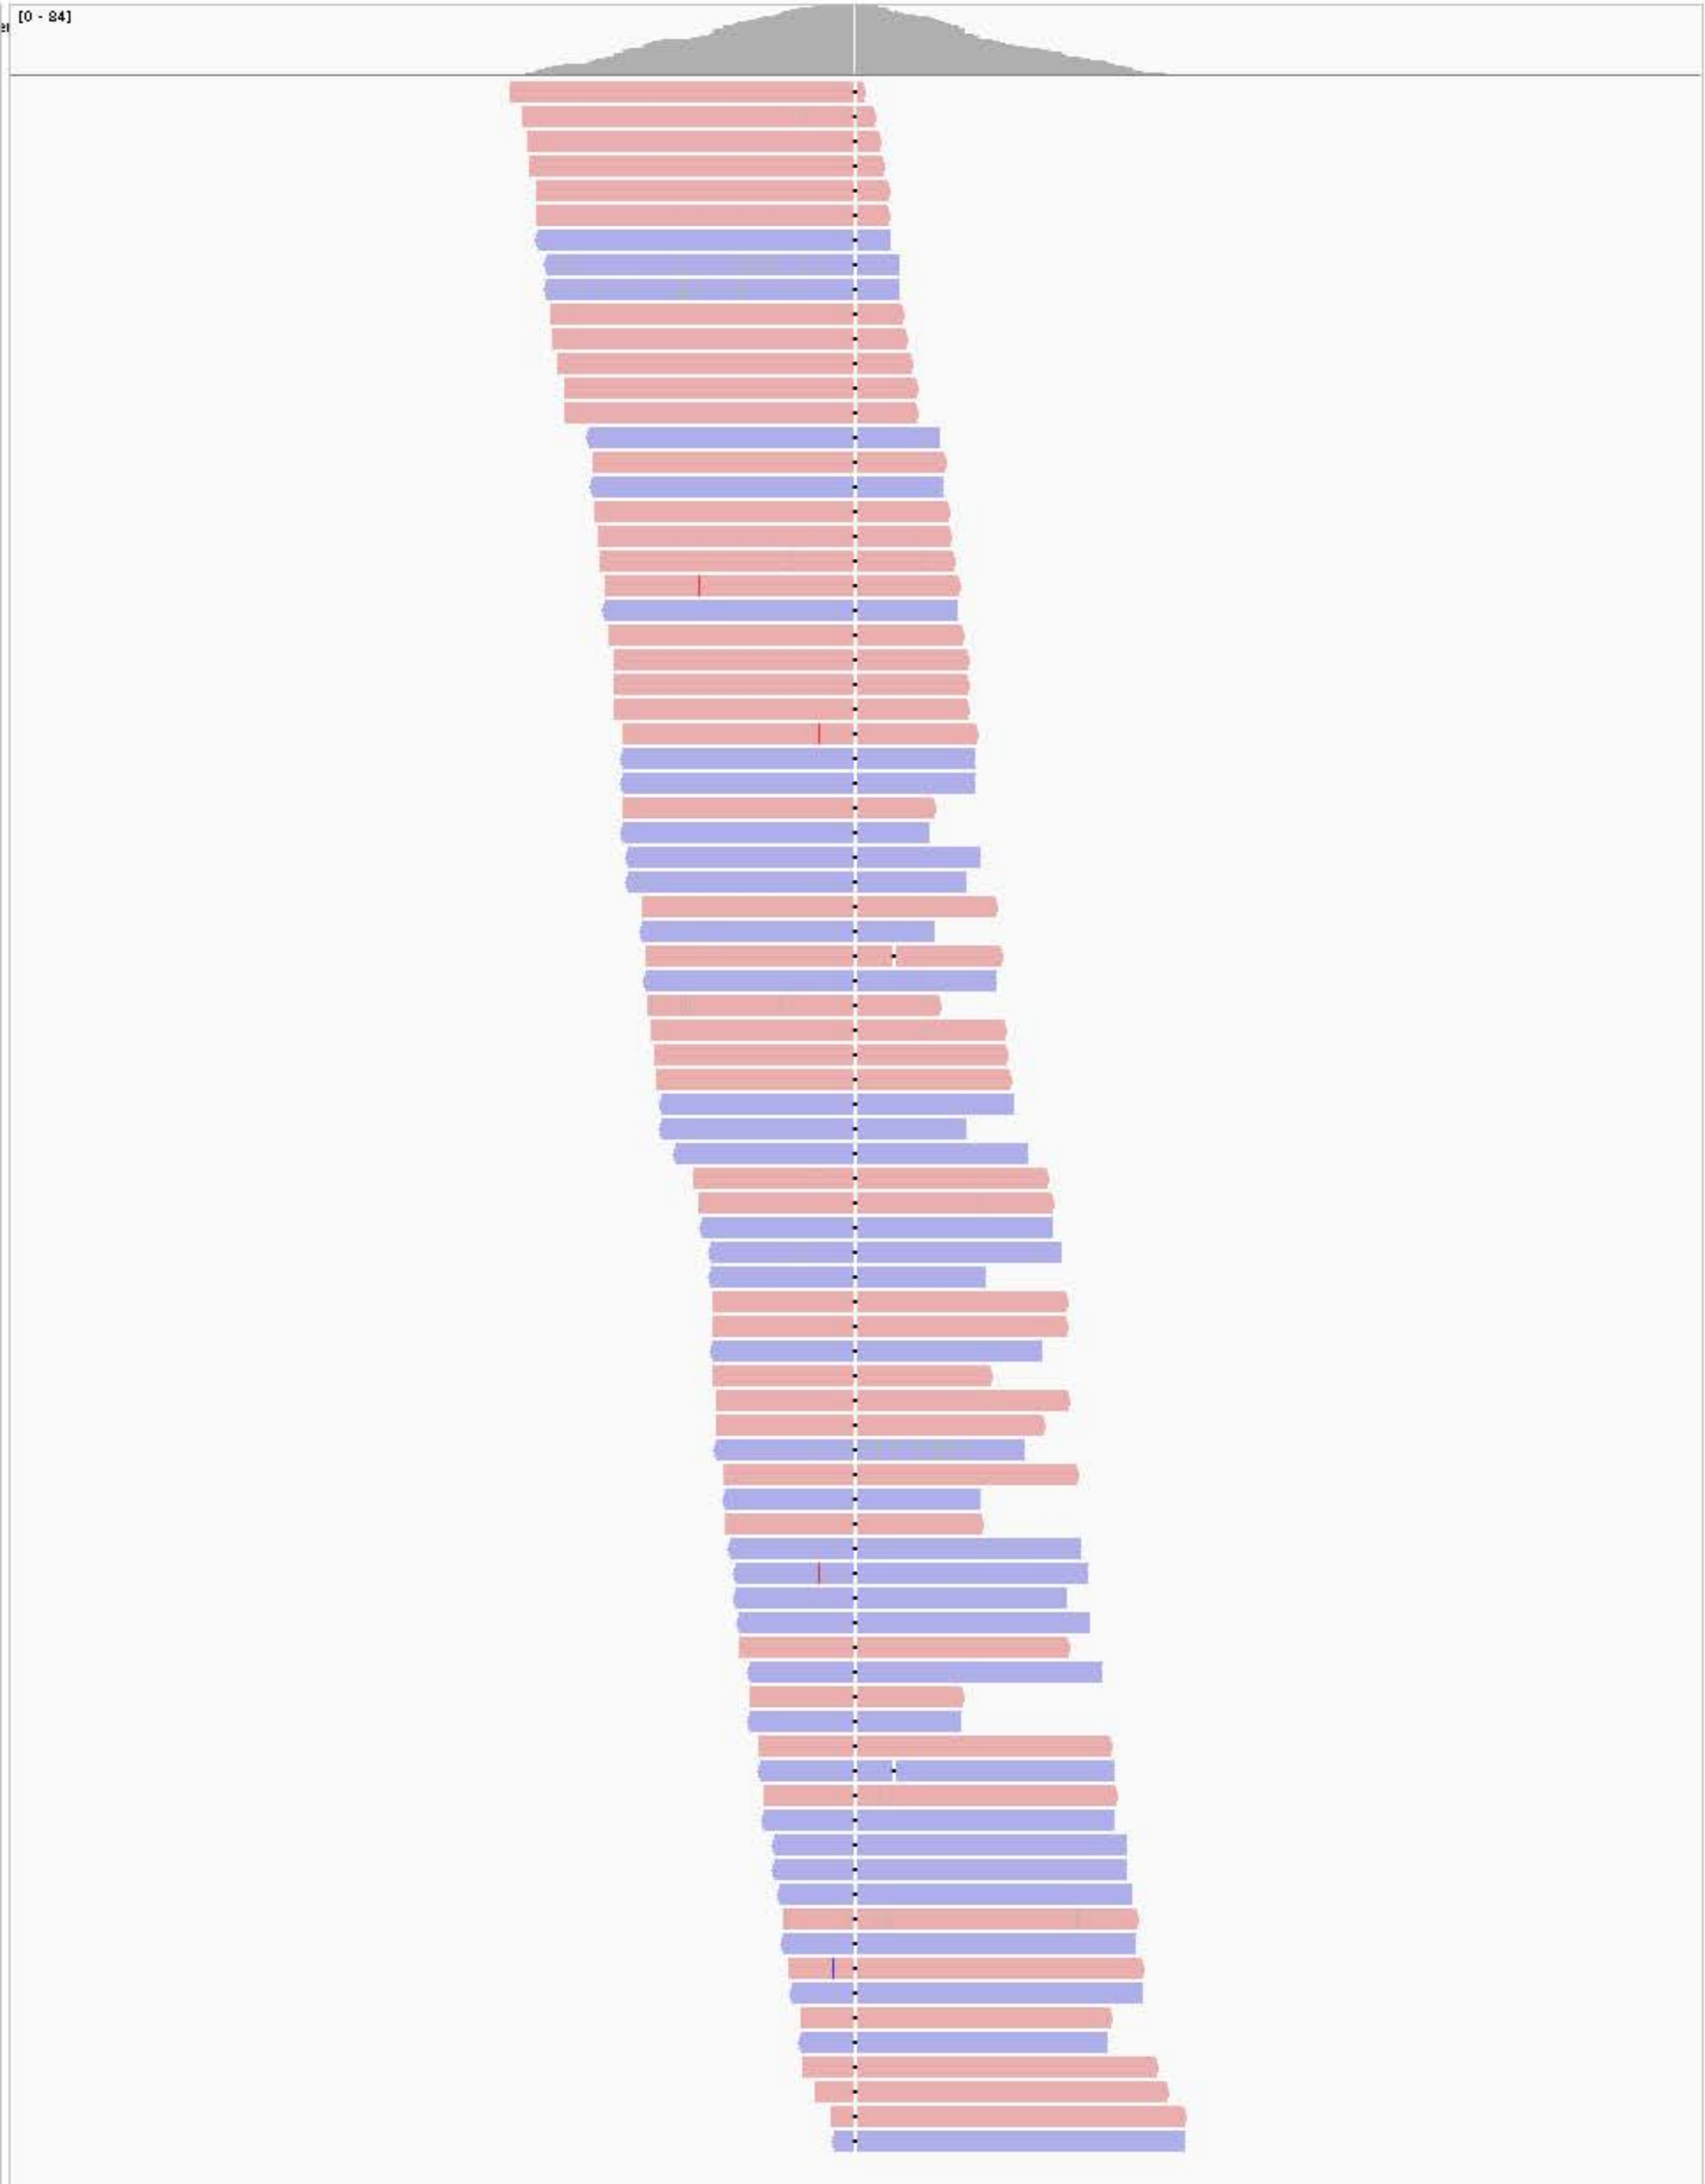

SL\_0011-LT\_11-B\_mut.bam

Sequence

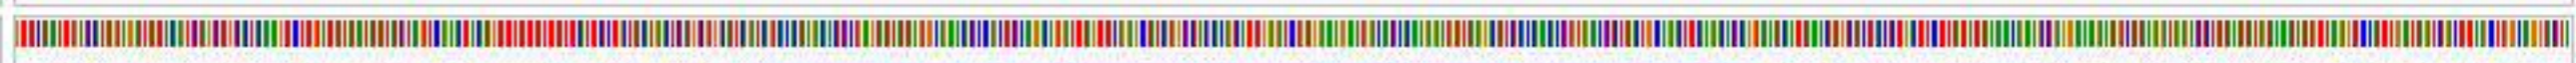

Refseq Genes

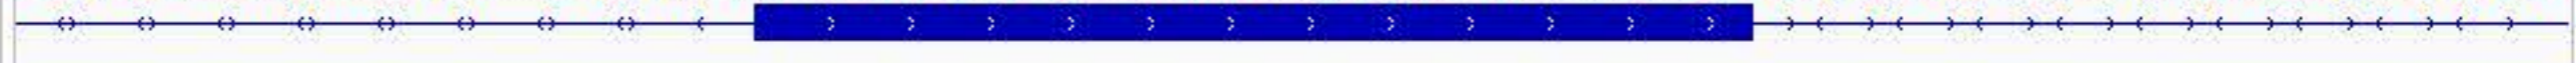

ATM



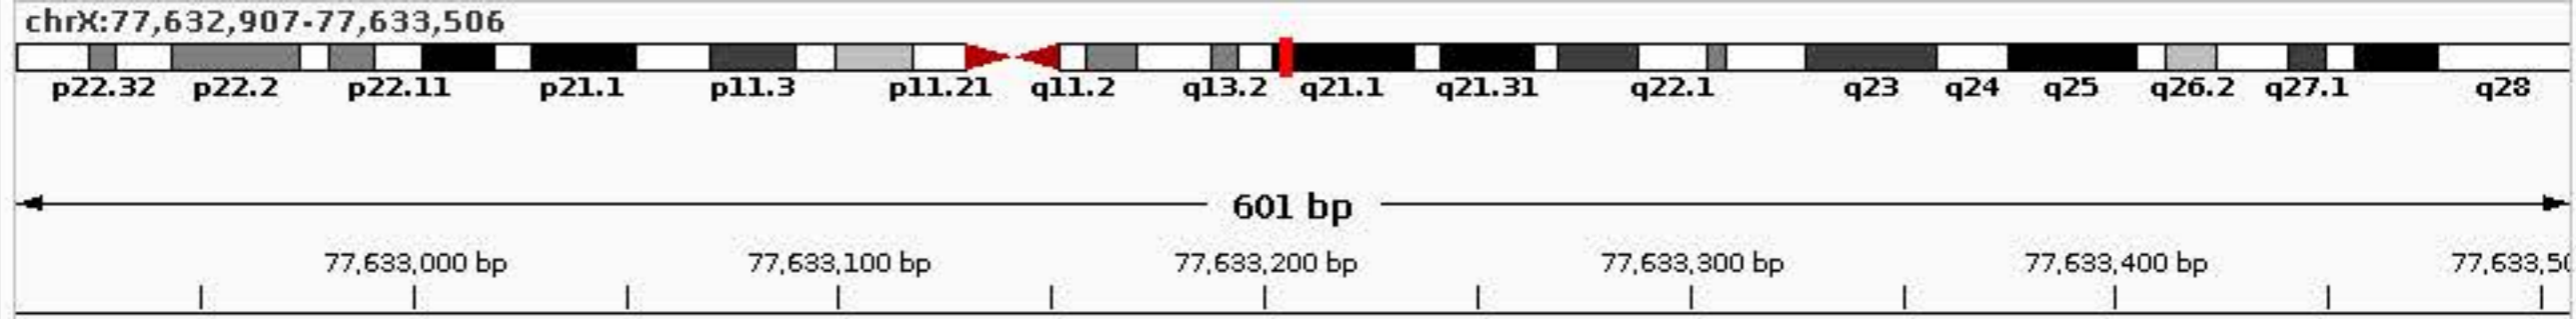

SL\_0008-LT\_15-B\_mut.bam Coverage

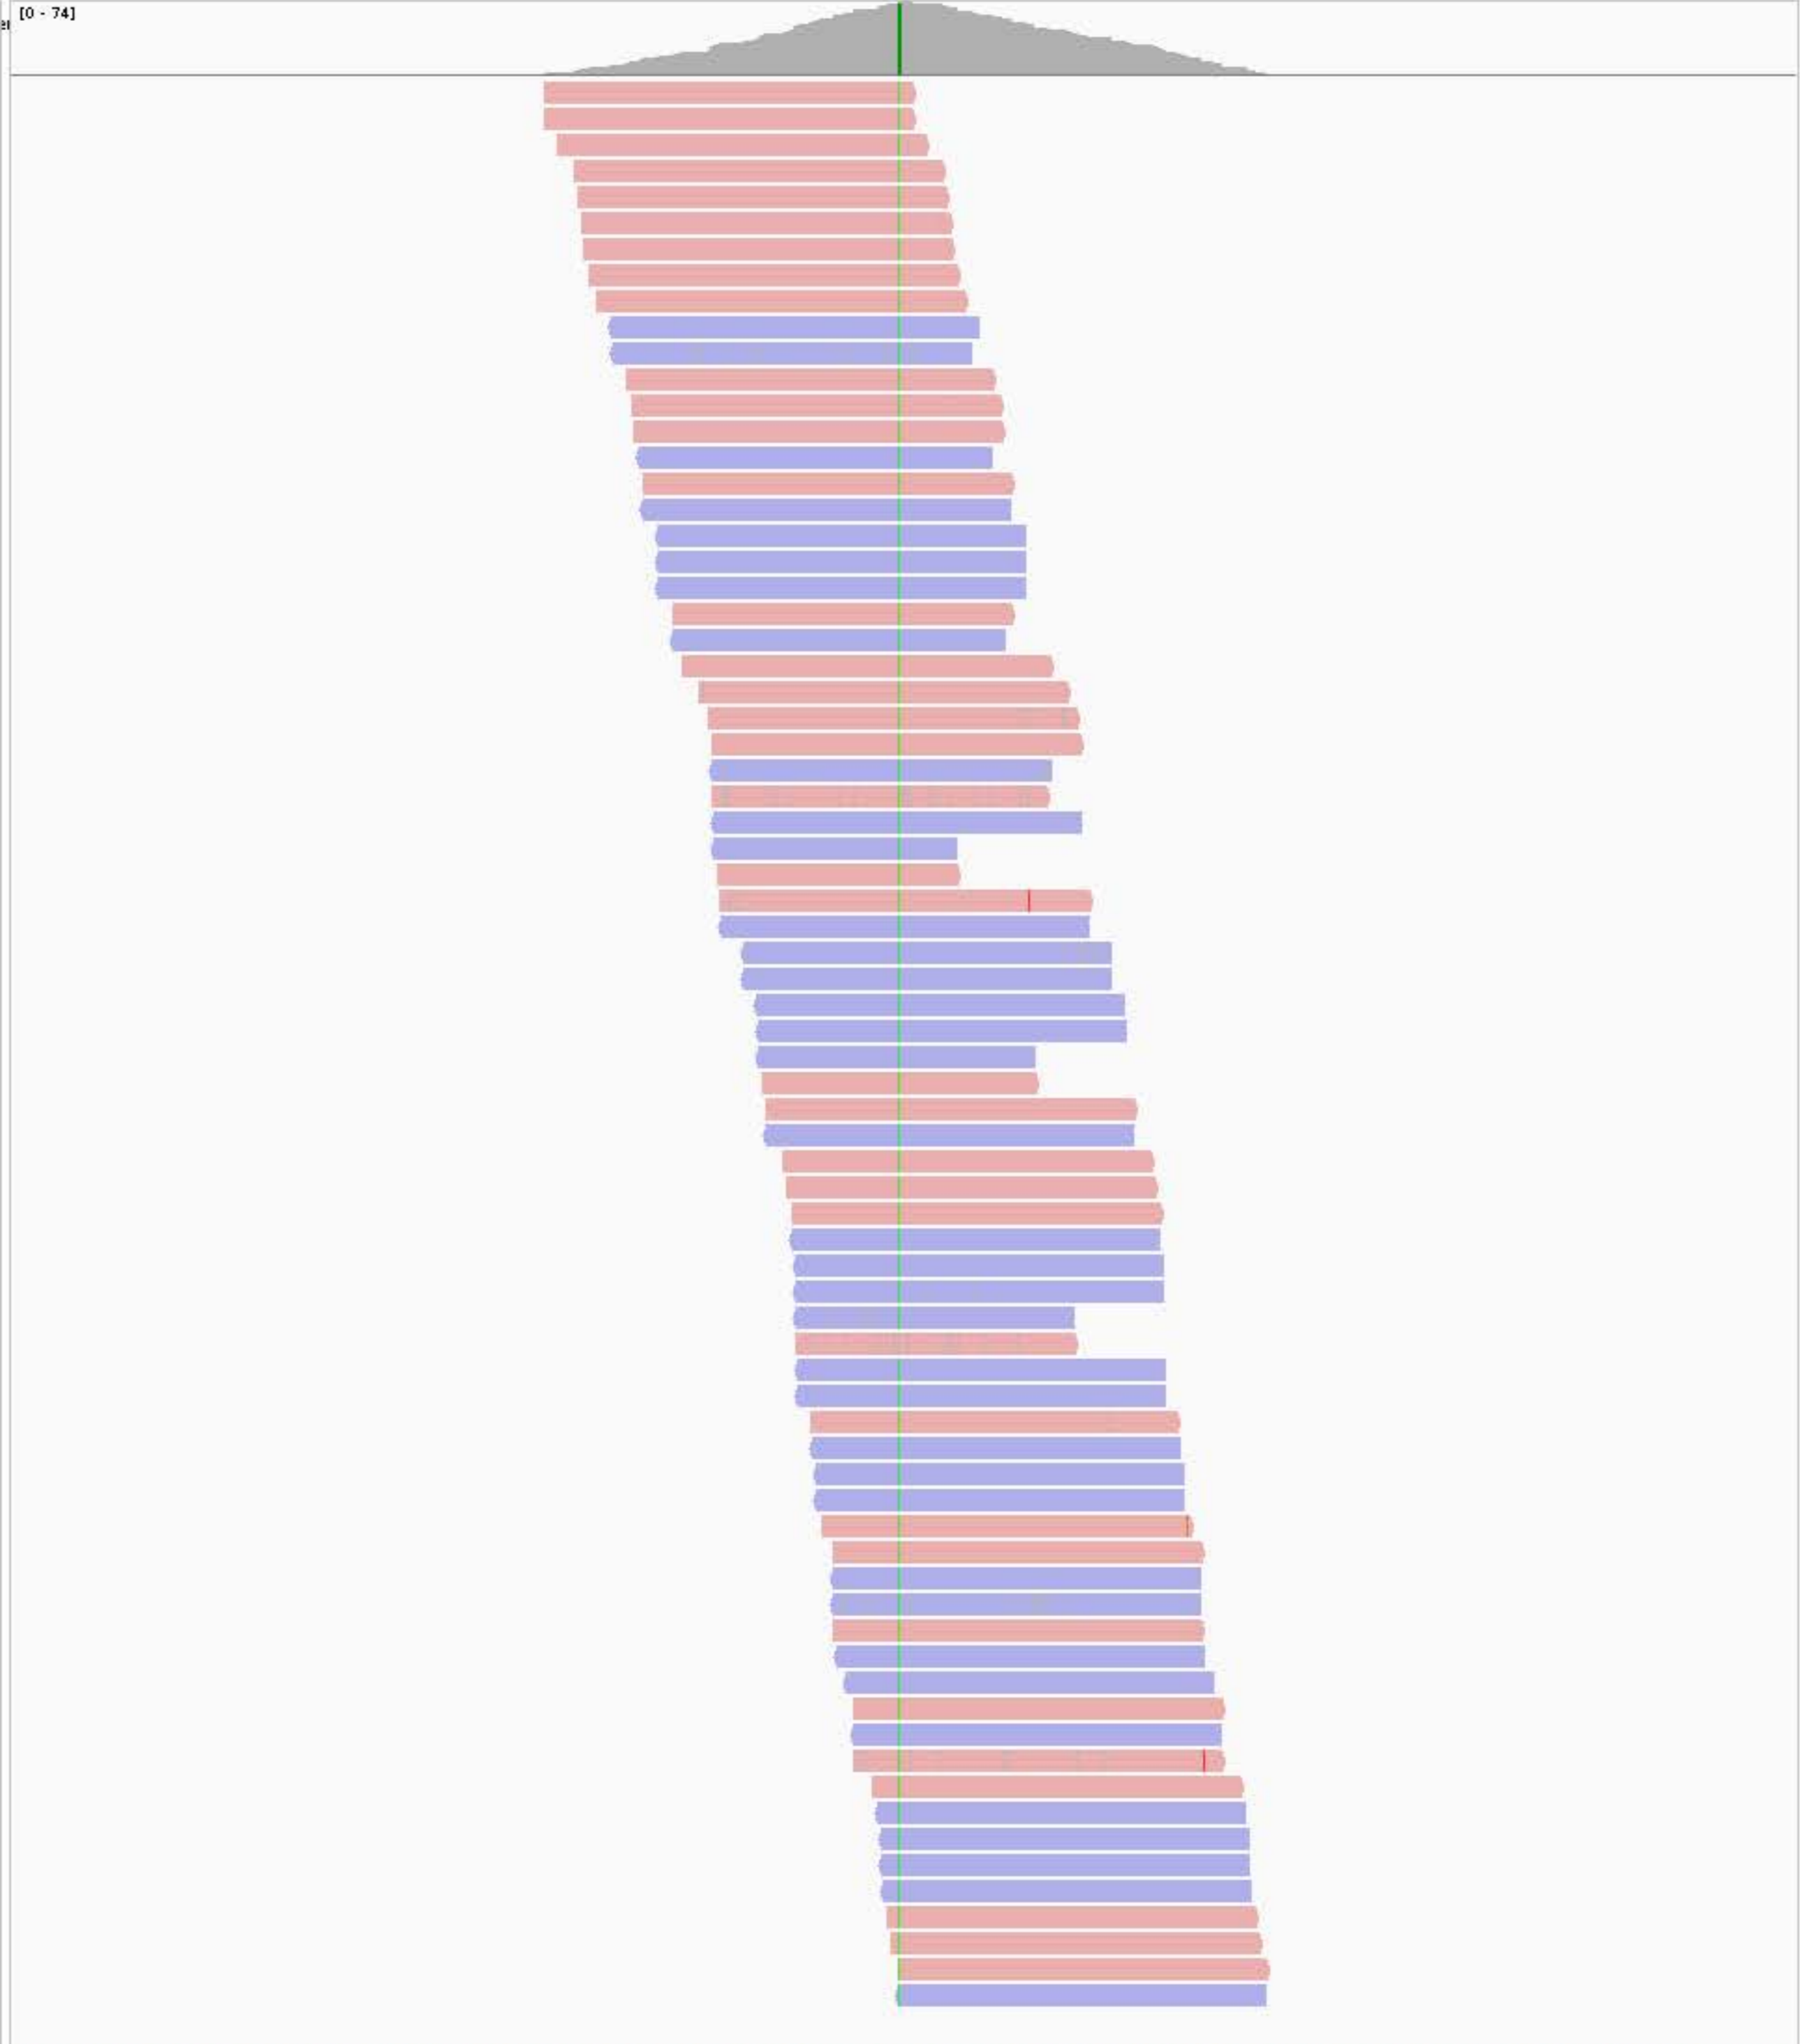

SL\_0008-LT\_15-B\_mut.bam

Sequence →  
Refseq Genes

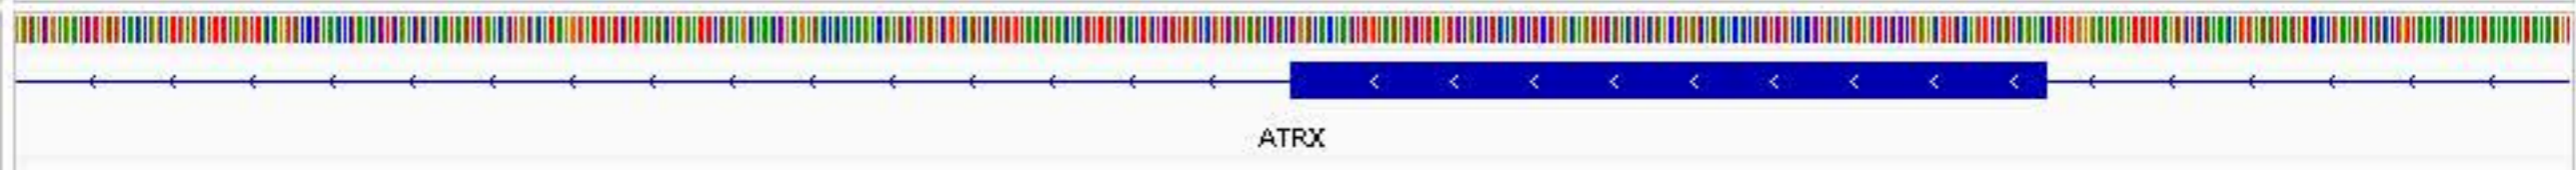

chr20:56,373,117-56,373,716

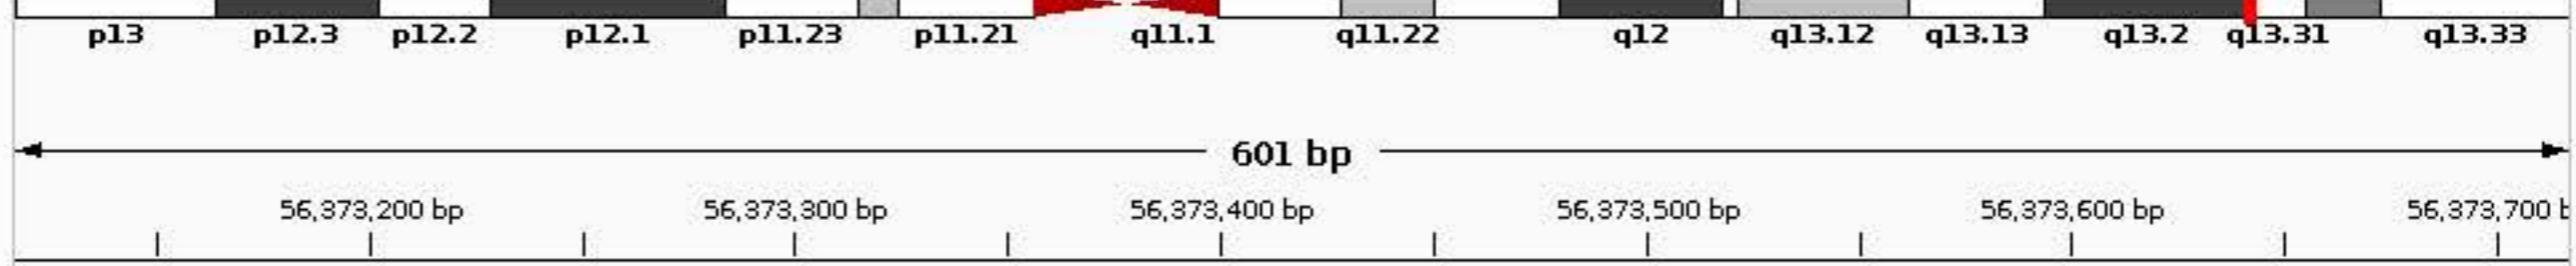

SL\_1010-T1-B\_mut.bam Coverage

SL\_1010-T1-B\_mut.bam

Sequence →

Refseq Genes

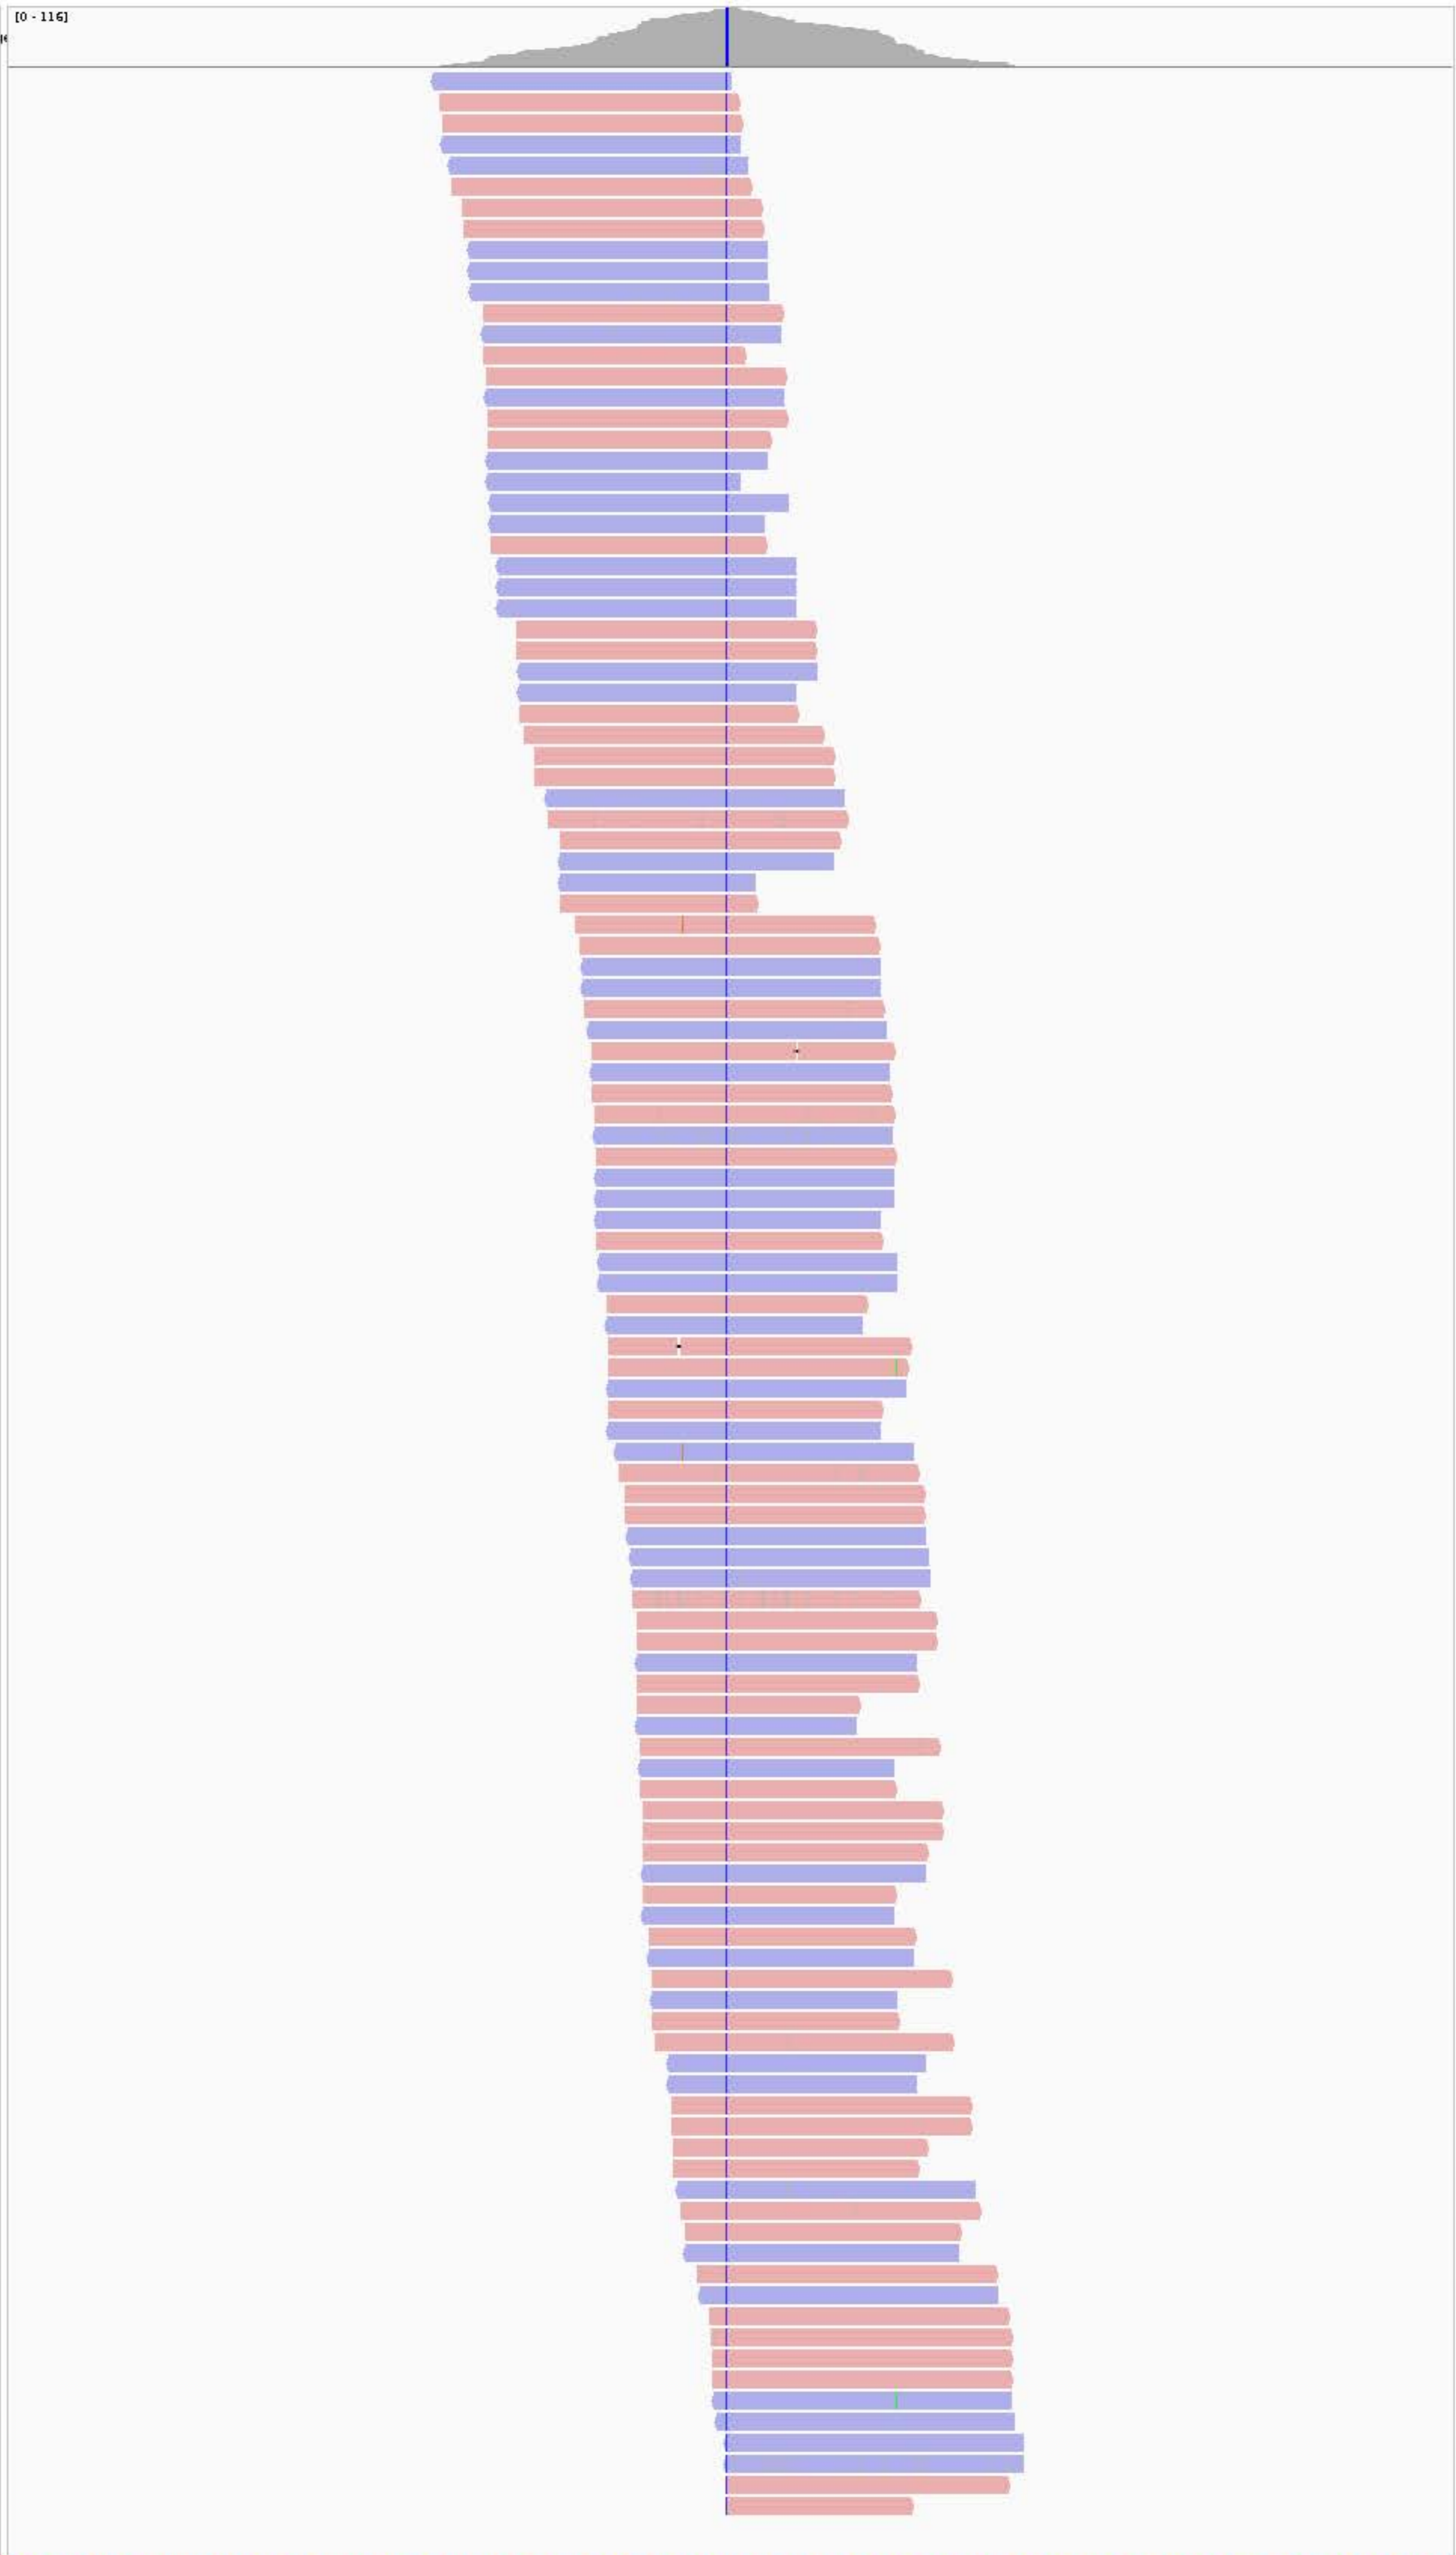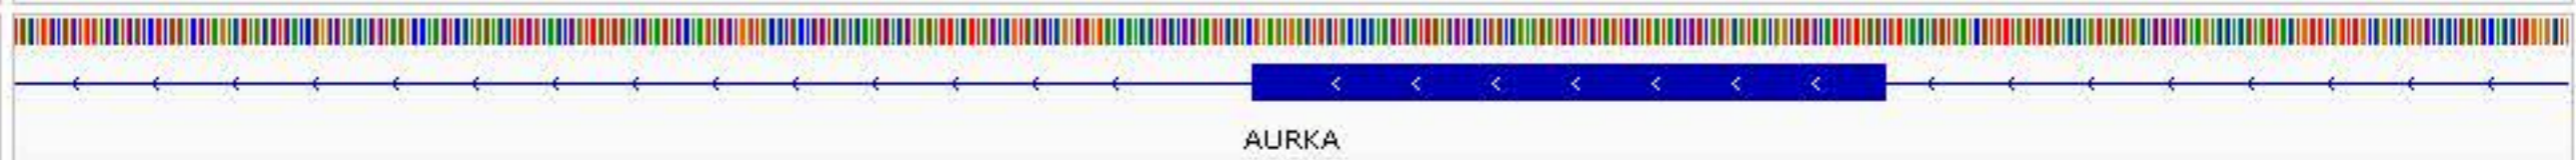

AURKA



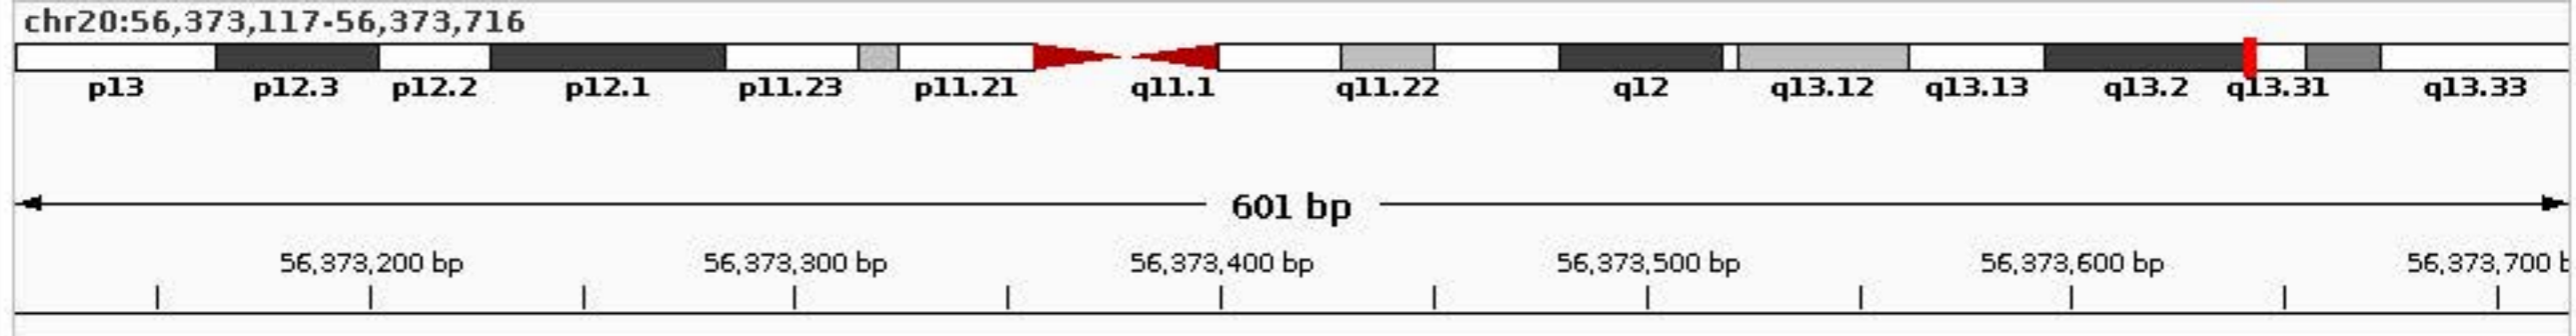

SL\_1010-T2-B\_mut.bam Coverage

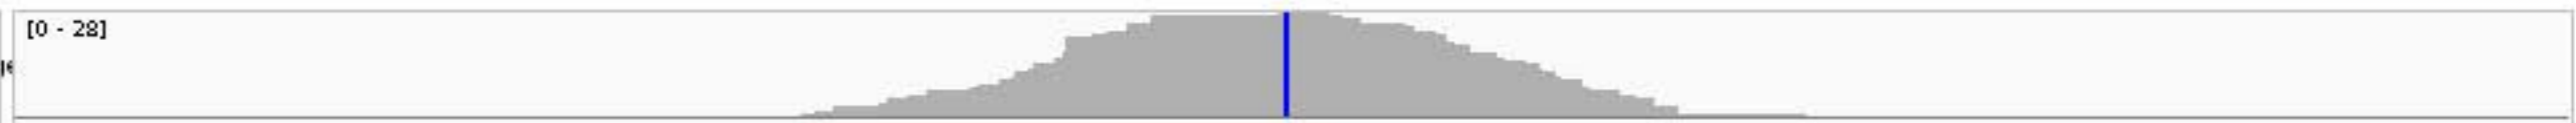

SL\_1010-T2-B\_mut.bam

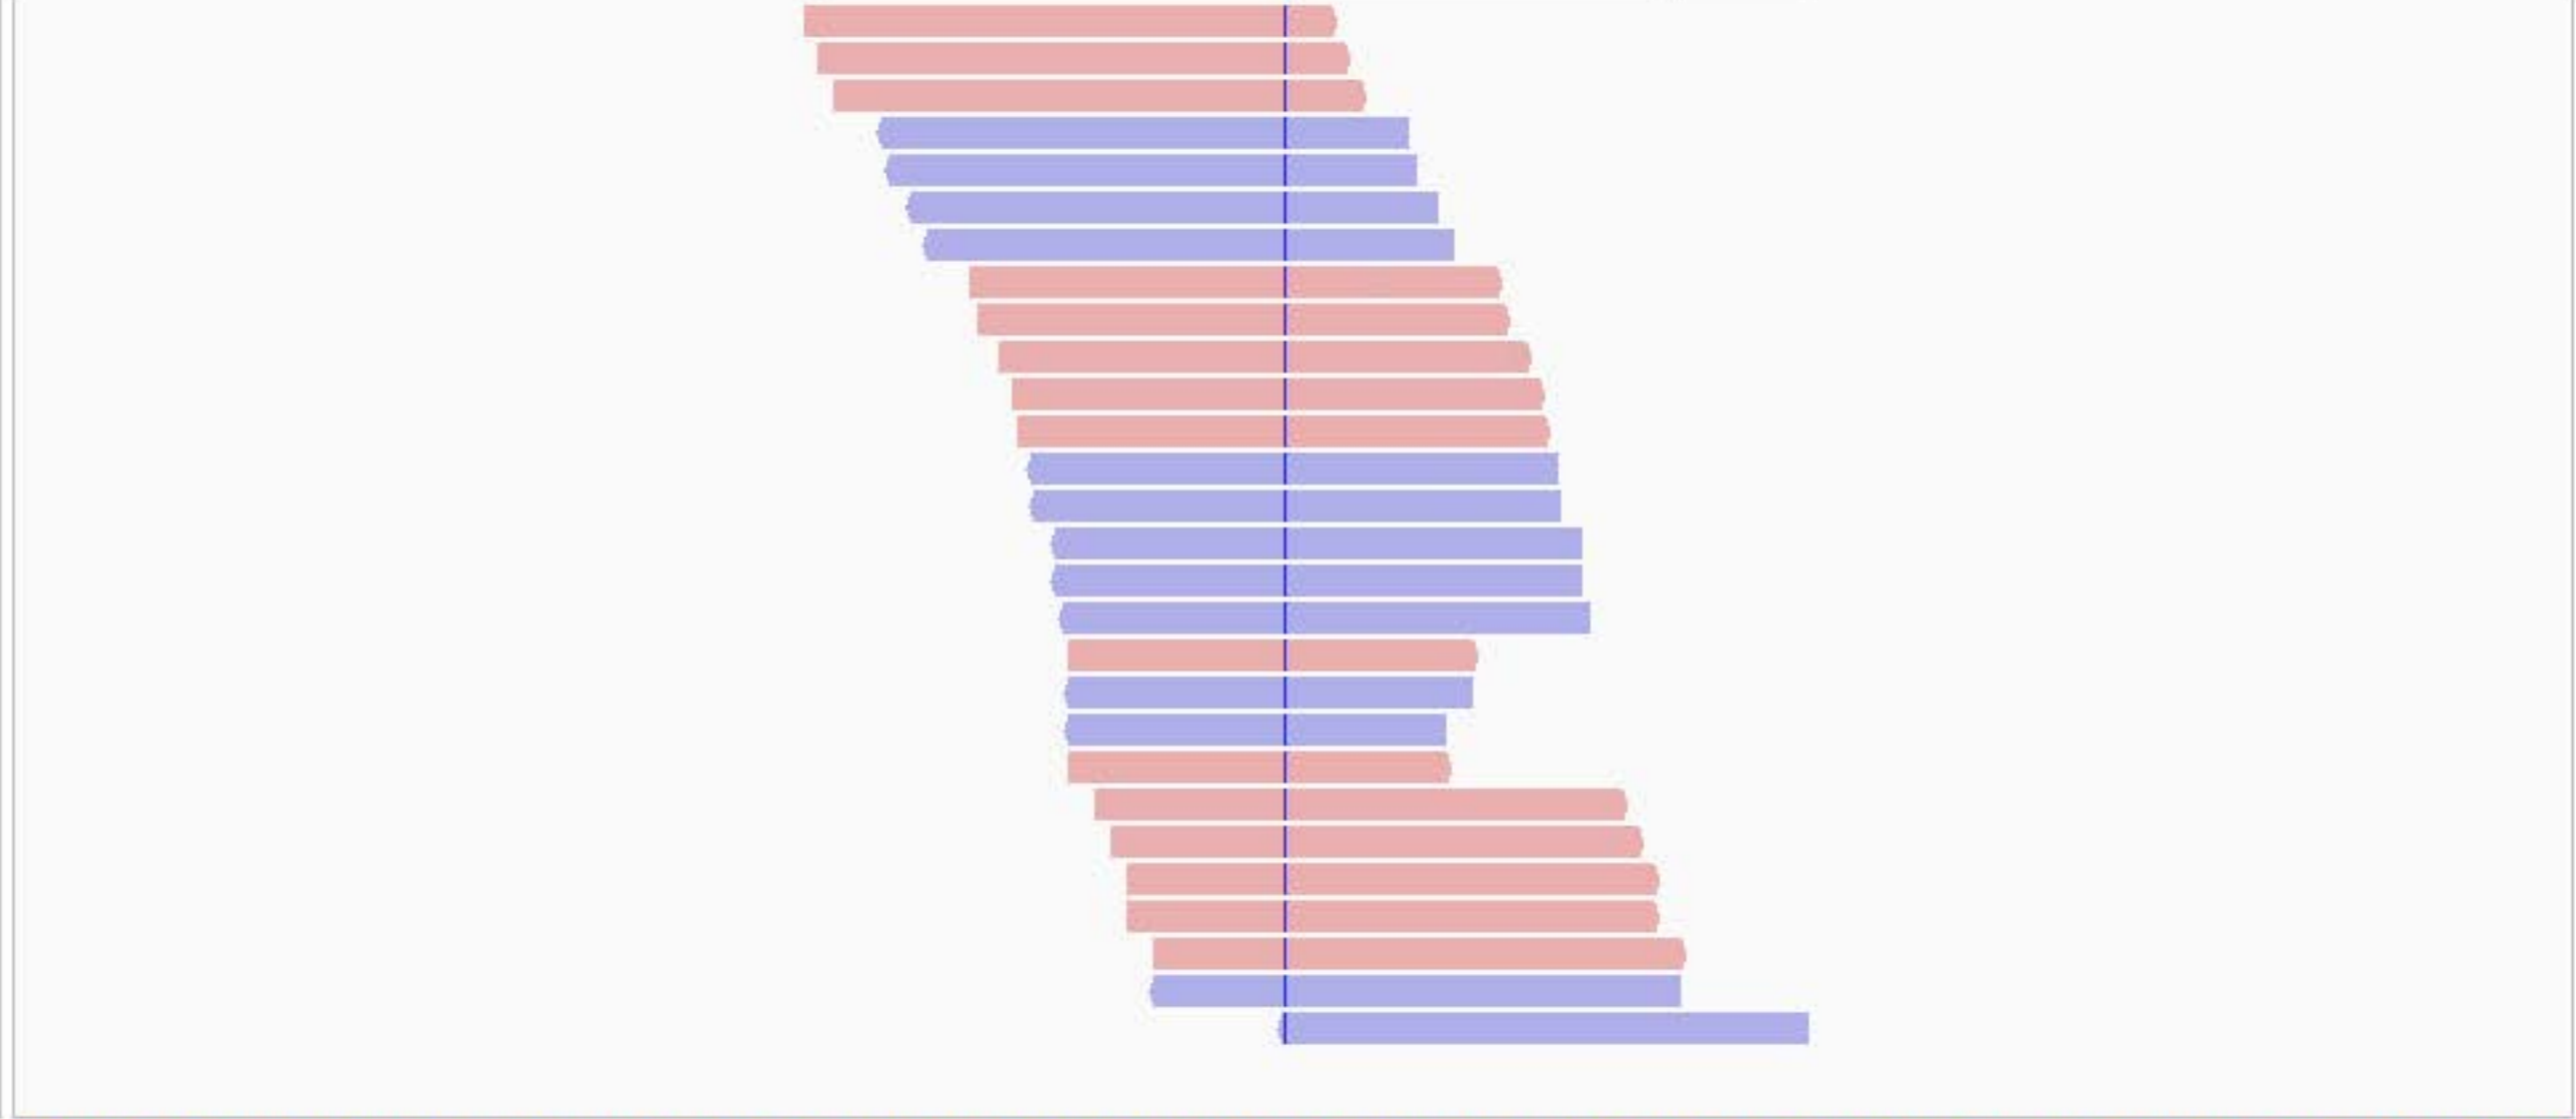

Sequence →

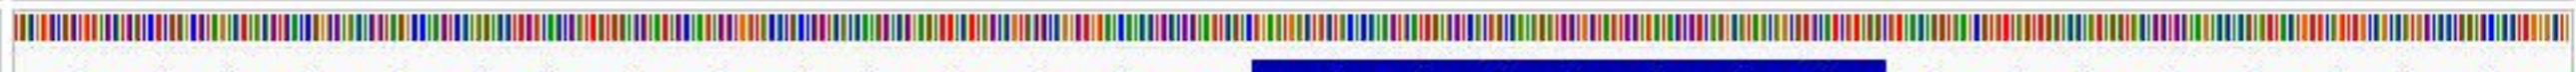

Refseq Genes

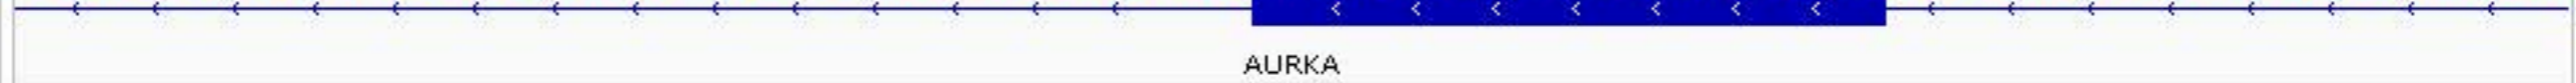

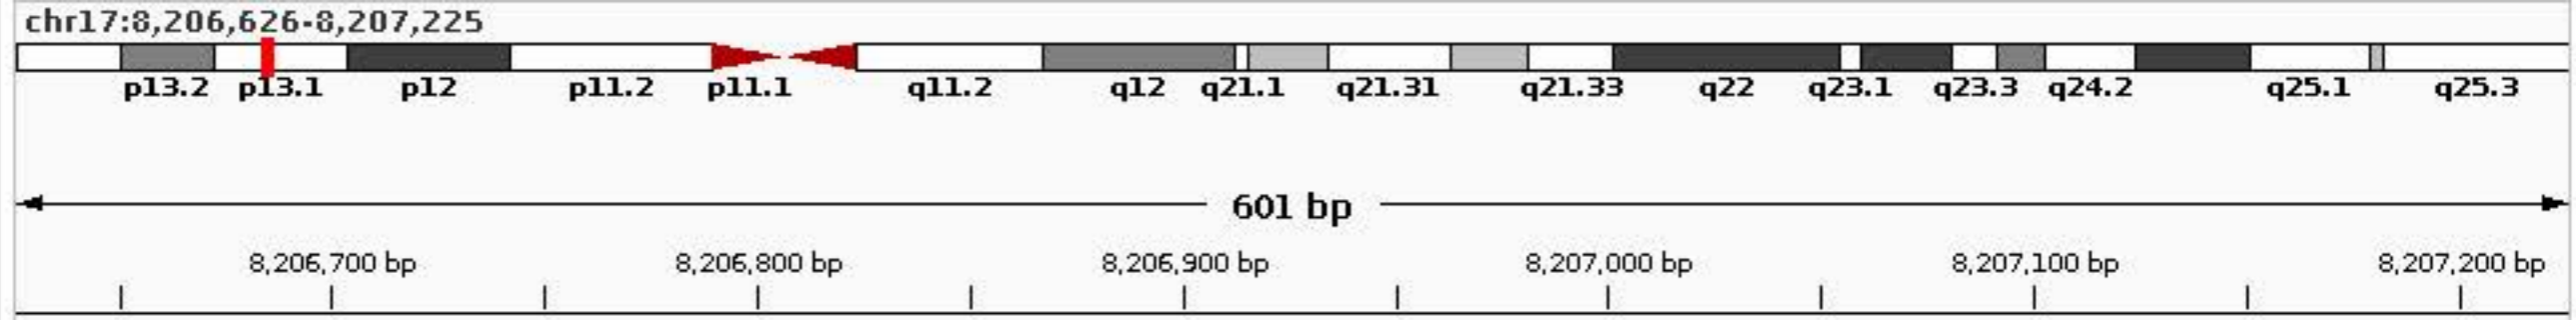

SL\_1010-T1-B\_mut.bam Coverage

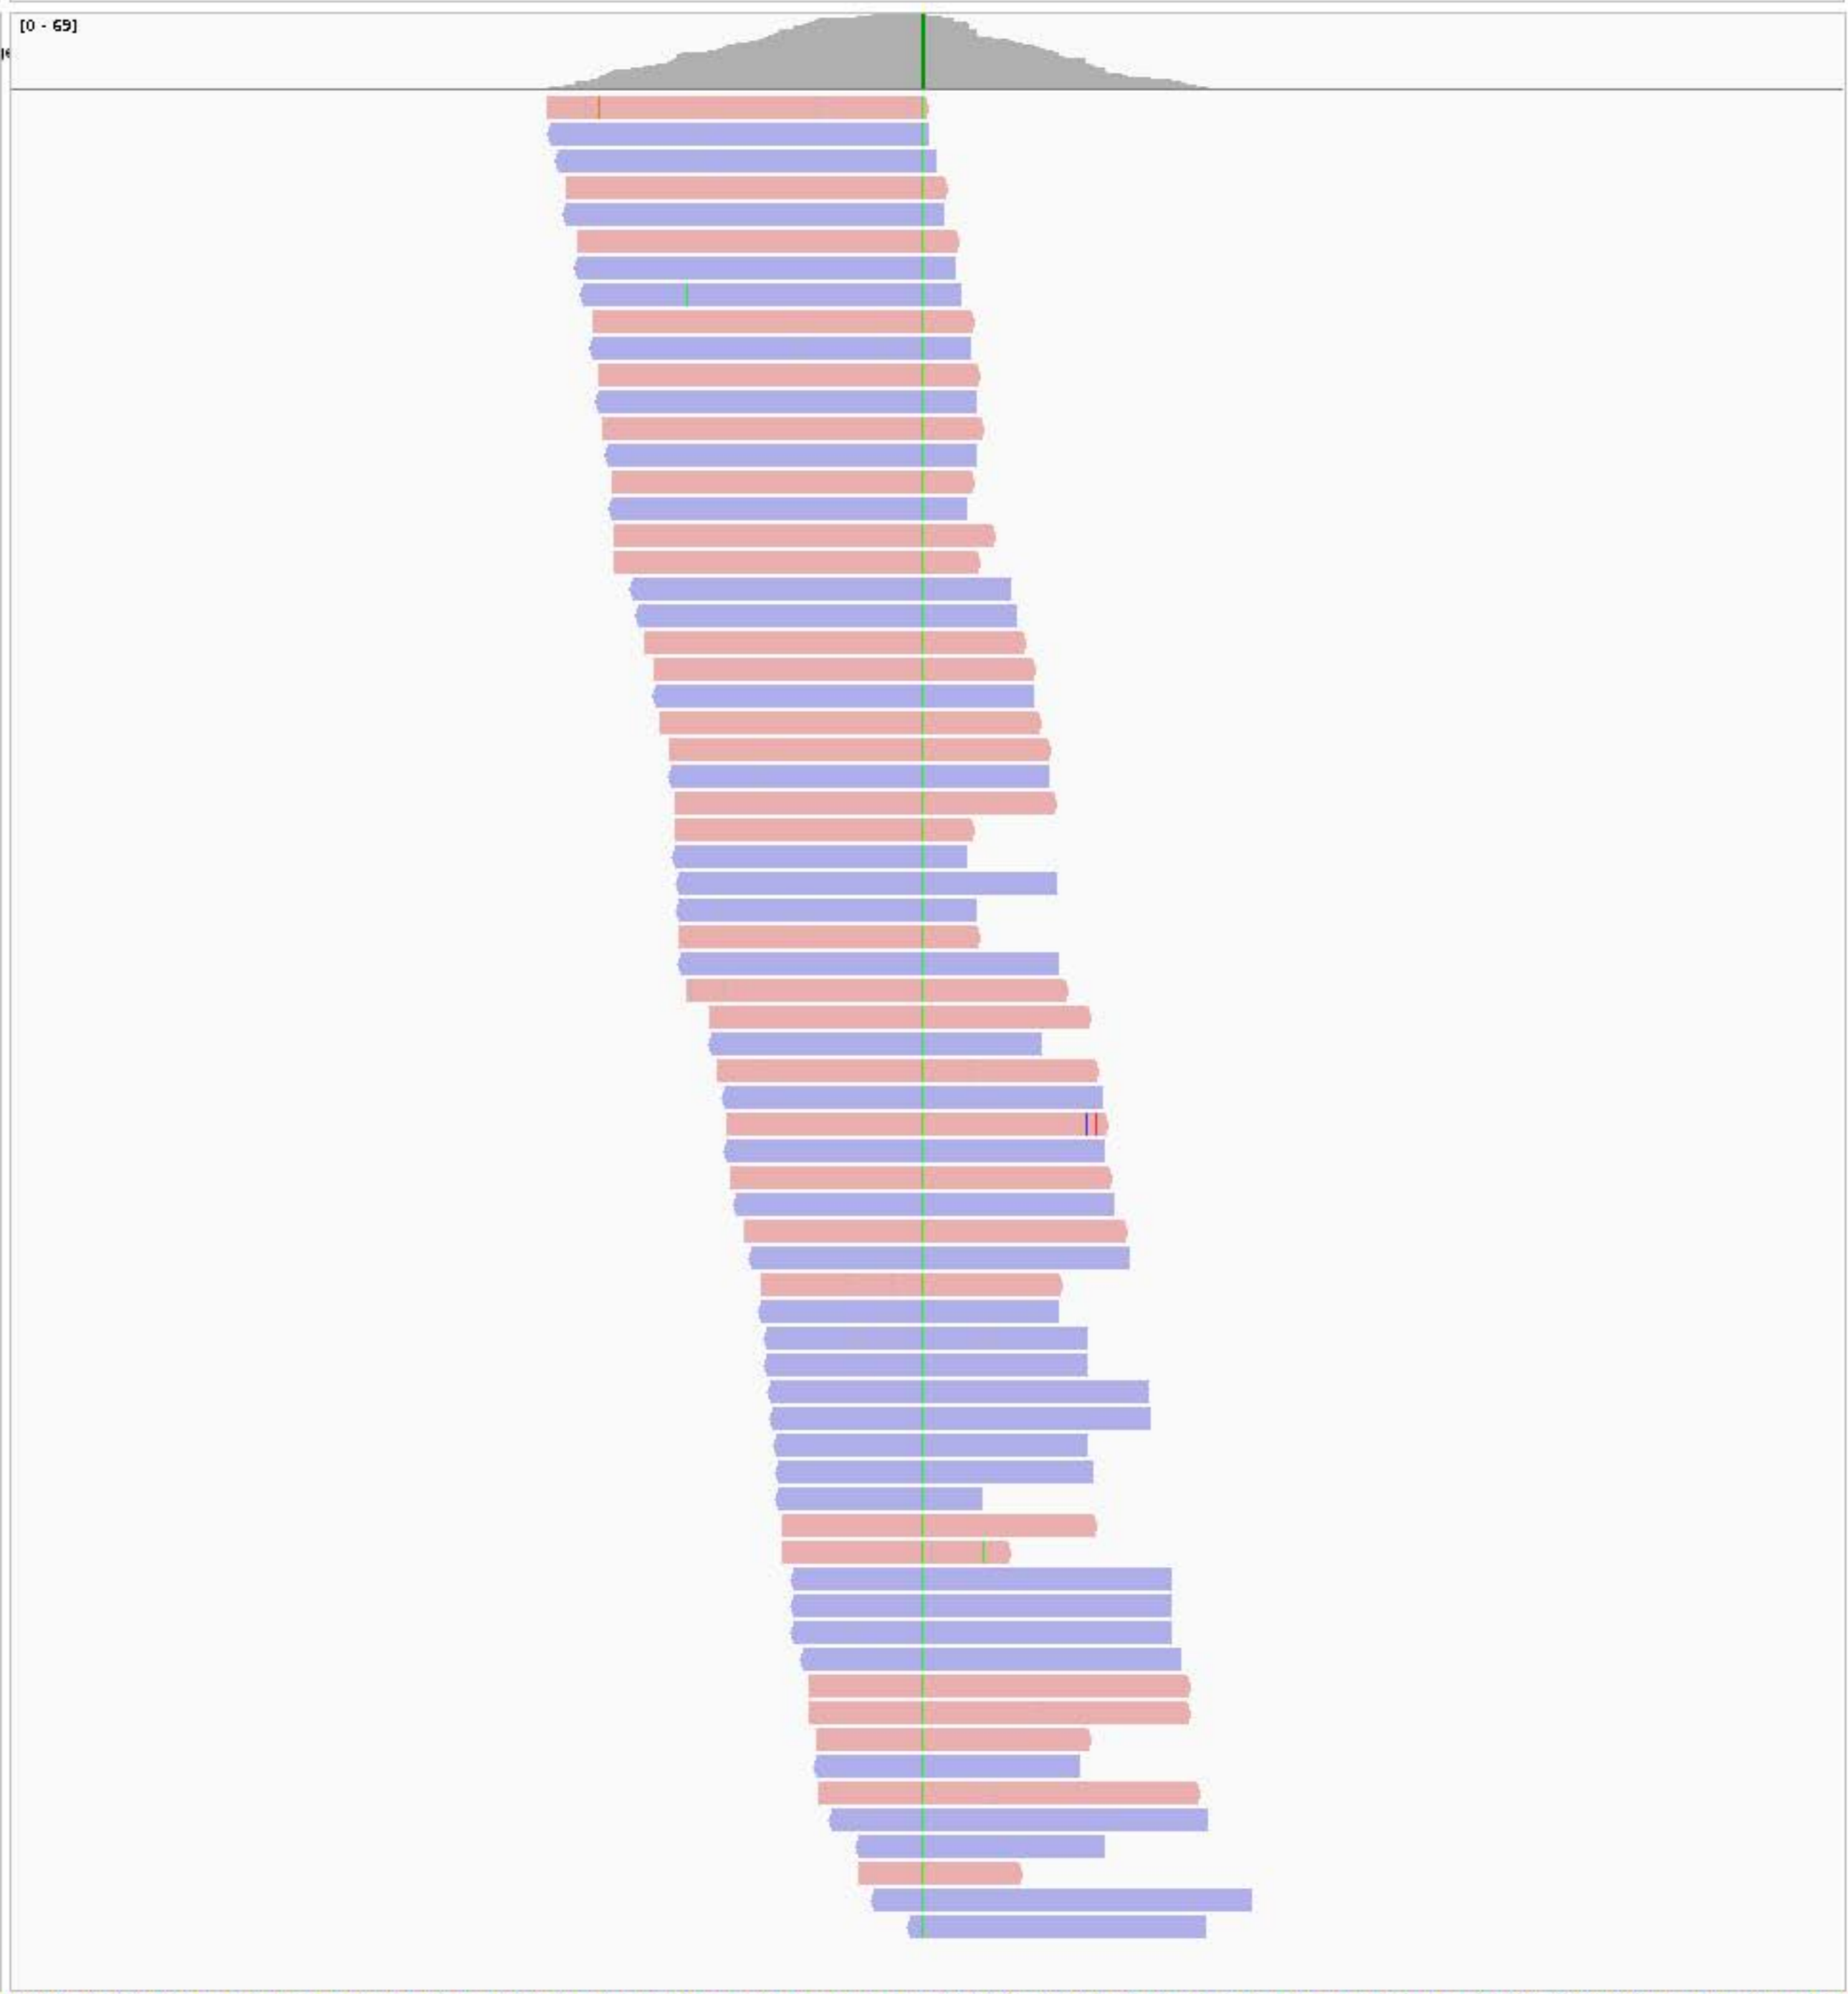

SL\_1010-T1-B\_mut.bam

Sequence →  
Refseq Genes

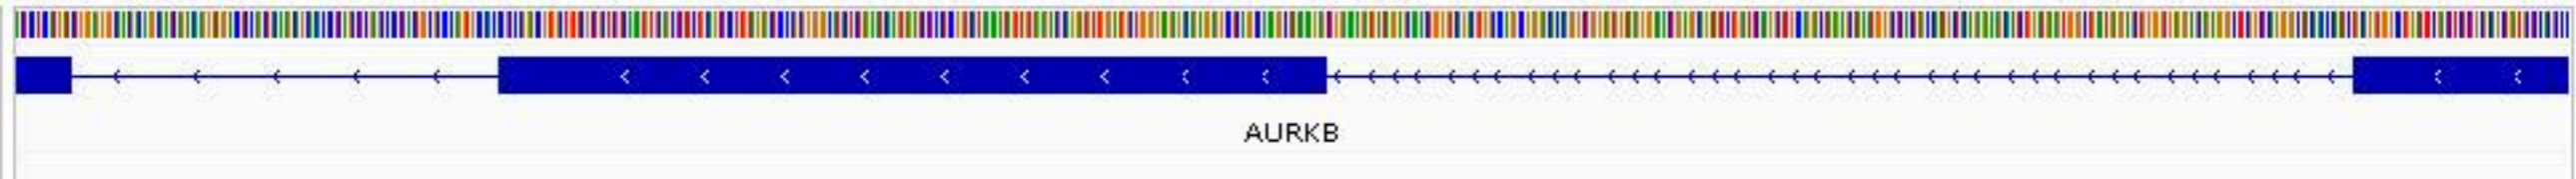



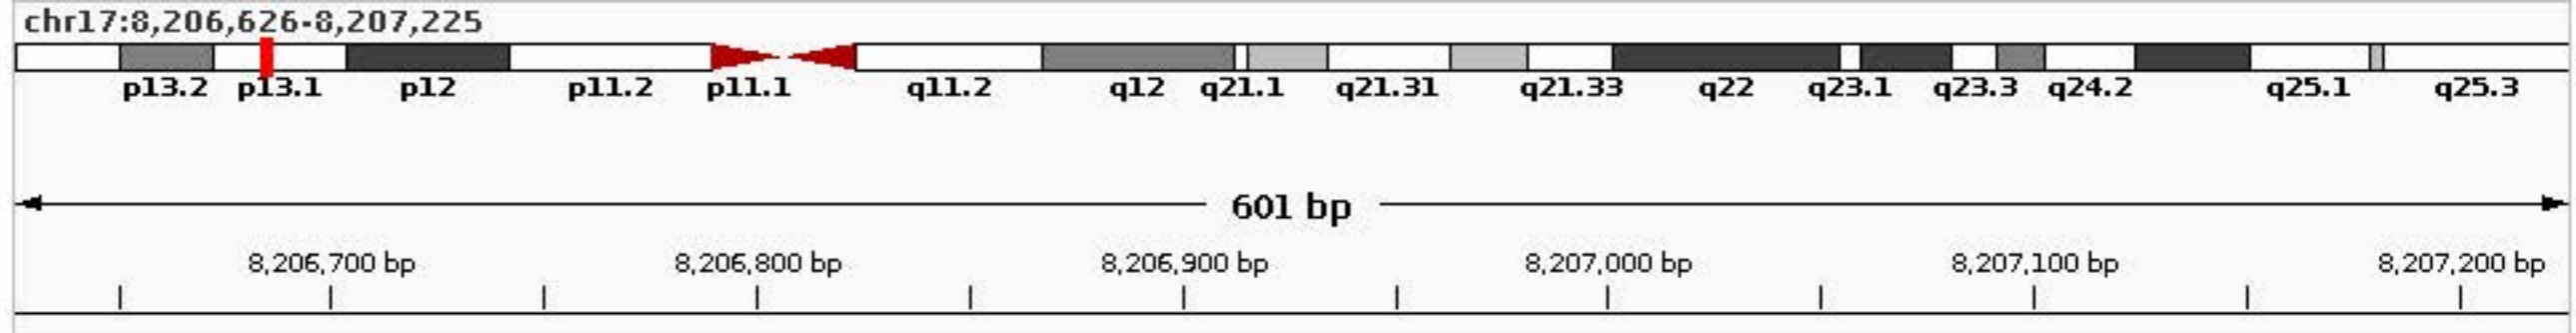

SL\_1010-T2-B\_mut.bam Coverage

SL\_1010-T2-B\_mut.bam

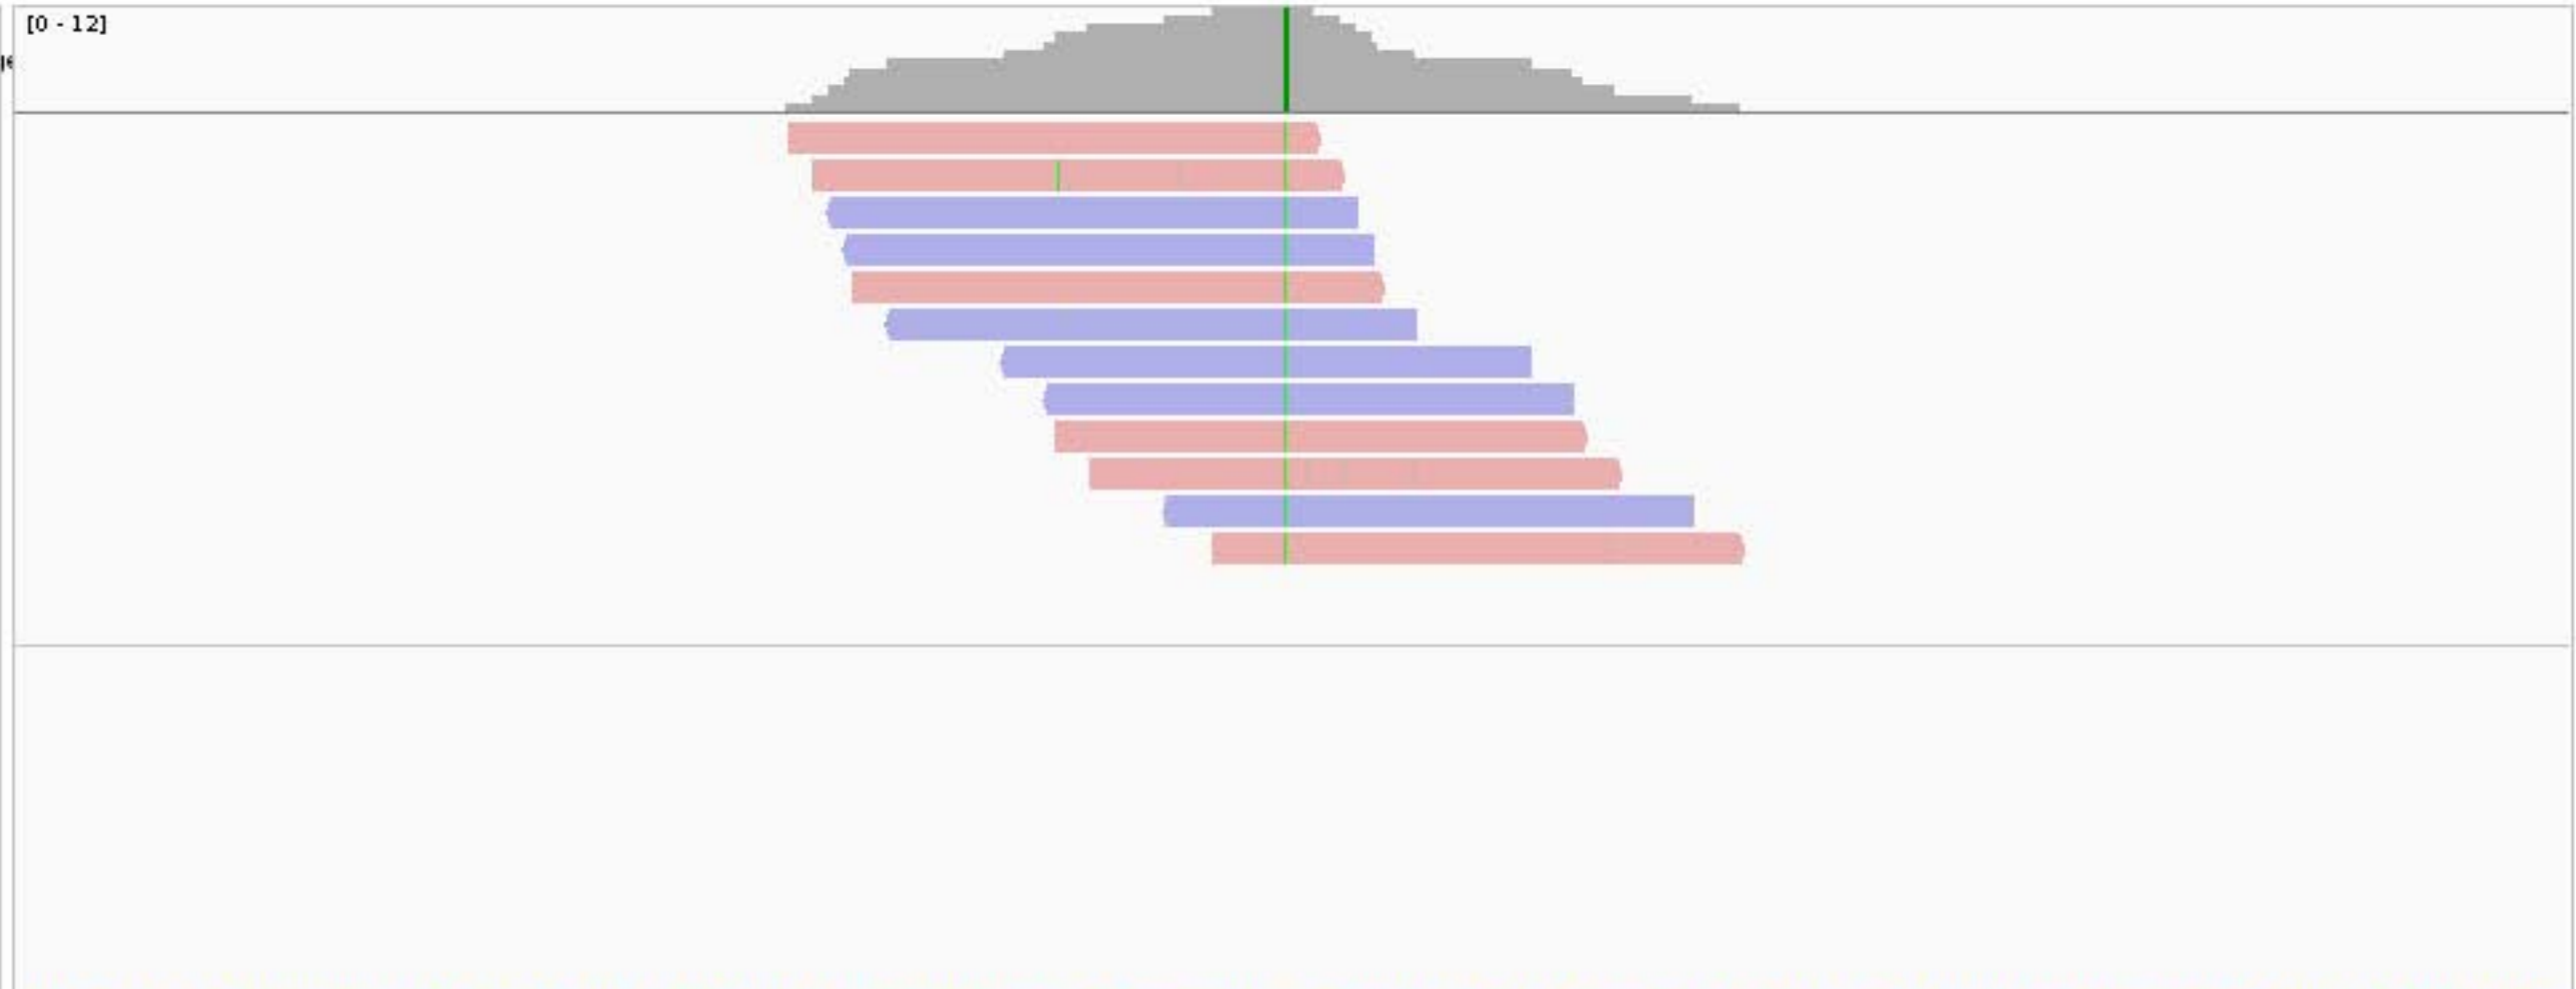

Sequence

Refseq Genes

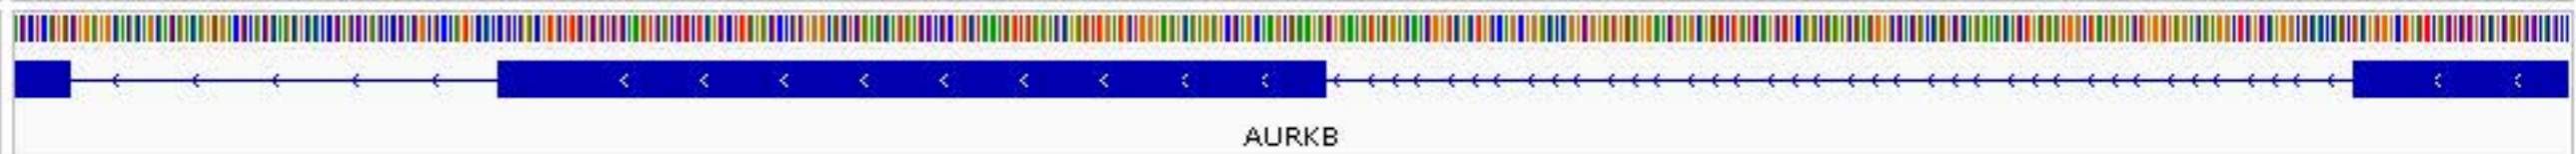

chr17:8,207,478-8,208,077

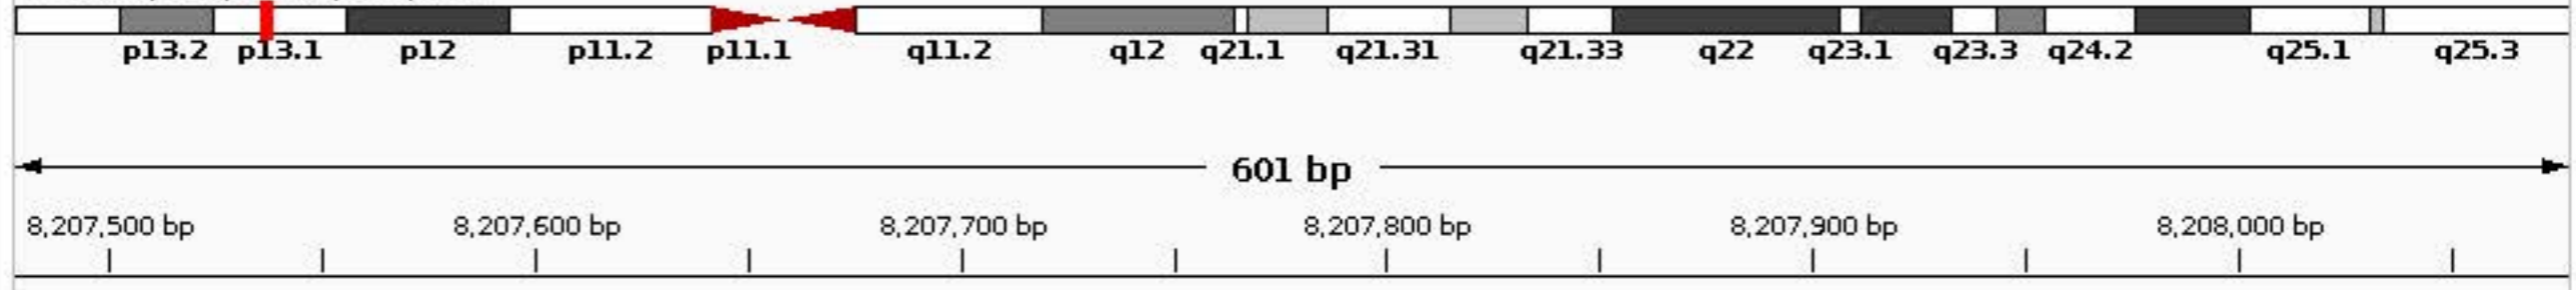

SL\_1011\_R\_FFPE\_31-B\_mut.bam  
rage

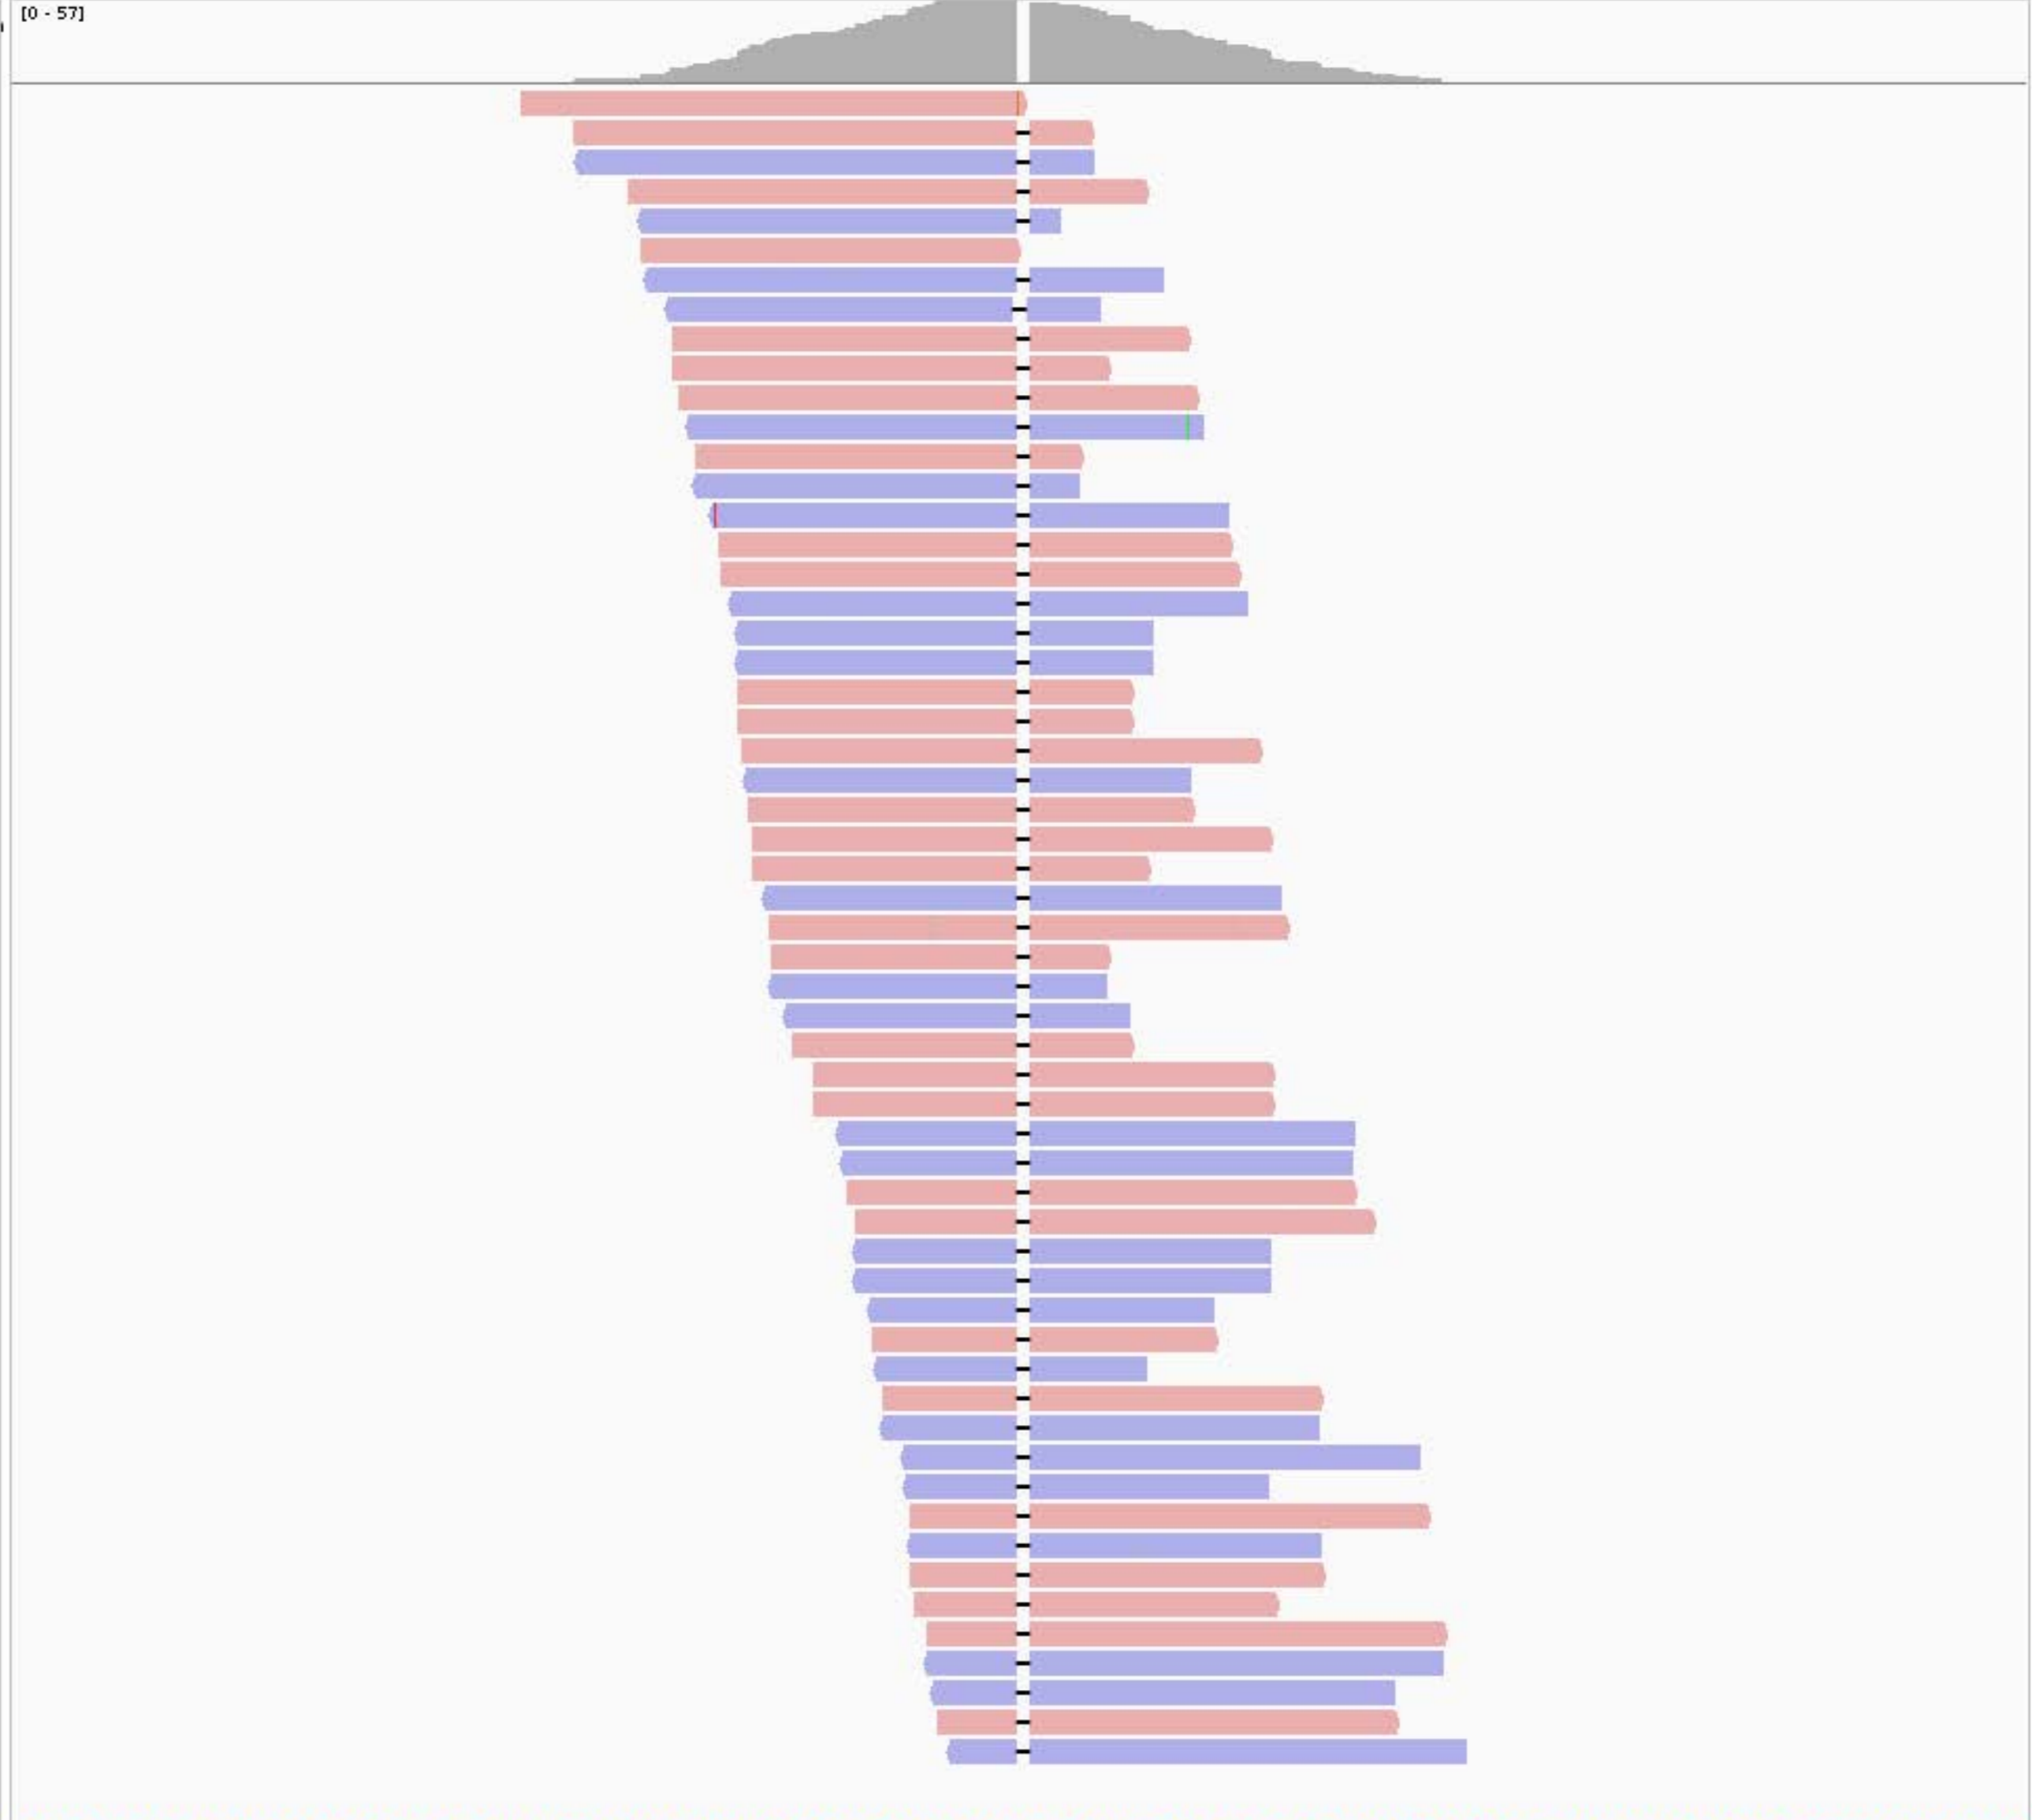

SL\_1011\_R\_FFPE\_31-B\_mut.ba  
m

Sequence →

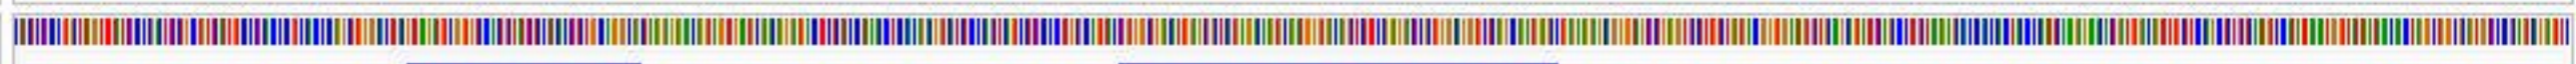

Refseq Genes

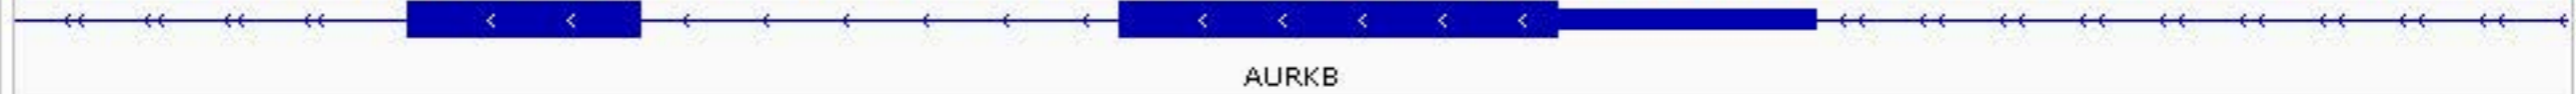

AURKB



chr15:90,759,981-90,760,580

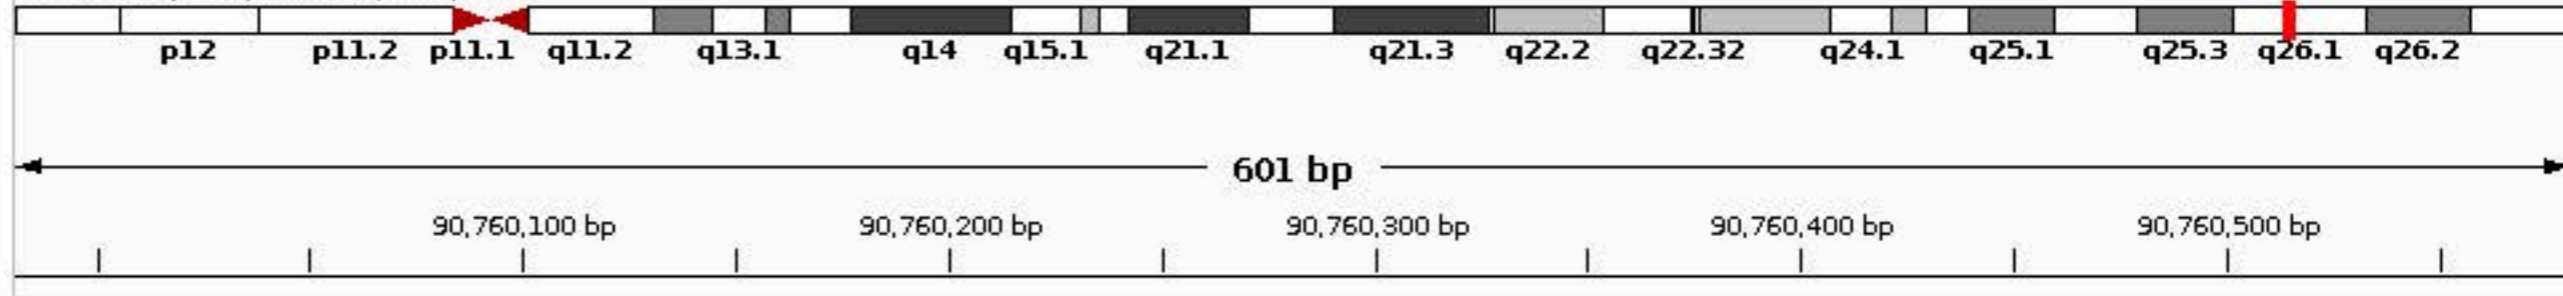

SL\_1008\_R\_51\_FFPE-B\_mut.bam  
range

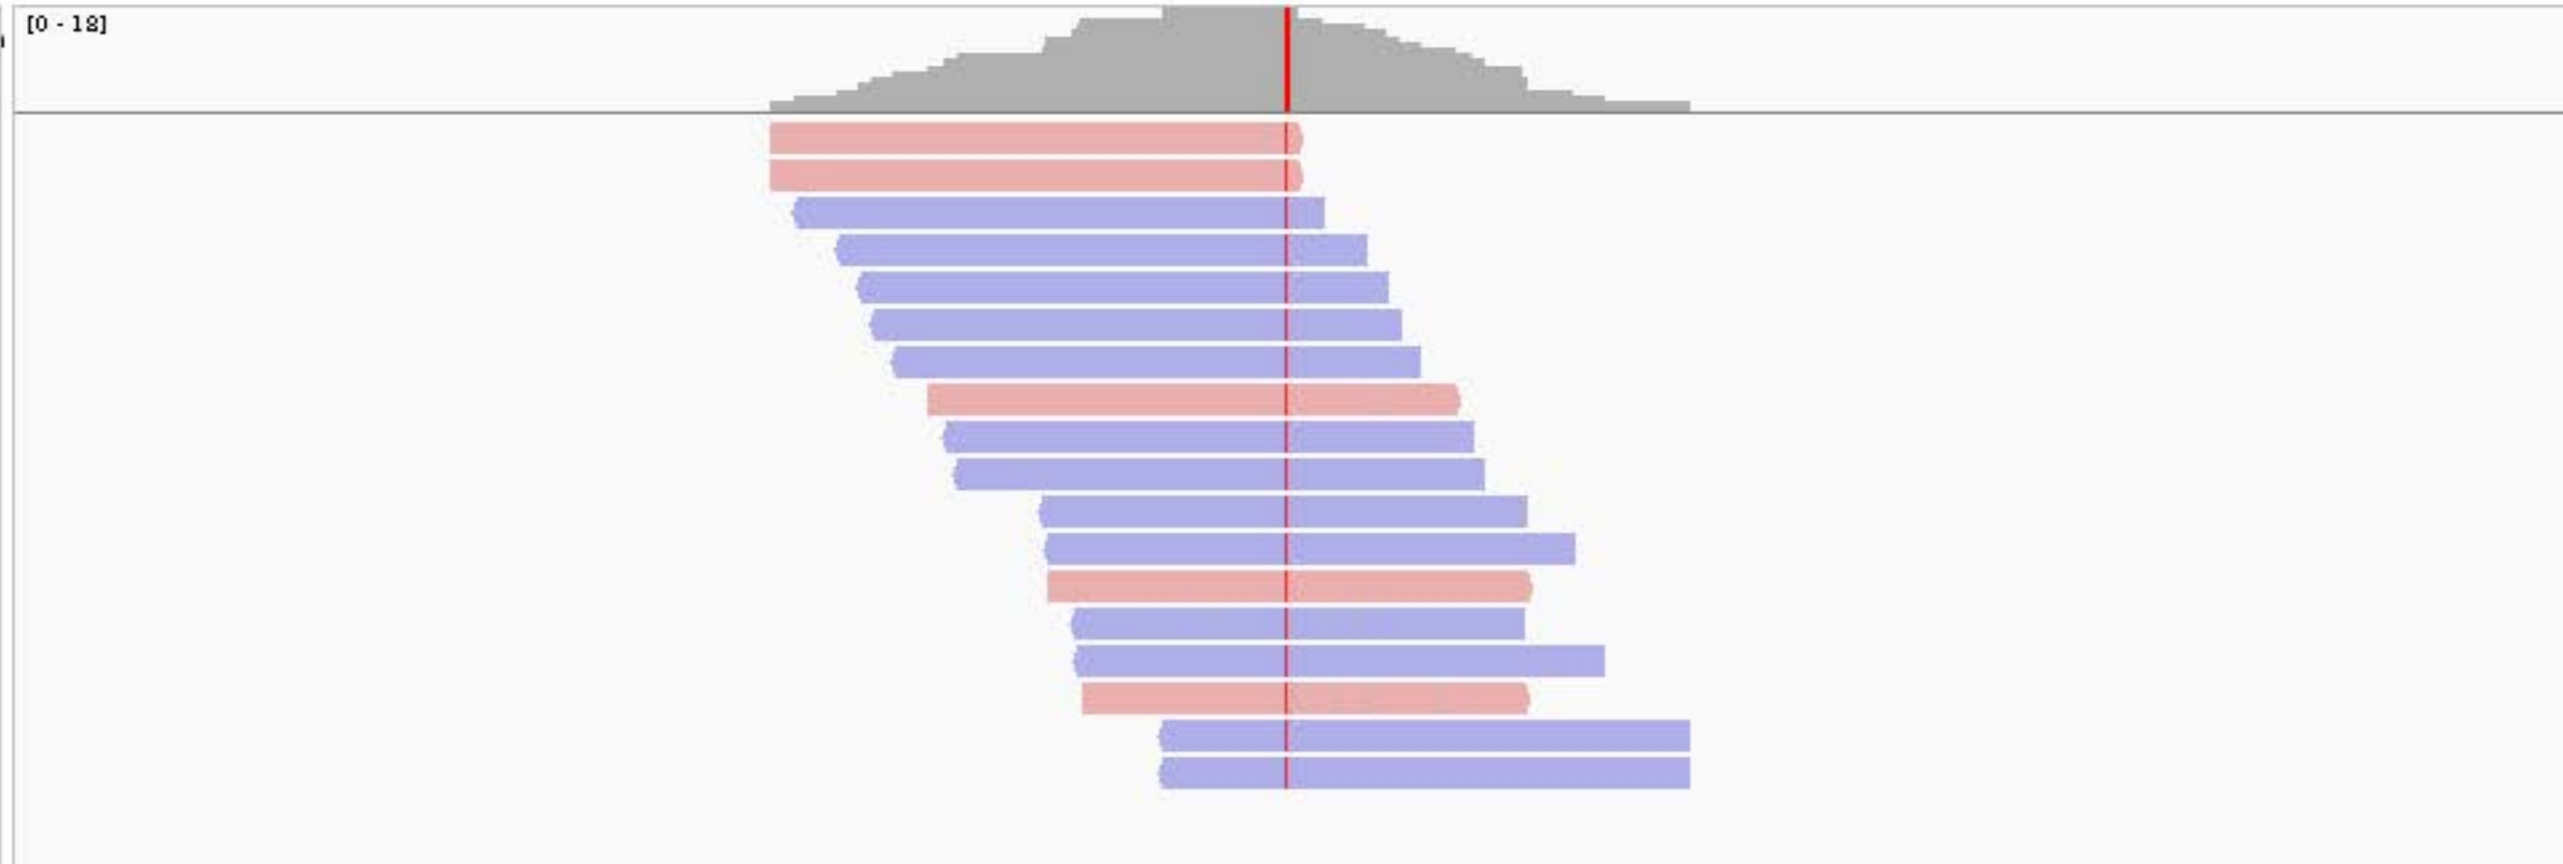

SL\_1008\_R\_51\_FFPE-B\_mut.ba  
m

Sequence →

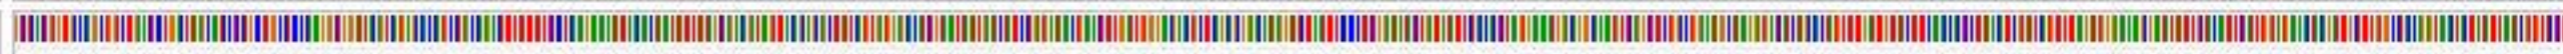

Refseq Genes

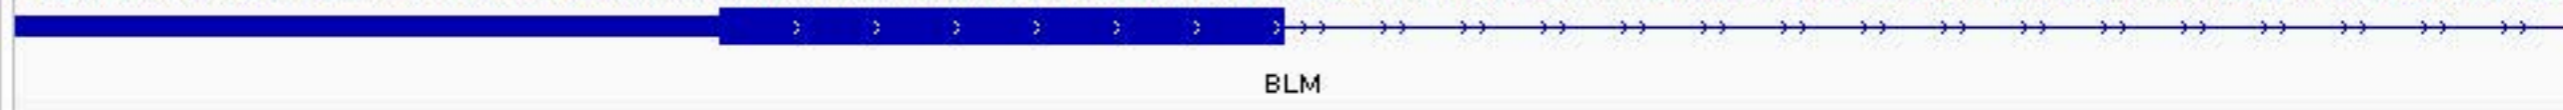

BLM

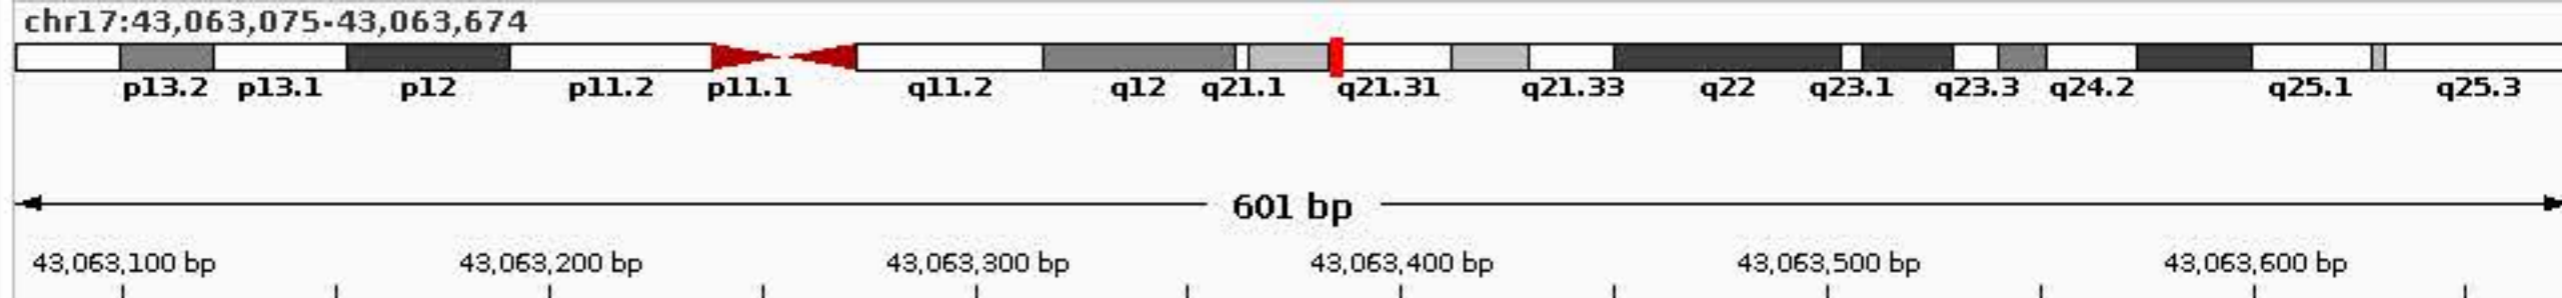

SL\_1011-T1-B\_mut.bam Coverage

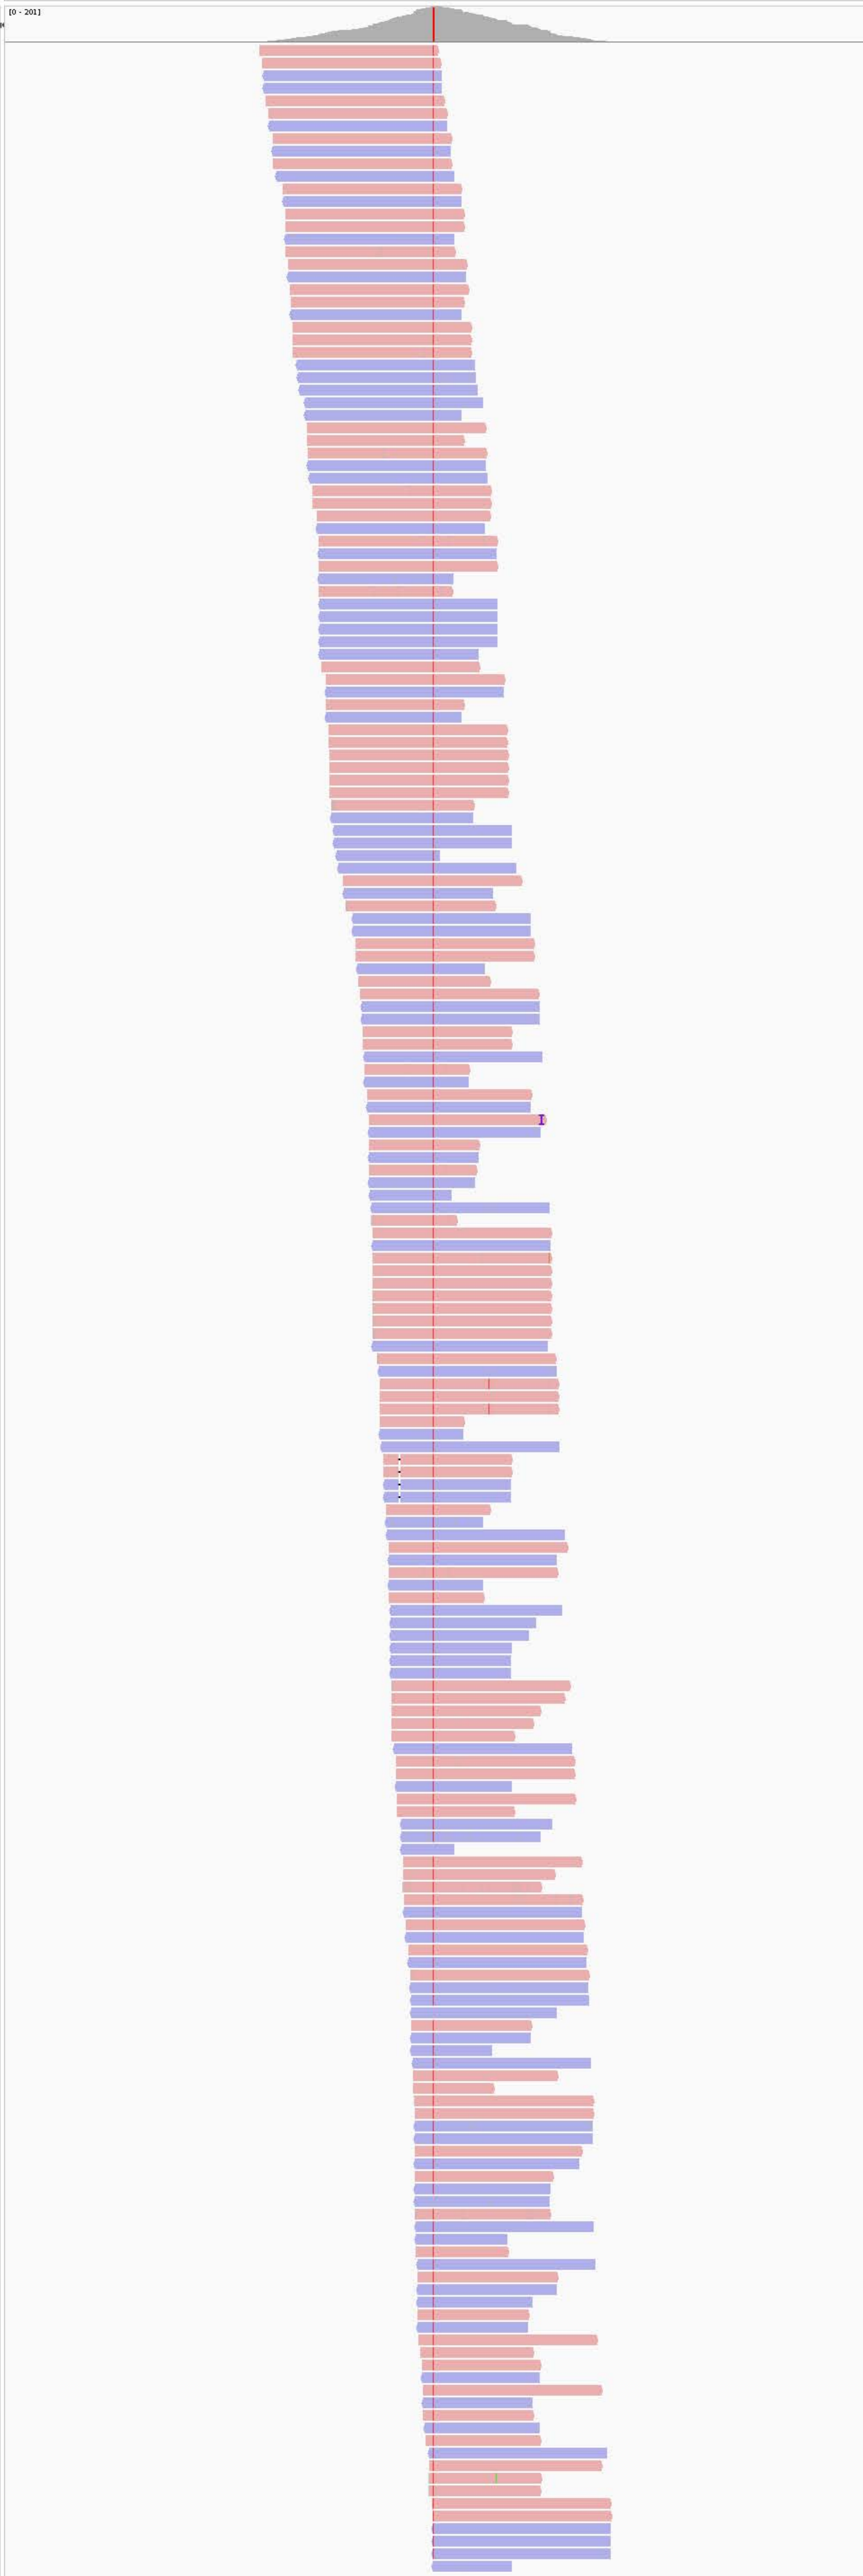

SL\_1011-T1-B\_mut.bam

Sequence  
Refseq Genes

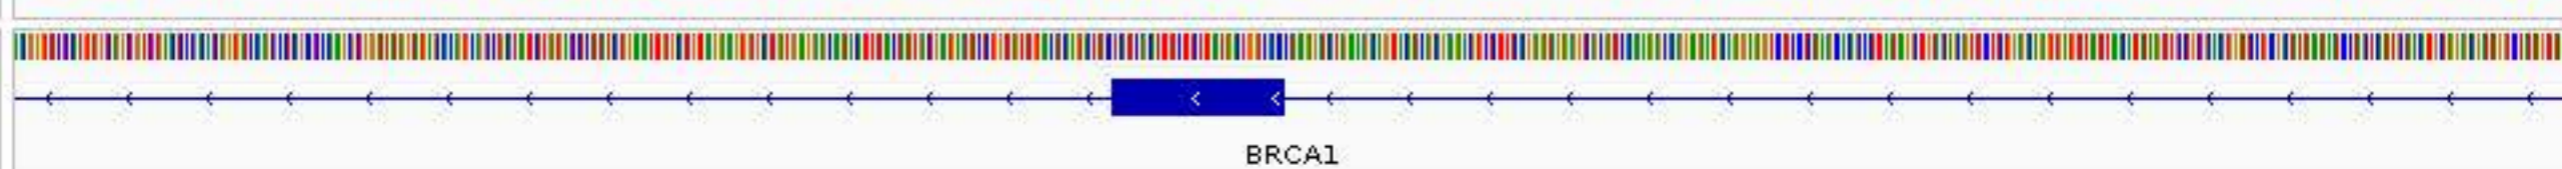



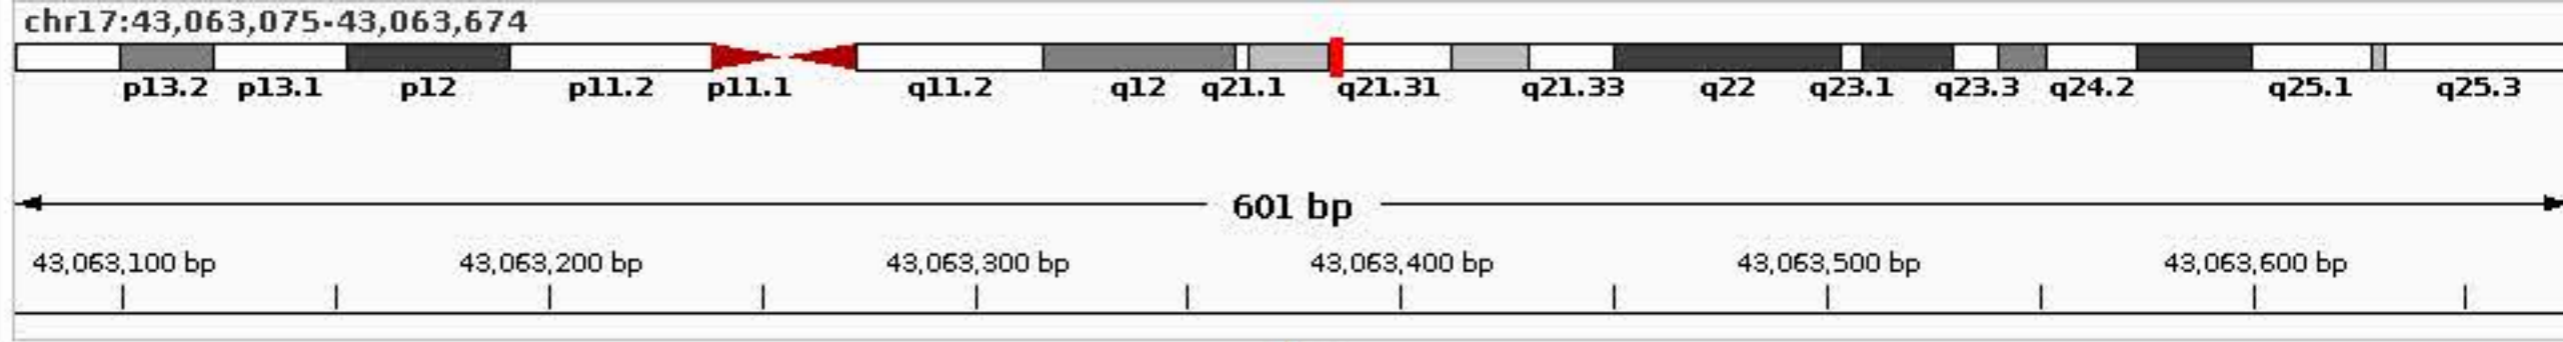

SL\_1011-T2-B\_mut.bam Coverage

SL\_1011-T2-B\_mut.bam

Sequence

Refseq Genes

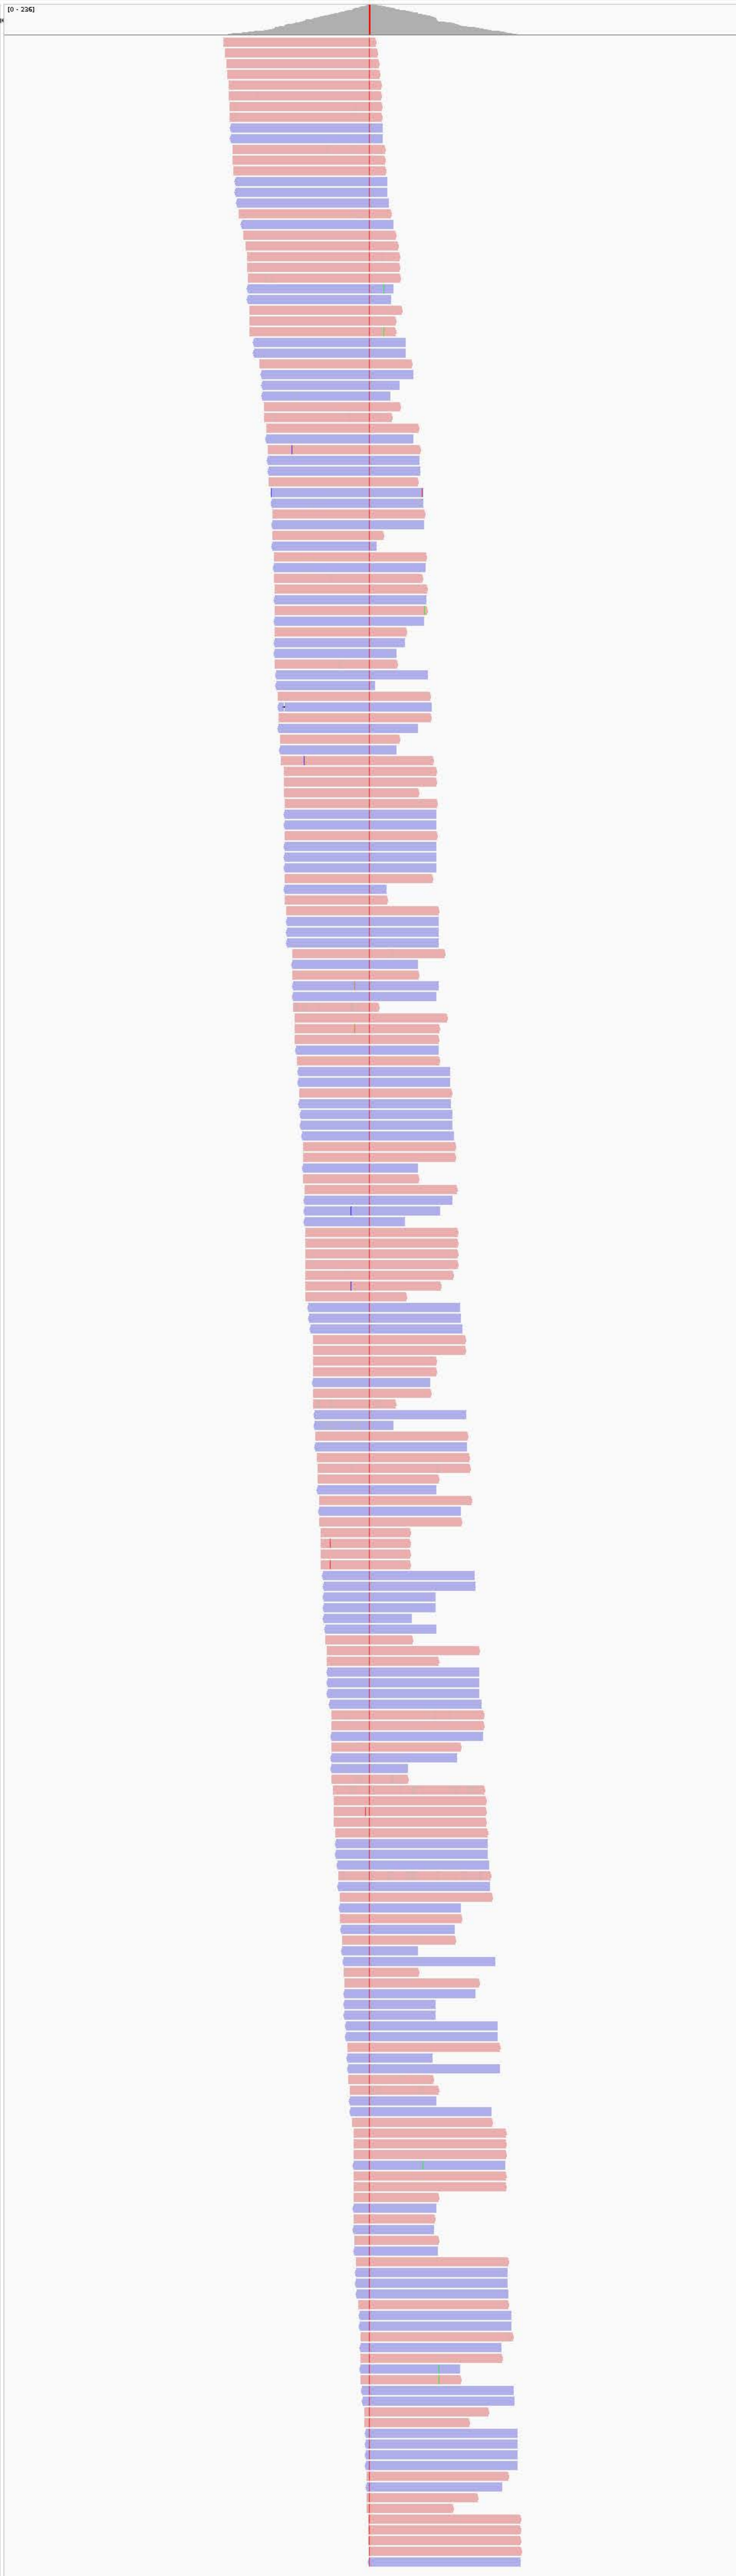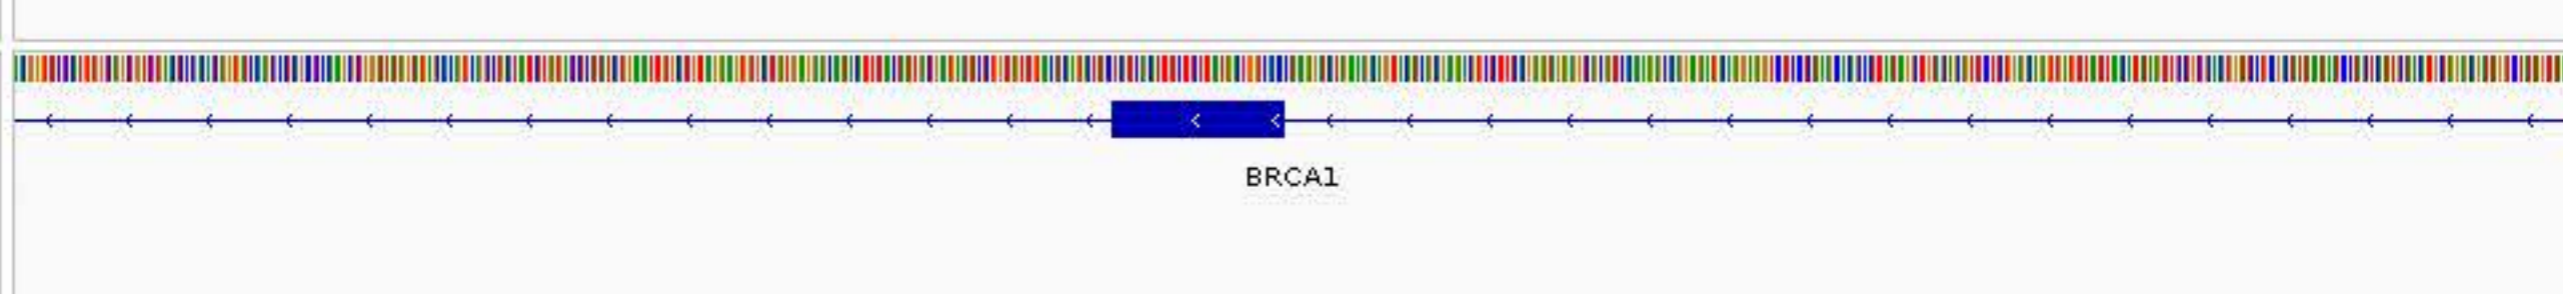



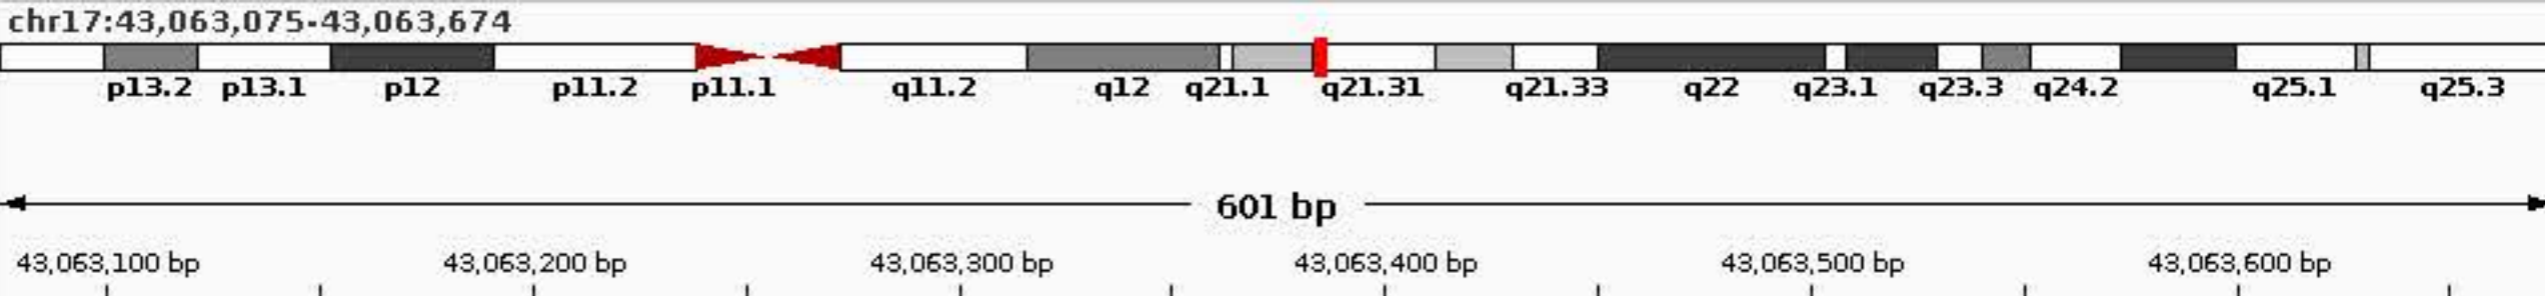

SL\_1011-T9-B\_mut.bam Coverage

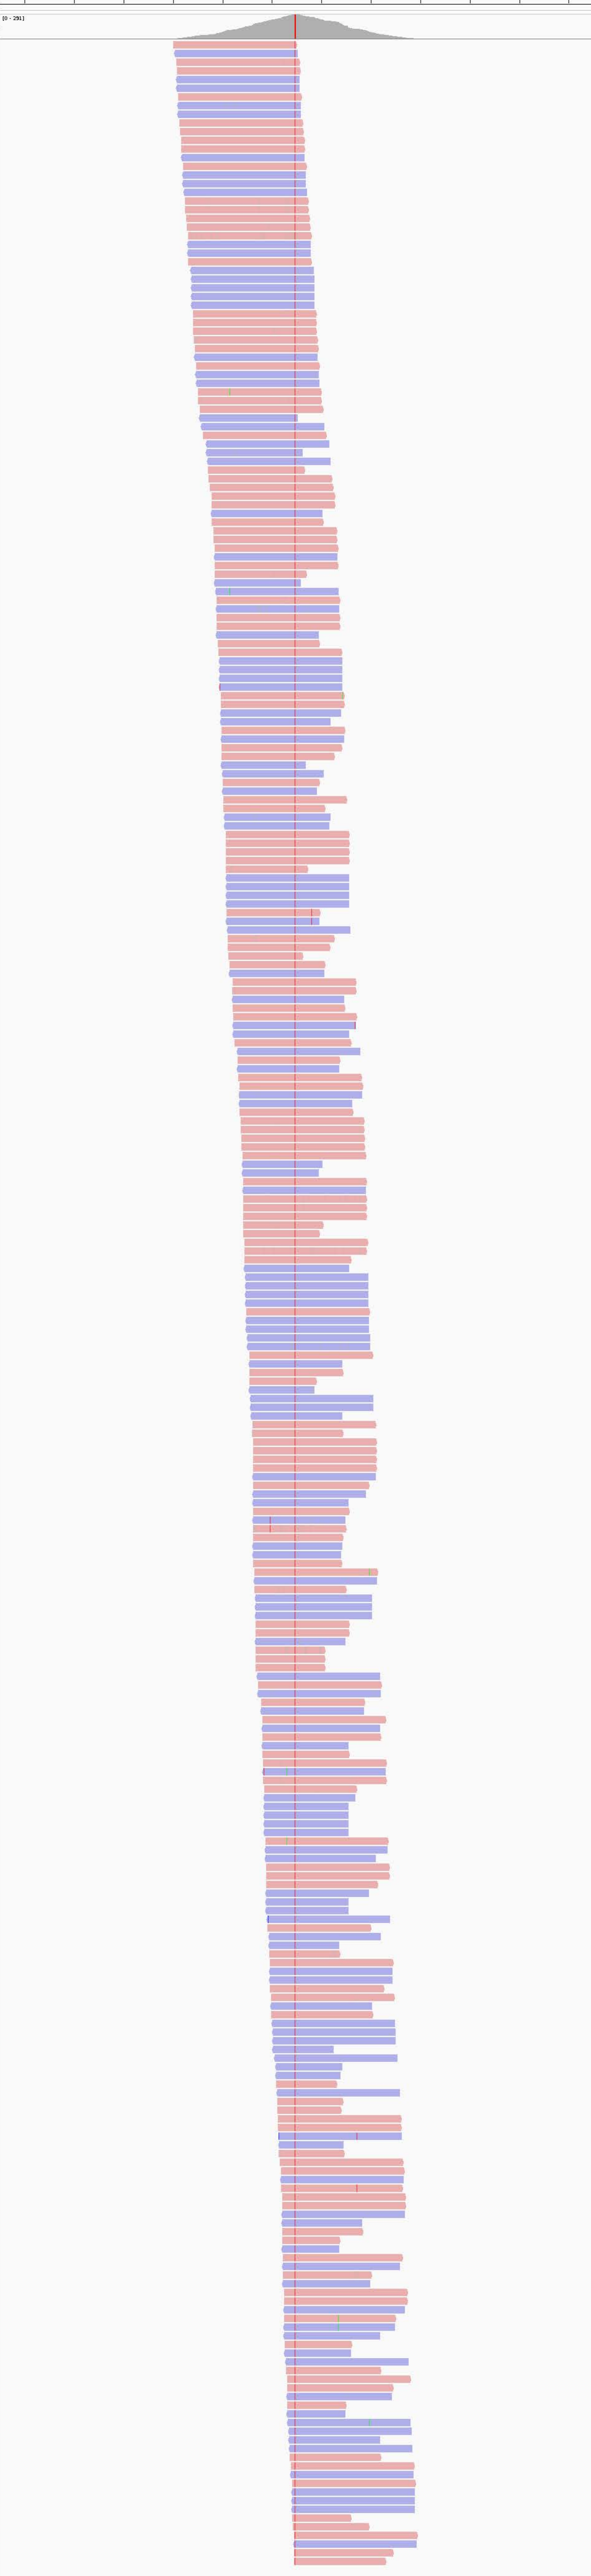

SL\_1011-T9-B\_mut.bam

Sequence

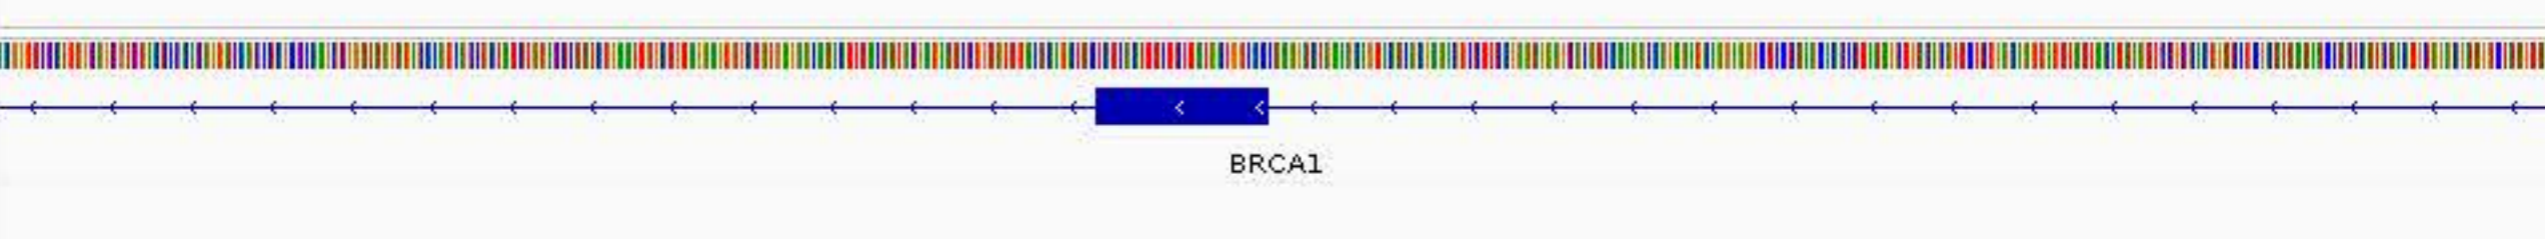



chr13:32,357,495-32,358,094

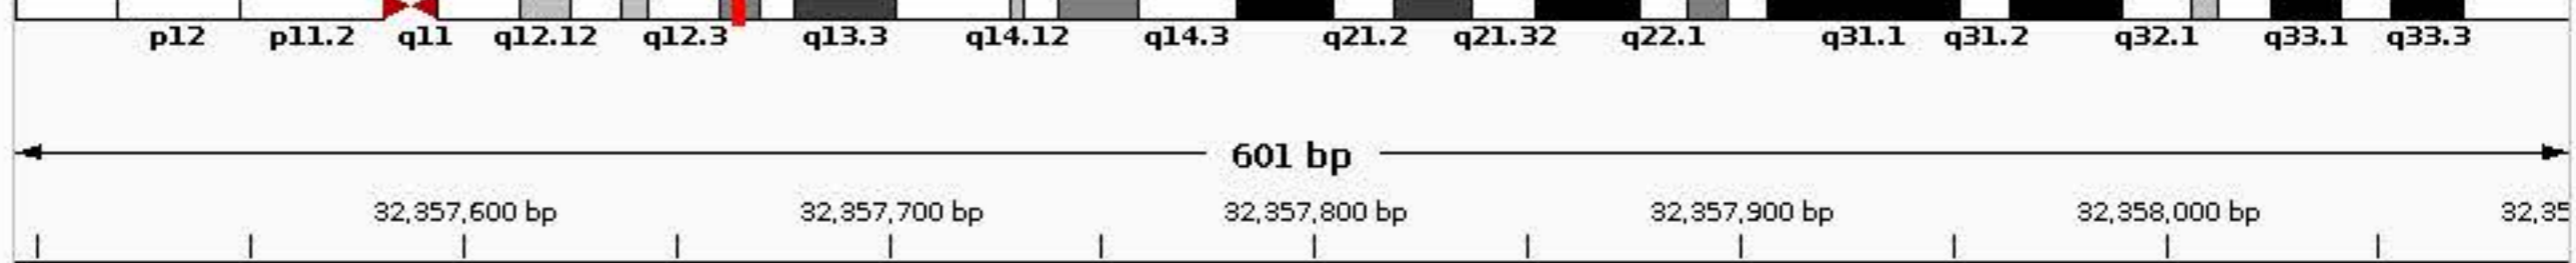

SL\_1003\_R\_78\_FFPE-B\_mut.bam  
rage

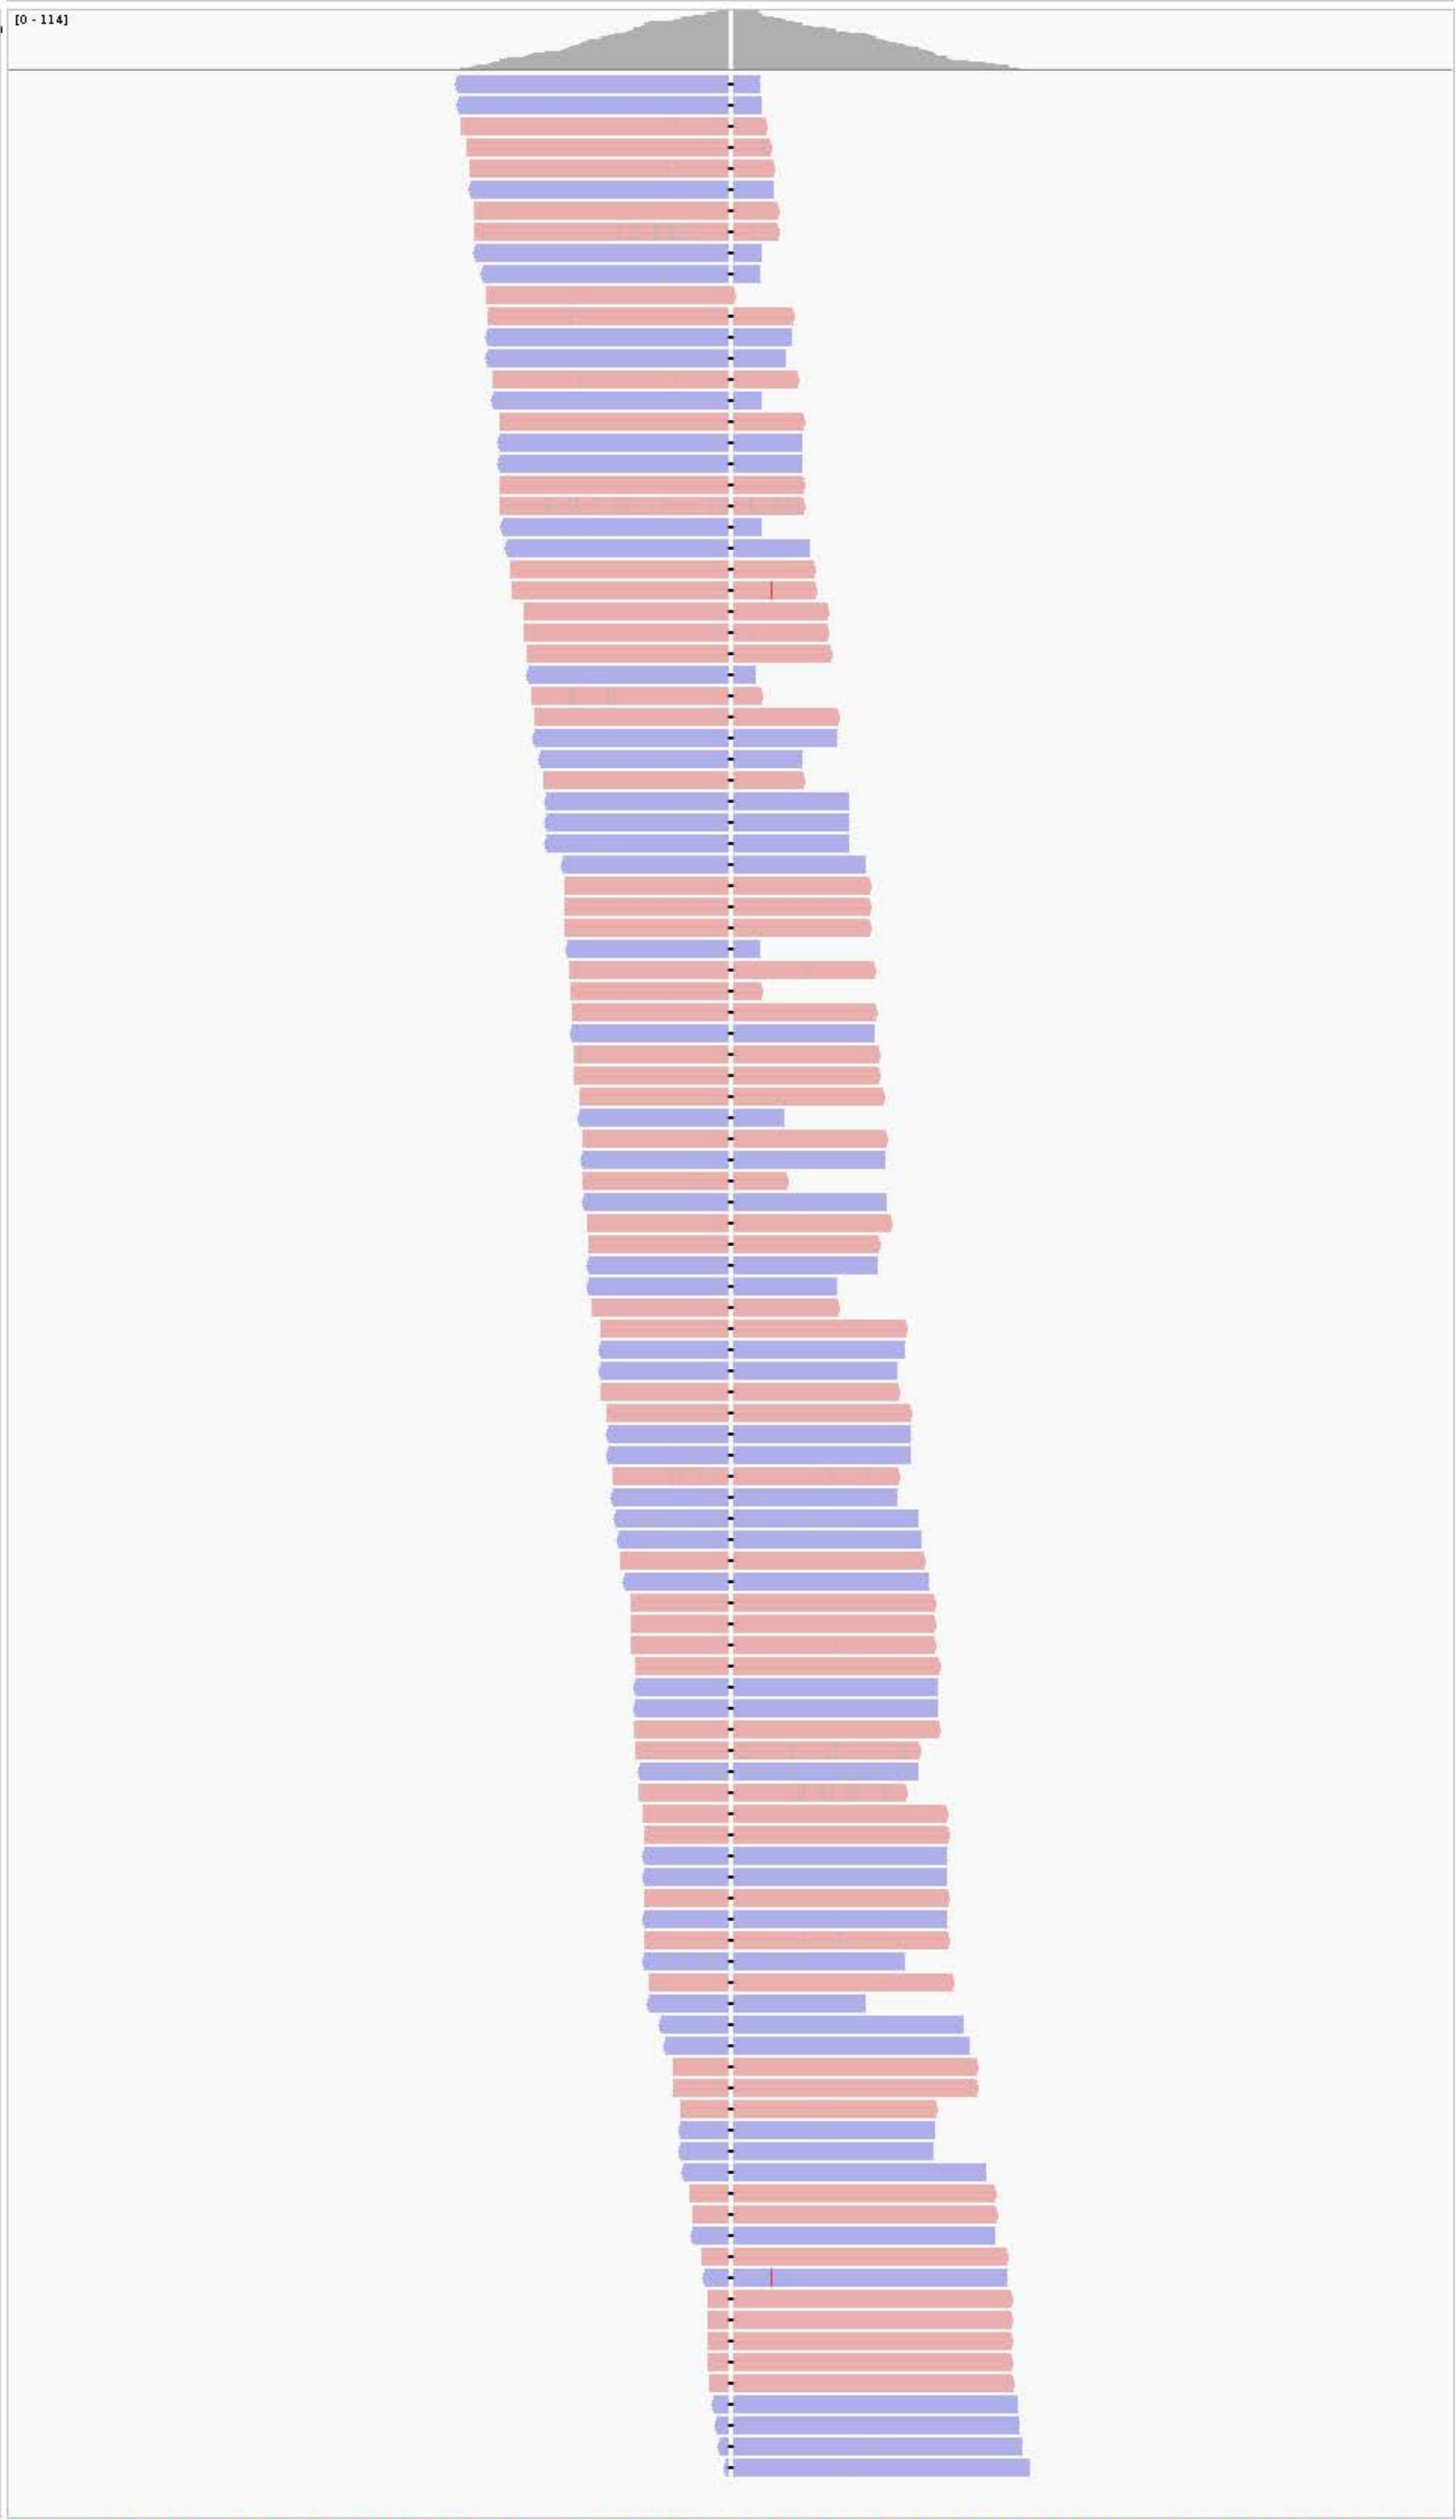

SL\_1003\_R\_78\_FFPE-B\_mut.ba  
m

Sequence →  
Refseq Genes

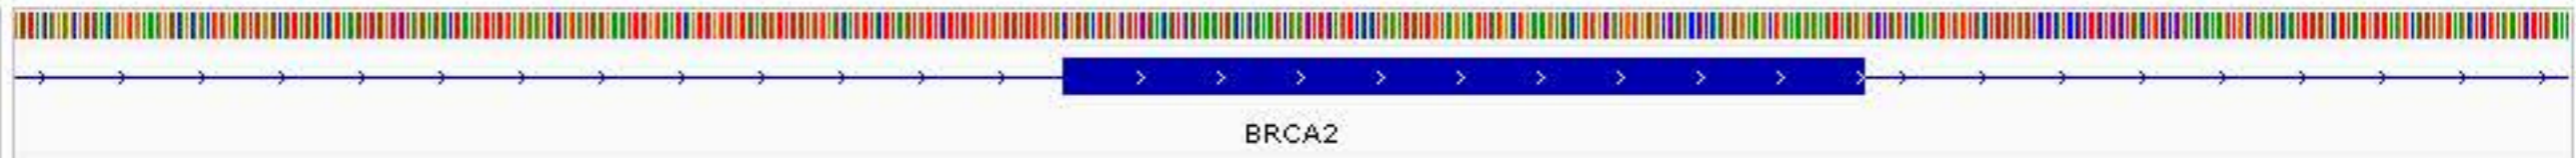

BRCA2



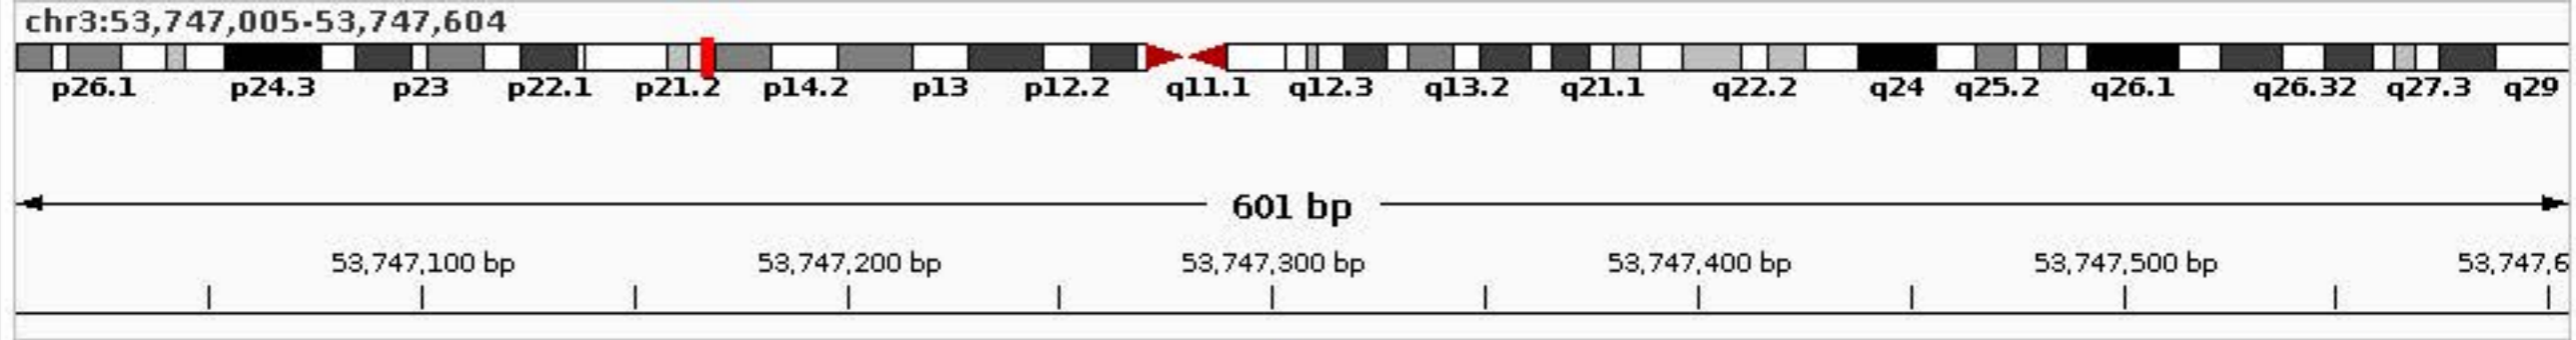

SL\_1010-T1-B\_mut.bam Coverage

SL\_1010-T1-B\_mut.bam

Sequence

Refseq Genes

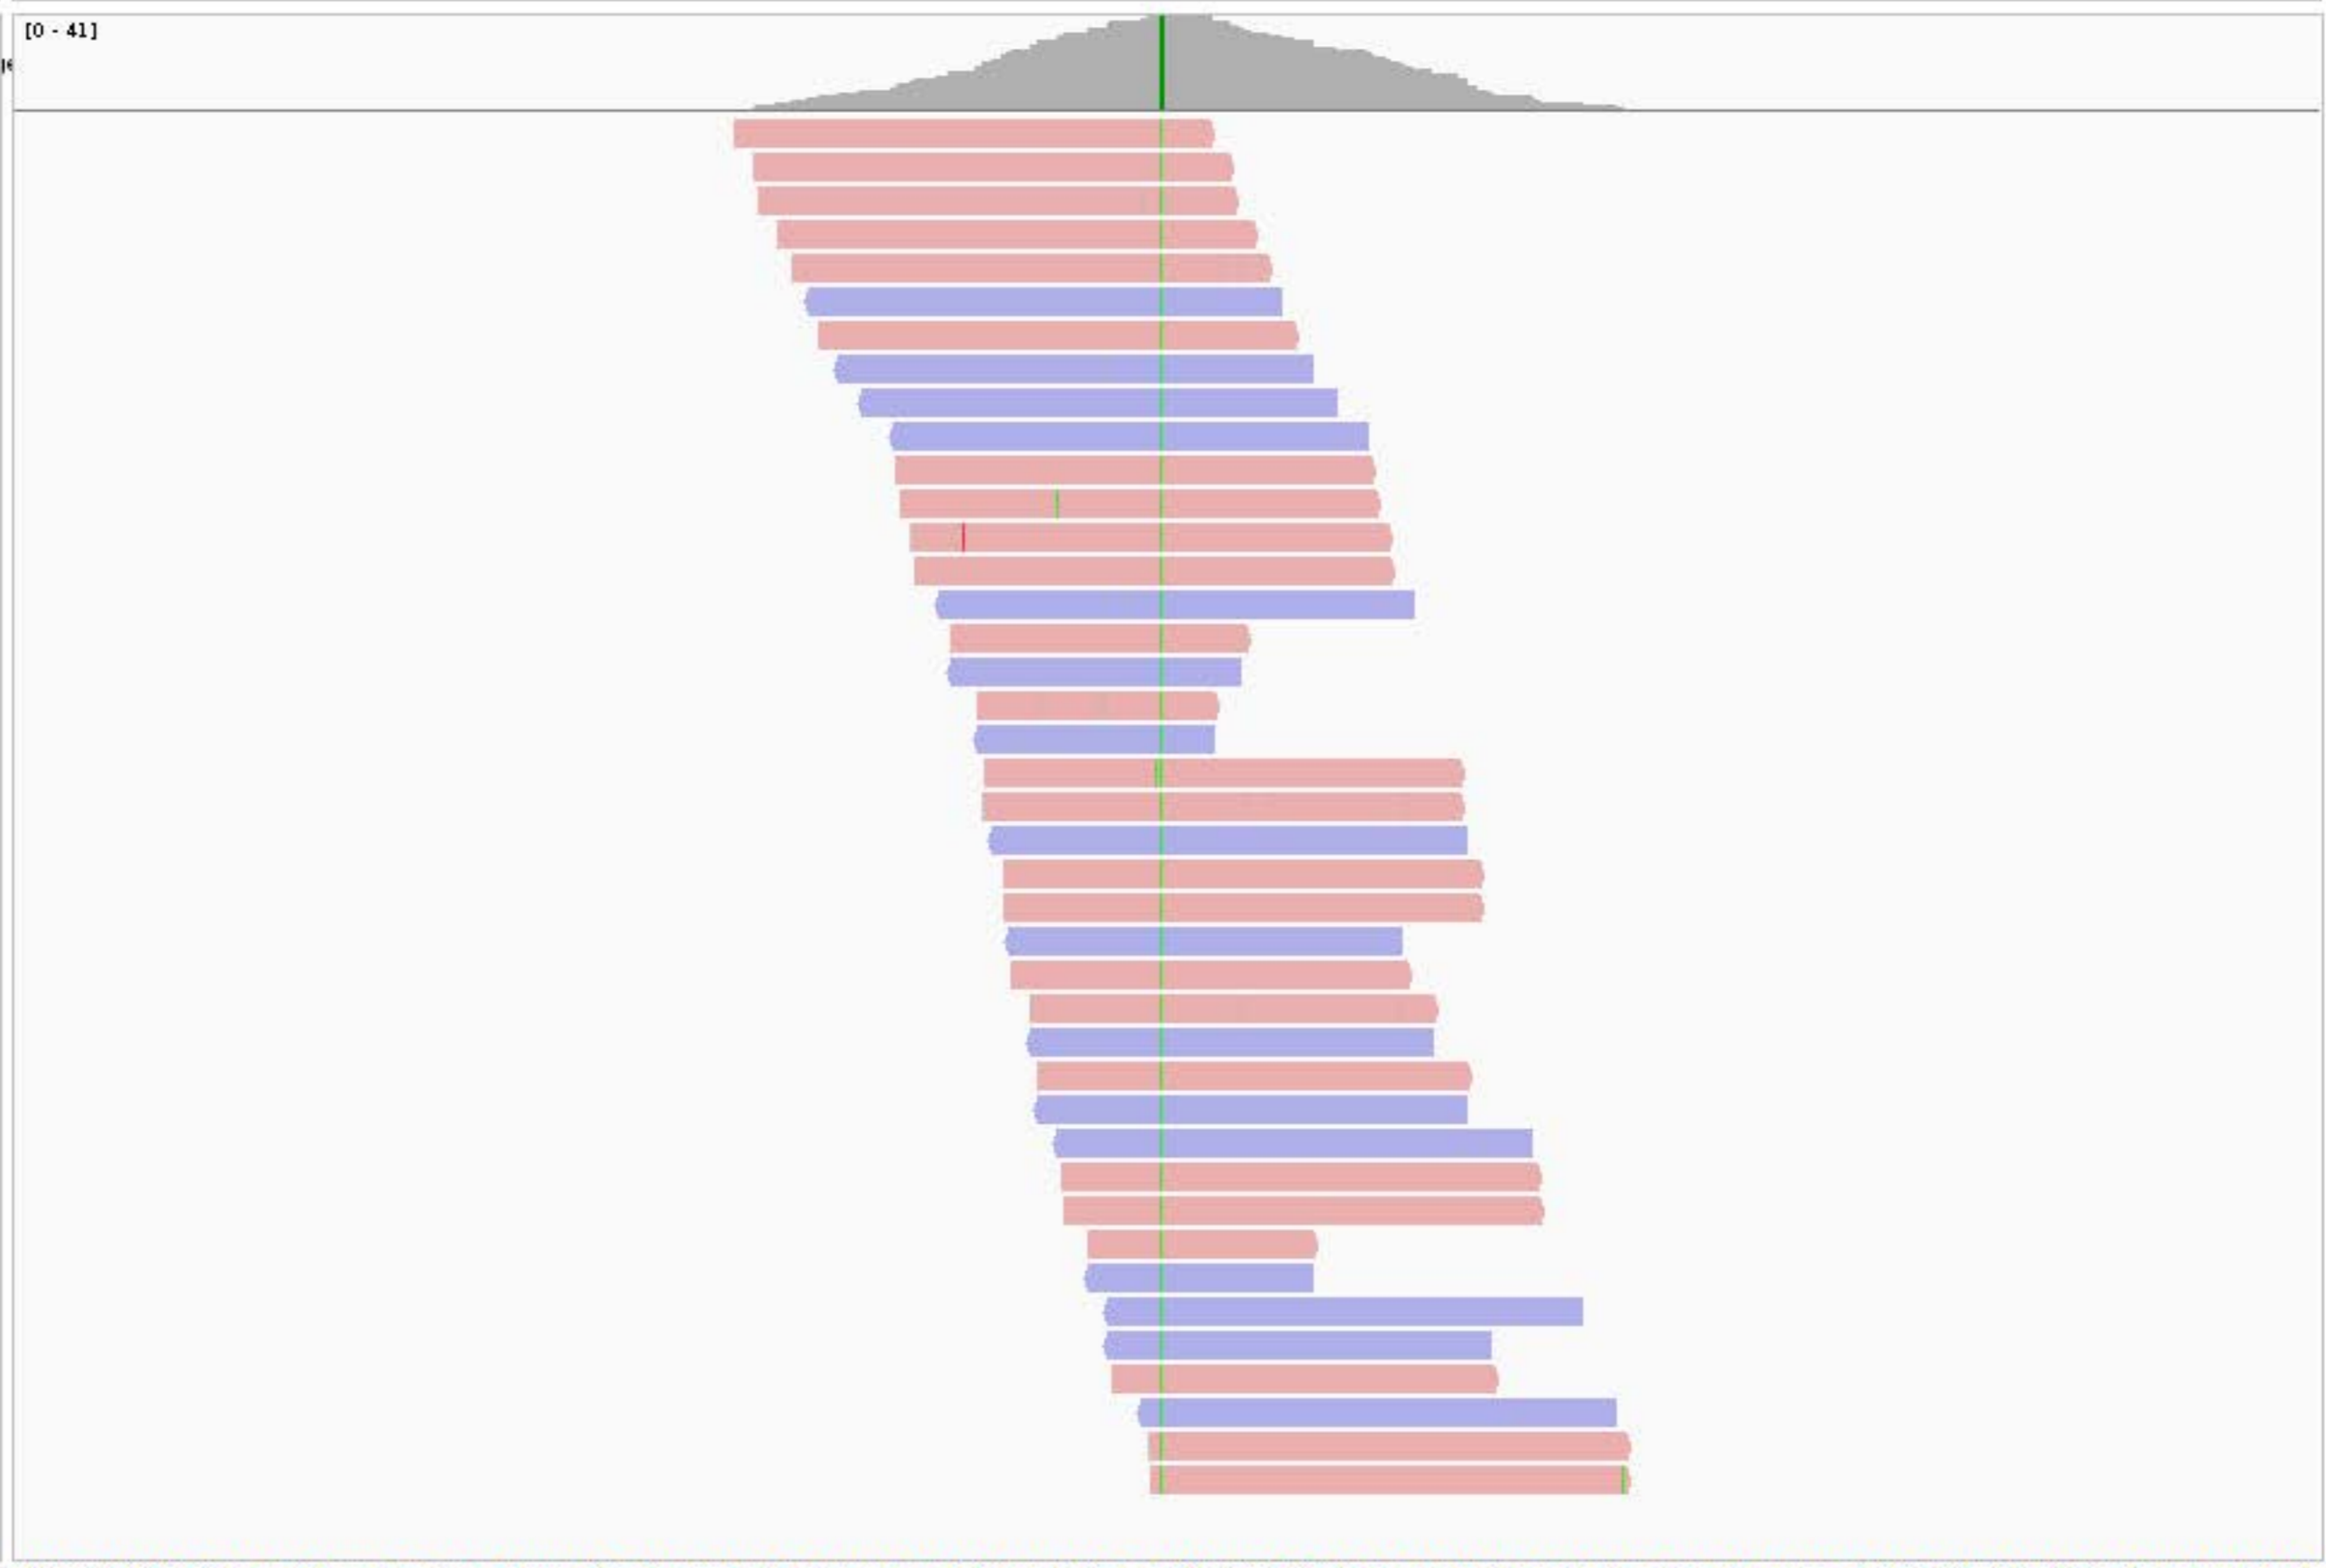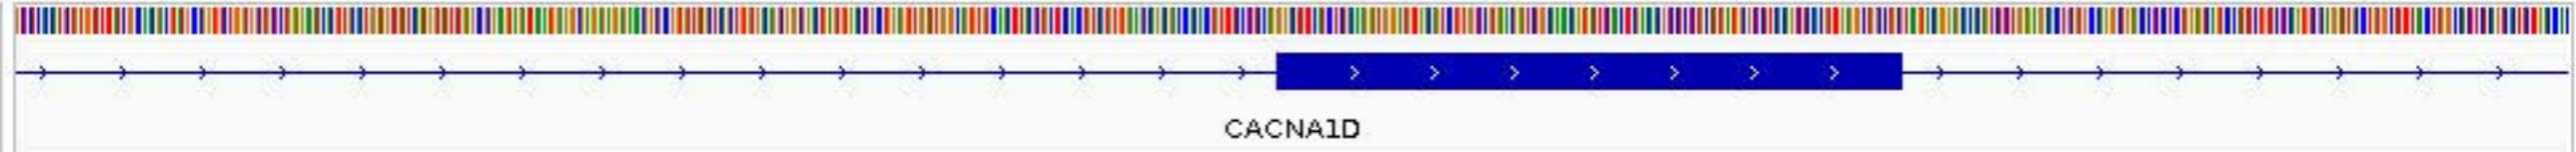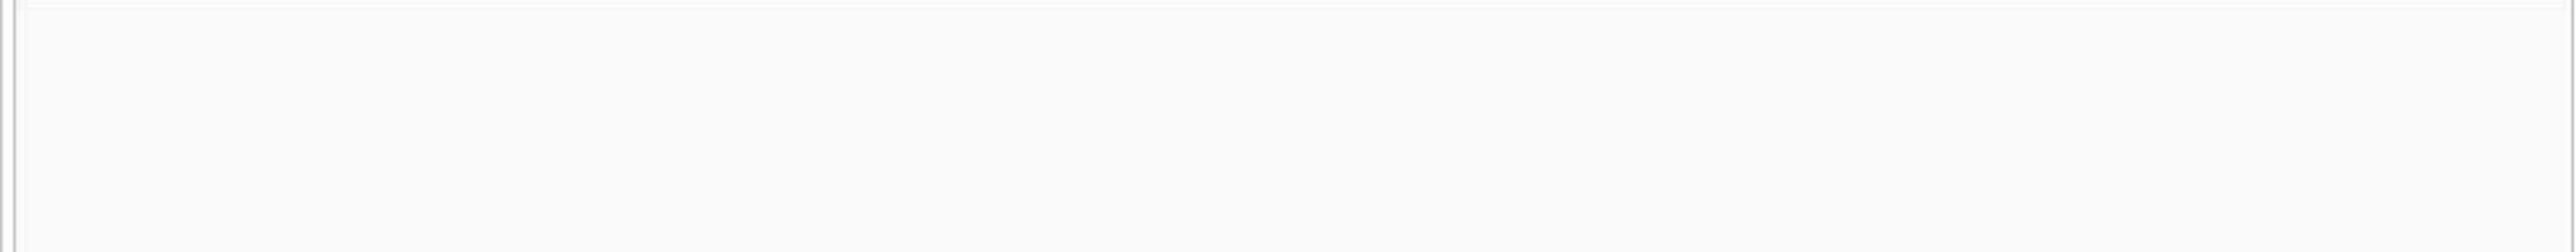

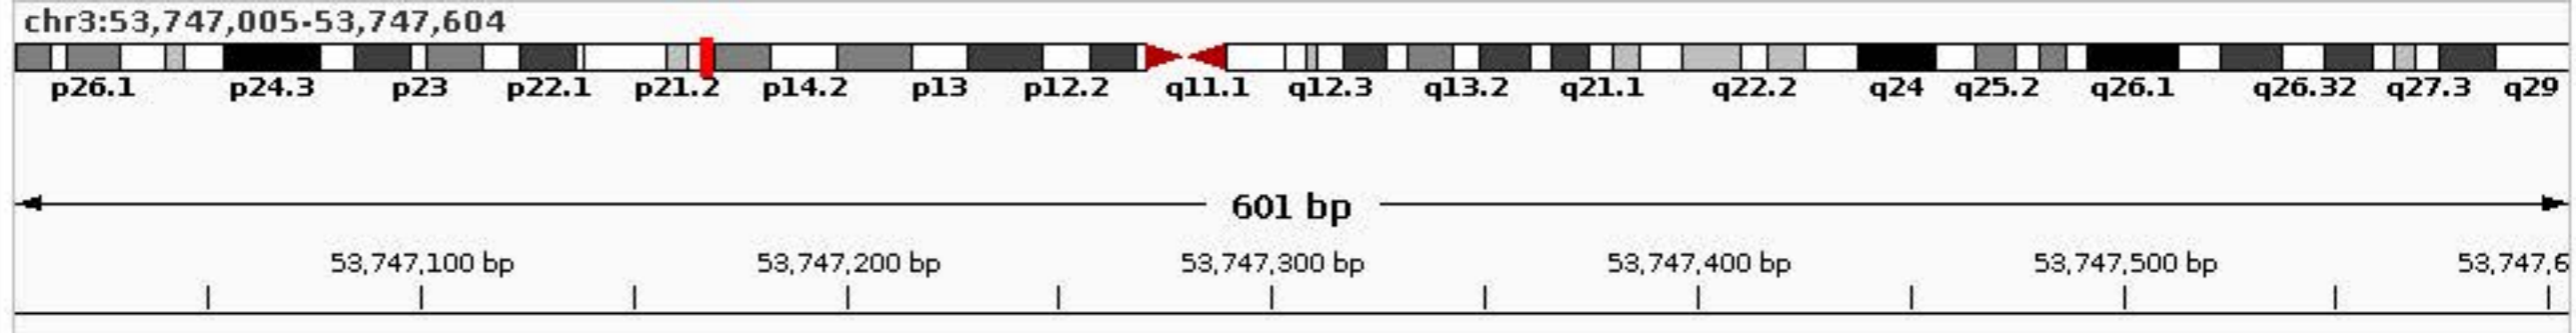

SL\_1010-T2-B\_mut.bam Coverage

SL\_1010-T2-B\_mut.bam

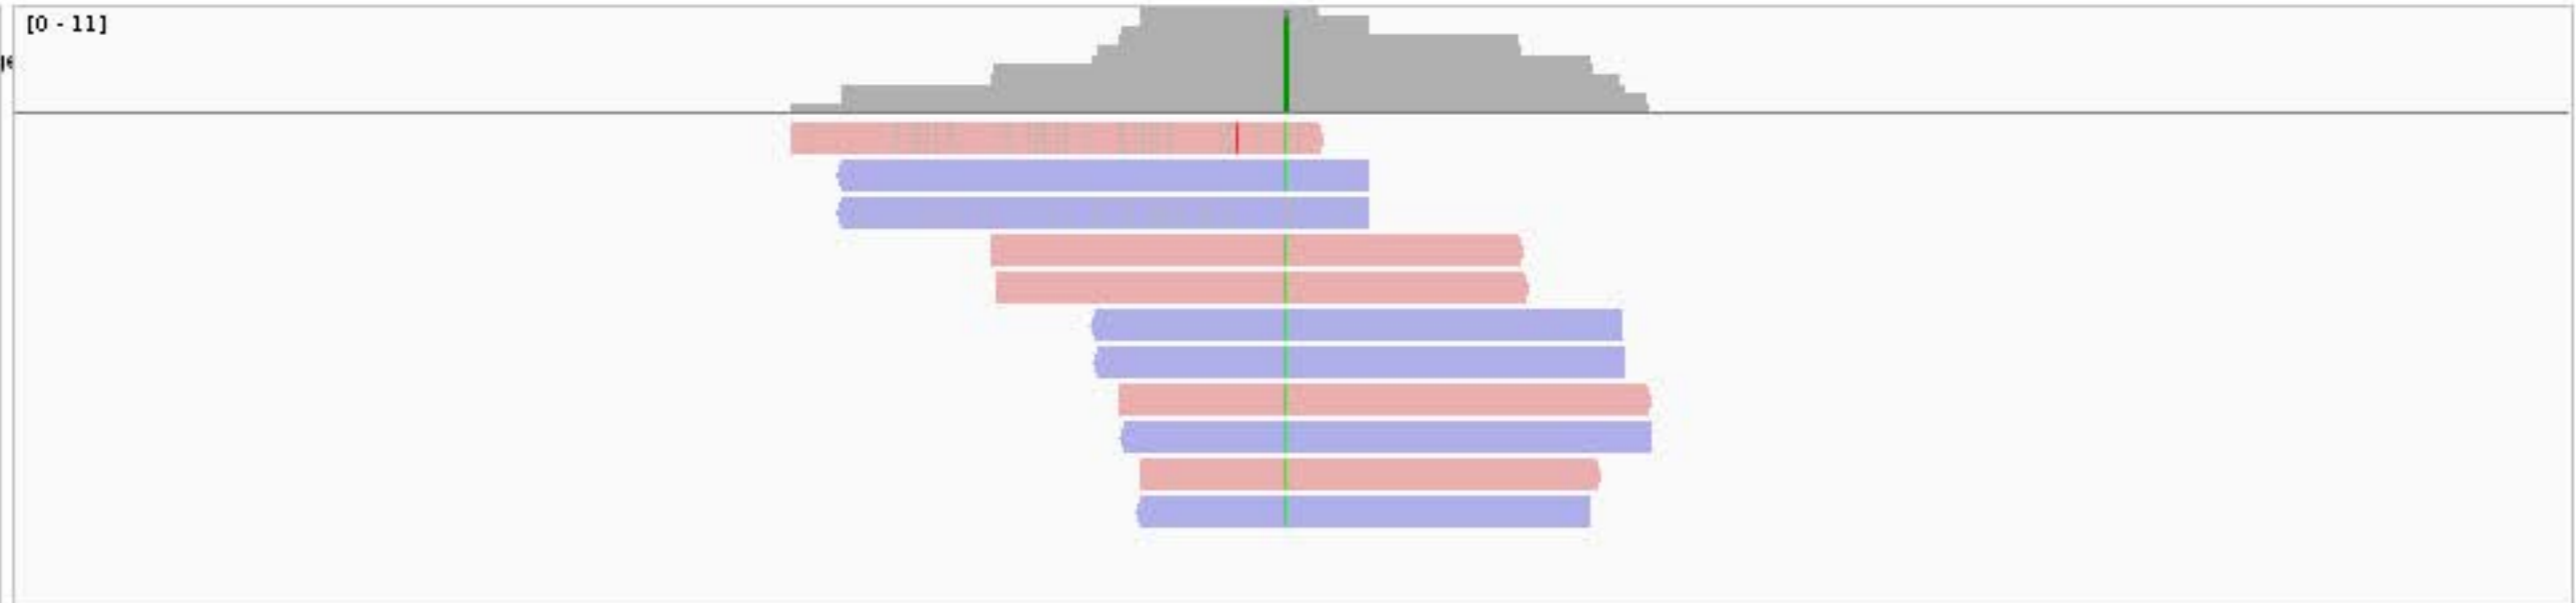

Sequence

Refseq Genes

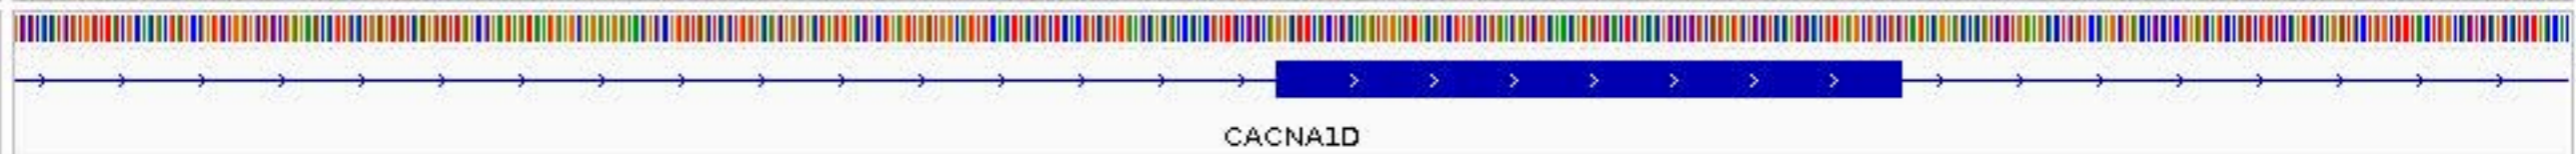

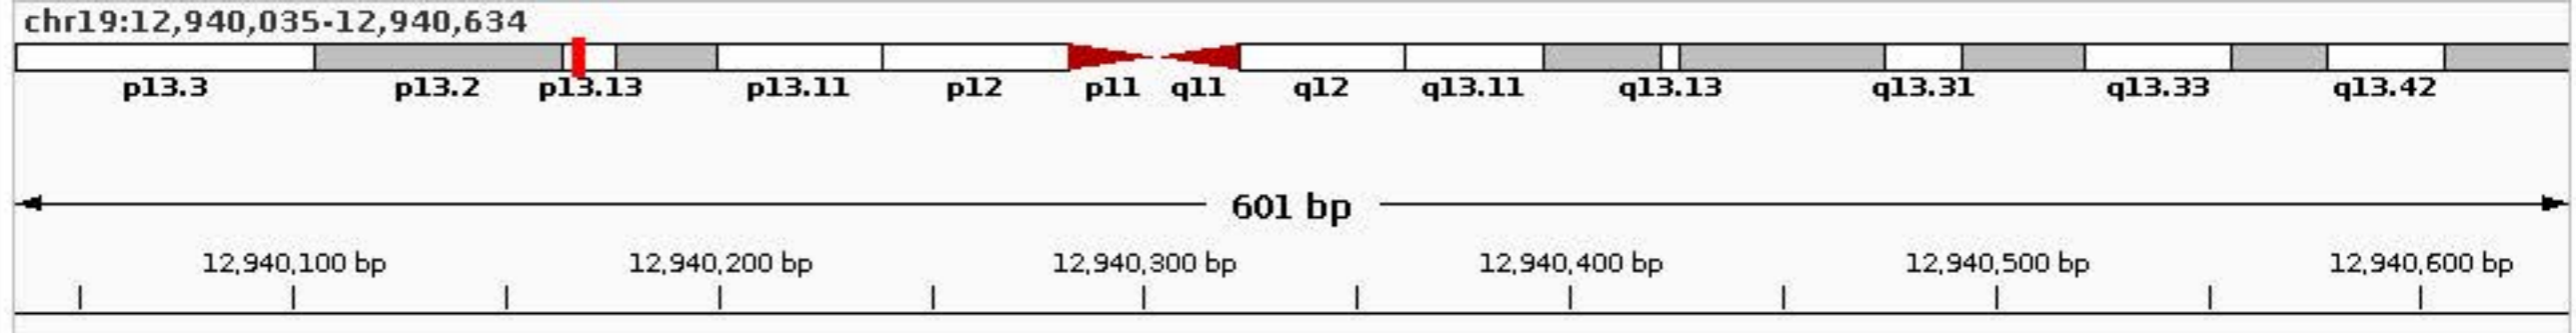

SL\_0005-LT\_11-B\_mut.bam Cover

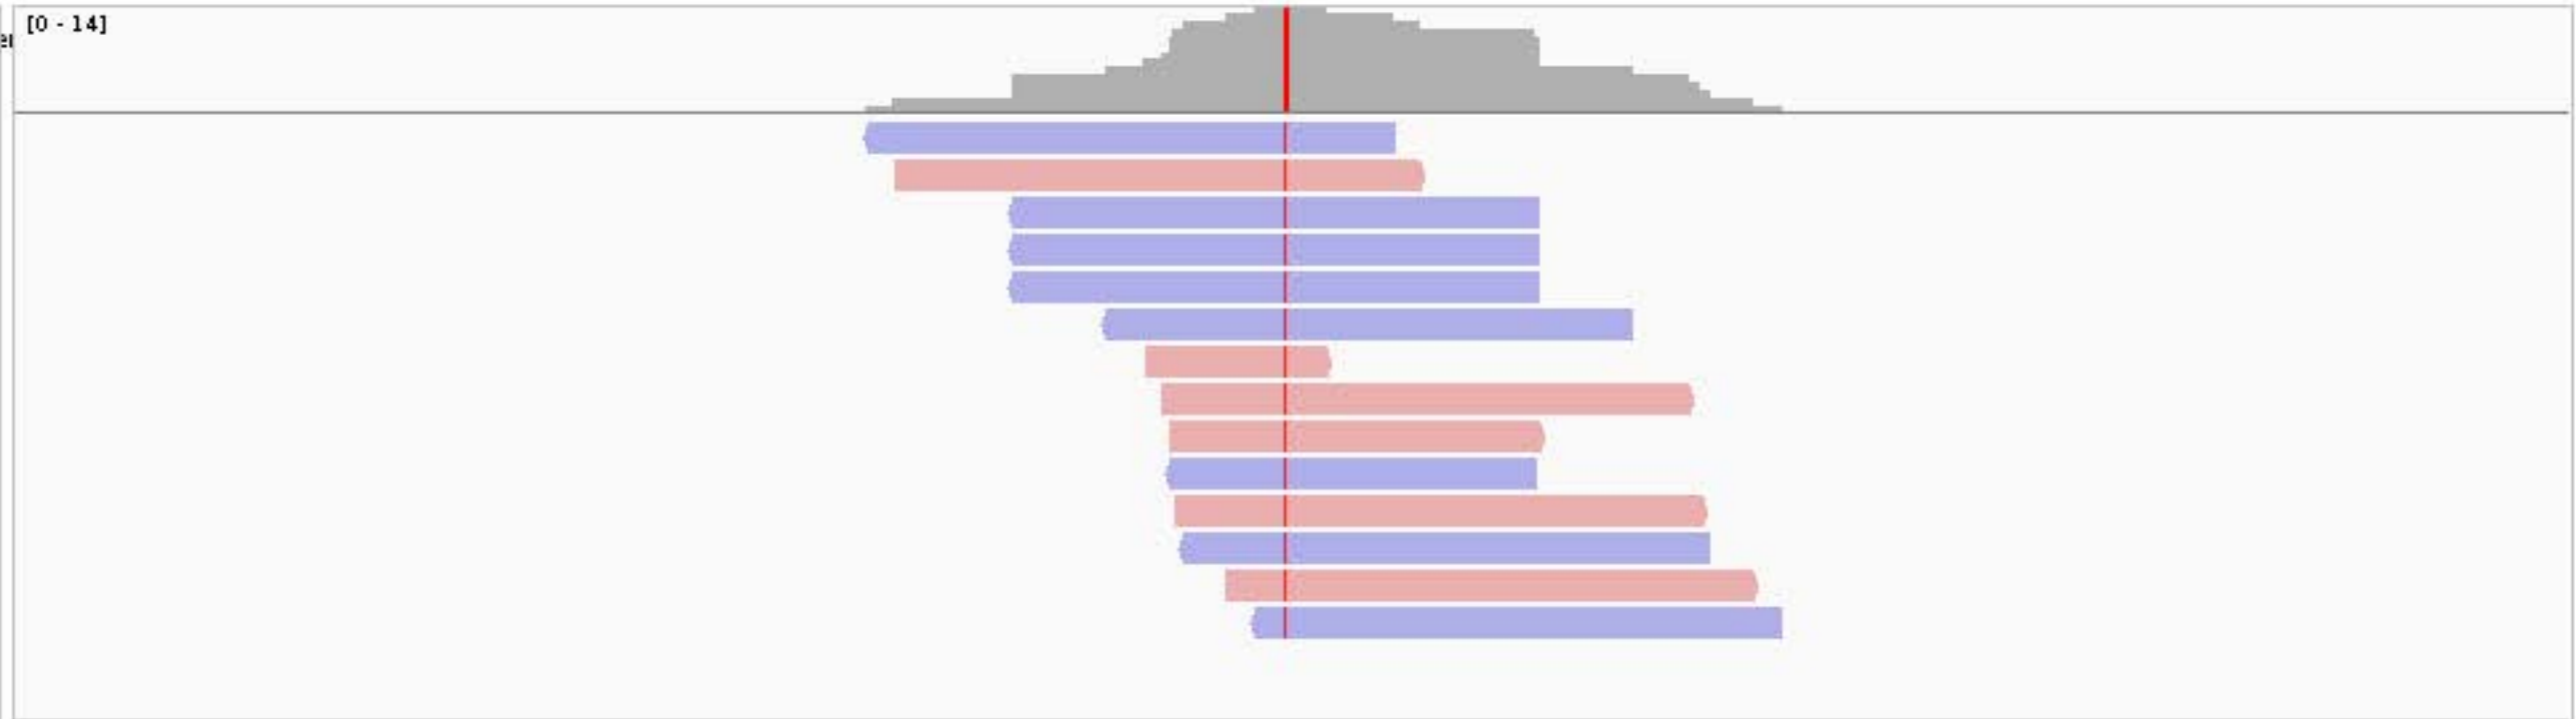

Sequence

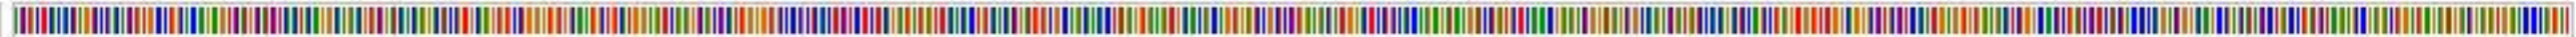

Refseq Genes

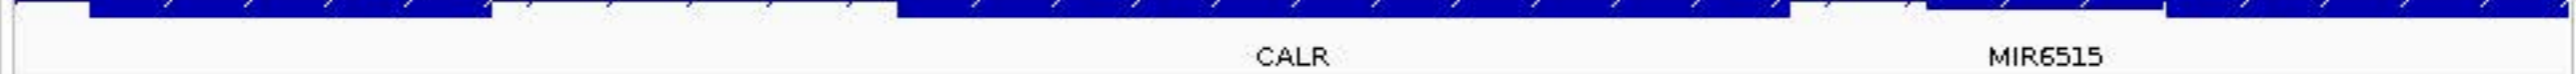



chr19:12,940,035-12,940,634

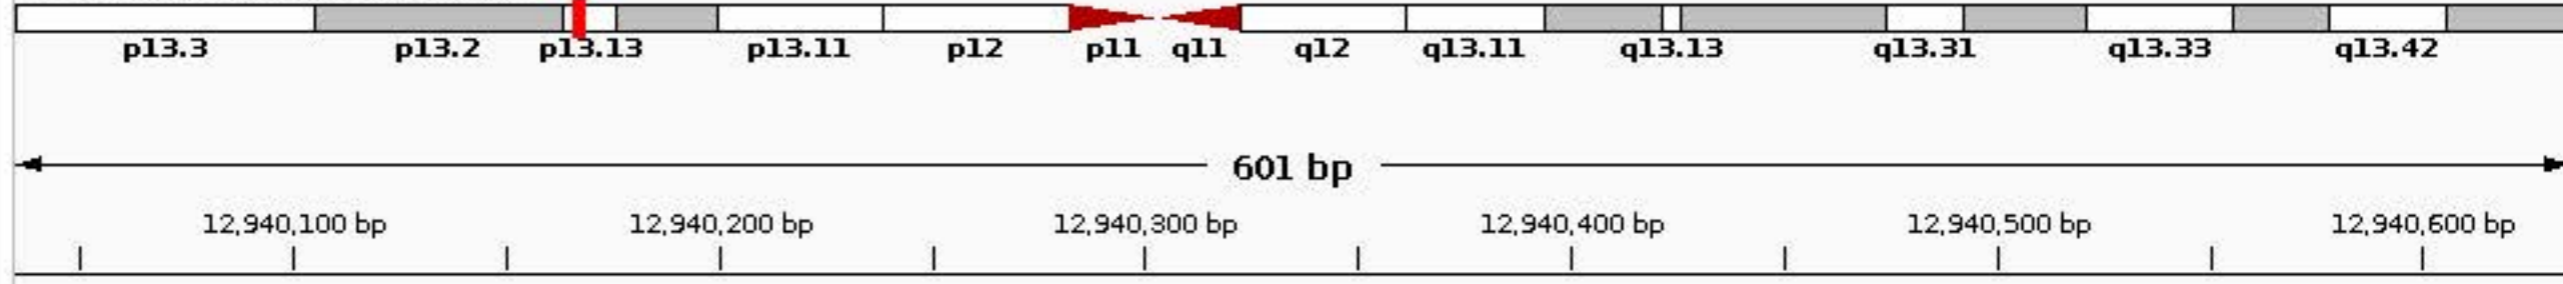

SL\_0005-LT-1-B\_mut.bam Coverage

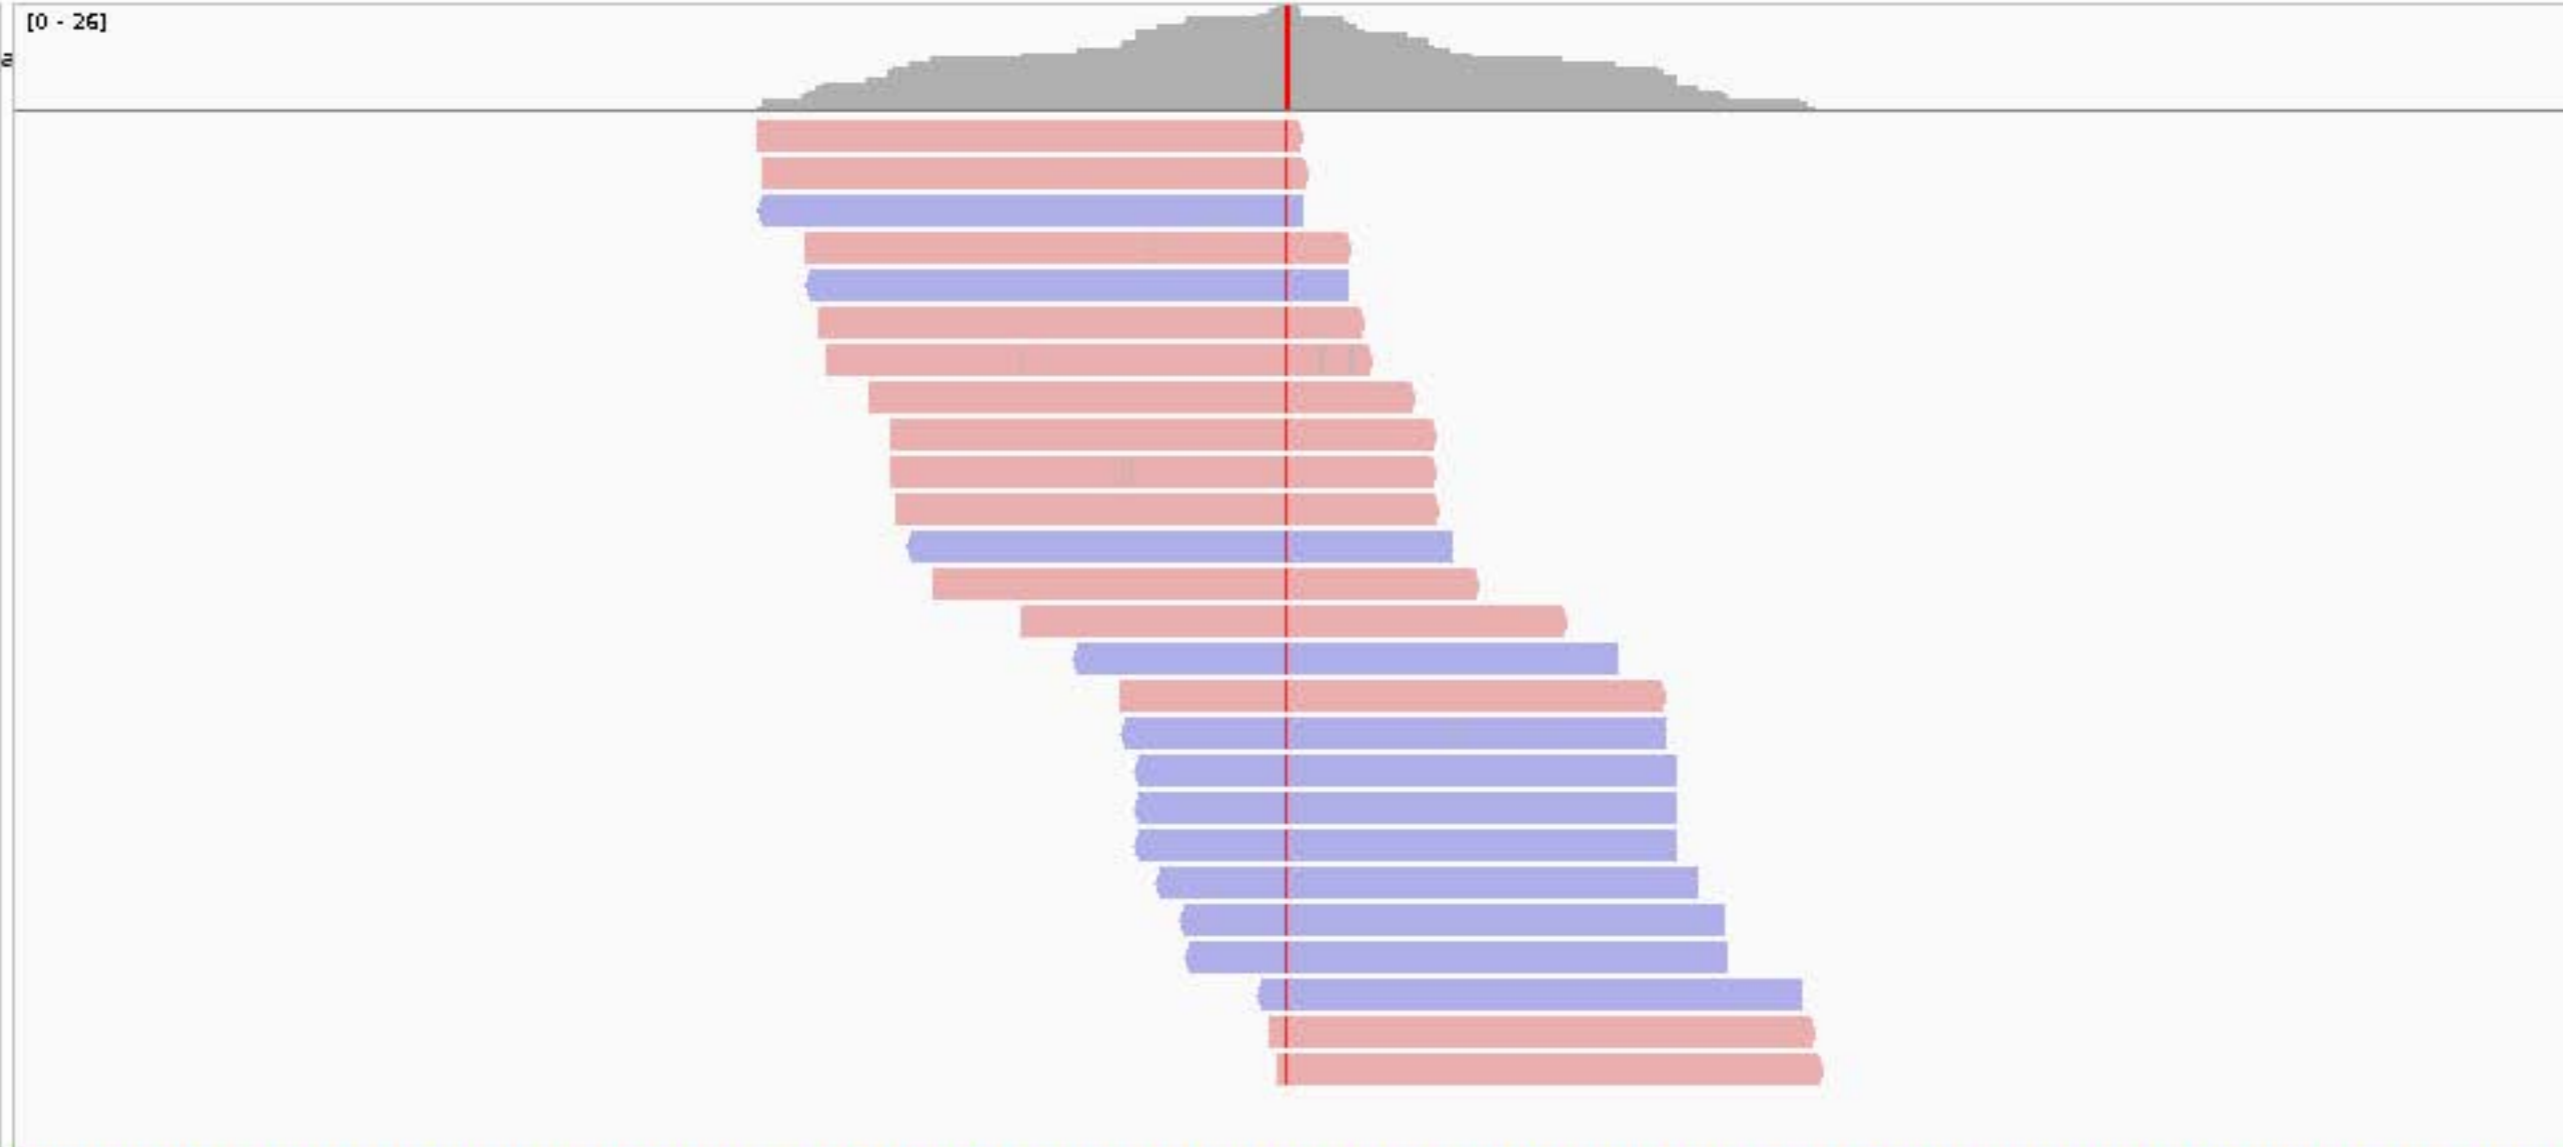

SL\_0005-LT-1-B\_mut.bam

Sequence

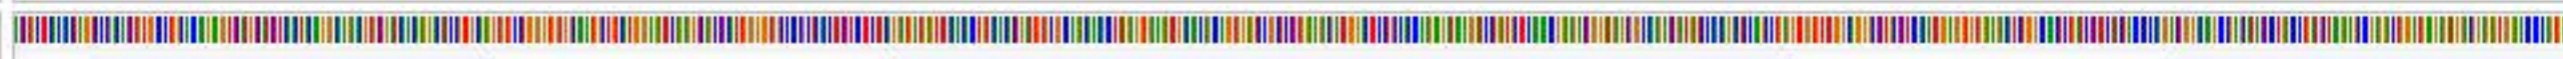

Refseq Genes

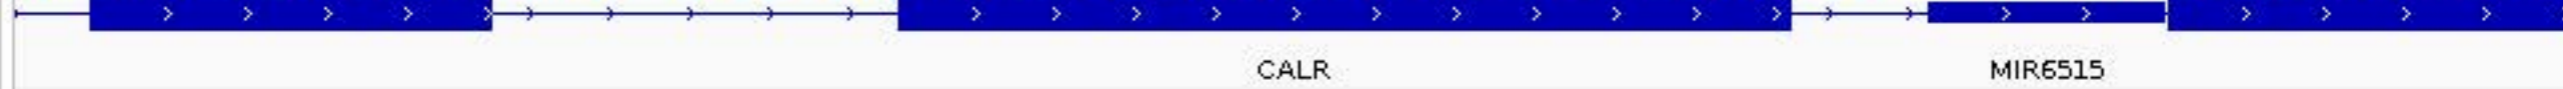

CALR

MIR6515

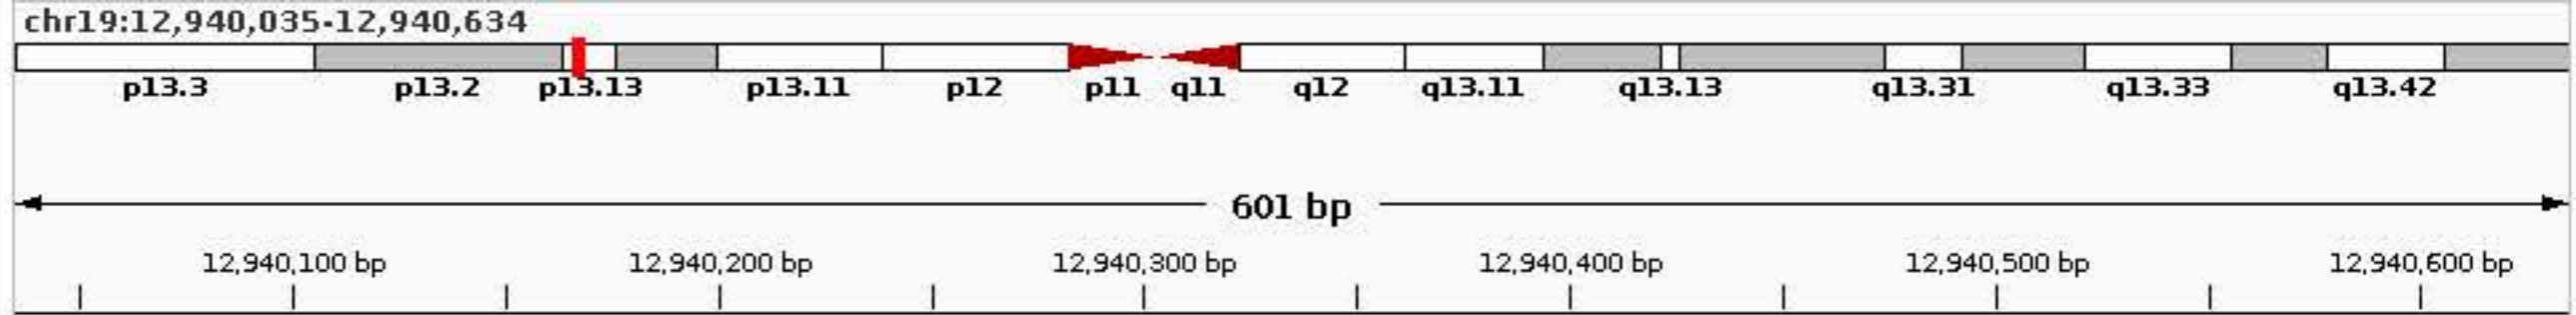

SL\_0005-LT-4-B\_mut.bam Coverage

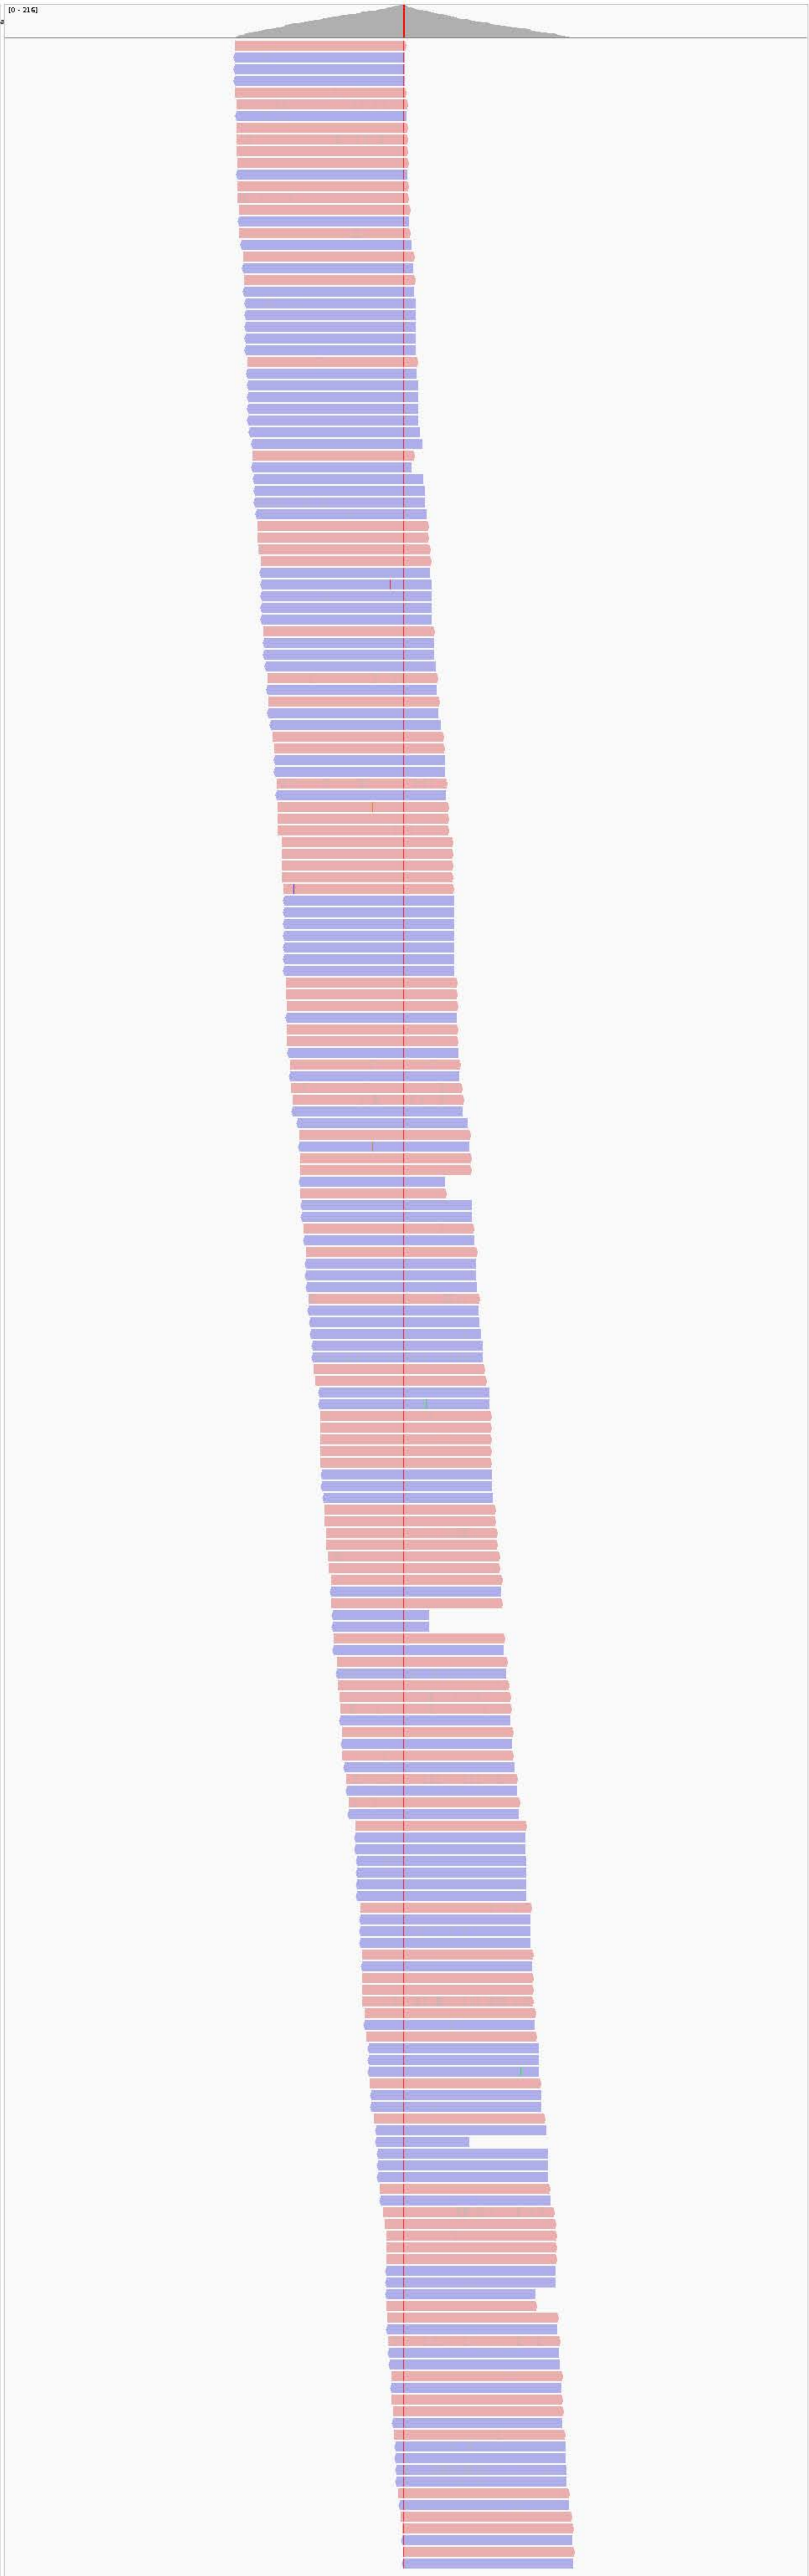

SL\_0005-LT-4-B\_mut.bam

Sequence  
Refseq Genes

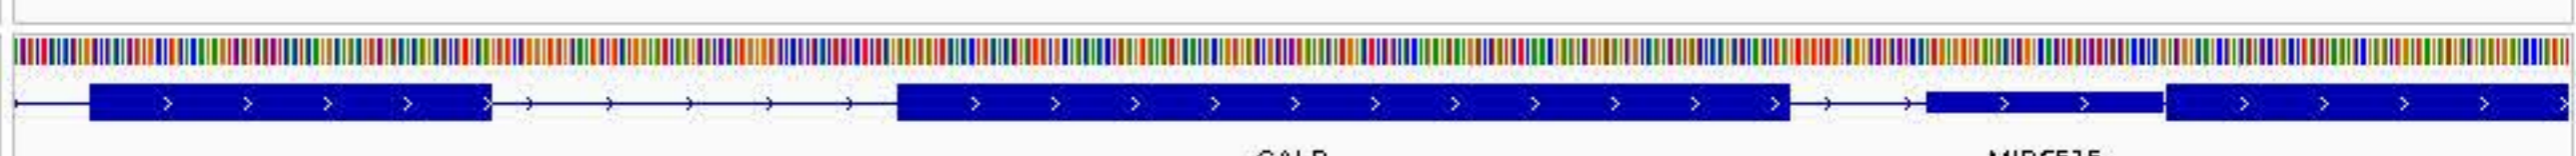

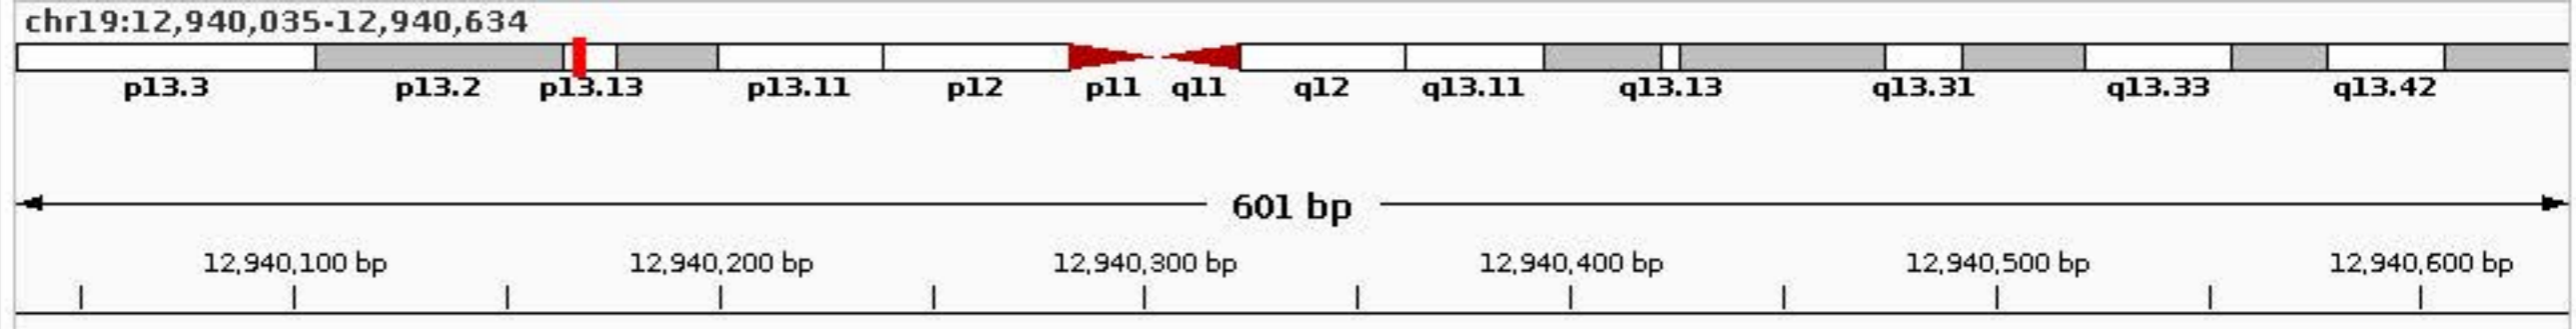

SL\_0005-LT-9-B\_mut.bam Coverage

SL\_0005-LT-9-B\_mut.bam

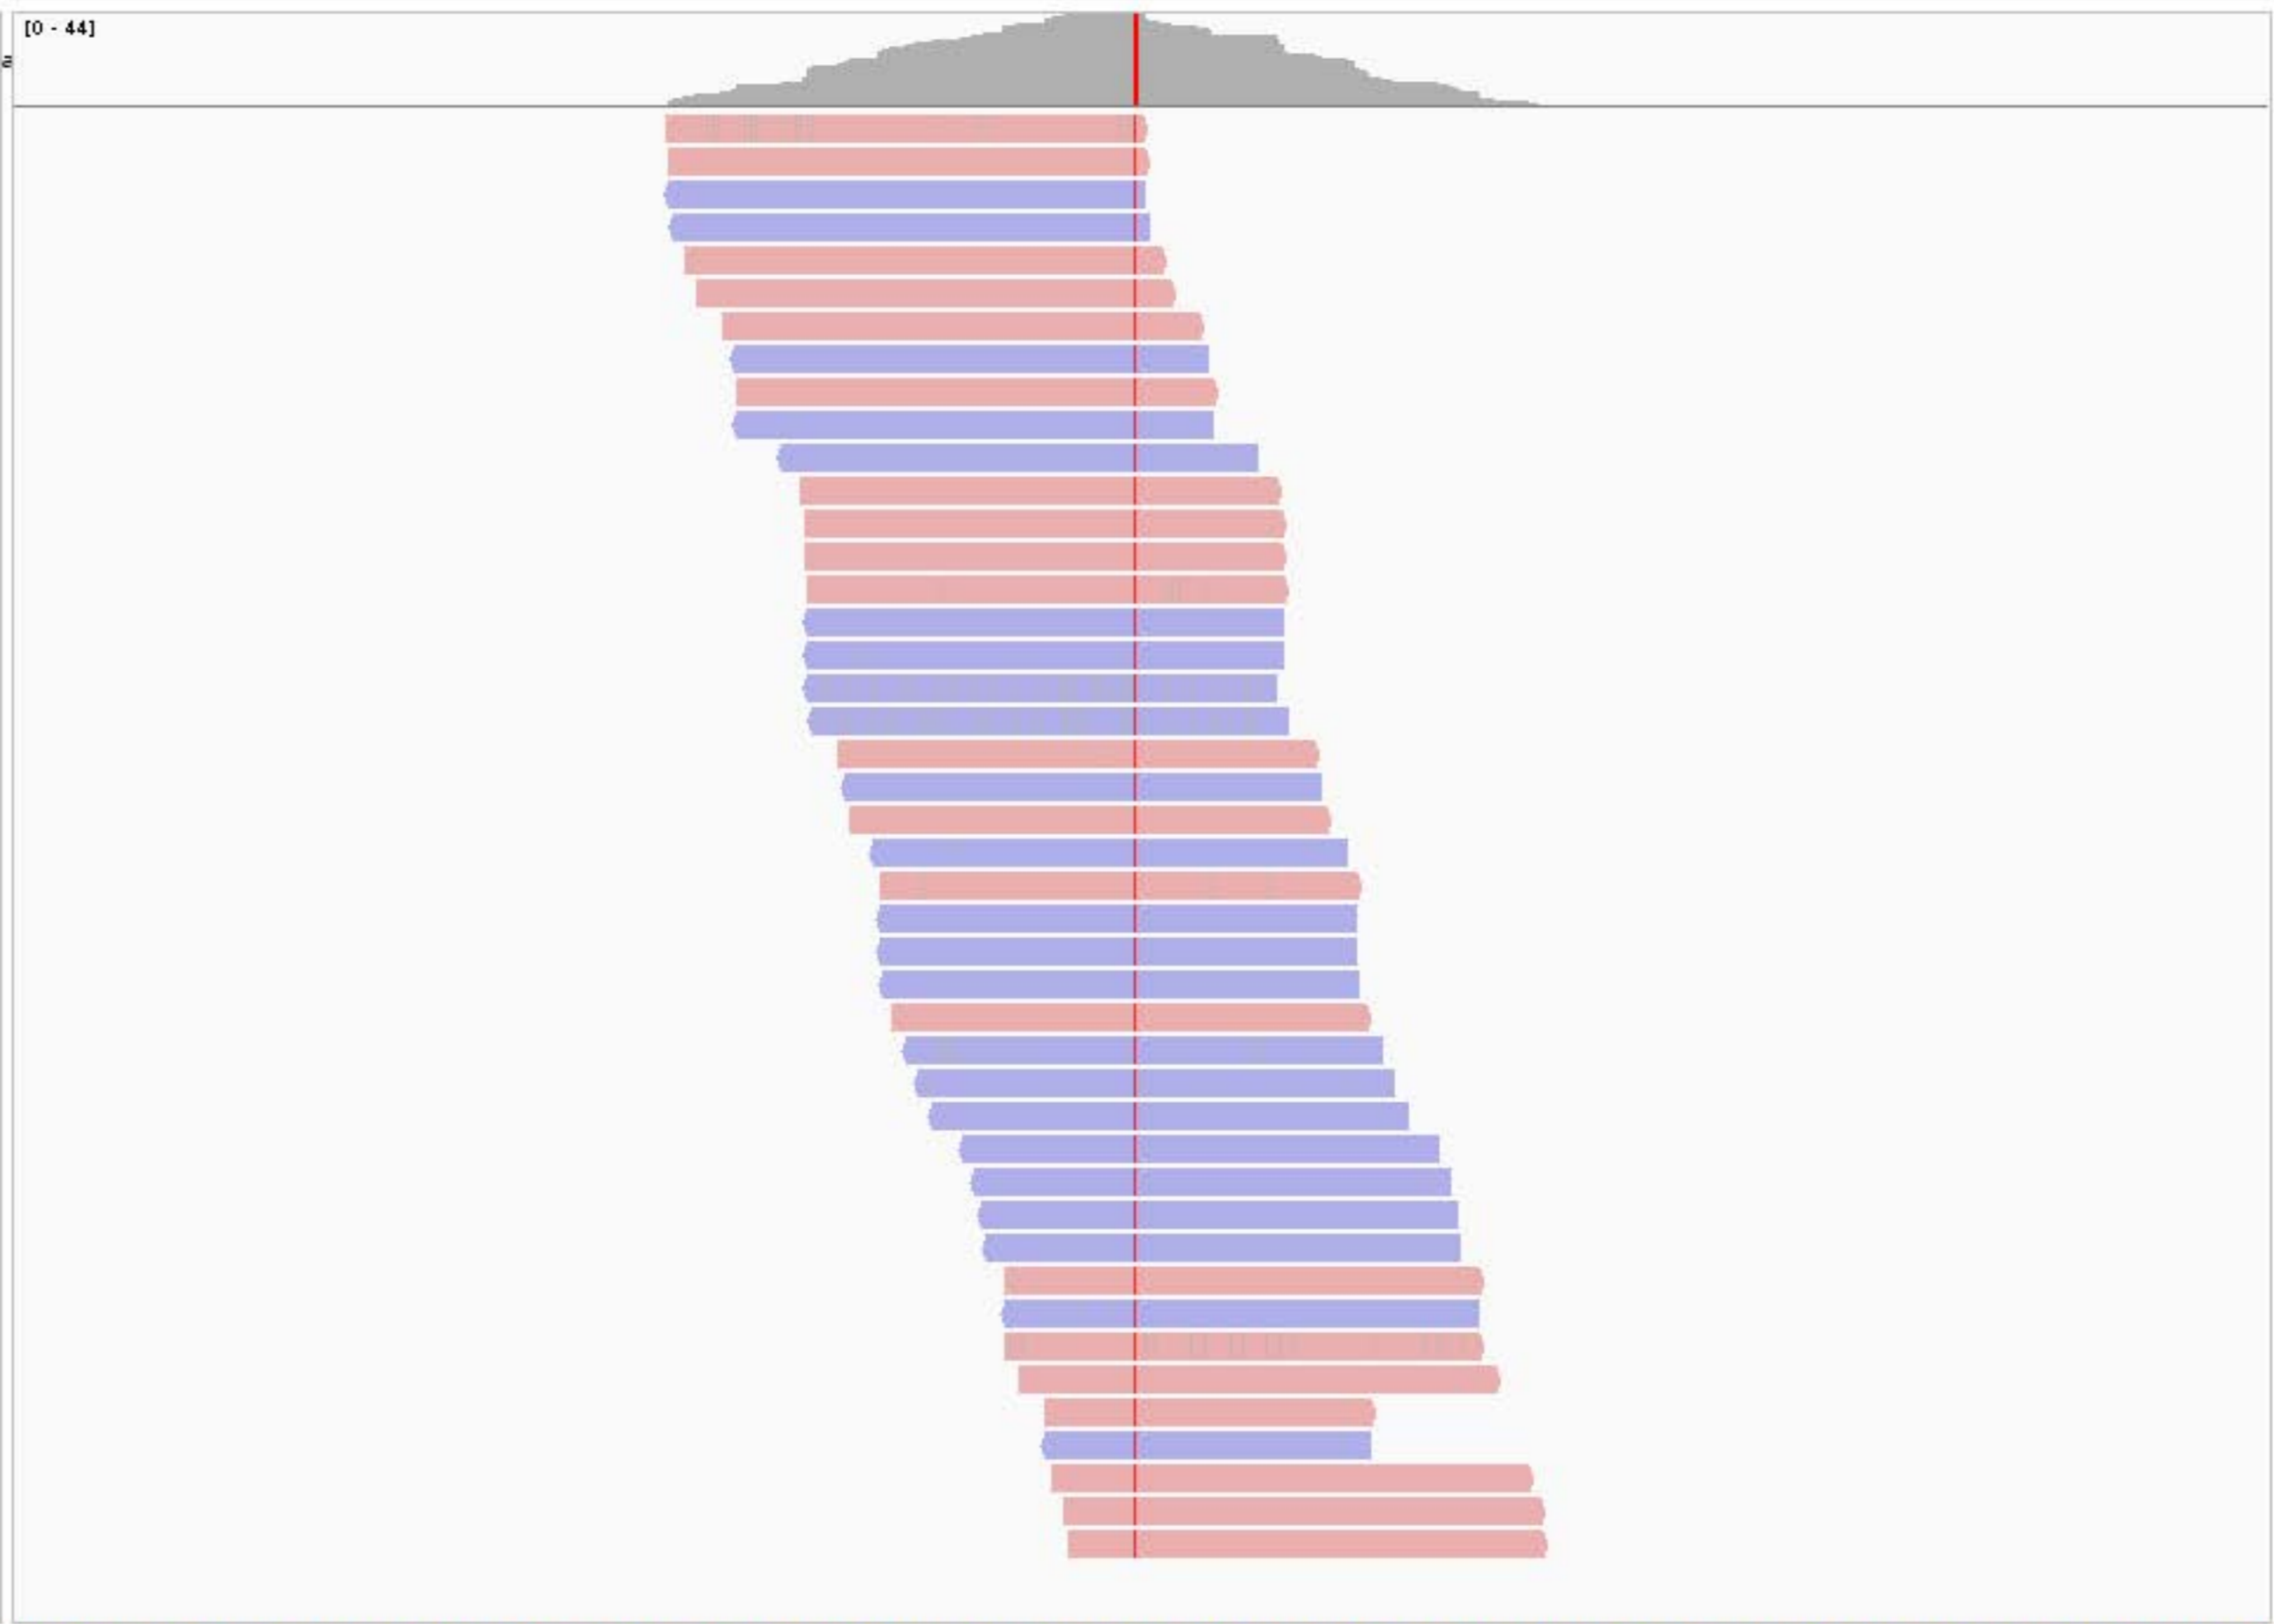

Sequence

Refseq Genes

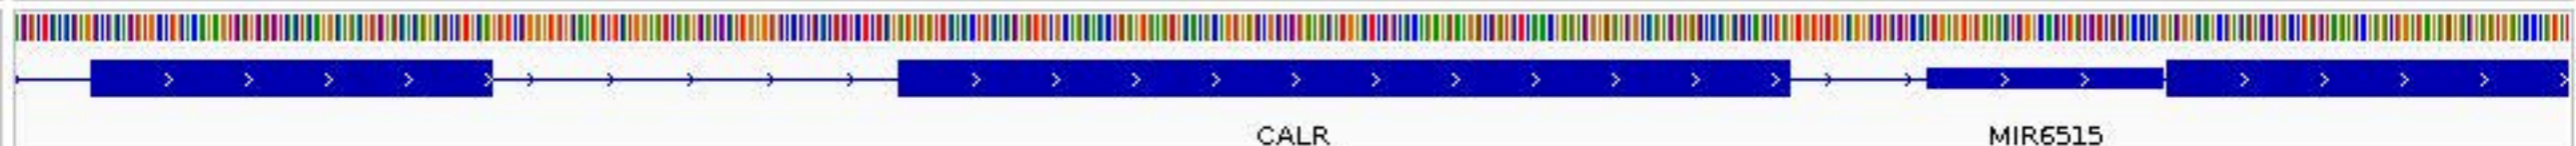



chr16:67,029,493-67,030,092

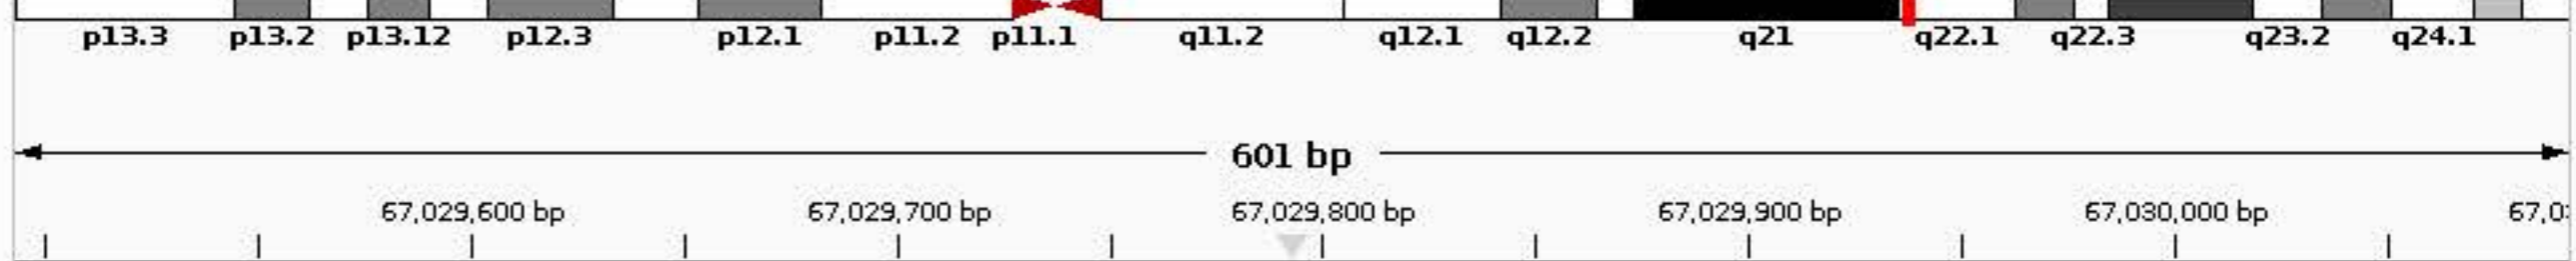

SL\_1002\_L\_FFPE\_24-B\_mut.bam  
rage

SL\_1002\_L\_FFPE\_24-B\_mut.ba  
m

Sequence →

Refseq Genes

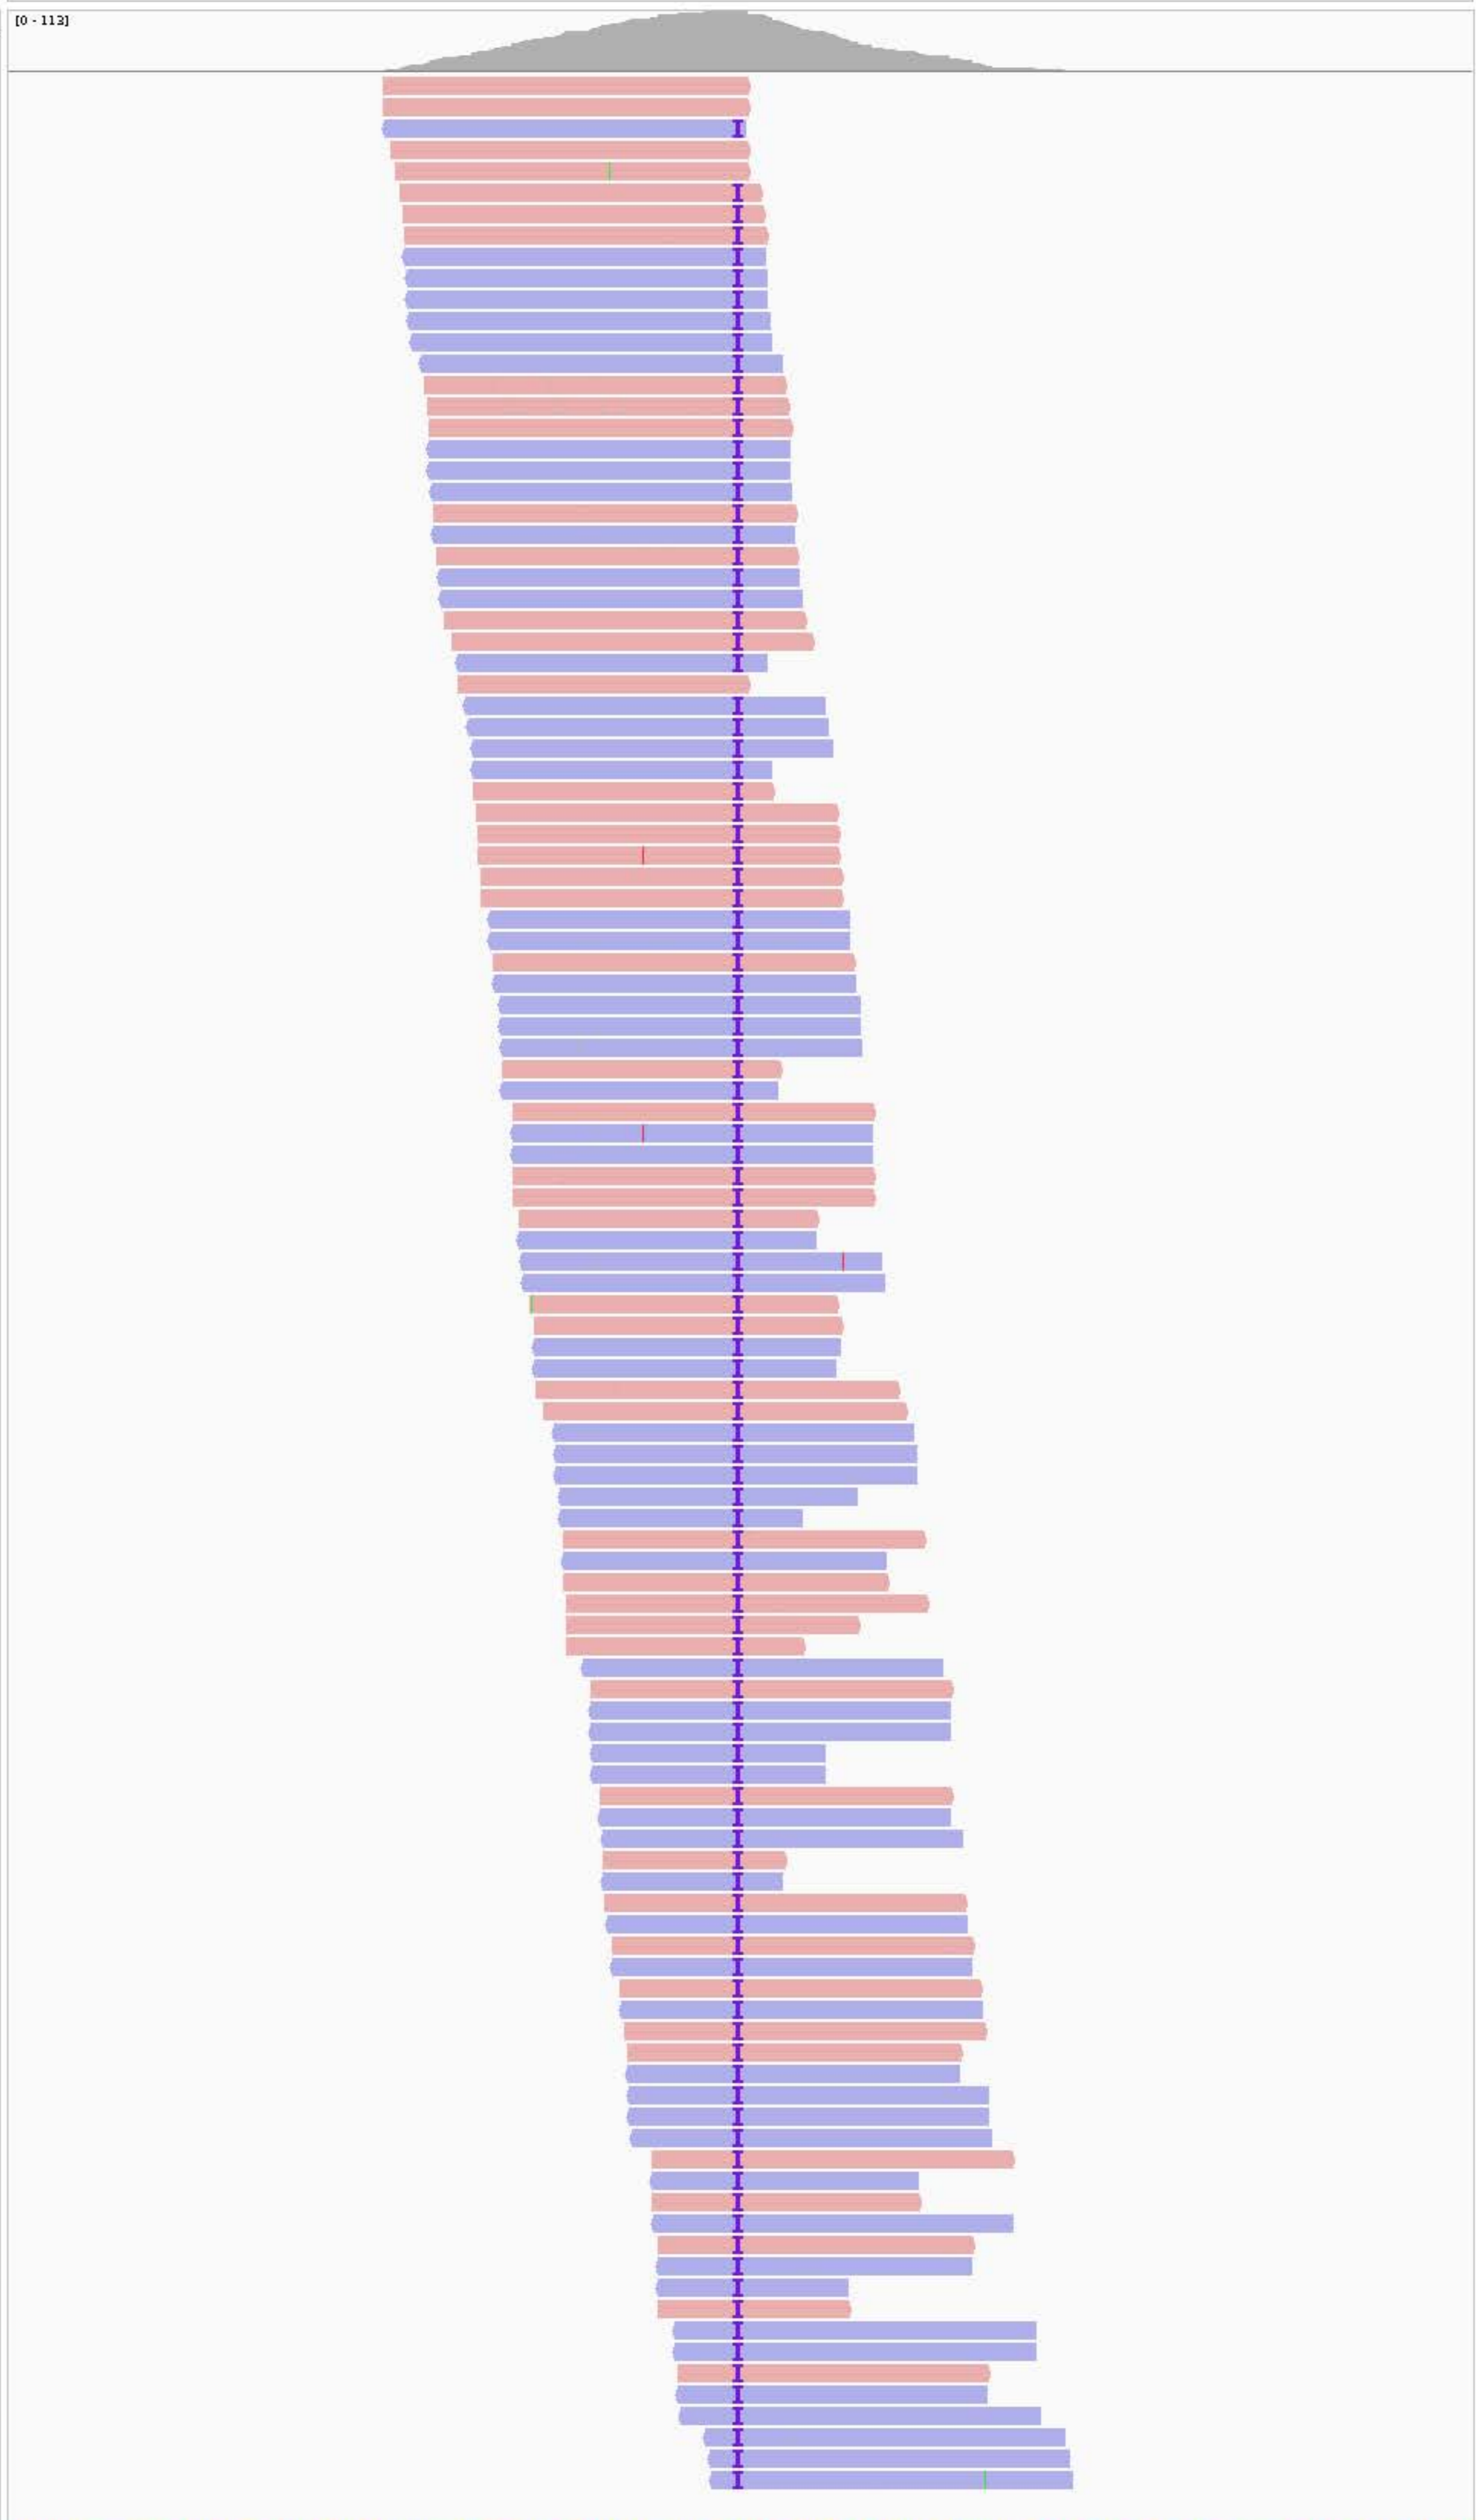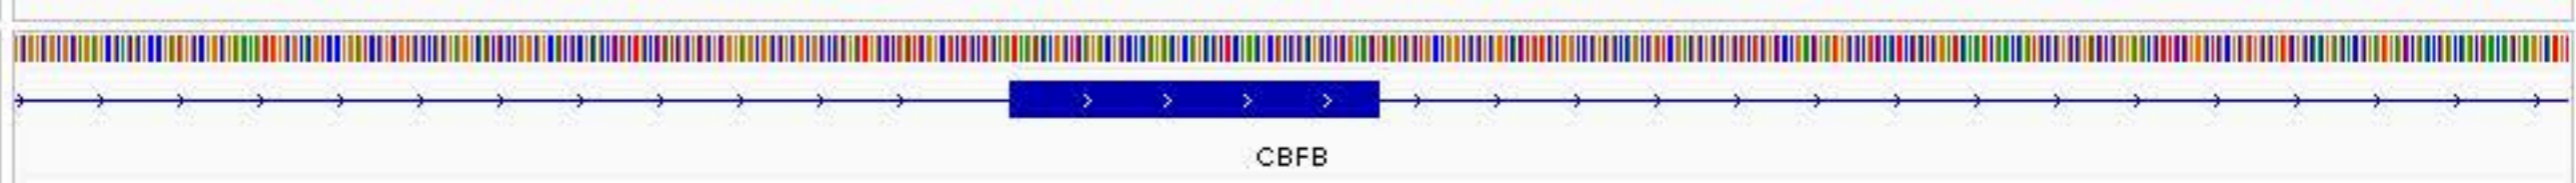

CBFB

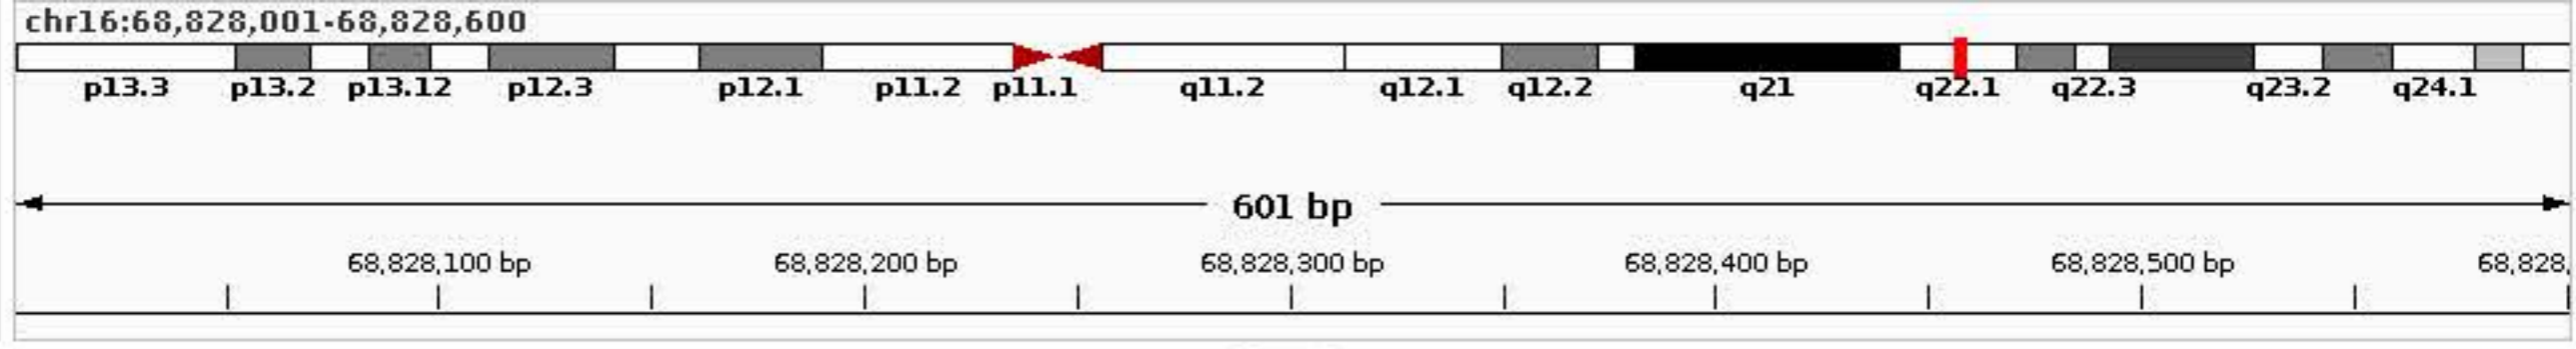

SL\_0013\_RT\_4-B\_mut.bam Coverage

SL\_0013\_RT\_4-B\_mut.bam

Sequence

Refseq Genes

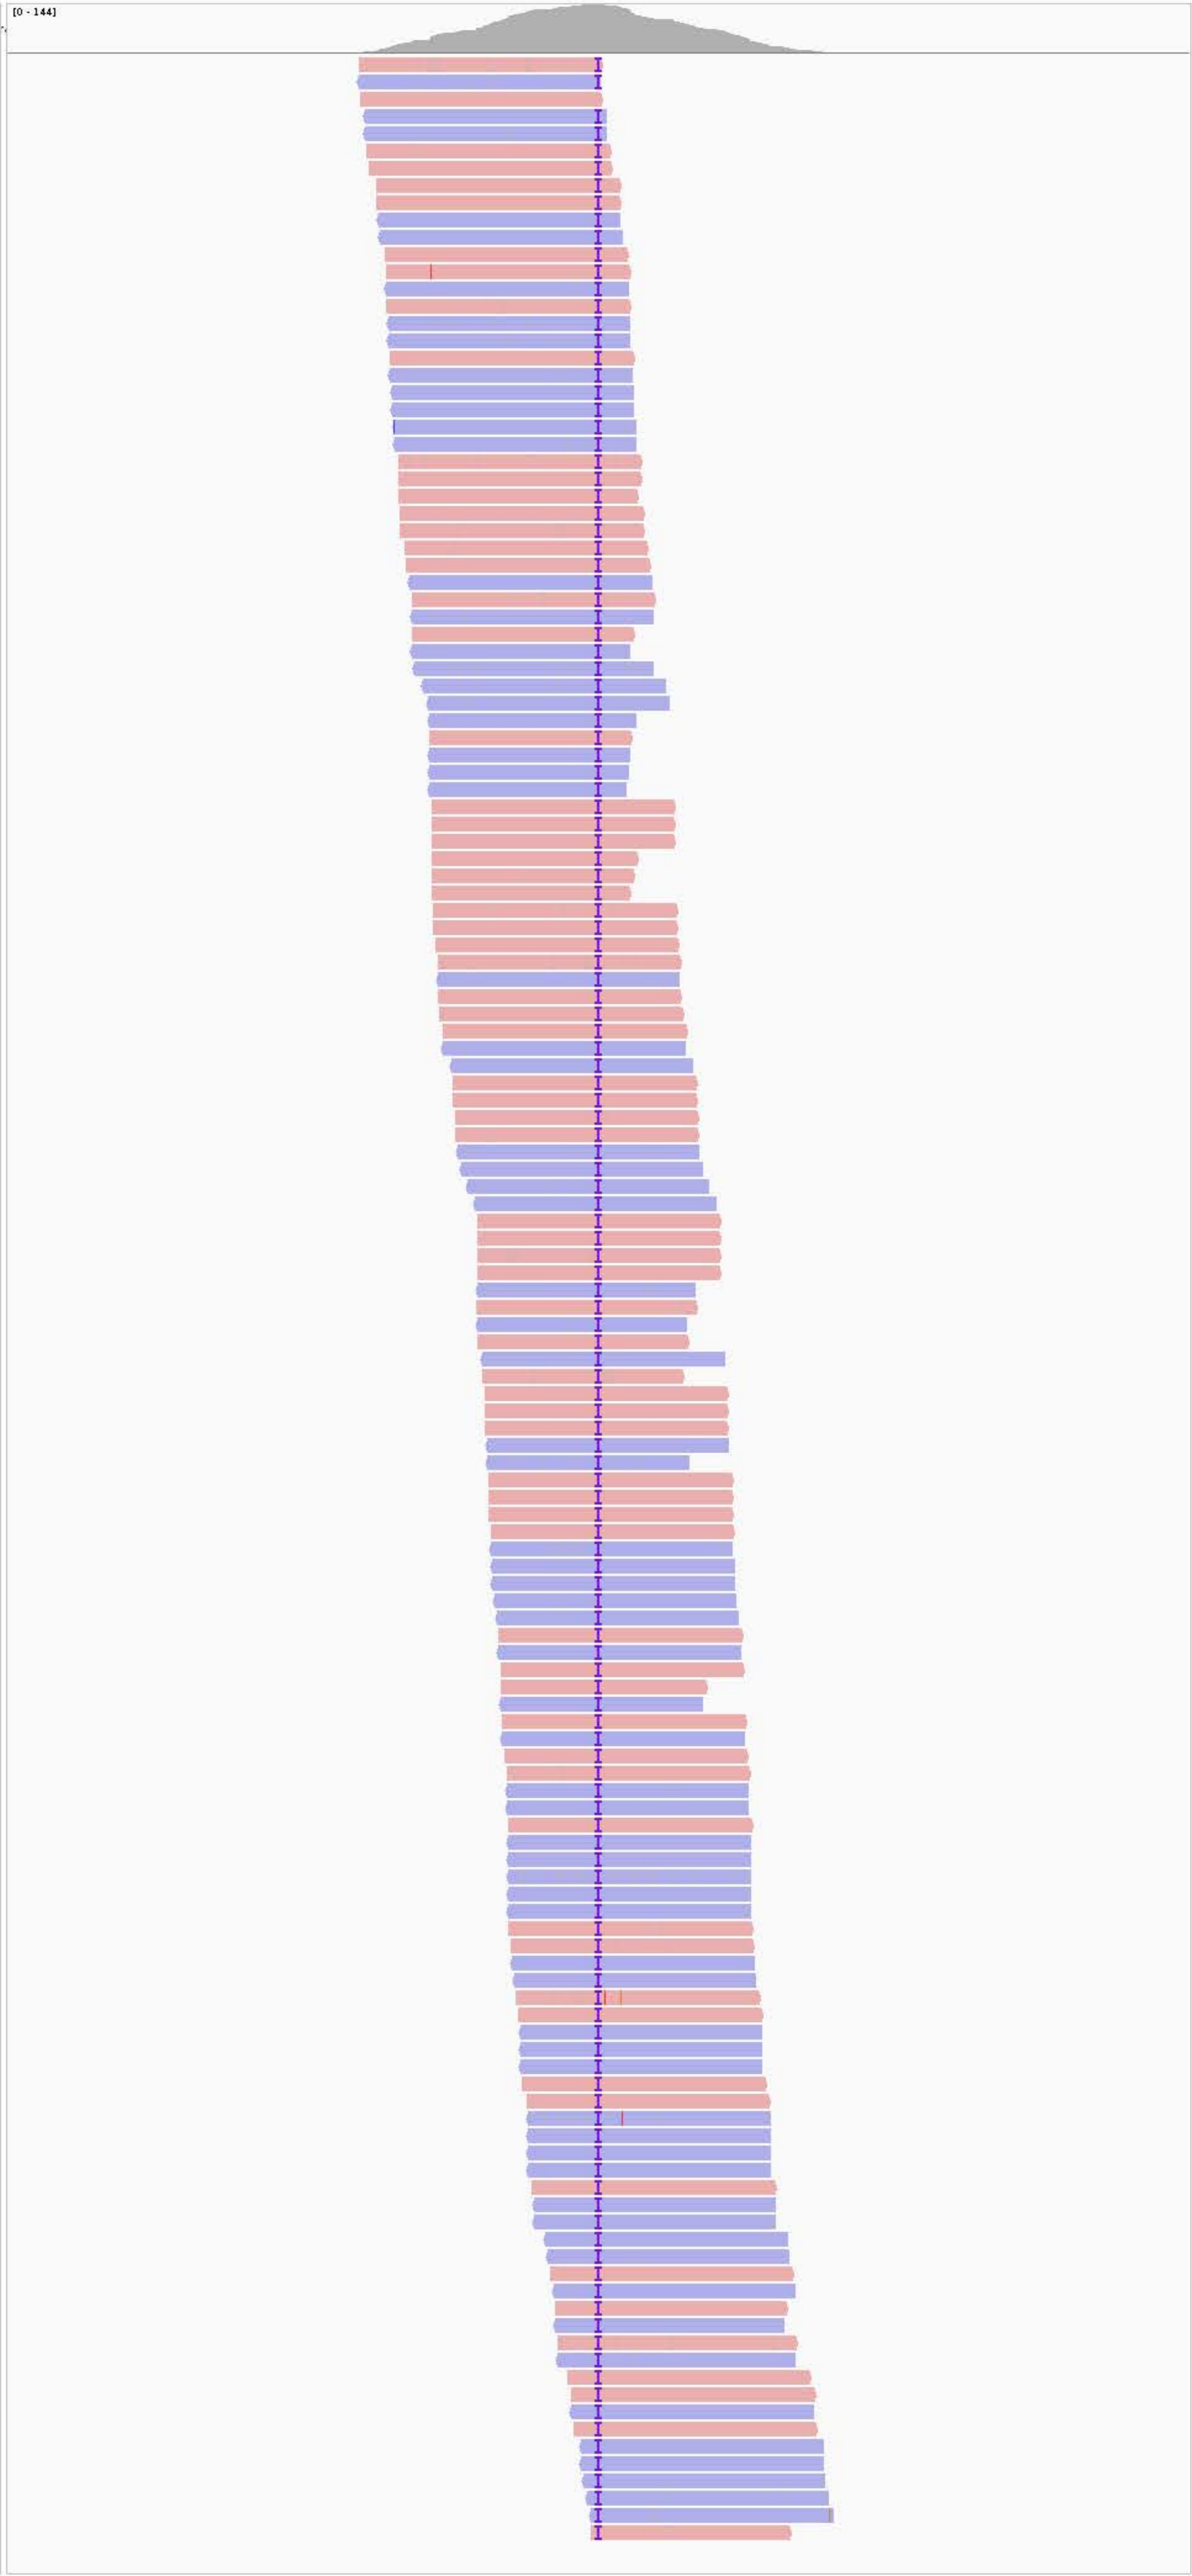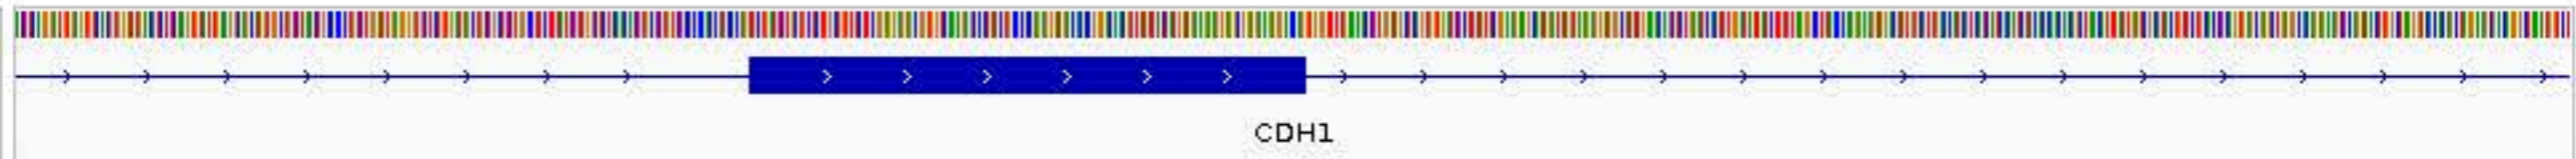

CDH1



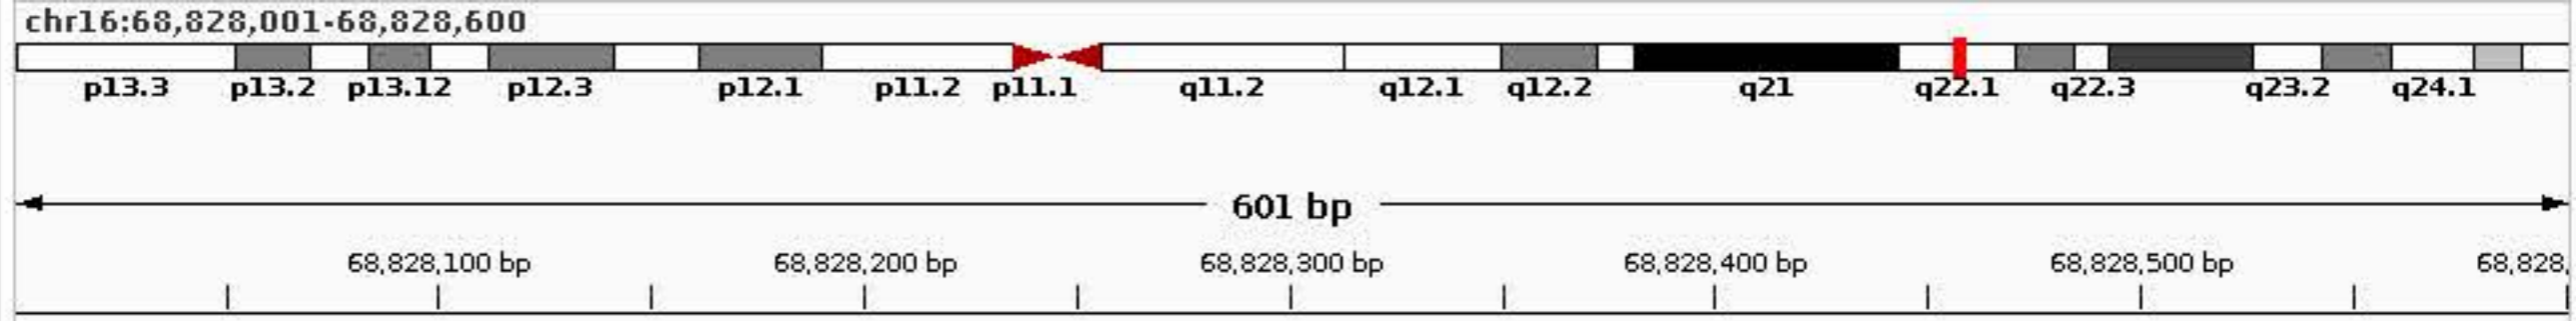

SL\_0013\_RT\_5-B\_mut.bam Cover

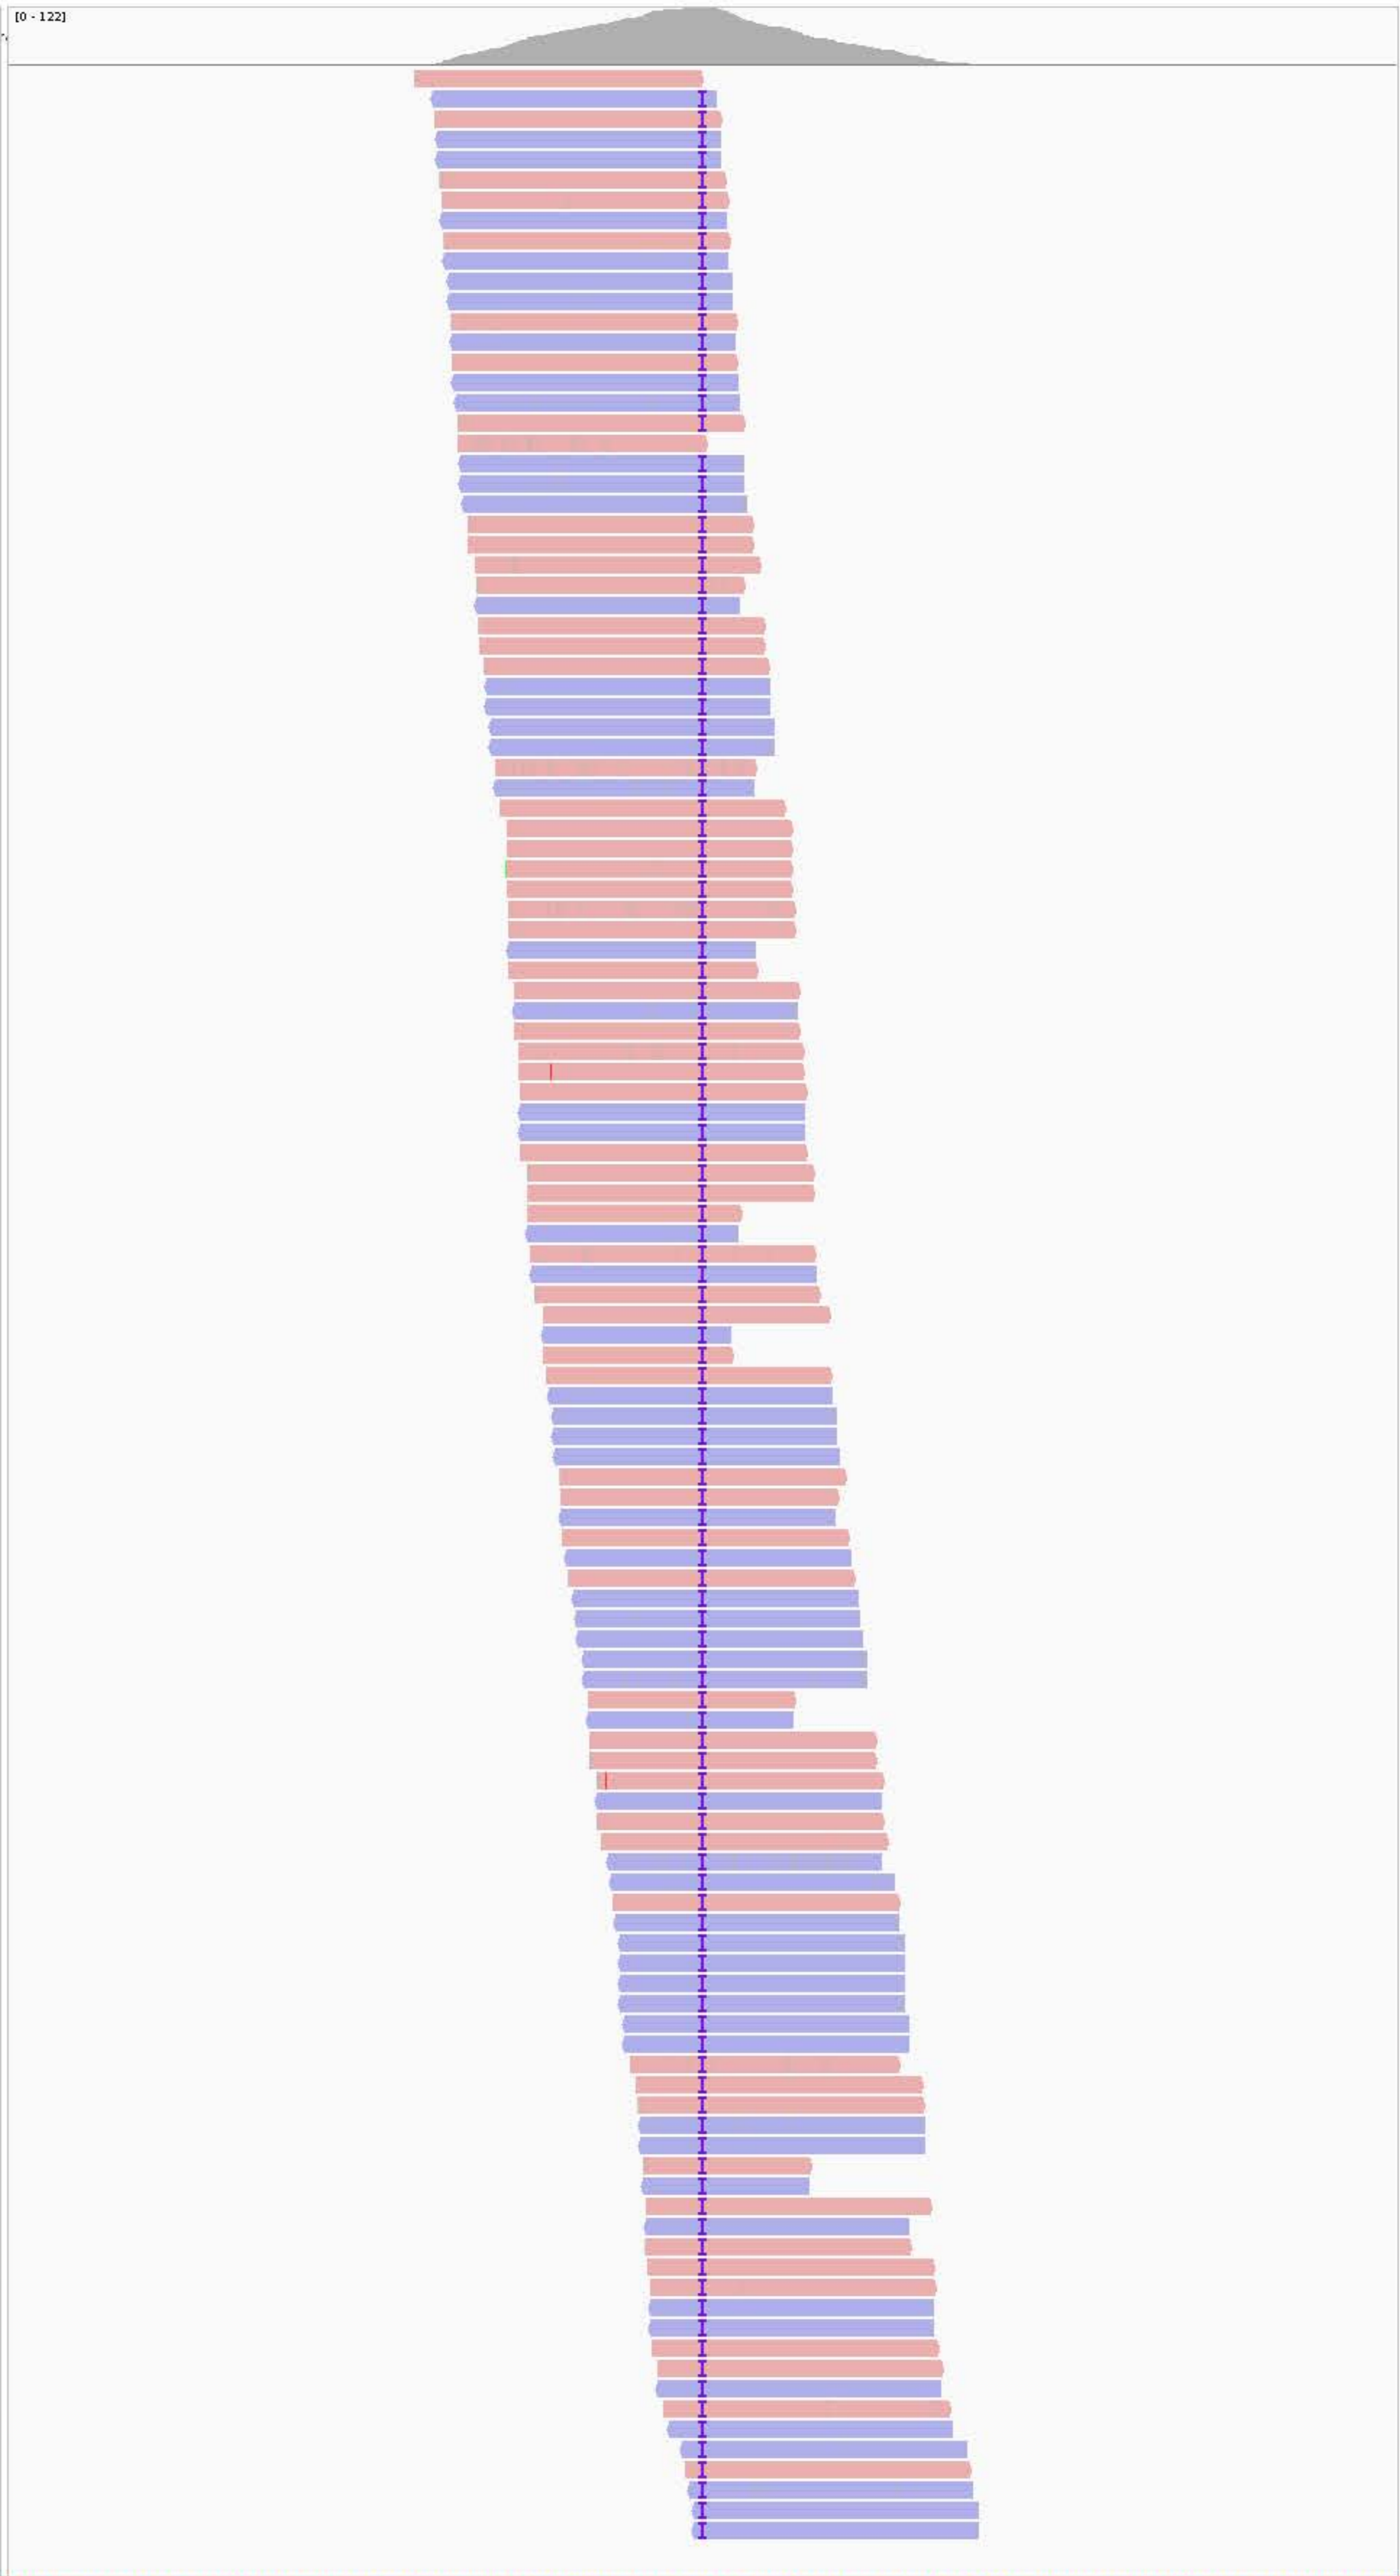

SL\_0013\_RT\_5-B\_mut.bam

Sequence →  
Refseq Genes

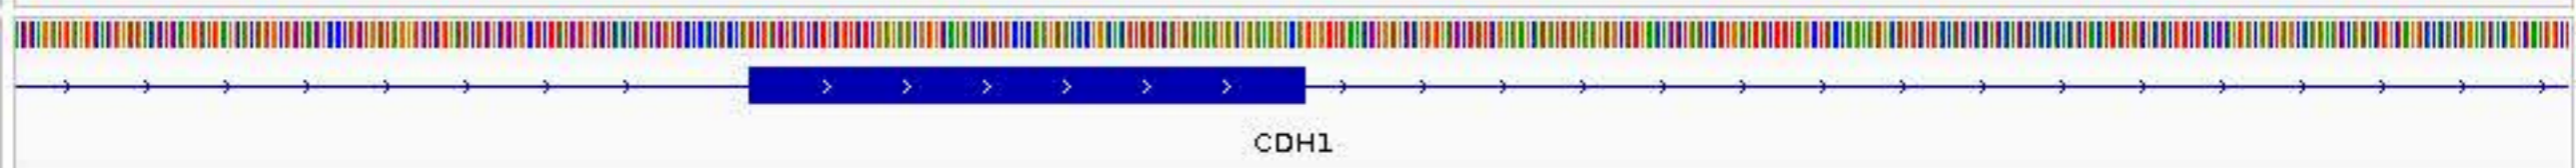



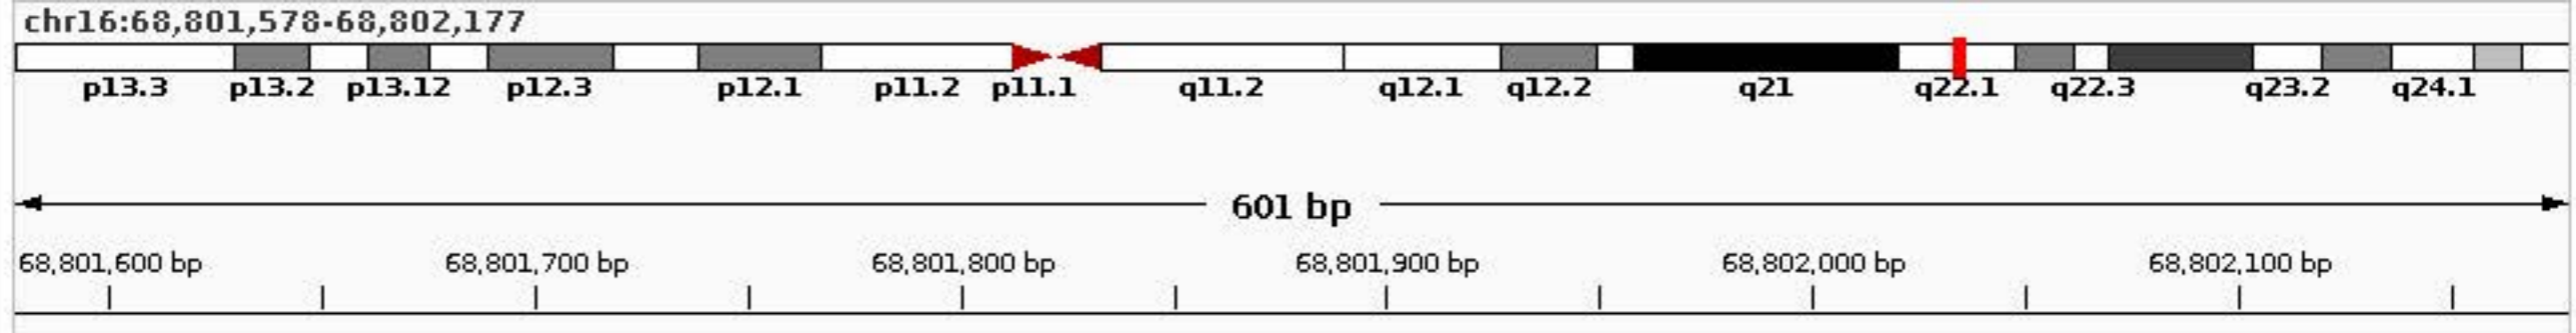

SL\_1008\_R\_51\_FFPE-B\_mut.bam  
 SL\_1008\_R\_51\_FFPE-B\_mut.bam

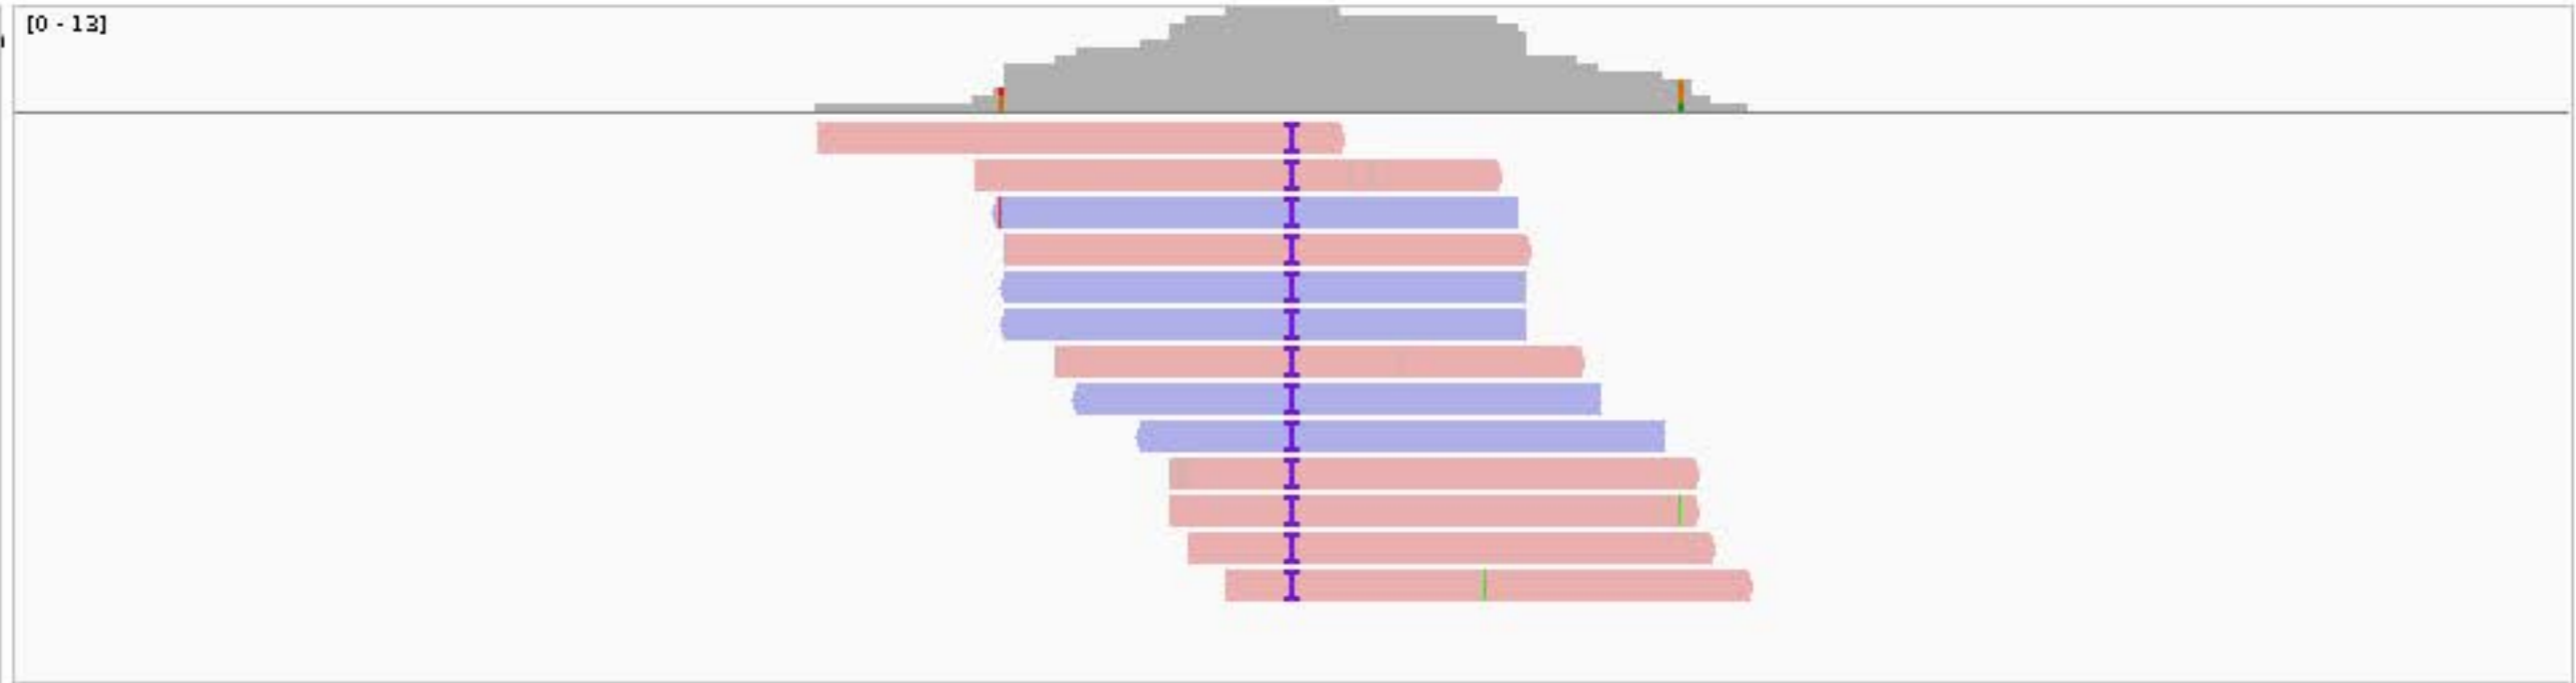

Sequence →

Refseq Genes

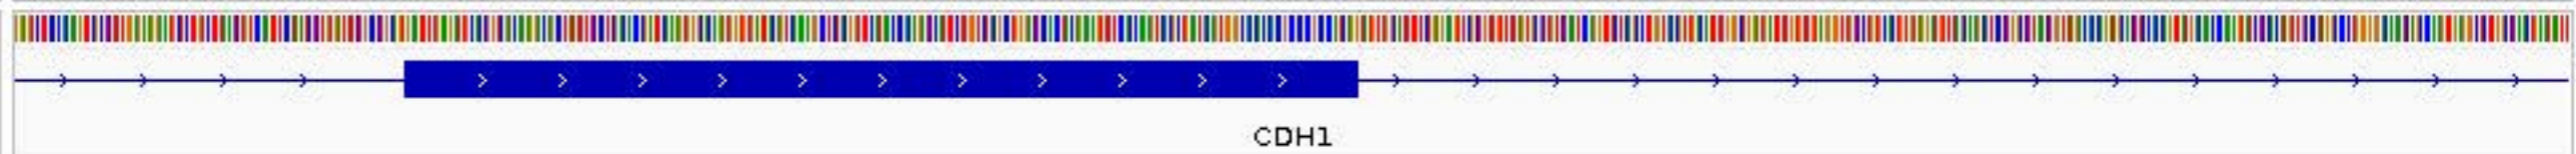

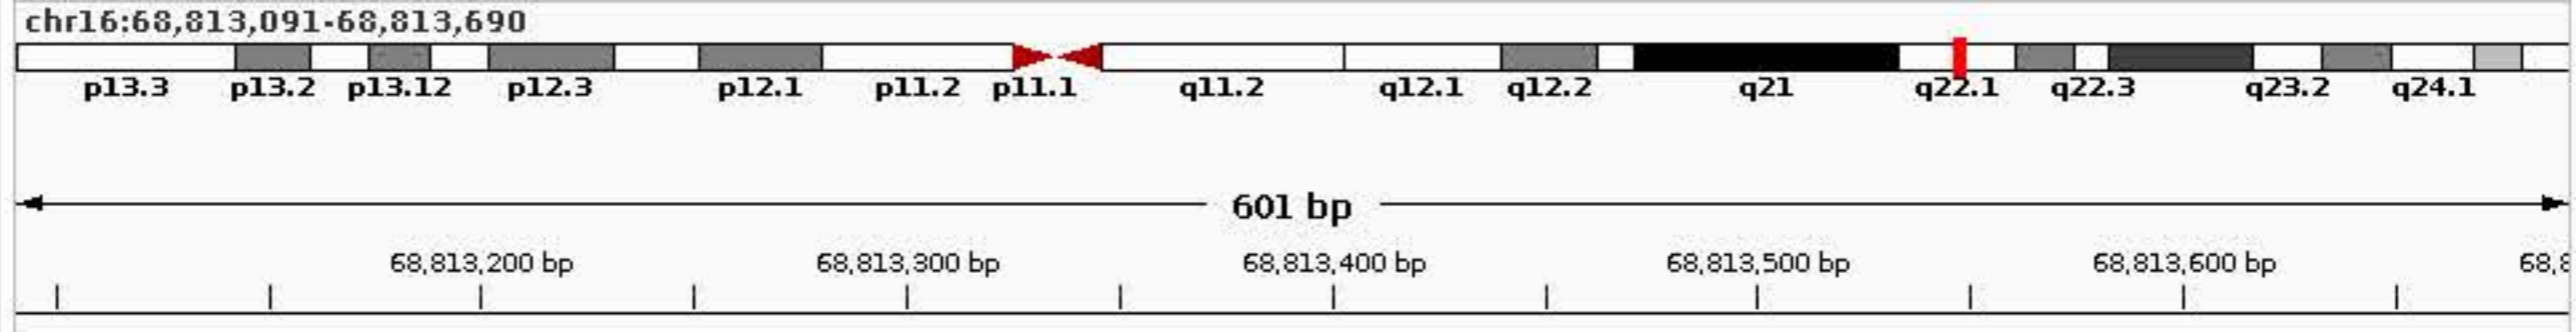

SL\_0008\_LT\_8-B\_mut.bam Coverage

SL\_0008\_LT\_8-B\_mut.bam

Sequence →

Refseq Genes

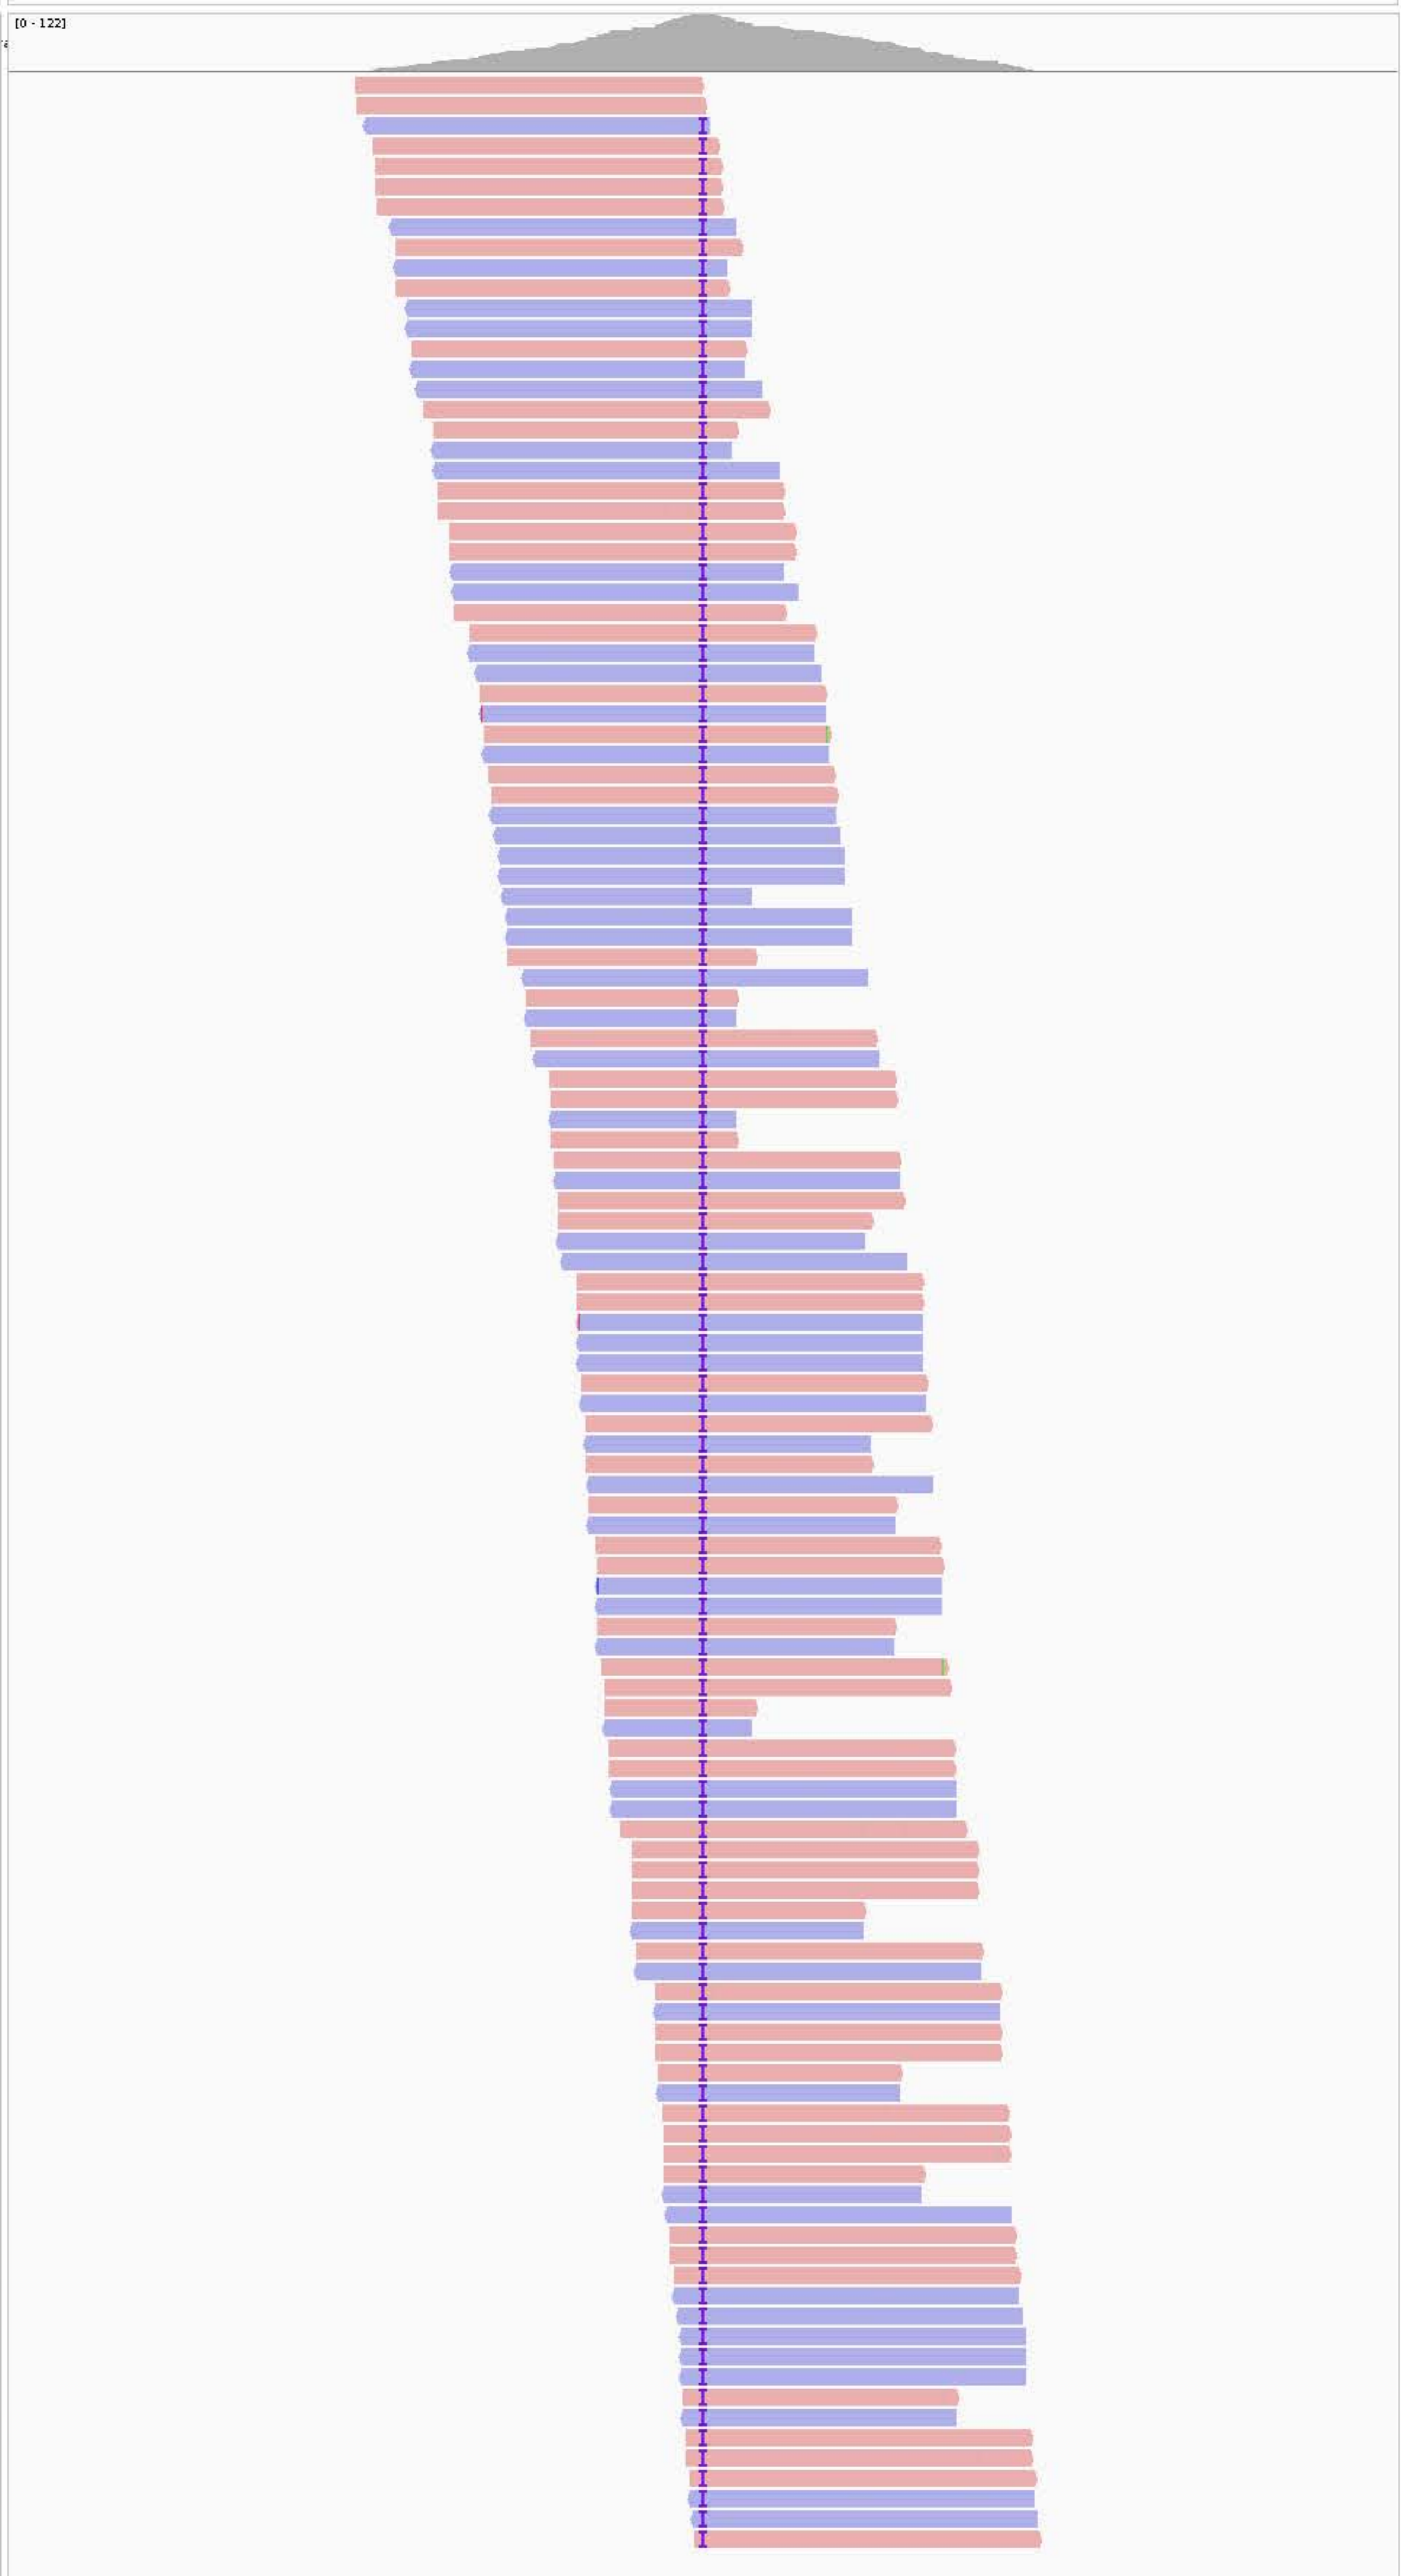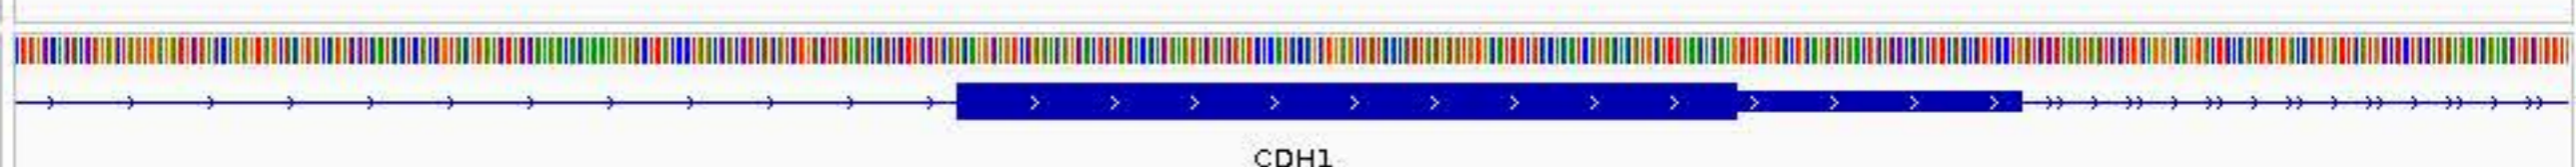



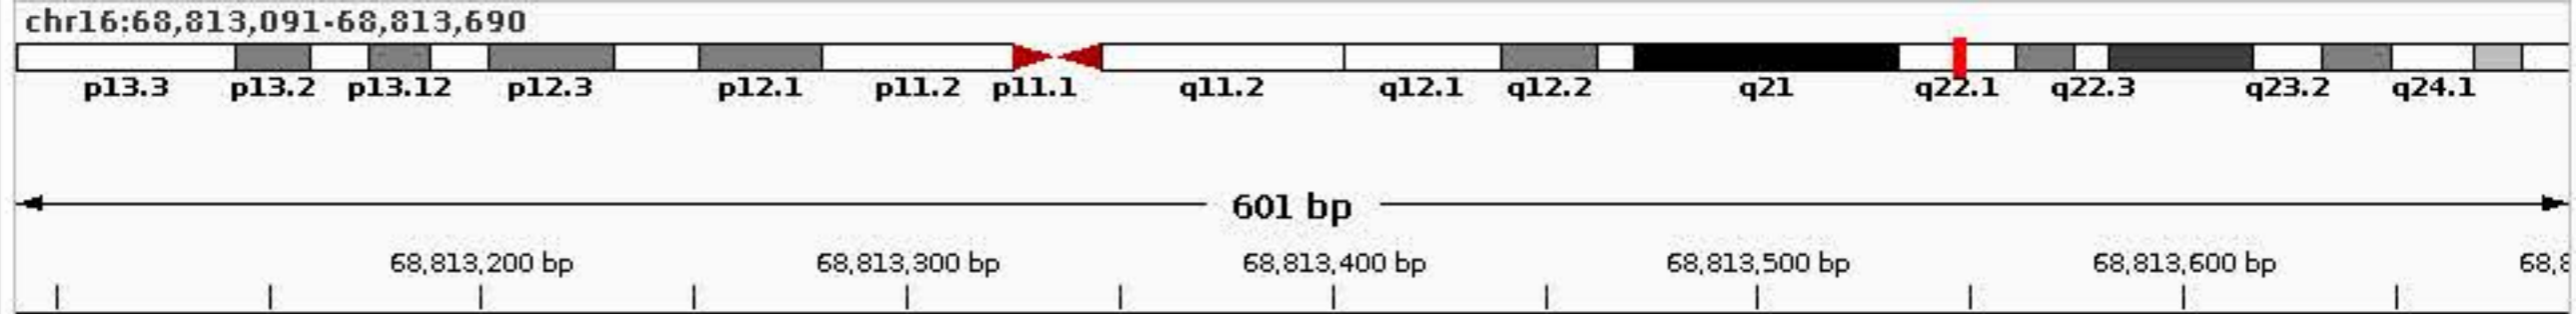

SL\_0008-LT\_15-B\_mut.bam Cov

SL\_0008-LT\_15-B\_mut.bam

Sequence

Refseq Genes

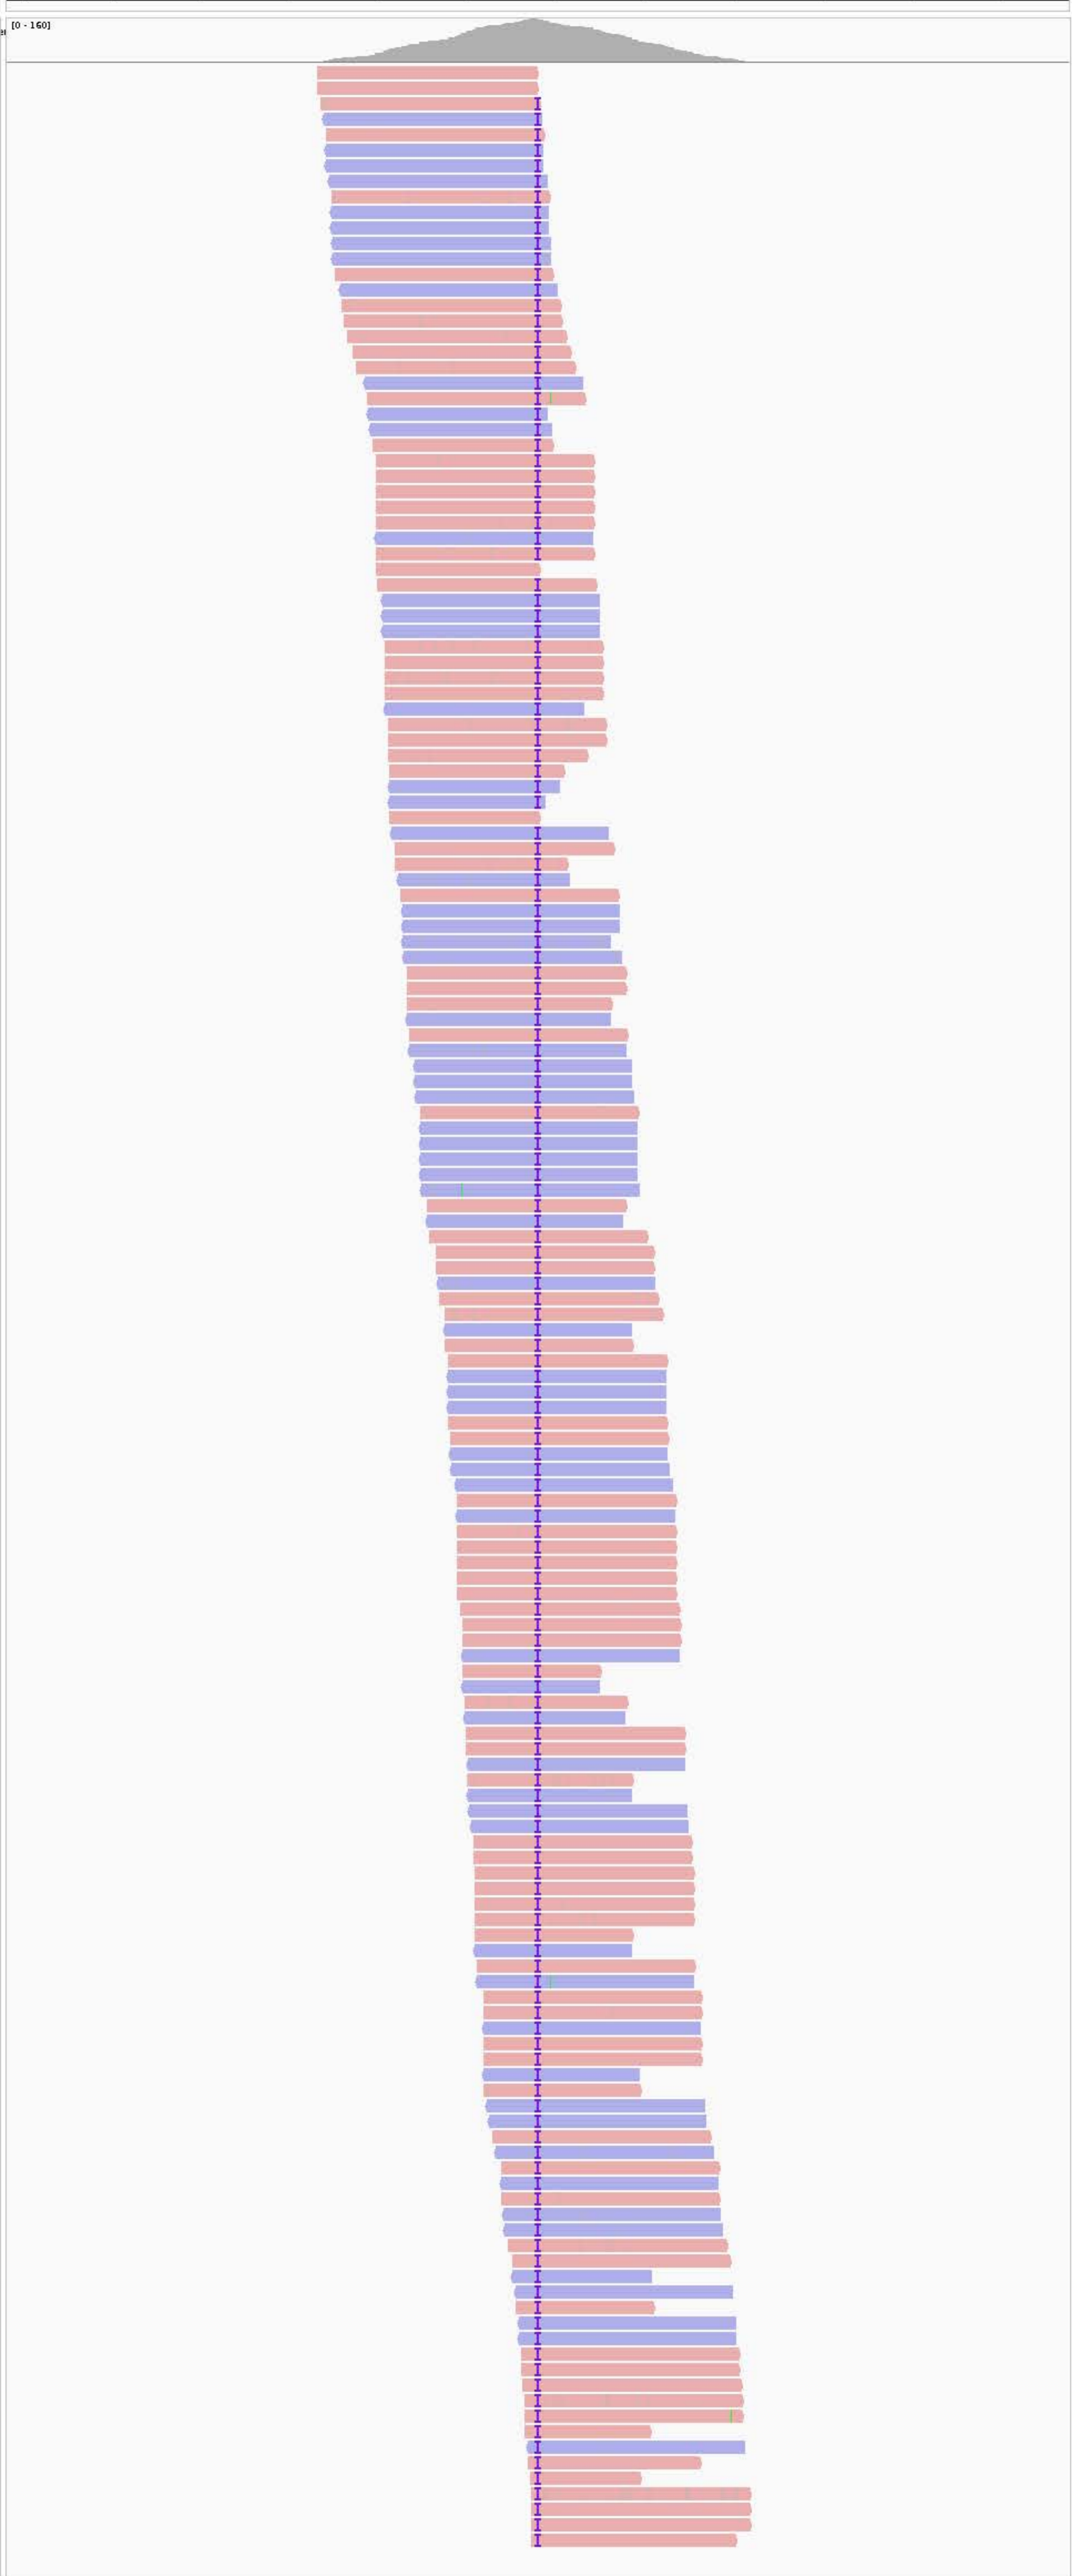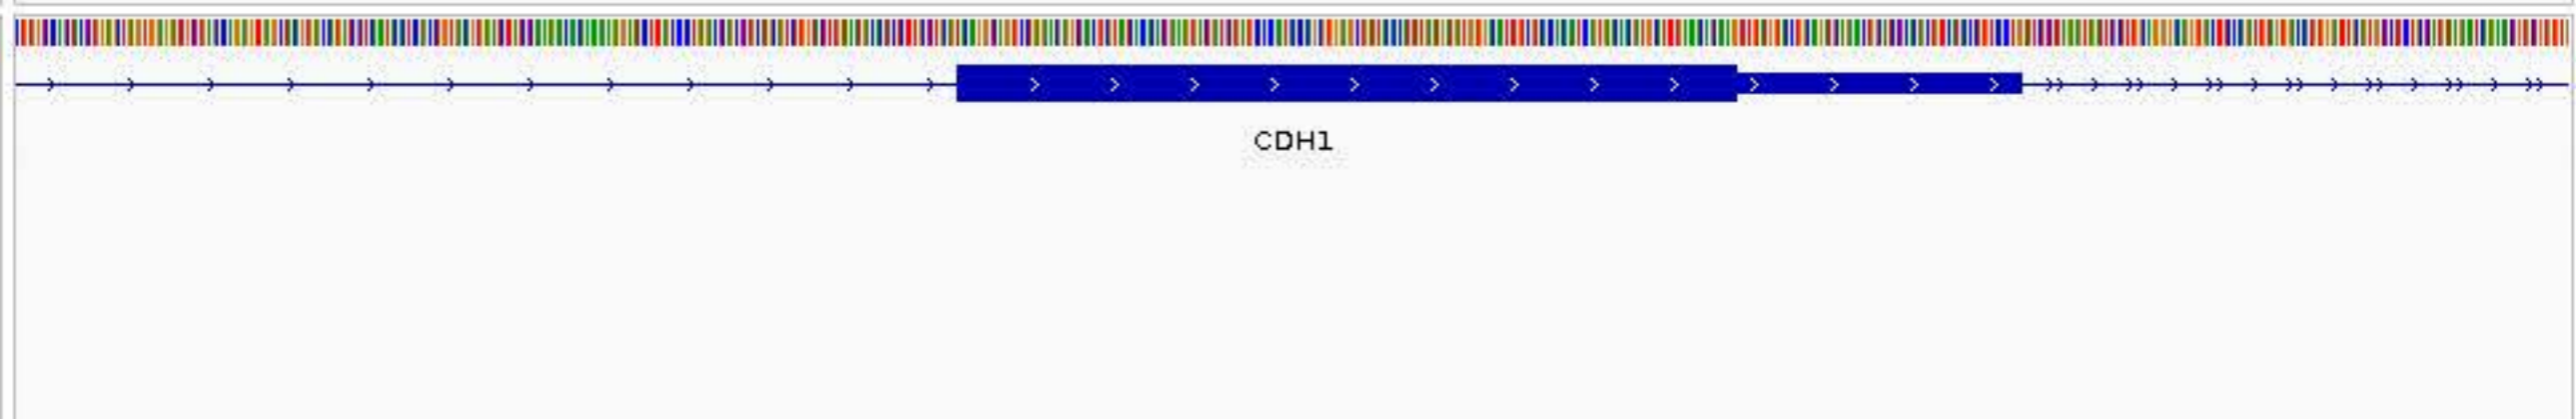



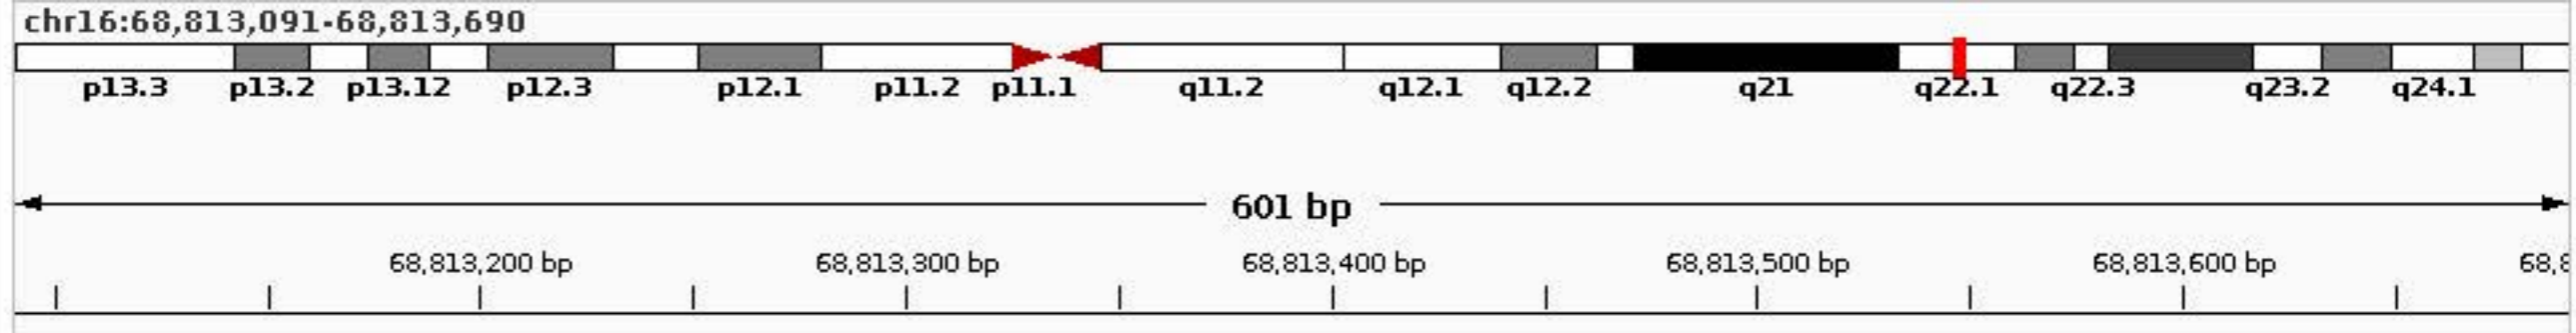

SL\_0009-LT\_9-B\_mut.bam Coverage

SL\_0009-LT\_9-B\_mut.bam

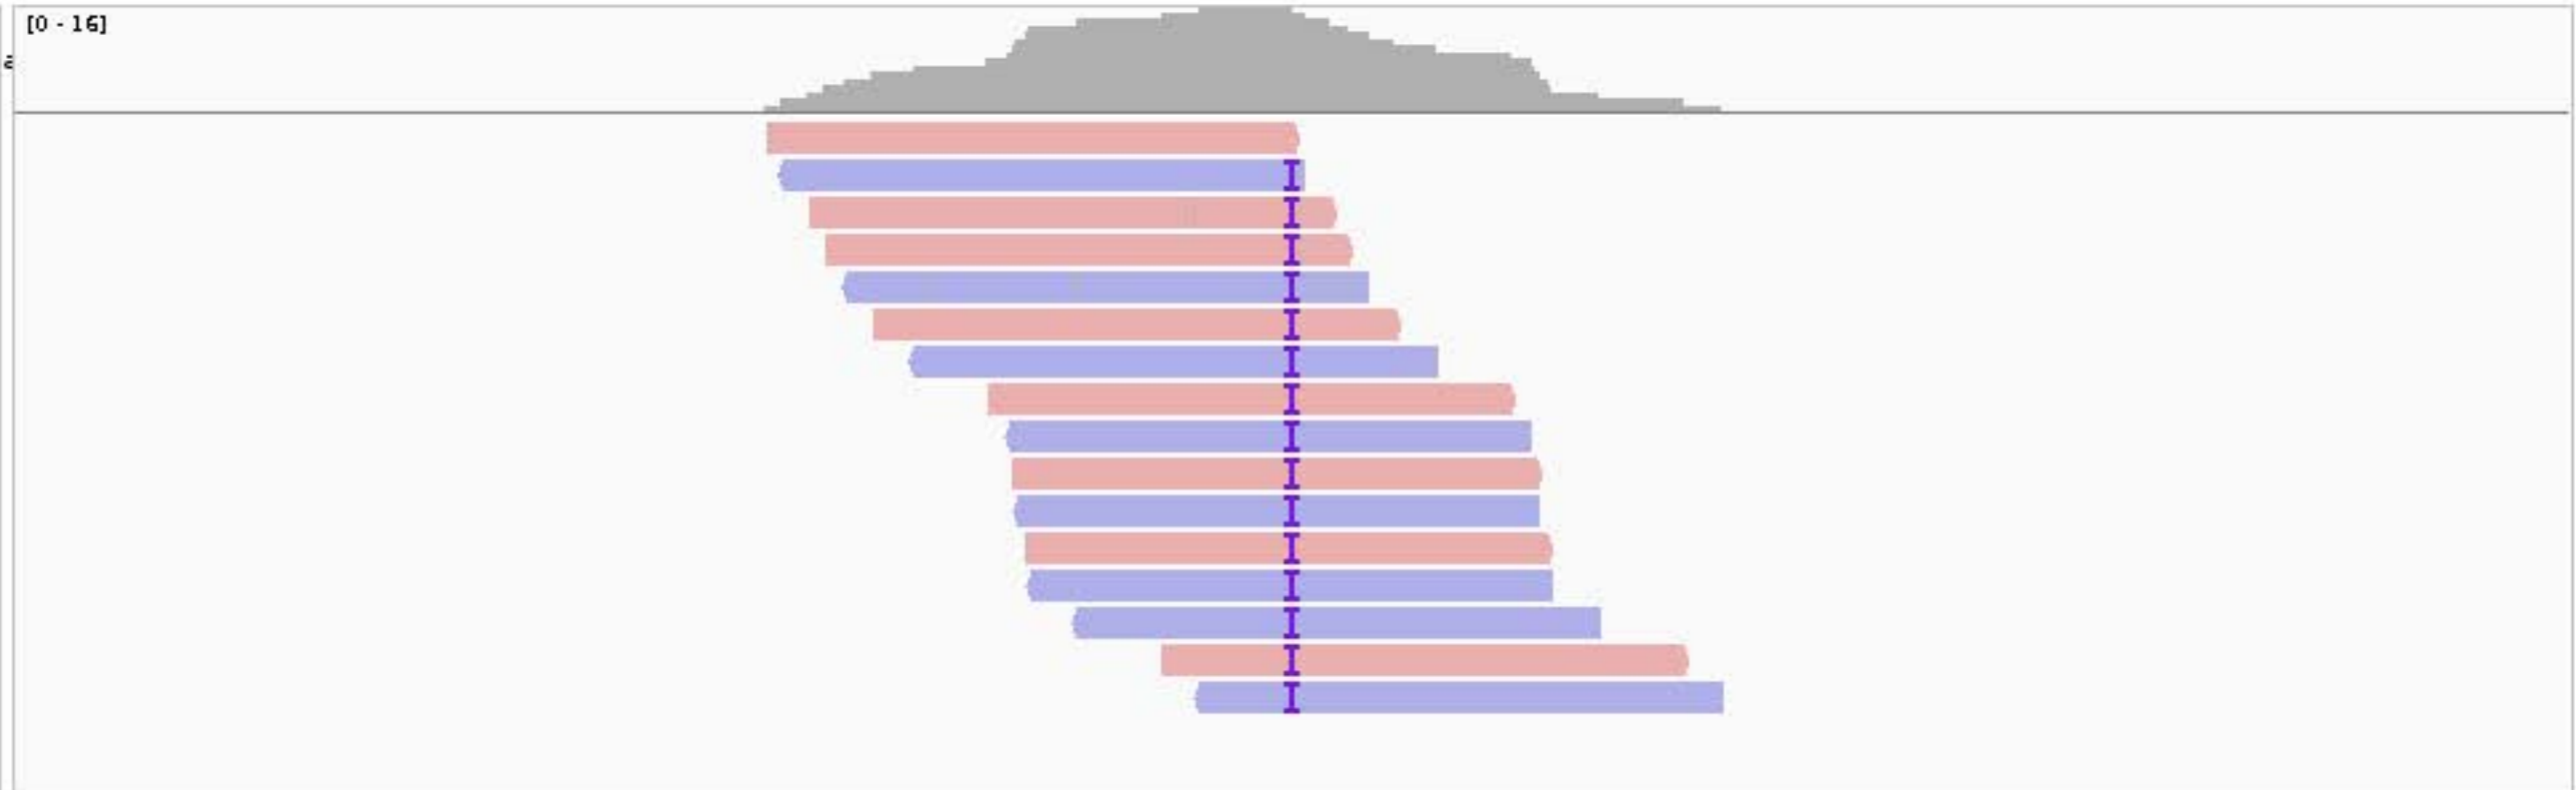

Sequence

Refseq Genes

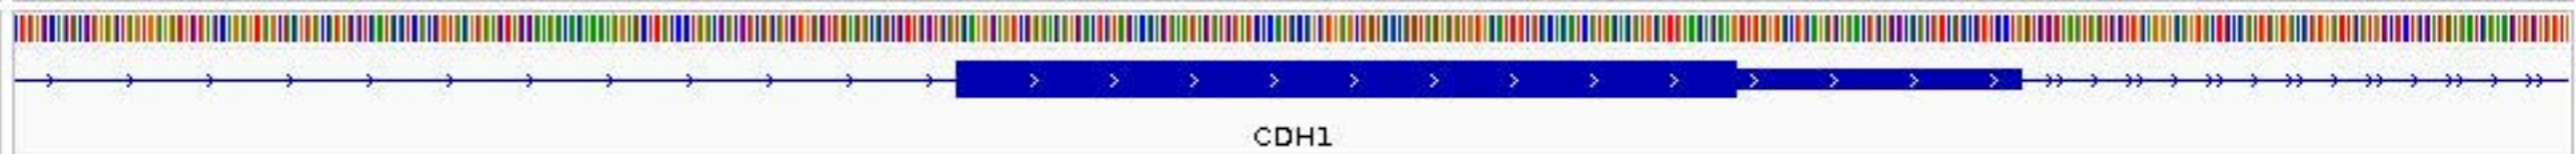

chr12:12,717,733-12,718,332  
p13.32 p13.2 p12.2 p11.23 p11.1 q12 q13.12 q13.3 q14.2 q15 q21.2 q21.32 q22 q23.2 q24.11 q24.22 q24.32

601 bp  
12,717,800 bp 12,717,900 bp 12,718,000 bp 12,718,100 bp 12,718,200 bp 12,718,300 bp

[0 - 78]

SL\_0013\_RT\_4-B\_mut.bam Cover

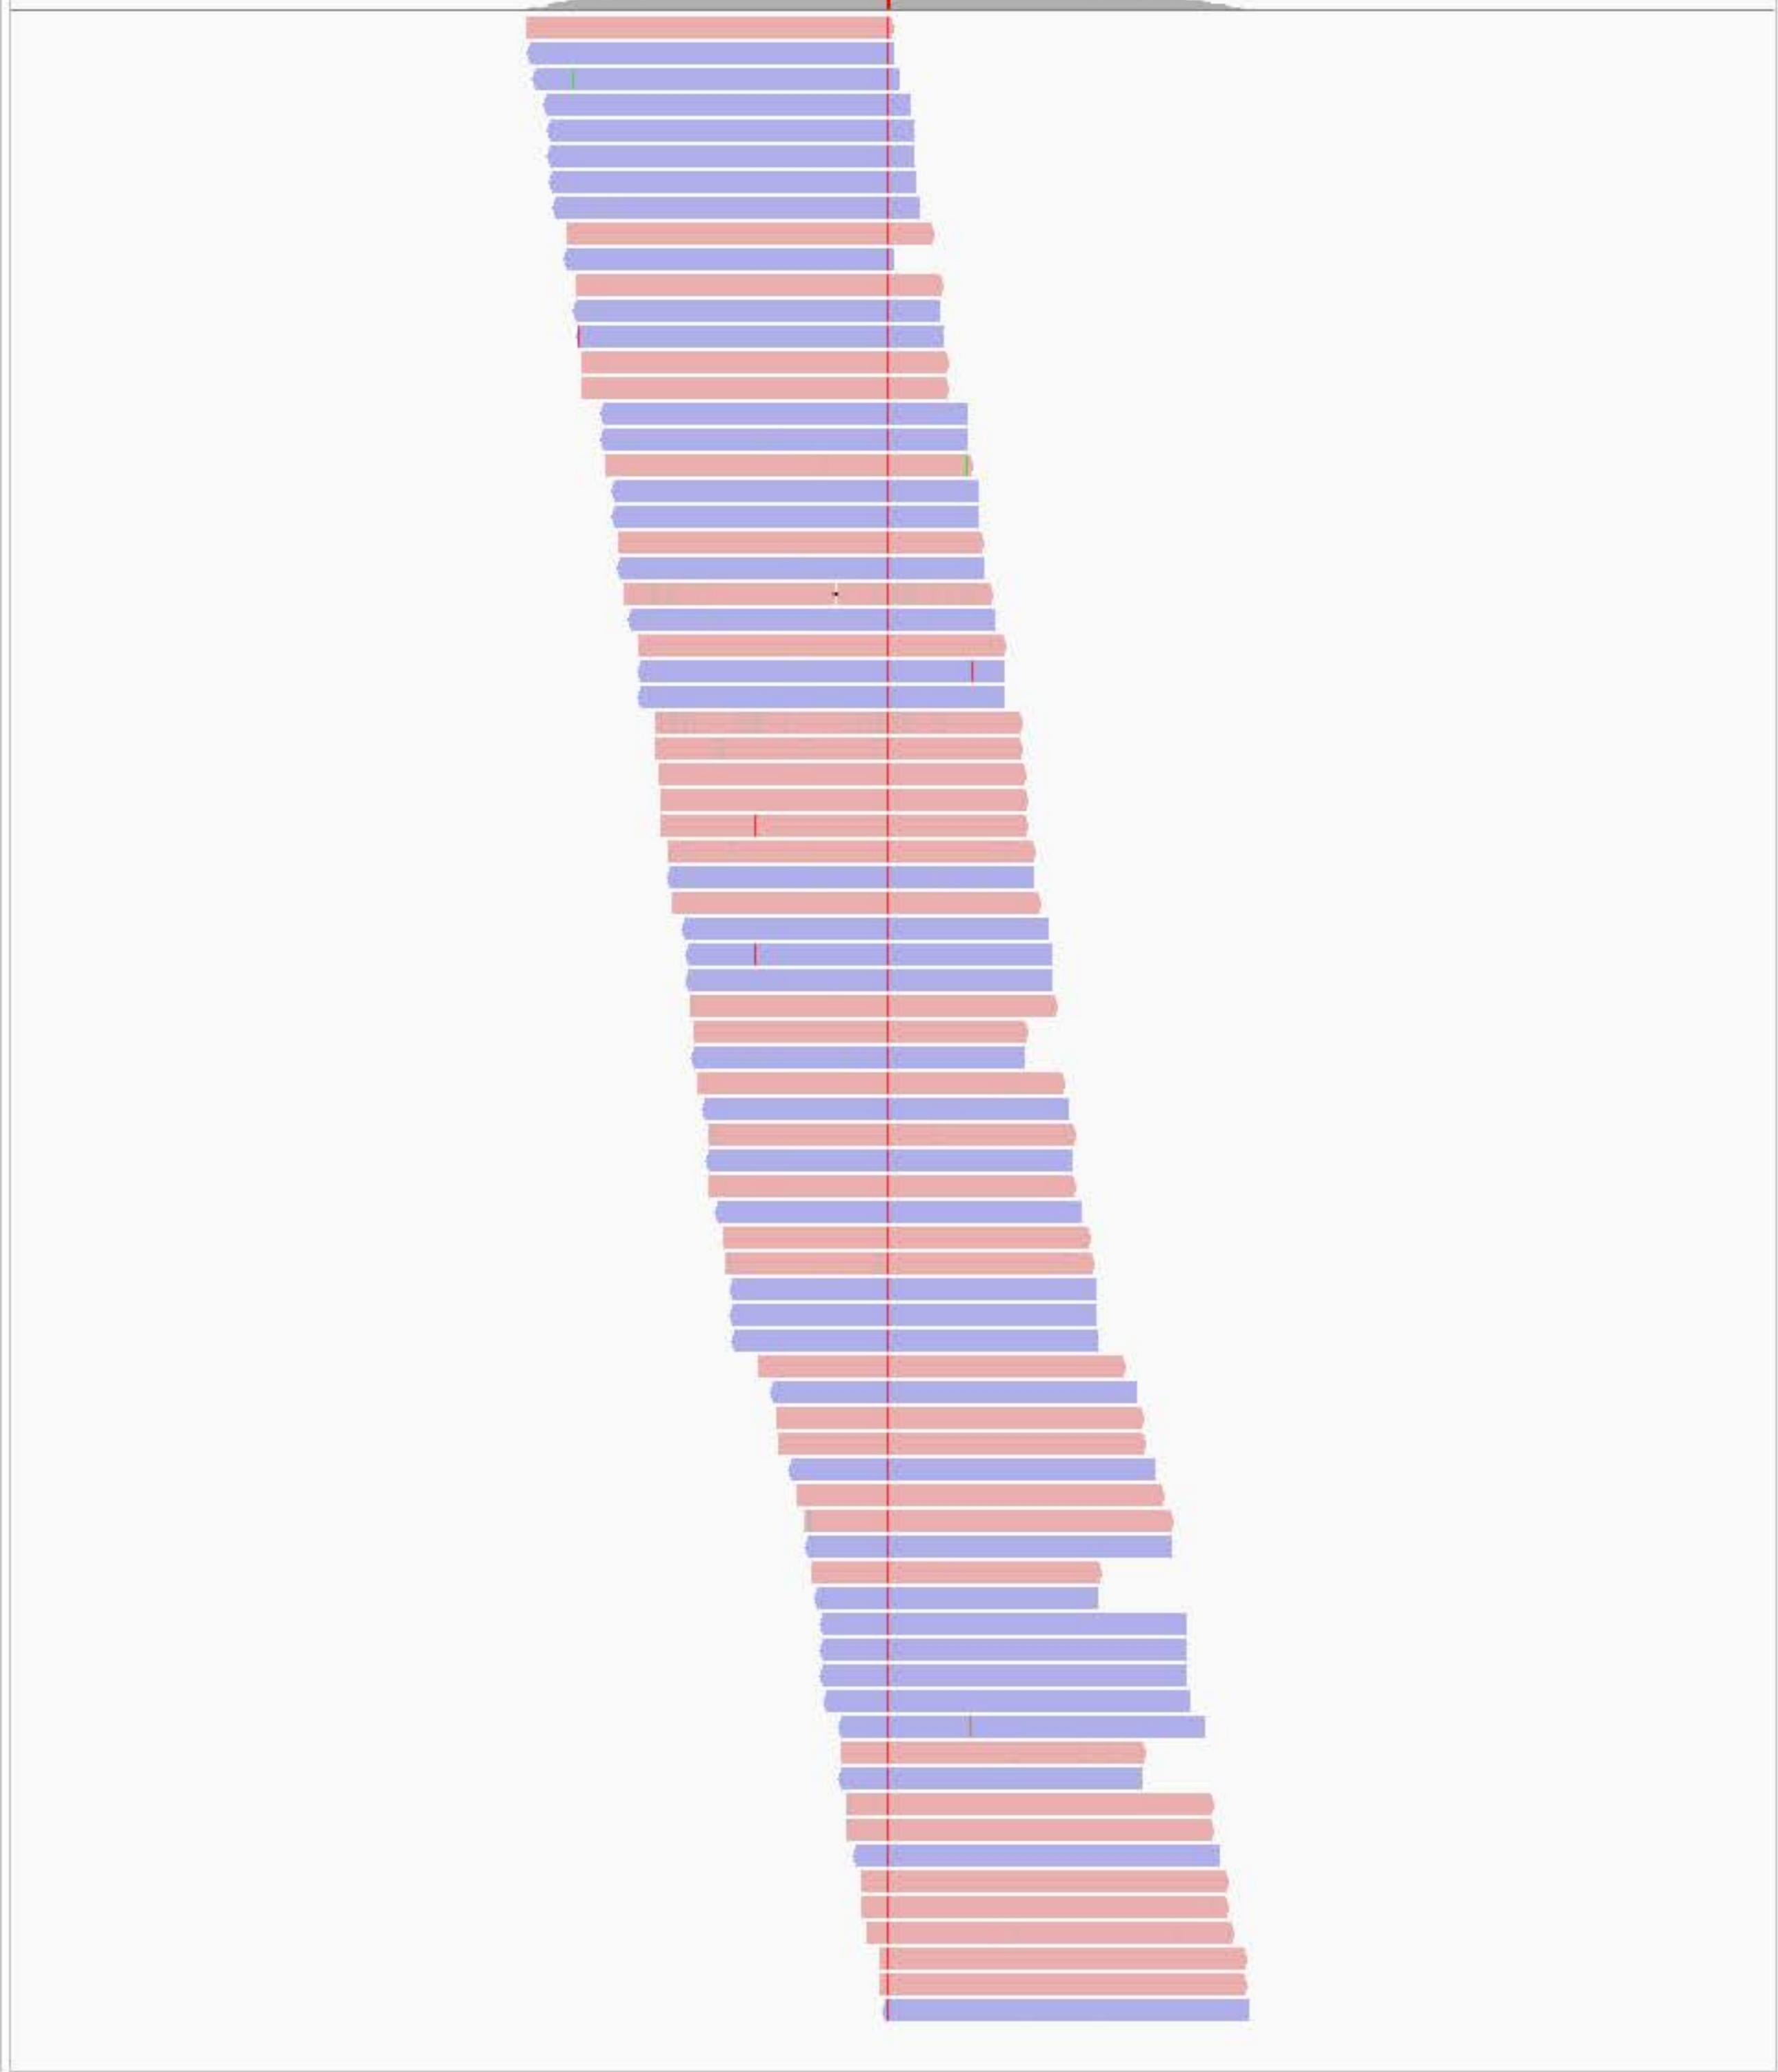

SL\_0013\_RT\_4-B\_mut.bam

Sequence

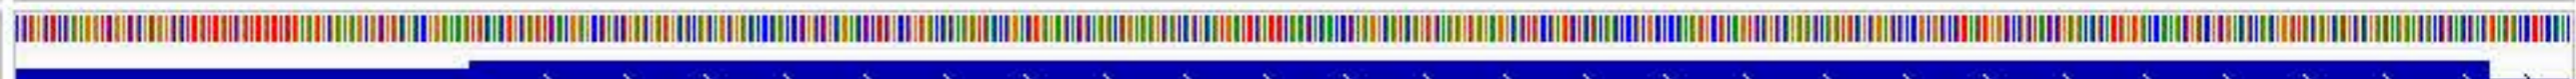

Refseq Genes

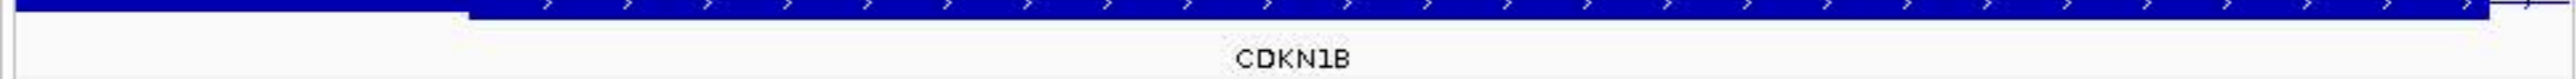

CDKN1B

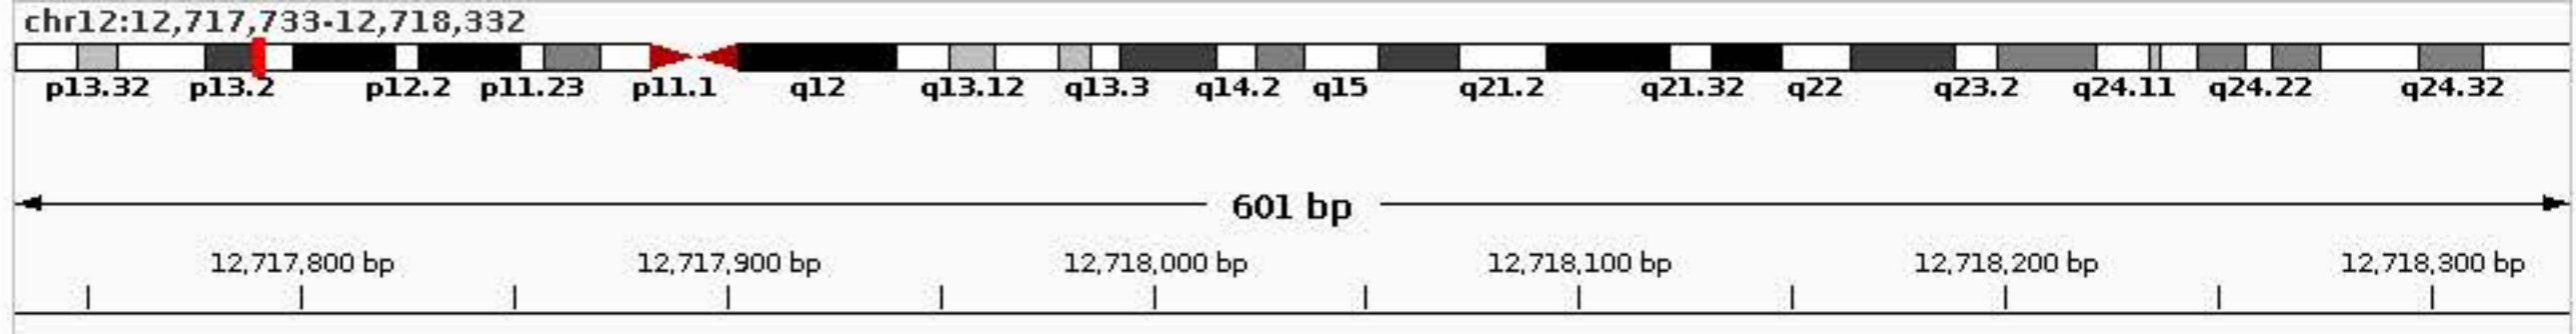

SL\_0013\_RT\_5-B\_mut.bam Cover.

SL\_0013\_RT\_5-B\_mut.bam

Sequence →

Refseq Genes

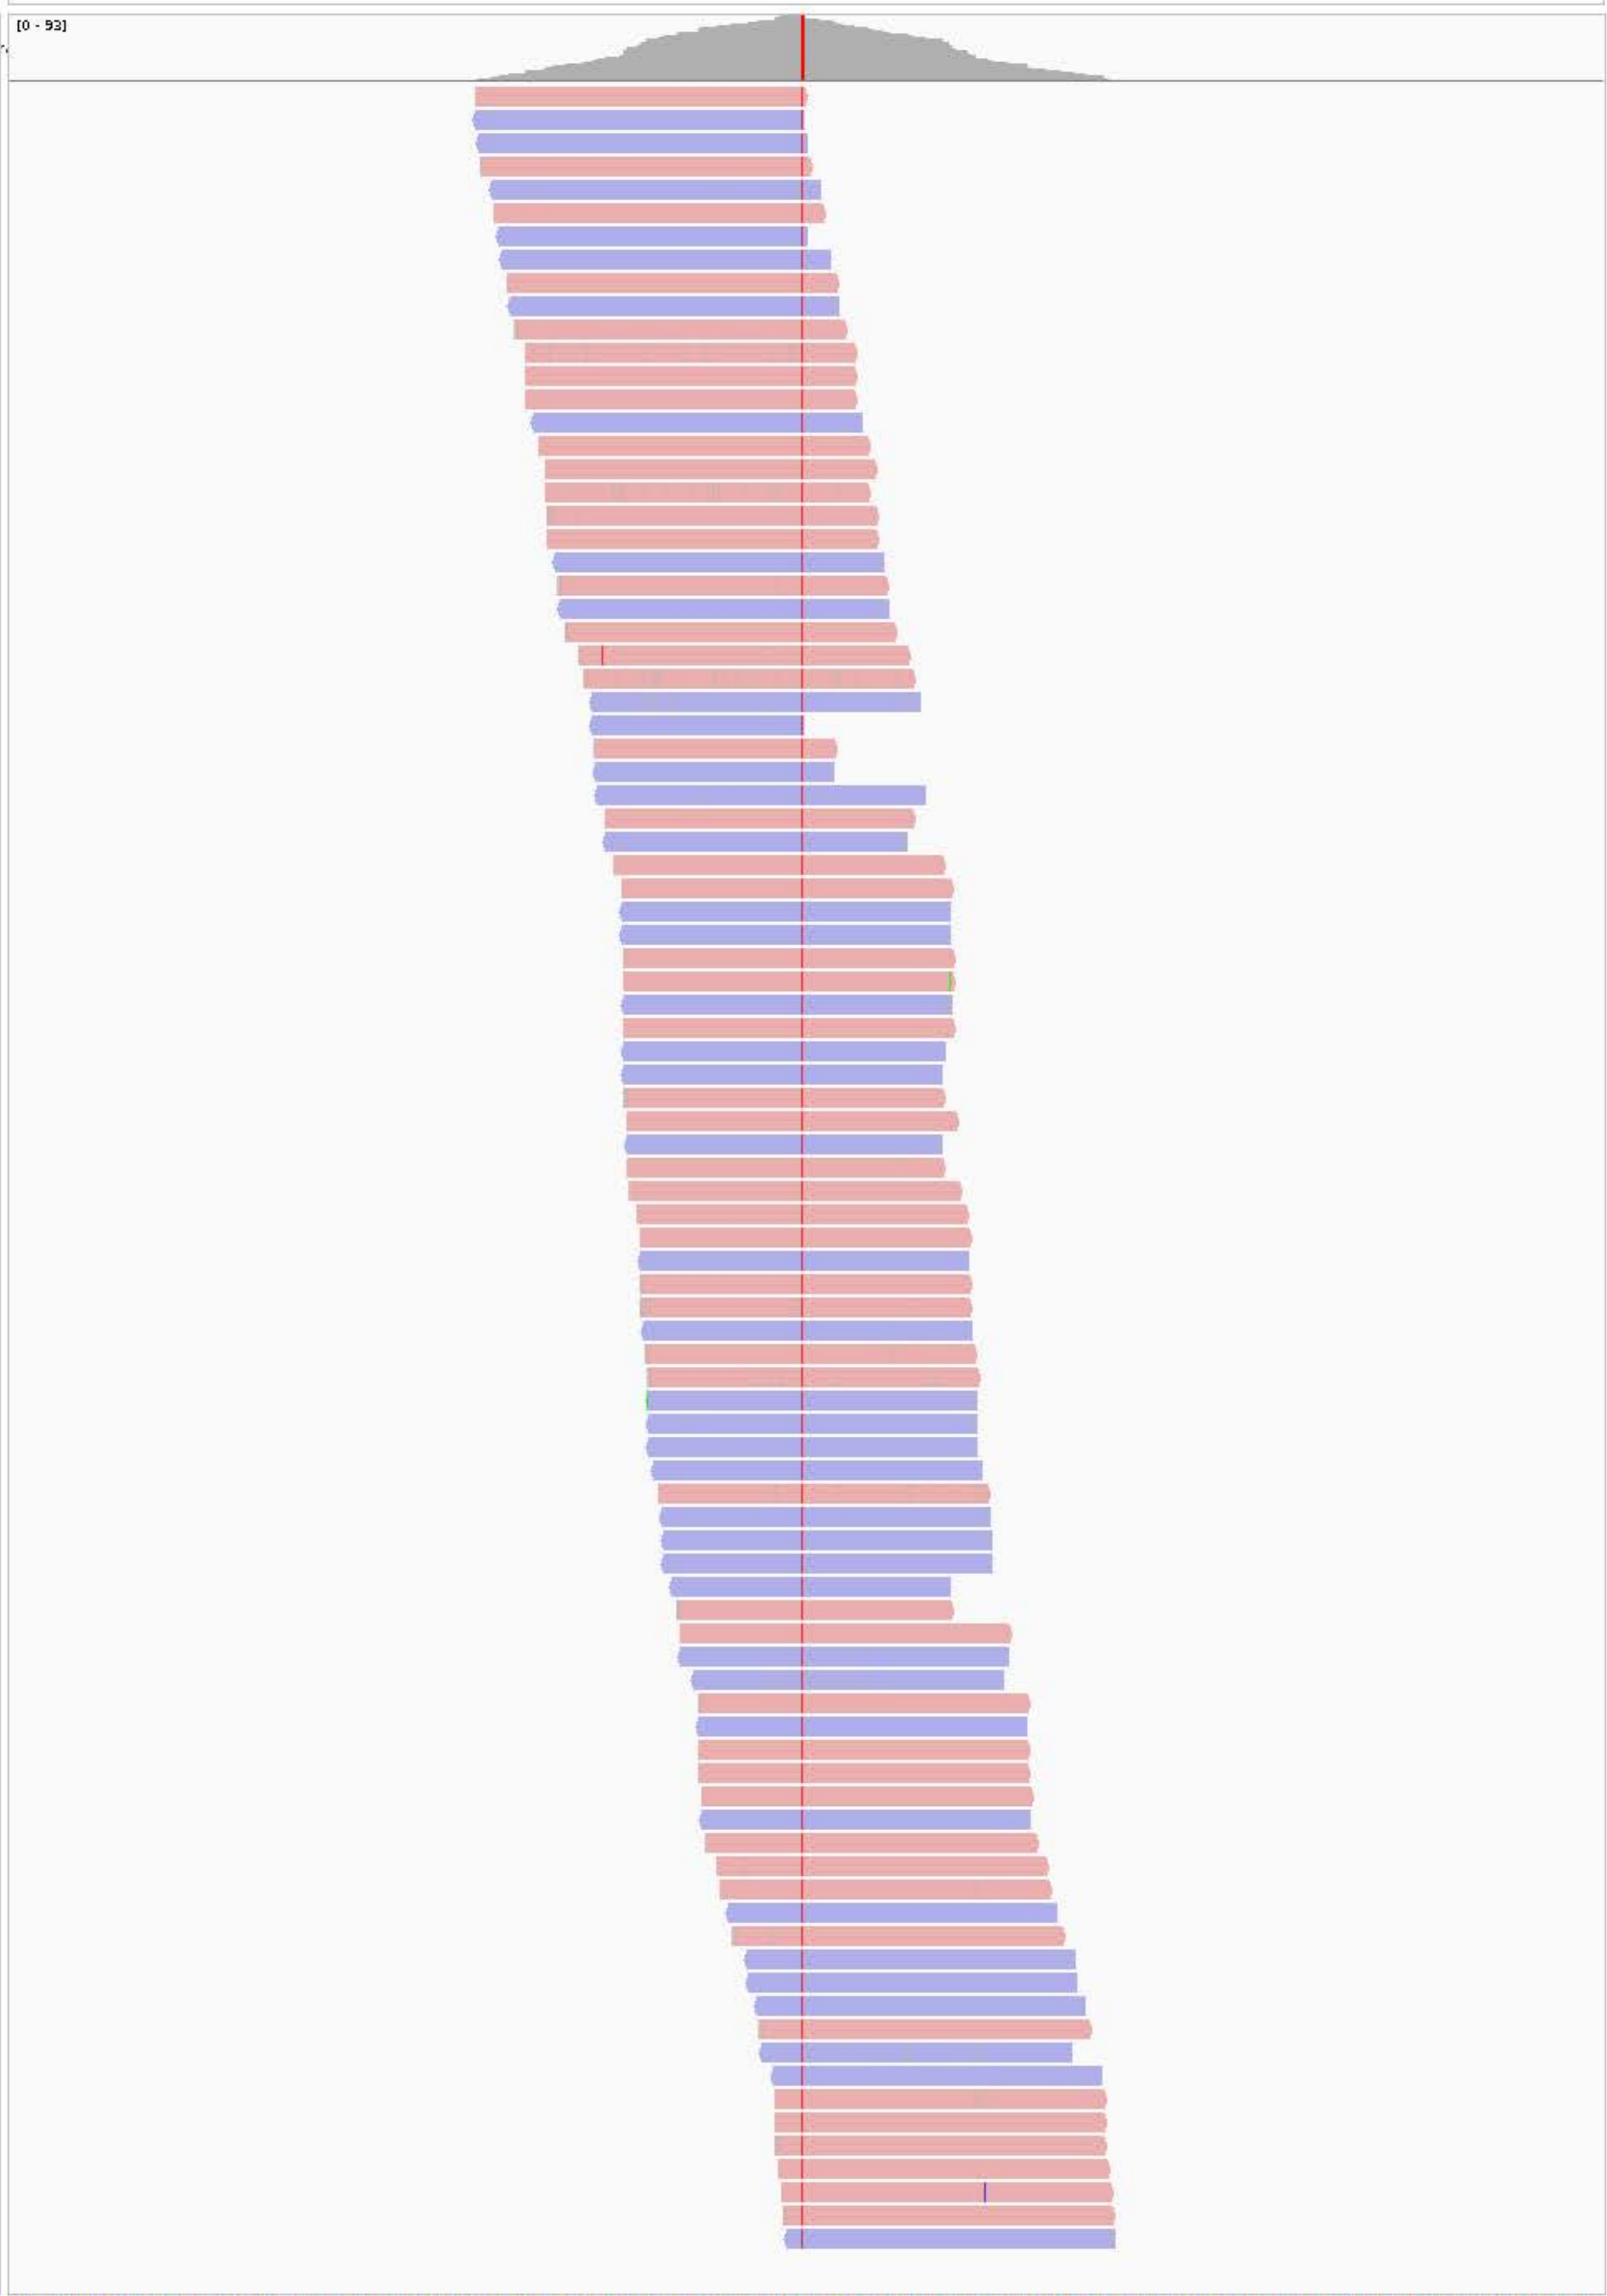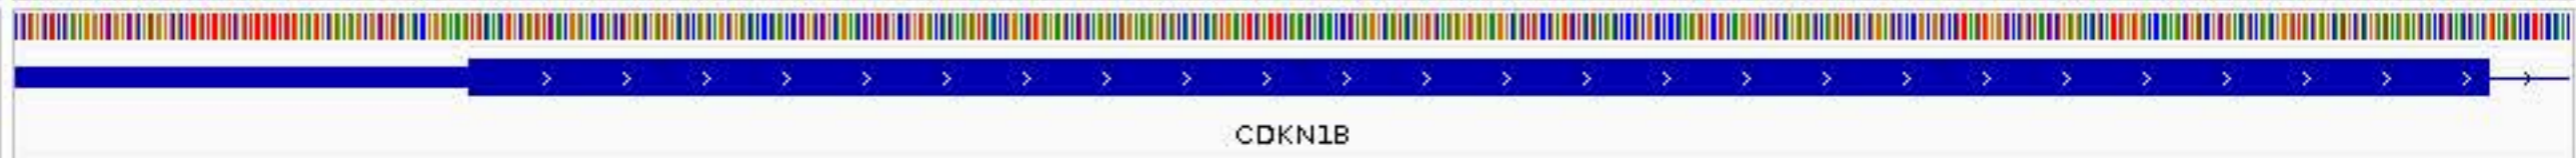



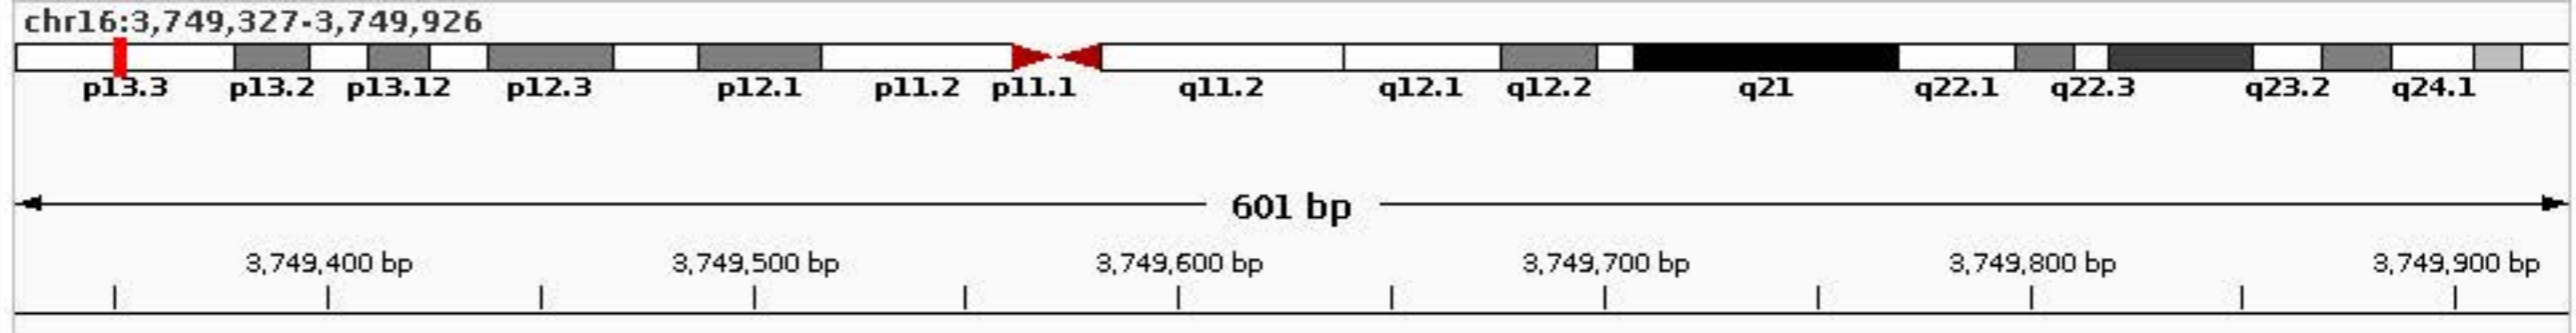

SL\_0001\_L\_FFPE\_10-B\_mut.barr  
rage

SL\_0001\_L\_FFPE\_10-B\_mut.ba  
m

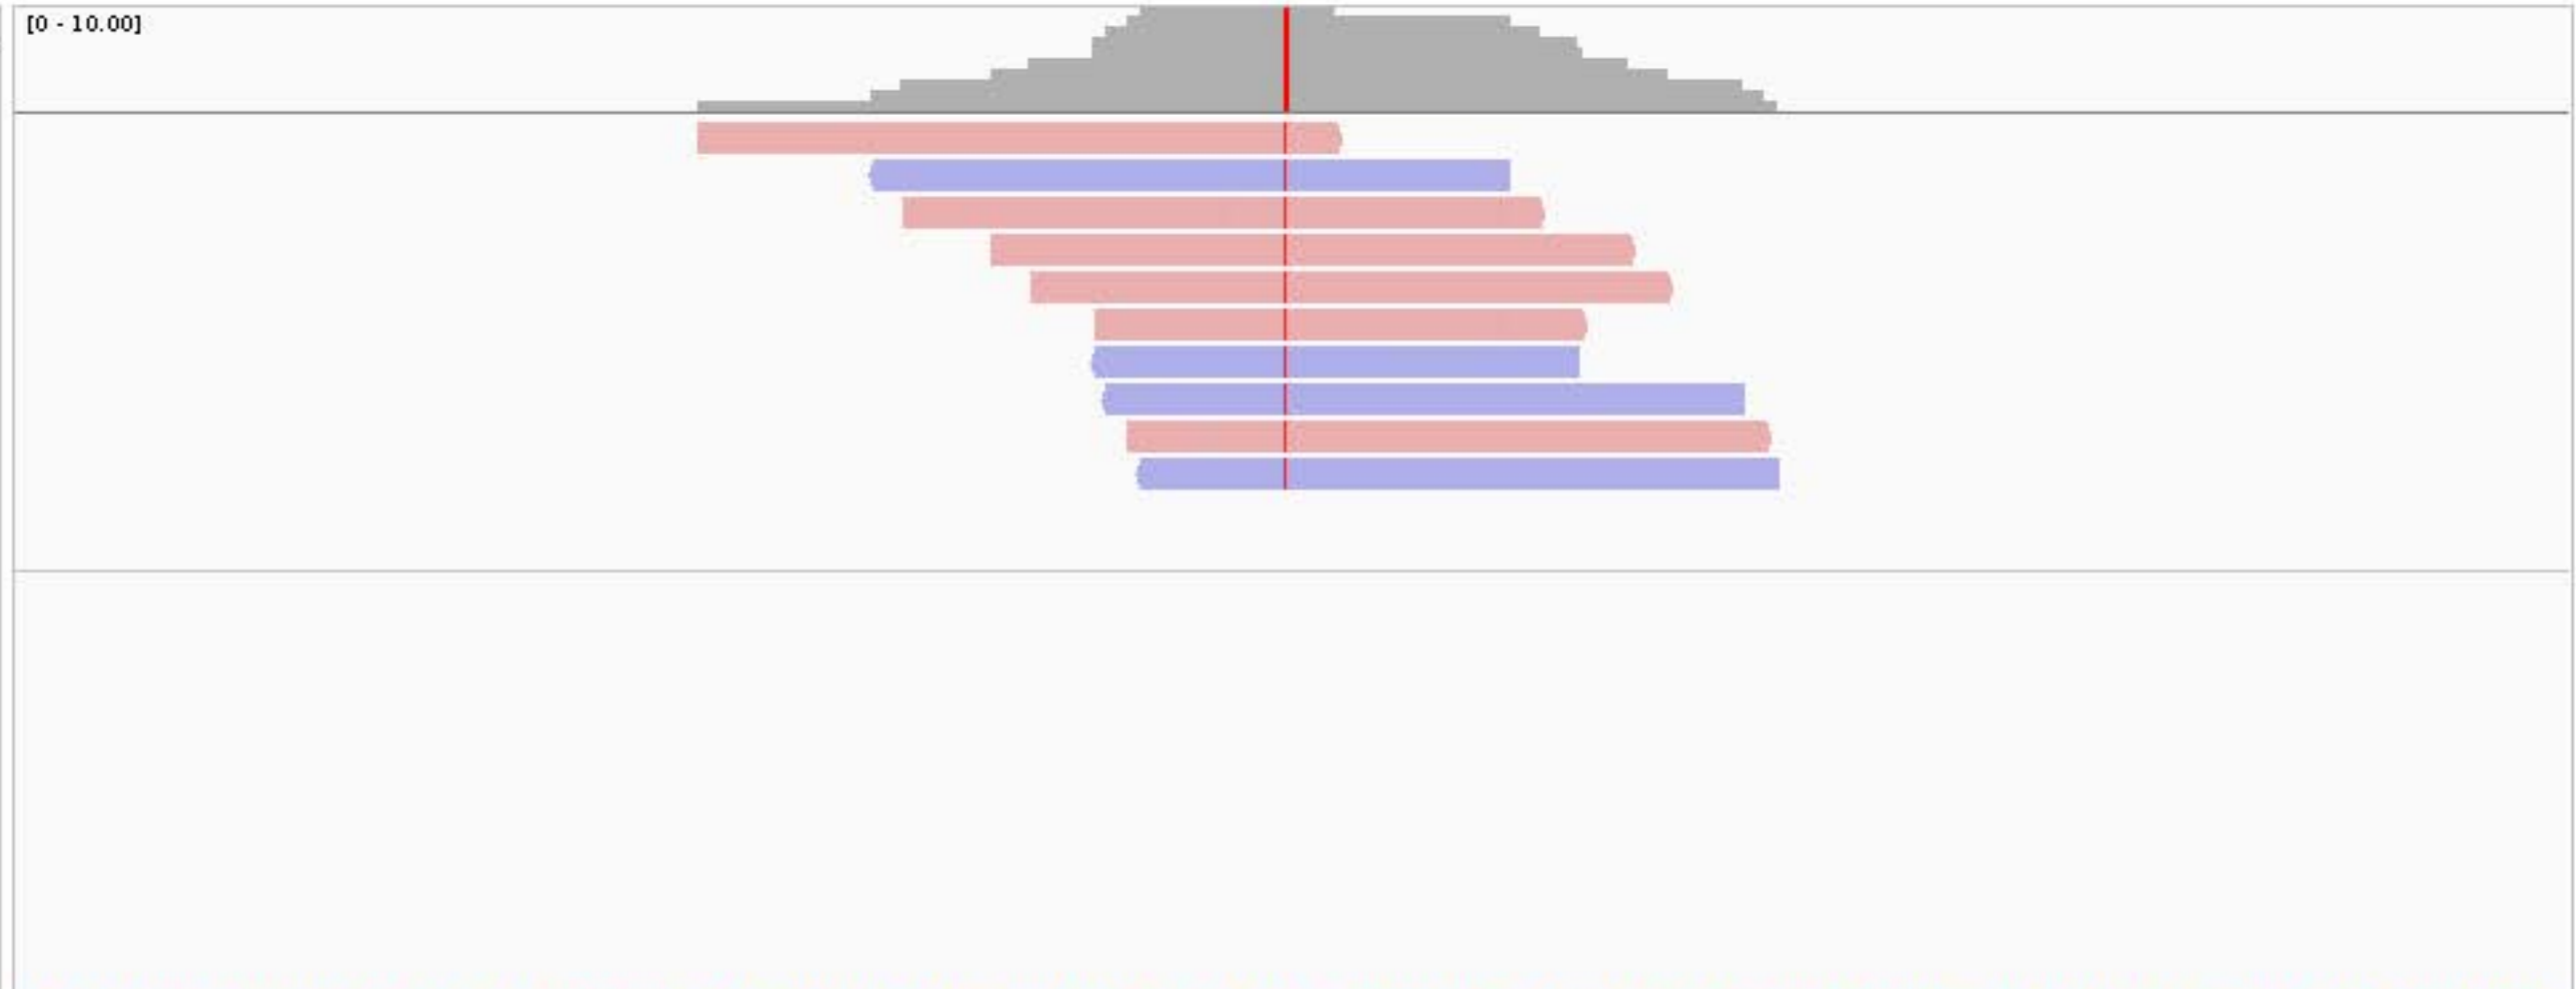

Sequence →

Refseq Genes

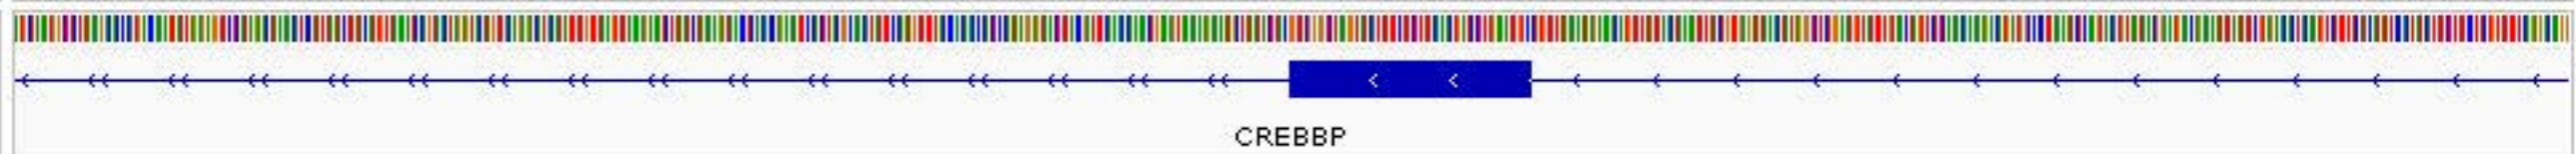

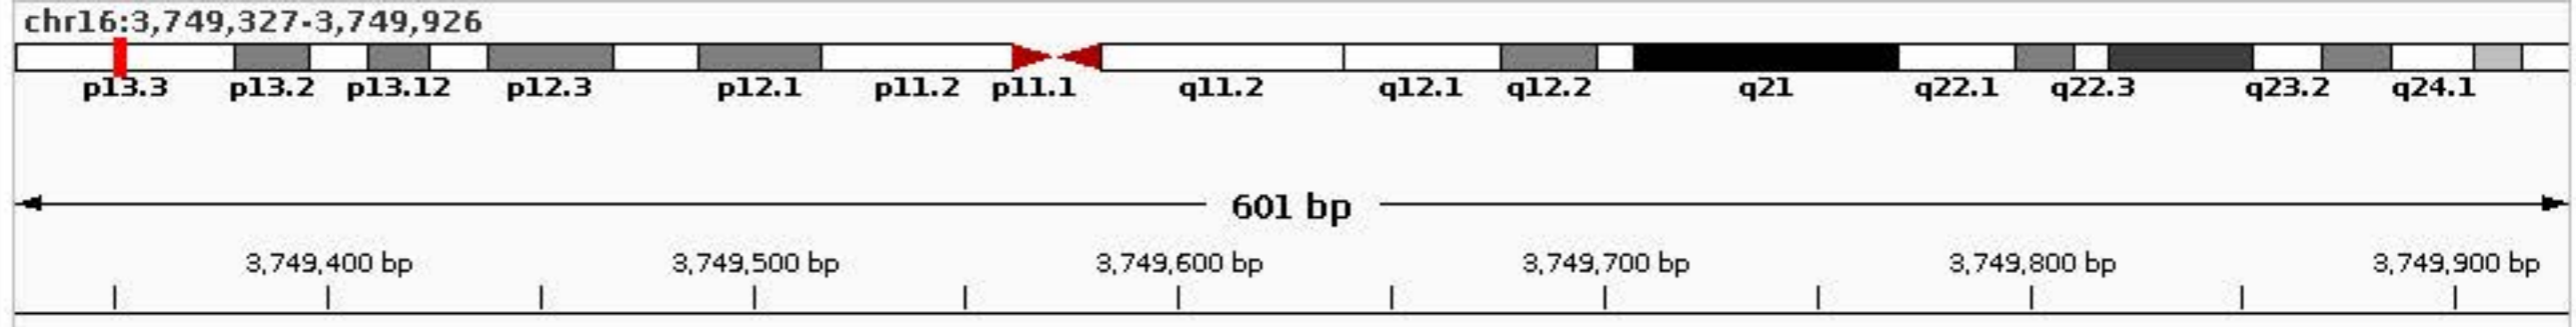

SL\_1007\_L\_FFPE\_21-B\_mut.barrage

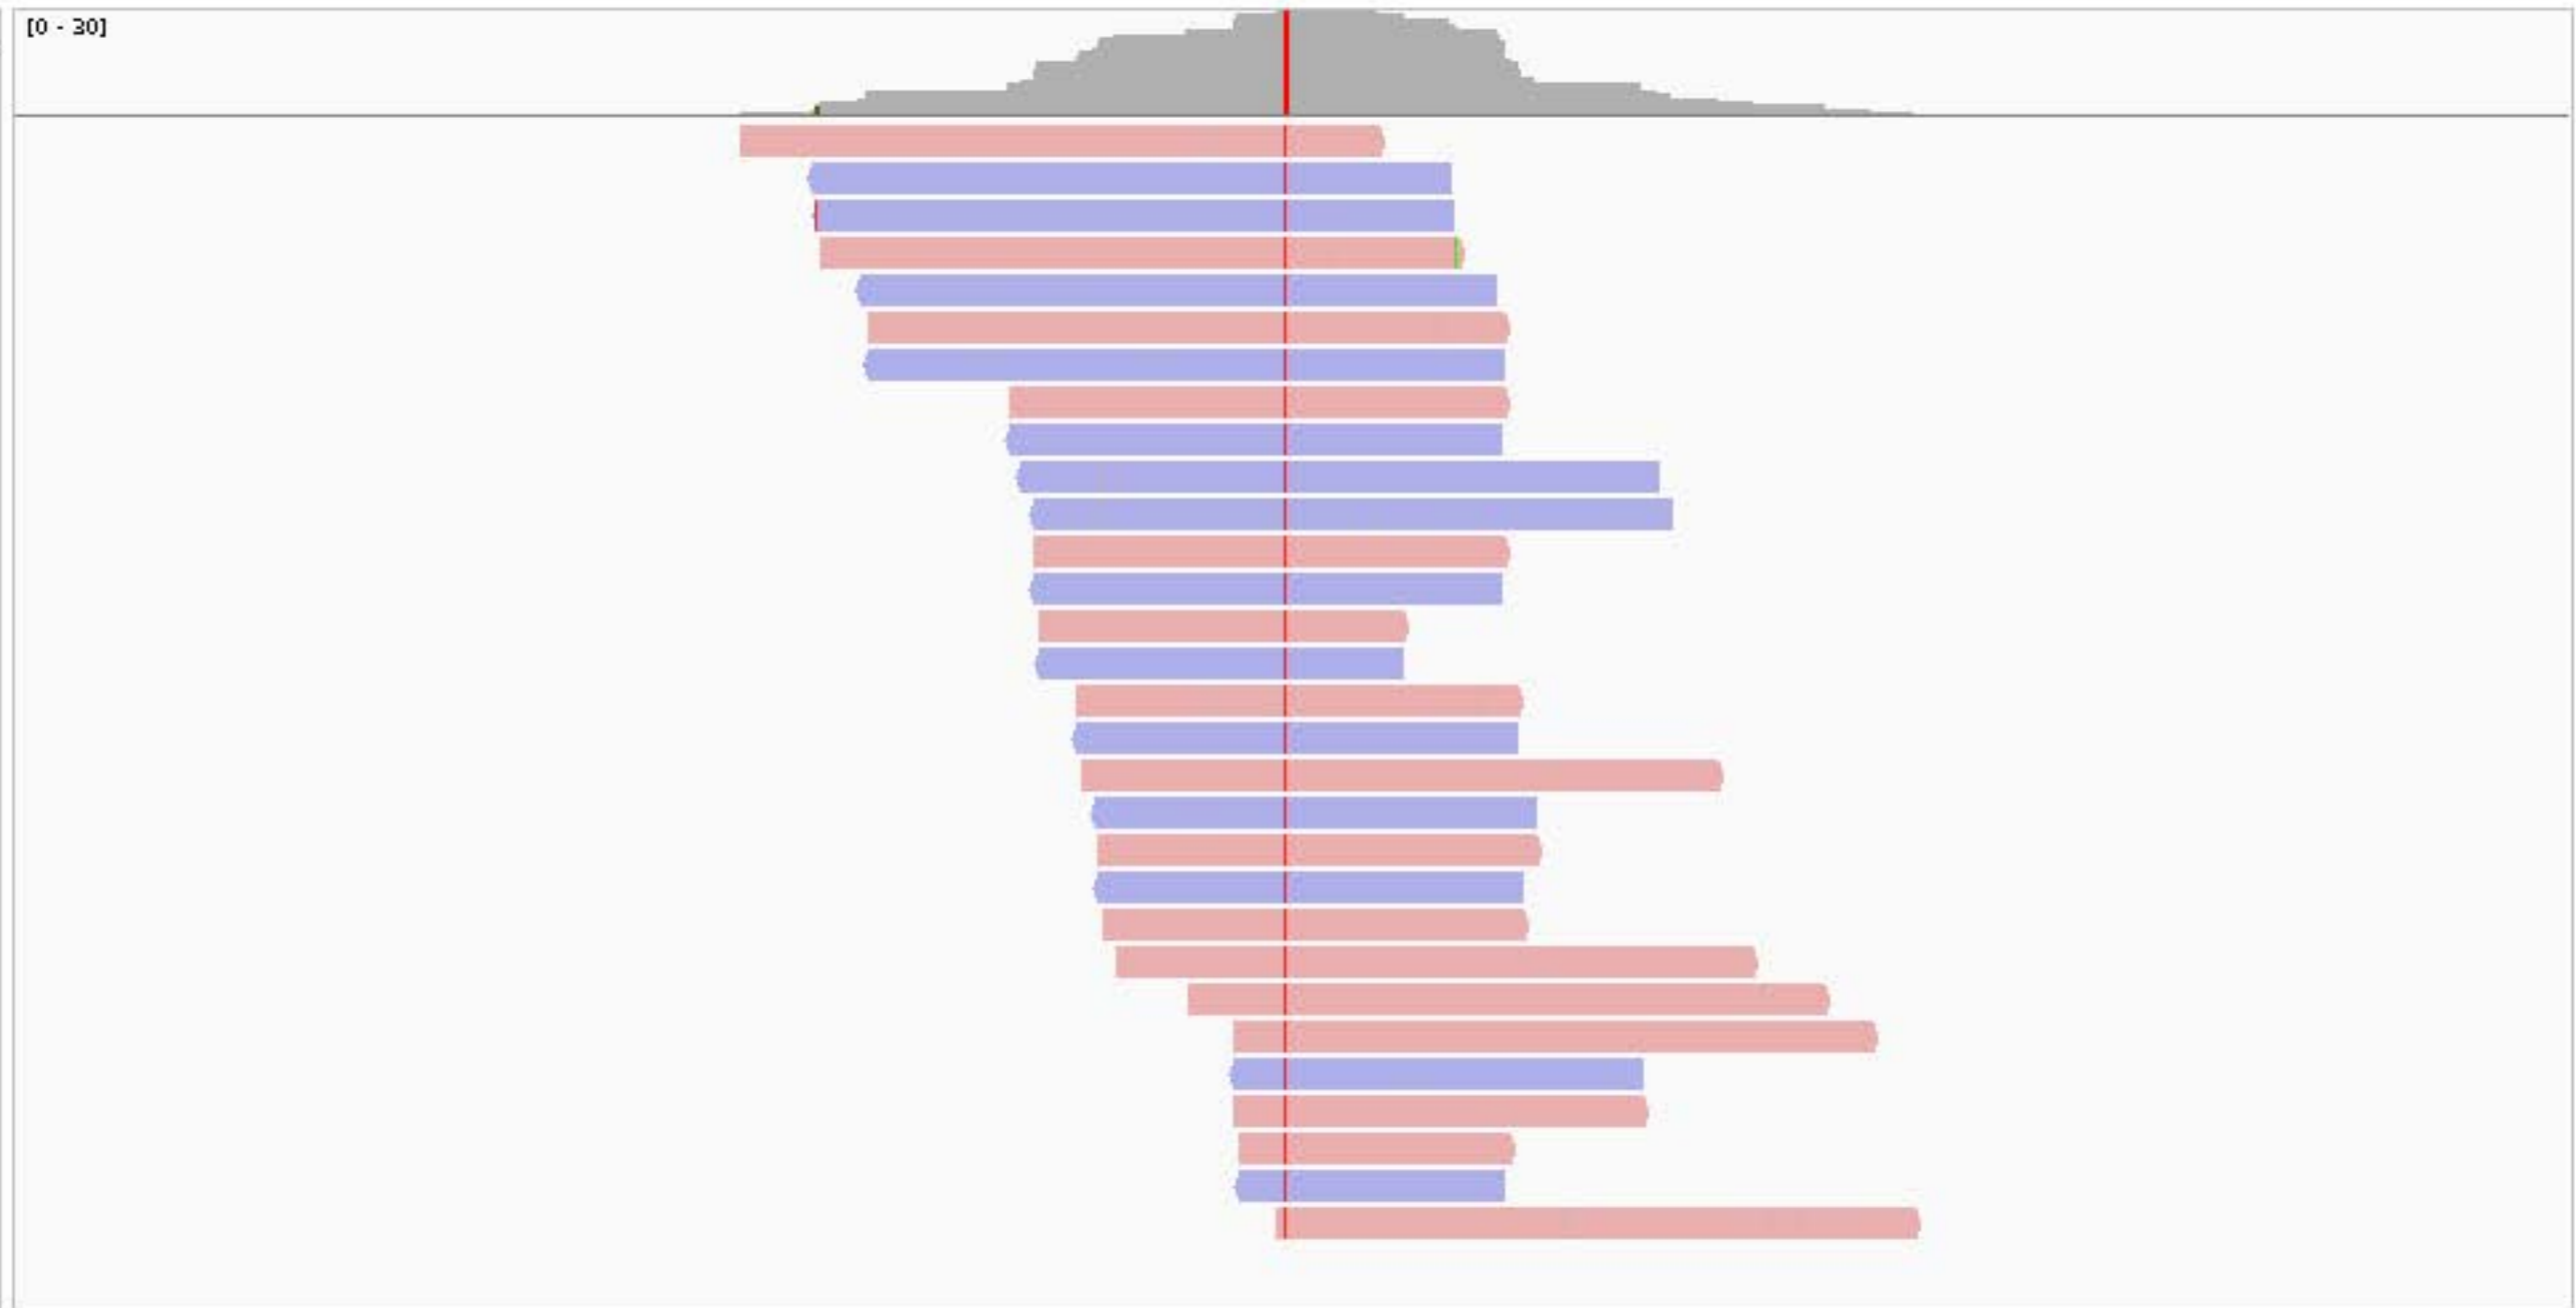

Sequence →

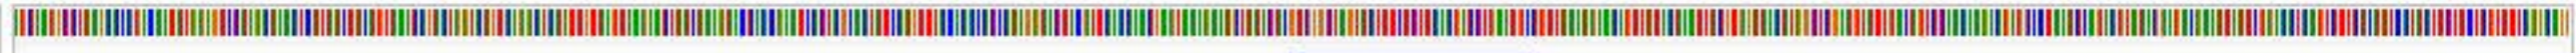

Refseq Genes

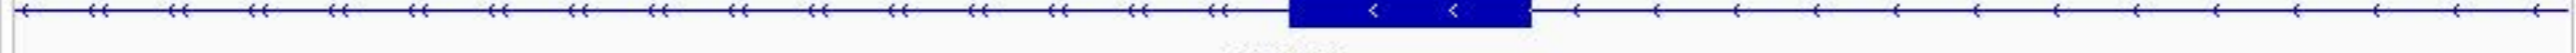

CREBBP



SL\_1010\_L\_FFPE\_3-B\_mut.bam  
age

SL\_1010\_L\_FFPE\_3-B\_mut.bam

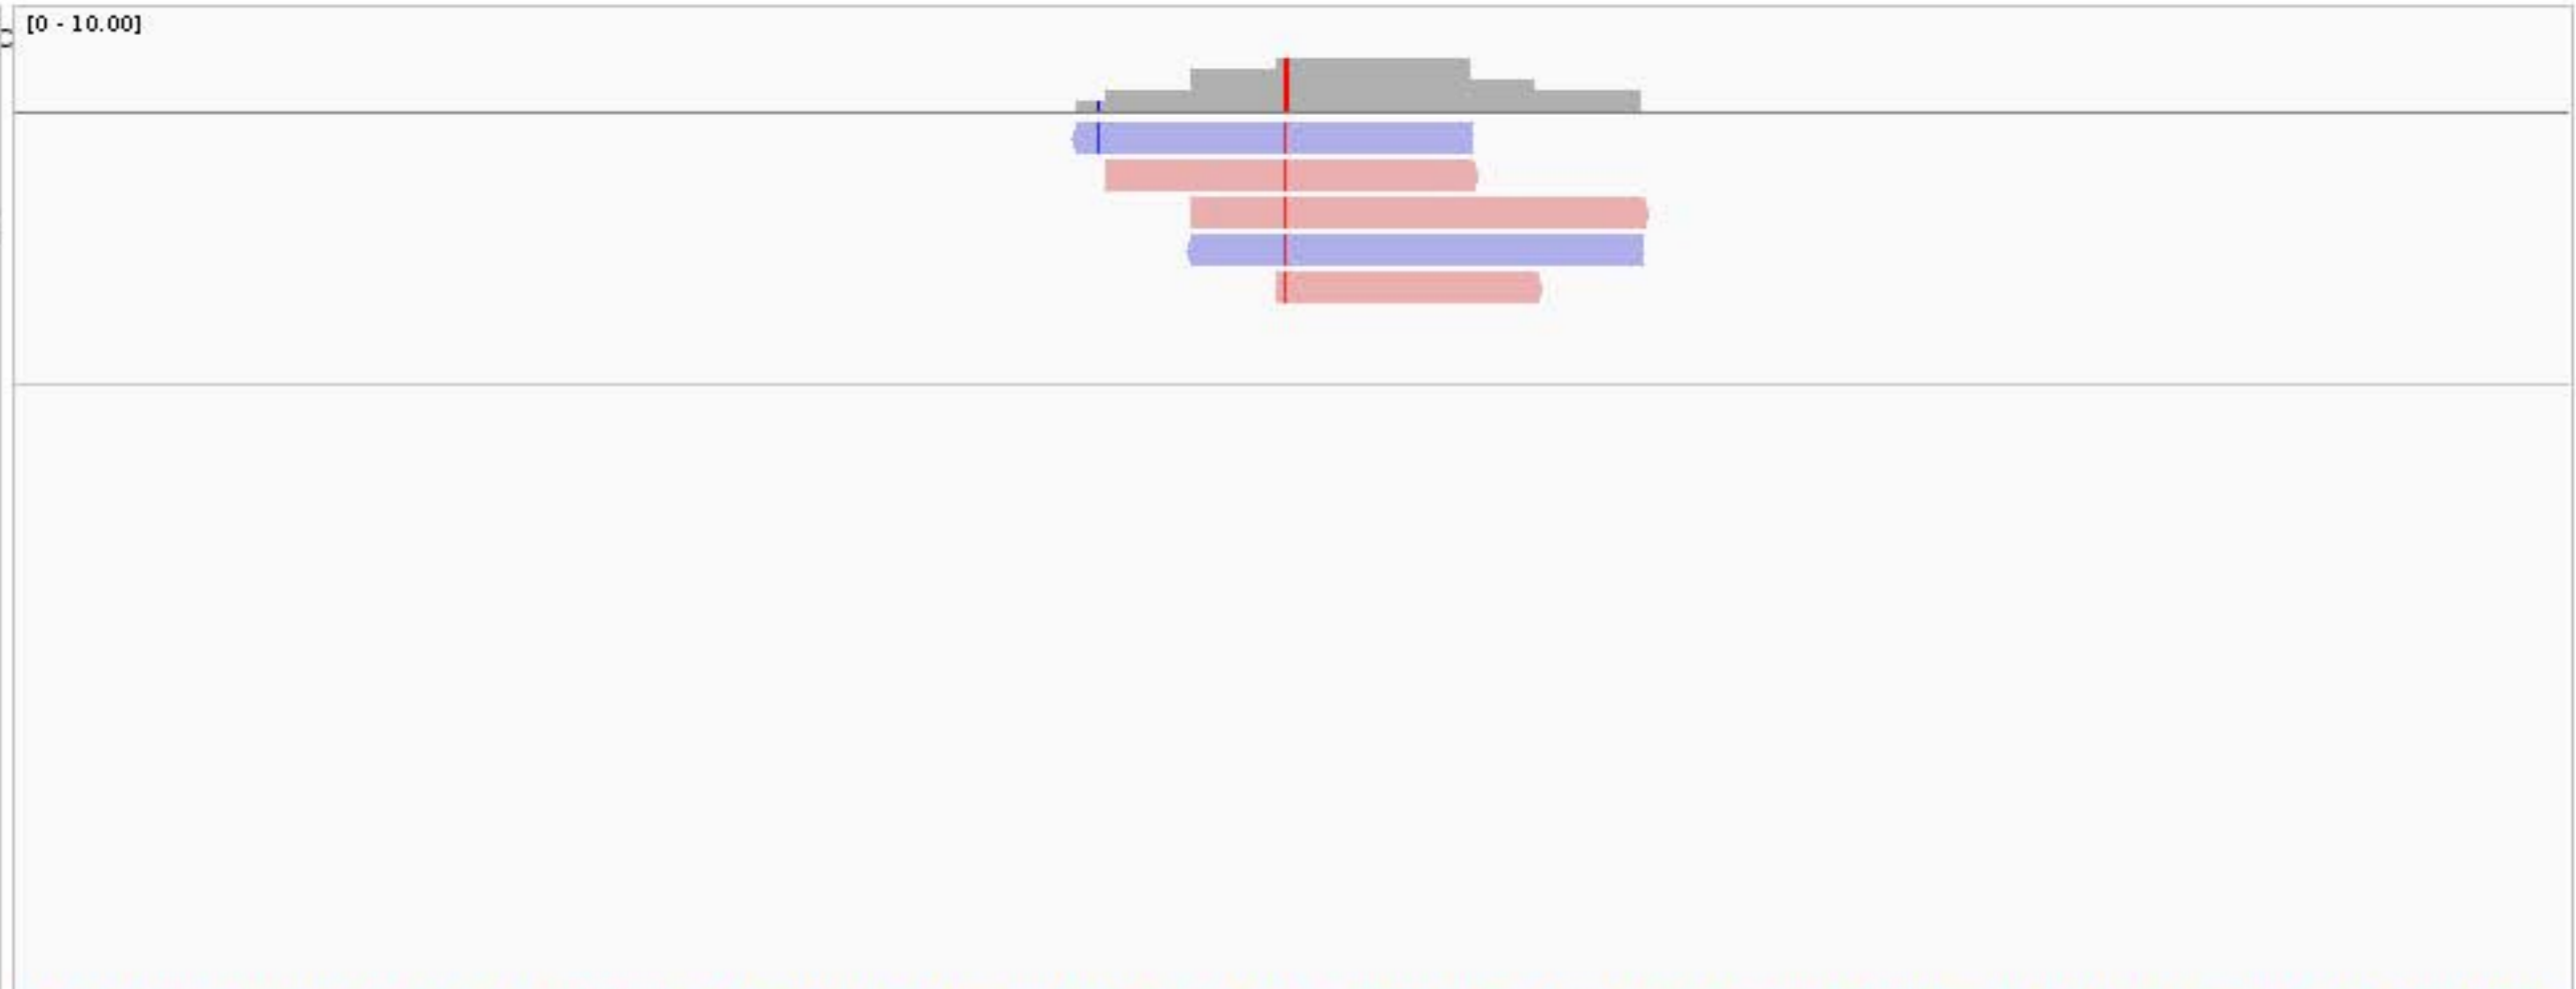

Sequence →

Refseq Genes





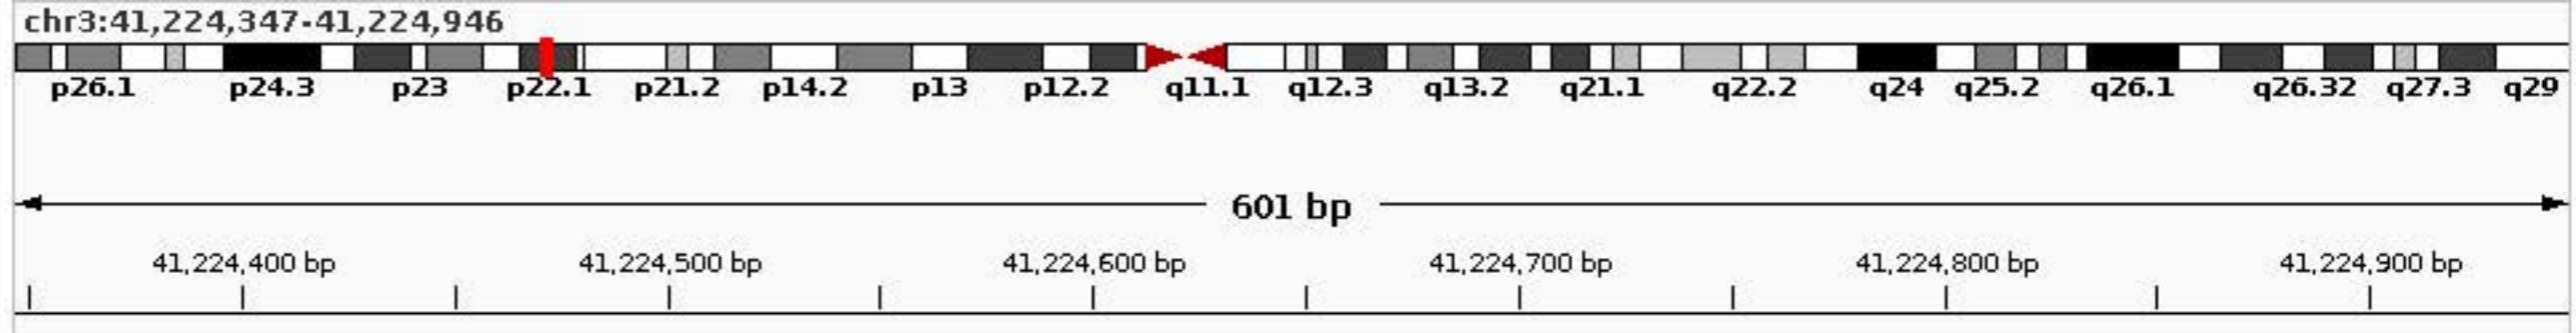

SL\_0005\_L\_FFPE\_21-B\_mut.bam  
range

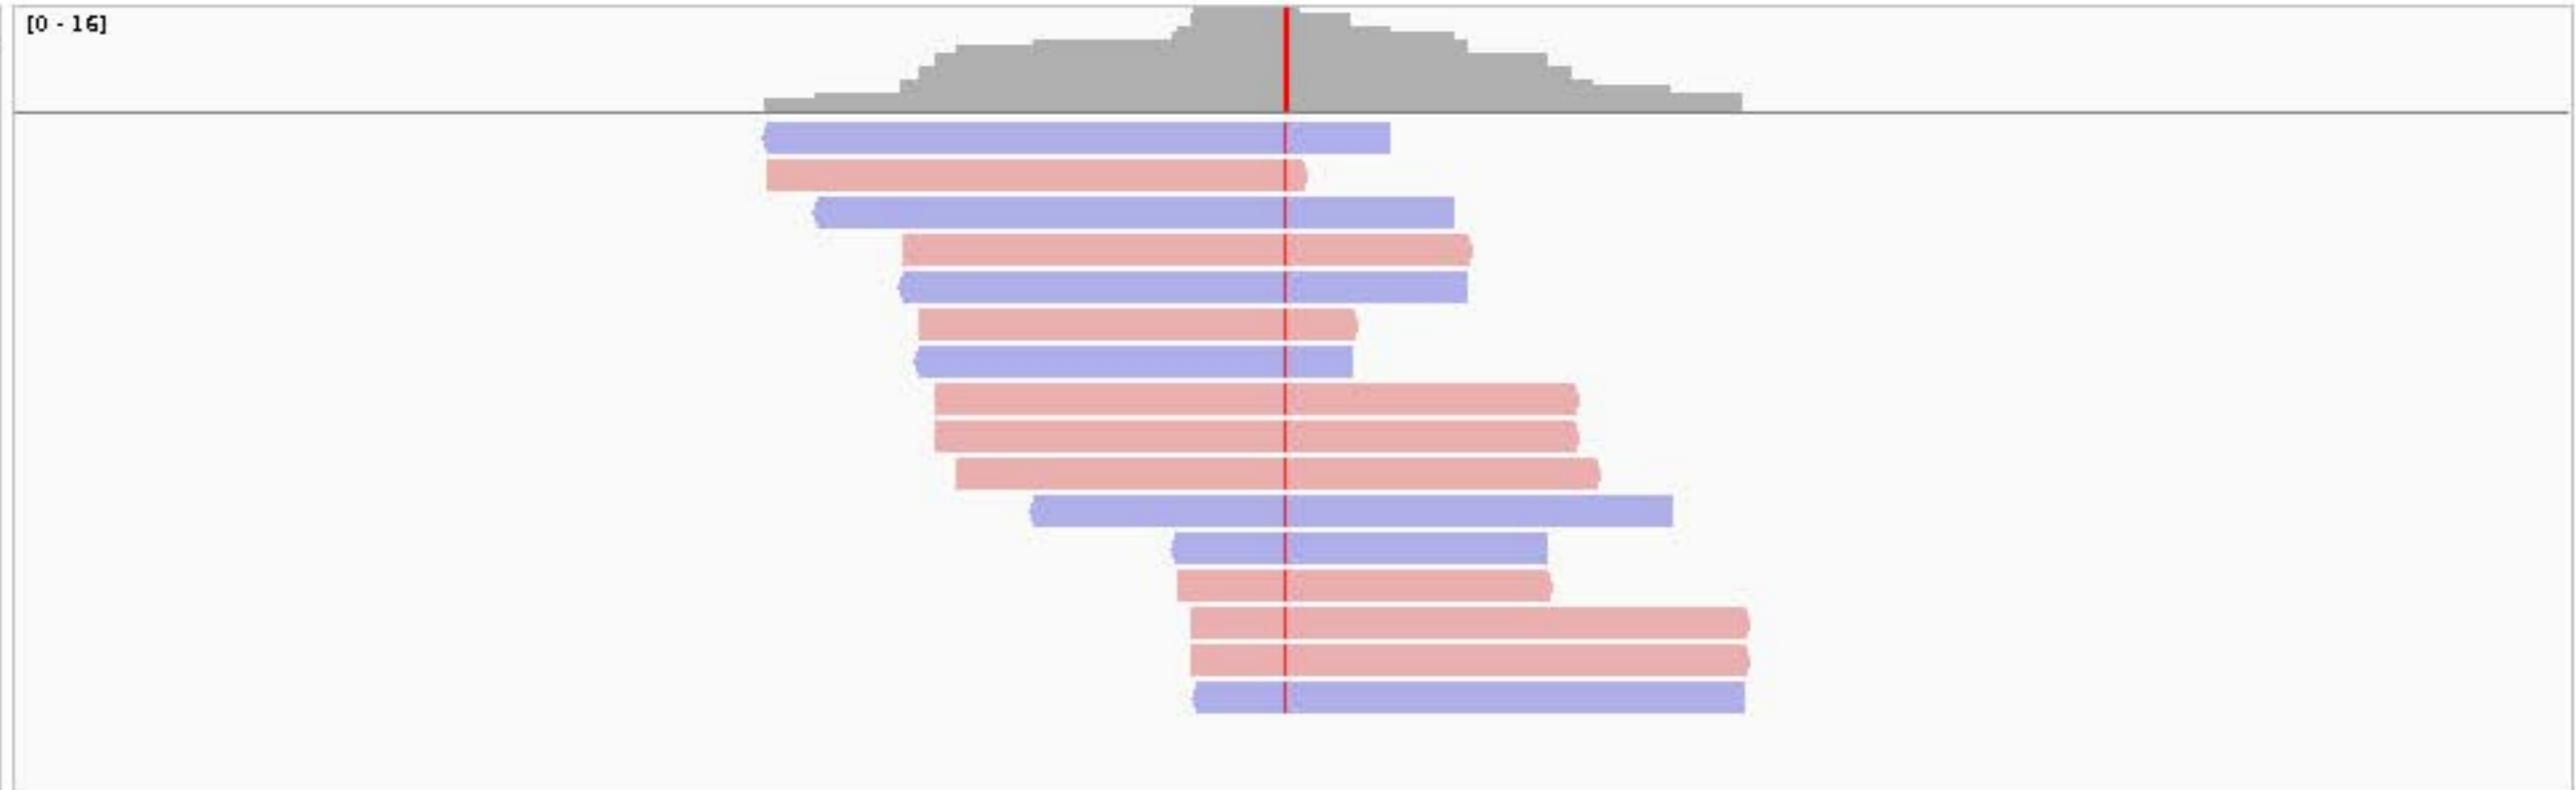

SL\_0005\_L\_FFPE\_21-B\_mut.bam

Sequence →  
Refseq Genes

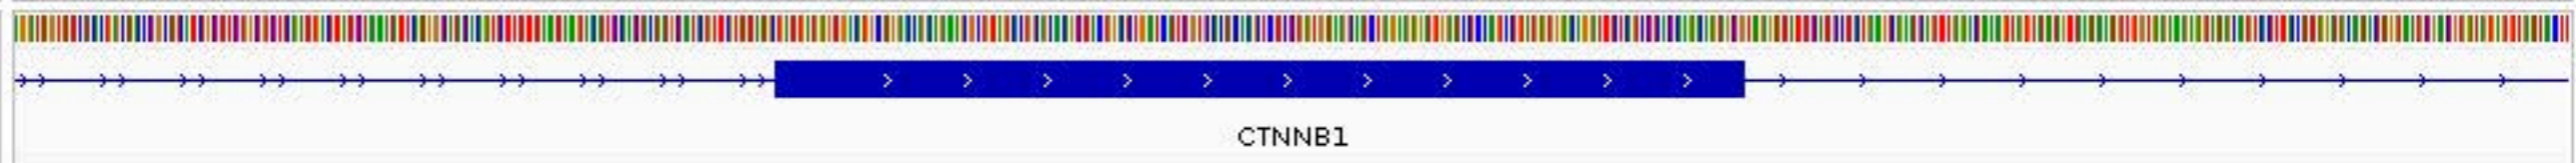

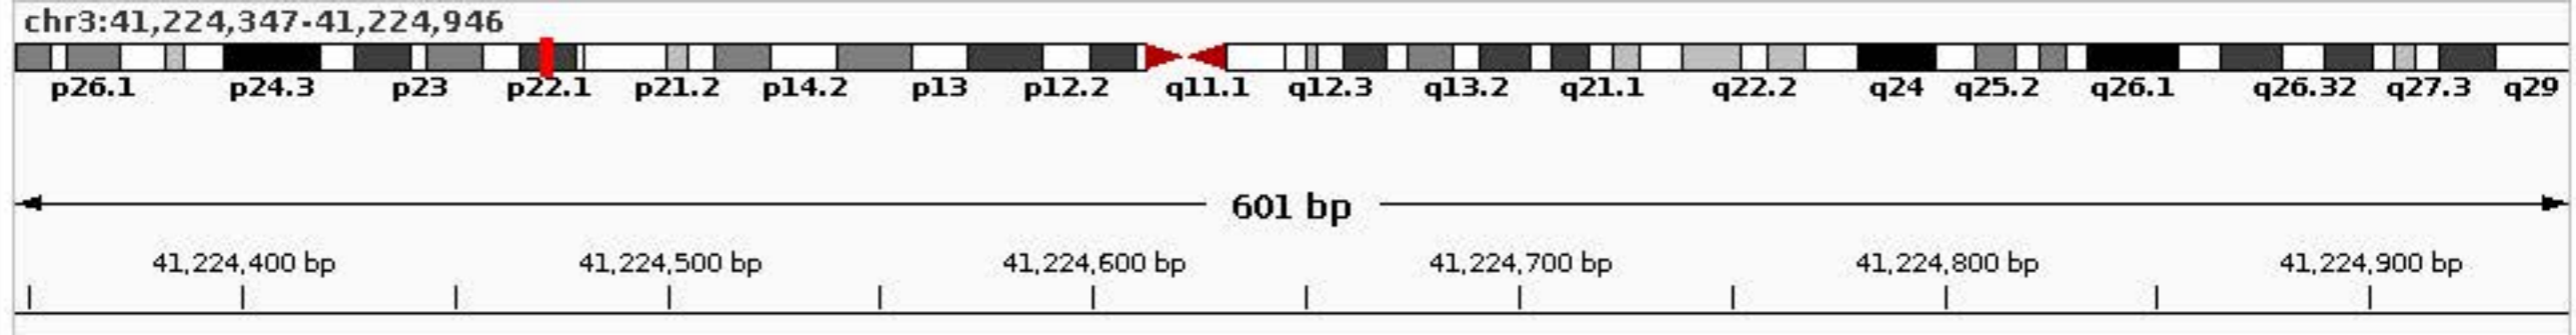

SL\_1010-N2-B\_mut.bam Coverage

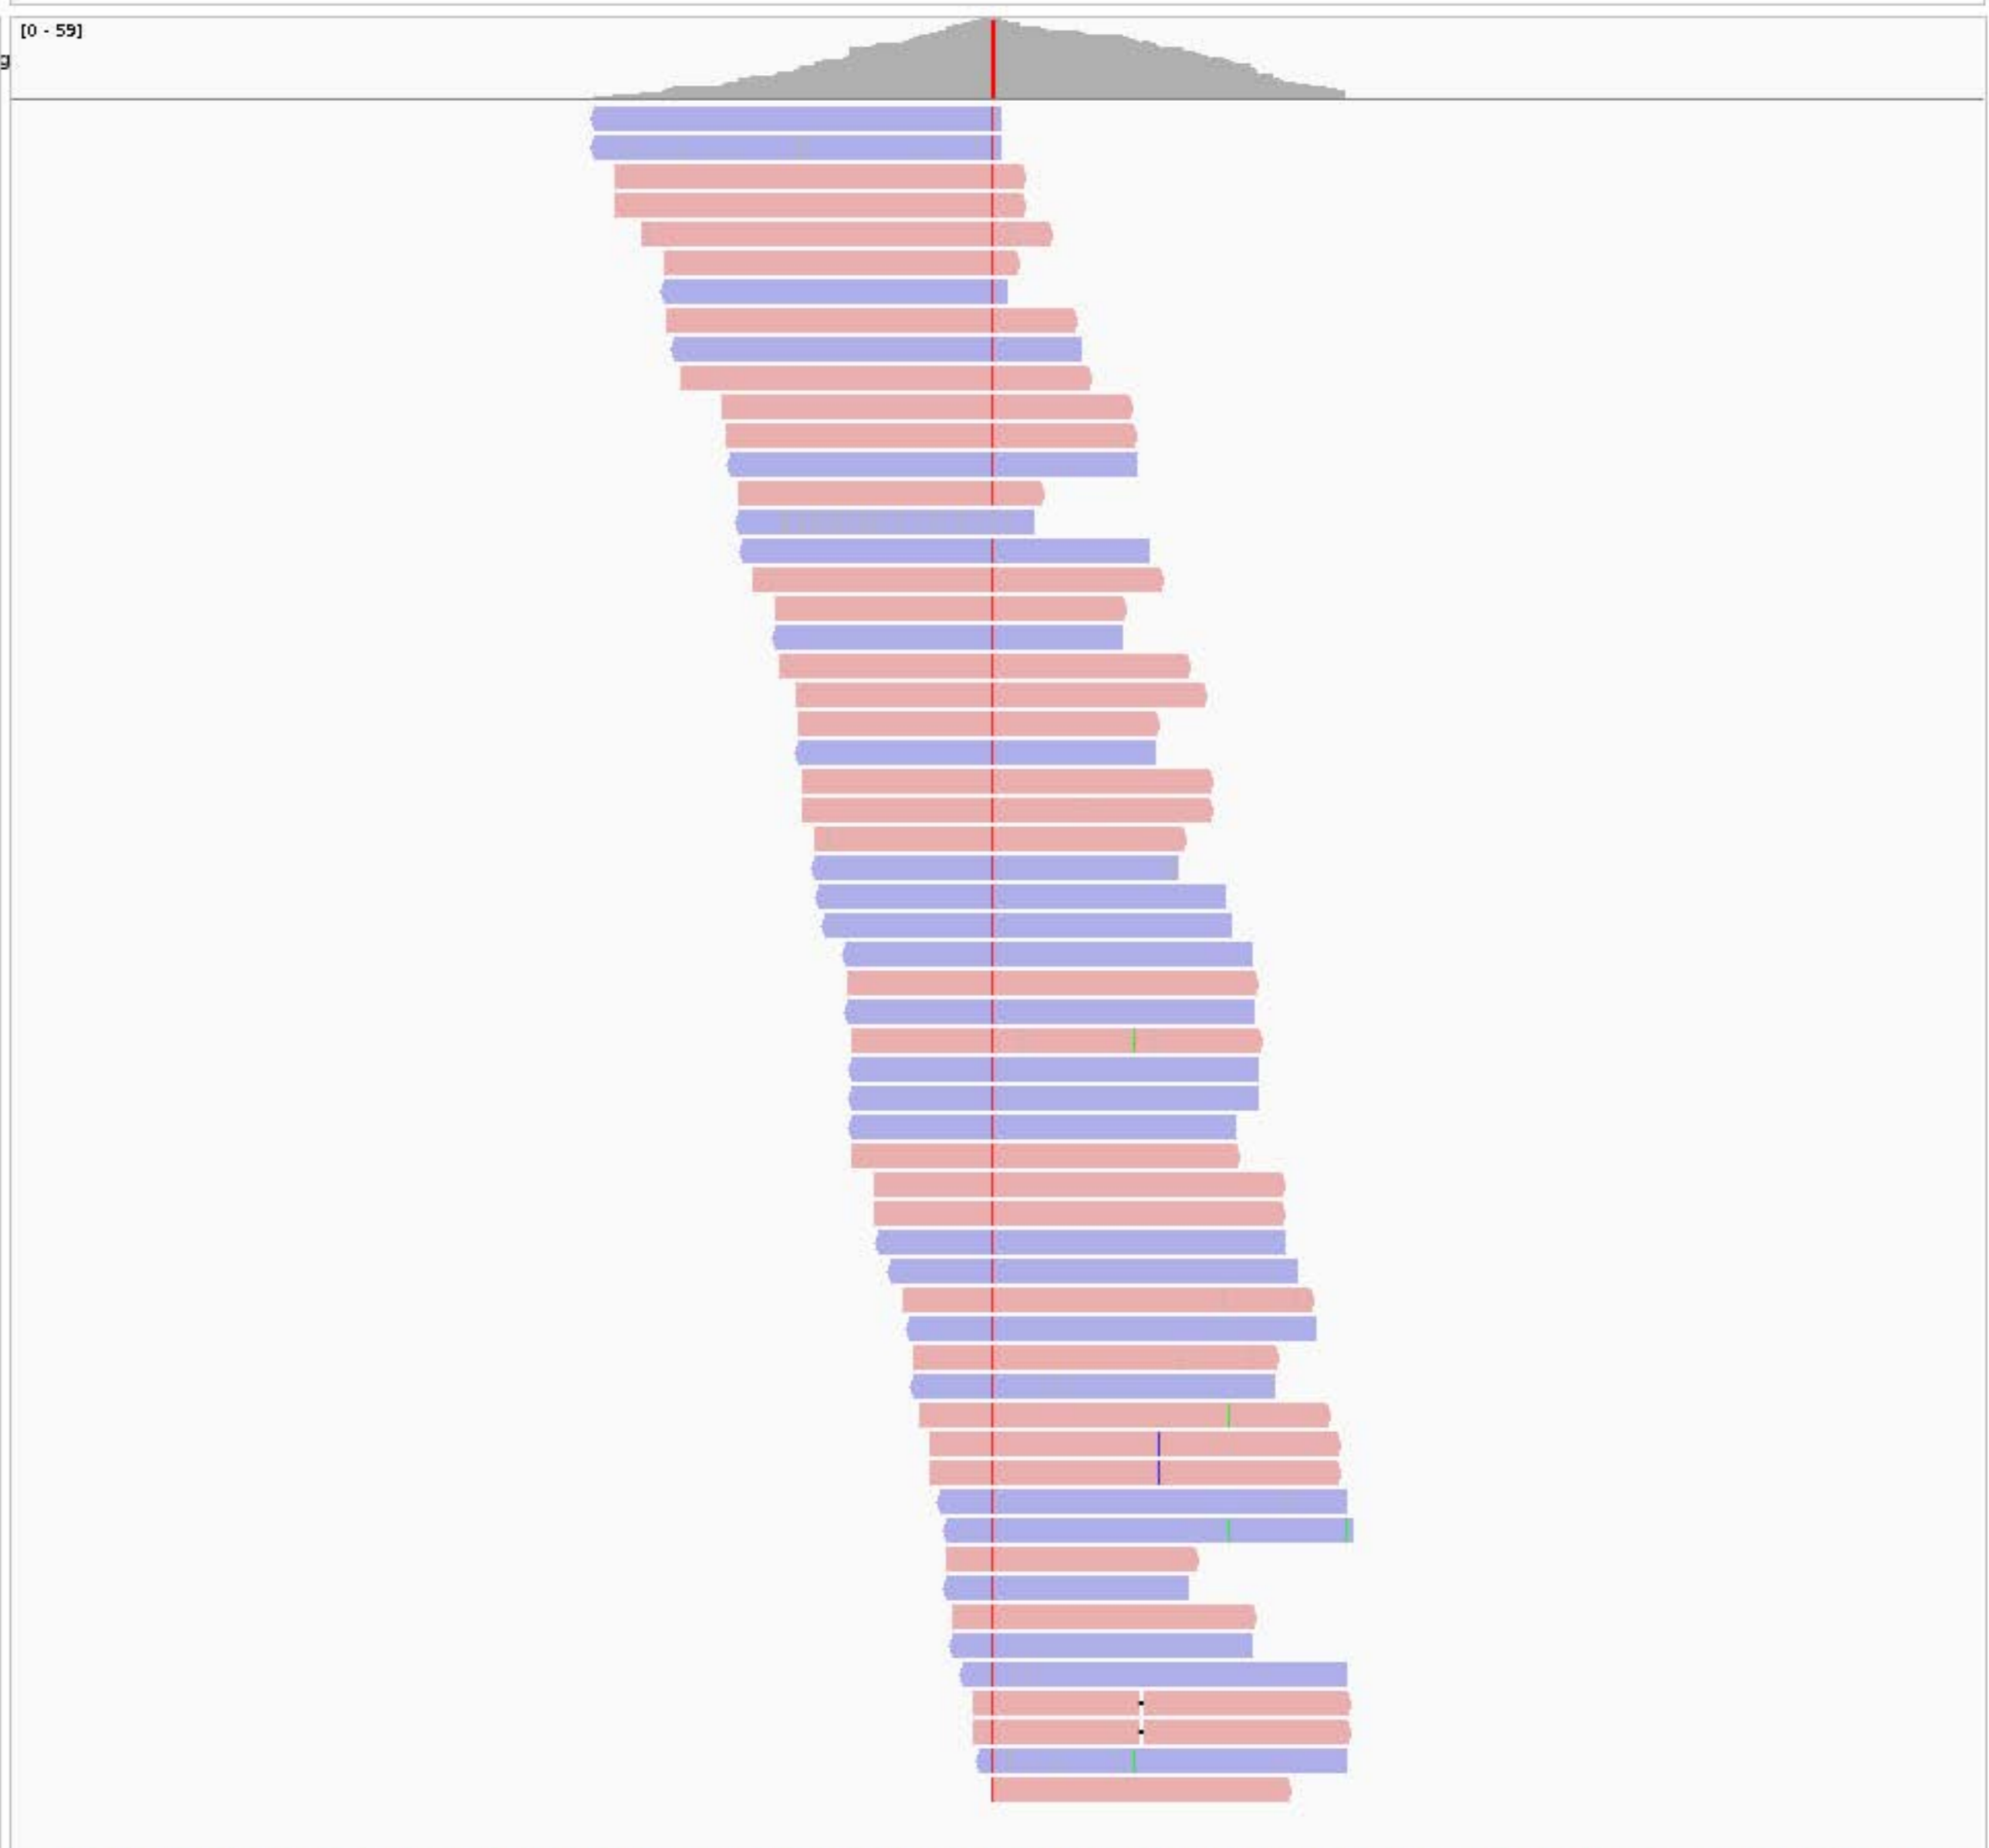

SL\_1010-N2-B\_mut.bam

Sequence

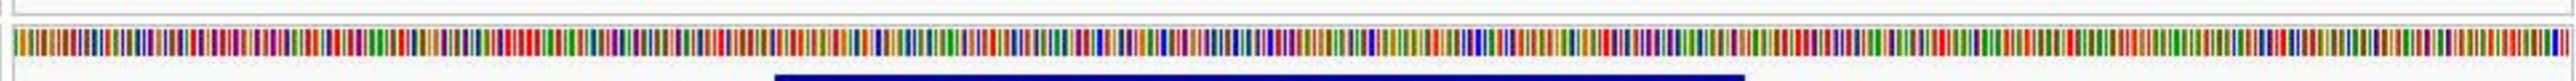

Refseq Genes

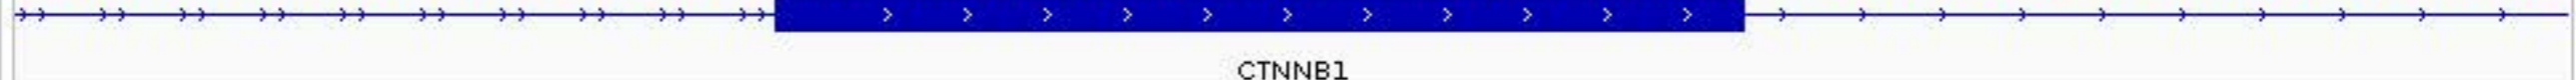

CTNNB1



SL\_1010-N3-B\_mut.bam Coverage  
[0 - 215]  
SL\_1010-N3-B\_mut.bam

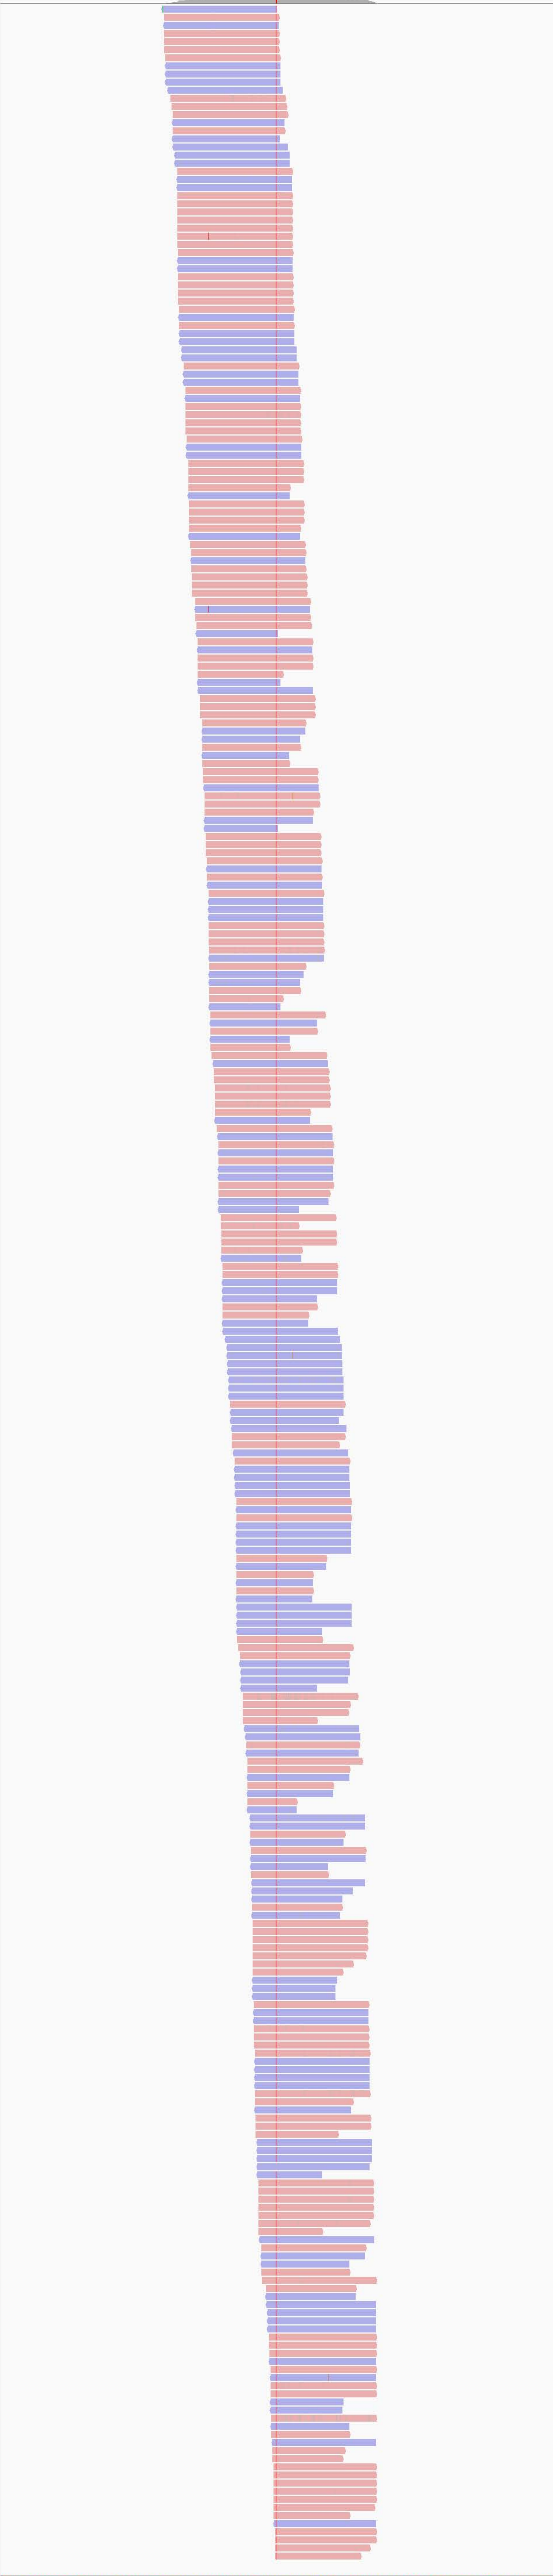

Sequence

Refseq Genes

CTNNE1



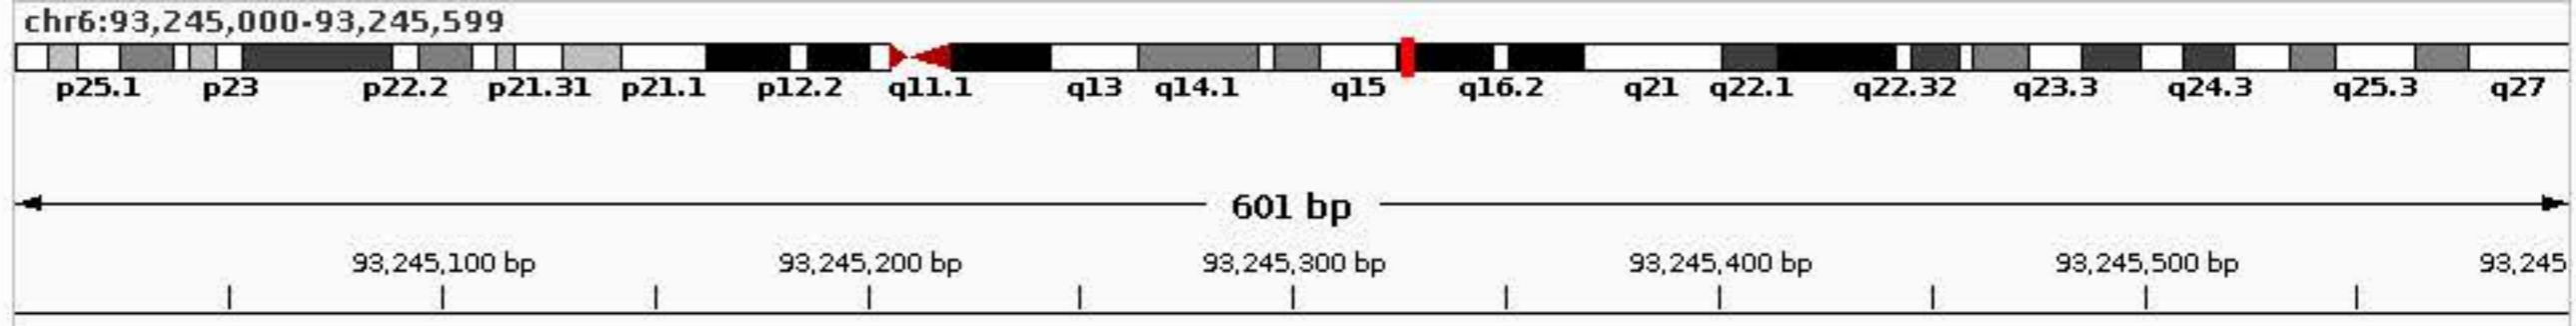

SL\_1011-T1-B\_mut.bam Coverage

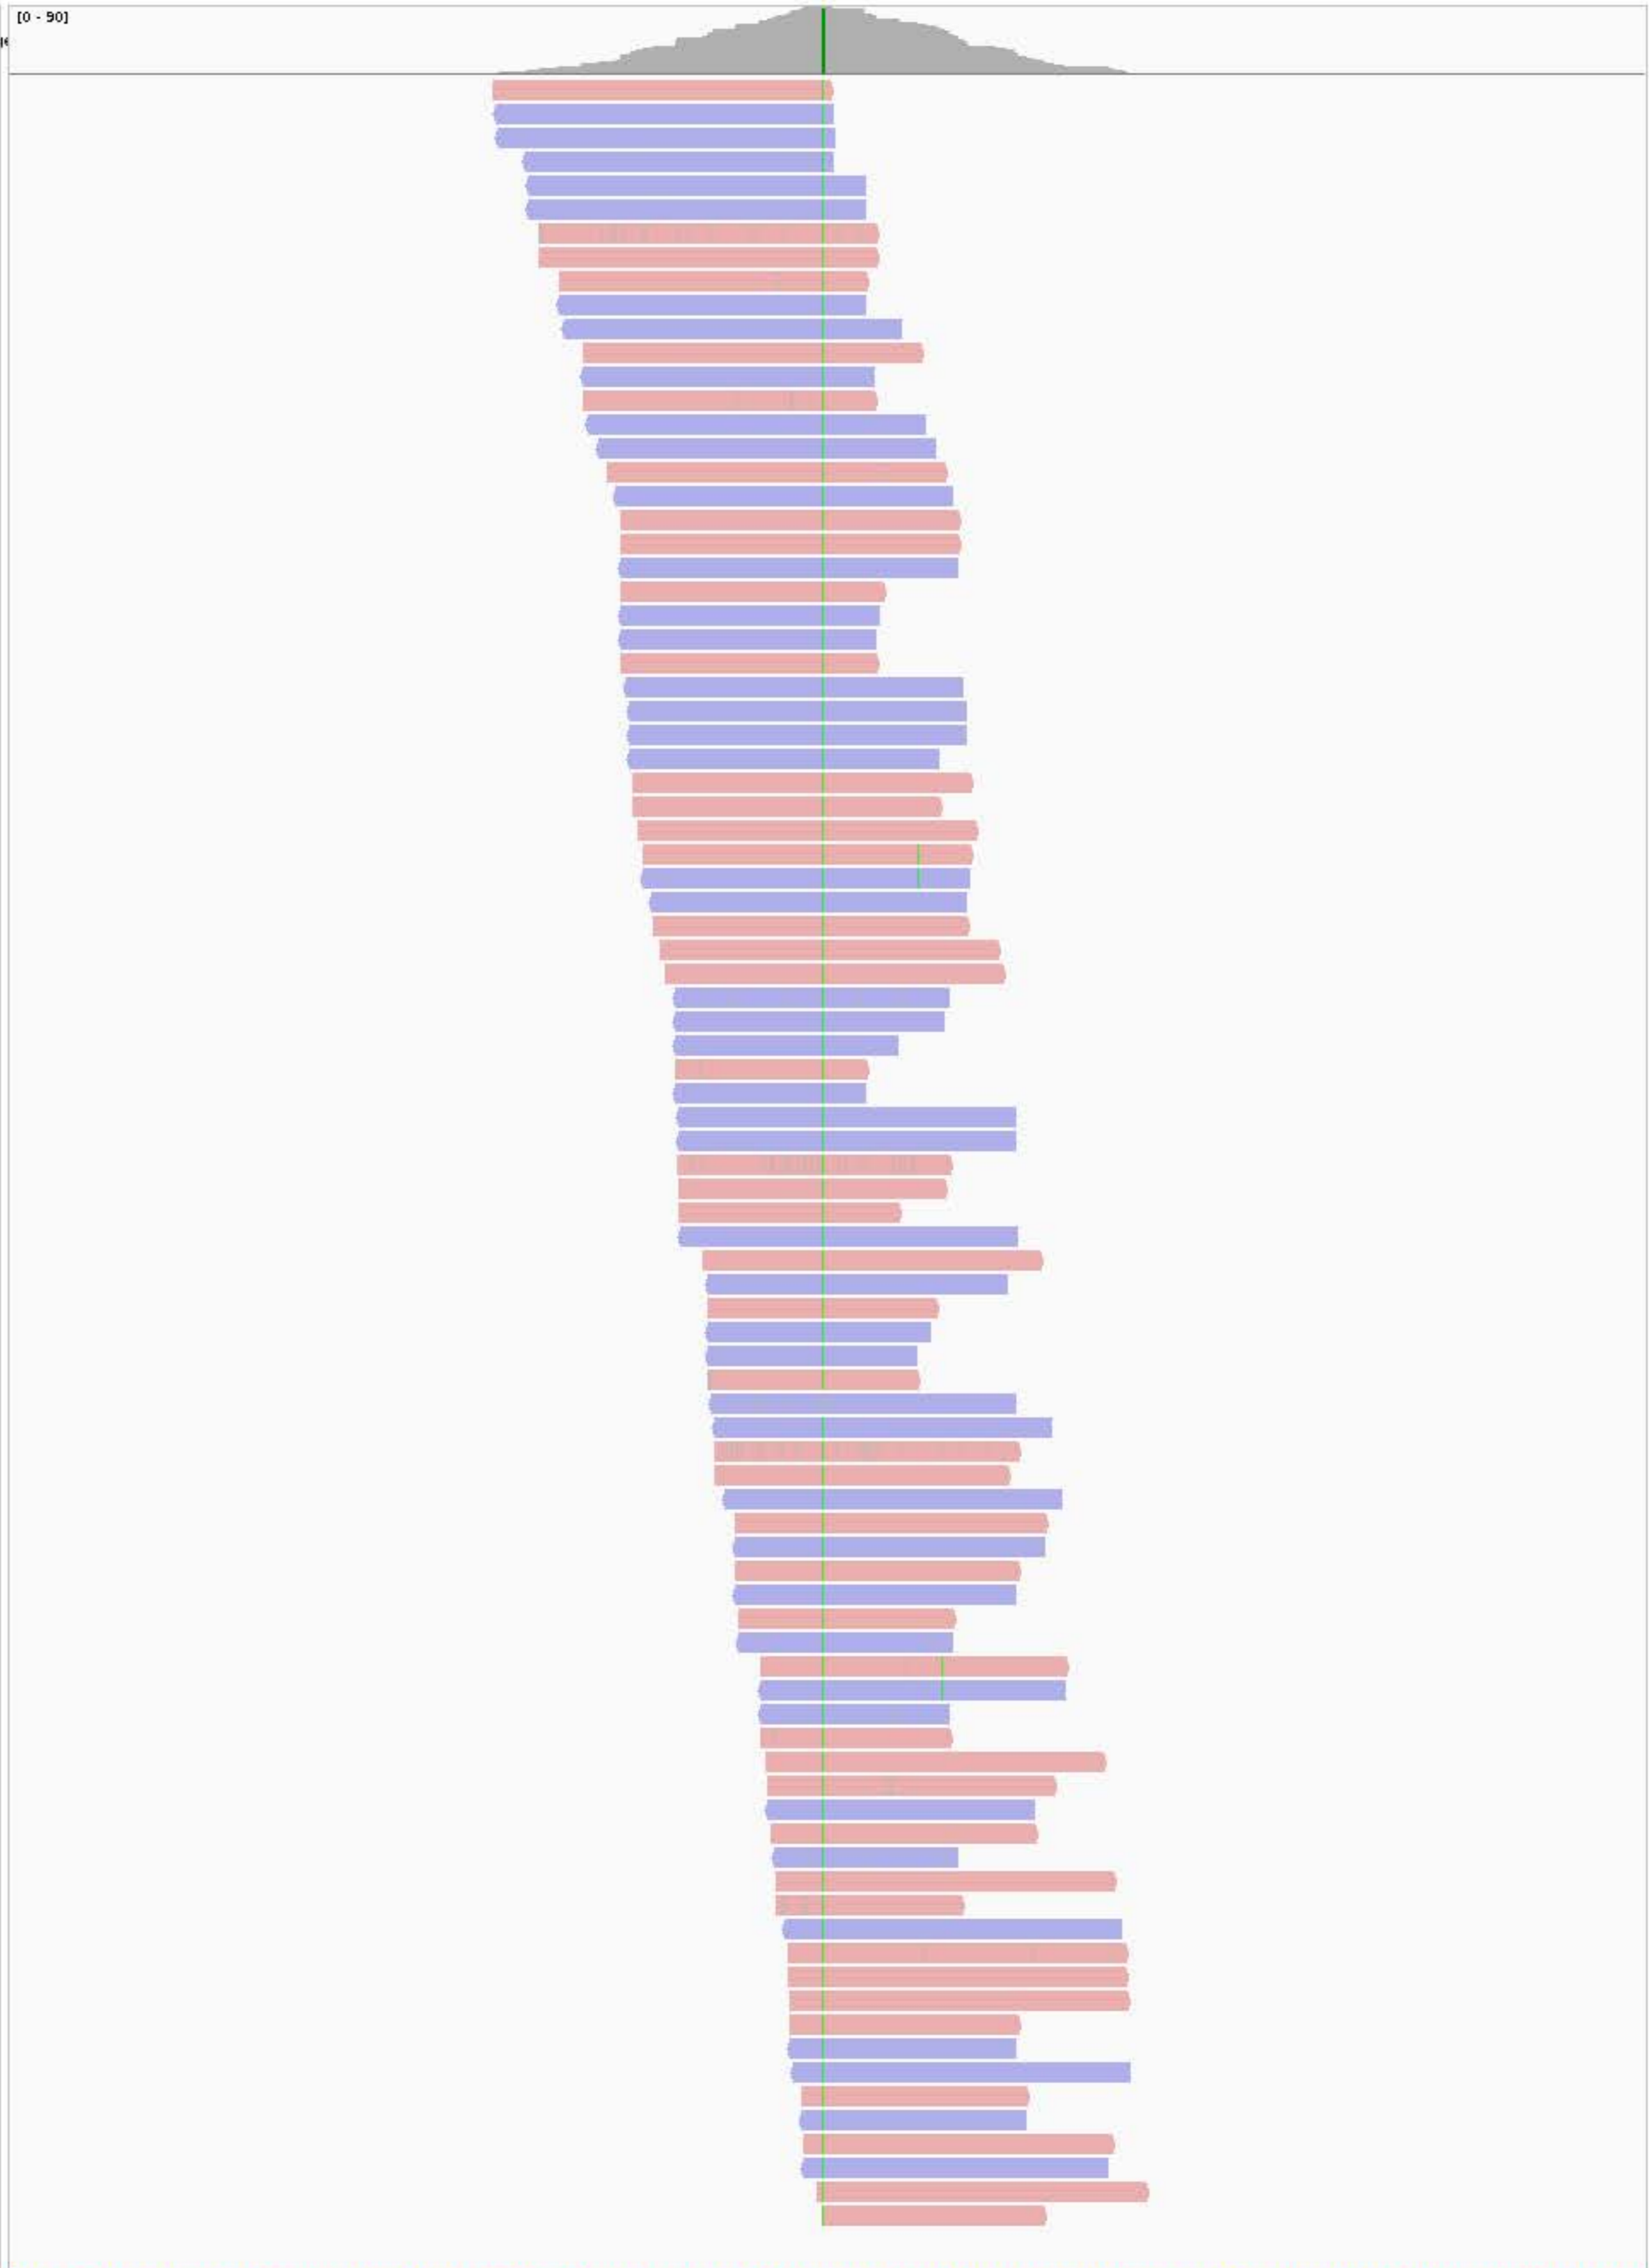

SL\_1011-T1-B\_mut.bam

Sequence →

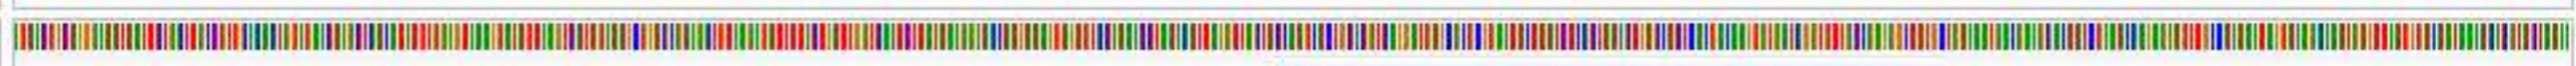

Refseq Genes

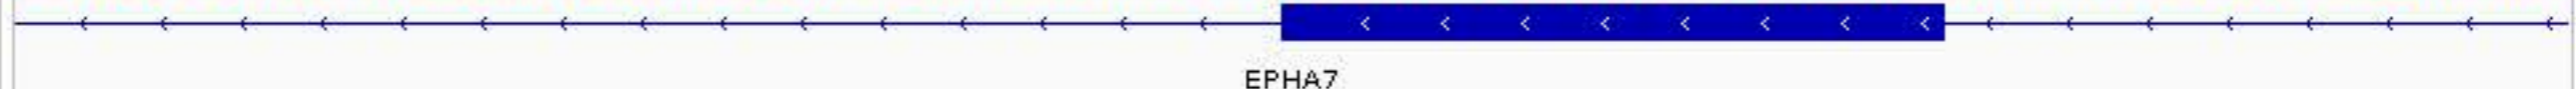

EPHA7

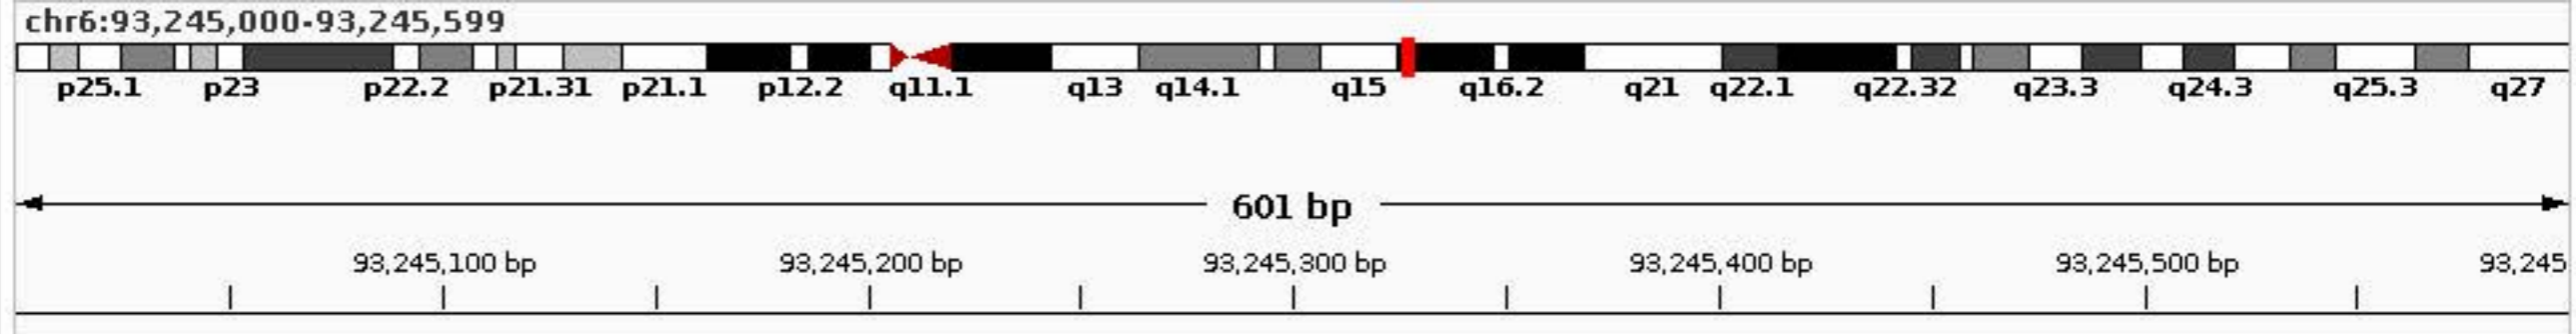

SL\_1011-T2-B\_mut.bam Coverage

SL\_1011-T2-B\_mut.bam

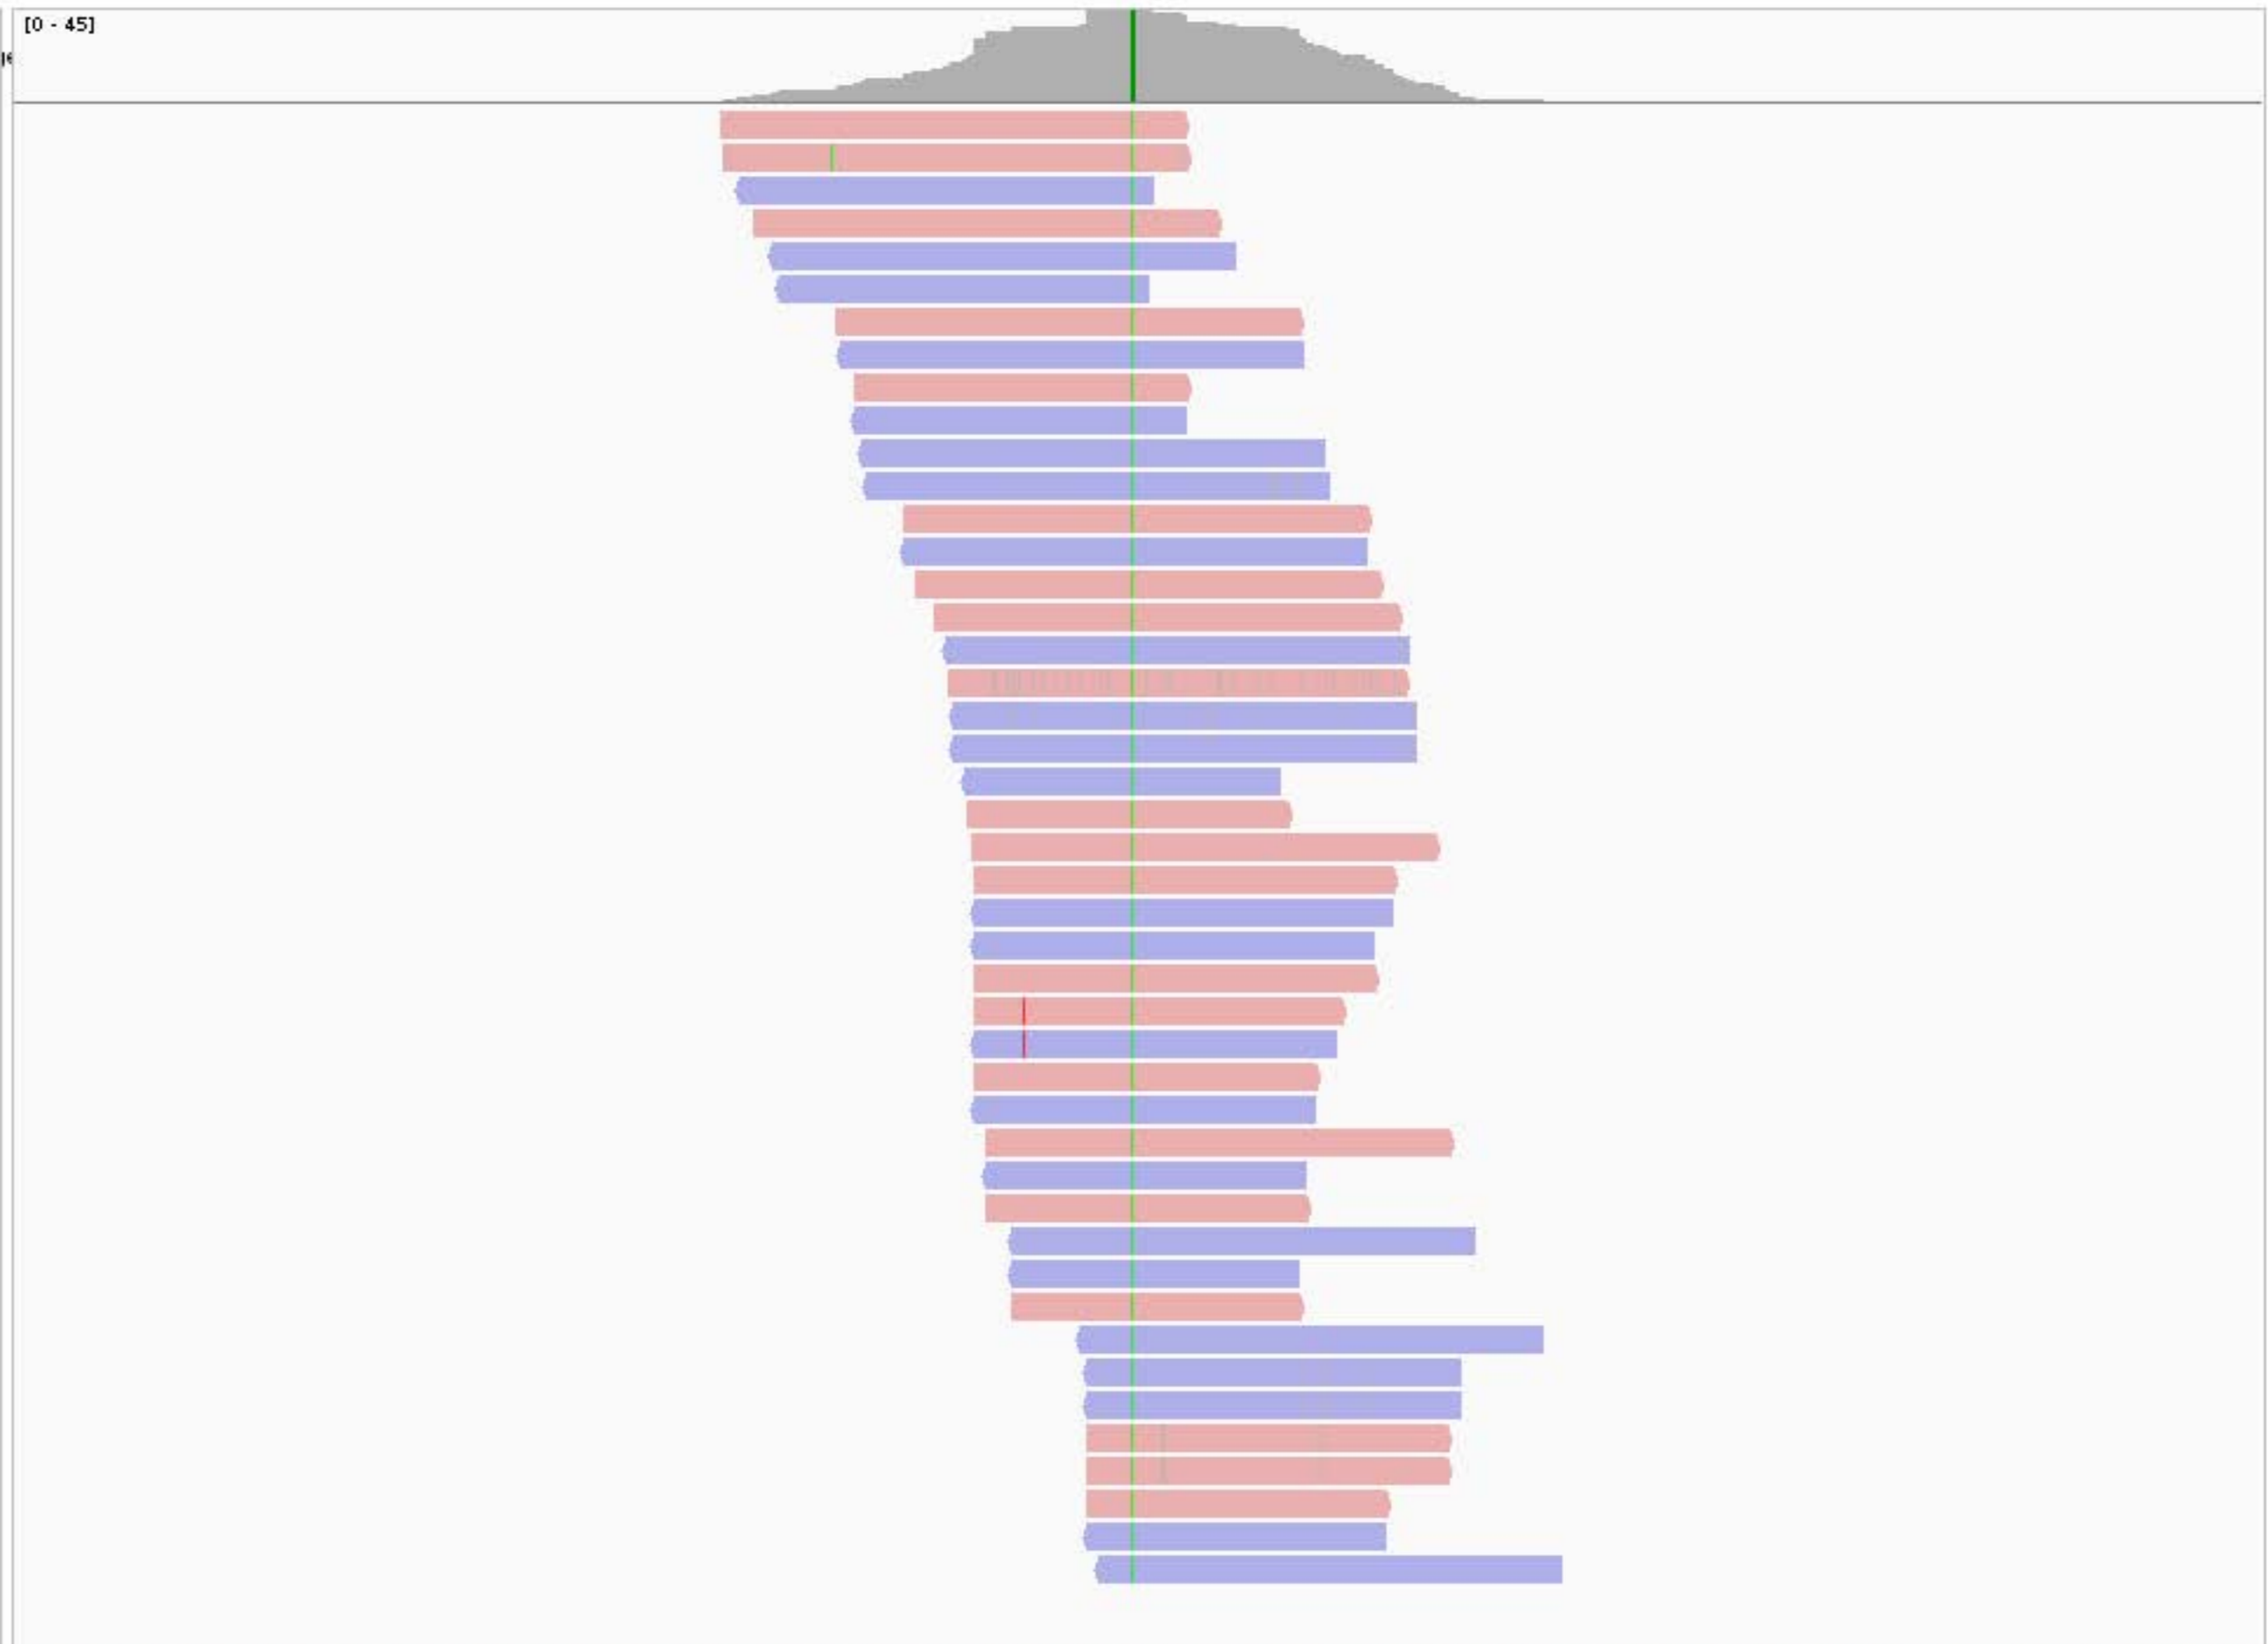

Sequence

Refseq Genes

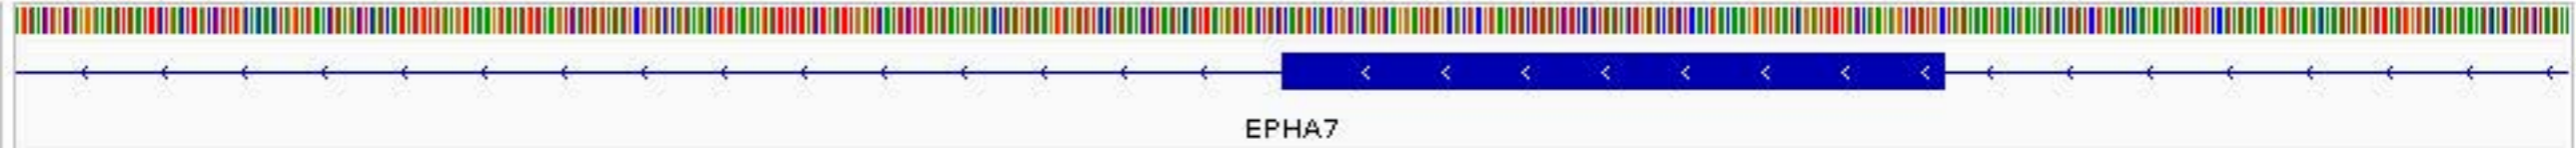



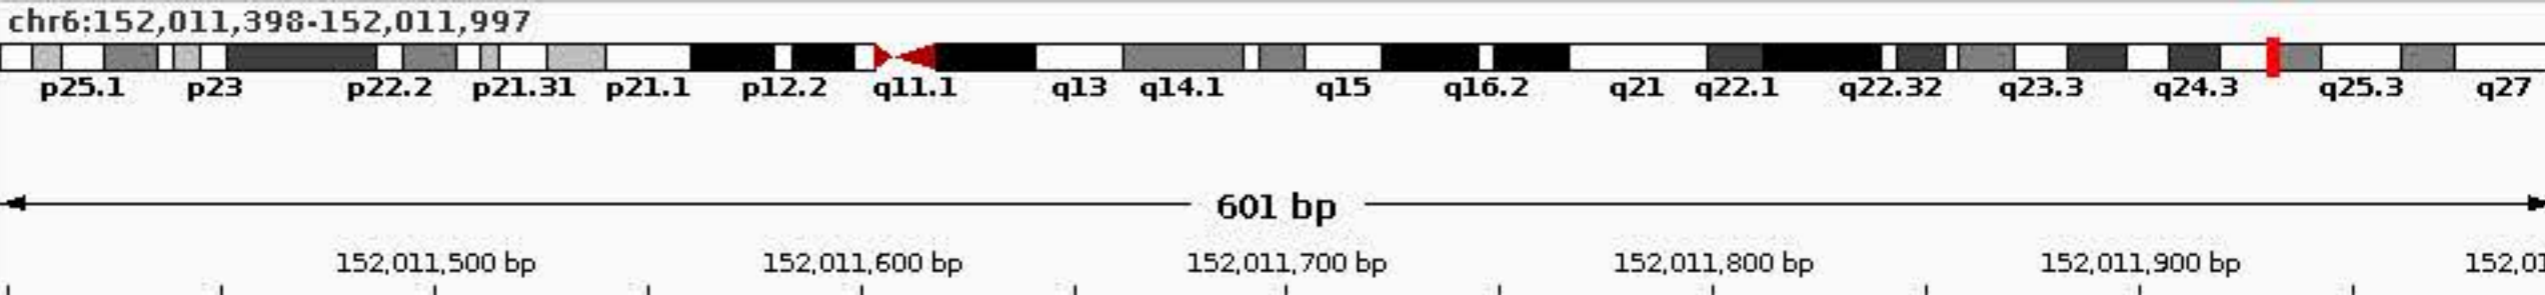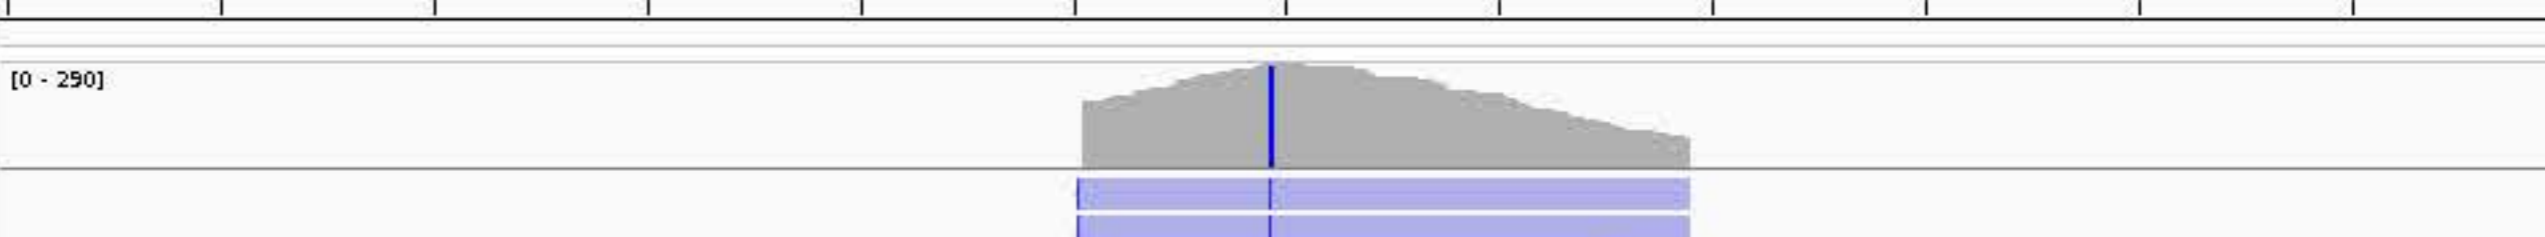

SL\_0003\_L\_FFPE\_25-B\_mut.barrage

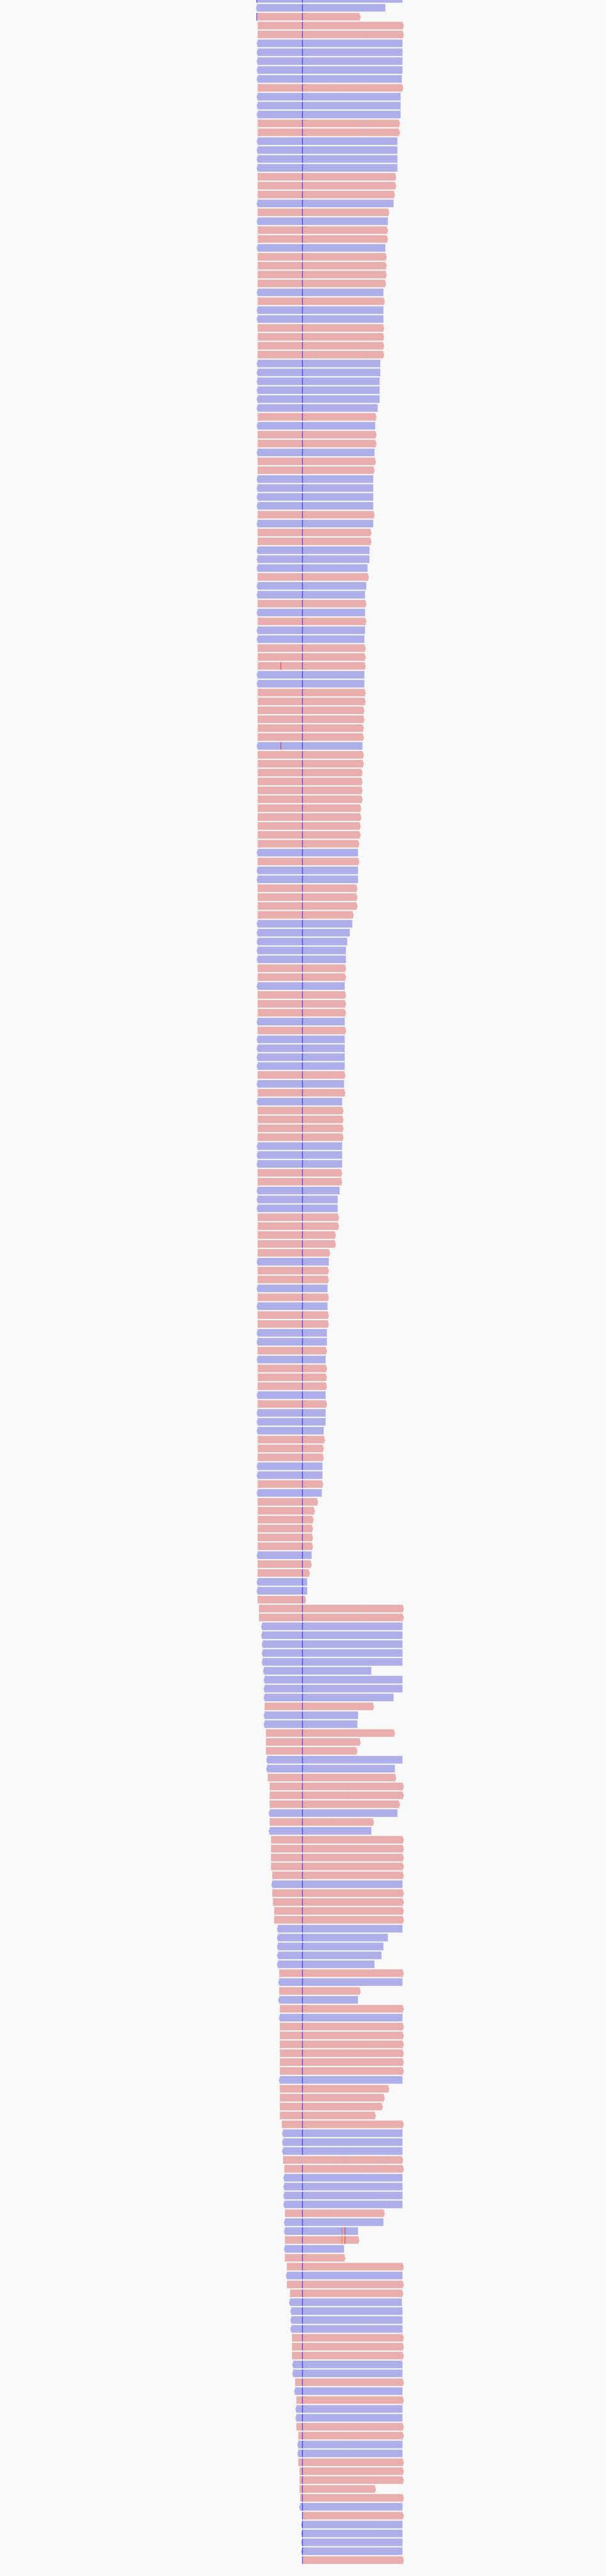

Sequence

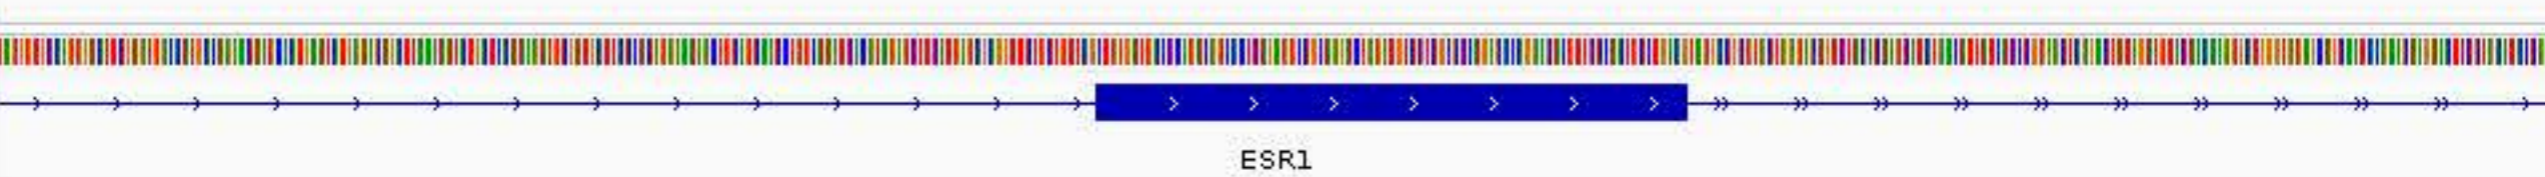

Refseq Genes

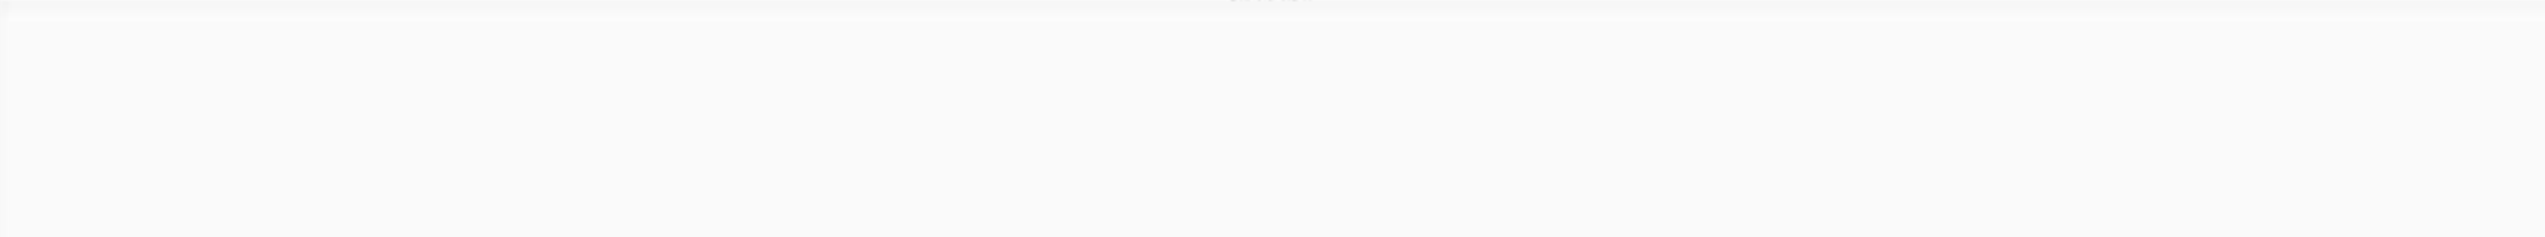



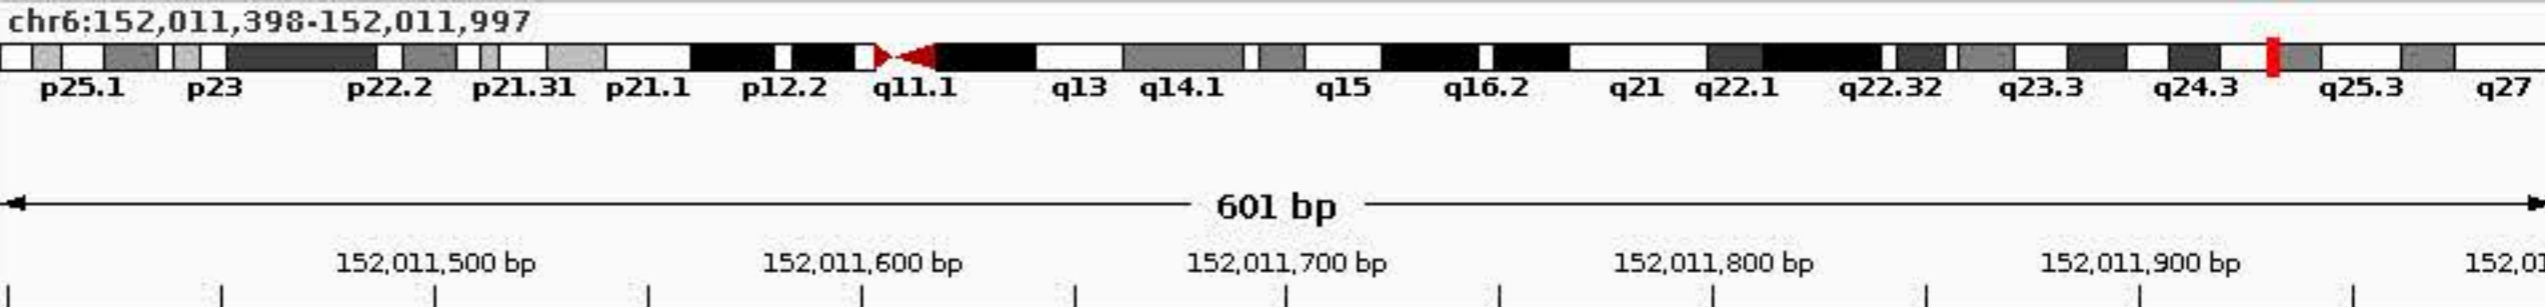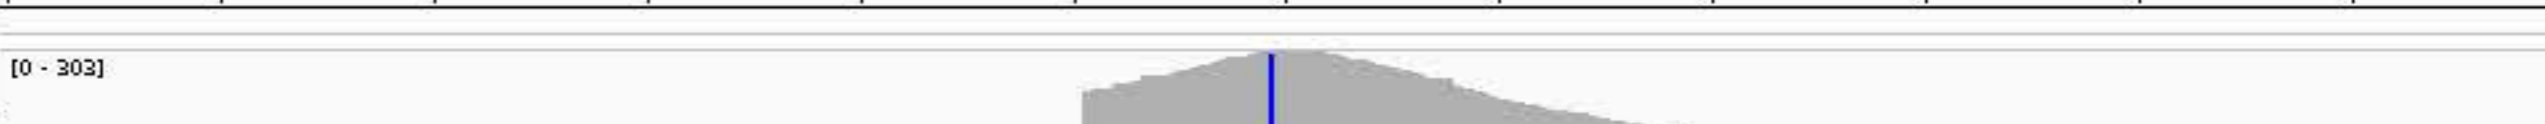

SL\_1010-N2-B\_mut.bam Coverage

SL\_1010-N2-B\_mut.bam

Sequence

Refseq Genes

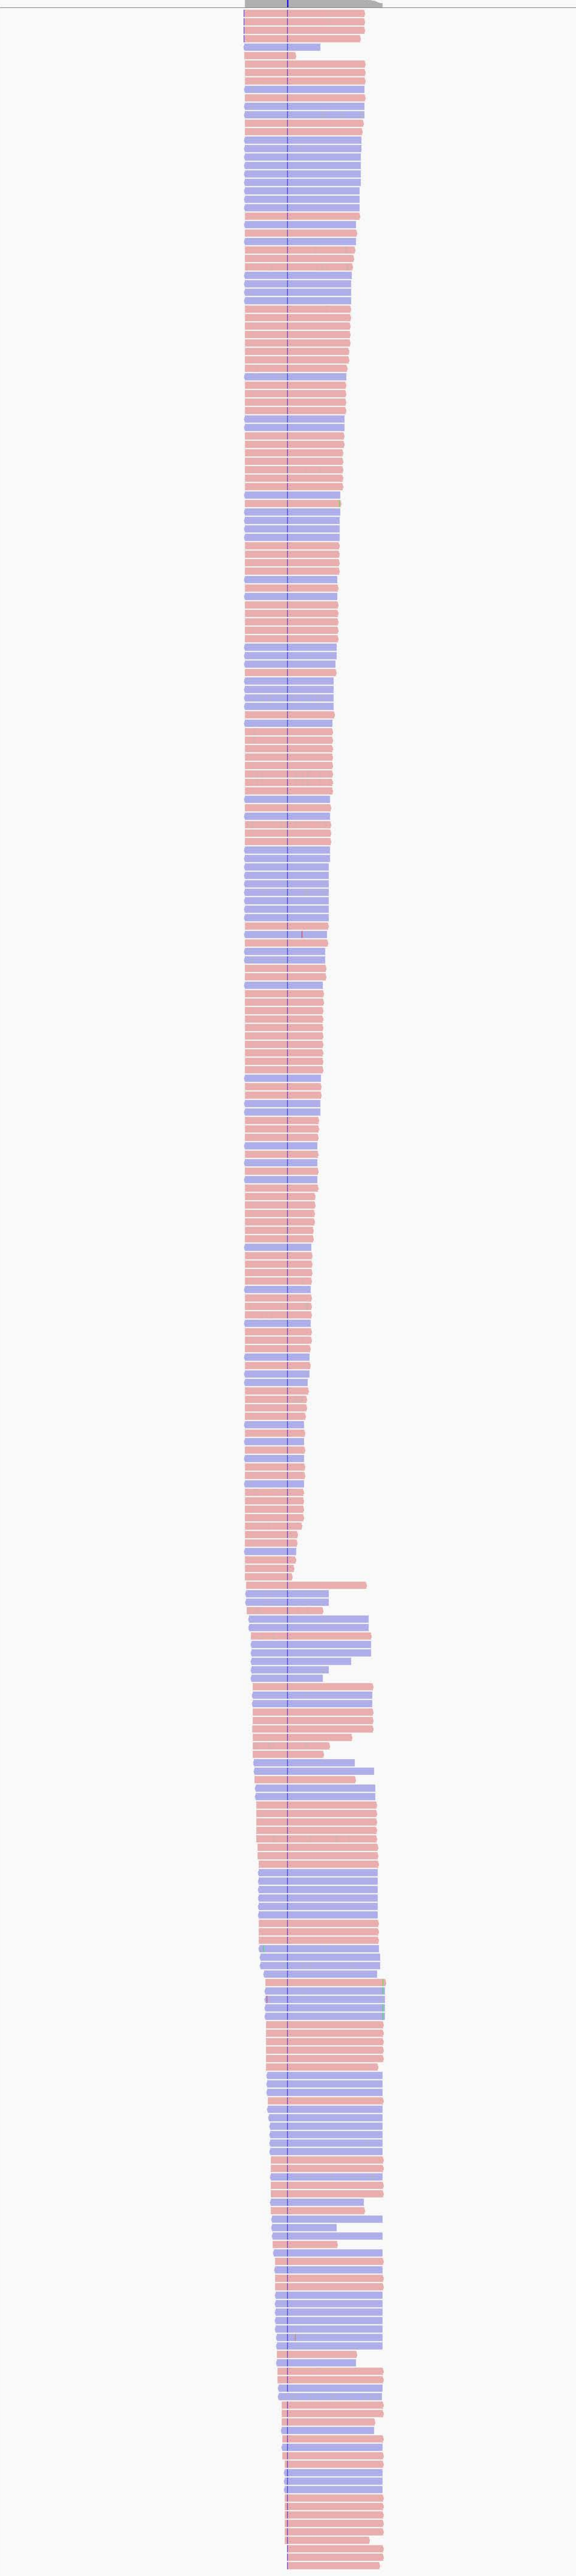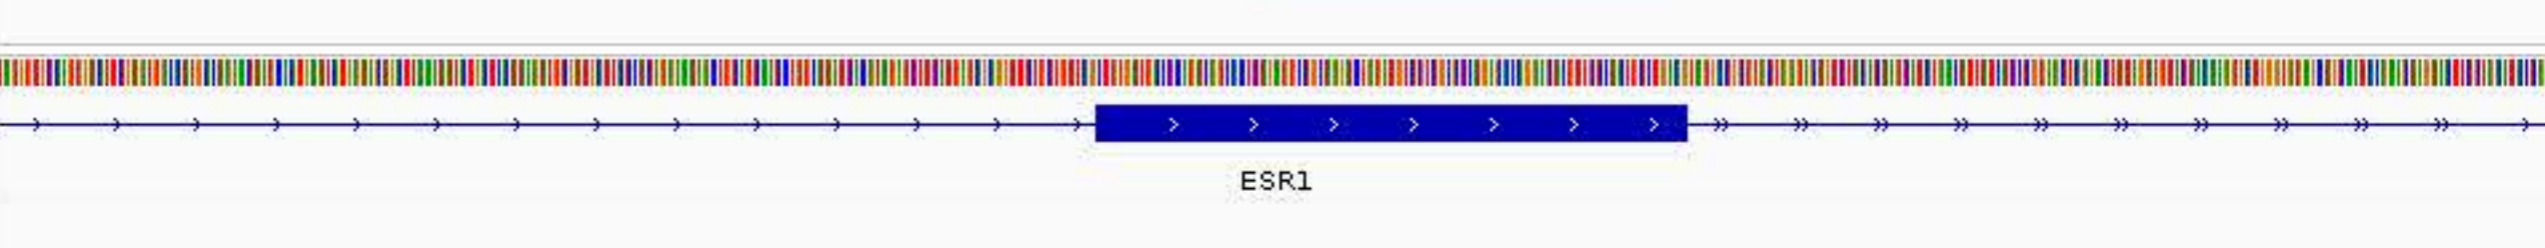



SL\_1010-N3-8\_mut.bam Coverage  
SL\_1010-N3-8\_mut.bam  
SL\_1010-N3-8\_mut.bam

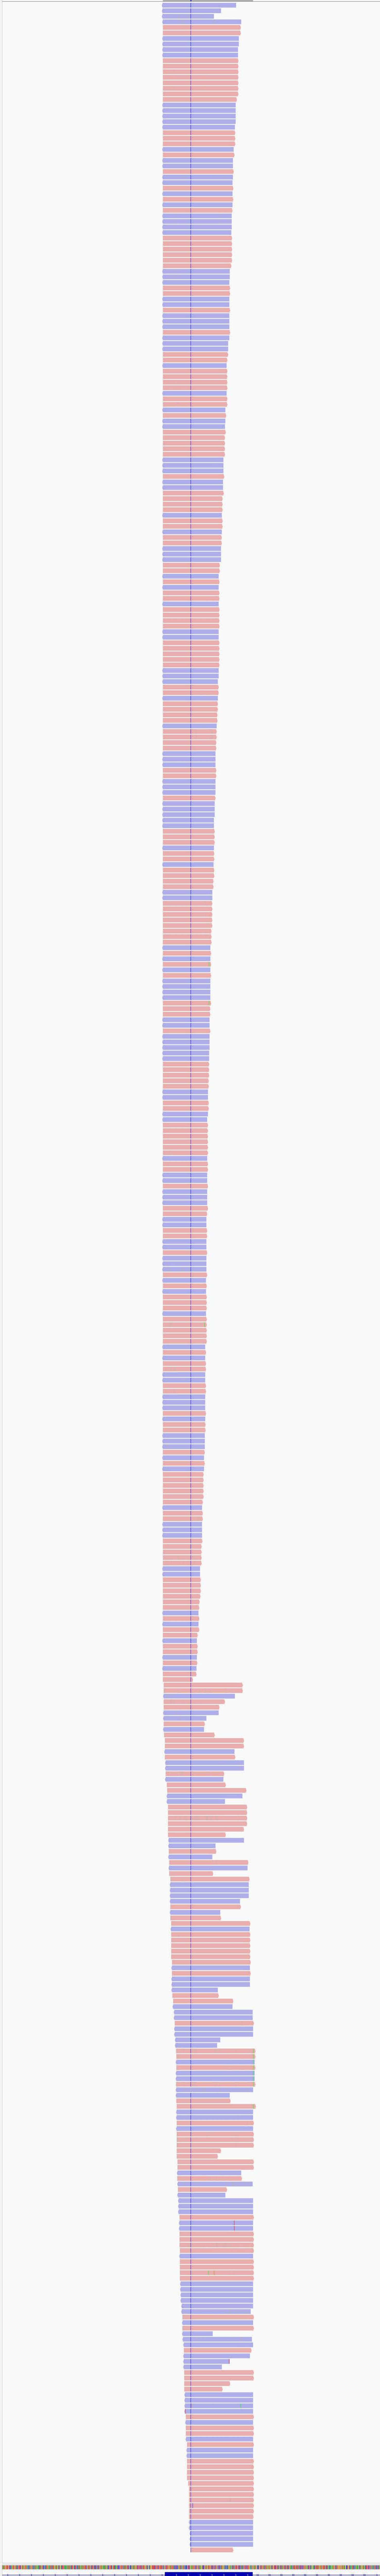



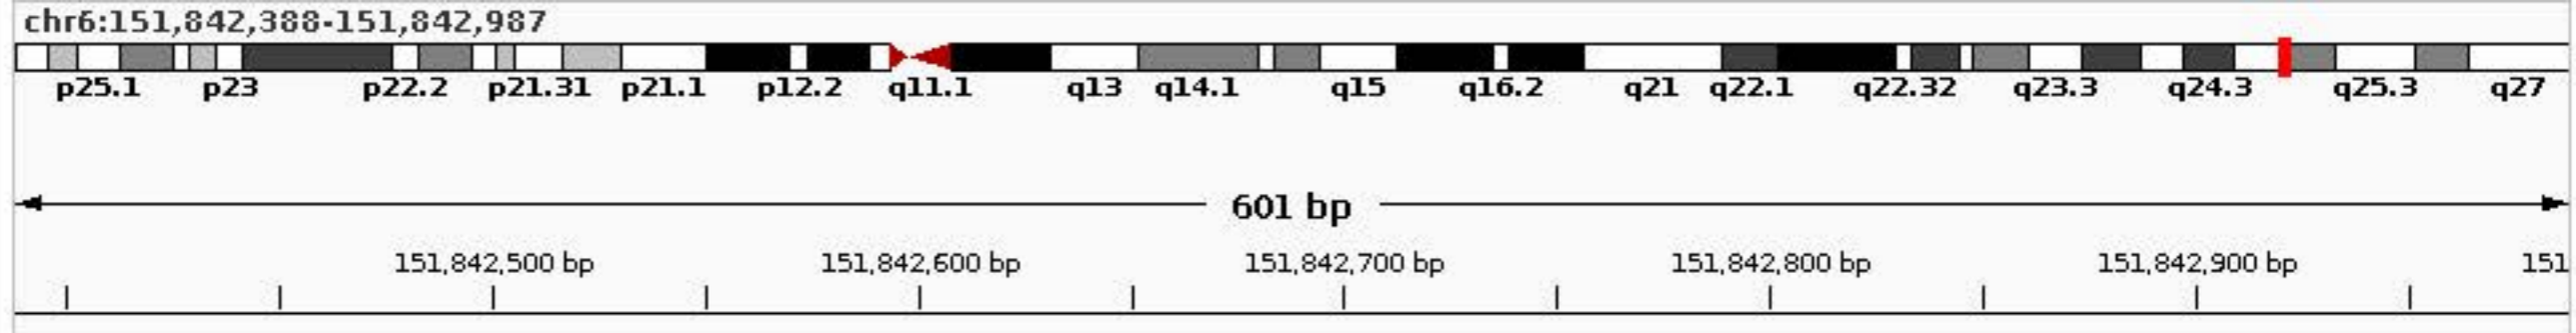

SL\_1010\_L\_FFPE\_17-B\_mut.bam  
range

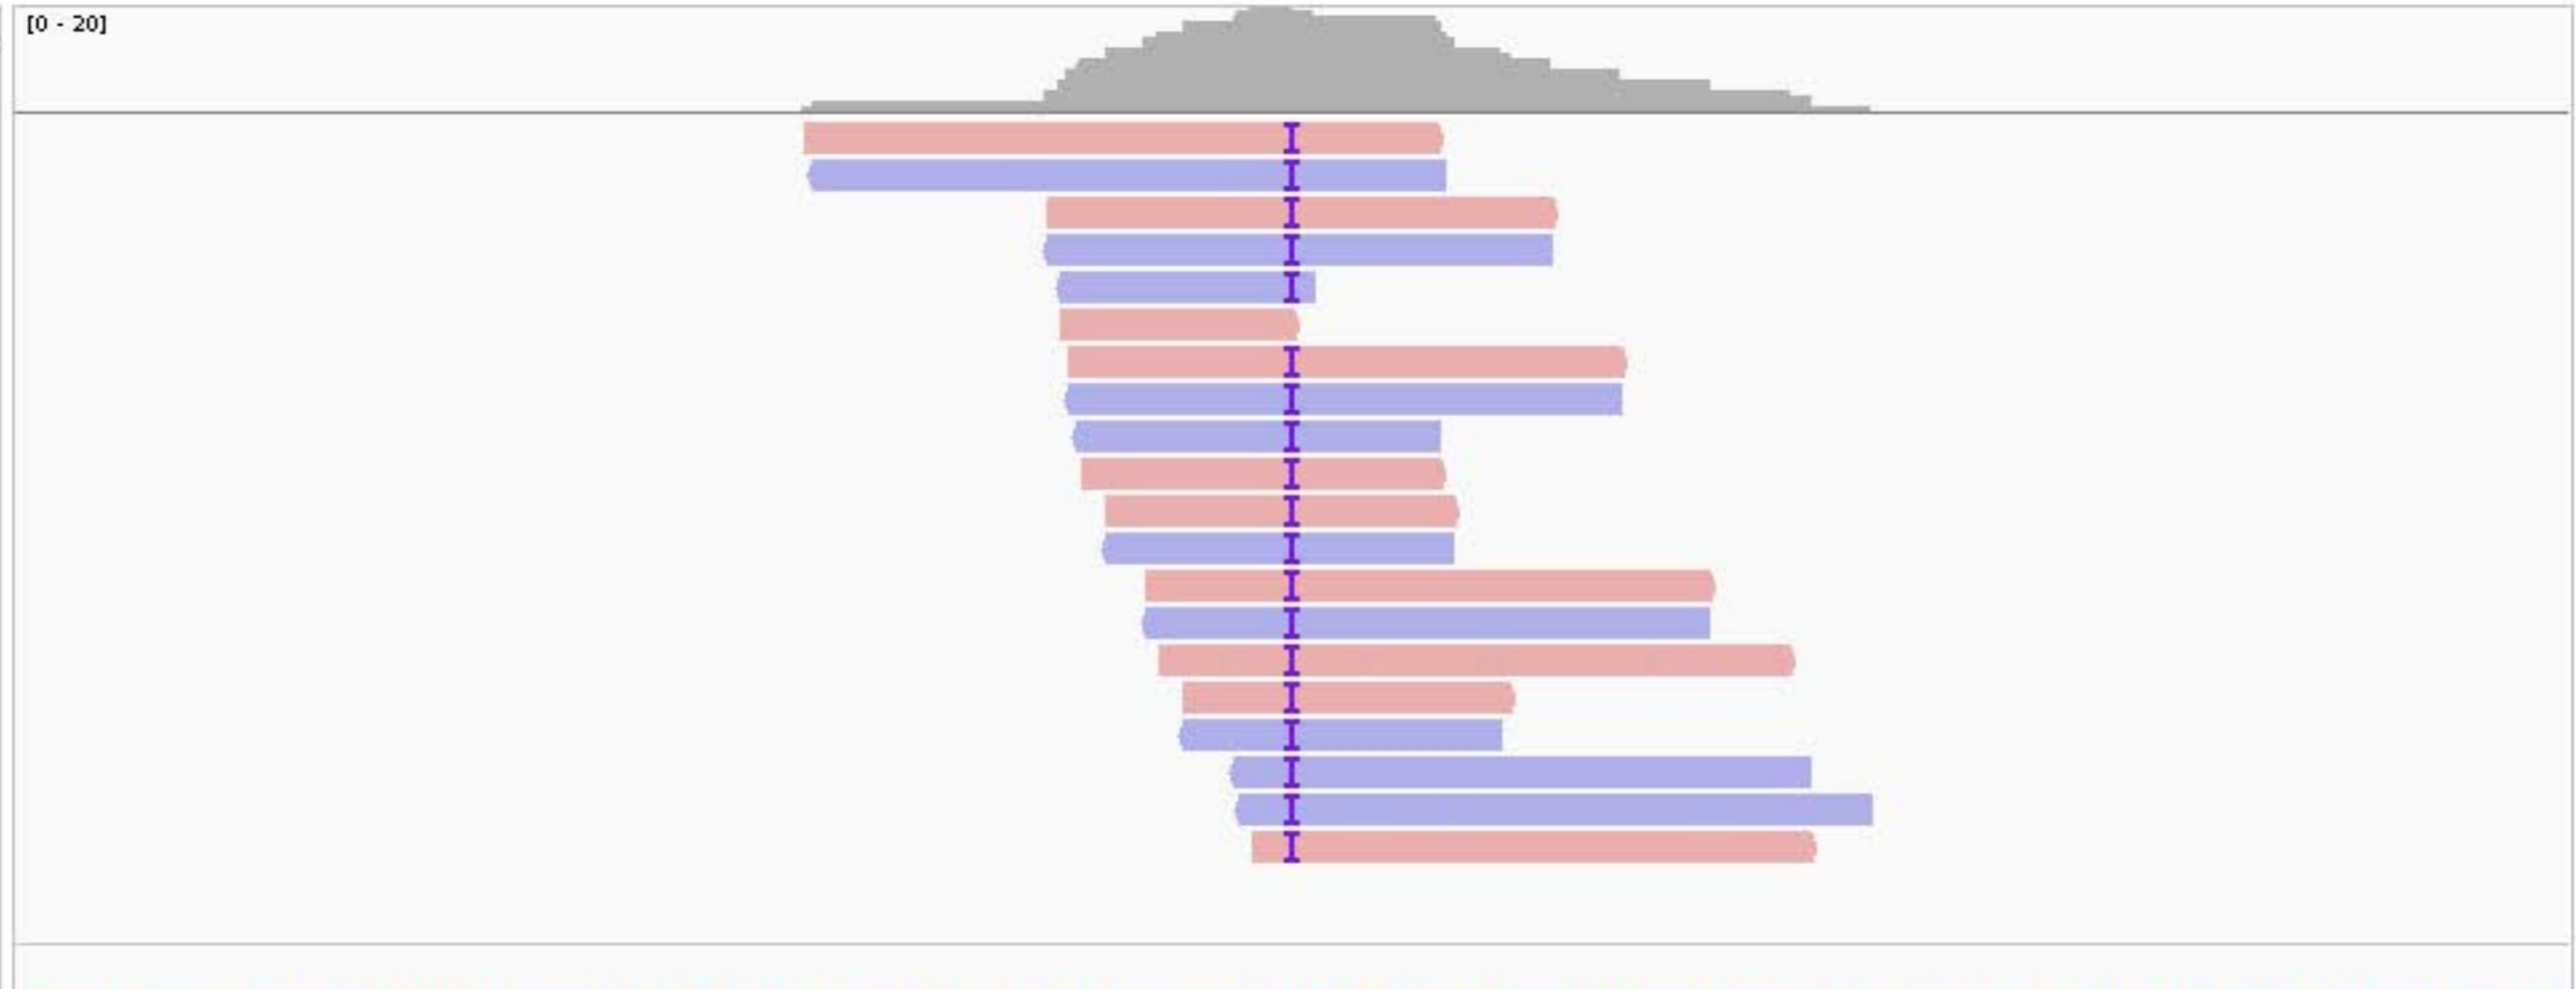

SL\_1010\_L\_FFPE\_17-B\_mut.bam

Sequence →  
Refseq Genes

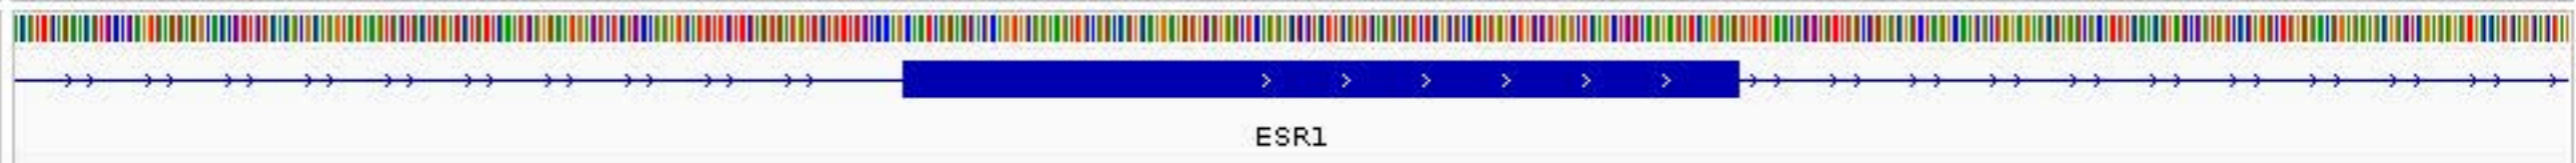



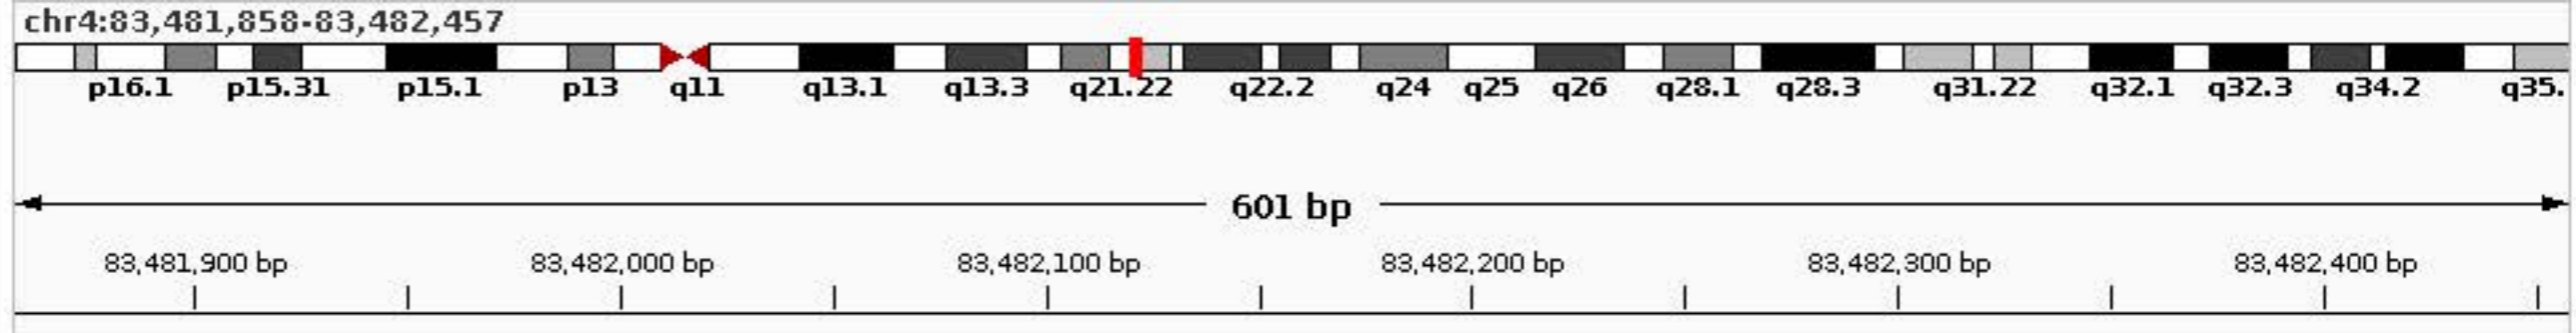

SL\_0004-LT-6-B\_mut.bam Coverage

SL\_0004-LT-6-B\_mut.bam

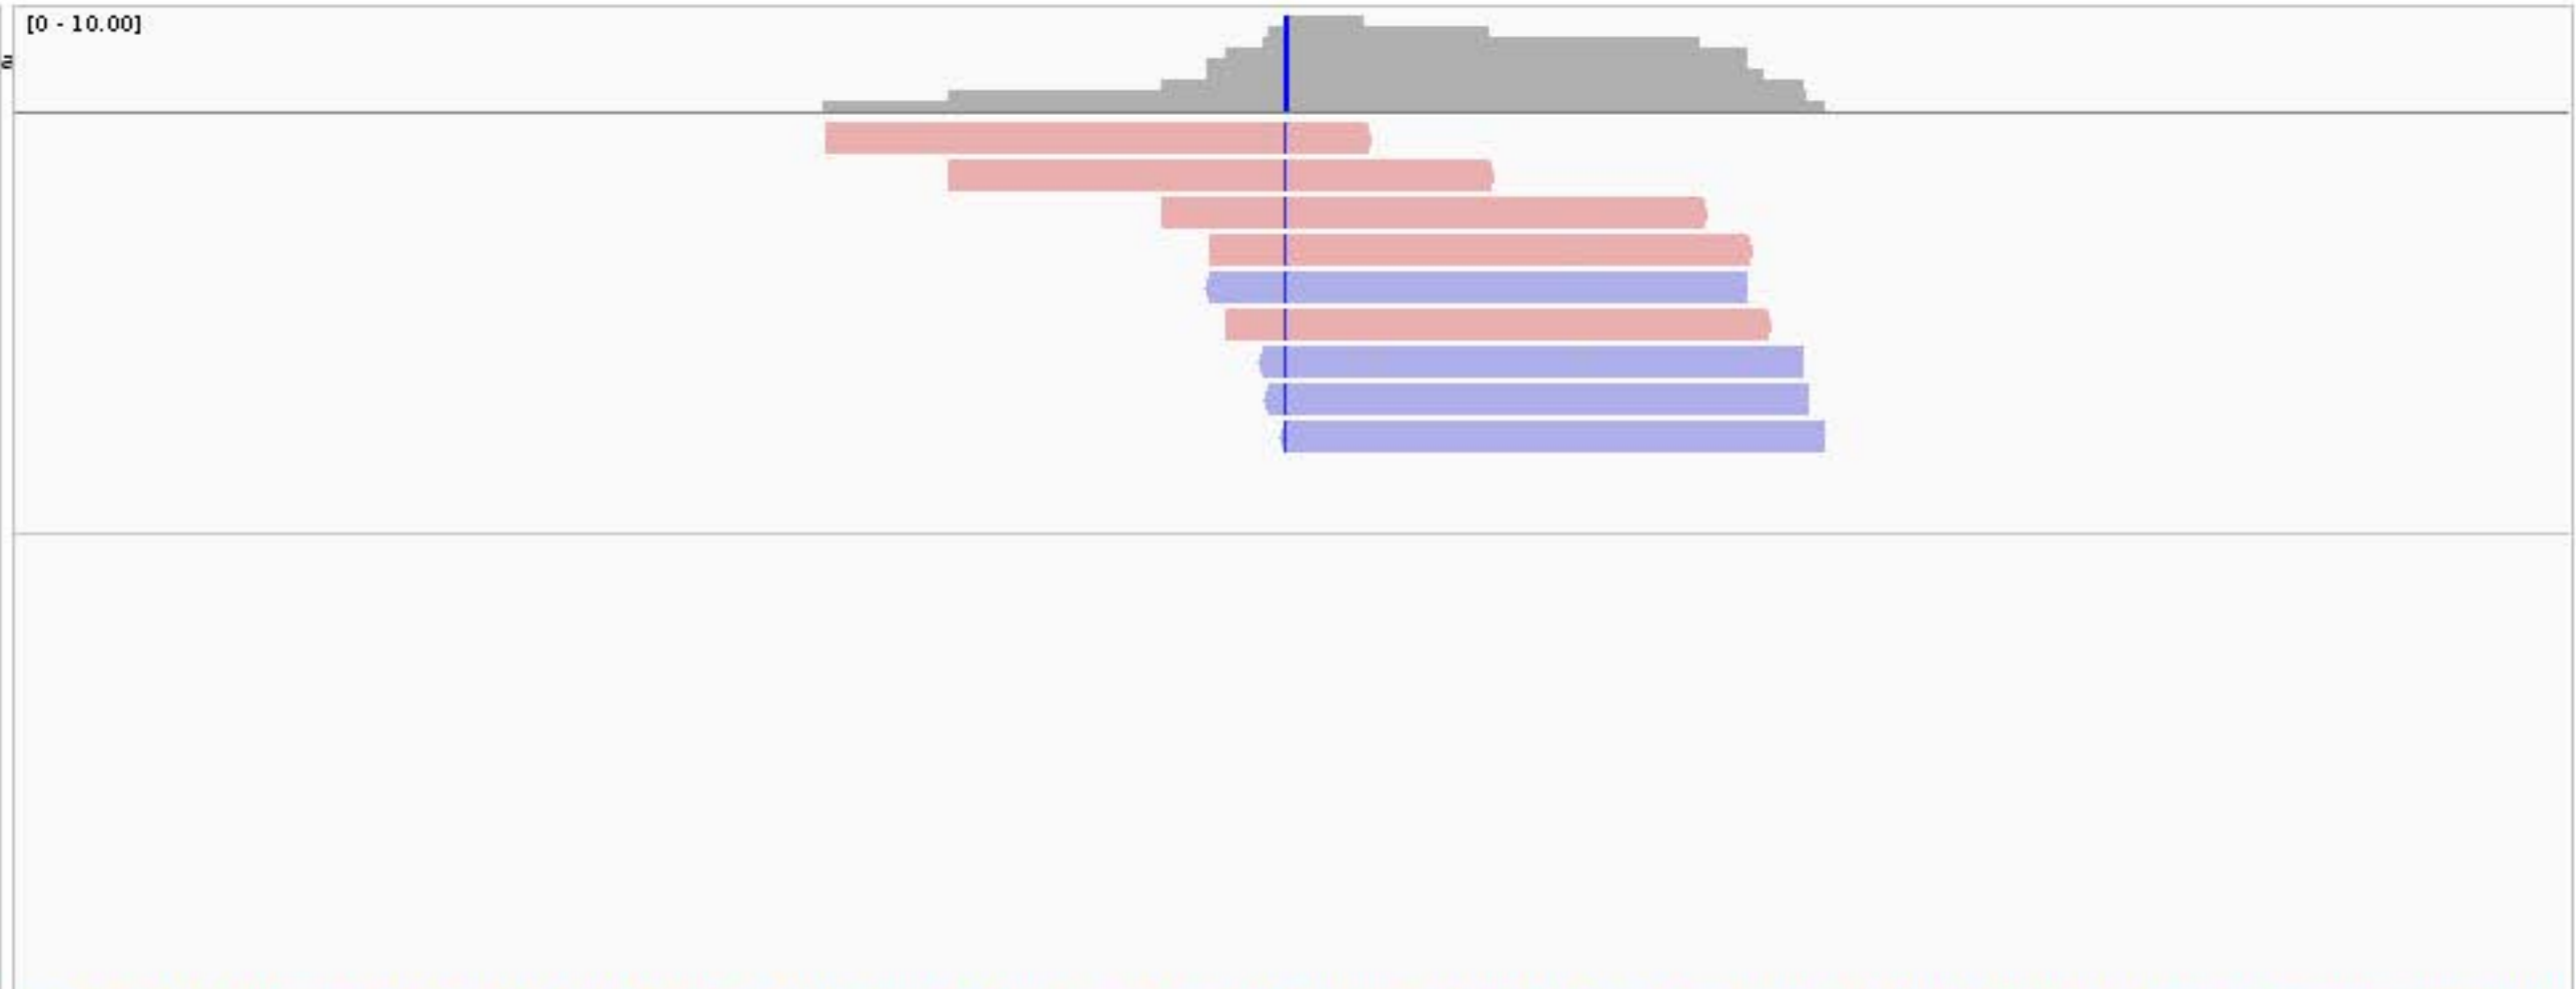

Sequence

Refseq Genes

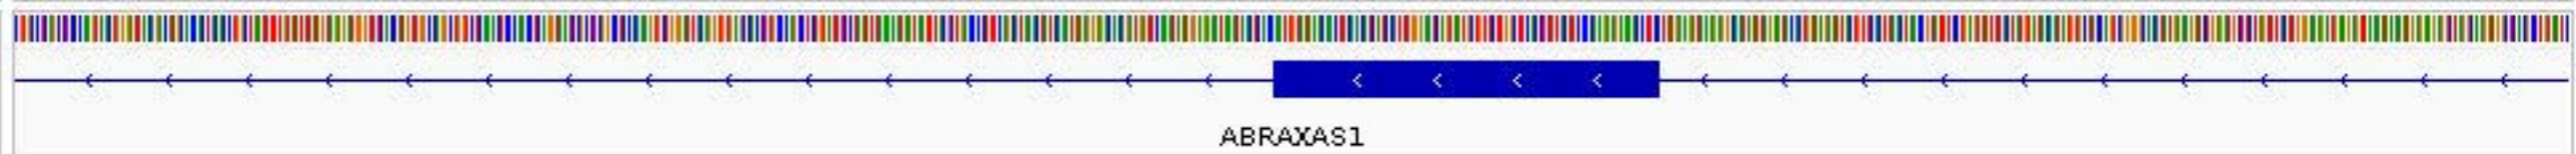

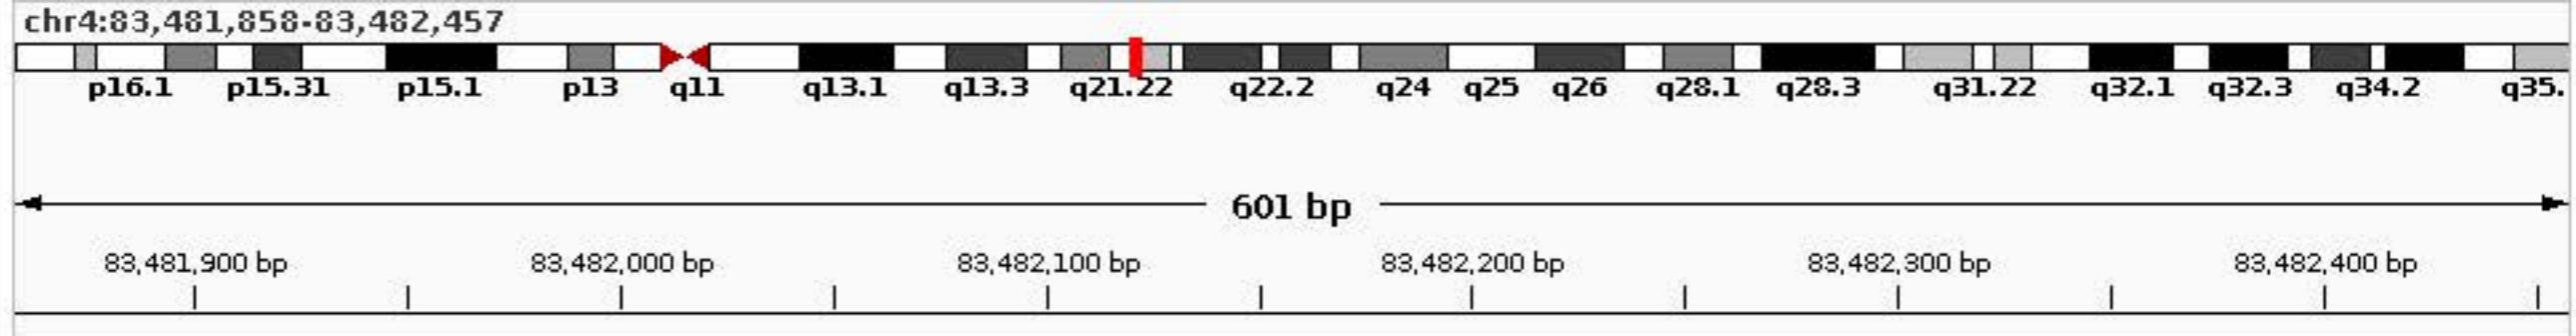

SL\_0004-LT-8-B\_mut.bam Coverage

SL\_0004-LT-8-B\_mut.bam

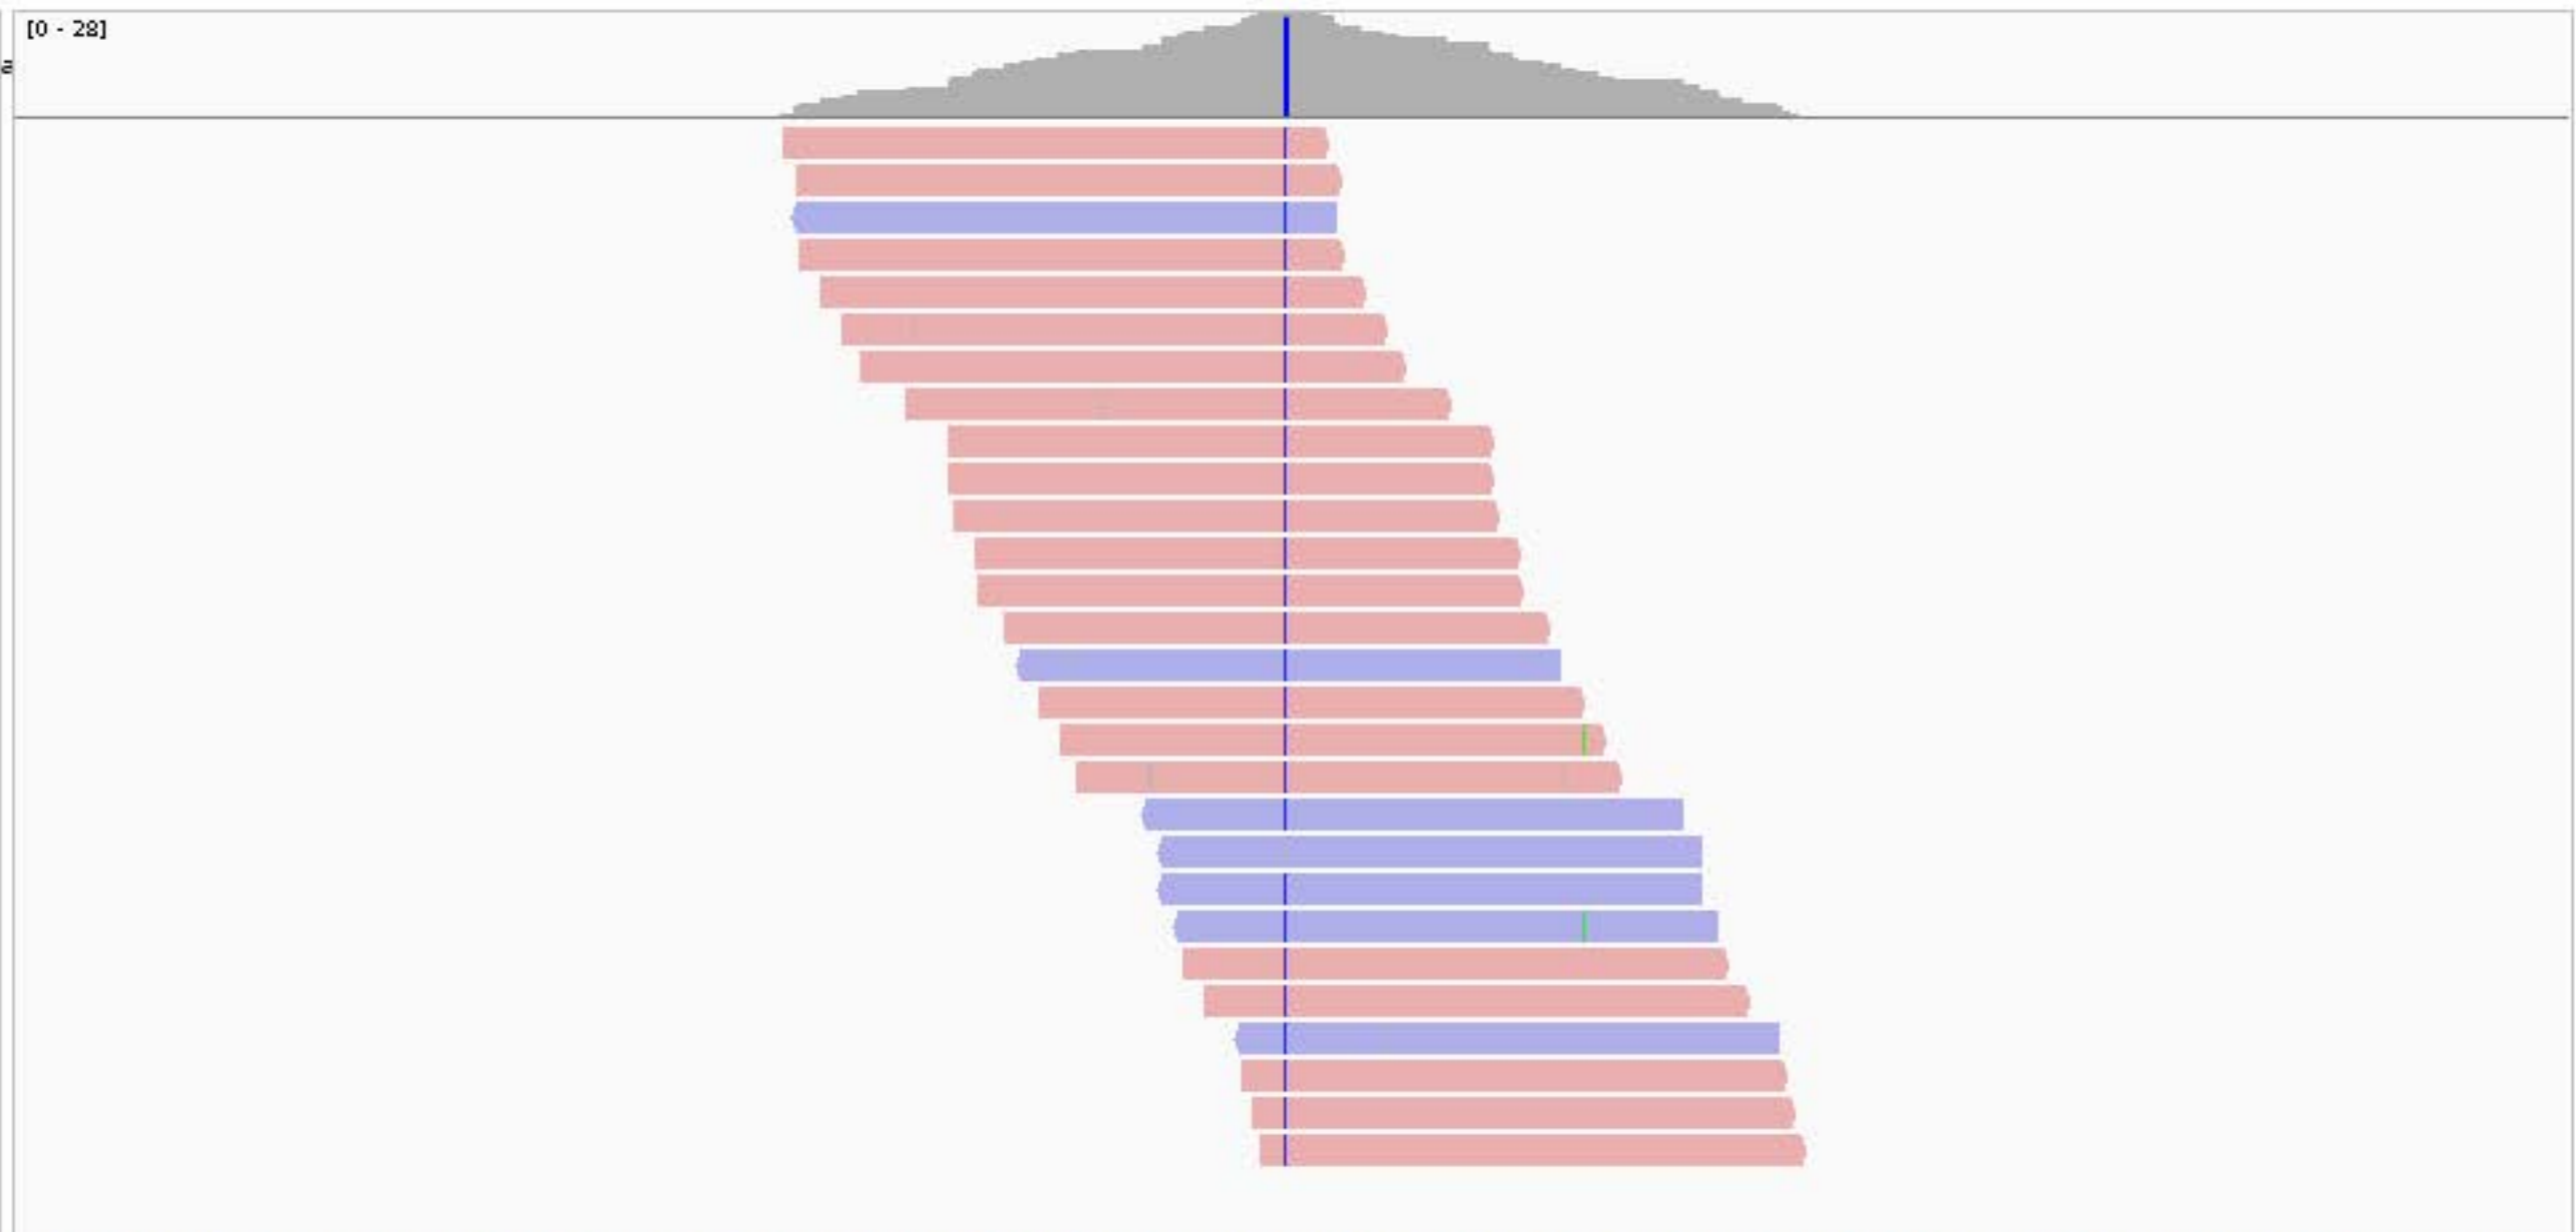

Sequence →

Refseq Genes

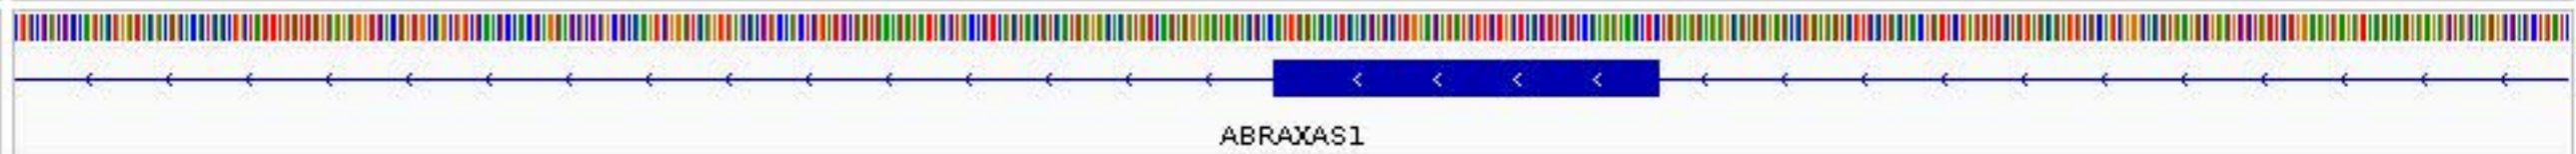

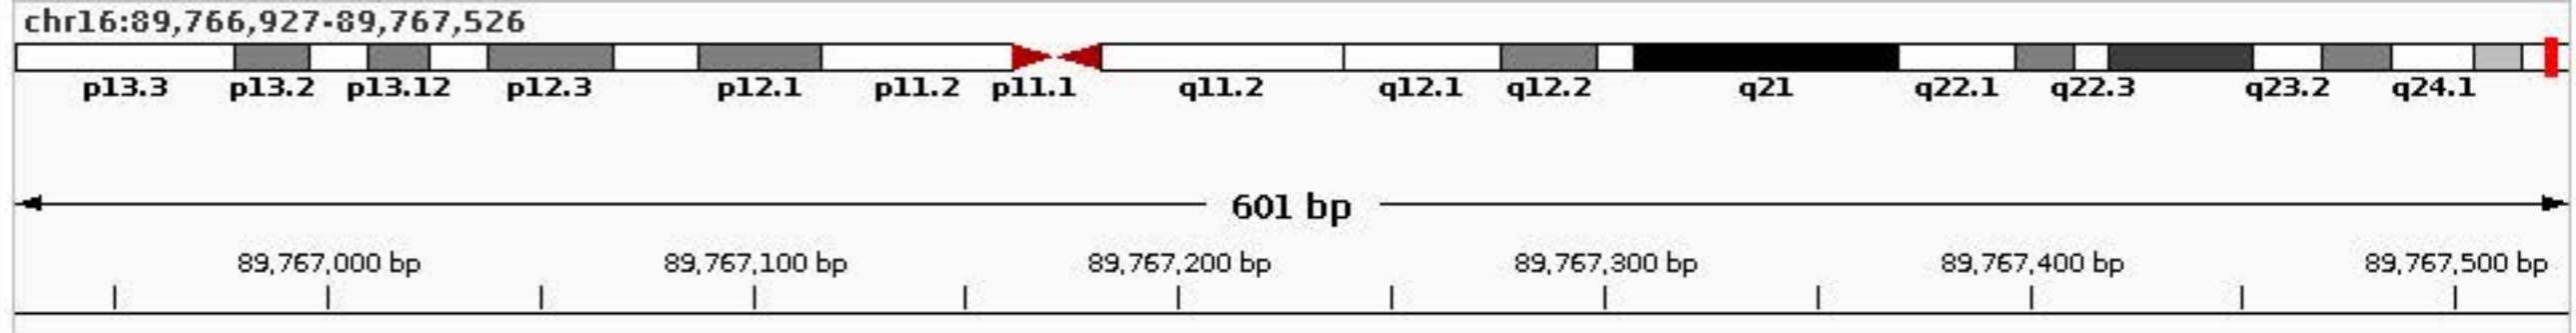

SL\_0013\_RT\_2-B\_mut.bam Cover

SL\_0013\_RT\_2-B\_mut.bam

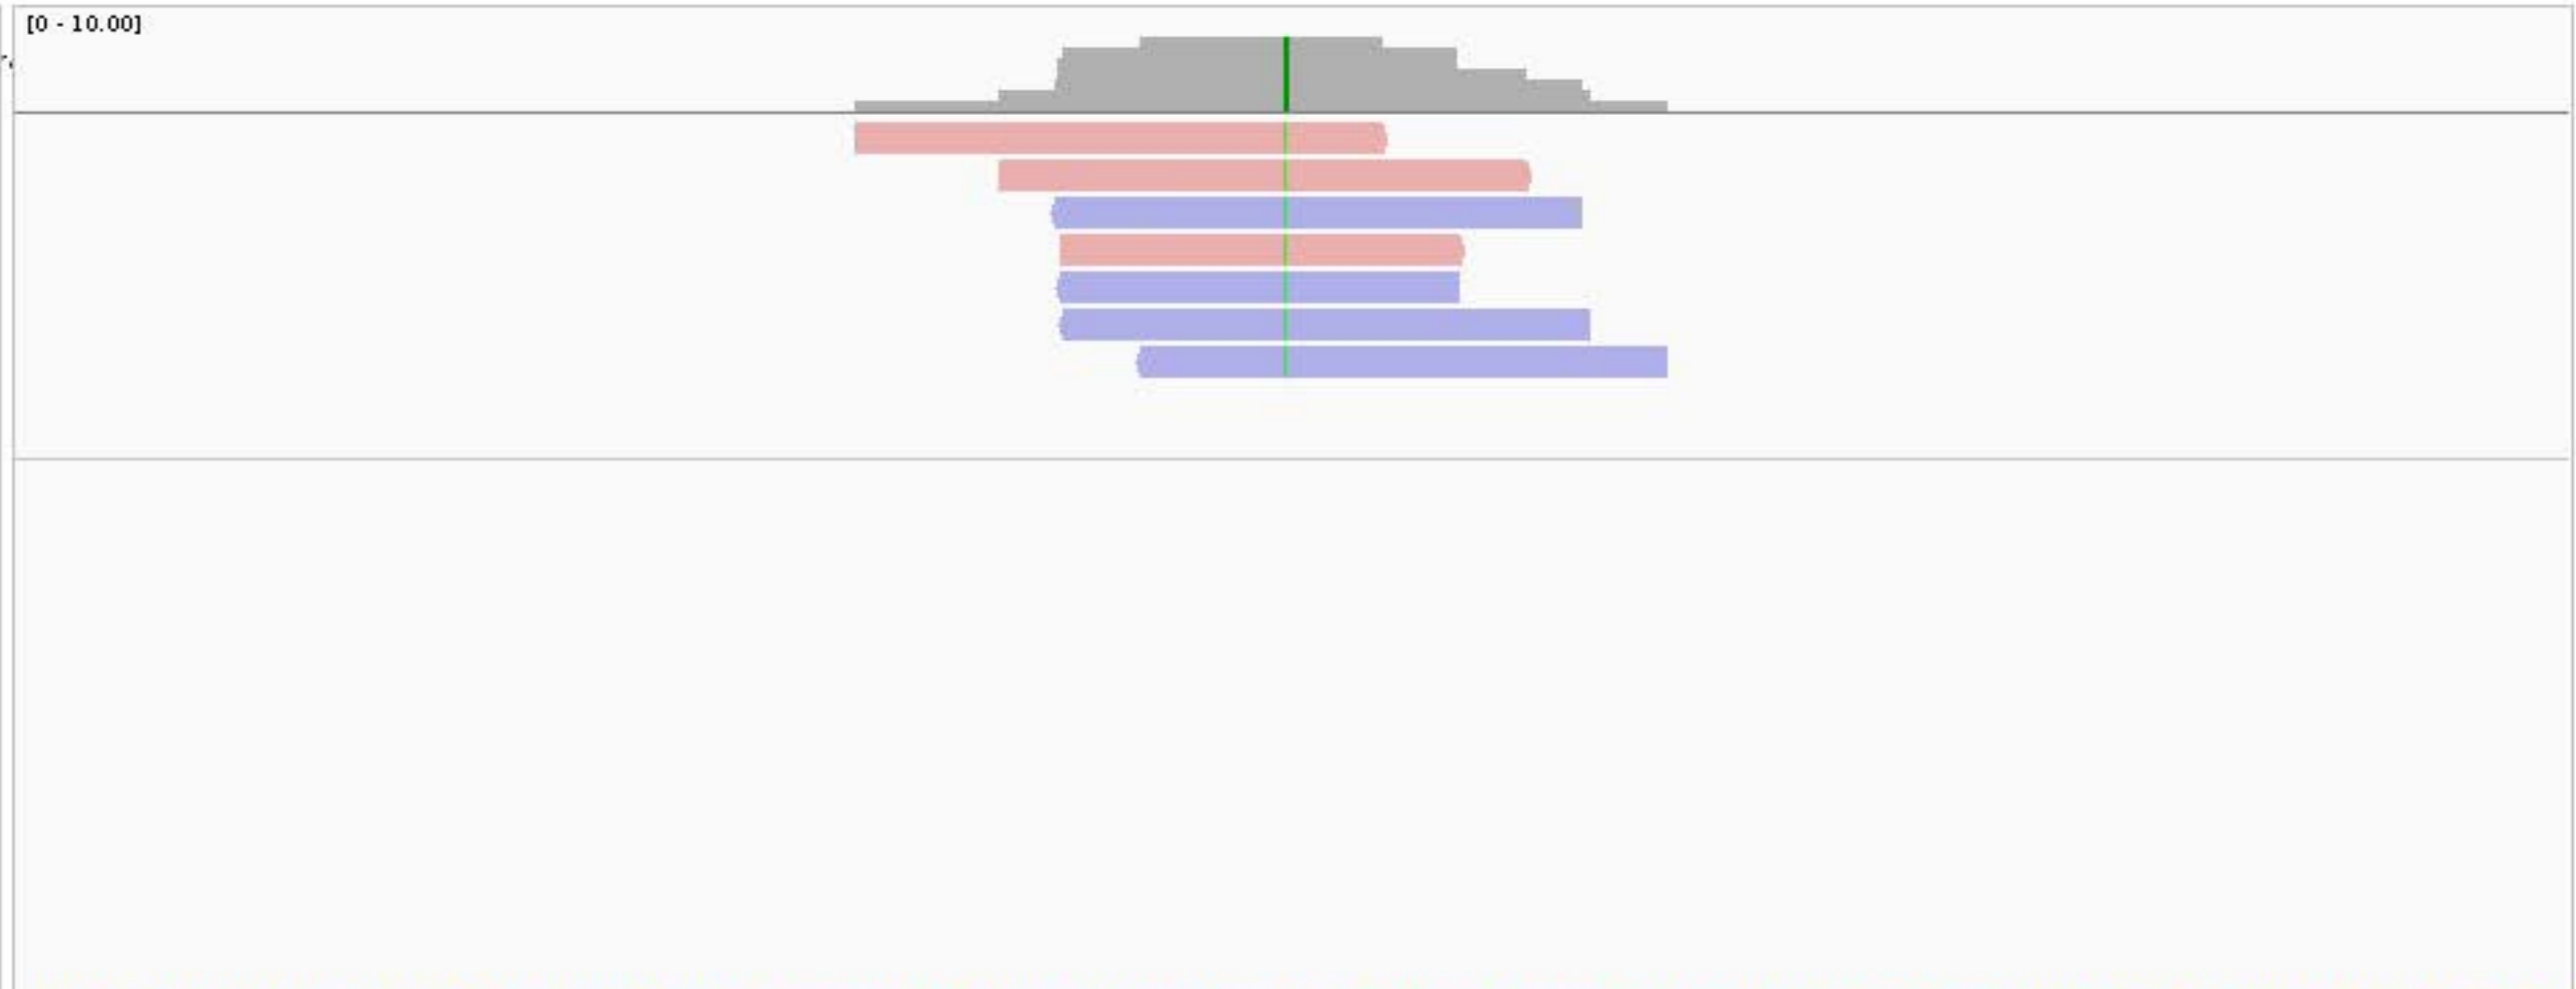

Sequence →

Refseq Genes

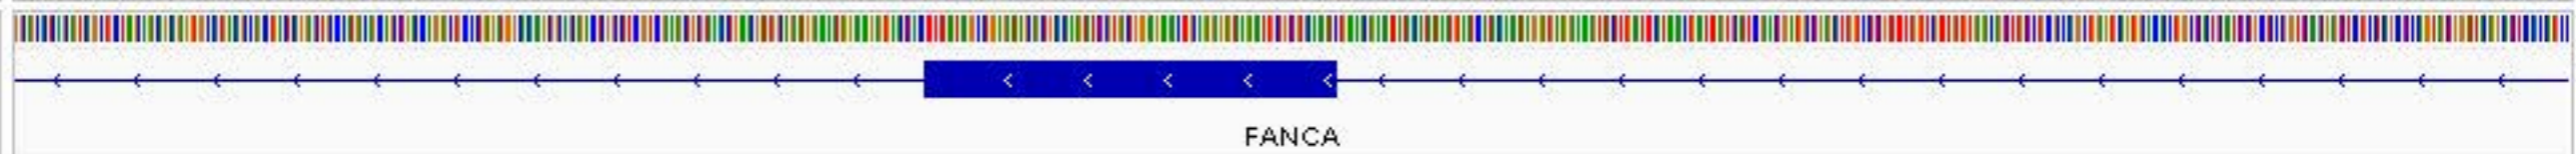



chr16:89,766,927-89,767,526

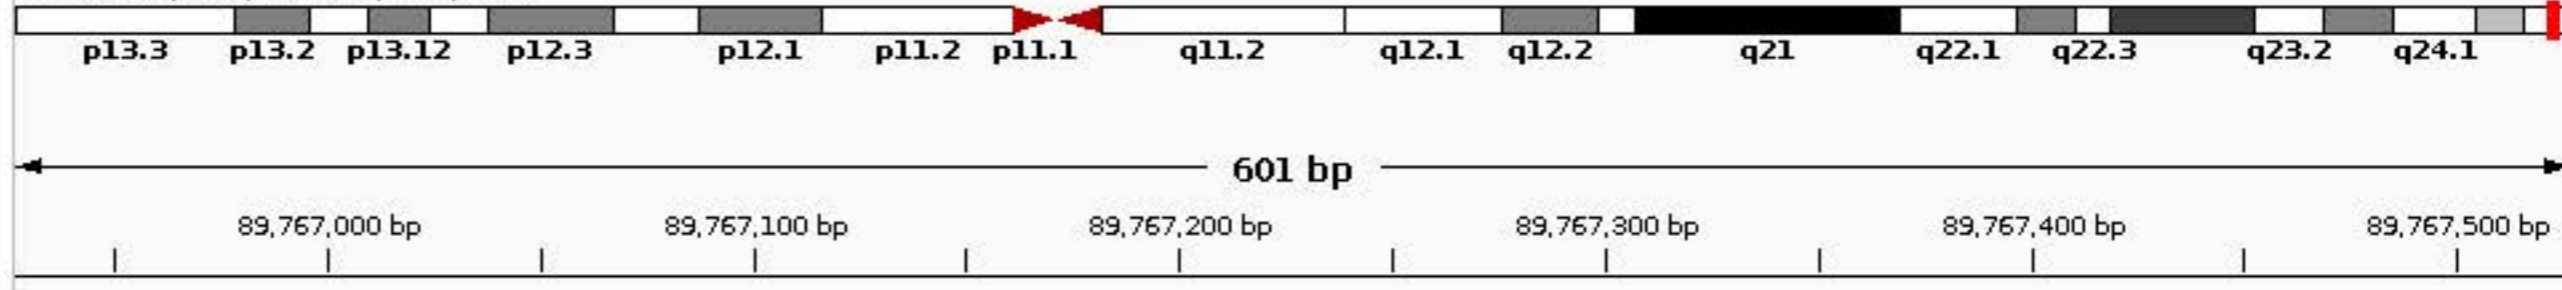

SL\_0013\_RT\_6-B\_mut.bam Cover.  
SL\_0013\_RT\_6-B\_mut.bam  
Sequence  
Refseq Genes

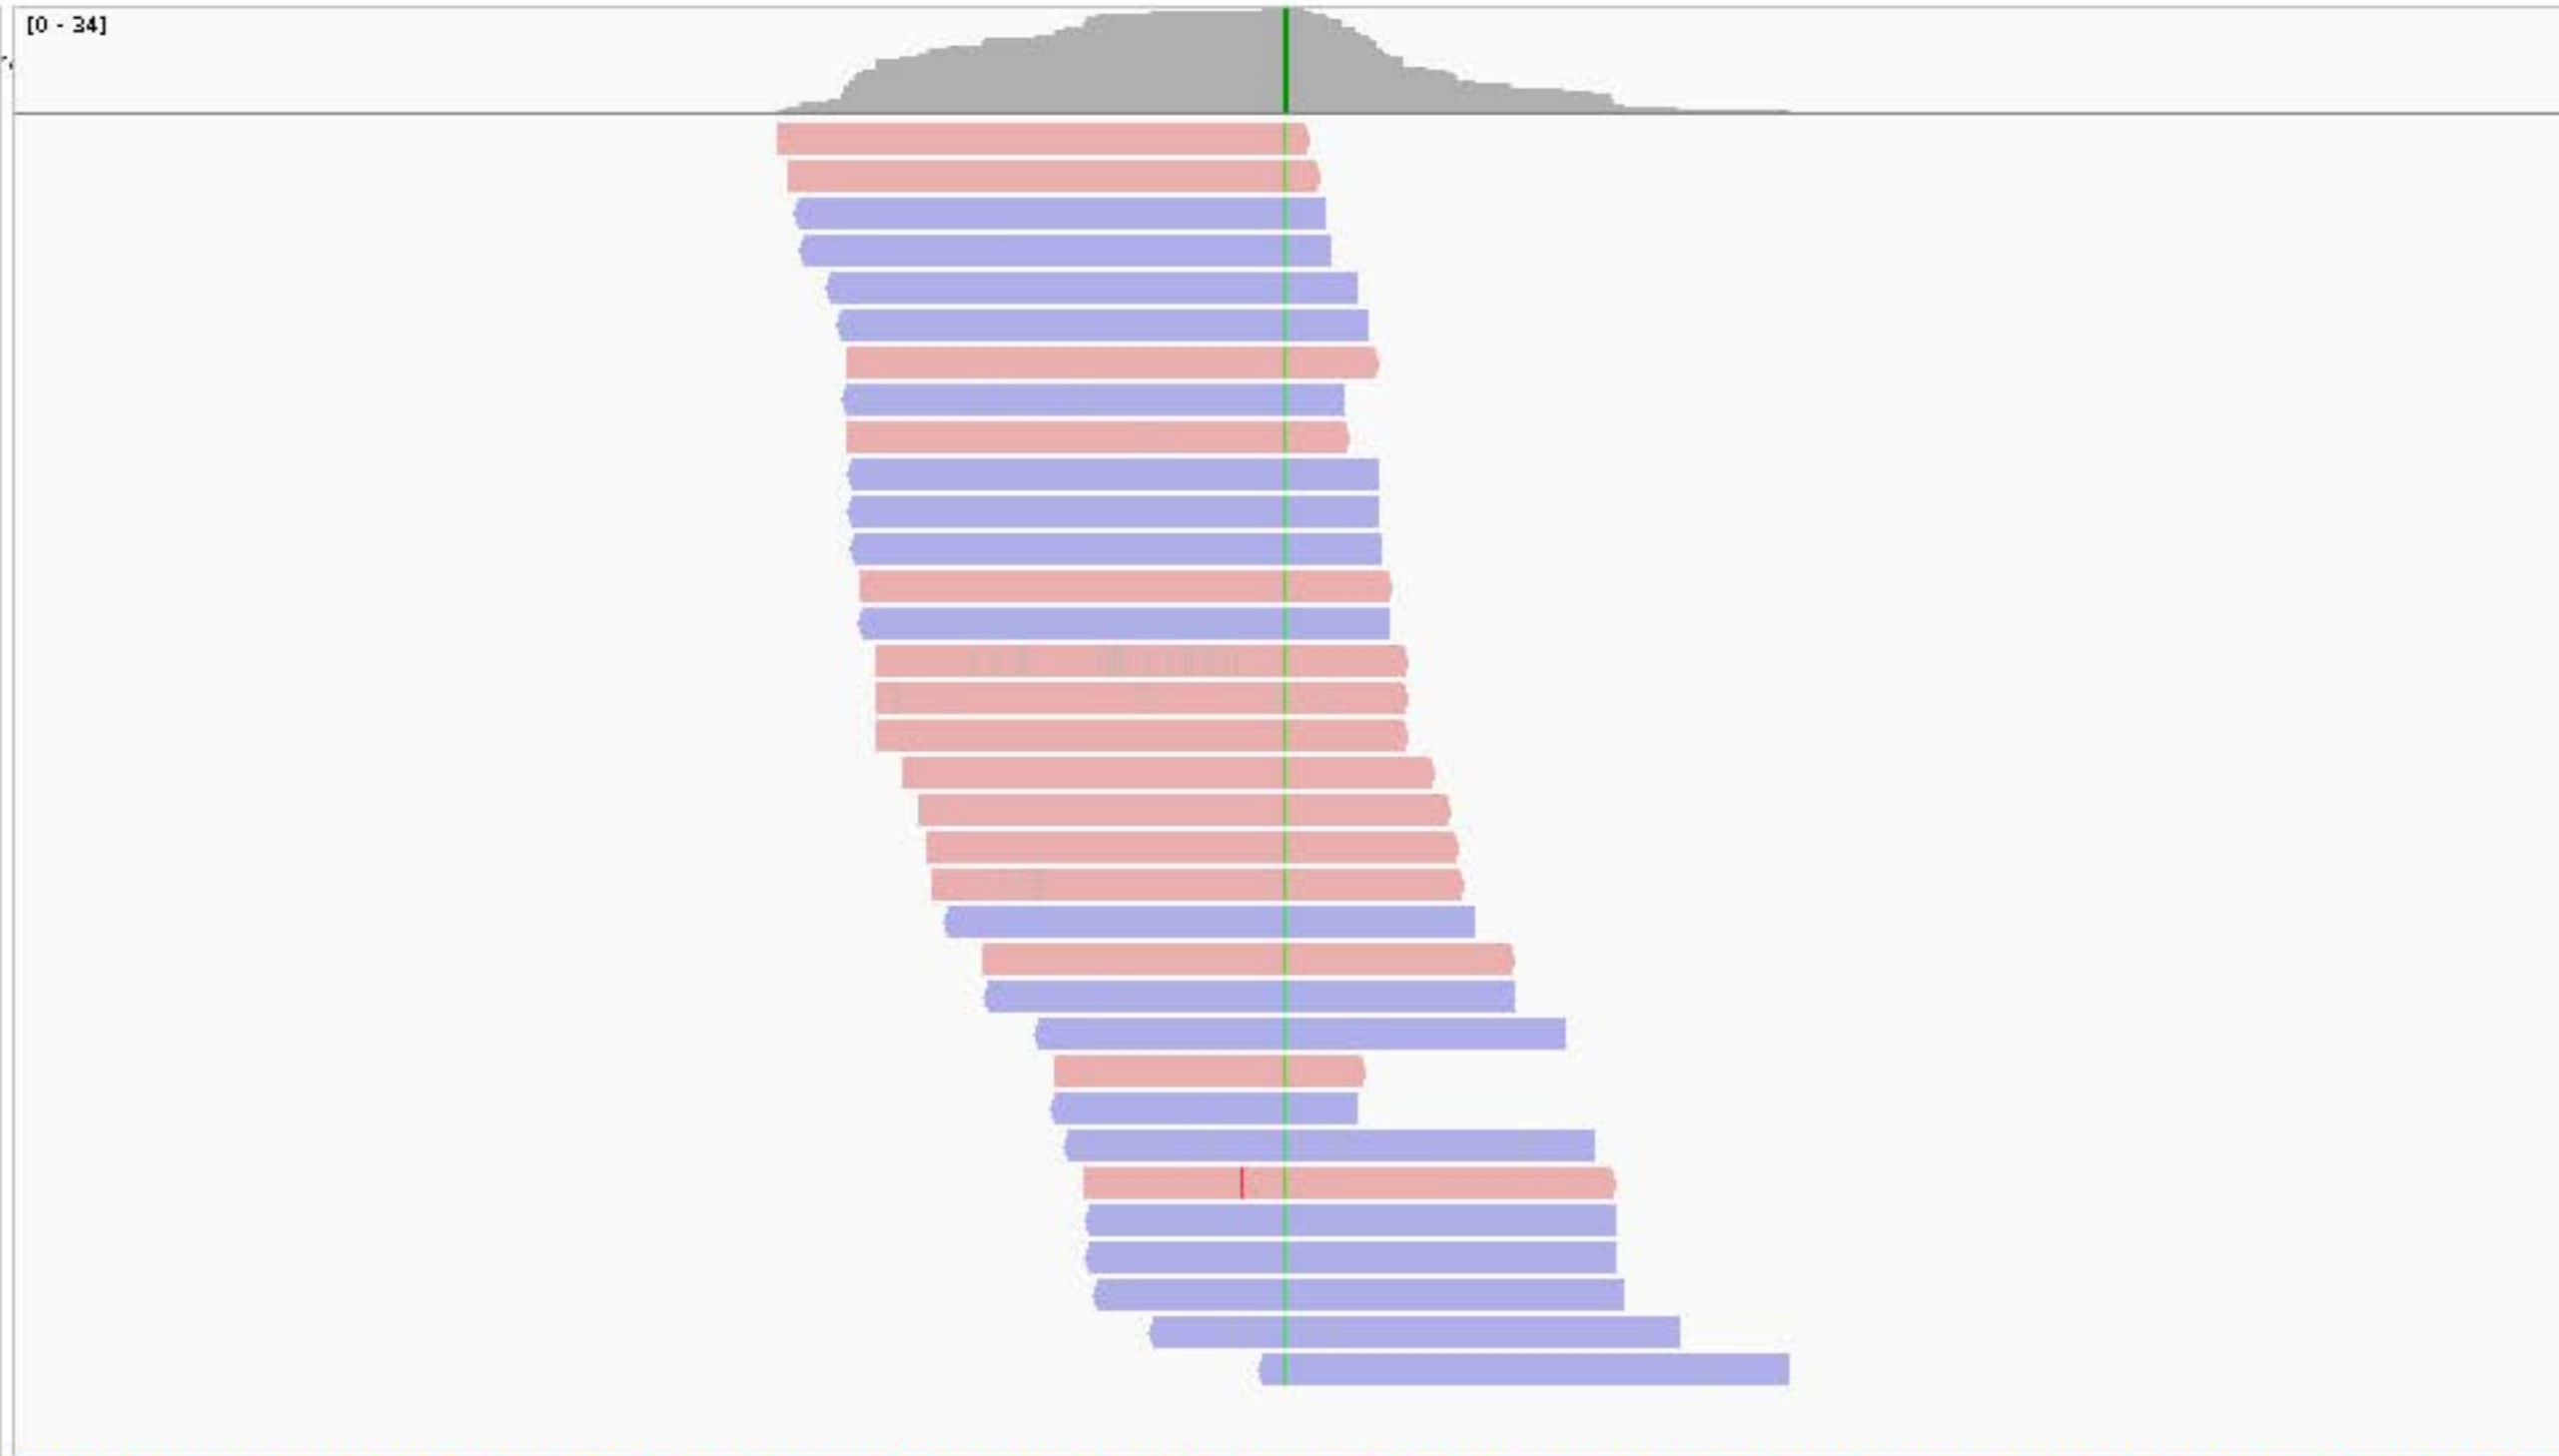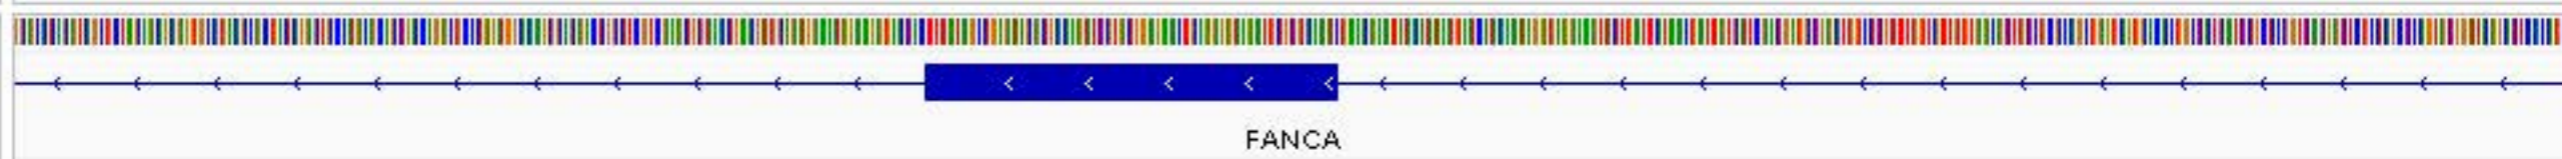

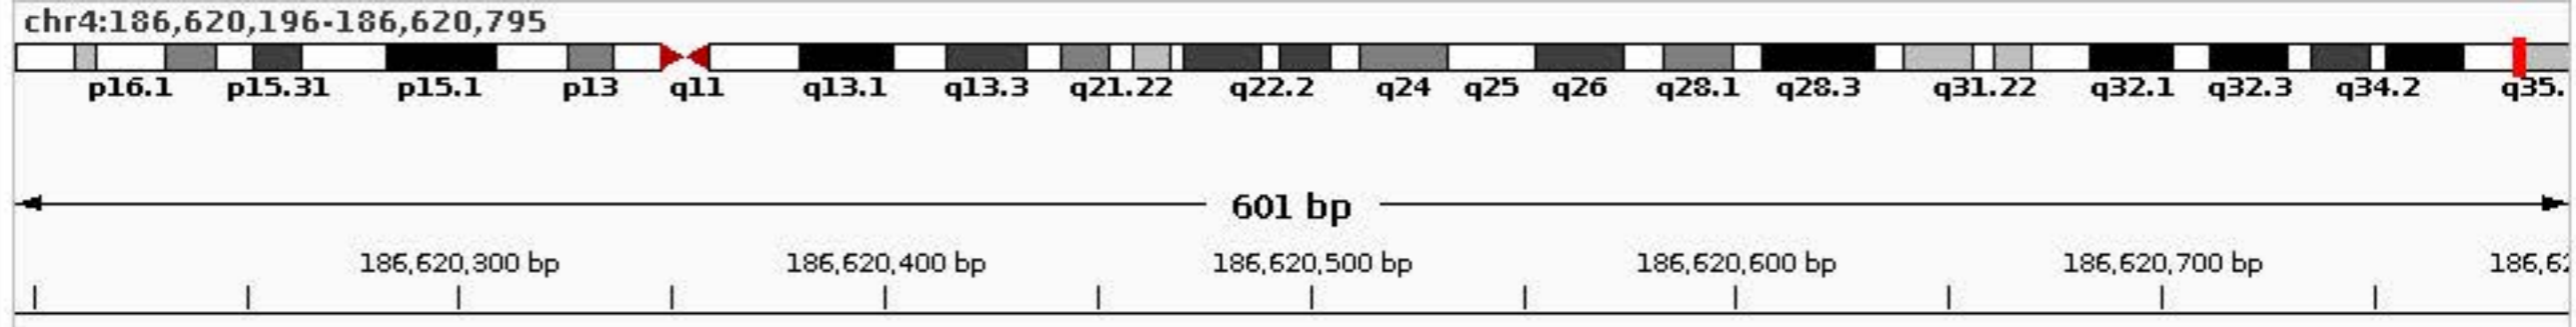

SL\_1011-T1-B\_mut.bam Coverage

SL\_1011-T1-B\_mut.bam

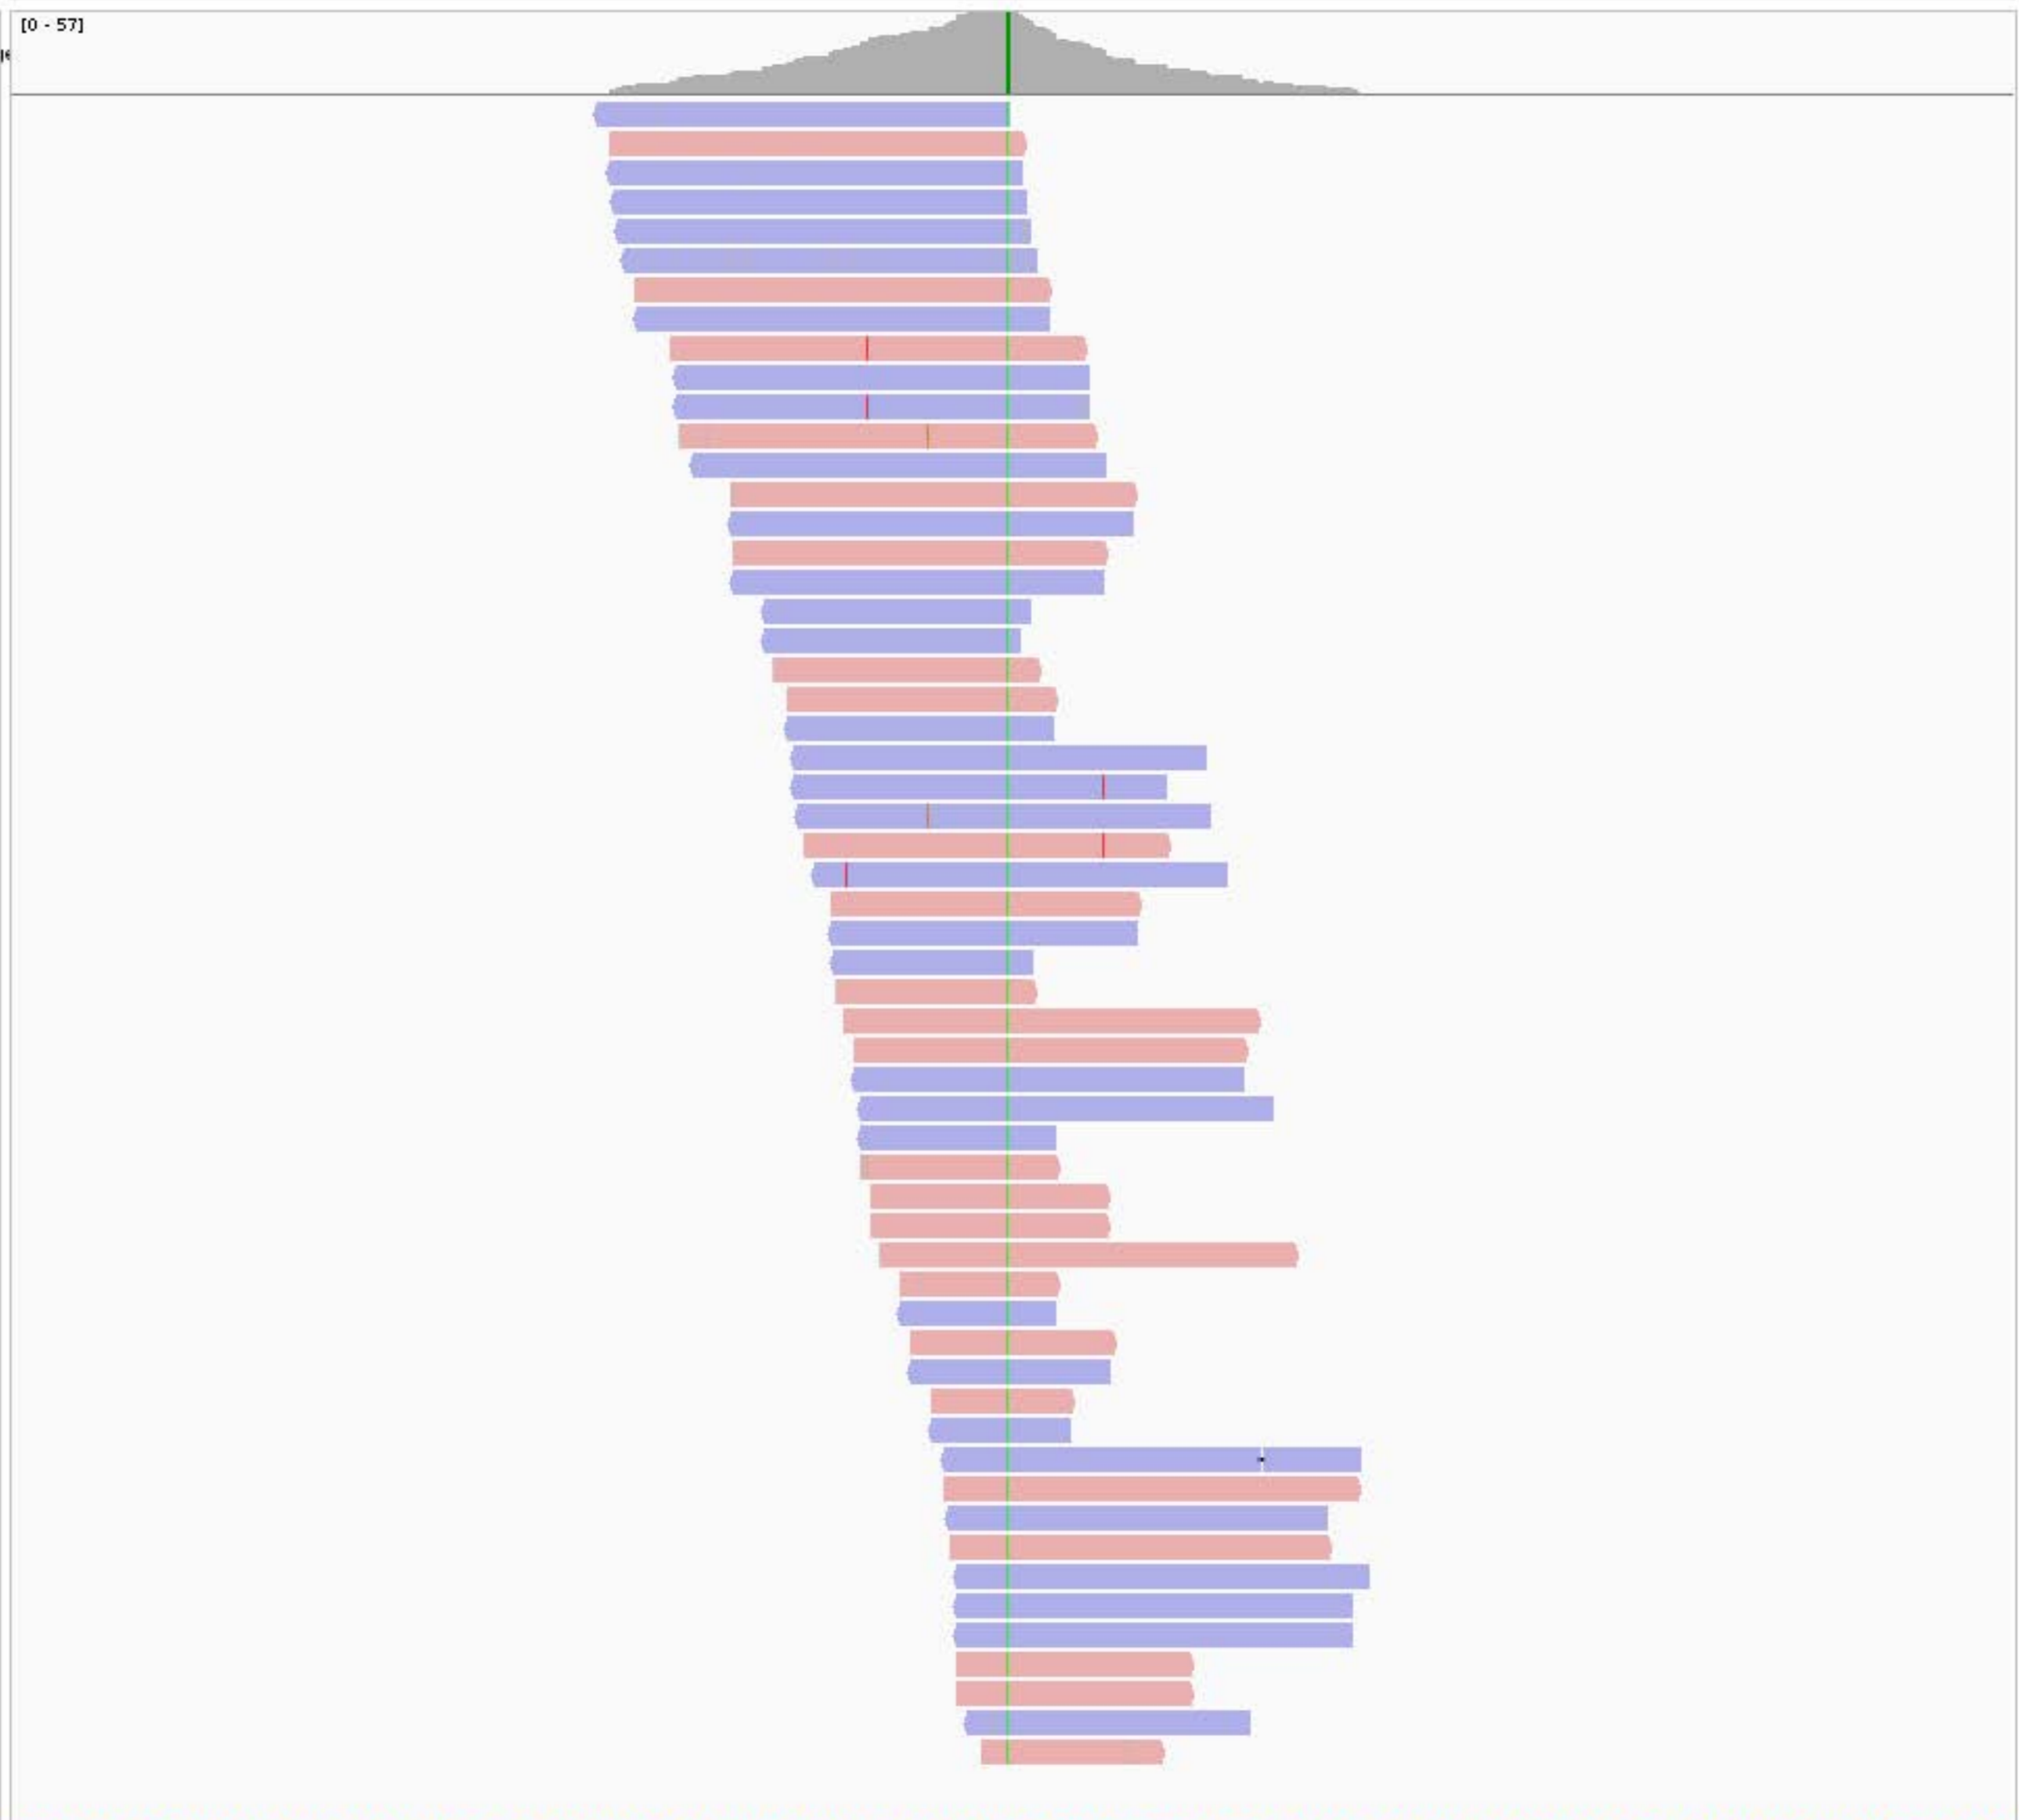

Sequence

Refseq Genes

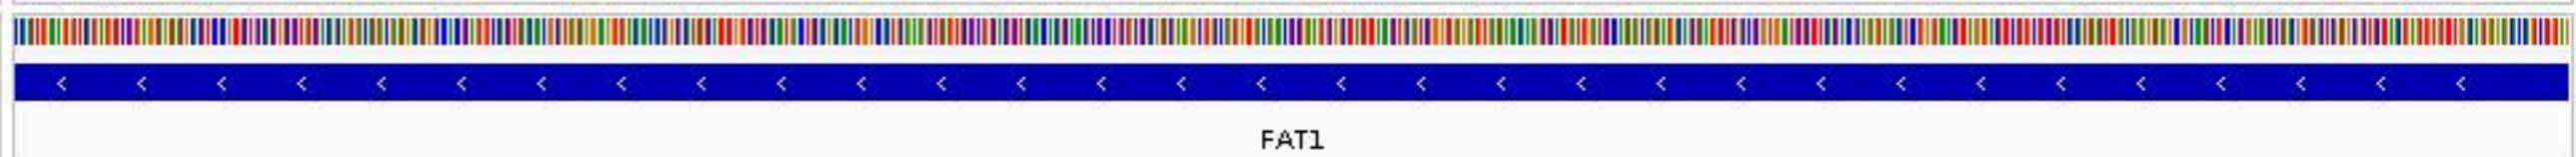



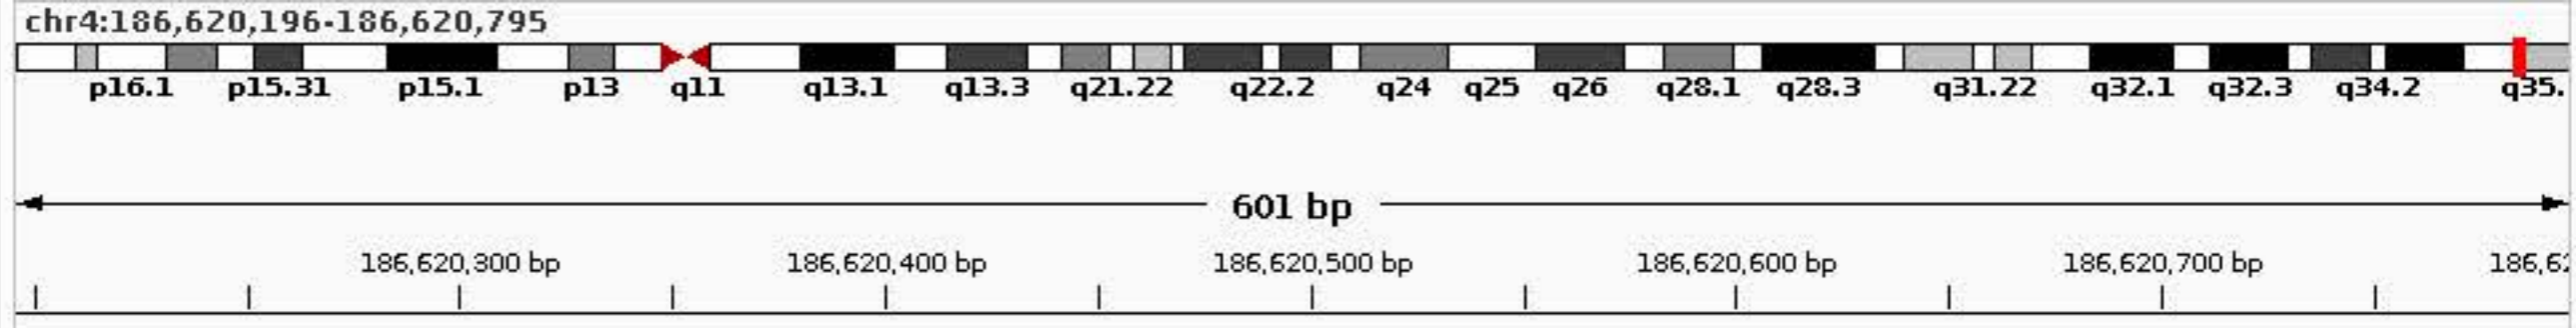

SL\_1011-T2-B\_mut.bam Coverage

SL\_1011-T2-B\_mut.bam

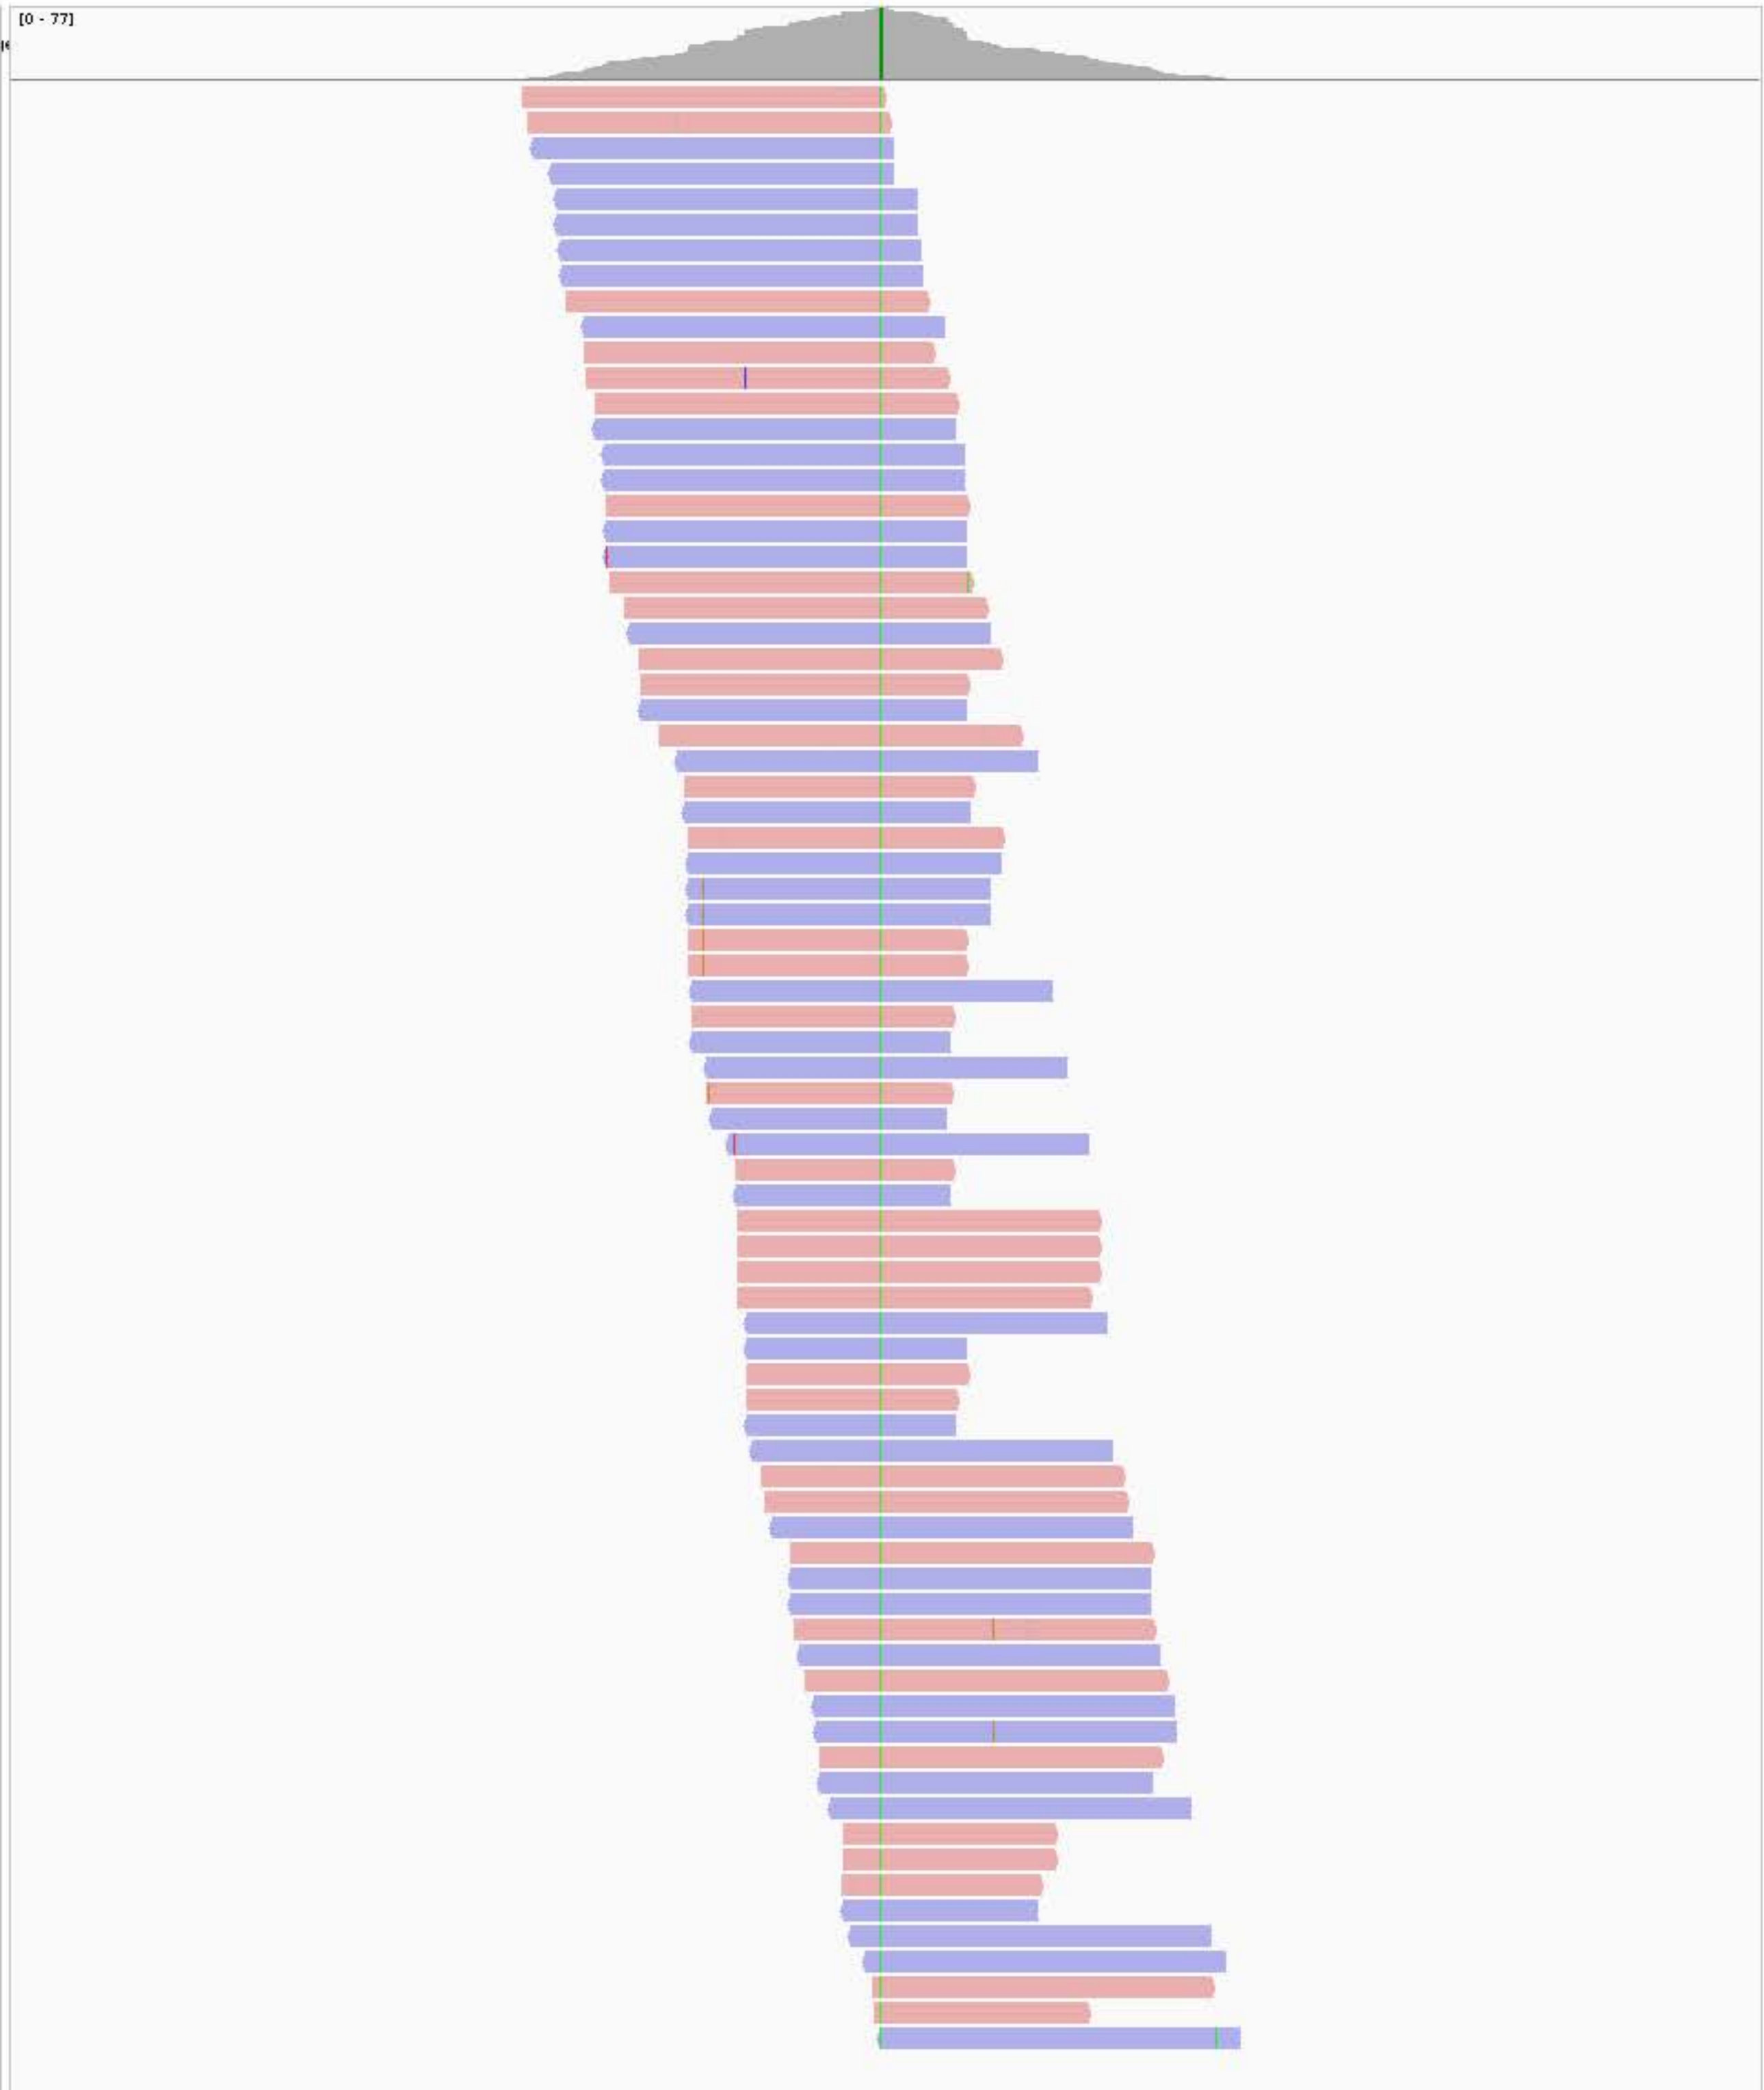

Sequence →

Refseq Genes

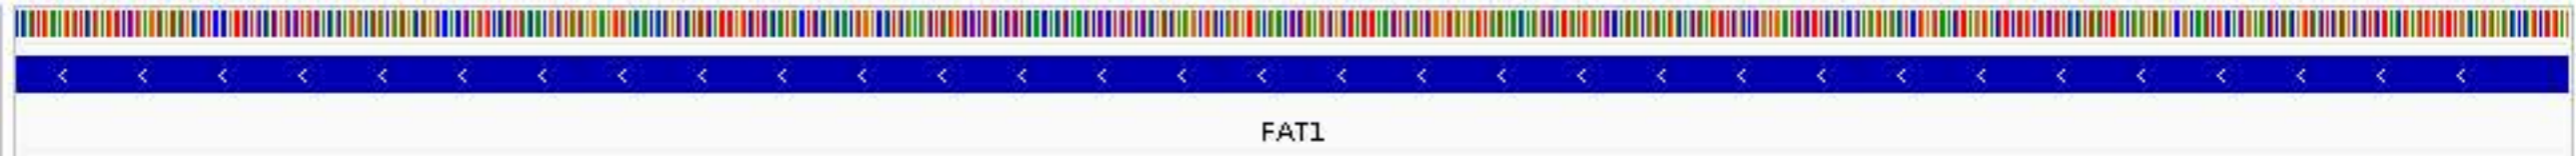

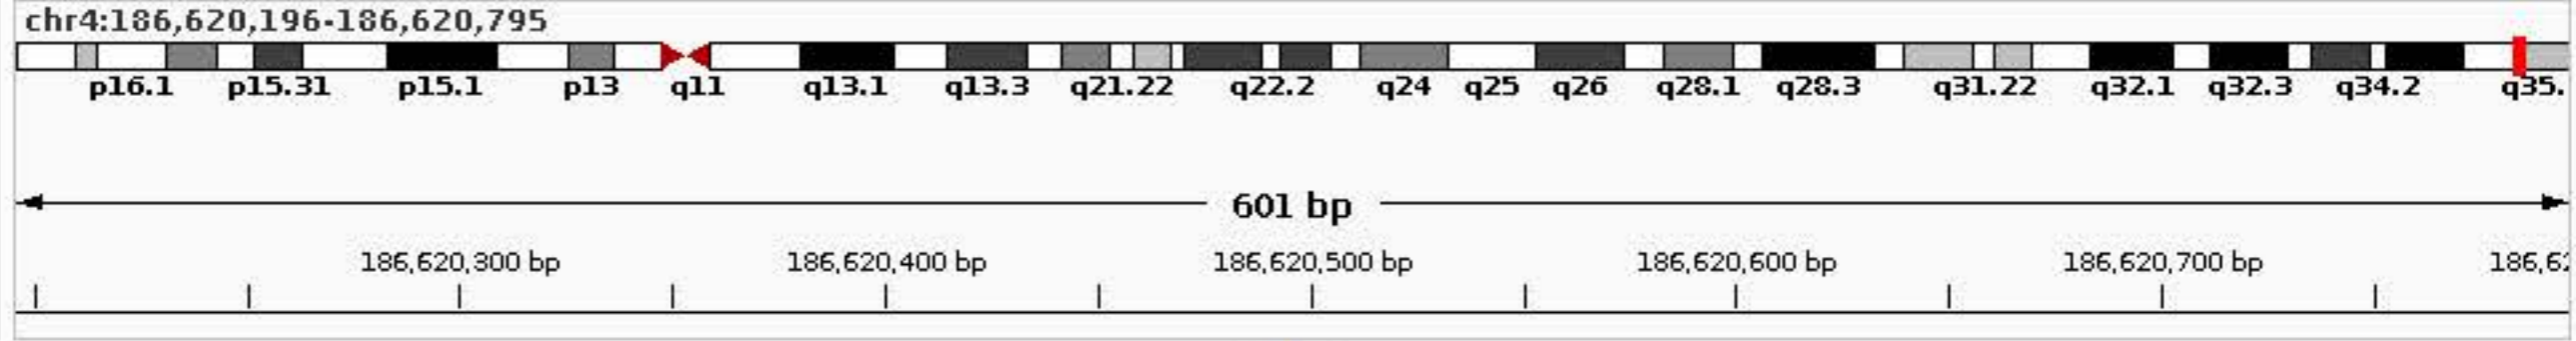

SL\_1011-T3-B\_mut.bam Coverage

SL\_1011-T3-B\_mut.bam

Sequence →

Refseq Genes

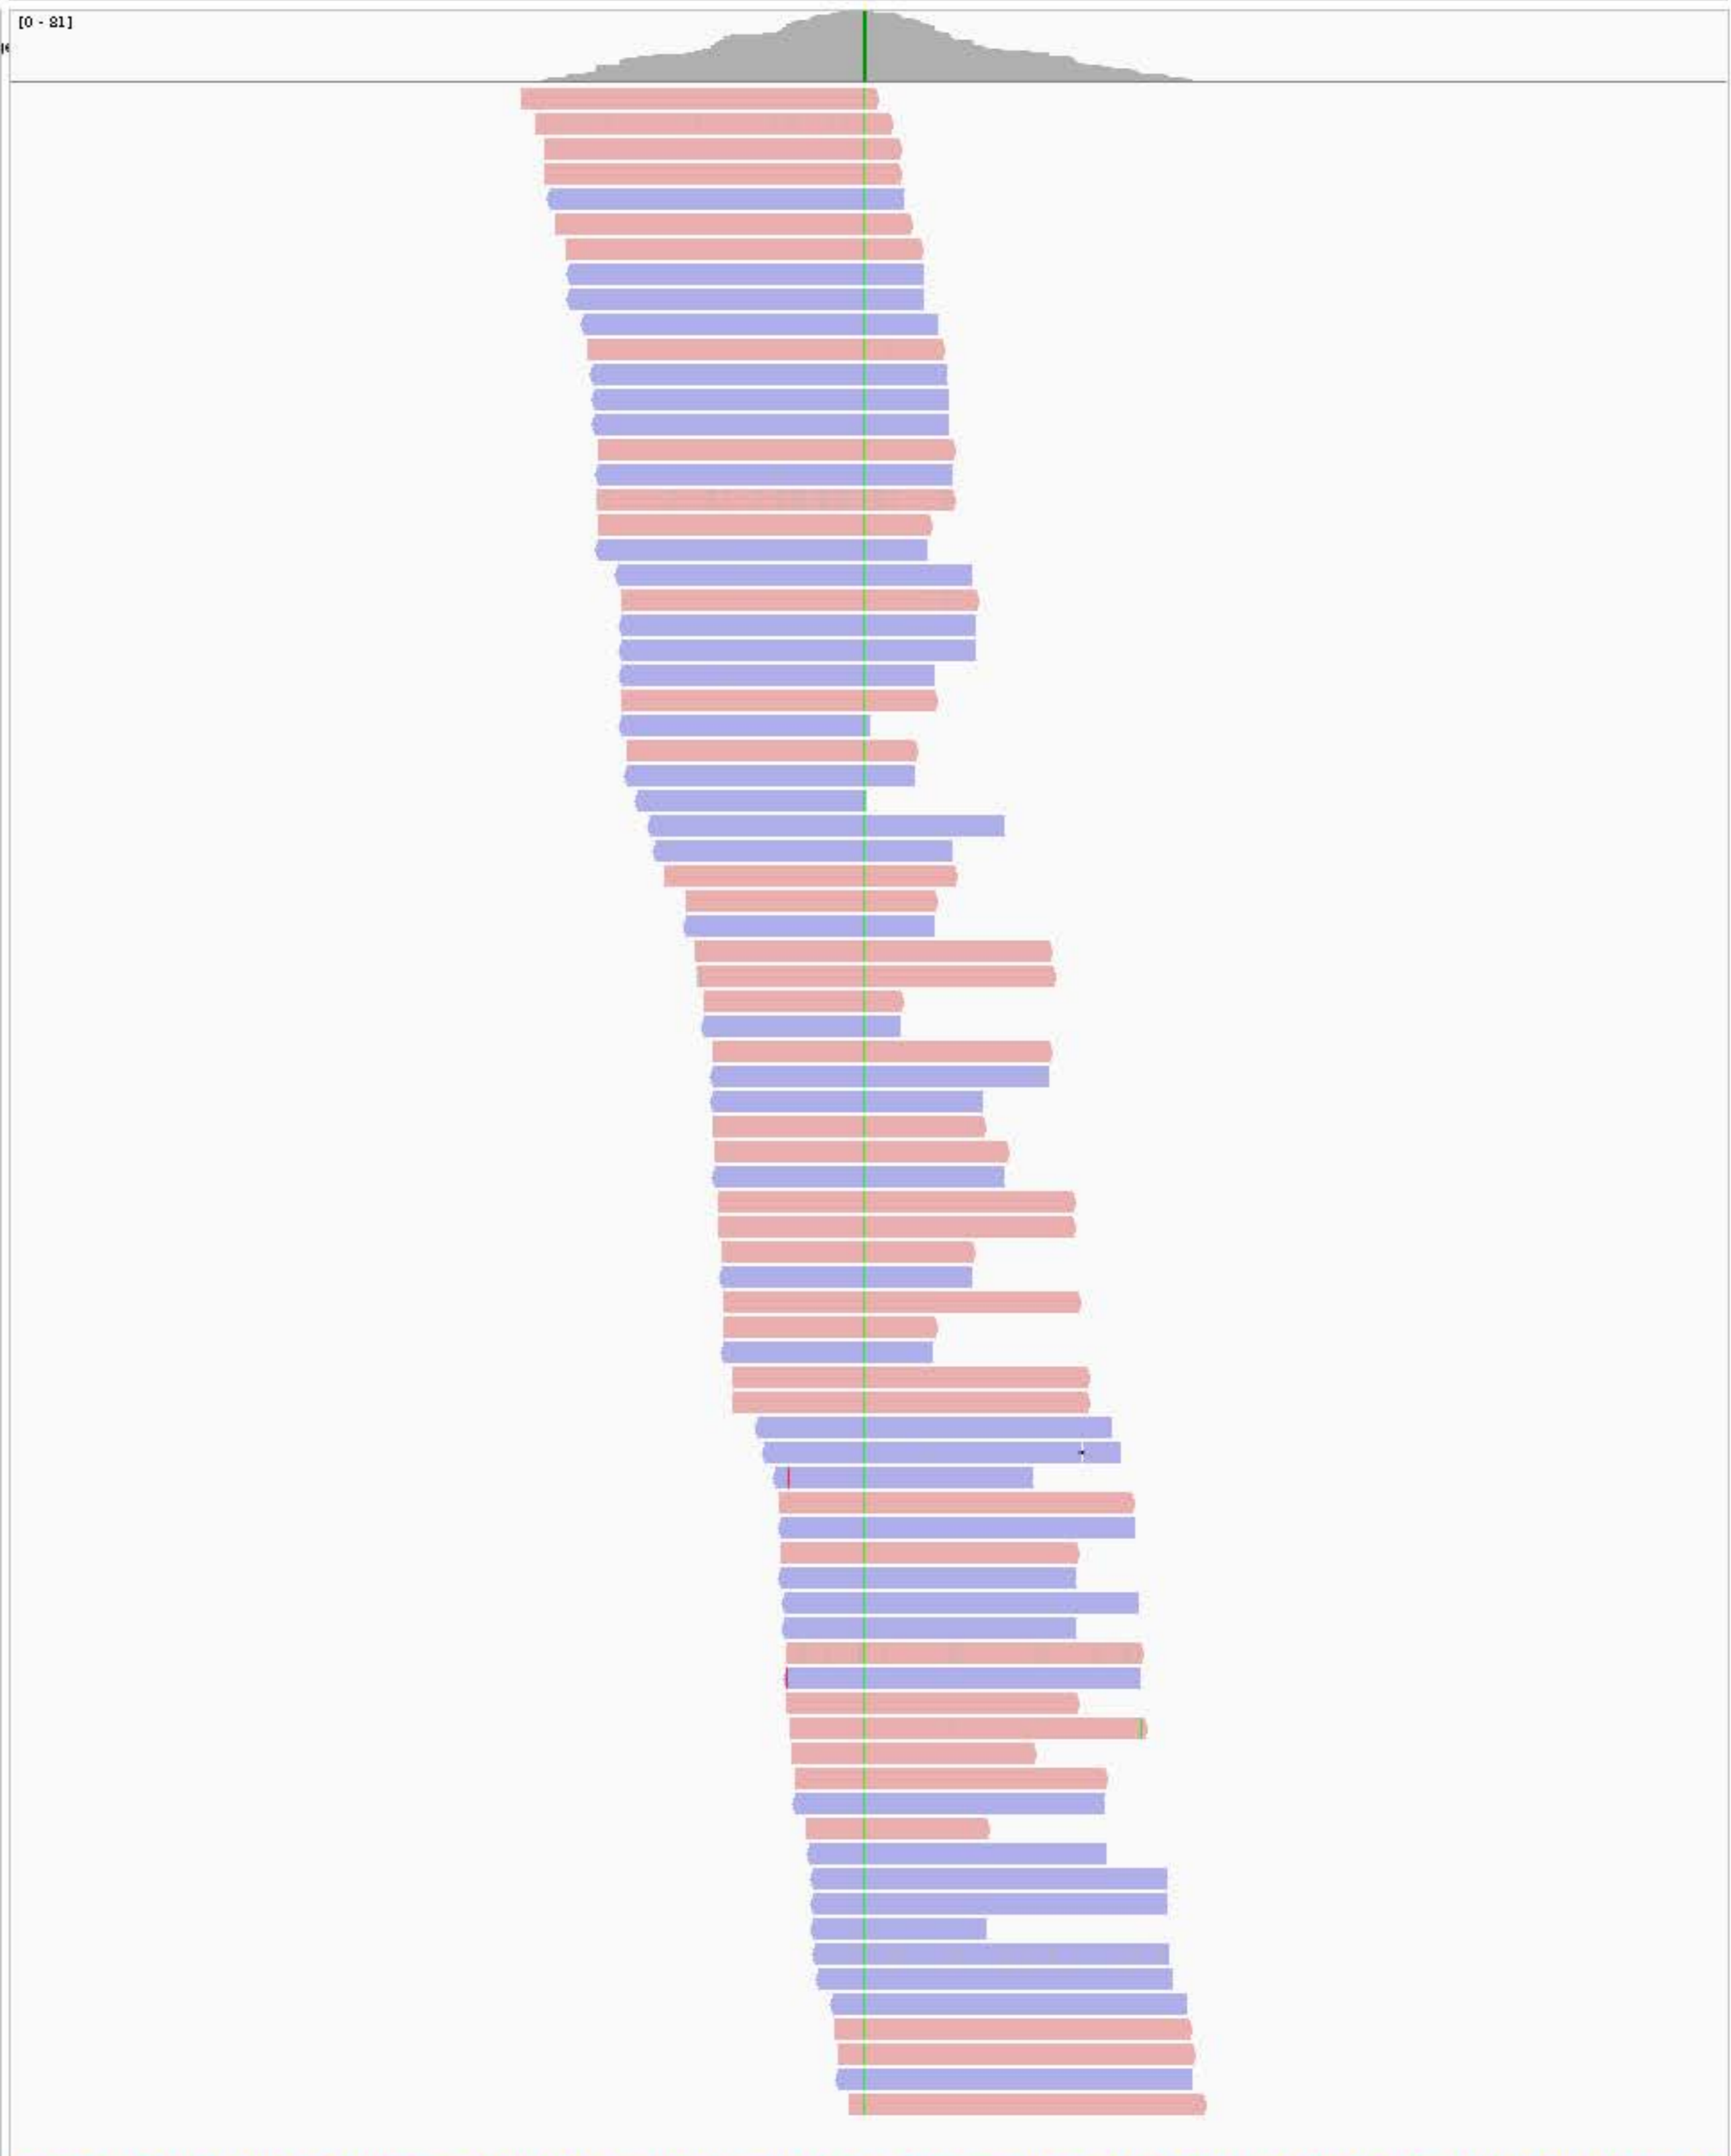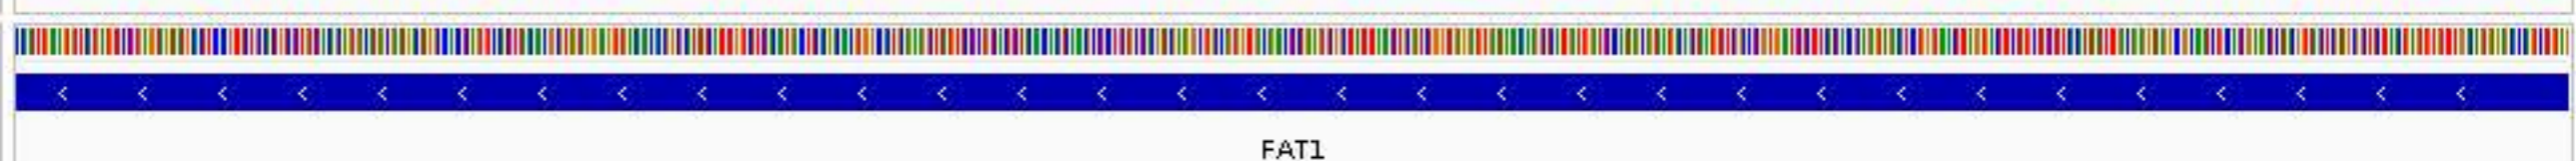

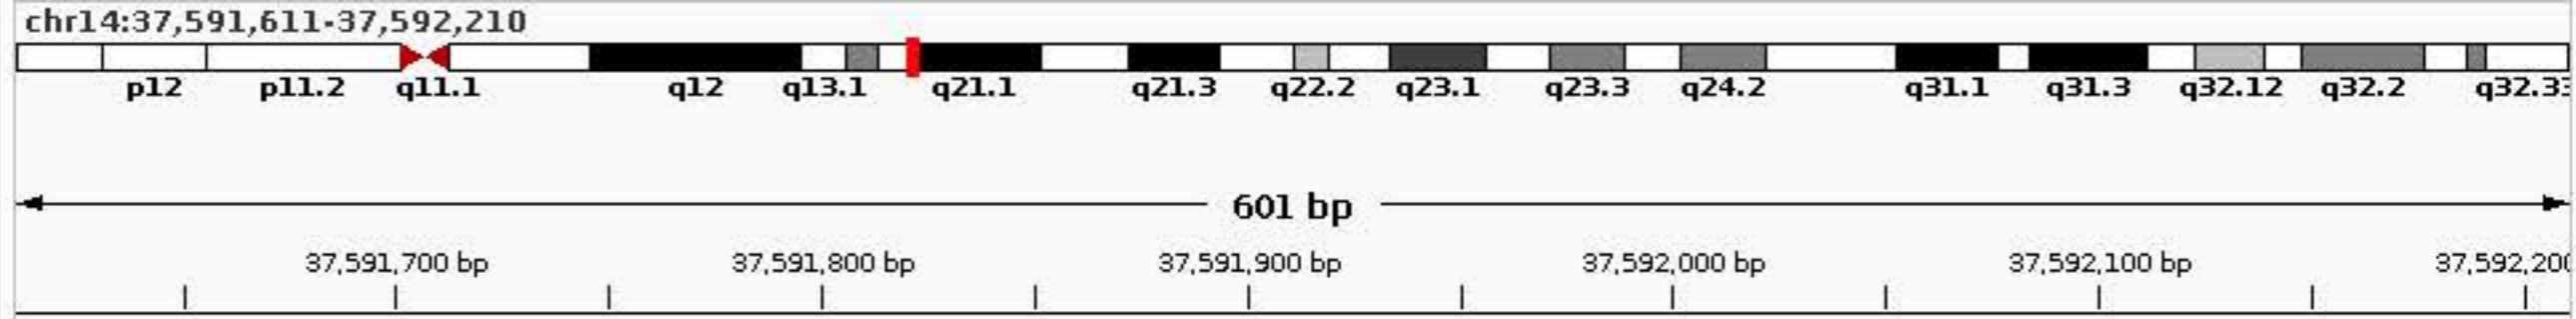

SL\_0013\_RT\_4-B\_mut.bam Cover

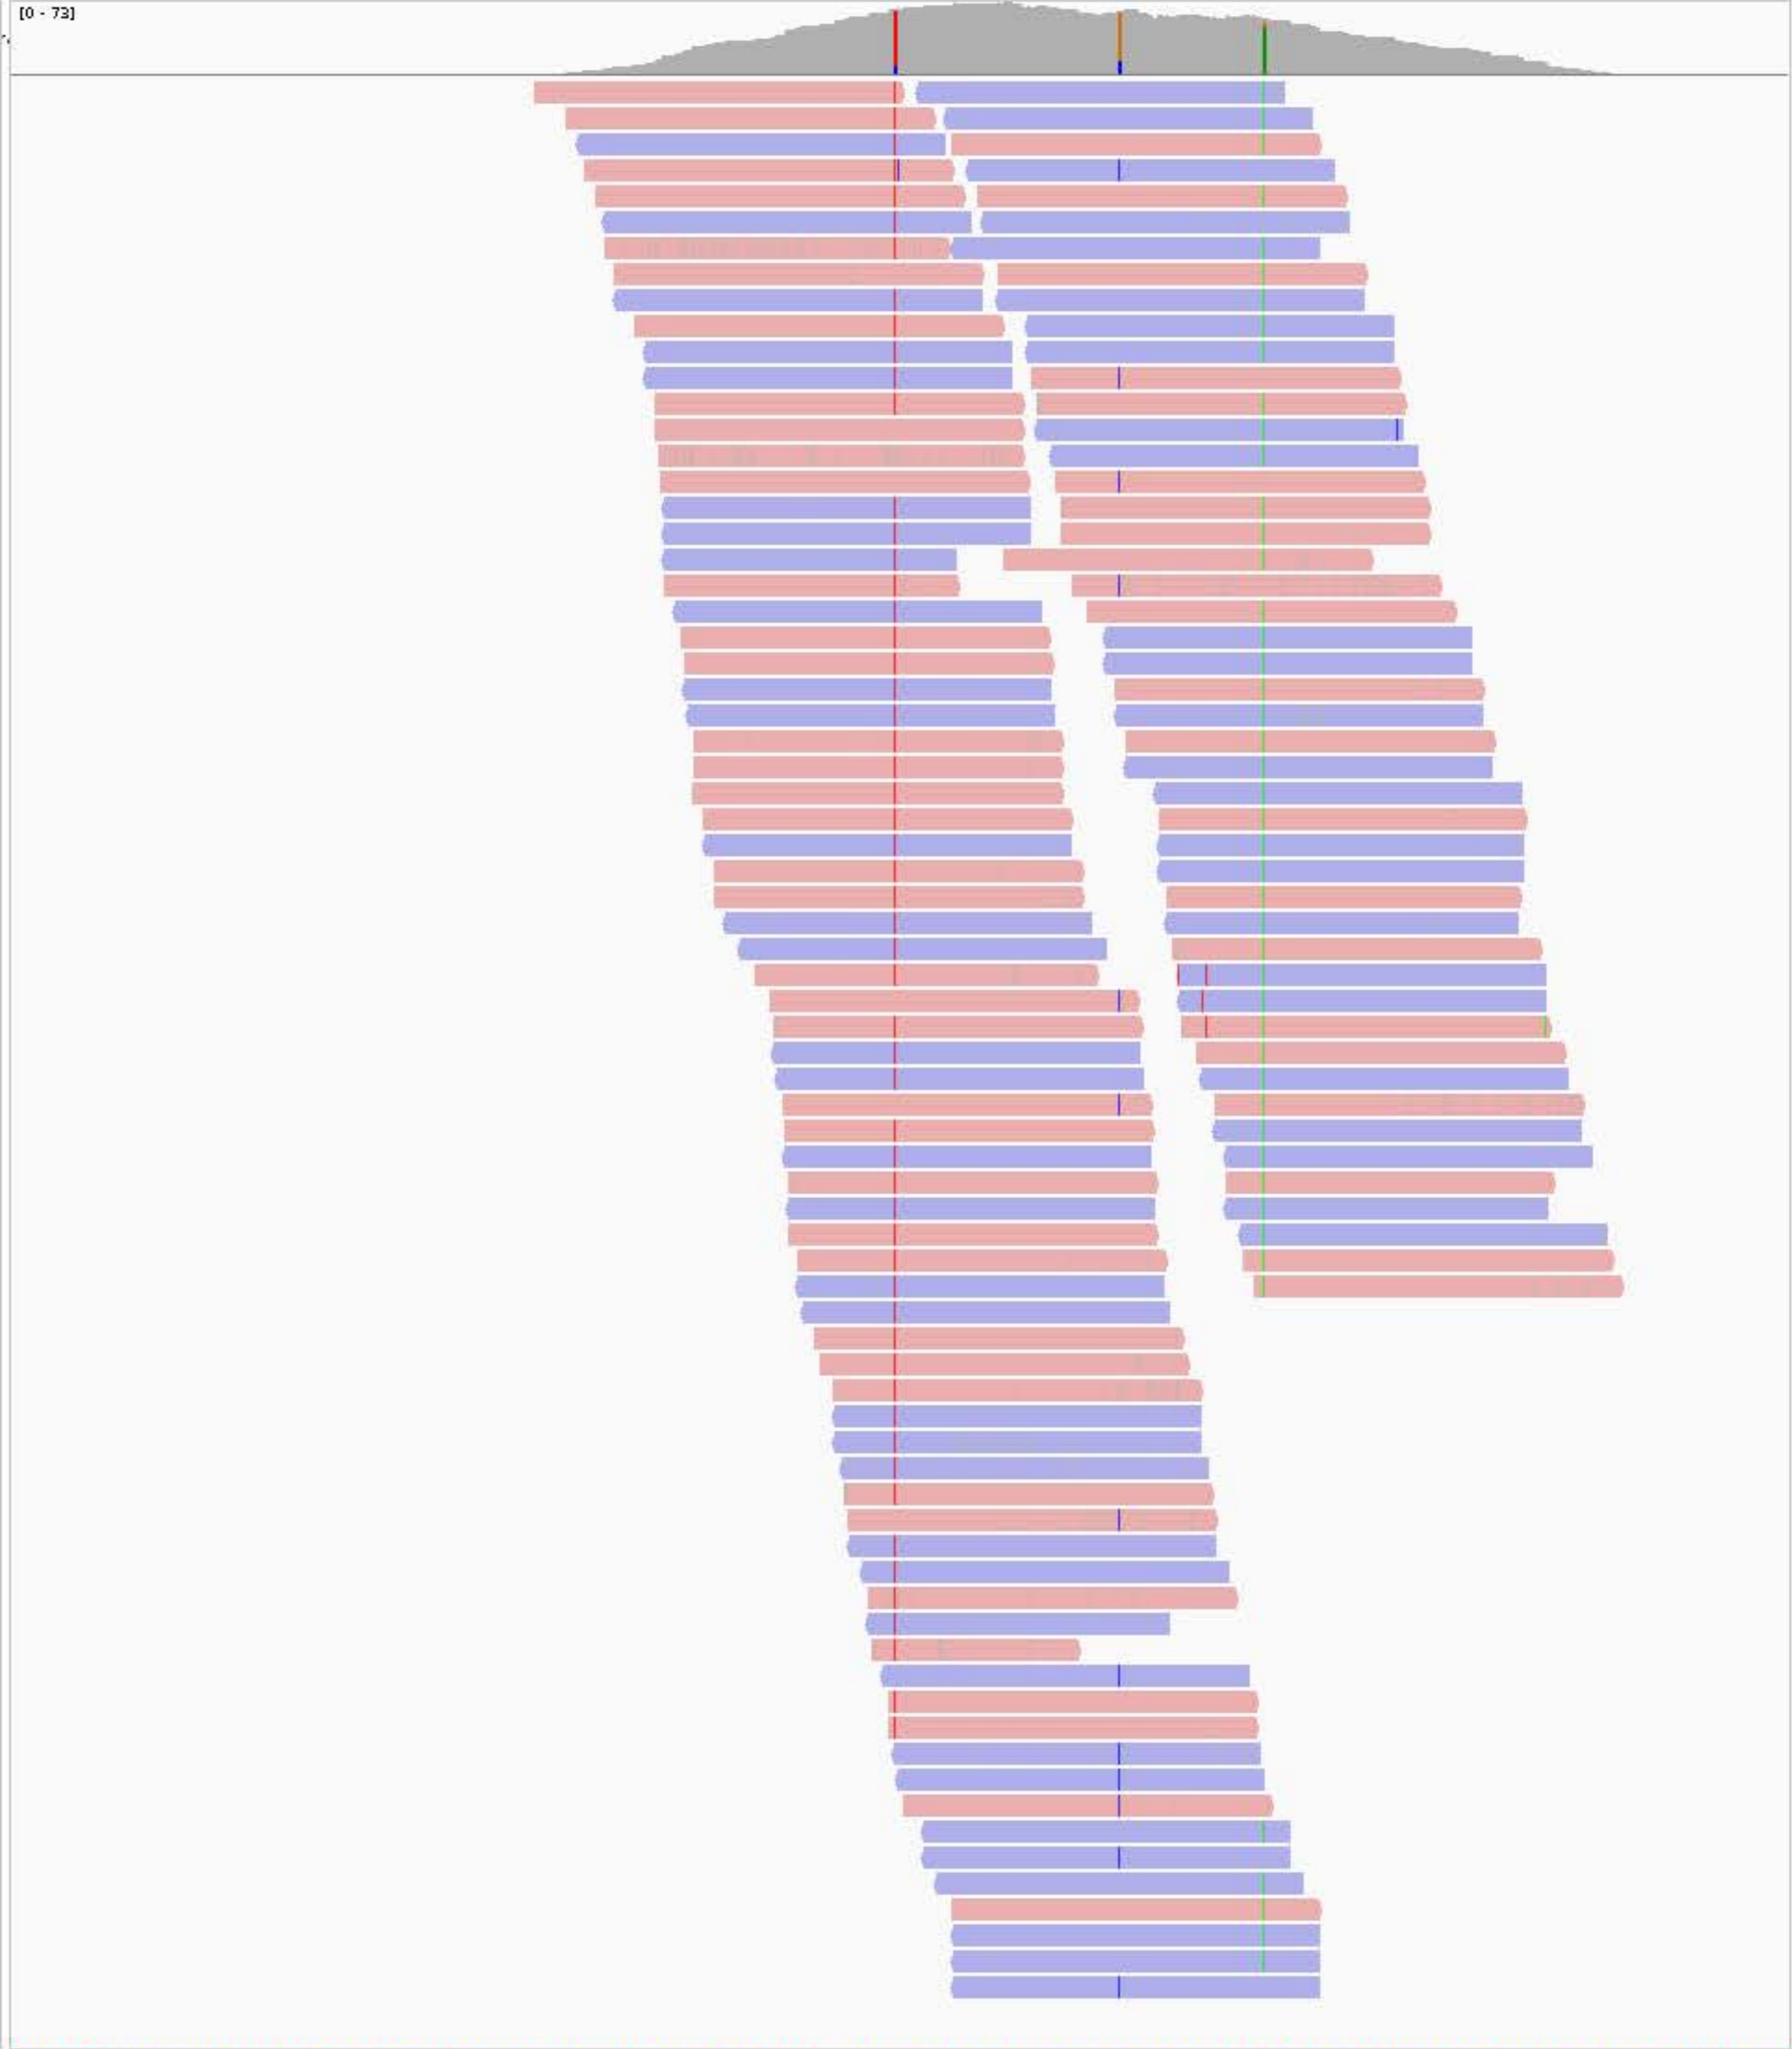

SL\_0013\_RT\_4-B\_mut.bam

Sequence →

Refseq Genes

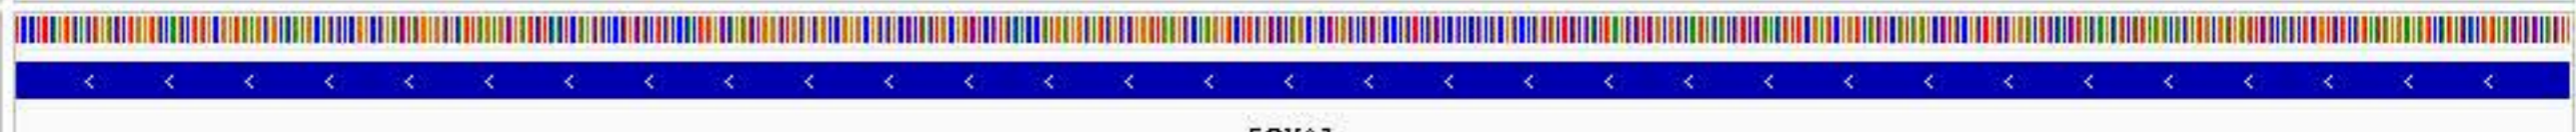

FOXA1



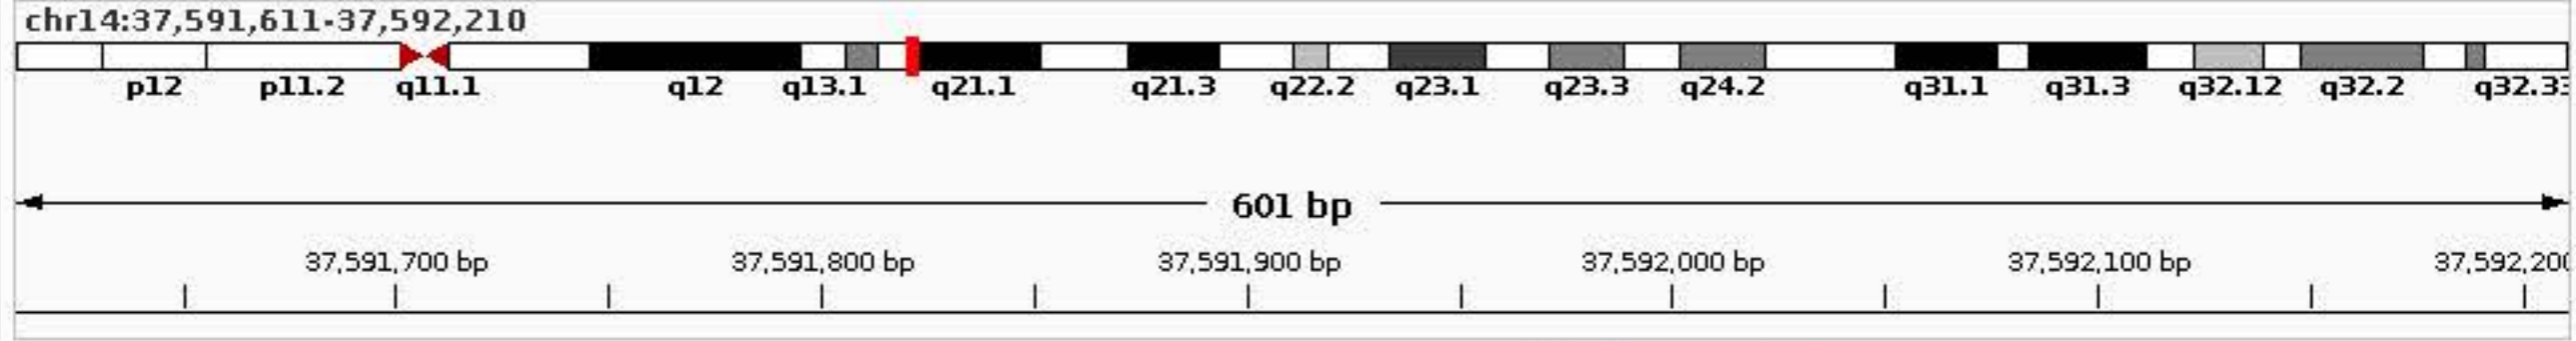

SL\_0013\_RT\_5-B\_mut.bam Cover

SL\_0013\_RT\_5-B\_mut.bam

Sequence →

Refseq Genes

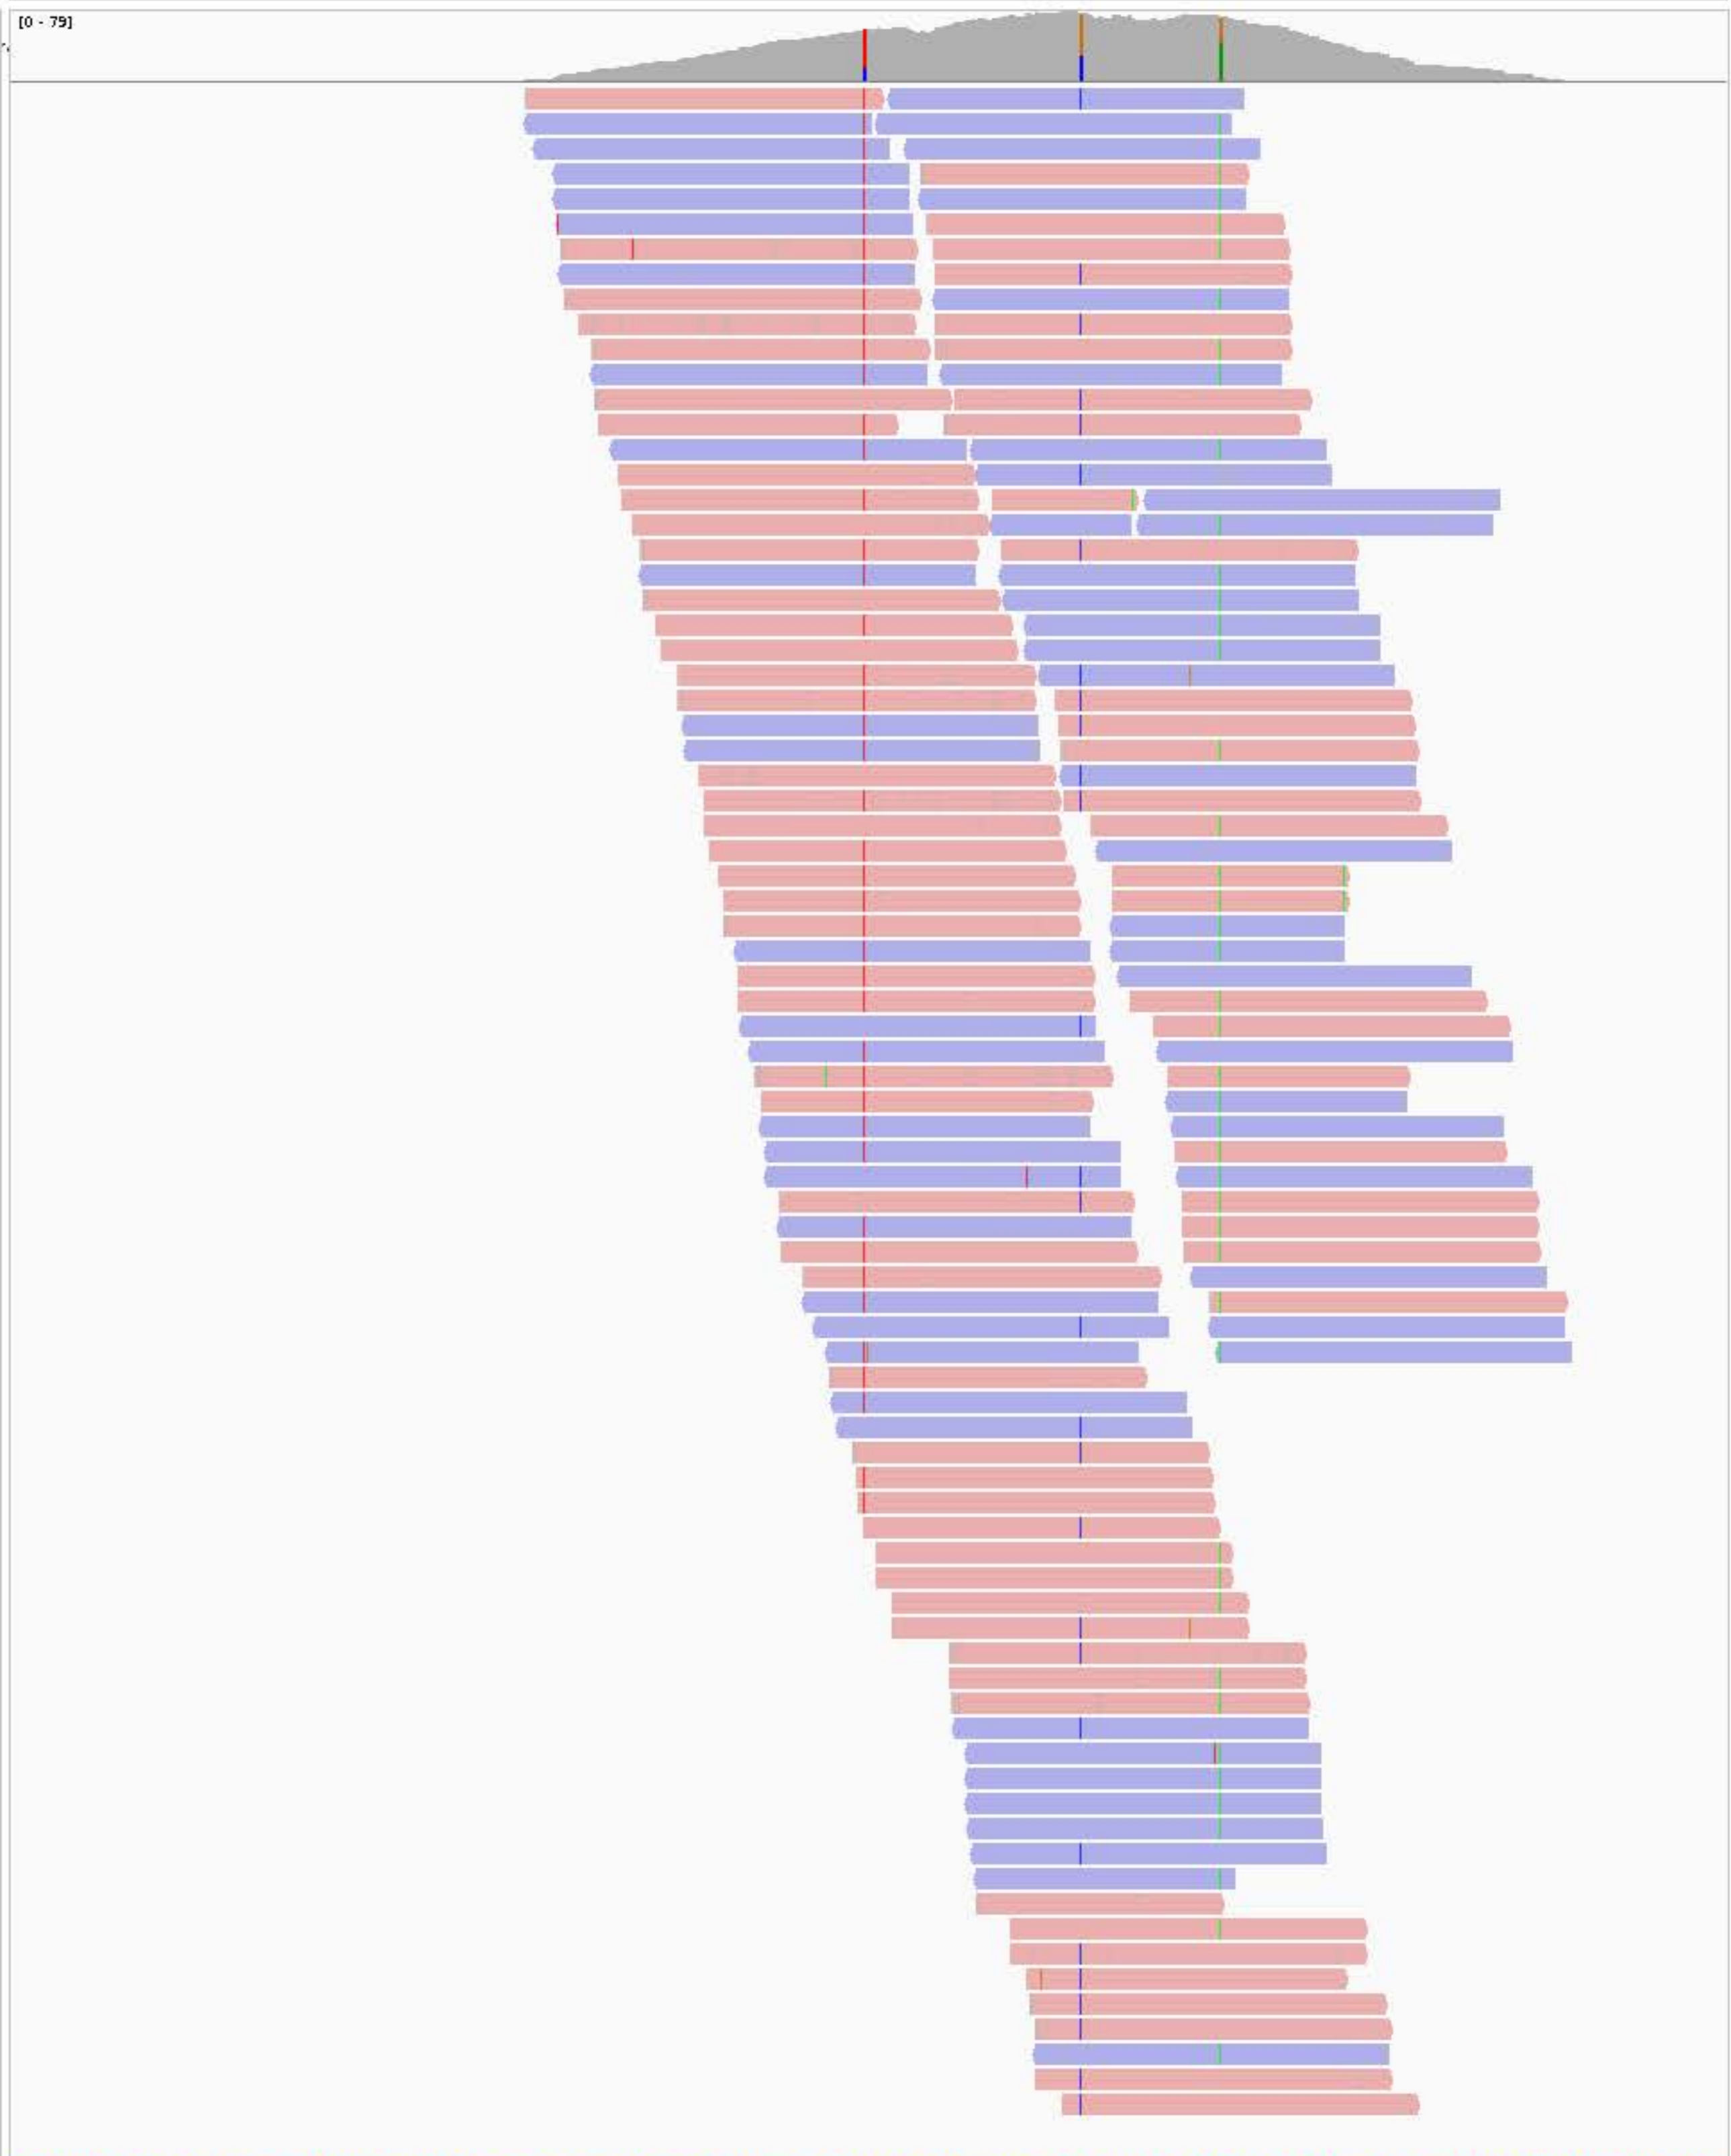

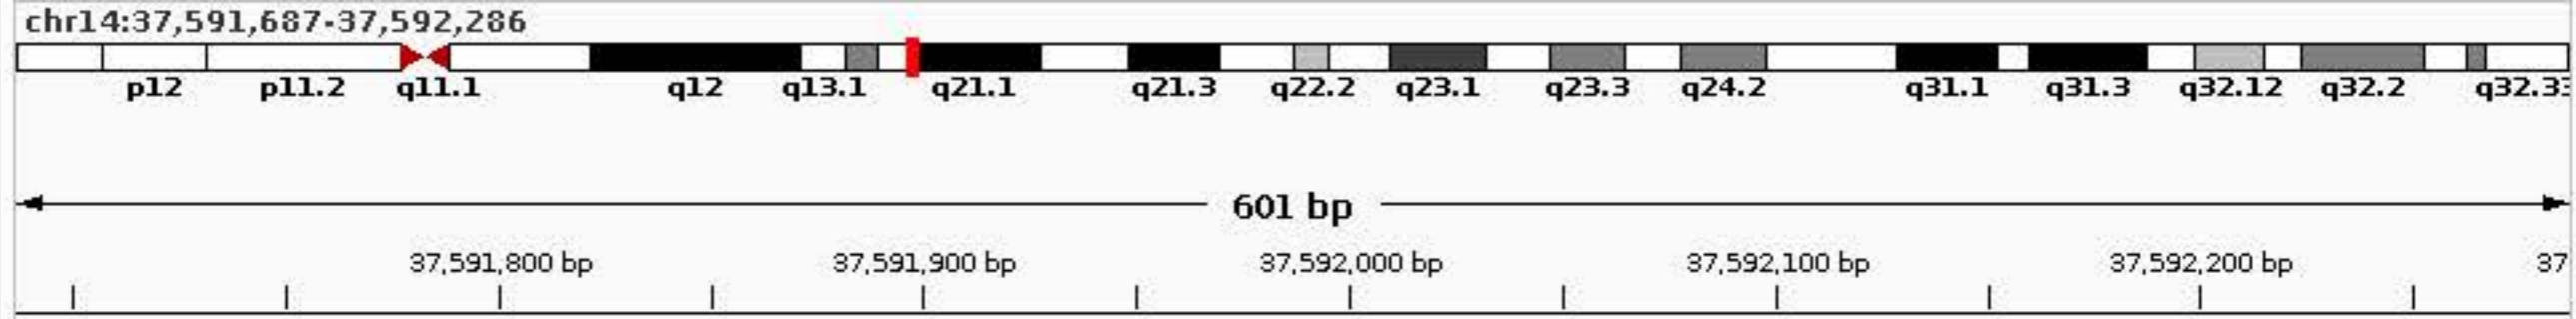

SL\_0013\_RT\_4-B\_mut.bam Cover

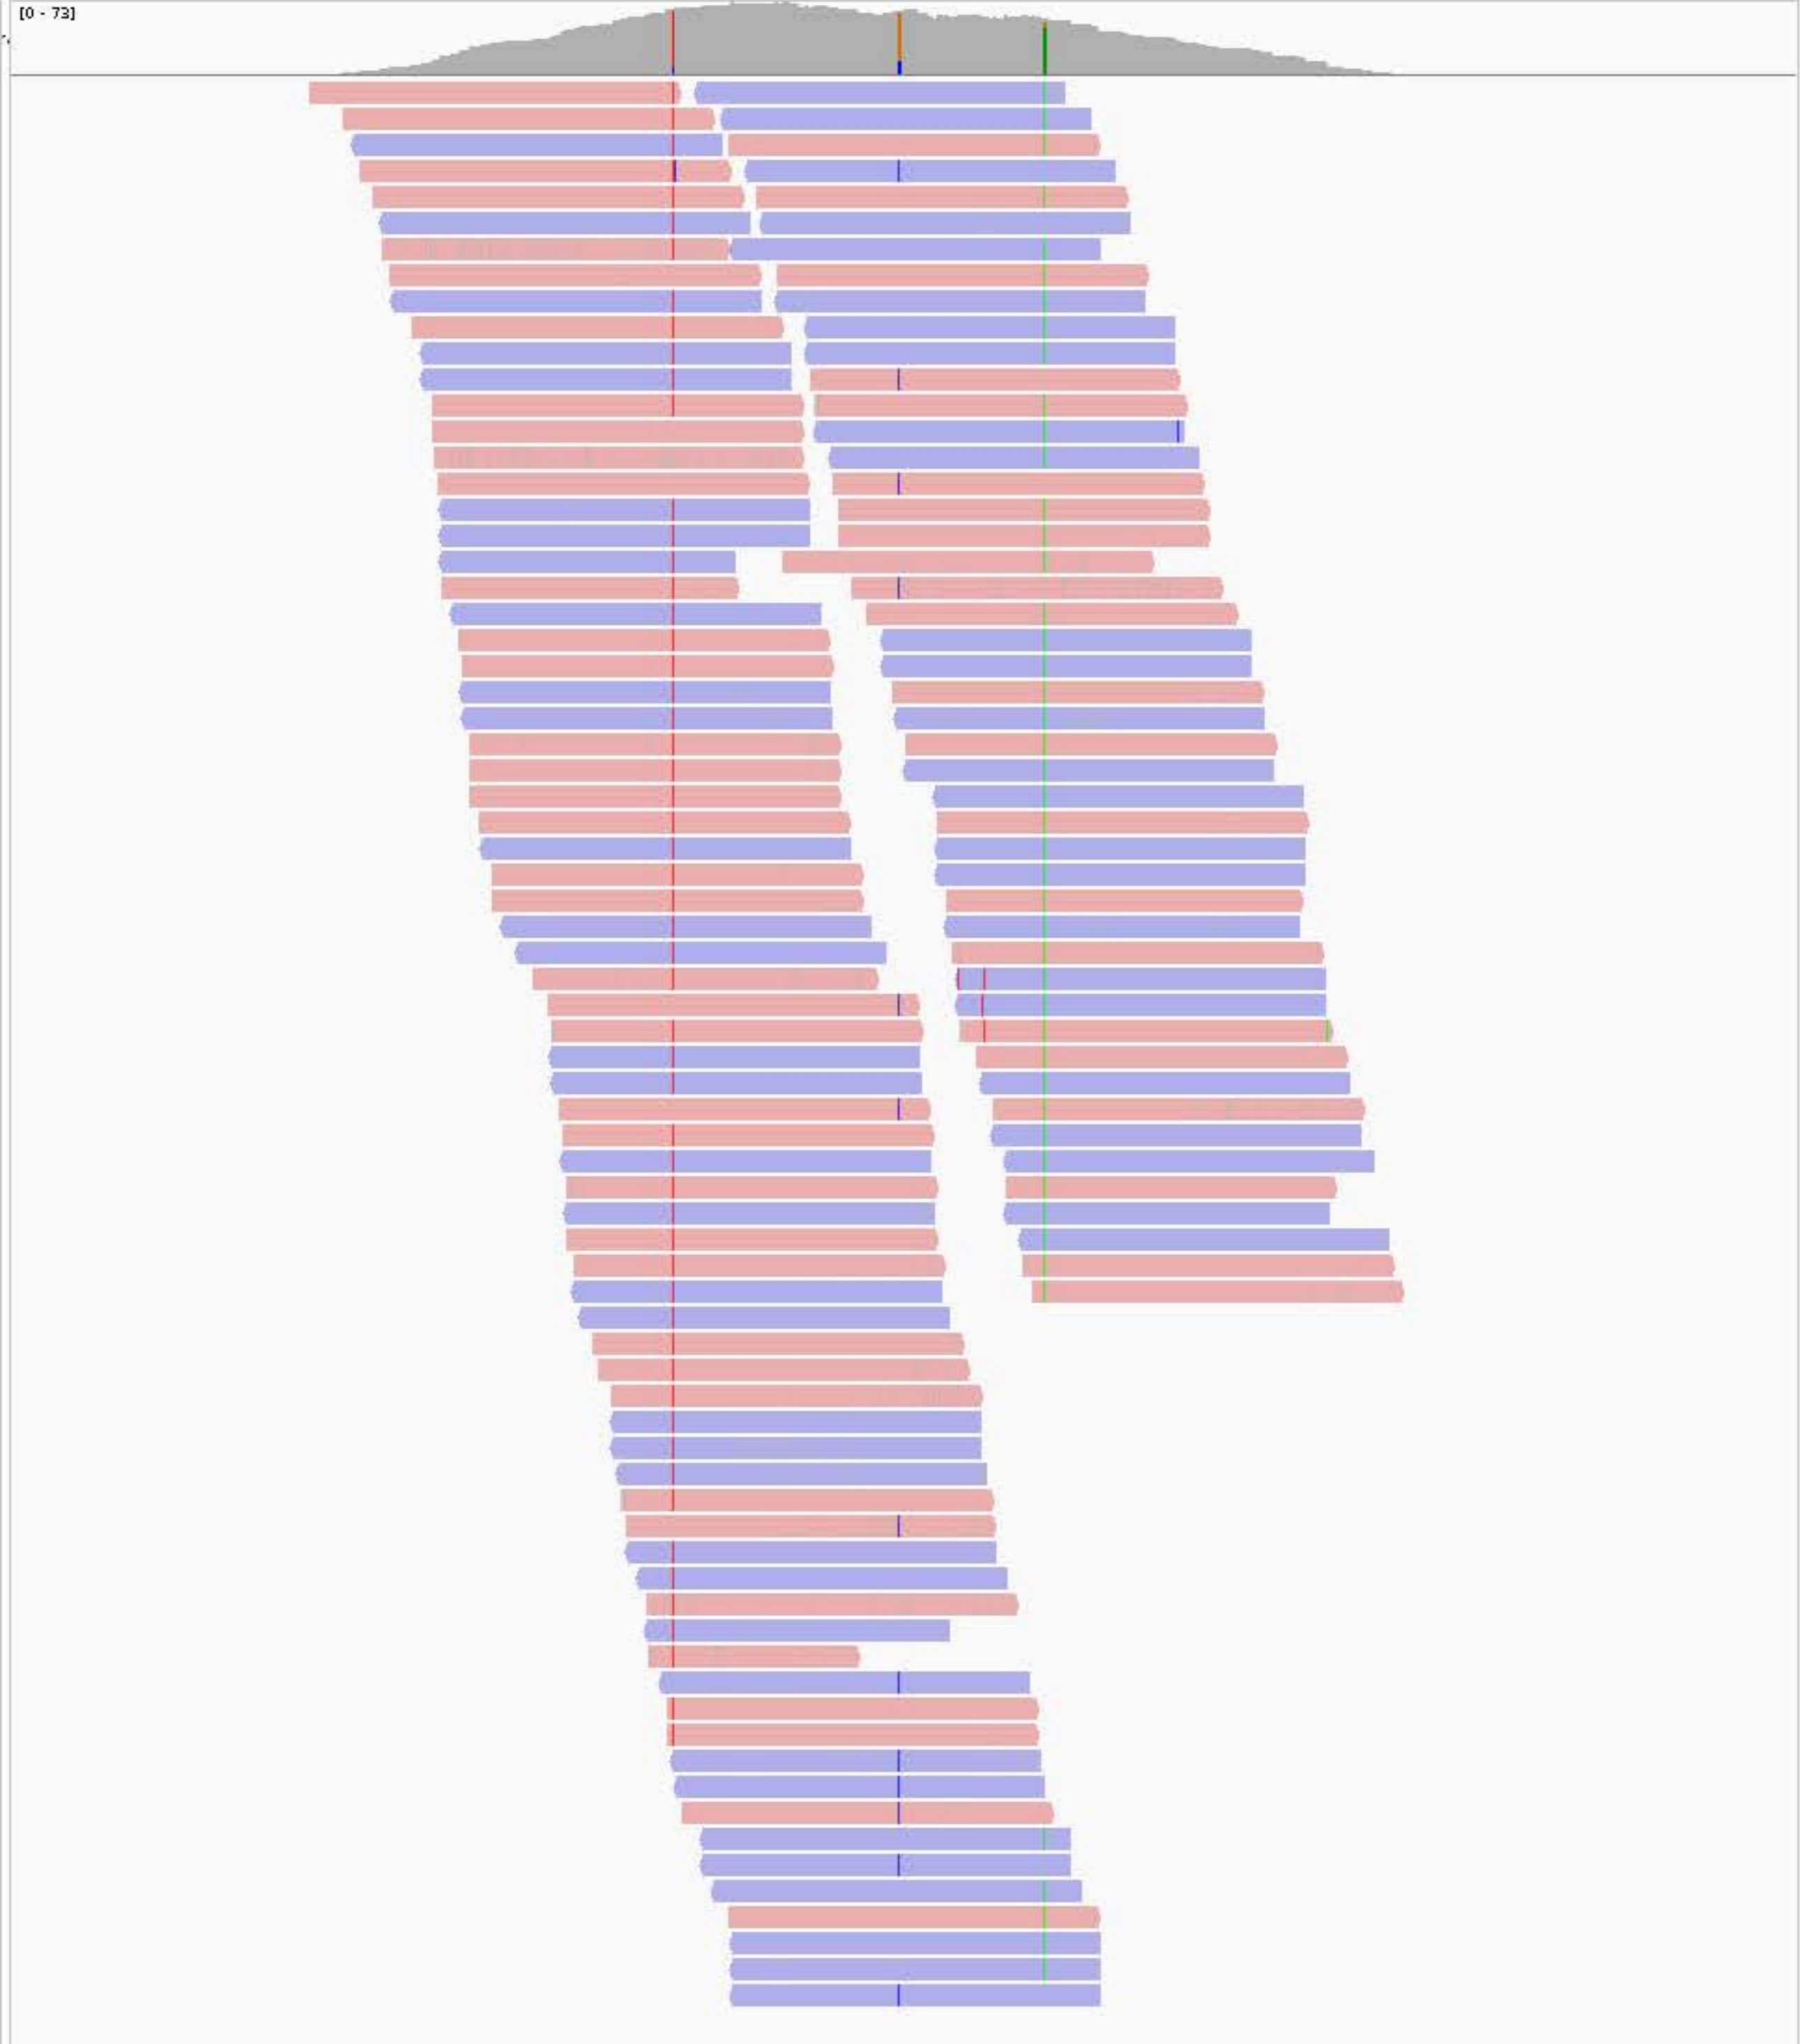

SL\_0013\_RT\_4-B\_mut.bam

Sequence →  
Refseq Genes

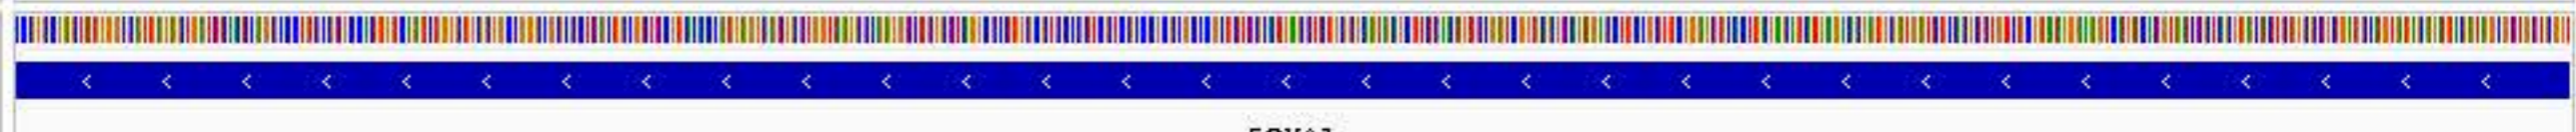

FOXA1



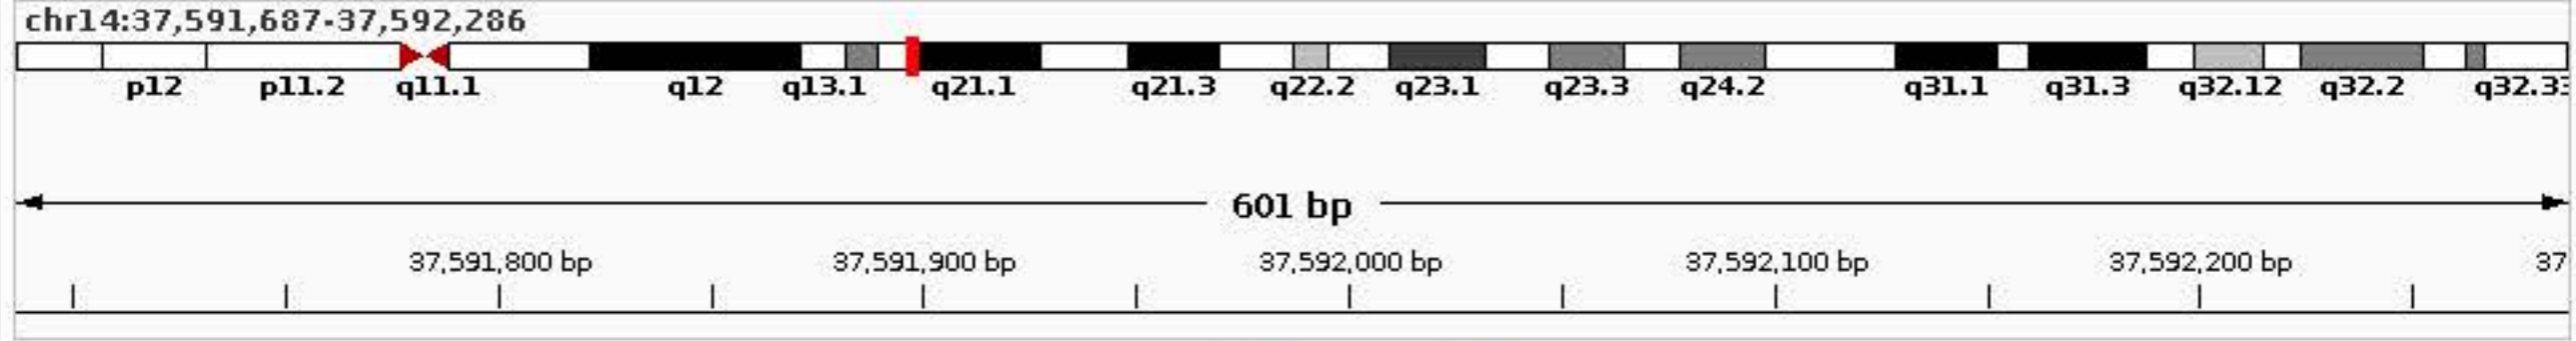

SL\_0013\_RT\_5-B\_mut.bam Cover

SL\_0013\_RT\_5-B\_mut.bam

Sequence →

Refseq Genes

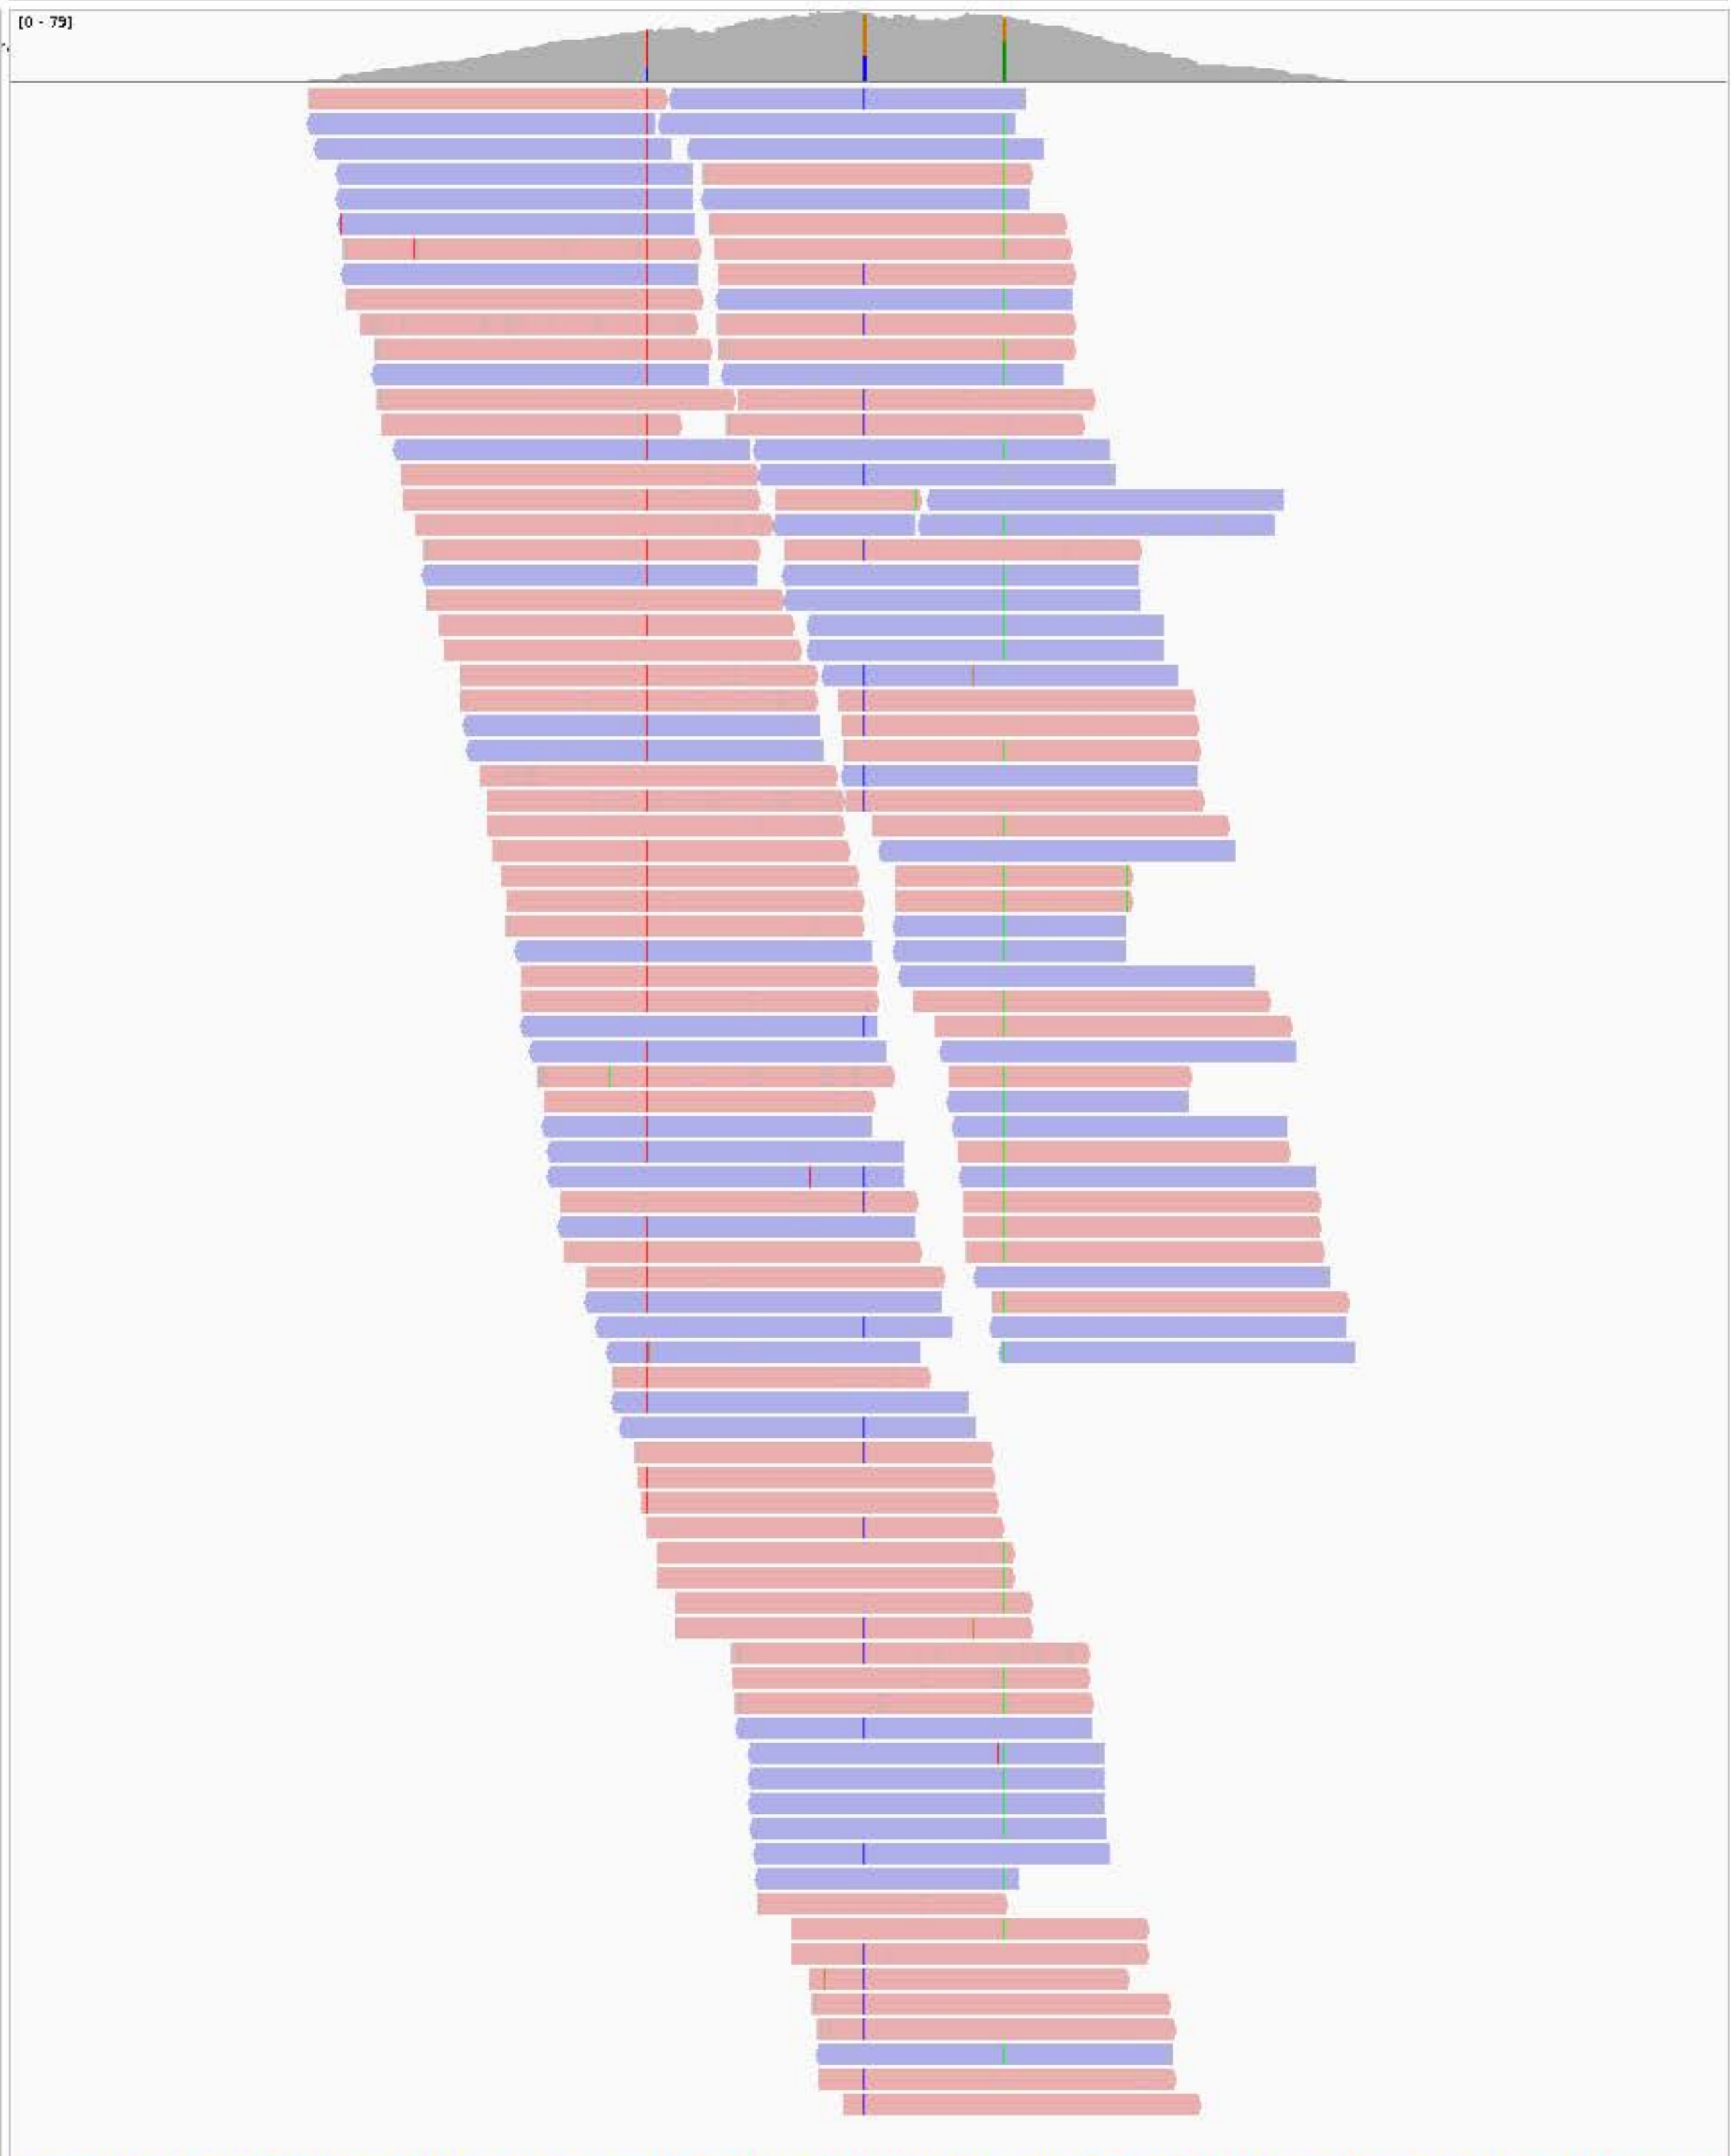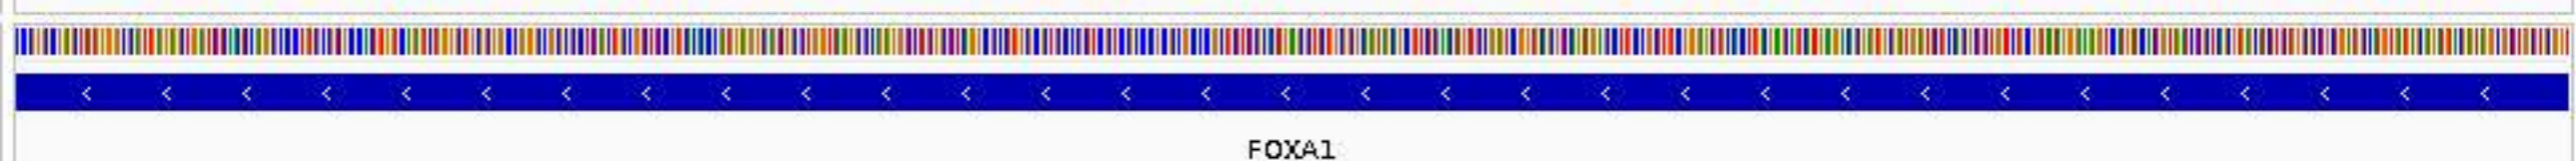

FOXA1



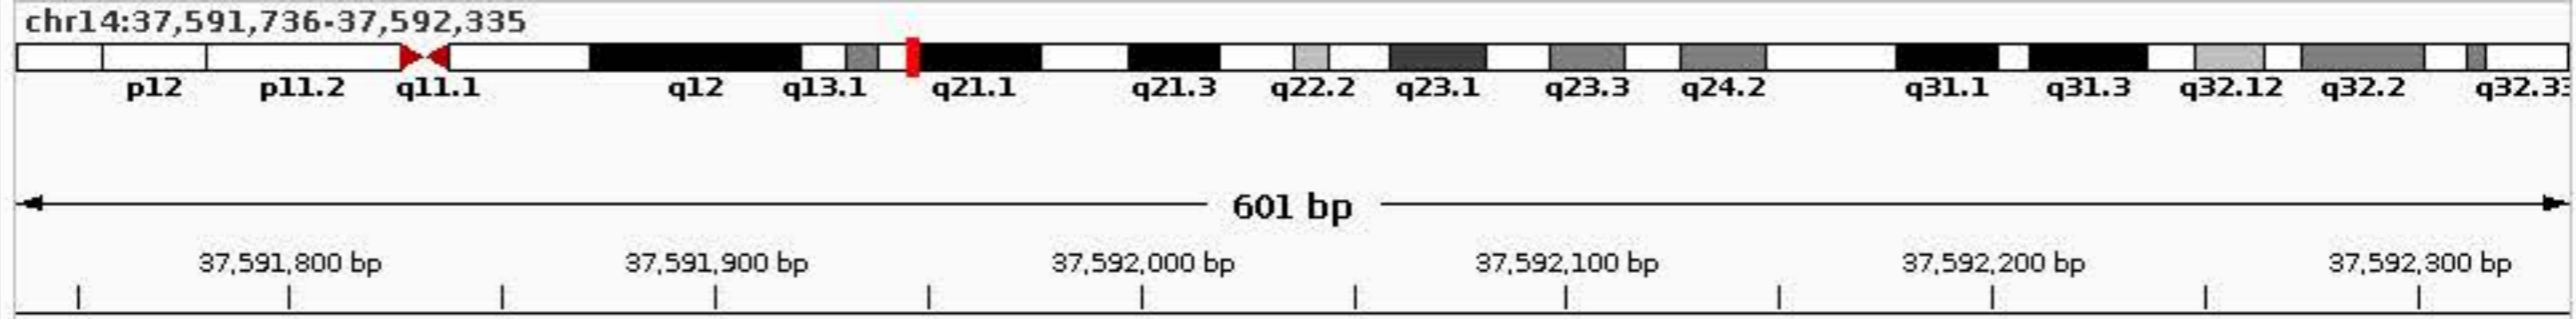

SL\_0013\_RT\_4-B\_mut.bam Cover

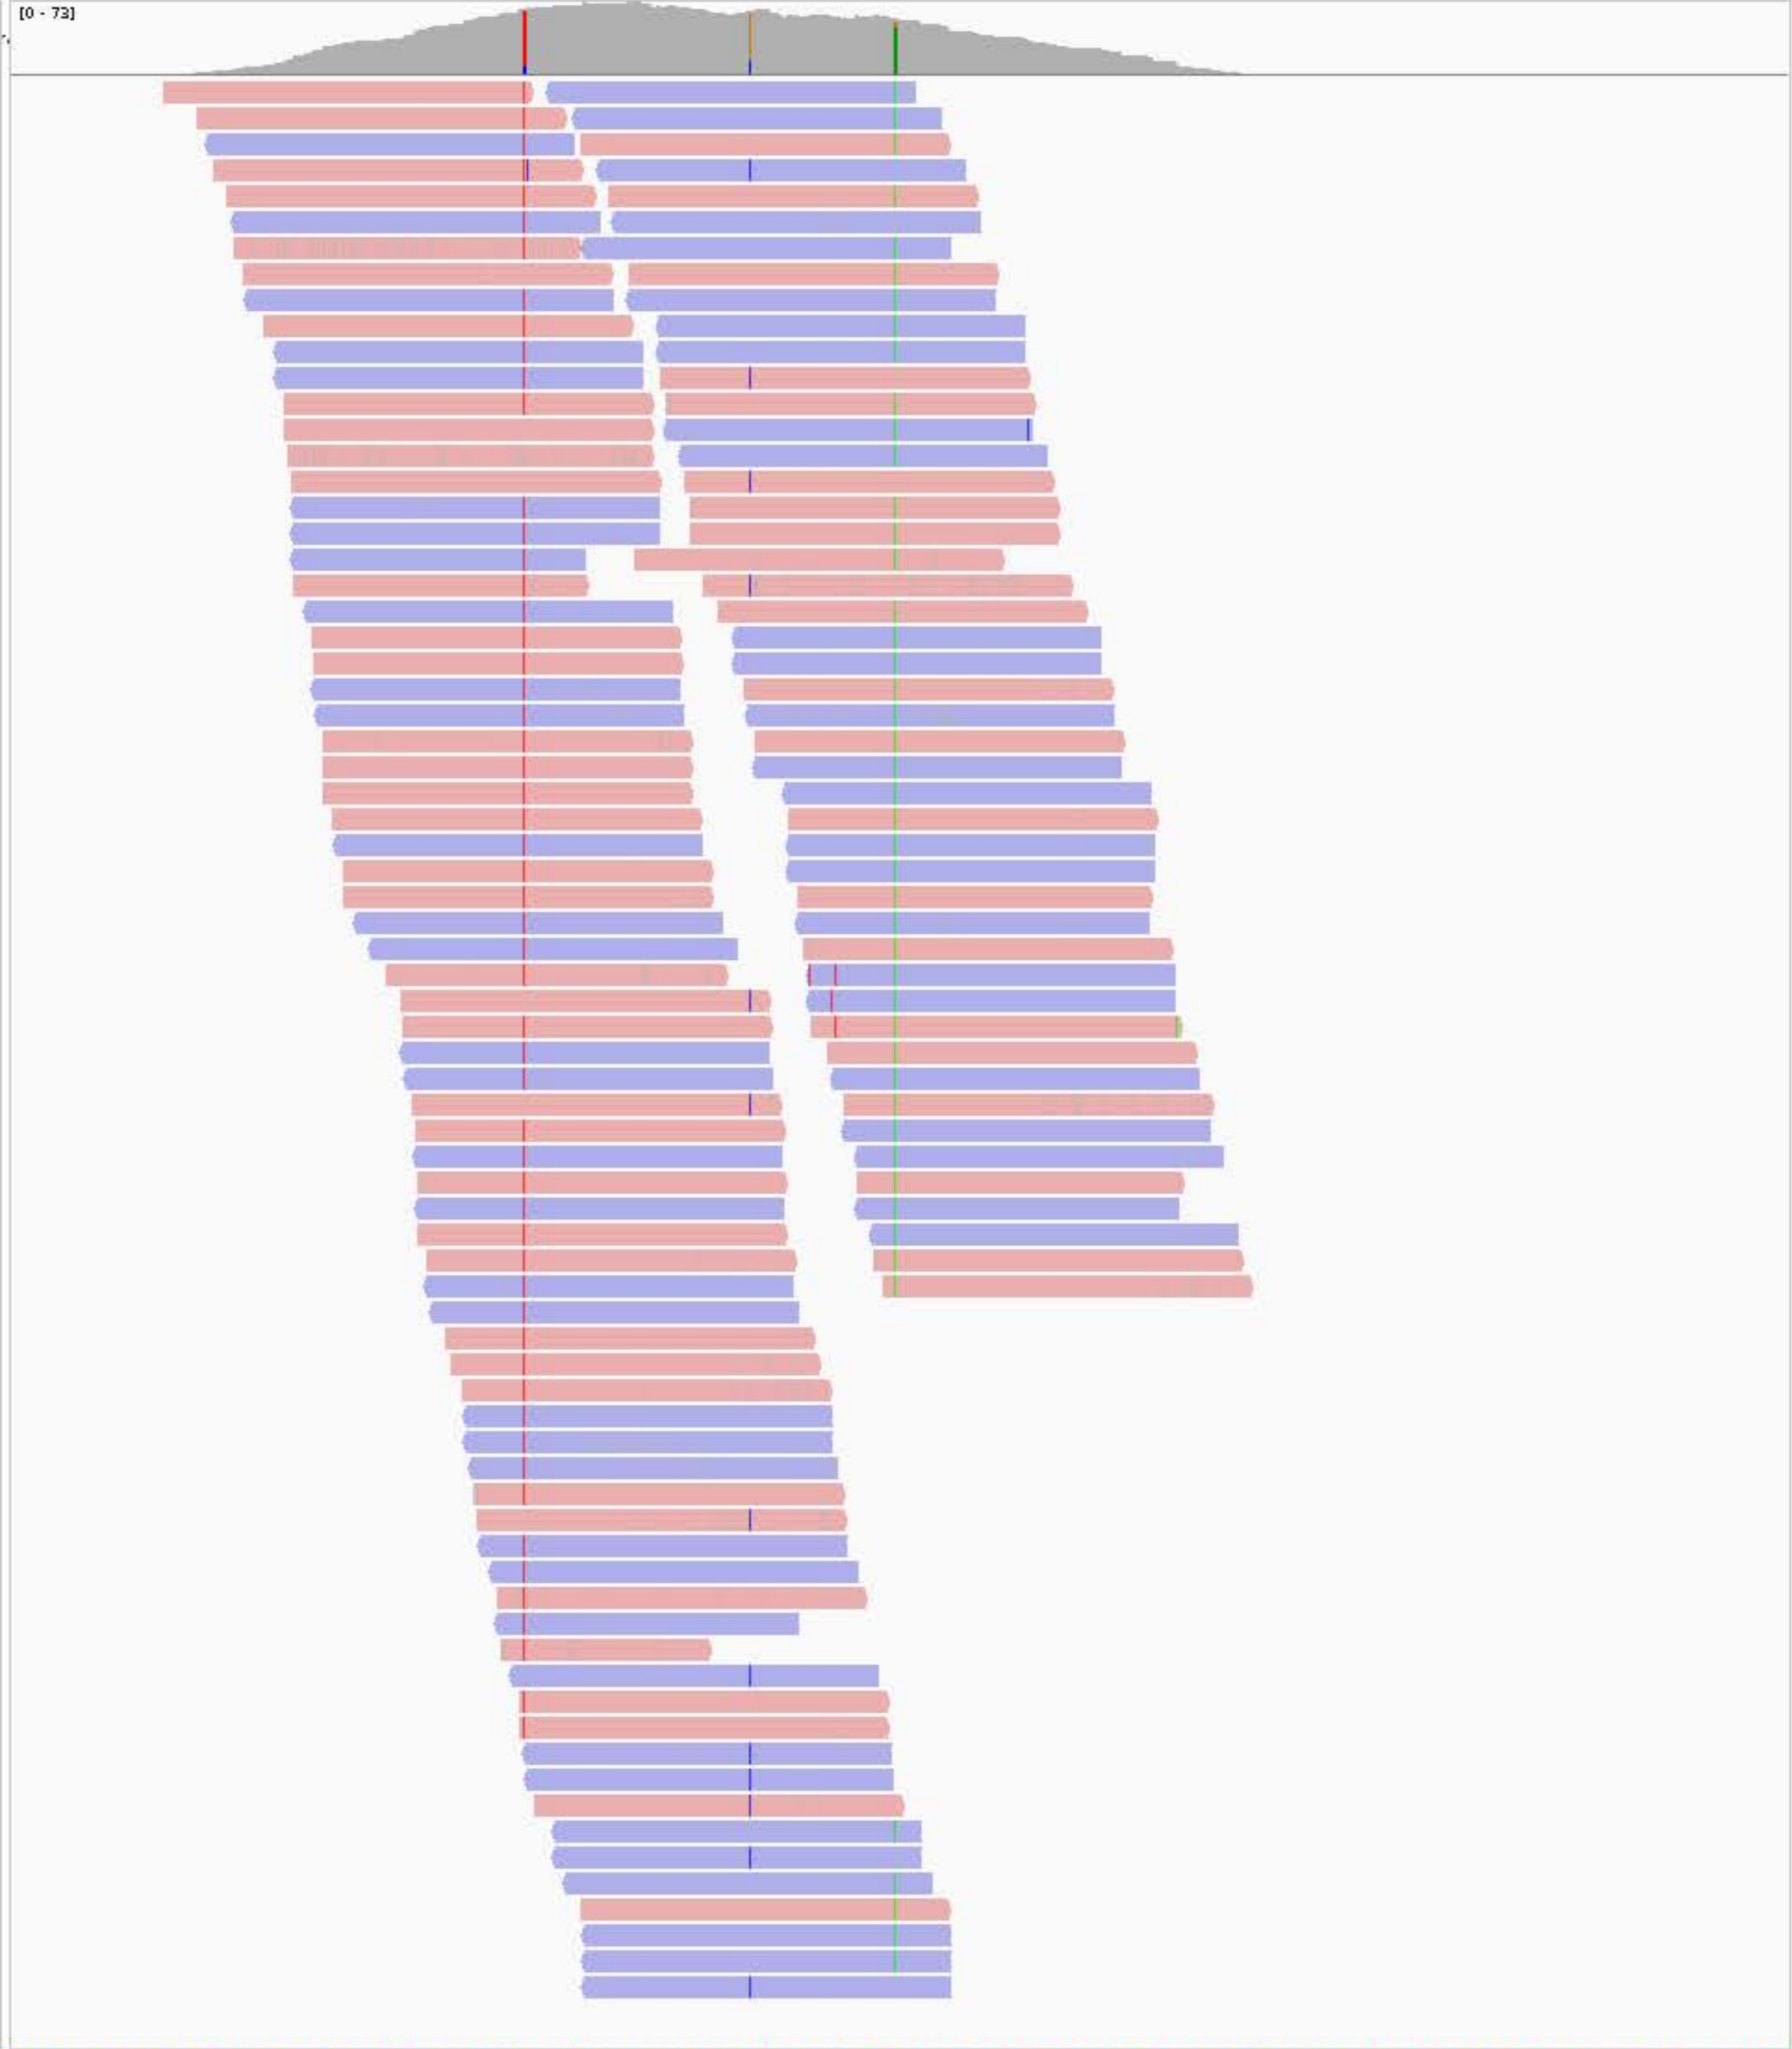

SL\_0013\_RT\_4-B\_mut.bam

Sequence →  
Refseq Genes

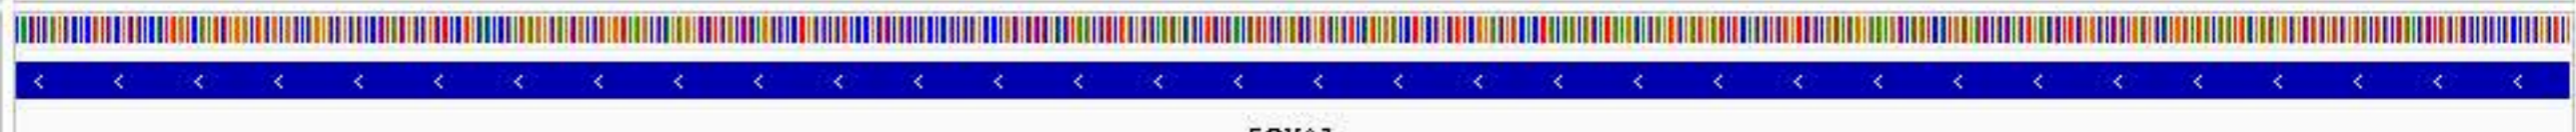

FOXA1

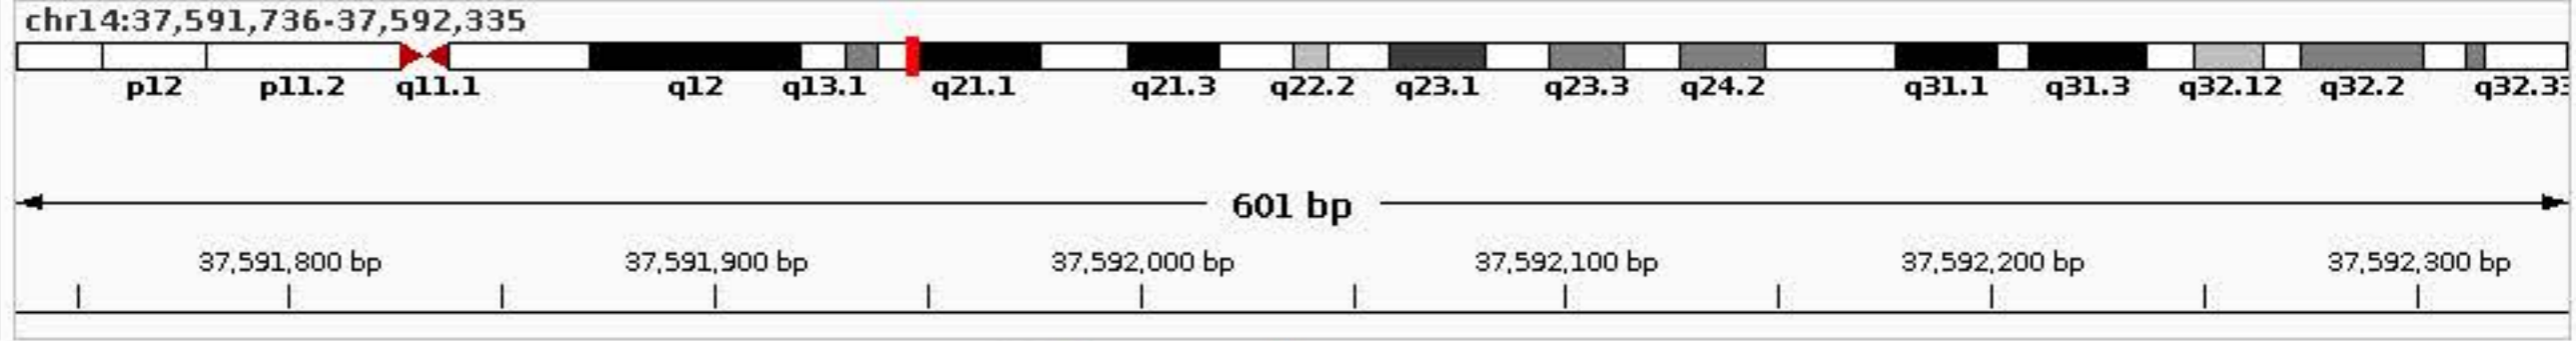

SL\_0013\_RT\_5-B\_mut.bam Cover

SL\_0013\_RT\_5-B\_mut.bam

Sequence →

Refseq Genes

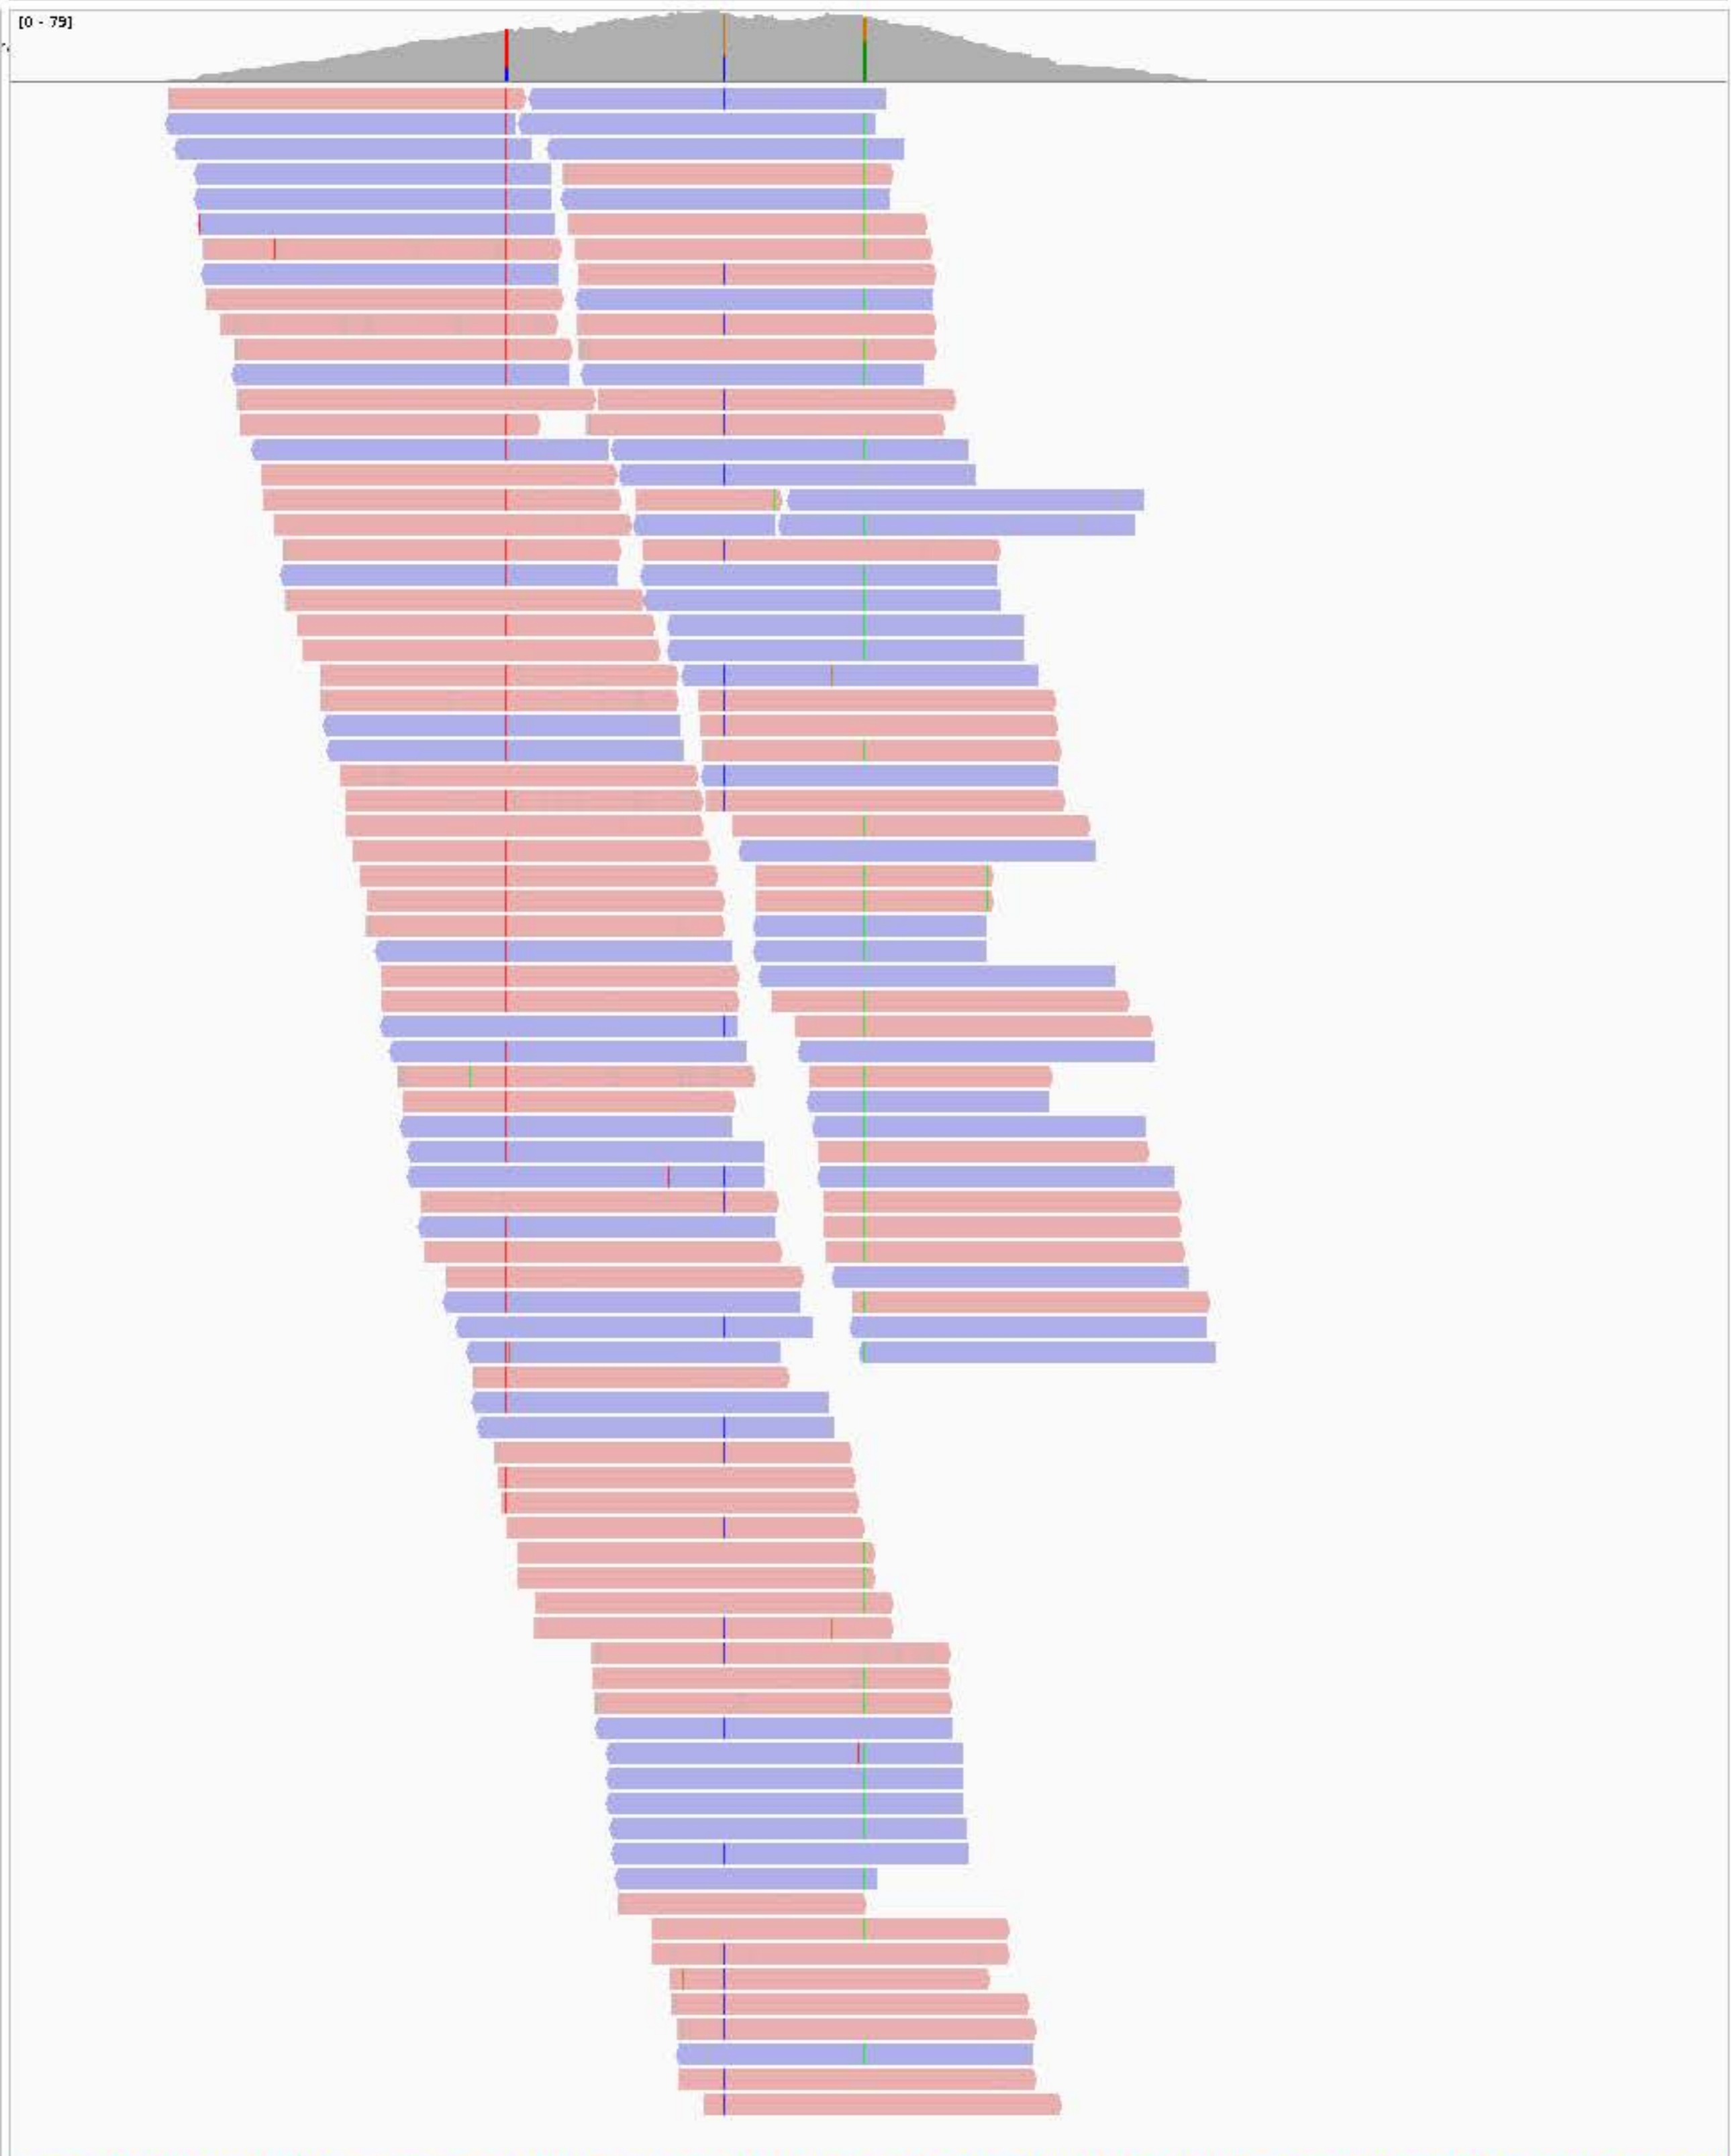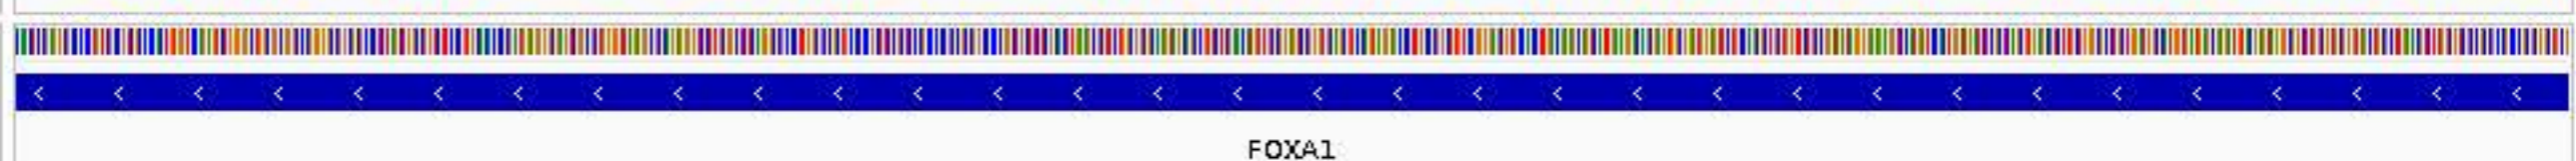



chr3:70,977,656-70,978,255  
p26.1 p24.3 p23 p22.1 p21.2 p14.2 p13 p12.2 q11.1 q12.3 q13.2 q21.1 q22.2 q24 q25.2 q26.1 q26.32 q27.3 q29

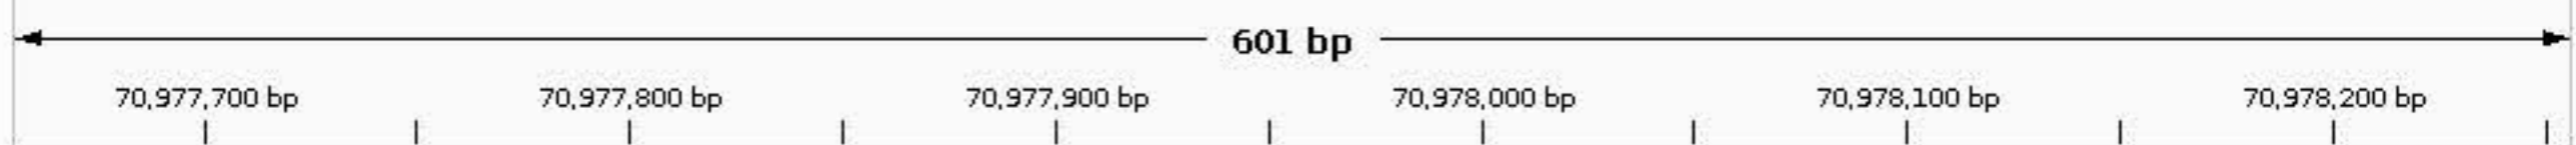

SL\_0003\_R\_FFPE\_52-B\_mut.bam  
rage

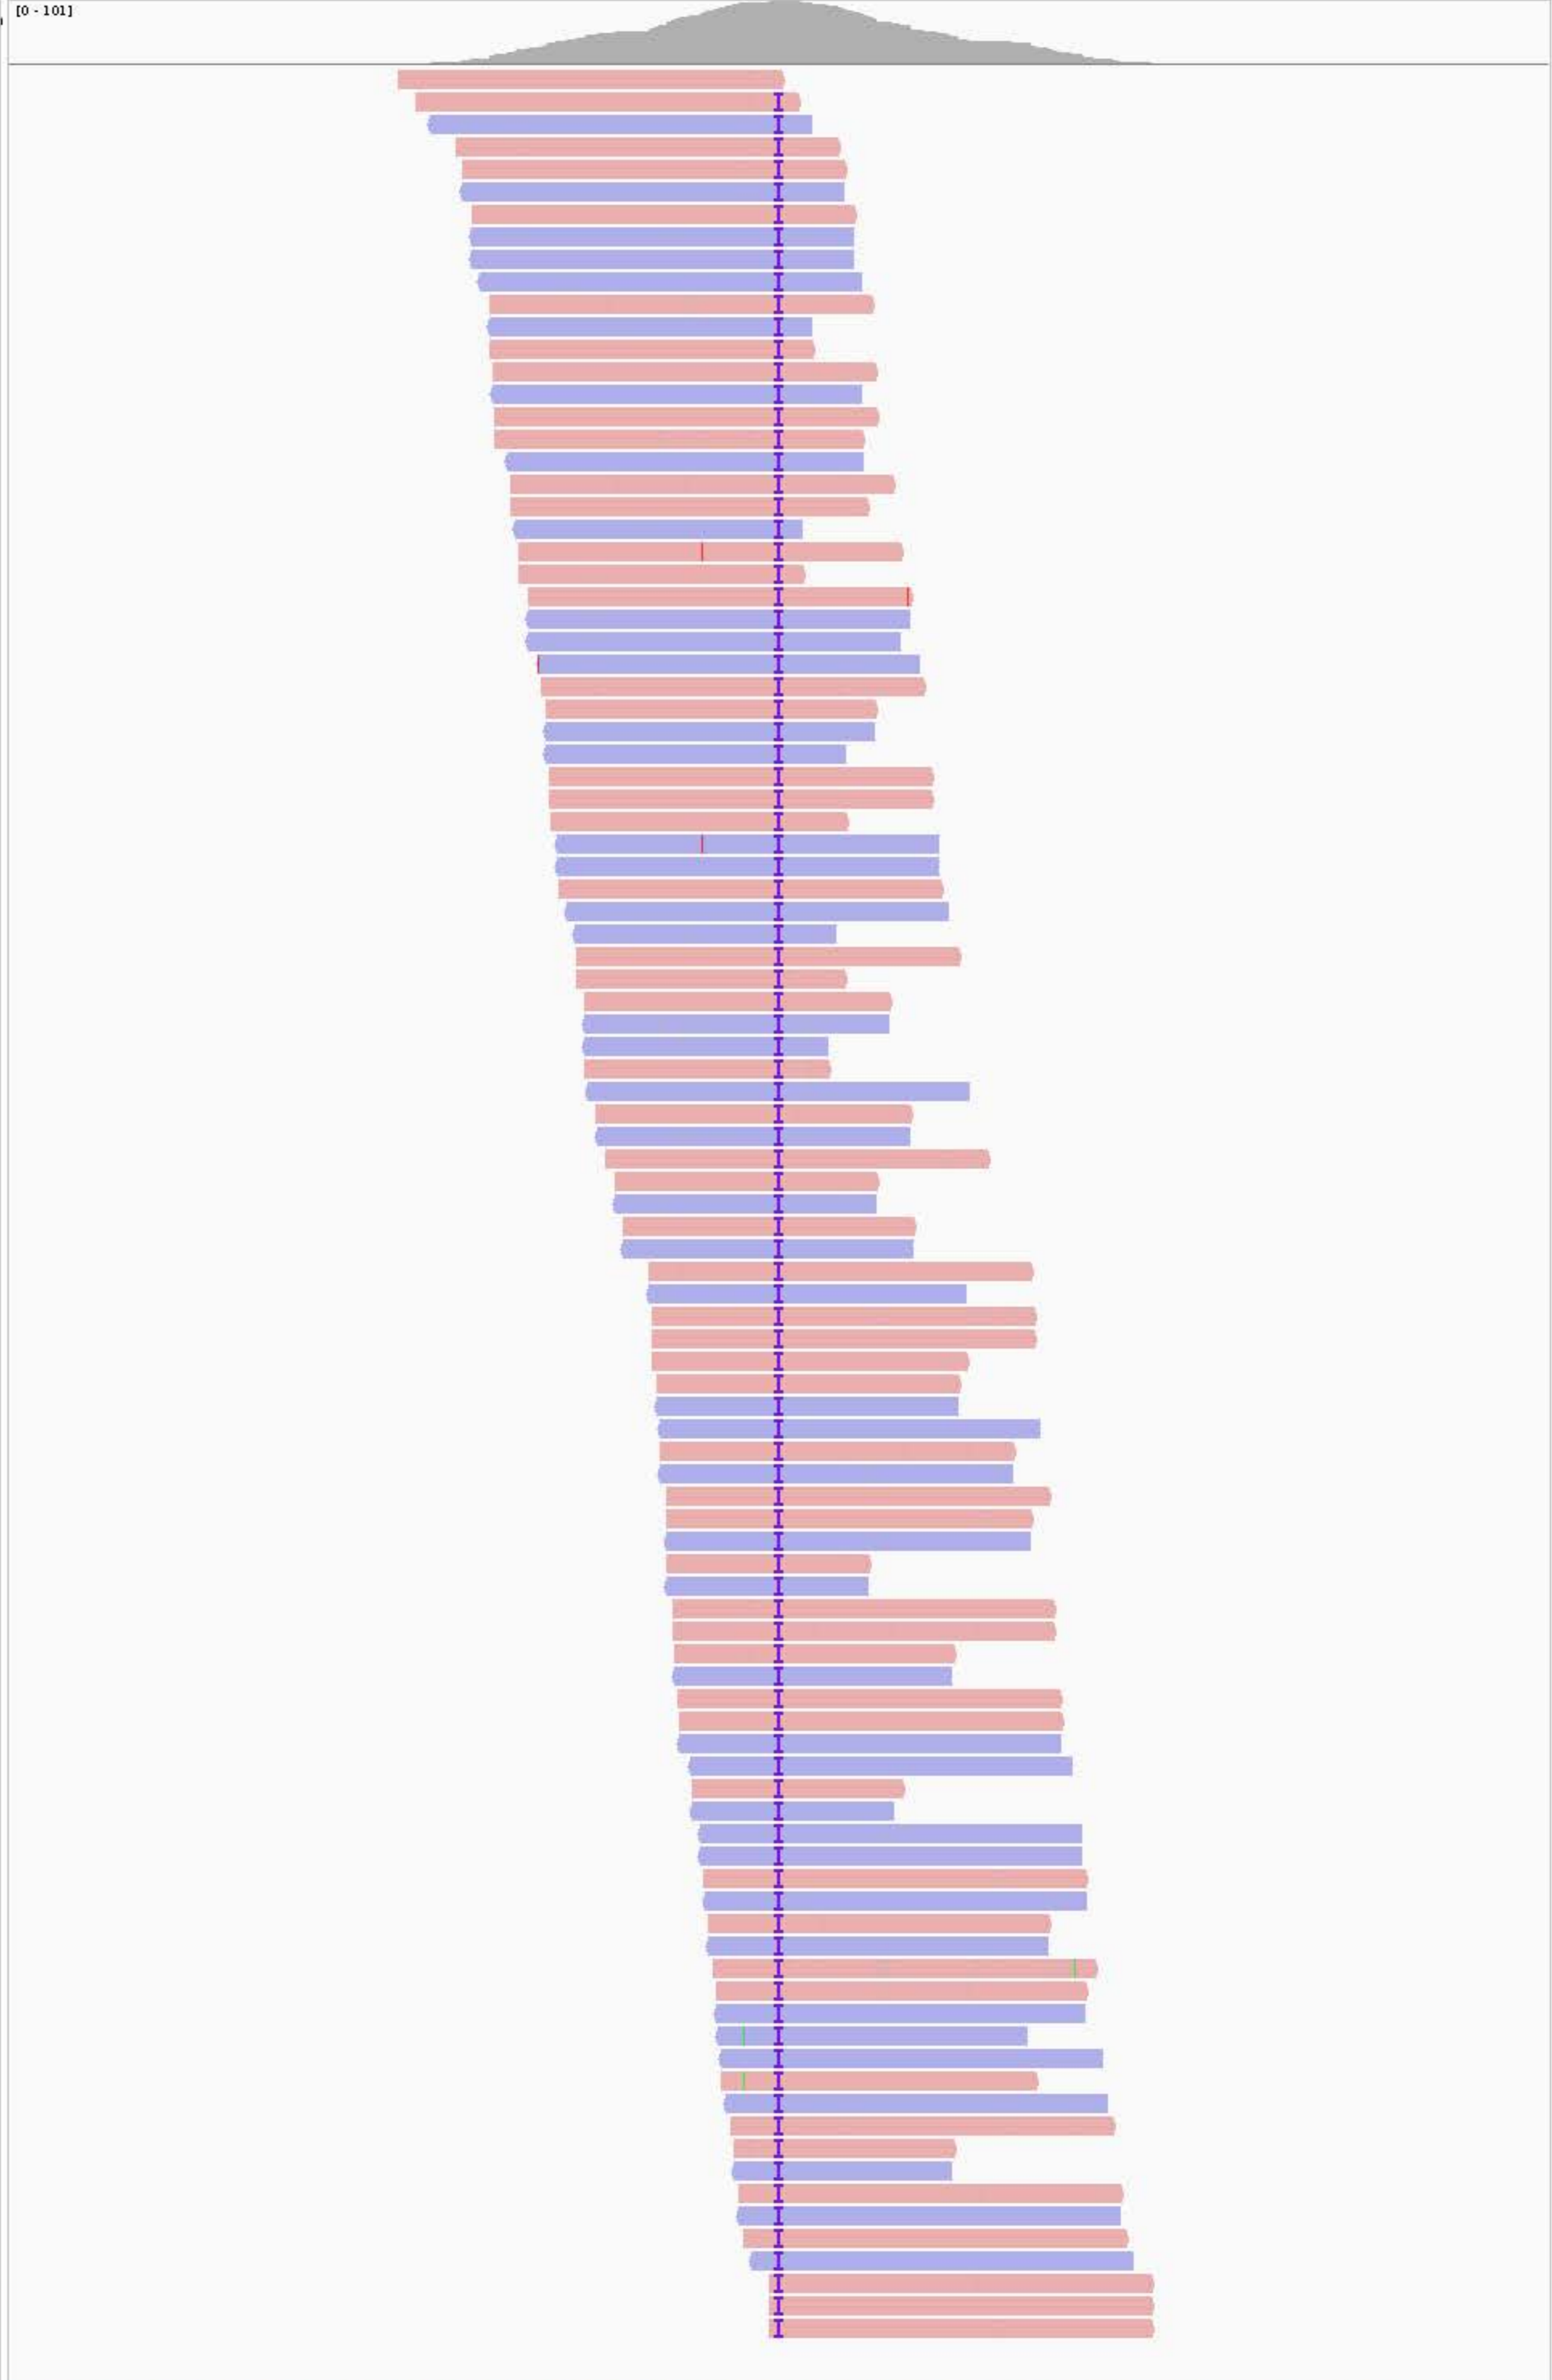

SL\_0003\_R\_FFPE\_52-B\_mut.ba  
m

Sequence  
Refseq Genes

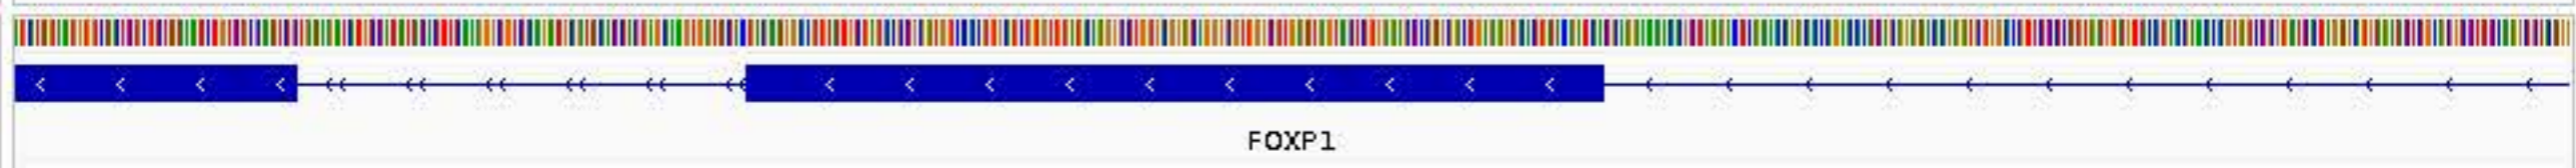



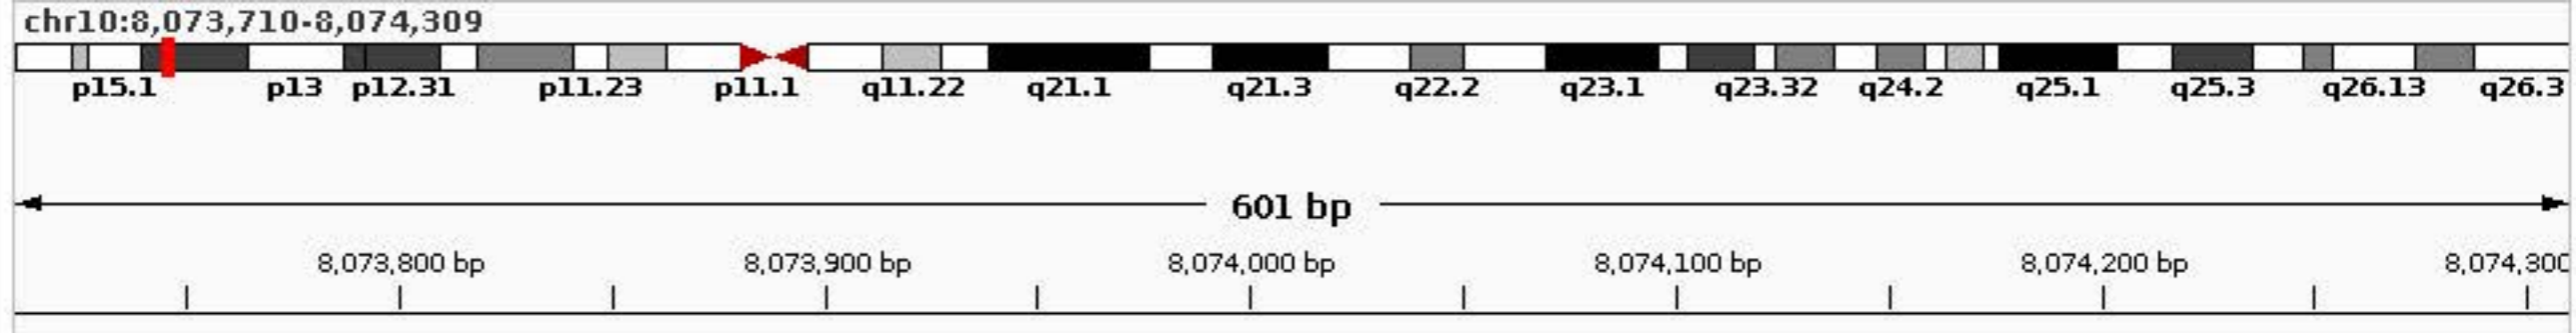

SL\_0009-LT\_1-B\_mut.bam Coverage

SL\_0009-LT\_1-B\_mut.bam

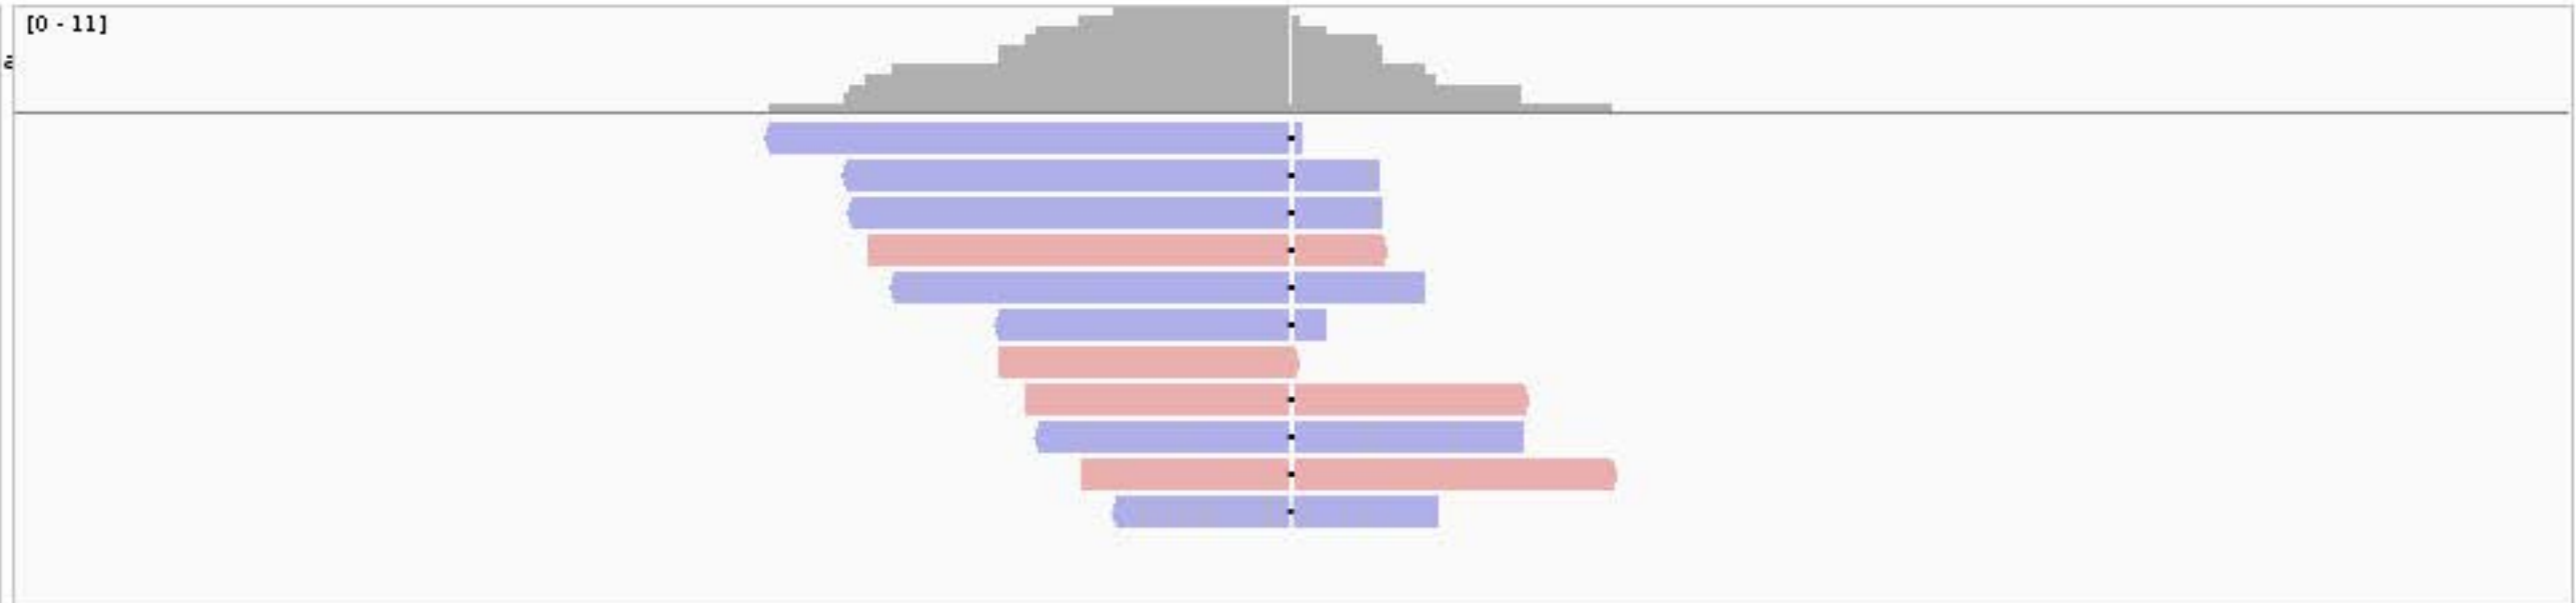

Sequence

Refseq Genes

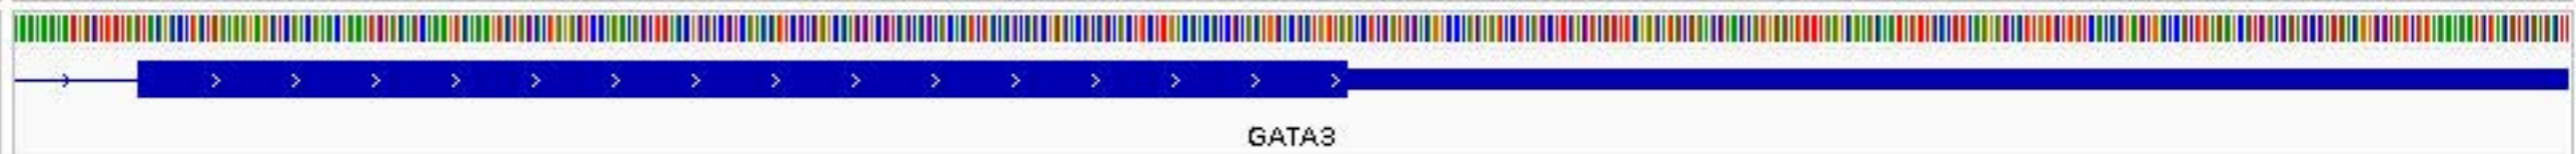

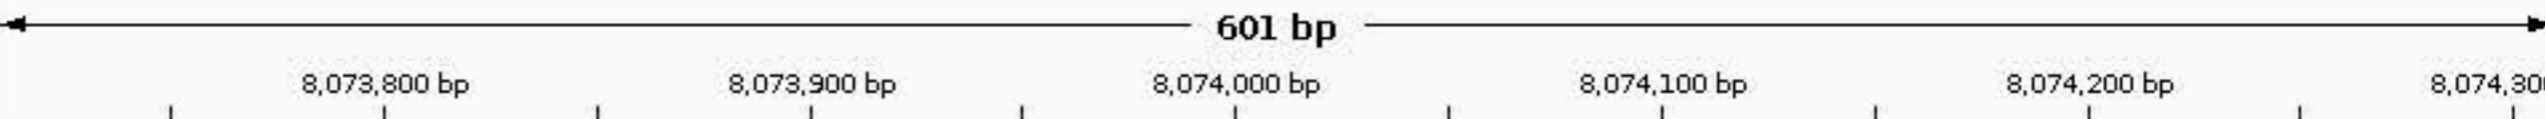

SL\_0009-LT\_3-B\_mut.bam Coverage

SL\_0009-LT\_3-B\_mut.bam

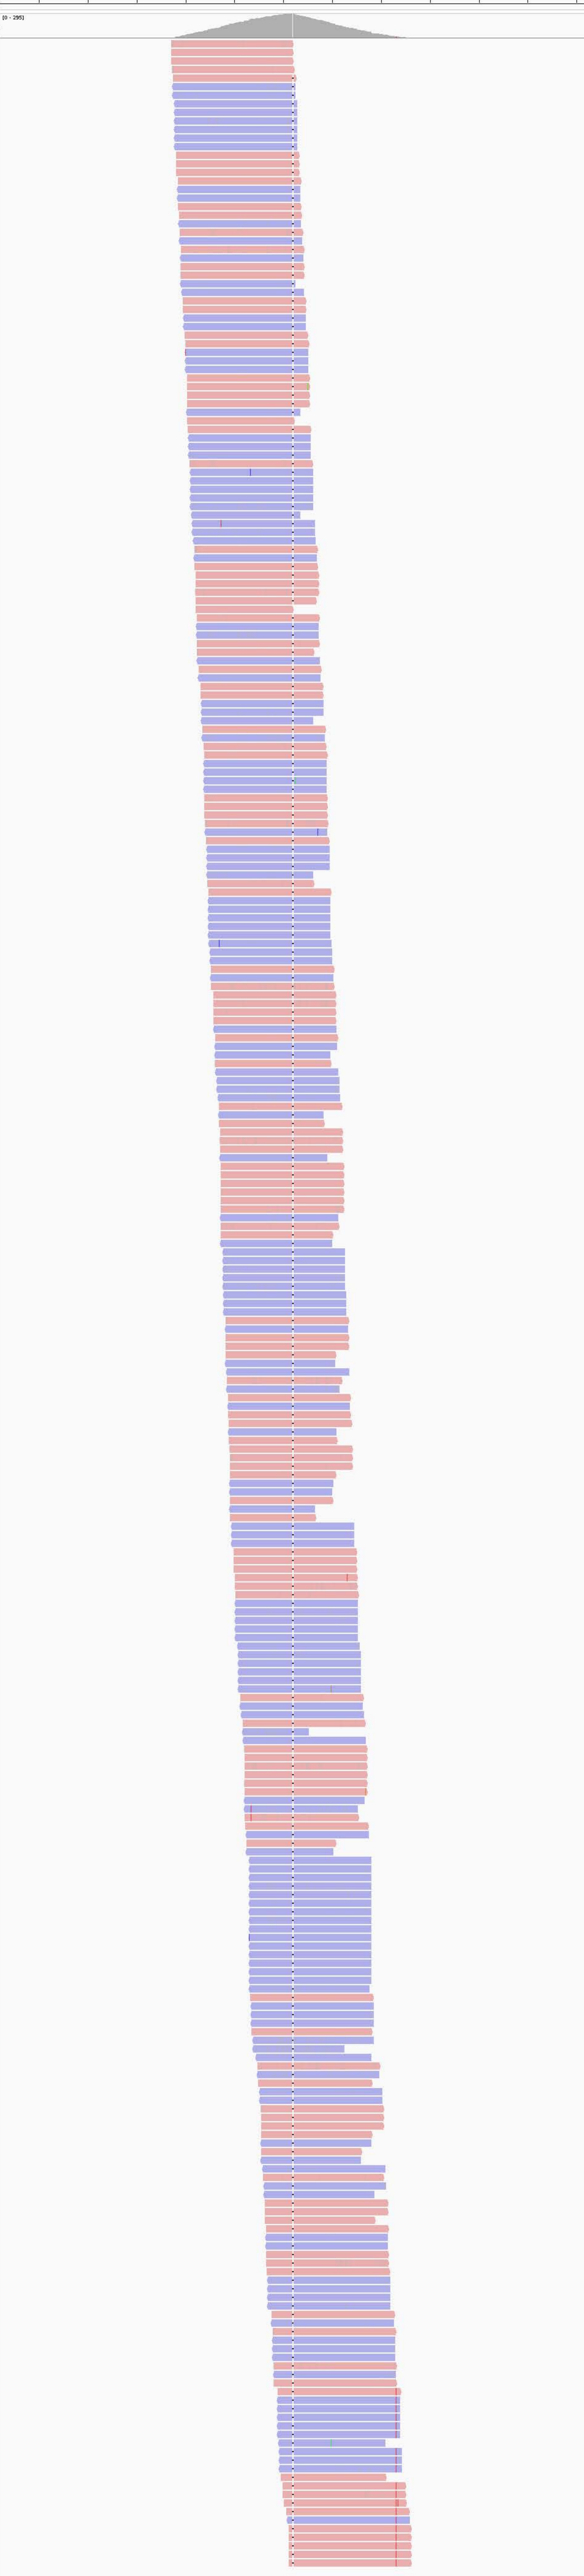

Sequence  
Refseq Genes

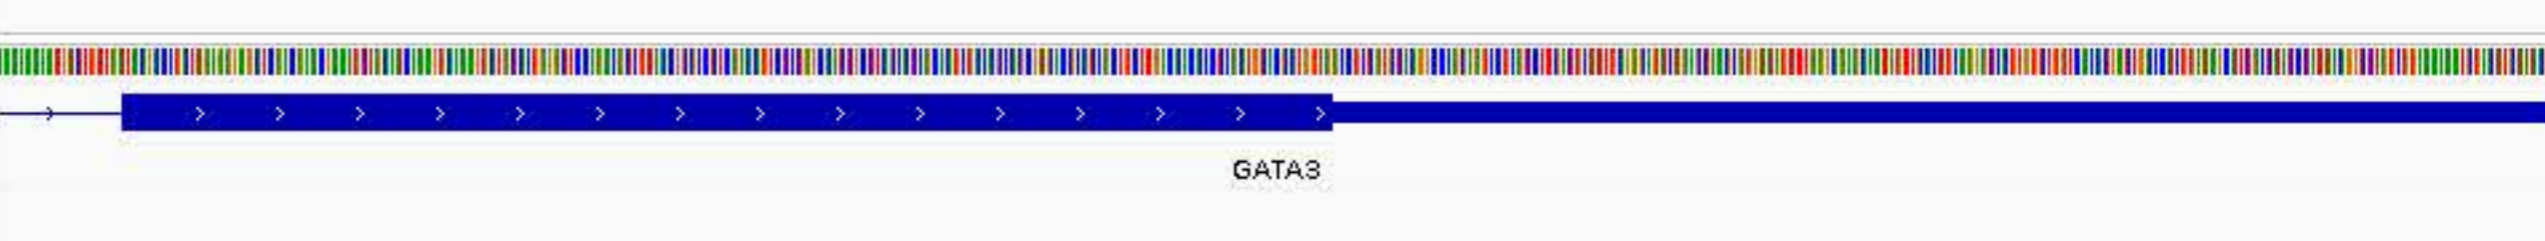

GAT3



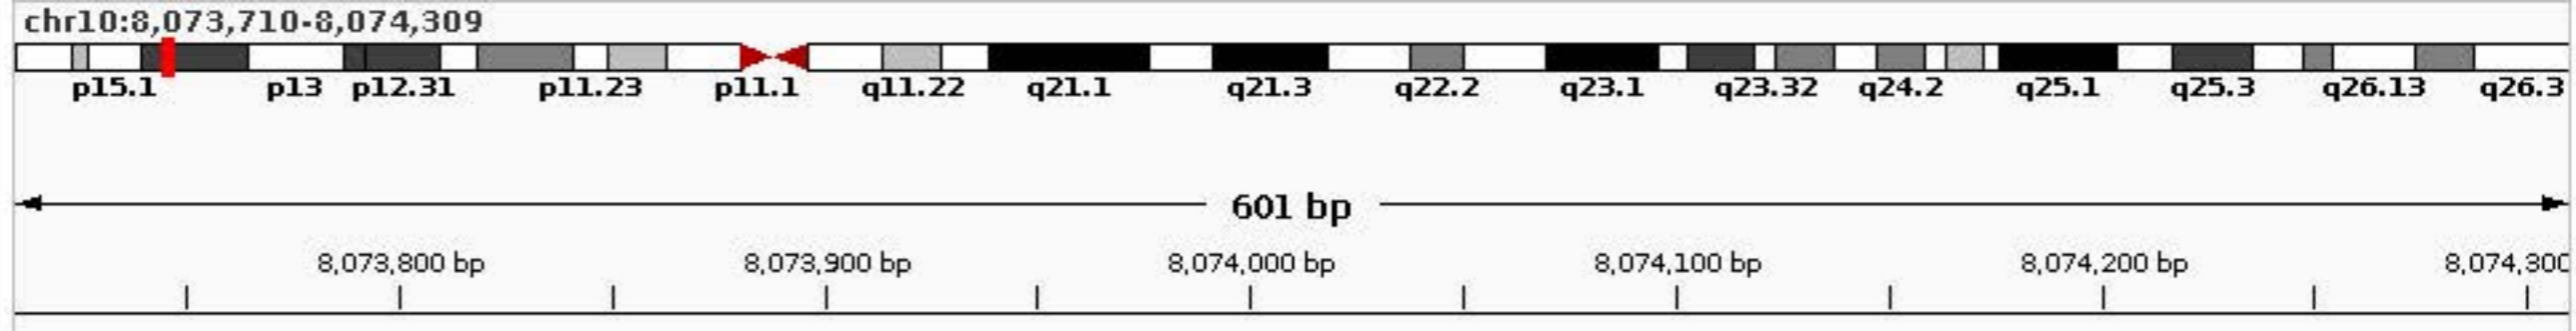

SL\_0009-LT\_9-B\_mut.bam Coverage

SL\_0009-LT\_9-B\_mut.bam

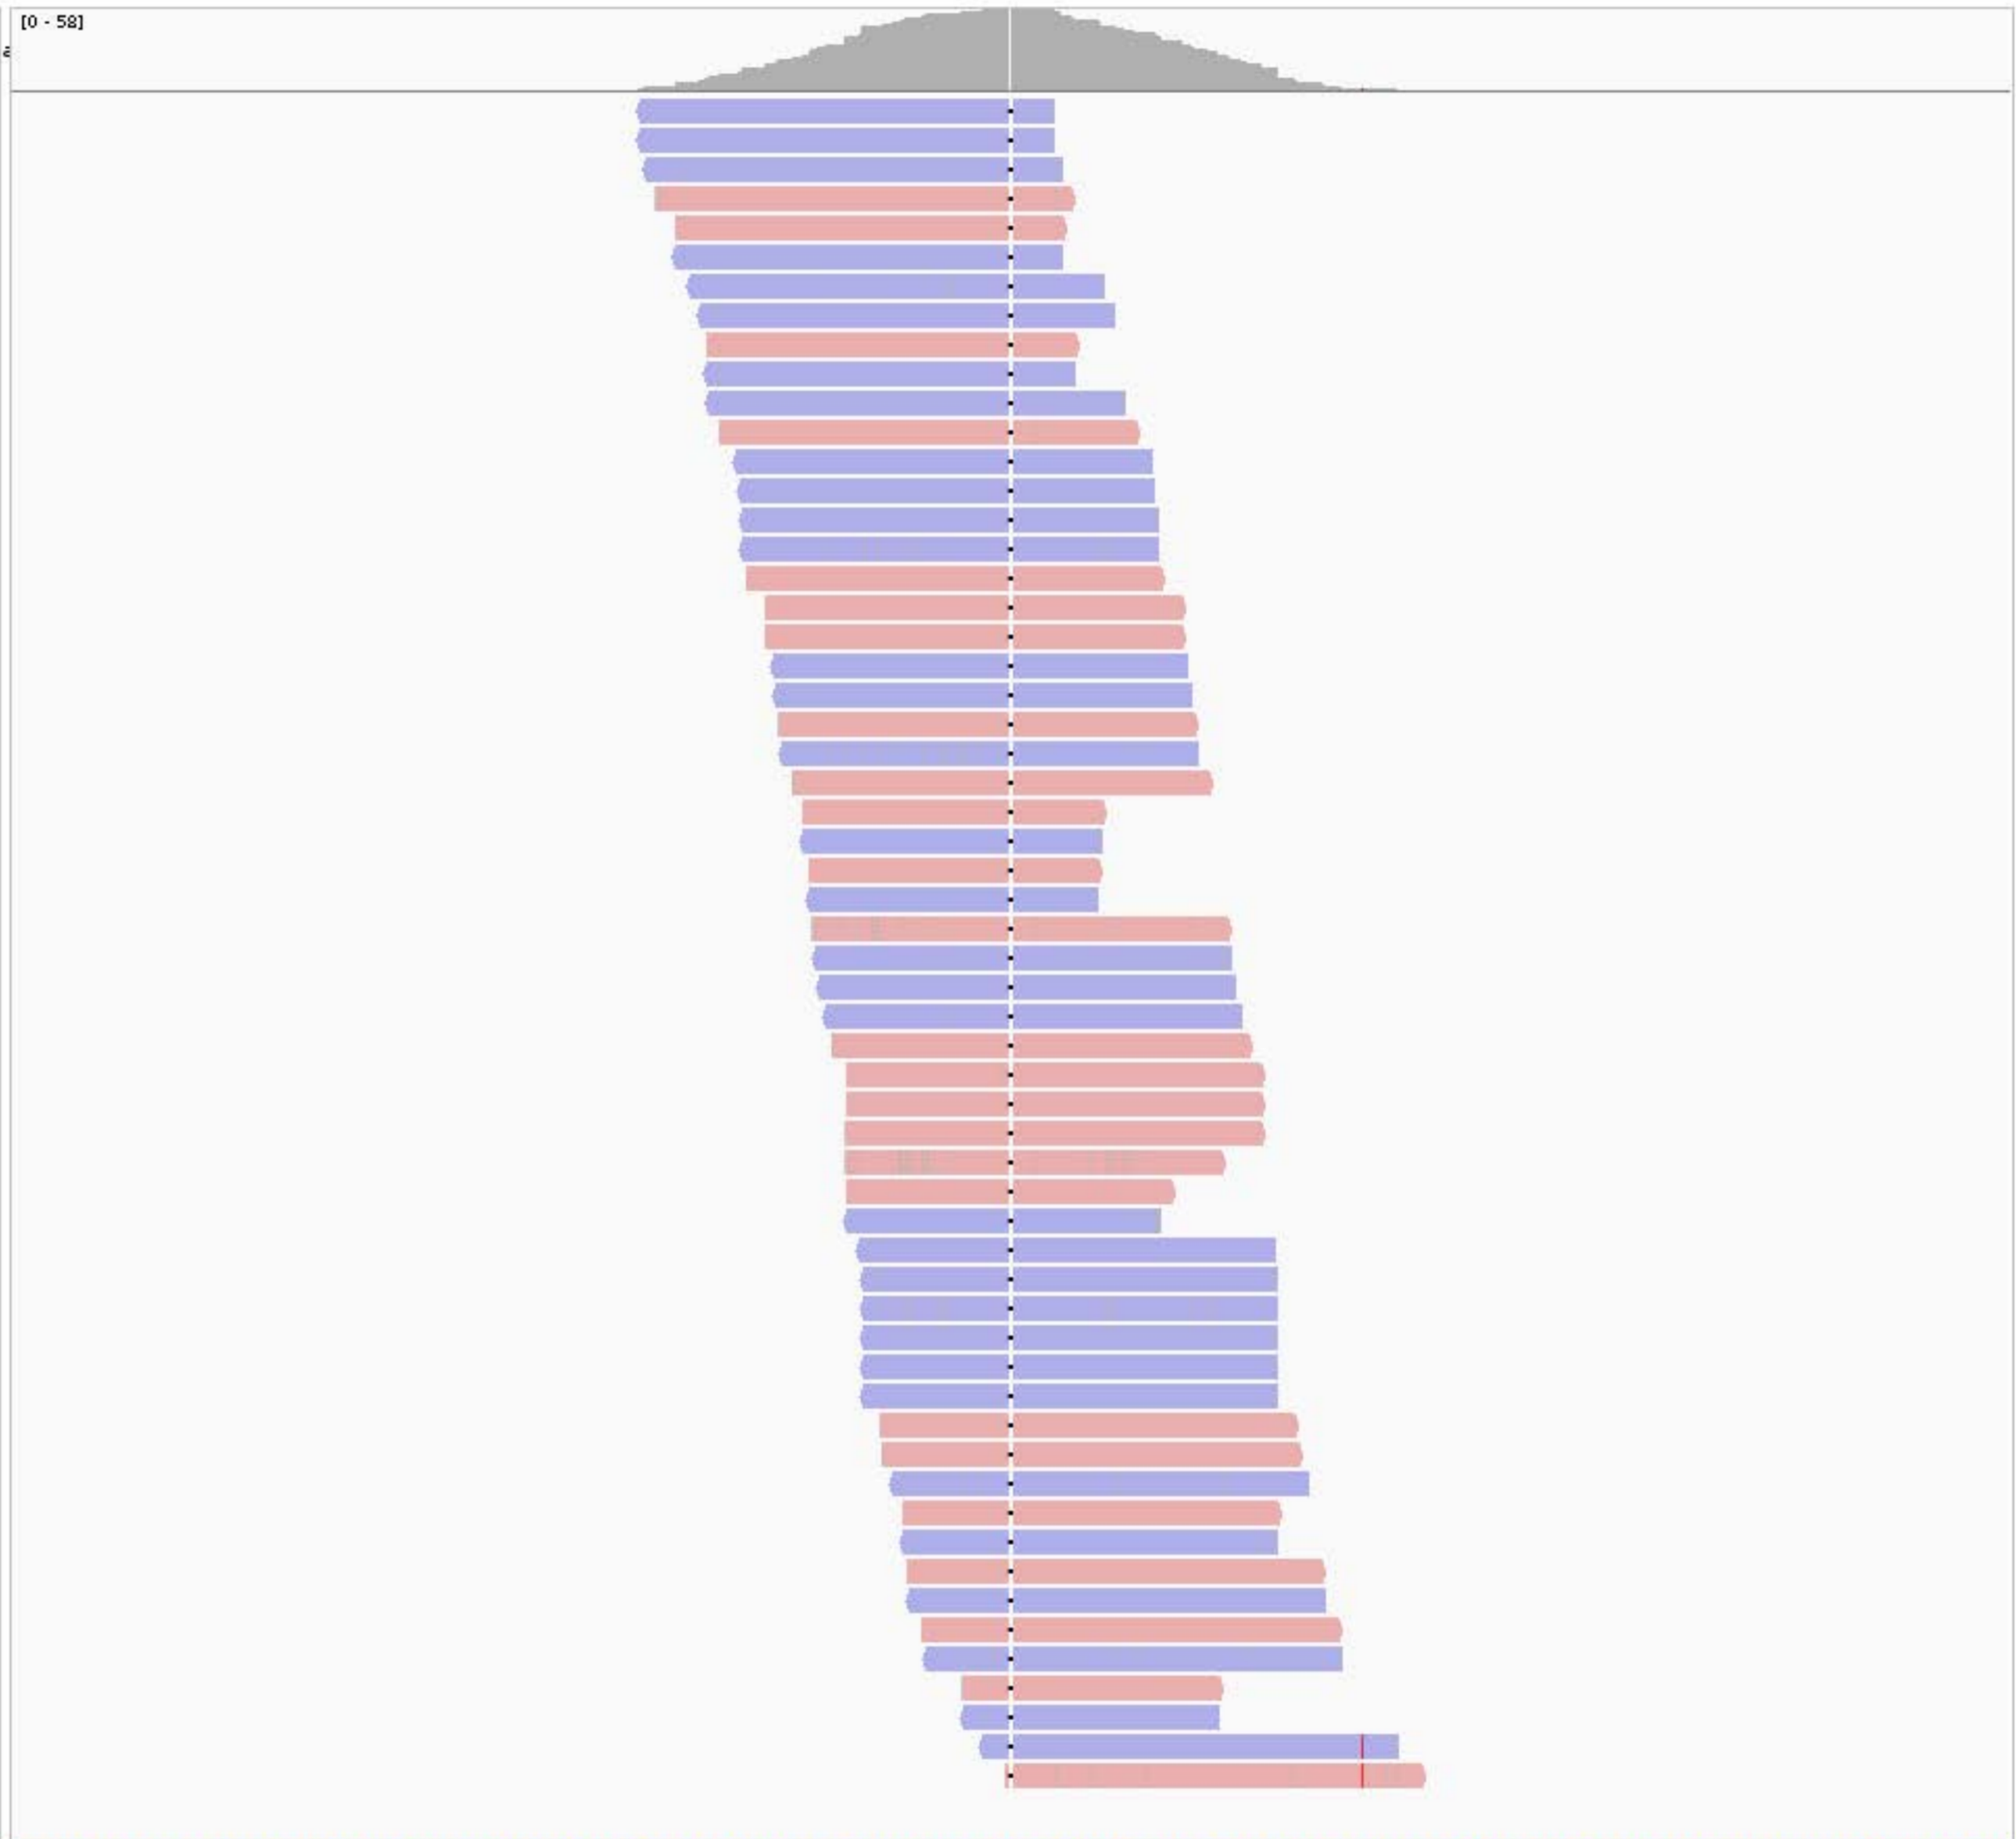

Sequence

Refseq Genes

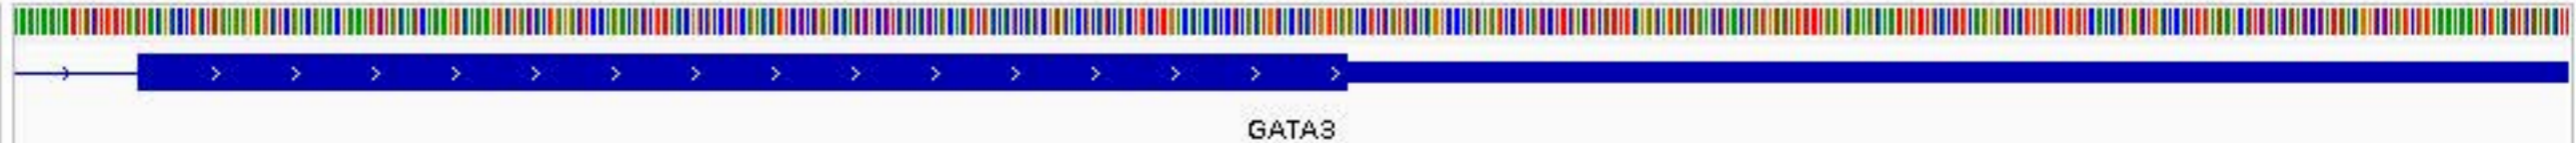

chr19:3,121,167-3,121,766

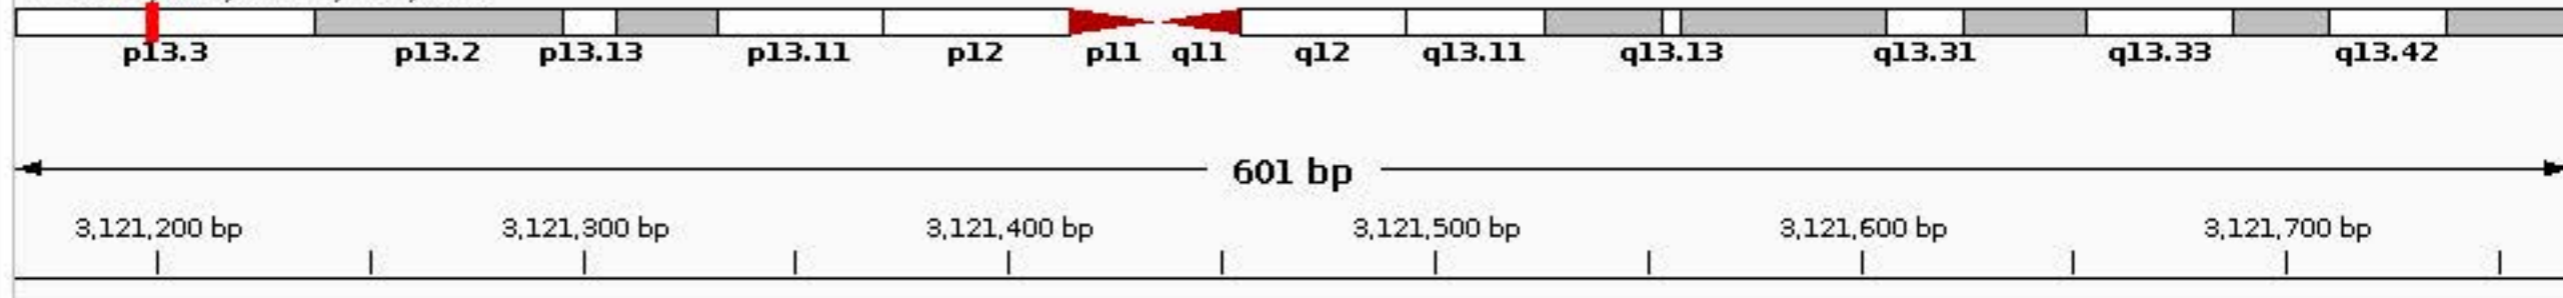

SL\_0003\_L\_FFPE\_11-B\_mut.barrage

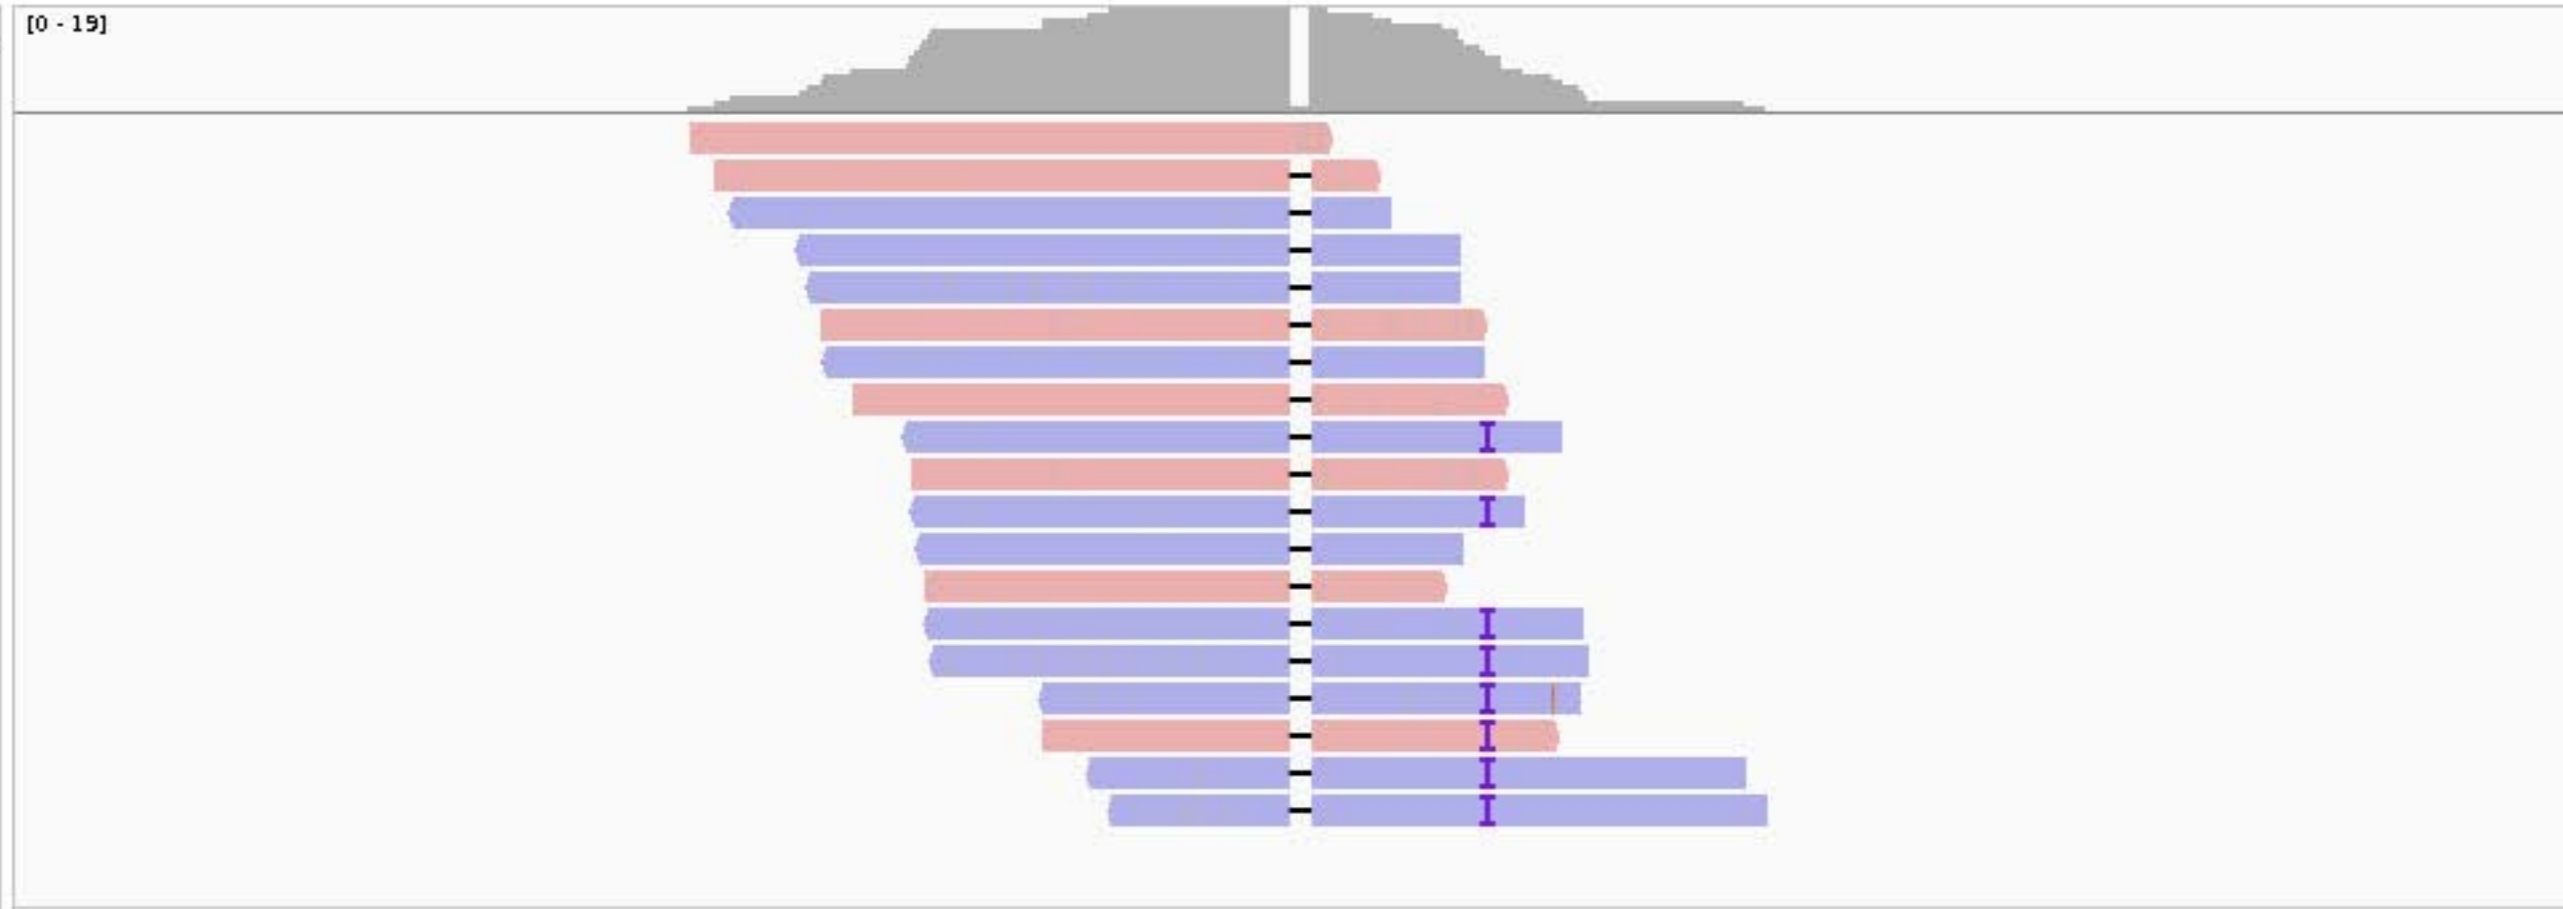

SL\_0003\_L\_FFPE\_11-B\_mut.bam

Sequence →

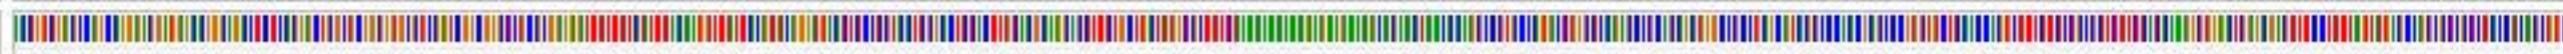

Refseq Genes

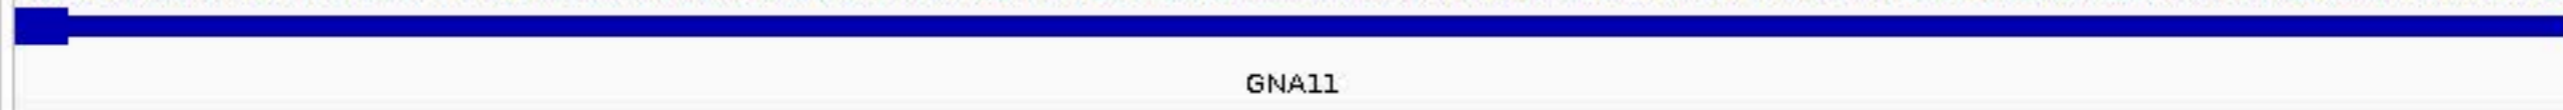

GNAT1



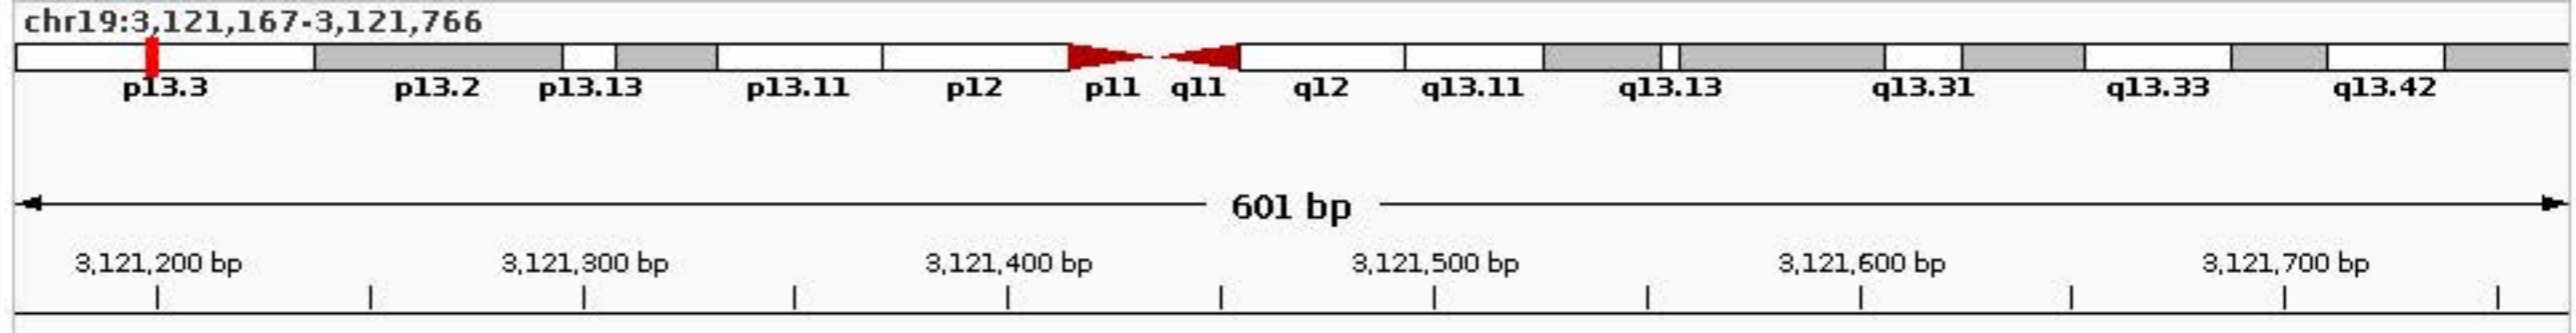

SL\_0003\_L\_FFPE\_40\_skin-B\_mut l  
Coverage

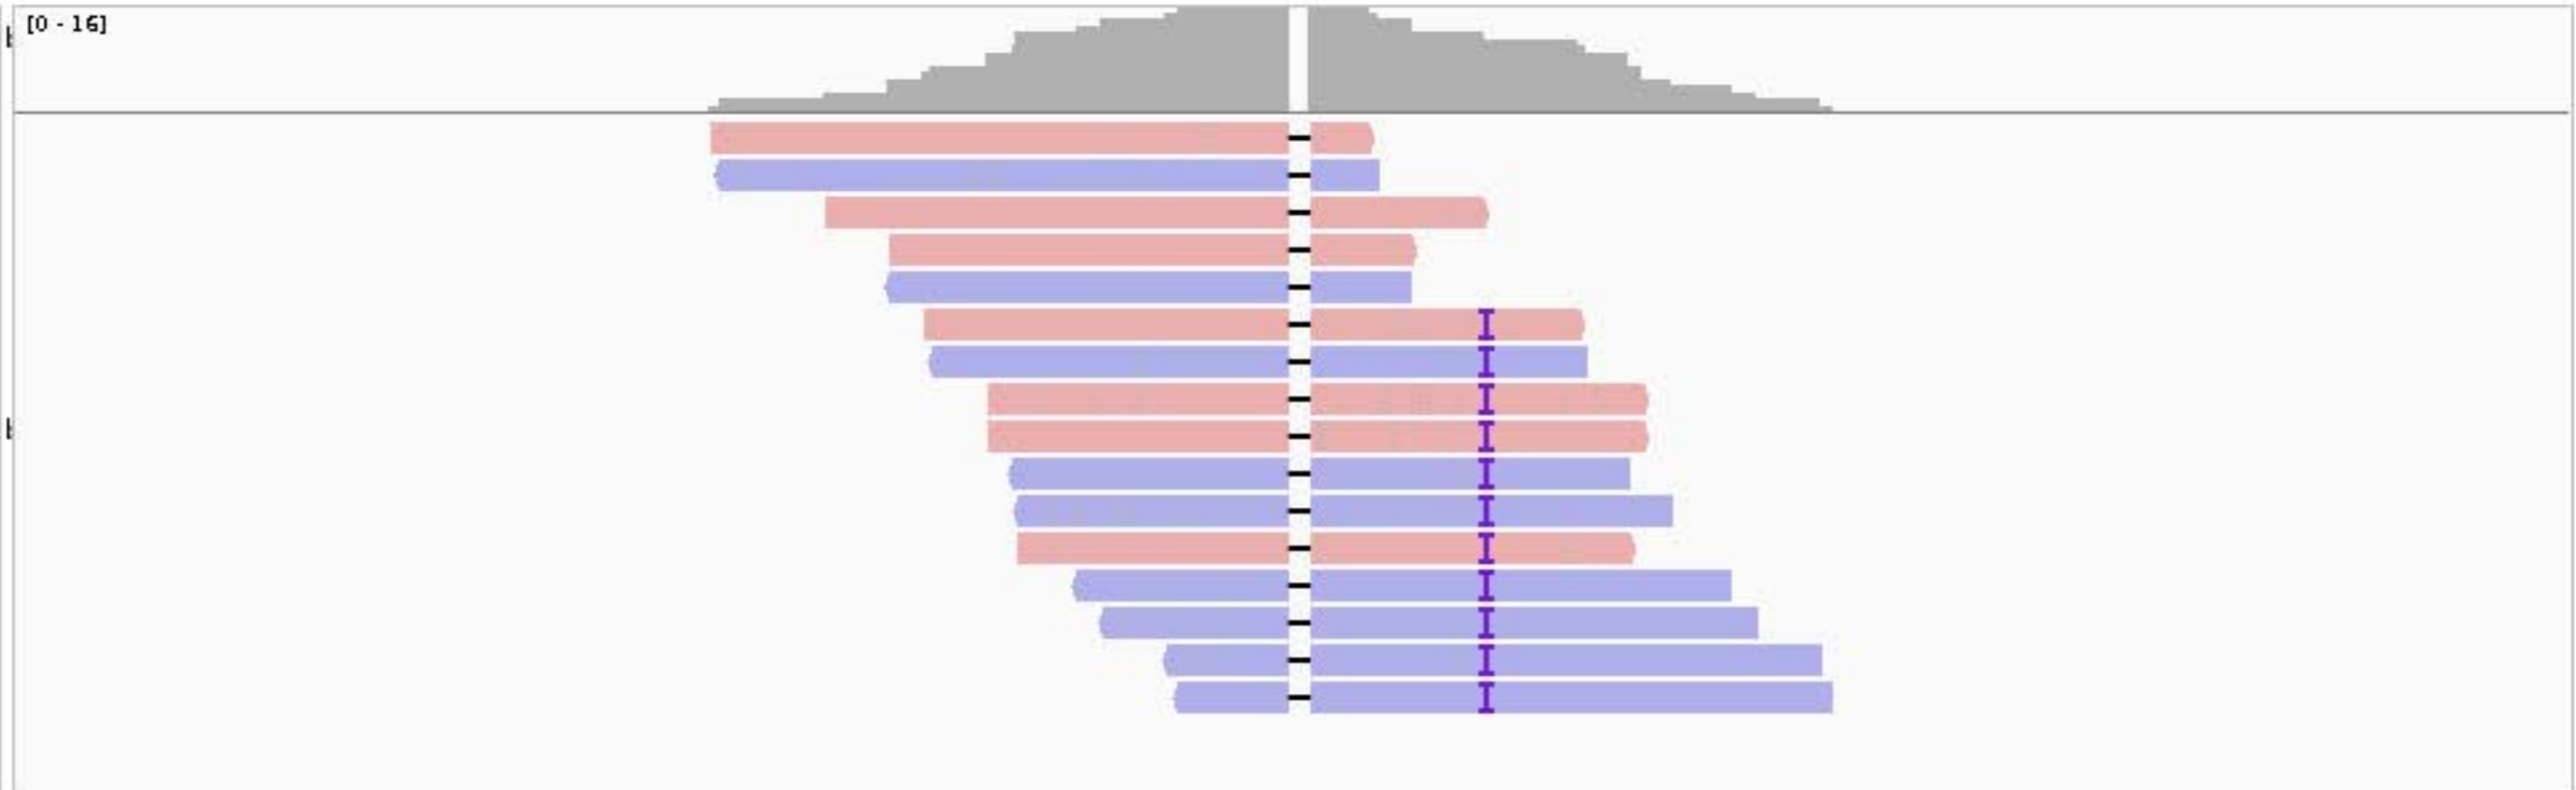

SL\_0003\_L\_FFPE\_40\_skin-B\_mut l

Sequence →

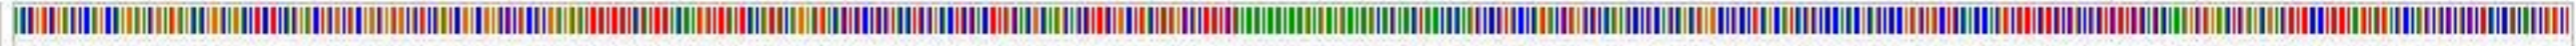

Refseq Genes

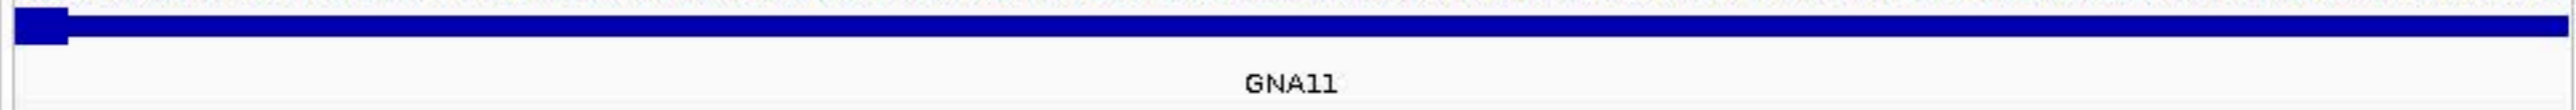

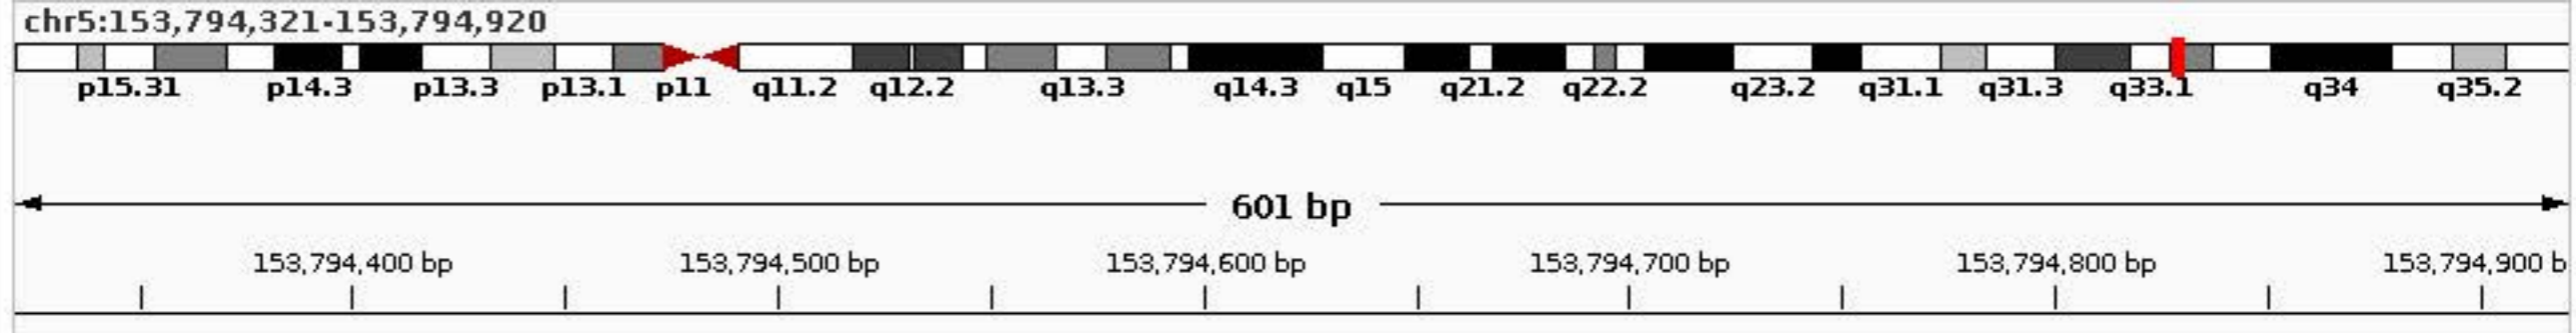

SL\_1012\_R\_10\_FFPE-B\_mut.bam  
rage

SL\_1012\_R\_10\_FFPE-B\_mut.ba  
m

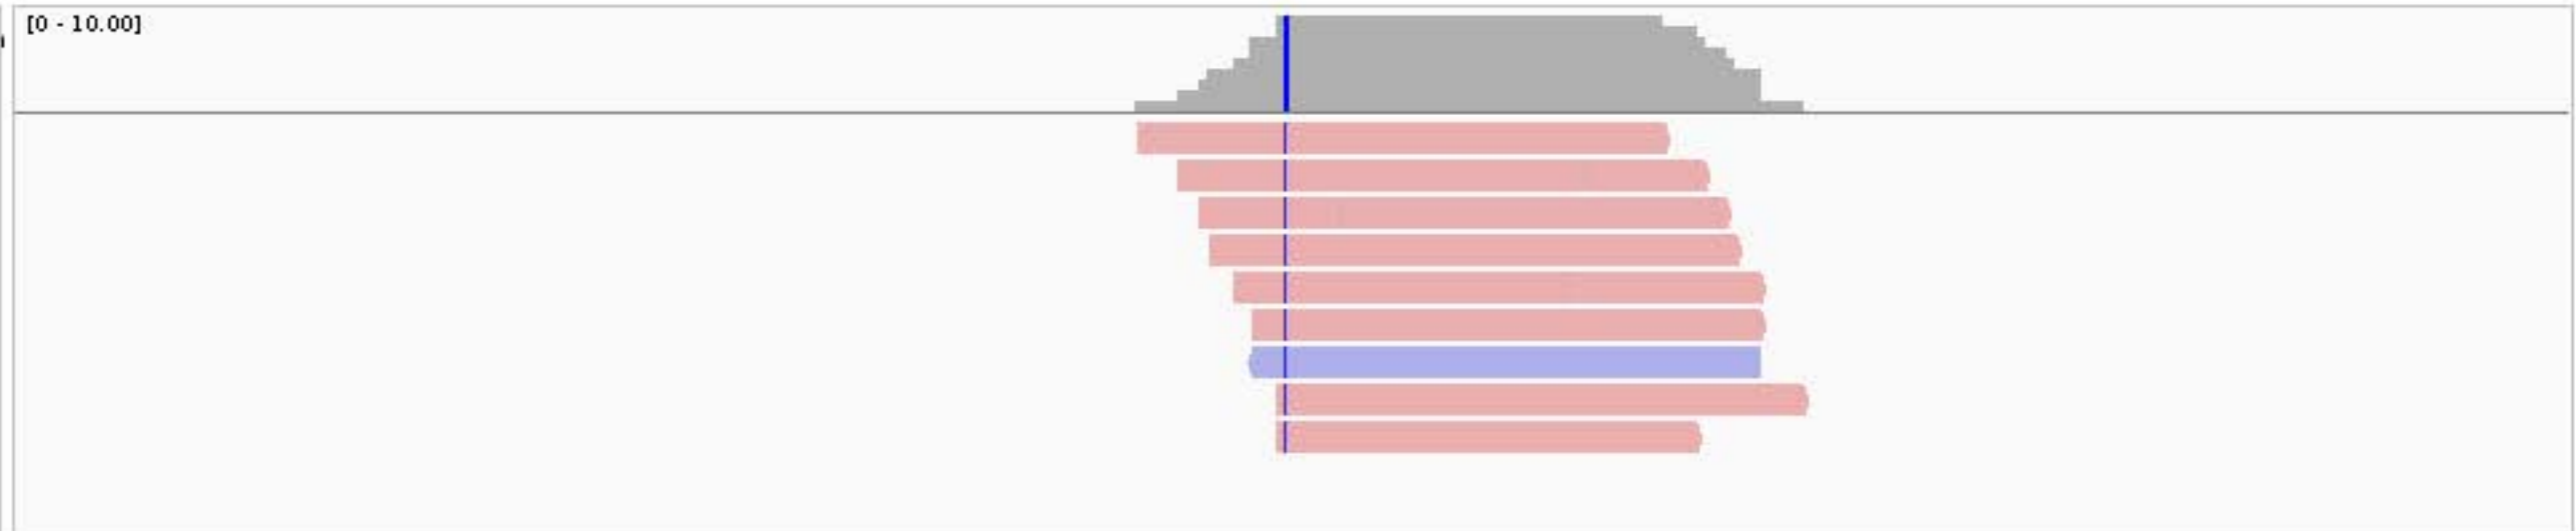

Sequence →

Refseq Genes

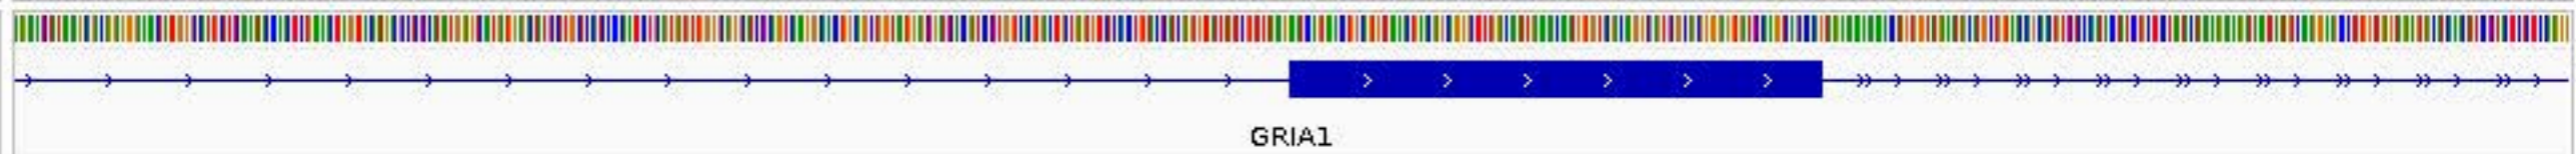



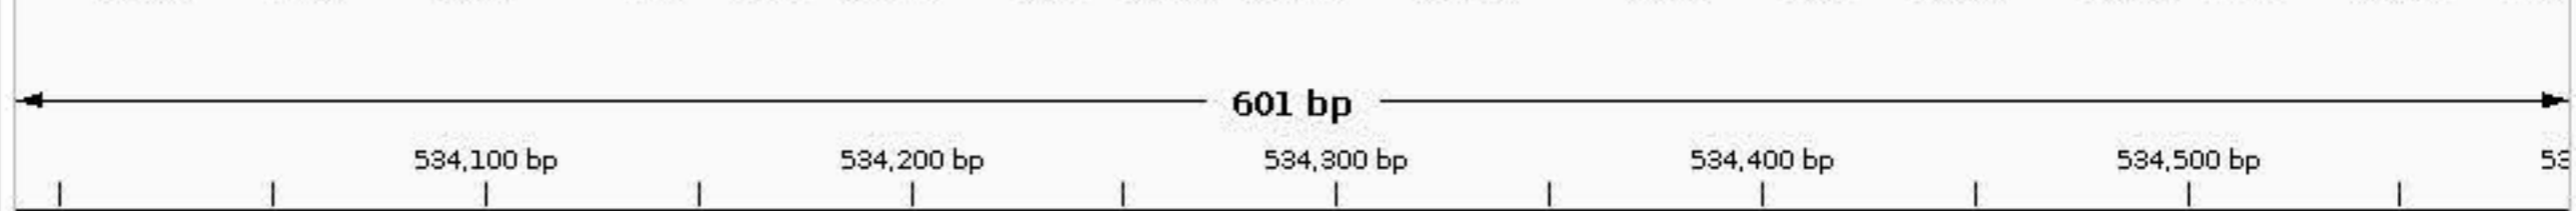

SL\_1010\_R\_FFPE\_2-B\_mut.bam  
age

SL\_1010\_R\_FFPE\_2-B\_mut.bam

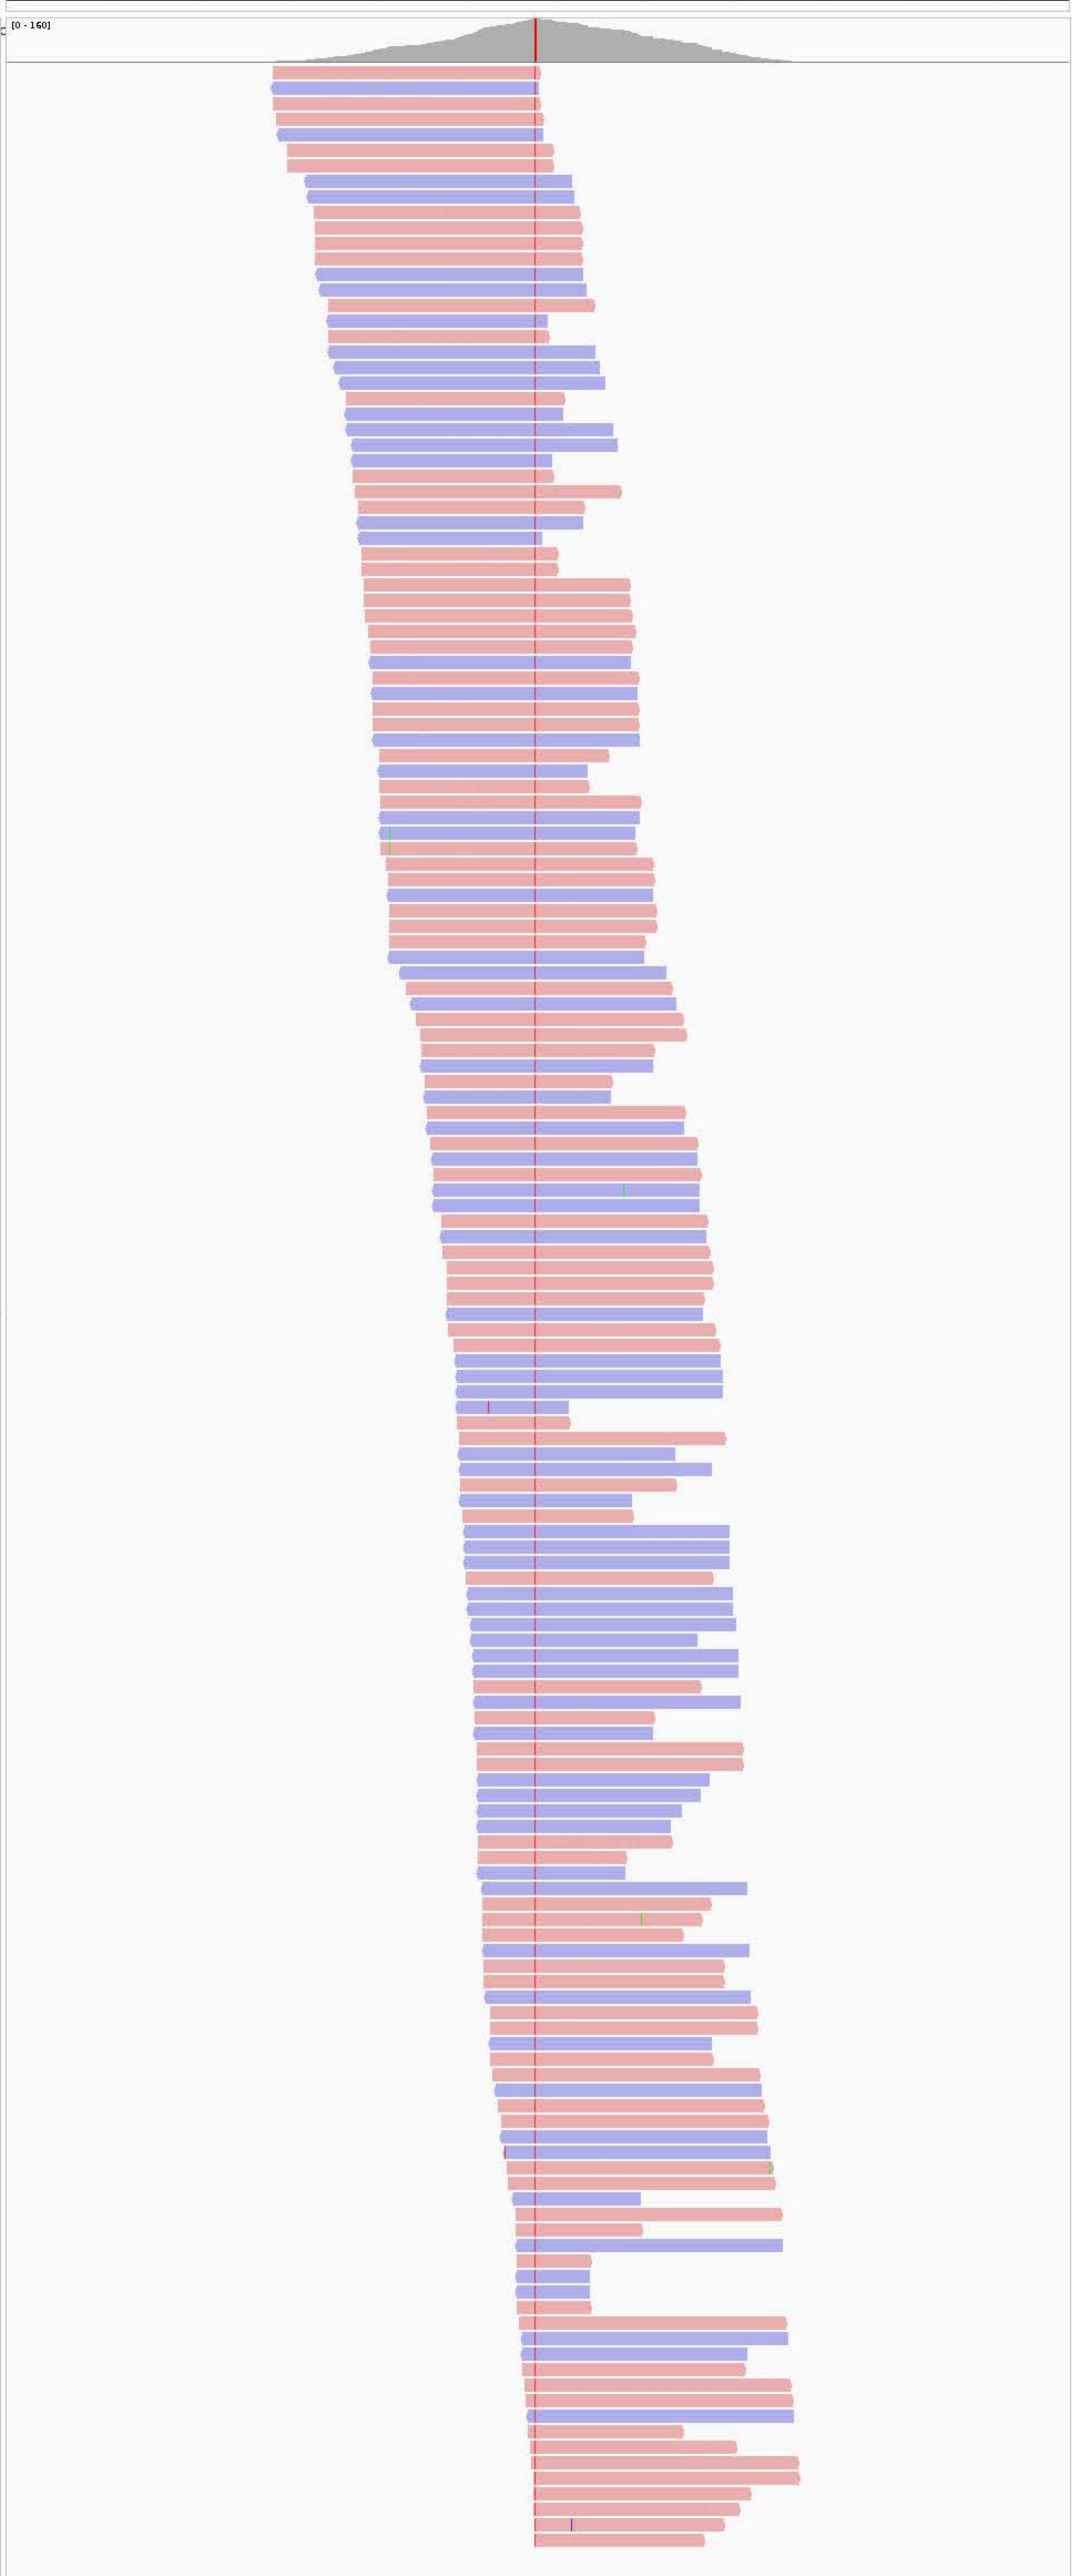

Sequence

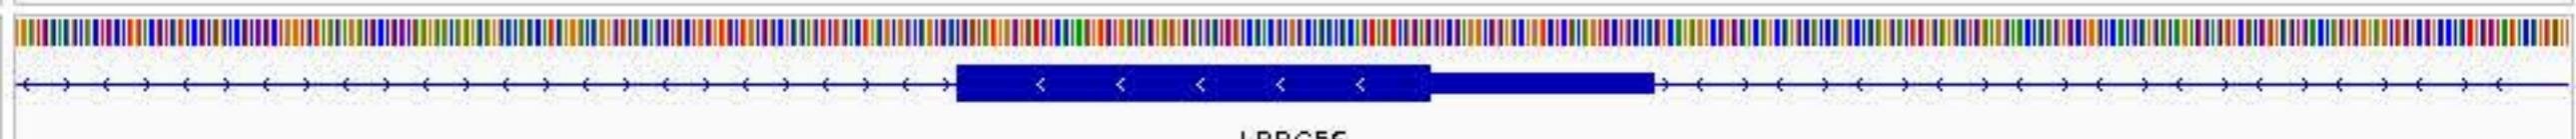

Refseq Genes

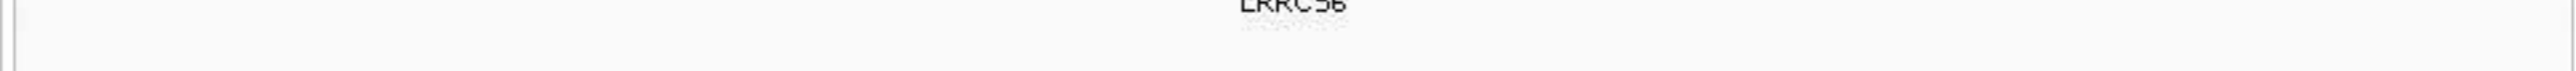

LRR56

chr11:533,990-534,589

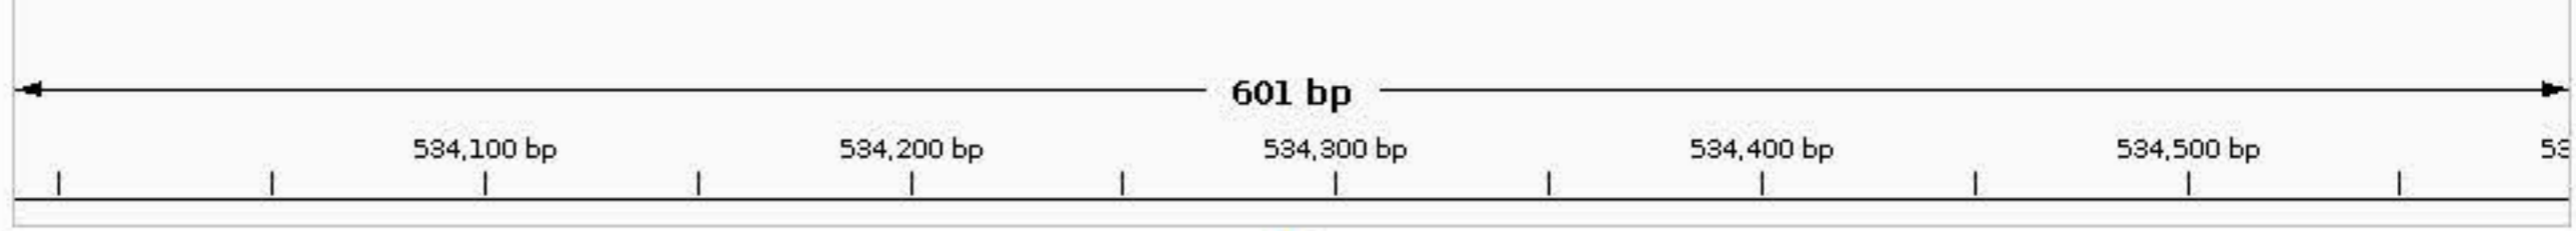

SL\_1010\_R\_FFPE\_11-B\_mut.bam  
rage

SL\_1010\_R\_FFPE\_11-B\_mut.ba  
m

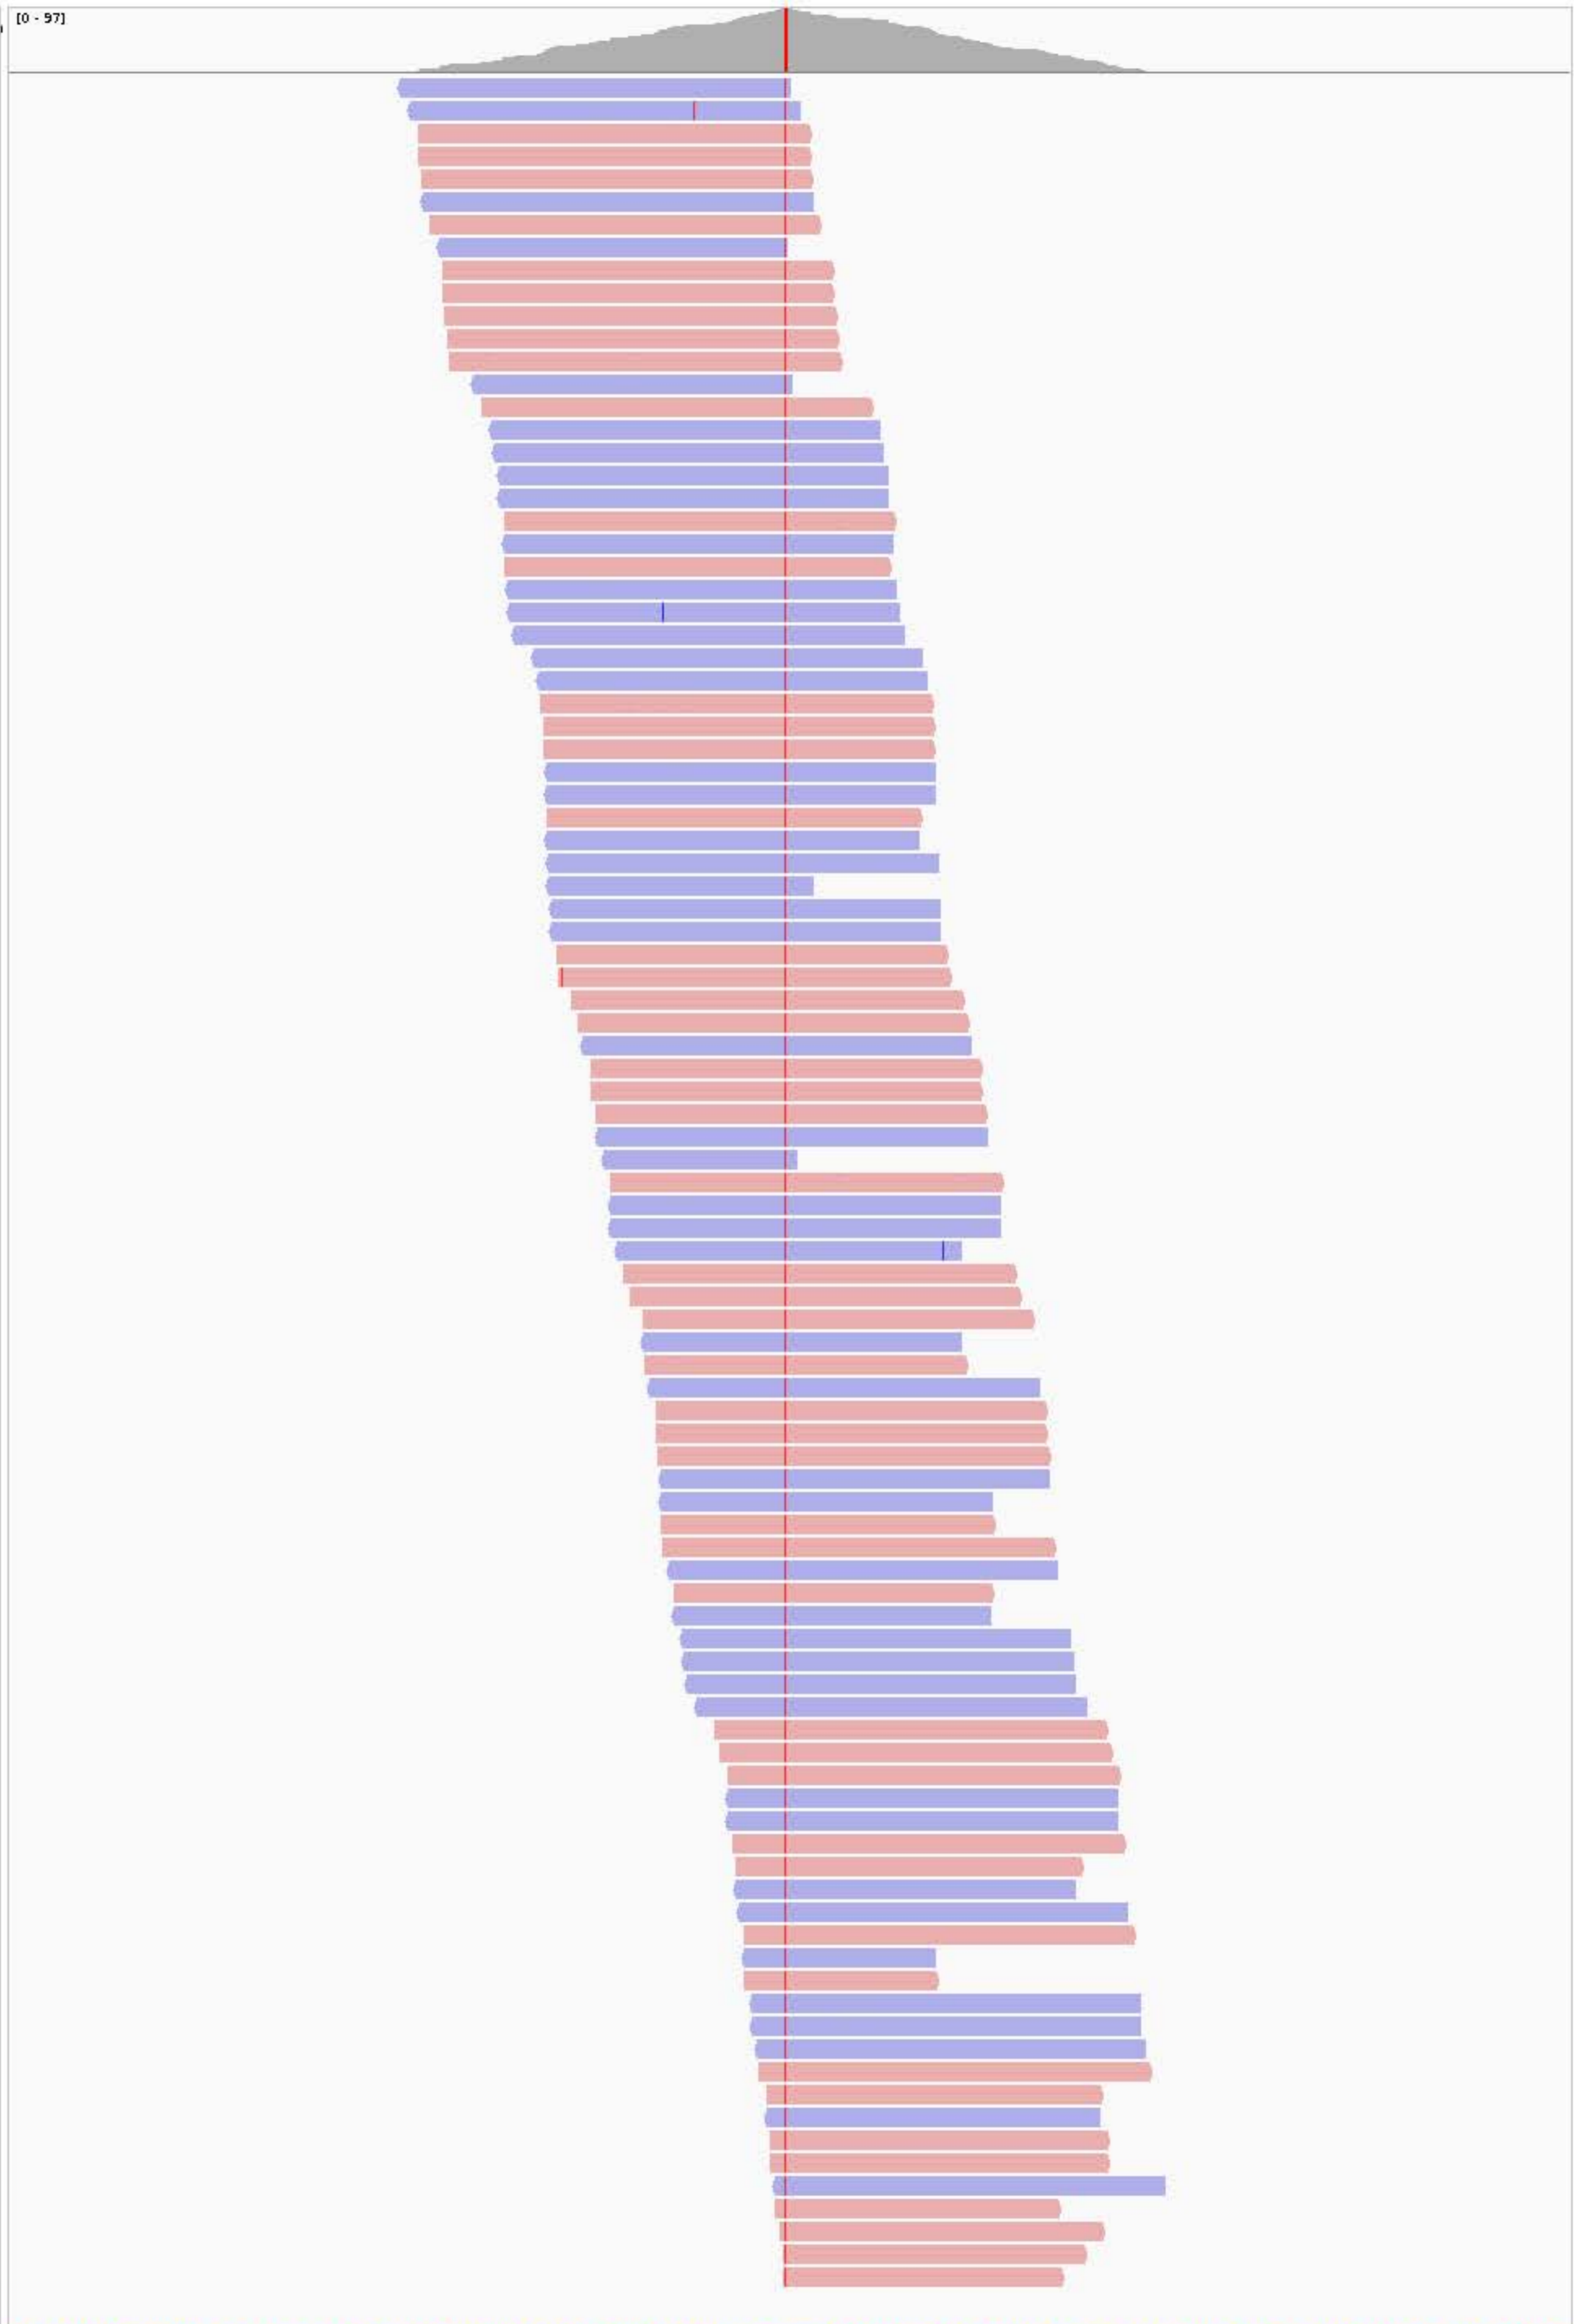

Sequence →

Refseq Genes

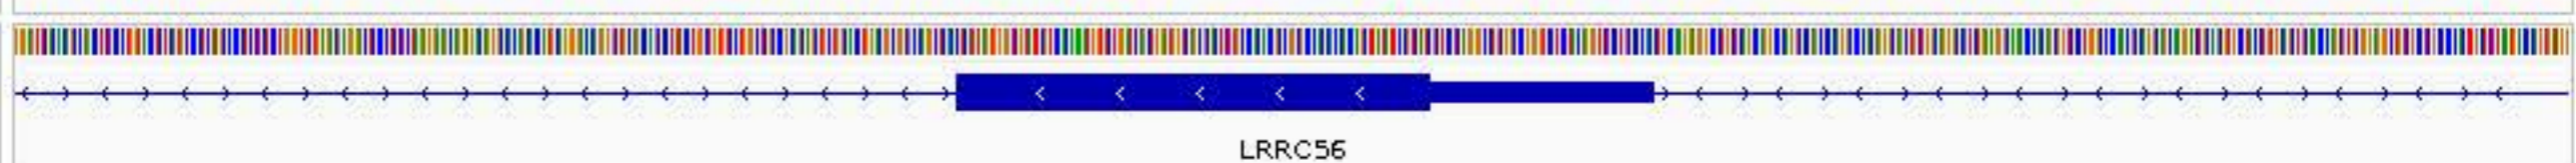

LRR56

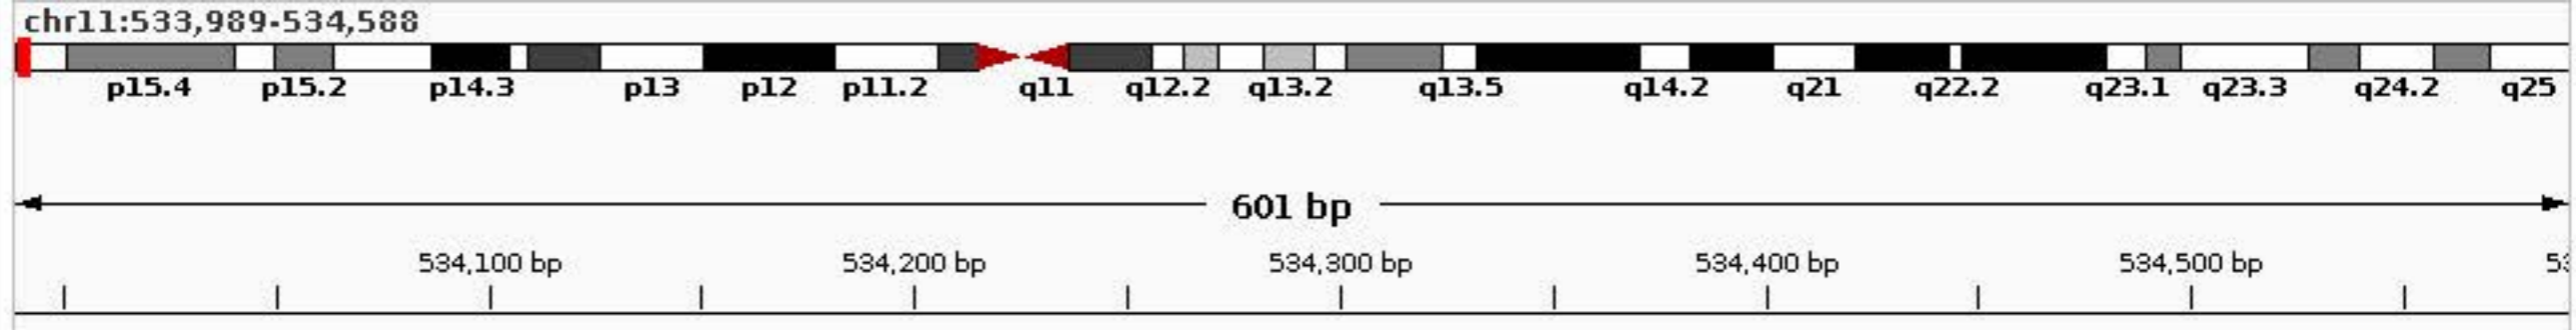

SL\_1006\_L\_FFPE\_7-B\_mut.bam  
age

SL\_1006\_L\_FFPE\_7-B\_mut.bam

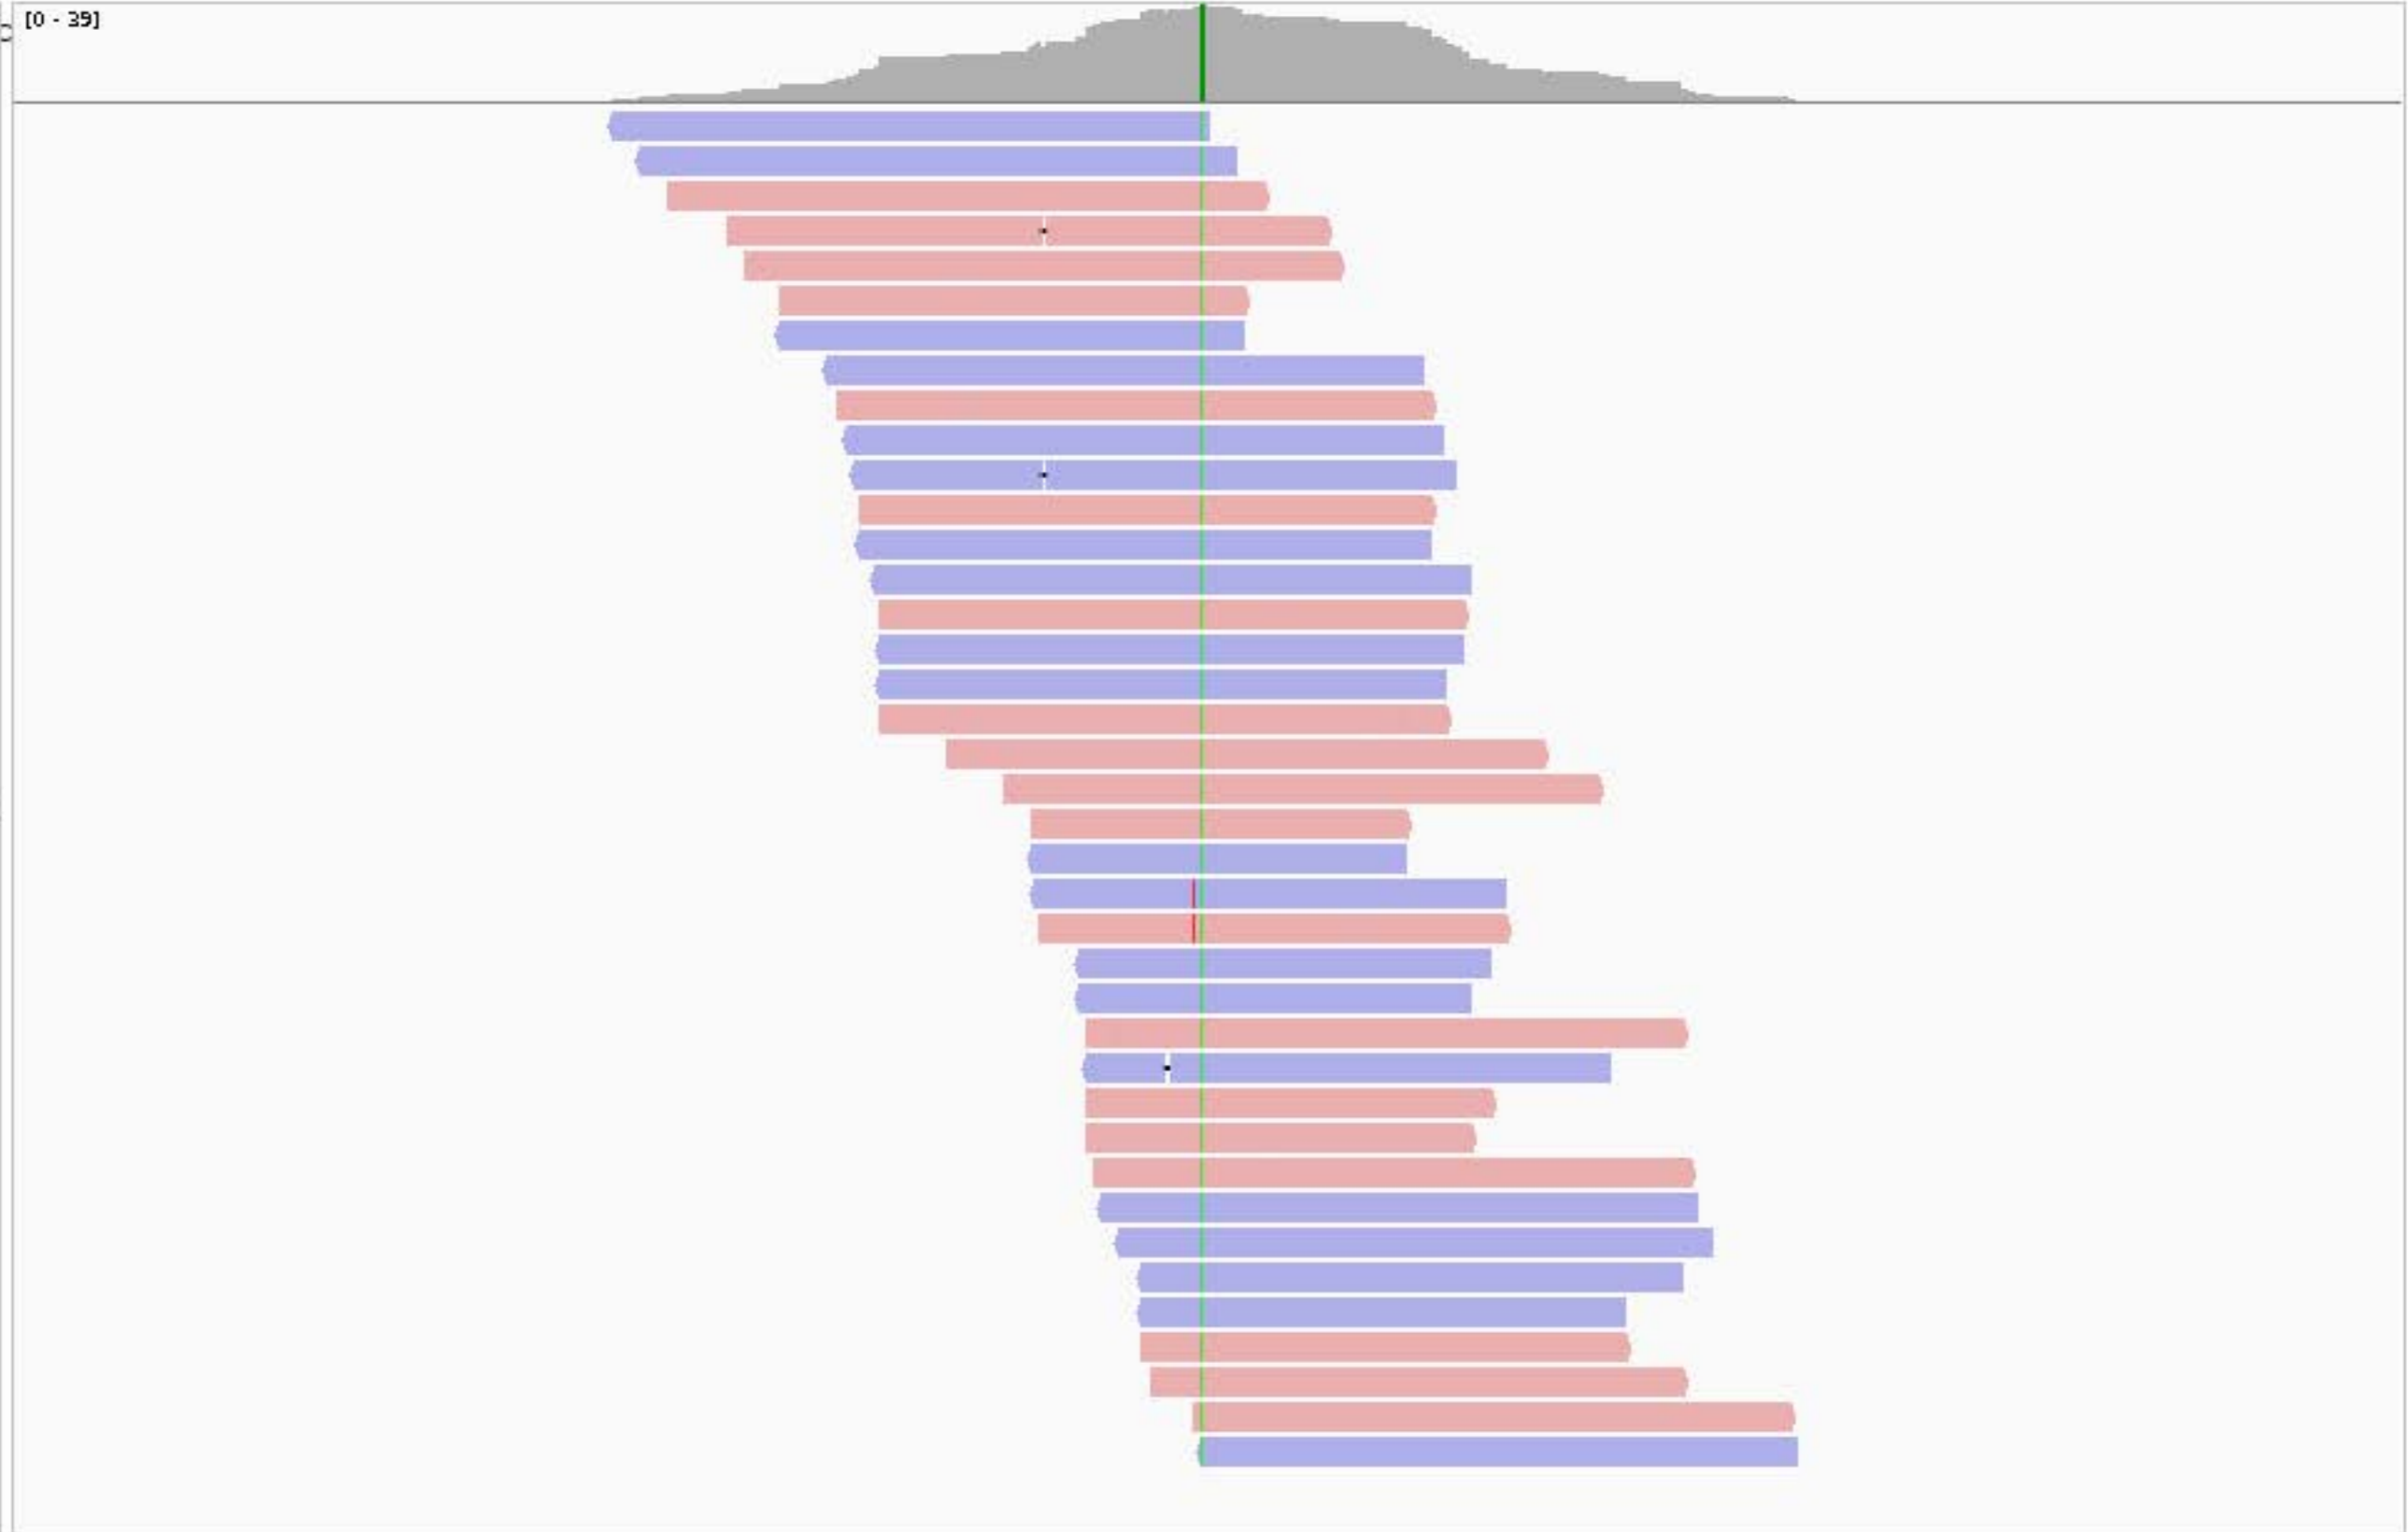

Sequence →

Refseq Genes

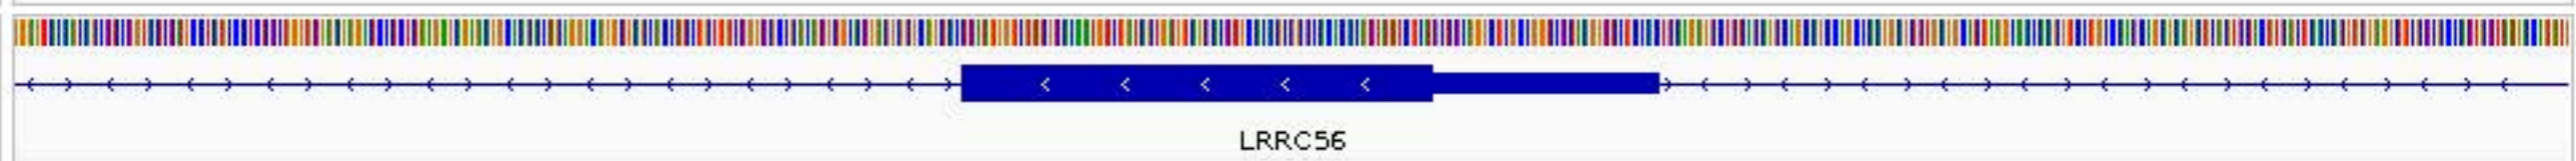



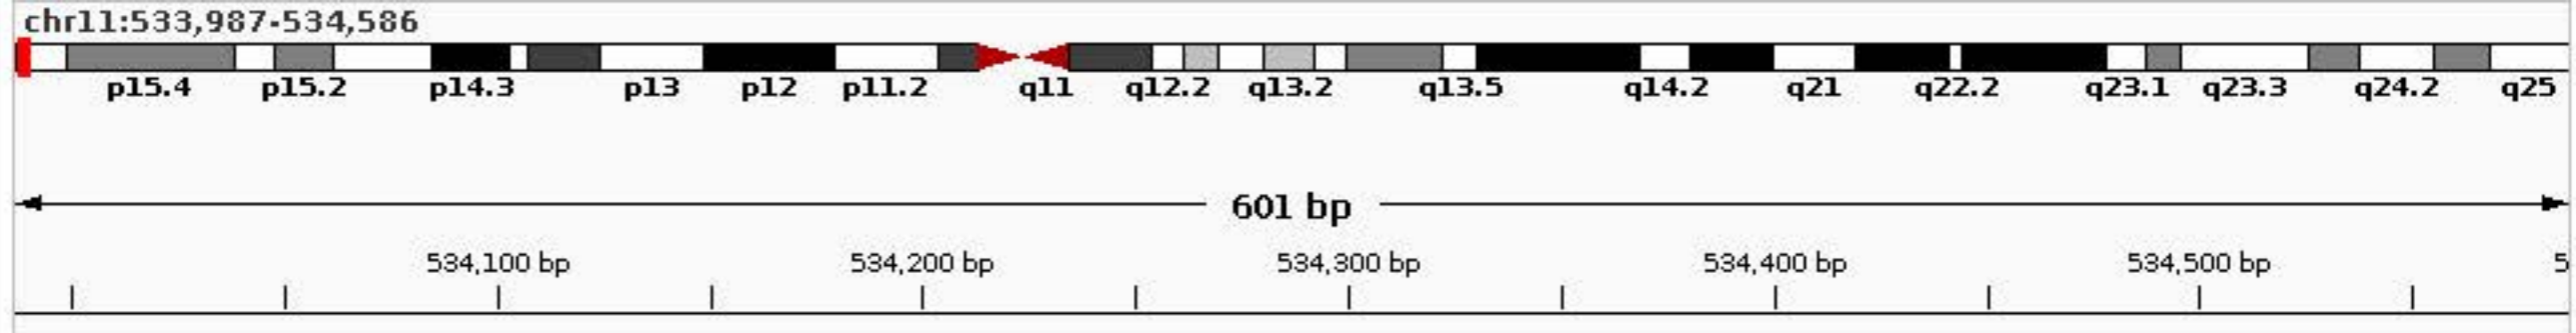

SL\_1015\_L\_14\_FFPE-B\_mut.barr  
rage

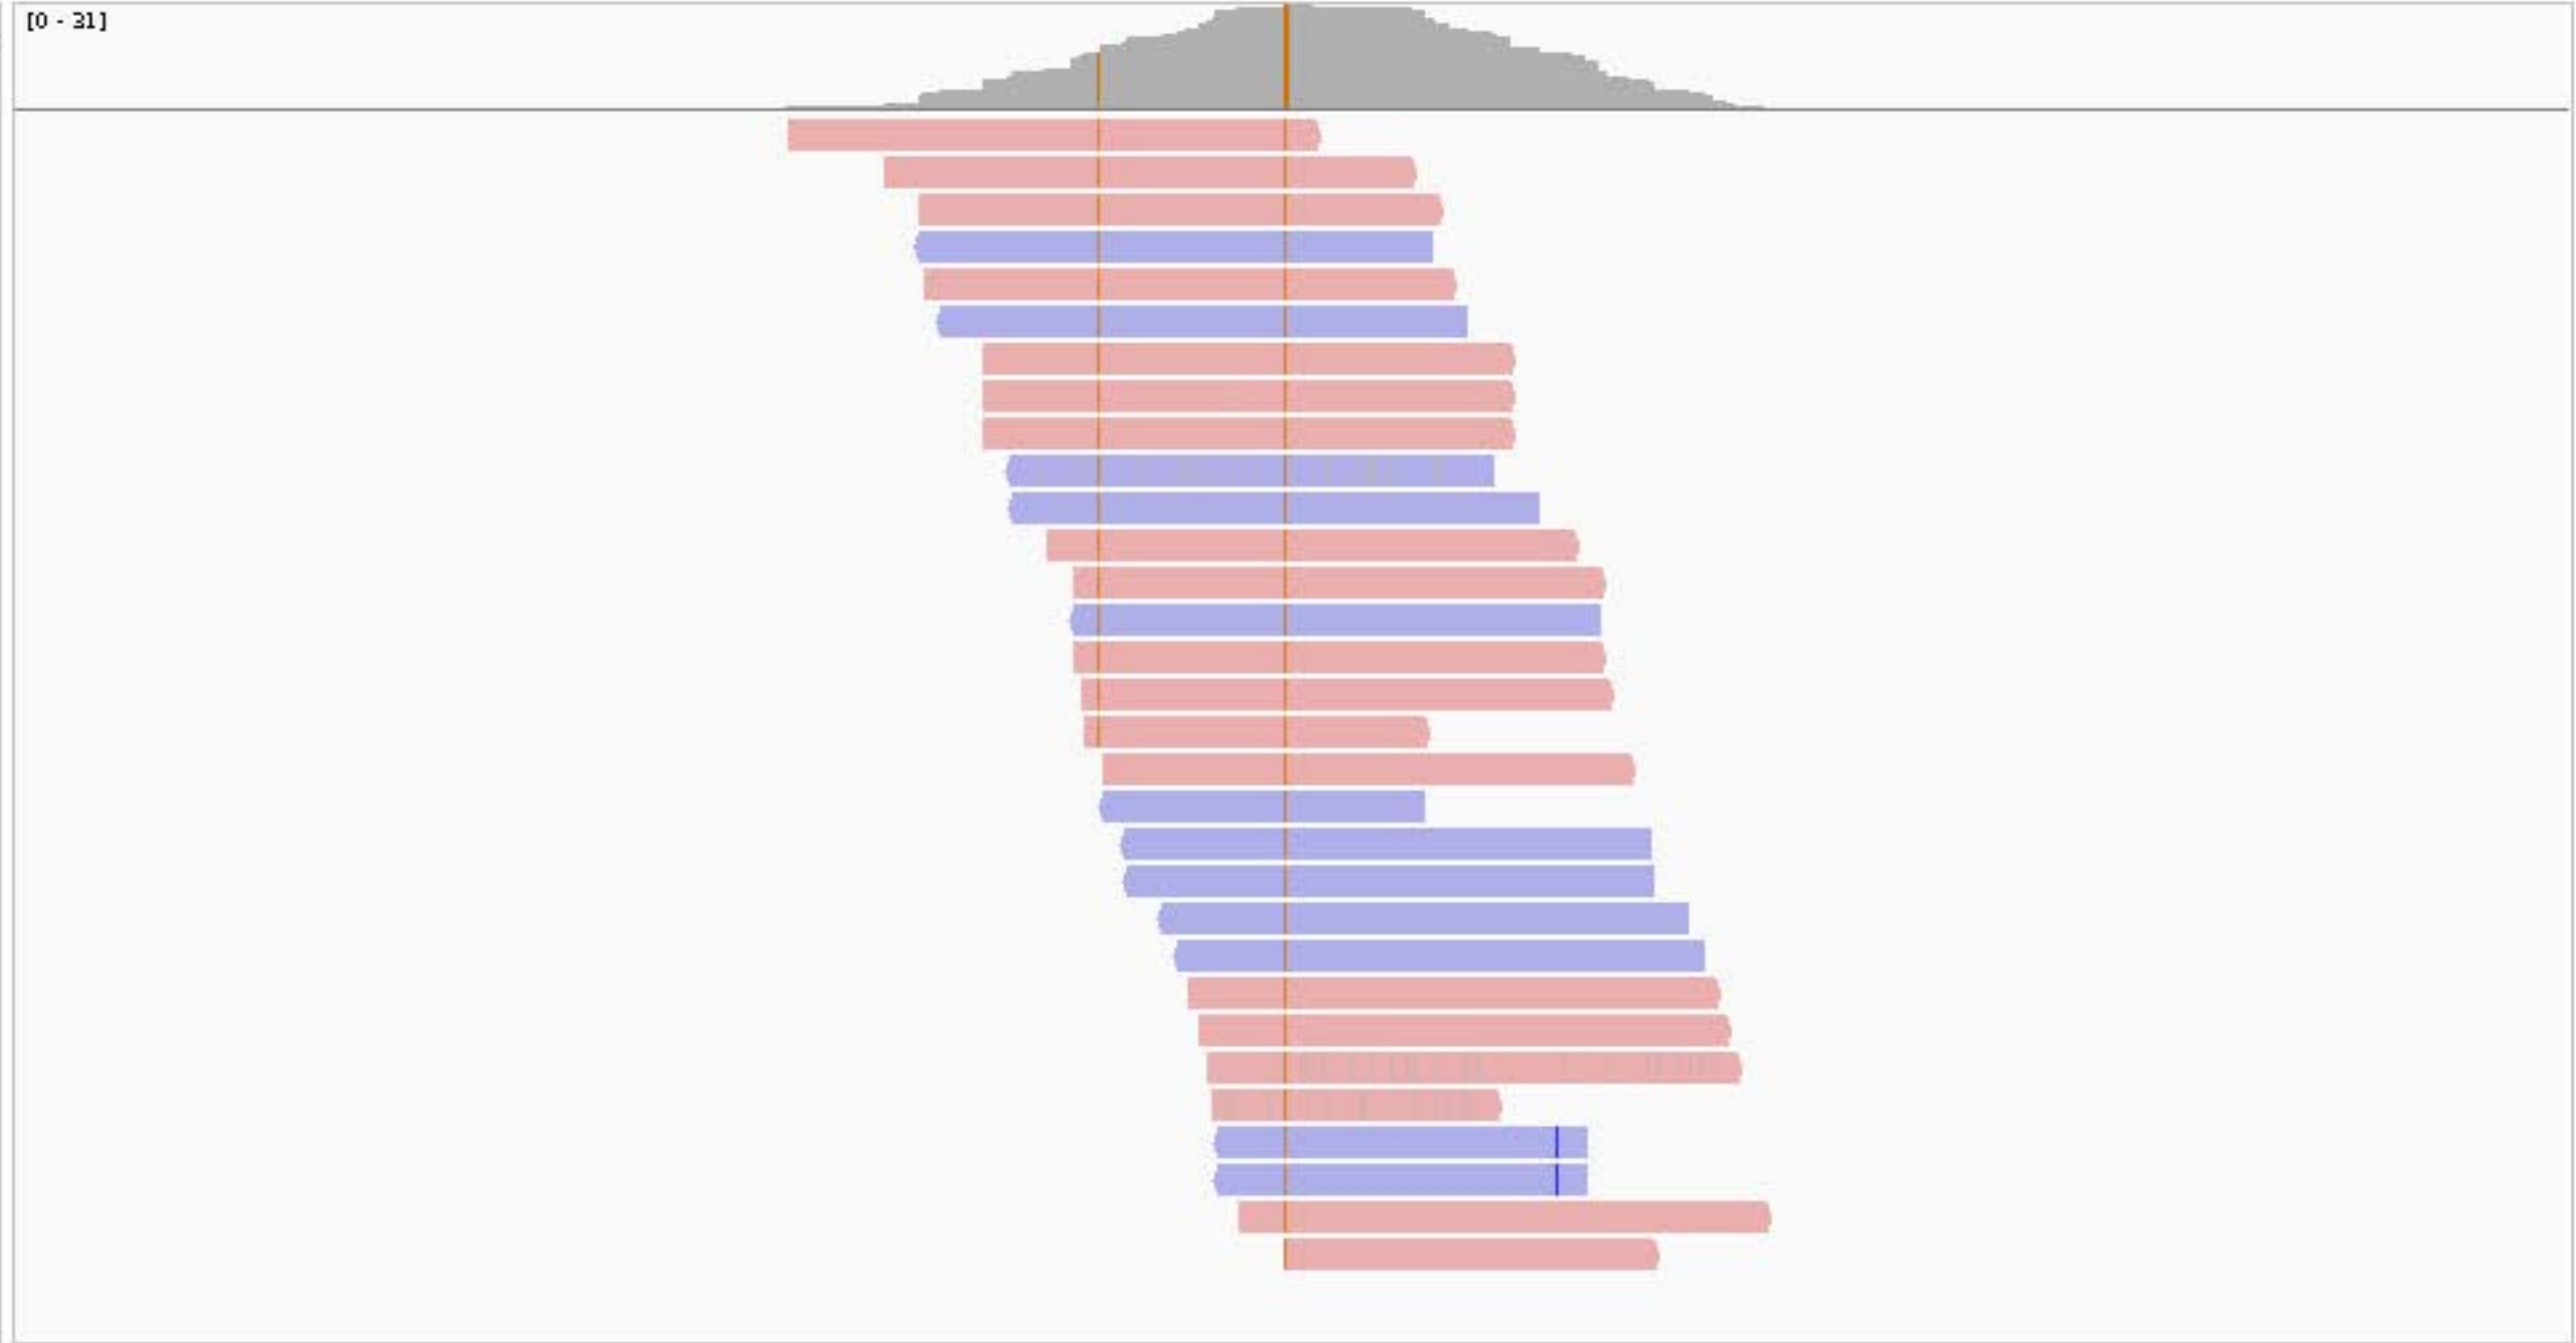

SL\_1015\_L\_14\_FFPE-B\_mut.ba  
m

Sequence →  
Refseq Genes

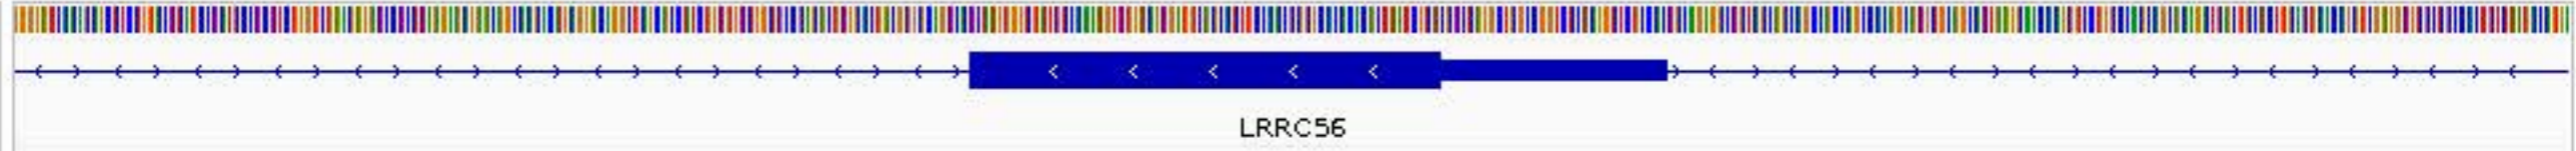

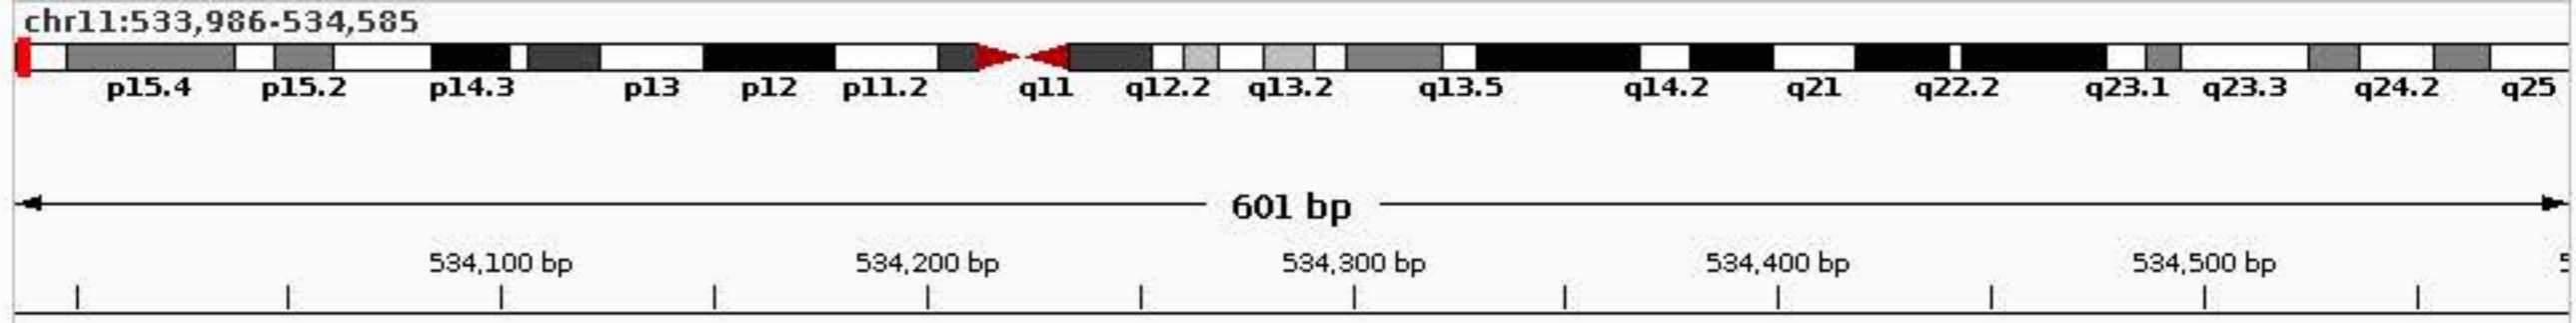

SL\_0011\_L\_FFPE\_9-B\_mut.bam  
age

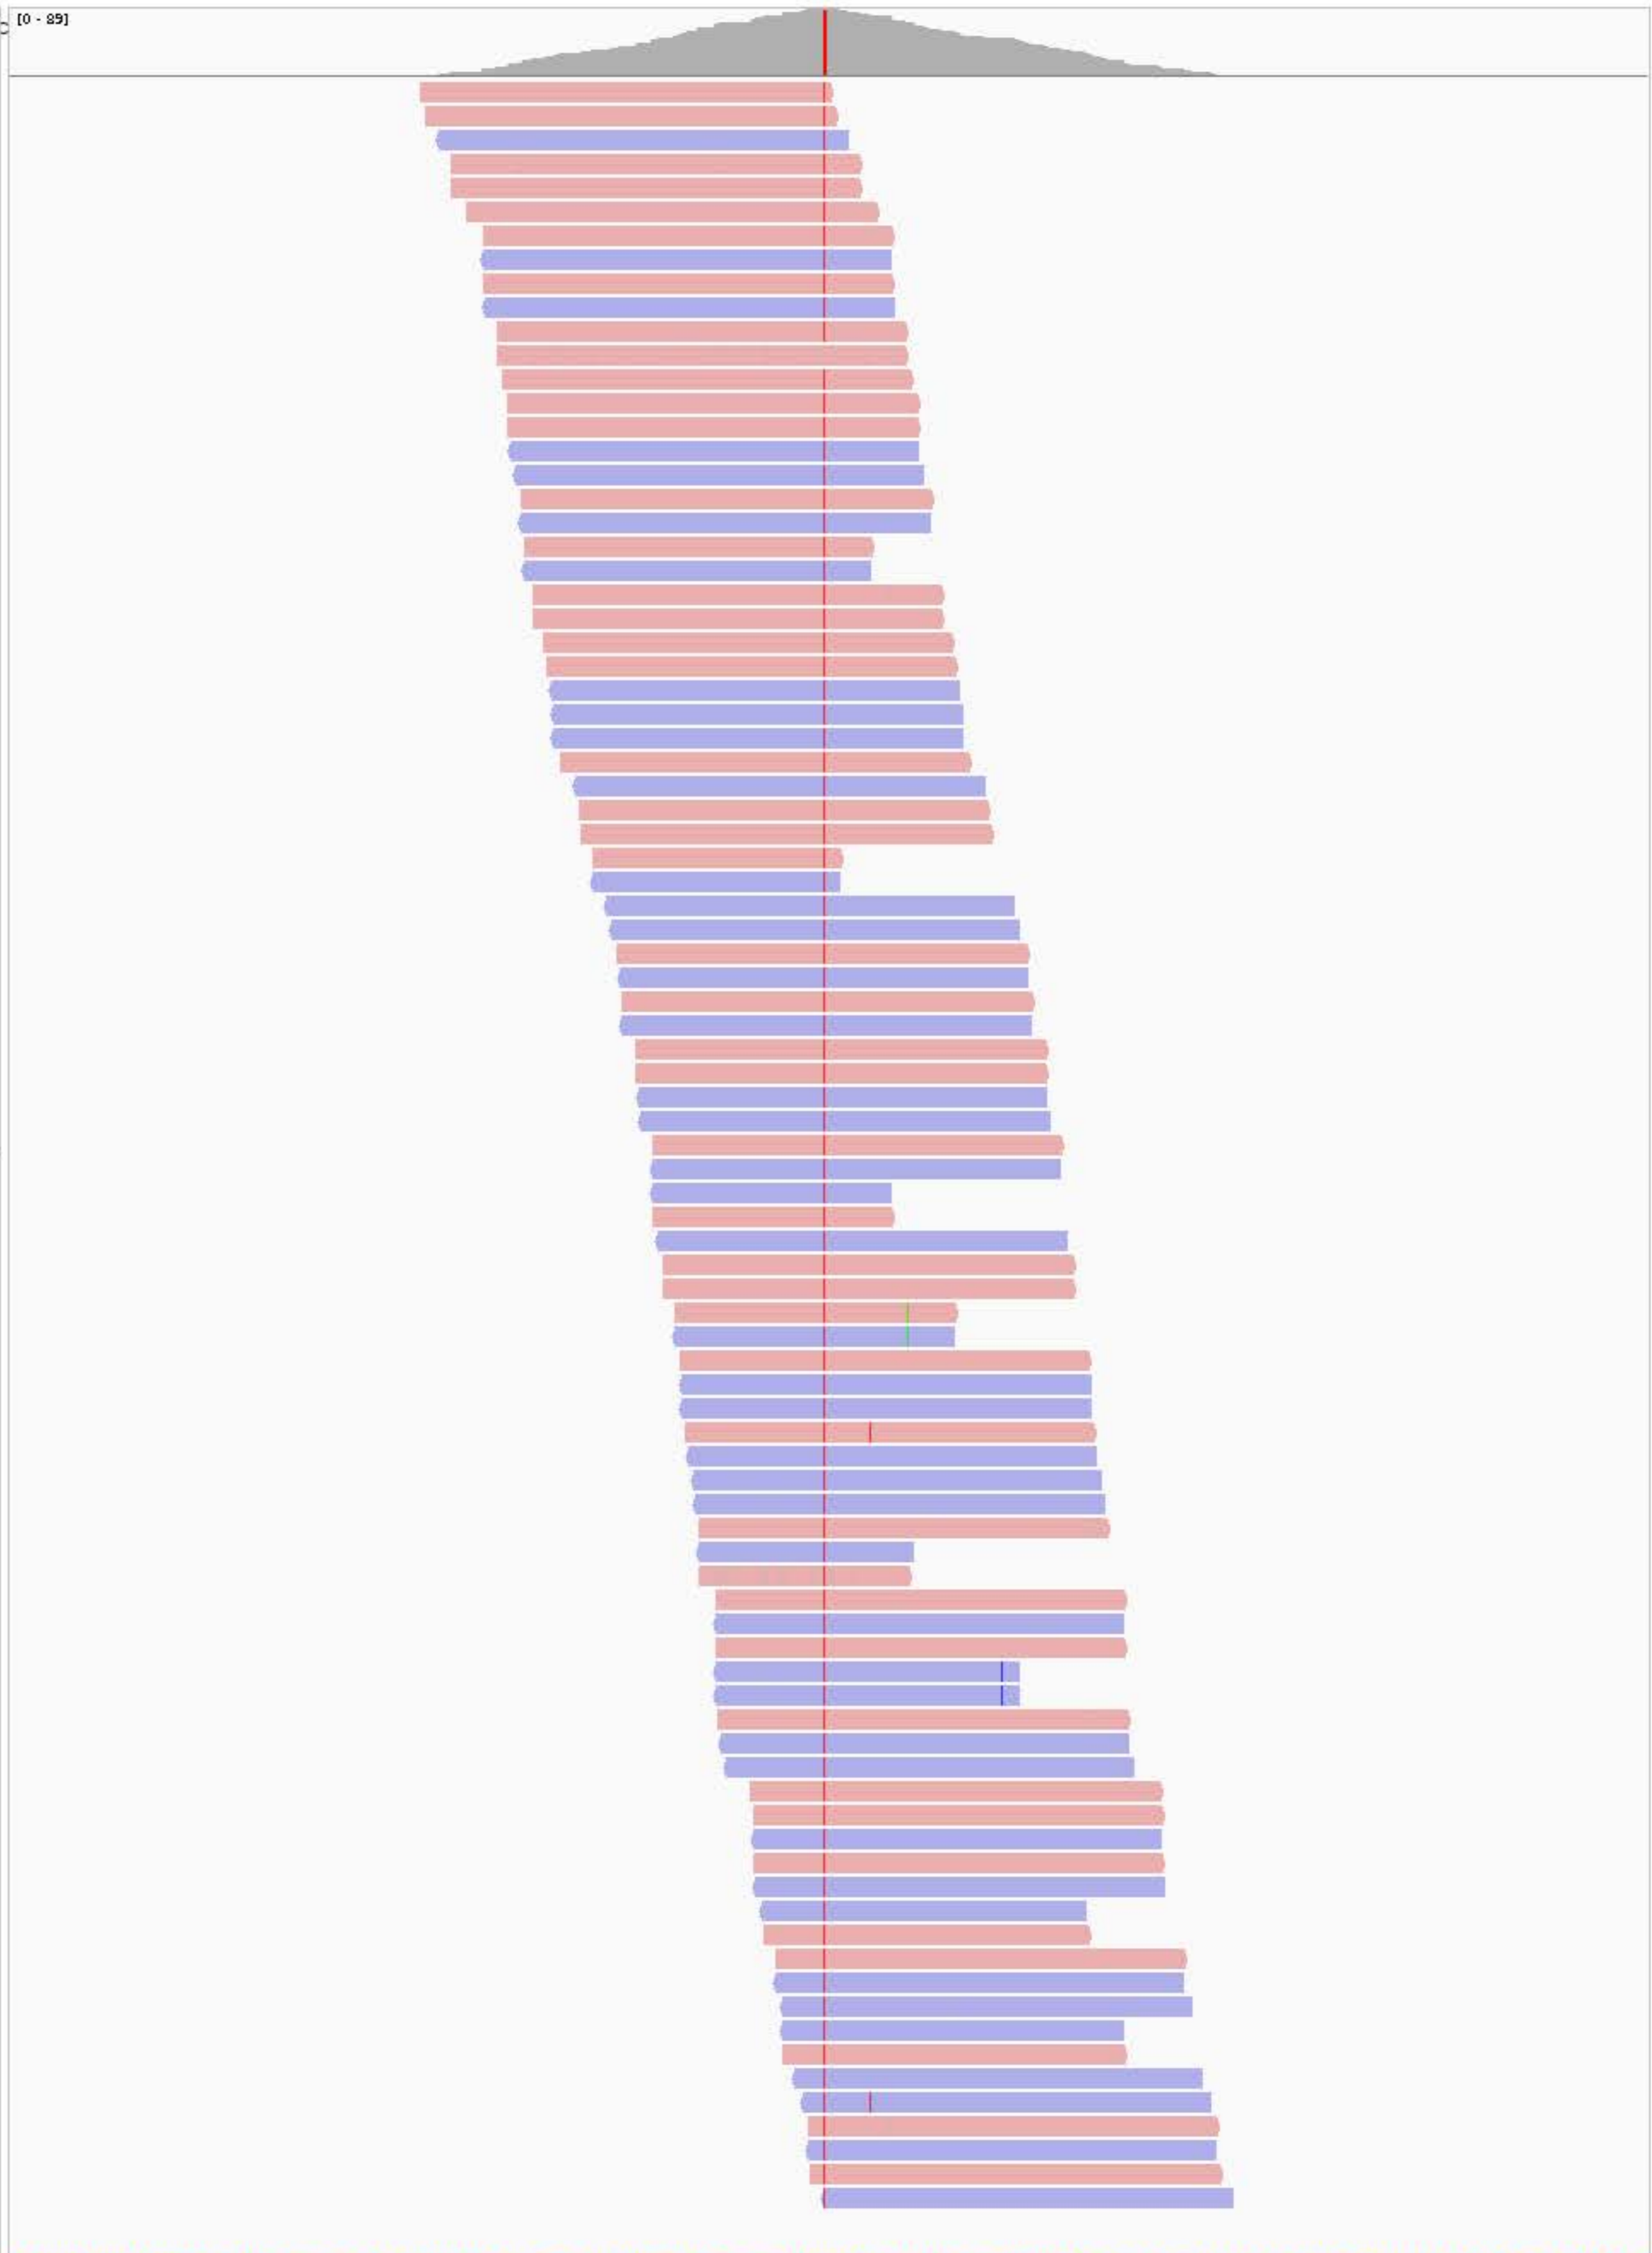

SL\_0011\_L\_FFPE\_9-B\_mut.bam

Sequence →  
Refseq Genes

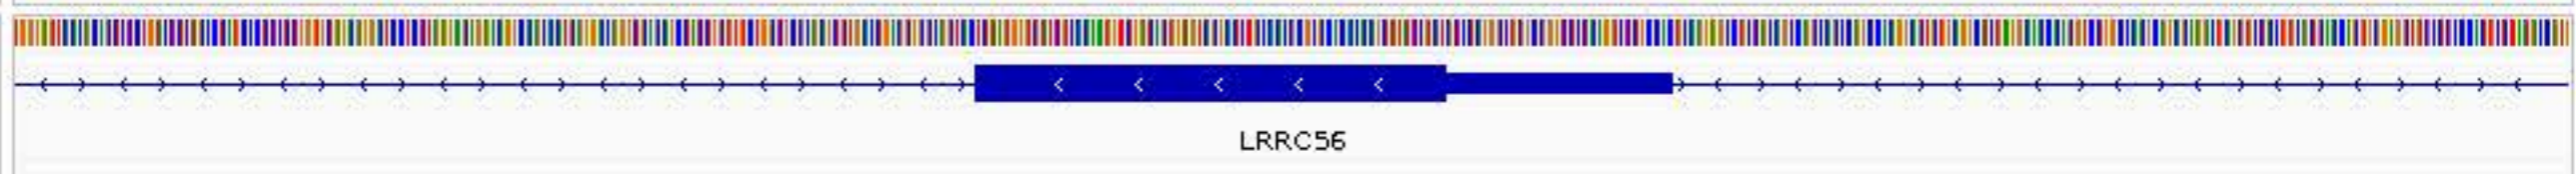

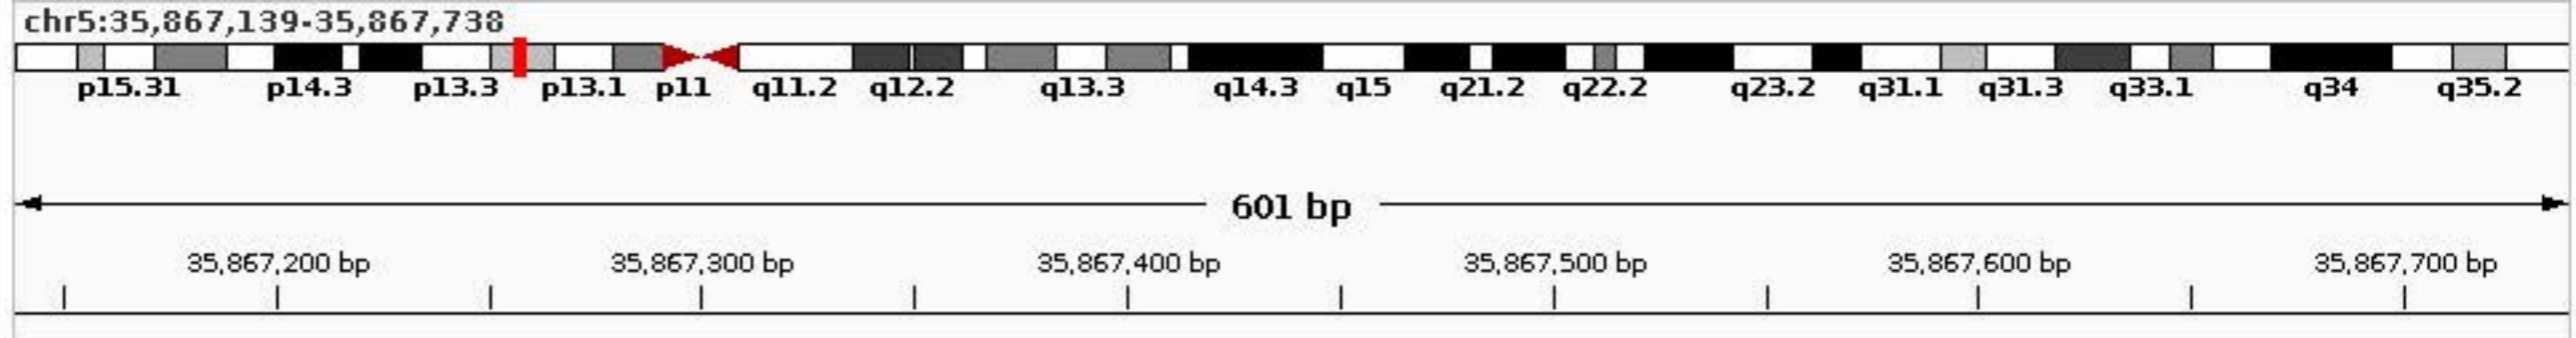

SL\_1002\_L\_FFPE\_24-B\_mut.bam  
rage

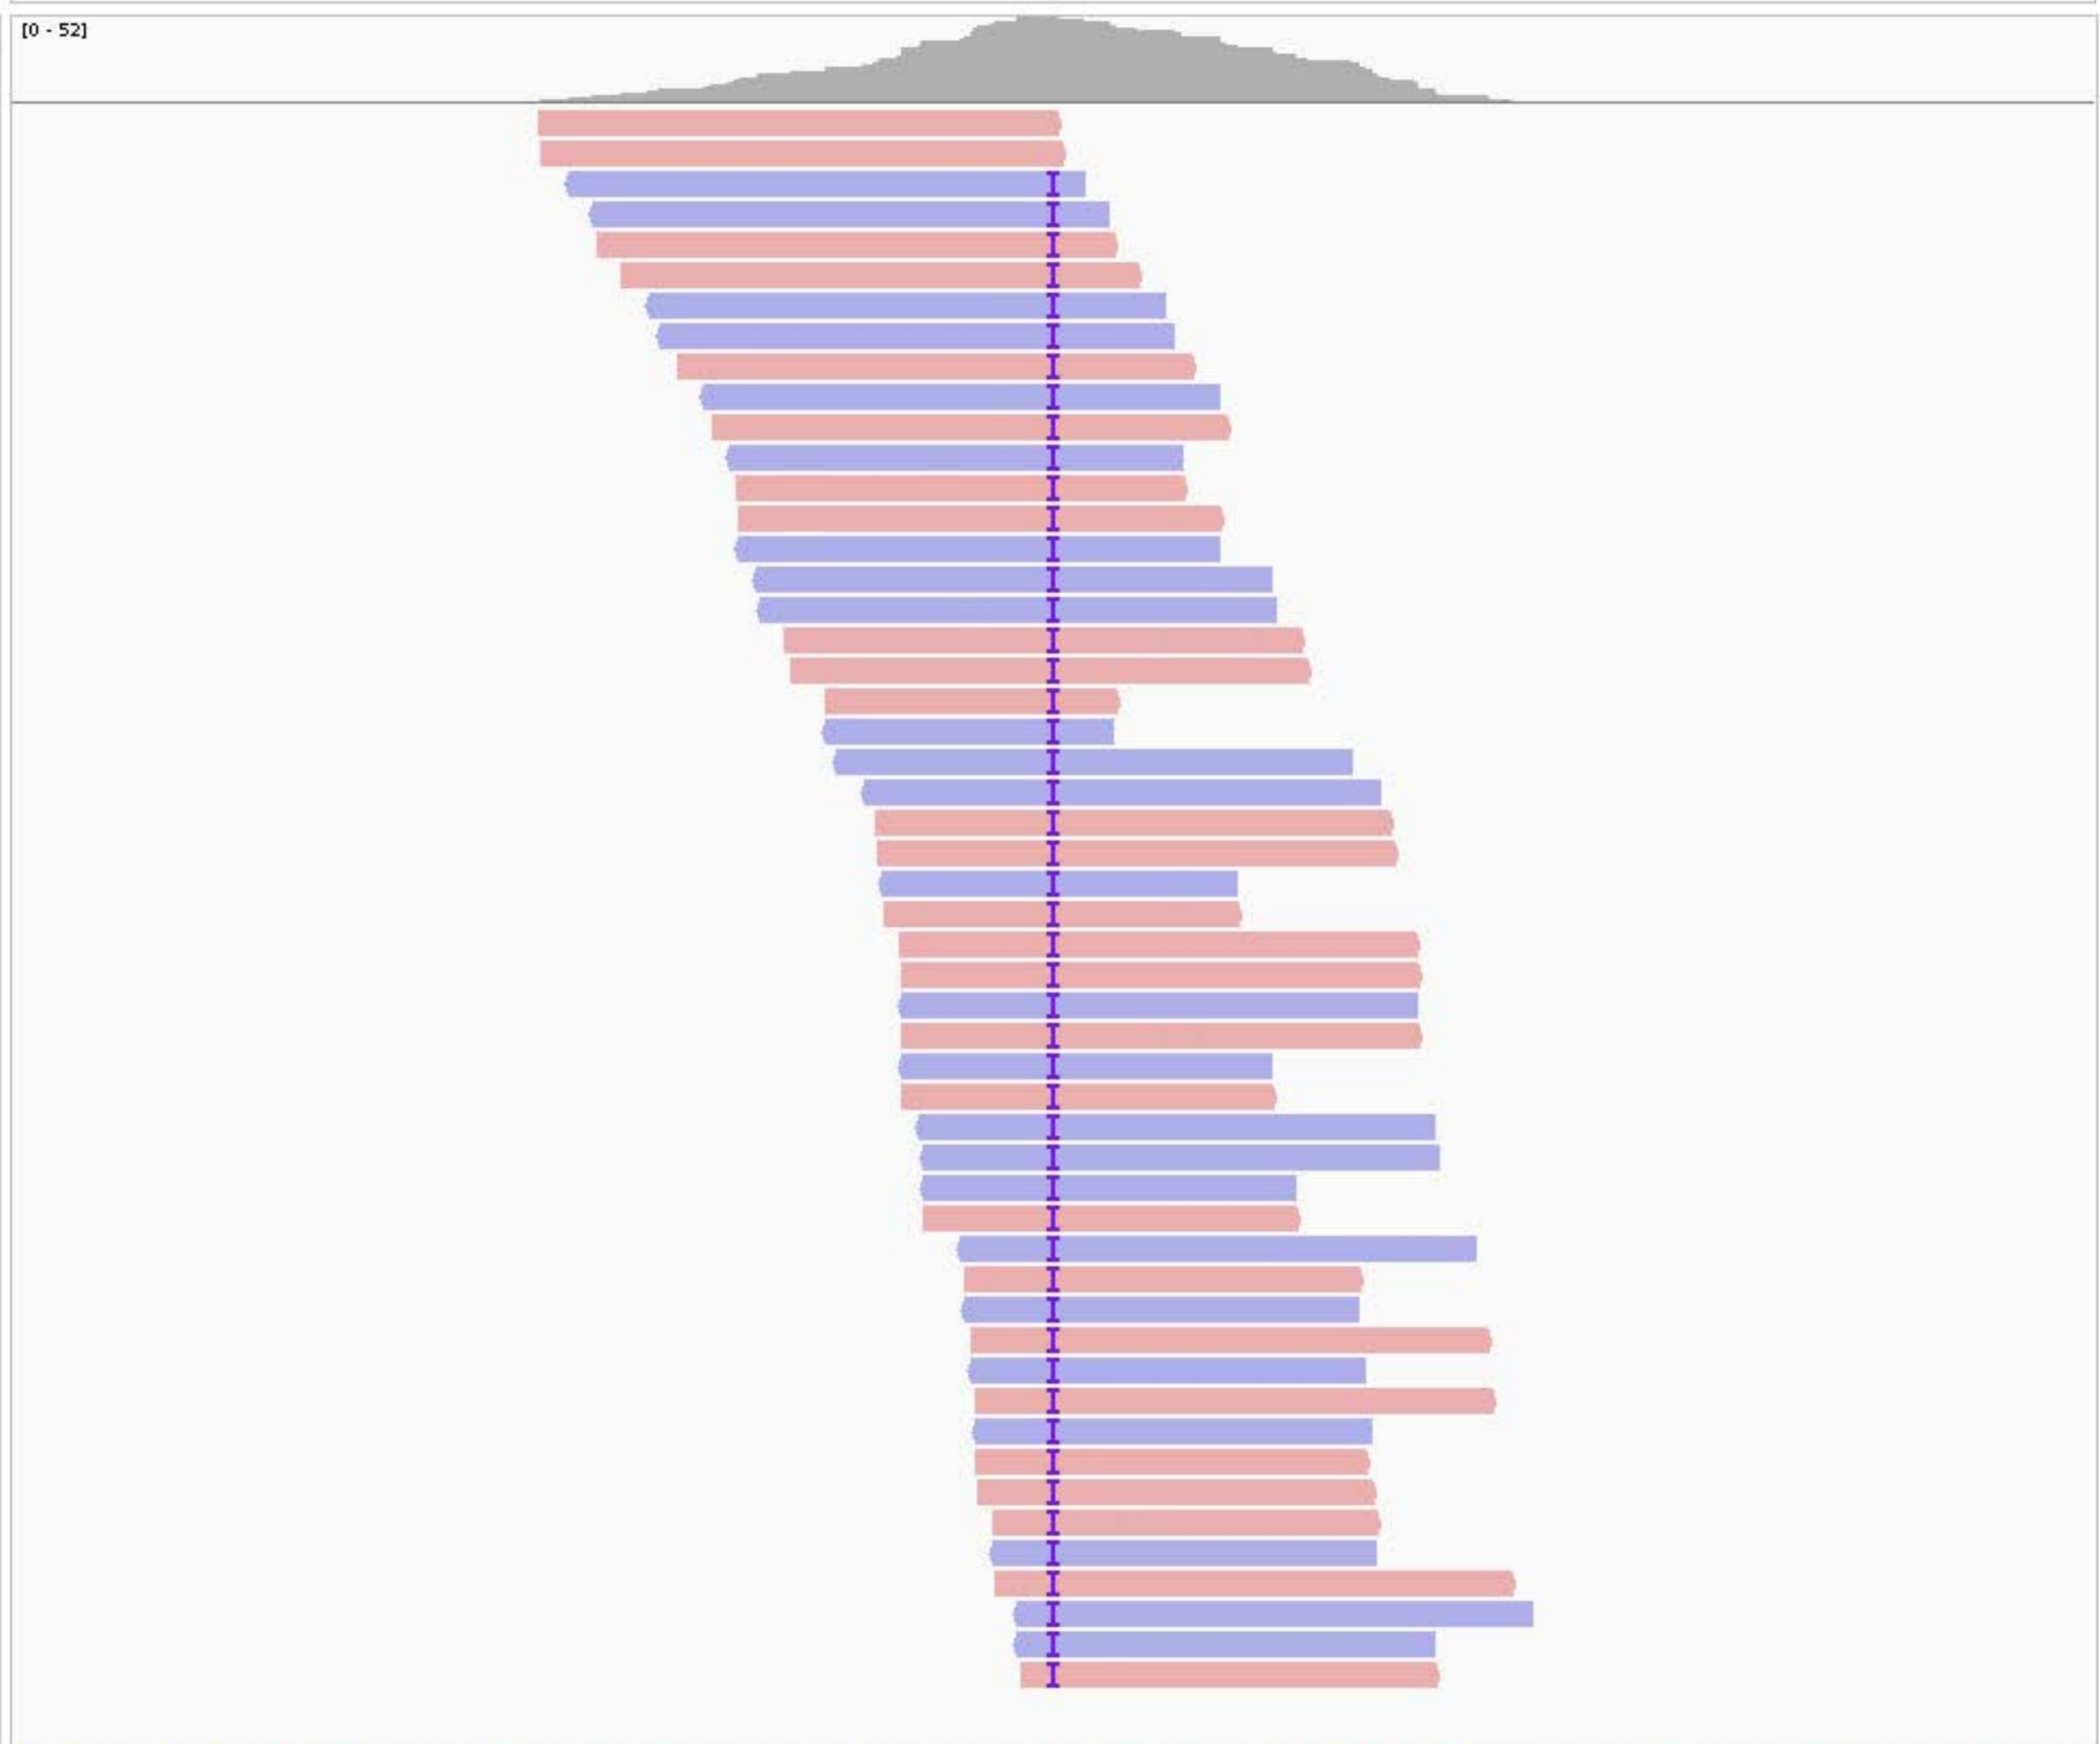

SL\_1002\_L\_FFPE\_24-B\_mut.ba  
m

Sequence →

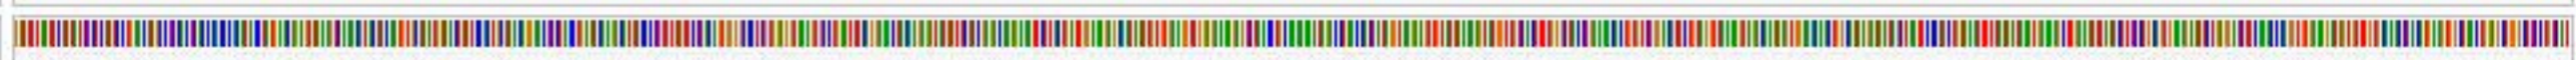

Refseq Genes

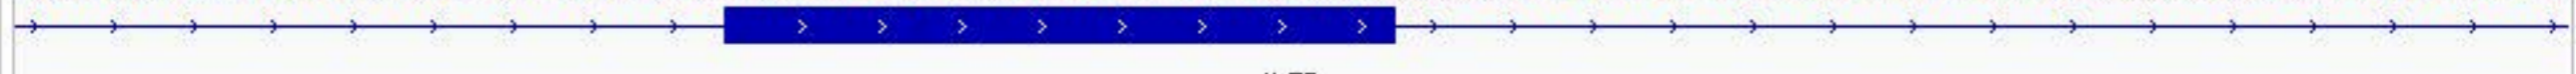

IL7R



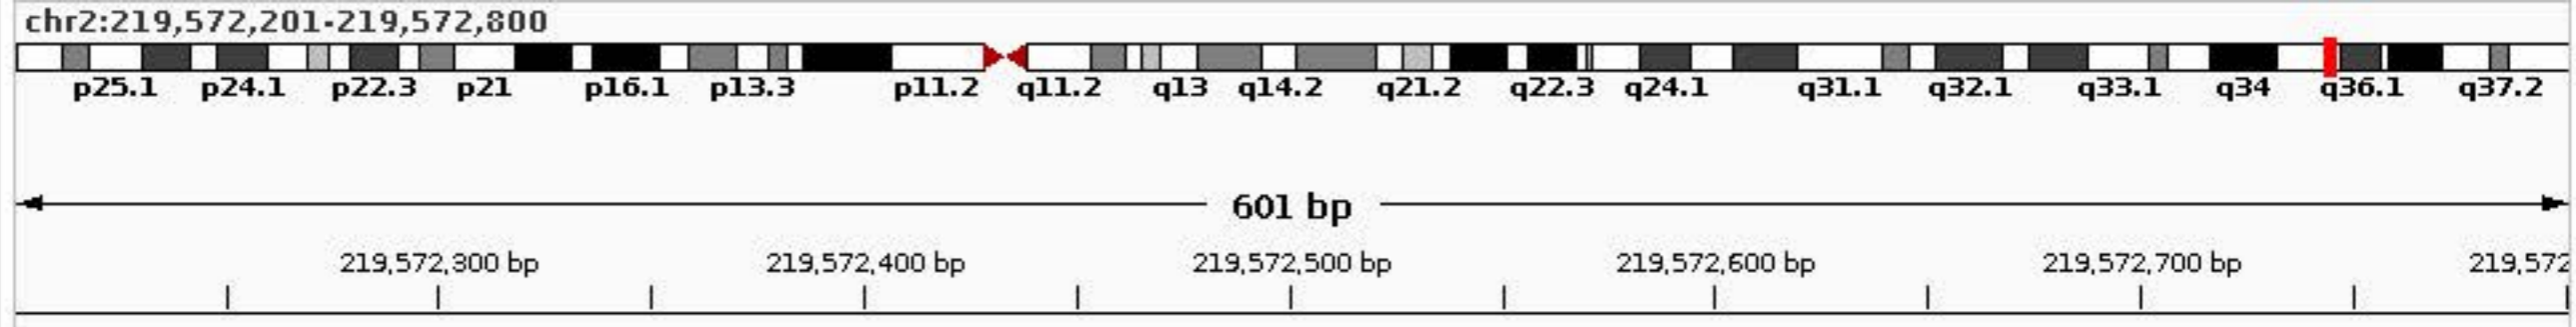

SL\_1002\_R\_FFPE\_33-B\_mut.bam  
rage

SL\_1002\_R\_FFPE\_33-B\_mut.ba  
m

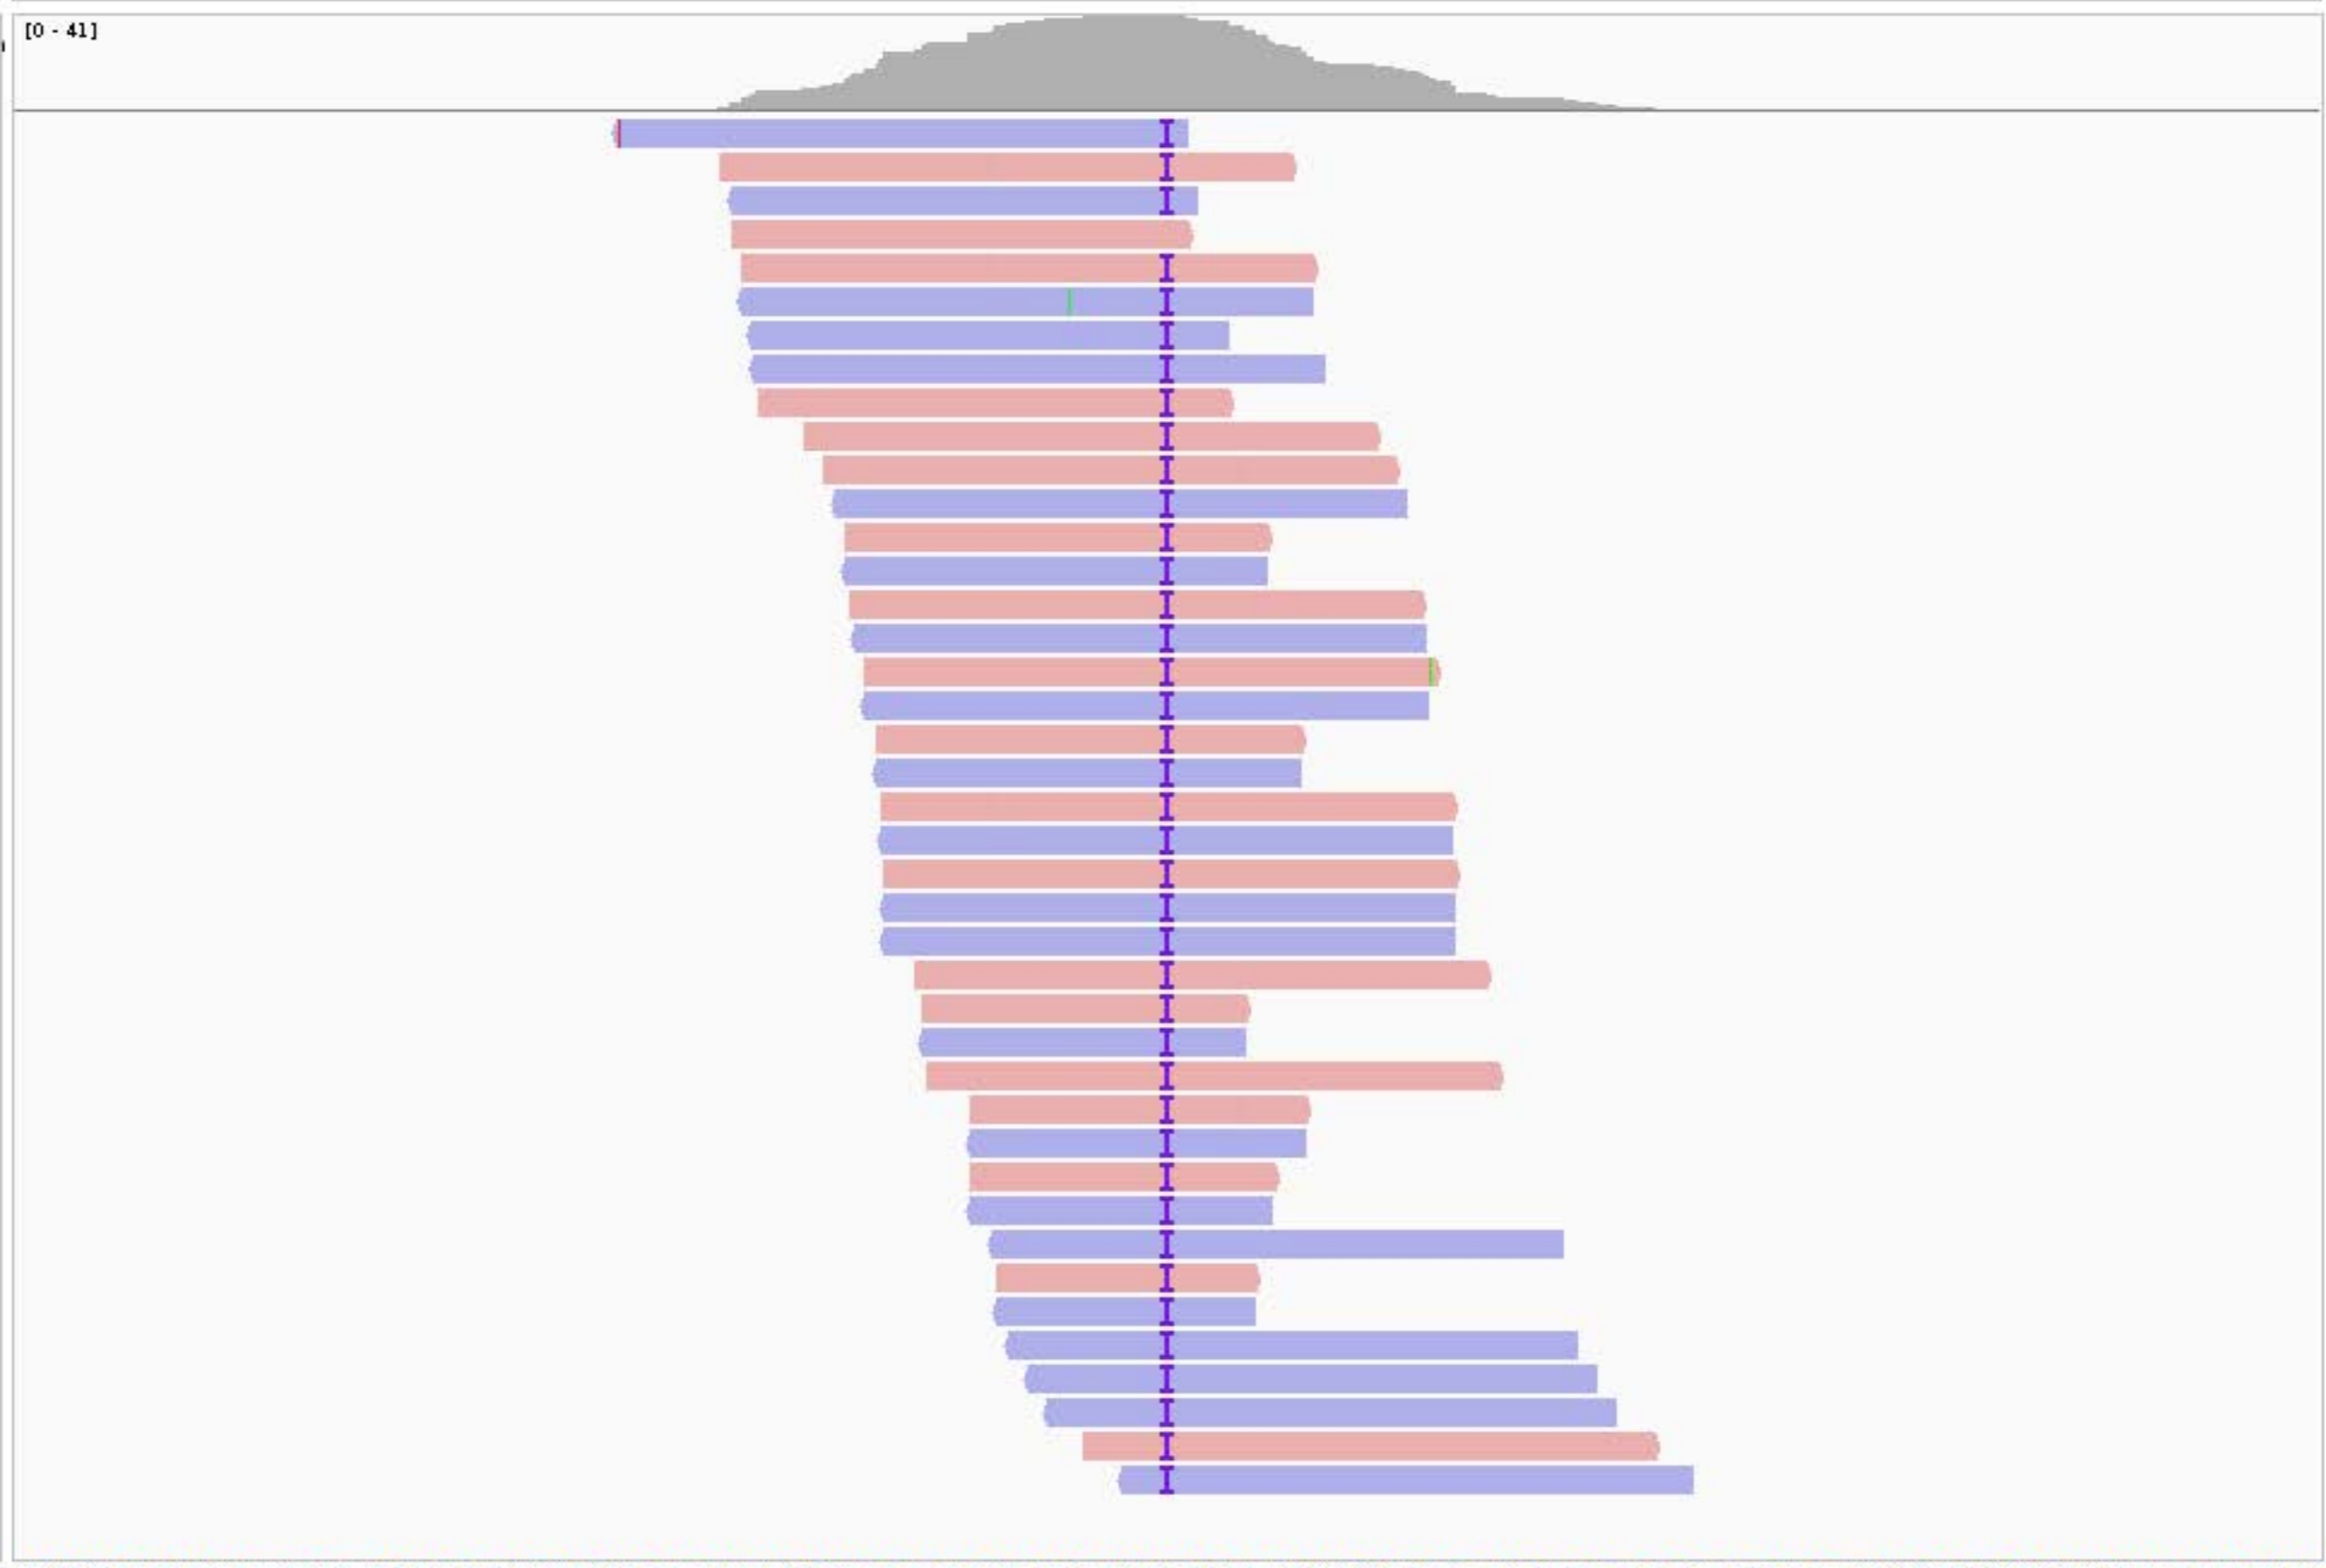

Sequence →

Refseq Genes

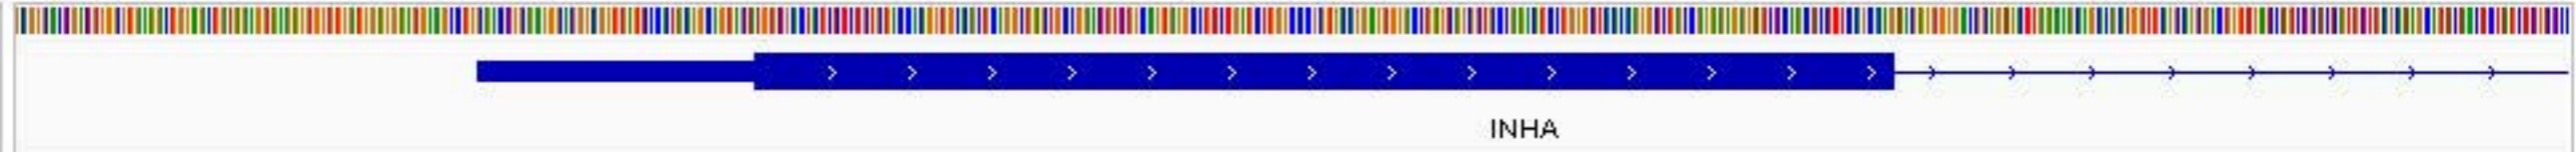

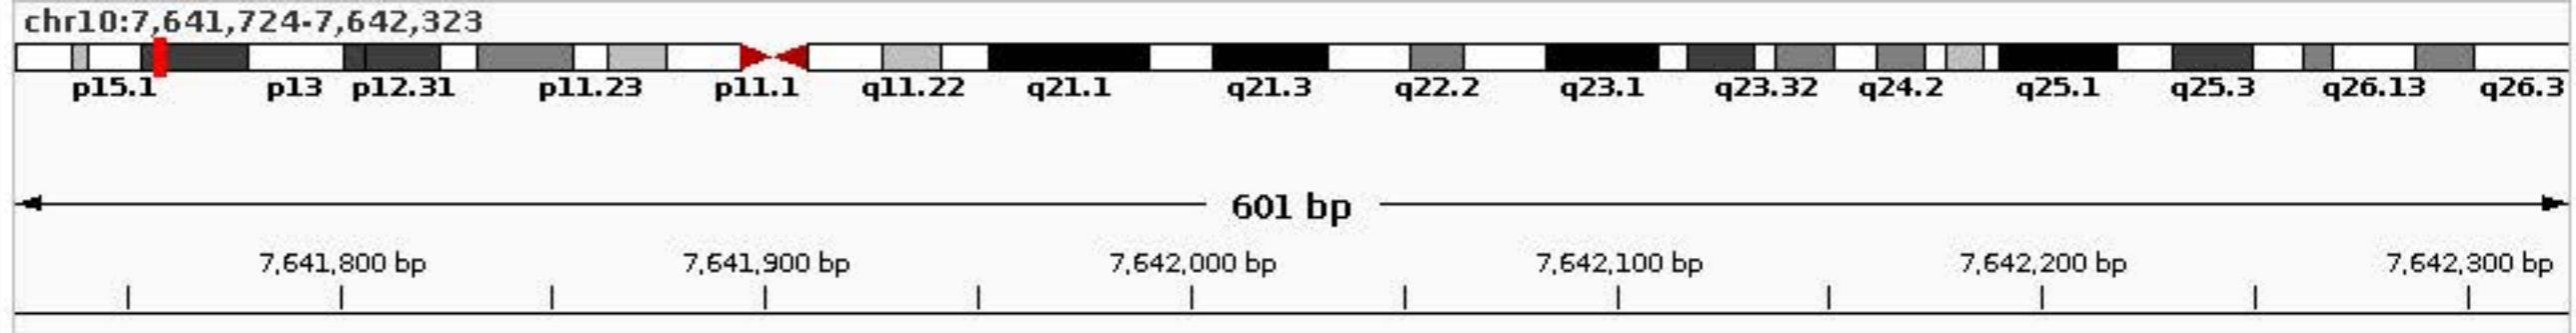

SL\_0001\_R\_FFPE\_55-B\_mut.bam  
rage

SL\_0001\_R\_FFPE\_55-B\_mut.ba  
m

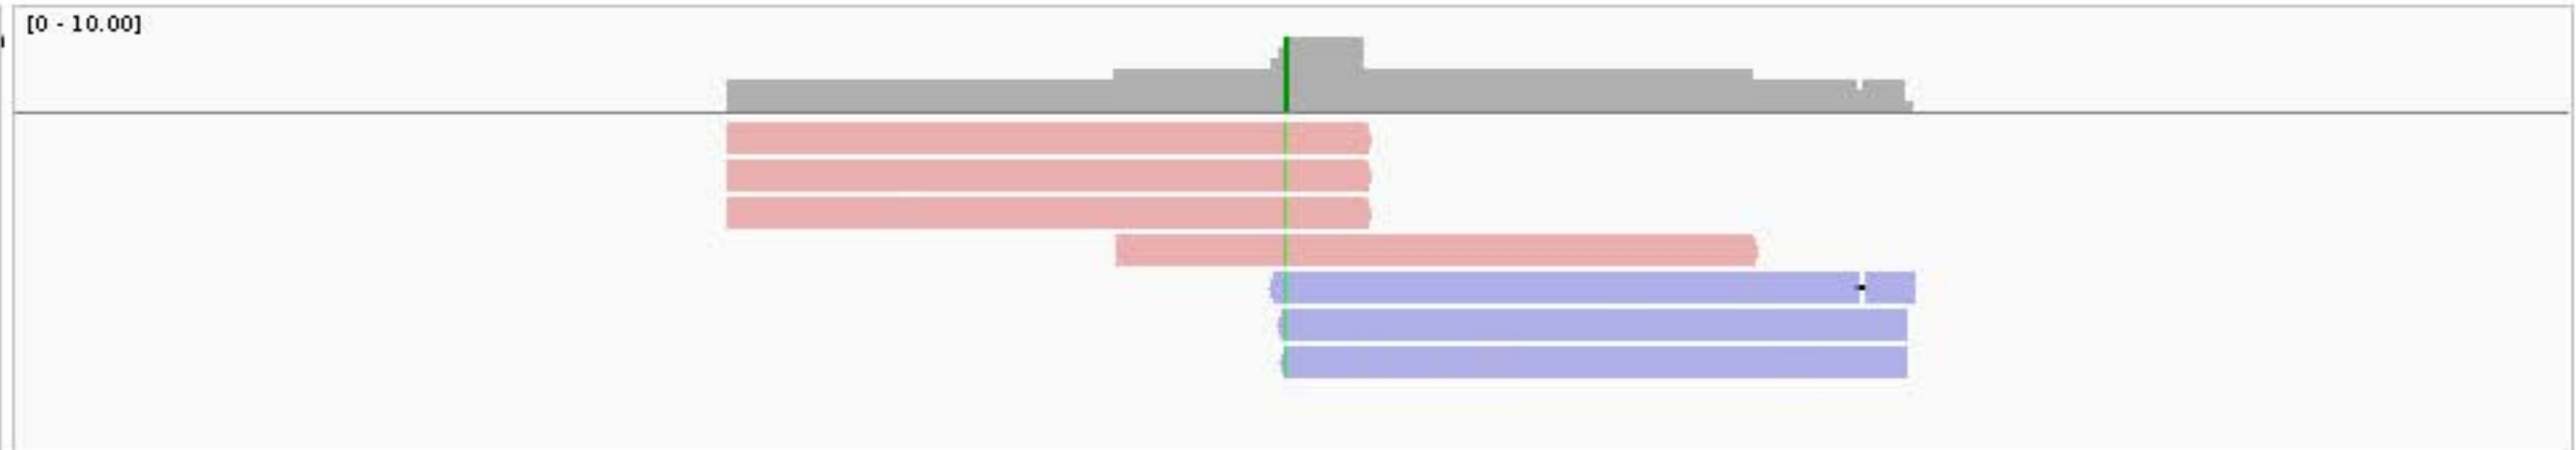

Sequence →

Refseq Genes

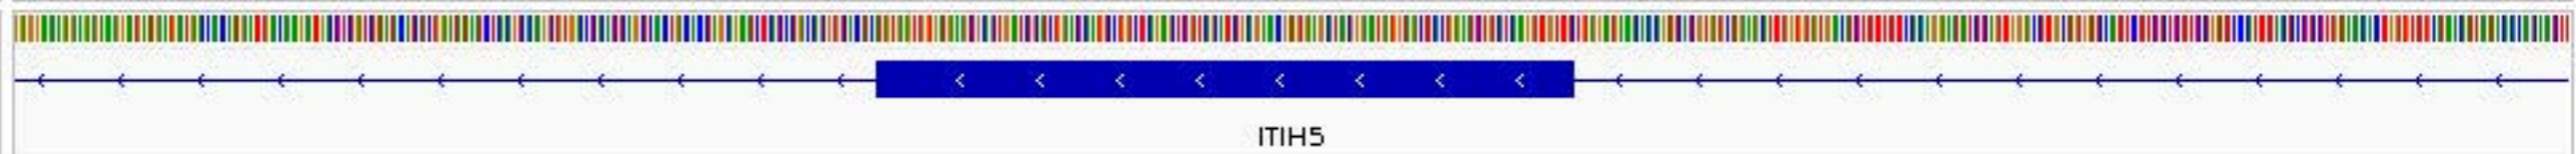



SL\_0001\_R\_FFPE\_56-B\_mut.bam  
 SL\_0001\_R\_FFPE\_56-B\_mut.bam

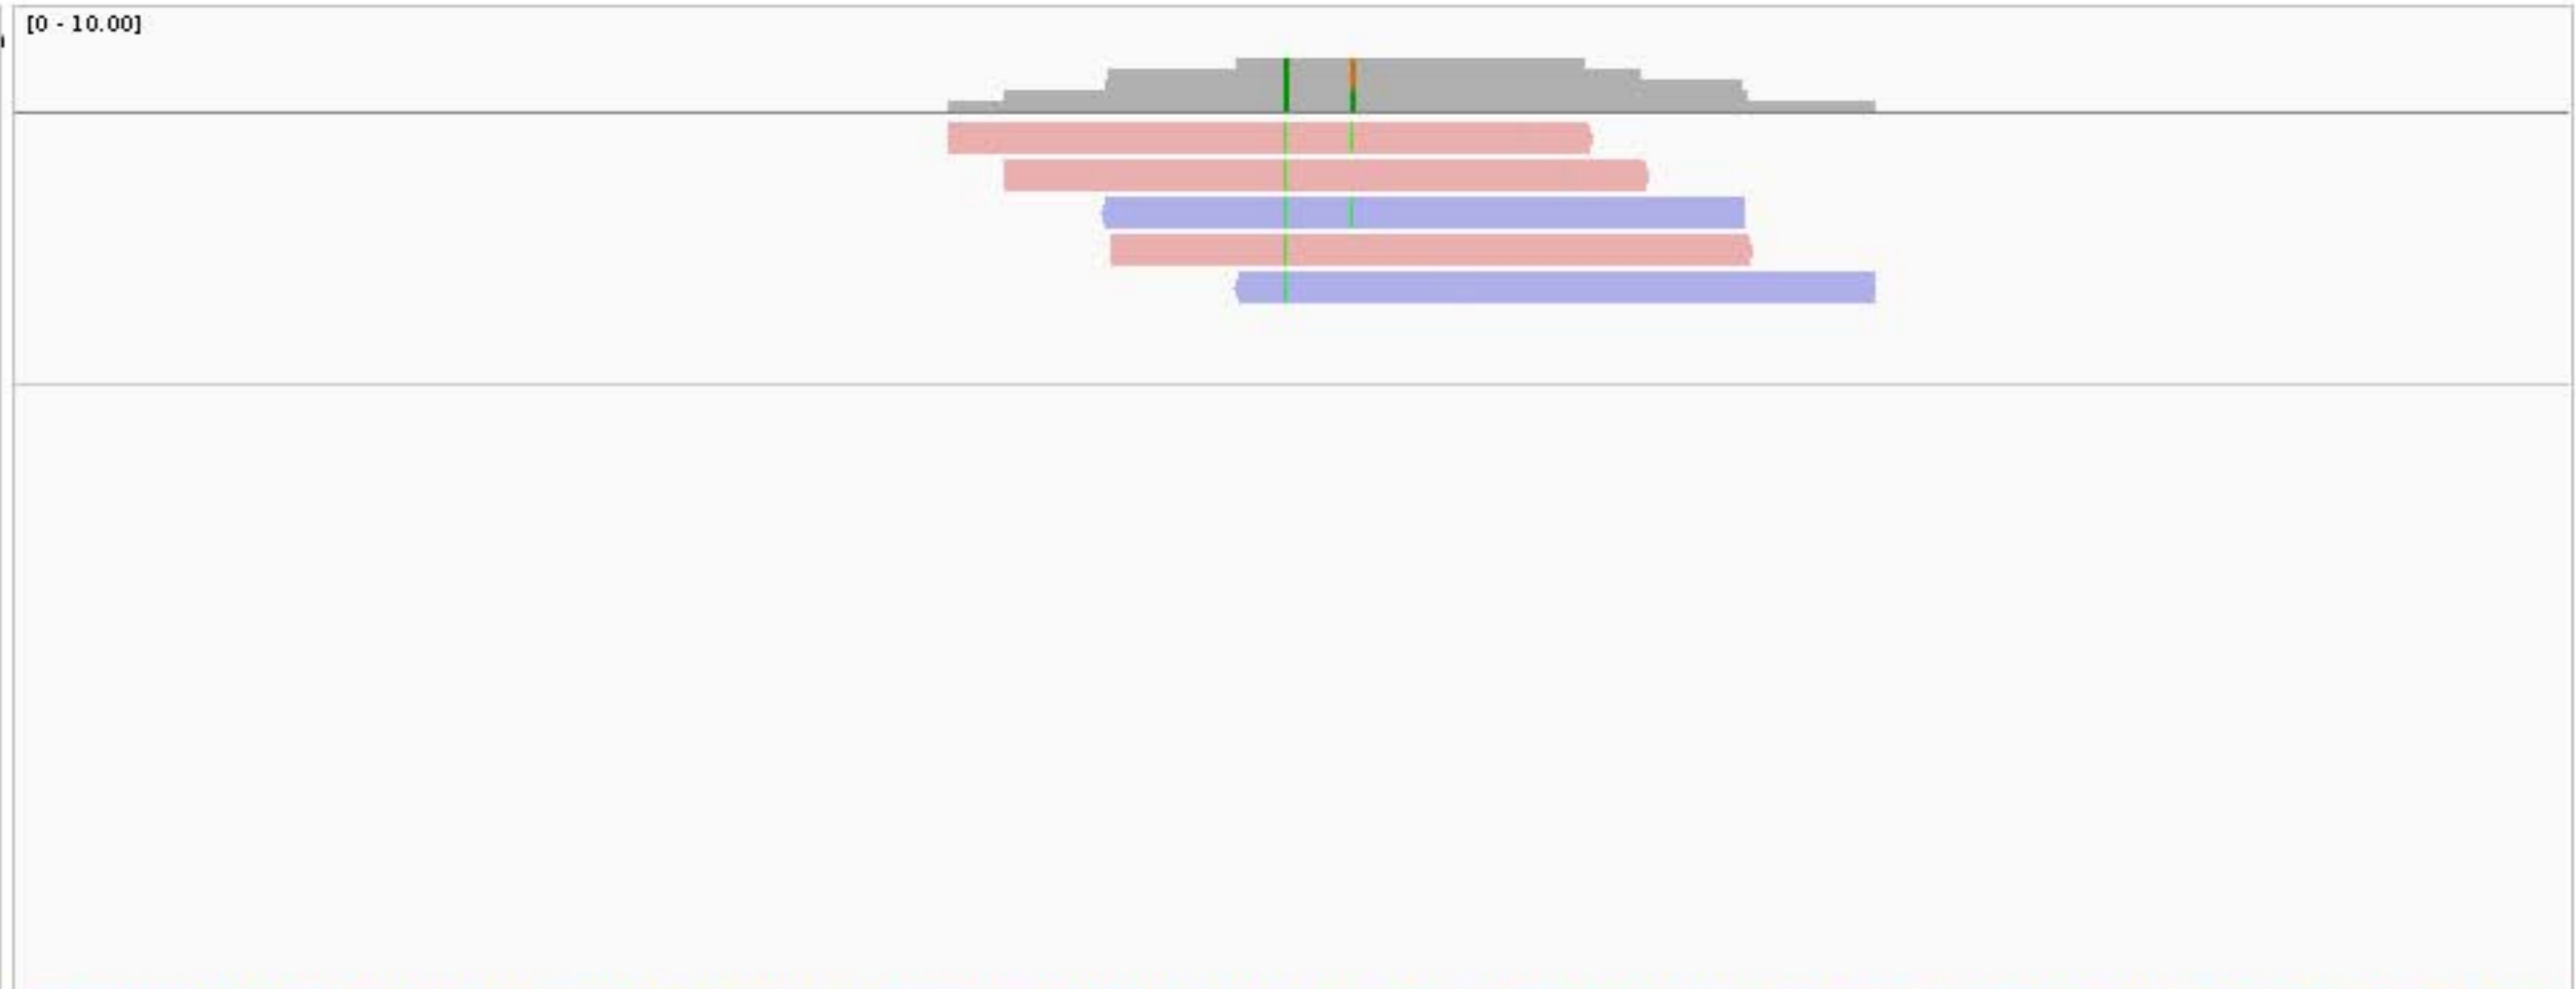

Sequence →

Refseq Genes





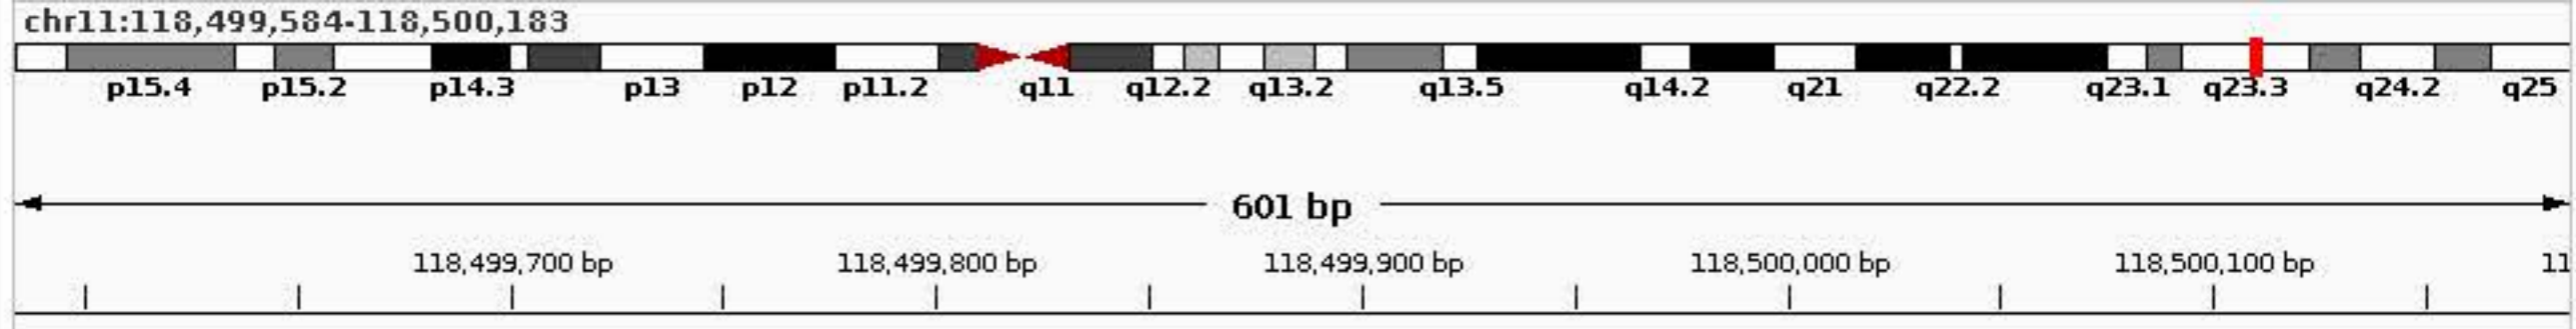

SL\_0009-LT\_3-B\_mut.bam Coverage

SL\_0009-LT\_3-B\_mut.bam

Sequence

Refseq Genes

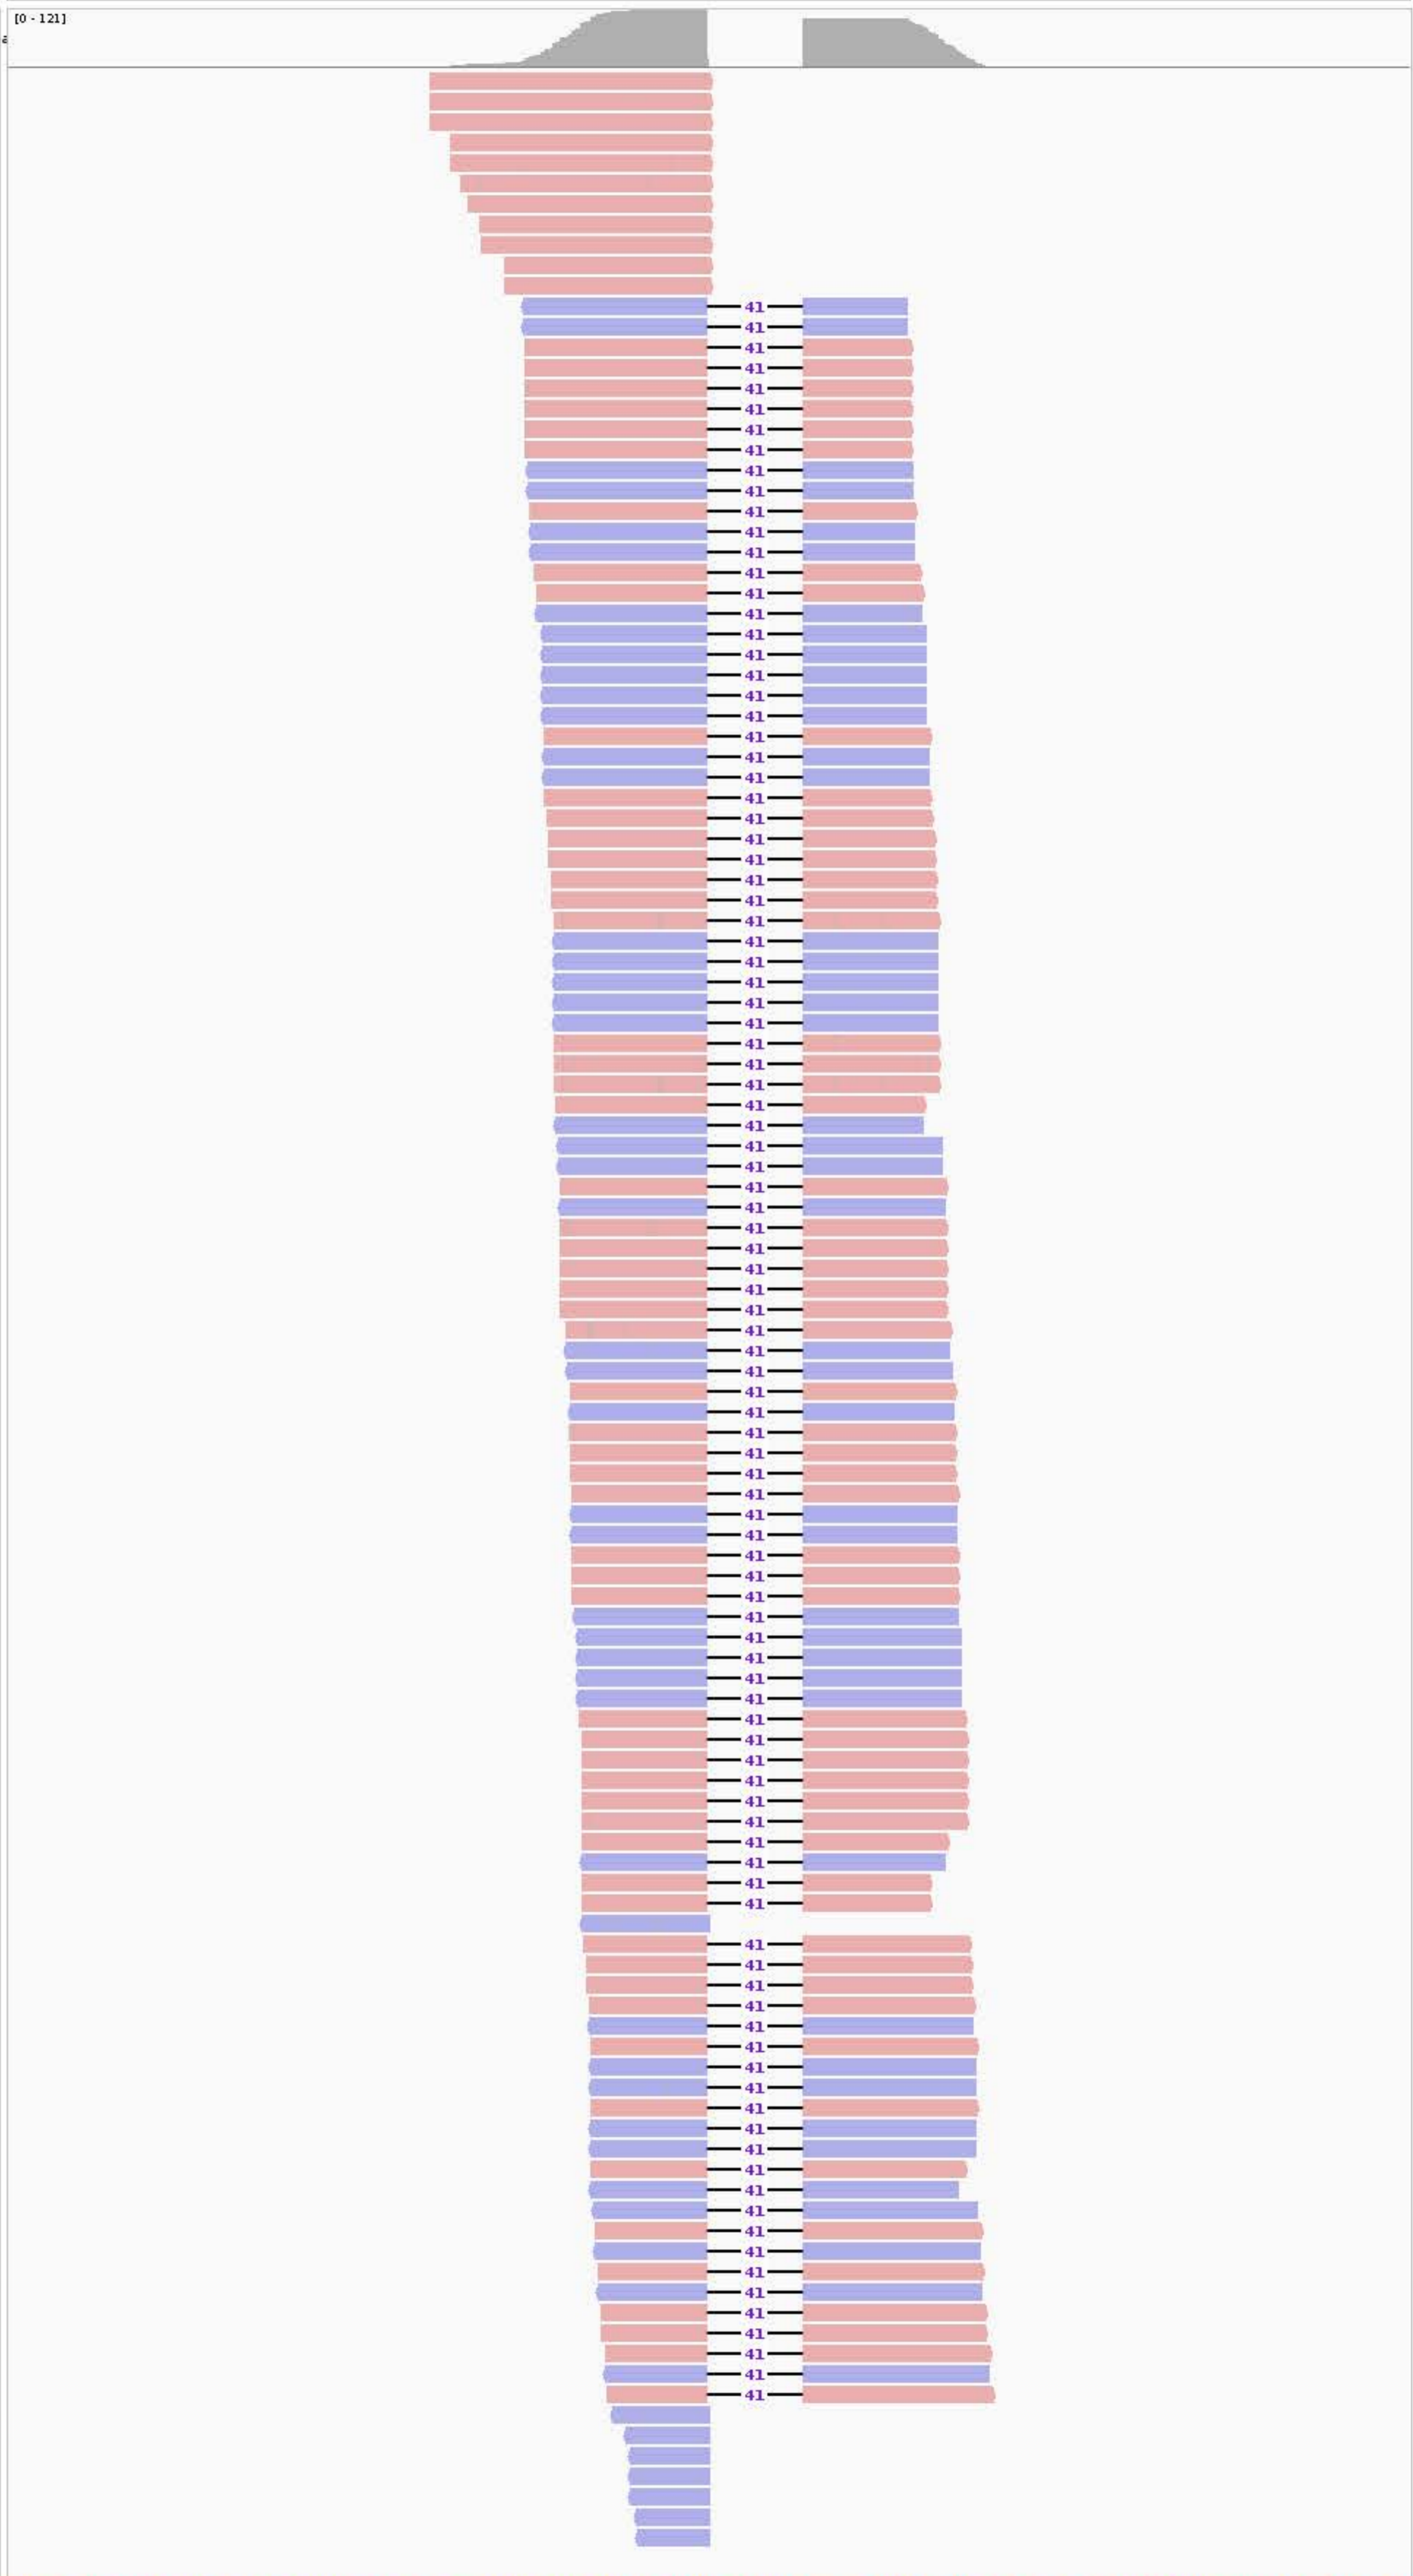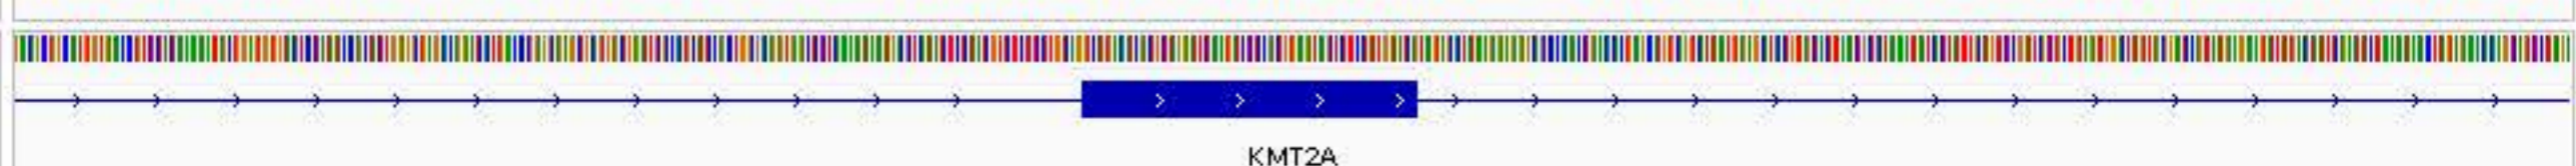

chr7:152,148,608-152,149,207

p22.1 p21.2 p15.3 p14.3 p14.1 p12.2 p11.1 q11.22 q21.11 q21.2 q22.1 q31.1 q31.31 q32.1 q33 q35 q36.2

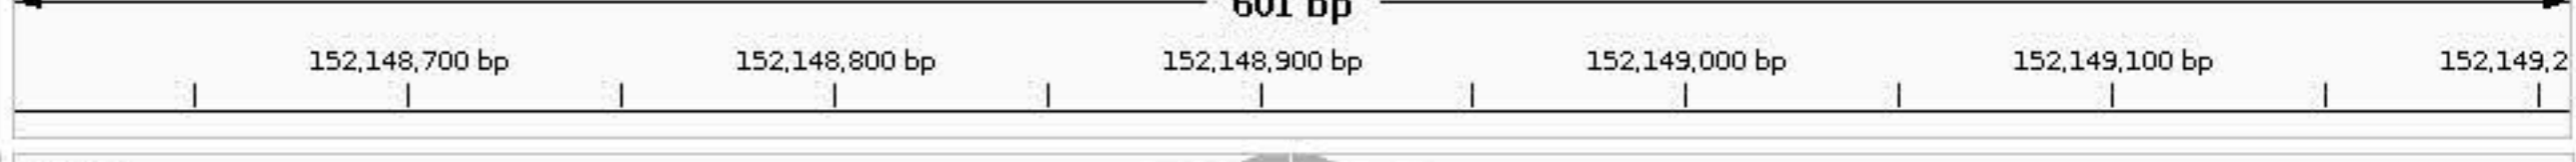

[0 - 191]

SL\_0013\_RT\_4-B\_mut.bam Cover

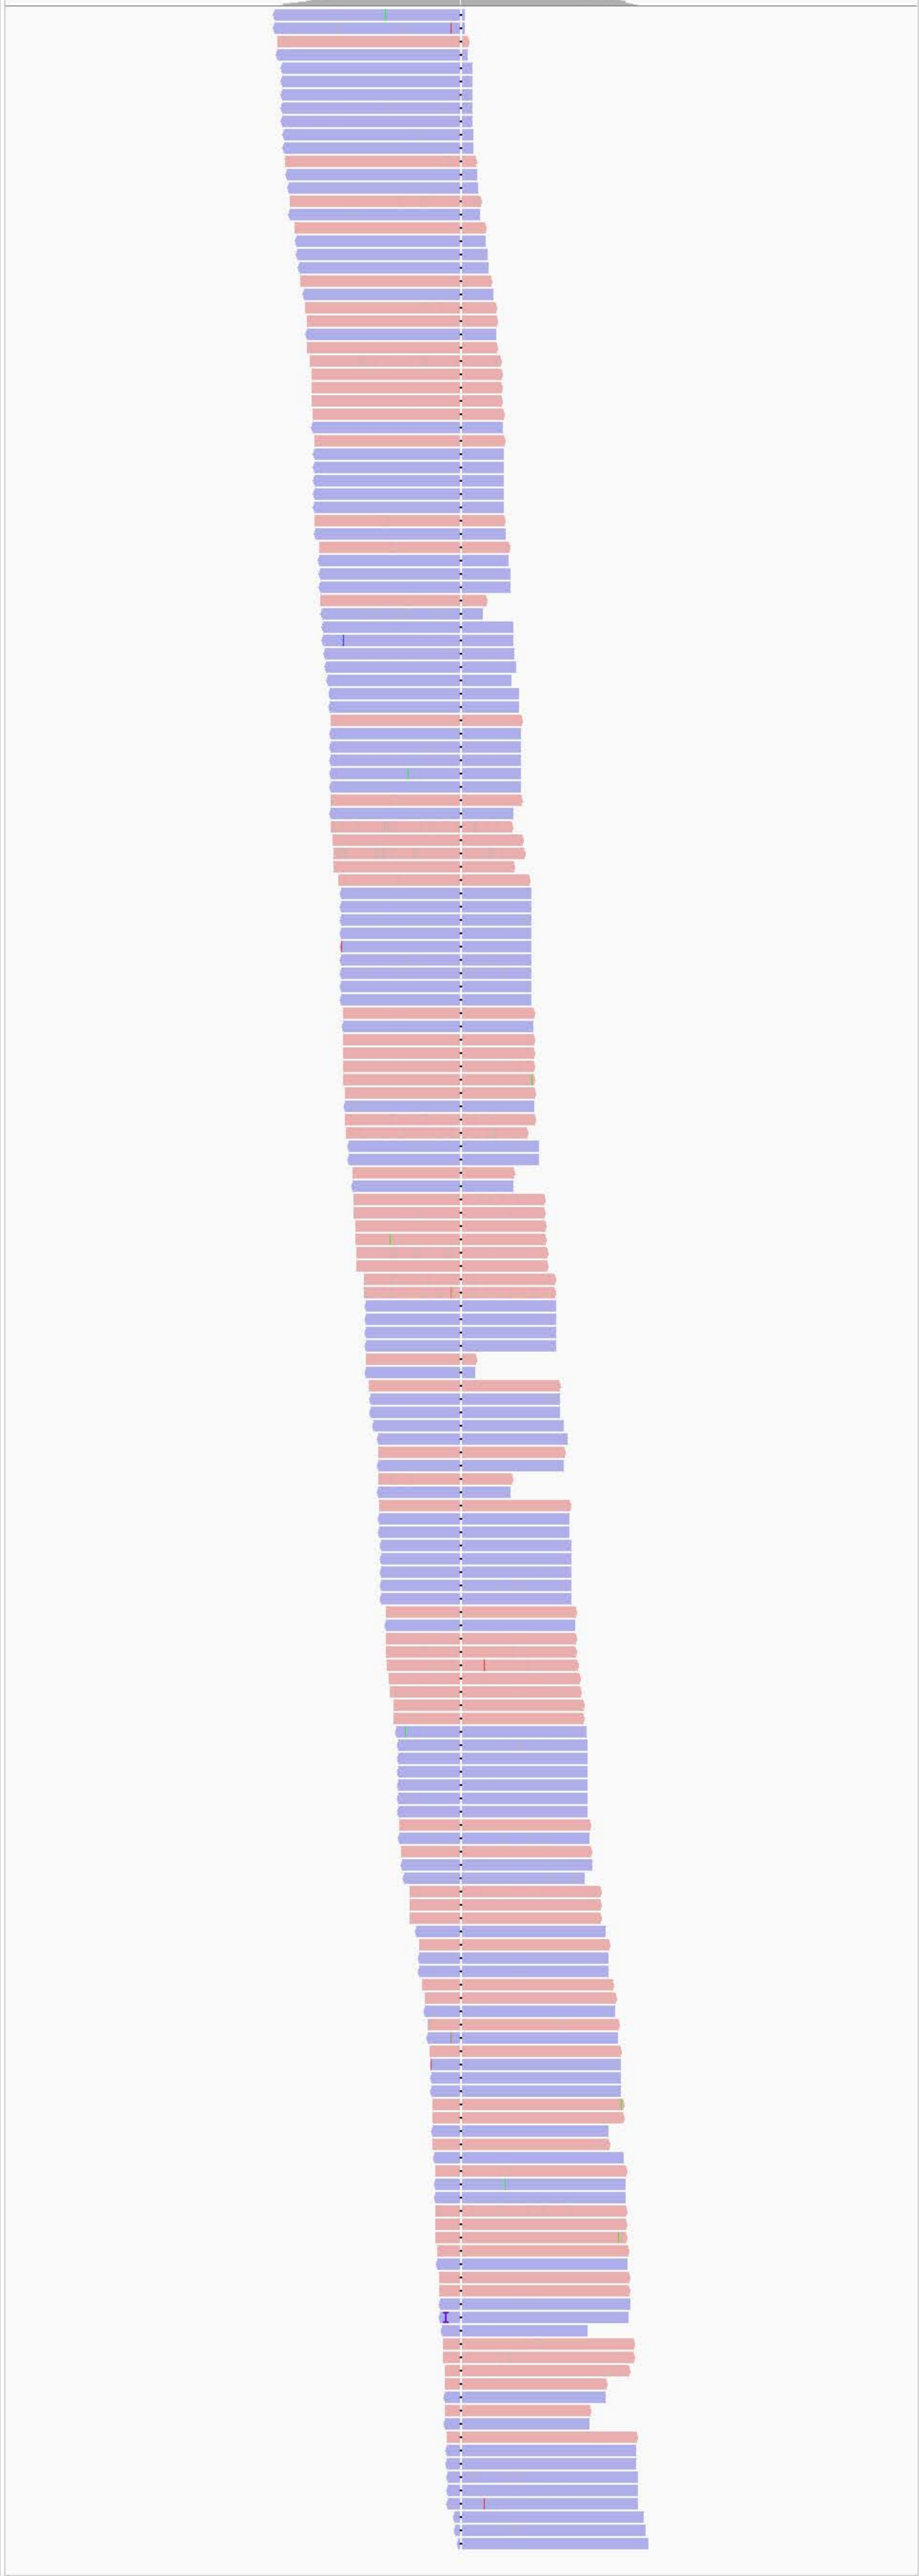

SL\_0013\_RT\_4-B\_mut.bam

Sequence

Refseq Genes

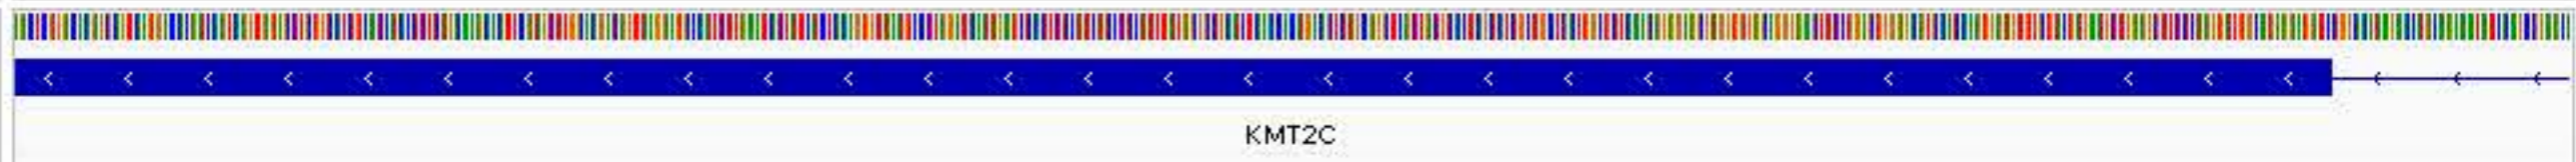

KMT2C



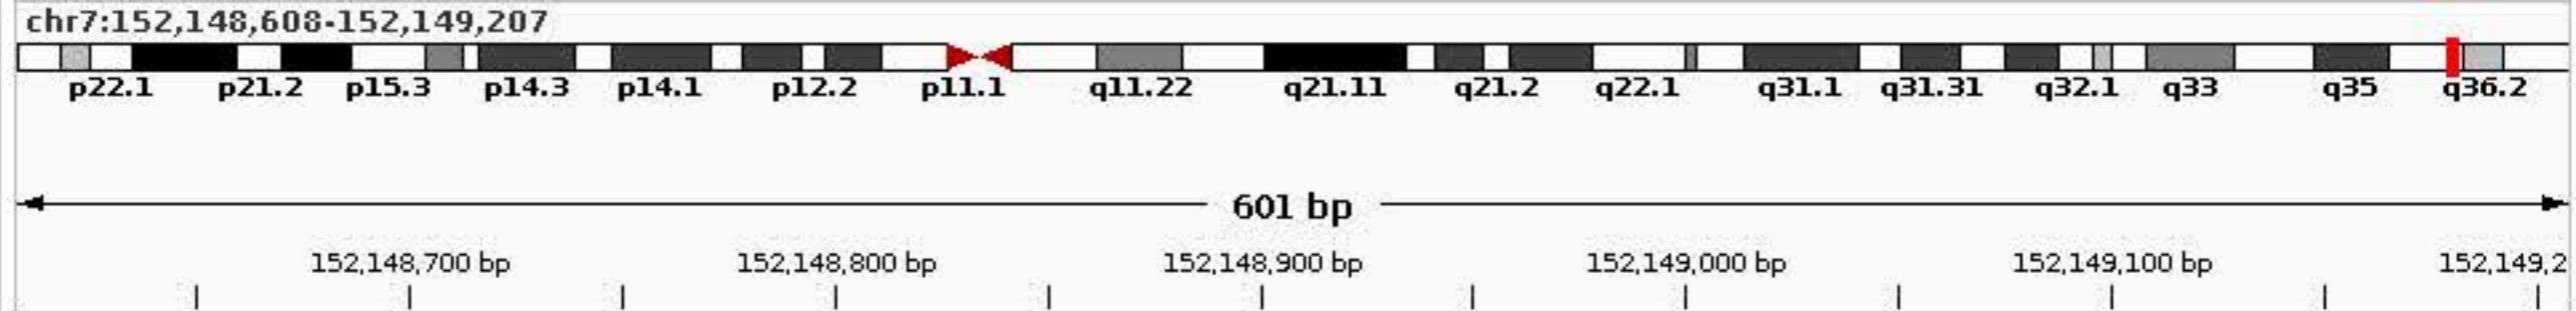

SL\_0013\_RT\_5-B\_mut.bam Cover

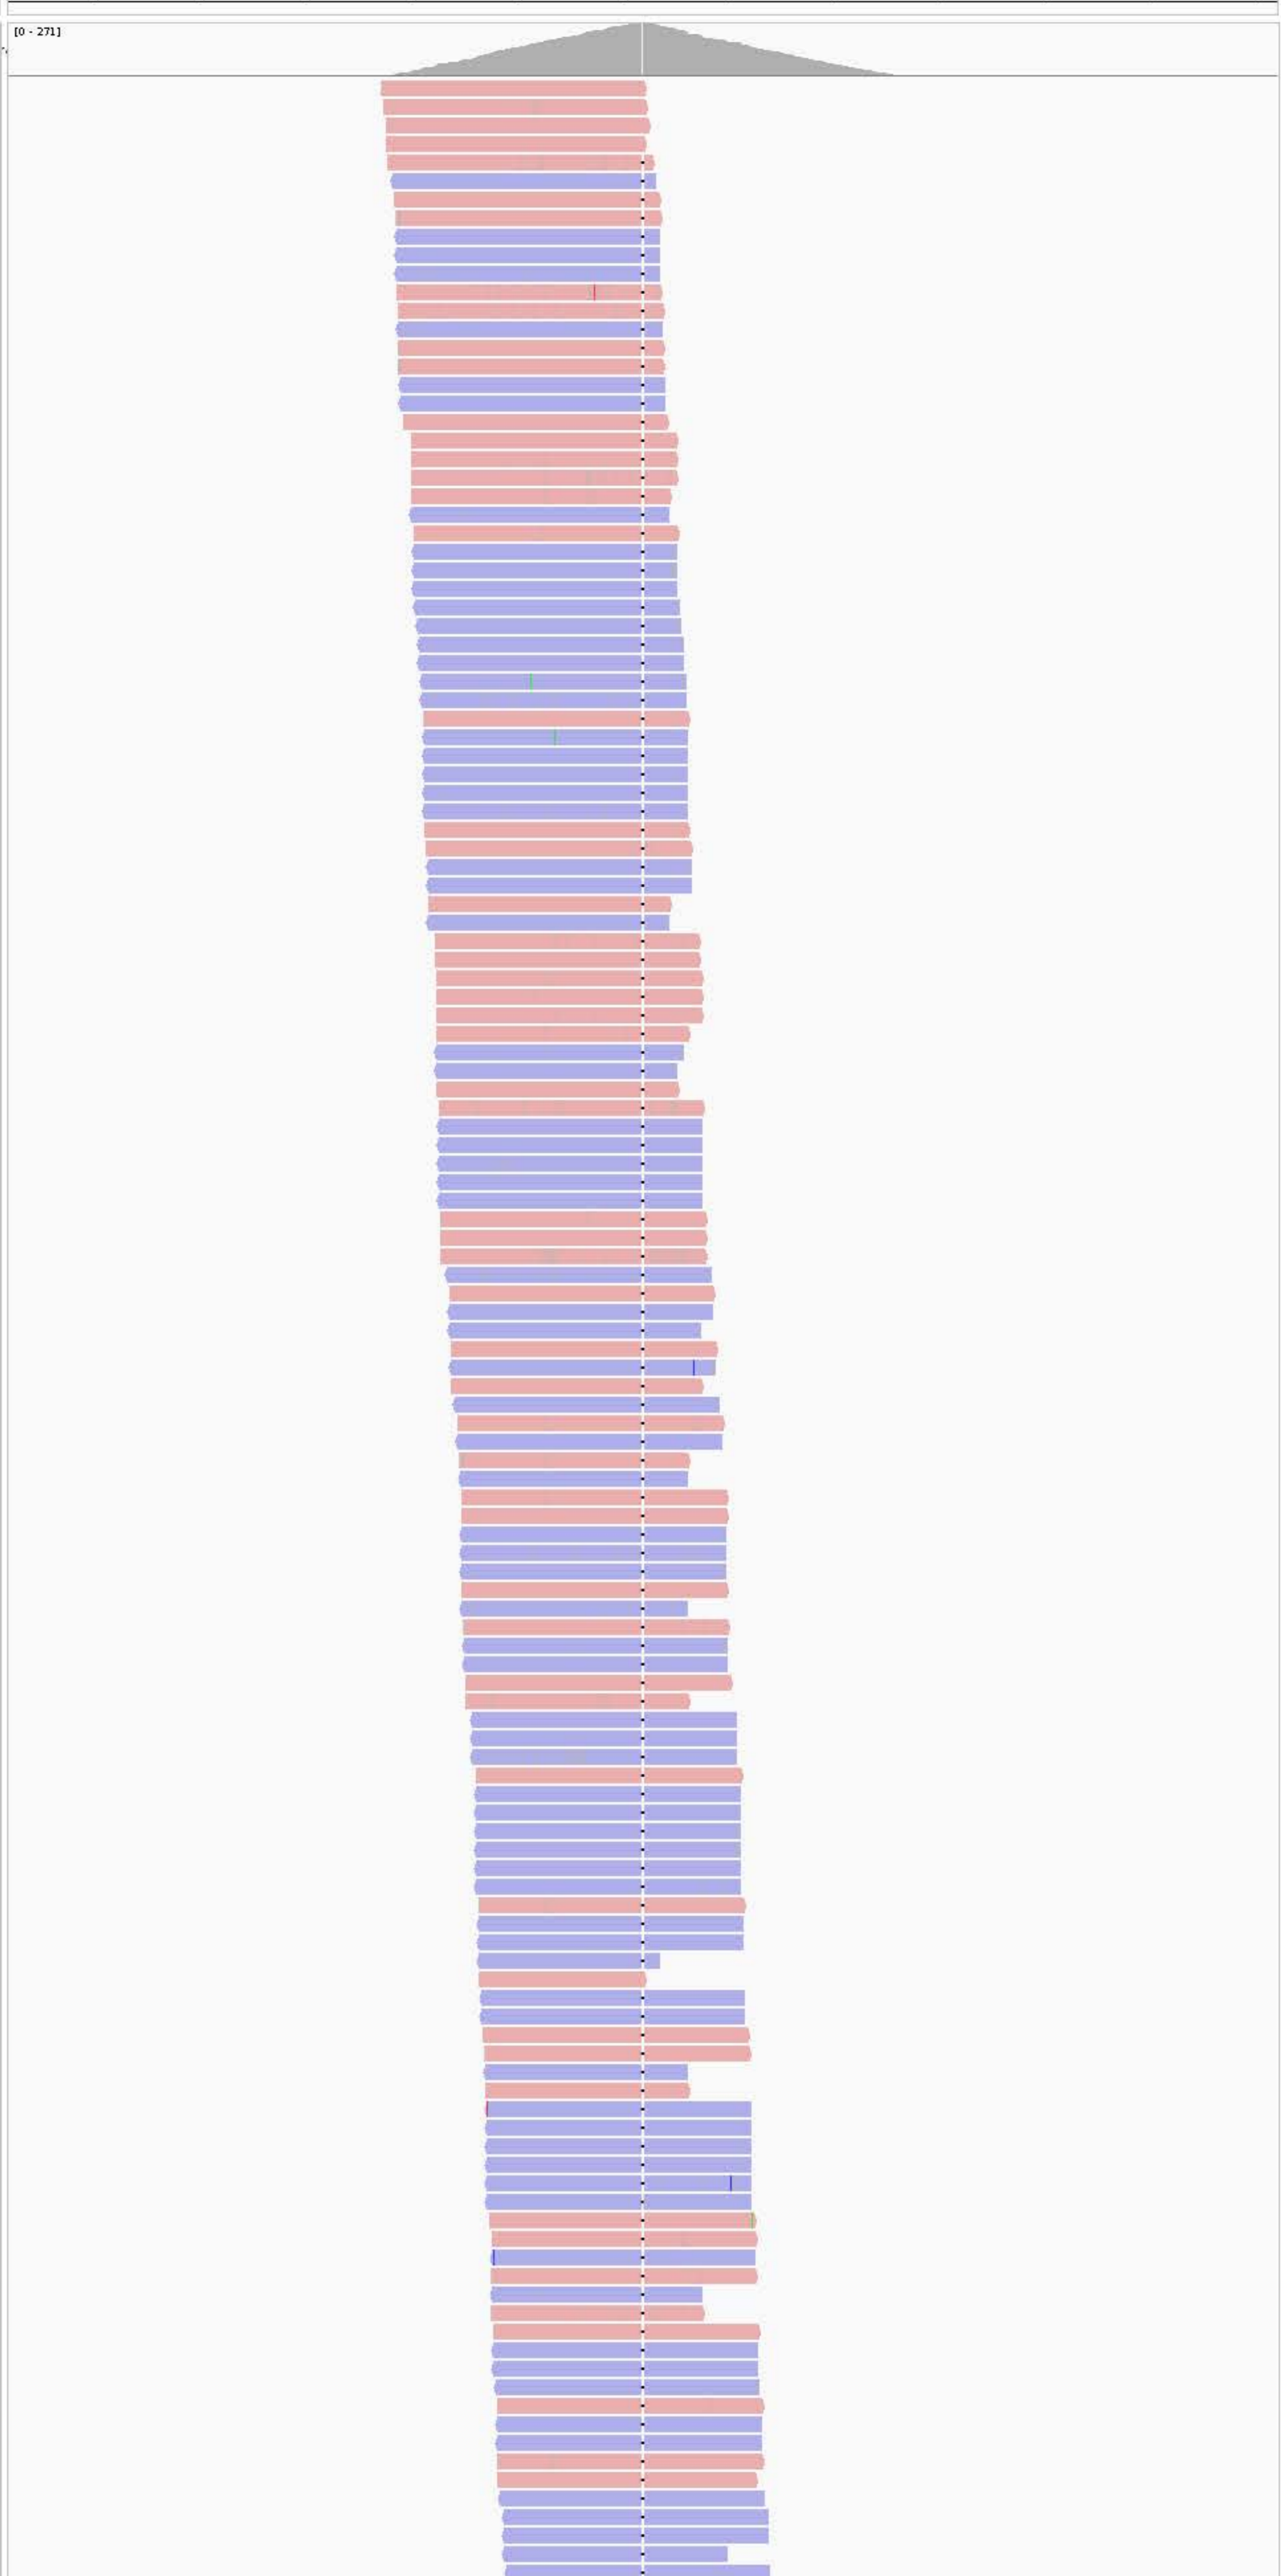

SL\_0013\_RT\_5-B\_mut.bam

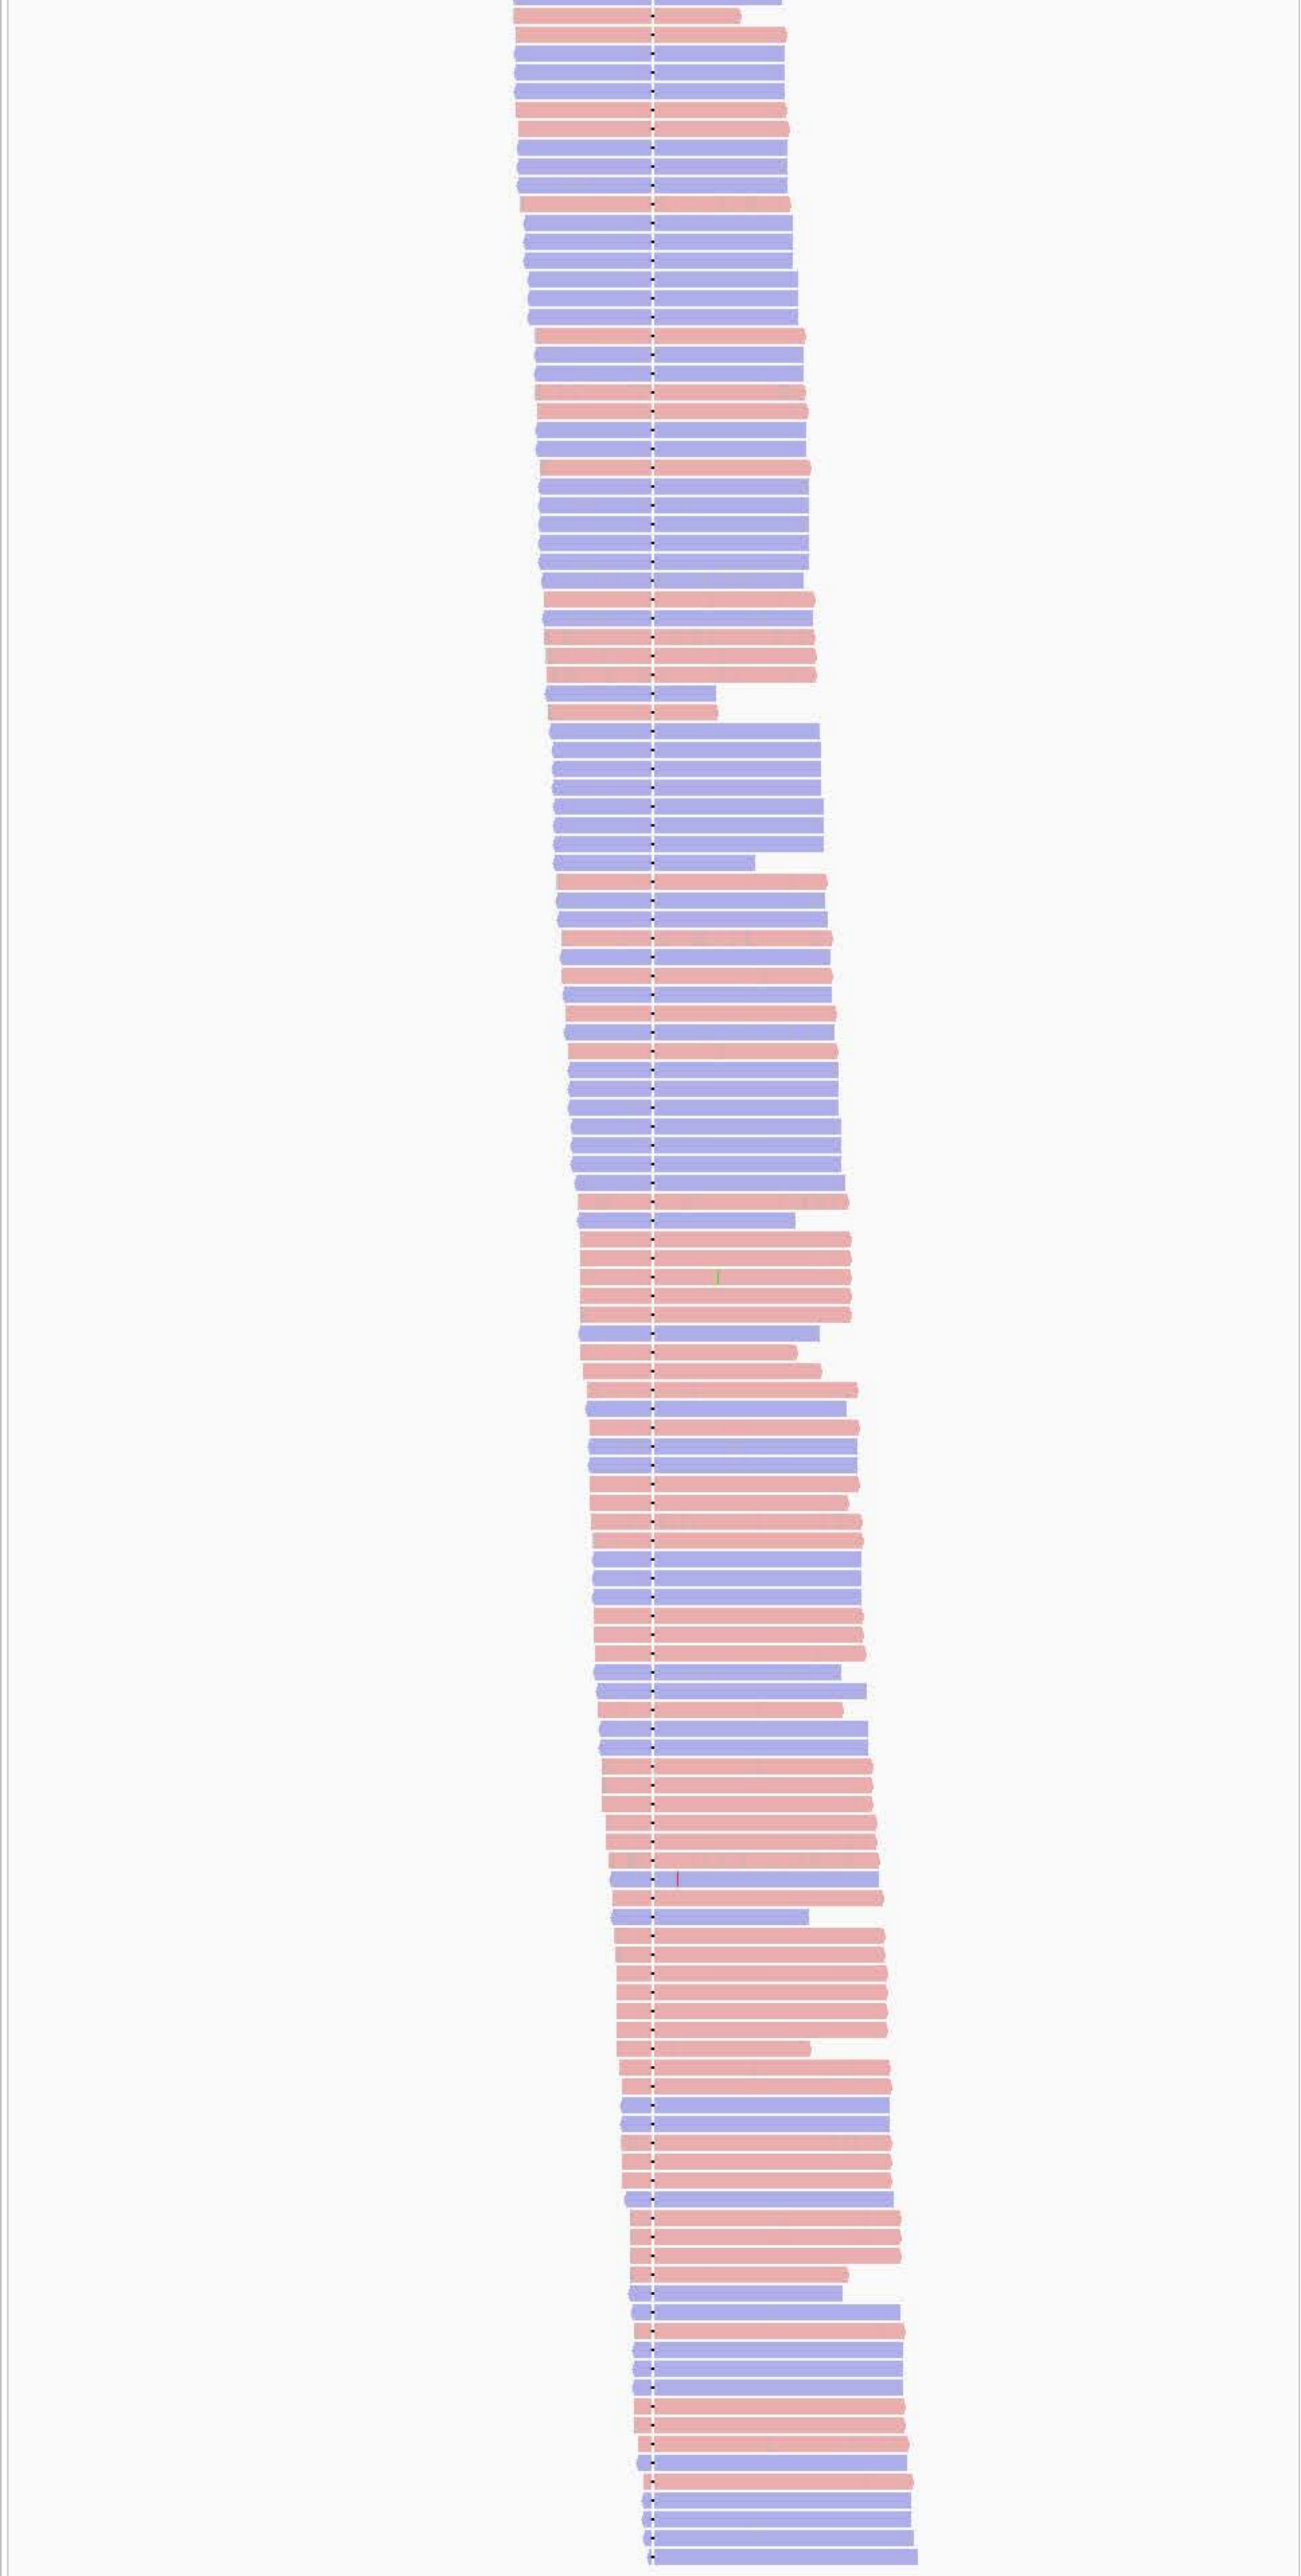

Sequence

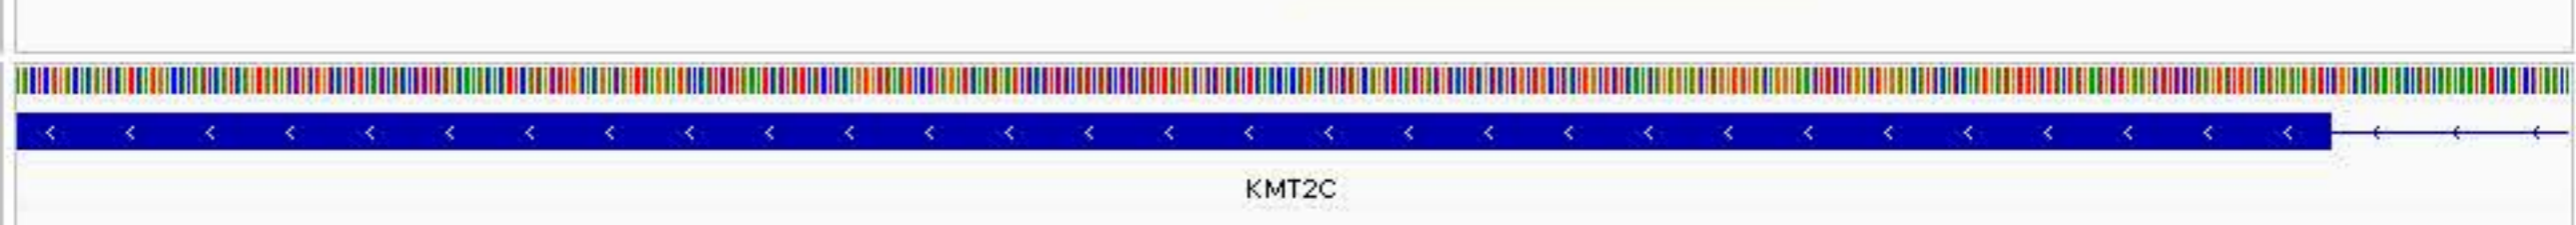

Refseq Genes

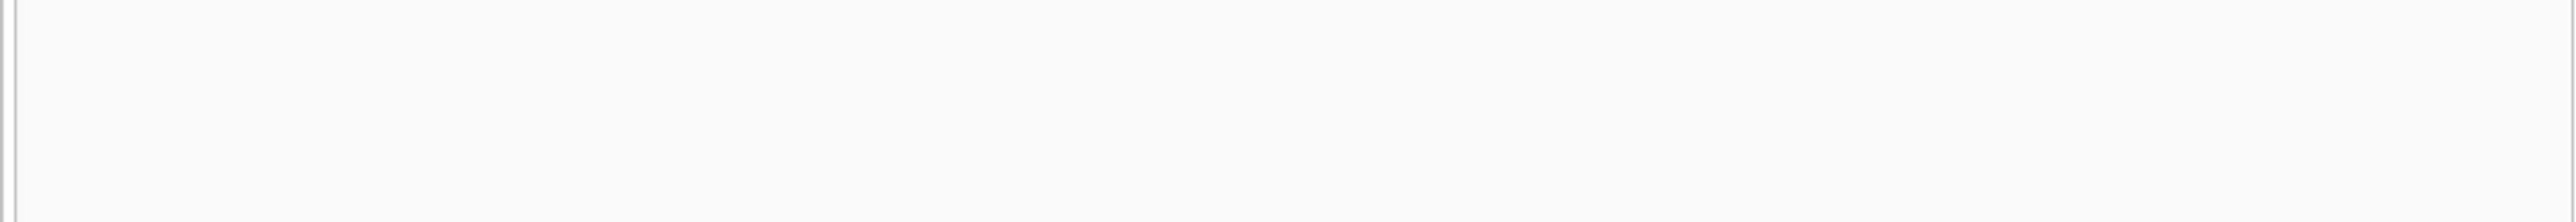



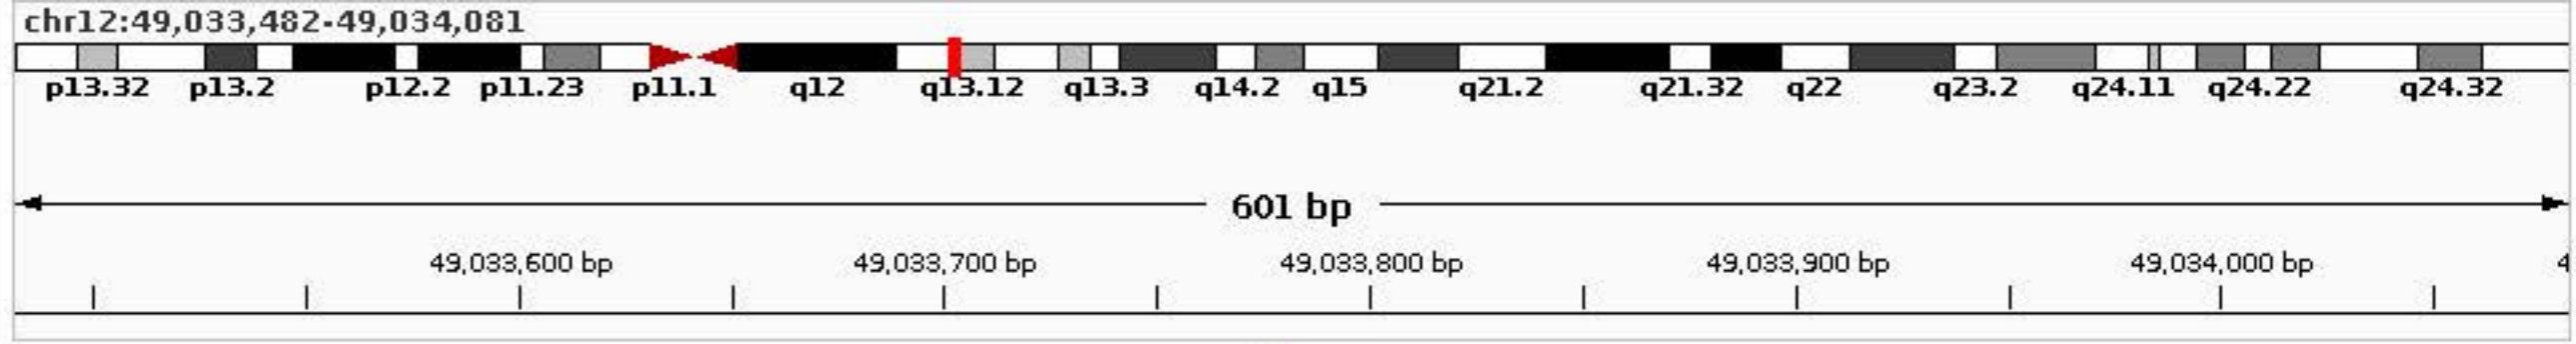

SL\_0007\_R\_FFPE\_58-B\_mut.bam  
rage

SL\_0007\_R\_FFPE\_58-B\_mut.ba  
m

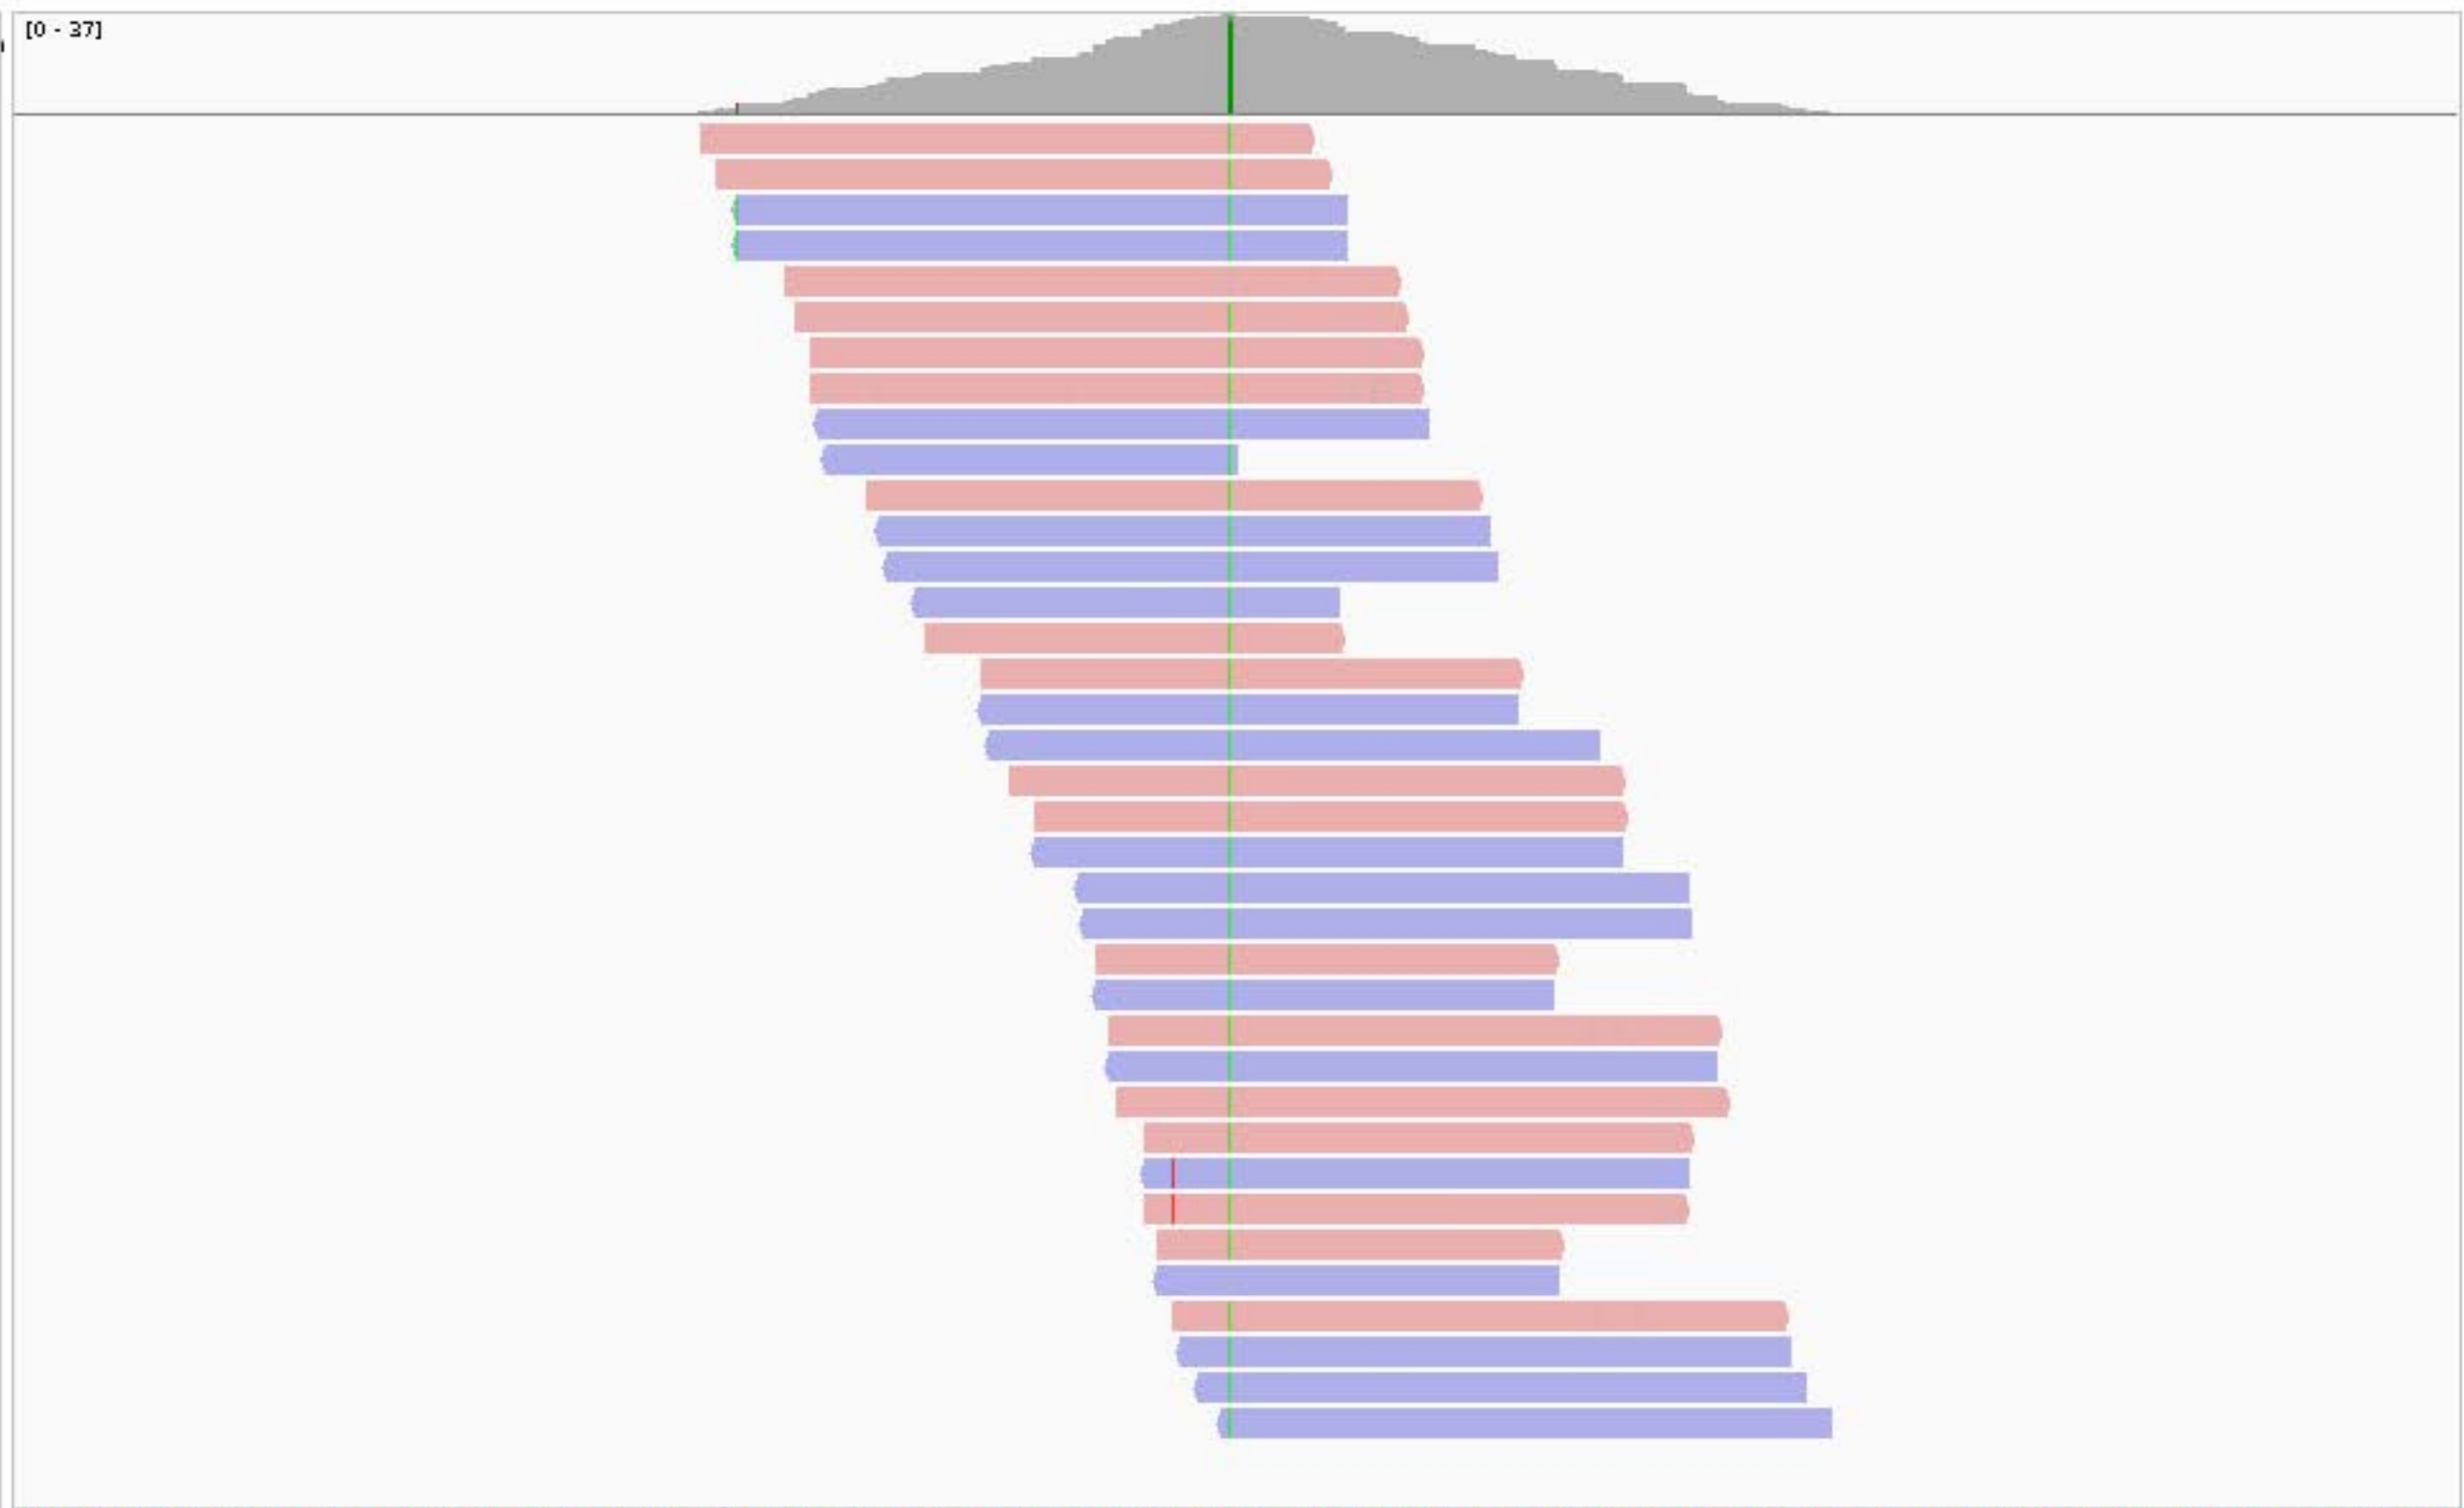

Sequence →

Refseq Genes

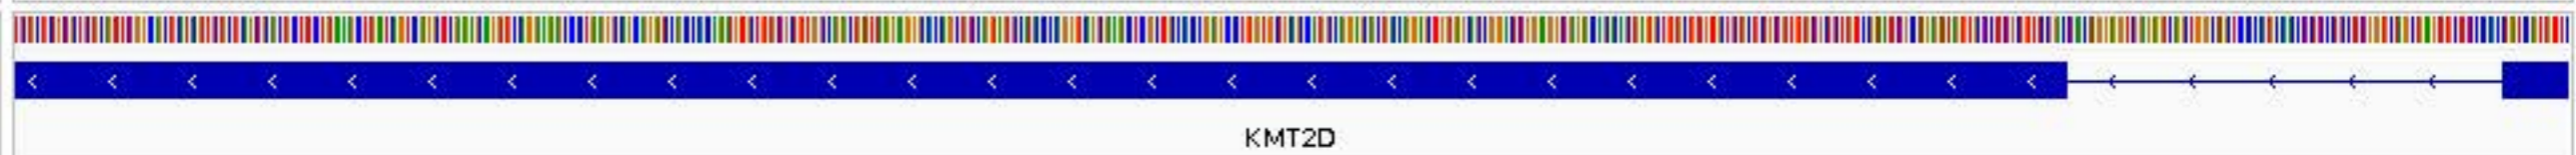

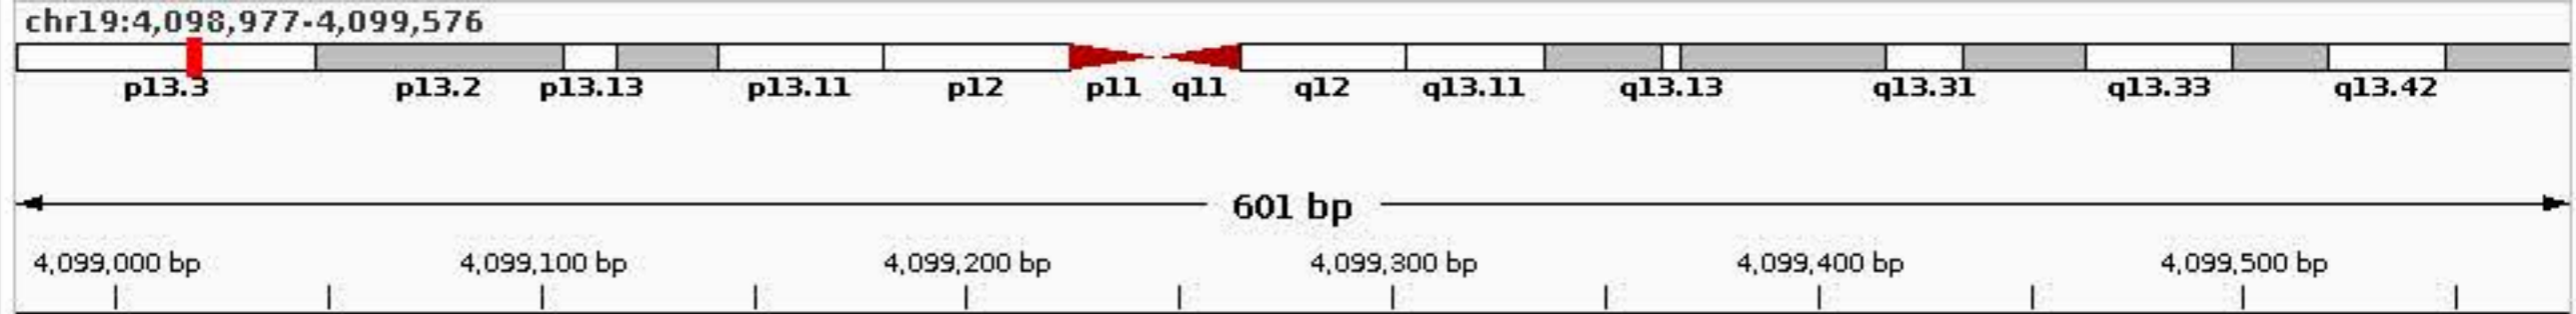

SL\_1007-T1-B\_mut.bam Coverage

SL\_1007-T1-B\_mut.bam

Sequence →

Refseq Genes

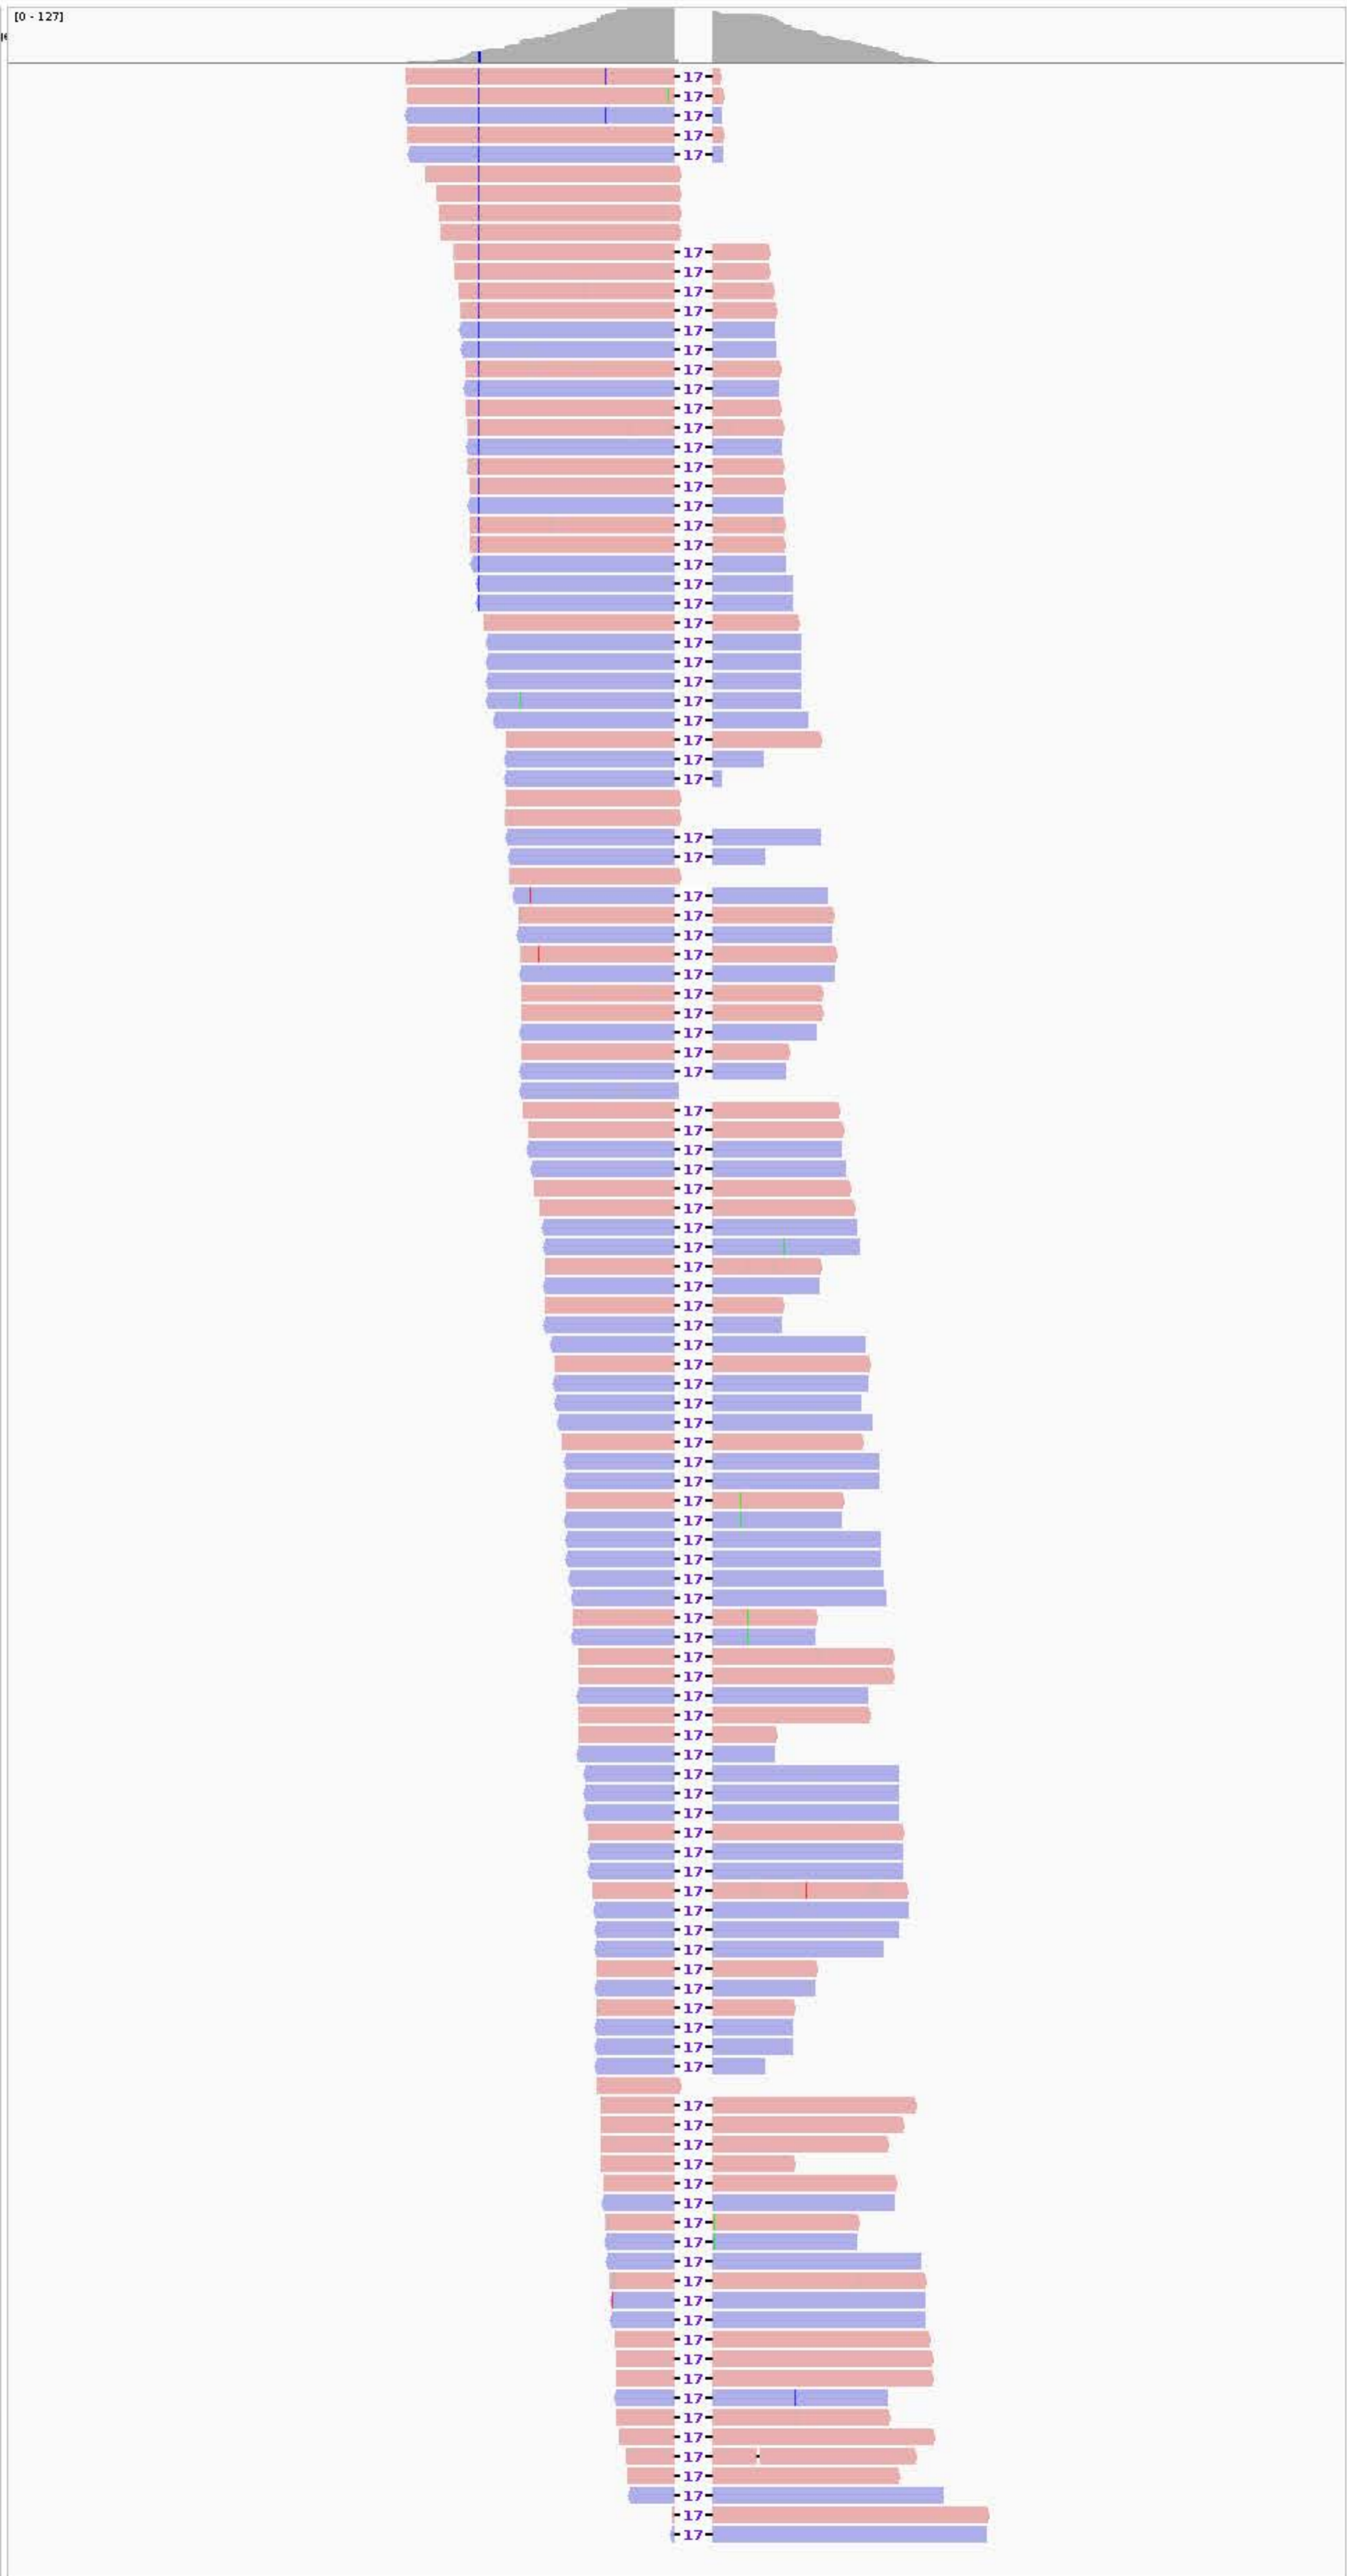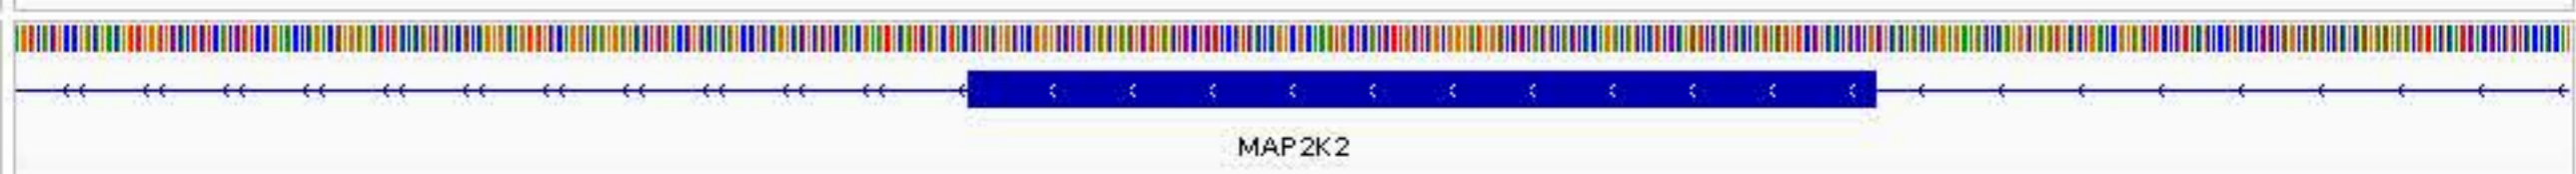

MAP2K2



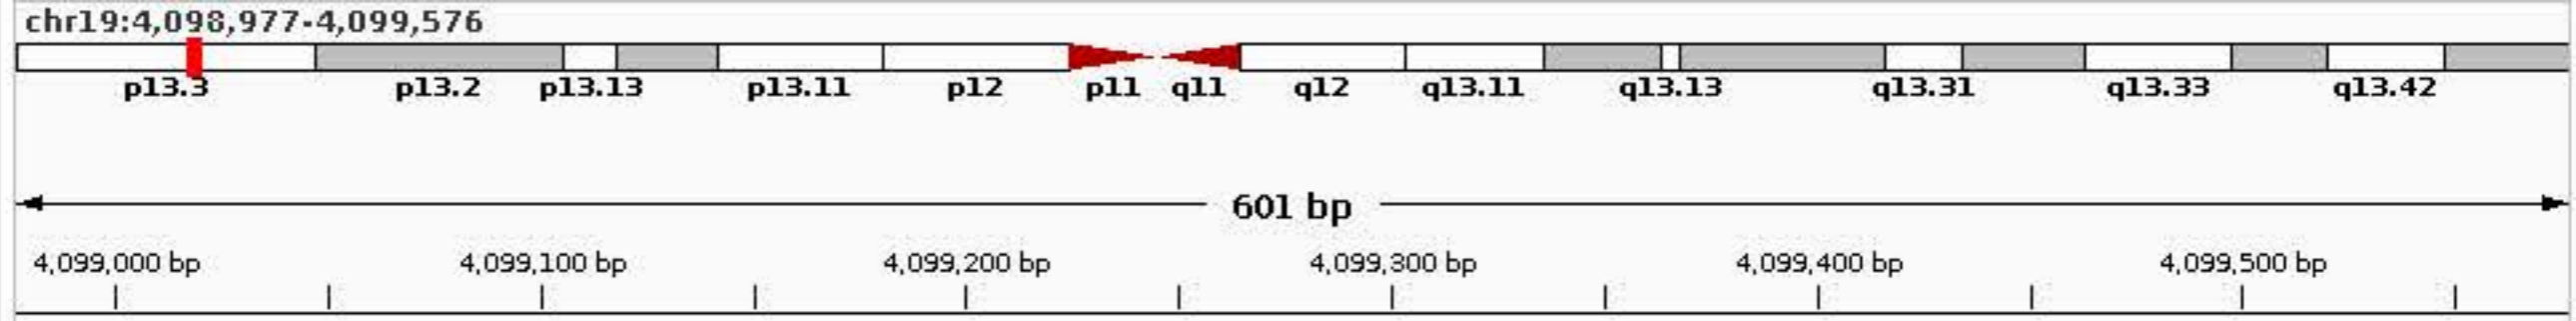

SL\_1007-T2-B\_mut.bam Coverage

SL\_1007-T2-B\_mut.bam

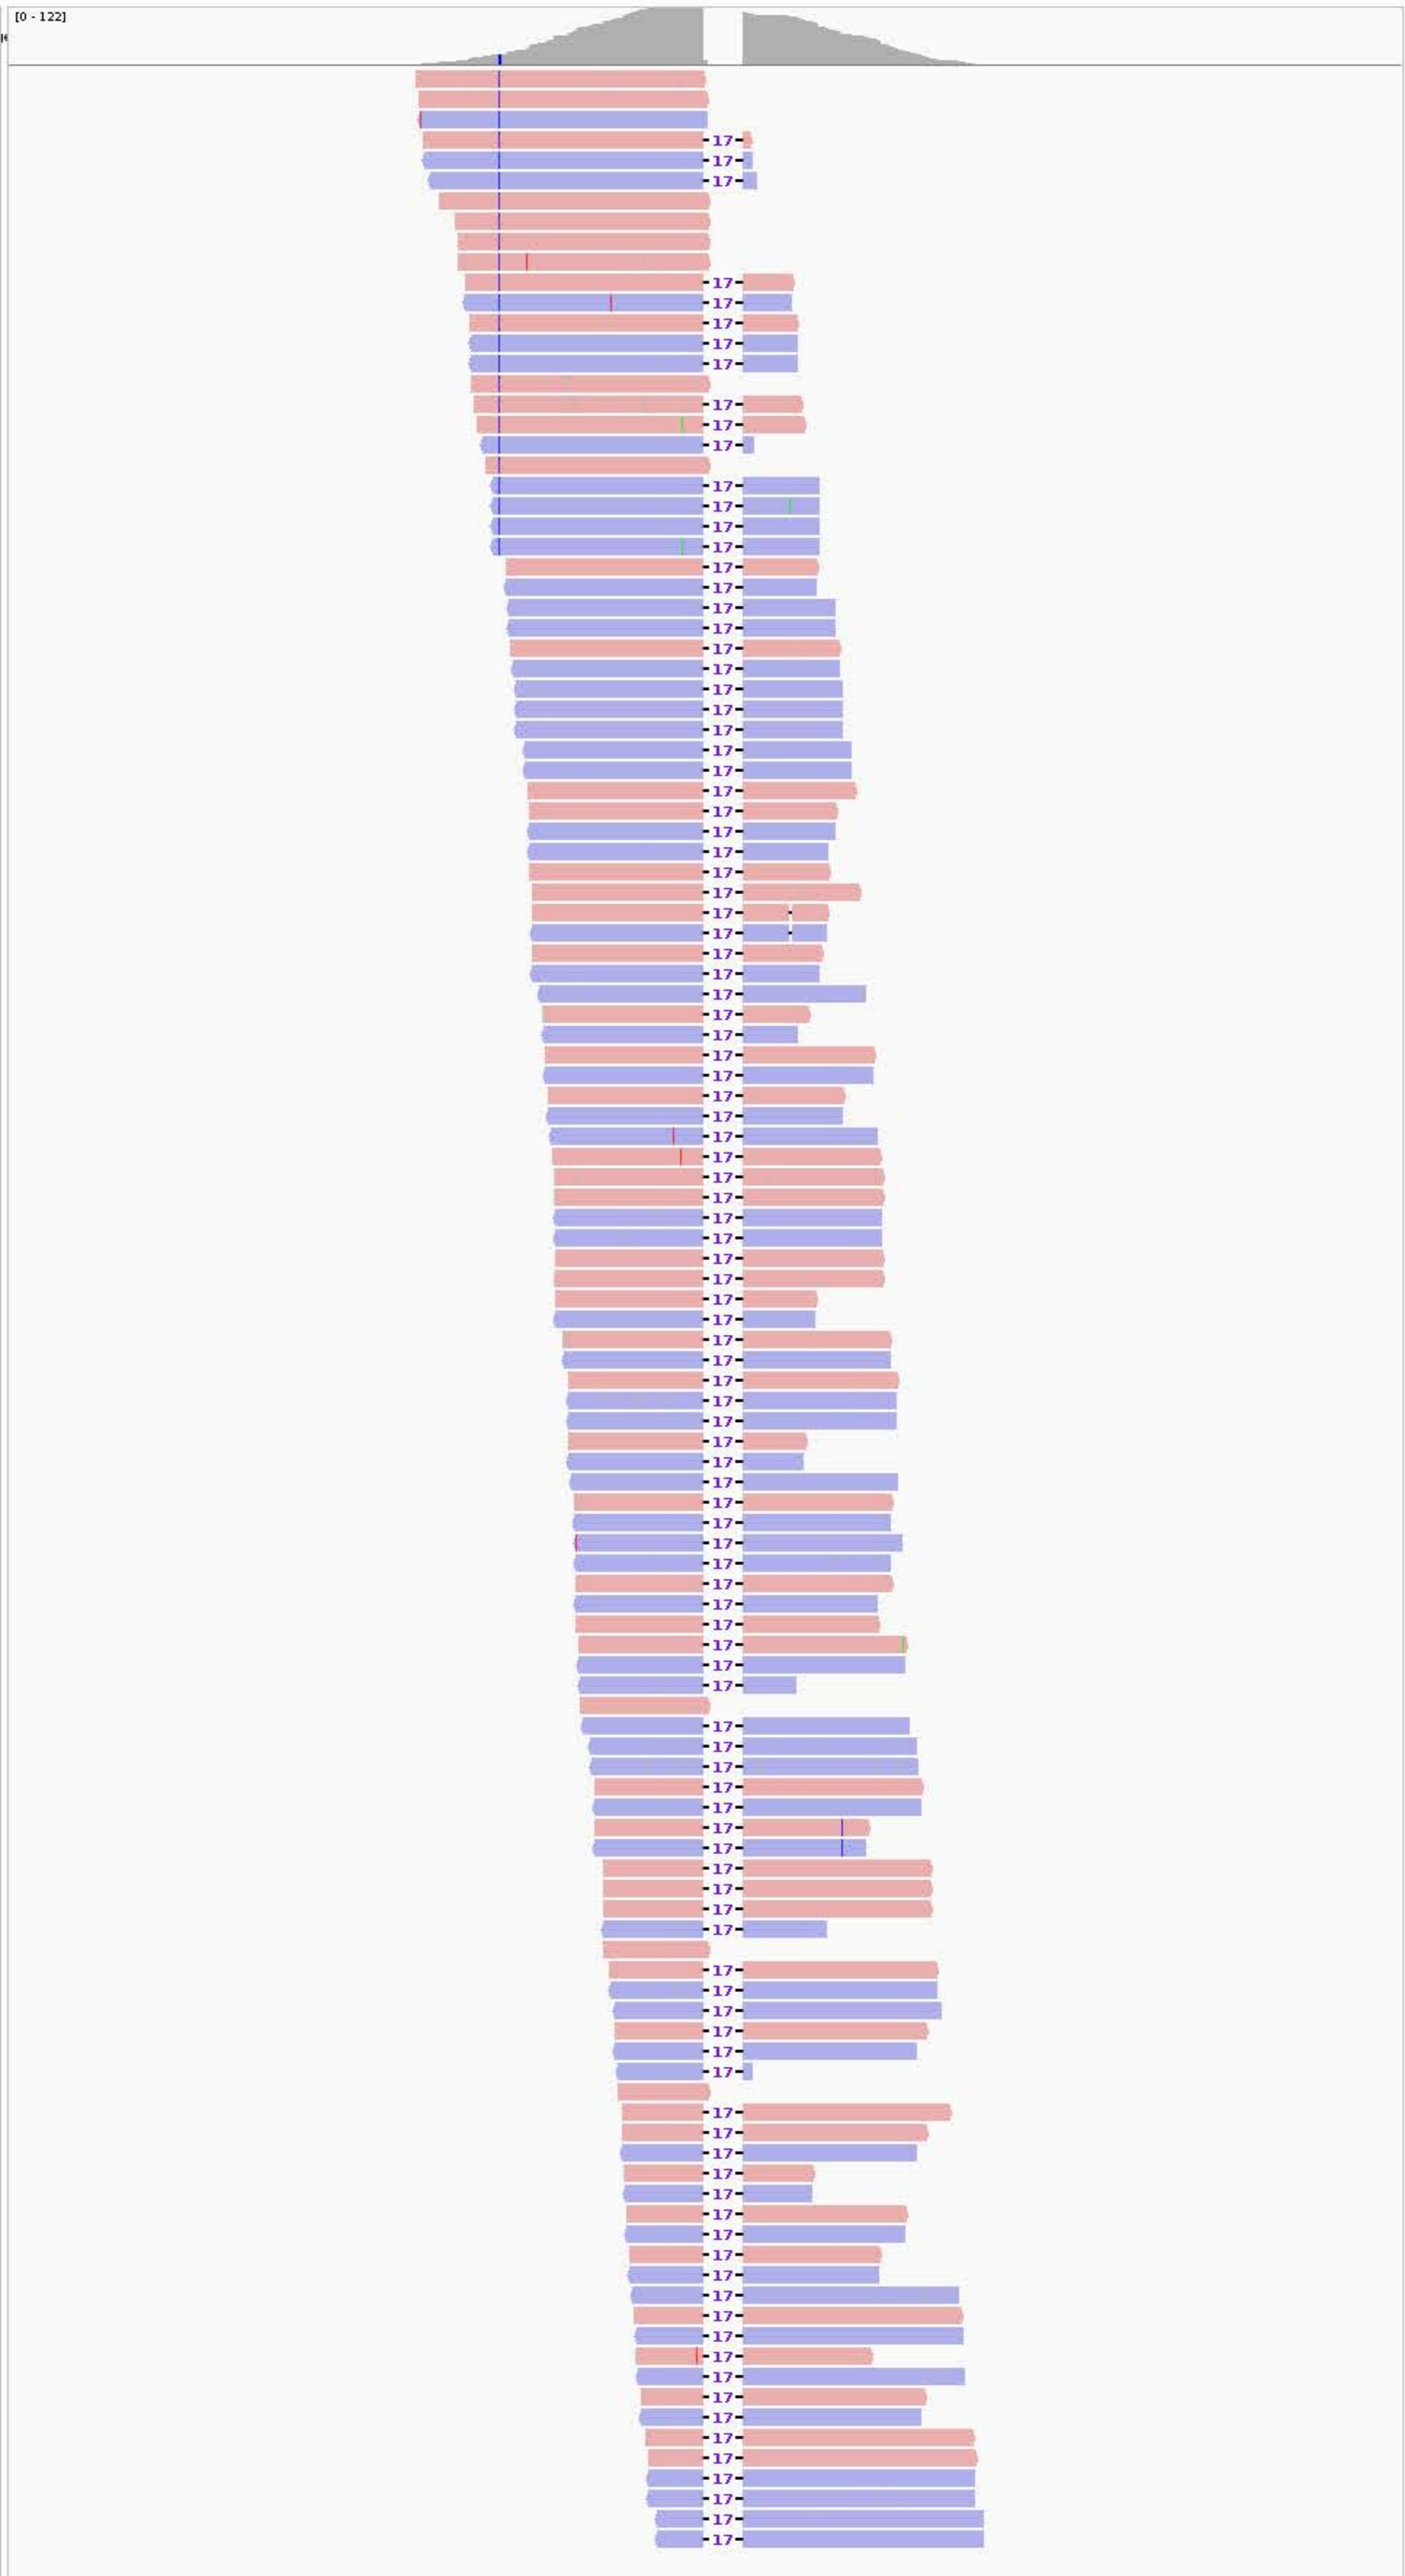

Sequence

Refseq Genes

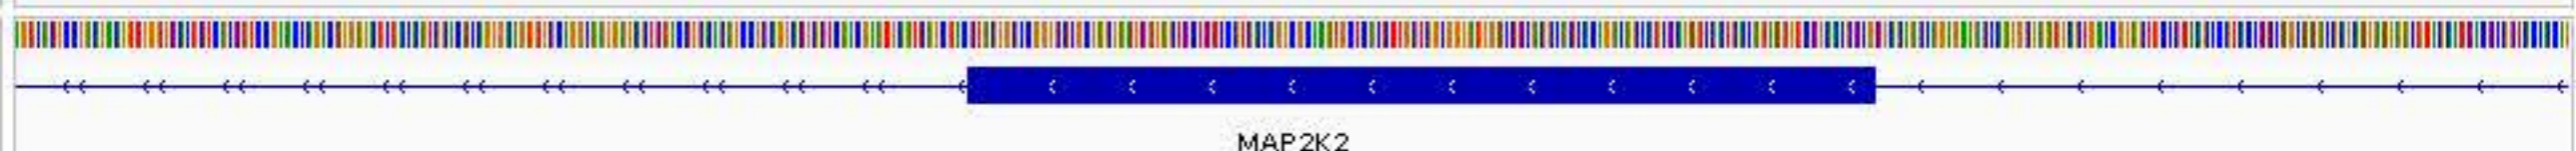



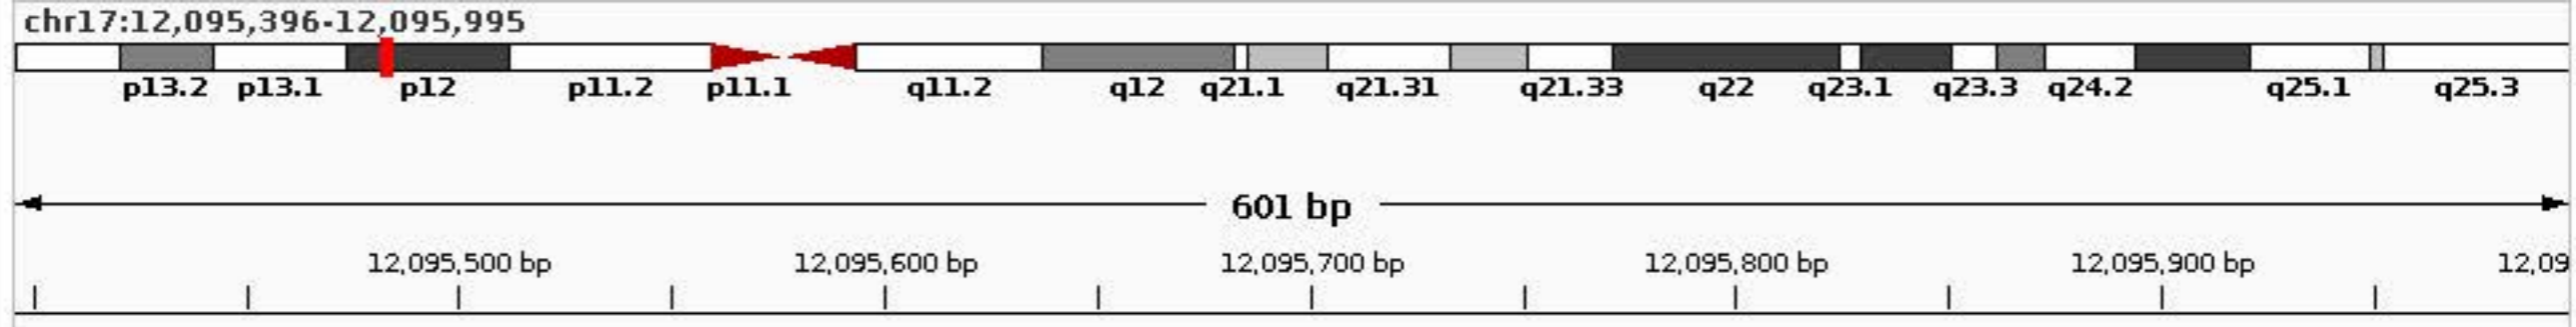

SL\_0005-RN\_11-B\_mut.bam Coverage

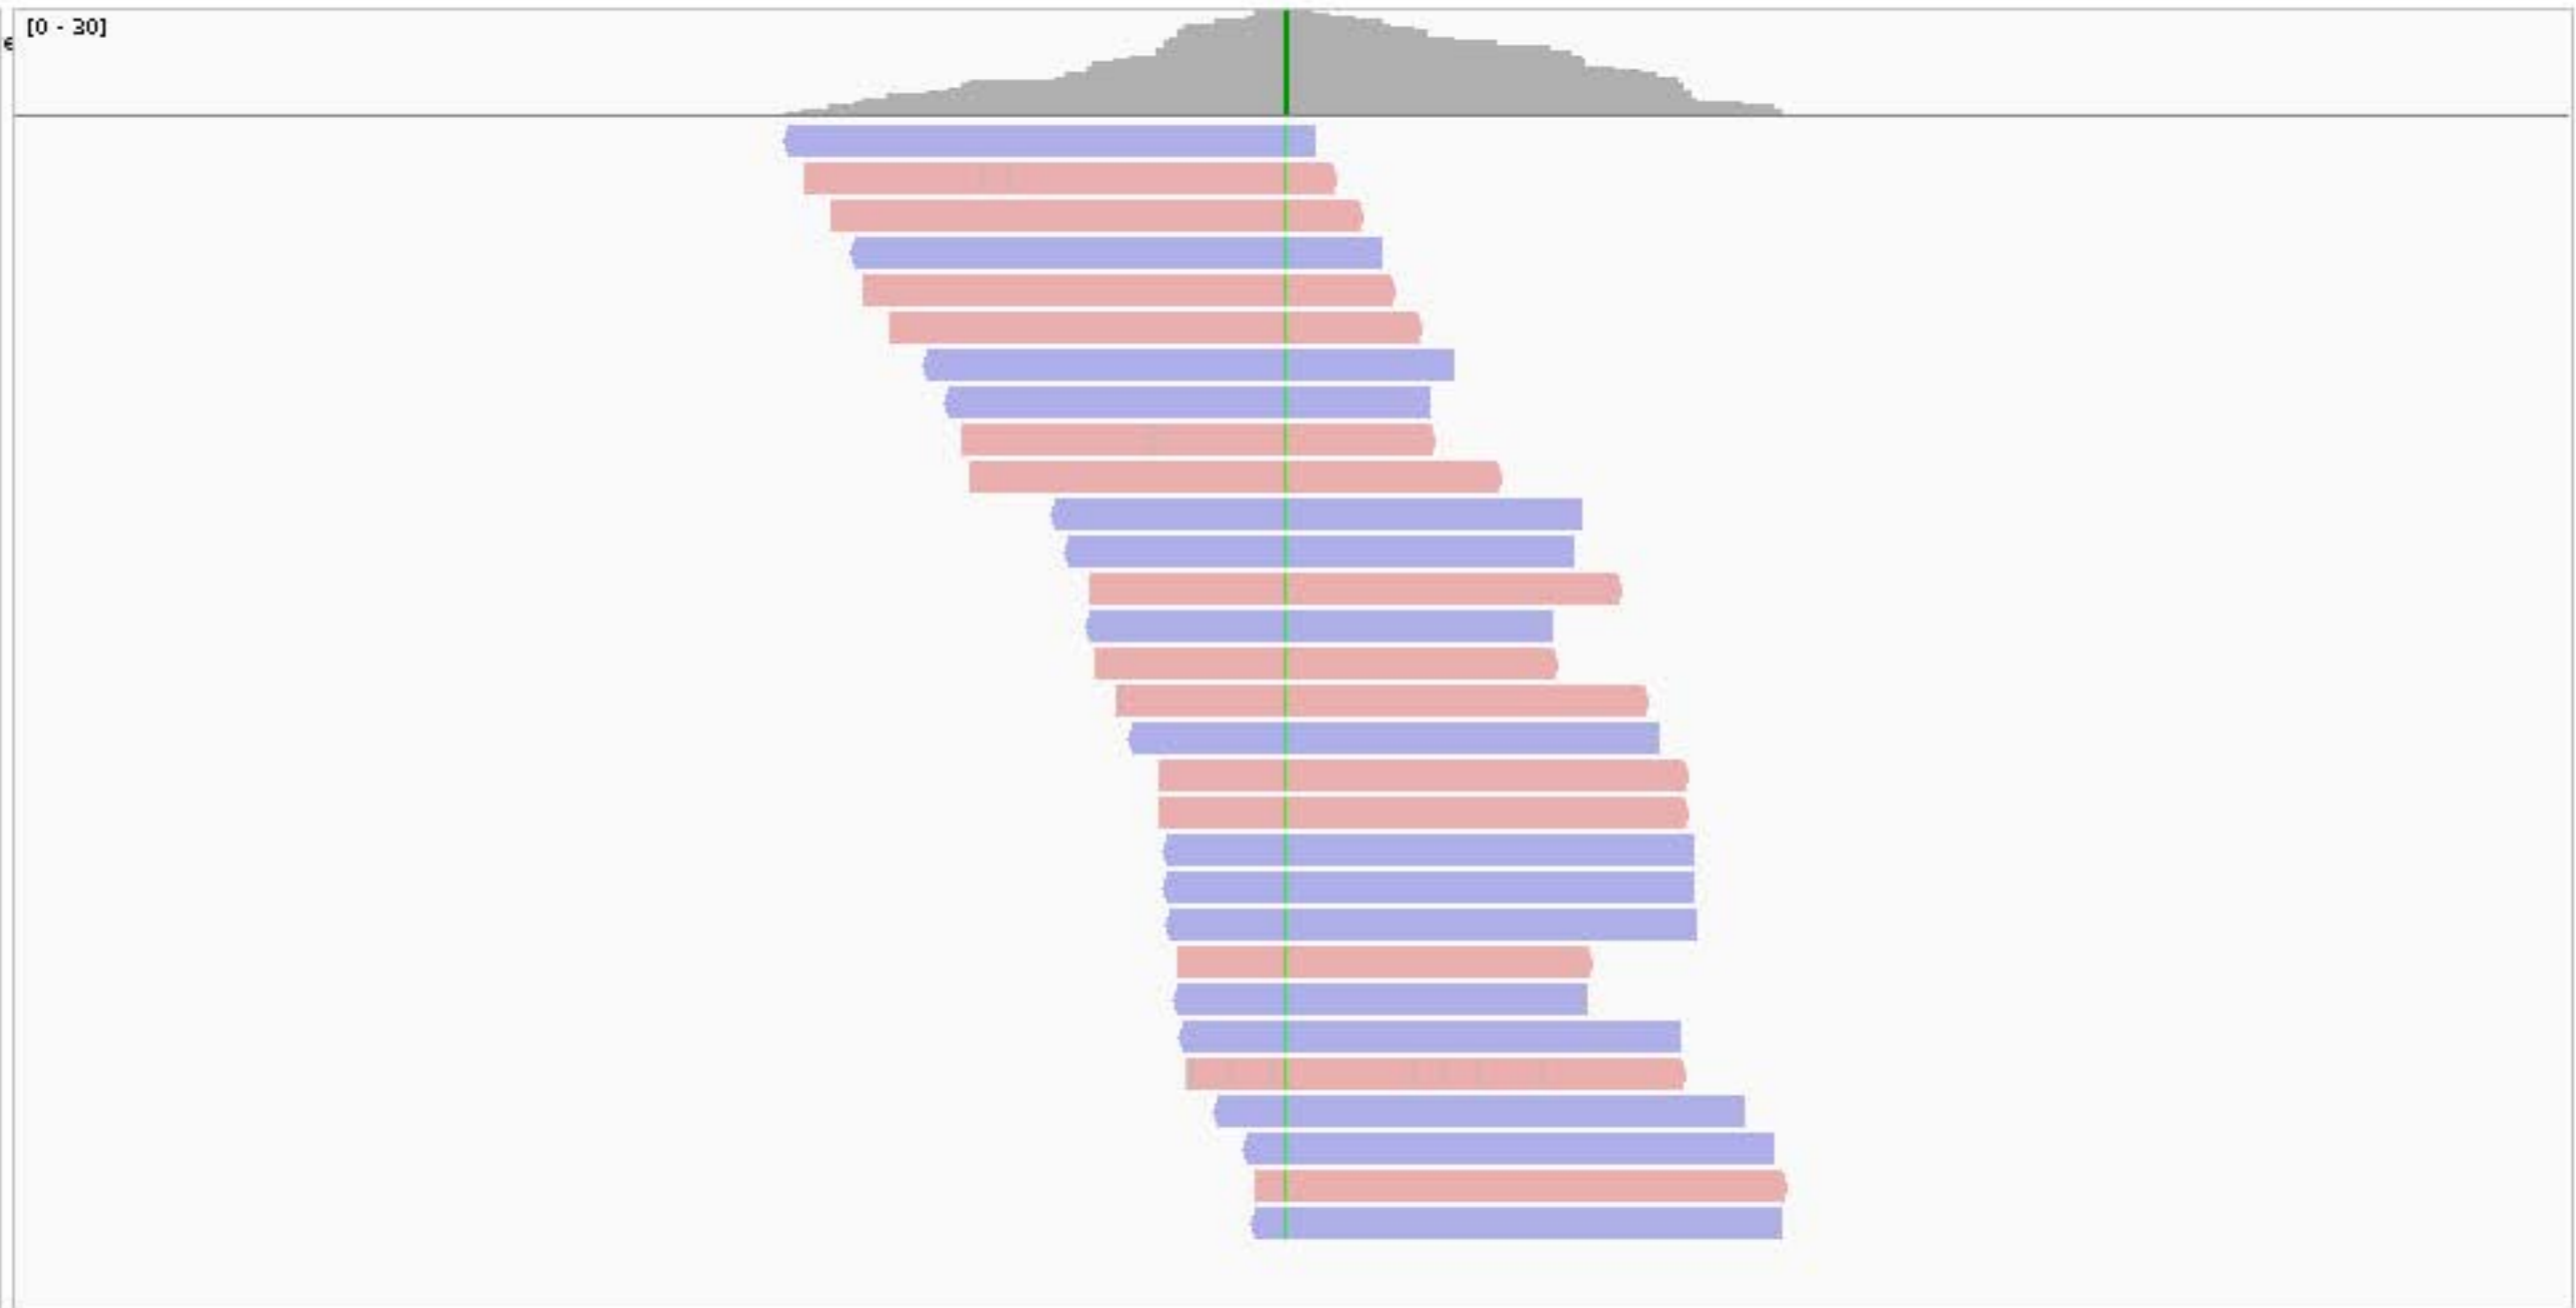

SL\_0005-RN\_11-B\_mut.bam

Sequence

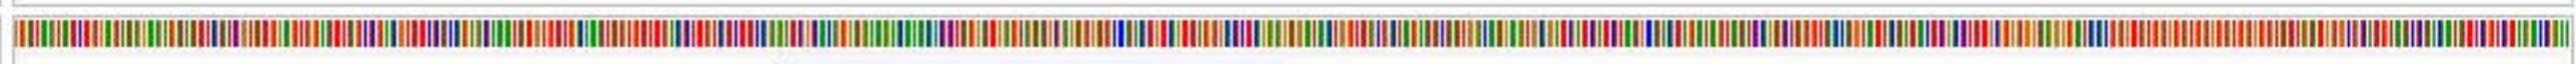

Refseq Genes

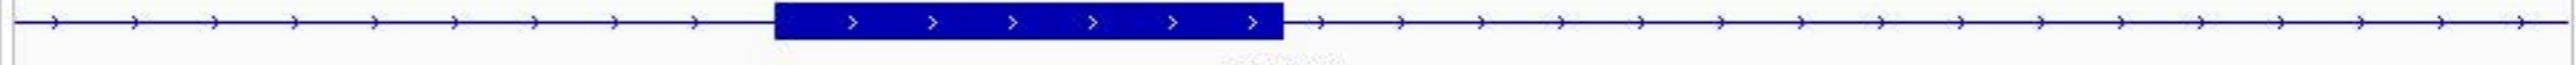

MAP2K4

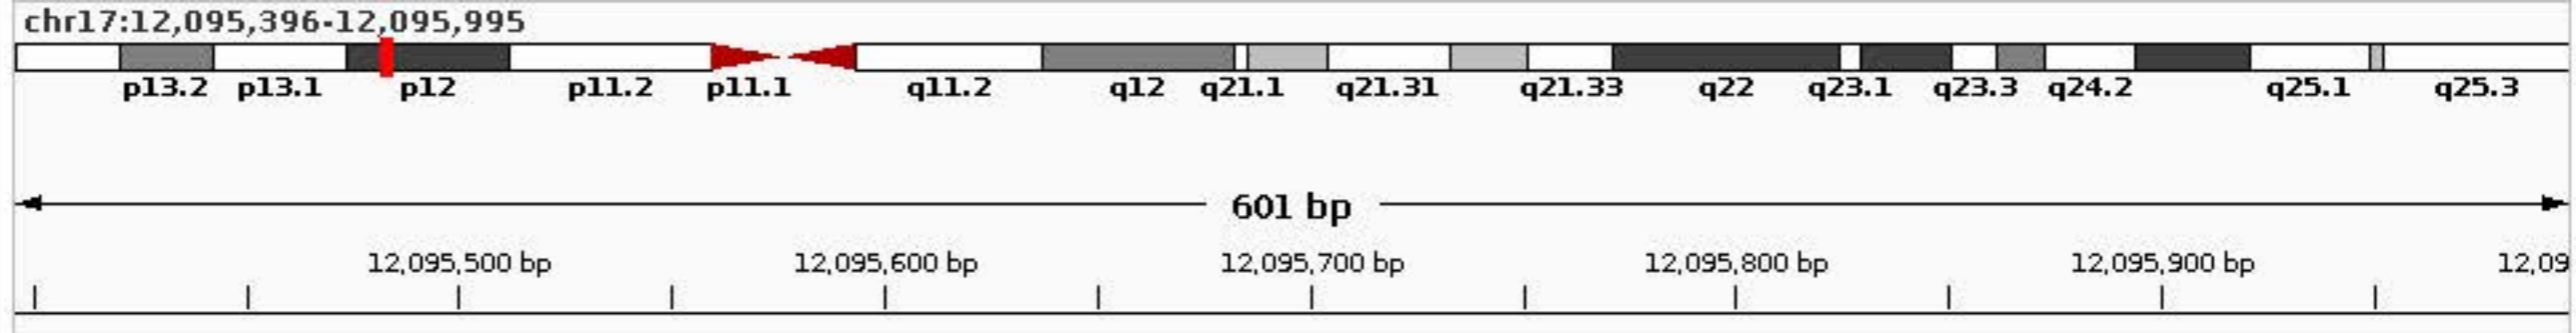

SL\_0009-LT\_1-B\_mut.bam Coverage

SL\_0009-LT\_1-B\_mut.bam

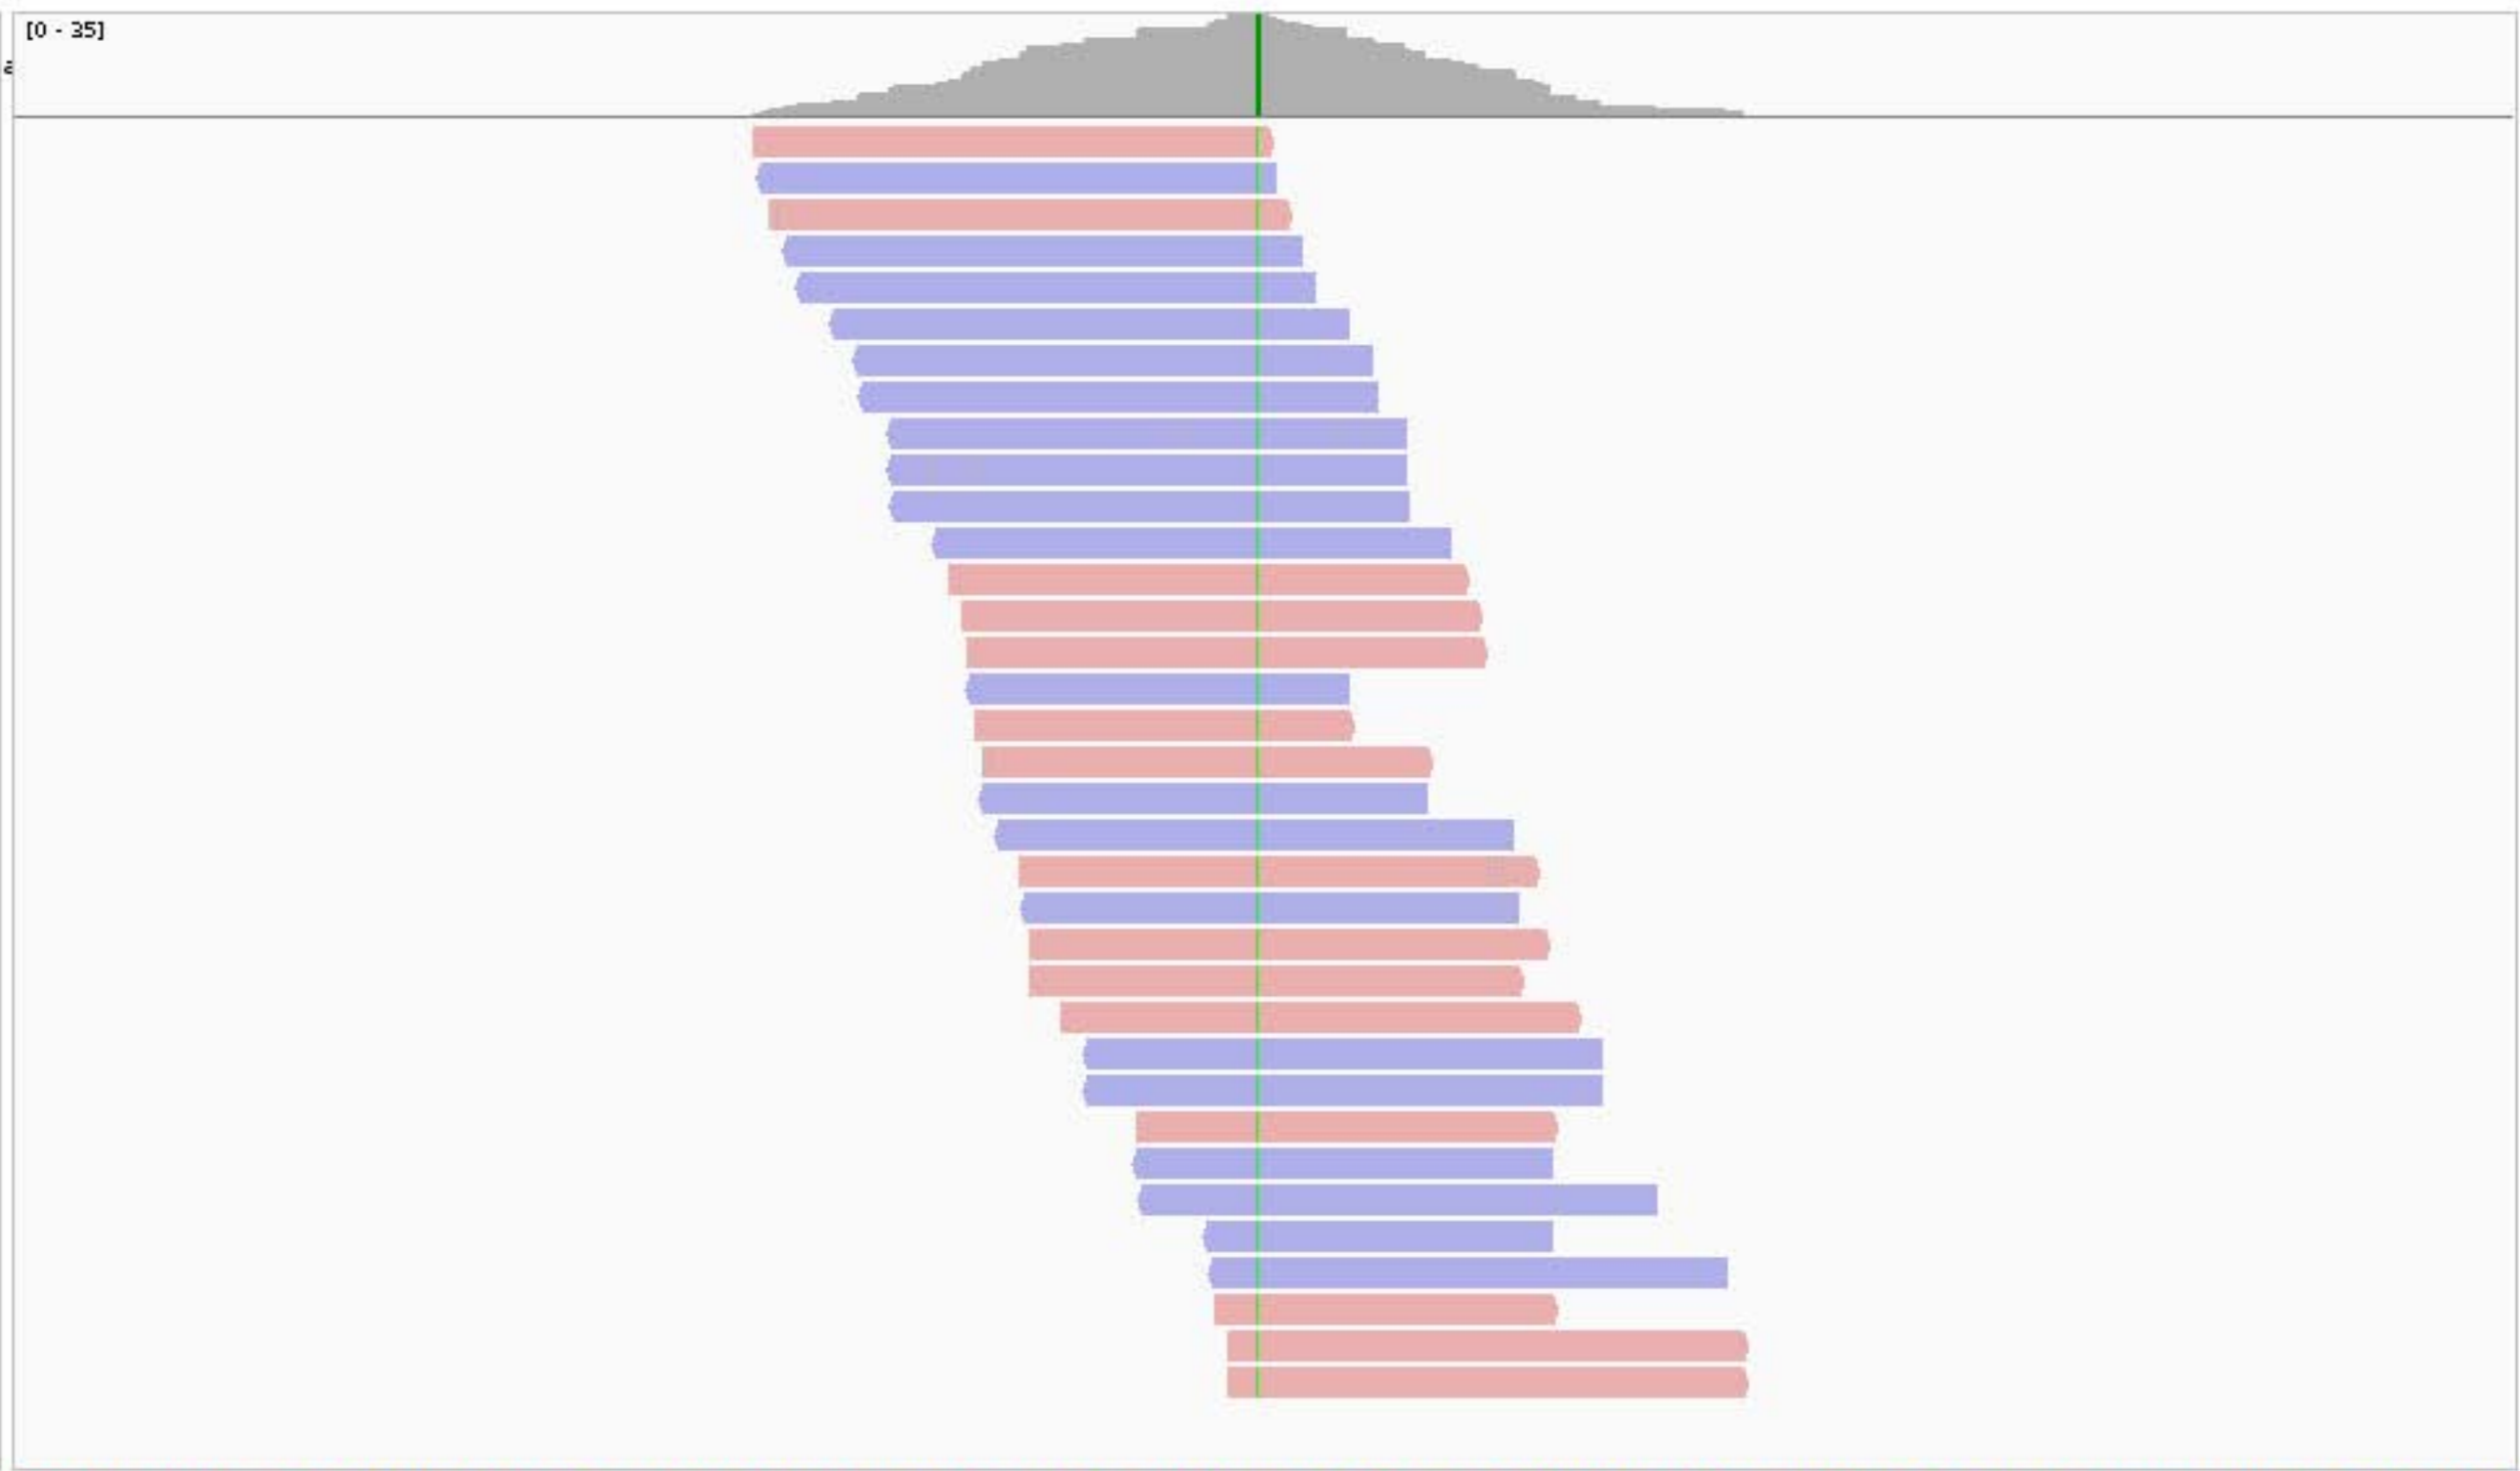

Sequence →

Refseq Genes

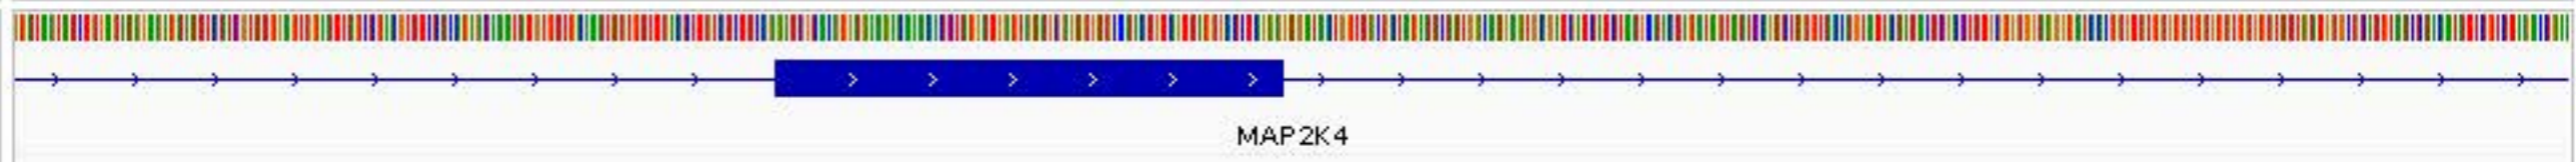



SL\_0011-LT\_2-B\_mut.bam Coverage

SL\_0011-LT\_2-B\_mut.bam

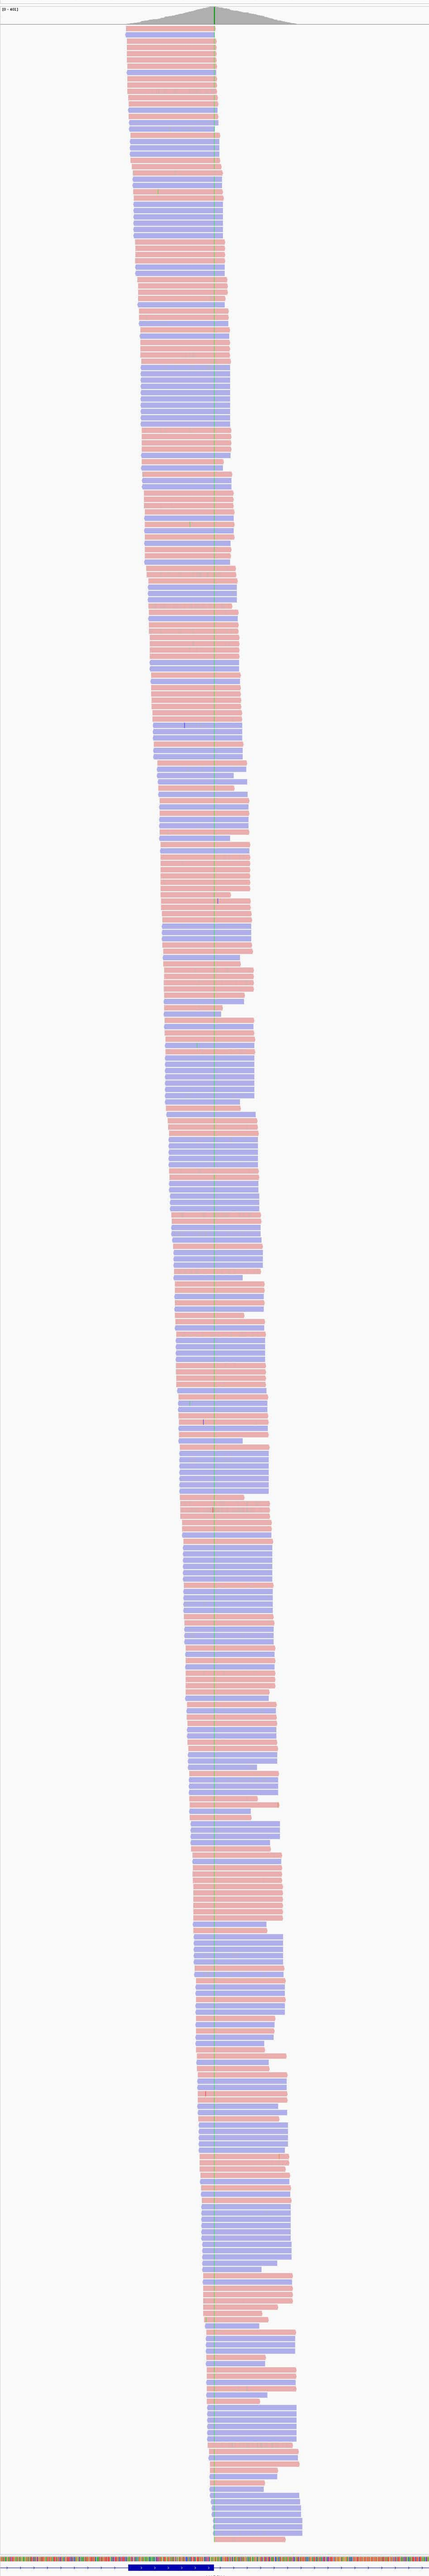



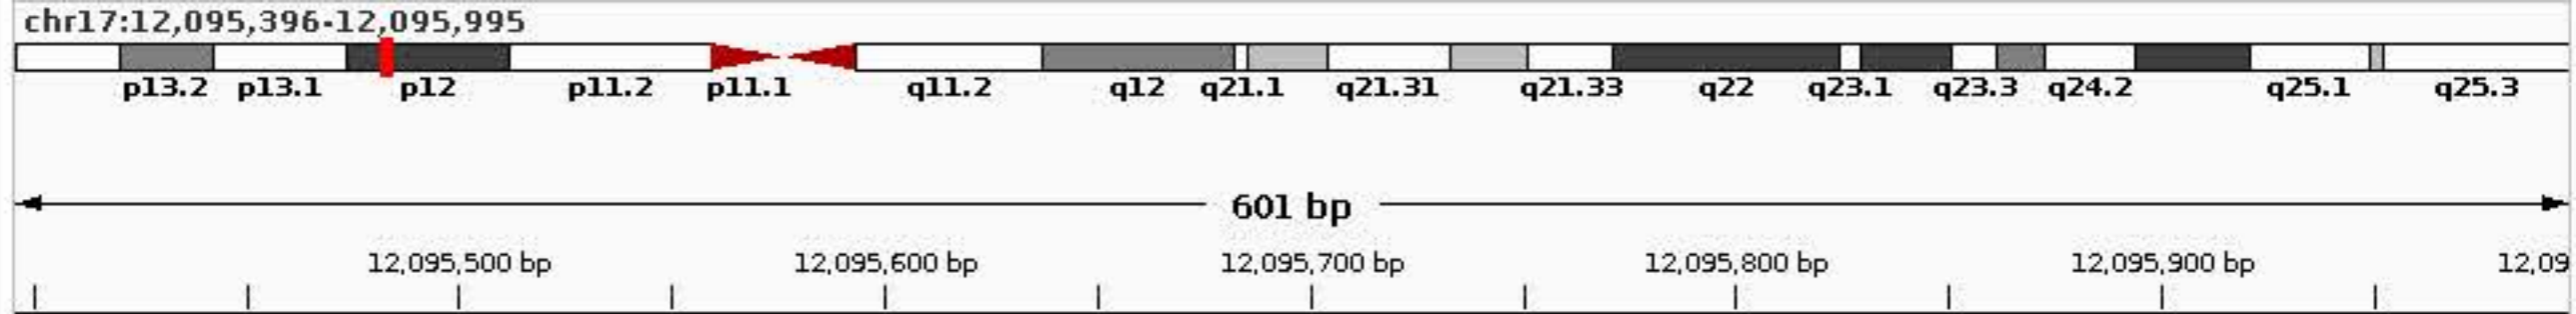

SL\_0011-LT\_5-B\_mut.bam Coverage

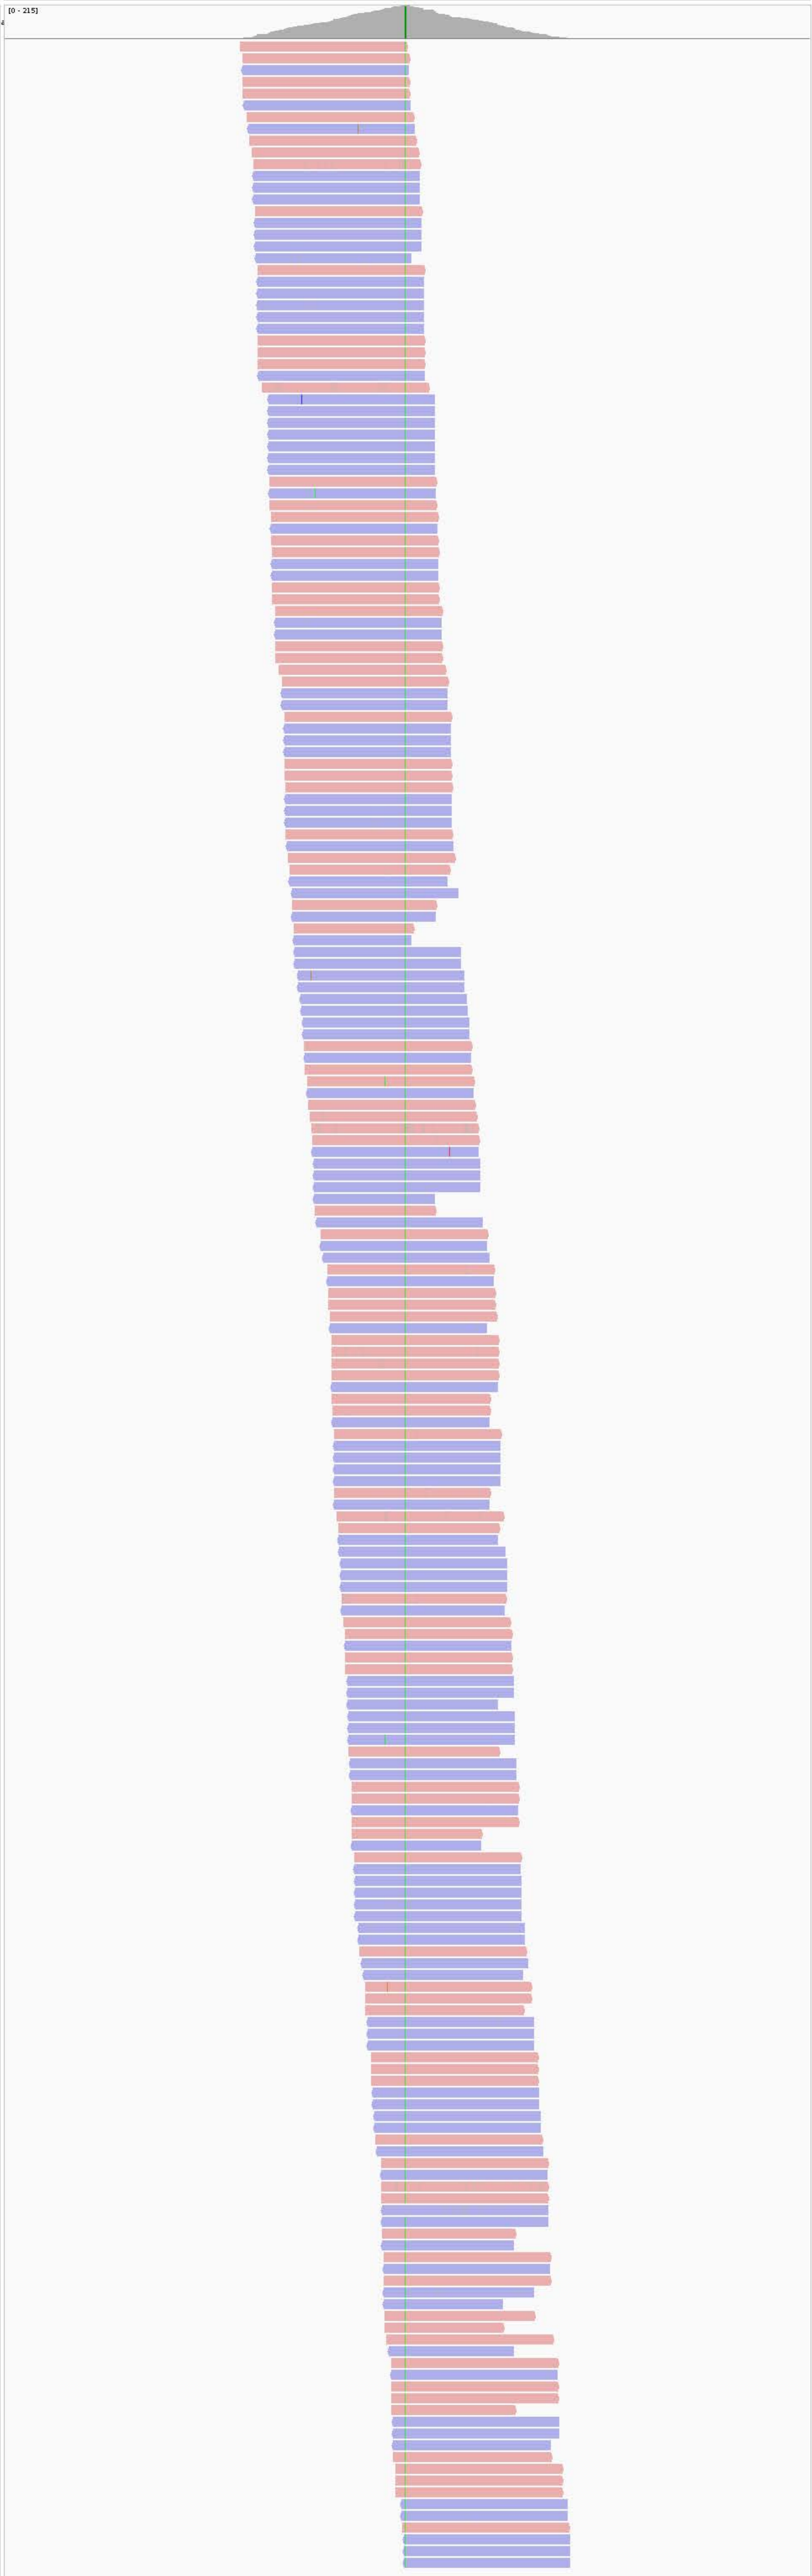

Sequence

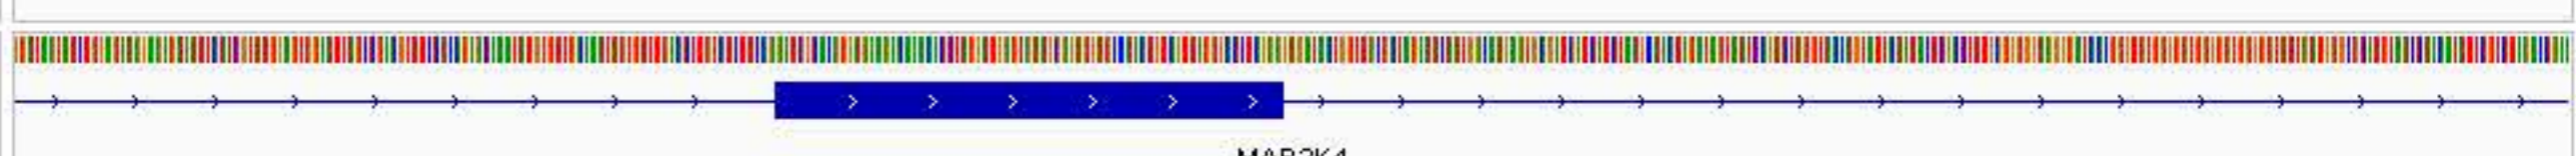

Refseq Genes

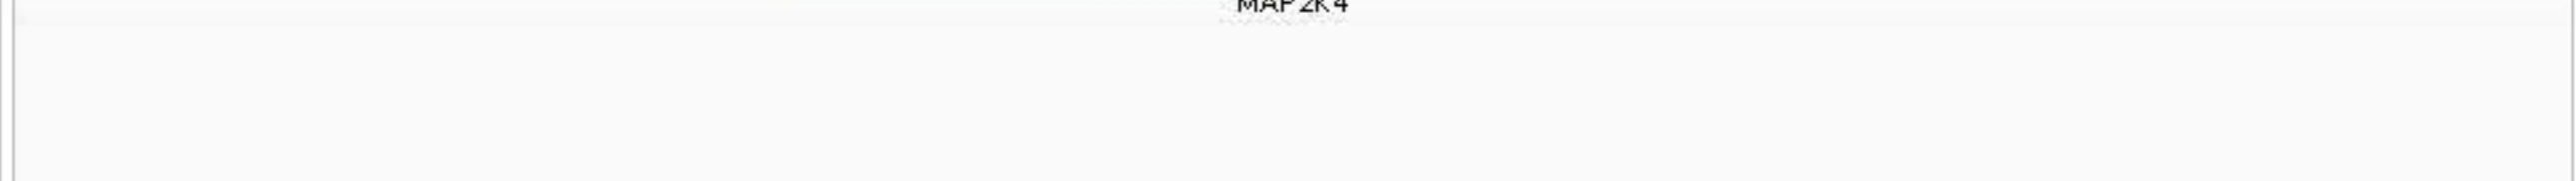



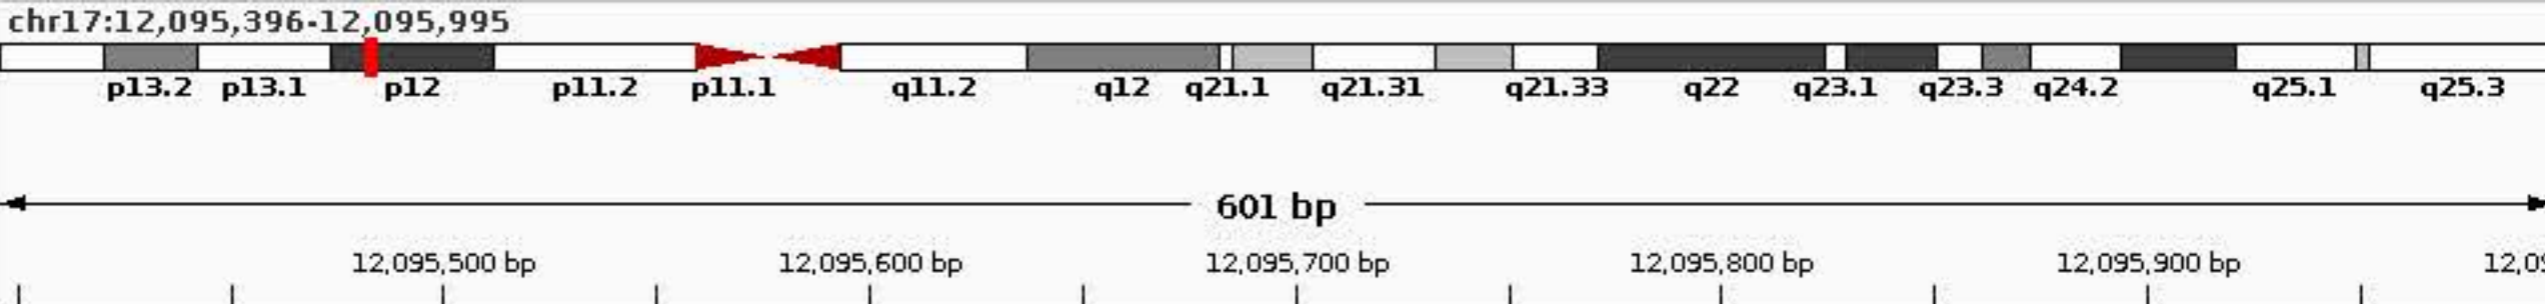

SL\_0011-LT\_6-B\_mut.bam Coverage

SL\_0011-LT\_6-B\_mut.bam

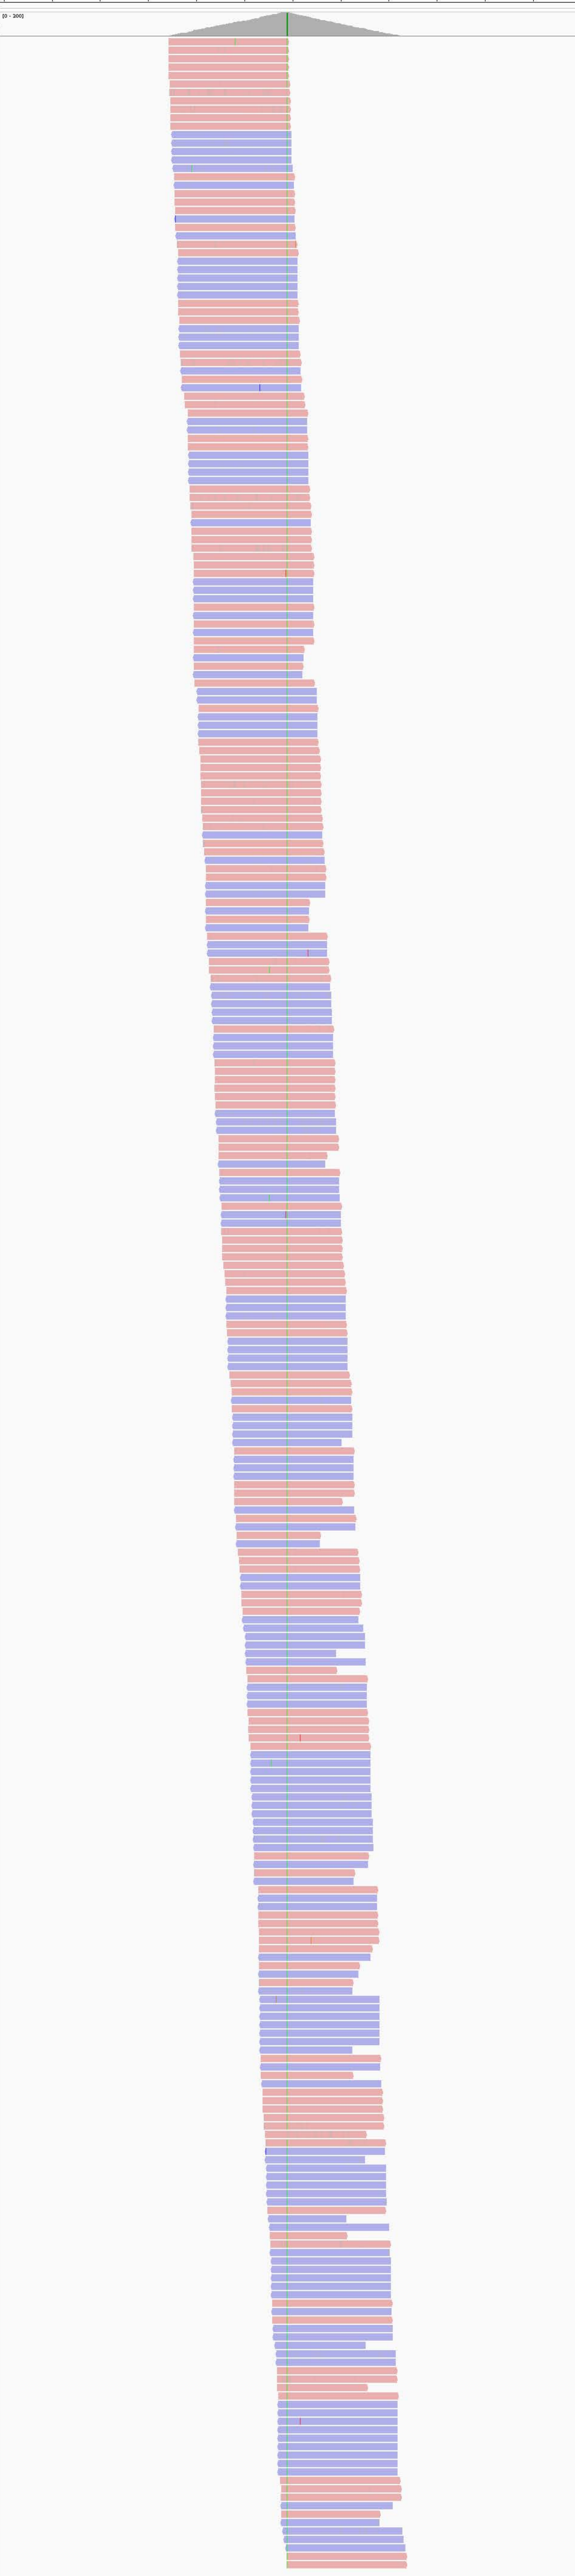

Sequence

Refseq Genes

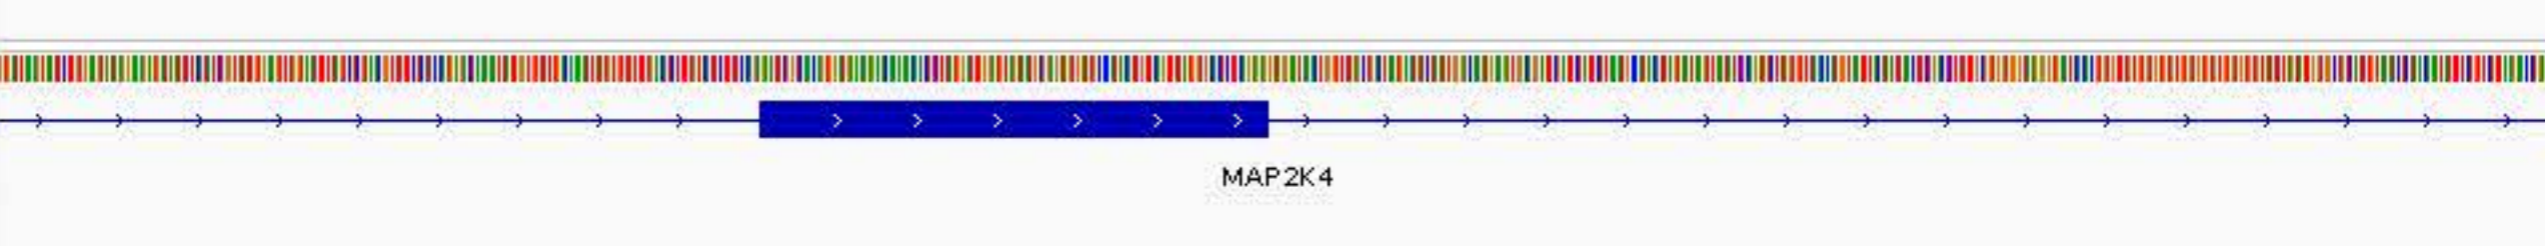

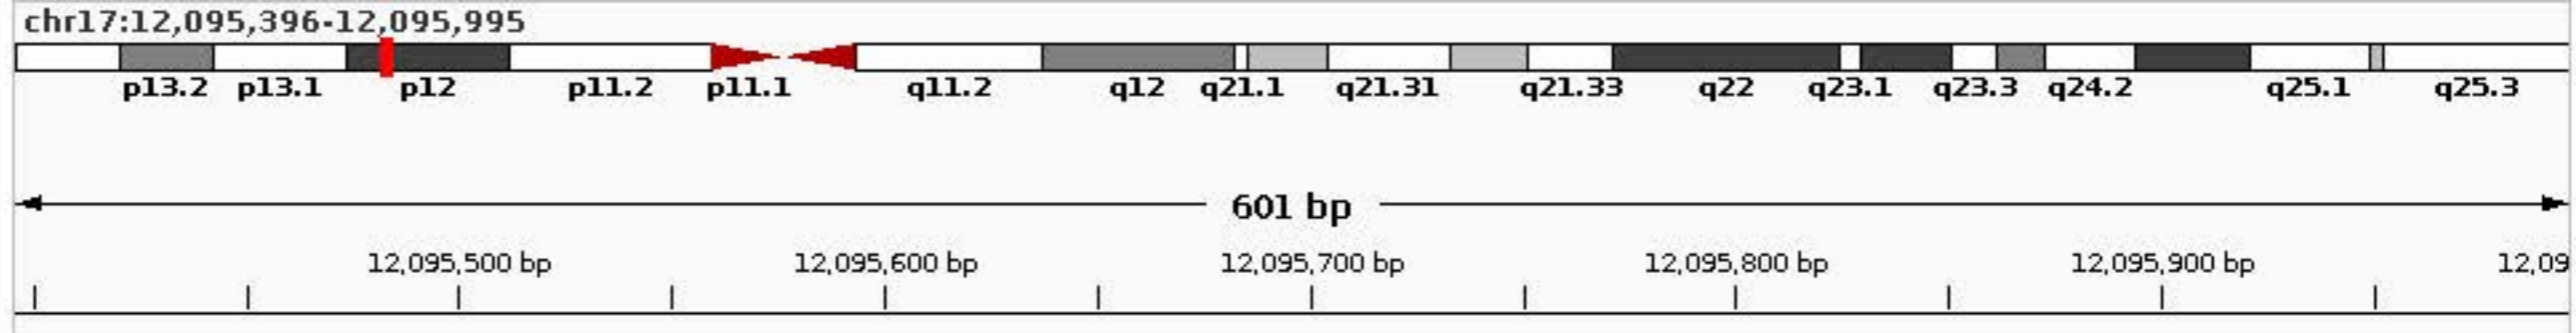

SL\_0011-LT\_7-B\_mut.bam Coverage

SL\_0011-LT\_7-B\_mut.bam

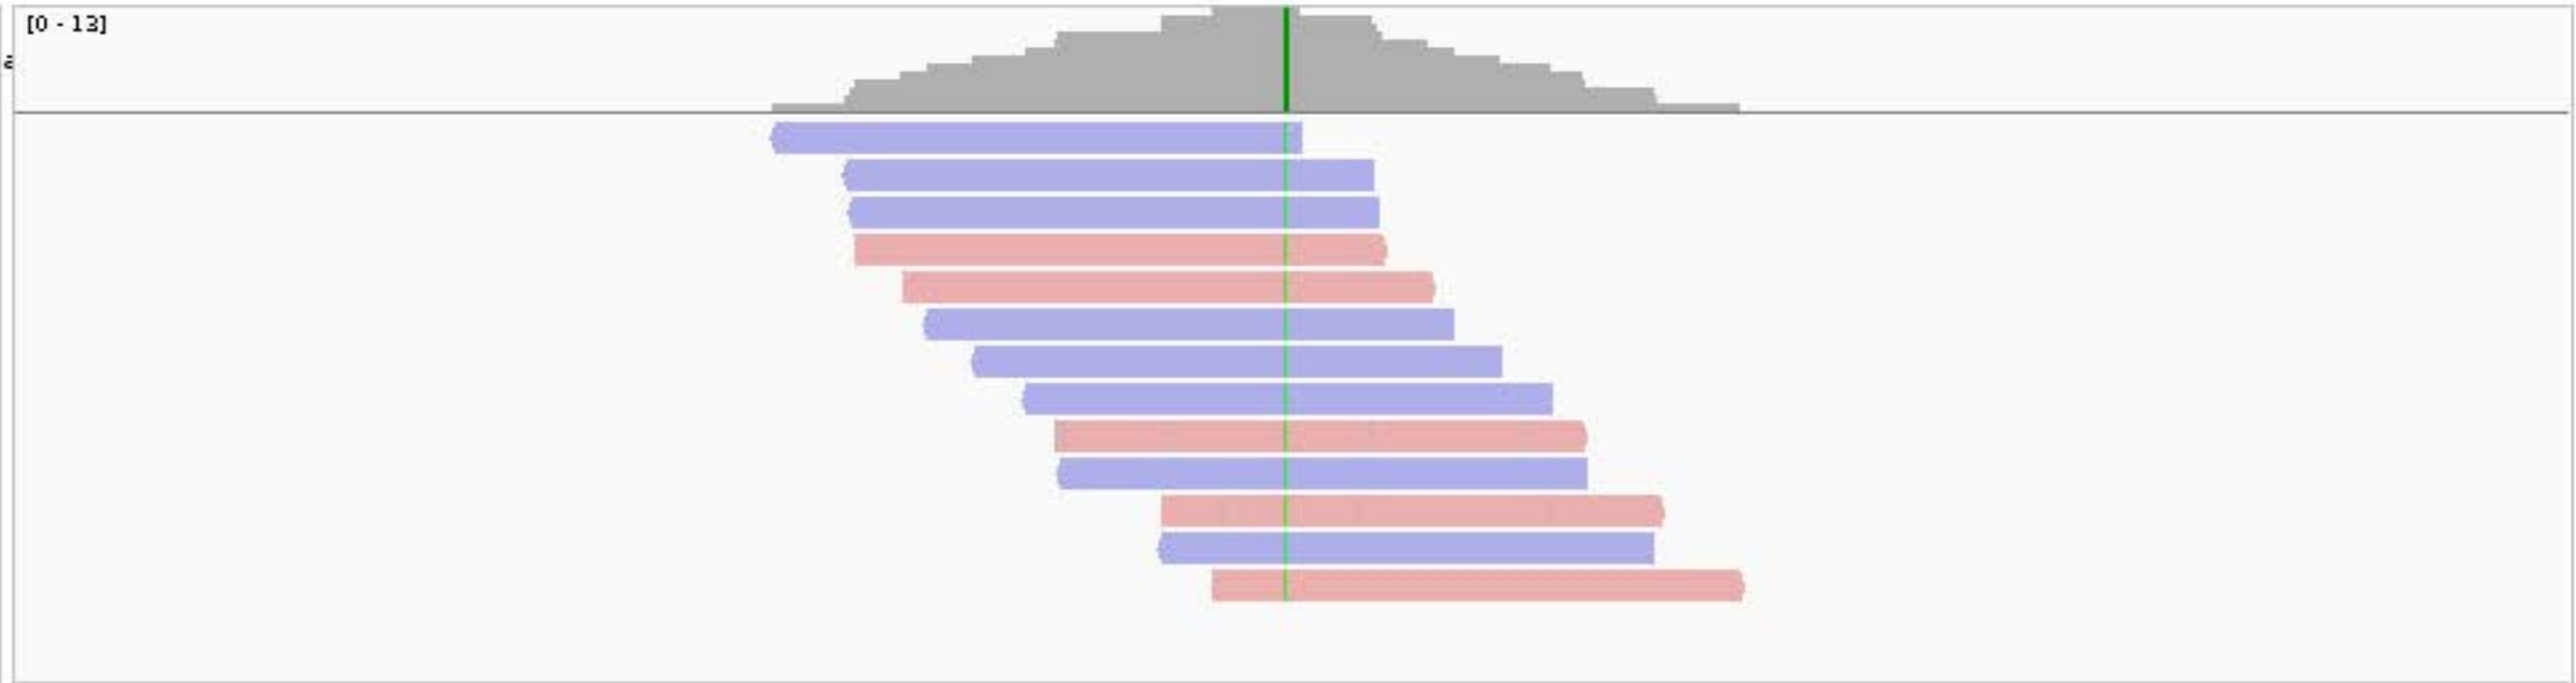

Sequence →

Refseq Genes

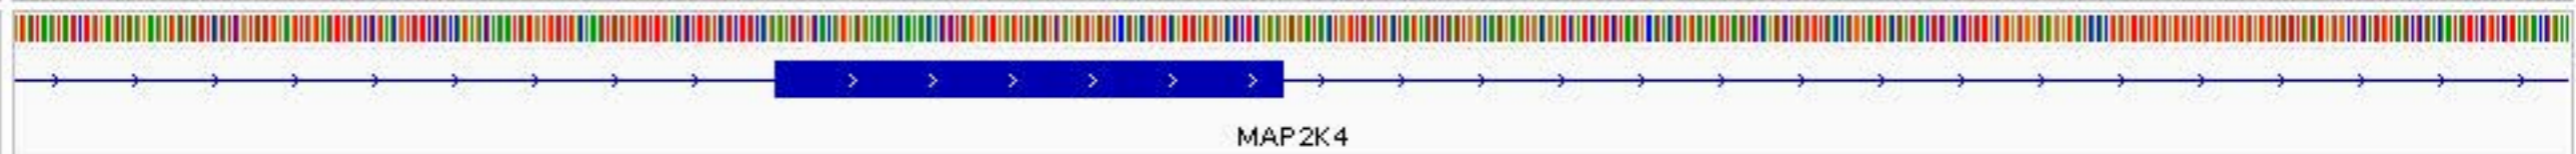



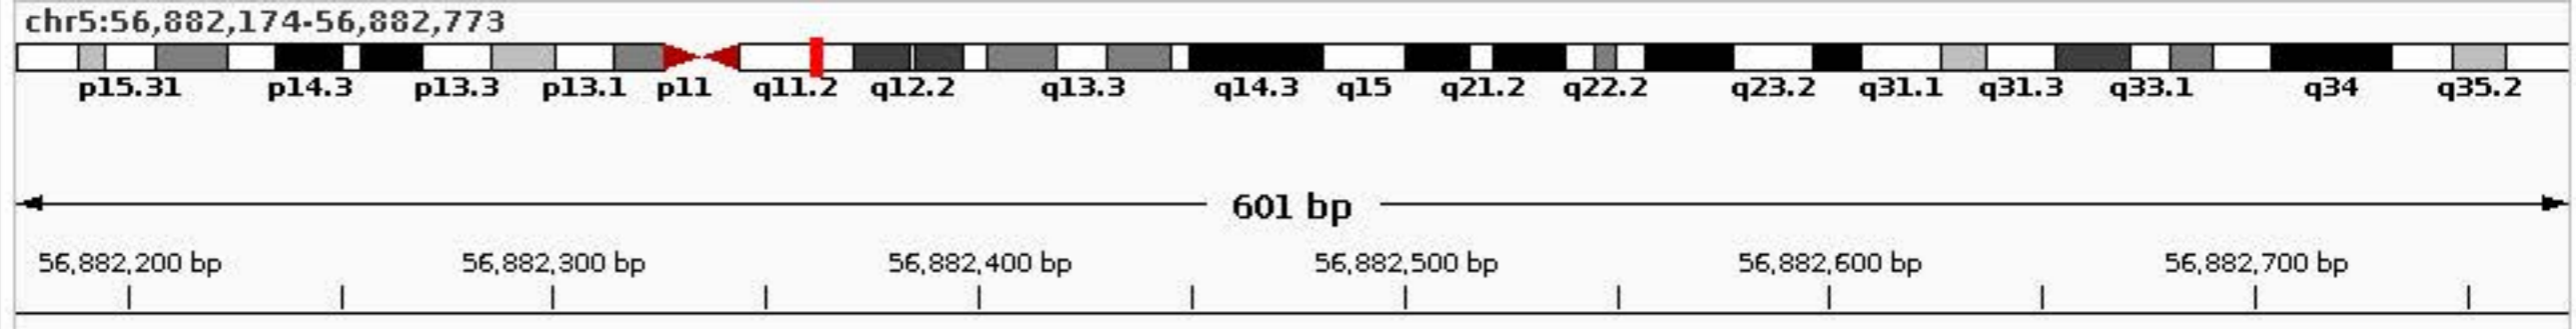

SL\_0007\_R\_FFPE\_58-B\_mut.bam  
rage

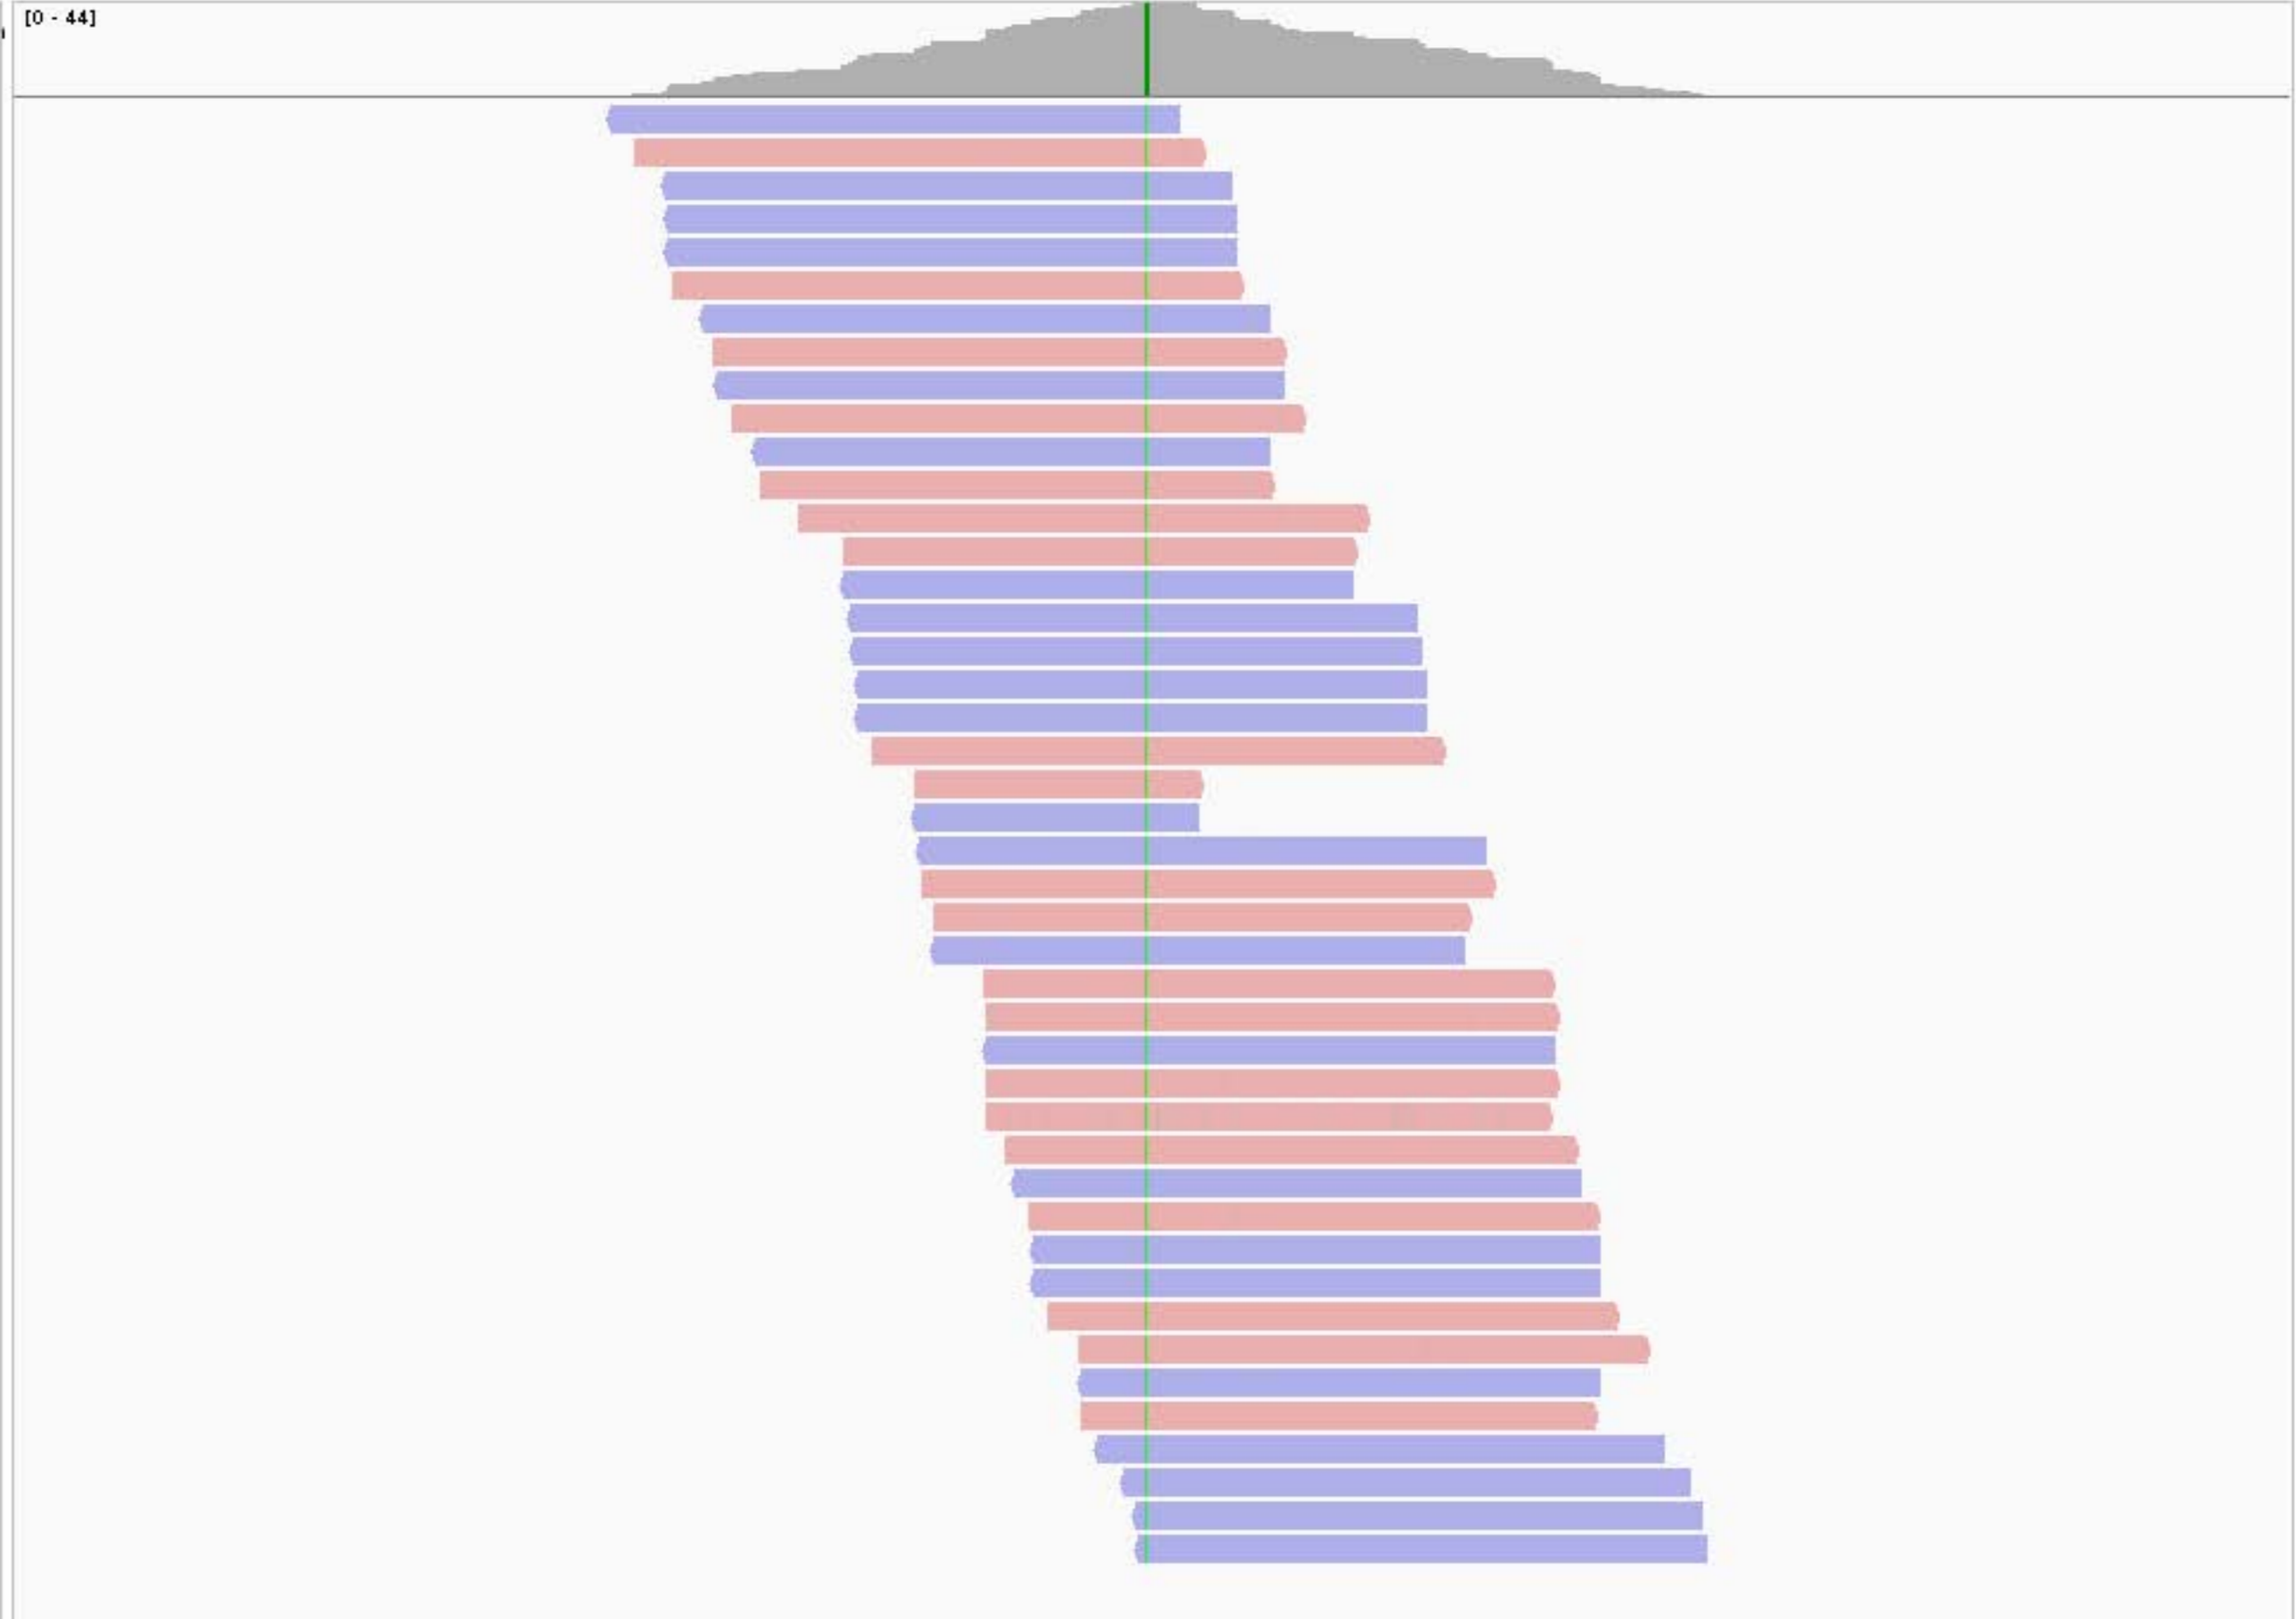

Sequence →

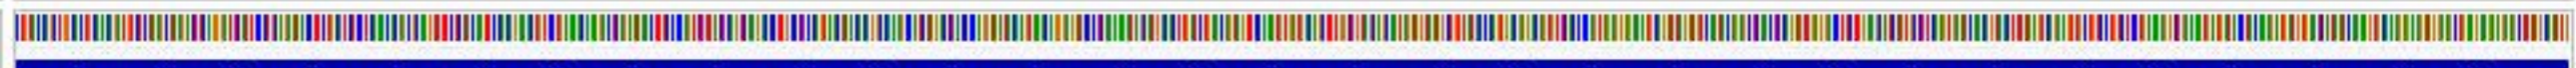

Refseq Genes

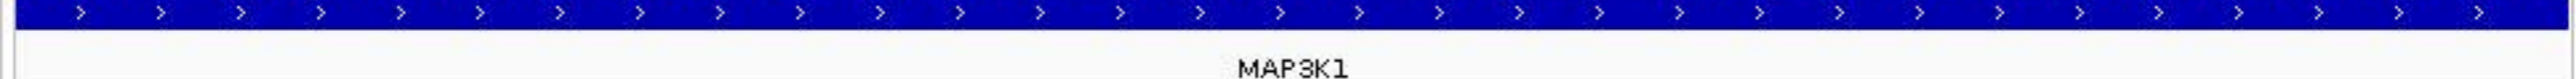

MAP3K1

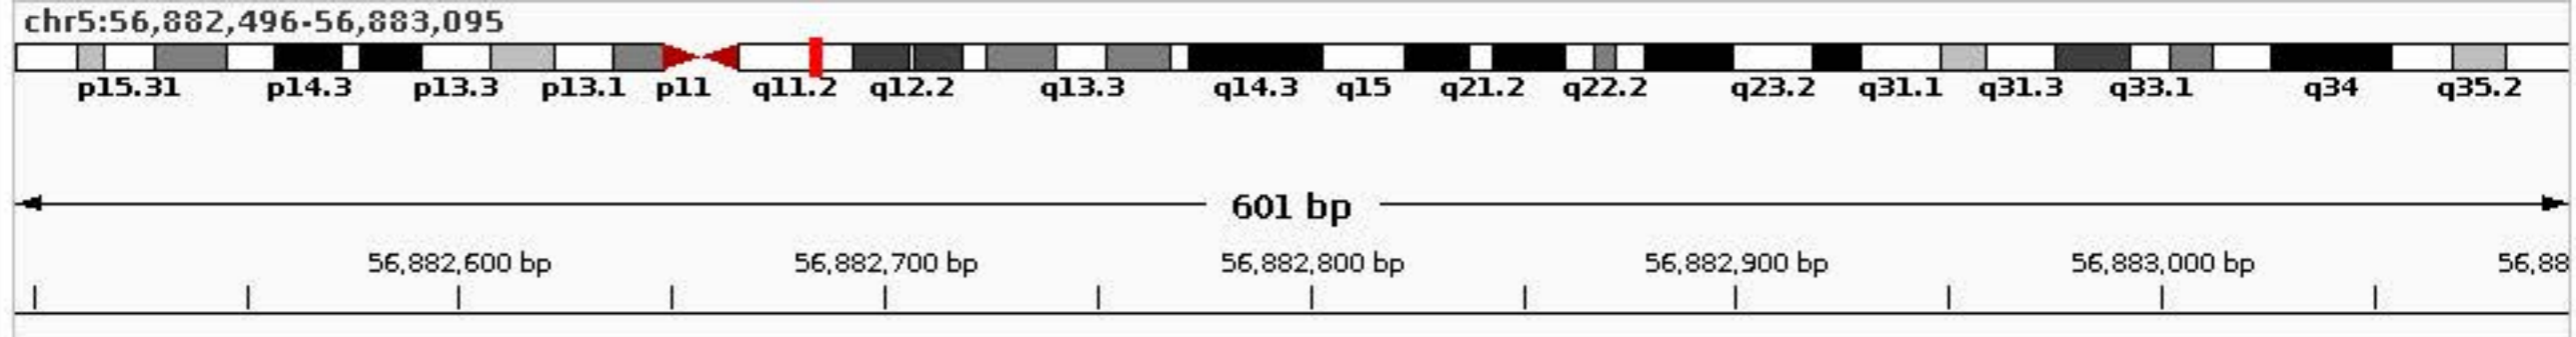

SL\_1010\_L\_FFPE\_9-B\_mut.bam  
age

SL\_1010\_L\_FFPE\_9-B\_mut.bam

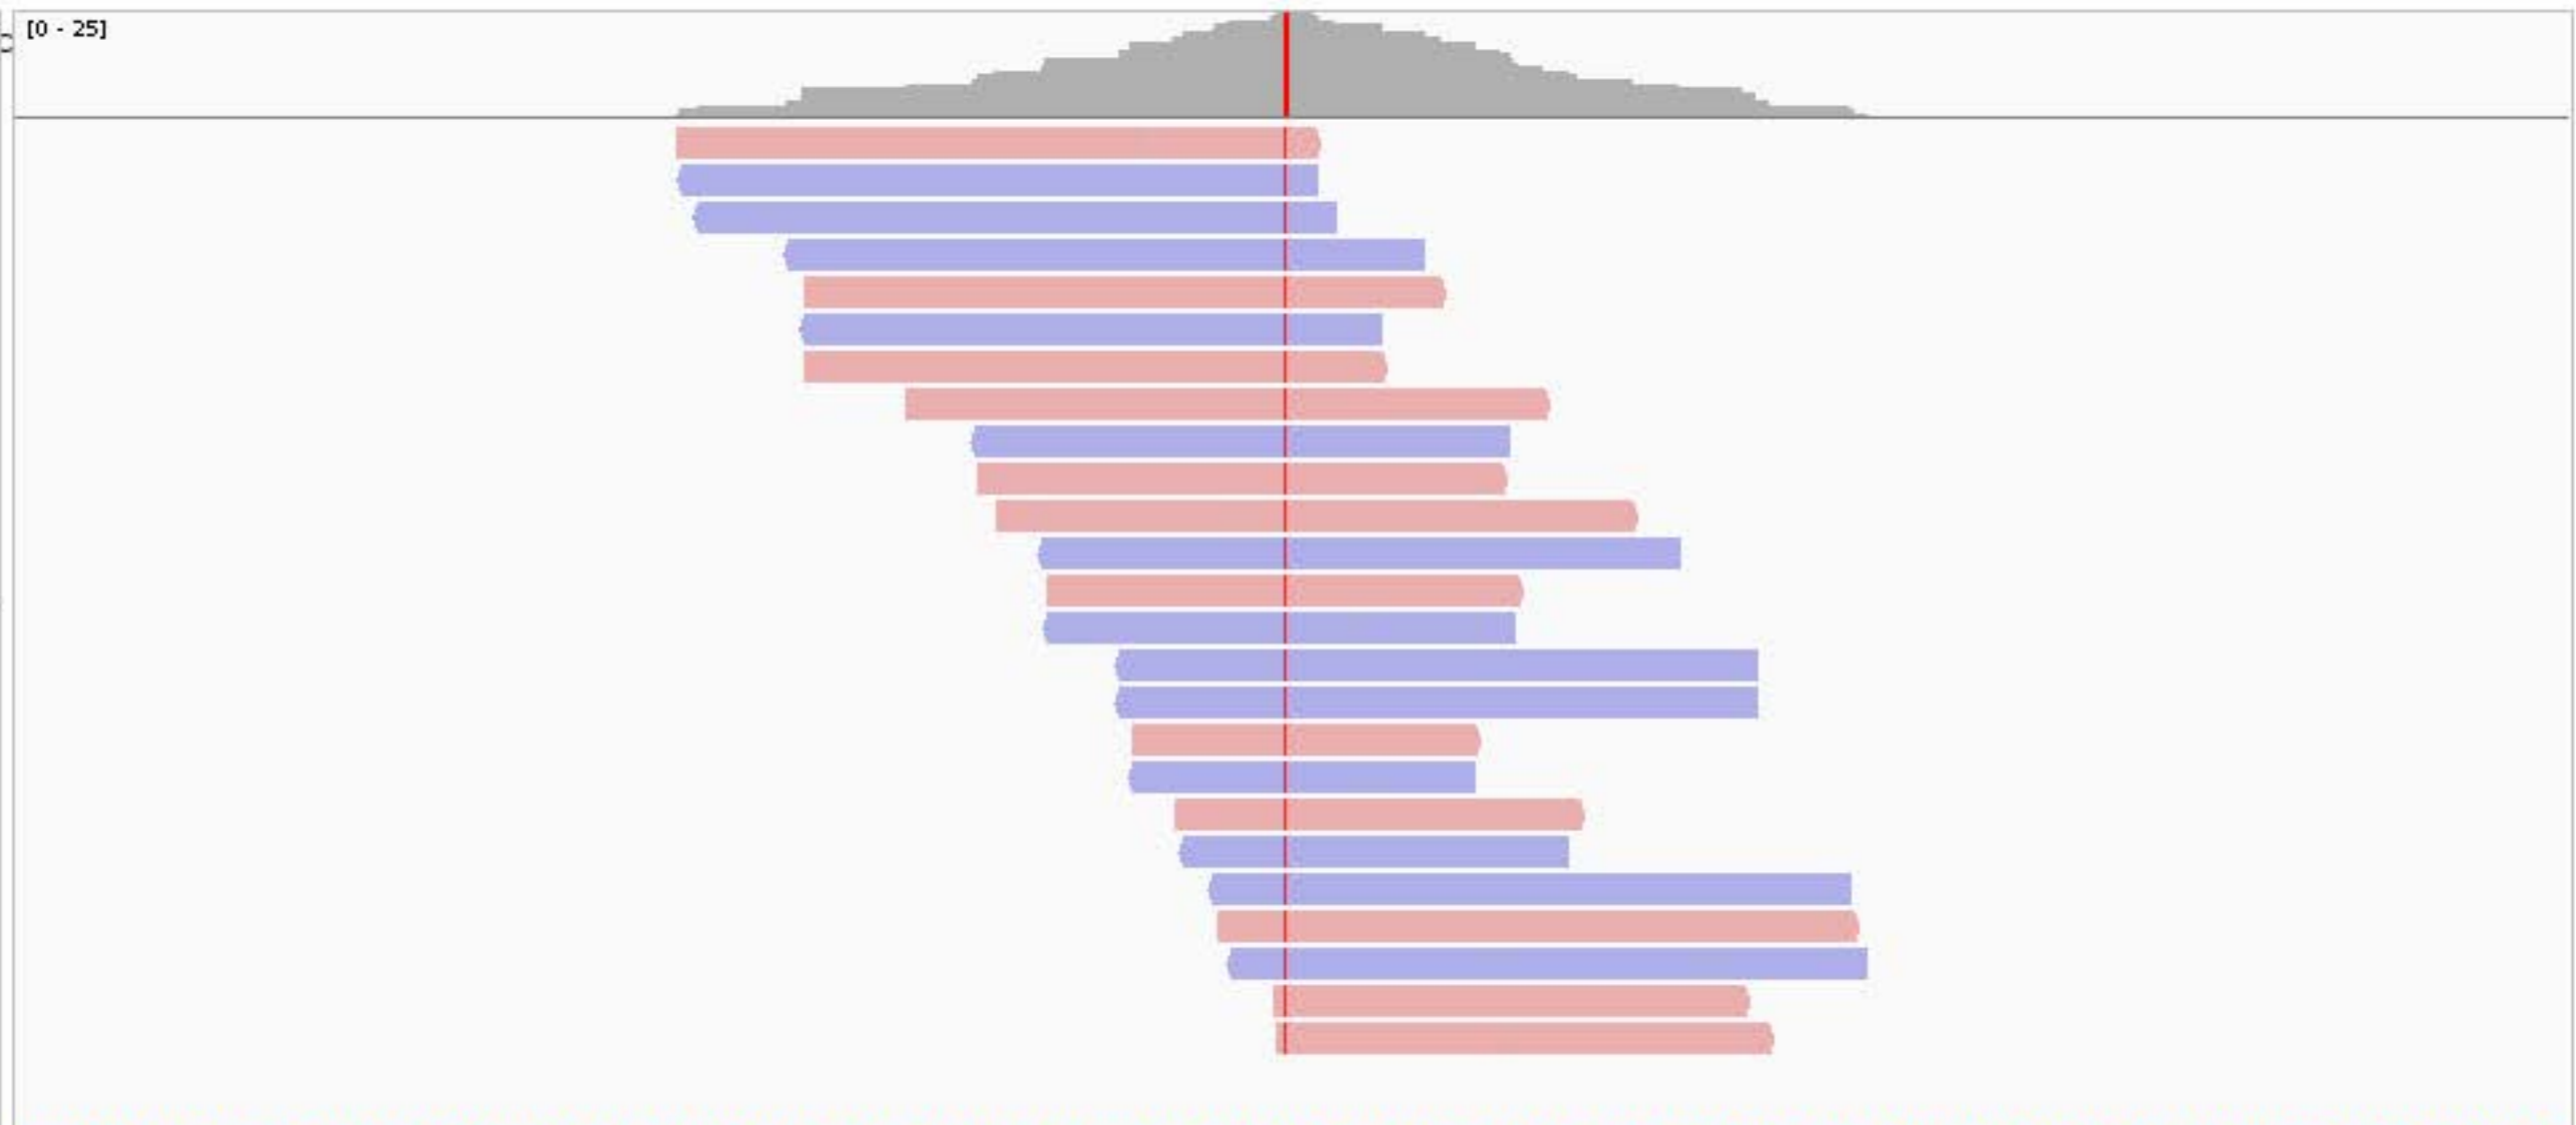

Sequence →

Refseq Genes

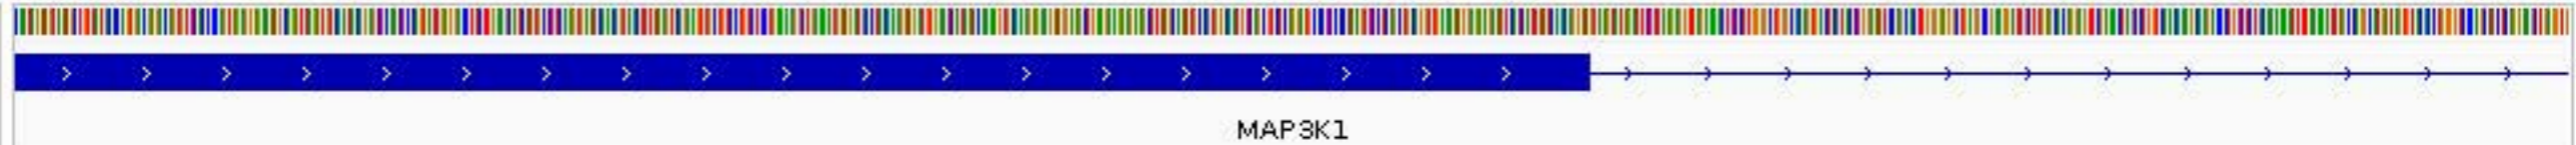



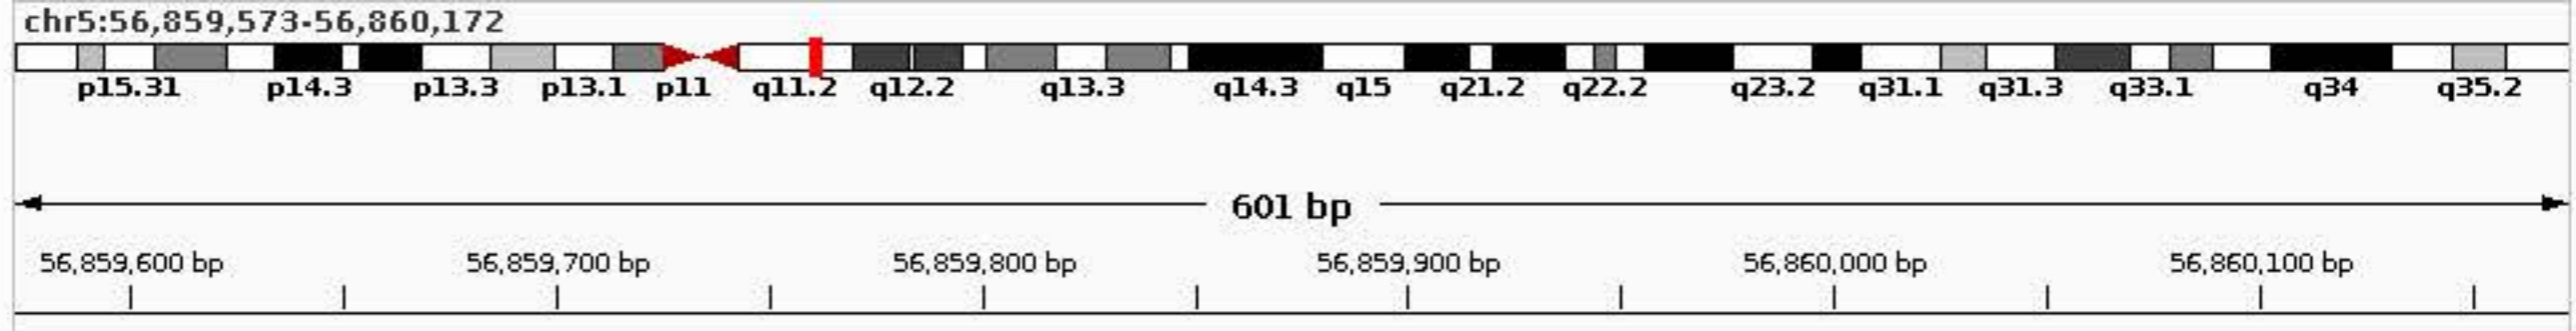

SL\_1010-N5-B\_mut.bam Coverage

SL\_1010-N5-B\_mut.bam

Sequence

Refseq Genes

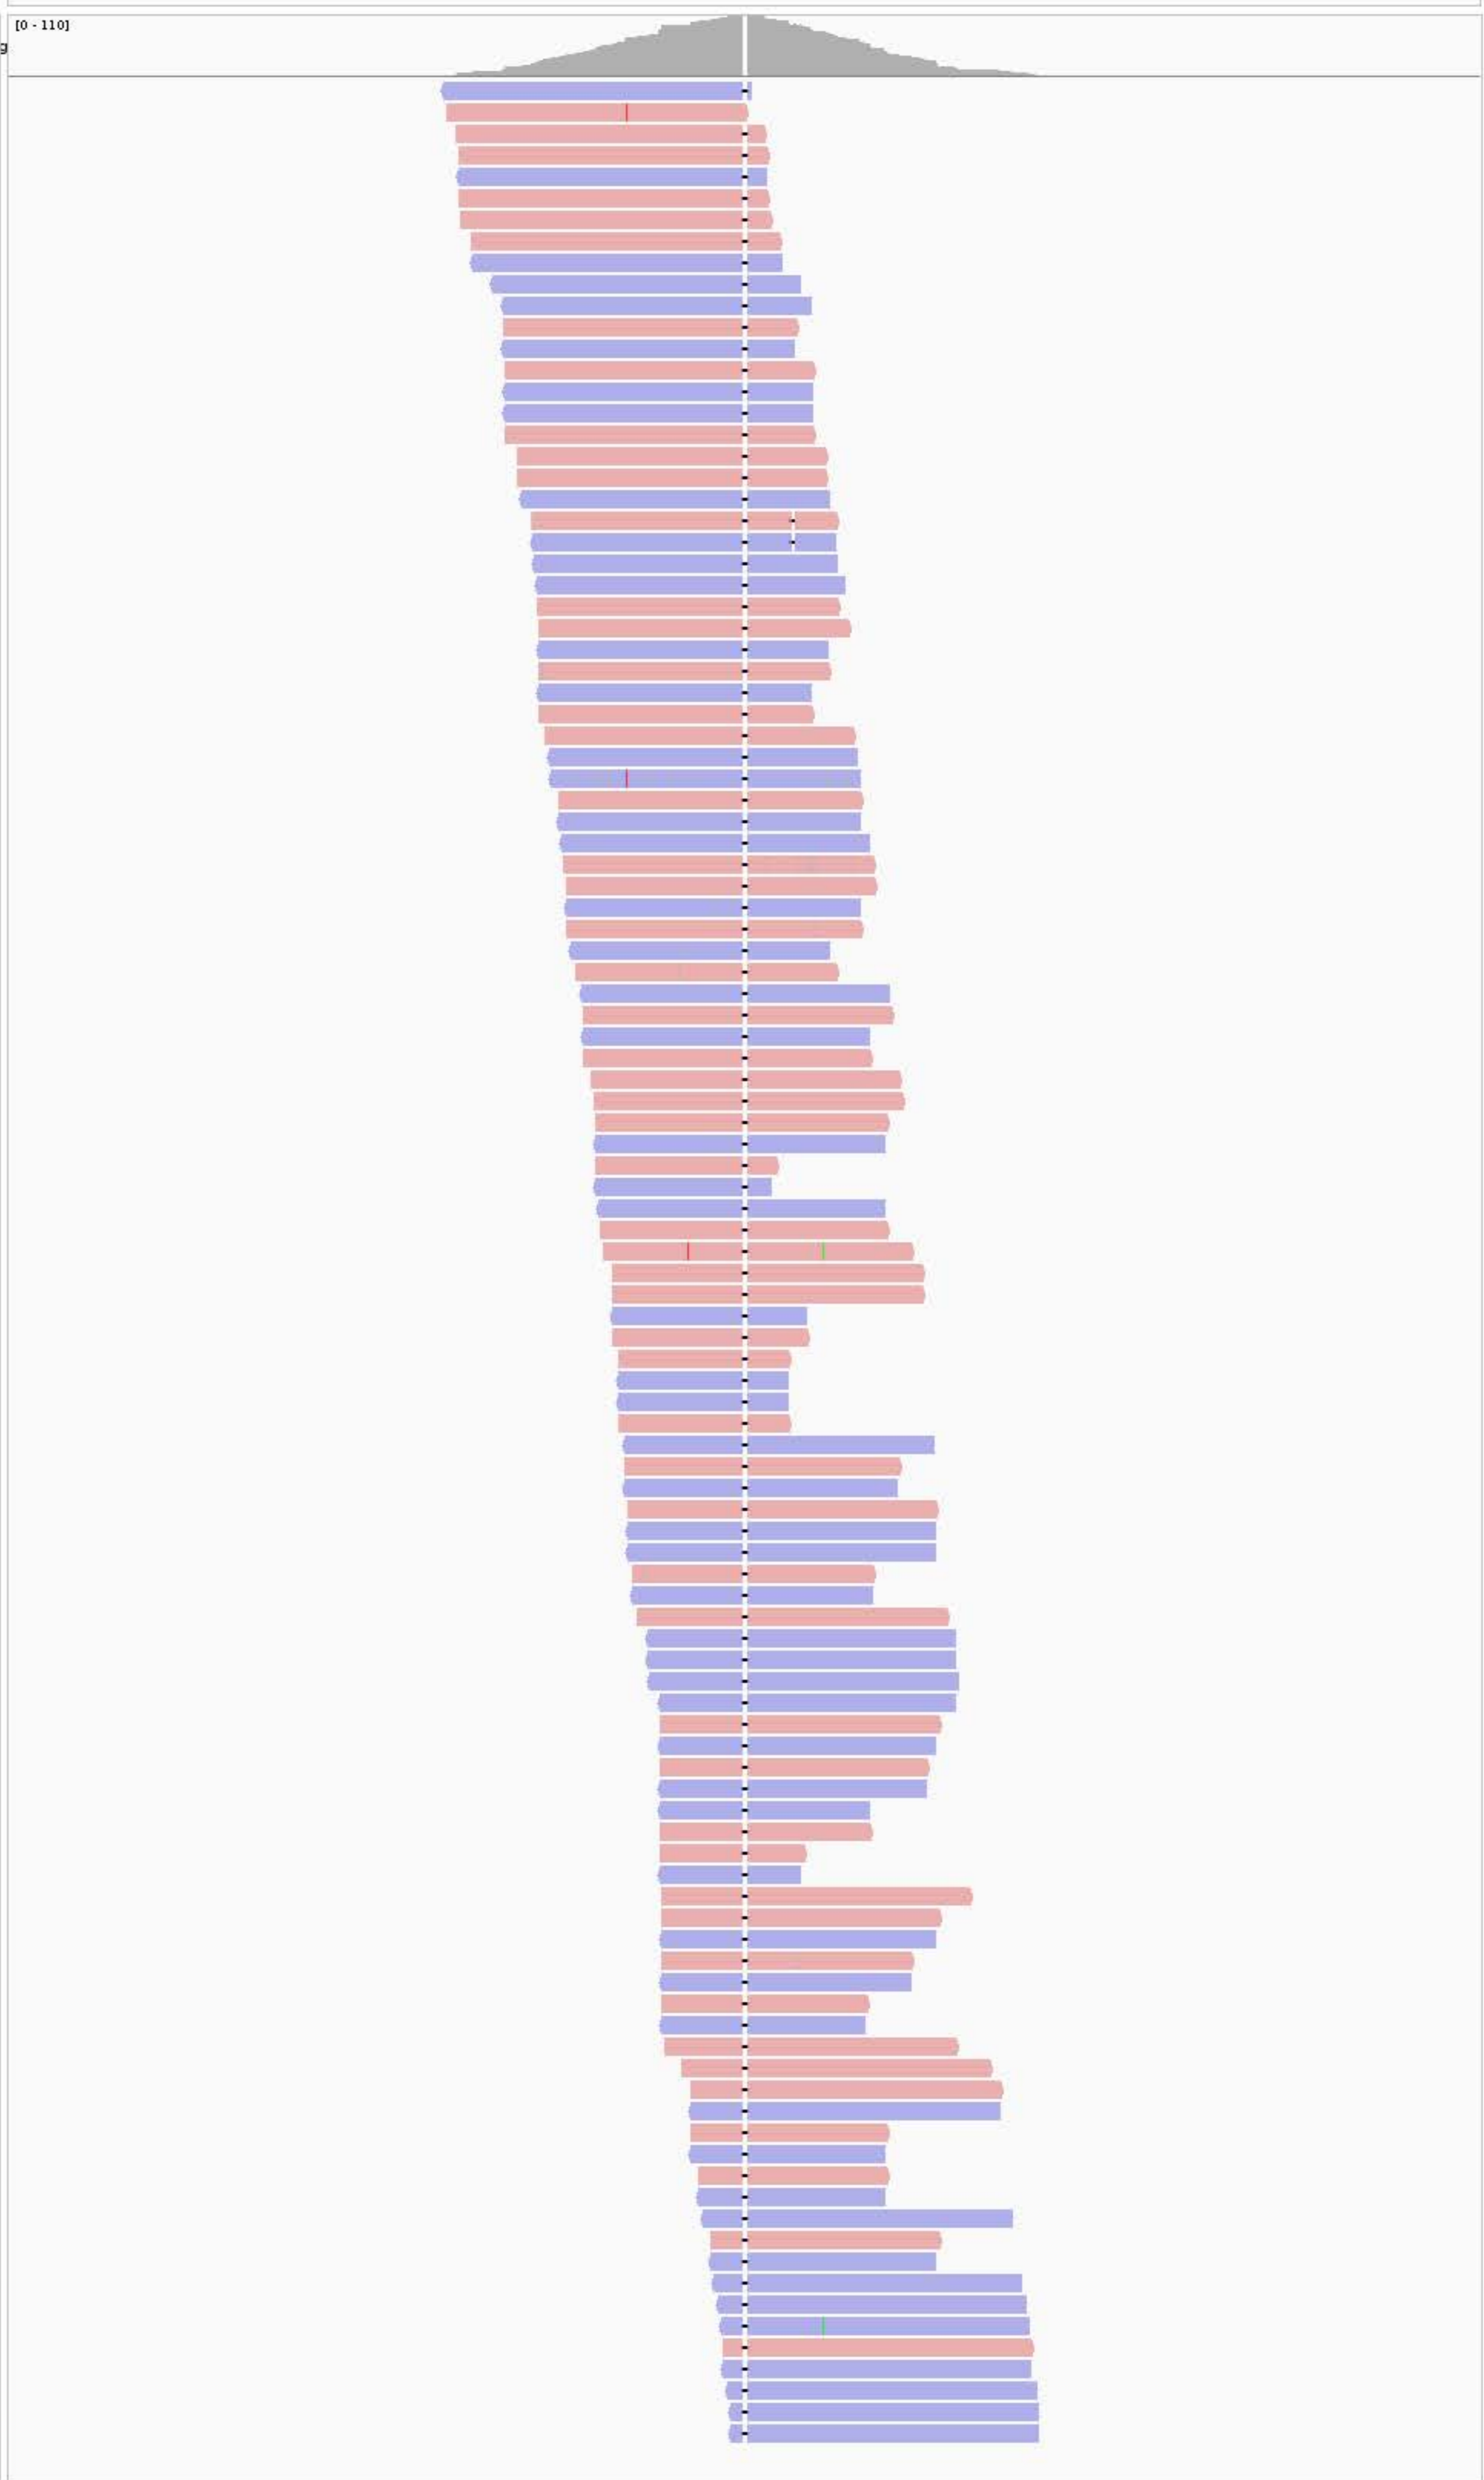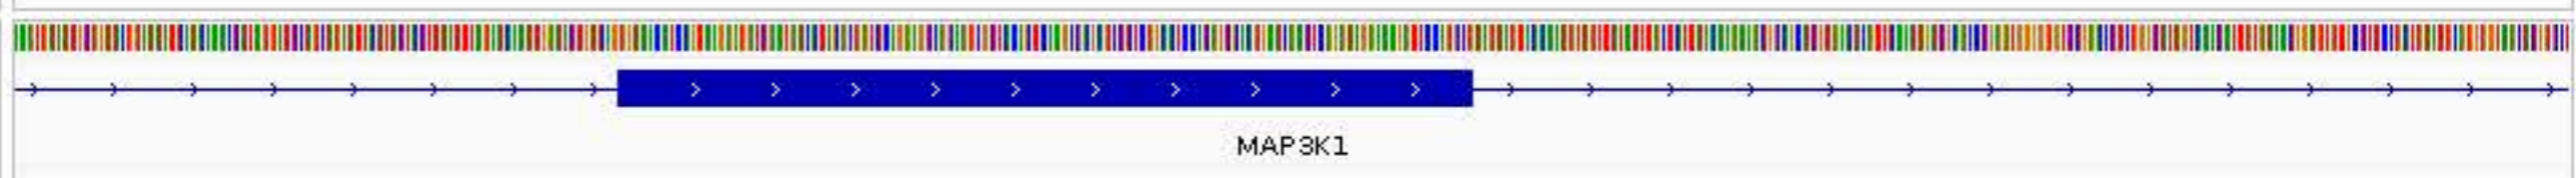

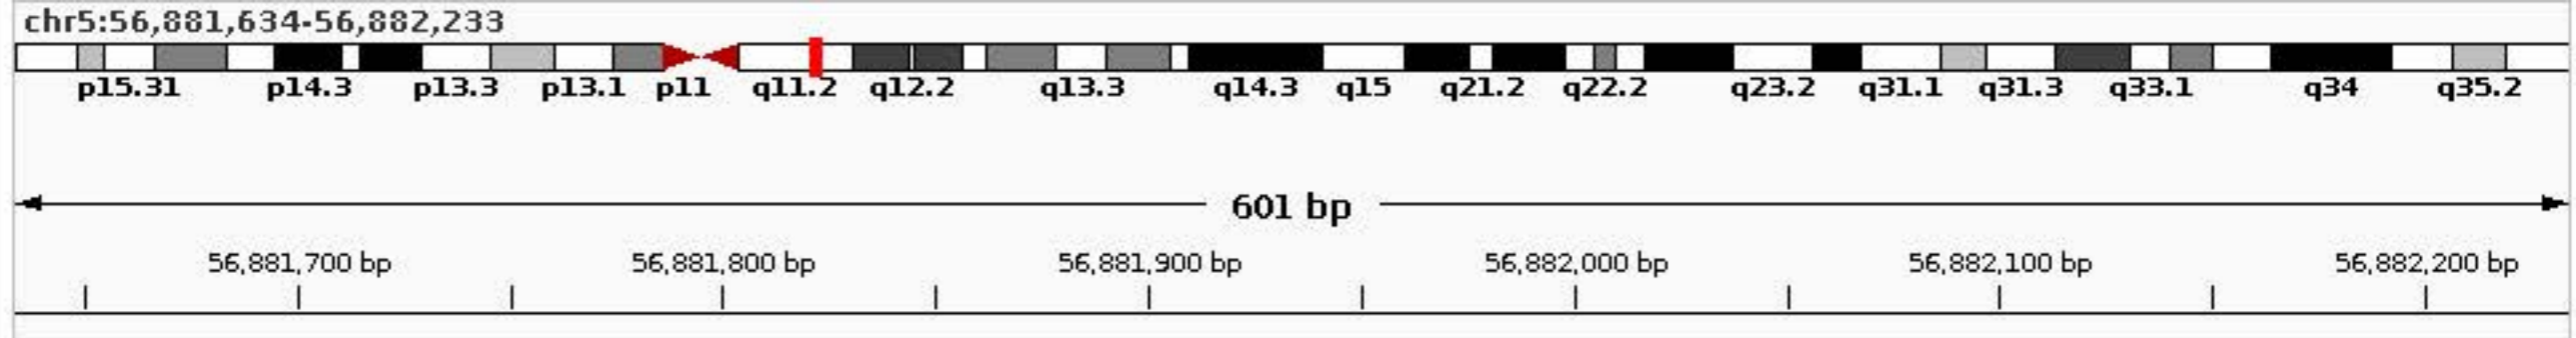

SL\_1010\_L\_FFPE\_13-B\_mut.barrage

SL\_1010\_L\_FFPE\_13-B\_mut.bam

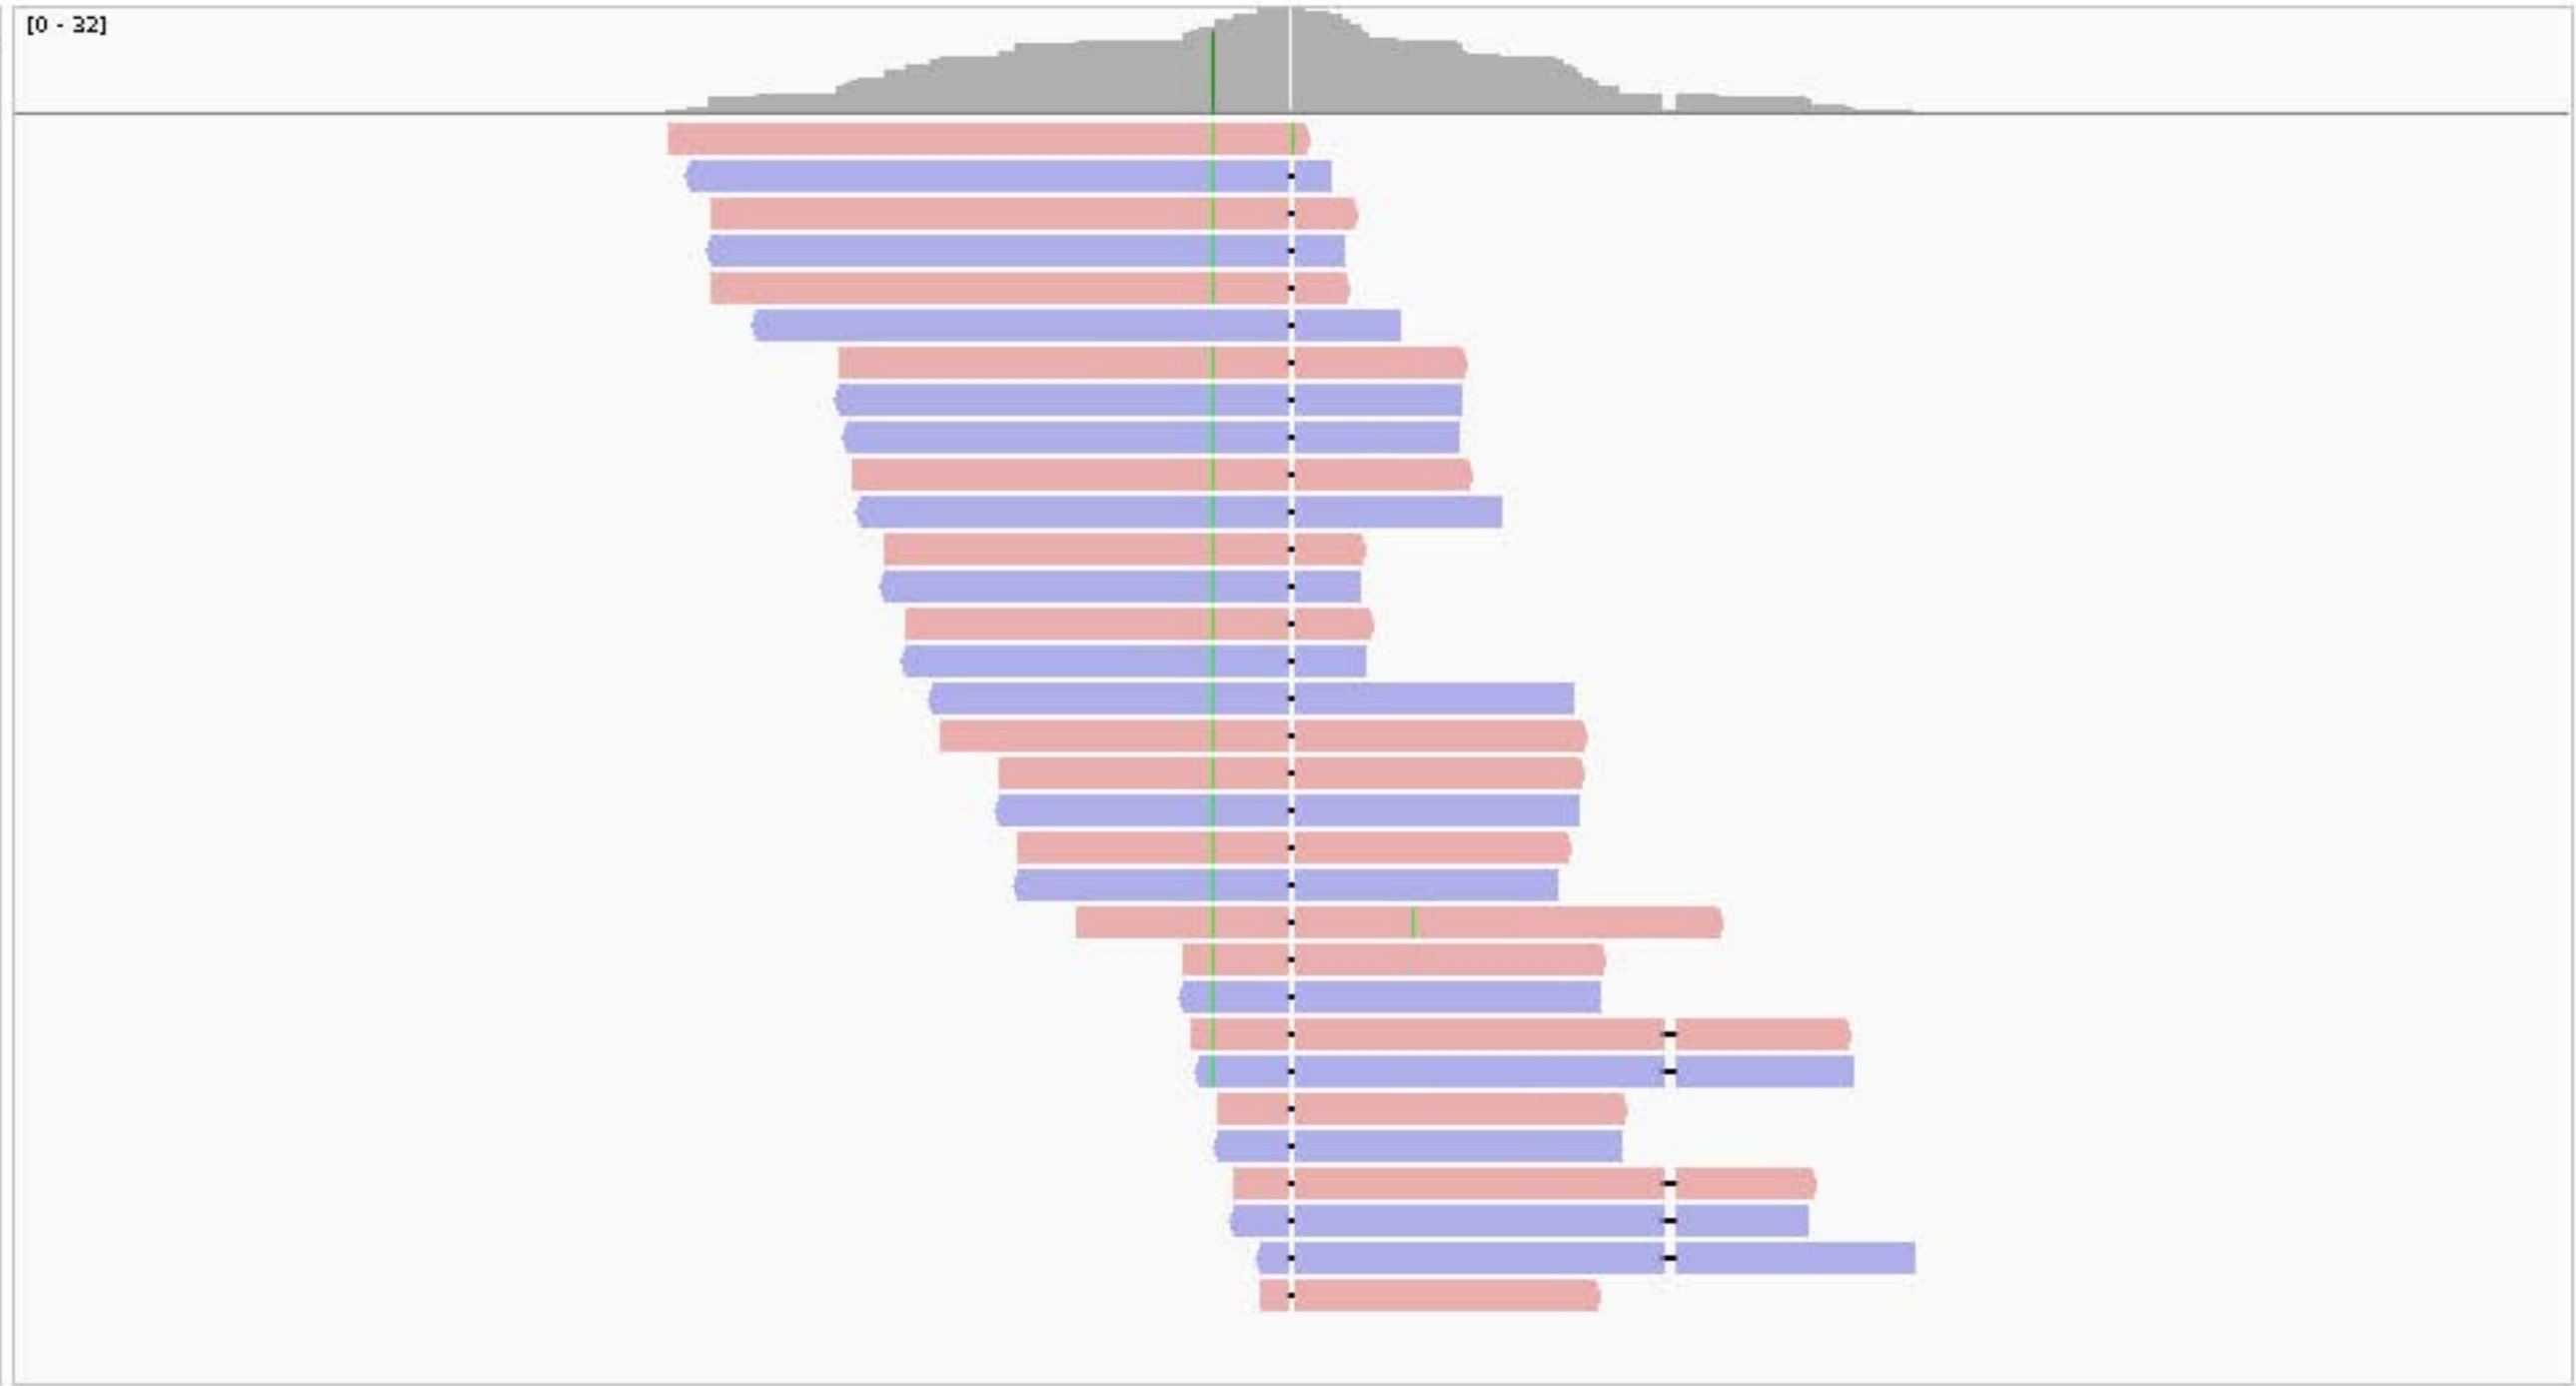

Sequence

Refseq Genes

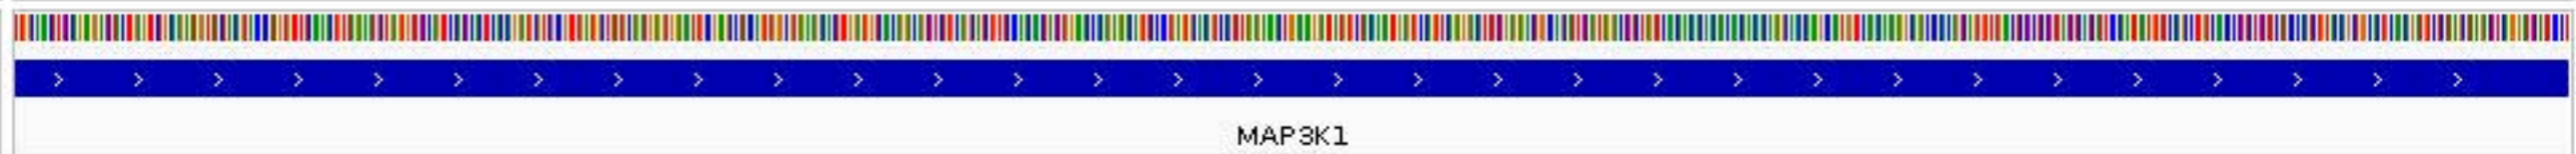



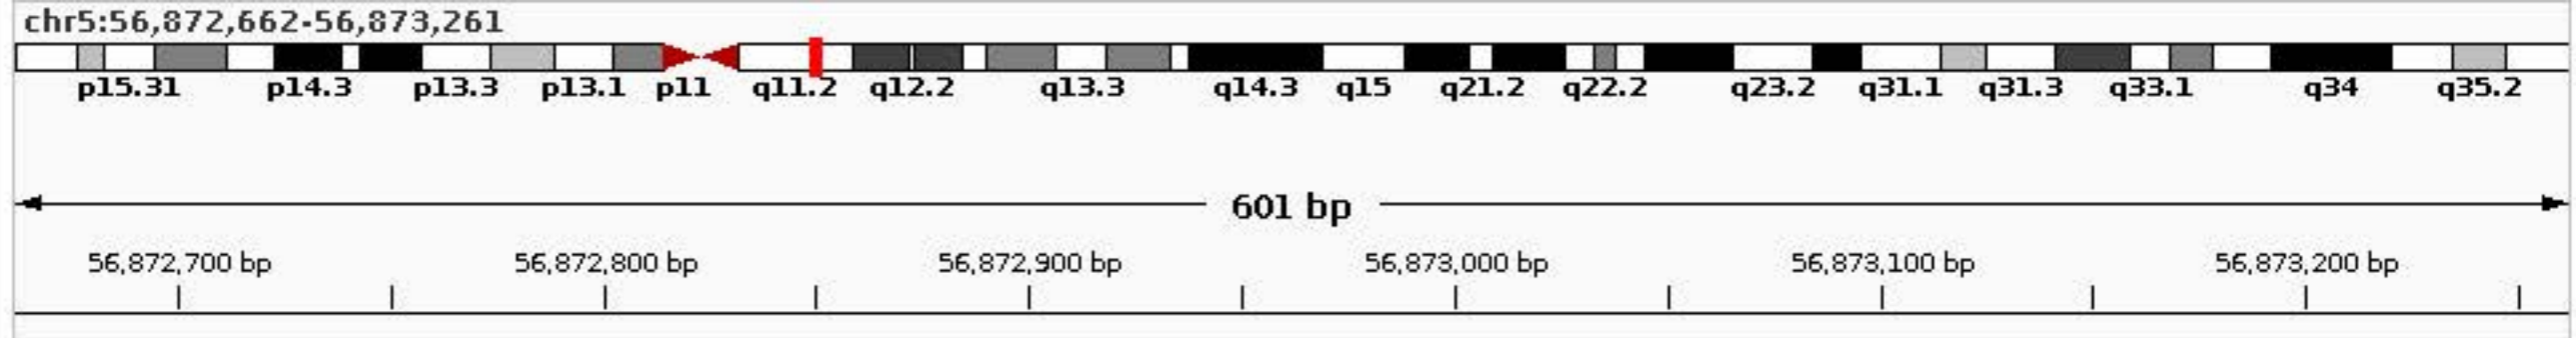

SL\_1010-N5-B\_mut.bam Coverage

SL\_1010-N5-B\_mut.bam

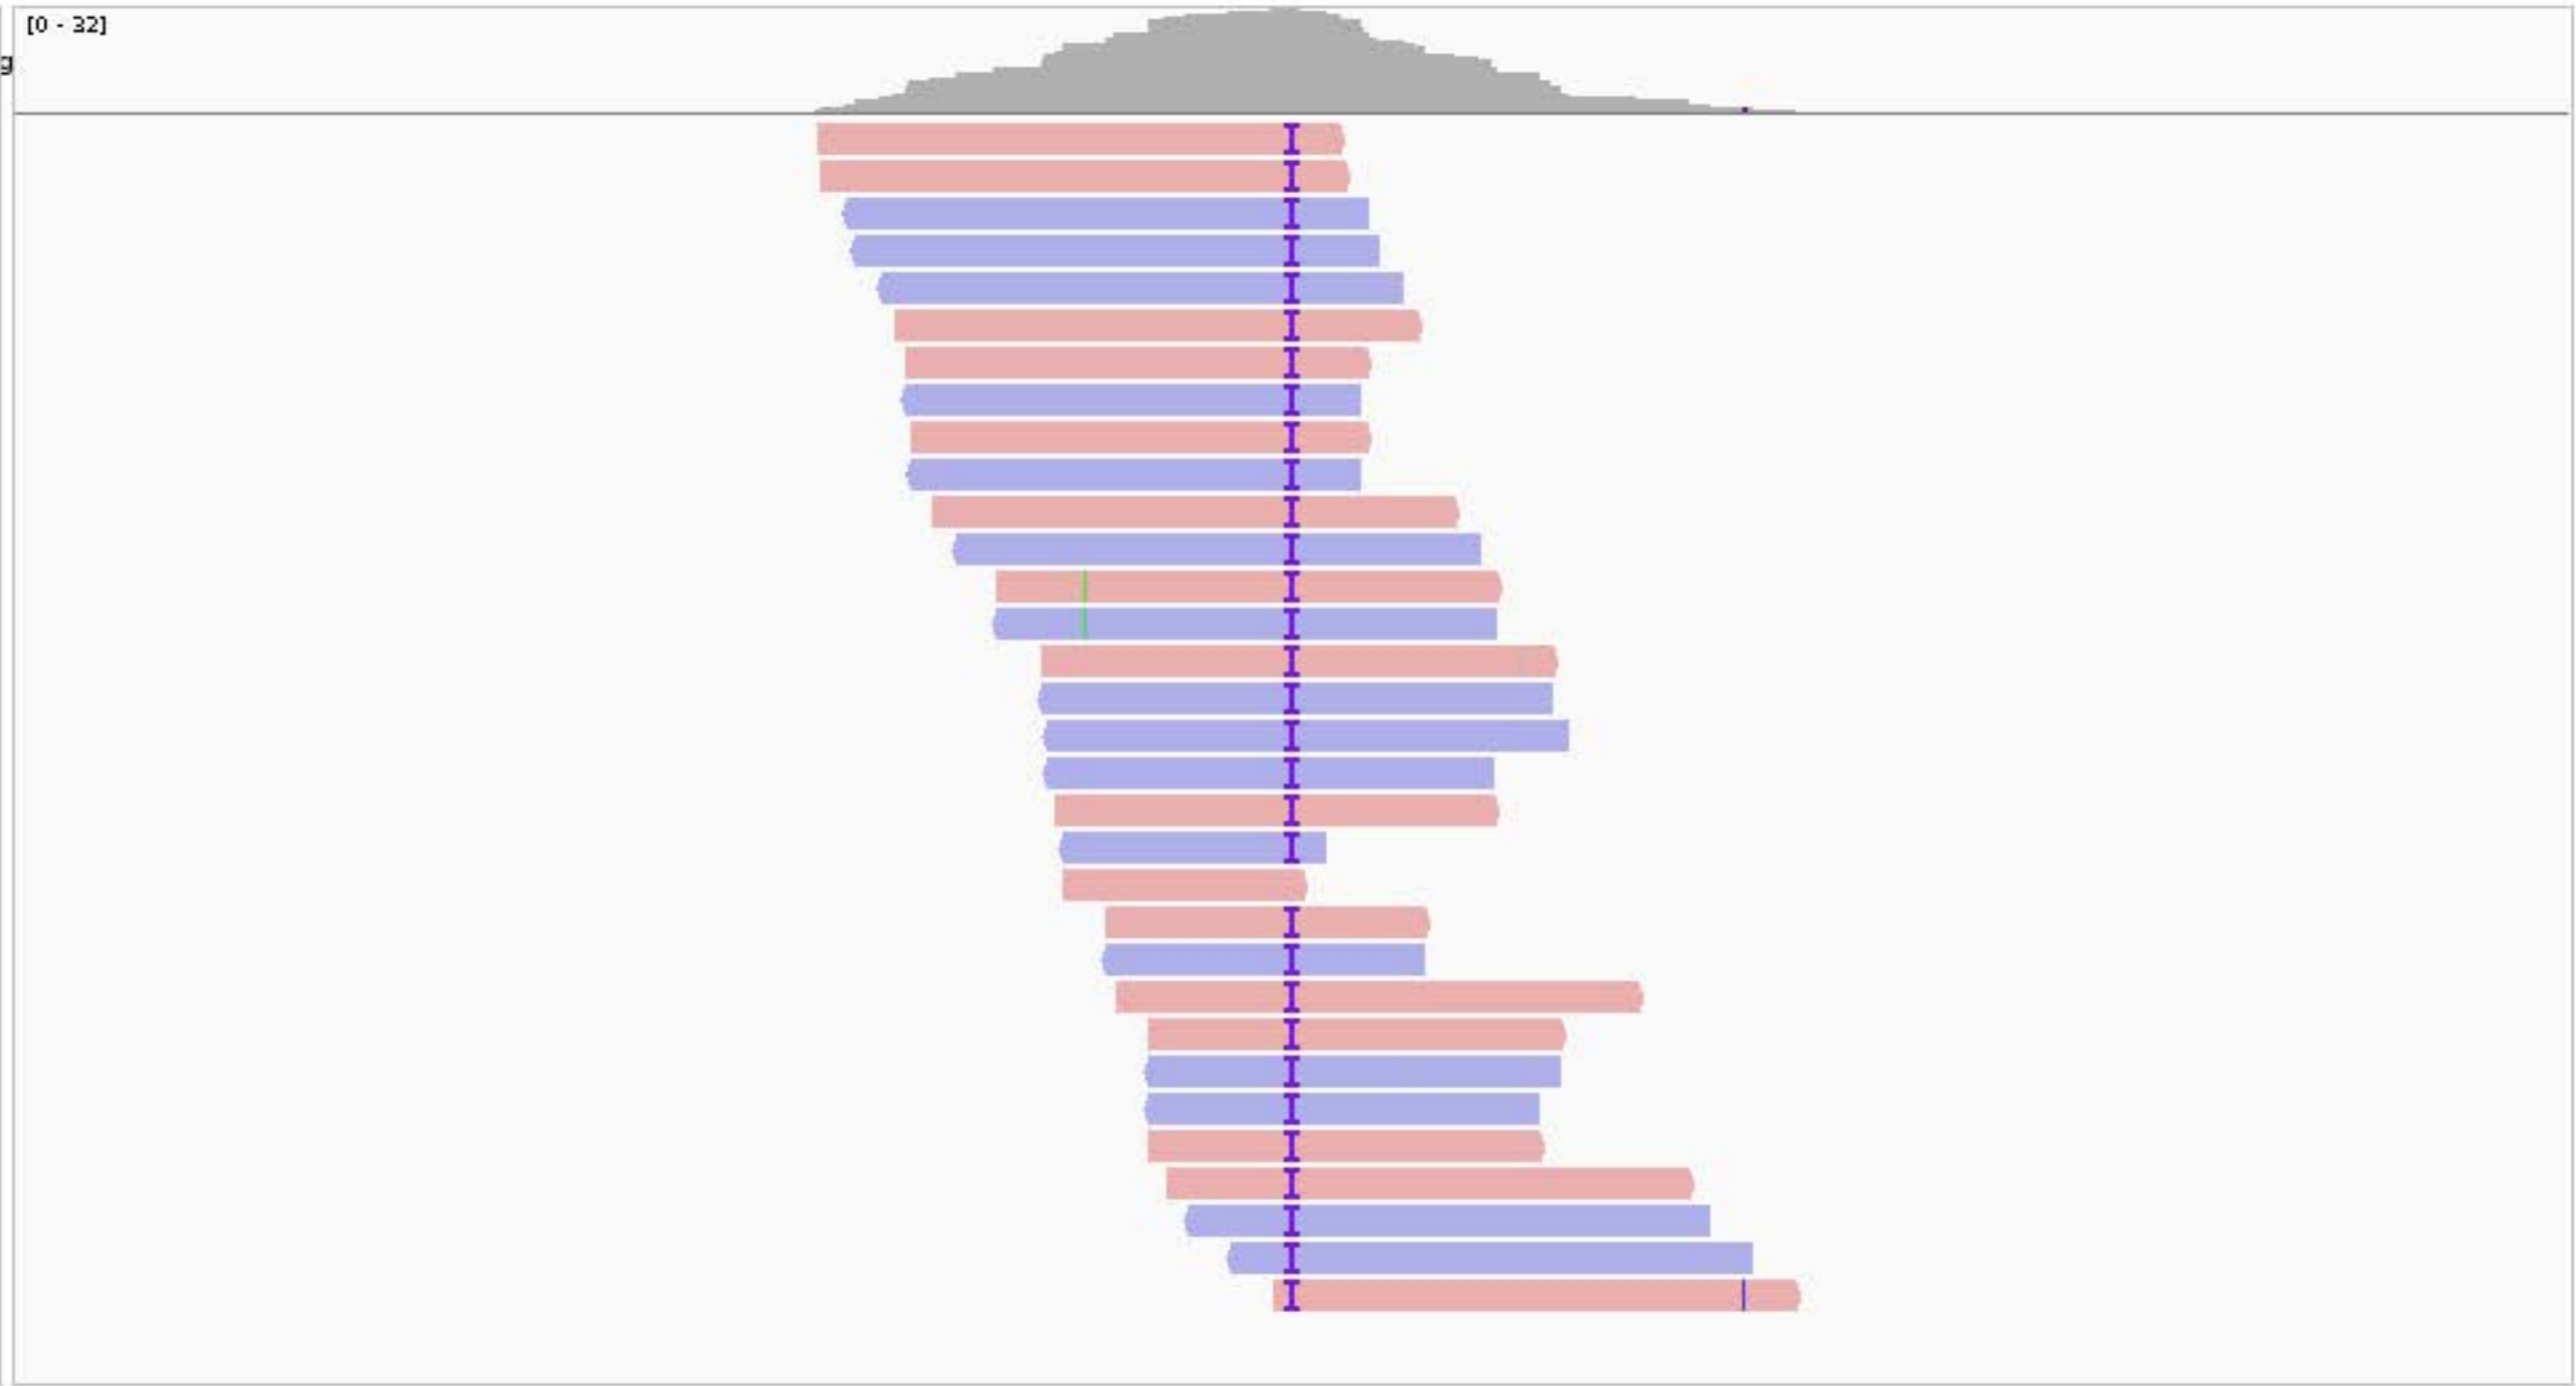

Sequence

Refseq Genes

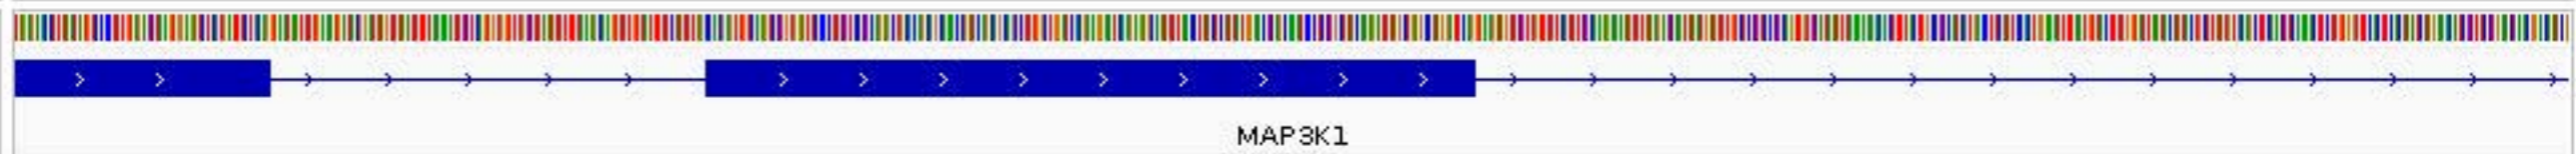

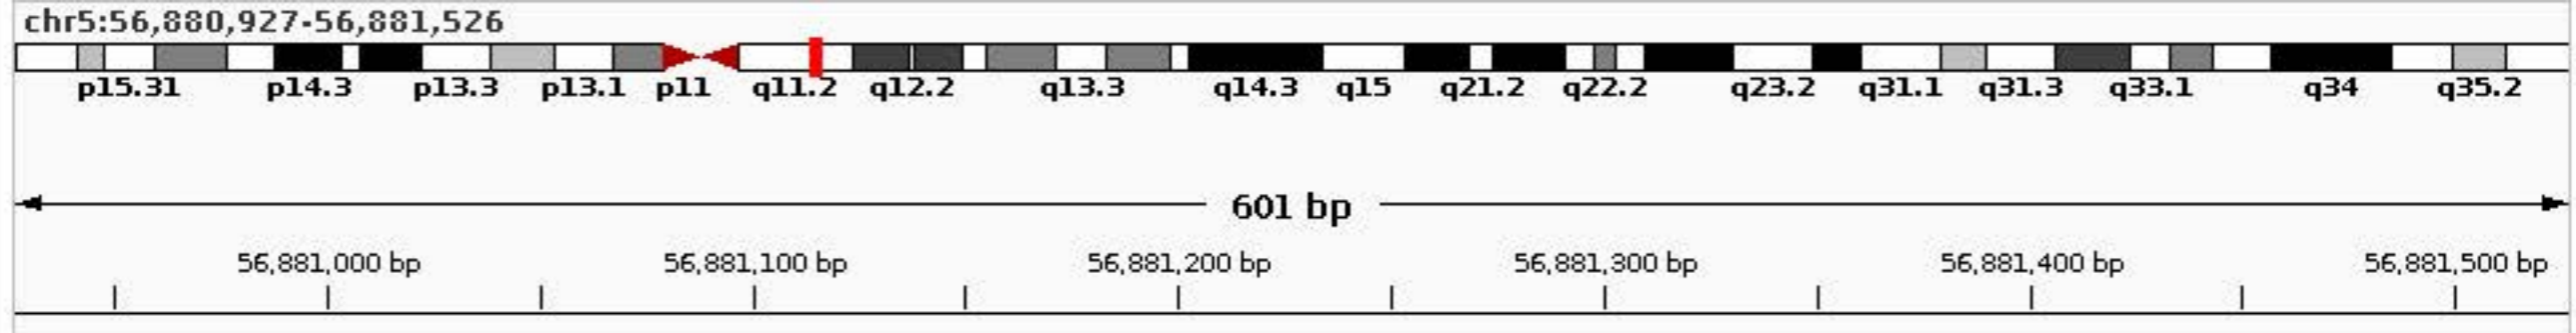

SL\_1010\_L\_FFPE\_14-B\_mut.barr  
rage

SL\_1010\_L\_FFPE\_14-B\_mut.ba  
m

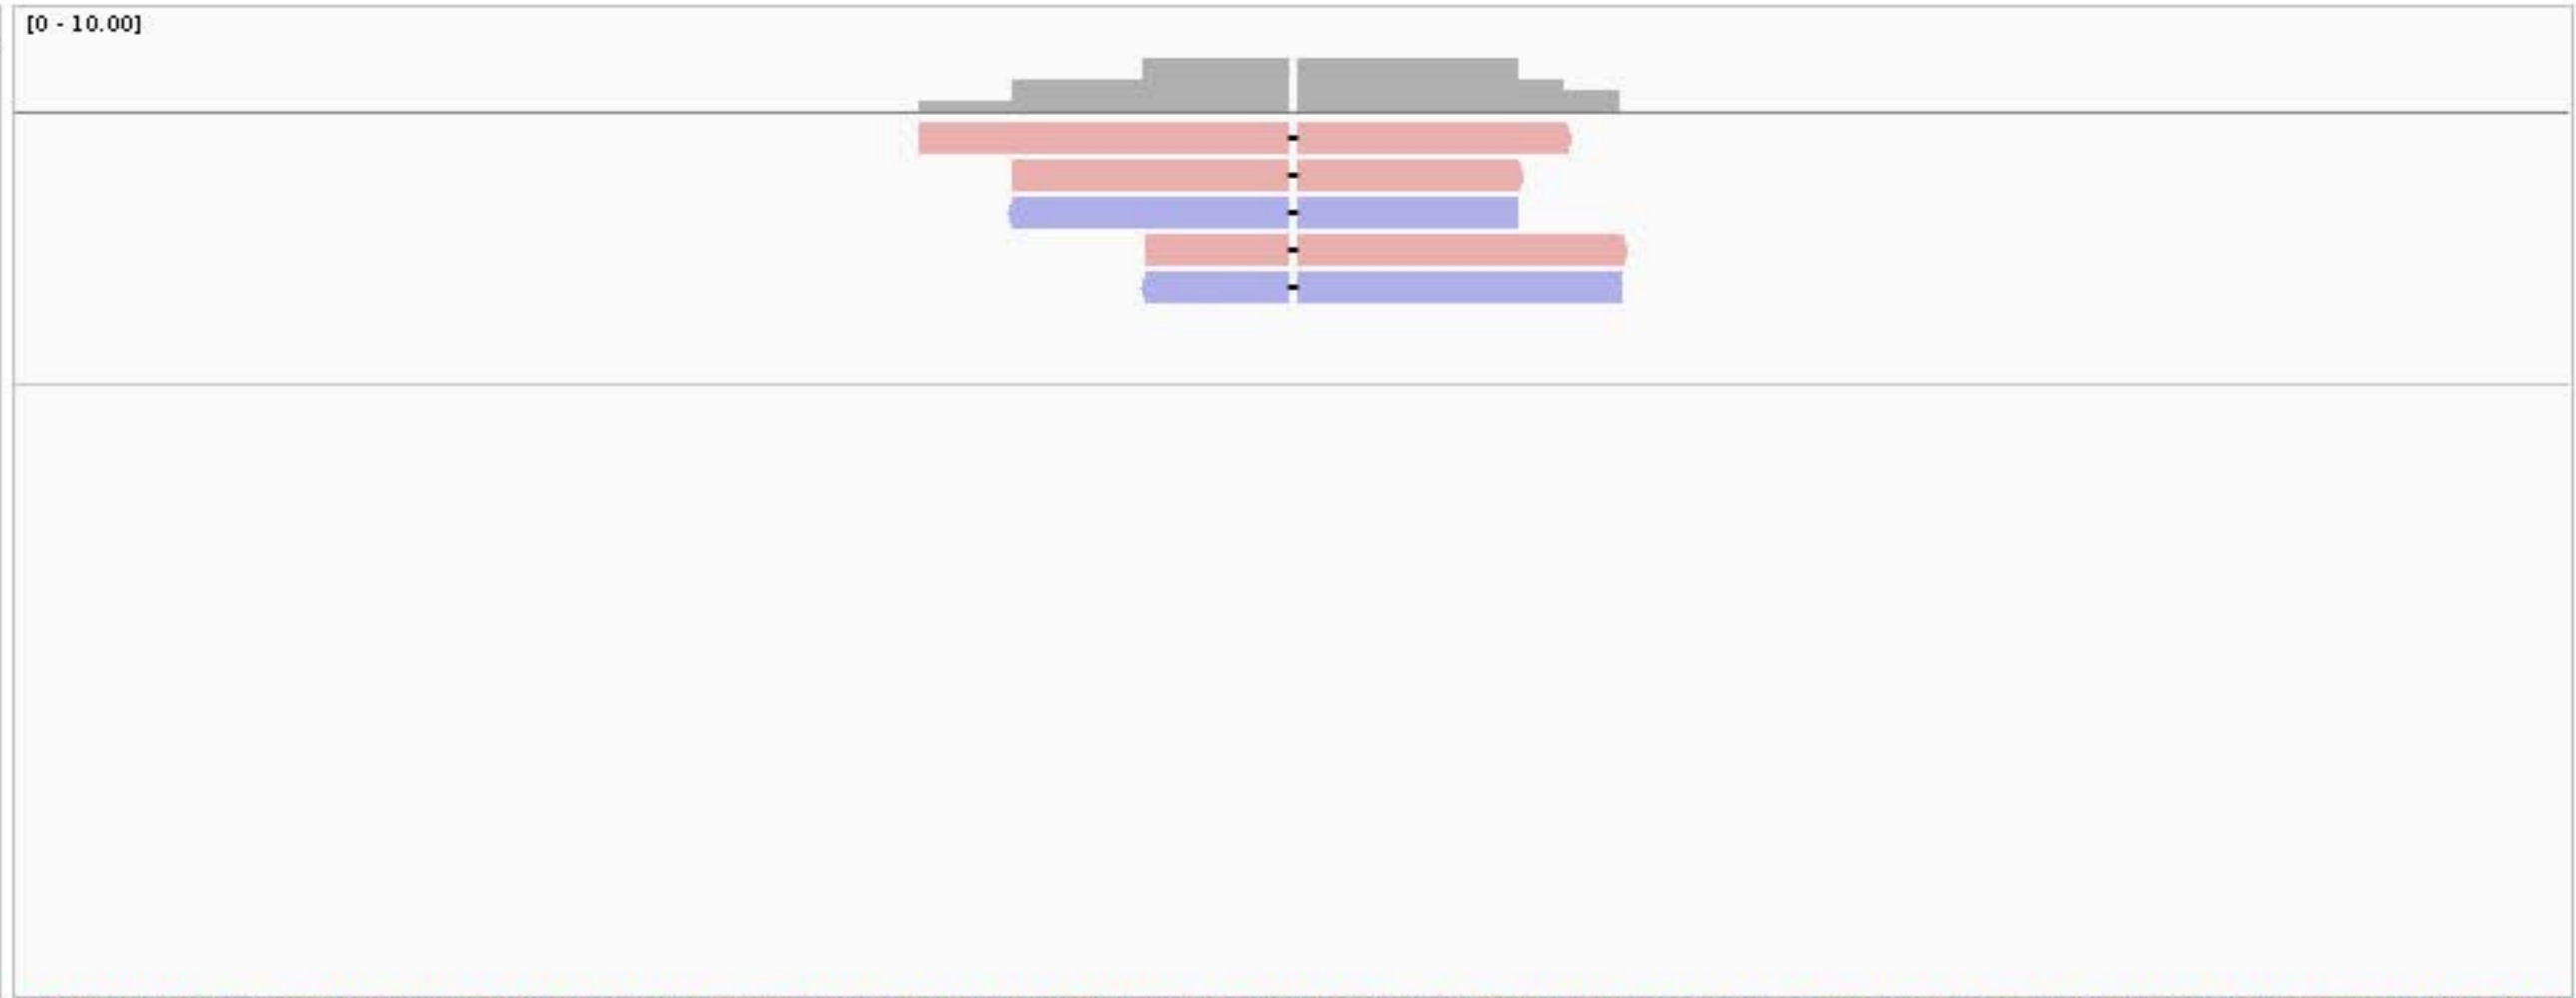

Sequence →

Refseq Genes

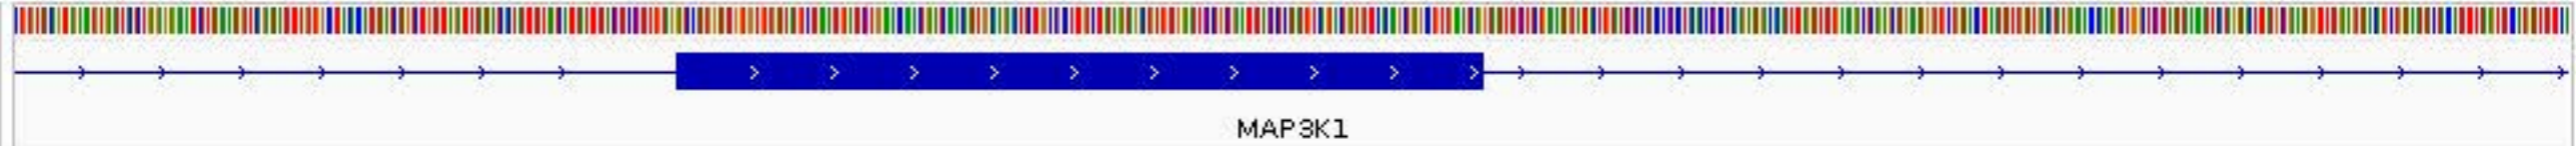



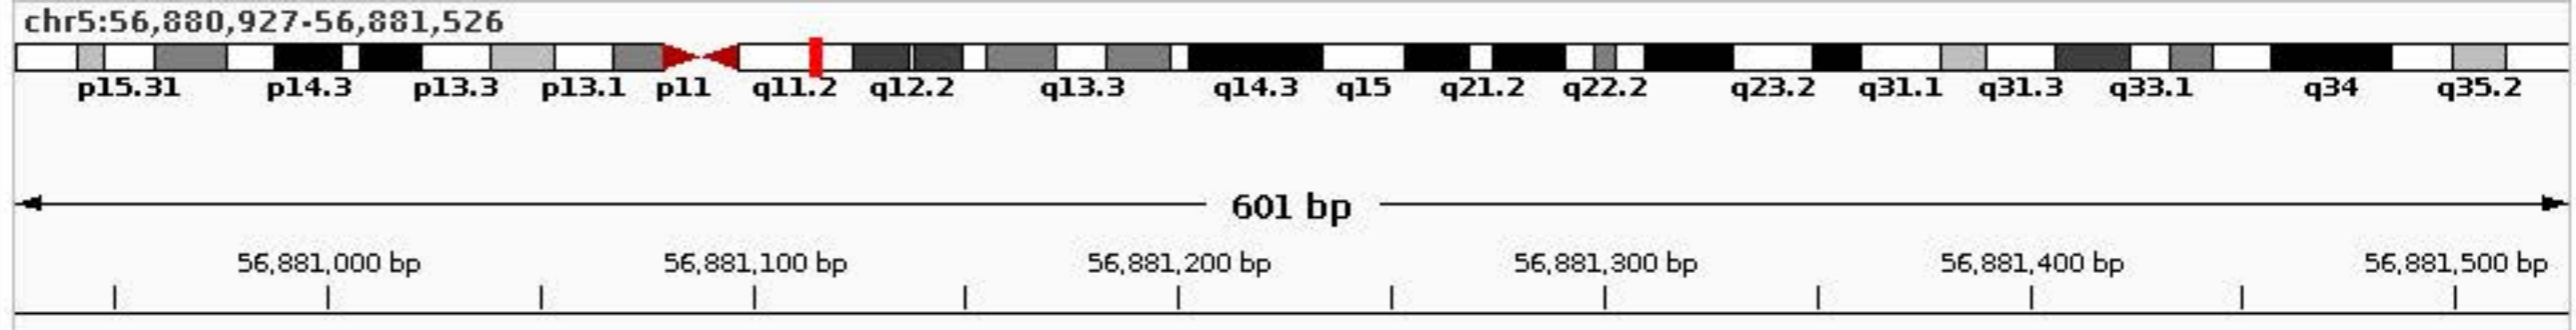

SL\_1010-N4-B\_mut.bam Coverage

SL\_1010-N4-B\_mut.bam

Sequence →

Refseq Genes

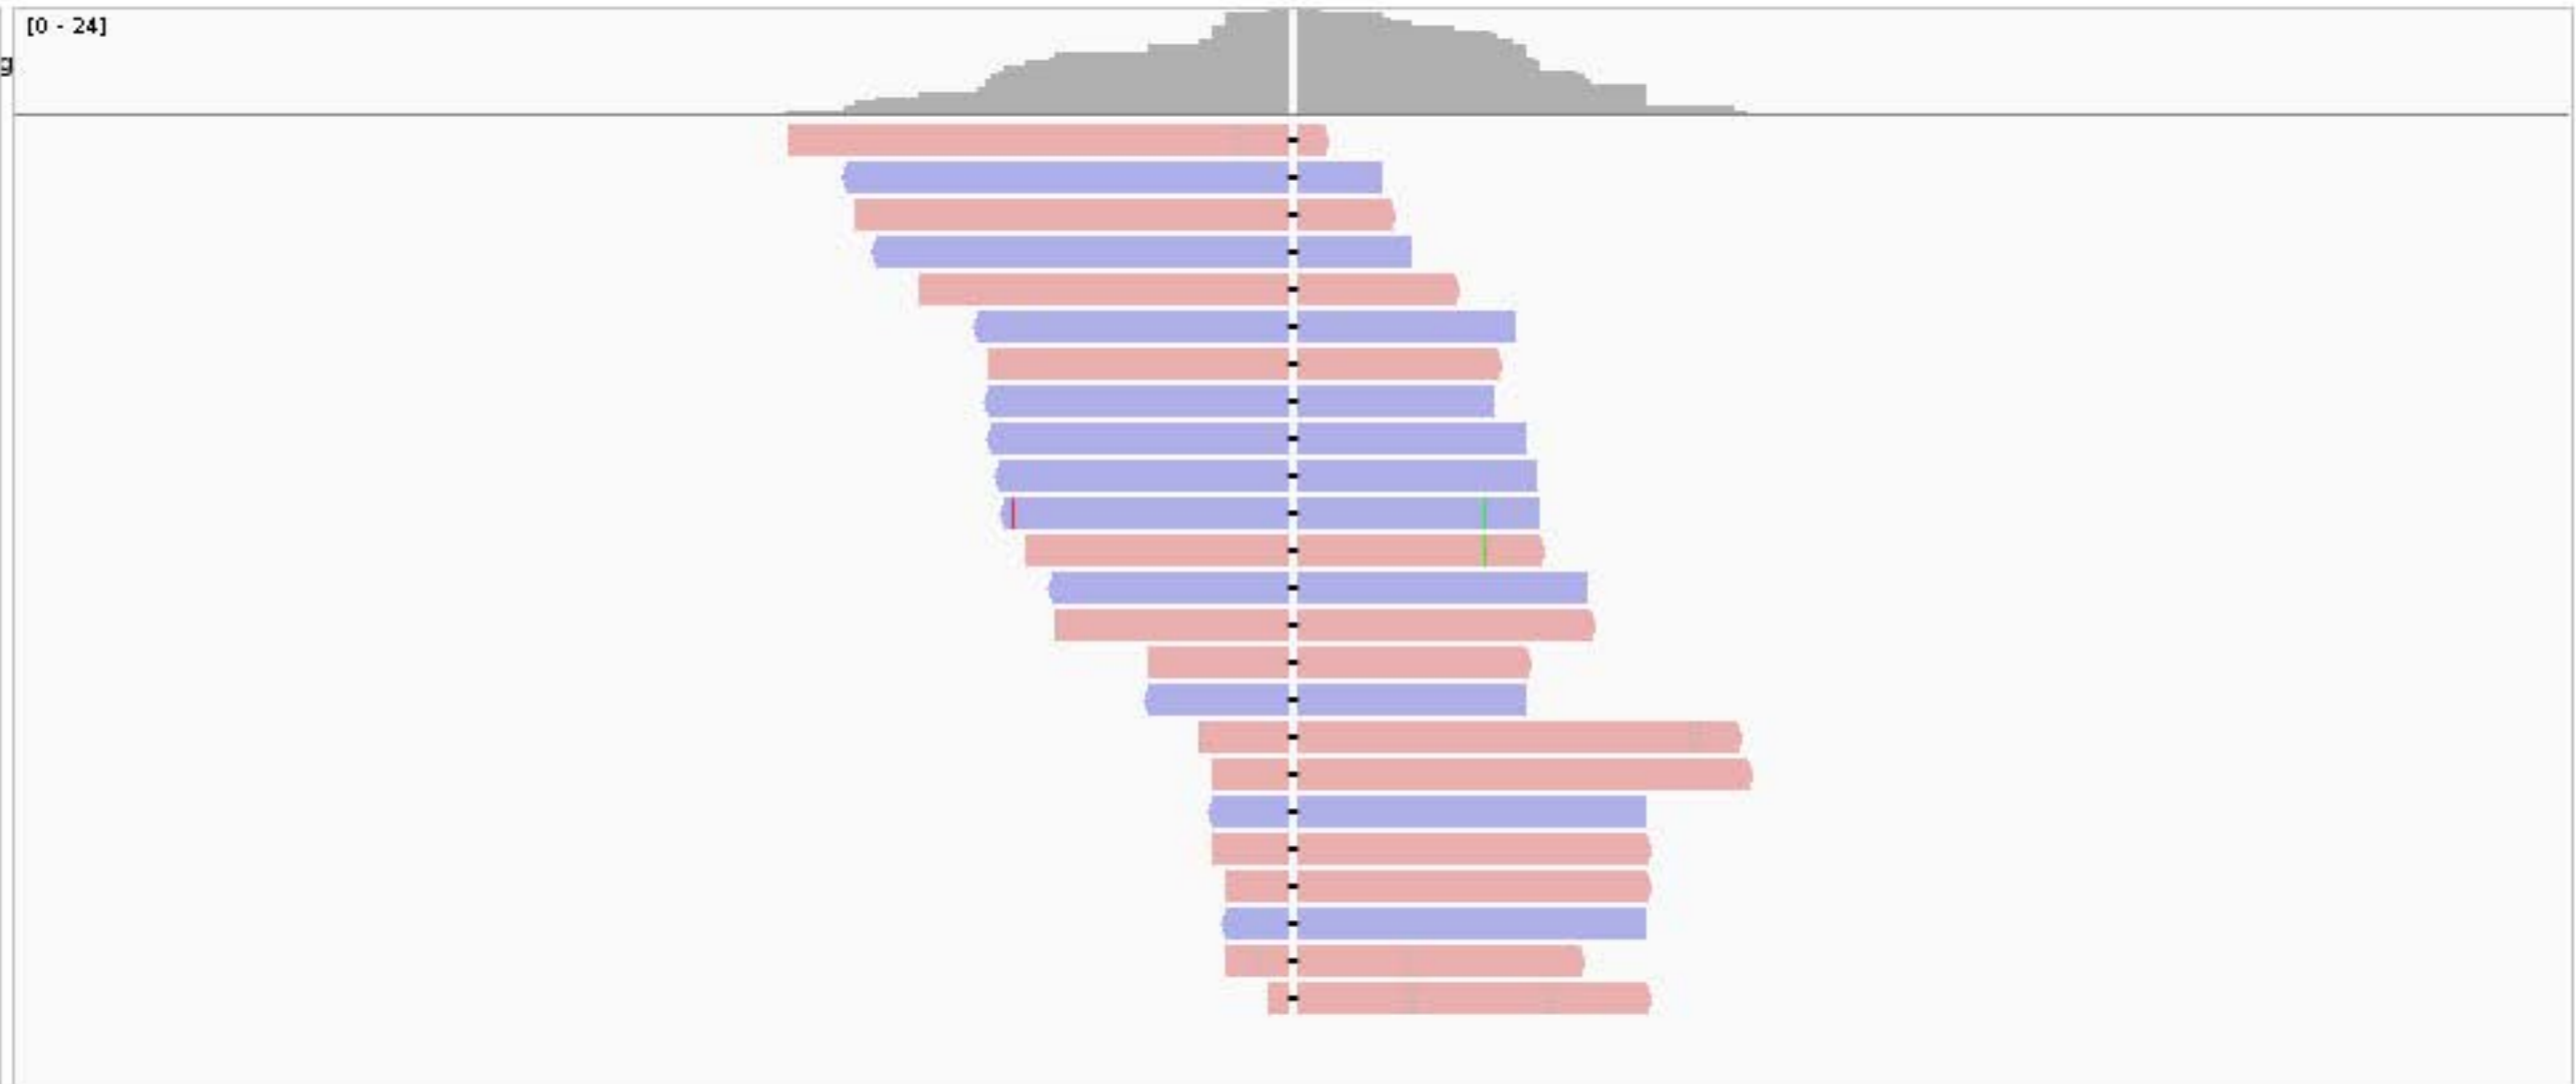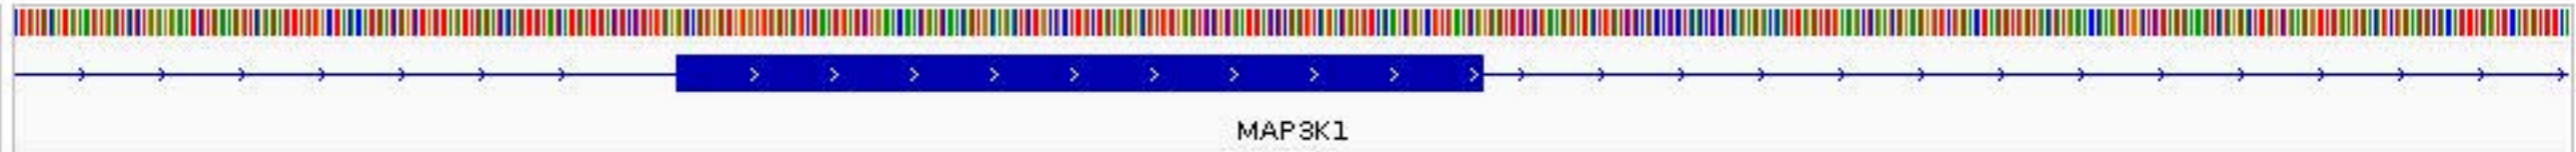

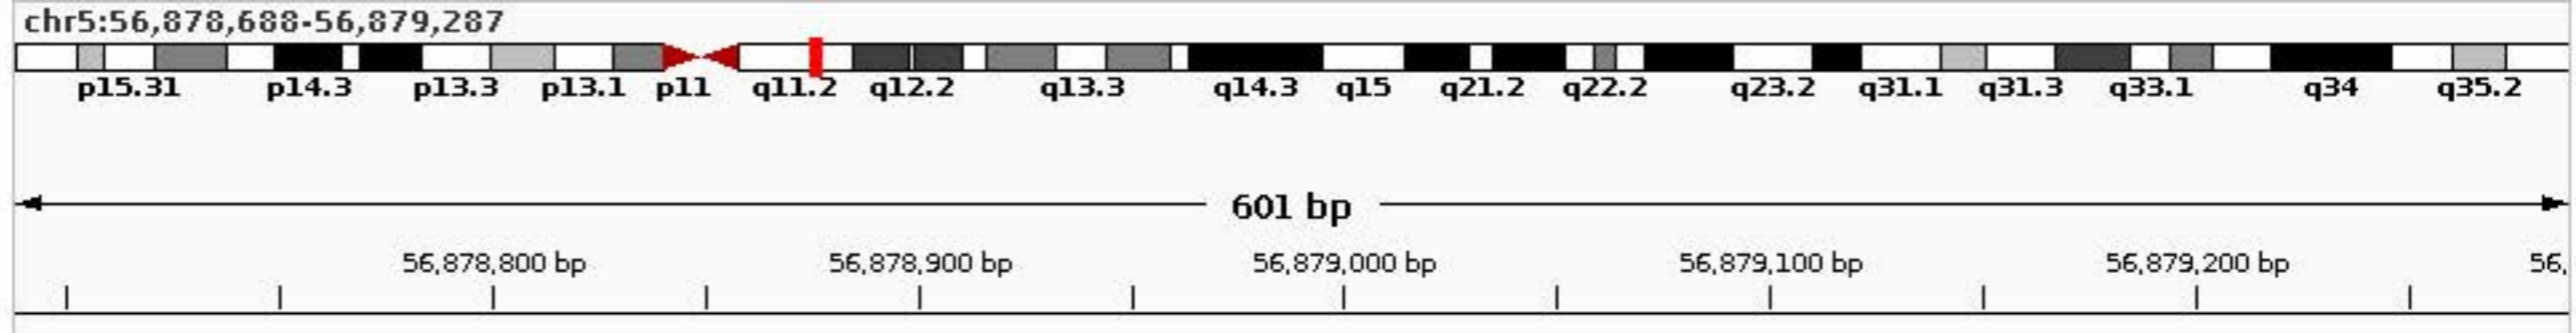

SL\_1010\_L\_FFPE\_12-B\_mut.bam  
range

SL\_1010\_L\_FFPE\_12-B\_mut.bam

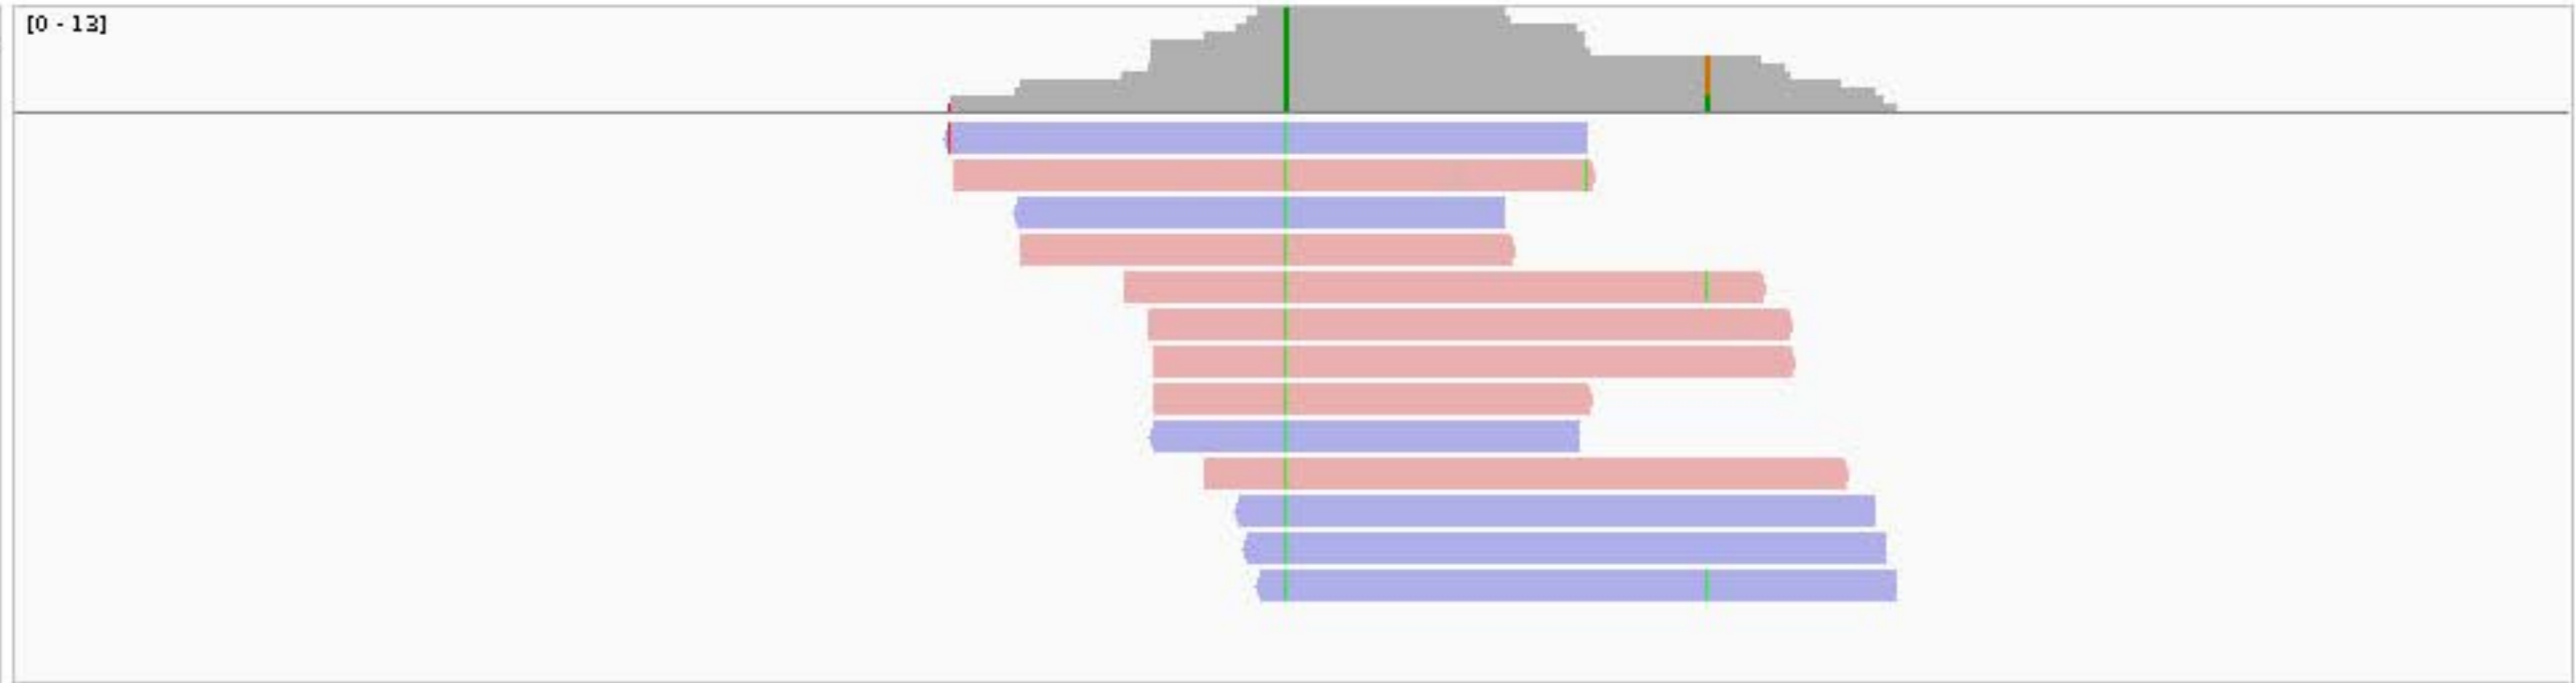

Sequence →

Refseq Genes

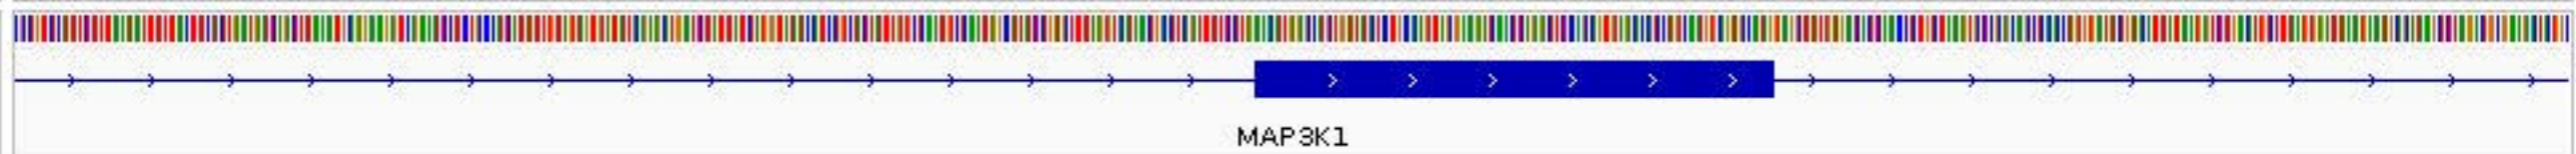

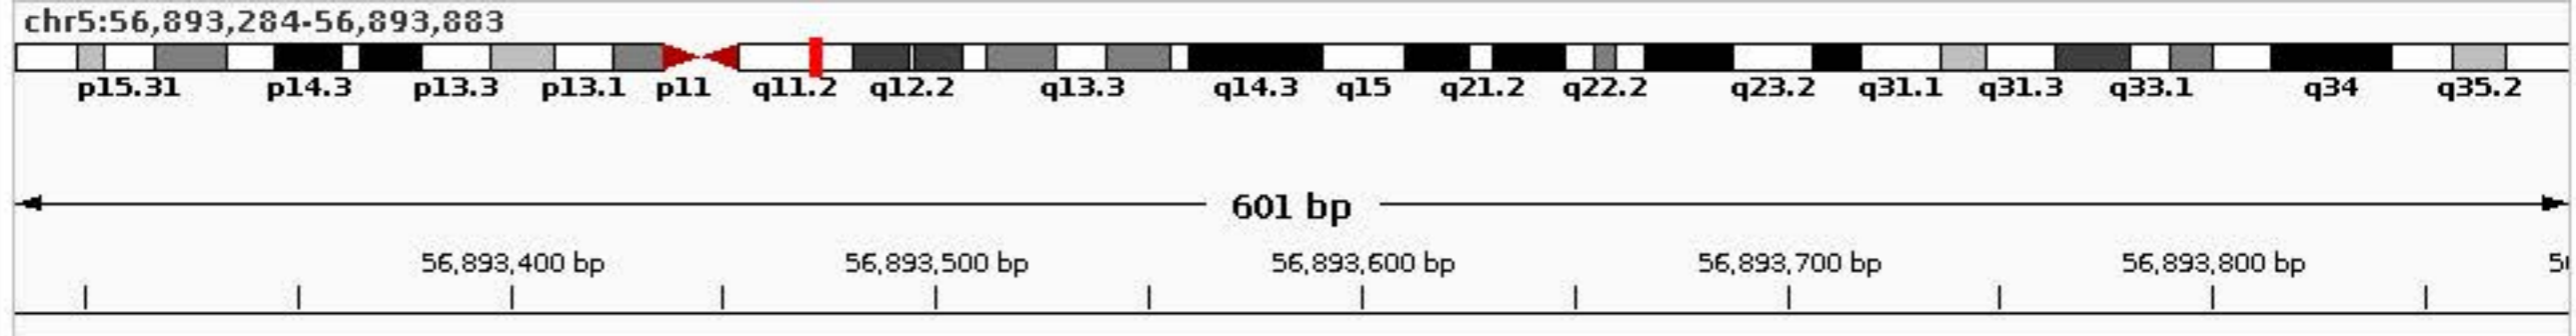

SL\_1010\_L\_FFPE\_10-B\_mut.bam  
rage

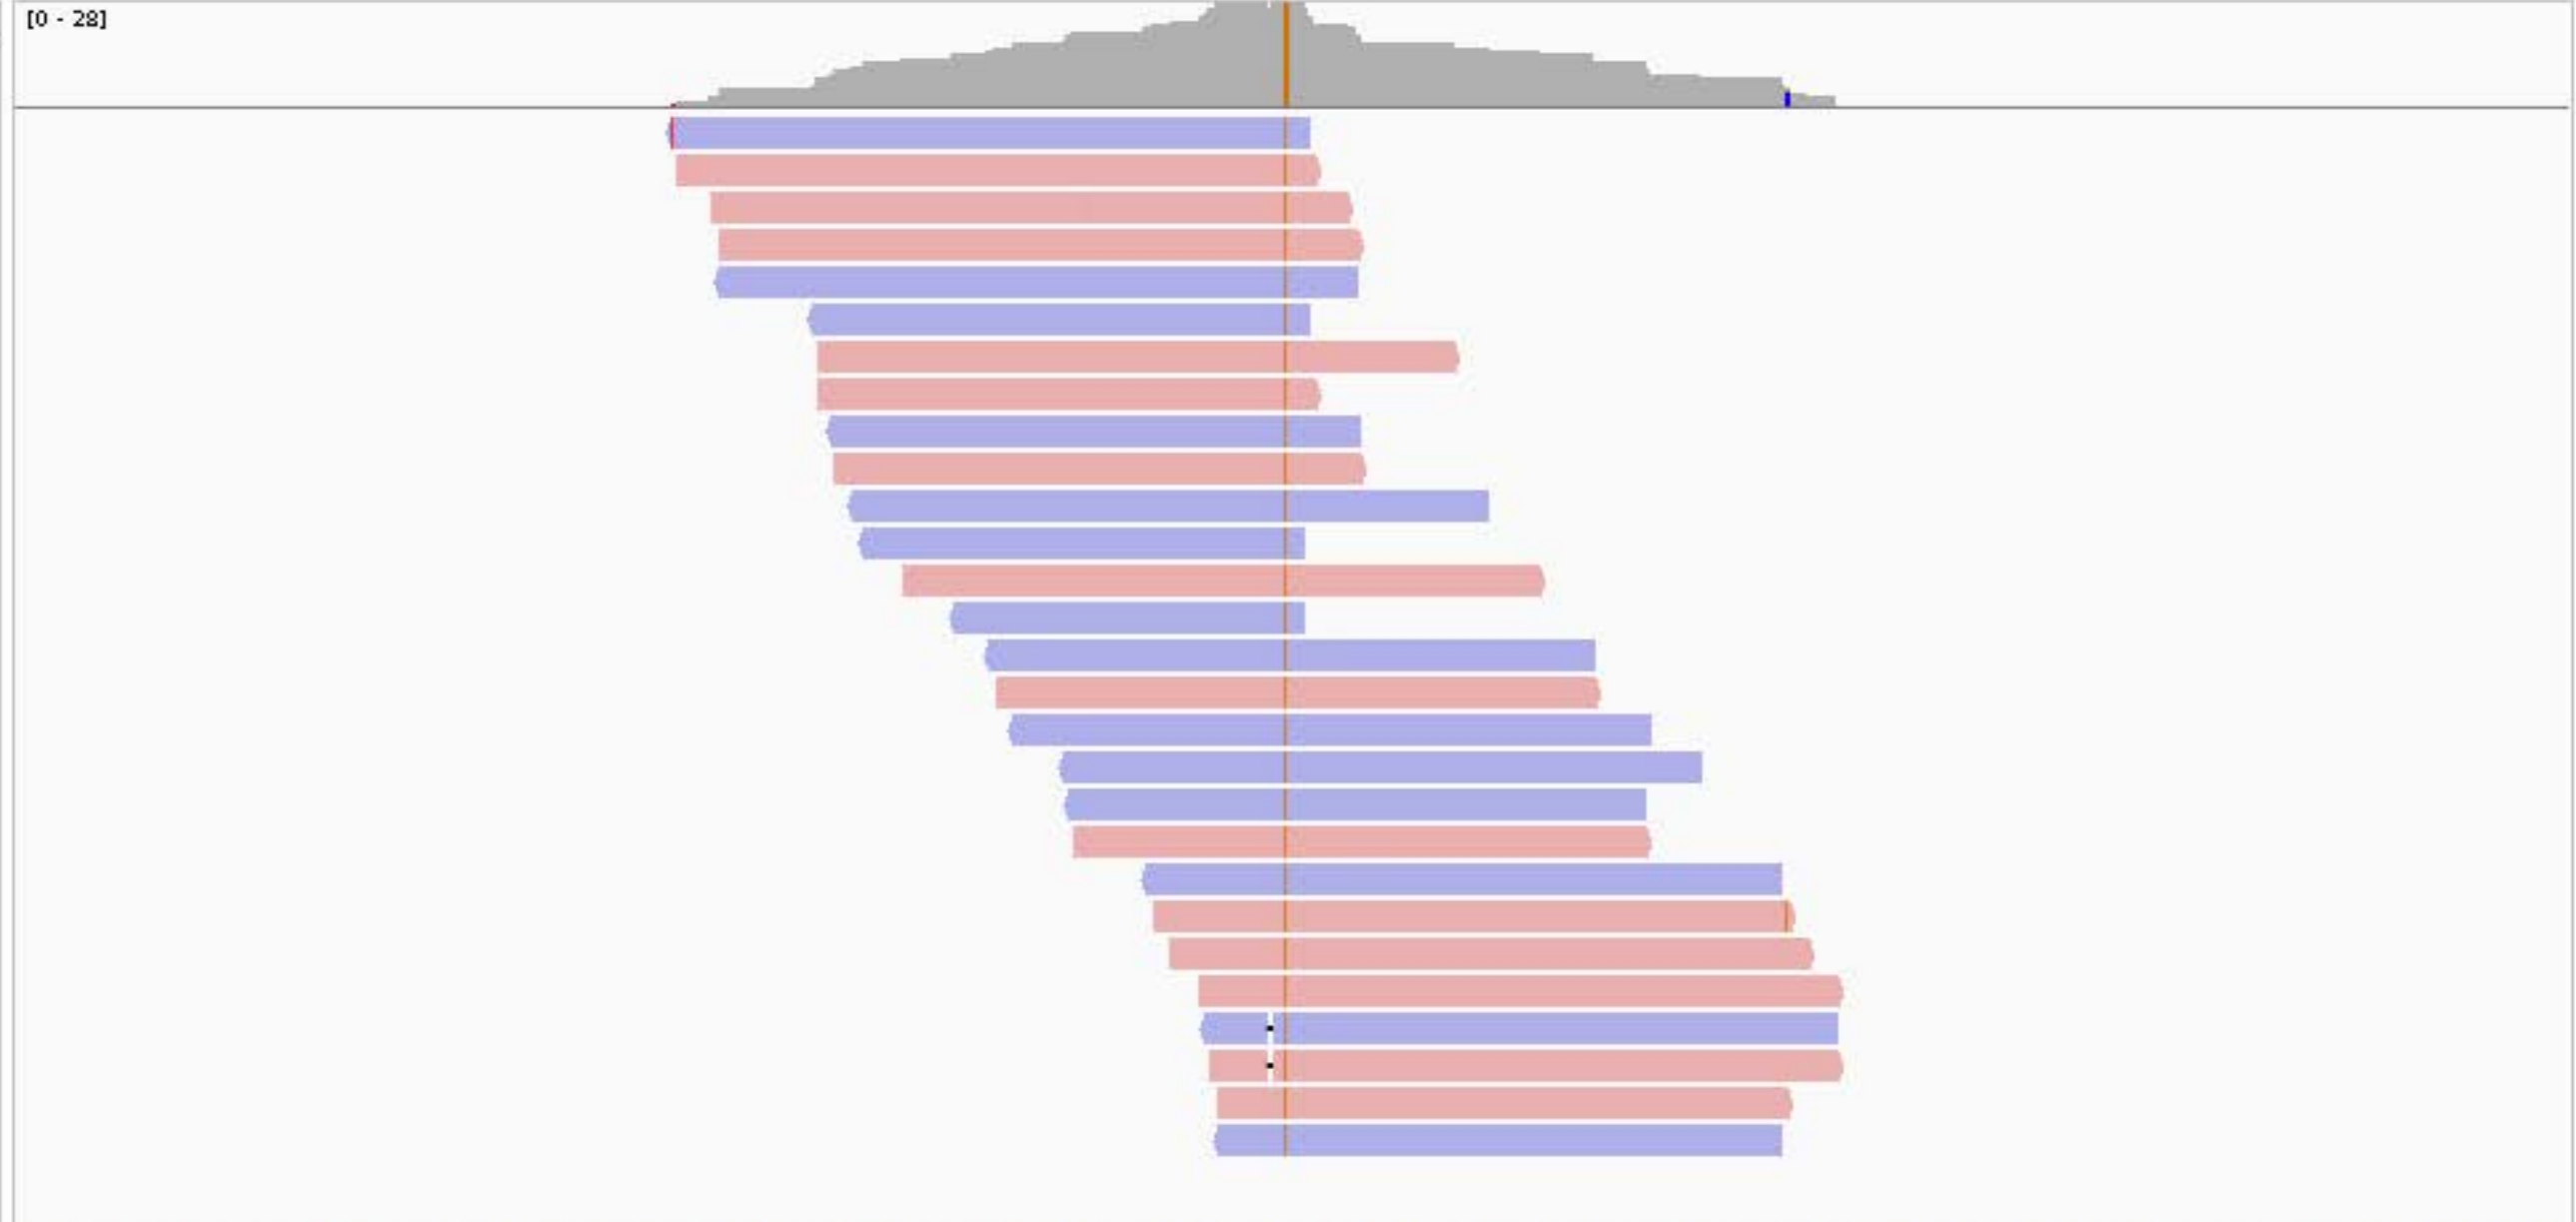

SL\_1010\_L\_FFPE\_10-B\_mut.ba  
m

Sequence →

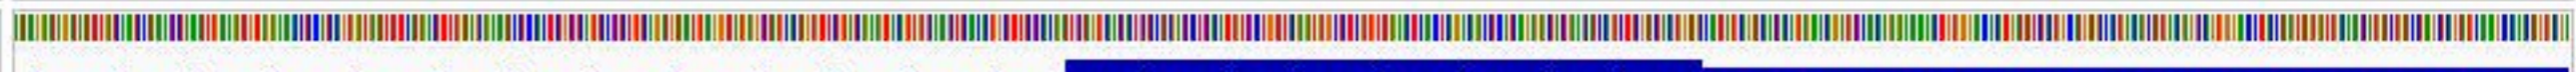

Refseq Genes

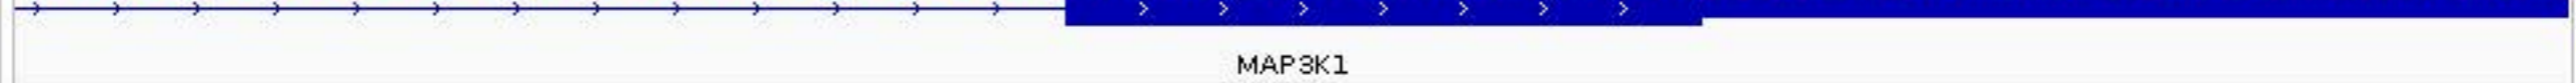

MAP3K1



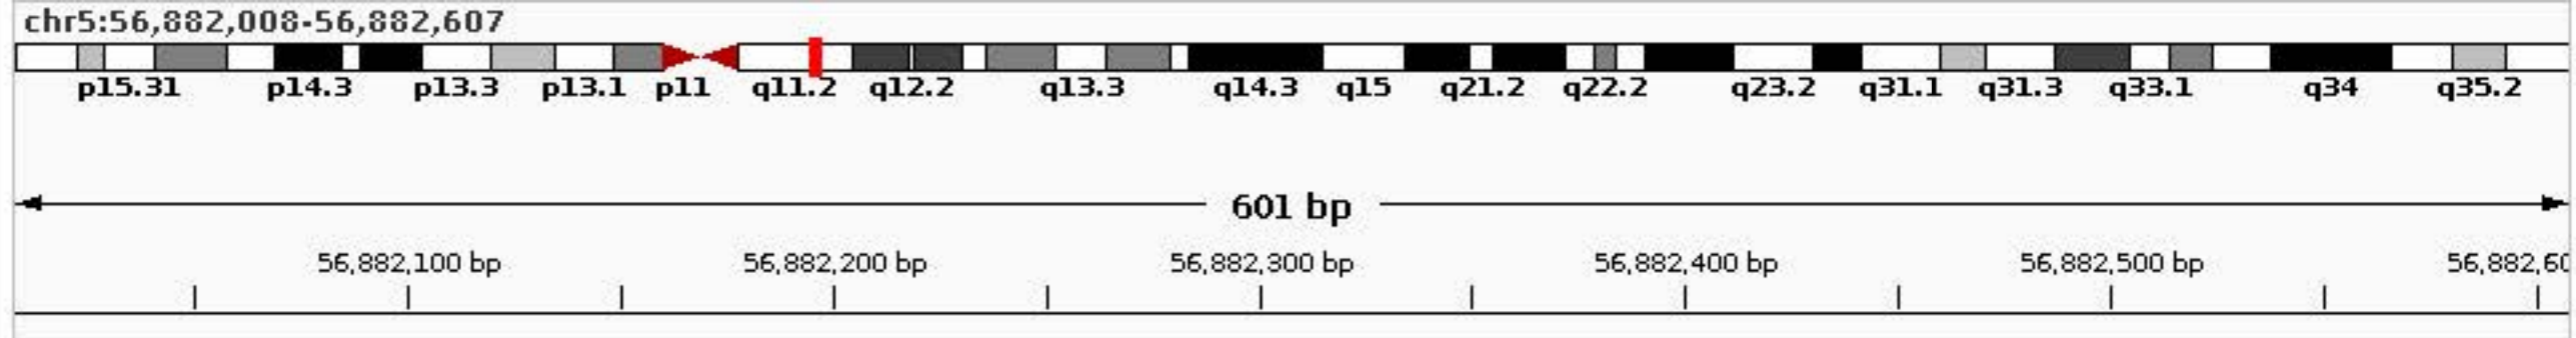

SL\_1010-N6-B\_mut.bam Coverage

SL\_1010-N6-B\_mut.bam

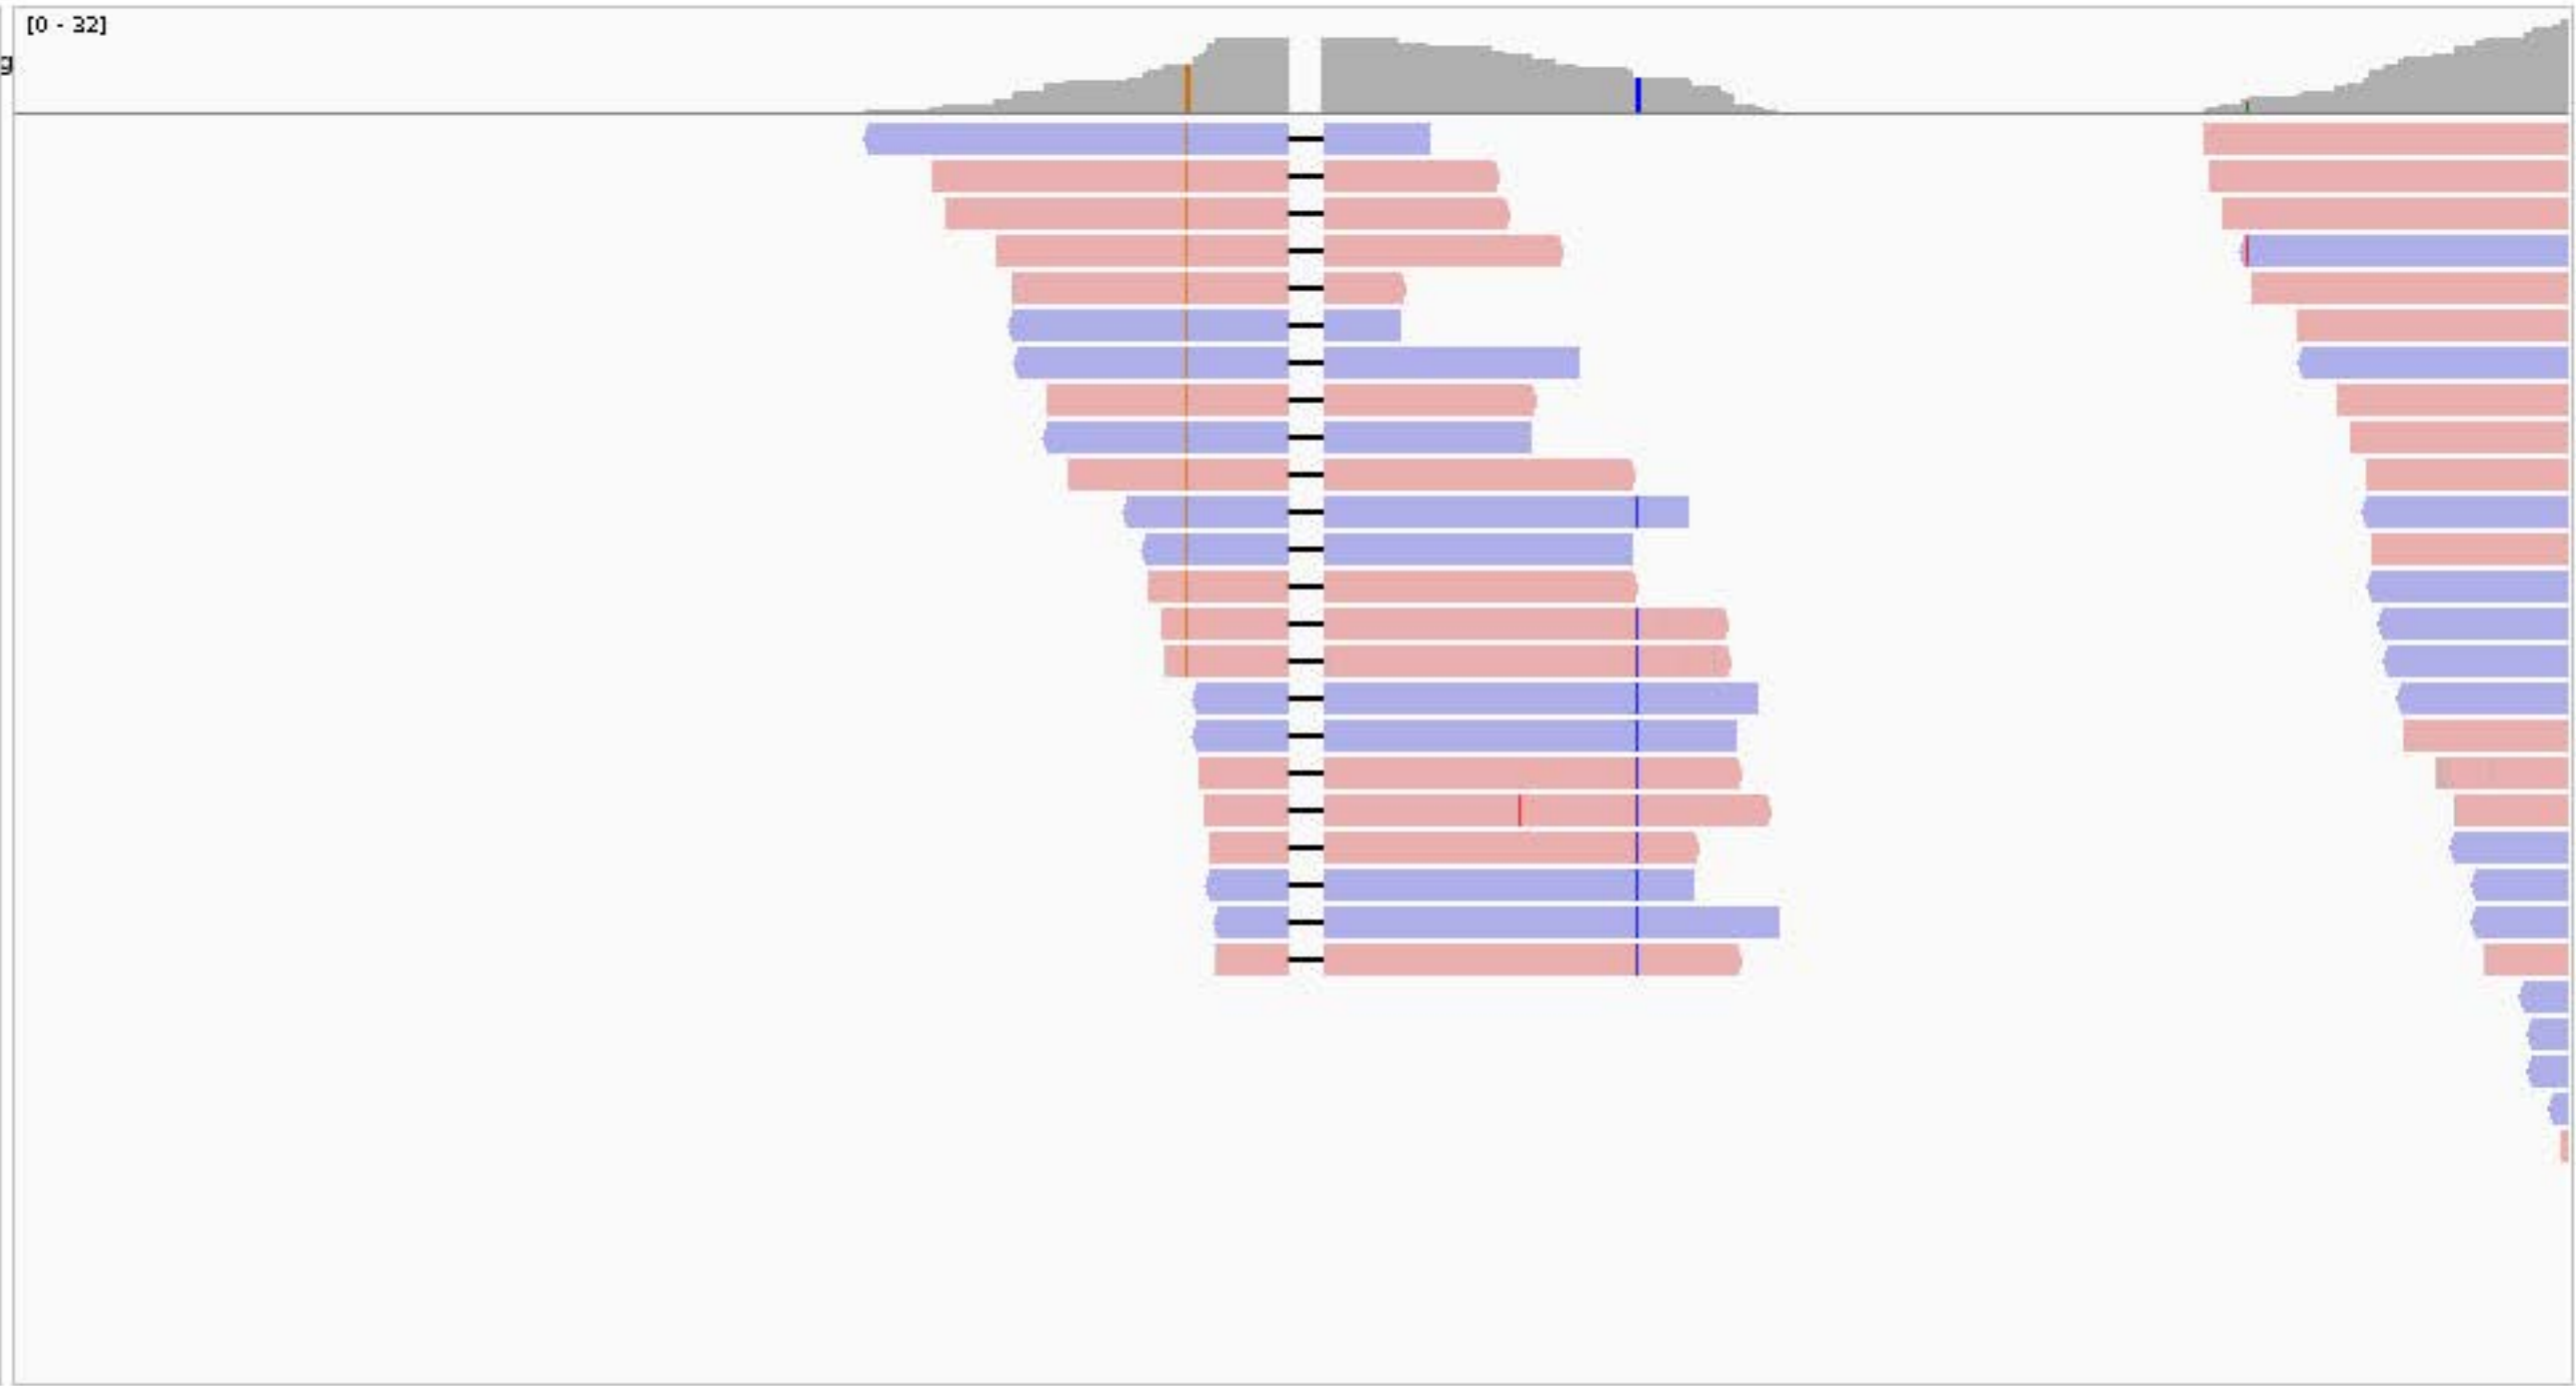

Sequence

Refseq Genes

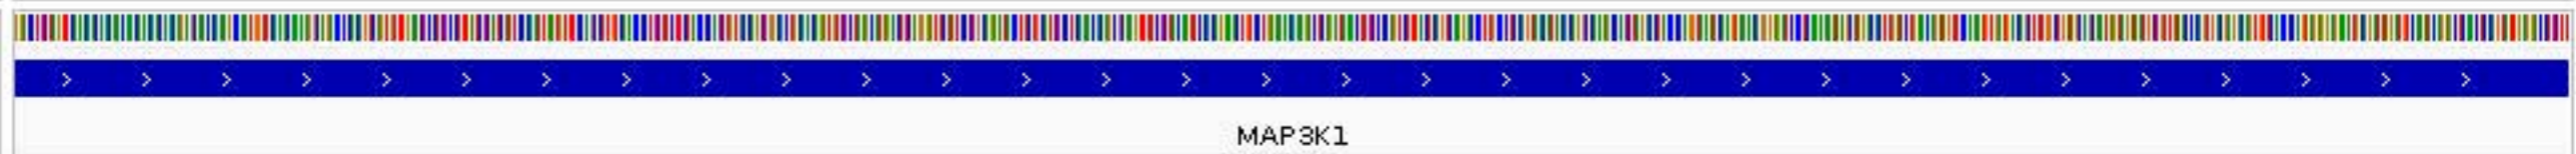

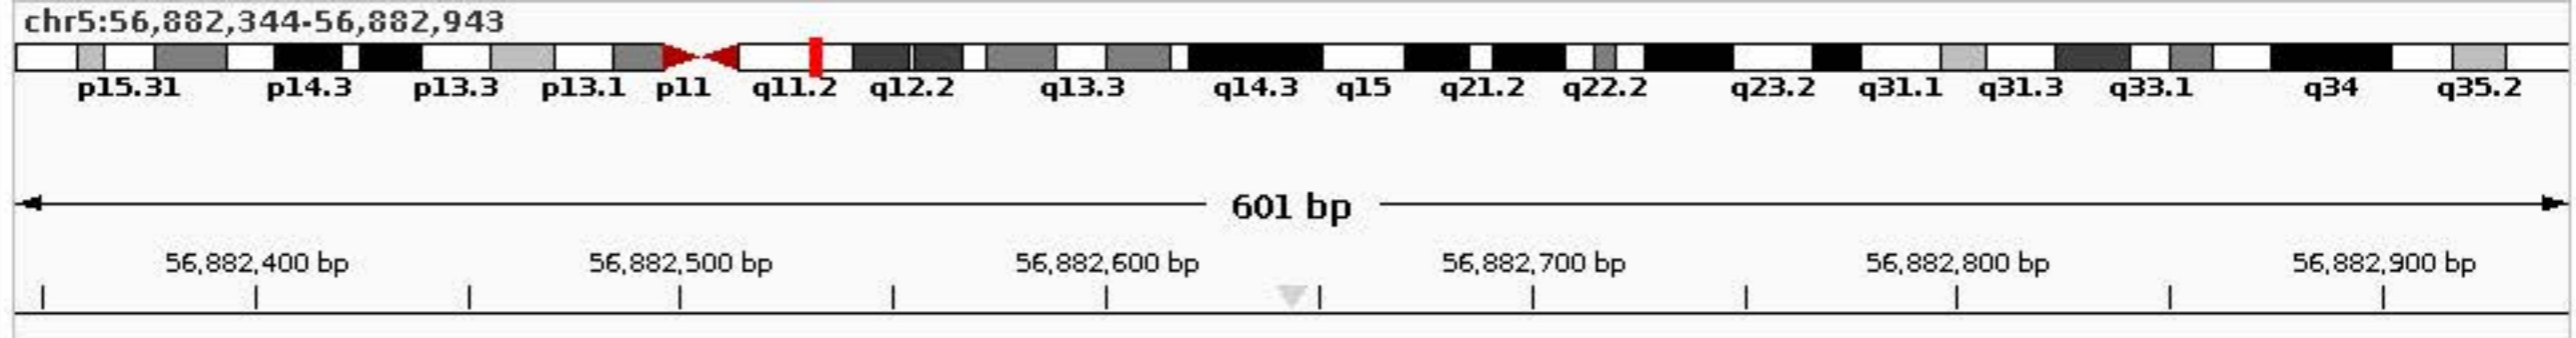

SL\_1010-N6-B\_mut.bam Coverage

SL\_1010-N6-B\_mut.bam

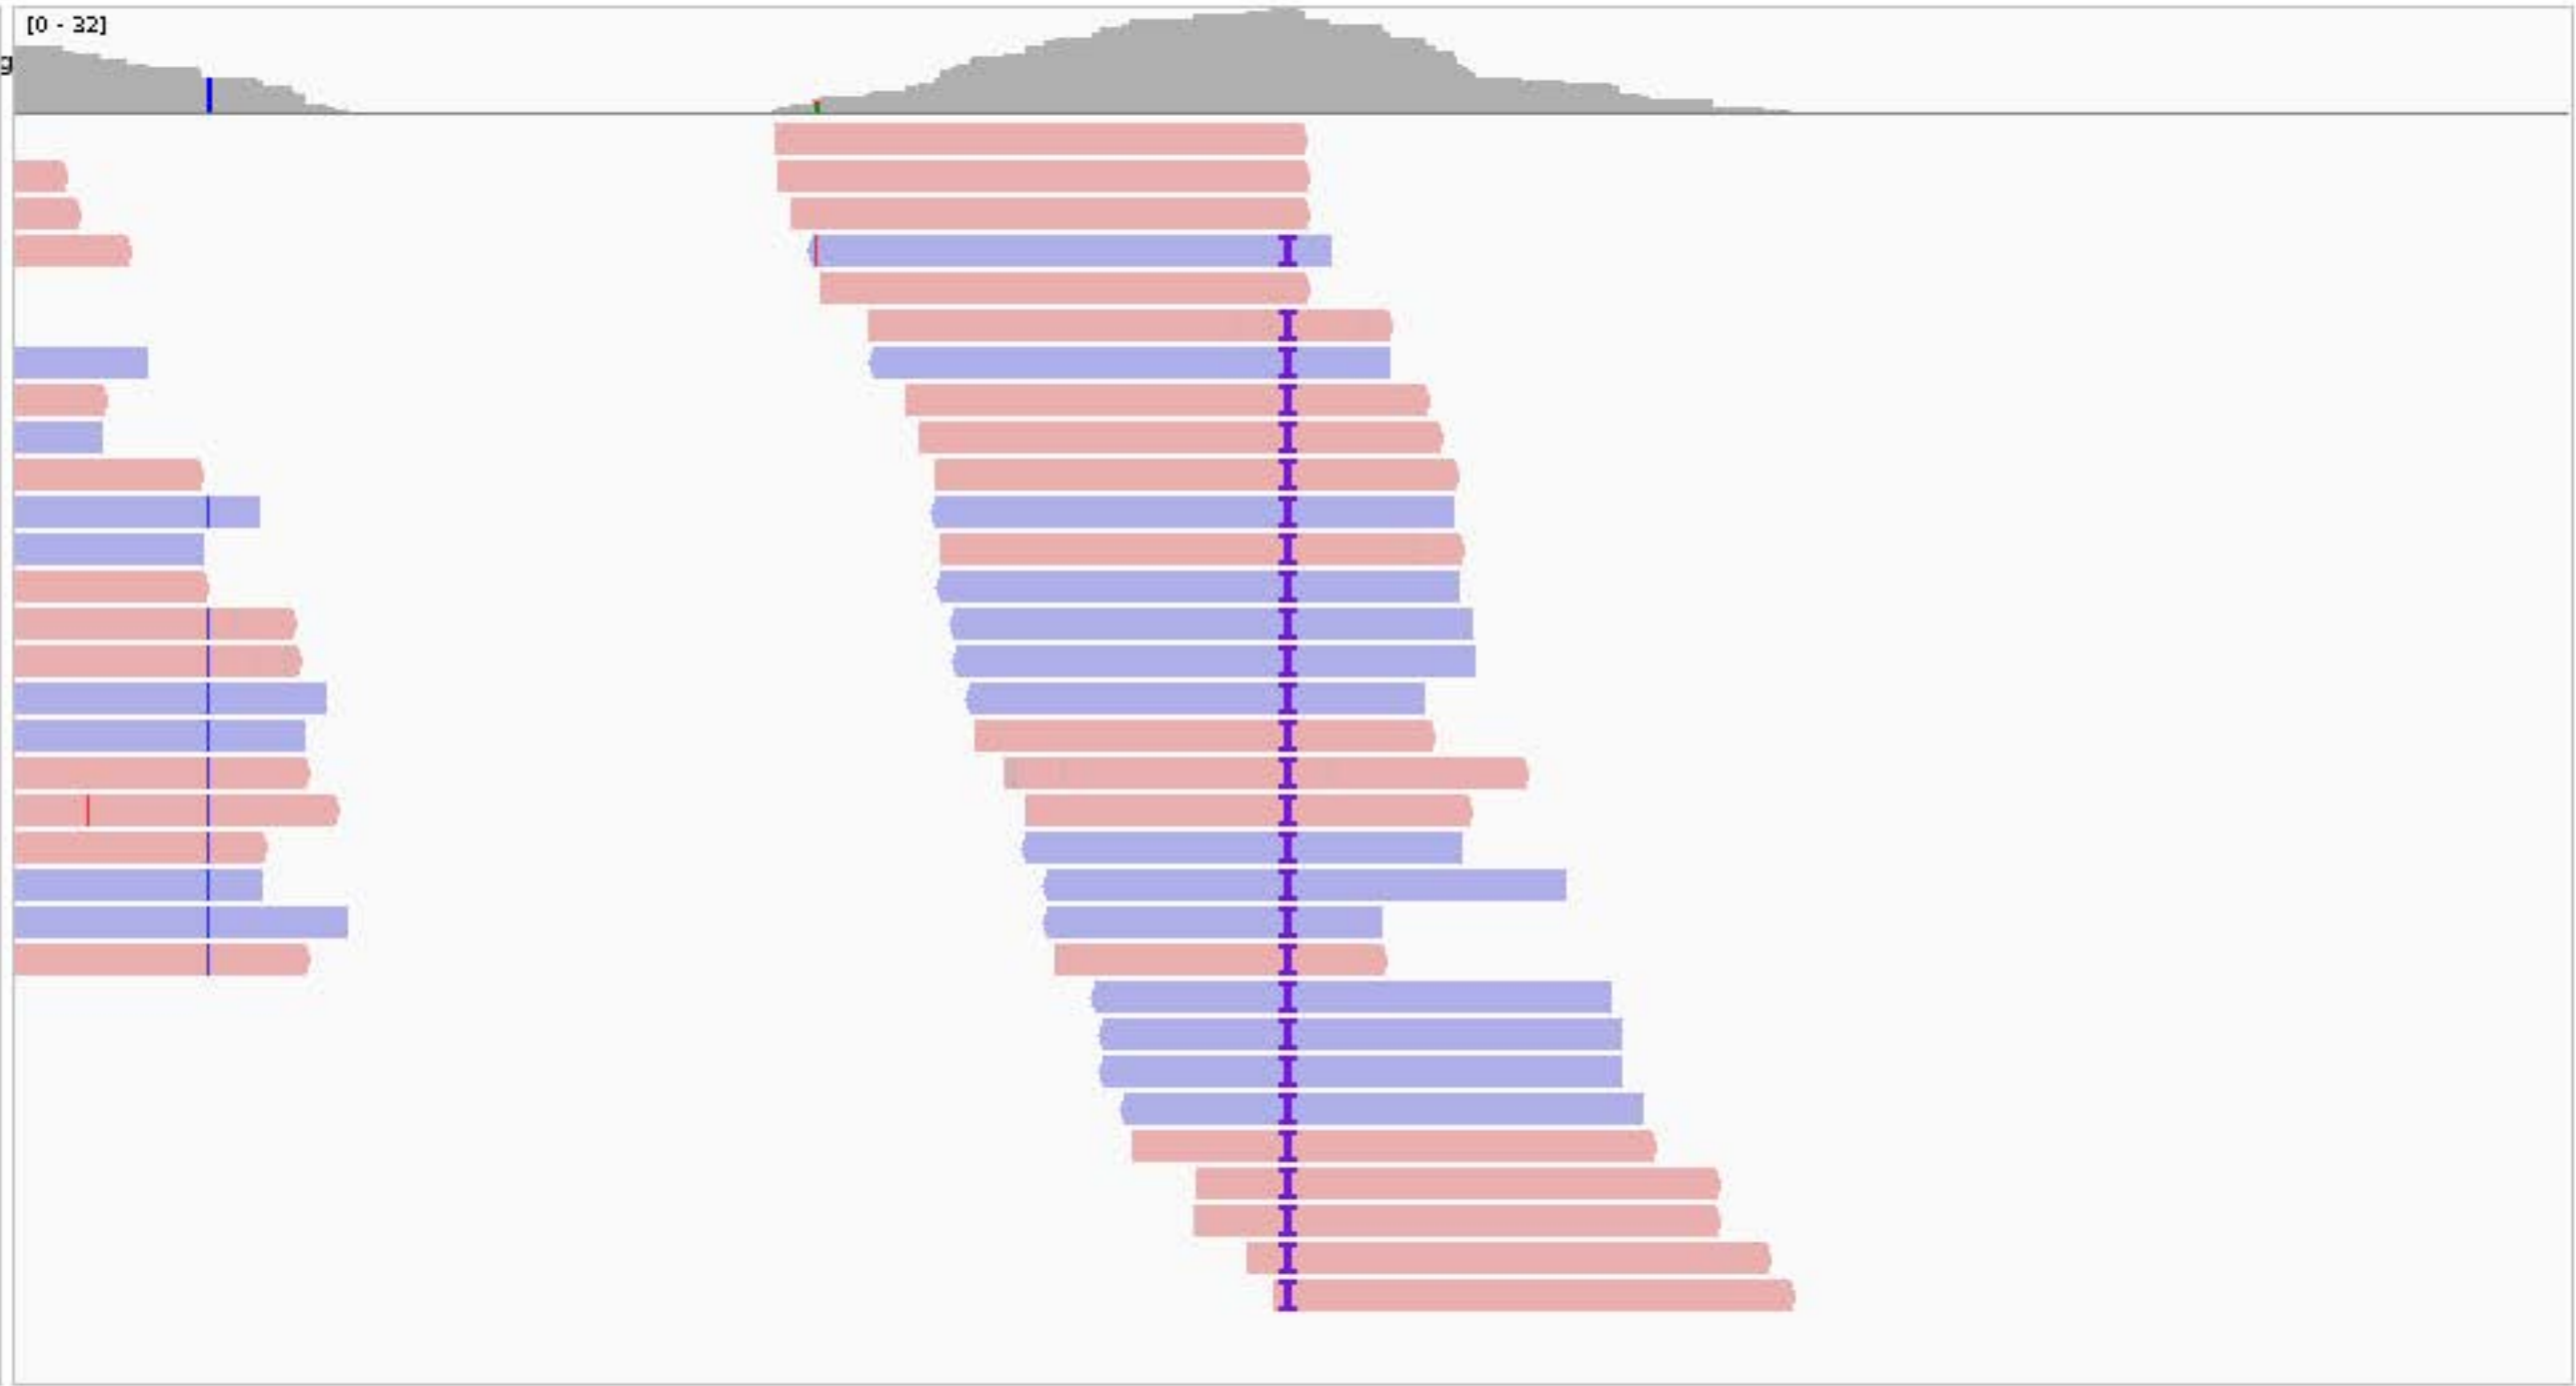

Sequence

Refseq Genes

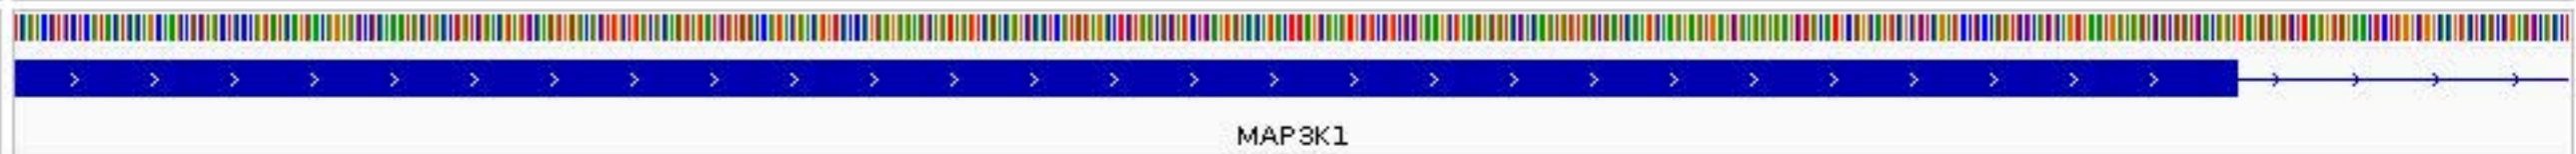

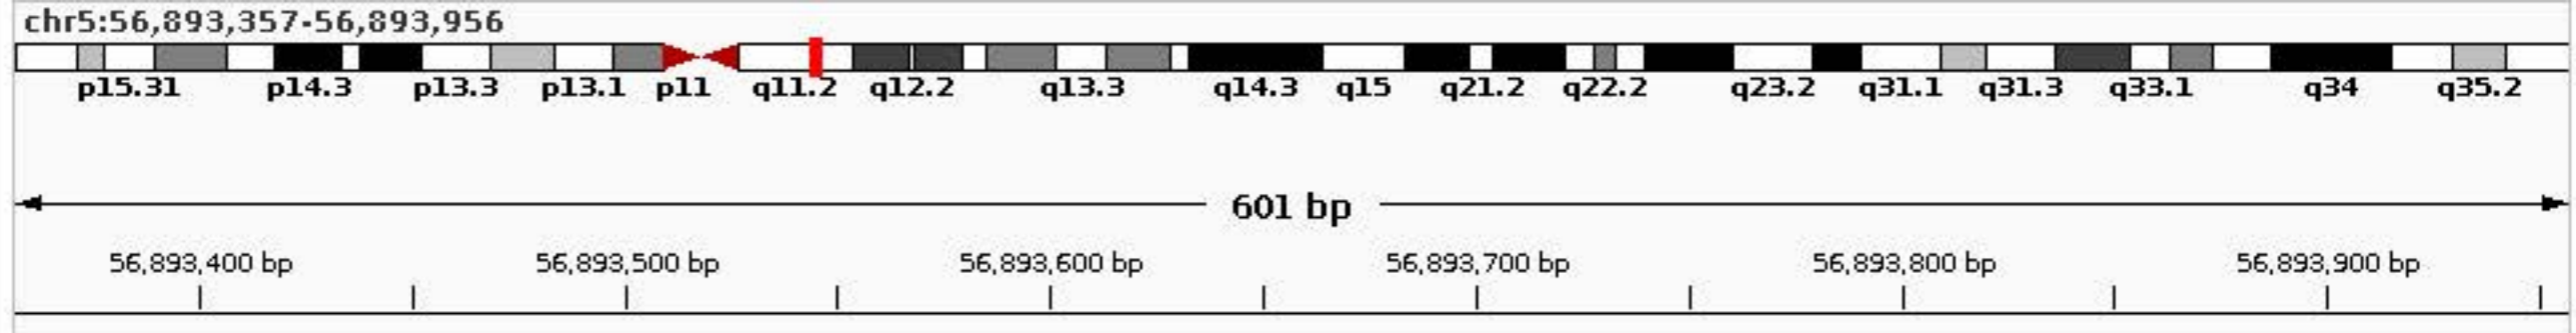

SL\_1010\_L\_FFPE\_9-B\_mut.bam  
age

SL\_1010\_L\_FFPE\_9-B\_mut.bam

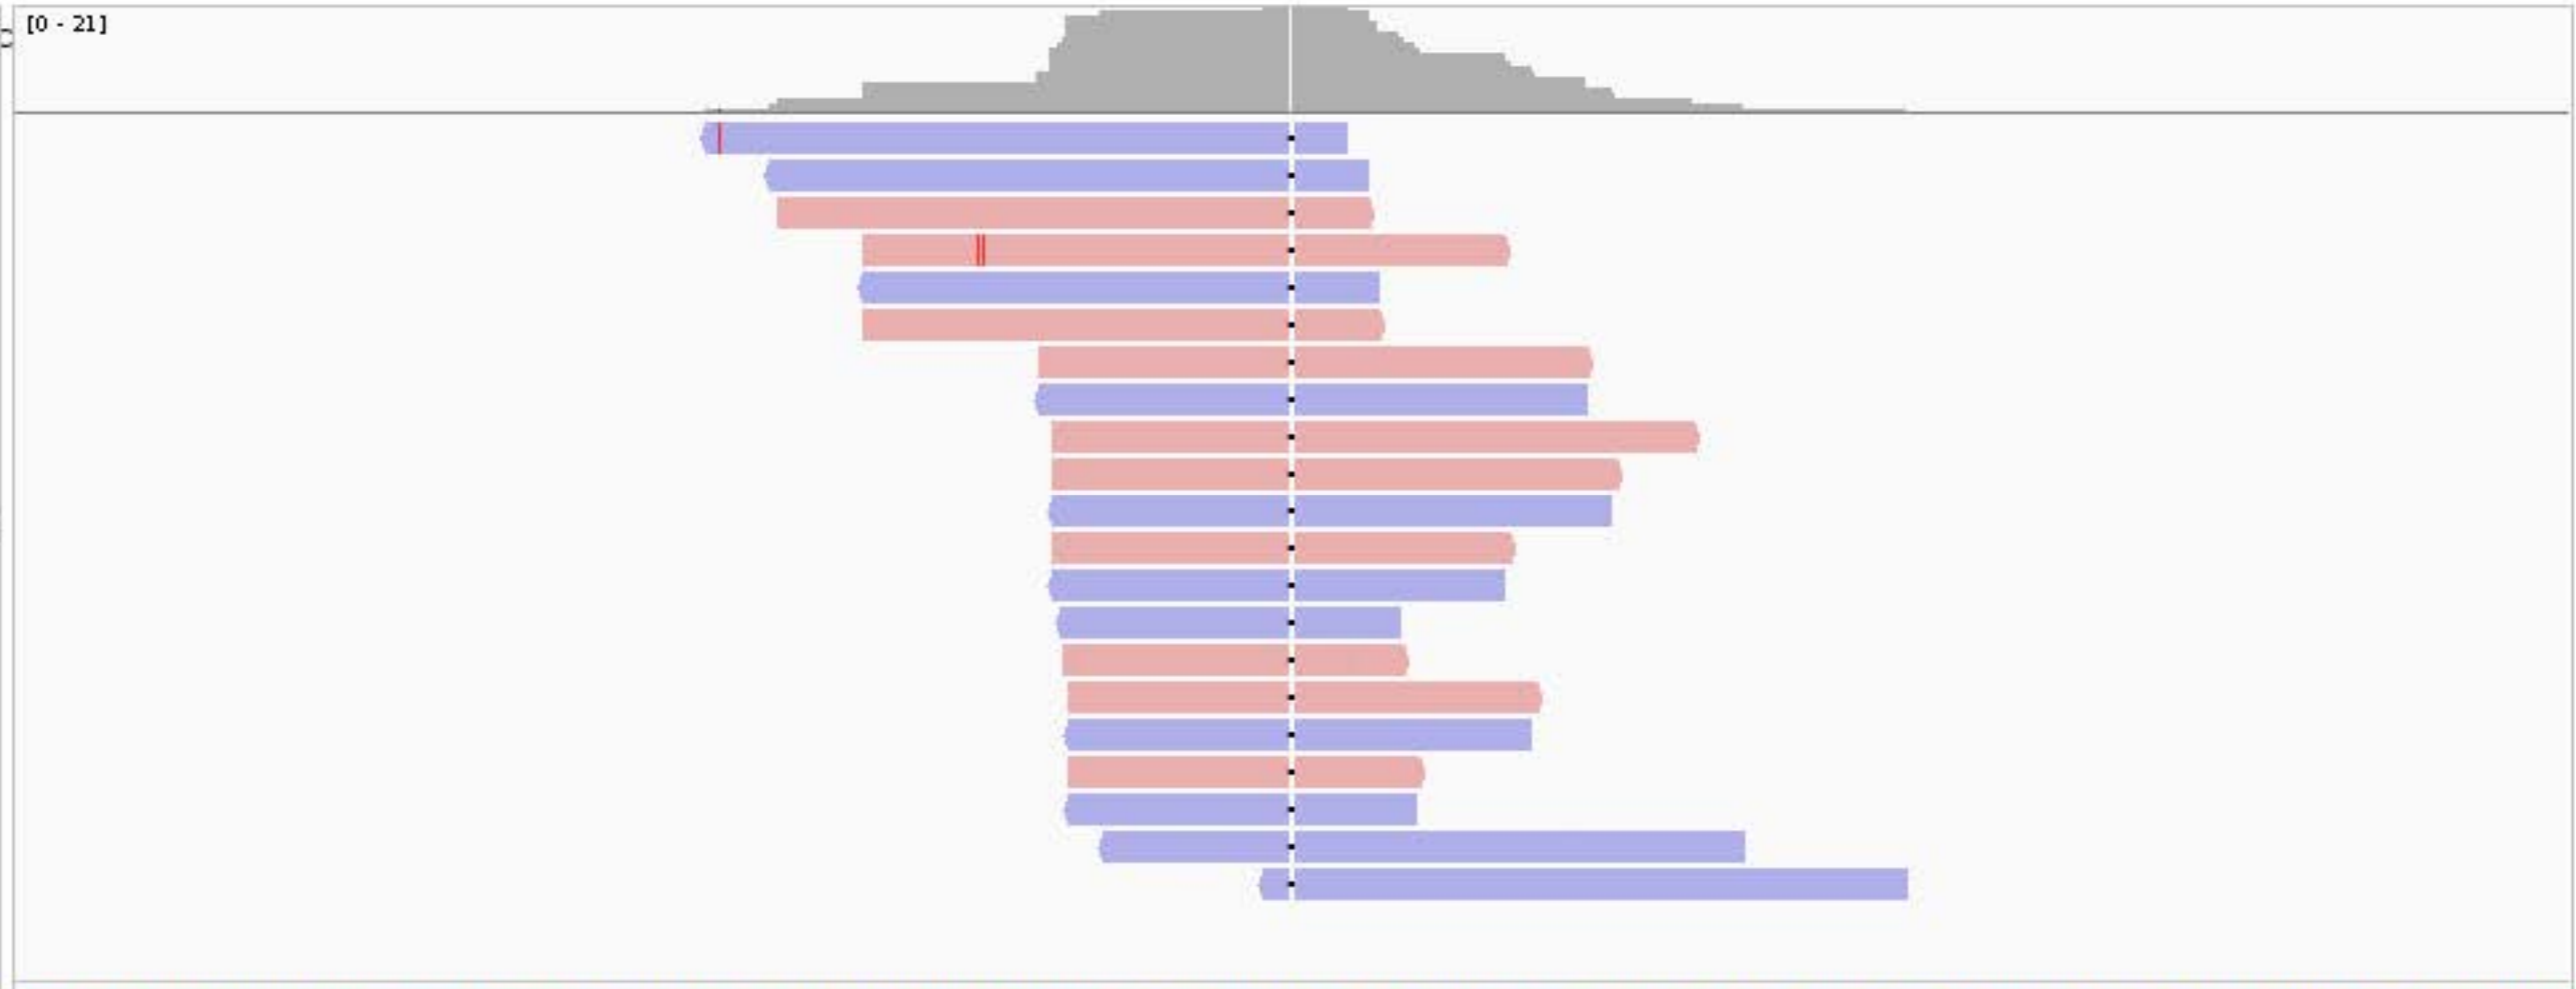

Sequence →

Refseq Genes

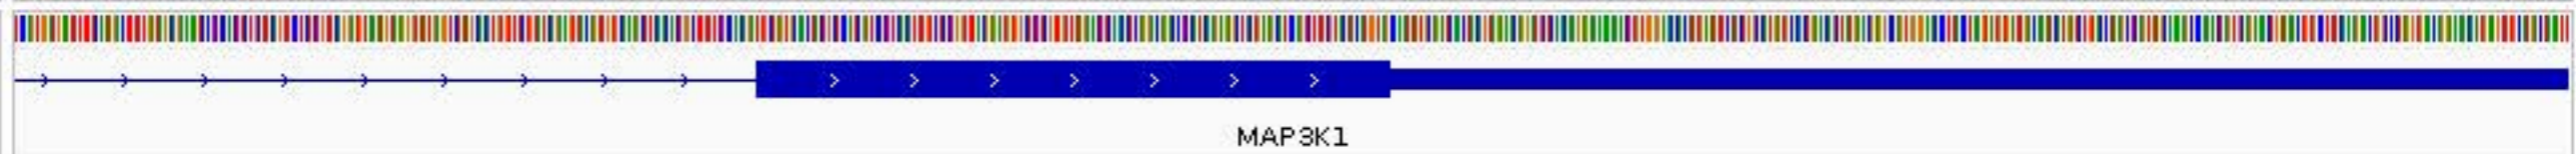



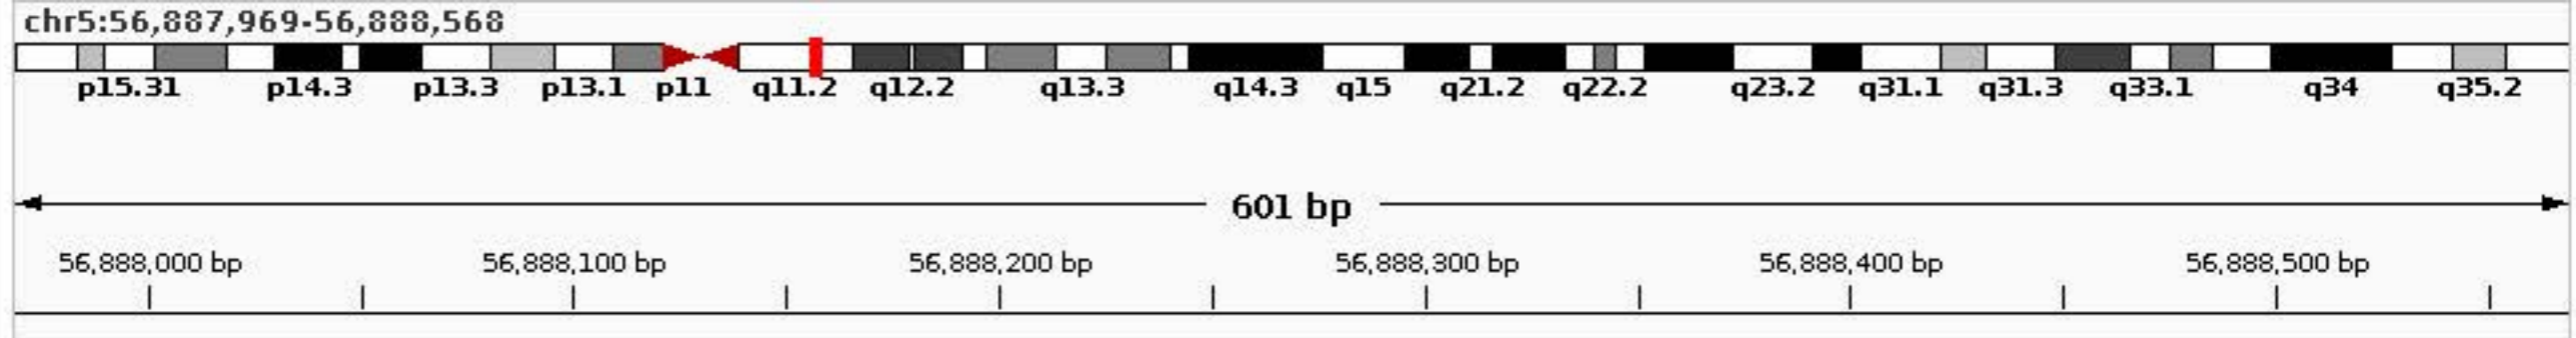

SL\_1010\_L\_FFPE\_13-B\_mut.barr  
rage

SL\_1010\_L\_FFPE\_13-B\_mut.ba  
m

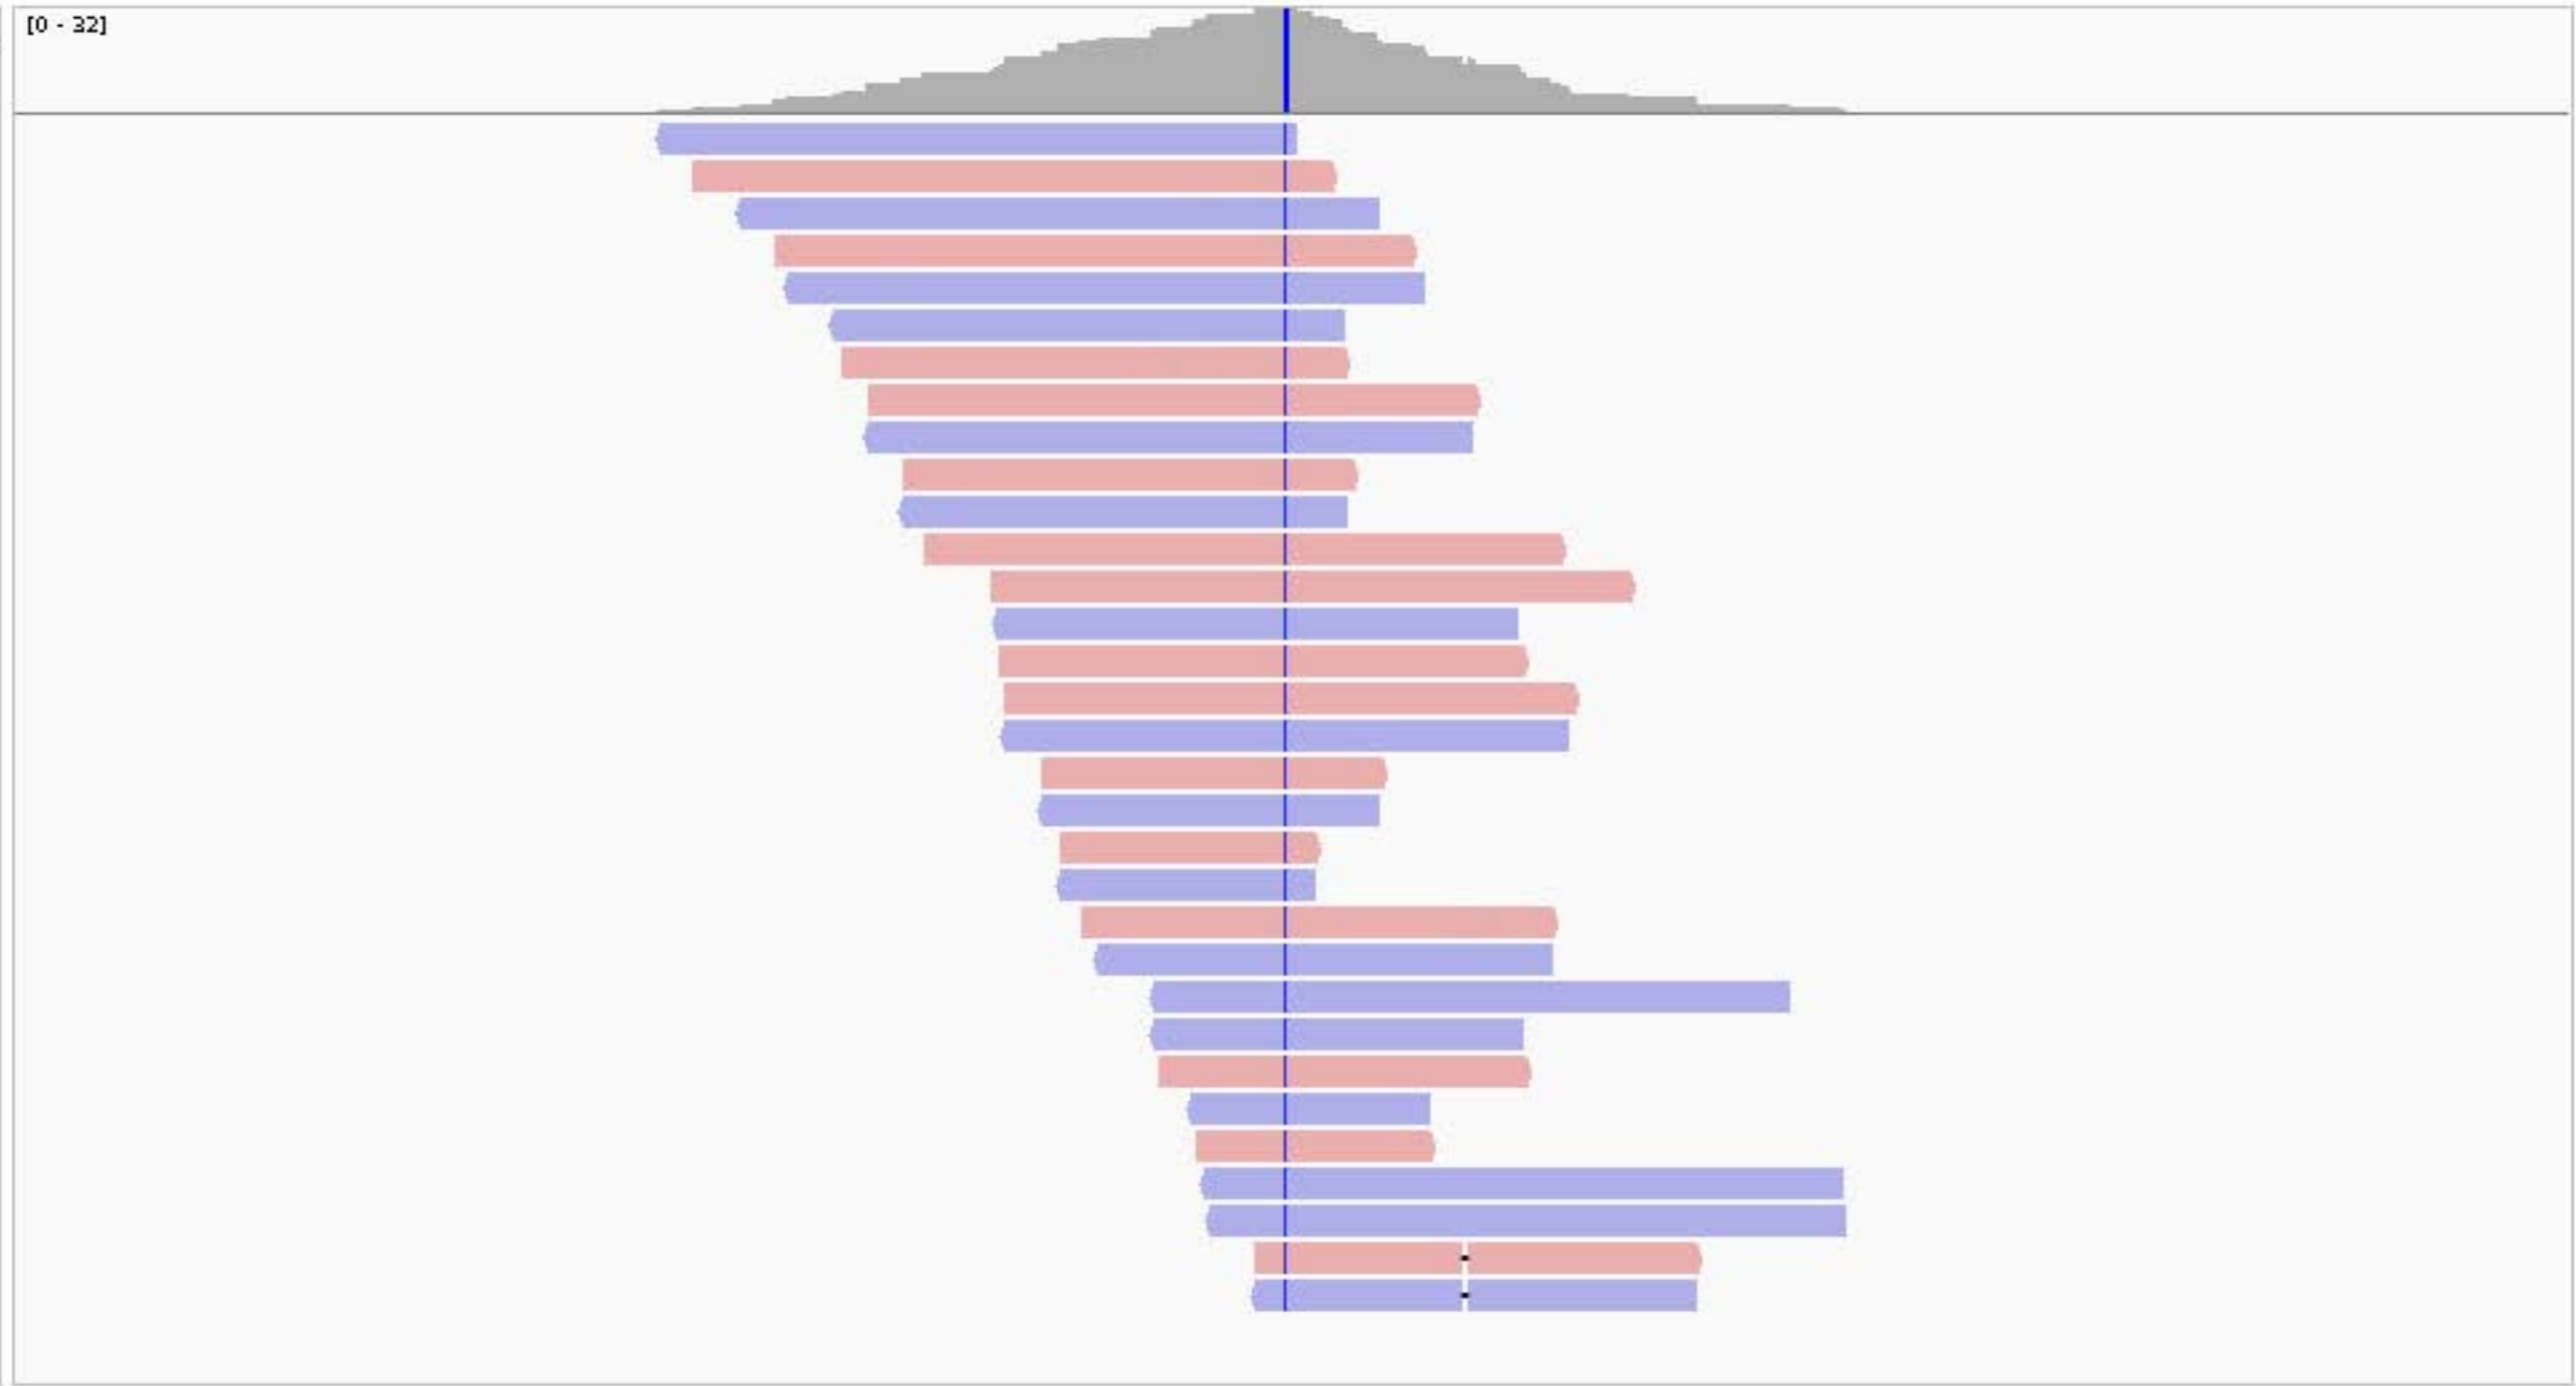

Sequence →

Refseq Genes

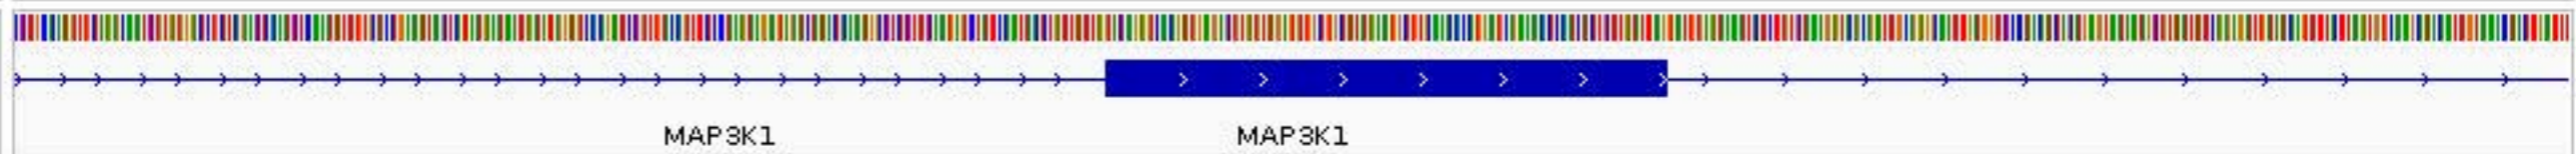

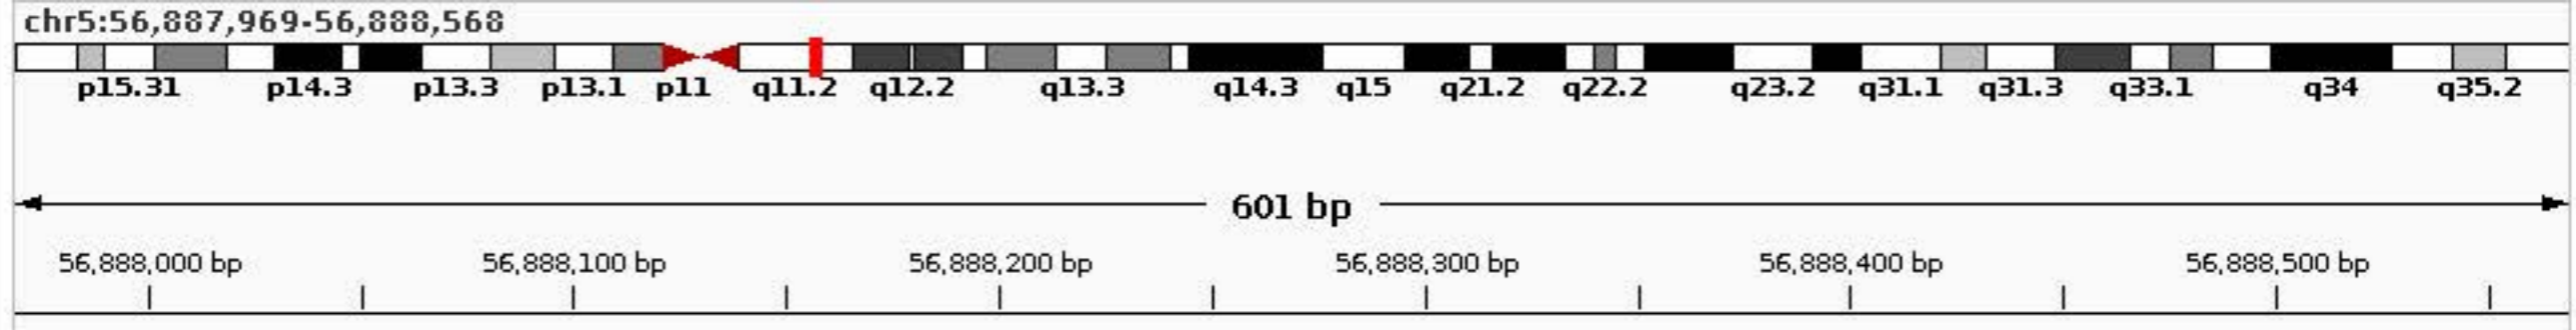

SL\_1010-N6-B\_mut.bam Coverage

SL\_1010-N6-B\_mut.bam

Sequence →

Refseq Genes

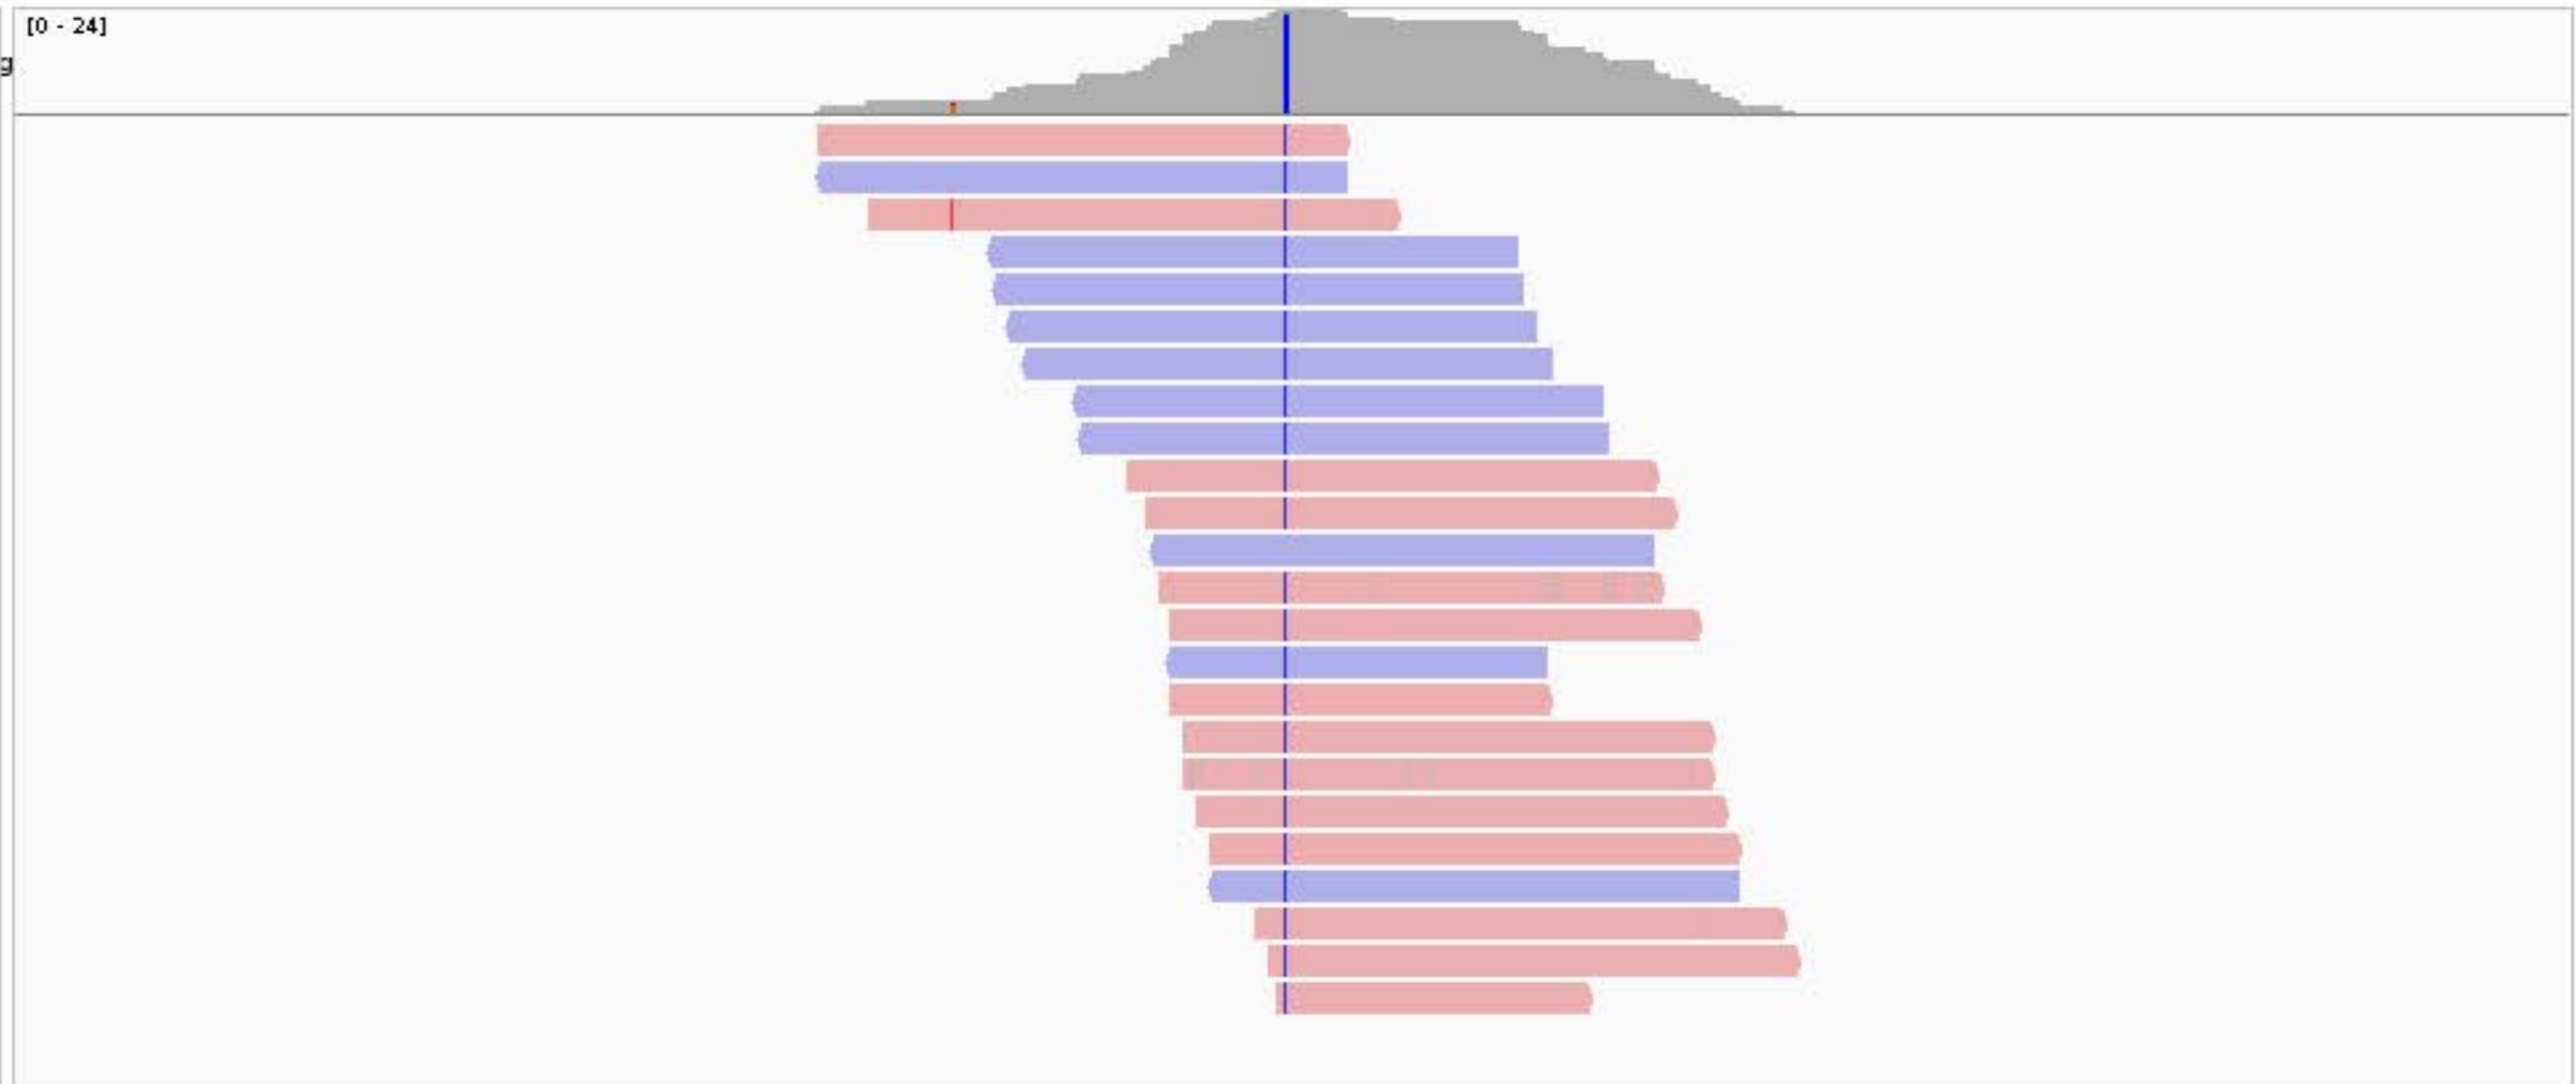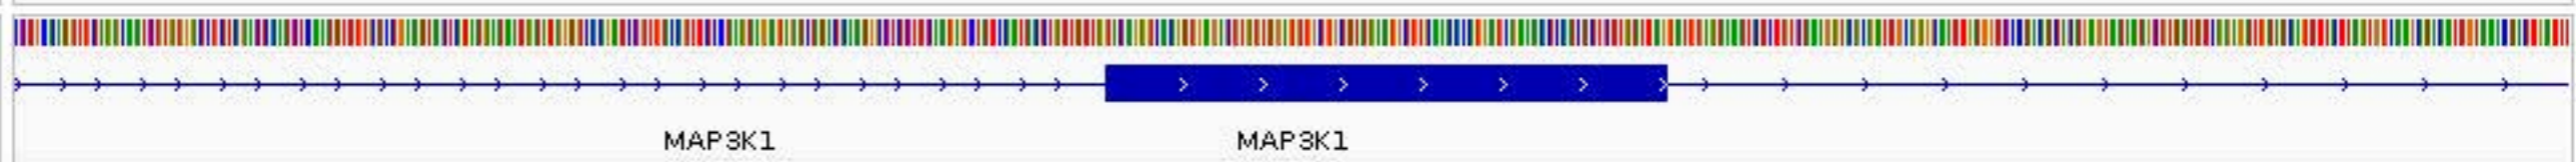

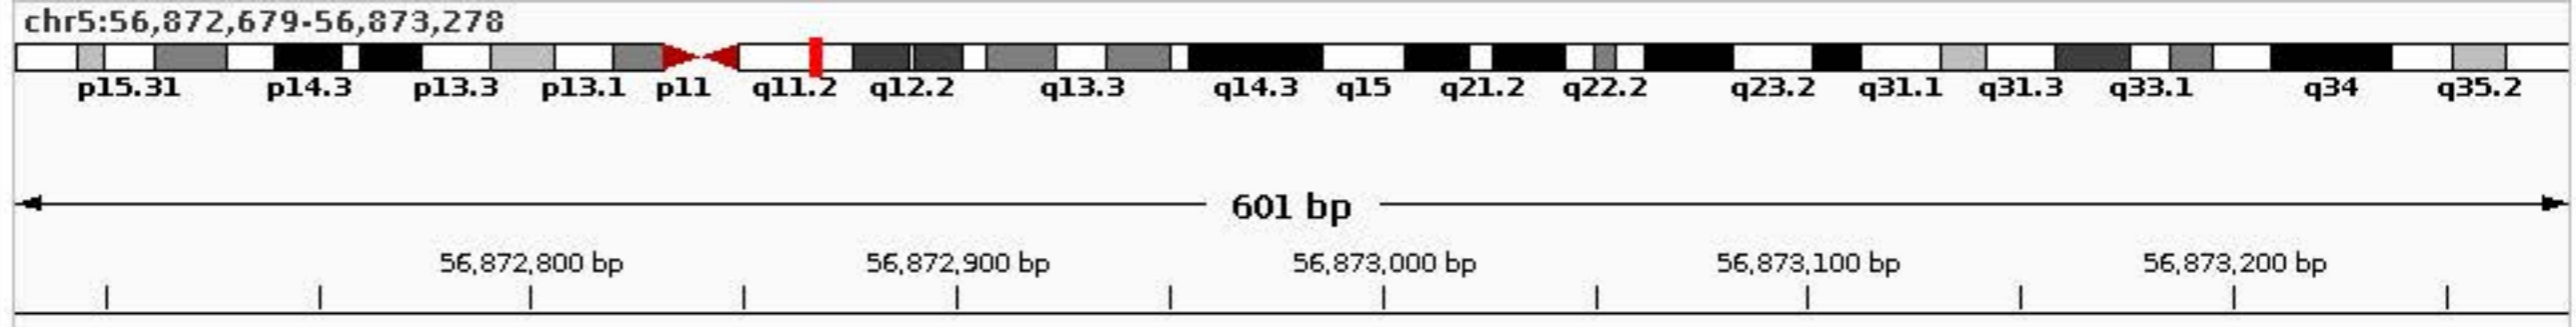

SL\_1010-N4-B\_mut.bam Coverage

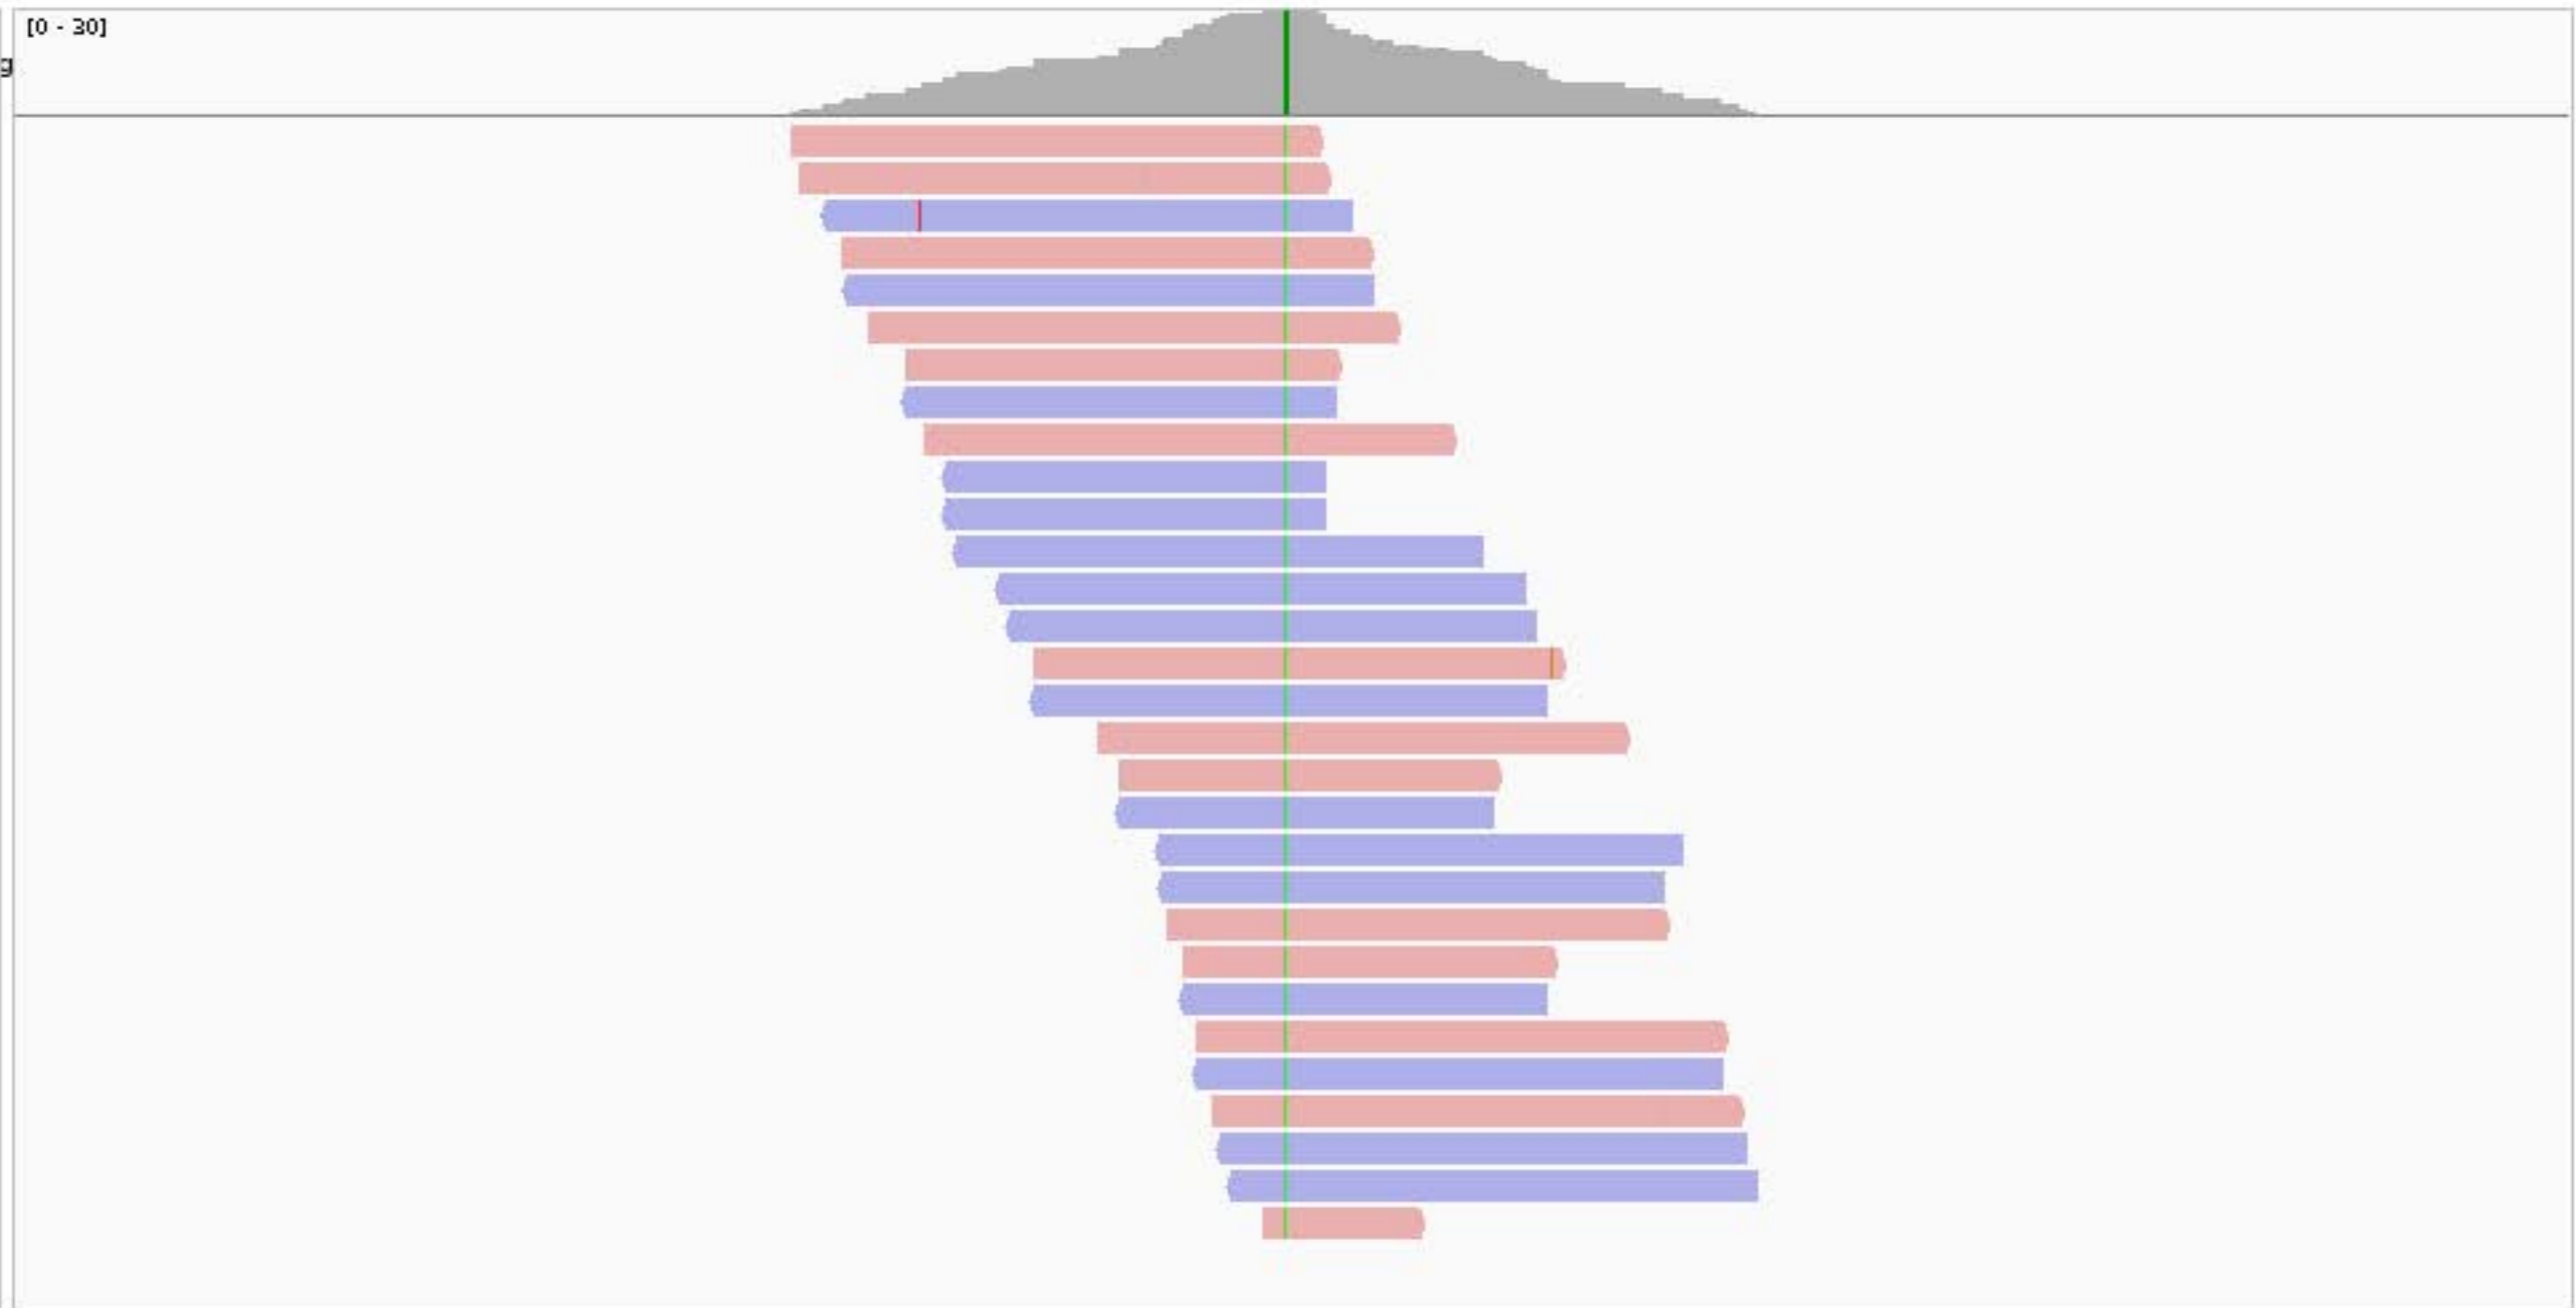

SL\_1010-N4-B\_mut.bam

Sequence →

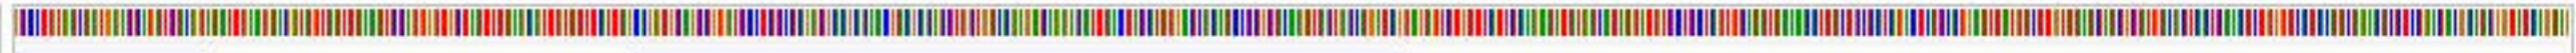

Refseq Genes

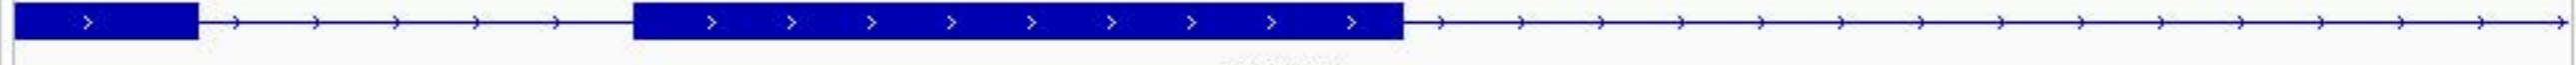

MAP3K1



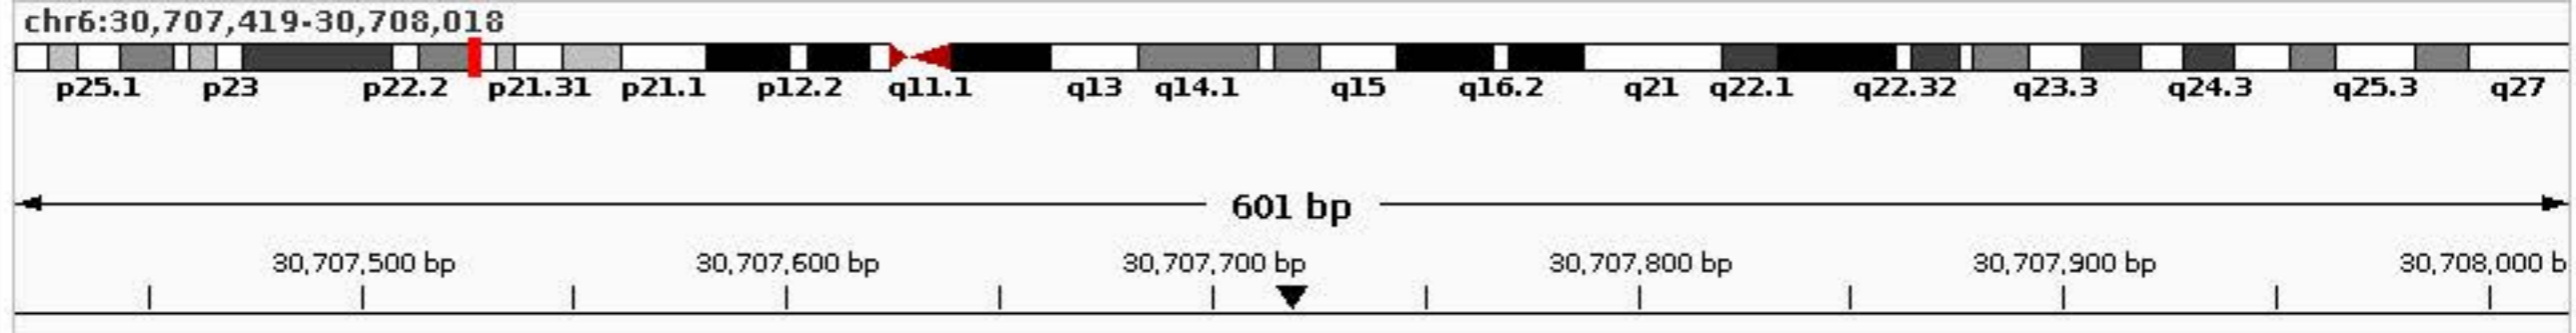

SL\_0005-LT\_11-B\_mut.bam Cover

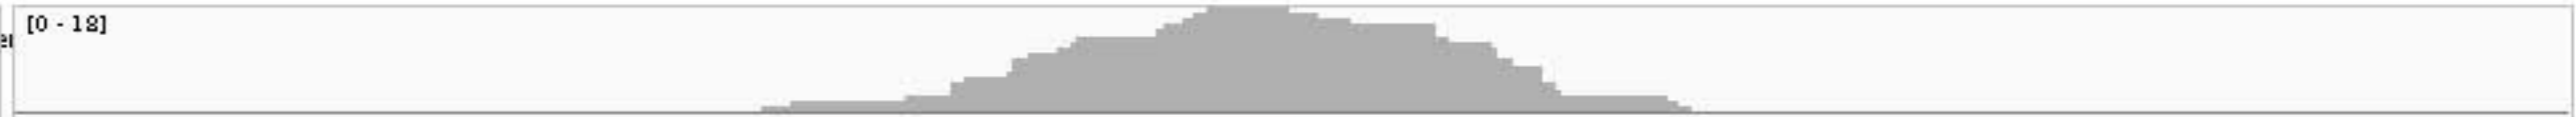

SL\_0005-LT\_11-B\_mut.bam

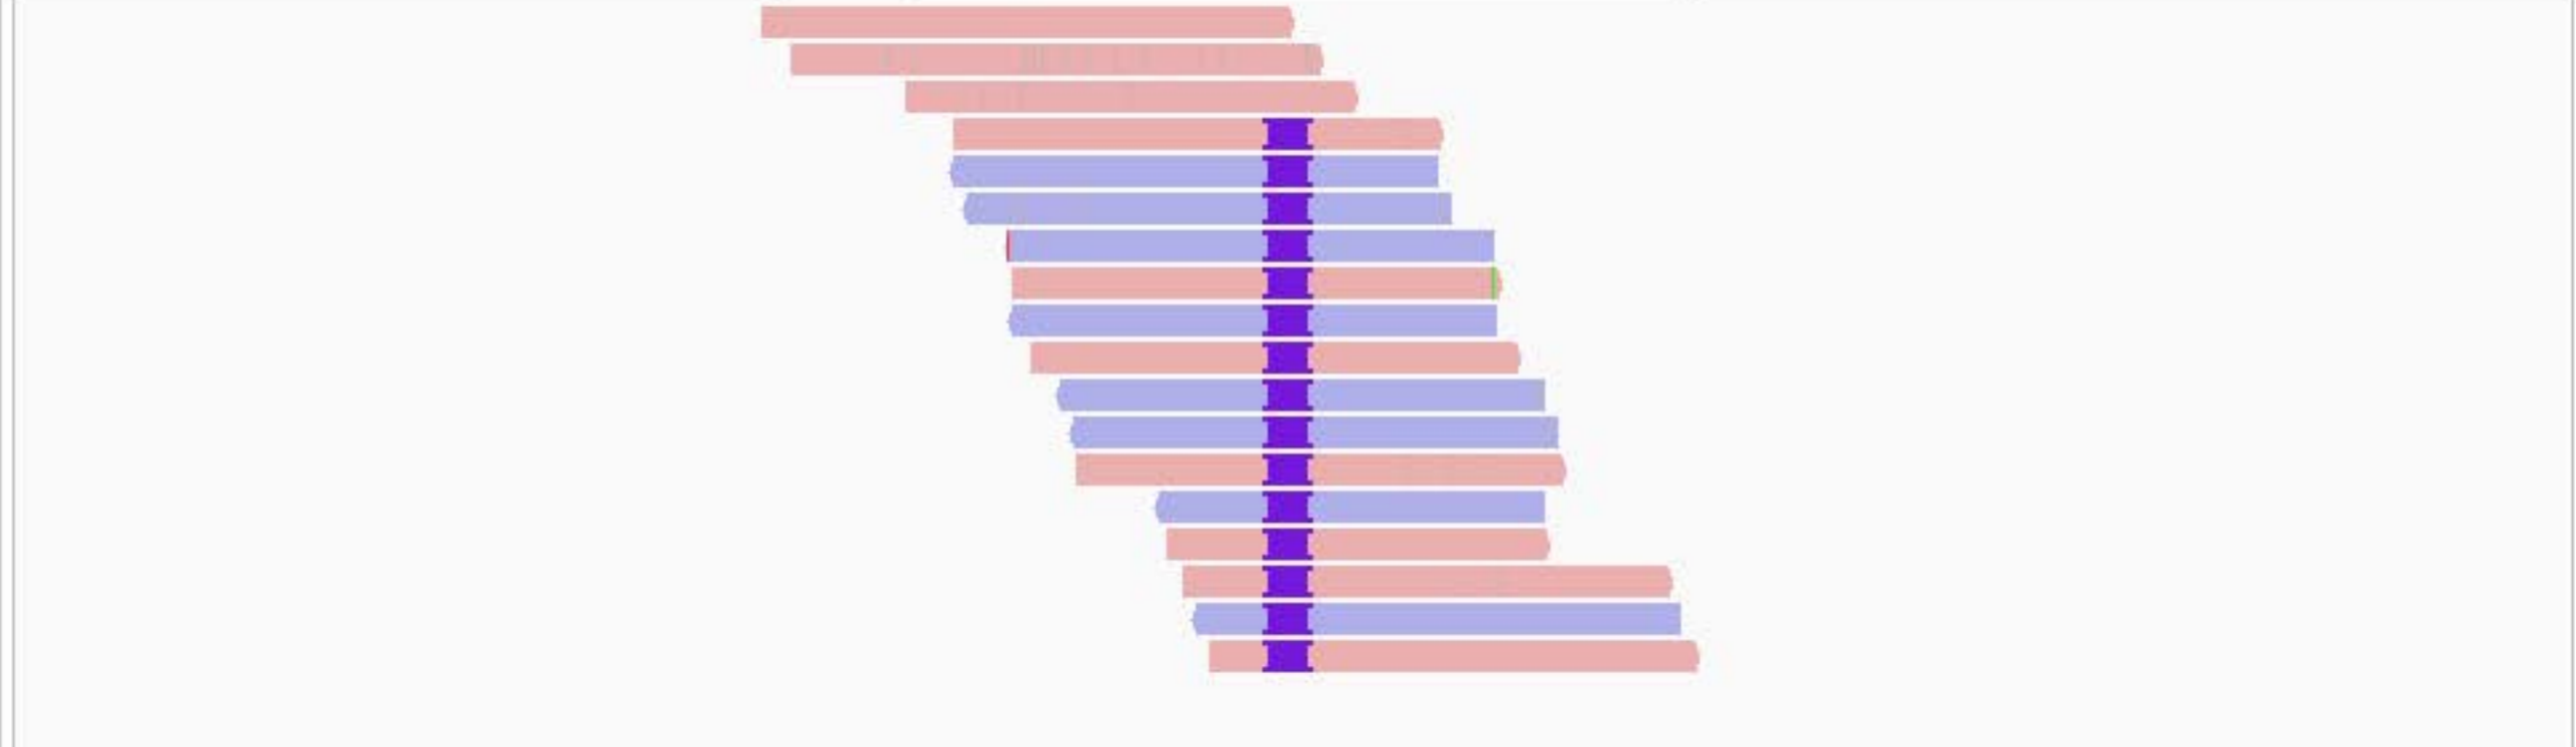

Sequence

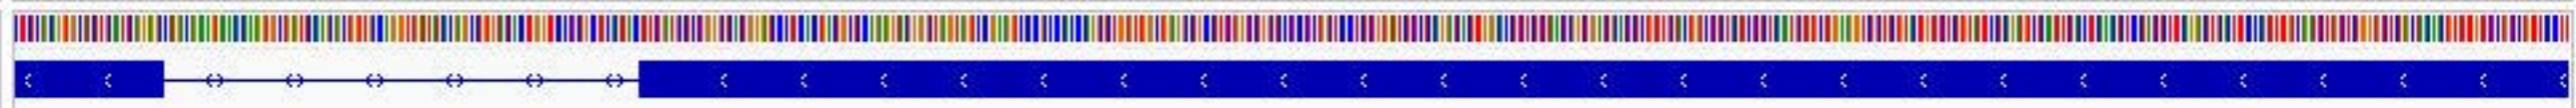

Refseq Genes

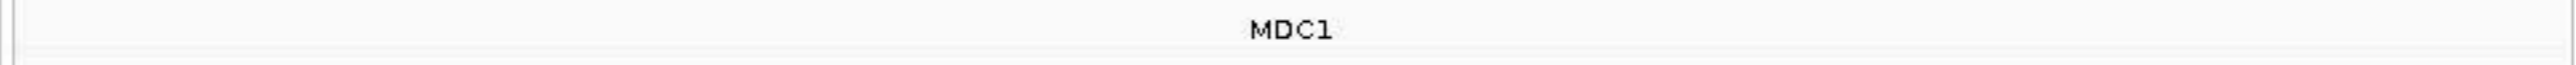

MDC1

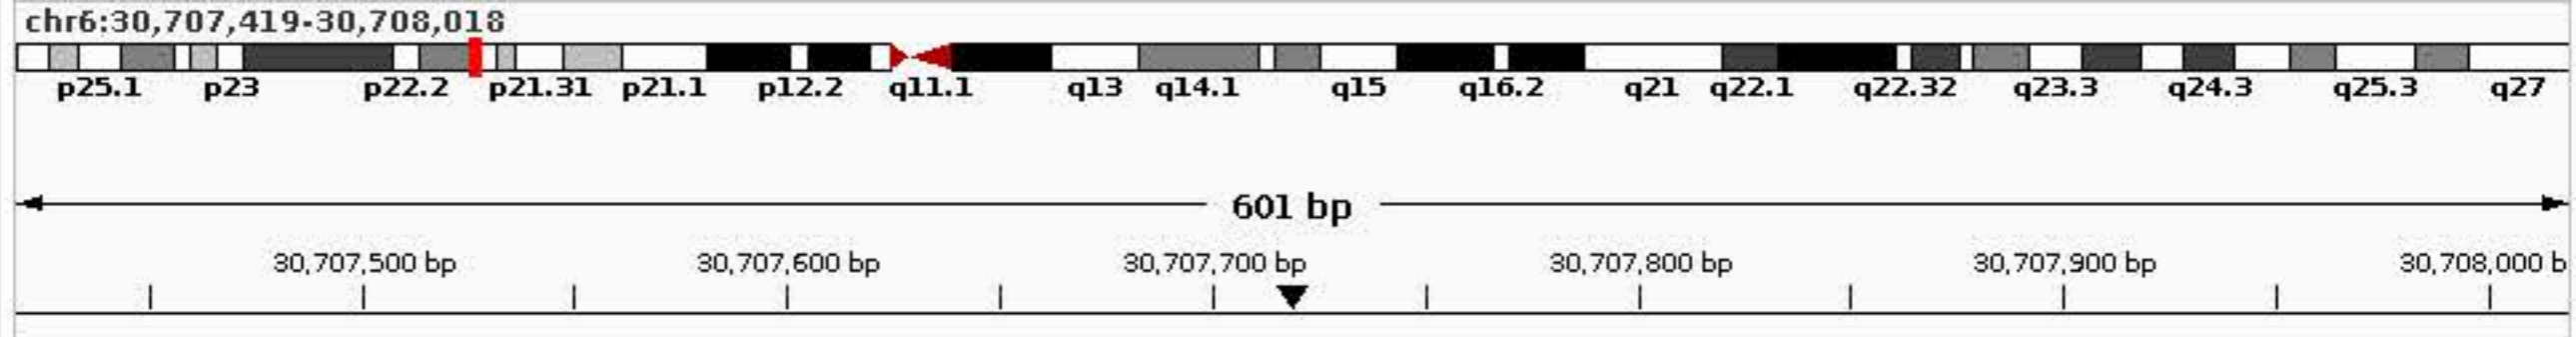

SL\_0005-LT-4-B\_mut.bam Coverage

SL\_0005-LT-4-B\_mut.bam

Sequence

Refseq Genes

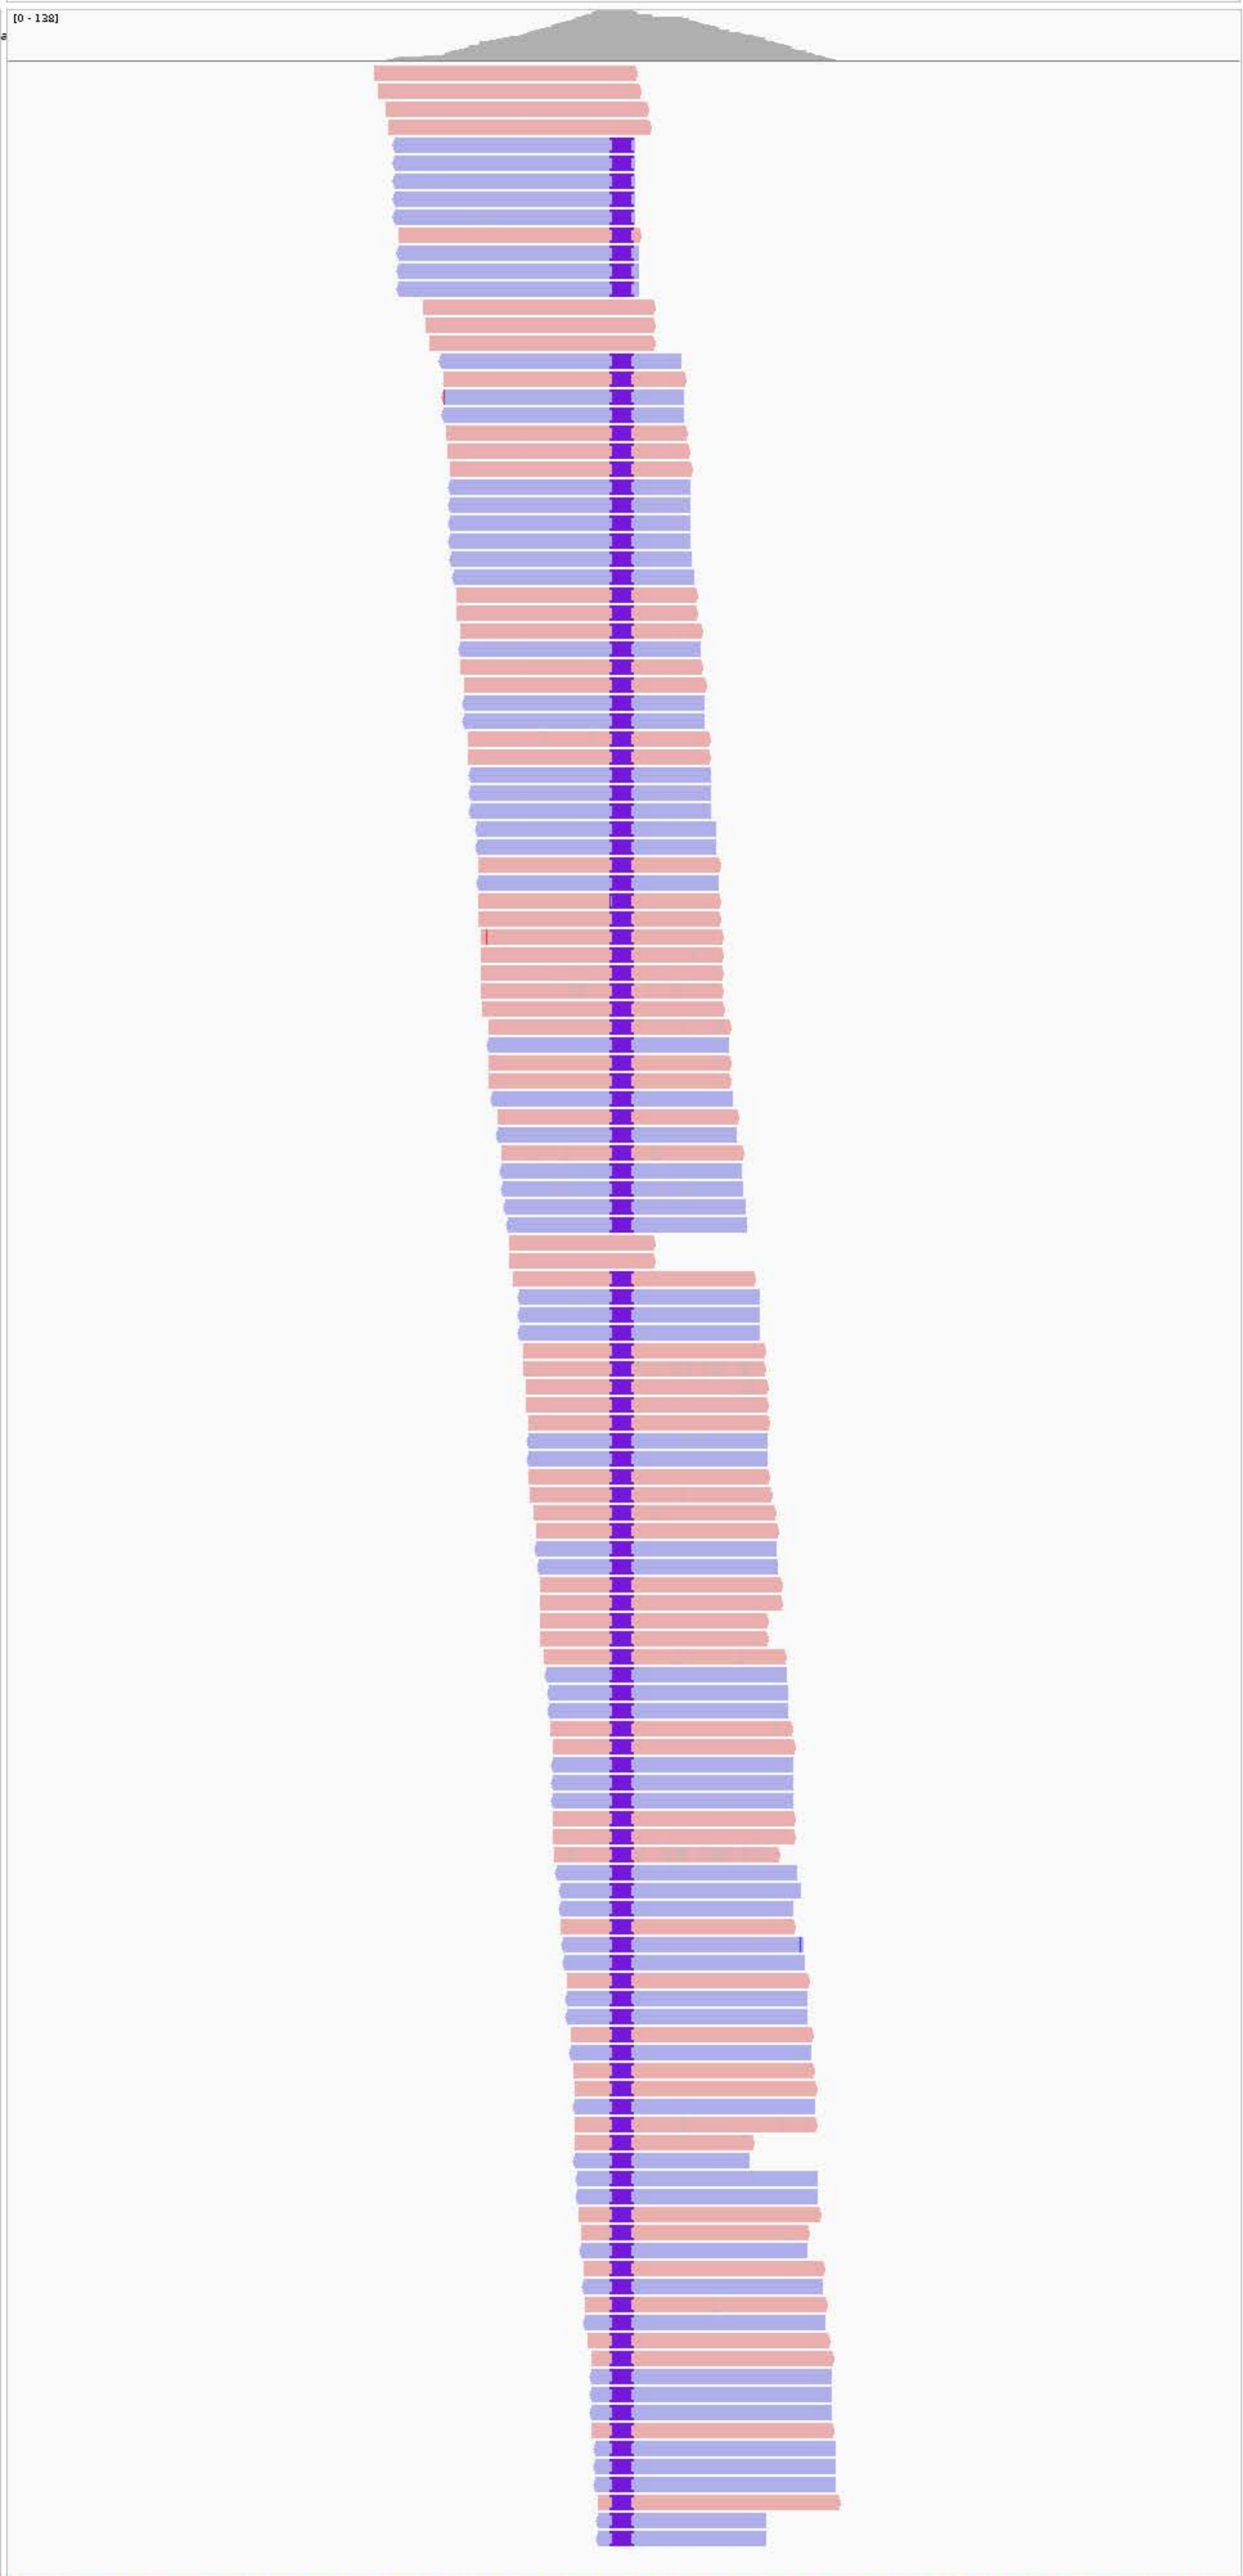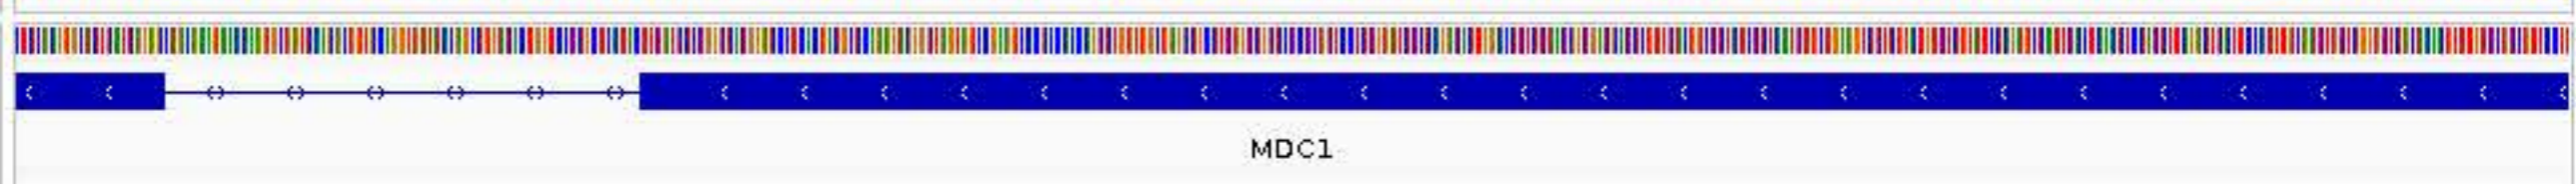

MDC1

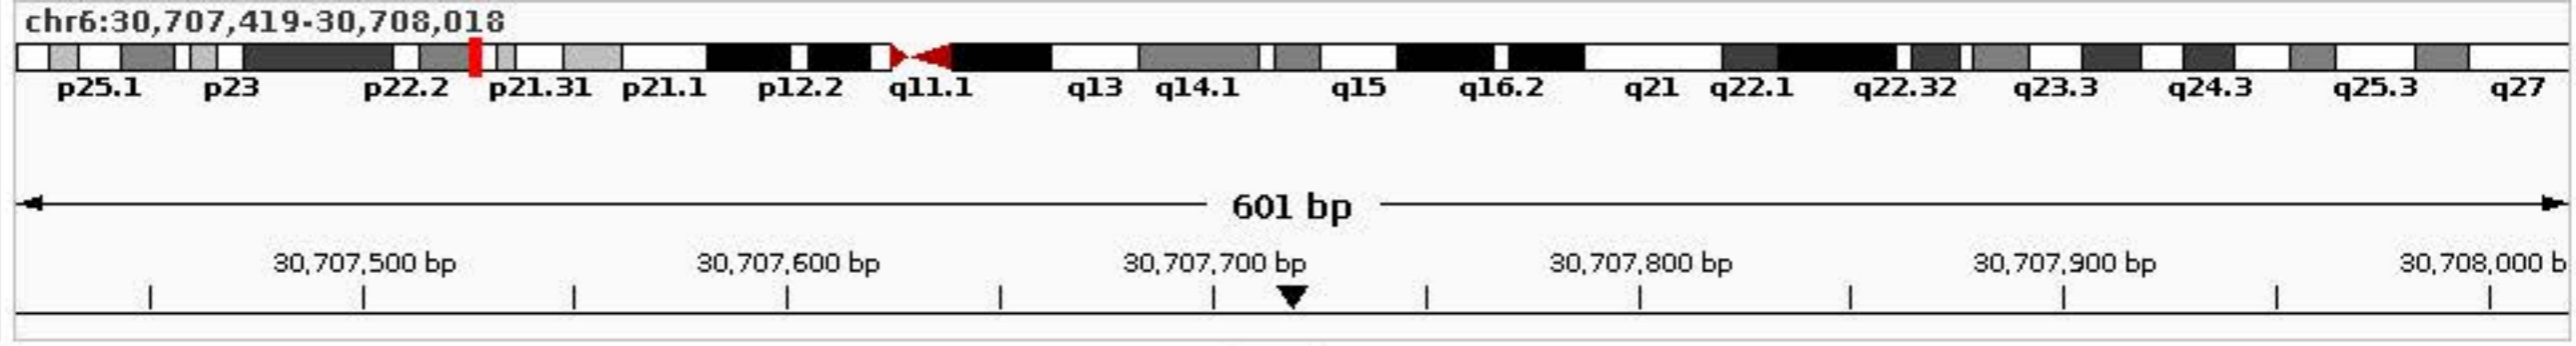

SL\_0005-LT-9-B\_mut.bam Coverage

SL\_0005-LT-9-B\_mut.bam

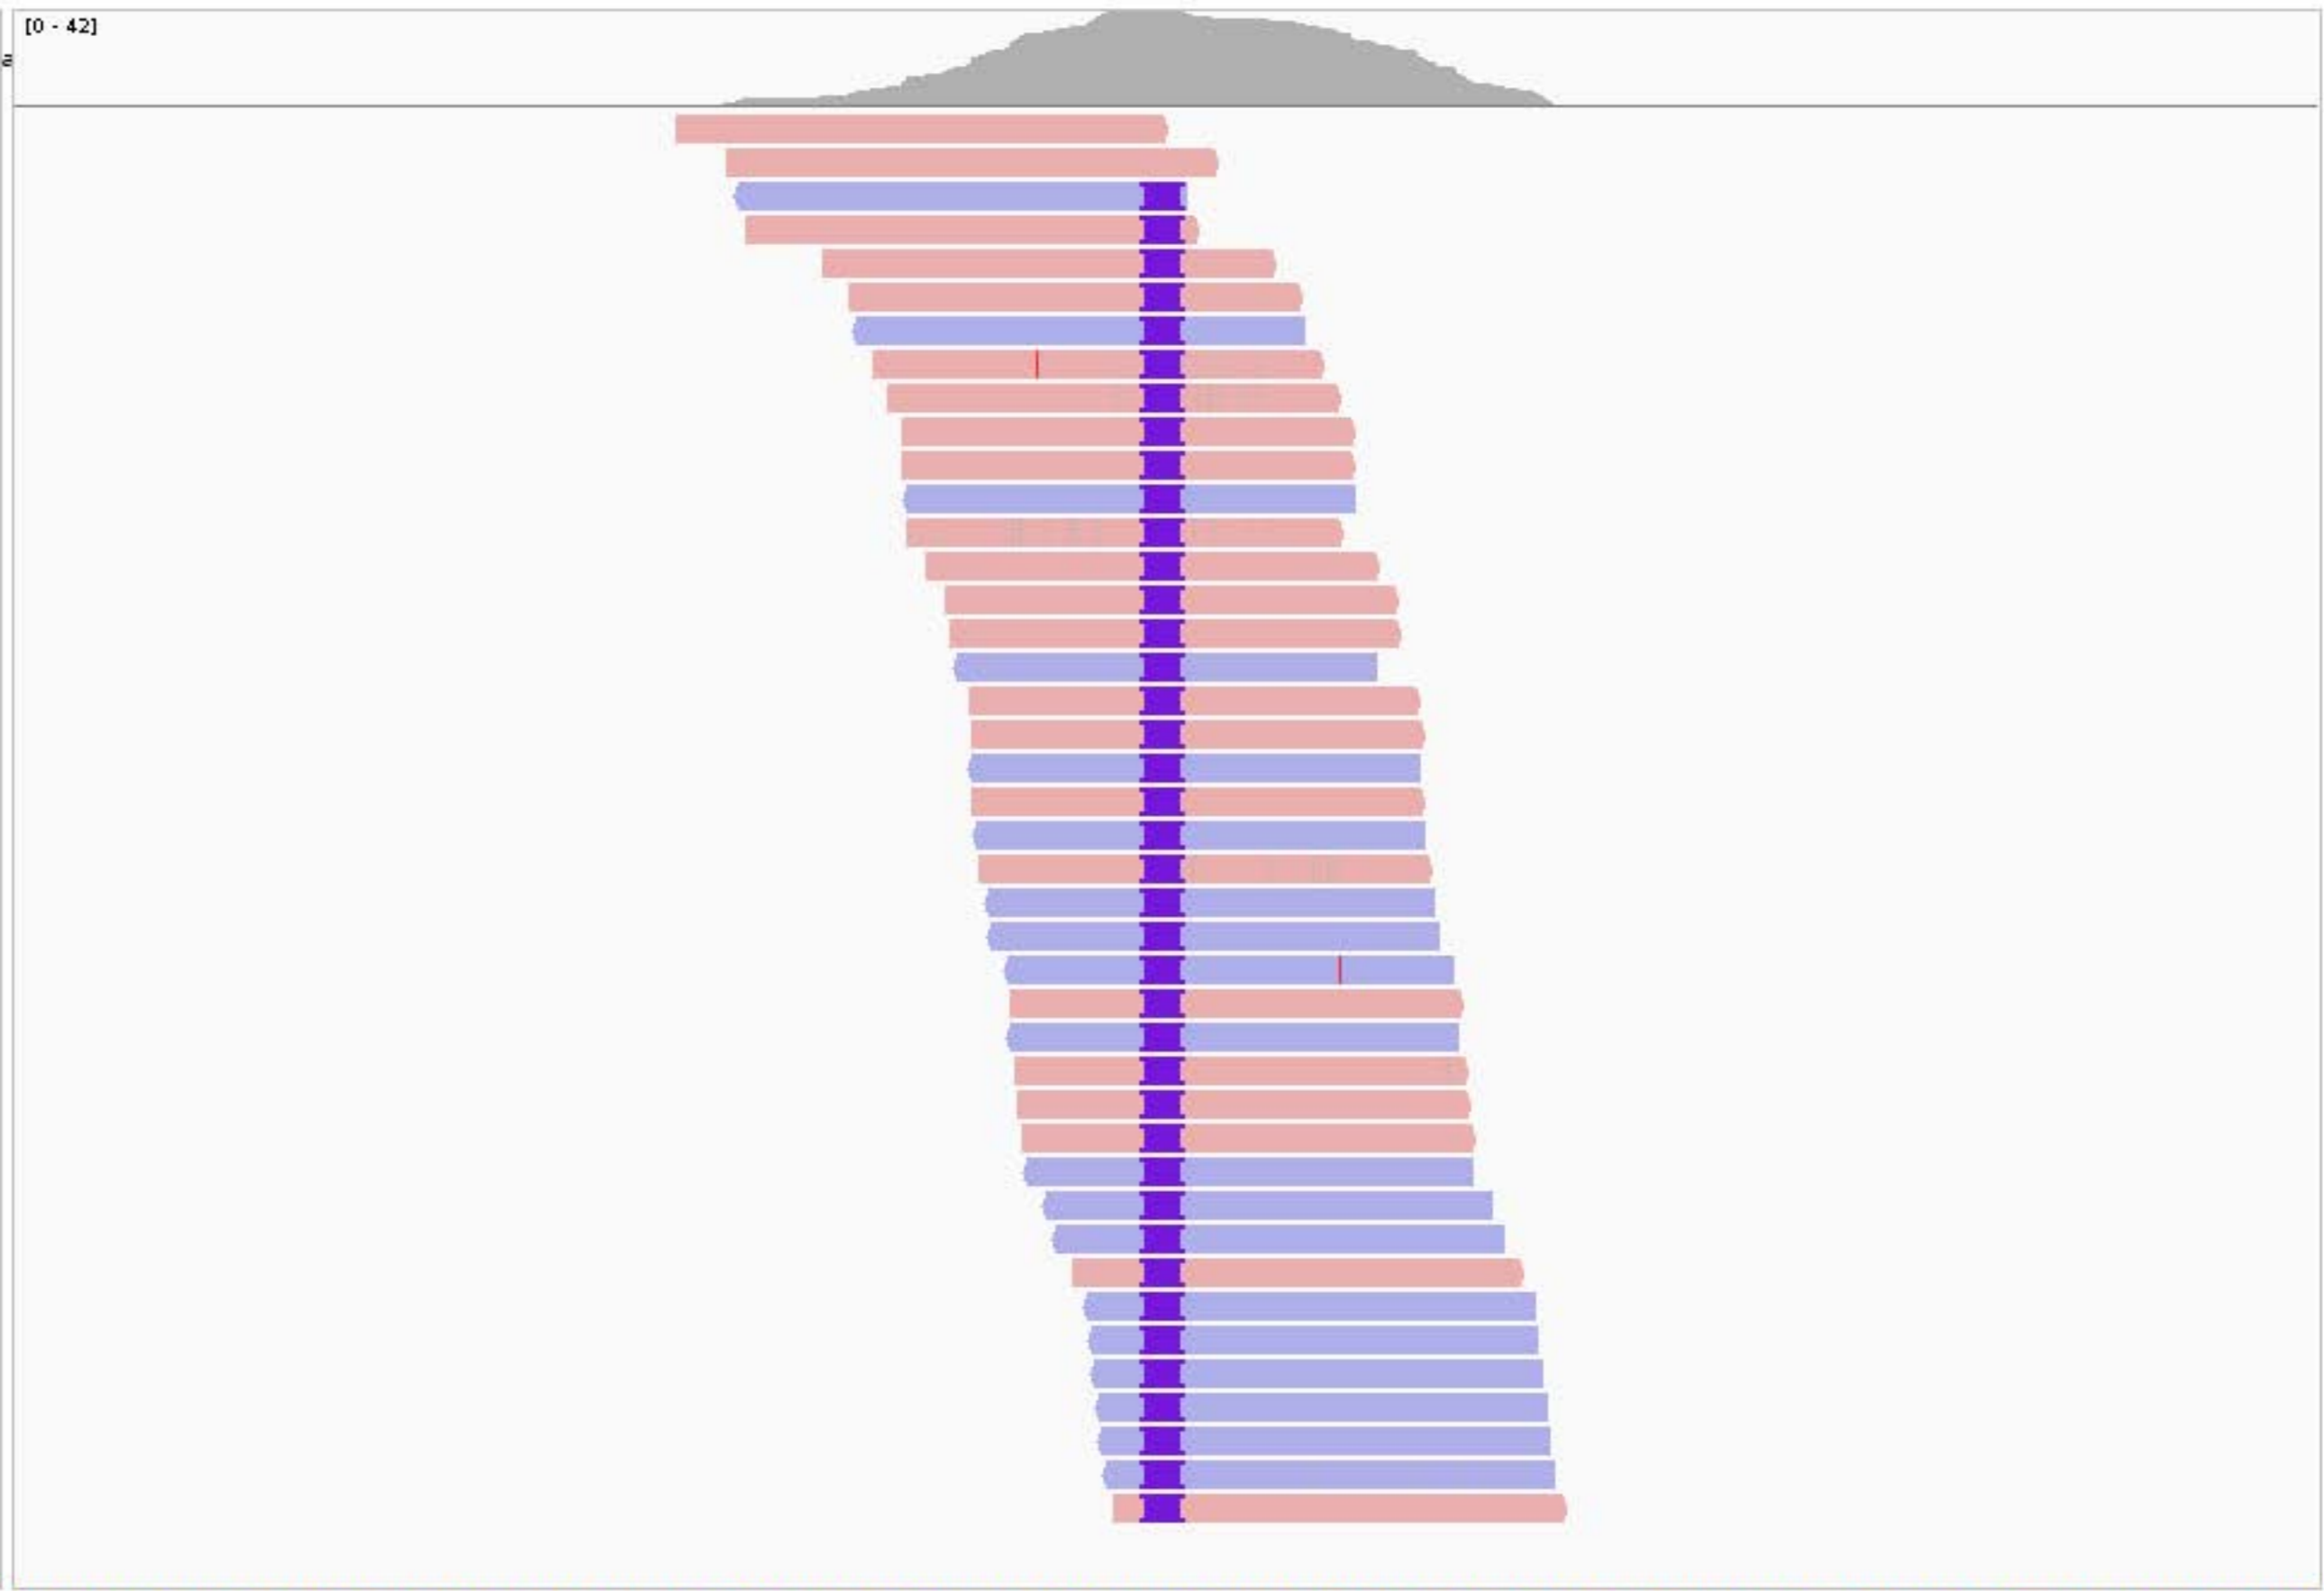

Sequence →

Refseq Genes

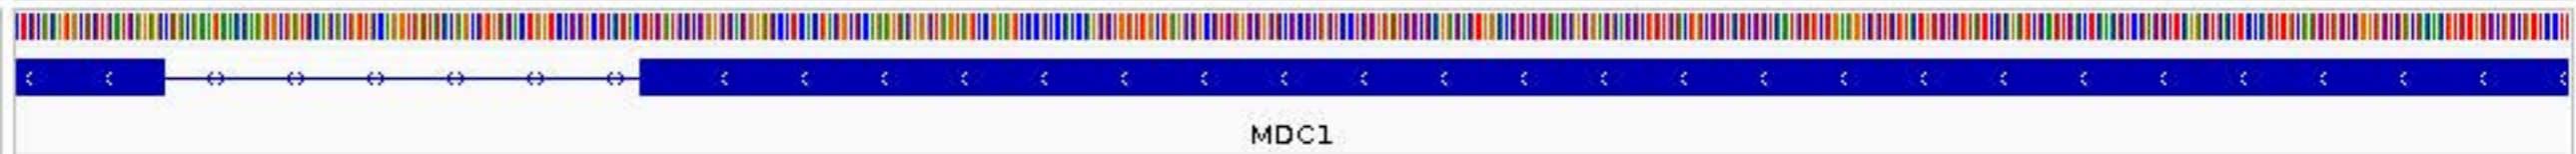



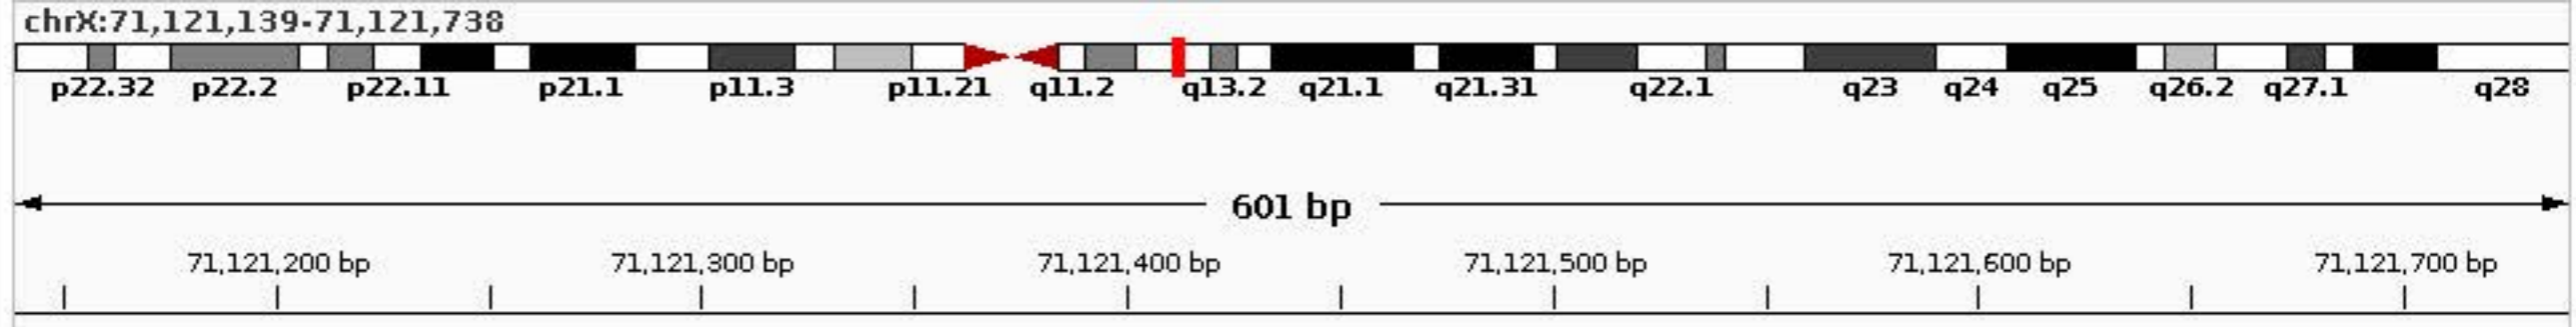

SL\_1012-N2-B\_mut.bam Coverage

SL\_1012-N2-B\_mut.bam

Sequence

Refseq Genes

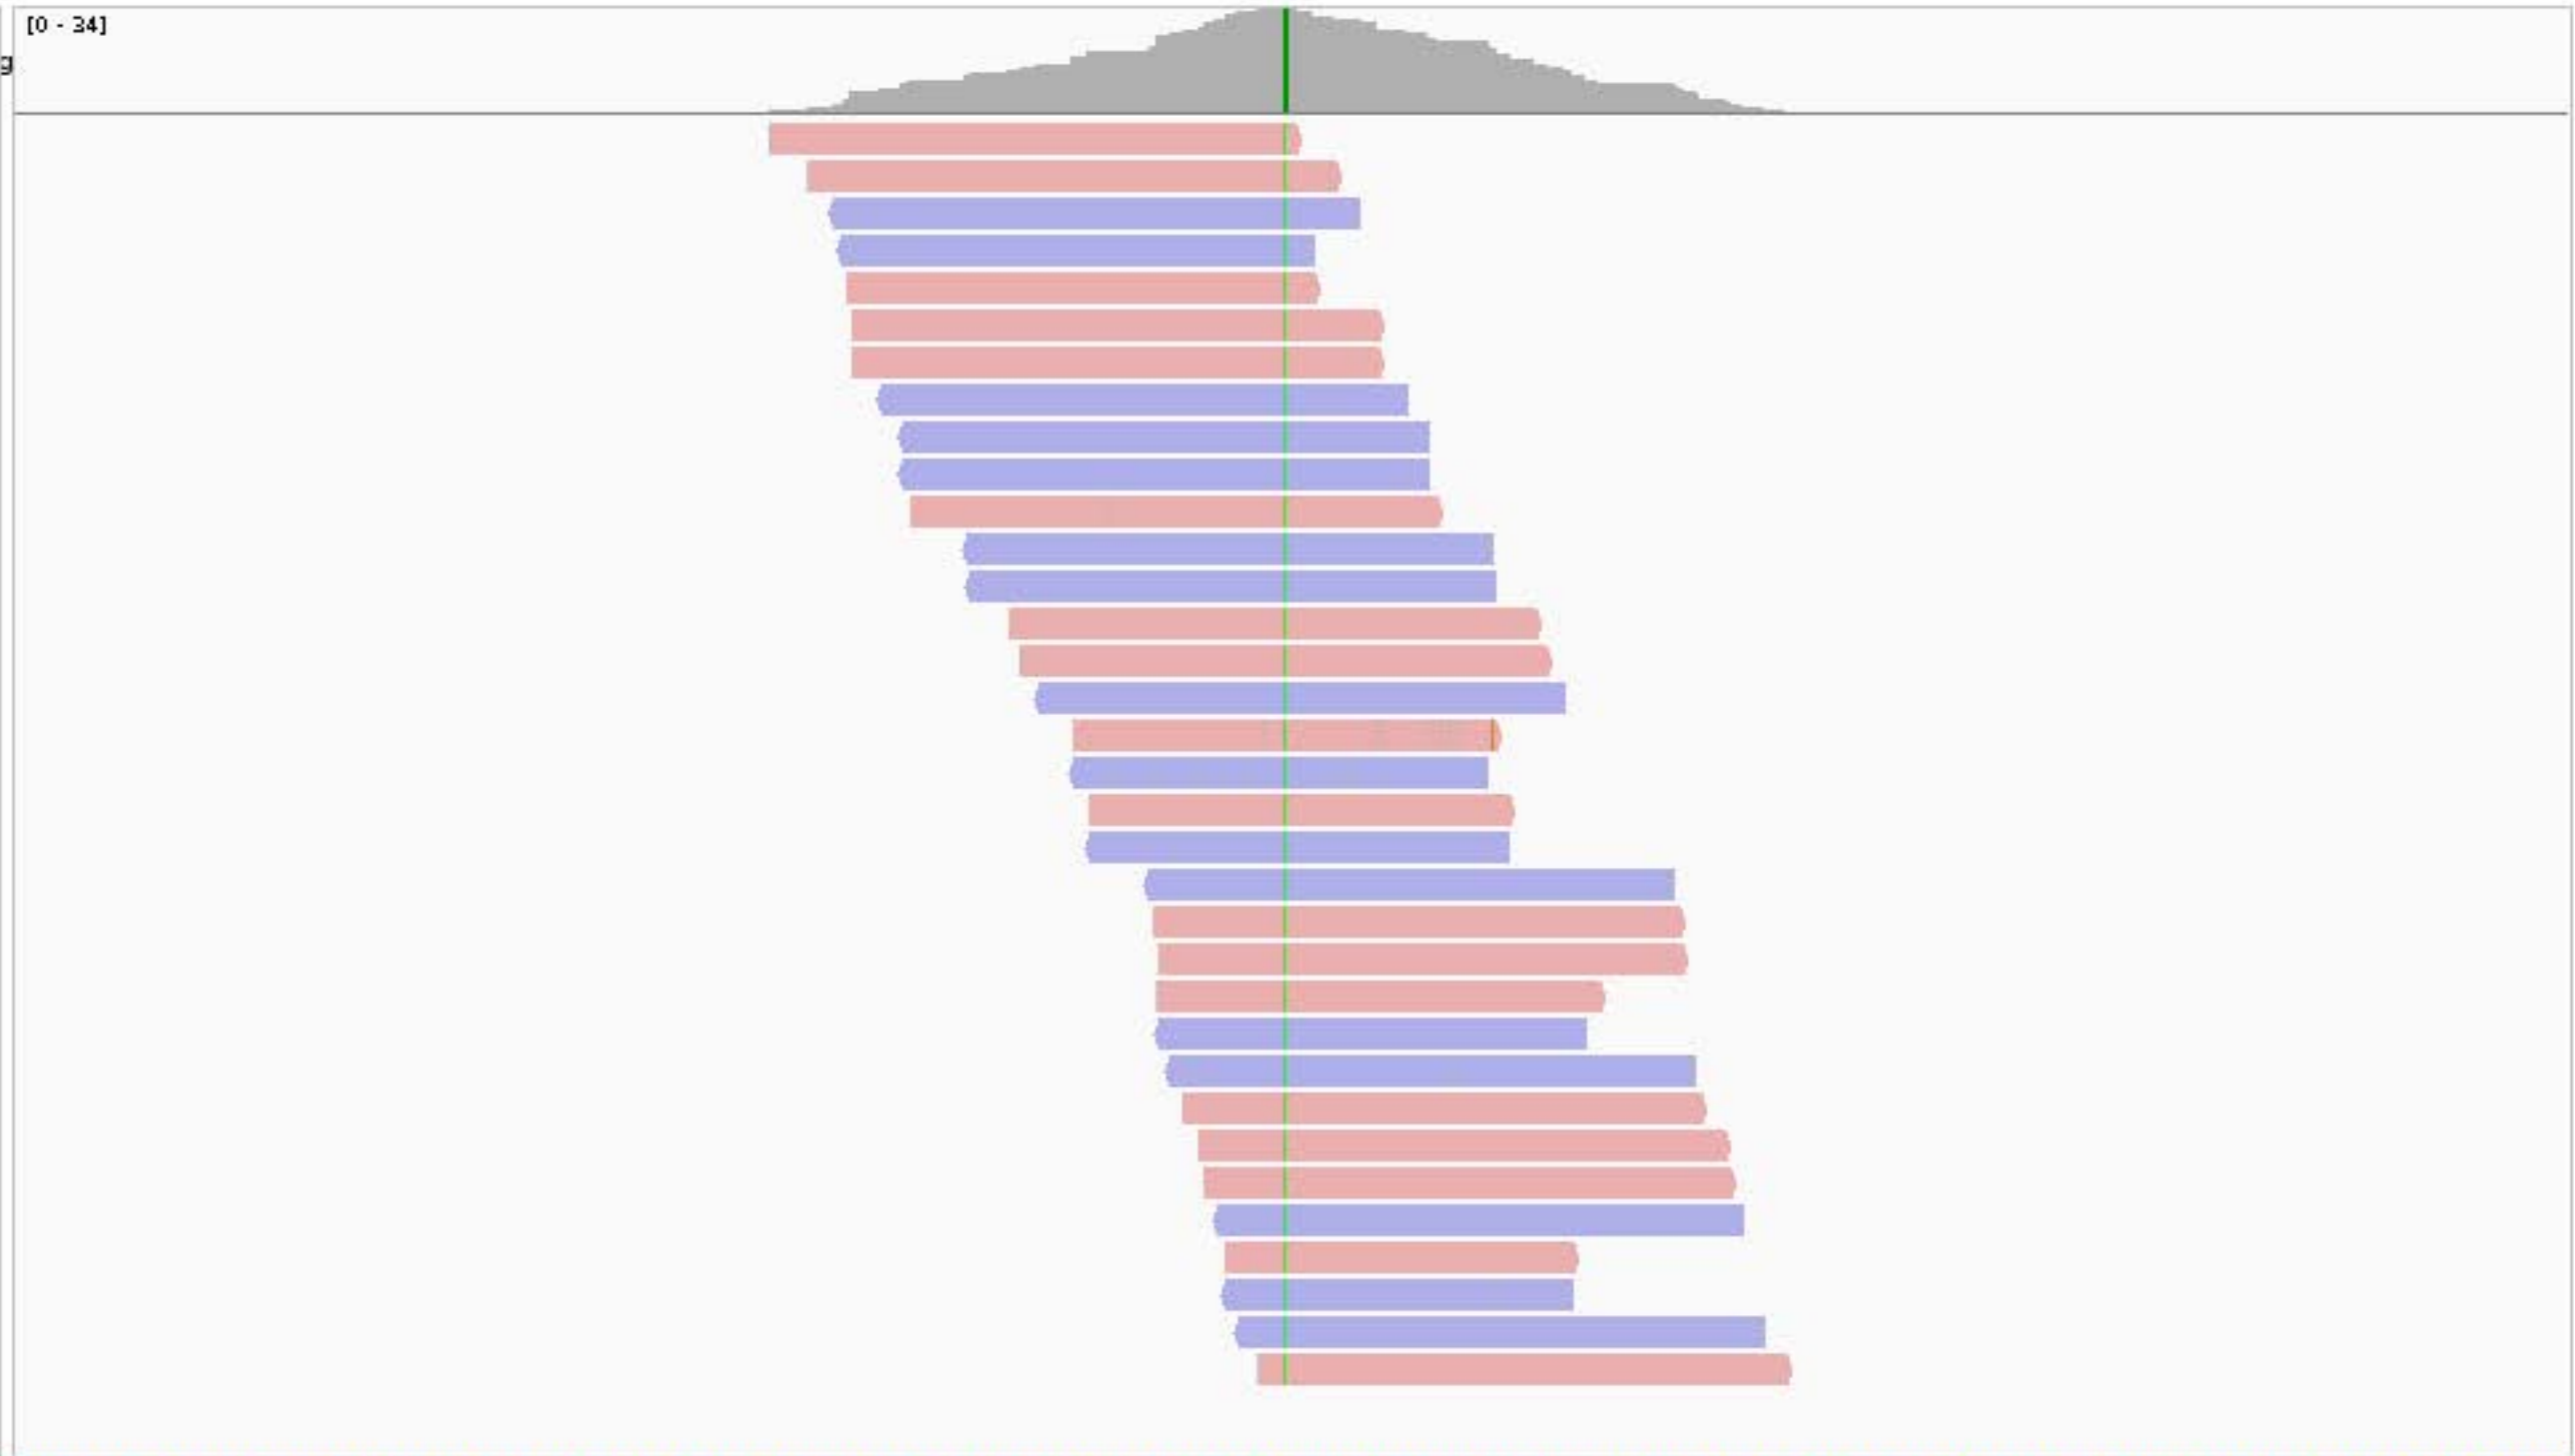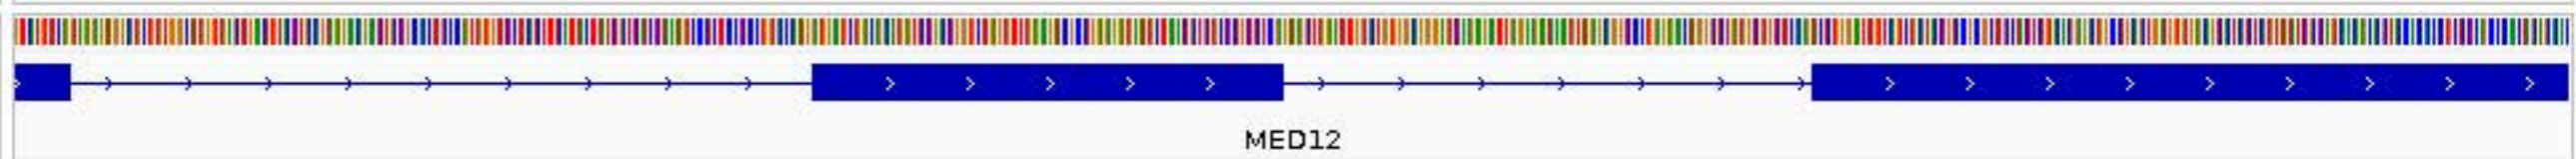

chr15:41,668,945-41,669,544

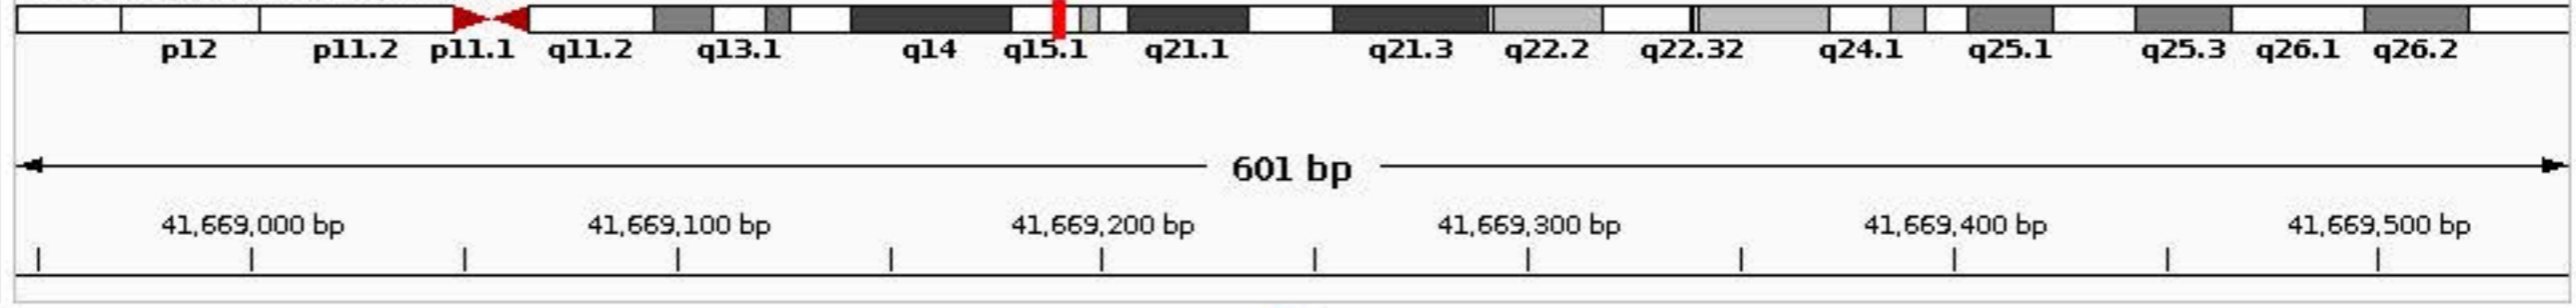

SL\_1012\_R\_10\_FFPE-B\_mut.bam  
rage

SL\_1012\_R\_10\_FFPE-B\_mut.ba  
m

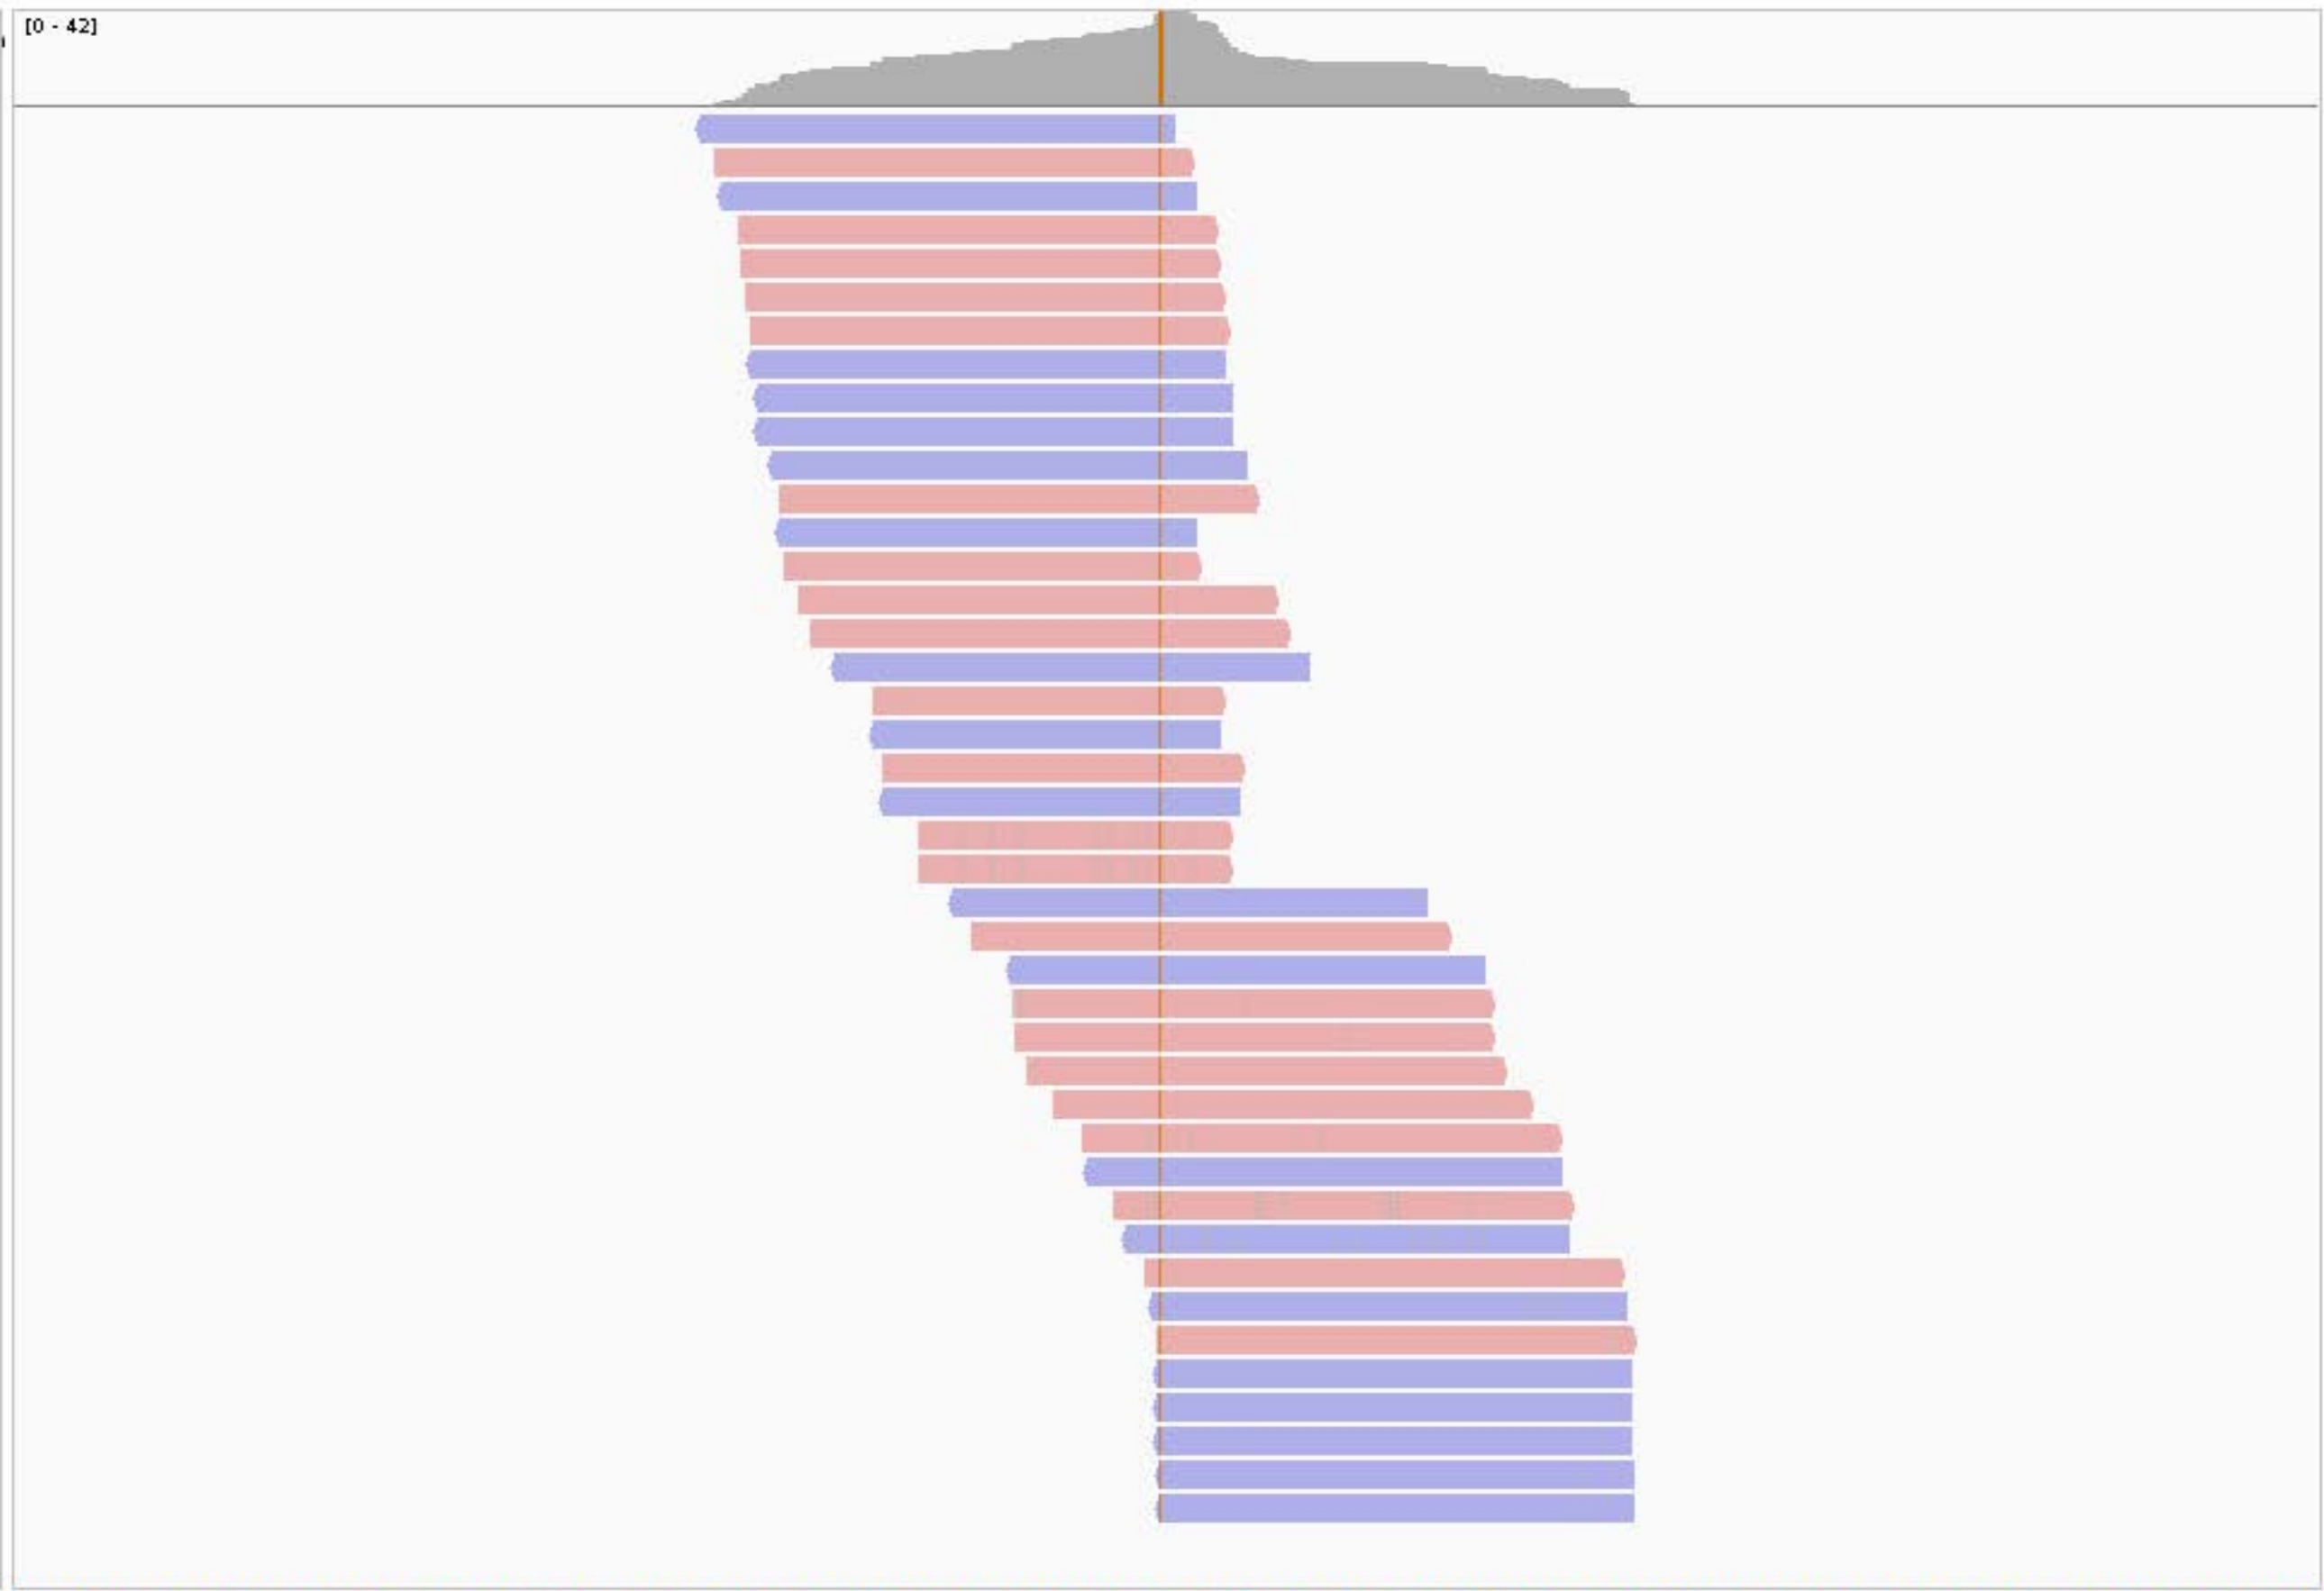

Sequence →

Refseq Genes

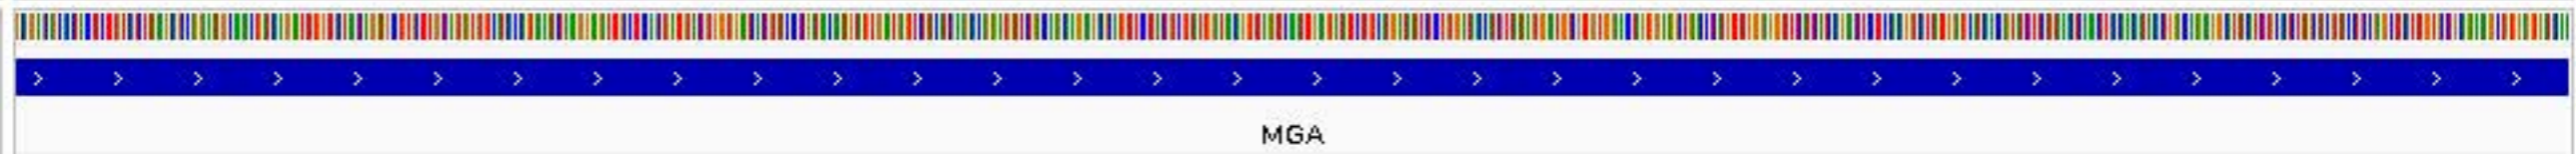

MGA

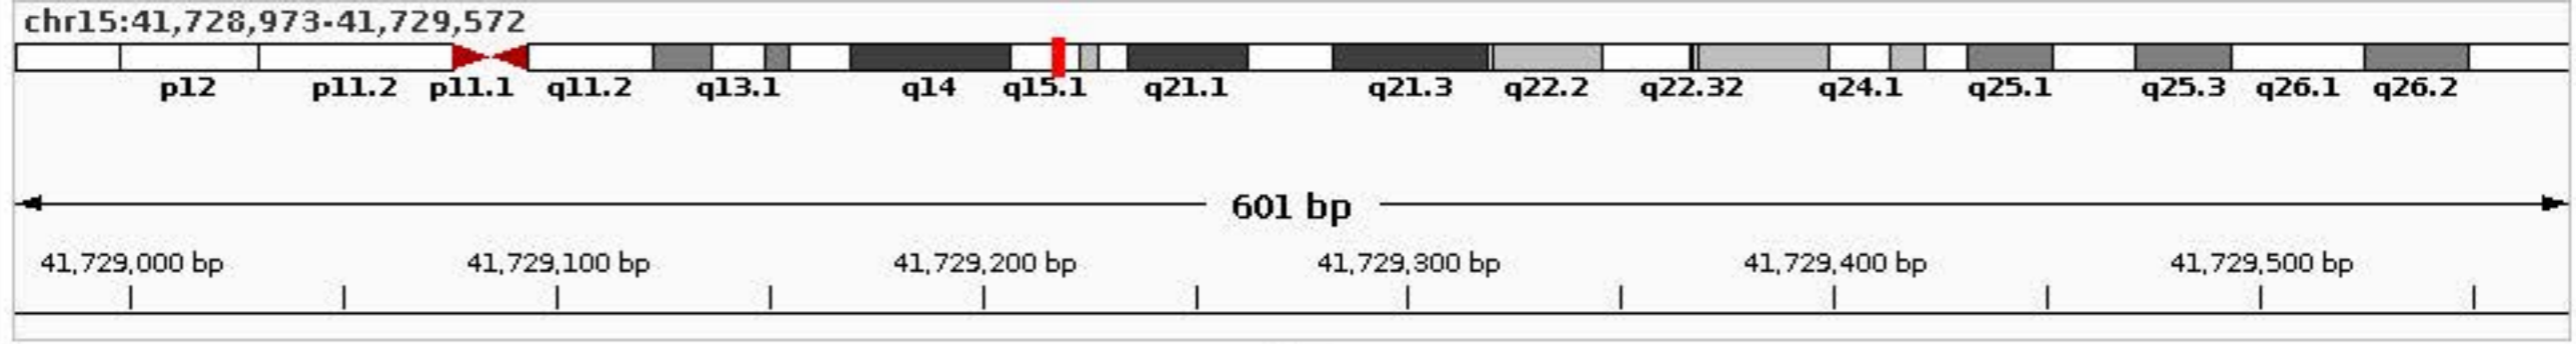

SL\_1012-N1-B\_mut.bam Coverage

SL\_1012-N1-B\_mut.bam

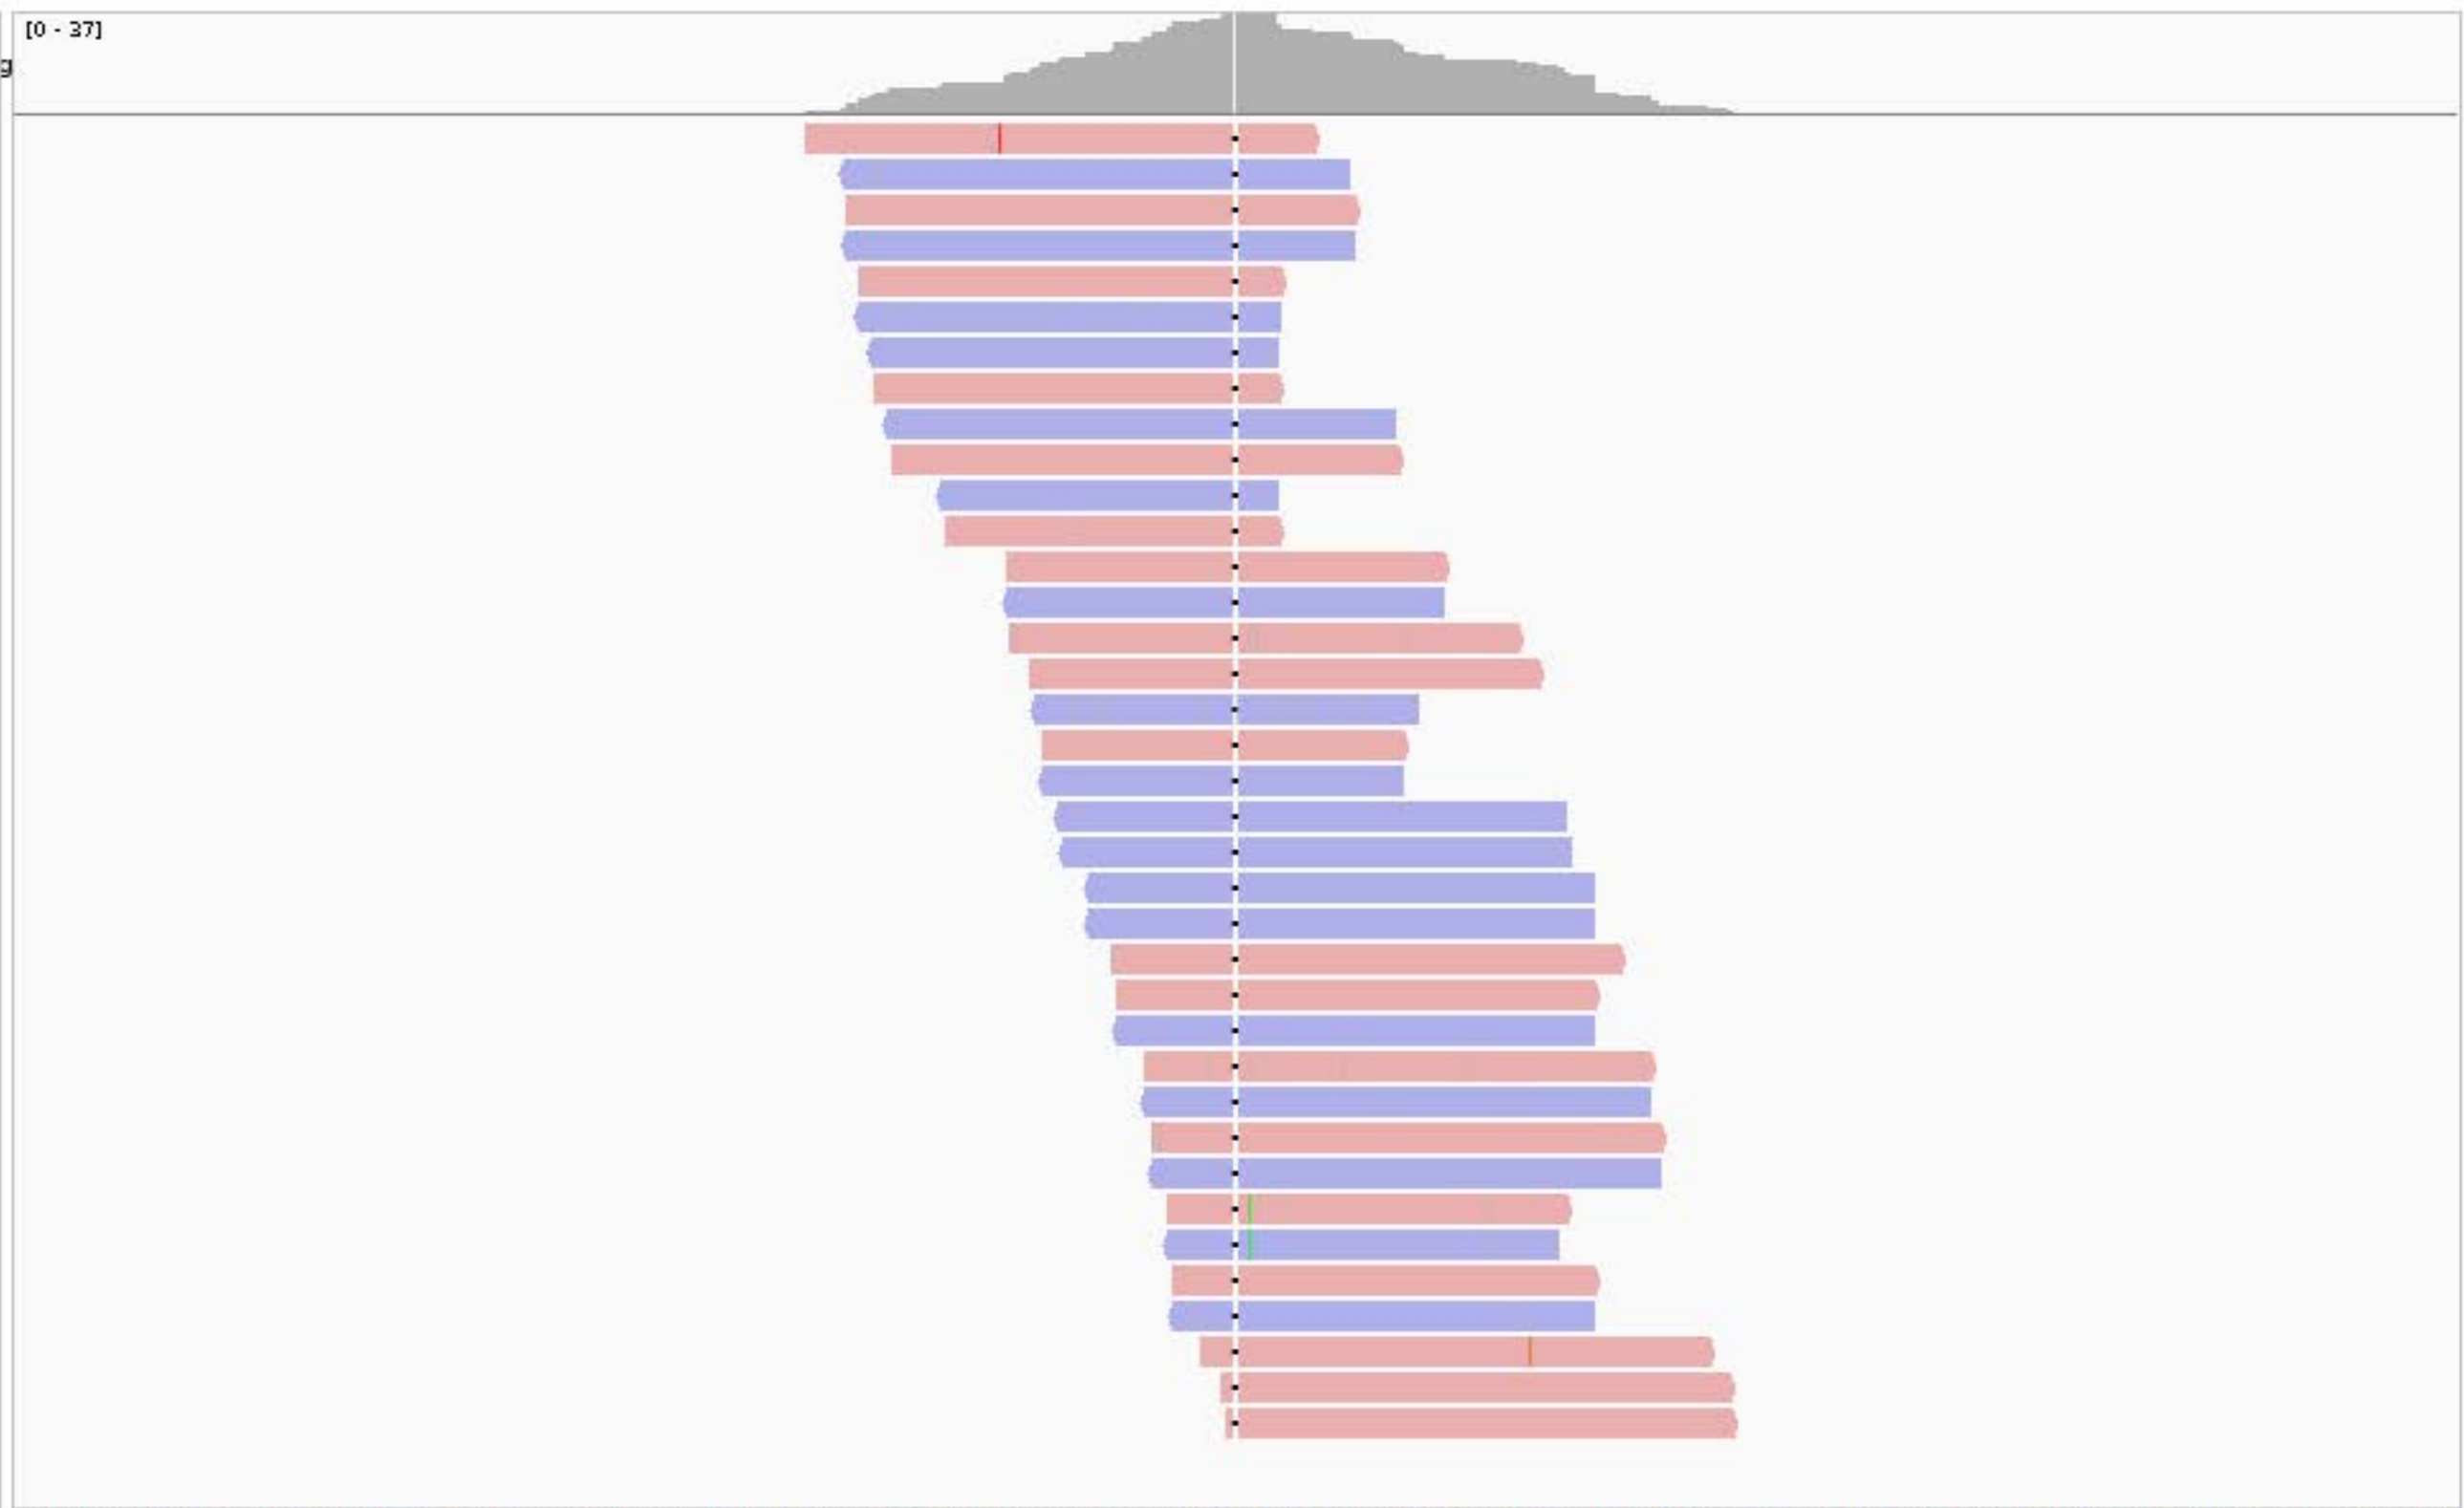

Sequence →

Refseq Genes

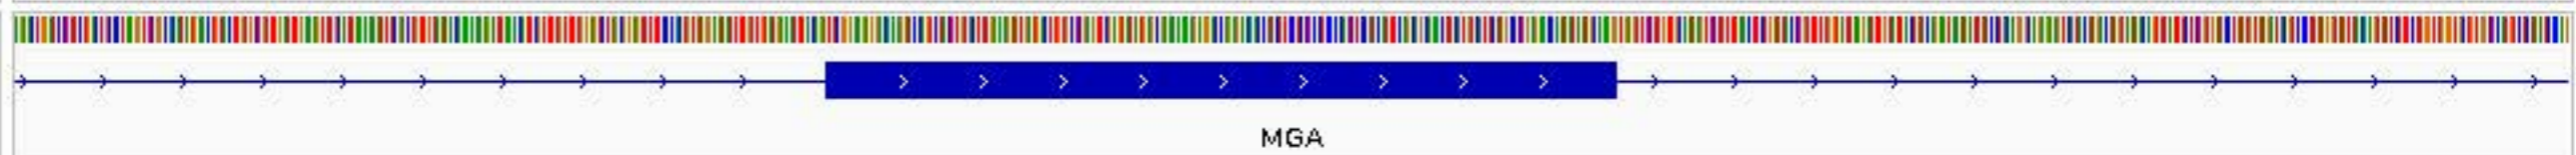



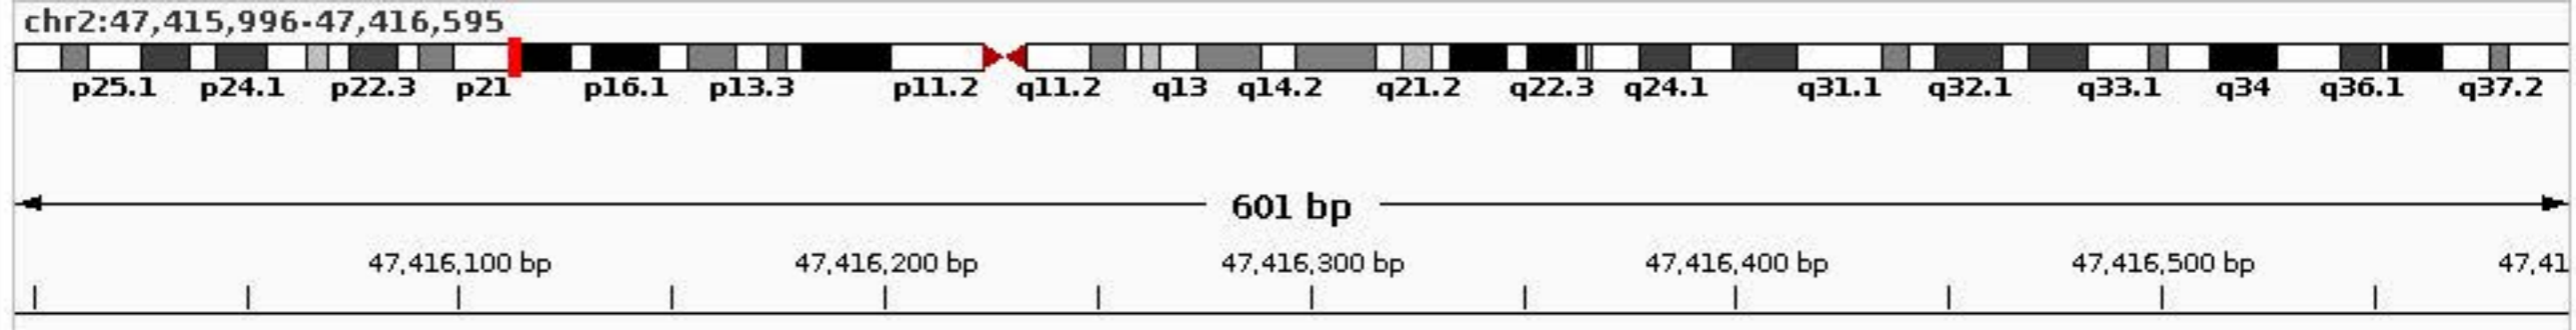

SL\_0007\_L\_FFPE\_13-B\_mut.bam  
rage

SL\_0007\_L\_FFPE\_13-B\_mut.ba  
m

Sequence →

Refseq Genes

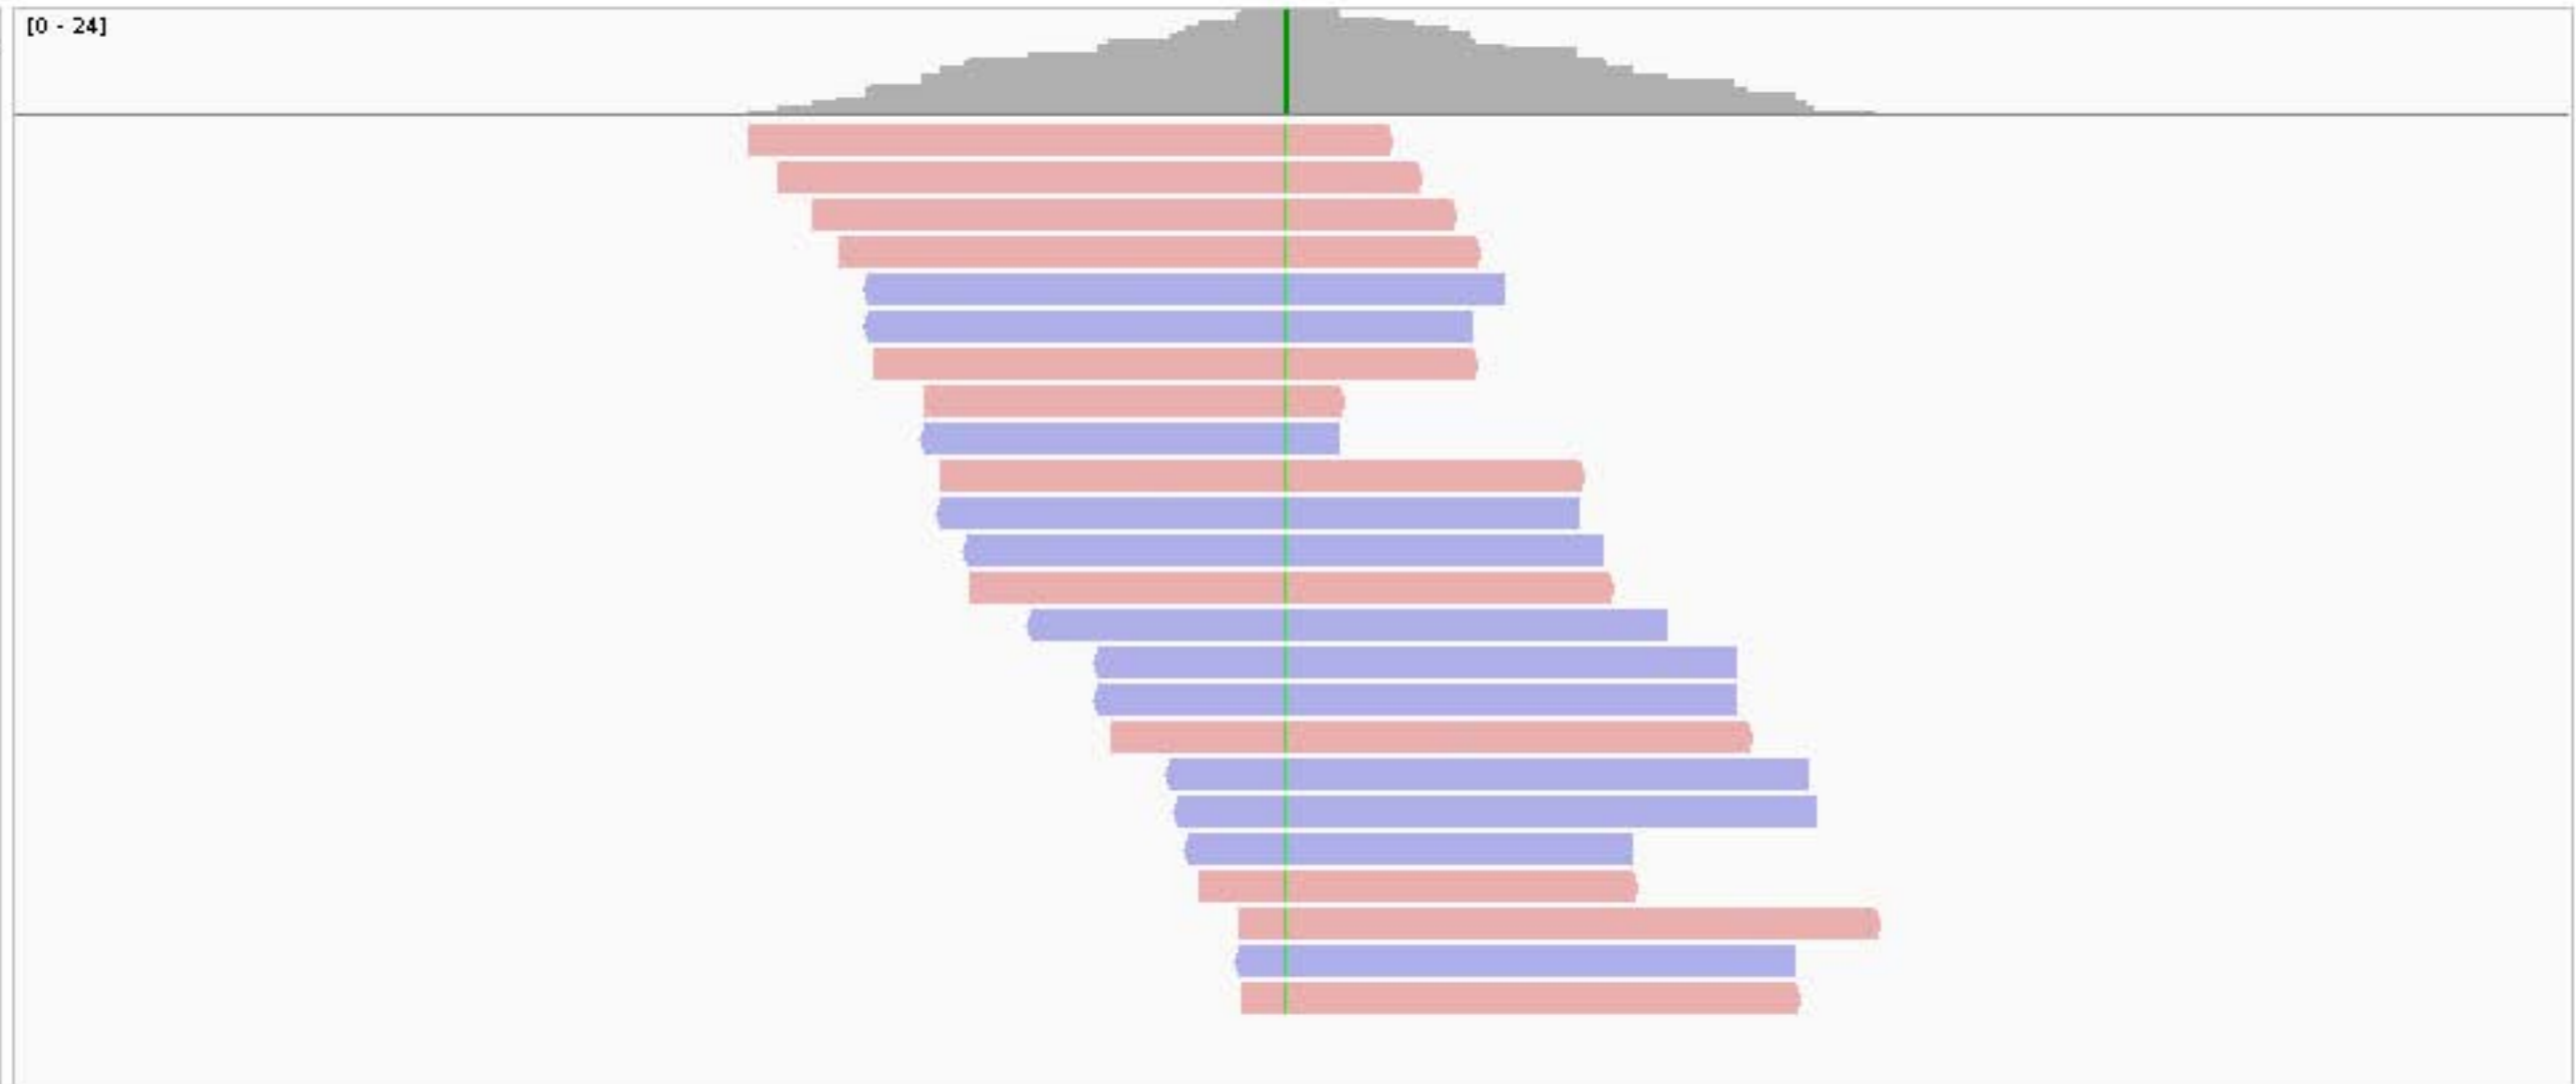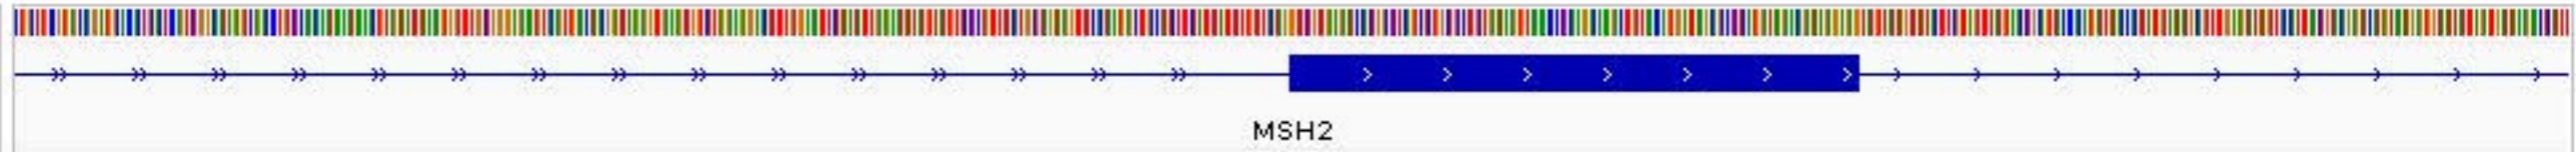

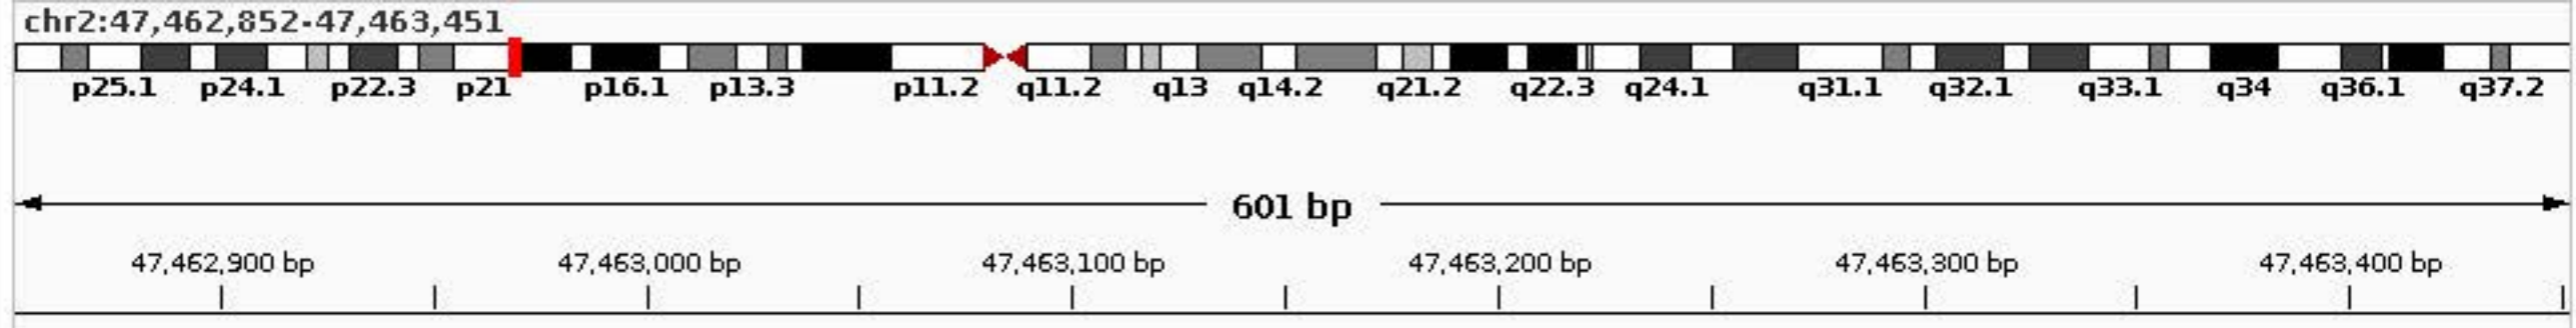

SL\_1005\_R\_FFPE\_59-B\_mut.bam  
 range

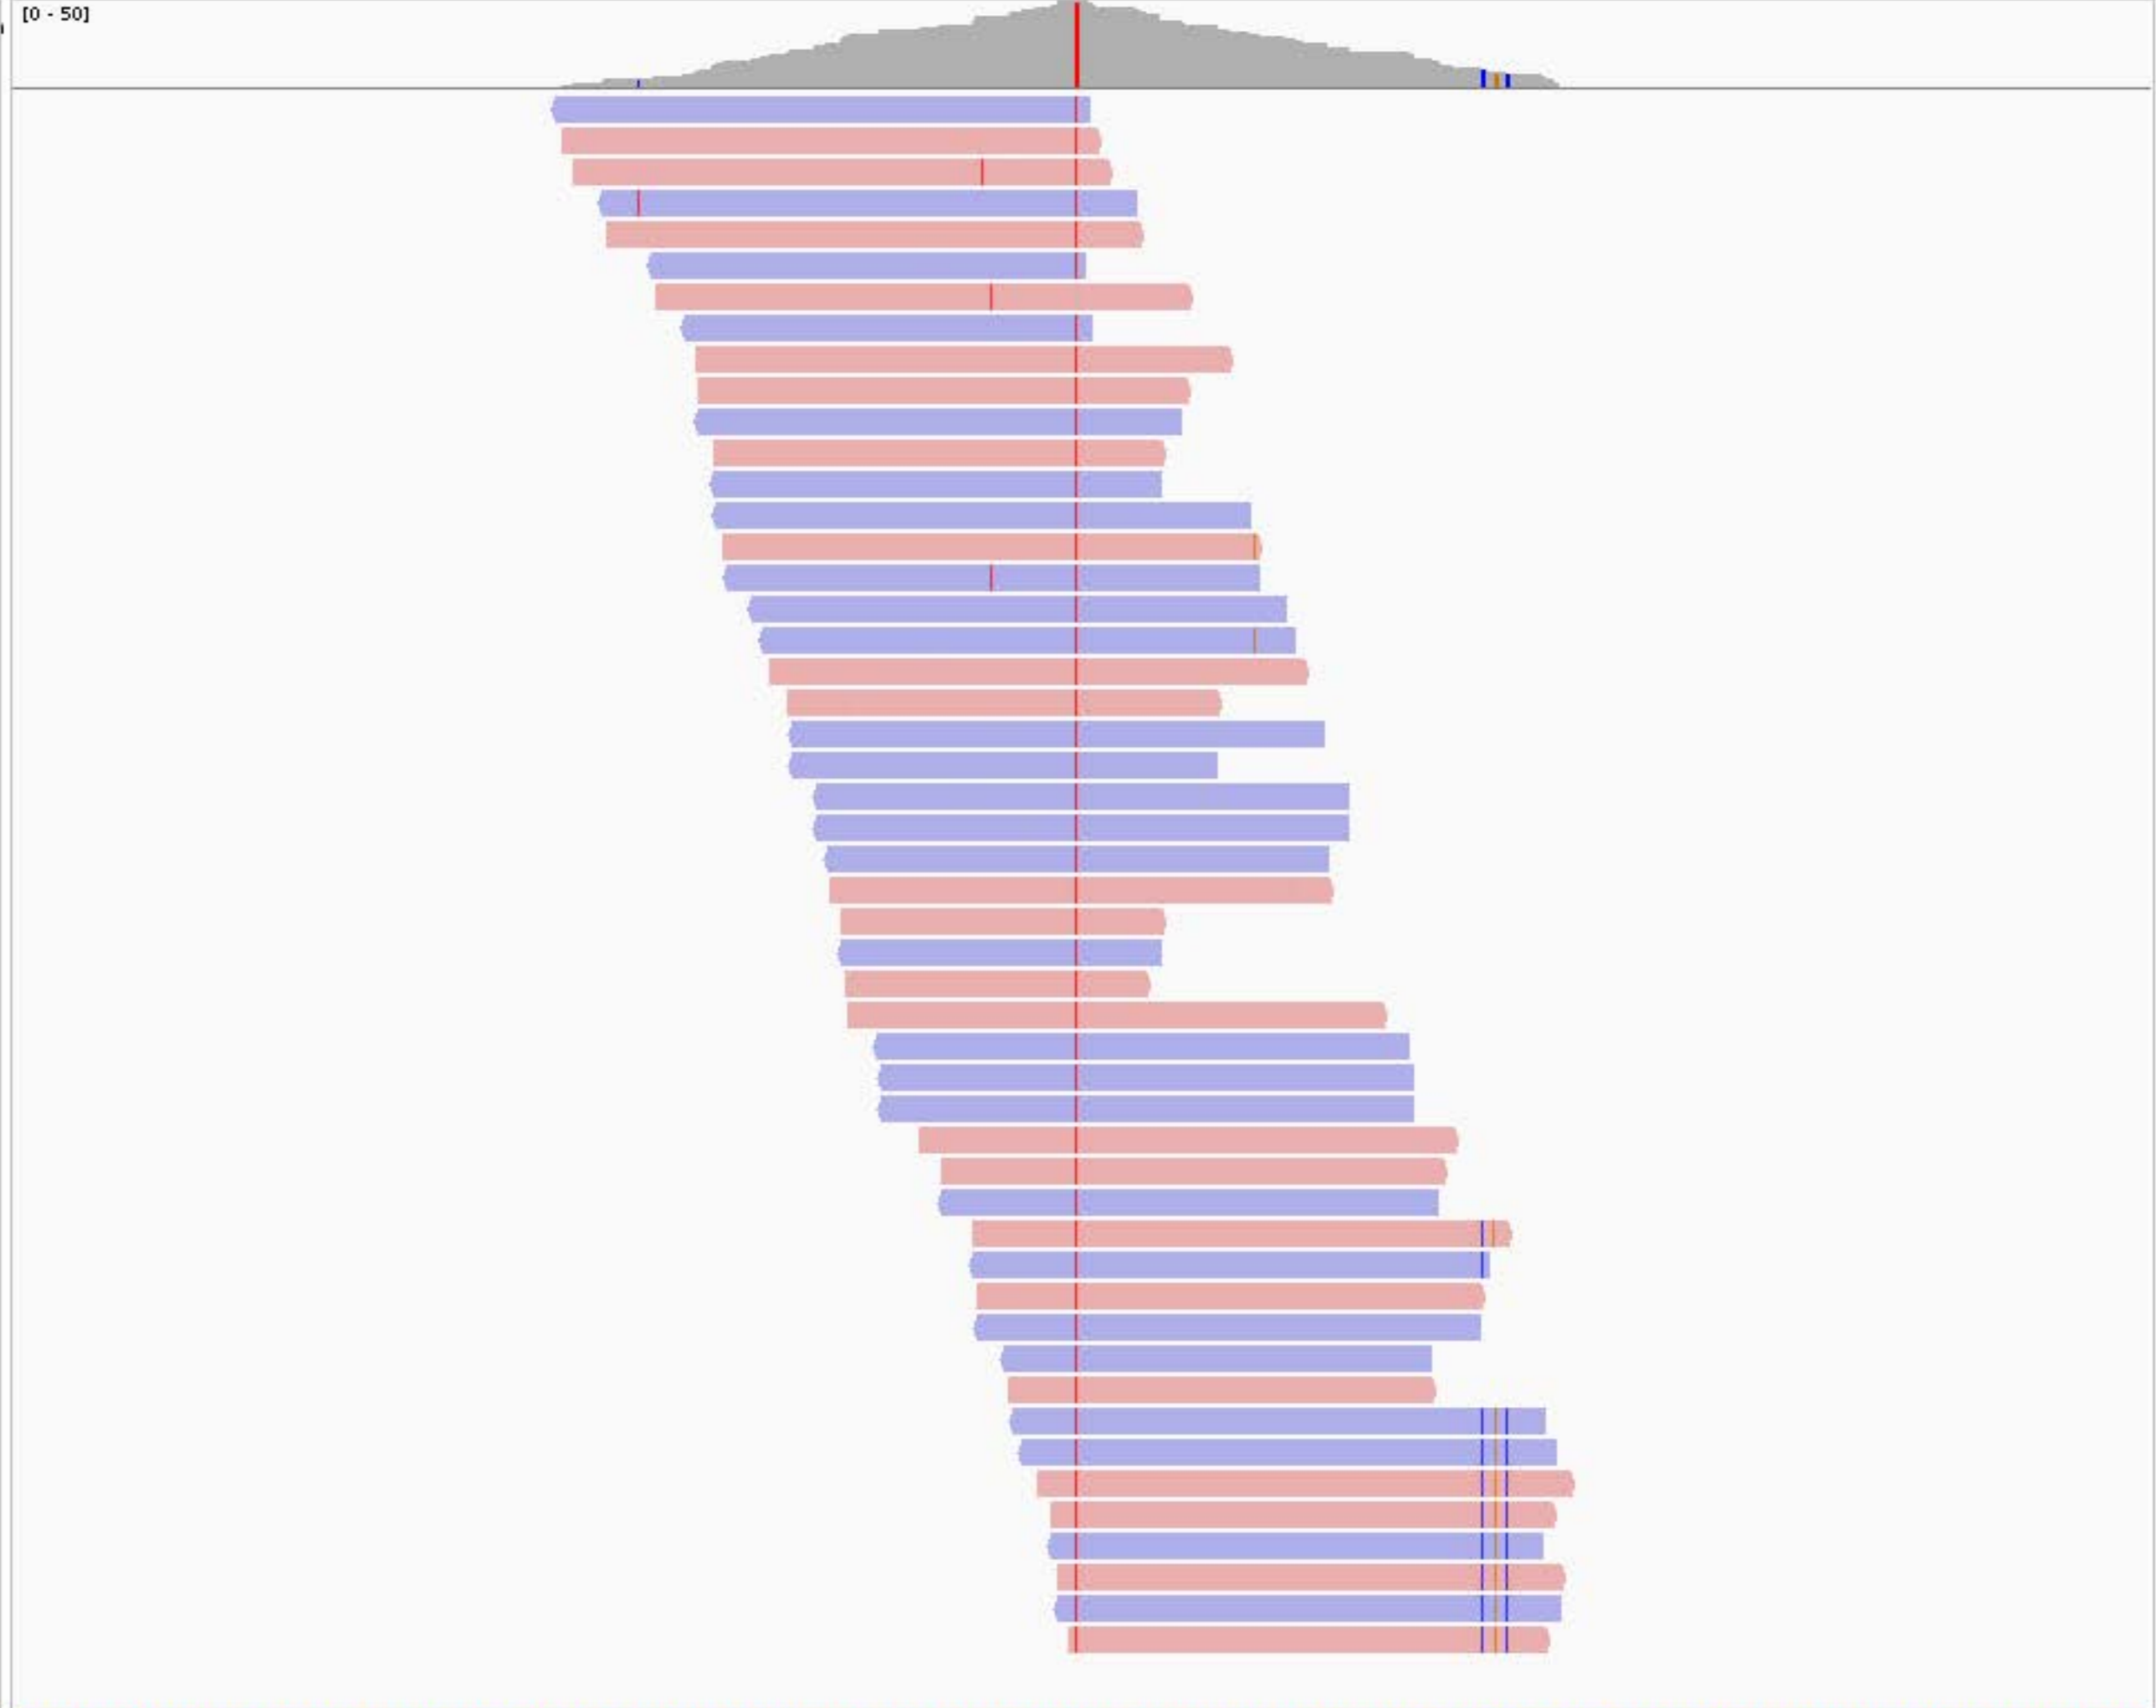

SL\_1005\_R\_FFPE\_59-B\_mut.ba  
 m

Sequence →

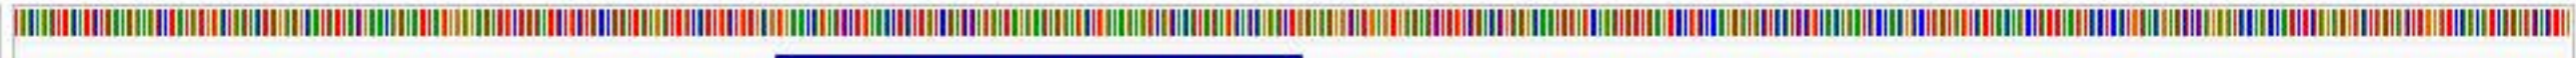

Refseq Genes

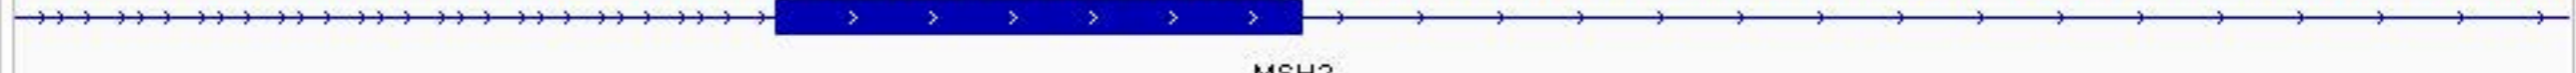

MSH2

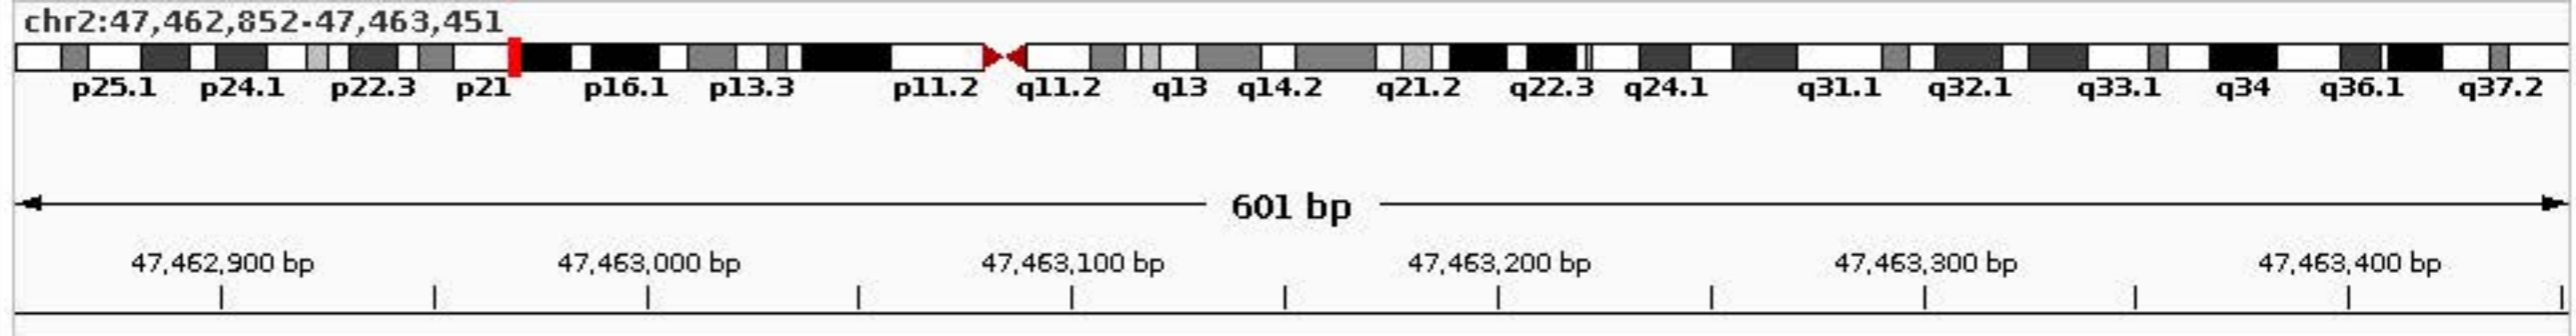

SL\_1005\_R\_FFPE\_66-B\_mut.bam  
rage

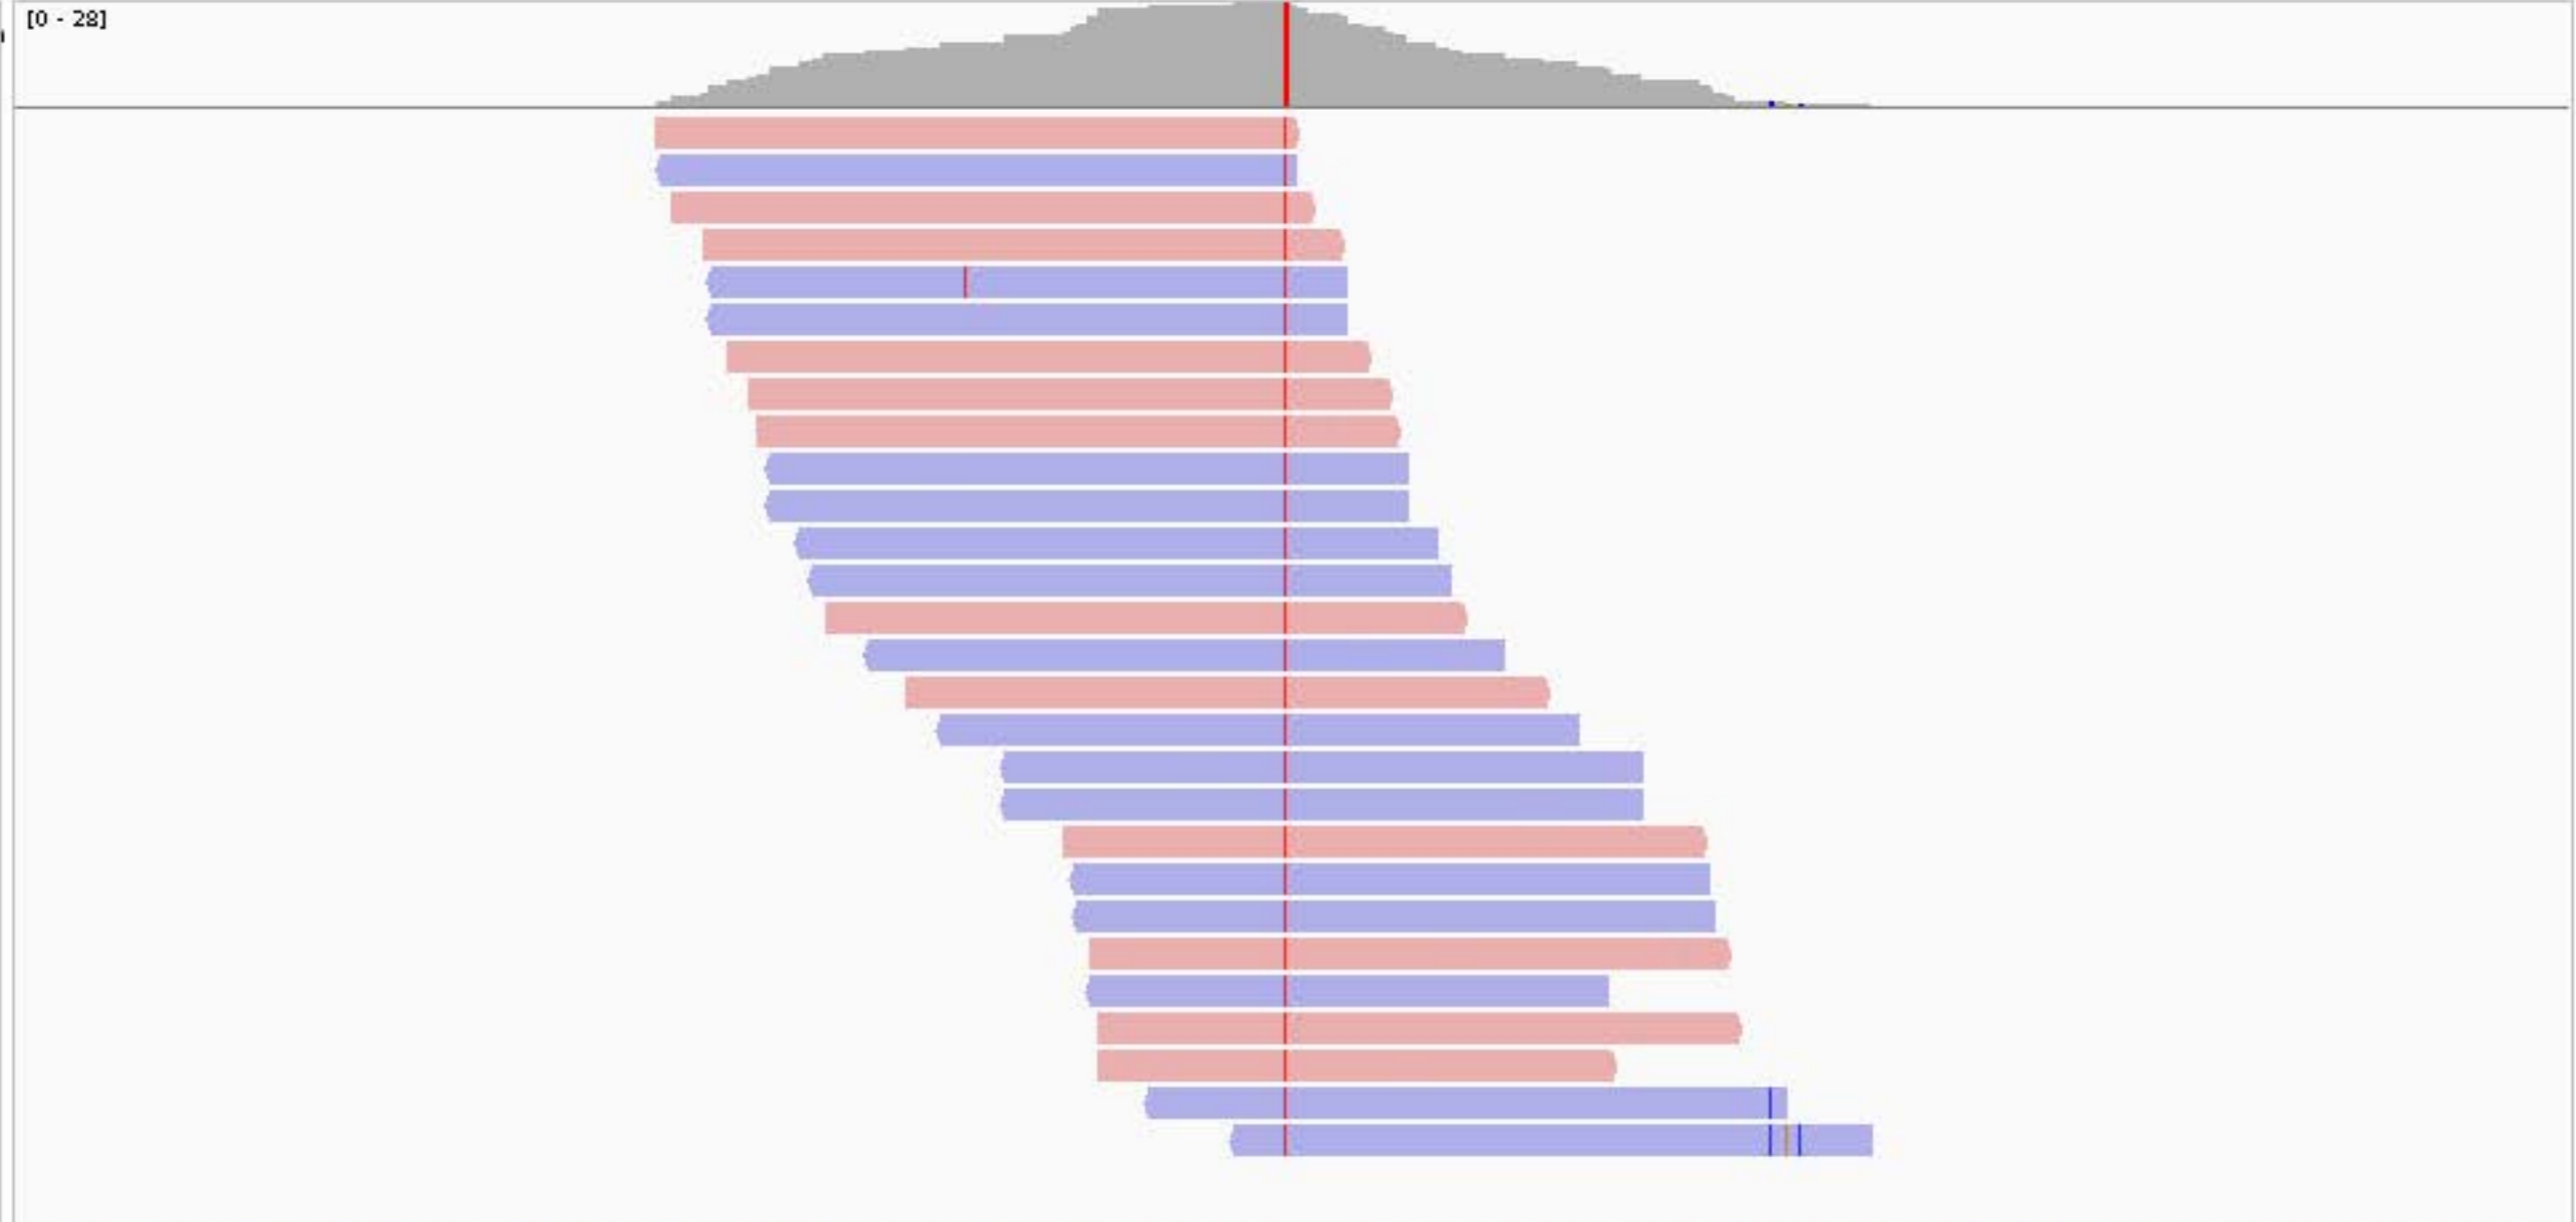

SL\_1005\_R\_FFPE\_66-B\_mut.ba  
m

Sequence →  
Refseq Genes

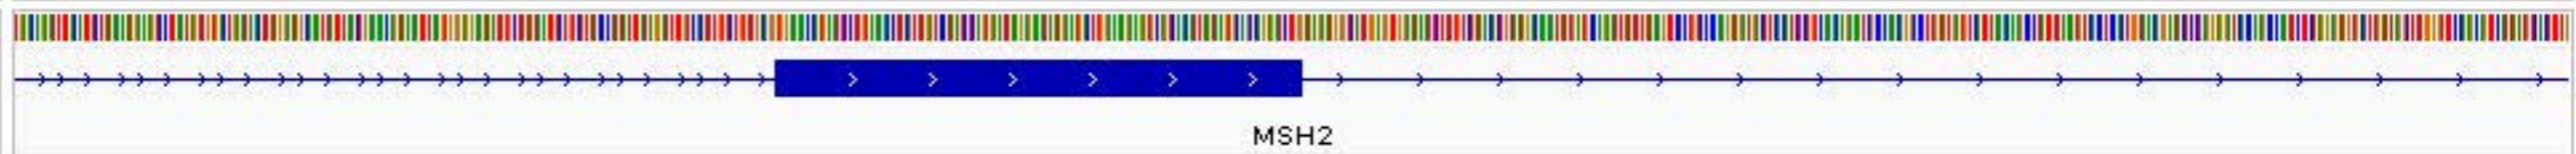



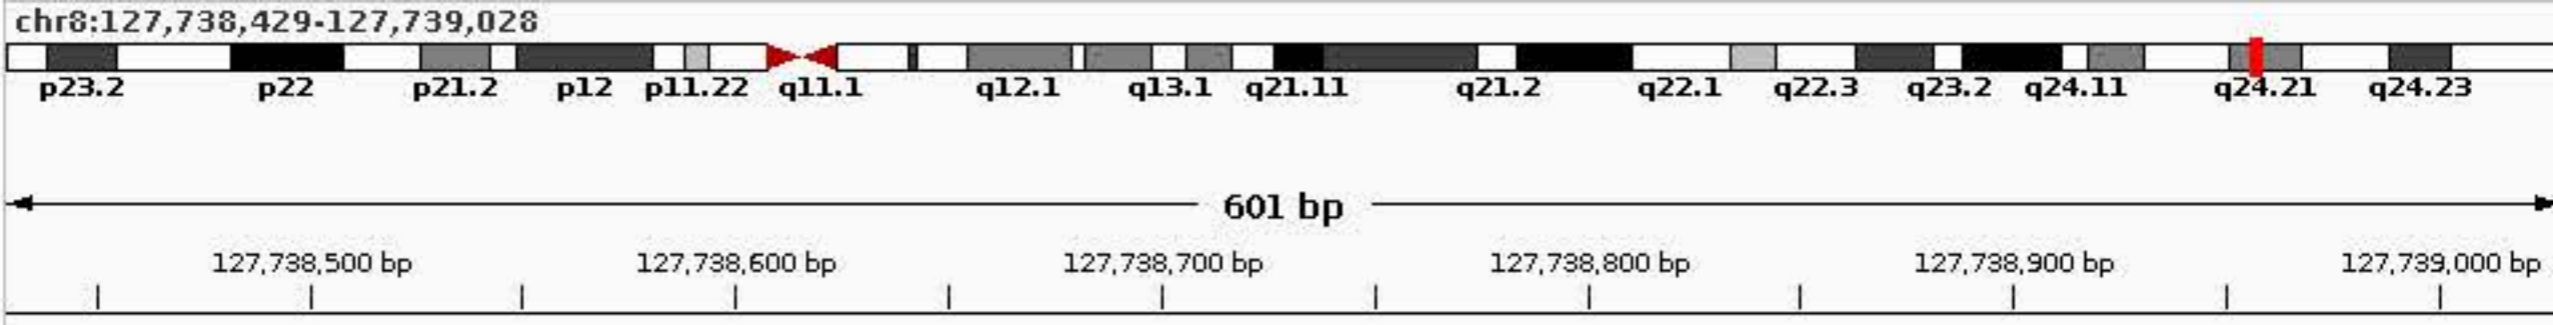

SL\_1010-T1-B\_mut.bam Coverage

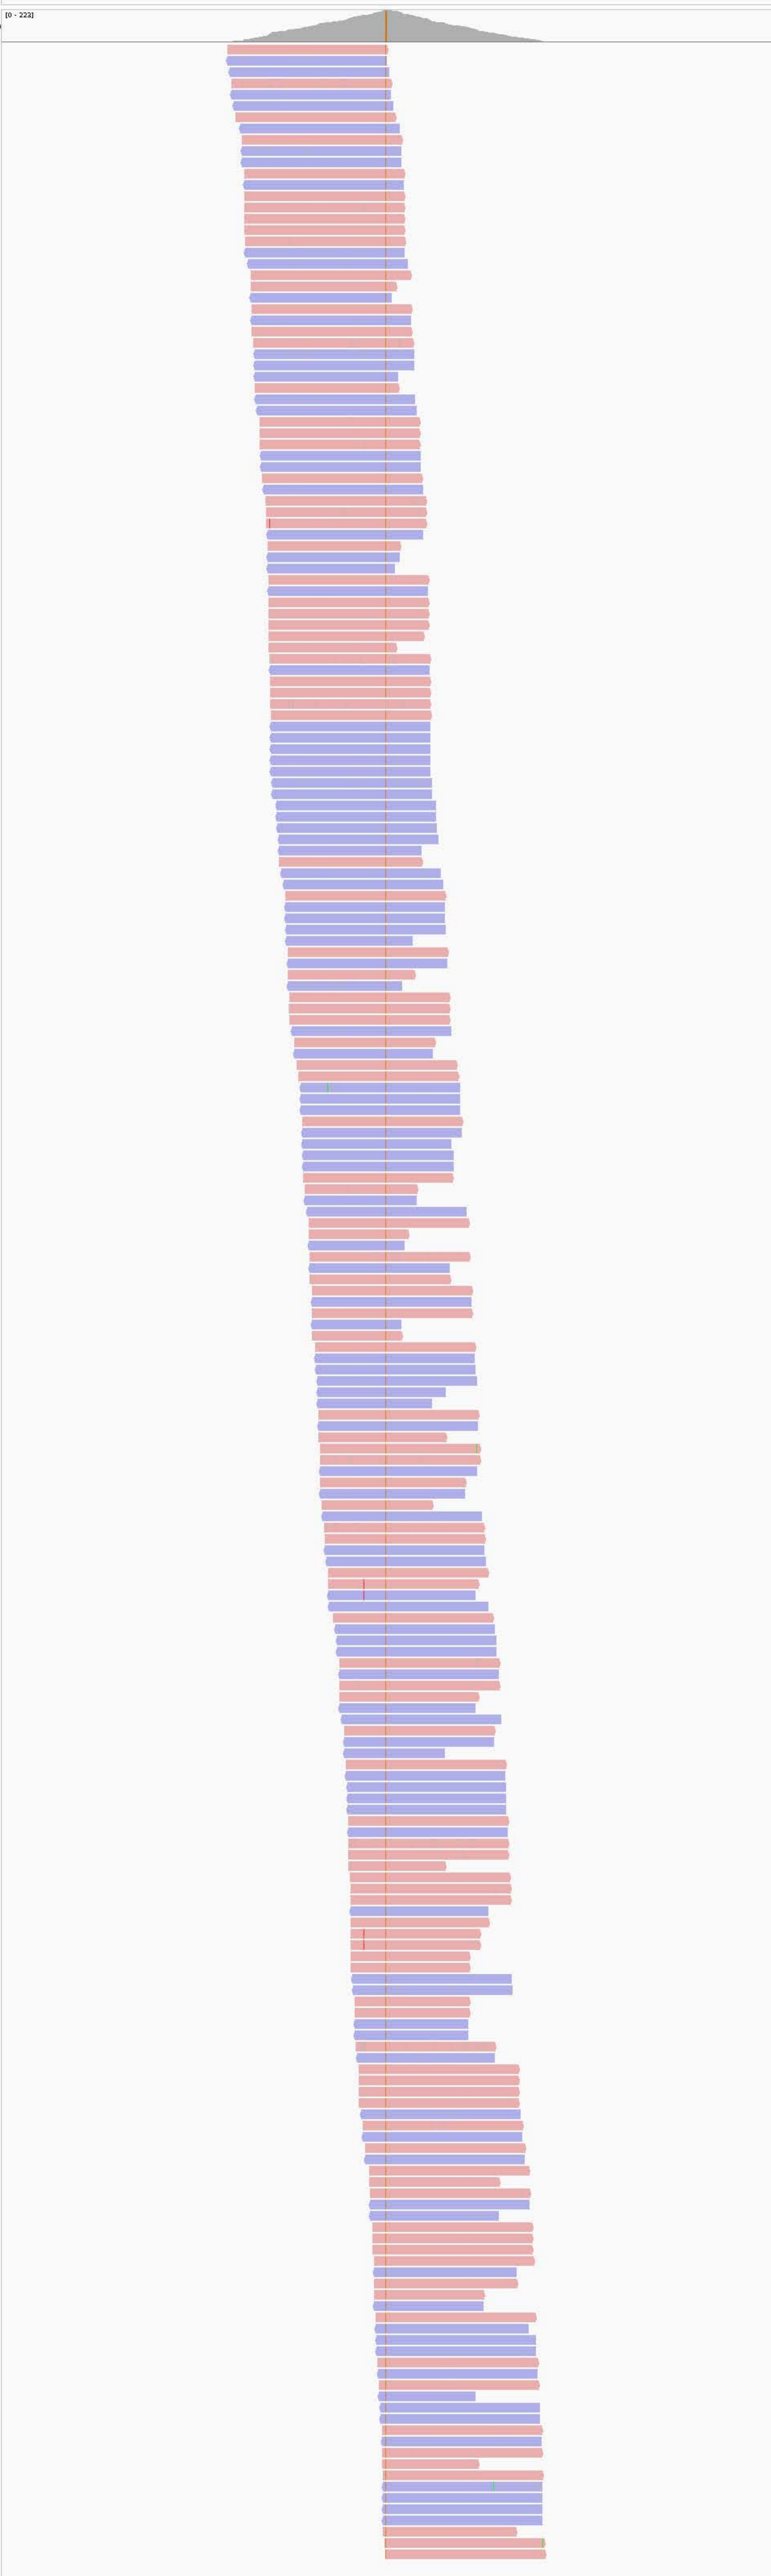

SL\_1010-T1-B\_mut.bam

Sequence

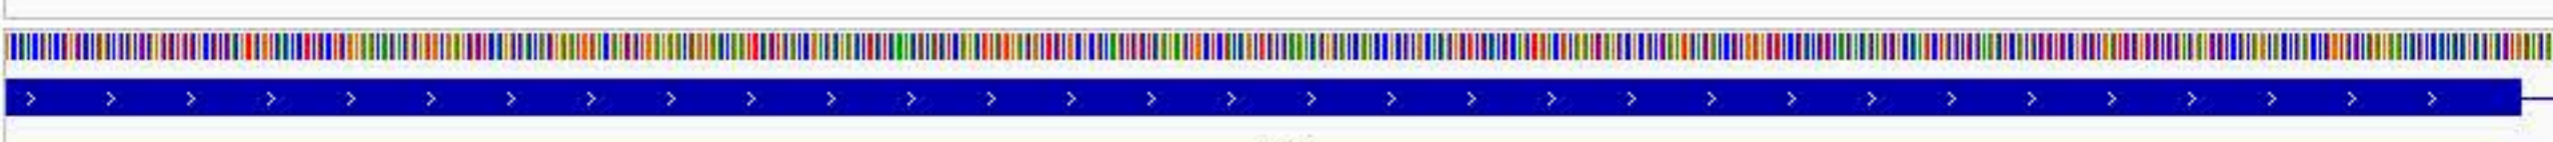

Refseq Genes

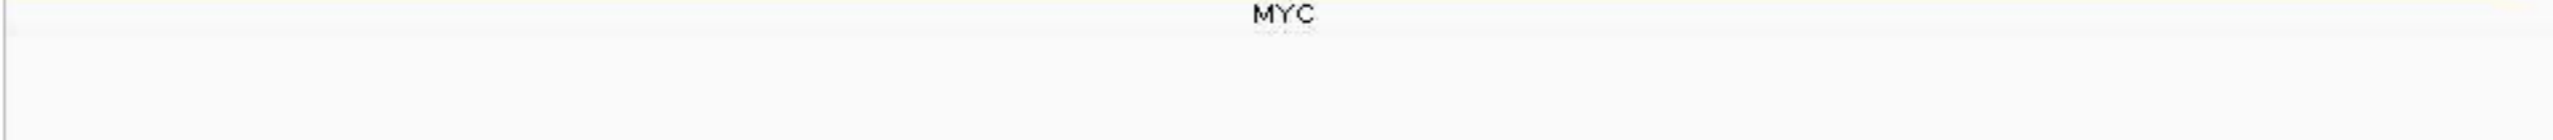

MYC

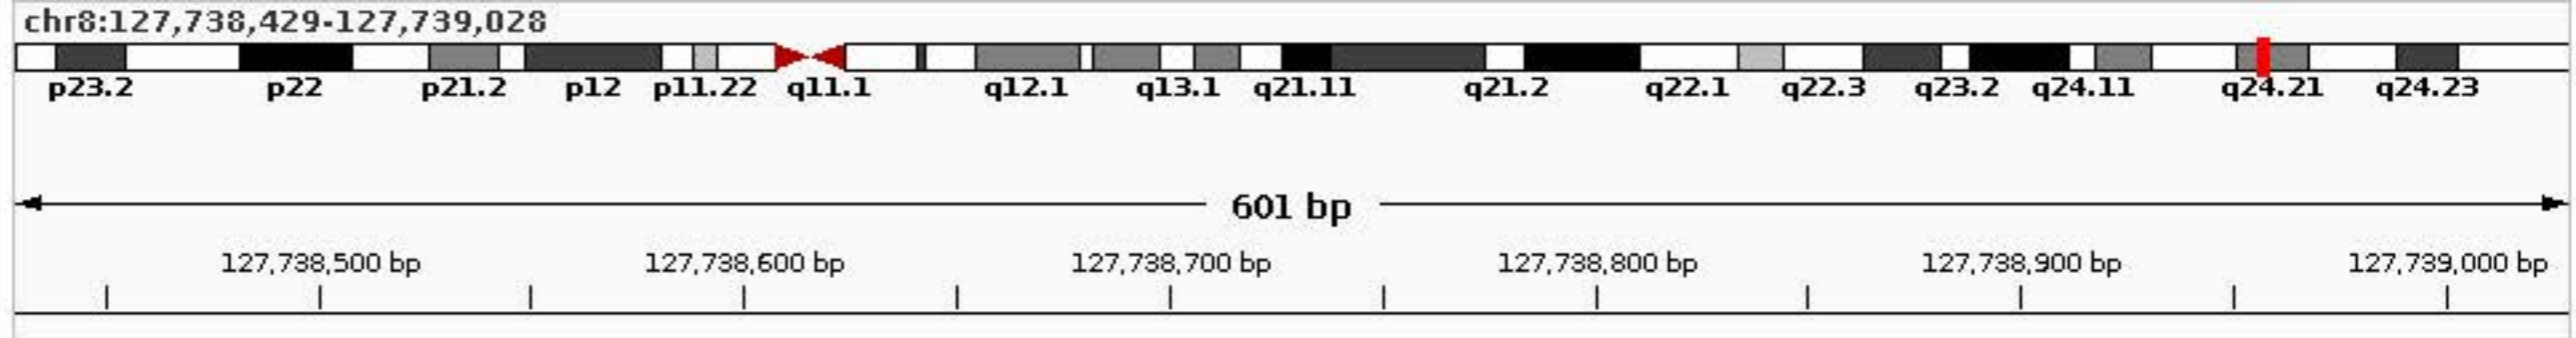

SL\_1010-T2-B\_mut.bam Coverage

SL\_1010-T2-B\_mut.bam

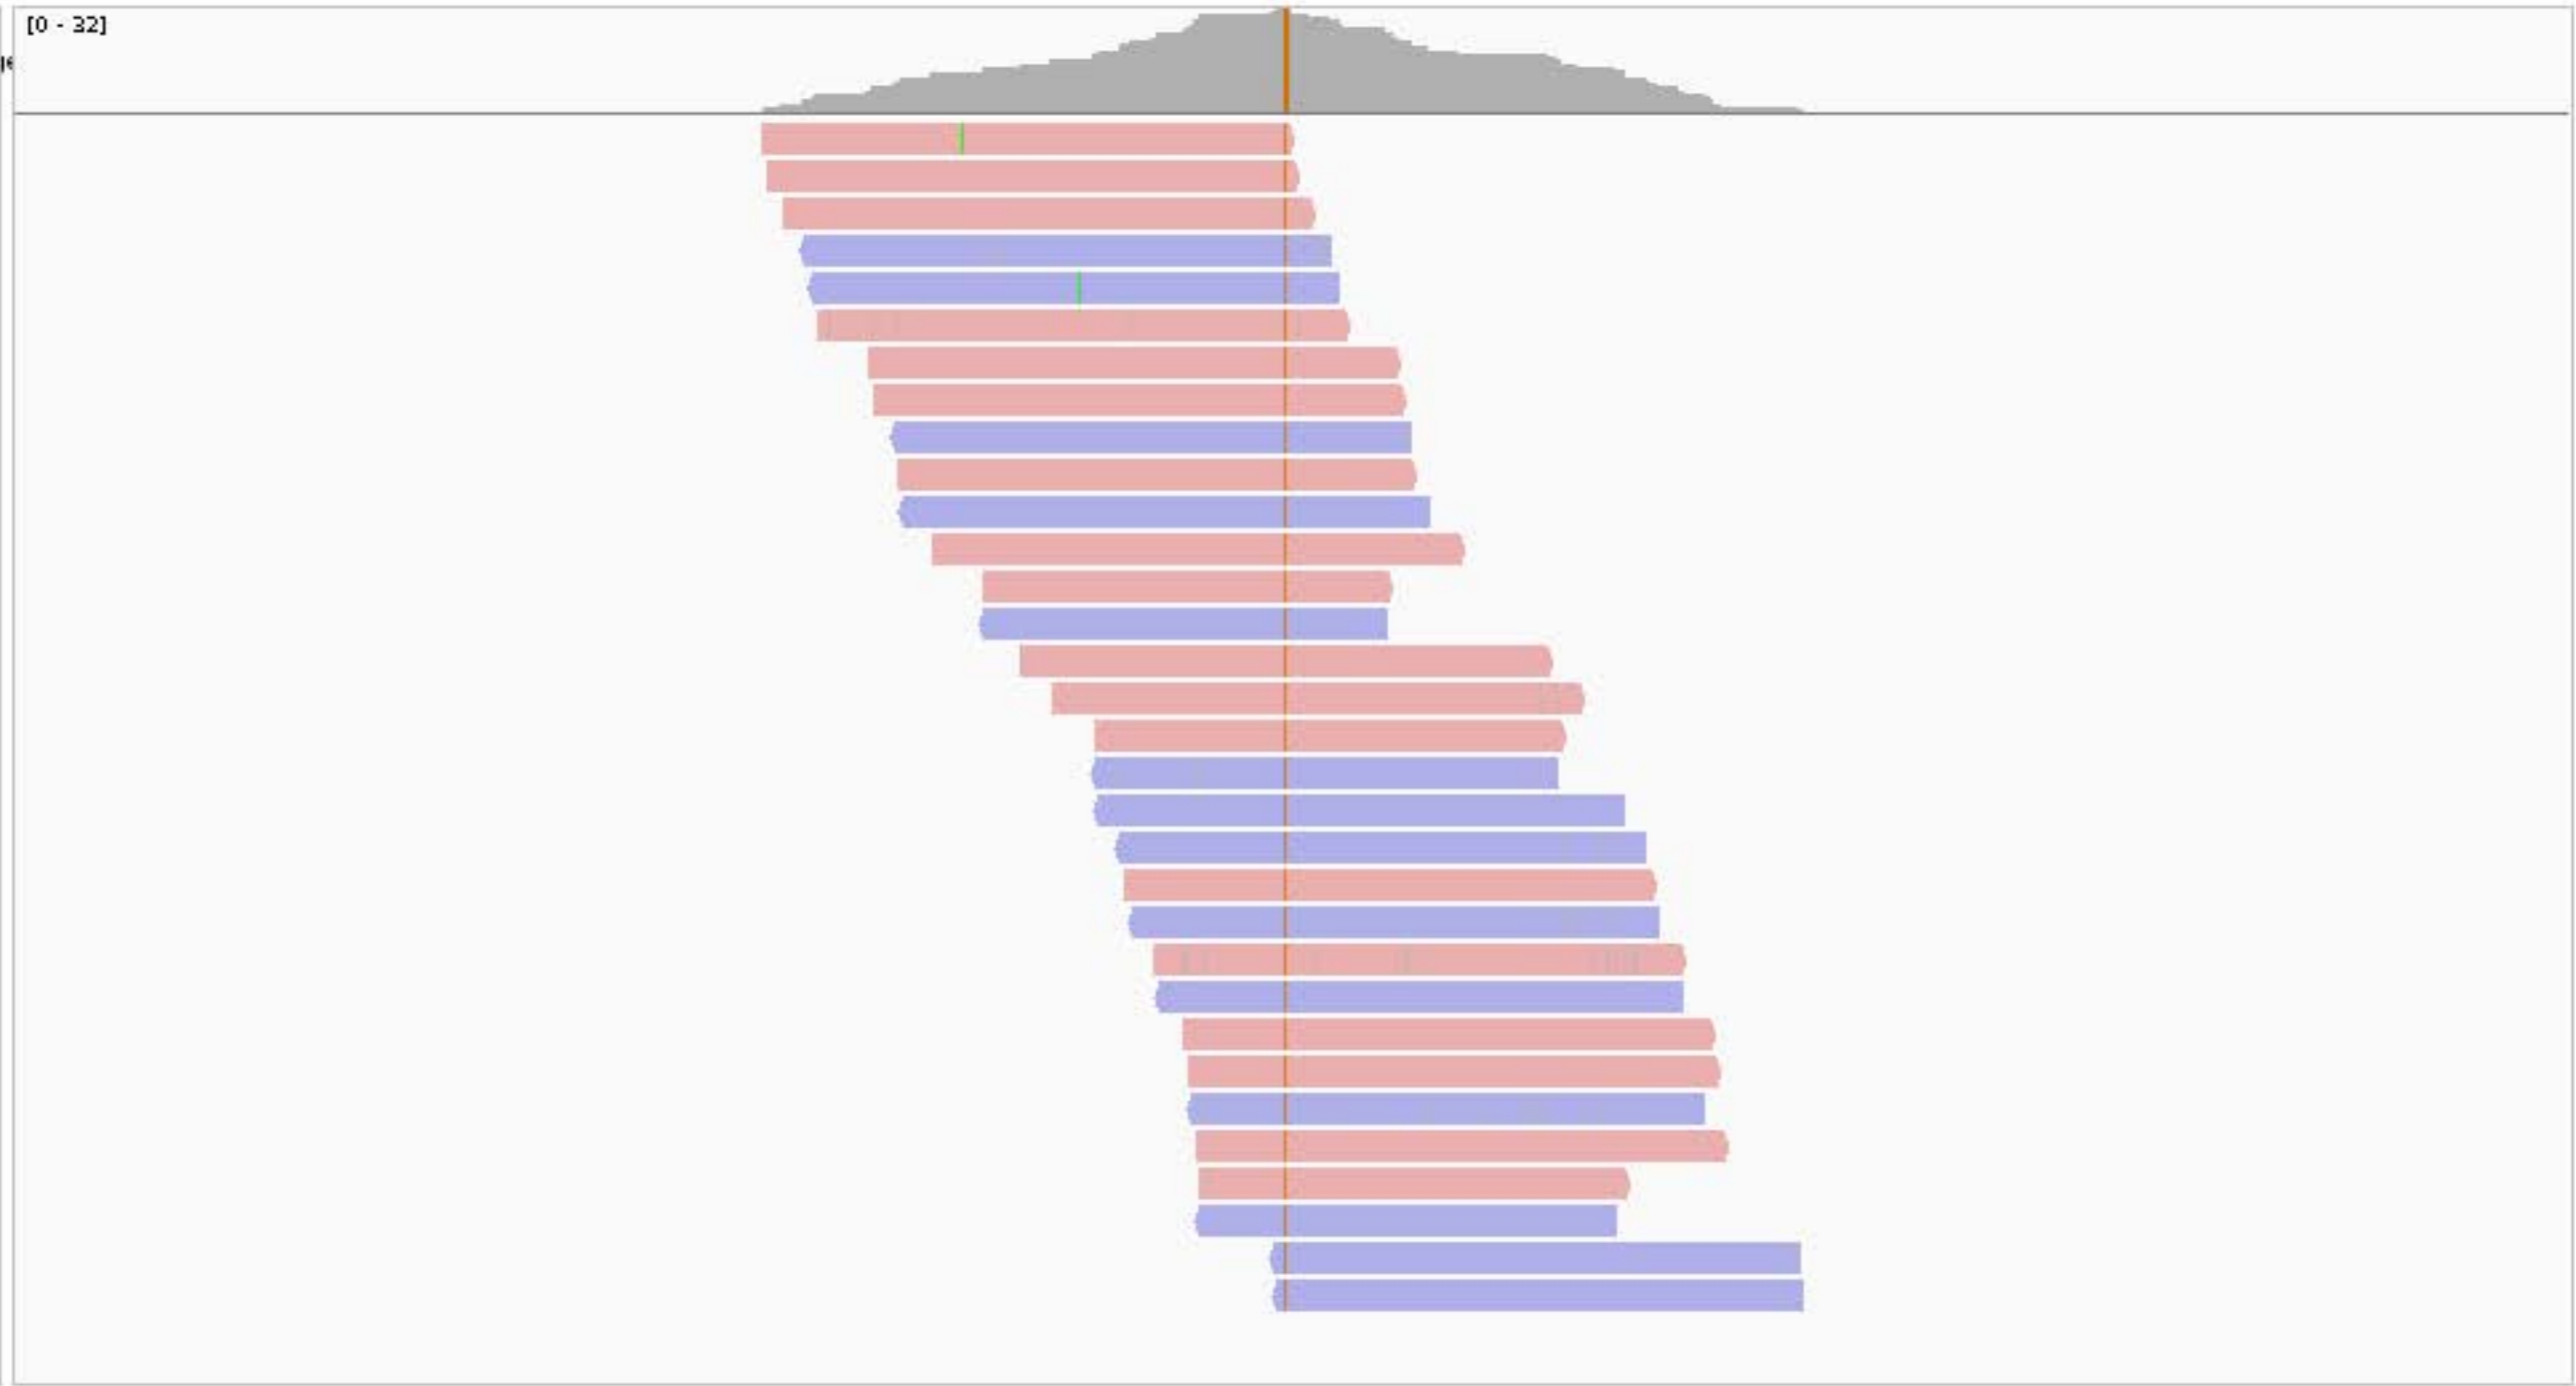

Sequence

Refseq Genes

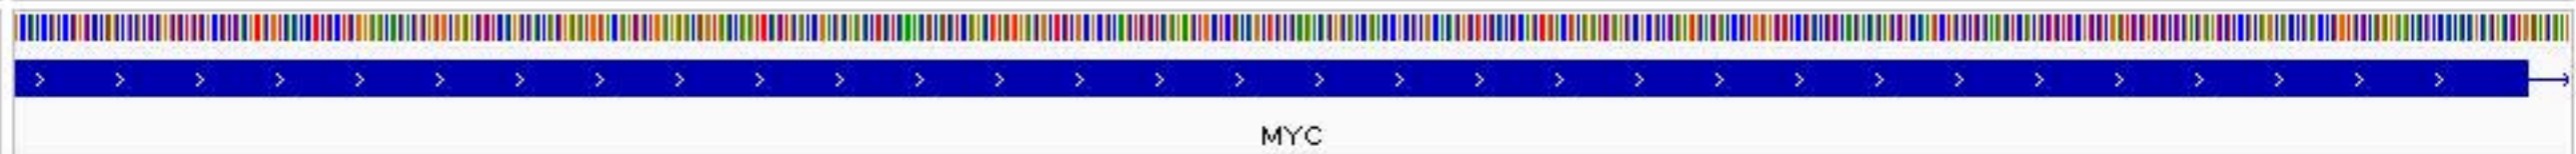

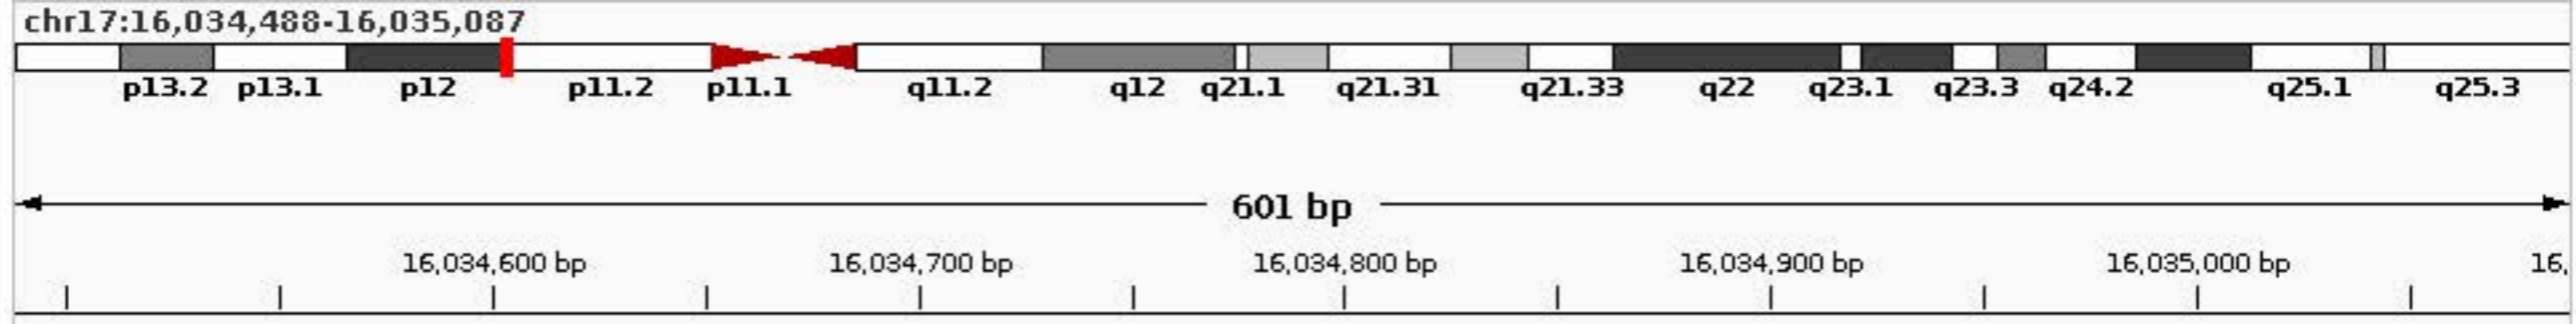

SL\_0005-RN\_11-B\_mut.bam Cov

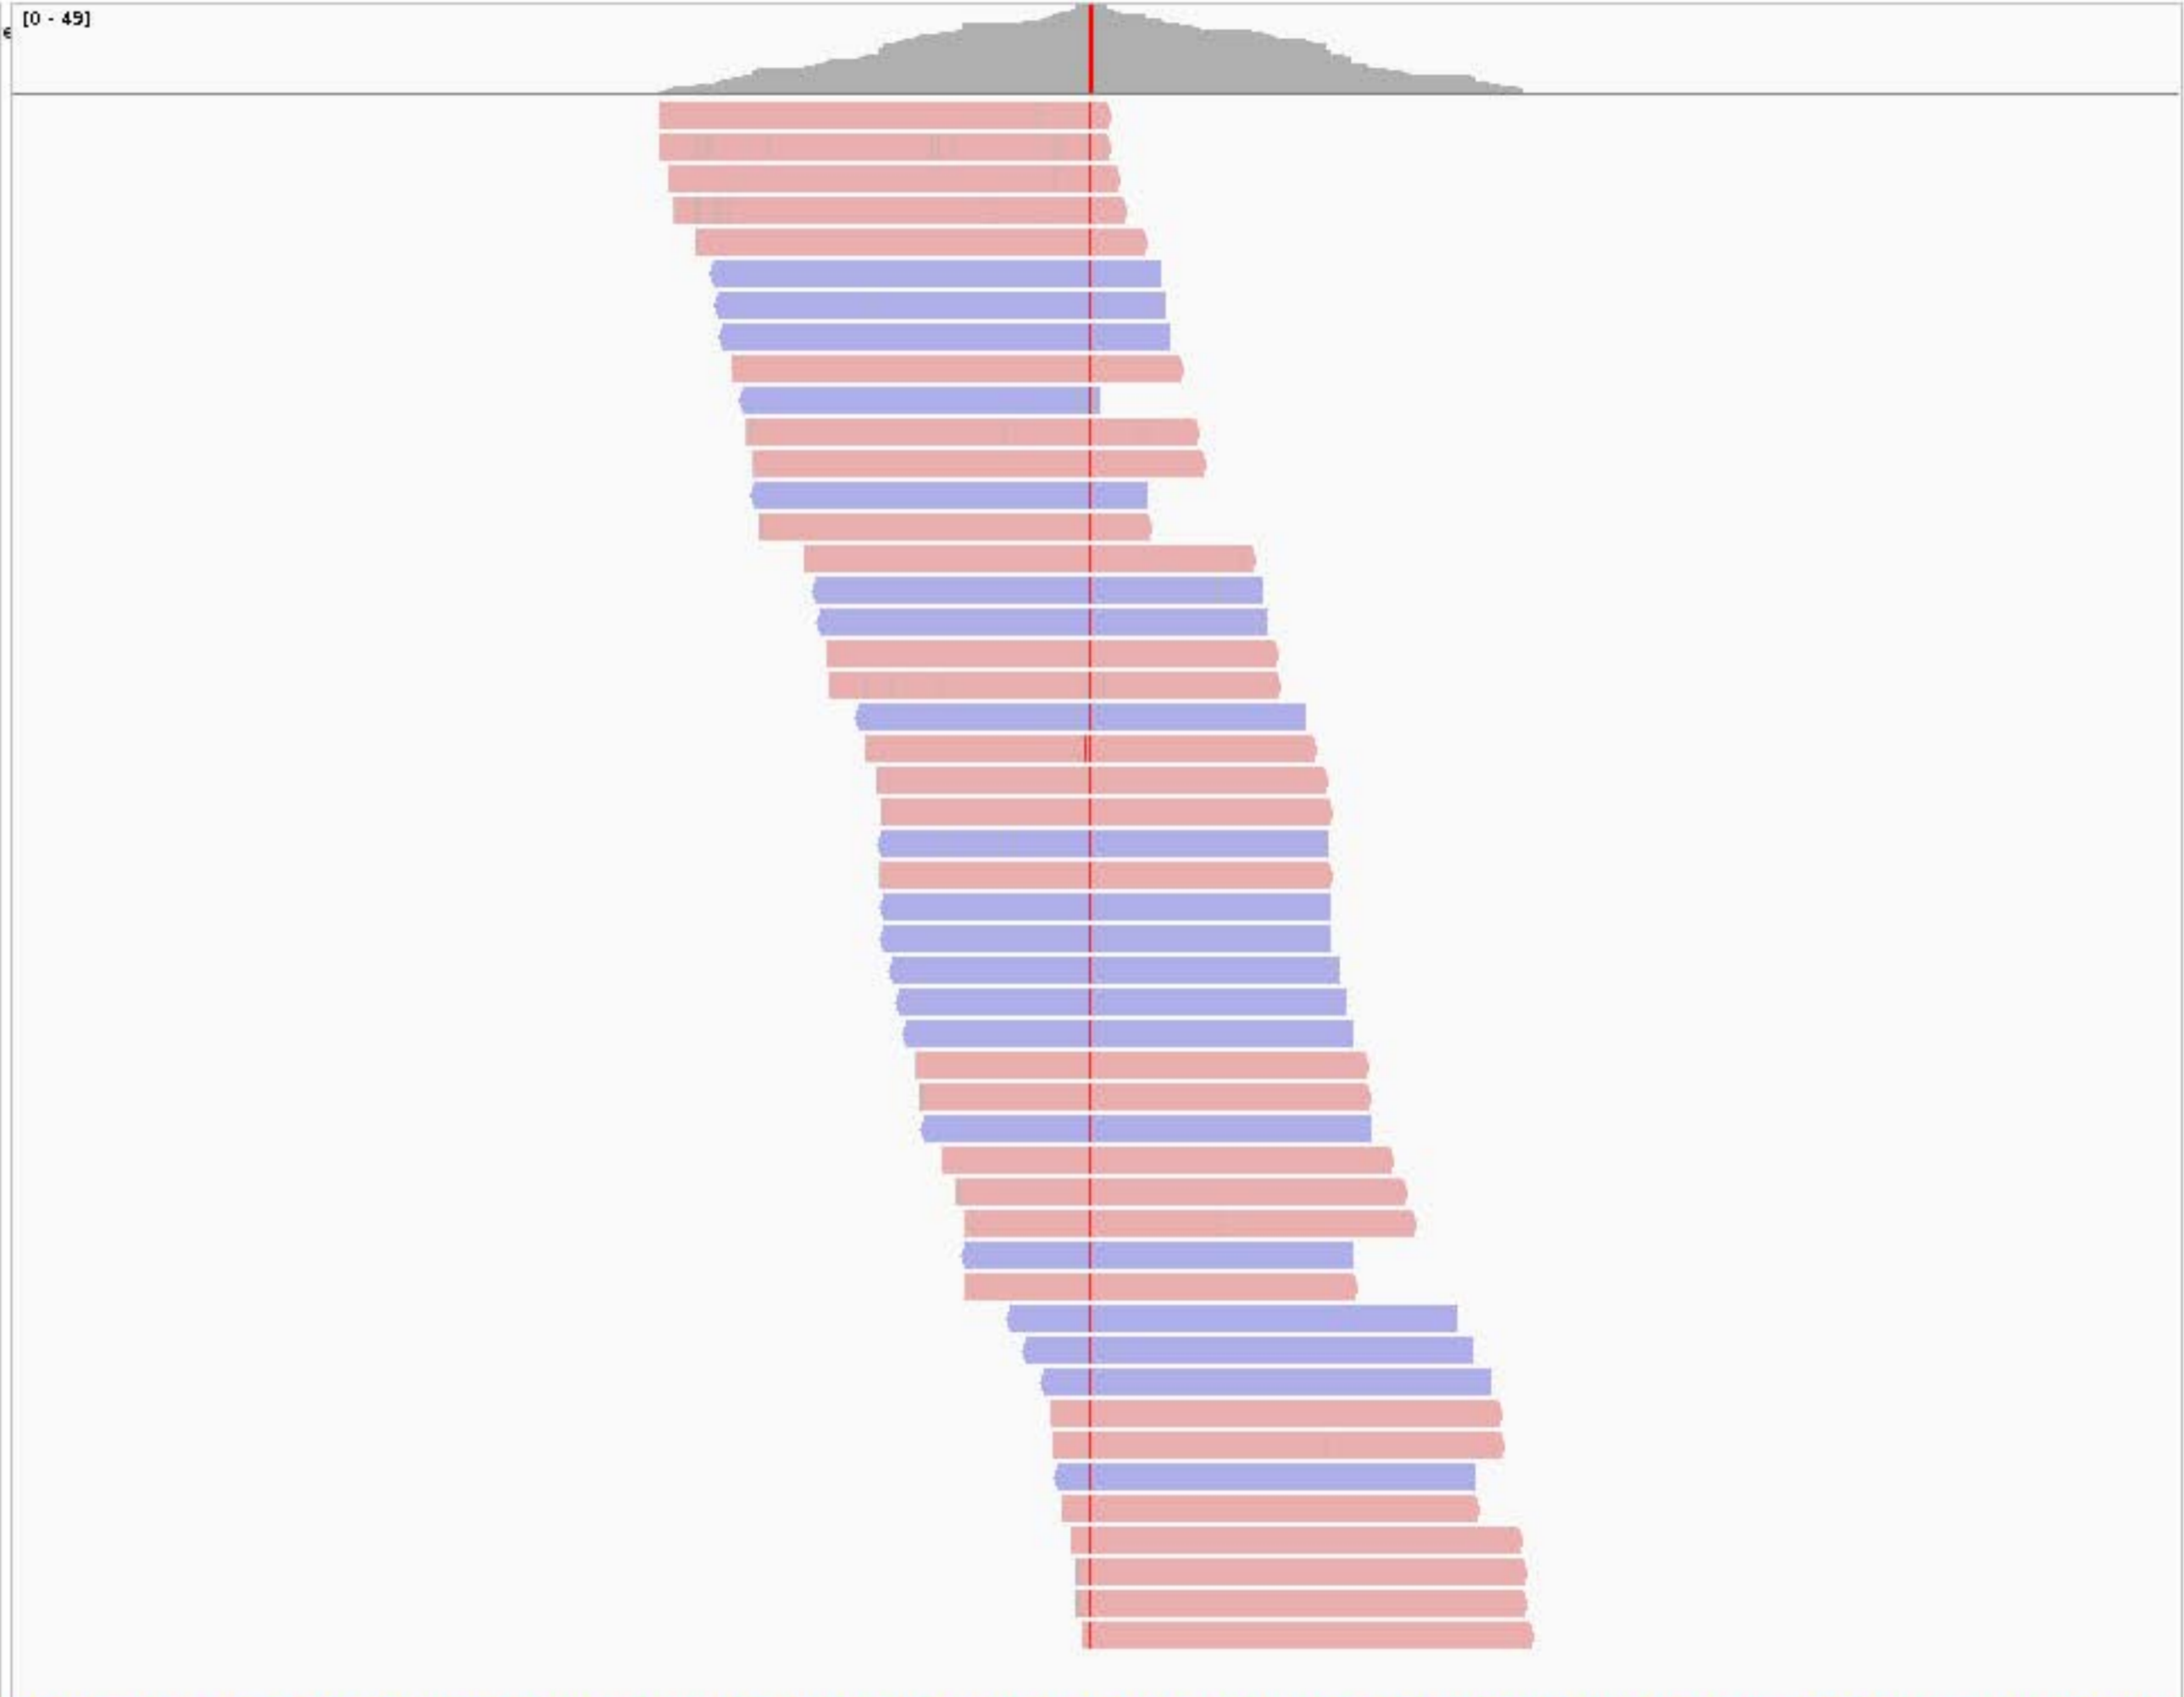

SL\_0005-RN\_11-B\_mut.bam

Sequence

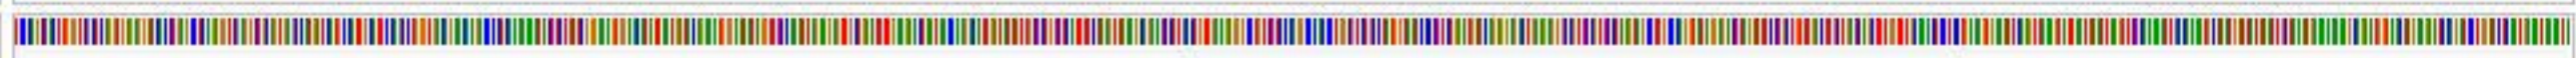

Refseq Genes

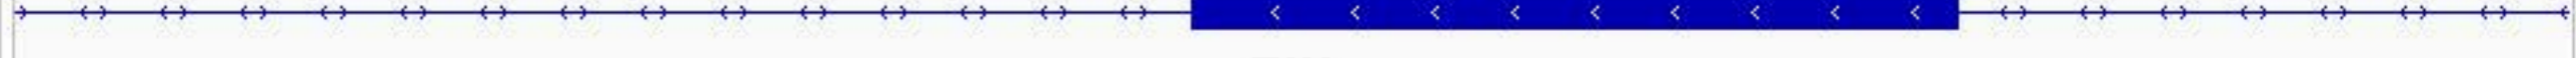

TTC19



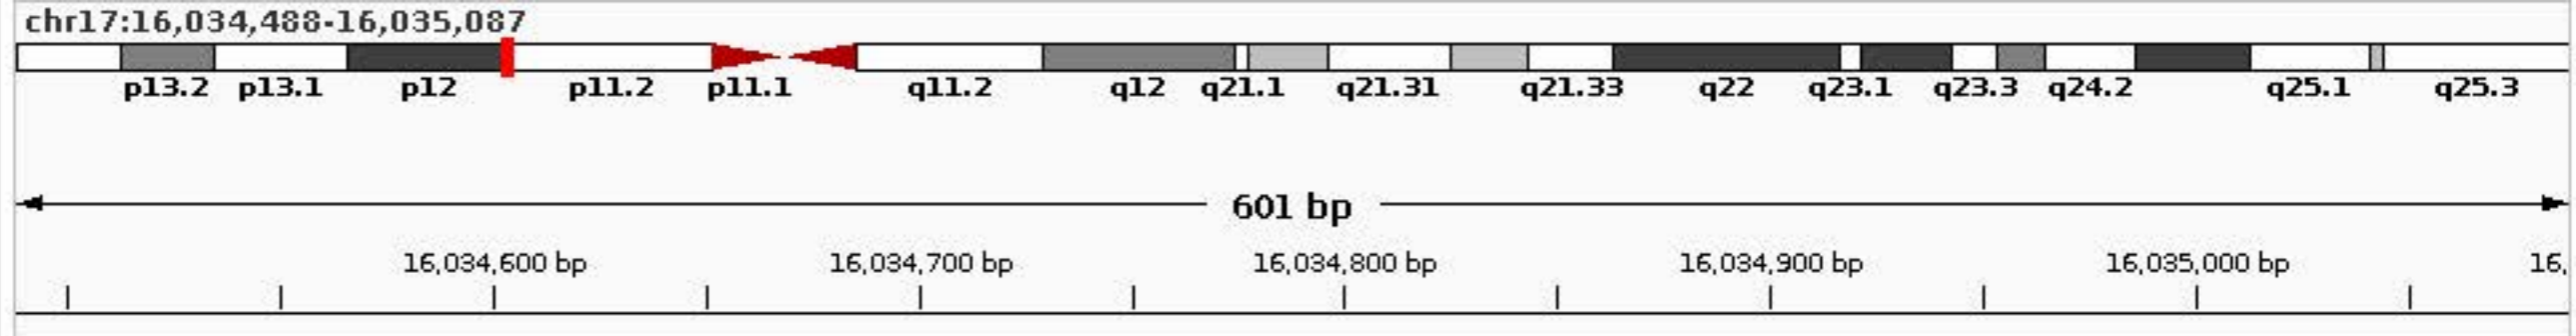

SL\_0009-LT\_1-B\_mut.bam Coverage

SL\_0009-LT\_1-B\_mut.bam

Sequence

Refseq Genes

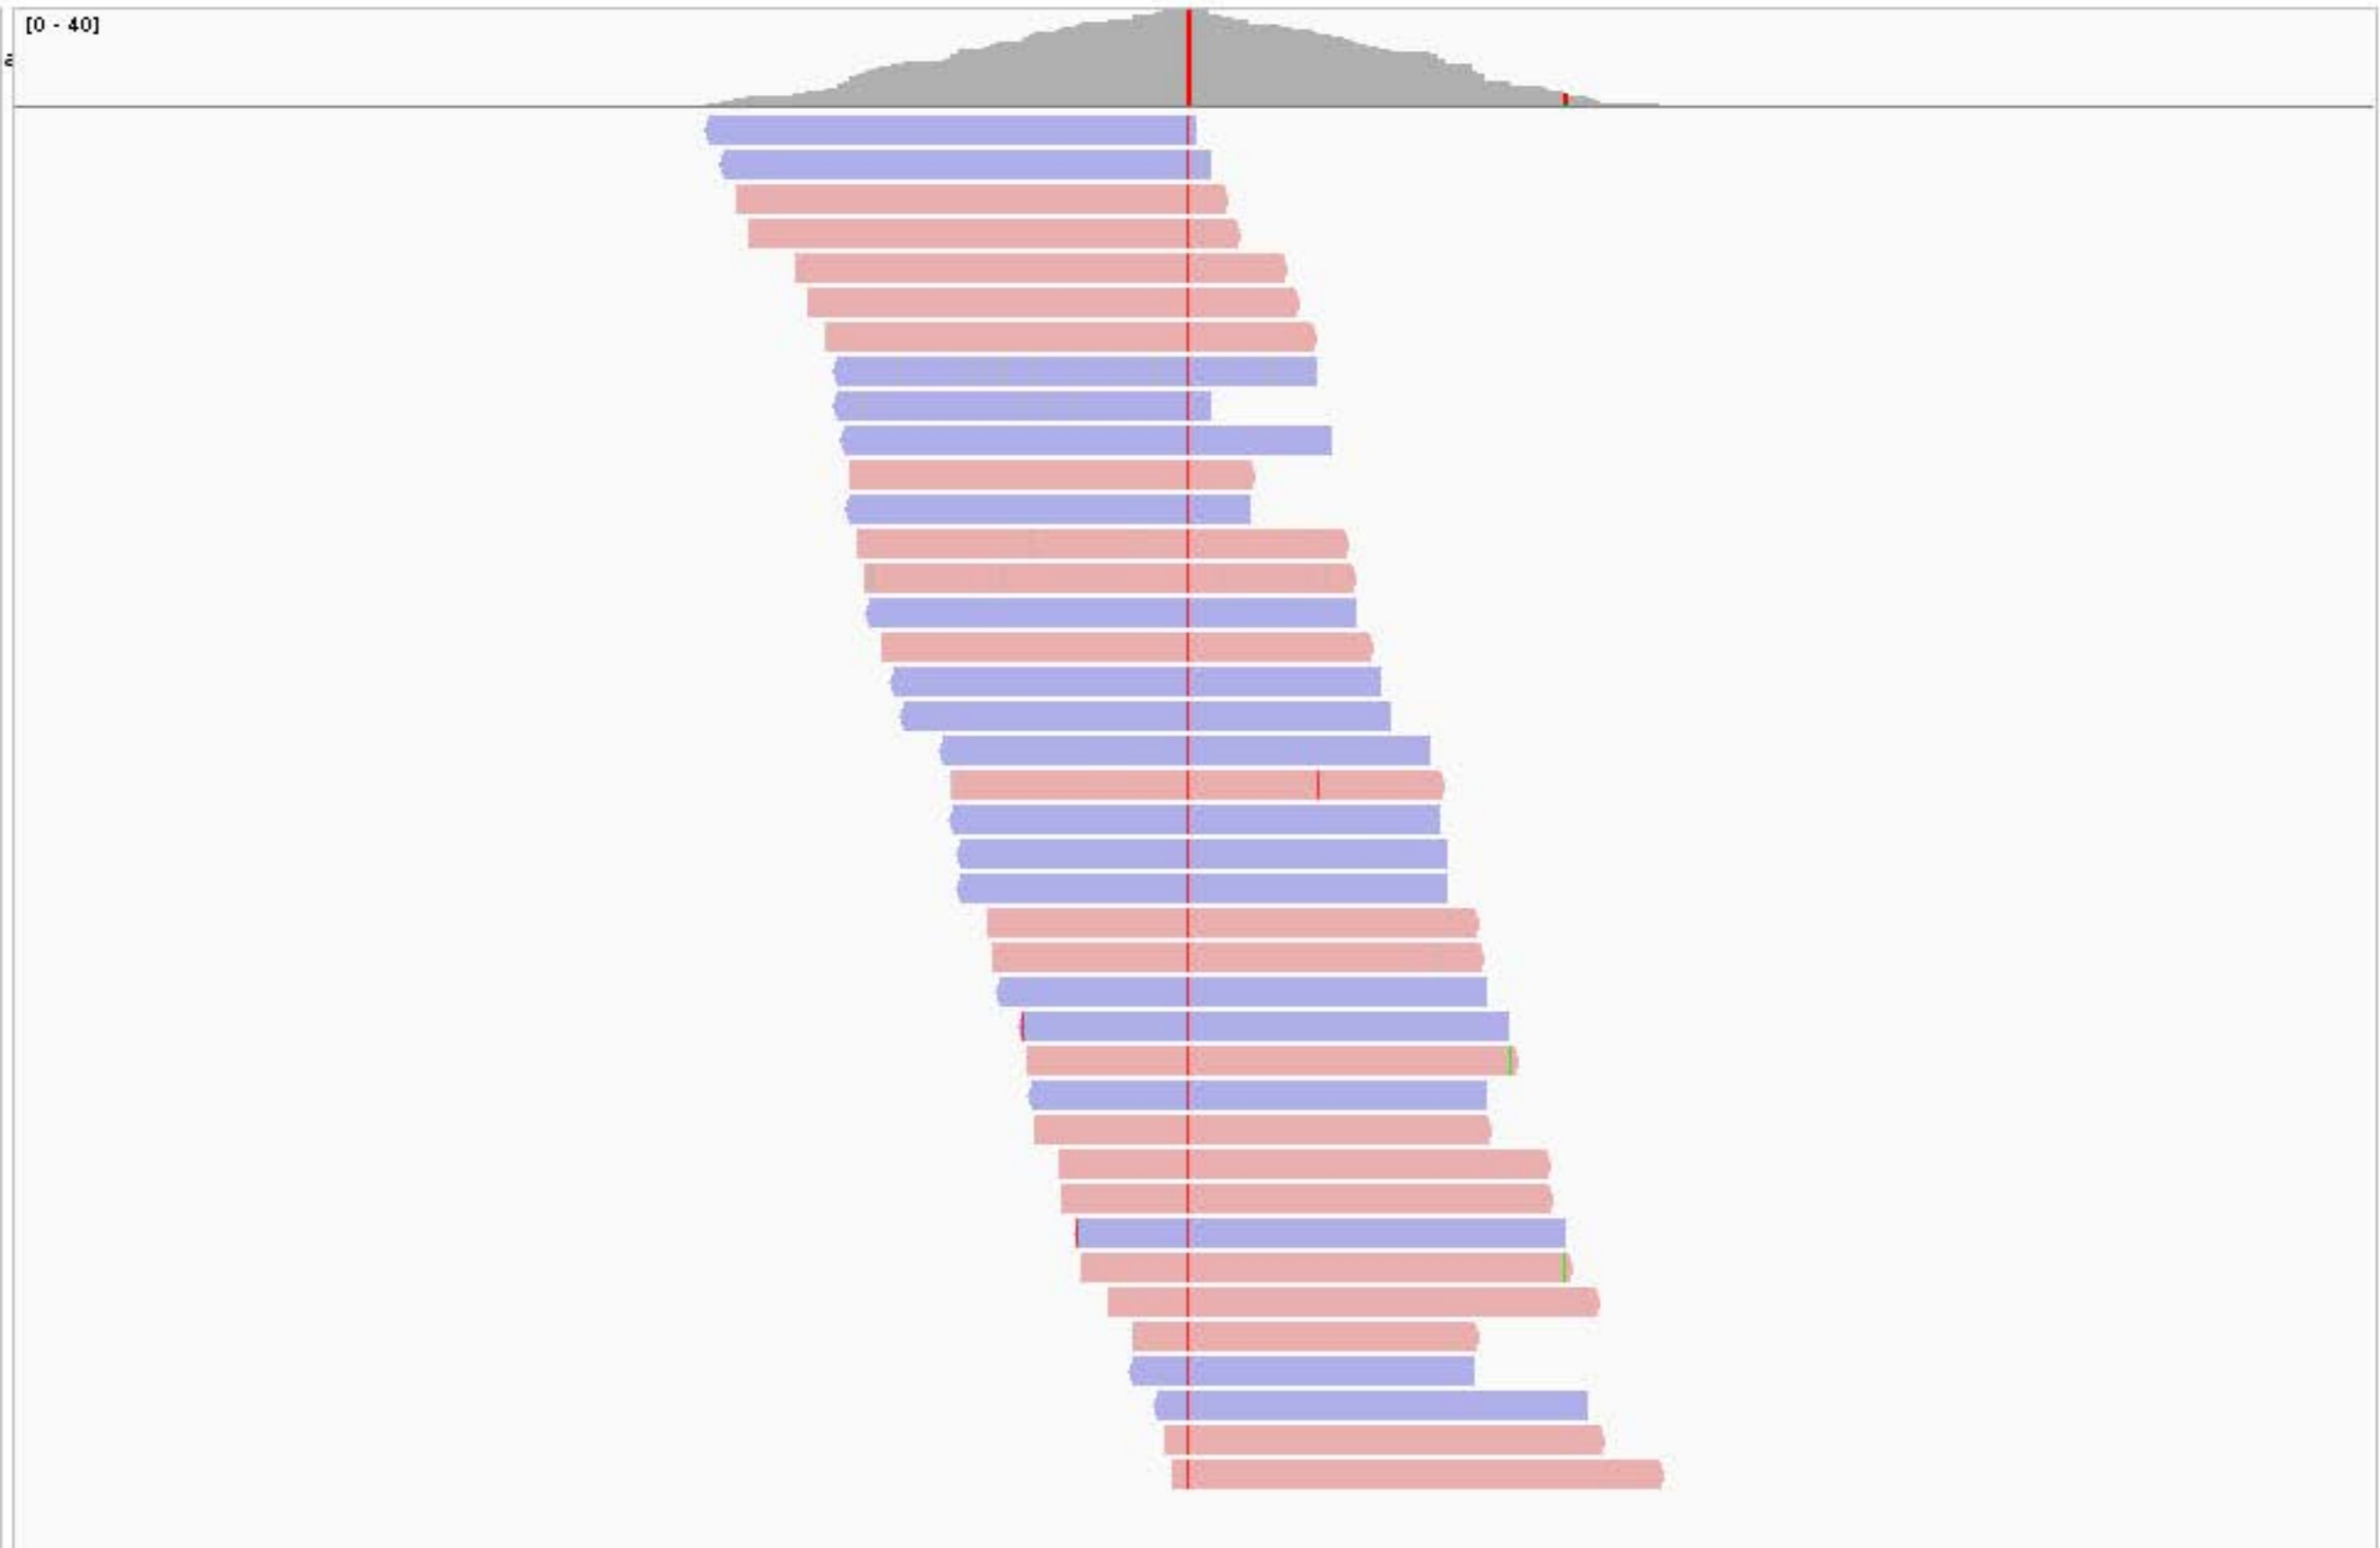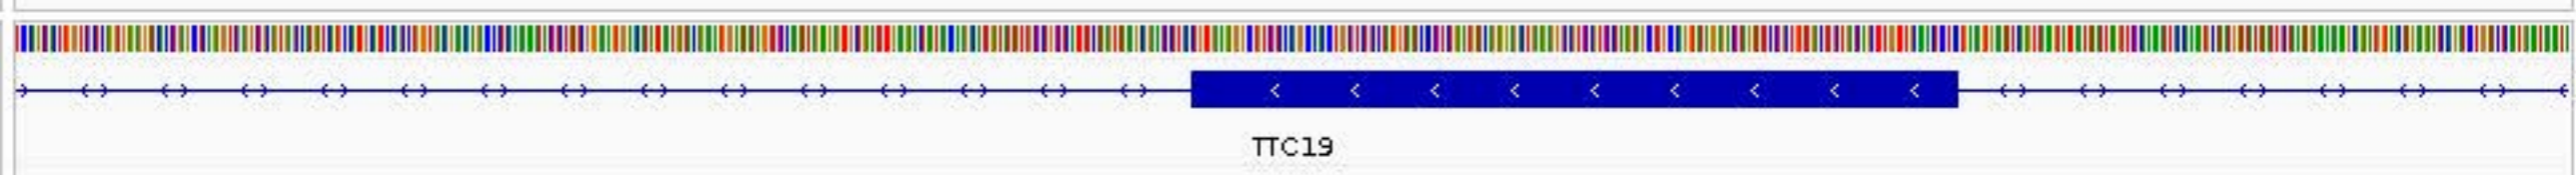



SL\_0011-LT\_2-8.bam Coverage  
SL\_0011-LT\_2-8\_rmt.bam

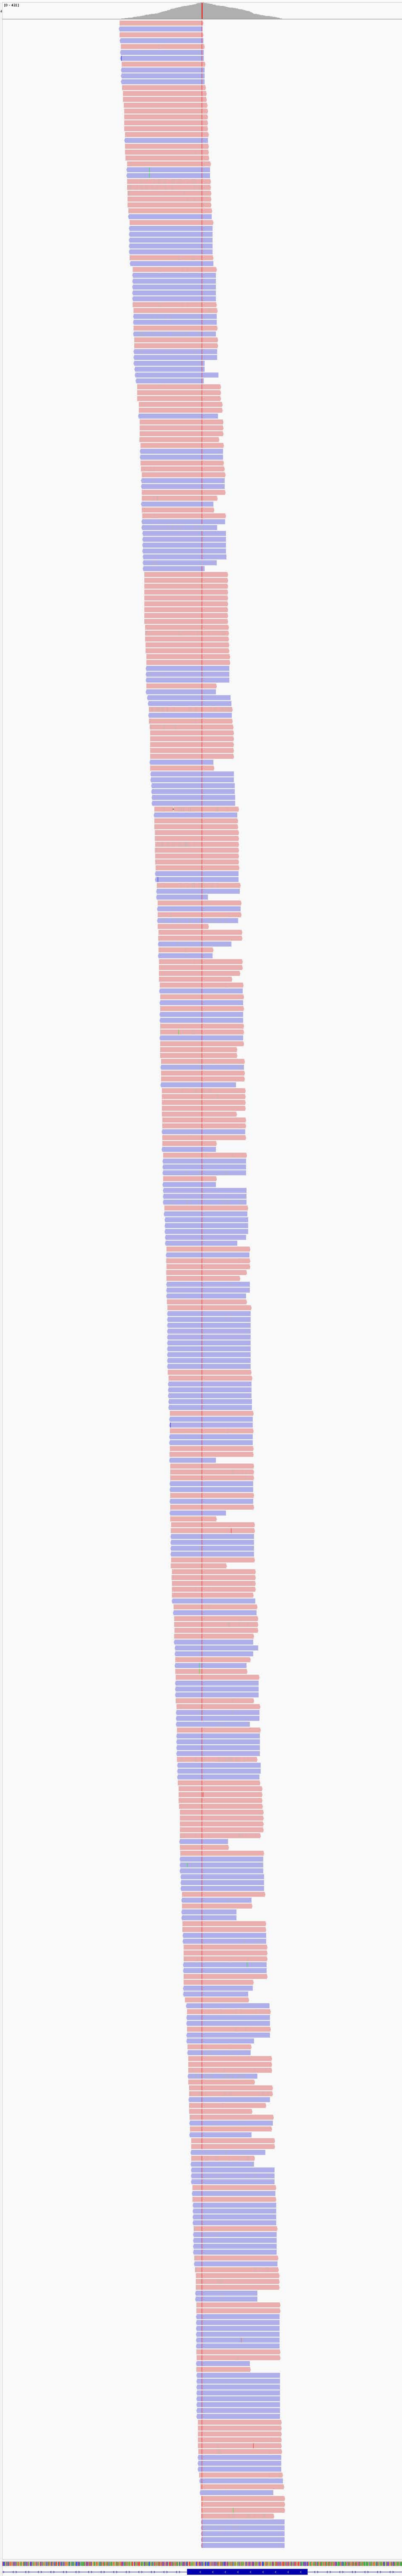



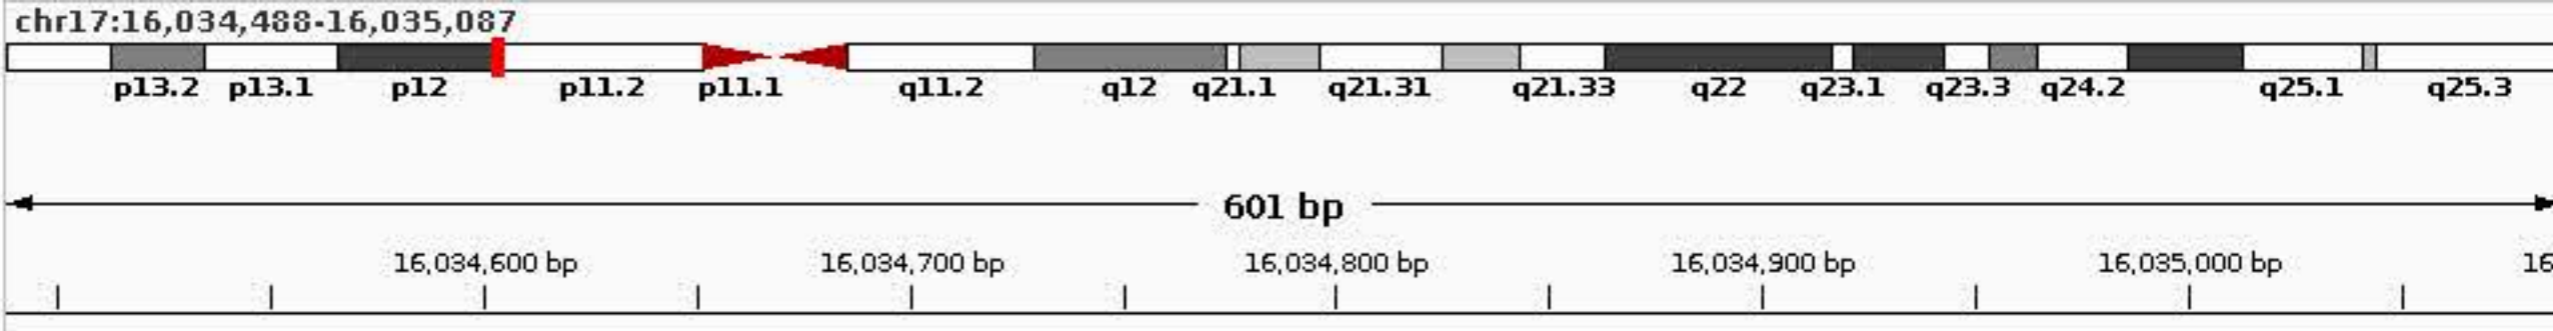

SL\_0011-LT\_5-B\_mut.bam Coverage

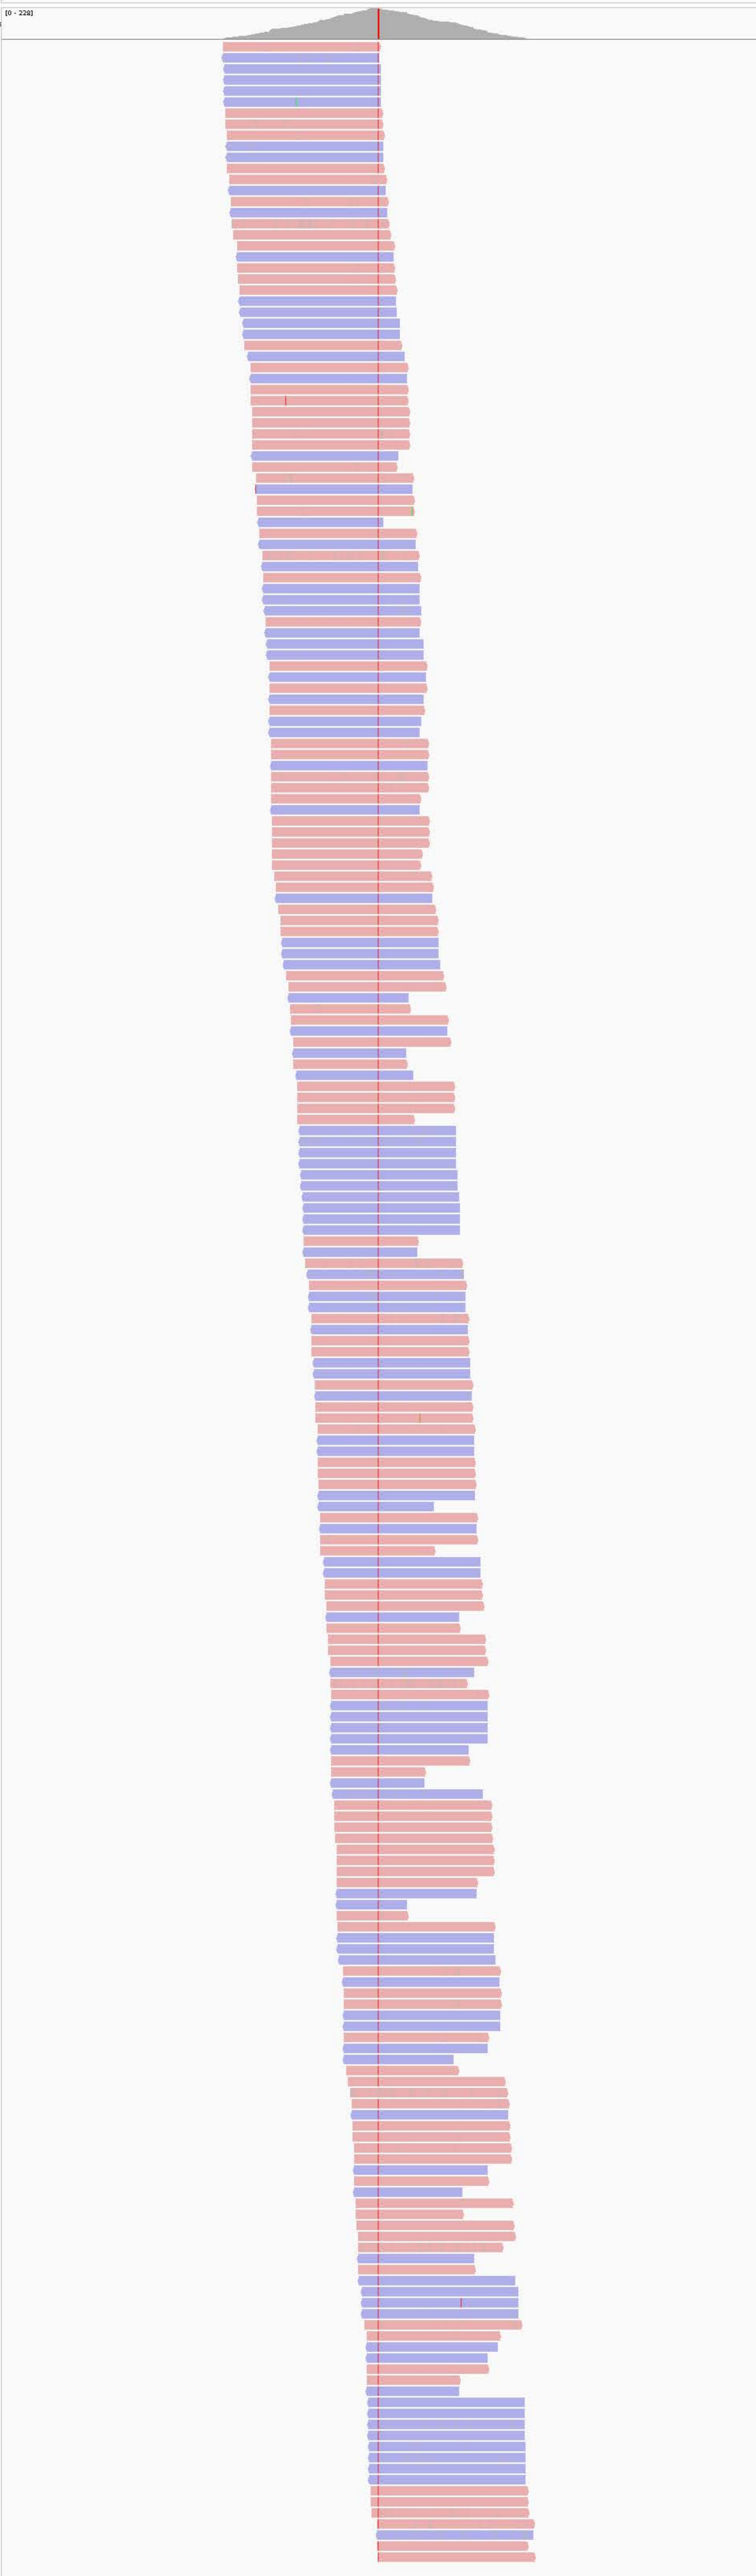

SL\_0011-LT\_5-B\_mut.bam

Sequence

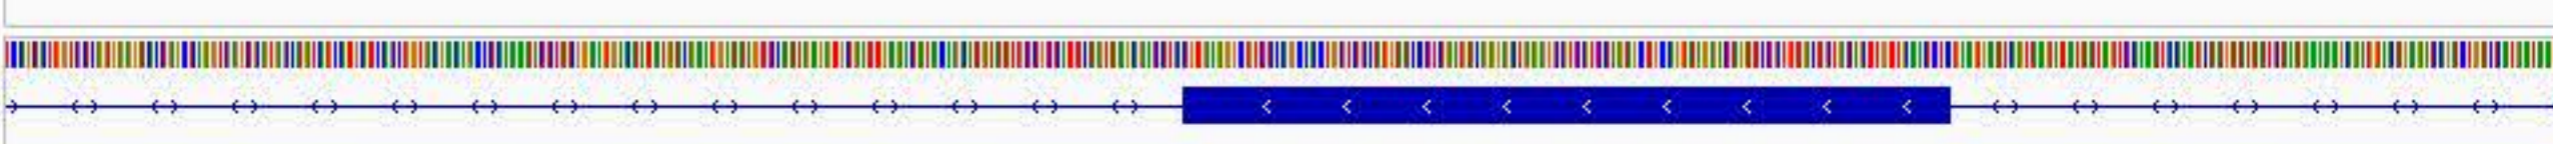

Refseq Genes

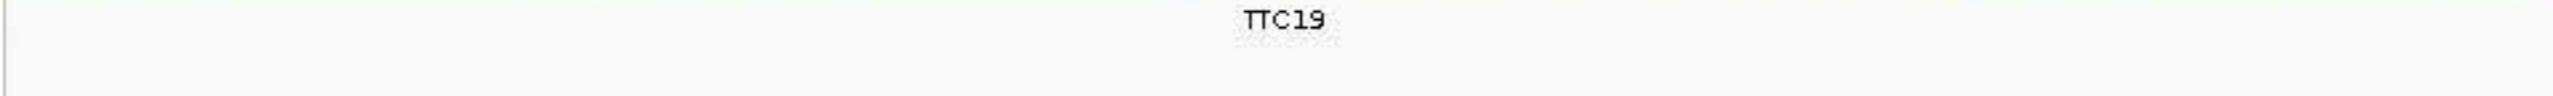

TTC19



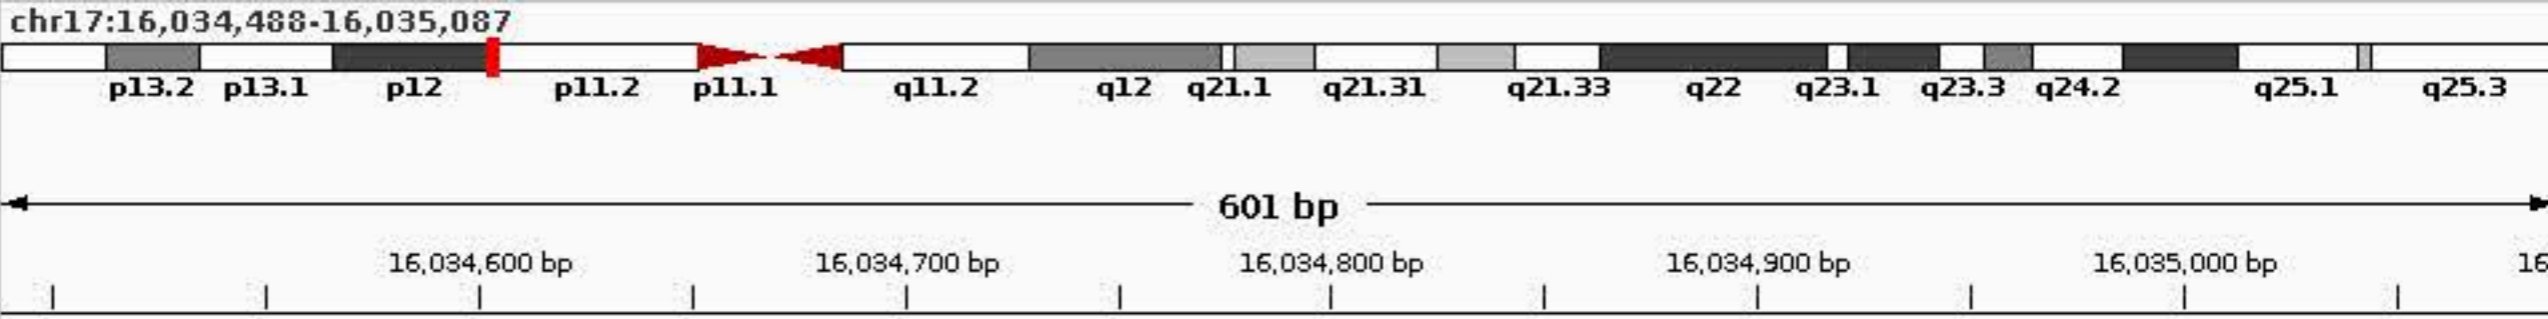

SL\_0011-LT\_6-B\_mut.bam Coverage

SL\_0011-LT\_6-B\_mut.bam

Sequence

Refseq Genes

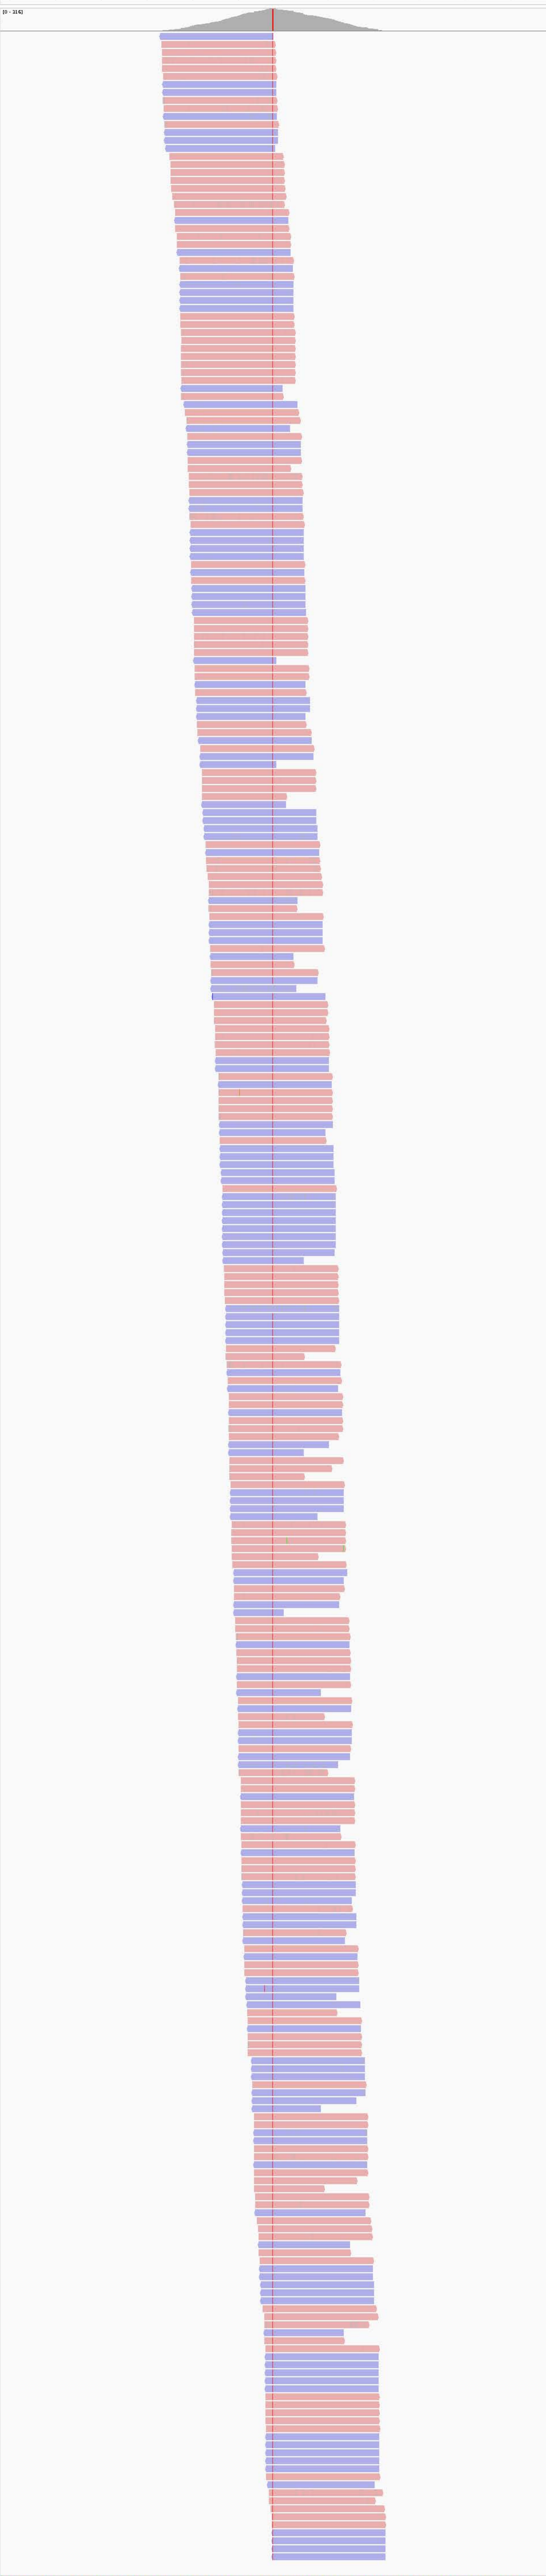

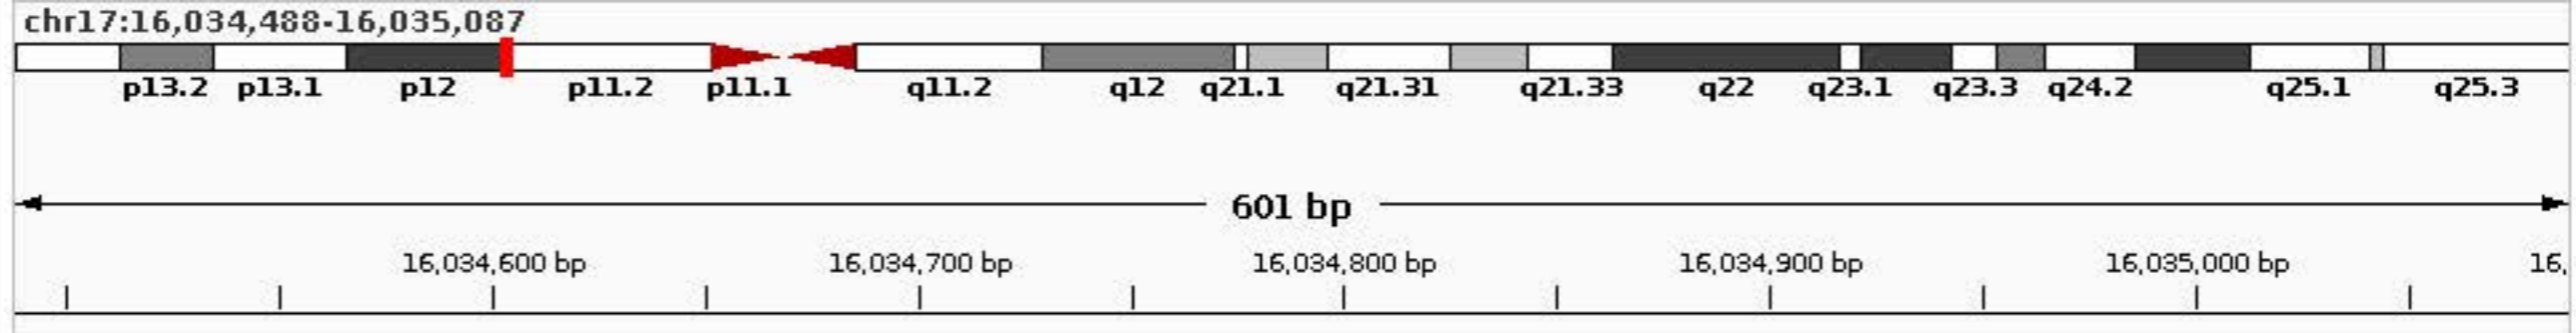

SL\_0011-LT\_7-B\_mut.bam Coverage

SL\_0011-LT\_7-B\_mut.bam

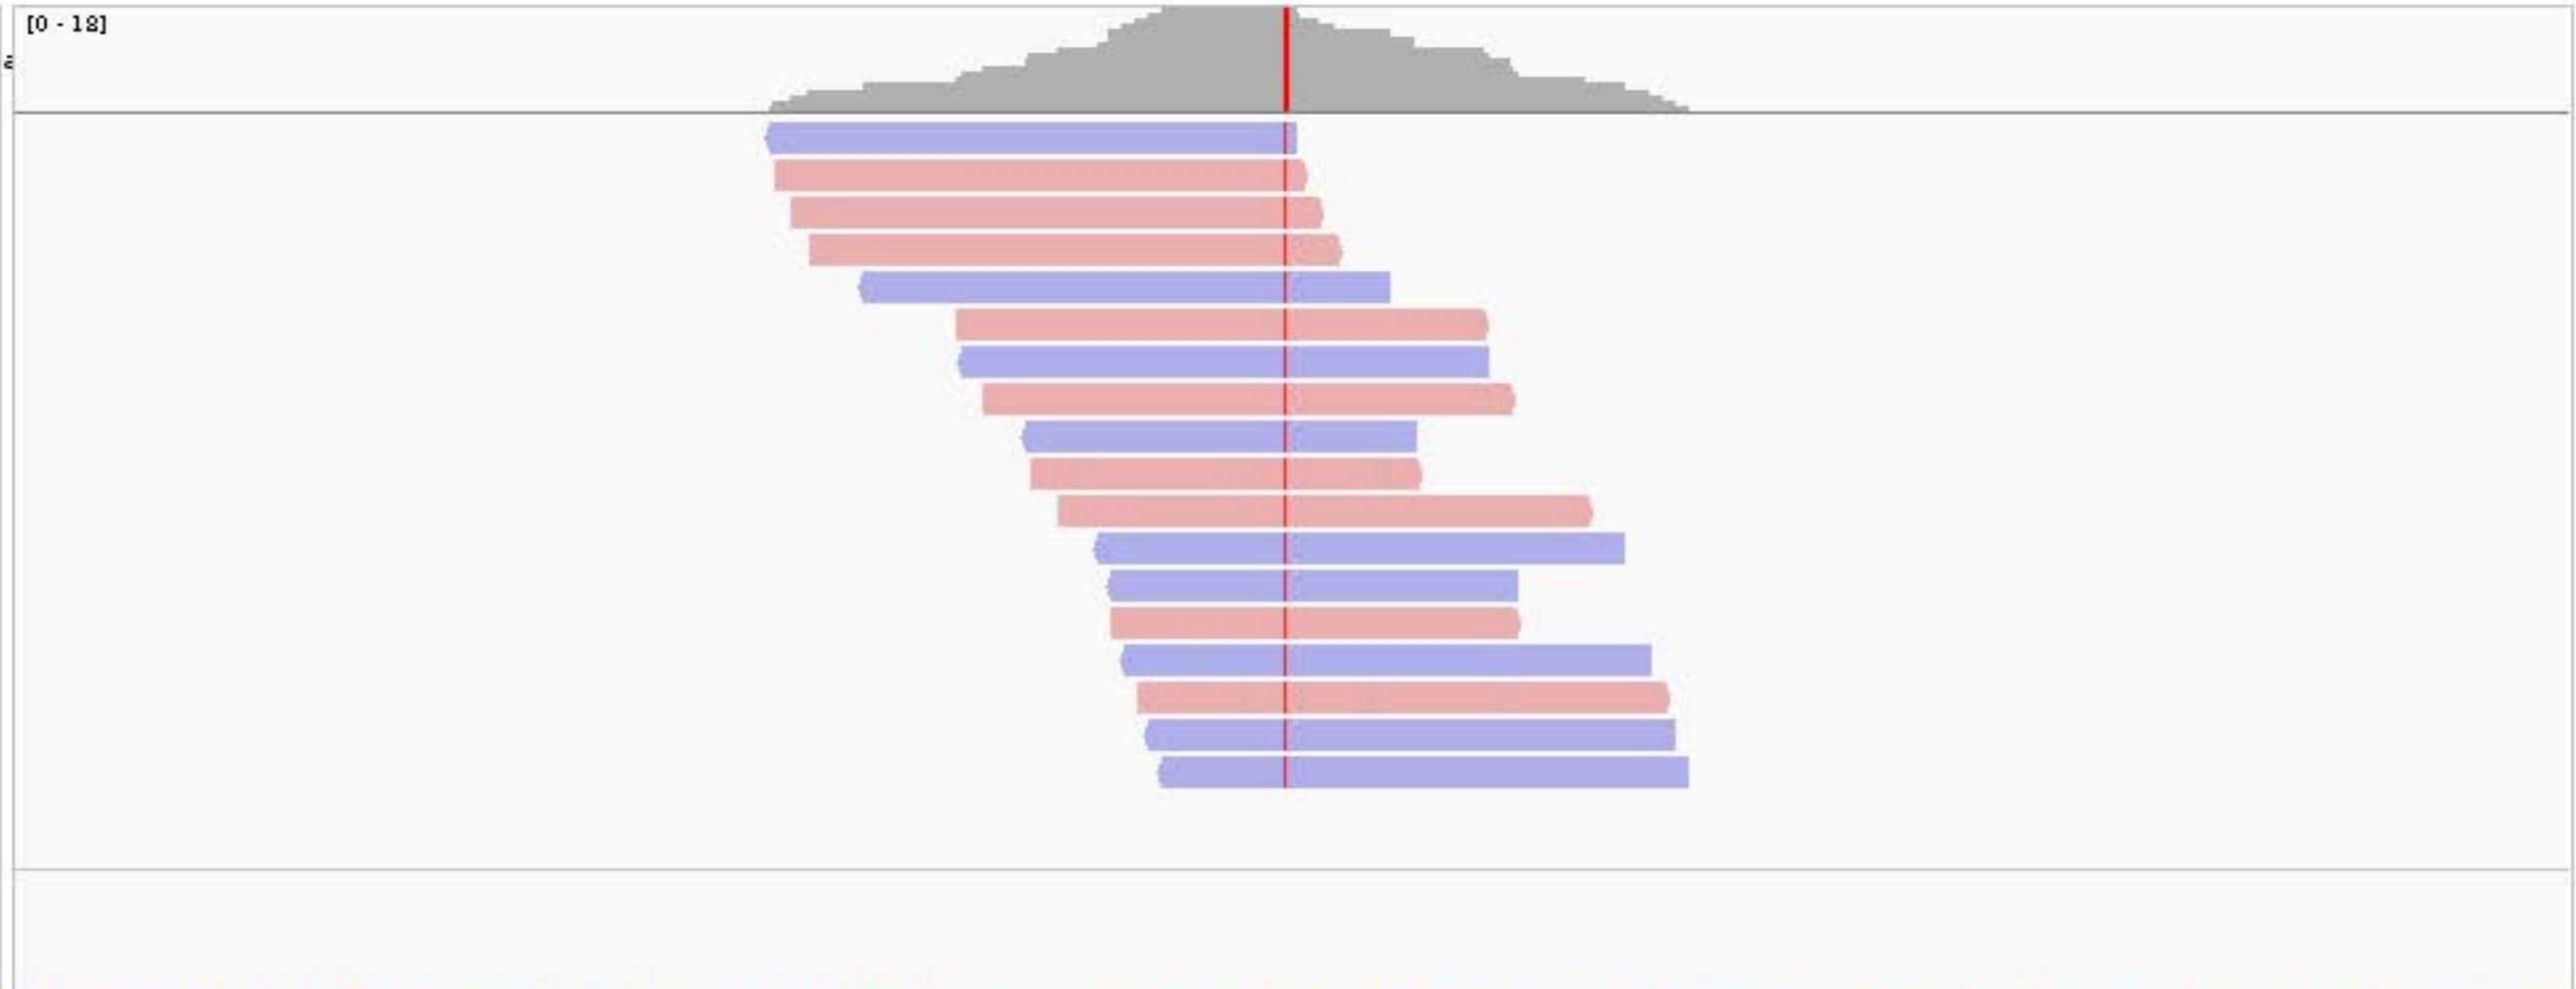

Sequence →

Refseq Genes

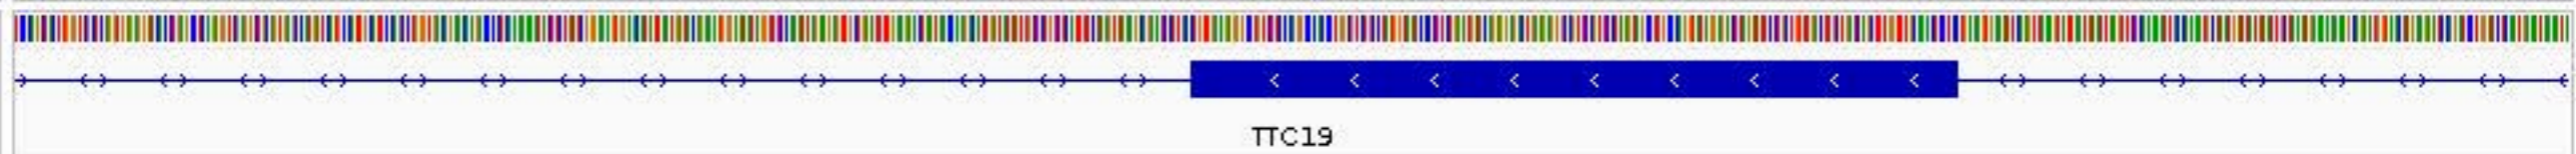



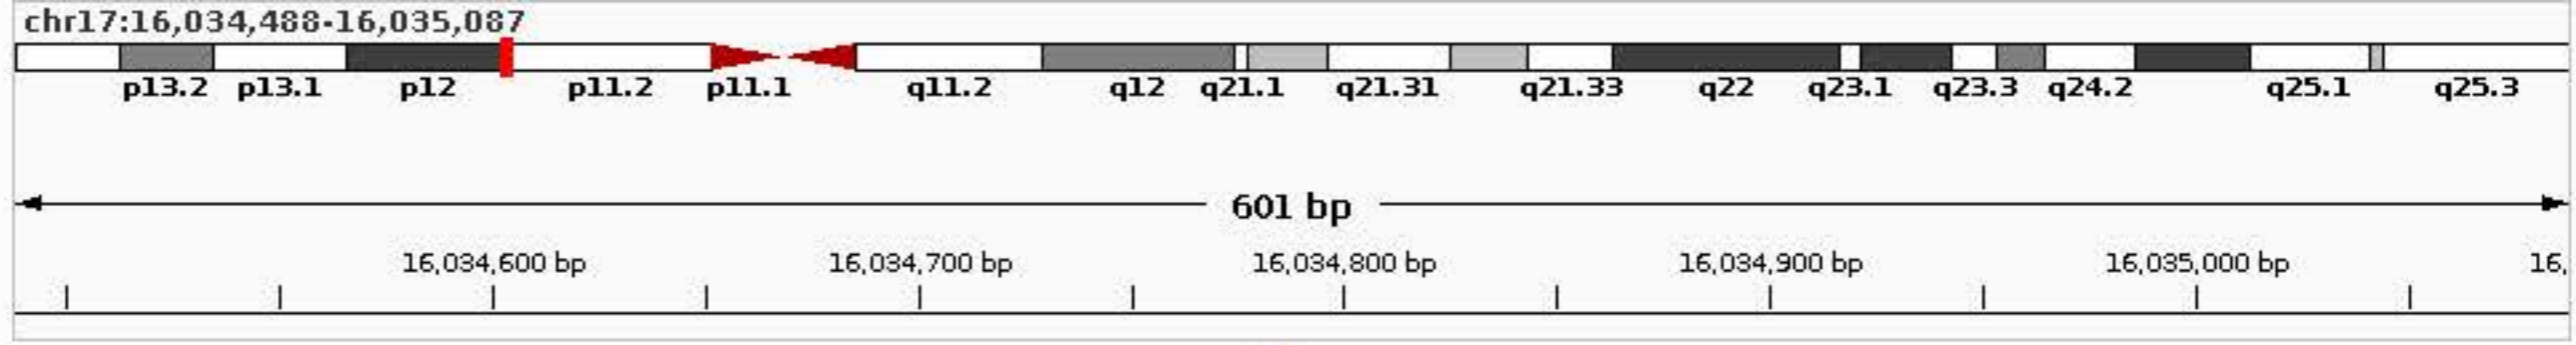

SL\_0011-LT\_11-B\_mut.bam Cov

SL\_0011-LT\_11-B\_mut.bam

Sequence

Refseq Genes

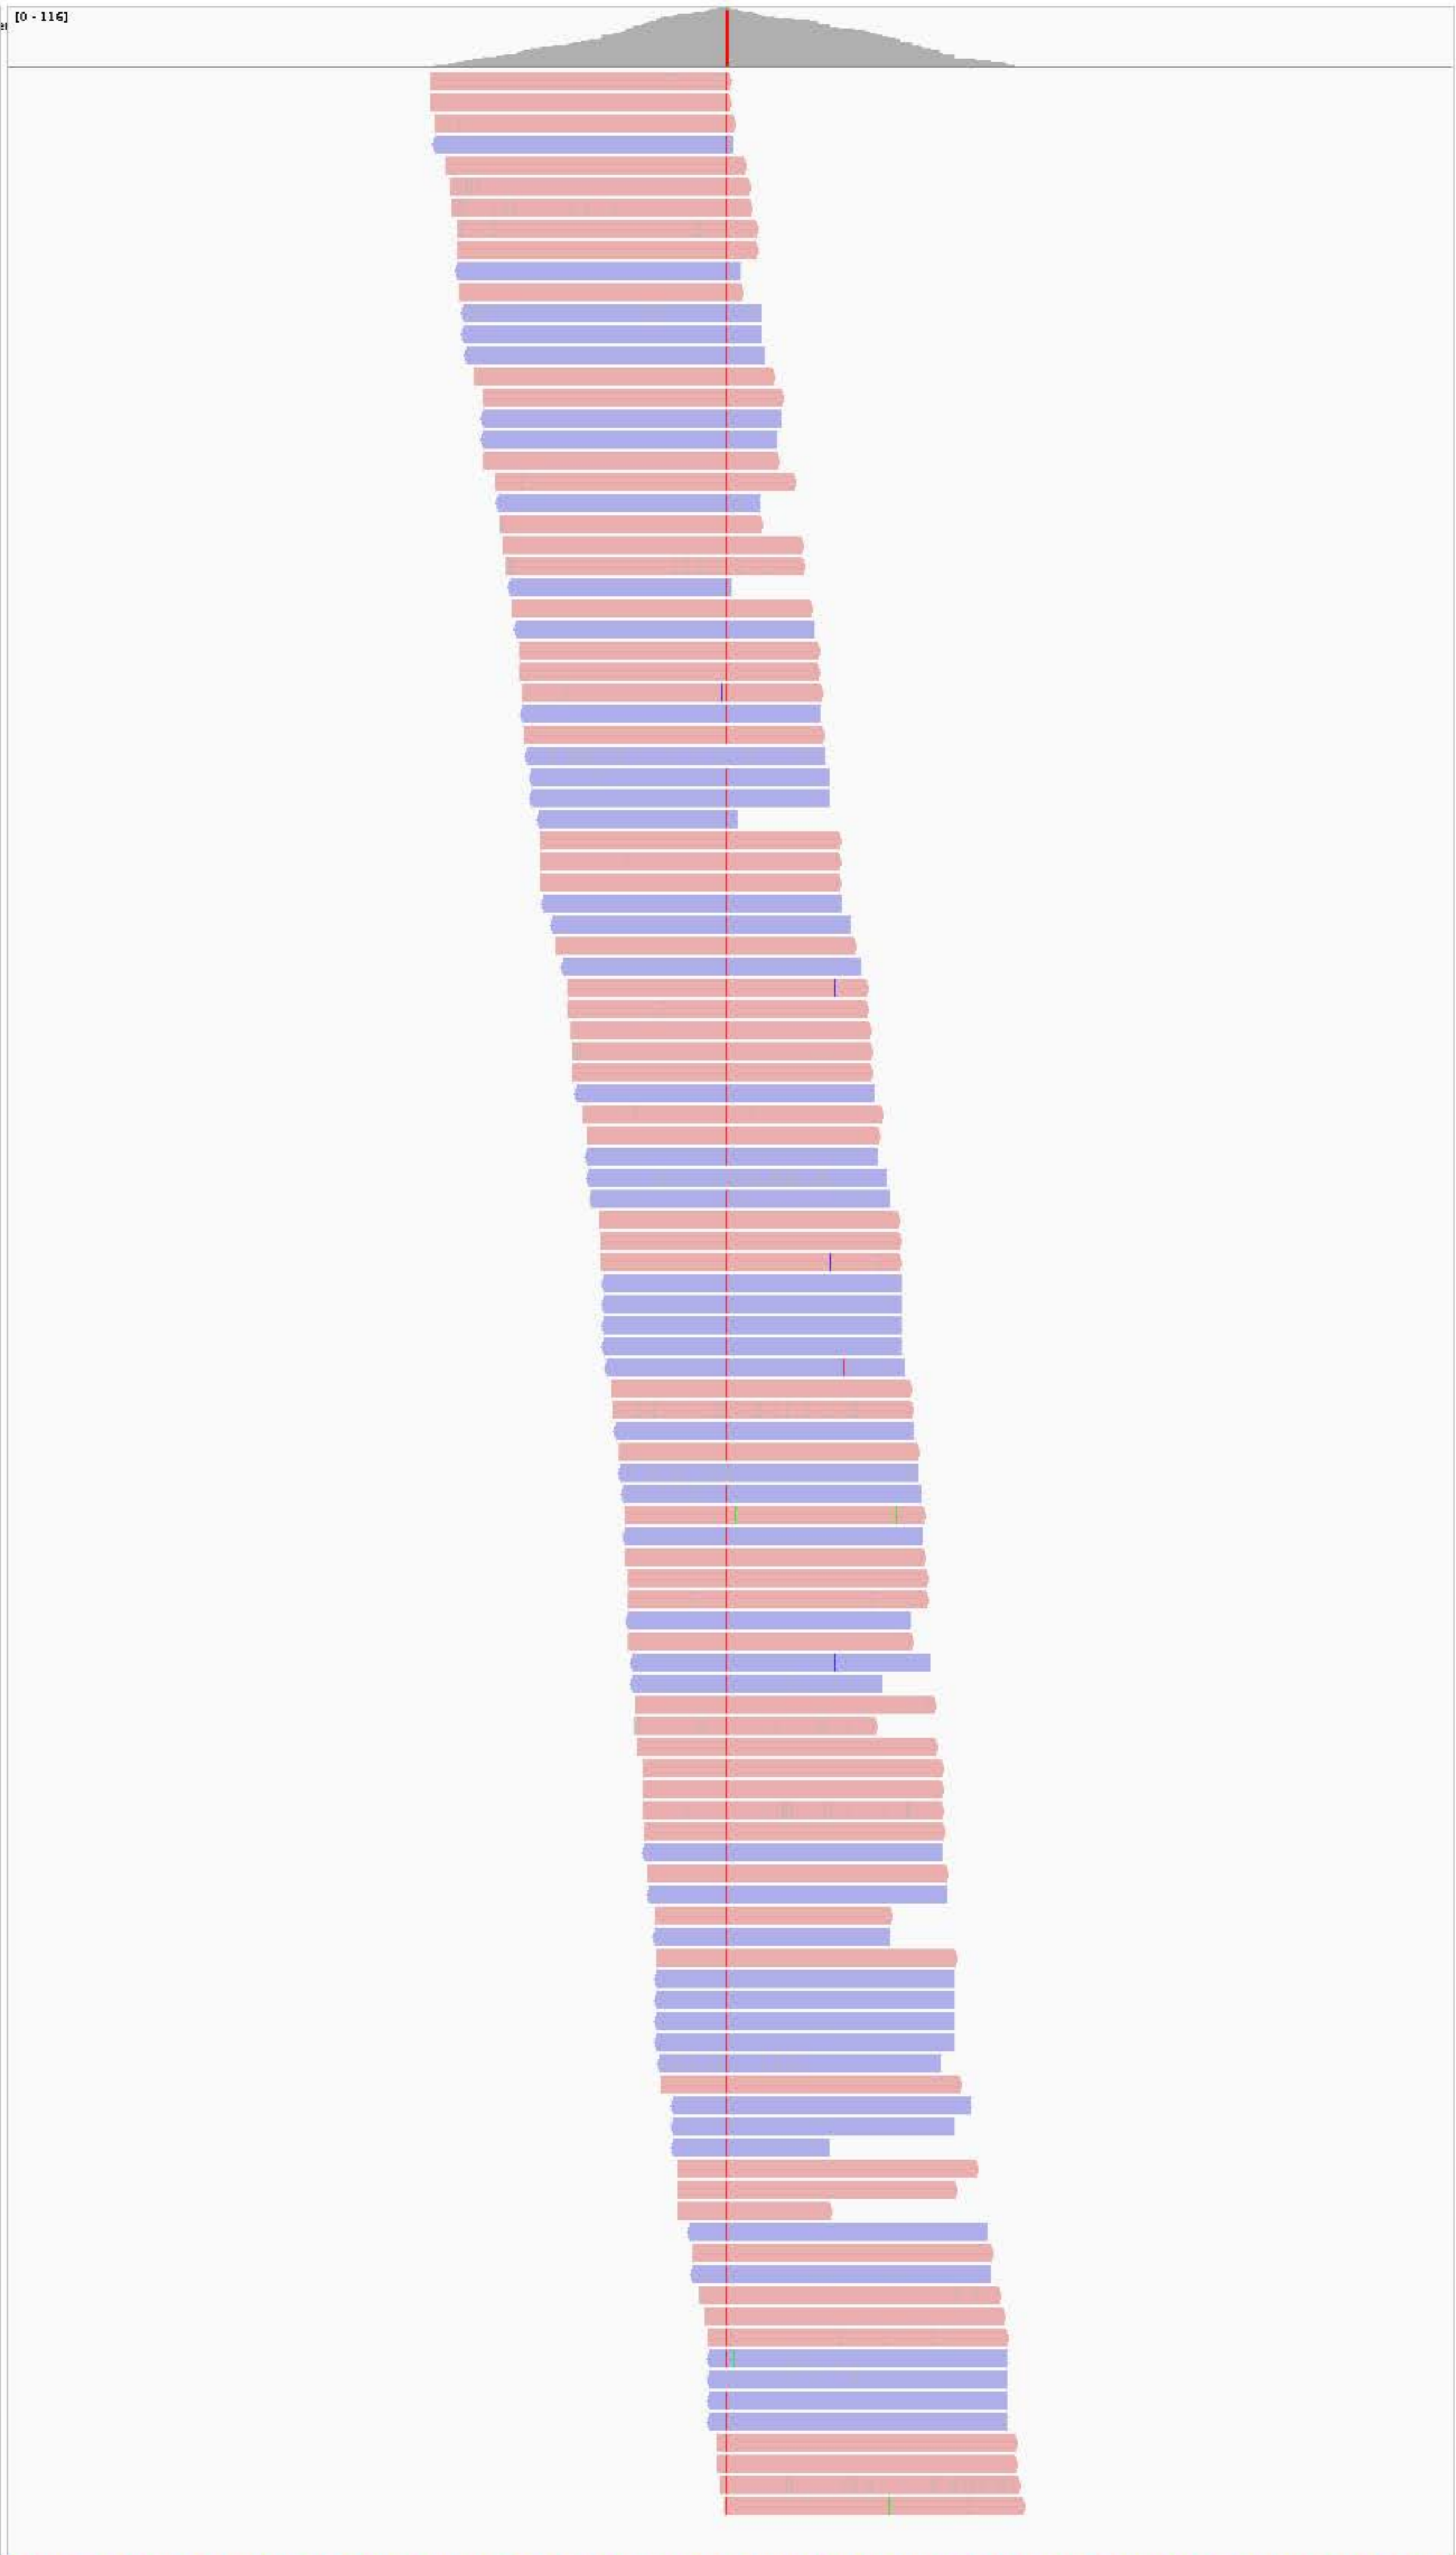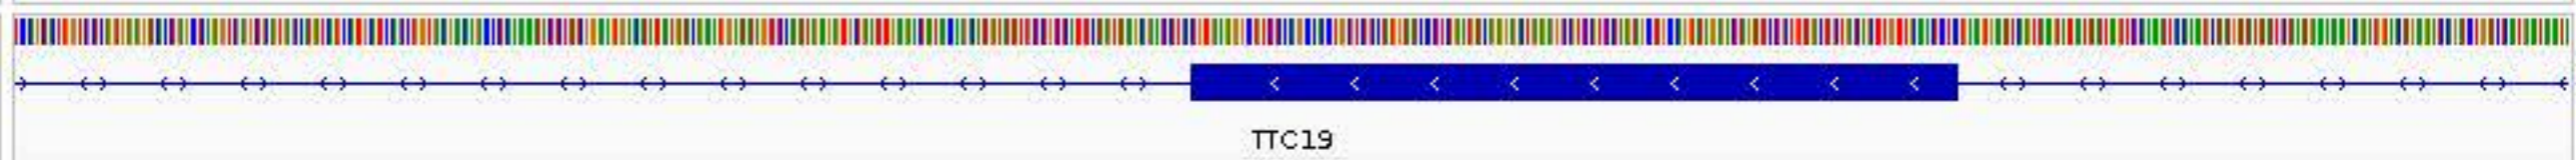



chr22:29,668,148-29,668,747

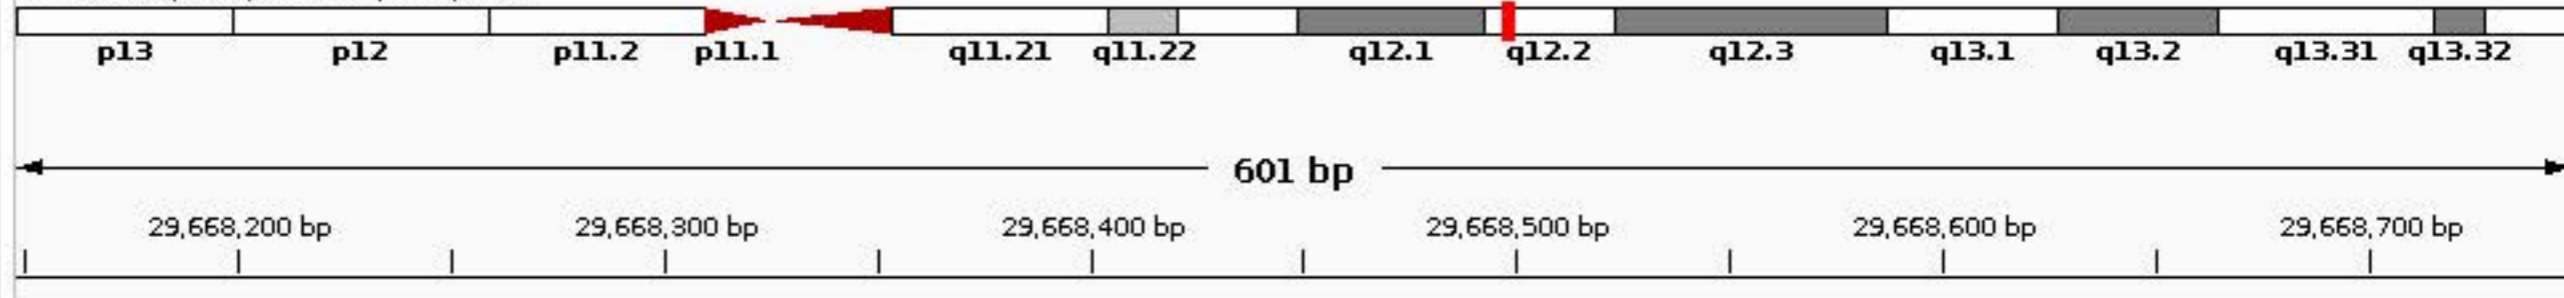

SL\_1002\_L\_FFPE\_24-B\_mut.bam  
rage

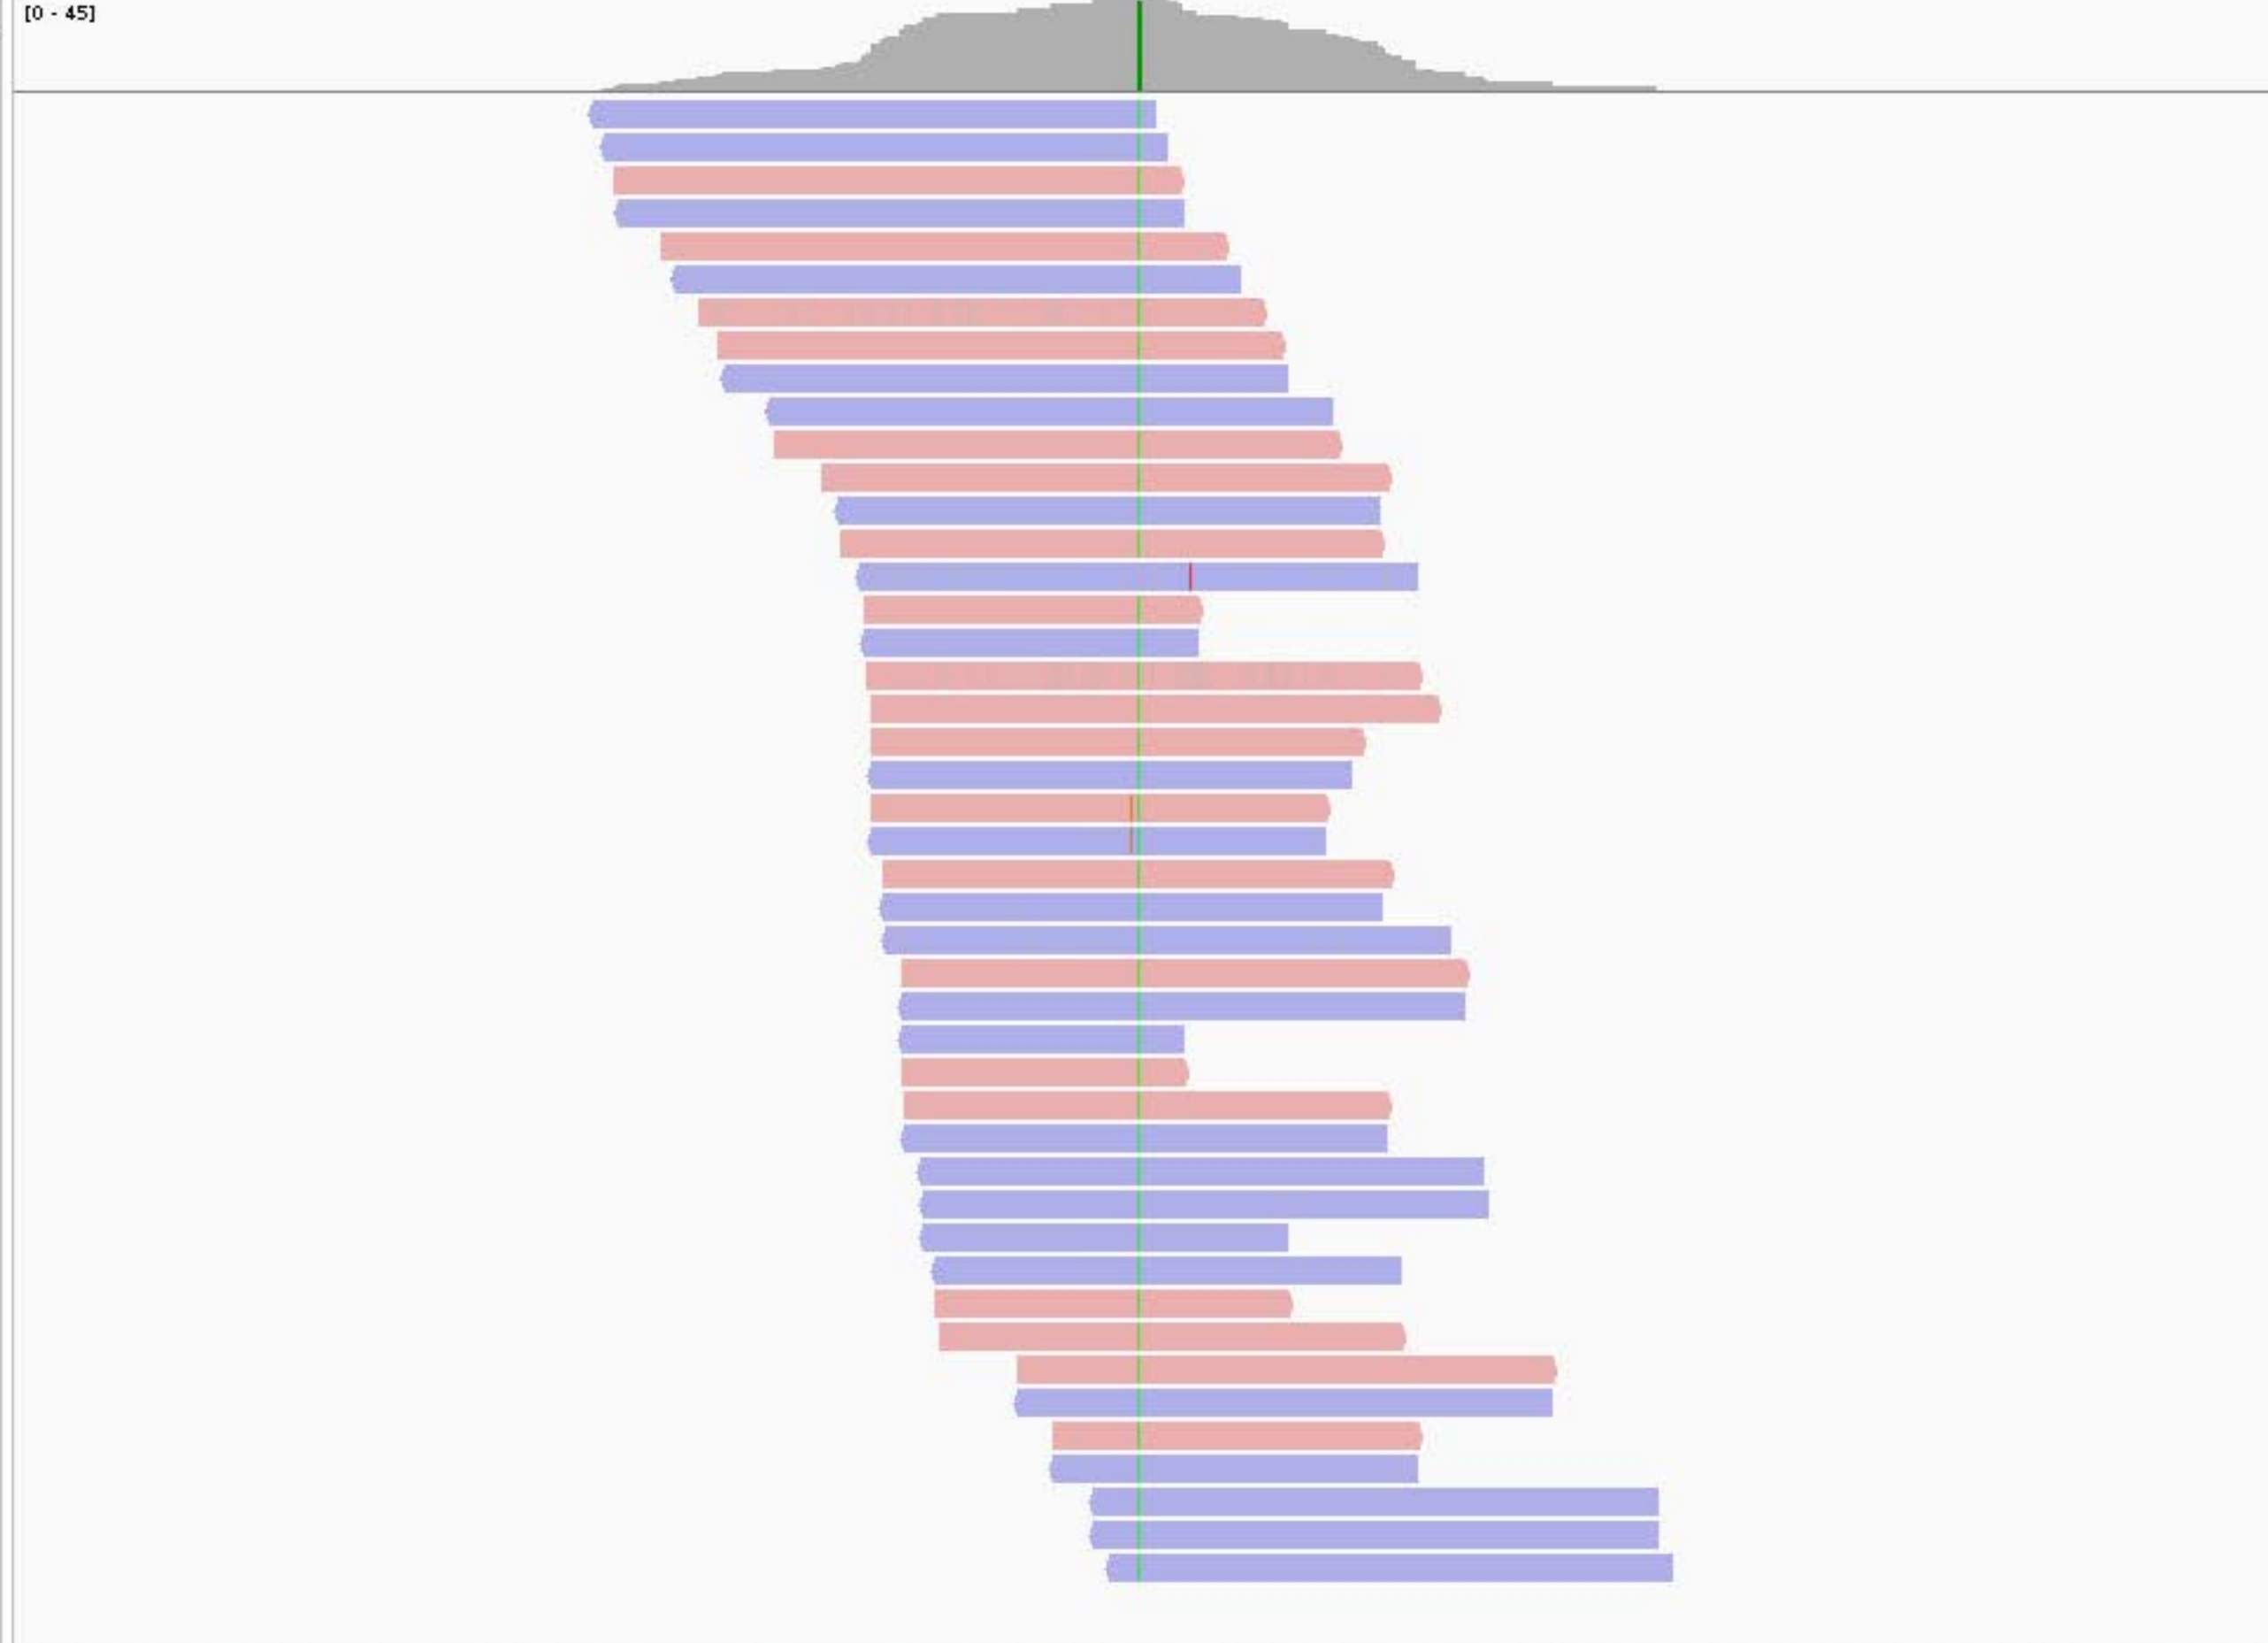

SL\_1002\_L\_FFPE\_24-B\_mut.ba  
m

Sequence →

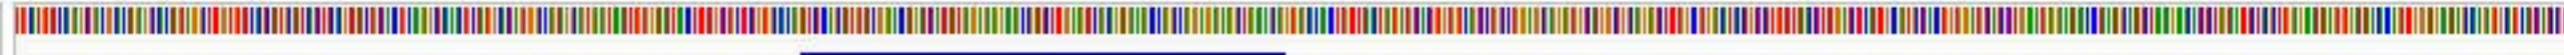

Refseq Genes

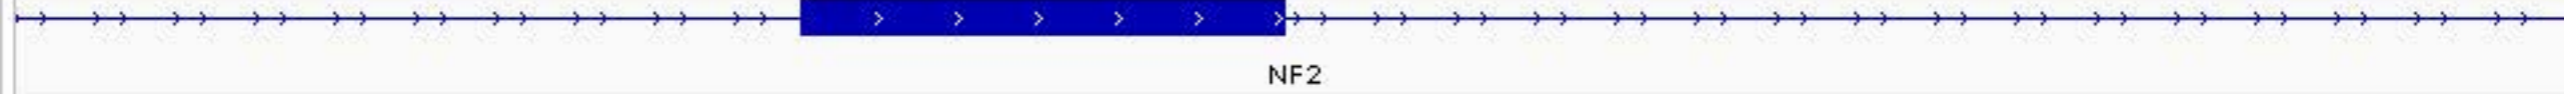

NF2

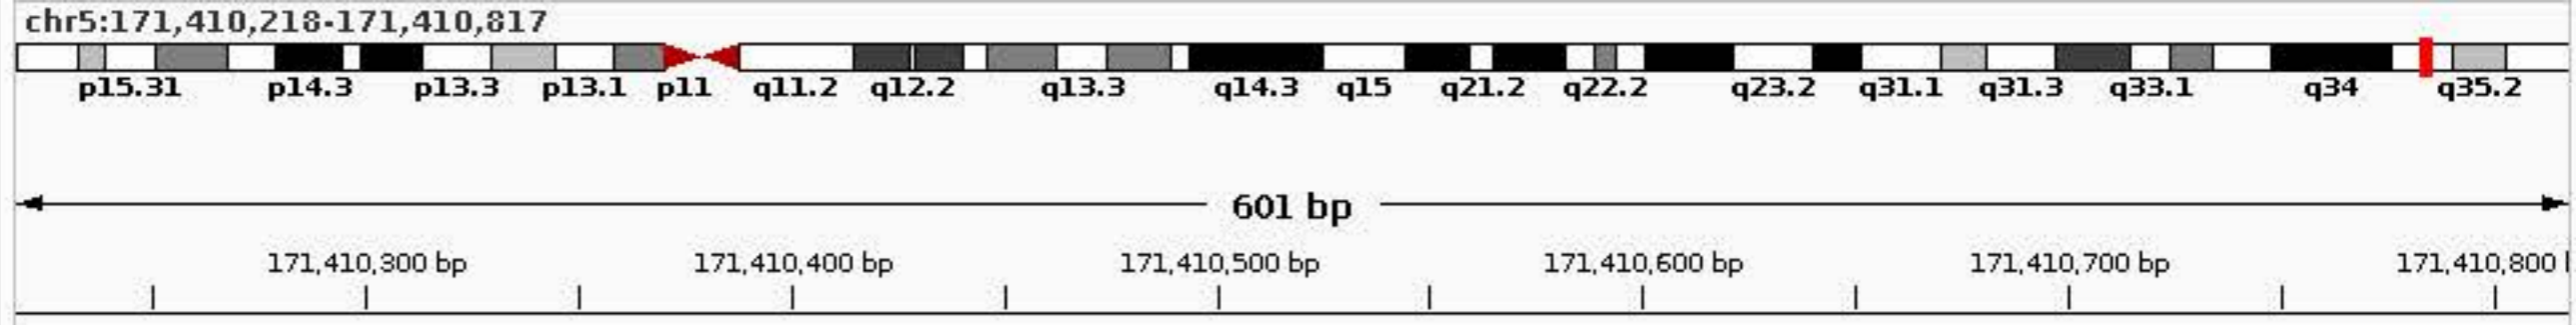

SL\_1007-T1-B\_mut.bam Coverage

SL\_1007-T1-B\_mut.bam

Sequence

Refseq Genes

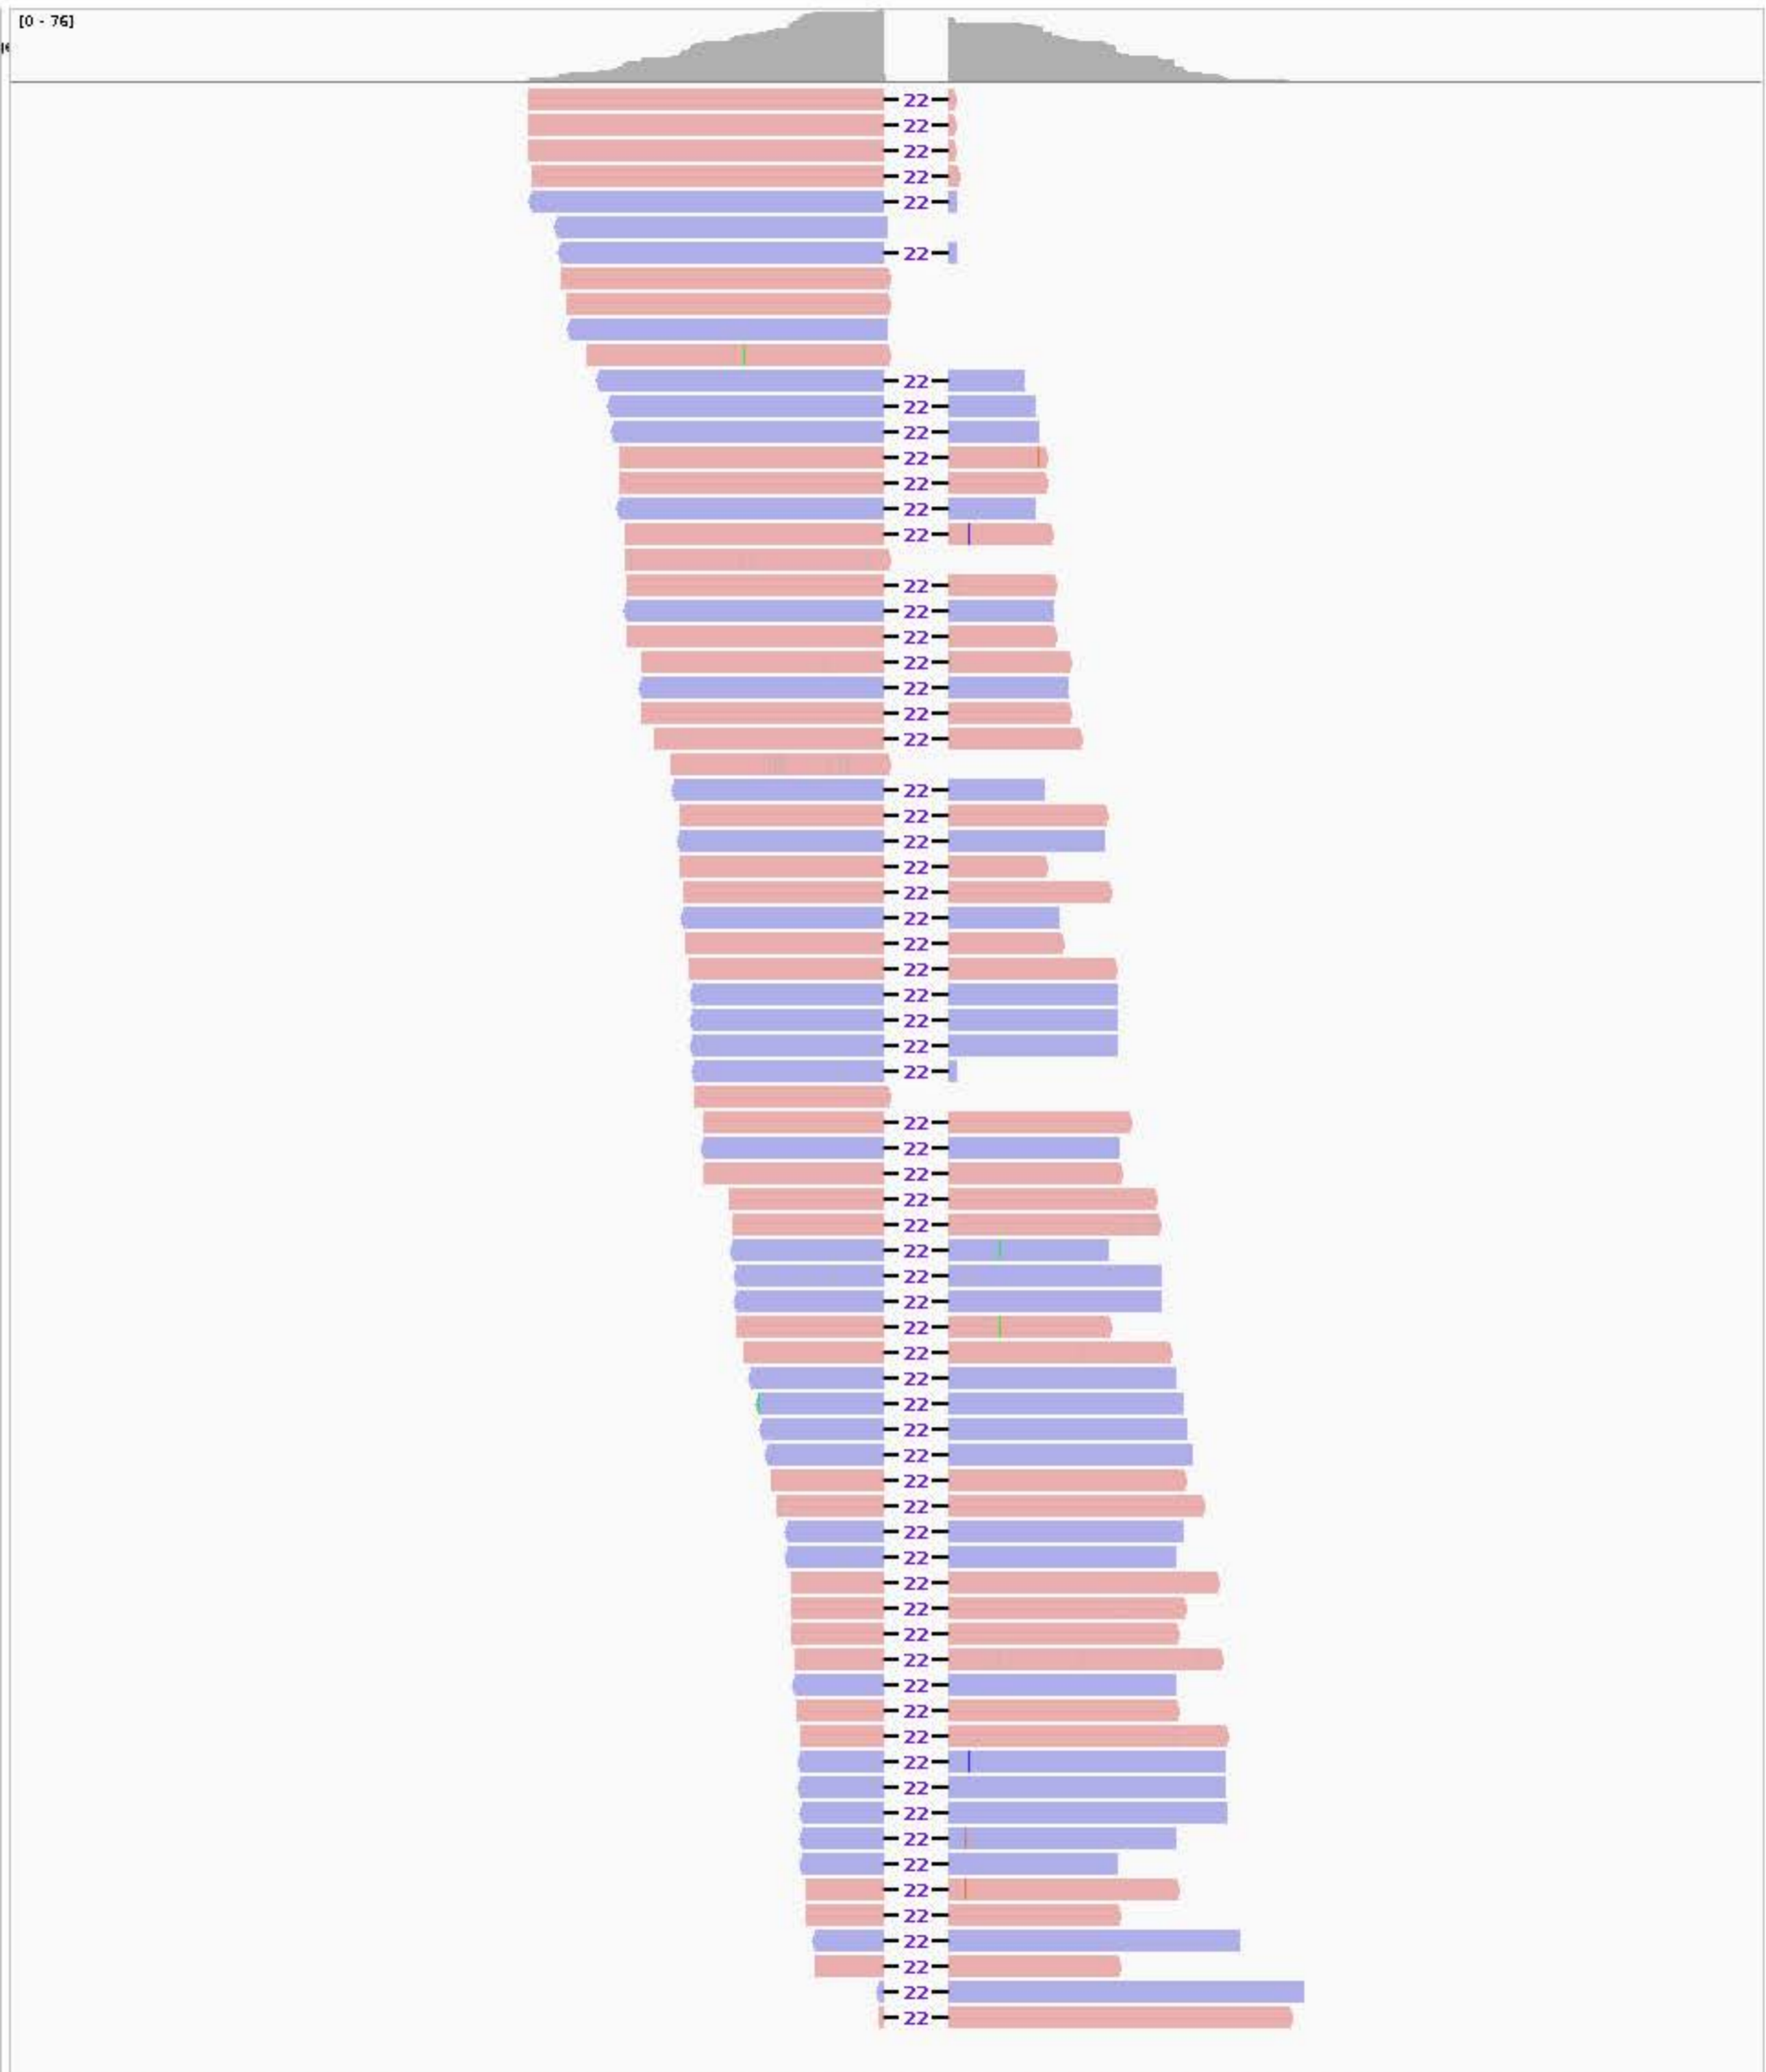

NPM1



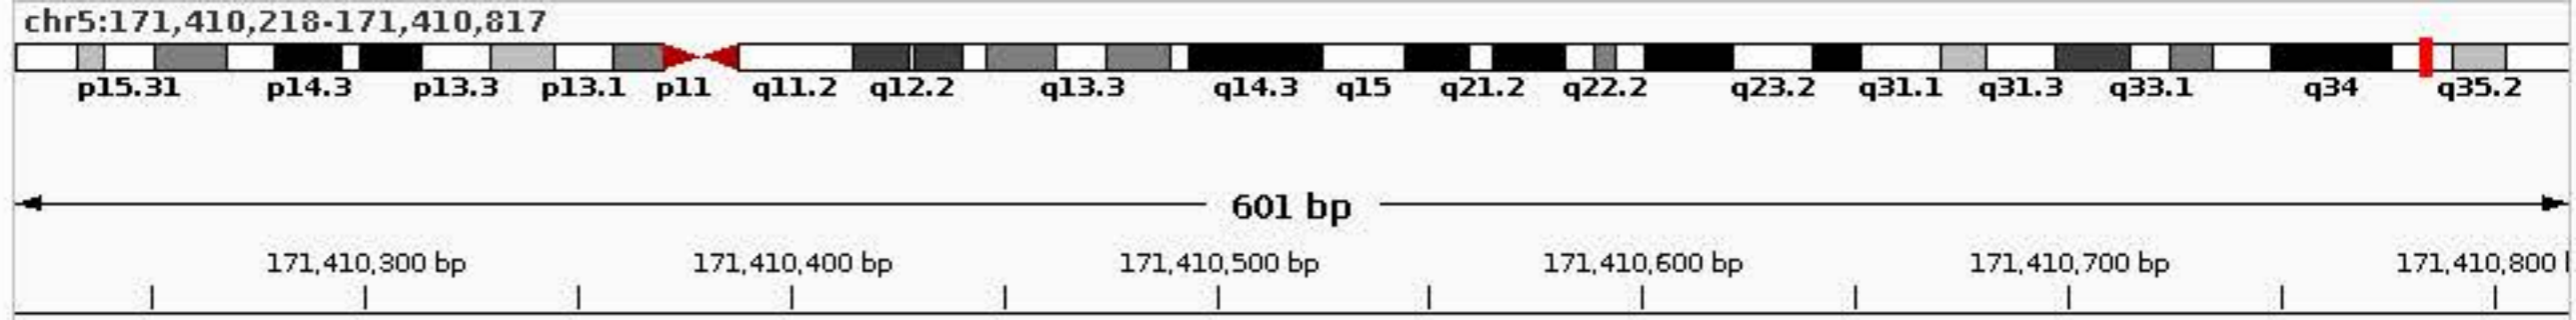

SL\_1007-T2-B\_mut.bam Coverage

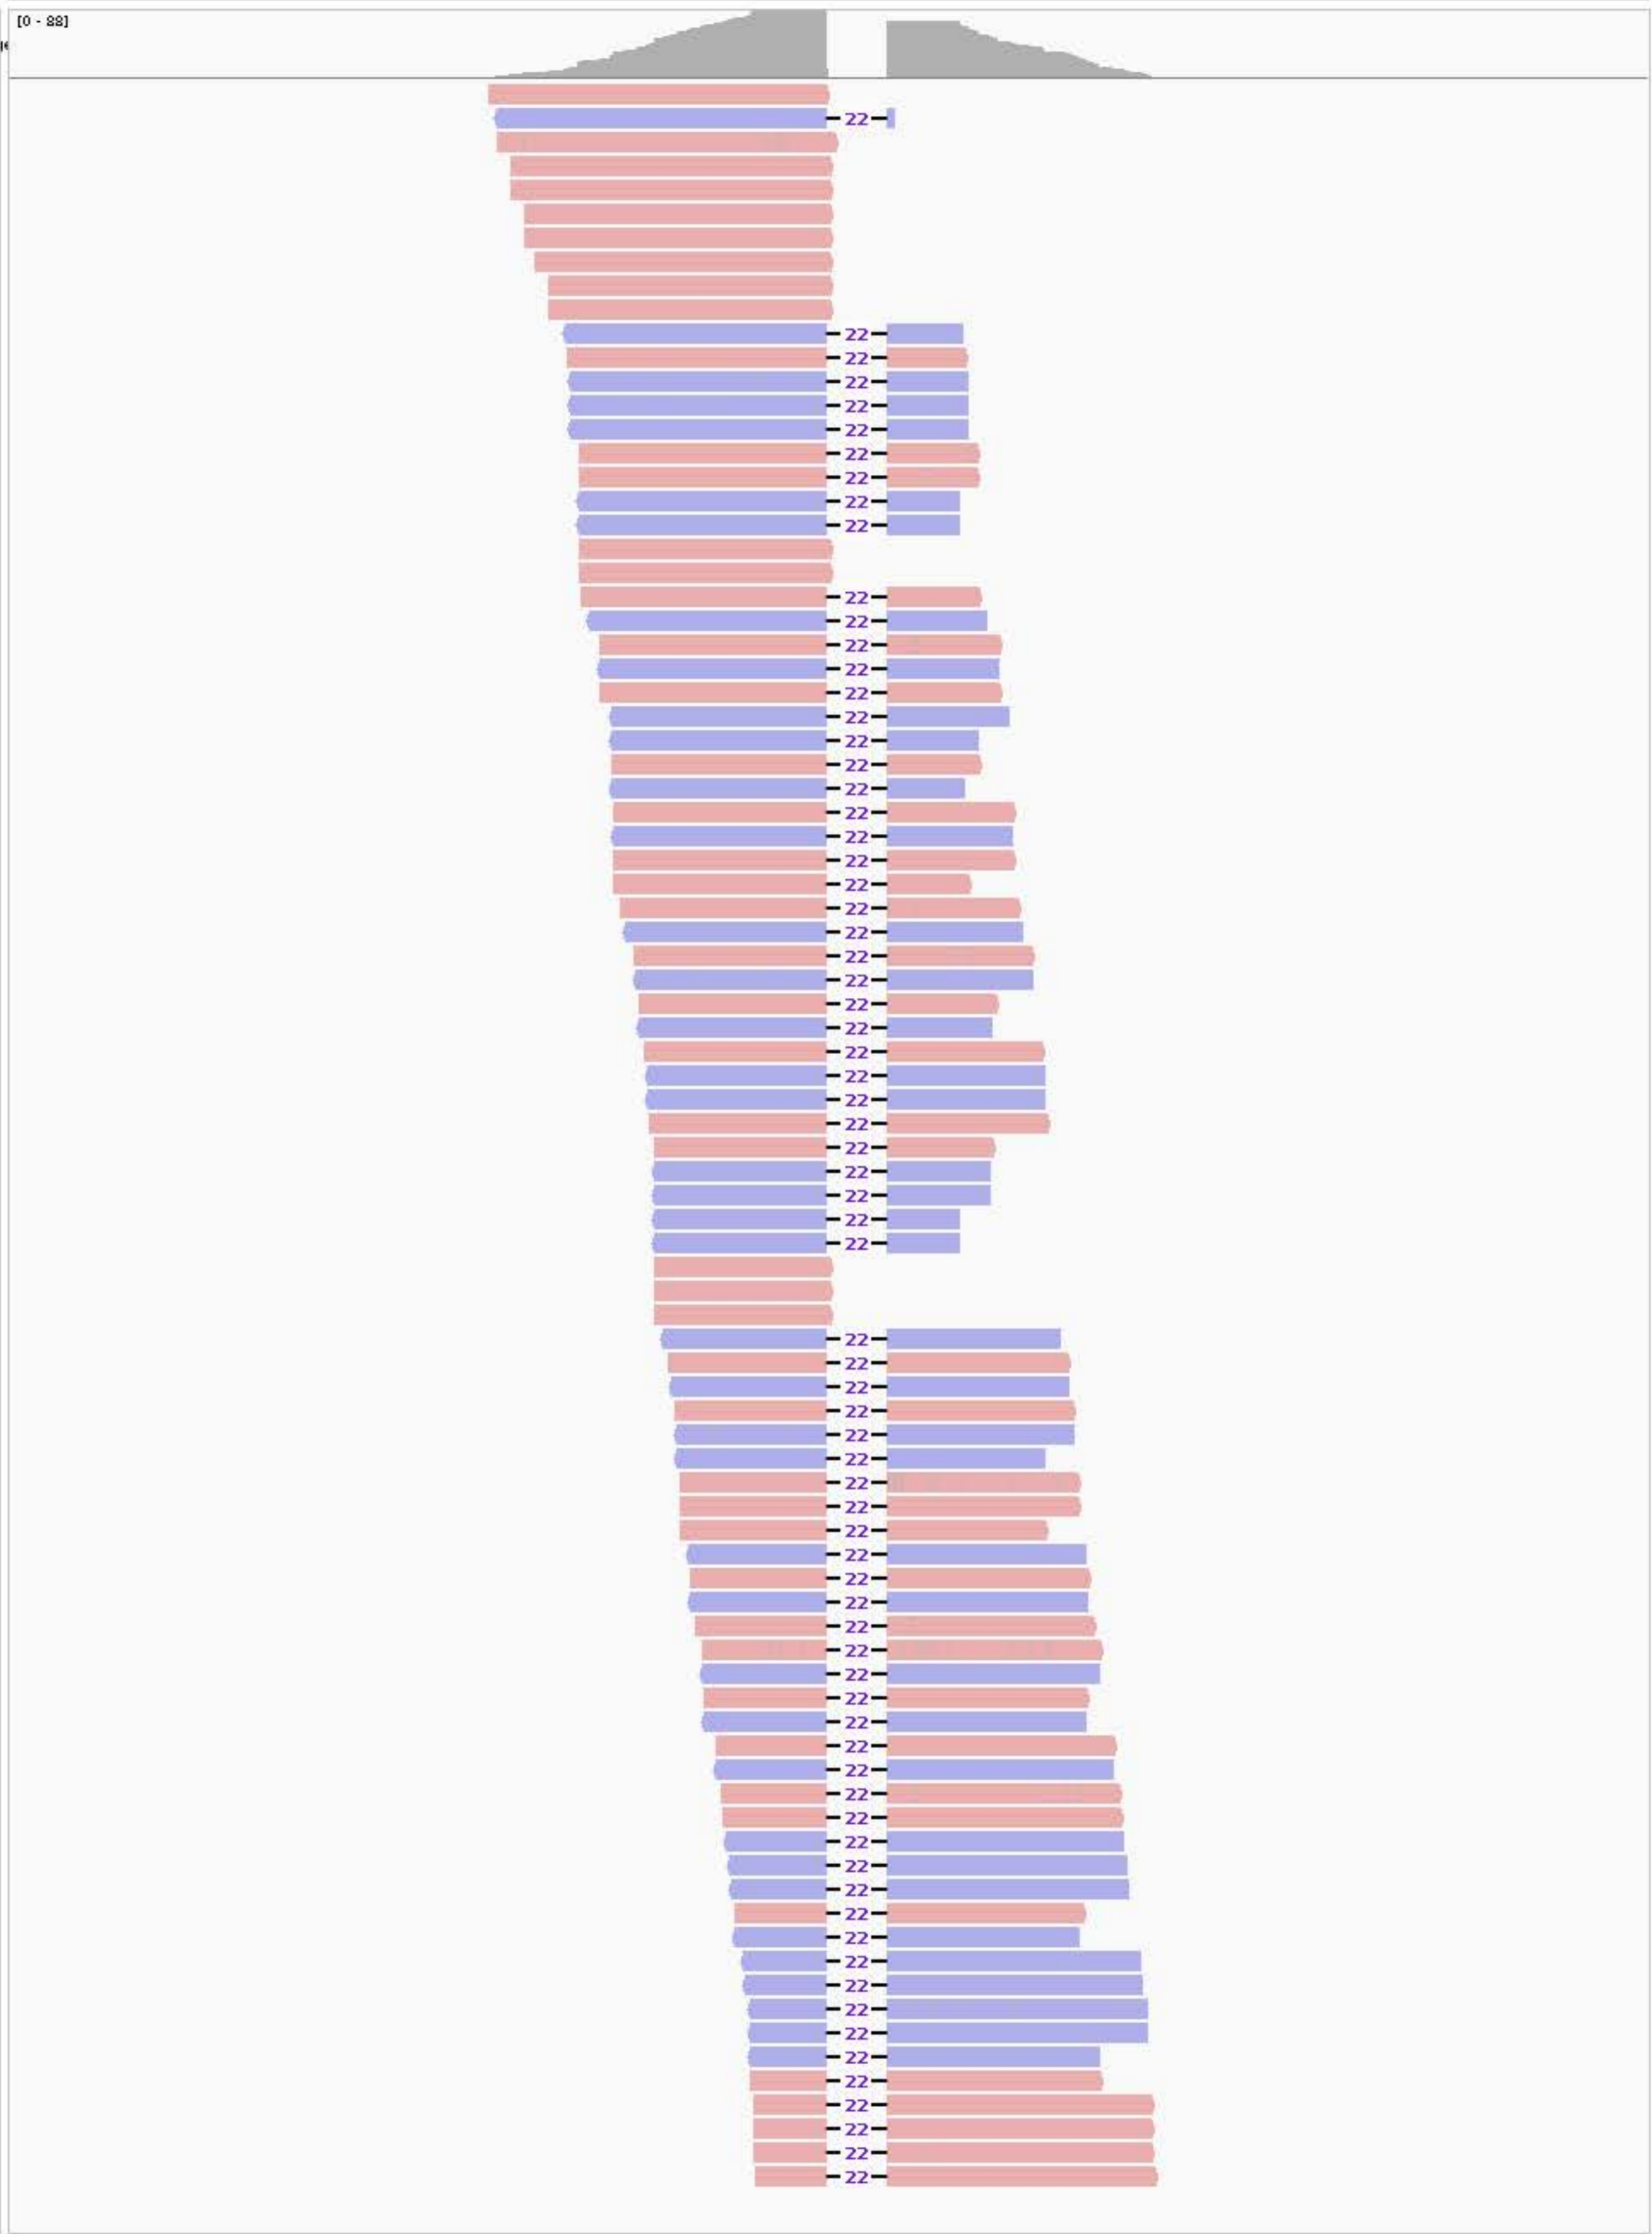

Sequence →  
Refseq Genes

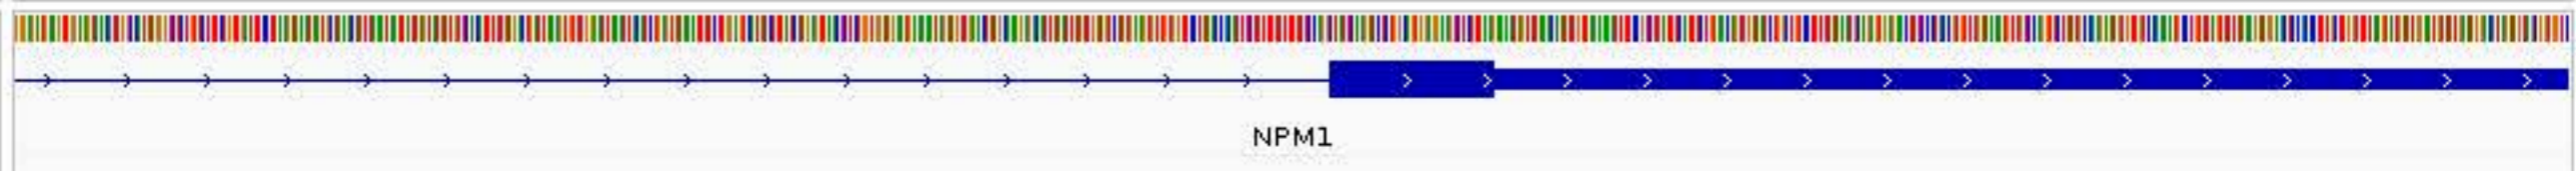



SL\_0012\_RT\_3-B\_mut.bam Cov

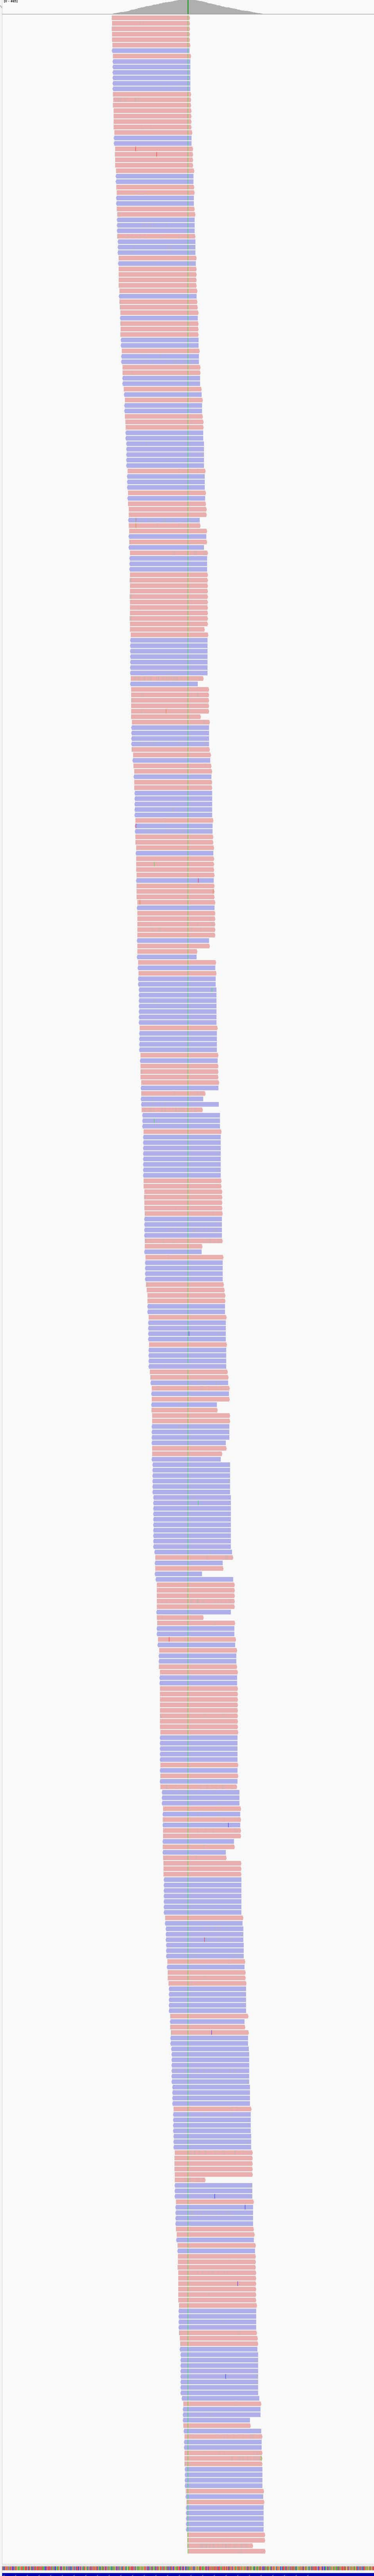

SL\_0012\_RT\_3-B\_mut.bam

Sequence  
Refseq Genes

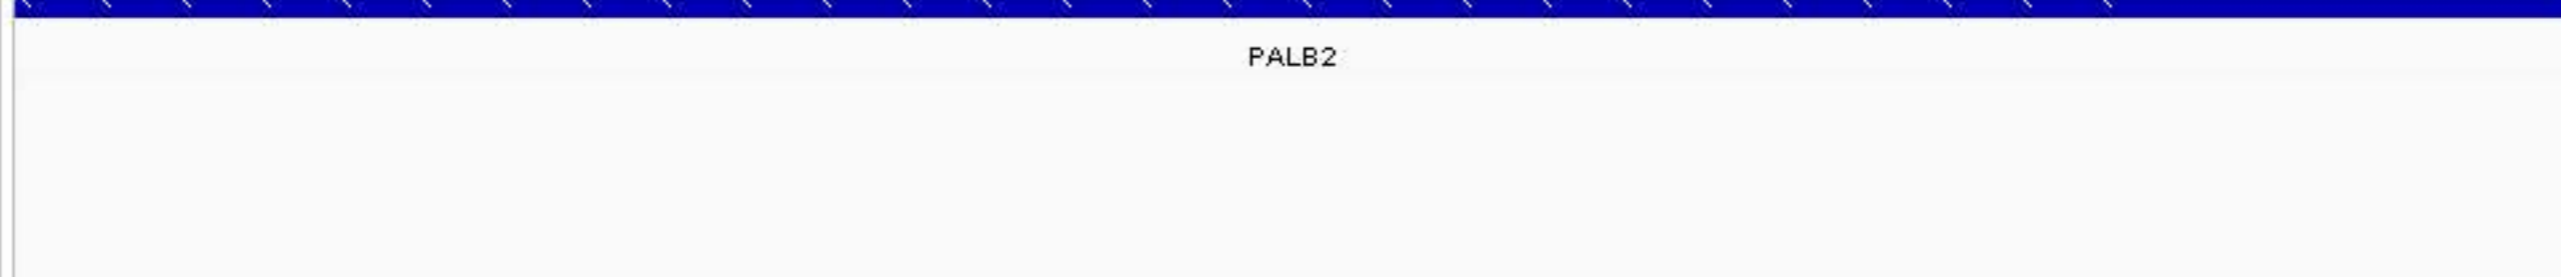



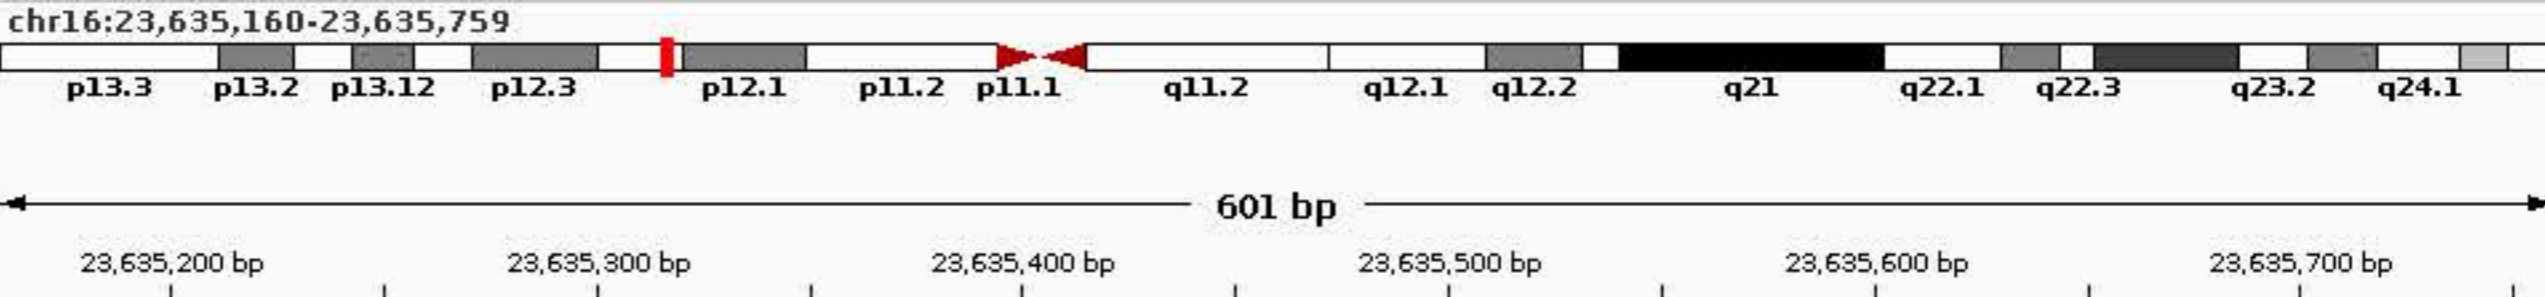

SL\_0012\_RT\_4-B\_mut.bam Coverage

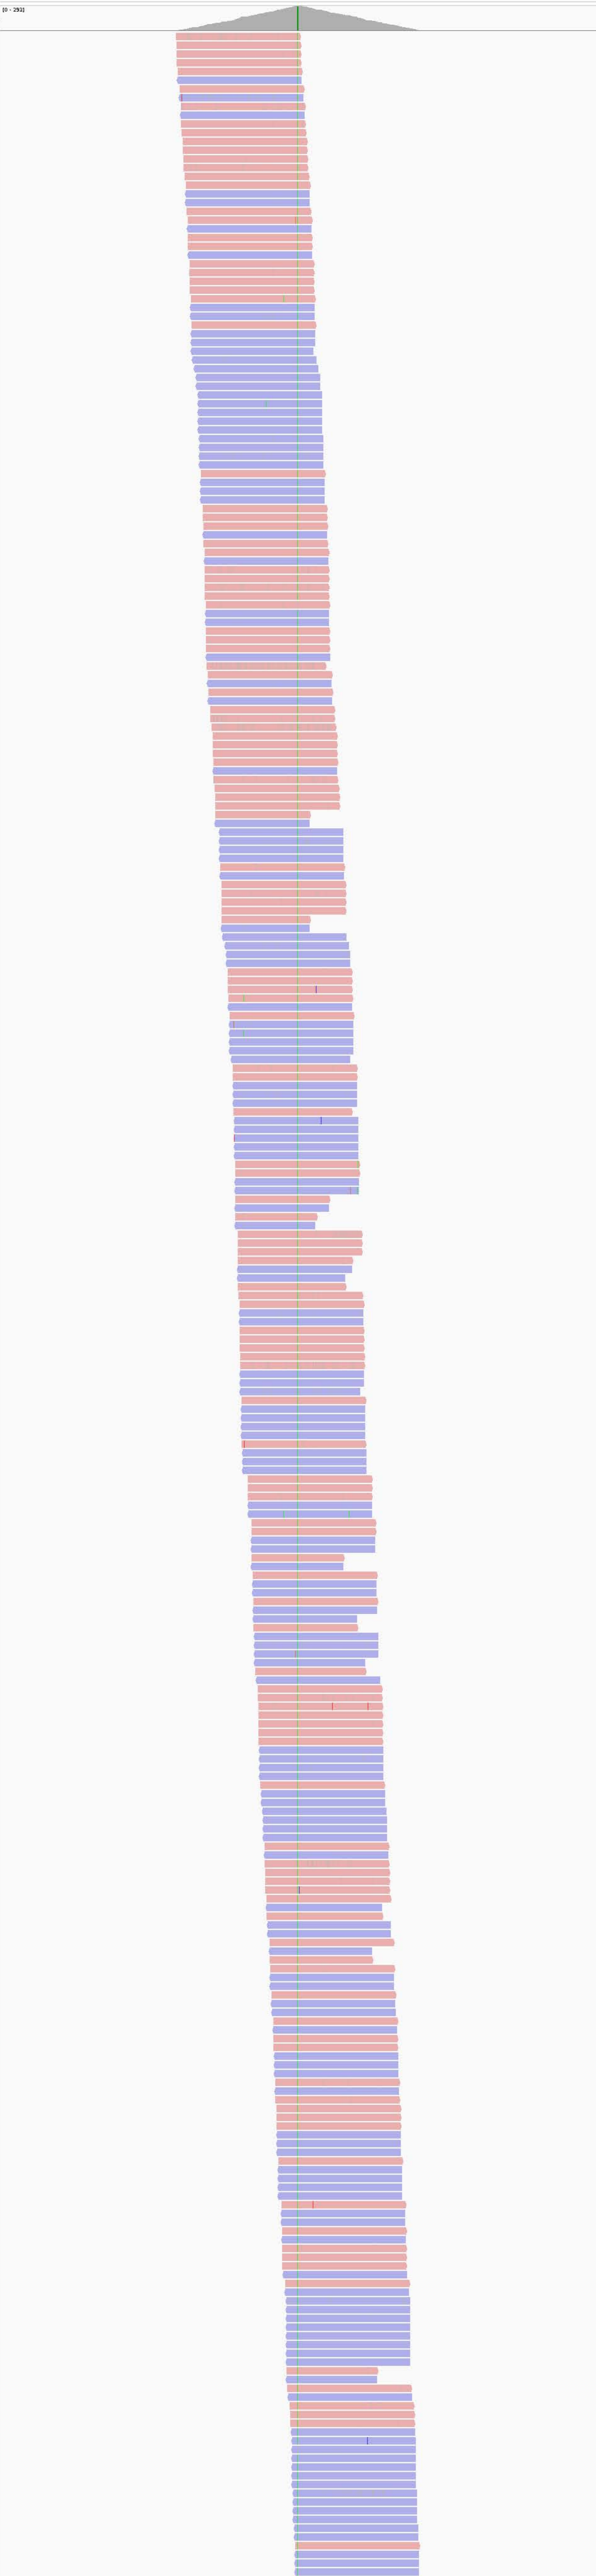

SL\_0012\_RT\_4-B\_mut.bam

Sequence

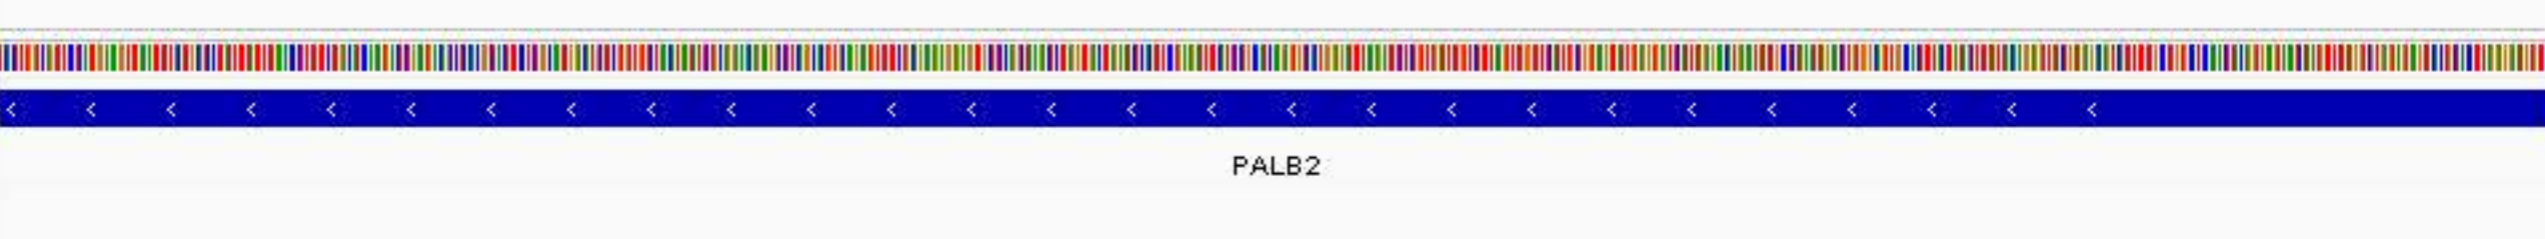

PALB2

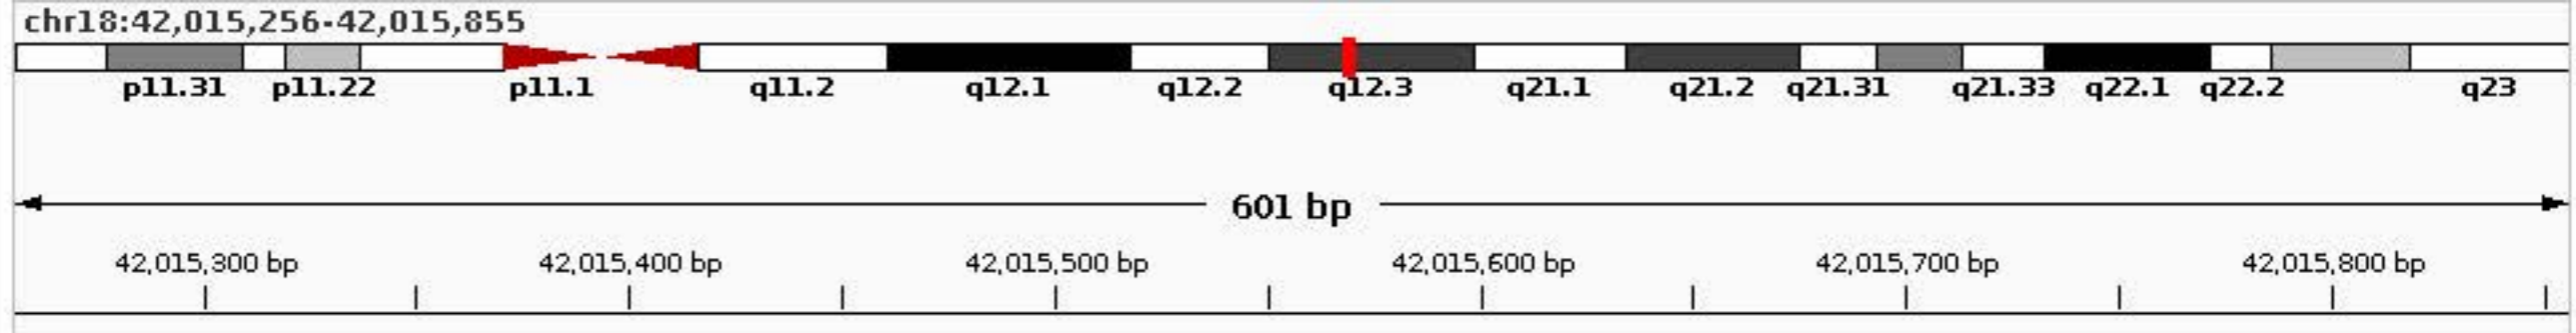

SL\_1010\_L\_FFPE\_3-B\_mut.bam  
age

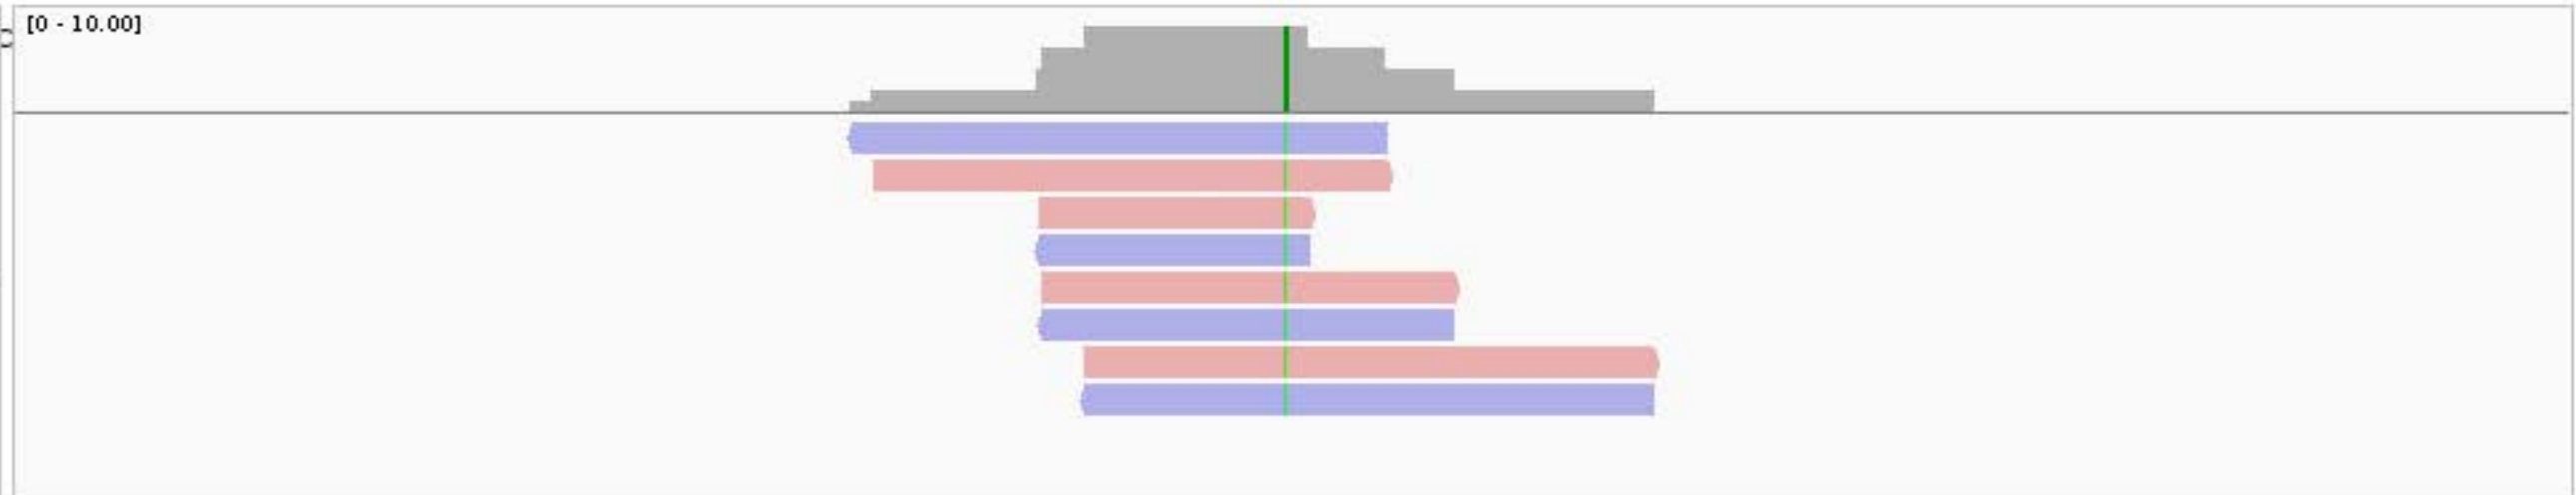

Sequence →  
Refseq Genes

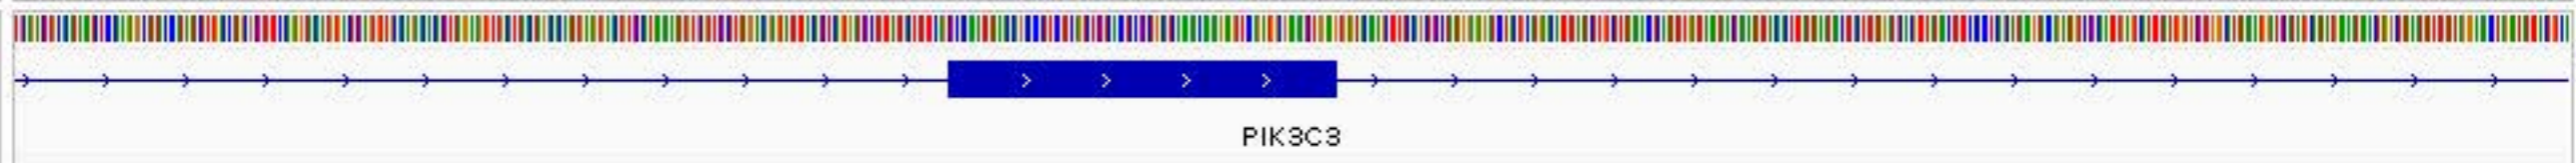





SL\_1010\_L\_FFPE\_12-B\_mut.barr  
rage

SL\_1010\_L\_FFPE\_12-B\_mut.ba  
m

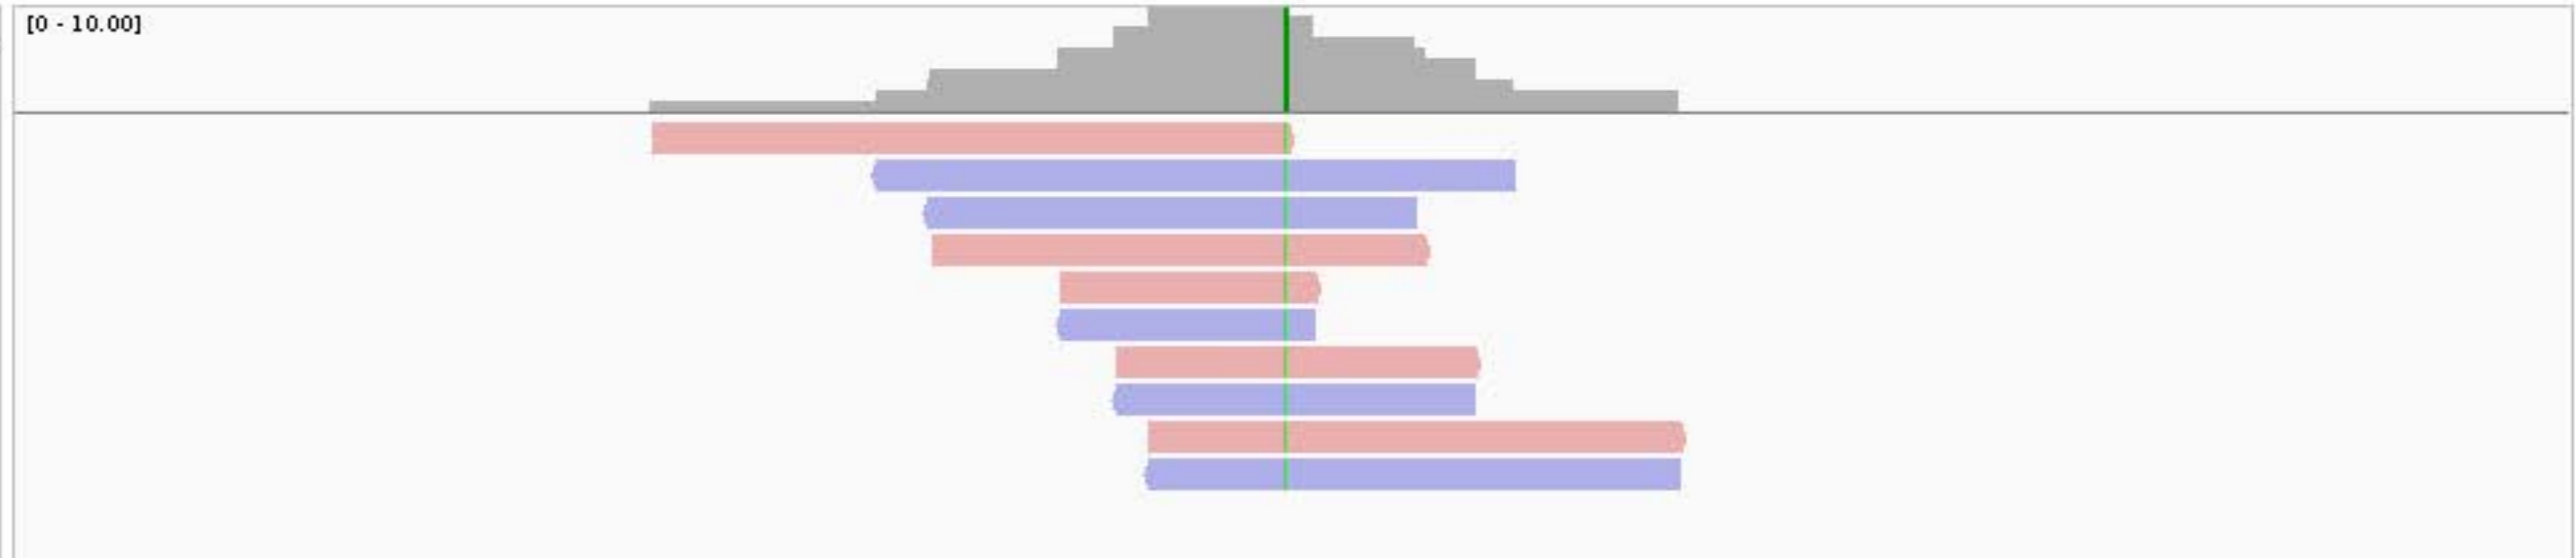

Sequence →

Refseq Genes

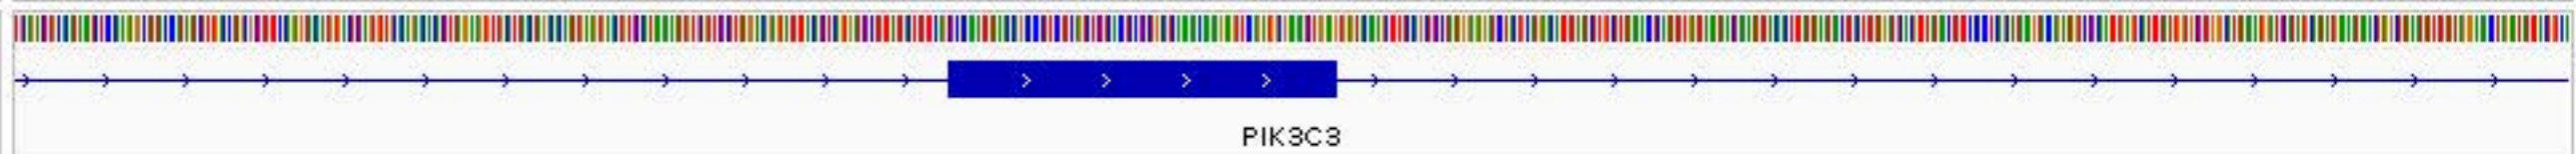

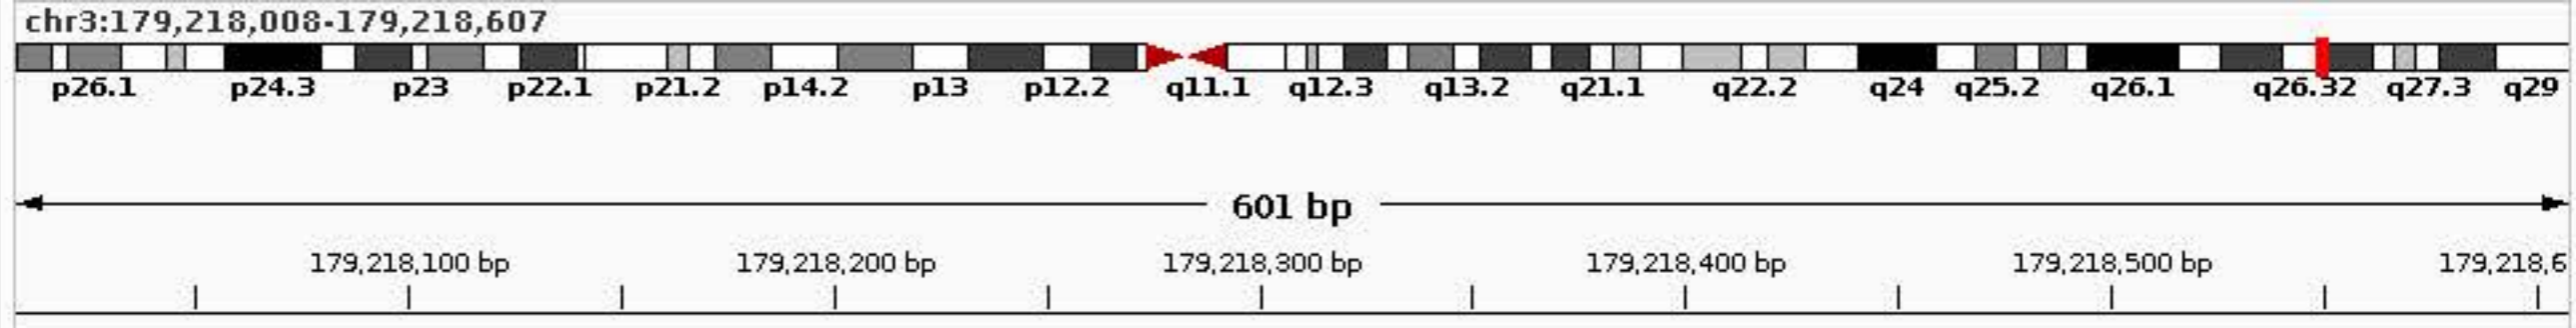

SL\_0011\_L\_FFPE\_20-B\_mut.bam  
rage

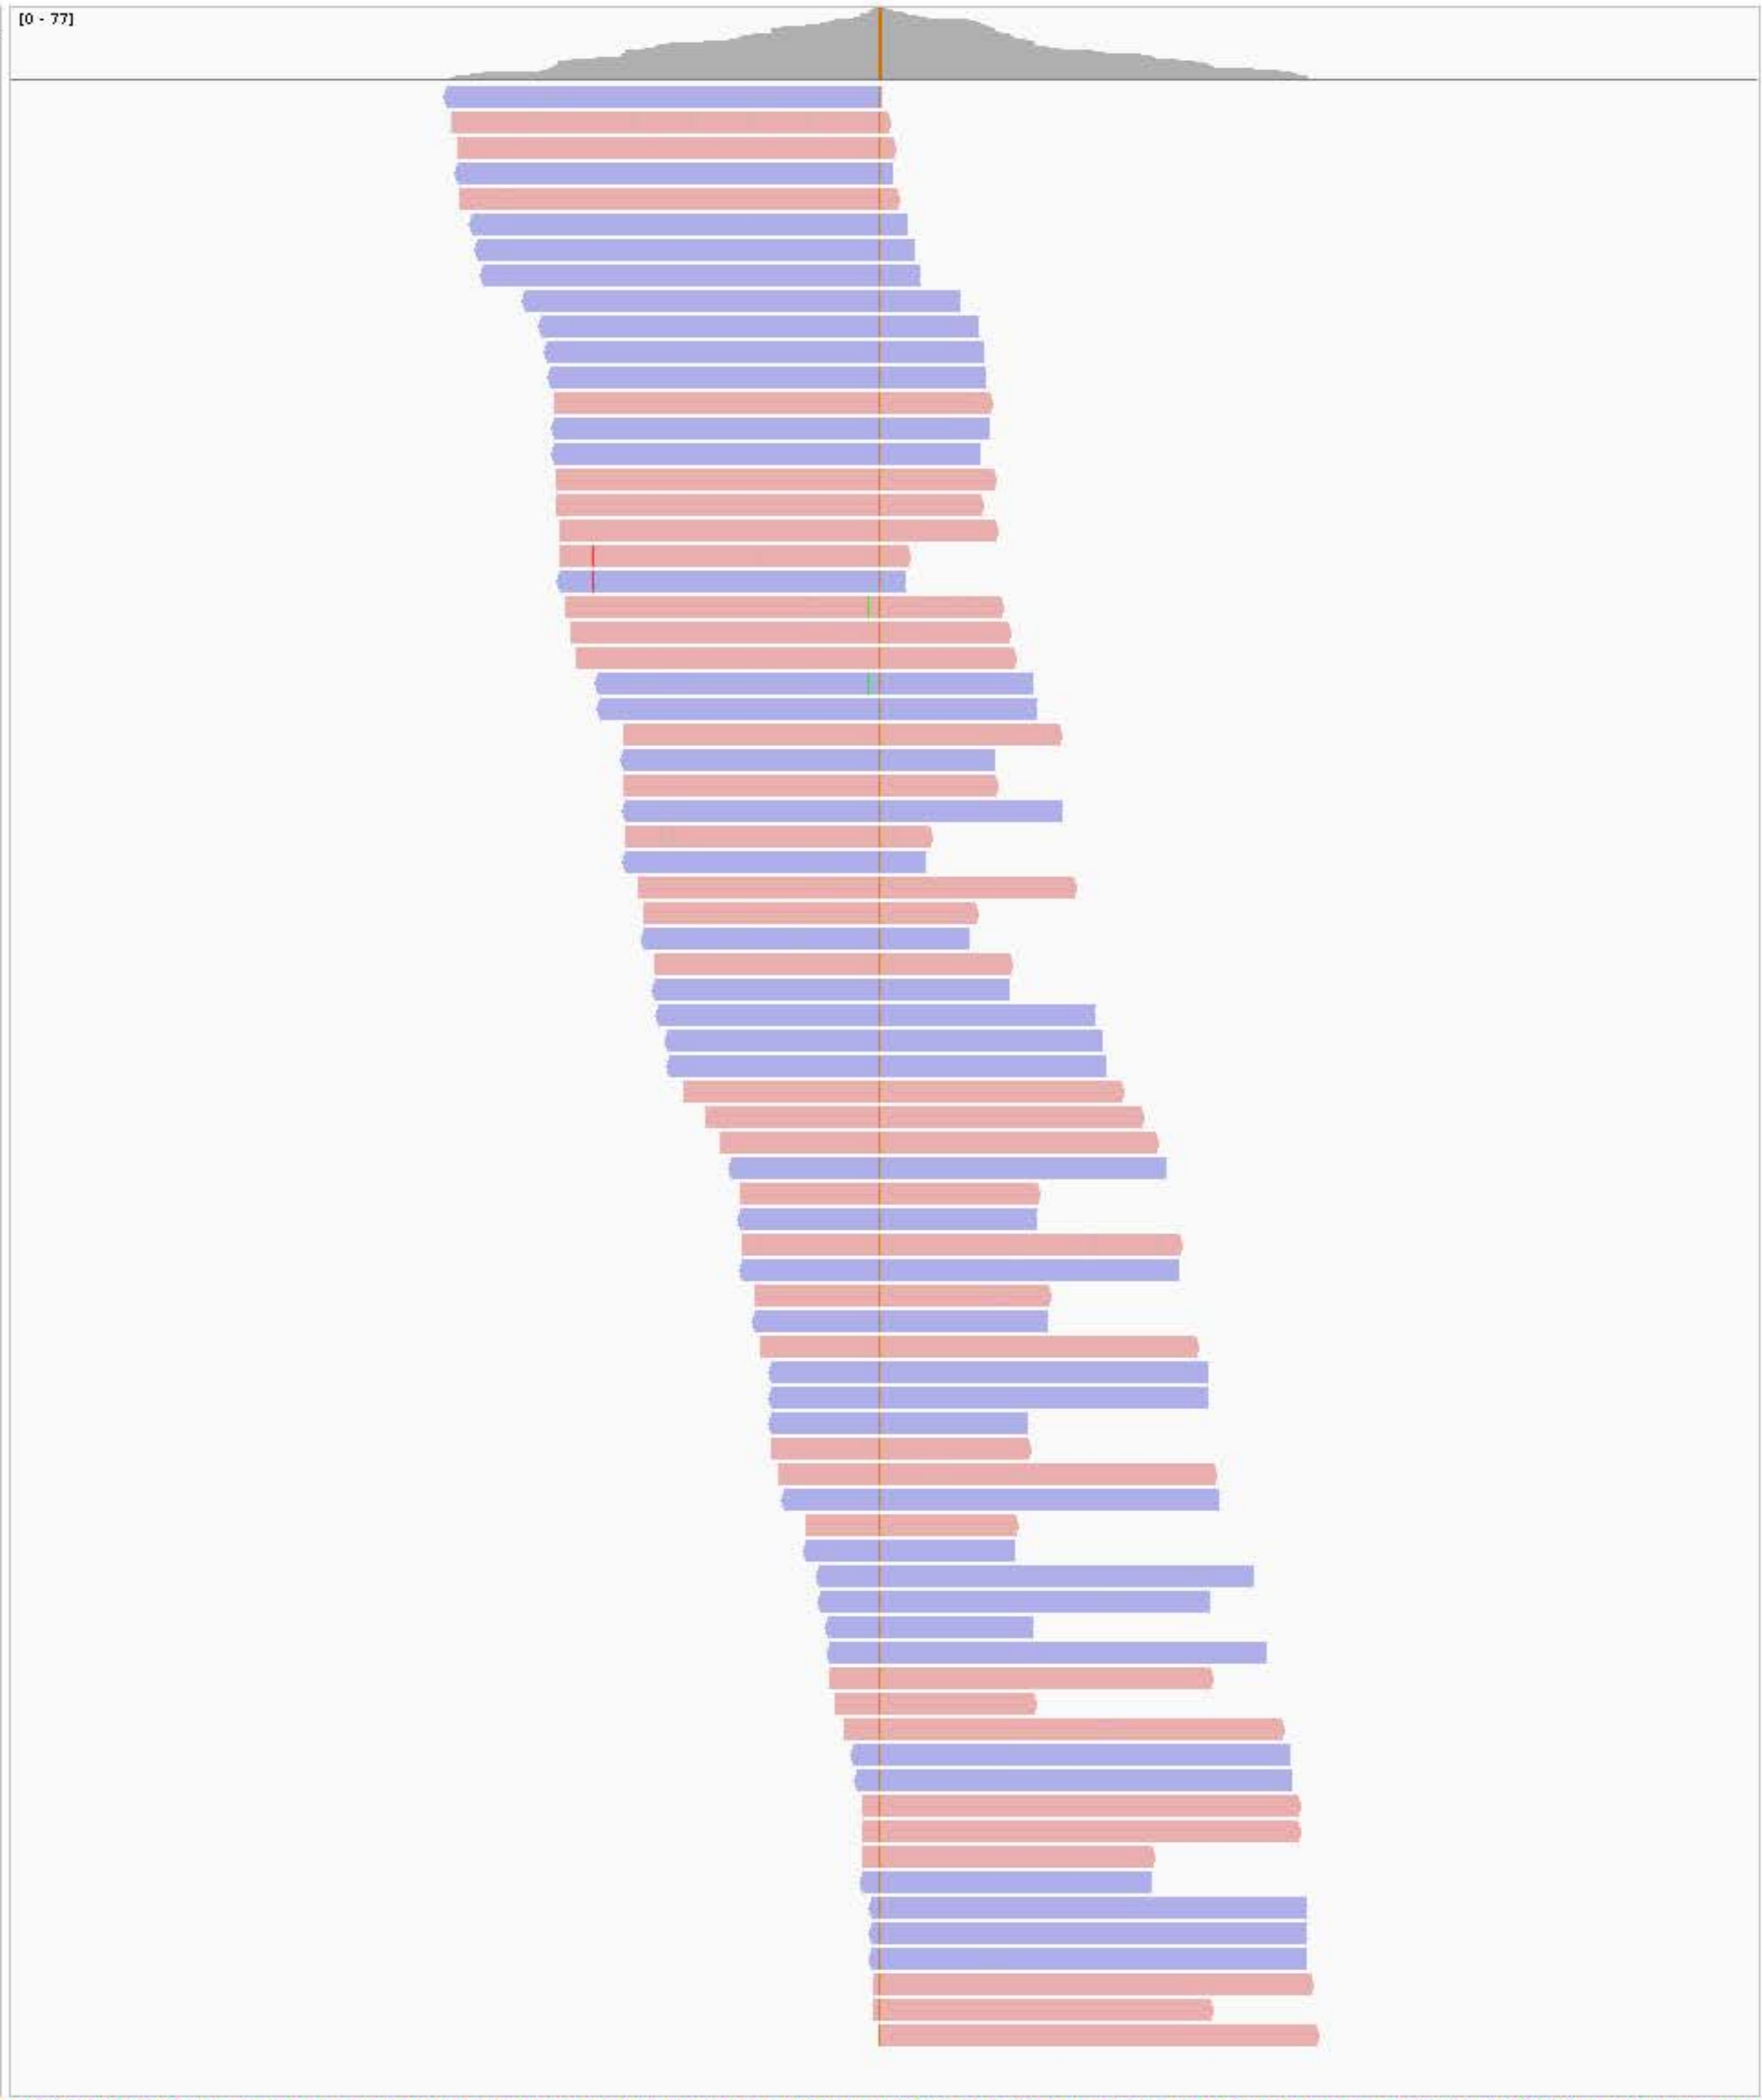

SL\_0011\_L\_FFPE\_20-B\_mut.bam

Sequence →  
Refseq Genes

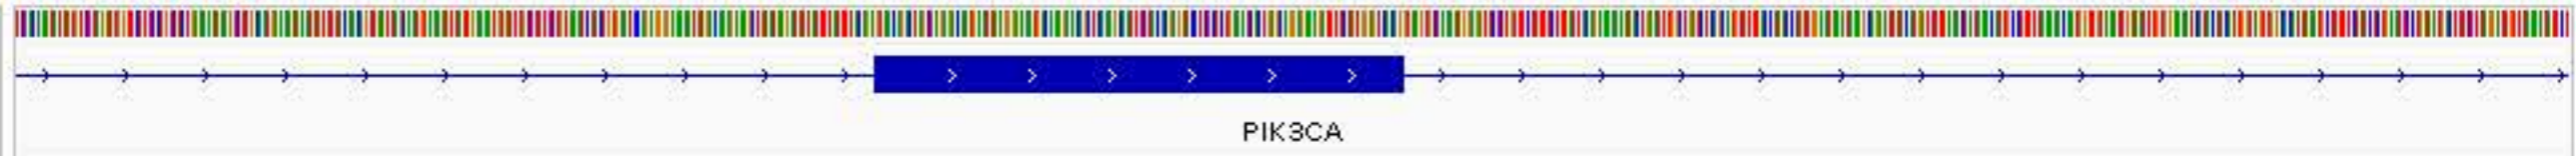

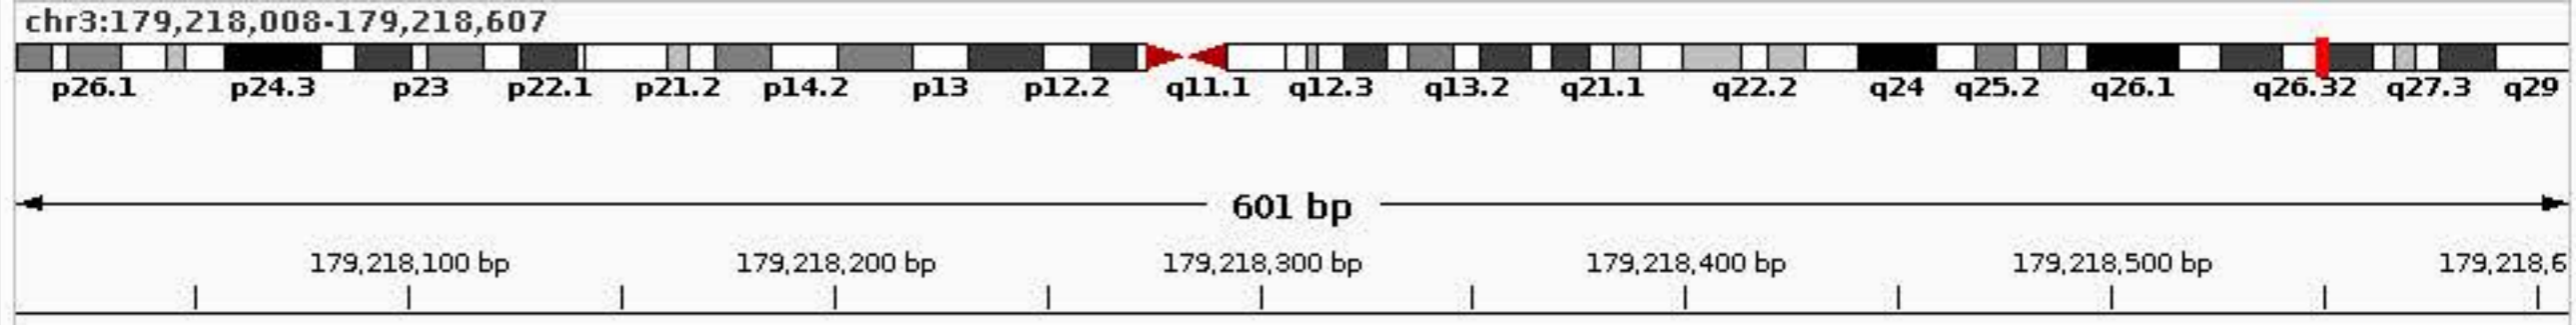

SL\_1002\_L\_FFPE\_15-B\_mut.bam  
rage

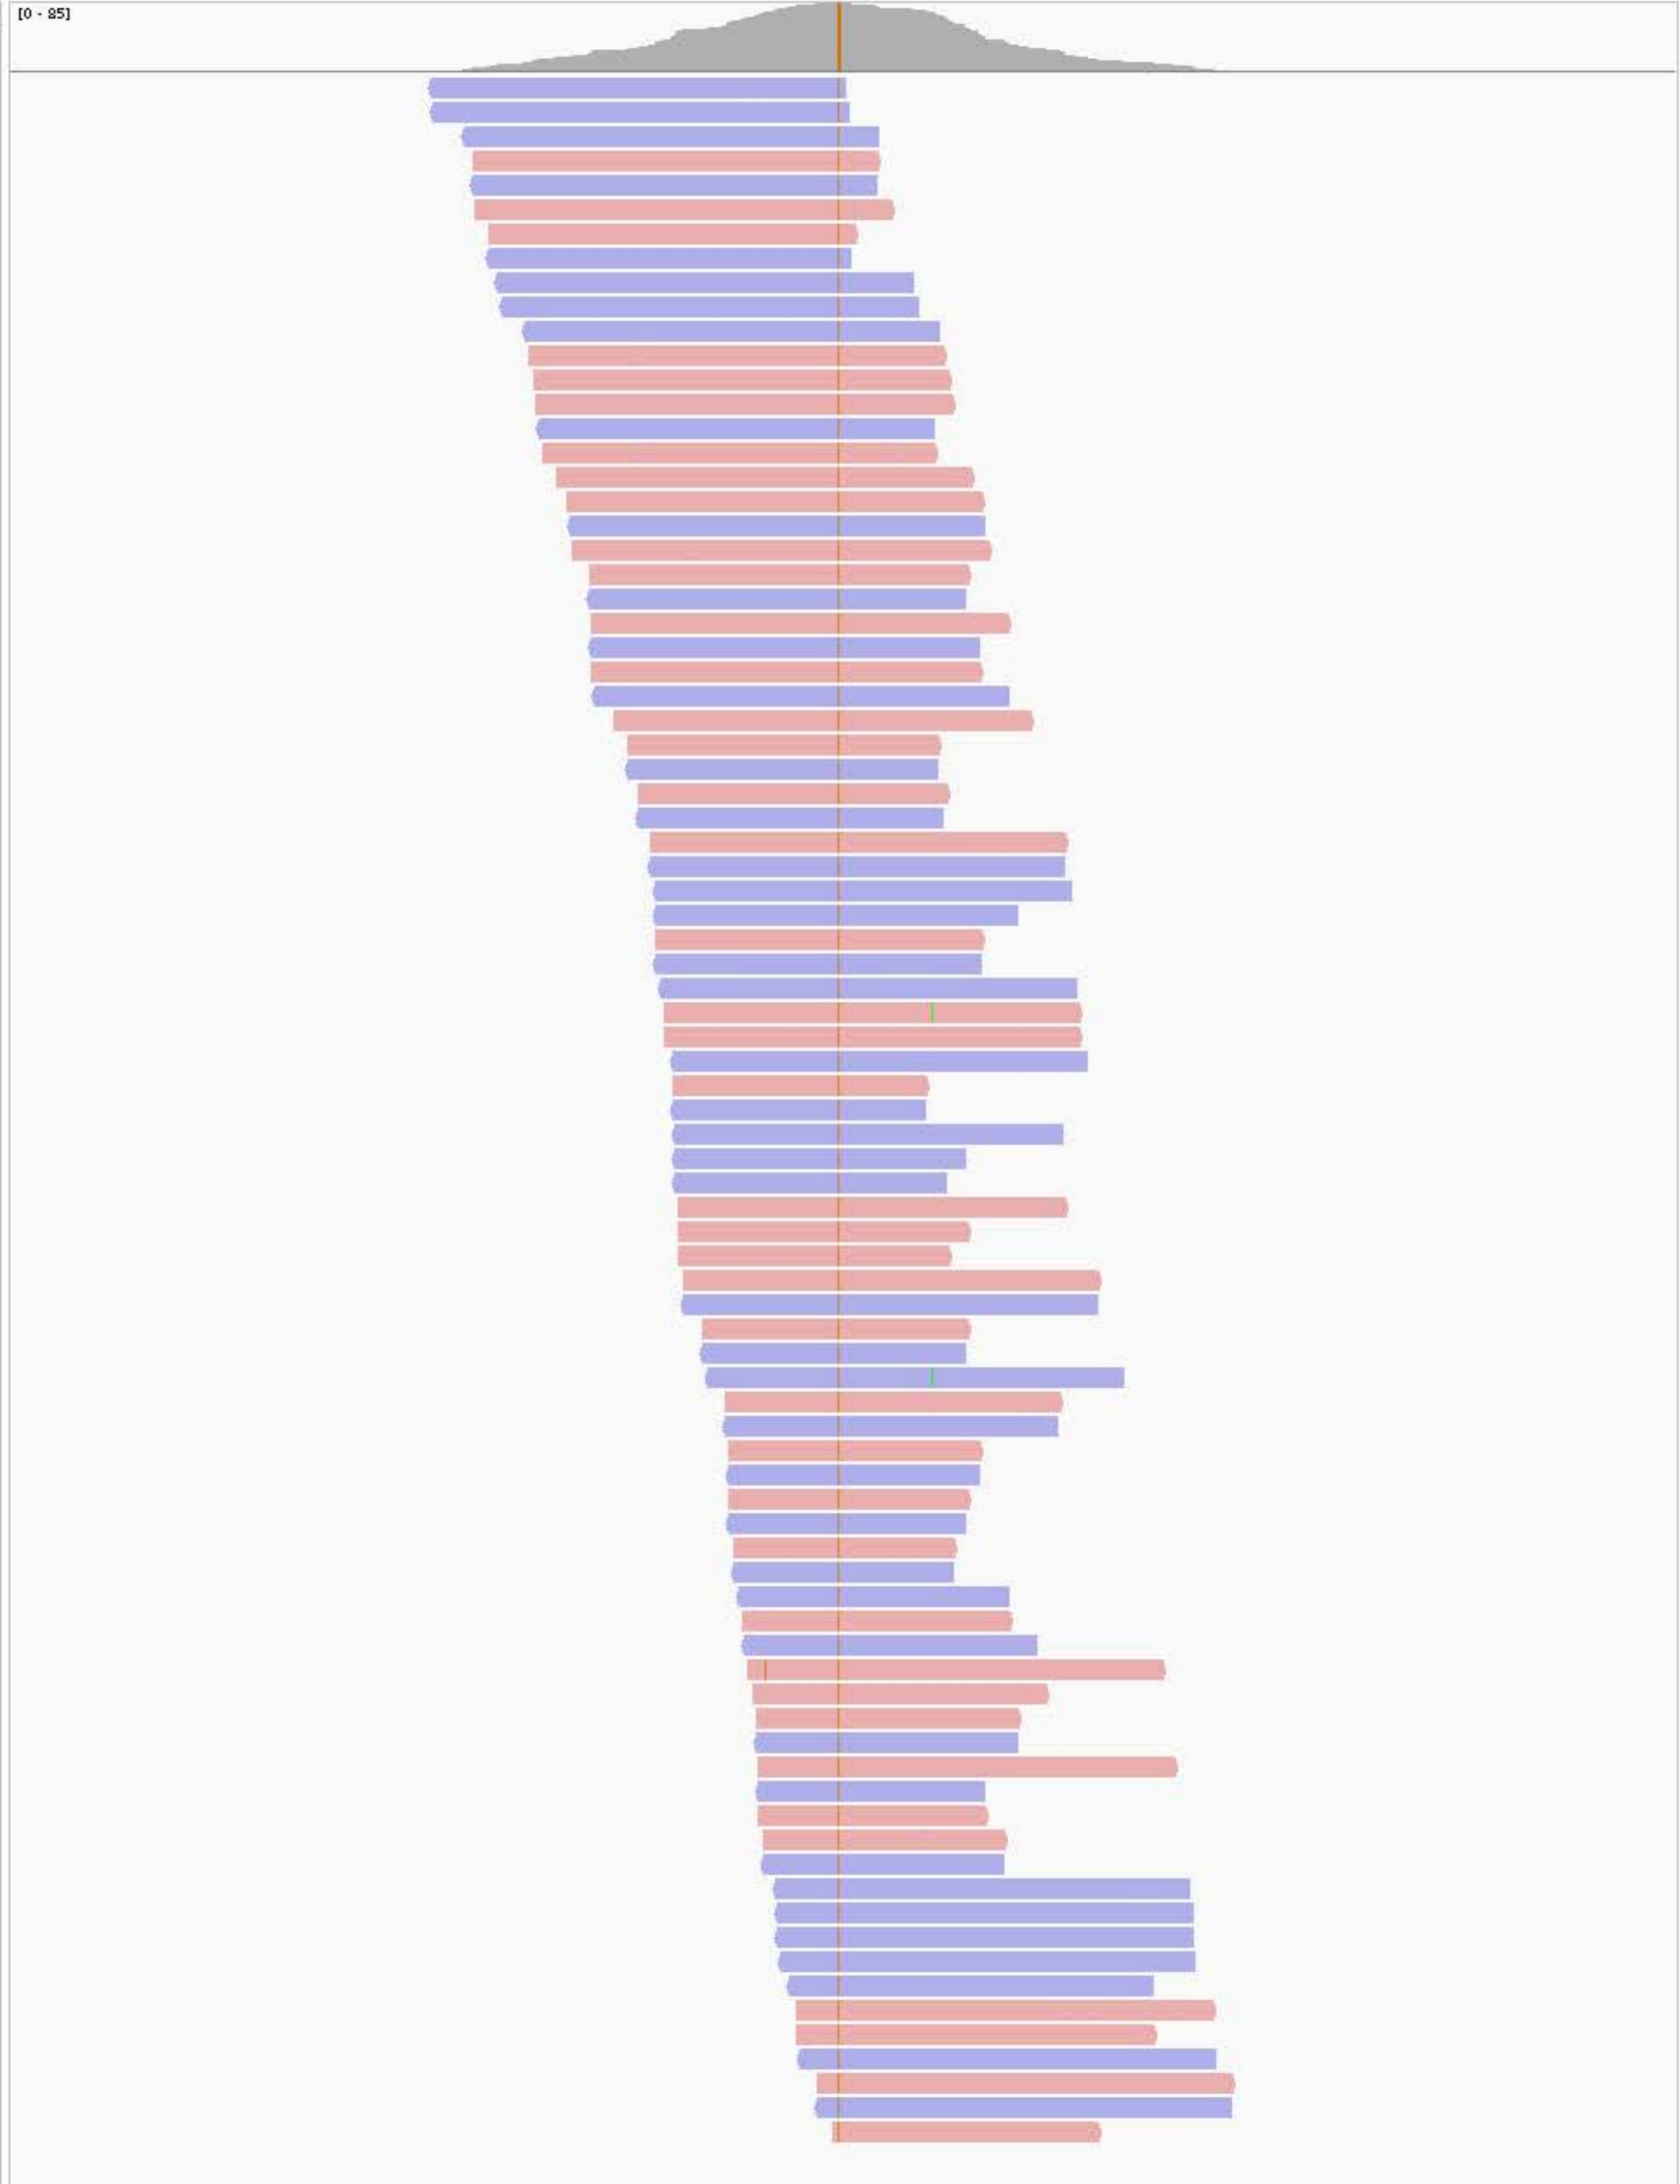

SL\_1002\_L\_FFPE\_15-B\_mut.ba  
m

Sequence →  
Refseq Genes

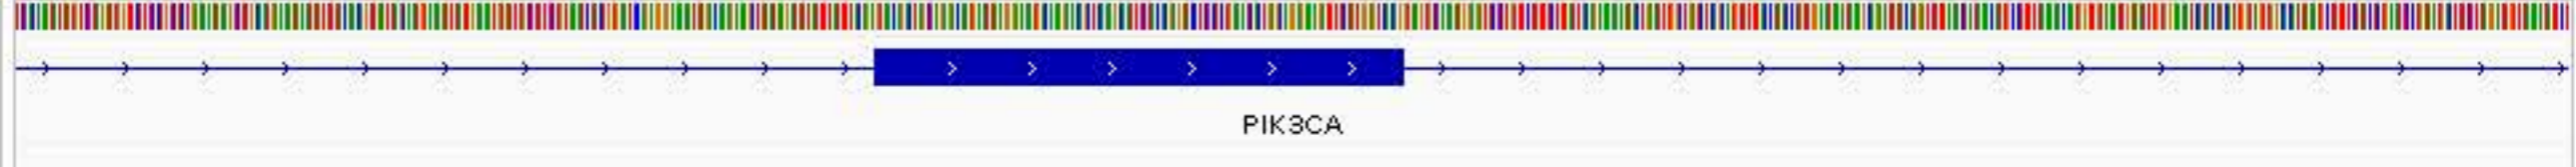



chr3:179,218,008-179,218,607

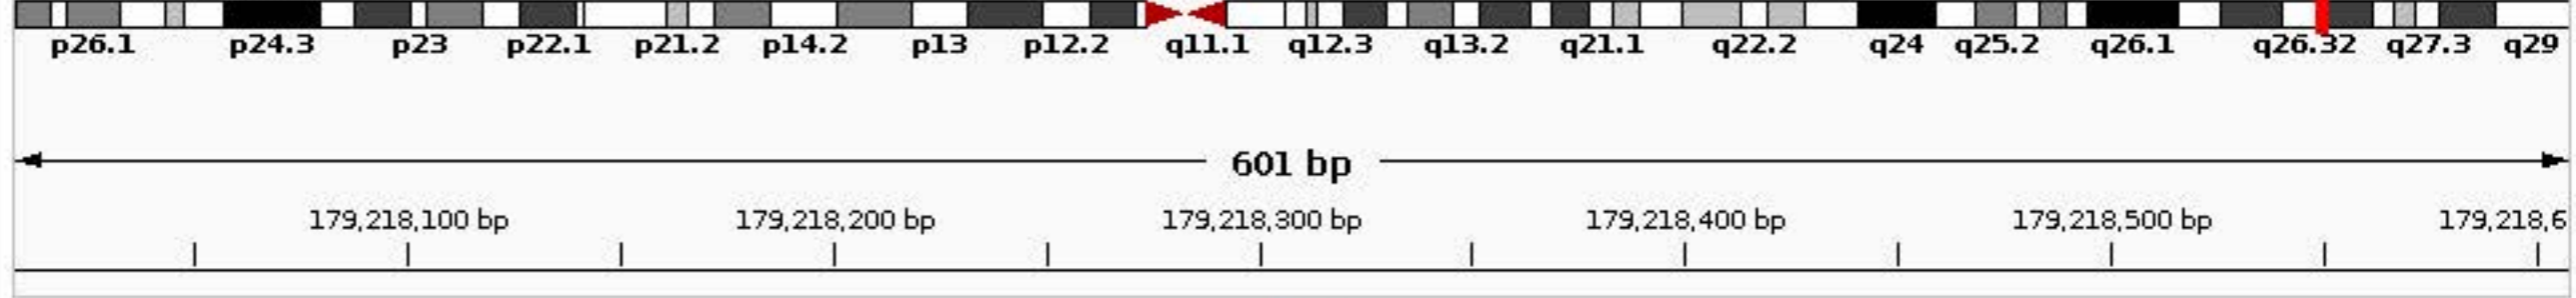

SL\_1003\_R\_FFPE\_93-B\_mut.bam  
rage

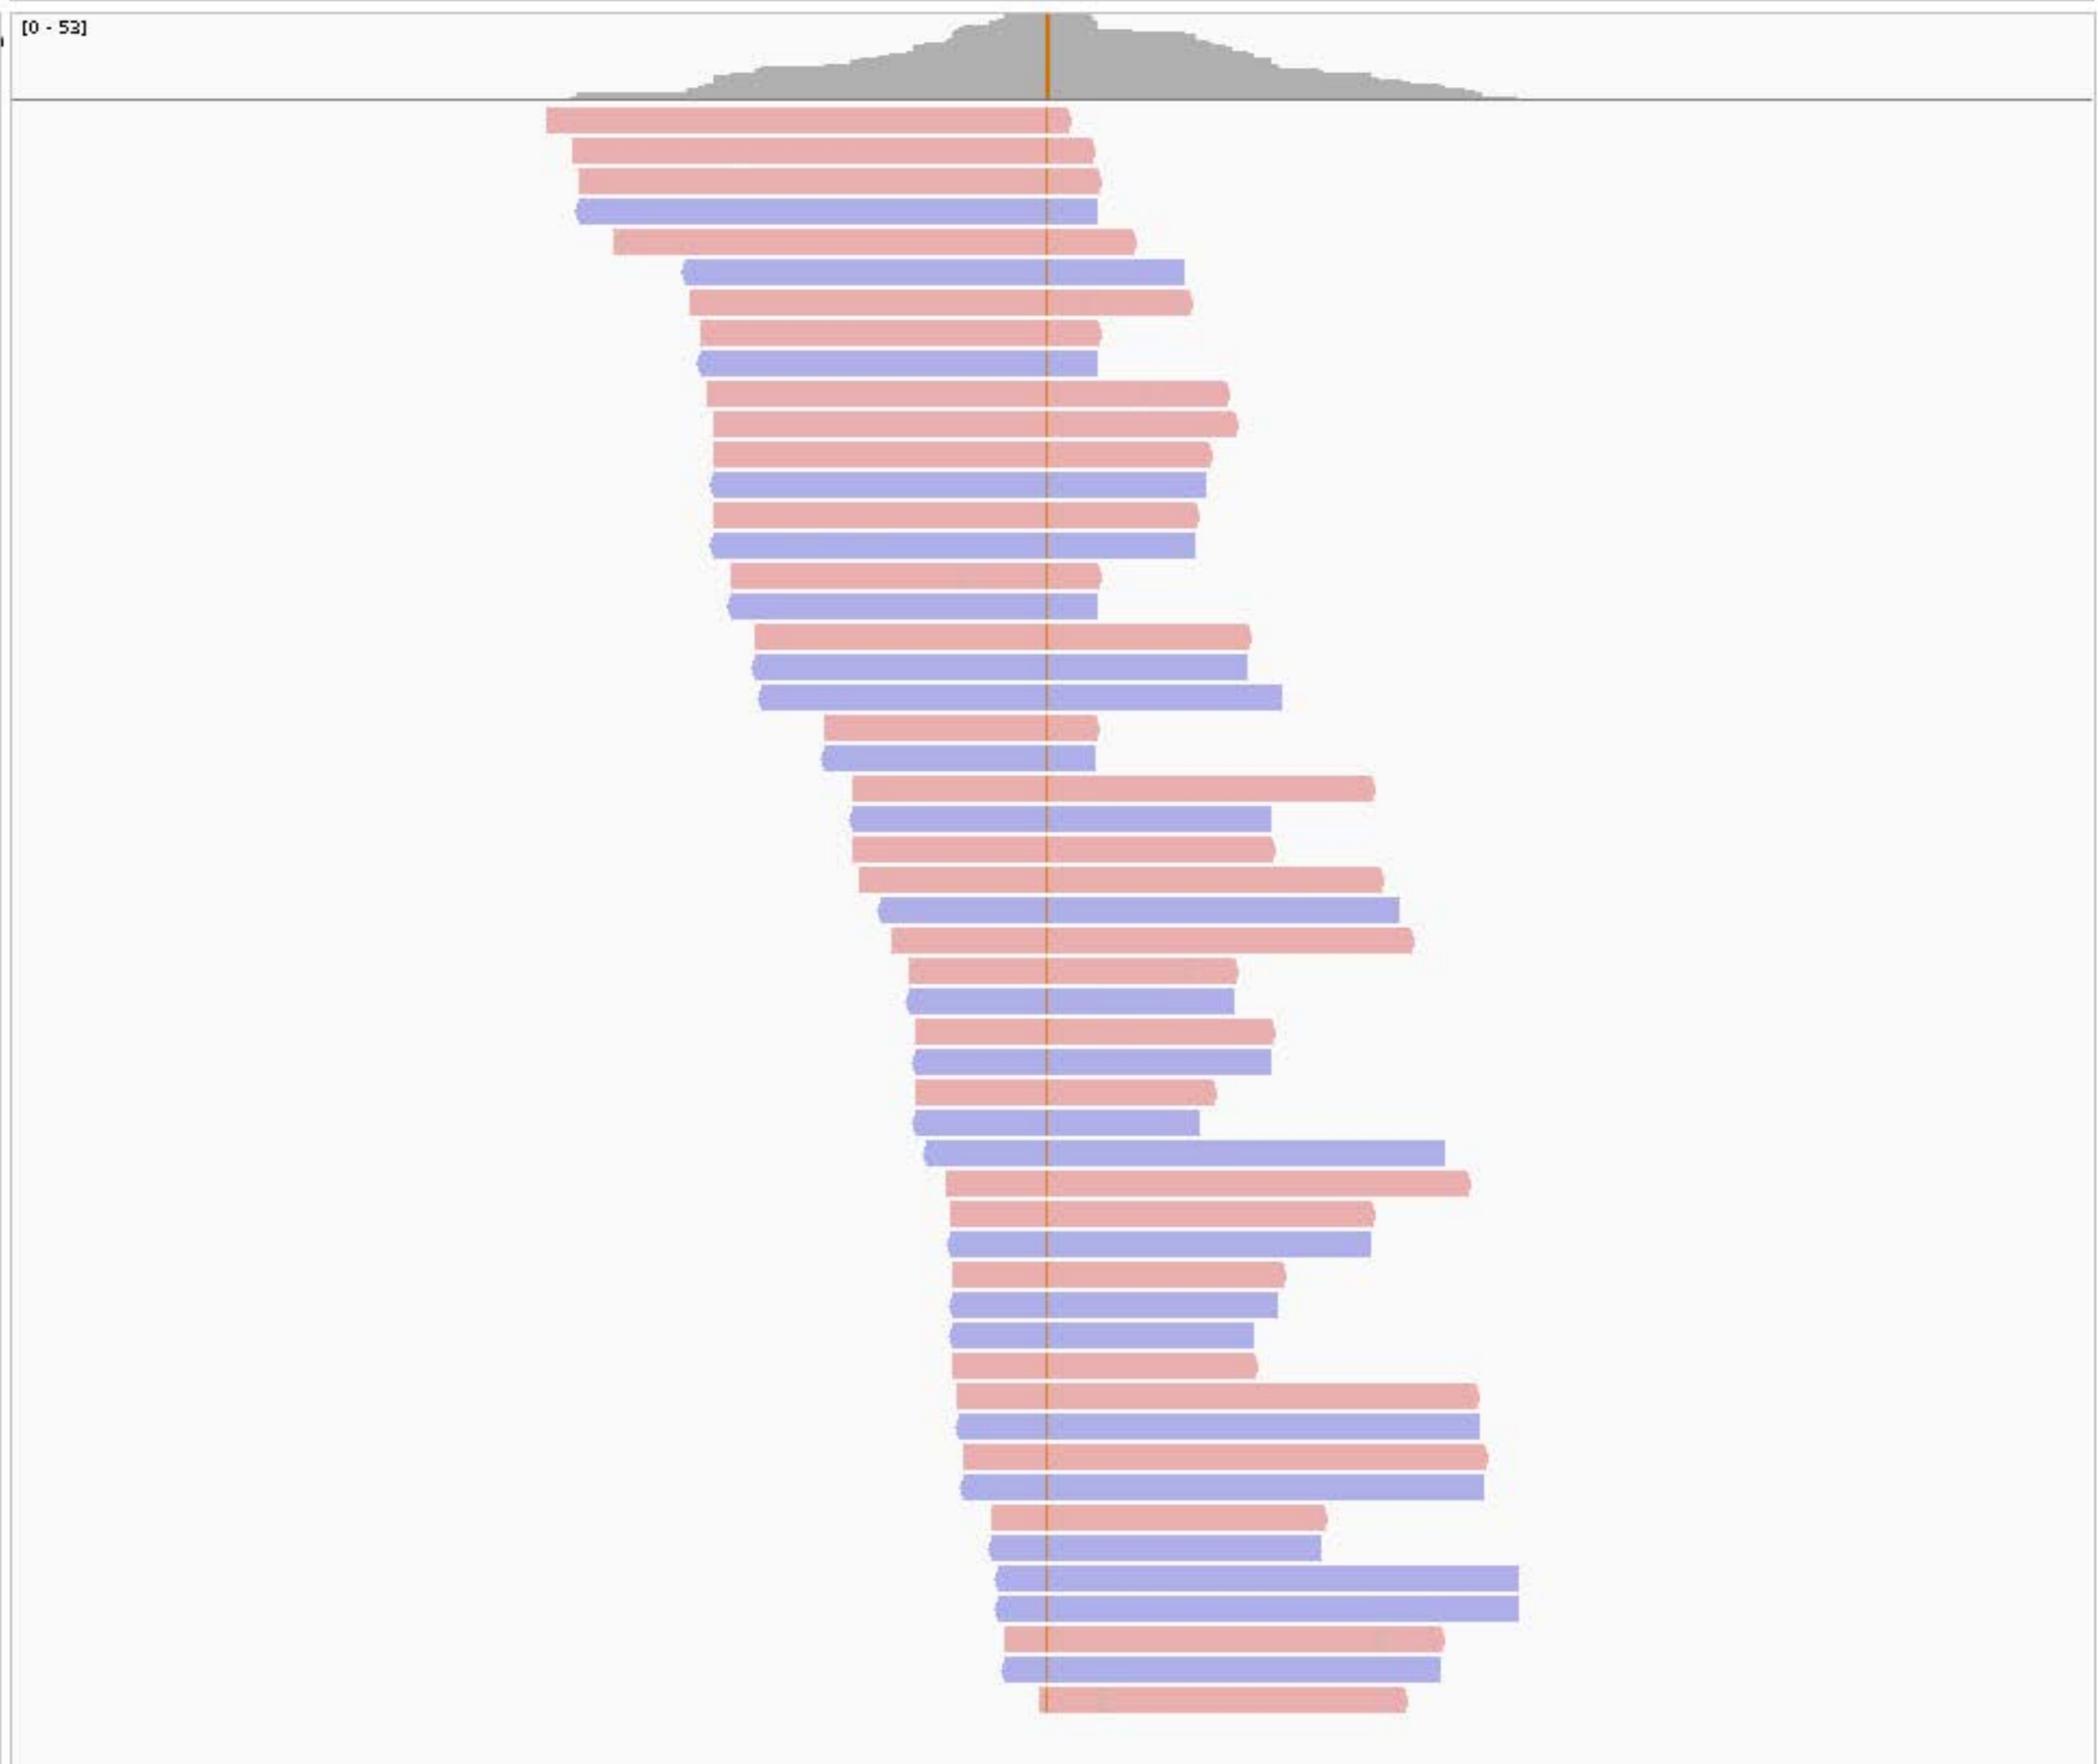

SL\_1003\_R\_FFPE\_93-B\_mut.ba  
m

Sequence →

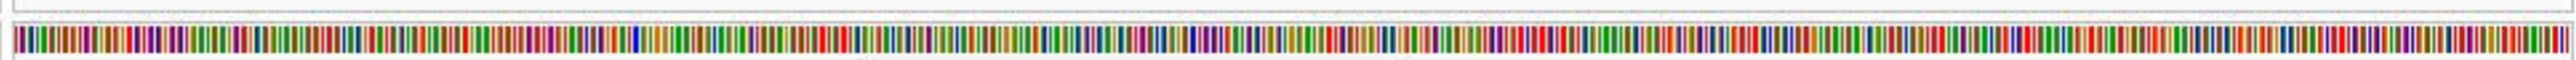

Refseq Genes

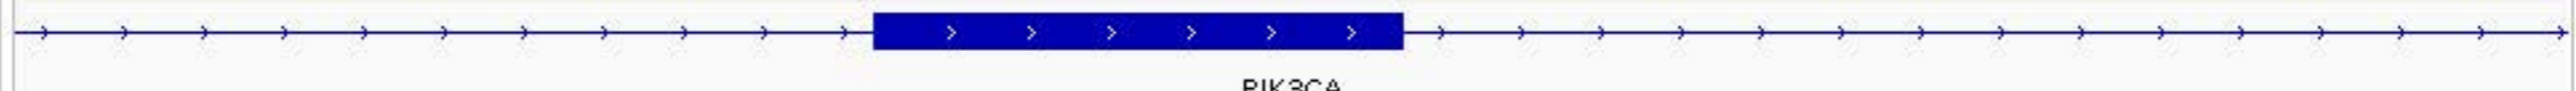

PIK3CA

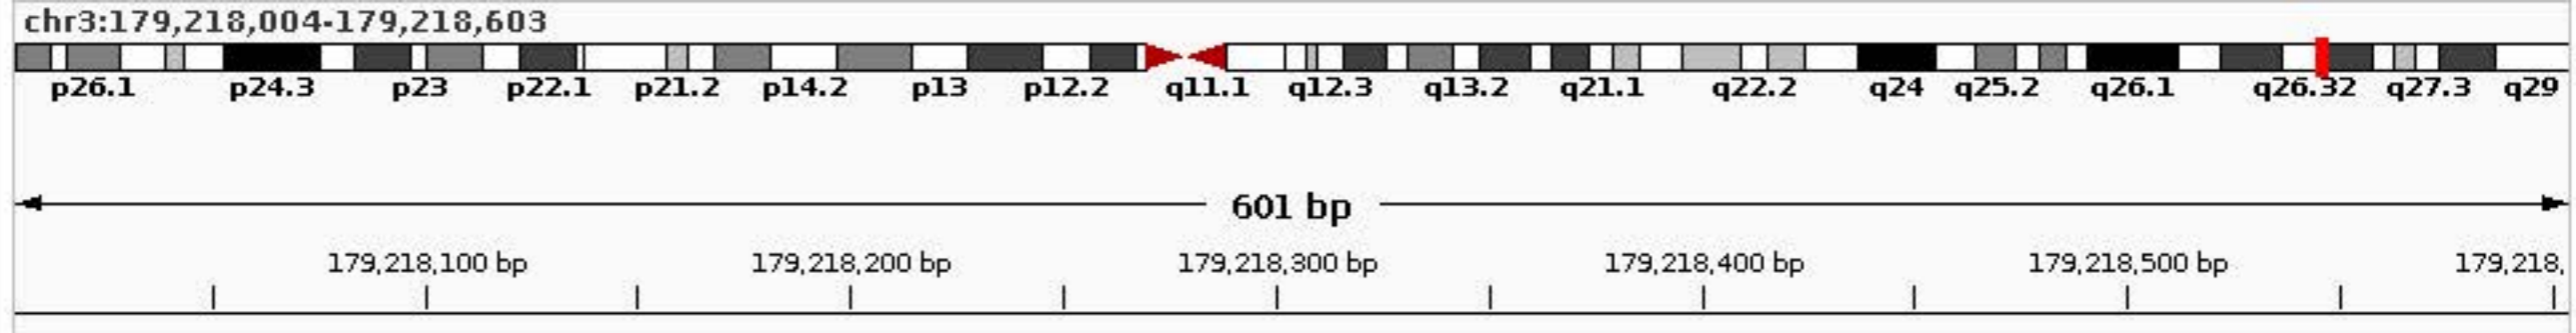

SL\_0005\_R\_FFPE\_73-B\_mut.bam  
rage

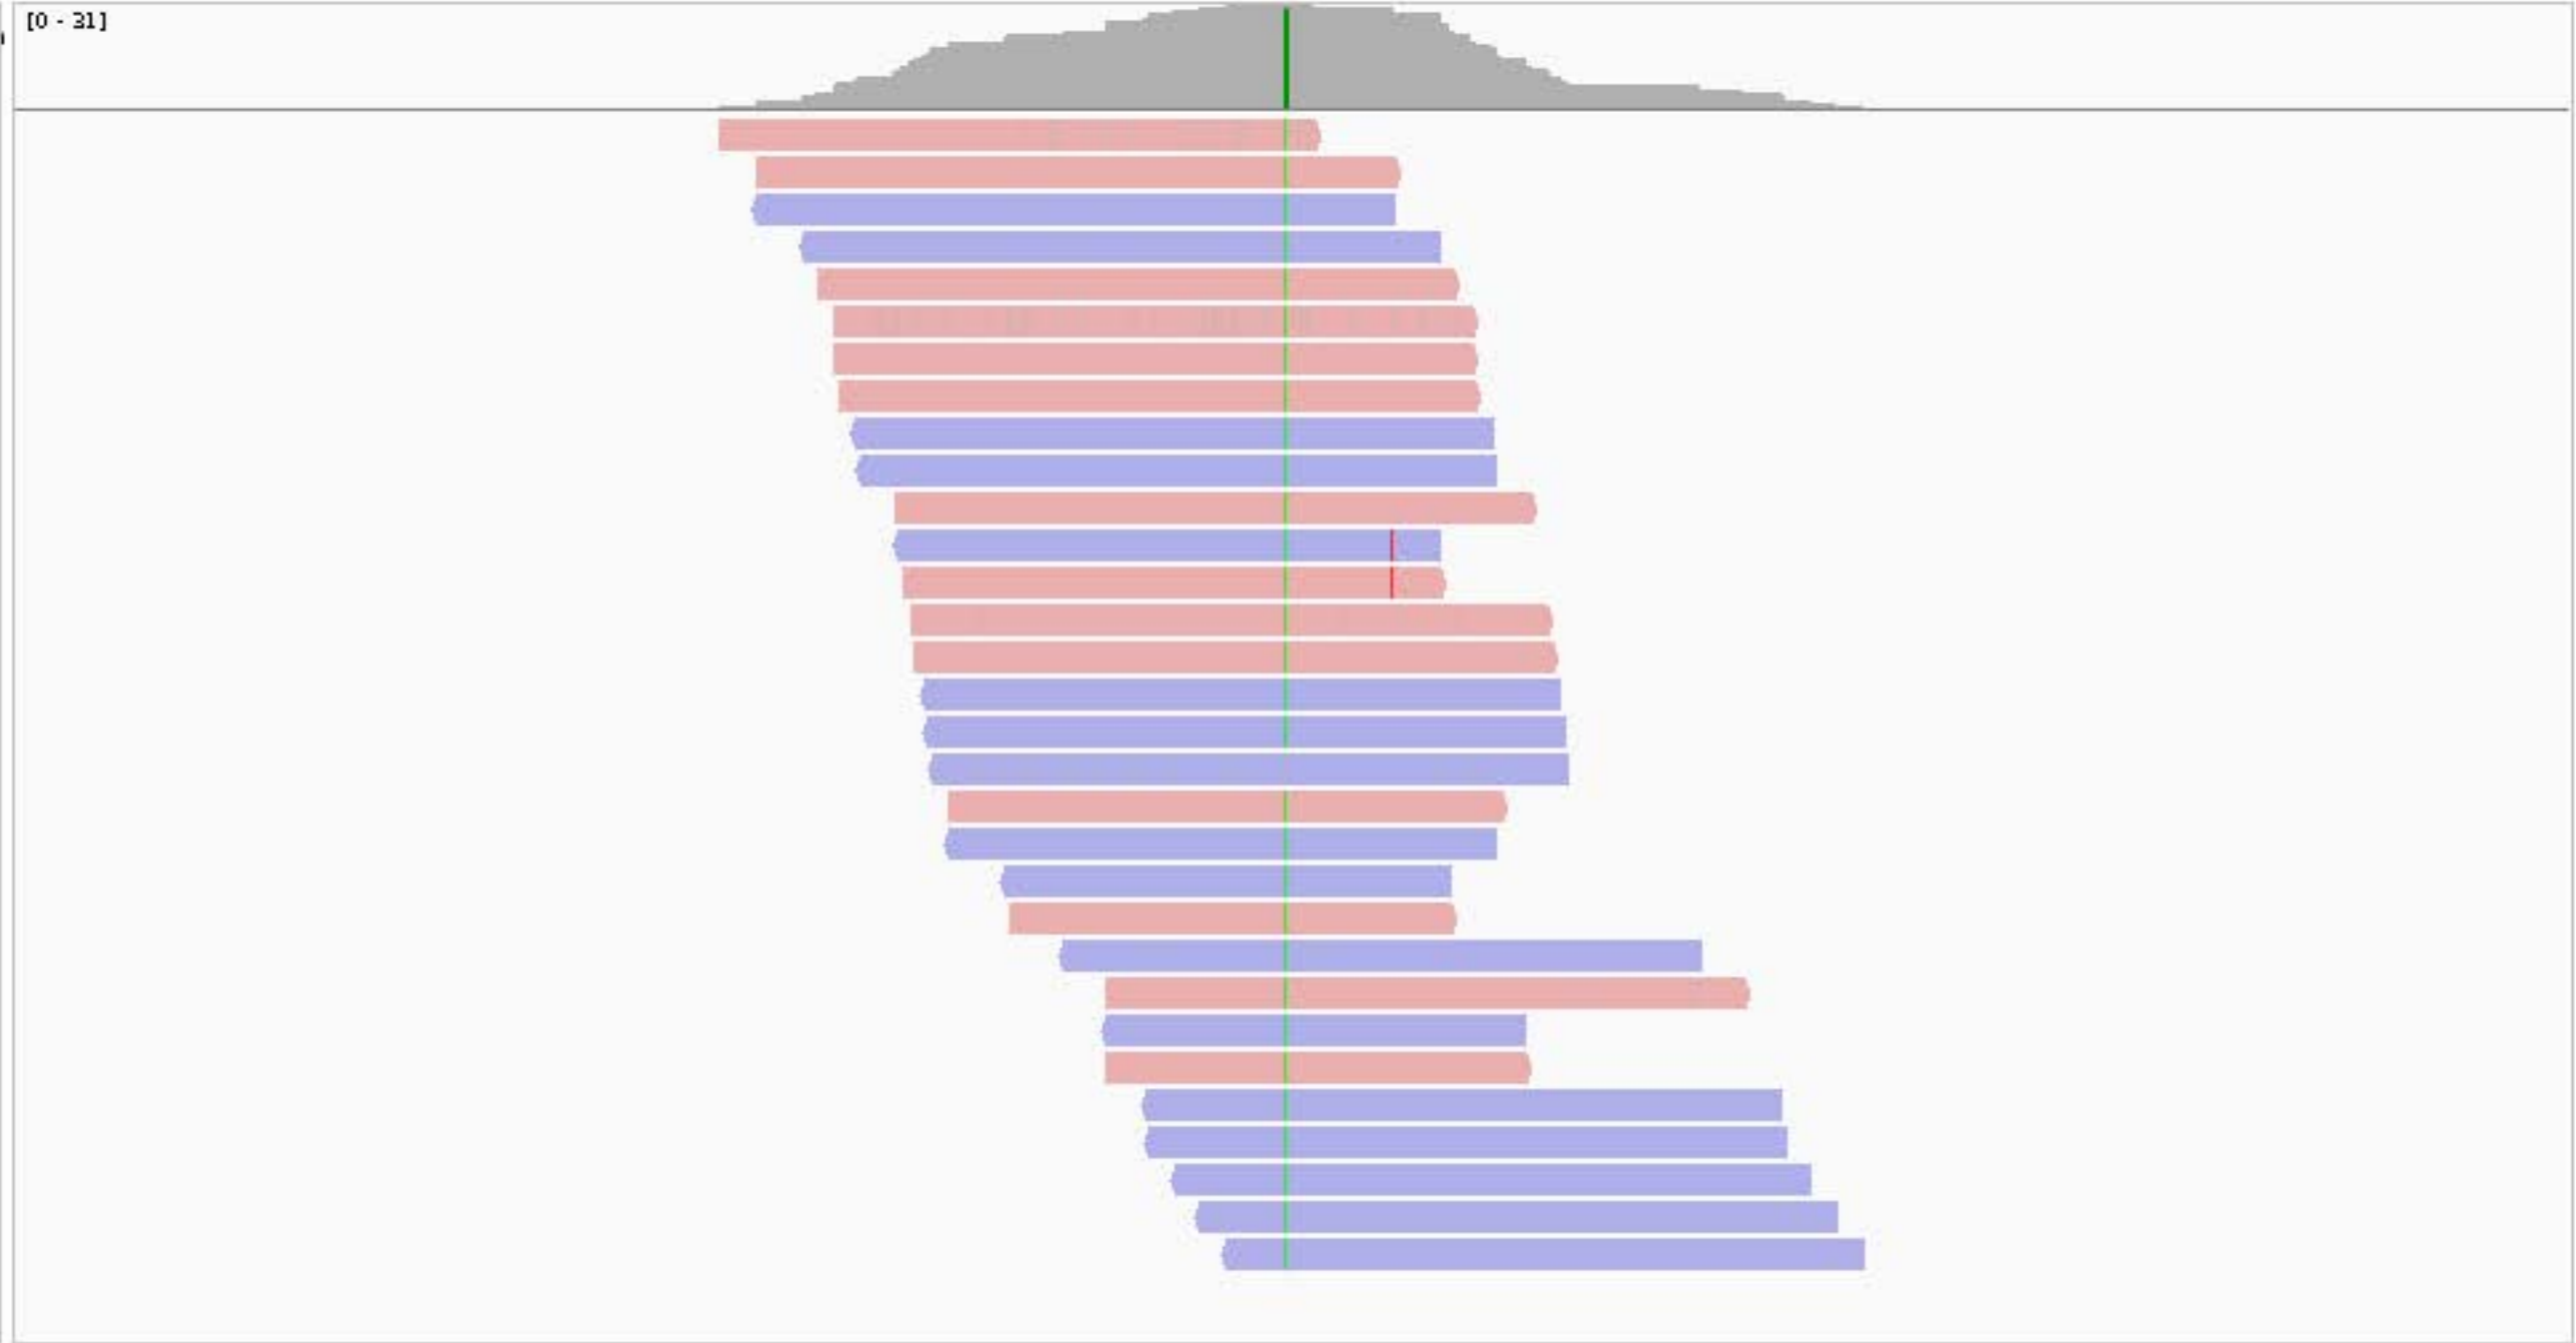

SL\_0005\_R\_FFPE\_73-B\_mut.ba  
m

Sequence →

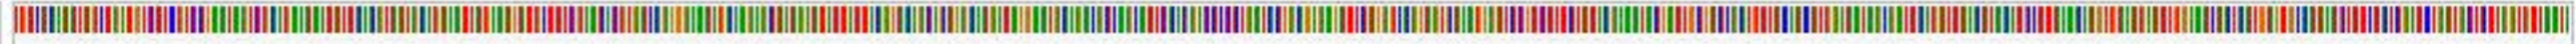

Refseq Genes

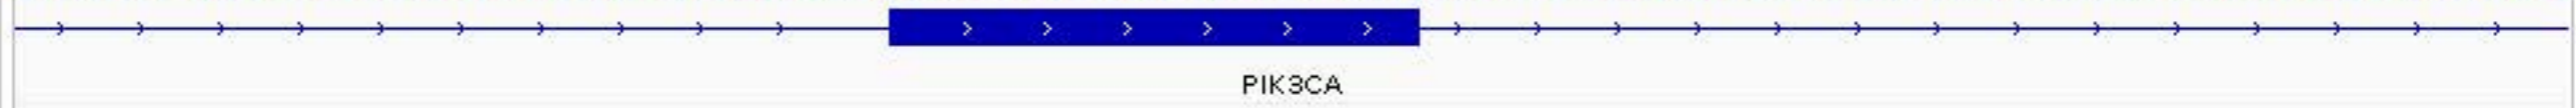

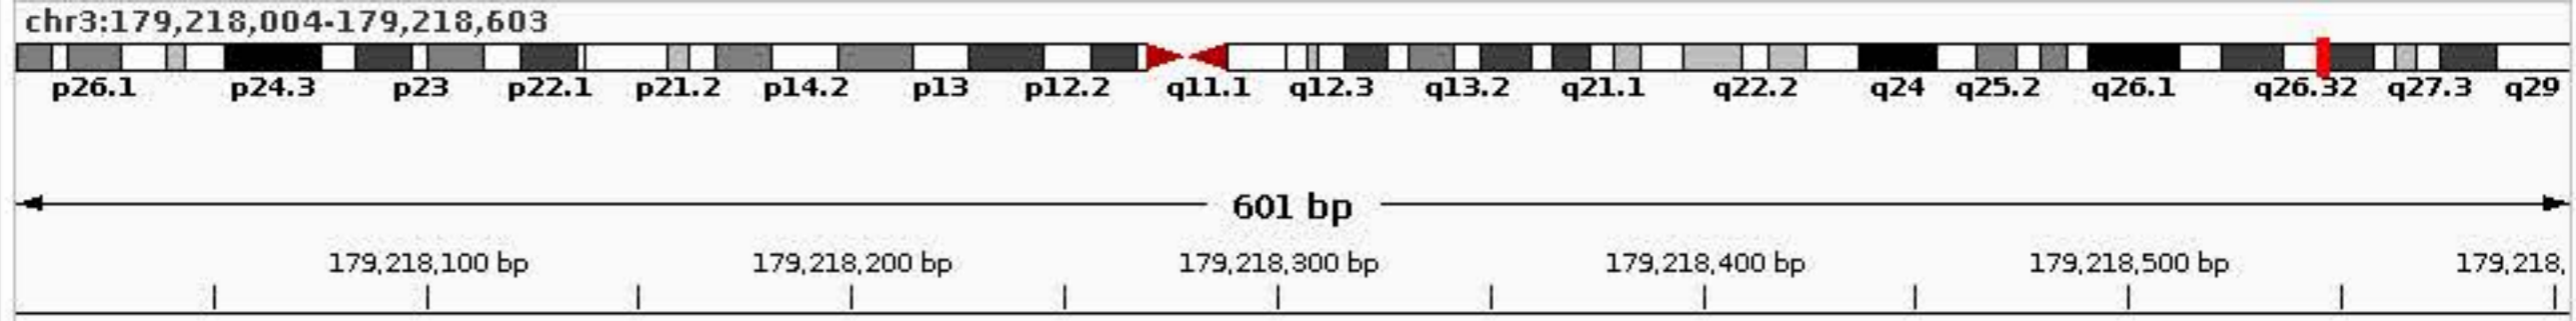

SL\_1004\_L\_FFPE\_38-B\_mut.barrage

SL\_1004\_L\_FFPE\_38-B\_mut.bam

Sequence →

Refseq Genes

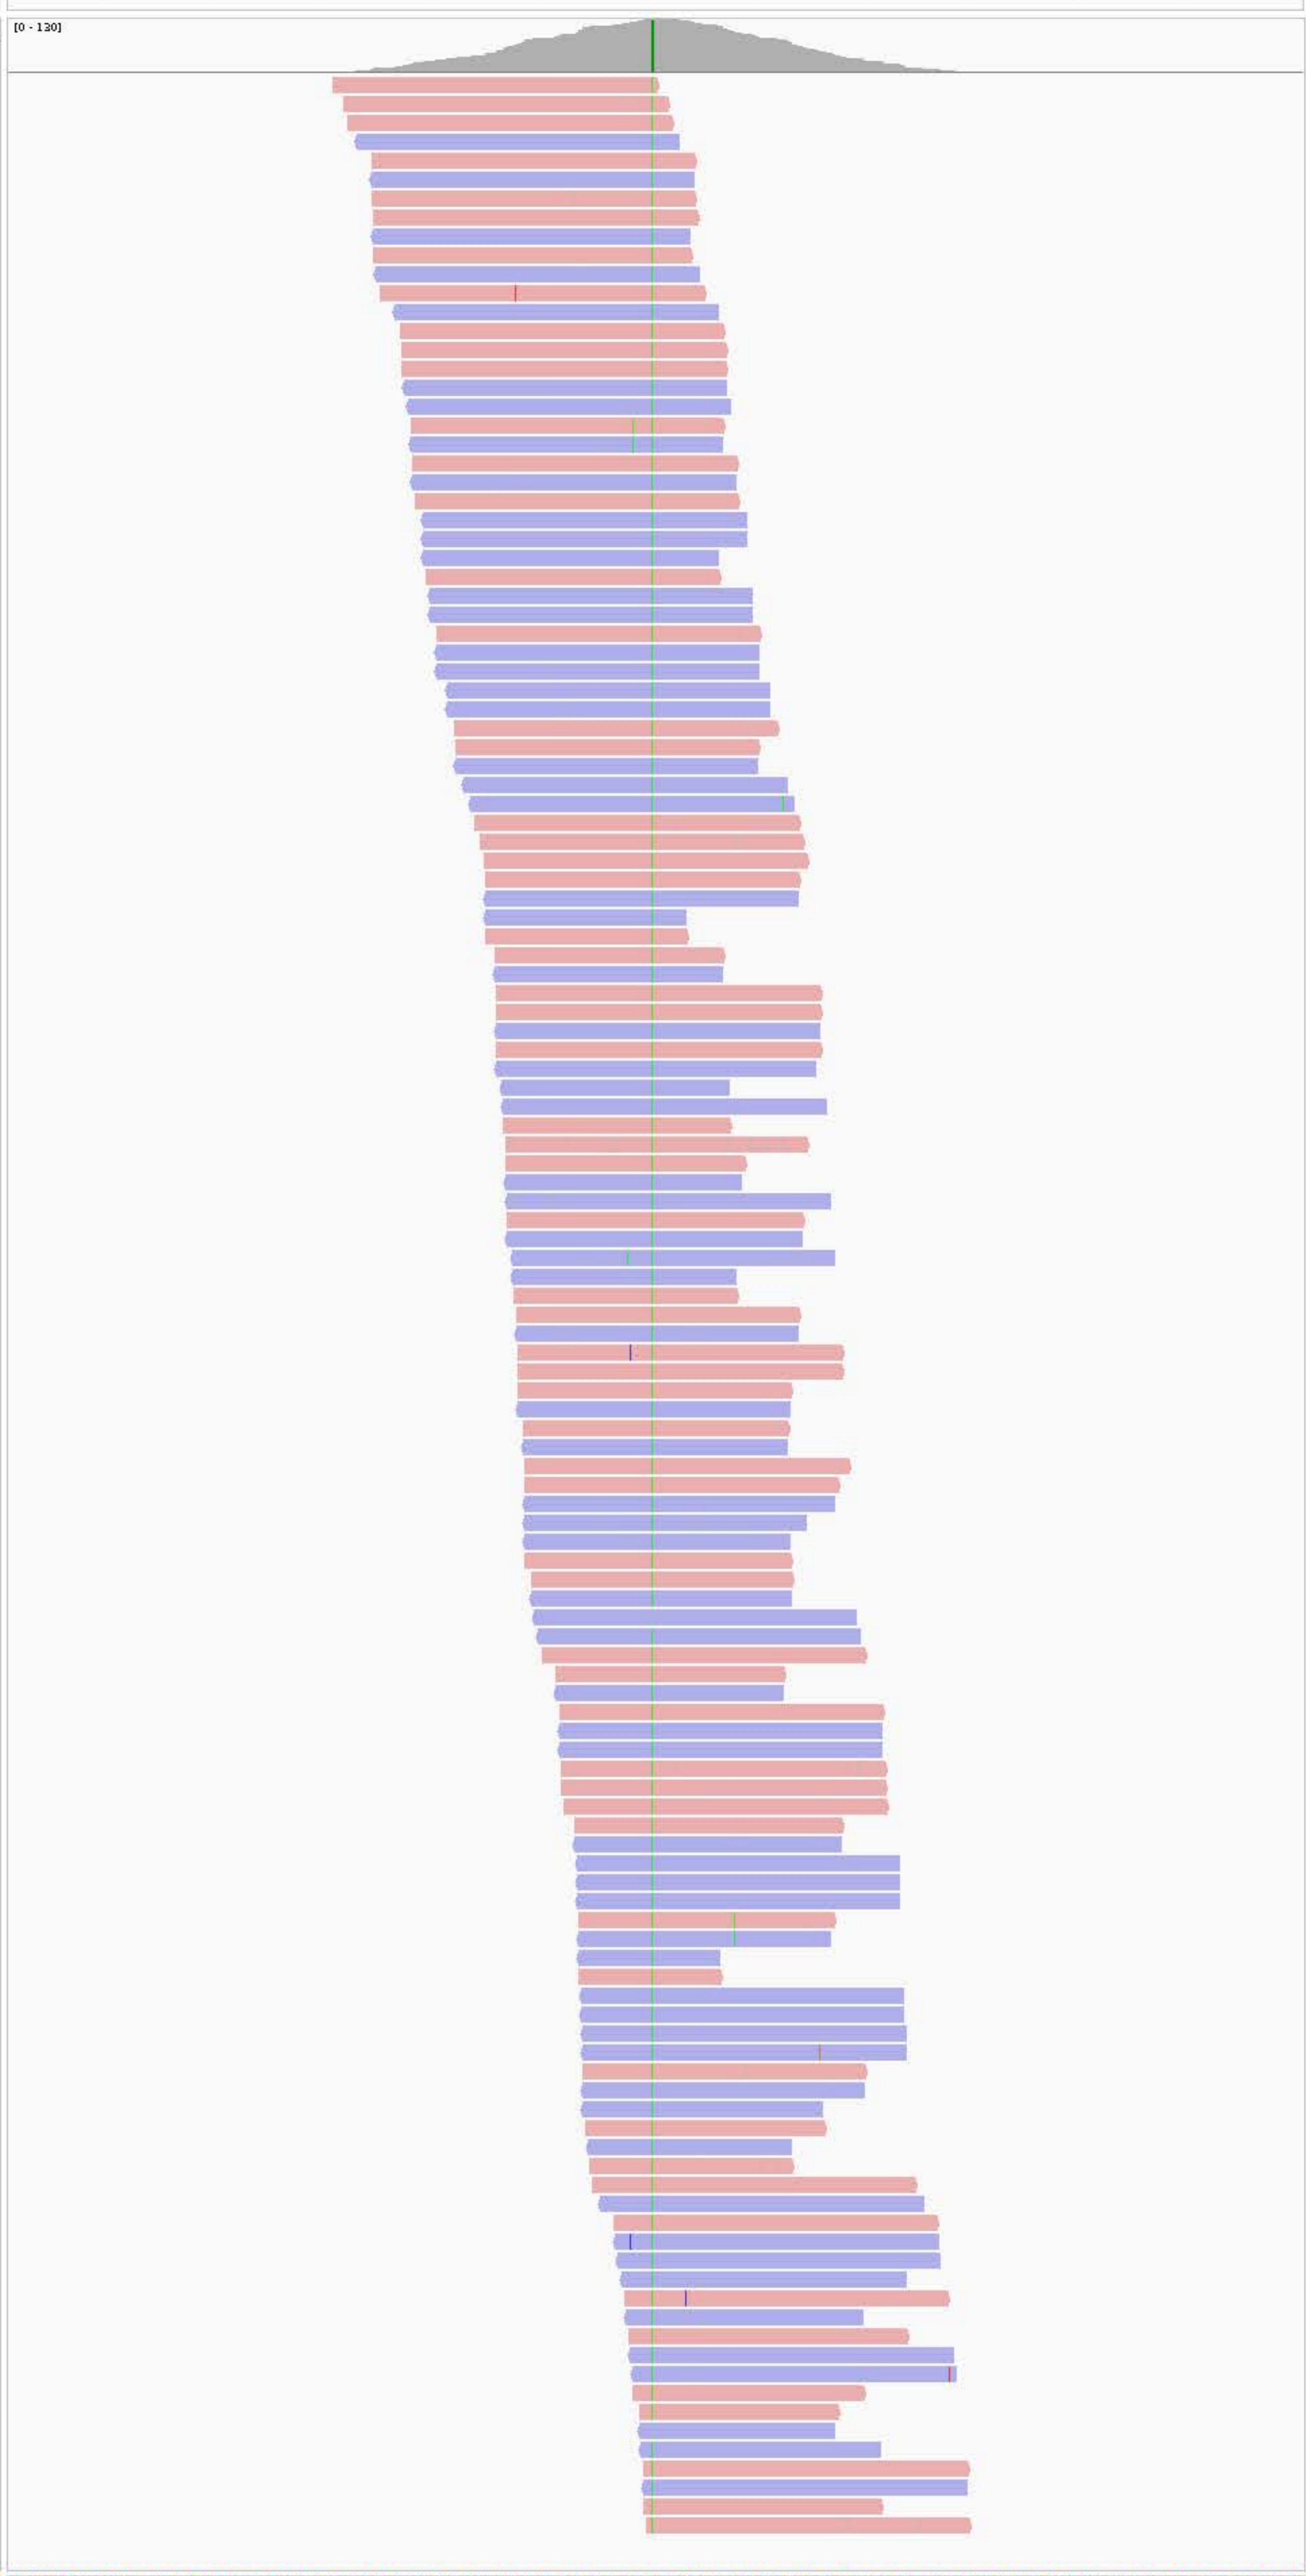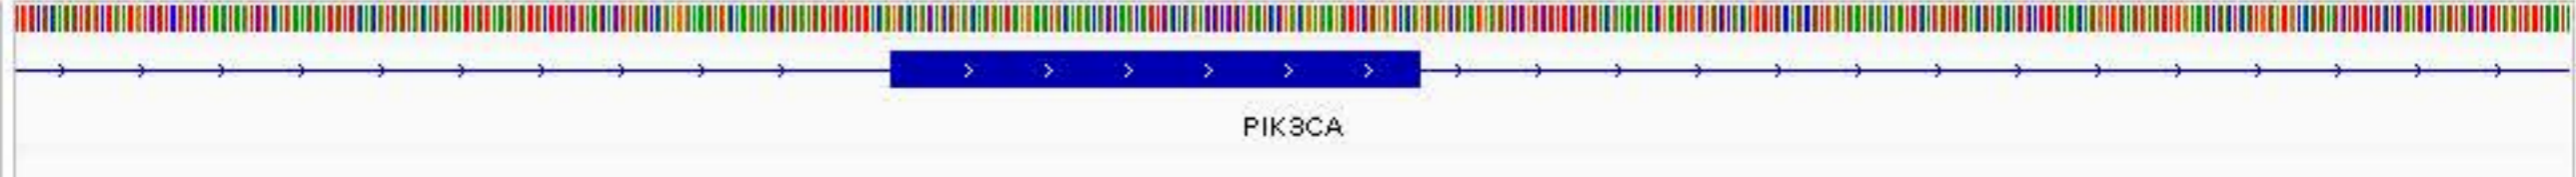

PIK3CA



chr3:179,218,004-179,218,603

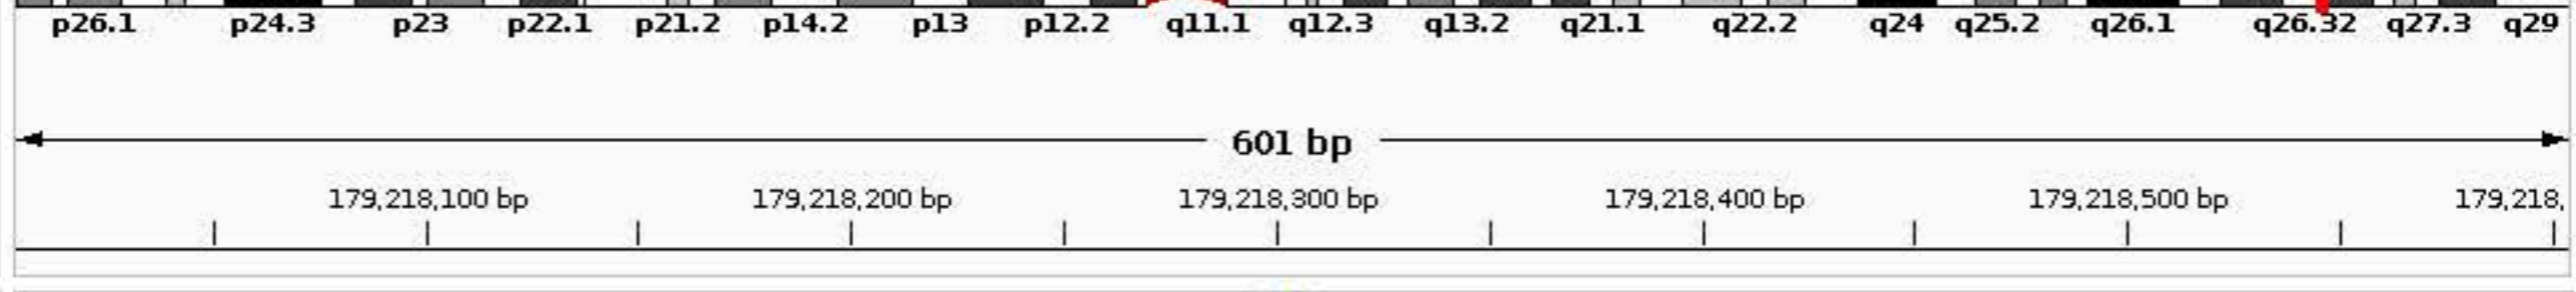

SL\_1008\_L\_FFPE\_3-B\_mut.bam  
age

SL\_1008\_L\_FFPE\_3-B\_mut.bam

Sequence →

Refseq Genes

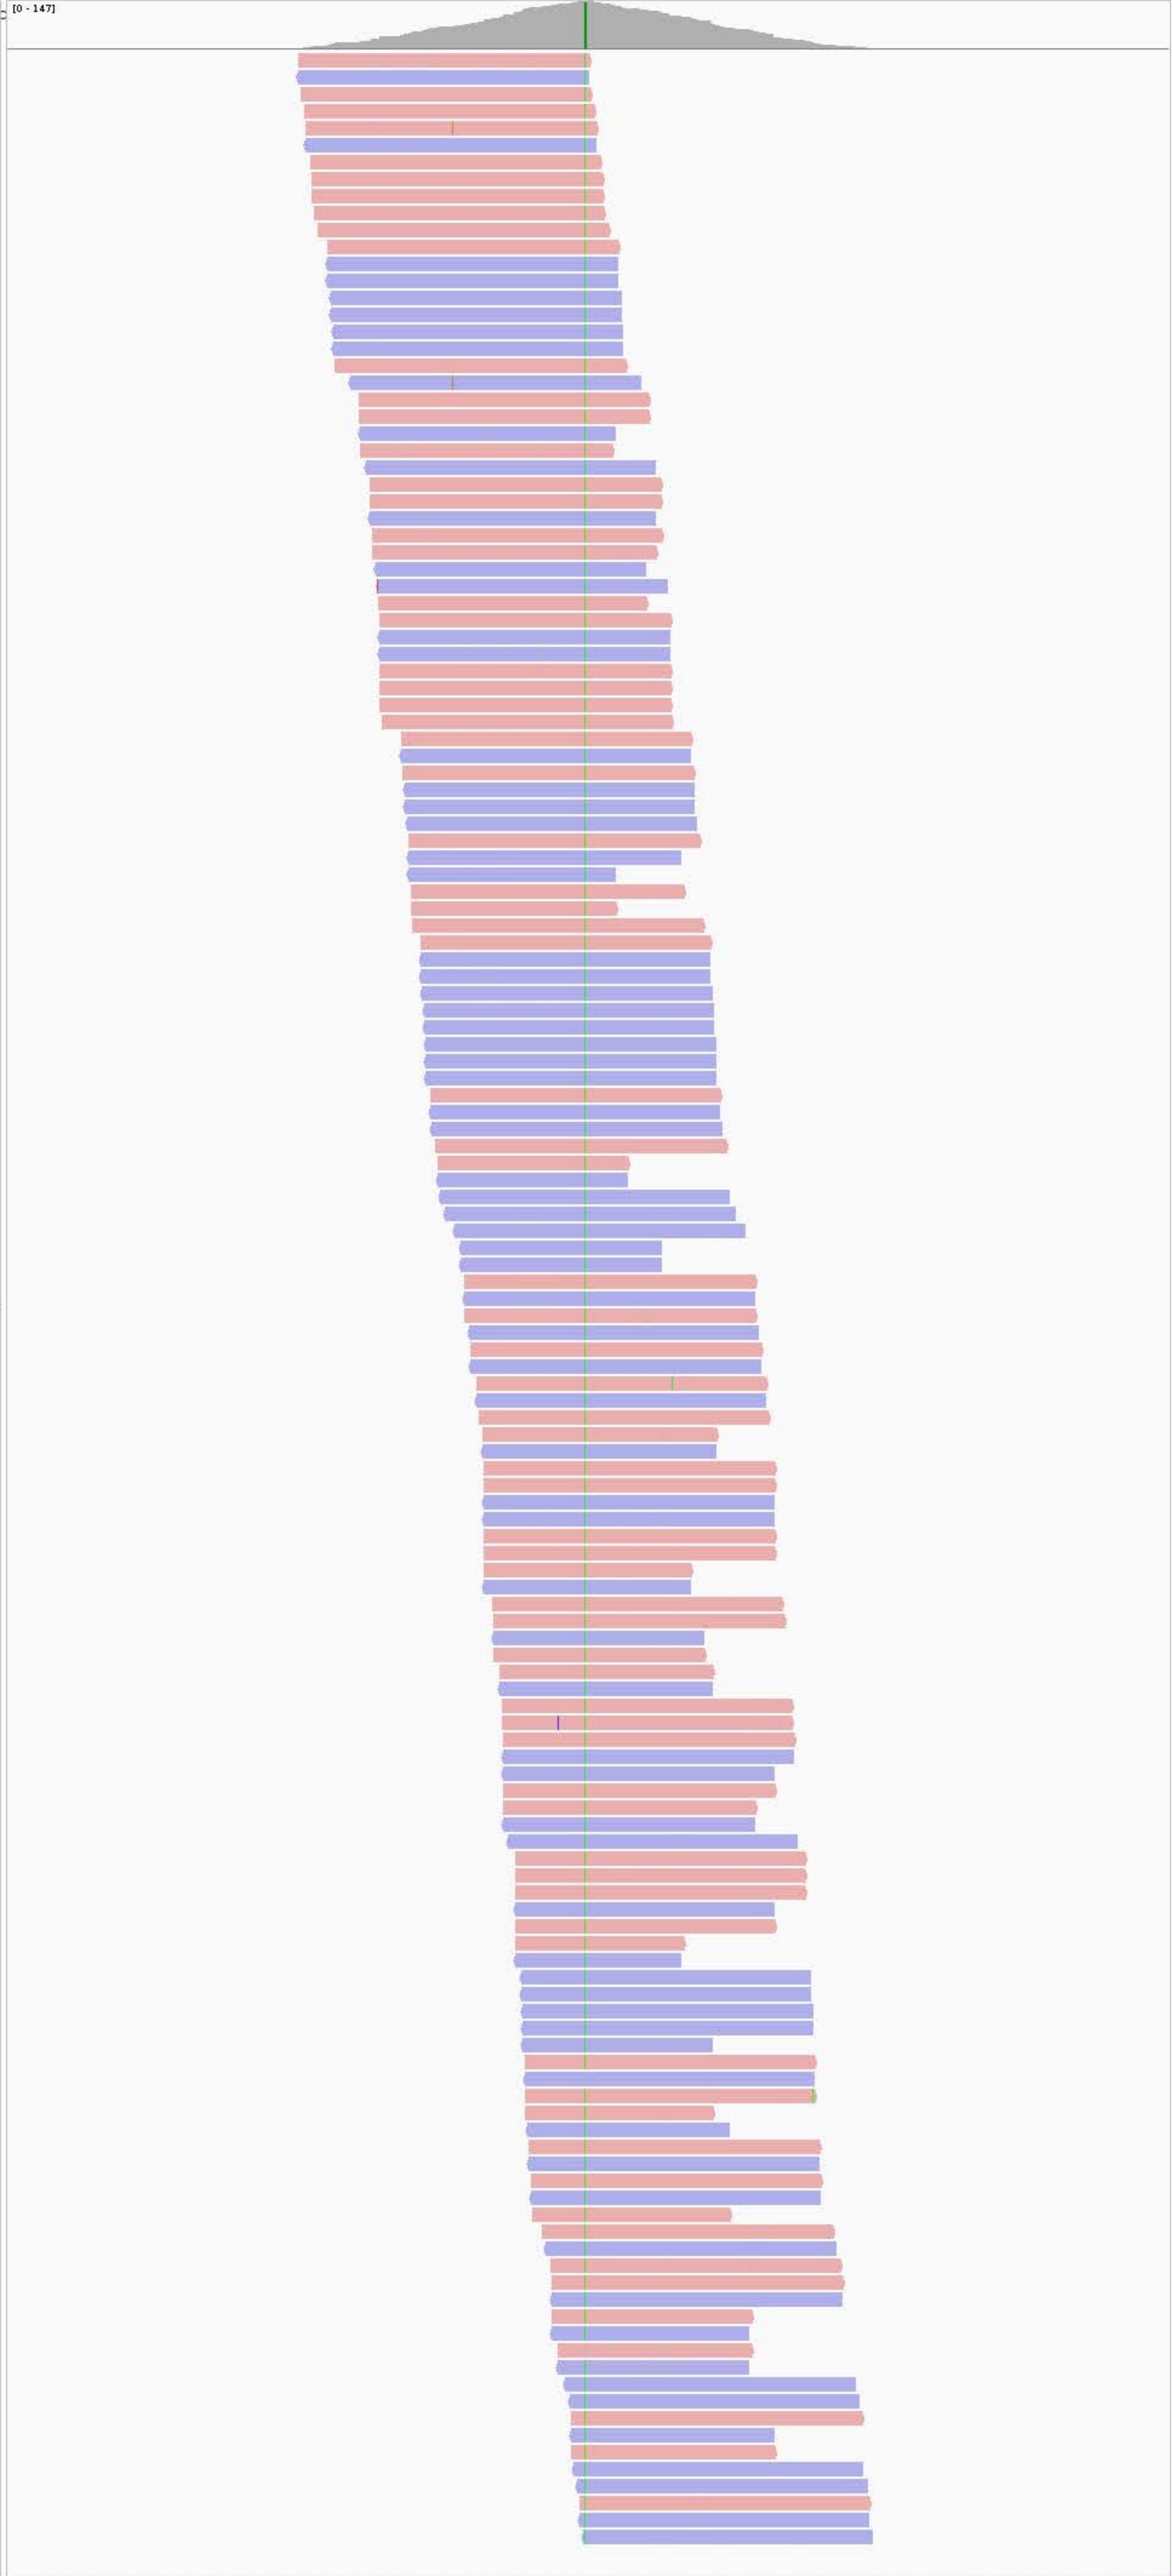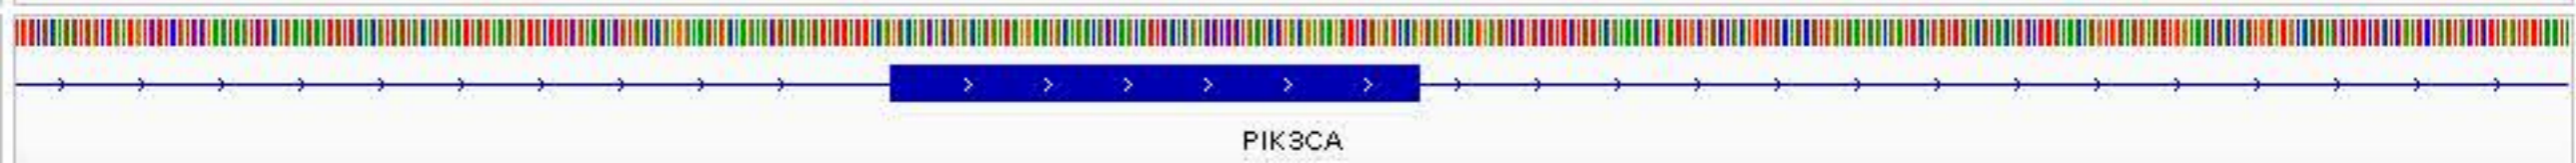

PIK3CA

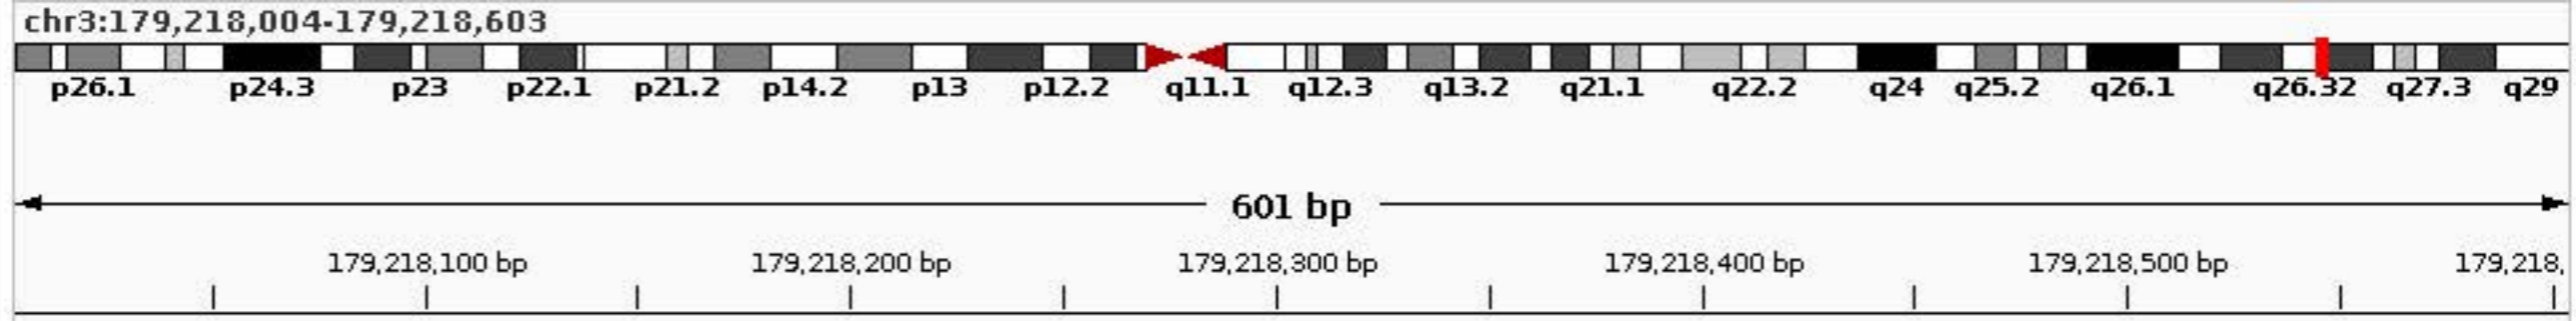

SL\_1012\_R\_10\_FFPE-B\_mut.bam  
rage

SL\_1012\_R\_10\_FFPE-B\_mut.ba  
m

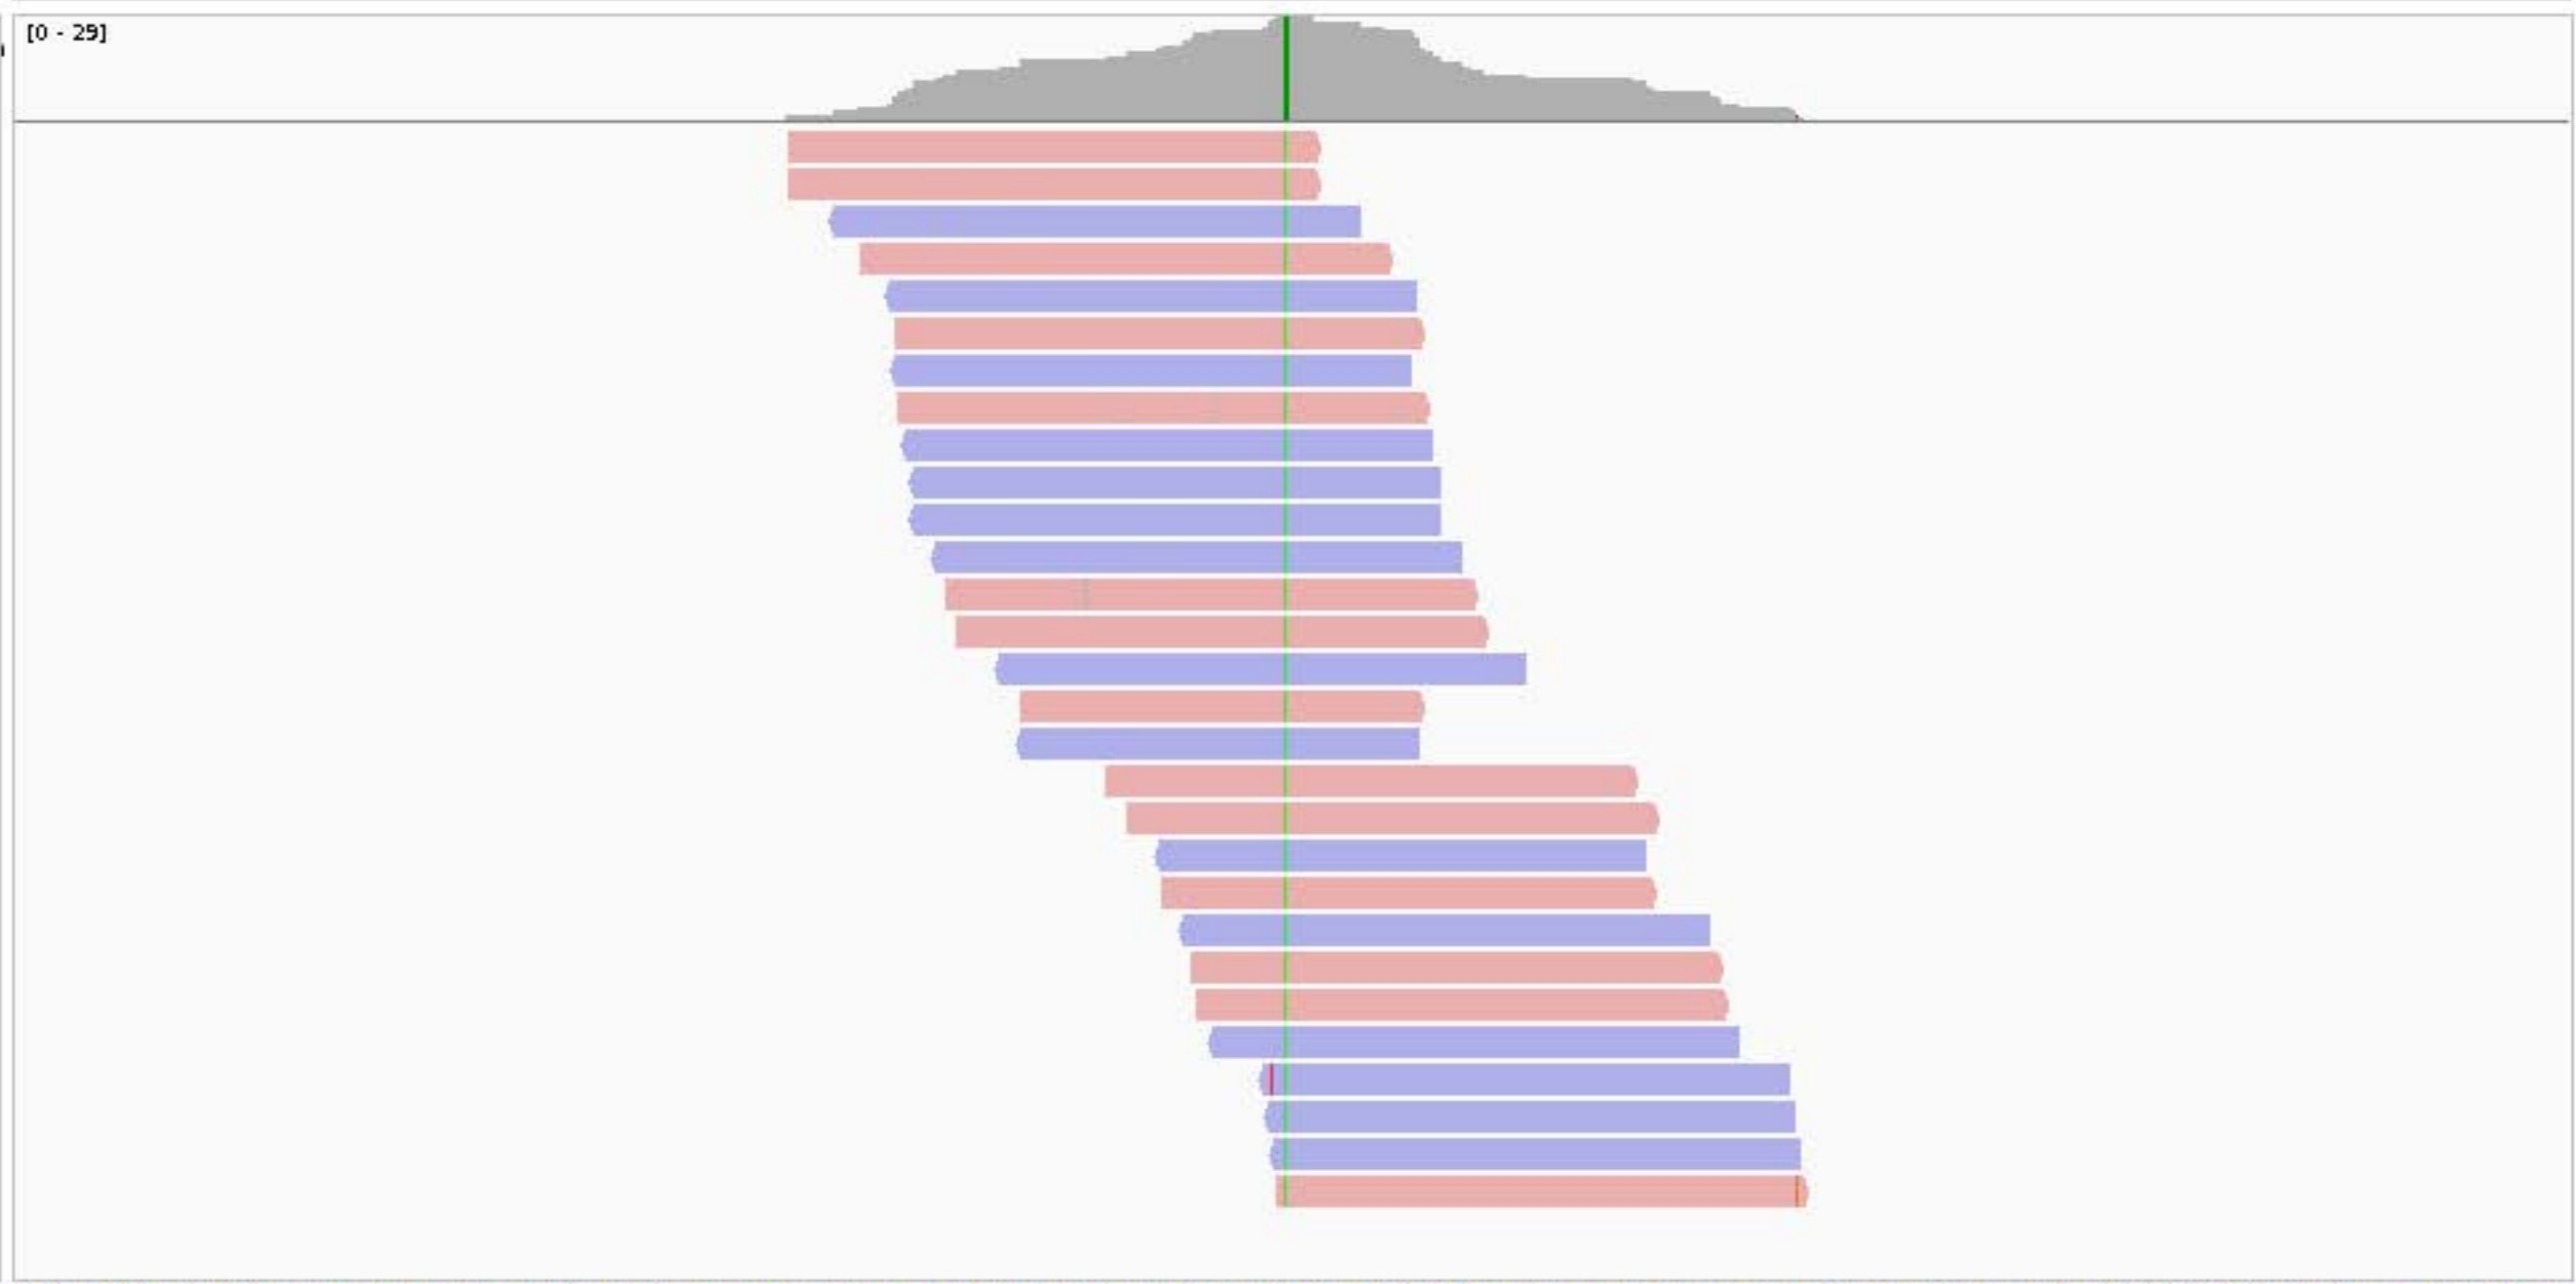

Sequence →

Refseq Genes

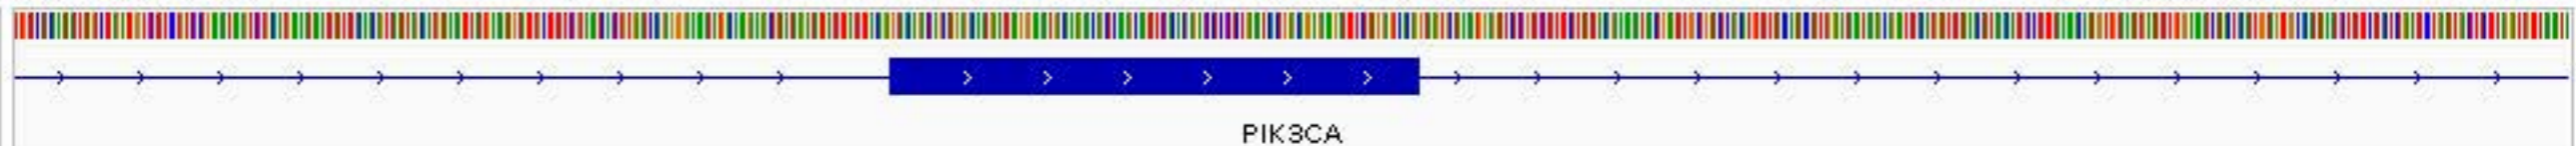

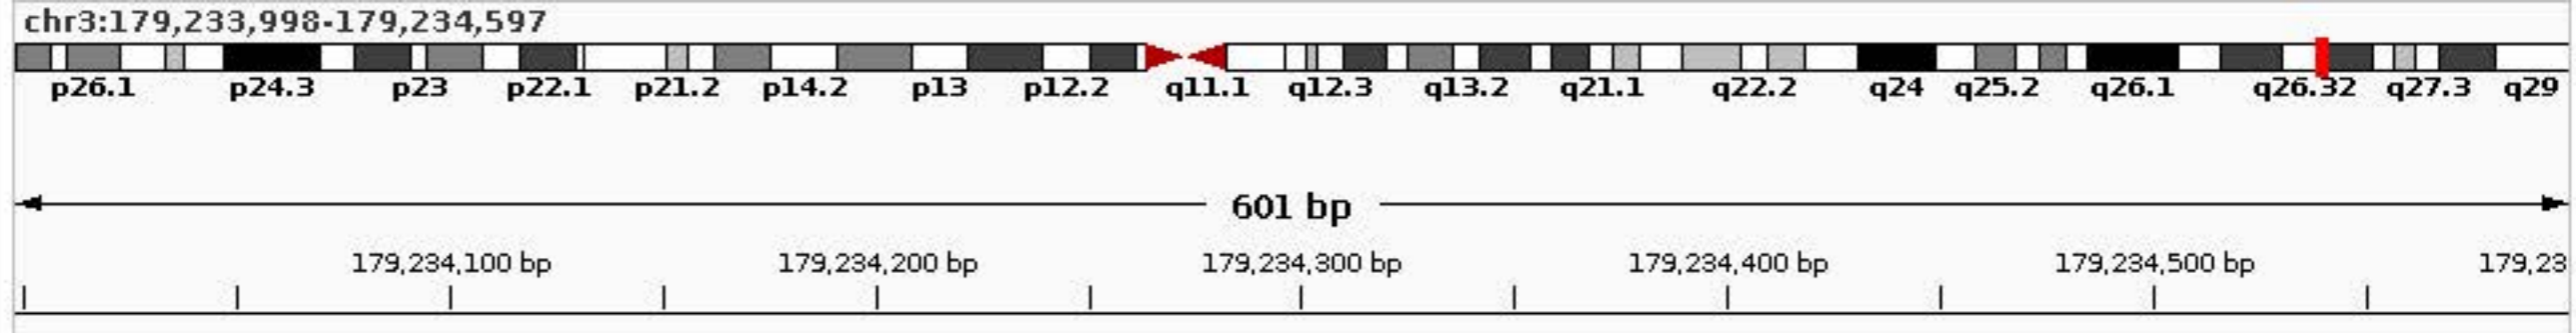

SL\_0001\_L\_FFPE\_10-B\_mut.barr  
rage

SL\_0001\_L\_FFPE\_10-B\_mut.ba  
m

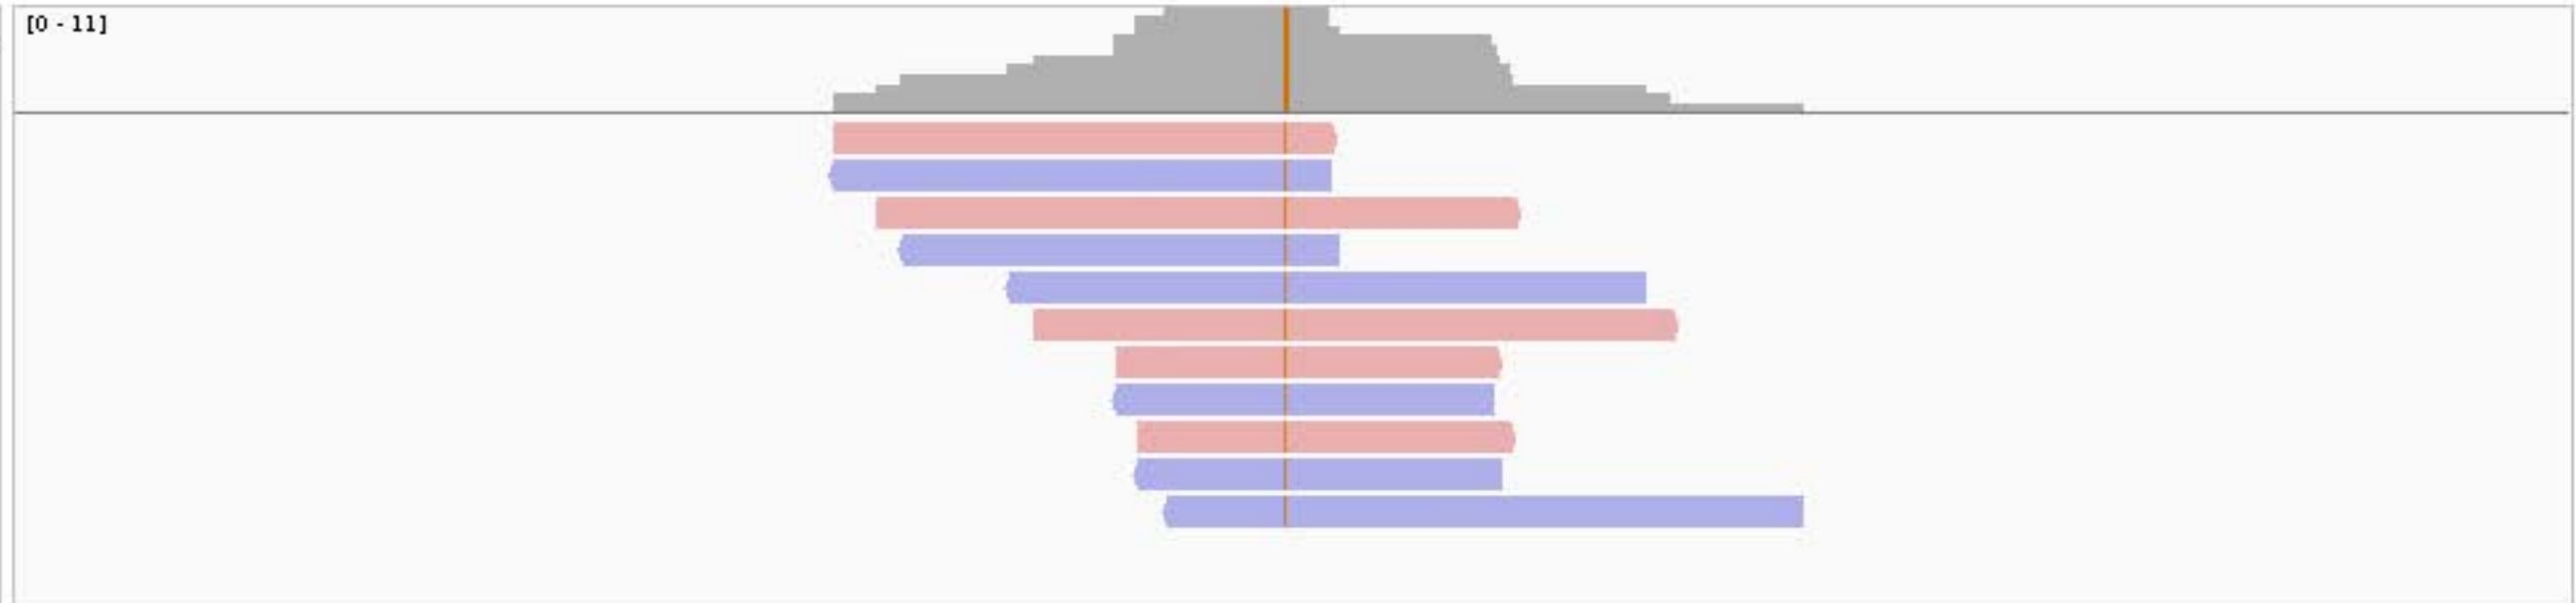

Sequence →

Refseq Genes

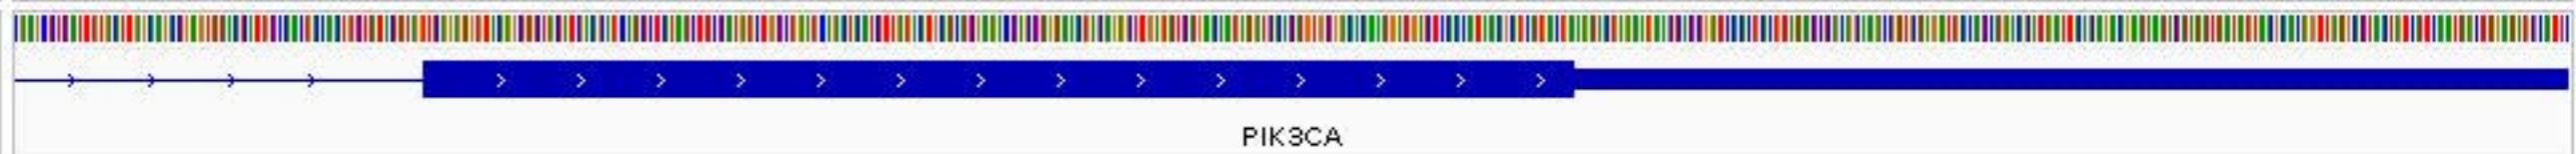



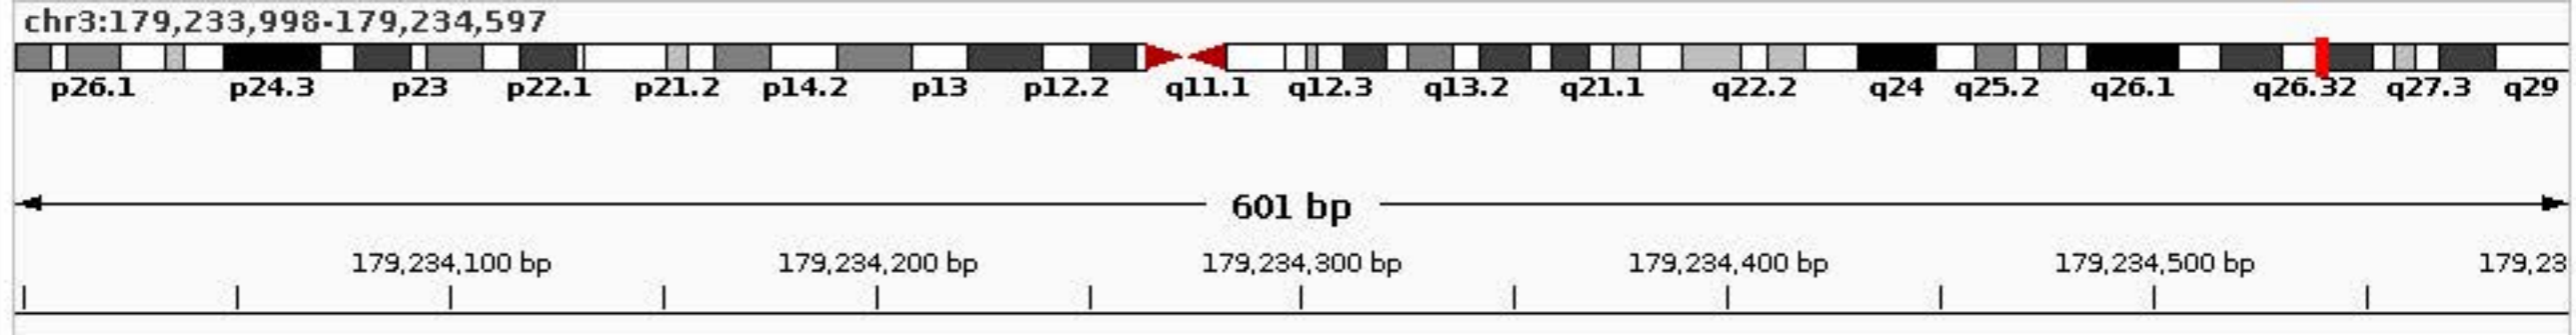

SL\_0001\_R\_FFPE\_58-B\_mut.bam  
rage

SL\_0001\_R\_FFPE\_58-B\_mut.ba  
m

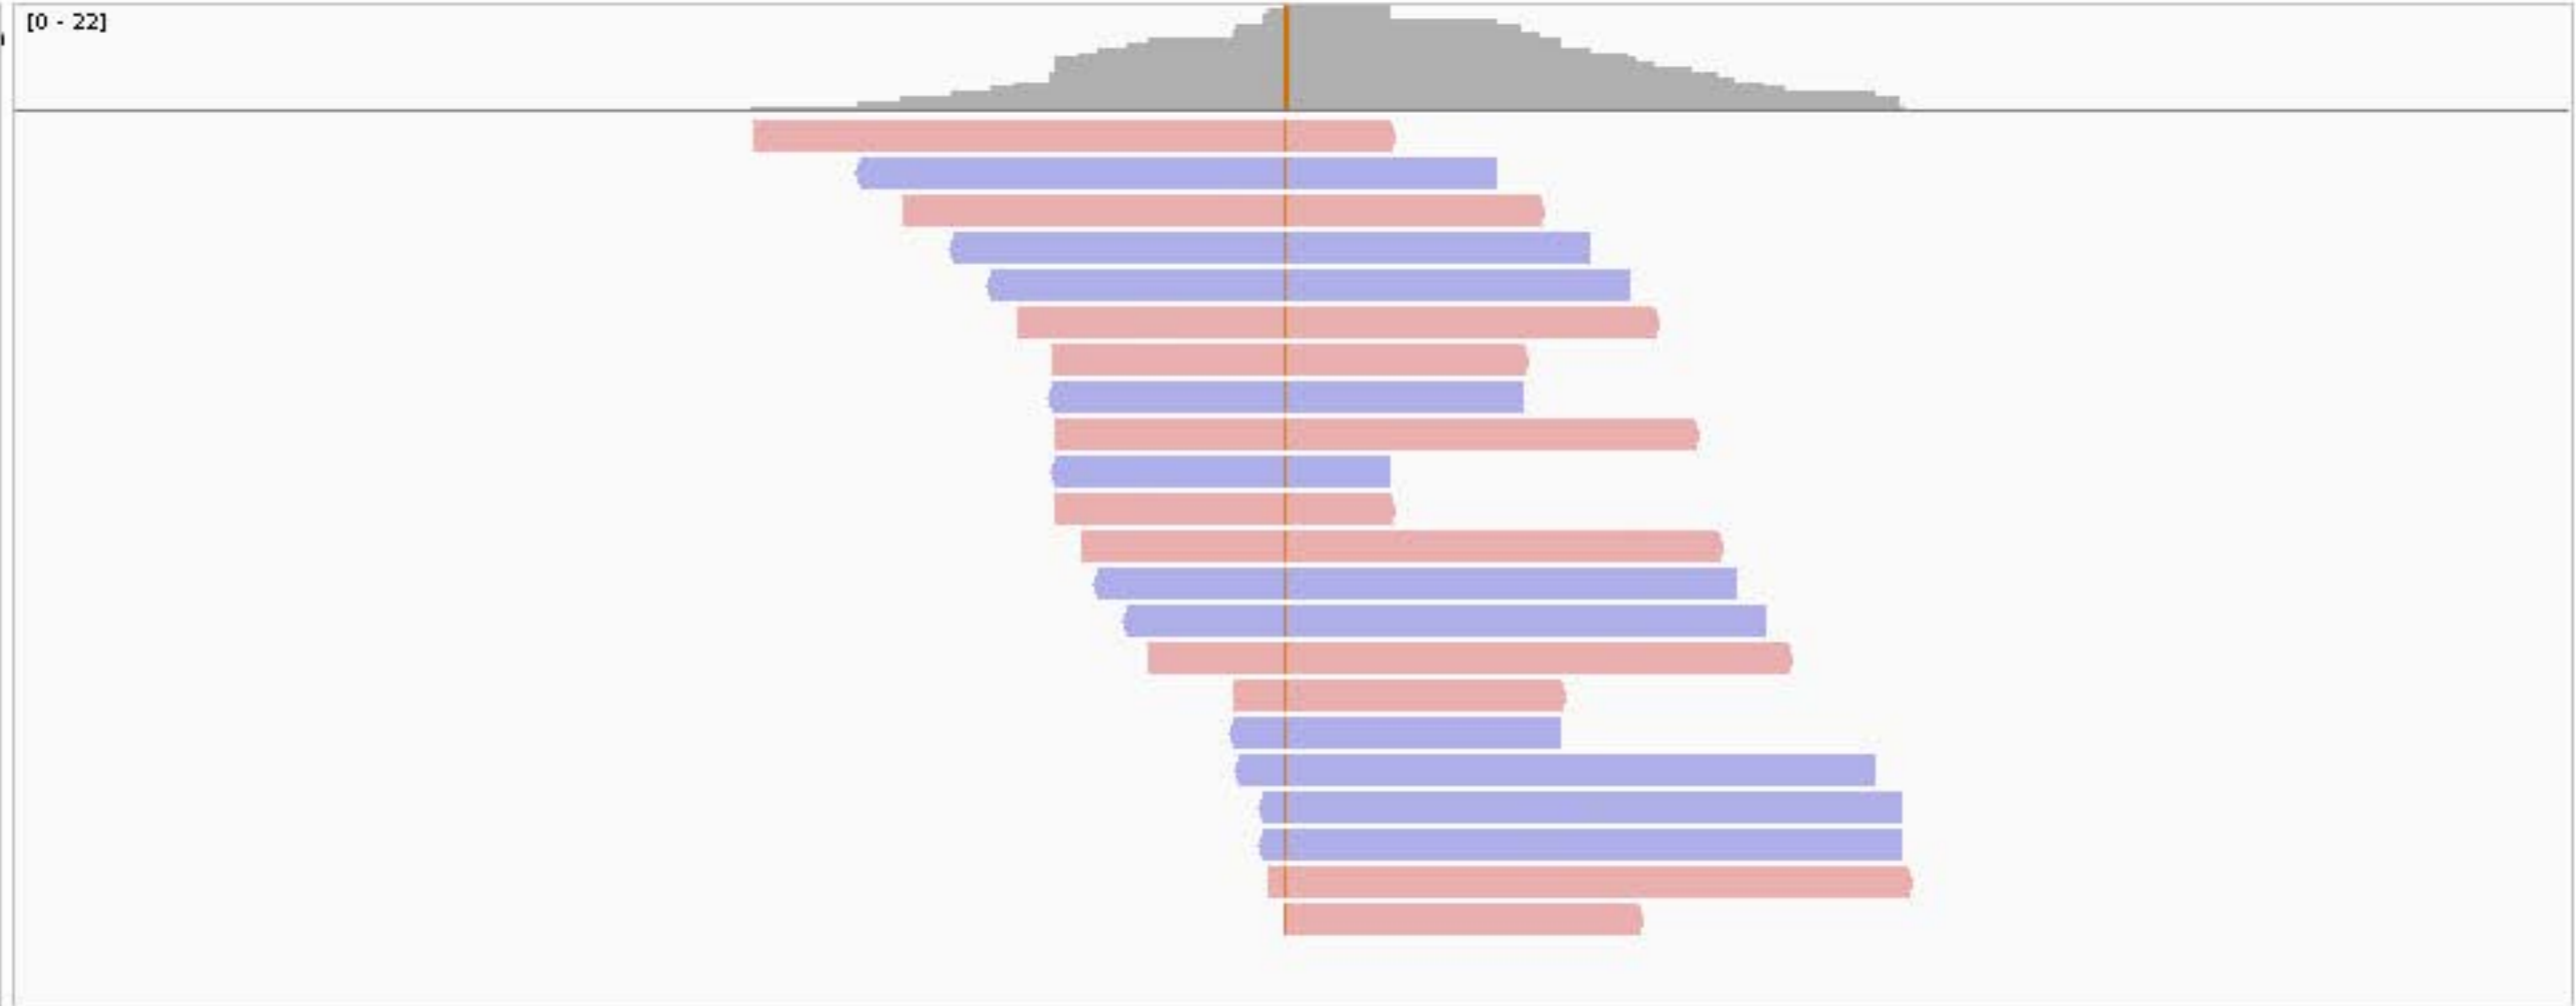

Sequence →

Refseq Genes

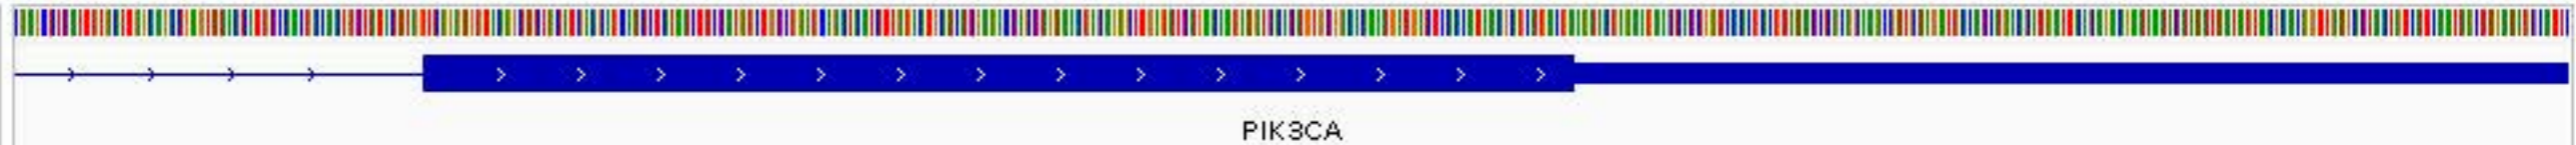

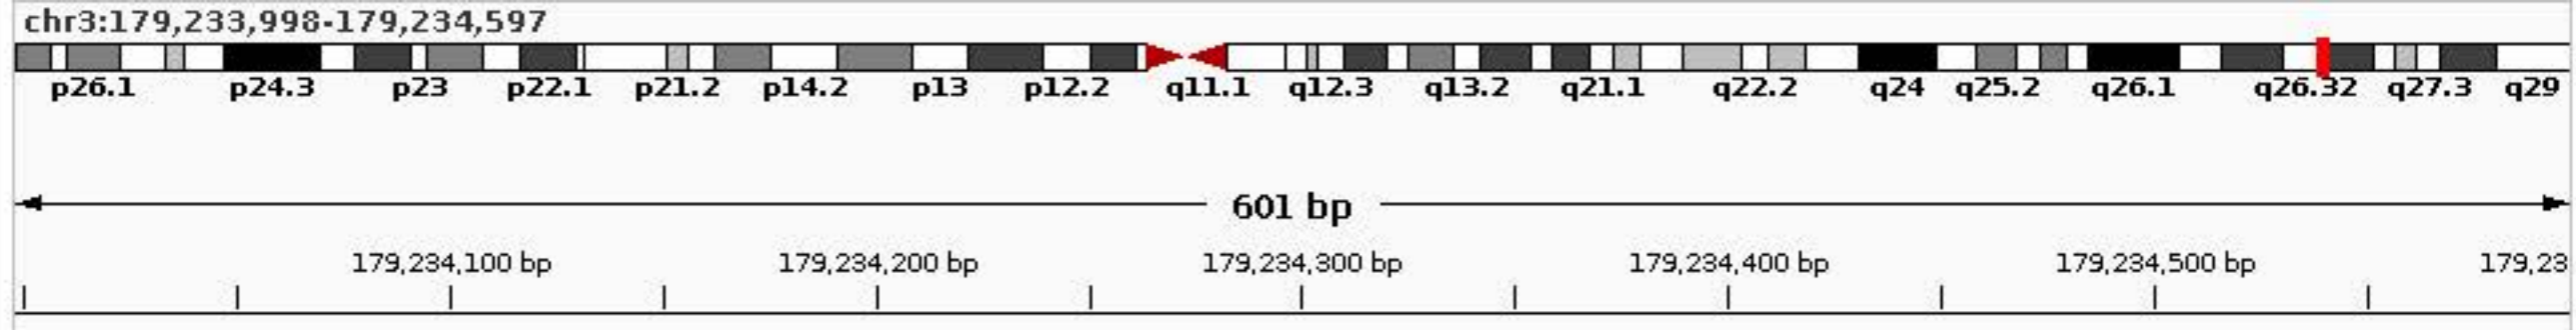

SL\_0004\_L\_FFPE\_14-B\_mut.barrage

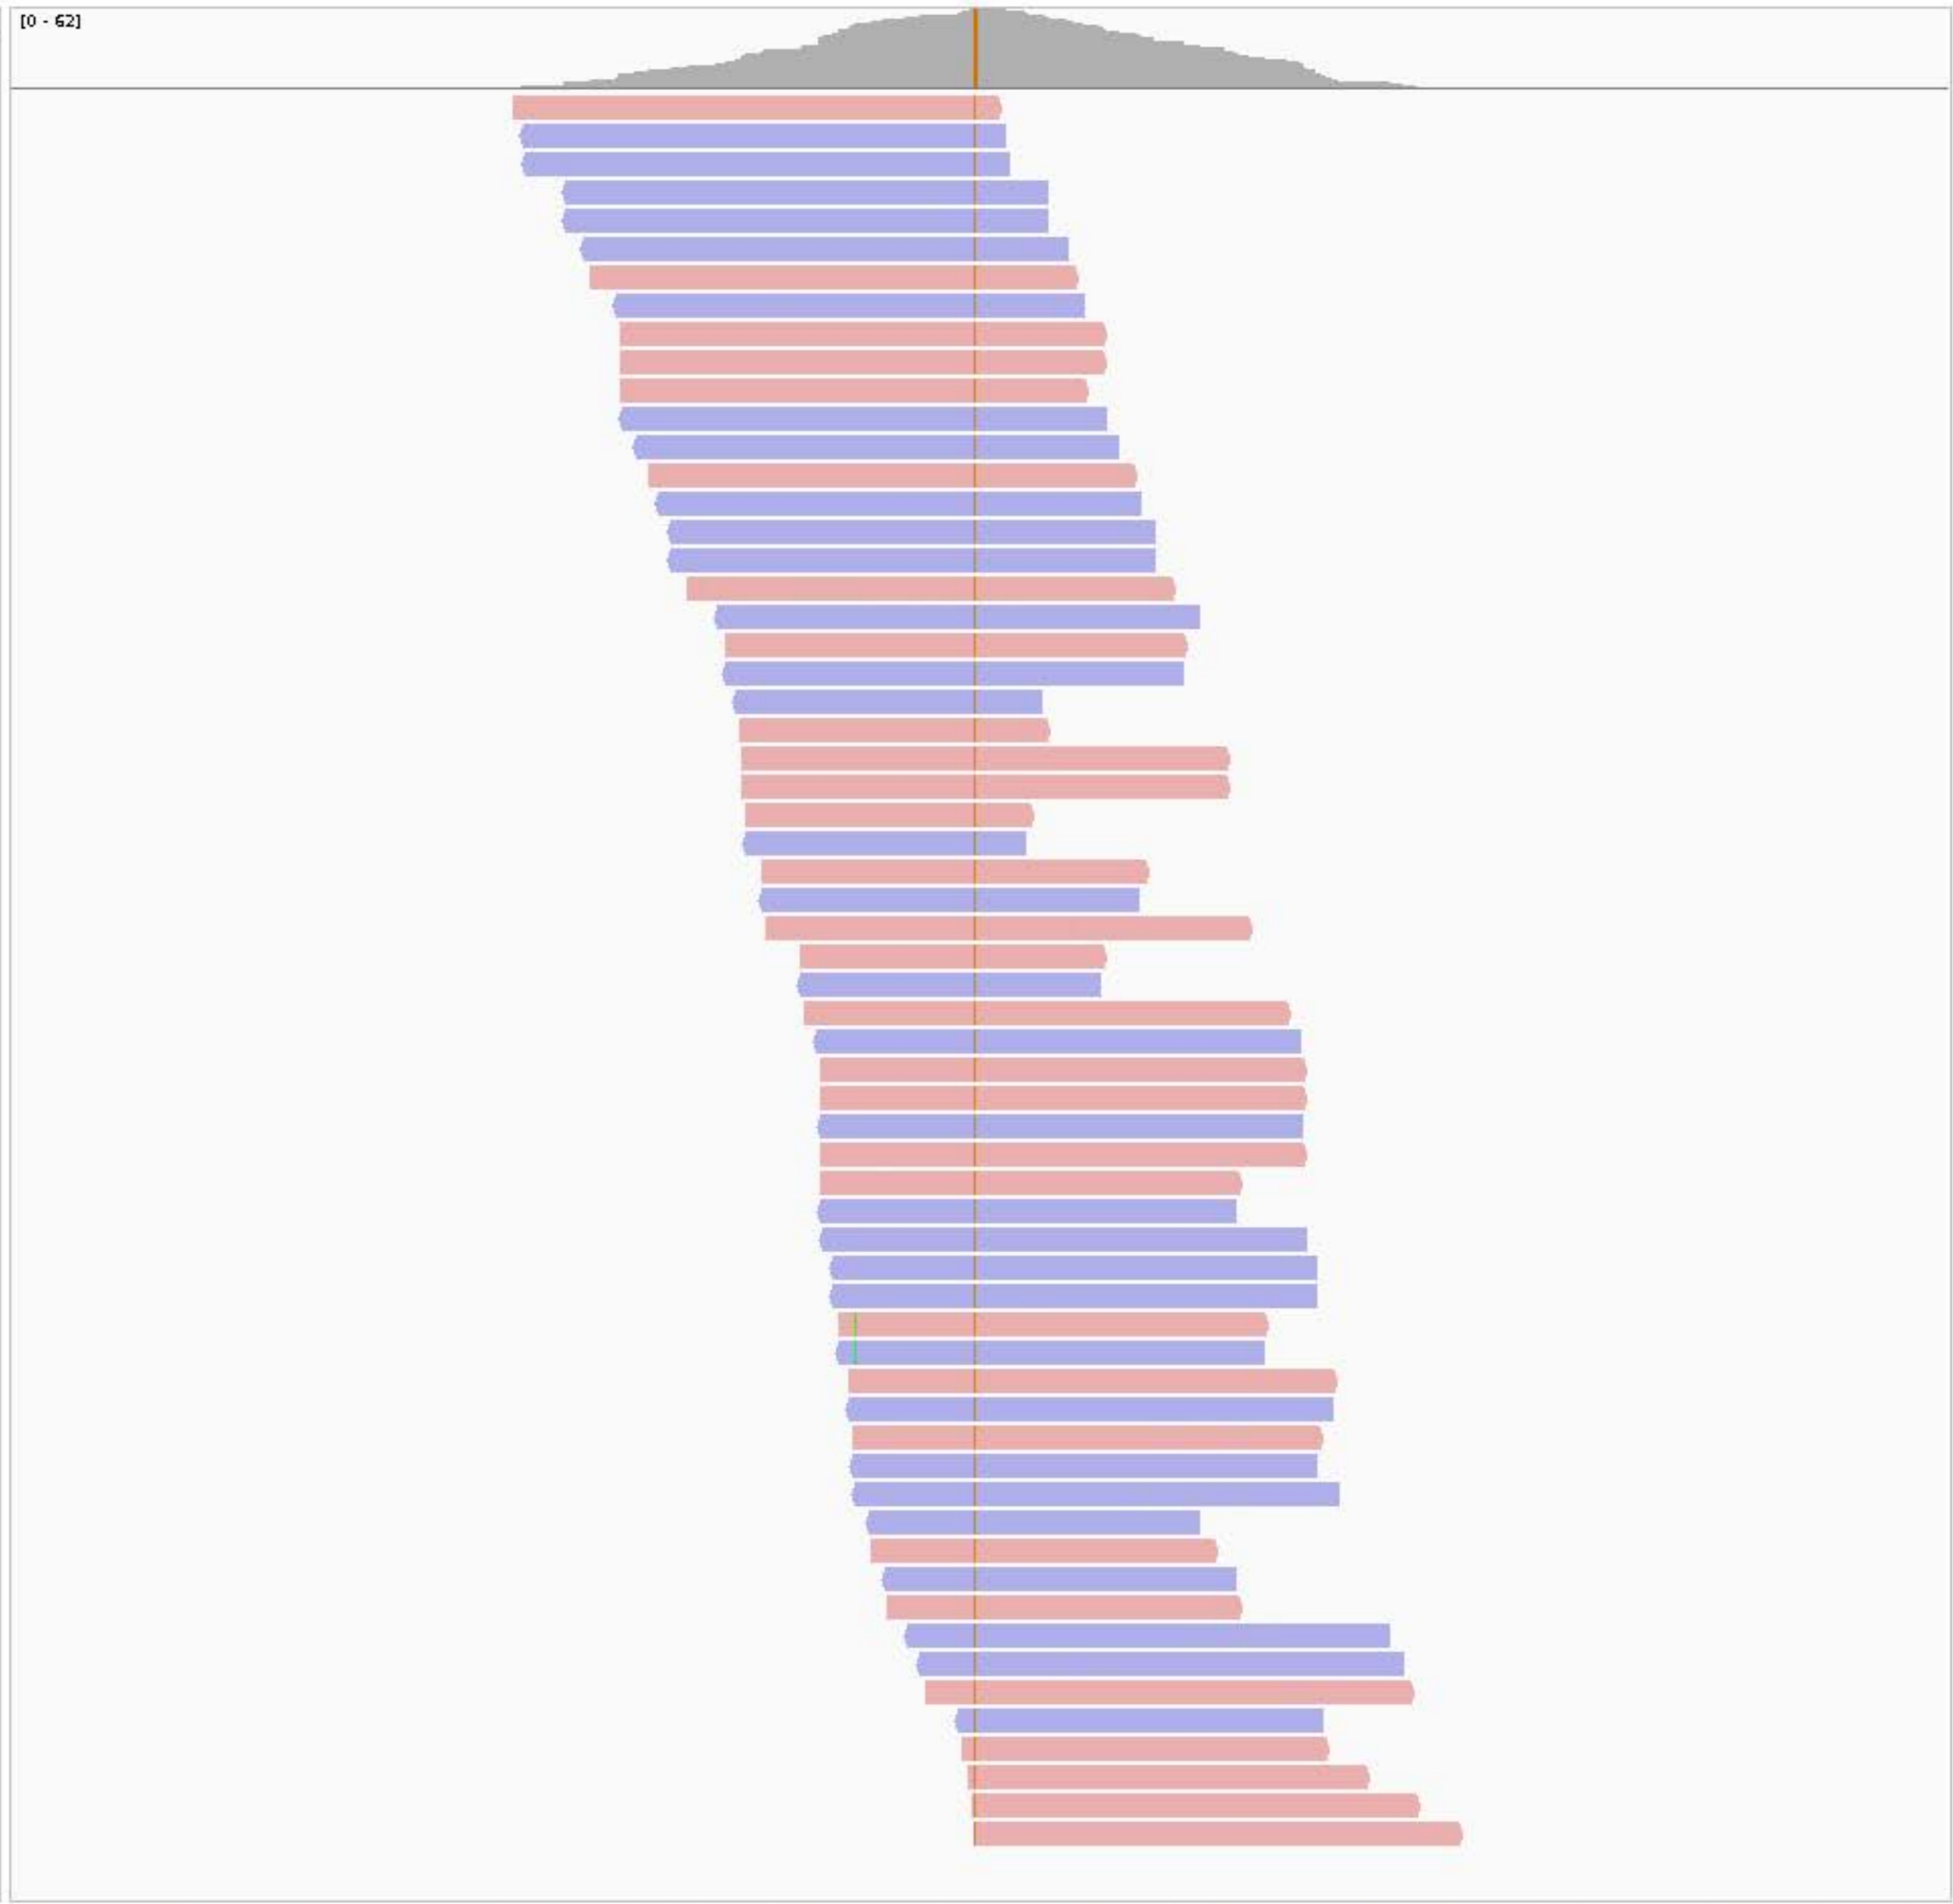

SL\_0004\_L\_FFPE\_14-B\_mut.bam

Sequence →  
Refseq Genes

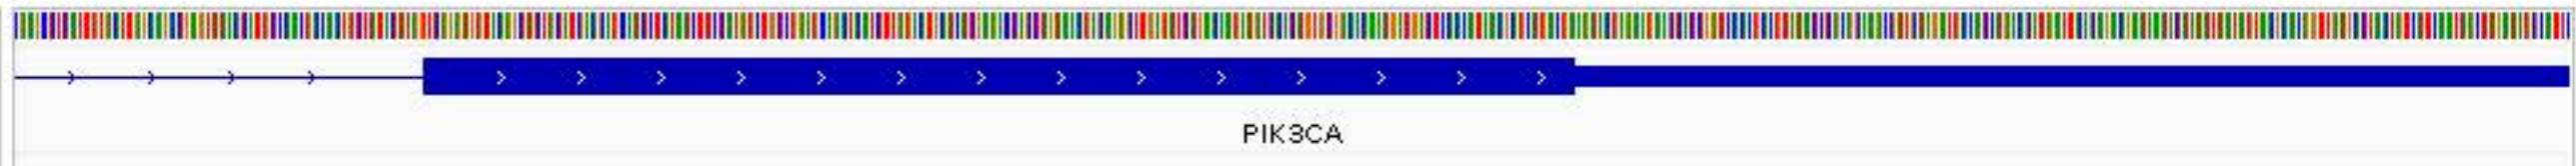



SL\_0004-RN-8-B\_mut.bam Cover

SL\_0004-RN-8-B\_mut.bam

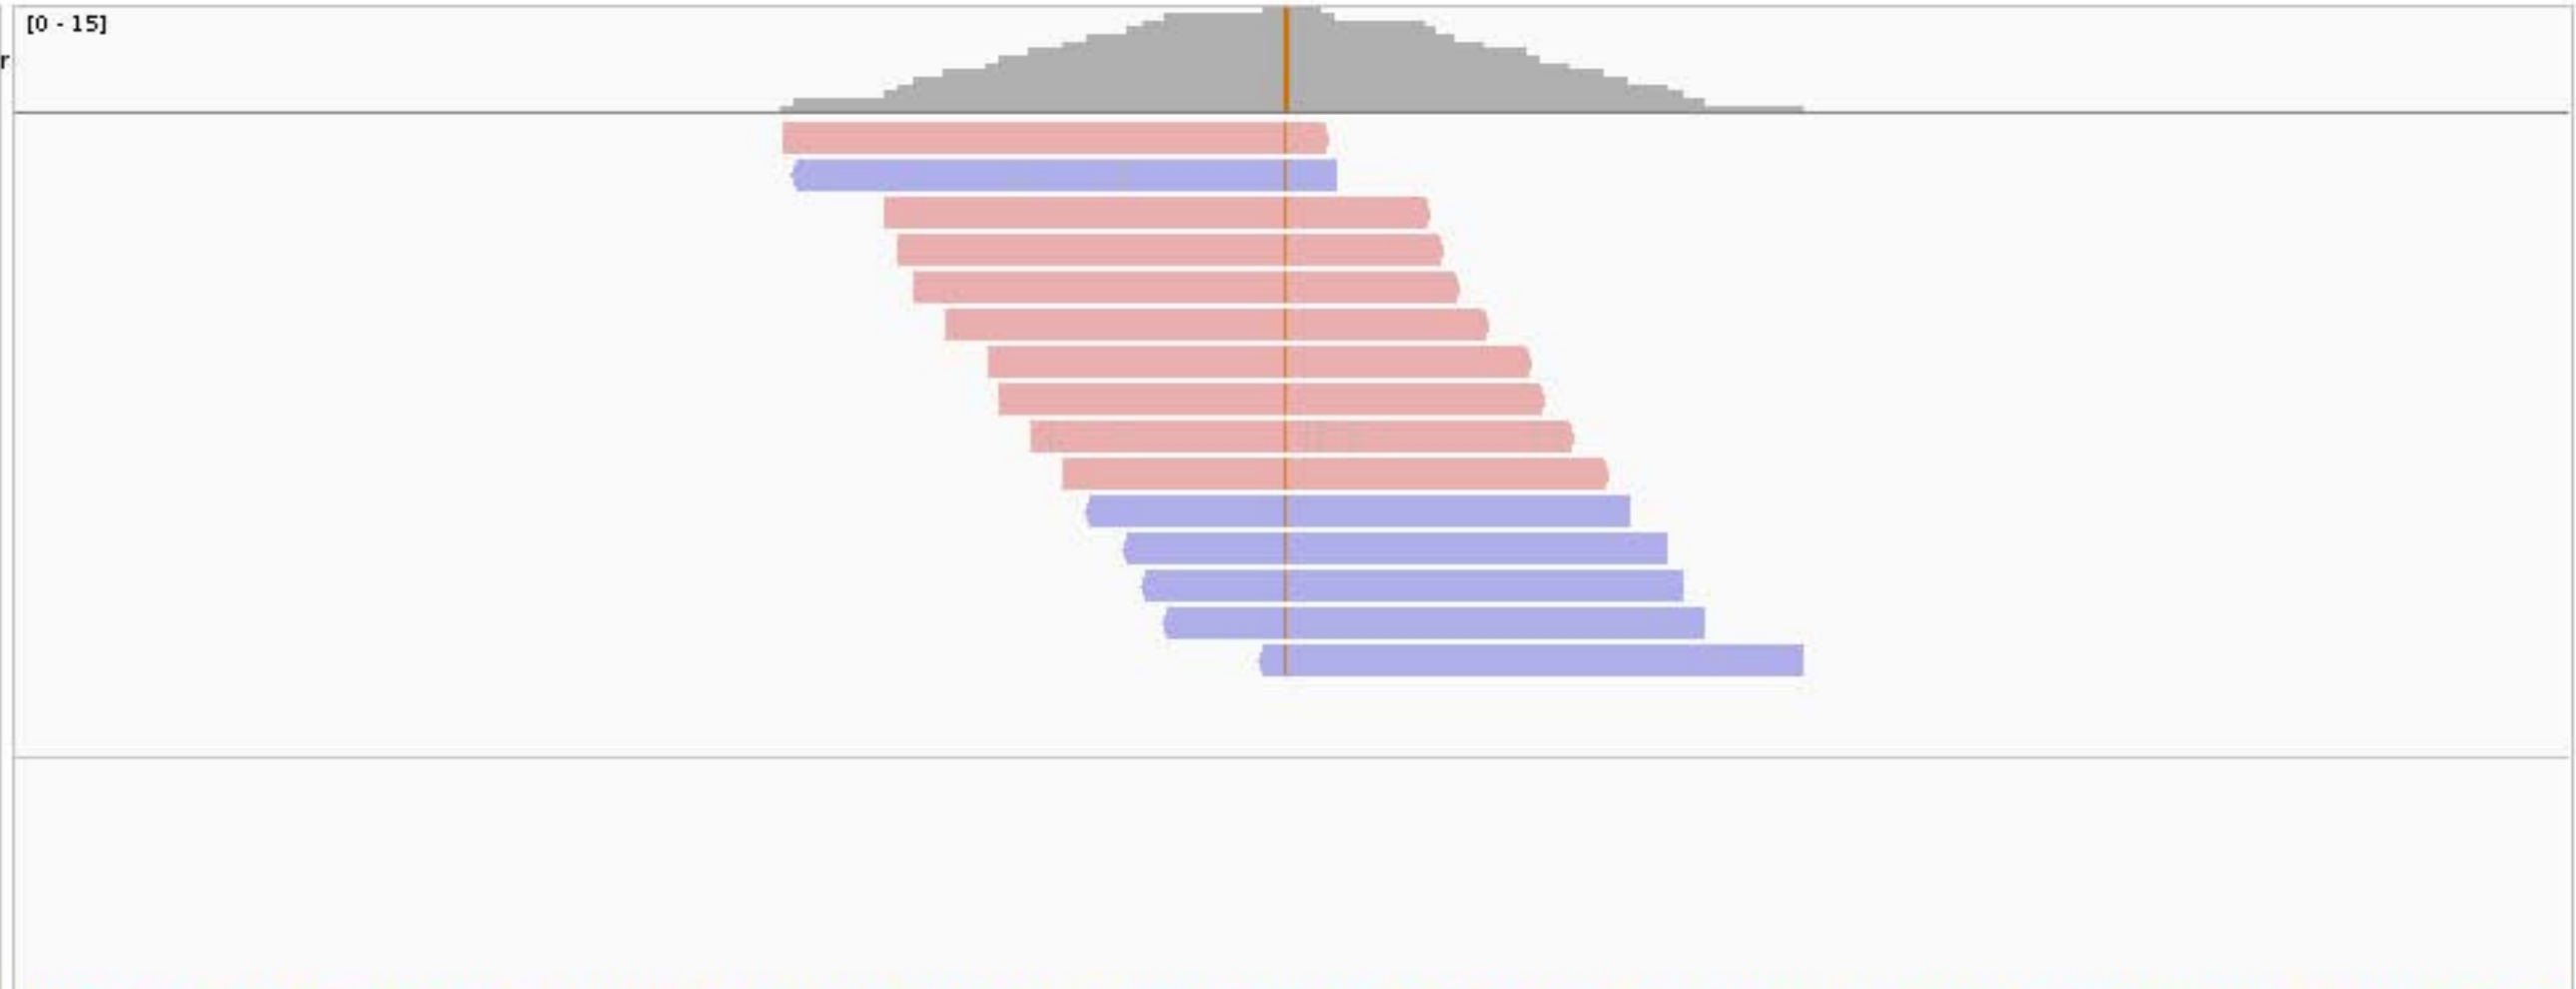

Sequence →

Refseq Genes







SL\_0005\_L\_FFPE\_6\_skin-B\_mut.hi  
Coverage

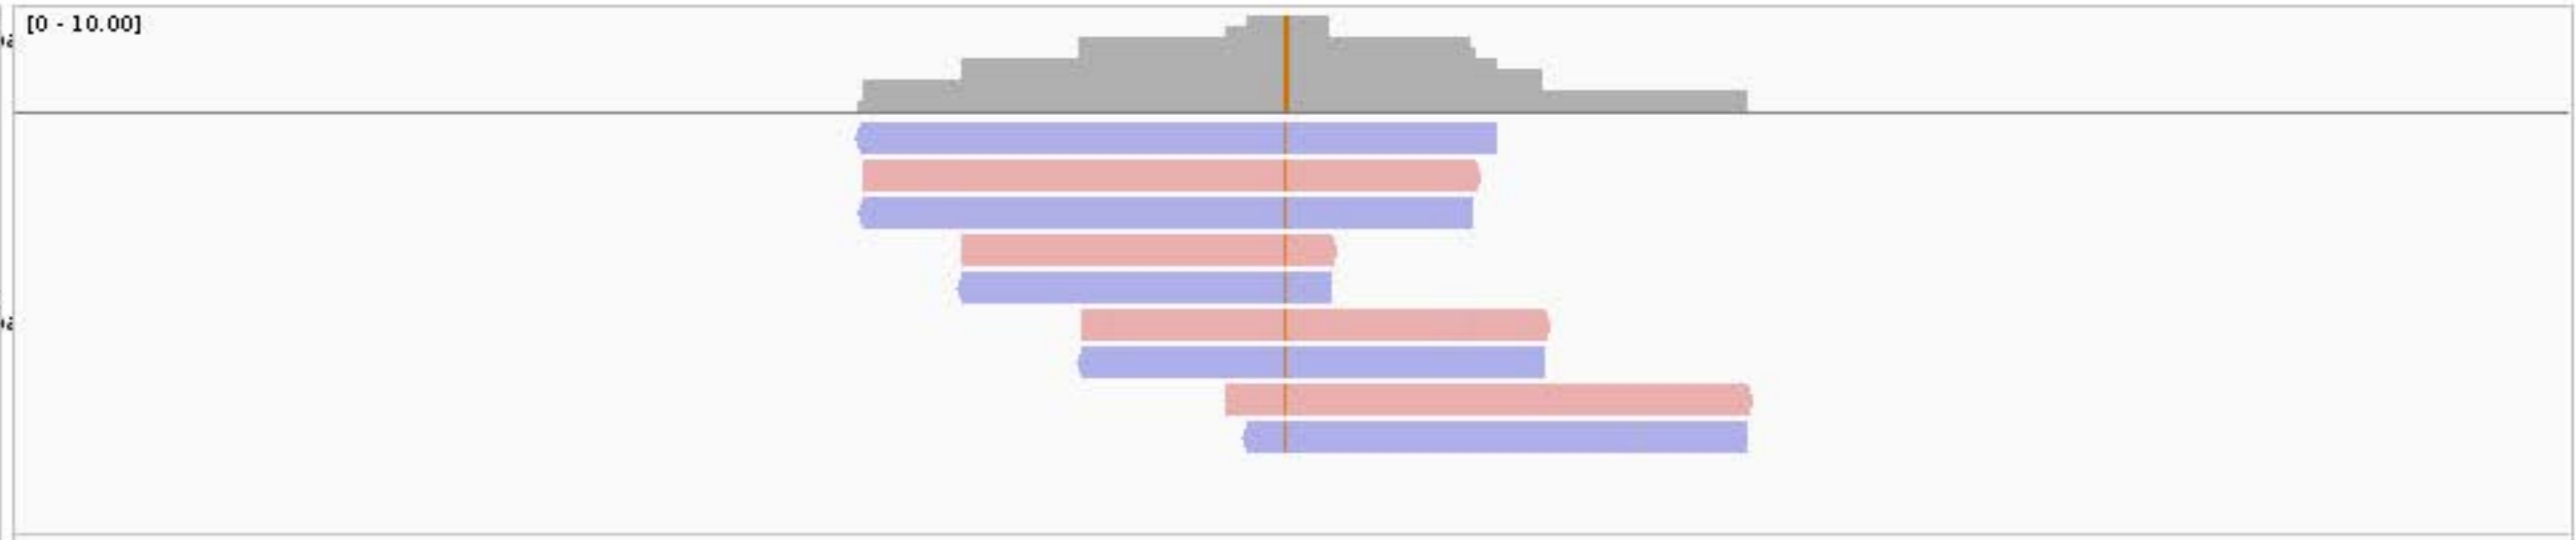

Sequence →  
Refseq Genes

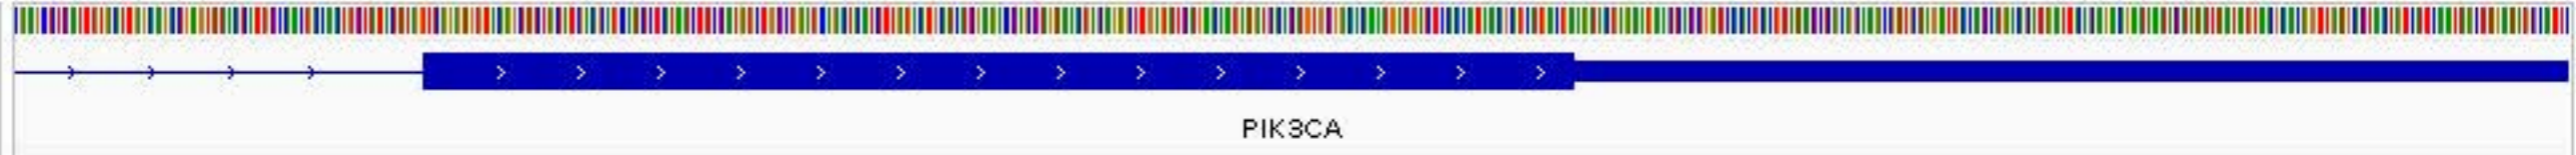



SL\_0005\_L\_FFPE\_38-B\_mut.bam  
rage

SL\_0005\_L\_FFPE\_38-B\_mut.ba  
m

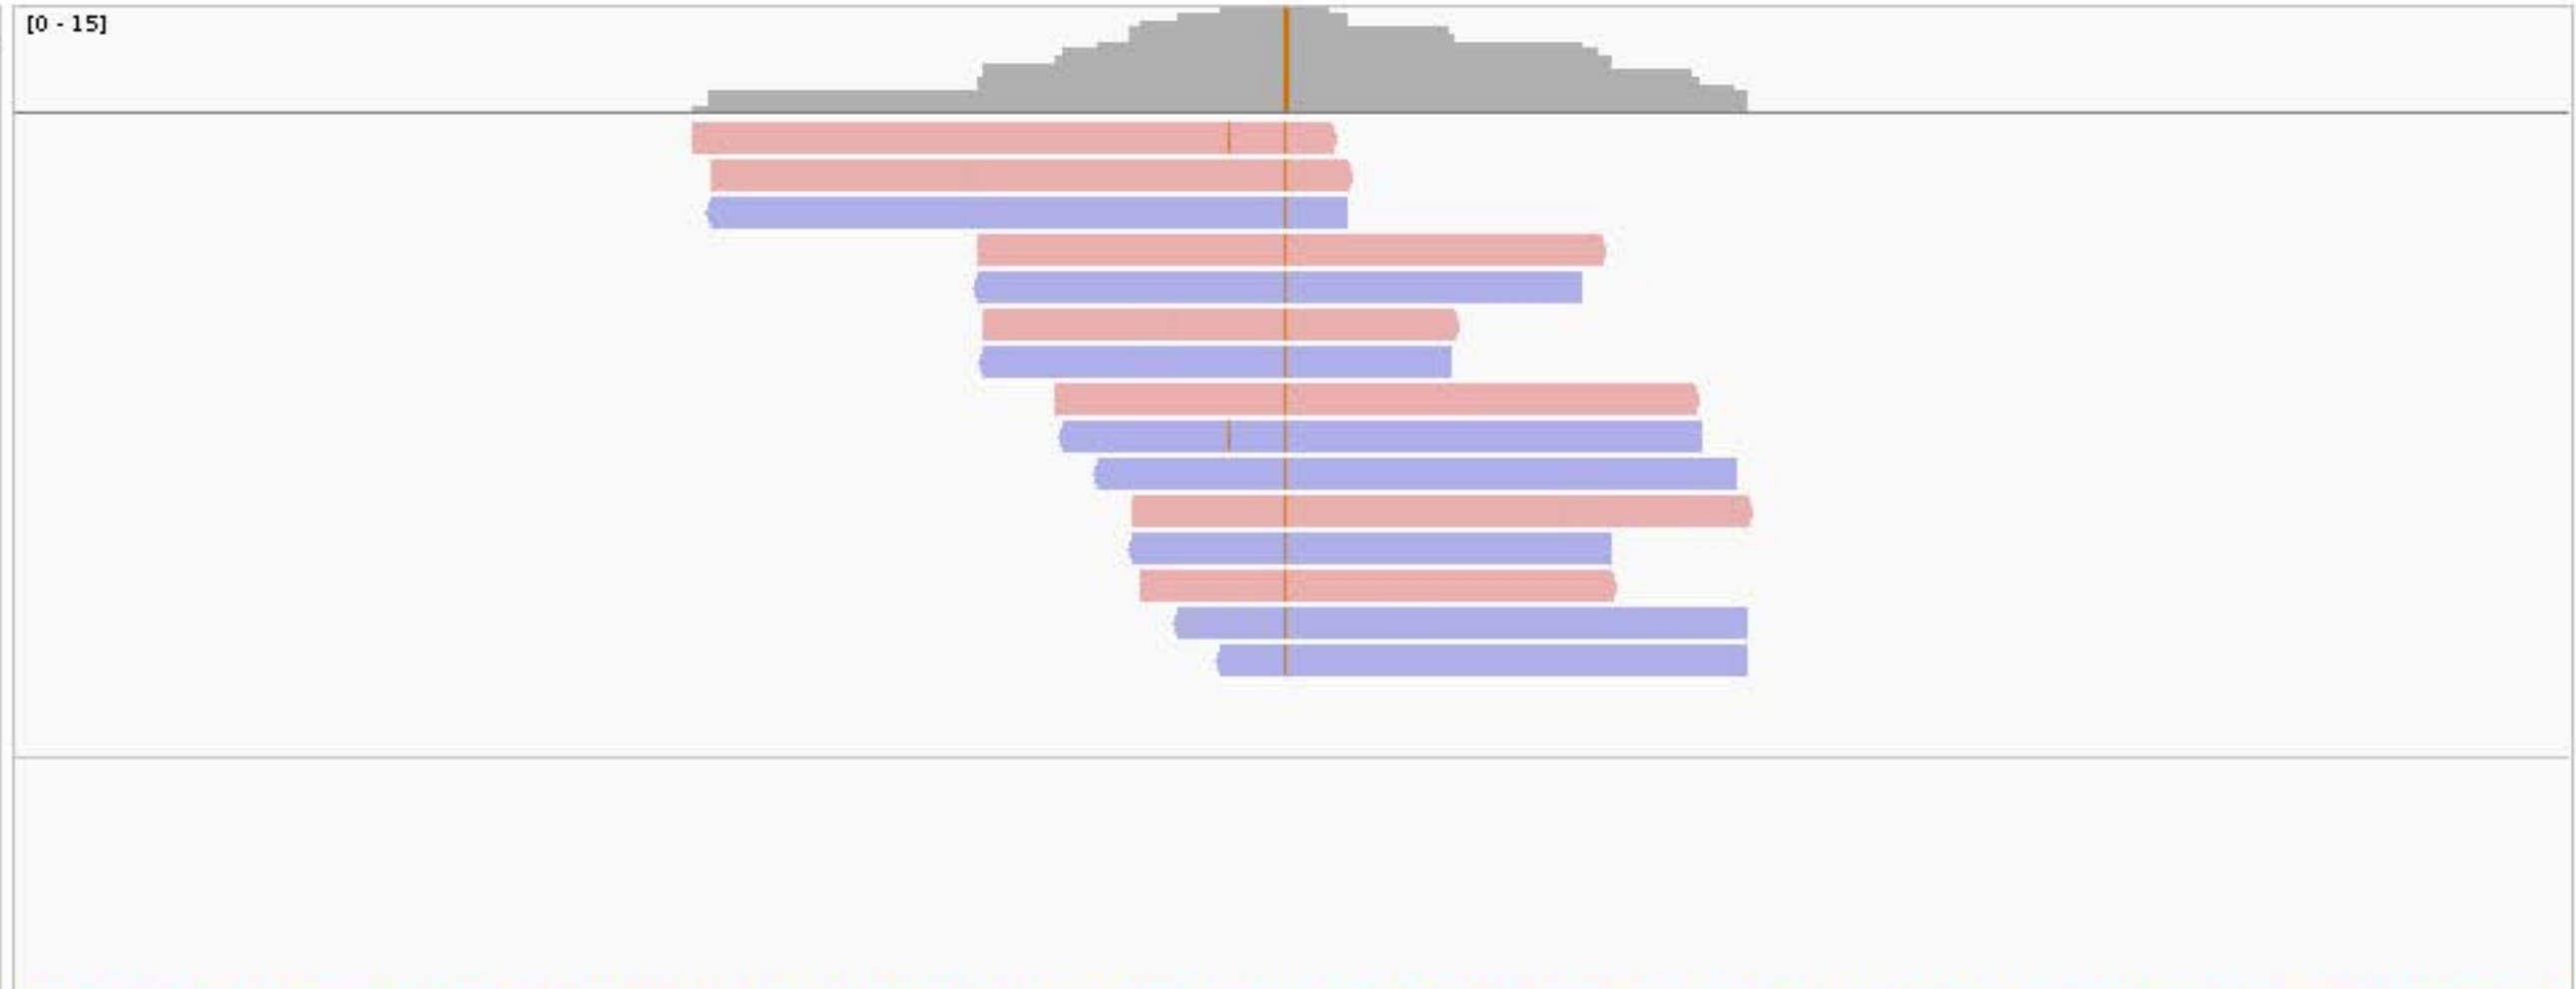

Sequence →

Refseq Genes





SL\_0005\_R\_FFPE\_78-B\_mut.bam  
range

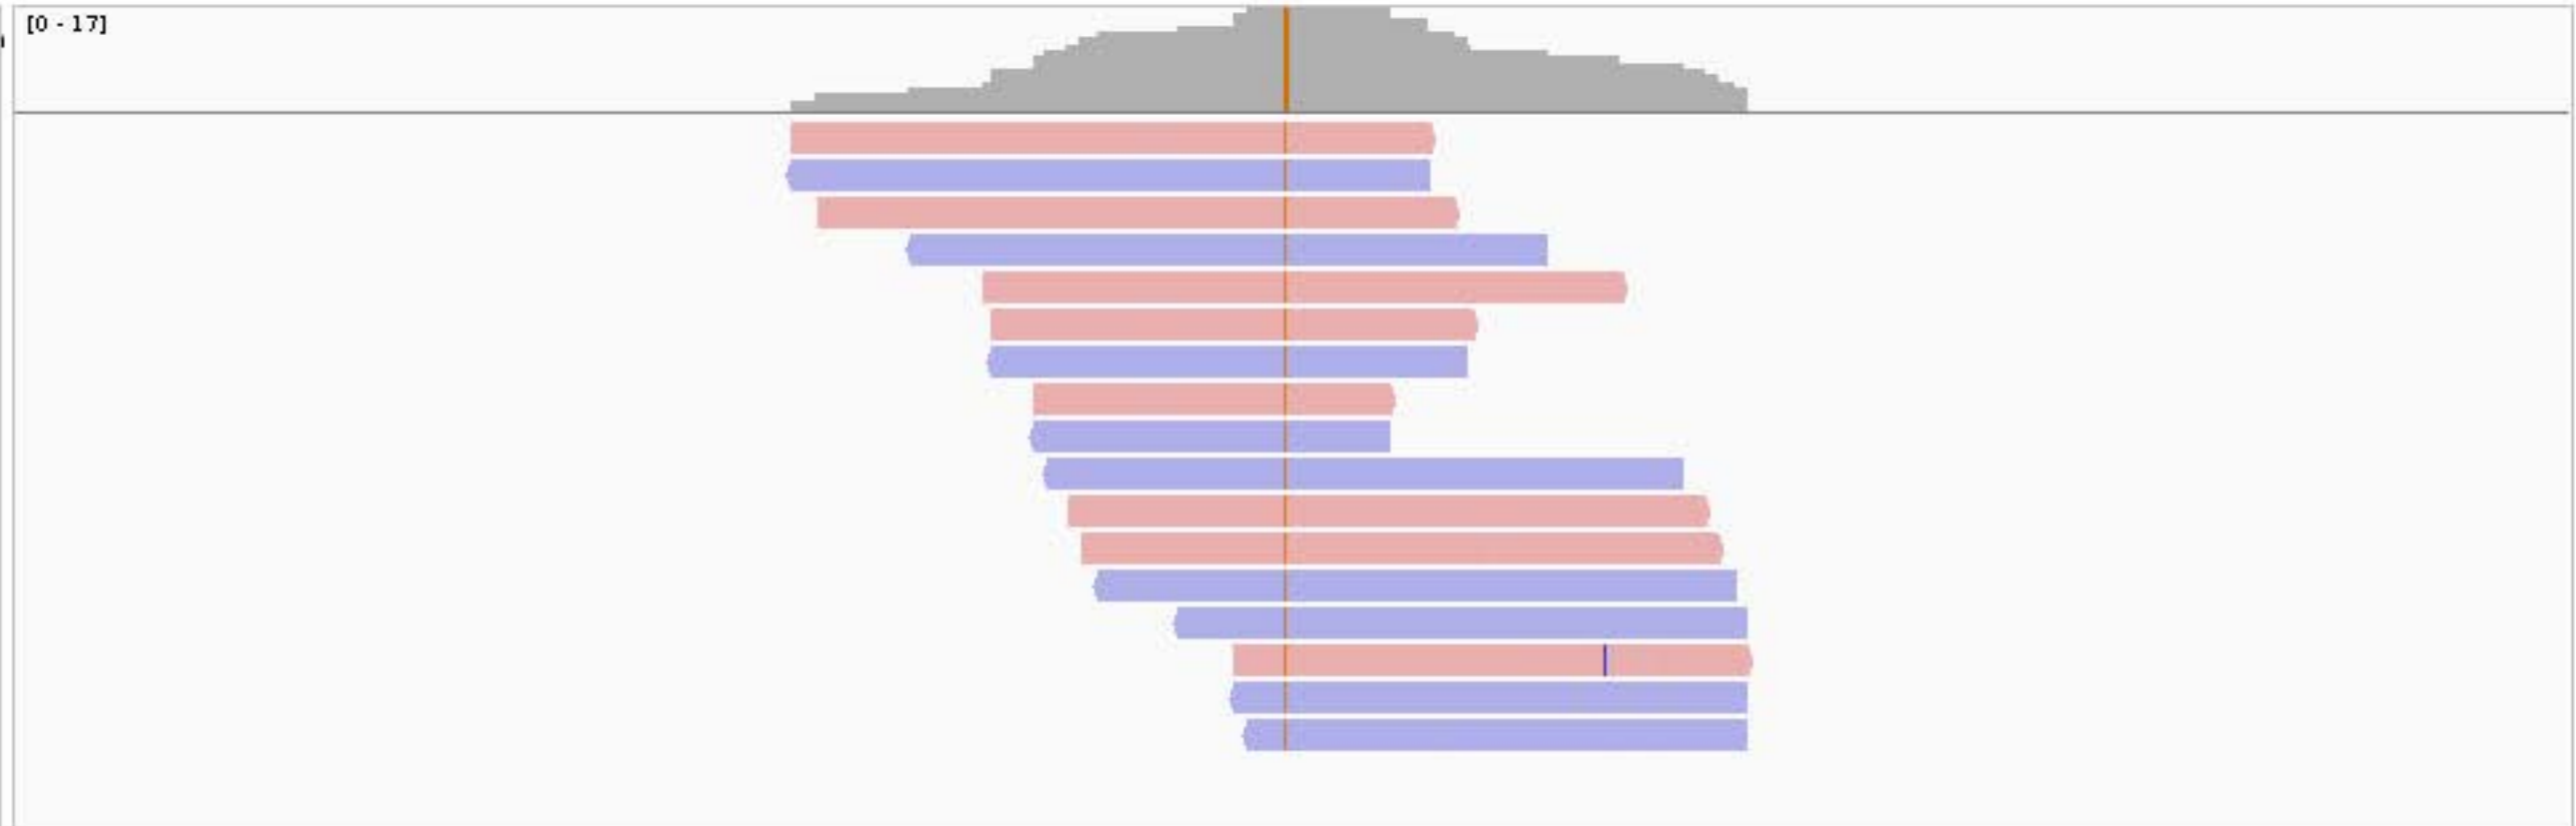

SL\_0005\_R\_FFPE\_78-B\_mut.bam

Sequence →

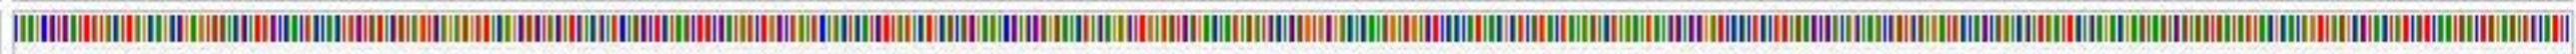

Refseq Genes

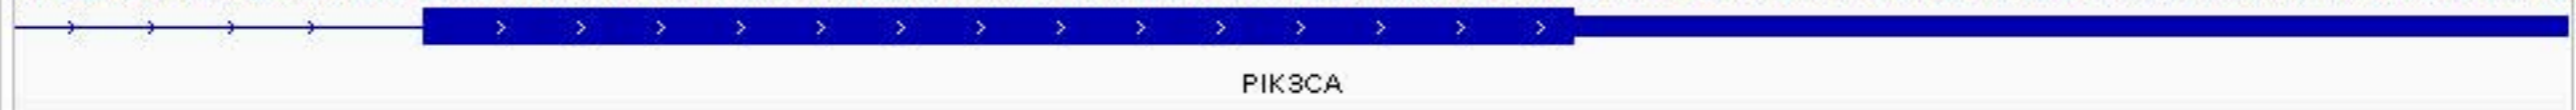



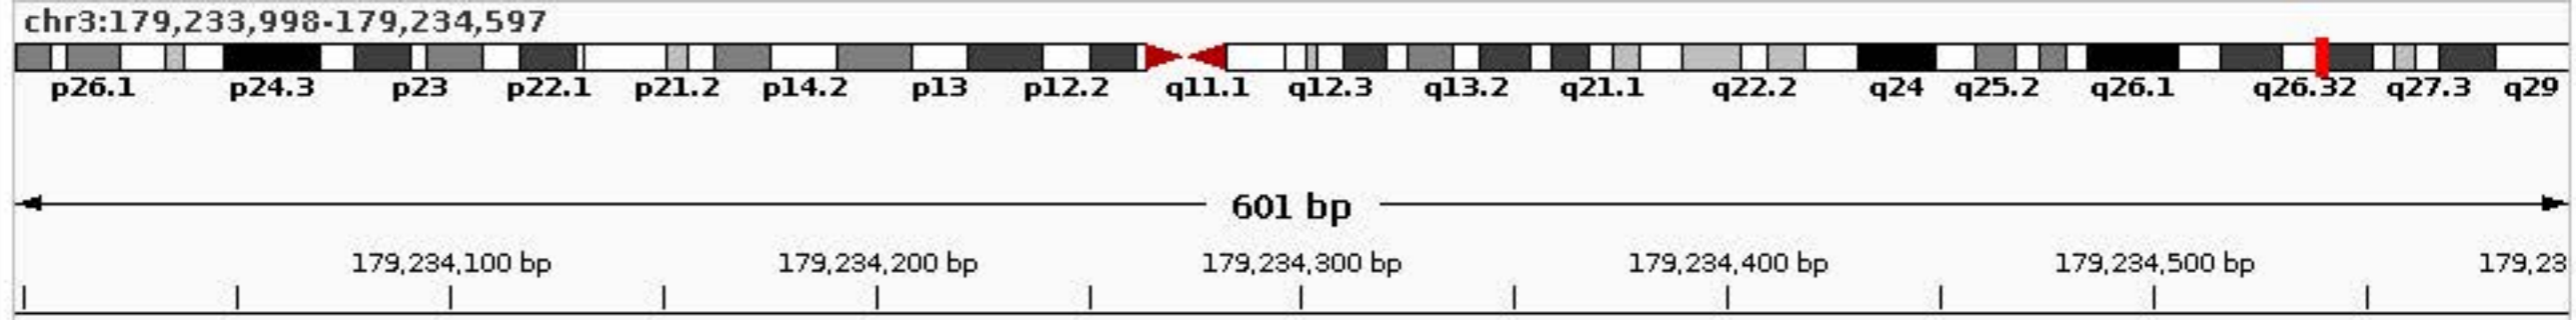

SL\_0006\_R\_FFPE\_21-B\_mut.bam  
rage

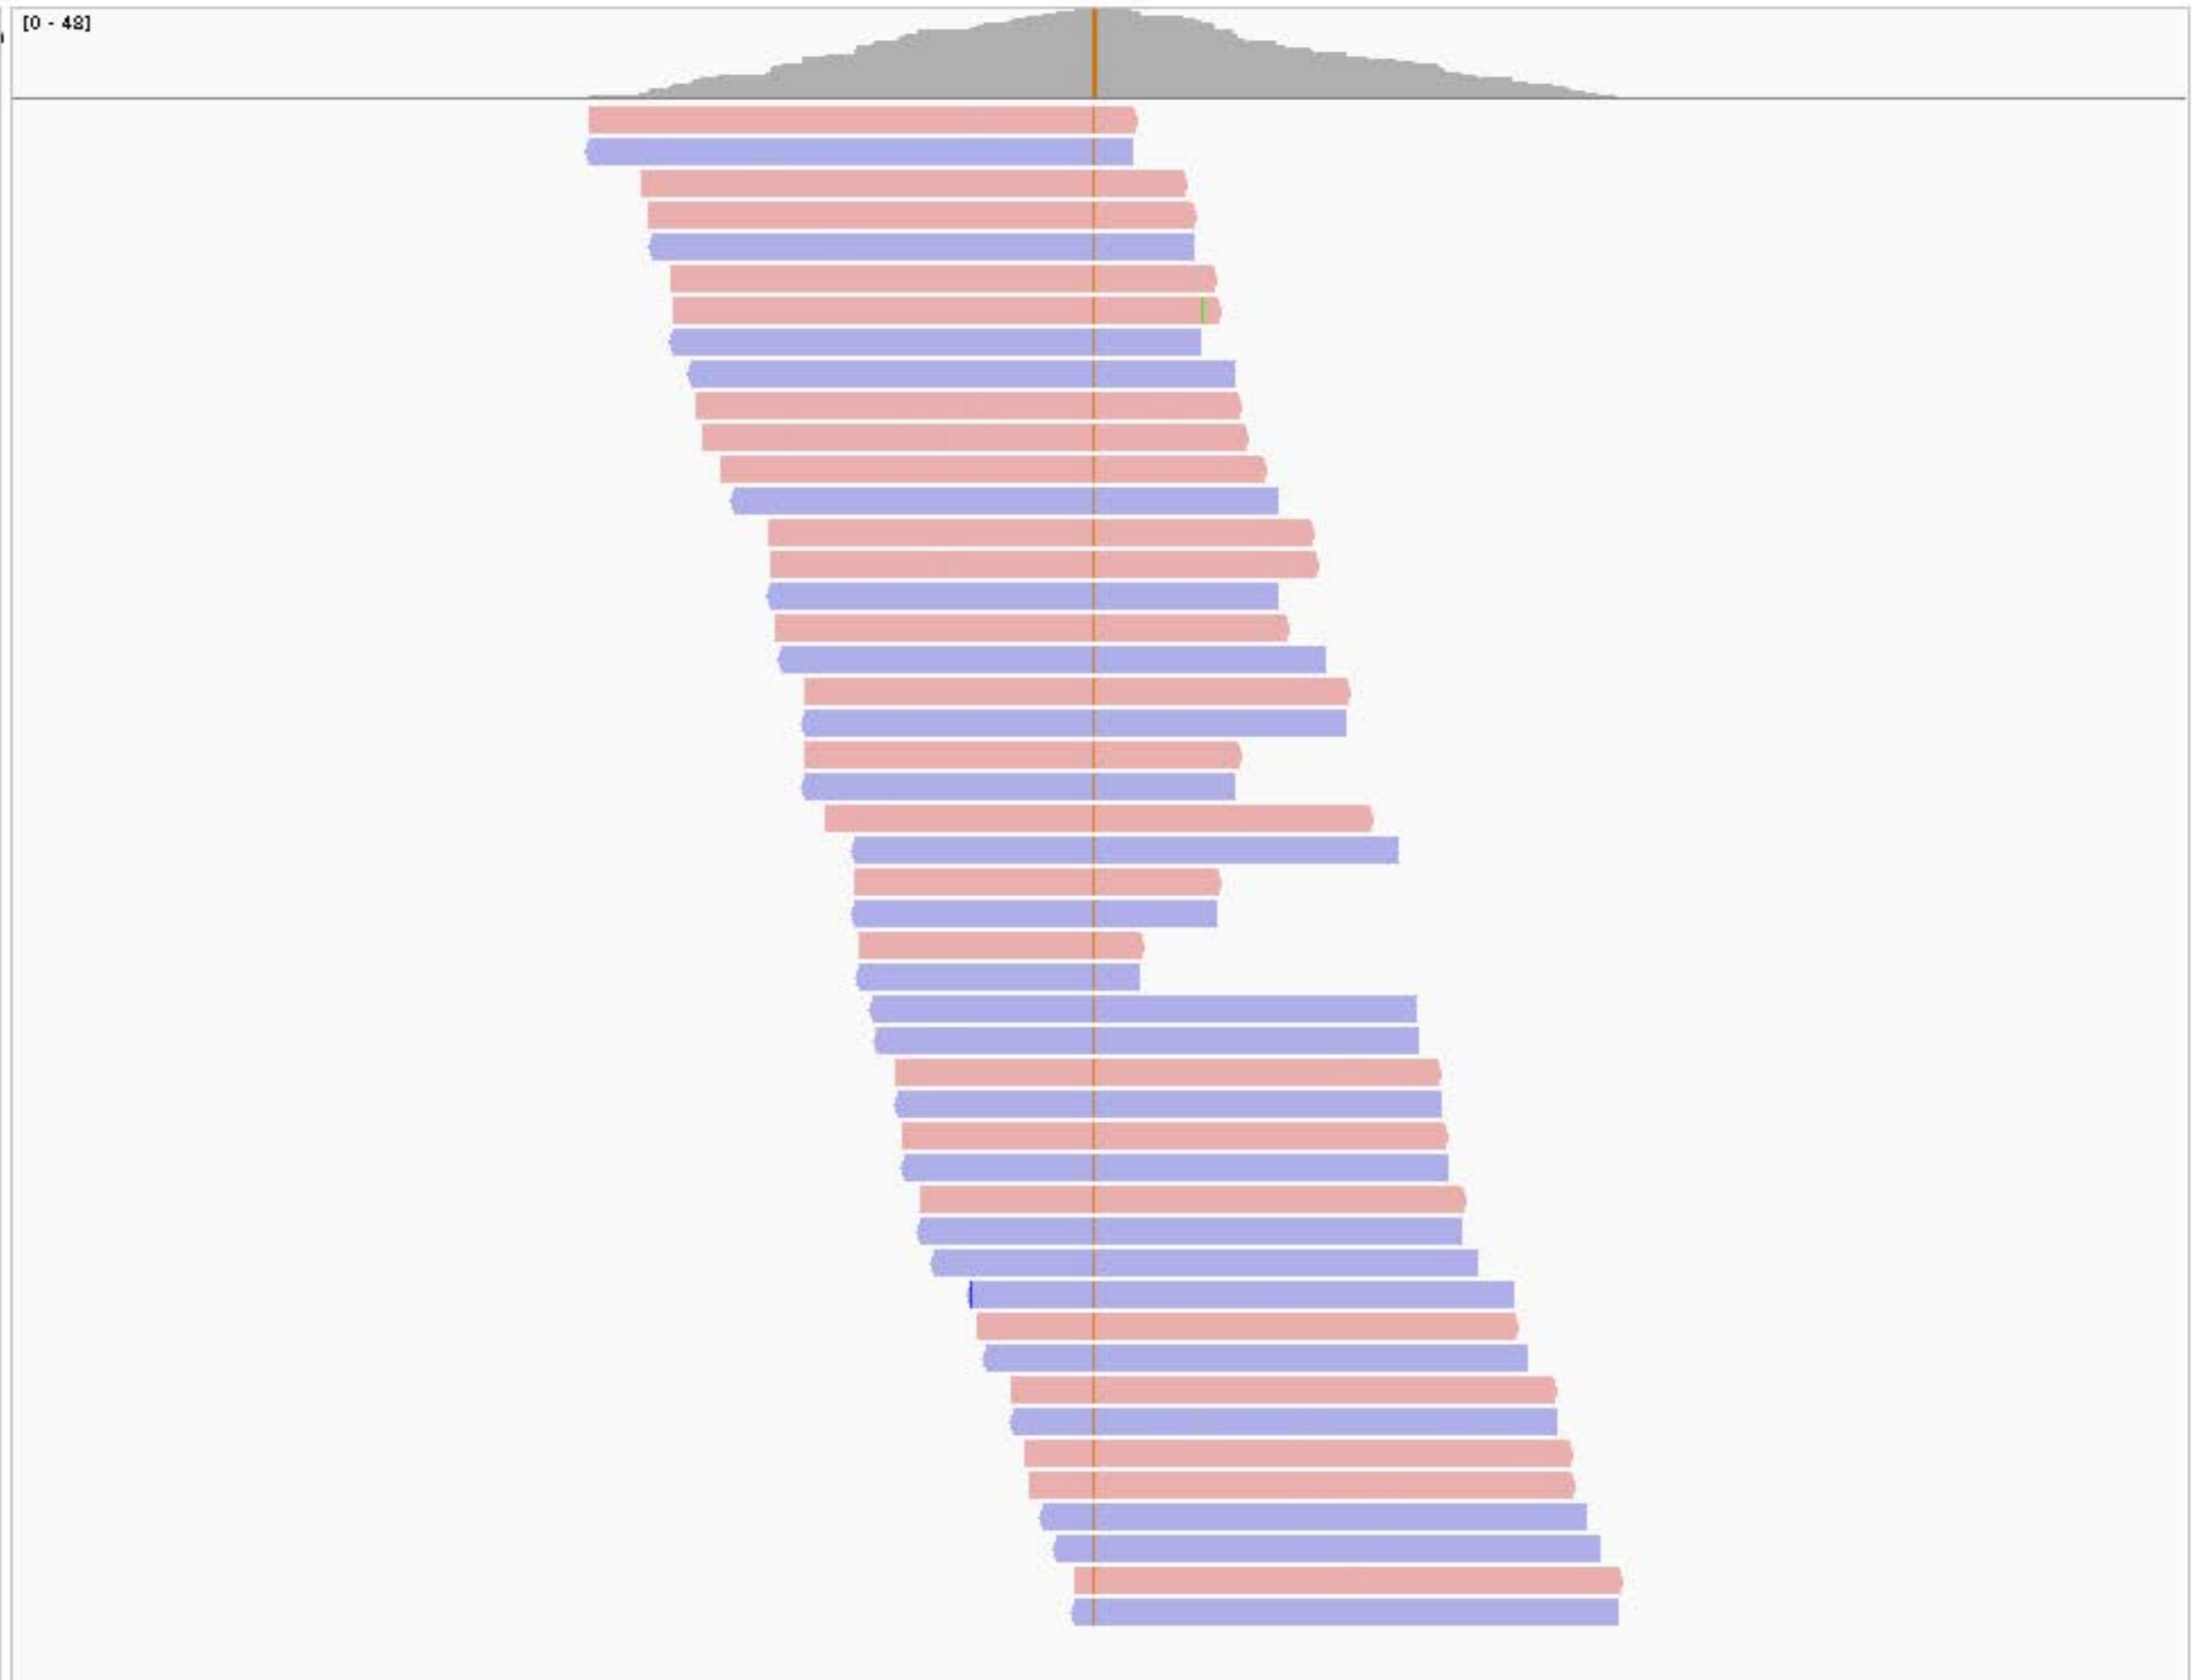

Sequence →  
Refseq Genes

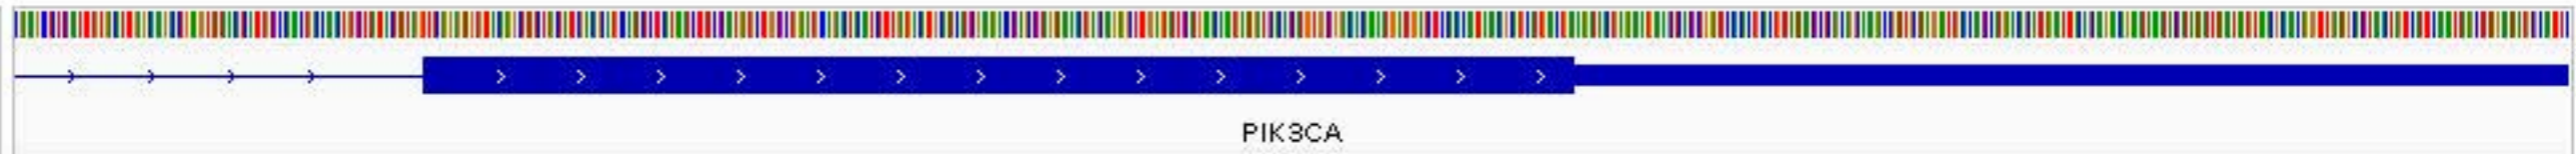



SL\_0007\_LT\_9-B\_mut.bam Coverage

SL\_0007\_LT\_9-B\_mut.bam

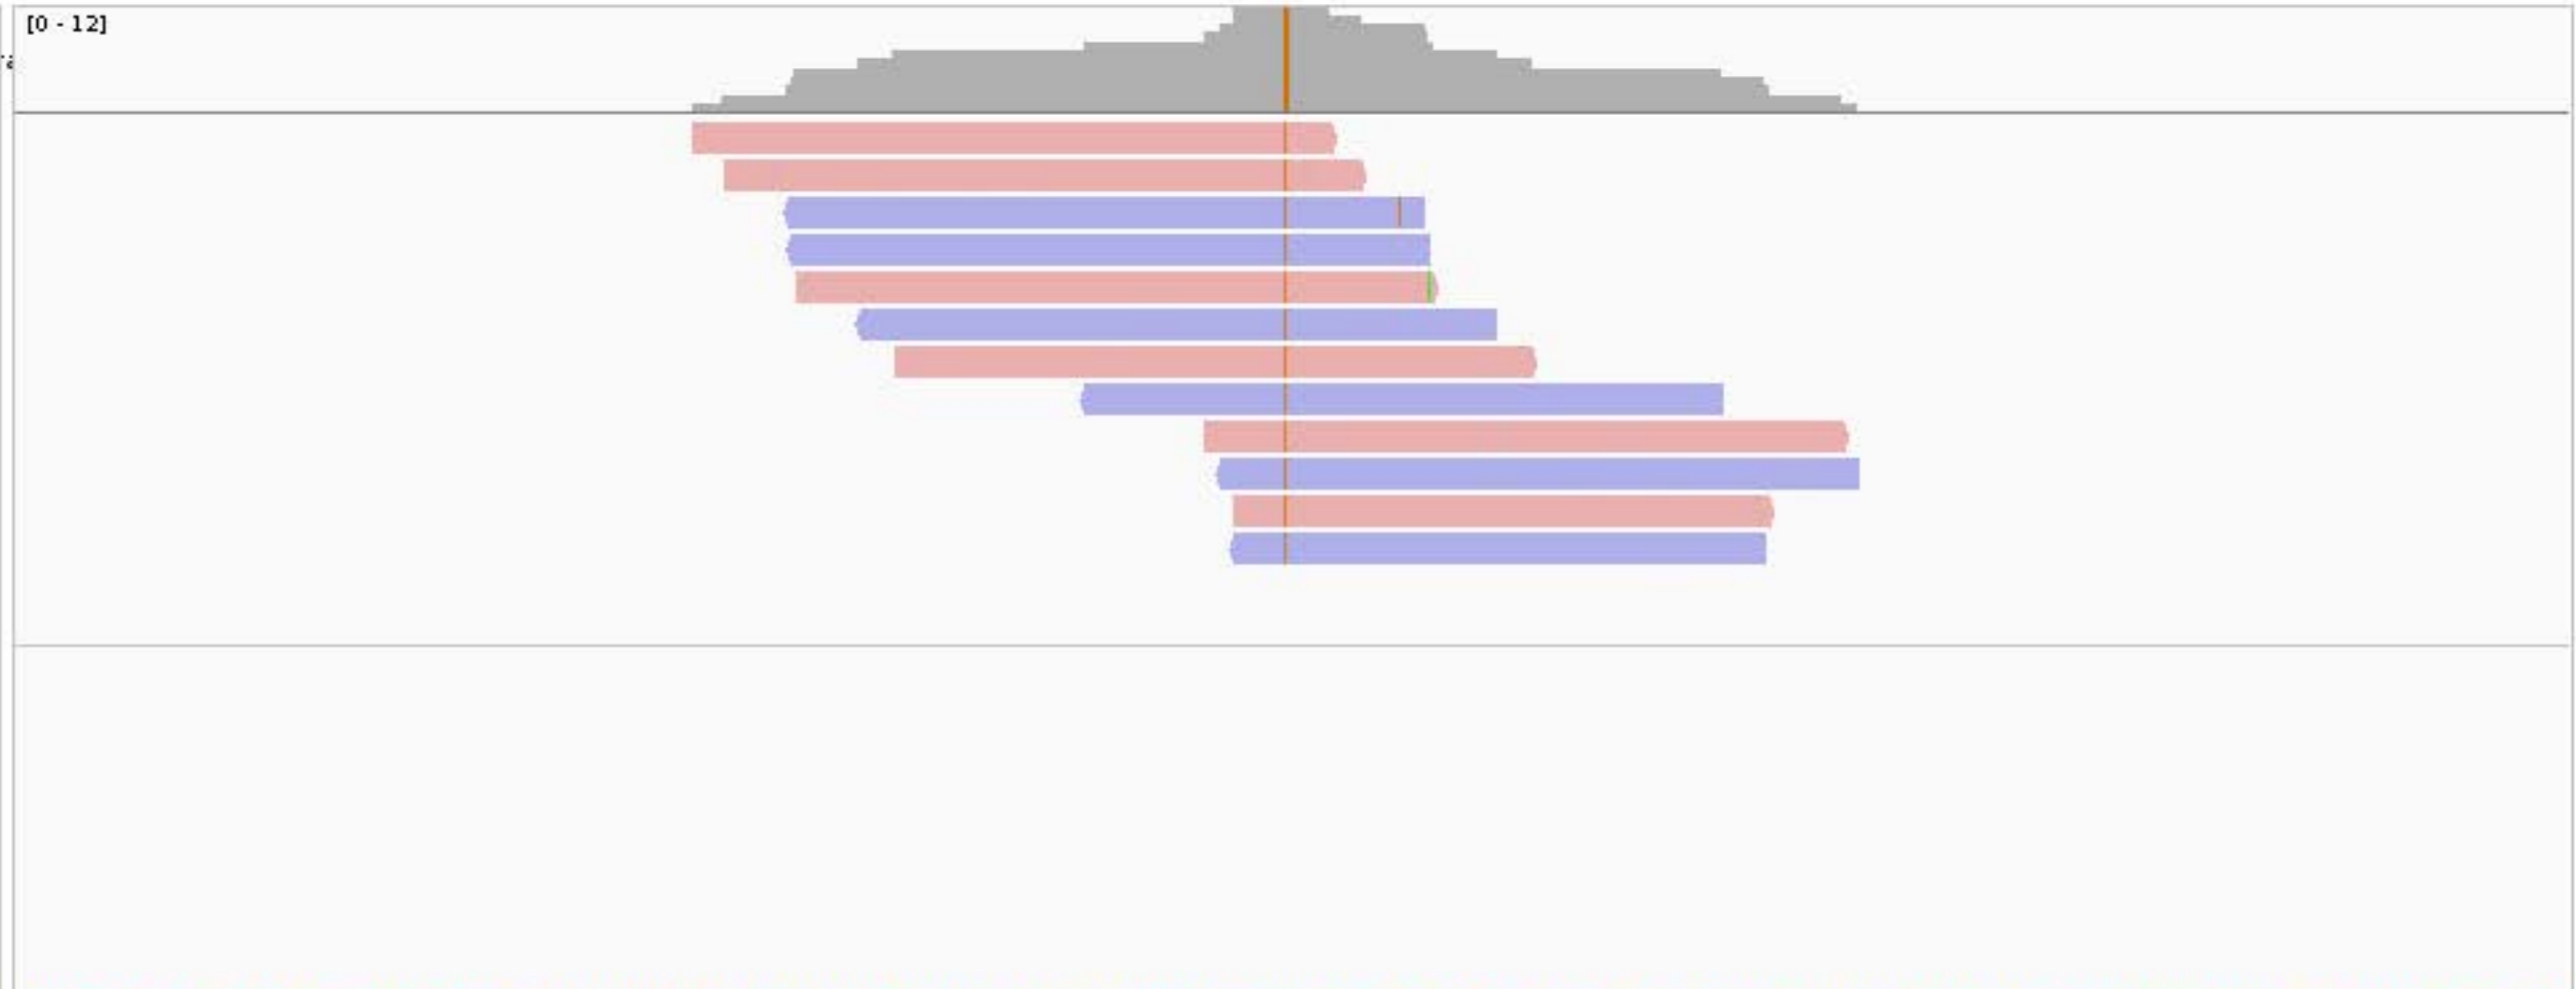

Sequence →

Refseq Genes



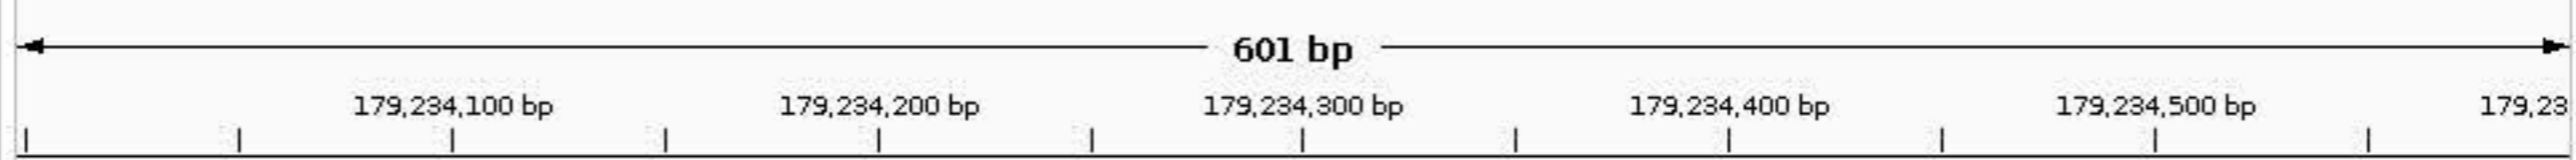

SL\_0007\_R\_FFPE\_67-B\_mut.bam  
rage

SL\_0007\_R\_FFPE\_67-B\_mut.ba  
m

Sequence →

Refseq Genes

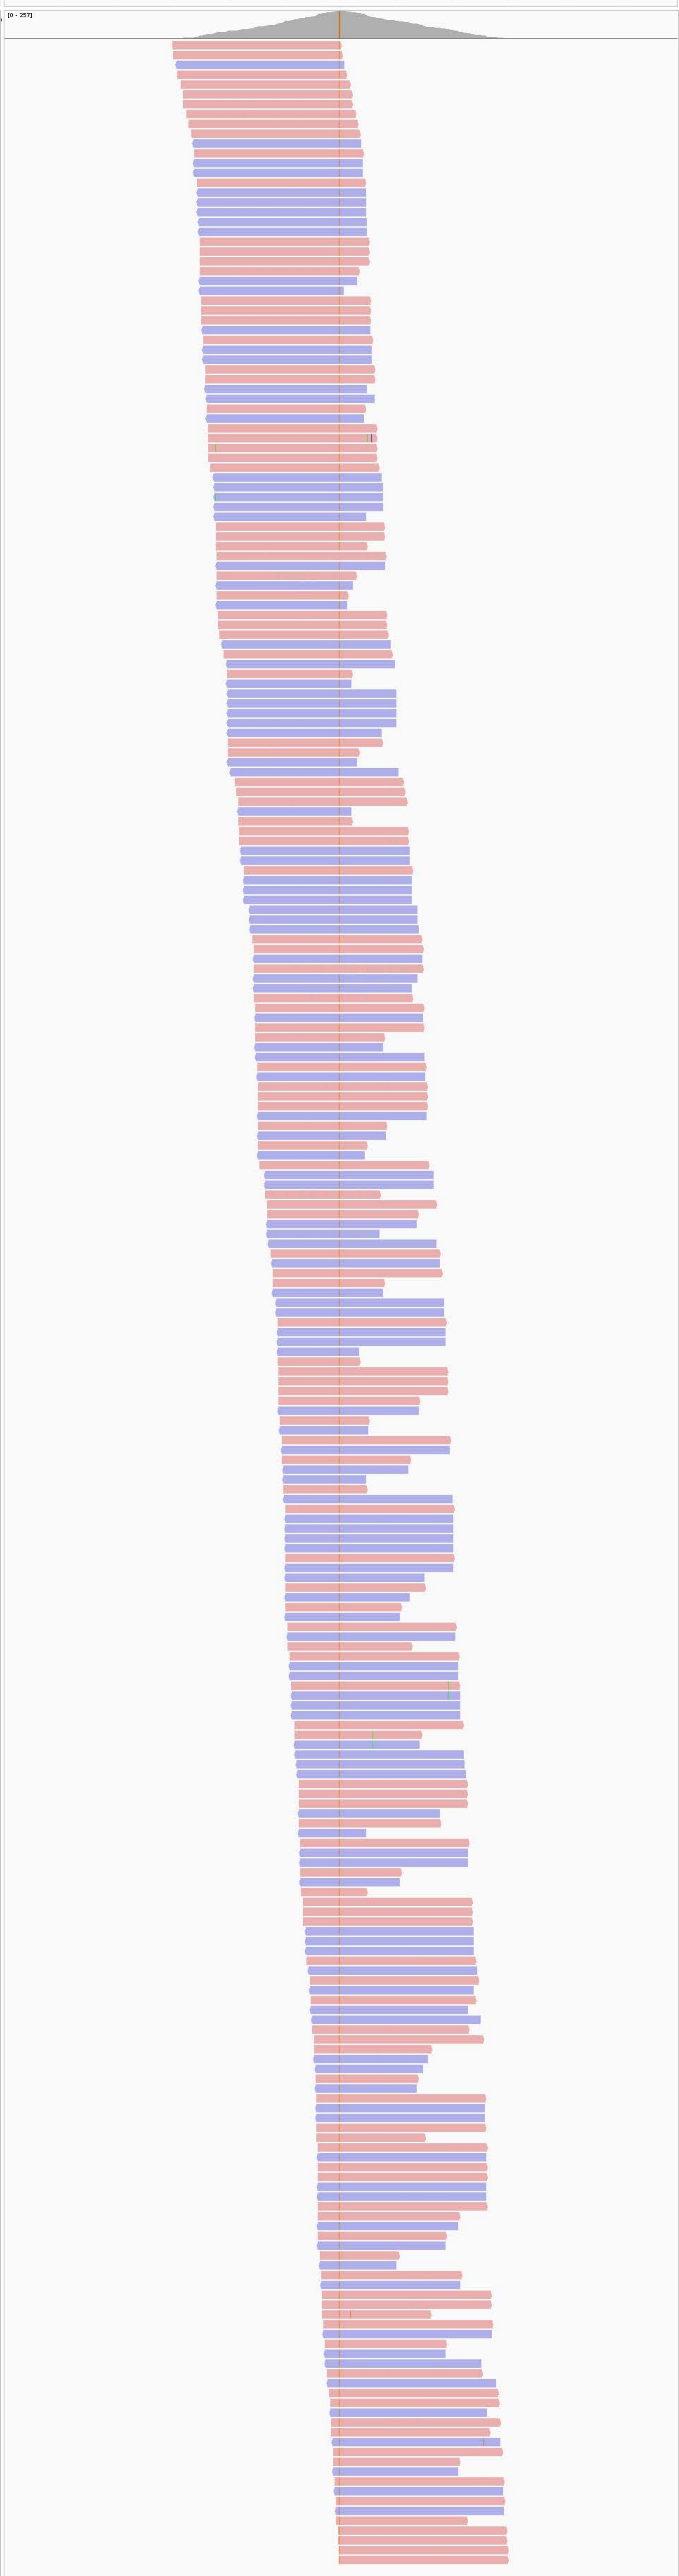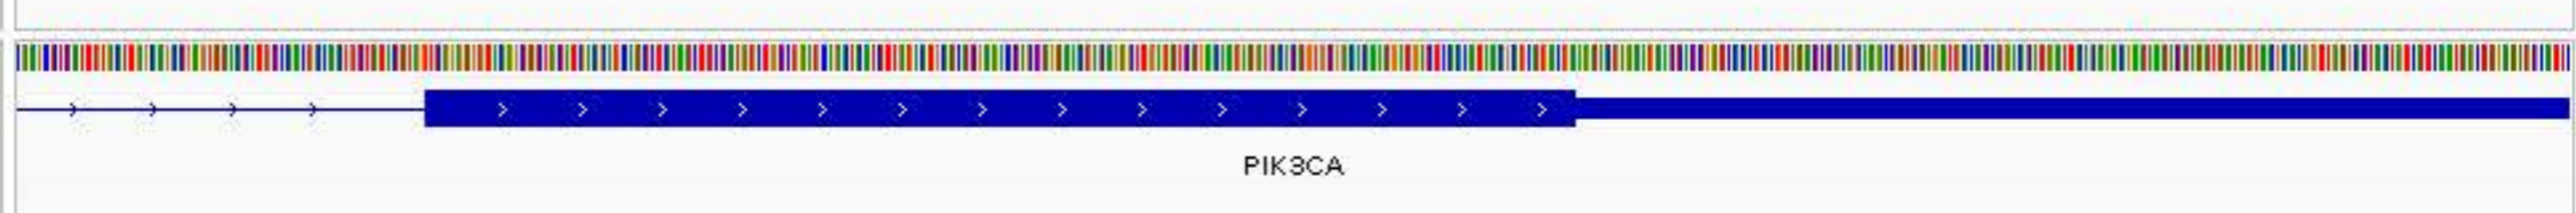



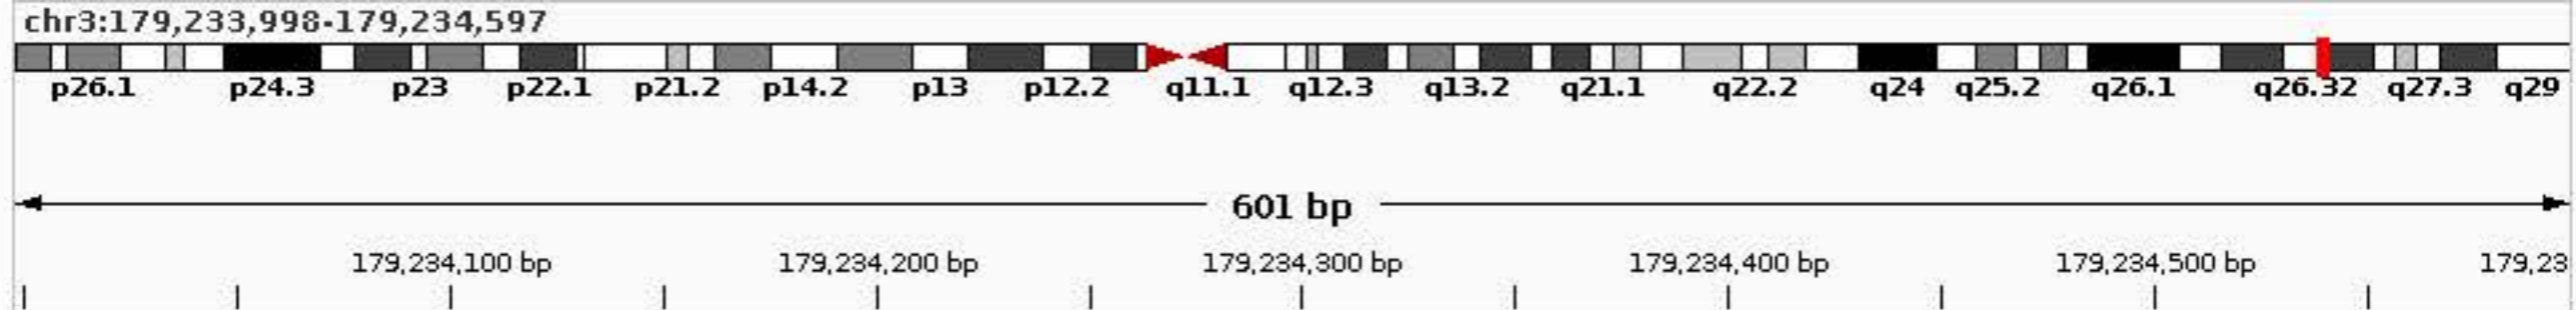

SL\_0008\_LT\_8-B\_mut.bam Coverage

SL\_0008\_LT\_8-B\_mut.bam

Sequence

Refseq Genes

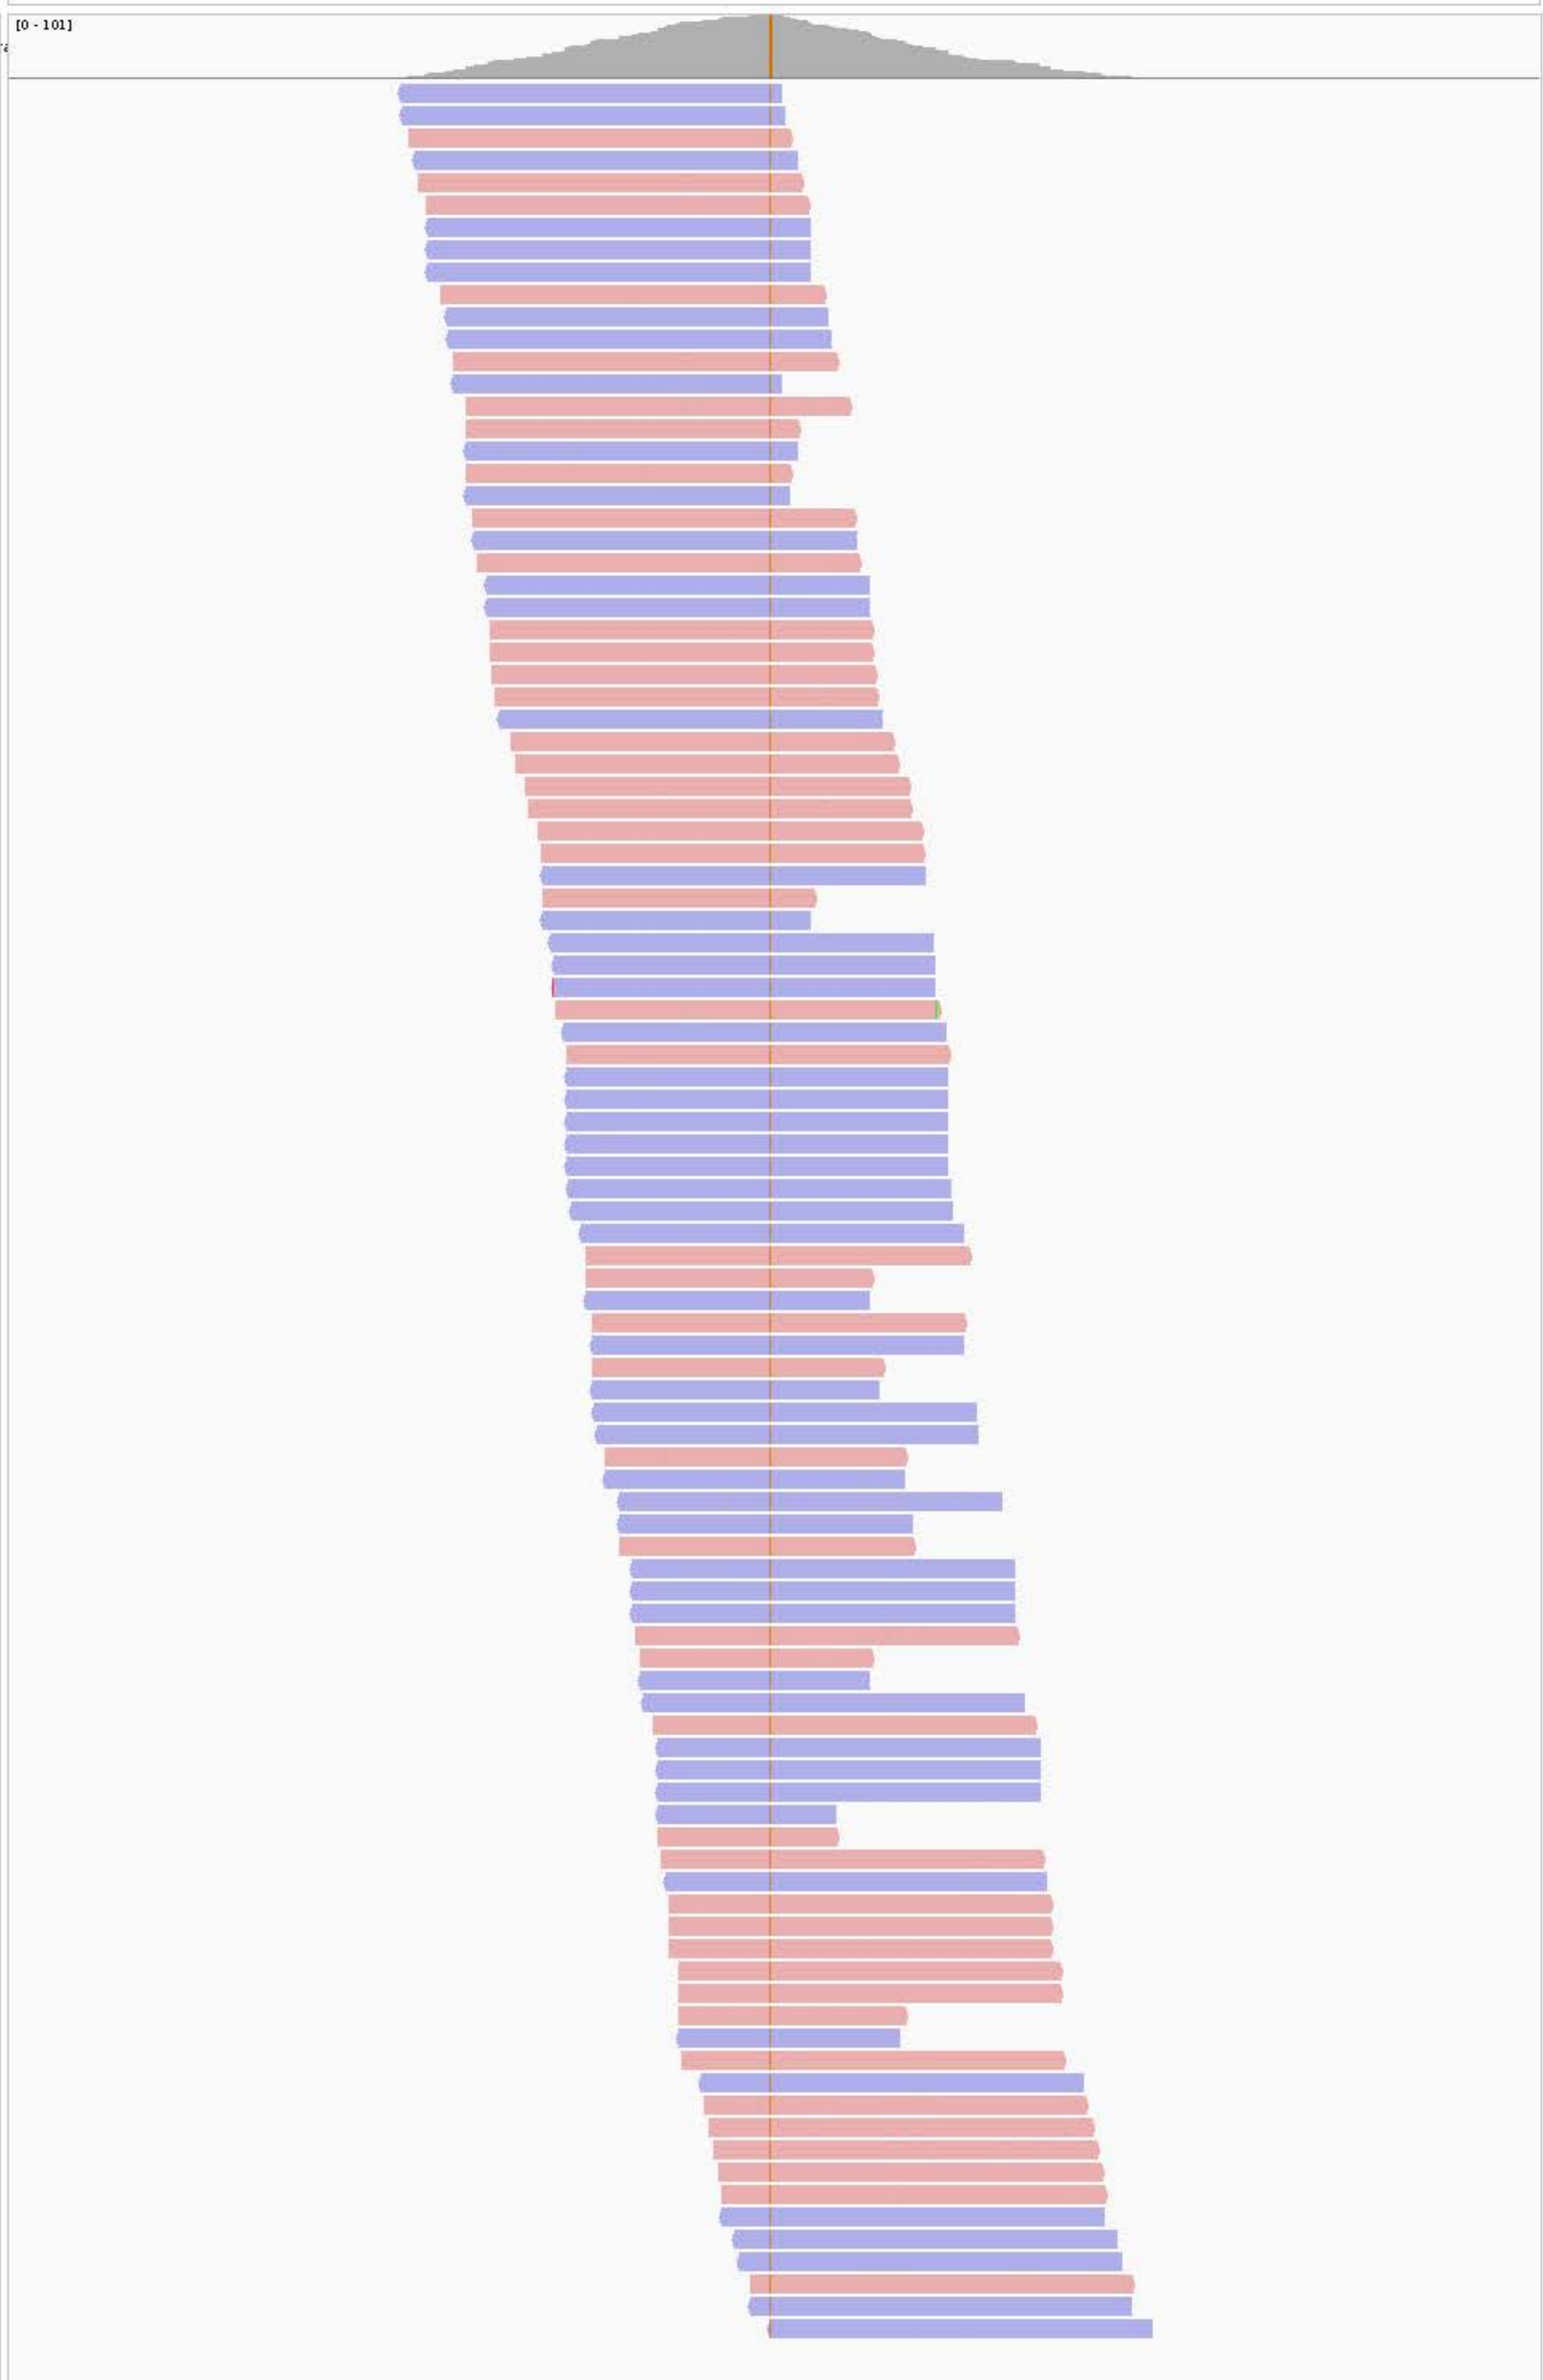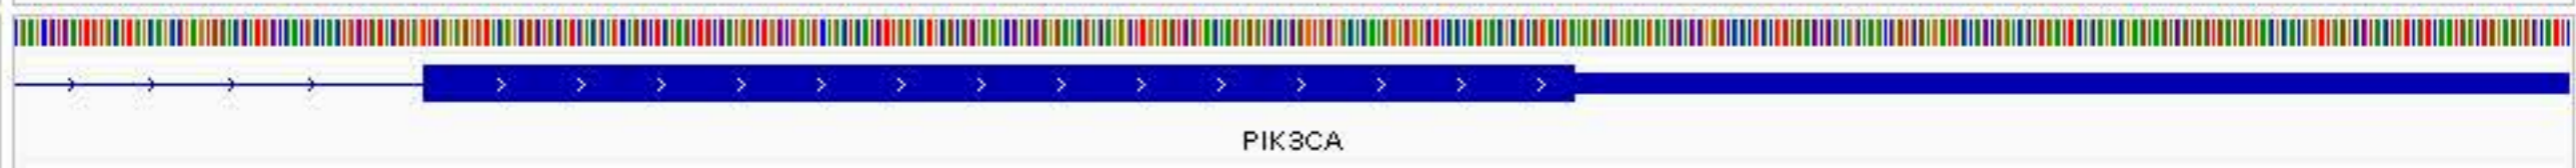

chr3:179,233,998-179,234,597

p26.1 p24.3 p23 p22.1 p21.2 p14.2 p13 p12.2 q11.1 q12.3 q13.2 q21.1 q22.2 q24 q25.2 q26.1 q26.32 q27.3 q29

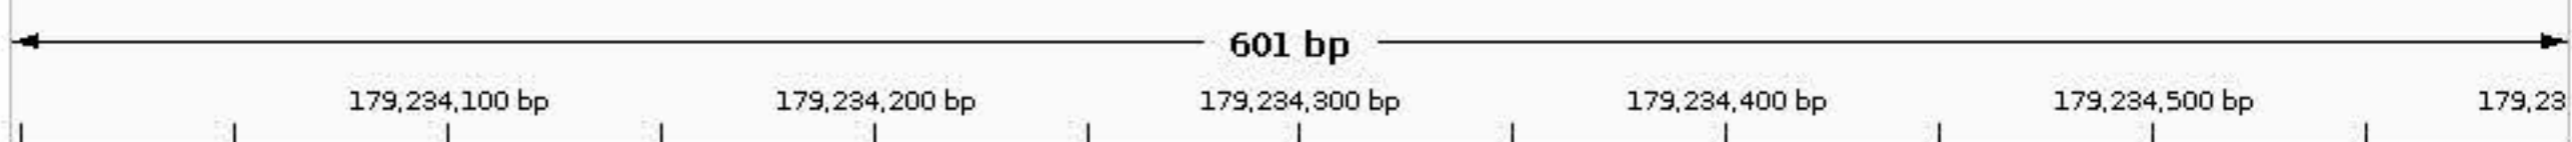

SL\_0008-LT\_15-B\_mut.bam Coverage

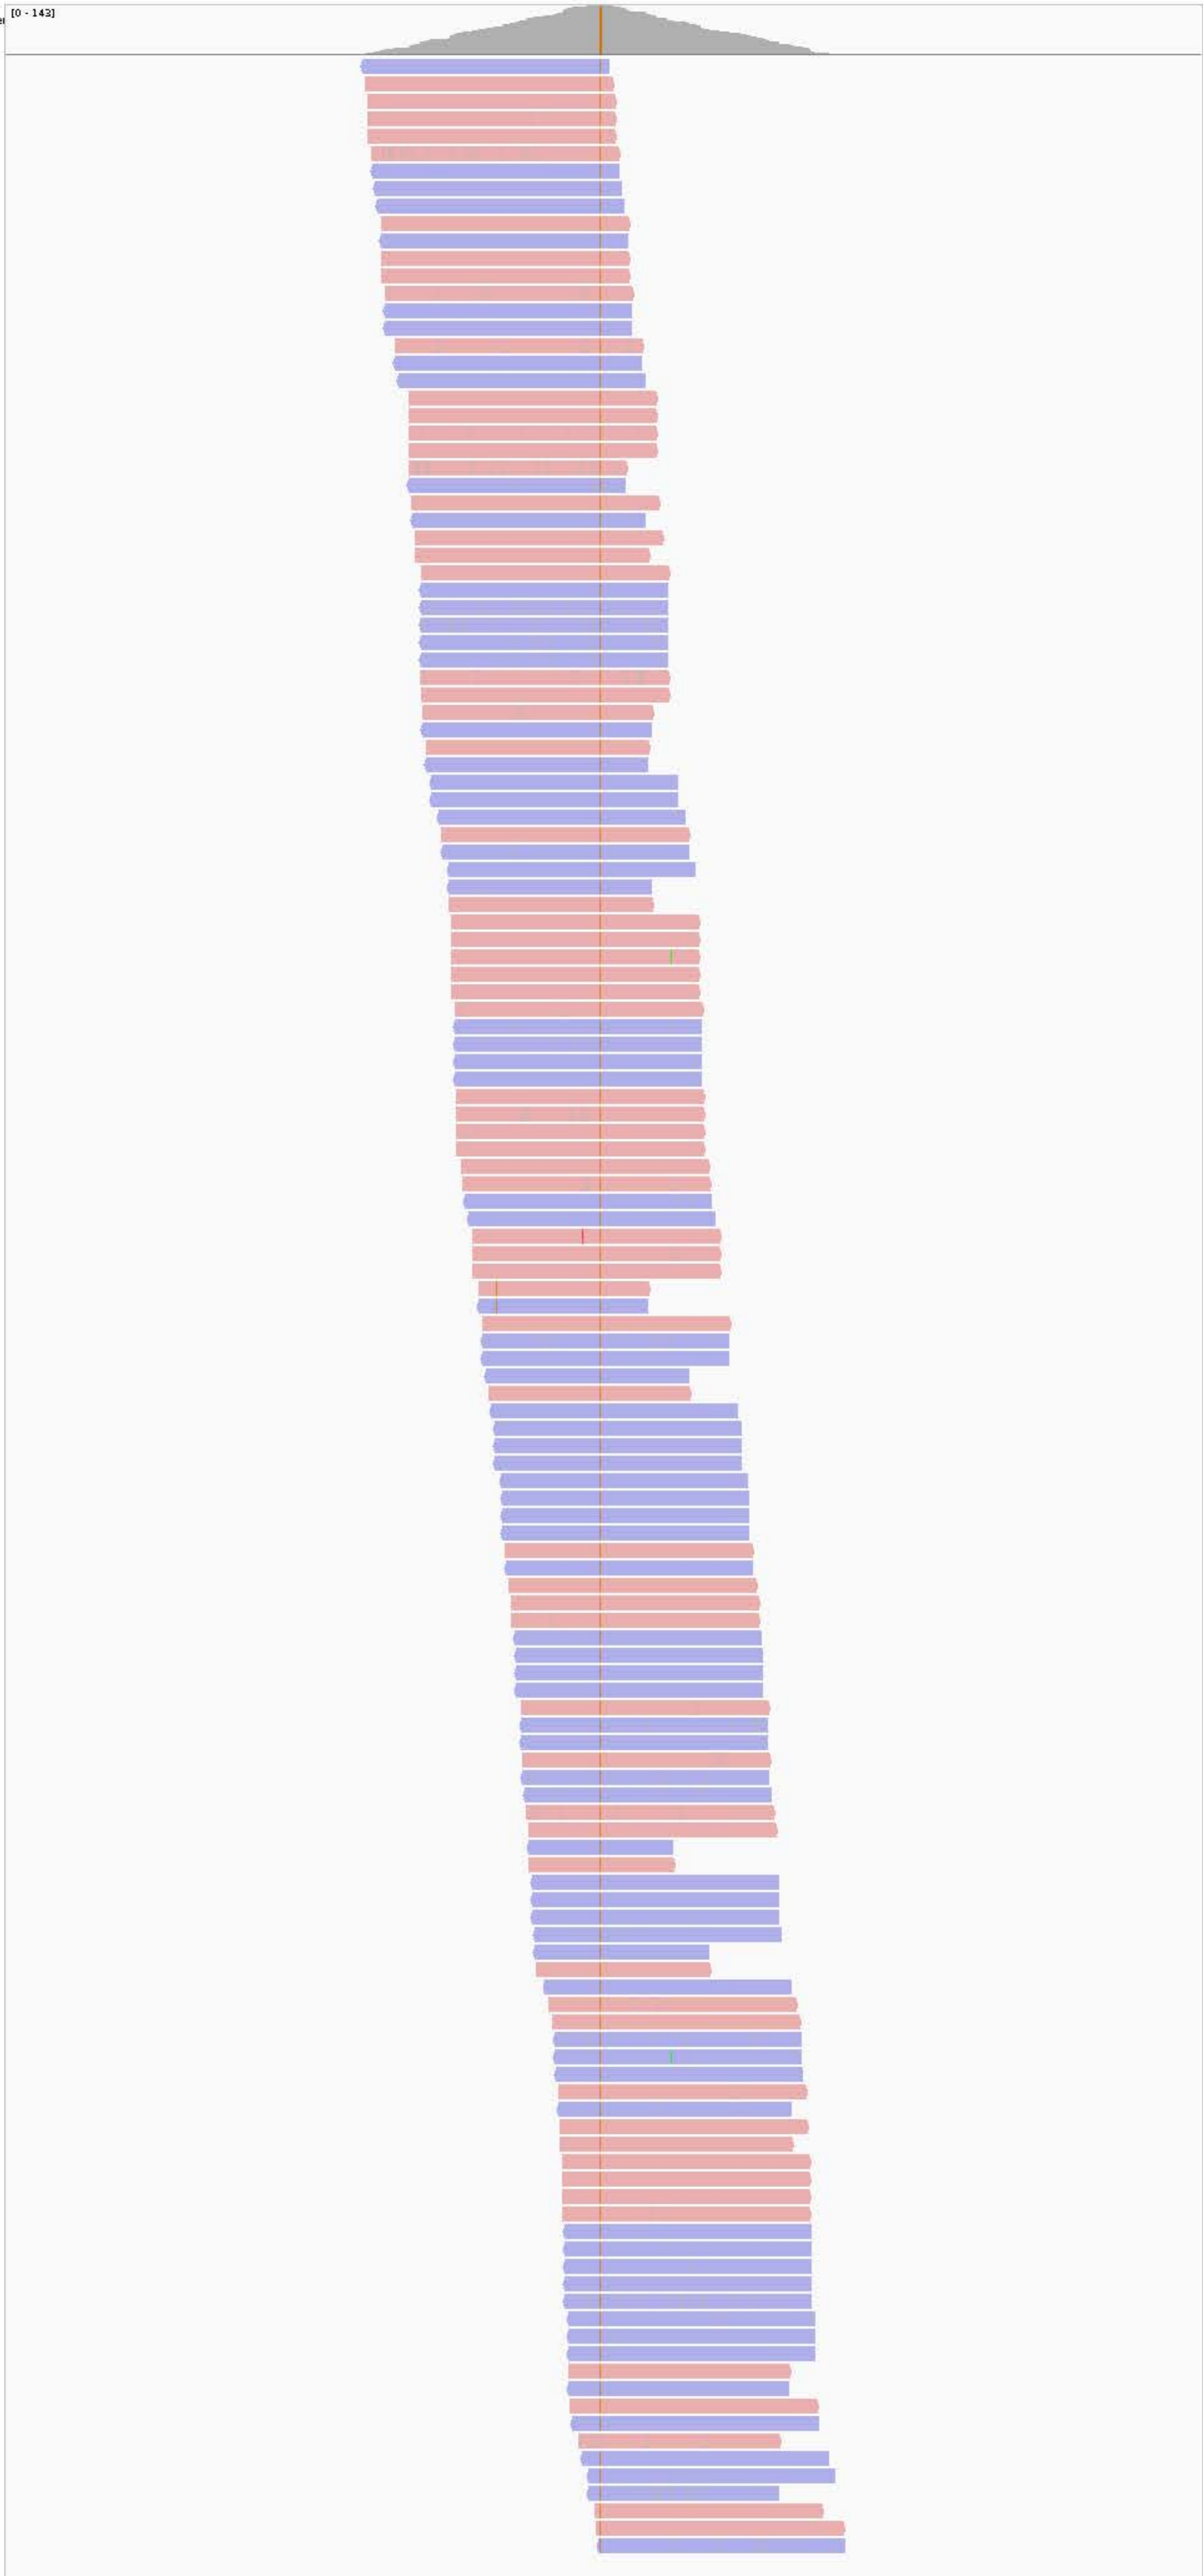

SL\_0008-LT\_15-B\_mut.bam

Sequence

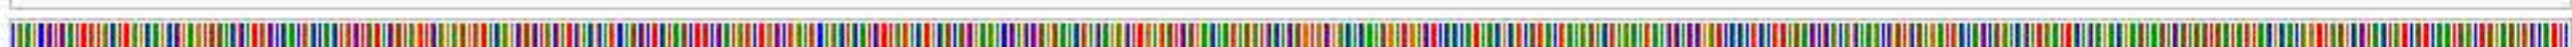

Refseq Genes

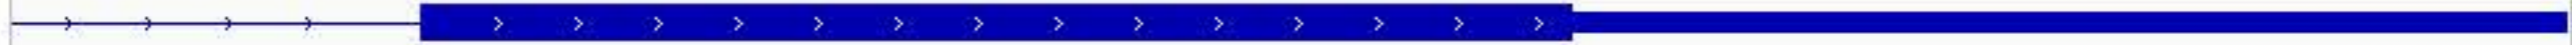

PIK3CA



SL\_0009\_L\_FFPE\_21-B\_mut.bam  
range

SL\_0009\_L\_FFPE\_21-B\_mut.bam

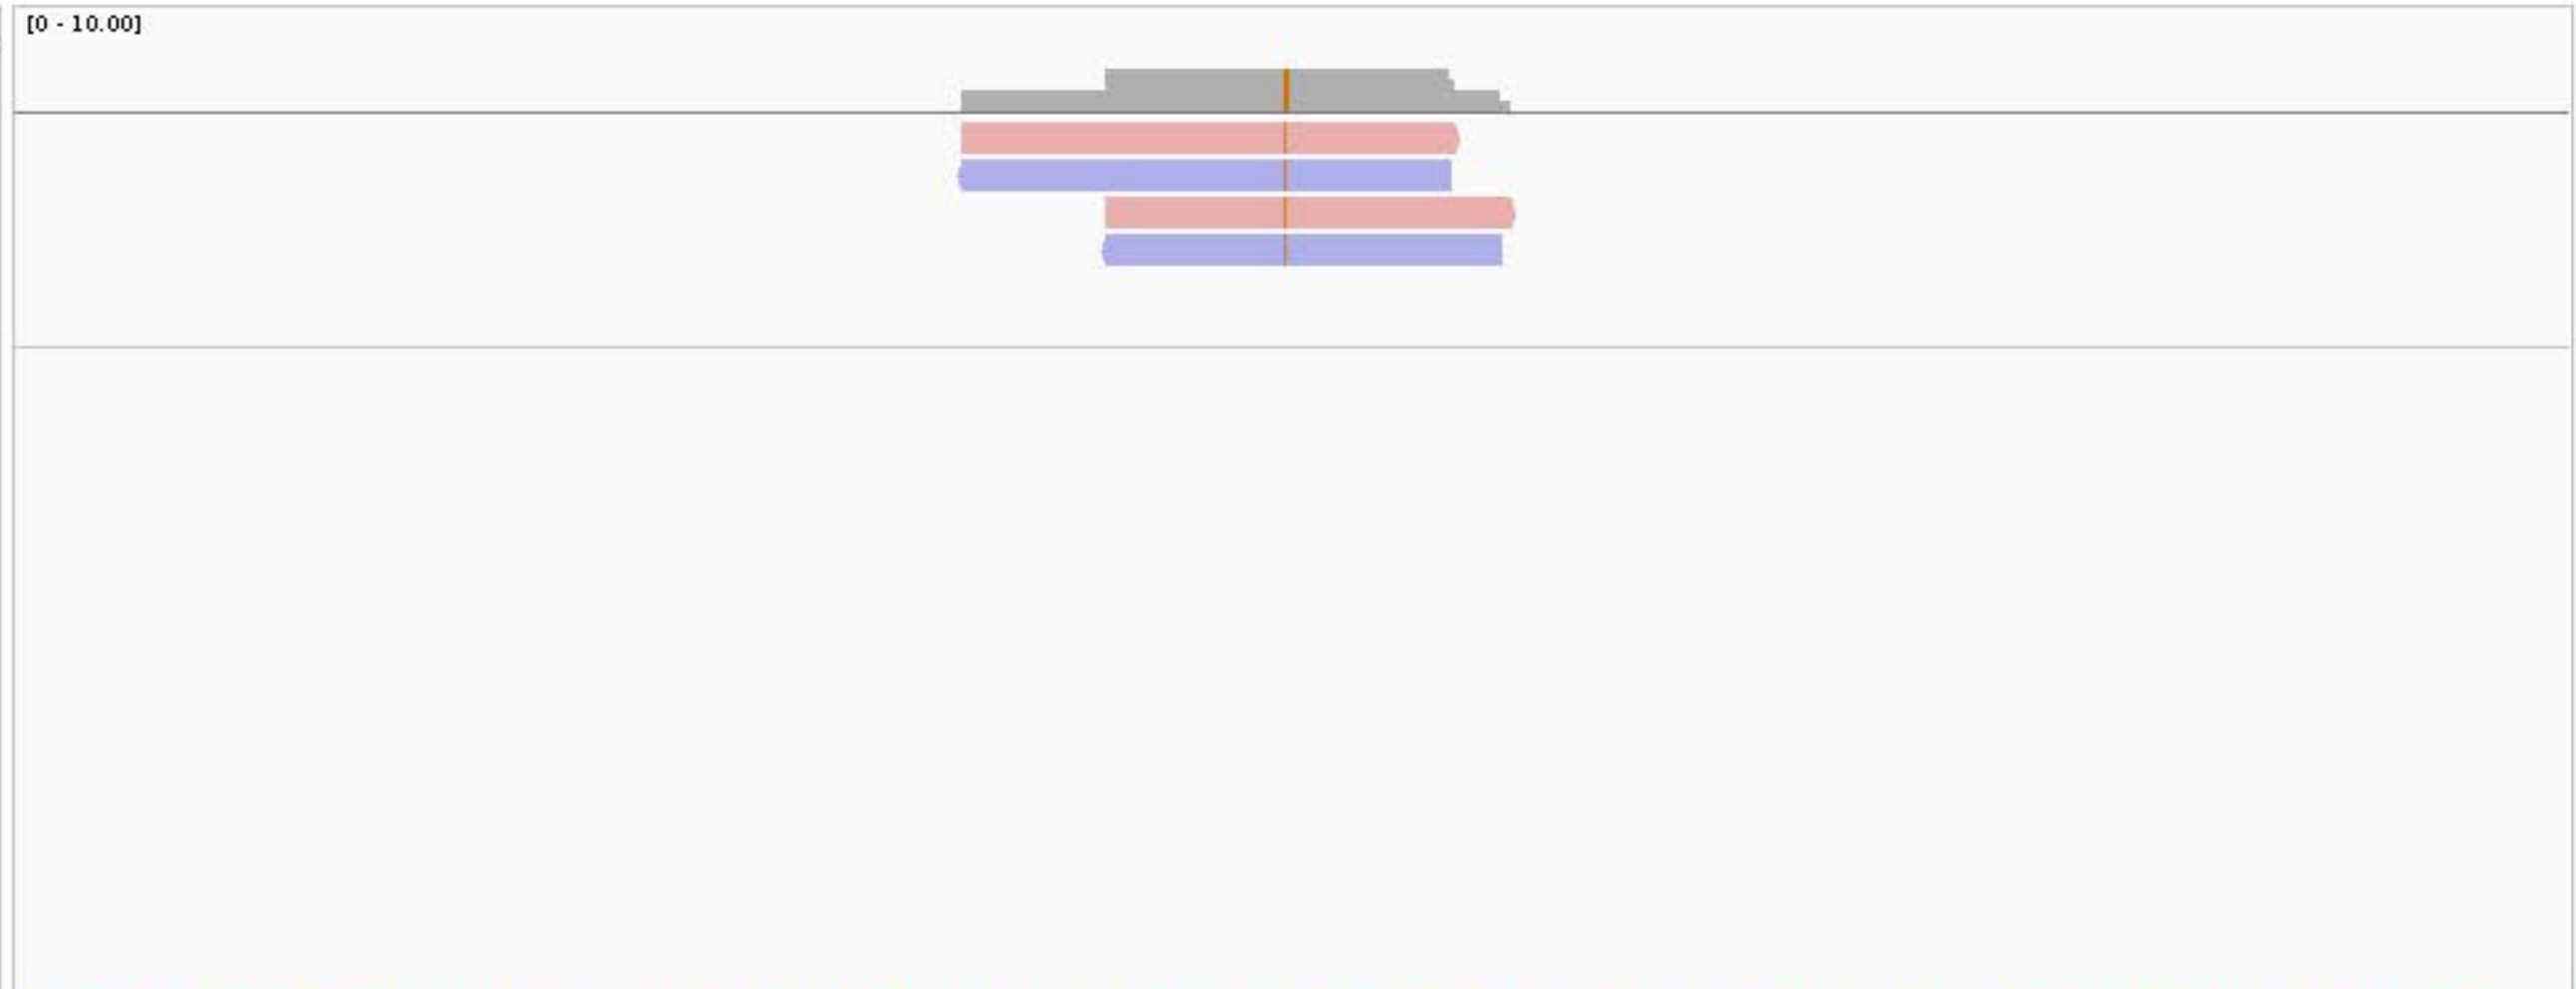

Sequence →

Refseq Genes





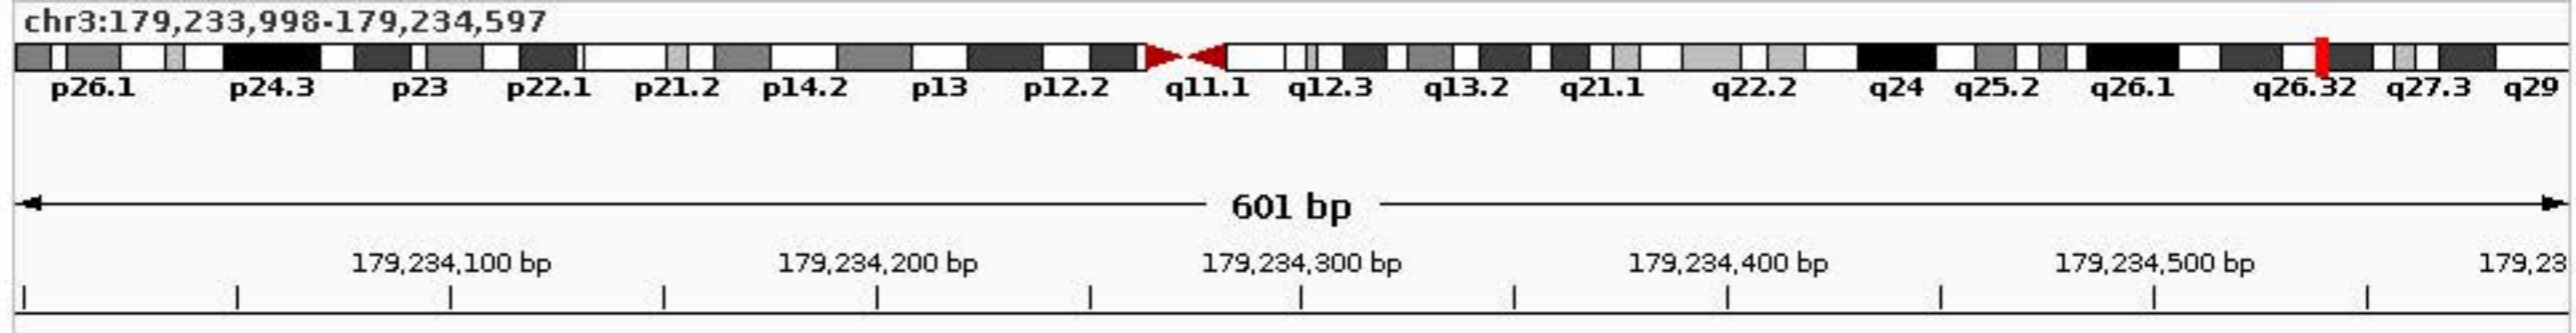

SL\_0009\_L\_FFPE\_26-B\_mut.barrage

SL\_0009\_L\_FFPE\_26-B\_mut.bam

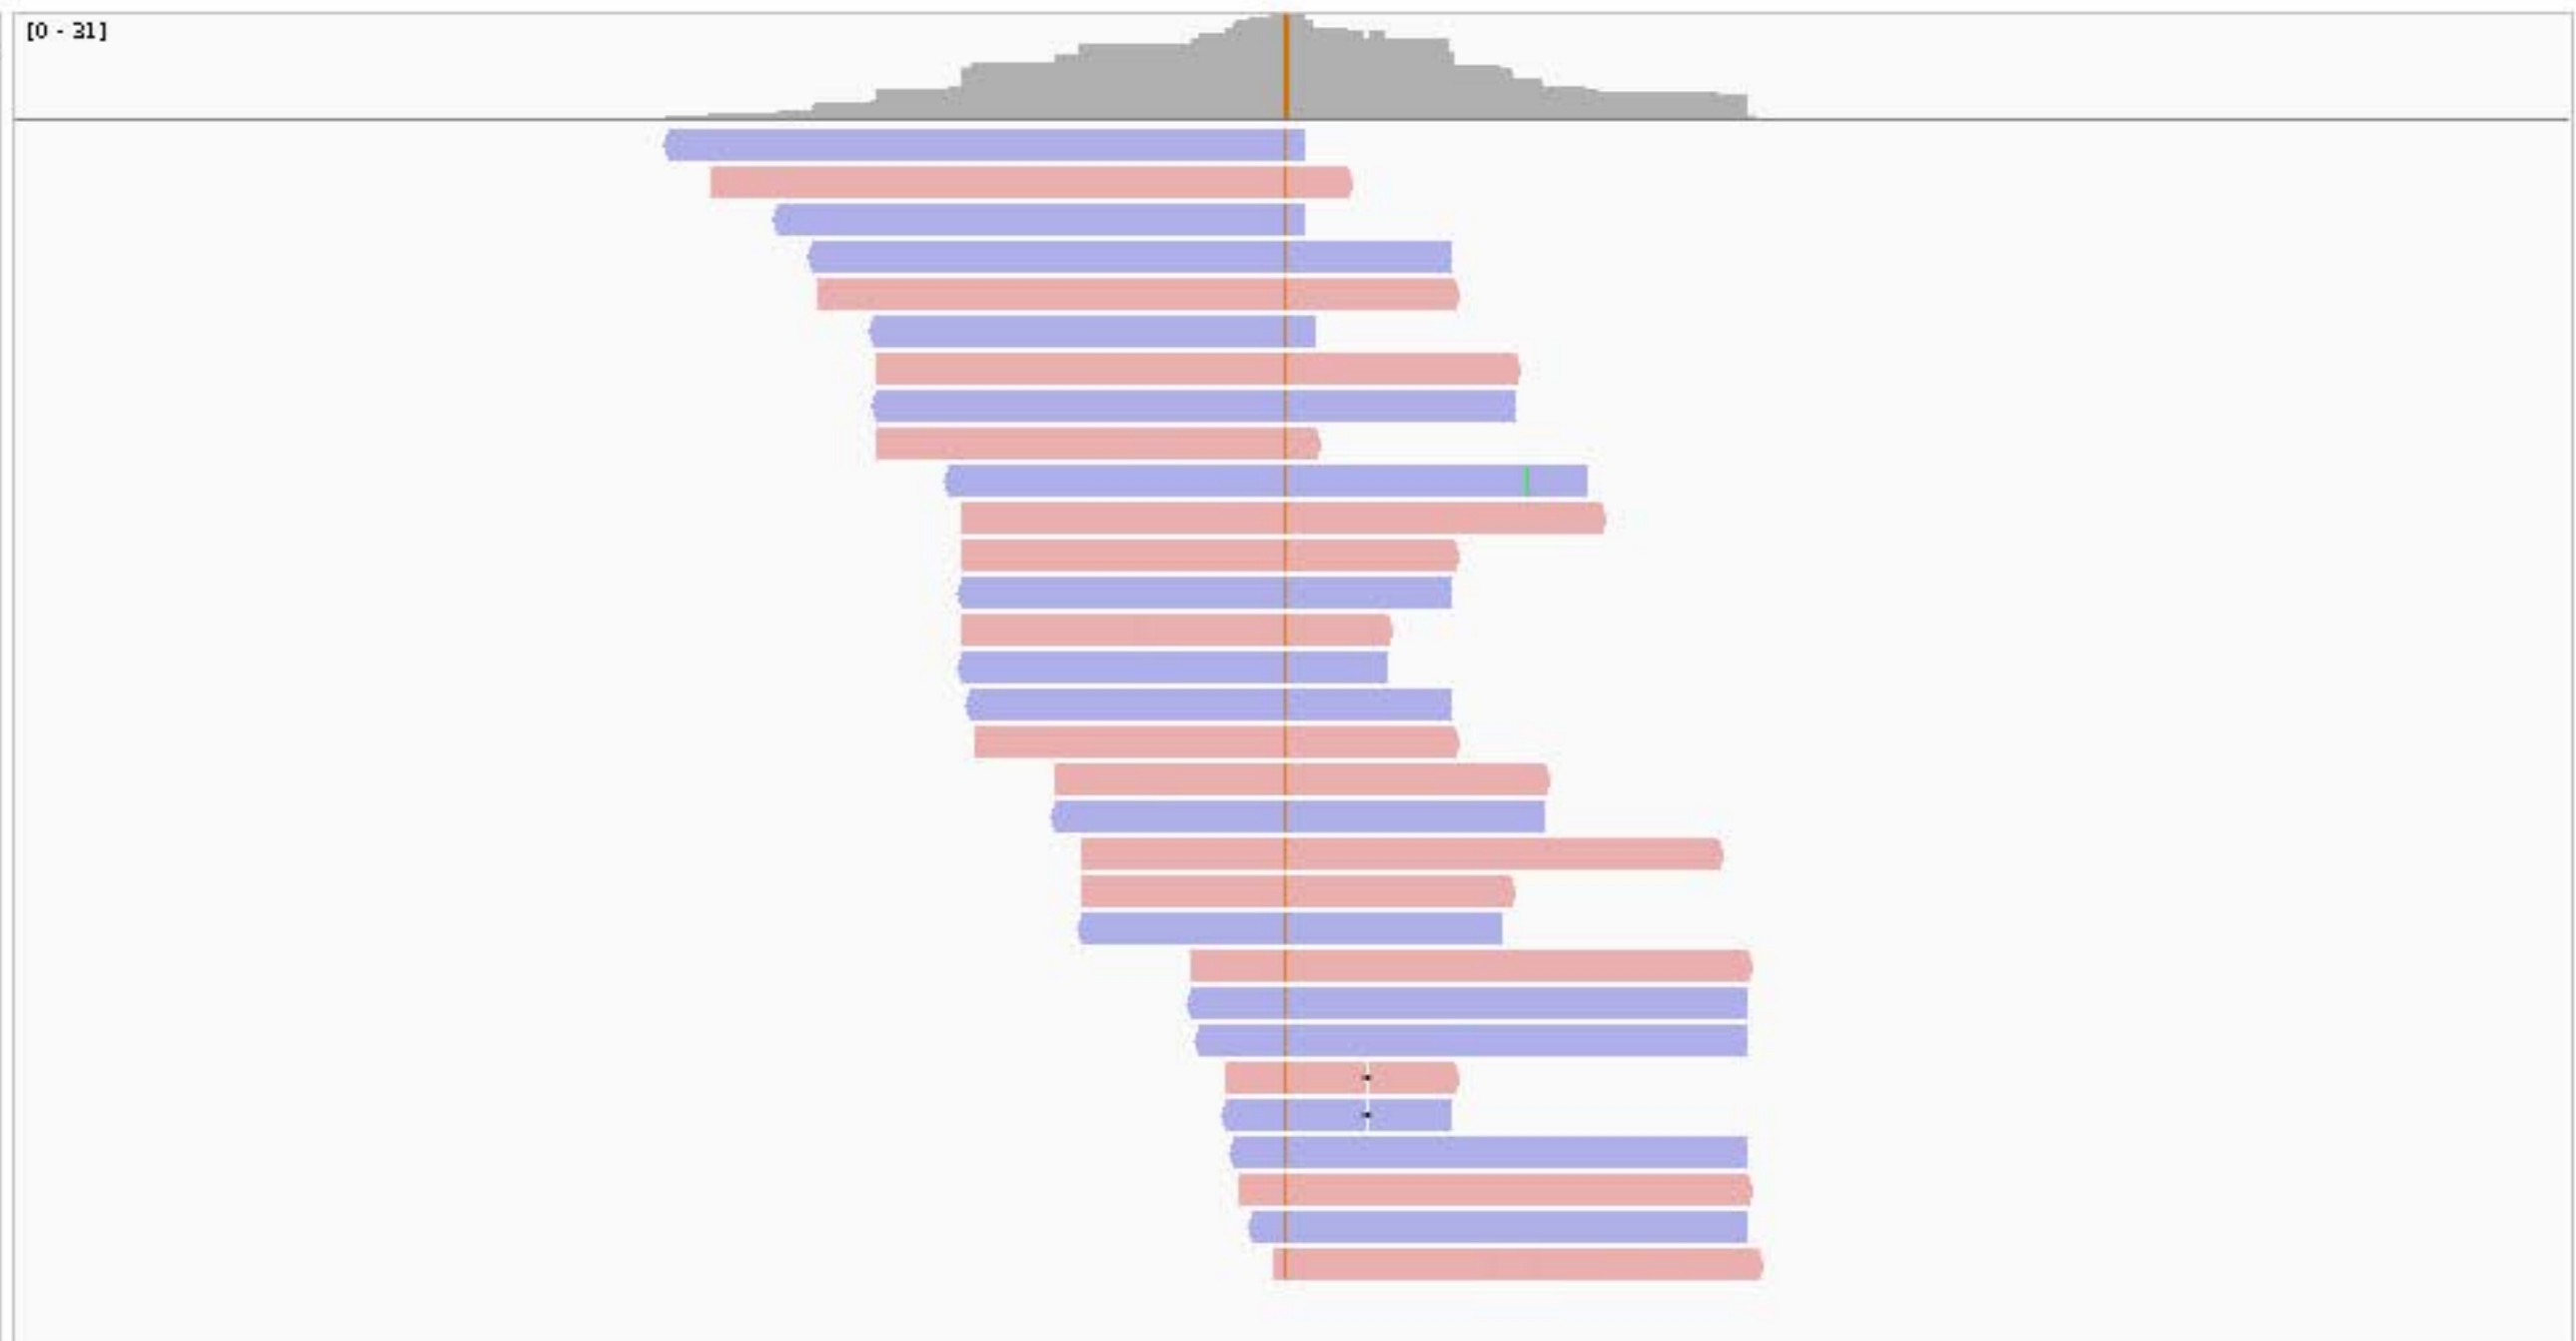

Sequence

Refseq Genes

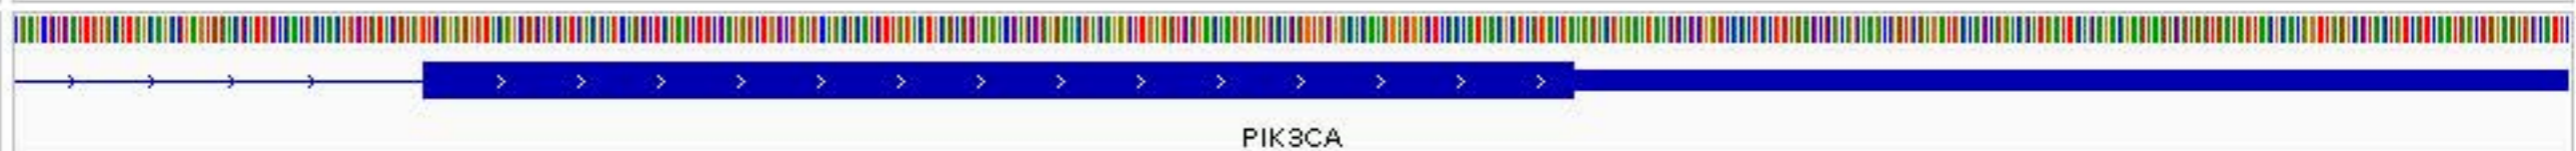



SL\_0009\_L\_FFPE\_30-B\_mut.barr  
age

SL\_0009\_L\_FFPE\_30-B\_mut.ba  
m

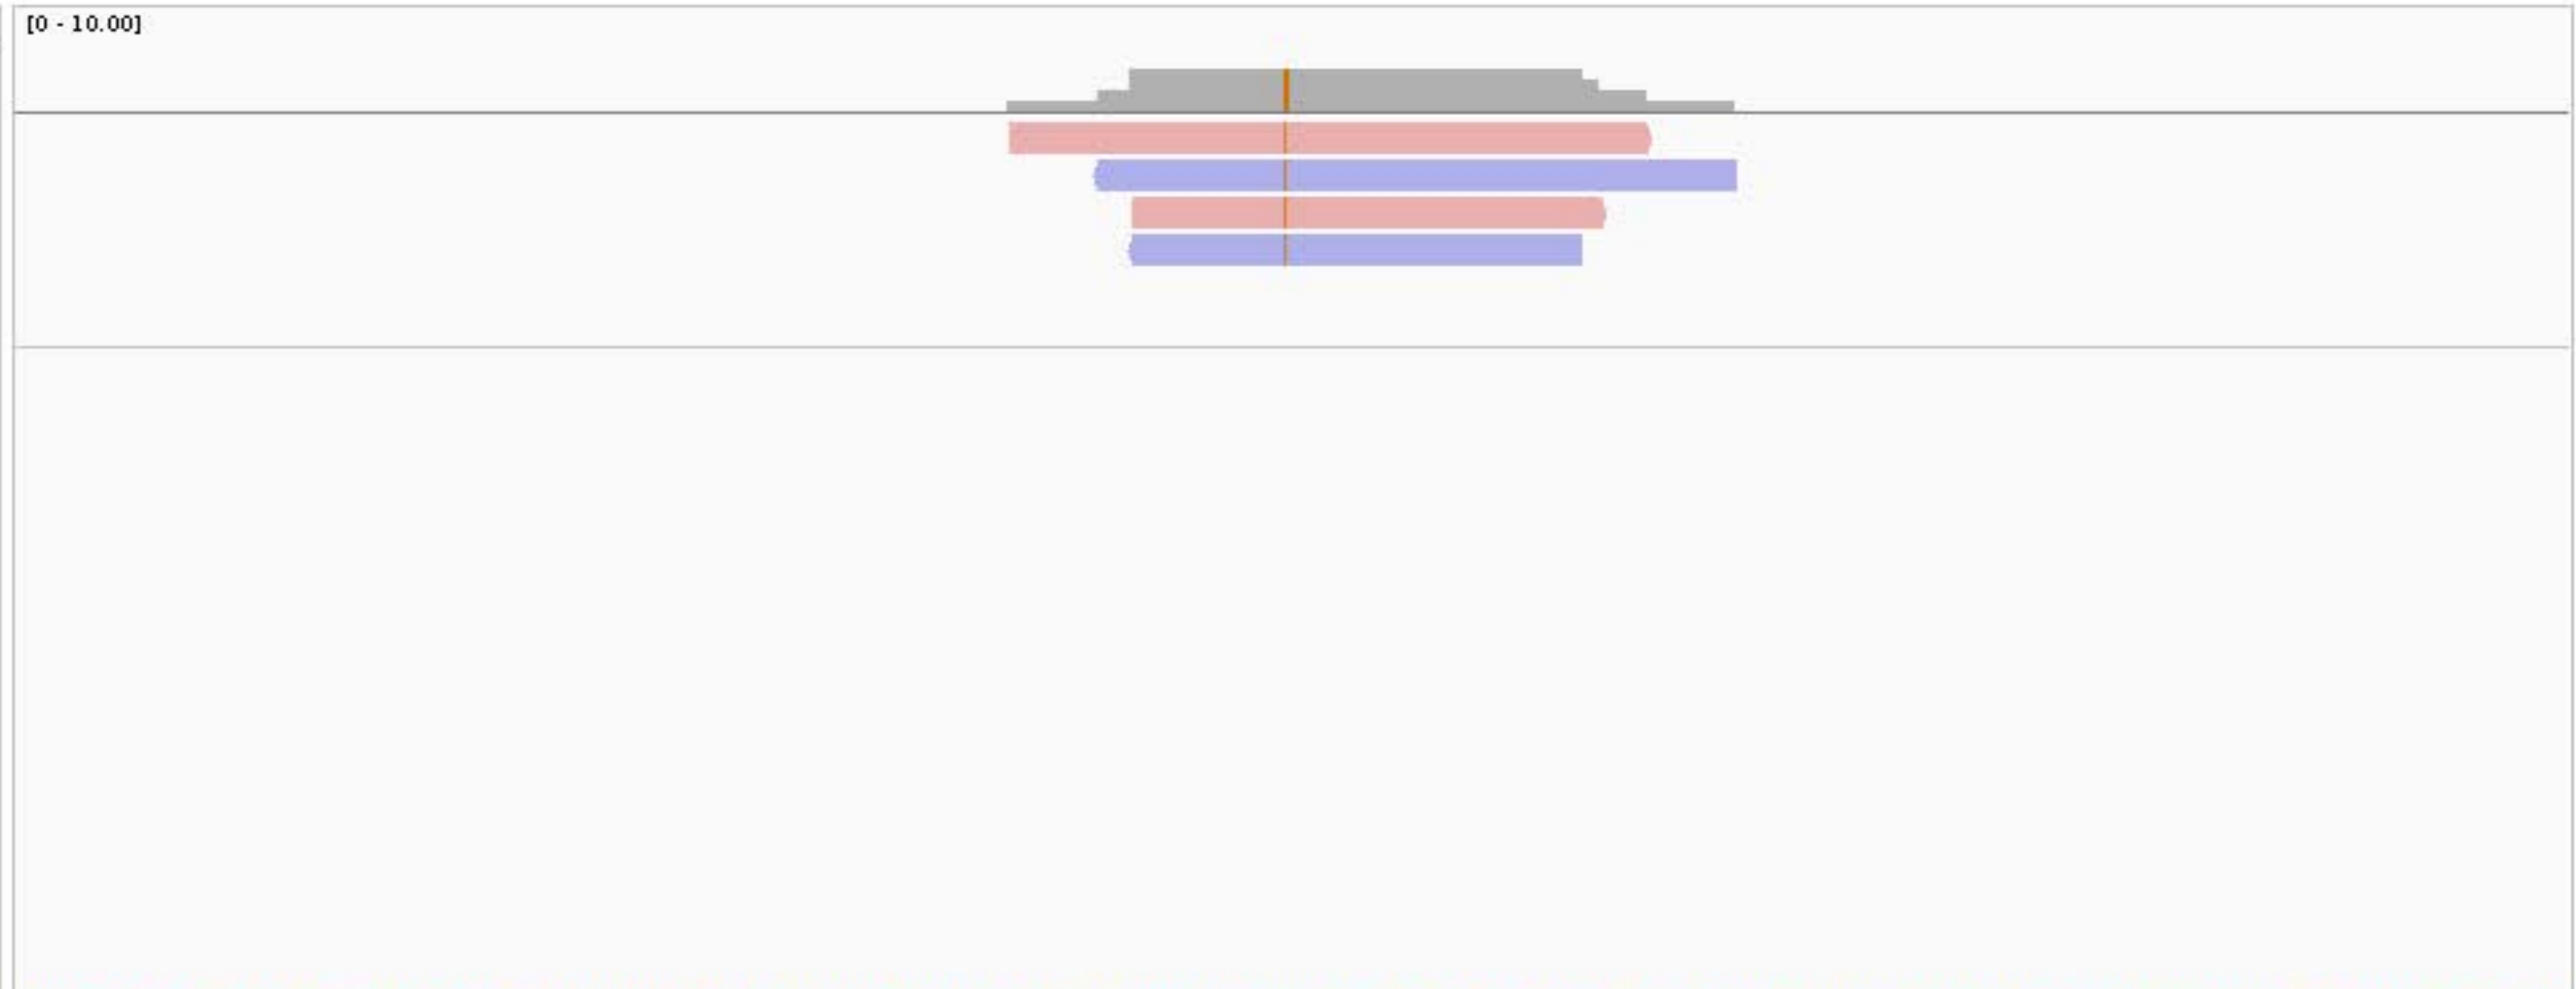

Sequence →

Refseq Genes





SL\_0010\_L\_FFPE\_18-B\_mut.bam  
range

SL\_0010\_L\_FFPE\_18-B\_mut.bam

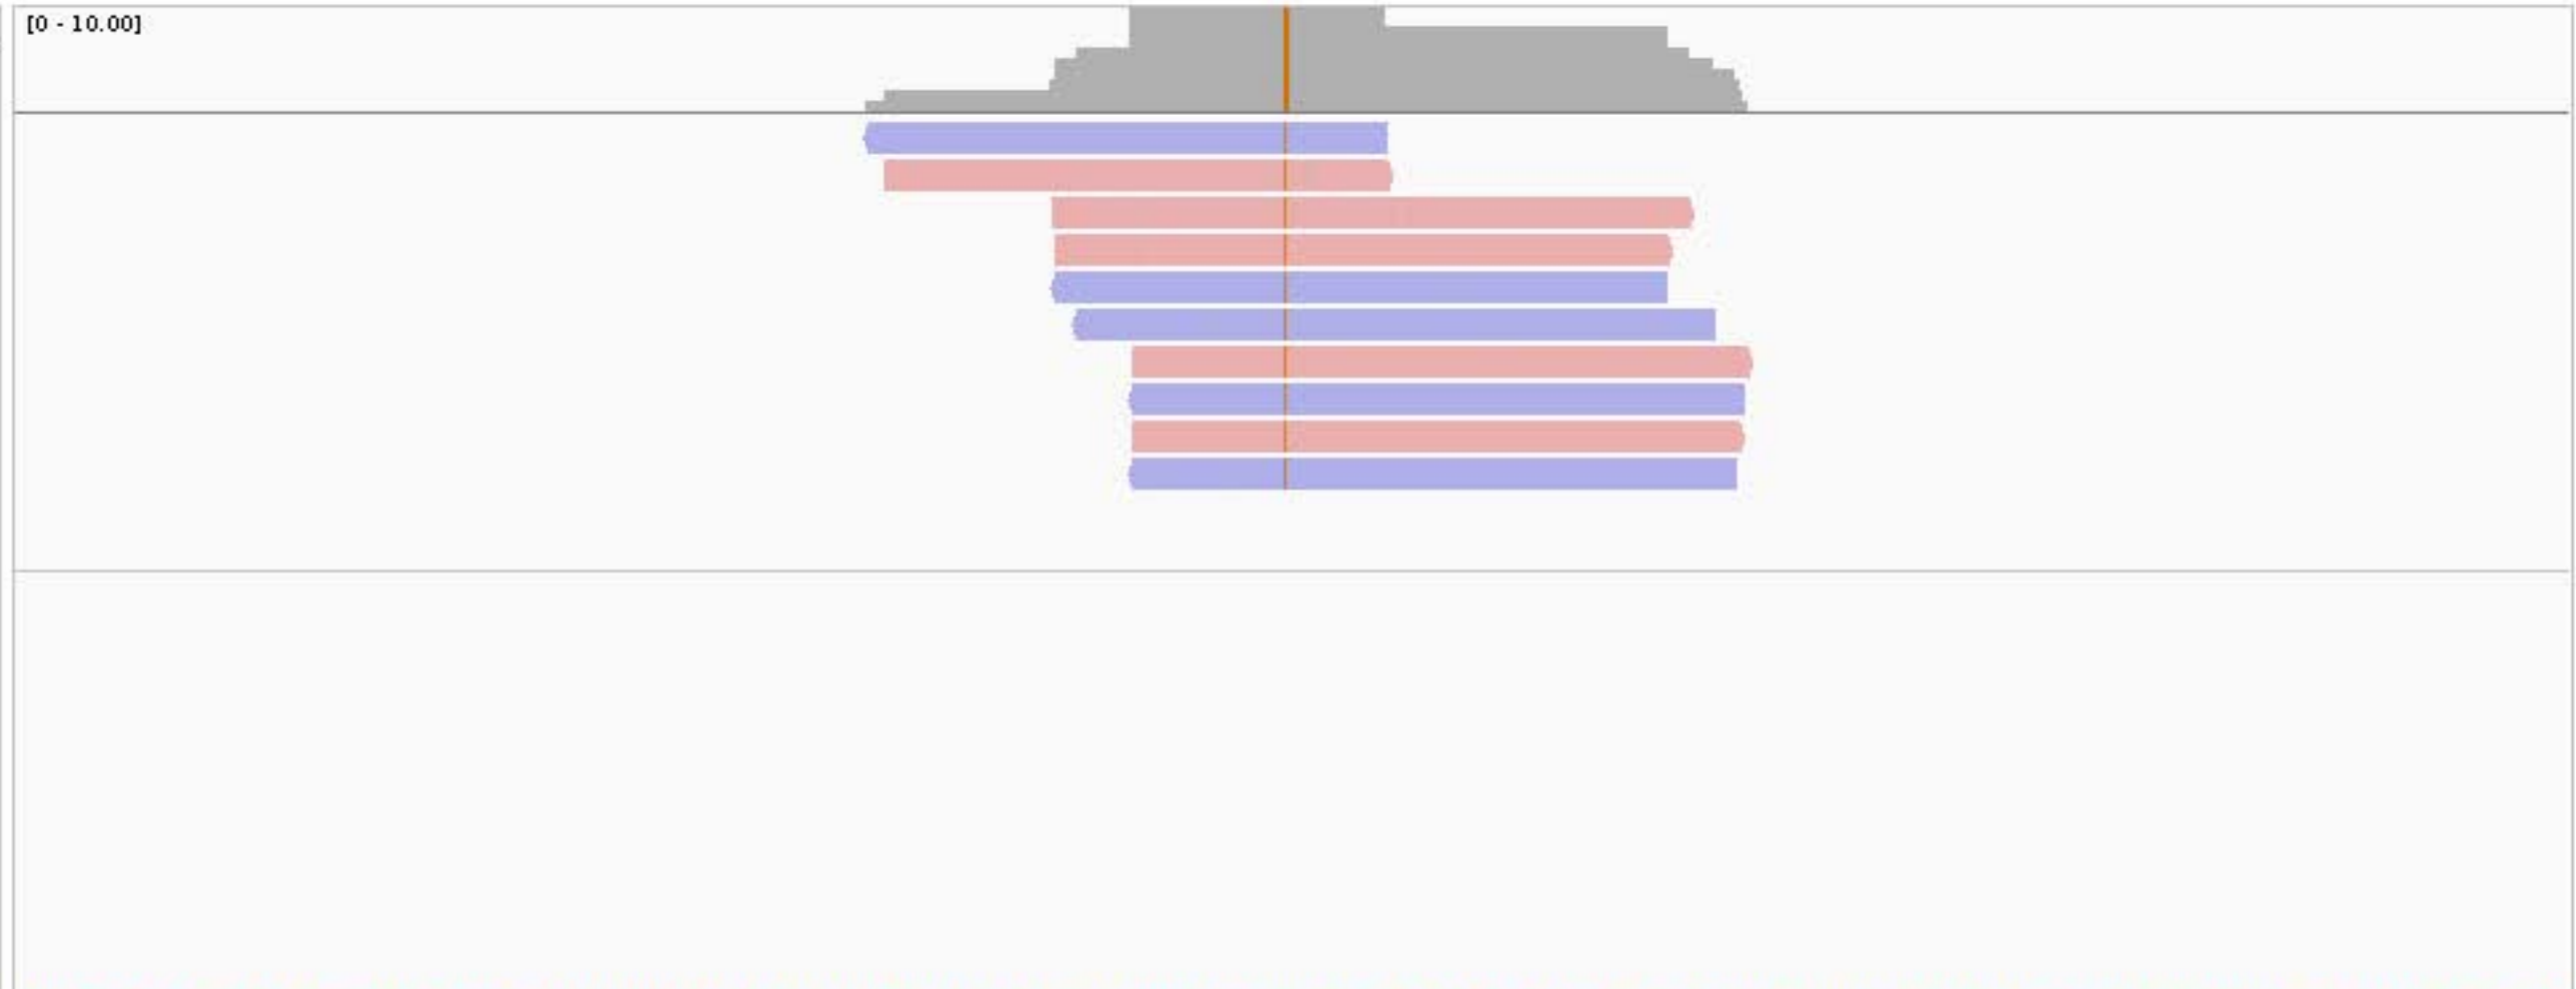

Sequence →

Refseq Genes





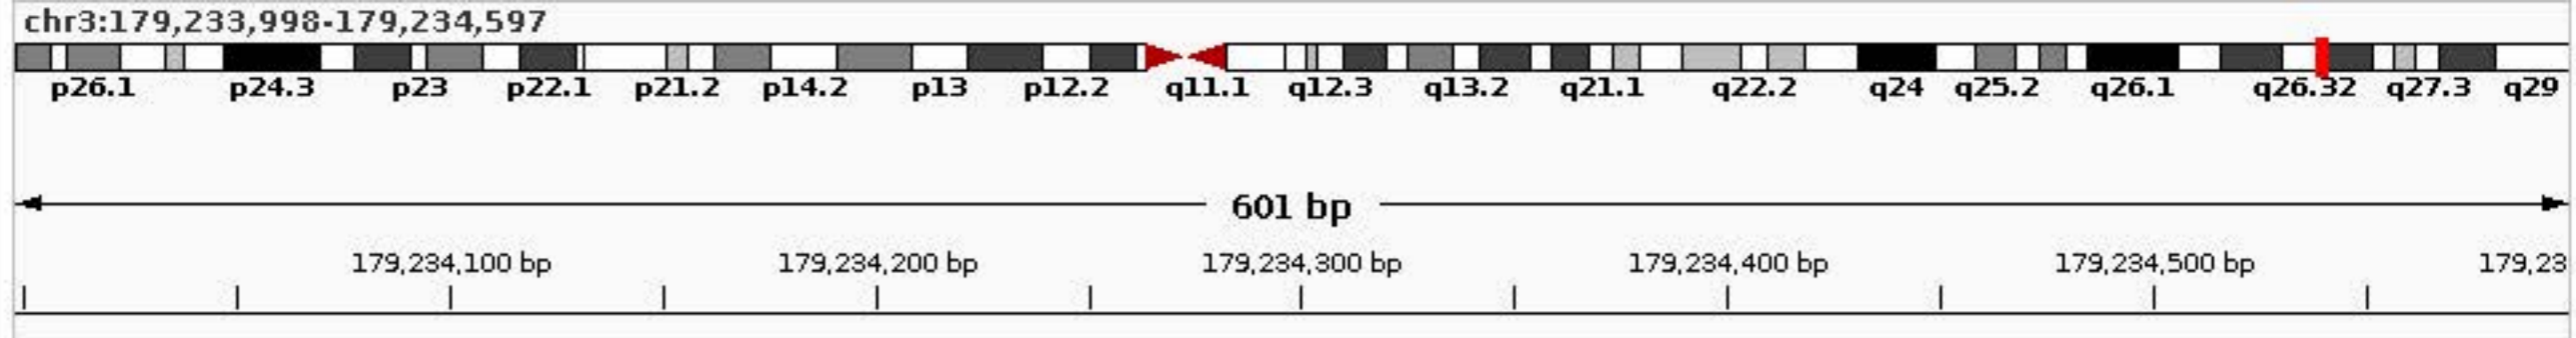

SL\_0010\_R\_FFPE\_42-B\_mut.bam  
range

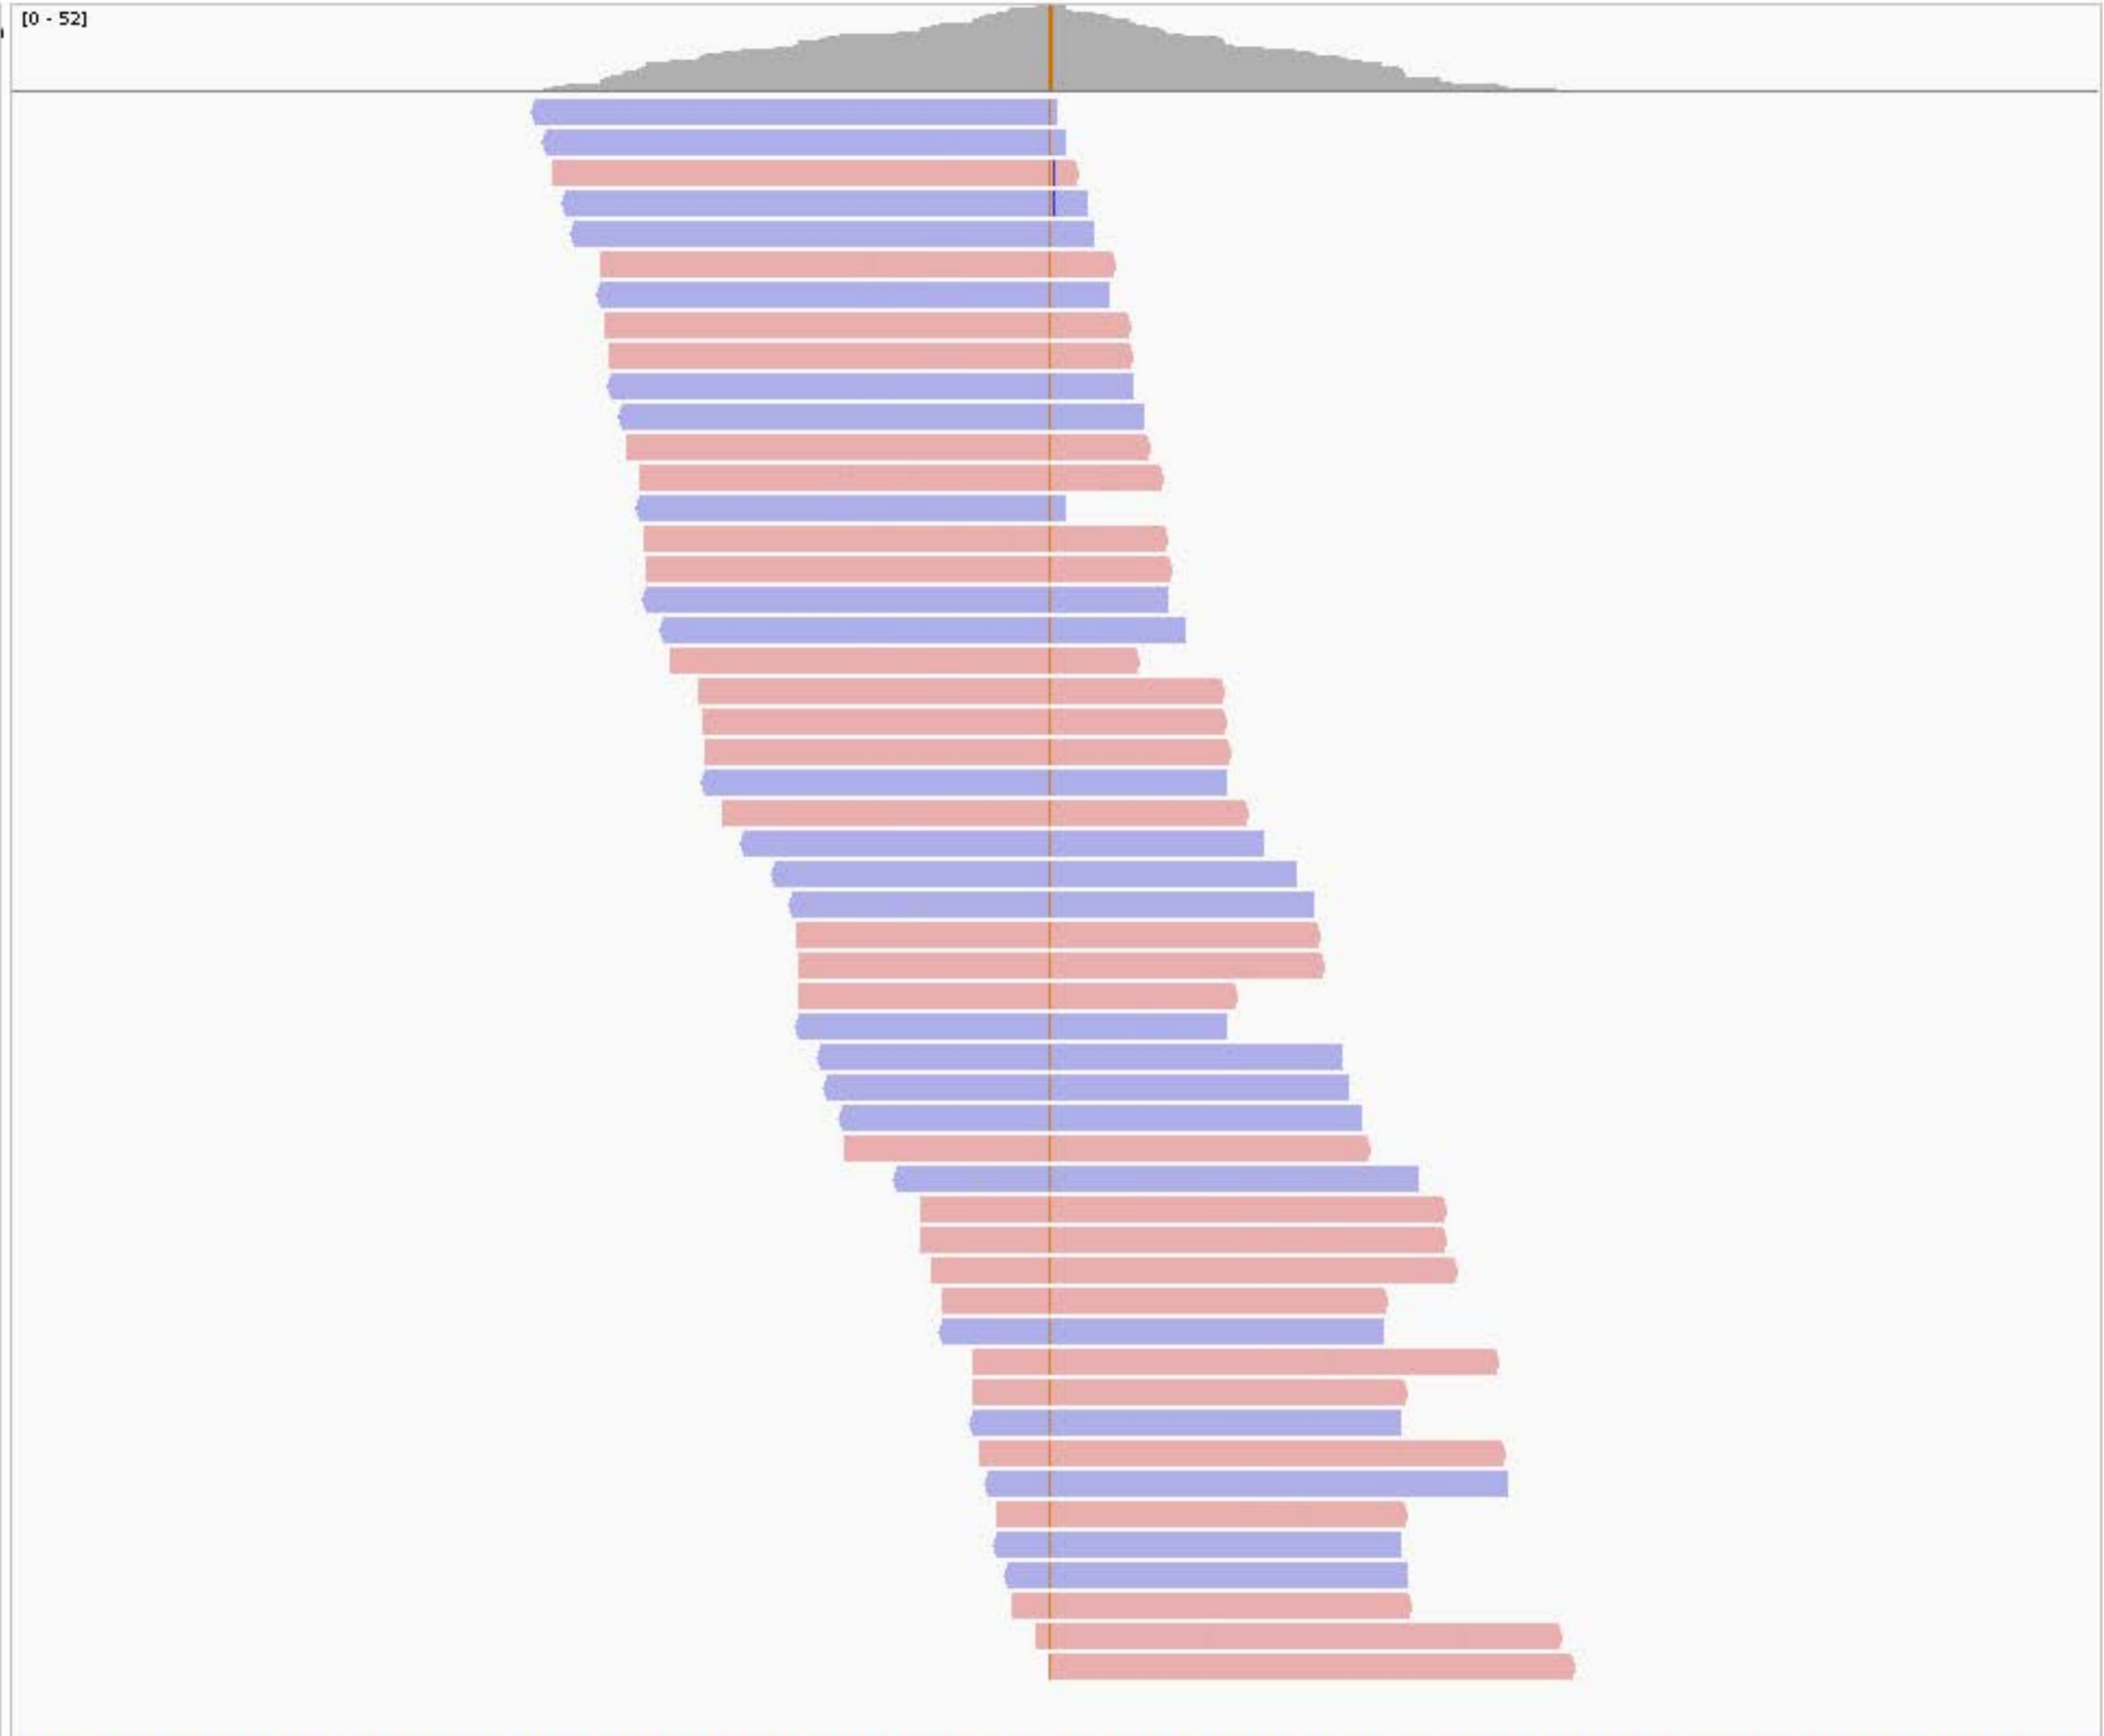

SL\_0010\_R\_FFPE\_42-B\_mut.bam

Sequence →

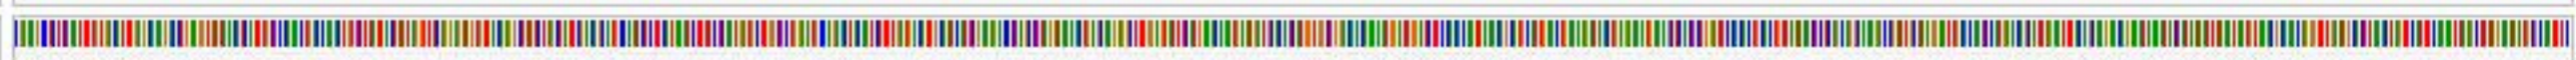

Refseq Genes

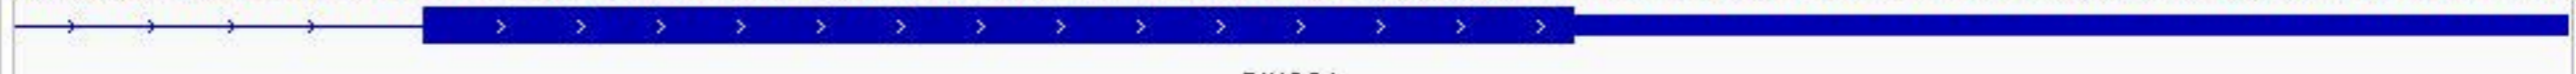

PIK3CA



SL\_0011\_L\_FFPE\_18-B\_mut.bam  
 SL\_0011\_L\_FFPE\_18-B\_mut.bam

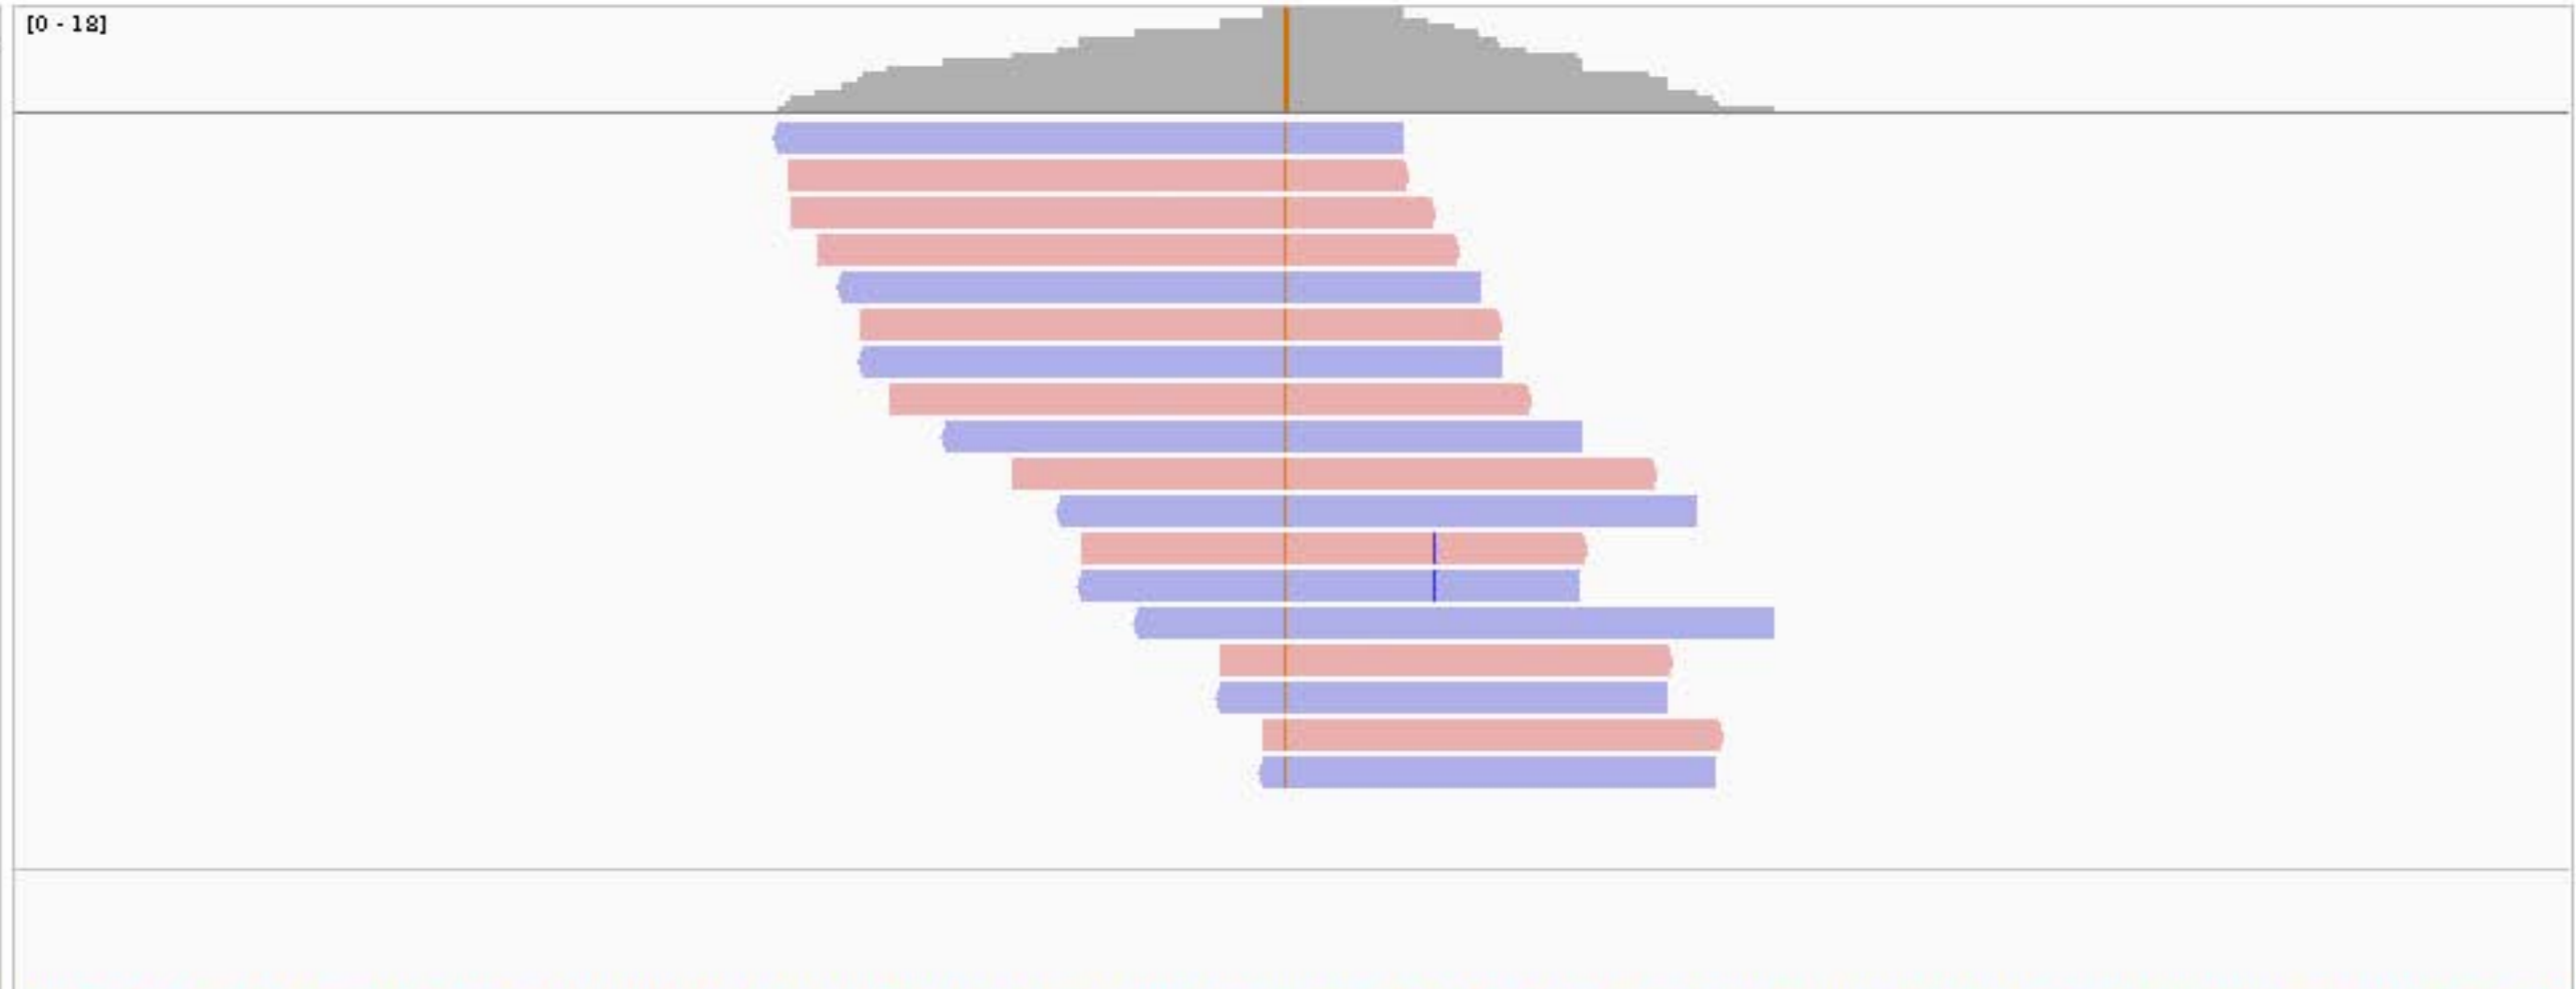

Sequence →

Refseq Genes



chr3:179,233,998-179,234,597  
p26.1 p24.3 p23 p22.1 p21.2 p14.2 p13 p12.2 q11.1 q12.3 q13.2 q21.1 q22.2 q24 q25.2 q26.1 q26.32 q27.3 q29

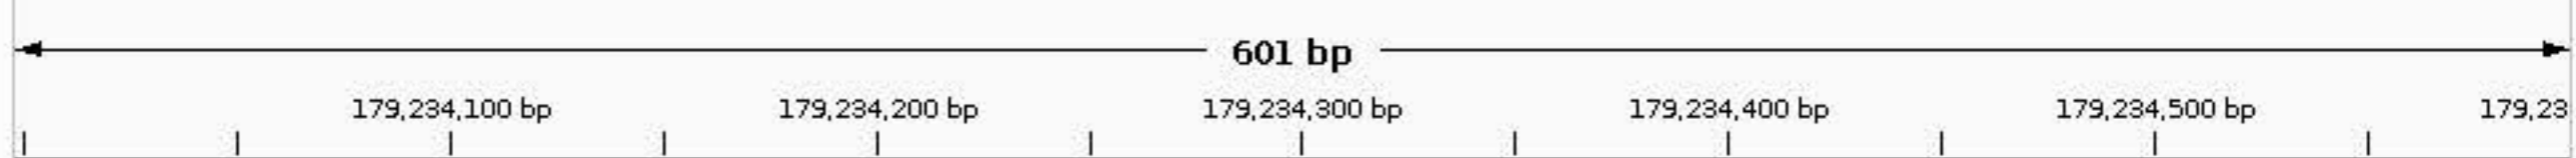

SL\_1002\_R\_FFPE\_33-B\_mut.bam  
rage

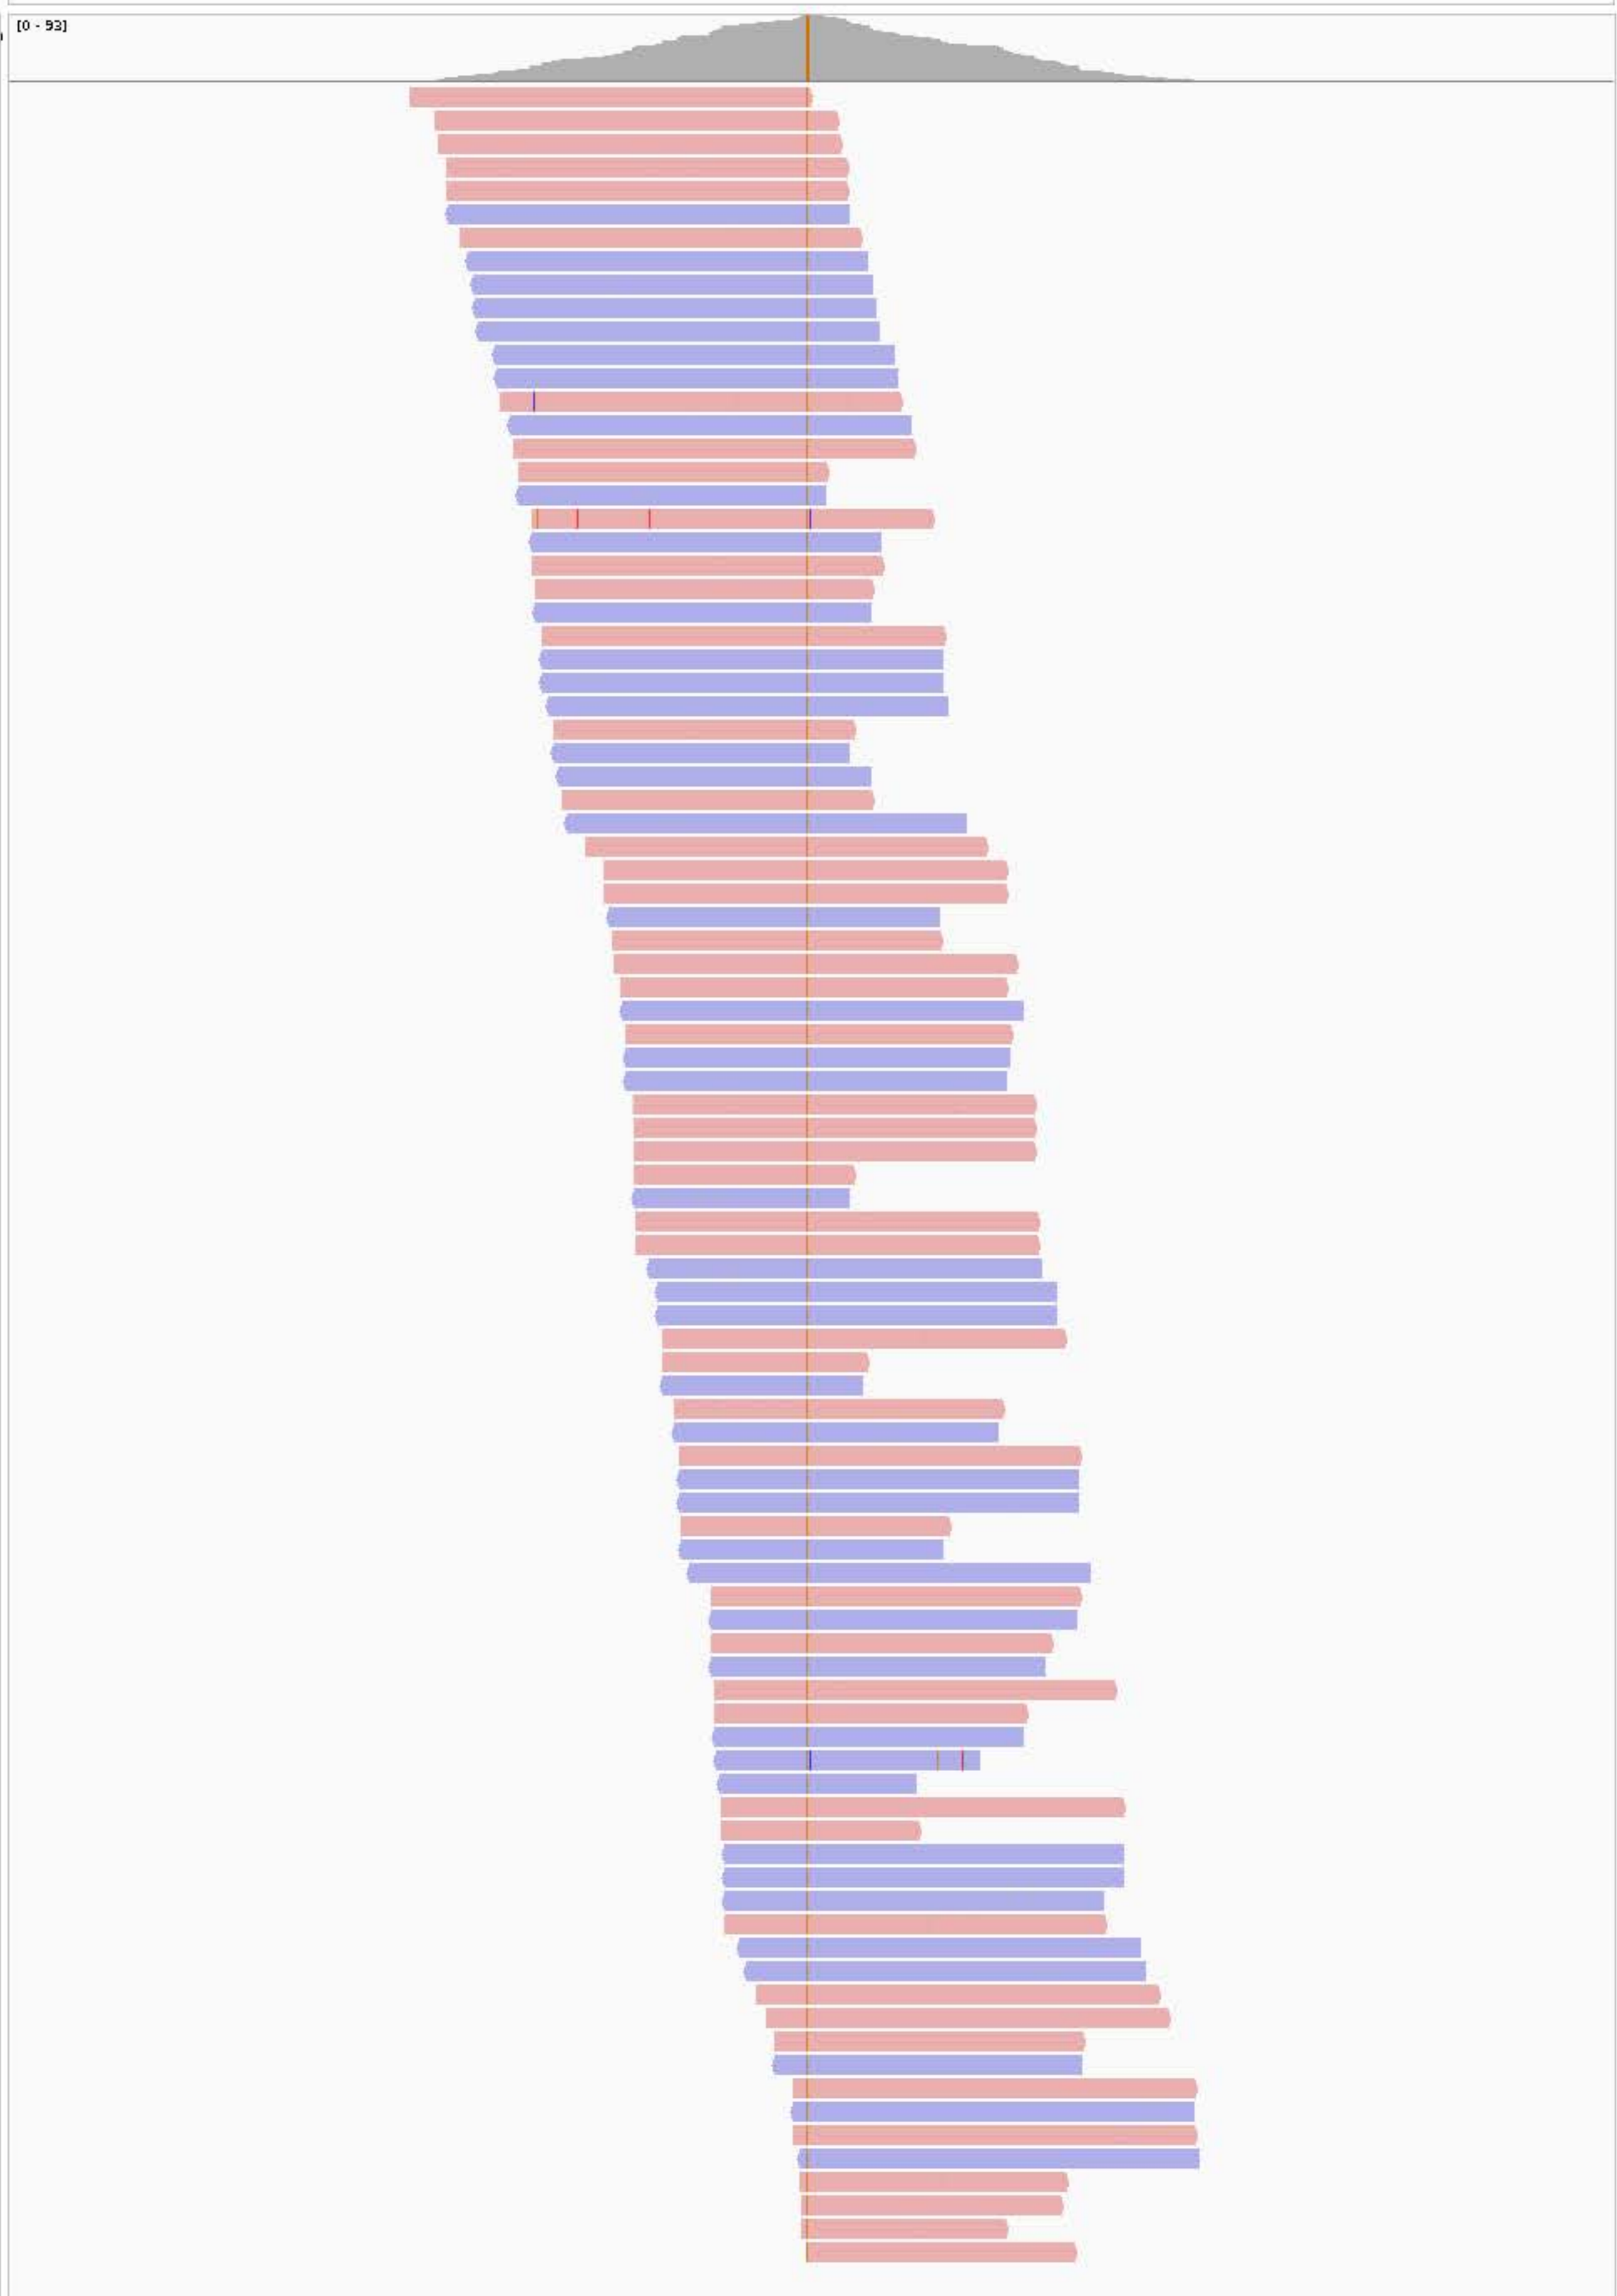

SL\_1002\_R\_FFPE\_33-B\_mut.bam

Sequence →  
Refseq Genes

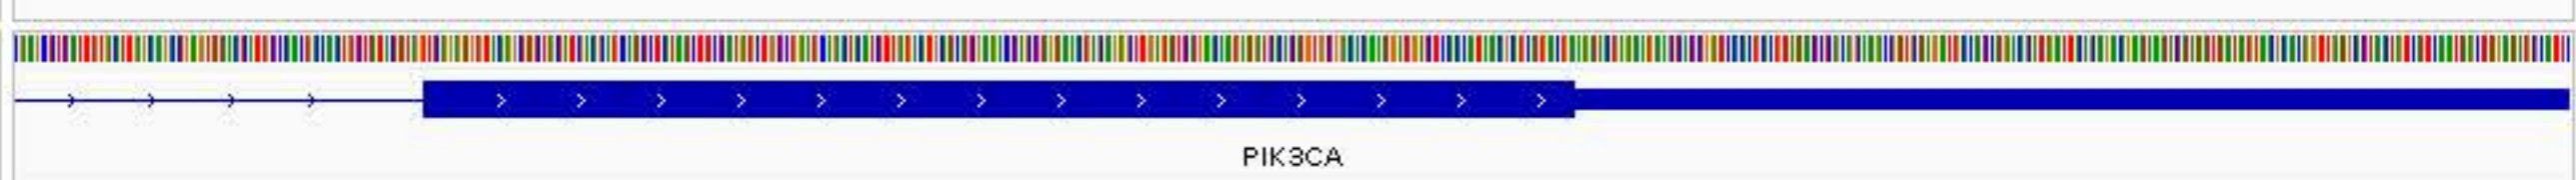



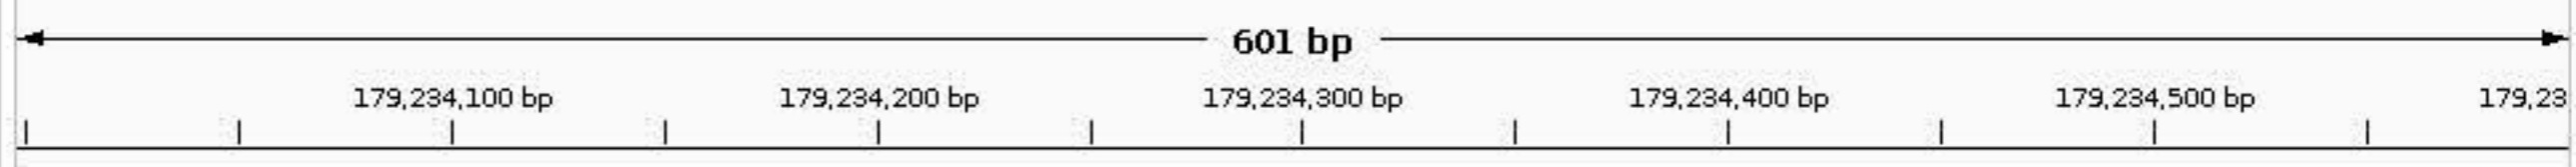

SL\_1004\_R\_49\_FFPE-8\_mut.bam  
rage

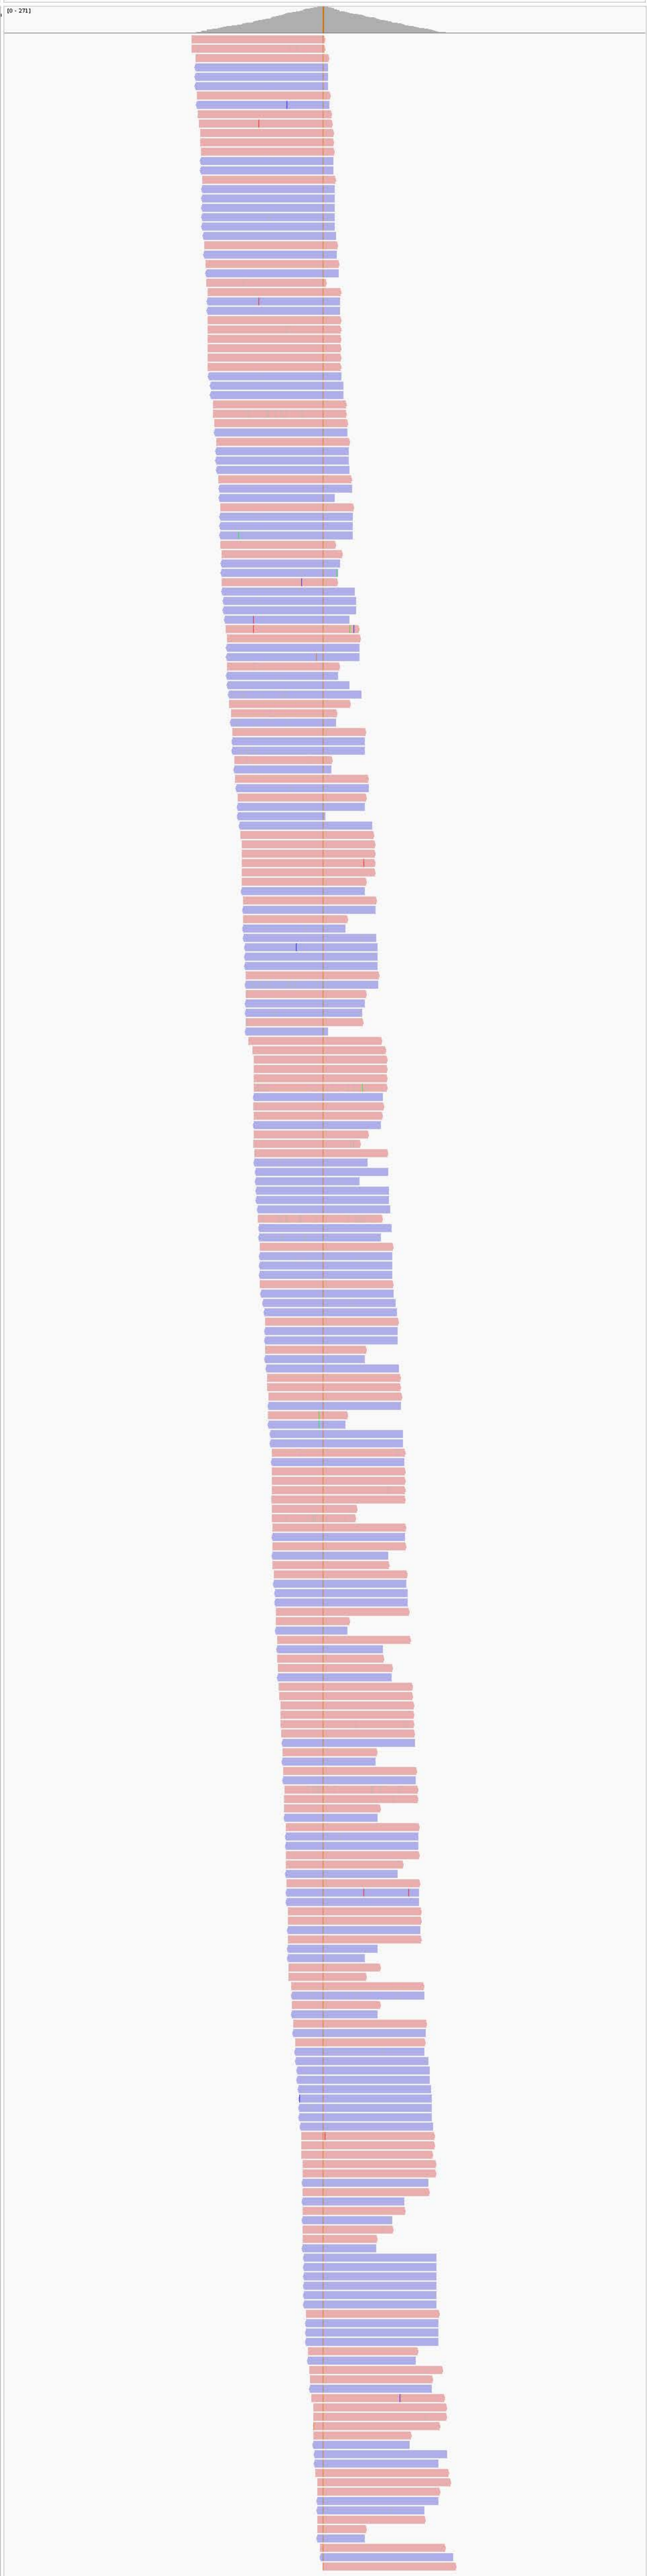

SL\_1004\_R\_49\_FFPE-8\_mut.bam

Sequence  
Refseq Genes

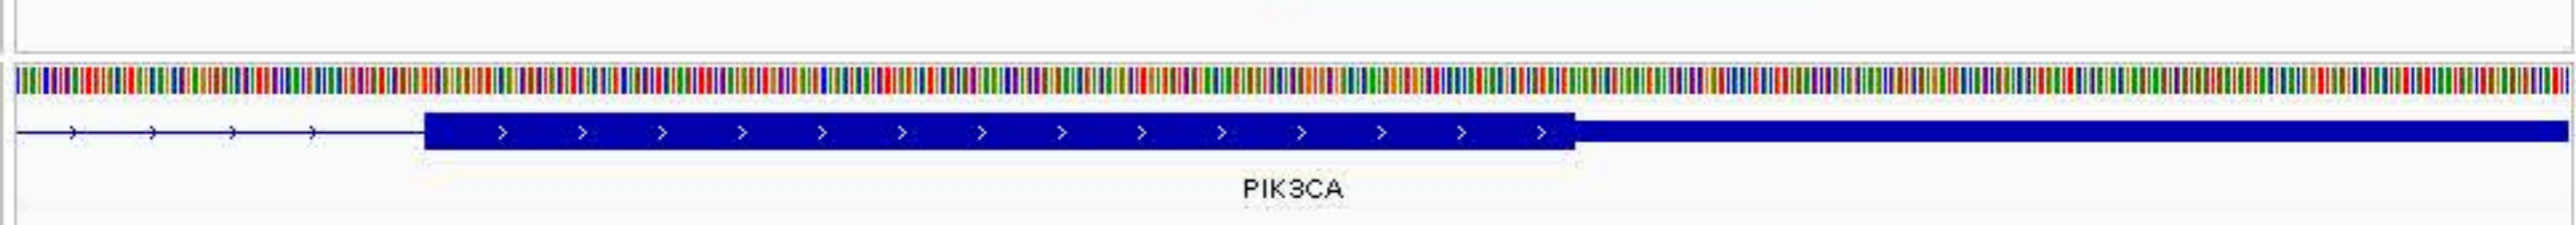

PIK3CA

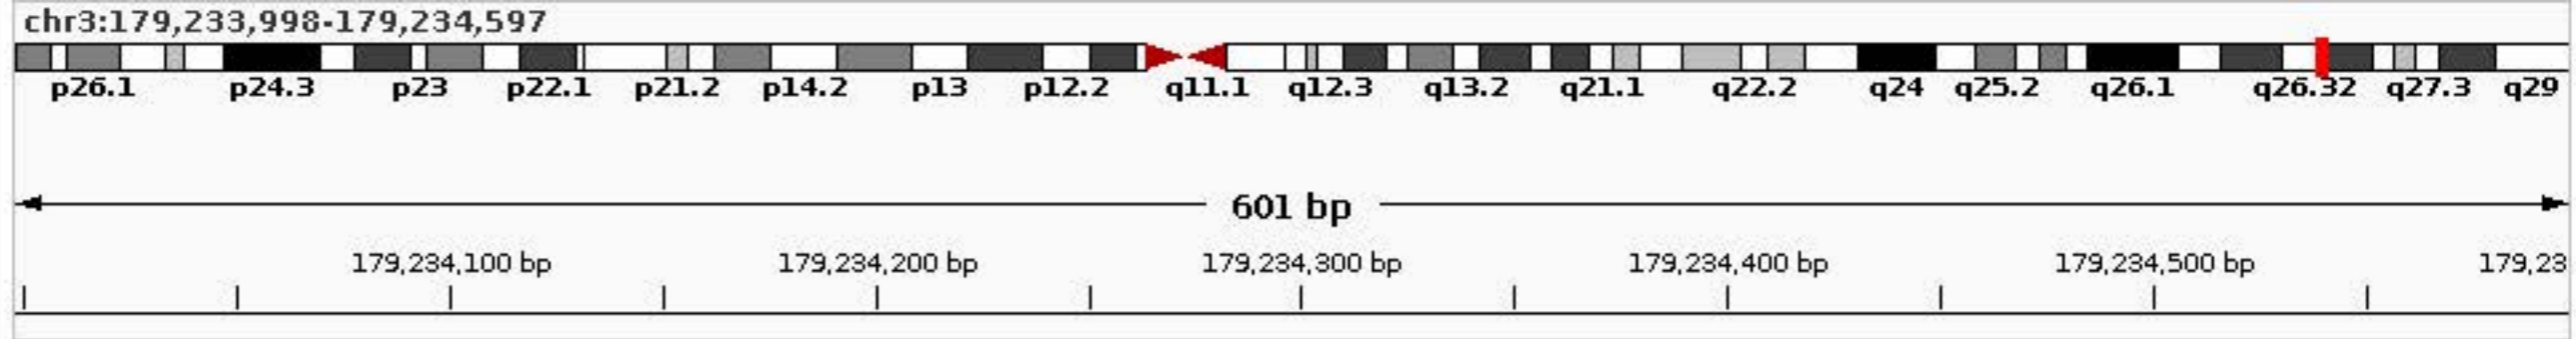

SL\_1007\_L\_FFPE\_26-B\_mut.bam  
rage

SL\_1007\_L\_FFPE\_26-B\_mut.ba  
m

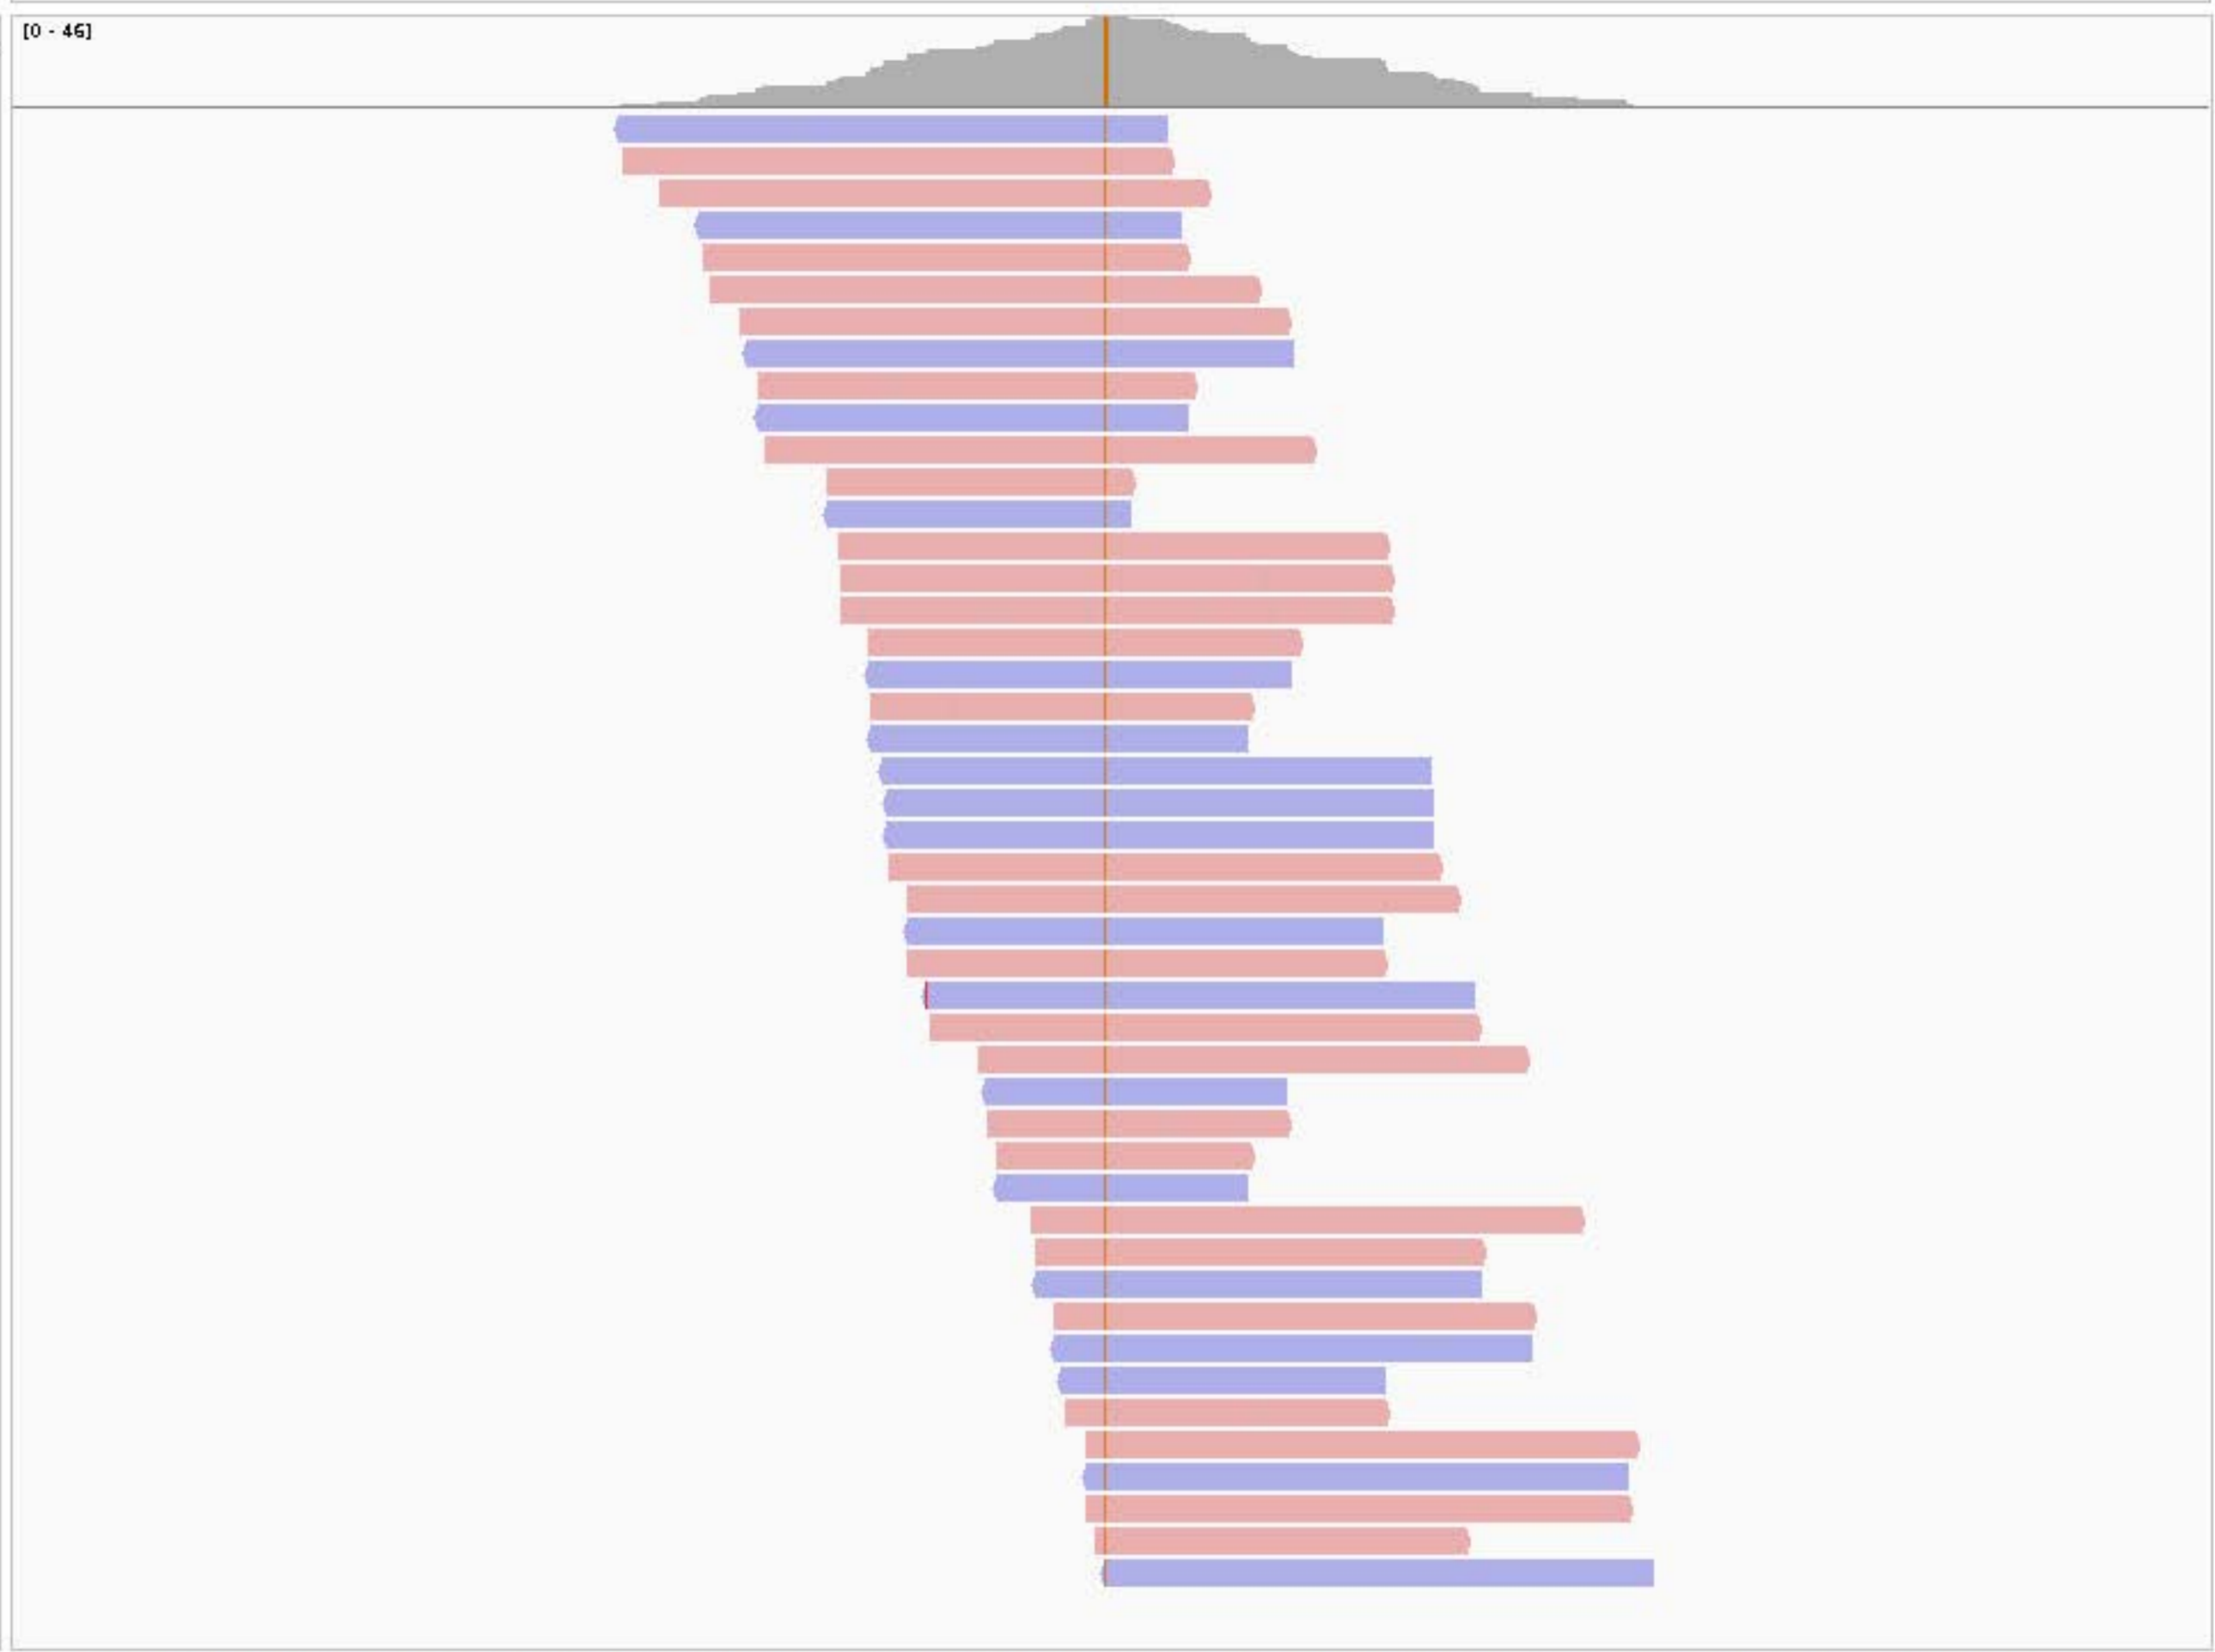

Sequence →

Refseq Genes

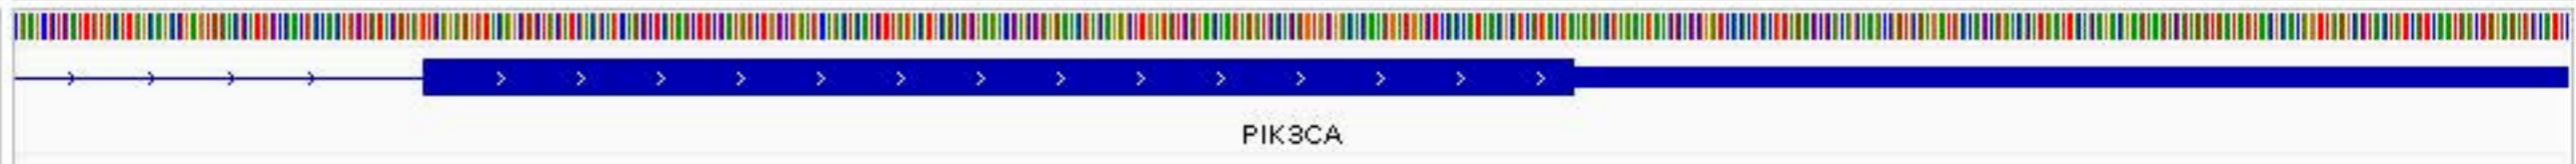



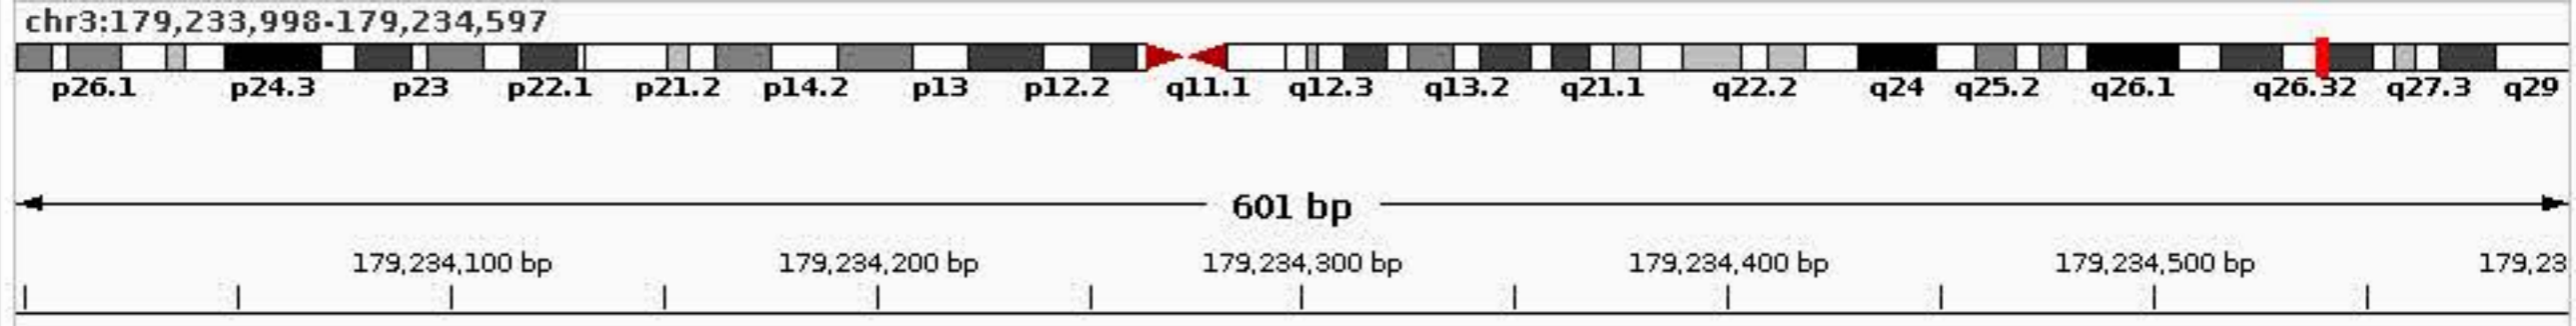

SL\_1007-N1-B\_mut.bam Coverage

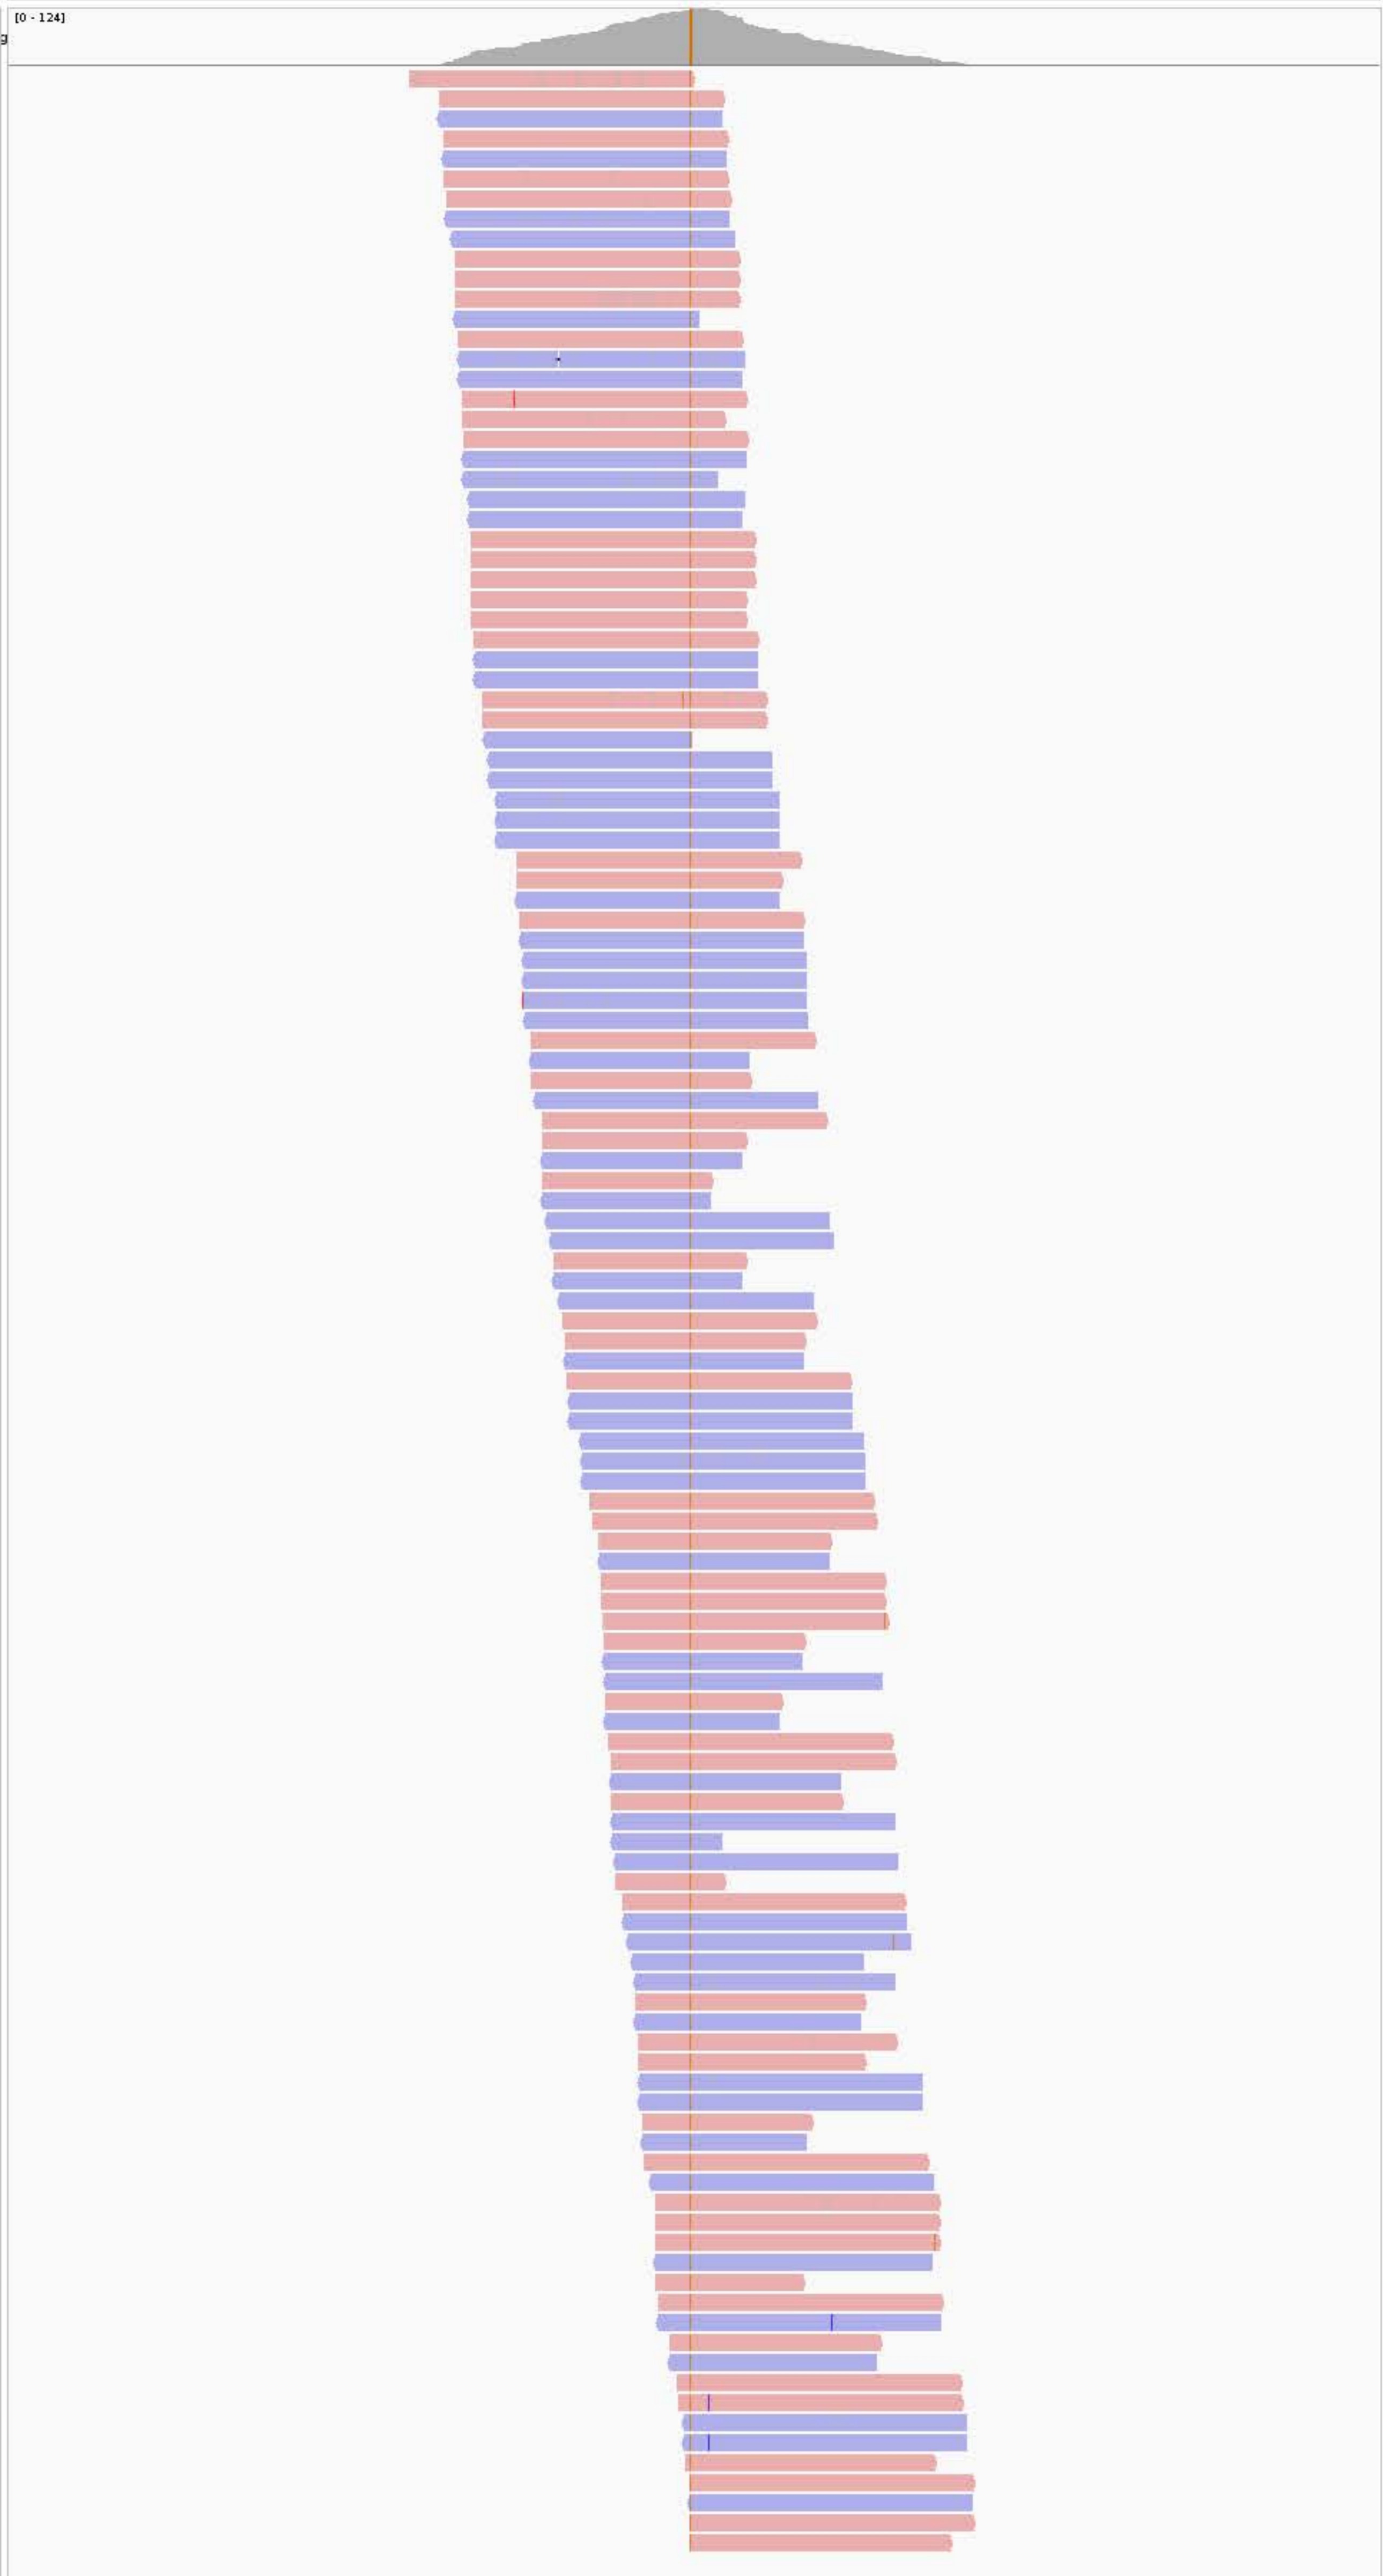

SL\_1007-N1-B\_mut.bam

Sequence

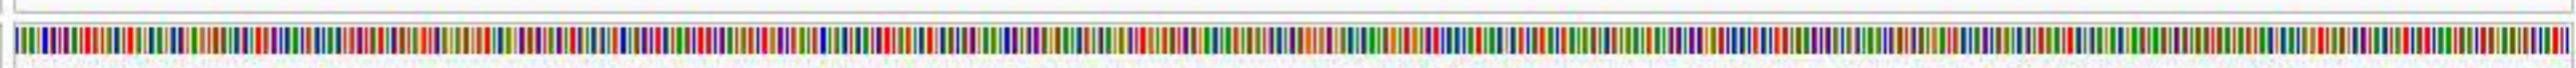

Refseq Genes

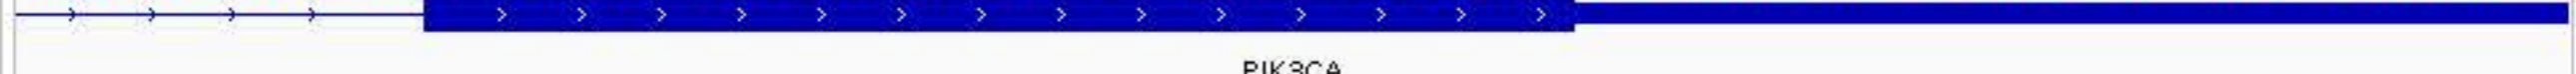

PIK3CA



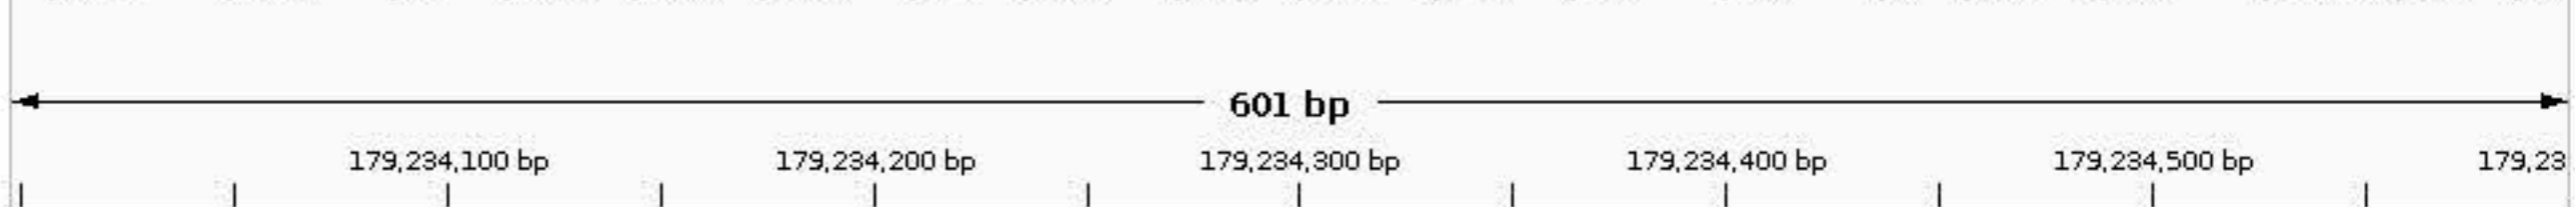

SL\_1007-N2-B\_mut.bam Coverage

SL\_1007-N2-B\_mut.bam

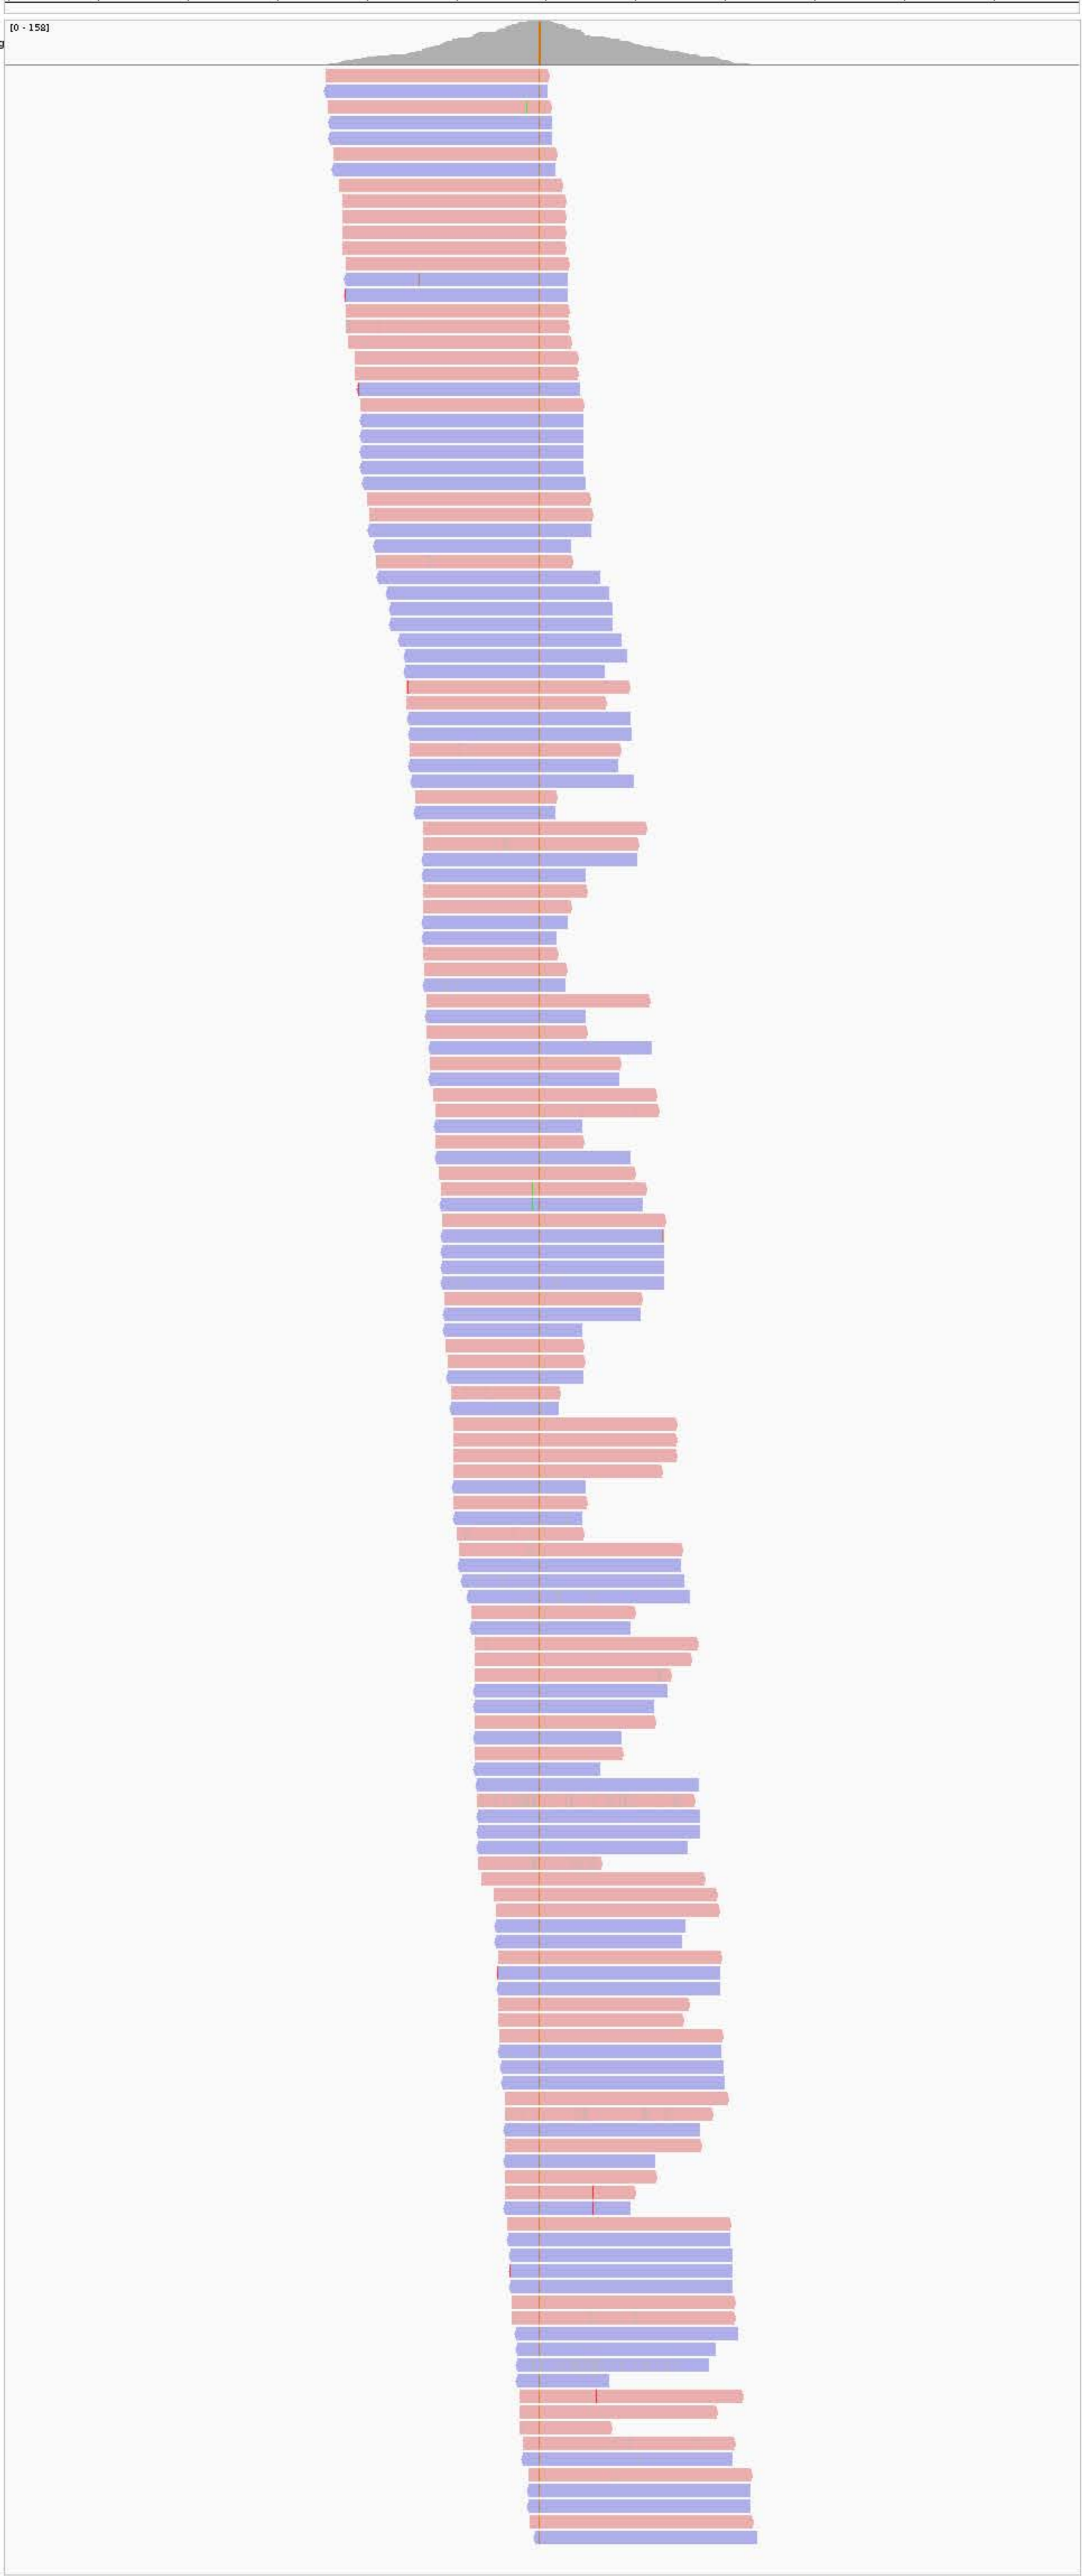

Sequence

Refseq Genes

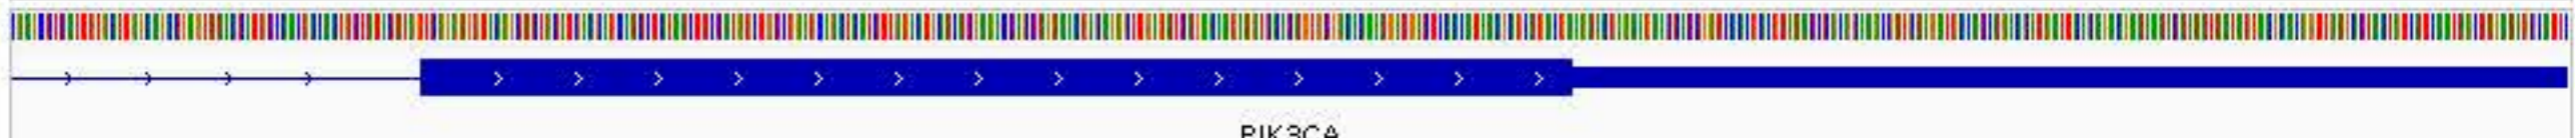

PIK3CA

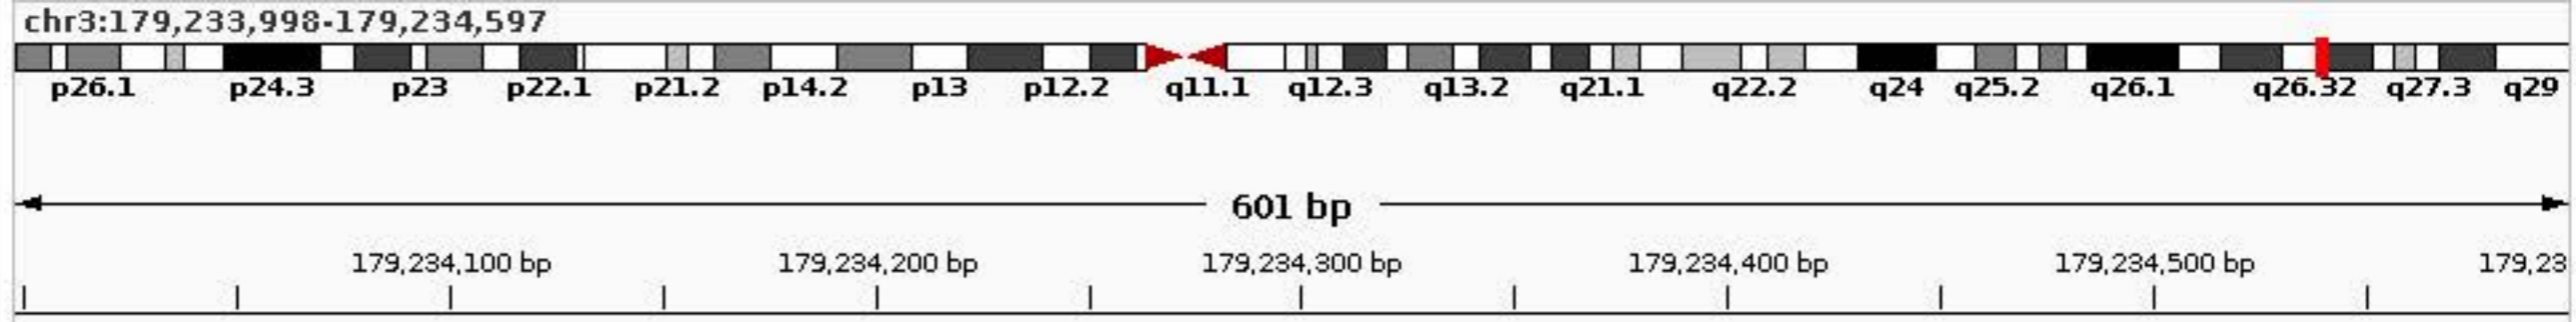

SL\_1007-N3-B\_mut.bam Coverage

SL\_1007-N3-B\_mut.bam

Sequence →

Refseq Genes

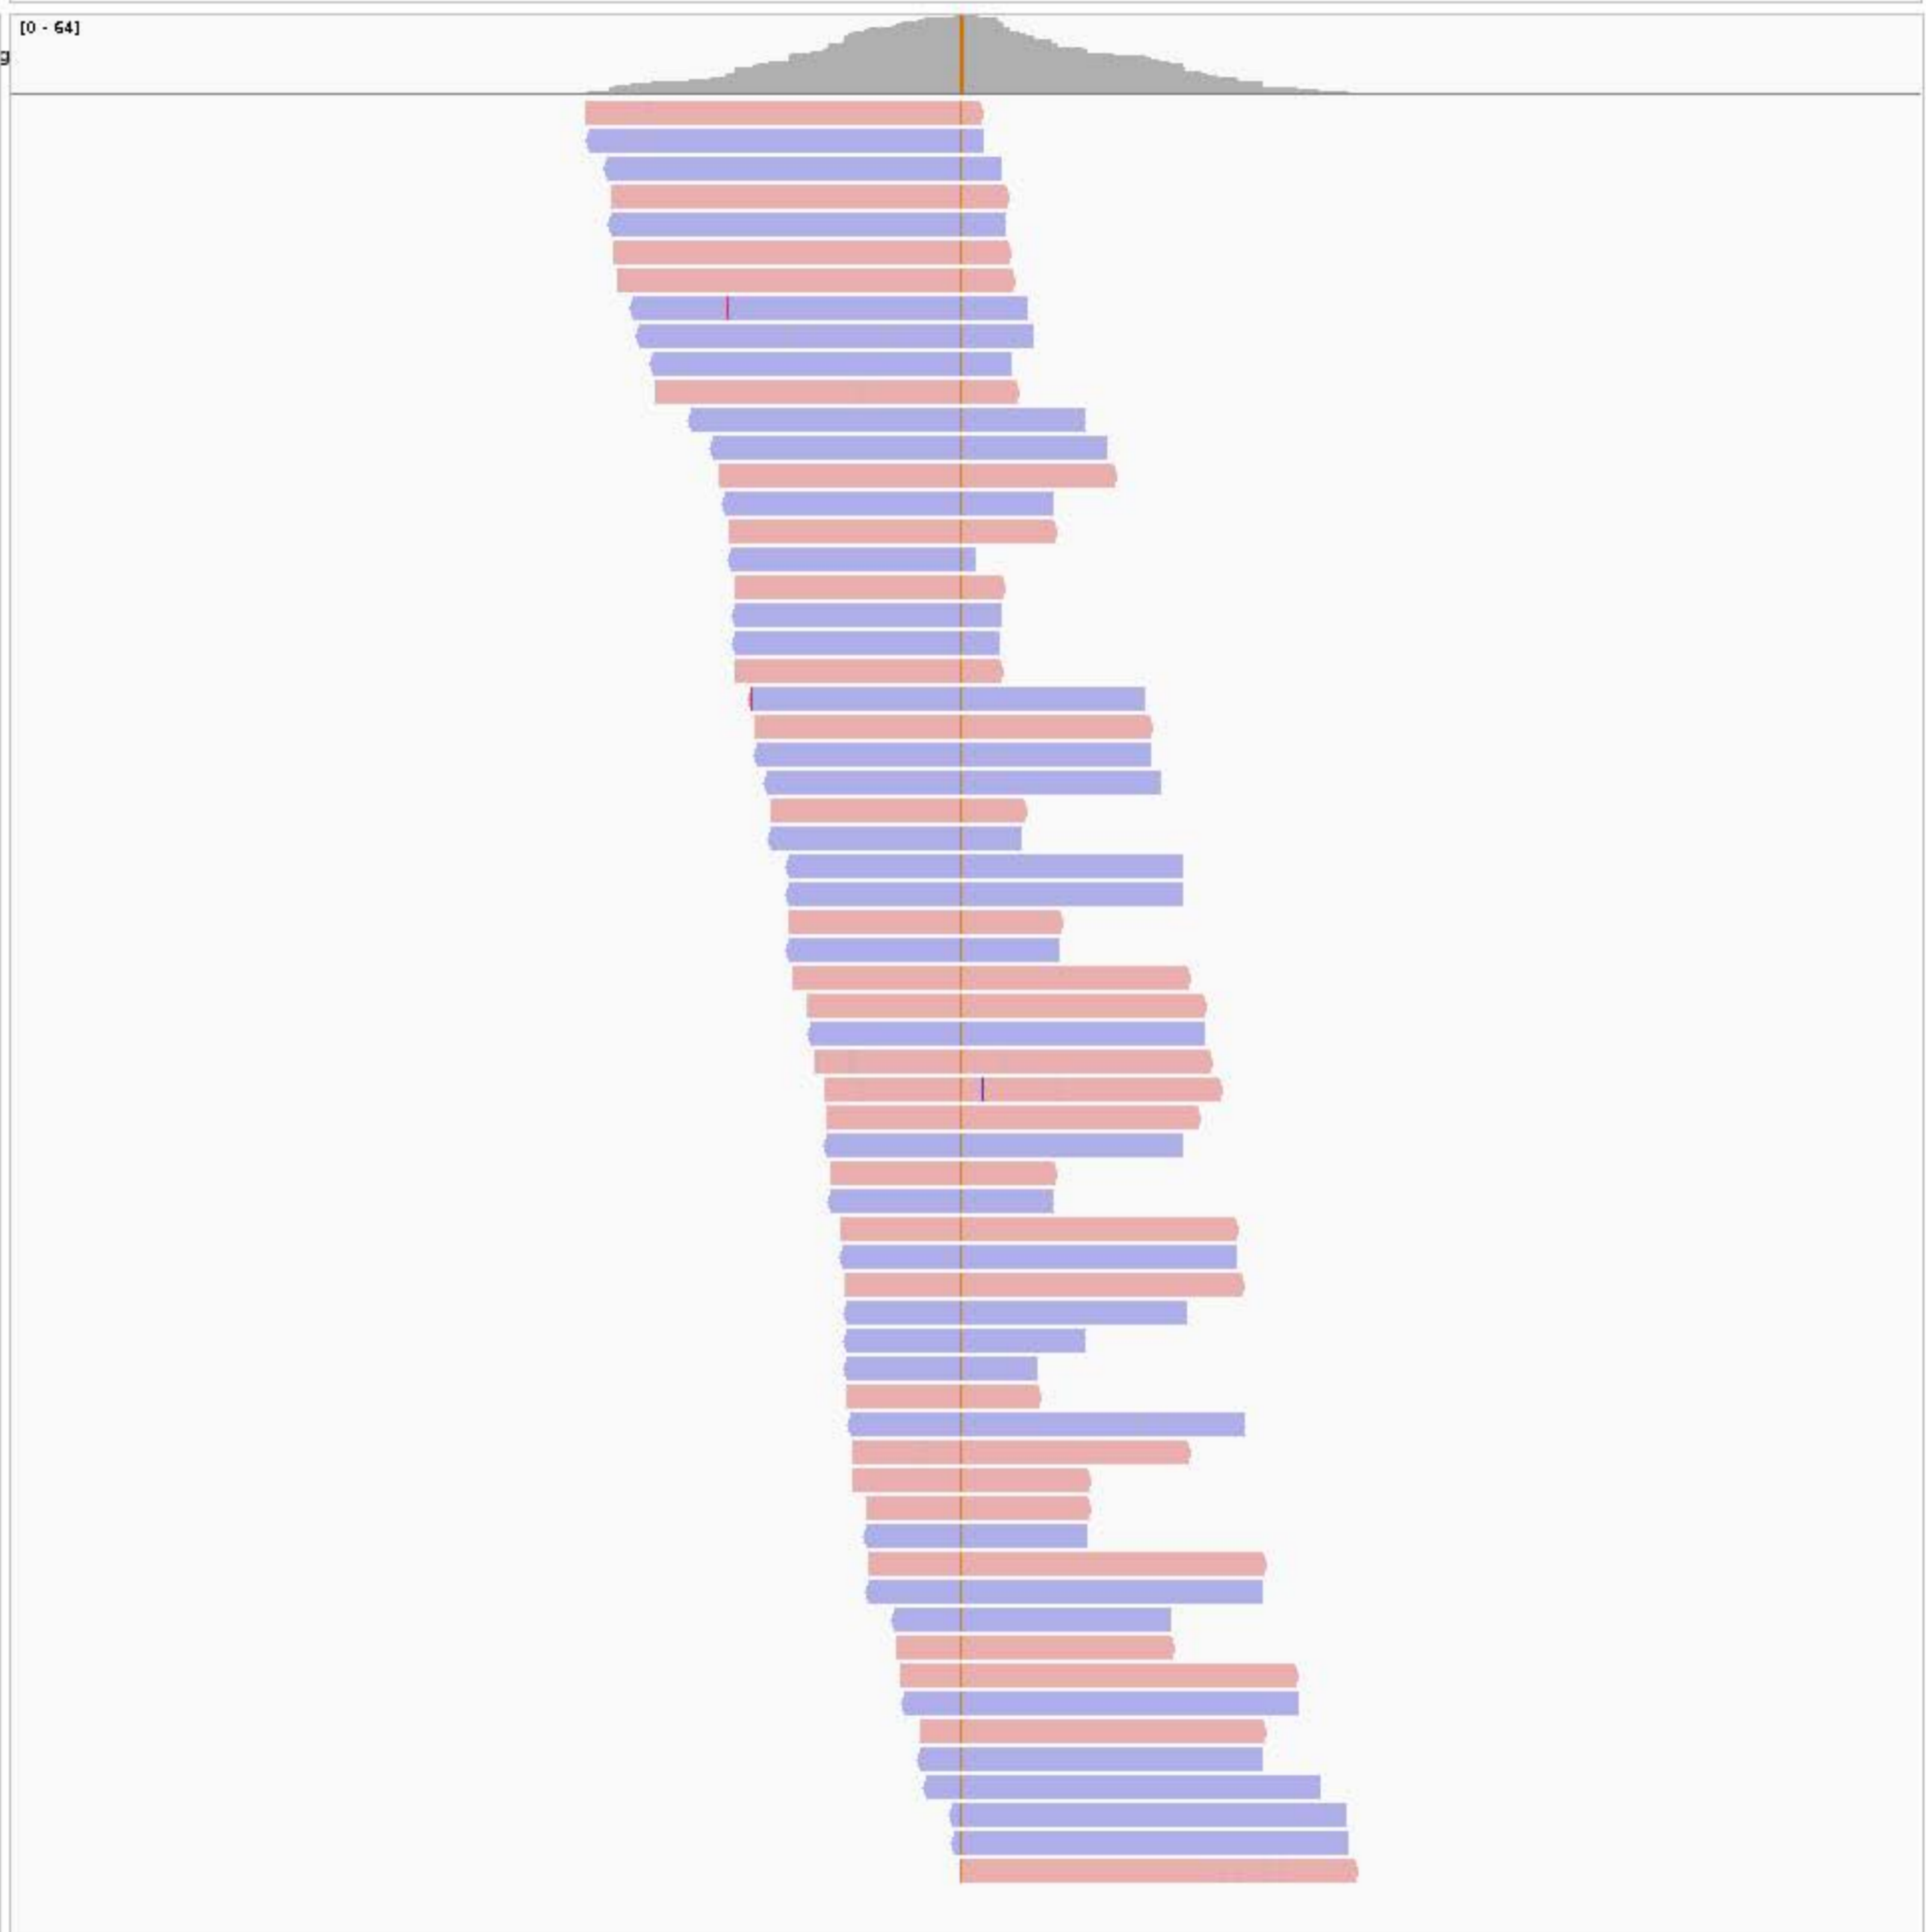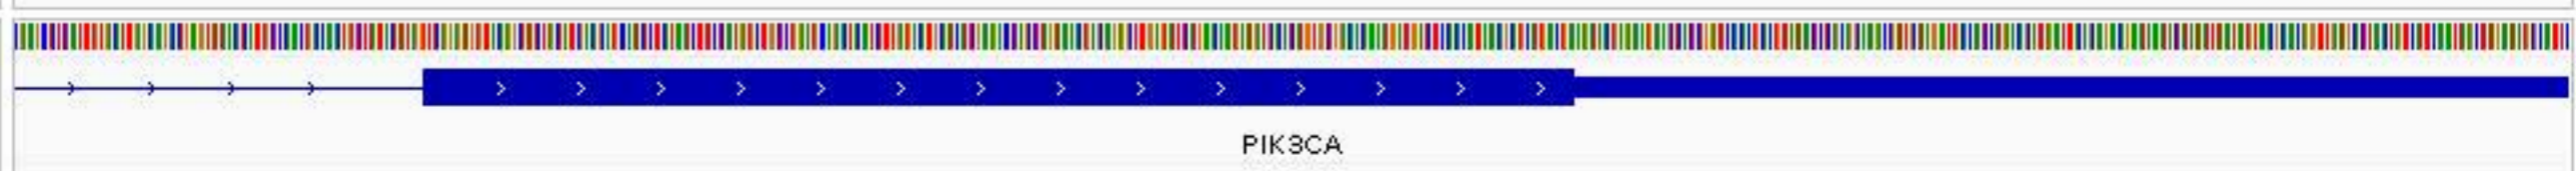



SL\_1010\_R\_FFPE\_15-B\_mut.bam  
rage

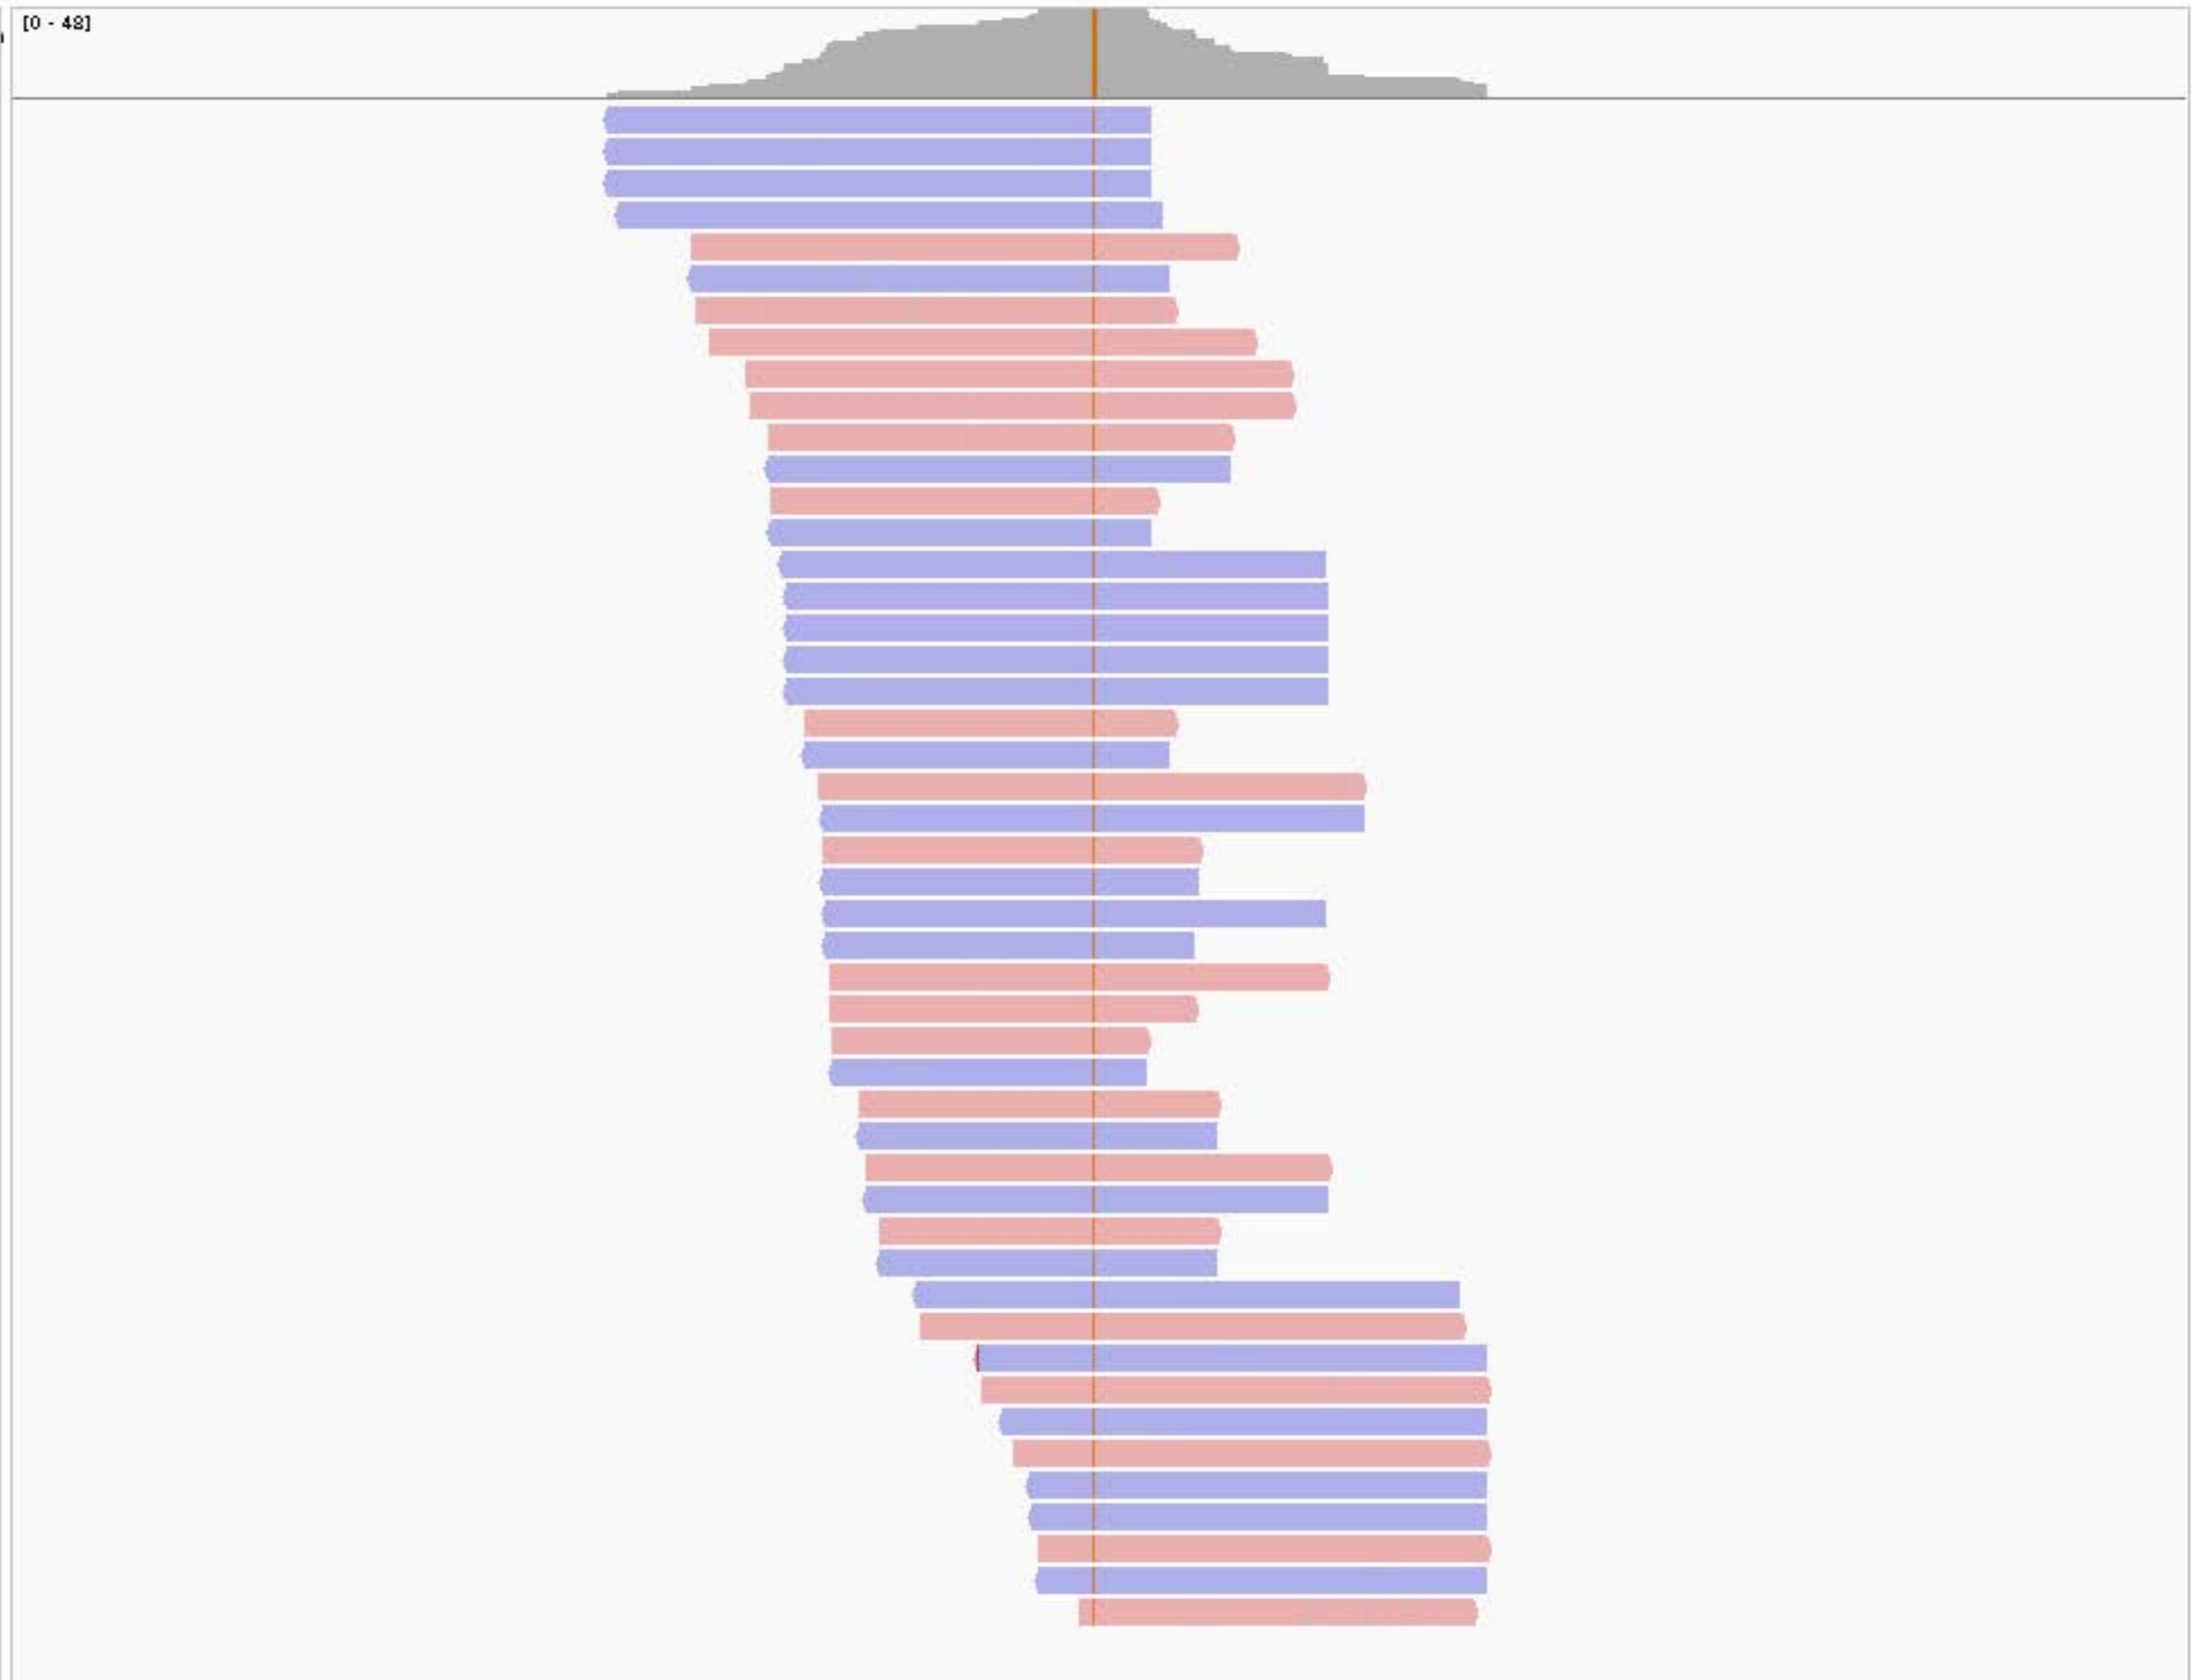

SL\_1010\_R\_FFPE\_15-B\_mut.ba  
m

Sequence →  
Refseq Genes

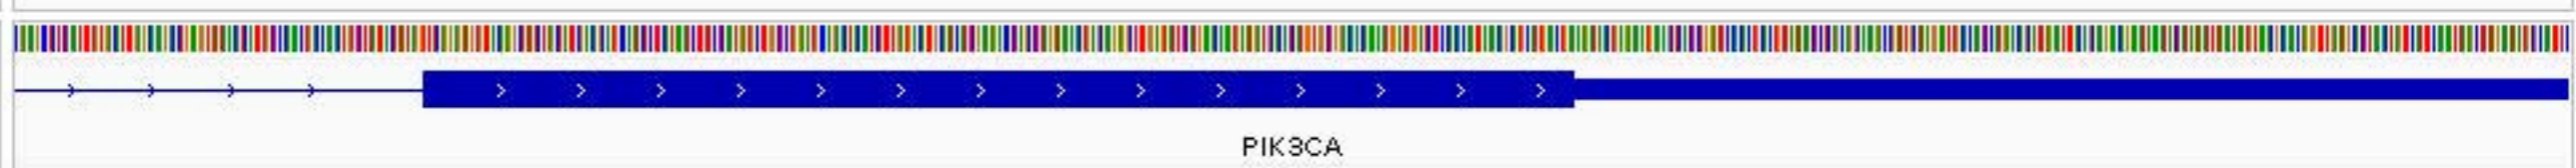





SL\_1011\_R\_FFPE\_62-B\_mut.bam  
rage

SL\_1011\_R\_FFPE\_62-B\_mut.ba  
m

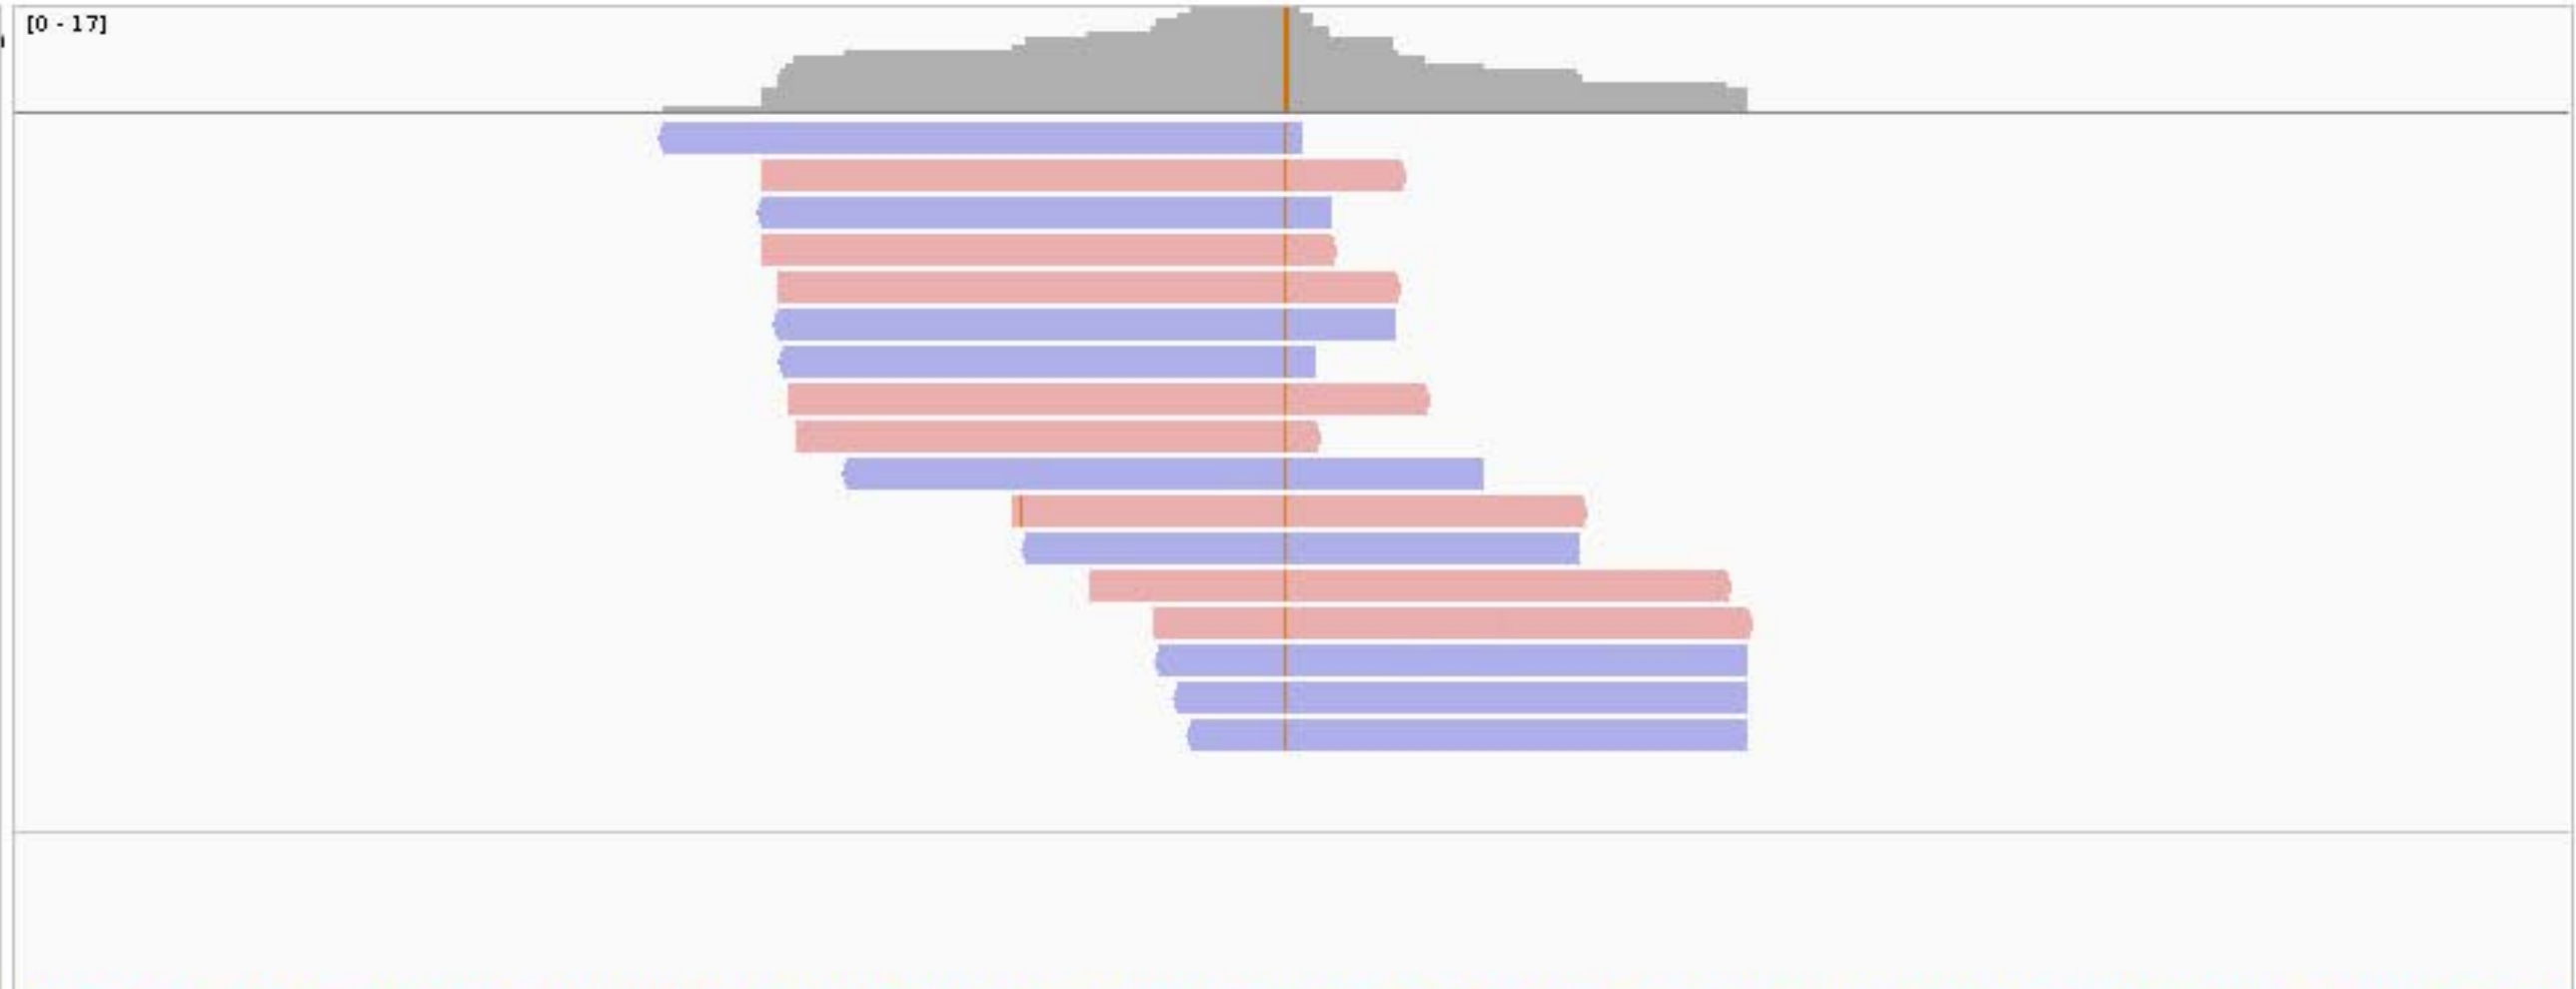

Sequence →

Refseq Genes





SL\_1012\_L\_FFPE\_47-B\_mut.bam  
range

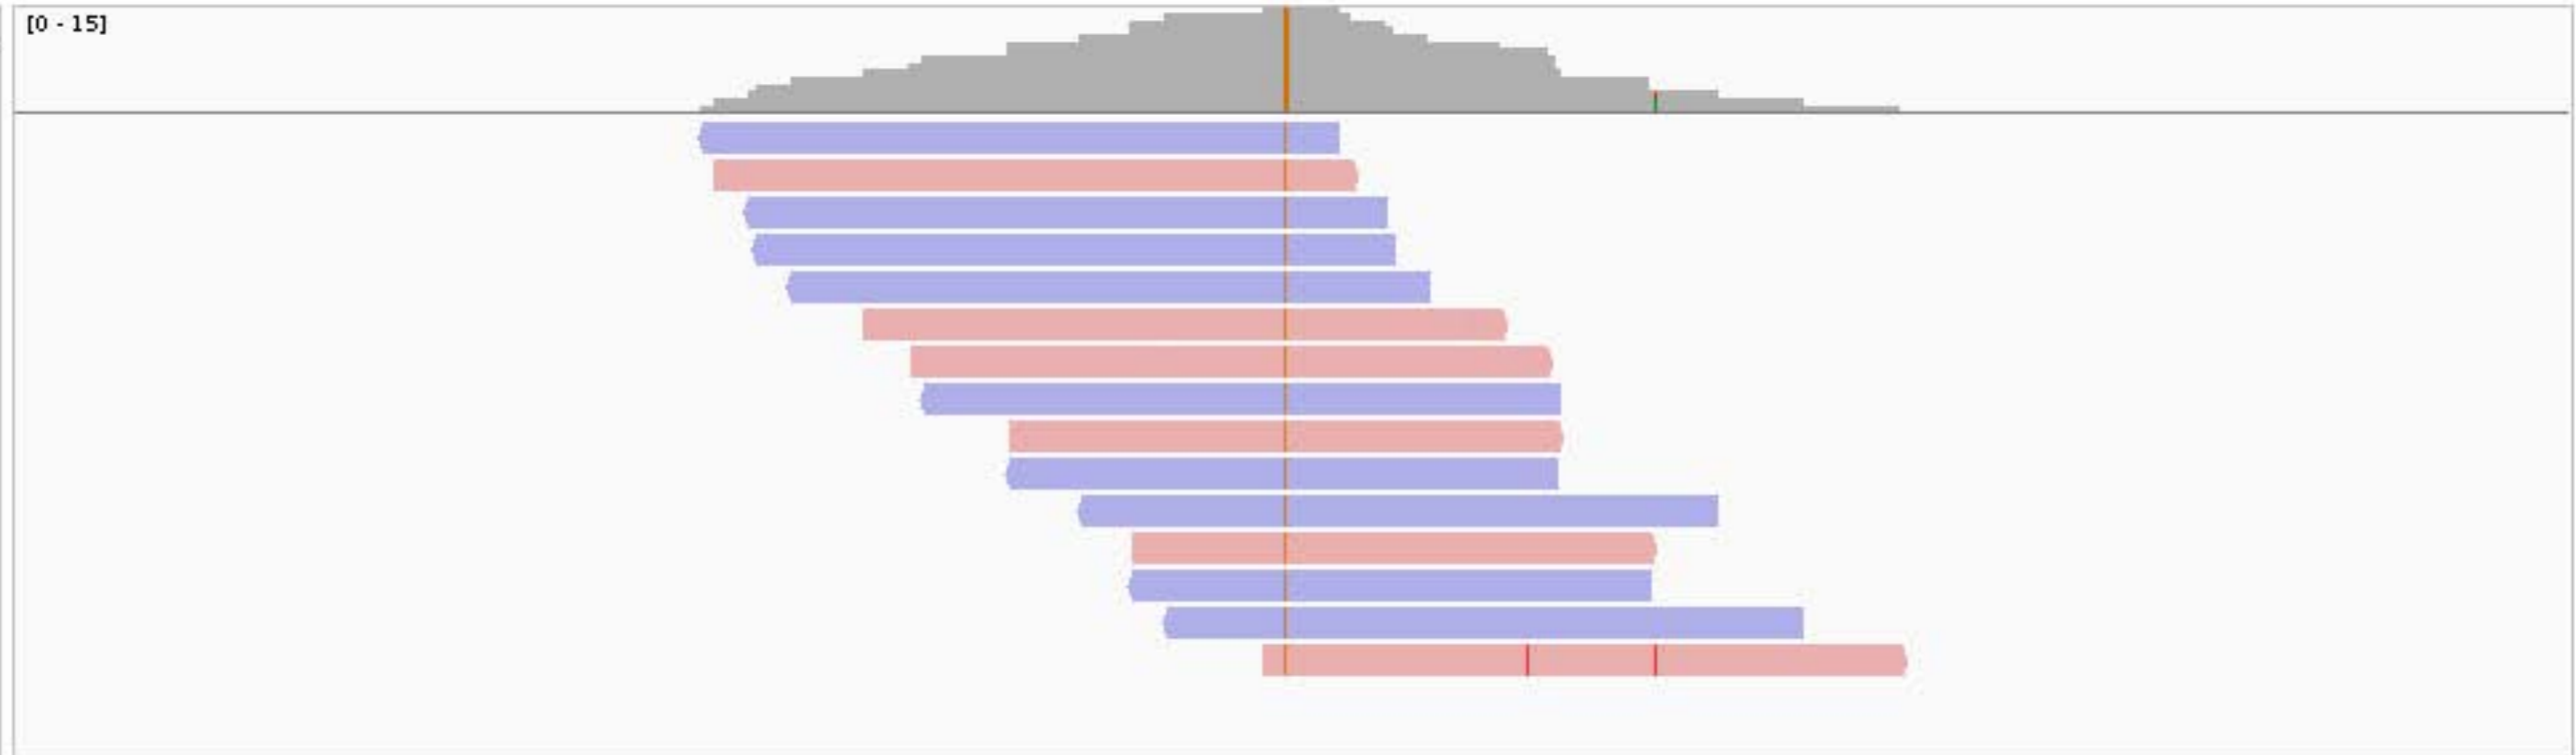

SL\_1012\_L\_FFPE\_47-B\_mut.ba  
m

Sequence →



Refseq Genes





SL\_1013\_R\_12\_FFPE-B\_mut.bam  
range

SL\_1013\_R\_12\_FFPE-B\_mut.bam

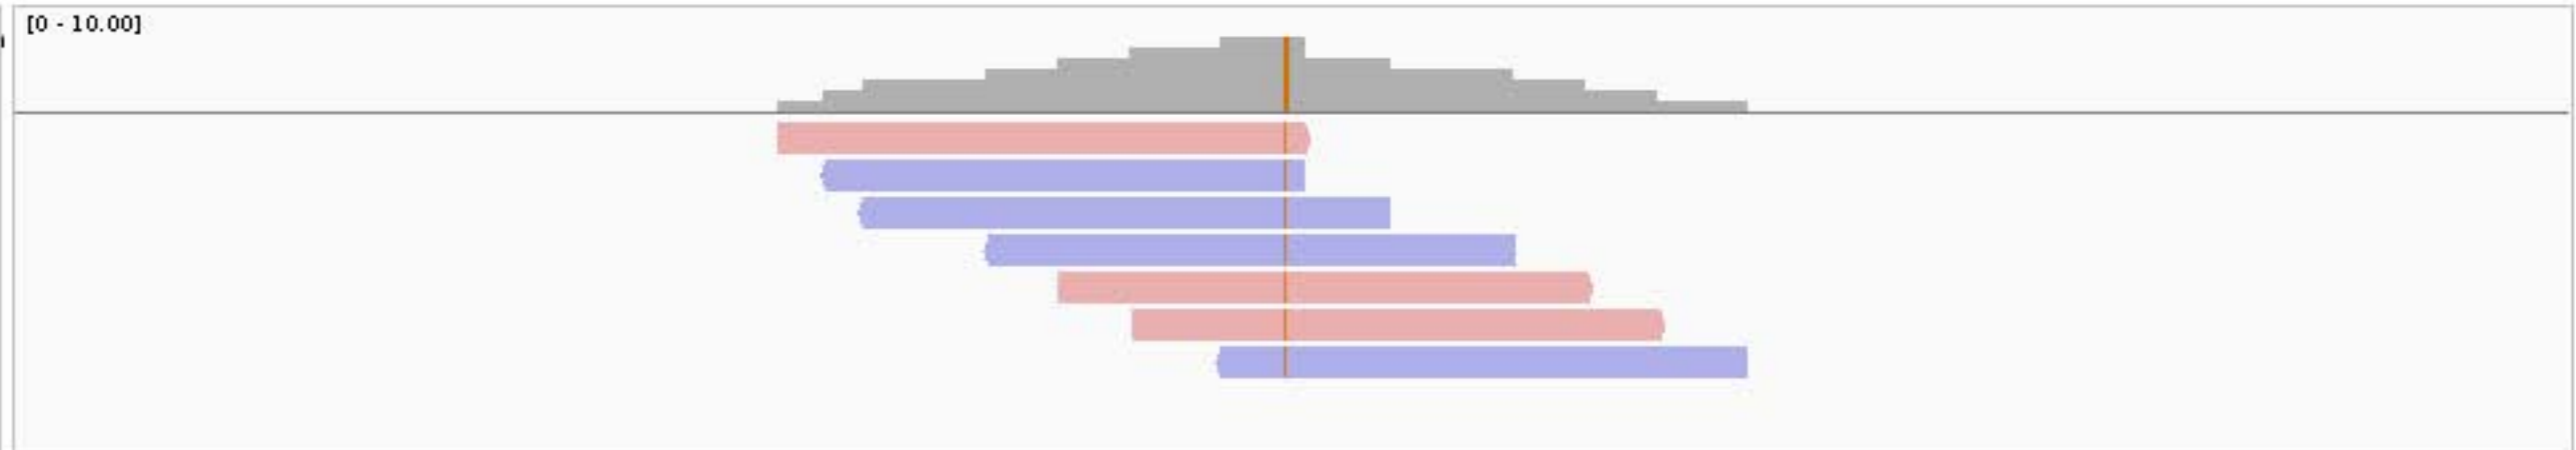

Sequence →

Refseq Genes







SL\_1015\_R\_63\_FFPE-B\_mut.bam  
SL\_1015\_R\_63\_FFPE-B\_mut.bam

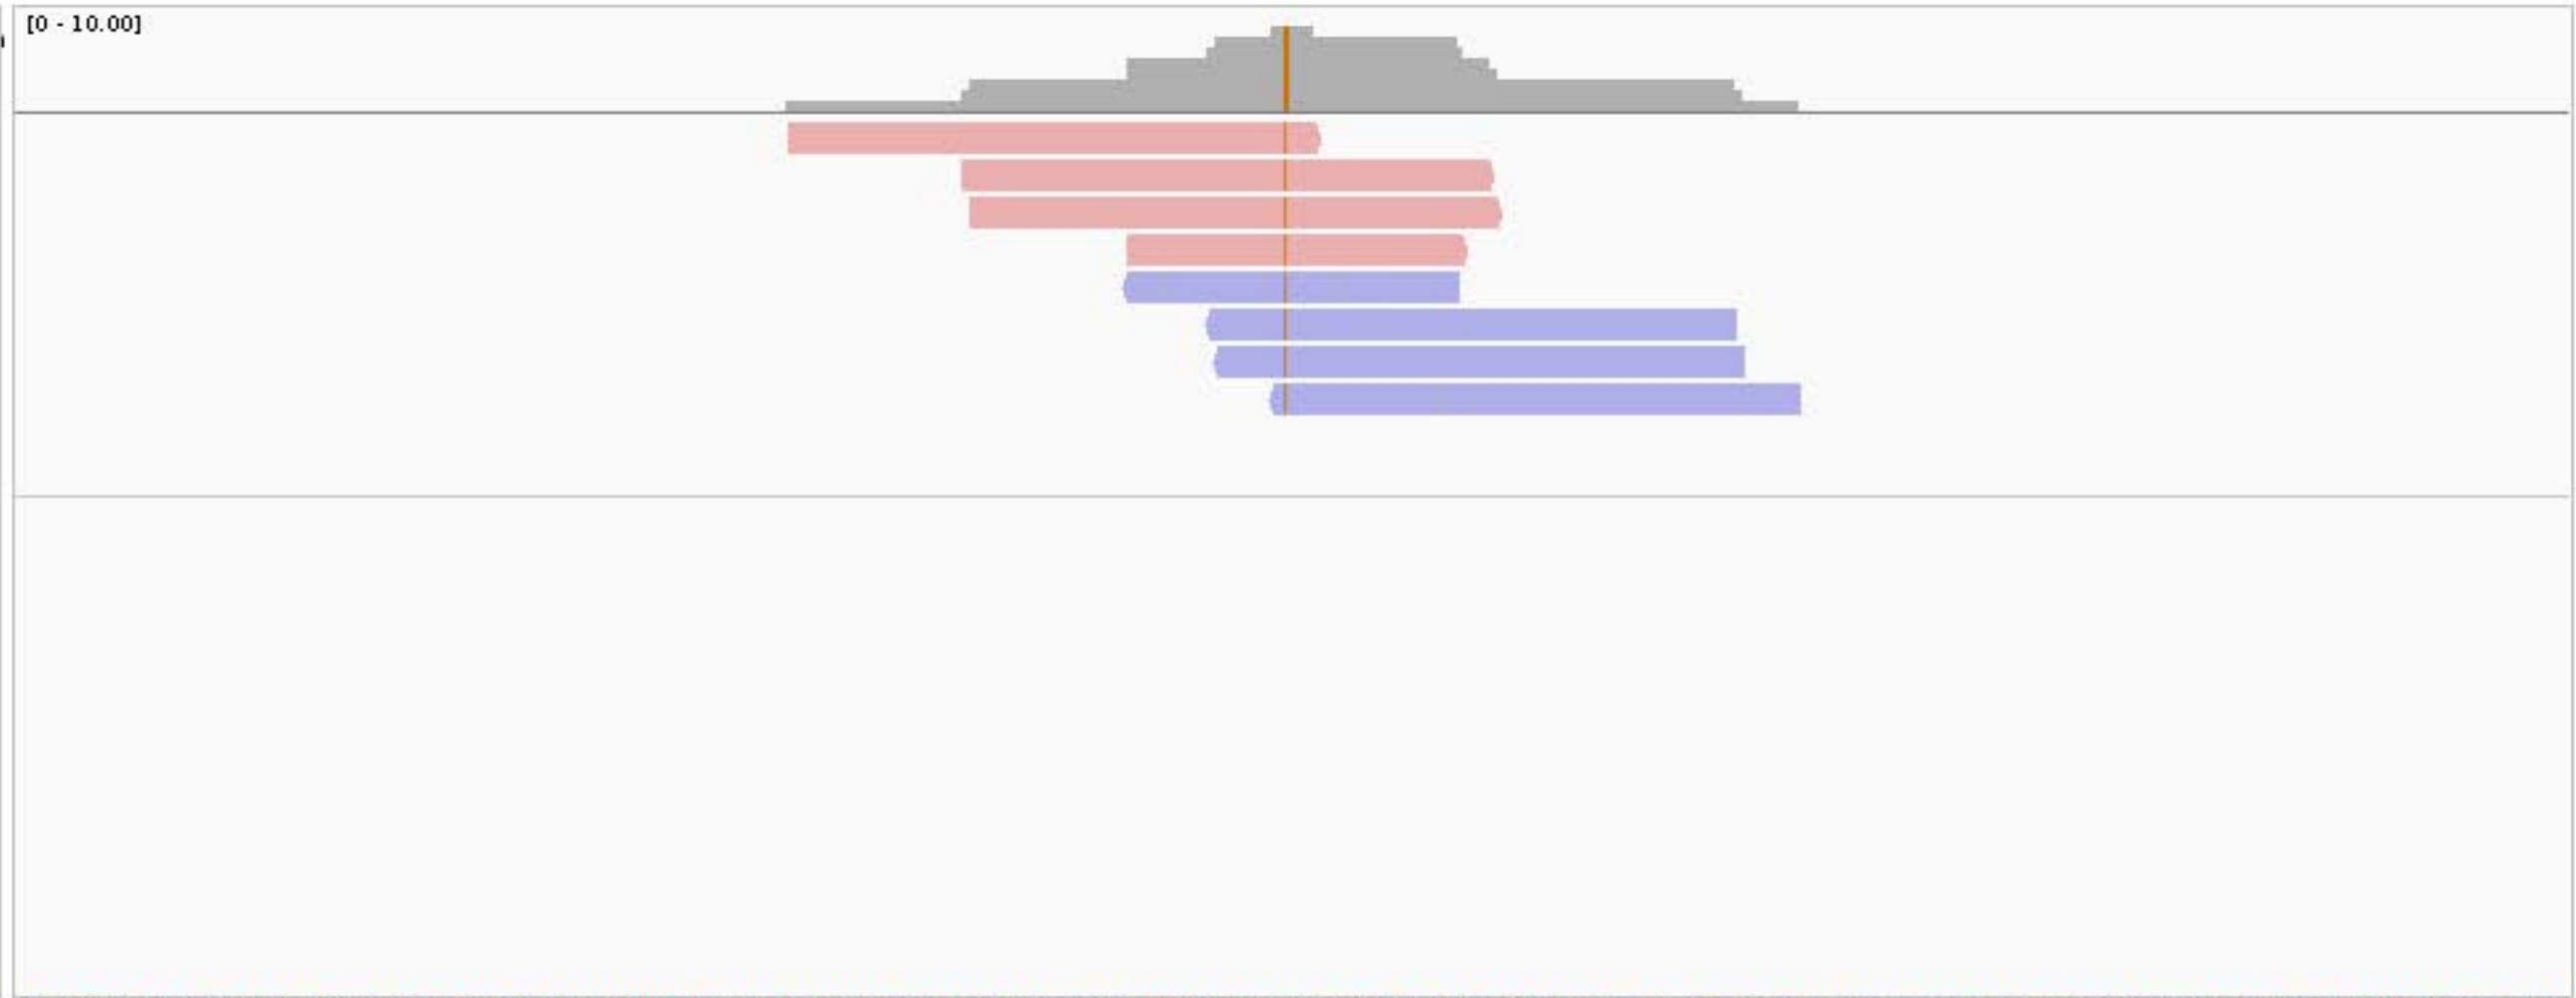

Sequence →  
Refseq Genes

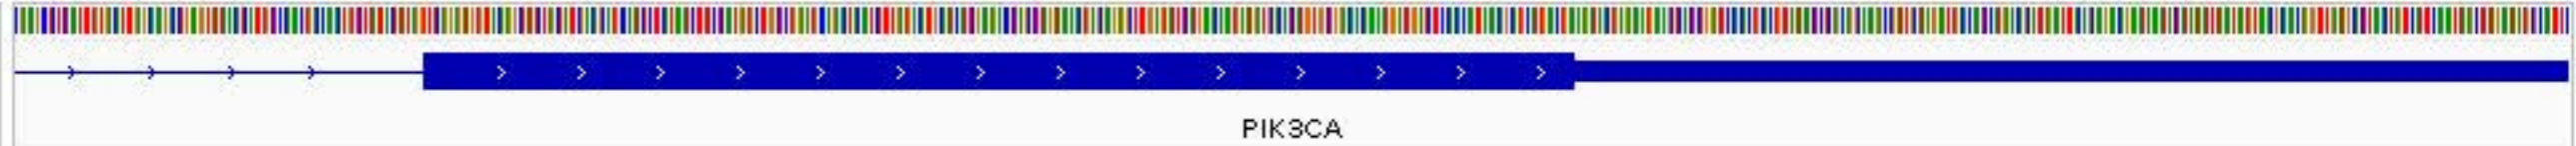



SL\_1015\_R\_78\_FFPE-B\_mut.bam  
range

SL\_1015\_R\_78\_FFPE-B\_mut.ba  
m

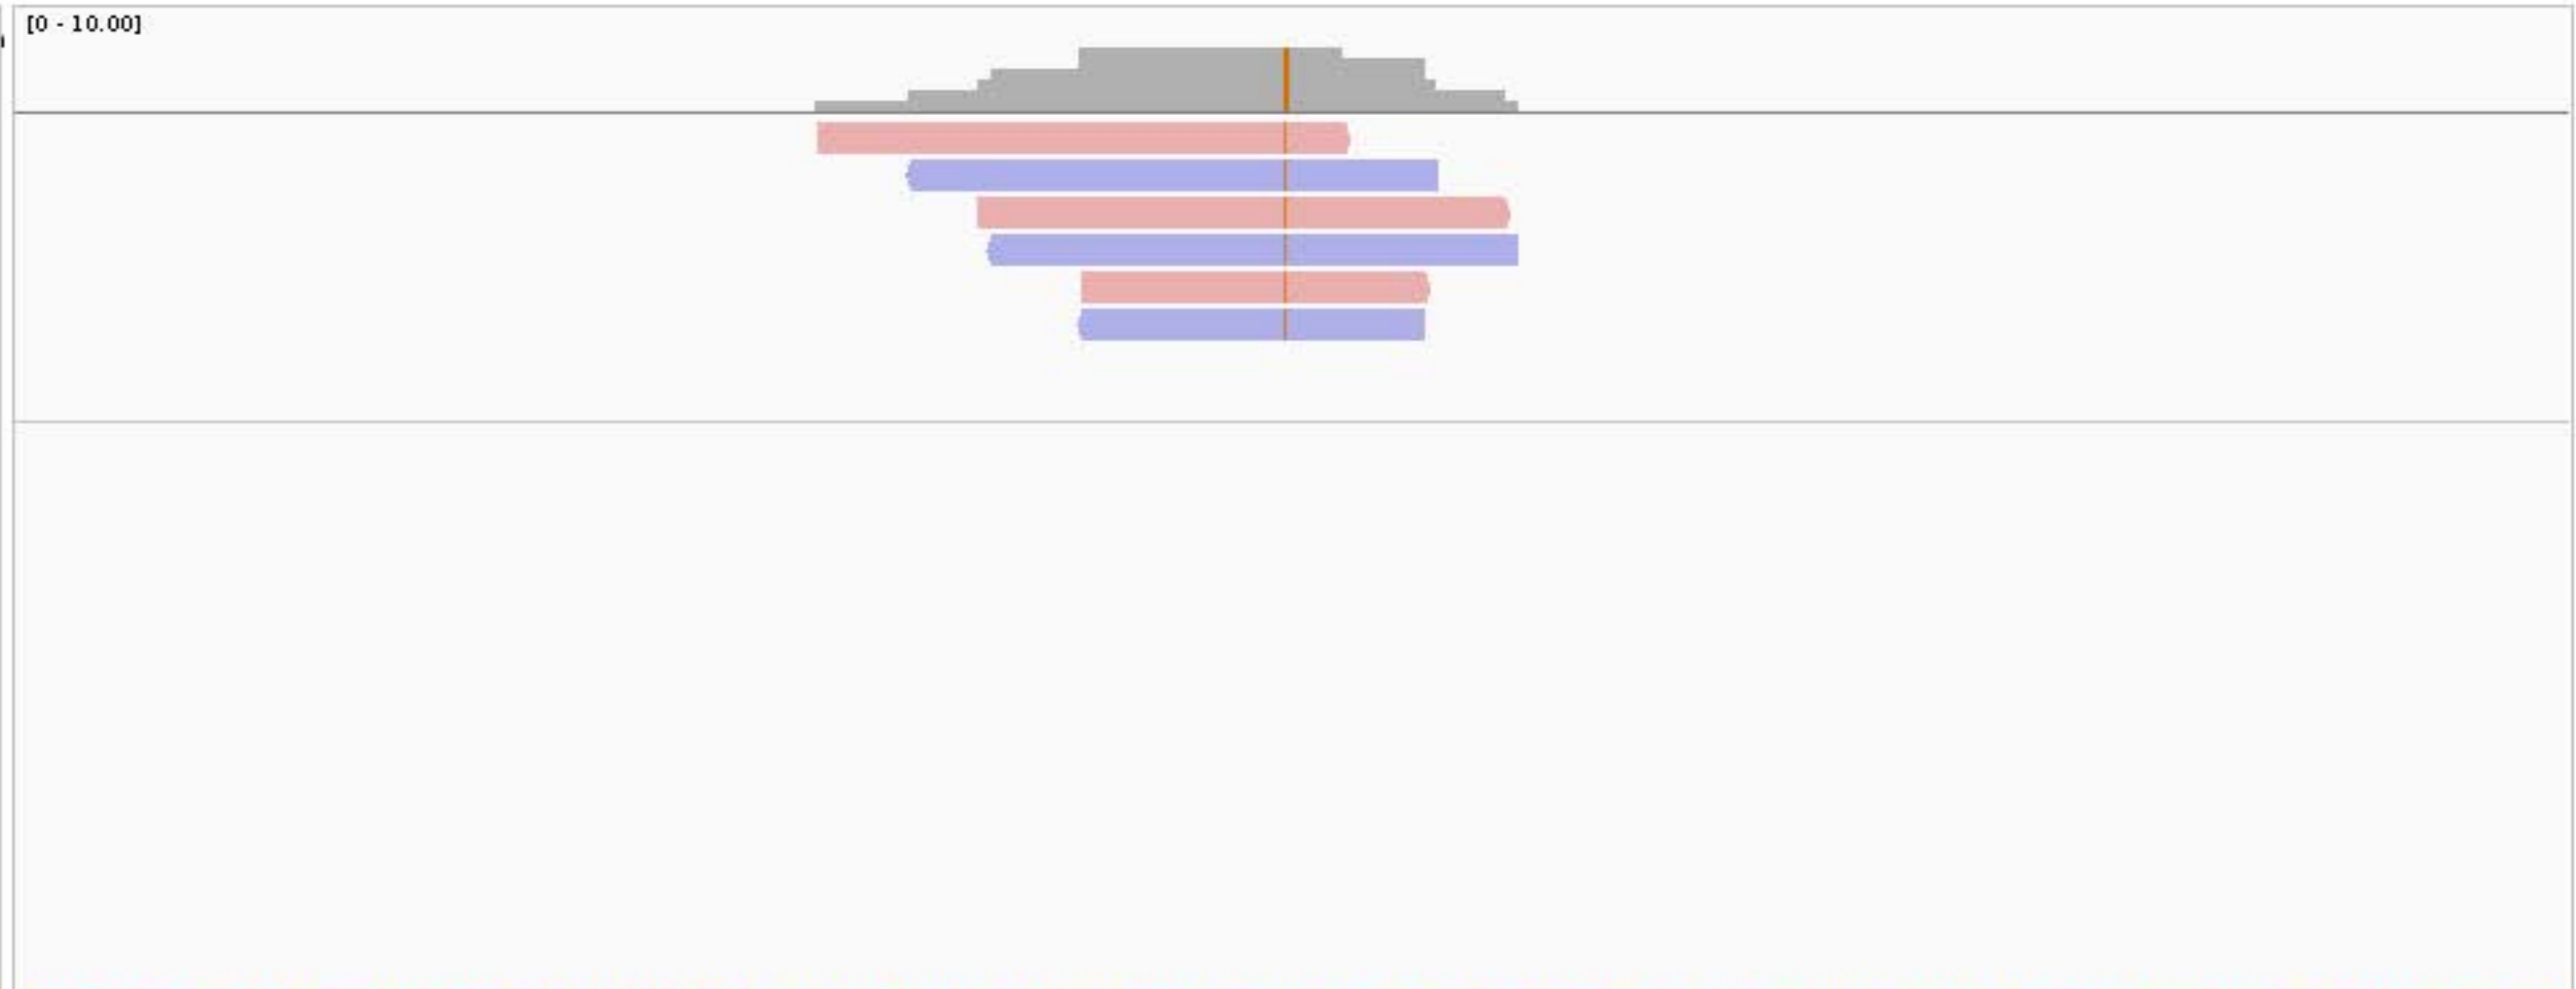

Sequence →

Refseq Genes





SL\_1015\_R\_100\_FFPE-B\_mut.bam  
verage

SL\_1015\_R\_100\_FFPE-B\_mut.bam

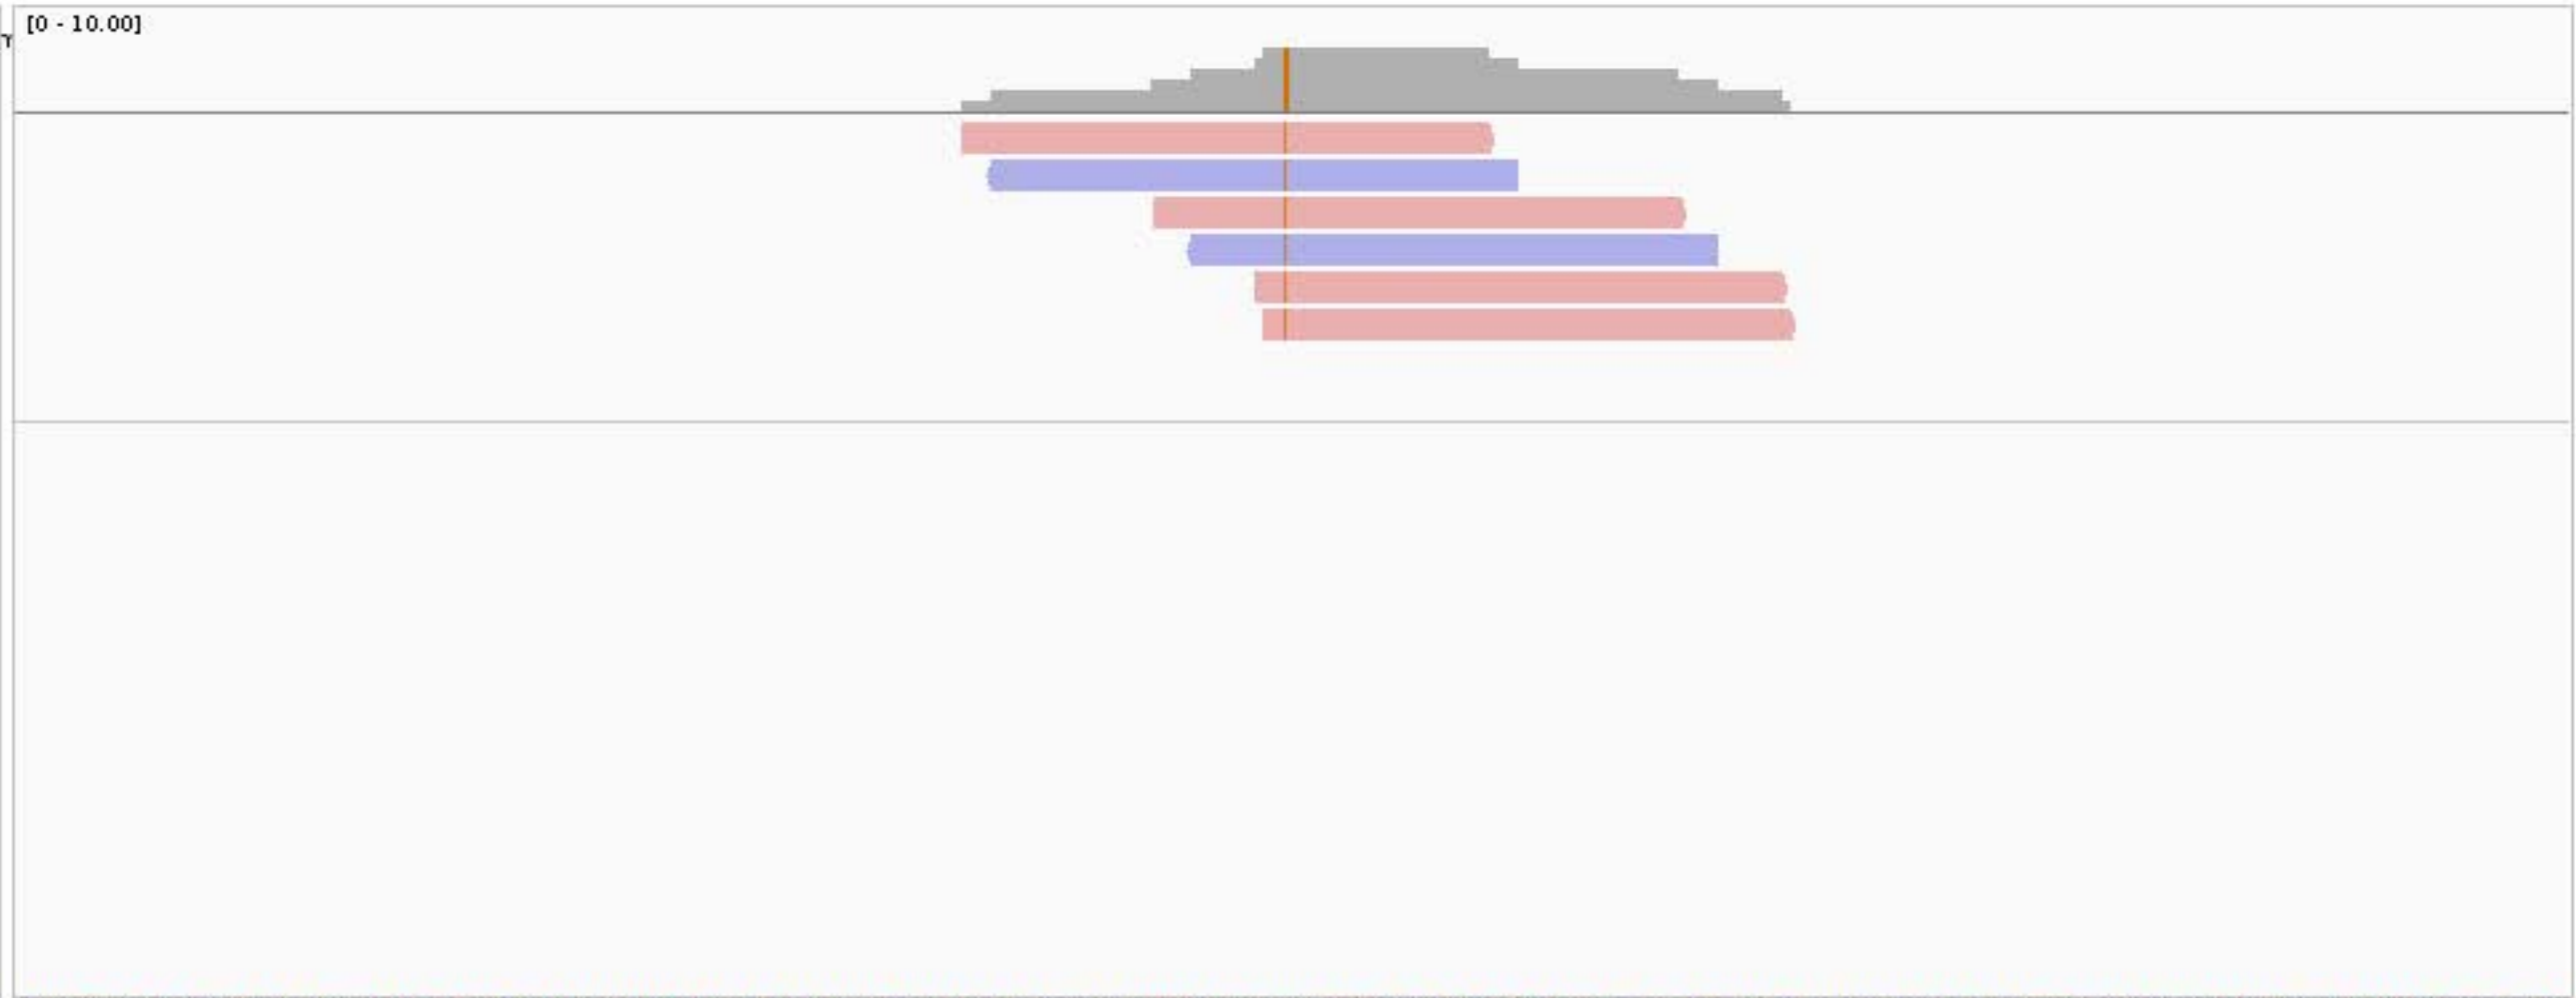

Sequence →

Refseq Genes





SL\_0012\_RT\_3-8\_mut.bam Cov

SL\_0012\_RT\_3-8\_mut.bam

Sequence

RefSeq Genes

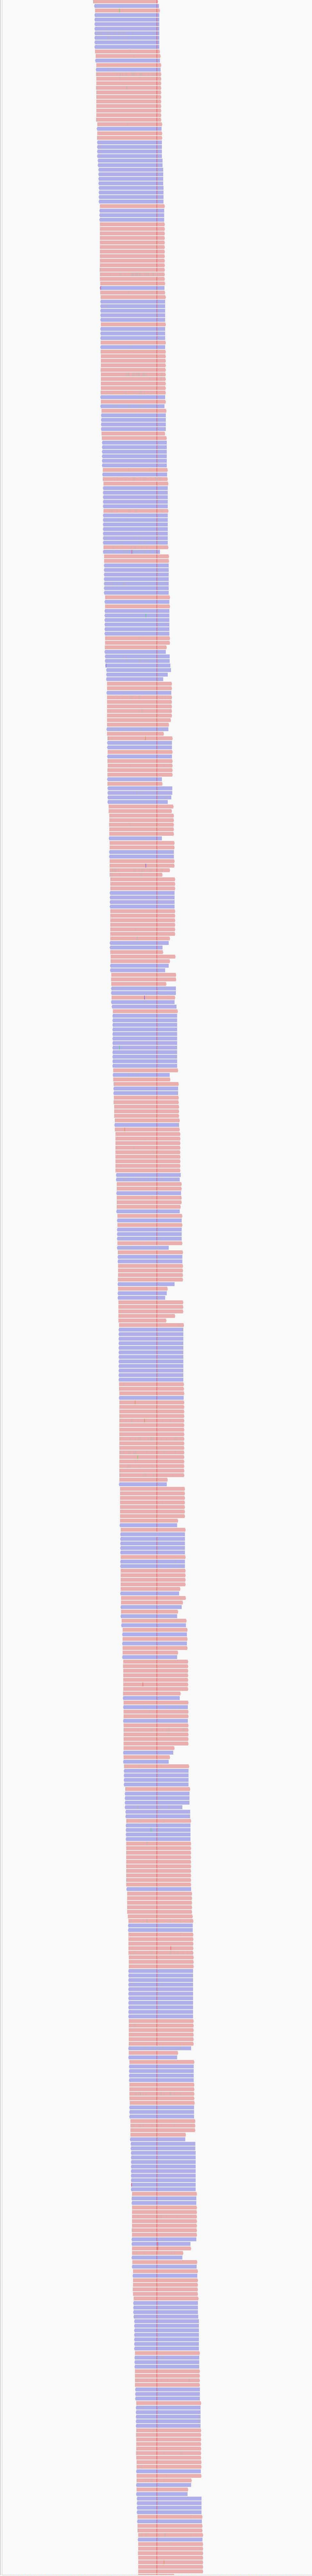



SL\_0012\_RT\_4B\_mut.bam Cov

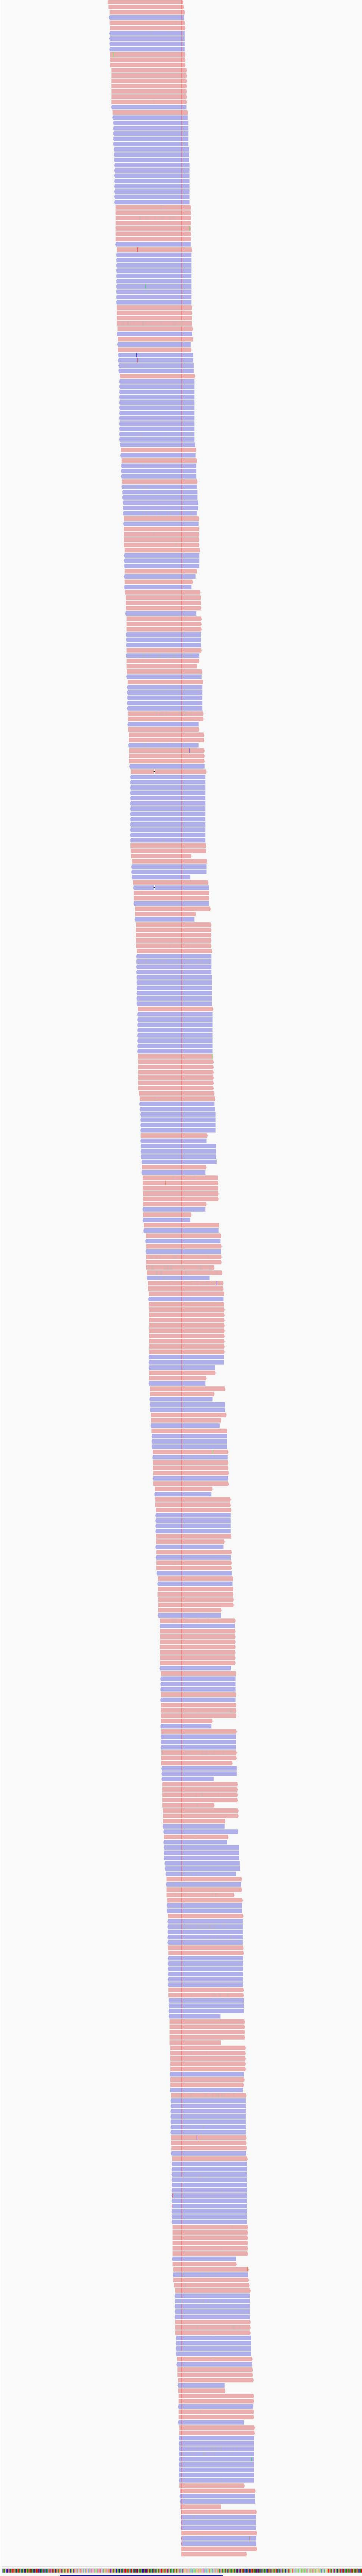

Sequence  
Refseq Genes

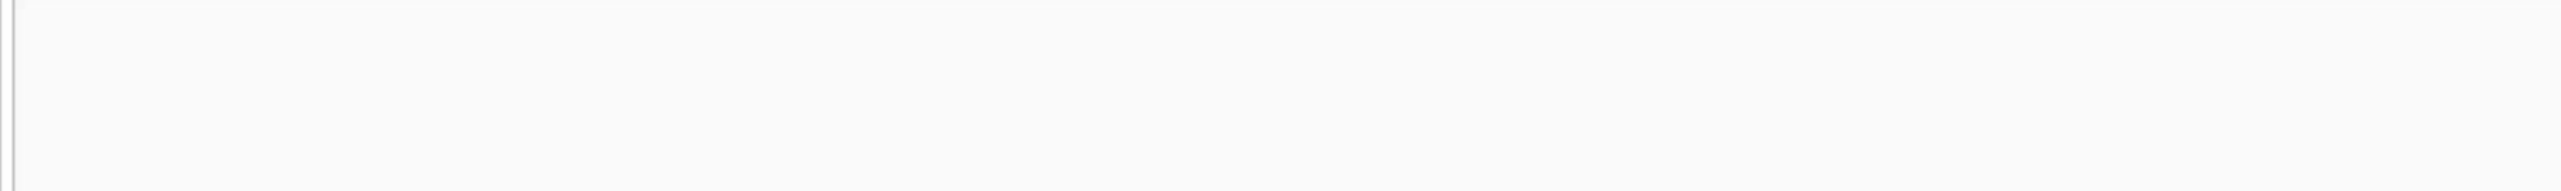



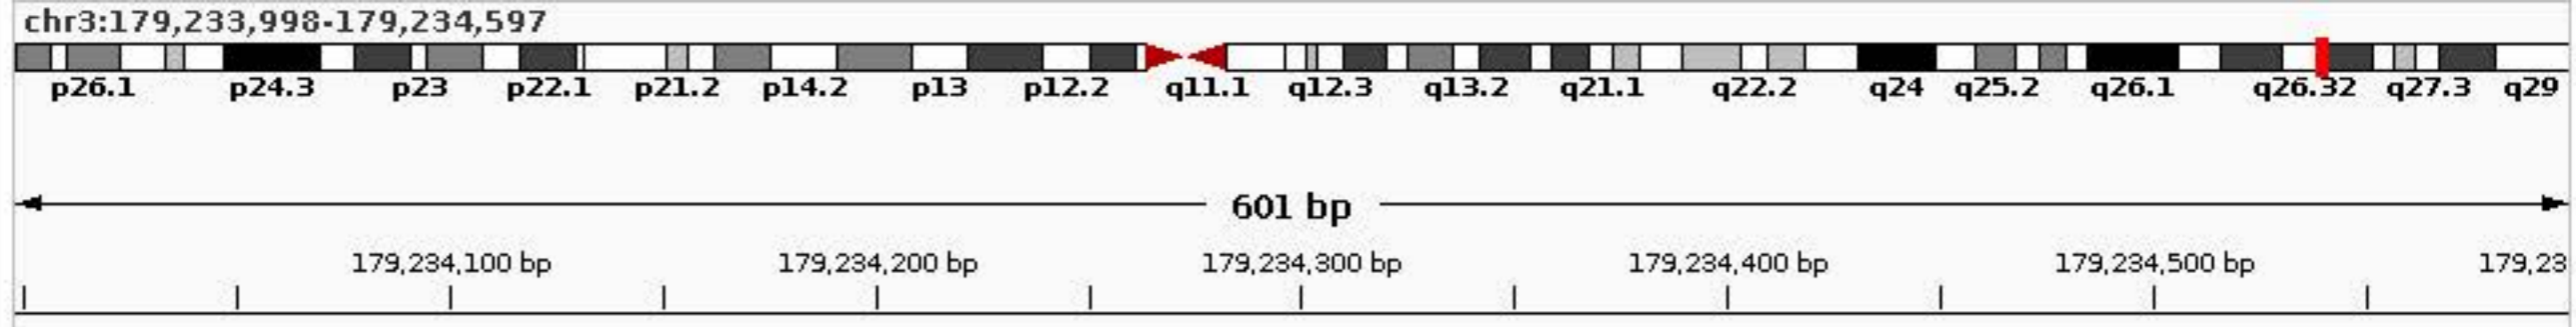

SL\_1002\_L\_FFPE\_15-B\_mut.barrage

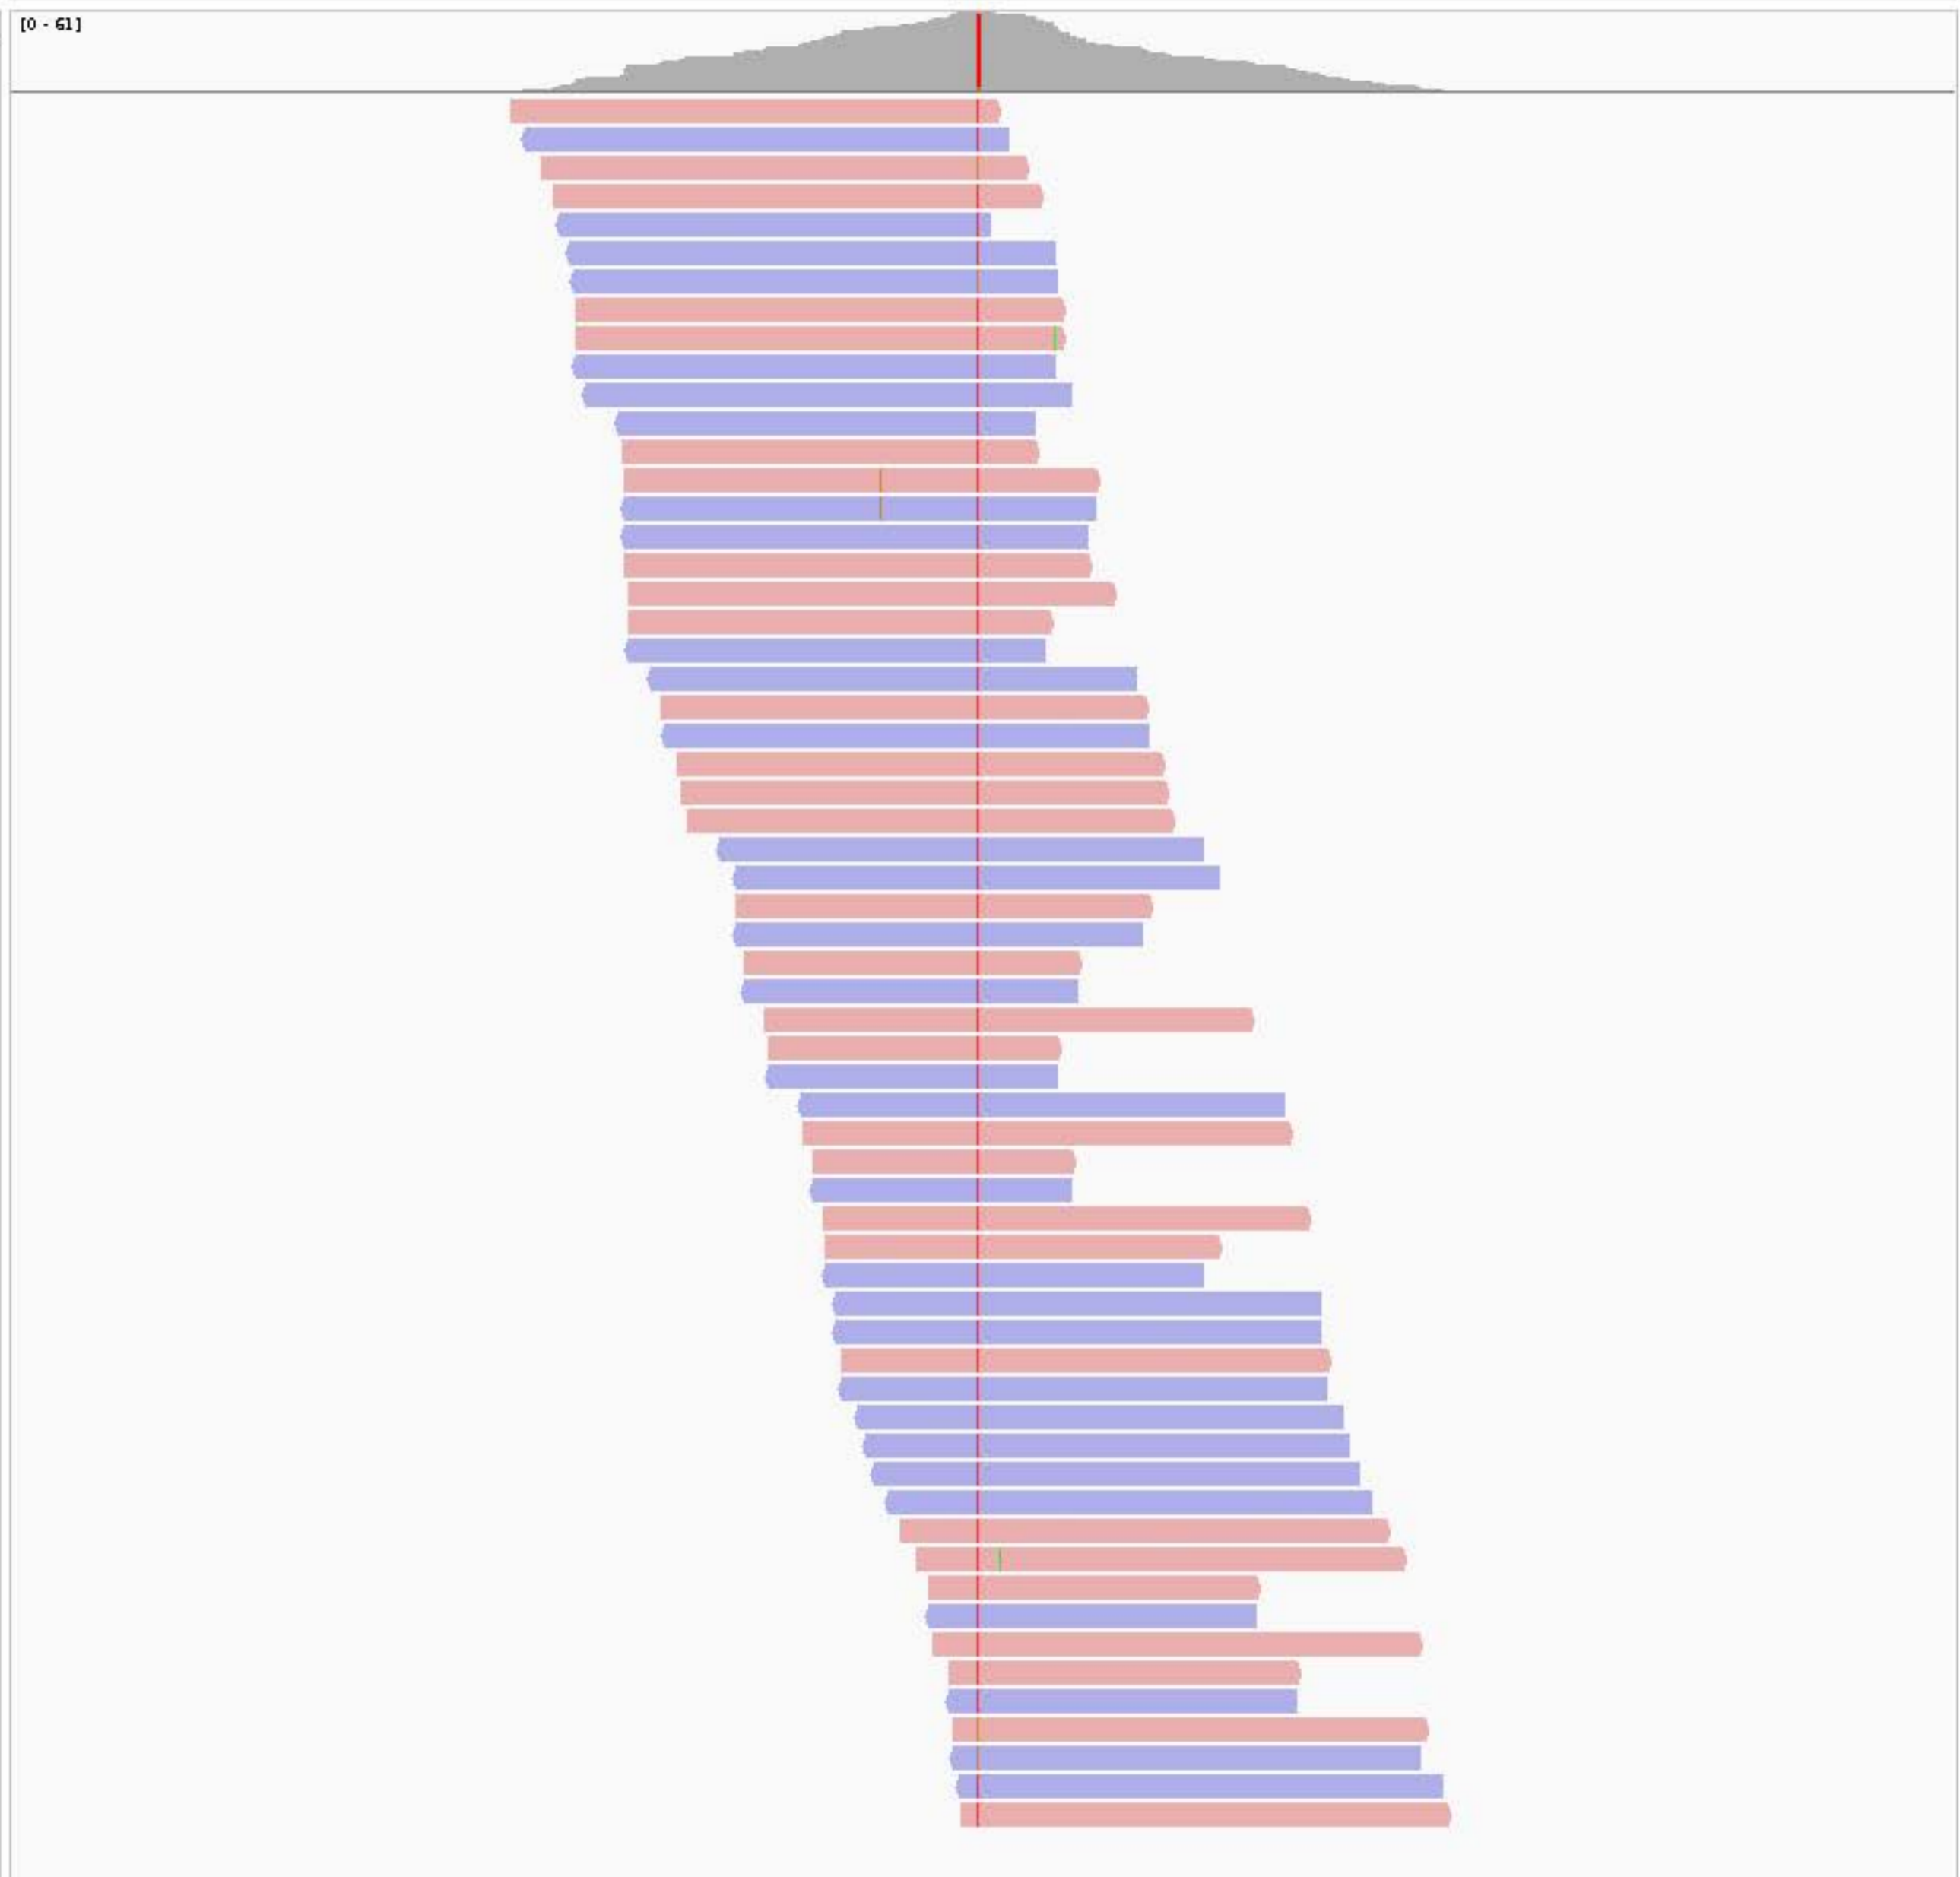

SL\_1002\_L\_FFPE\_15-B\_mut.bam

Sequence →  
Refseq Genes

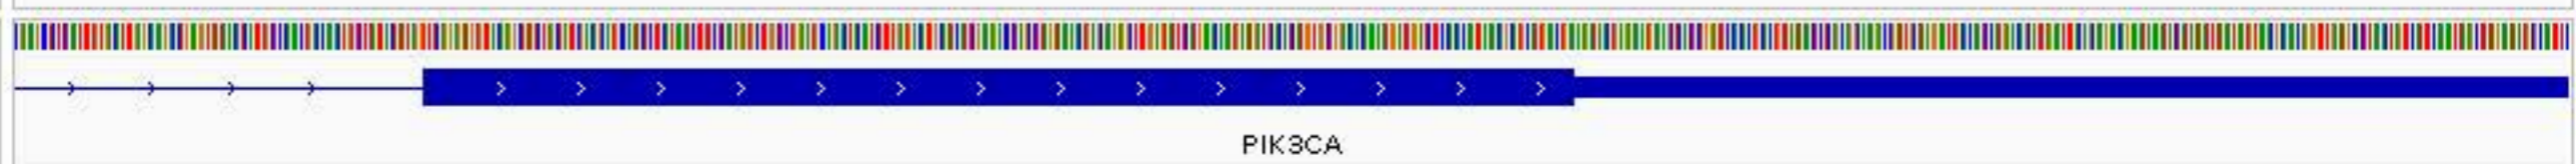





SL\_1008\_R\_51\_FFPE-B\_mut.bam  
range

SL\_1008\_R\_51\_FFPE-B\_mut.bam

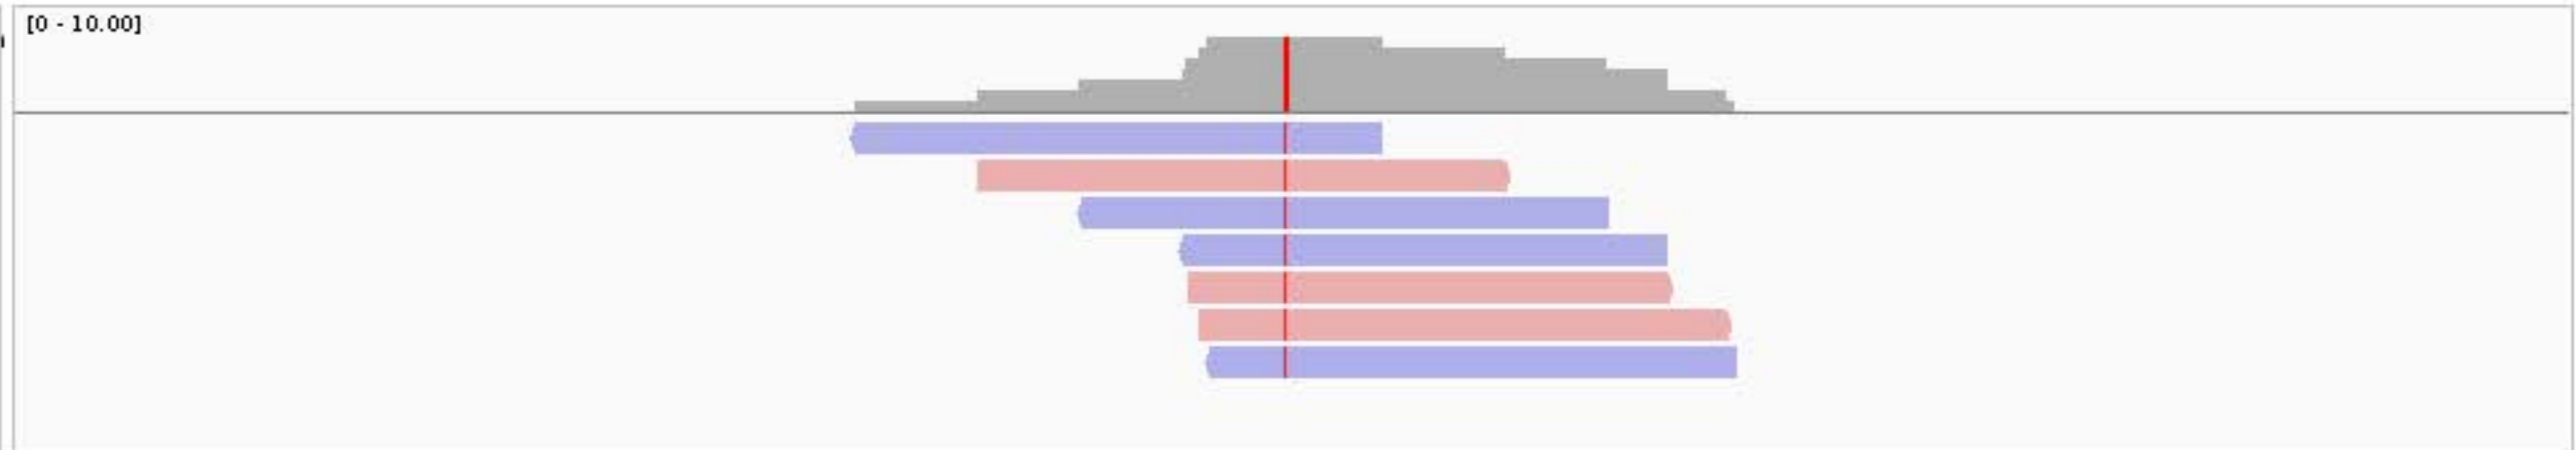

Sequence →

Refseq Genes





SL\_0007\_R\_FFPE\_39-B\_mut.bam  
rage

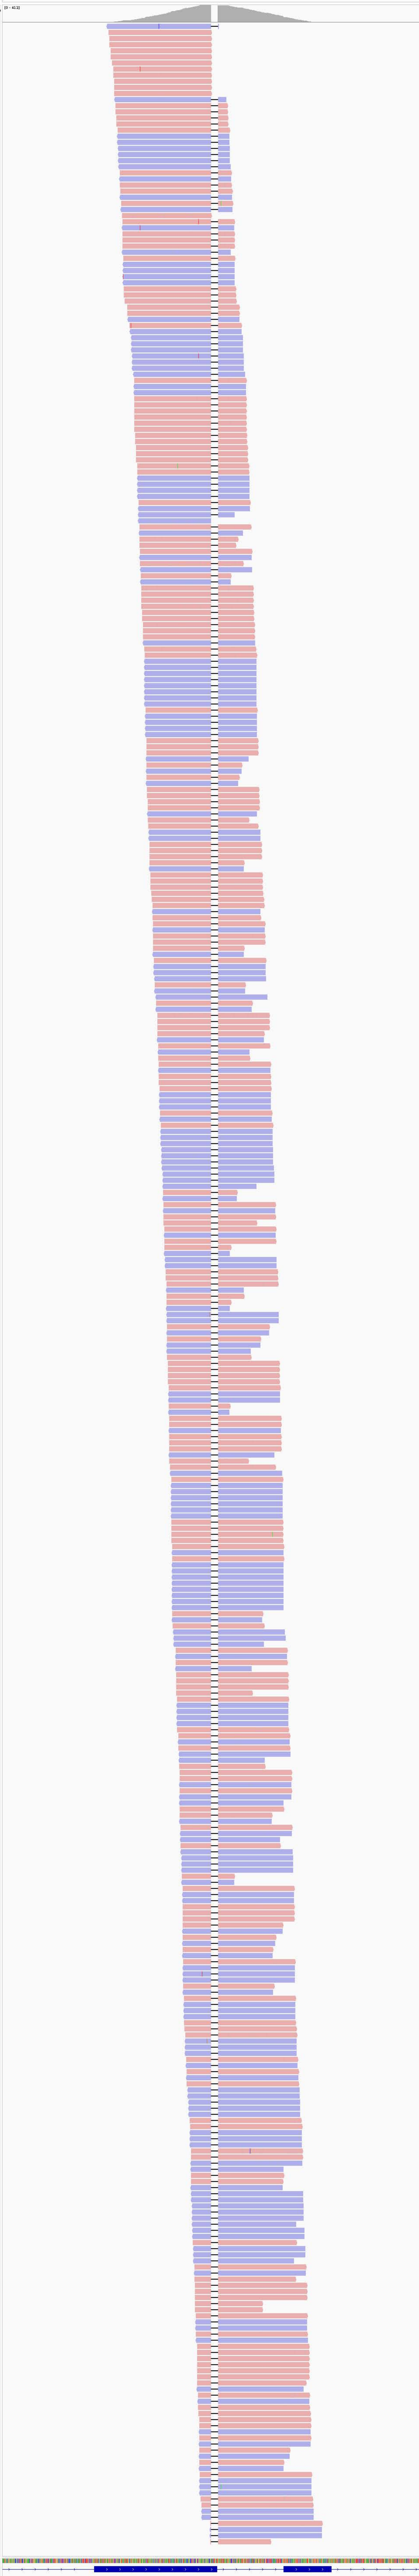

Sequence  
Refseq Genes

PIK3R1



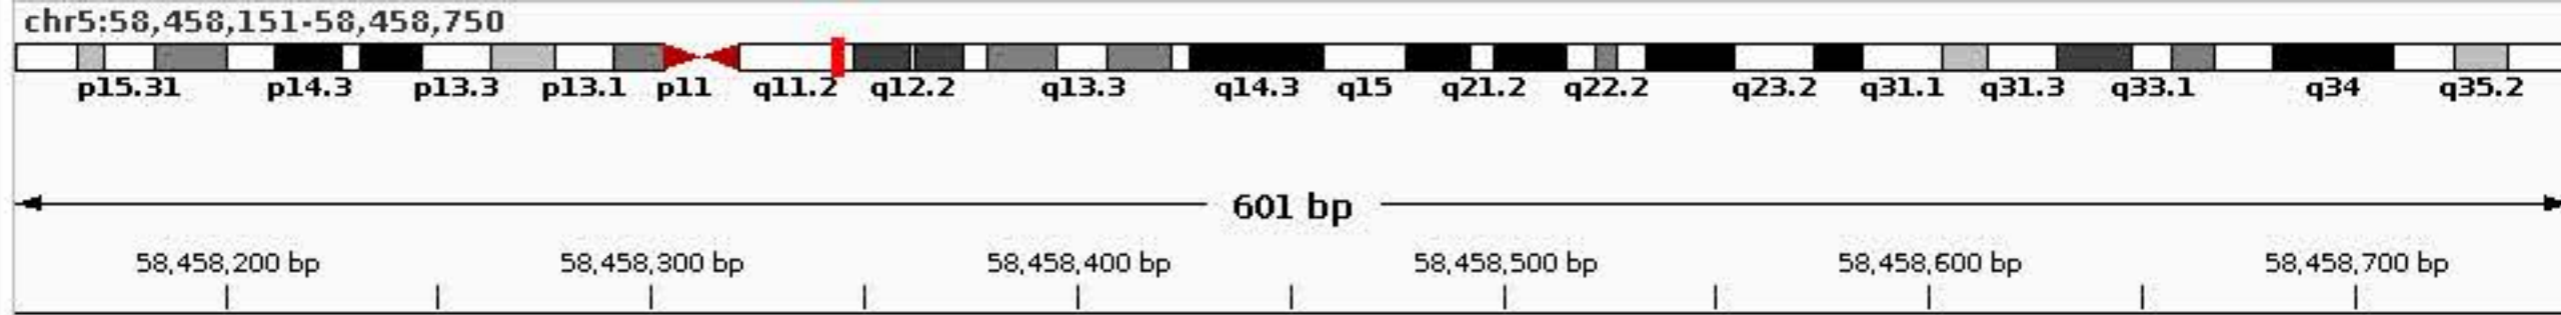

SL\_1007-T1-B\_mut.bam Coverage

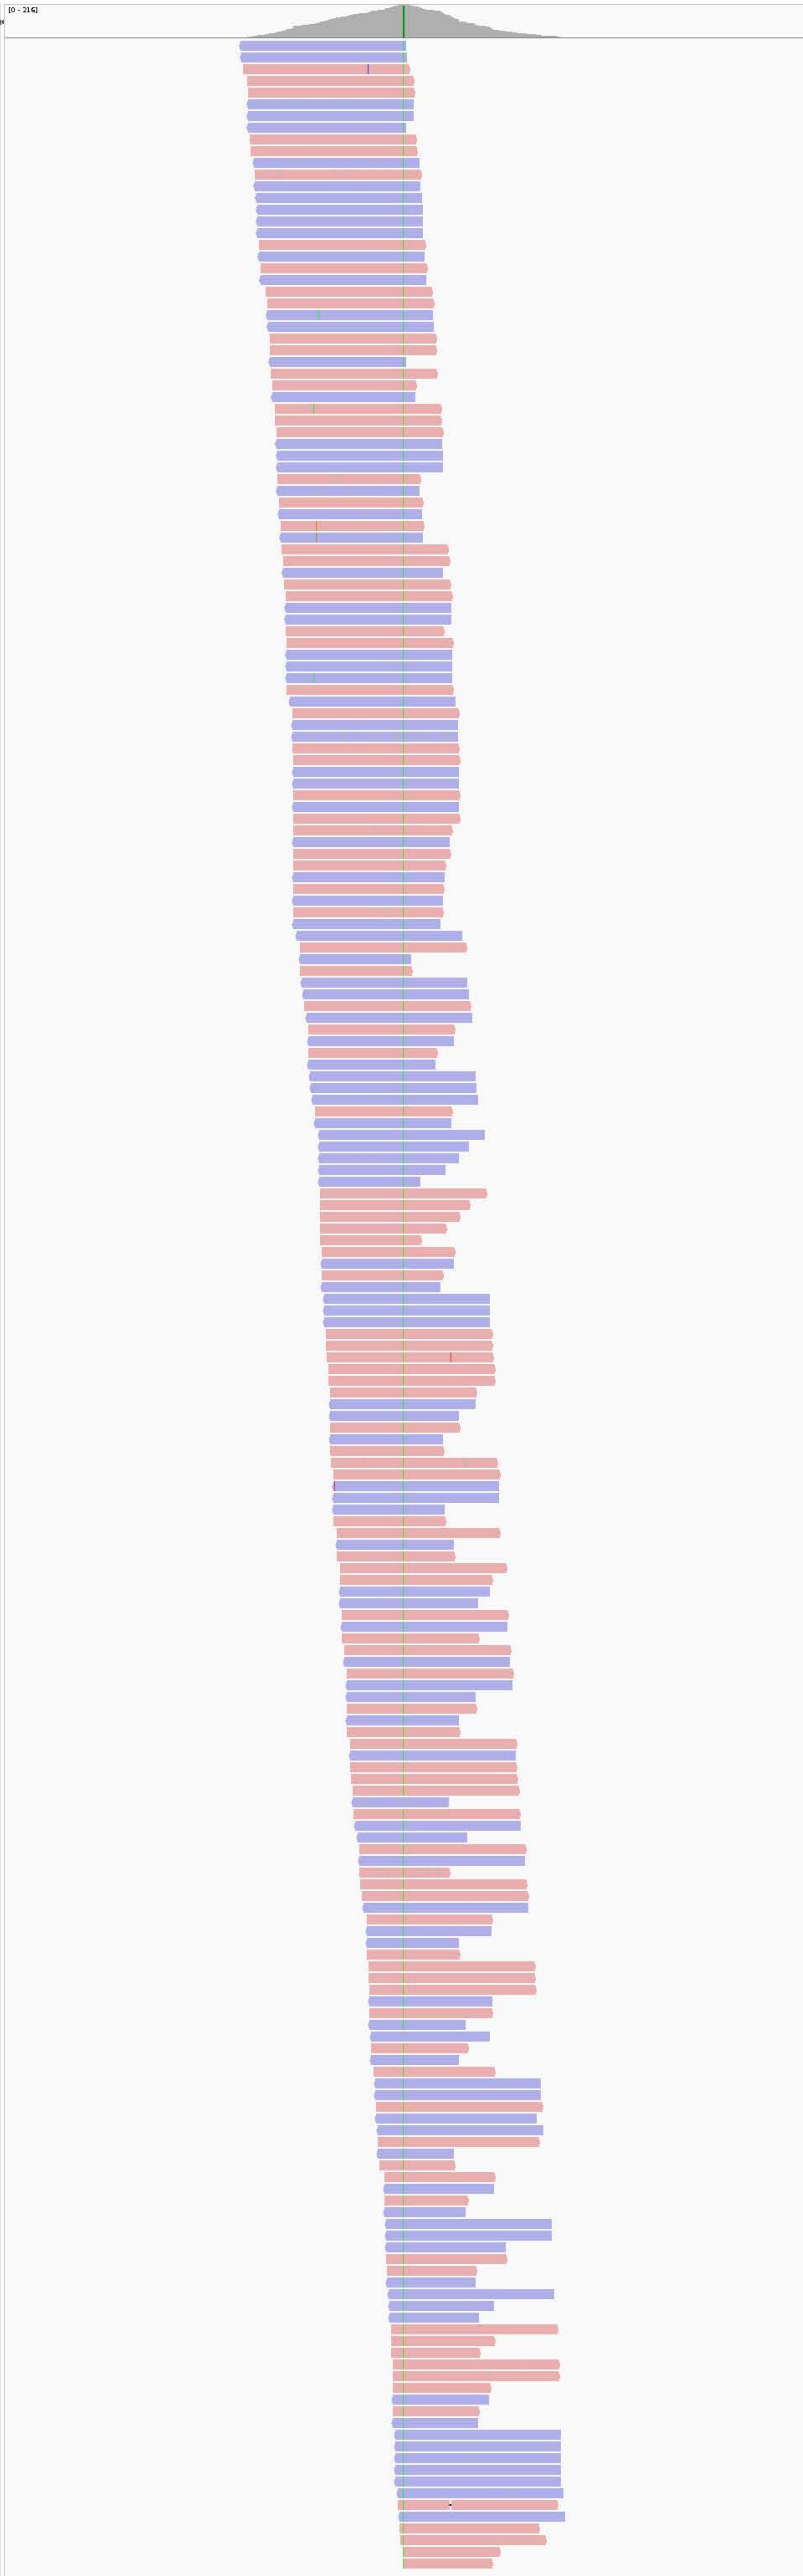

SL\_1007-T1-B\_mut.bam

Sequence

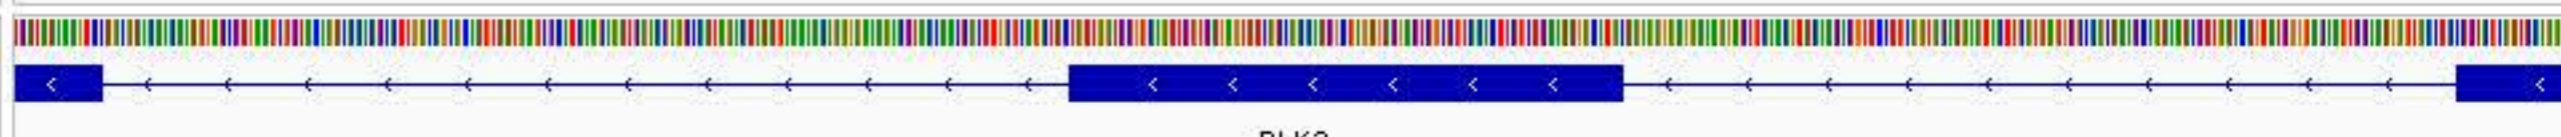

PLK2



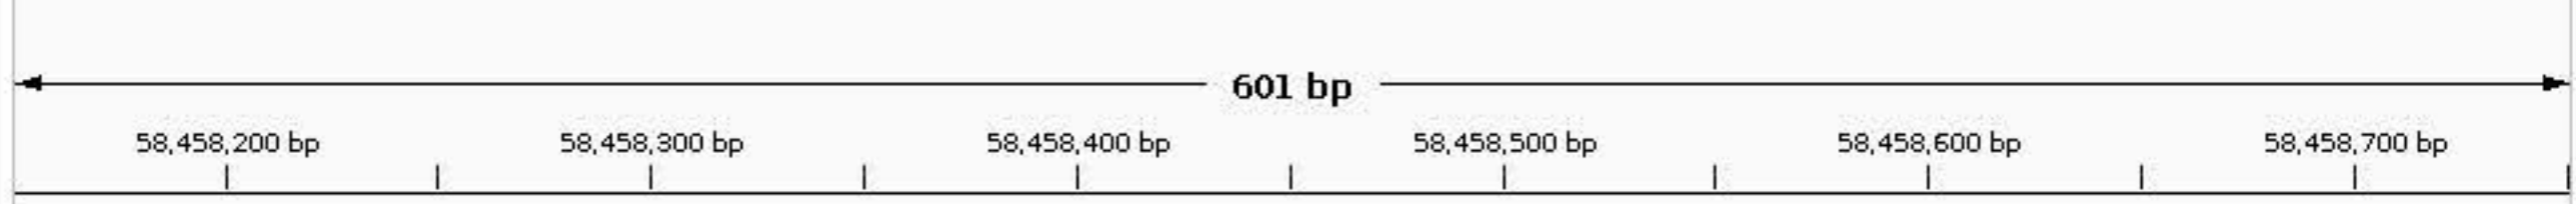

SL\_1007-T2-B\_mut.bam Coverage

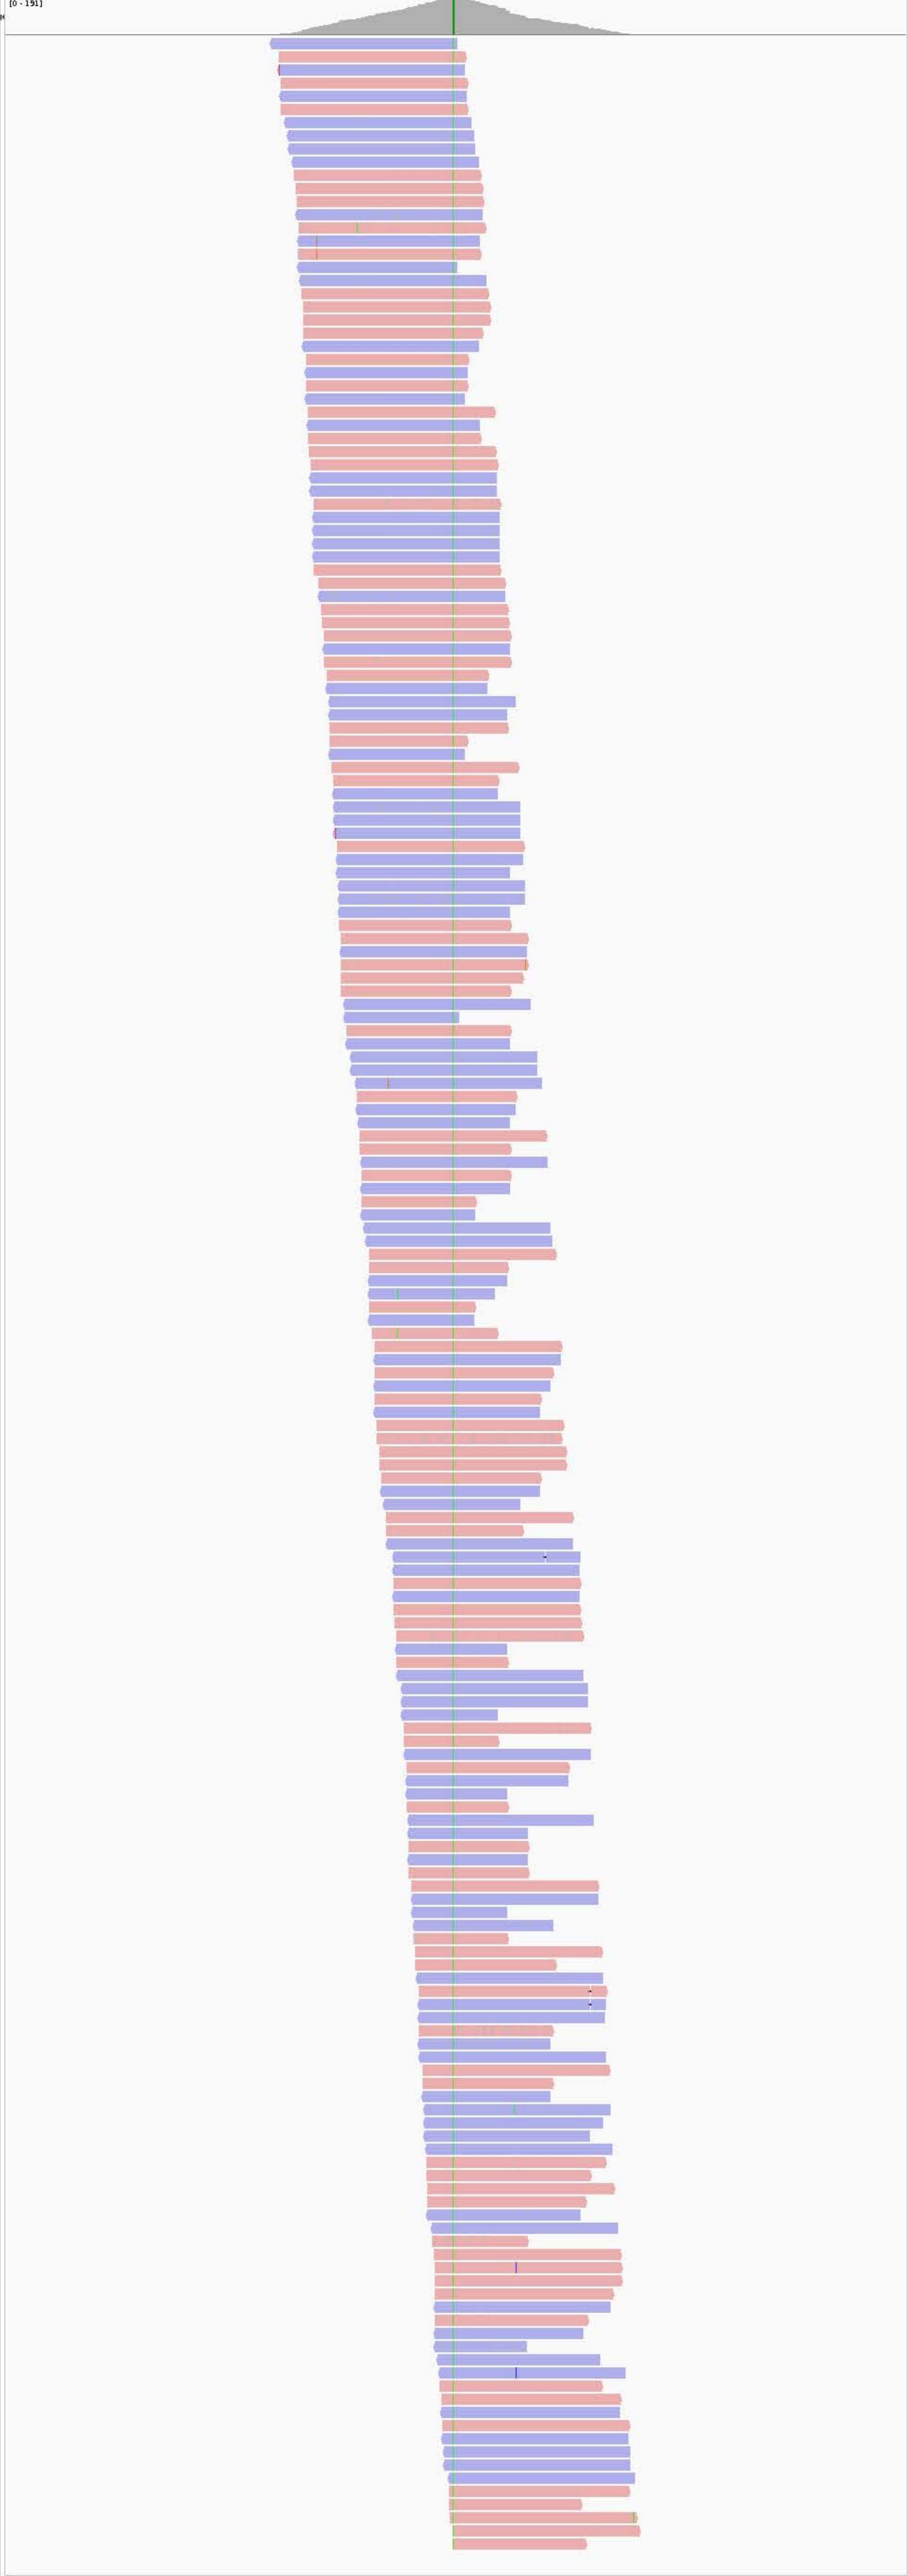

SL\_1007-T2-B\_mut.bam

Sequence

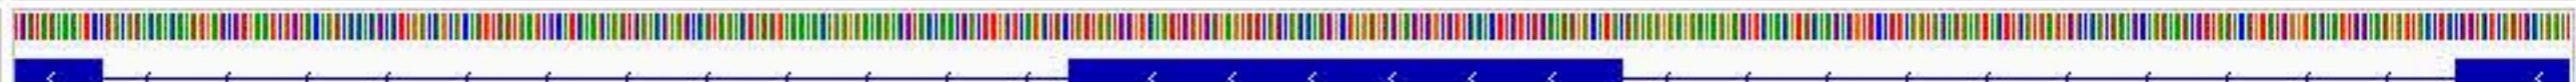

Refseq Genes

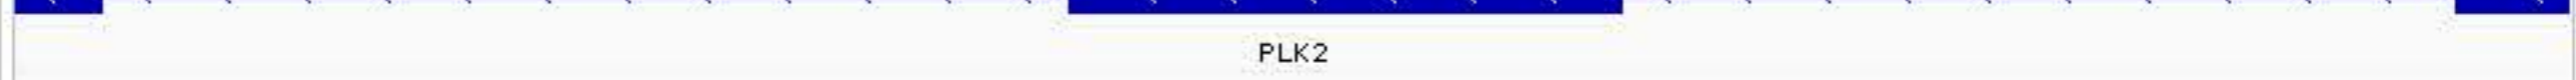

PLK2

chr19:50,416,971-50,417,570

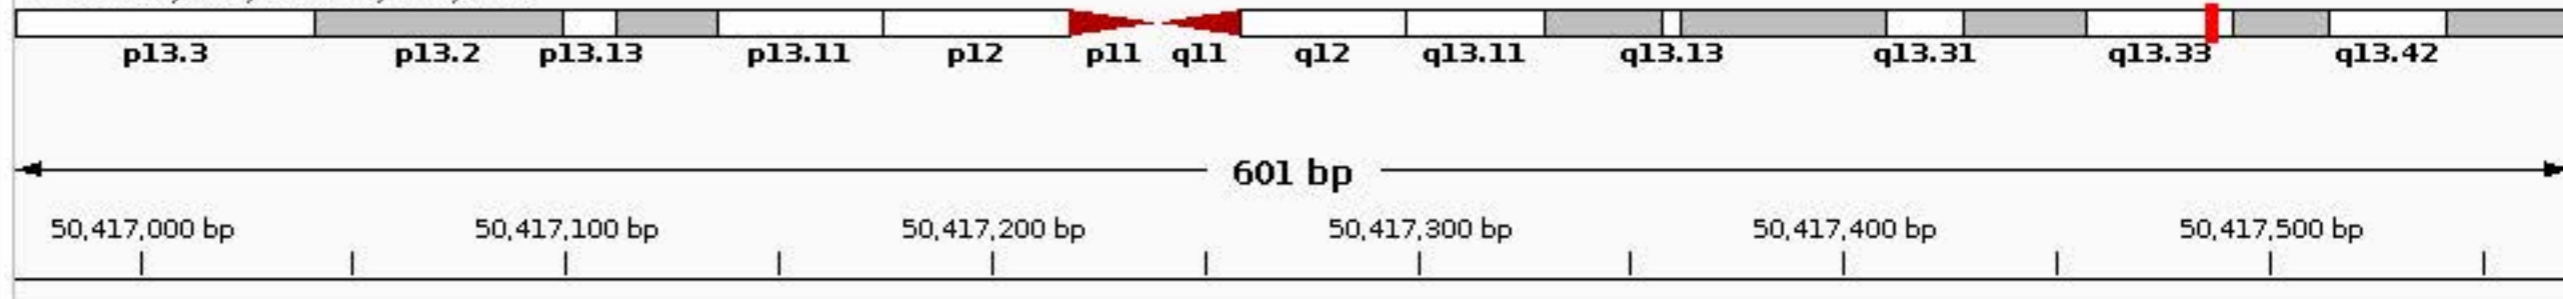

SL\_0007\_R\_FFPE\_61\_1-B\_mut.bam  
verage

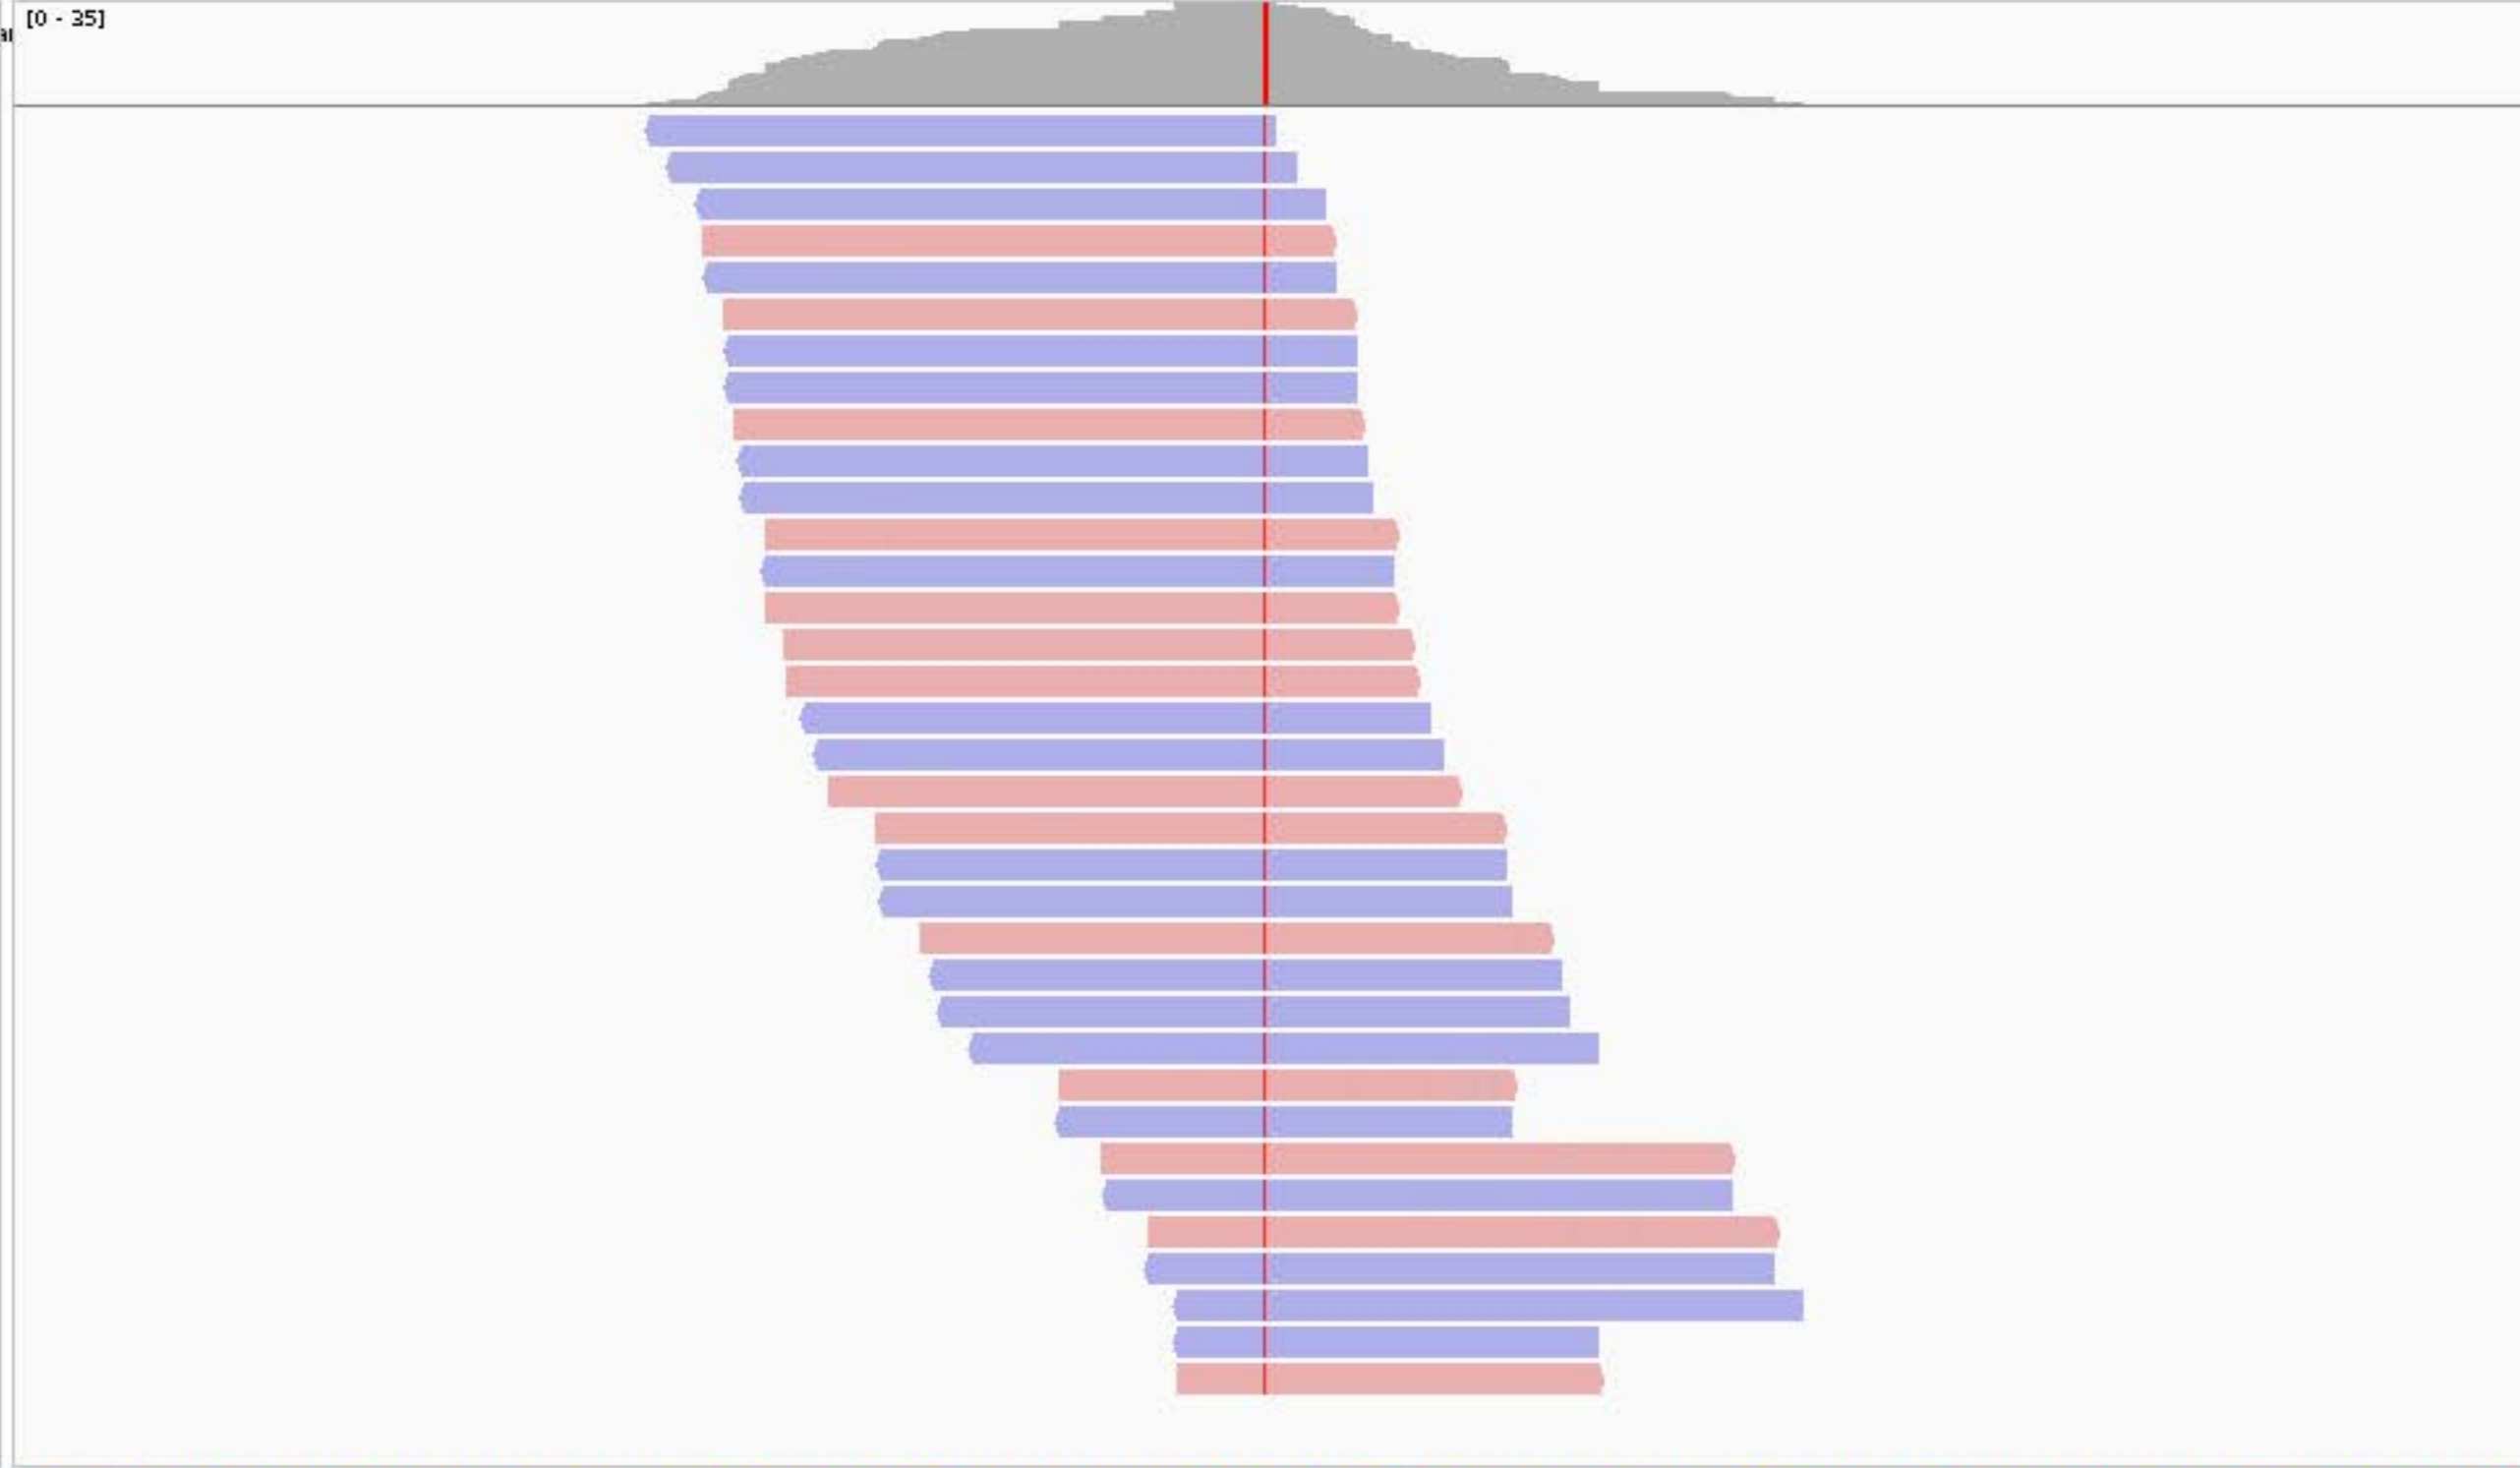

SL\_0007\_R\_FFPE\_61\_1-B\_mut.  
bam

Sequence →

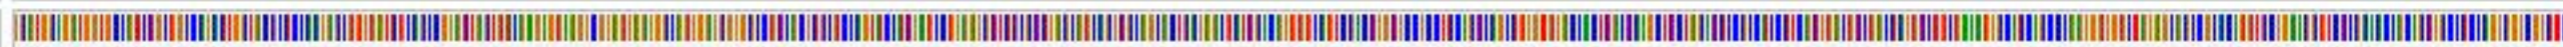

Refseq Genes

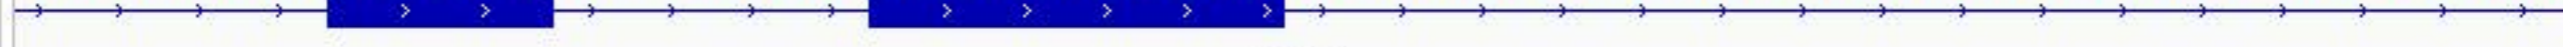

POLD1

chr6:106,105,359-106,105,958

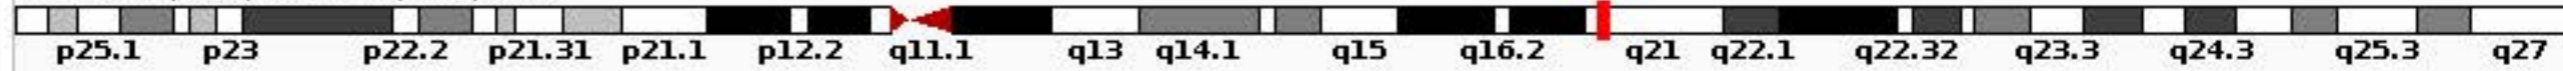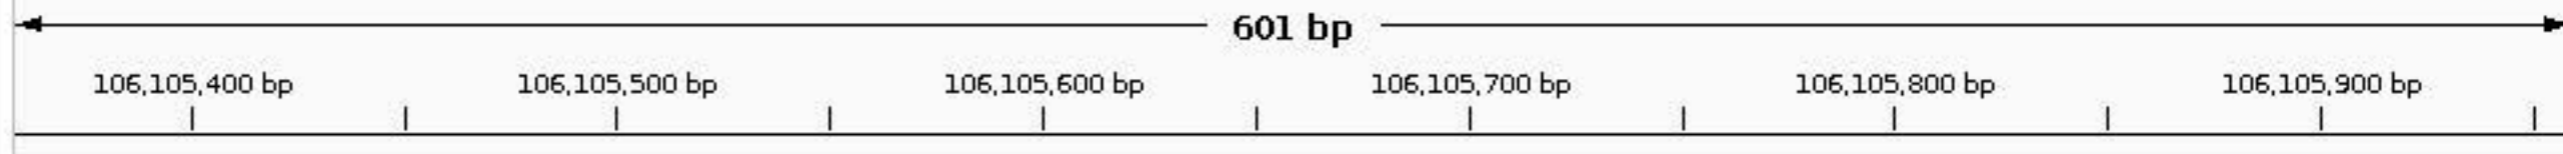

SL\_1015\_R\_100\_FFPE-B\_mut.bam  
verage

SL\_1015\_R\_100\_FFPE-B\_mut.bam

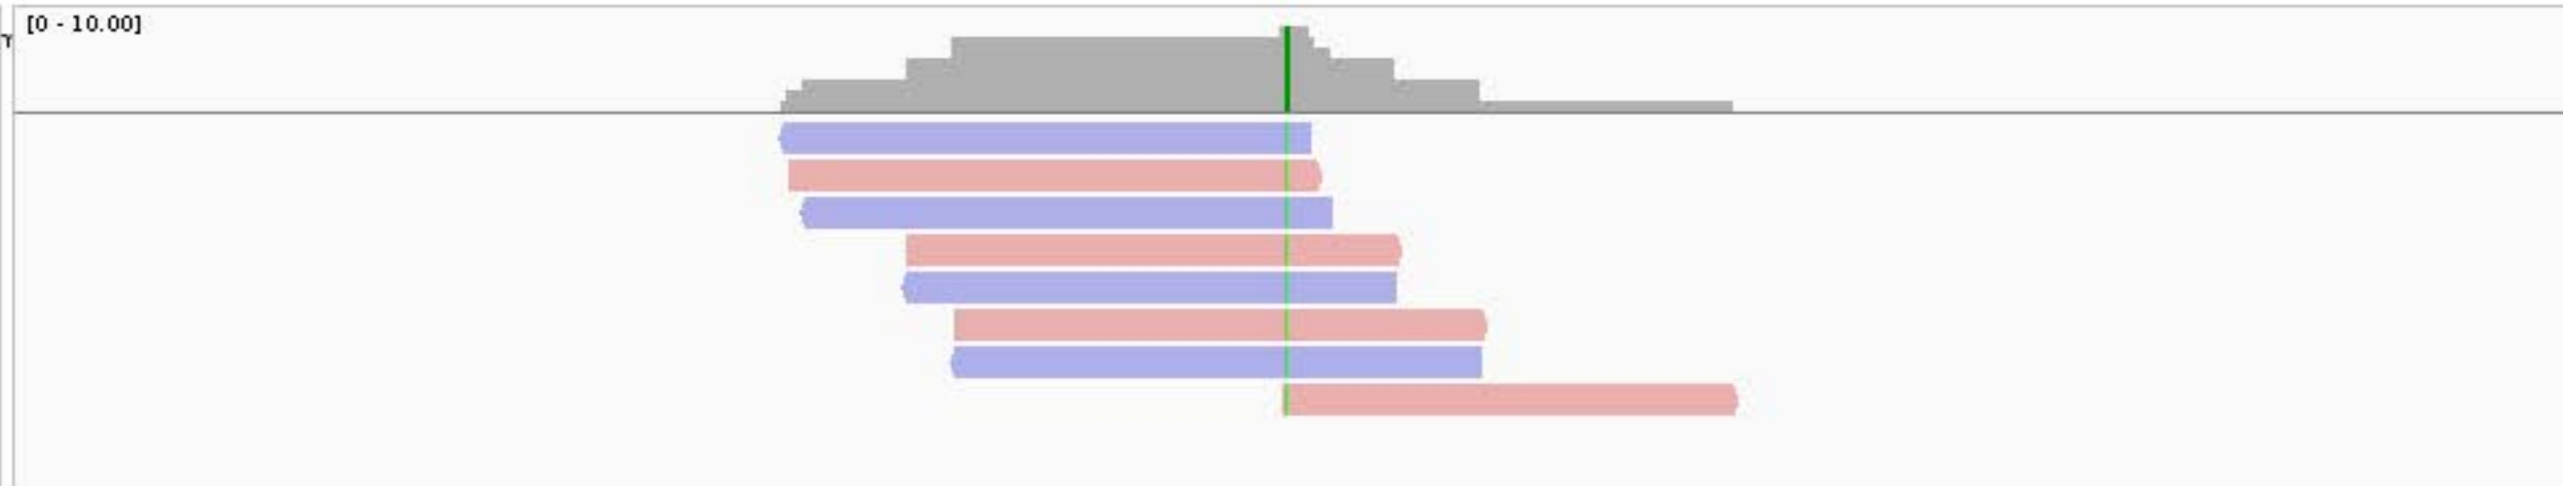

Sequence →

Refseq Genes

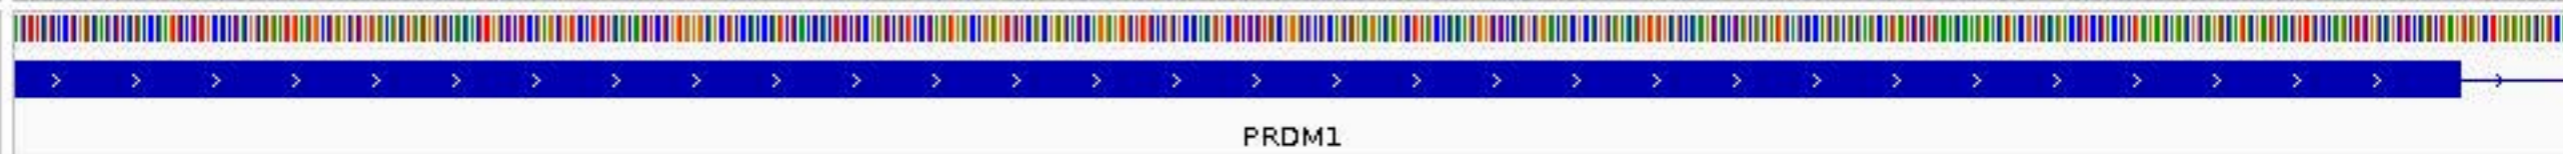



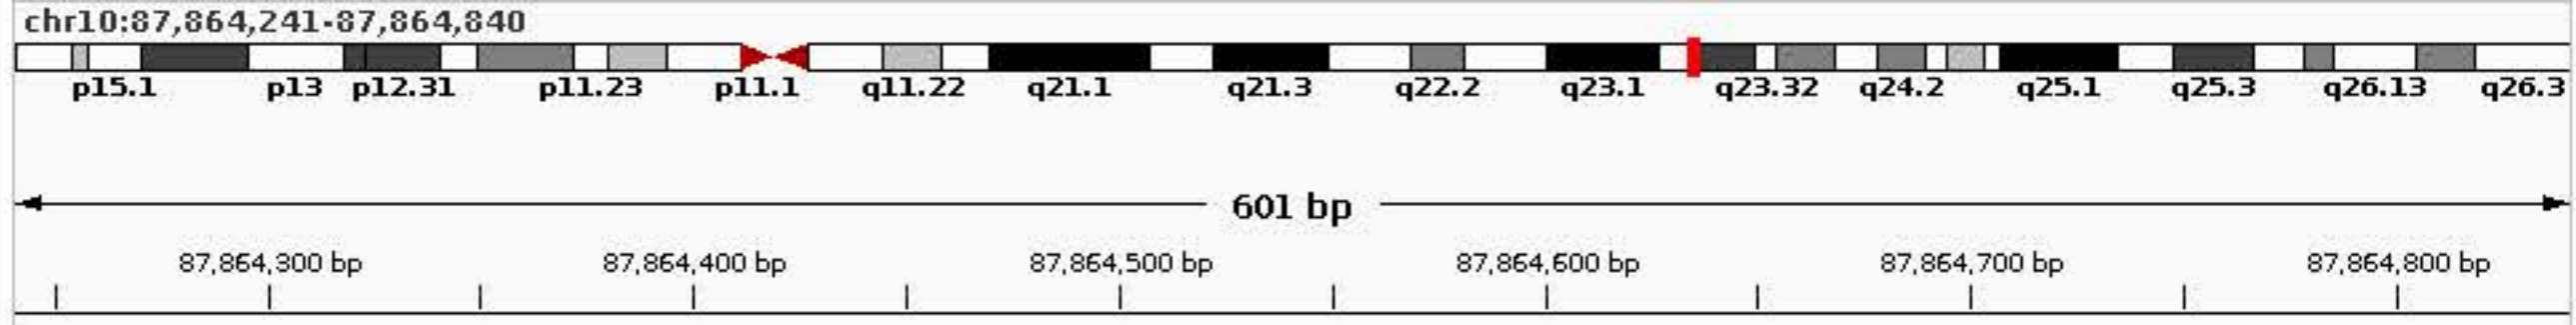

SL\_0008\_LT\_8-B\_mut.bam Coverage

SL\_0008\_LT\_8-B\_mut.bam

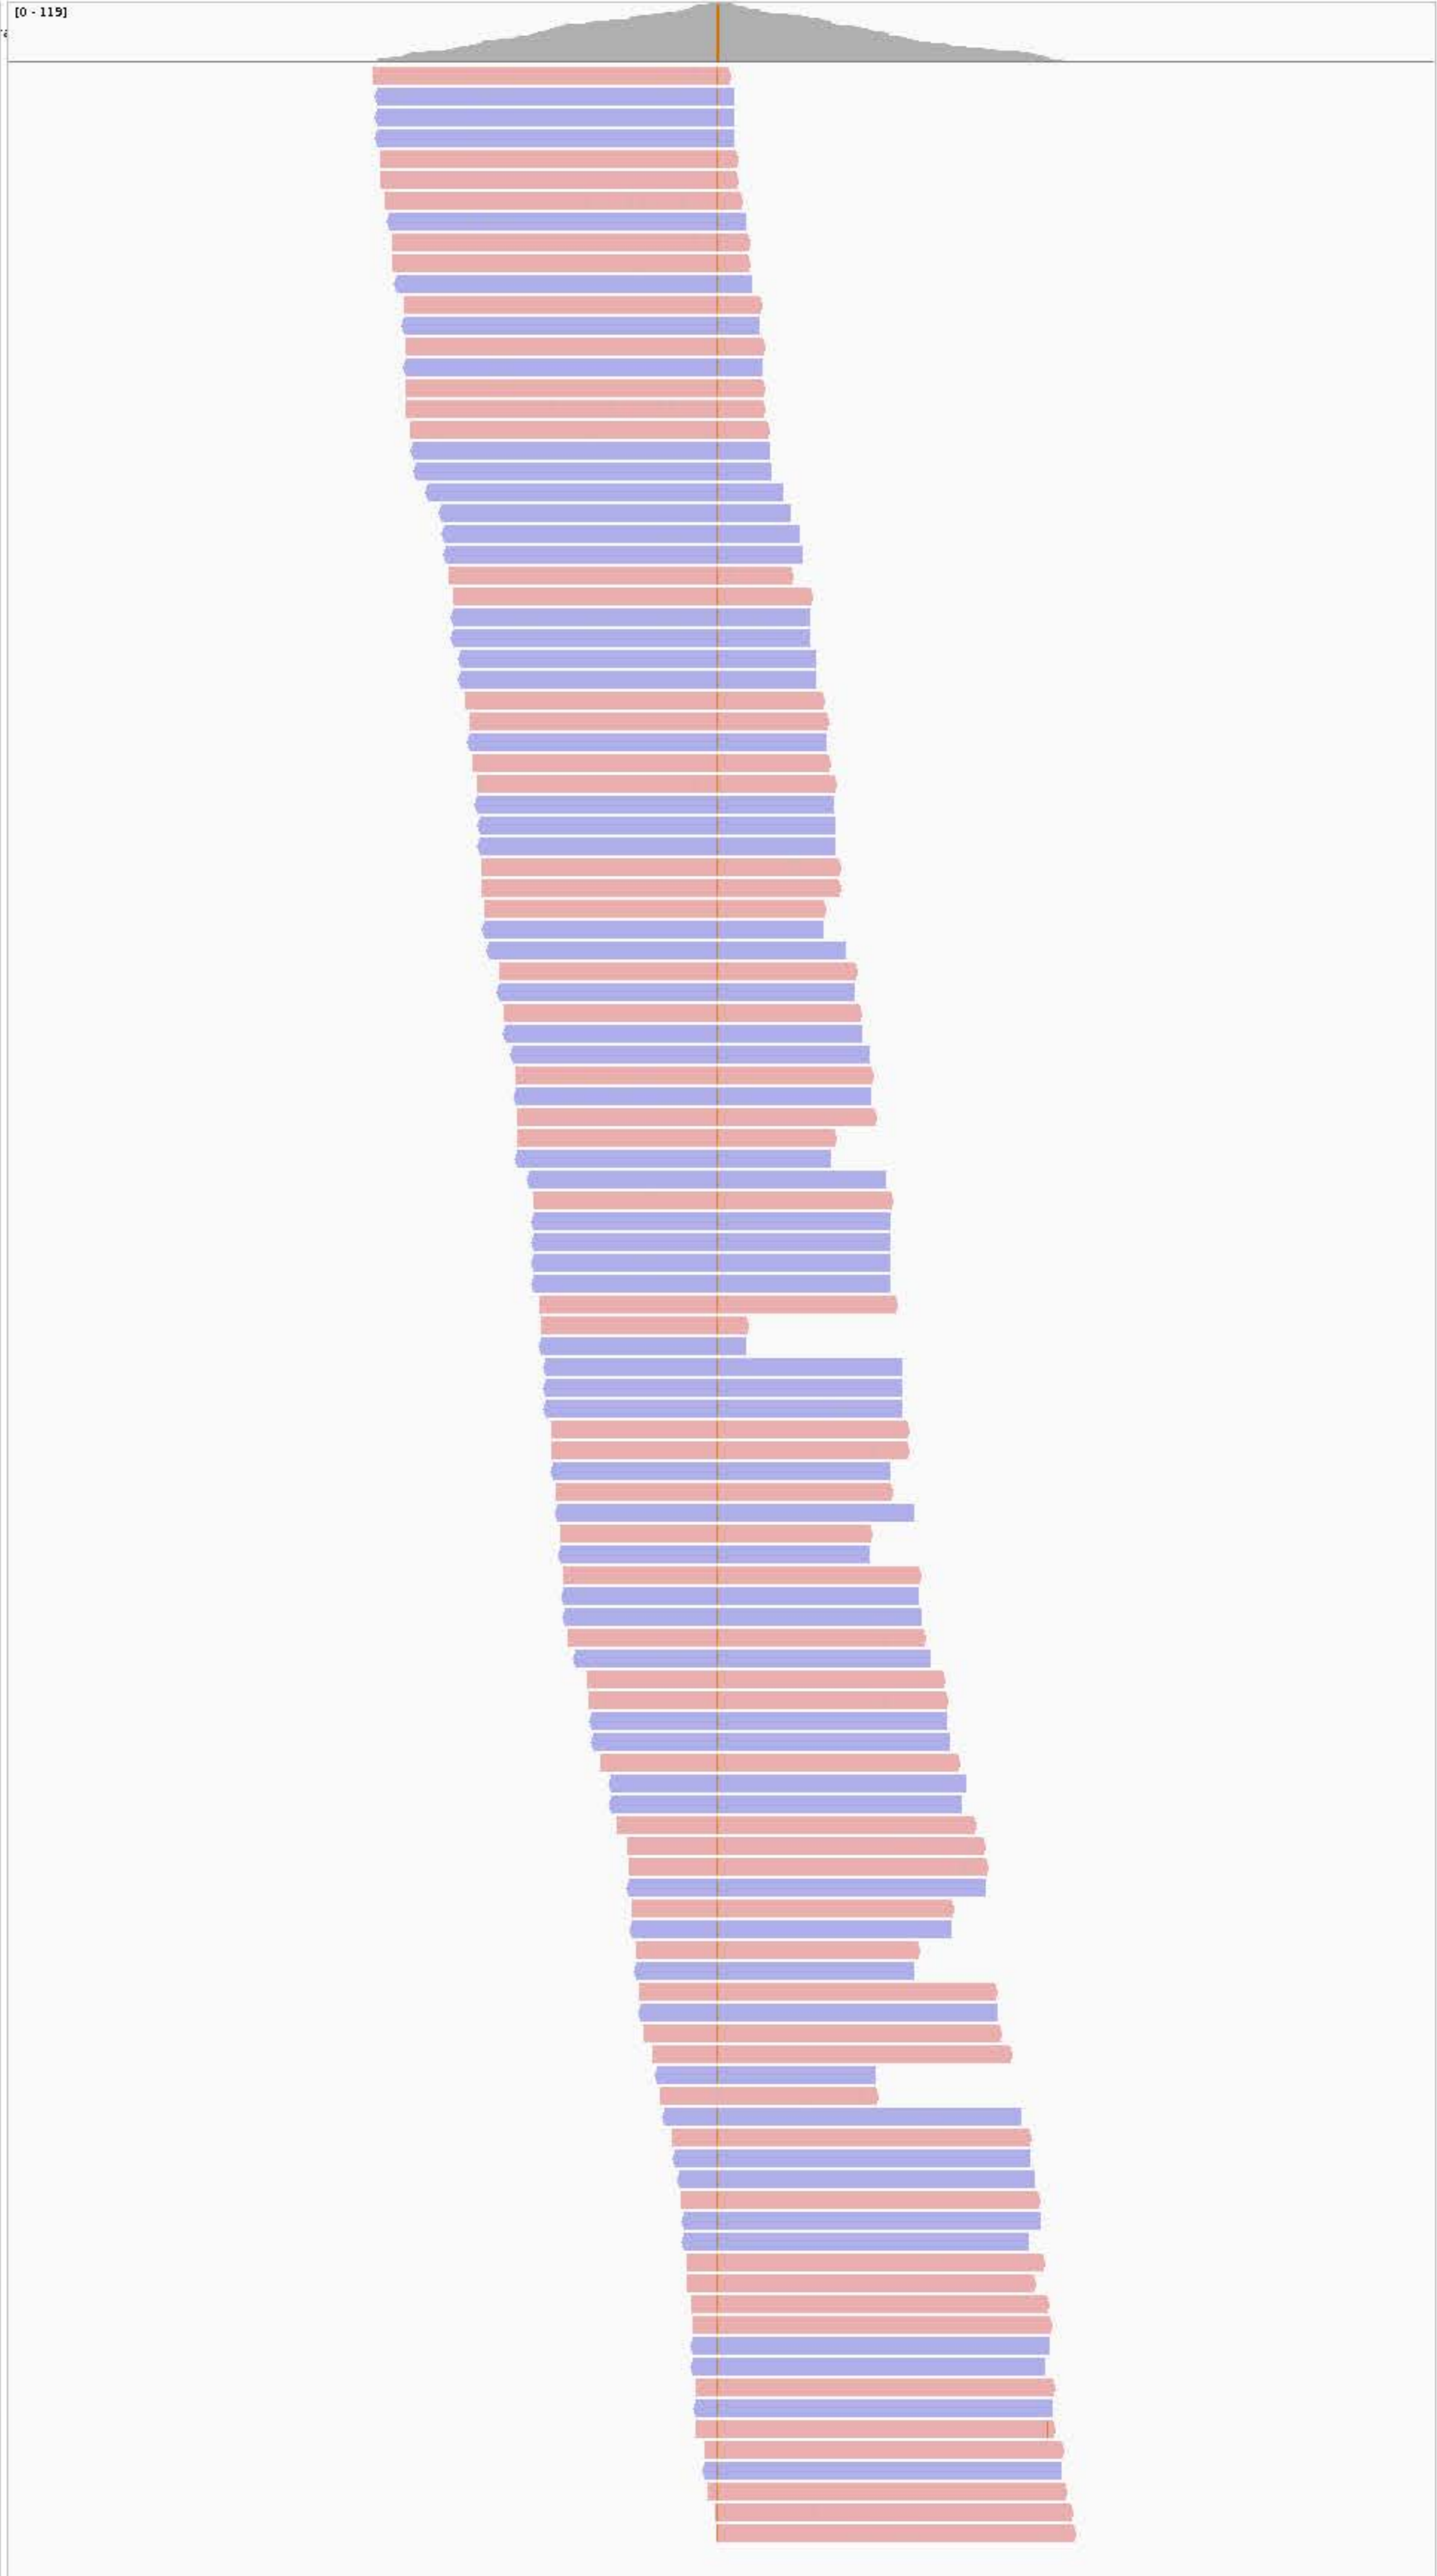

Sequence

Refseq Genes

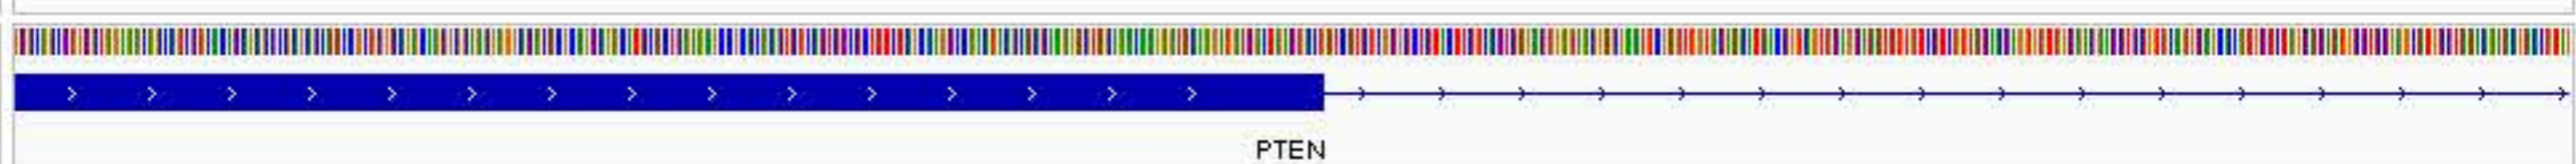

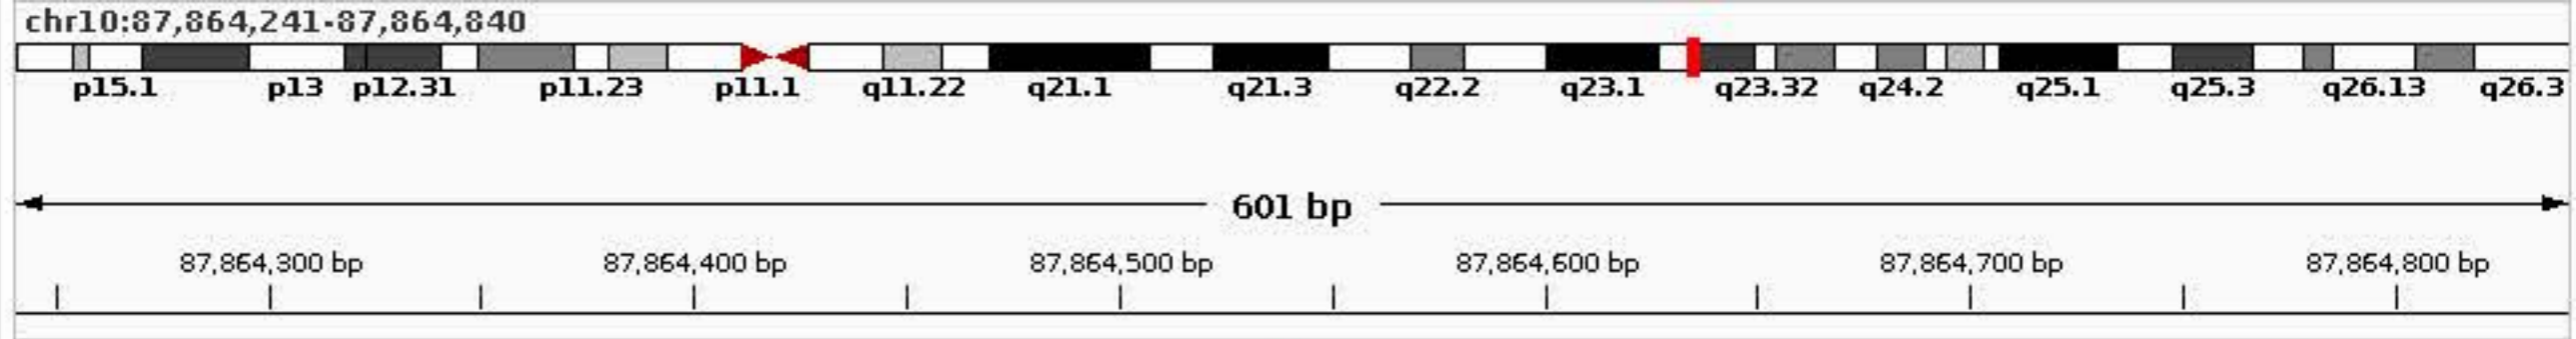

SL\_0008-LT\_15-B\_mut.bam Coverage [0 - 129]

SL\_0008-LT\_15-B\_mut.bam

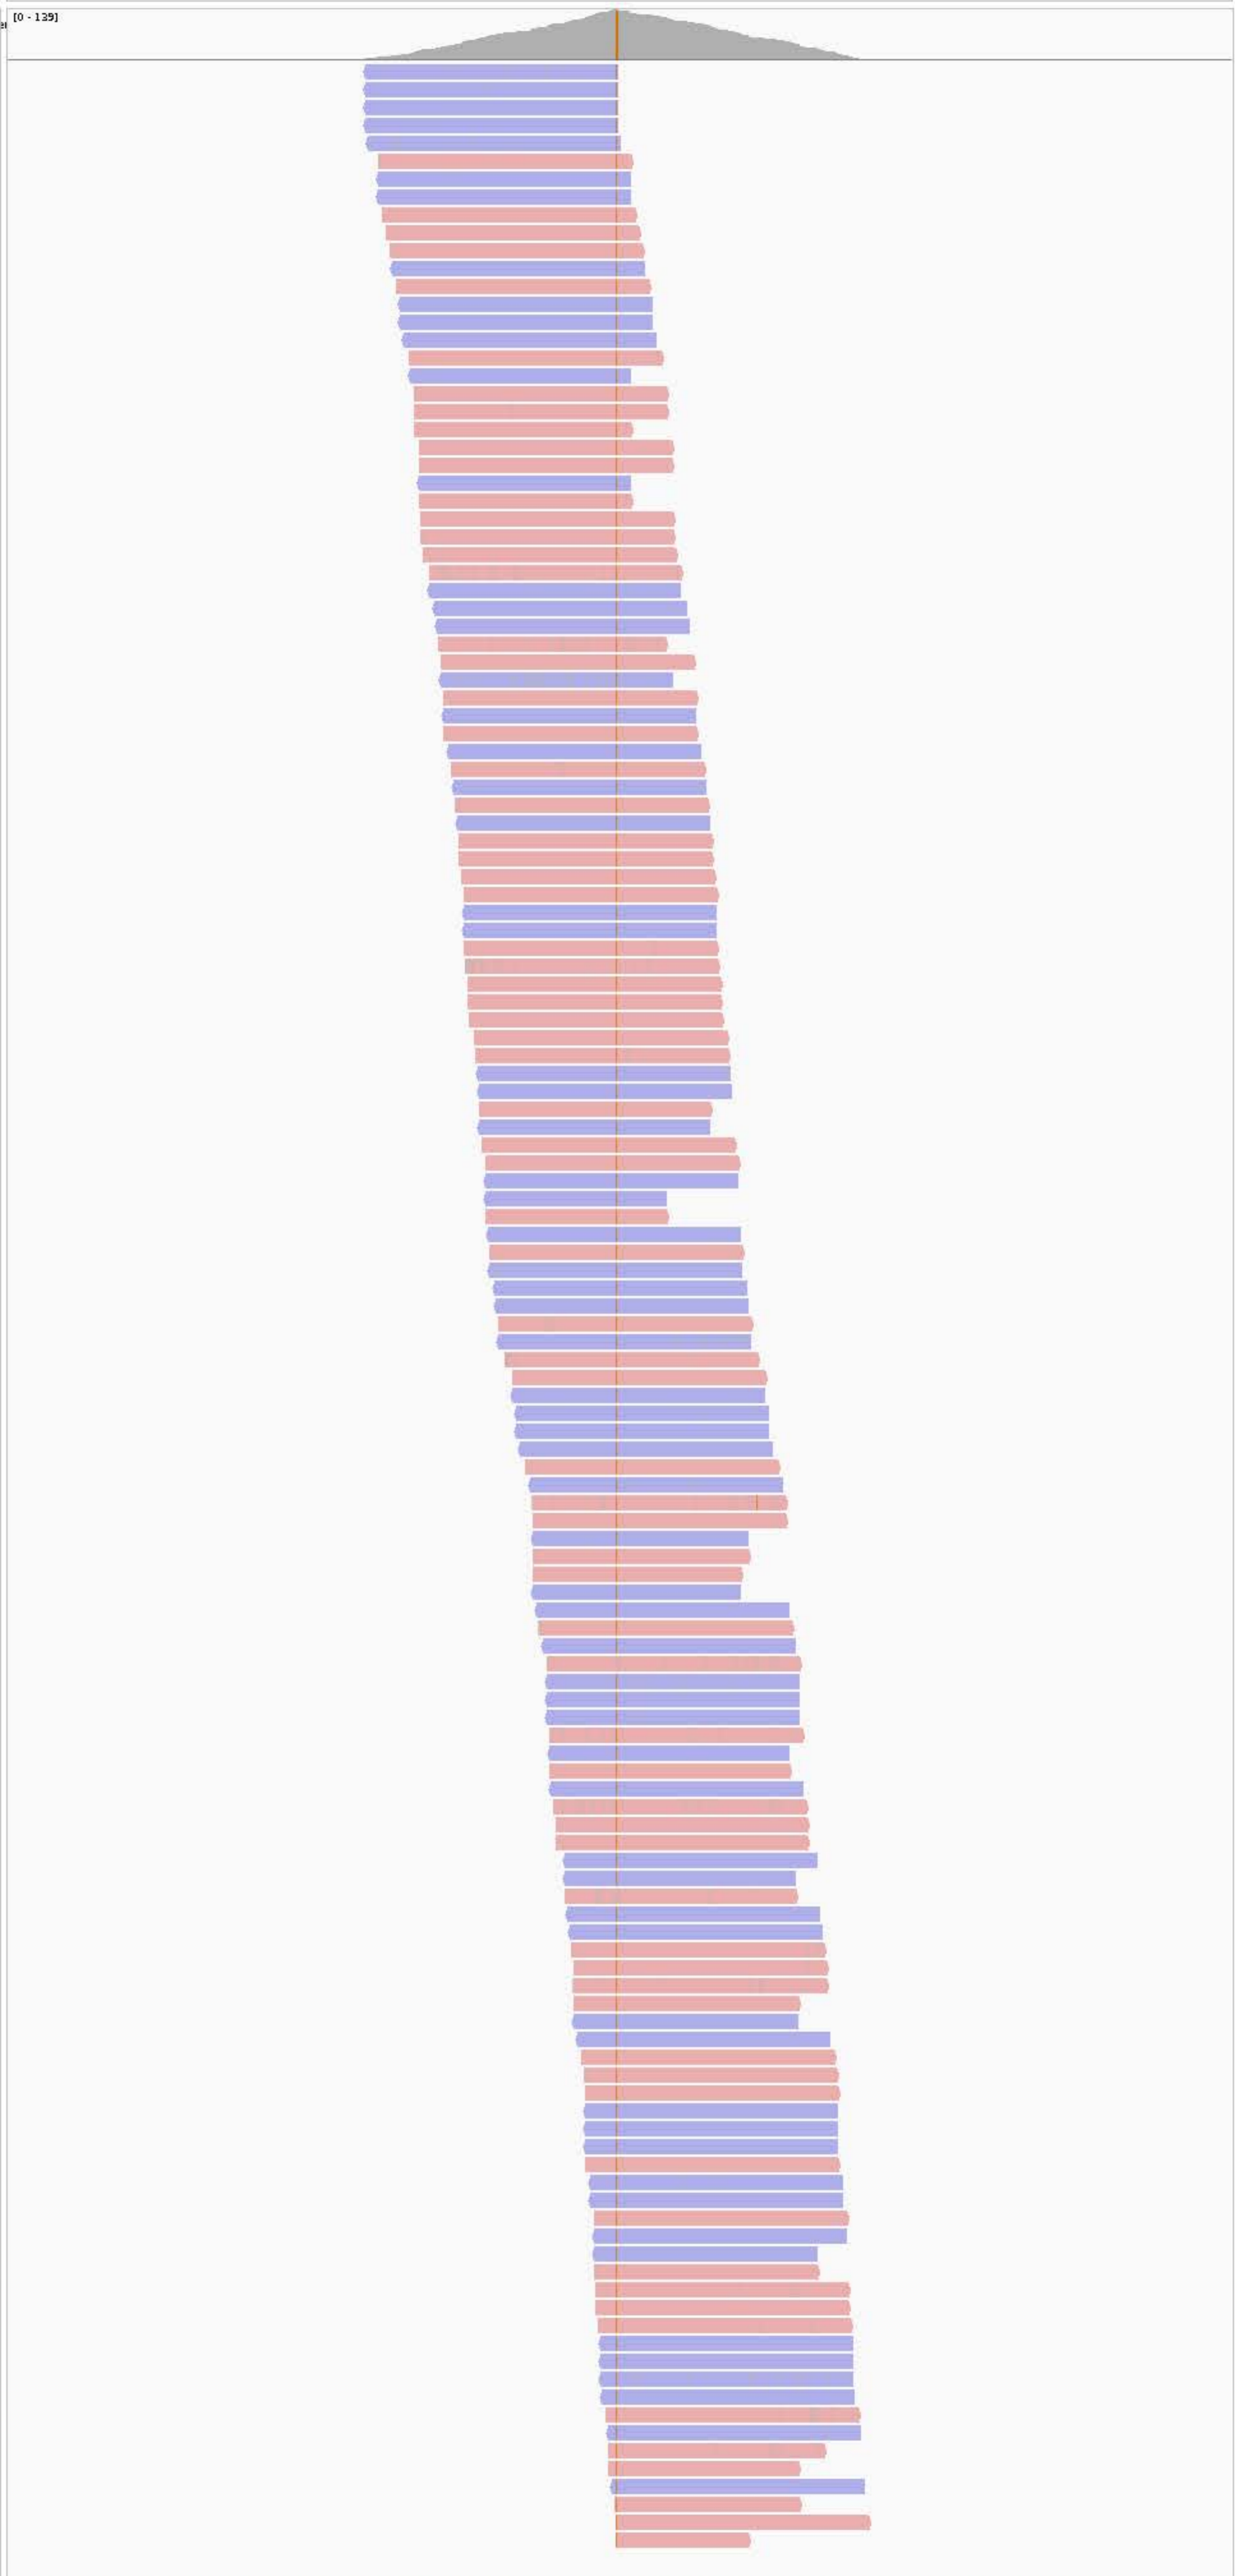

Sequence

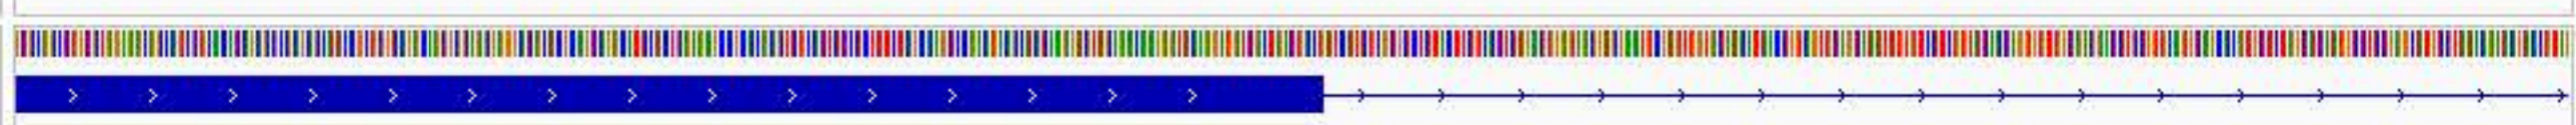

Refseq Genes

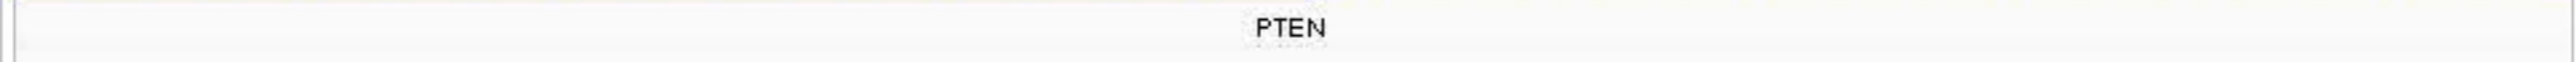

PTEN

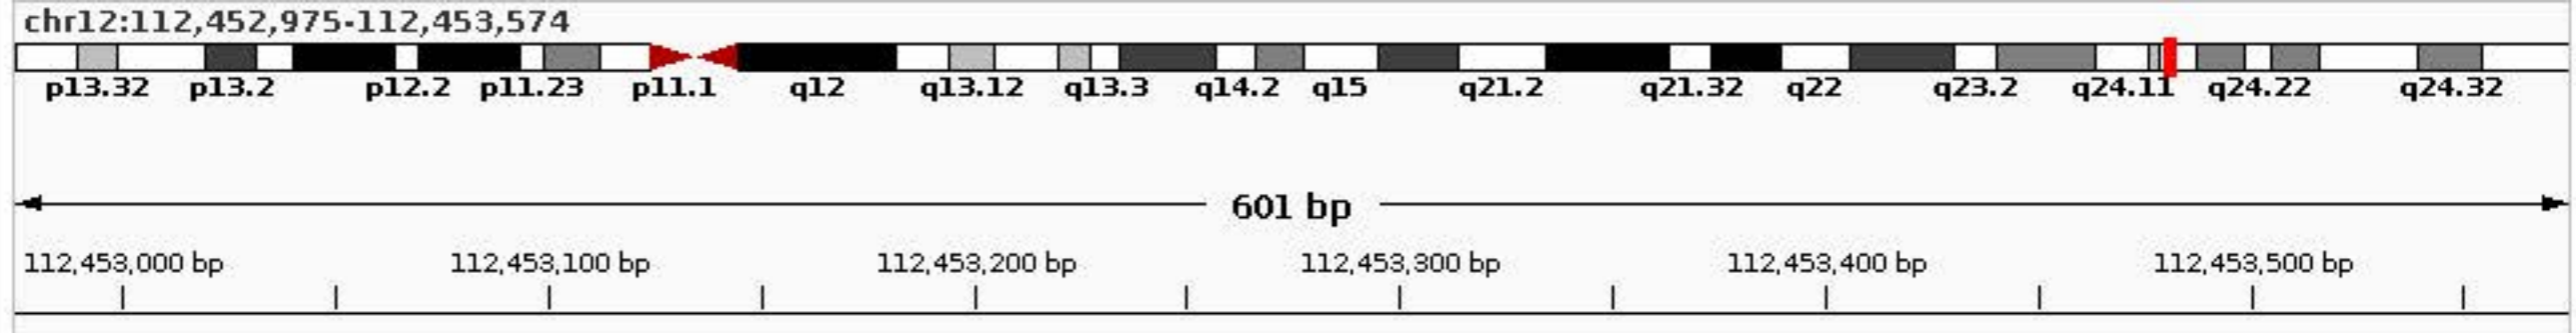

SL\_1010\_L\_FFPE\_3-B\_mut.bam  
age

SL\_1010\_L\_FFPE\_3-B\_mut.bam

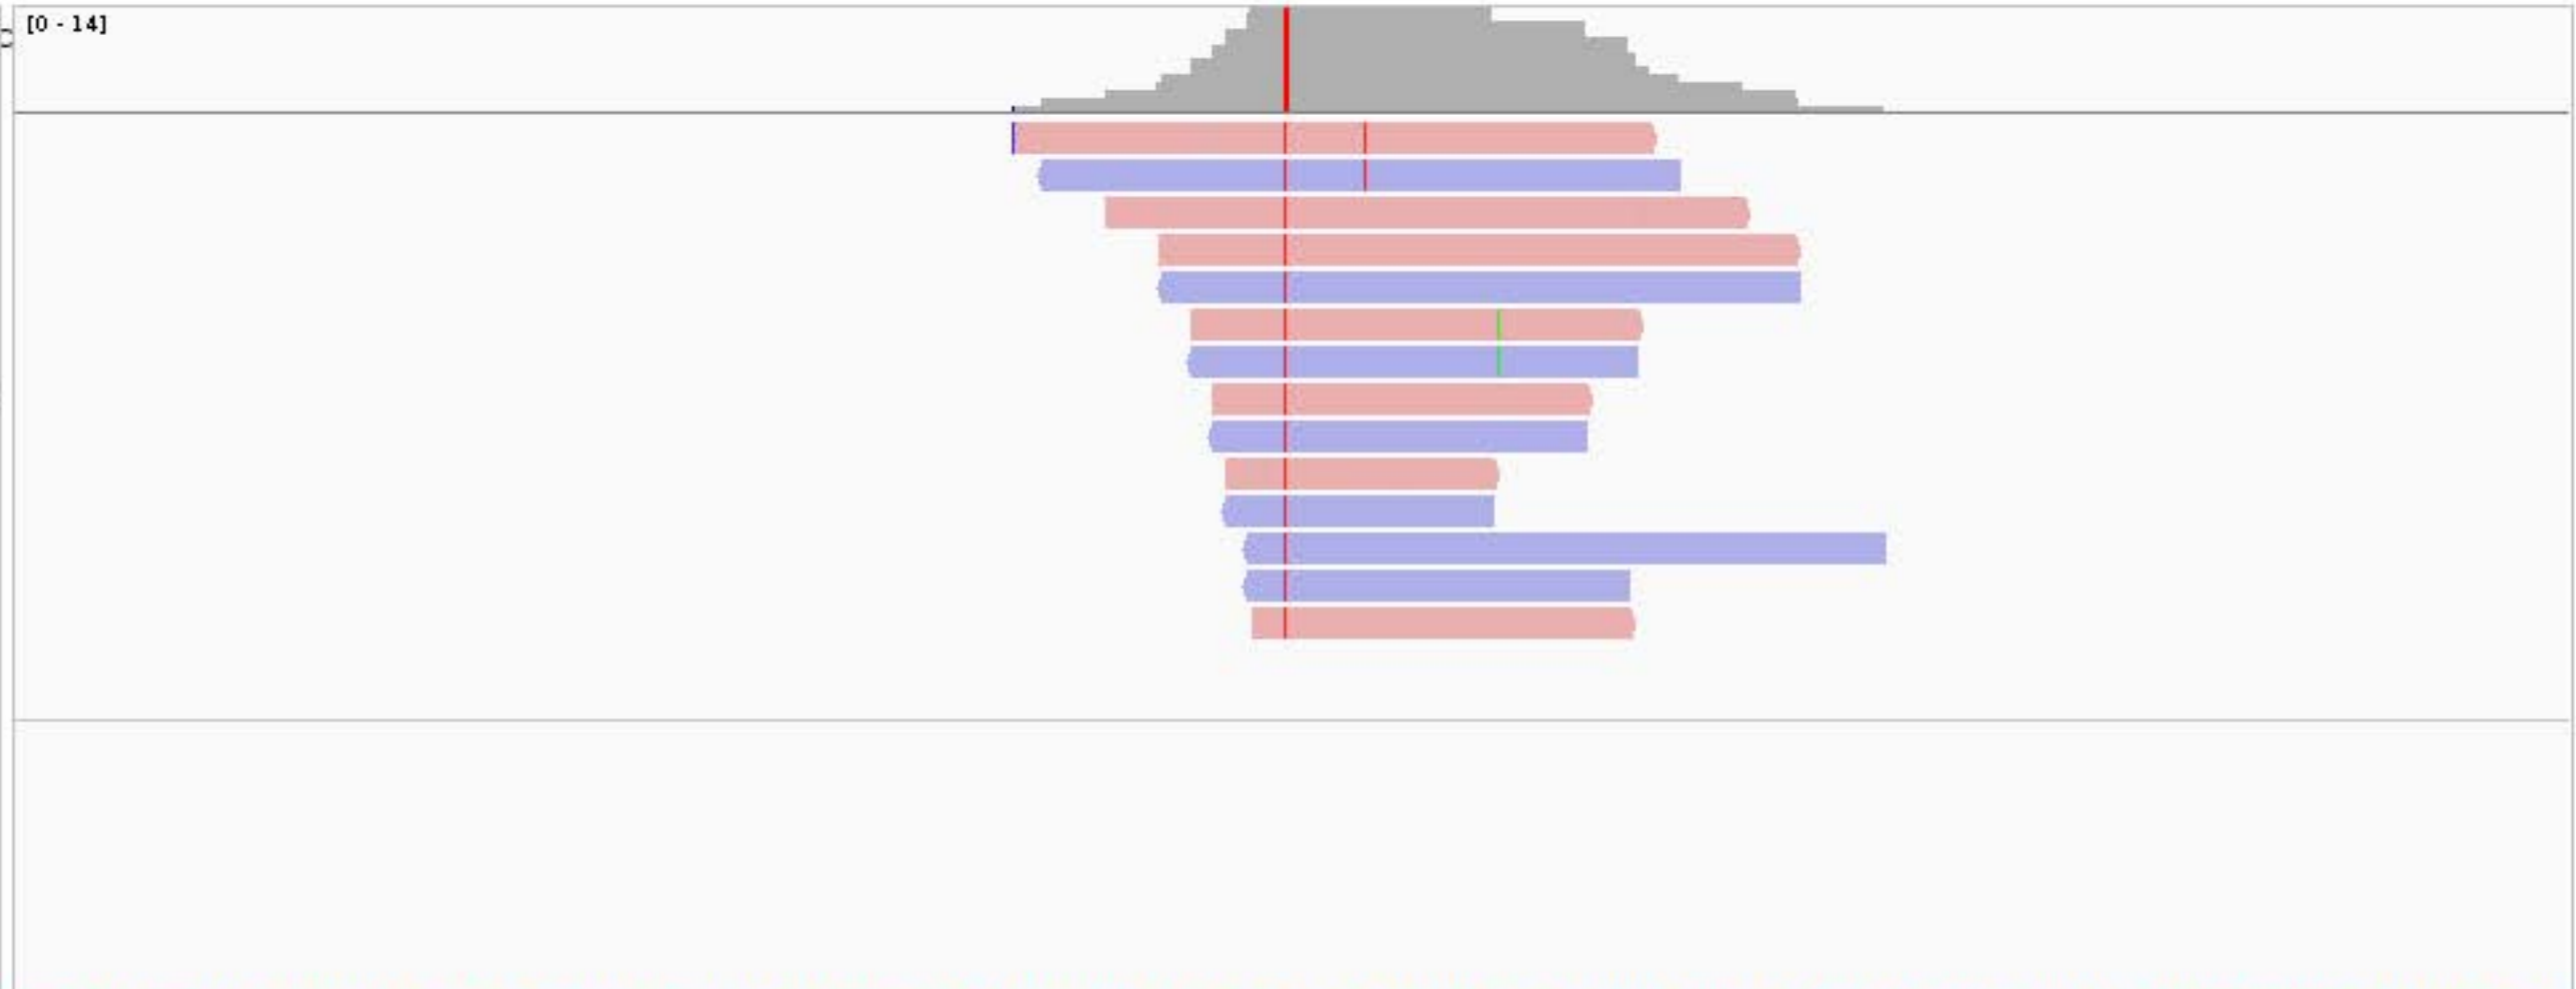

Sequence →

Refseq Genes

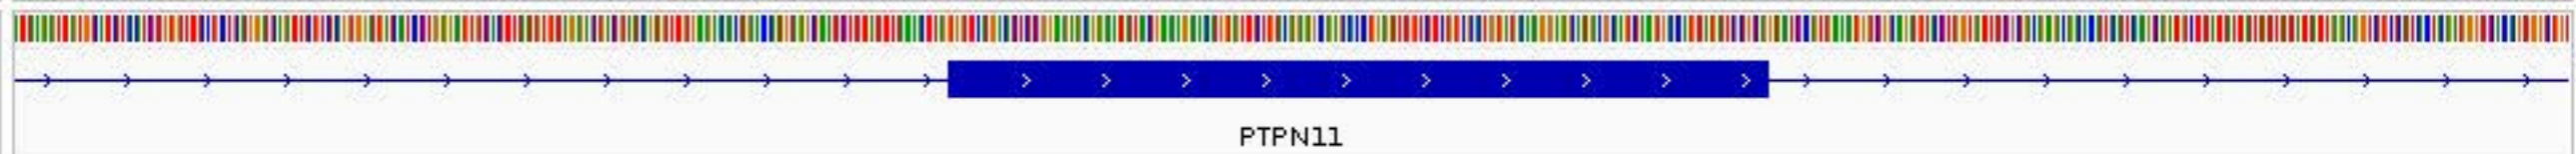





SL\_1010\_L\_FFPE\_8-B\_mut.bam  
age

SL\_1010\_L\_FFPE\_8-B\_mut.bam

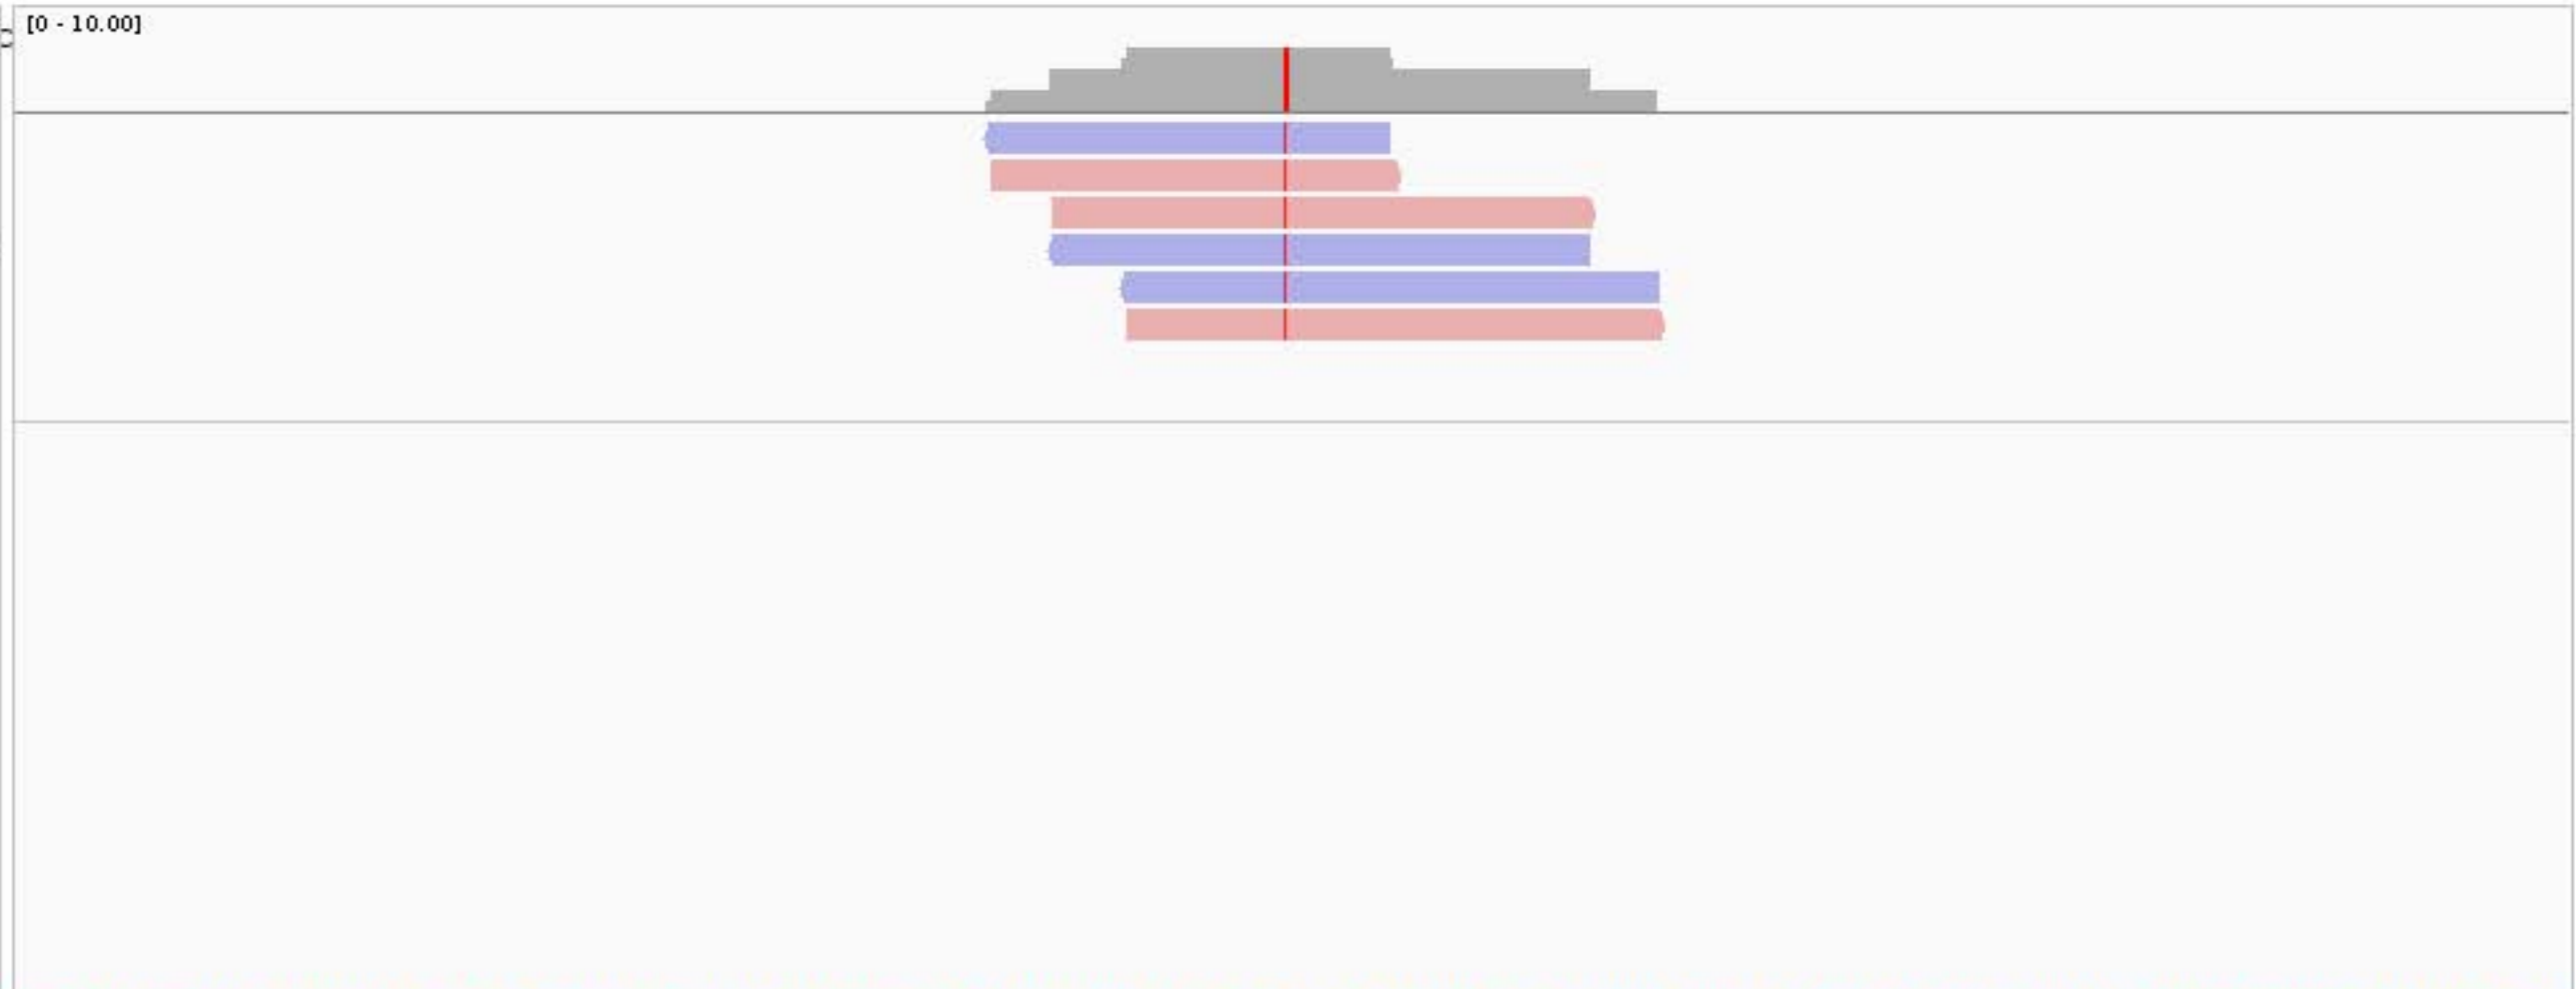

Sequence →

Refseq Genes





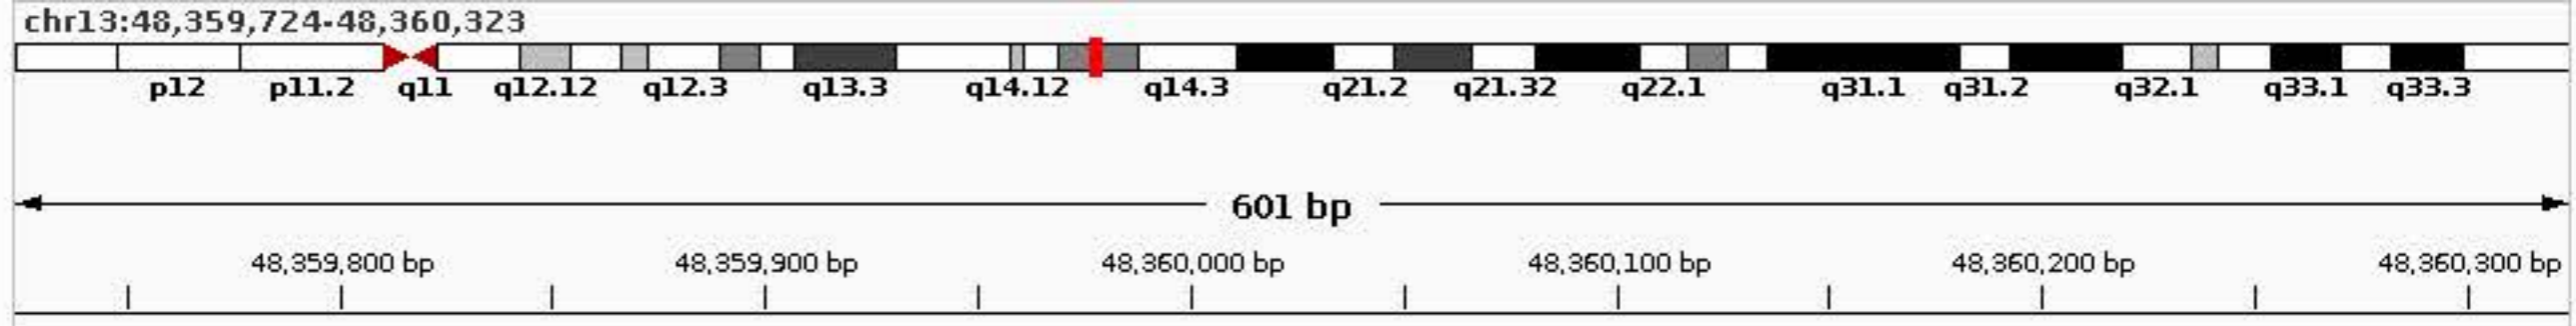

SL\_1007-T2-B\_mut.bam Coverage

SL\_1007-T2-B\_mut.bam

Sequence →

Refseq Genes

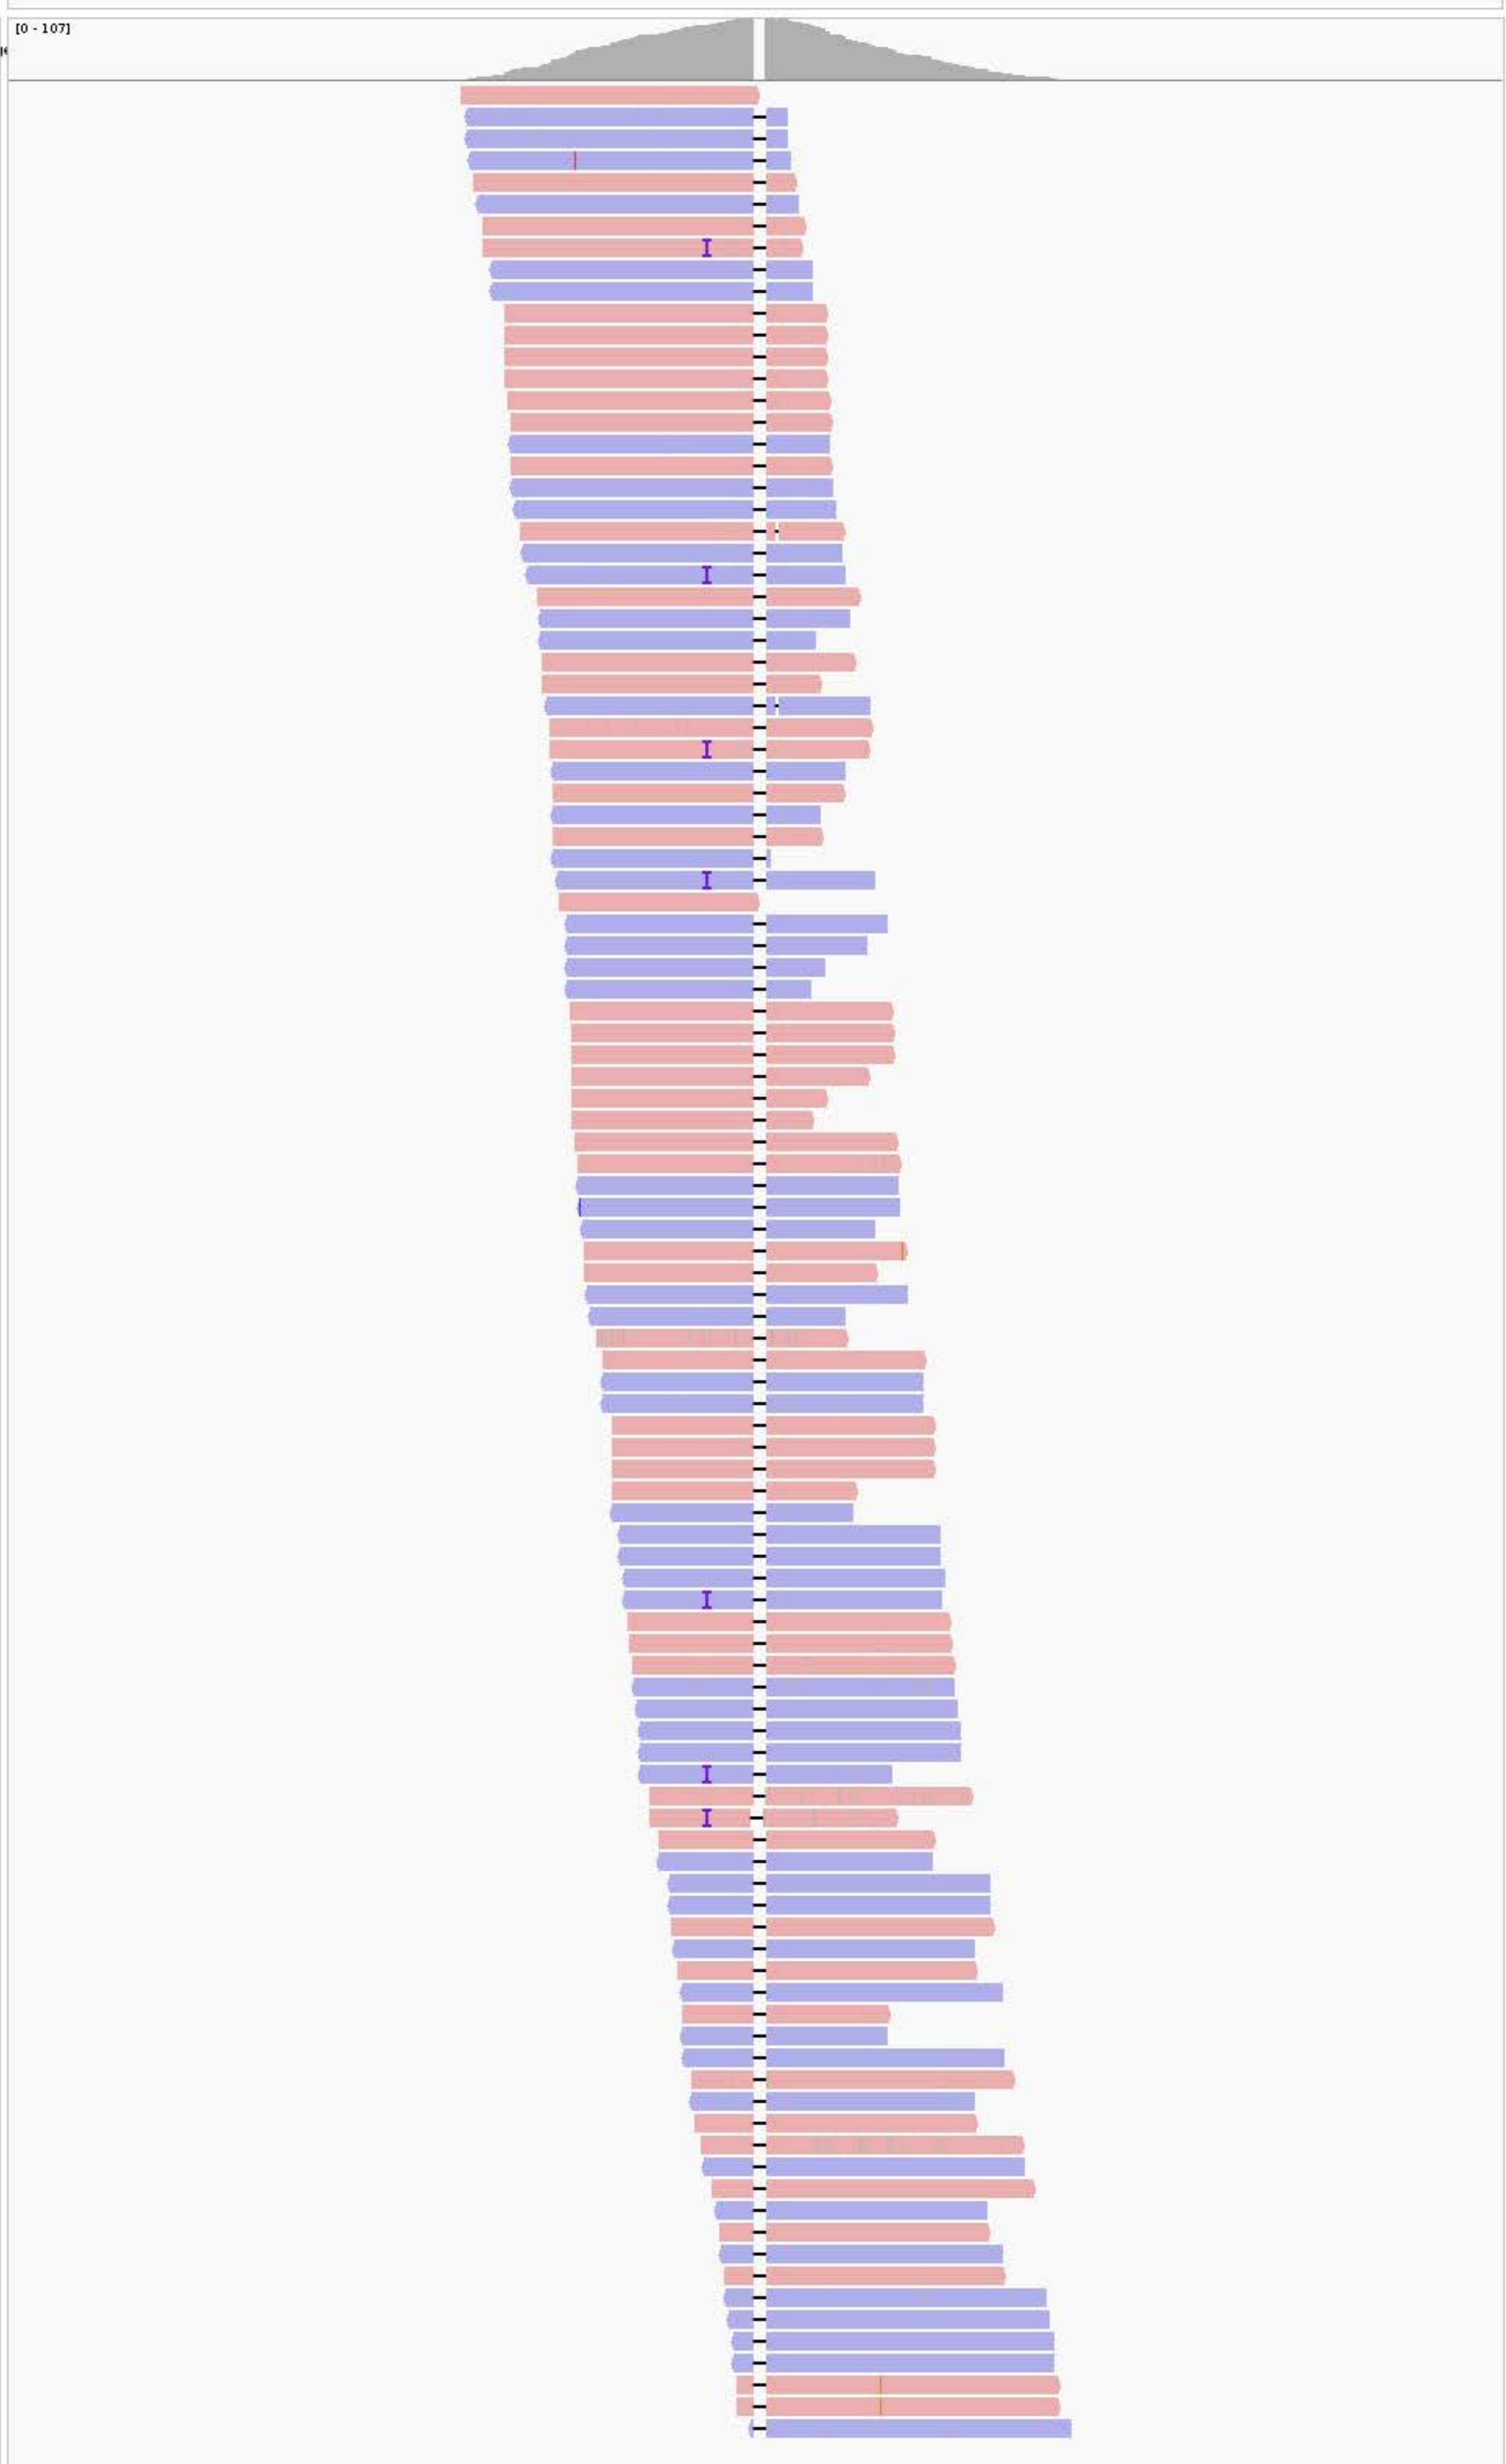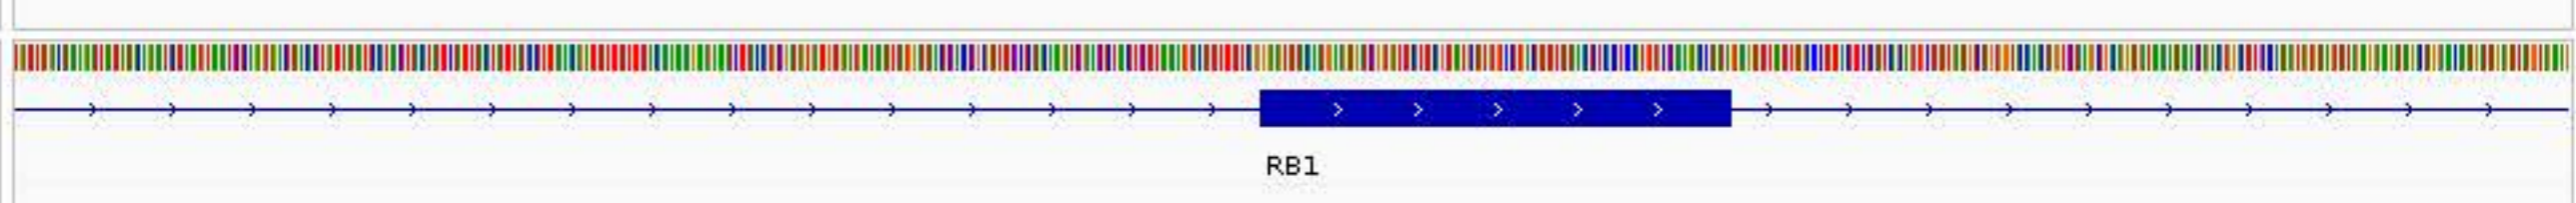



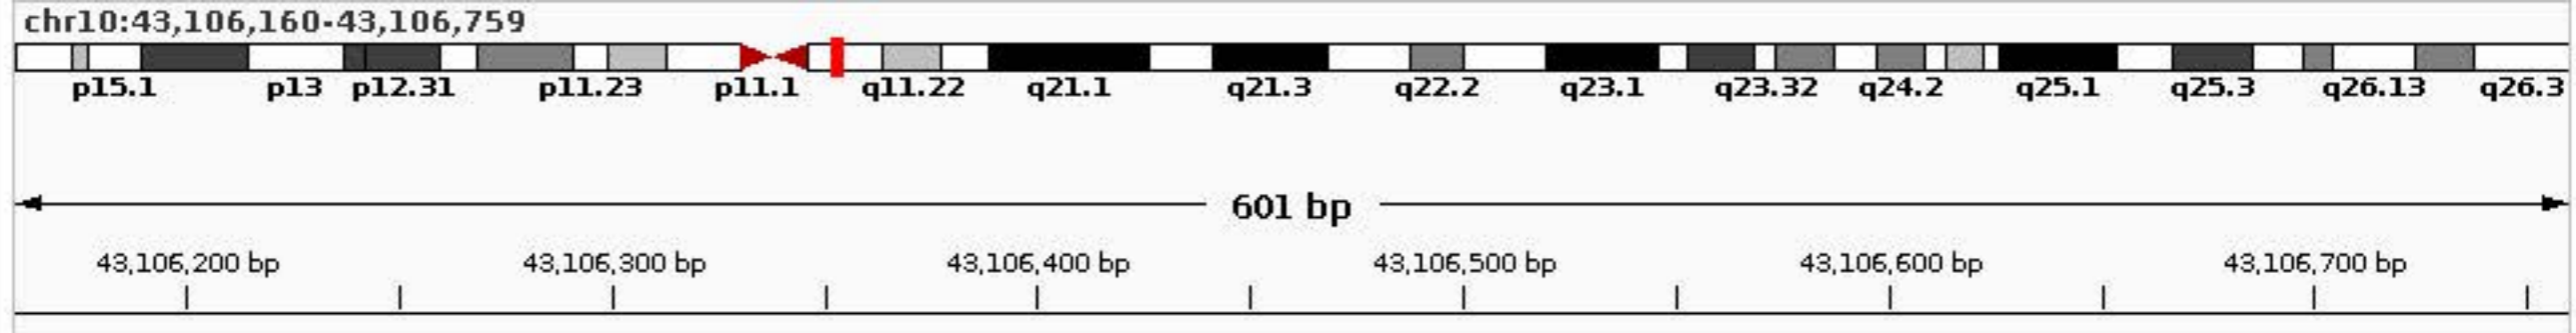

SL\_0001\_L\_FFPE\_10-B\_mut.barr  
rage

SL\_0001\_L\_FFPE\_10-B\_mut.ba  
m

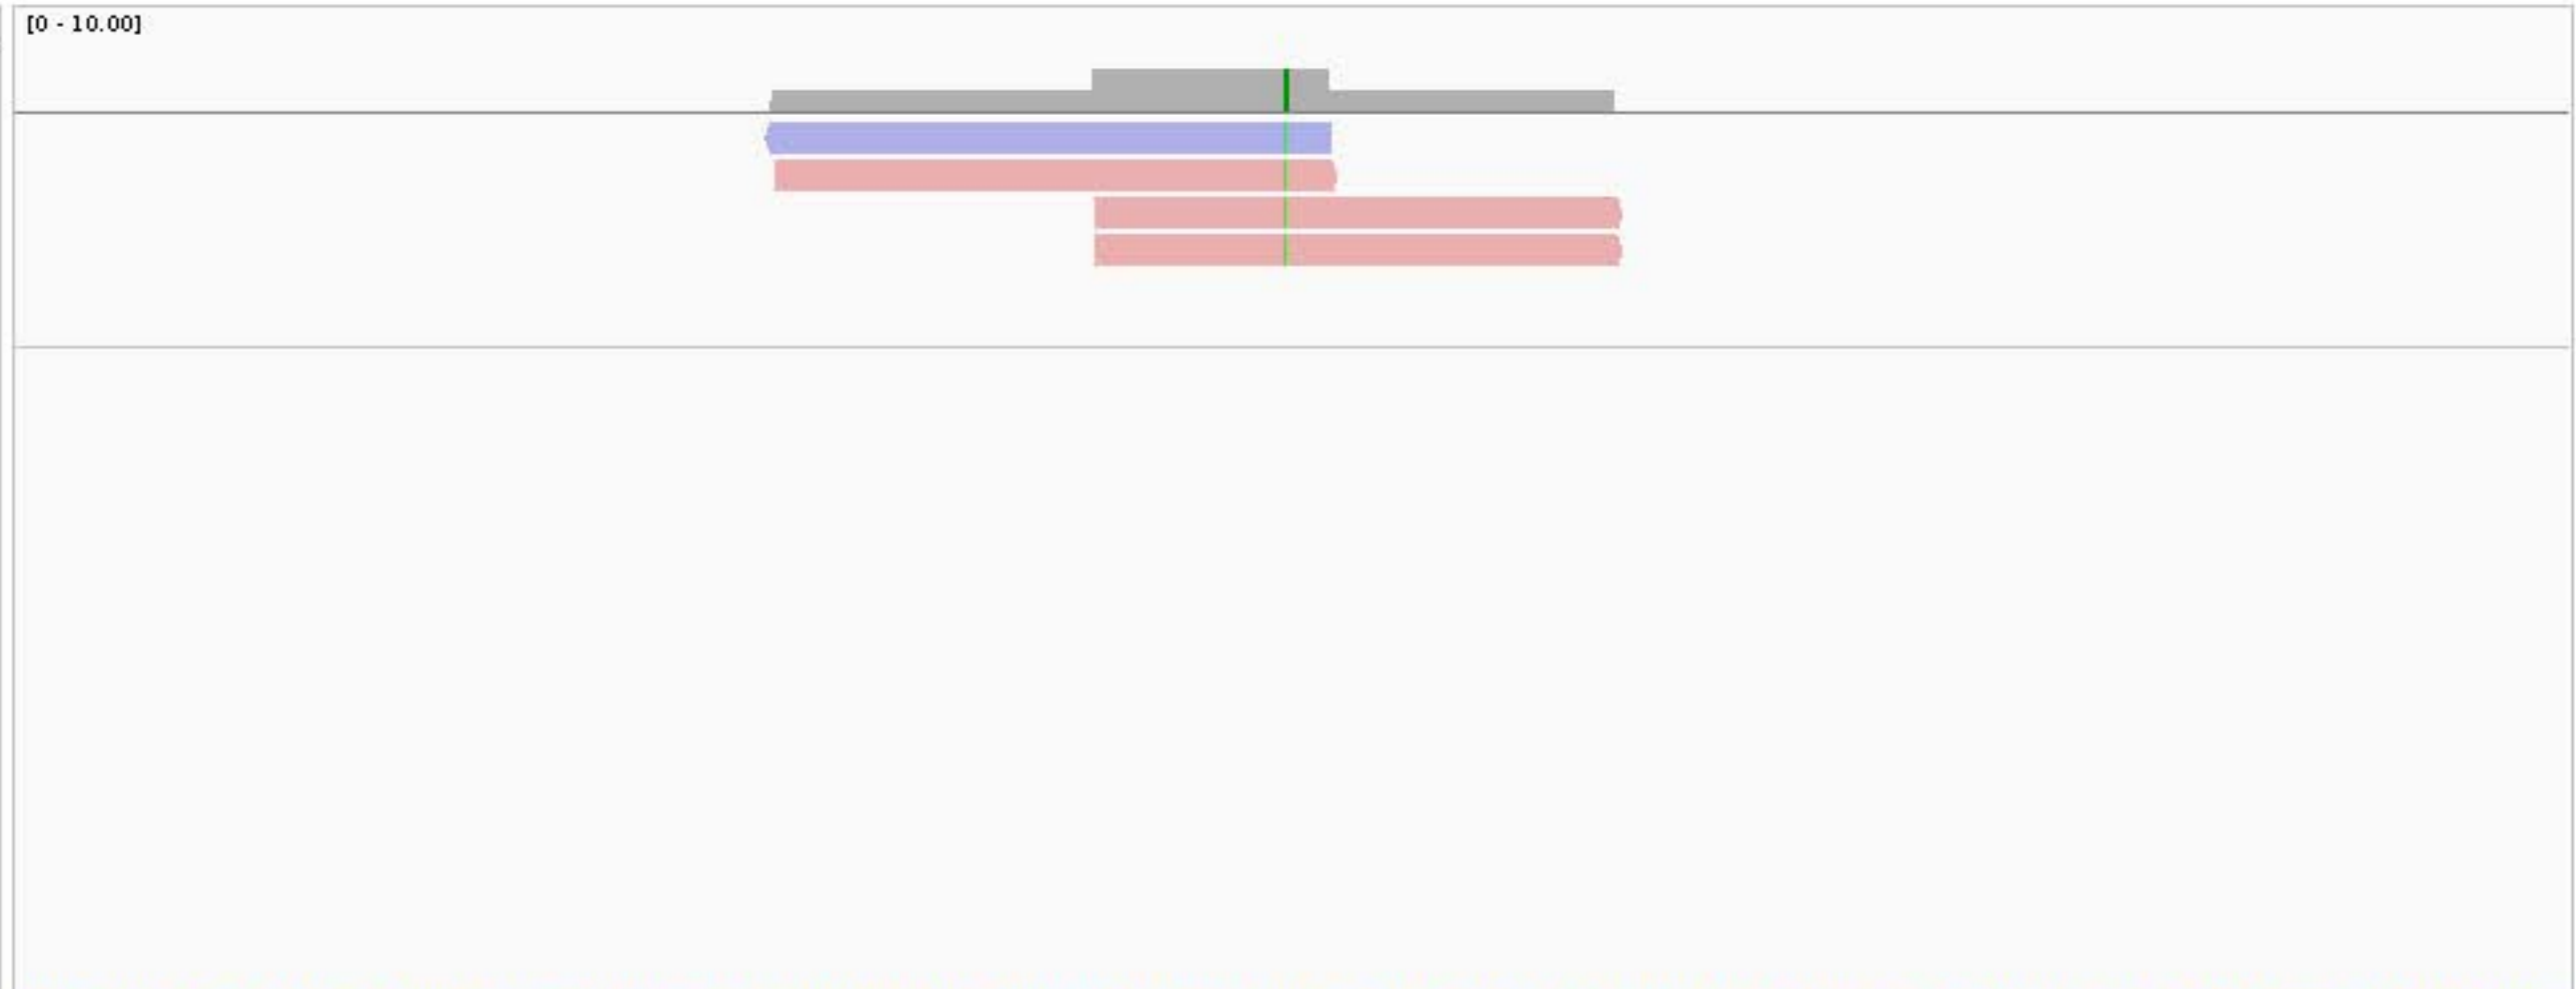

Sequence →

Refseq Genes

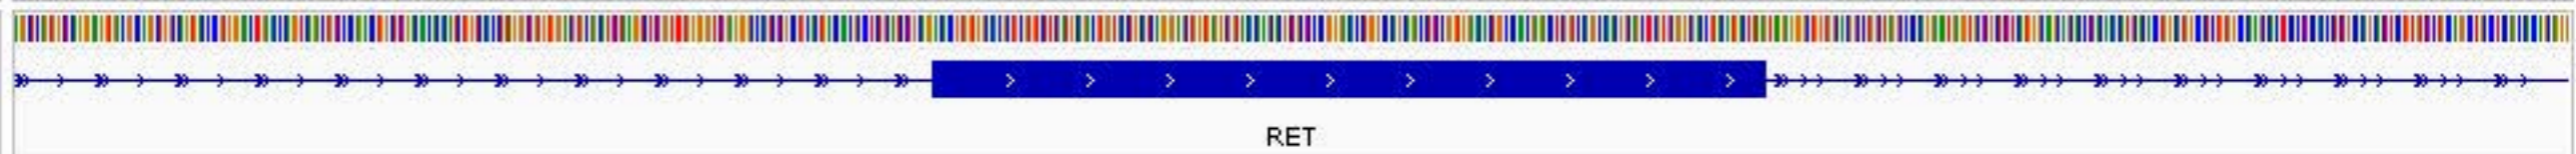



SL\_0001\_L\_FFPE\_29-B\_mut.bam  
SL\_0001\_L\_FFPE\_29-B\_mut.bam

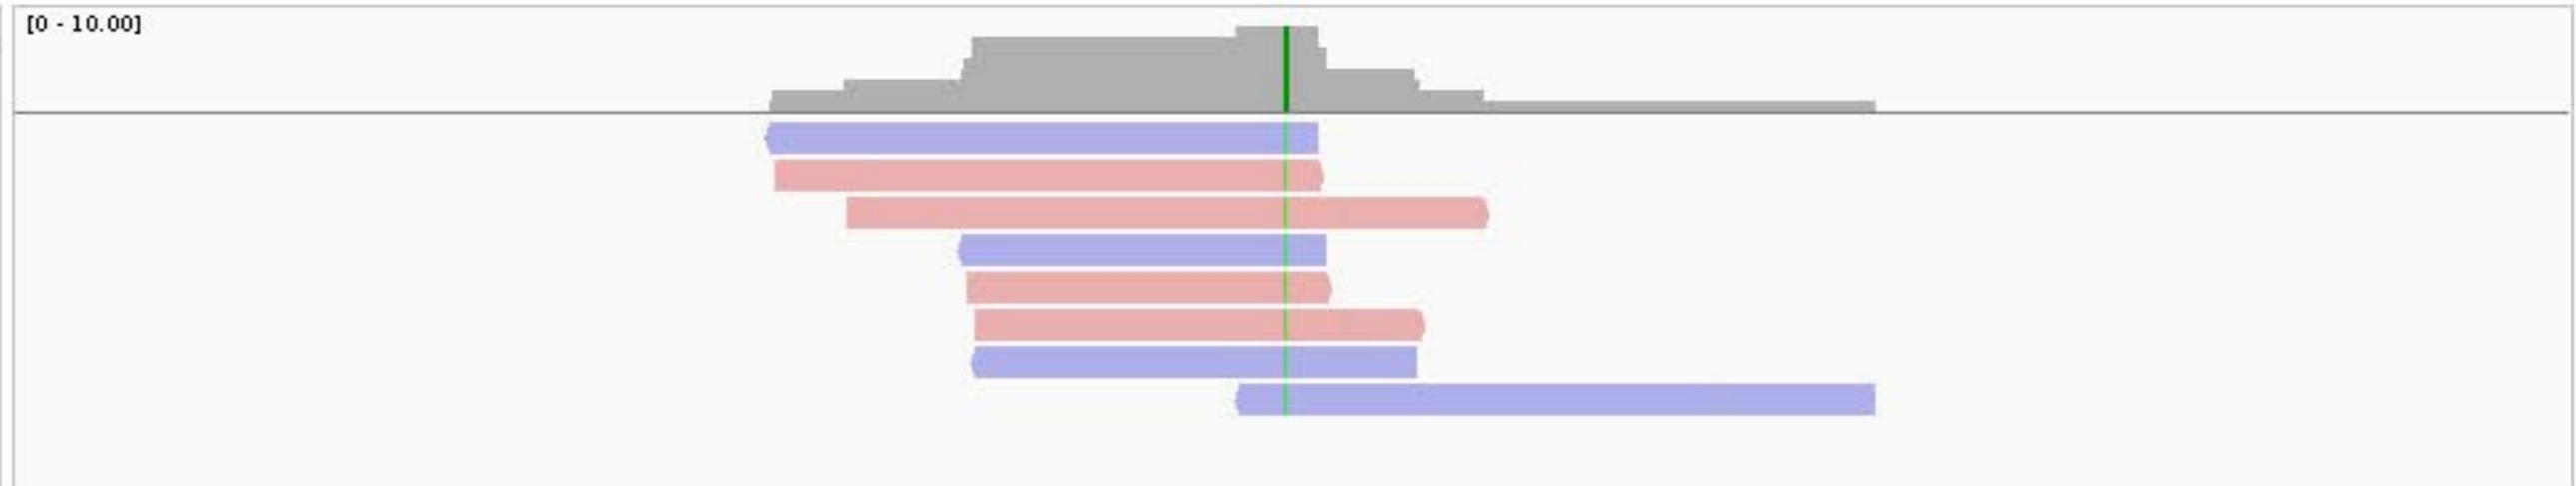

Sequence  
Refseq Genes



chr11:67,432,317-67,432,916

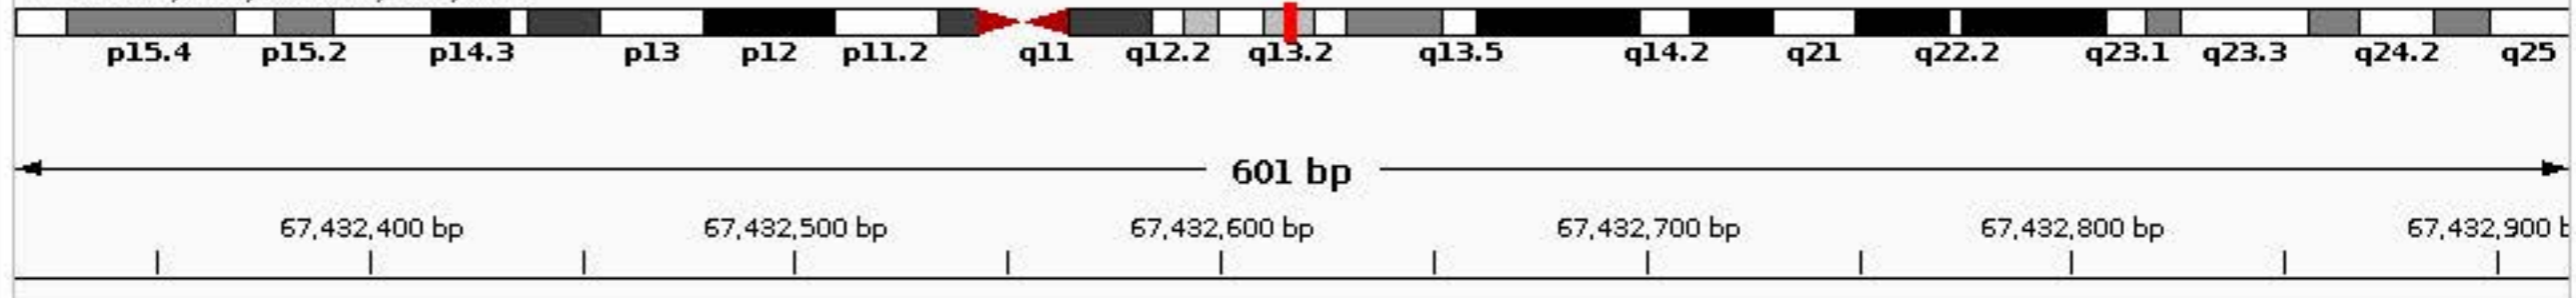

SL\_1006\_L\_FFPE\_7-B\_mut.bam  
age

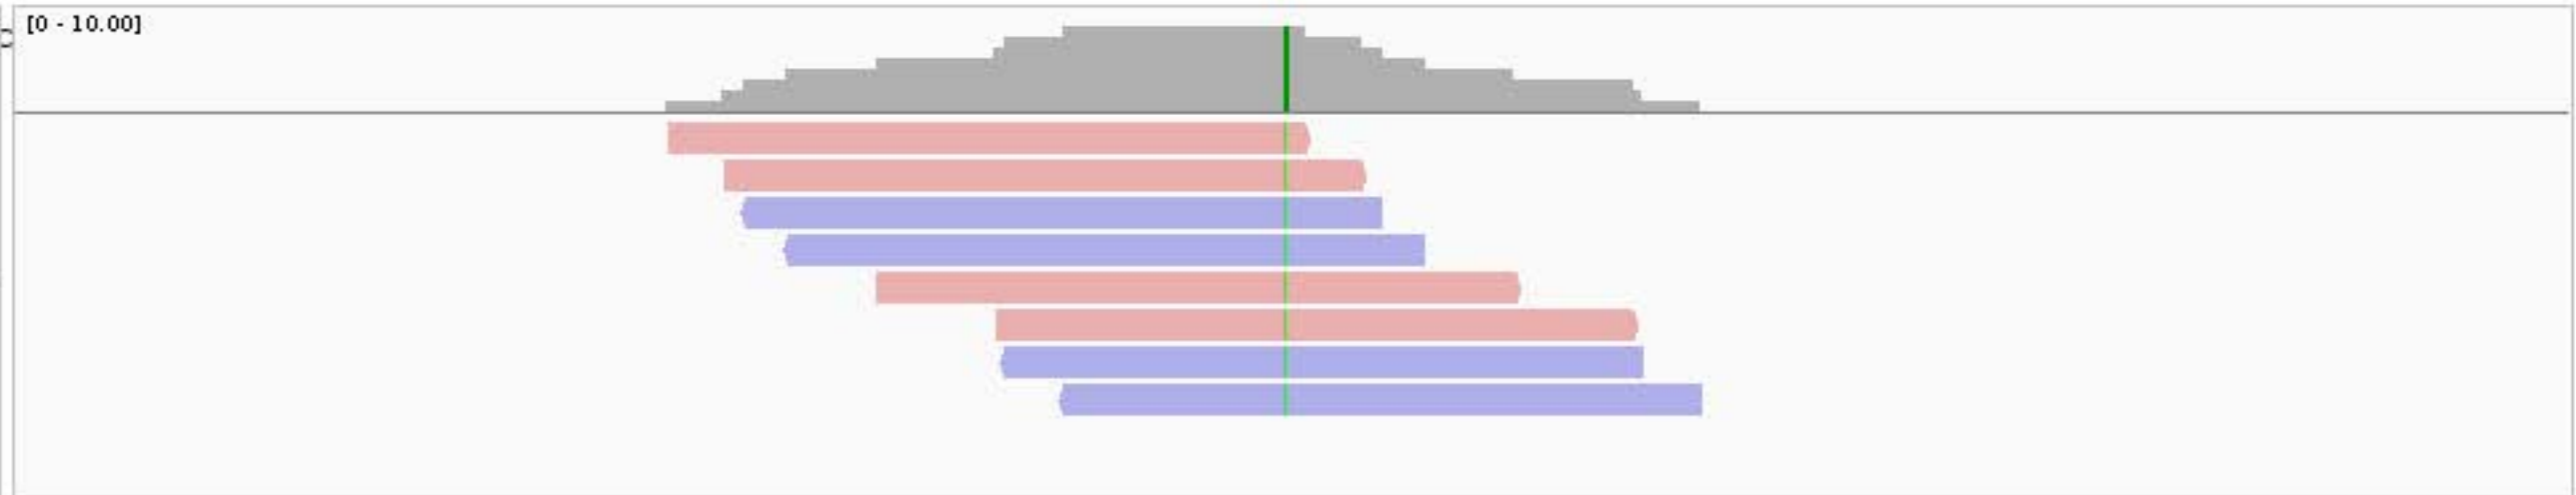

SL\_1006\_L\_FFPE\_7-B\_mut.bam

Sequence →  
Refseq Genes

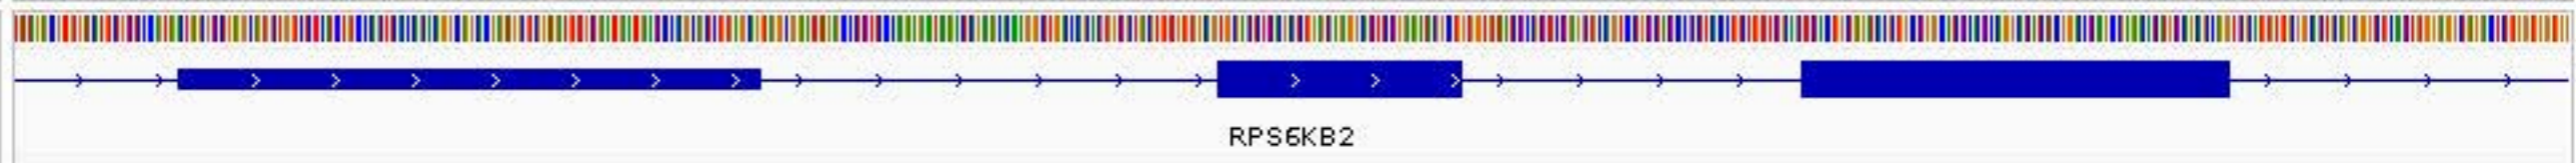



chr11:67,432,317-67,432,916



SL\_1006\_L\_FFPE\_28-B\_mut.barr  
rage

SL\_1006\_L\_FFPE\_28-B\_mut.ba  
m

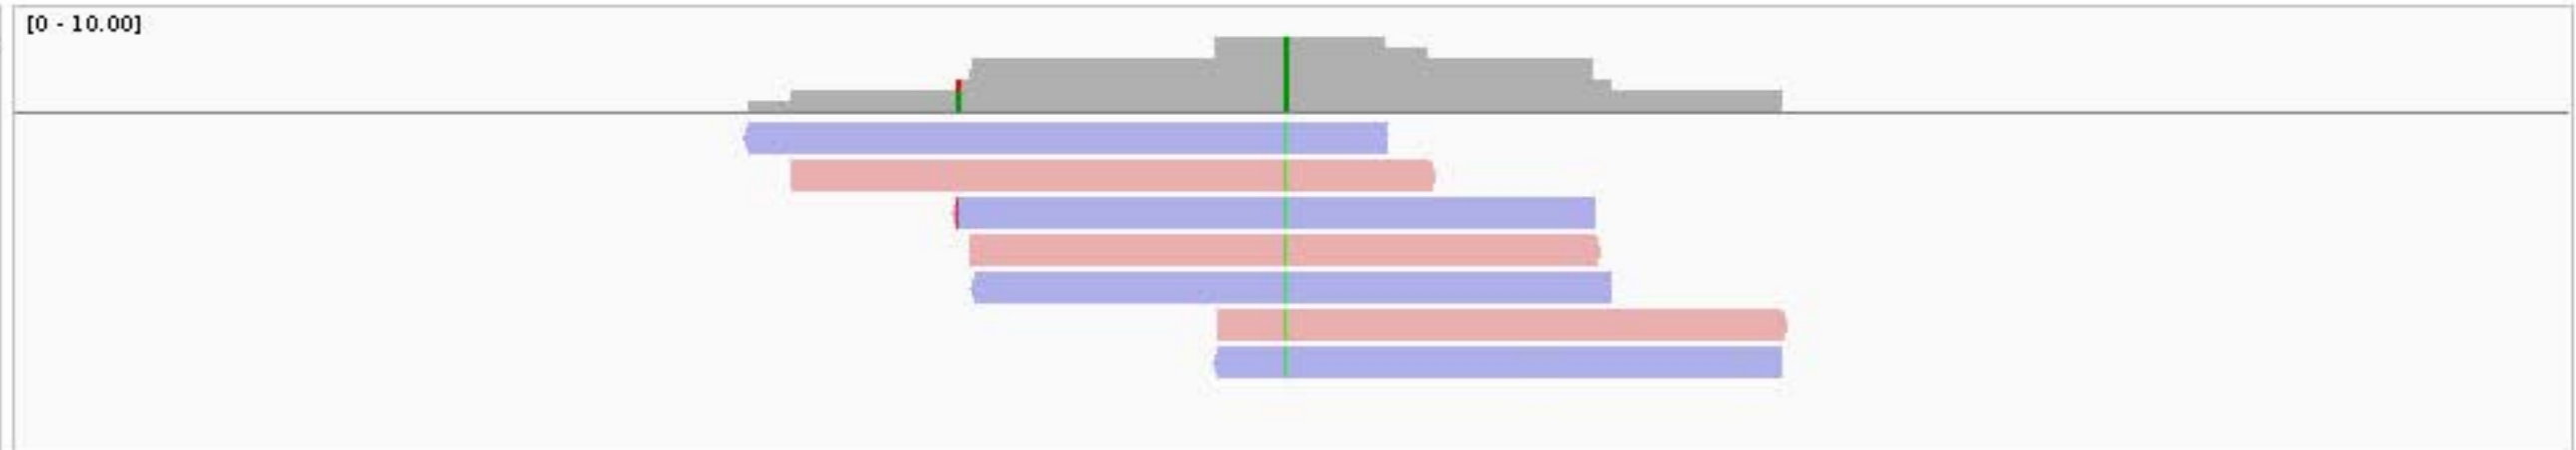

Sequence →

Refseq Genes

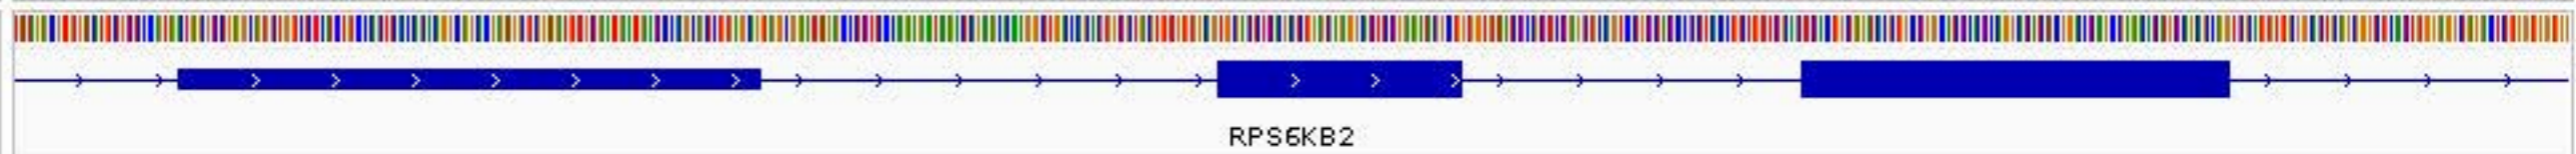



chr1:15,930,797-15,931,396  
p36.23 p36.12 p34.3 p33 p32.1 p31.1 p22.2 p21.1 p13.1 q12 q21.1 q22 q24.1 q25.2 q31.2 q32.2 q41 q42.2 q44

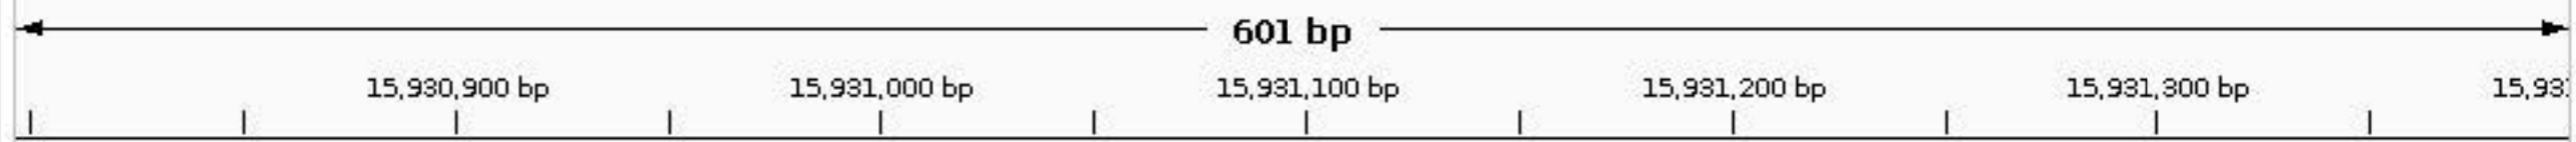

SL\_1011-T2-B\_mut.bam Coverage

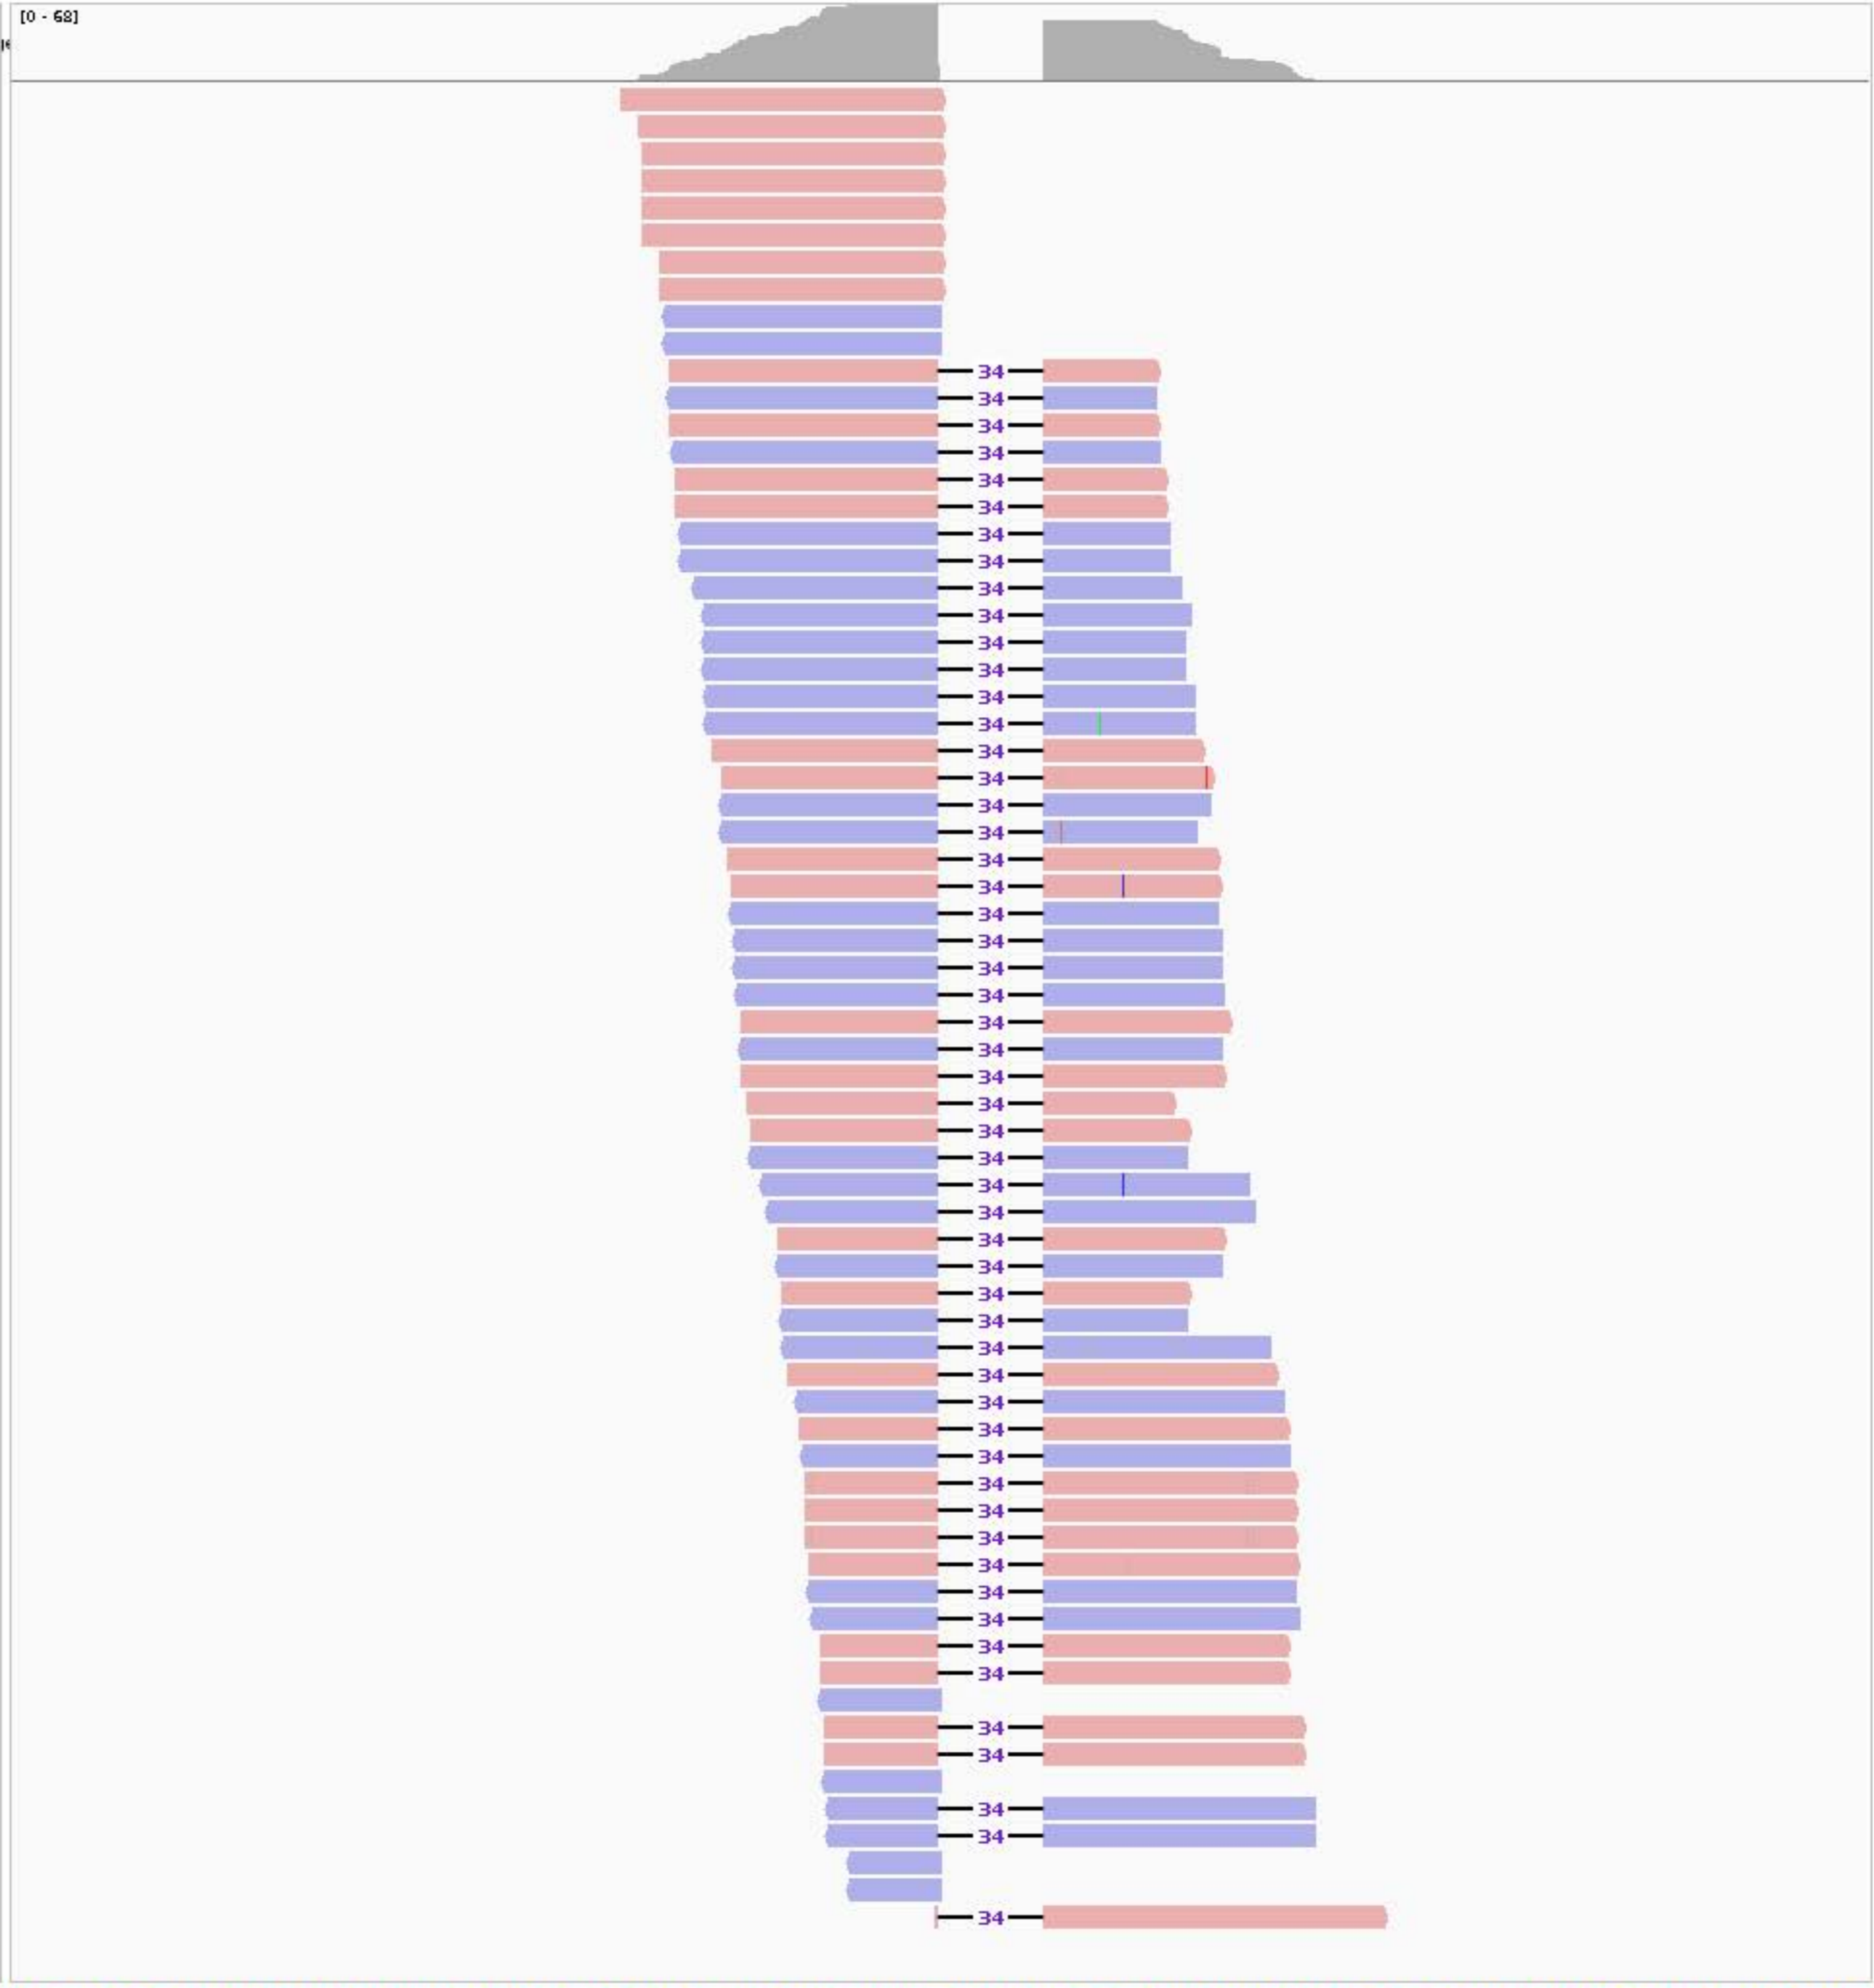

Sequence →  
Refseq Genes

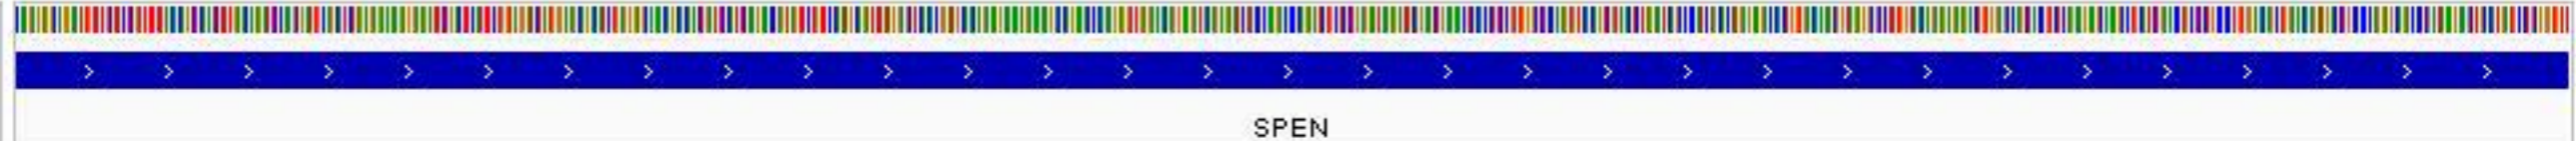



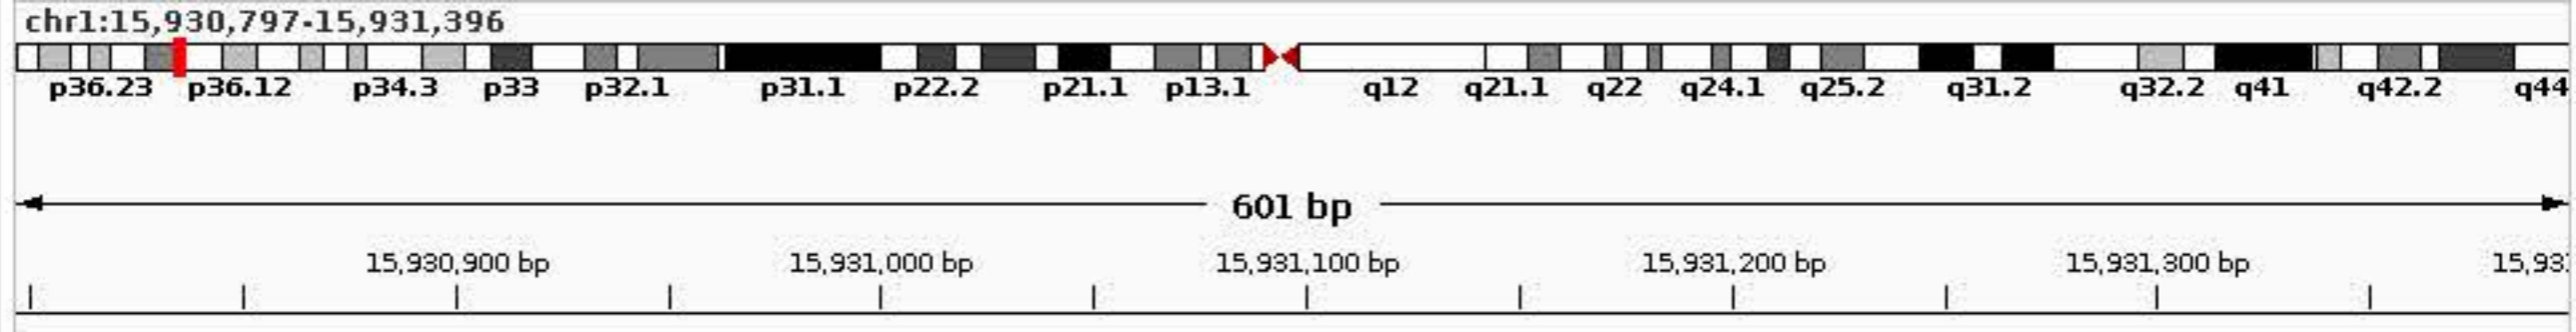

SL\_1011-T3-B\_mut.bam Coverage

SL\_1011-T3-B\_mut.bam

Sequence

Refseq Genes

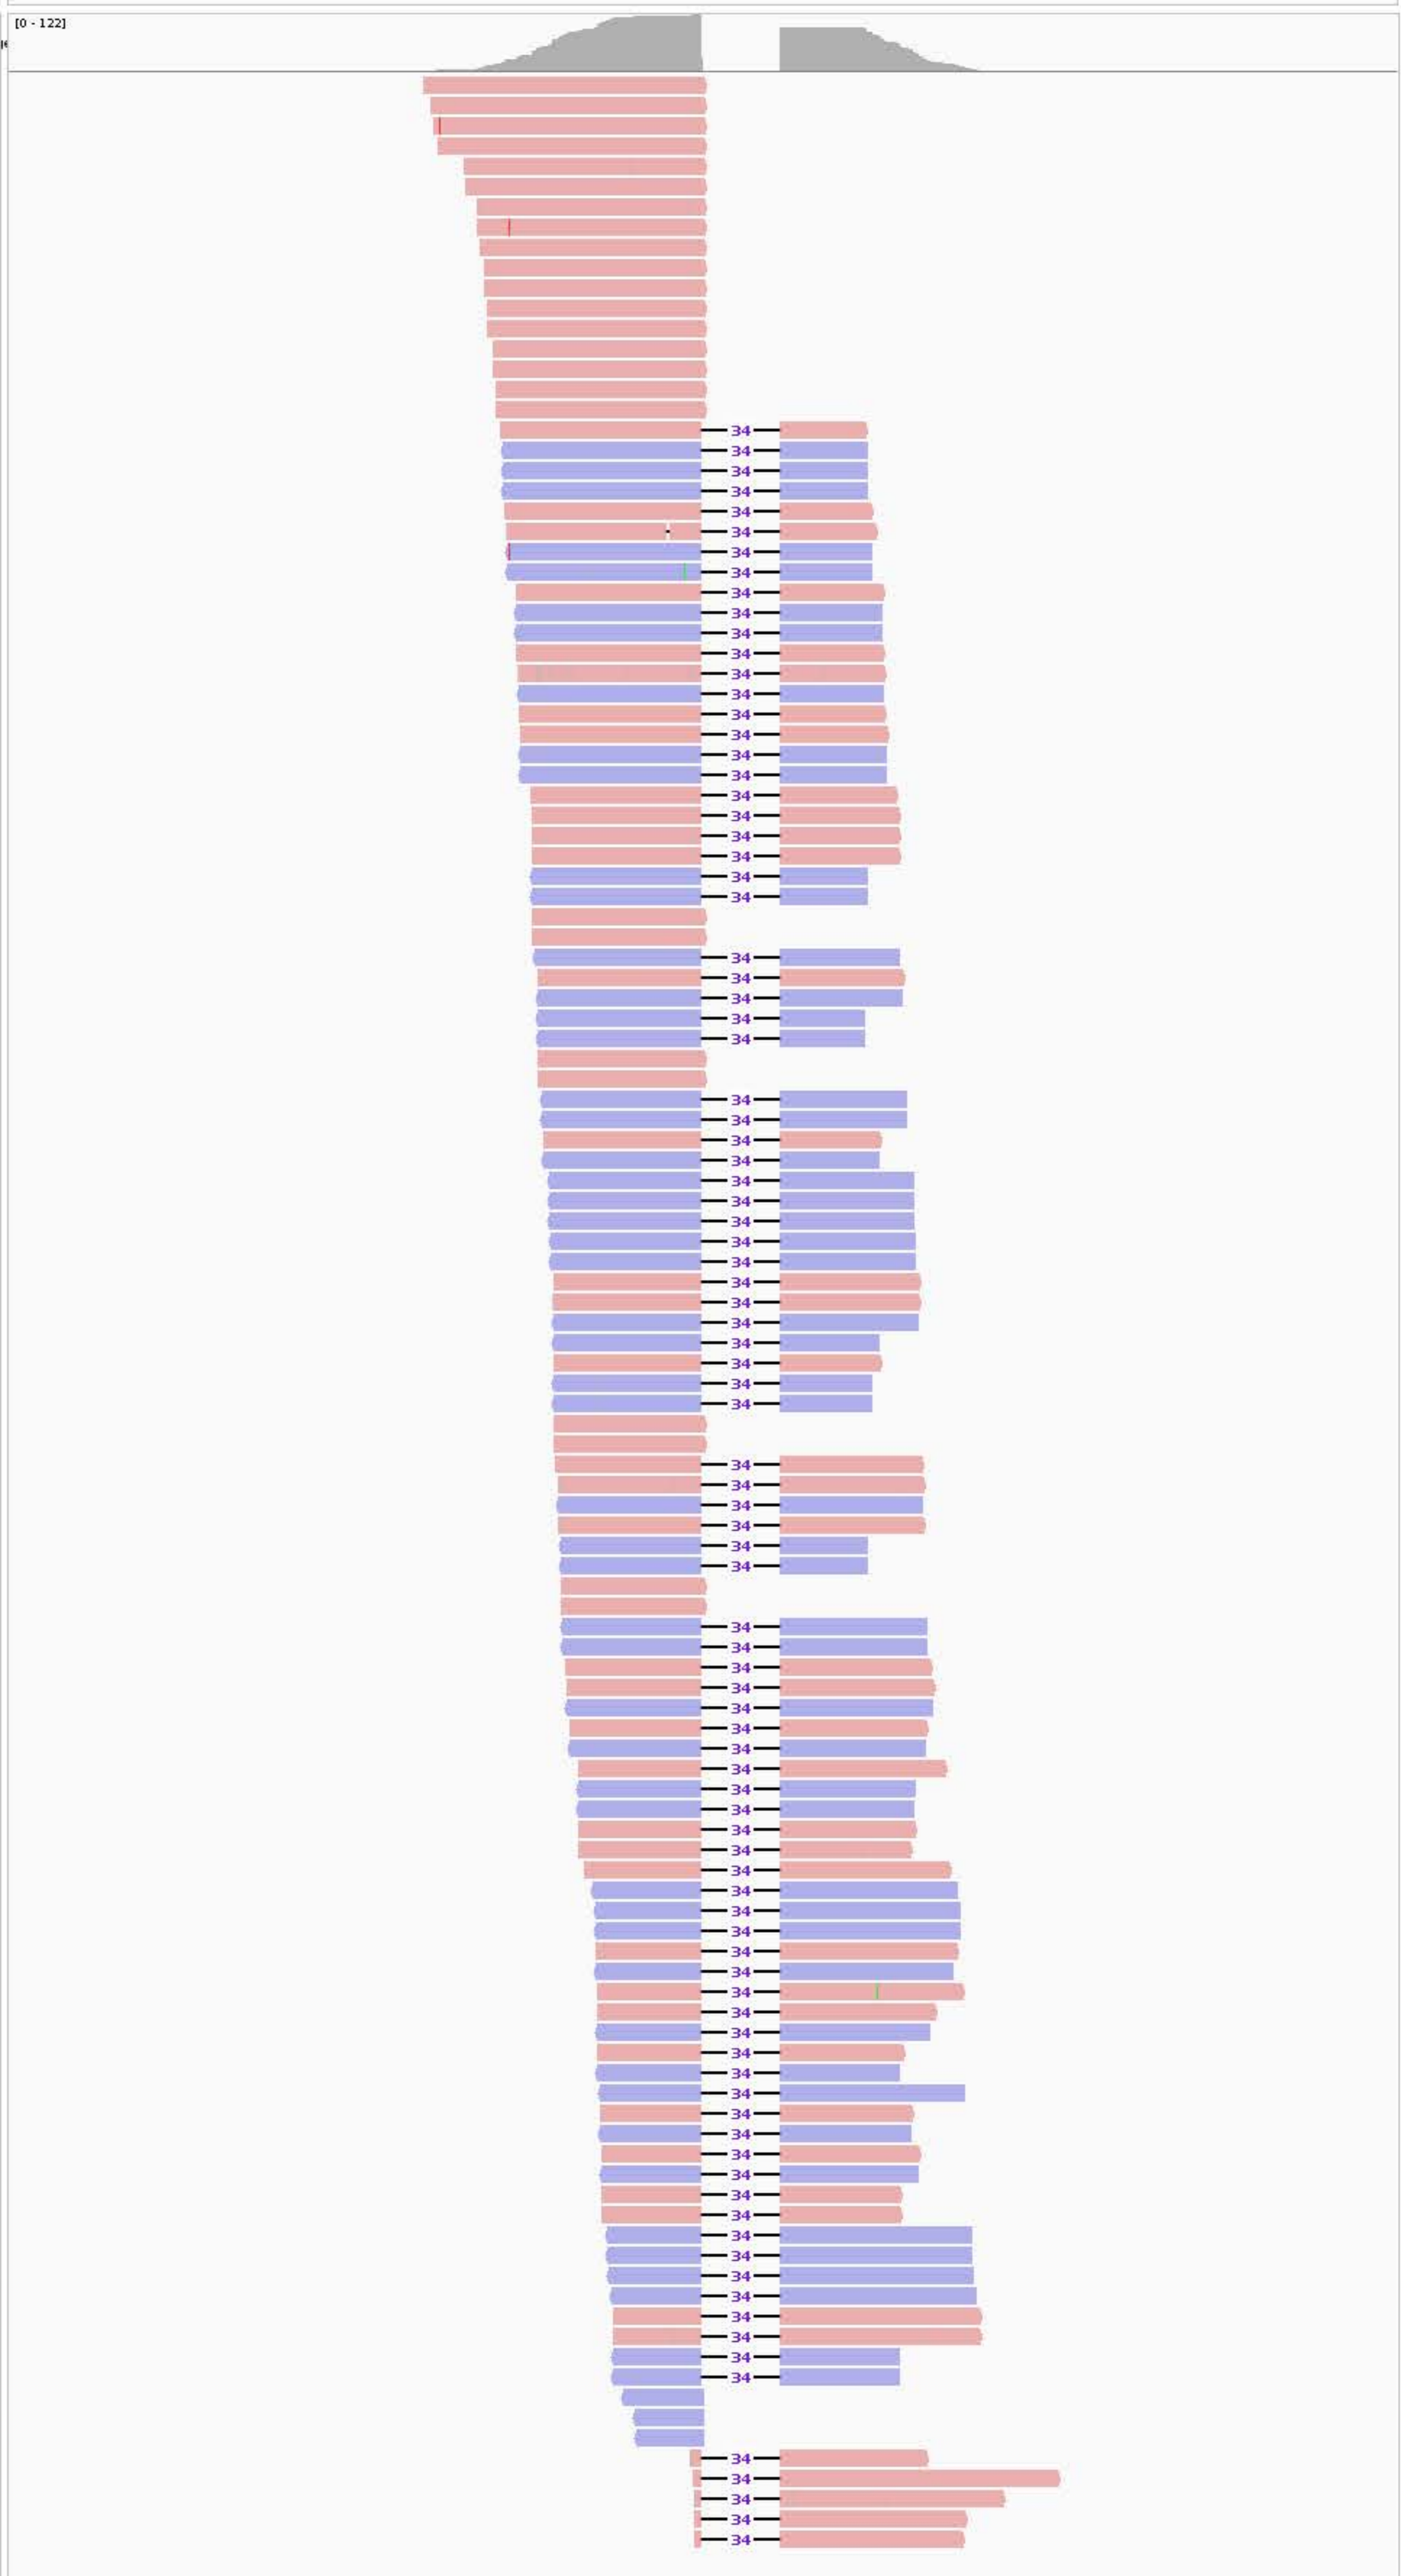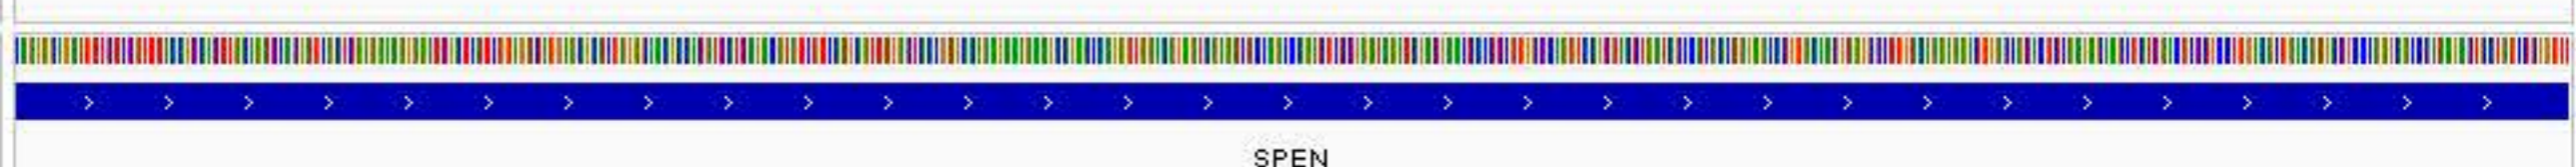

SPEN

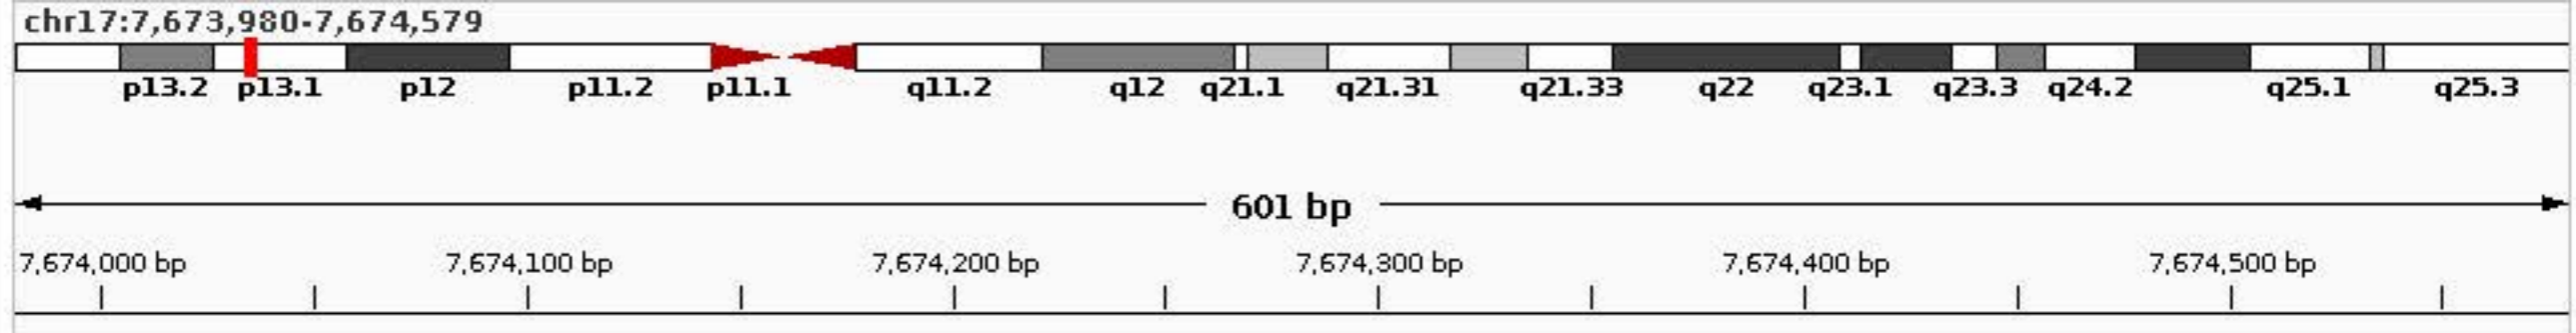

SL\_0005-LT\_11-B\_mut.bam Cover

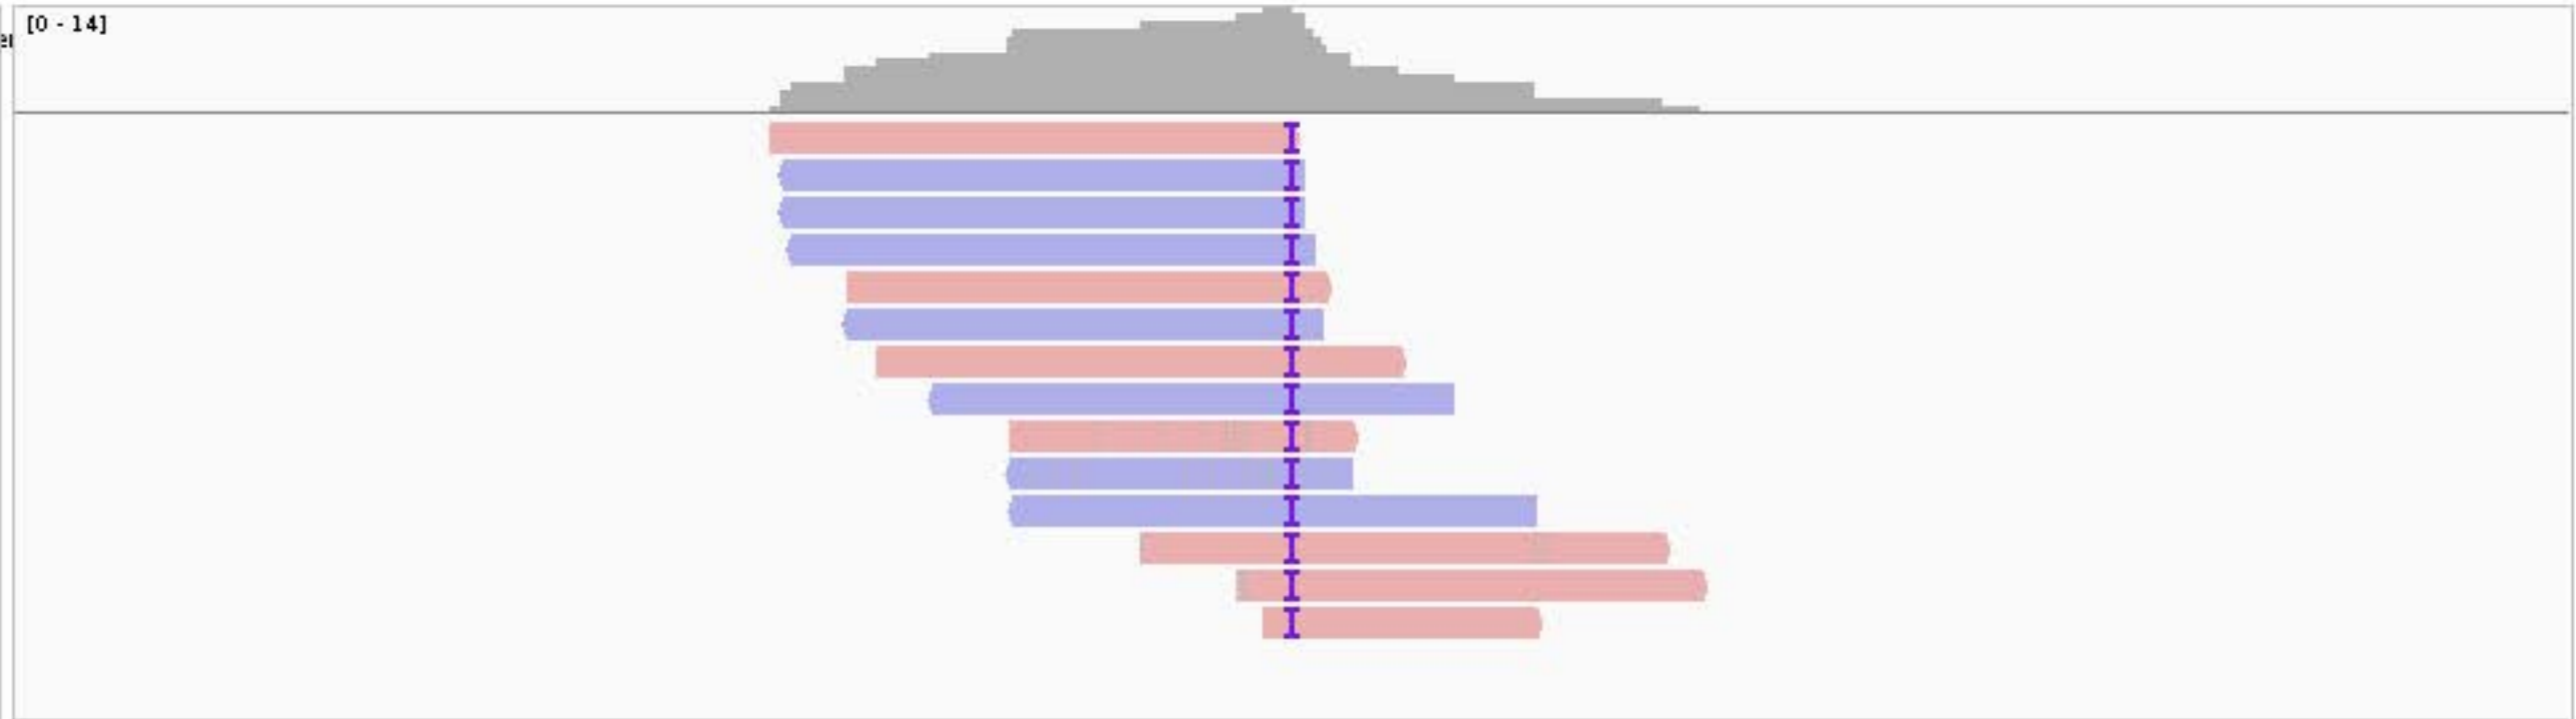

Sequence →

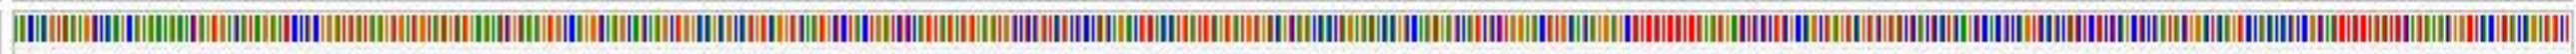

Refseq Genes

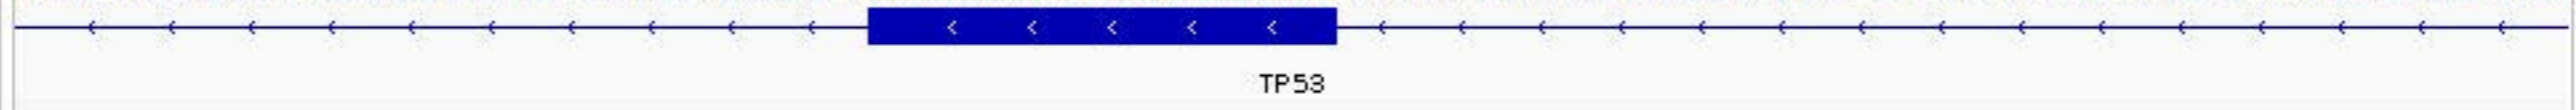

chr17:7,673,980-7,674,579

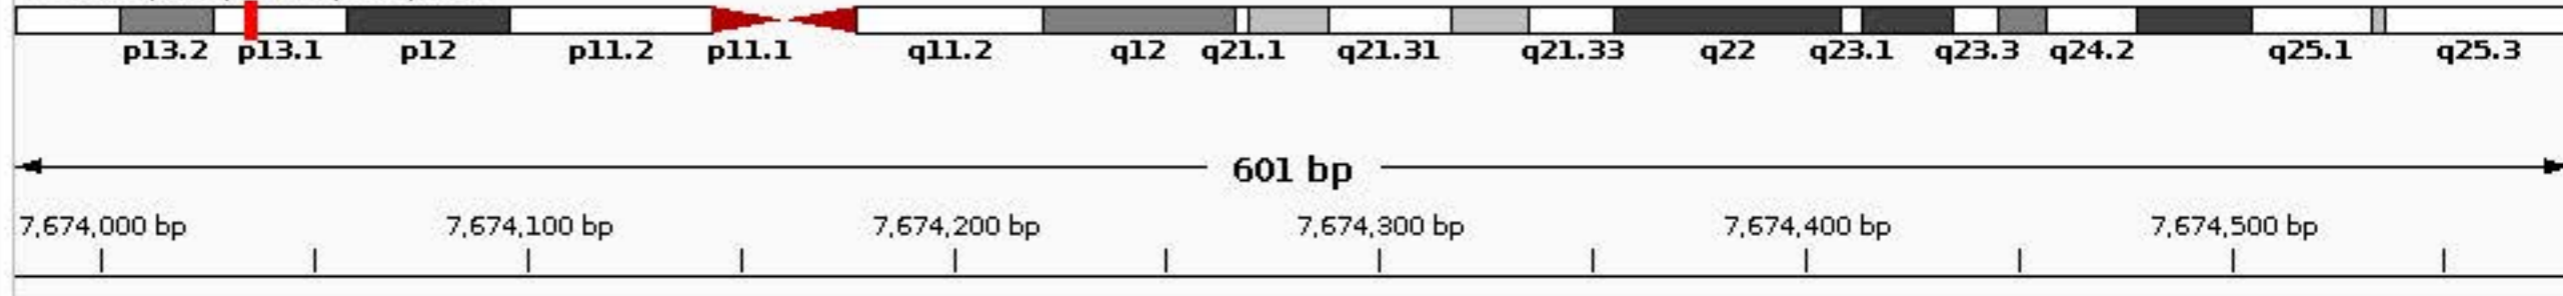

SL\_0005-LT\_12-B\_mut.bam Cover

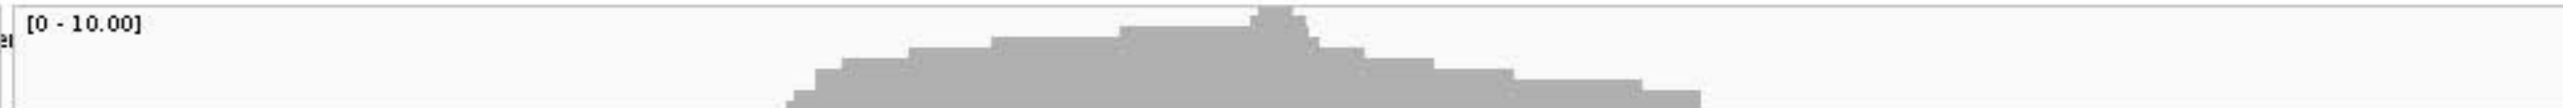

SL\_0005-LT\_12-B\_mut.bam

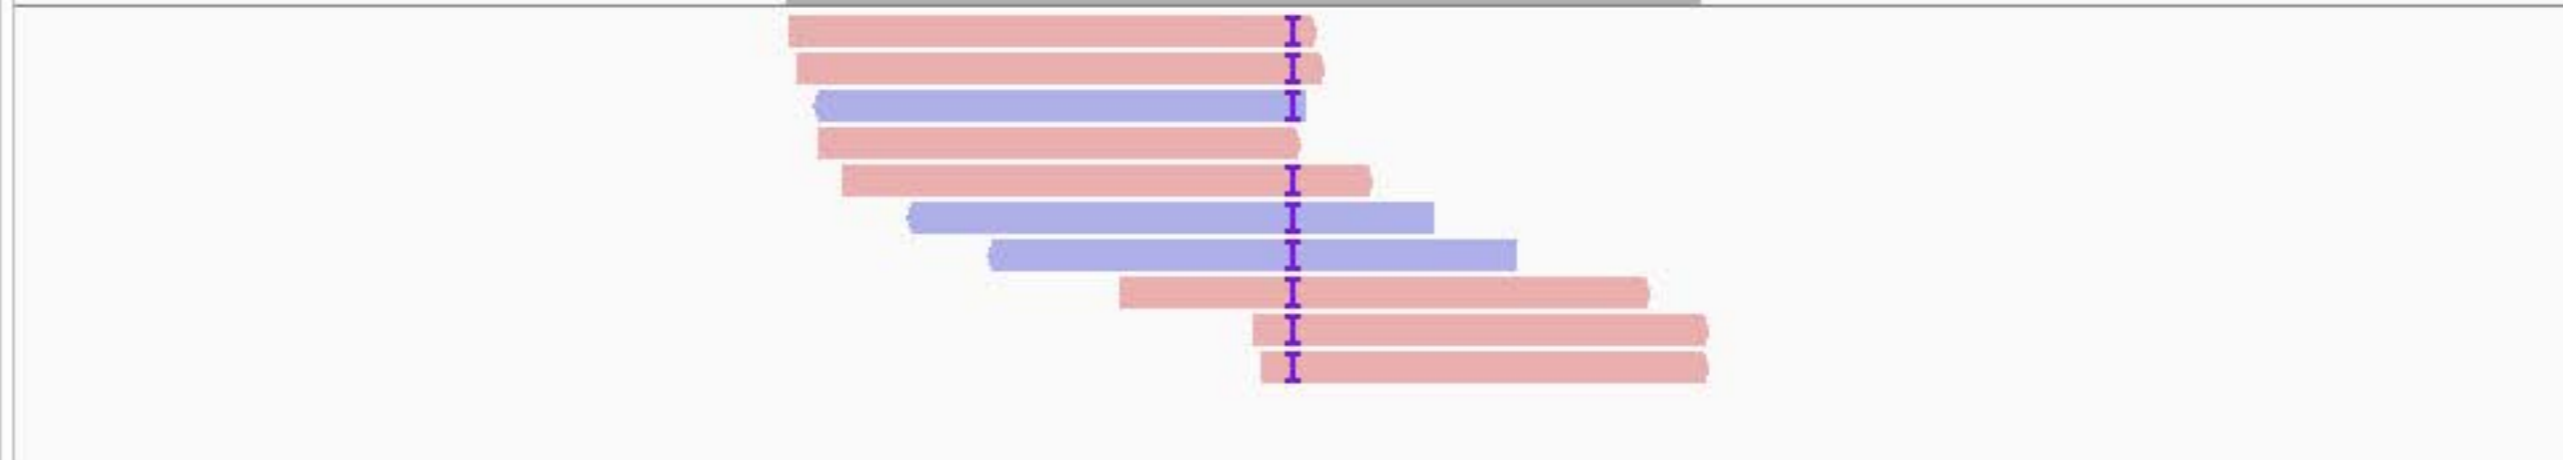

Sequence

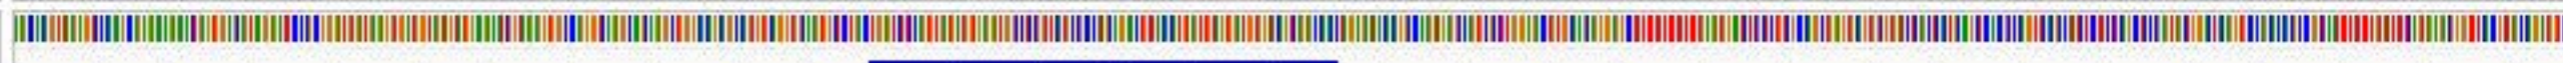

Refseq Genes

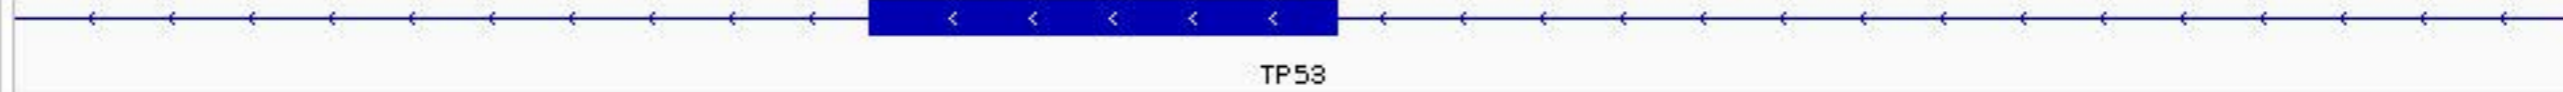



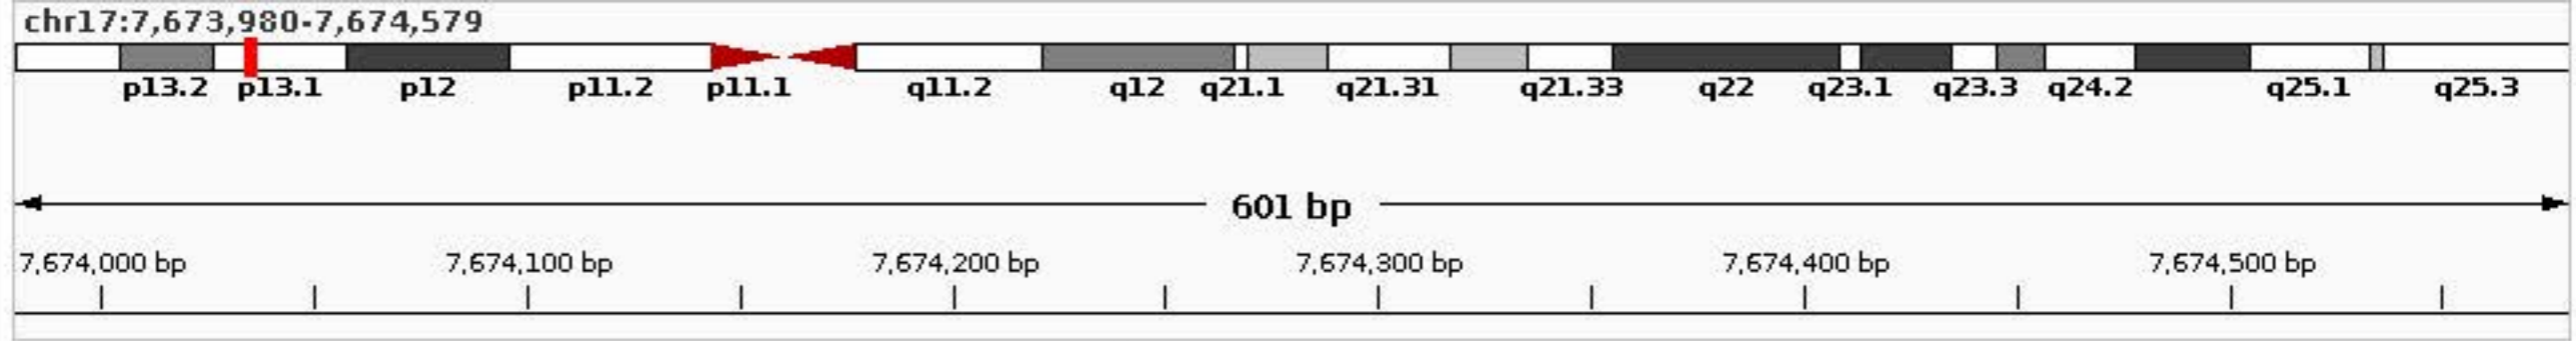

SL\_0005-LT-1-B\_mut.bam Coverage

SL\_0005-LT-1-B\_mut.bam

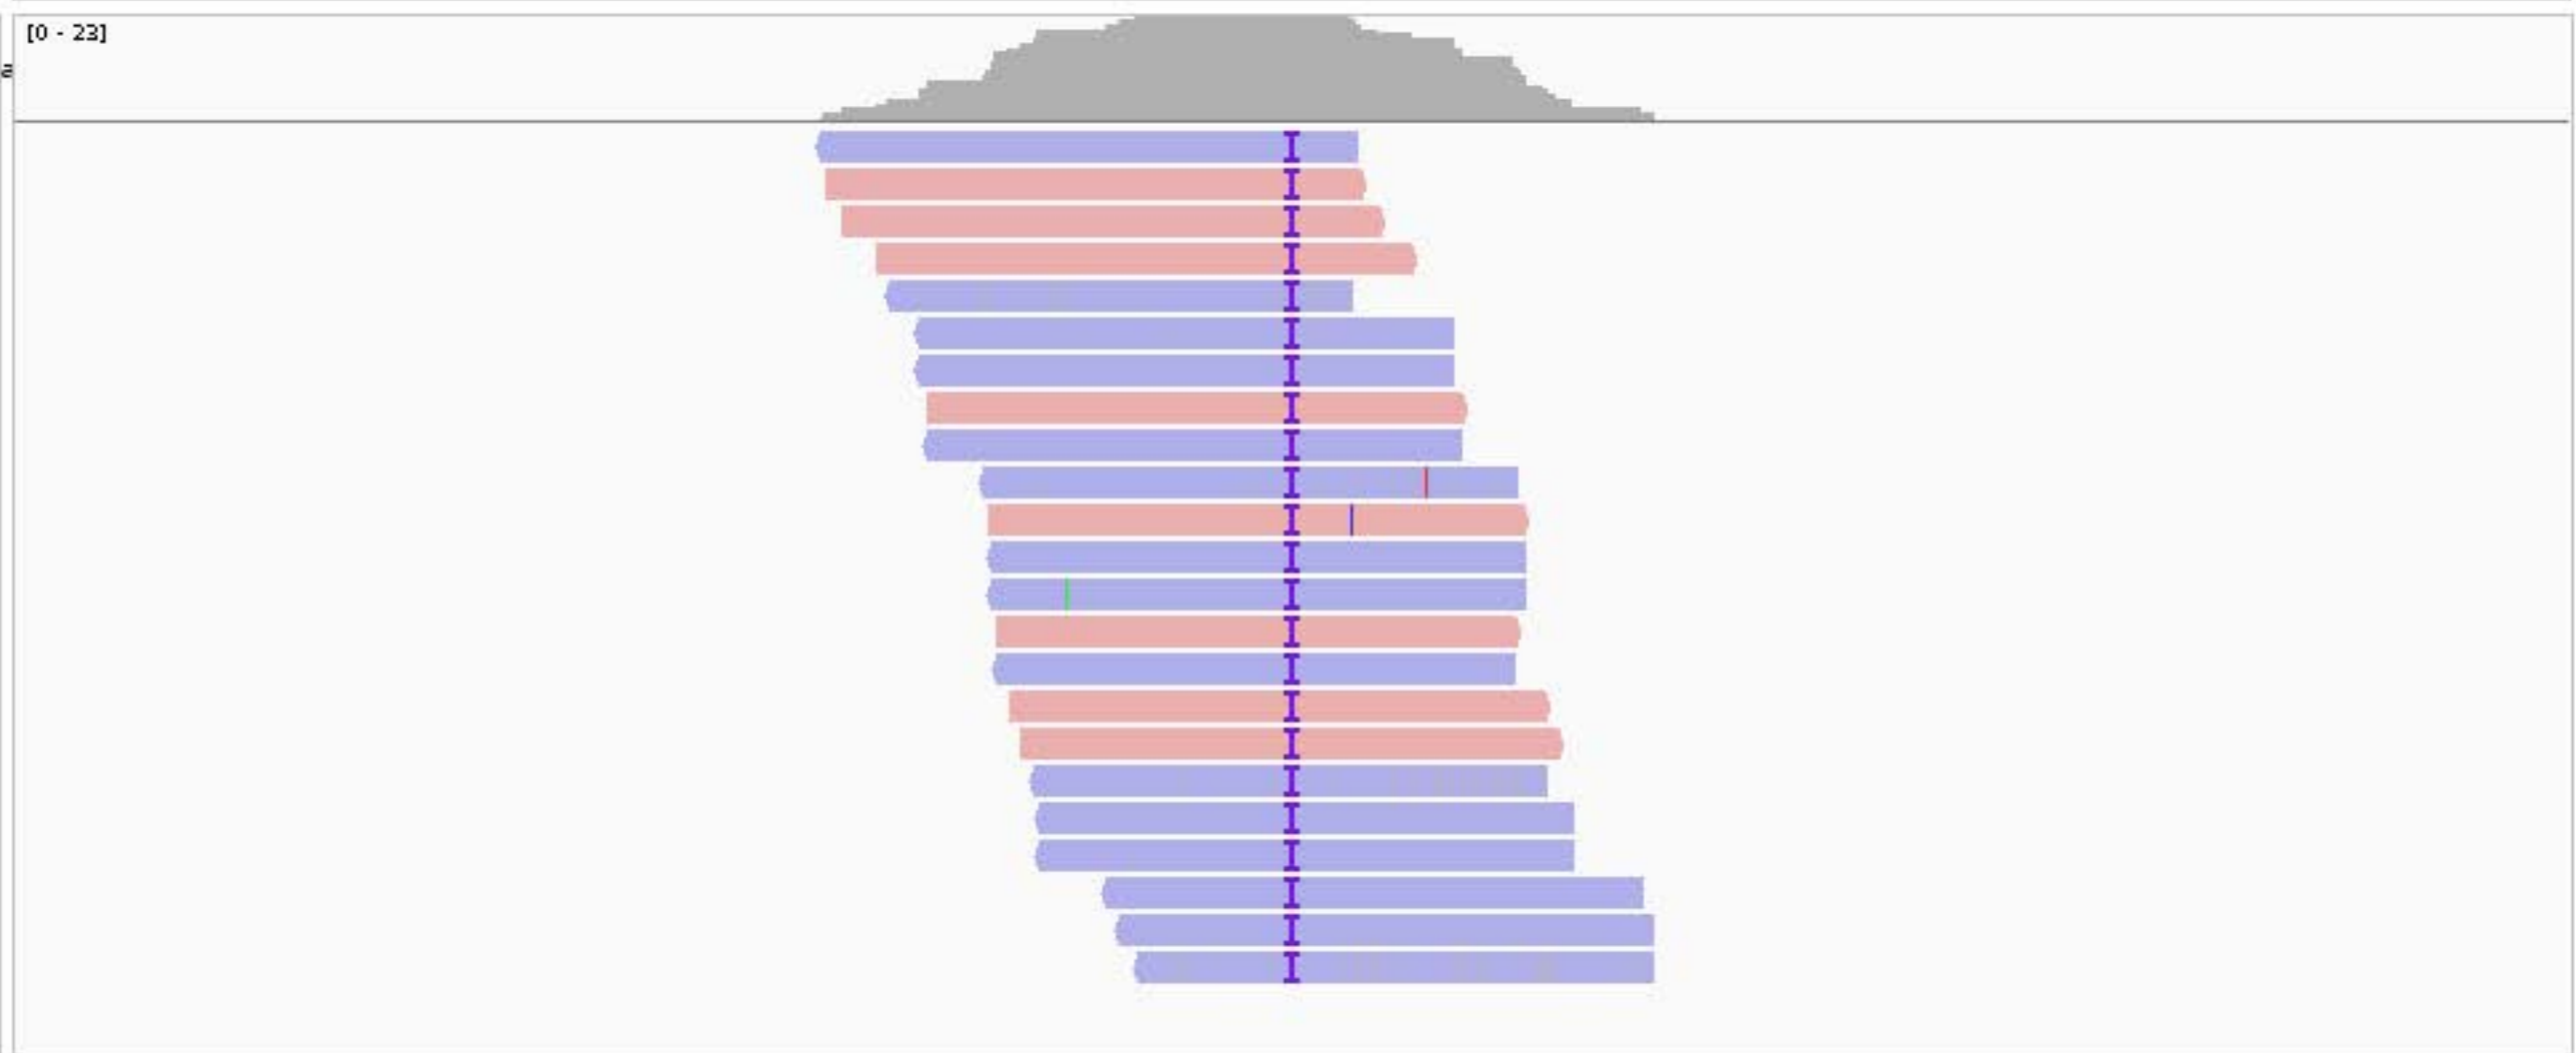

Sequence →

Refseq Genes

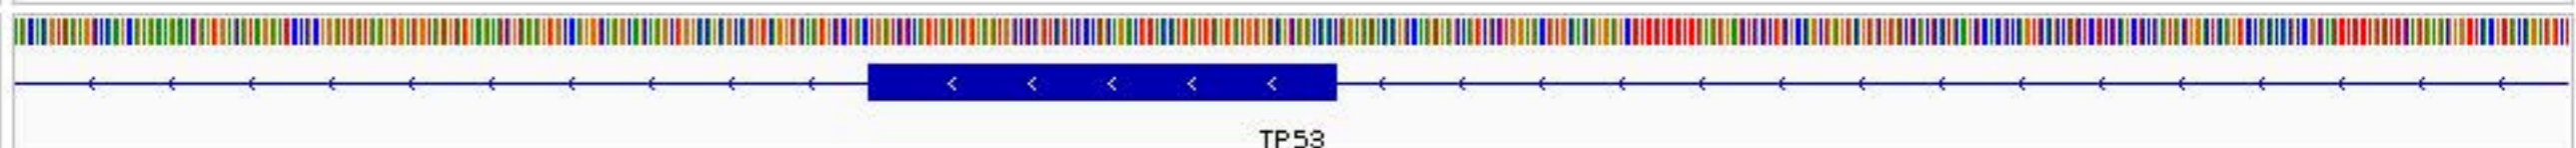

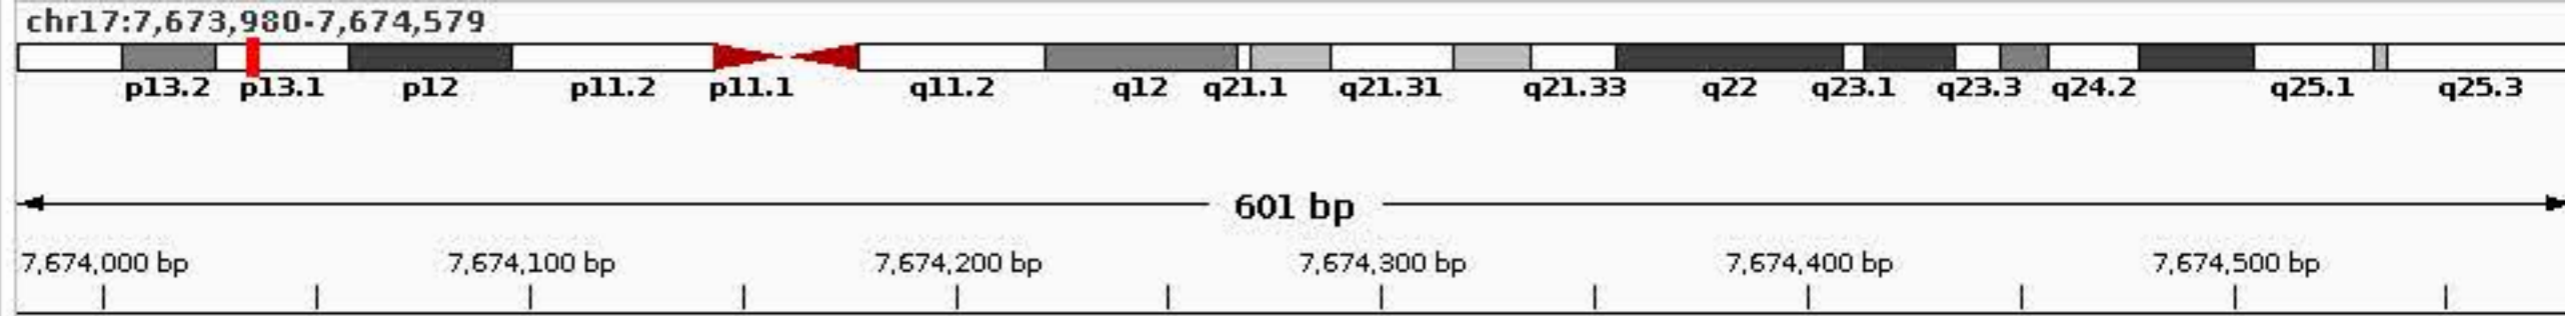

SL\_0005-LT-4-B\_mut.bam Coverage

SL\_0005-LT-4-B\_mut.bam

Sequence

Refseq Genes

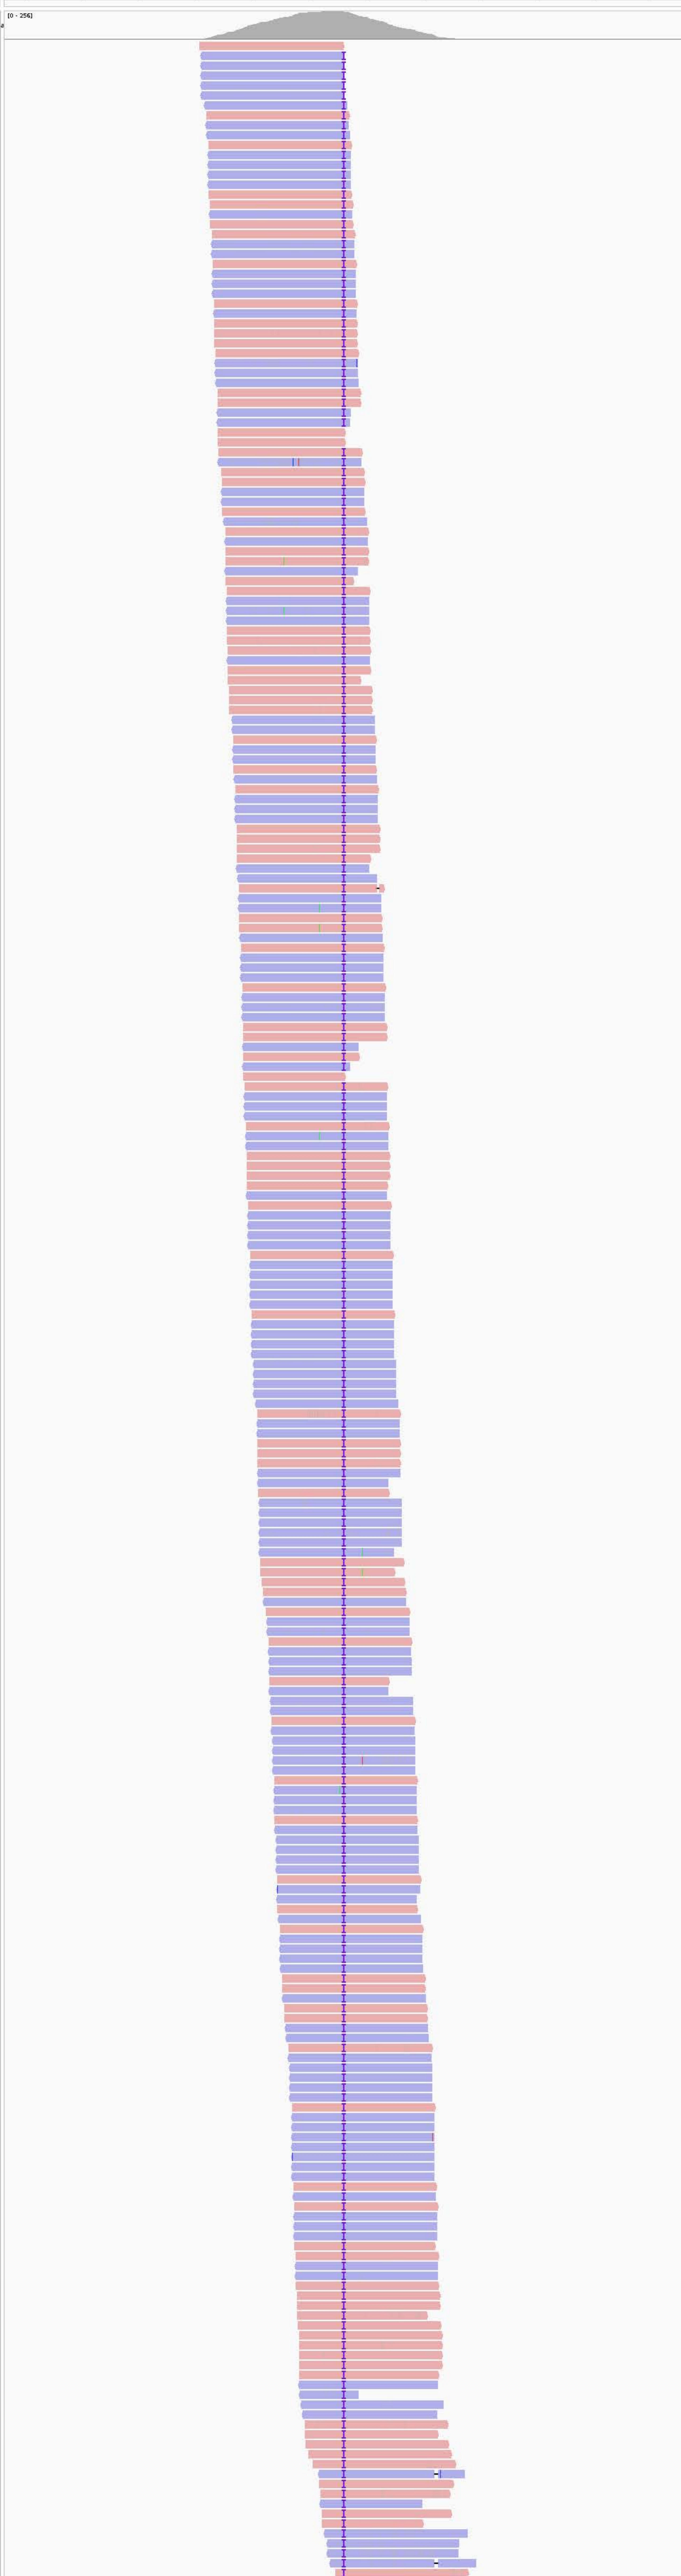



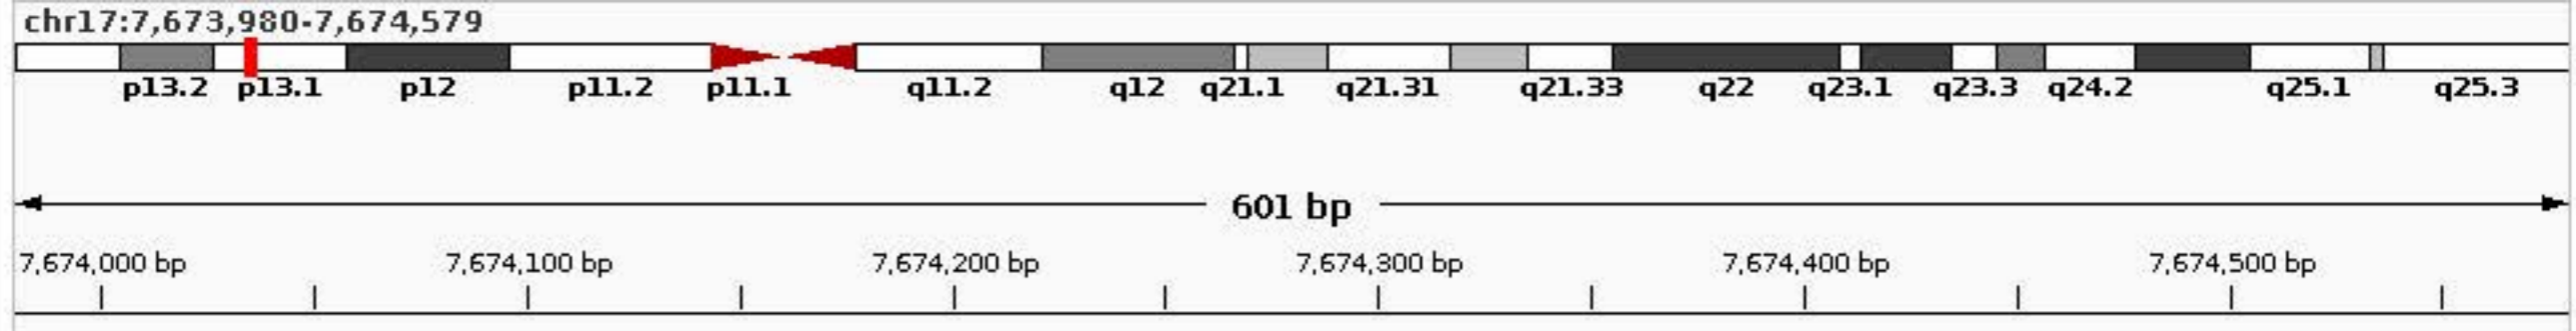

SL\_0005-LT-9-B\_mut.bam Coverage

SL\_0005-LT-9-B\_mut.bam

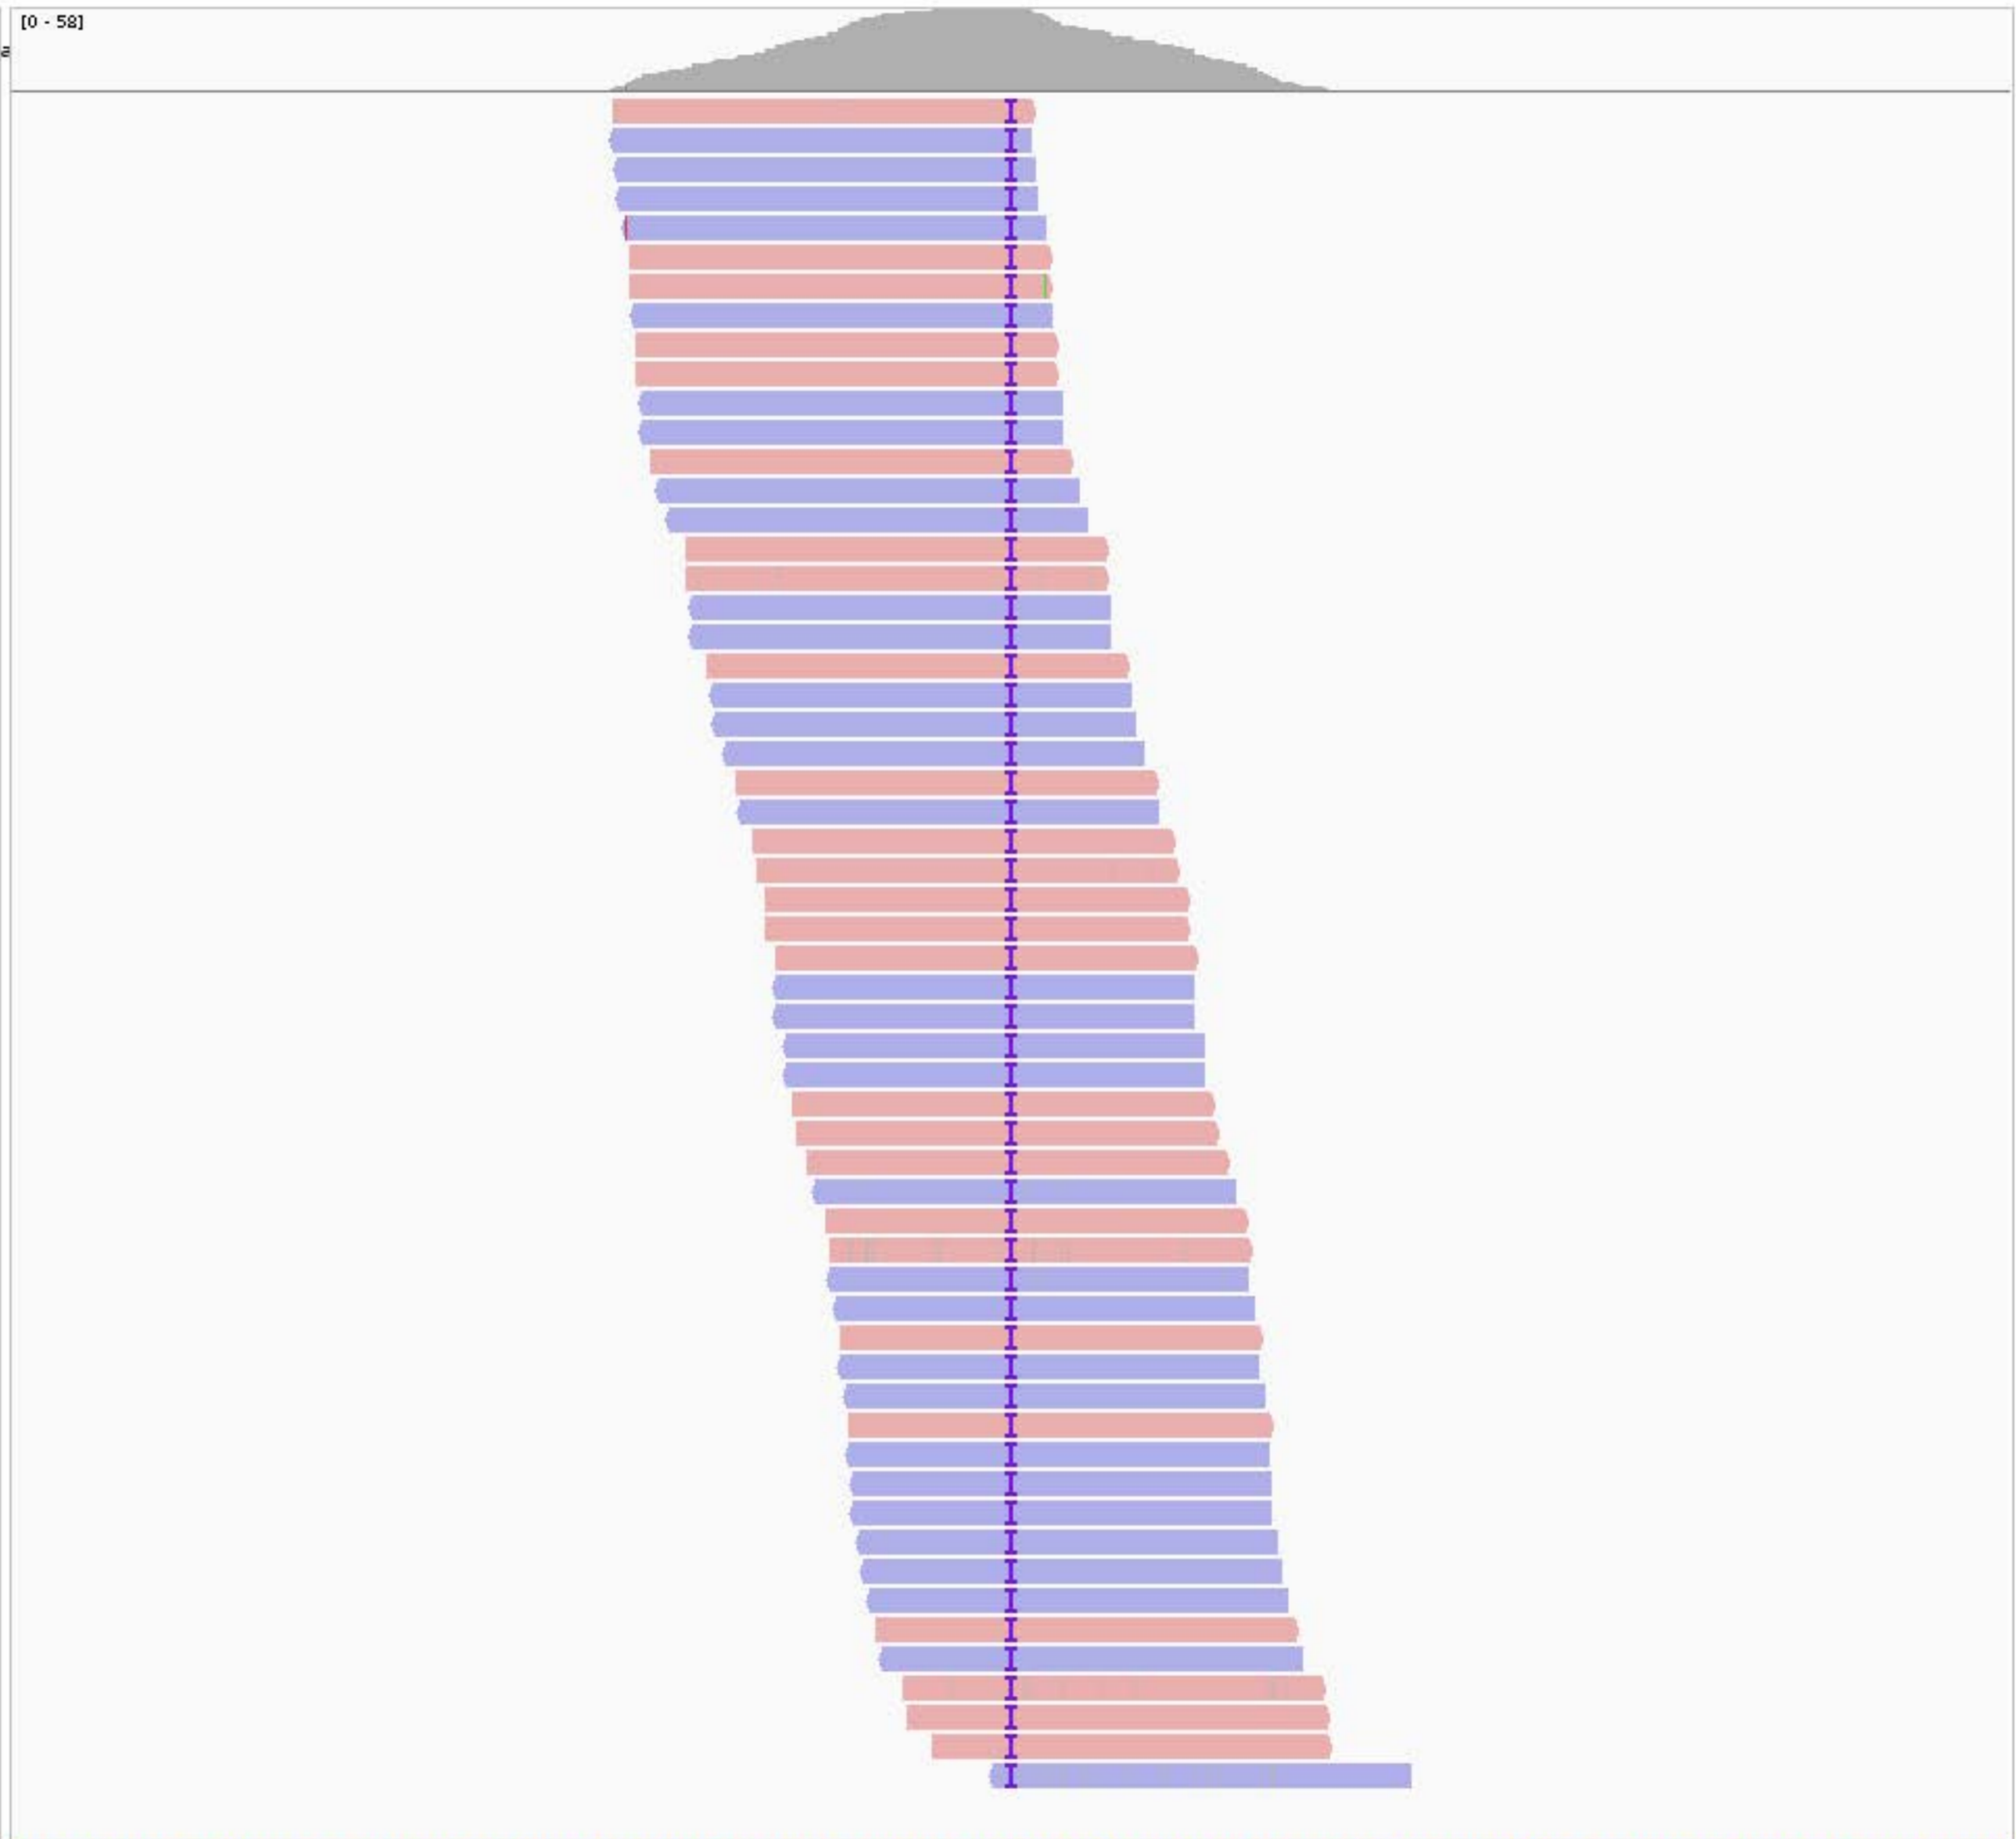

Sequence

Refseq Genes

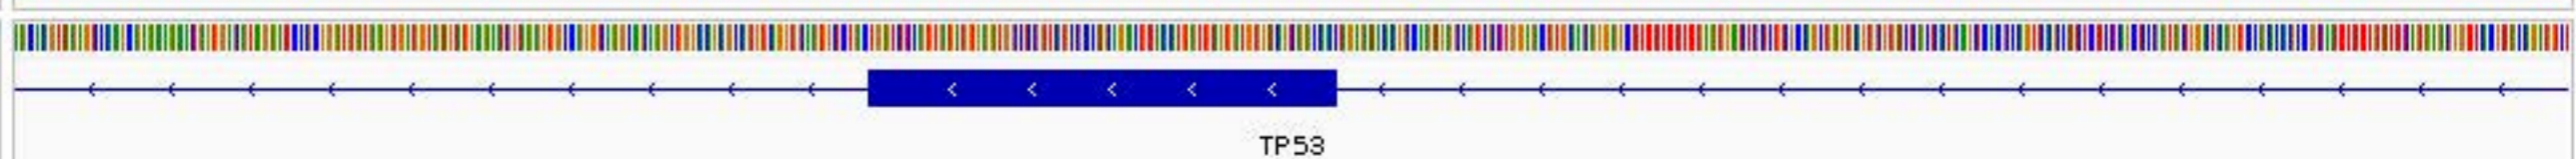





SL\_0005-RN-1-B\_mut.bam Cover

SL\_0005-RN-1-B\_mut.bam

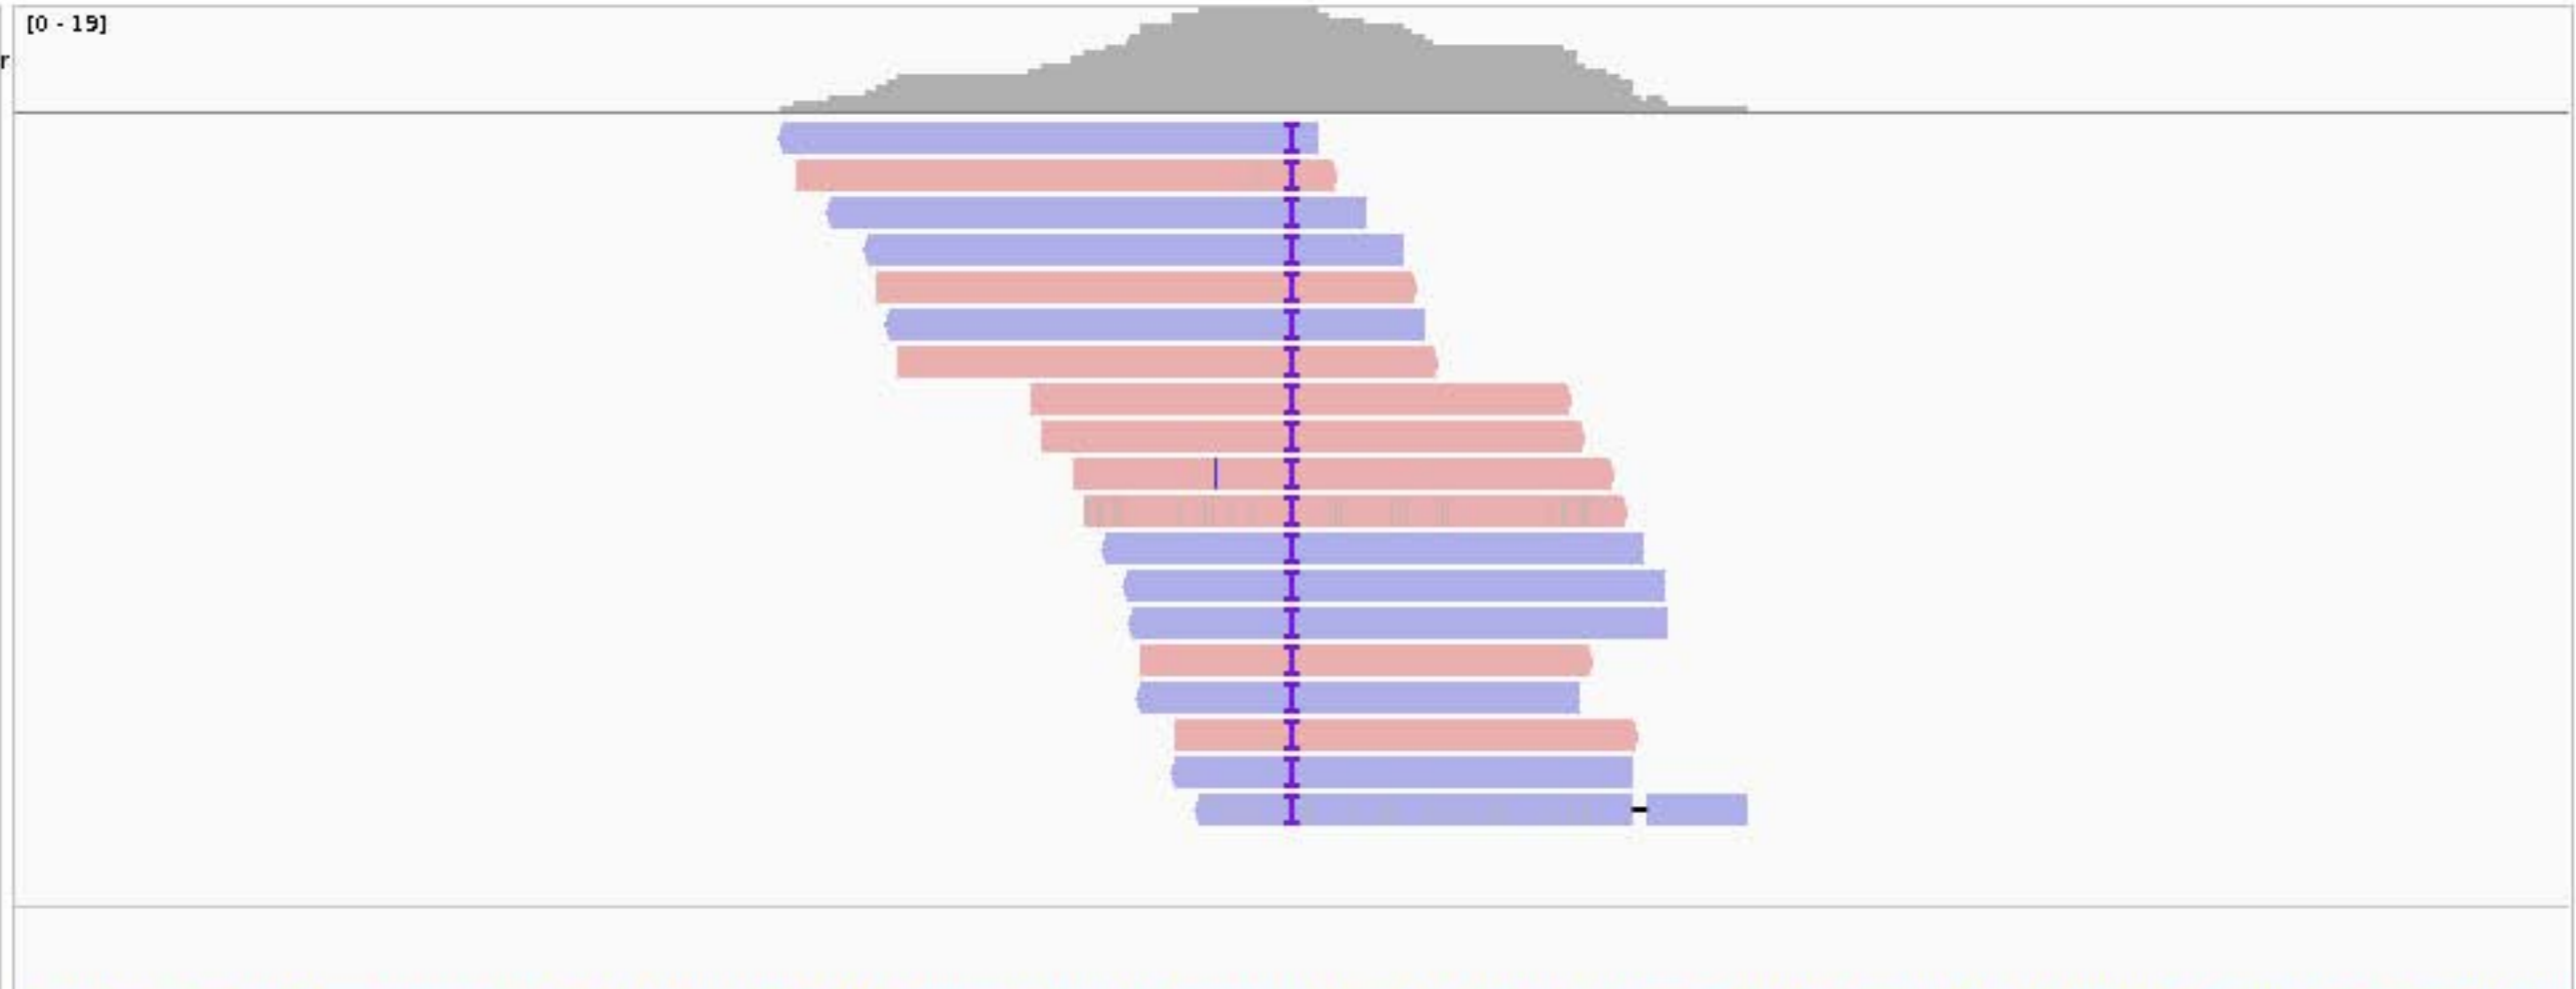

Sequence →

Refseq Genes

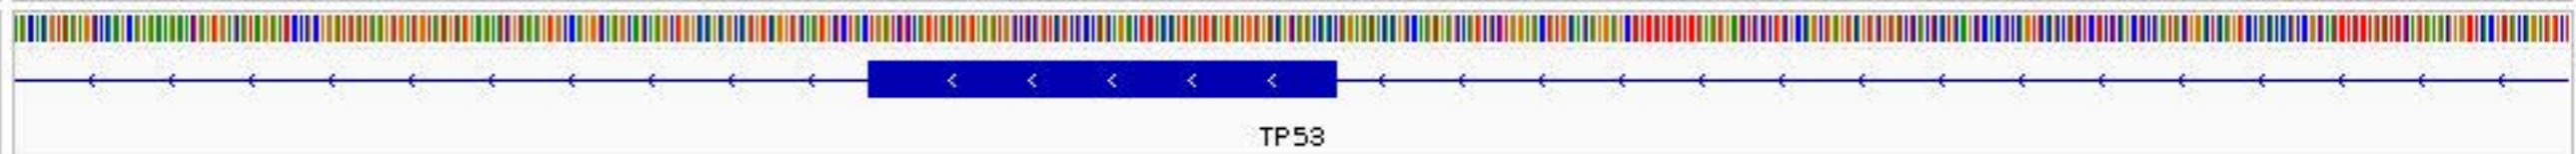

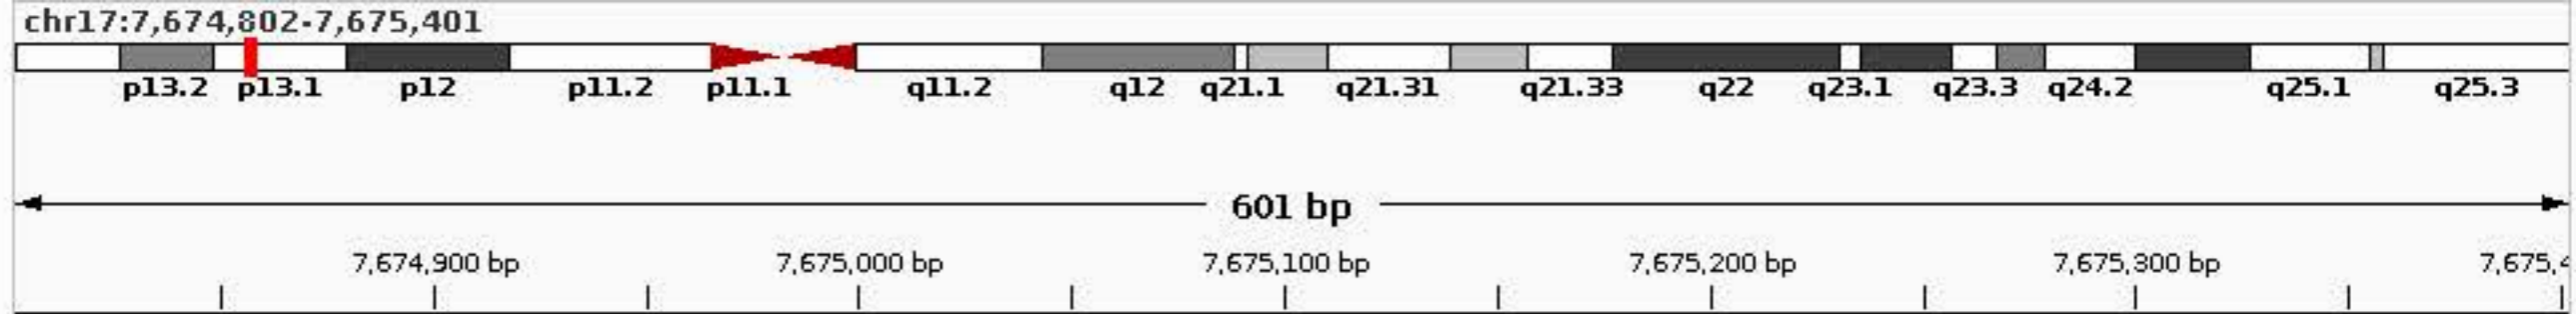

SL\_0008-LT\_15-B\_mut.bam Coverage [0 - 103]

SL\_0008-LT\_15-B\_mut.bam

Sequence →

Refseq Genes

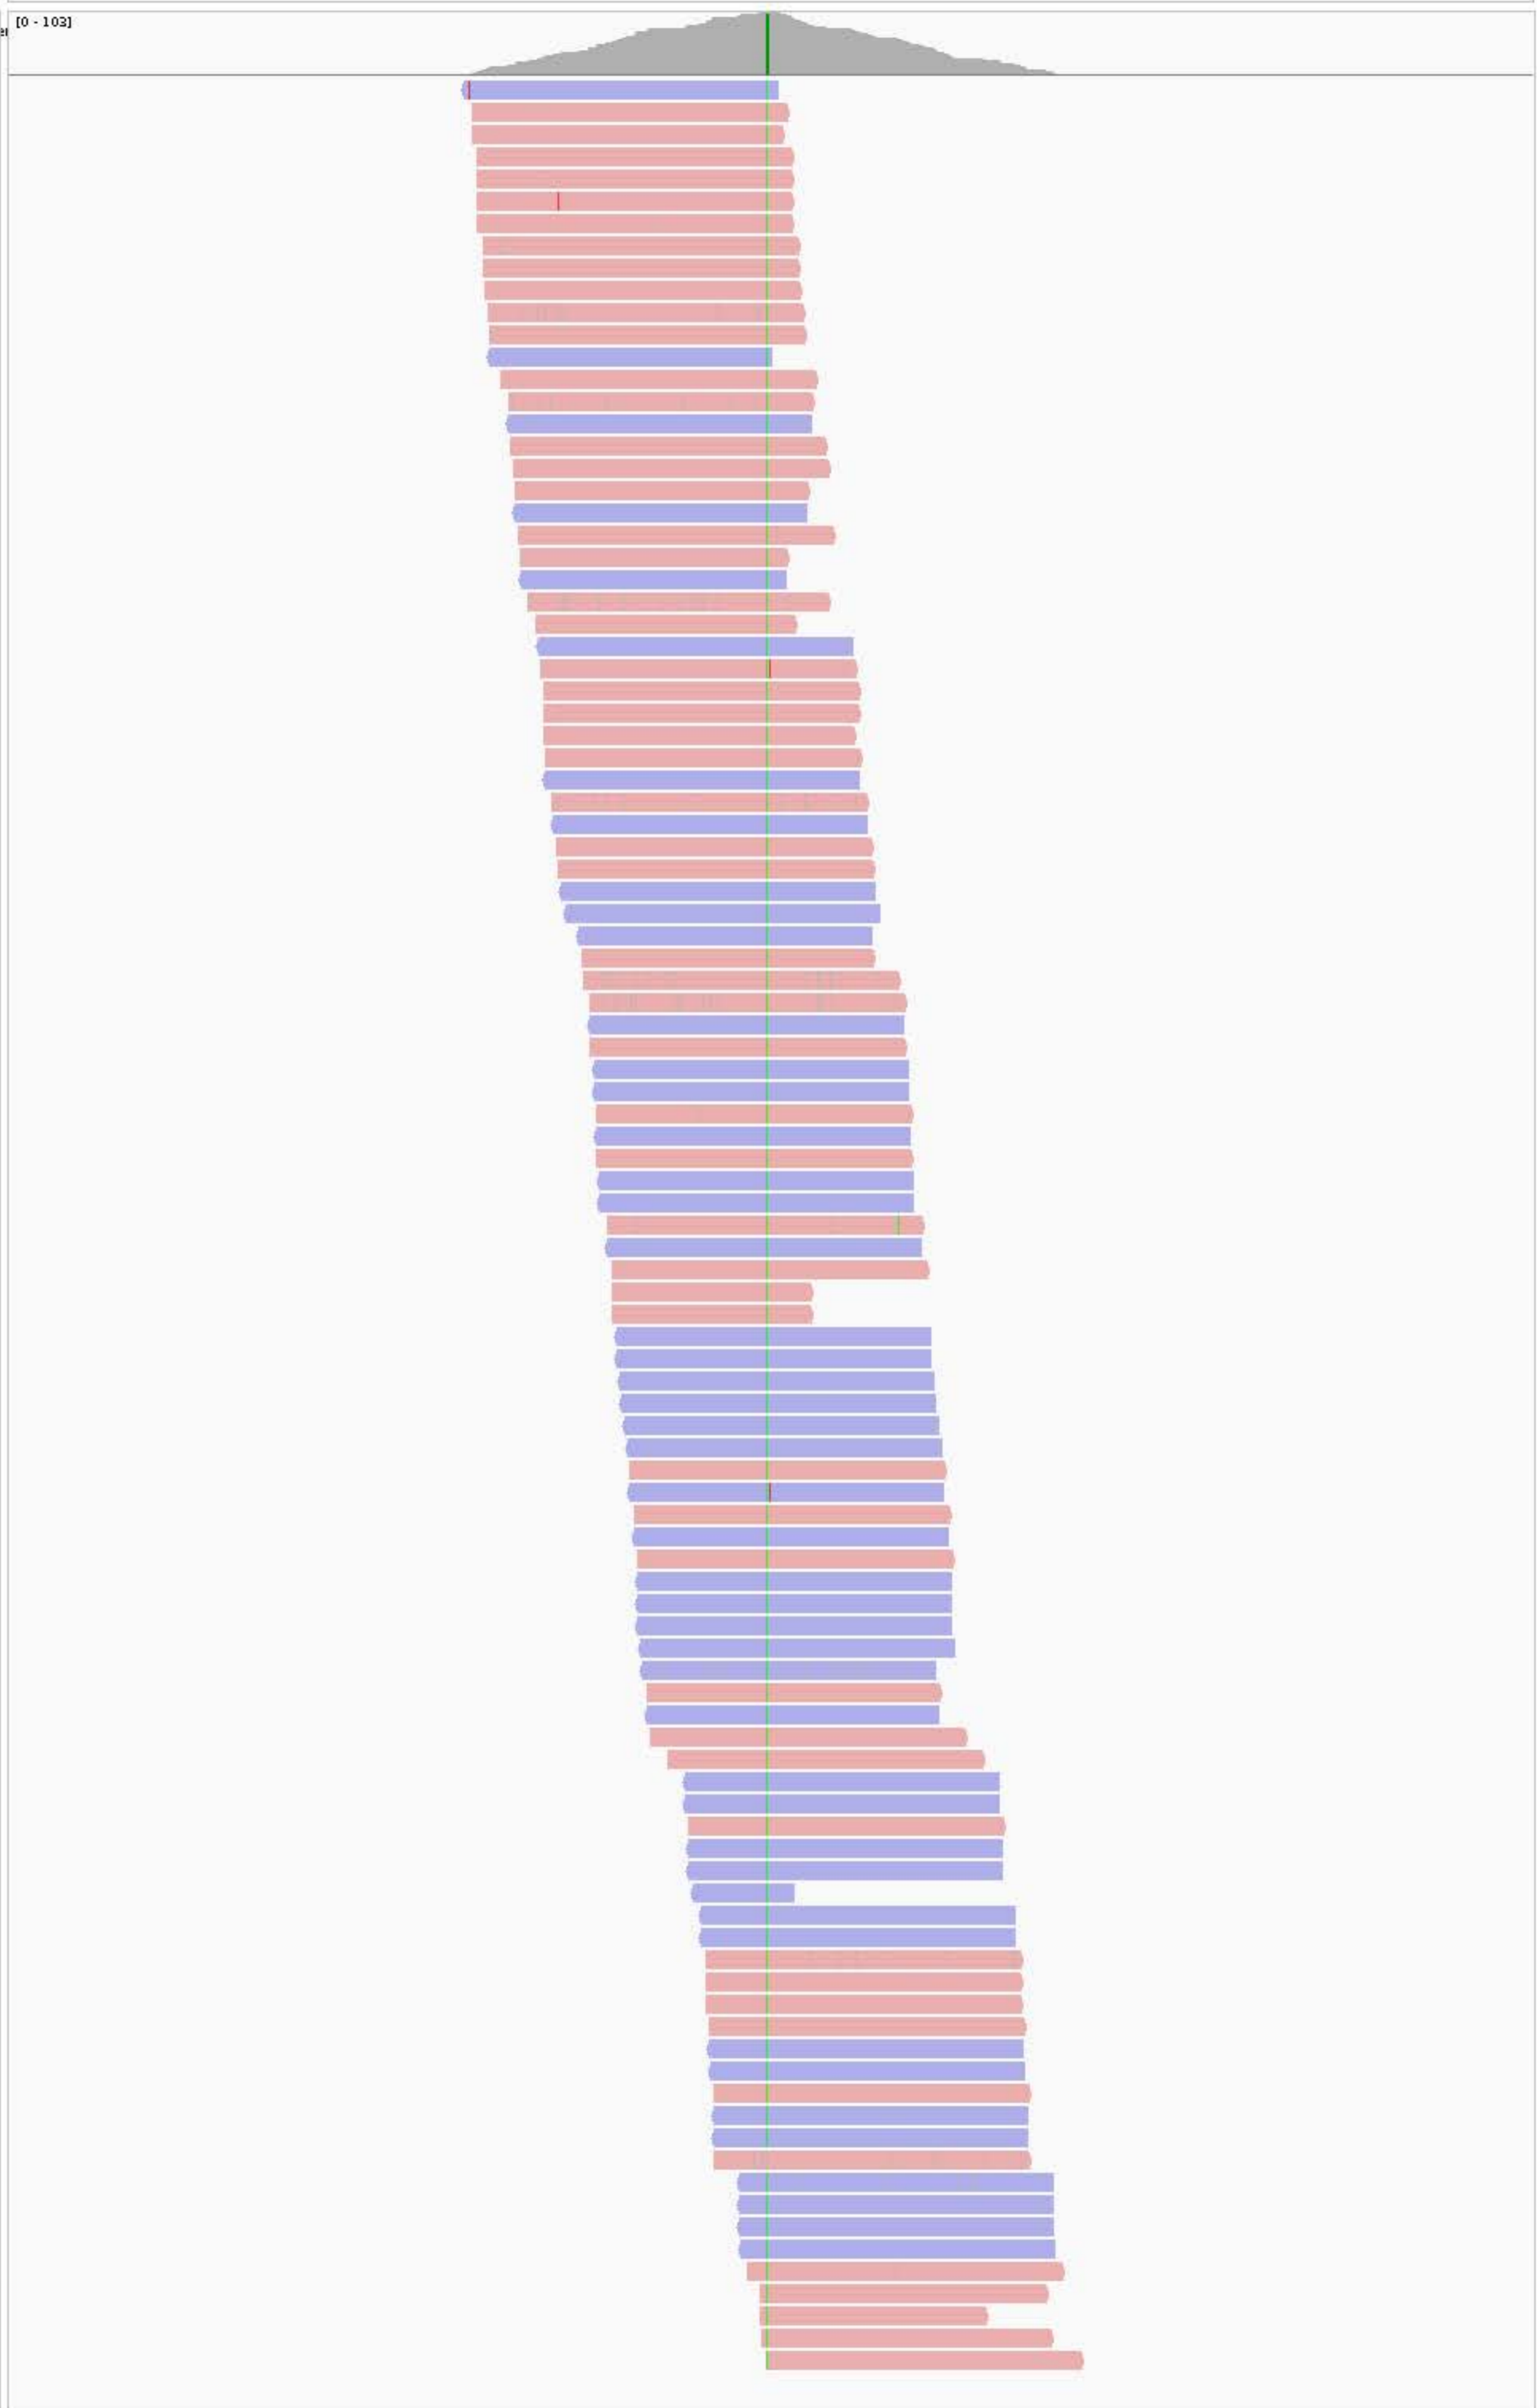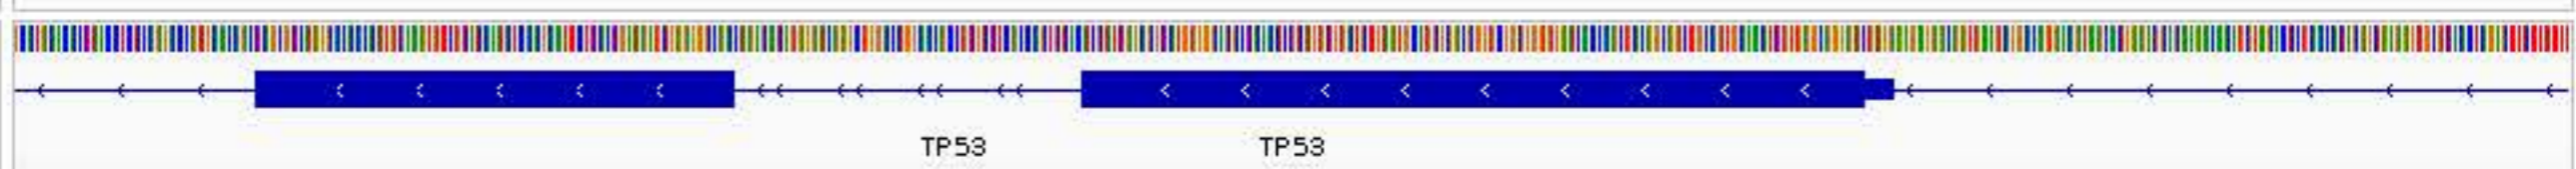

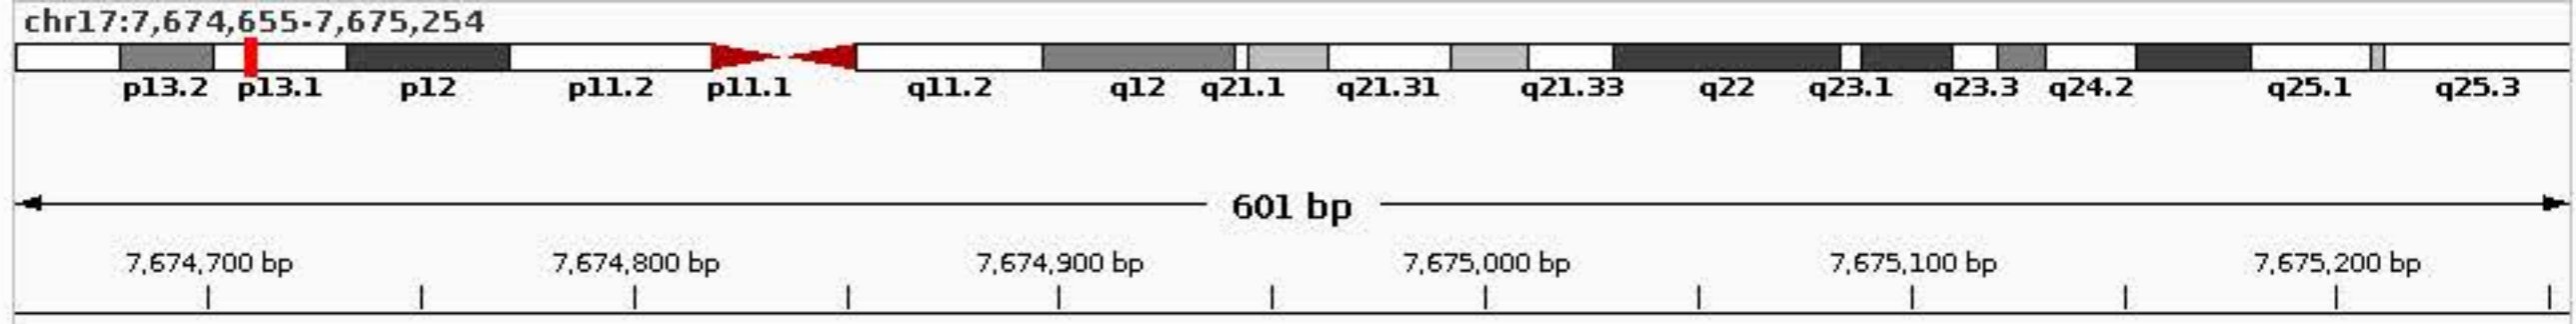

SL\_1010\_L\_FFPE\_3-B\_mut.bam  
age

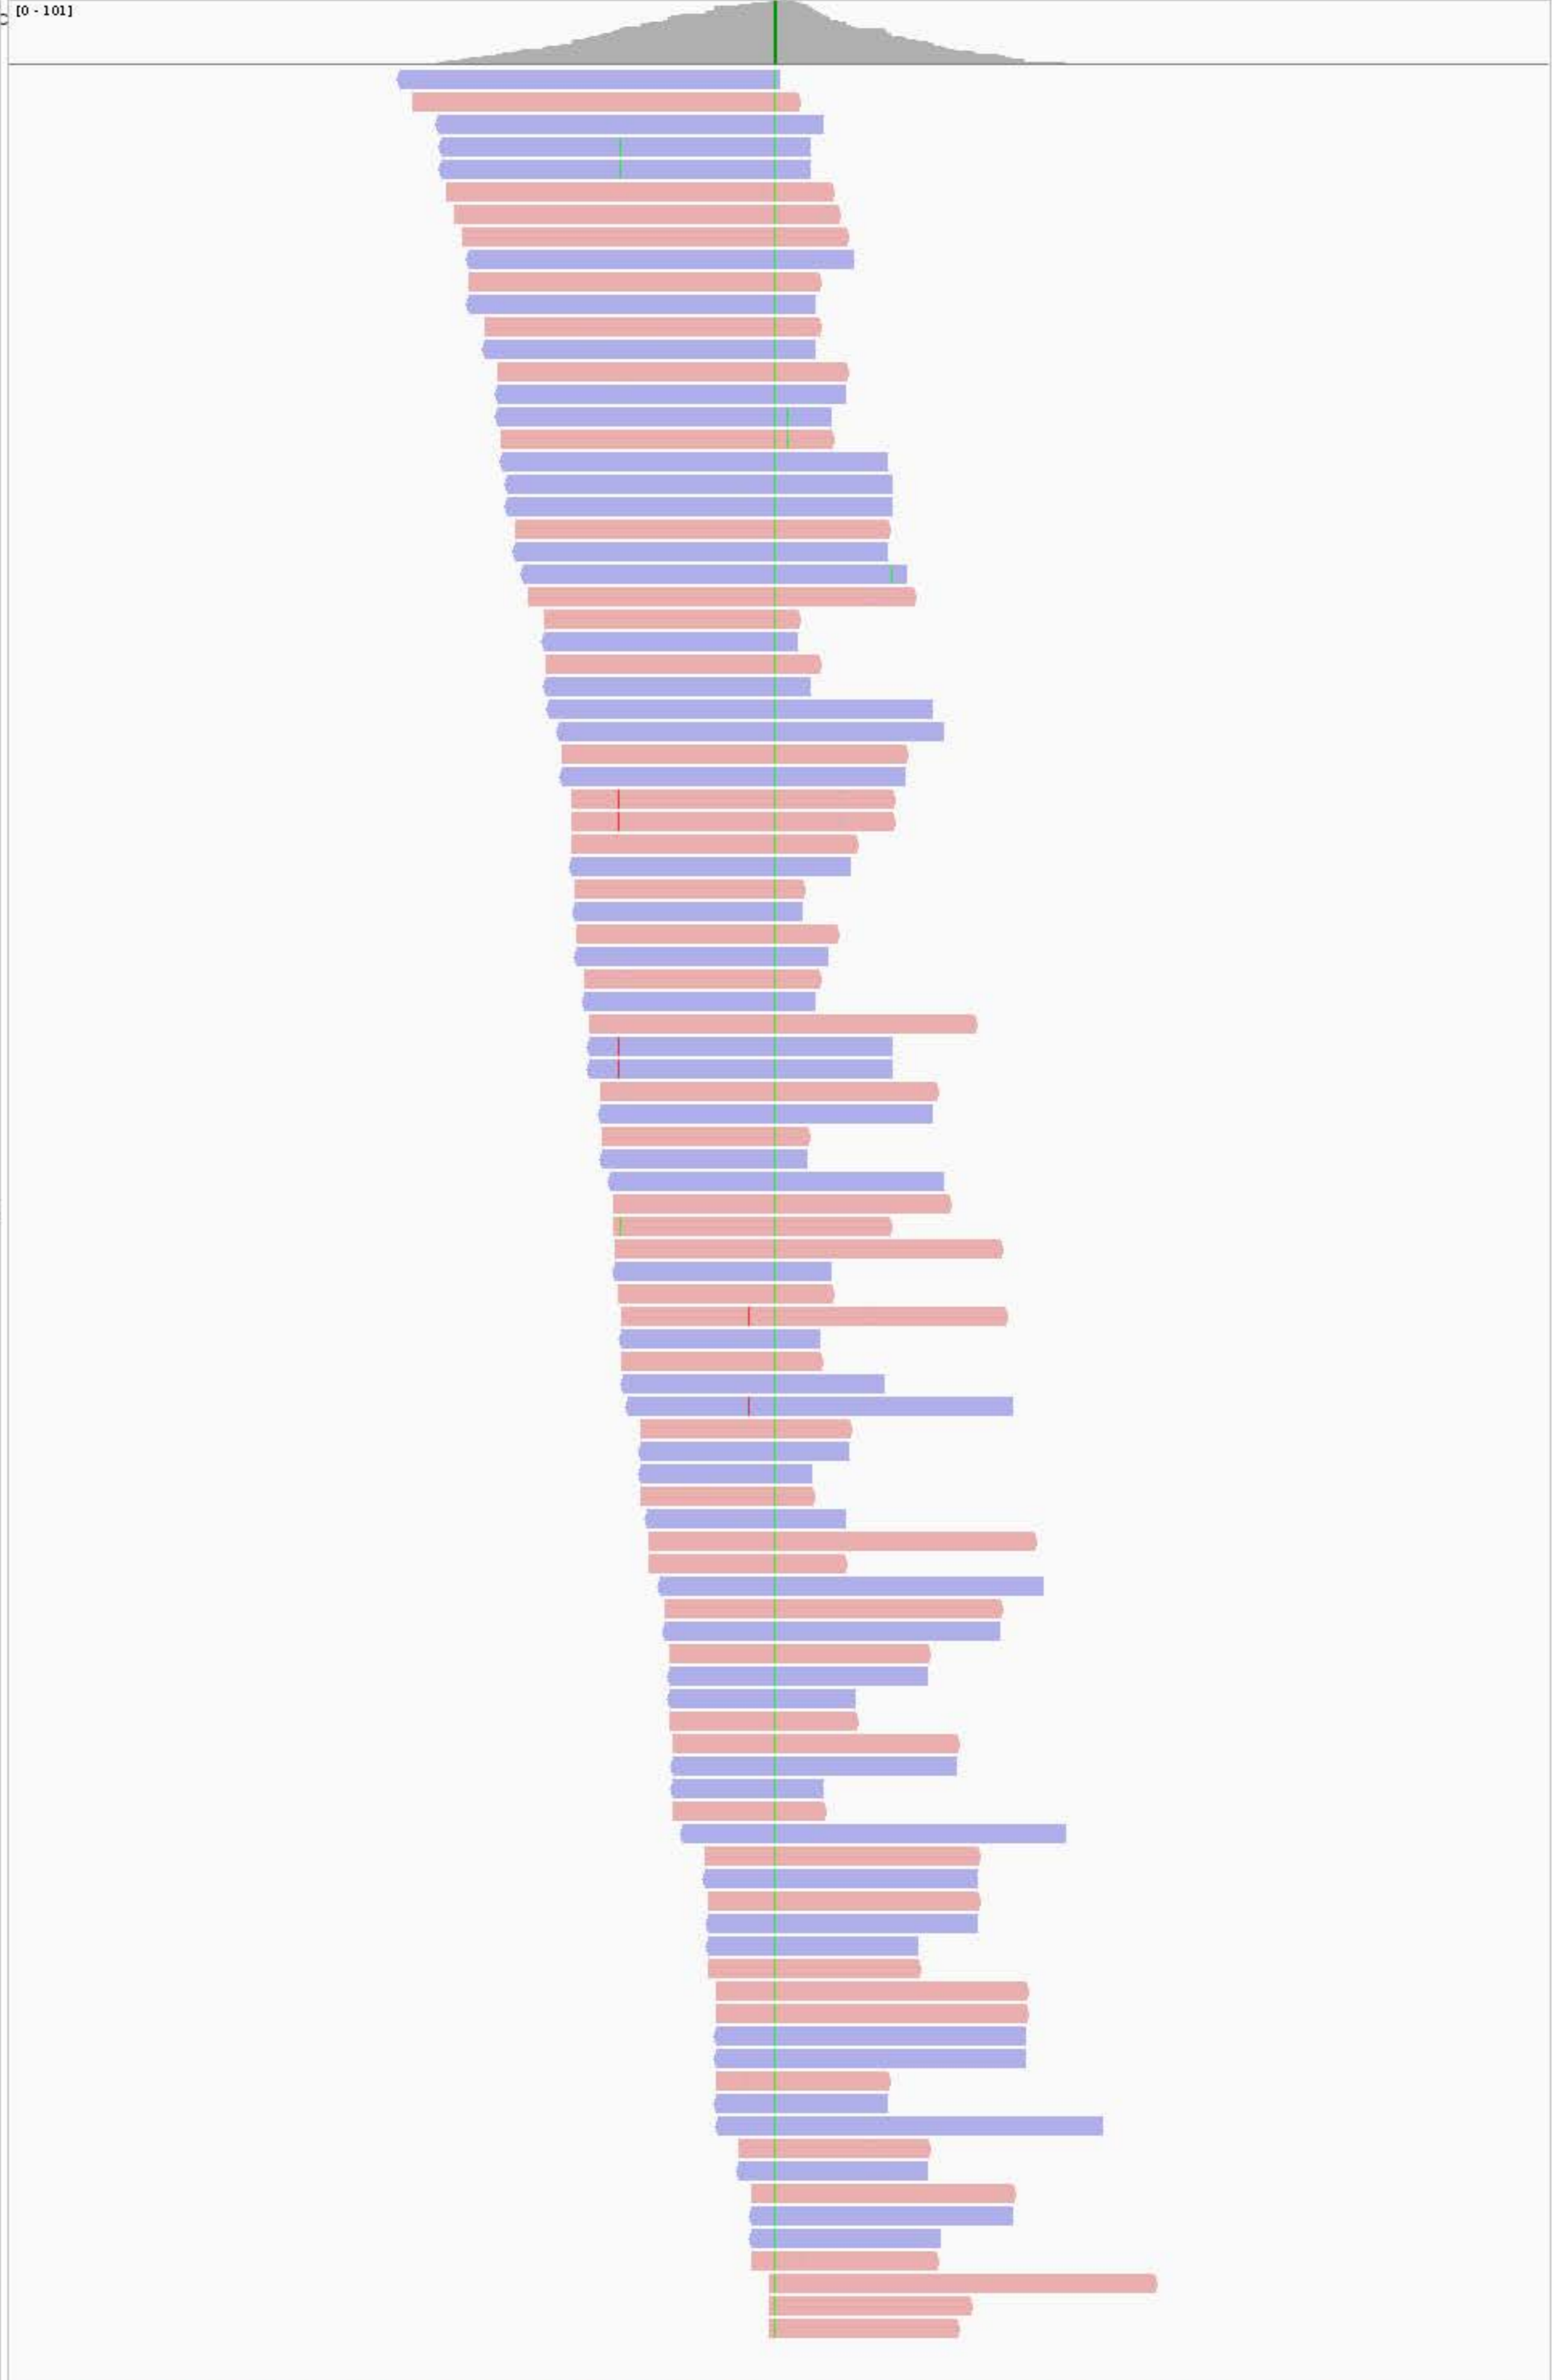

SL\_1010\_L\_FFPE\_3-B\_mut.bam

Sequence →  
Refseq Genes

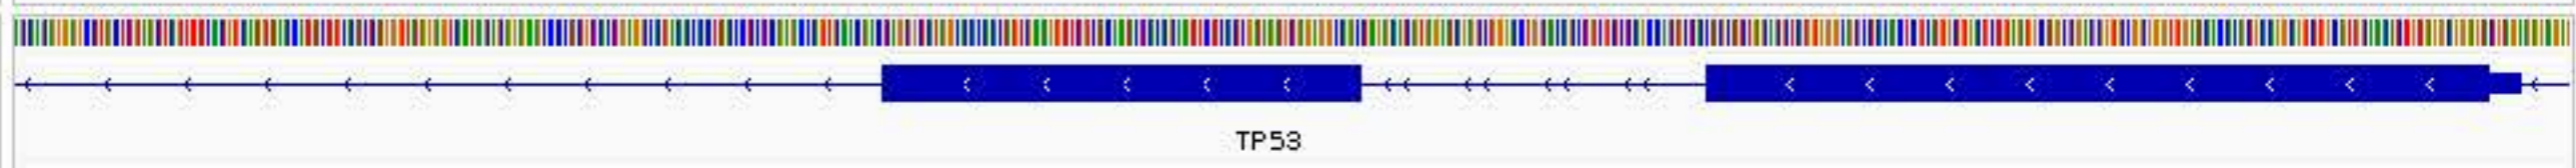

TP53



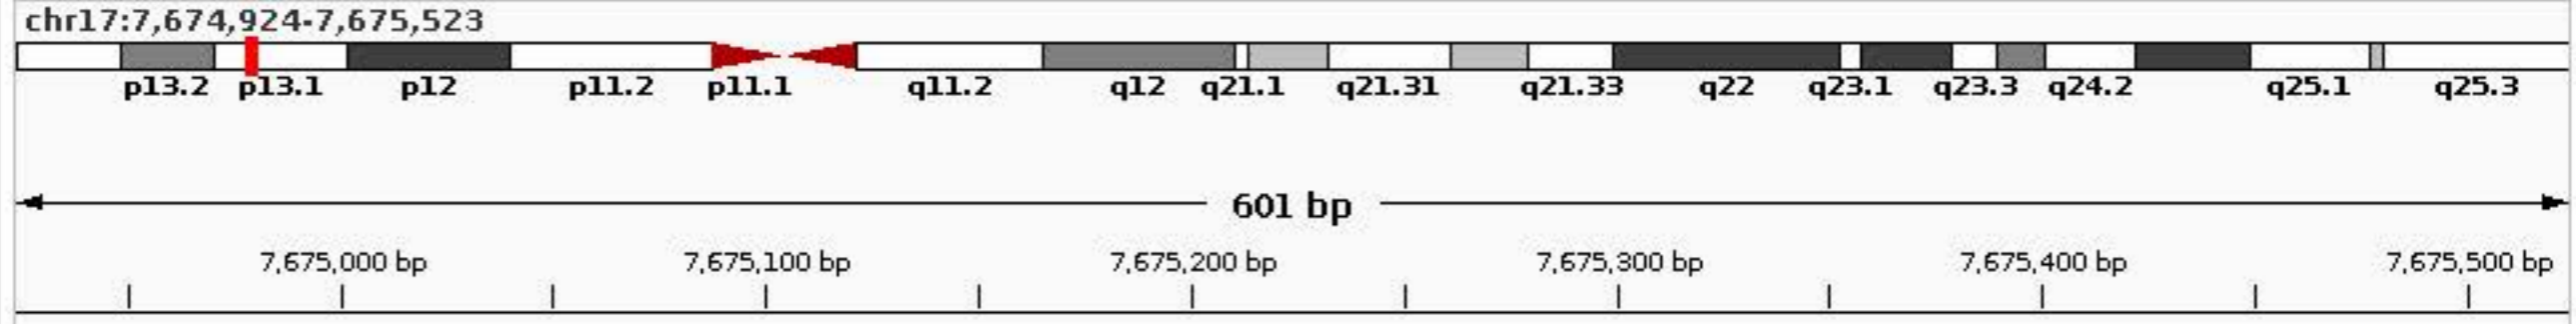

SL\_1007-T1-B\_mut.bam Coverage

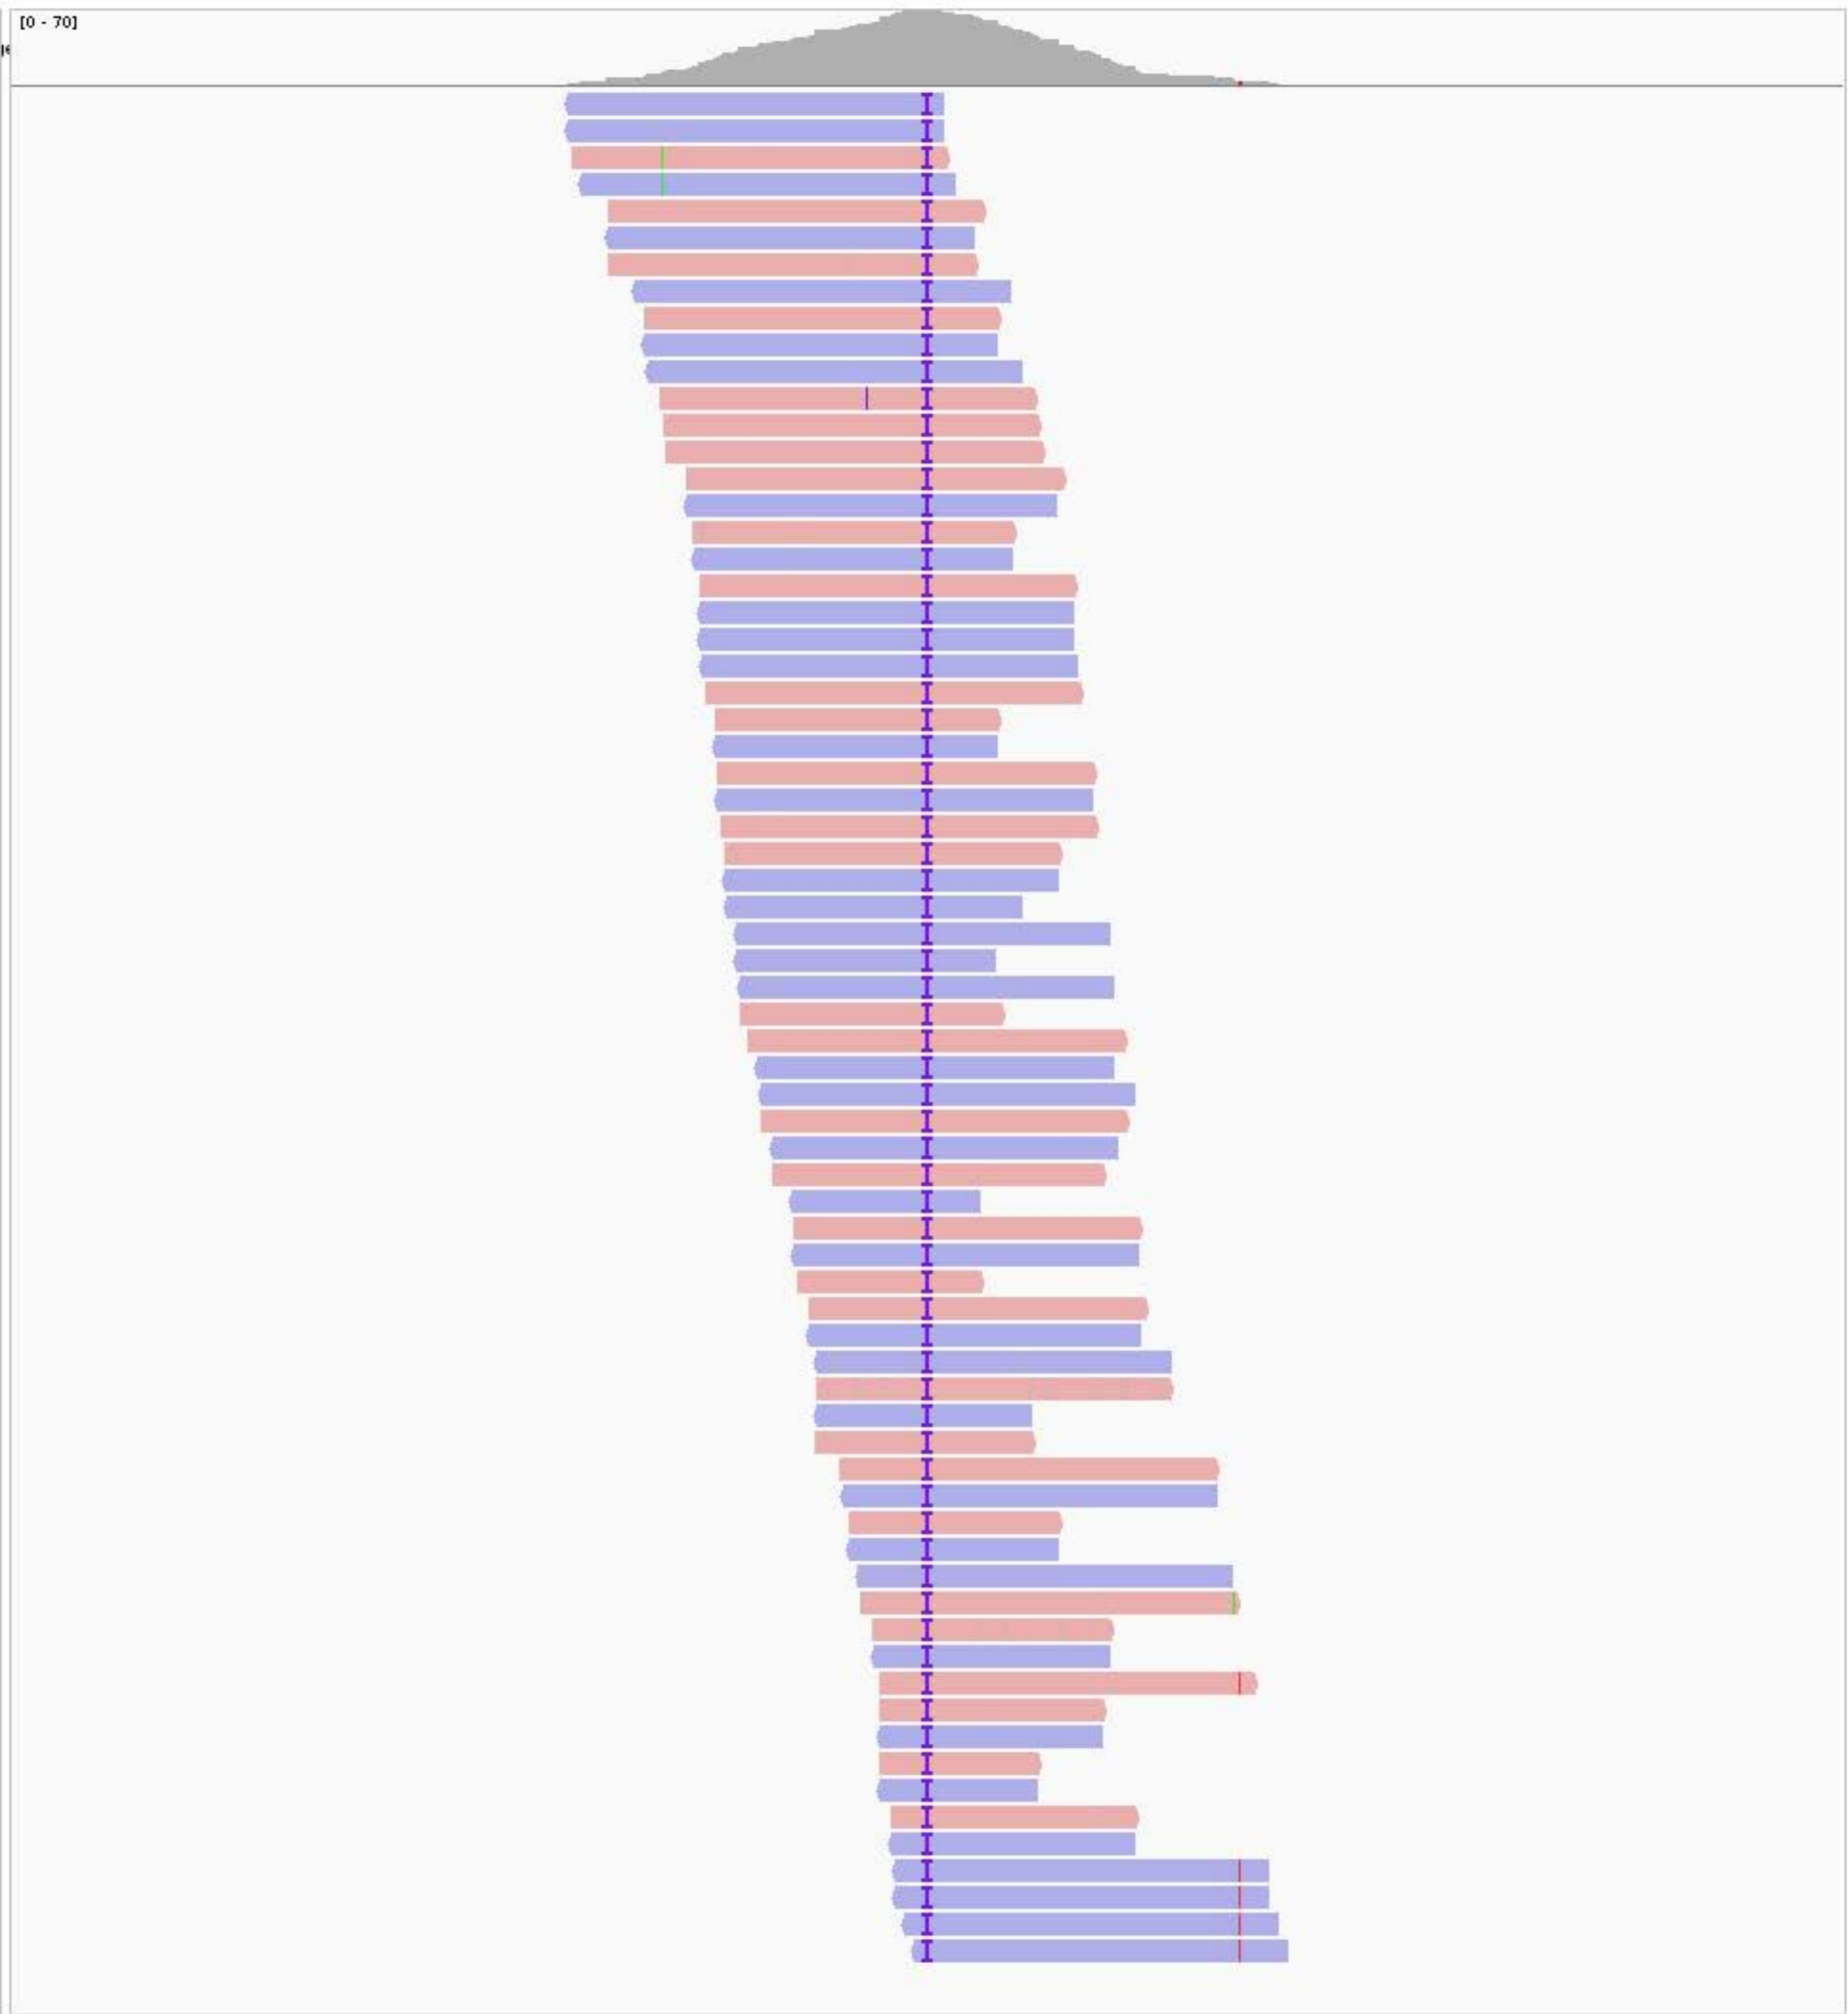

SL\_1007-T1-B\_mut.bam

Sequence →  
Refseq Genes

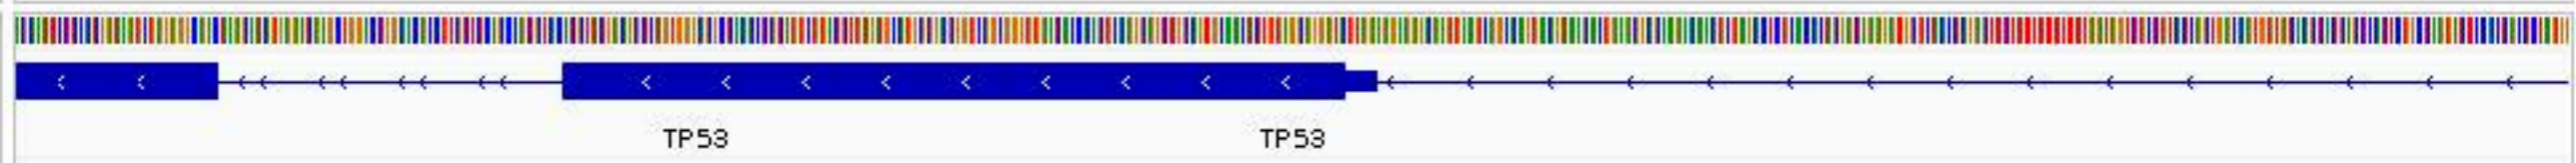

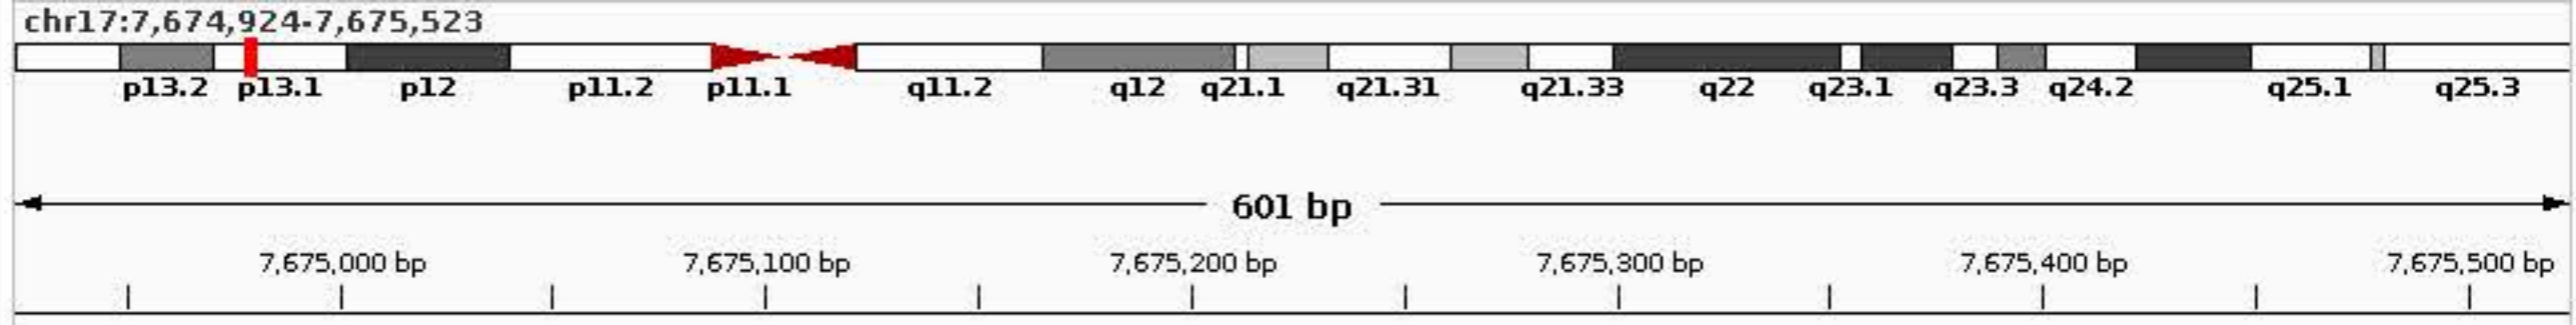

SL\_1007-T2-B\_mut.bam Coverage

SL\_1007-T2-B\_mut.bam

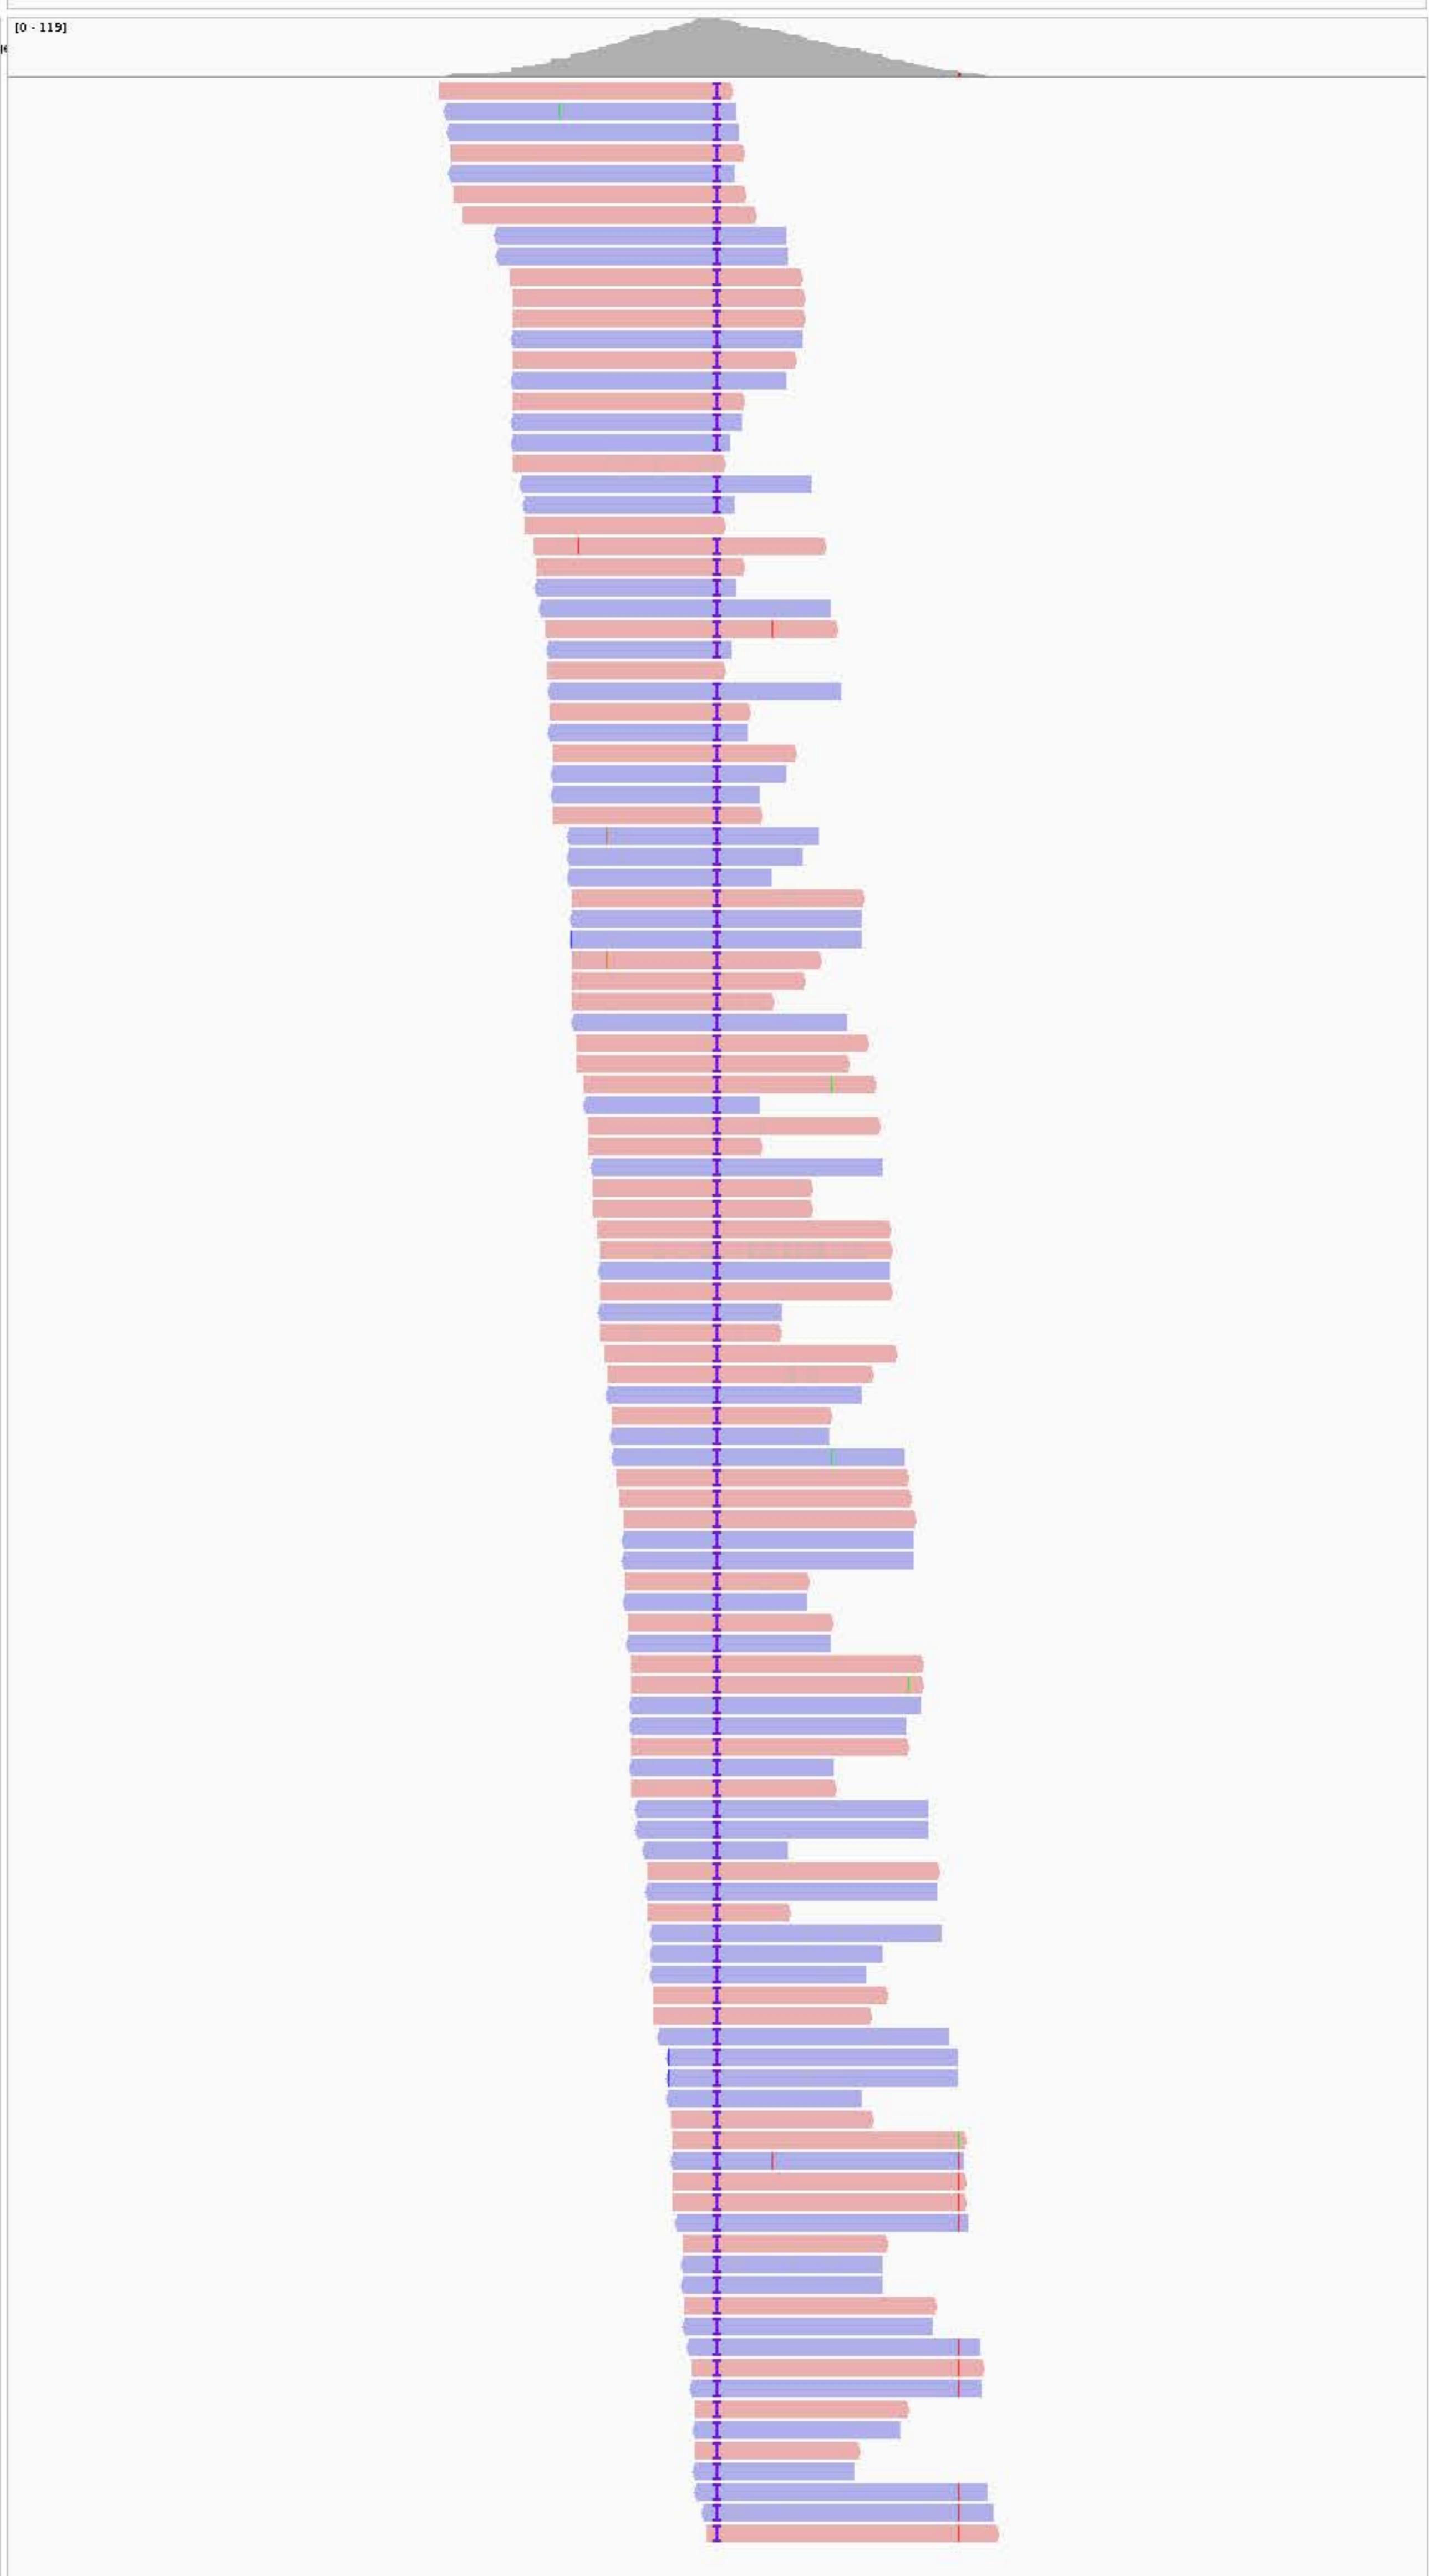

Sequence

Refseq Genes

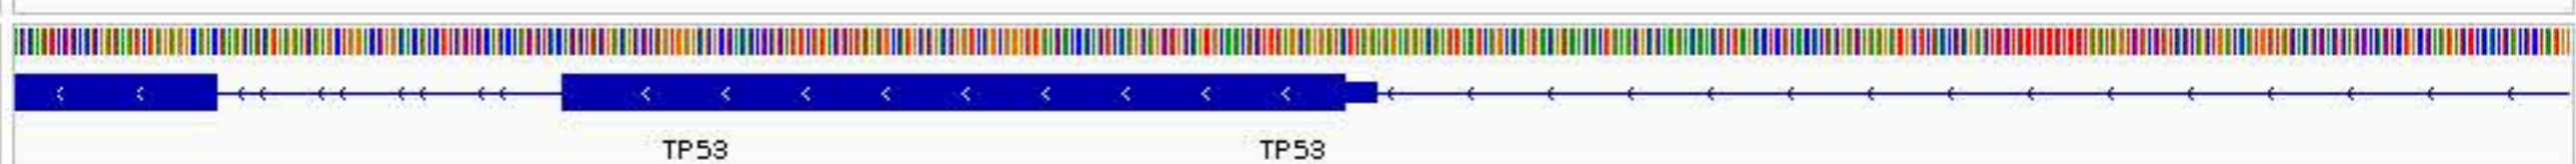

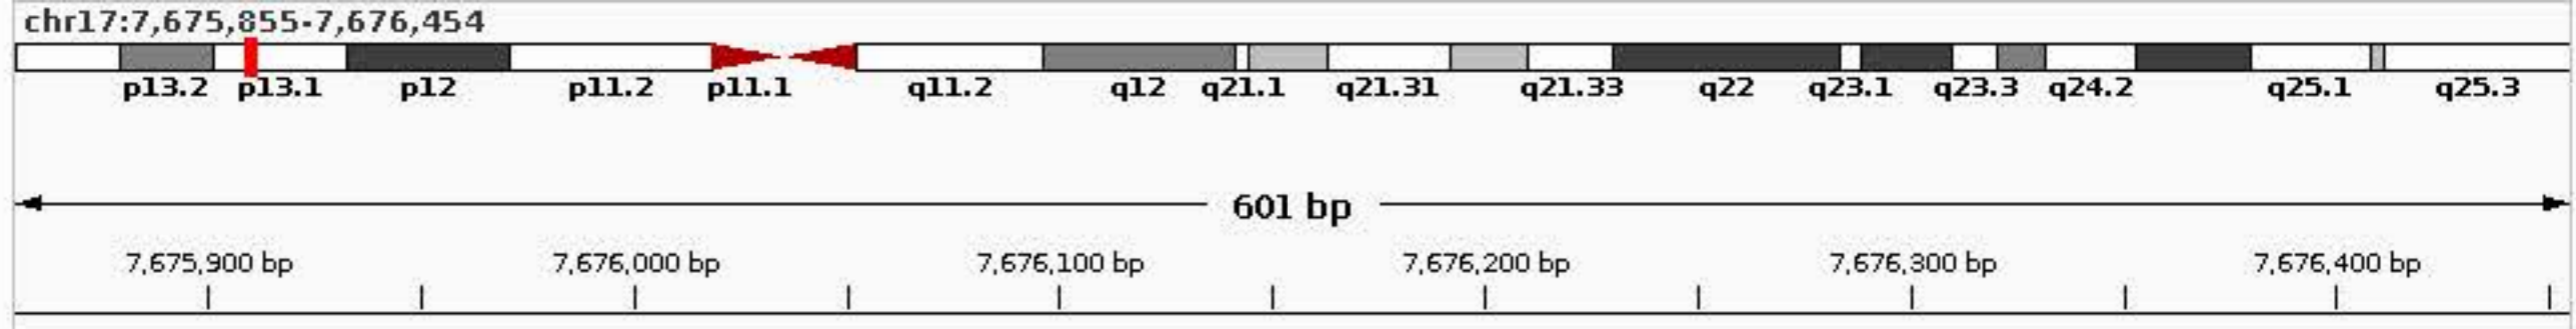

SL\_0011\_L\_FFPE\_4-B\_mut.bam  
age

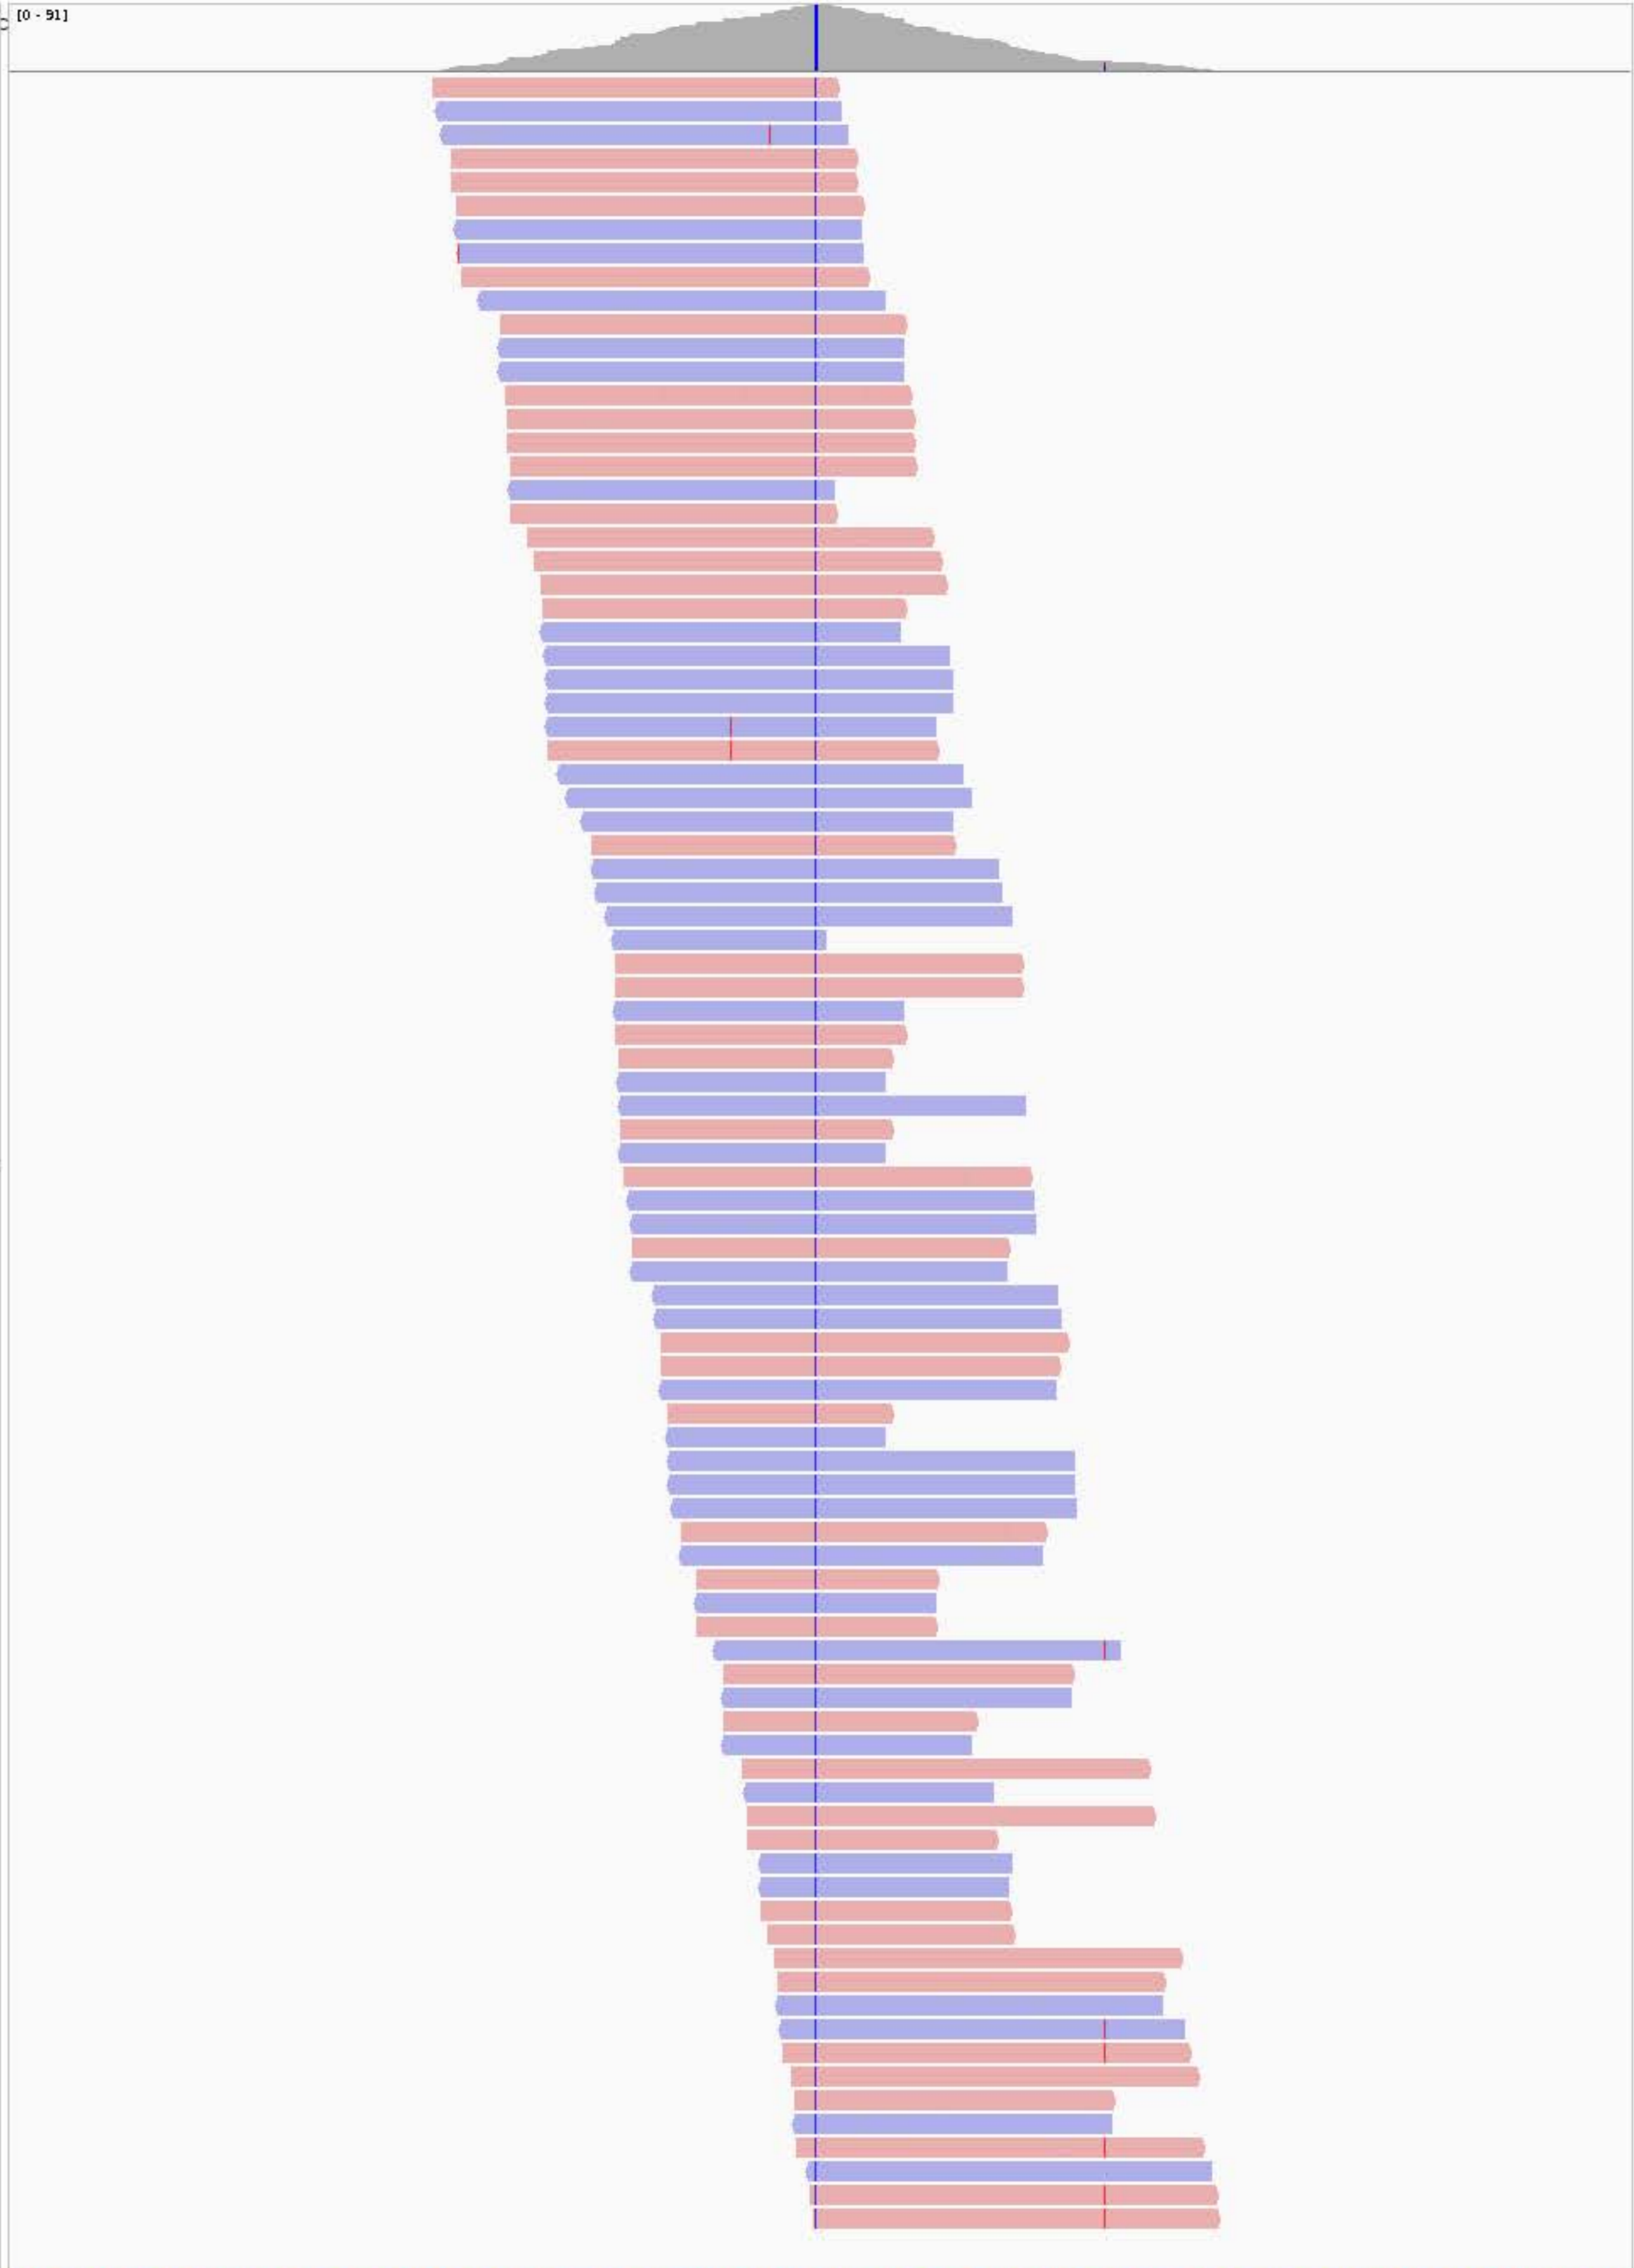

SL\_0011\_L\_FFPE\_4-B\_mut.bam

Sequence →

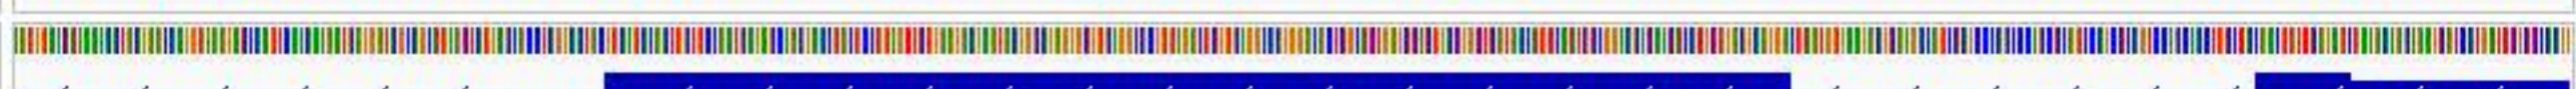

Refseq Genes

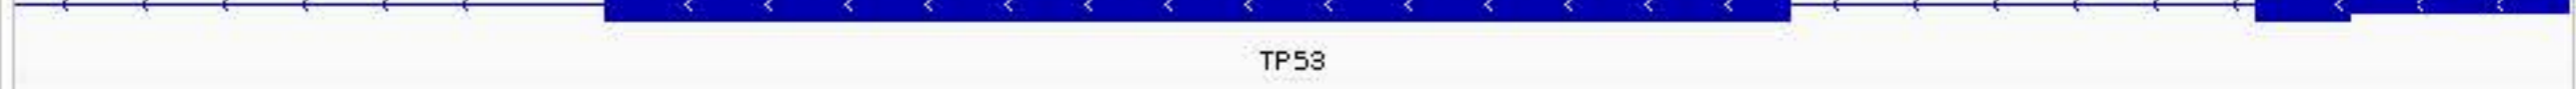

TP53



chr6:80,007,621-80,008,220  
p25.1 p23 p22.2 p21.31 p21.1 p12.2 q11.1 q13 q14.1 q15 q16.2 q21 q22.1 q22.32 q23.3 q24.3 q25.3 q27

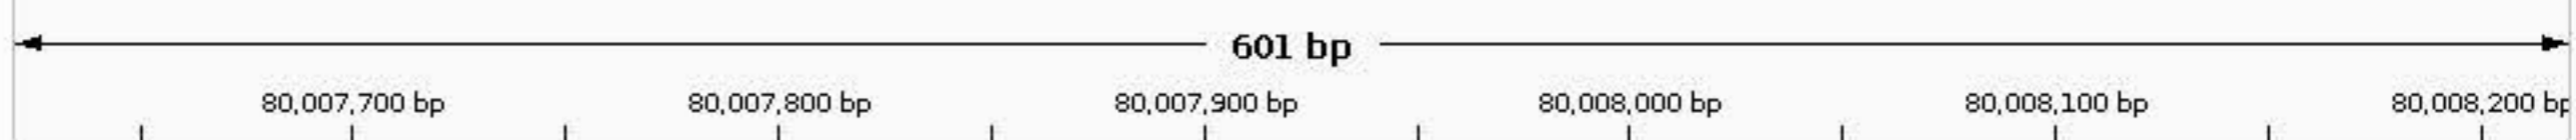

SL\_0008\_LT\_8-B\_mut.bam Coverage

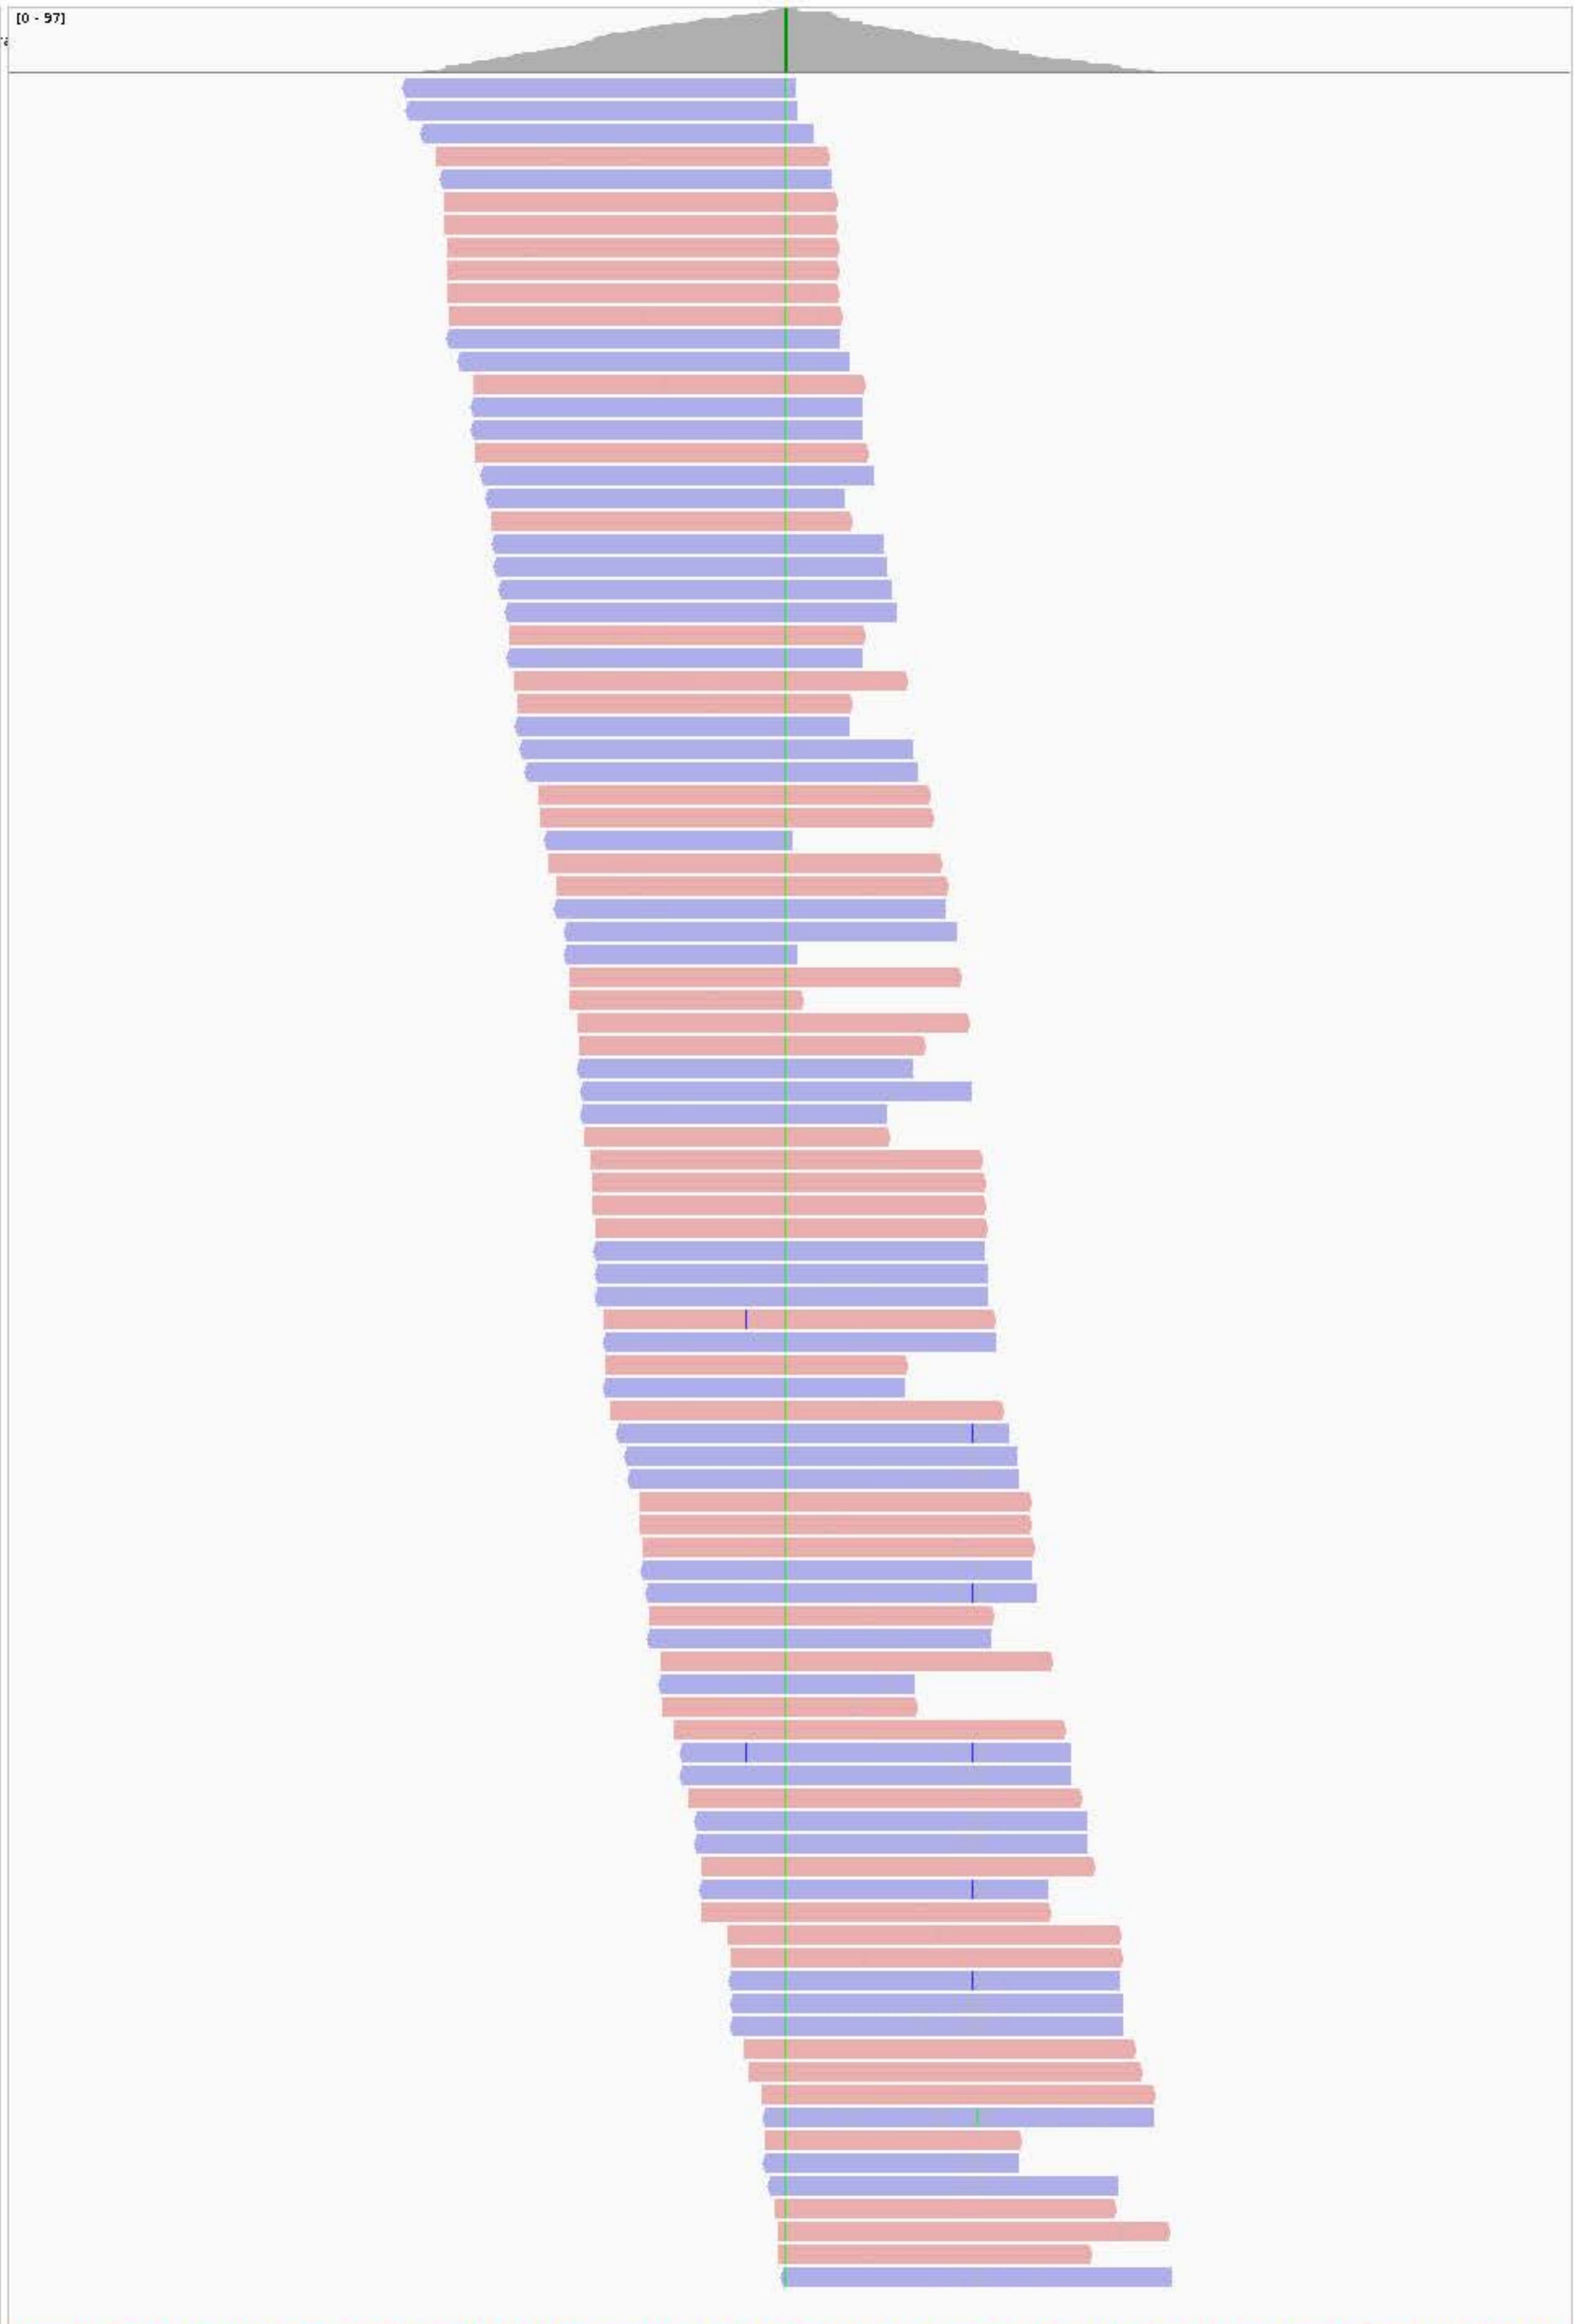

SL\_0008\_LT\_8-B\_mut.bam

Sequence

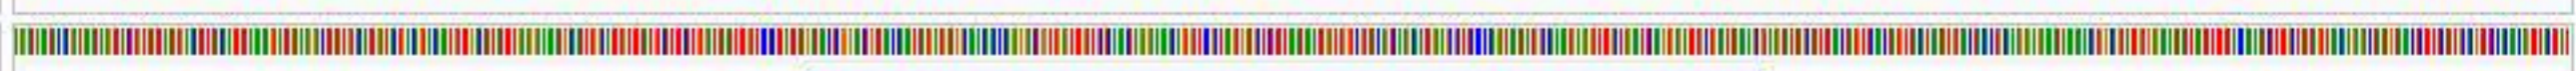

Refseq Genes

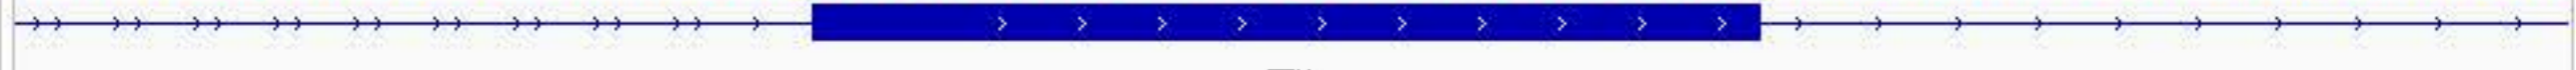

TTK

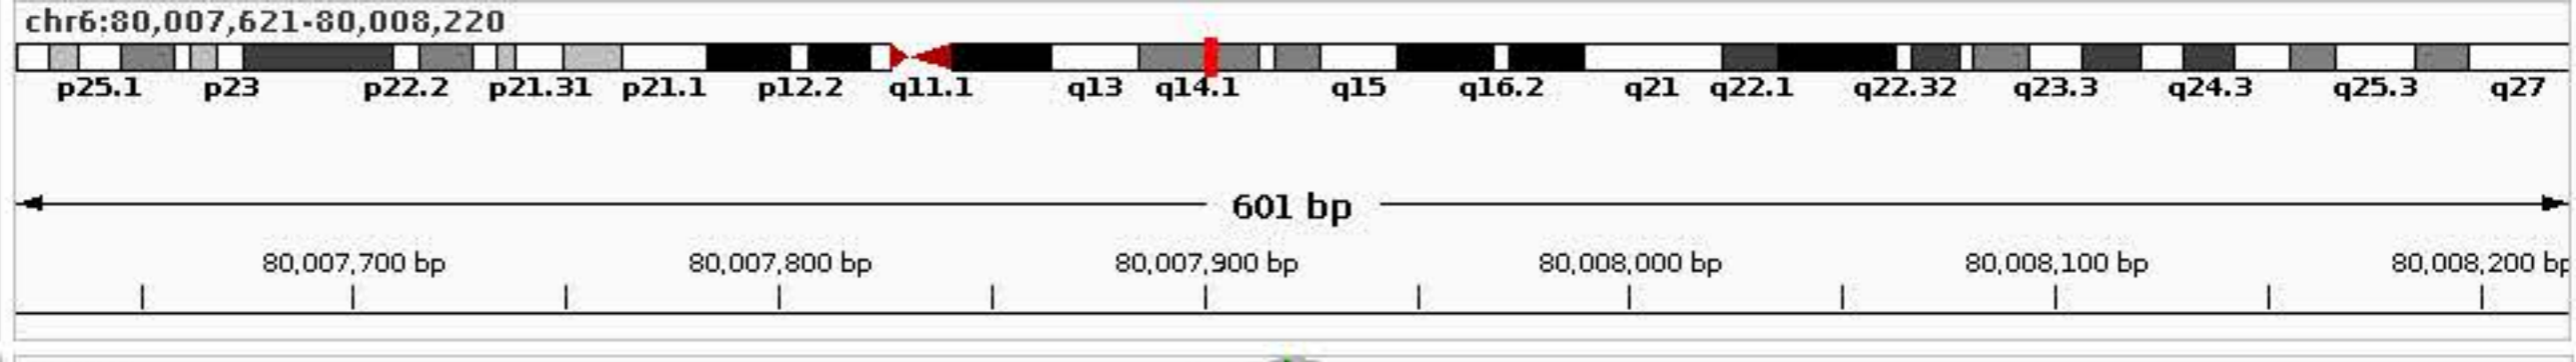

SL\_0008-LT\_15-8\_mut.bam Cov

SL\_0008-LT\_15-8\_mut.bam

Sequence

Refseq Genes

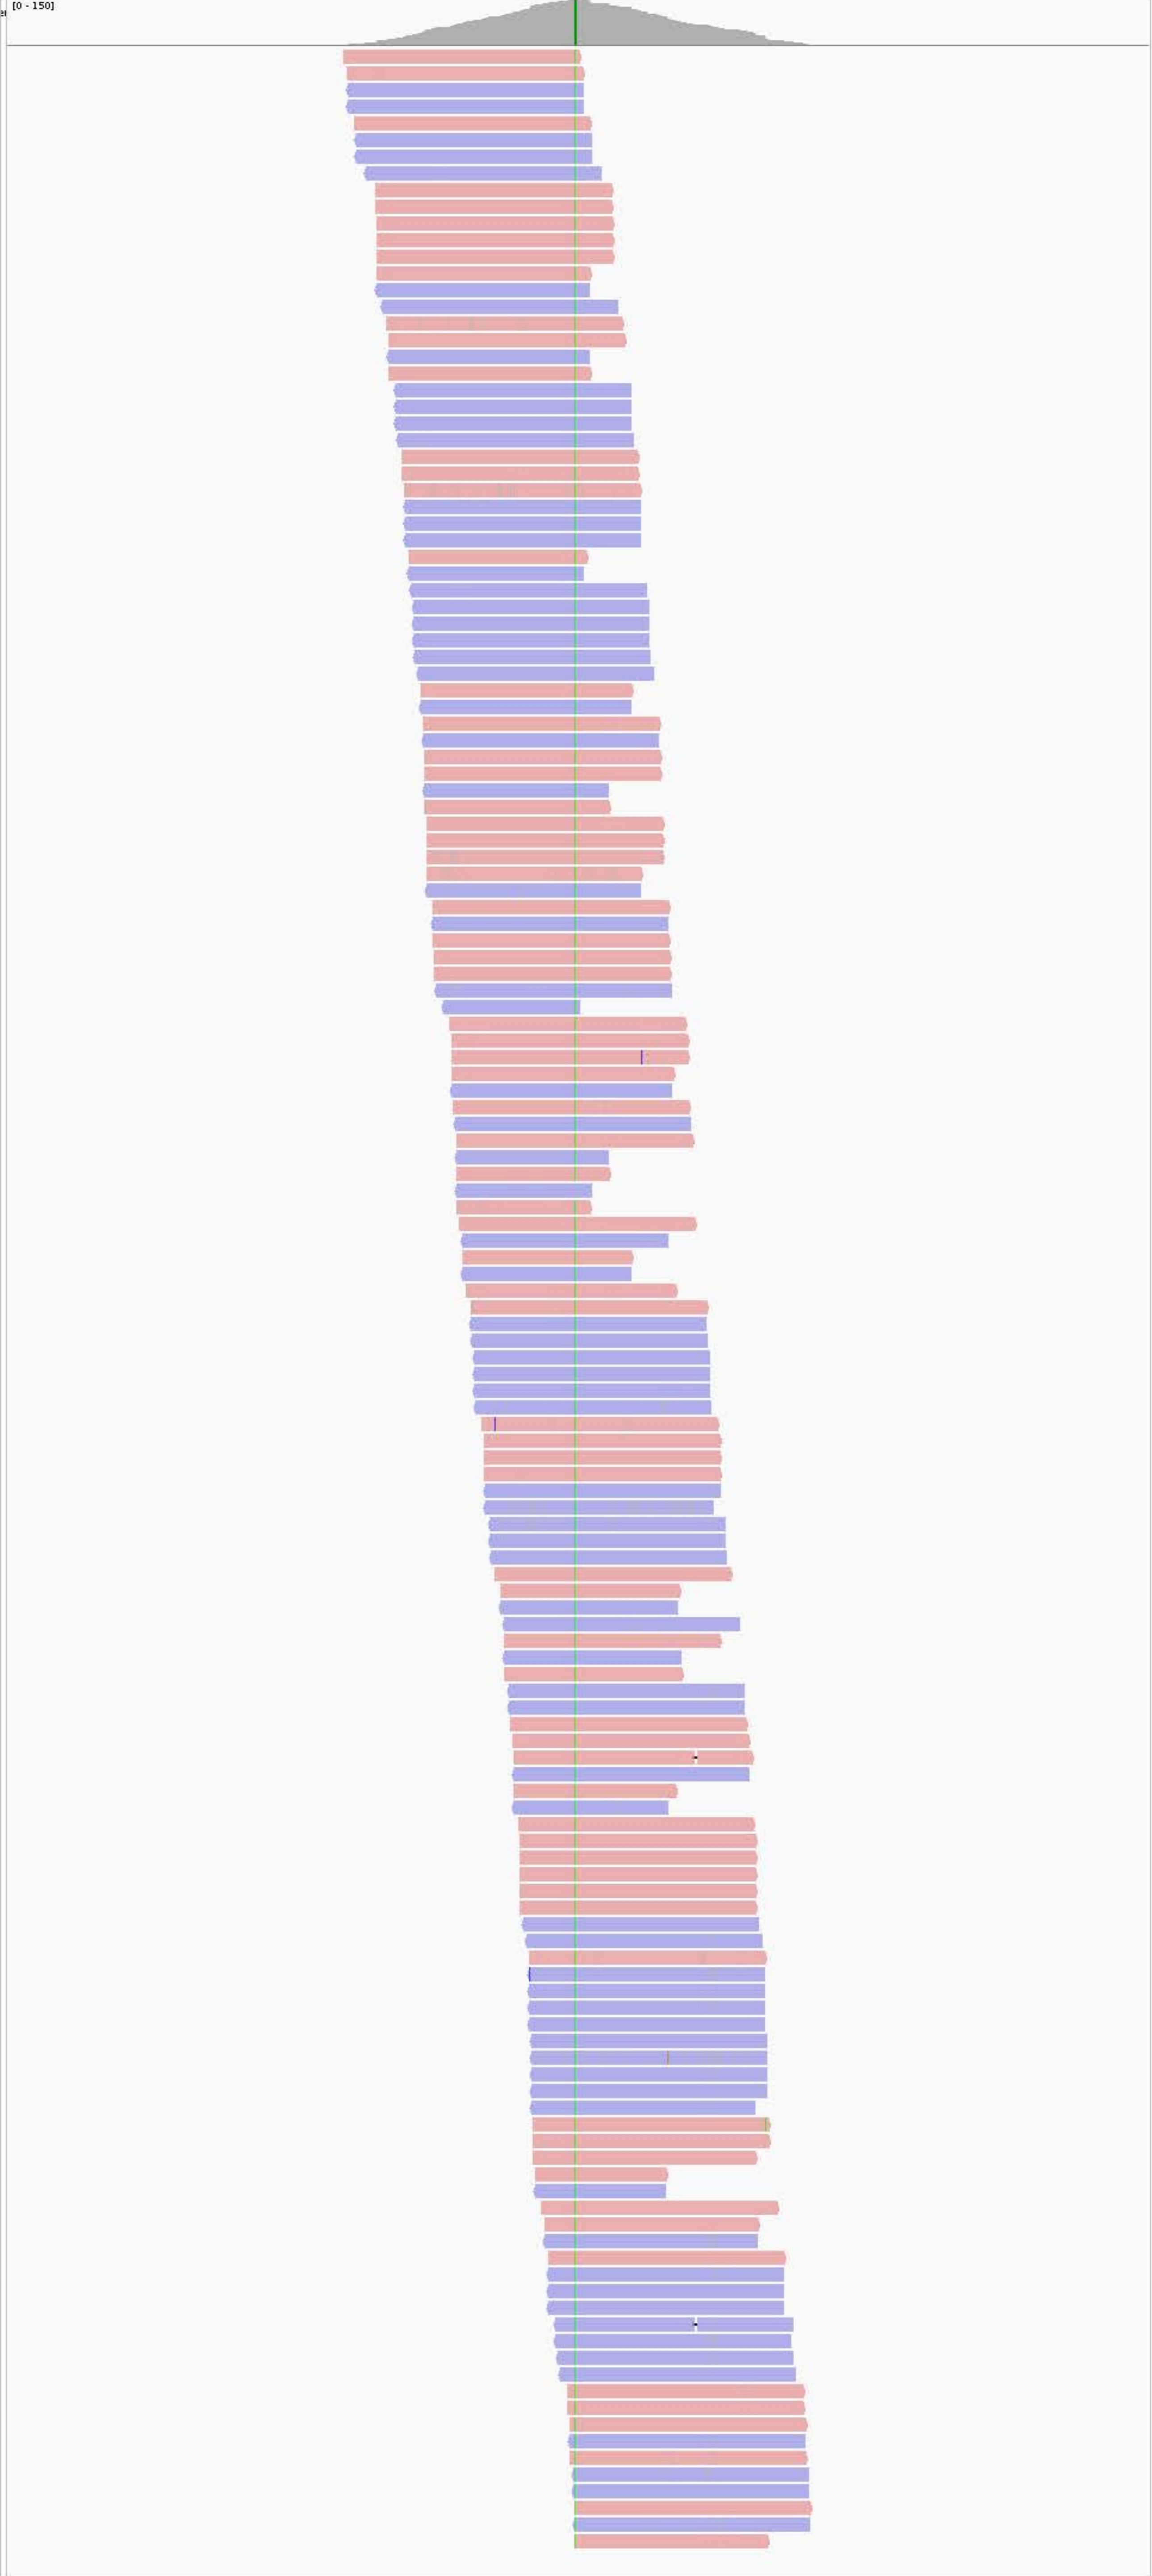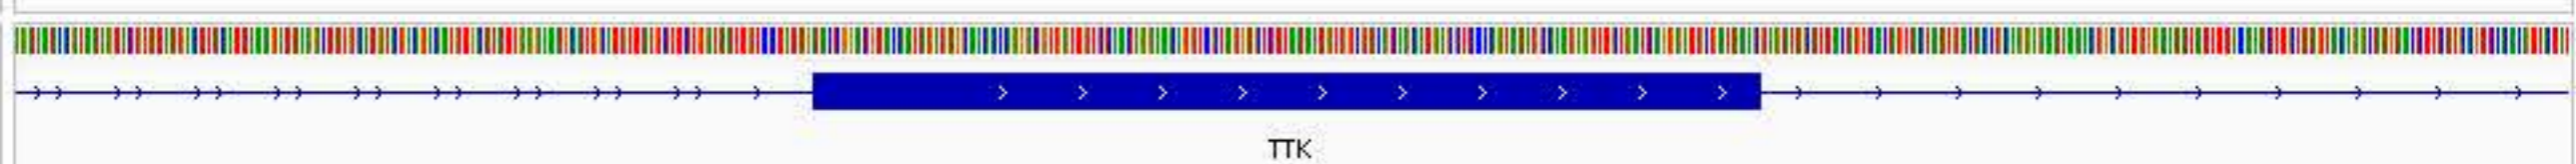

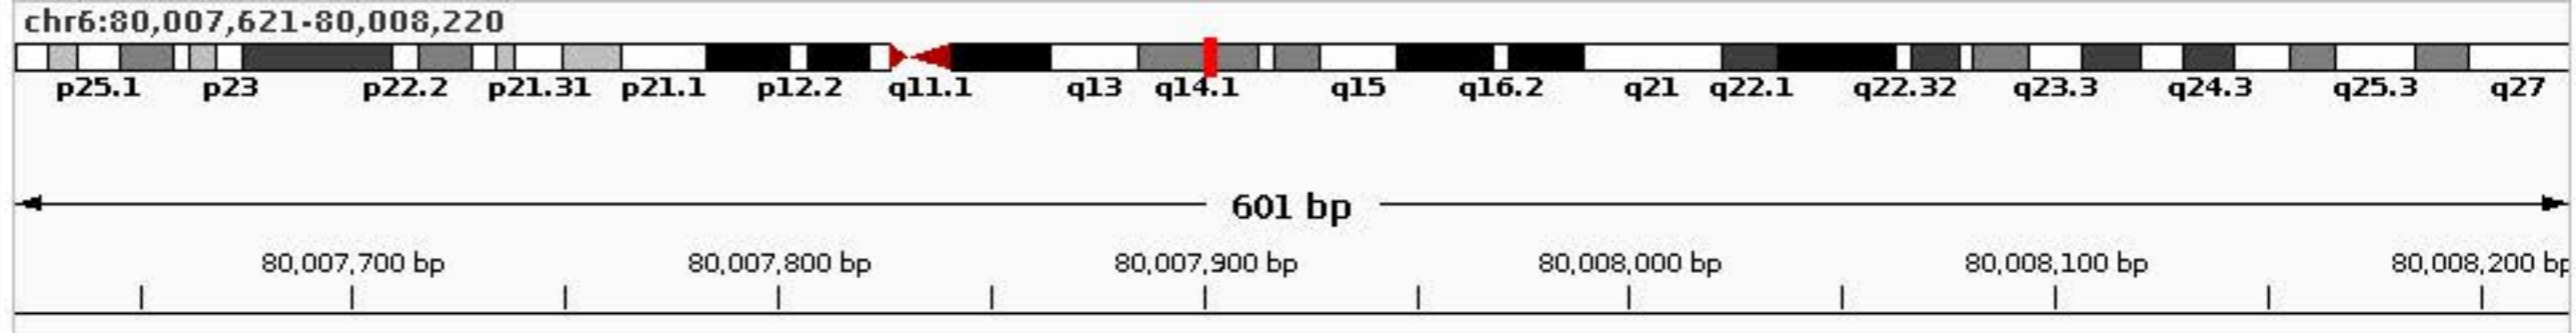

SL\_0009-LT\_9-B\_mut.bam Coverage

SL\_0009-LT\_9-B\_mut.bam

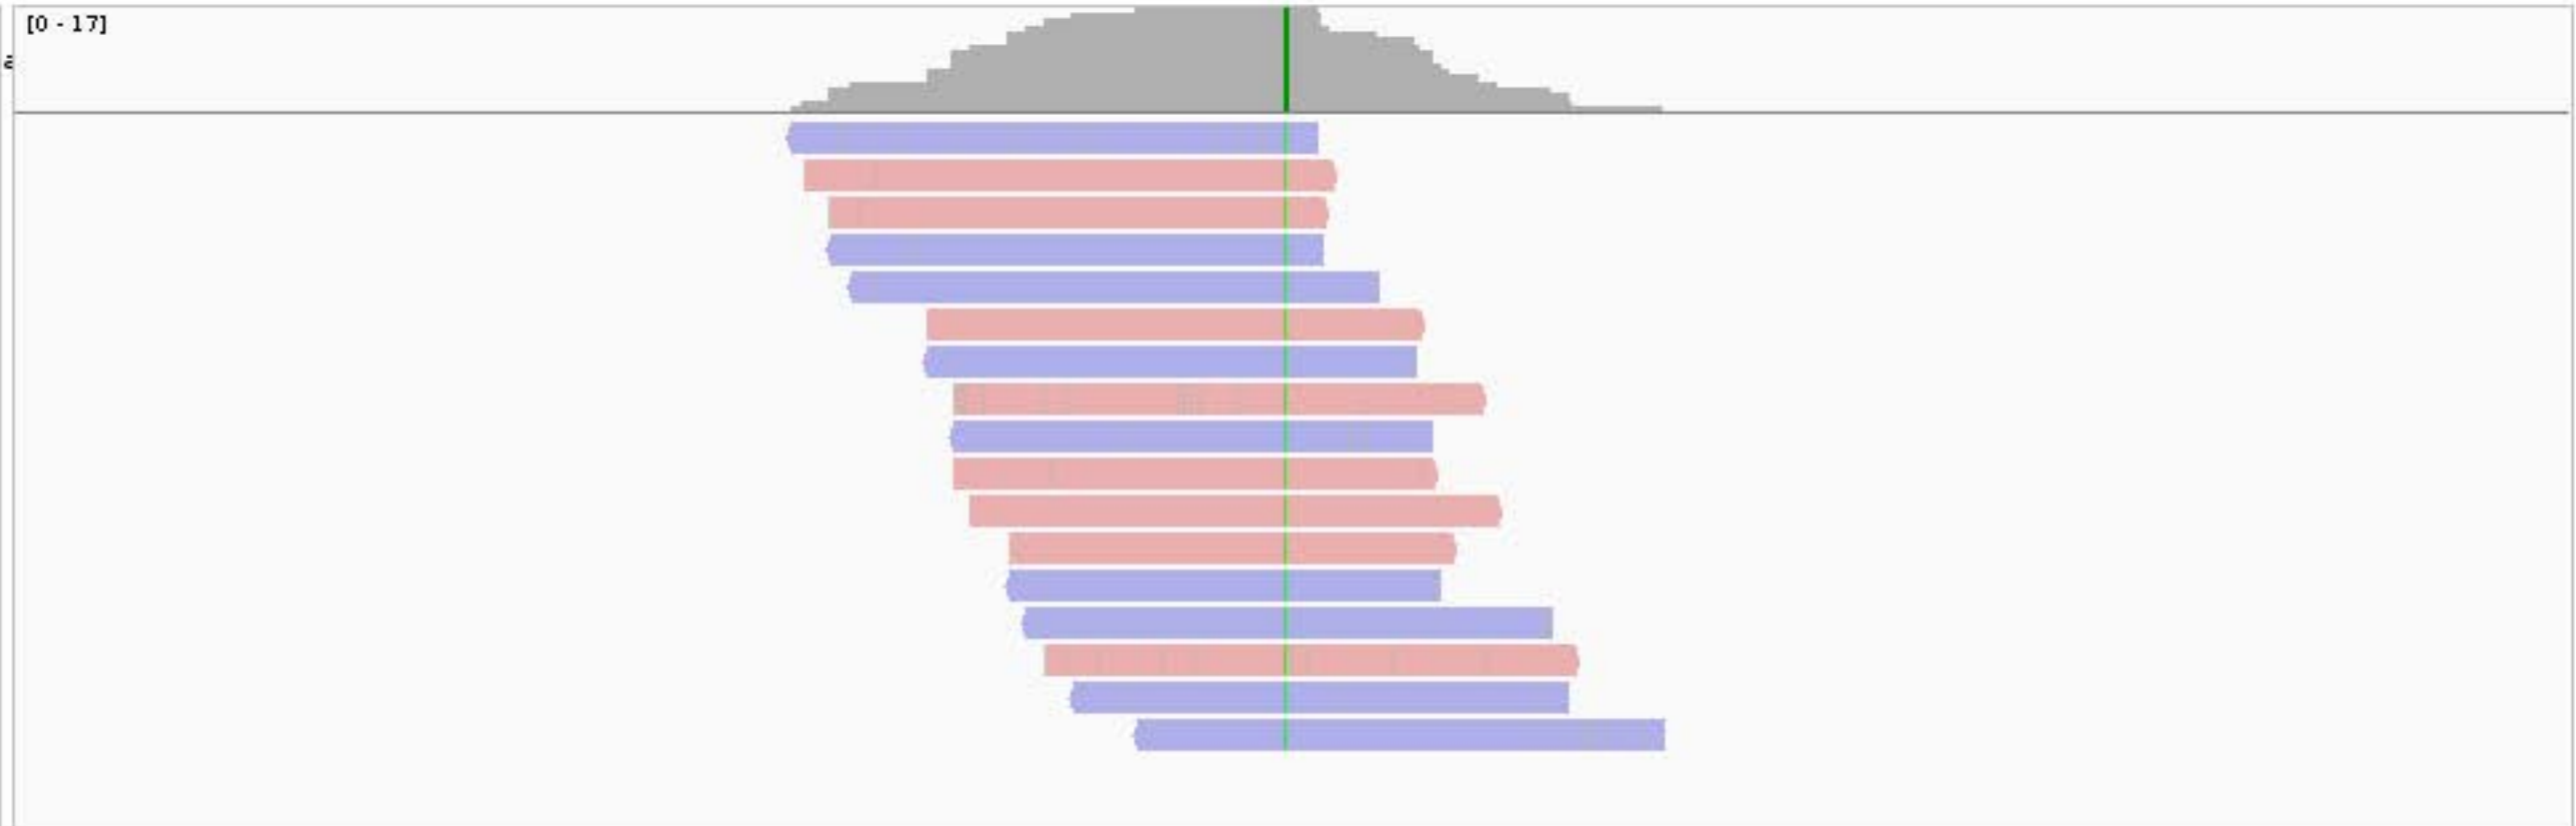

Sequence →

Refseq Genes

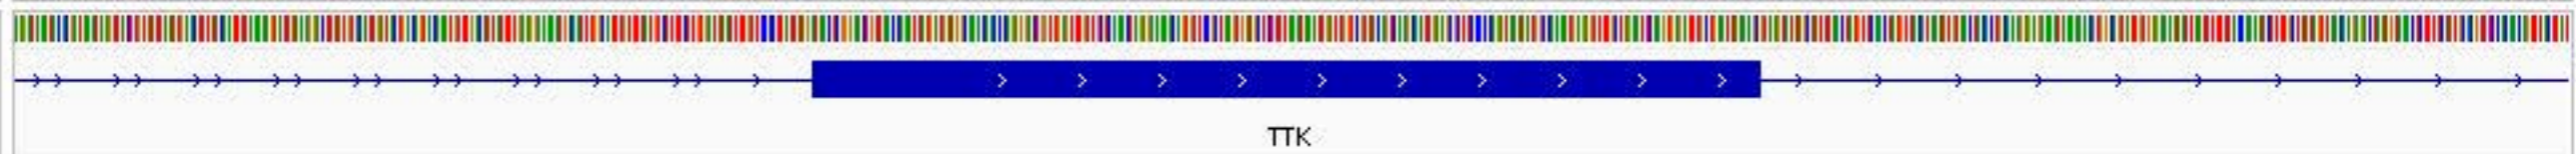



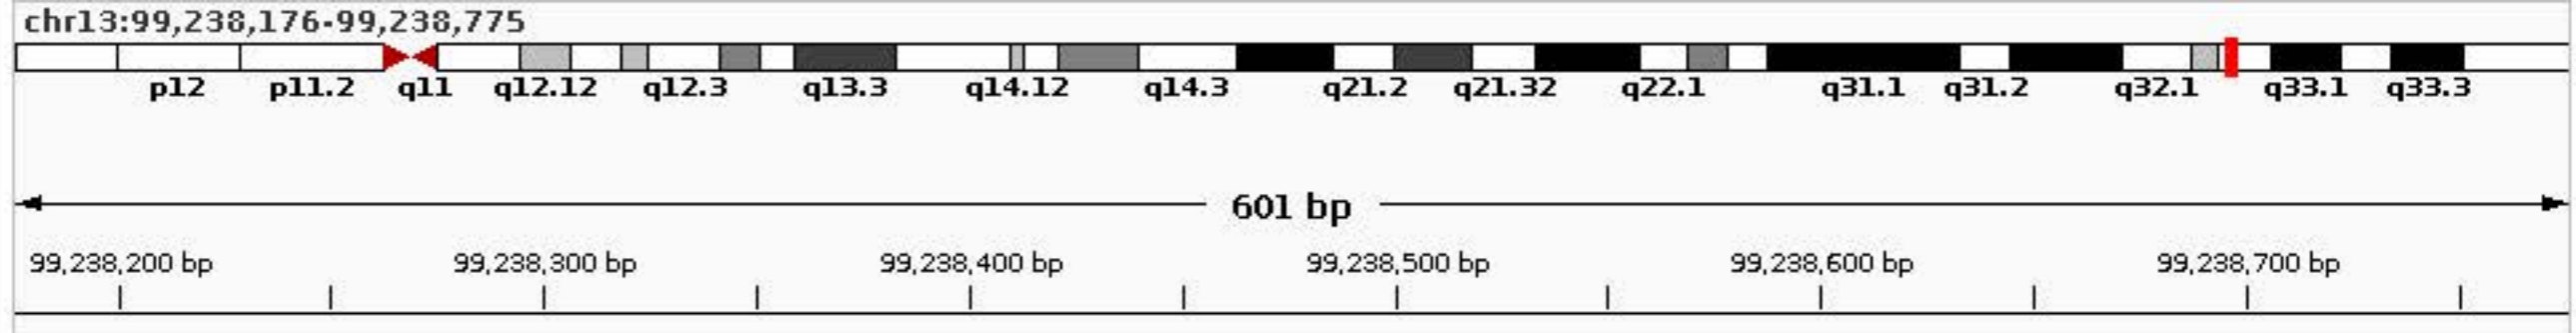

SL\_0004\_R\_FFPE\_45-B\_mut.bam  
rage

SL\_0004\_R\_FFPE\_45-B\_mut.ba  
m

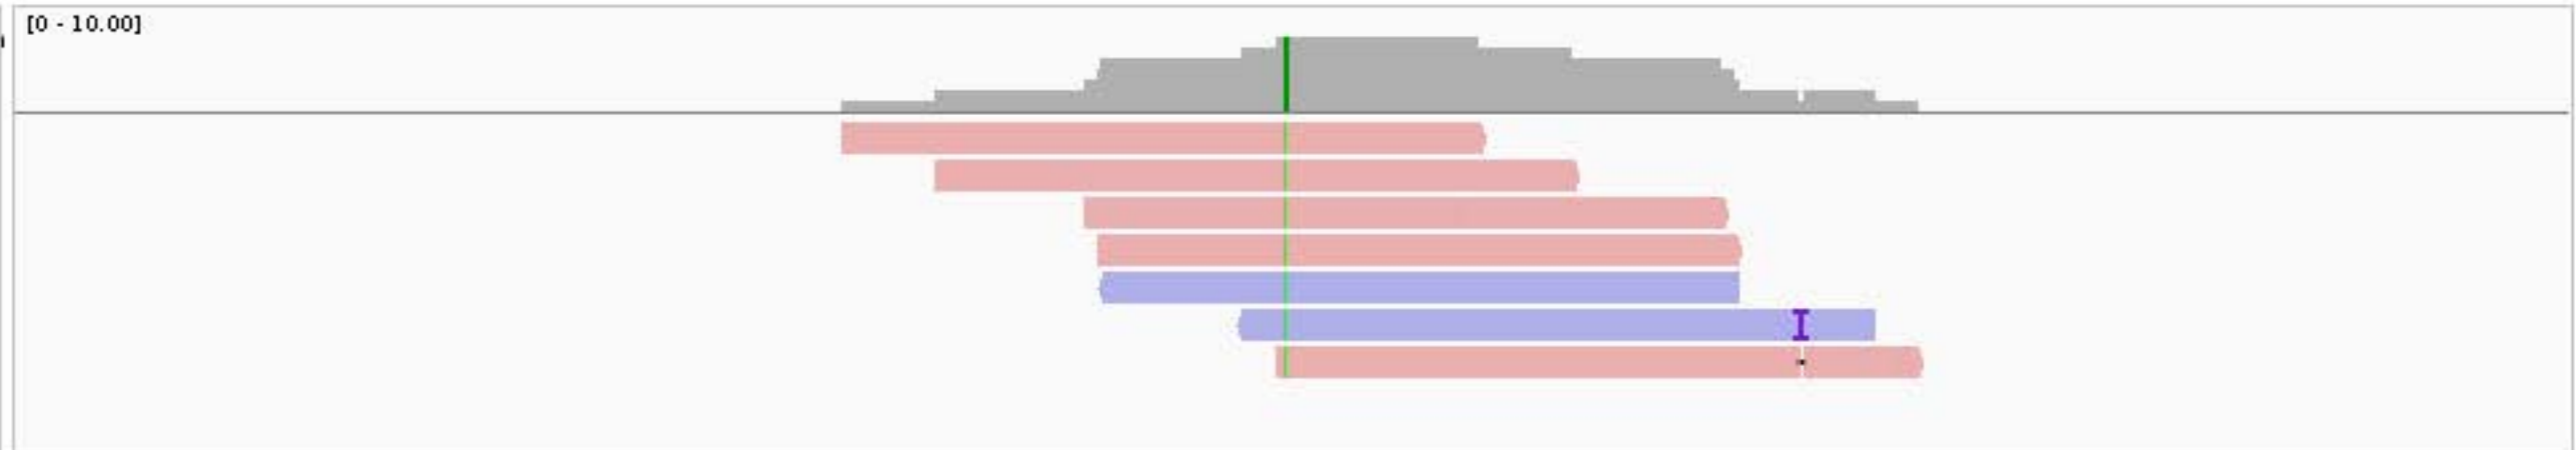

Sequence →

Refseq Genes

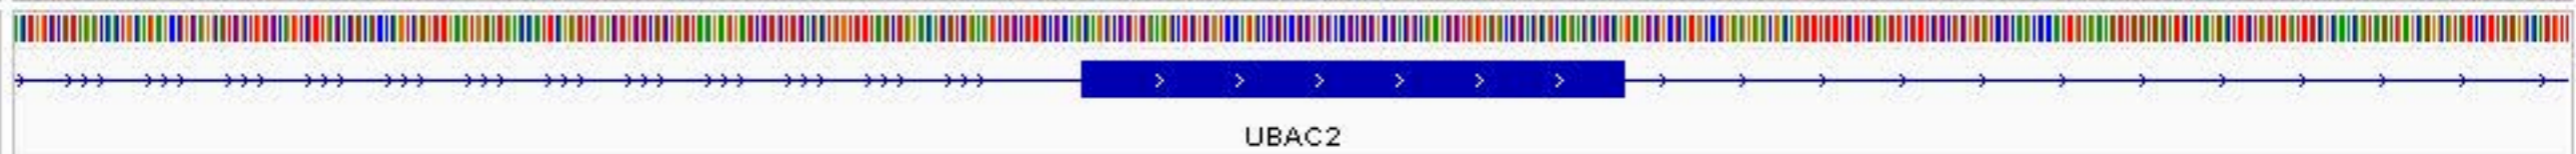

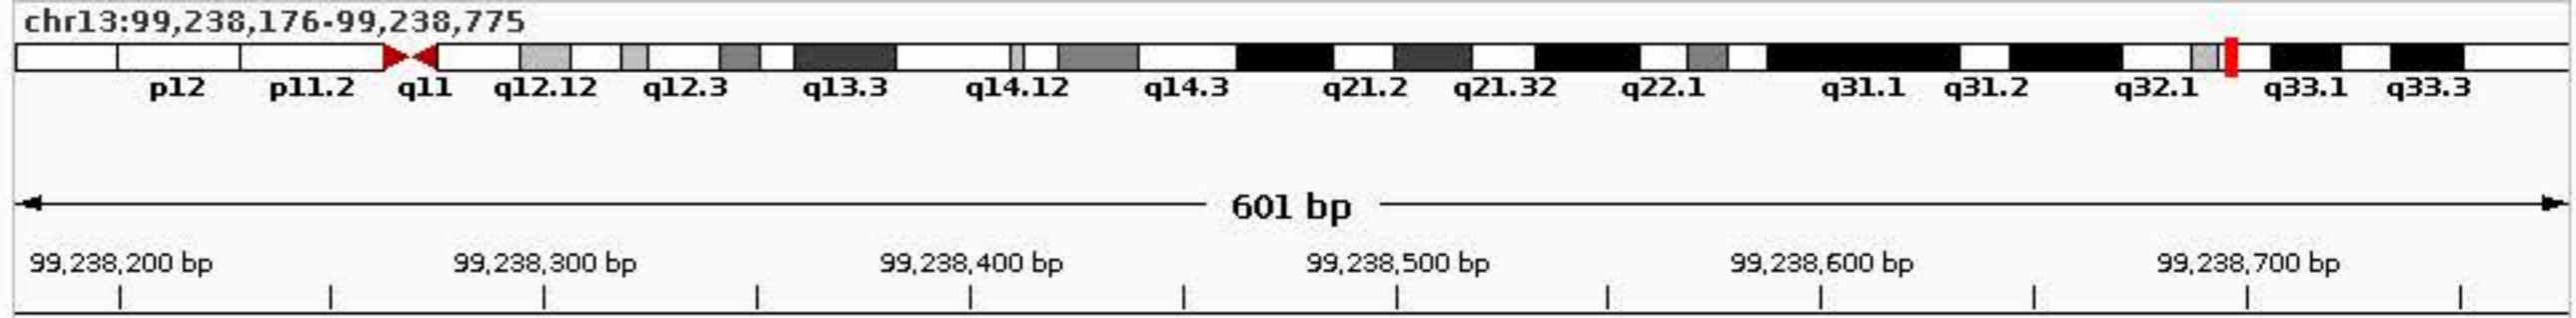

SL\_0004\_R\_FFPE\_50-B\_mut.bam  
 range

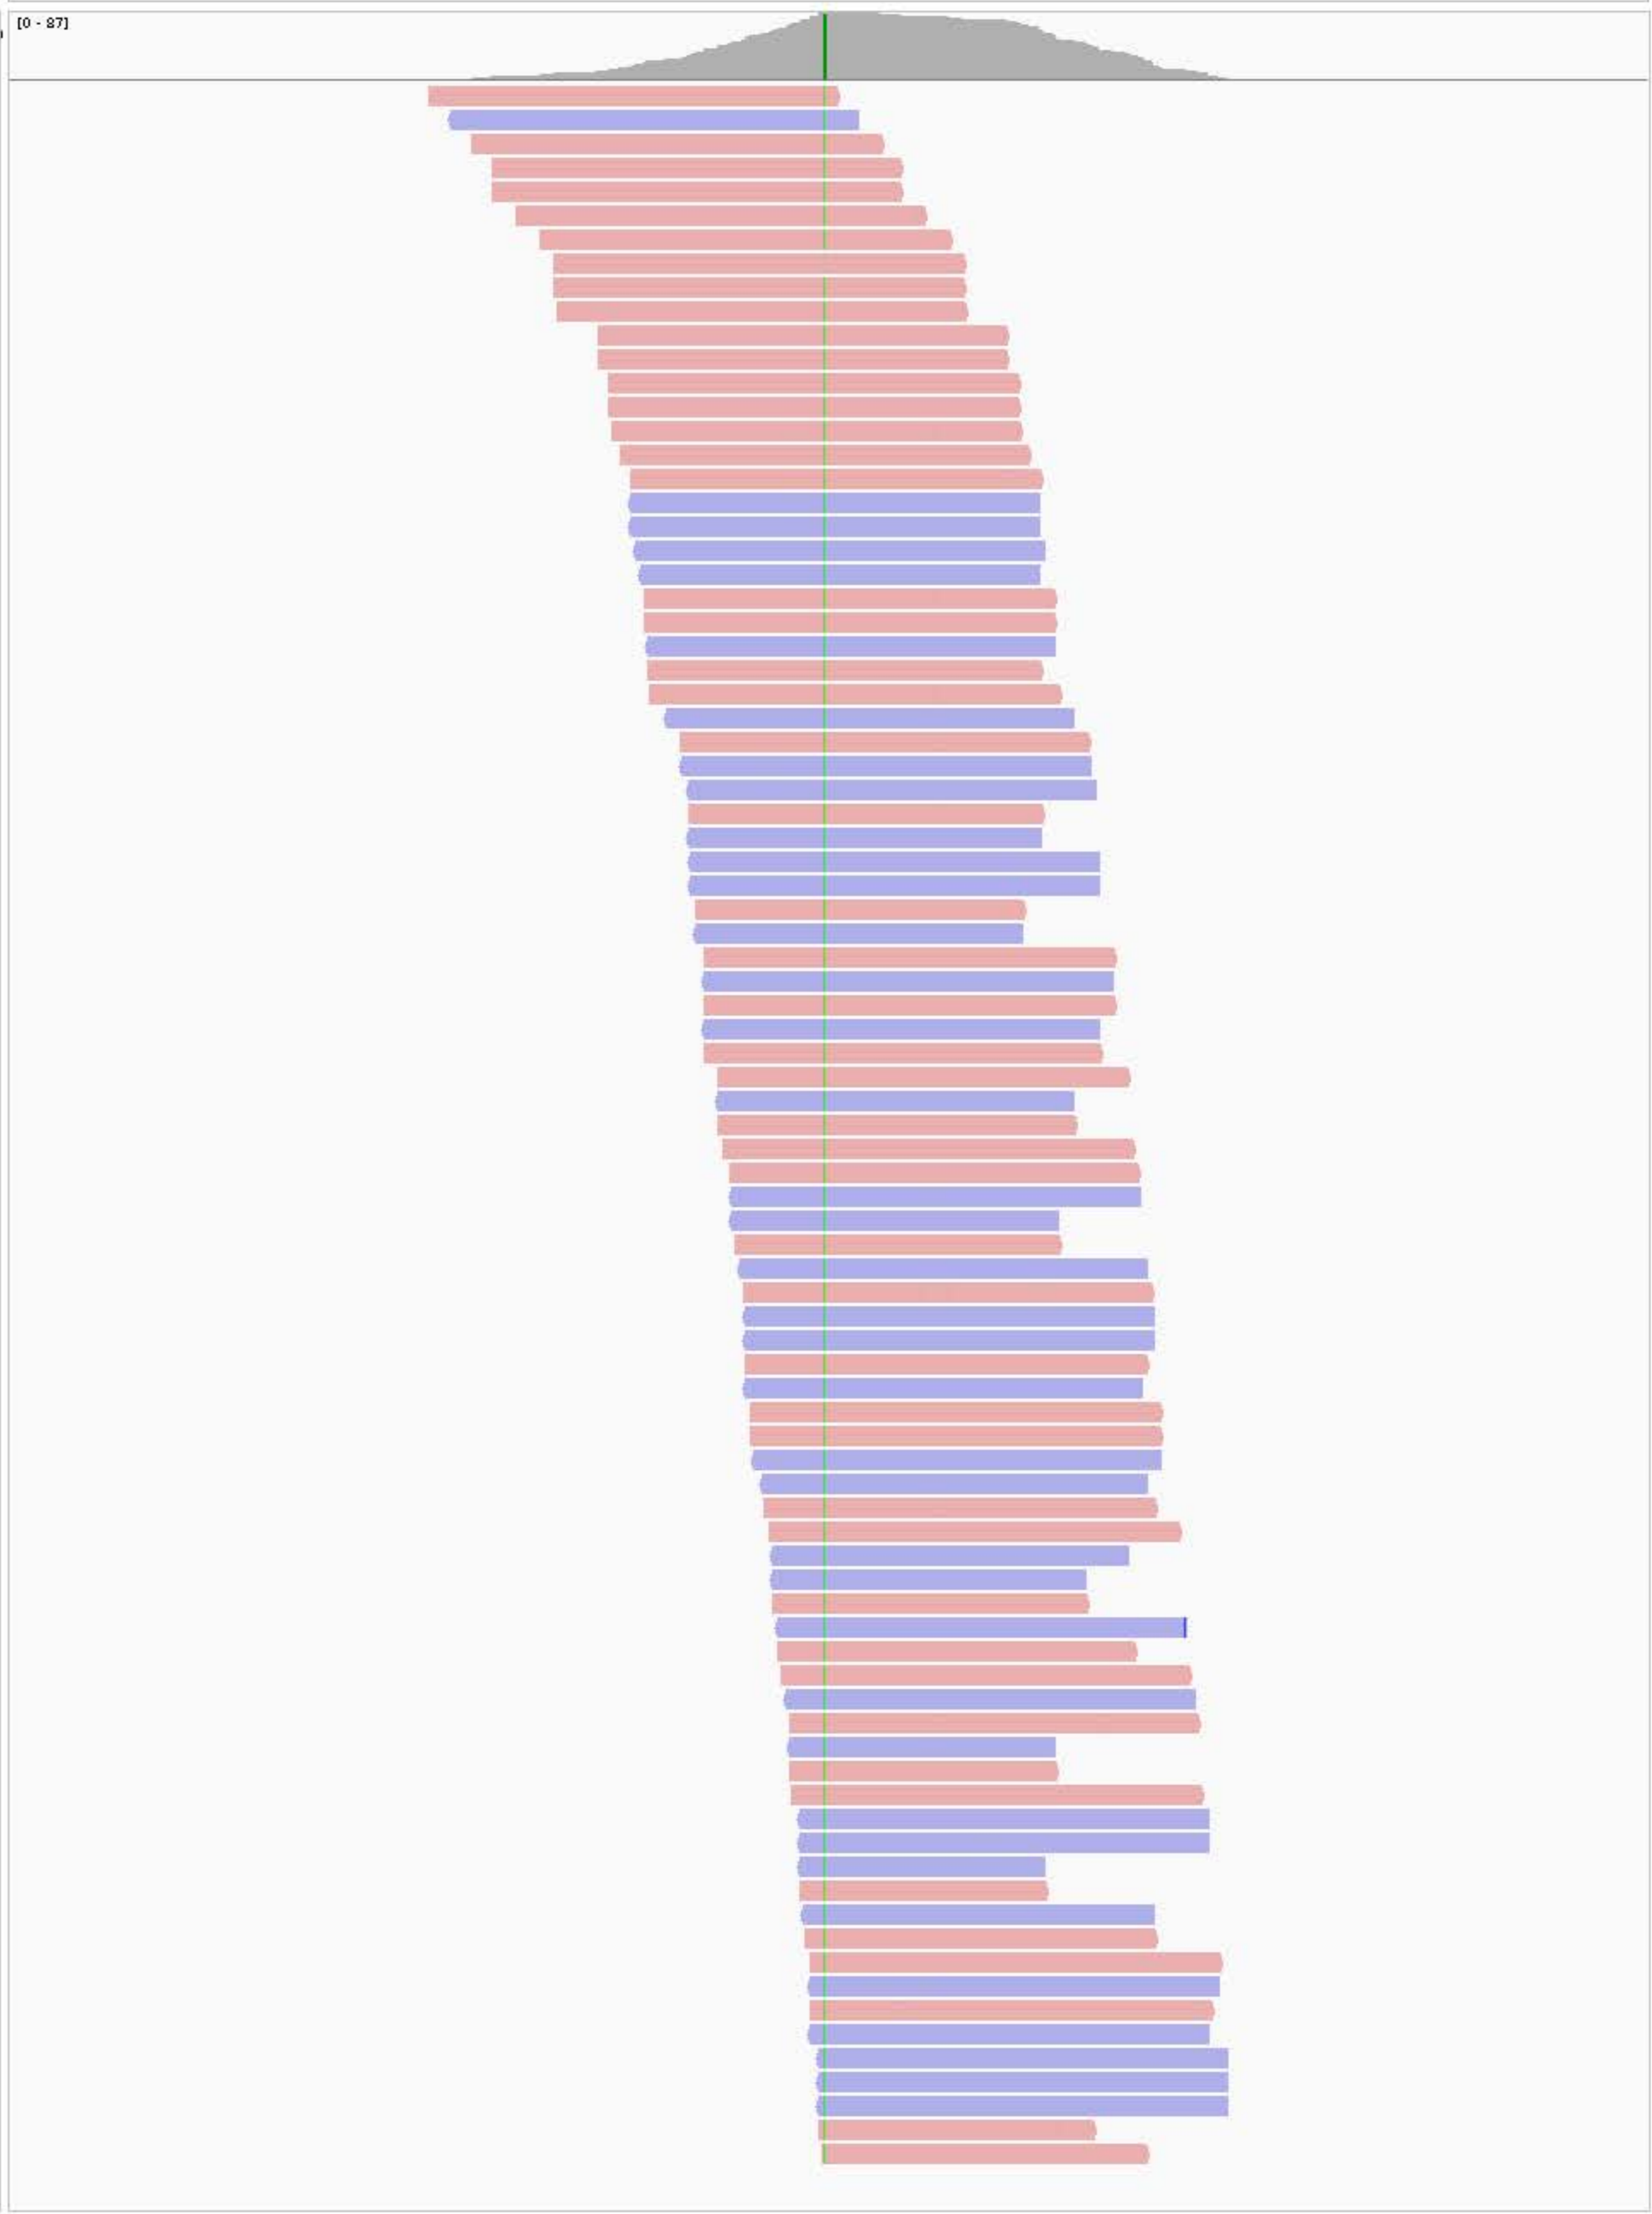

SL\_0004\_R\_FFPE\_50-B\_mut.ba  
 m

Sequence →  
 Refseq Genes

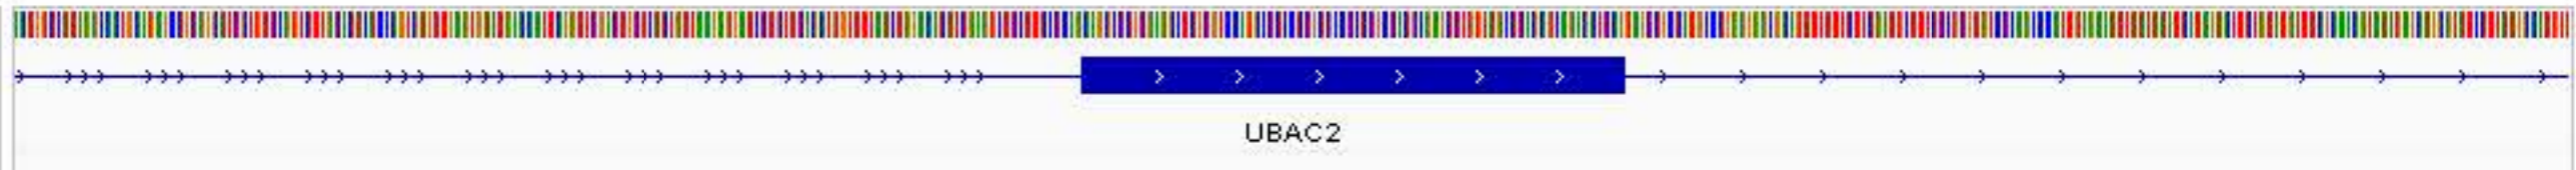



SL\_0004-RN-3-B\_mut.bam Cover

SL\_0004-RN-3-B\_mut.bam

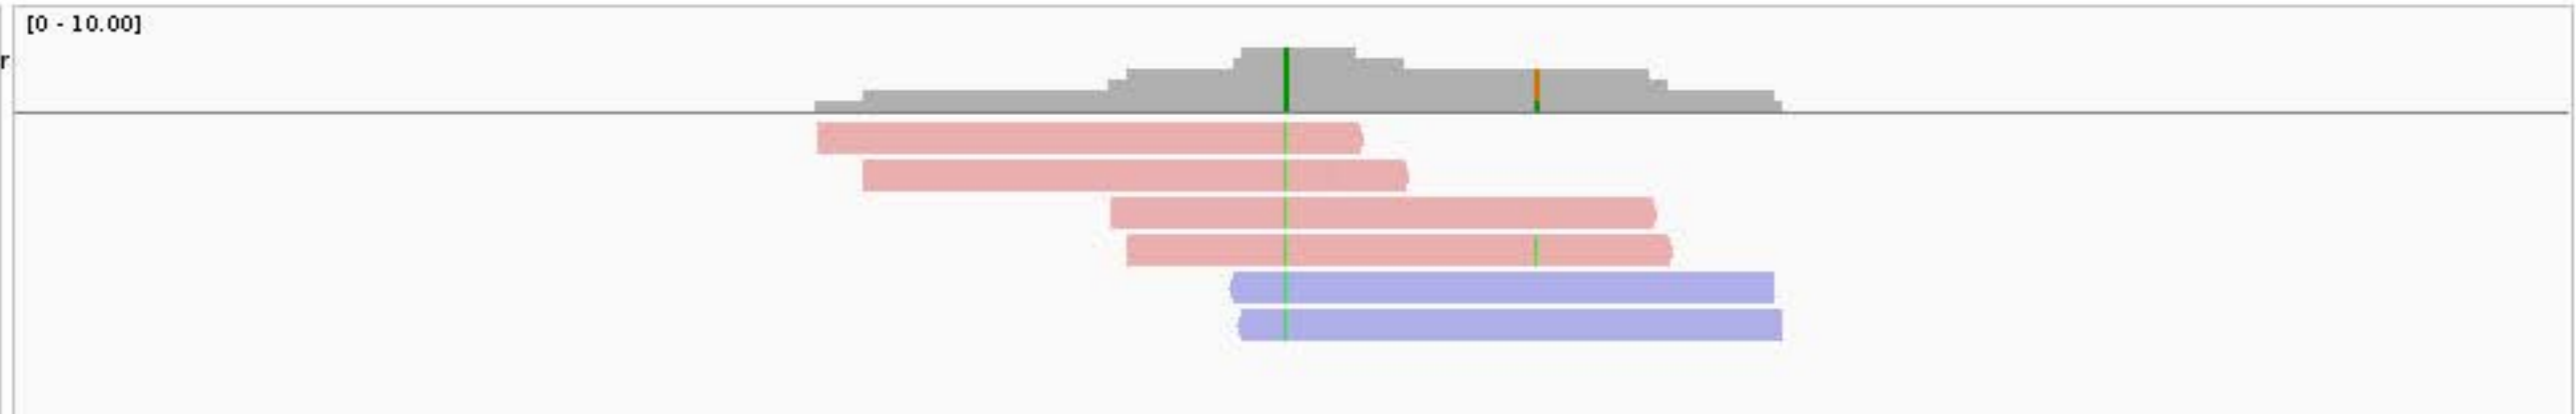

Sequence →

Refseq Genes





chr2:233,729,606-233,730,205

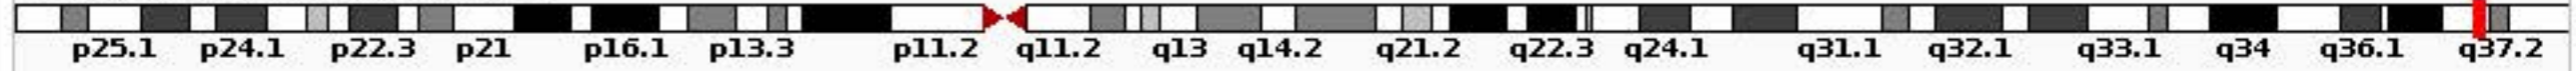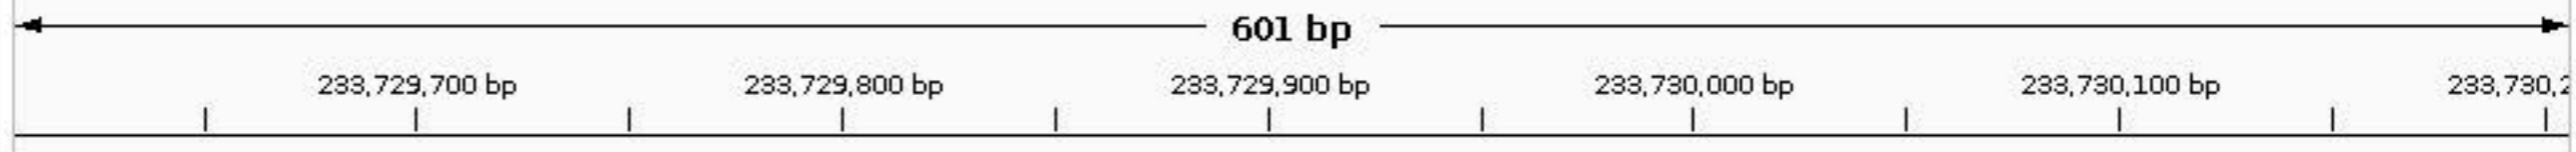

SL\_1006\_L\_35\_FFPE-B\_mut.bam  
range

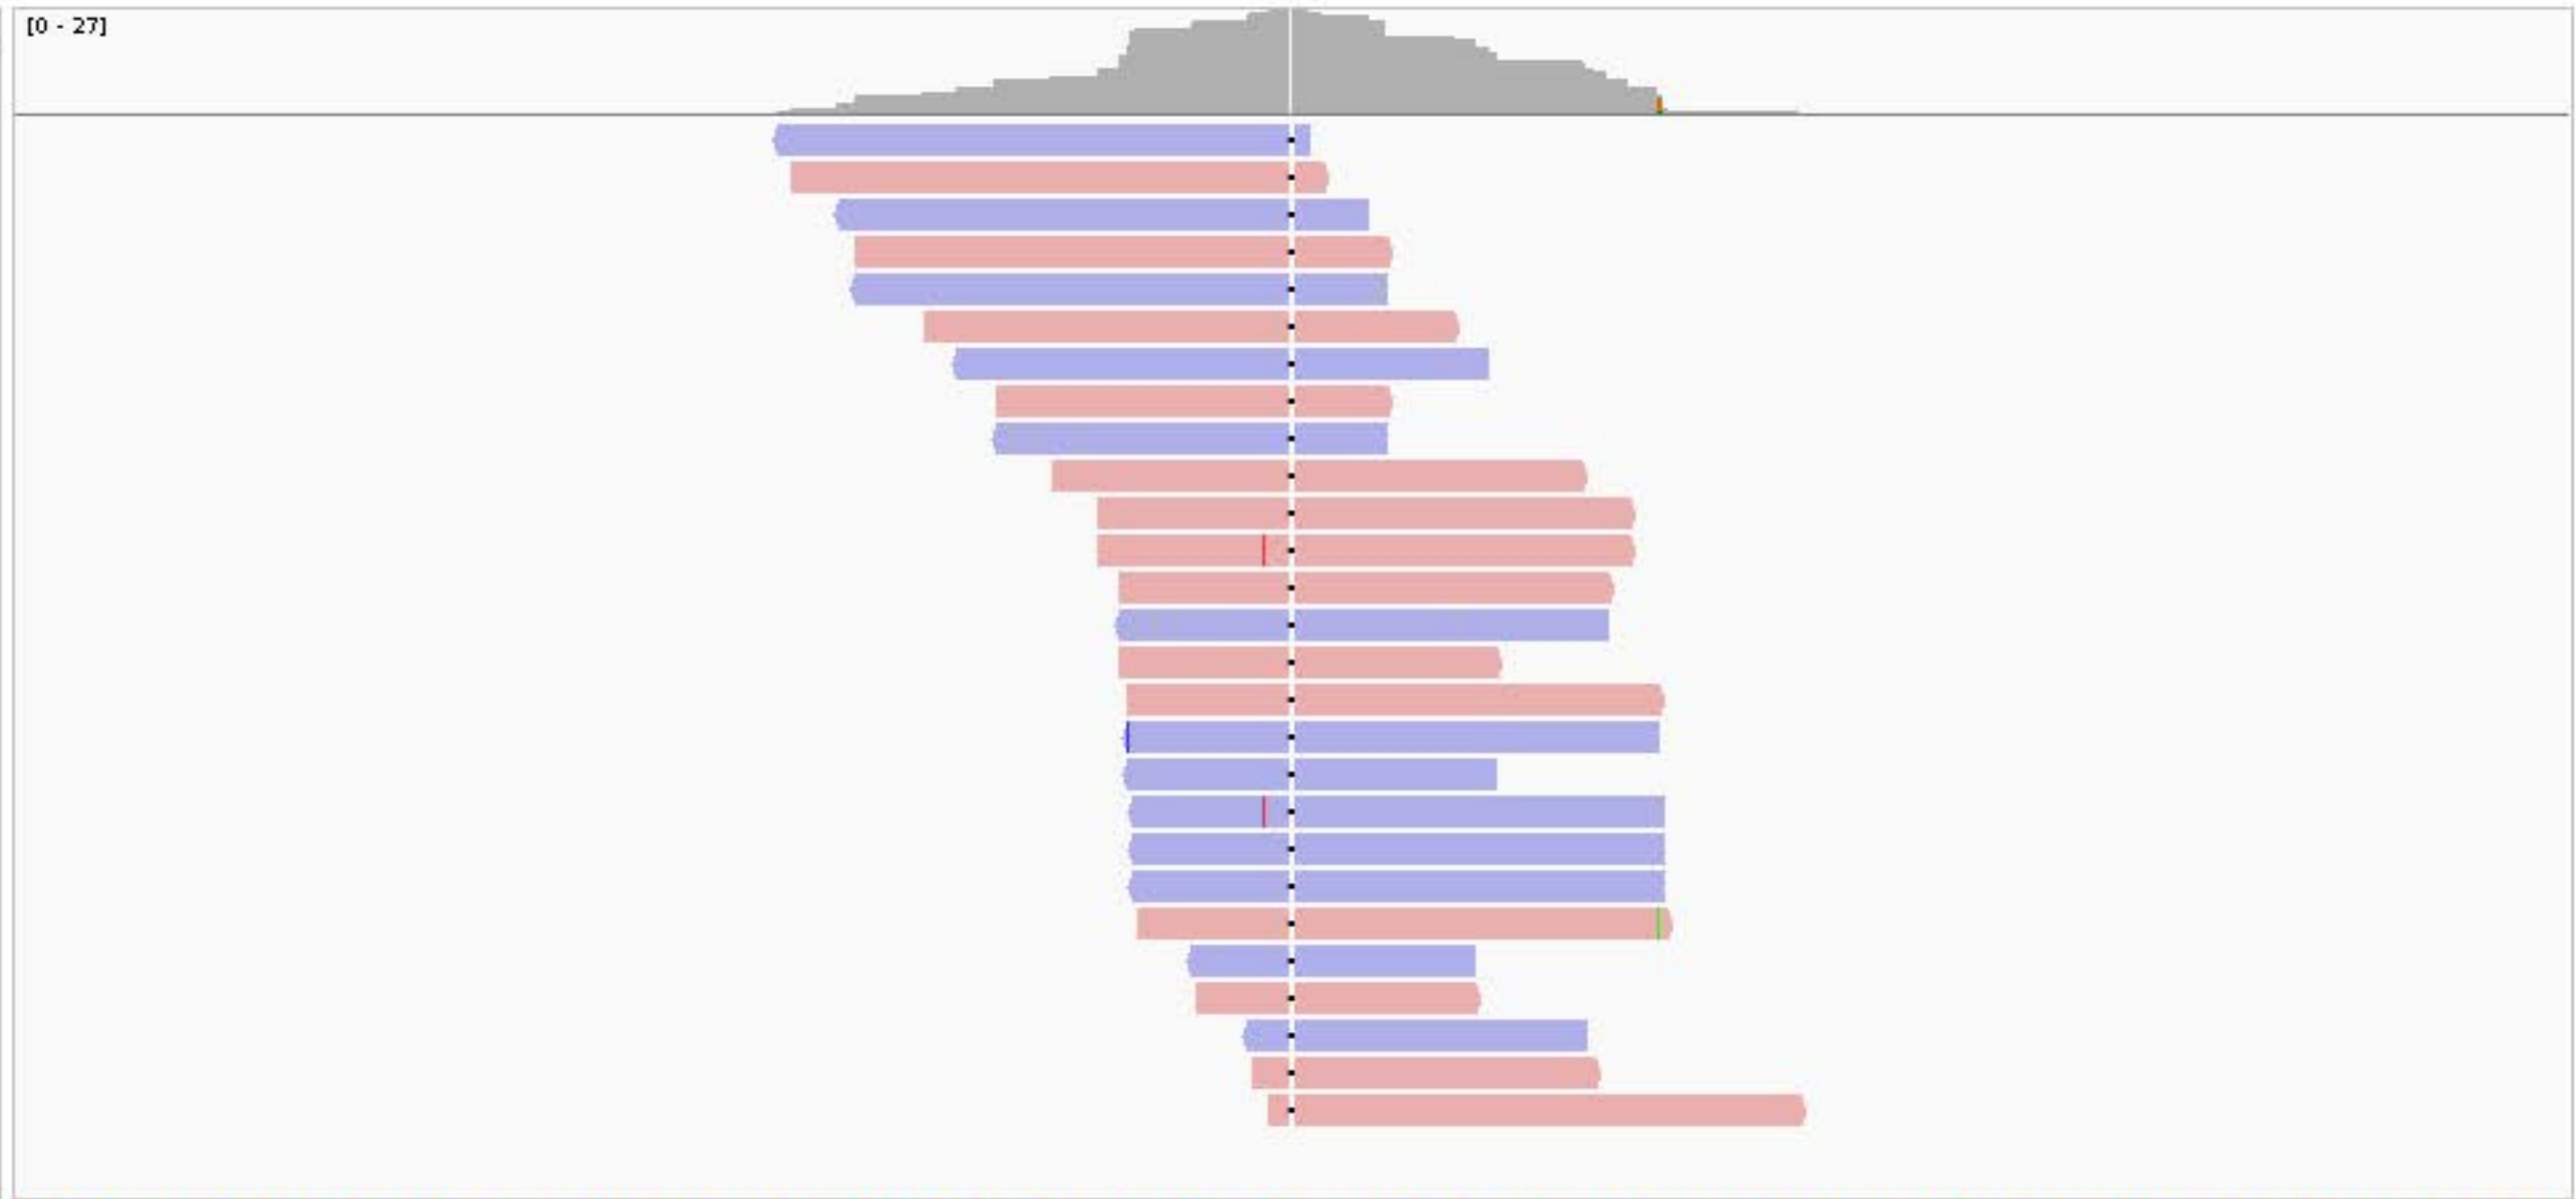

SL\_1006\_L\_35\_FFPE-B\_mut.bam

Sequence →

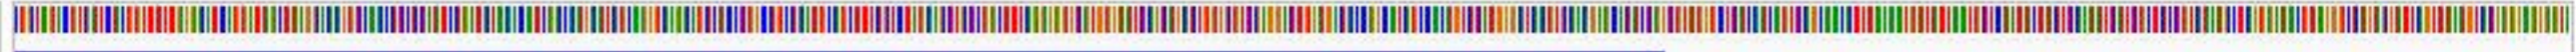

Refseq Genes

UGT1A8

chr7:152,648,456-152,649,055

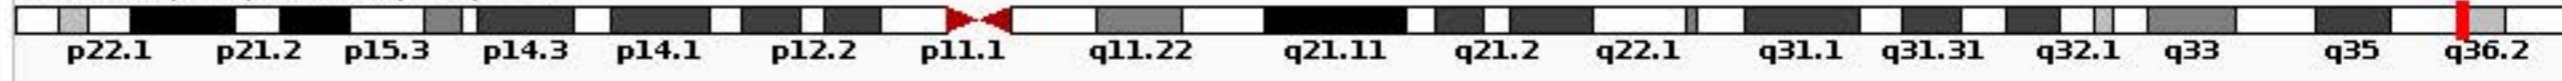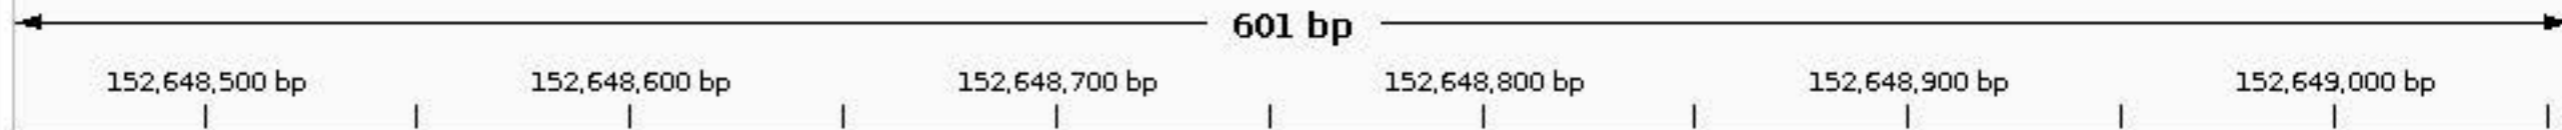

SL\_1012\_L\_FFPE\_36-B\_mut.barrage

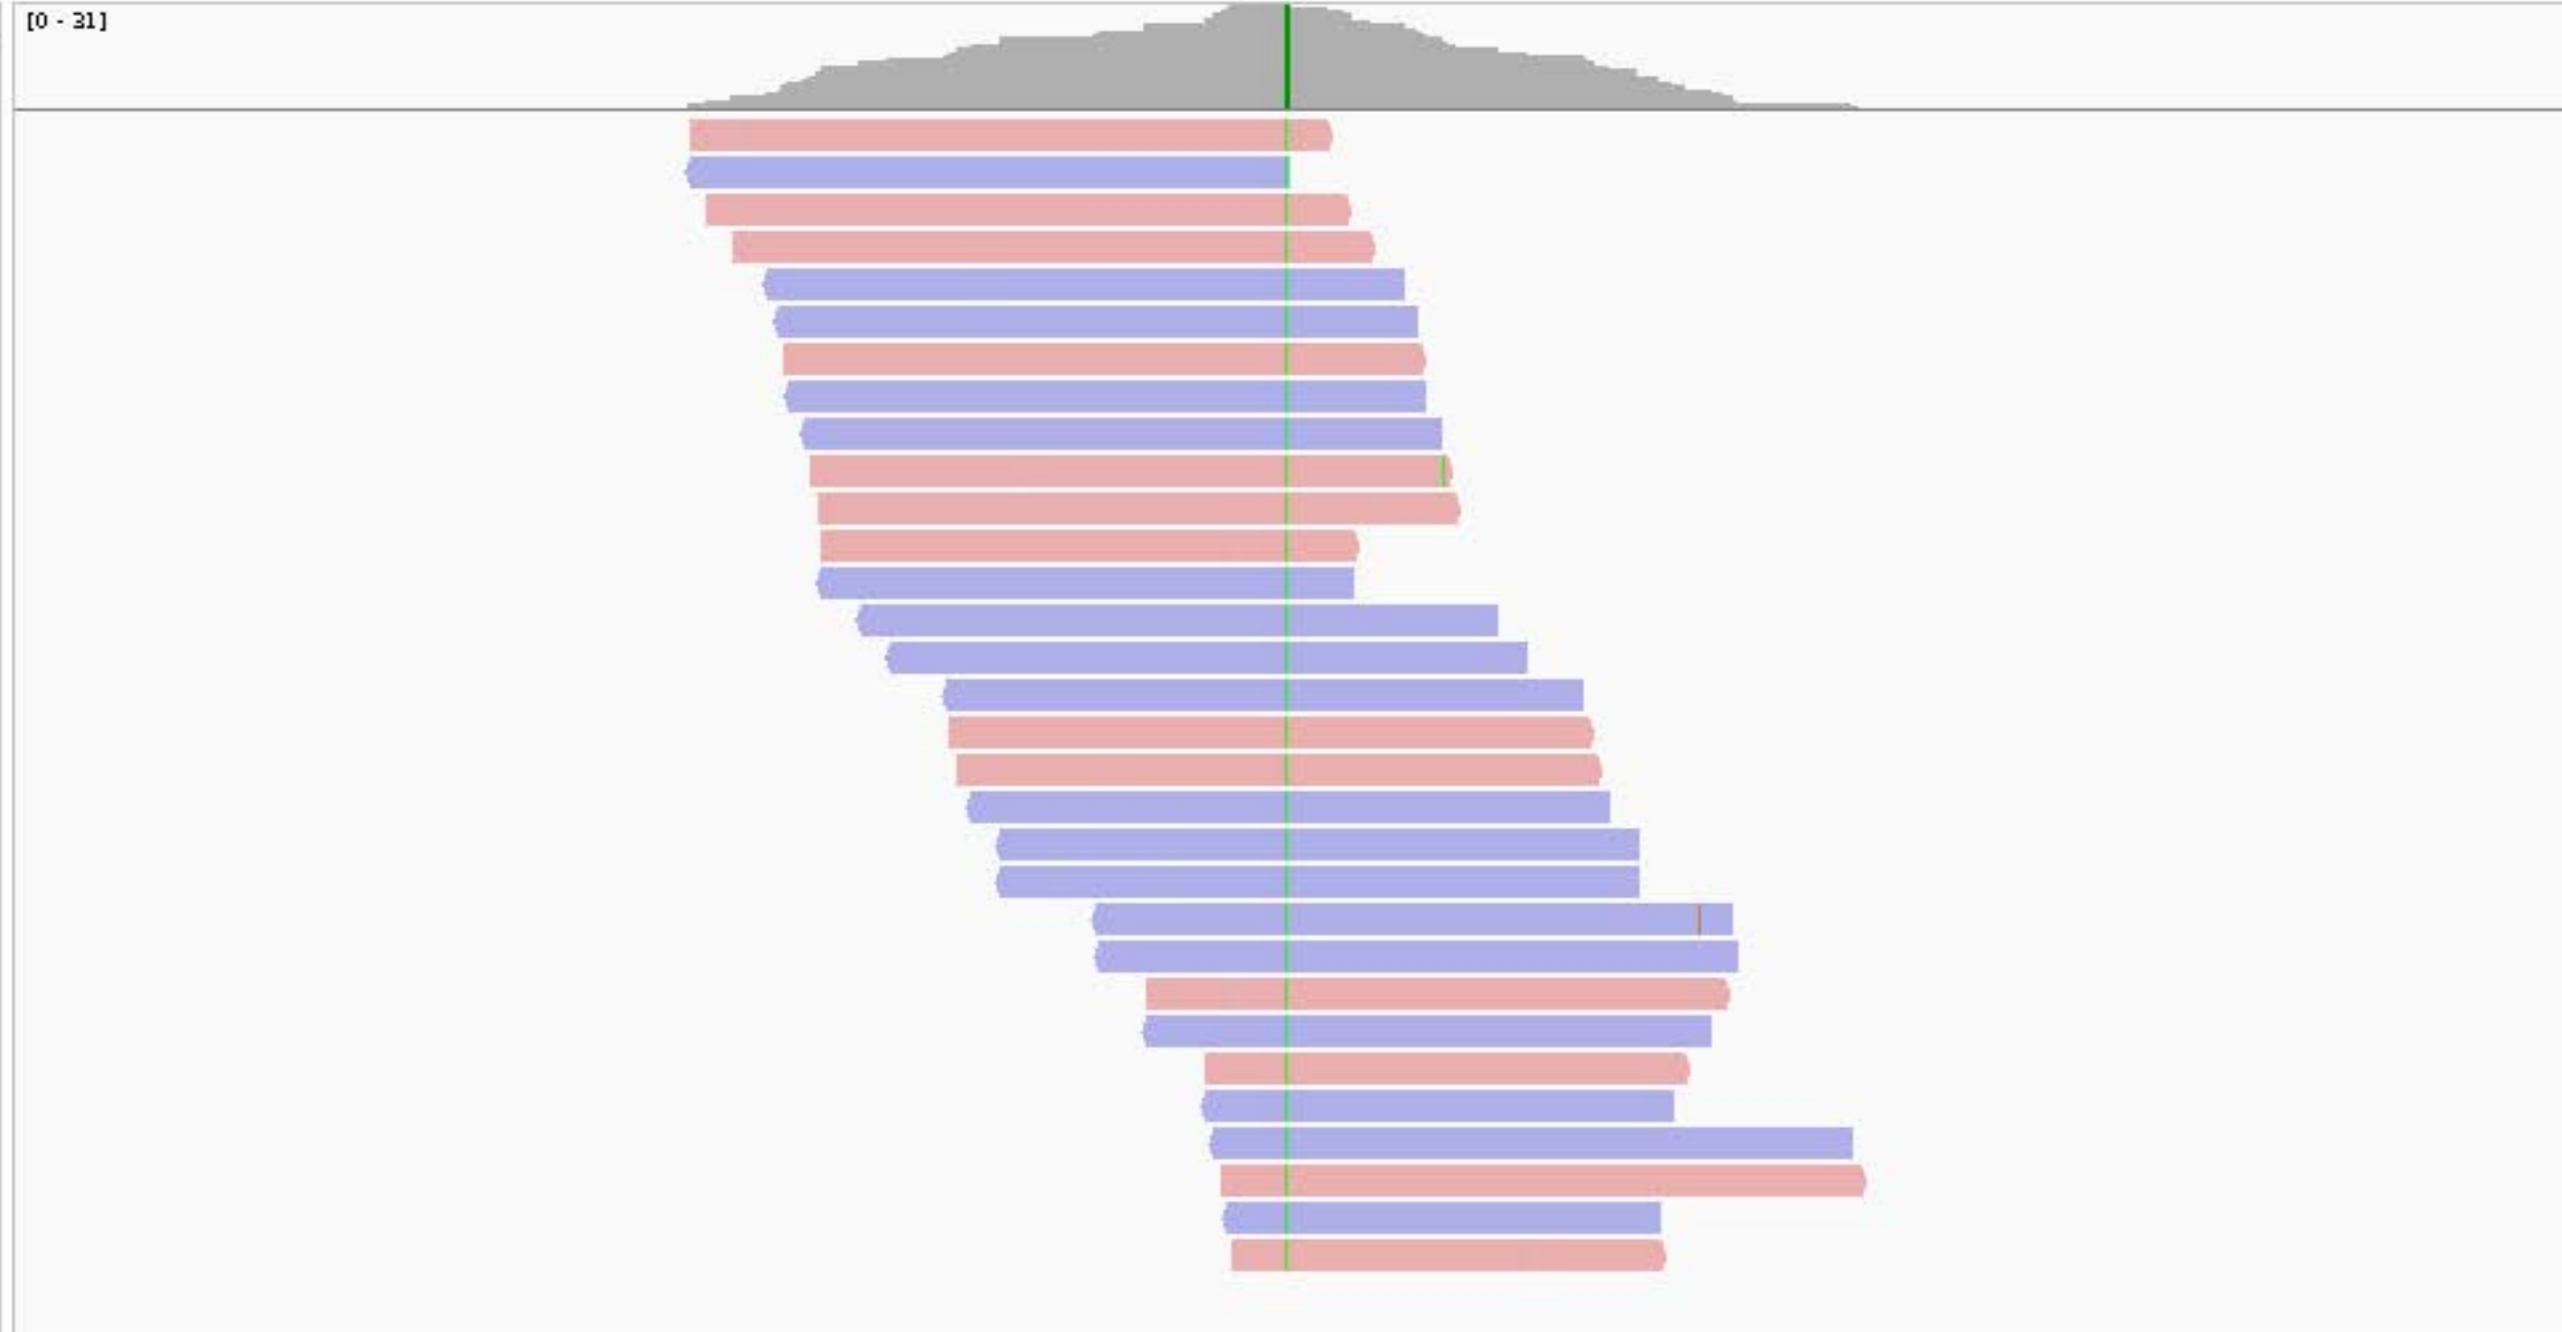

SL\_1012\_L\_FFPE\_36-B\_mut.bam

Sequence

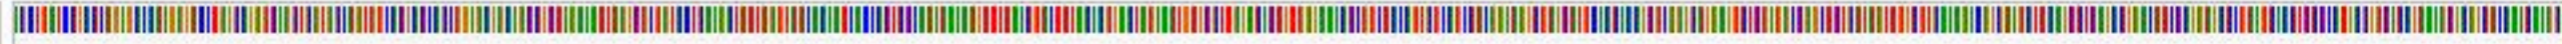

Refseq Genes

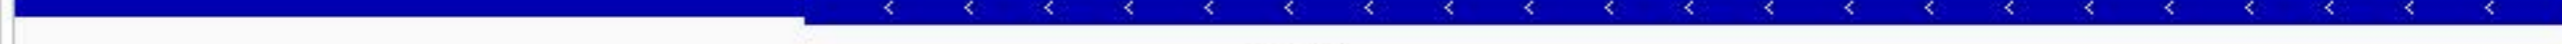

XRC2

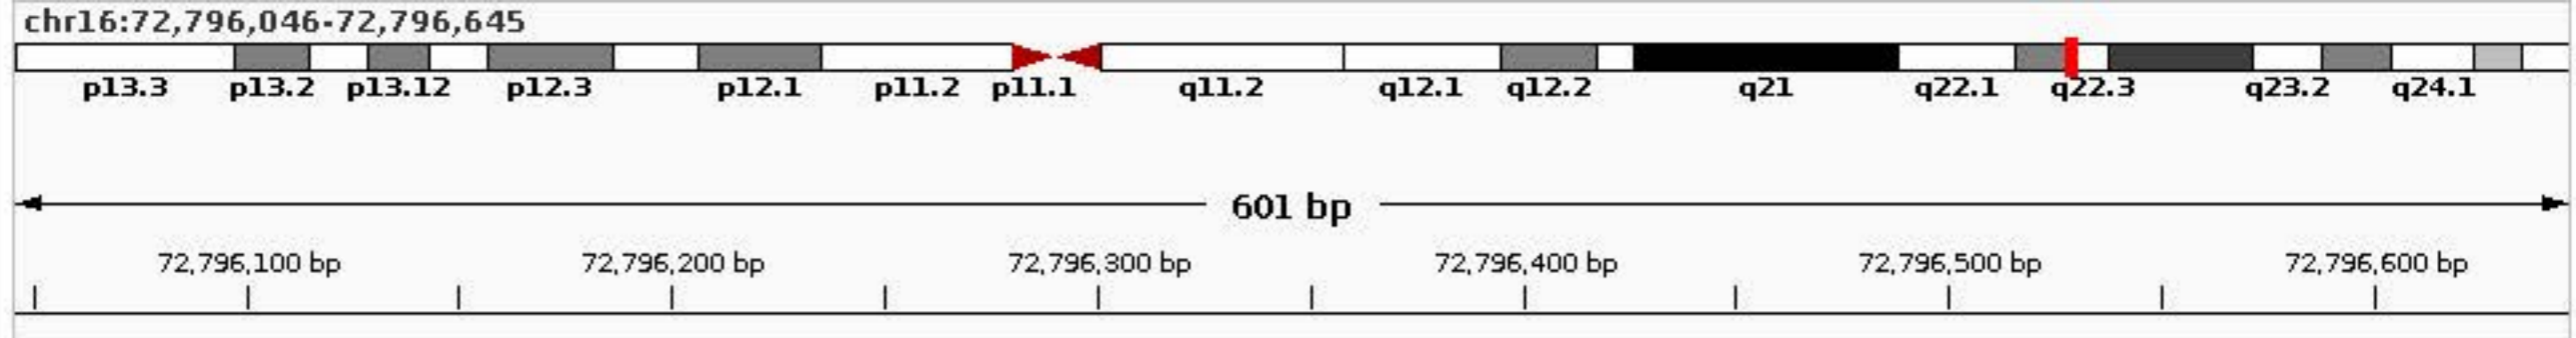

SL\_1012\_R\_10\_FFPE-B\_mut.bam  
rage

SL\_1012\_R\_10\_FFPE-B\_mut.ba  
m

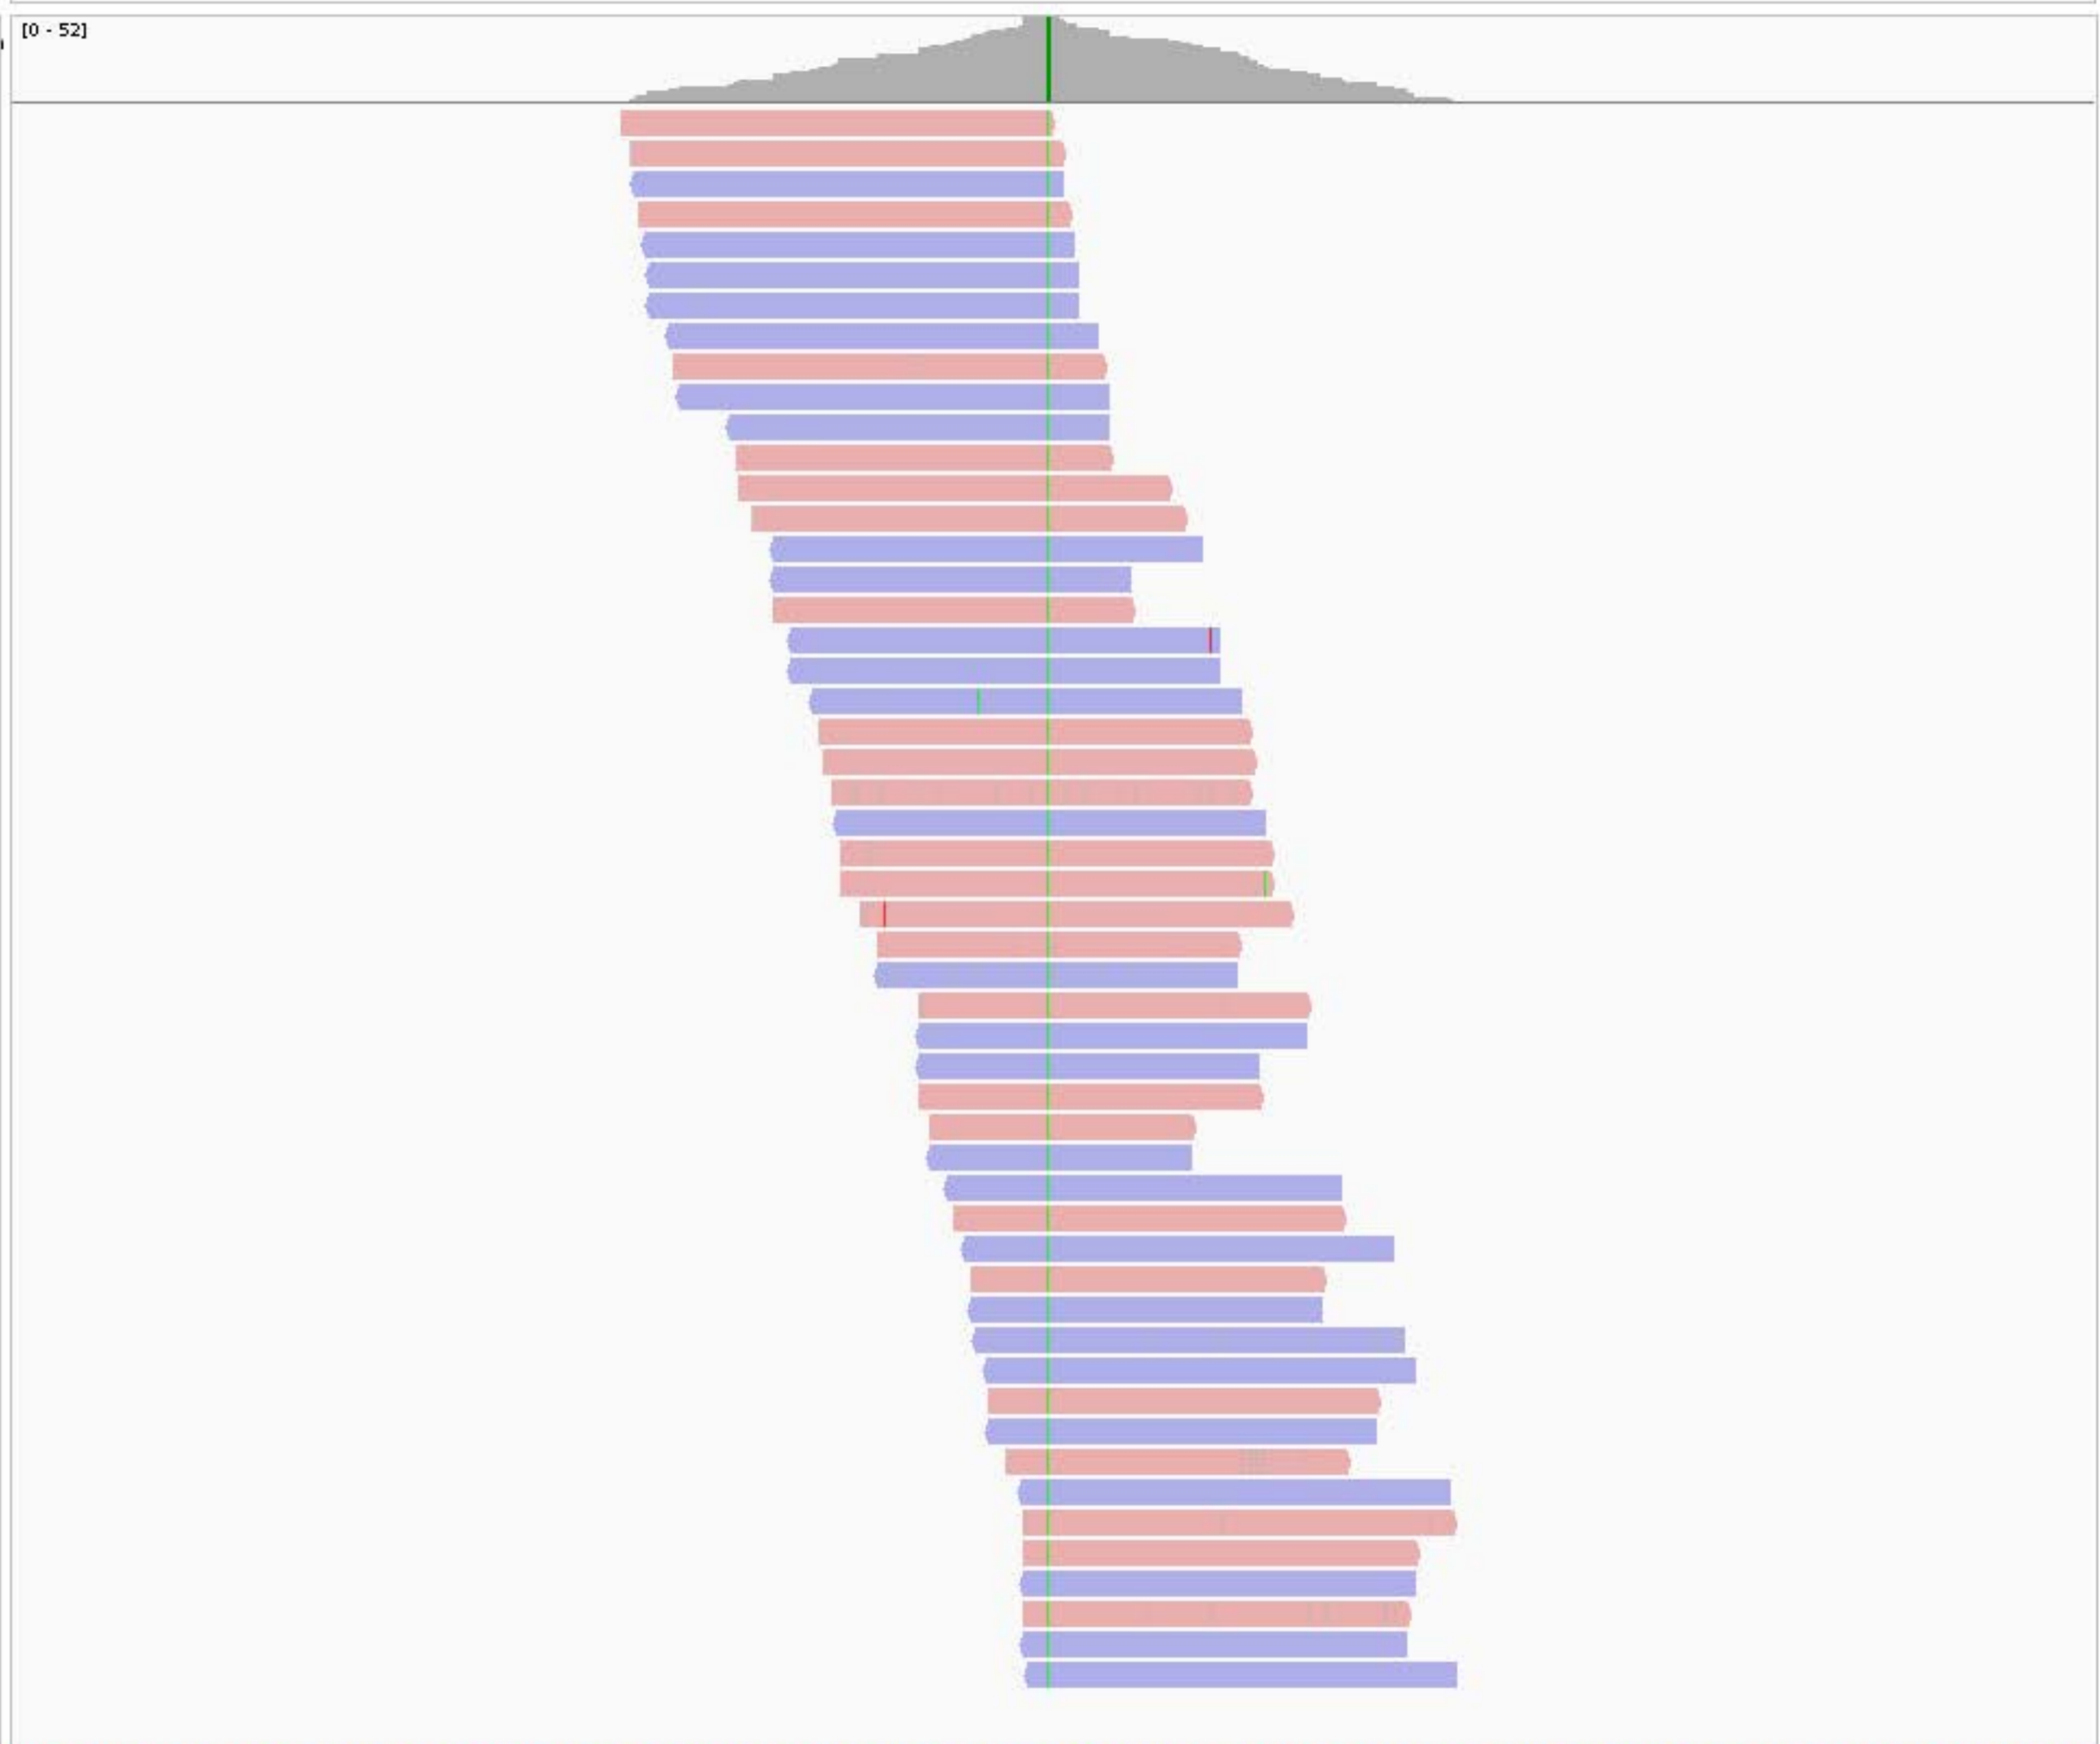

Sequence →

Refseq Genes

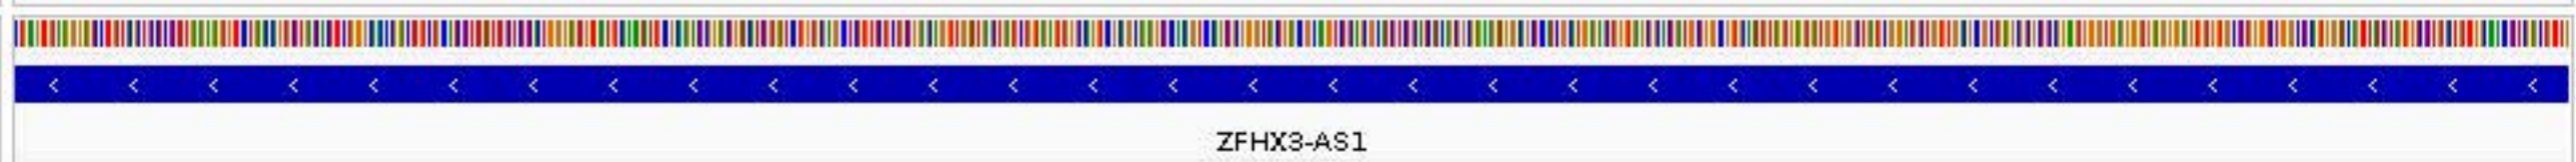

Supplement: 41523_2024_693_MOESM7_ESM.pdf [file 41523_2024_693_MOESM7_ESM.pdf]
