# Supplementary material for: Cancer risk assessment of premalignant breast tissues from patients with BRCA mutations by genome profiling
Source: PubMed Central journal article supplement — NPJ Breast Cancer. 2024 Oct 4;10:87. doi: 10.1038/s41523-024-00693-9 (PMC11452615; doi:10.1038/s41523-024-00693-9), 2024-10-04

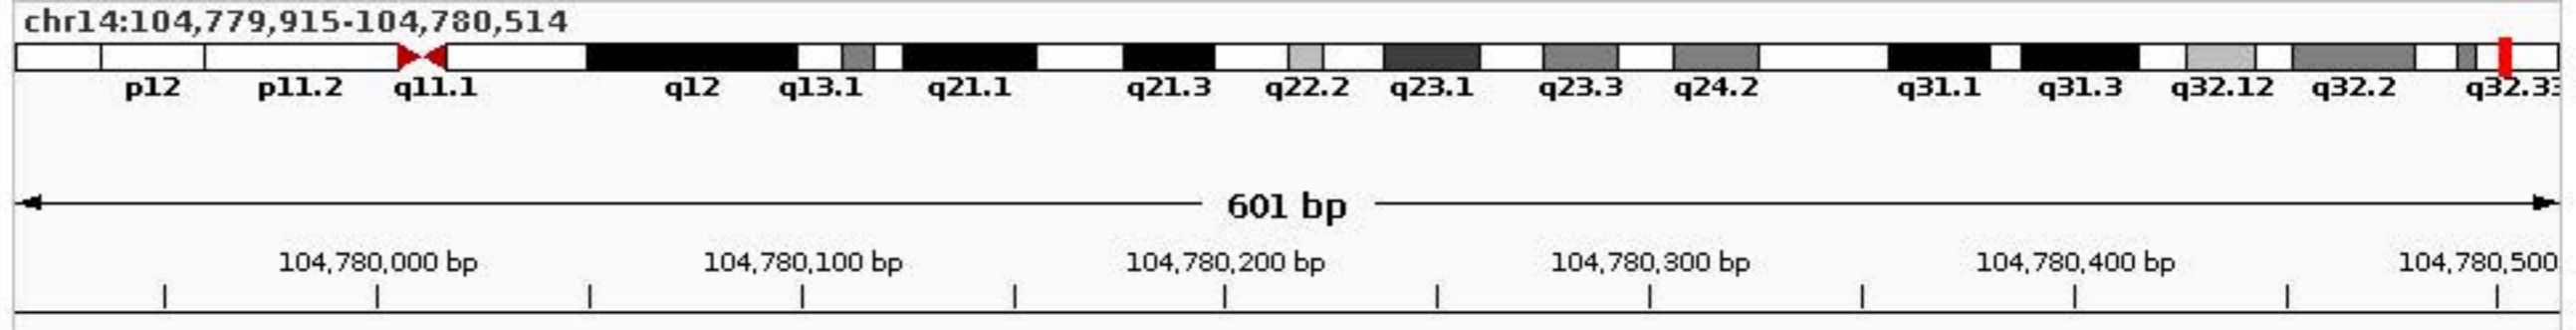

SL\_0004\_RN\_06\_mut.bam Coverage

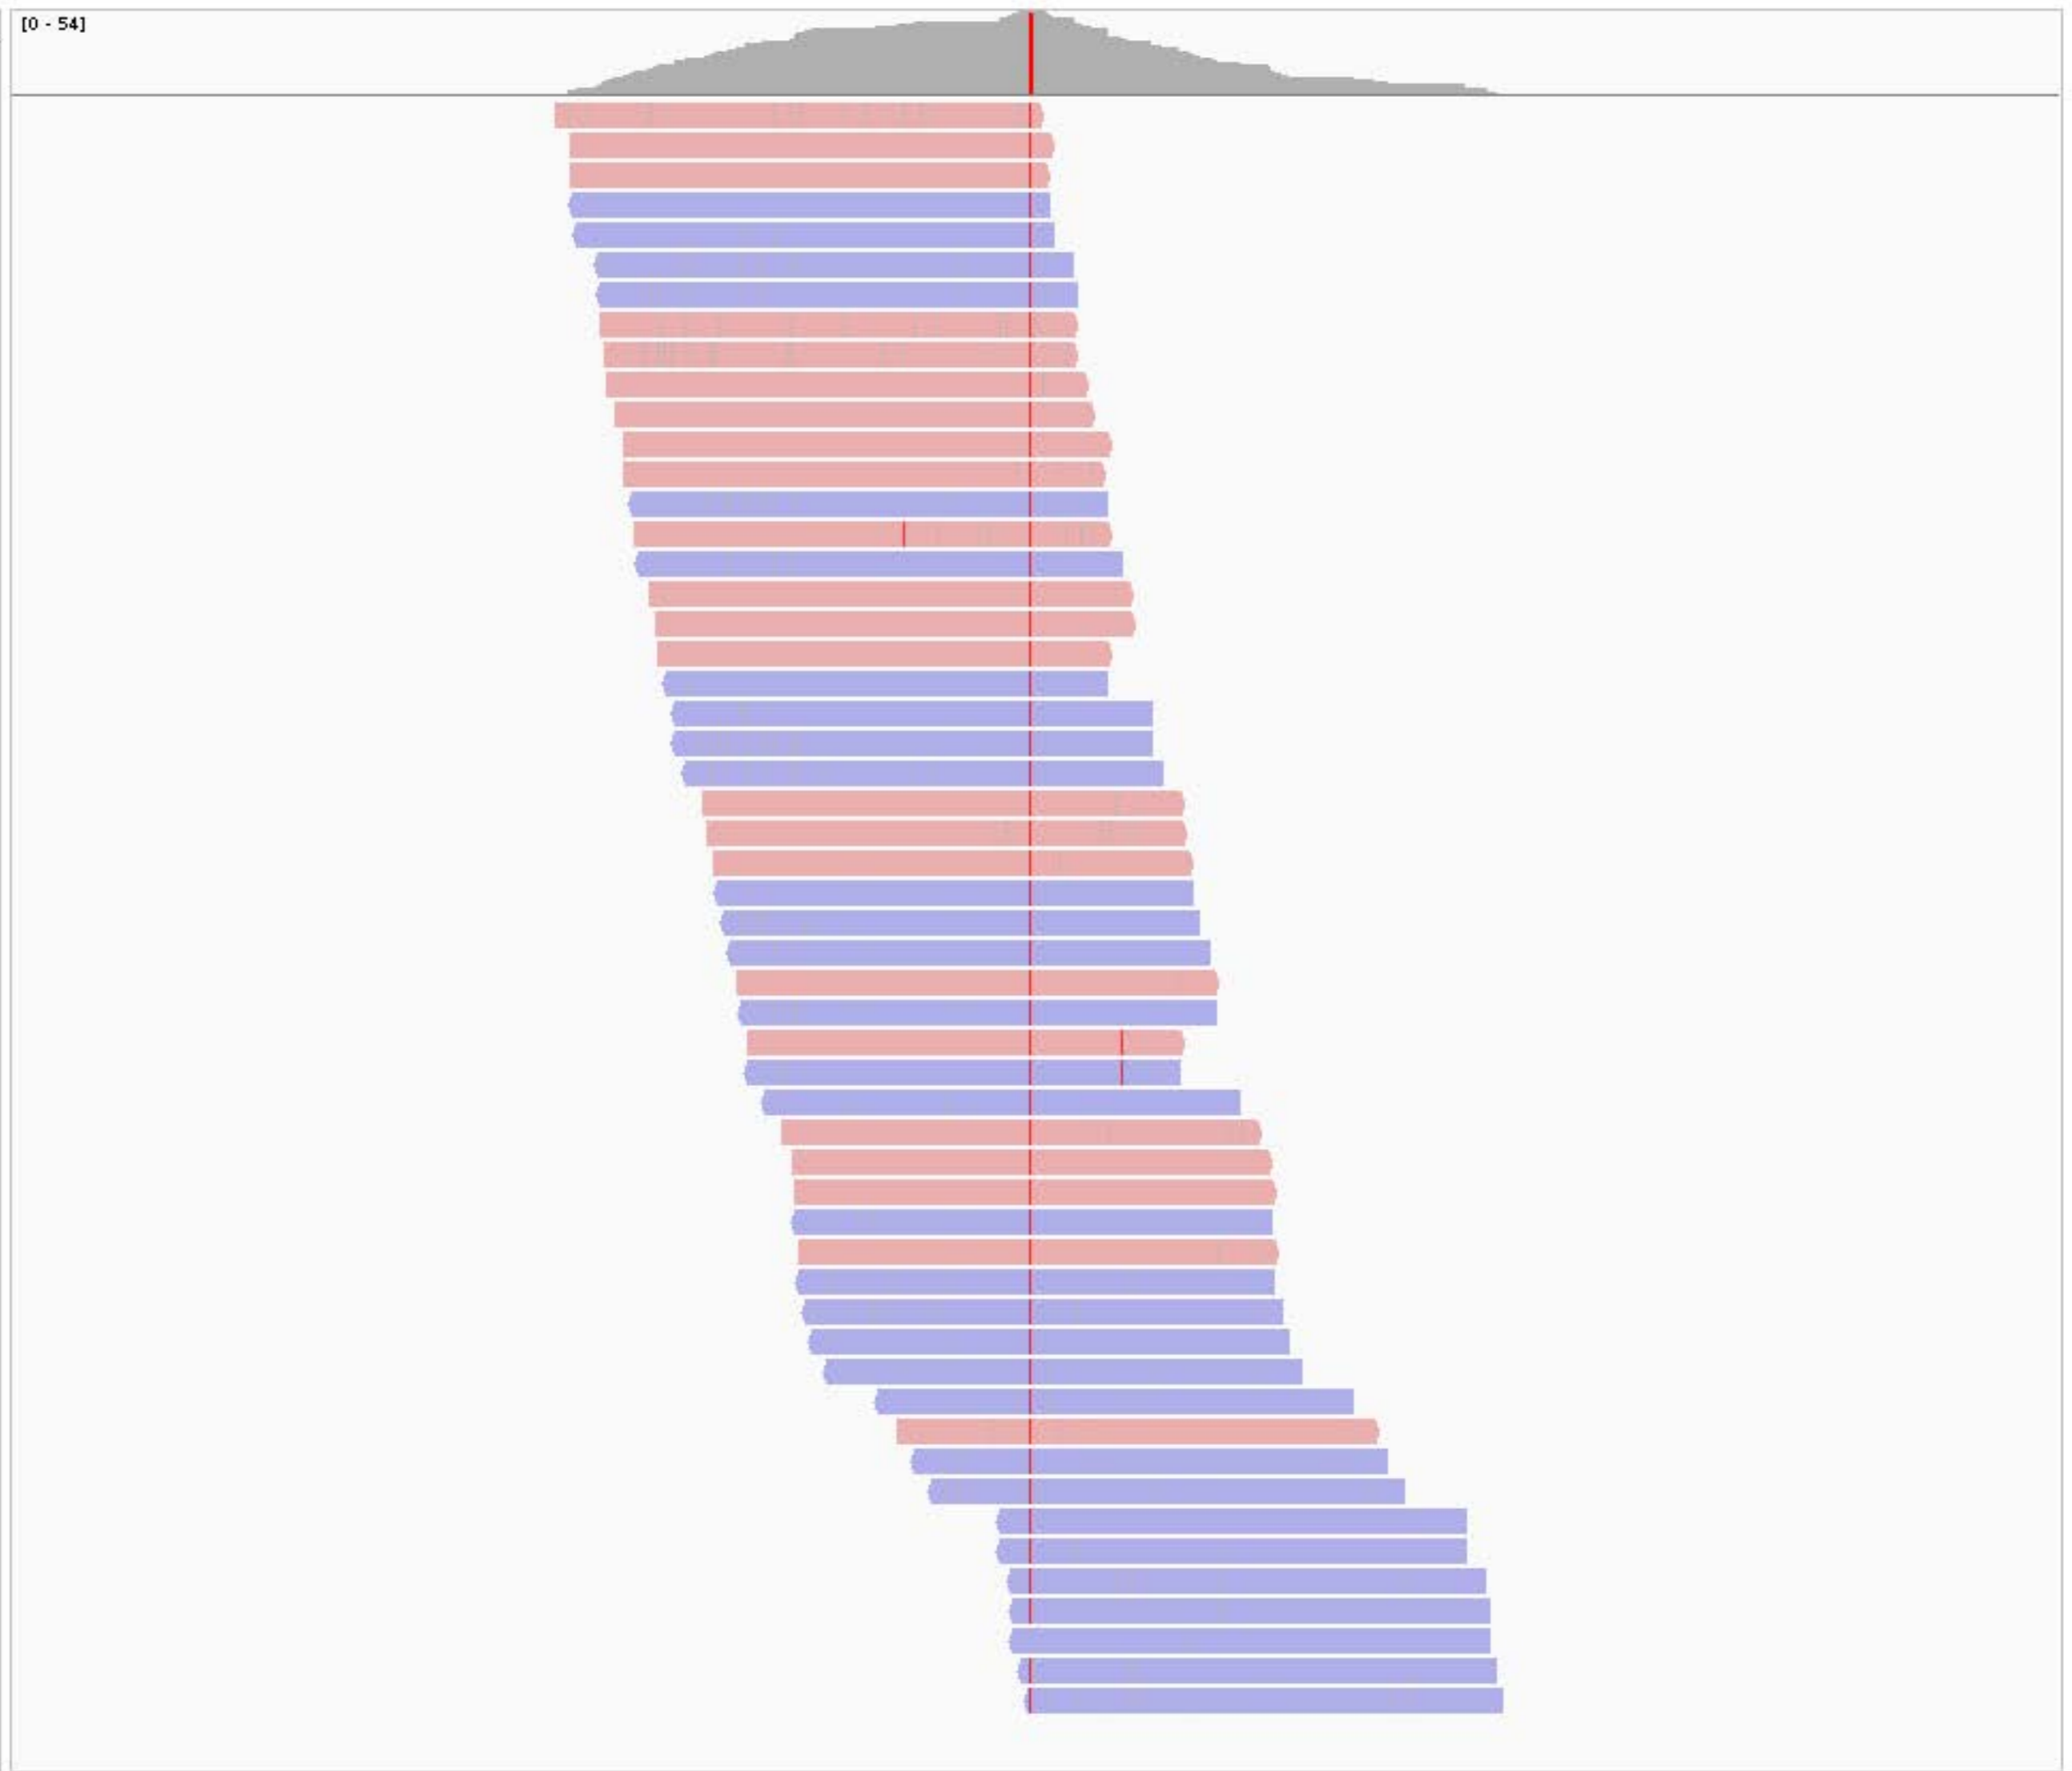

SL\_0004\_RN\_06\_mut.bam

Sequence

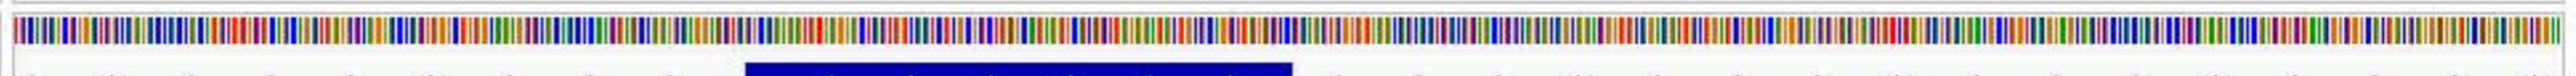

Refseq Genes

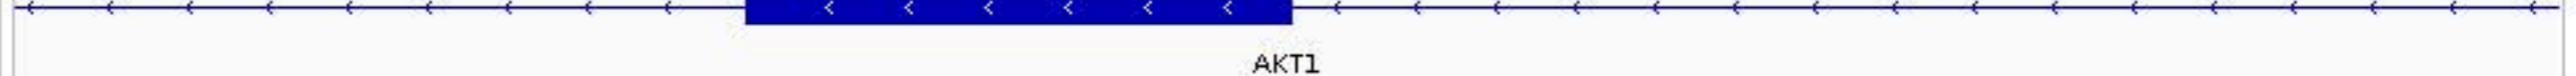

AKT1

chr19:46,919,399-46,919,998

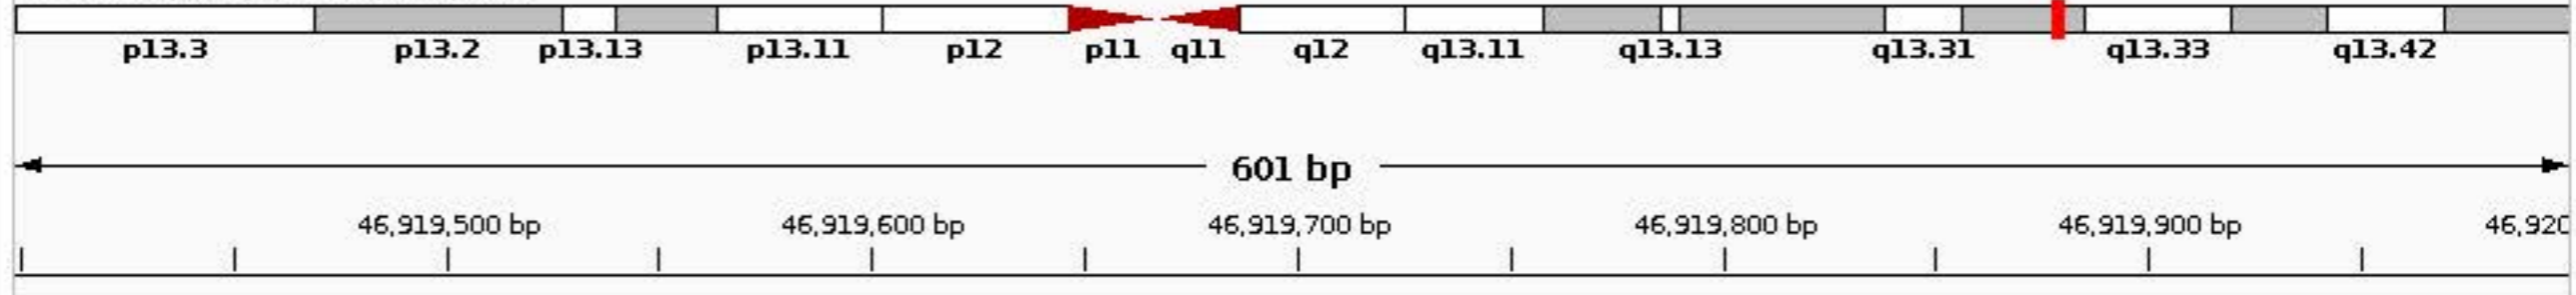

SL\_0006\_RN\_39\_mut.bam Coverage

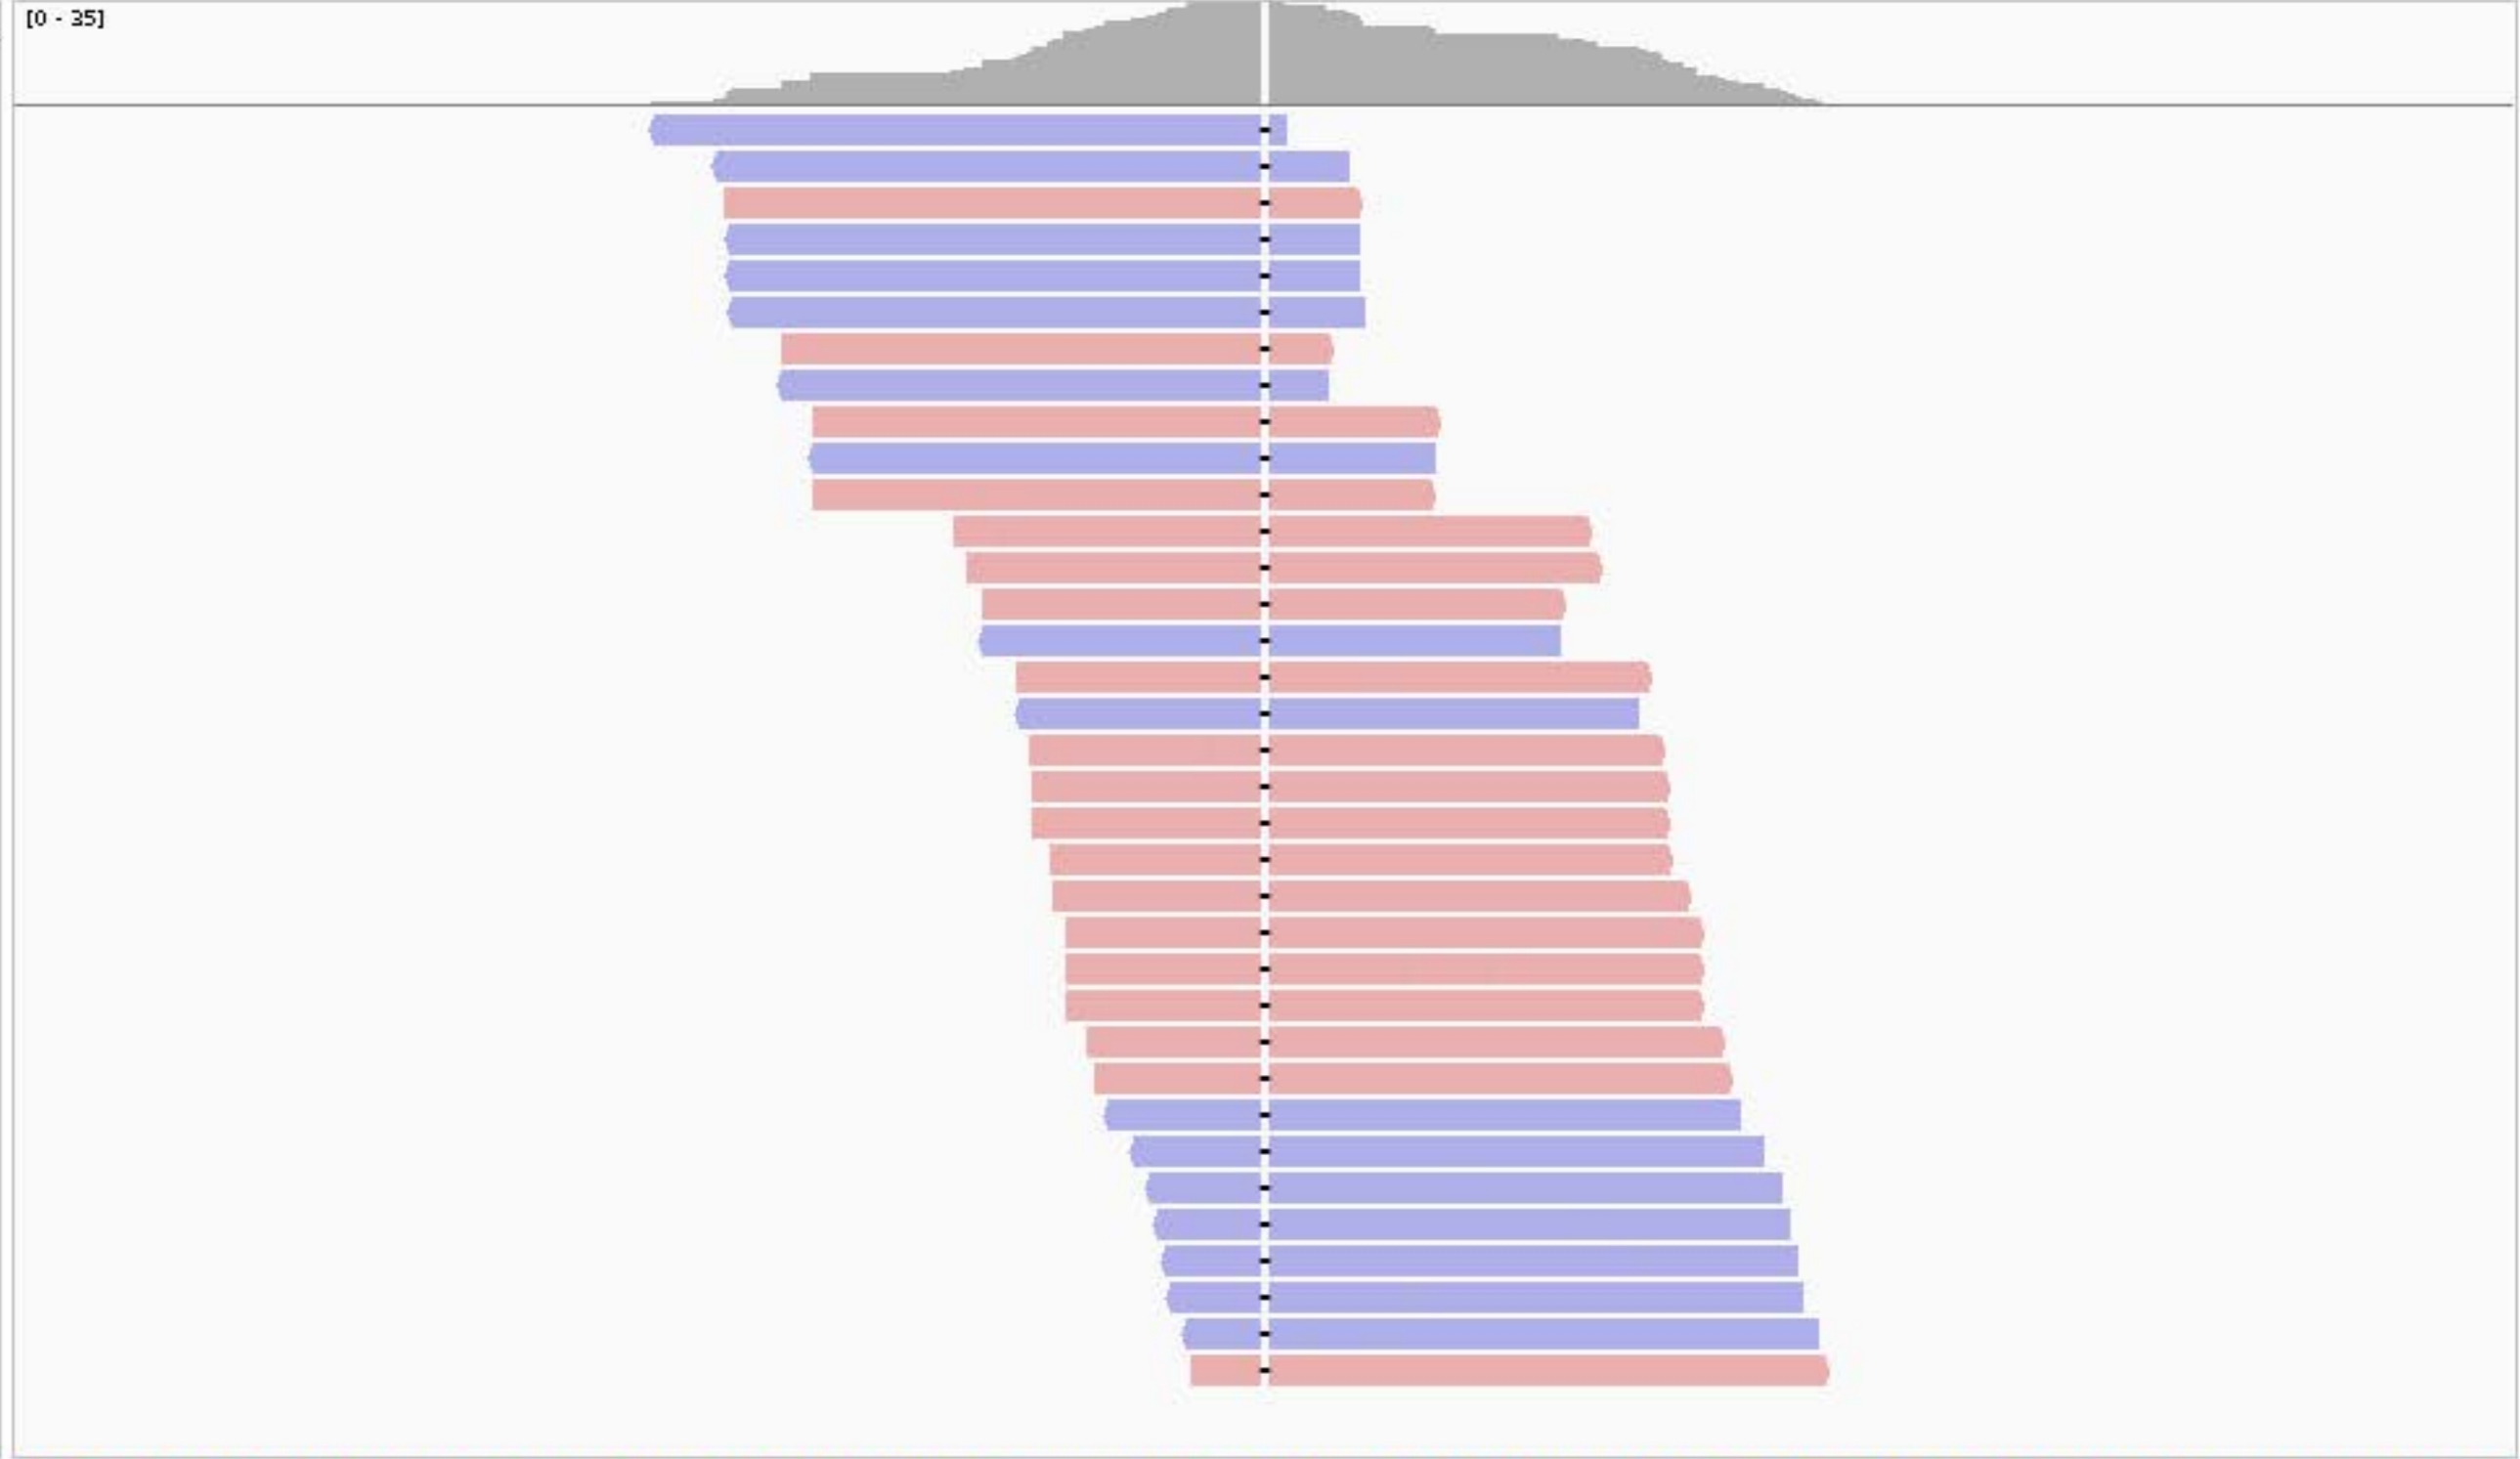

SL\_0006\_RN\_39\_mut.bam

Sequence

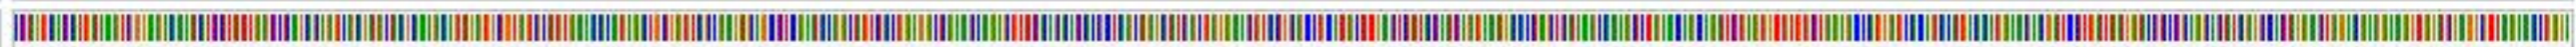

Refseq Genes

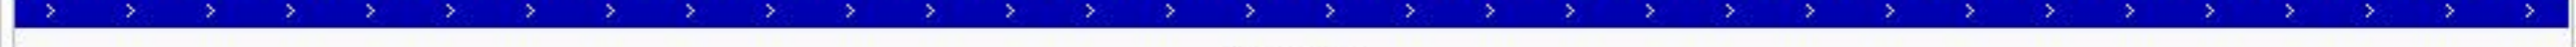

ARHGAP35

chr19:46,919,742-46,920,341

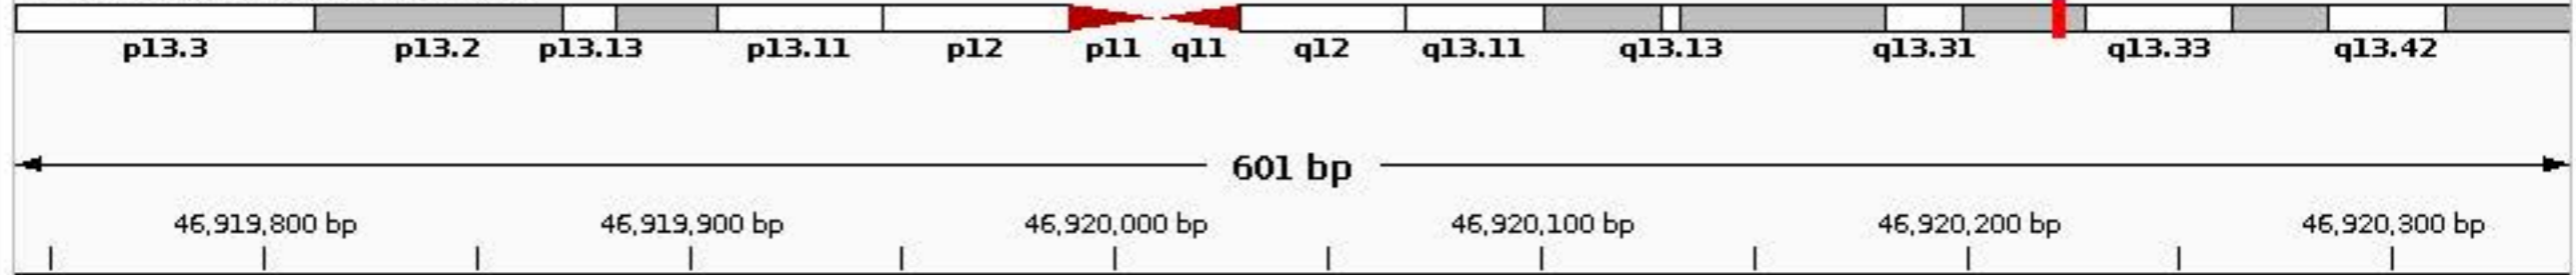

SL\_0001\_RN\_23\_mut.bam Coverage

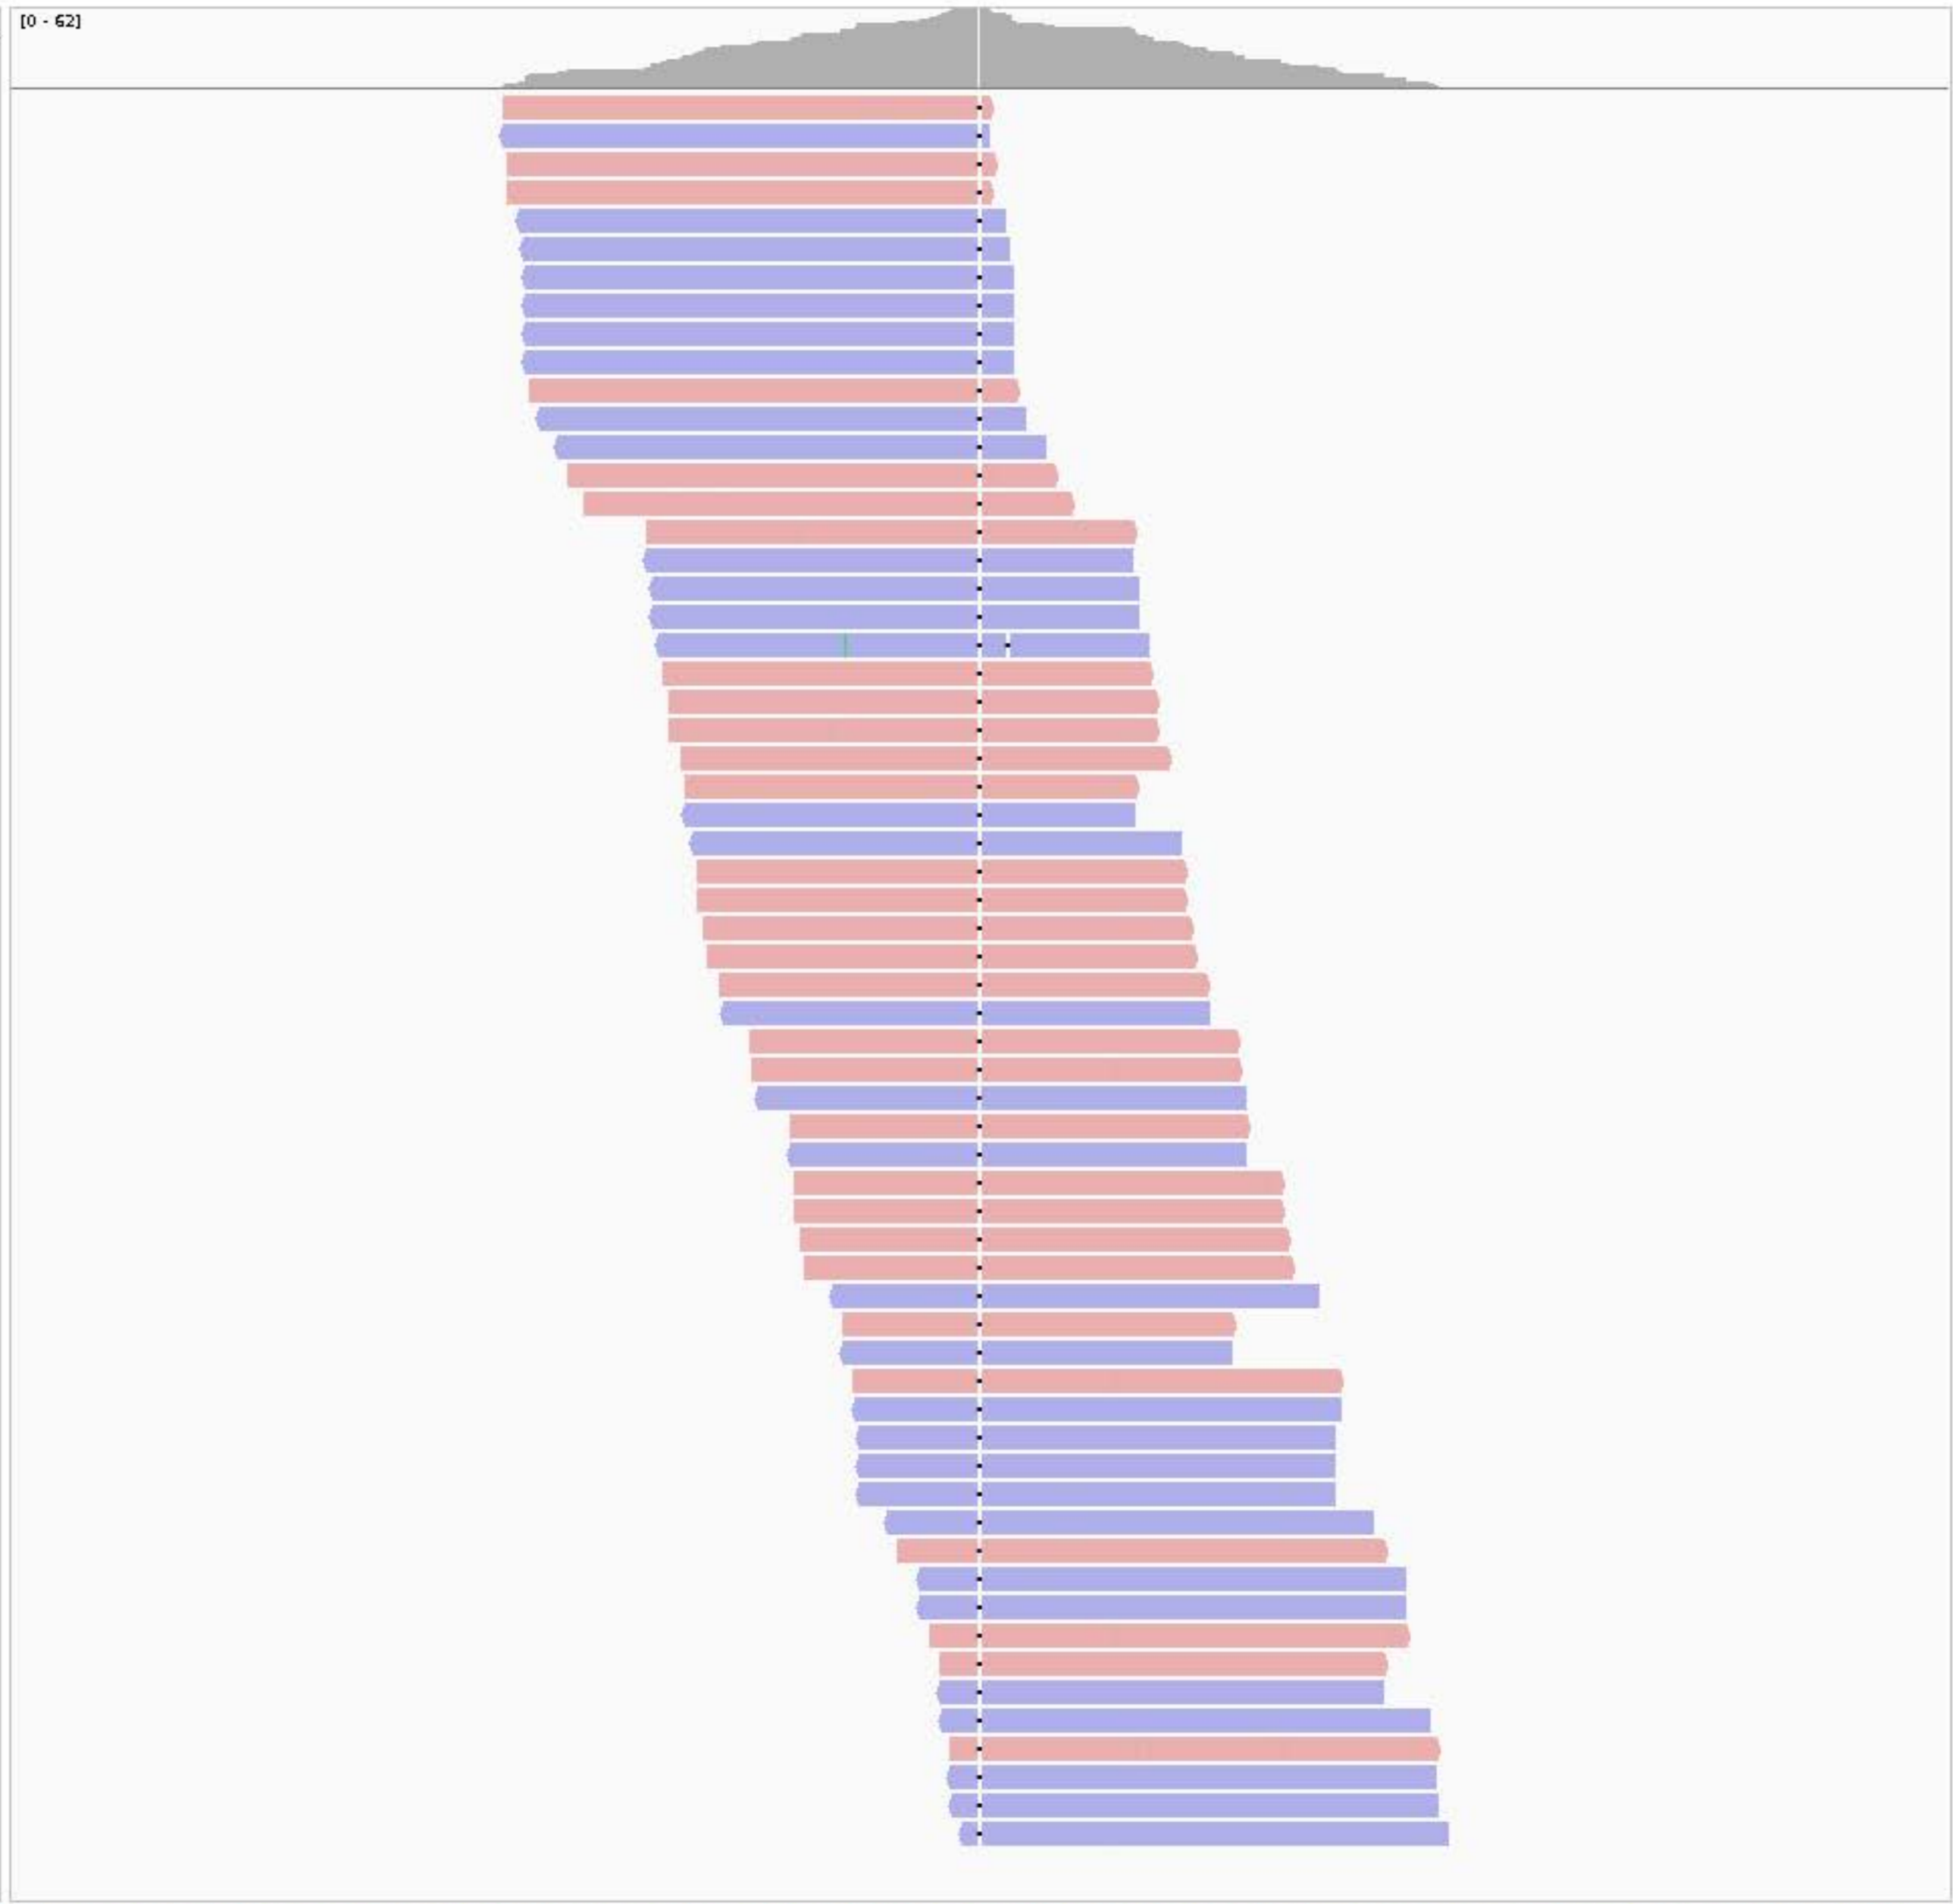

SL\_0001\_RN\_23\_mut.bam

Sequence

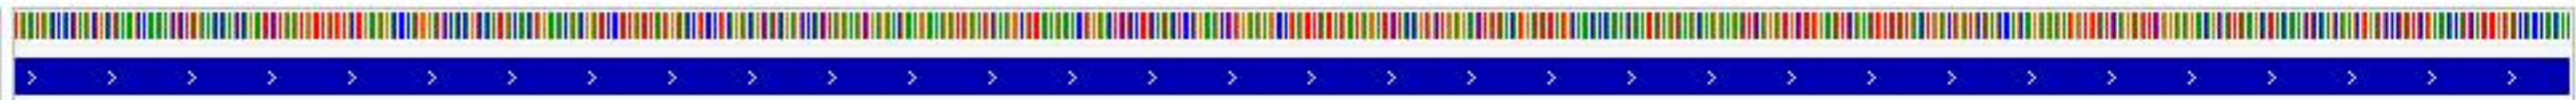

Refseq Genes

ARHGAP35

chr19:46,920,723-46,921,322

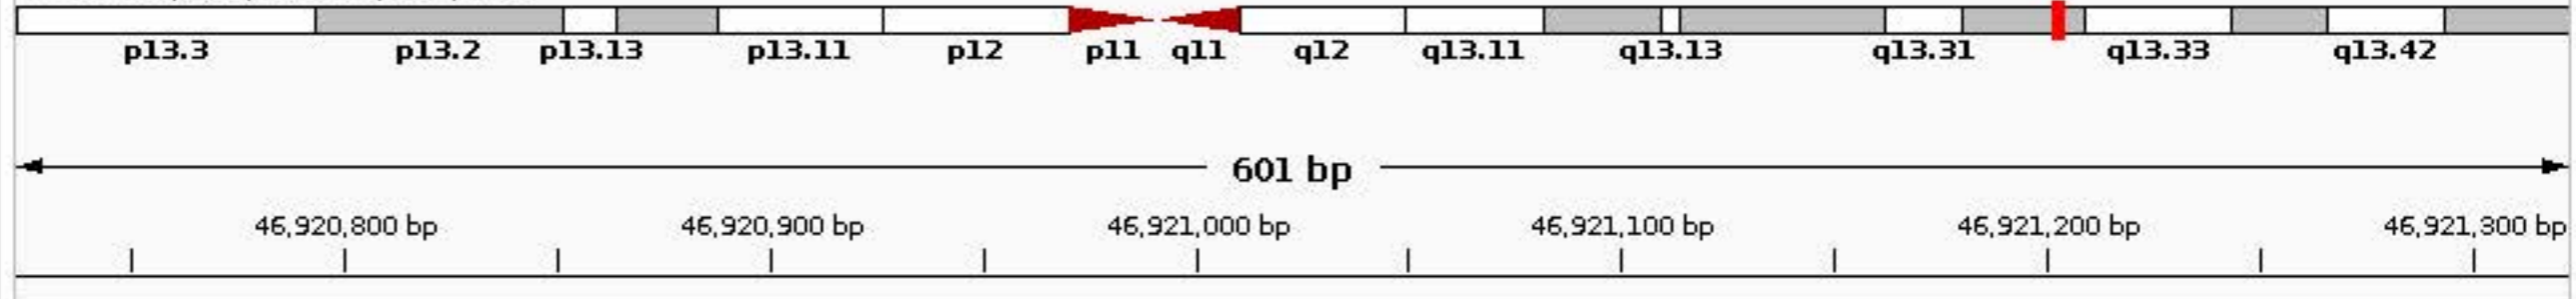

SL\_0001\_RN\_10\_mut.bam Coverage

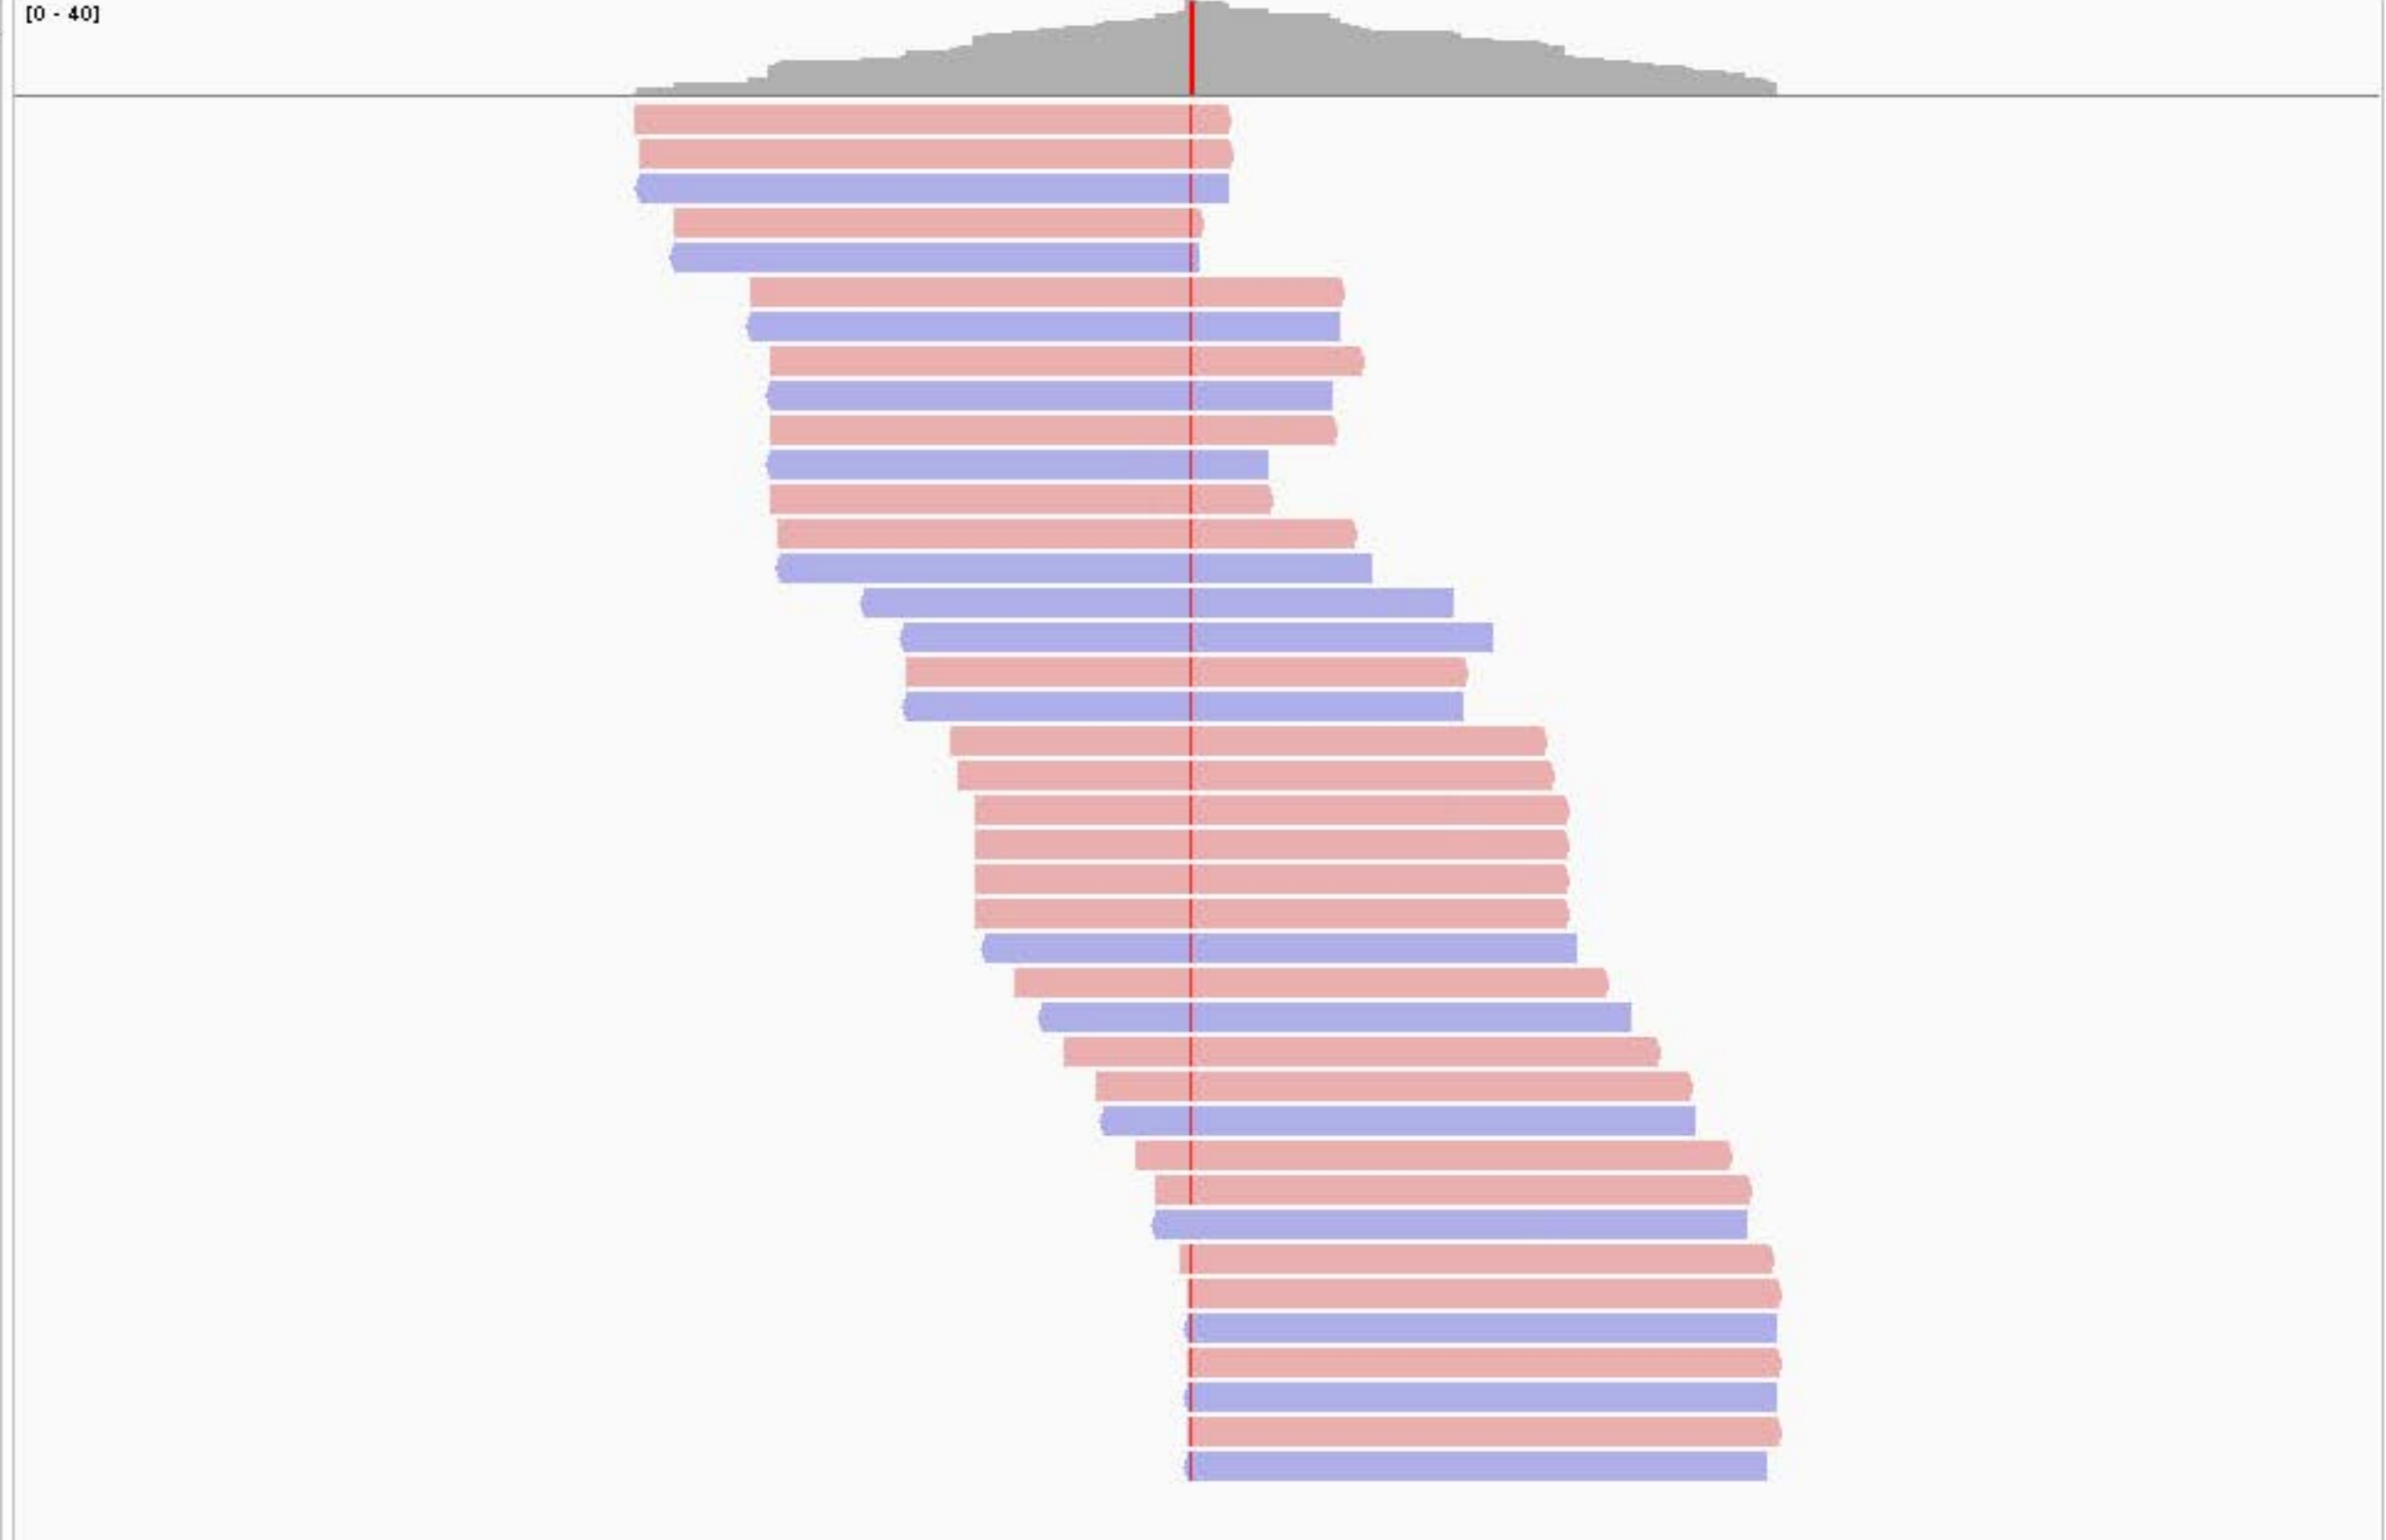

SL\_0001\_RN\_10\_mut.bam

Sequence

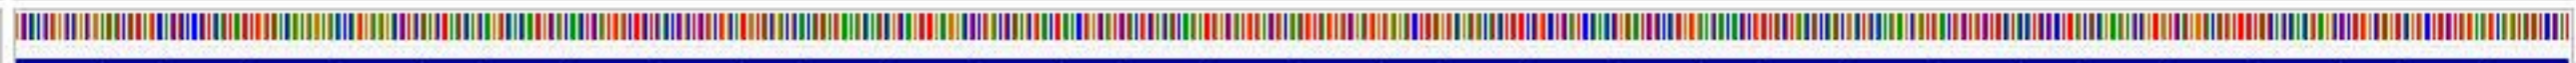

Refseq Genes

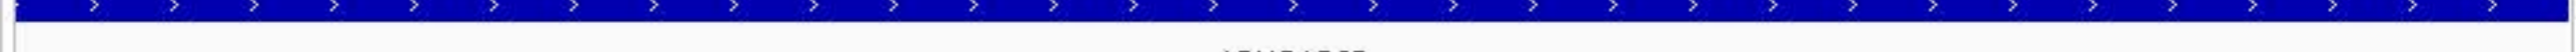

ARHGAP35



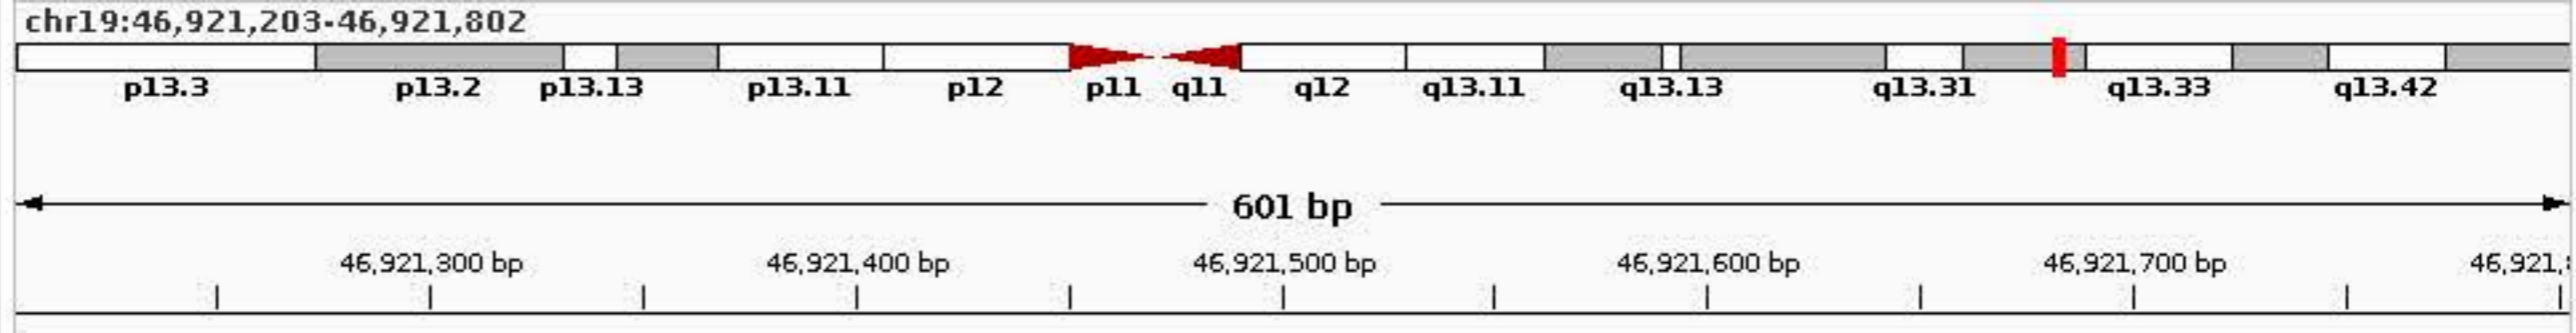

SL\_0002\_LN\_1\_mut.bam Coverage

SL\_0002\_LN\_1\_mut.bam

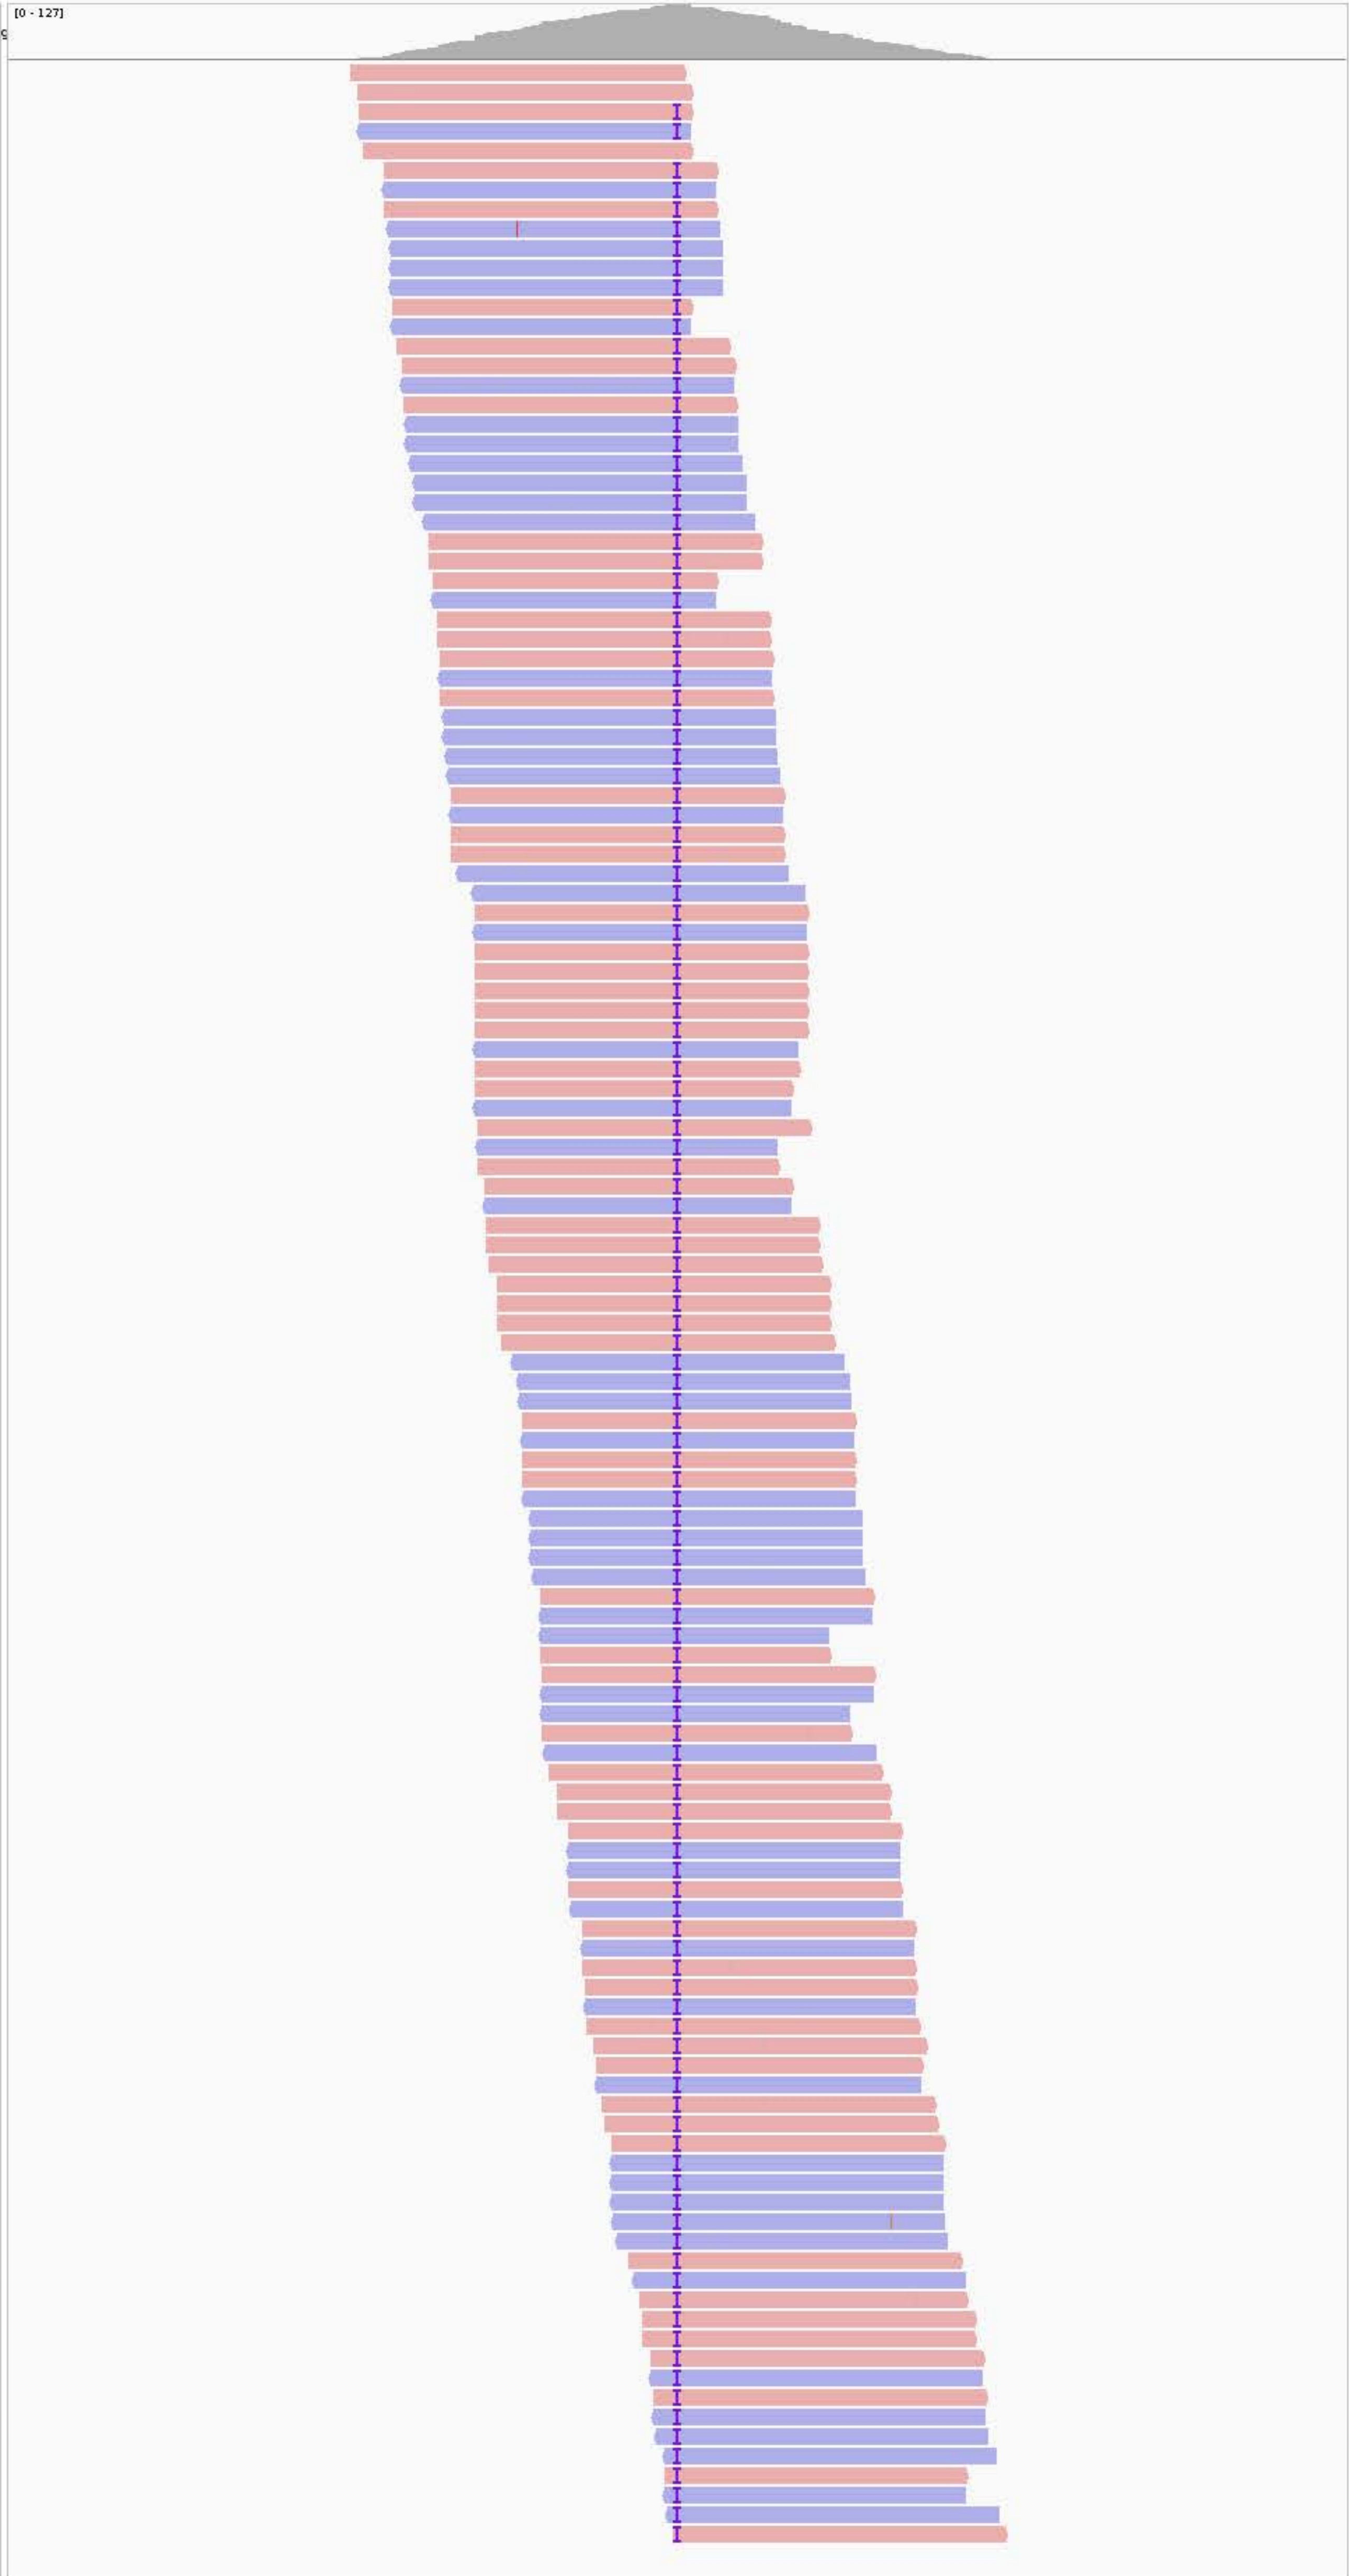

Sequence →

Refseq Genes

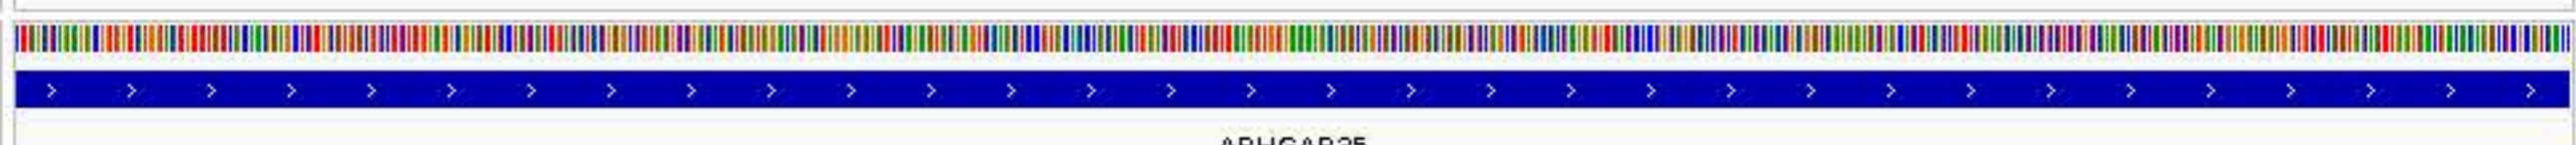

ARHGAP35

chr19:46,921,203-46,921,802

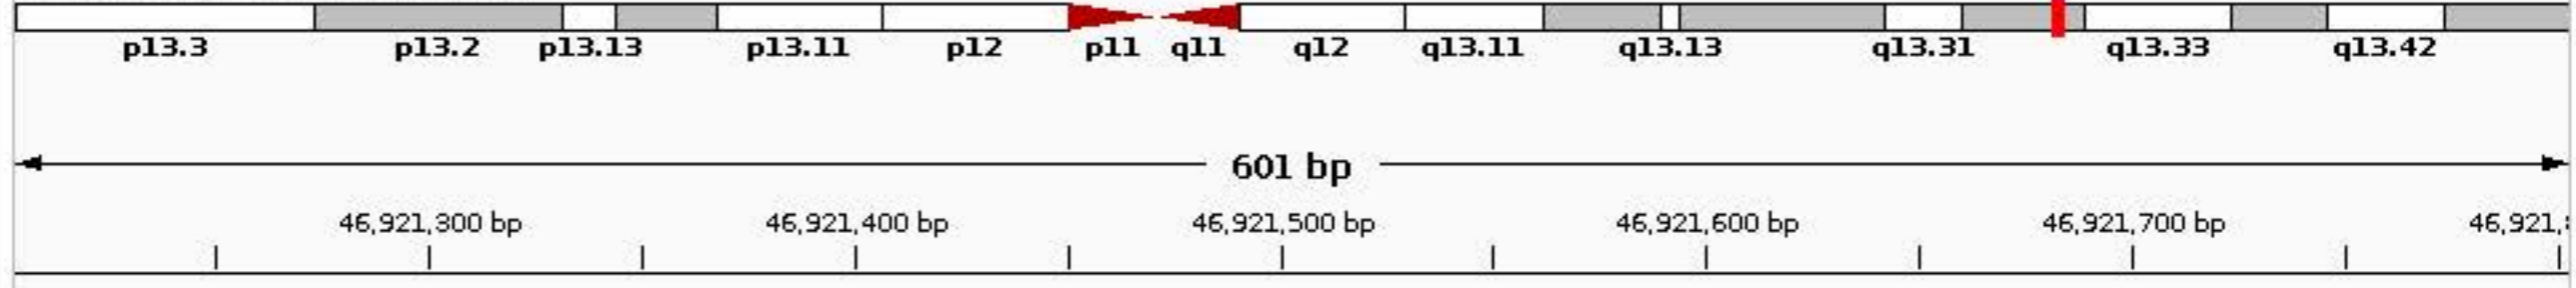

SL\_0002\_LN\_3\_mut.bam Coverage

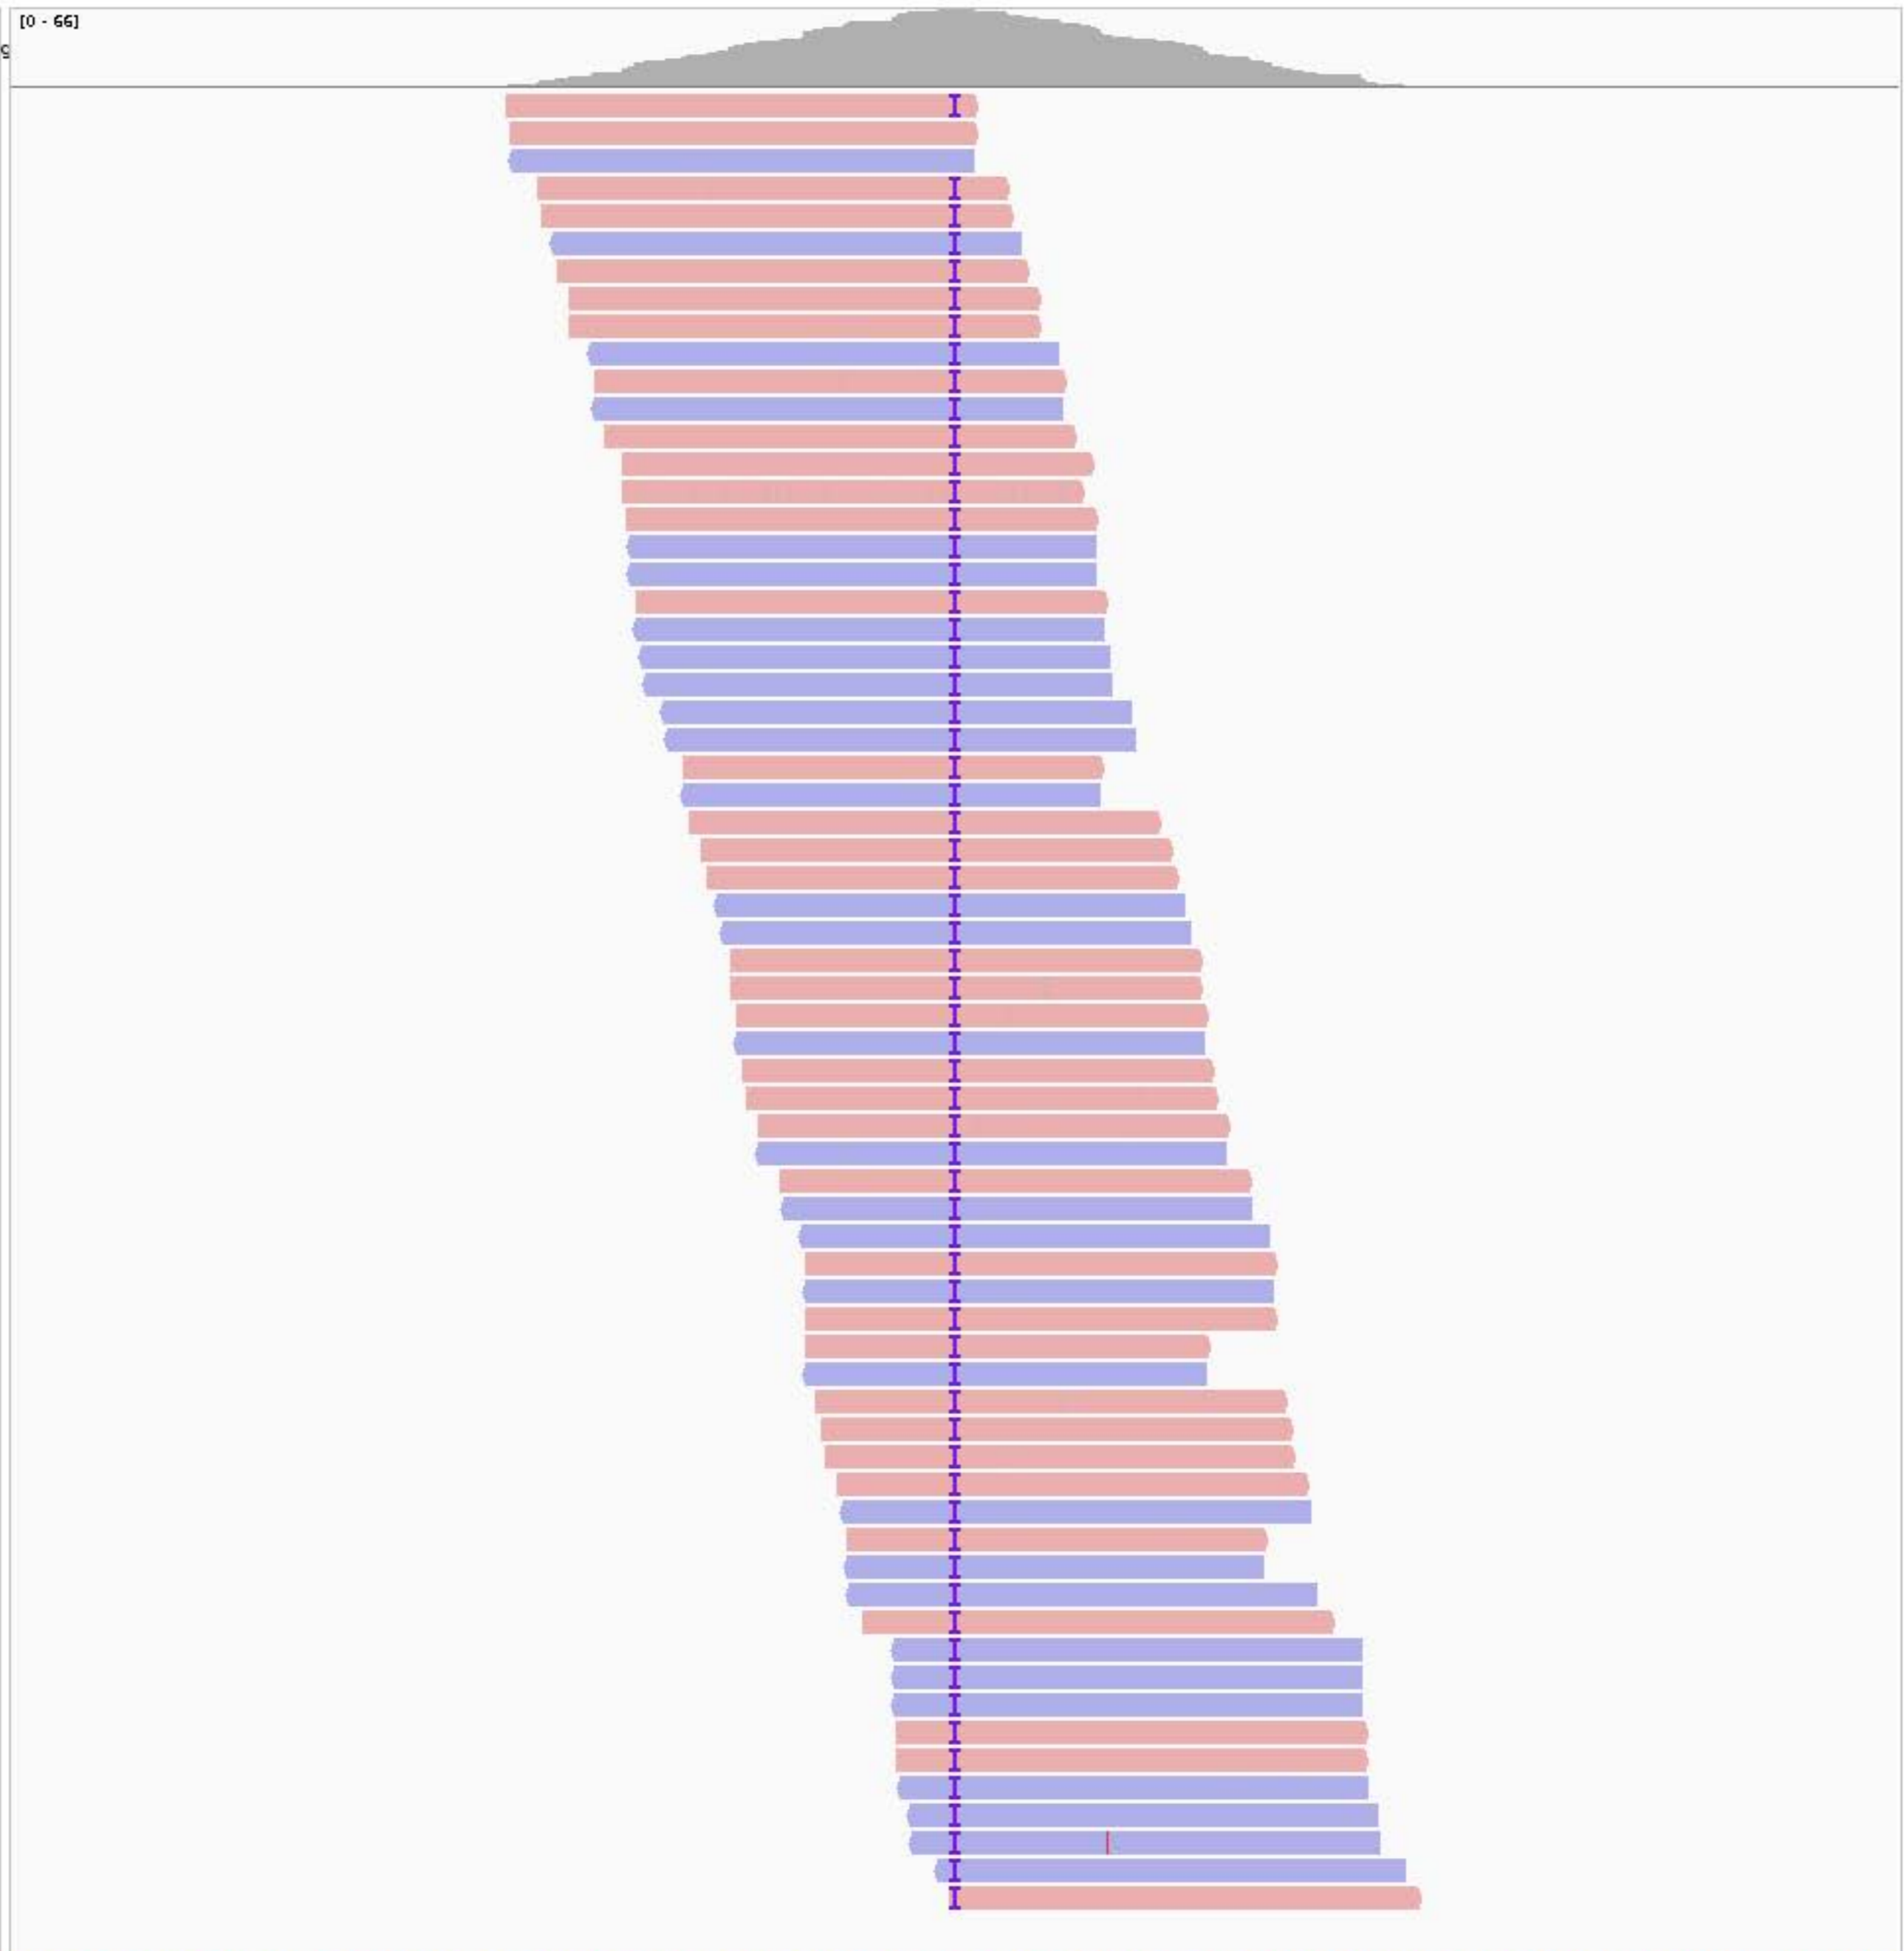

SL\_0002\_LN\_3\_mut.bam

Sequence →  
Refseq Genes

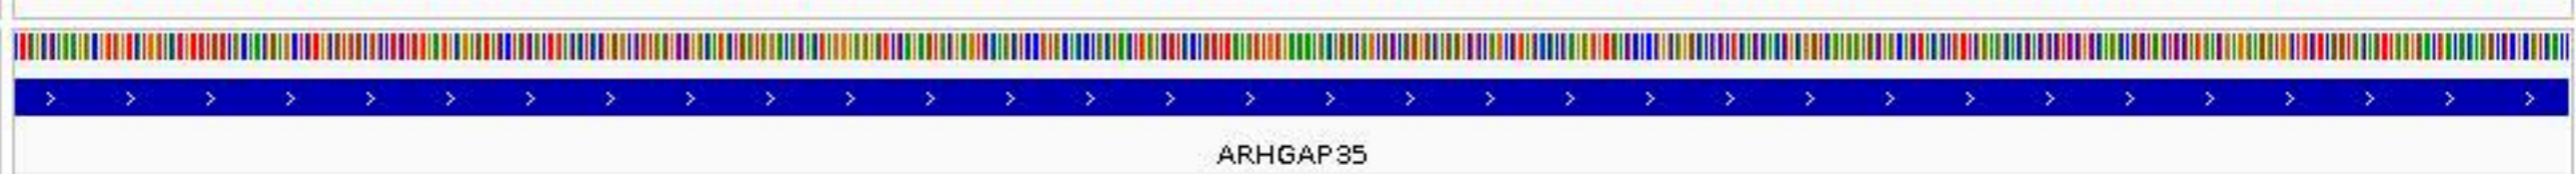

ARHGAP35

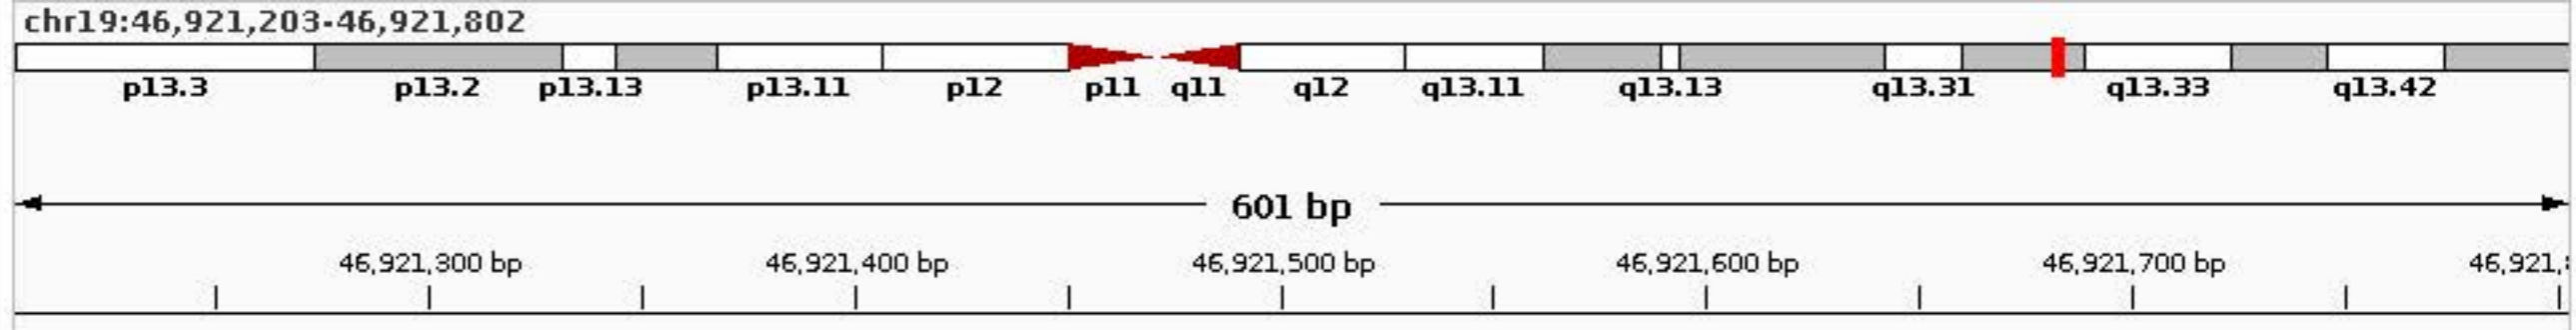

SL\_0002\_LN\_9\_mut.bam Coverage

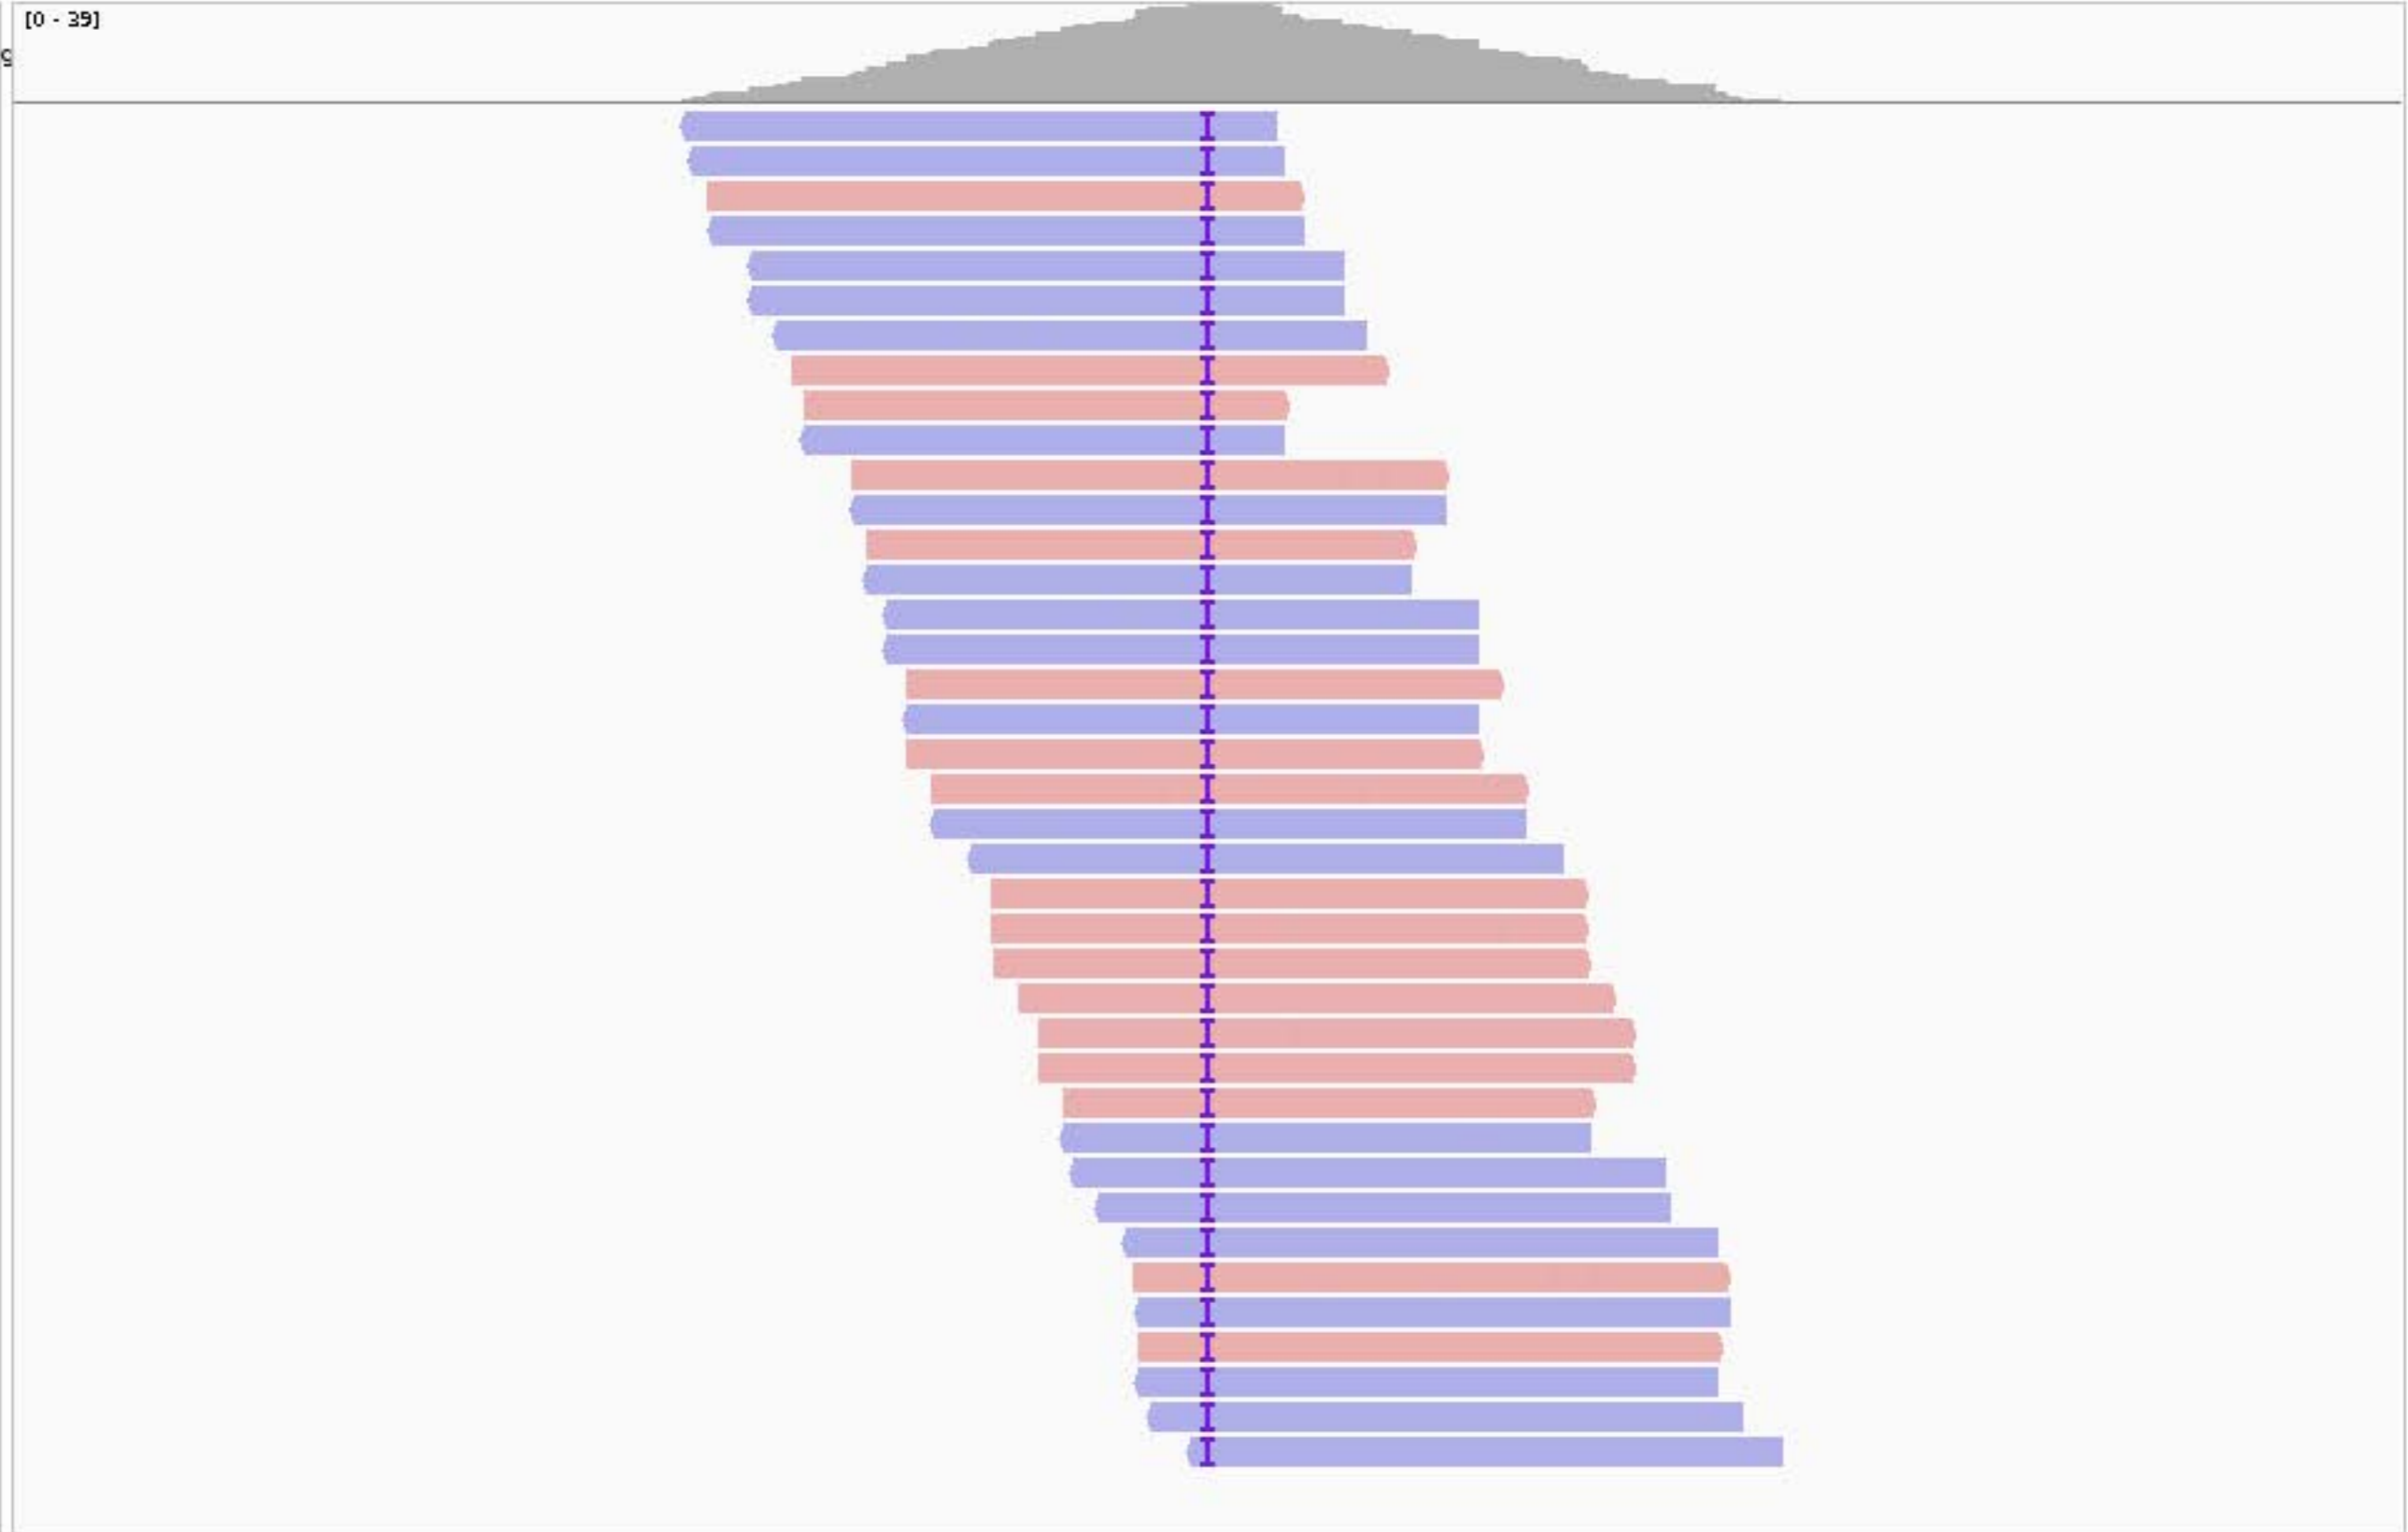

SL\_0002\_LN\_9\_mut.bam

Sequence

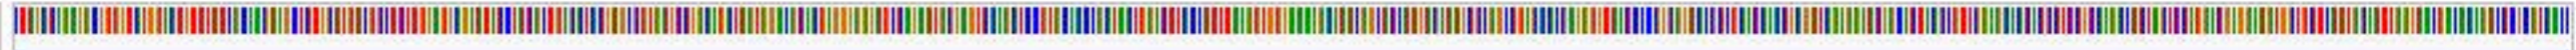

Refseq Genes

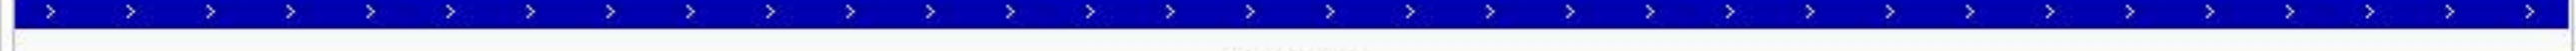

ARHGAP35



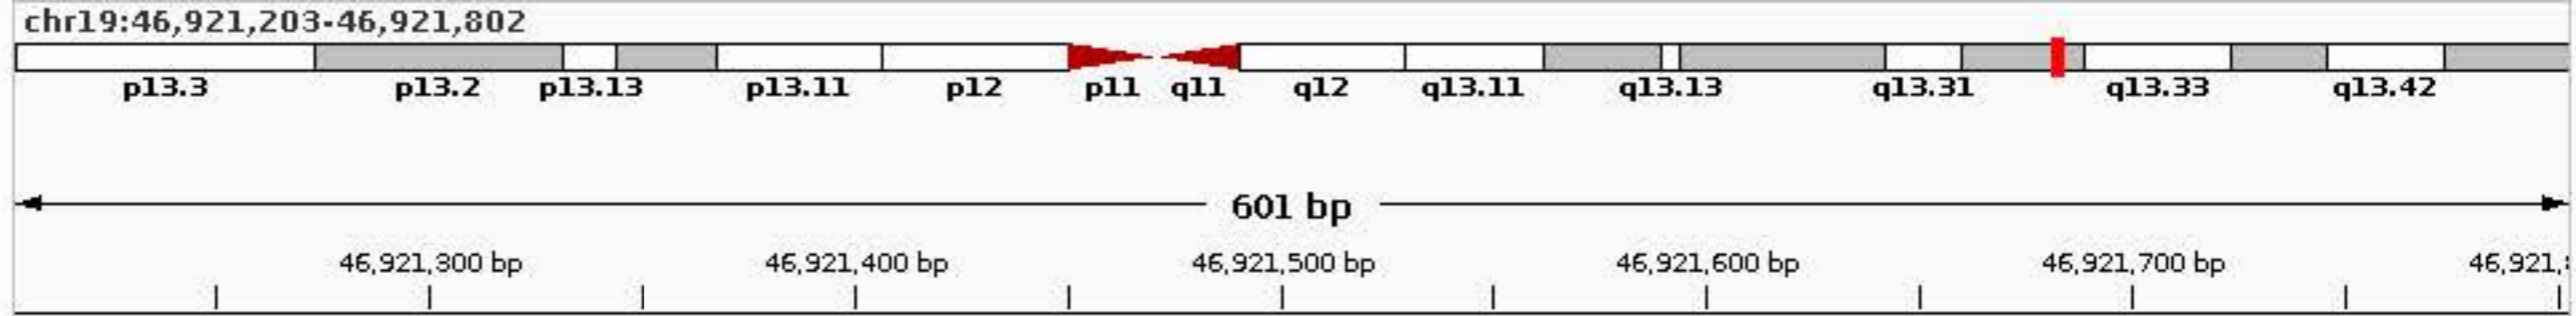

SL\_0002\_LN\_11\_mut.bam Coverage

SL\_0002\_LN\_11\_mut.bam

Sequence

Refseq Genes

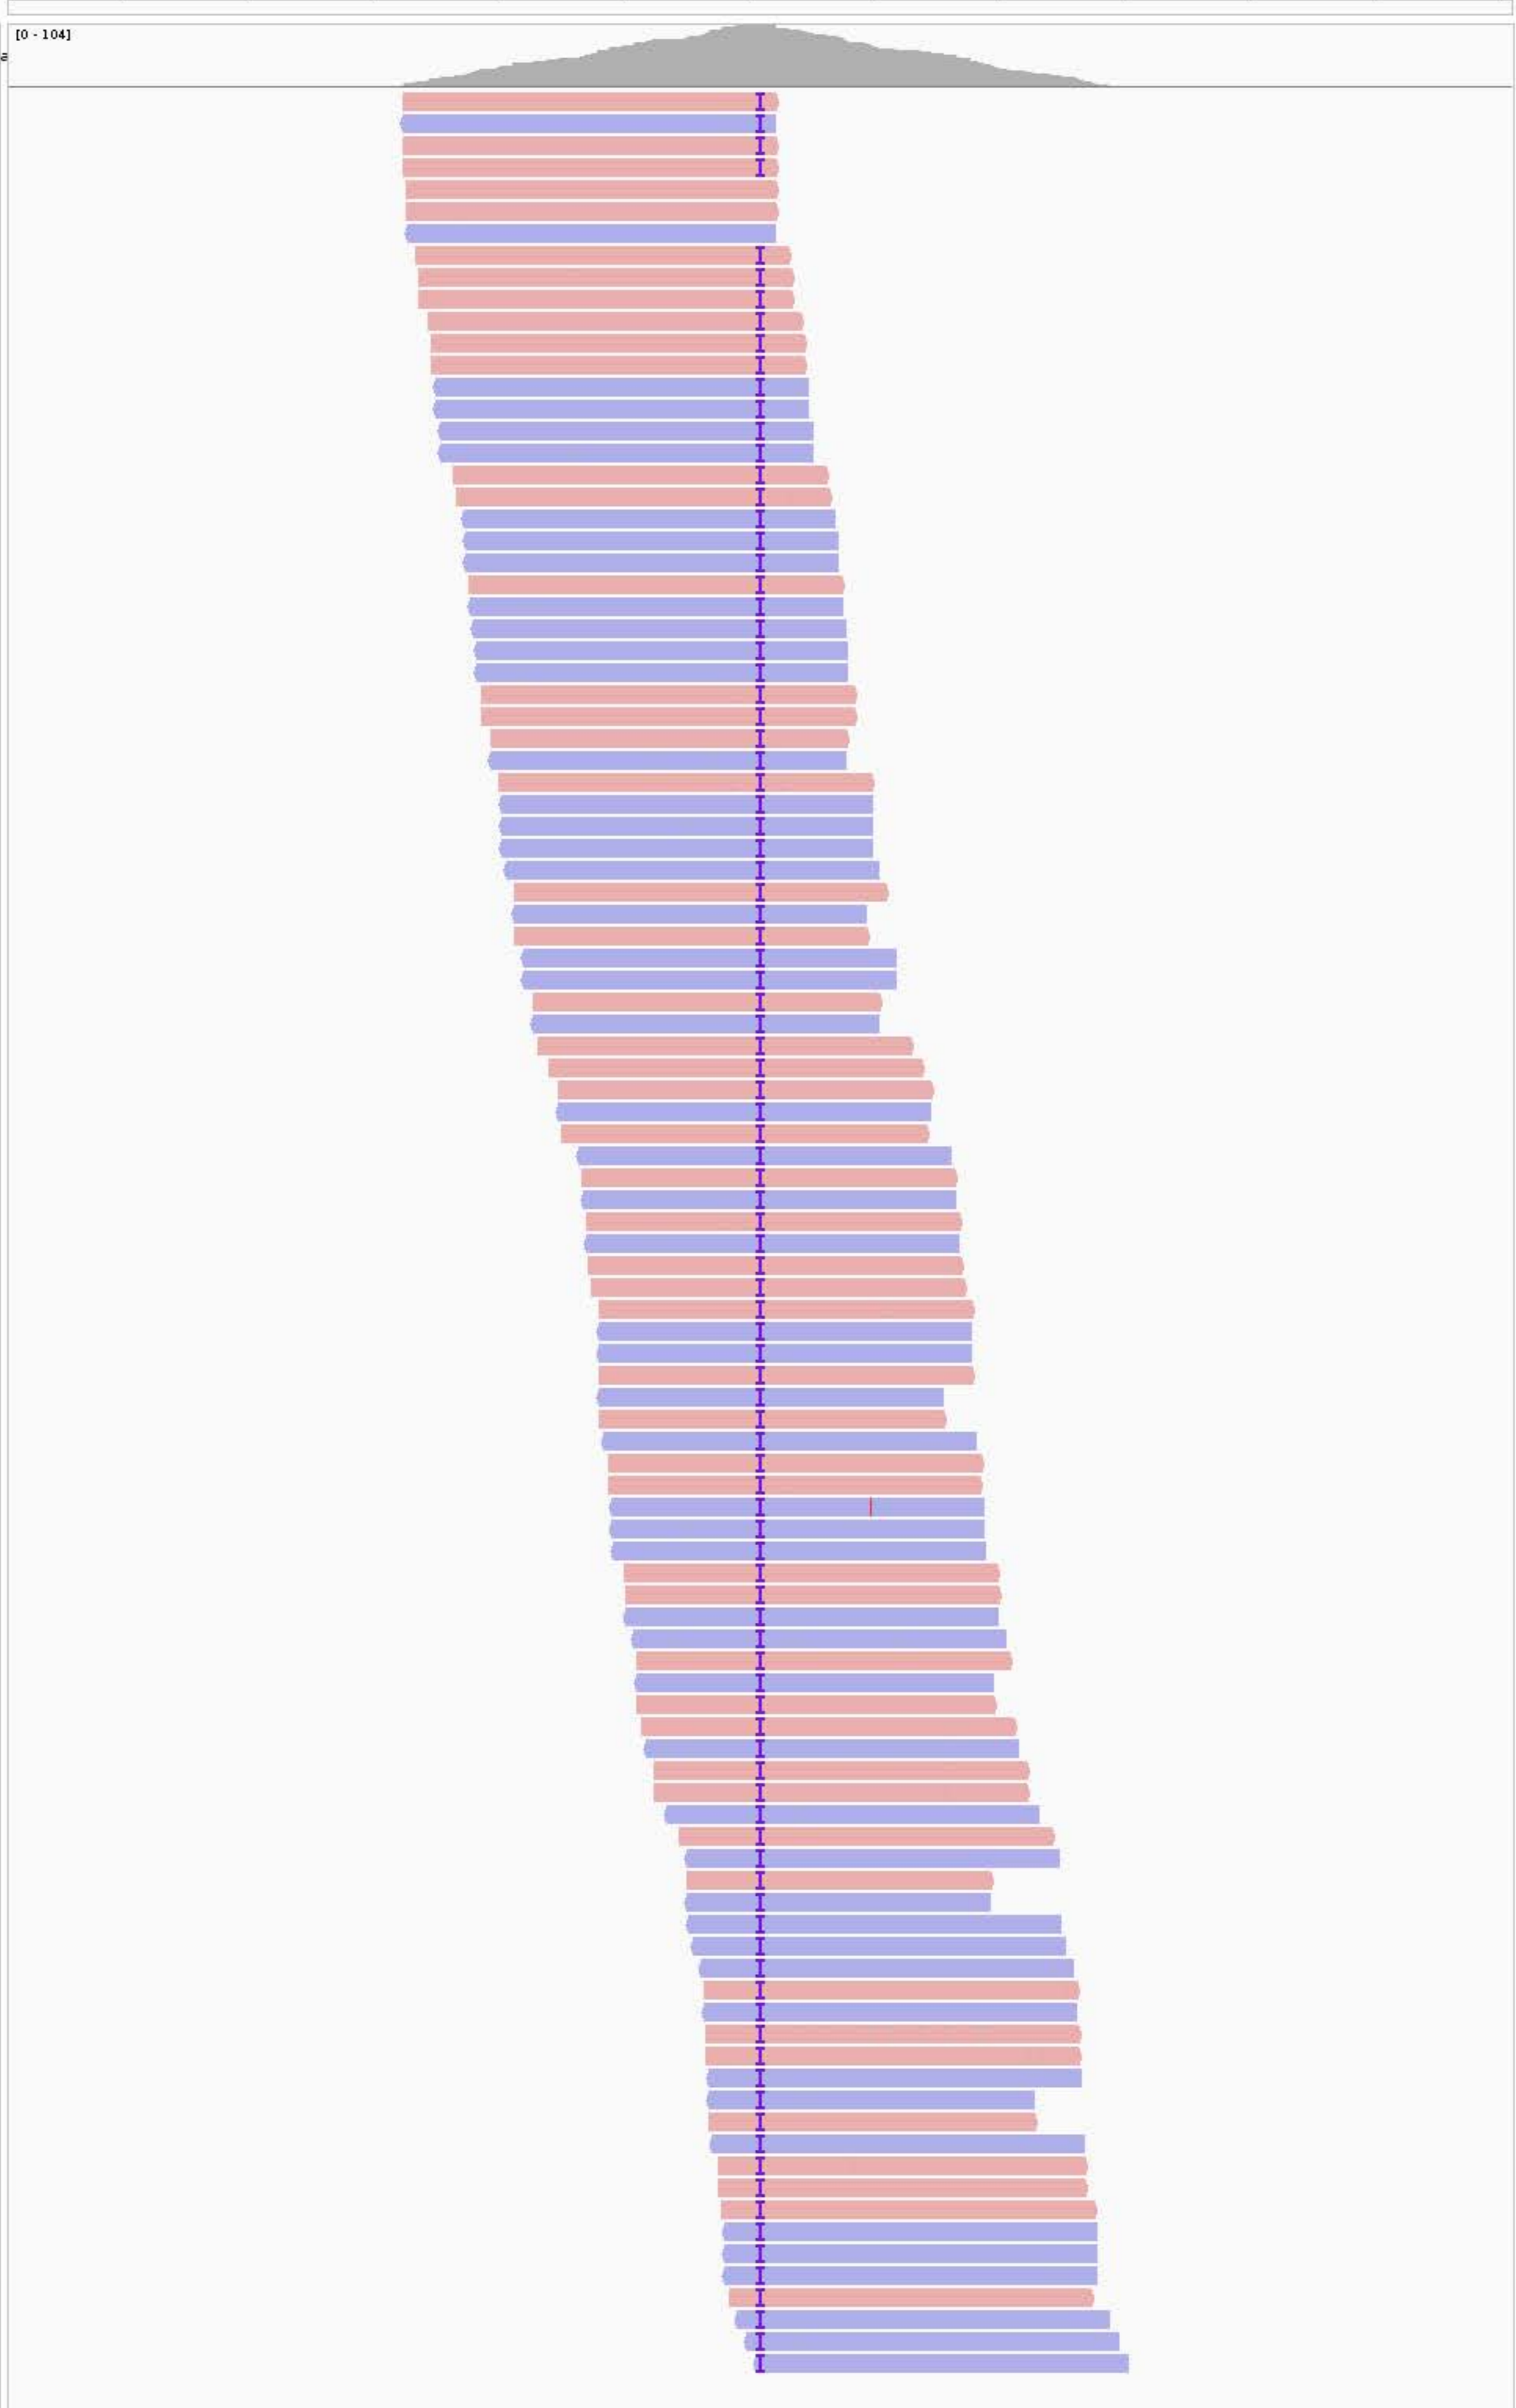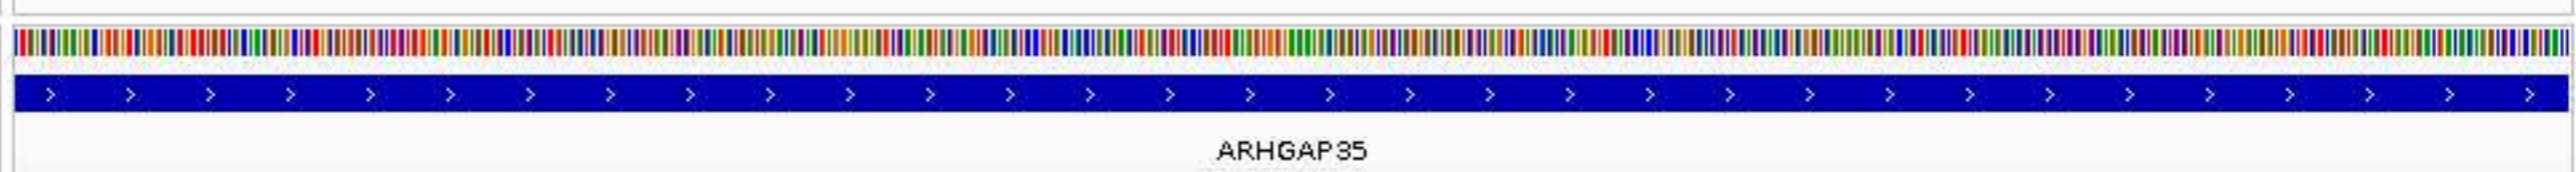

ARHGAP35



chr19:46,919,465-46,920,064

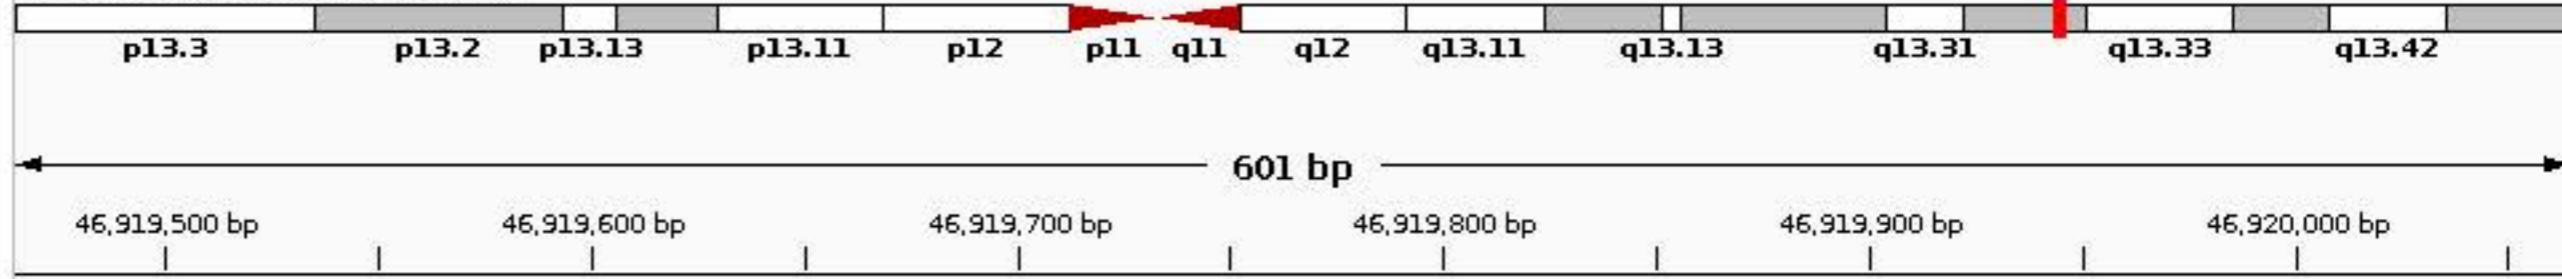

SL\_0006\_RN\_46\_mut.bam Coverage

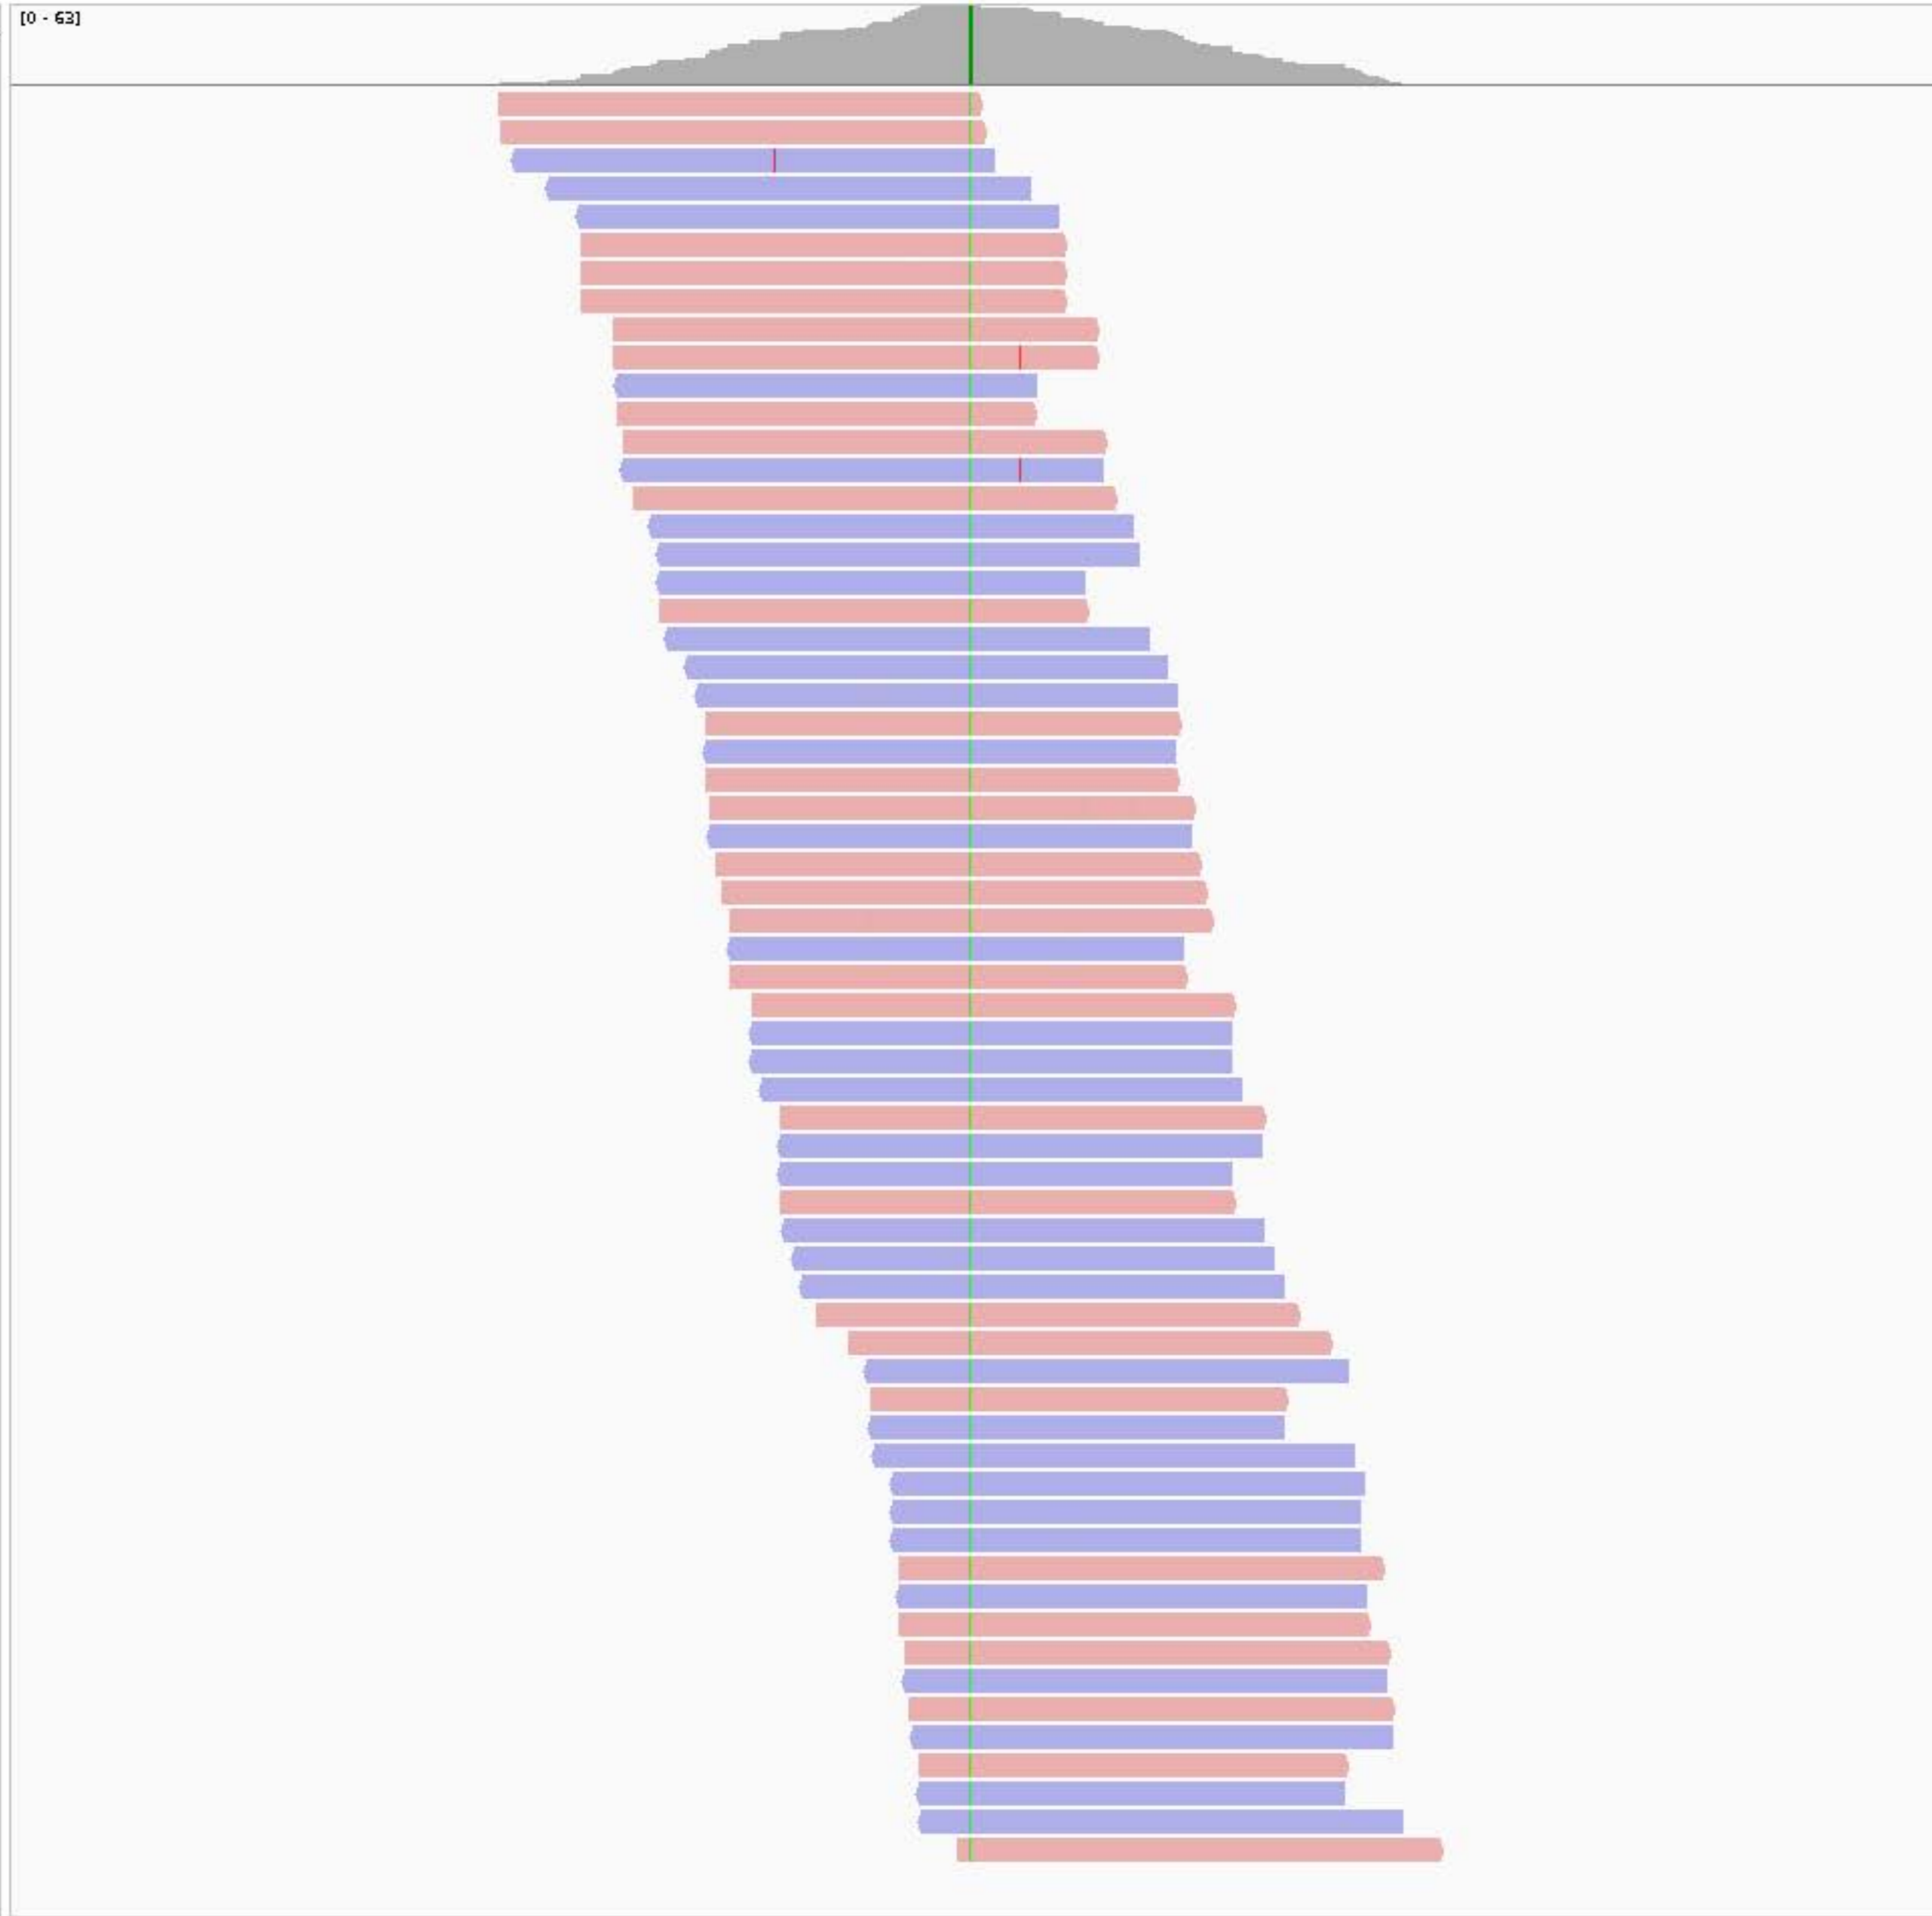

SL\_0006\_RN\_46\_mut.bam

Sequence

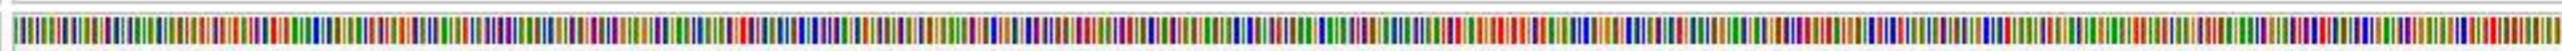

Refseq Genes

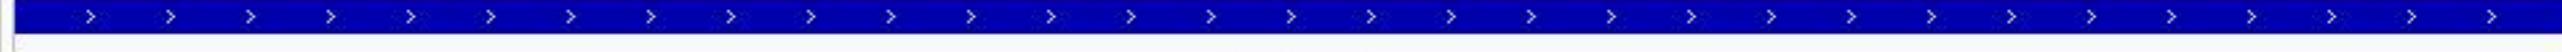

ARHGAP35

chr19:46,919,465-46,920,064

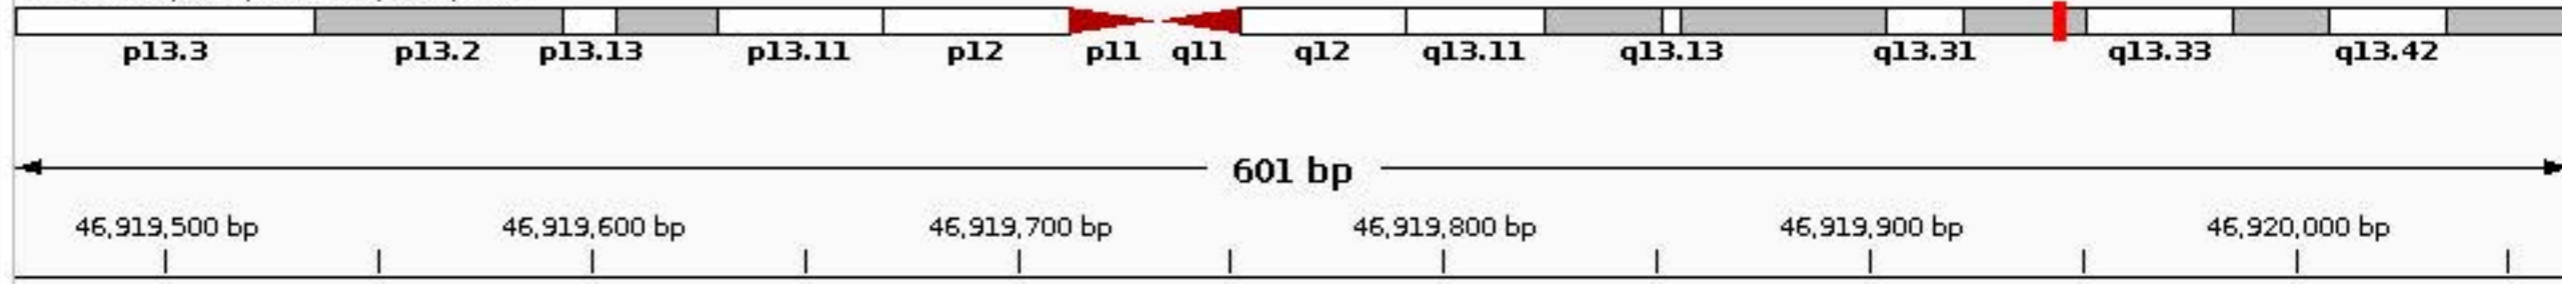

SL\_0006\_RN\_47\_mut.bam Coverage

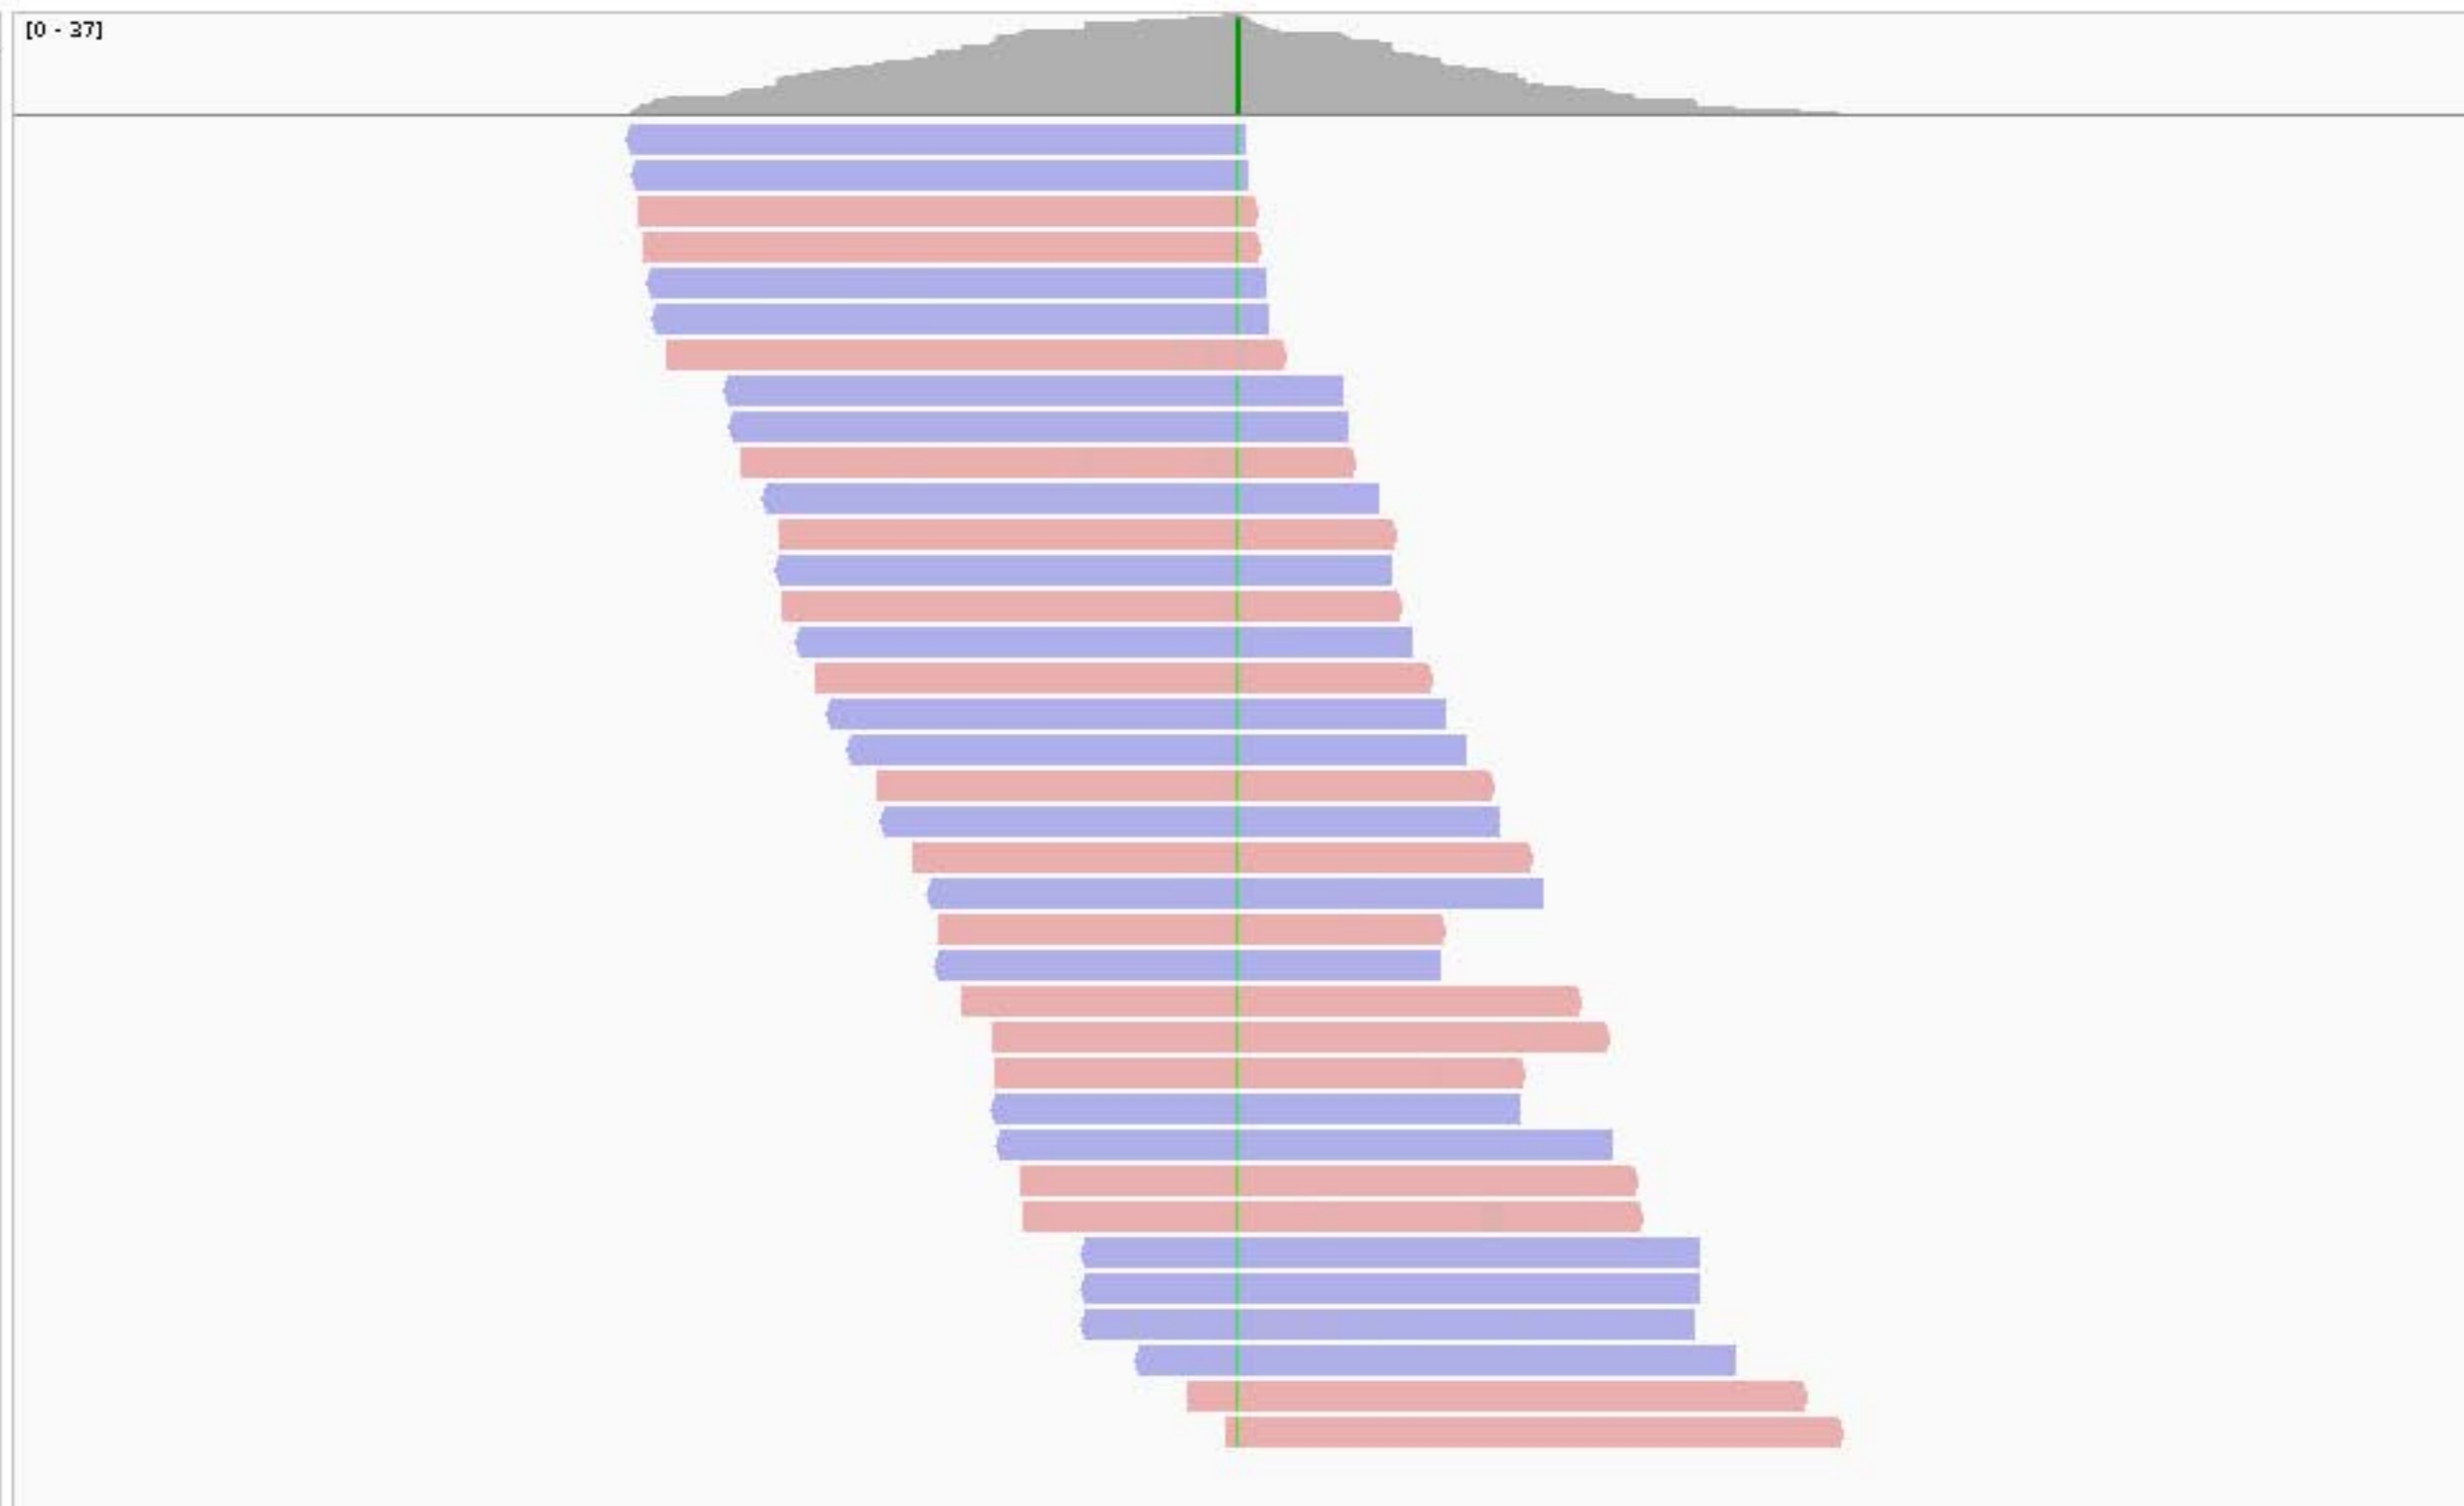

SL\_0006\_RN\_47\_mut.bam

Sequence

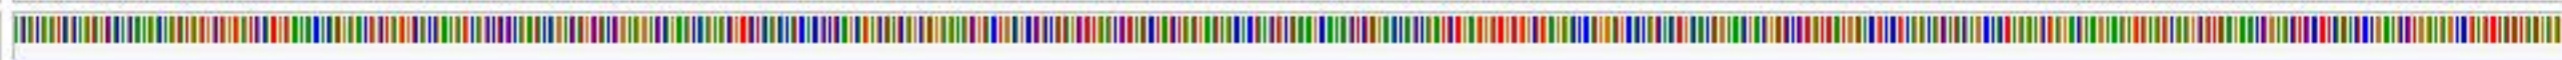

Refseq Genes

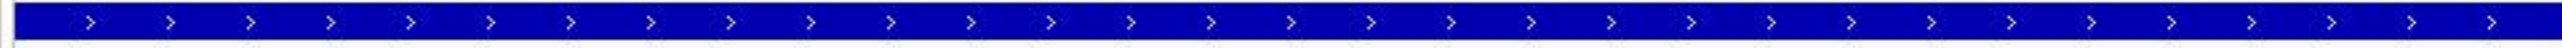

ARHGAP35

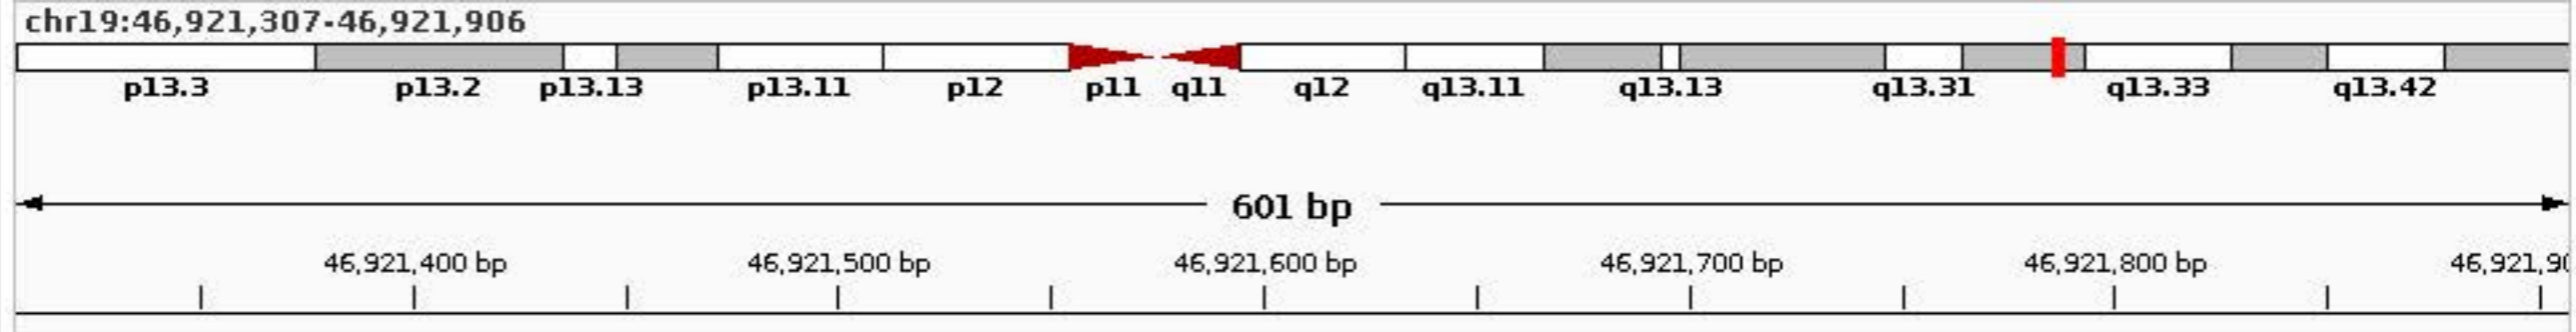

SL\_0002\_LN\_34\_mut.bam Coverage

SL\_0002\_LN\_34\_mut.bam

Sequence

Refseq Genes

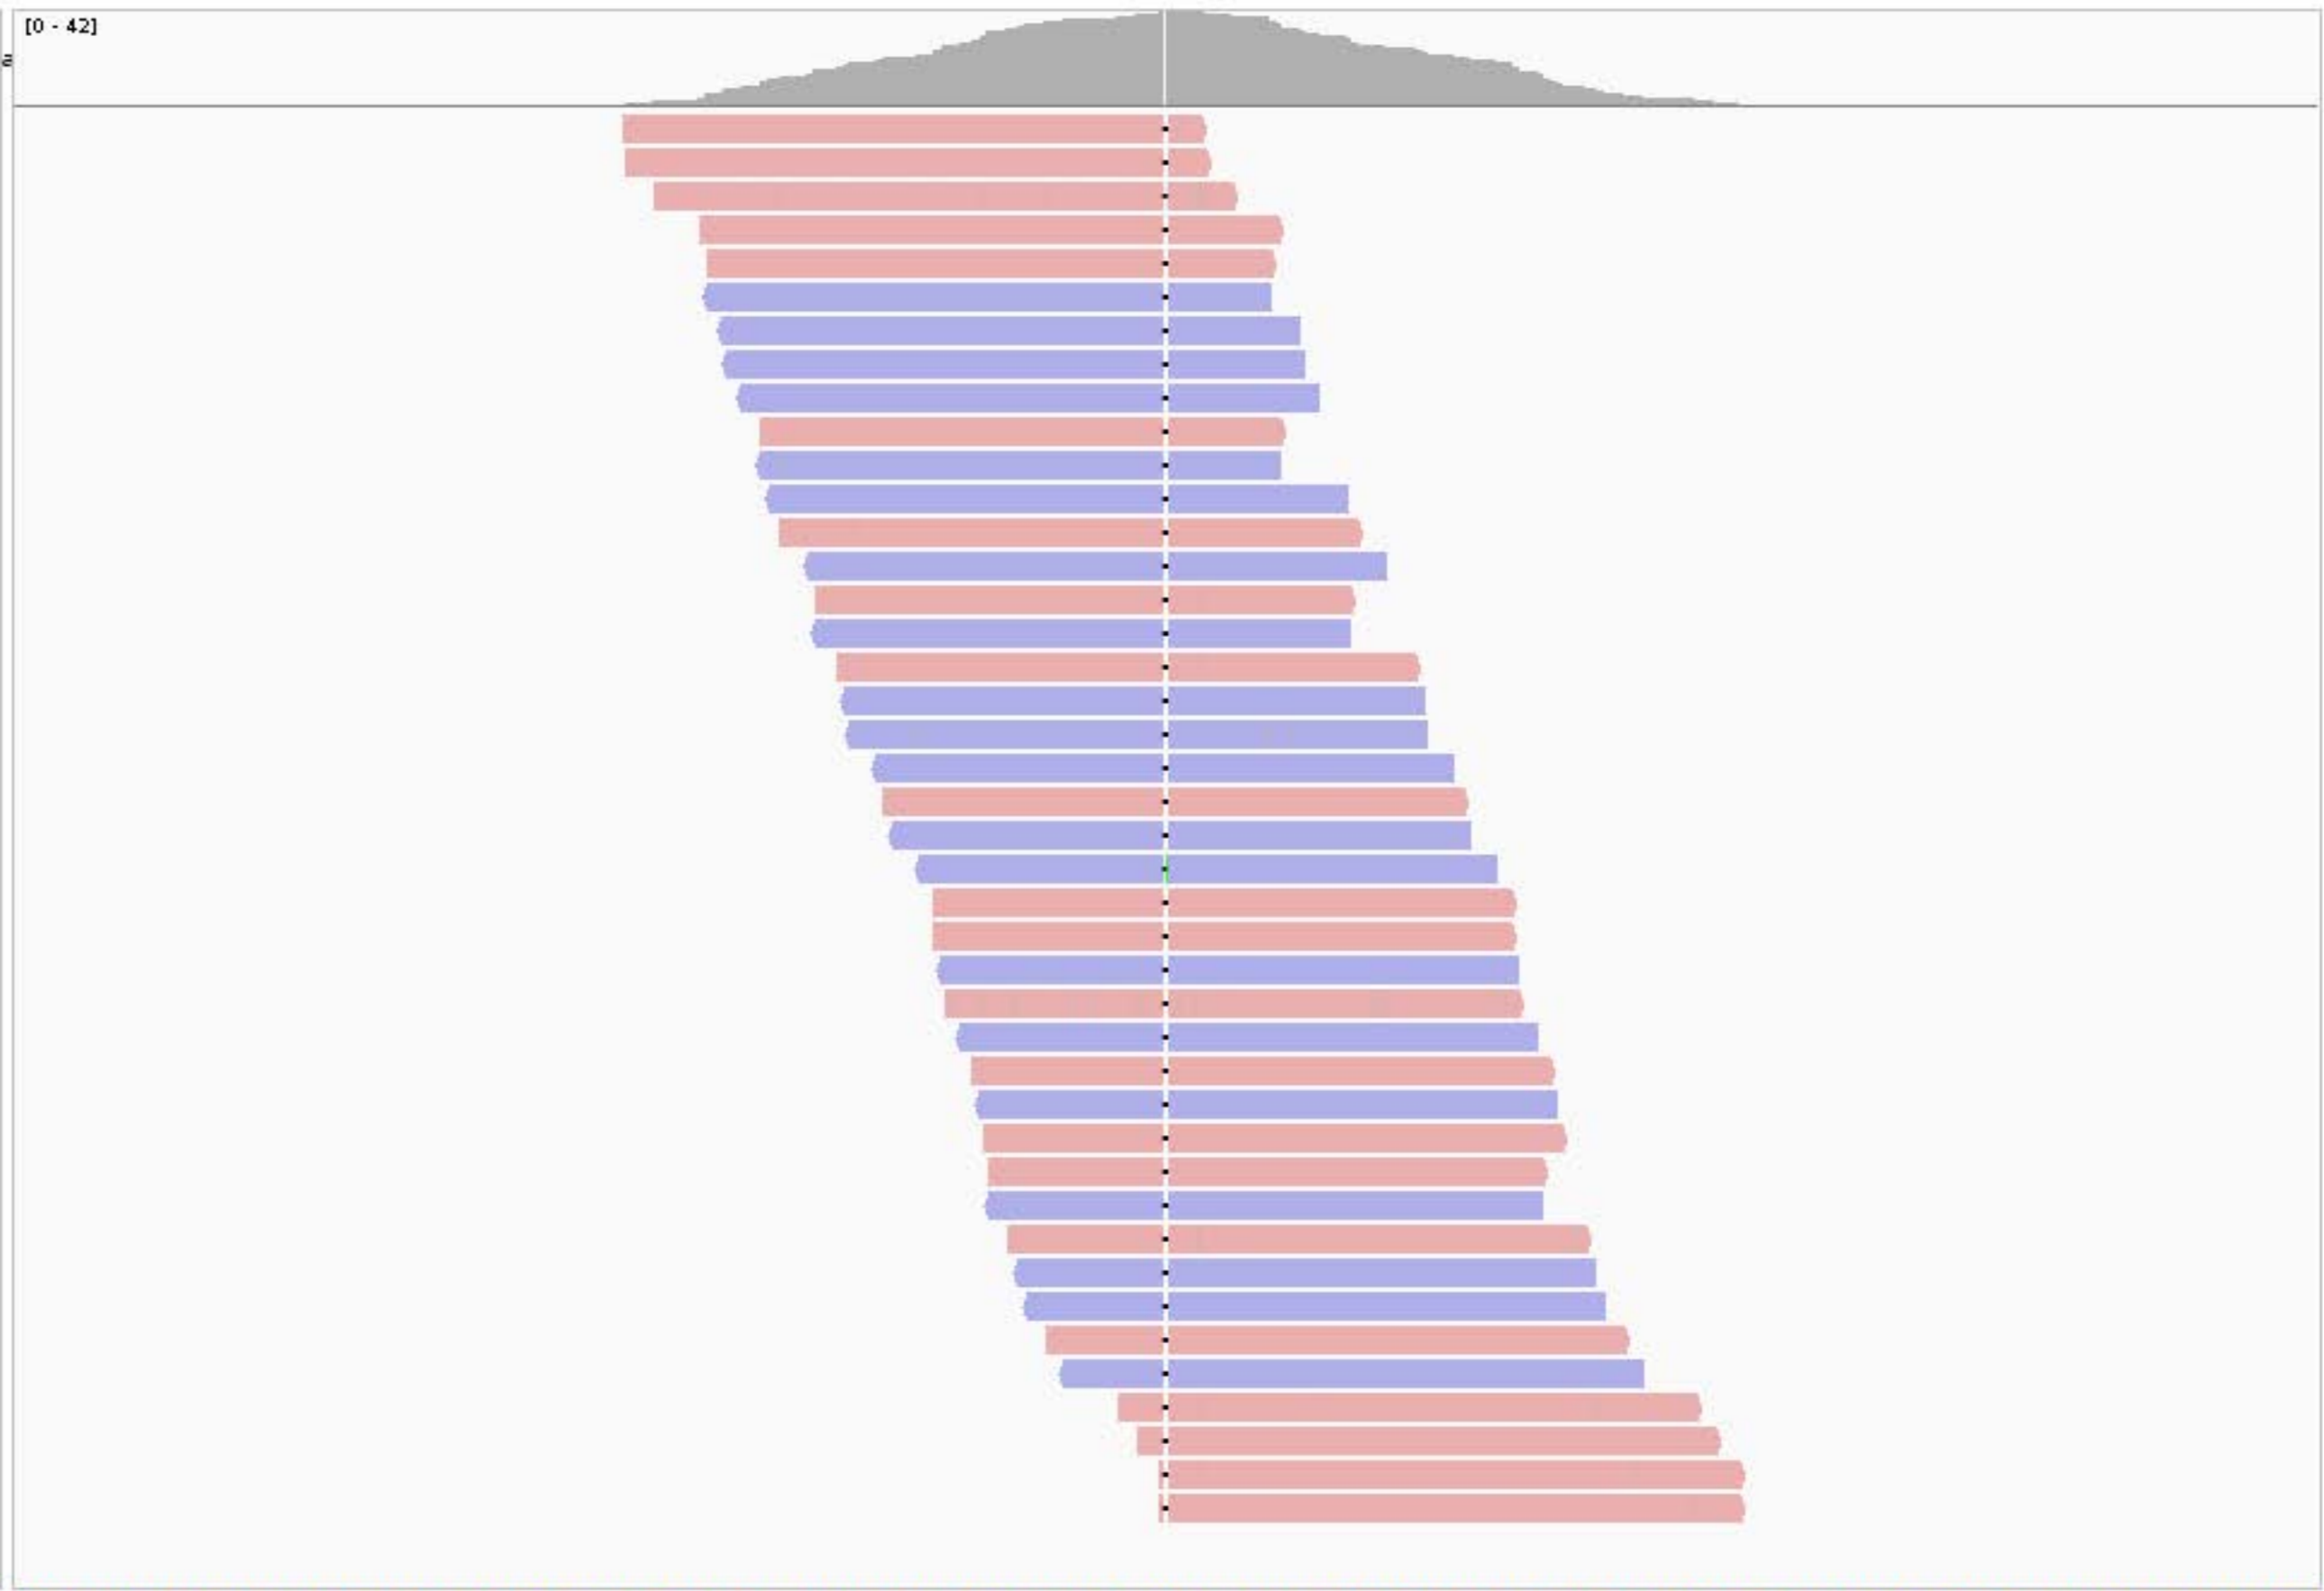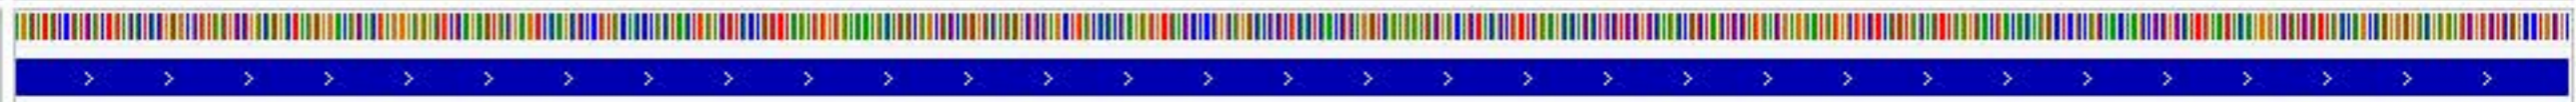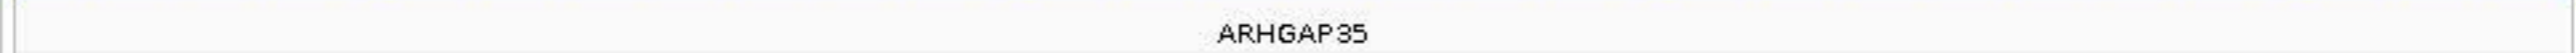

ARHGAP35



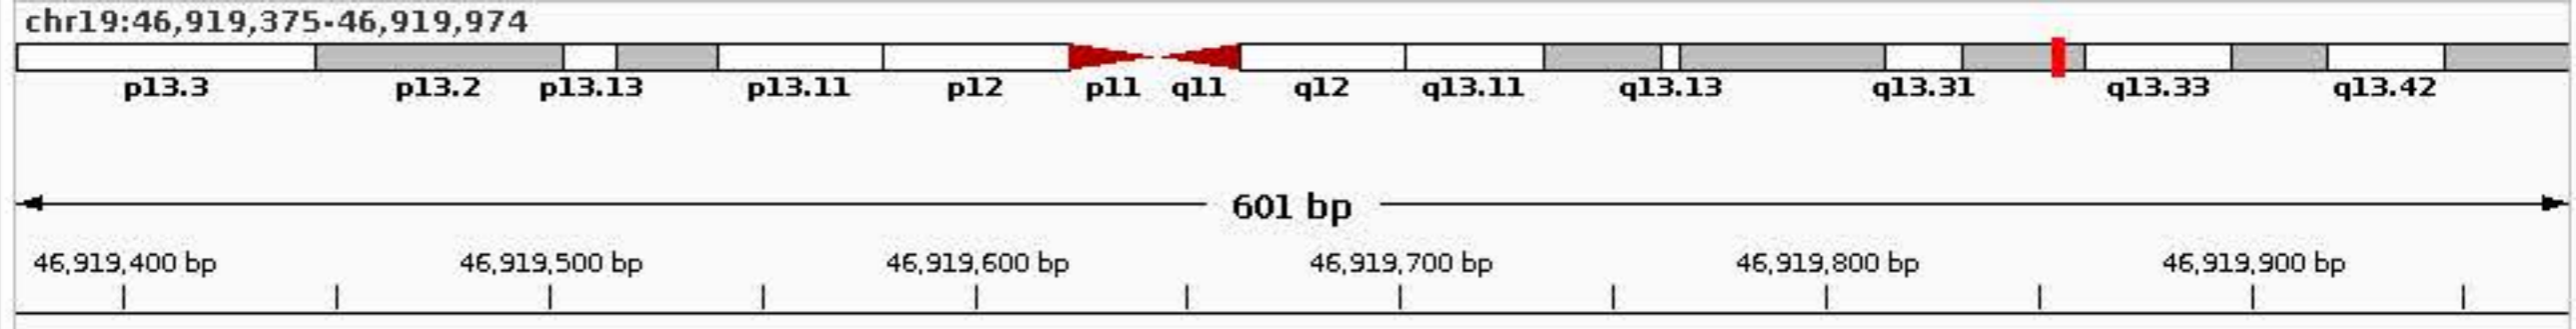

SL\_0001\_RN\_15\_mut.bam Coverage

SL\_0001\_RN\_15\_mut.bam

Sequence

Refseq Genes

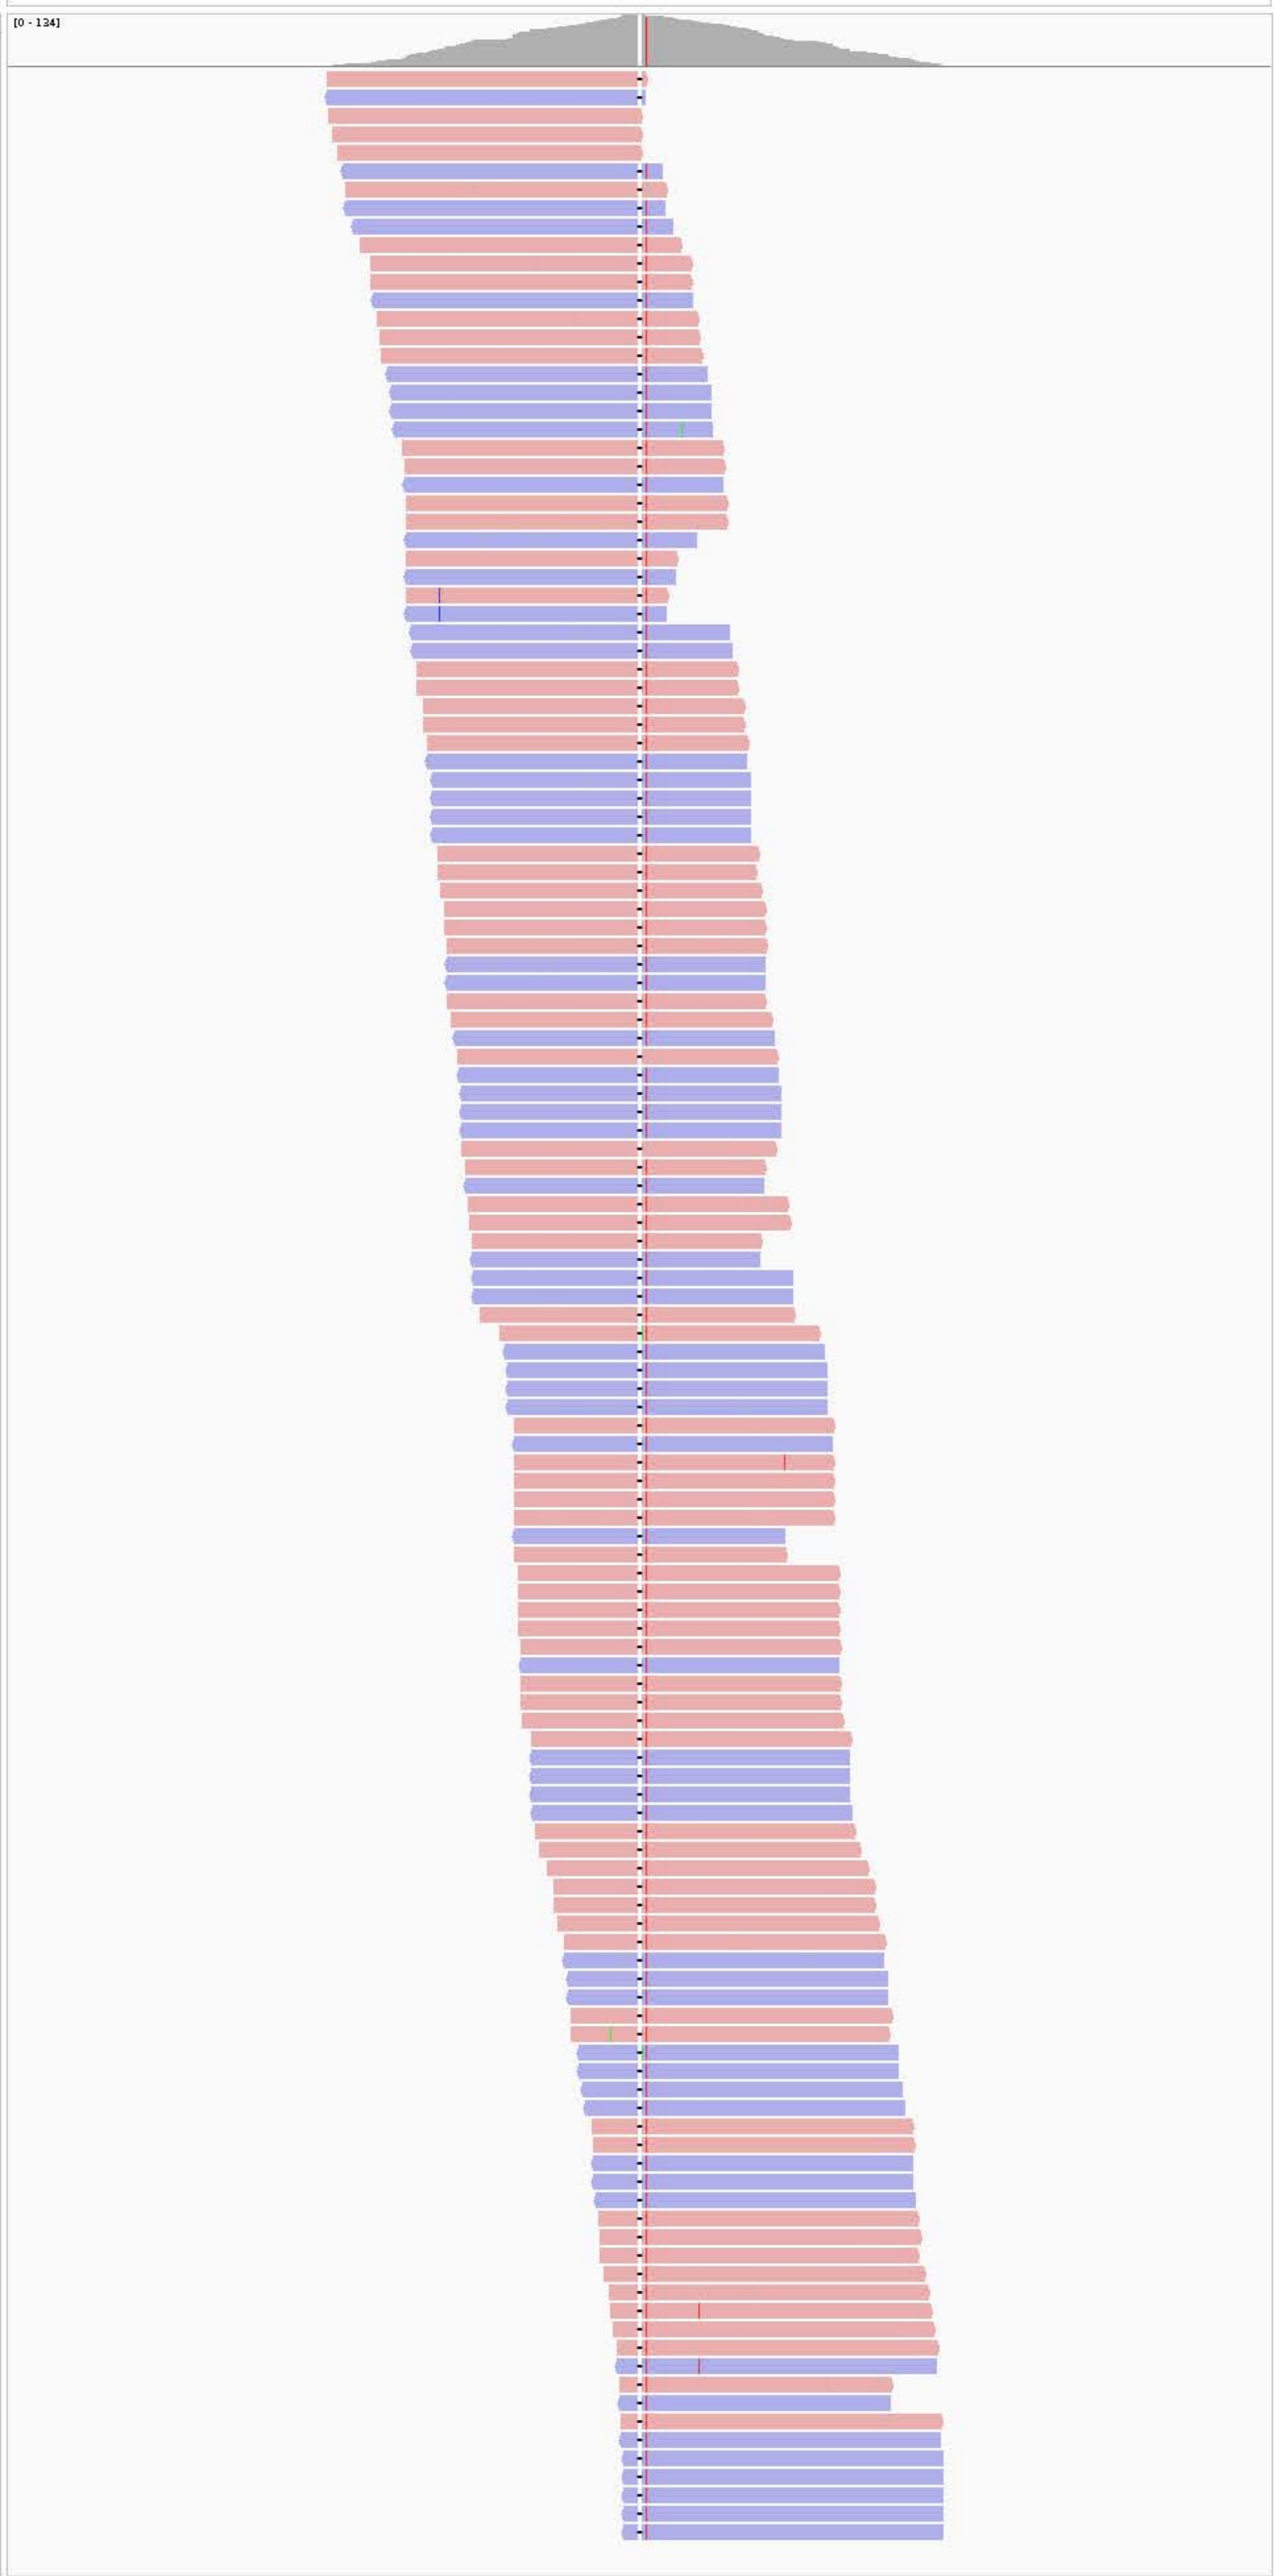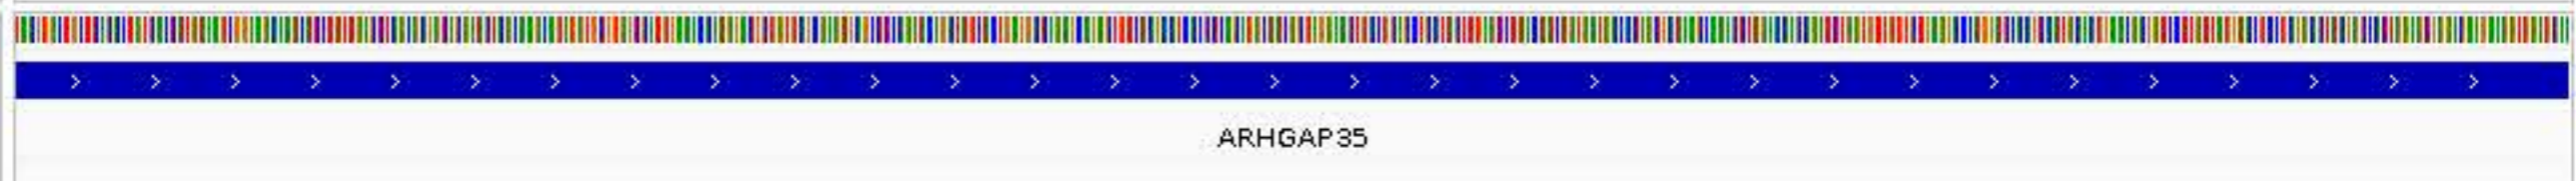

ARHGAP35



chr19:46,919,376-46,919,975

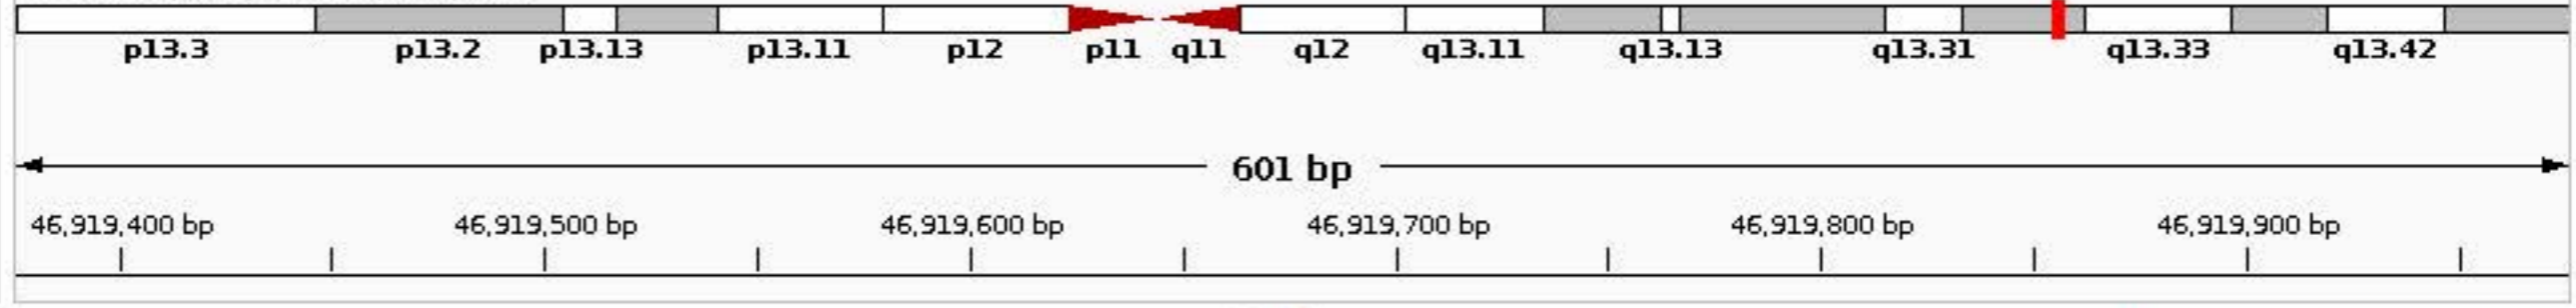

SL\_0004\_RN\_08\_mut.bam Coverage

SL\_0004\_RN\_08\_mut.bam

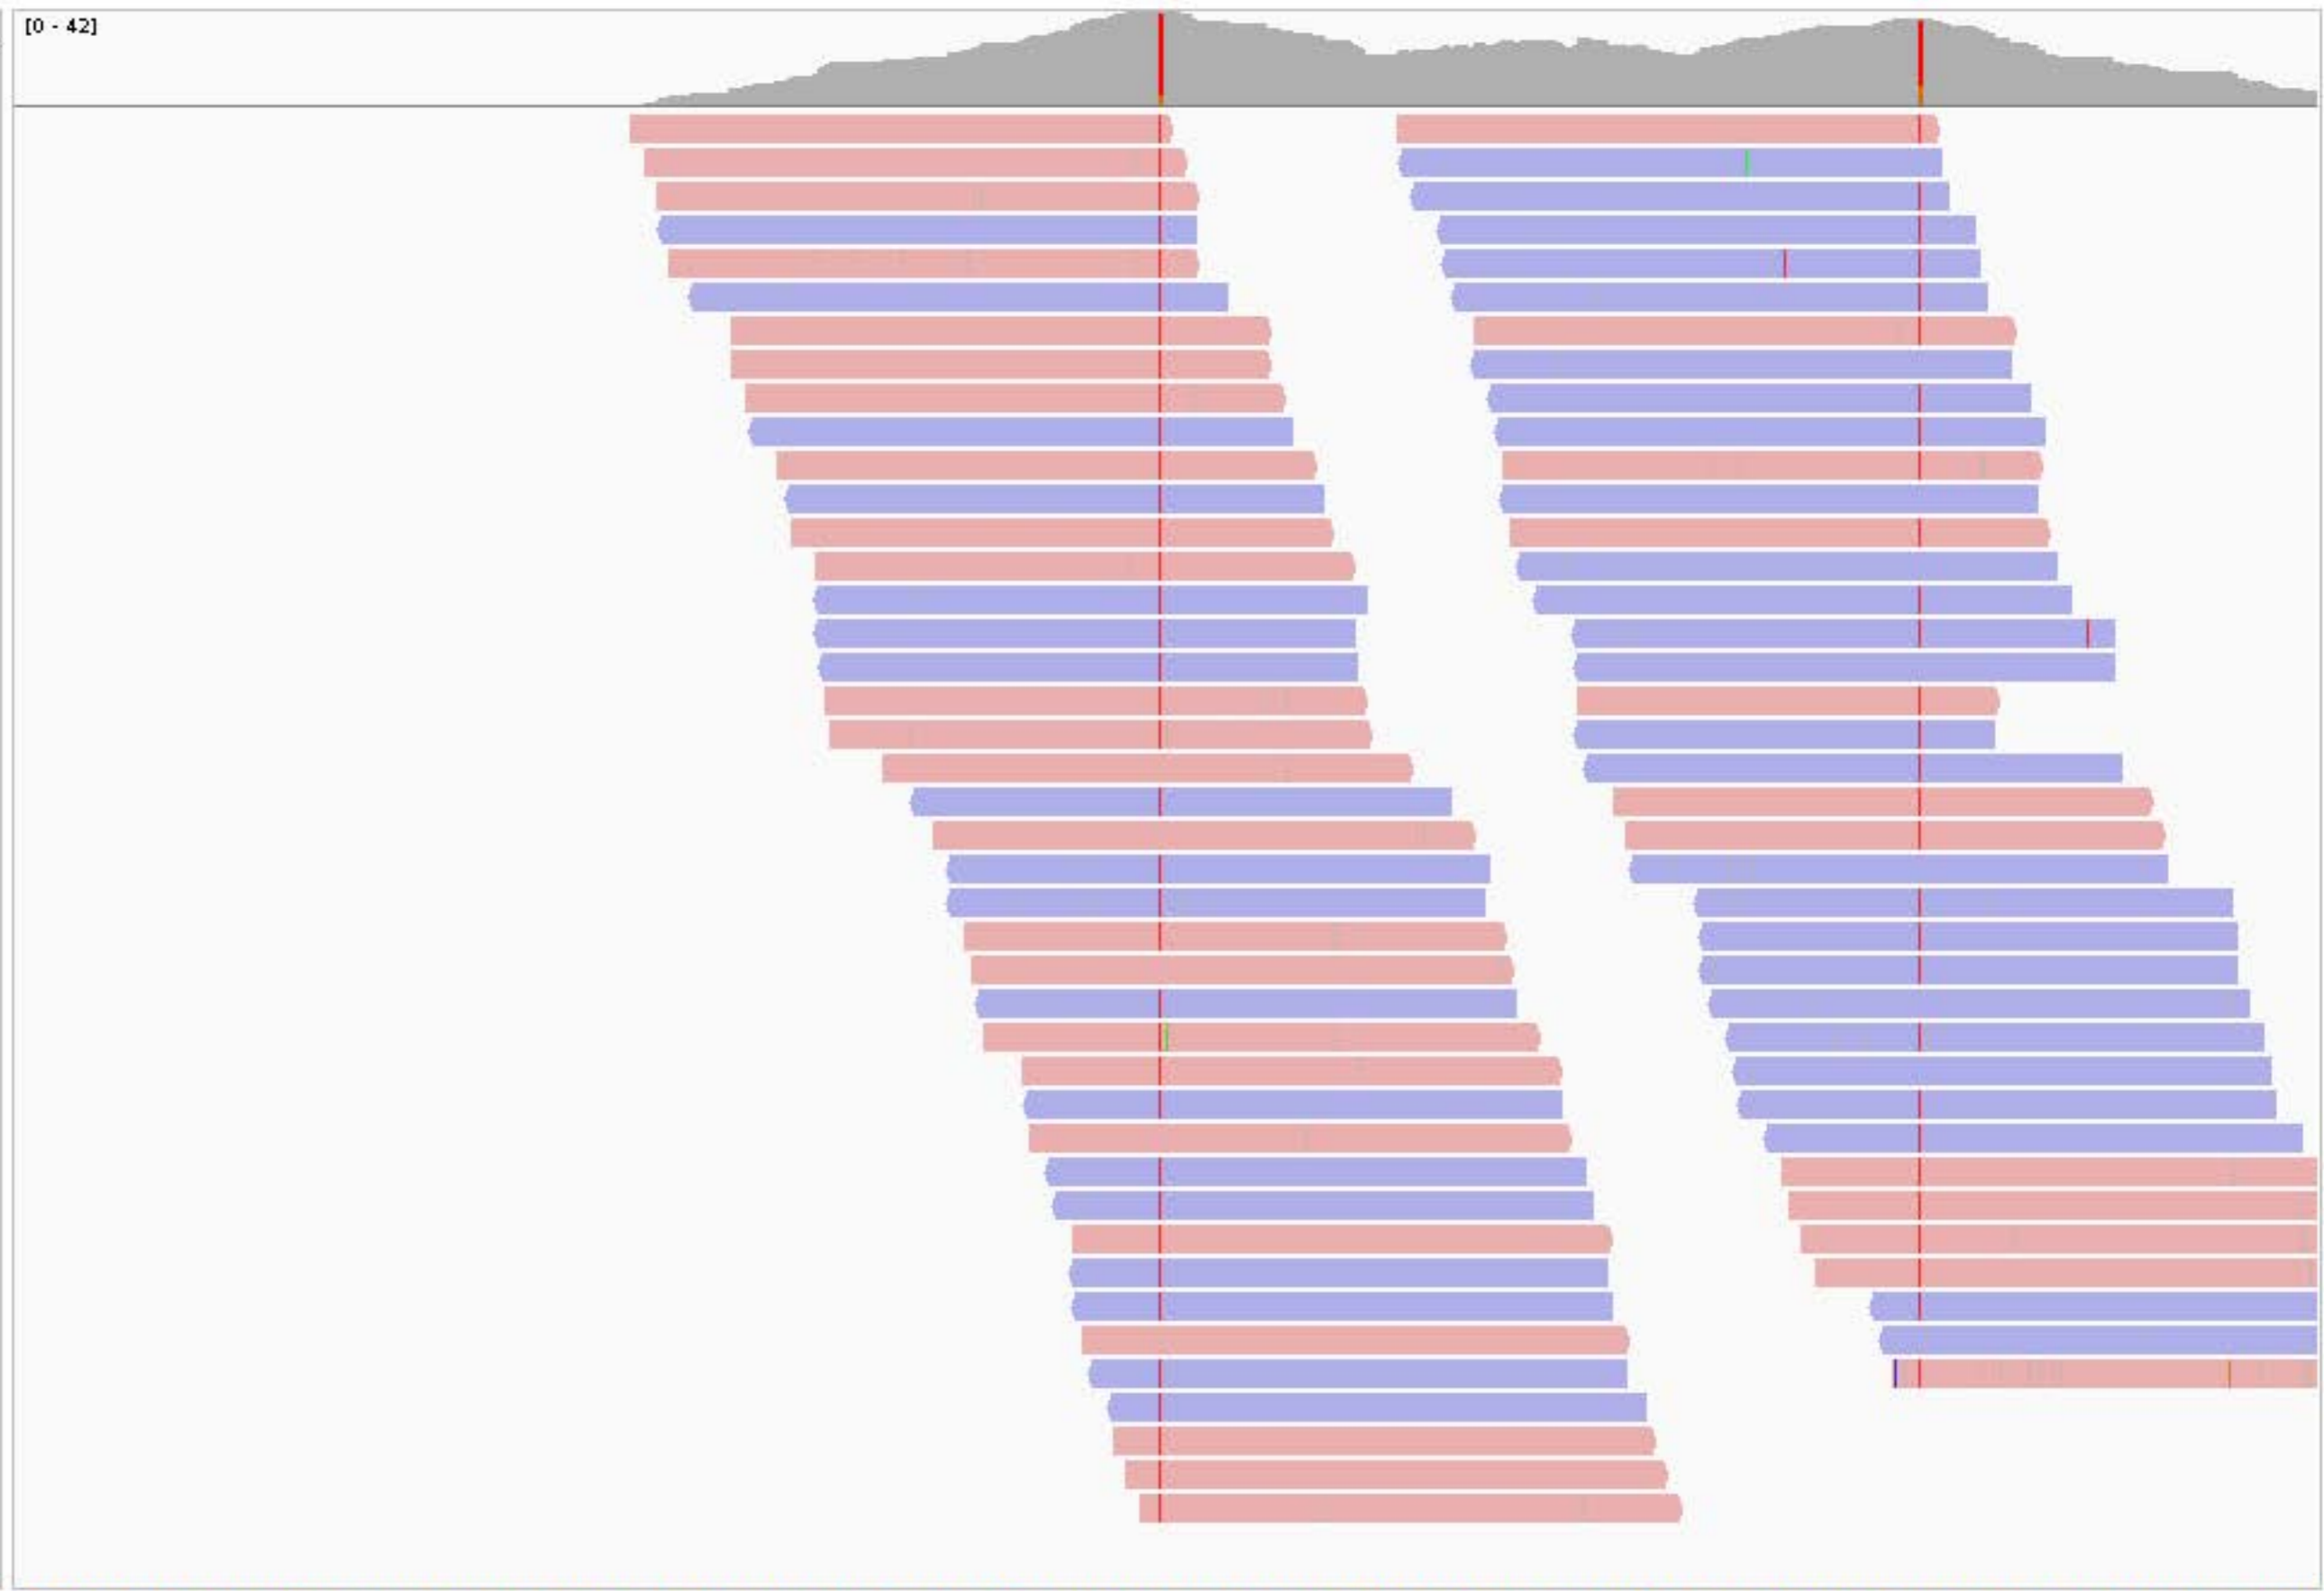

Sequence

Refseq Genes

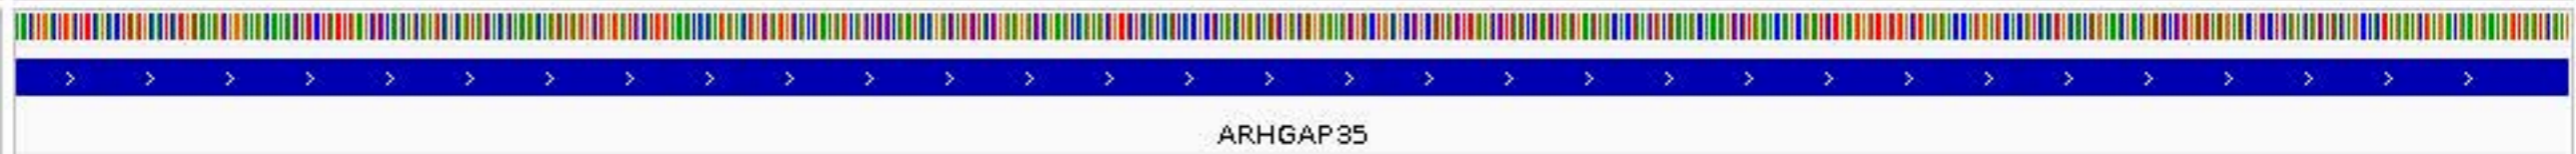

ARHGAP35

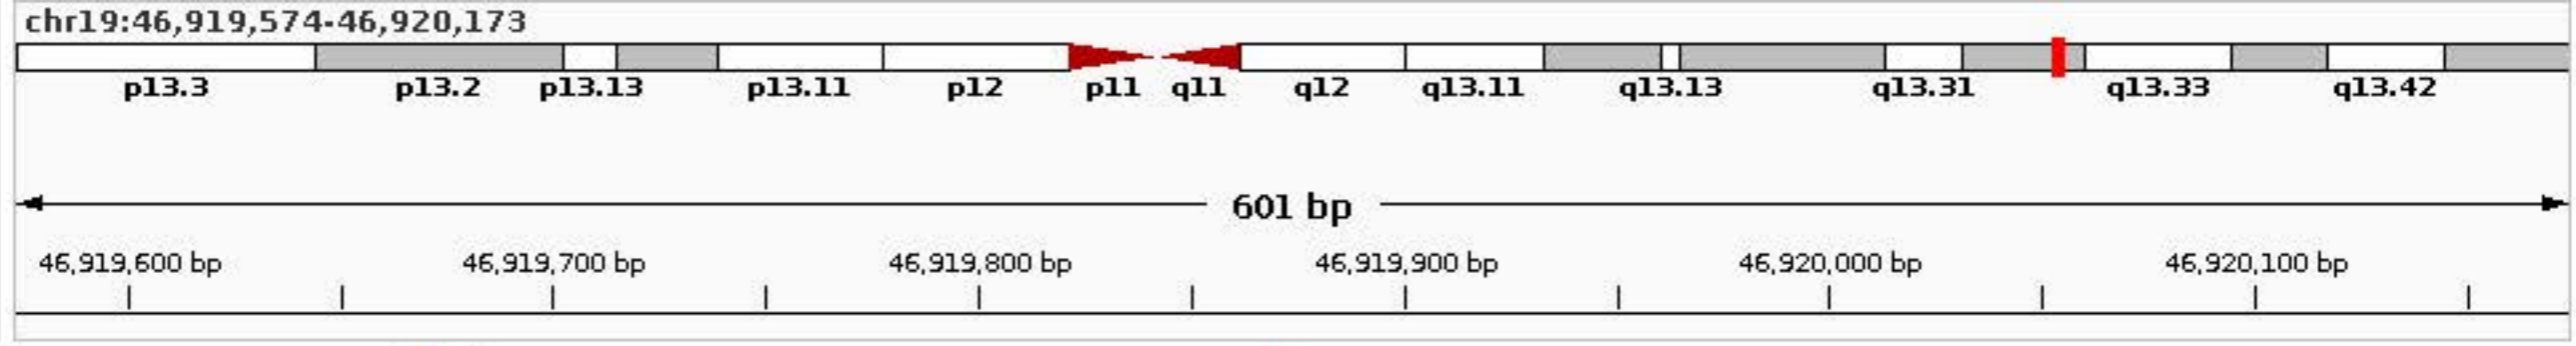

SL\_0004\_RN\_08\_mut.bam Coverage

SL\_0004\_RN\_08\_mut.bam

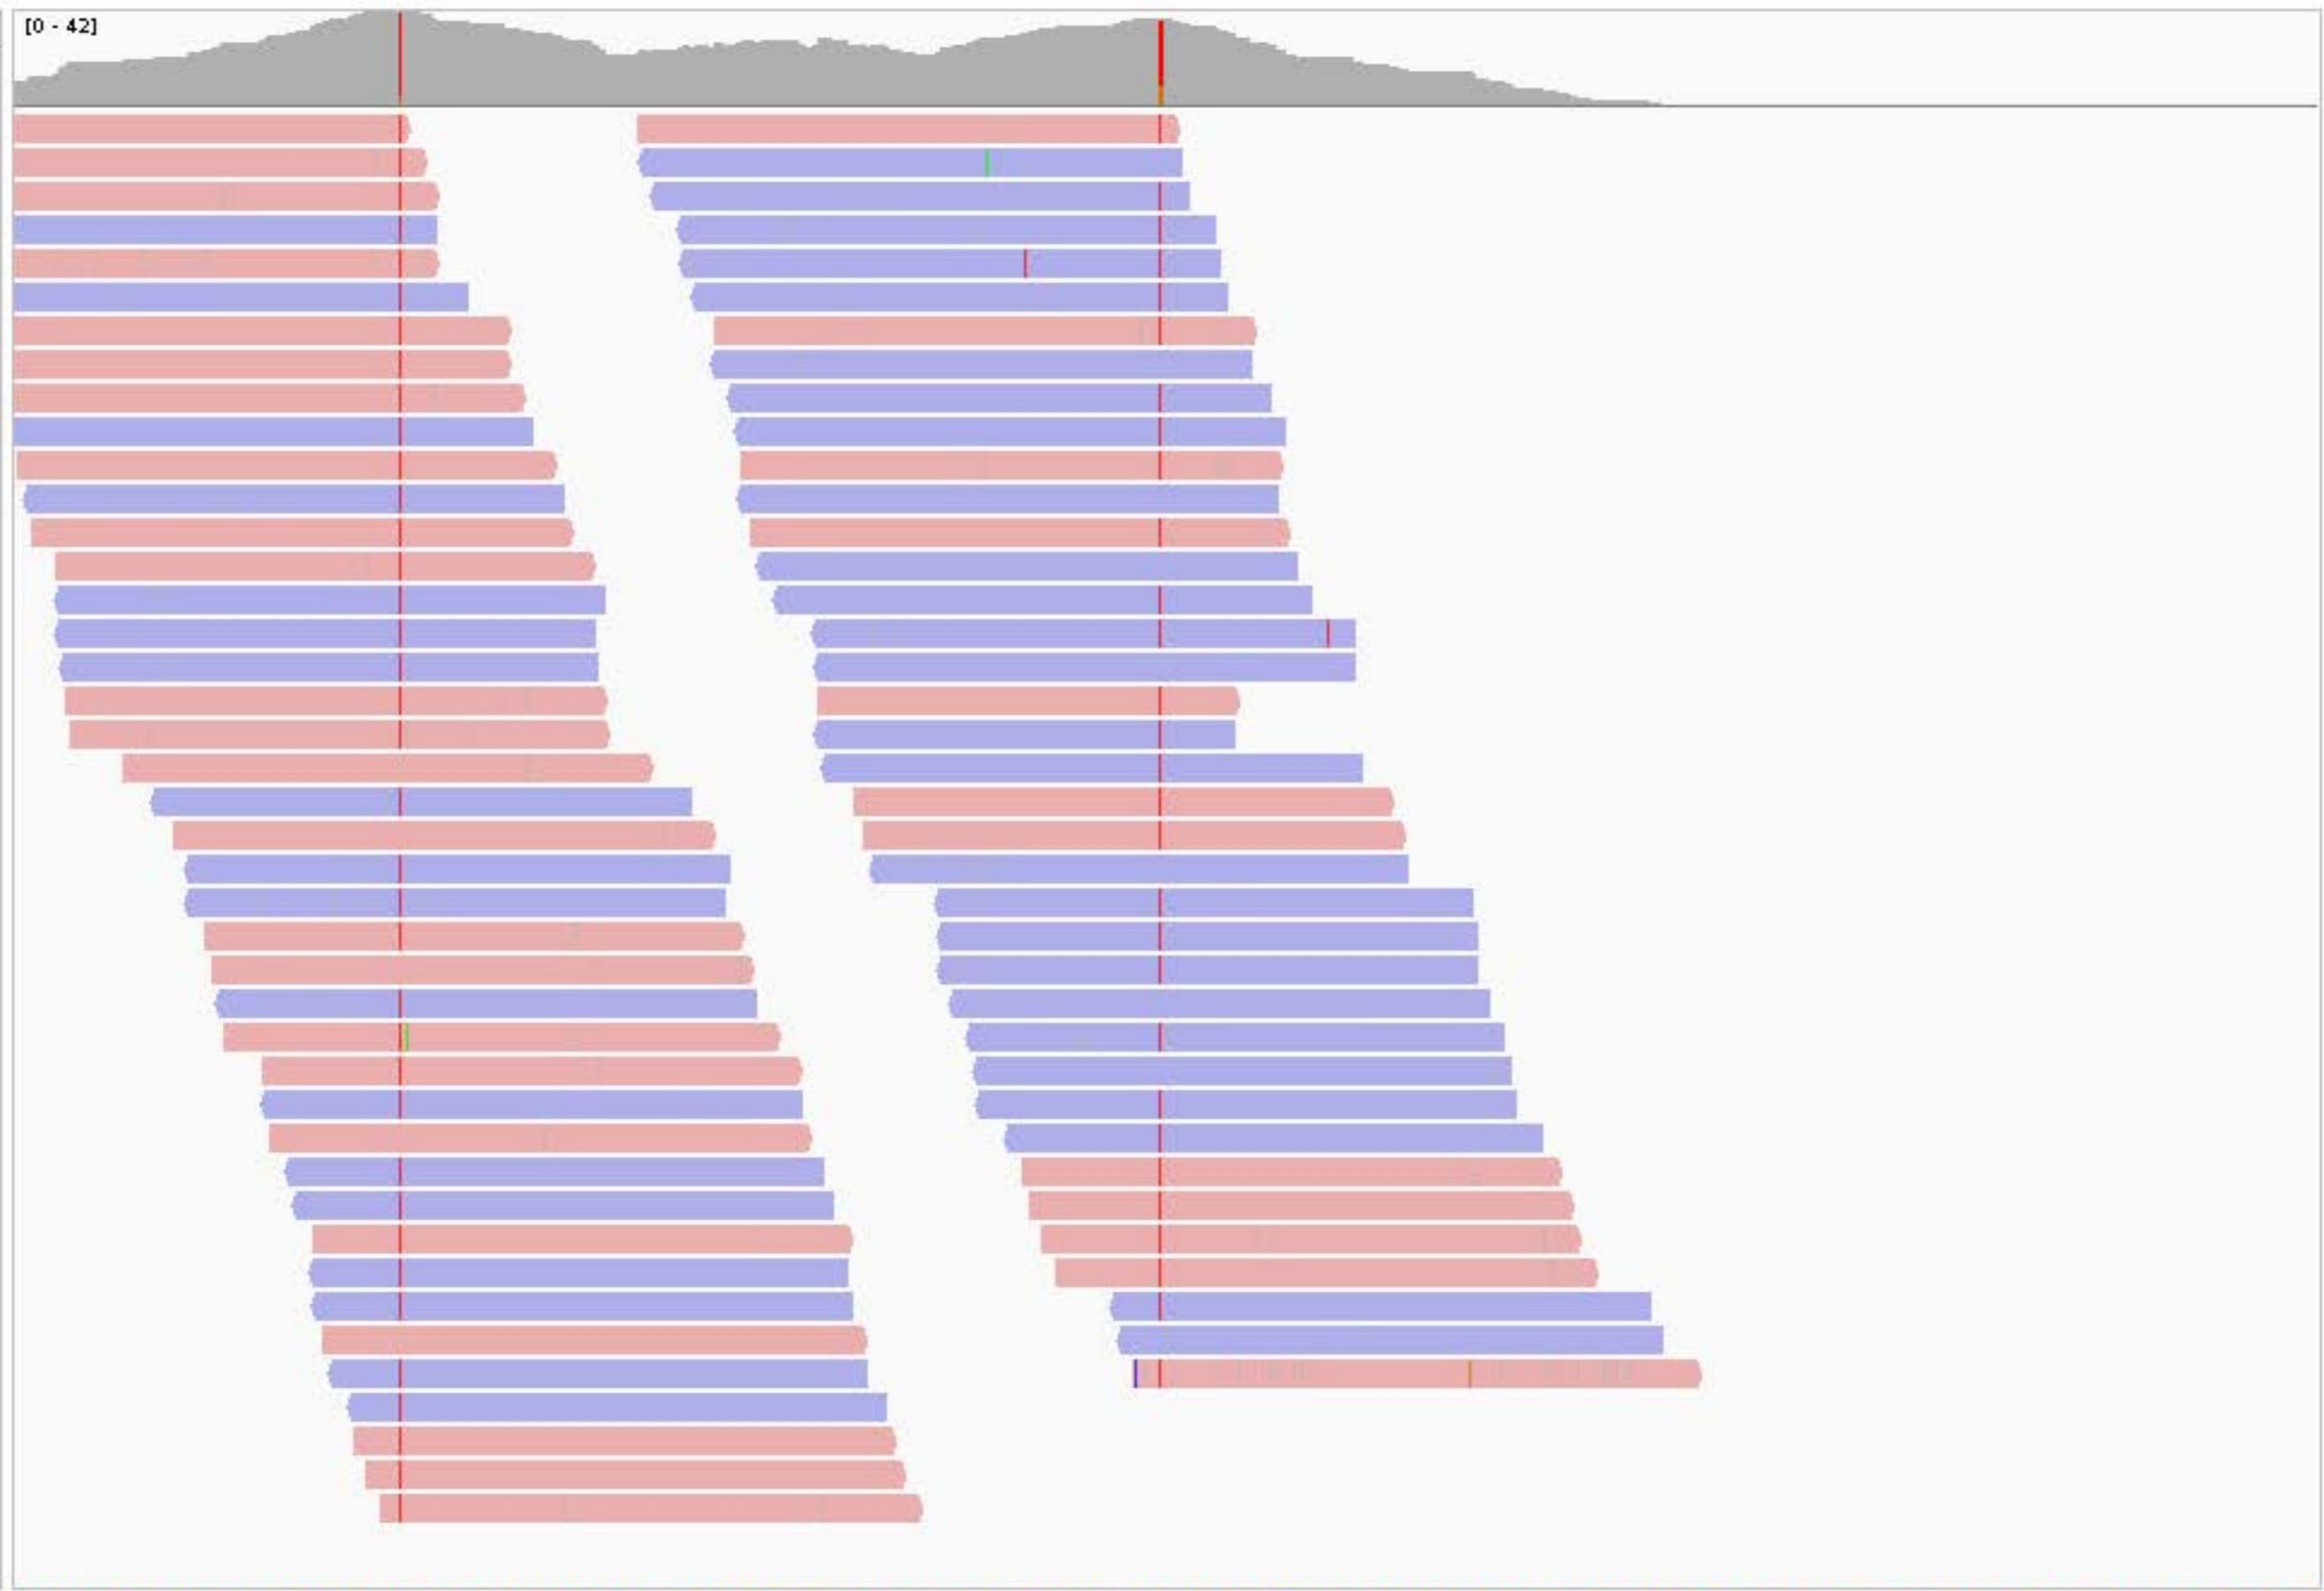

Sequence

Refseq Genes

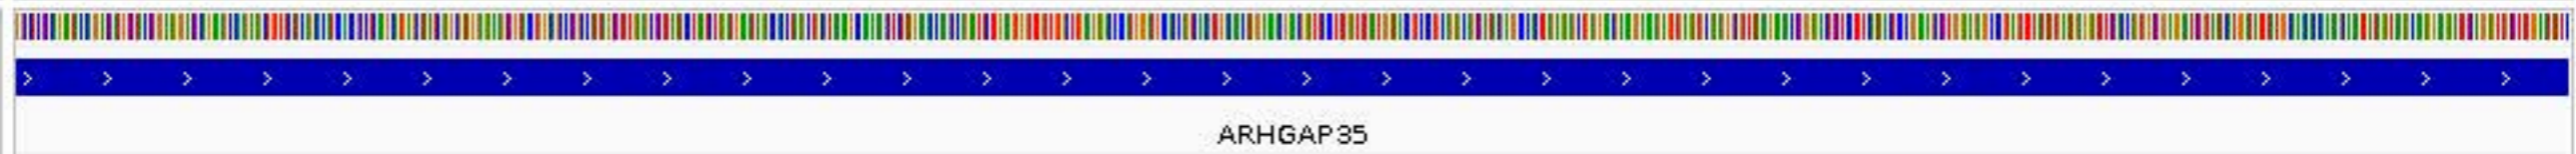

chr19:46,920,843-46,921,442

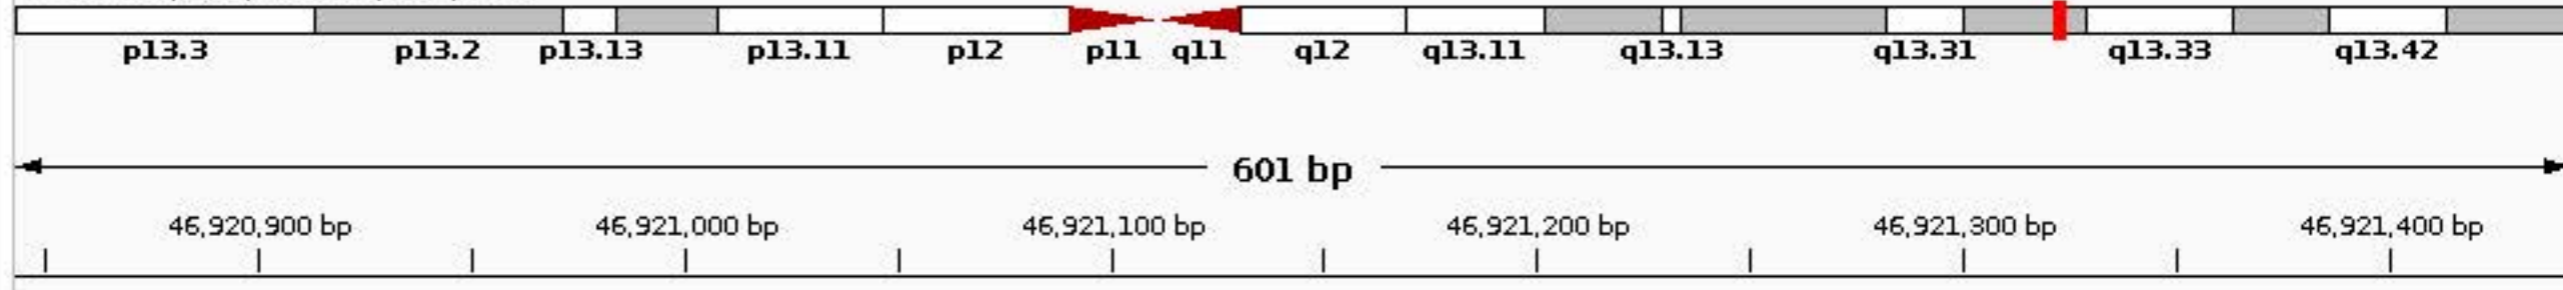

SL\_0004\_RN\_08\_mut.bam Coverage

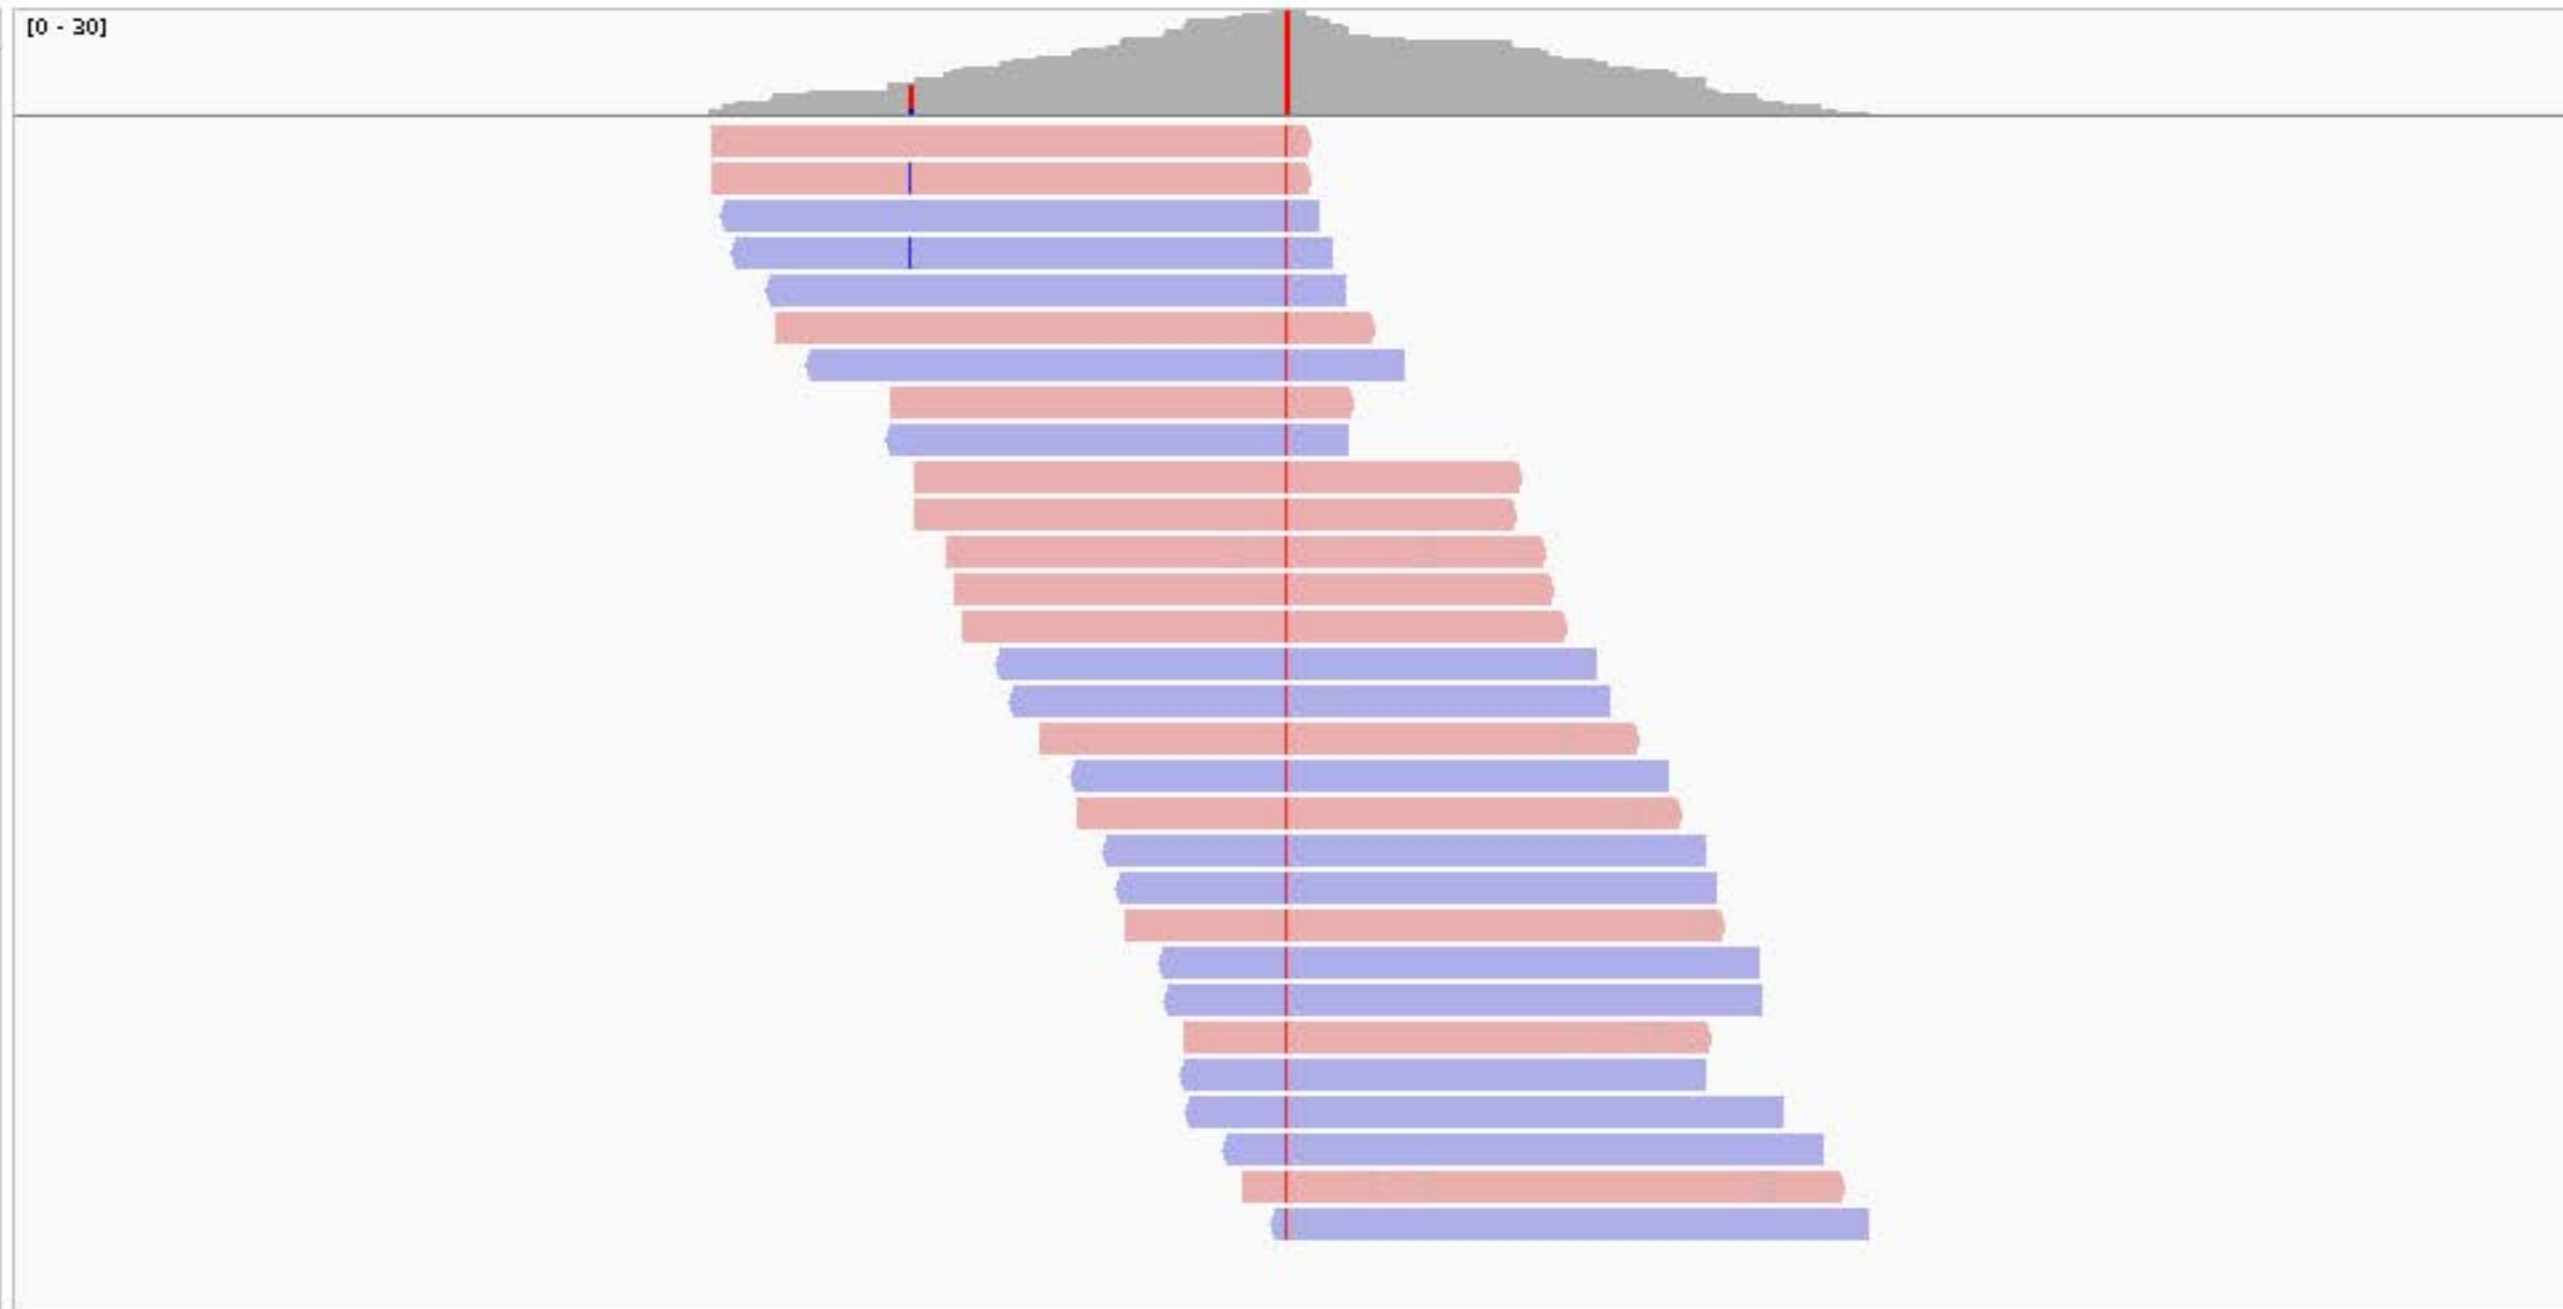

SL\_0004\_RN\_08\_mut.bam

Sequence

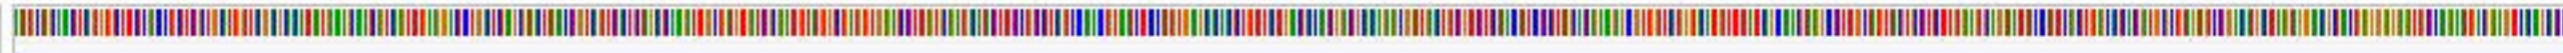

Refseq Genes

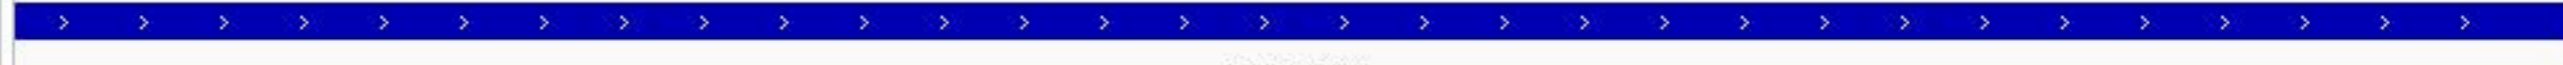

ARHGAP35



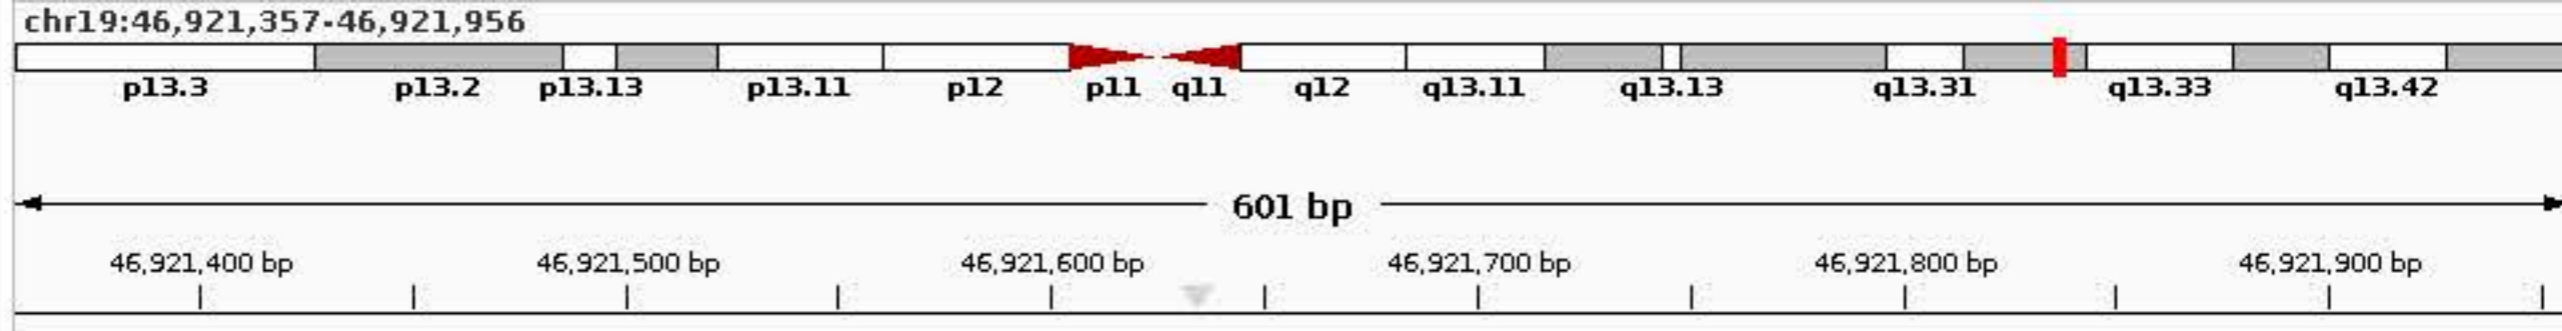

SL\_0004\_RN\_47\_mut.bam Coverage

SL\_0004\_RN\_47\_mut.bam

Sequence →

Refseq Genes

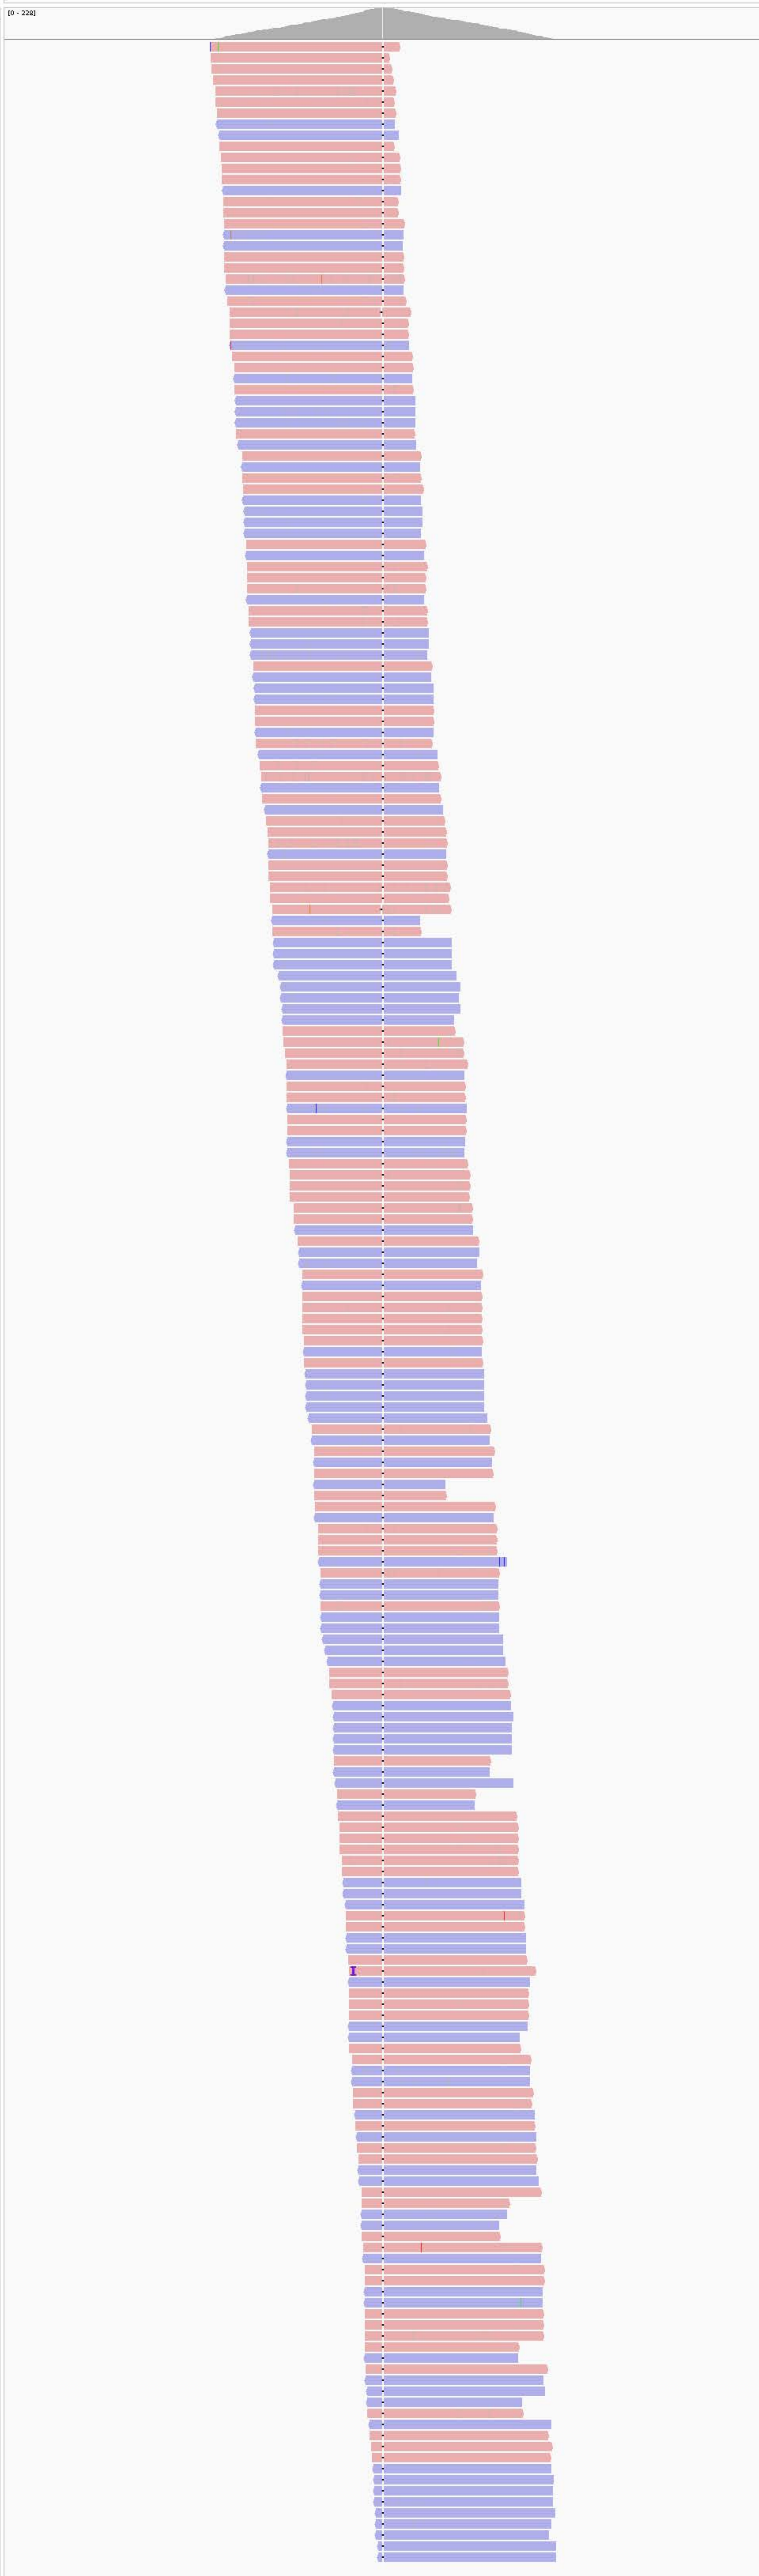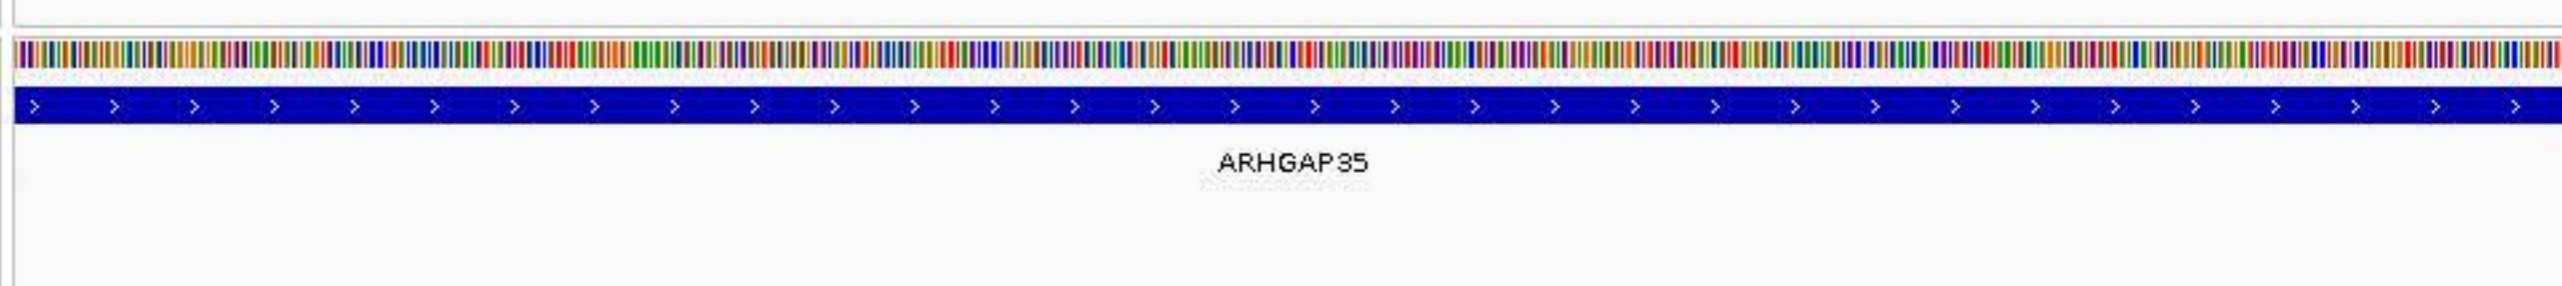



chr19:46,921,357-46,921,956

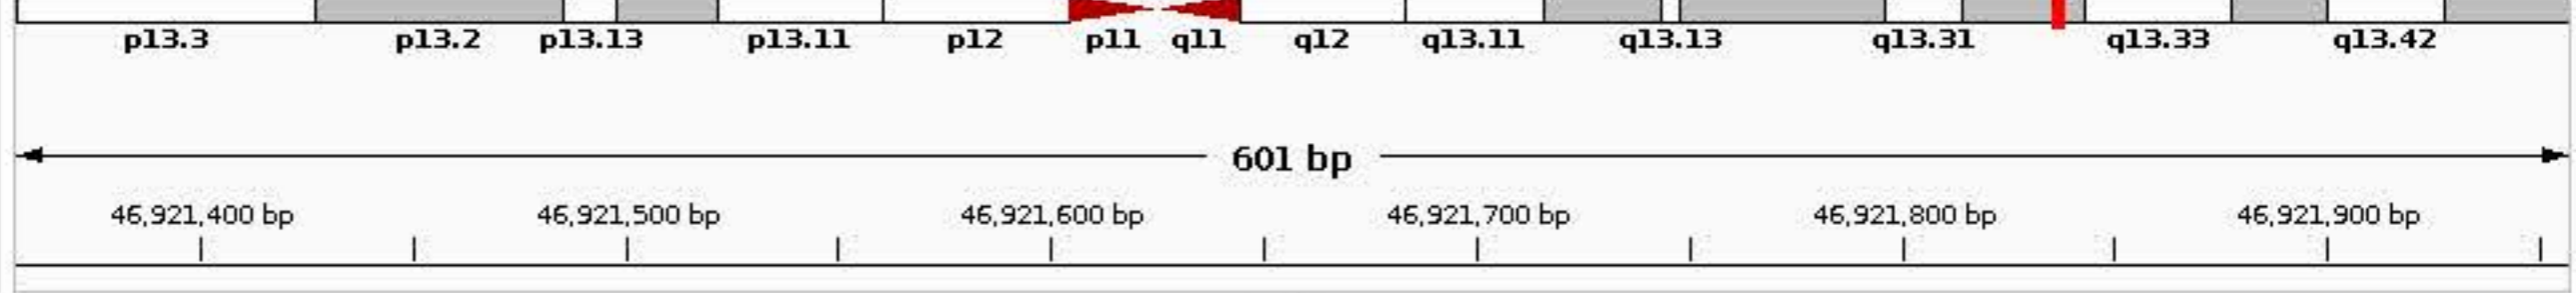

SL\_0004\_RN\_48\_mut.bam Coverage

SL\_0004\_RN\_48\_mut.bam

Sequence

Refseq Genes

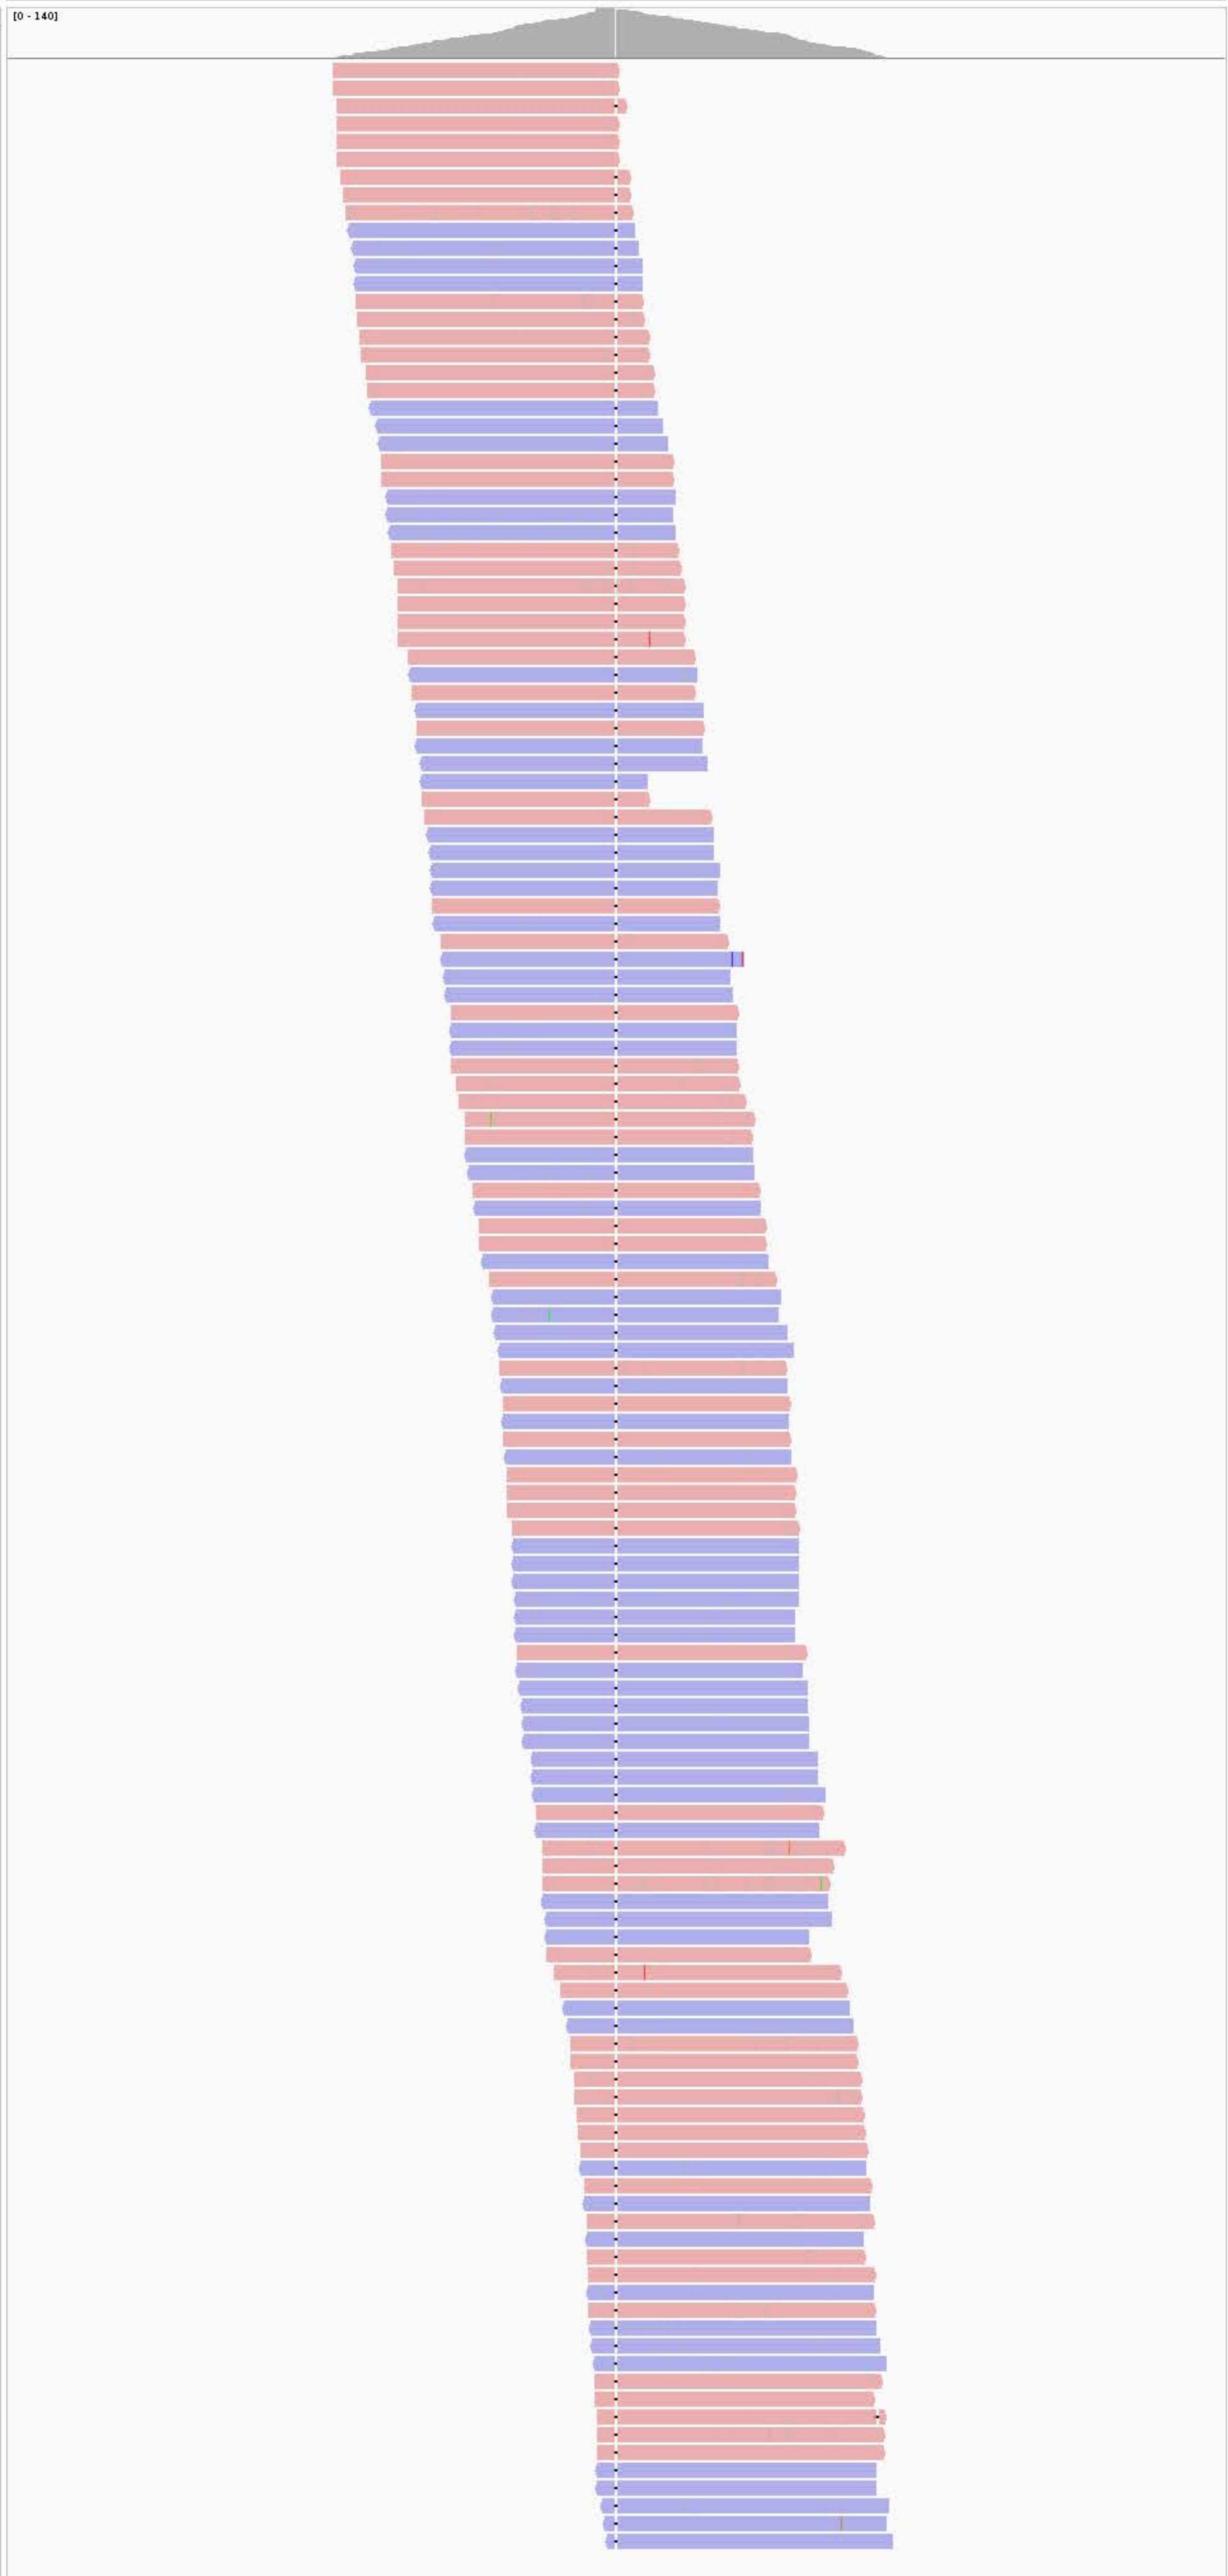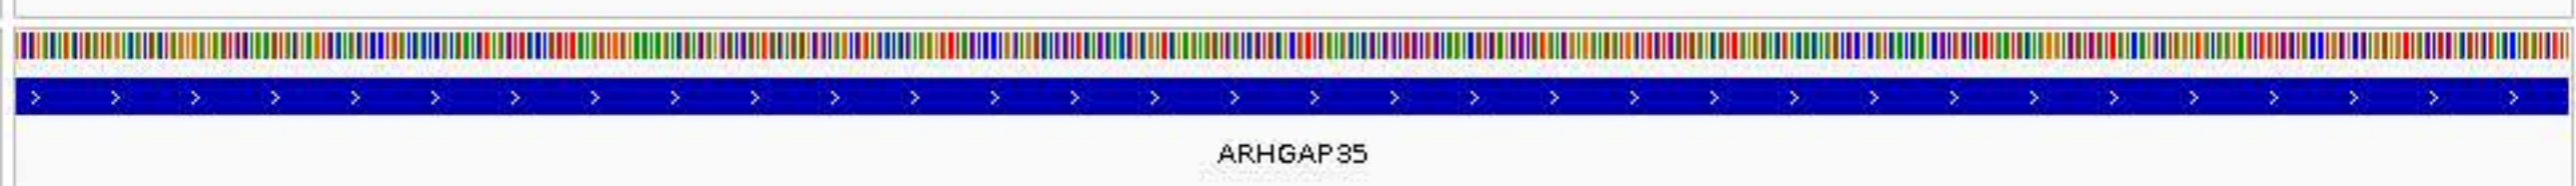

ARHGAP35

chr19:46,937,009-46,937,608

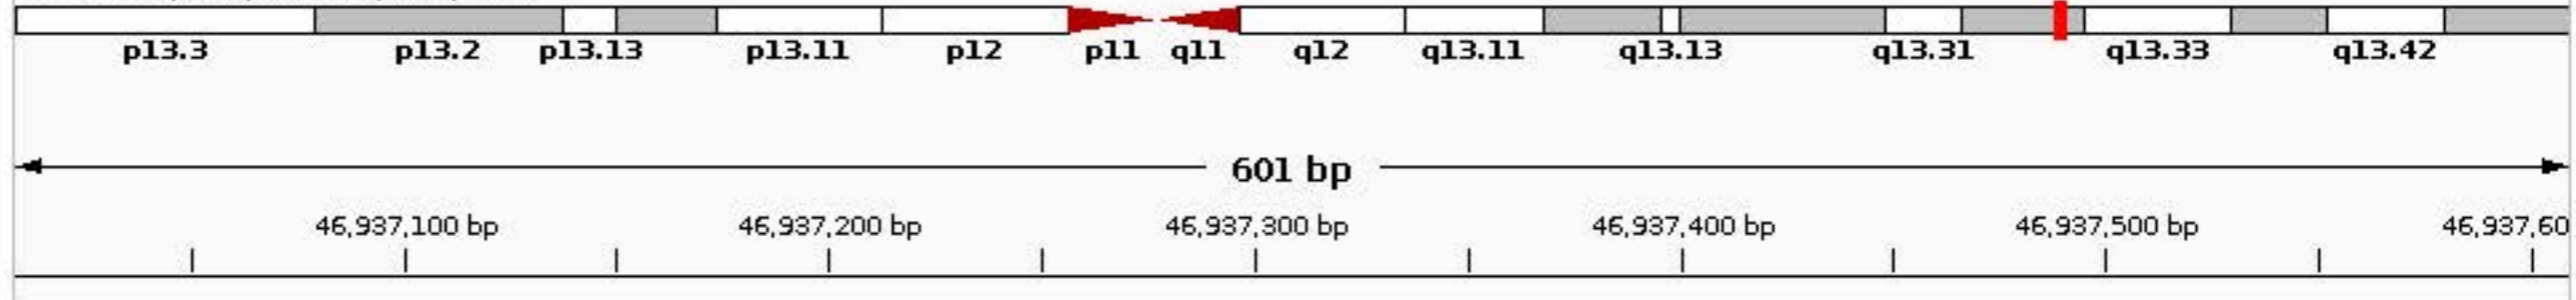

SL\_0002\_LN\_19\_mut.bam Coverage

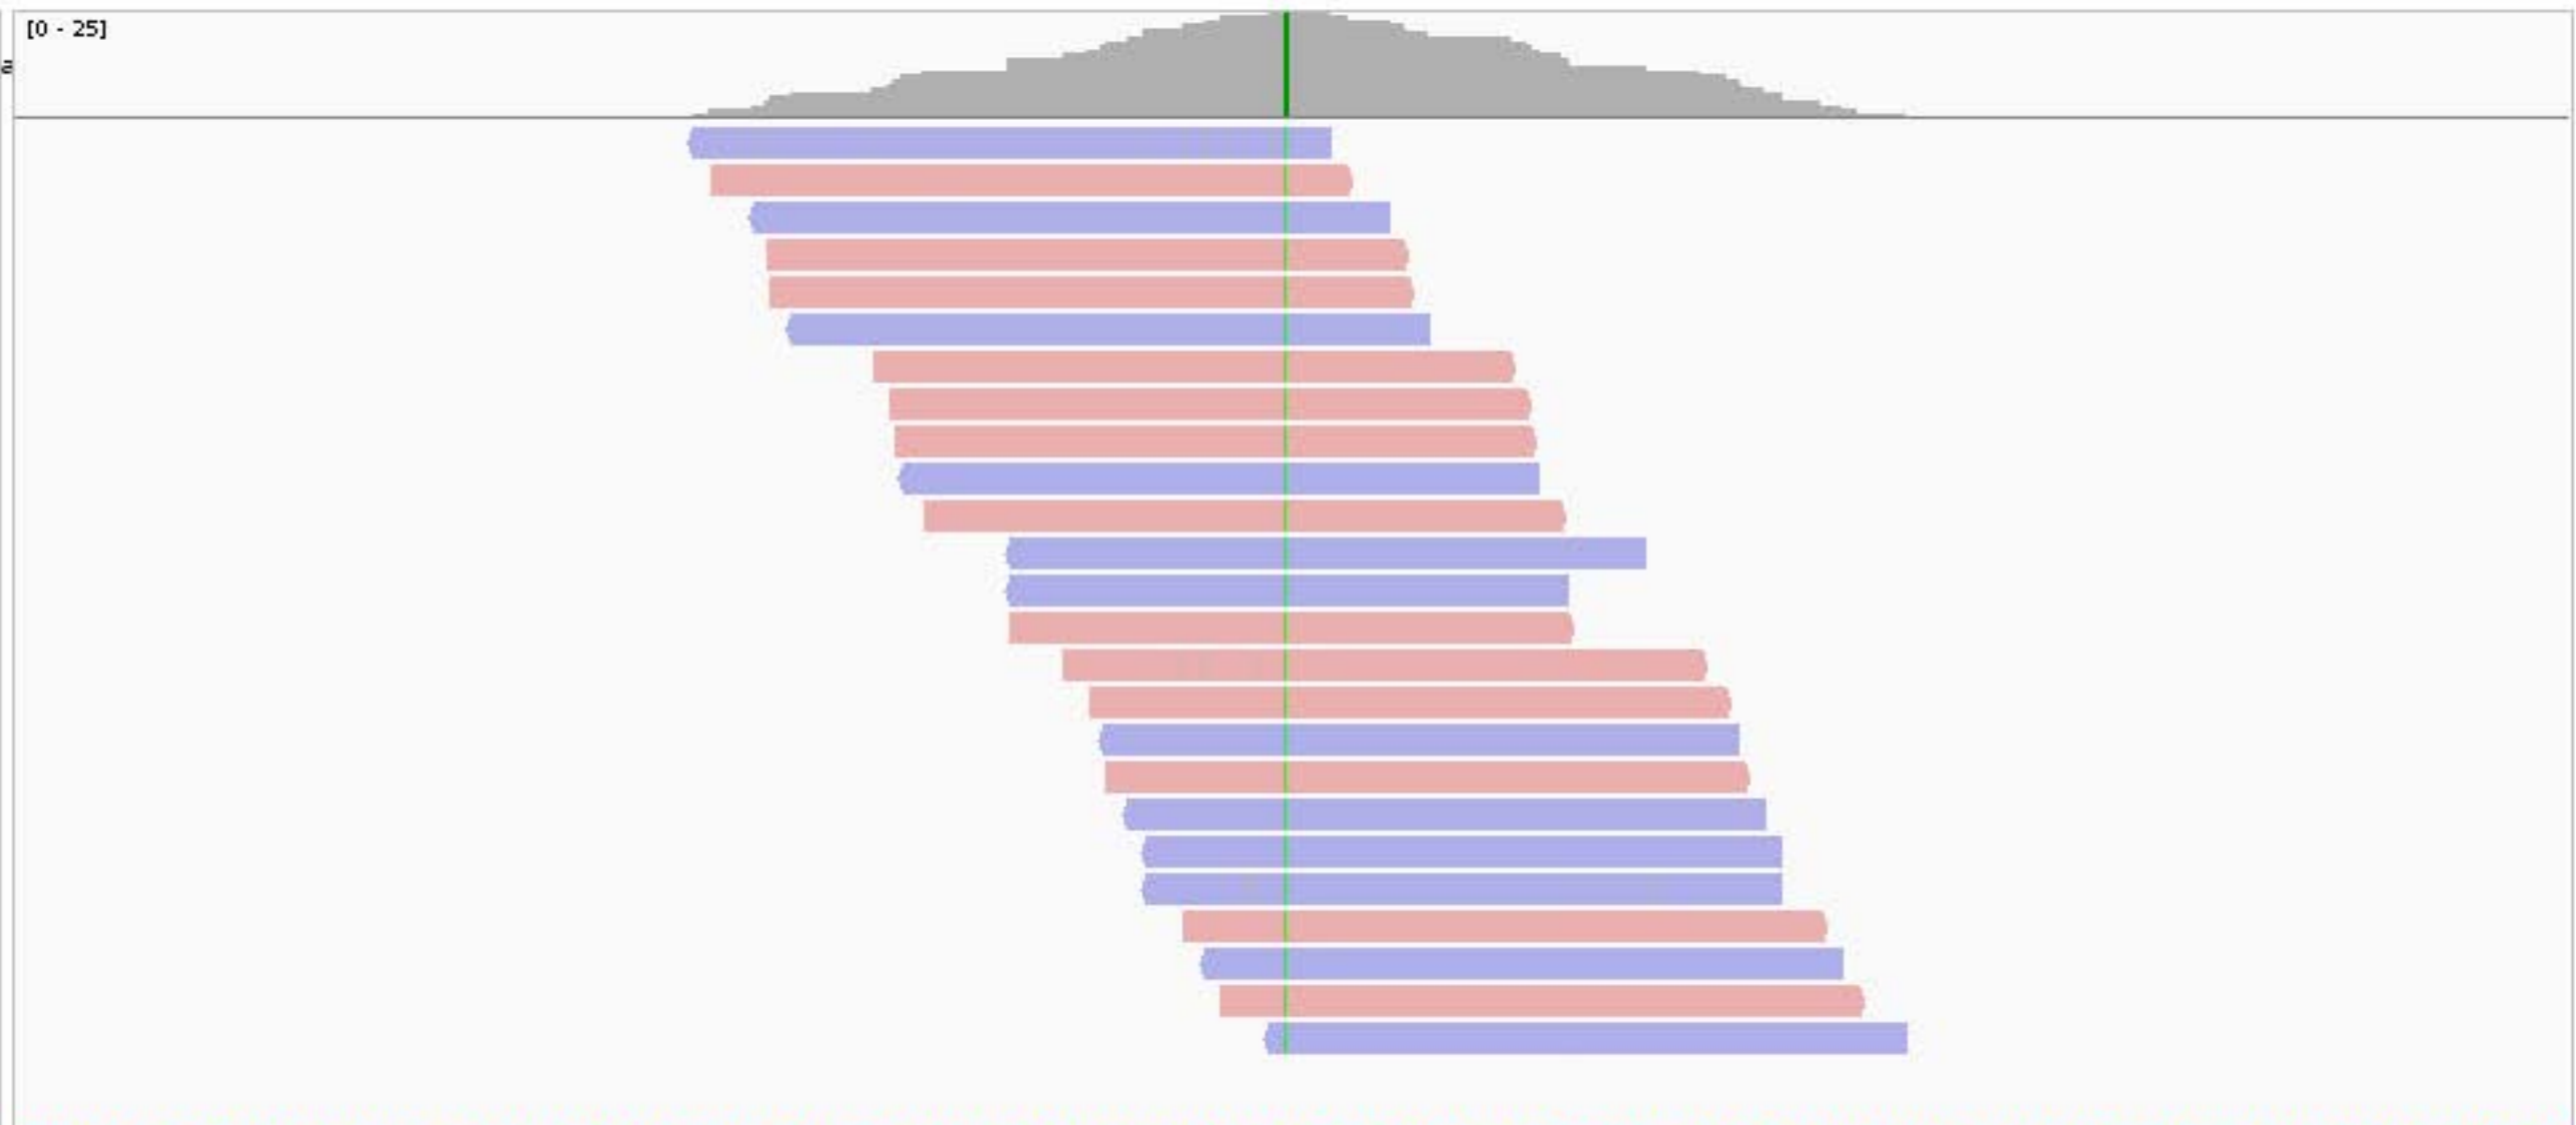

SL\_0002\_LN\_19\_mut.bam

Sequence

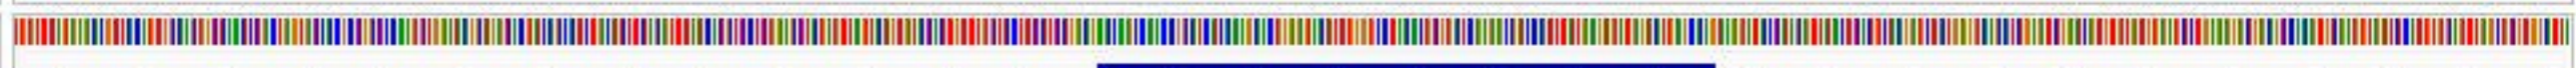

Refseq Genes

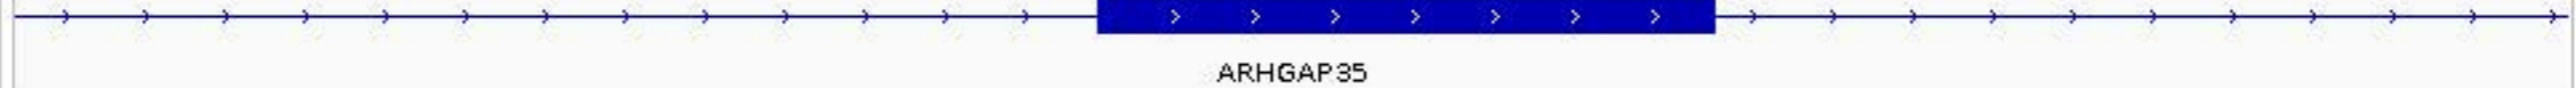

ARHGAP35

chr19:46,937,009-46,937,608

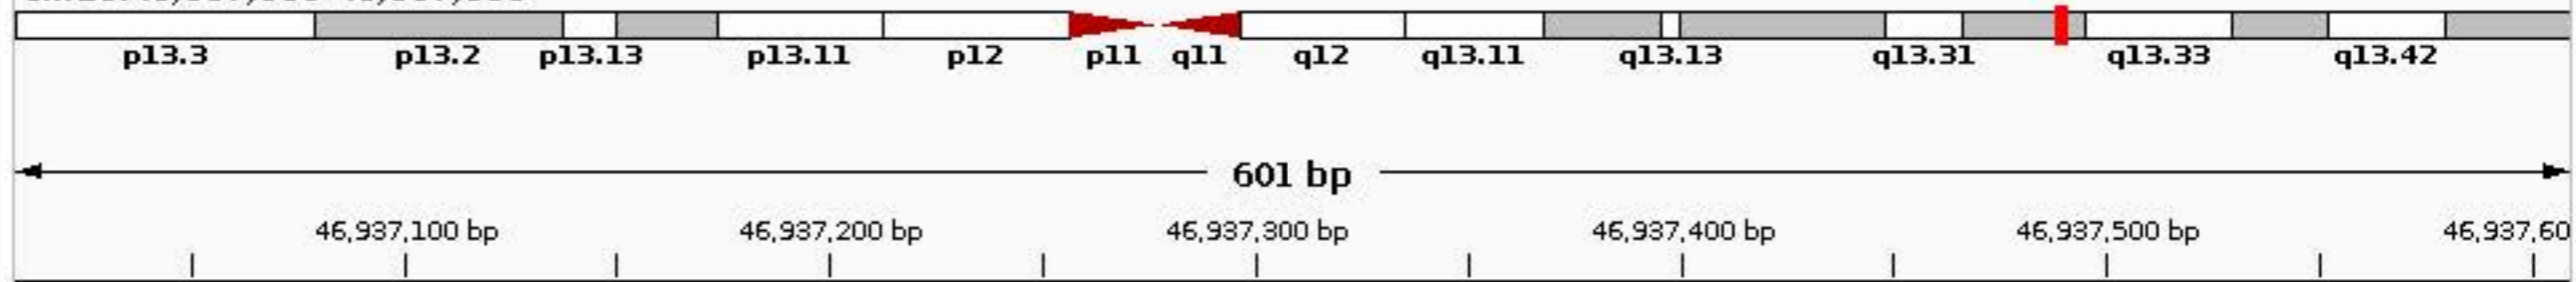

SL\_0002\_LN\_20\_mut.bam Coverage

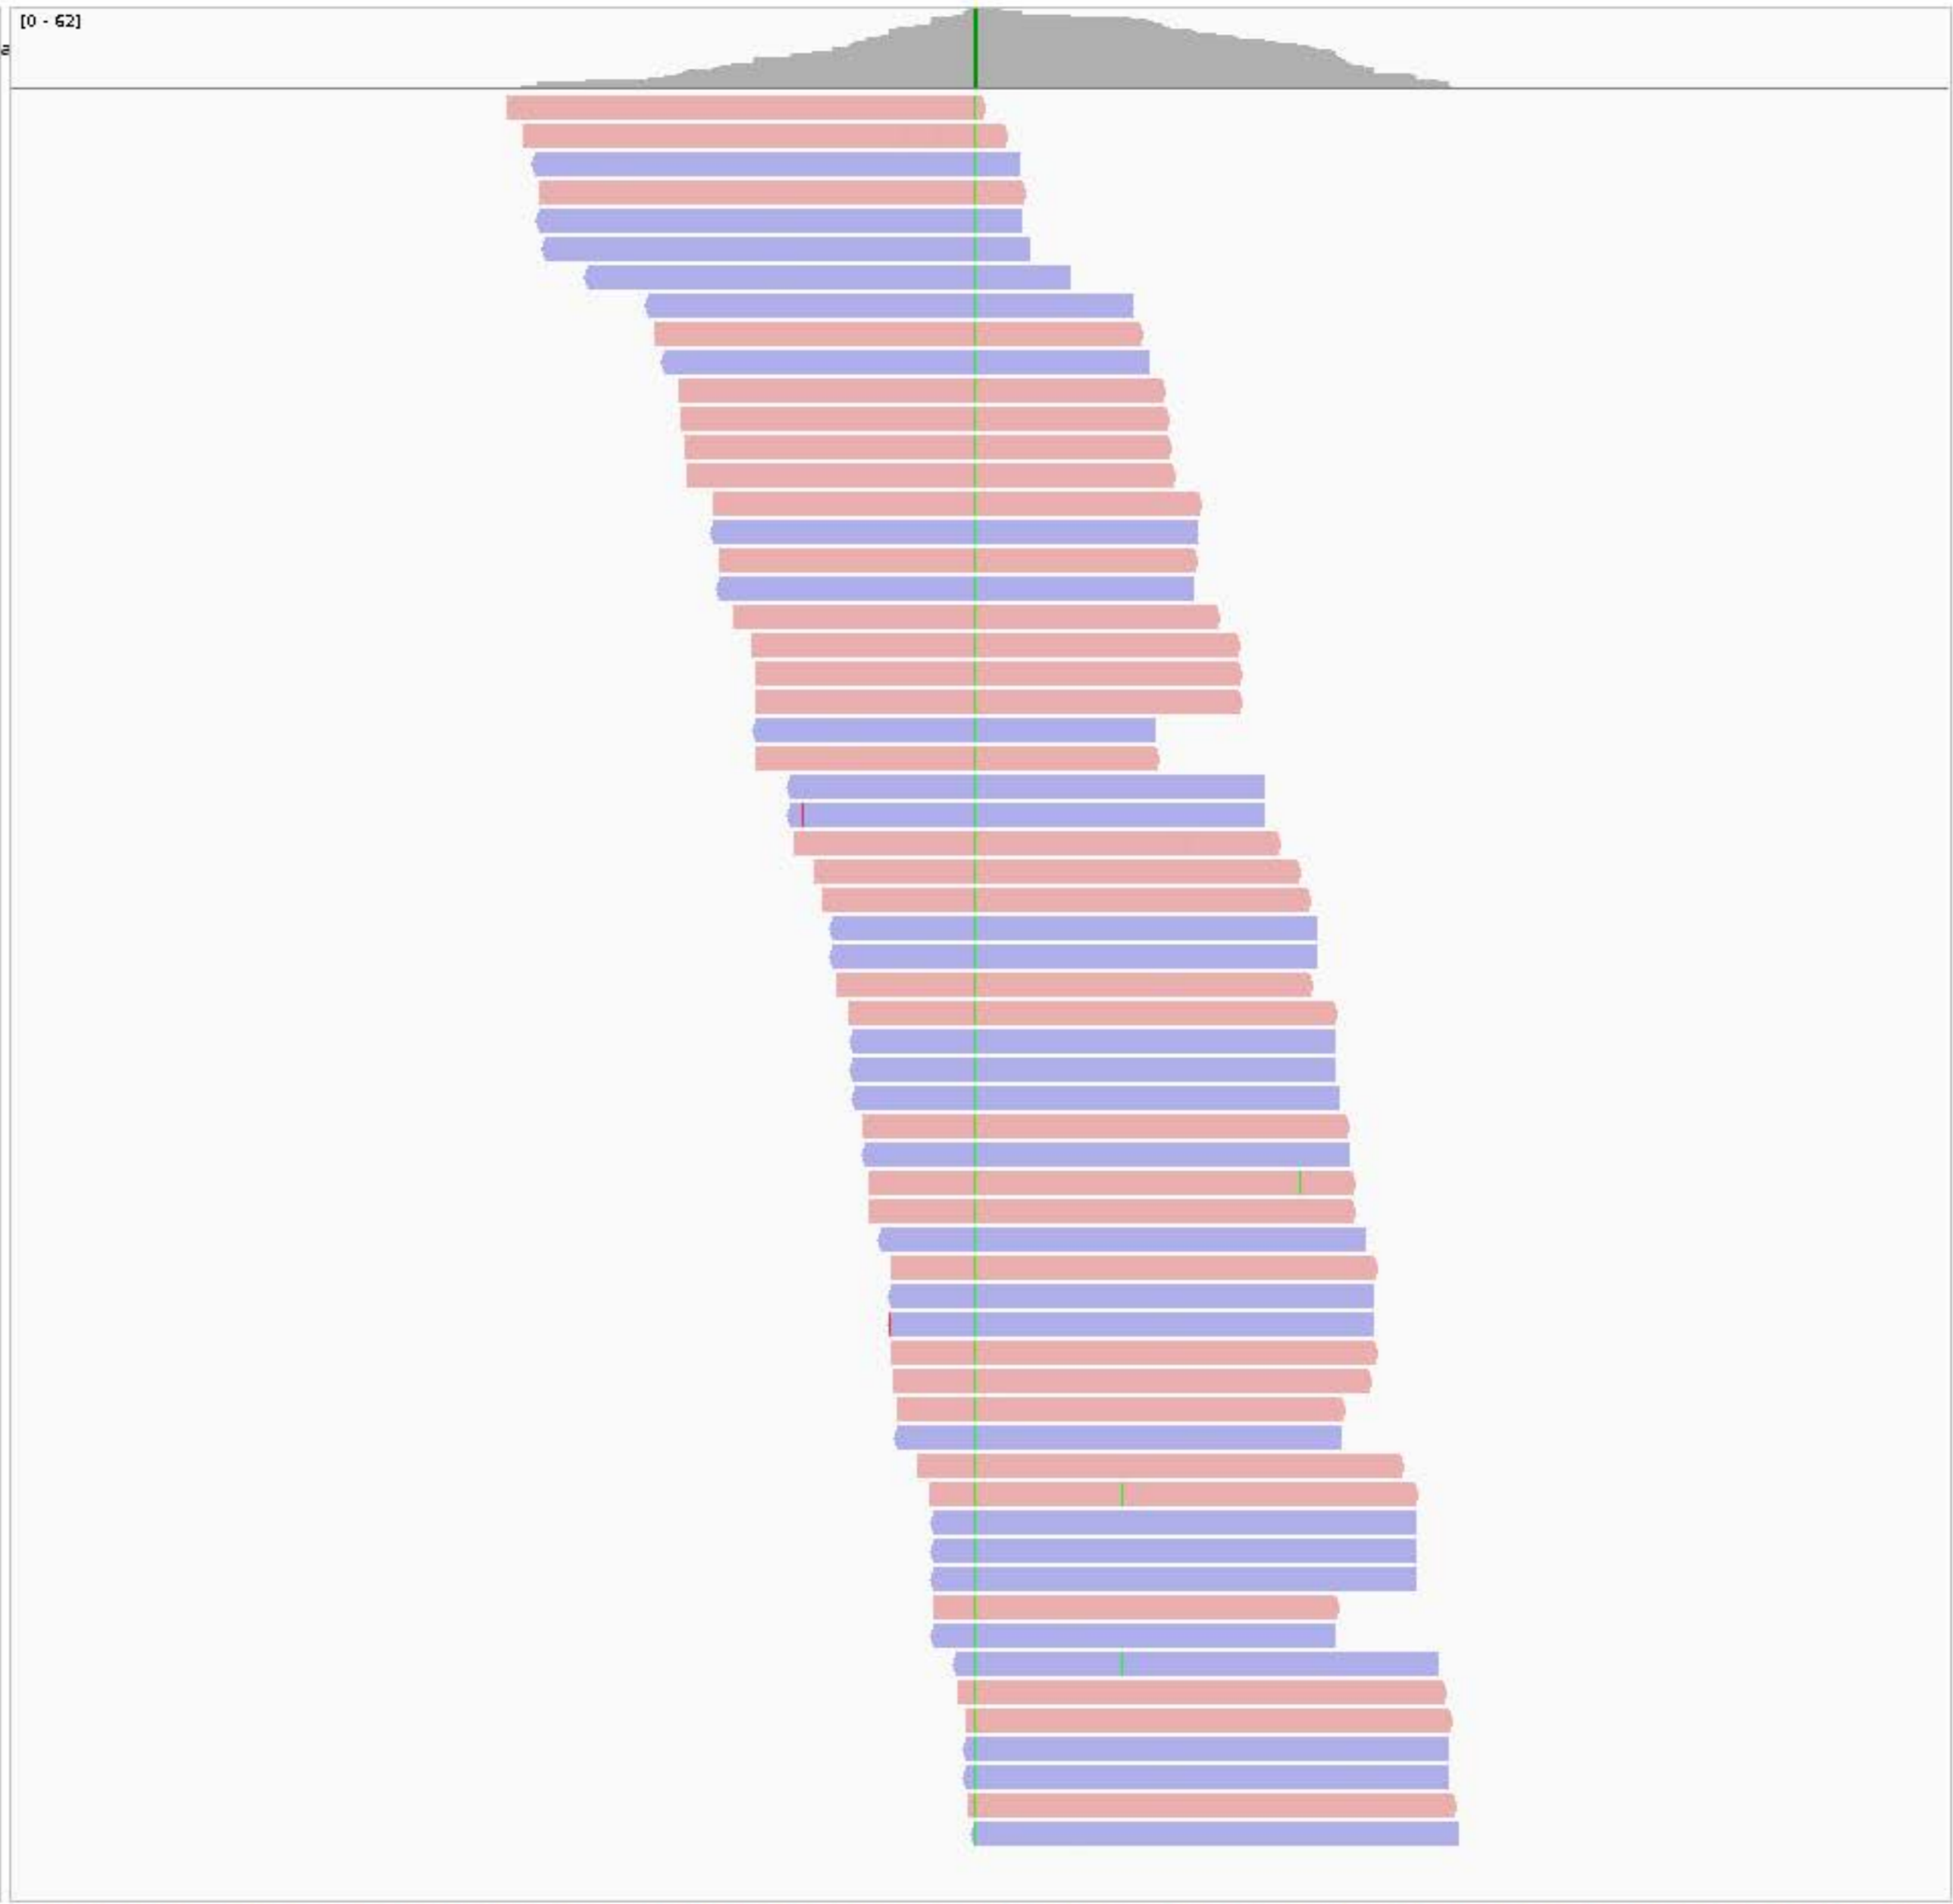

SL\_0002\_LN\_20\_mut.bam

Sequence →

Refseq Genes

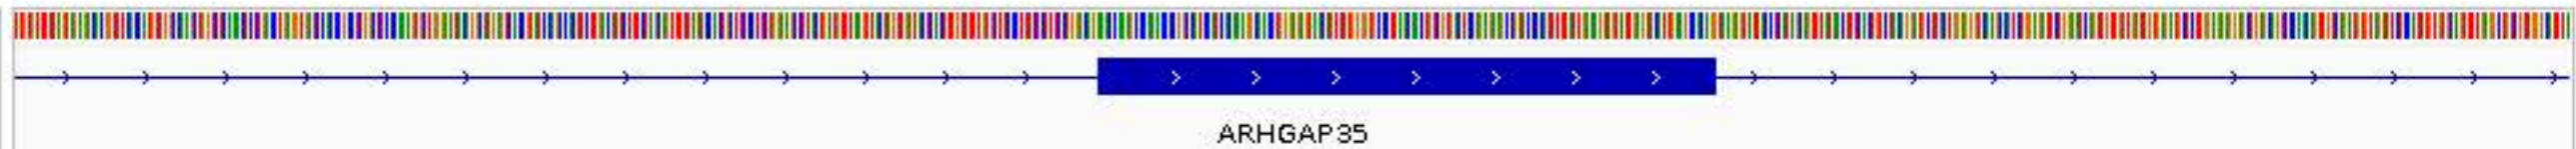

ARHGAP35



chr19:46,920,602-46,921,201

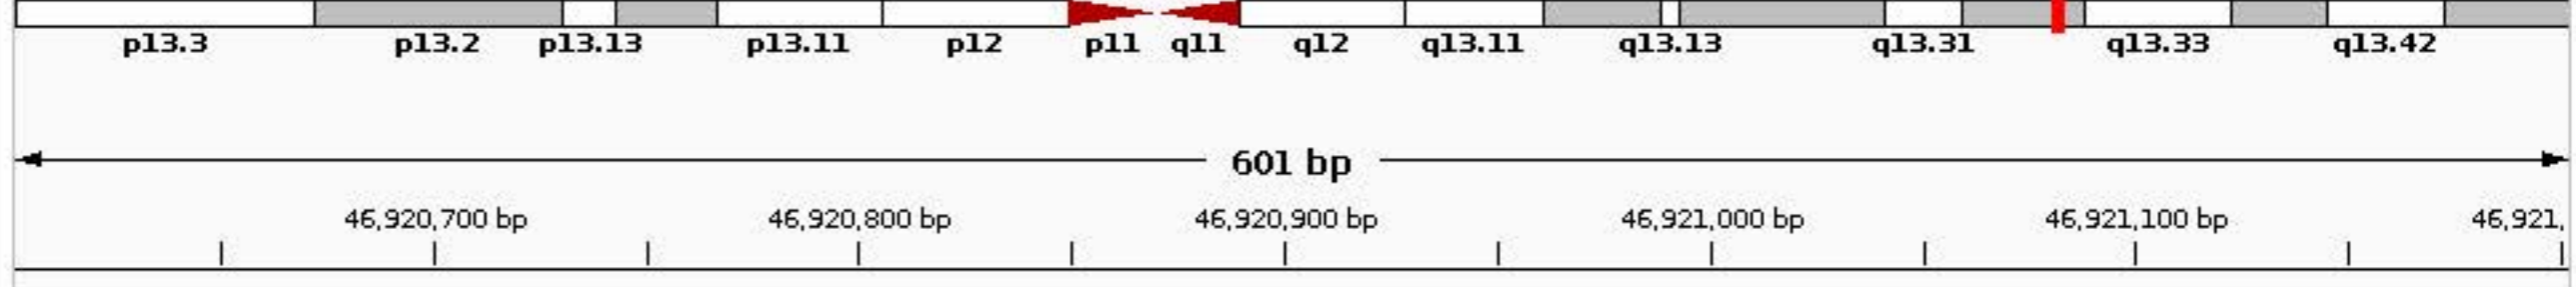

SL\_0001\_RN\_26\_mut.bam Coverage

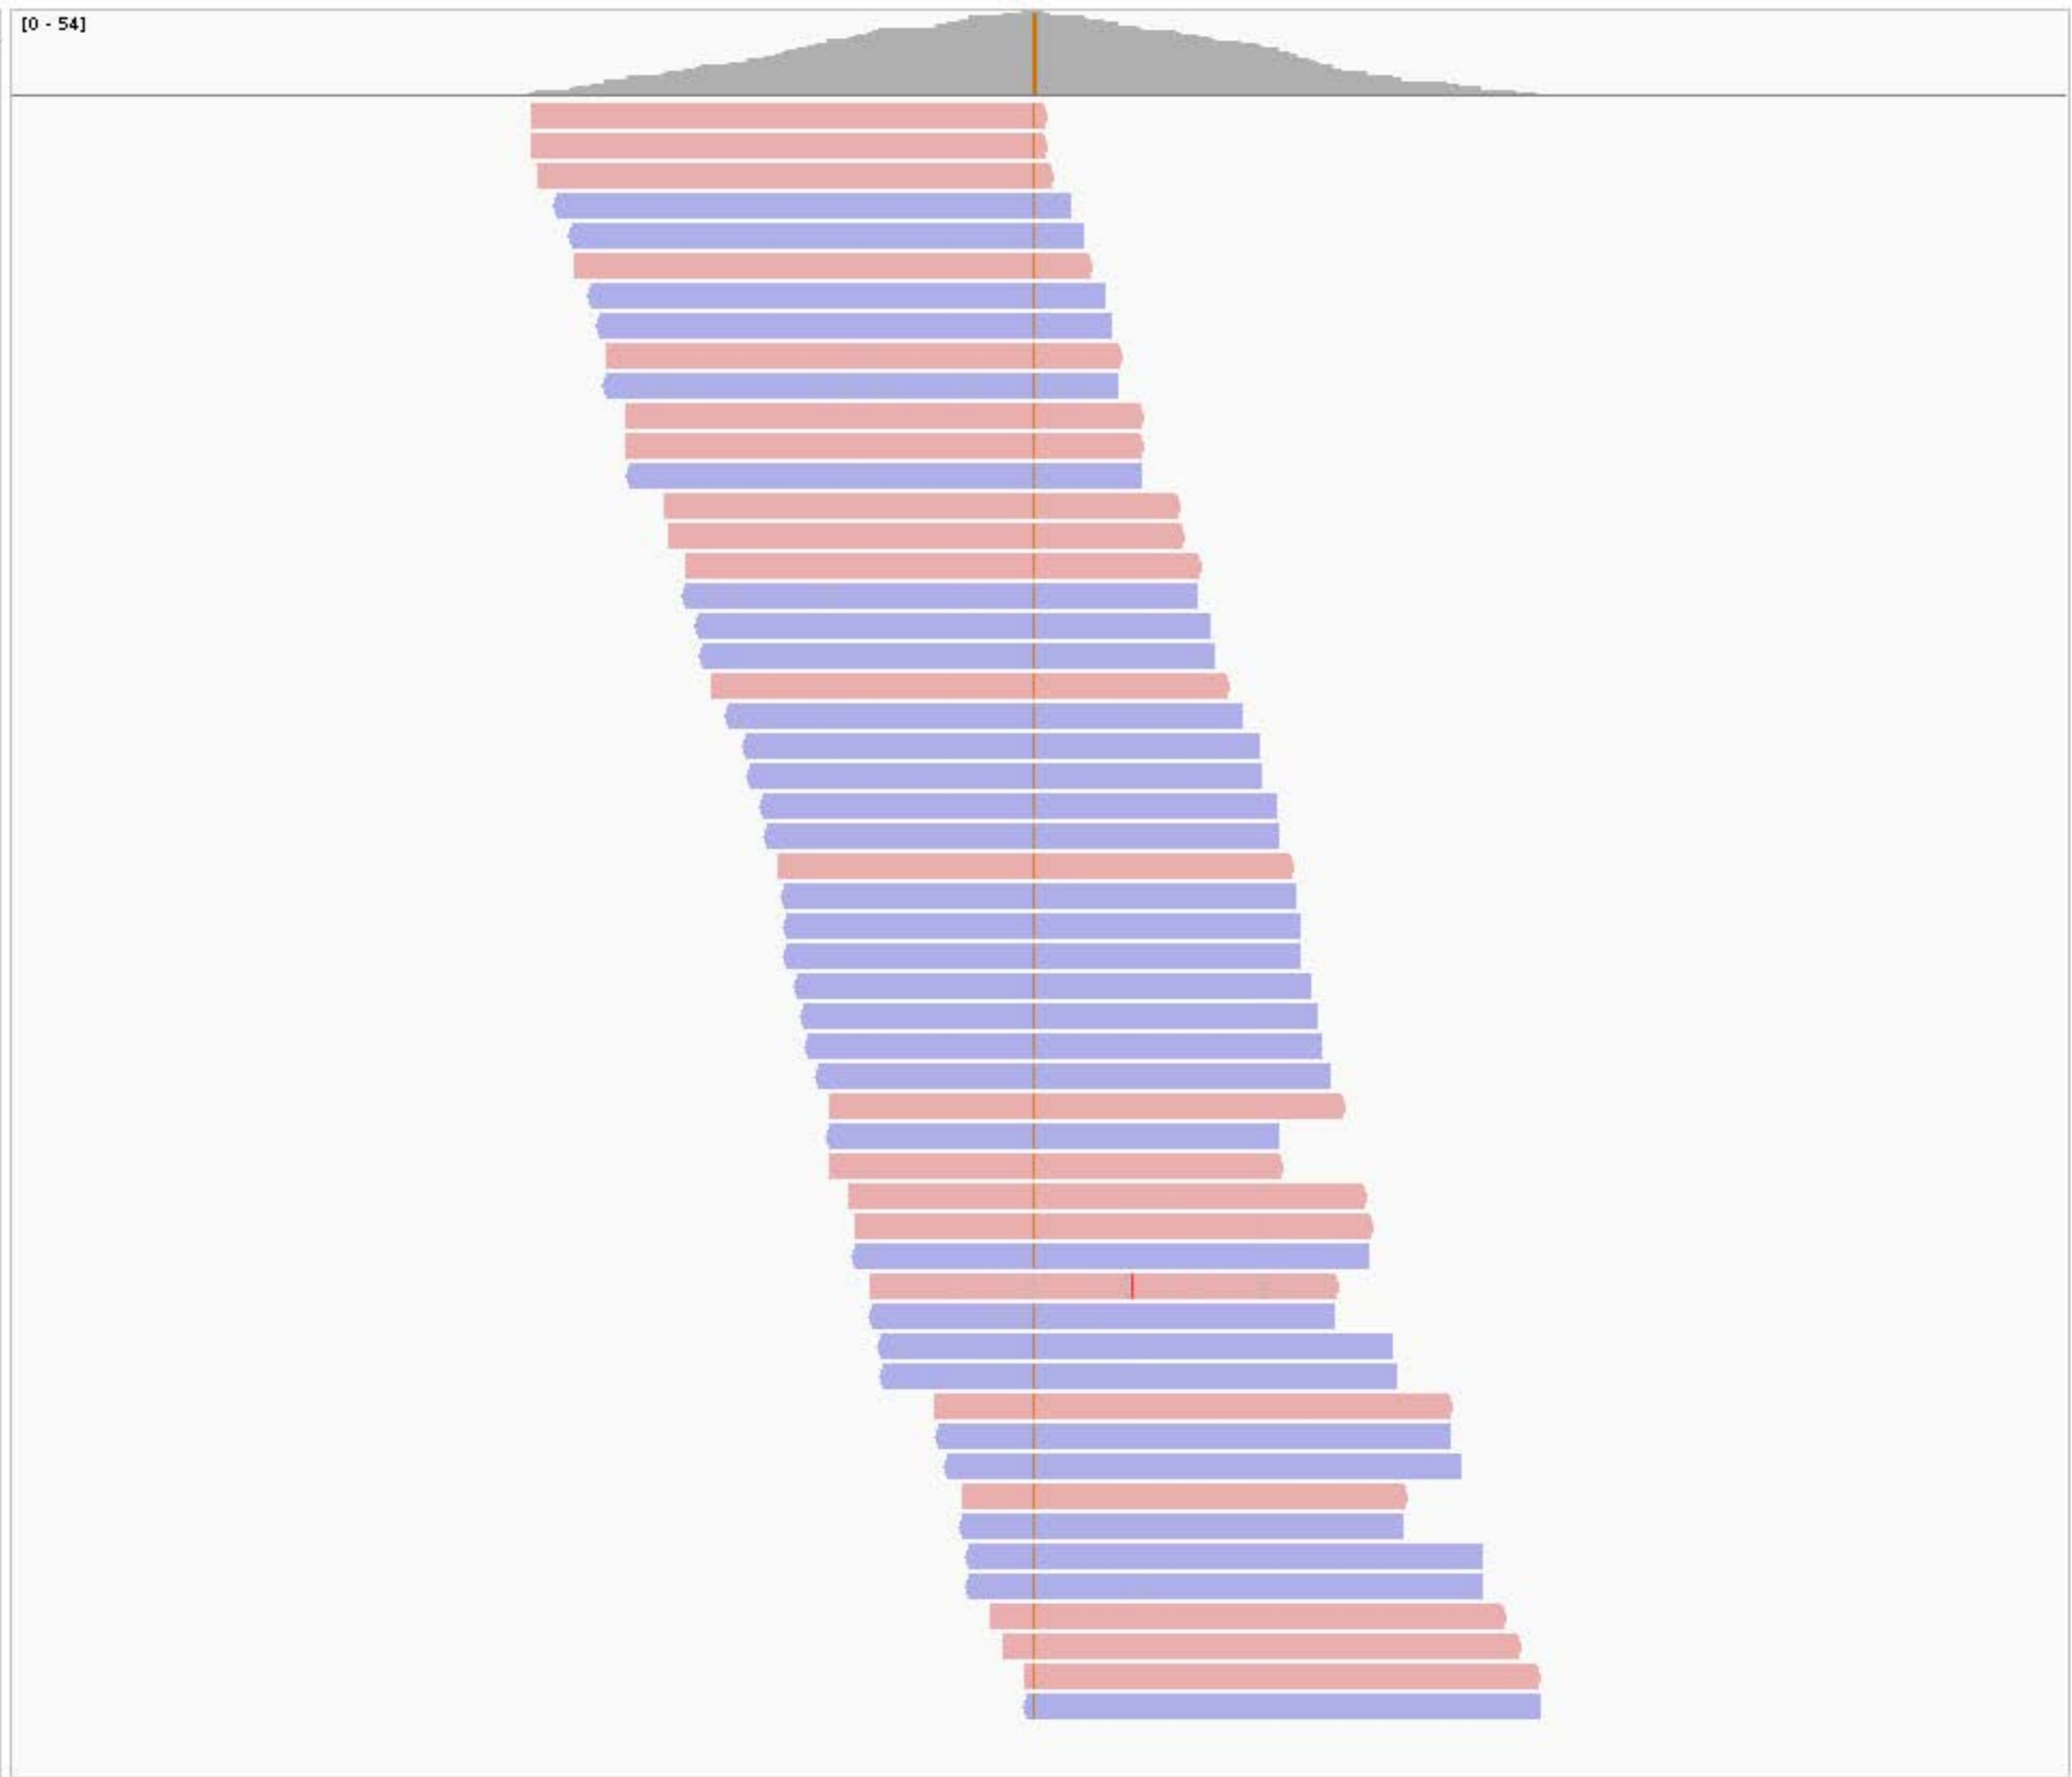

SL\_0001\_RN\_26\_mut.bam

Sequence

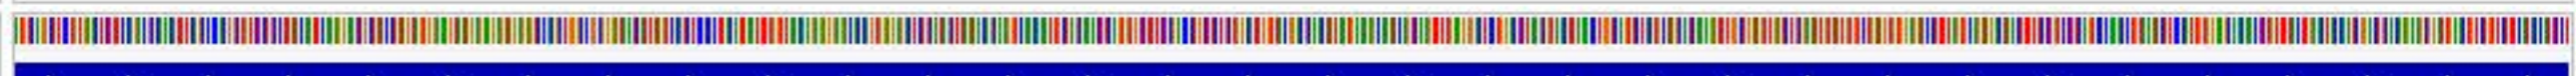

Refseq Genes

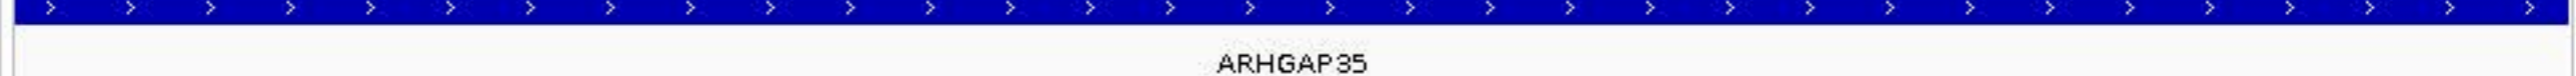

ARHGAP35



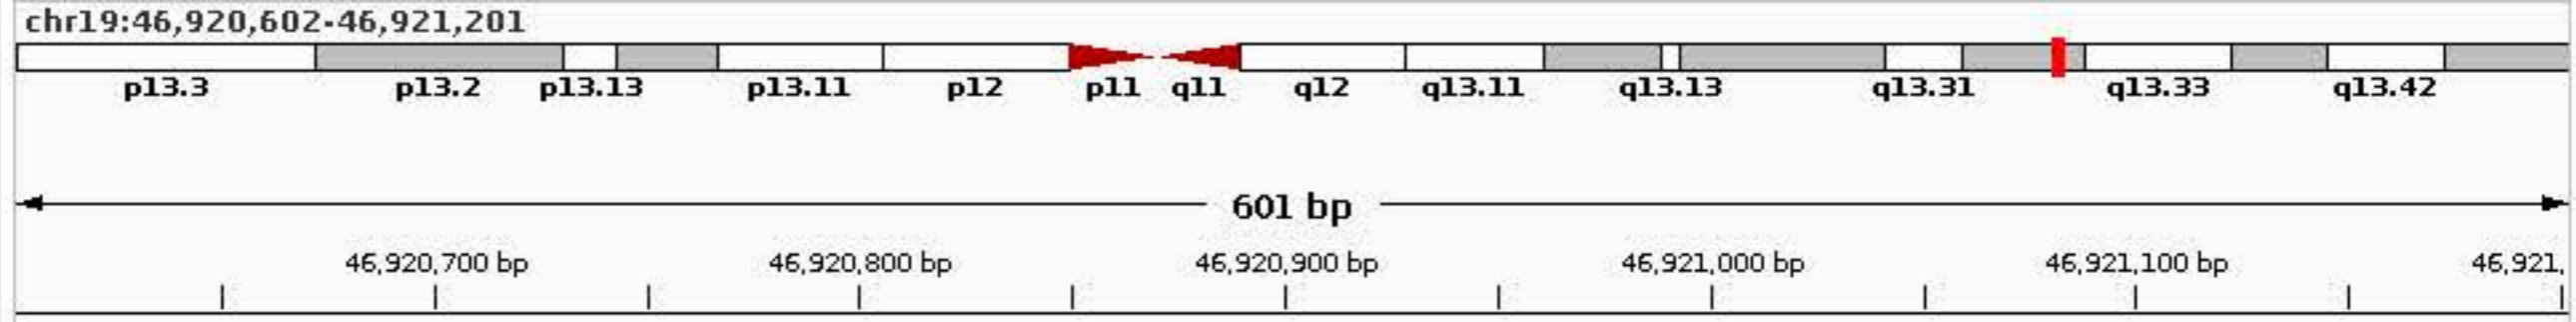

SL\_0001\_RN\_27\_mut.bam Coverage

SL\_0001\_RN\_27\_mut.bam

Sequence

Refseq Genes

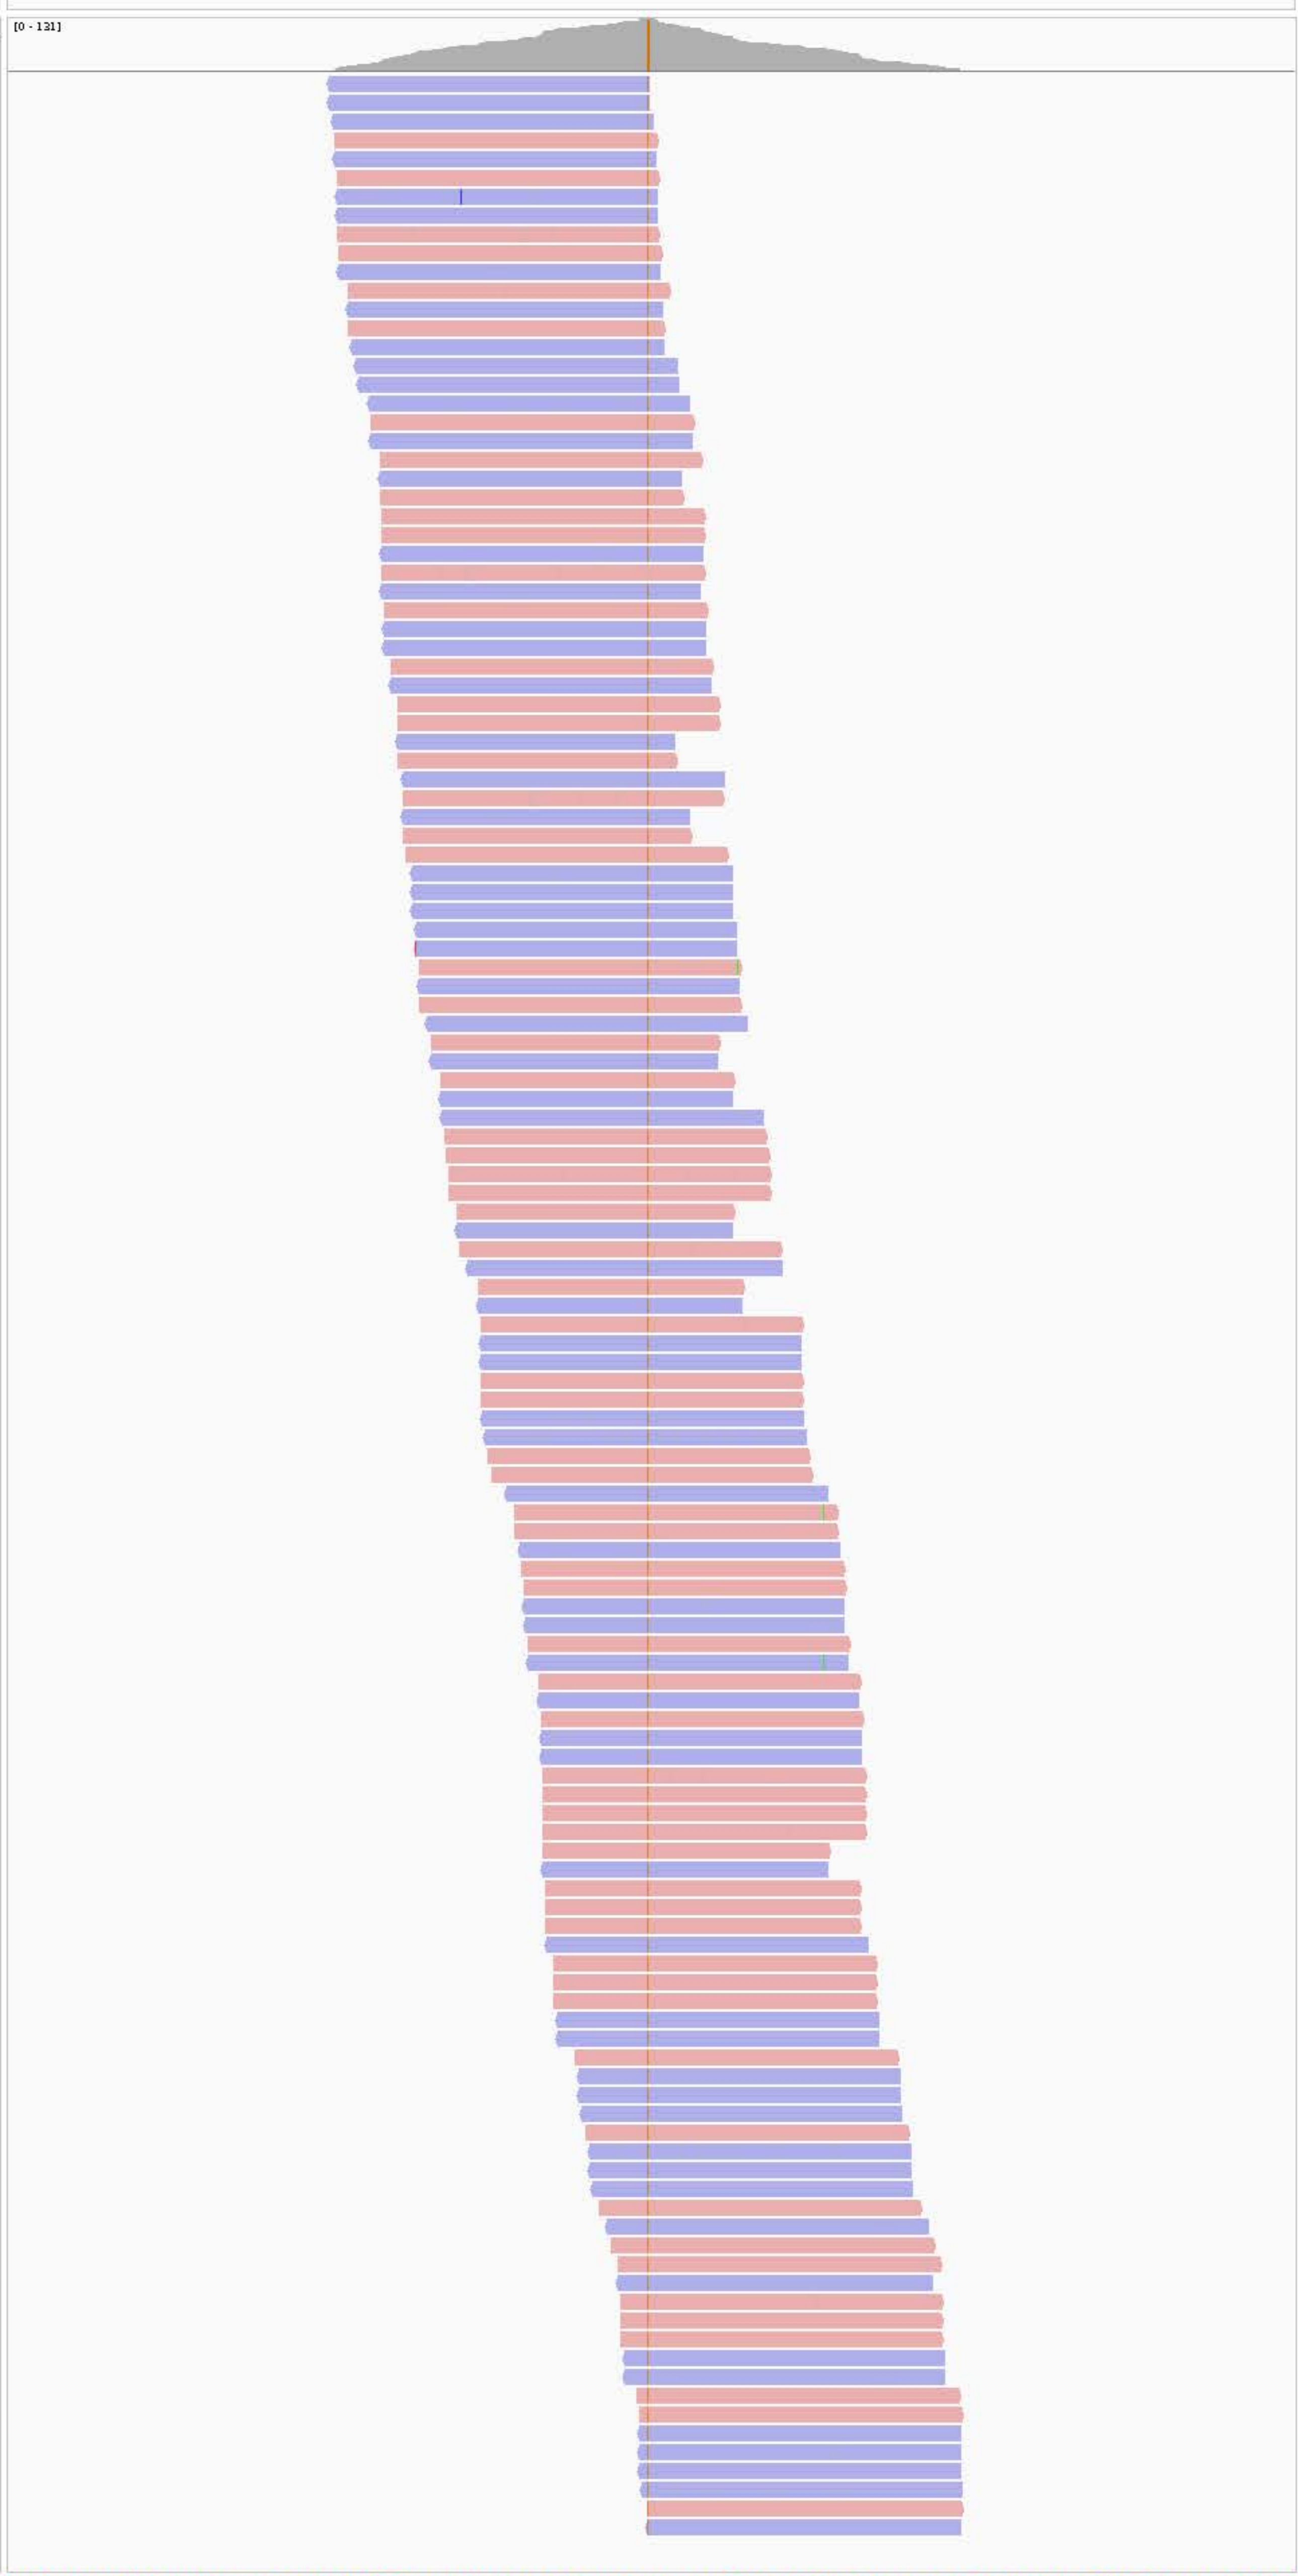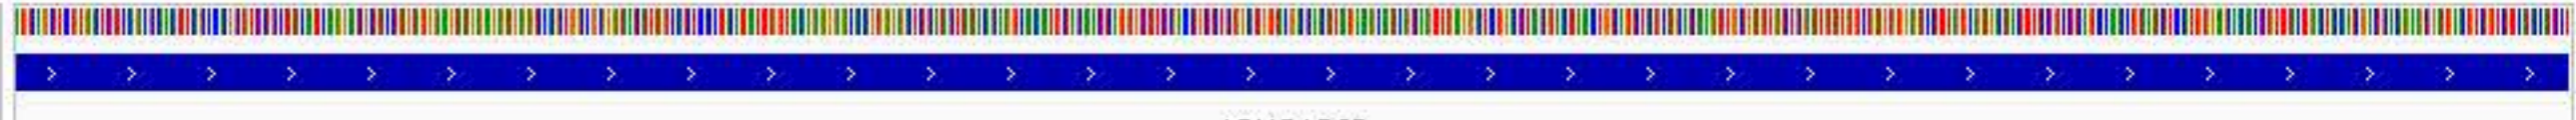

ARHGAP35

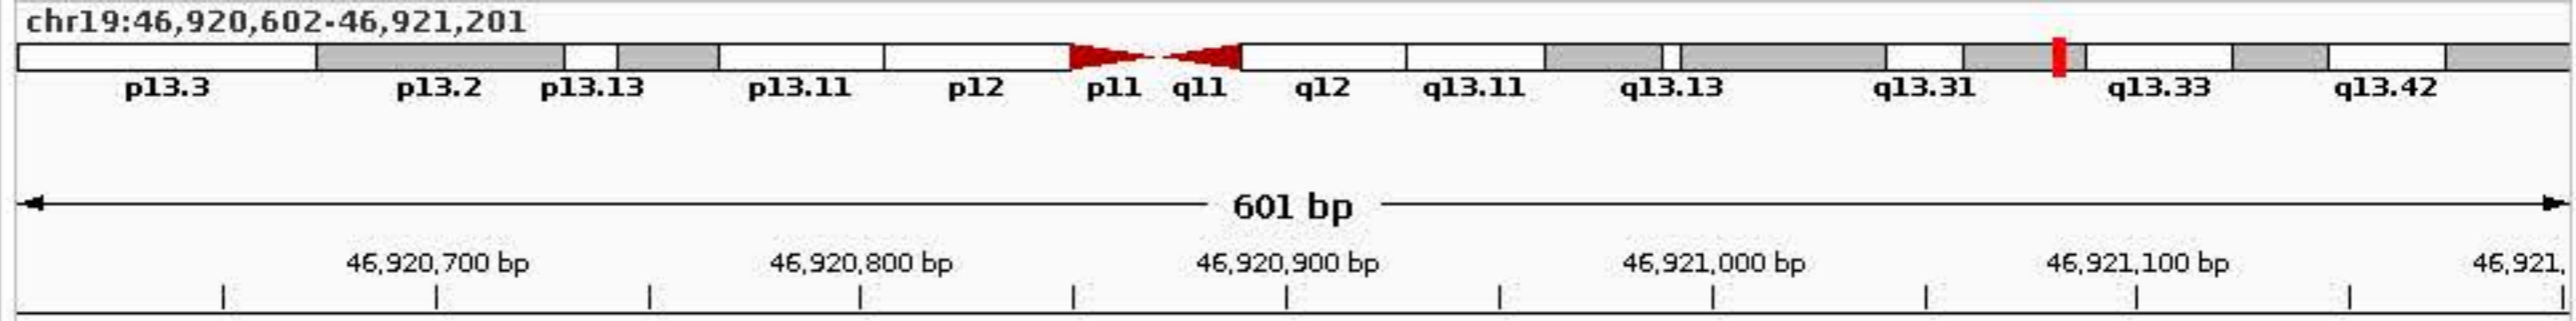

SL\_0001\_RN\_31\_mut.bam Coverage

SL\_0001\_RN\_31\_mut.bam

Sequence

Refseq Genes

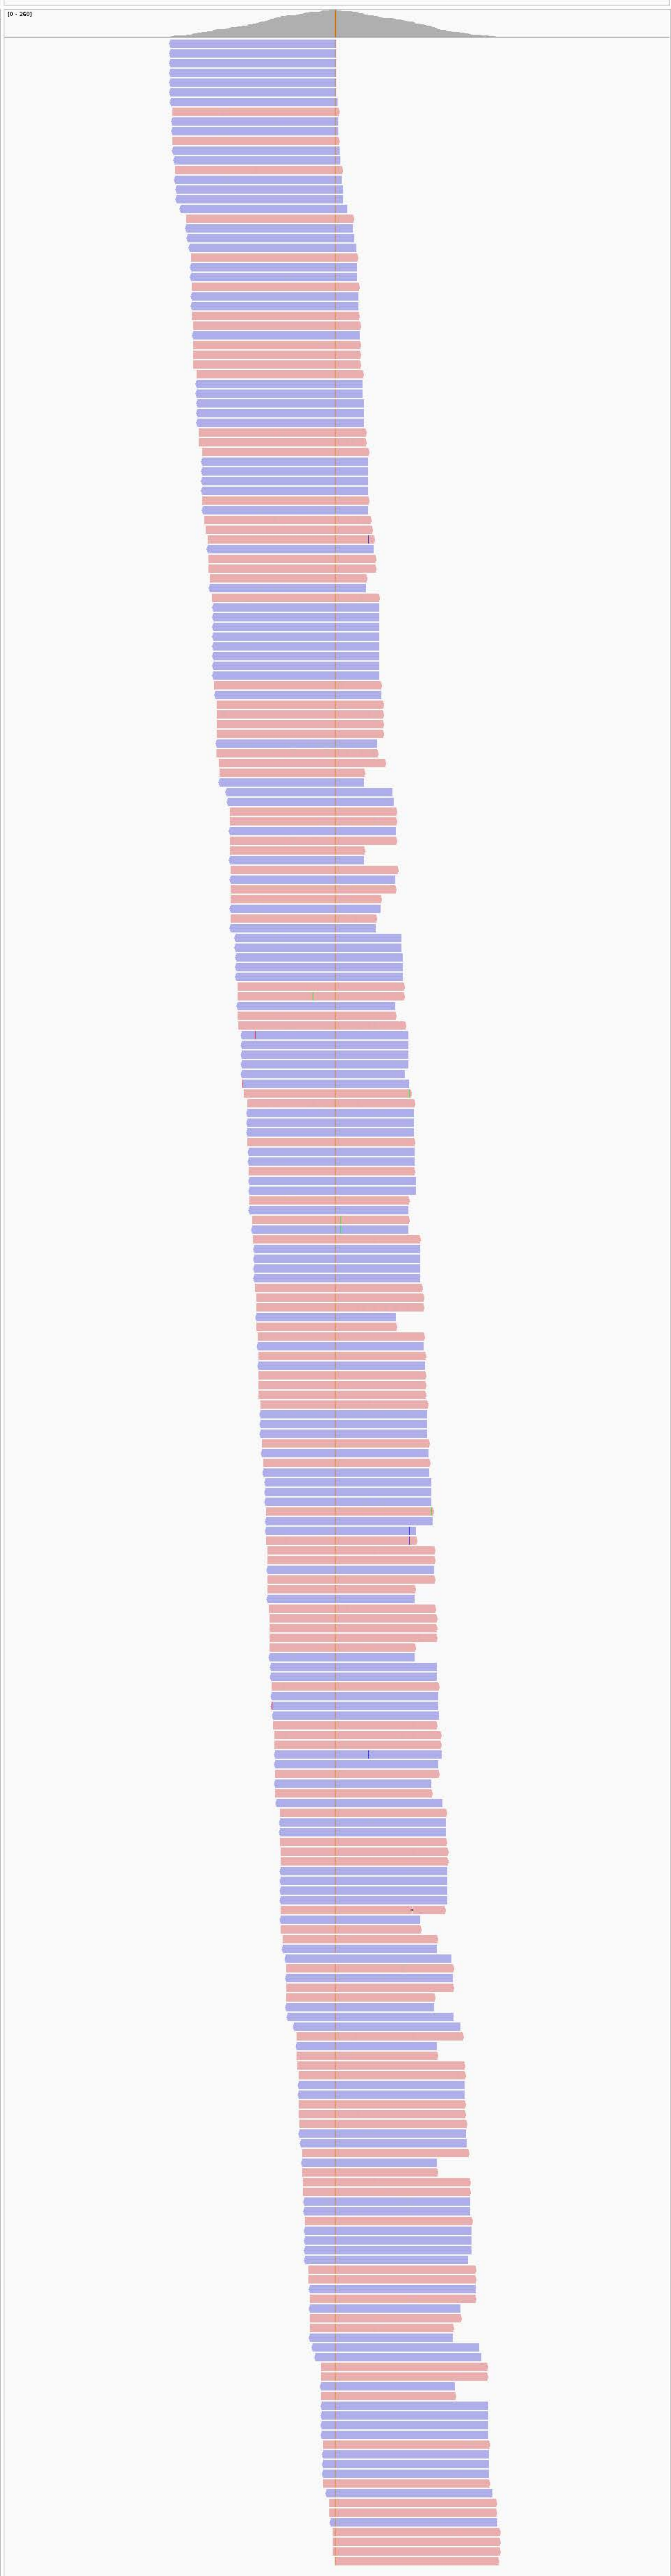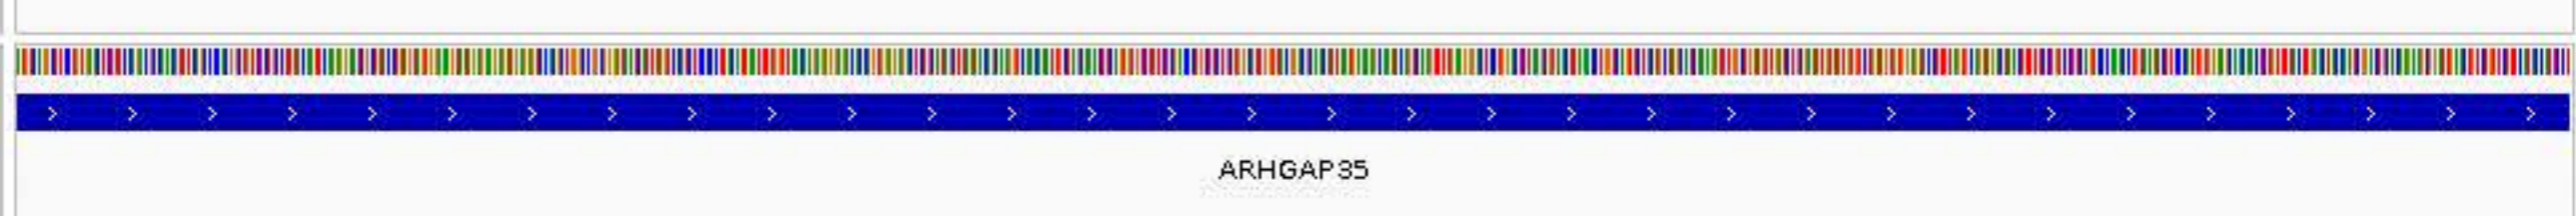



chr19:46,920,602-46,921,201

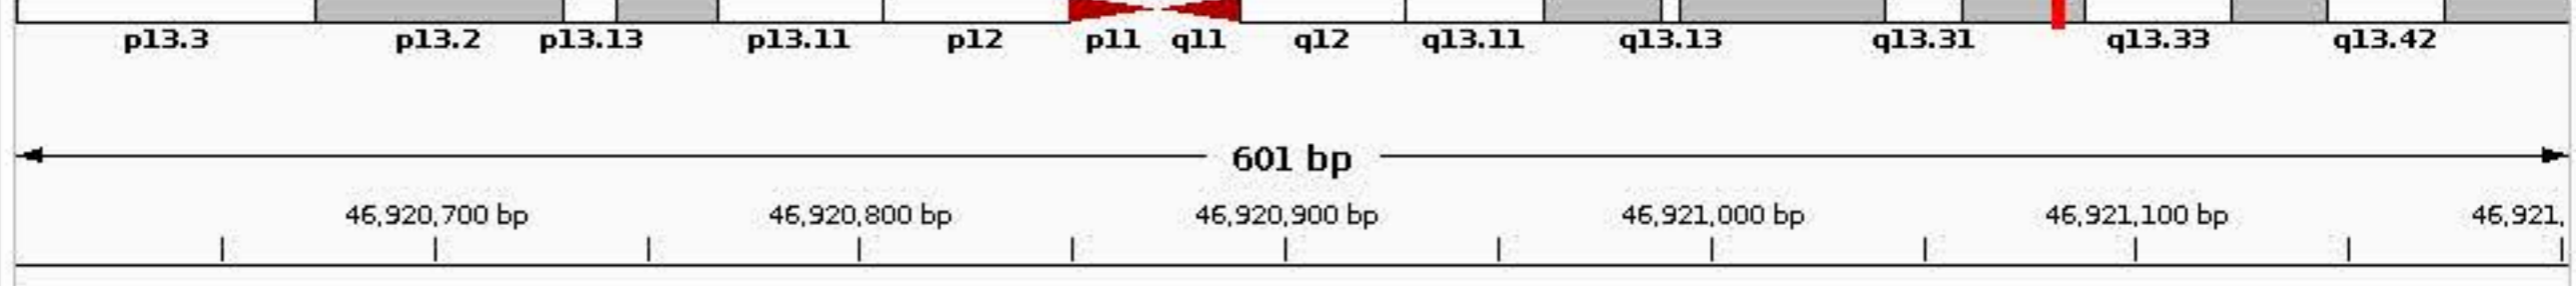

SL\_0001\_RN\_32\_mut.bam Coverage

SL\_0001\_RN\_32\_mut.bam

Sequence

Refseq Genes

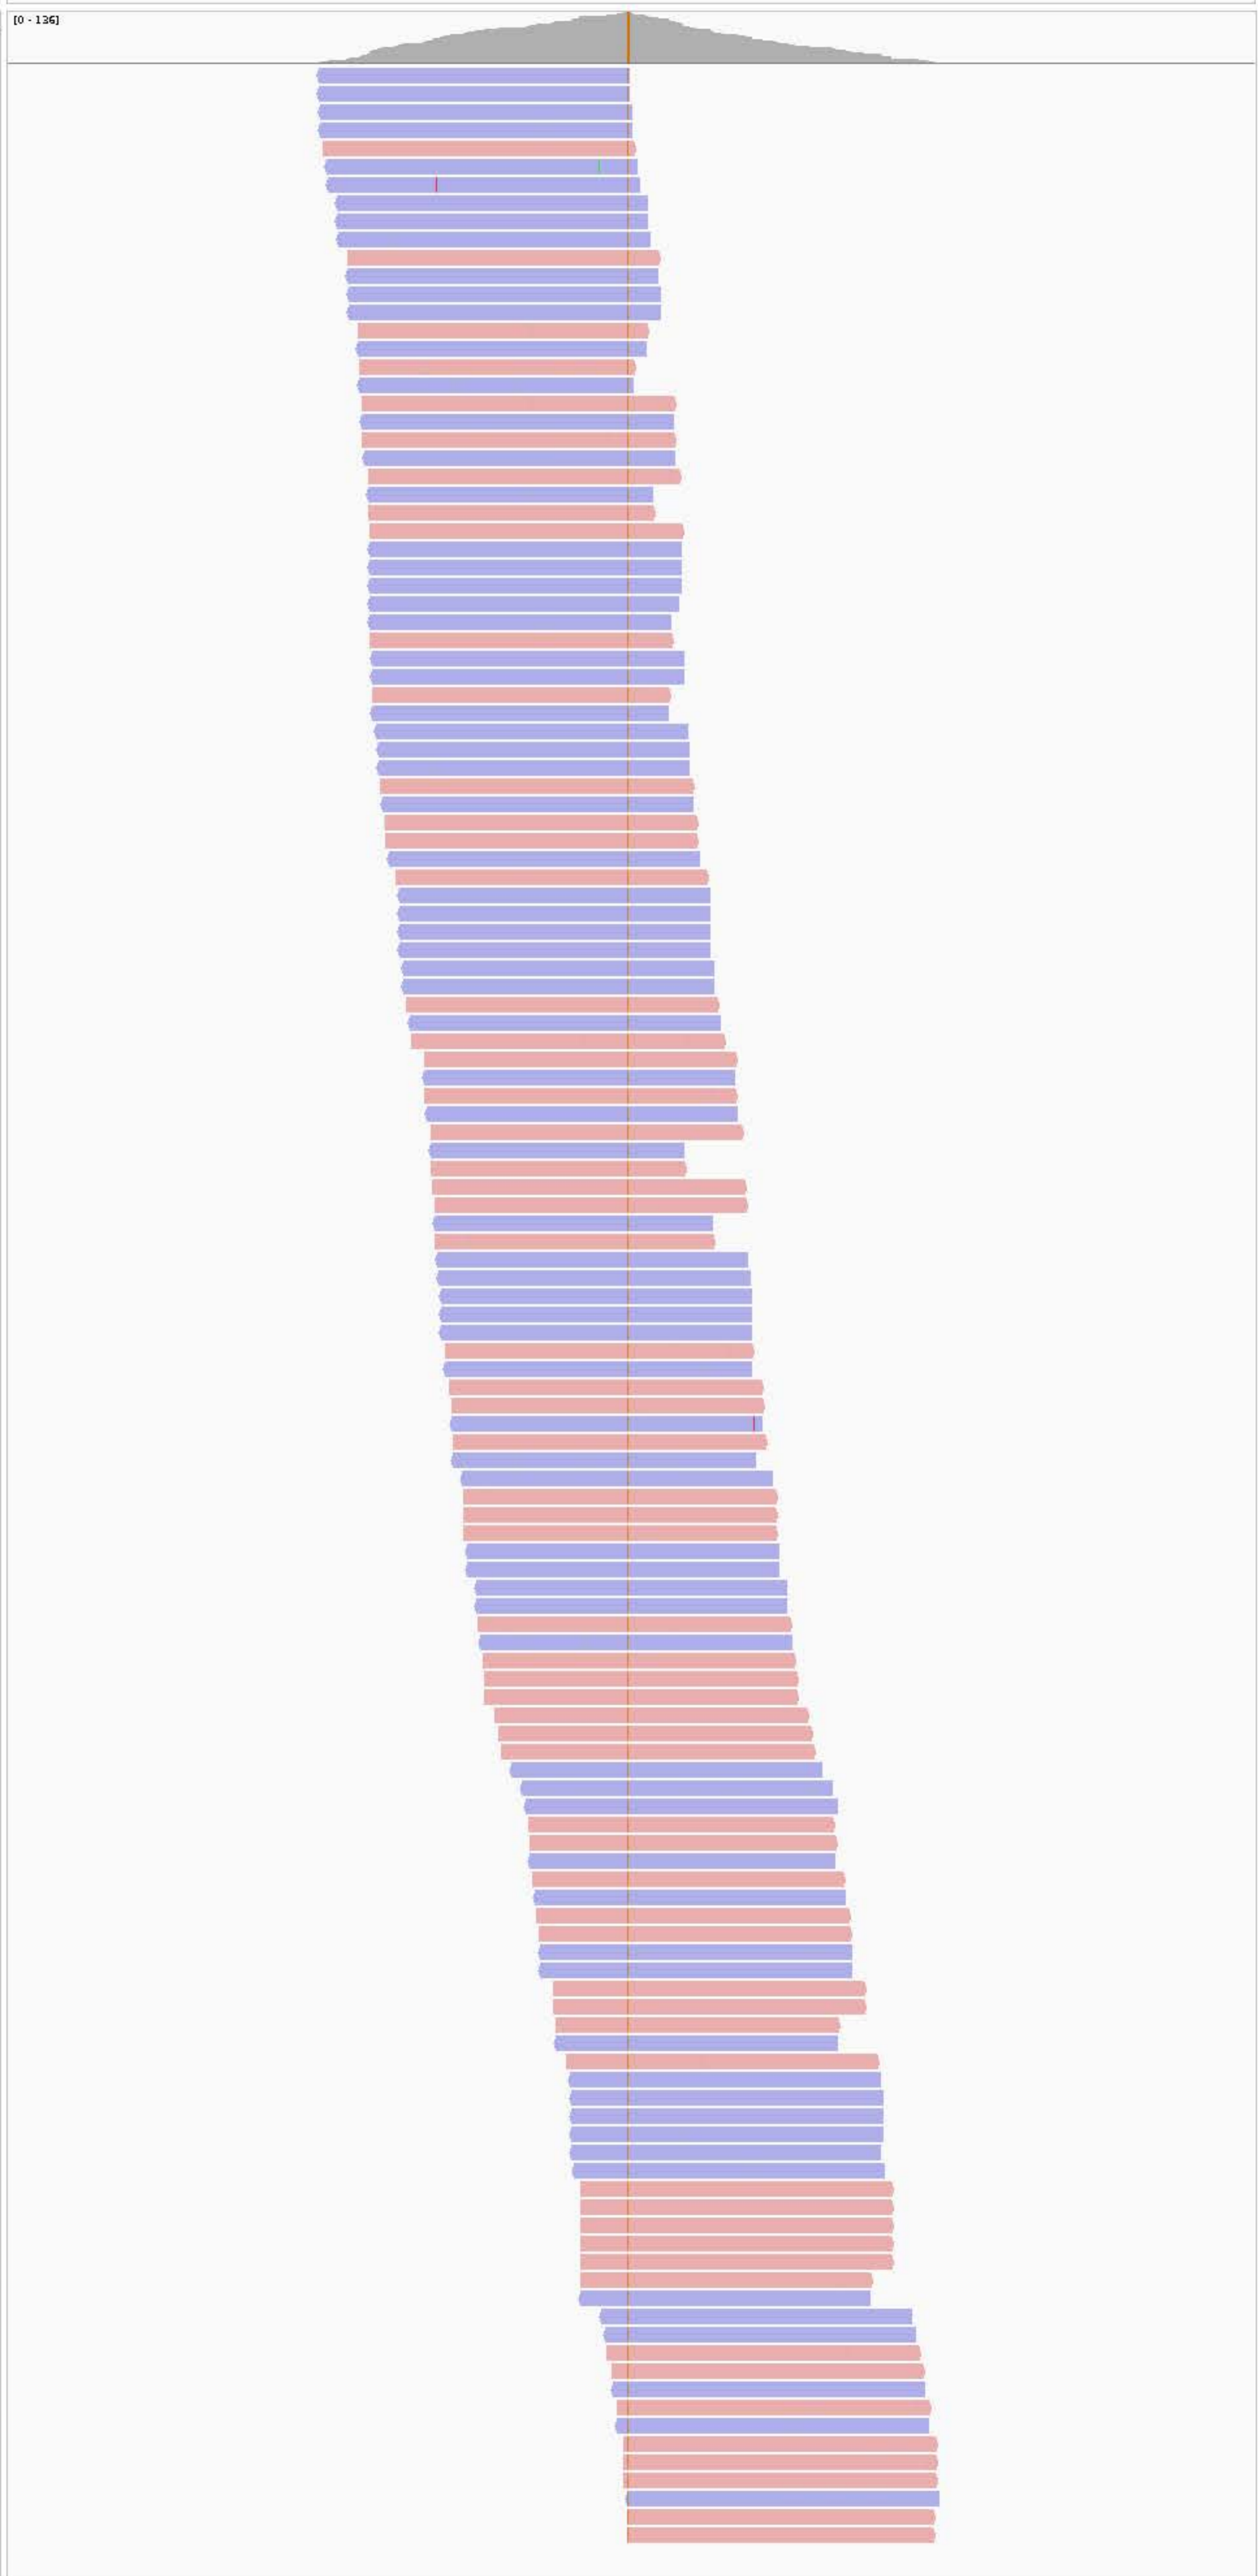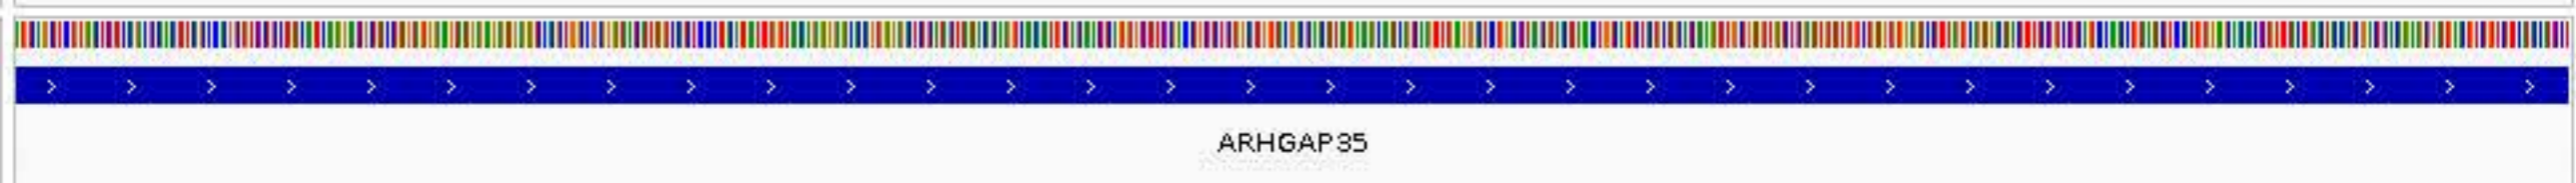

ARHGAP35



chr19:46,920,602-46,921,201

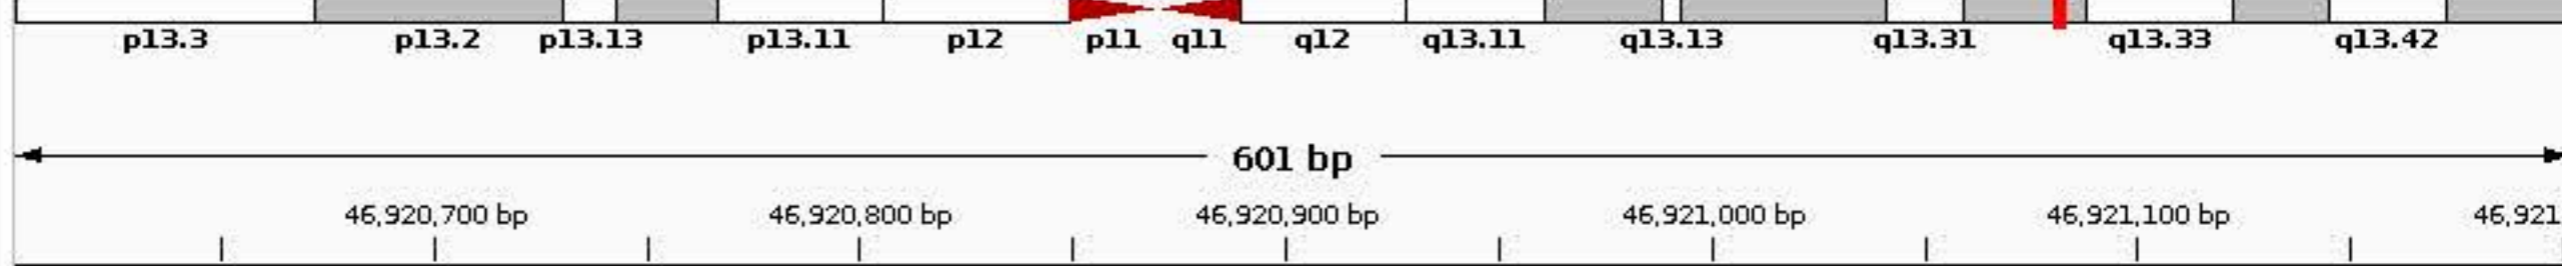

SL\_0001\_RN\_33\_mut.bam Coverage

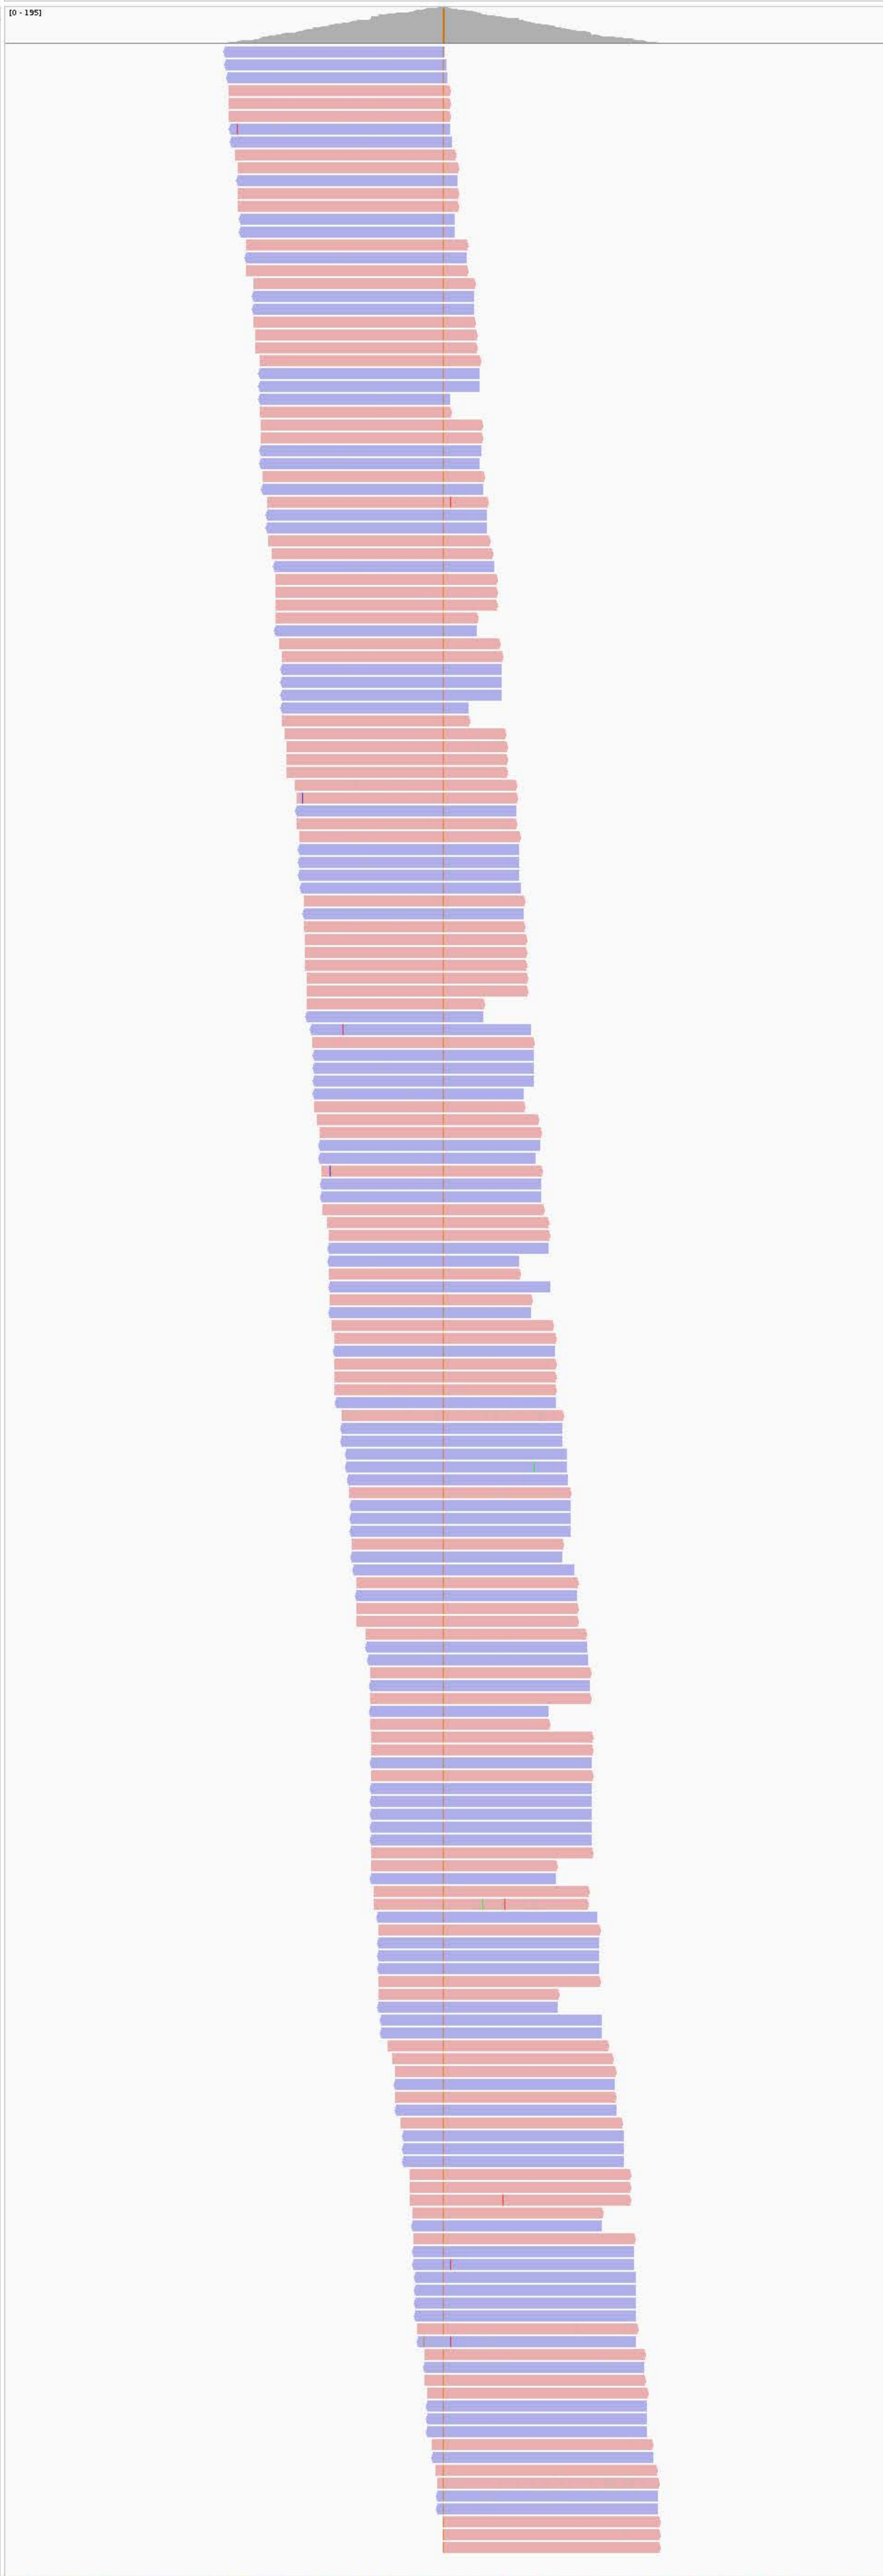

SL\_0001\_RN\_33\_mut.bam

Sequence

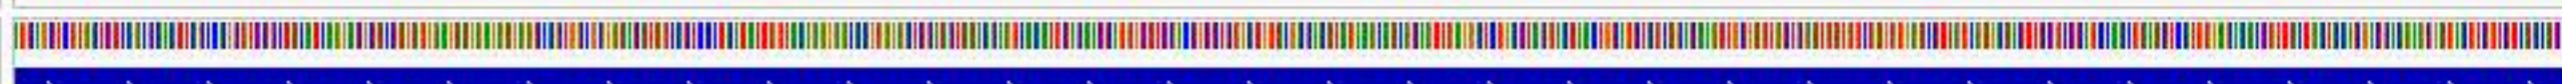

Refseq Genes

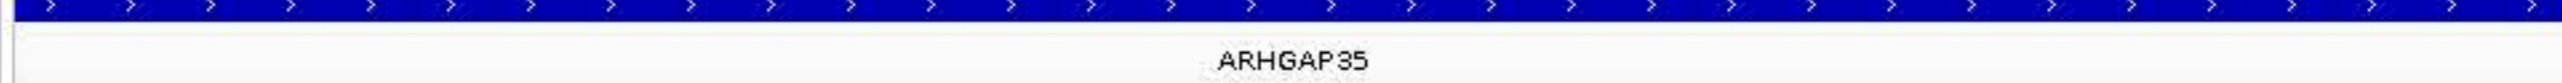

ARHGAP35



SL\_0001\_RN\_37\_mut.bam Coverage

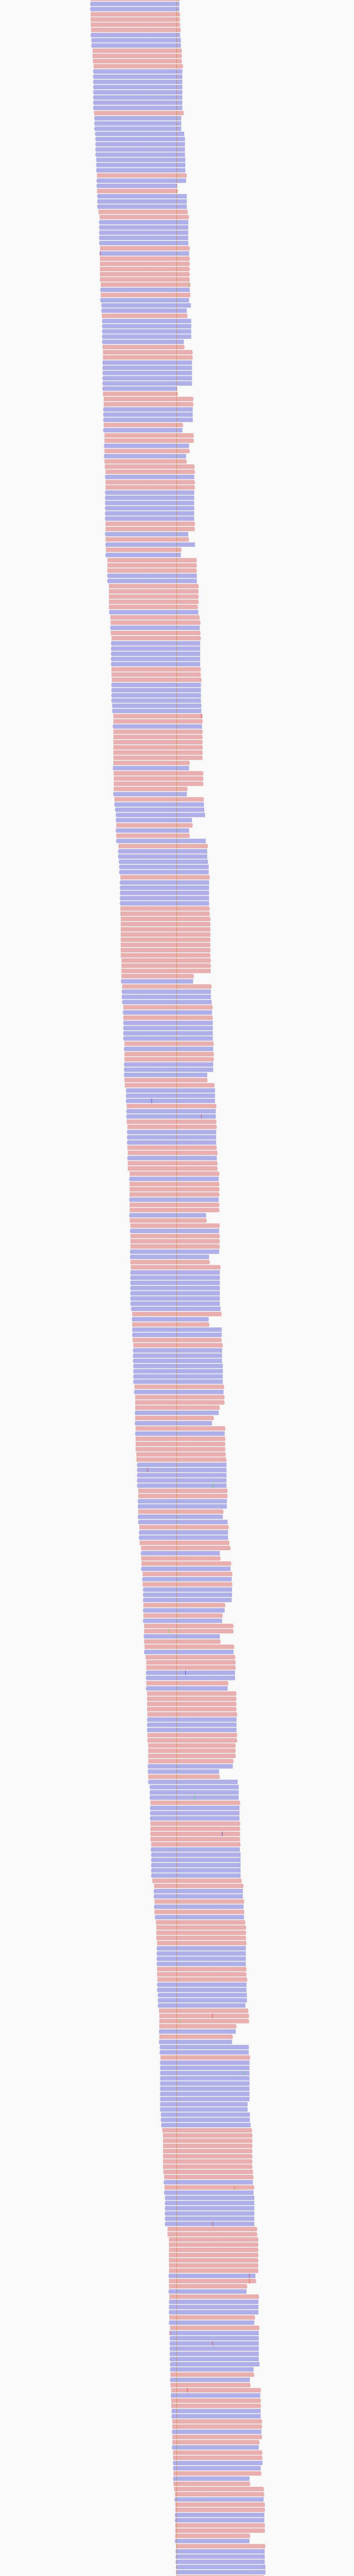

Sequence  
Refseq Genes

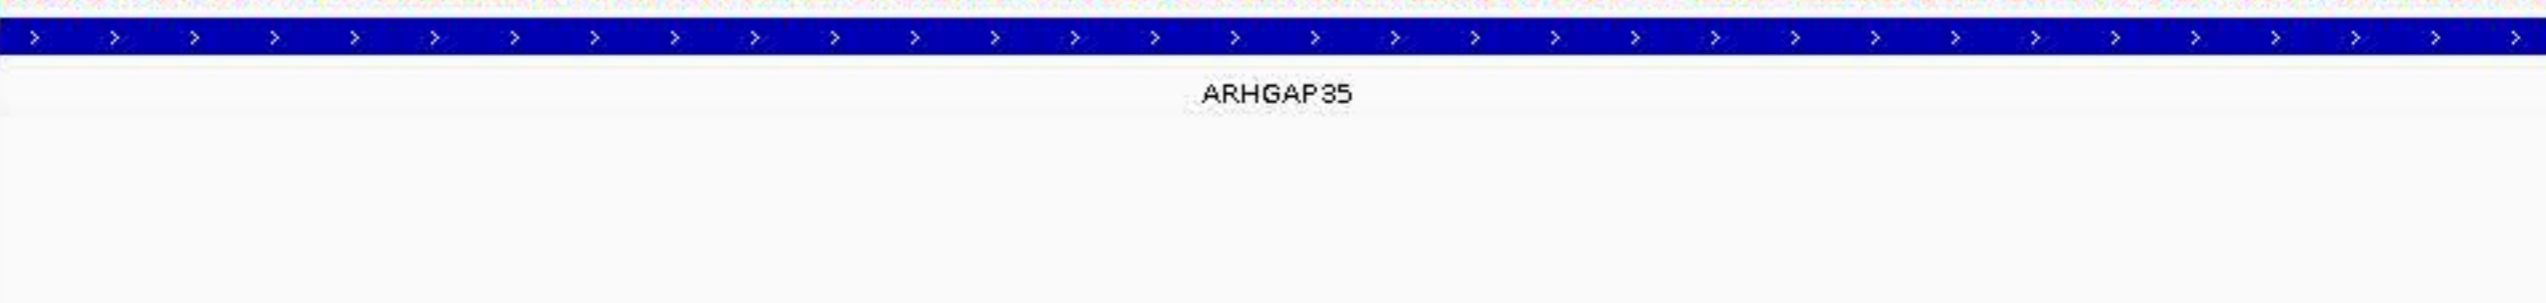



chr19:46,920,602-46,921,201

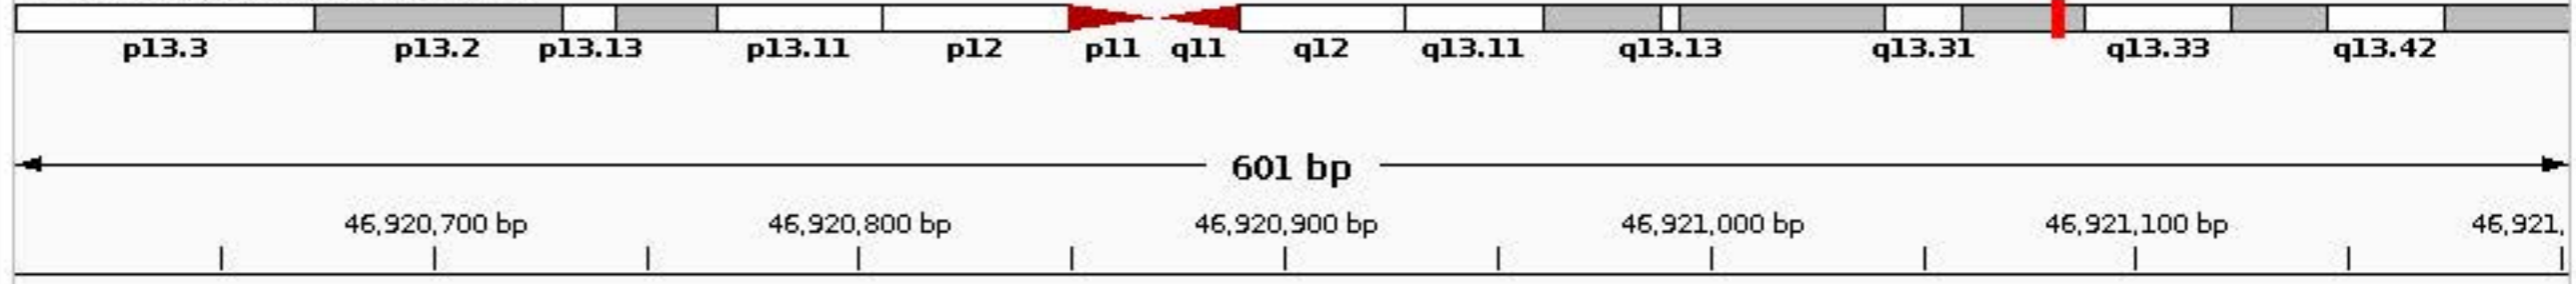

SL\_0001\_RN\_38\_mut.bam Coverage

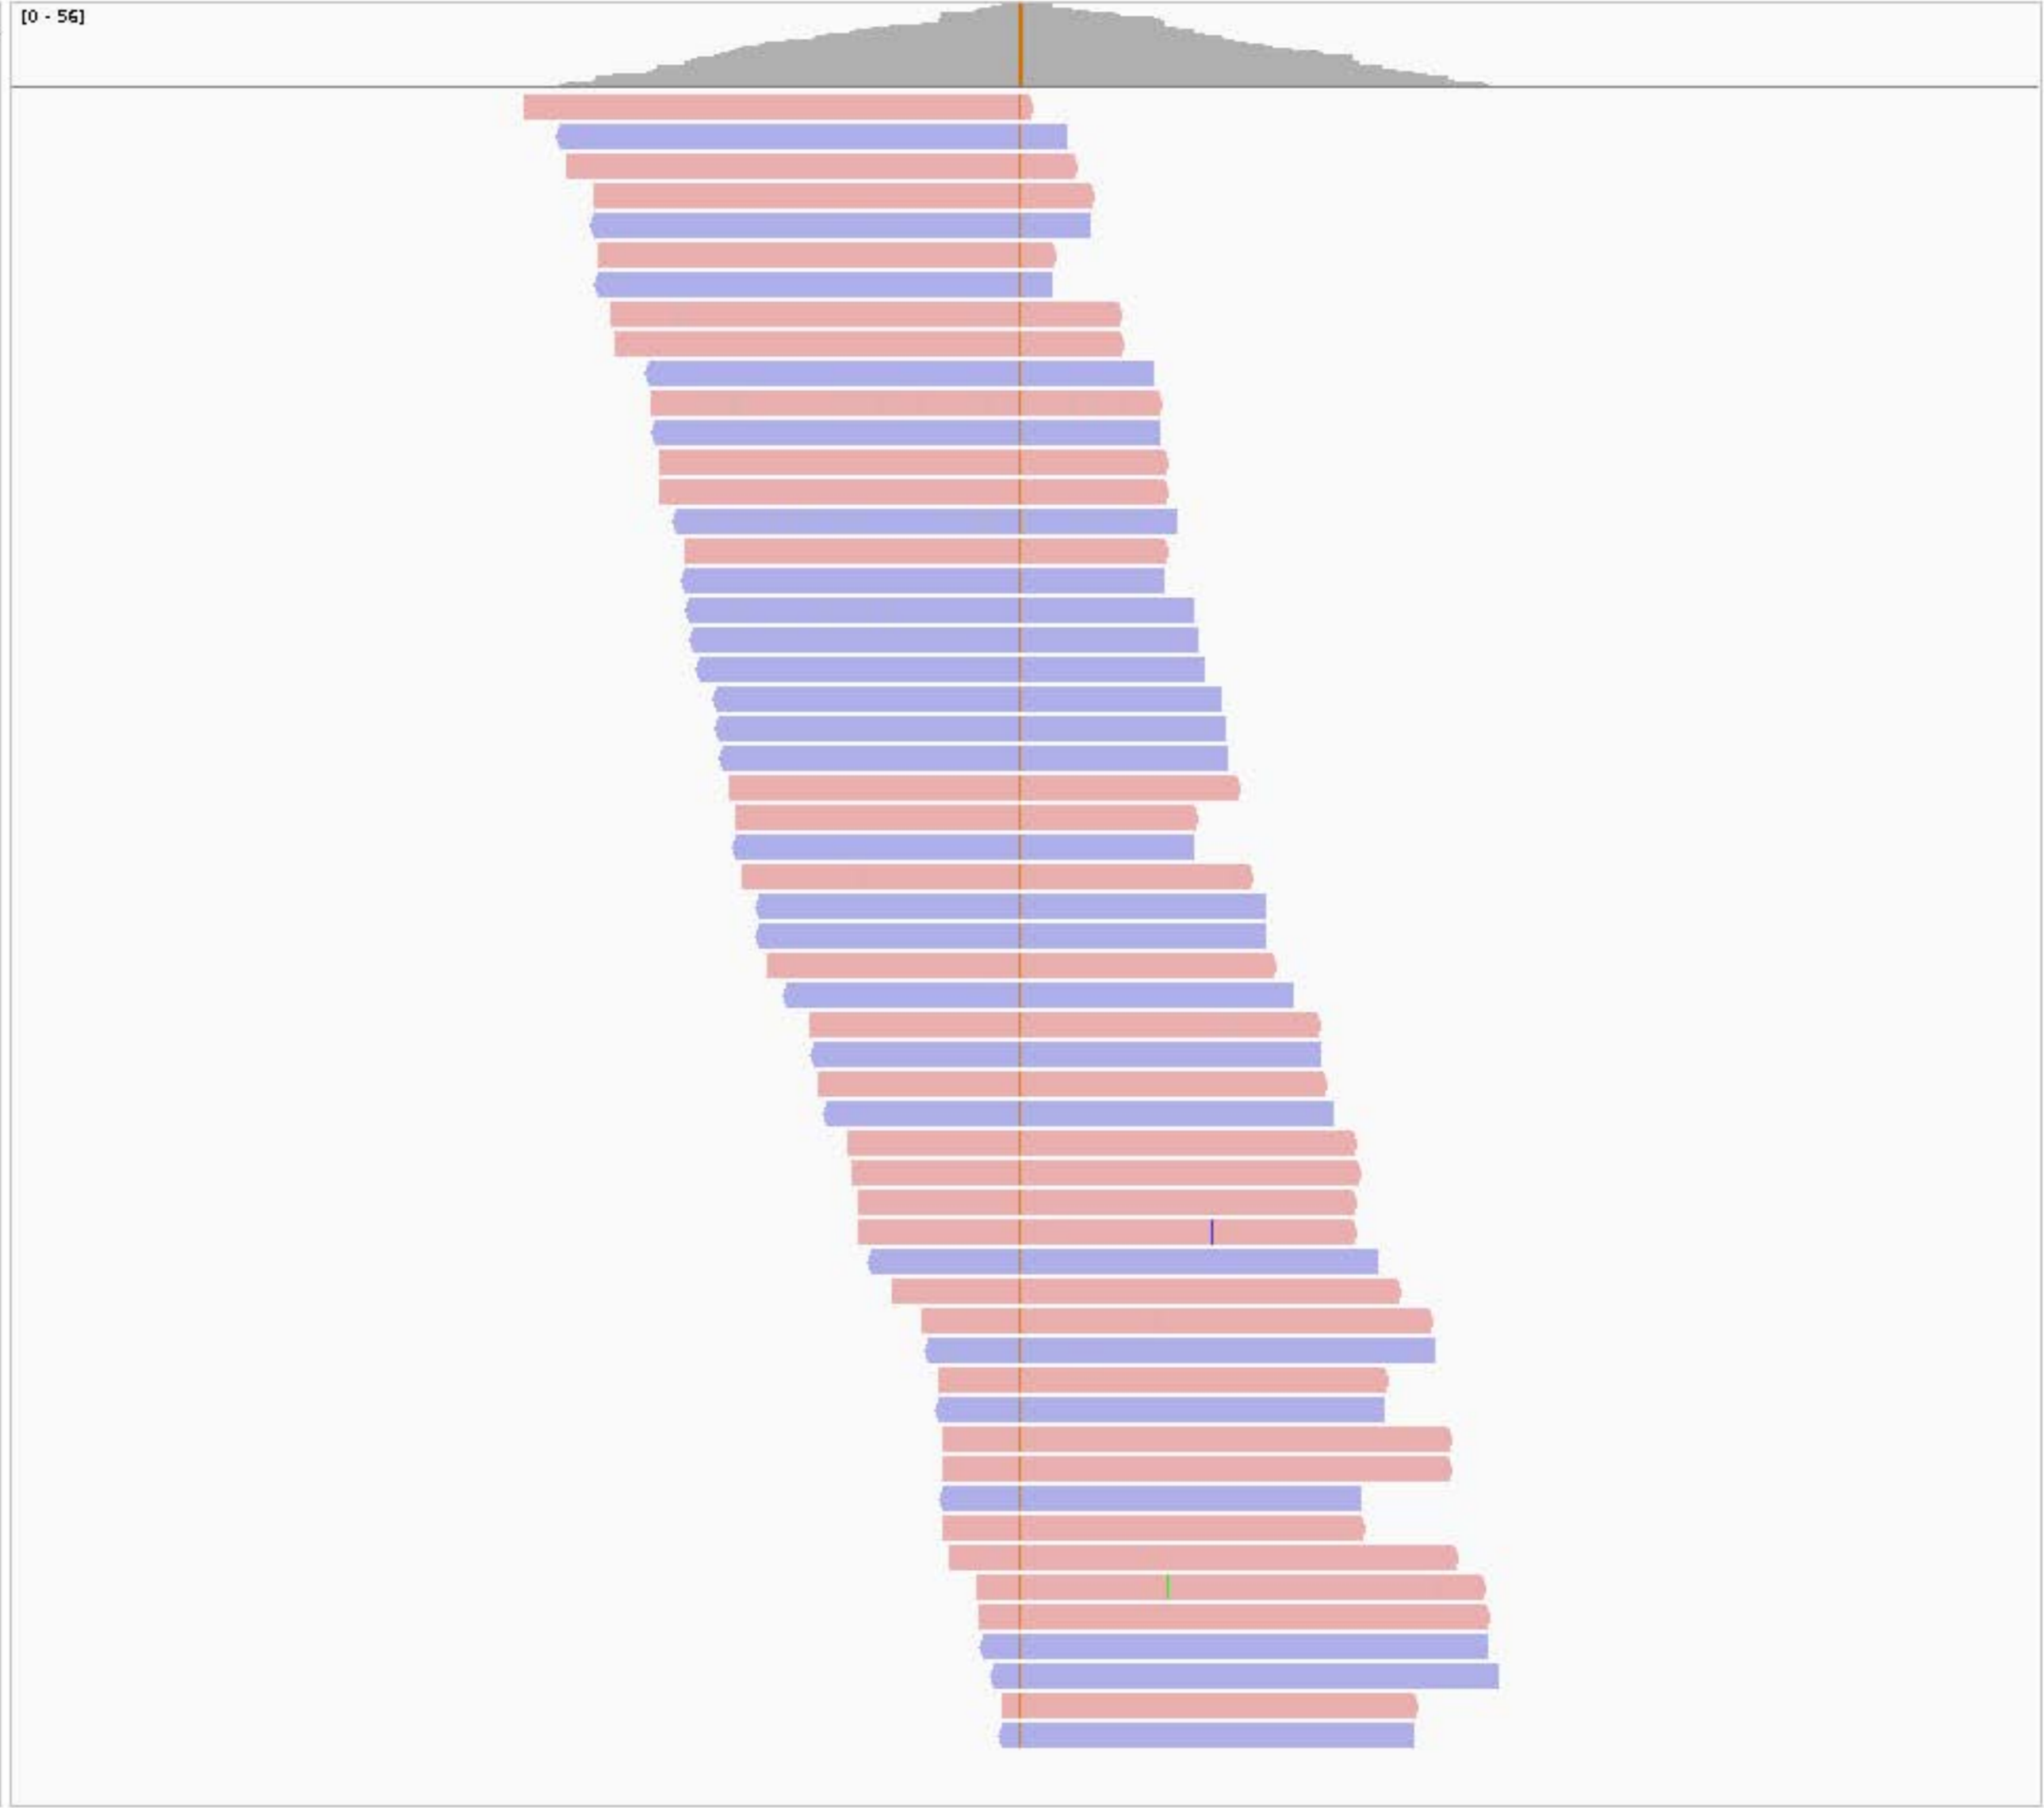

SL\_0001\_RN\_38\_mut.bam

Sequence

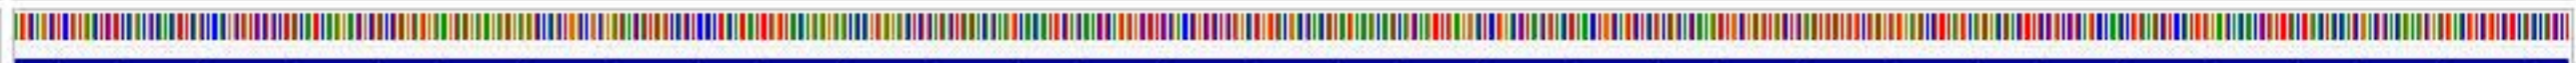

Refseq Genes

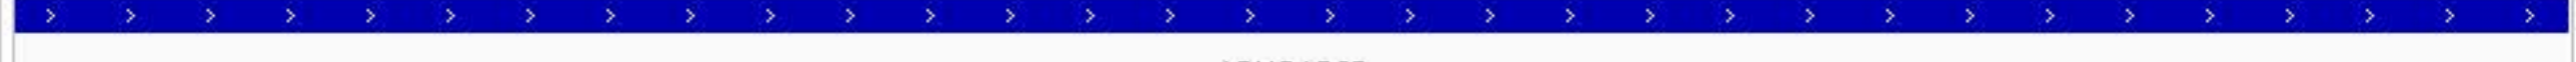

ARHGAP35



chr19:46,921,198-46,921,797

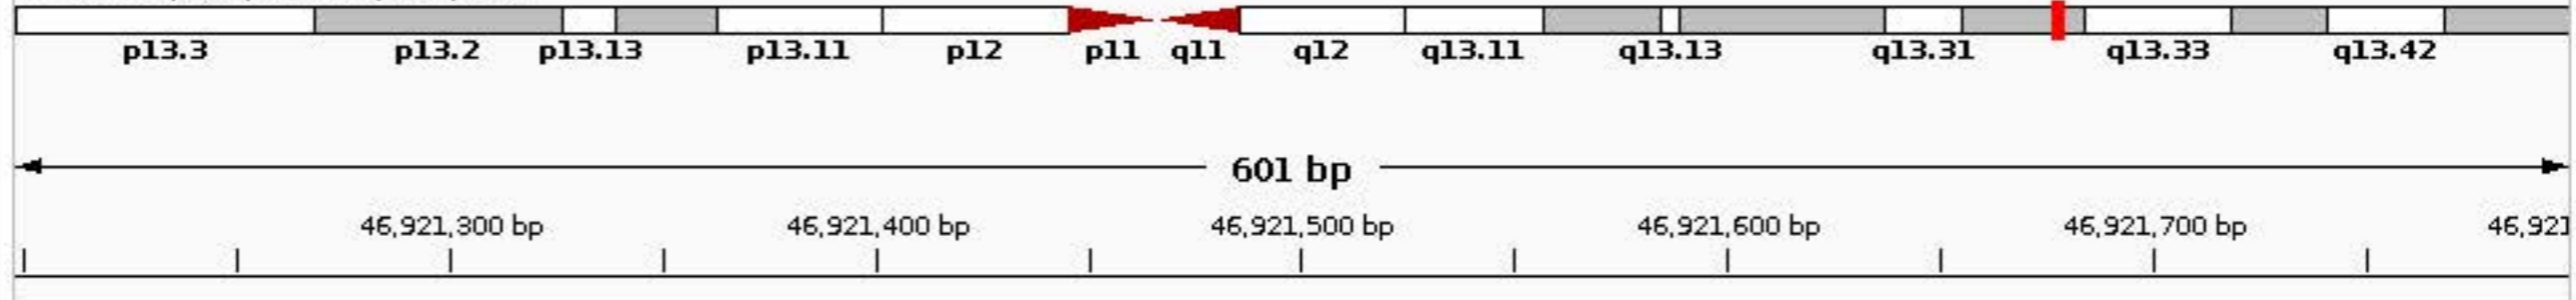

SL\_0010\_LN\_24\_mut.bam Coverage

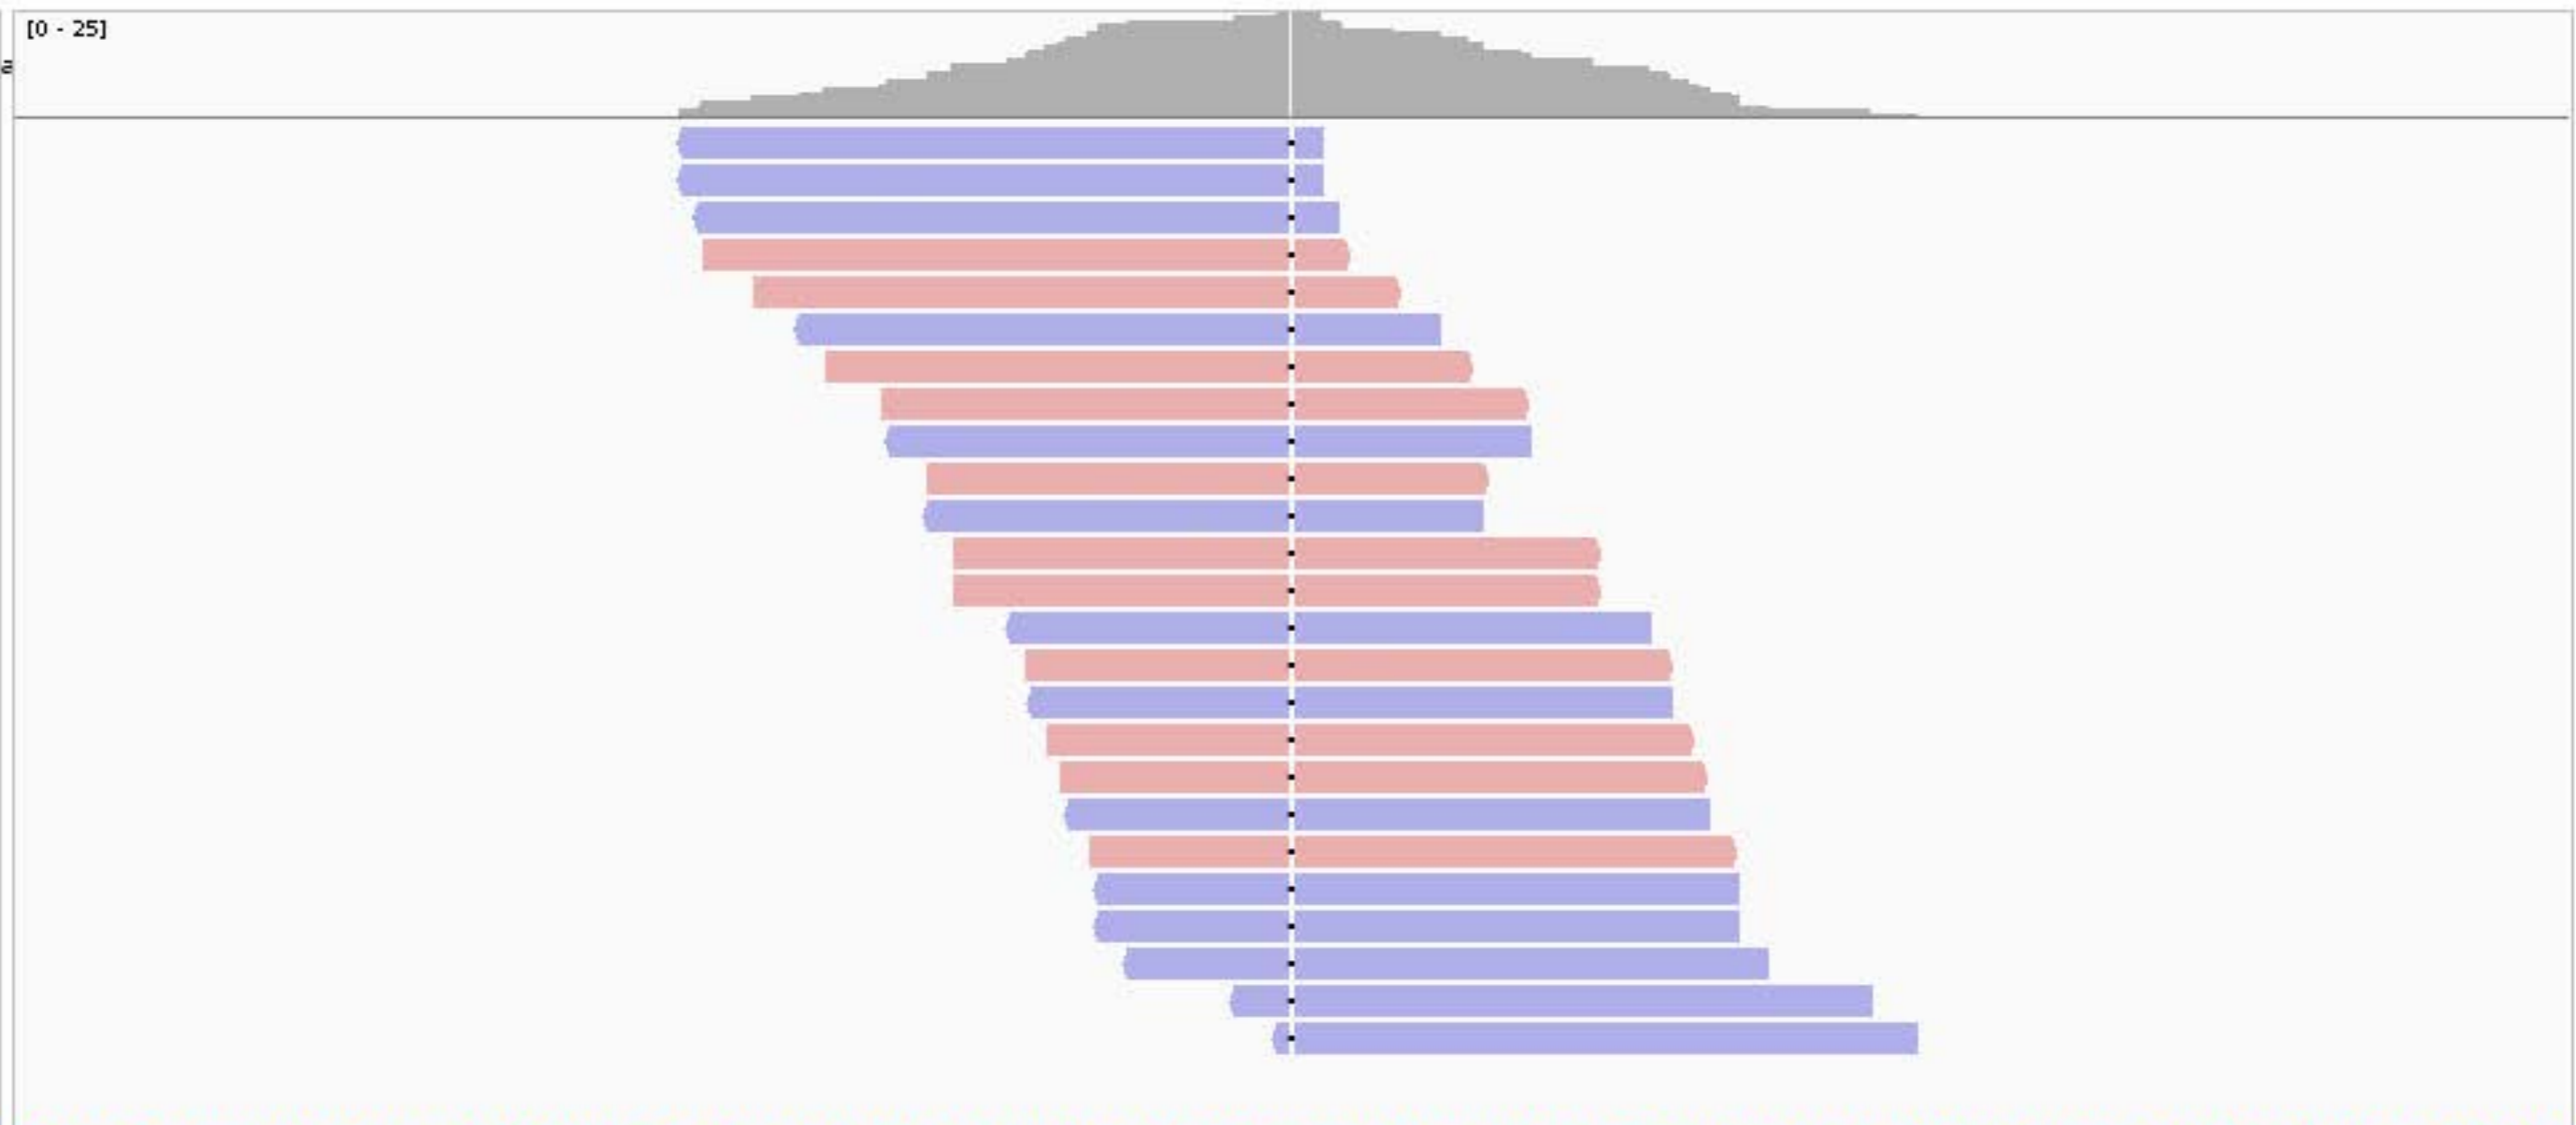

SL\_0010\_LN\_24\_mut.bam

Sequence

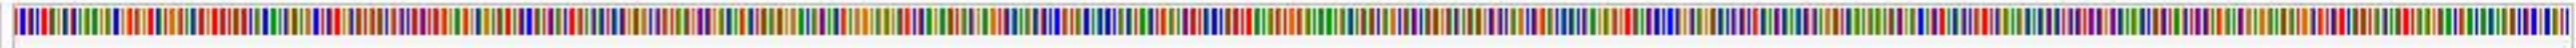

Refseq Genes

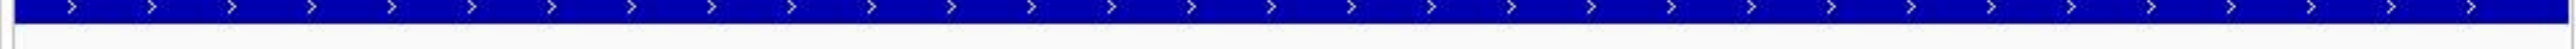

ARHGAP35

chr19:46,921,198-46,921,797

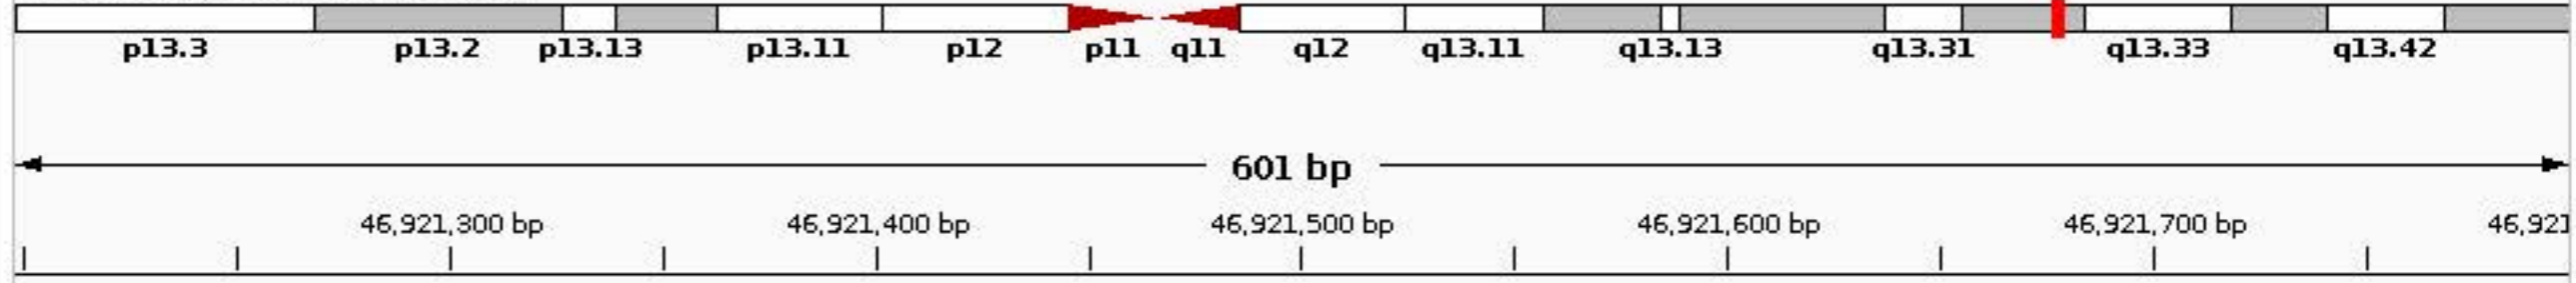

SL\_0010\_LN\_25\_mut.bam Coverage

SL\_0010\_LN\_25\_mut.bam

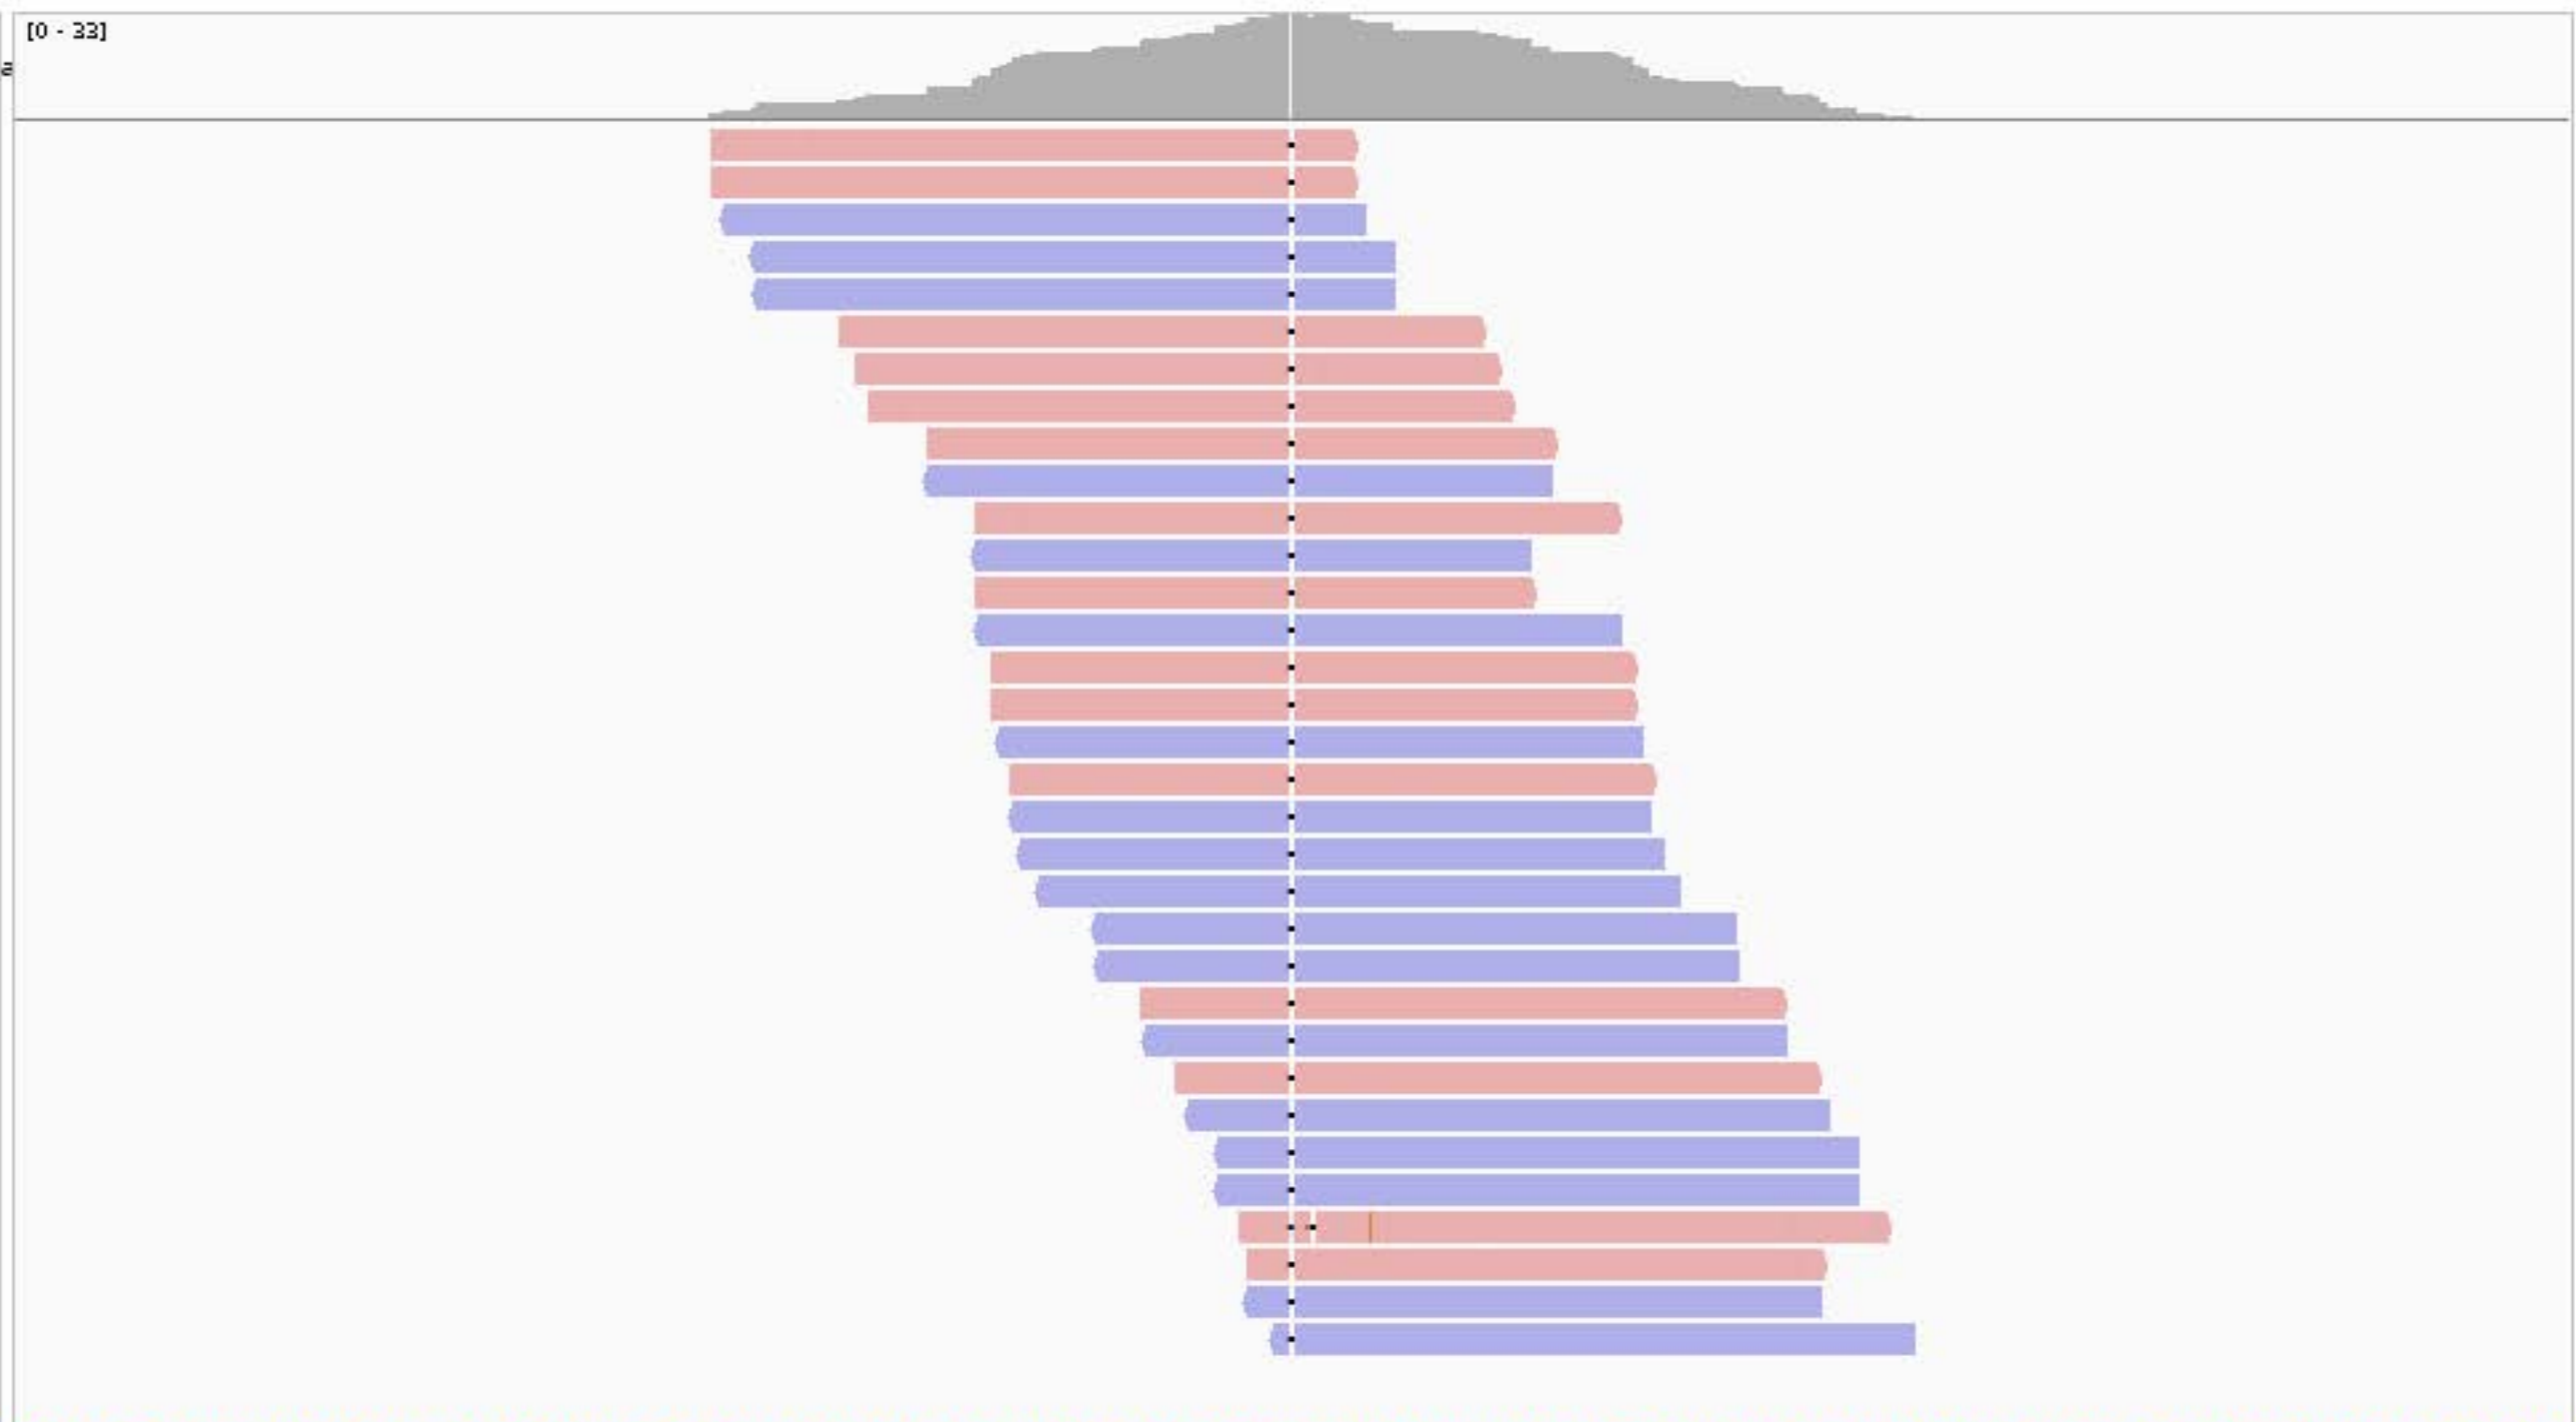

Sequence

Refseq Genes

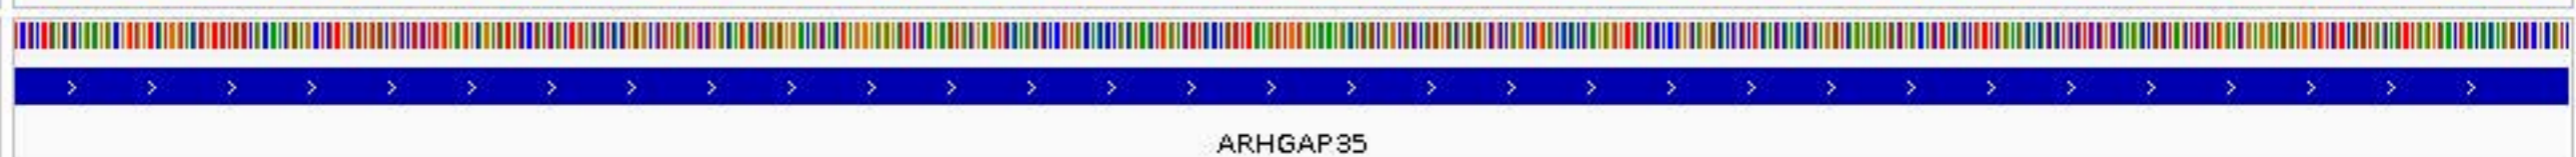

ARHGAP35

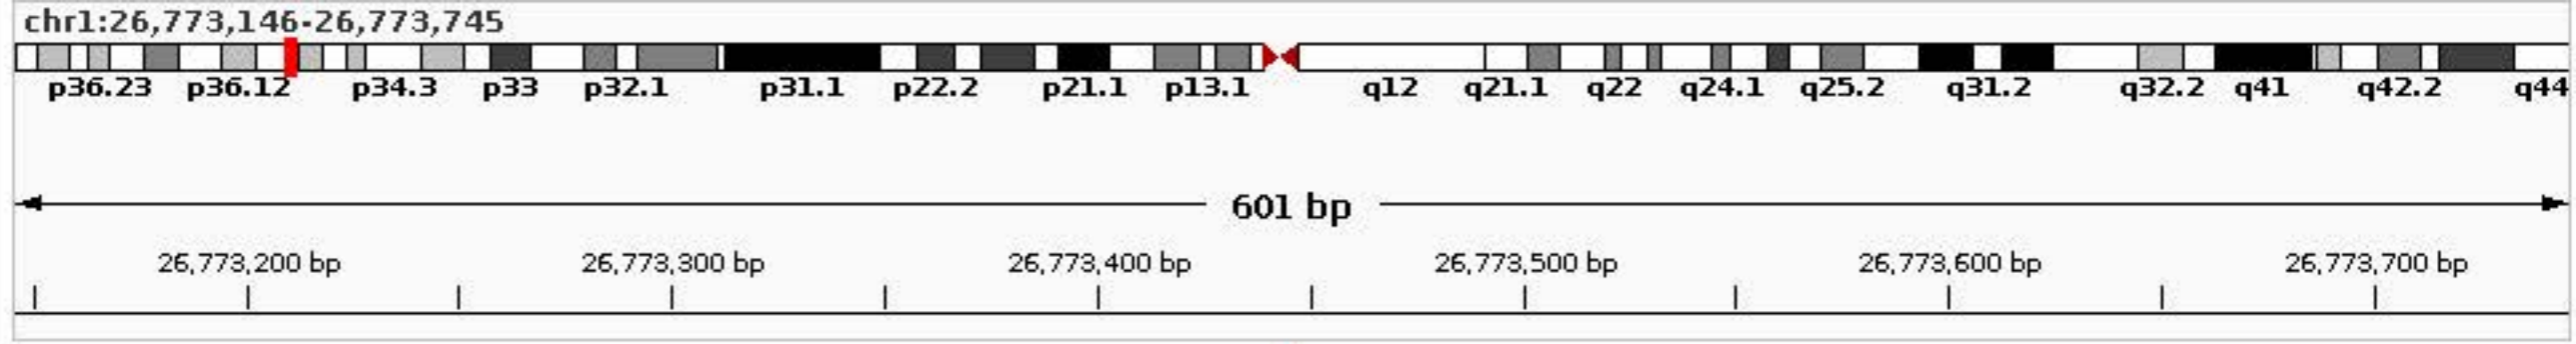

SL\_0015\_RN\_36\_mut.bam Coverage

SL\_0015\_RN\_36\_mut.bam

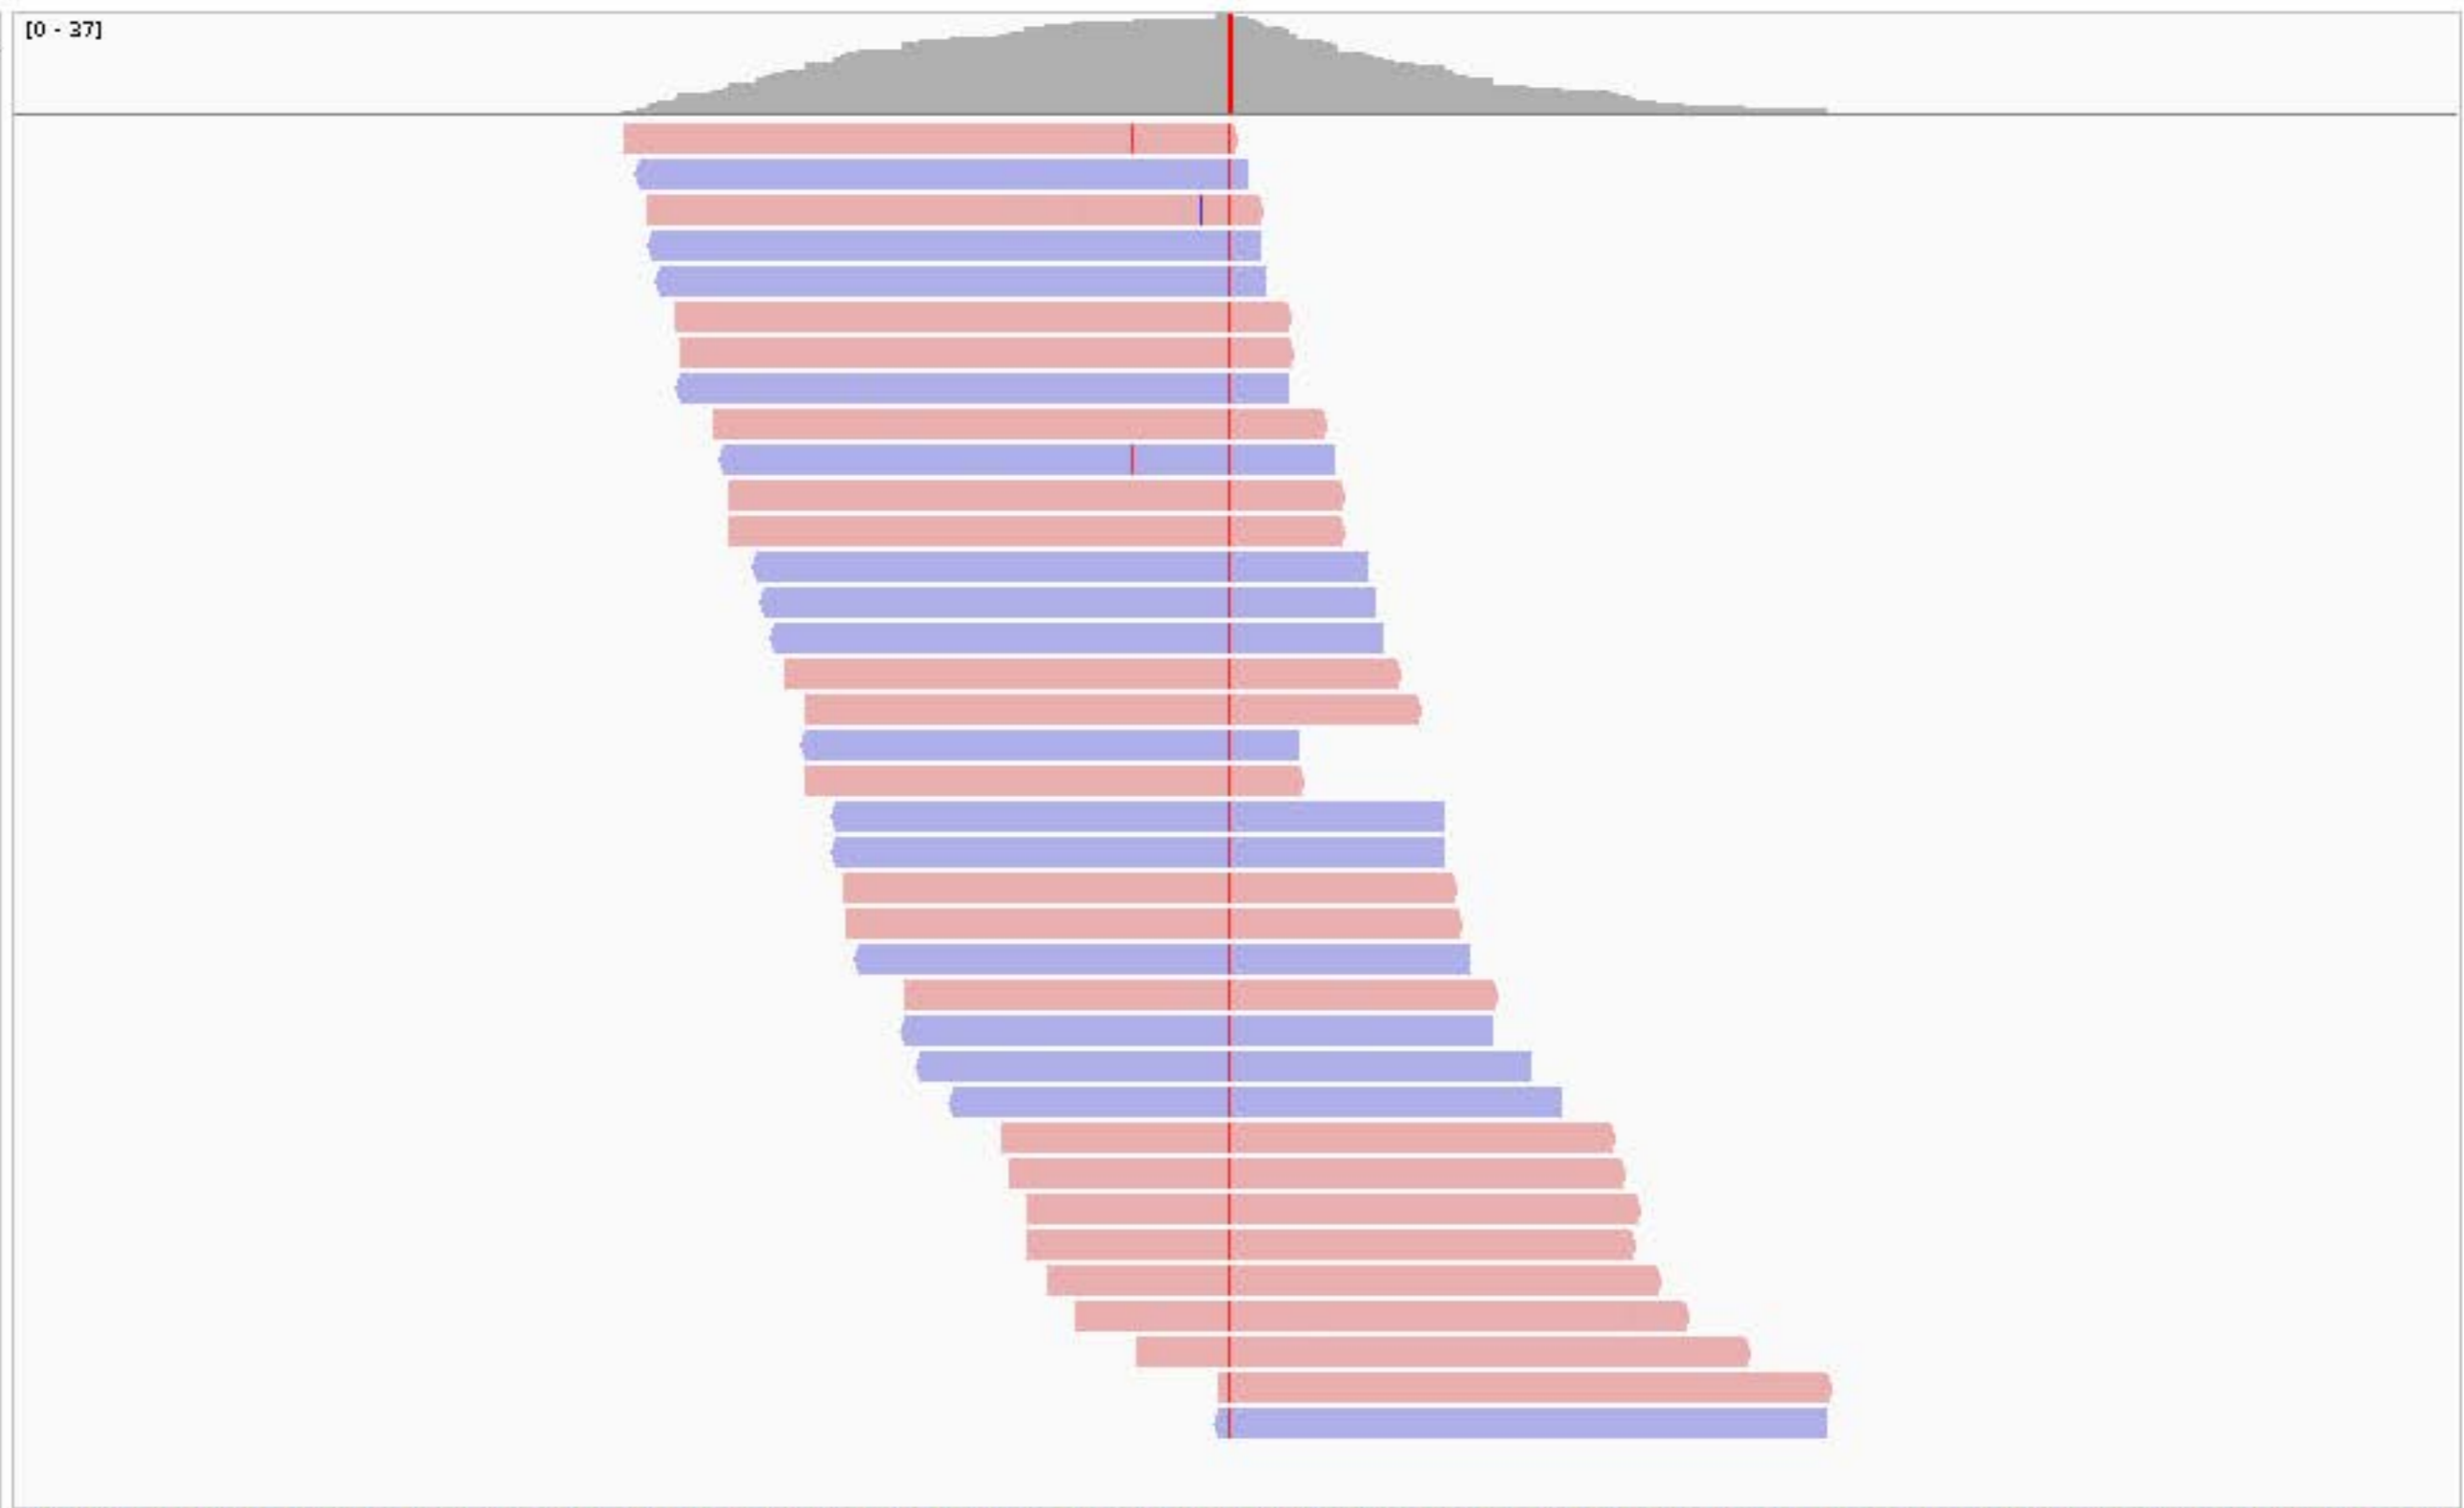

Sequence →

Refseq Genes

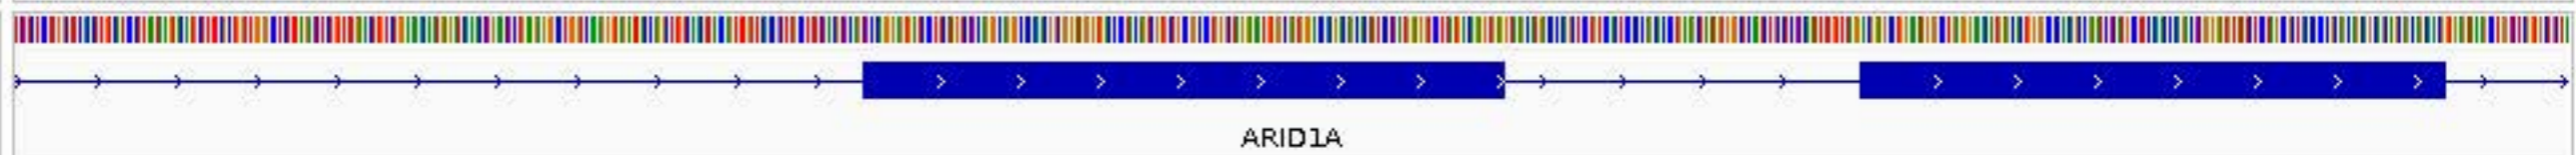



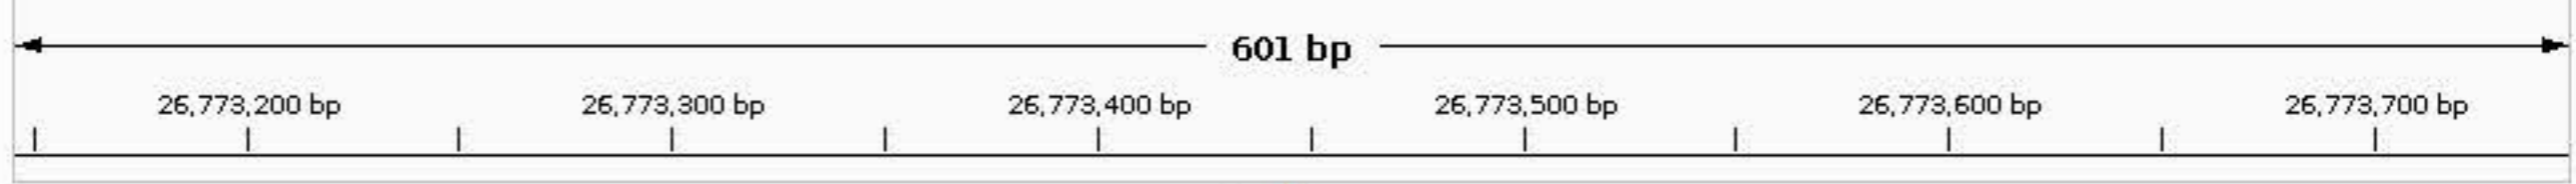

SL\_0015\_RN\_46\_mut.bam Coverage

SL\_0015\_RN\_46\_mut.bam

Sequence

Refseq Genes

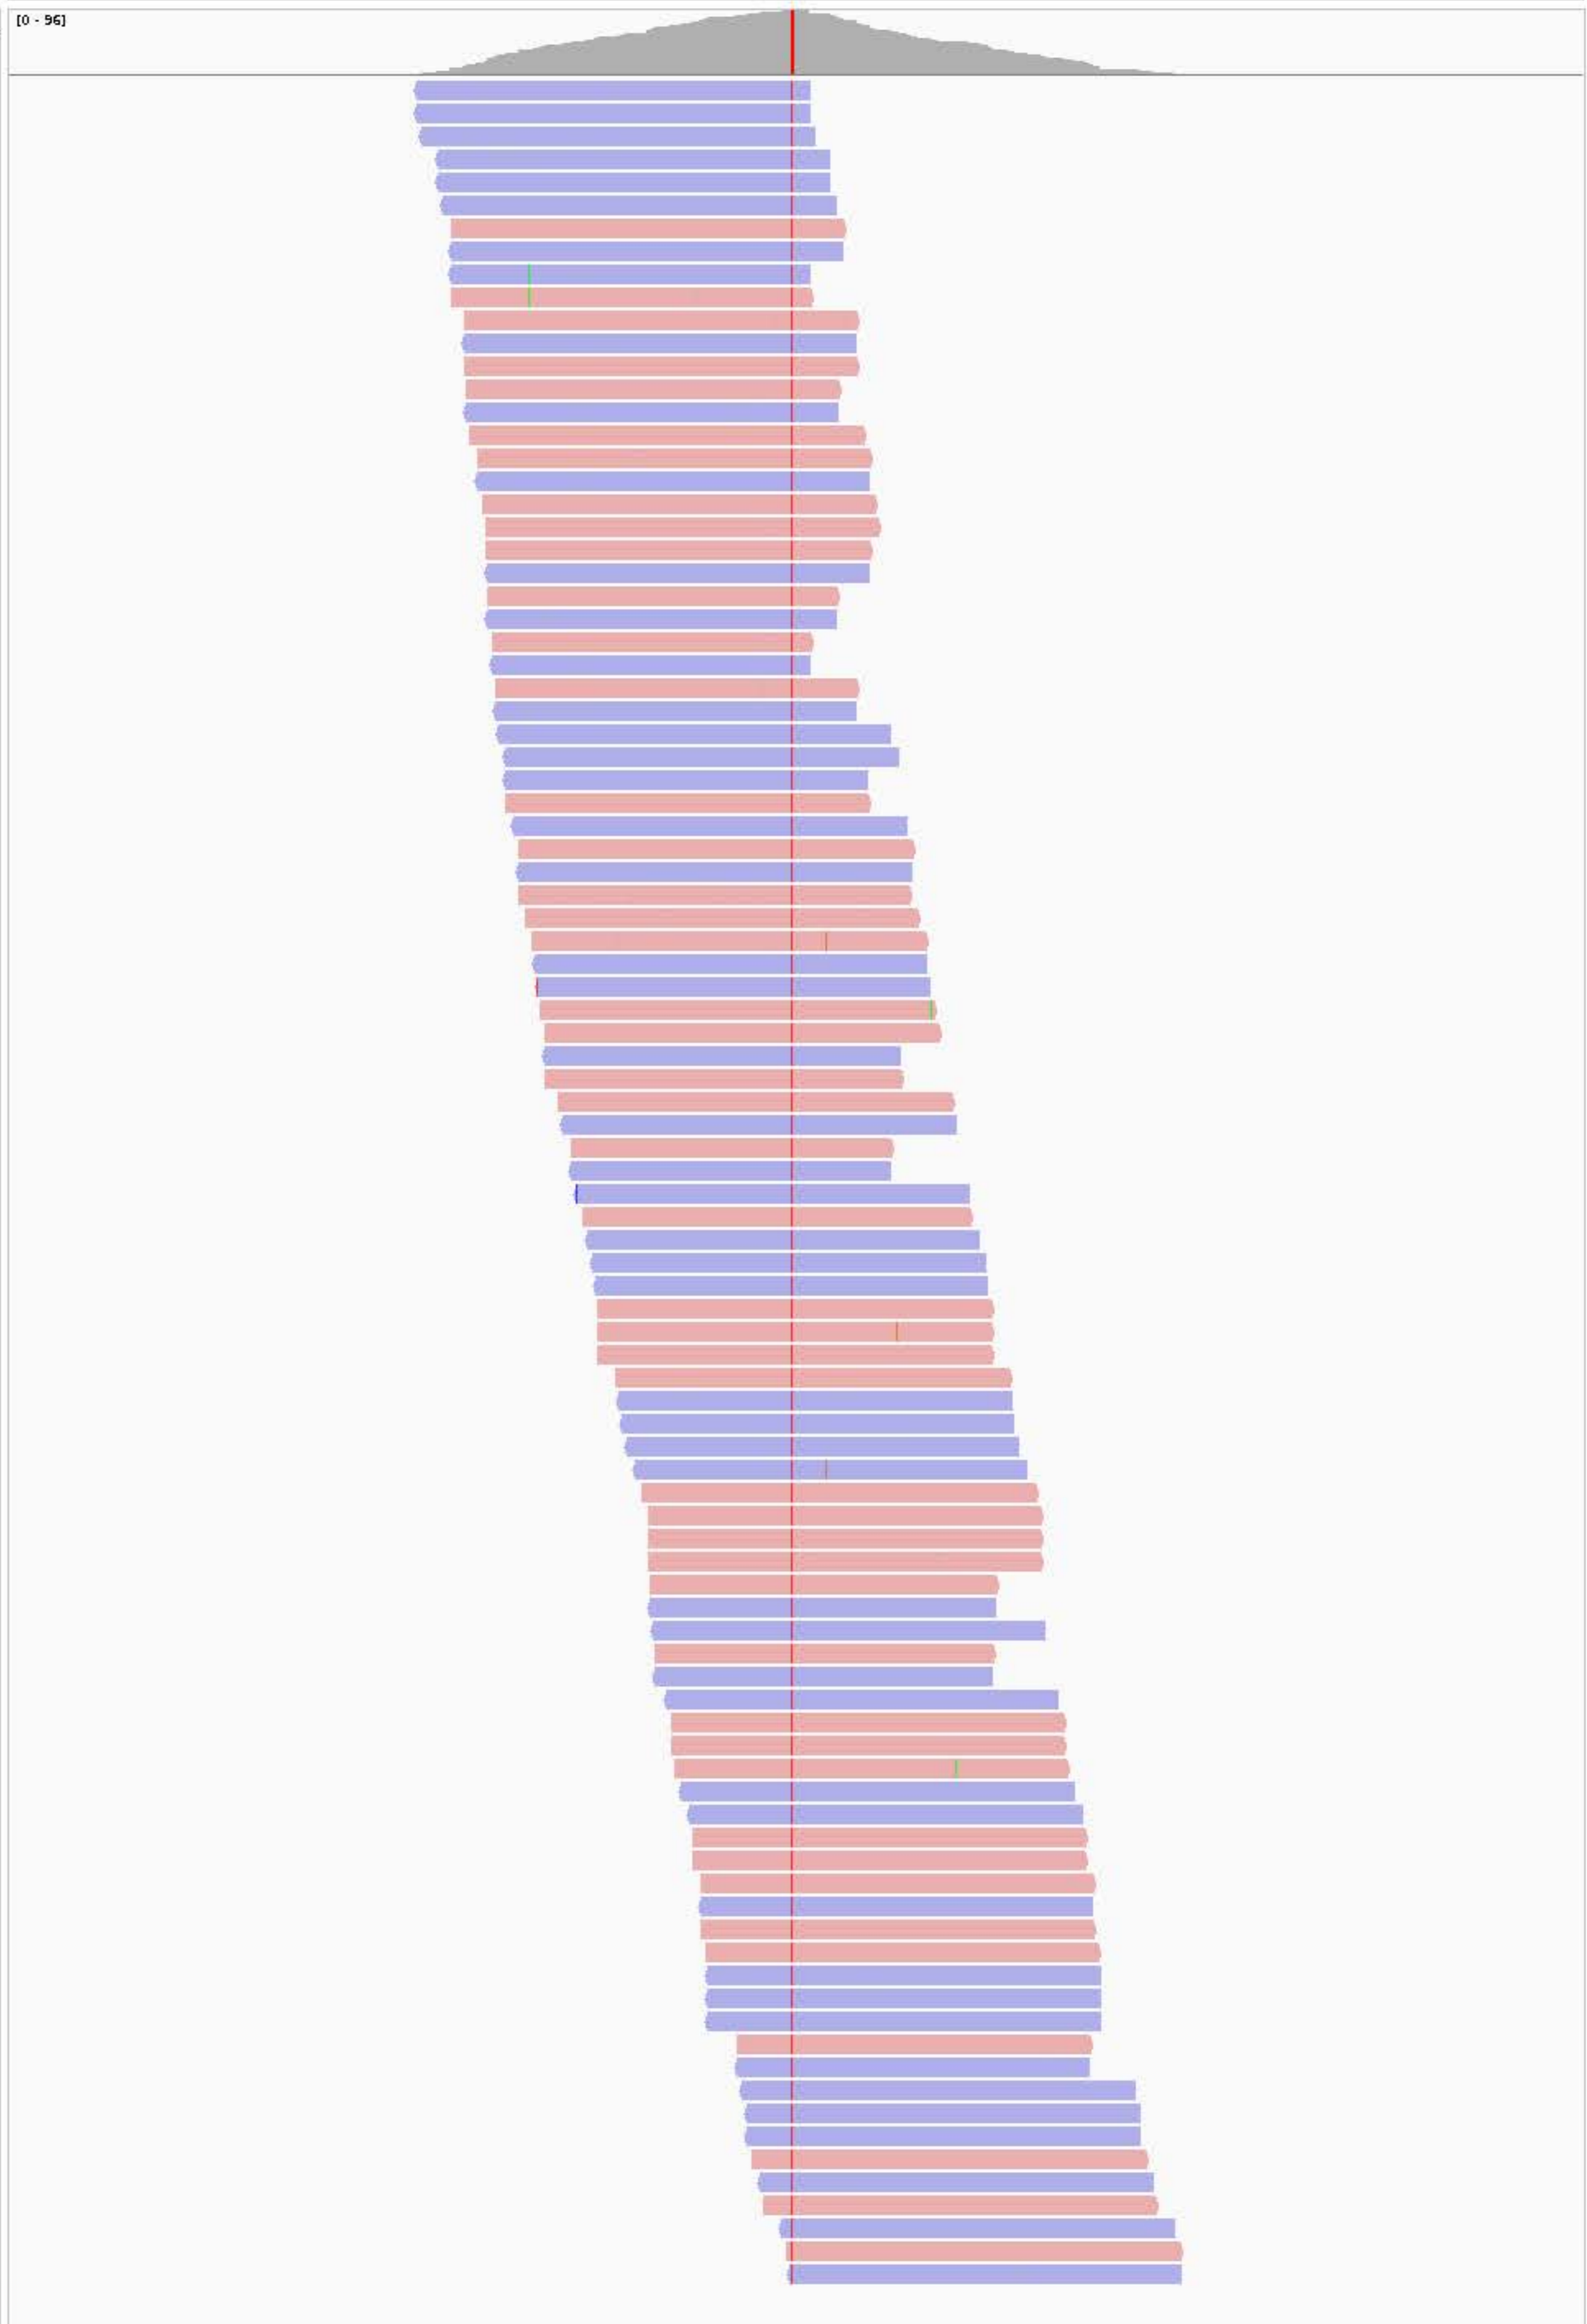

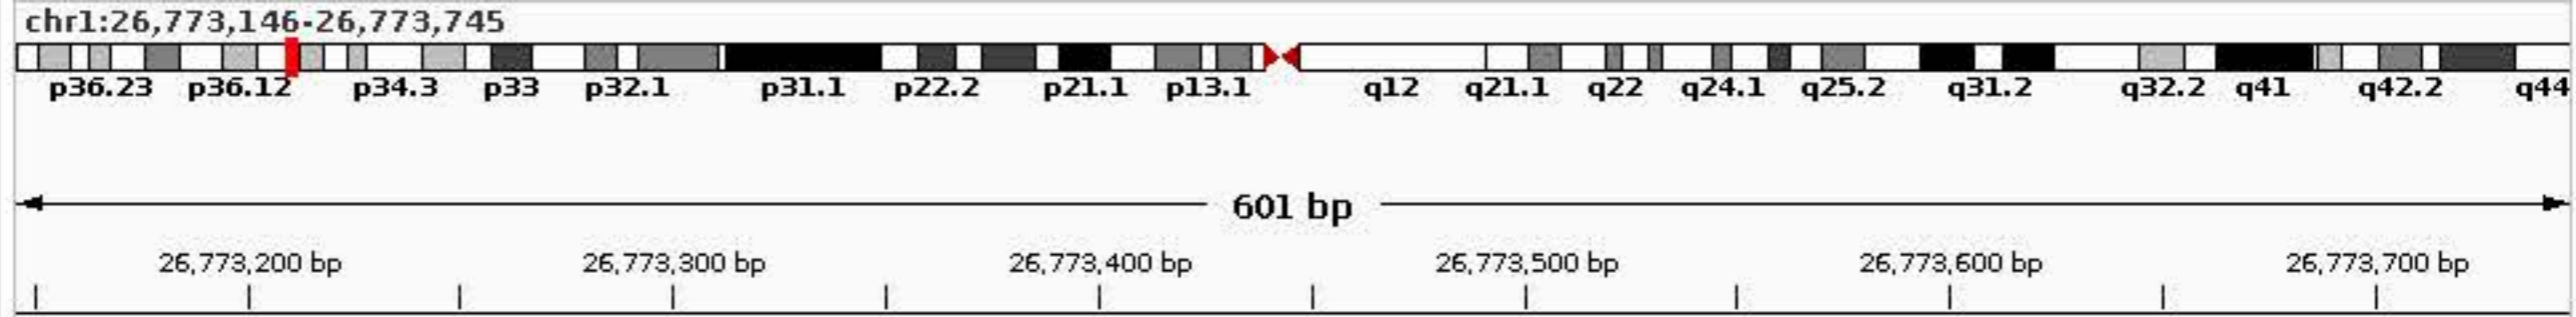

SL\_0015\_RN\_47\_mut.bam Coverage

SL\_0015\_RN\_47\_mut.bam

Sequence →

Refseq Genes

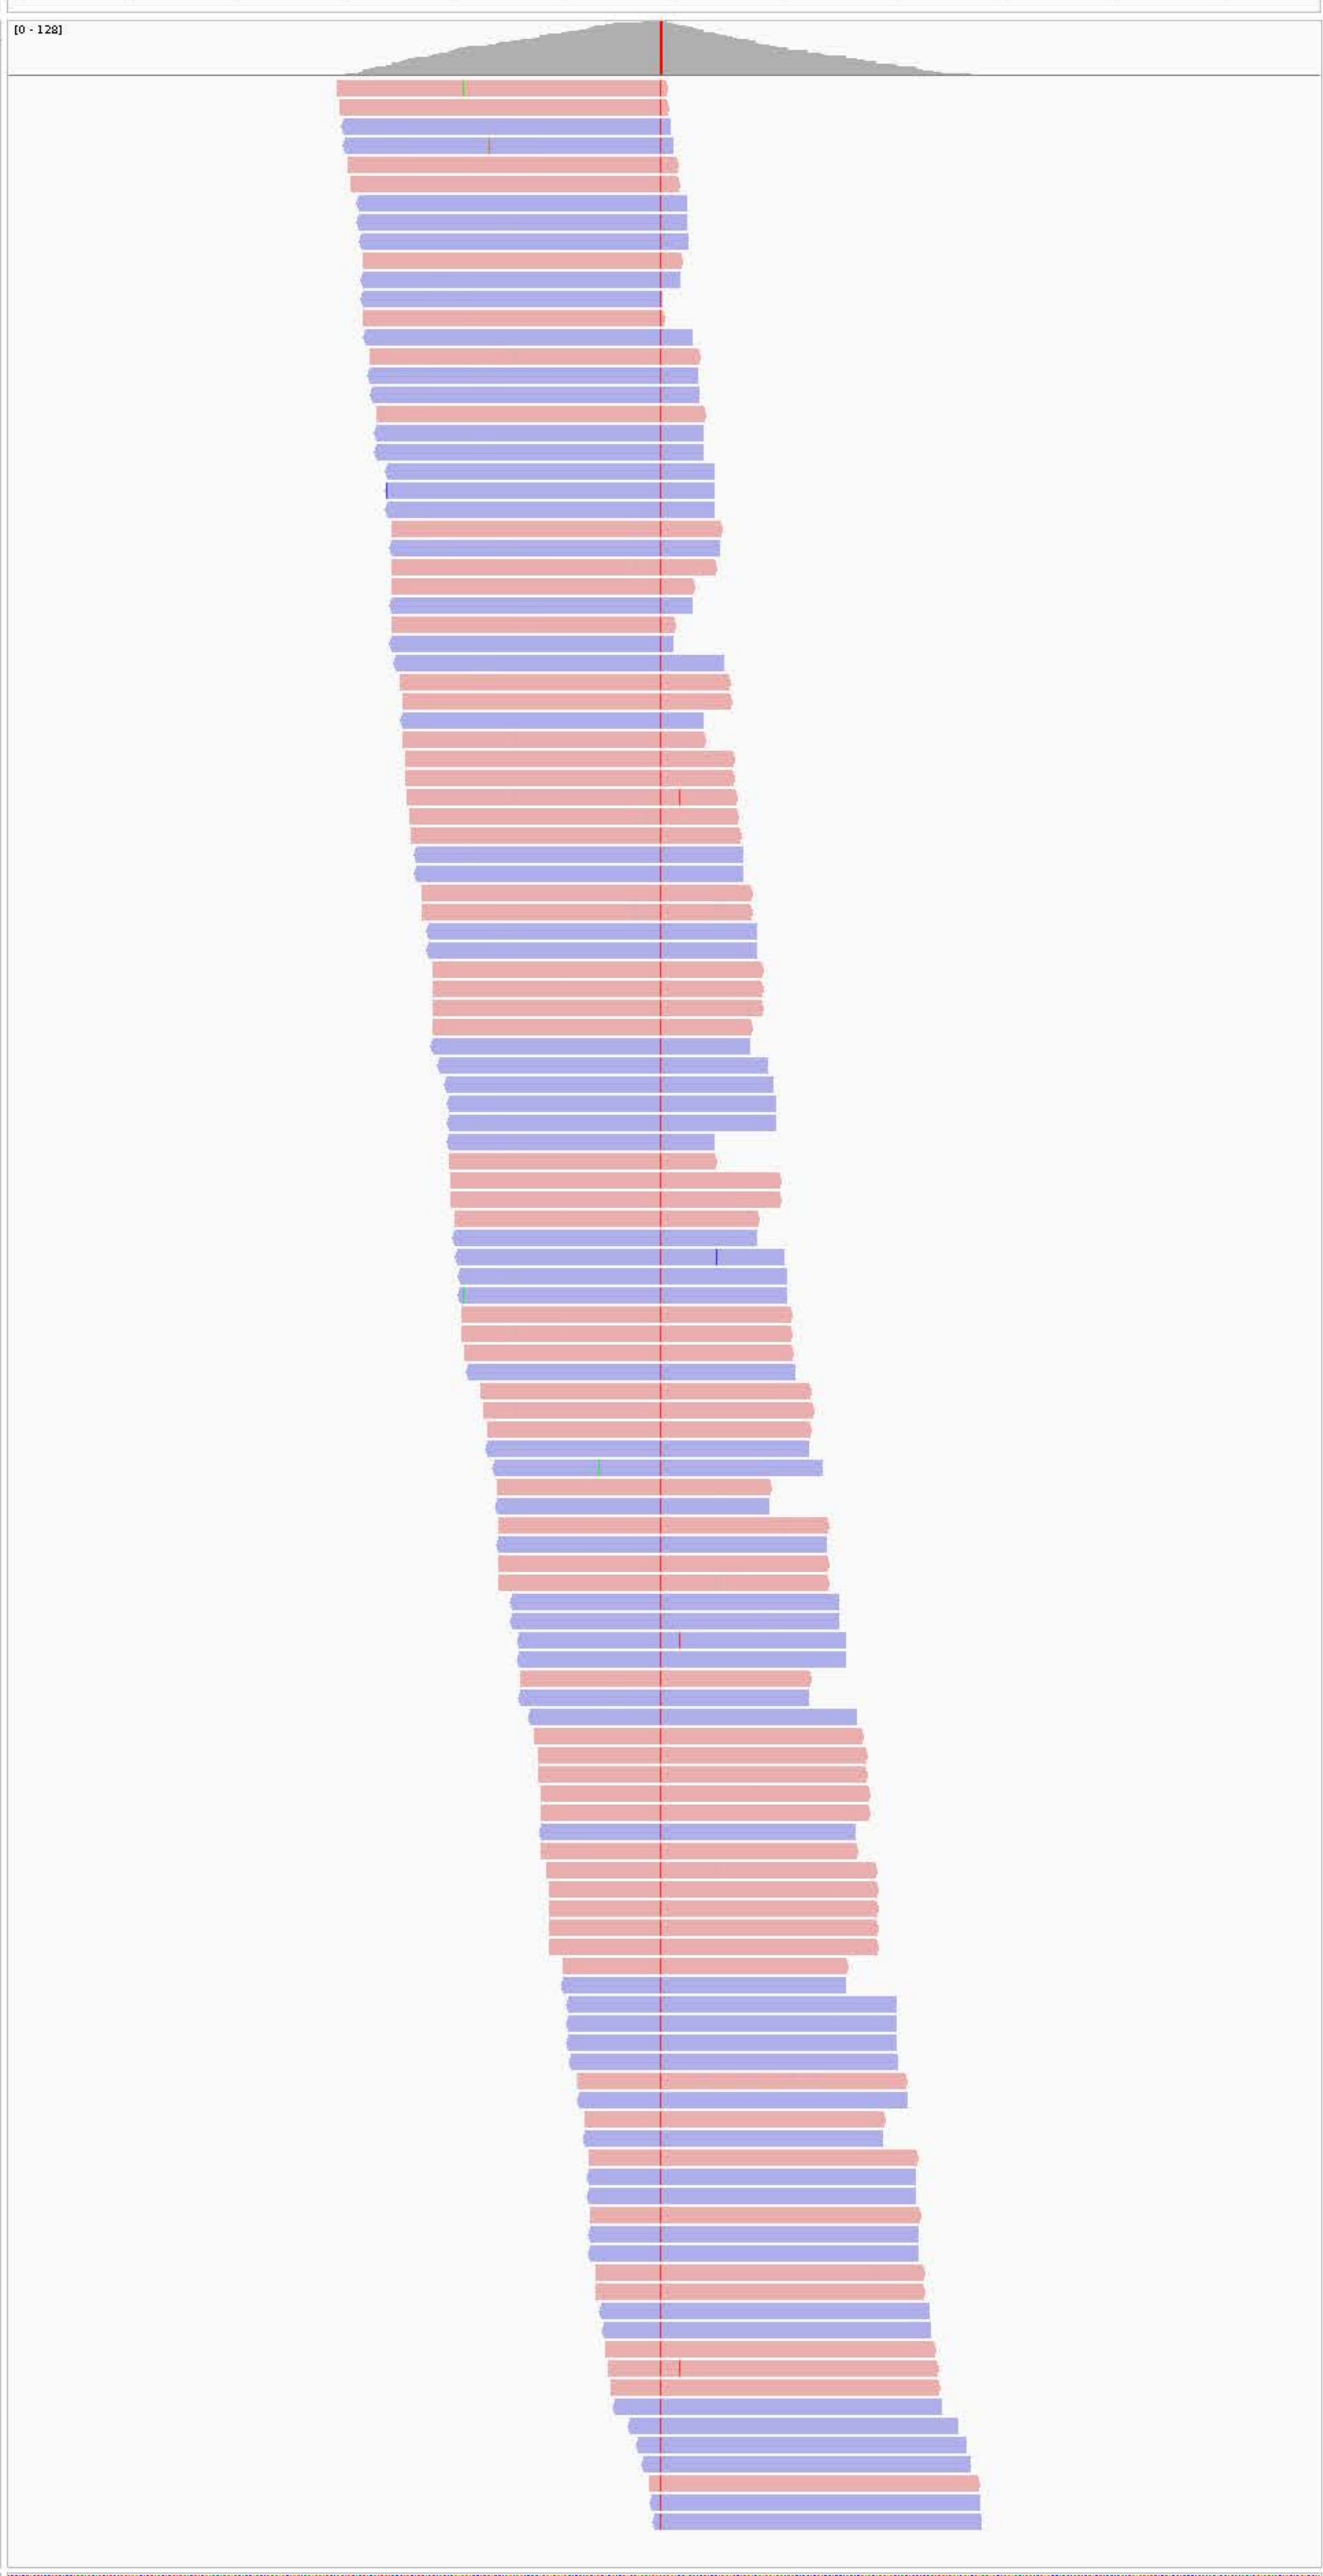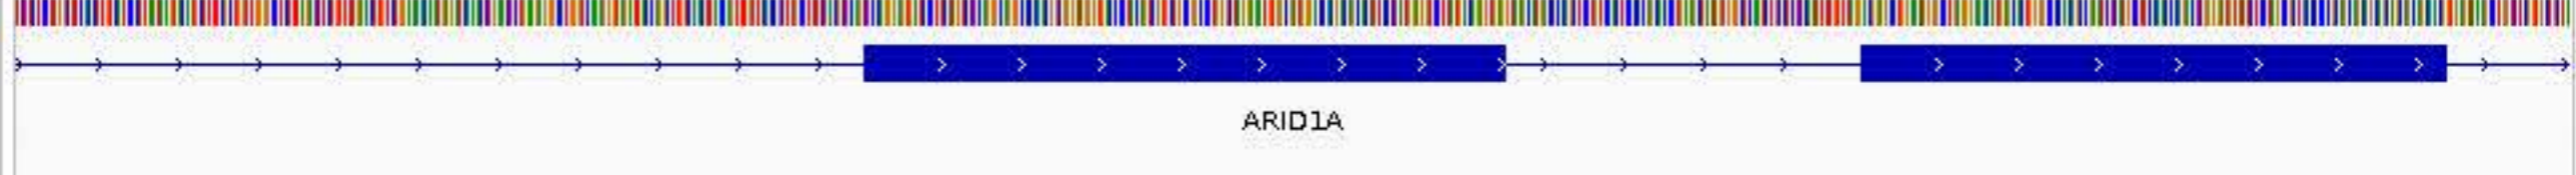

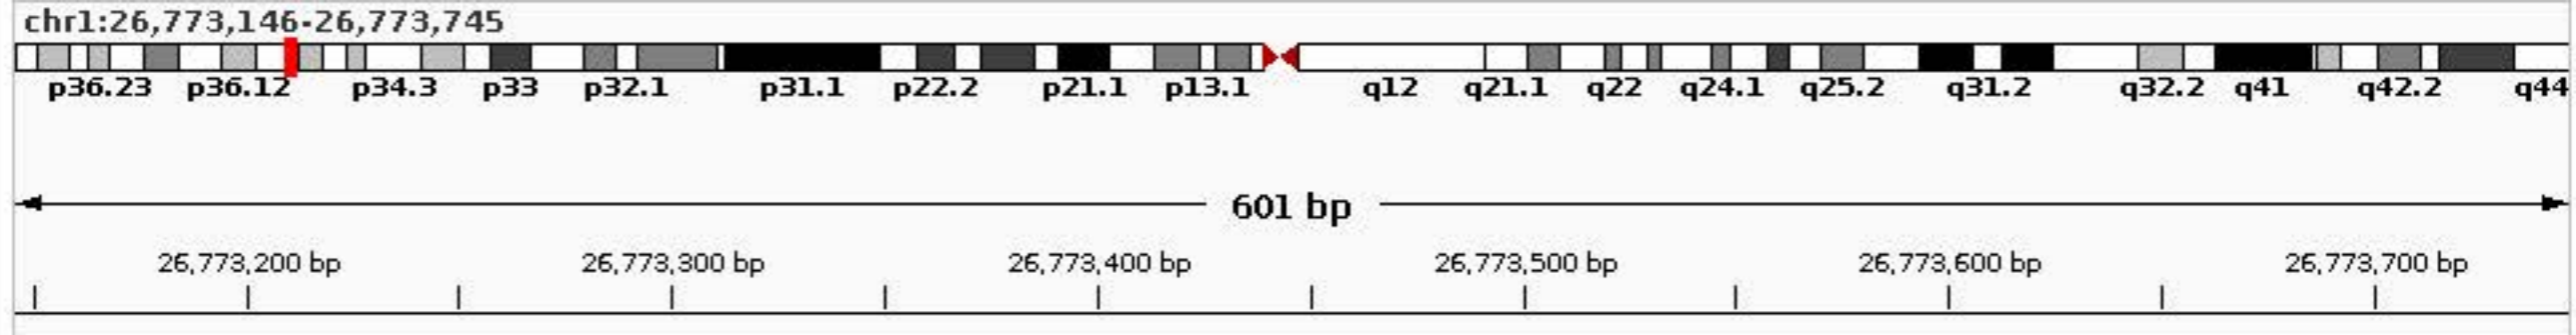

SL\_0015\_RN\_48\_mut.bam Coverage

SL\_0015\_RN\_48\_mut.bam

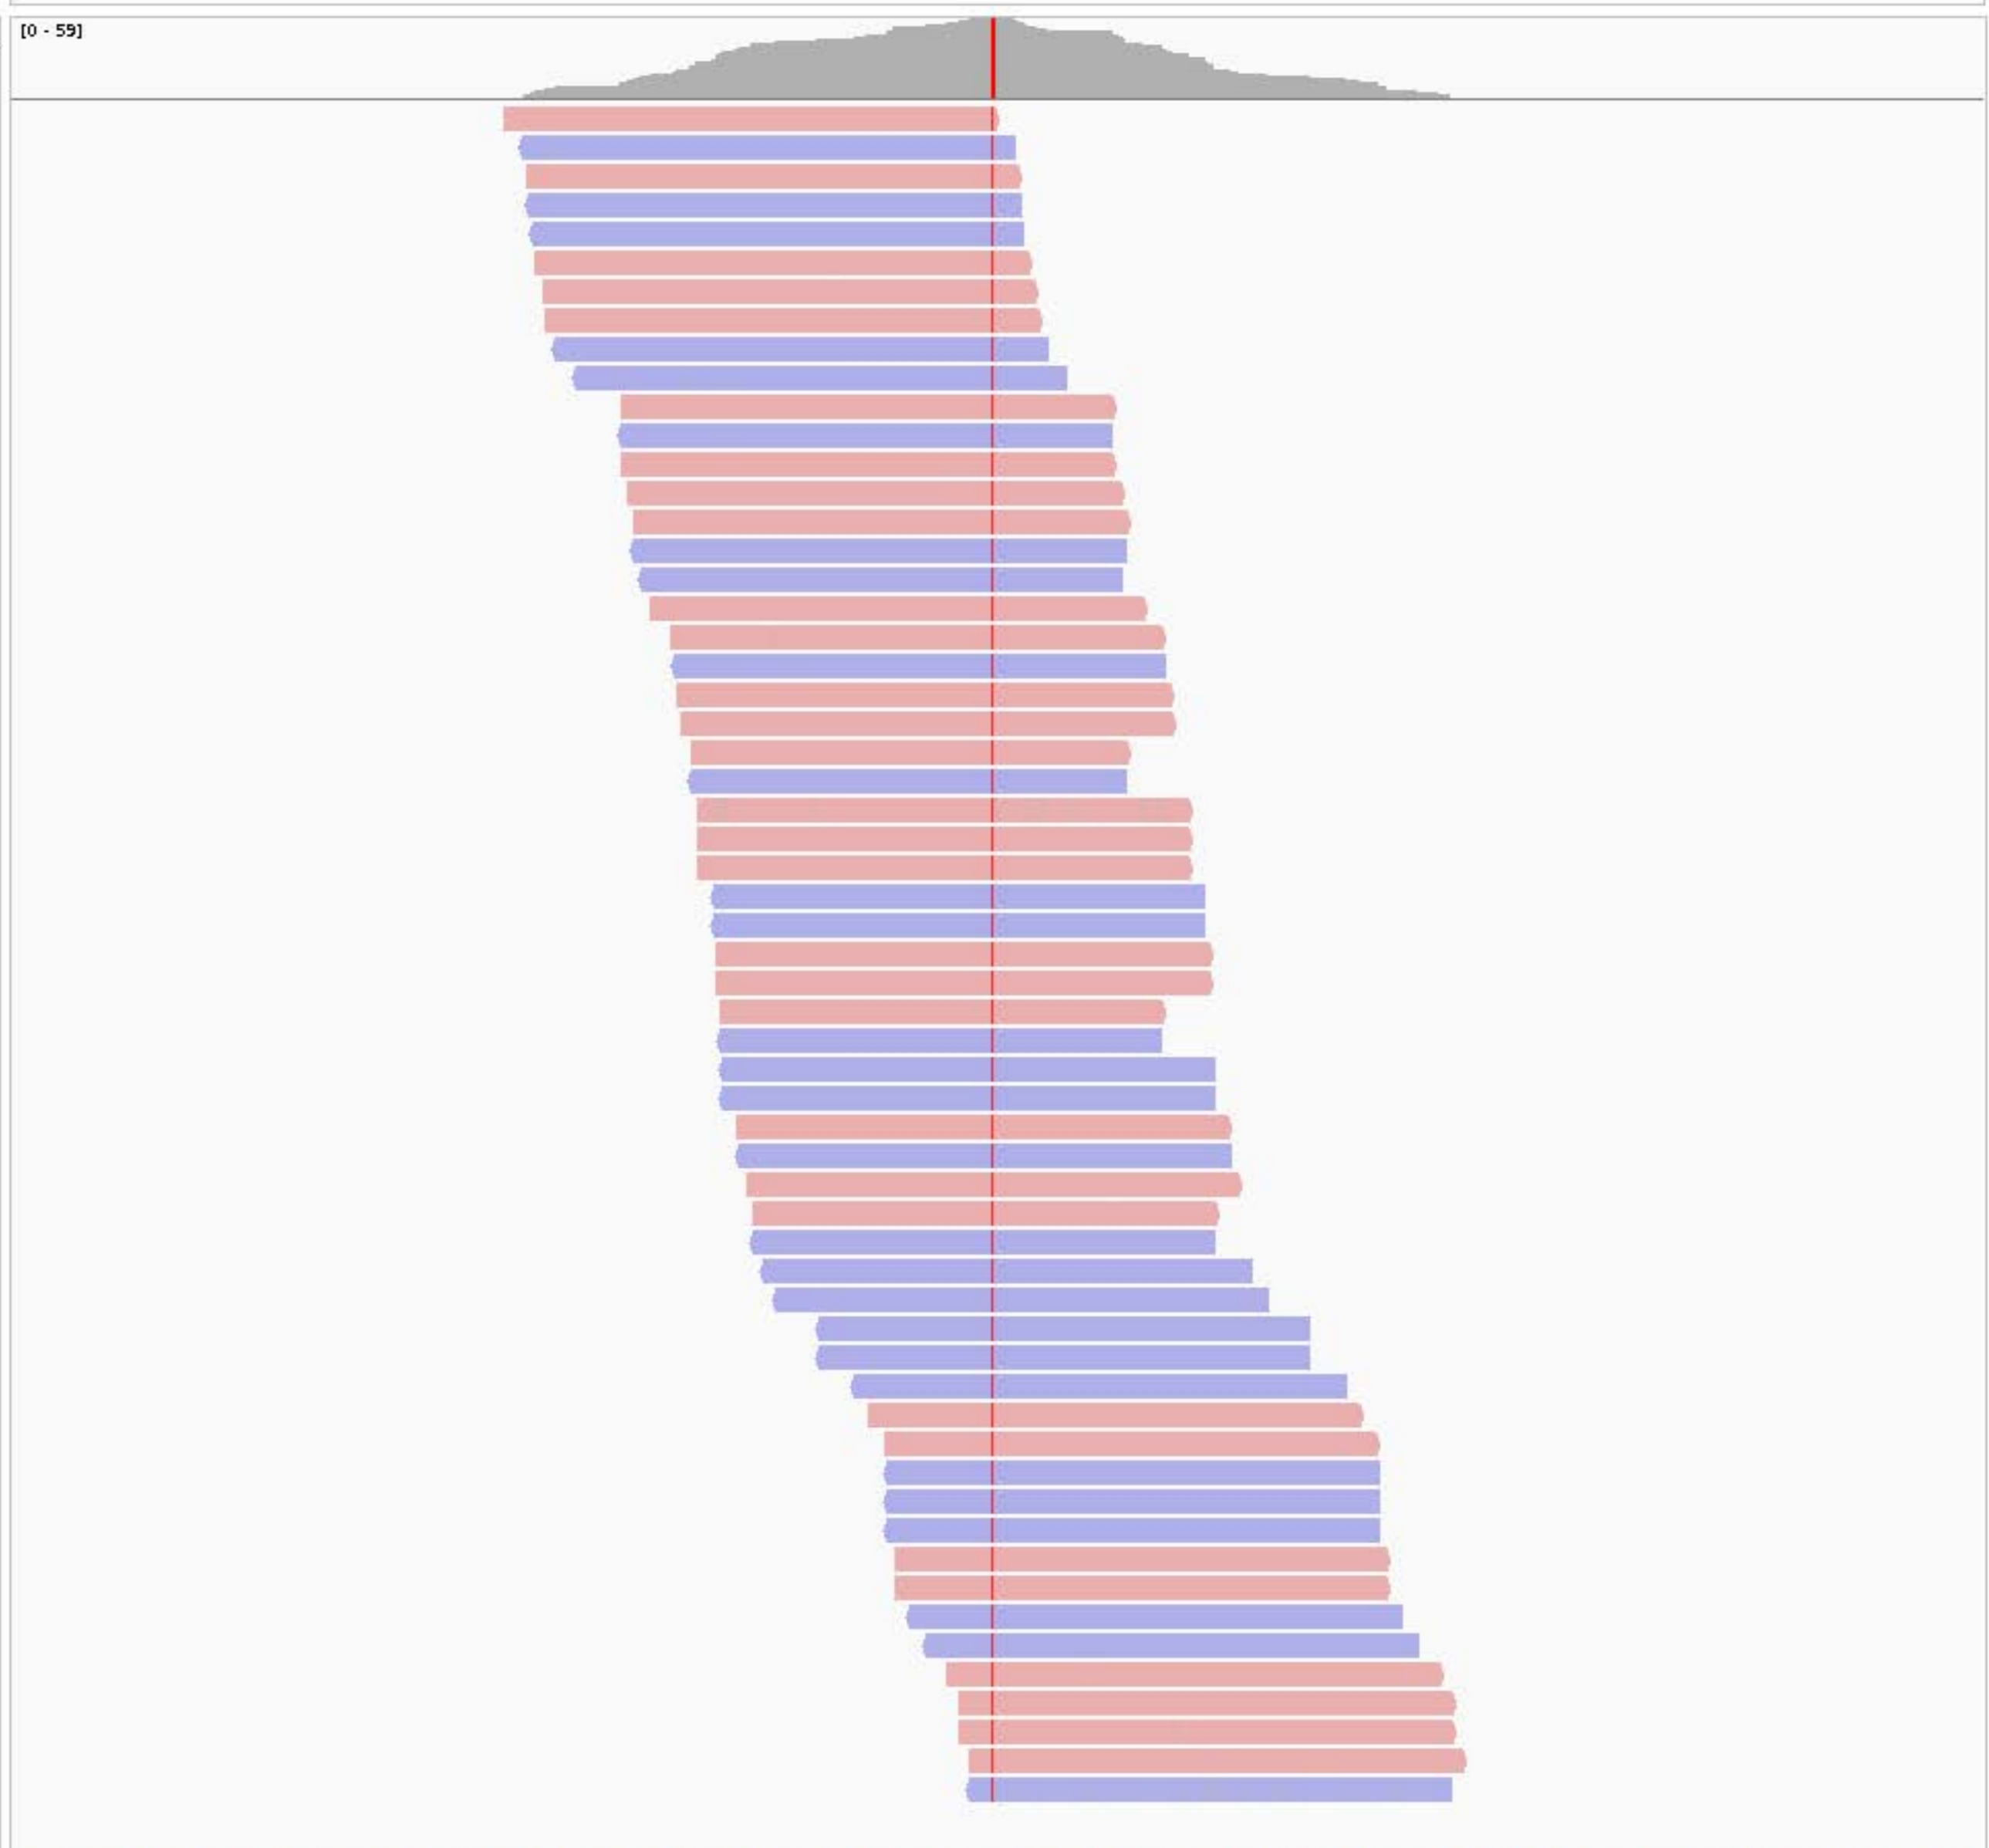

Sequence

Refseq Genes

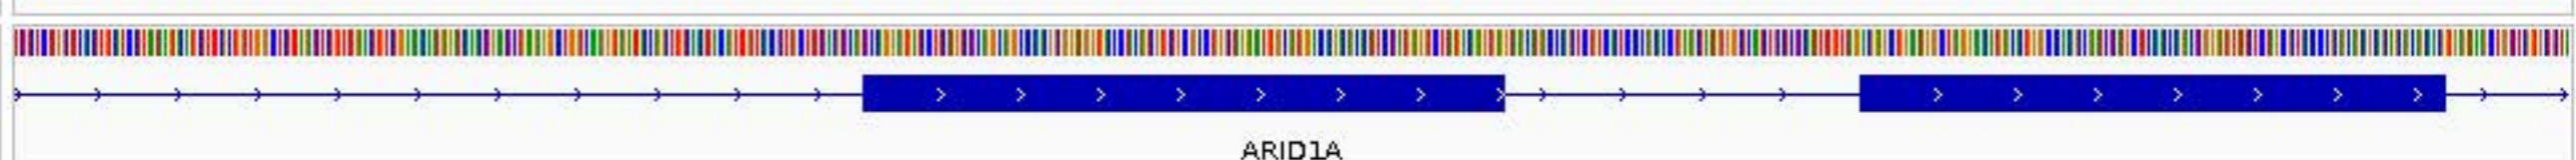



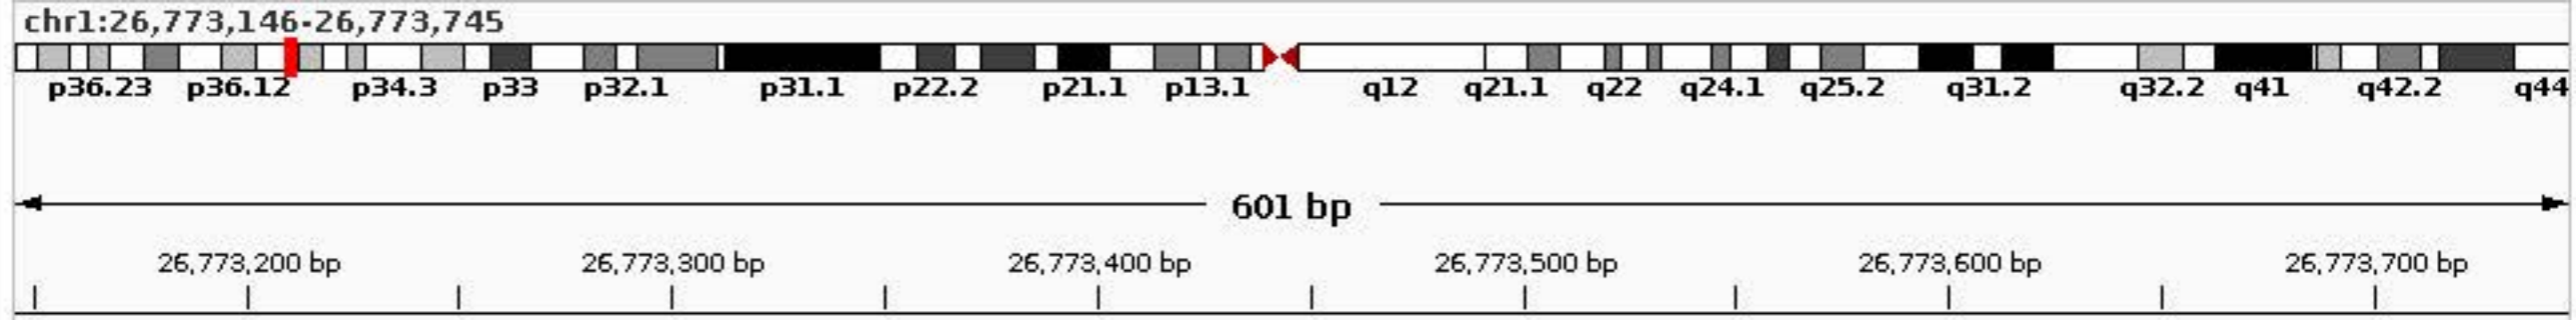

SL\_0015\_RN\_49\_mut.bam Coverage

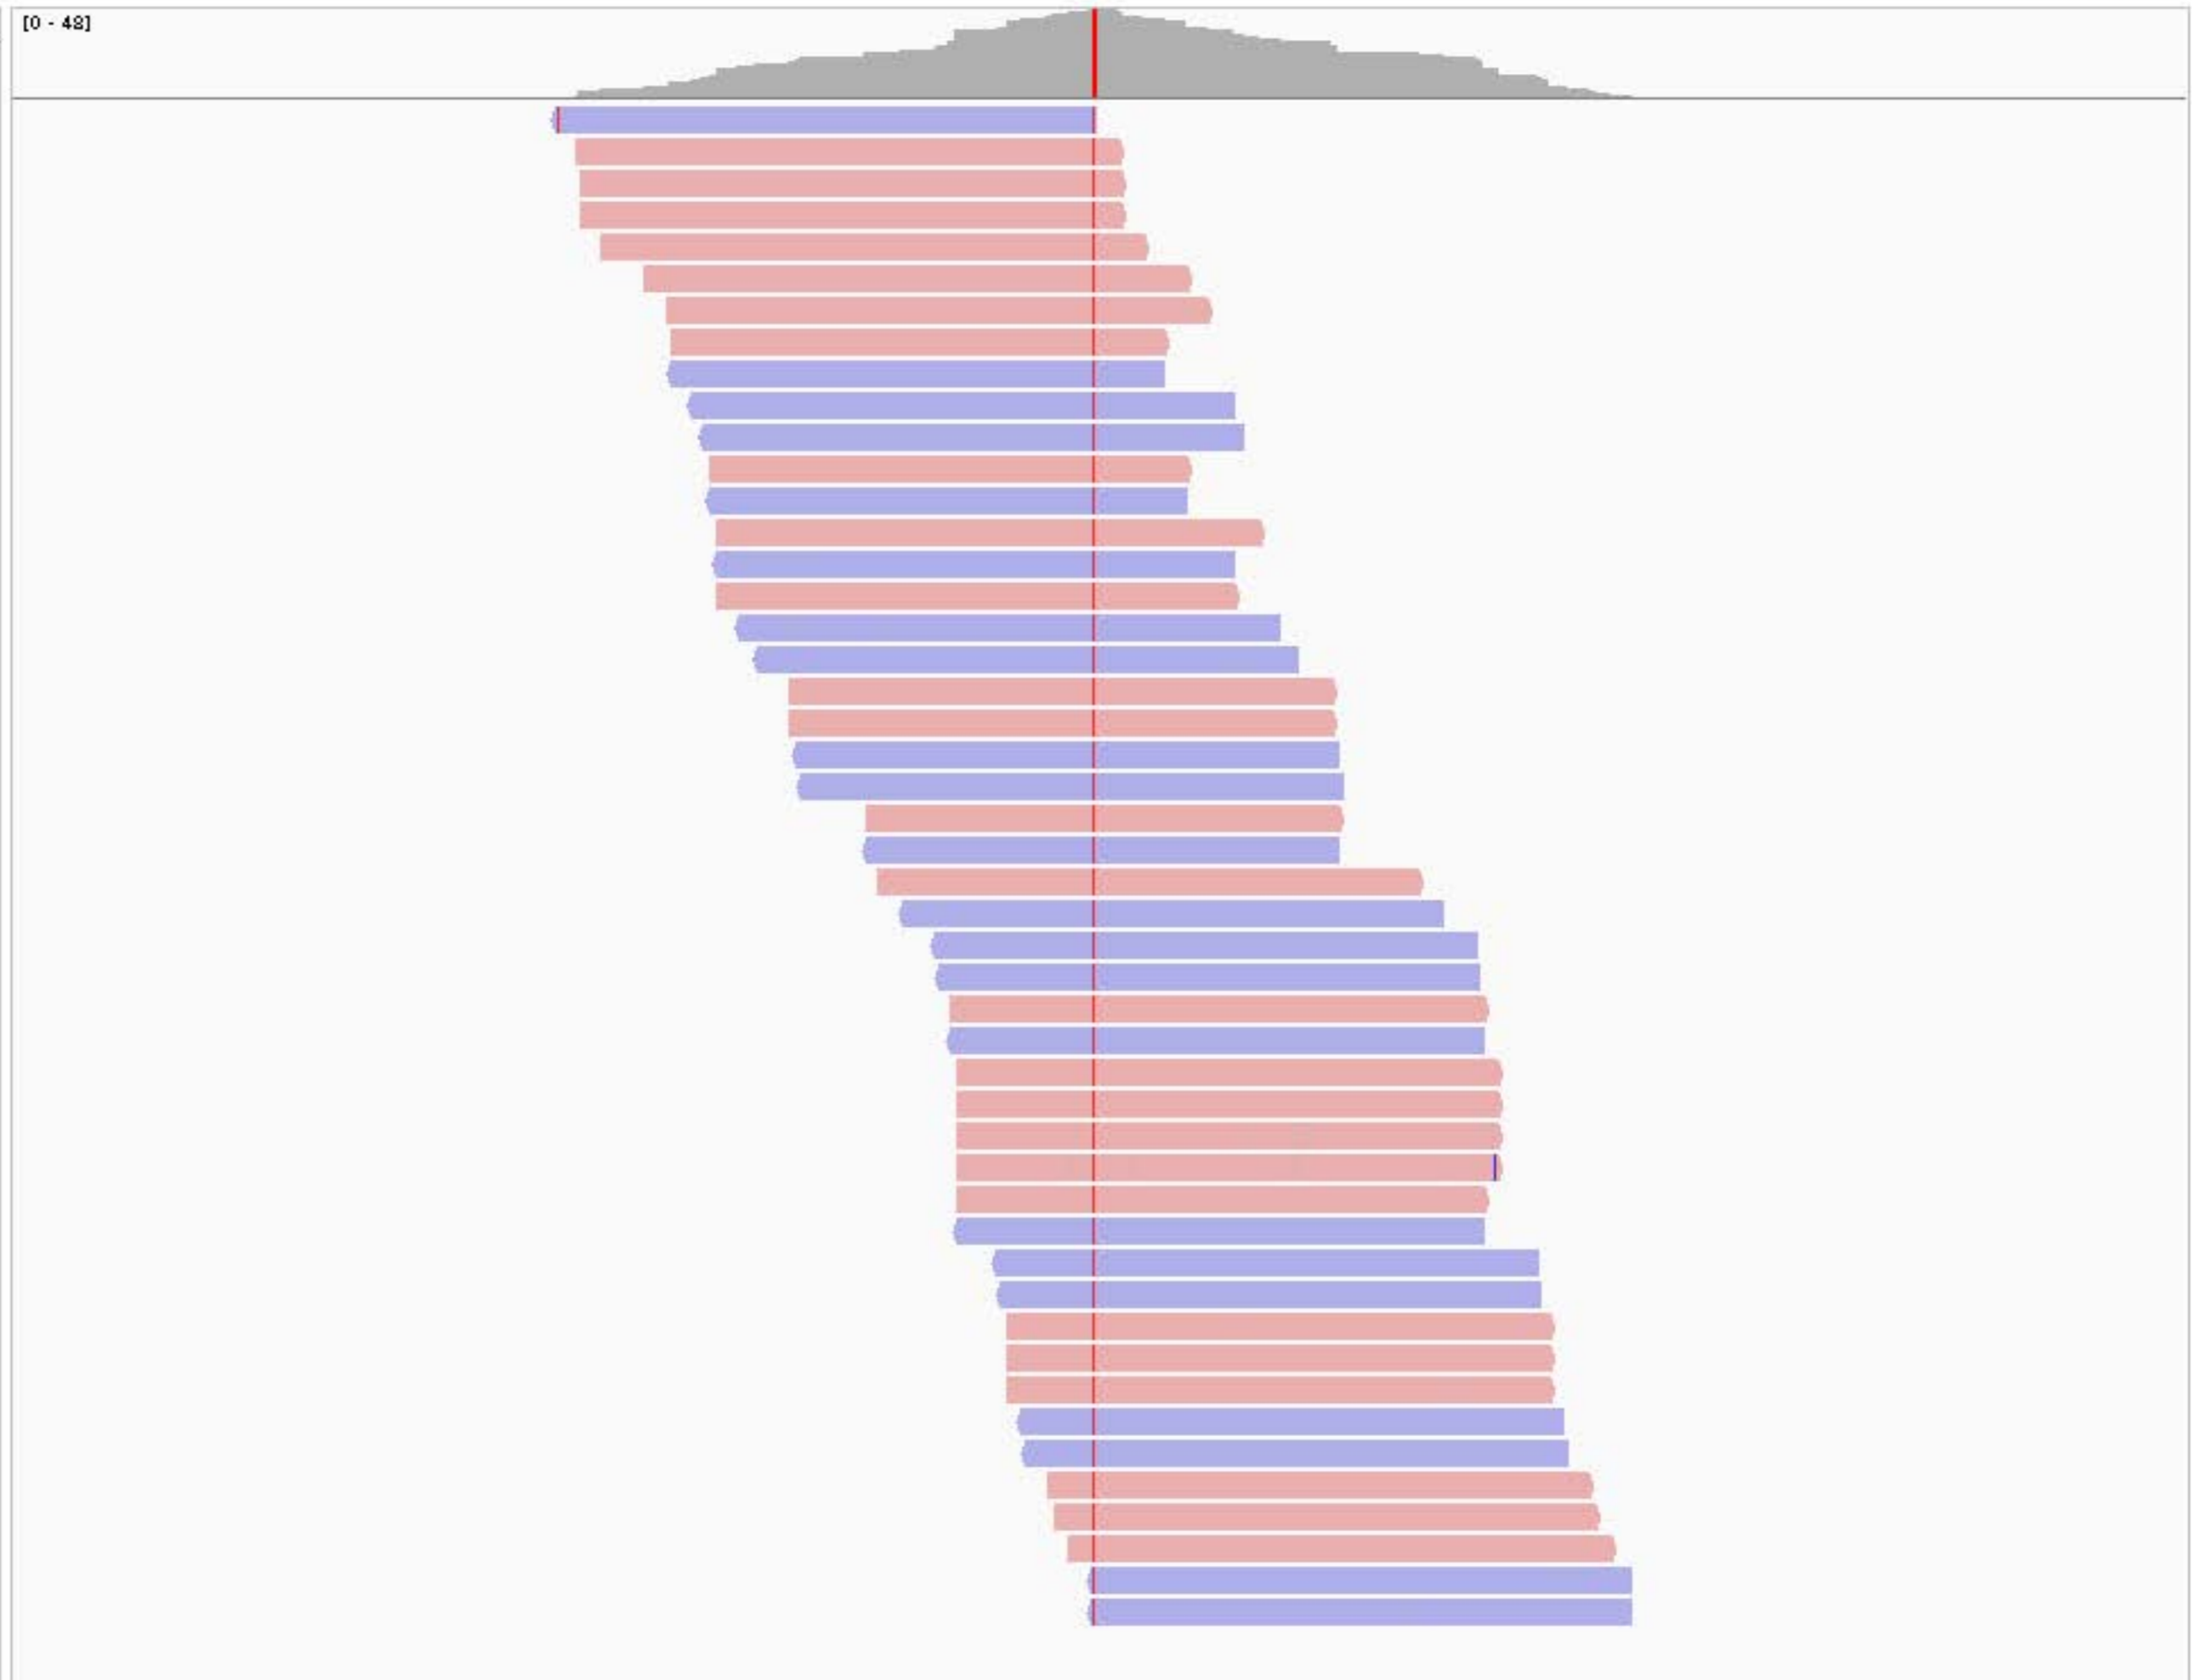

SL\_0015\_RN\_49\_mut.bam

Sequence →  
Refseq Genes

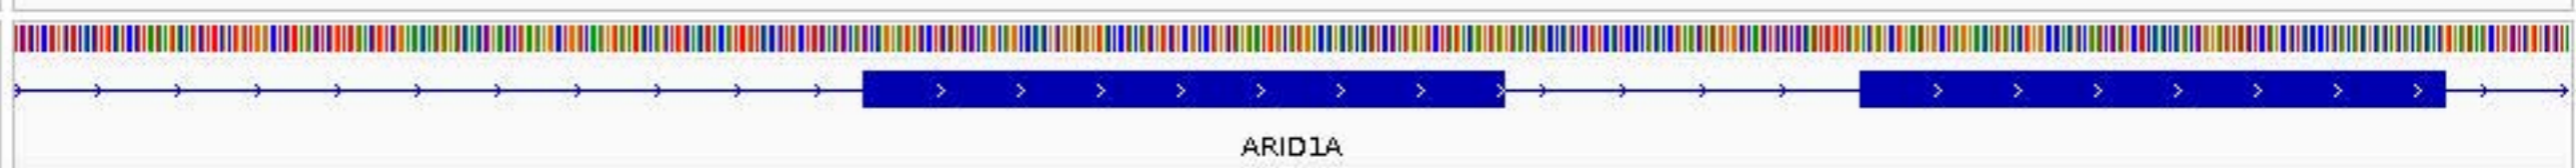

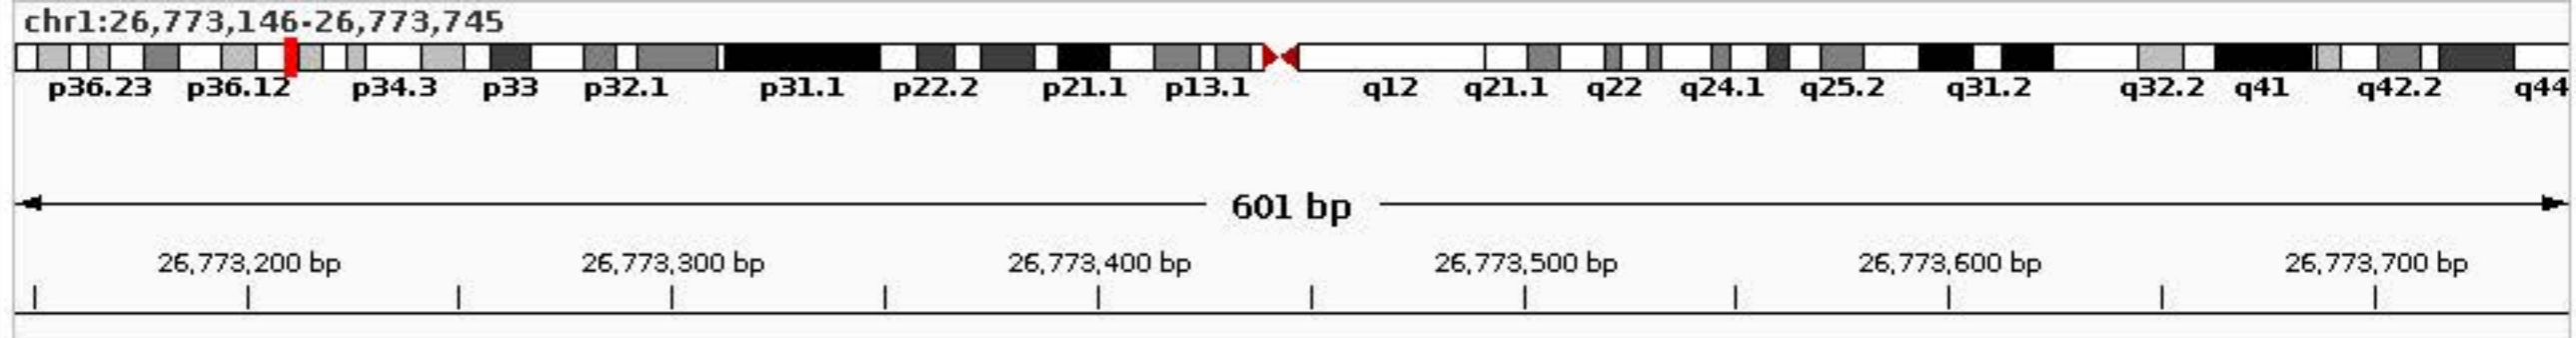

SL\_0015\_RN\_50\_mut.bam Coverage

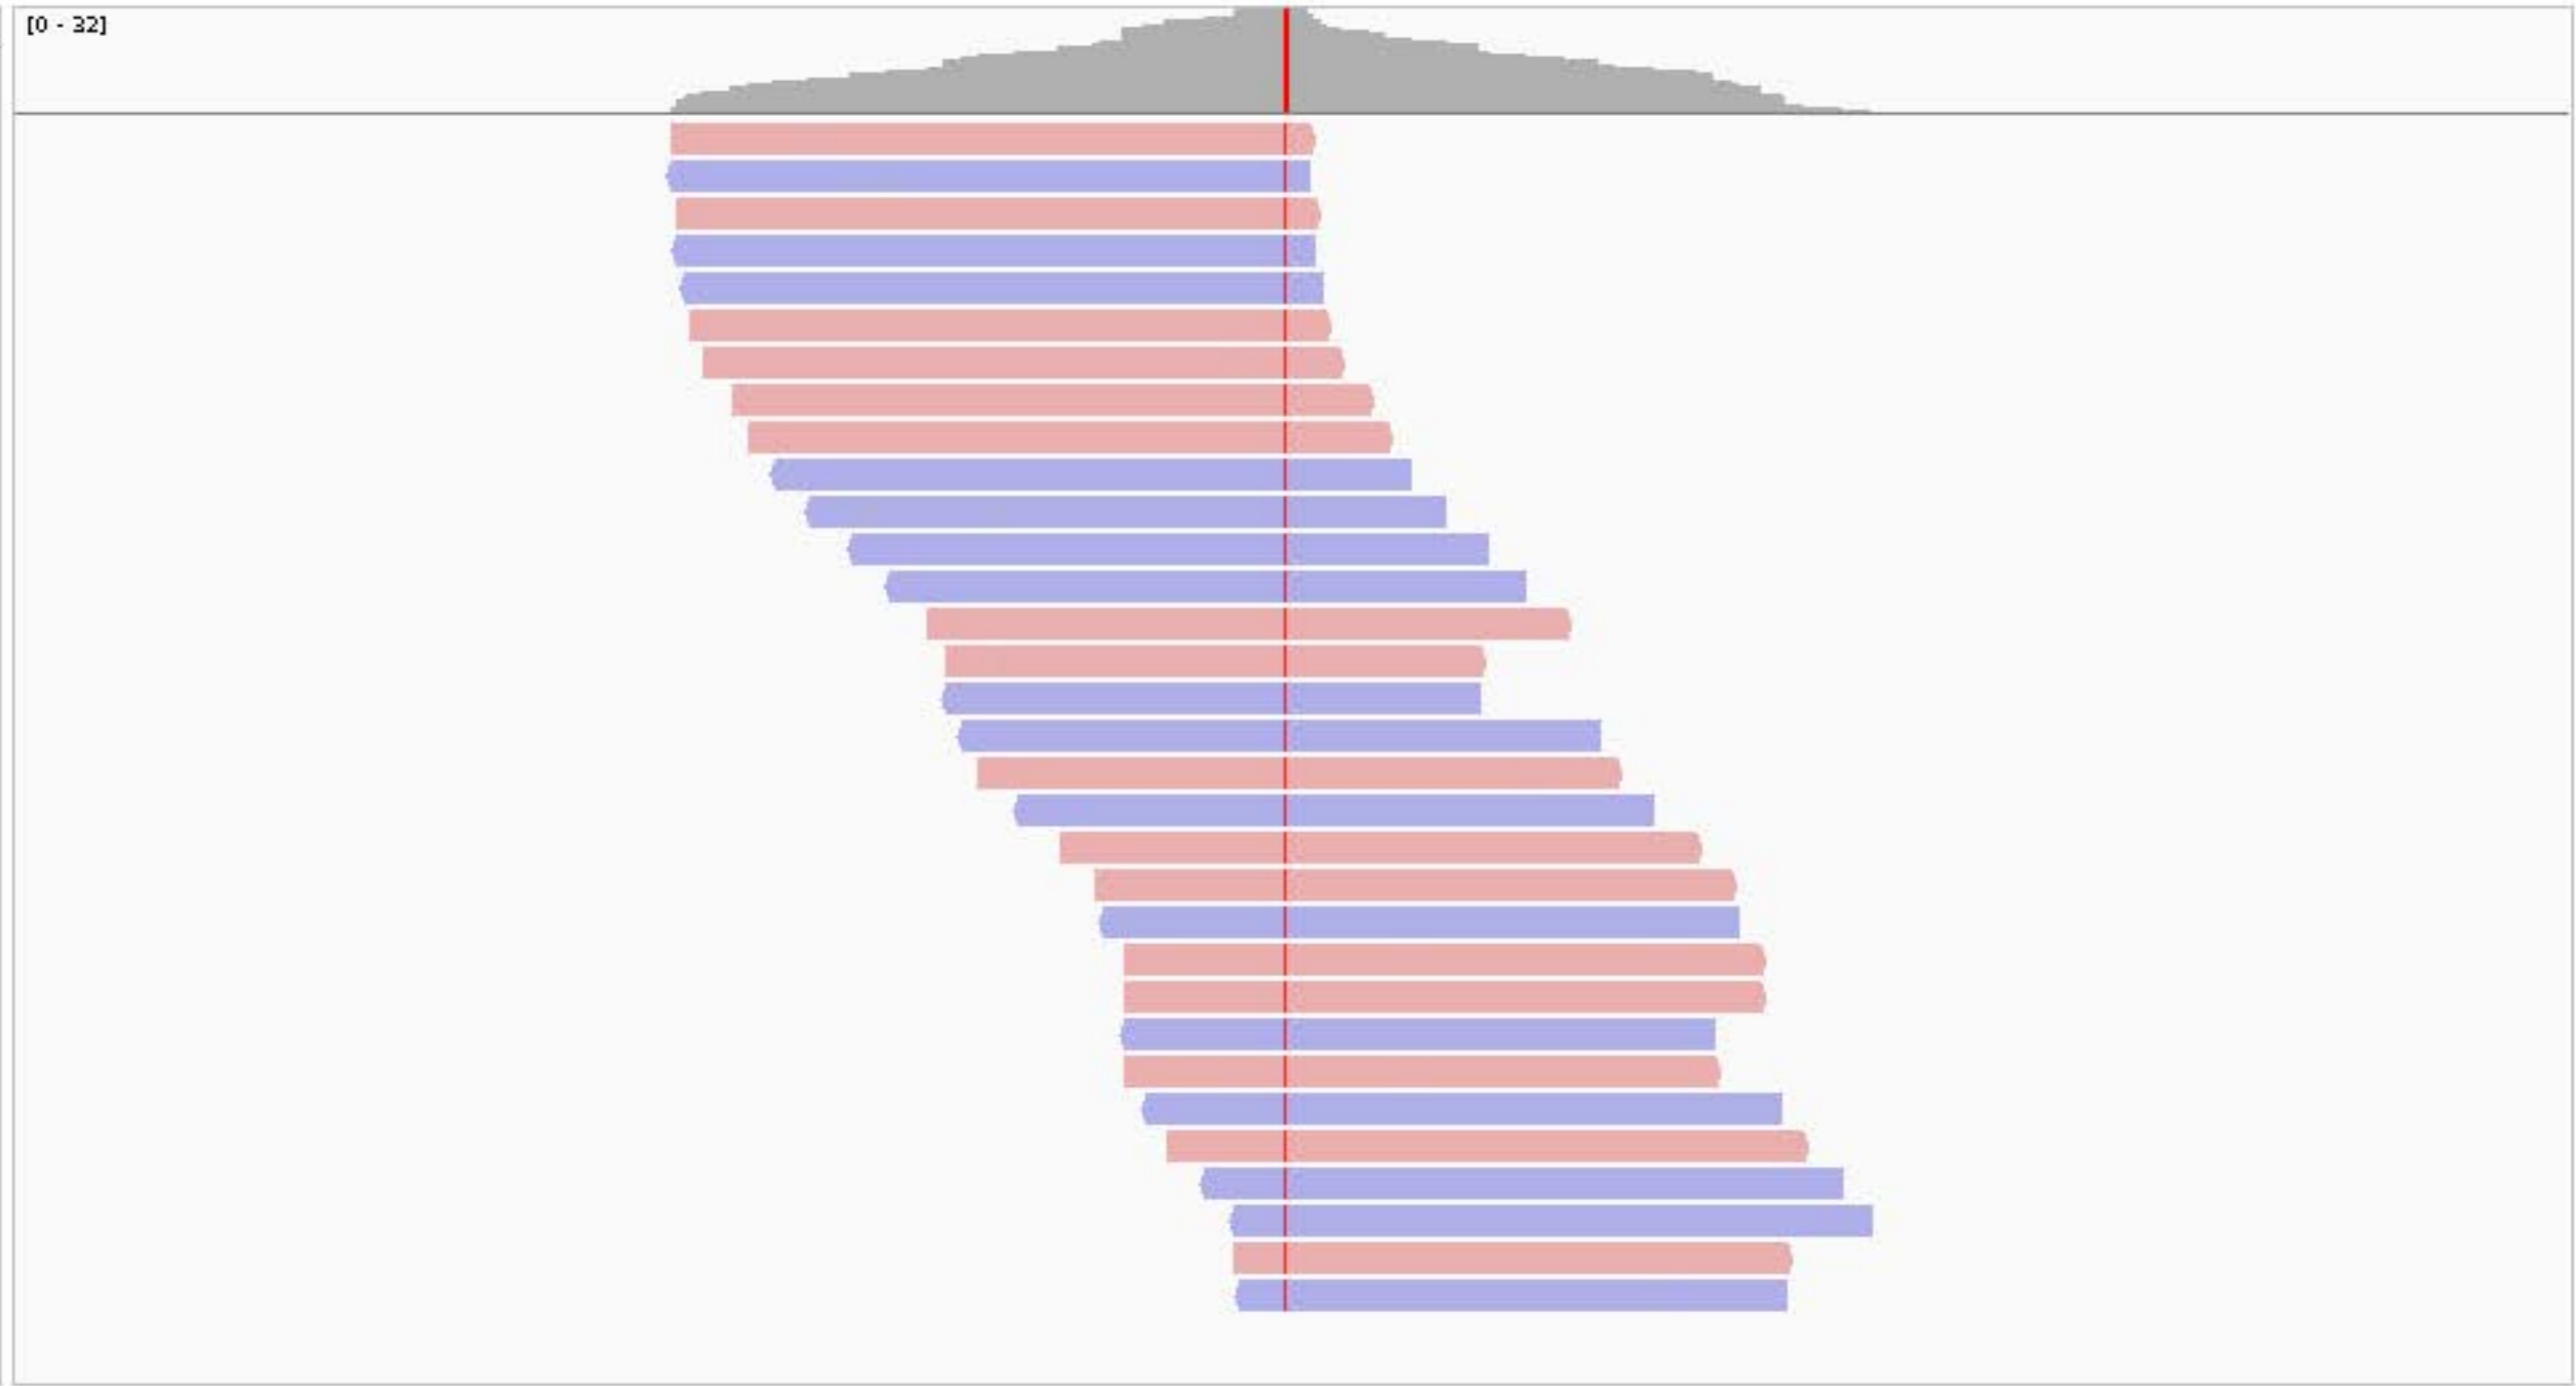

SL\_0015\_RN\_50\_mut.bam

Sequence

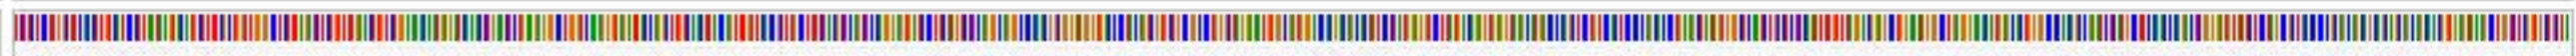

Refseq Genes

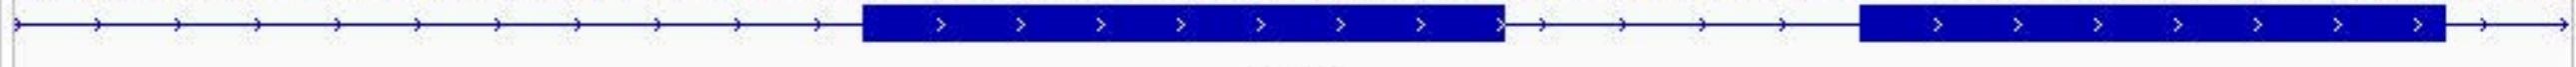

ARID1A

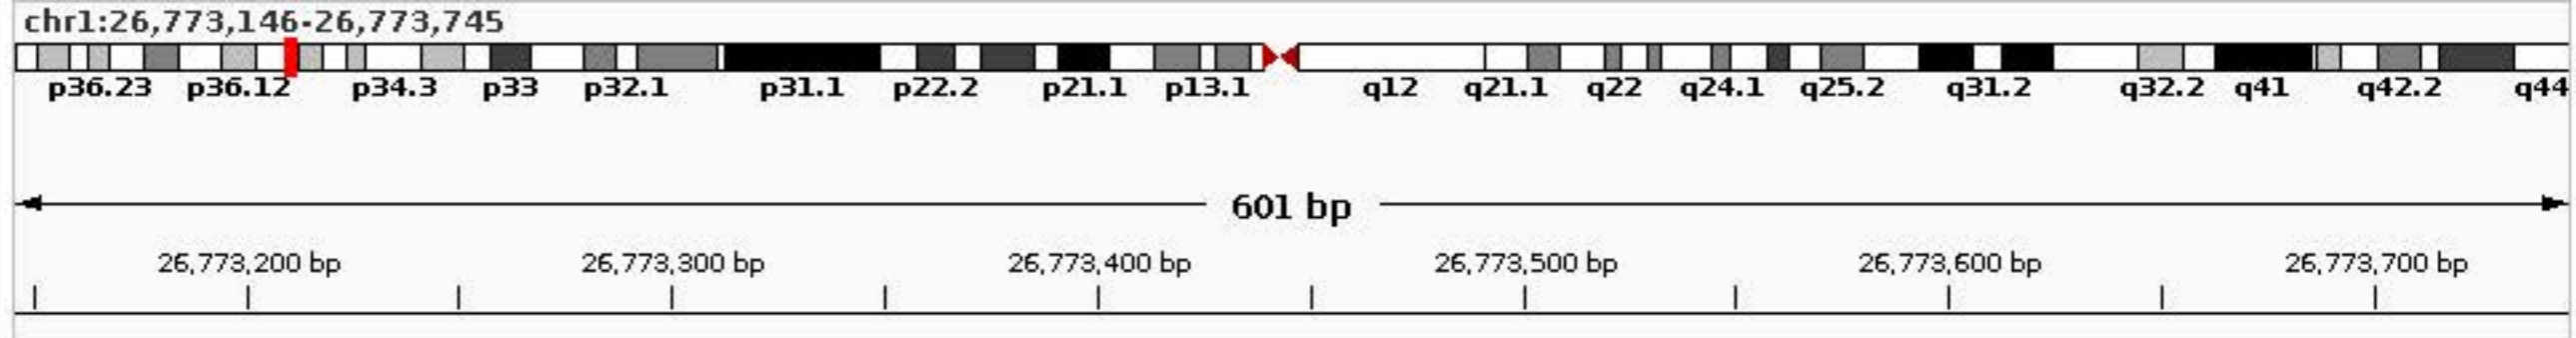

SL\_0015\_RN\_57\_mut.bam Coverage

SL\_0015\_RN\_57\_mut.bam

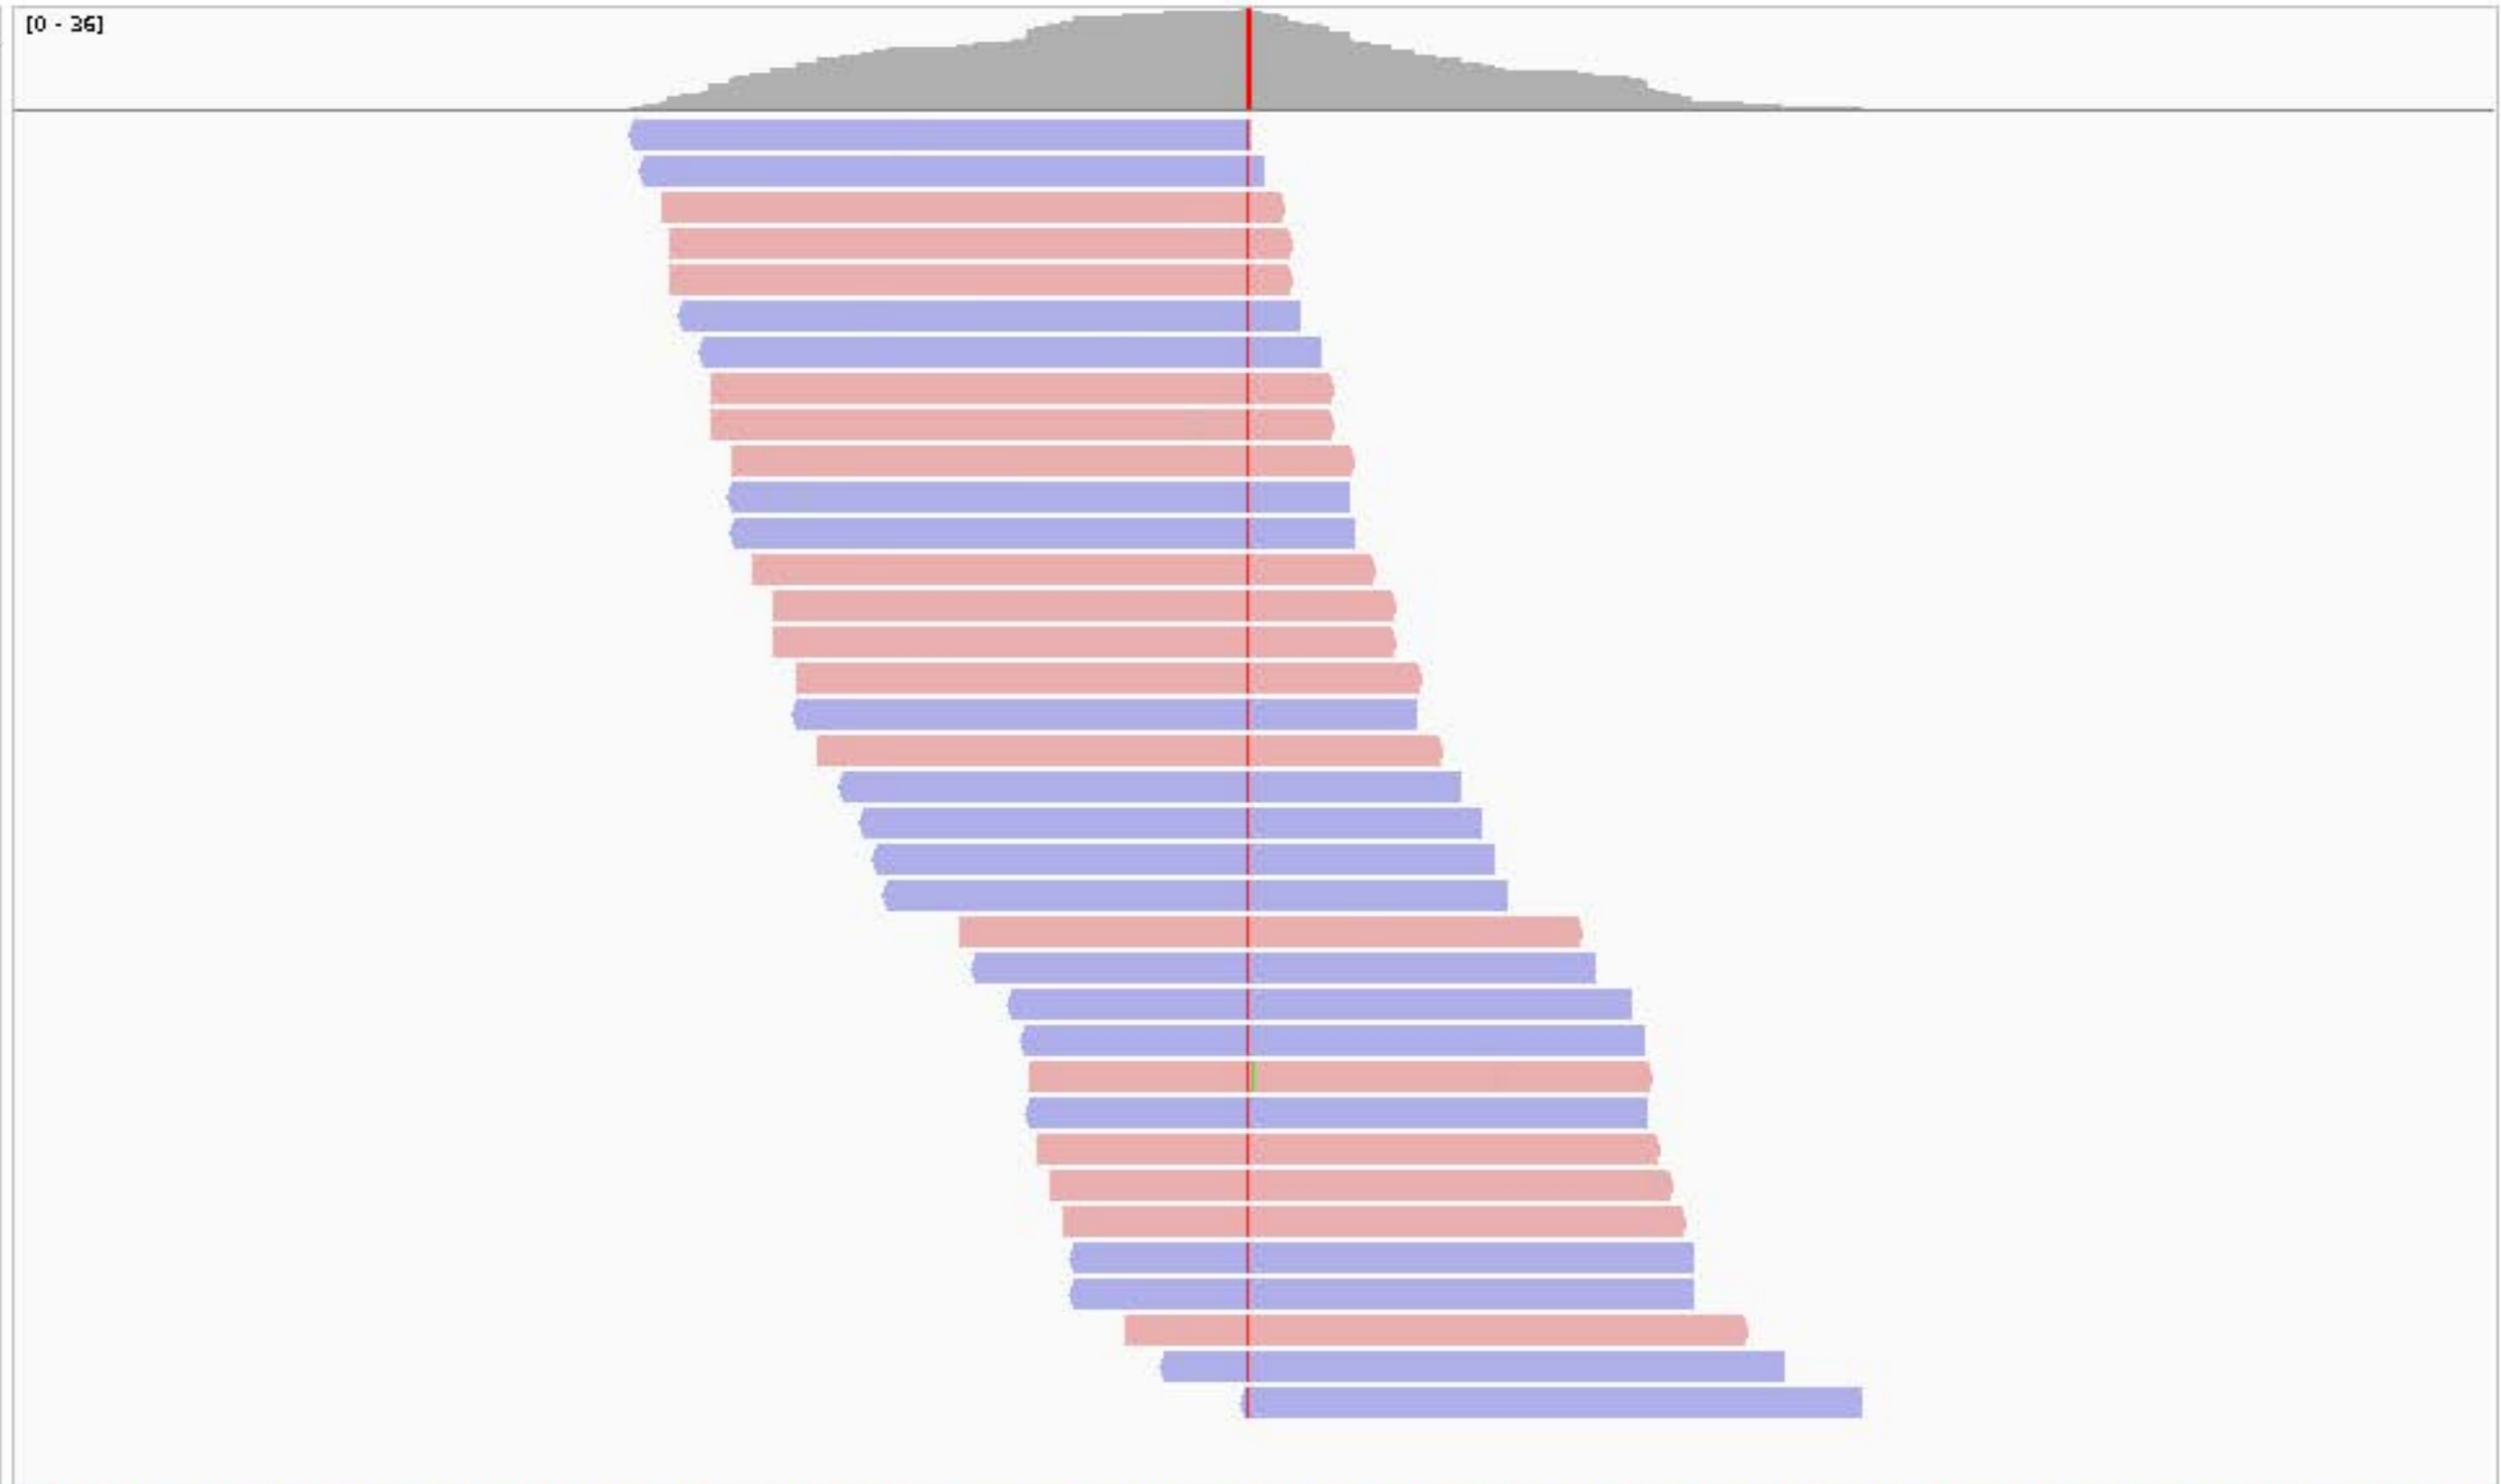

Sequence

Refseq Genes

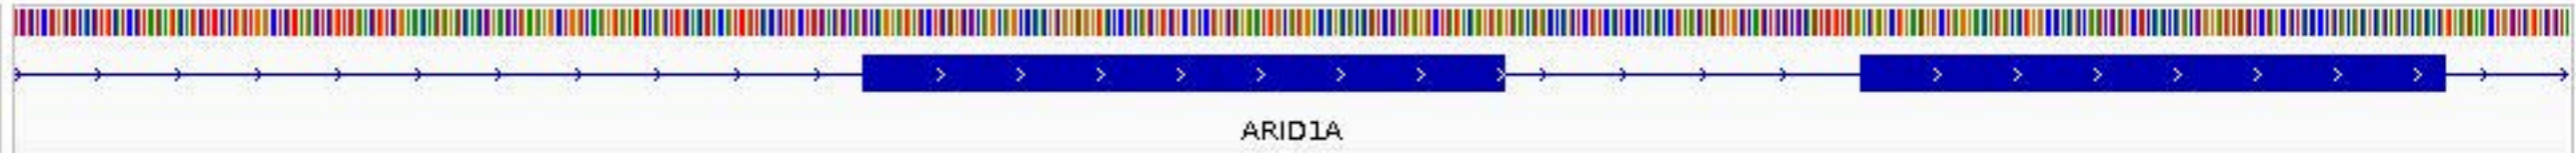



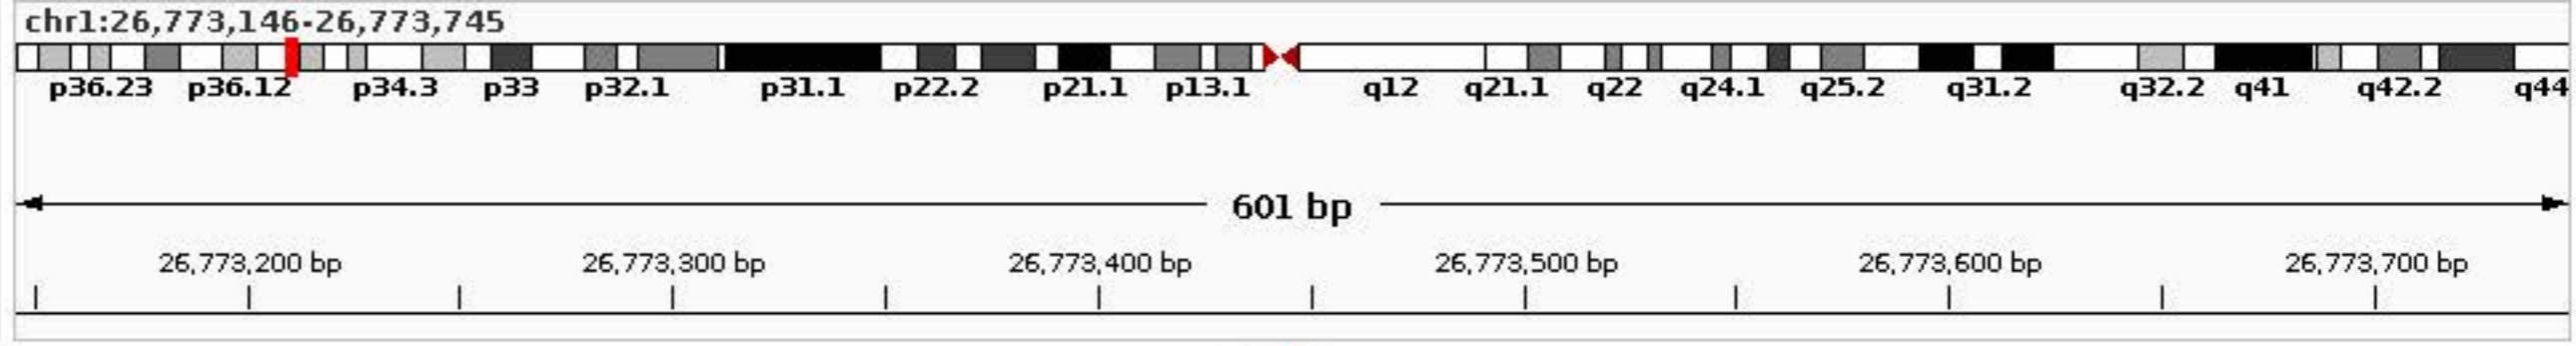

SL\_0015\_RN\_58\_mut.bam Coverage

SL\_0015\_RN\_58\_mut.bam

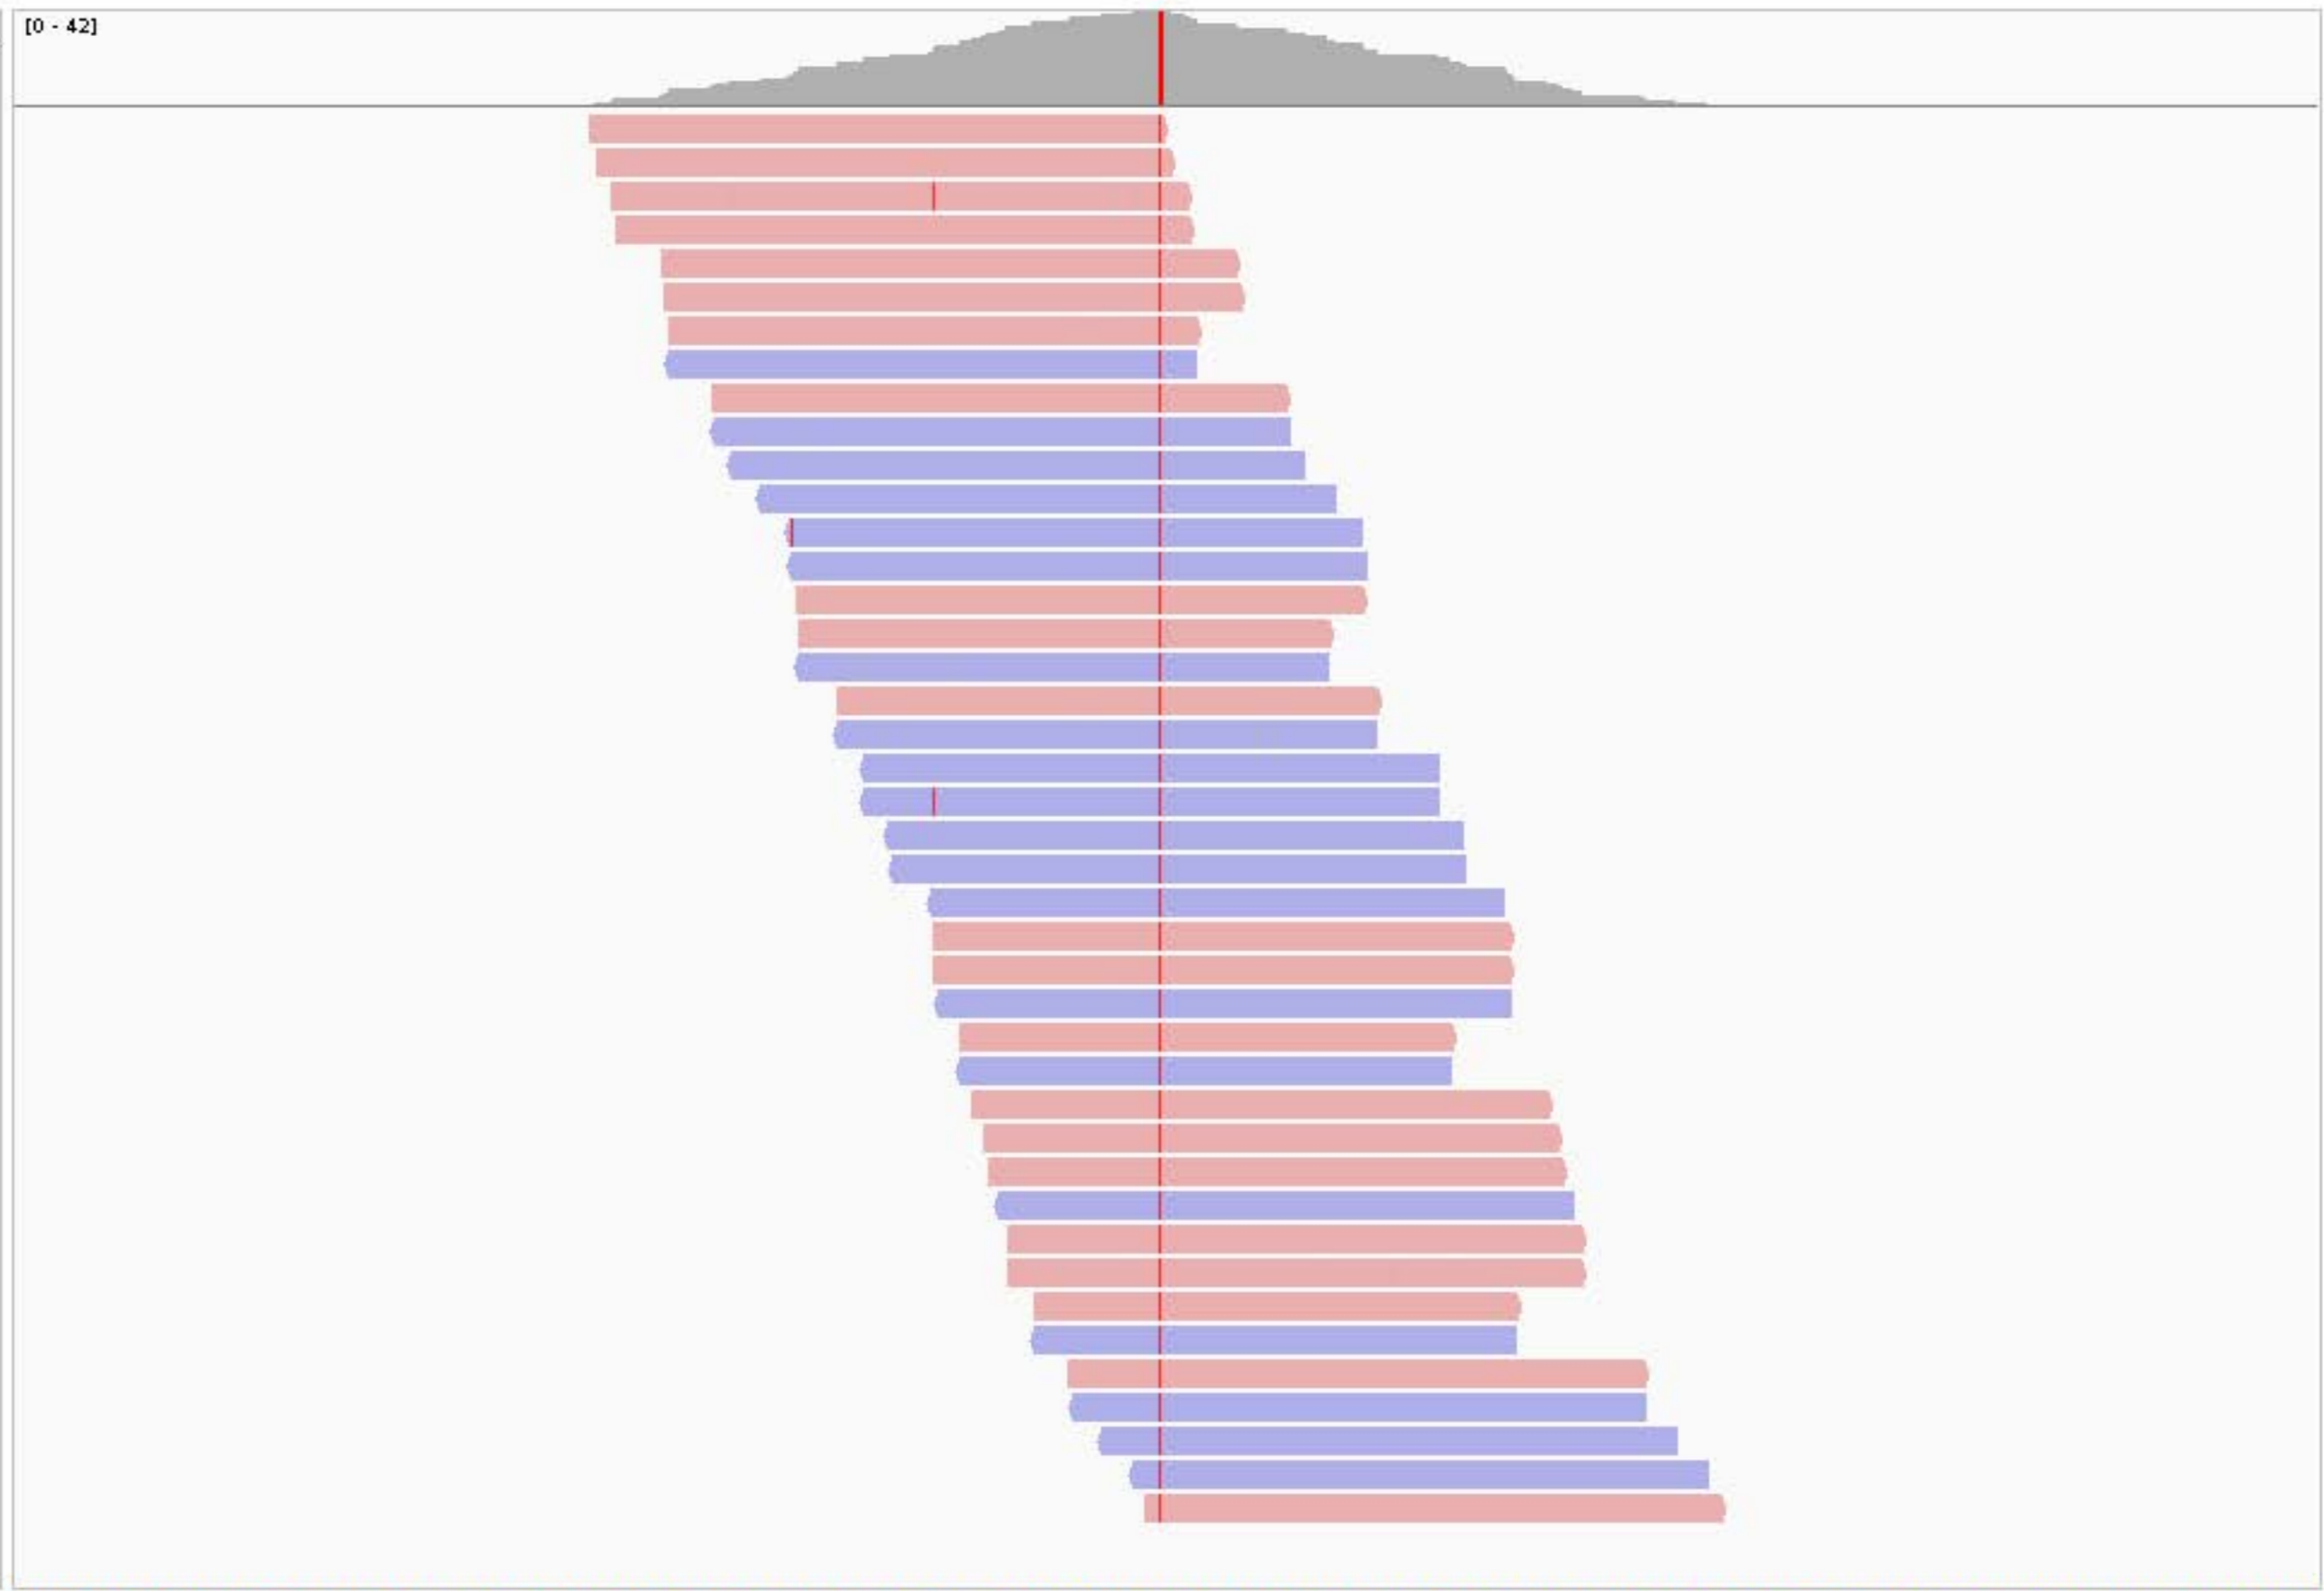

Sequence

Refseq Genes

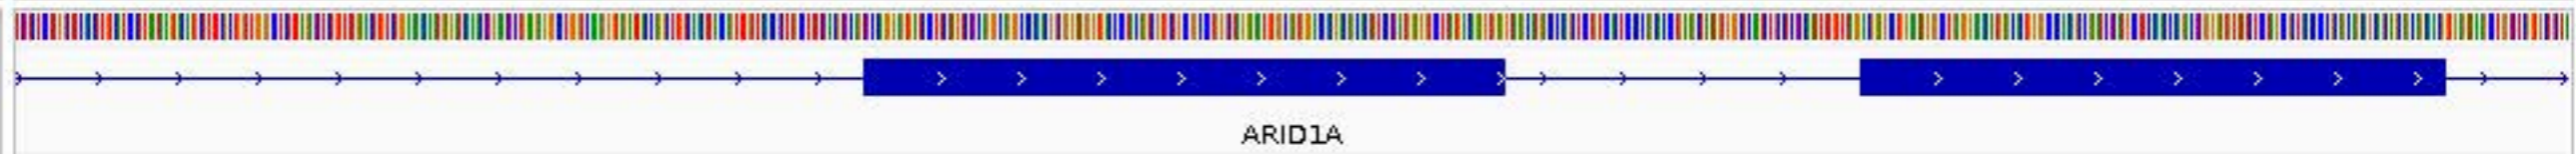

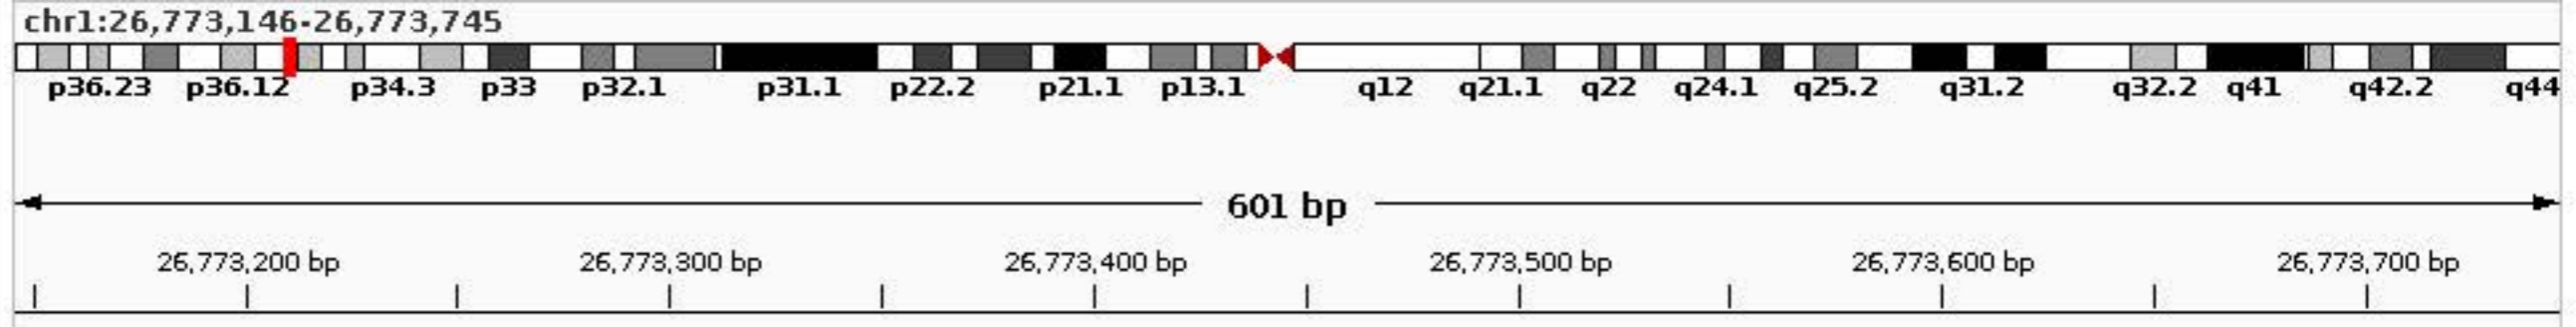

SL\_0015\_RN\_63\_mut.bam Coverage

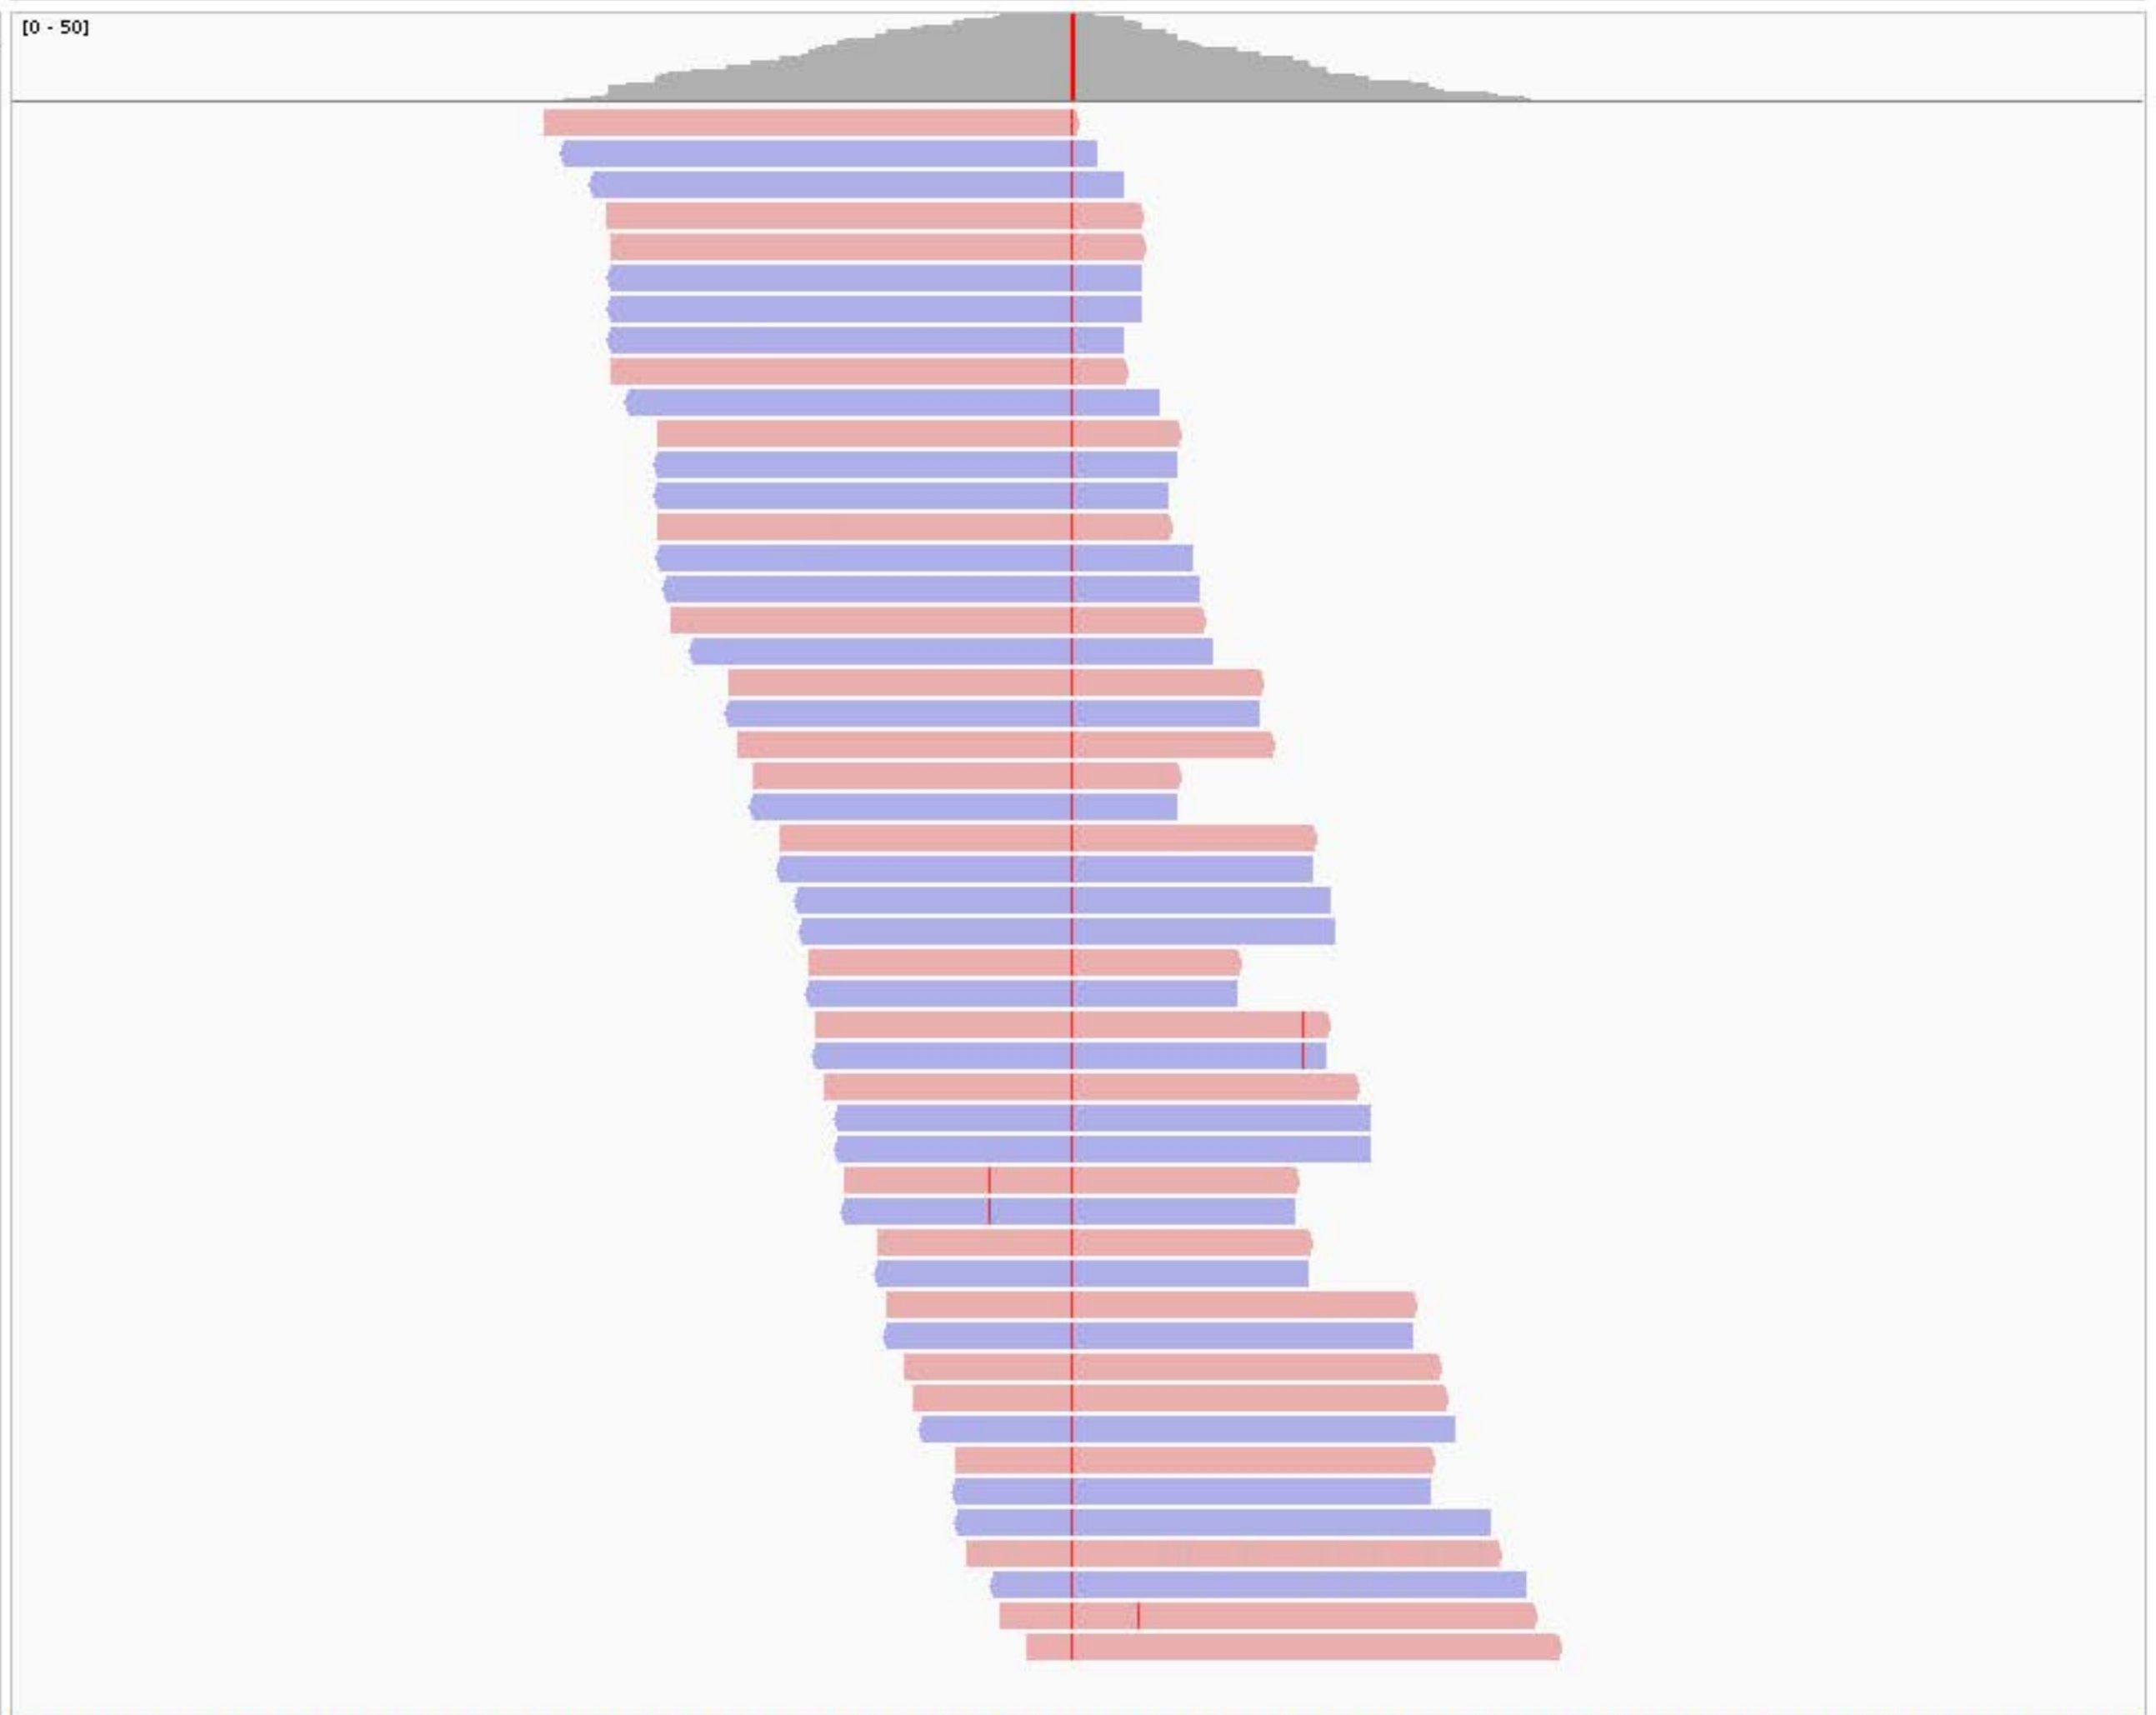

SL\_0015\_RN\_63\_mut.bam

Sequence

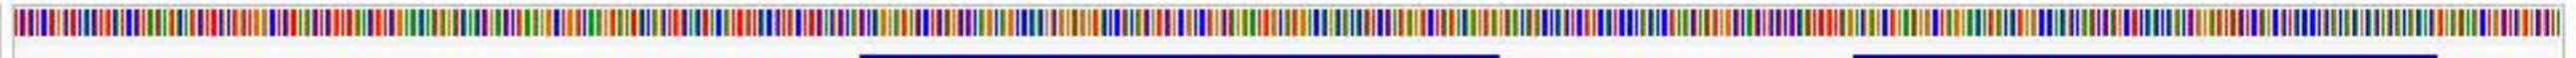

Refseq Genes

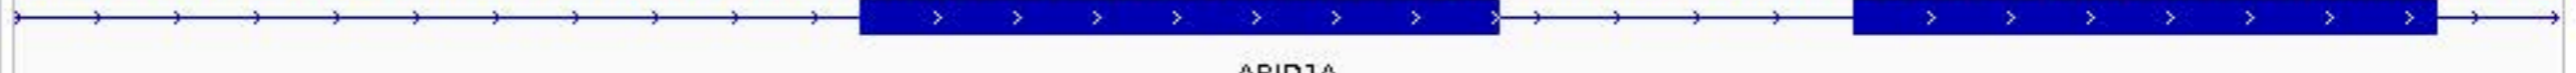

ARID1A

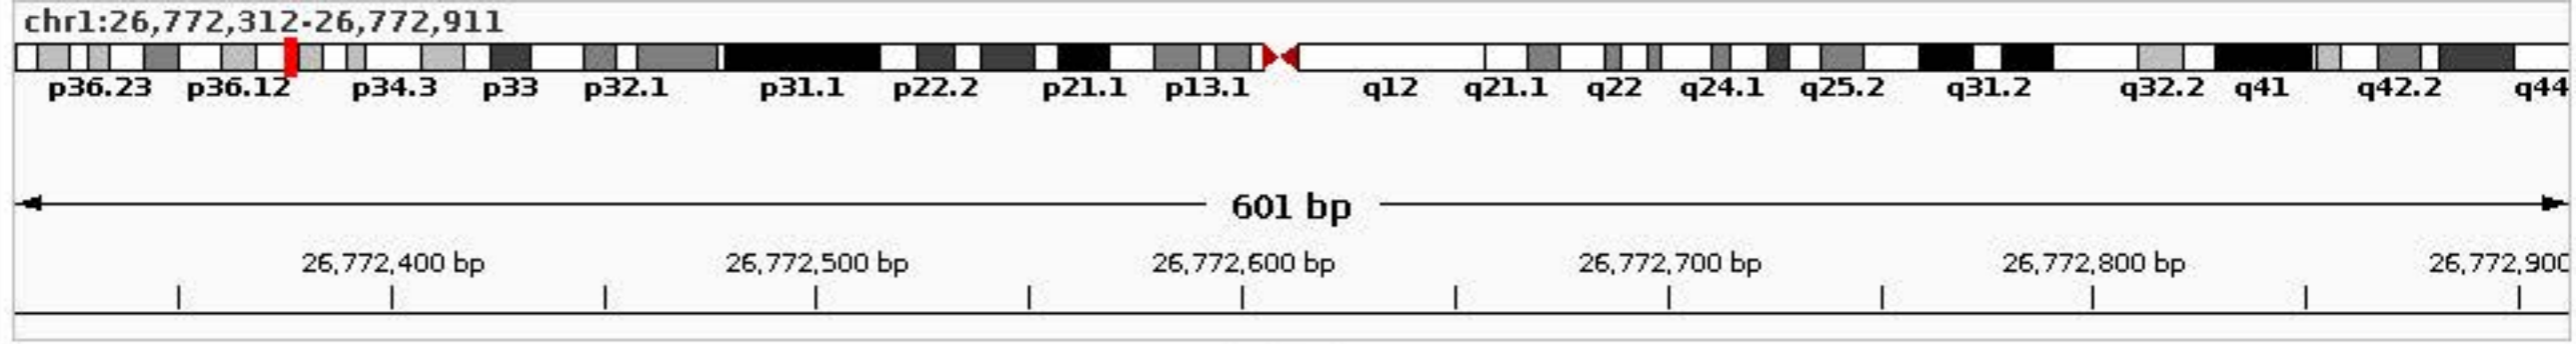

SL\_0016\_RN\_23\_mut.bam Coverage

SL\_0016\_RN\_23\_mut.bam

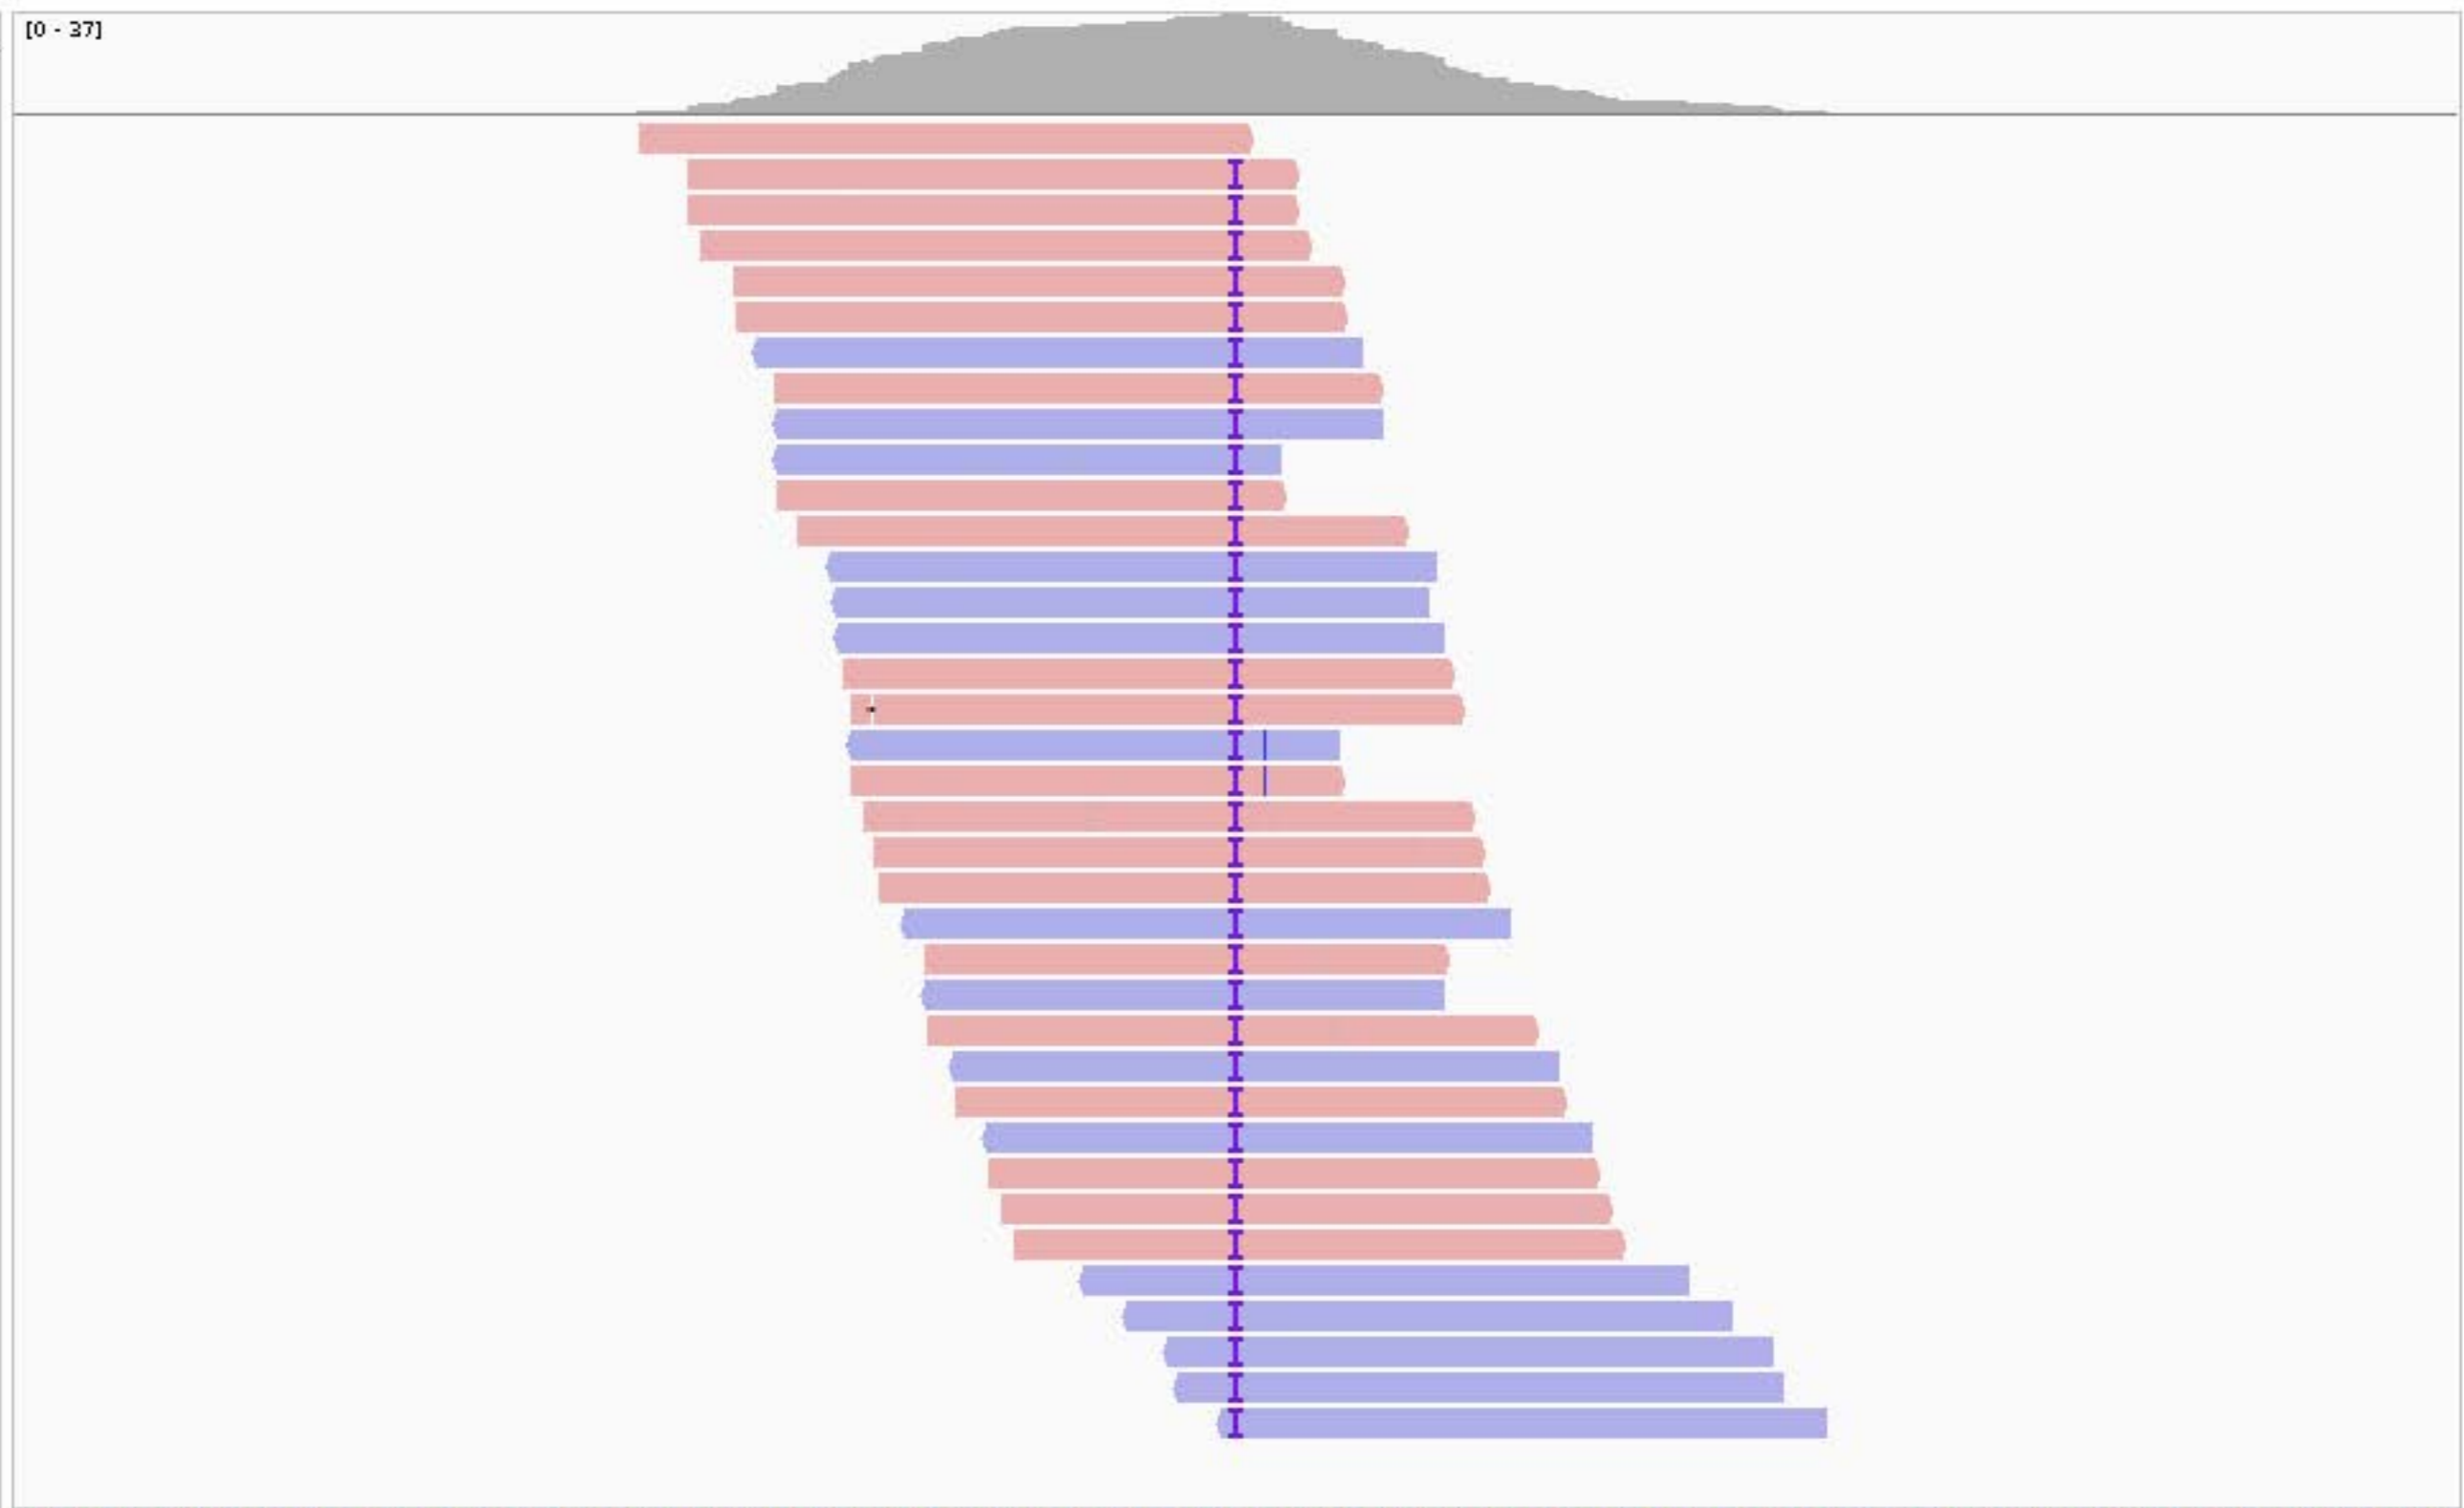

Sequence

Refseq Genes

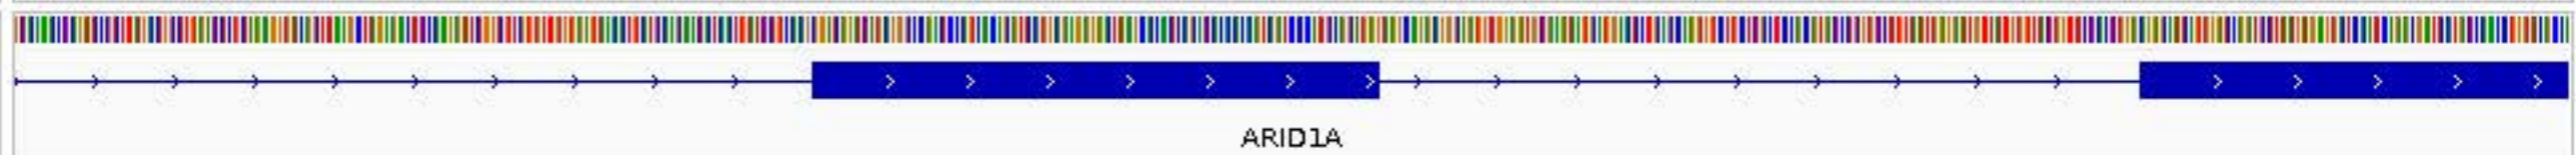



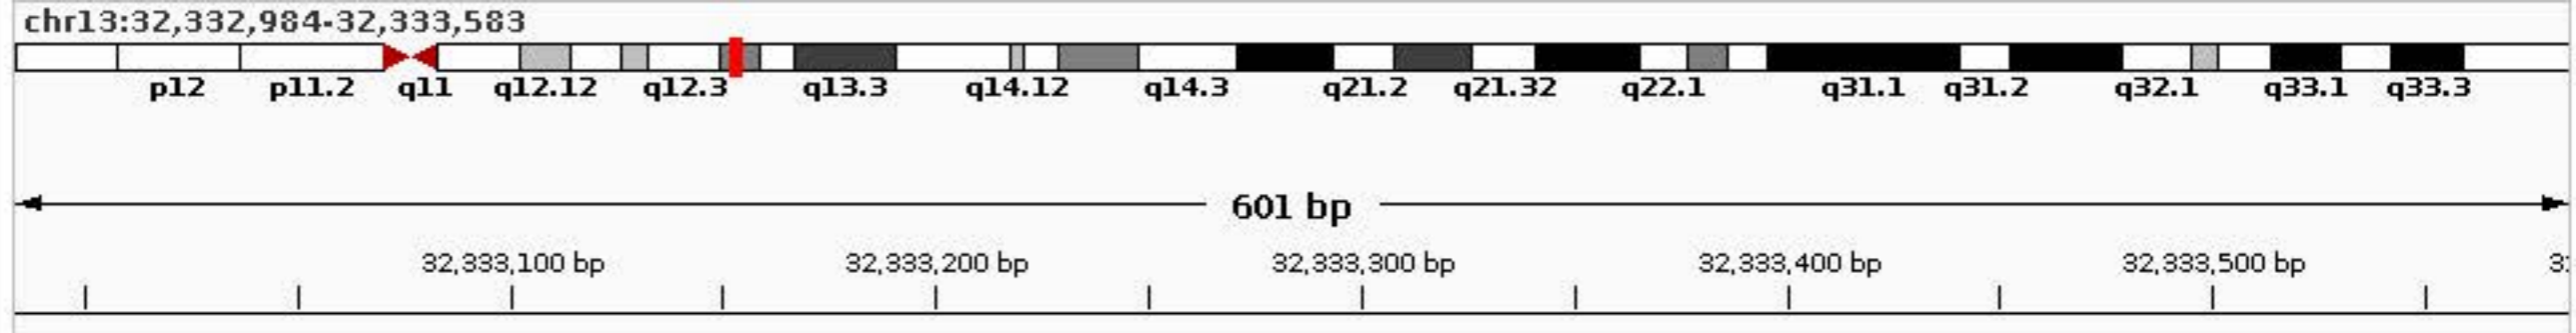

SL\_0007\_RN\_21\_mut.bam Coverage

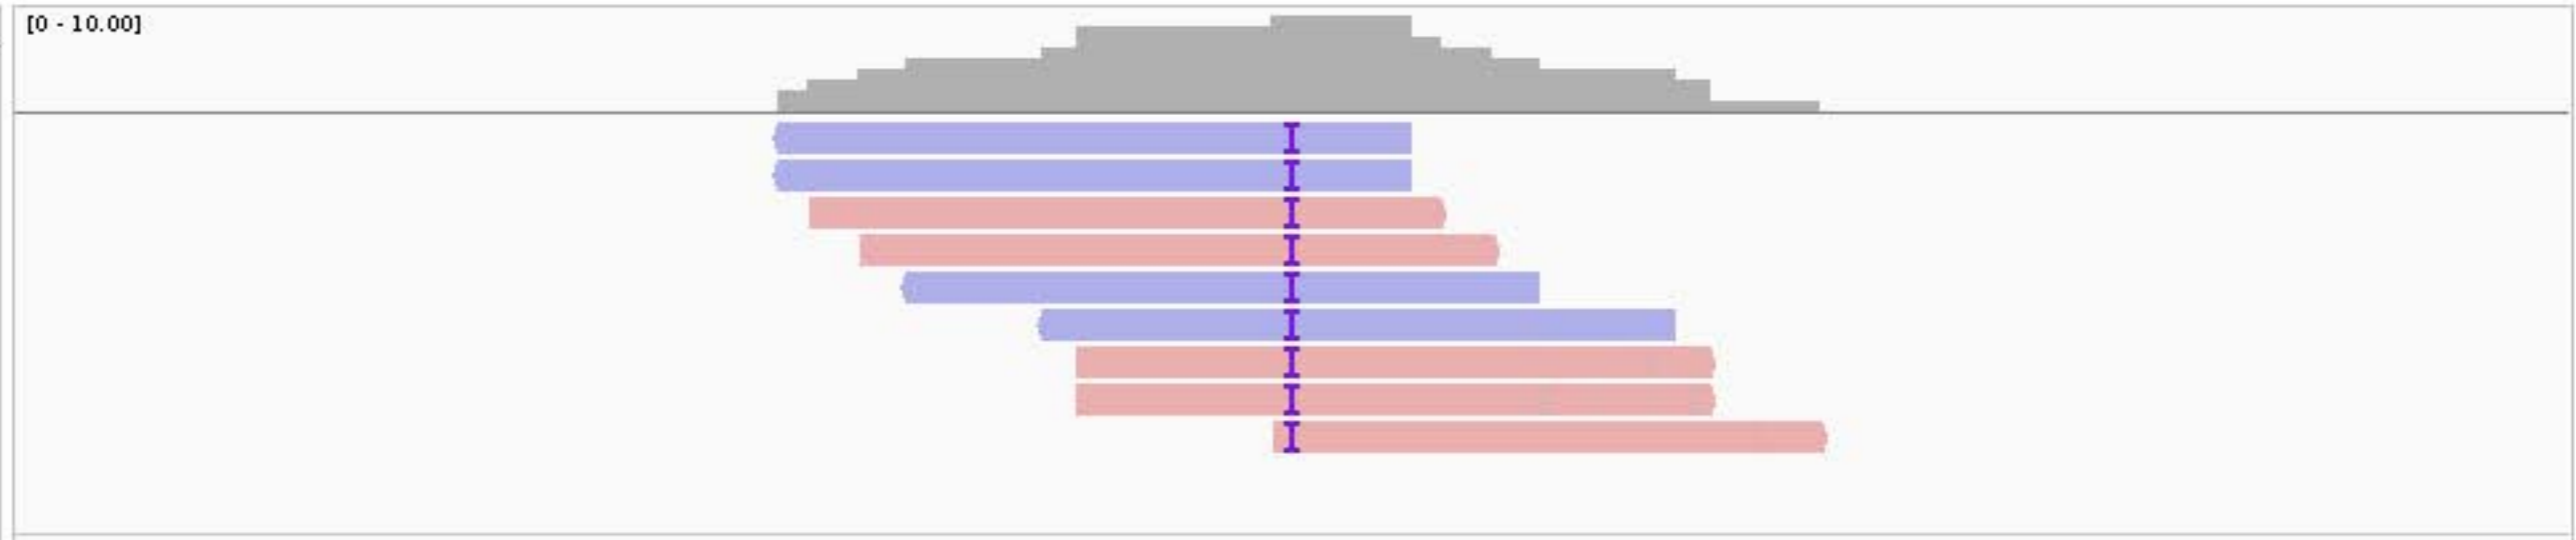

Sequence

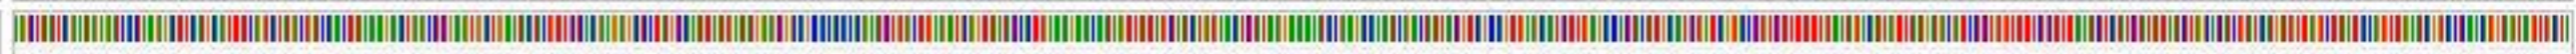

Refseq Genes

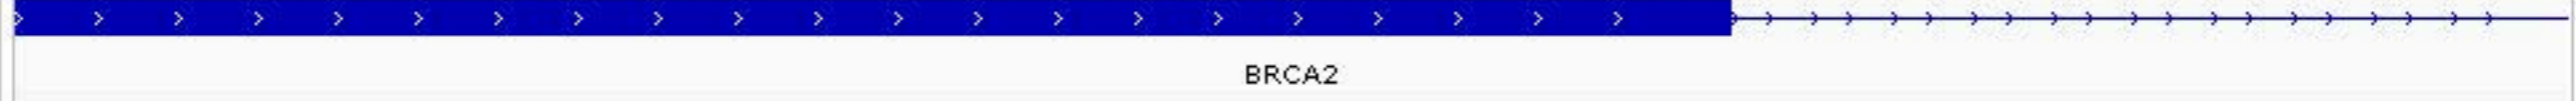

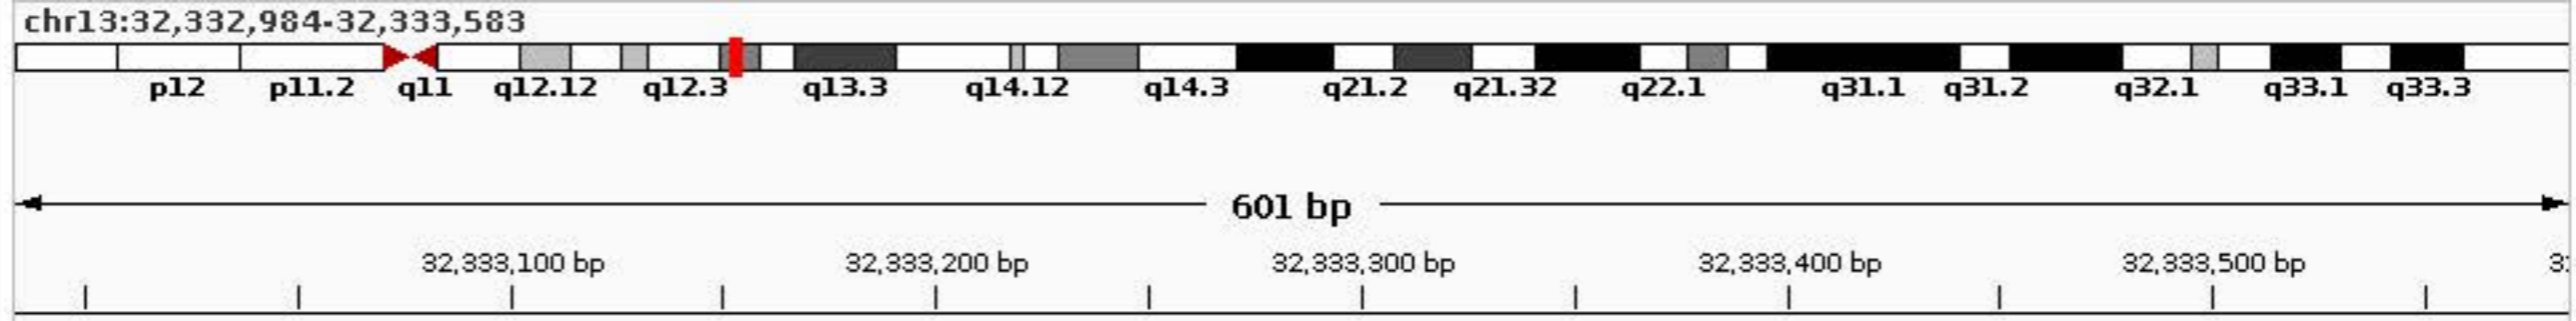

SL\_0015\_RN\_66\_mut.bam Coverage

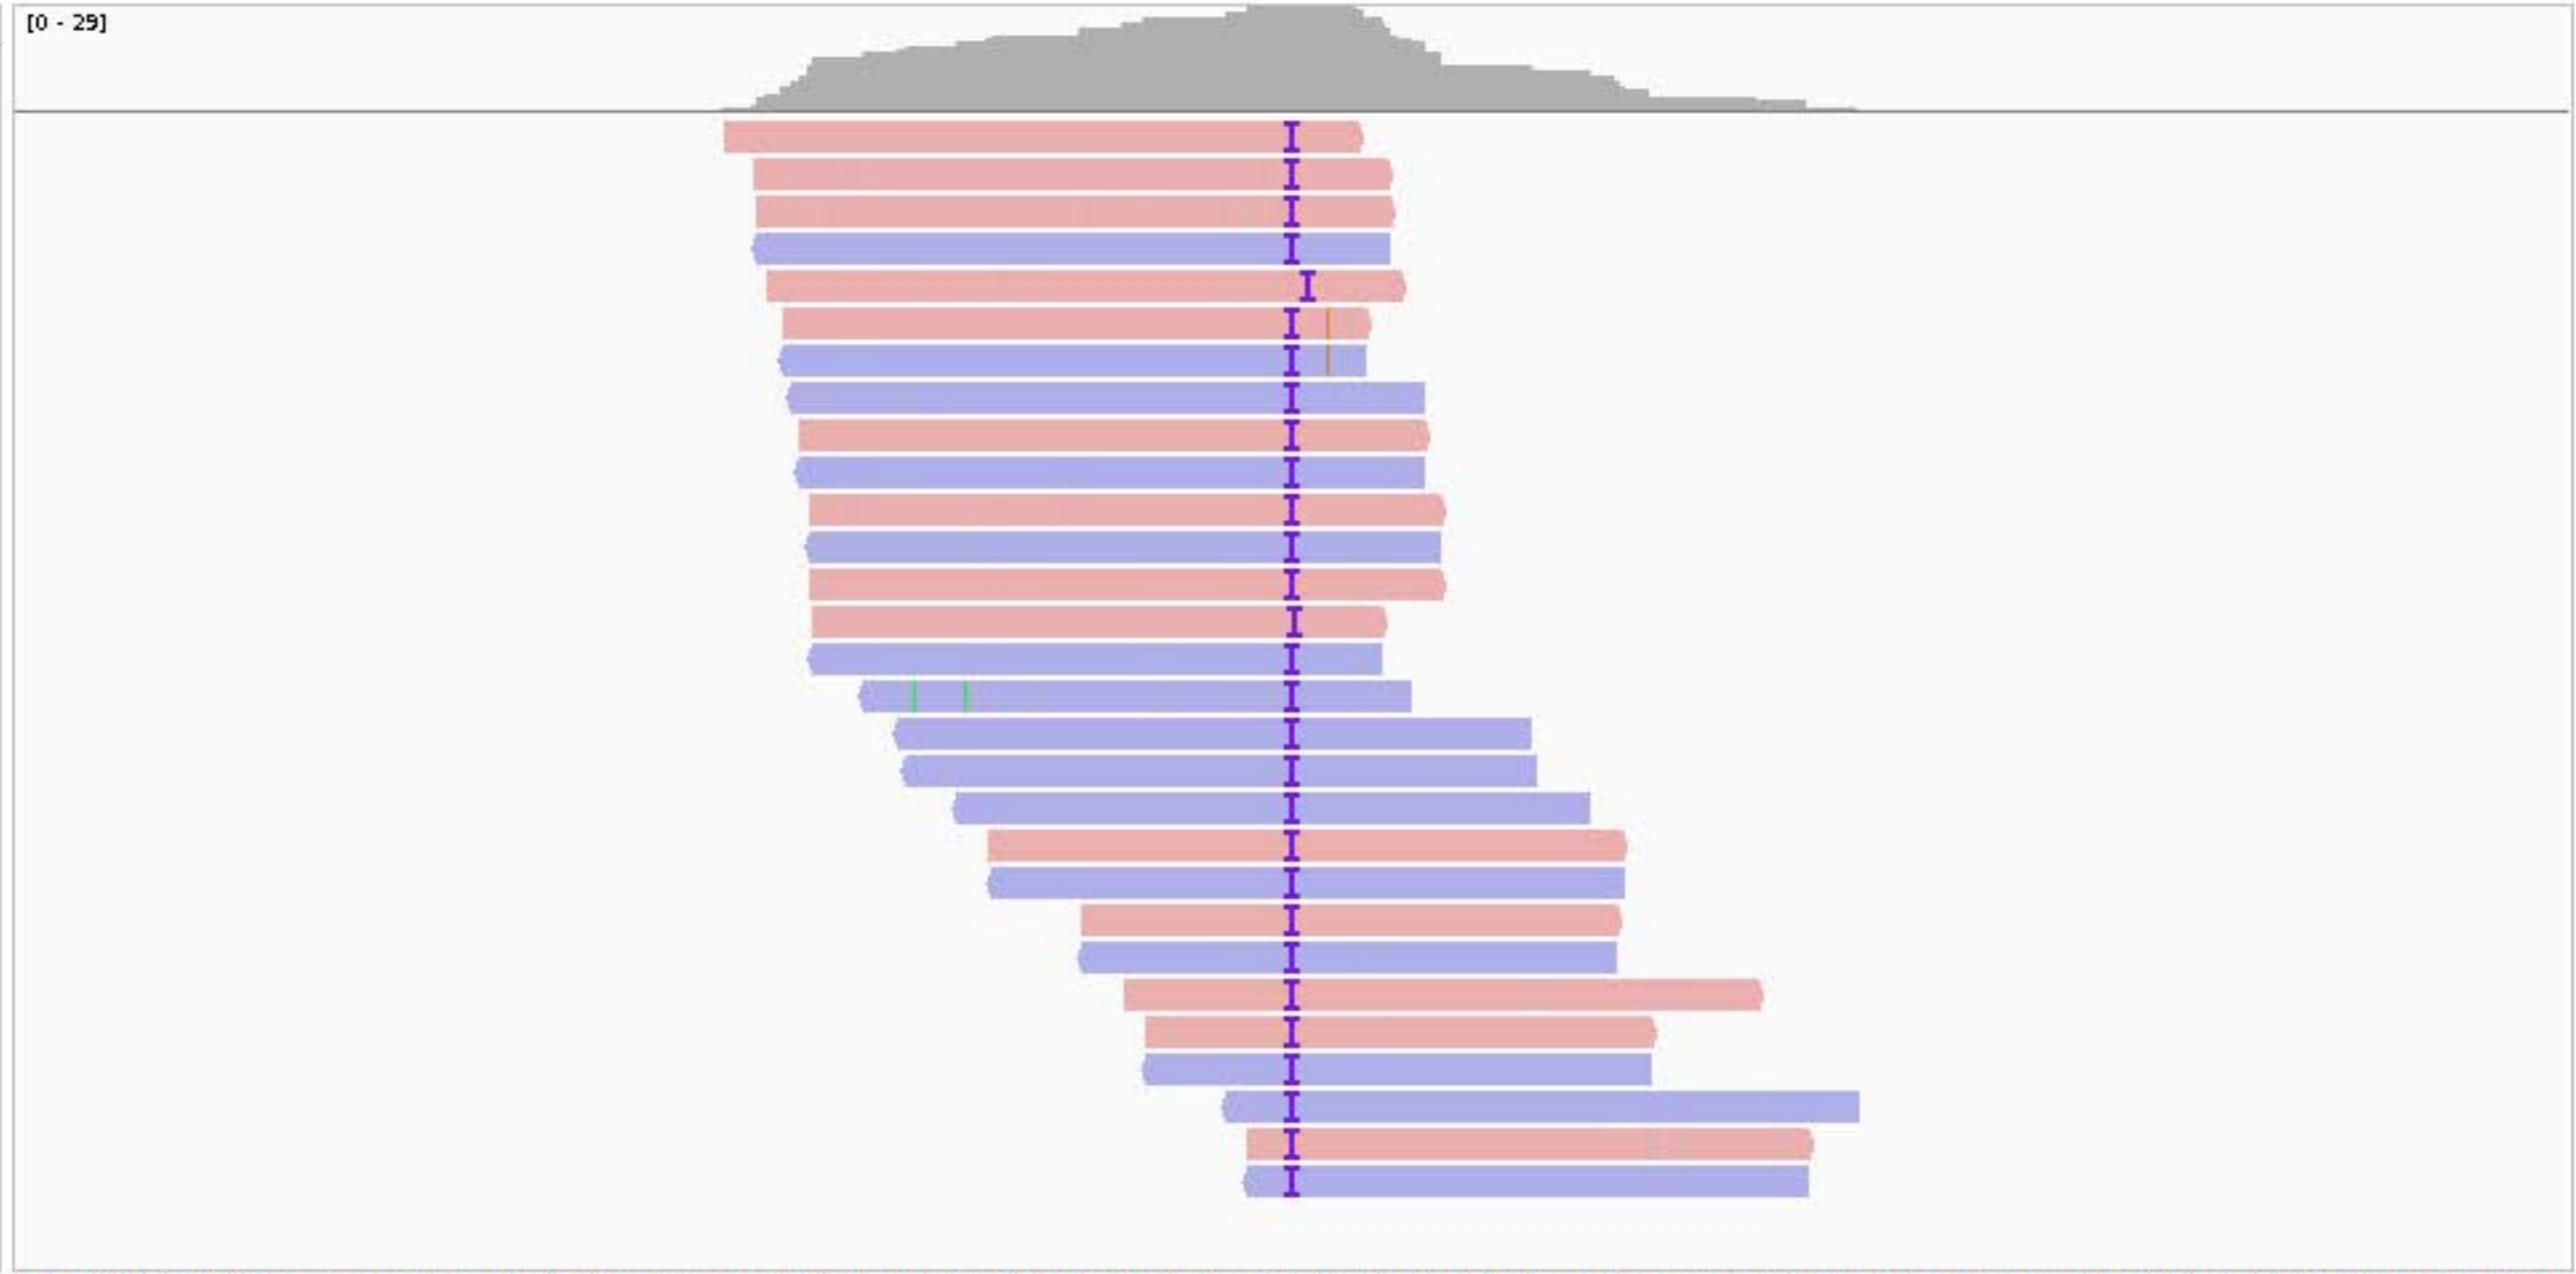

Sequence

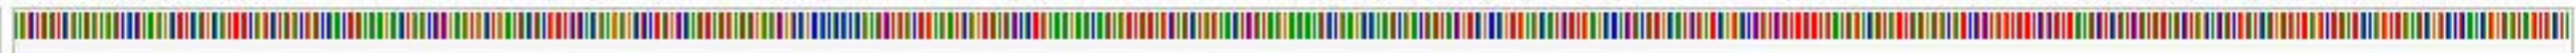

Refseq Genes

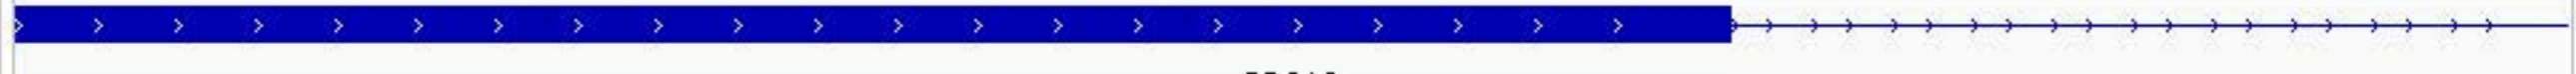

BRCA2

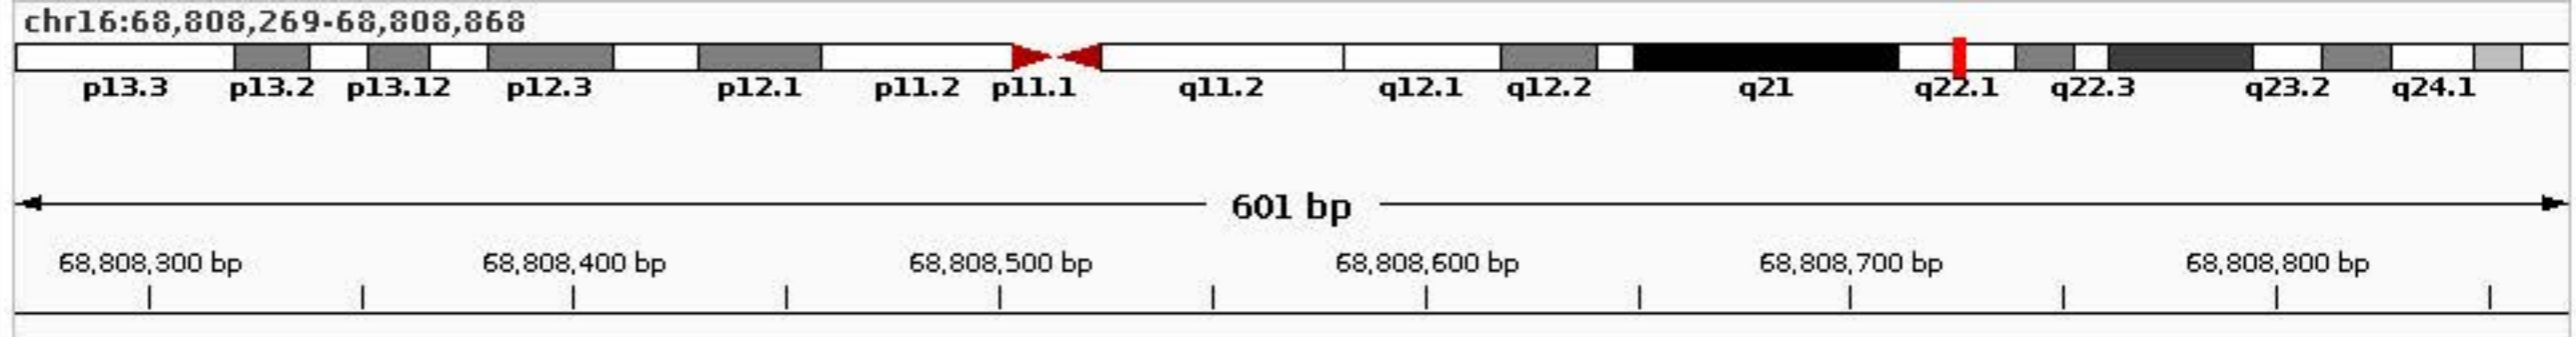

SL\_0001\_RN\_28\_mut.bam Coverage

SL\_0001\_RN\_28\_mut.bam

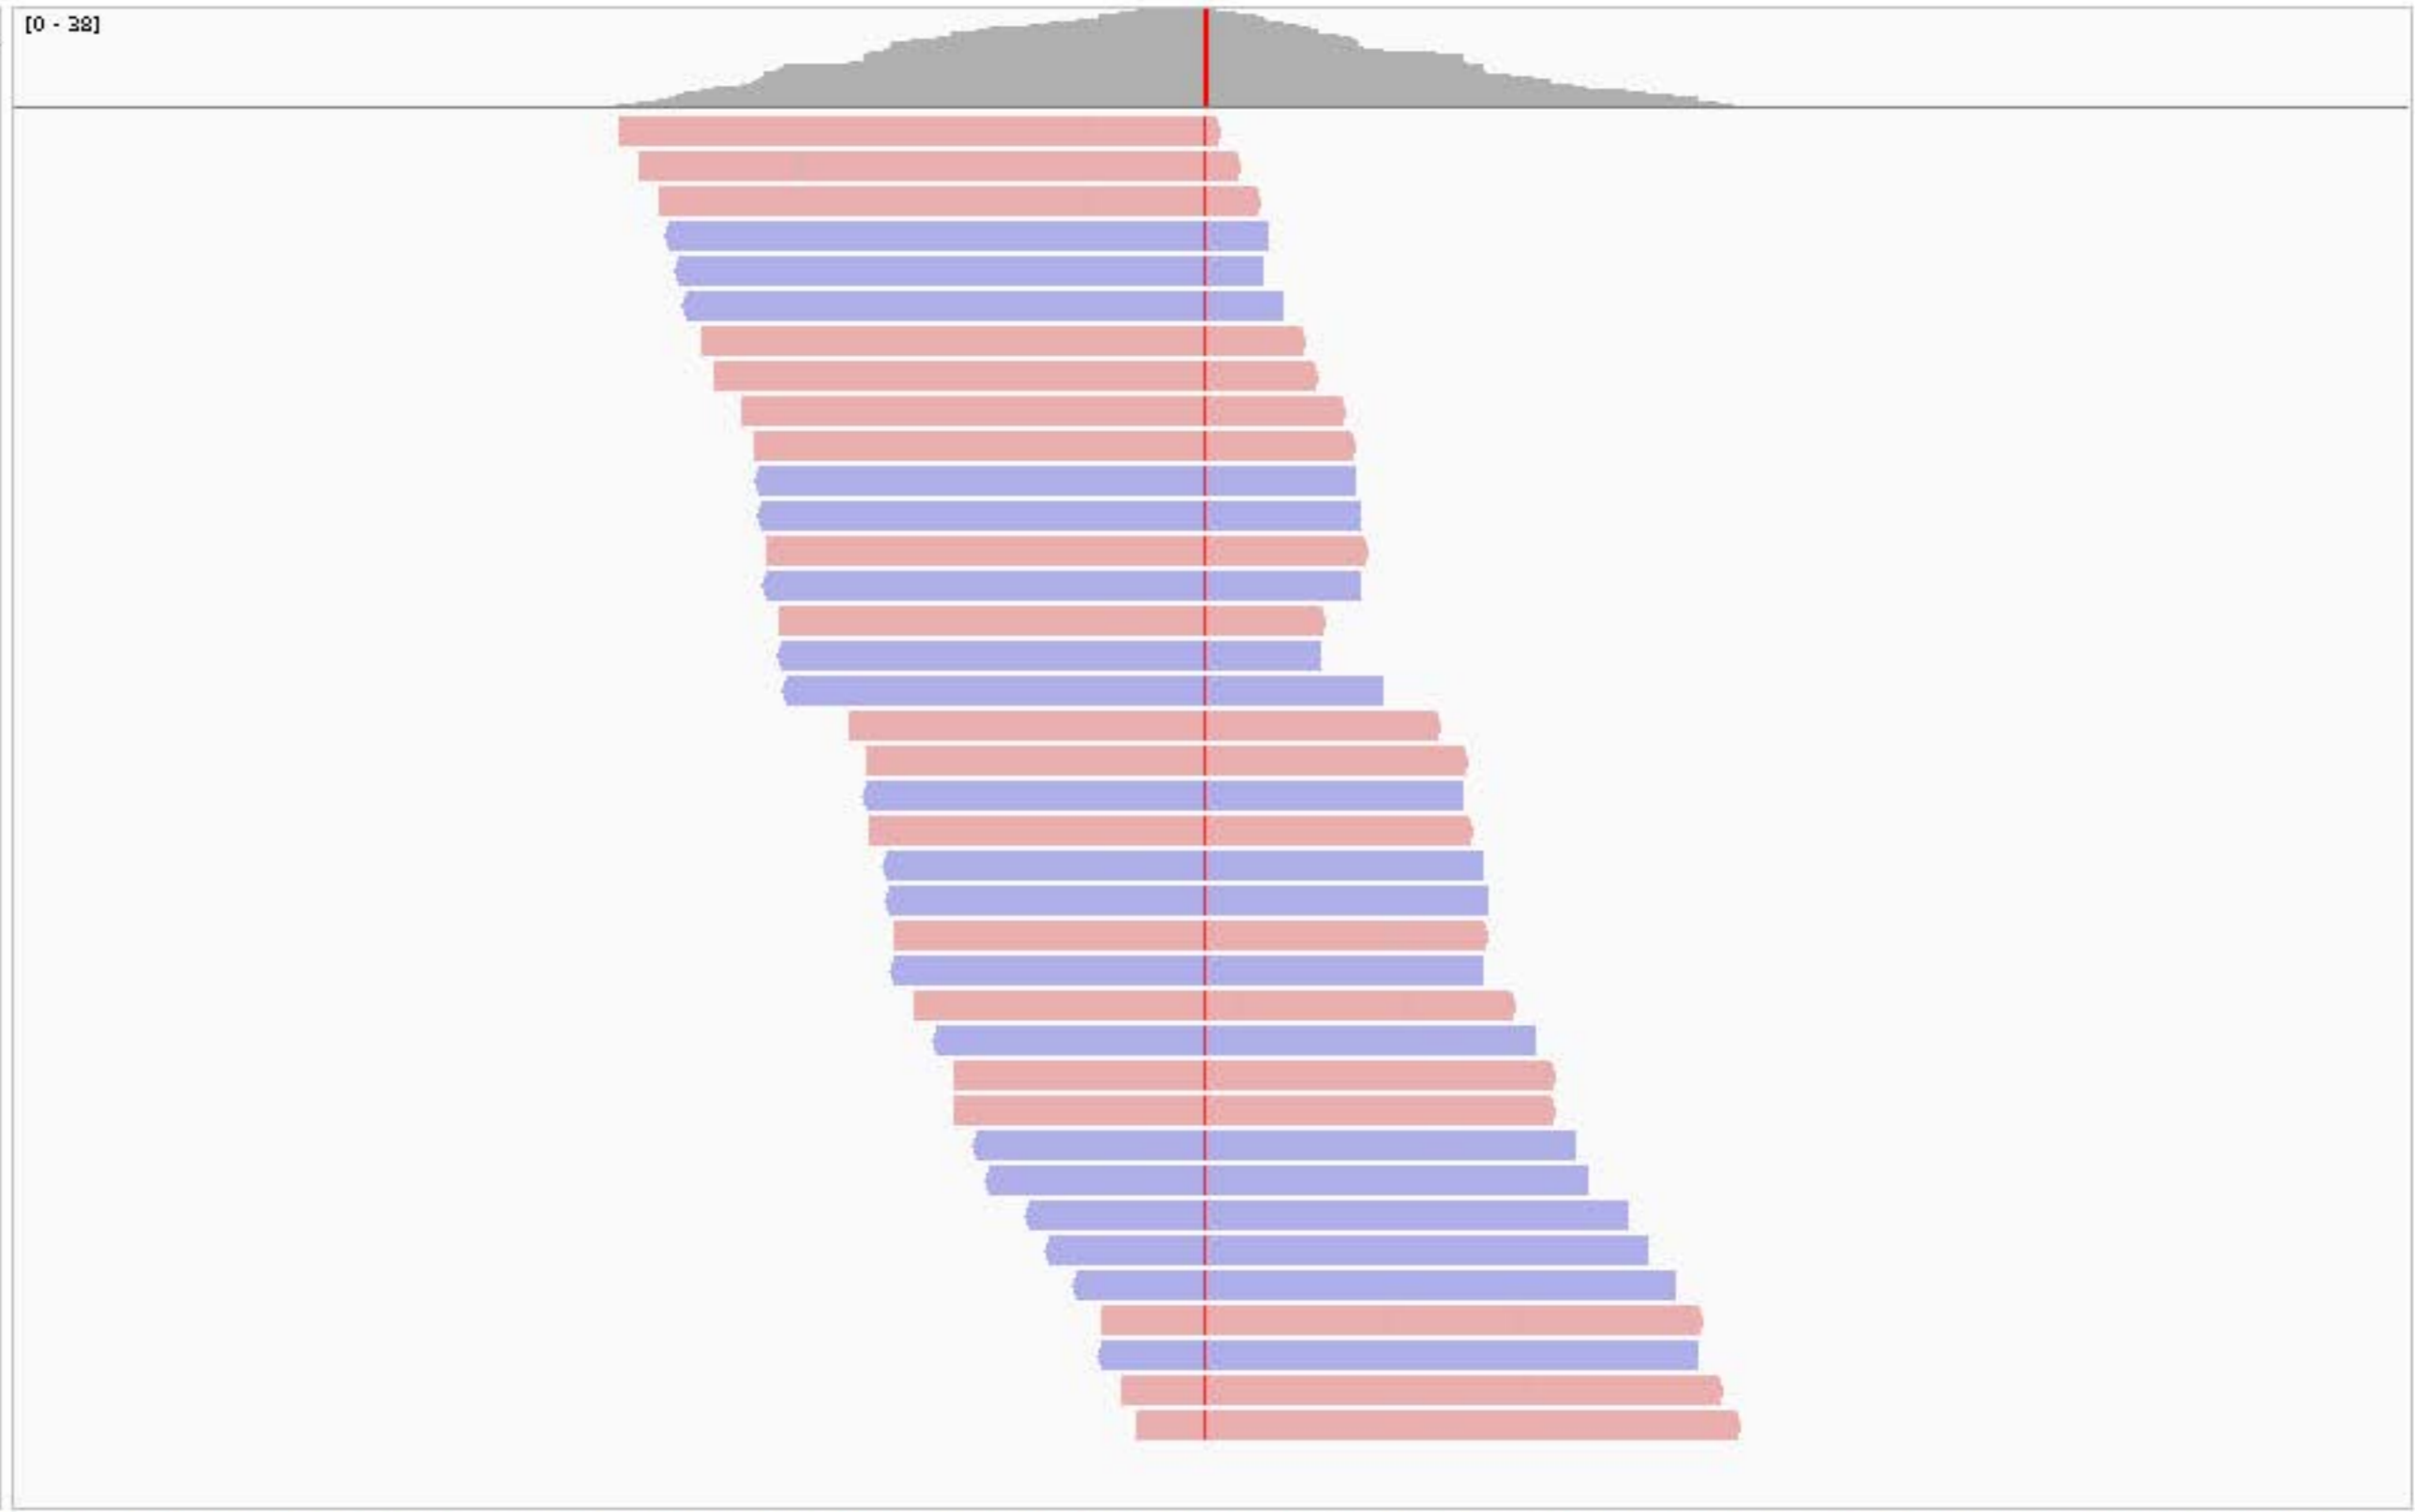

Sequence

Refseq Genes

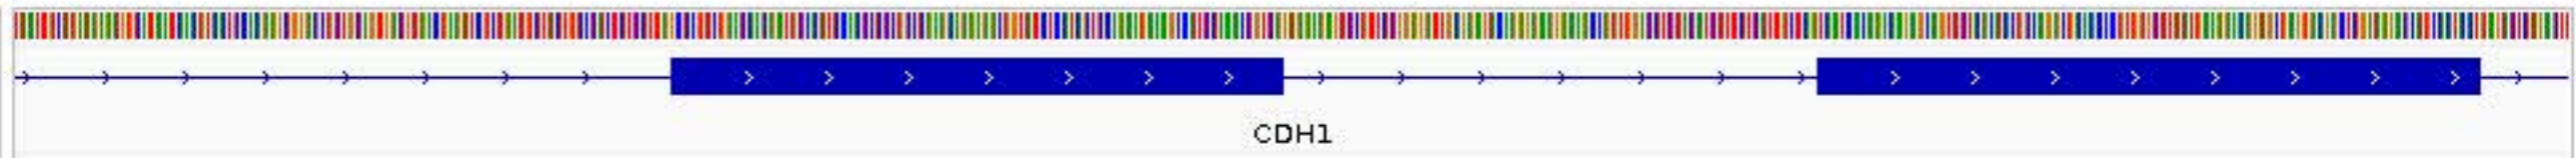



chr16:68,808,474-68,809,073

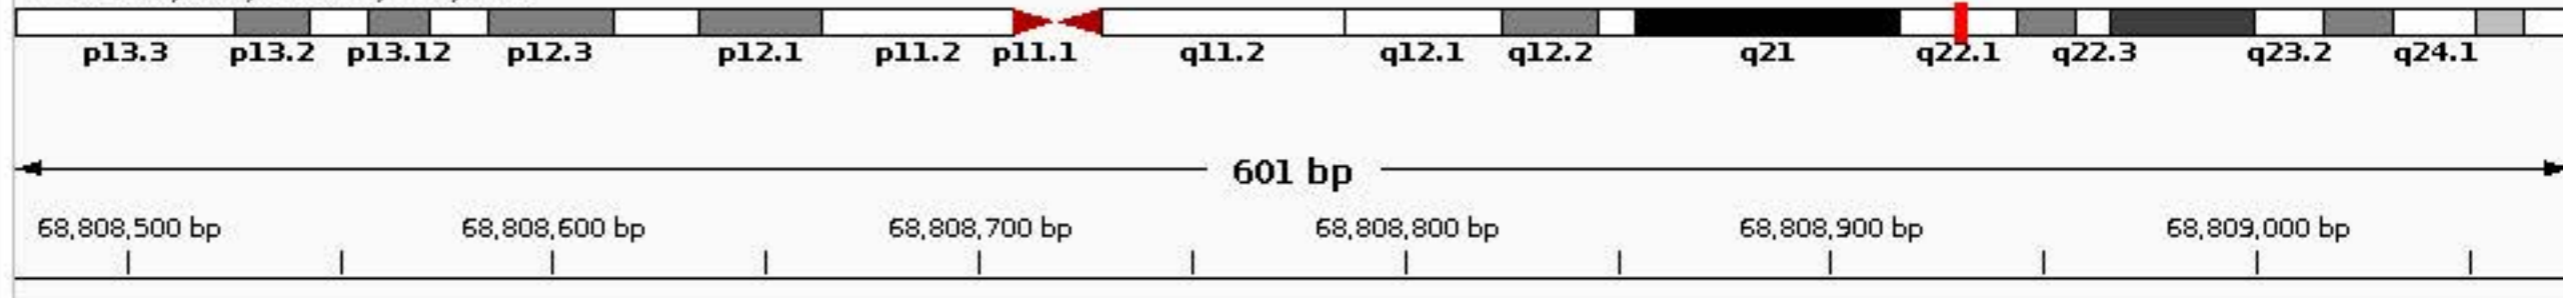

SL\_0007\_RN\_18\_mut.bam Coverage

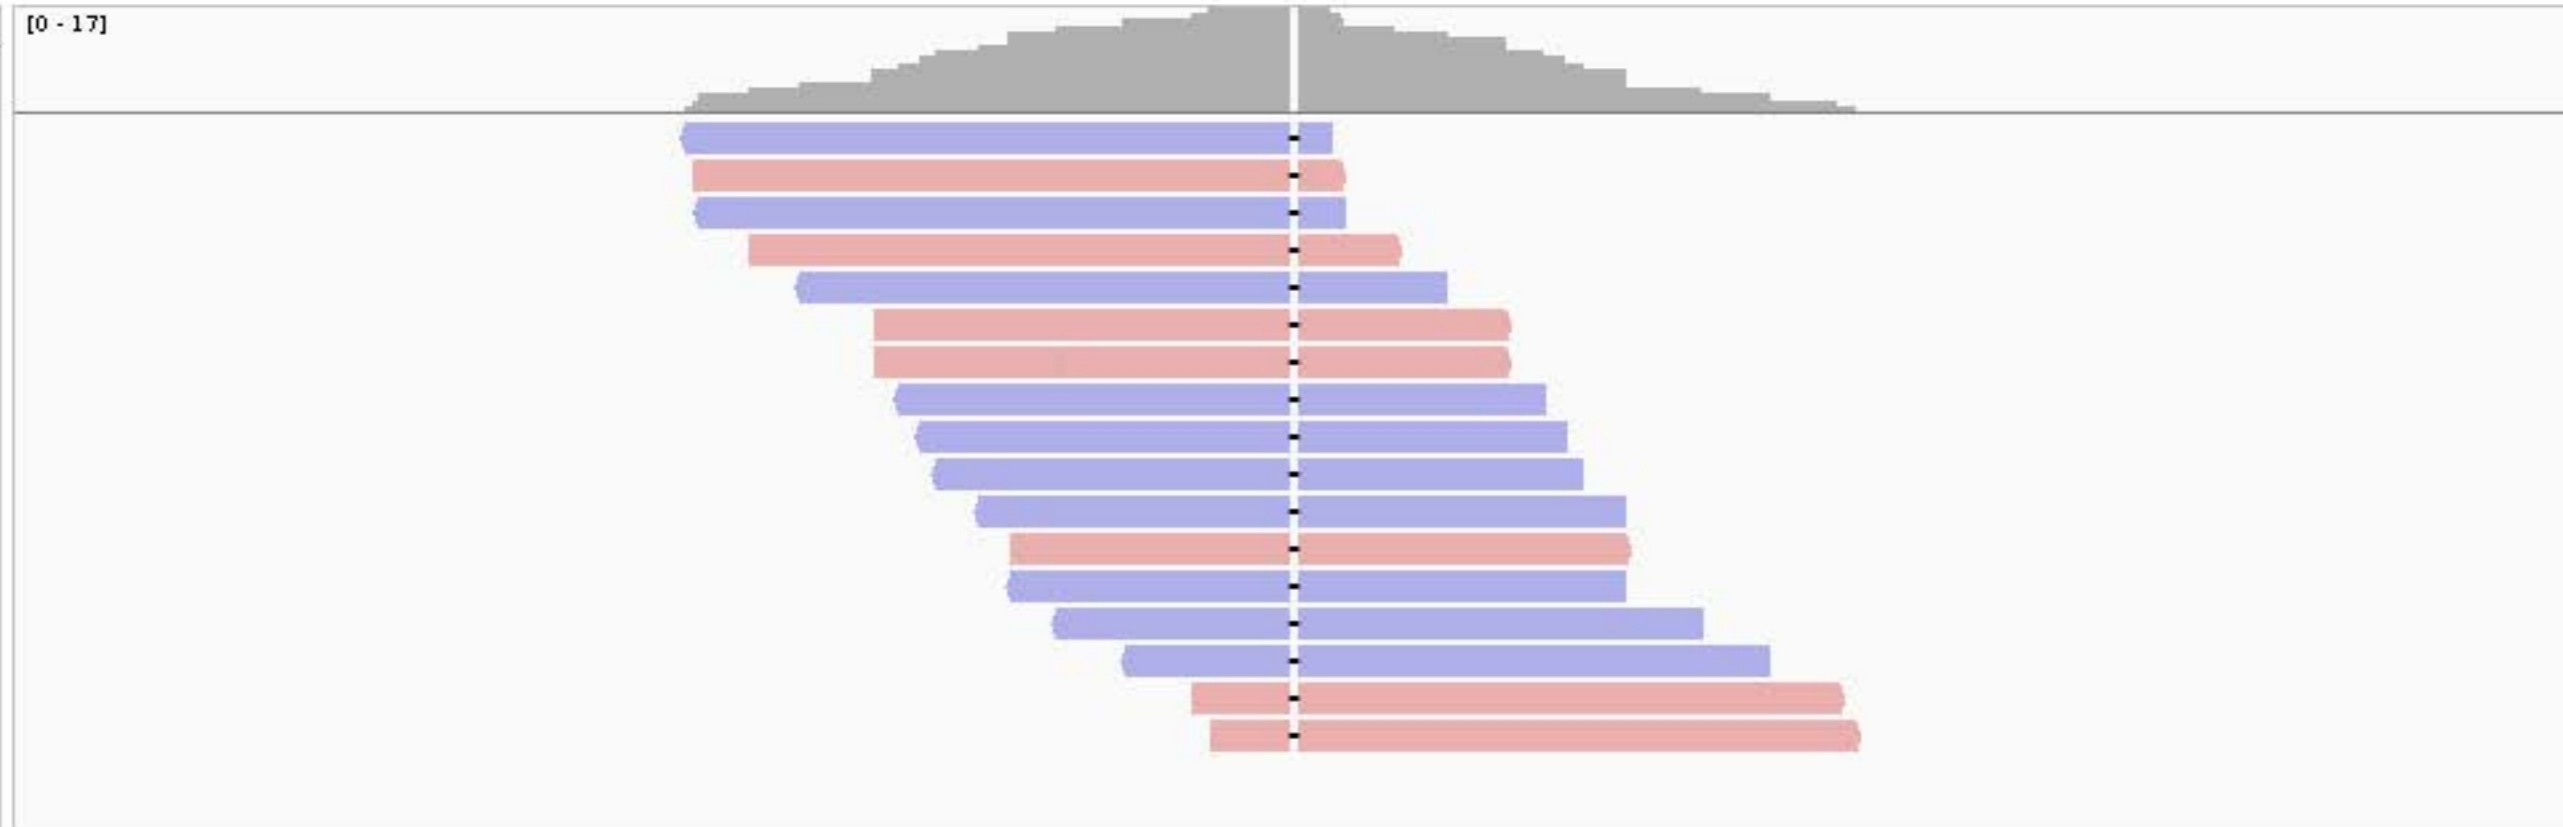

SL\_0007\_RN\_18\_mut.bam

Sequence

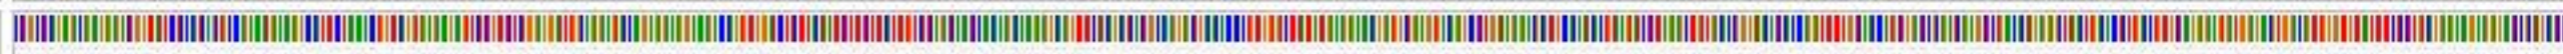

Refseq Genes

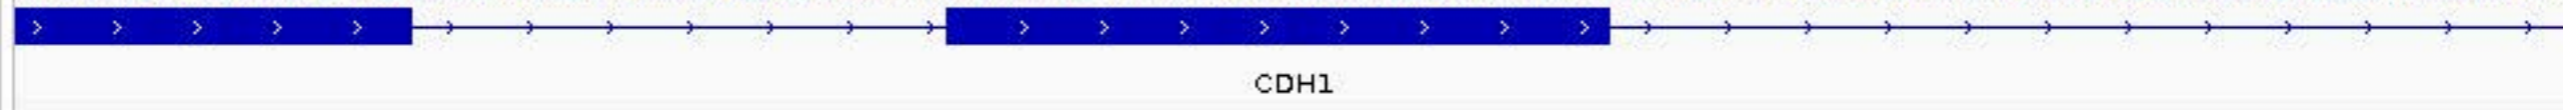

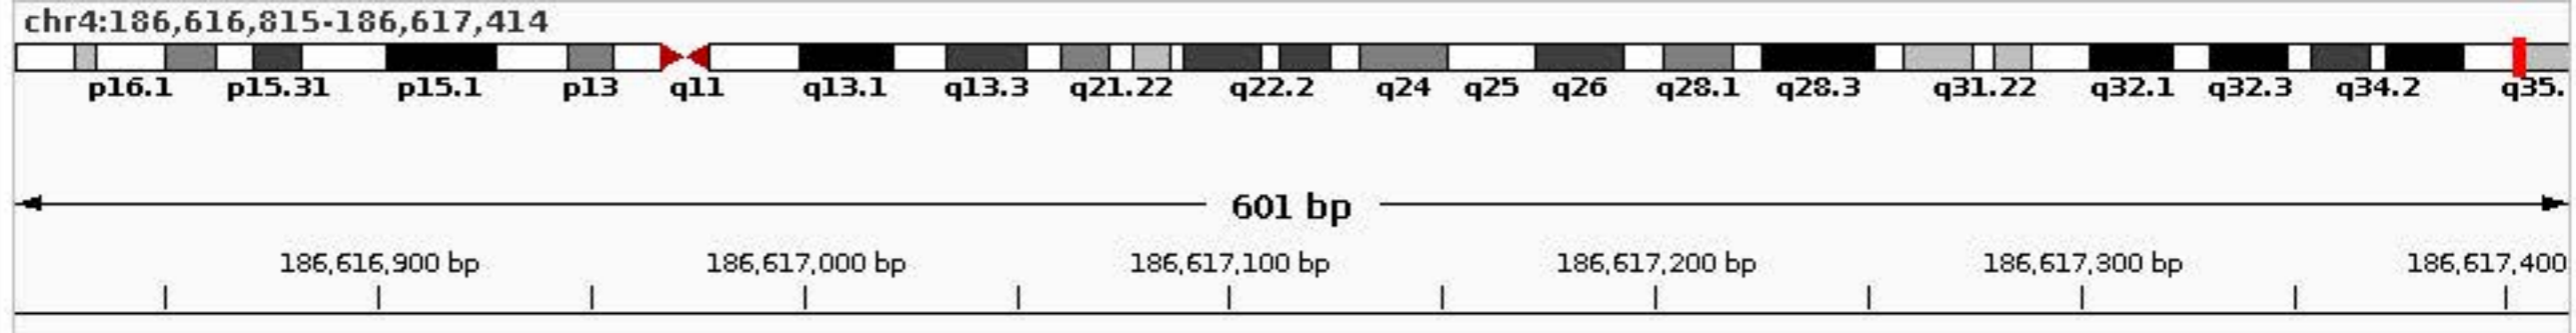

SL\_0007\_RN\_31\_mut.bam Coverage

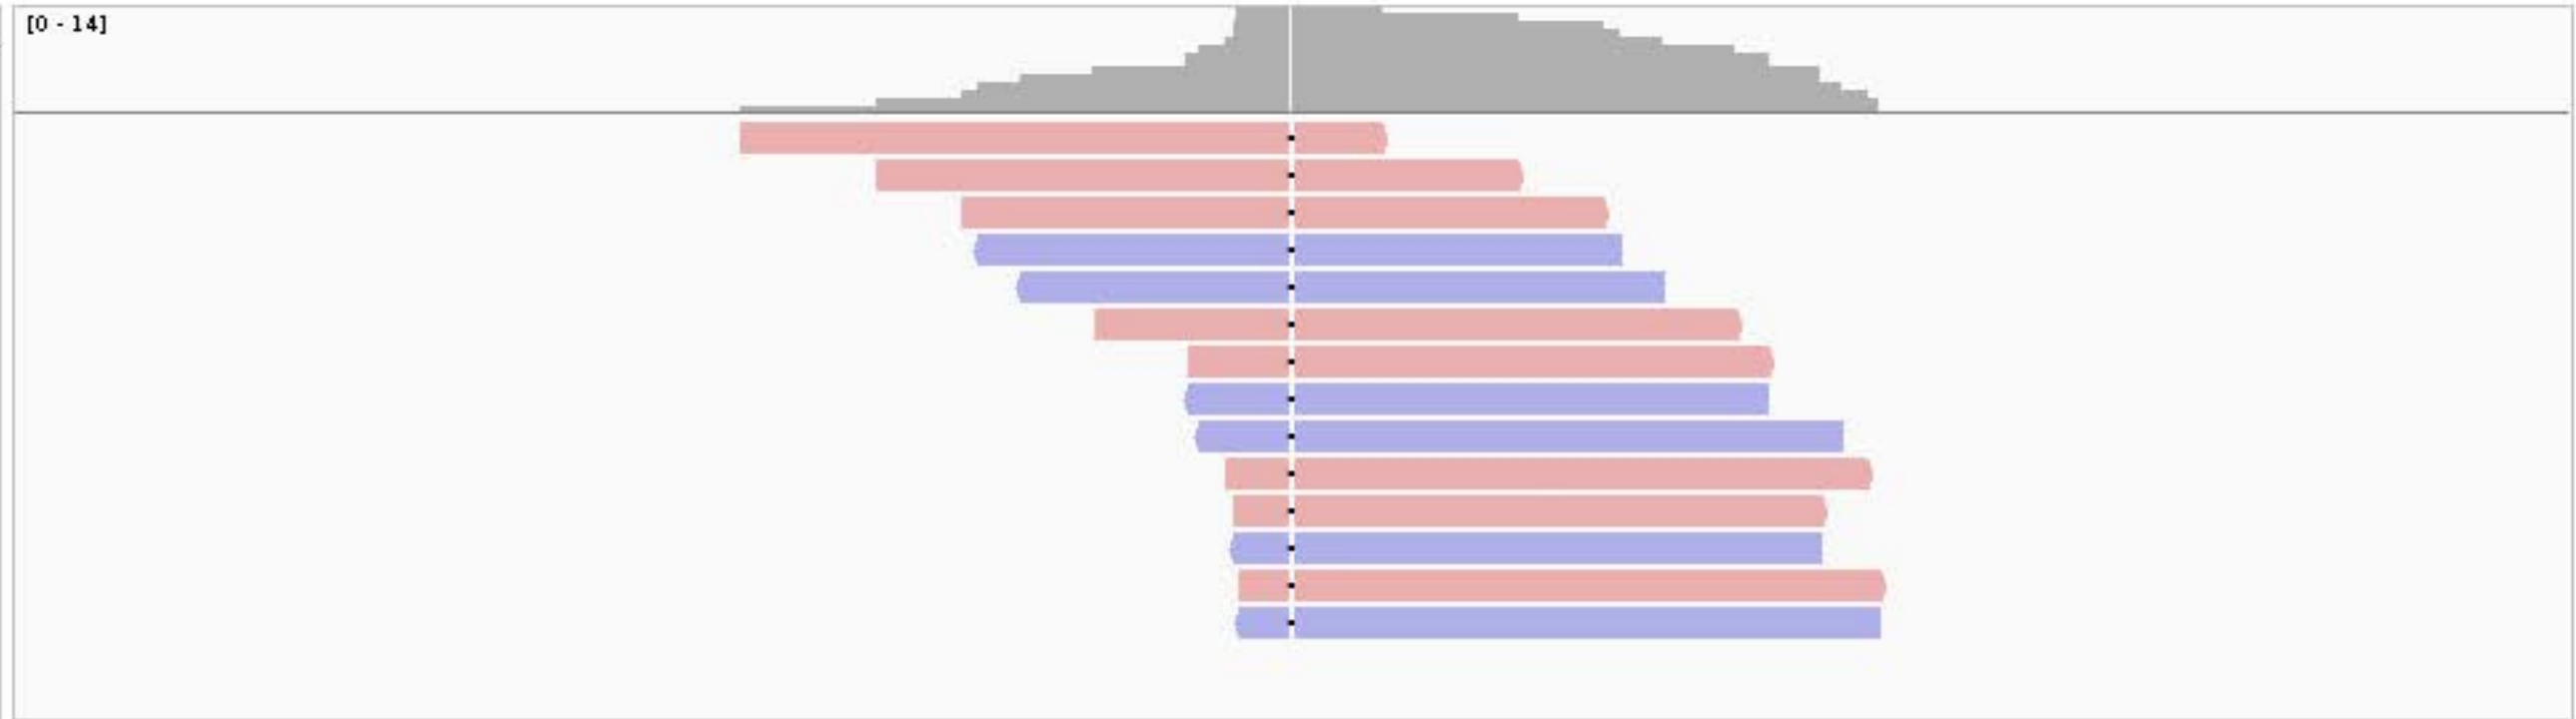

Sequence

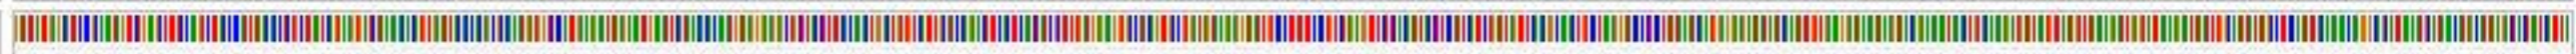

Refseq Genes

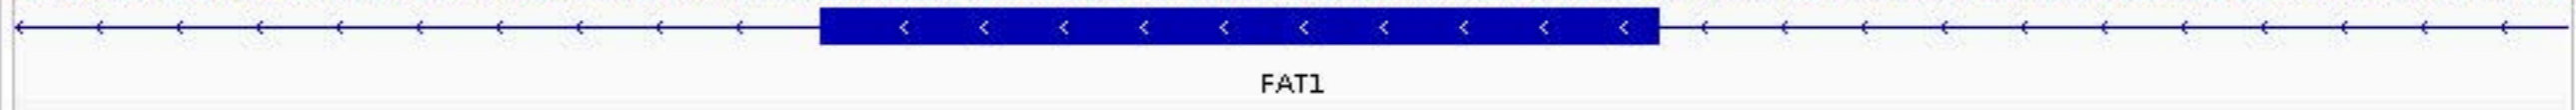

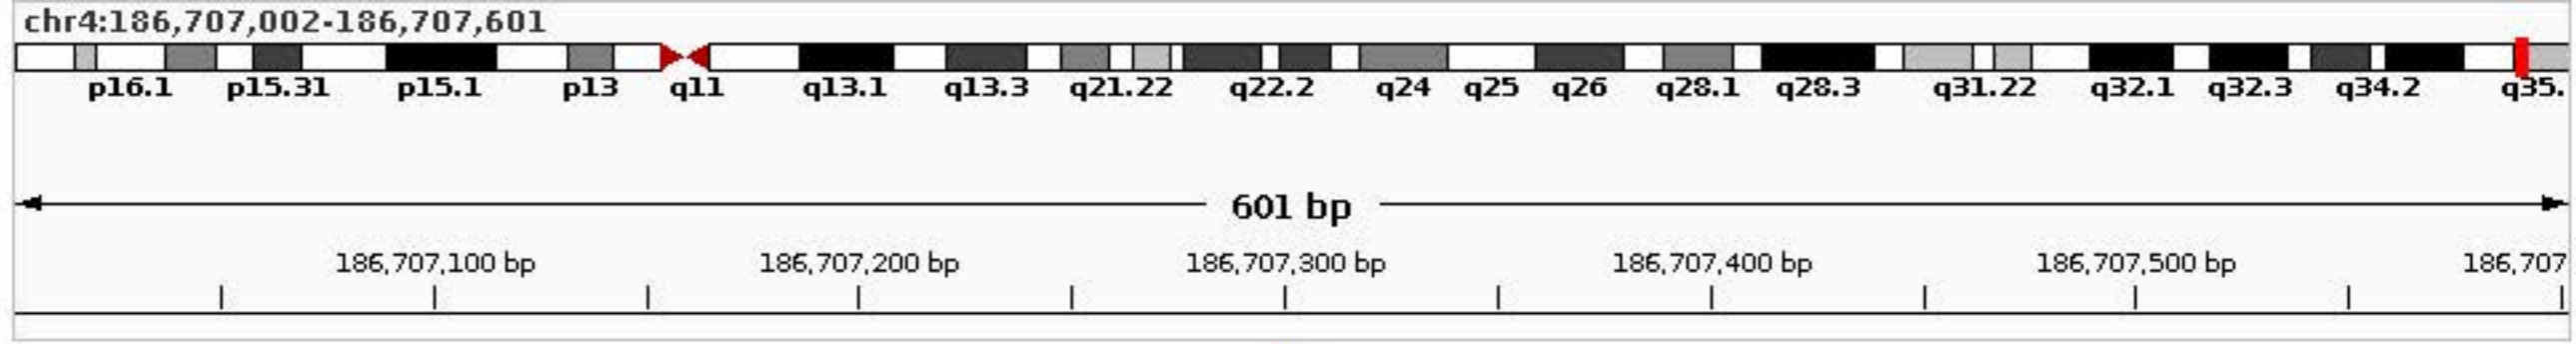

SL\_0015\_RN\_1\_mut.bam Coverage

SL\_0015\_RN\_1\_mut.bam

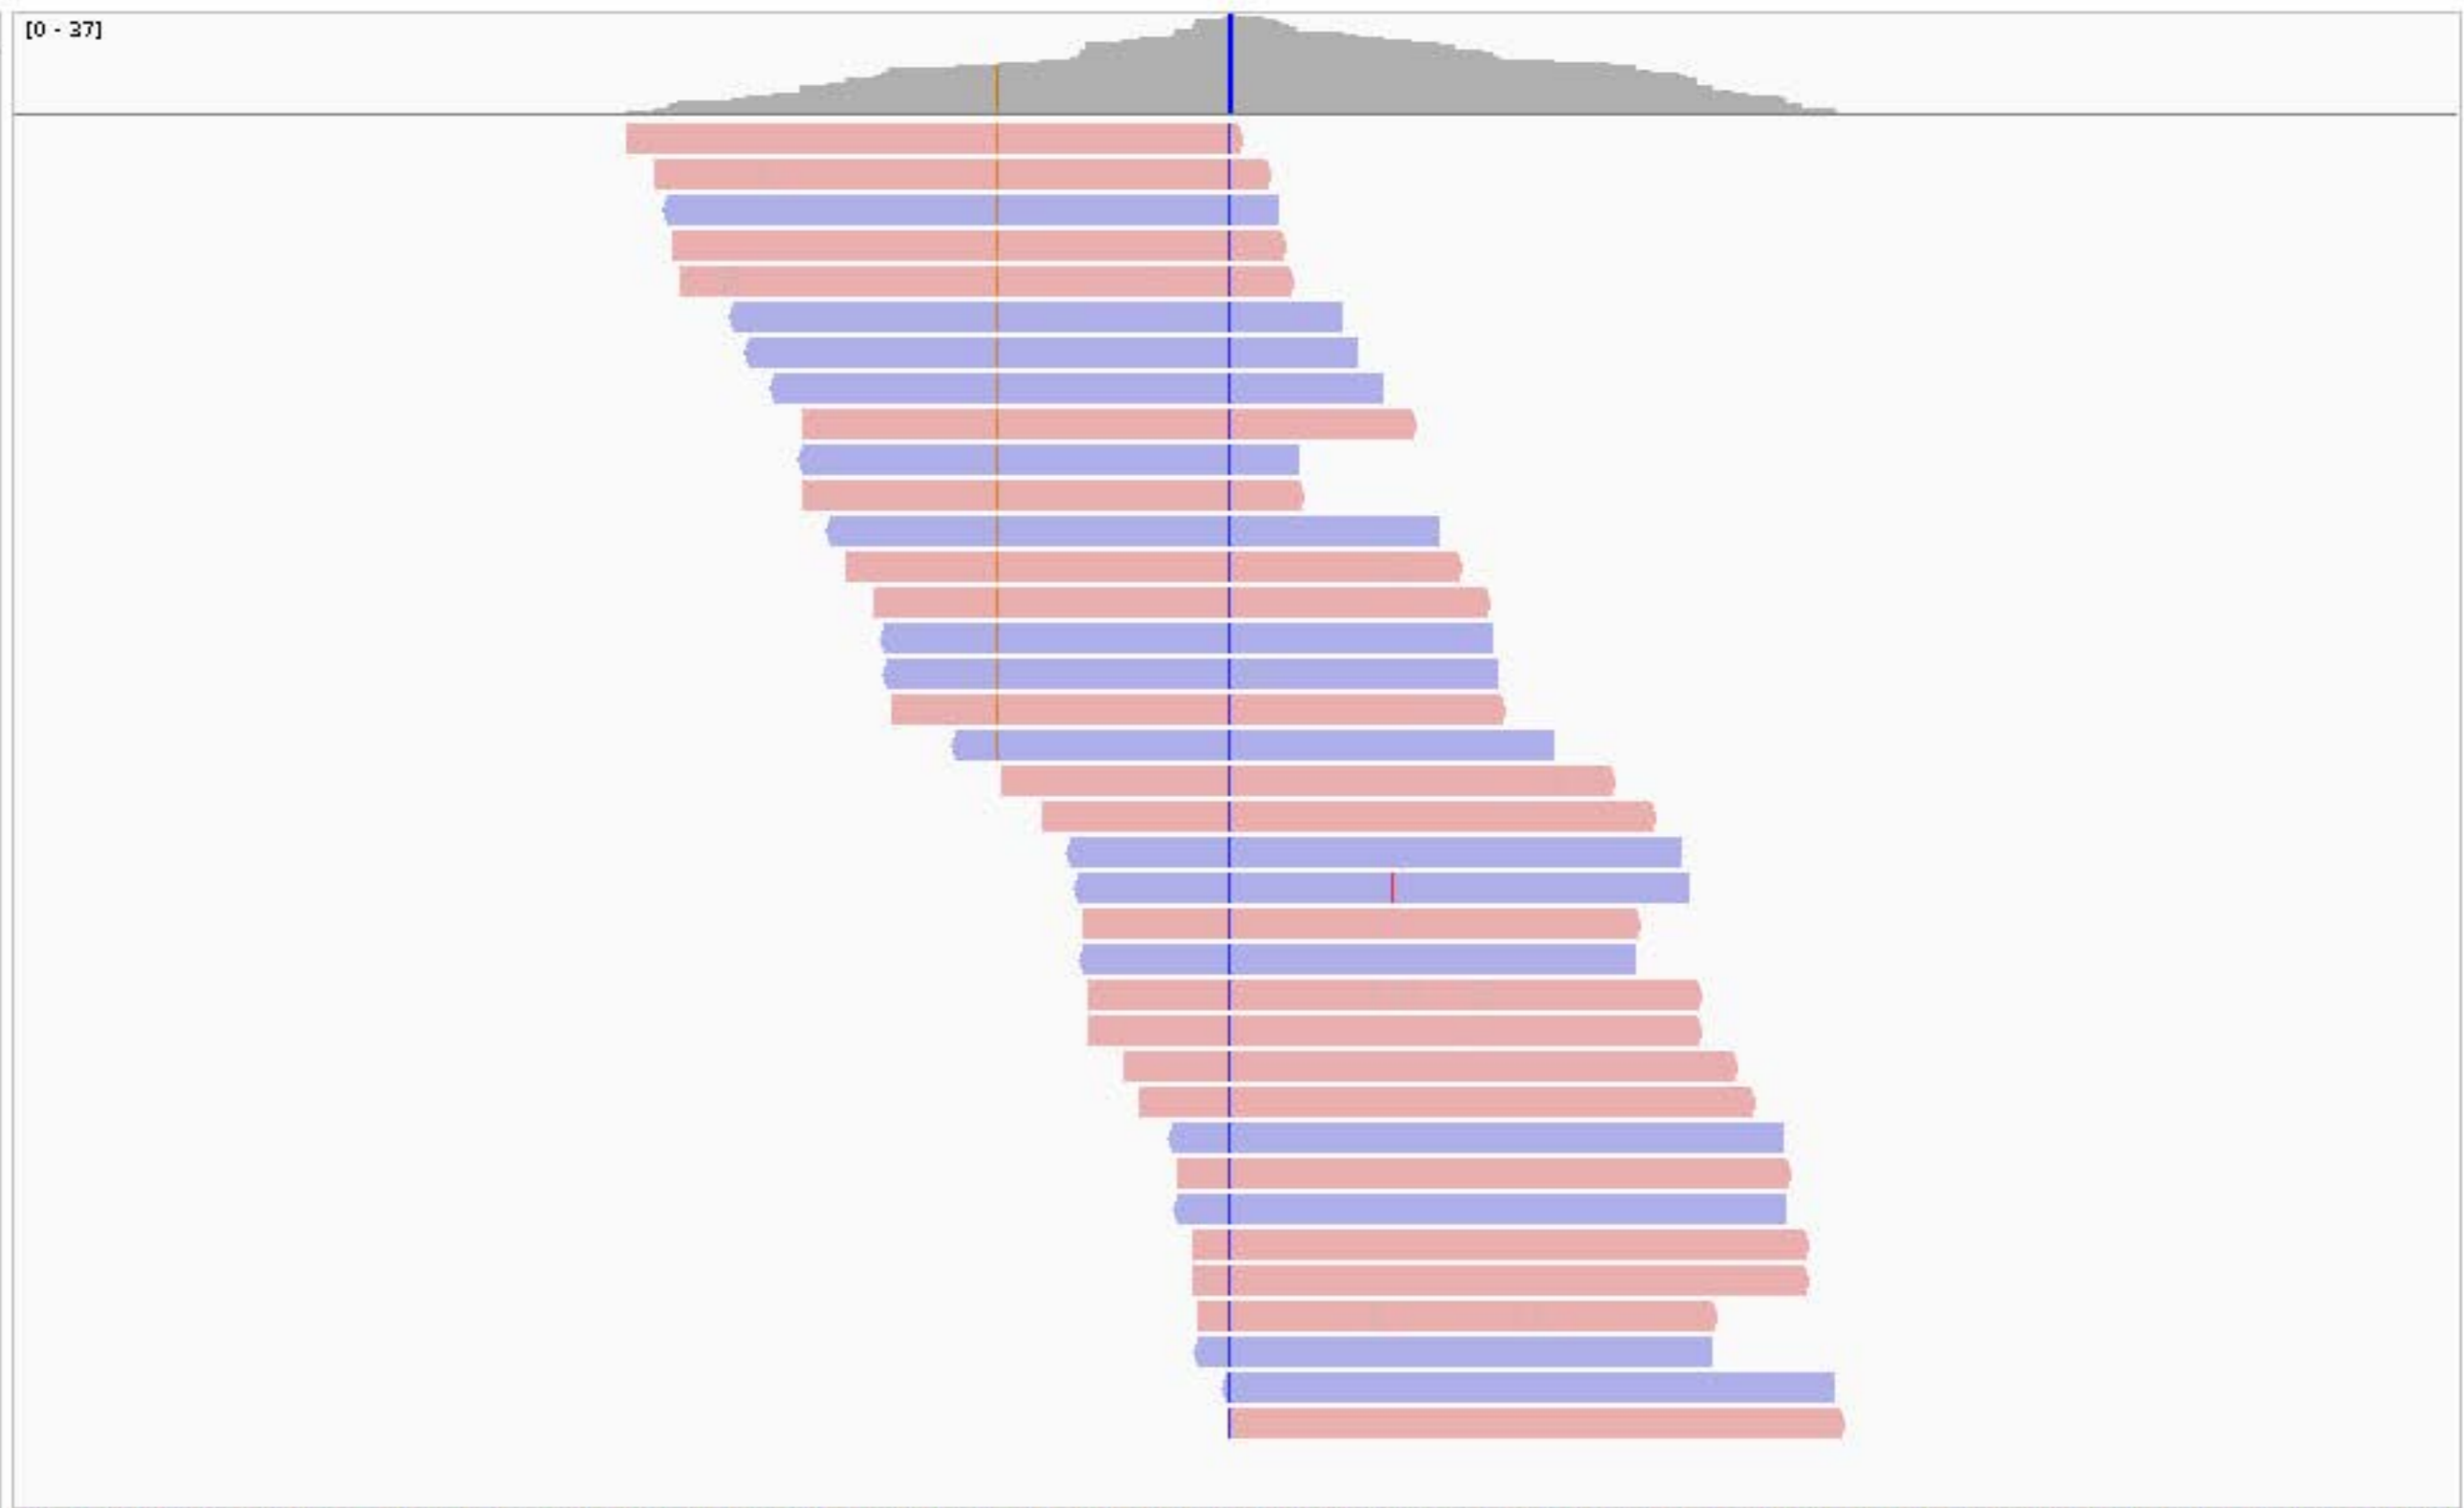

Sequence →

Refseq Genes

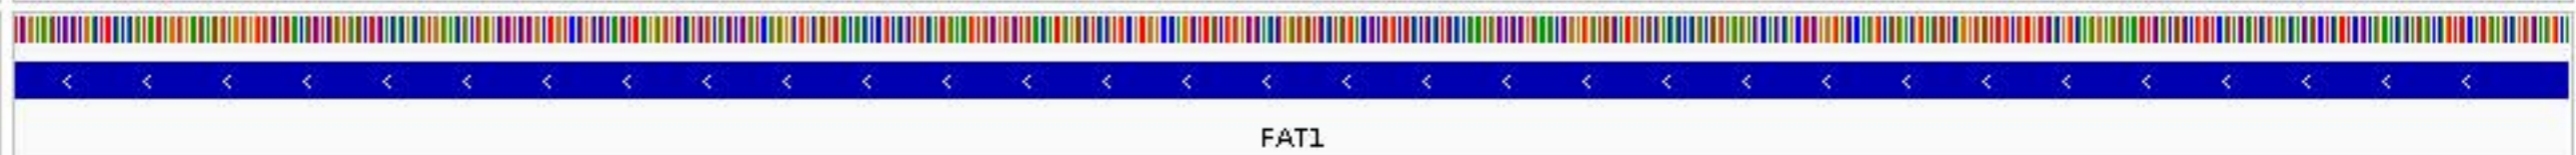



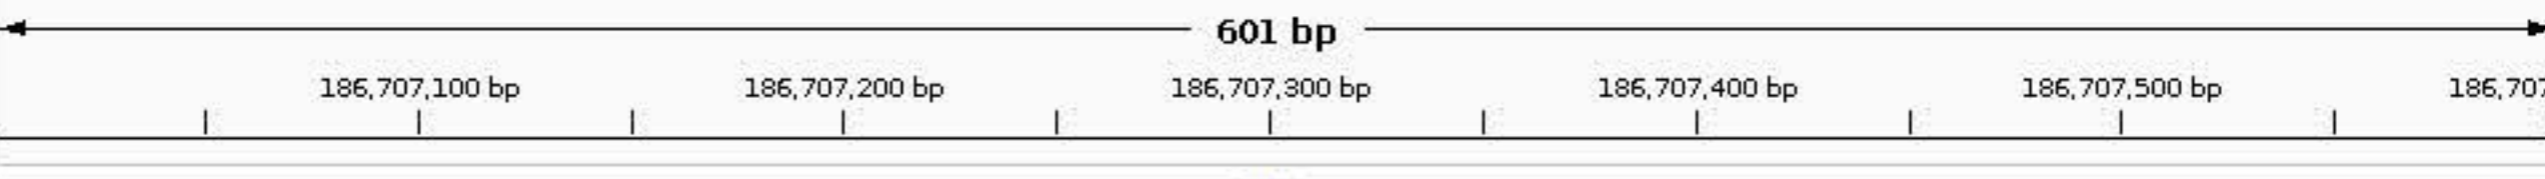

SL\_0015\_RN\_10\_mut.bam Coverage

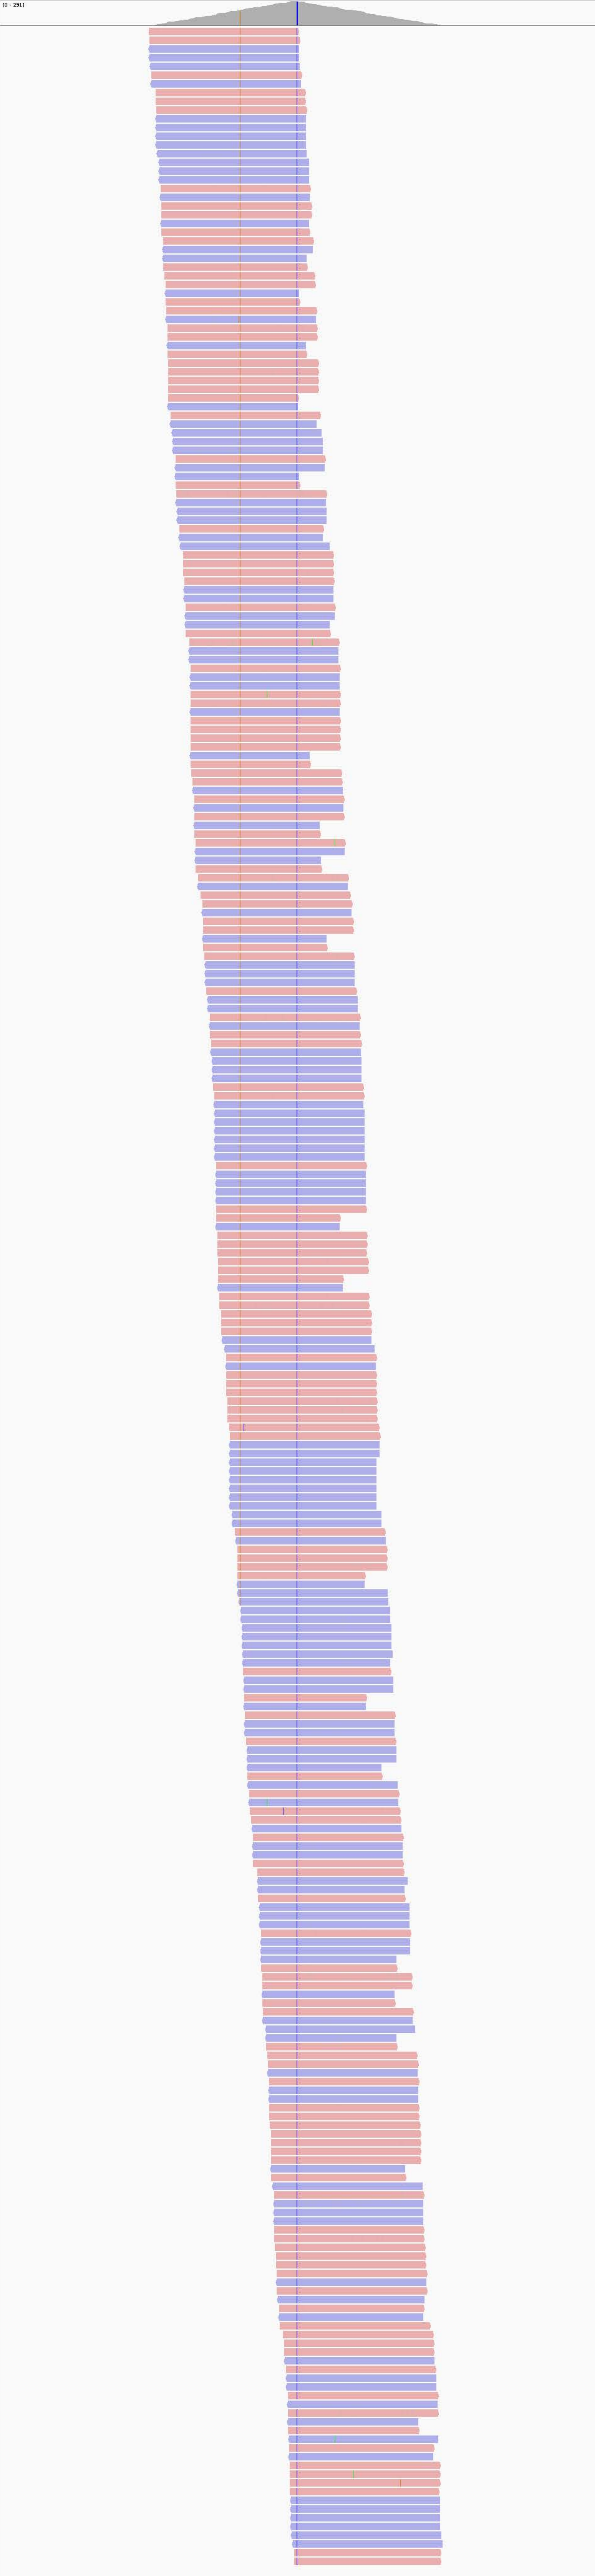

SL\_0015\_RN\_10\_mut.bam

Sequence

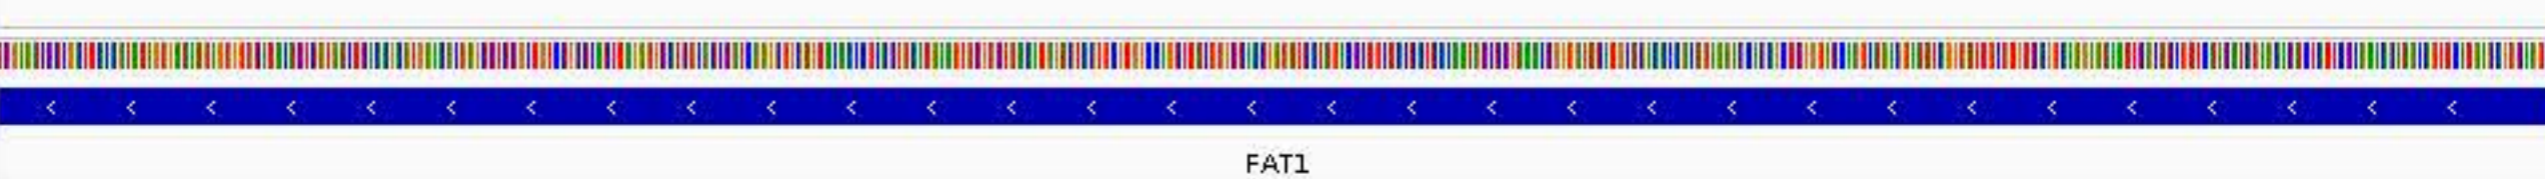

RefSeq Genes

FAT1

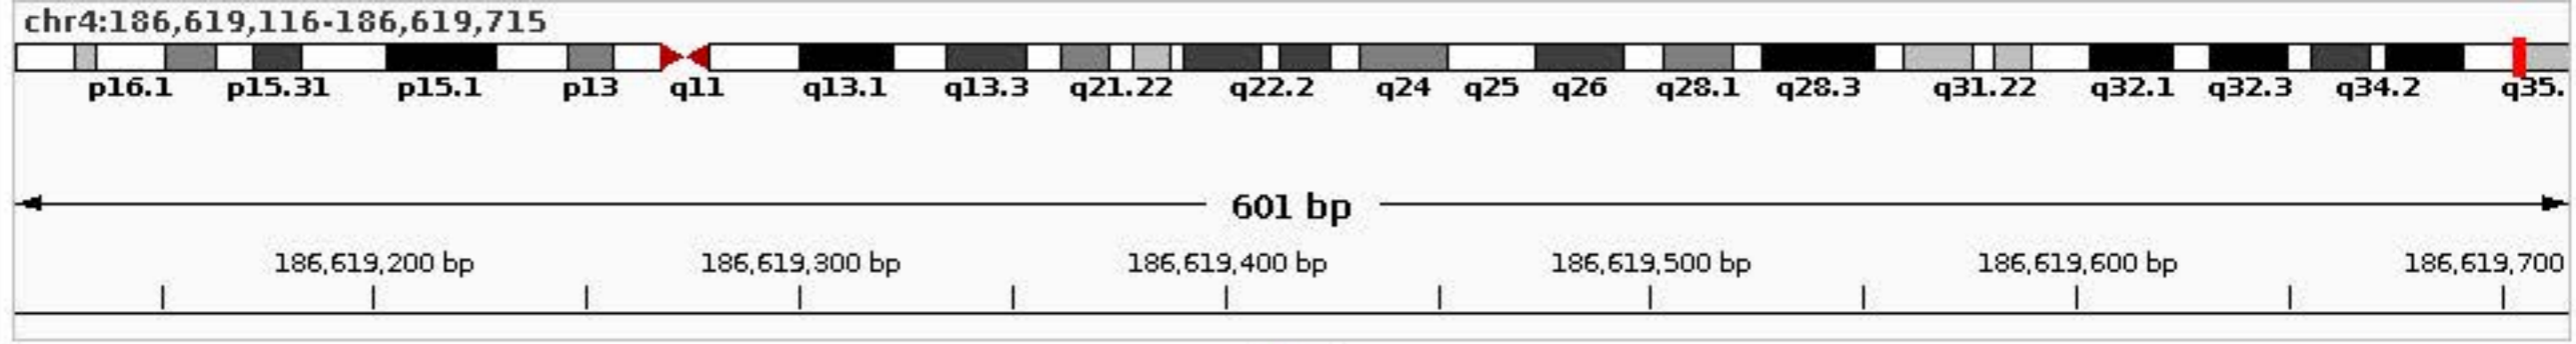

SL\_0004\_RN\_08\_mut.bam Coverage

SL\_0004\_RN\_08\_mut.bam

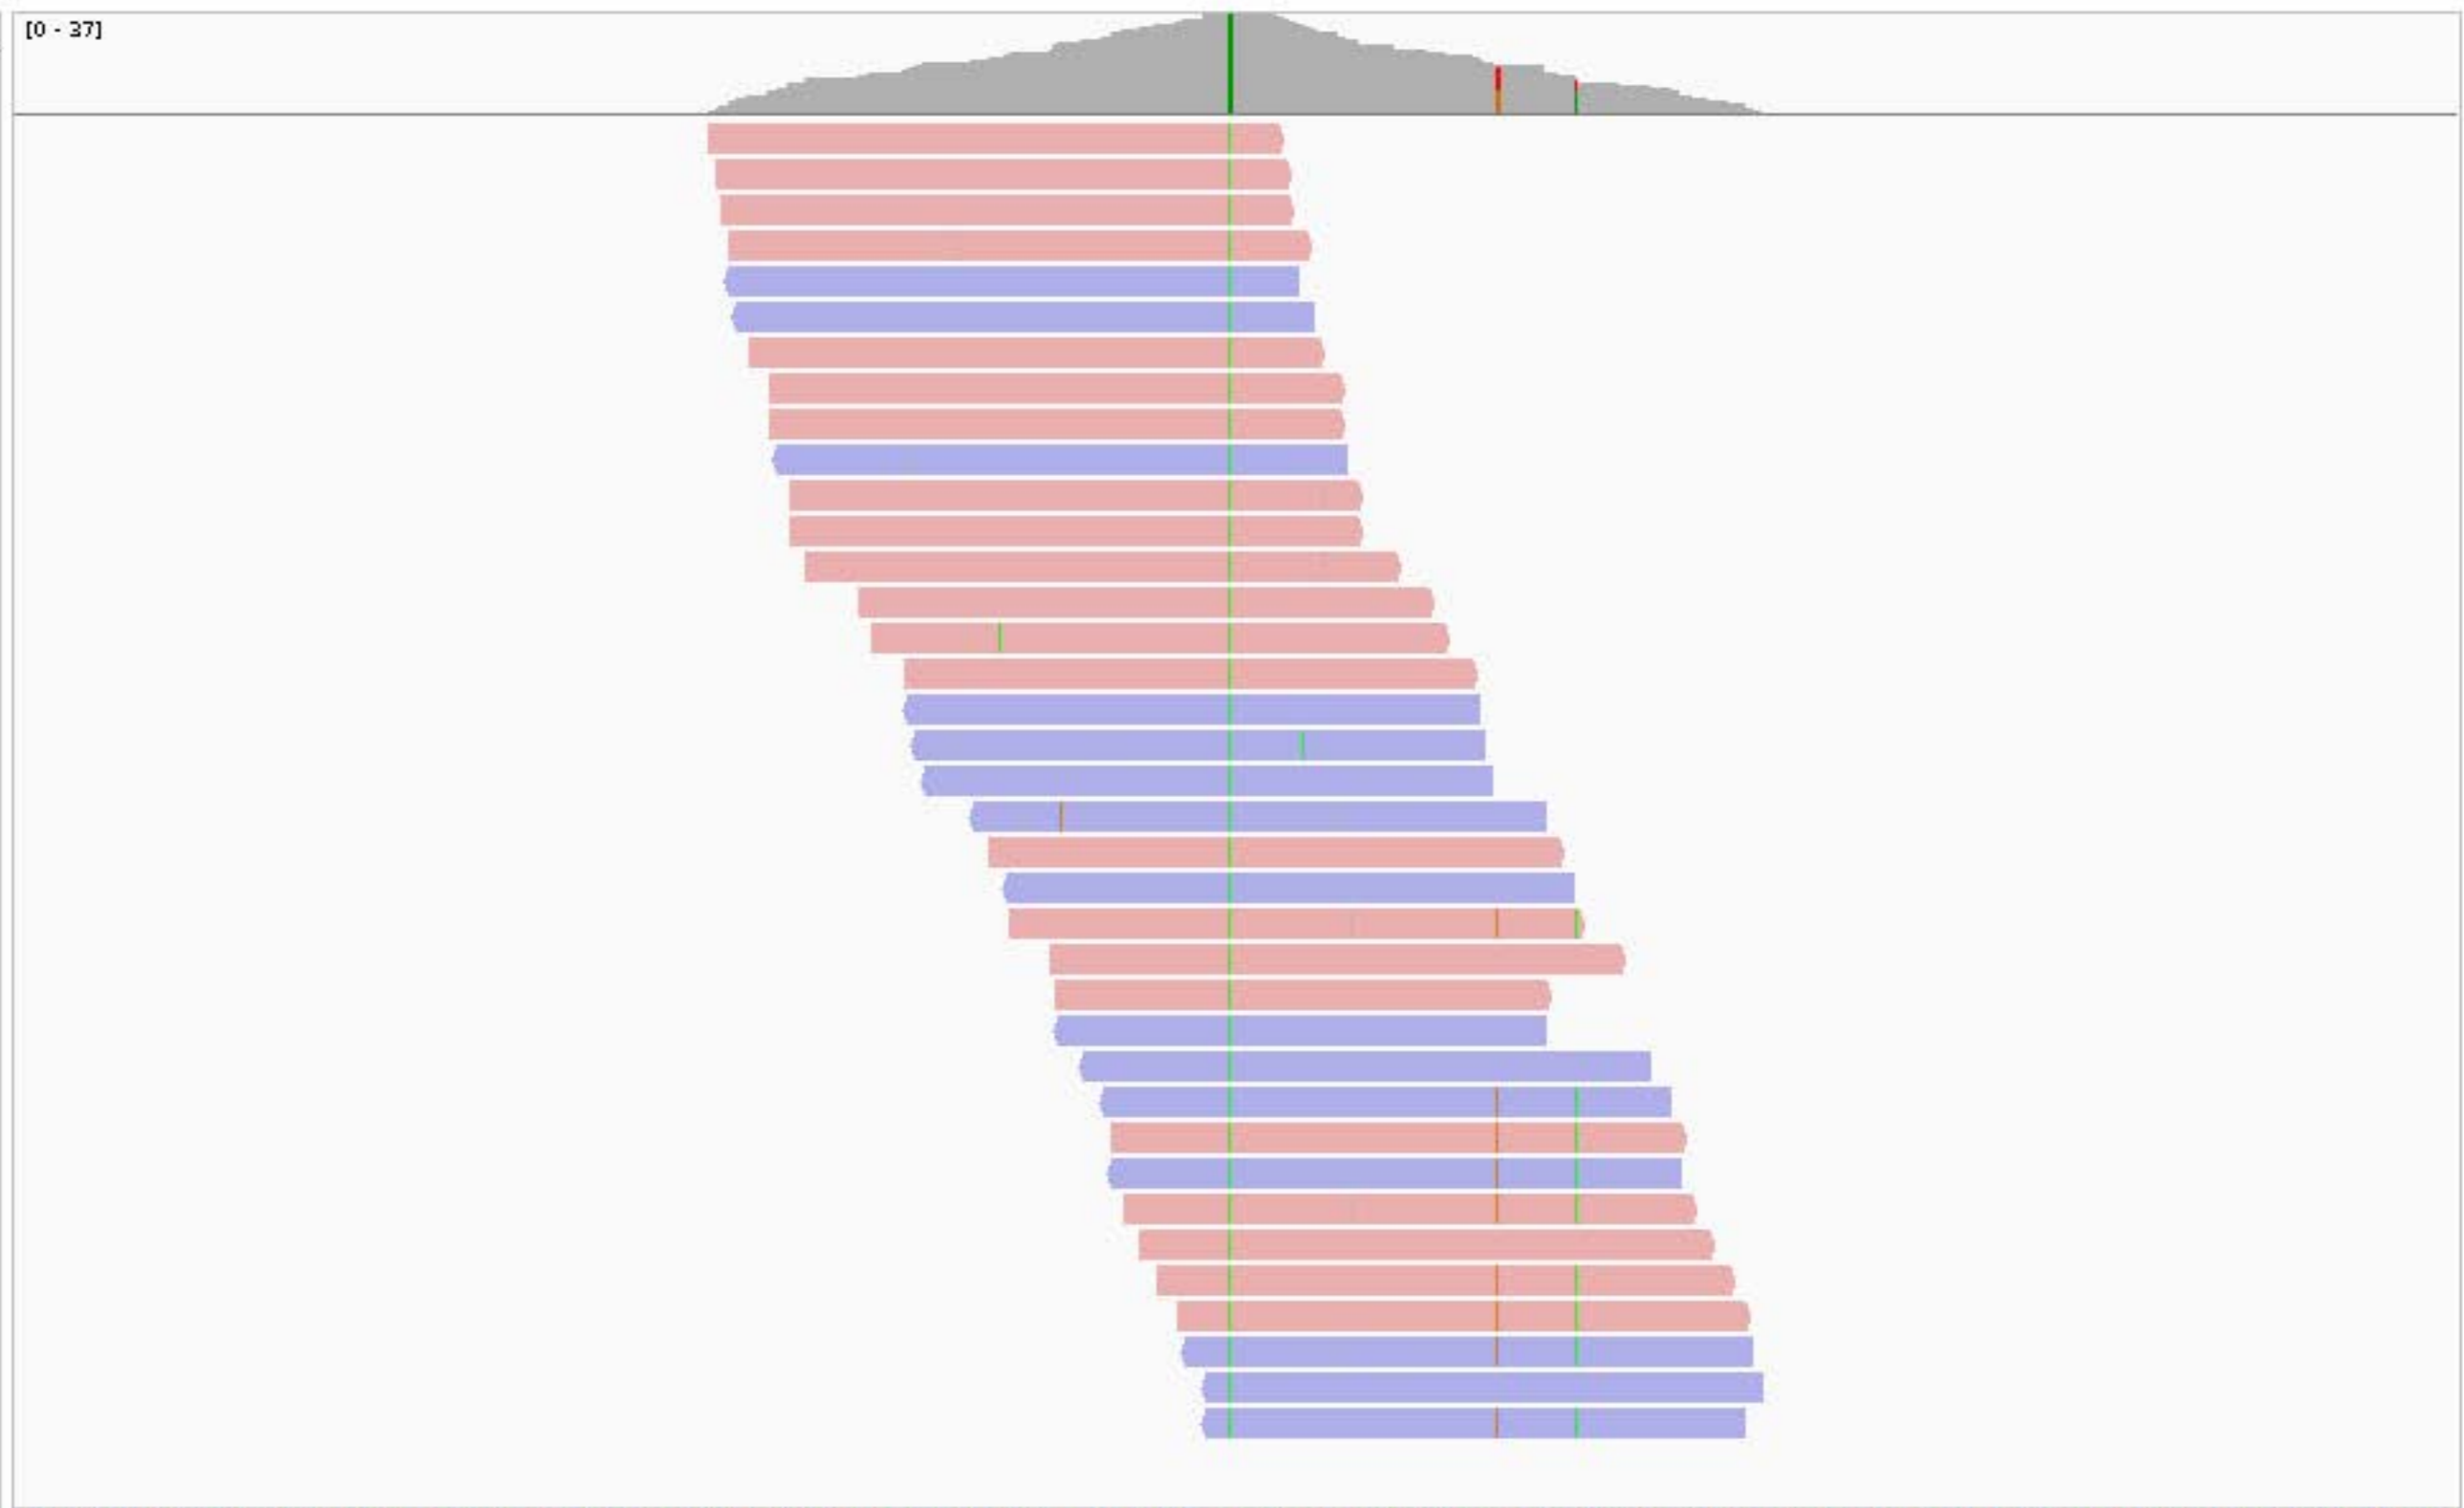

Sequence →

Refseq Genes

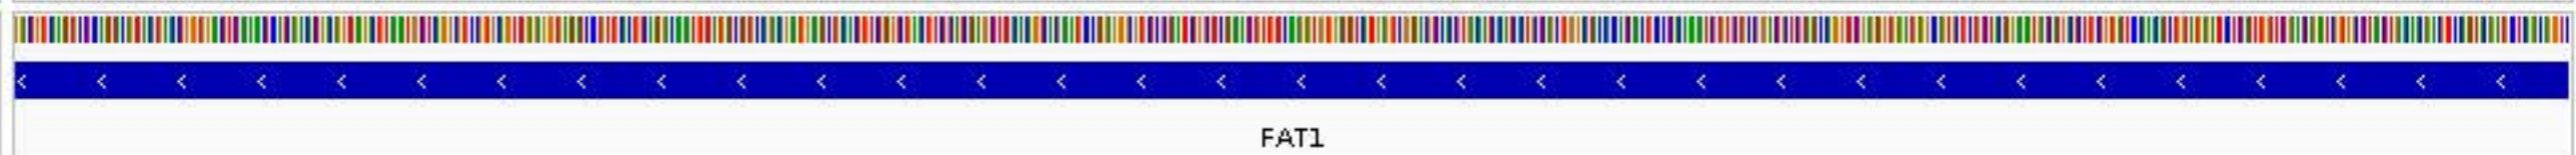

FAT1



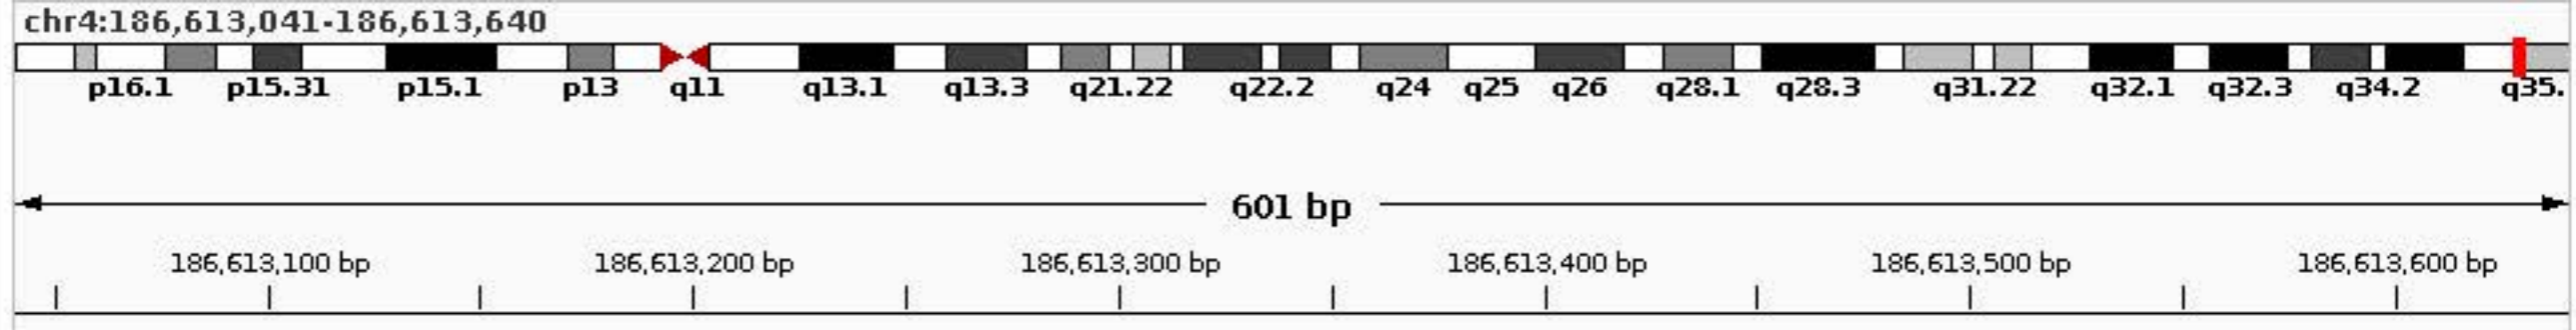

SL\_0004\_RN\_08\_mut.bam Coverage

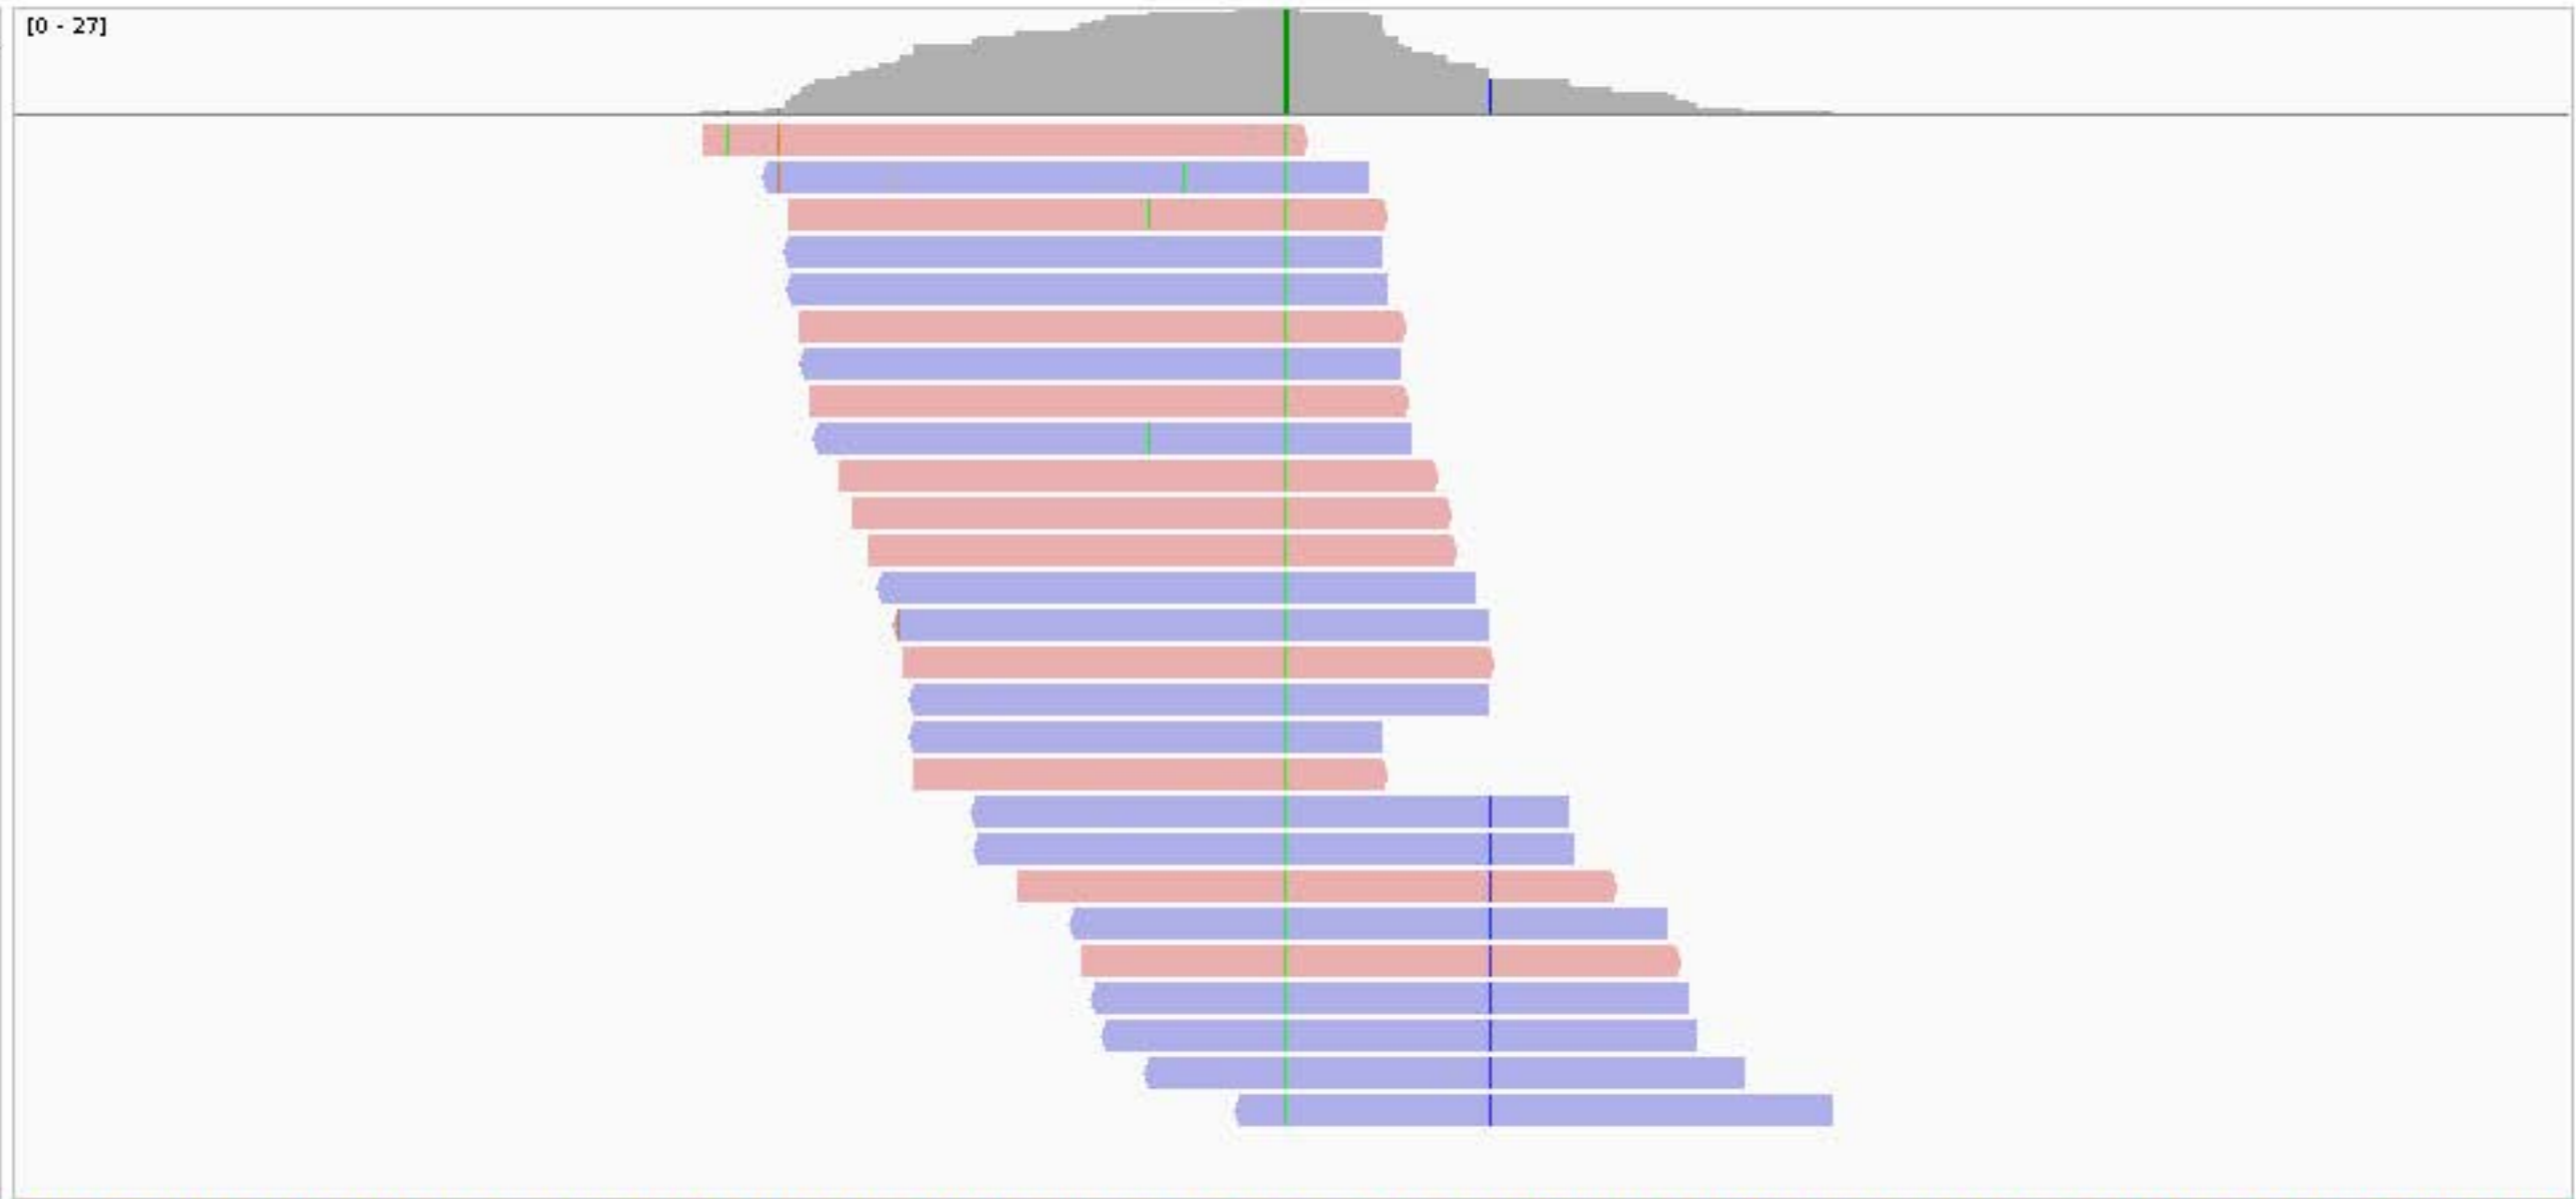

Sequence

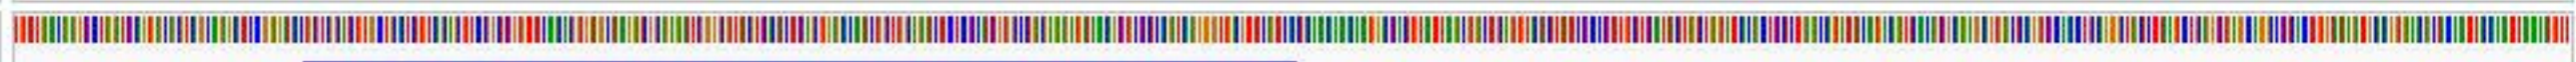

Refseq Genes

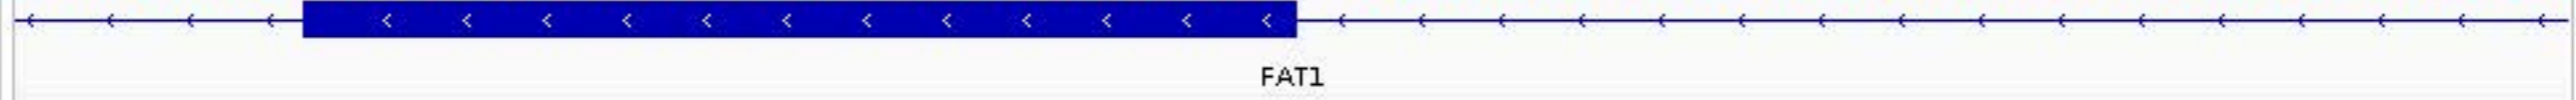



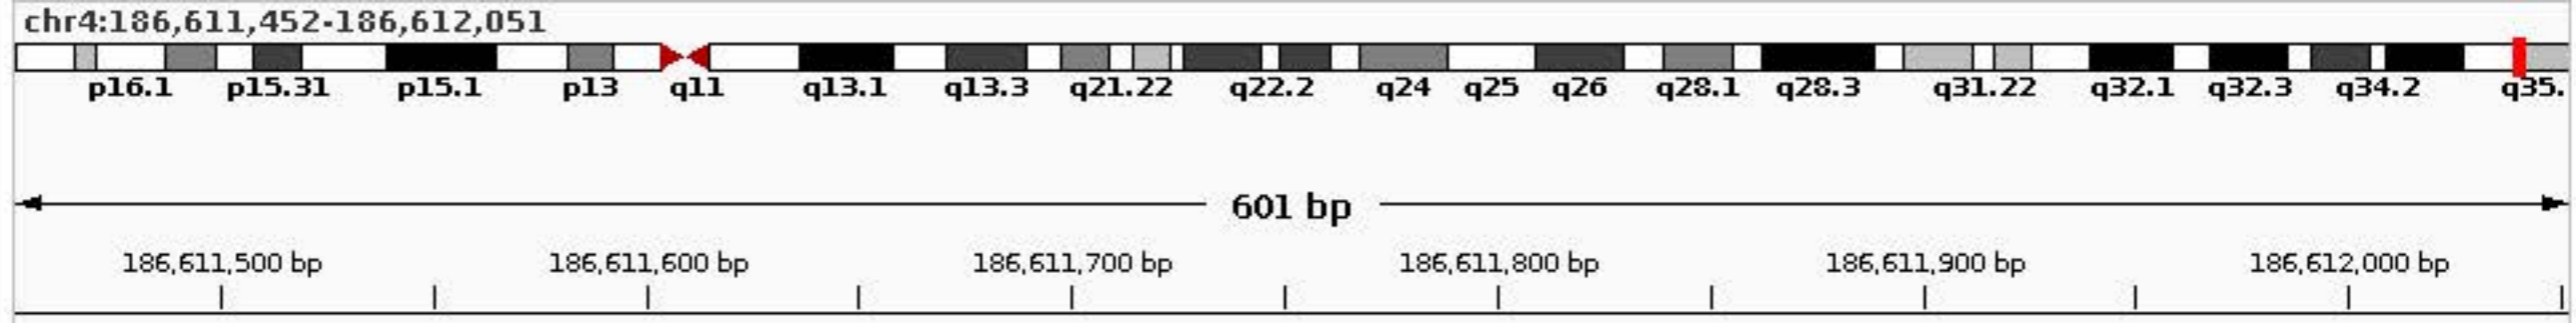

SL\_0004\_RN\_08\_mut.bam Coverage

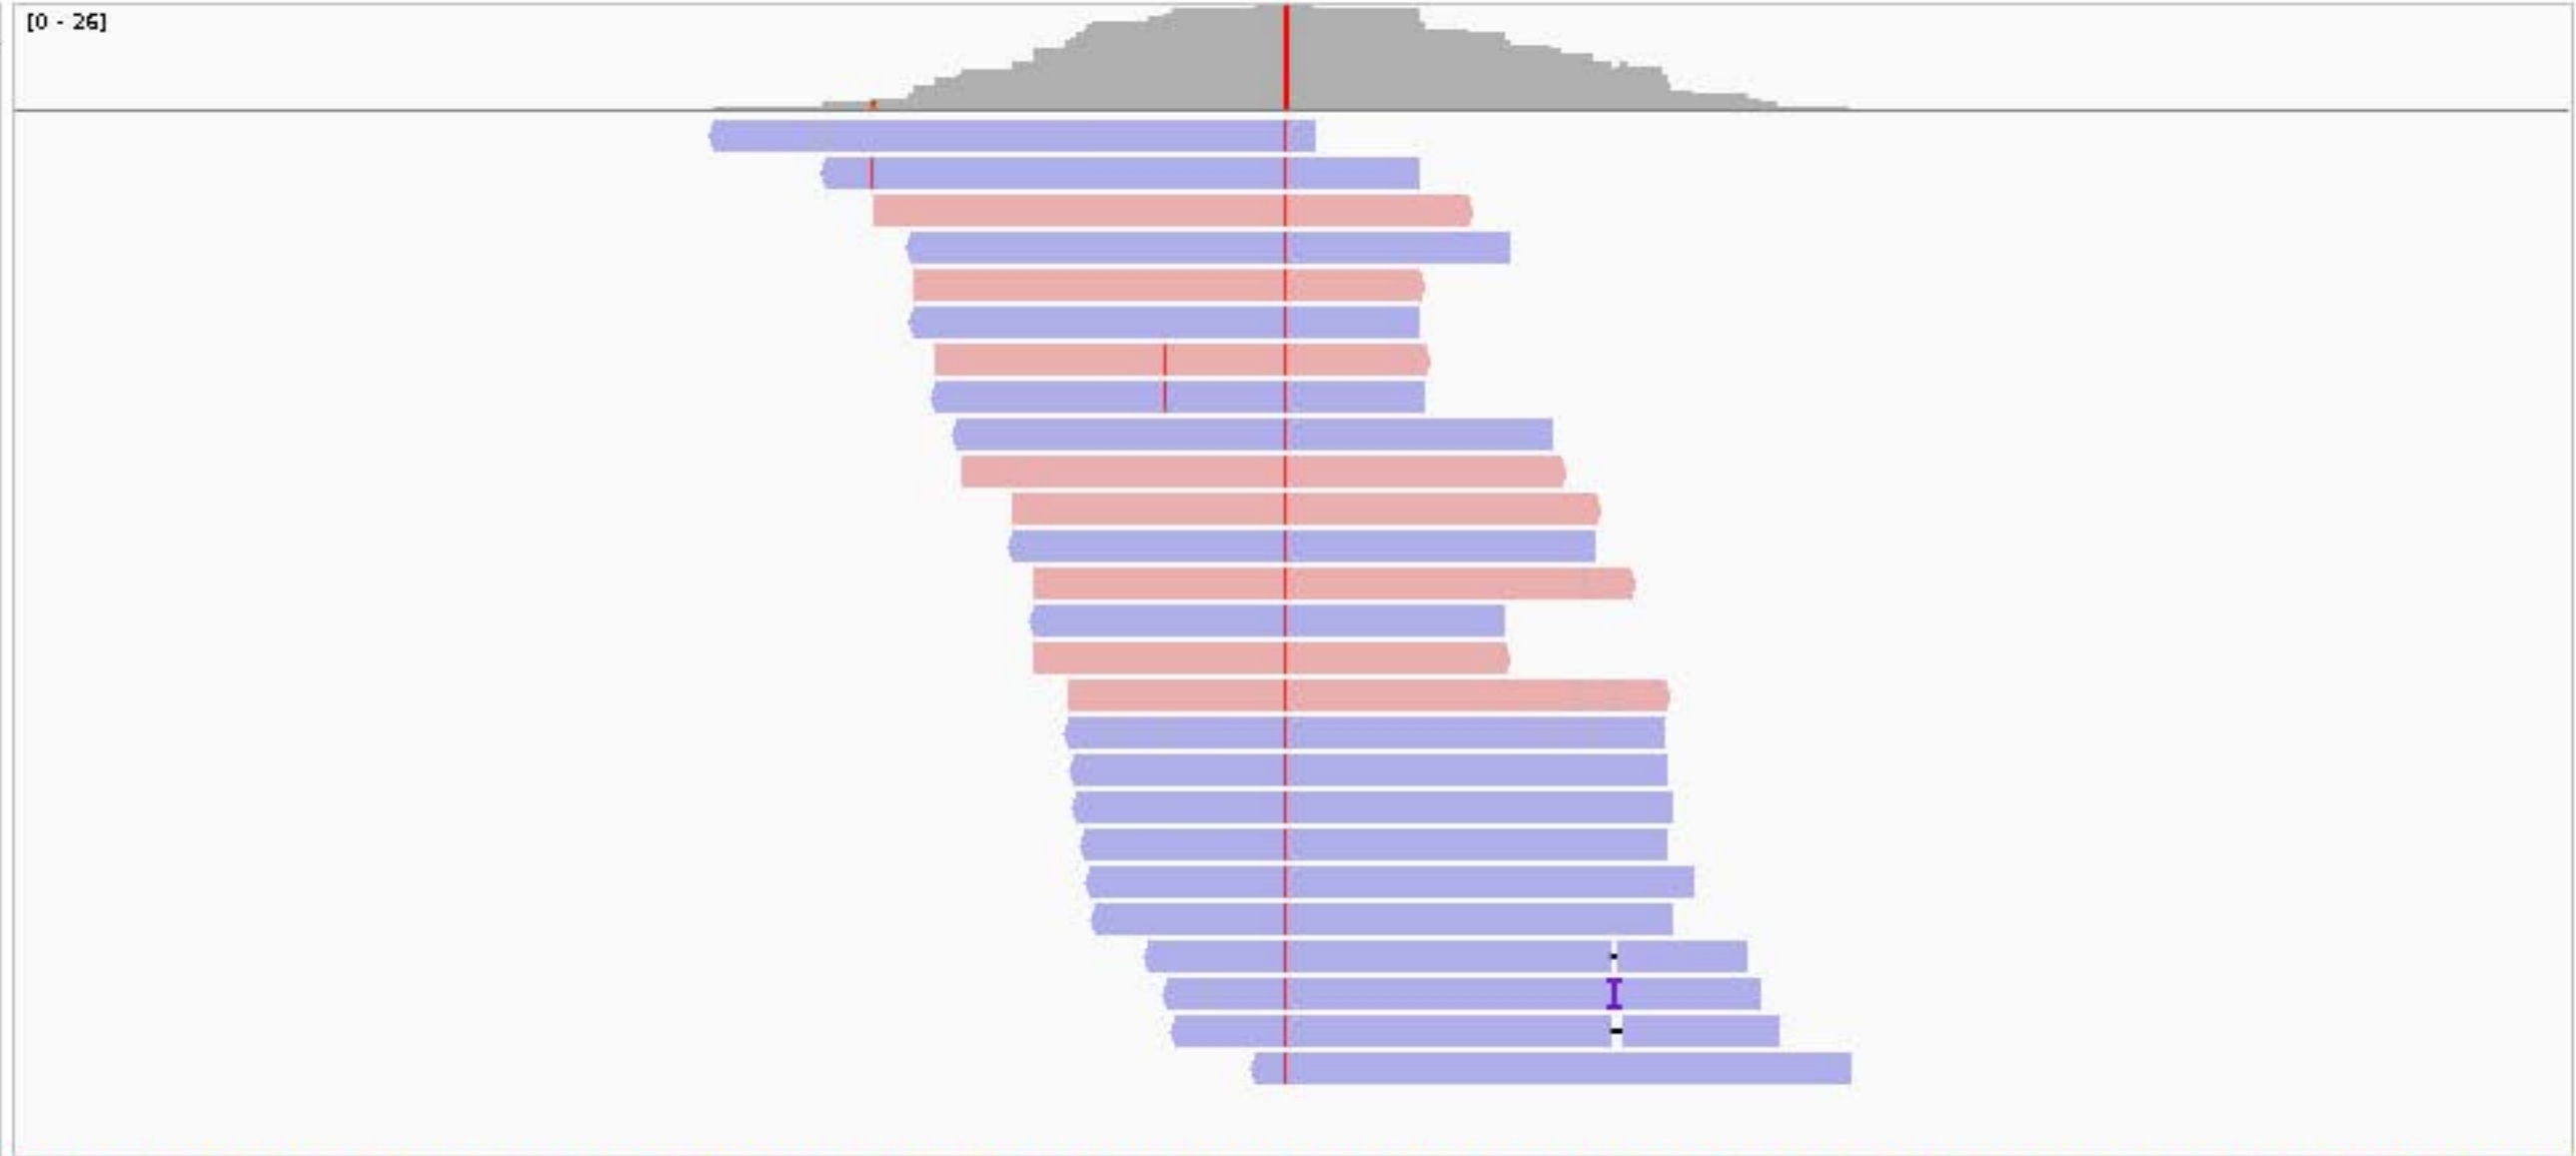

Sequence →

Refseq Genes

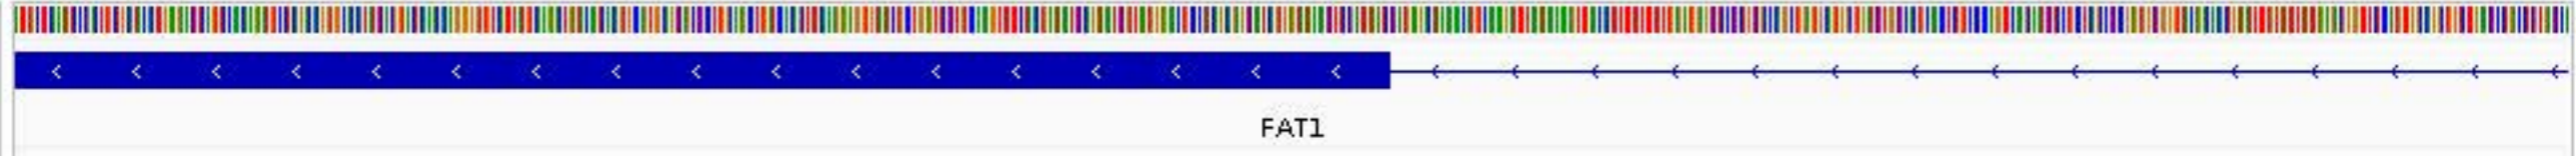

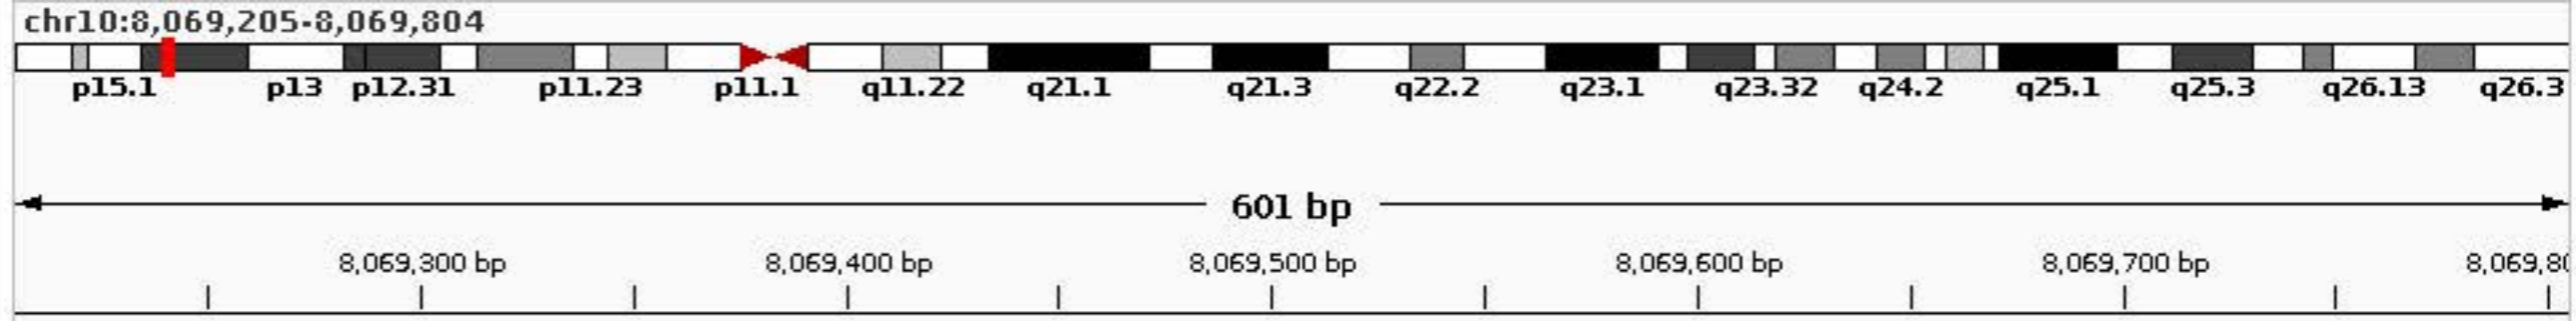

SL\_0015\_RN\_33\_mut.bam Coverage

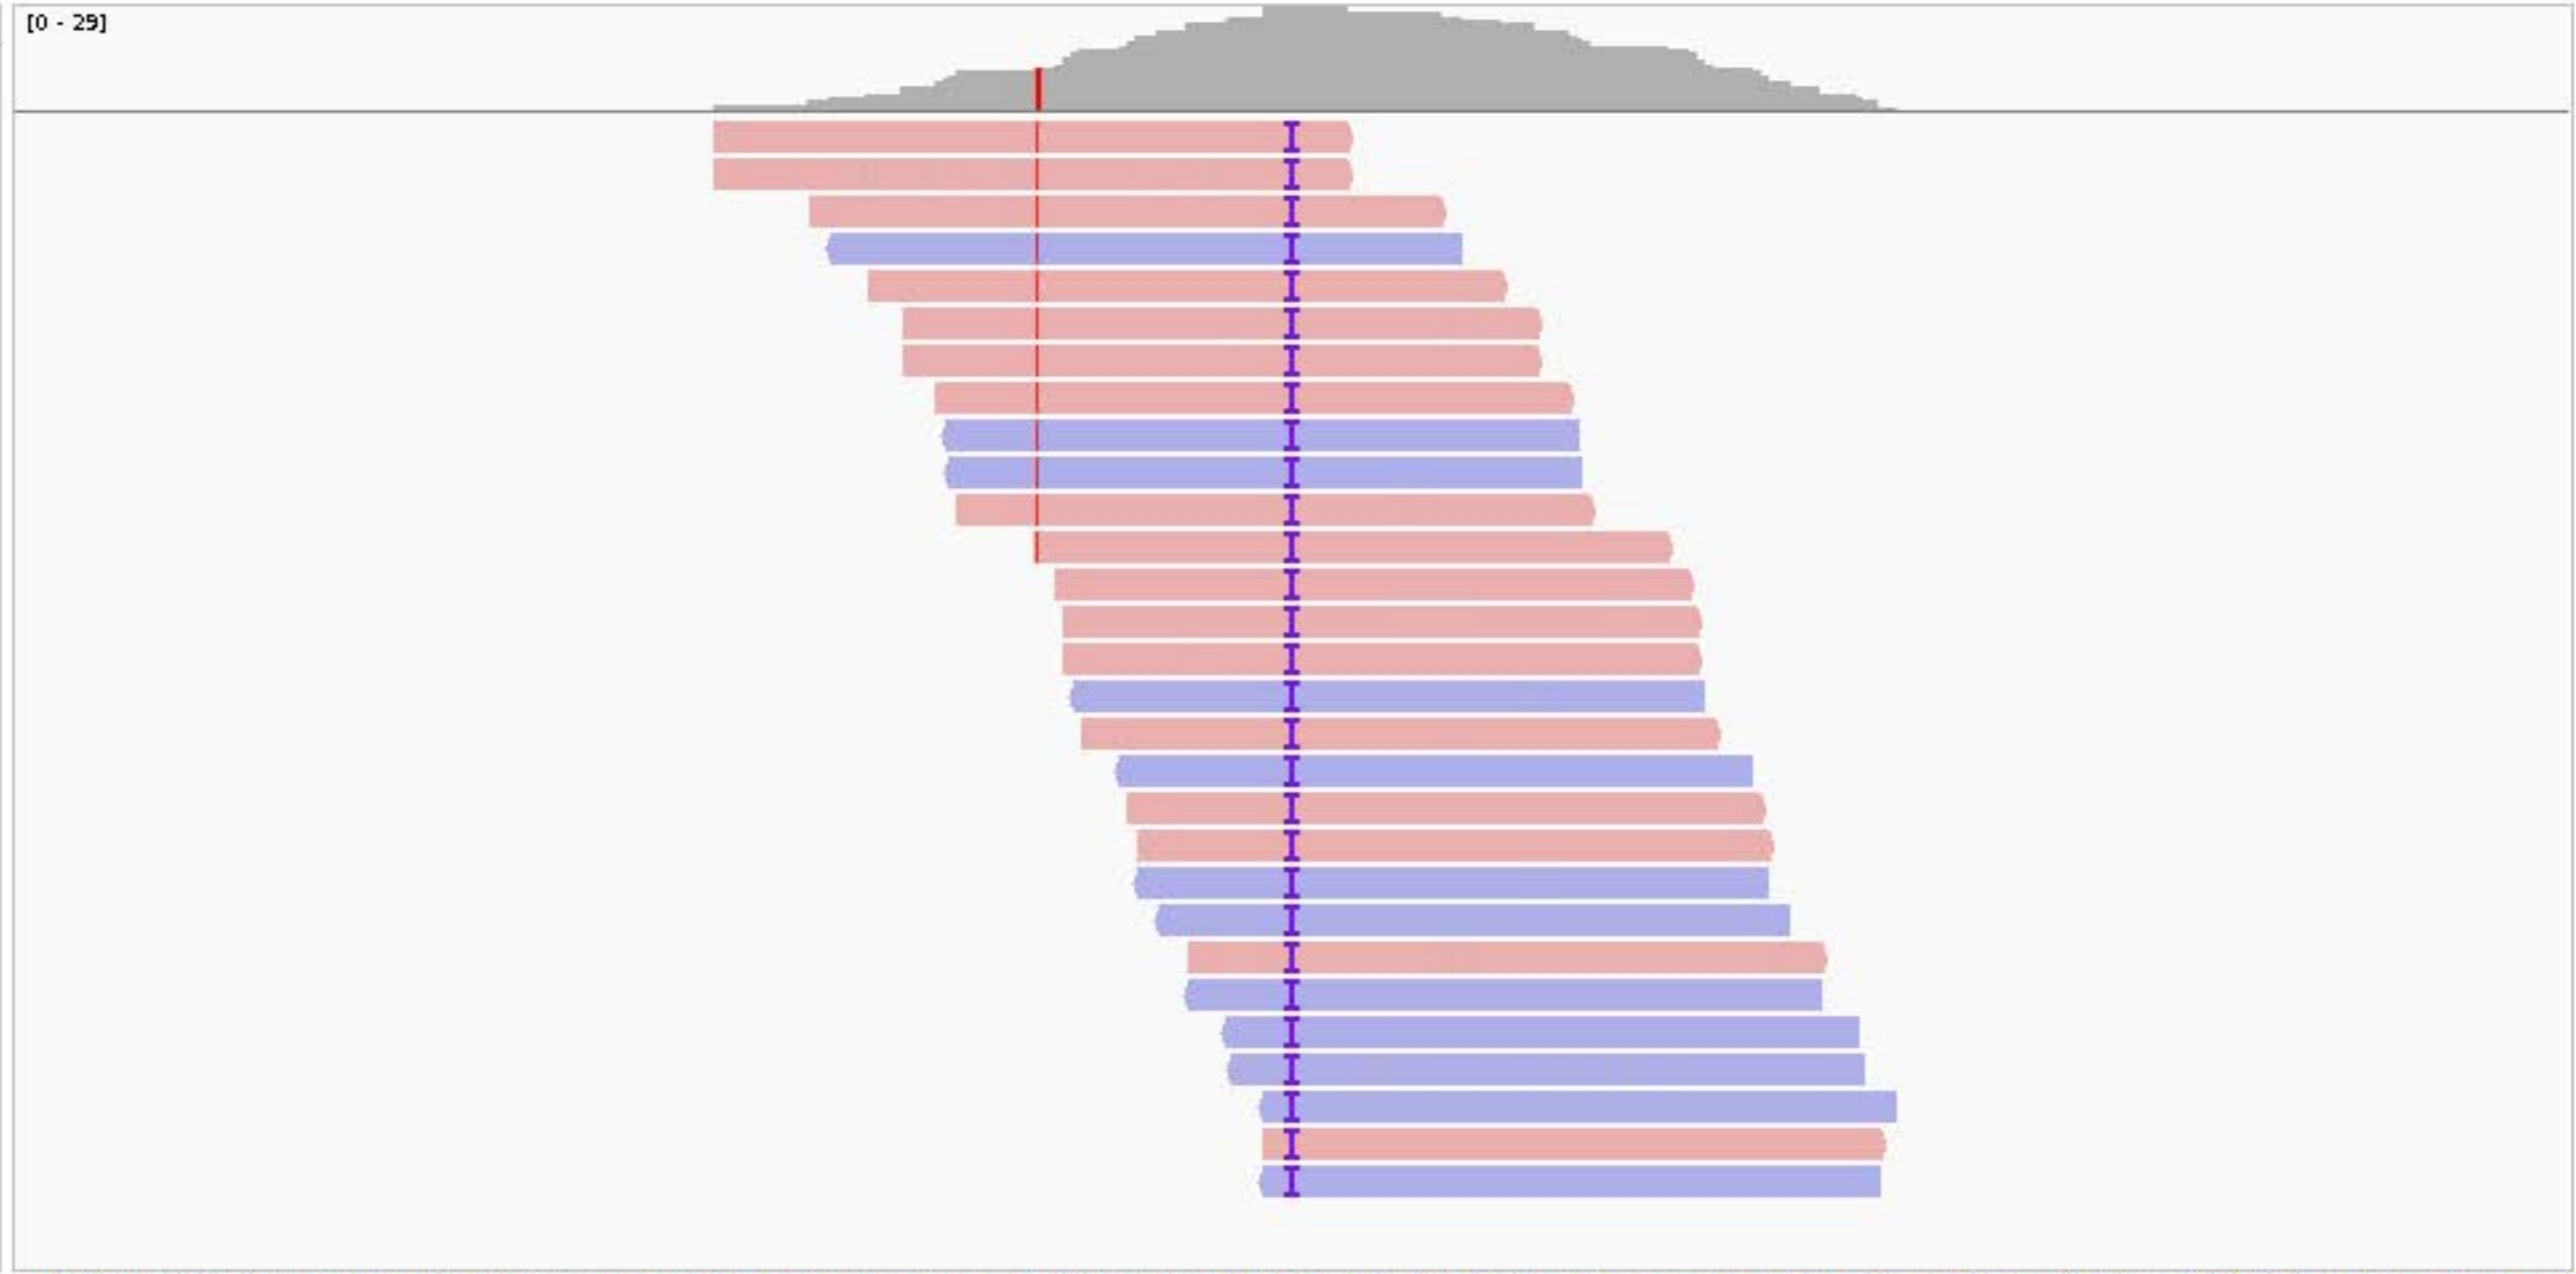

SL\_0015\_RN\_33\_mut.bam

Sequence

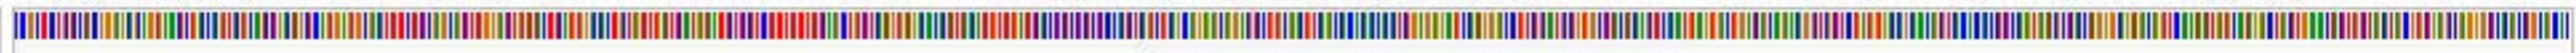

Refseq Genes

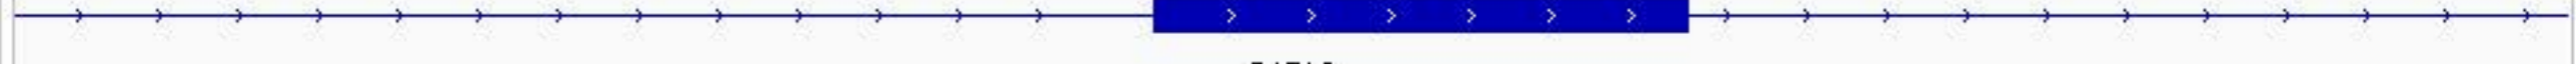

GATA3

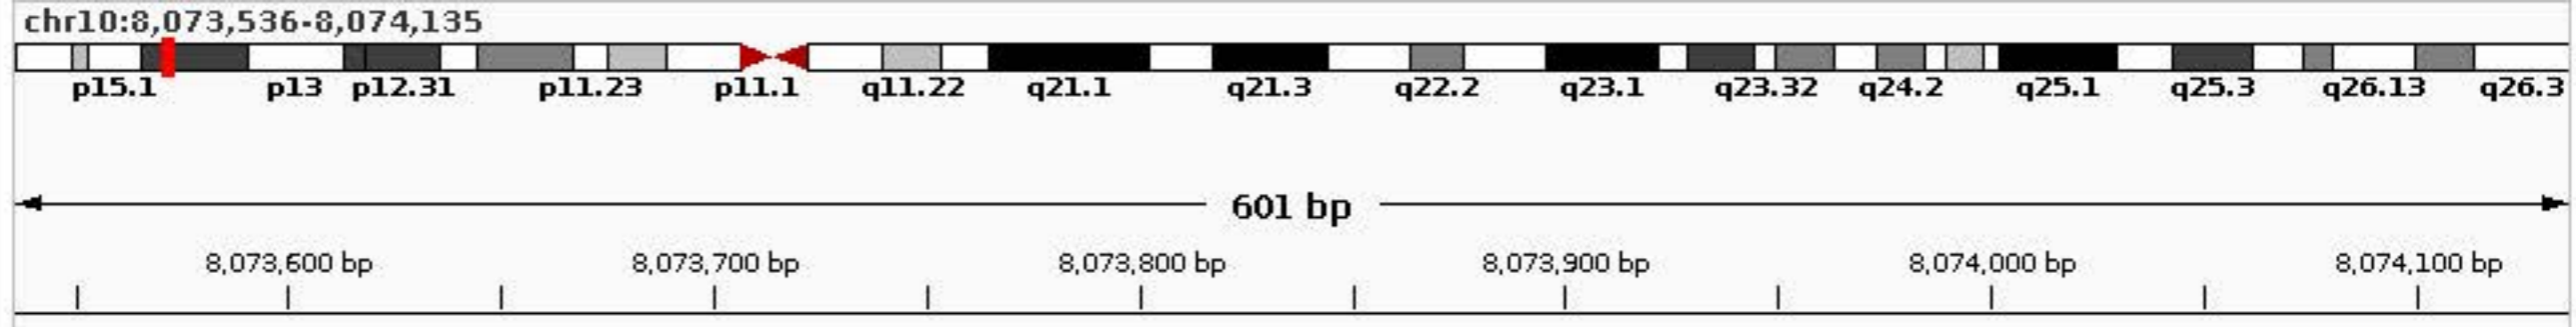

SL\_0007\_RN\_10\_mut.bam Coverage

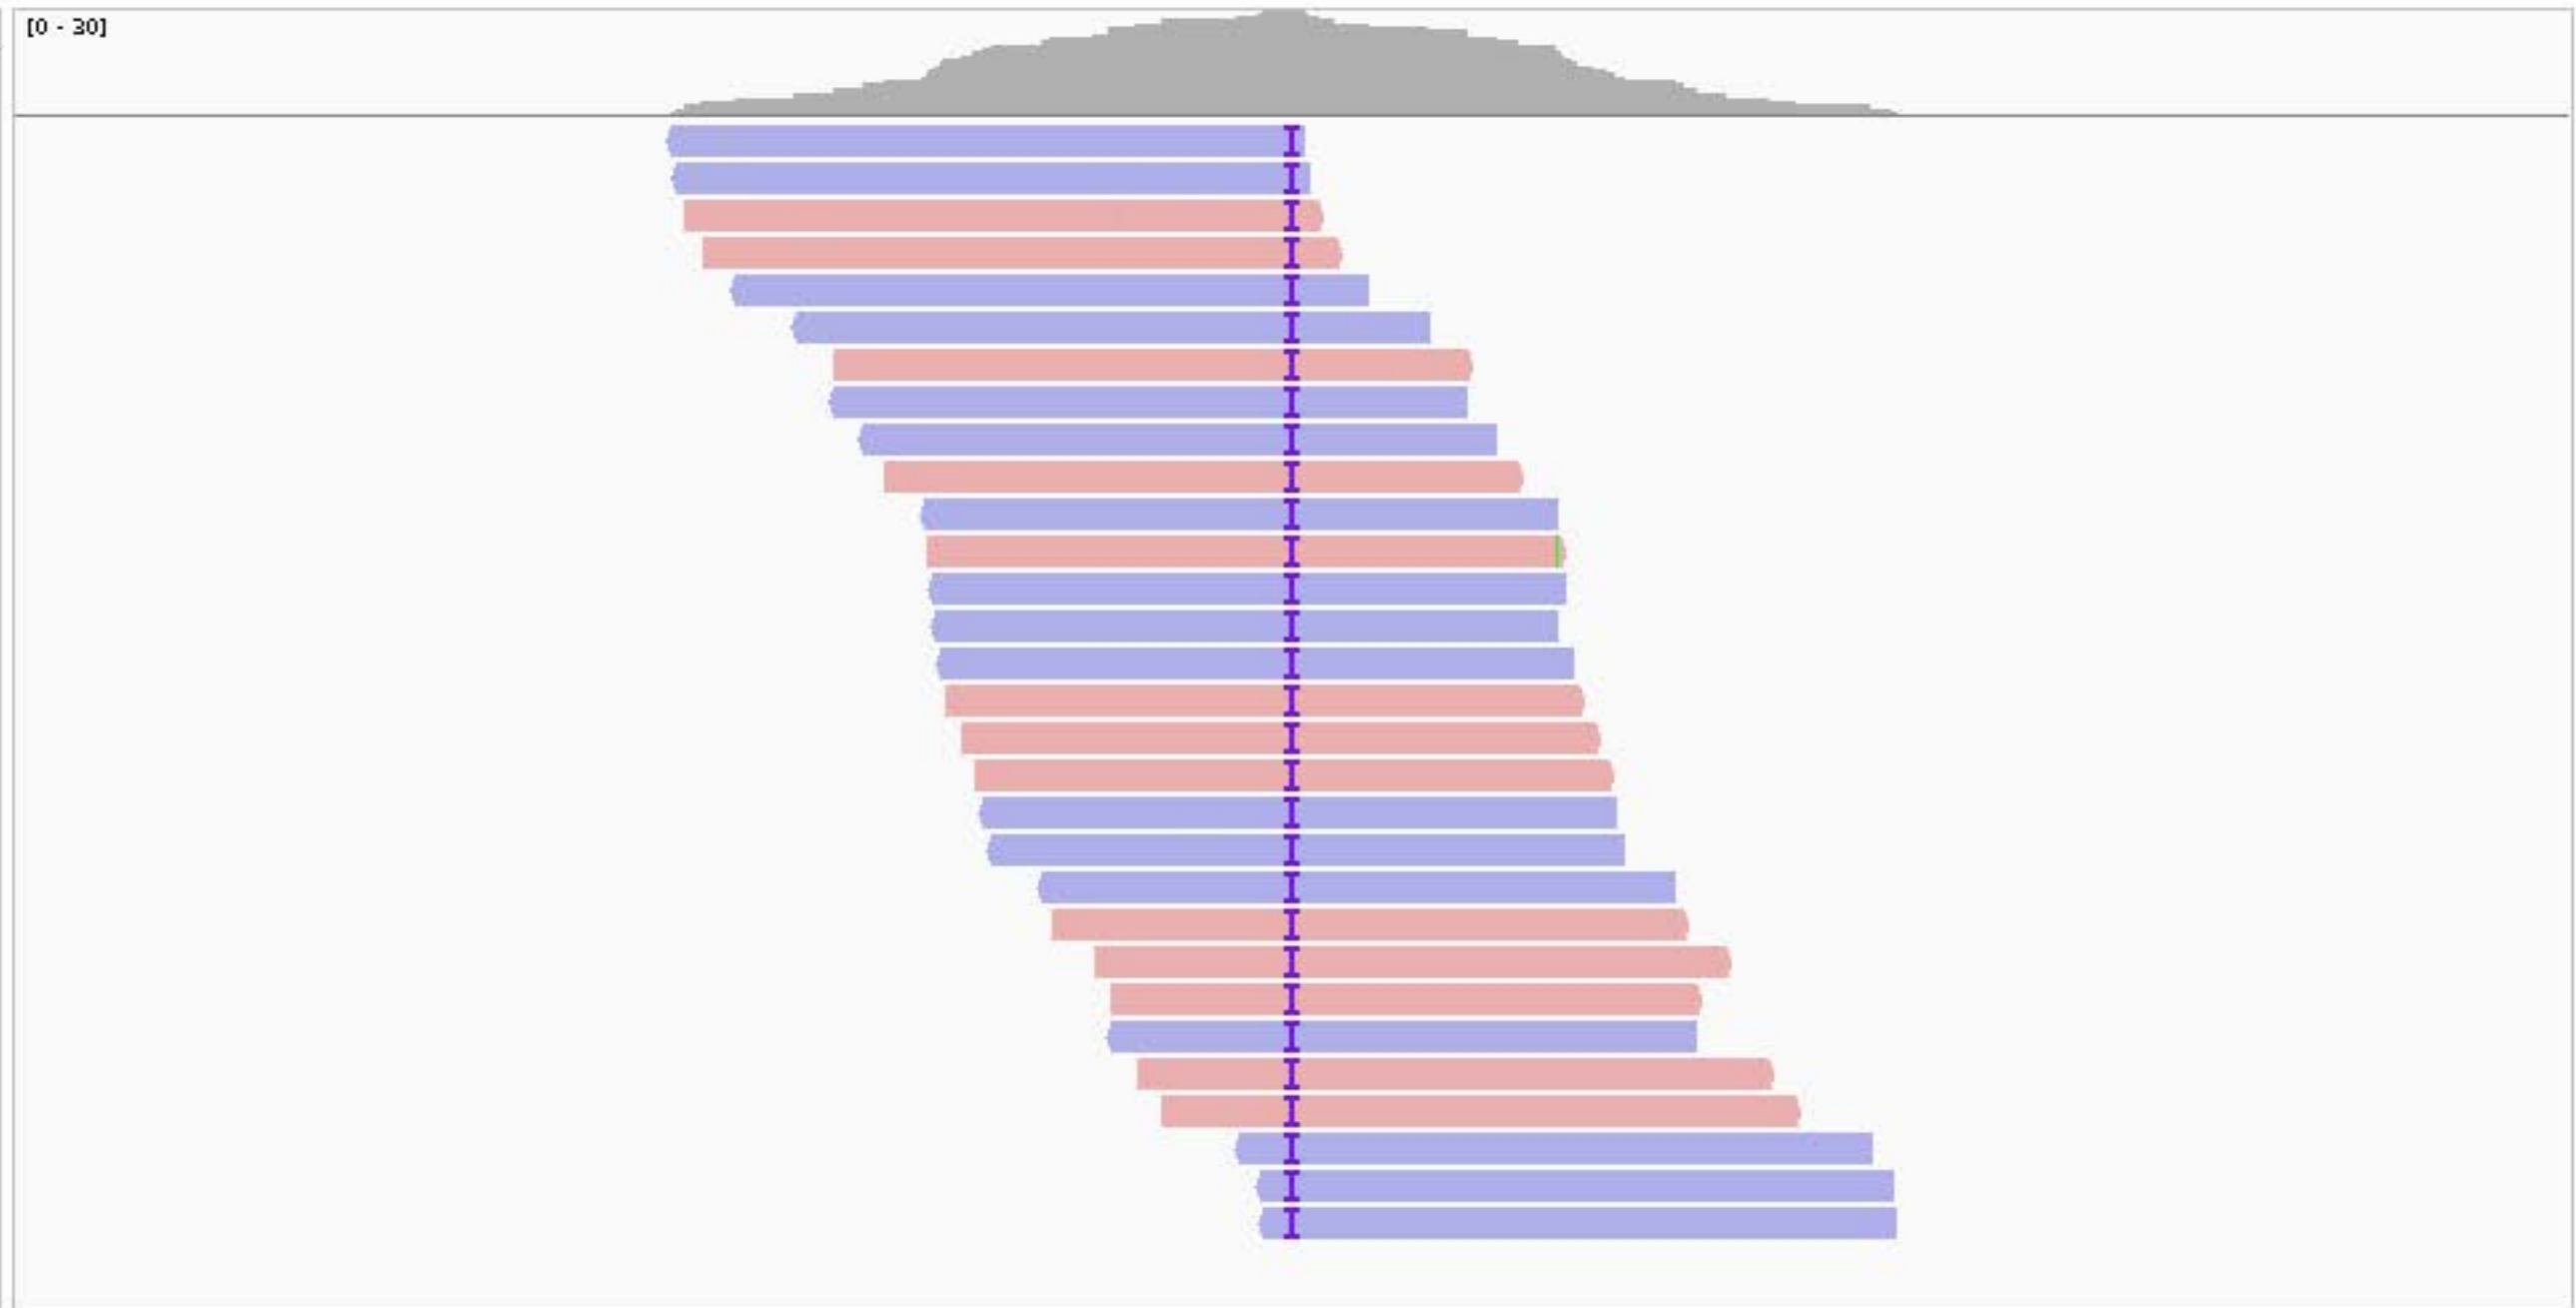

Sequence

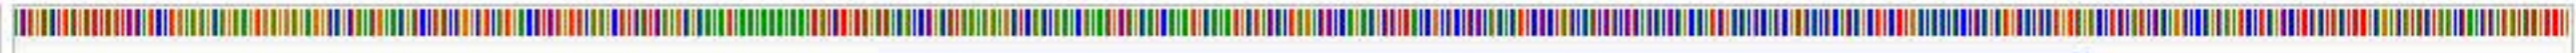

Refseq Genes

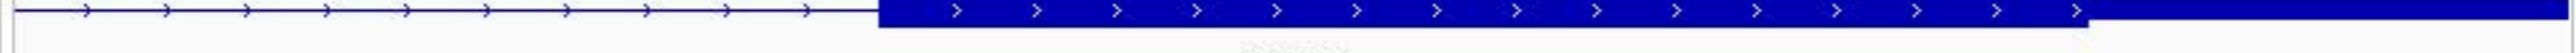

GATA3



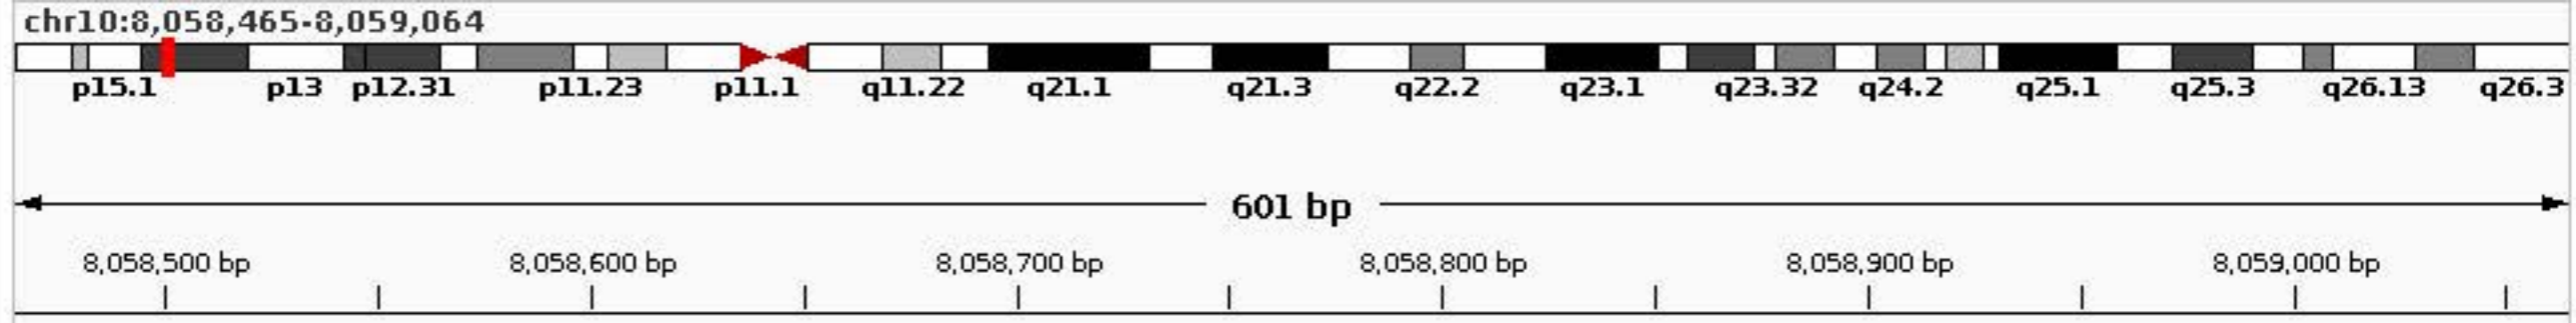

SL\_0010\_LN\_31\_mut.bam Coverage

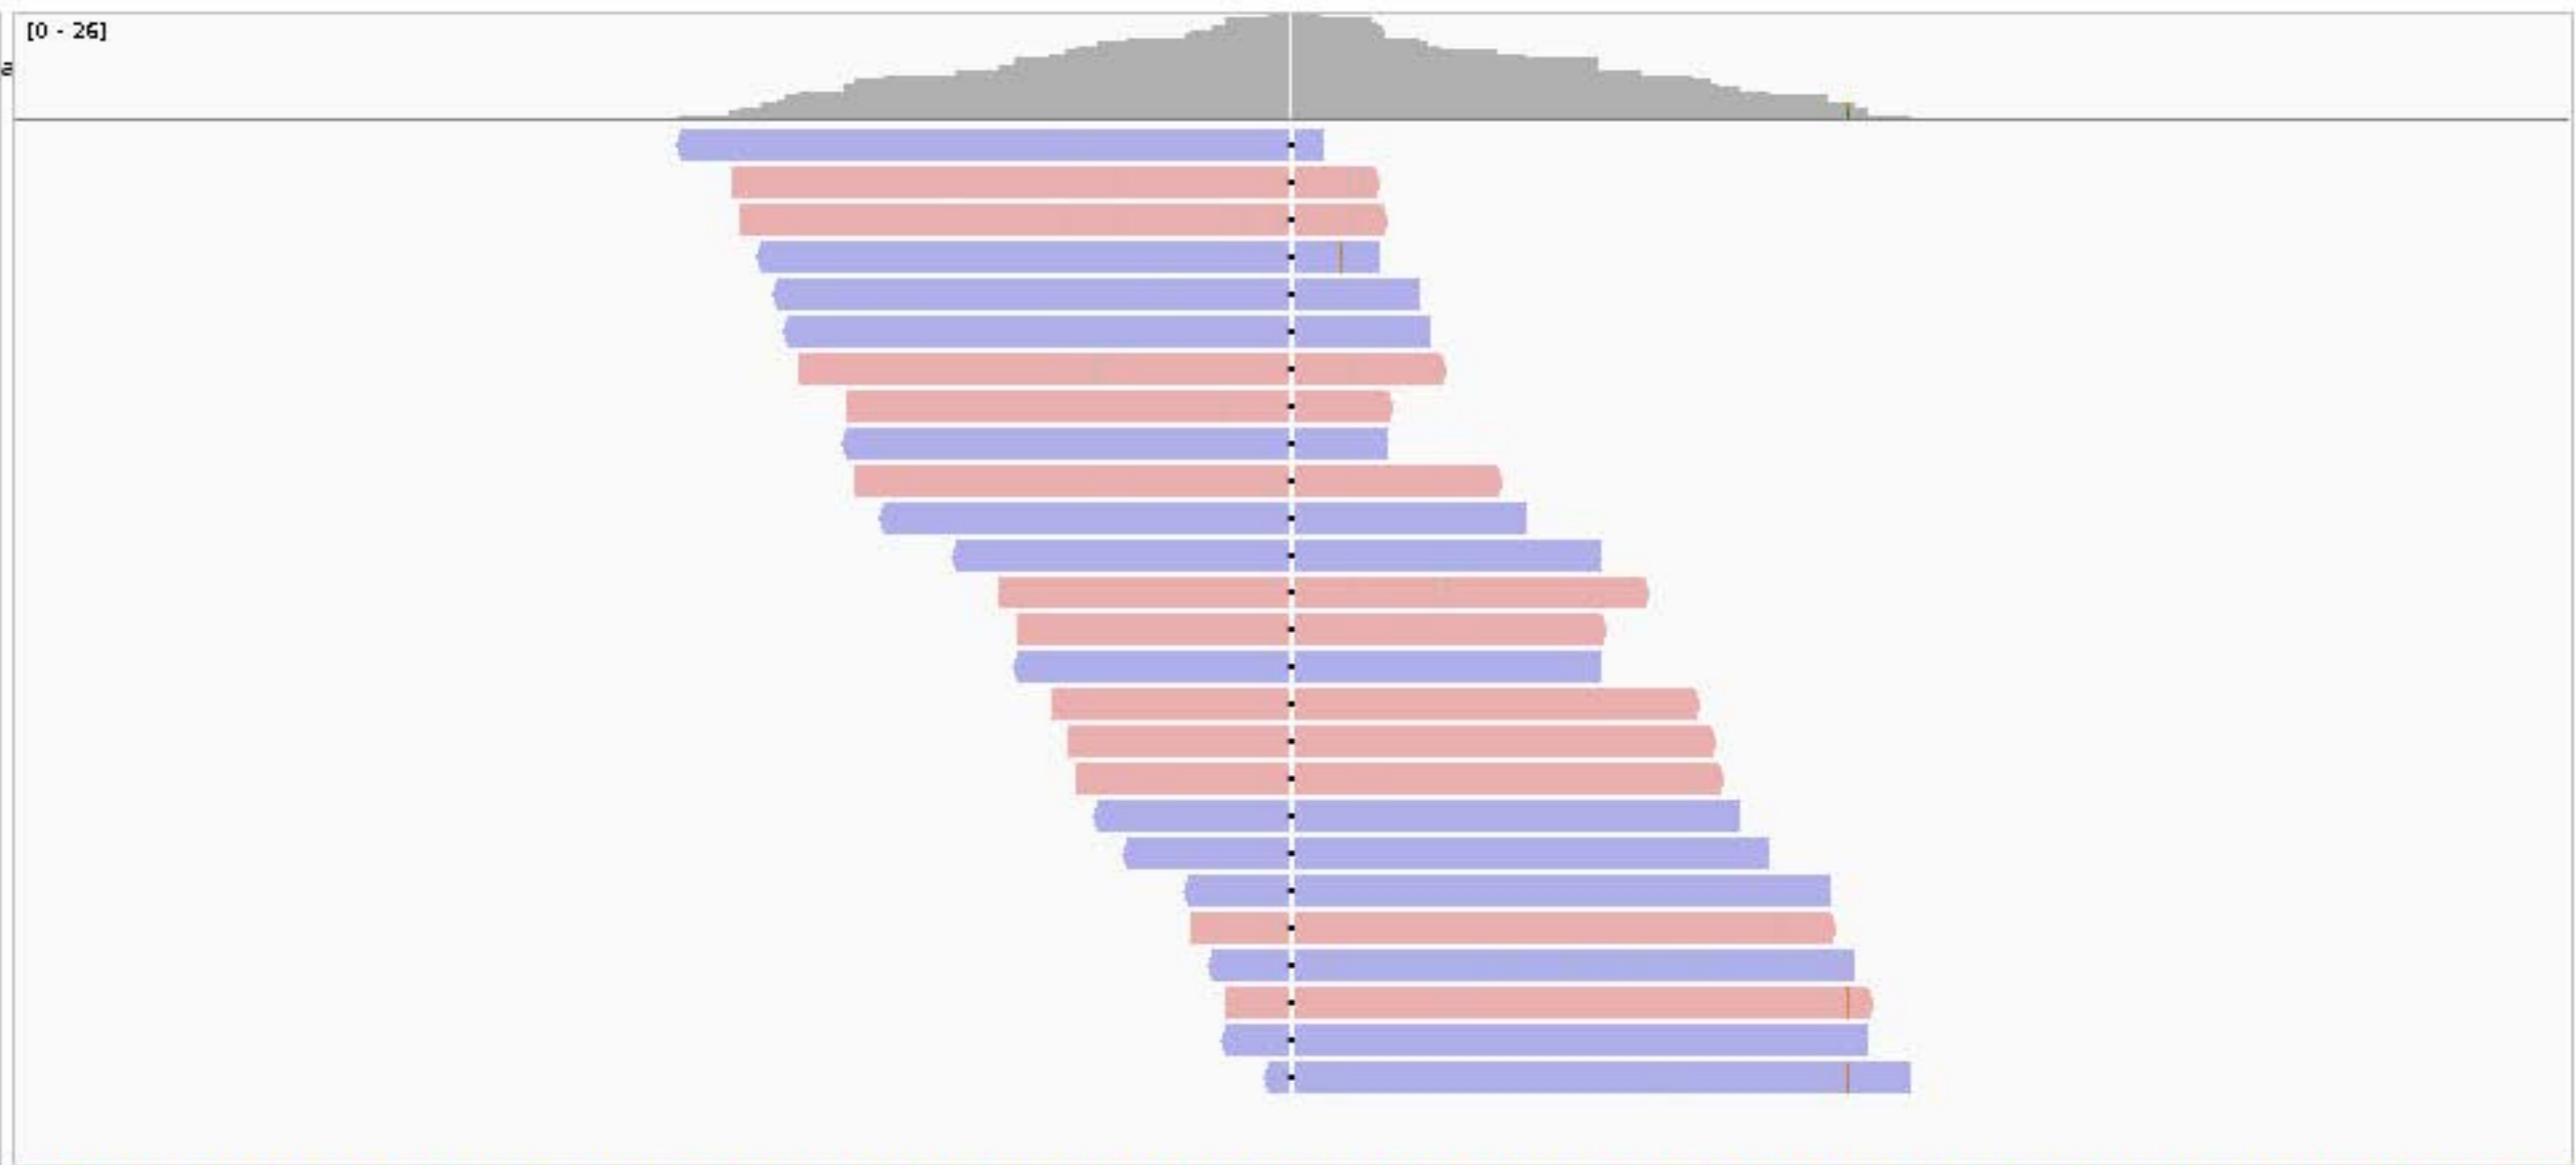

SL\_0010\_LN\_31\_mut.bam

Sequence

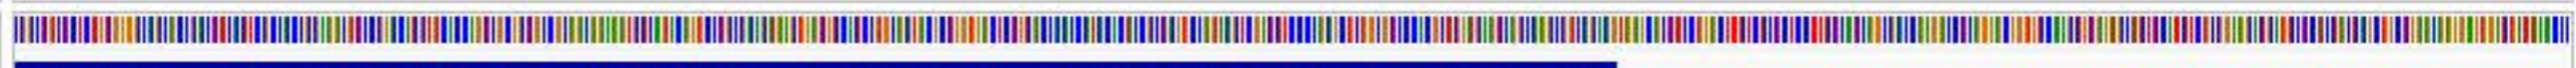

Refseq Genes

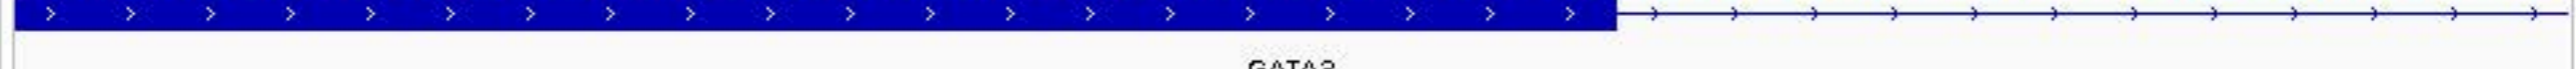

GATA3

chr20:58,909,066-58,909,665

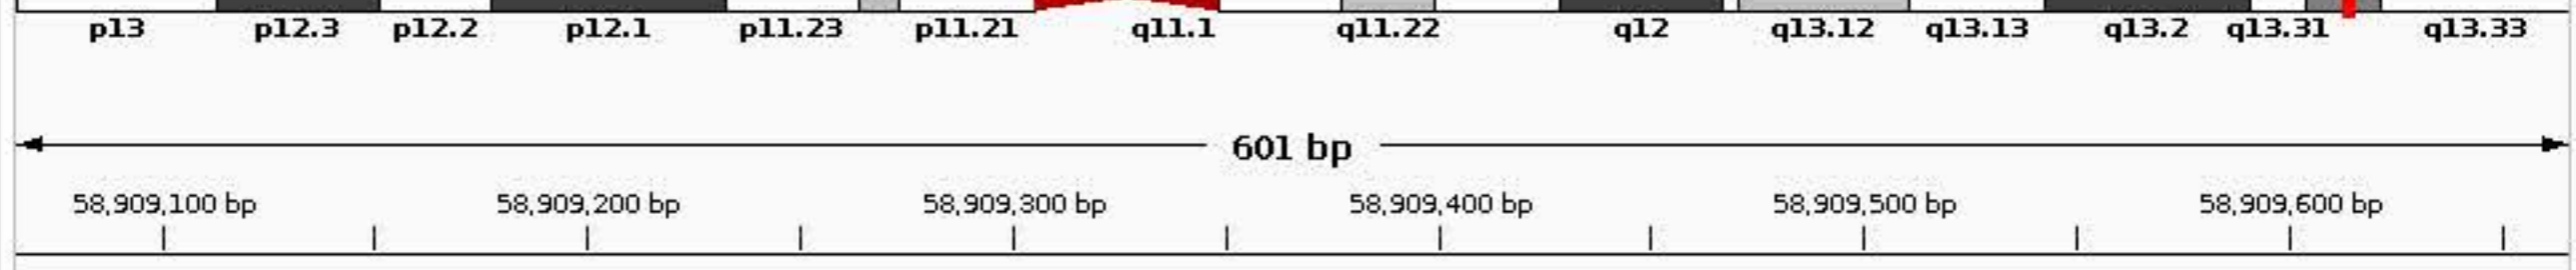

SL\_0003\_LN\_51\_mut.bam Coverage

SL\_0003\_LN\_51\_mut.bam

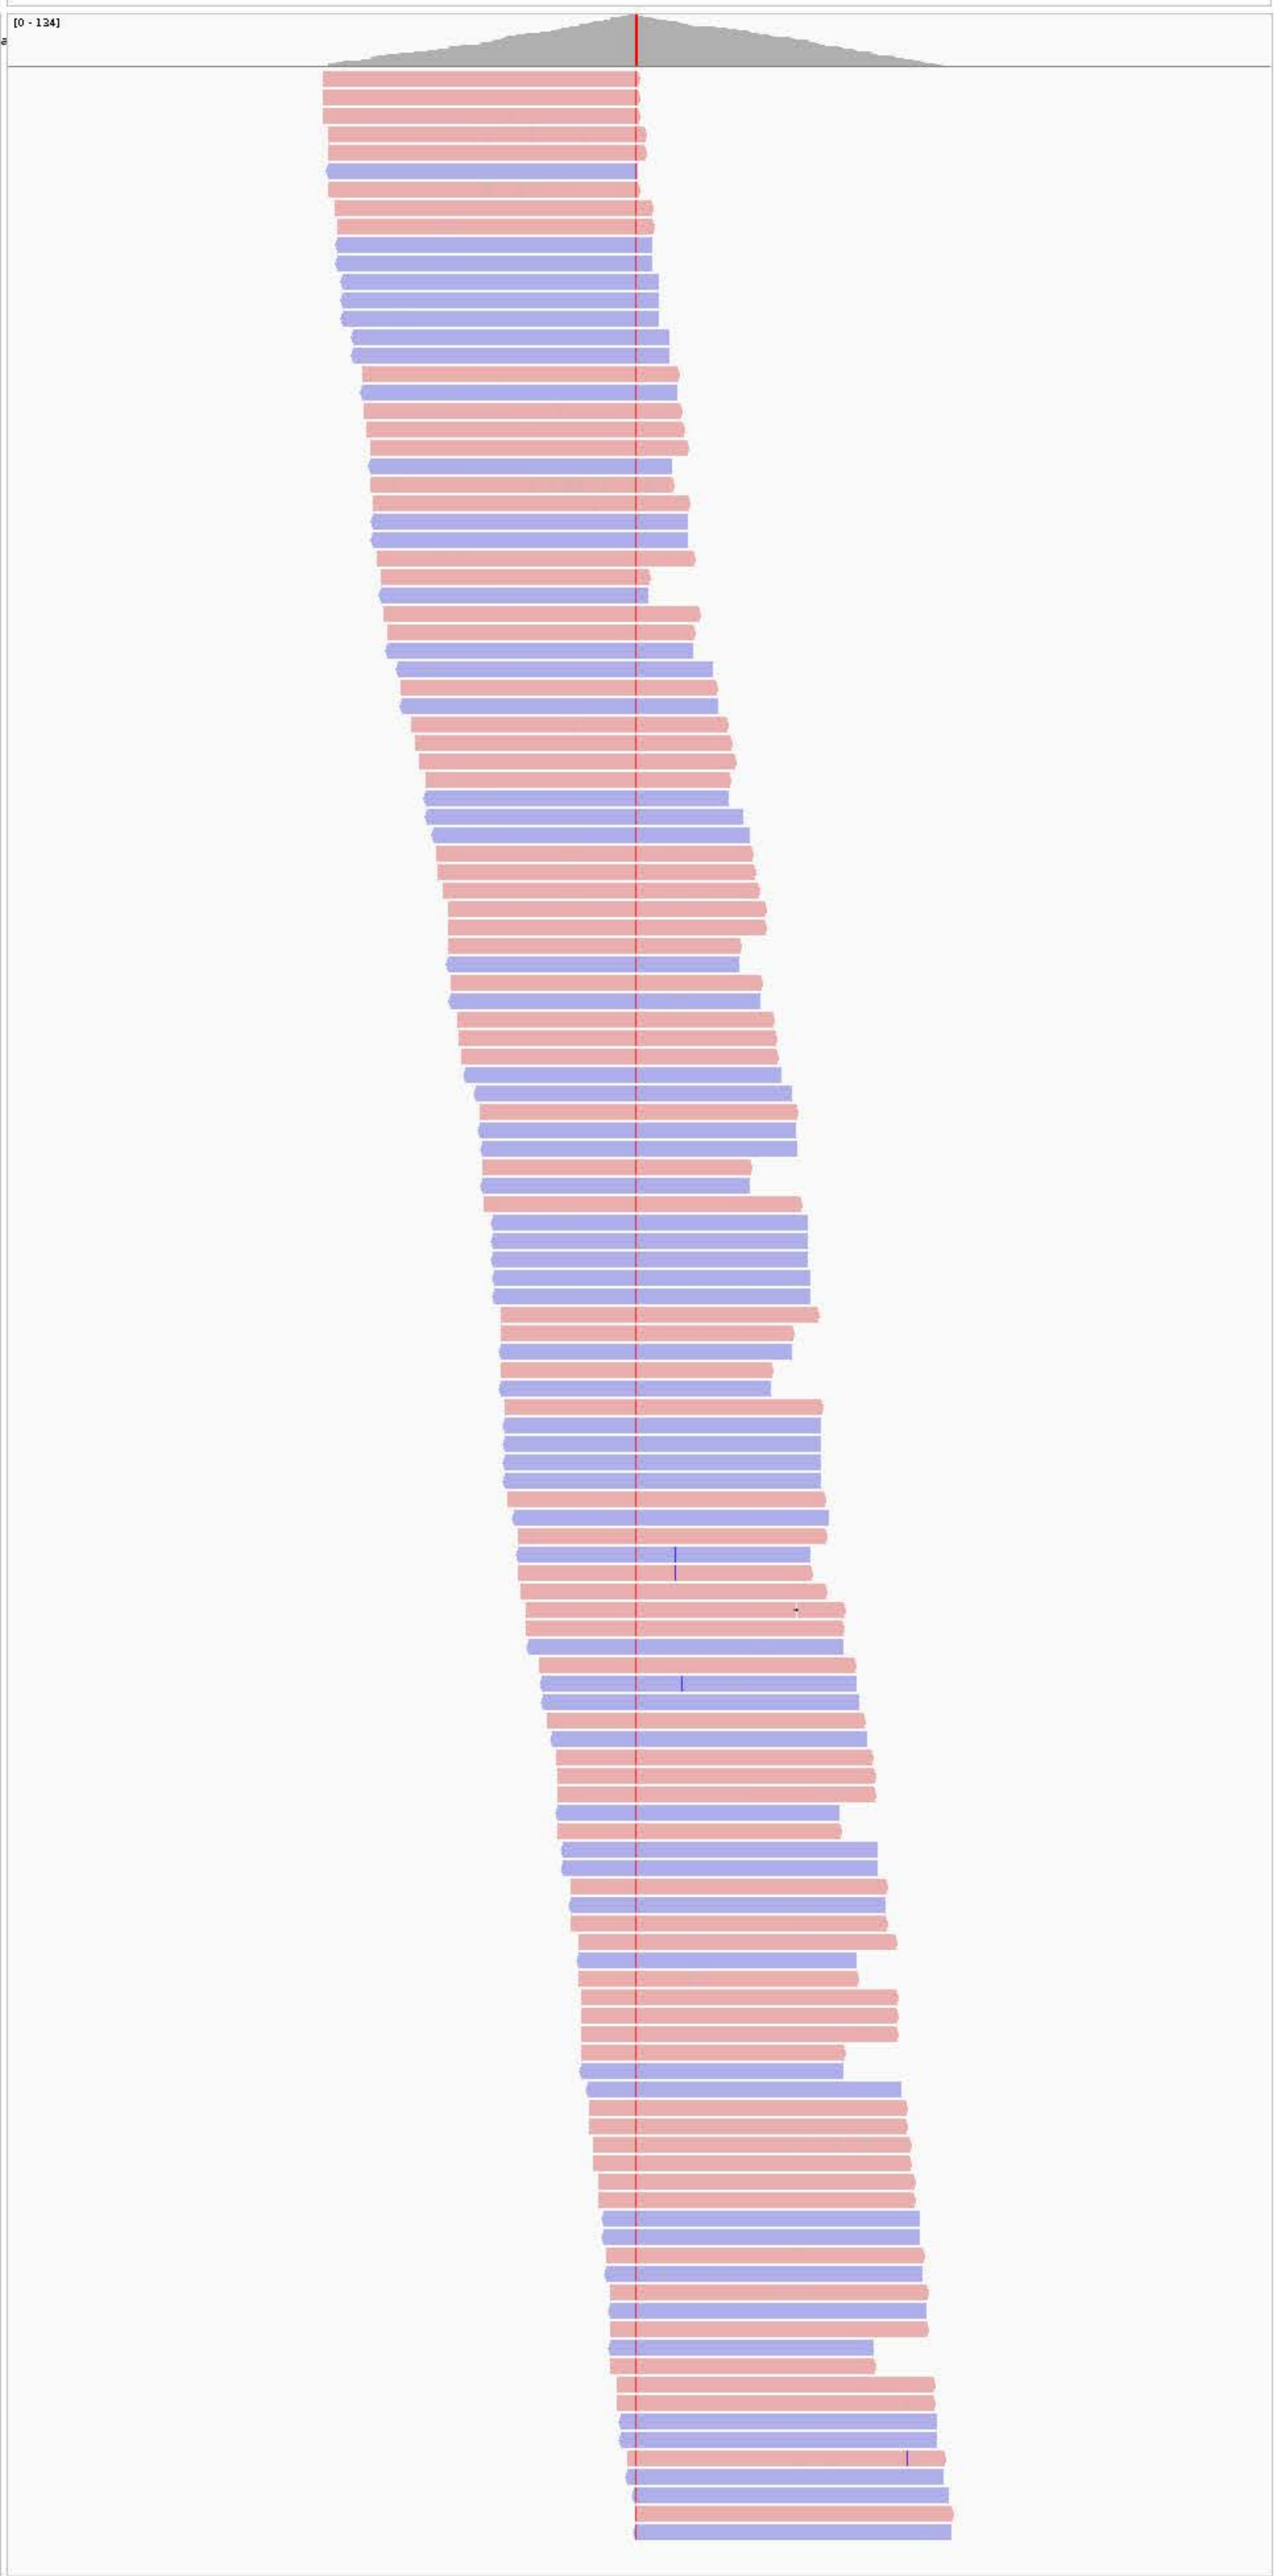

Sequence

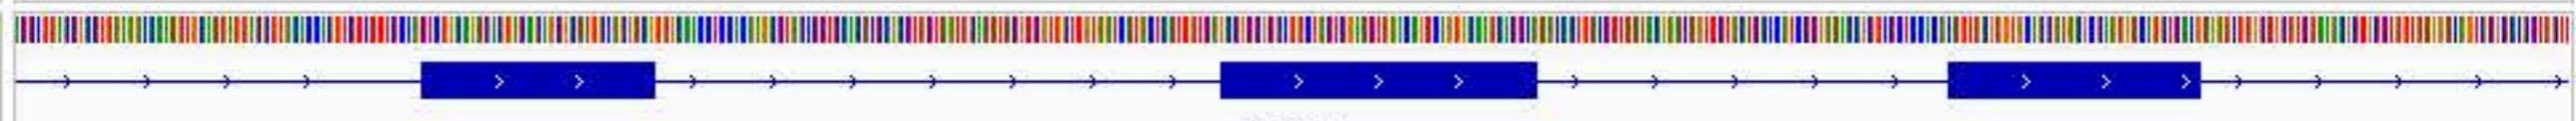

Refseq Genes

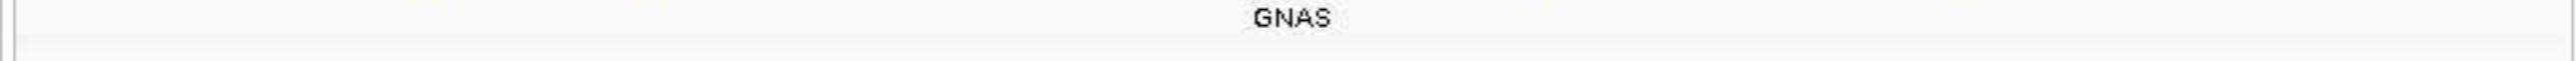

GNAS

chr20:58,909,242-58,909,841

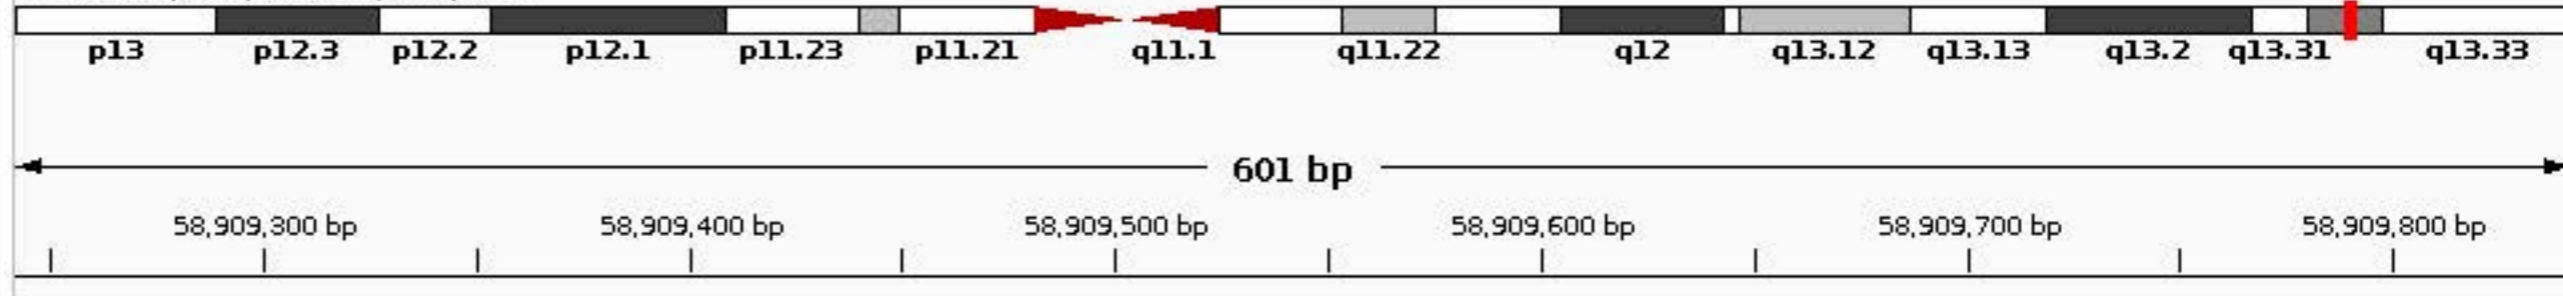

SL\_0015\_RN\_66\_mut.bam Coverage

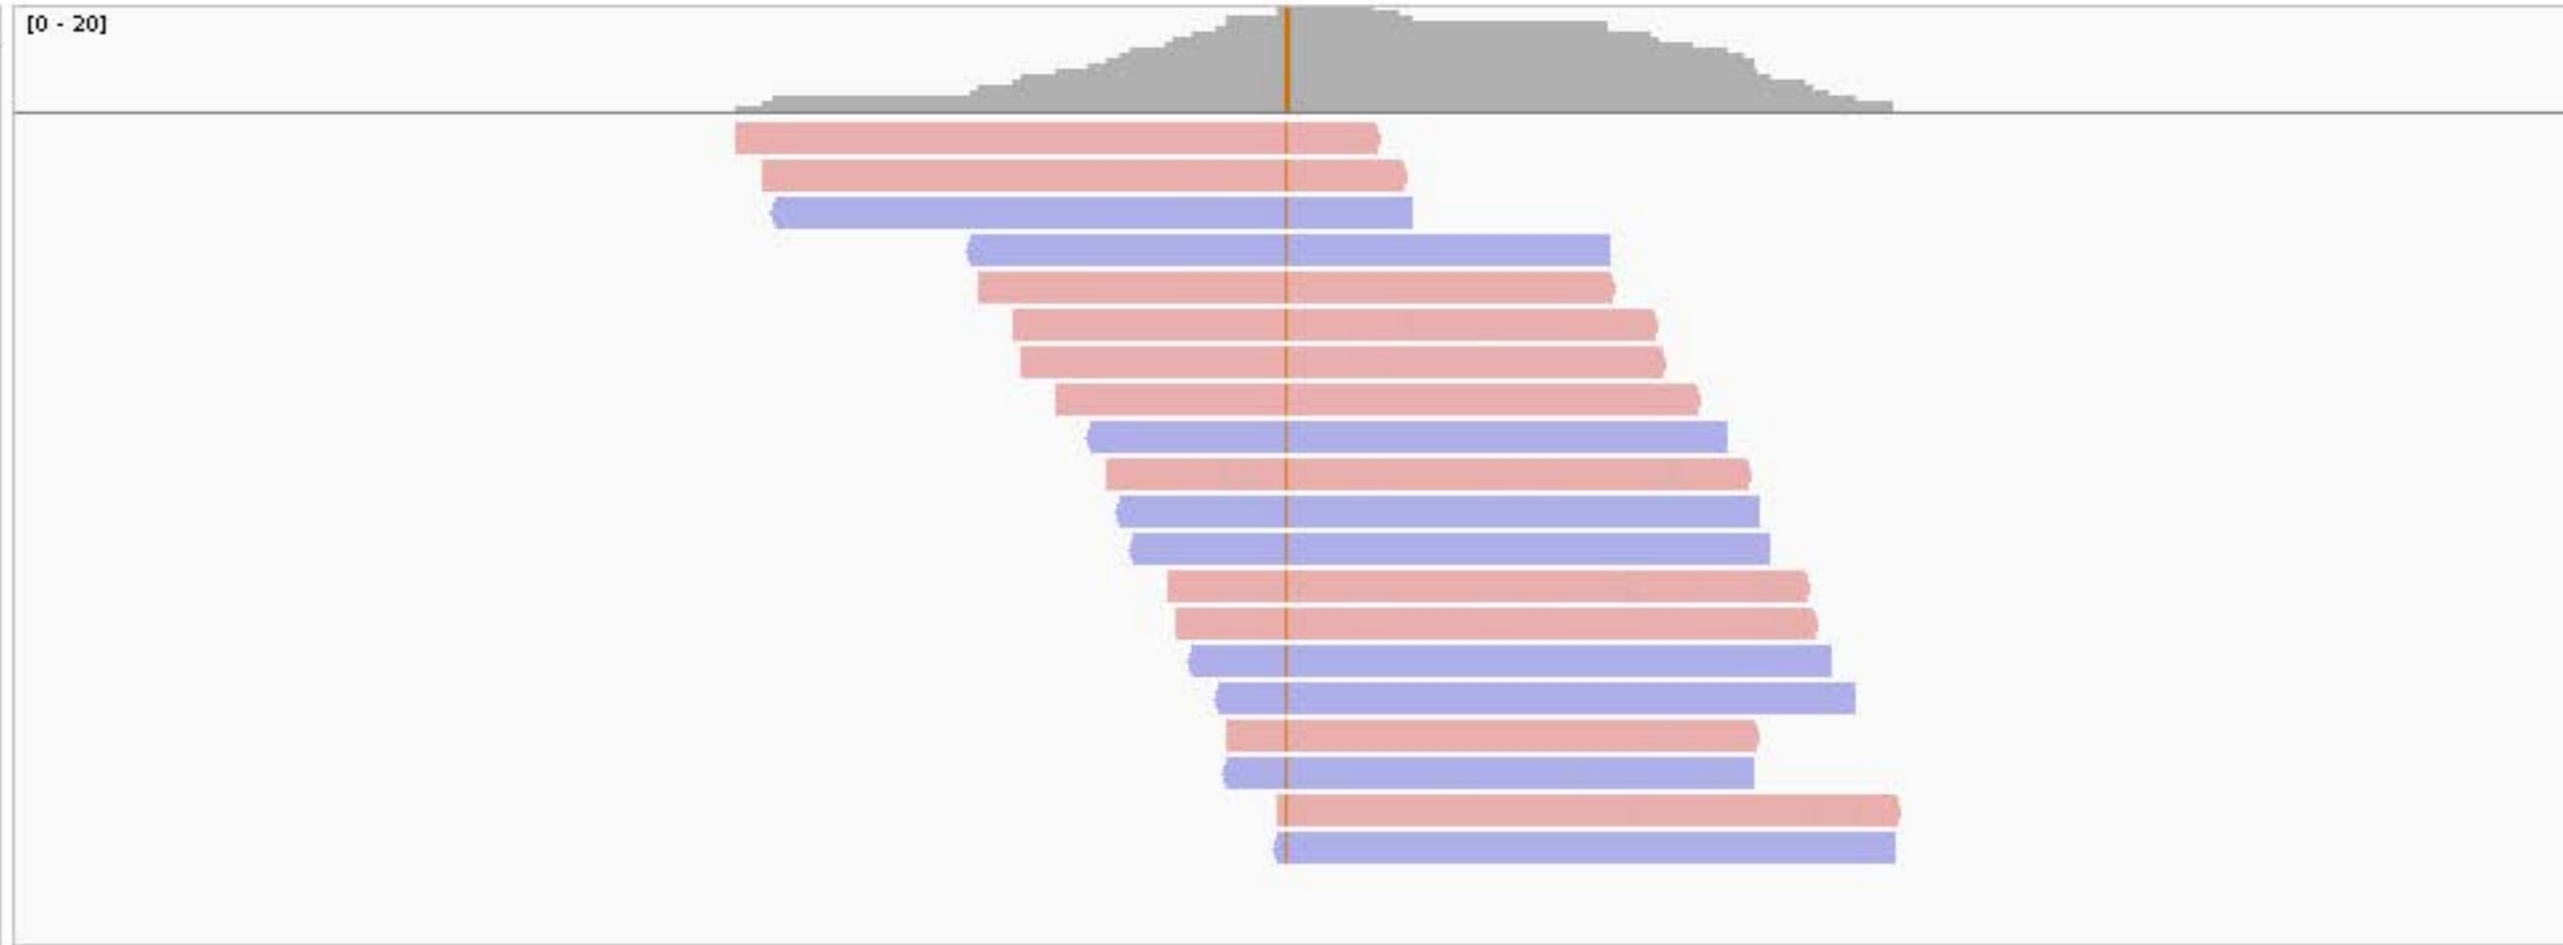

SL\_0015\_RN\_66\_mut.bam

Sequence

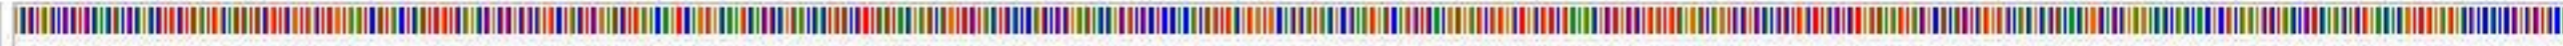

Refseq Genes

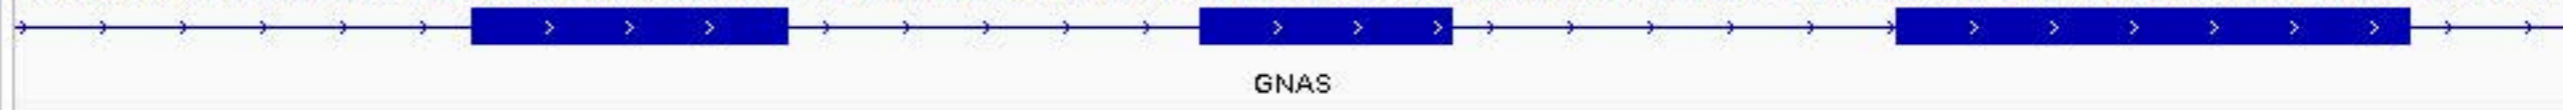

GNAS



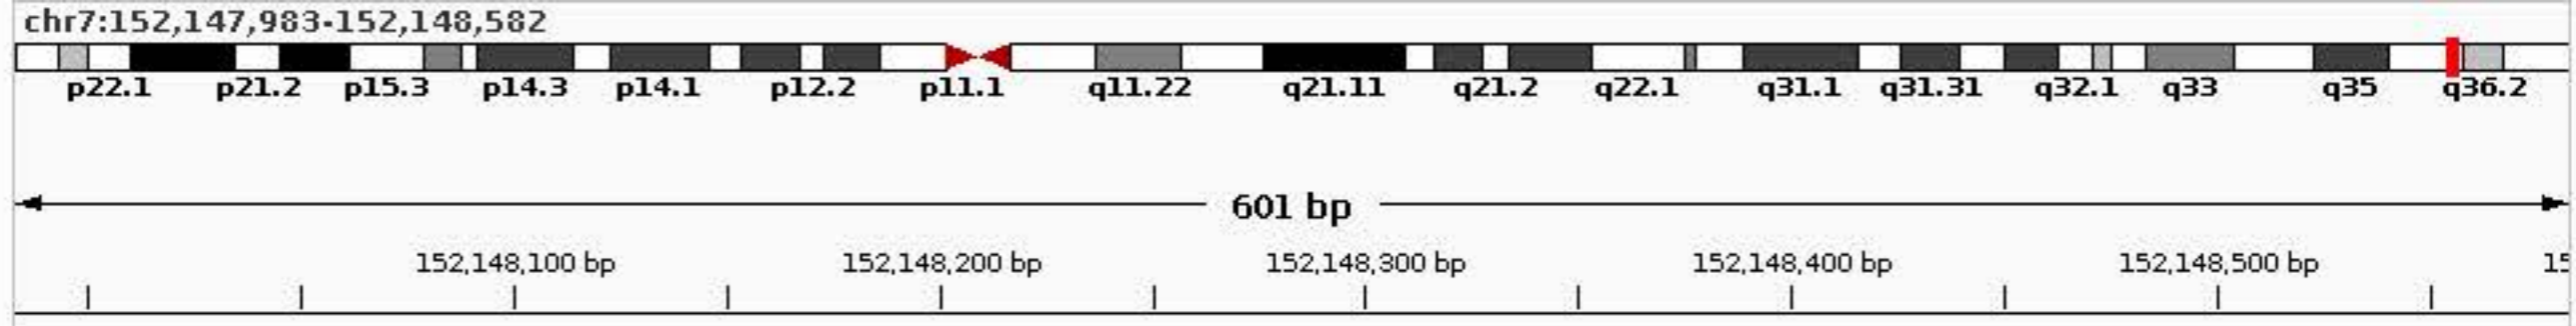

SL\_0001\_LN\_10\_mut.bam Coverage

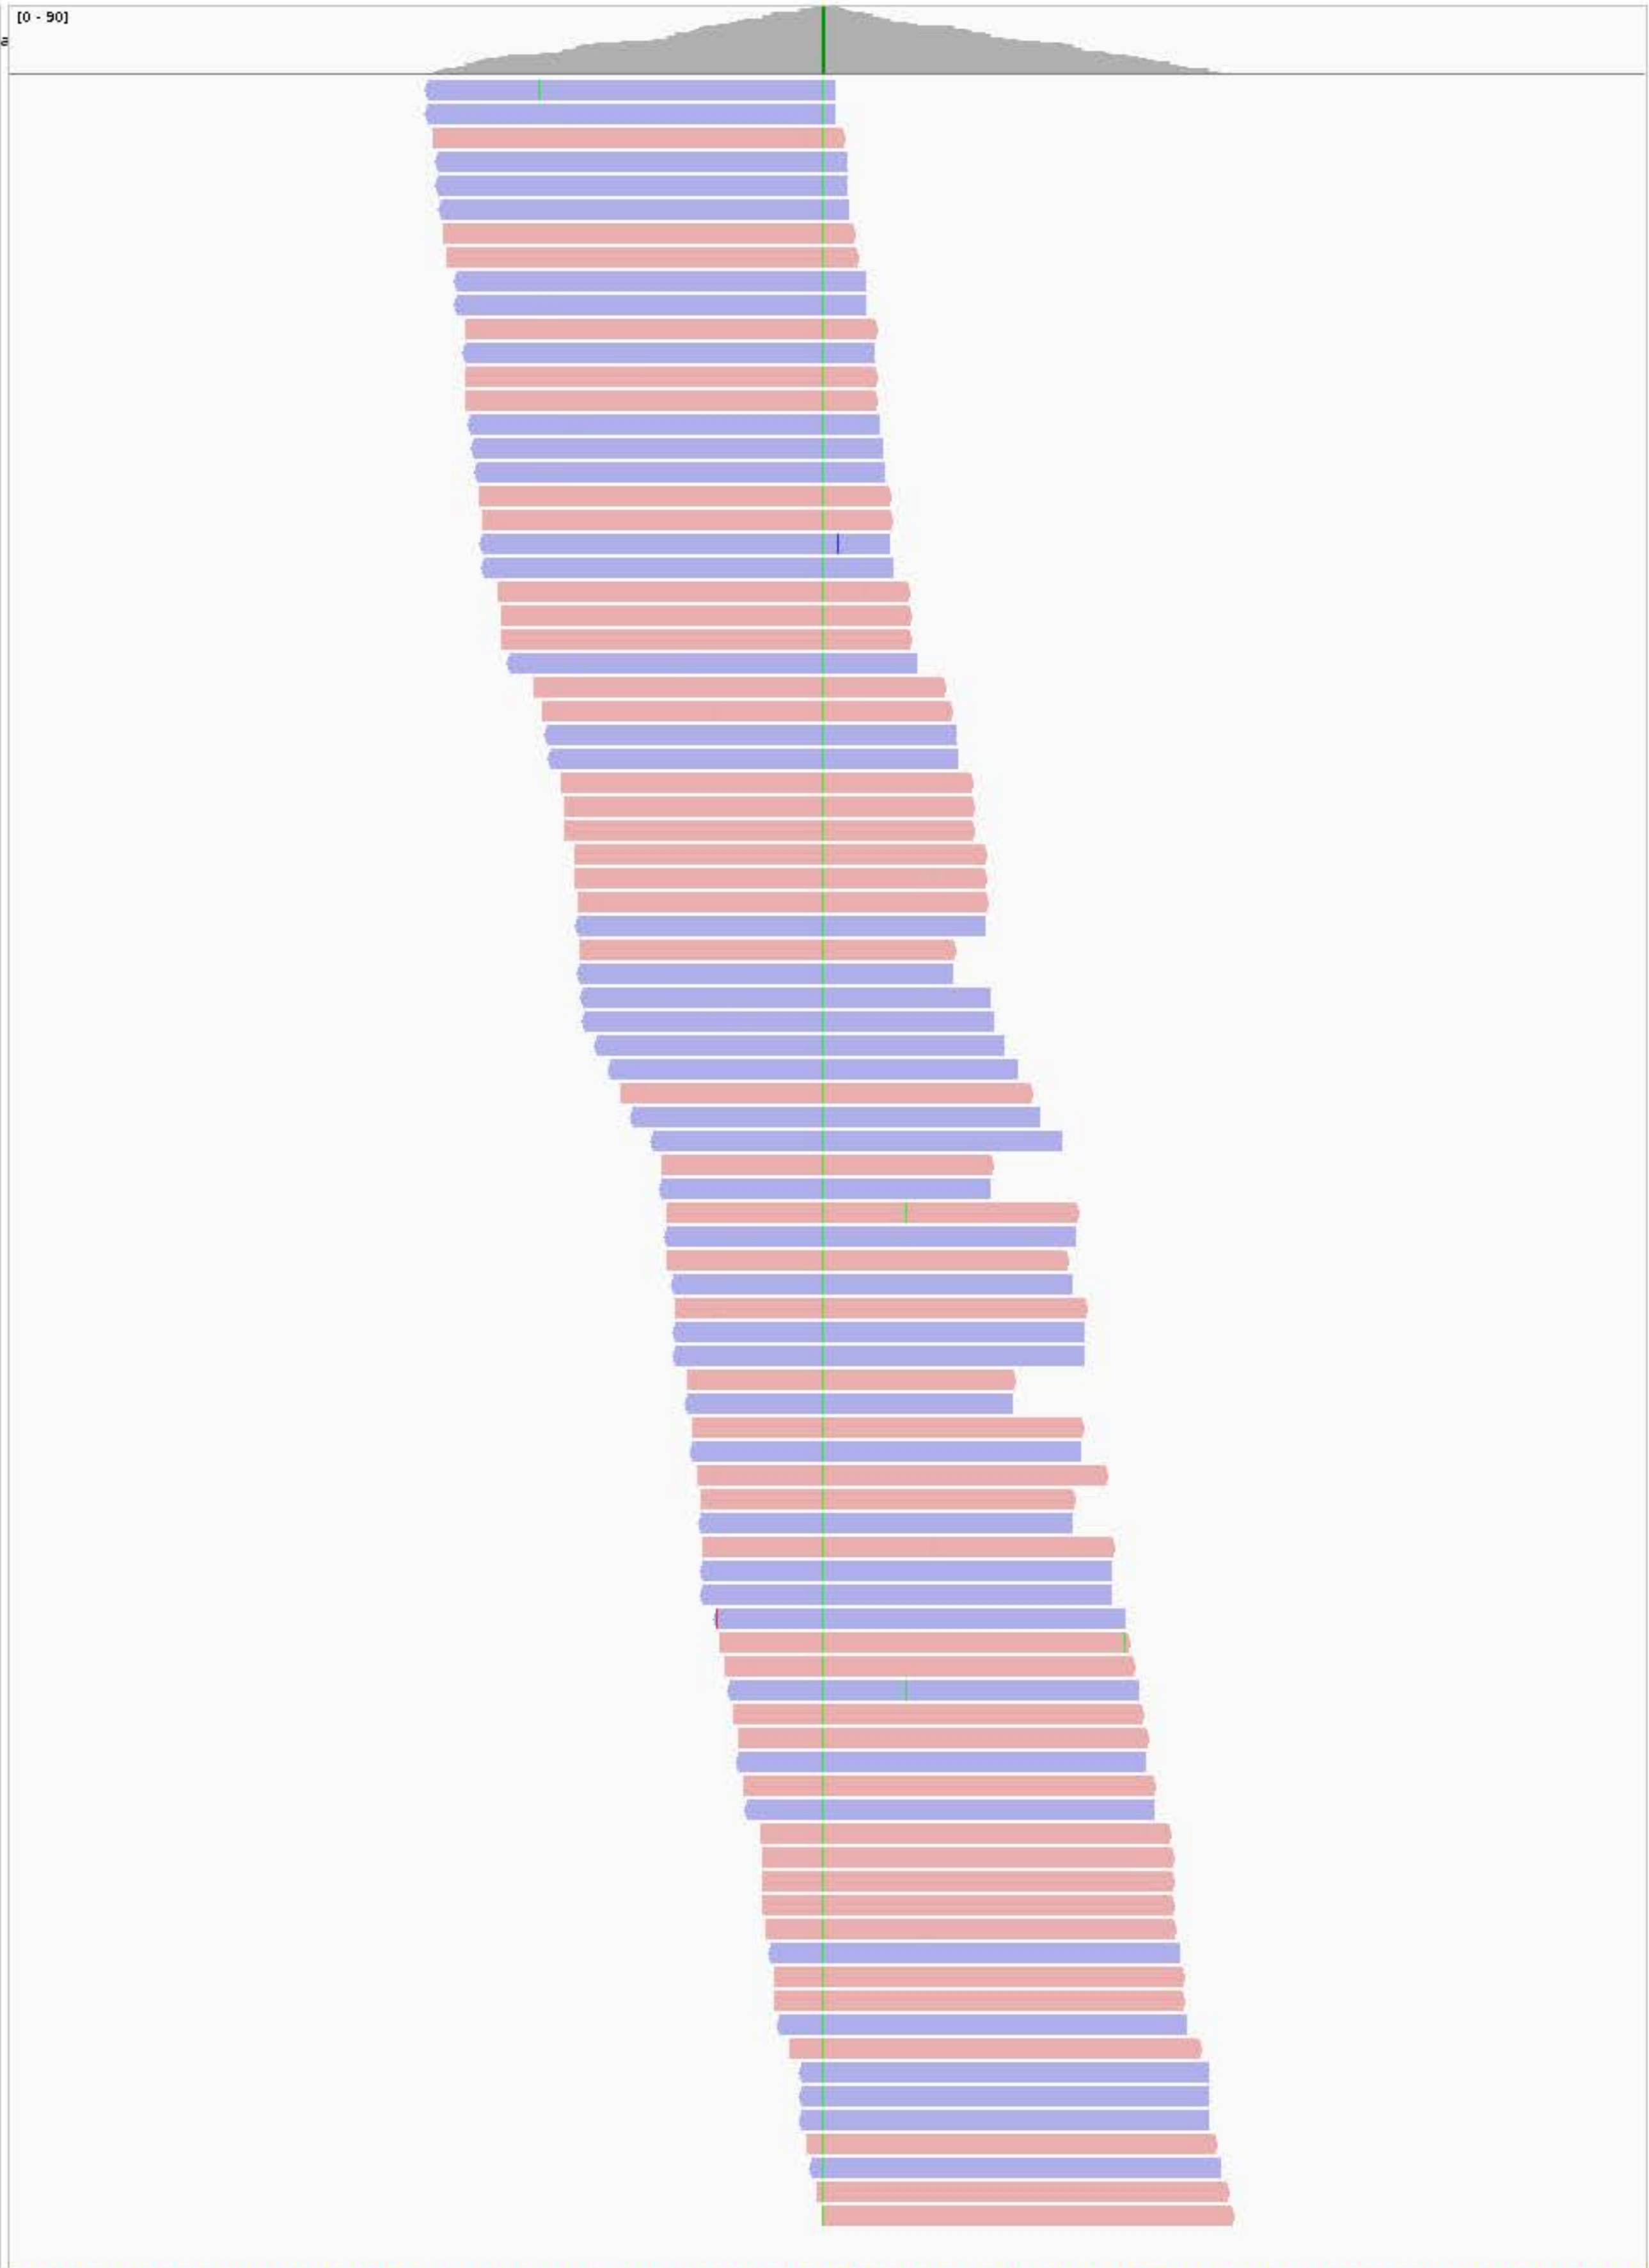

Sequence

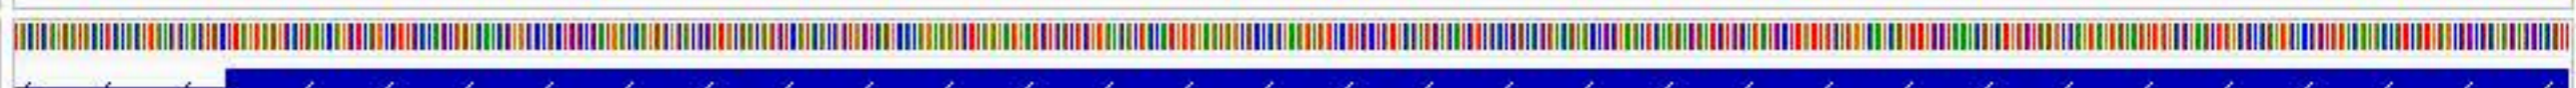

Refseq Genes

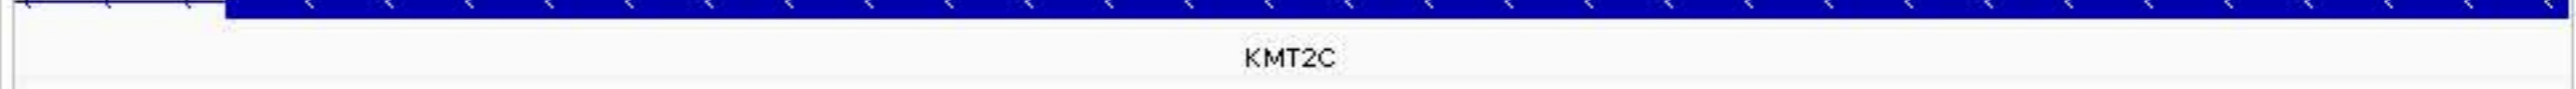

chr7:152,315,038-152,315,637

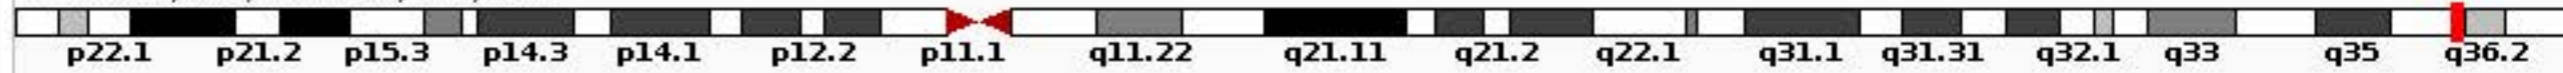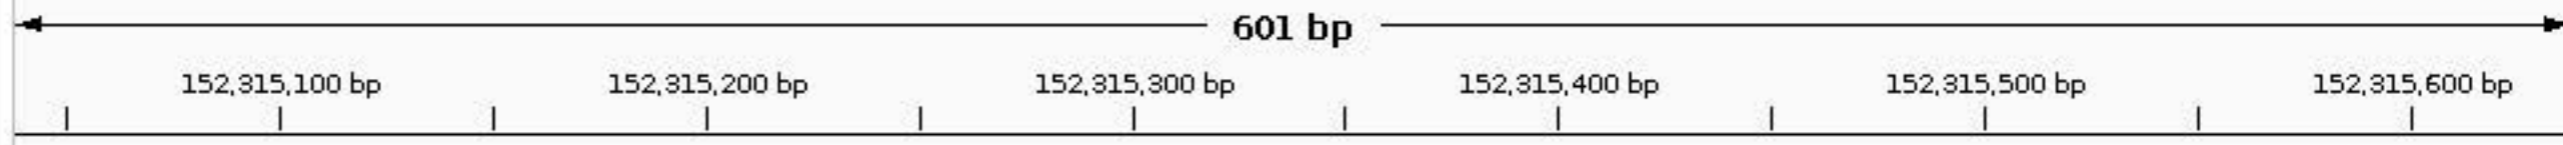

SL\_0004\_RN\_08\_mut.bam Coverage

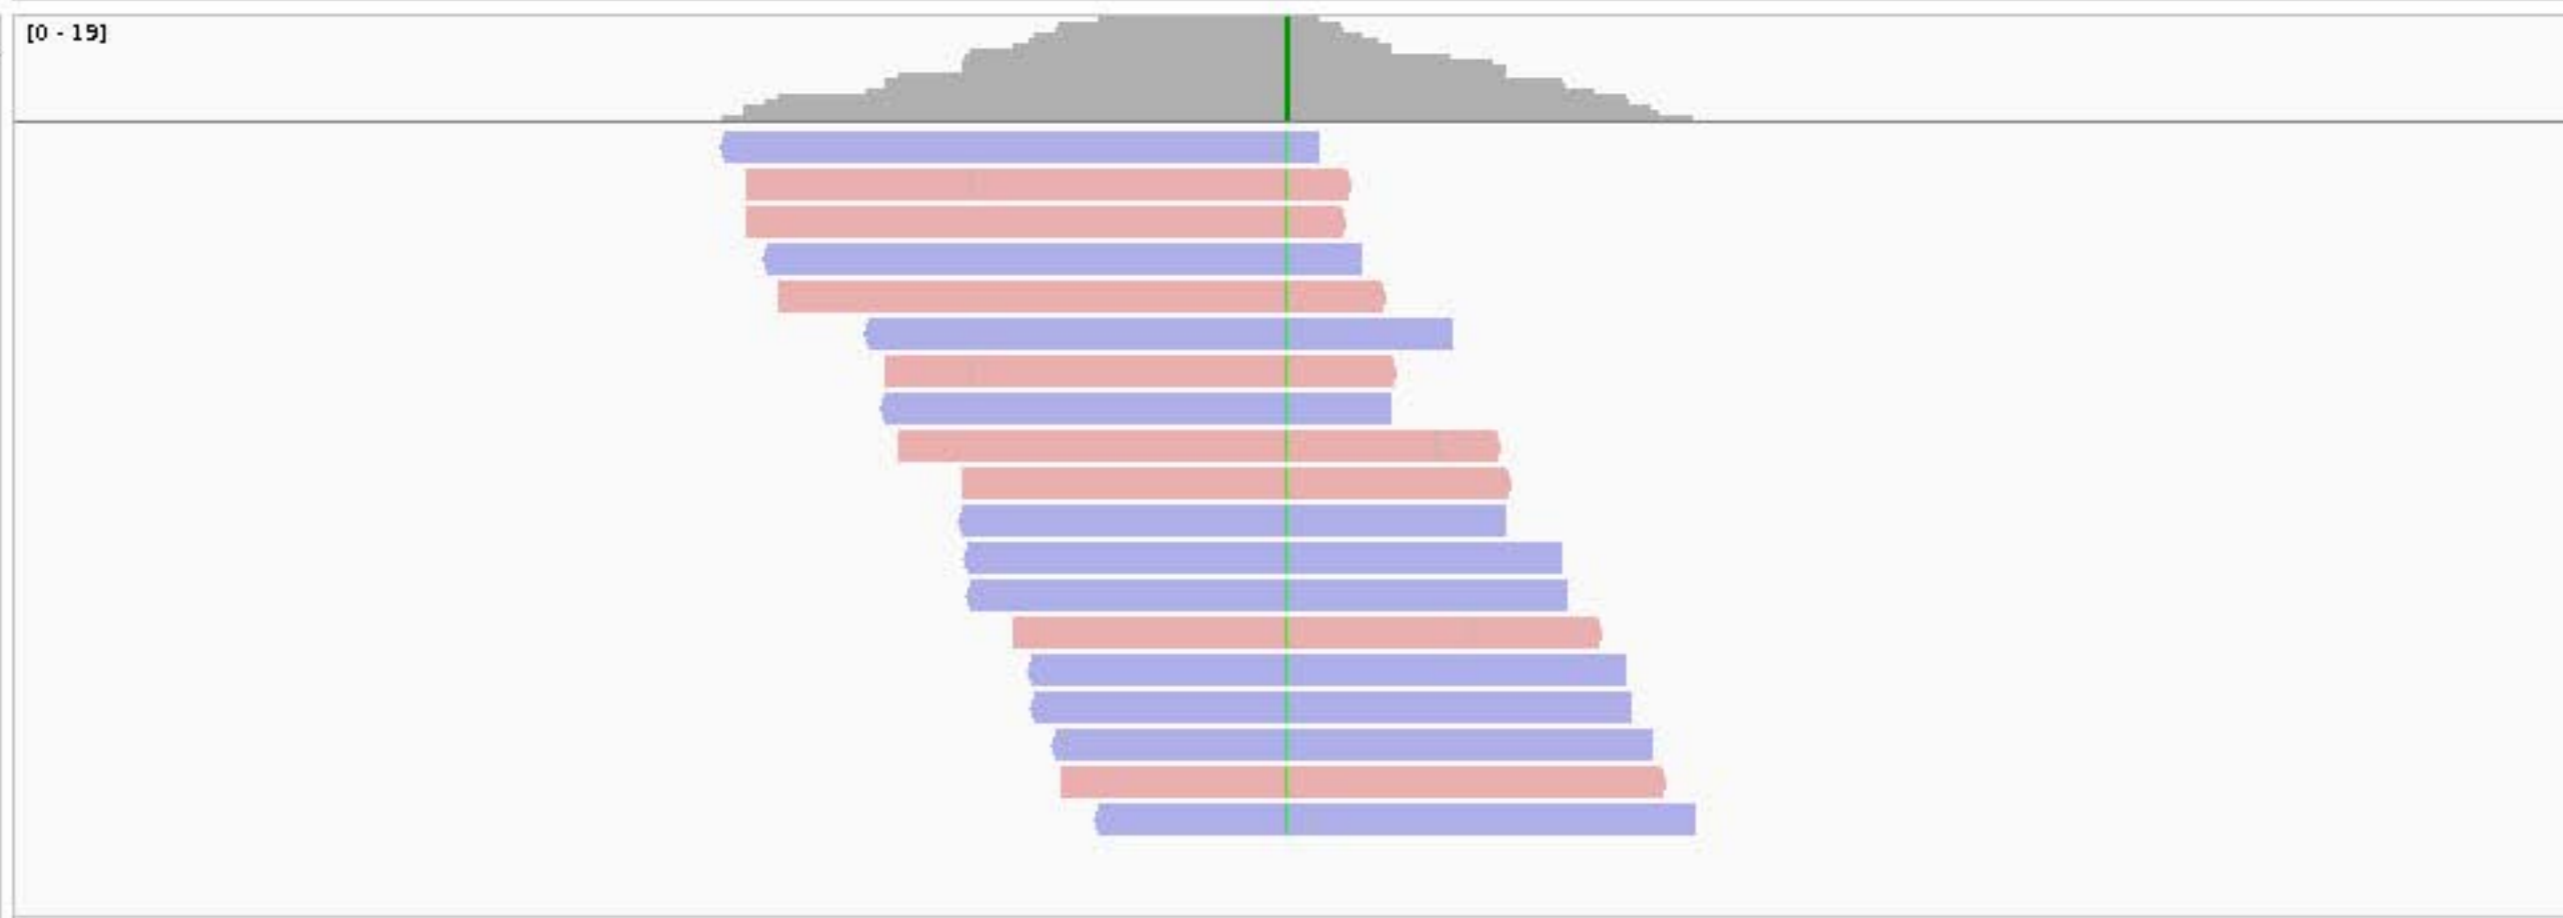

SL\_0004\_RN\_08\_mut.bam

Sequence

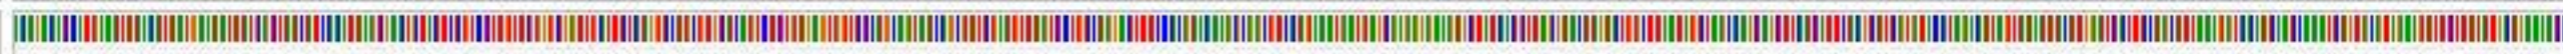

Refseq Genes

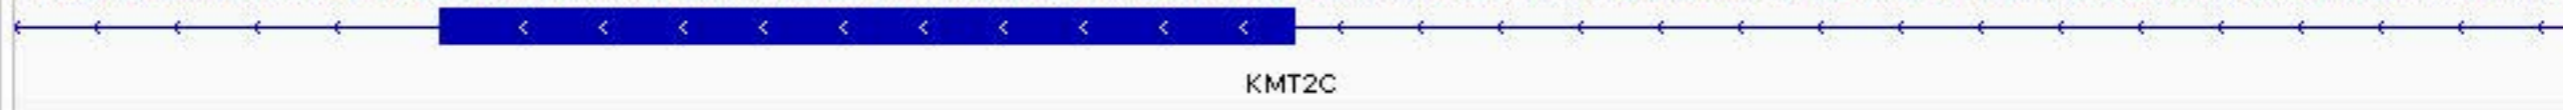

KMT2C

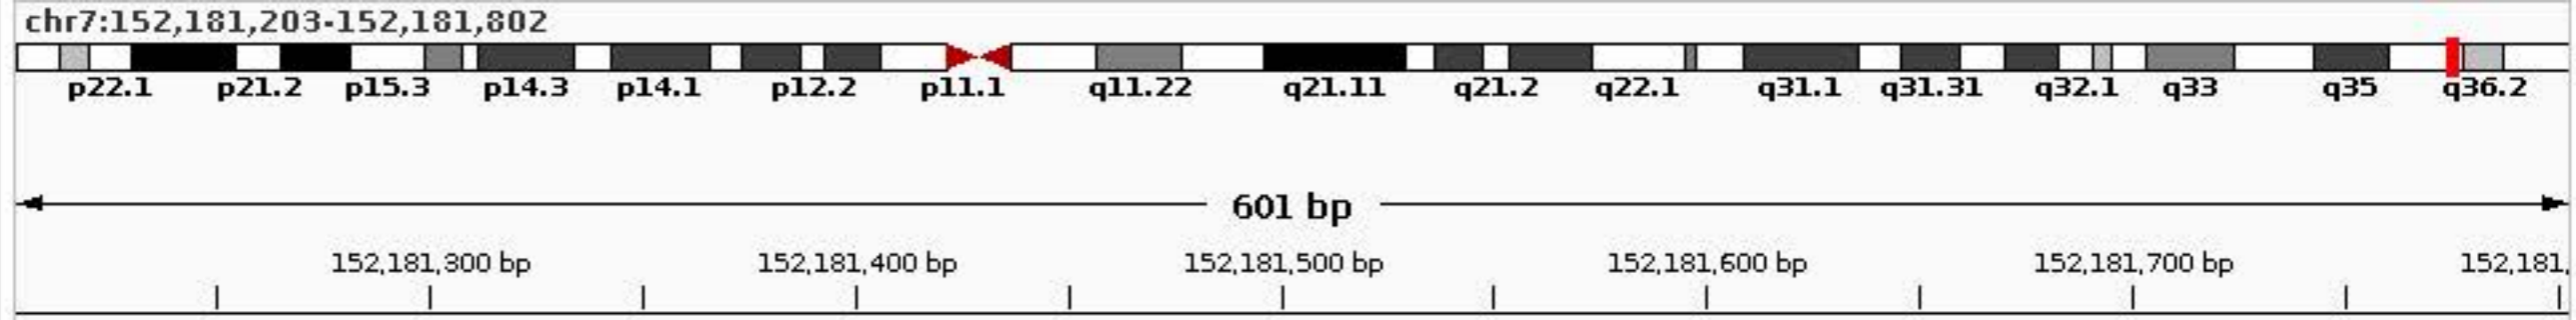

SL\_0015\_RN\_23\_mut.bam Coverage

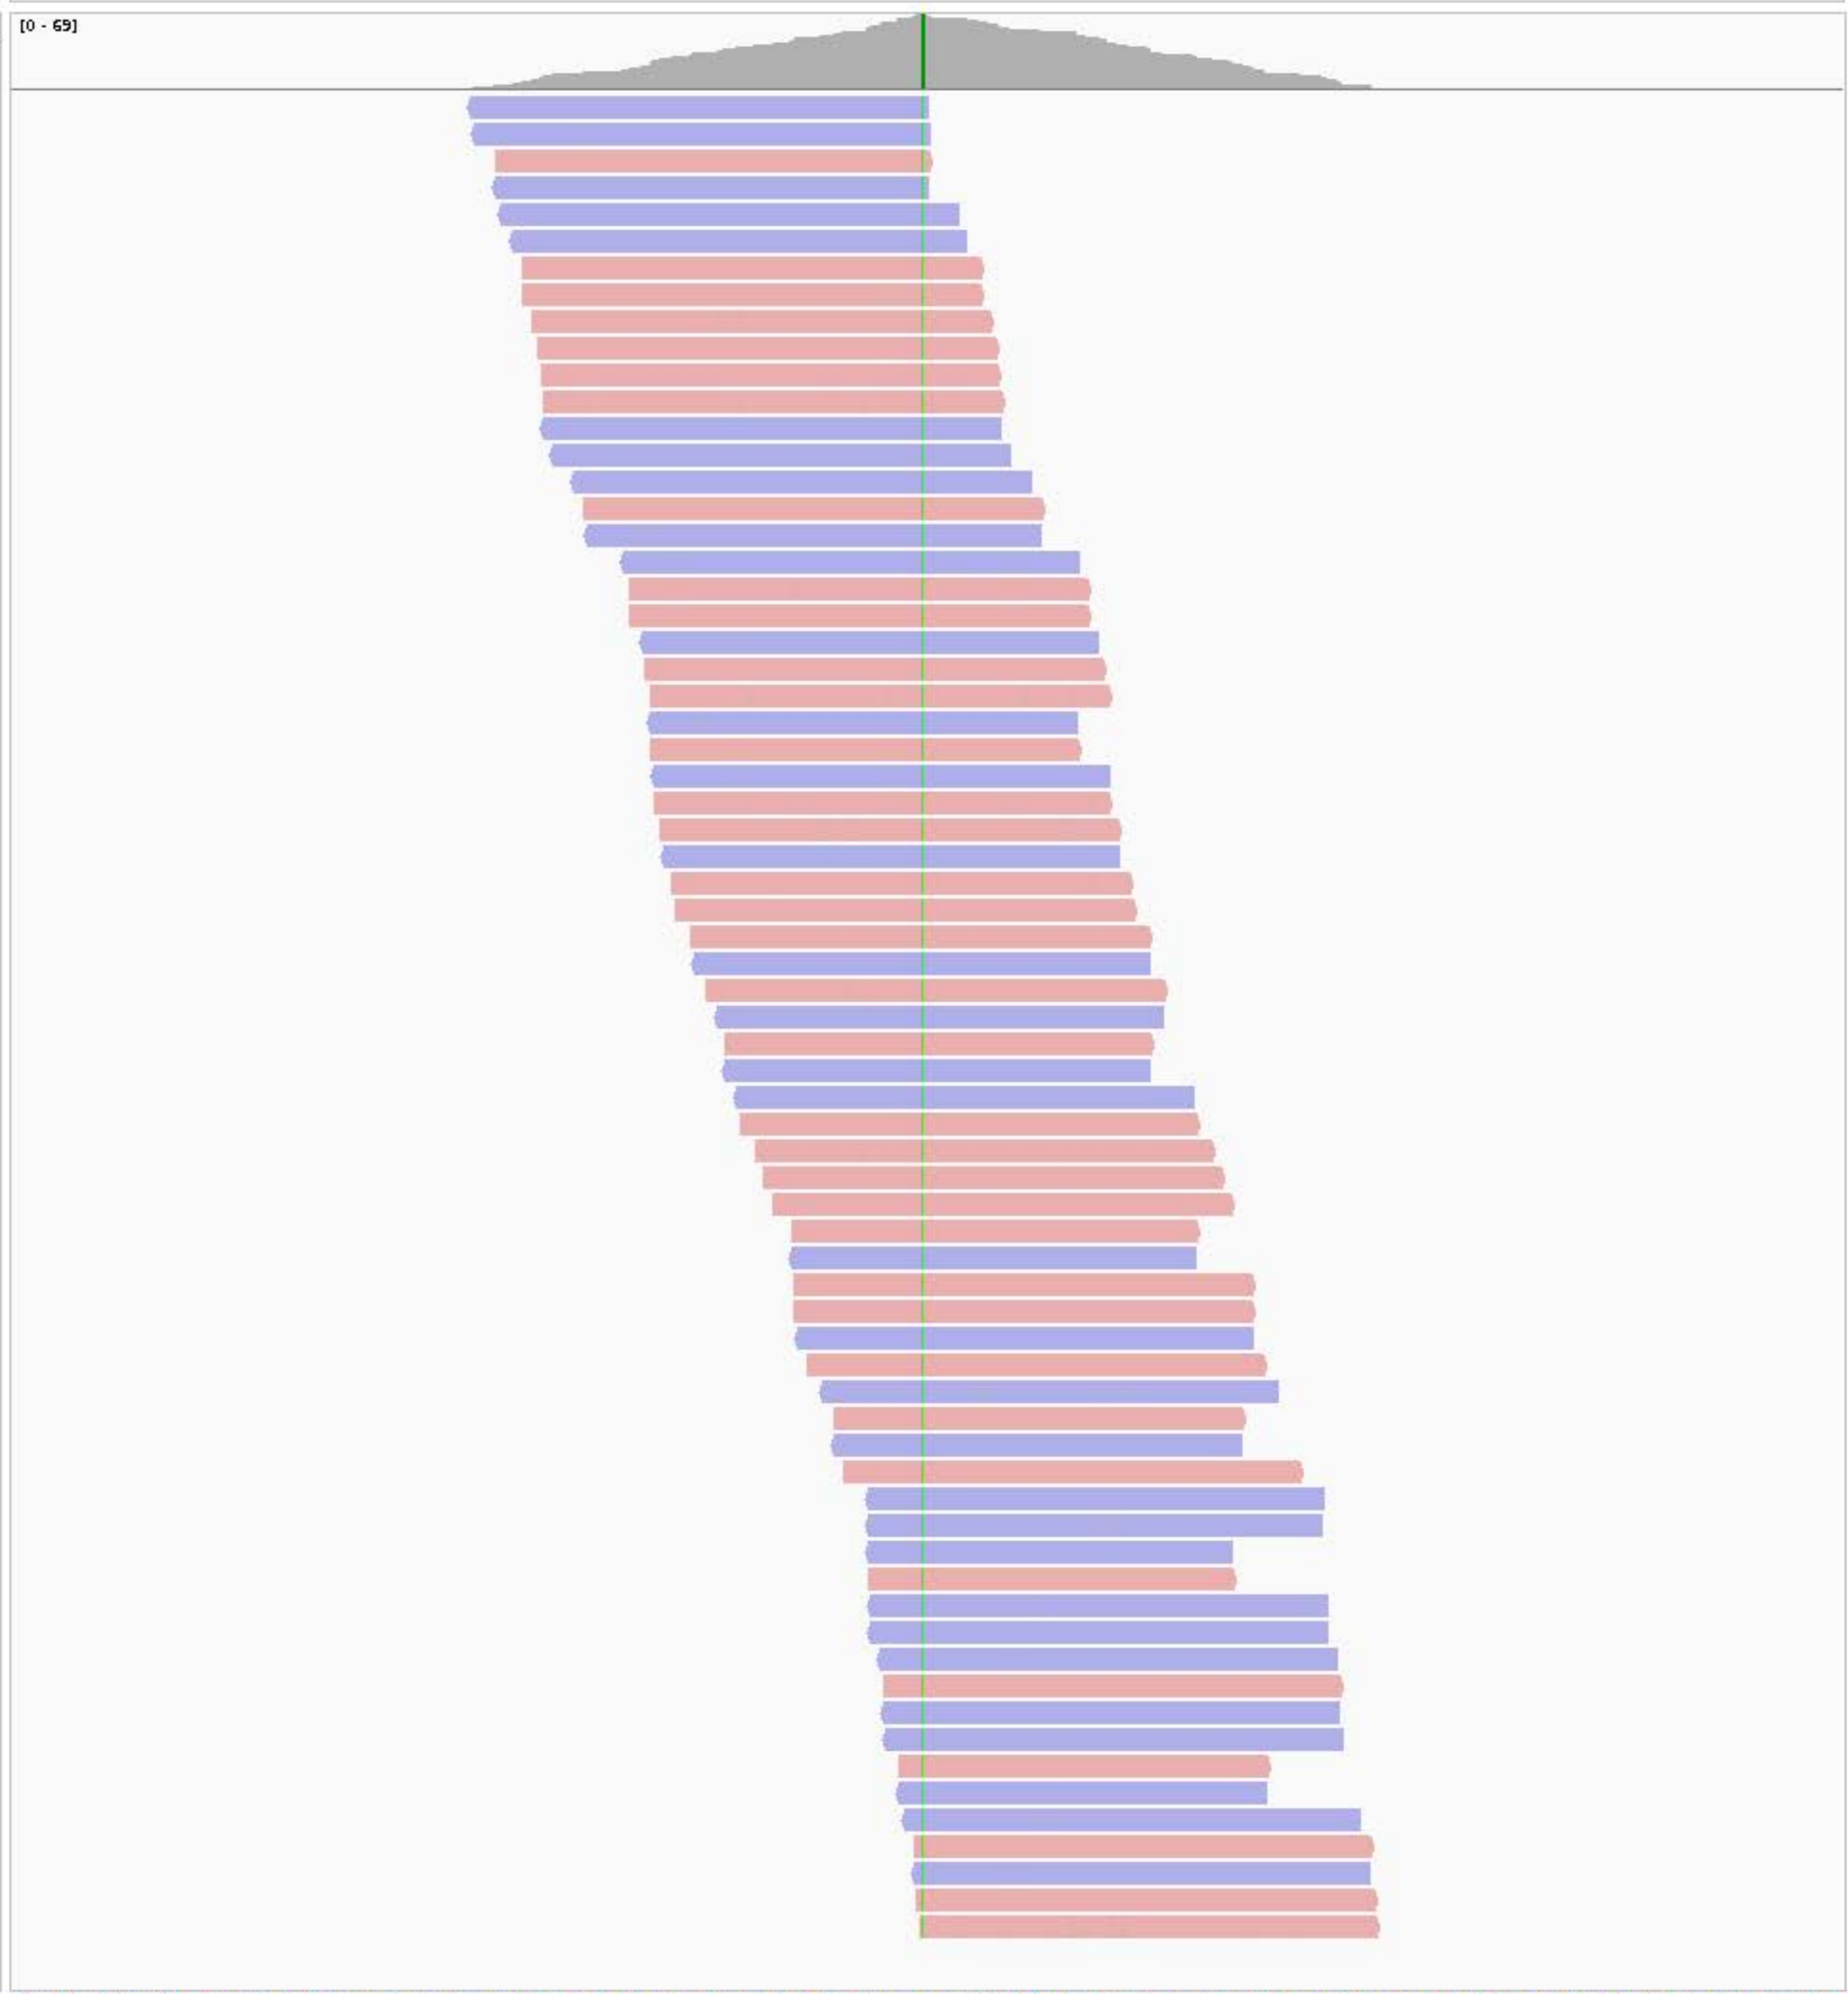

Sequence →

Refseq Genes

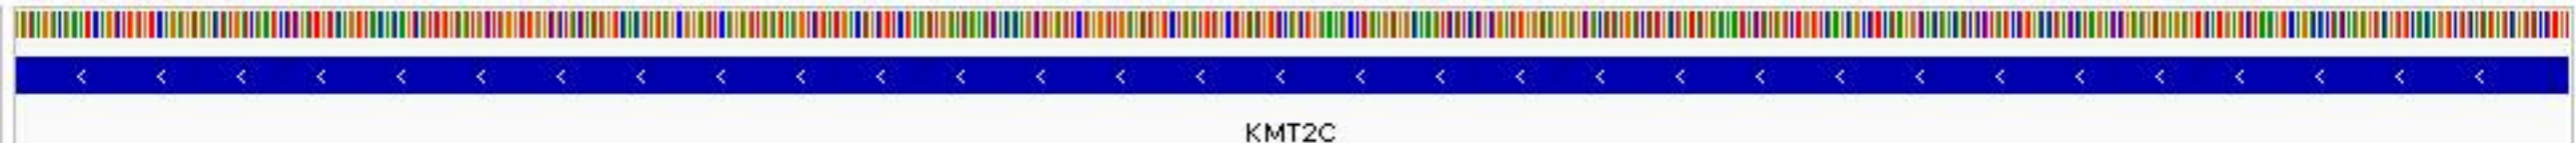



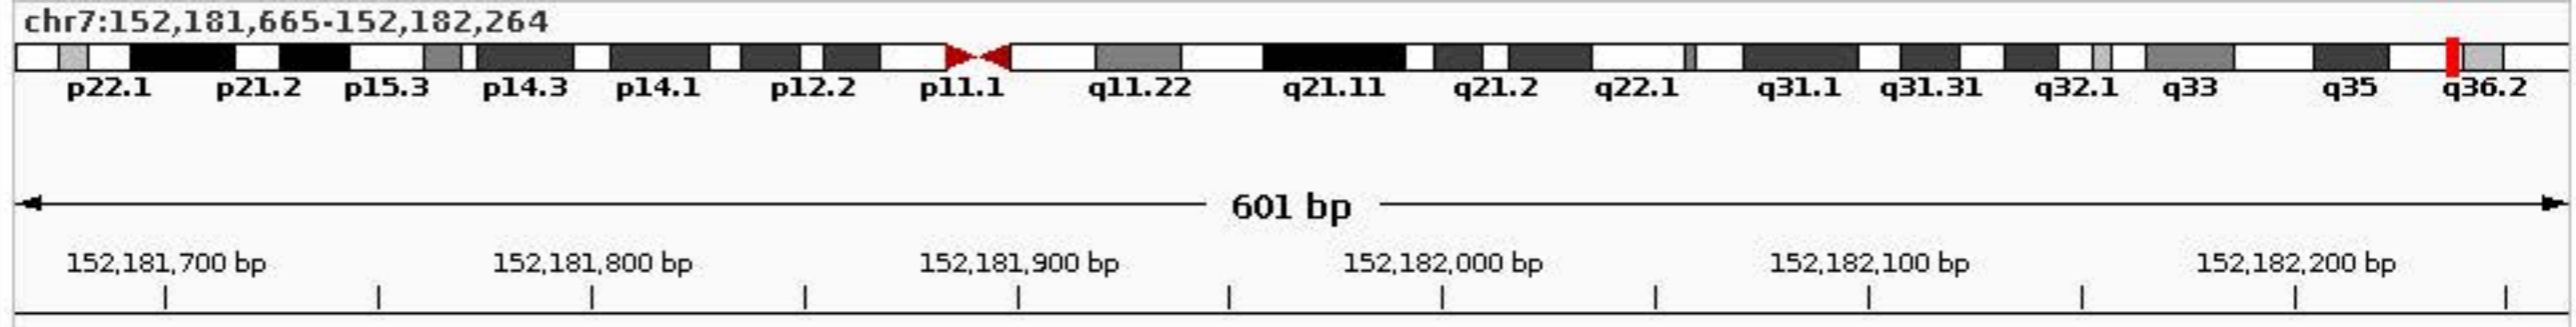

SL\_0001\_LN\_4\_mut.bam Coverage

SL\_0001\_LN\_4\_mut.bam

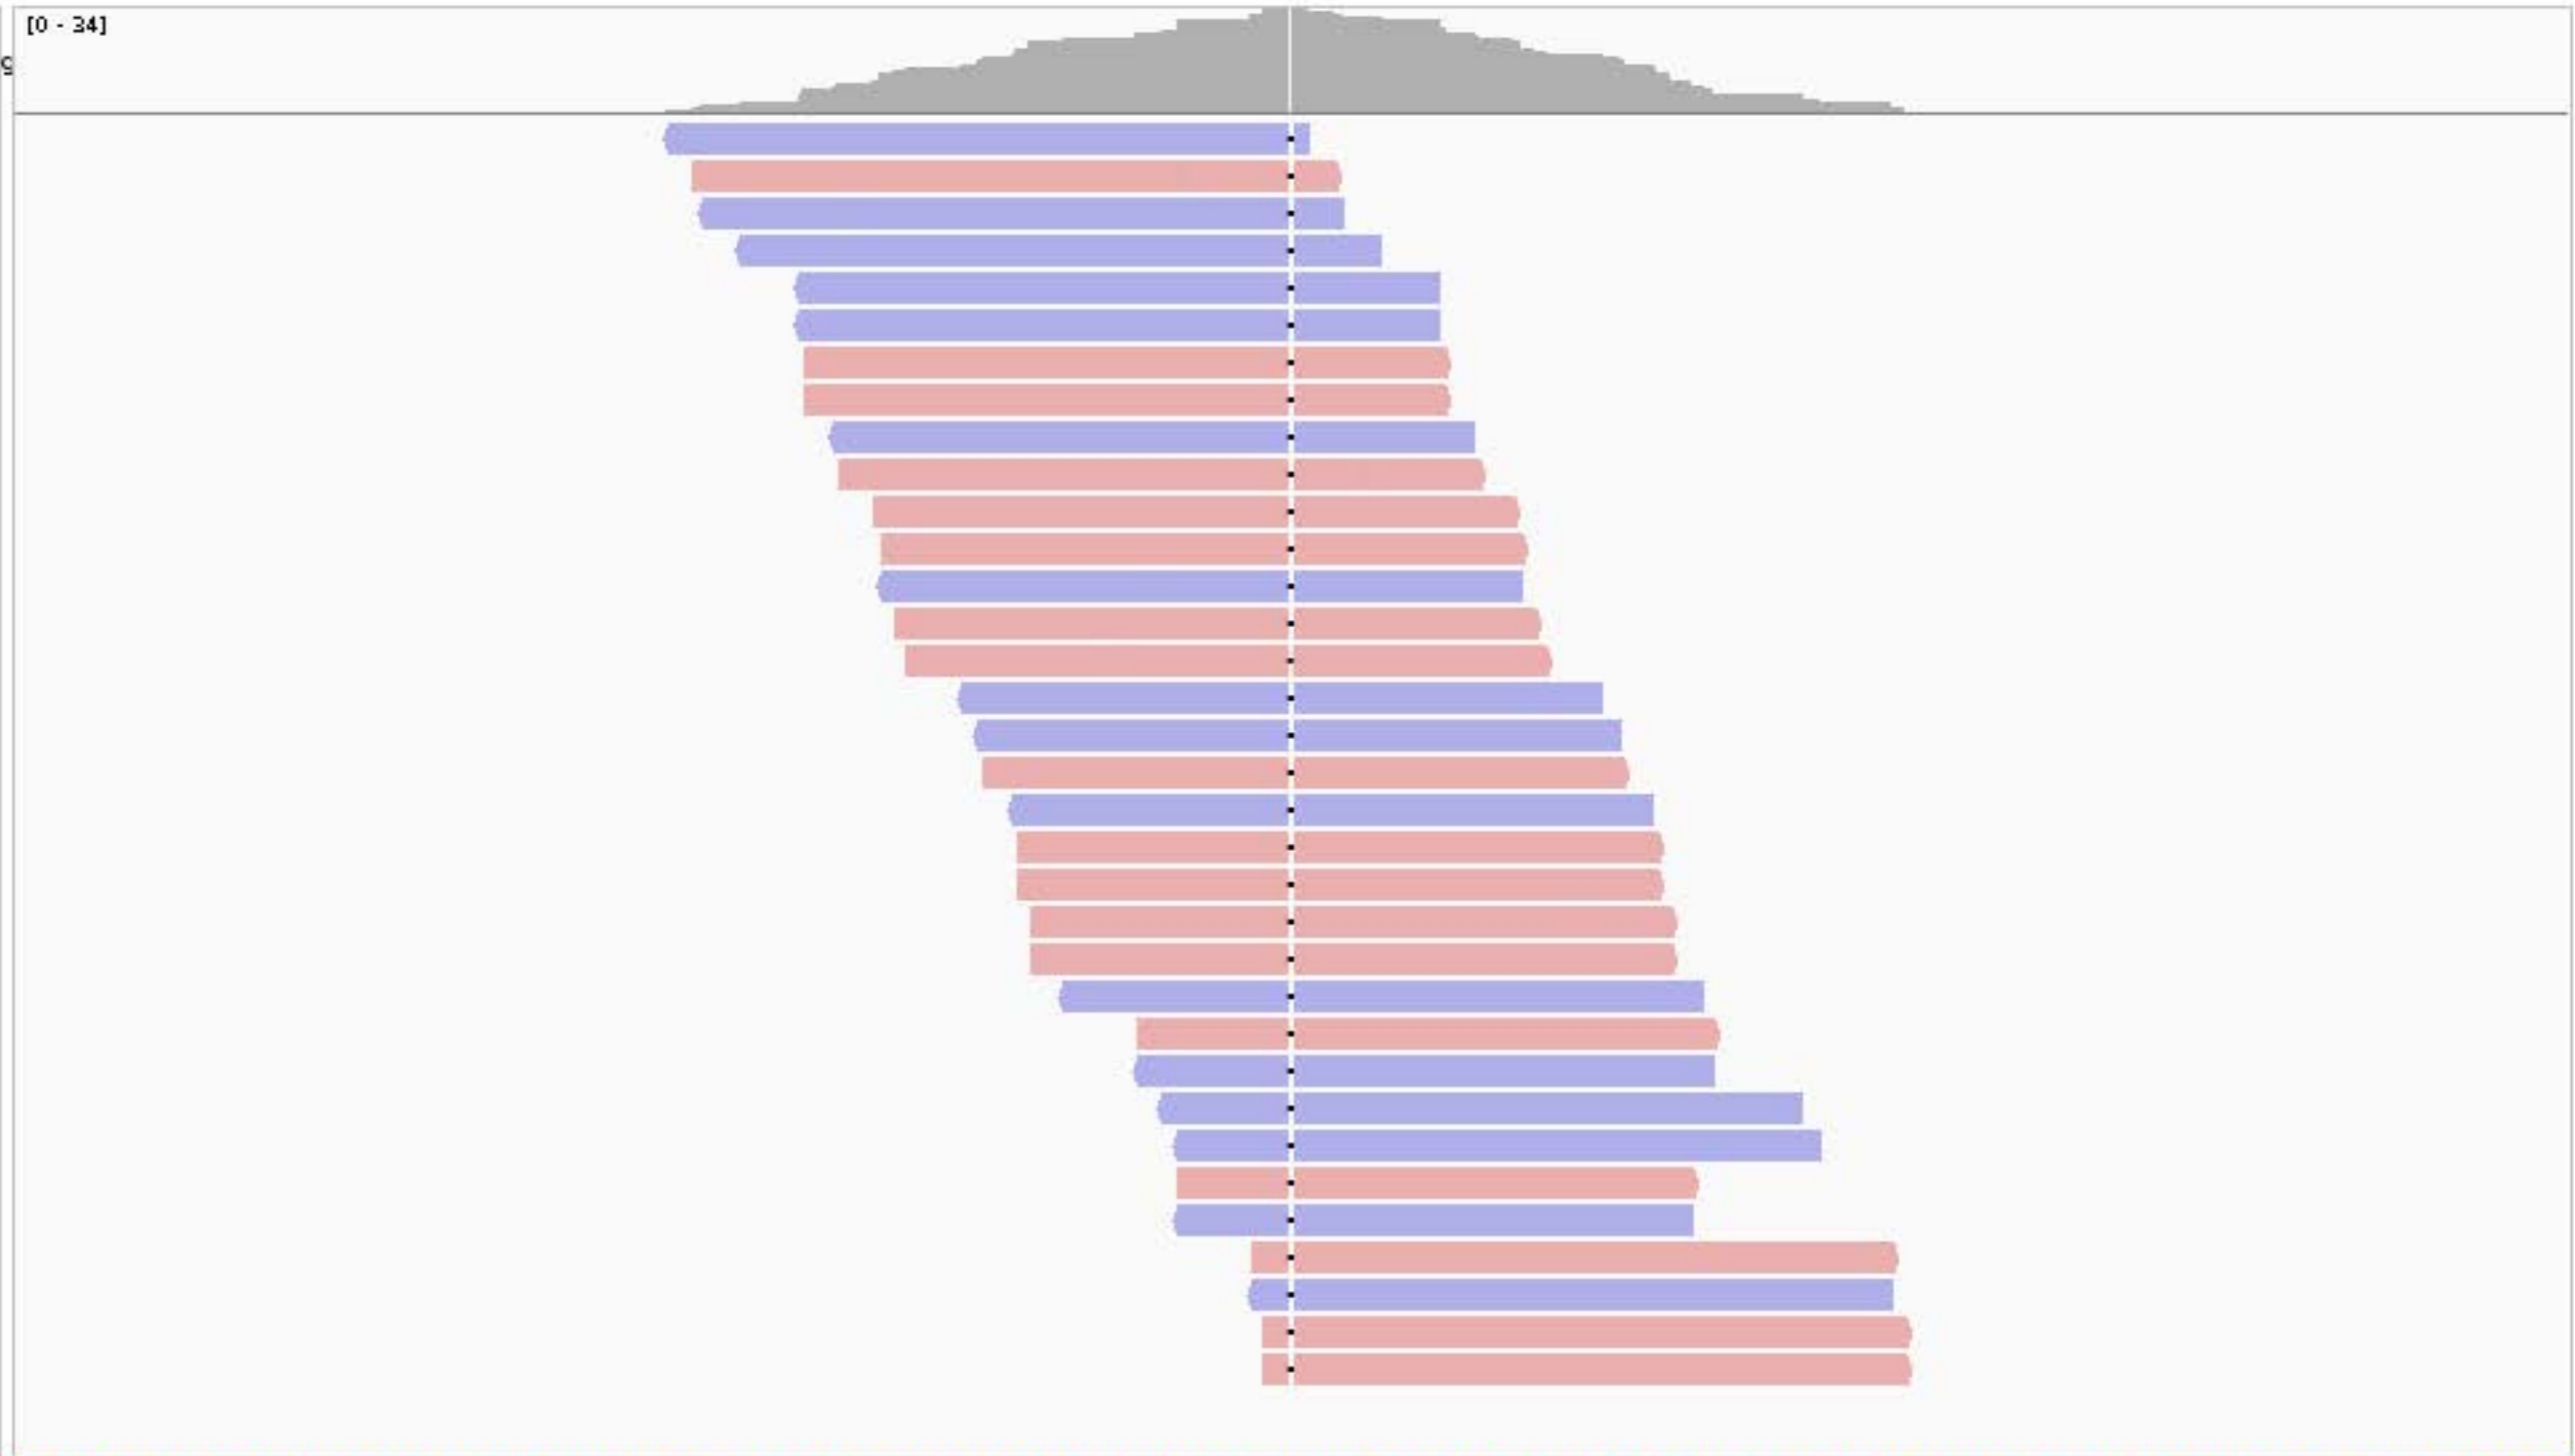

Sequence

Refseq Genes

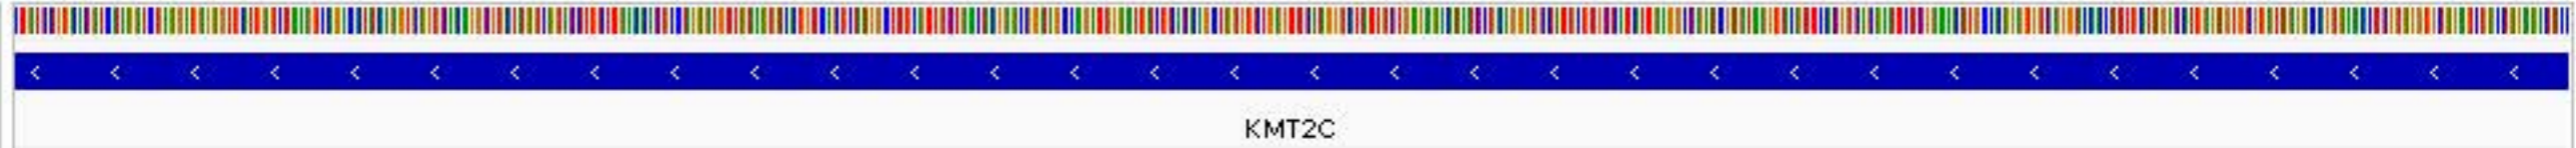

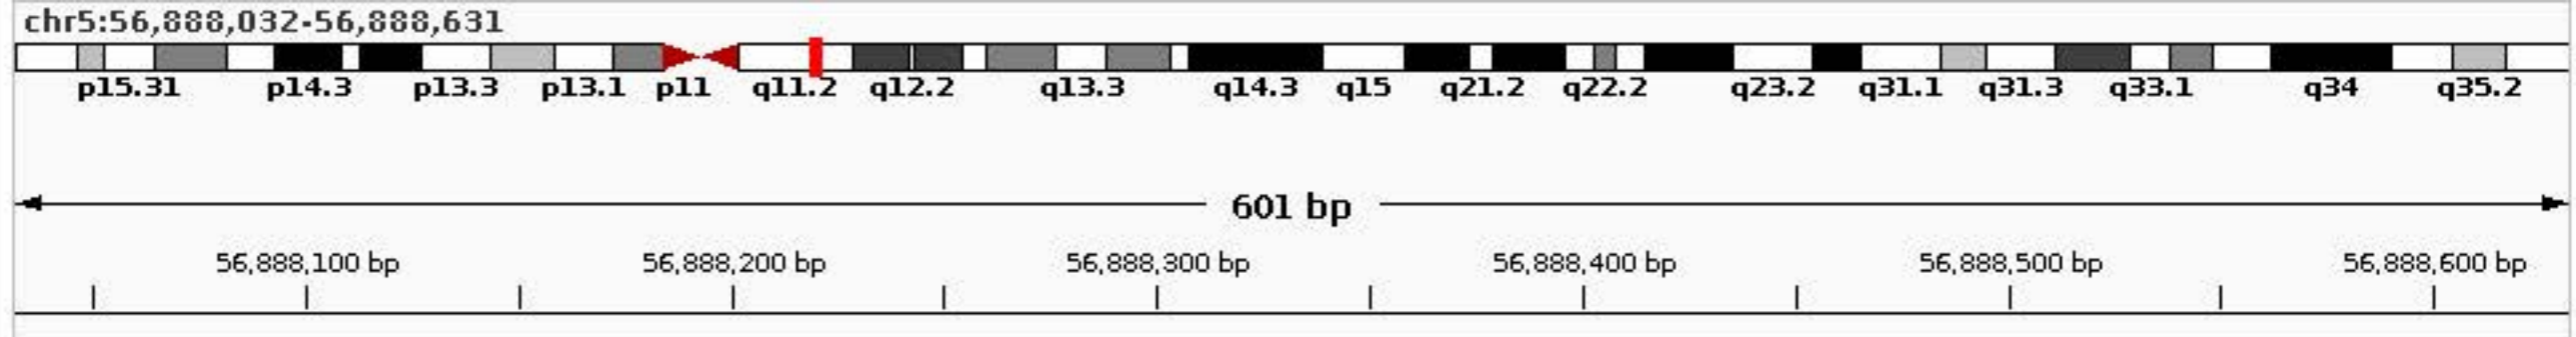

SL\_0004\_RN\_26\_mut.bam Coverage

SL\_0004\_RN\_26\_mut.bam

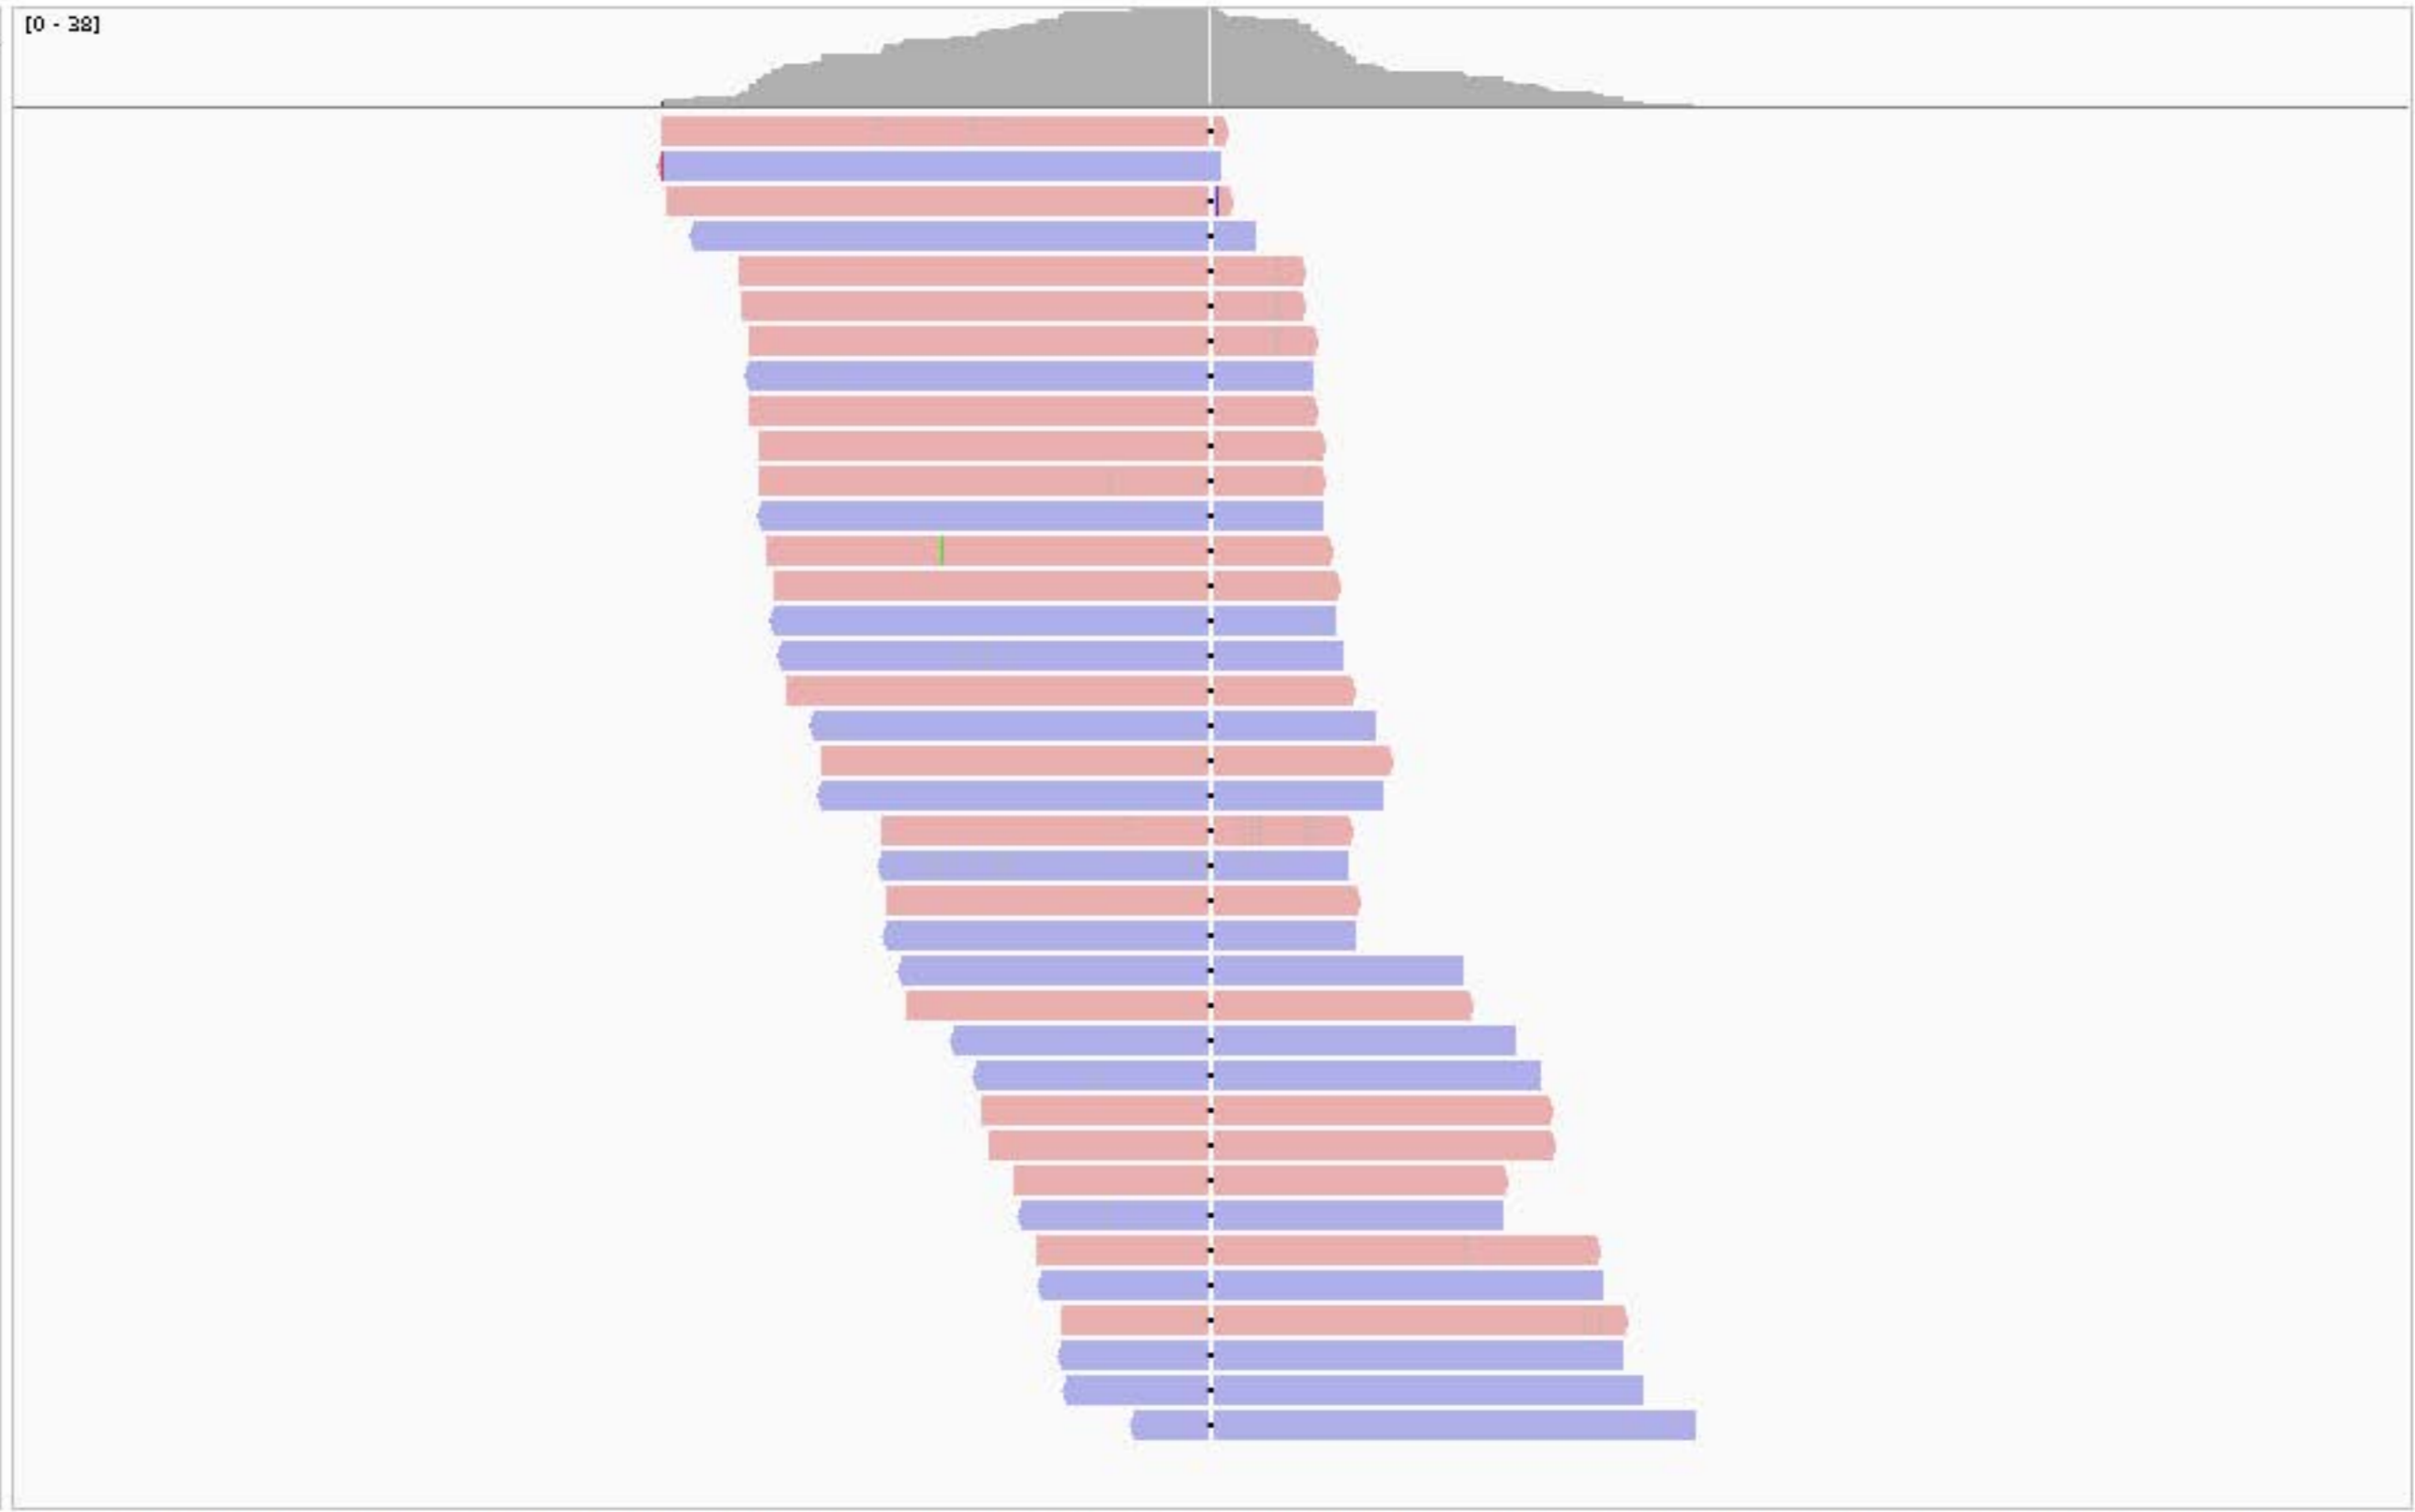

Sequence

Refseq Genes

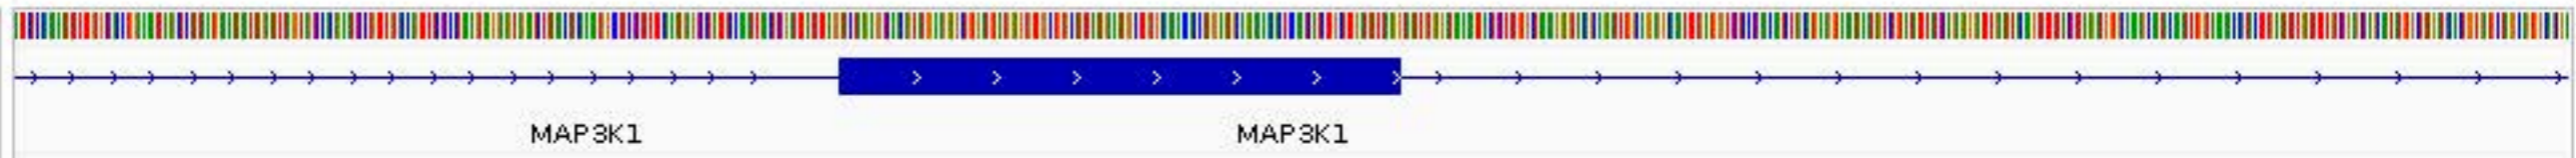

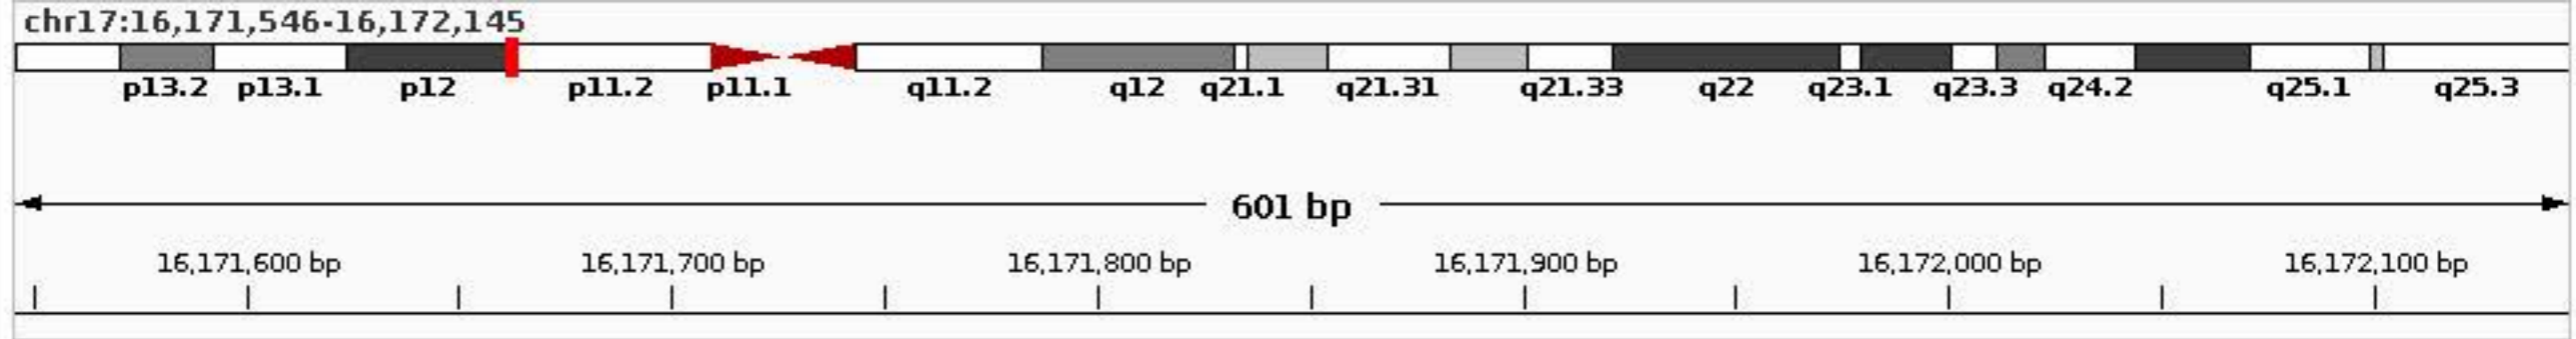

SL\_0006\_RN\_49\_mut.bam Coverage

SL\_0006\_RN\_49\_mut.bam

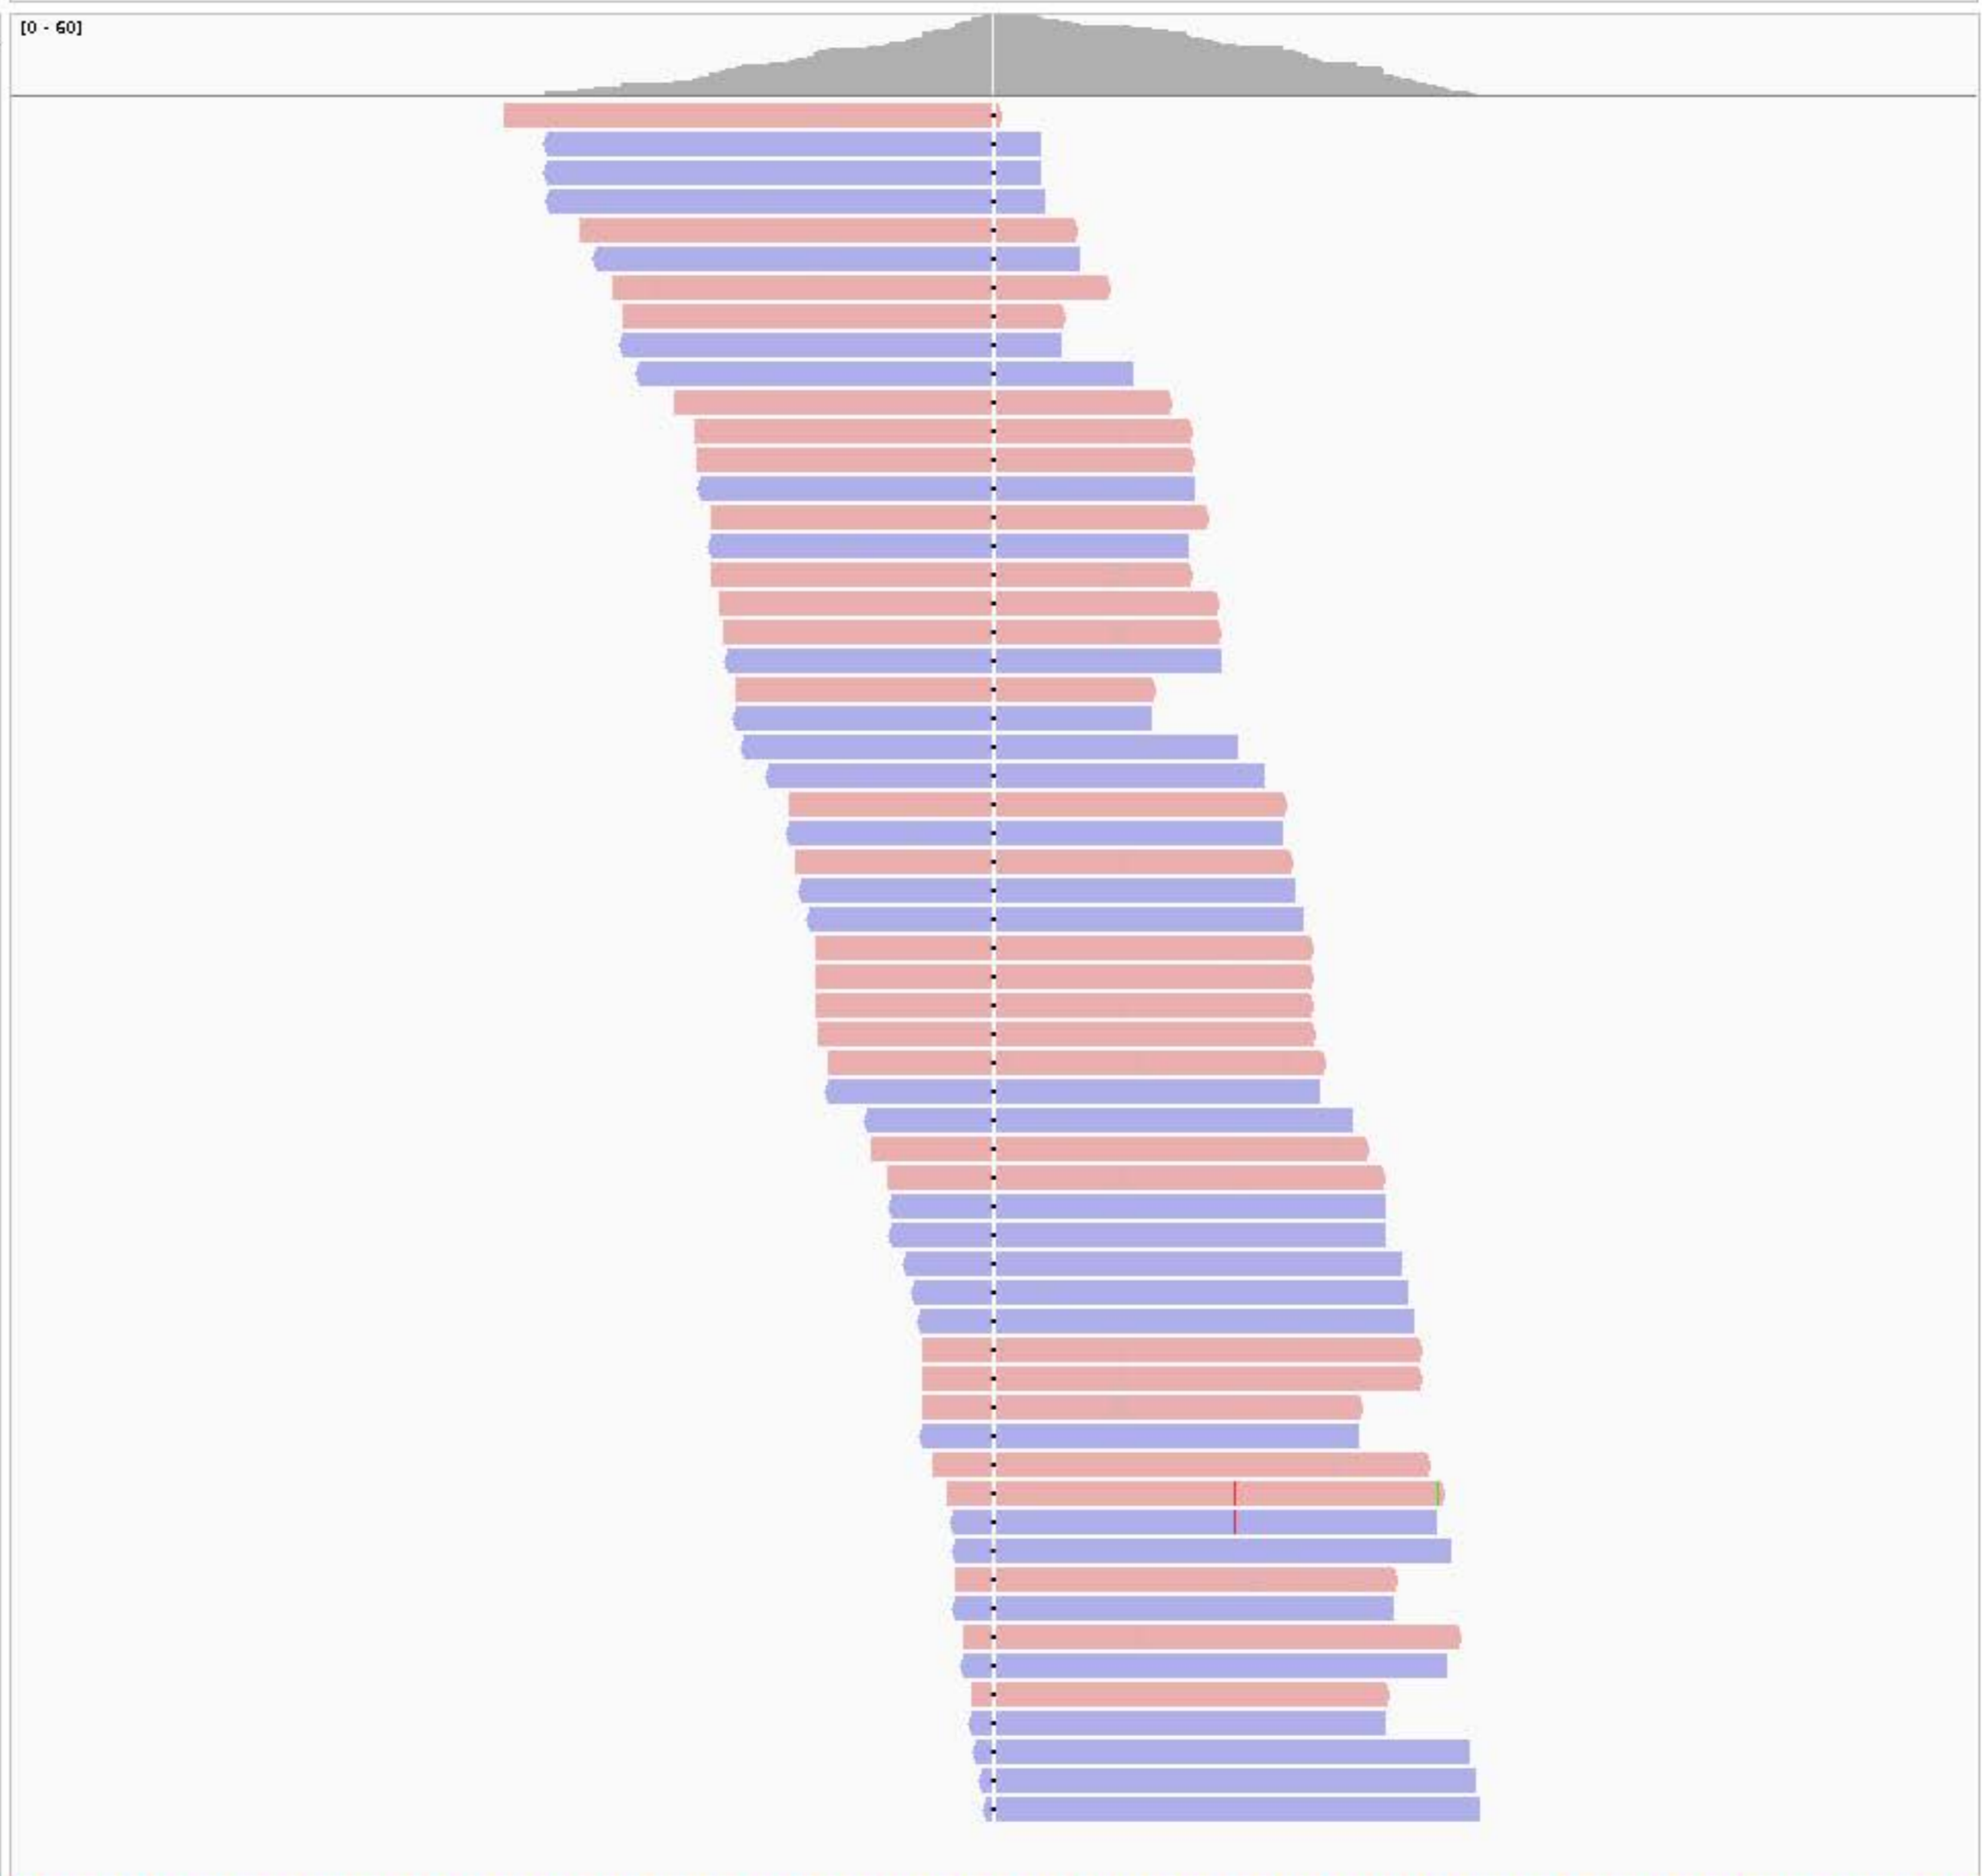

Sequence

Refseq Genes

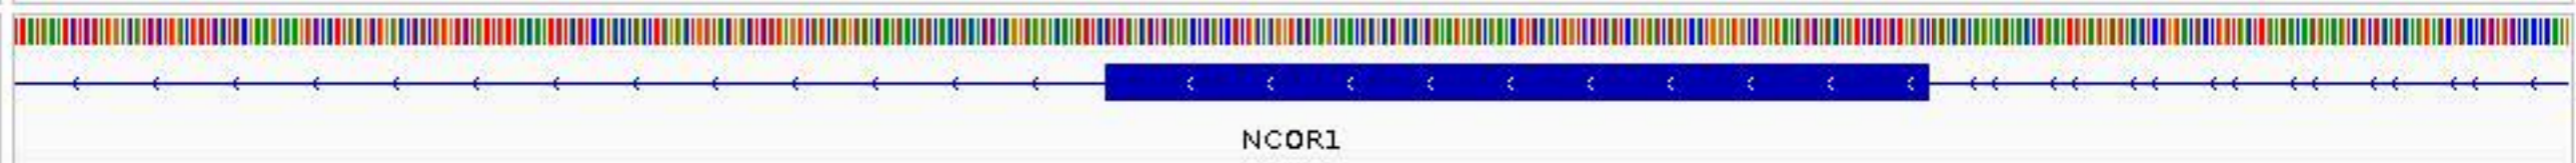



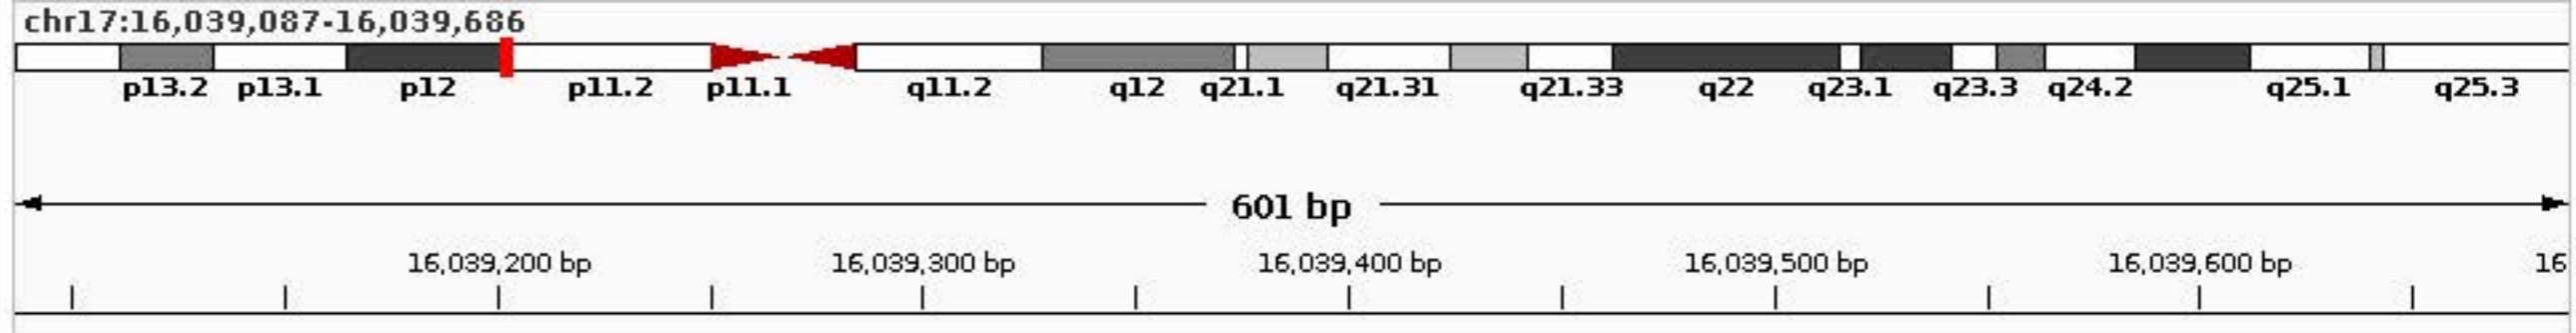

SL\_0017\_RN\_64\_mut.bam Coverage

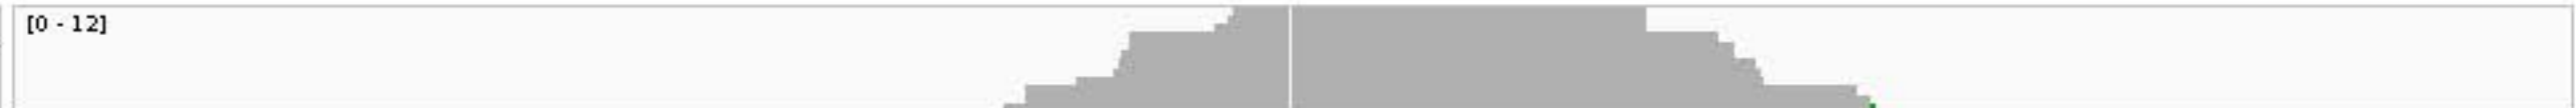

SL\_0017\_RN\_64\_mut.bam

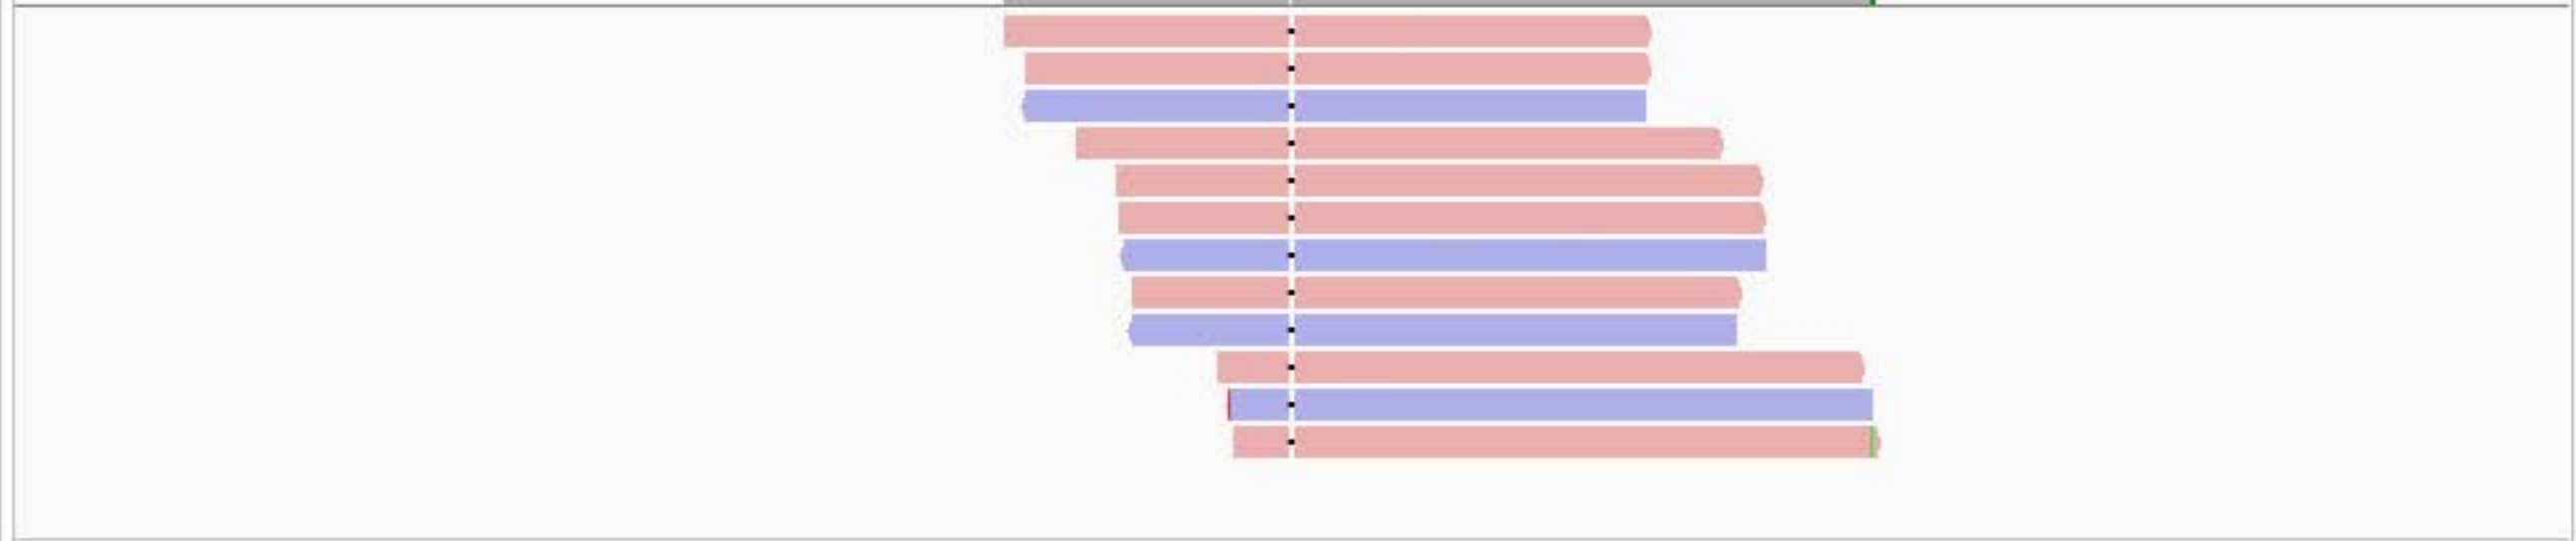

Sequence

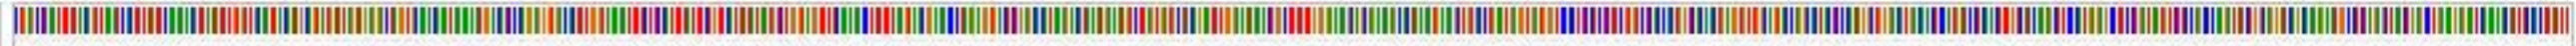

Refseq Genes

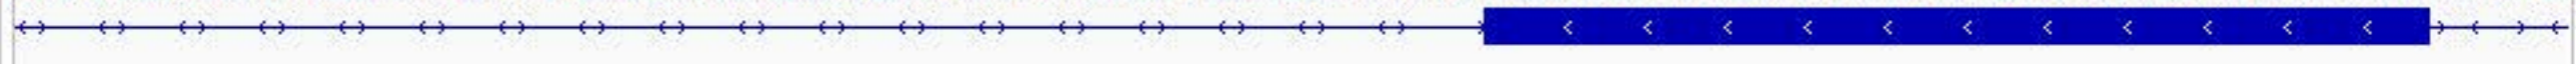

TTC19

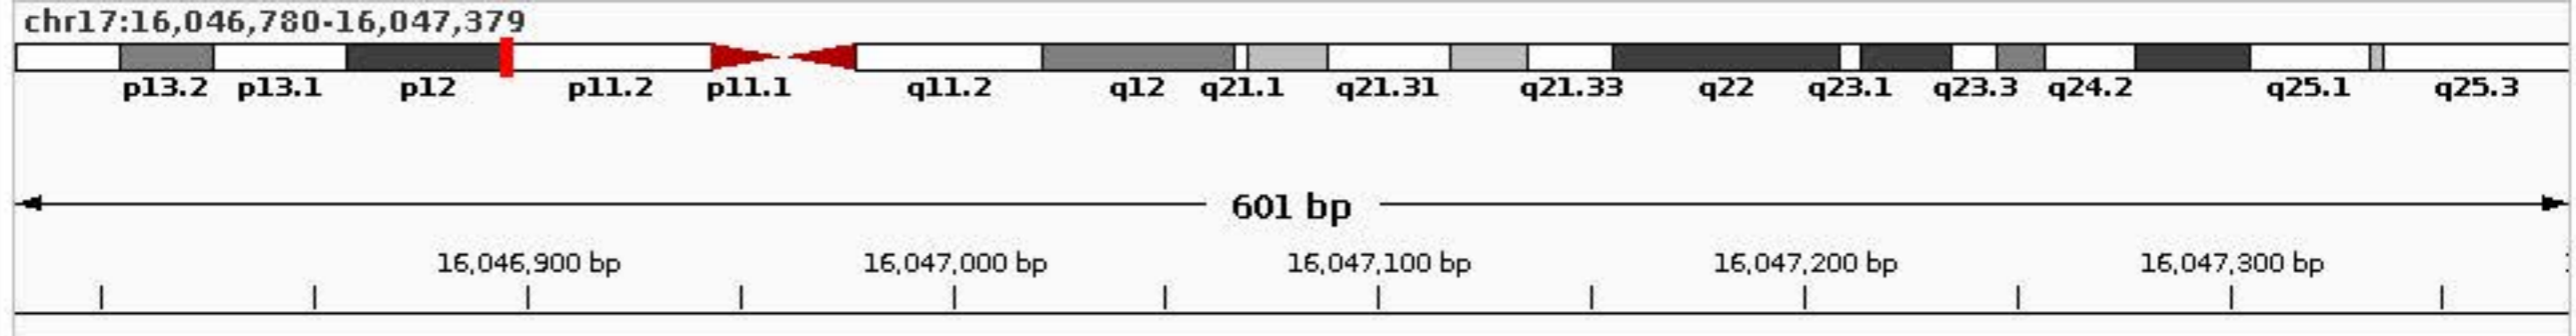

SL\_0004\_RN\_08\_mut.bam Coverage

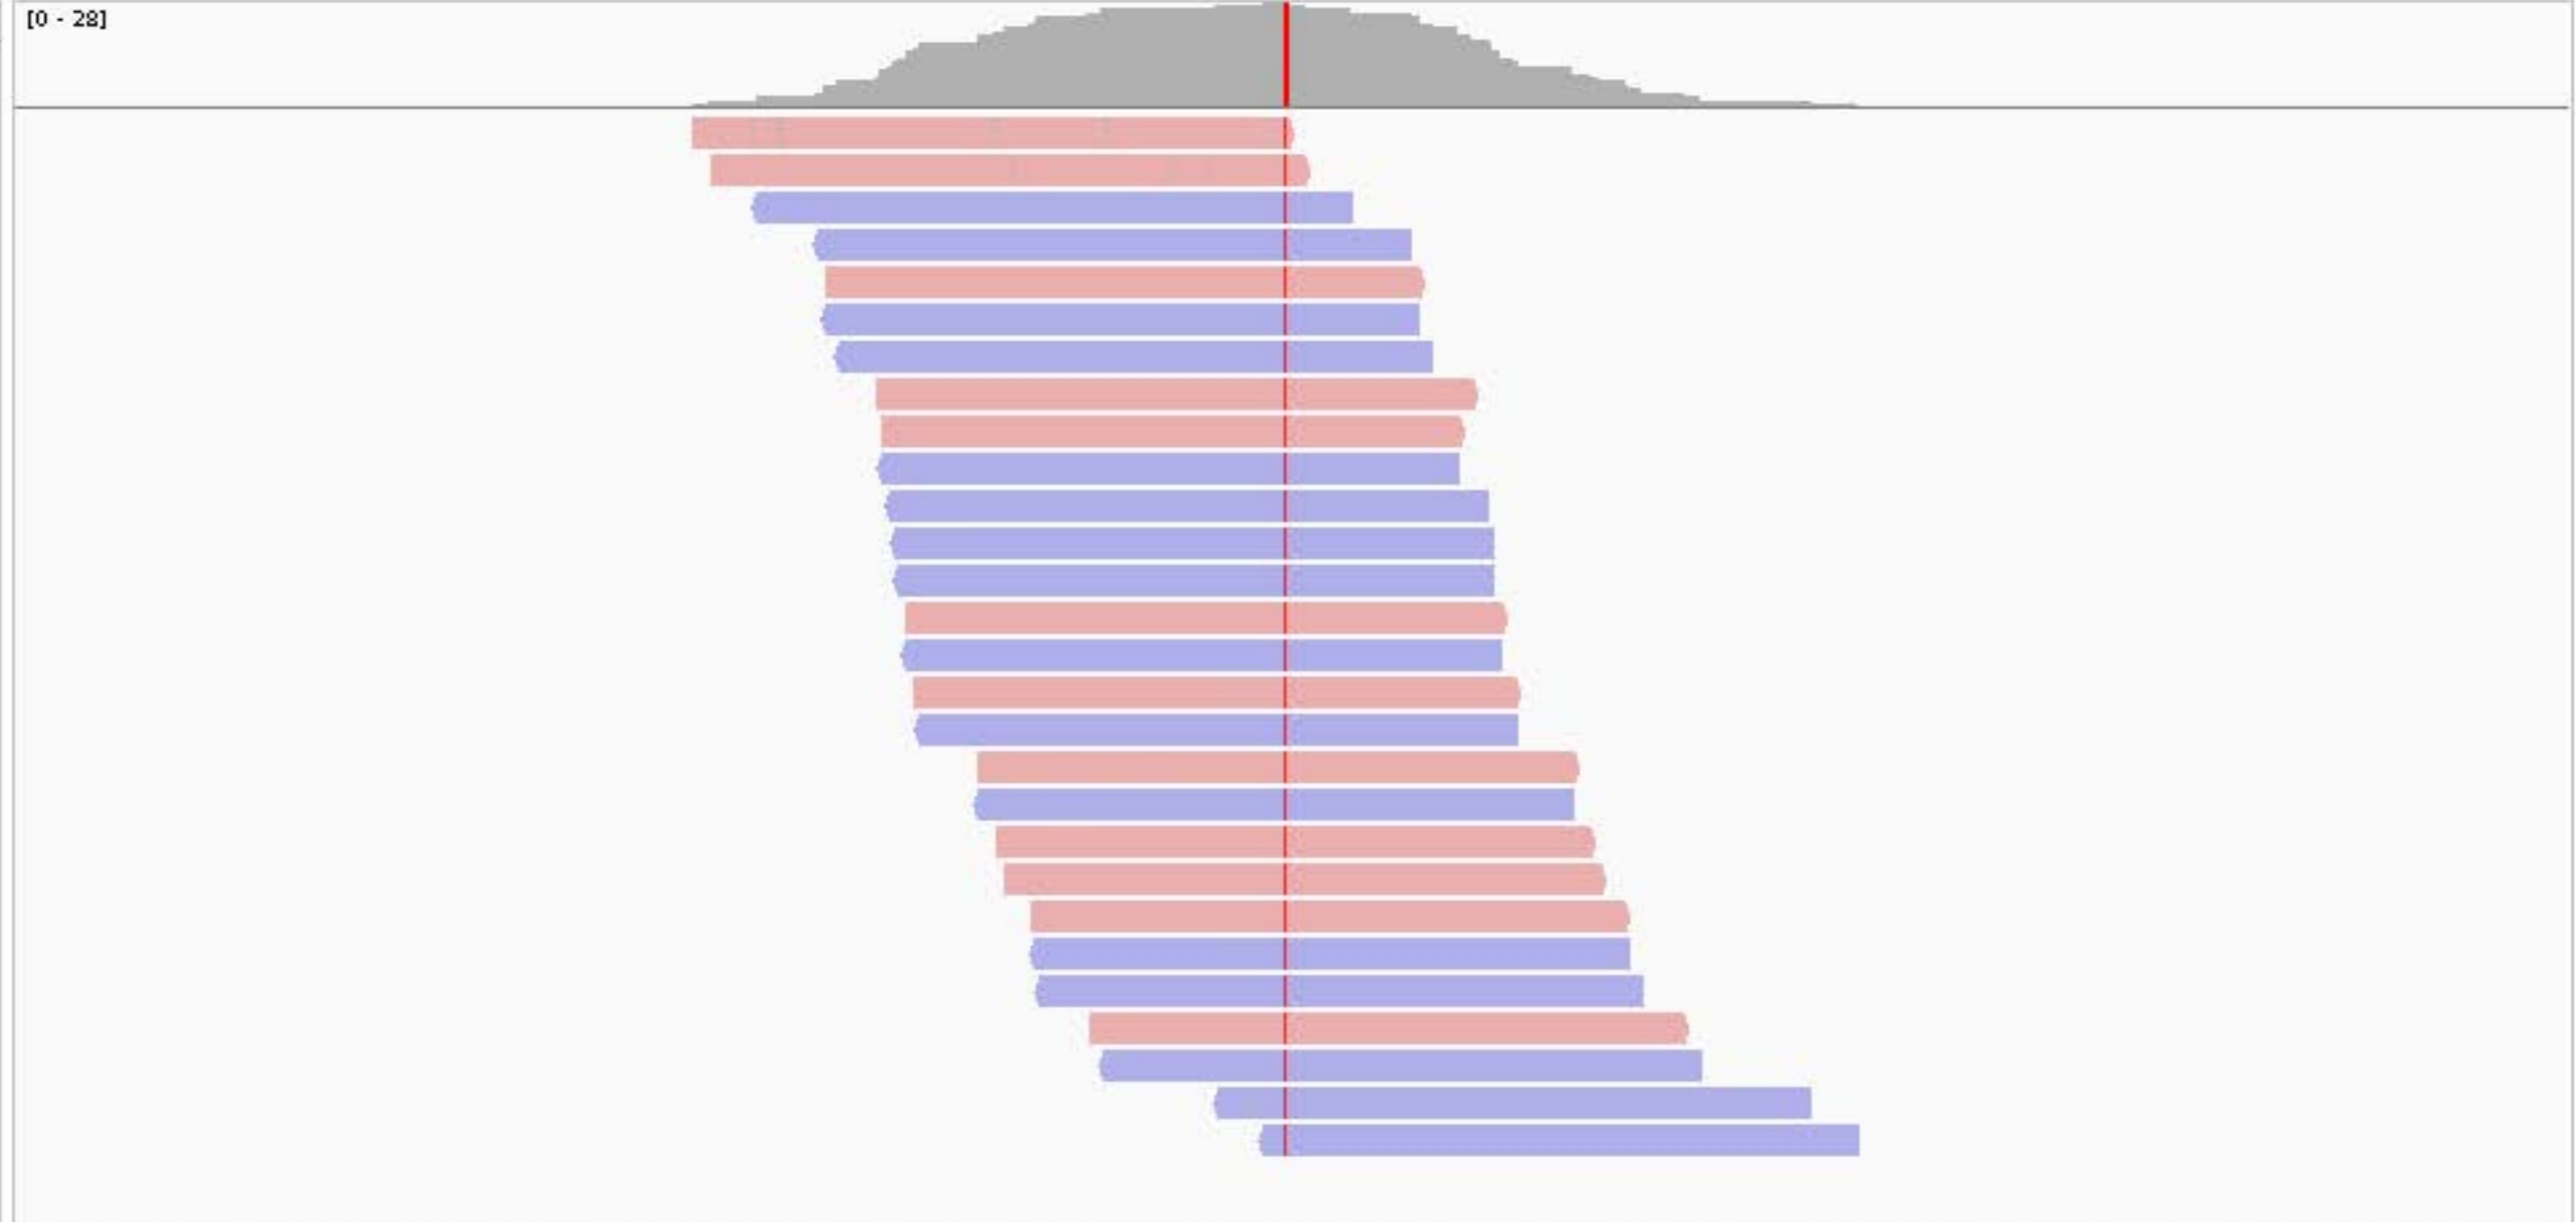

Sequence →

Refseq Genes

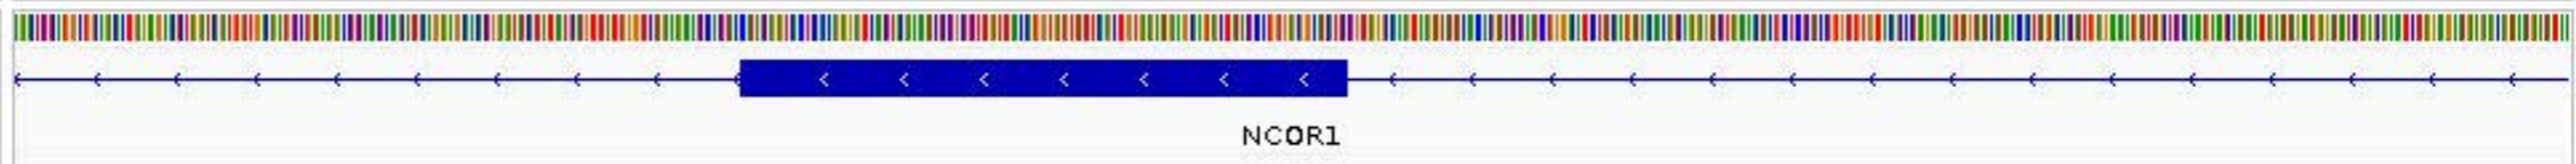

chr17:31,155,682-31,156,281

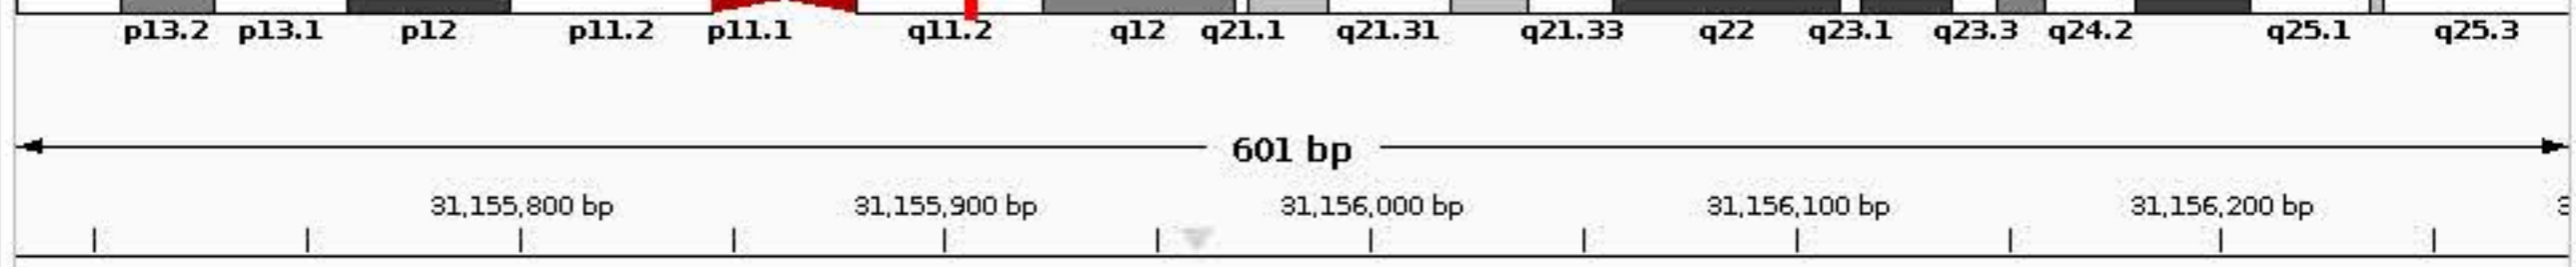

SL\_0001\_RN\_28\_mut.bam Coverage

SL\_0001\_RN\_28\_mut.bam

Sequence

Refseq Genes

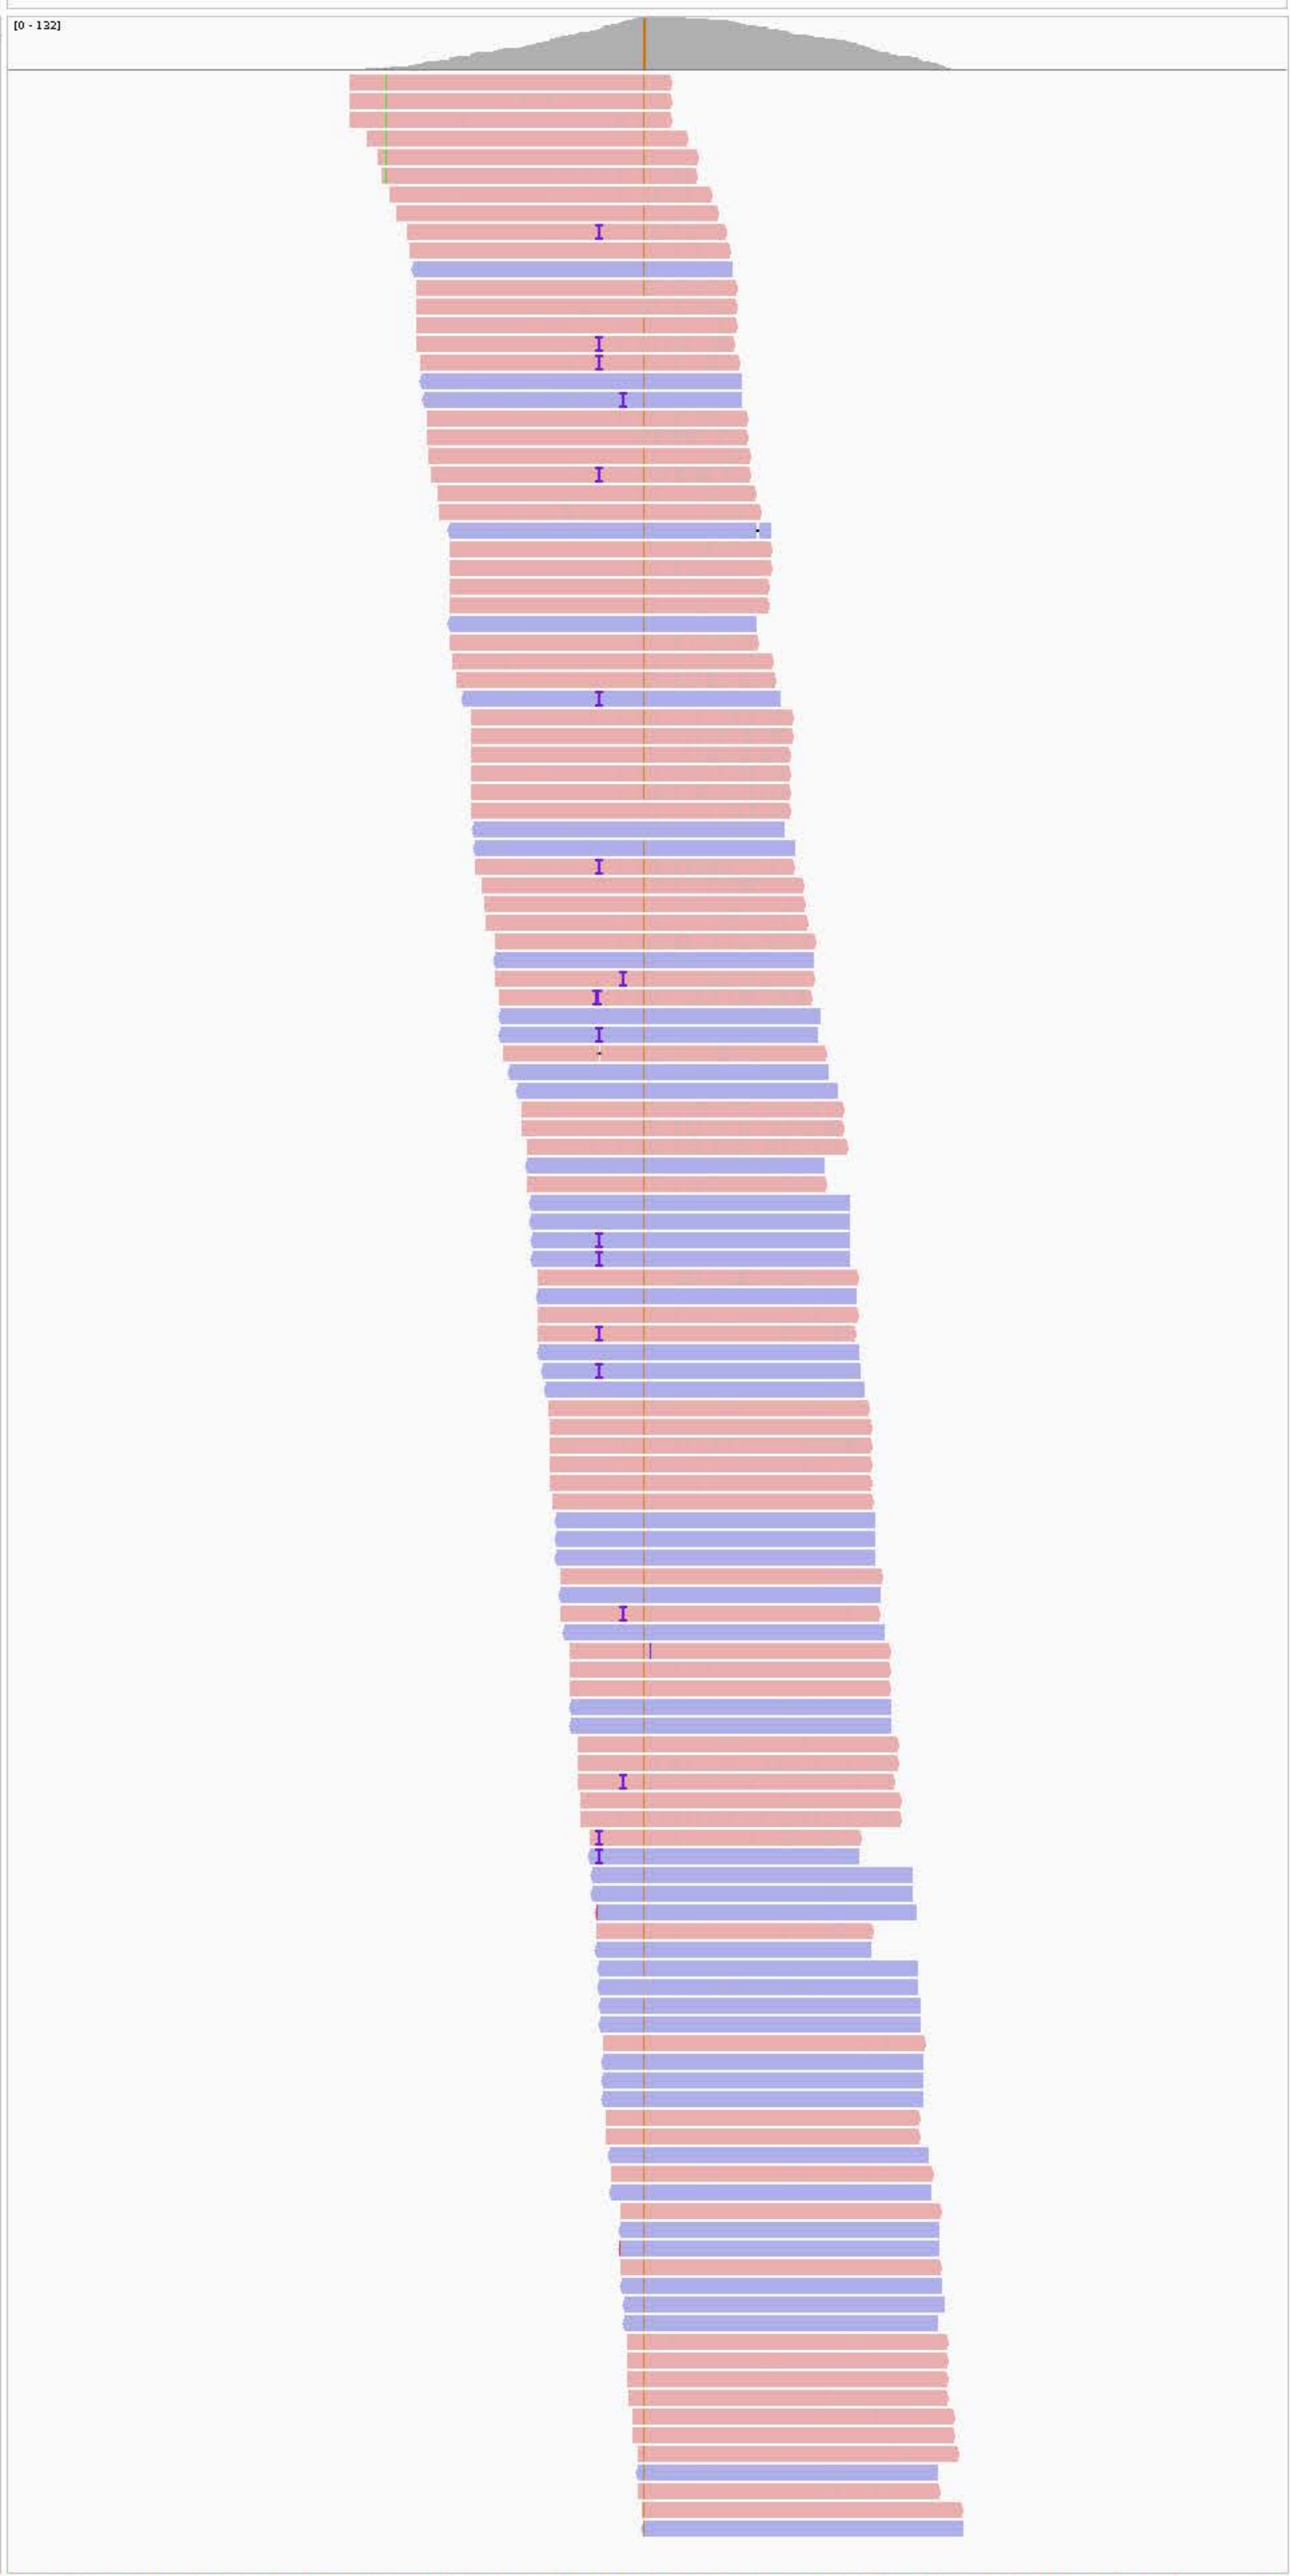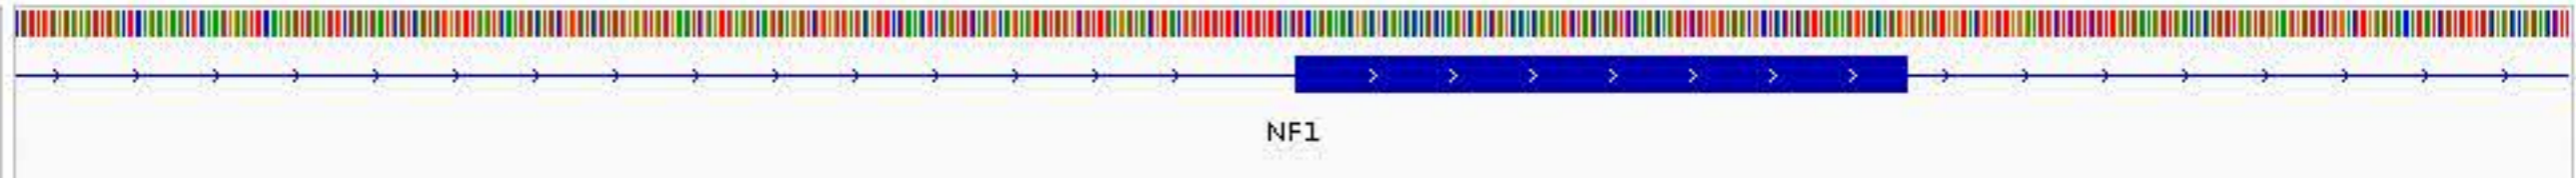



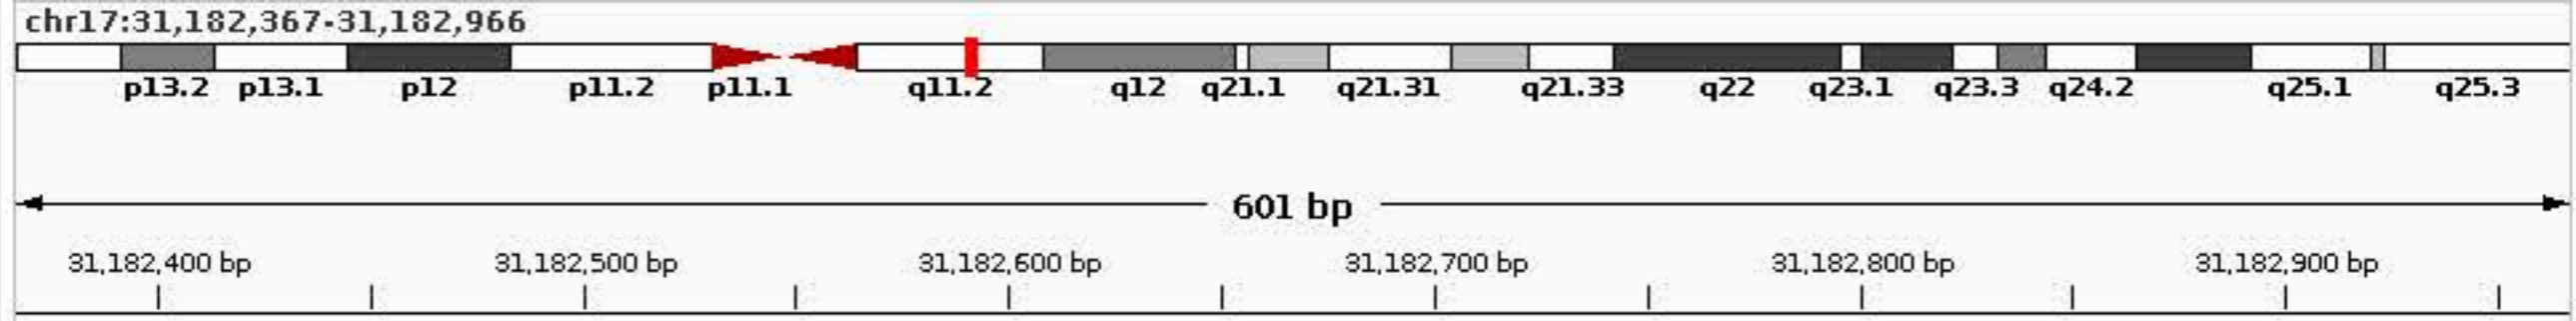

SL\_0006\_RN\_67\_mut.bam Coverage

SL\_0006\_RN\_67\_mut.bam

Sequence →

Refseq Genes

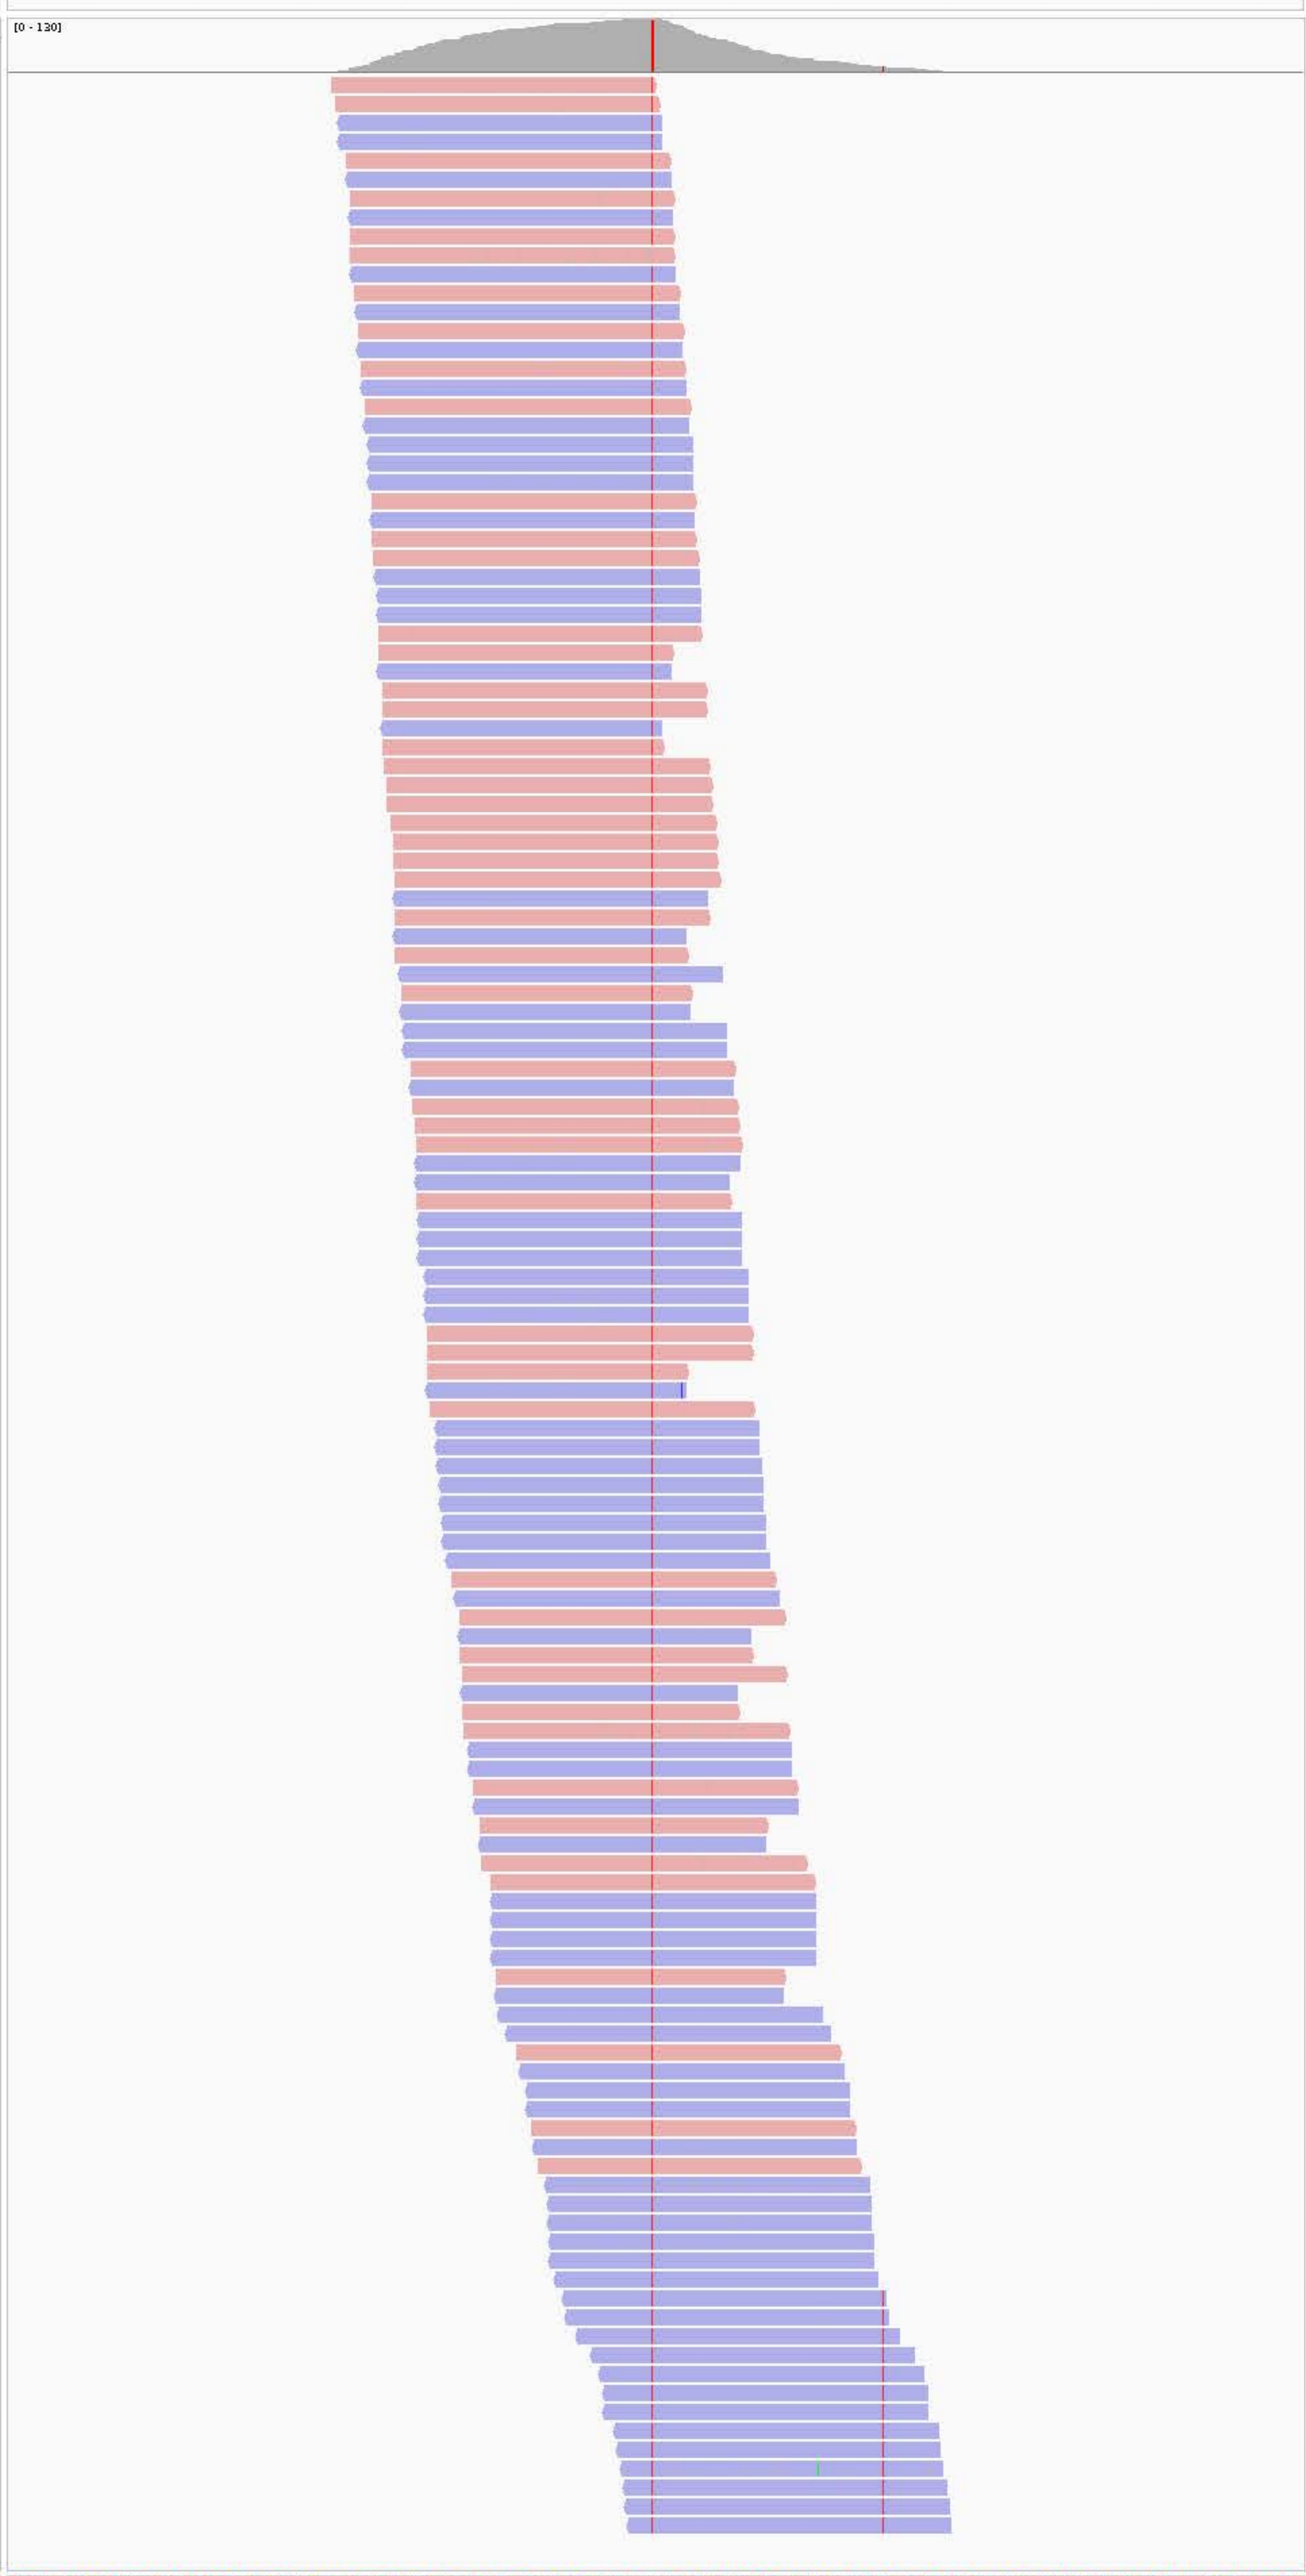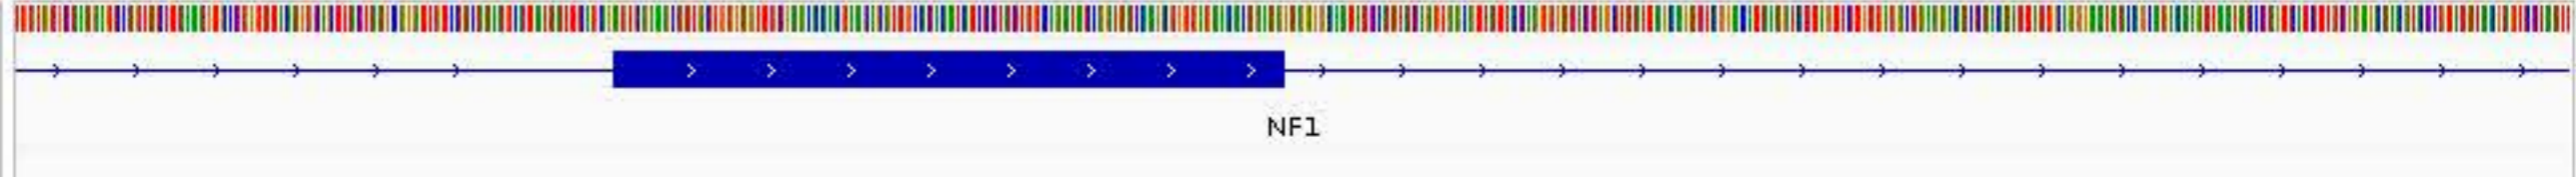

chr17:31,201,172-31,201,771

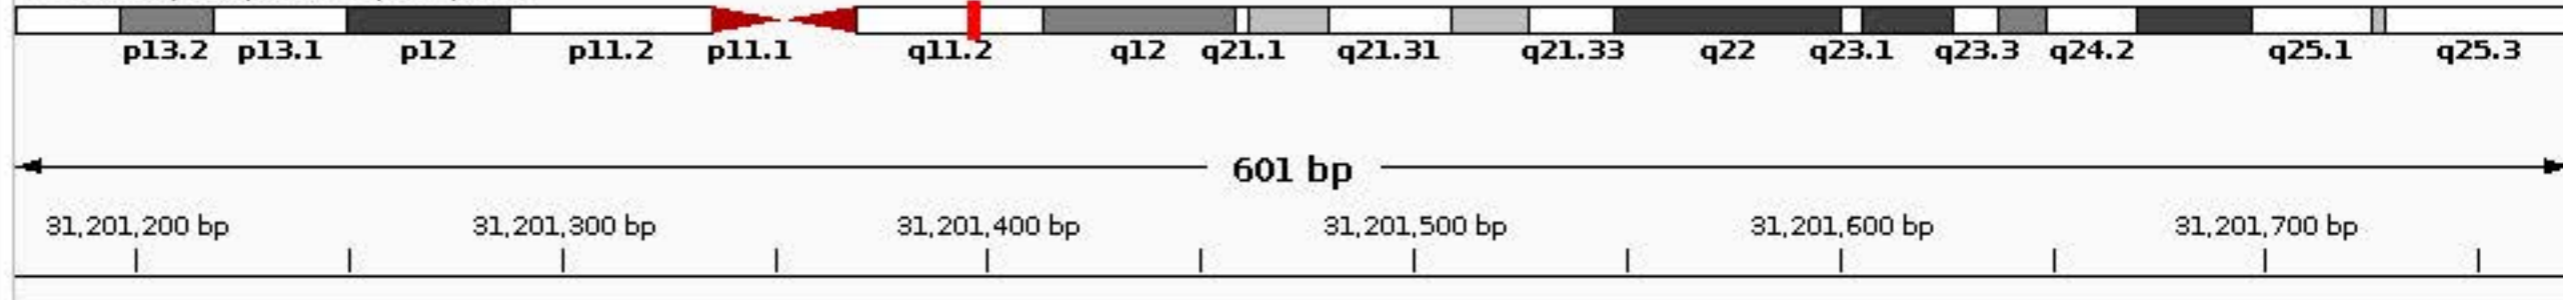

SL\_0004\_RN\_21\_mut.bam Coverage

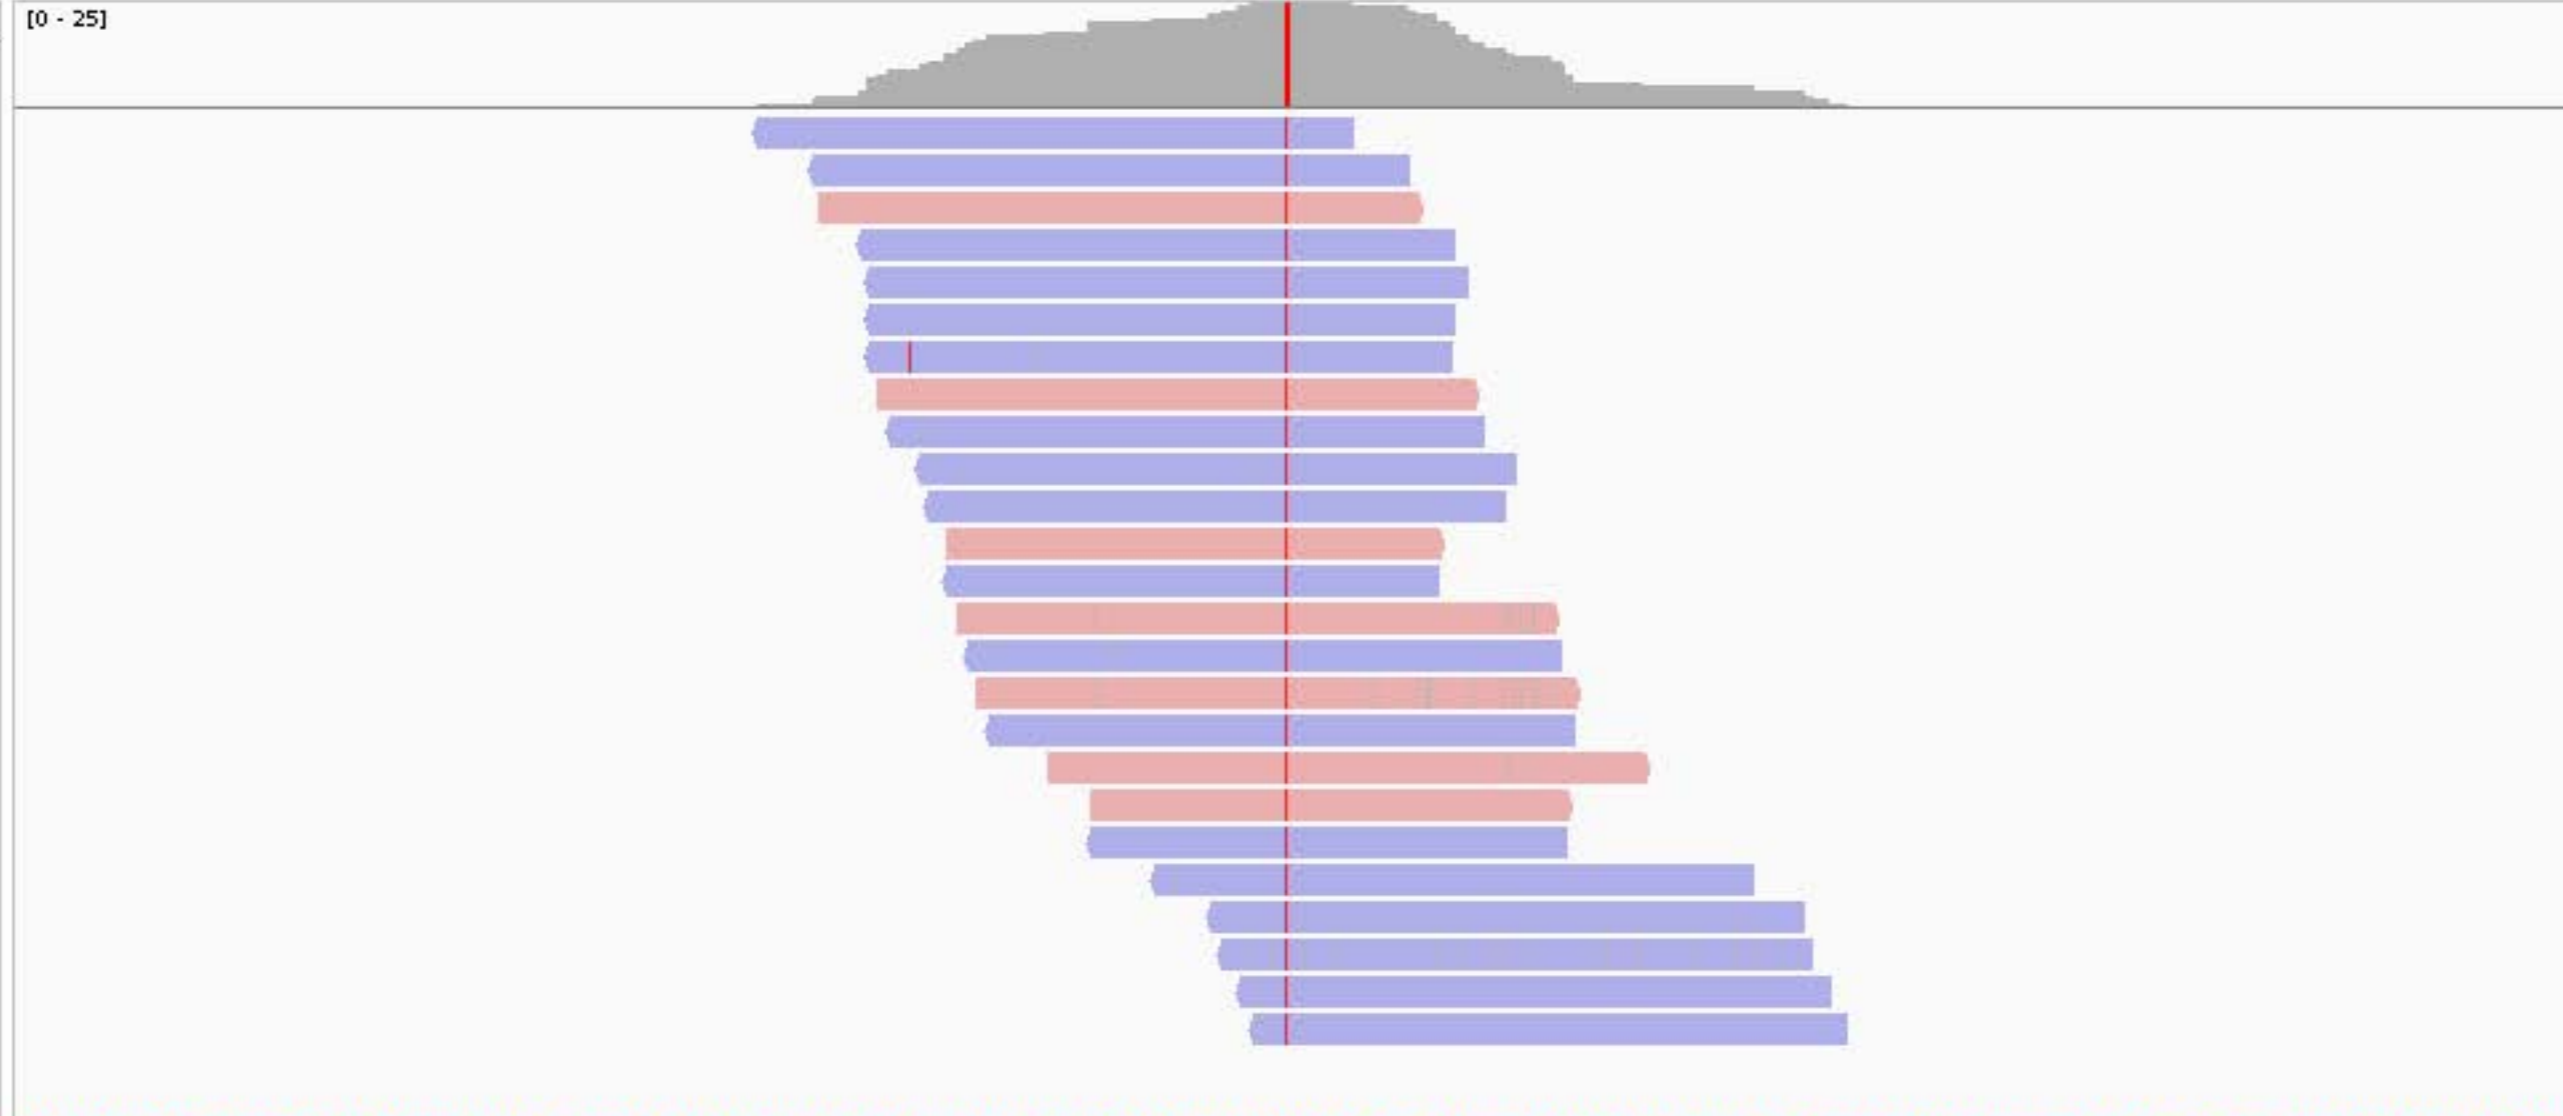

SL\_0004\_RN\_21\_mut.bam

Sequence

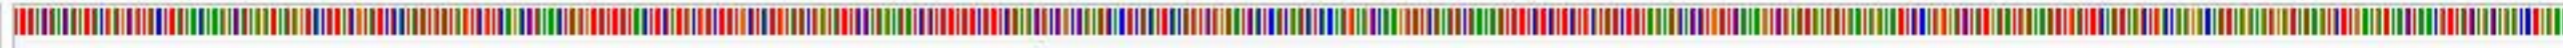

Refseq Genes

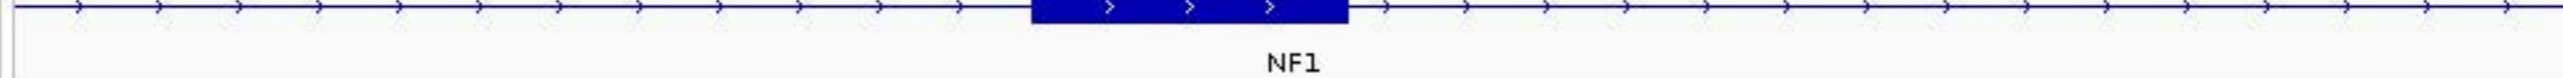

NF1

chr17:31,327,419-31,328,018

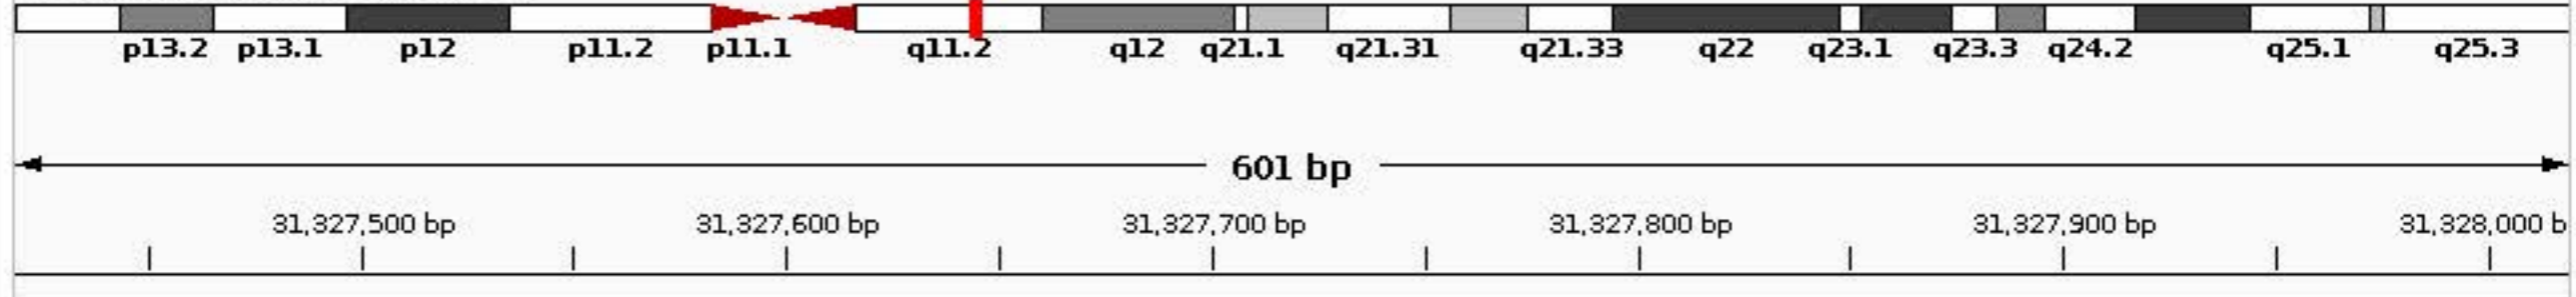

SL\_0004\_RN\_08\_mut.bam Coverage

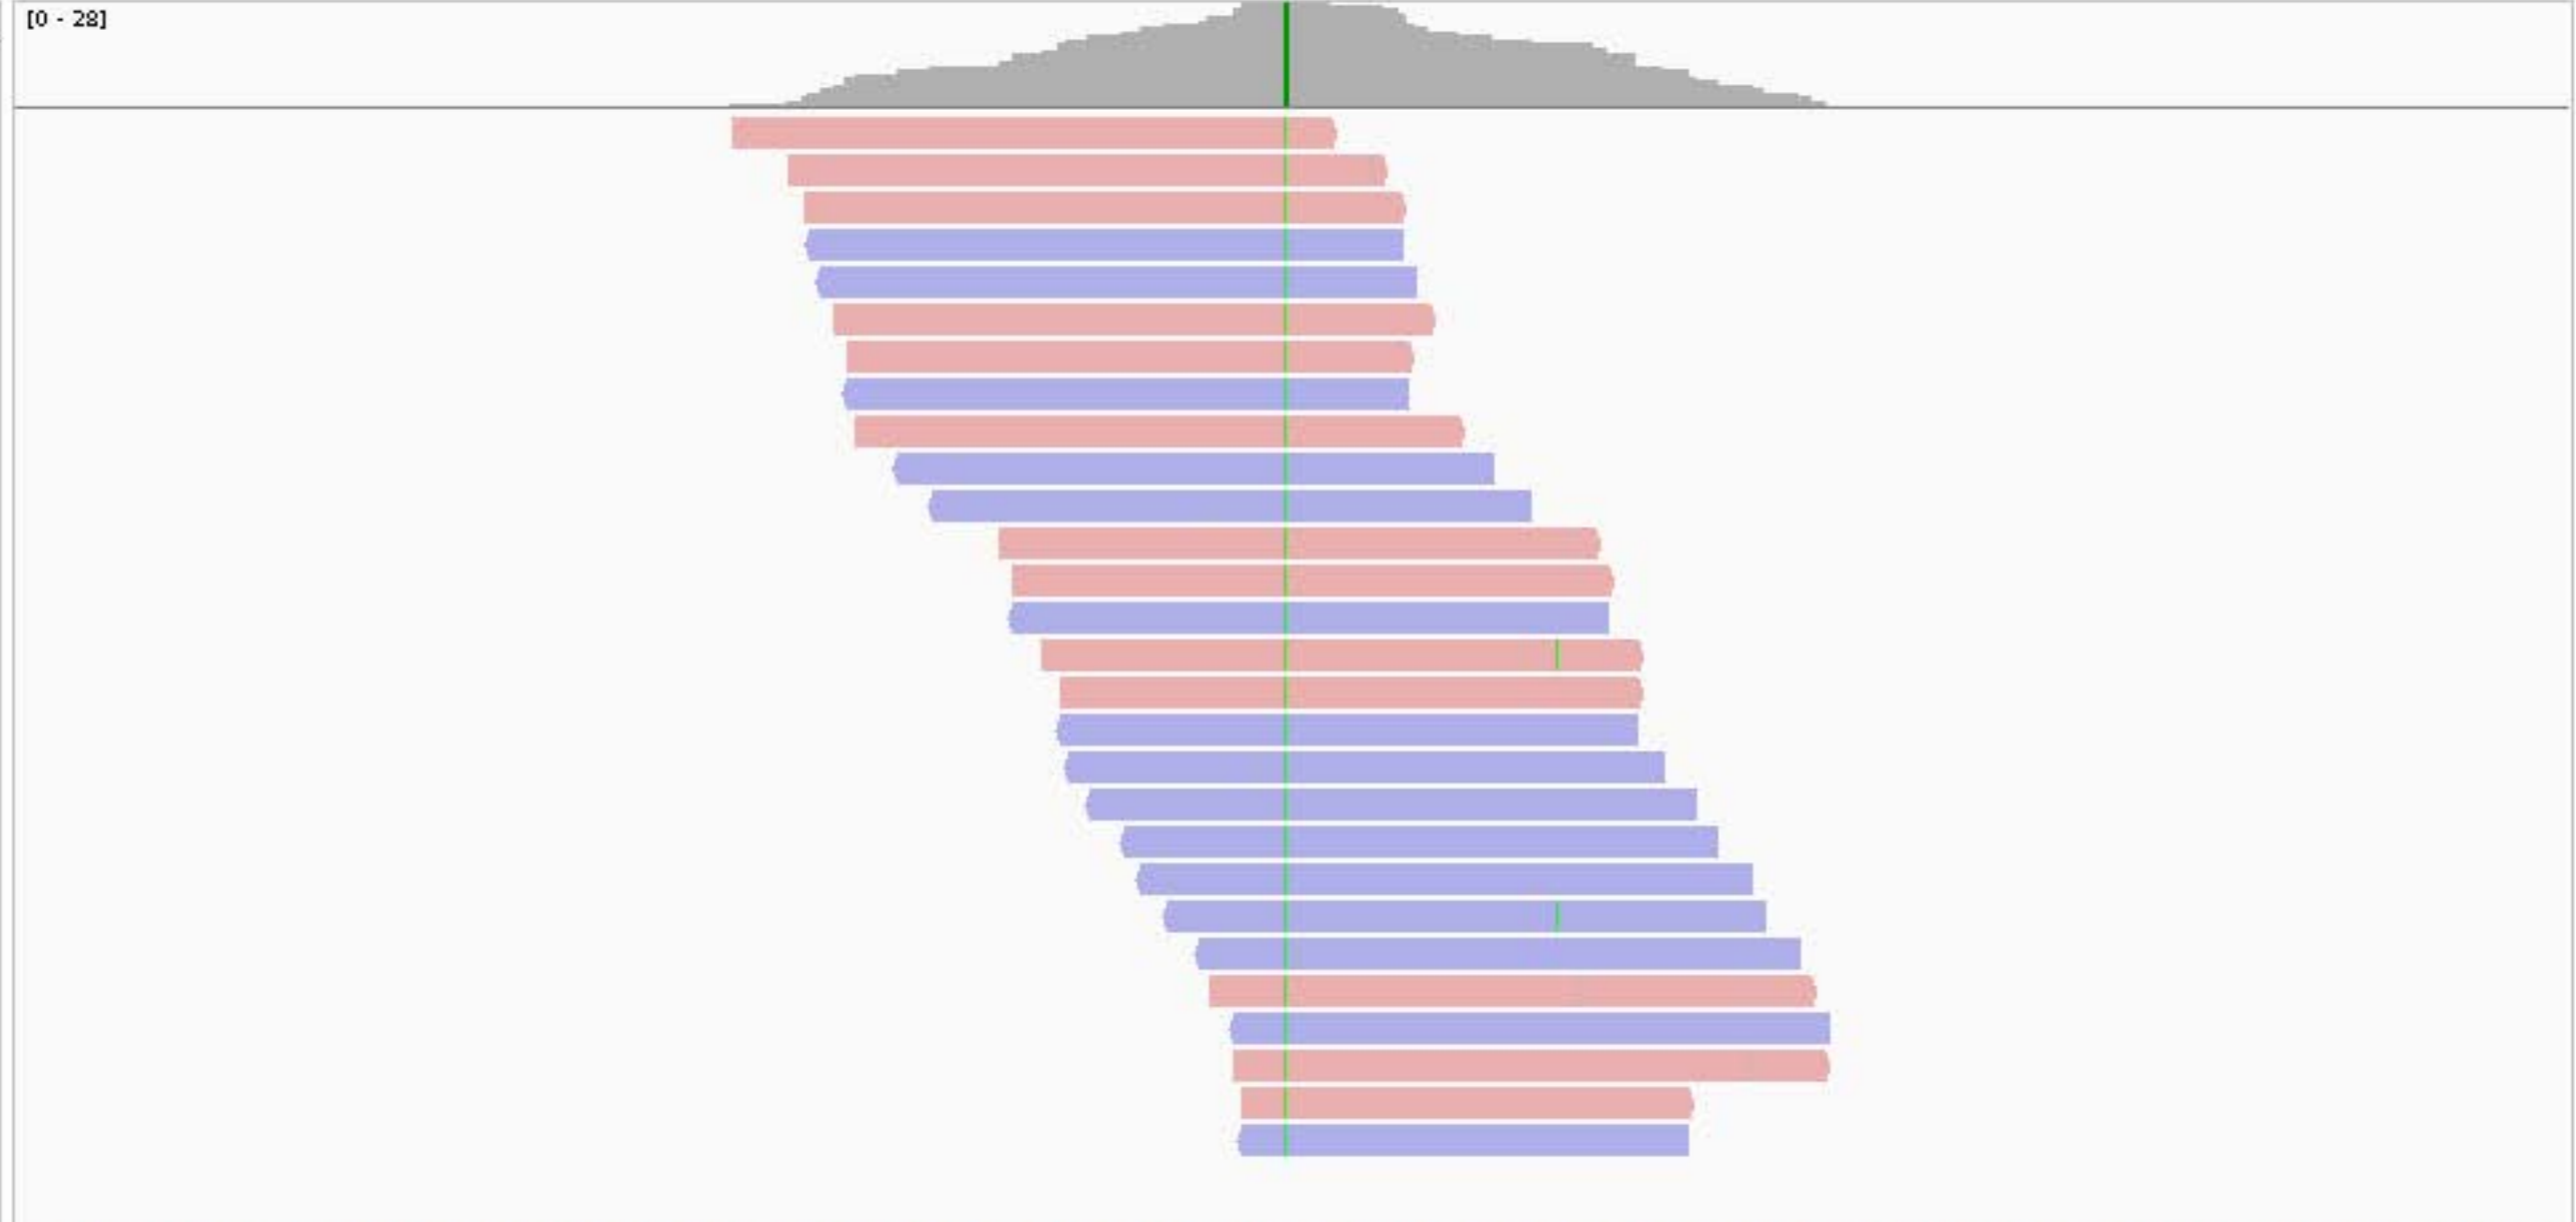

SL\_0004\_RN\_08\_mut.bam

Sequence

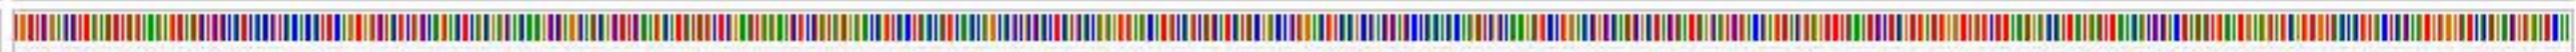

Refseq Genes

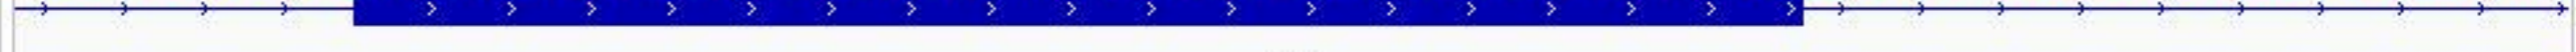

NF1



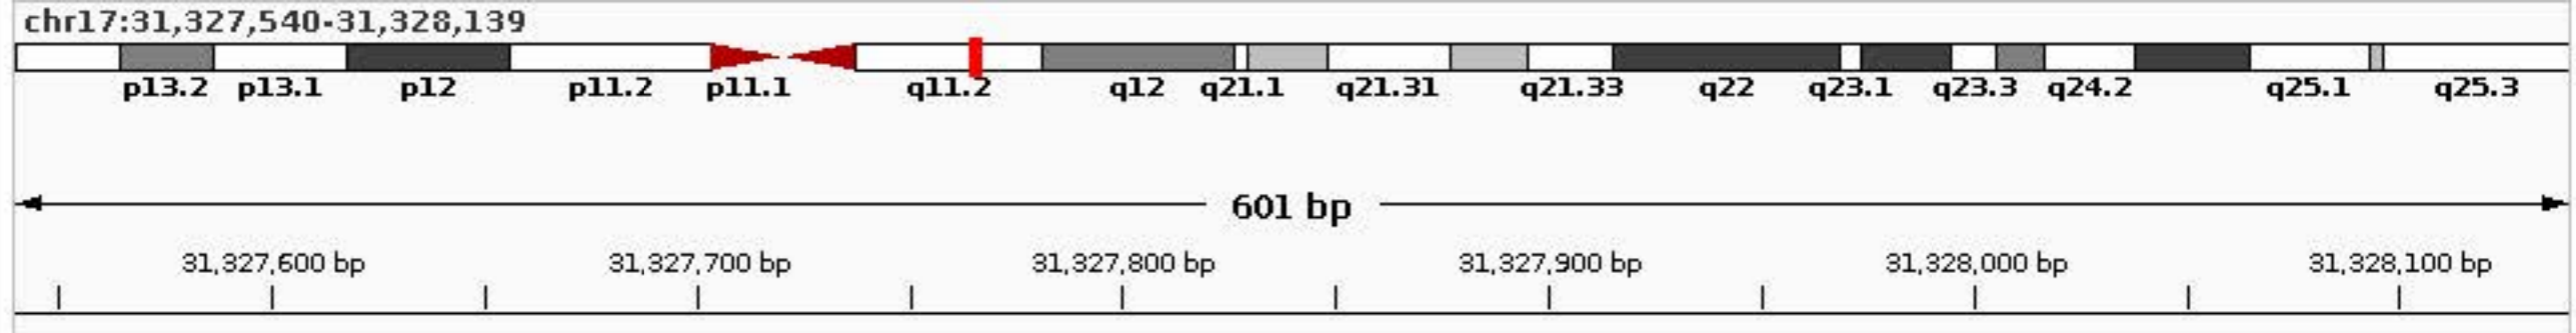

SL\_0004\_RN\_58\_mut.bam Coverage

SL\_0004\_RN\_58\_mut.bam

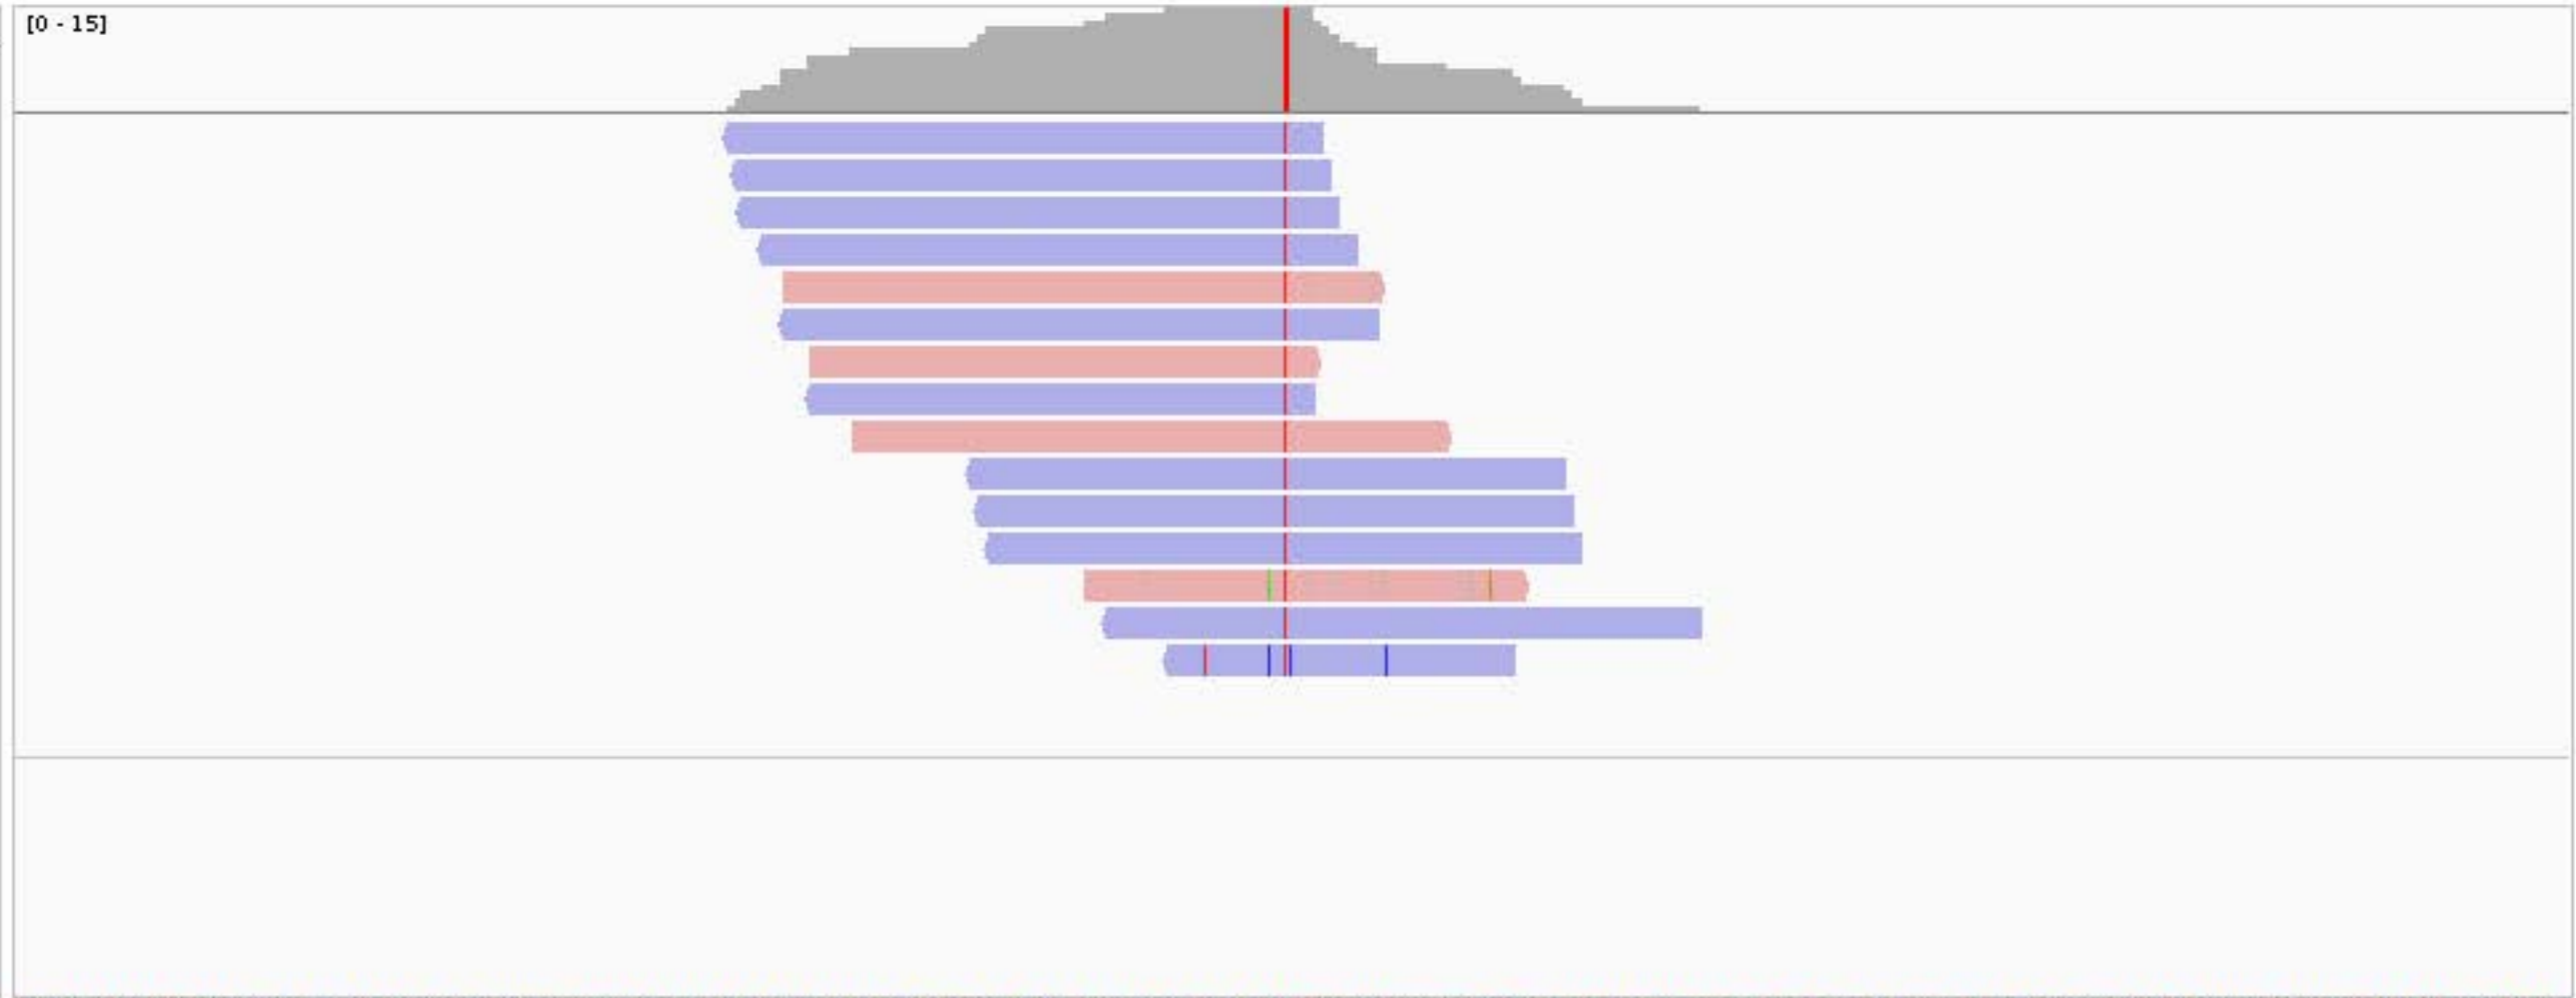

Sequence

Refseq Genes

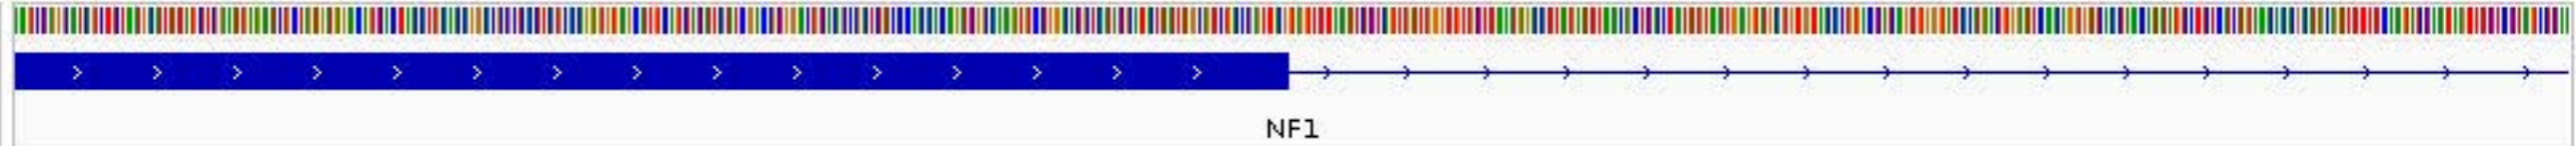

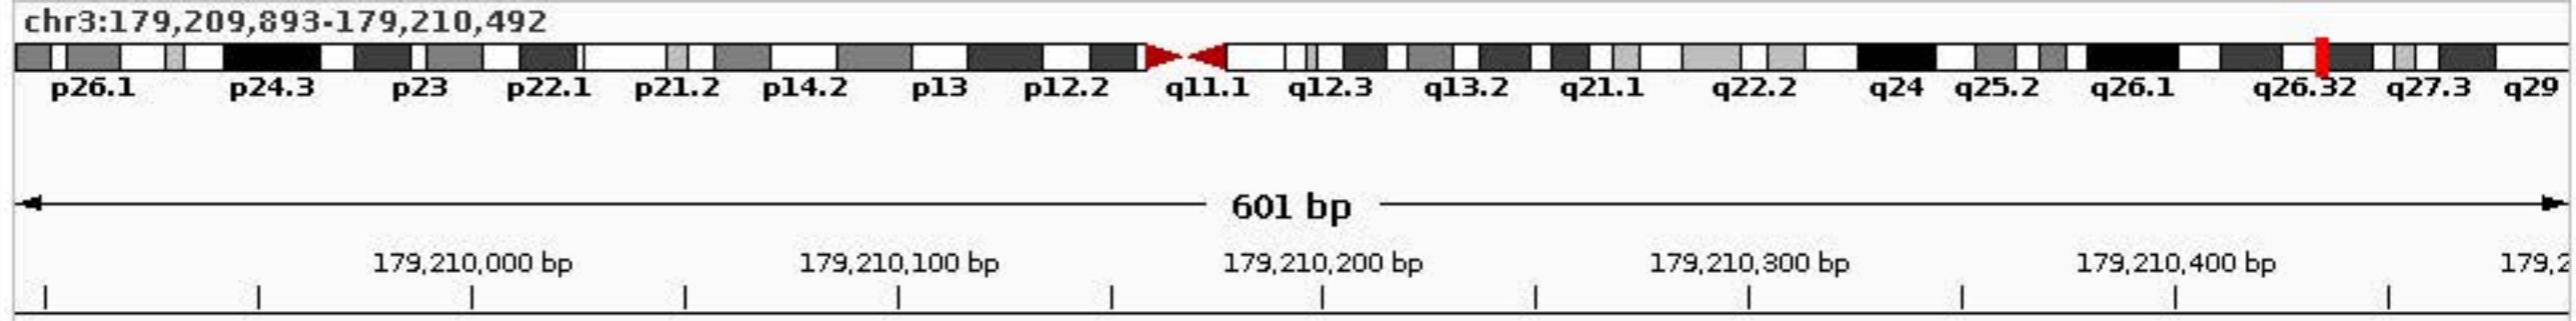

SL\_0004\_RN\_60\_mut.bam Coverage

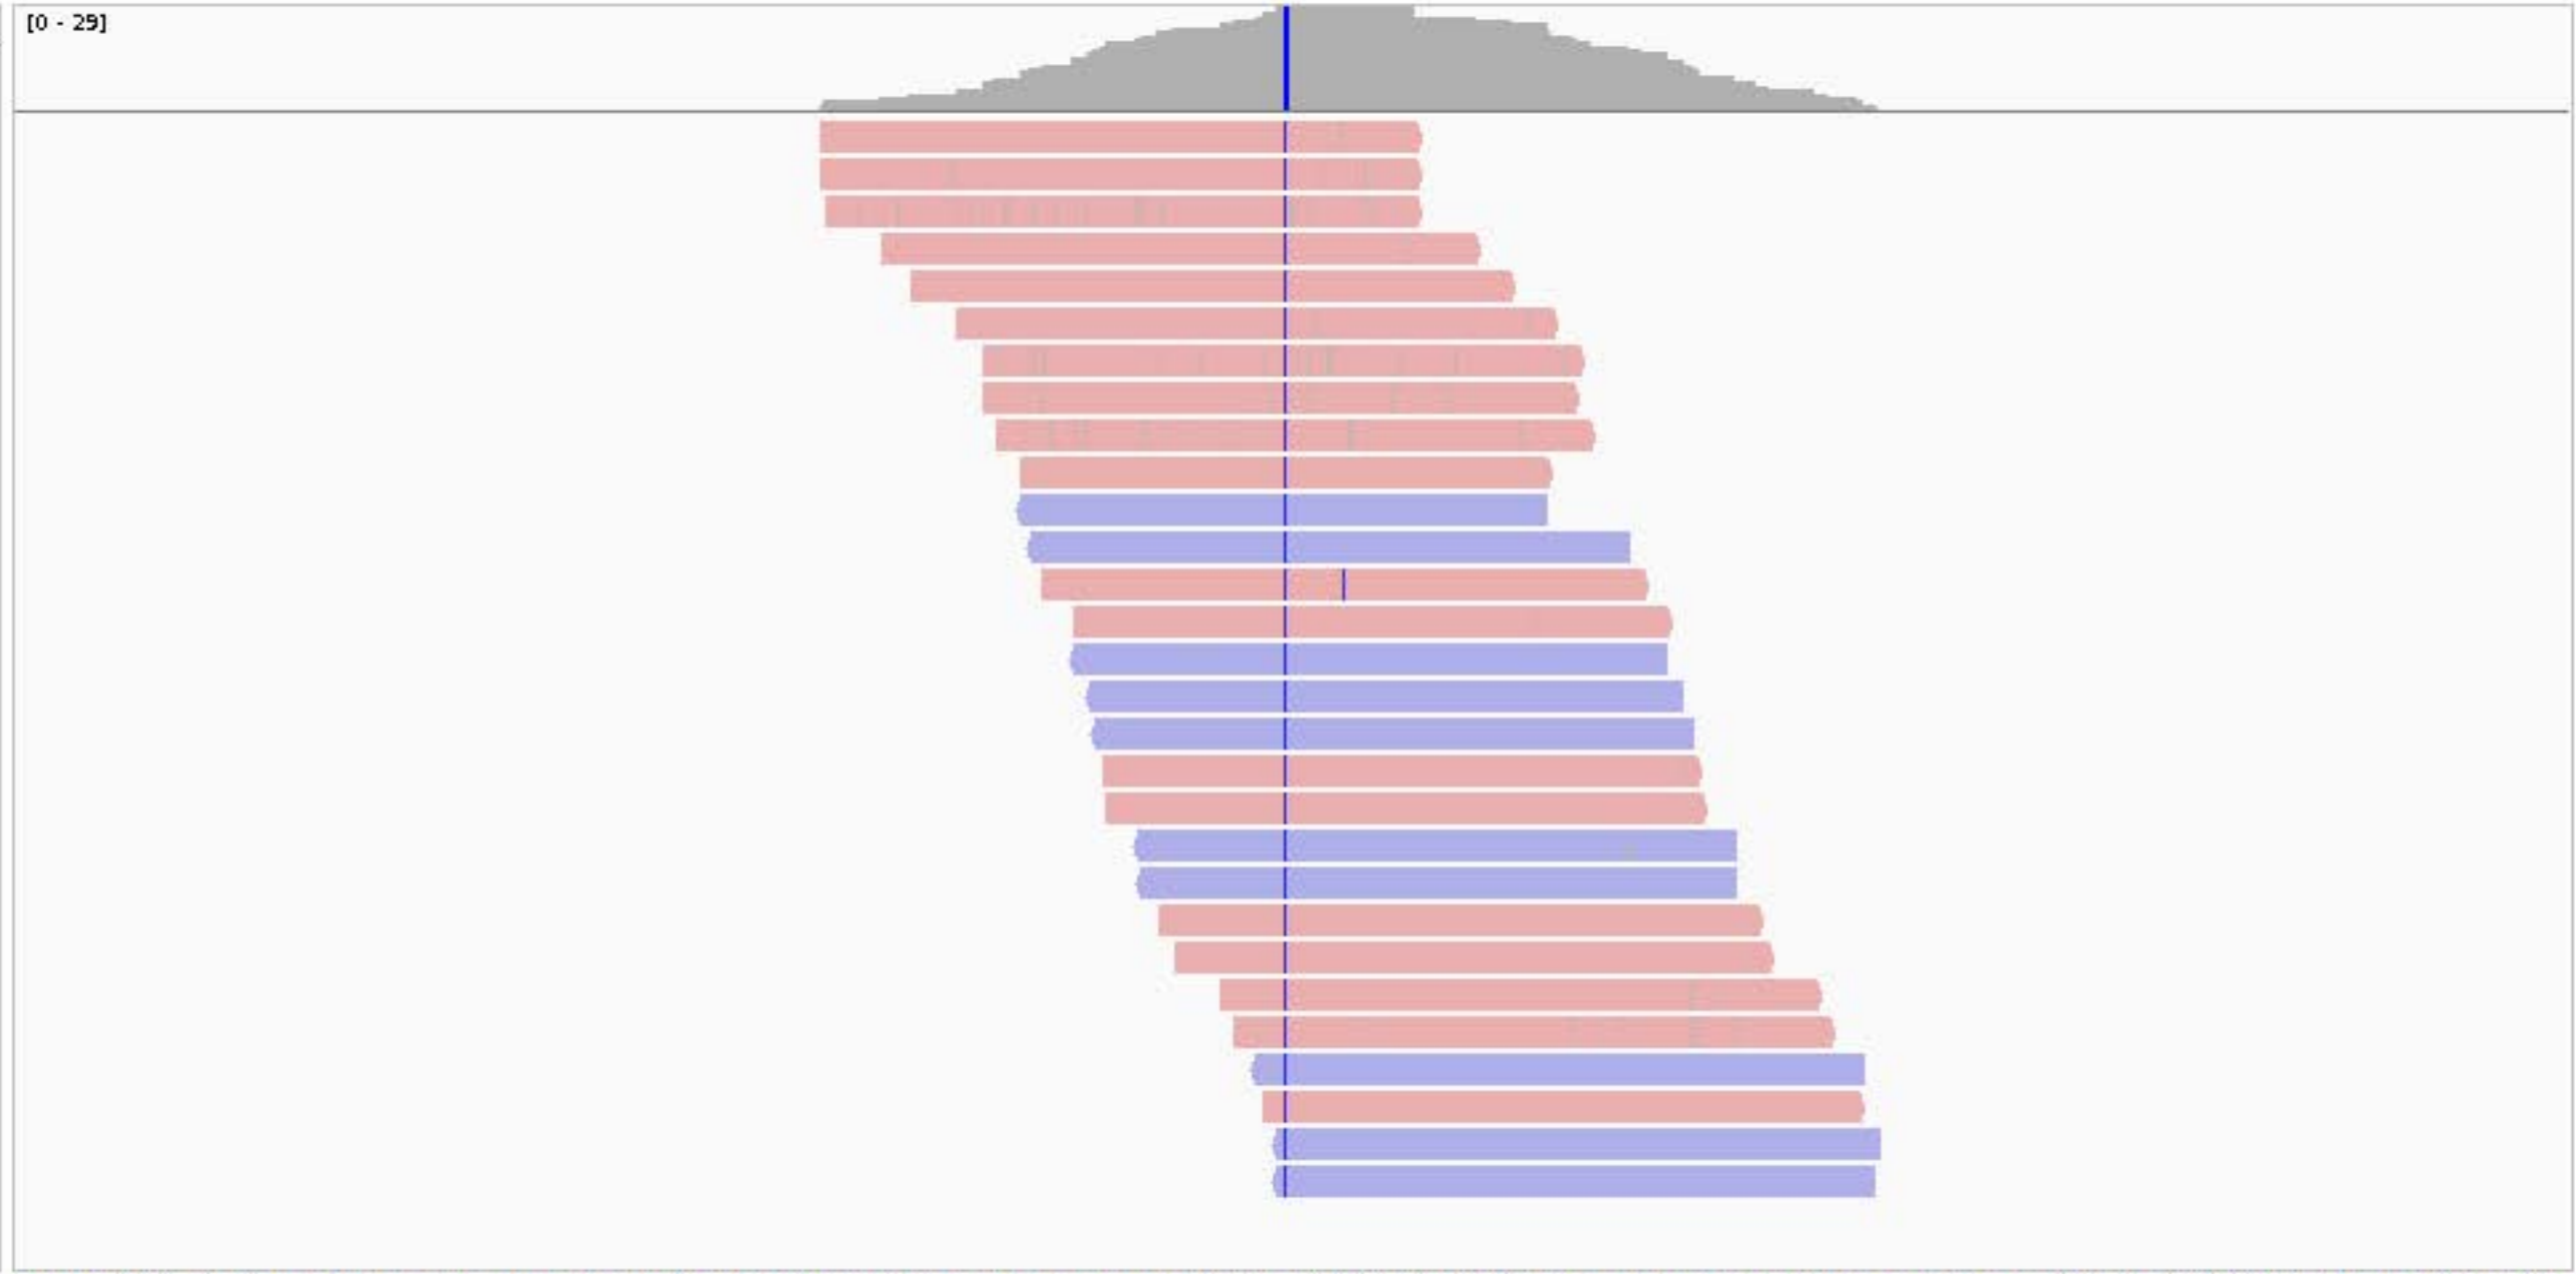

Sequence

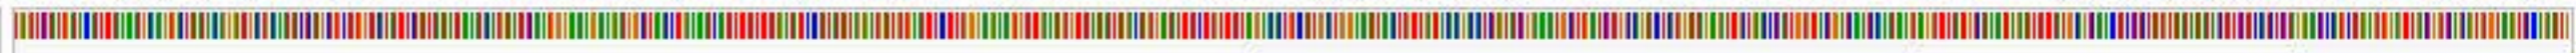

Refseq Genes

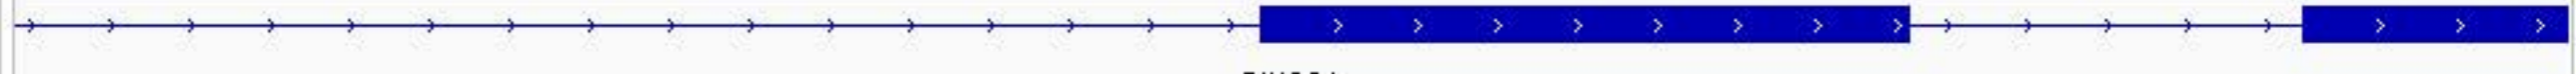

PIK3CA

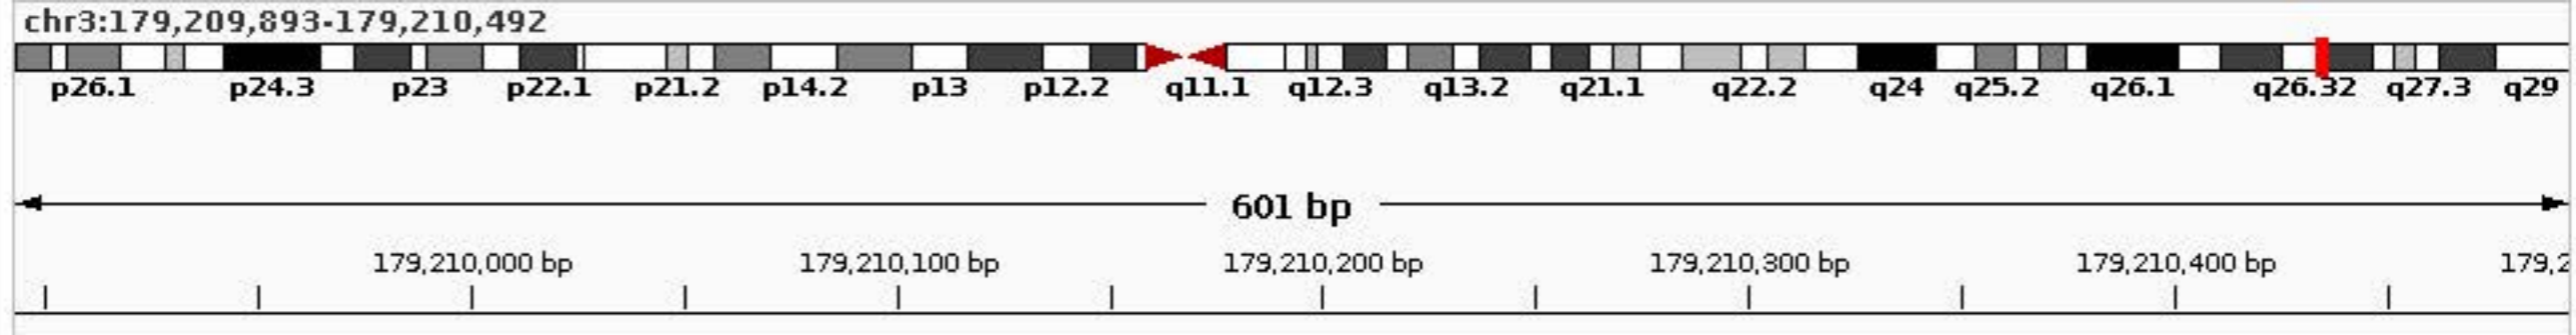

SL\_0015\_LN\_44\_mut.bam Coverage

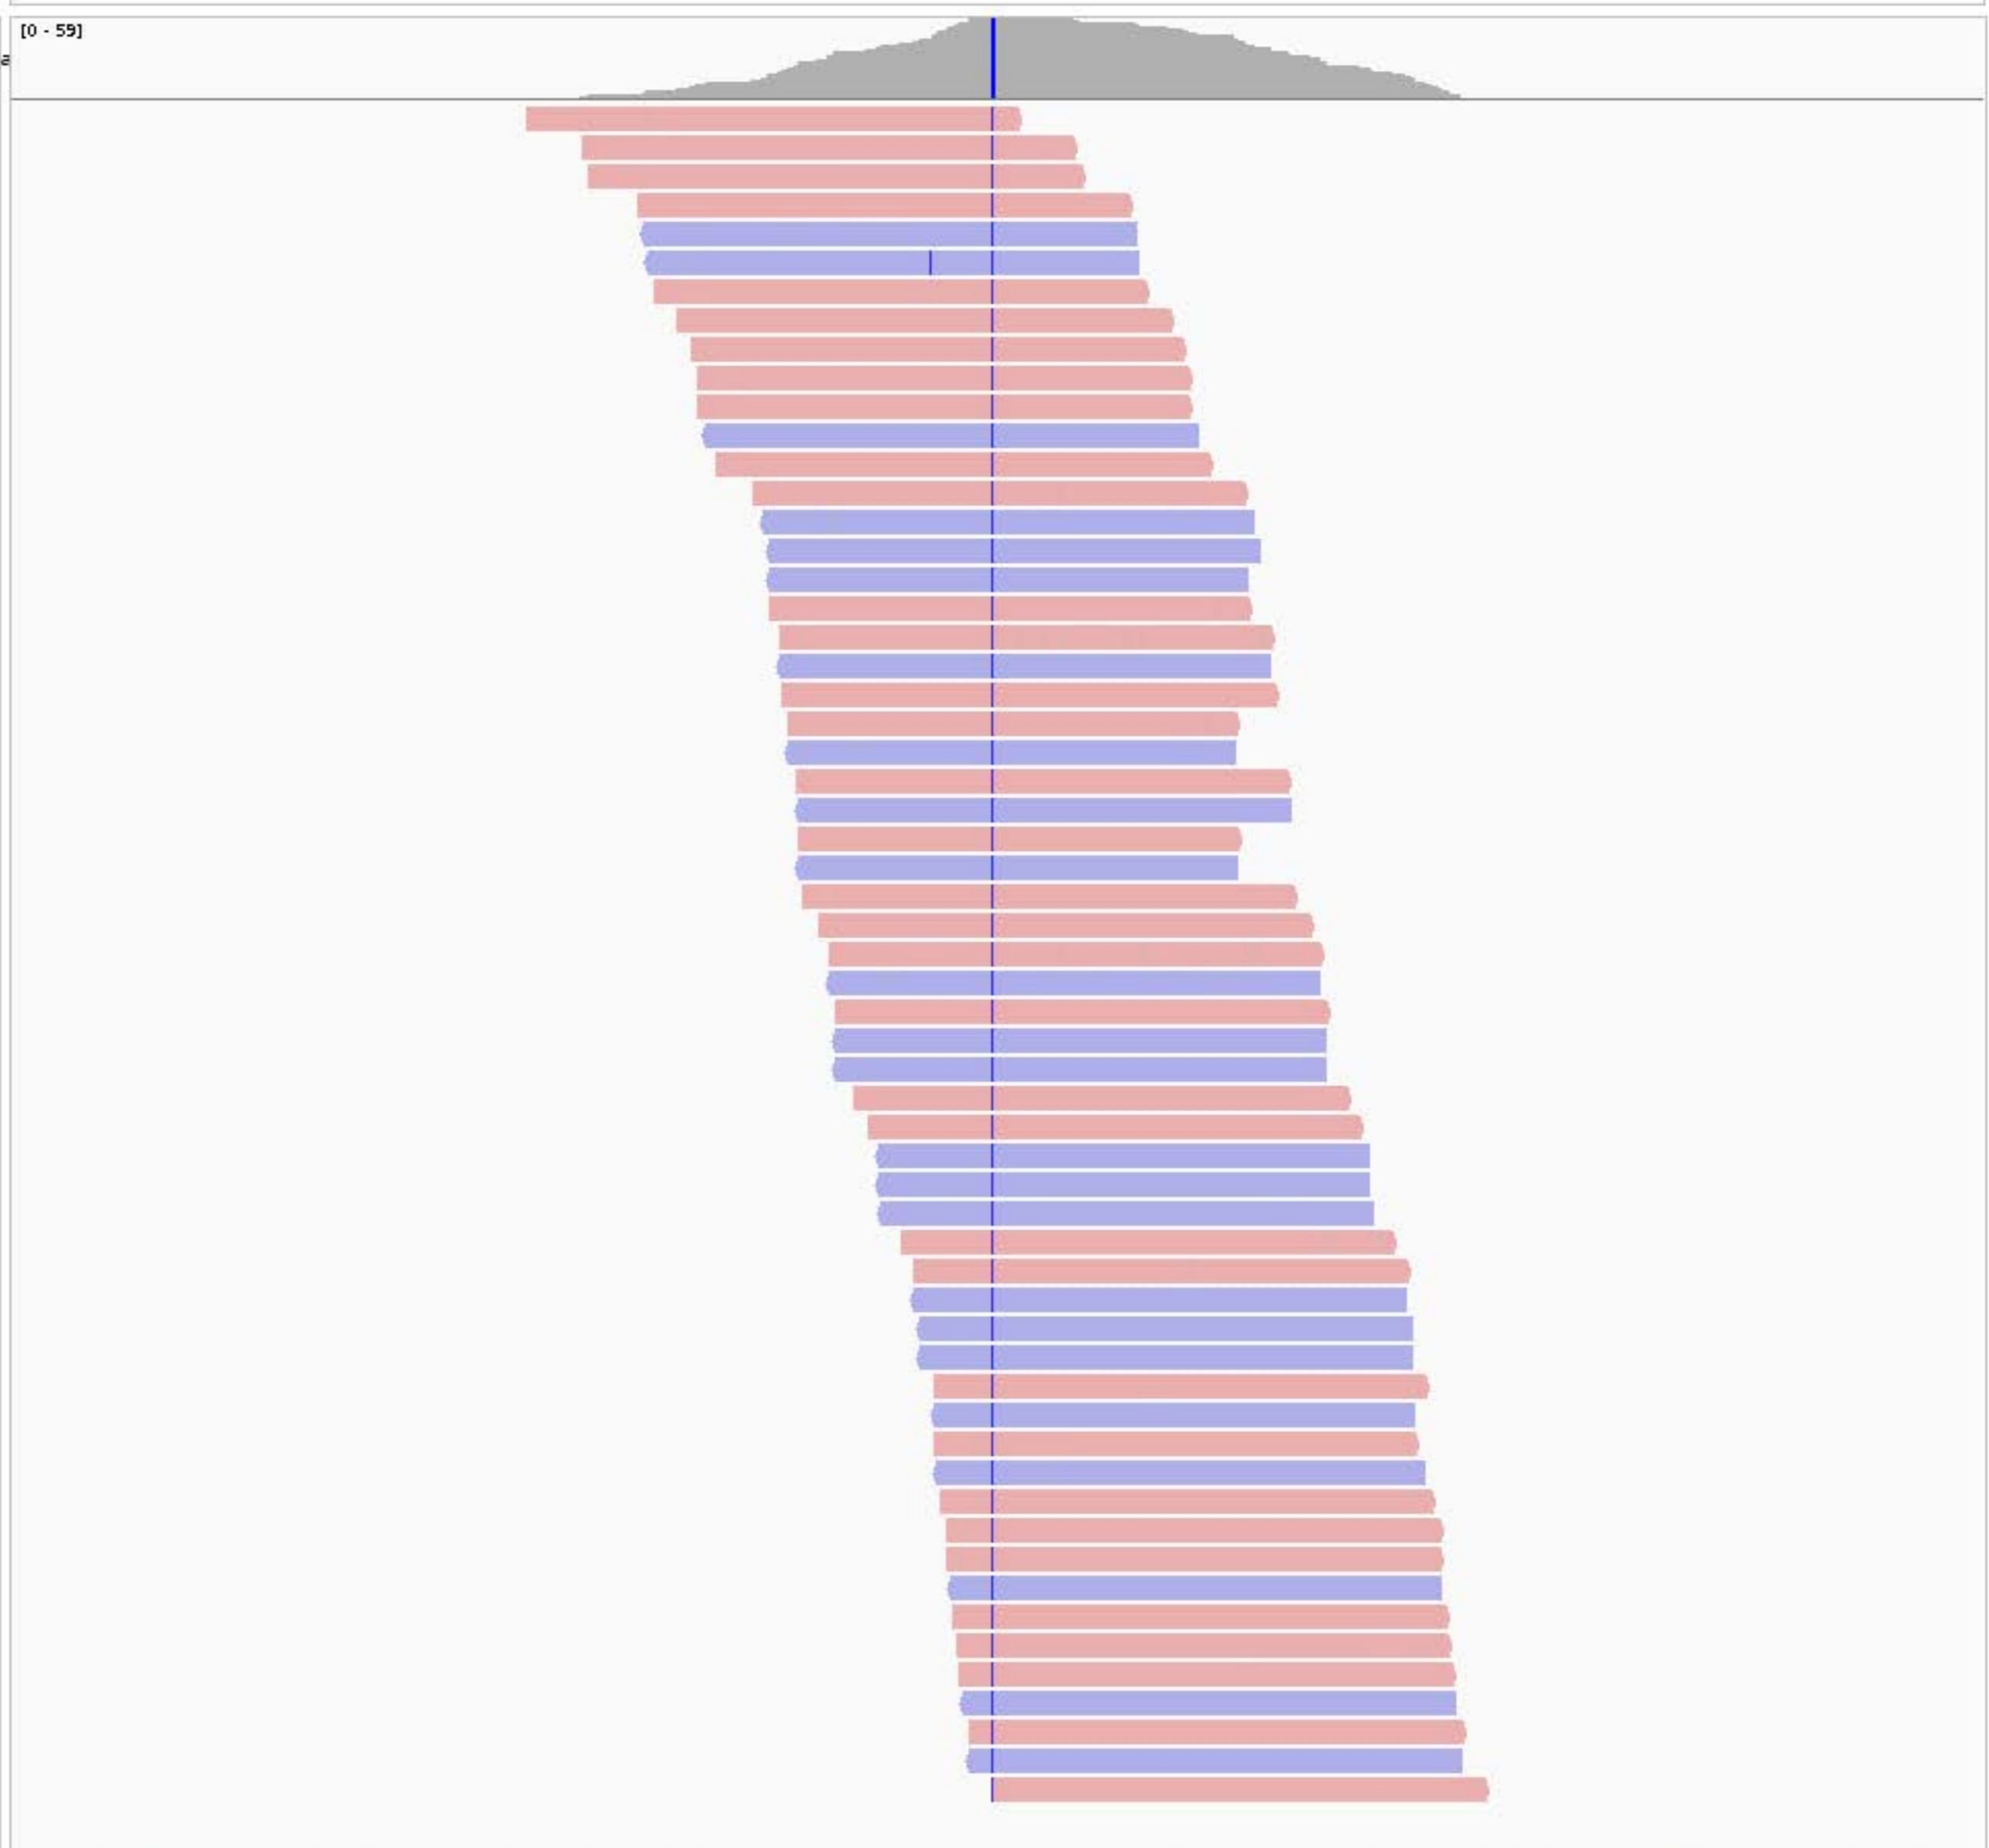

SL\_0015\_LN\_44\_mut.bam

Sequence

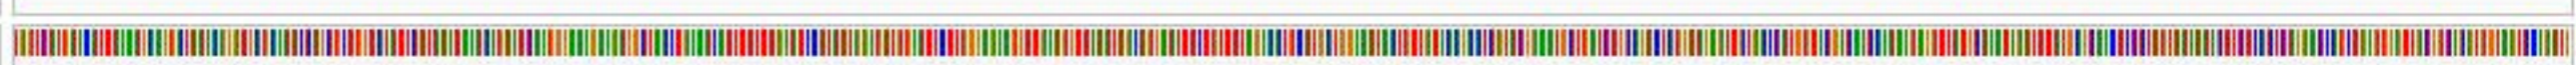

Refseq Genes

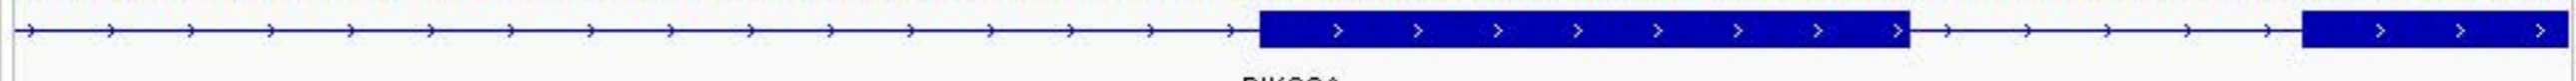

PIK3CA



chr3:179,209,893-179,210,492

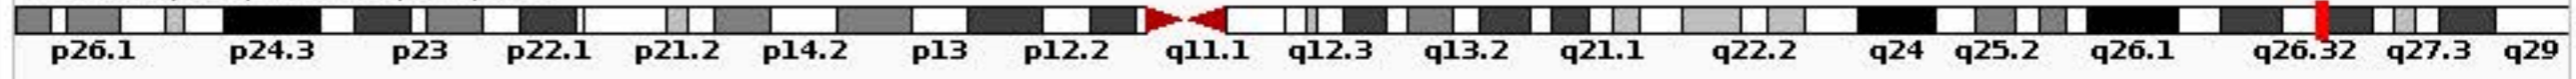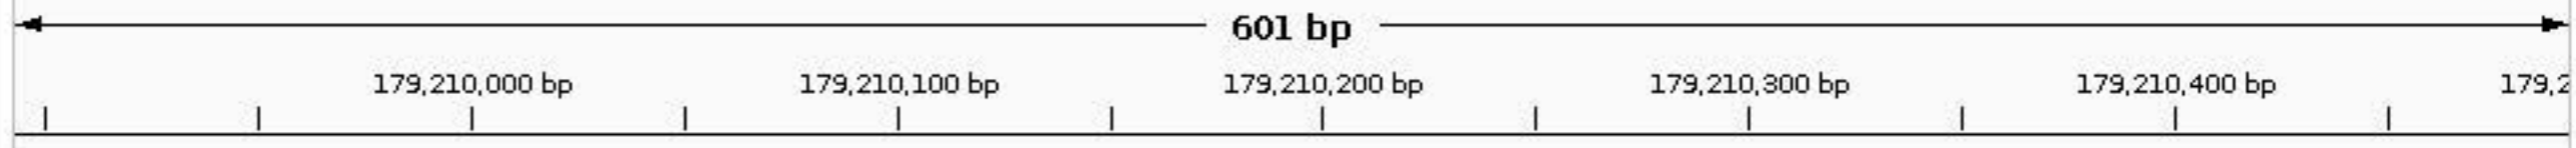

SL\_0015\_RN\_11\_mut.bam Coverage

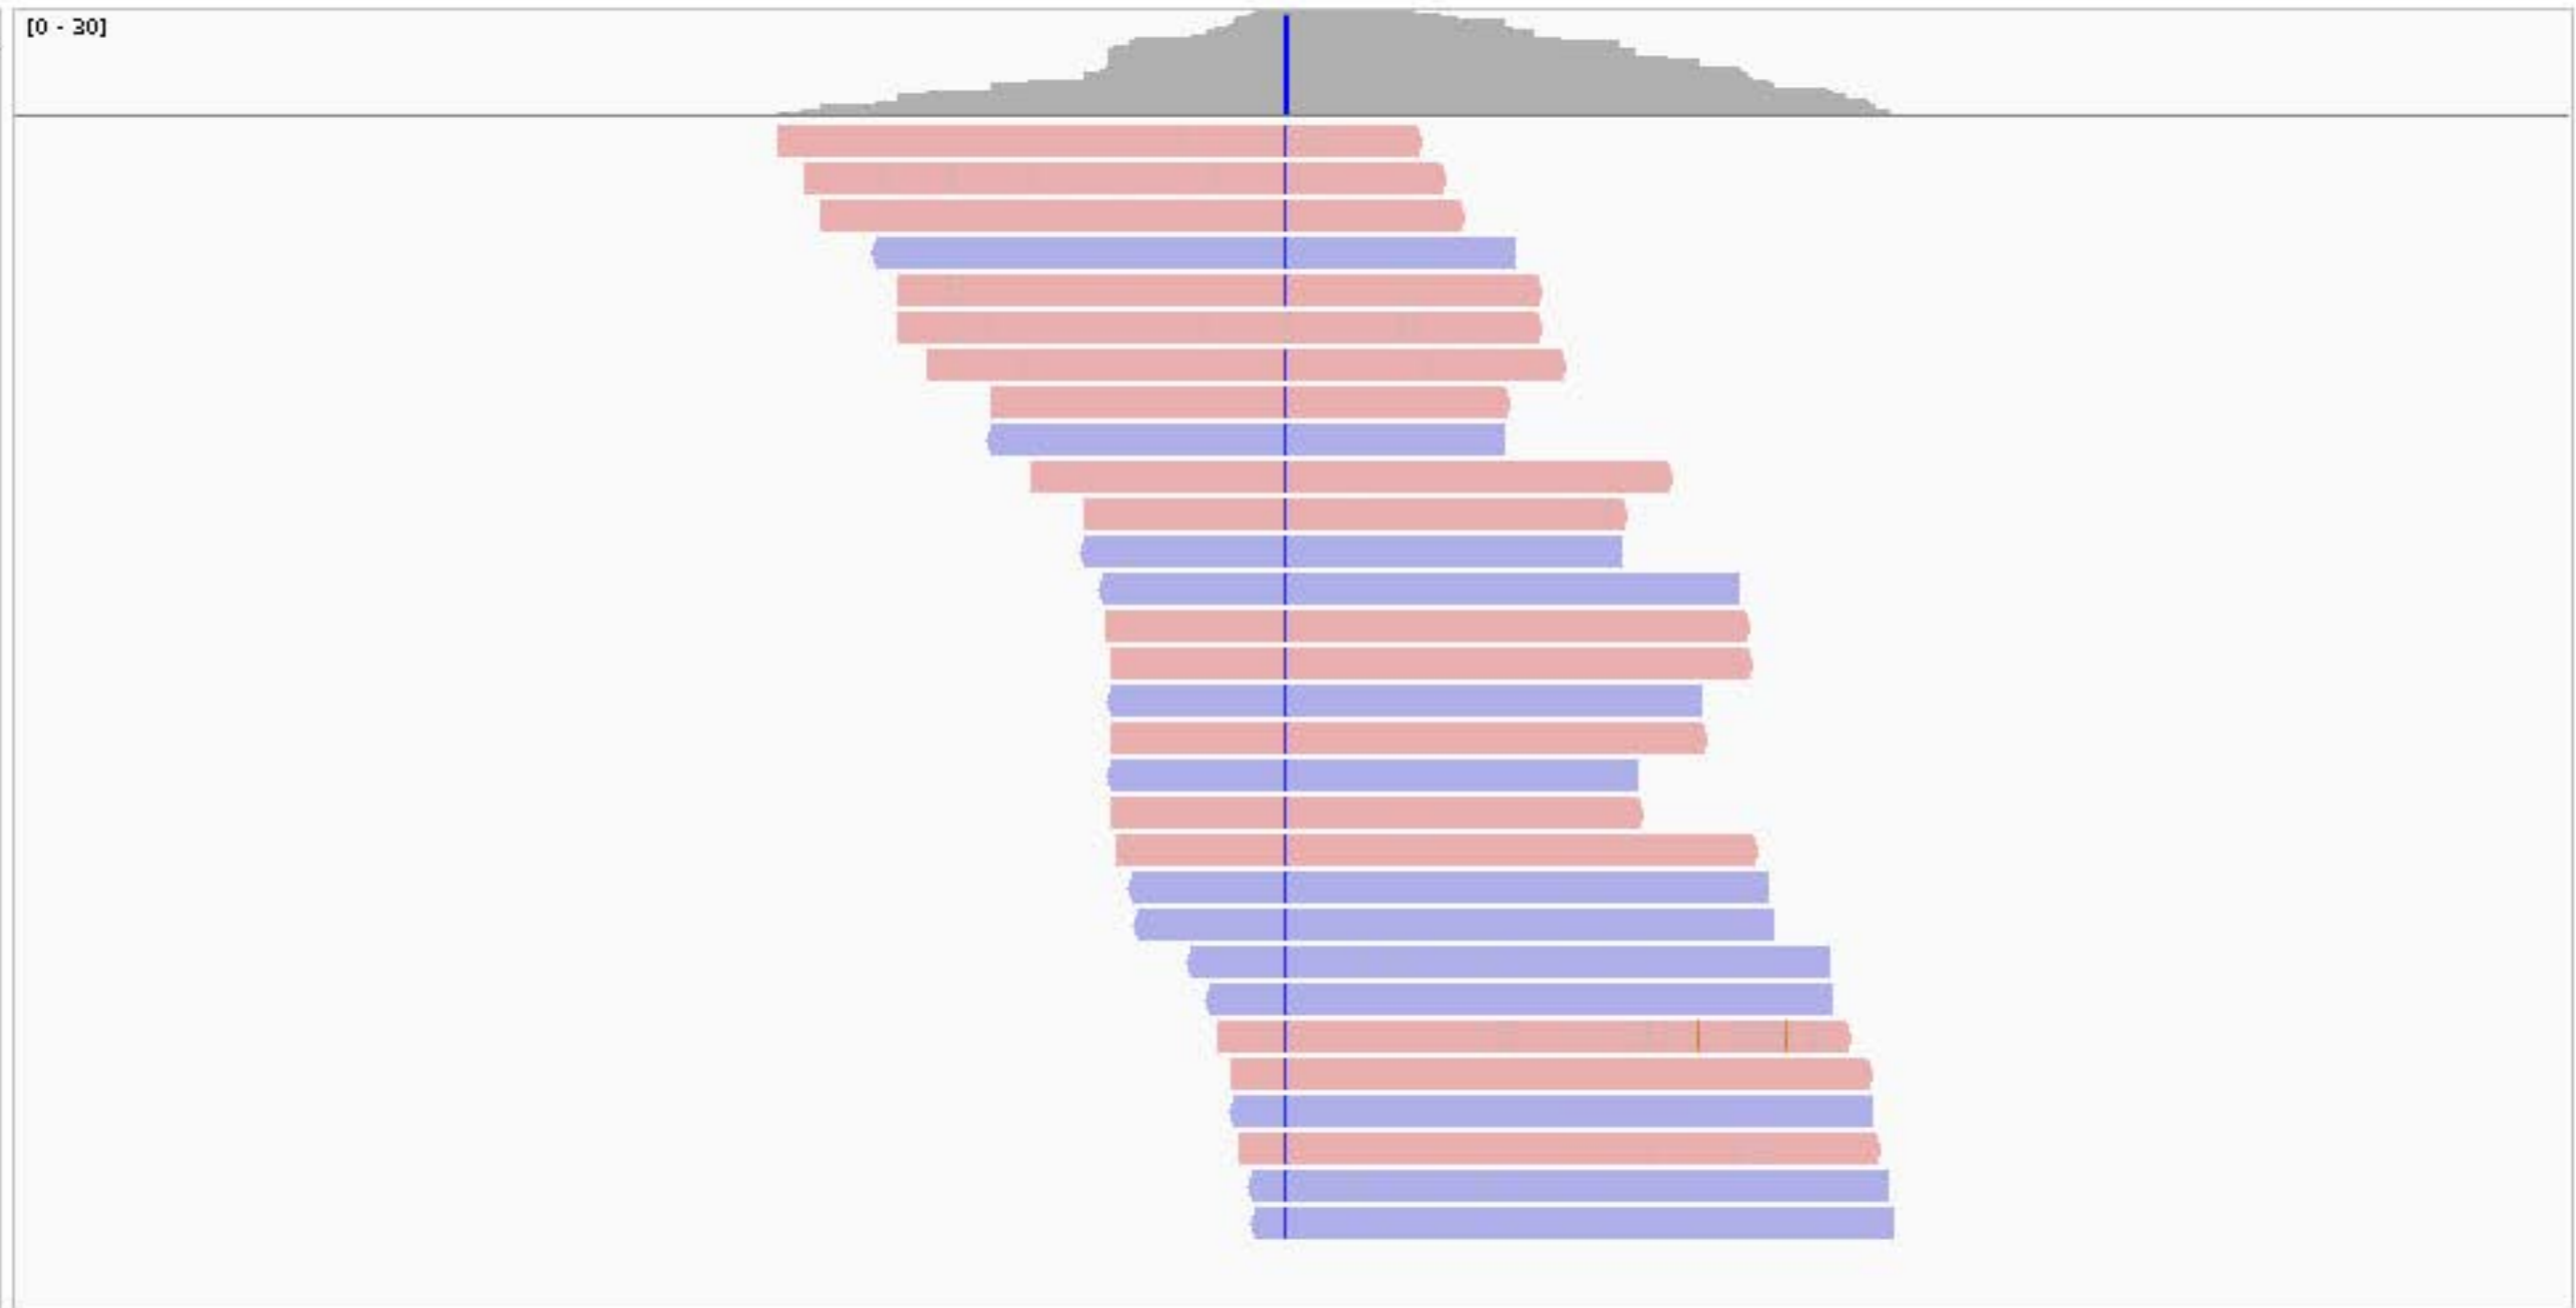

SL\_0015\_RN\_11\_mut.bam

Sequence

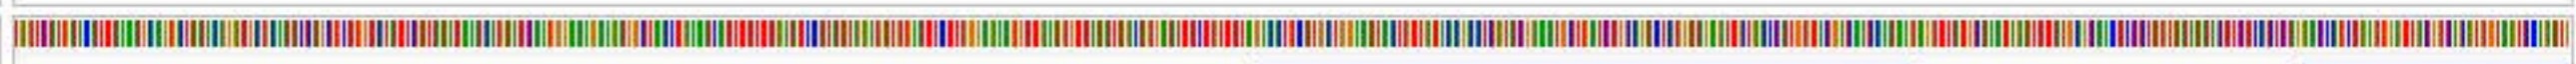

Refseq Genes

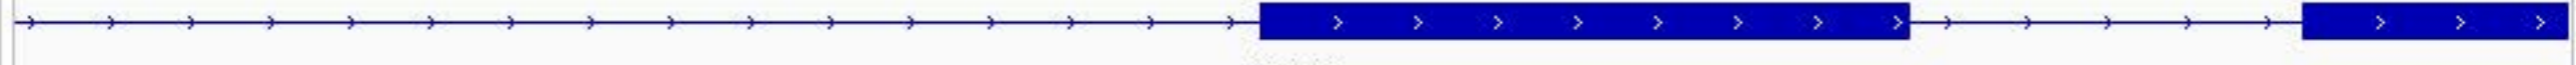

PIK3CA

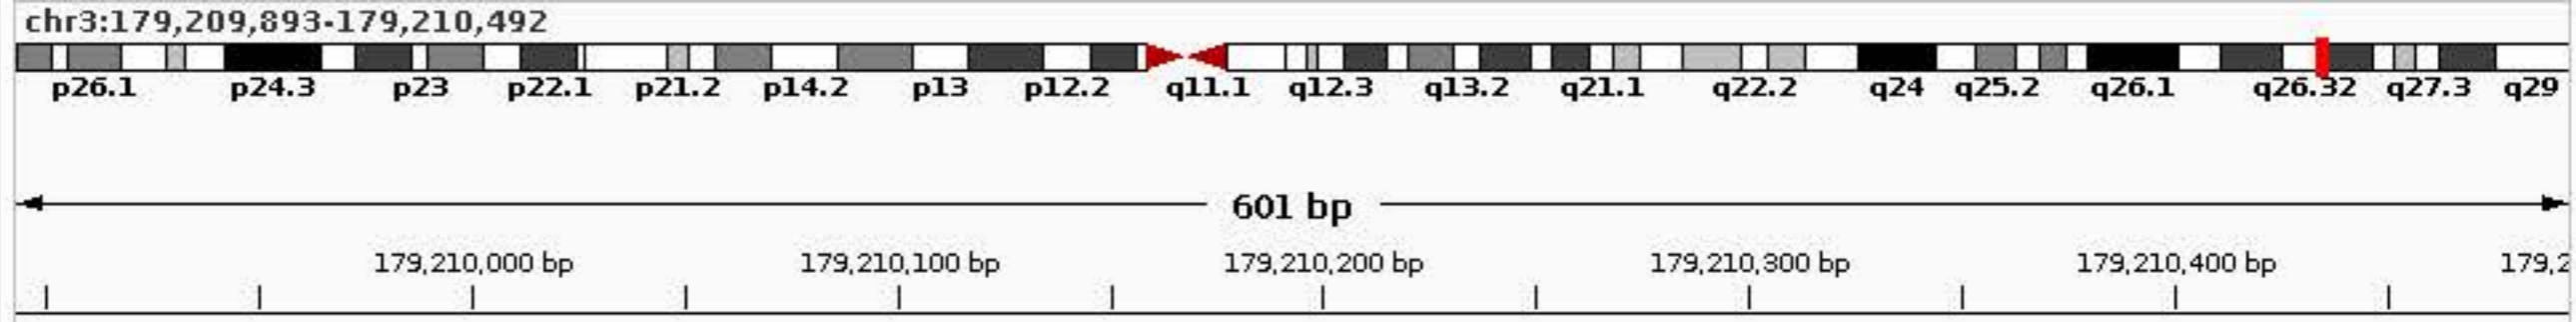

SL\_0015\_RN\_12\_mut.bam Coverage

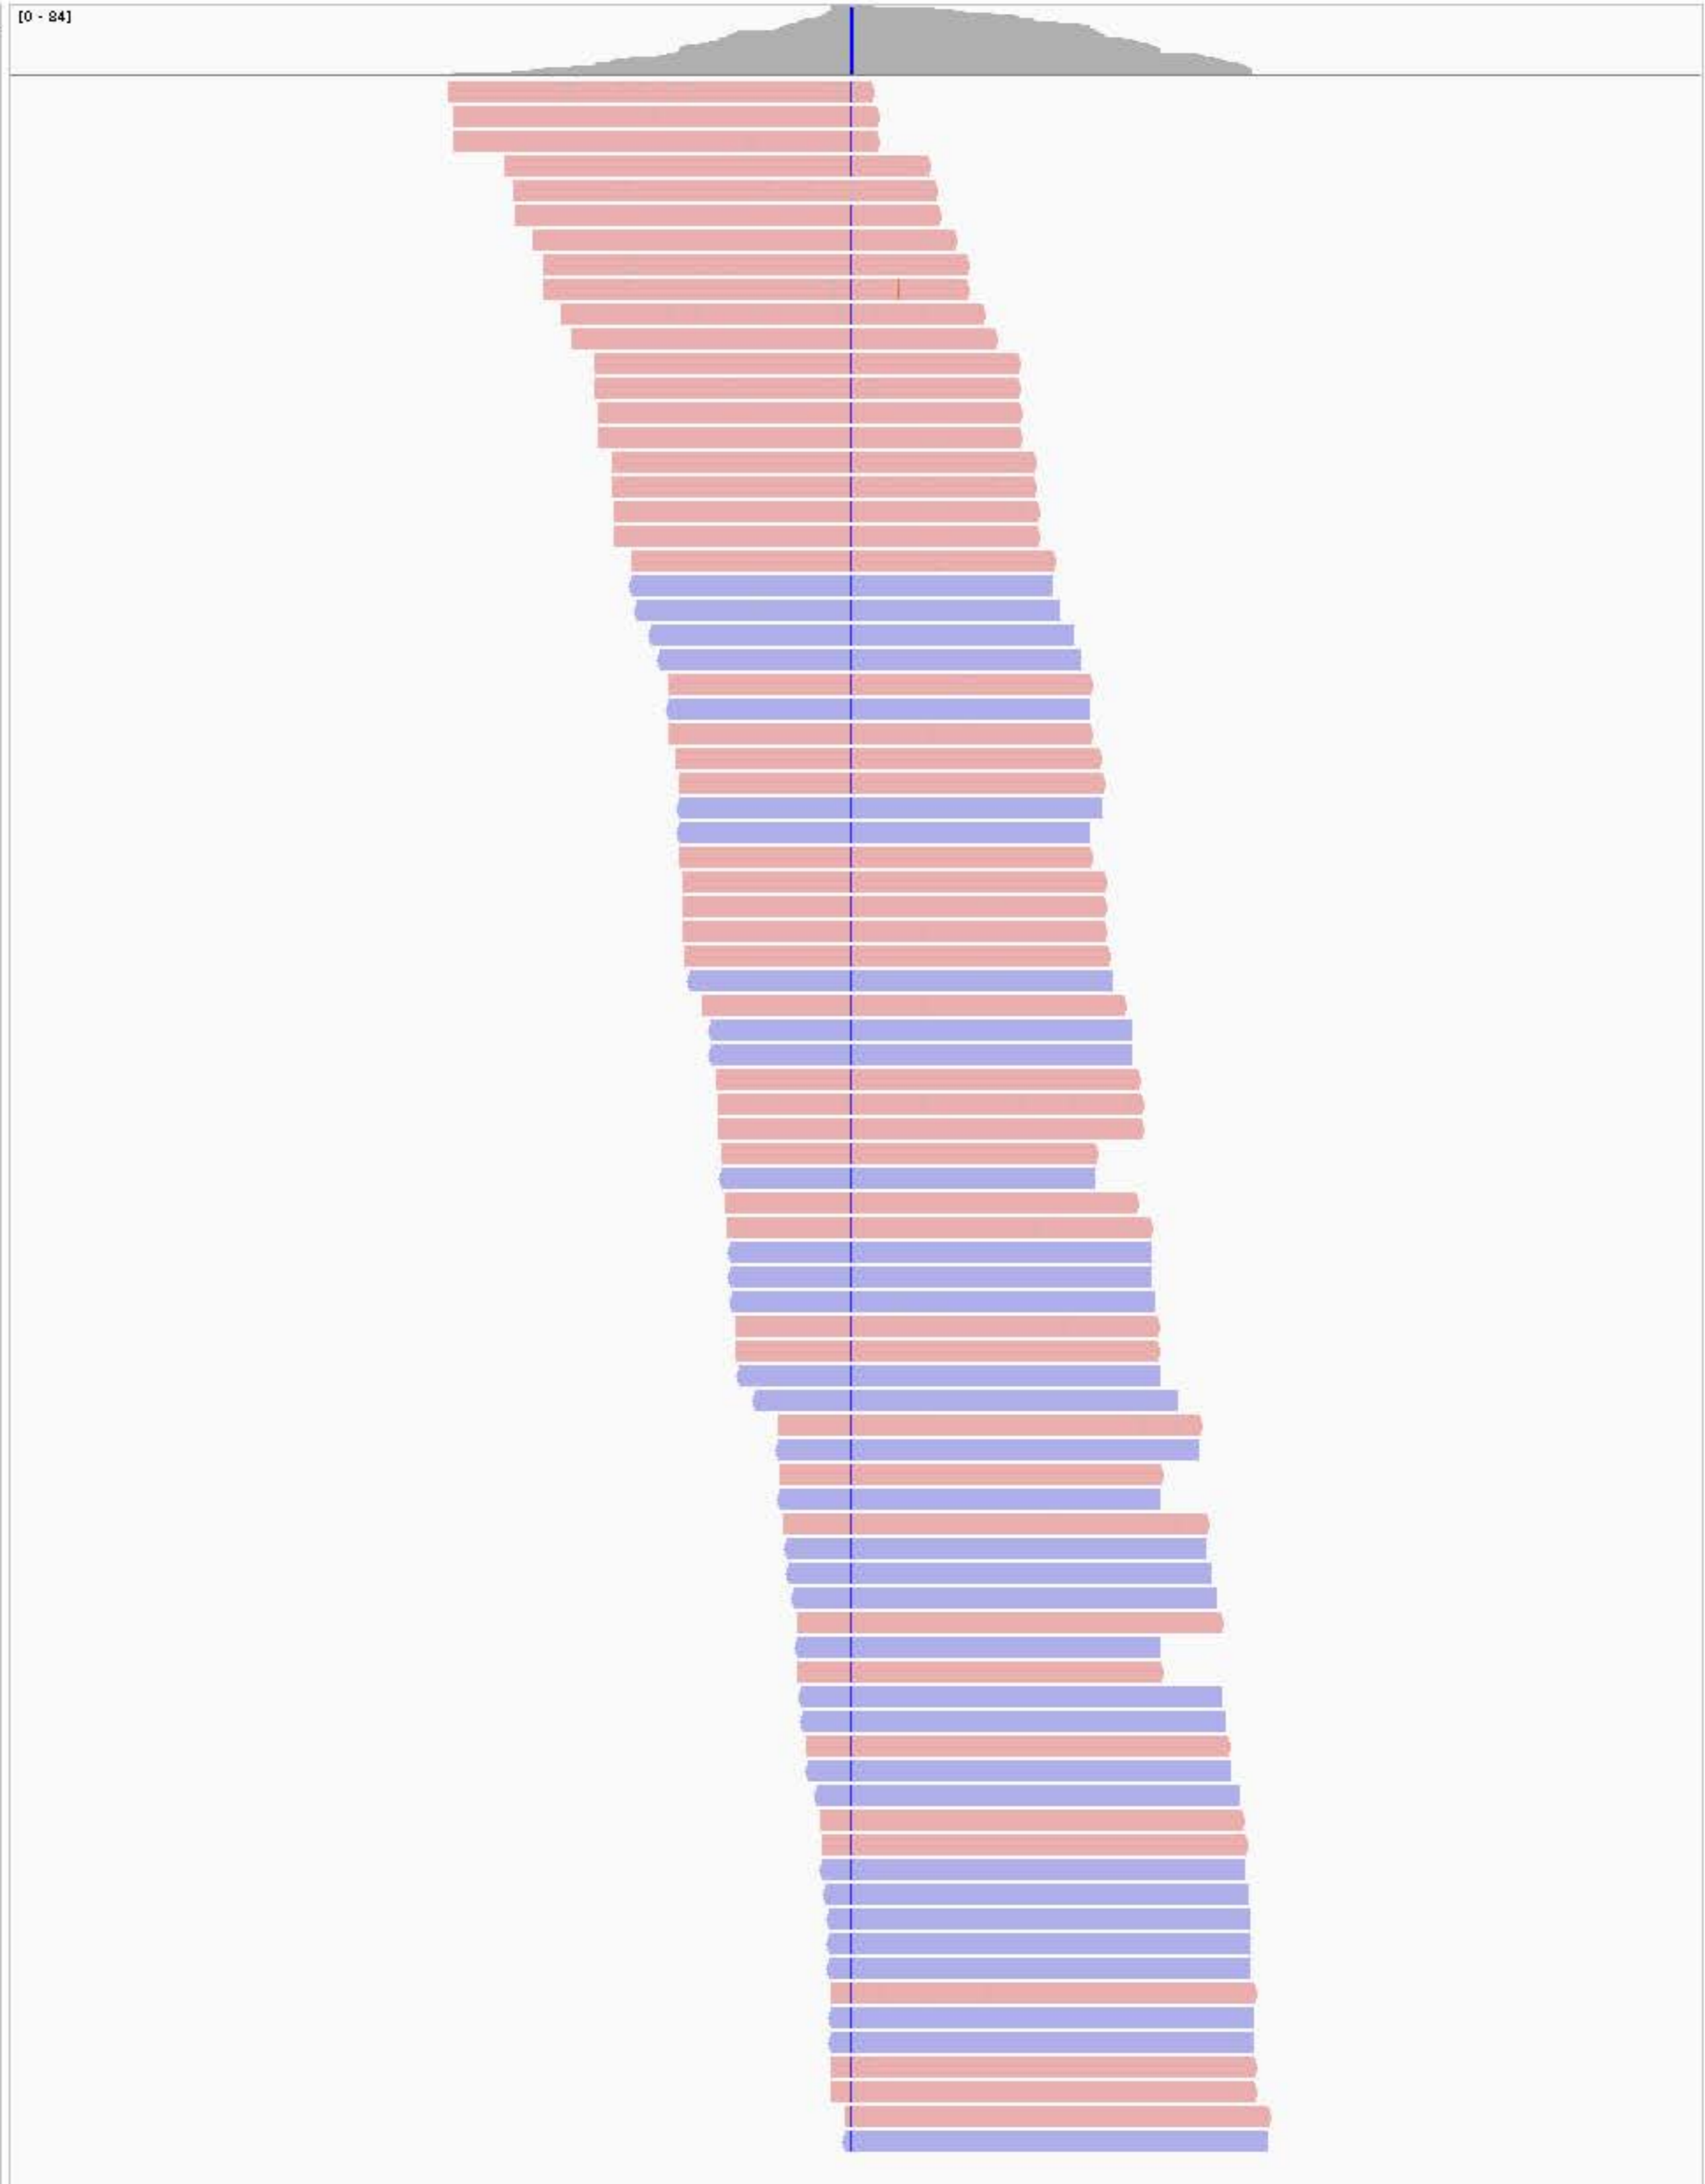

SL\_0015\_RN\_12\_mut.bam

Sequence →  
Refseq Genes

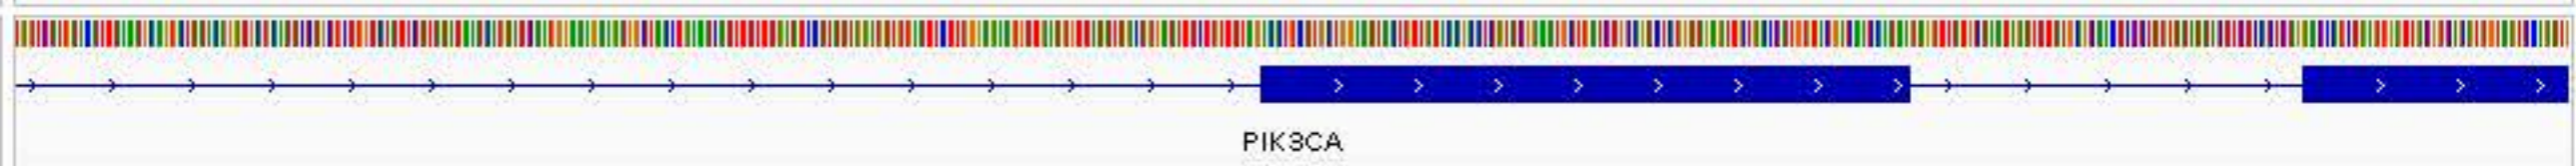



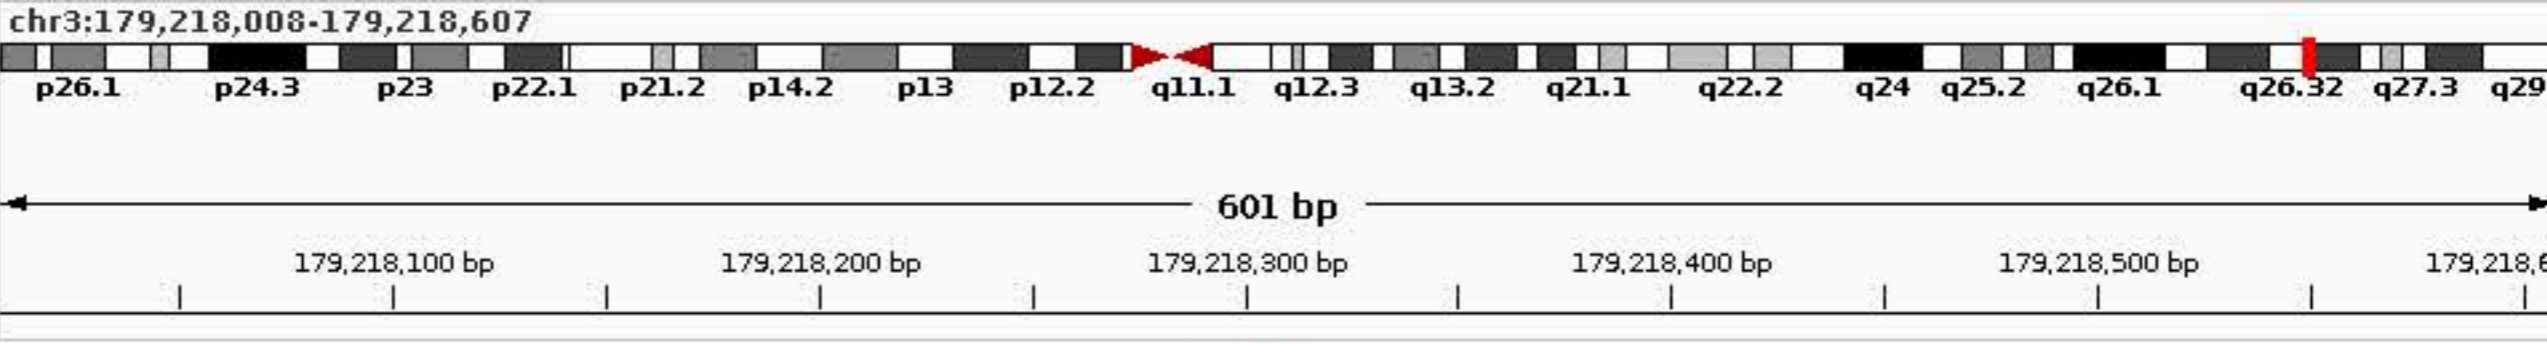

SL\_0004\_RN\_66\_mut.bam Coverage

SL\_0004\_RN\_66\_mut.bam

Sequence

Refseq Genes

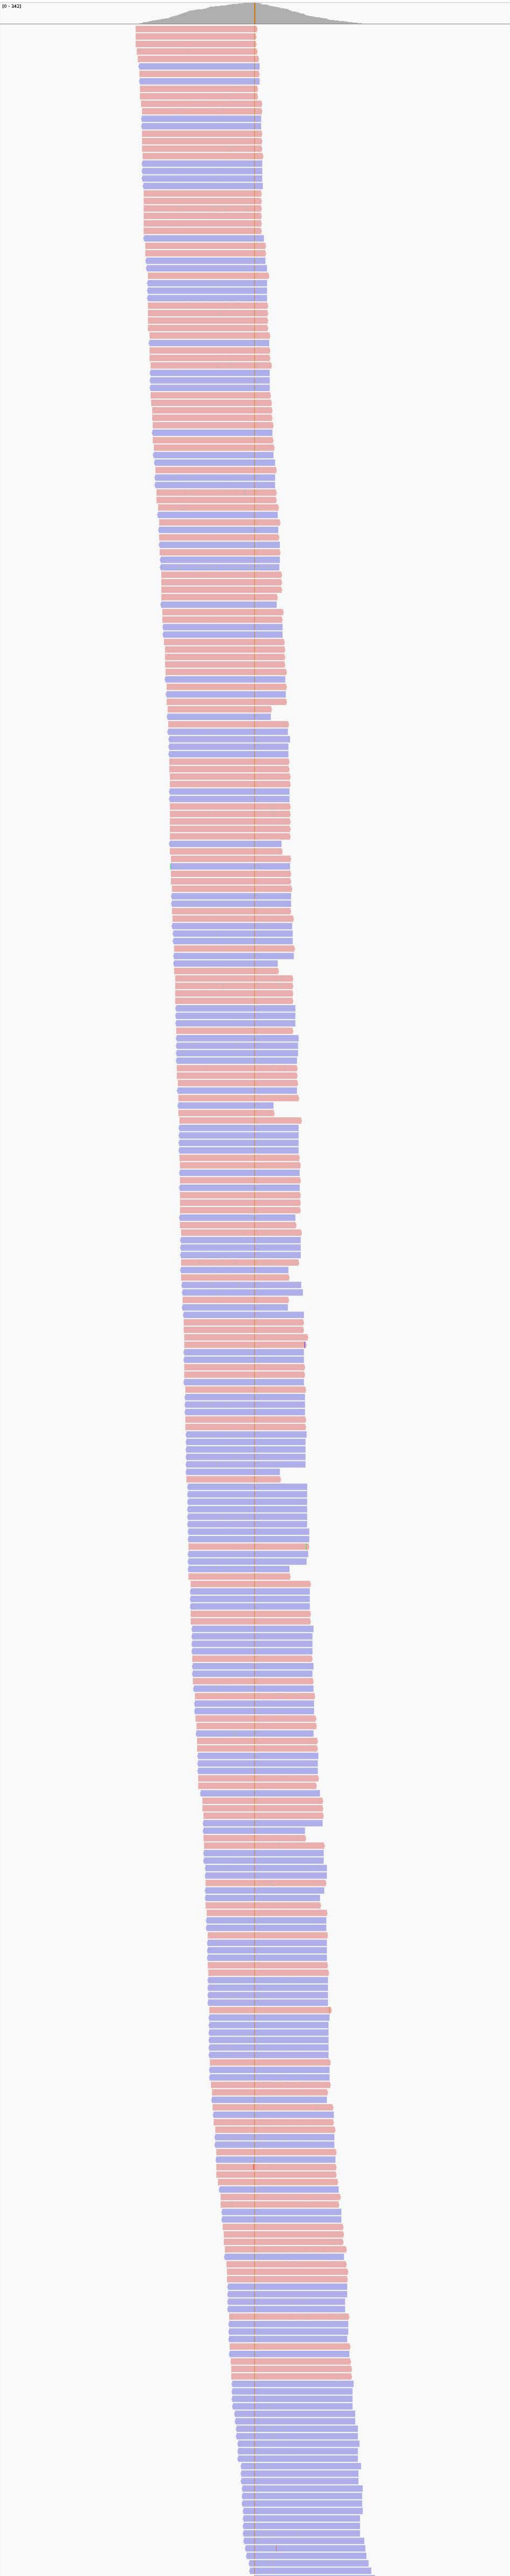



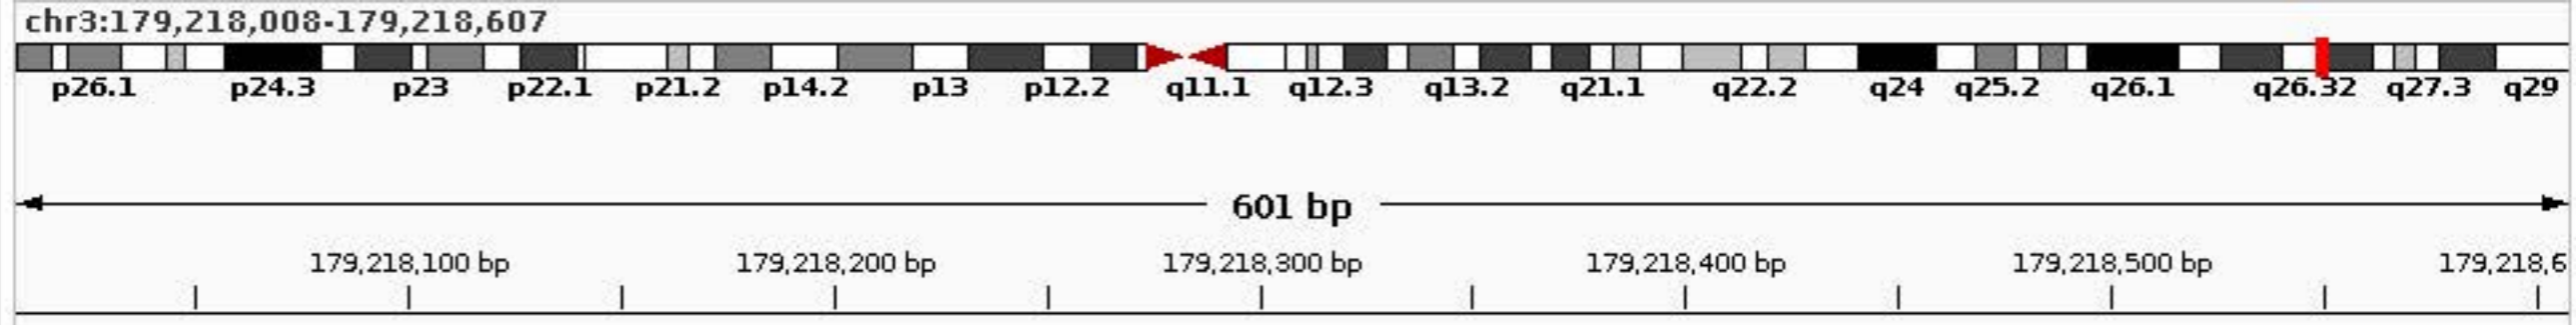

SL\_0015\_LN\_60\_mut.bam Coverage

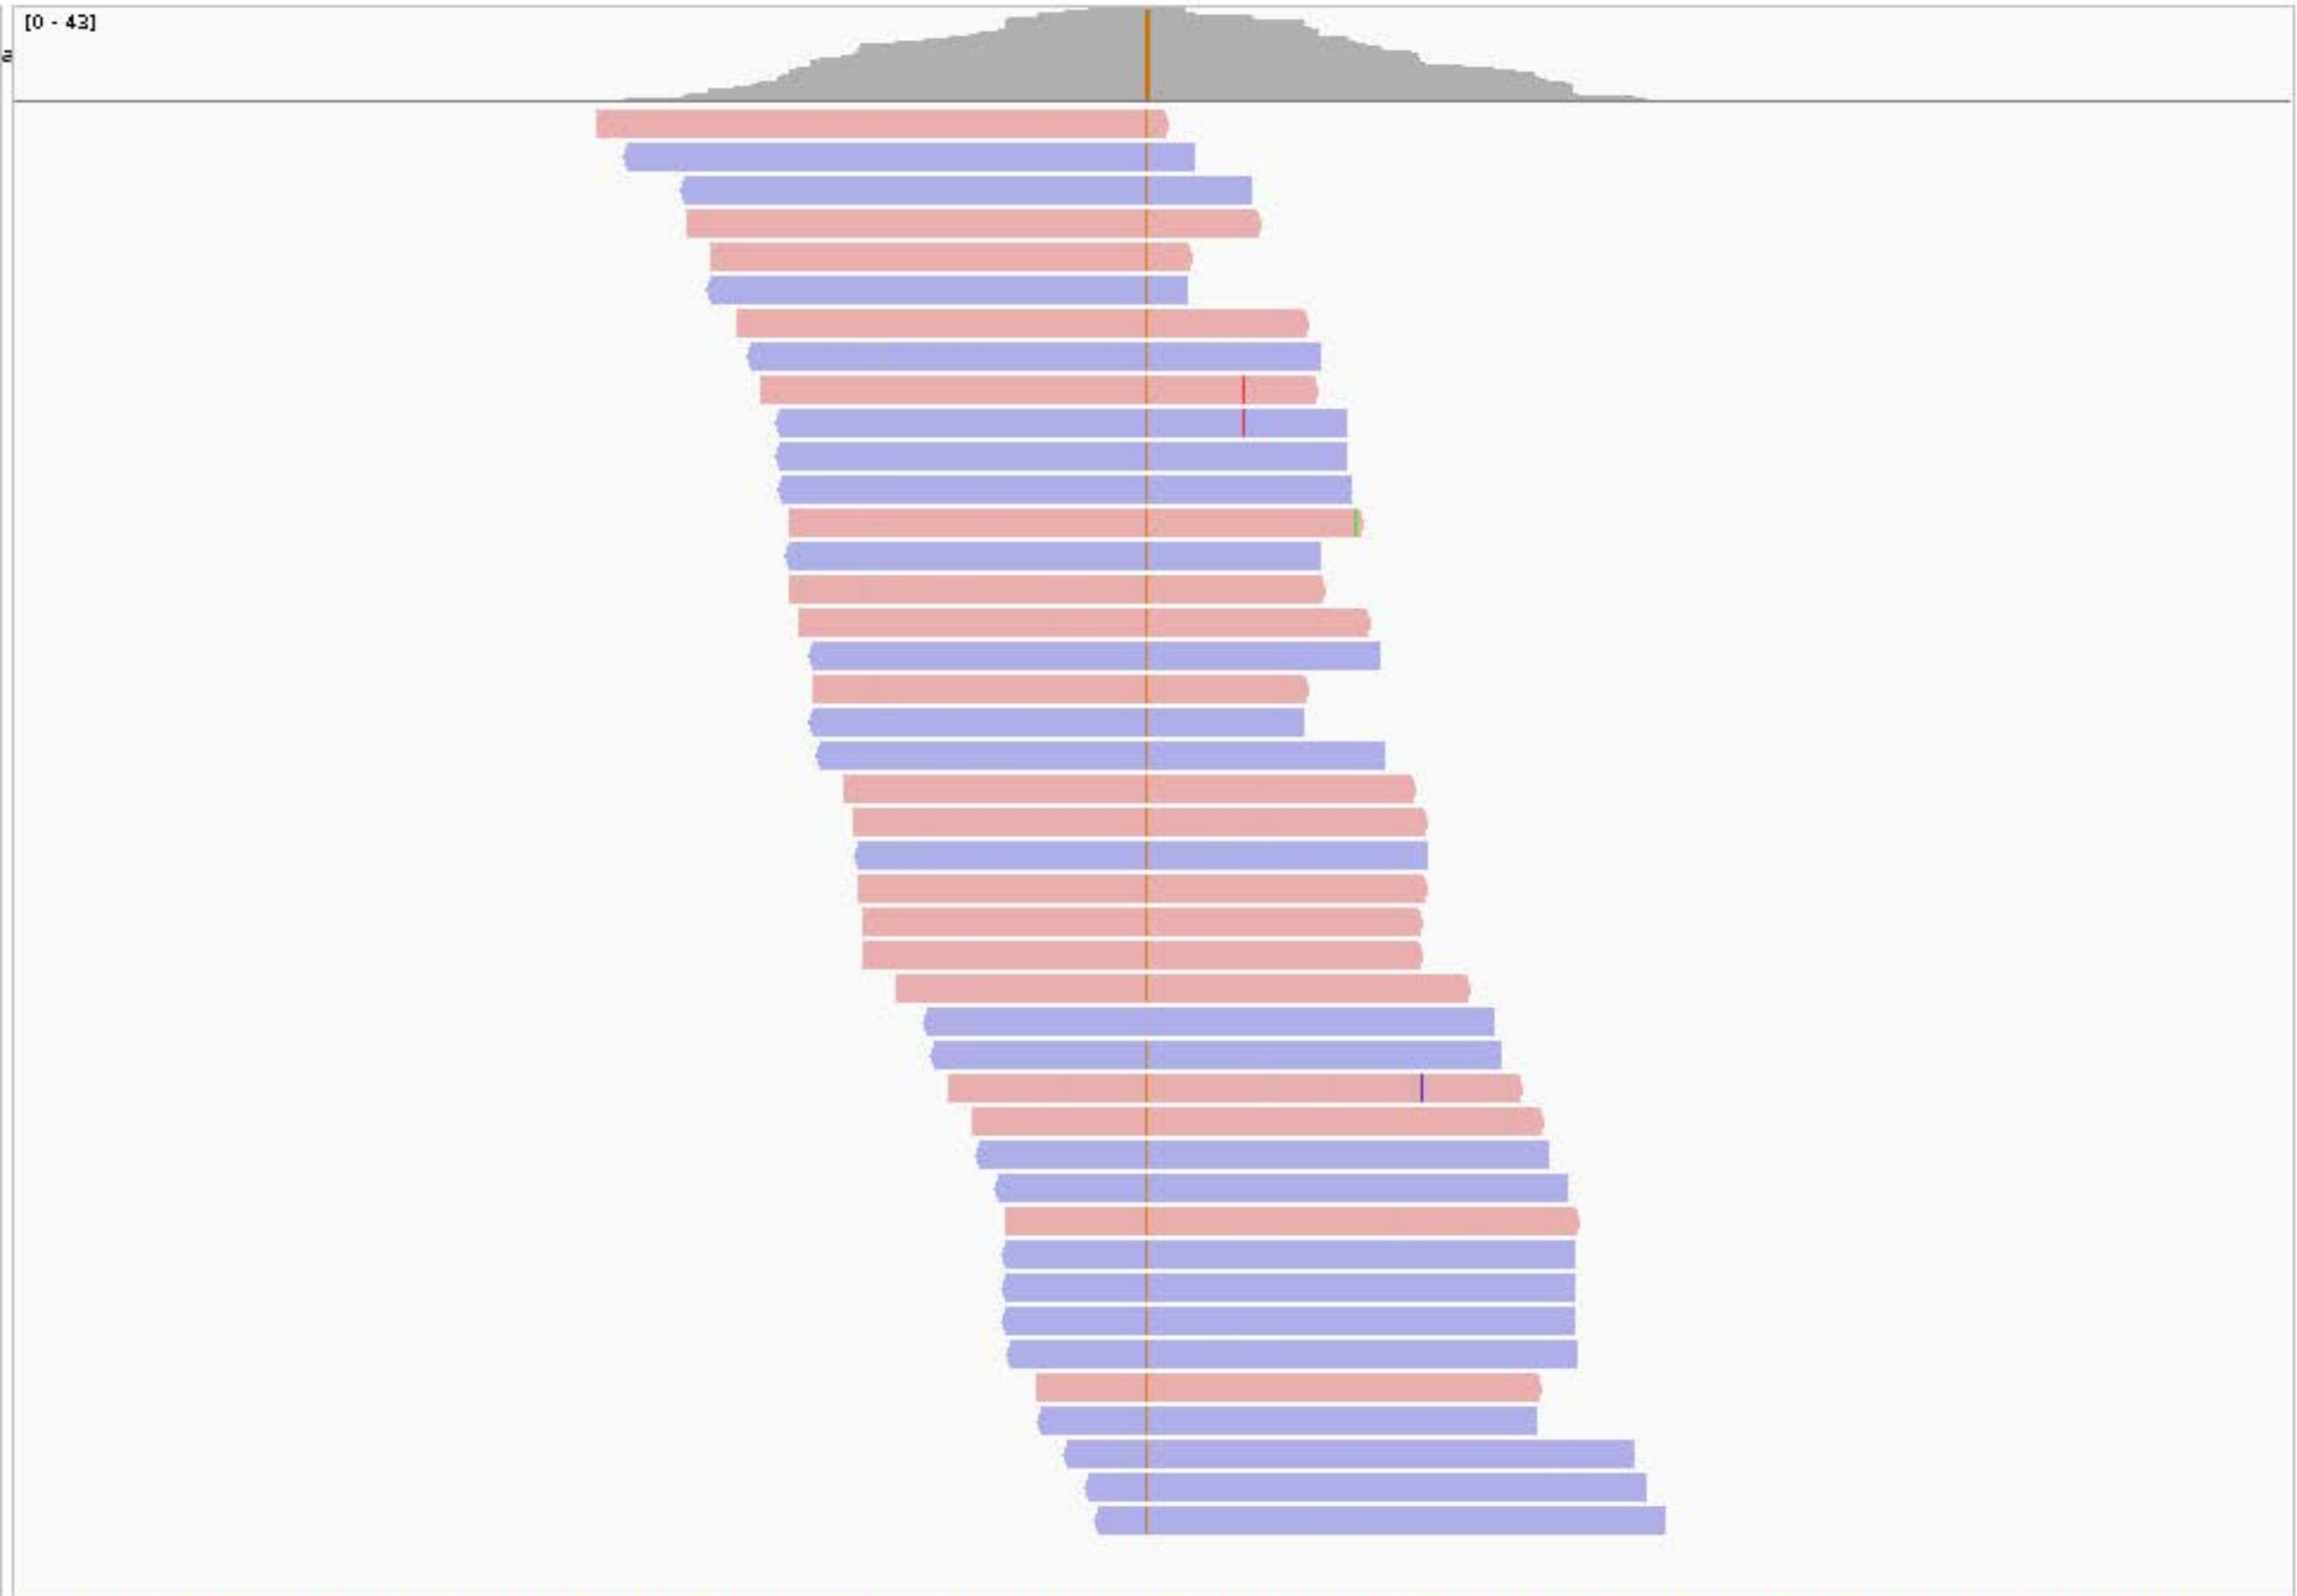

SL\_0015\_LN\_60\_mut.bam

Sequence

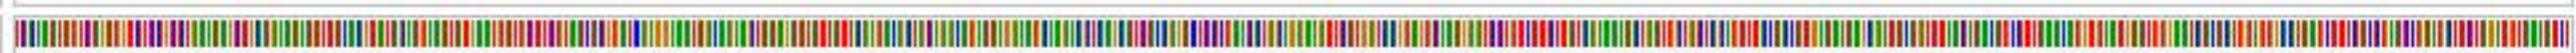

Refseq Genes

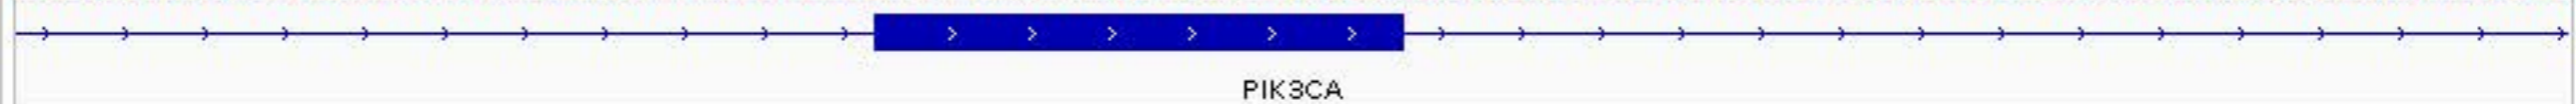

PIK3CA

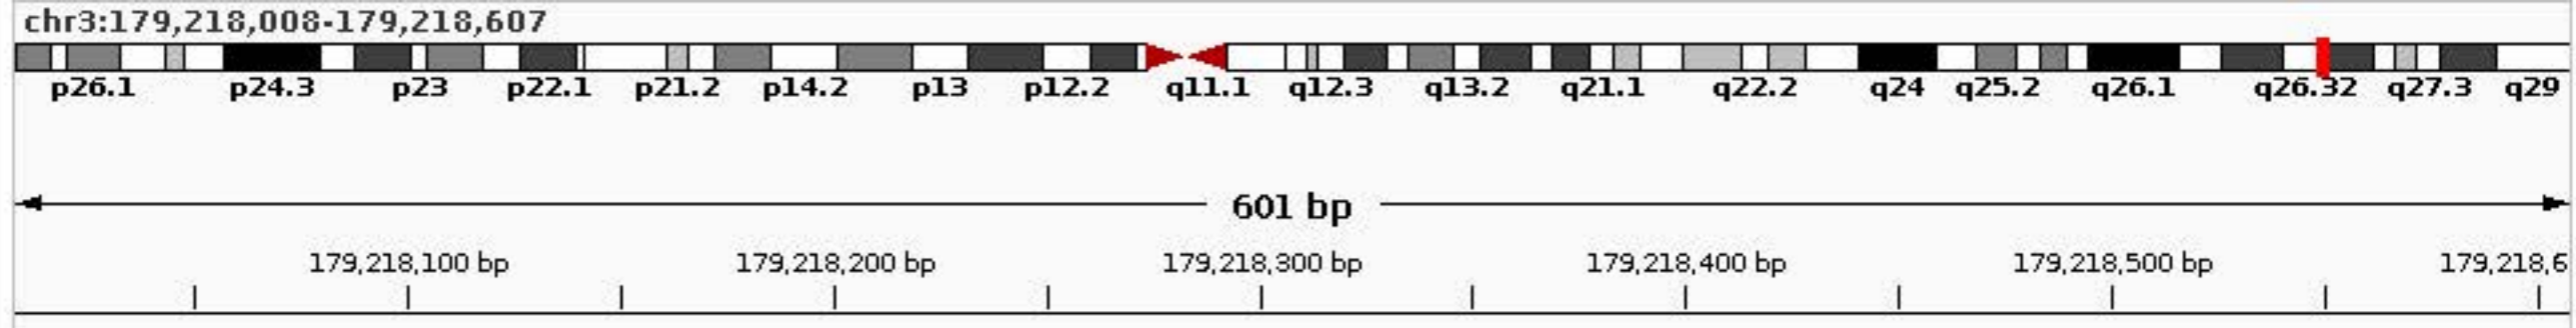

SL\_0004\_RN\_25\_mut.bam Coverage

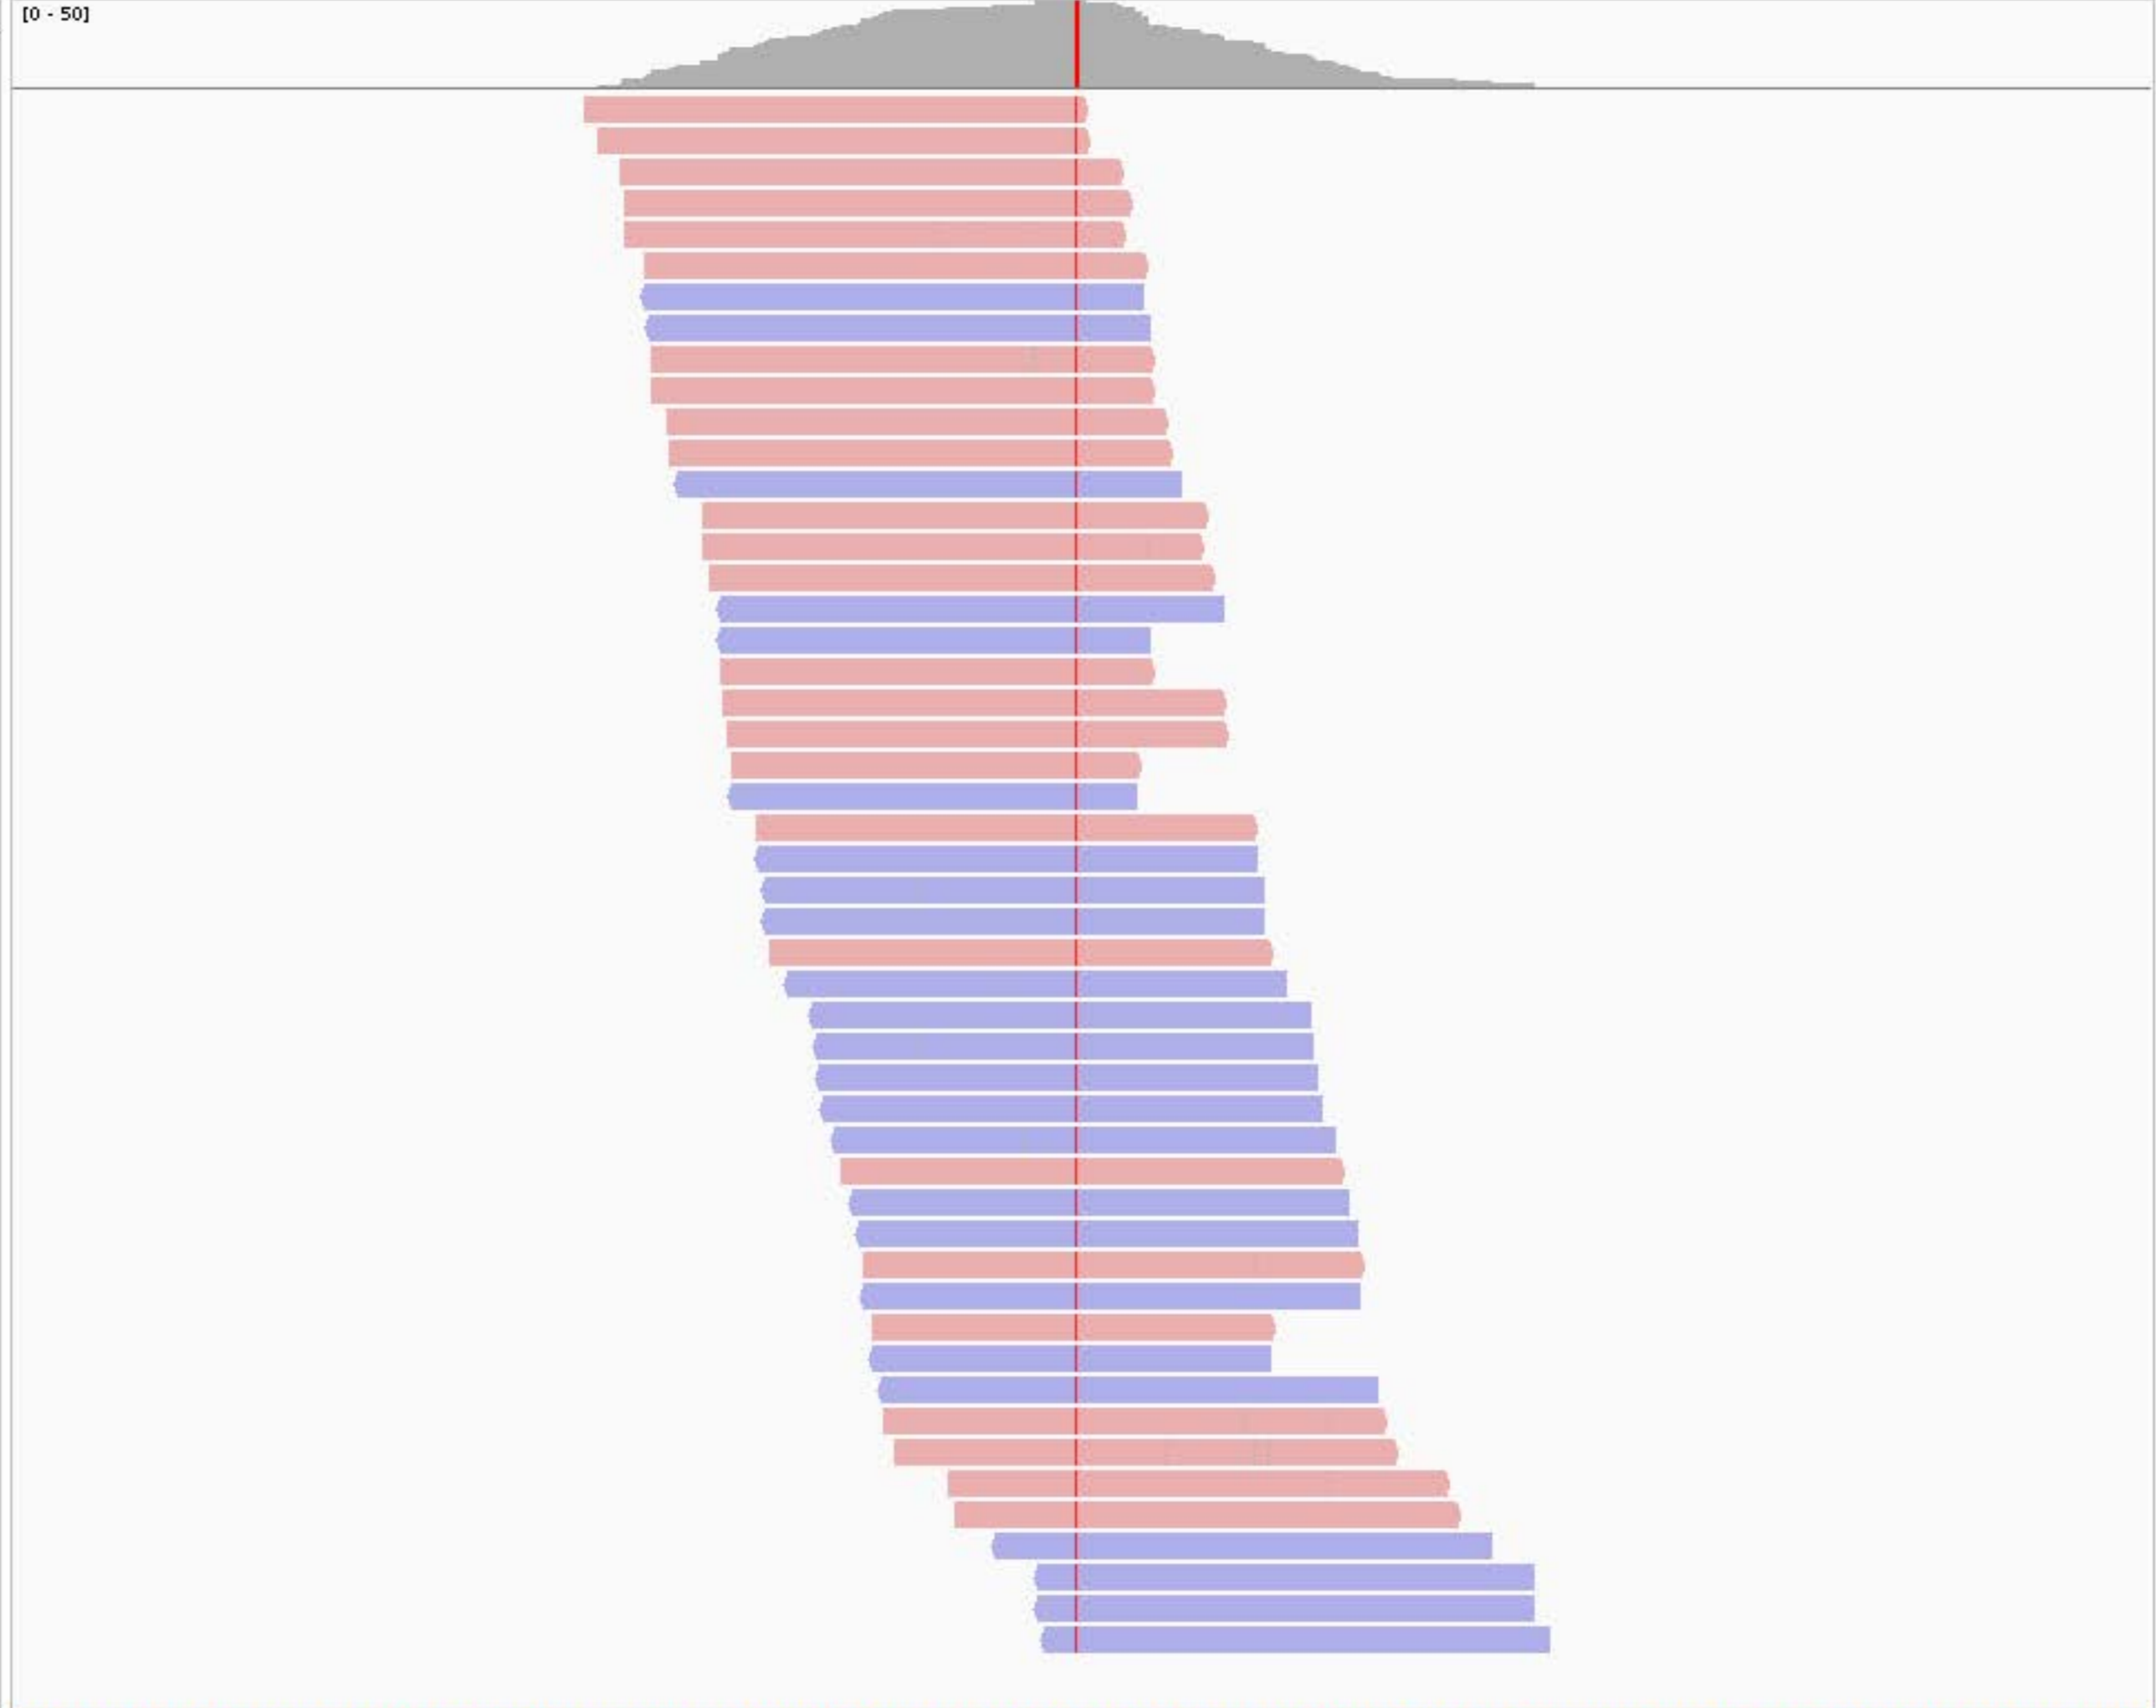

SL\_0004\_RN\_25\_mut.bam

Sequence

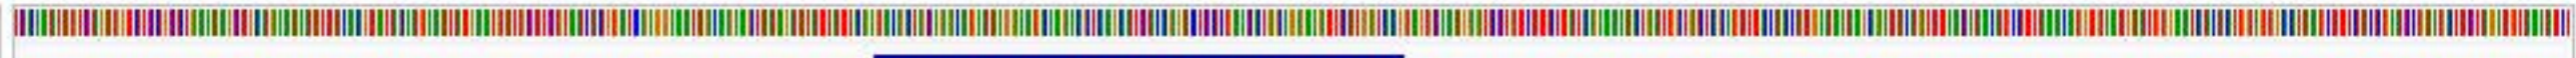

Refseq Genes

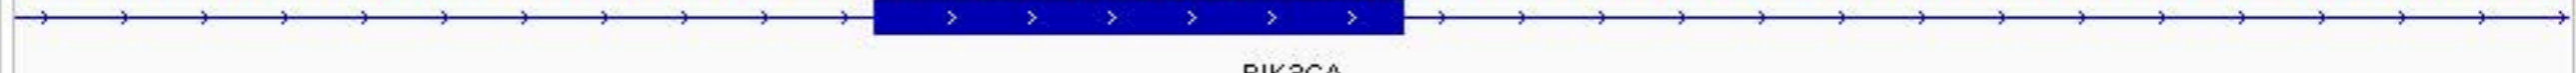

PIK3CA



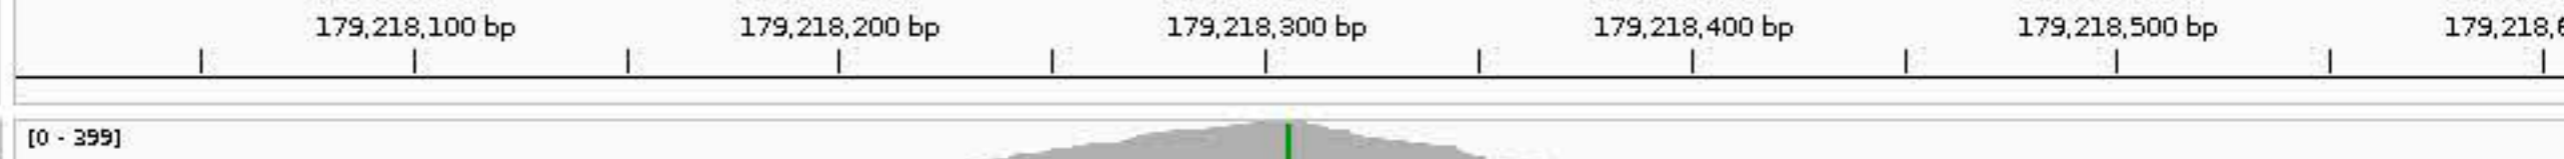

SL\_0007\_RN\_2\_mut.bam Coverage

SL\_0007\_RN\_2\_mut.bam

Sequence

Refseq Genes

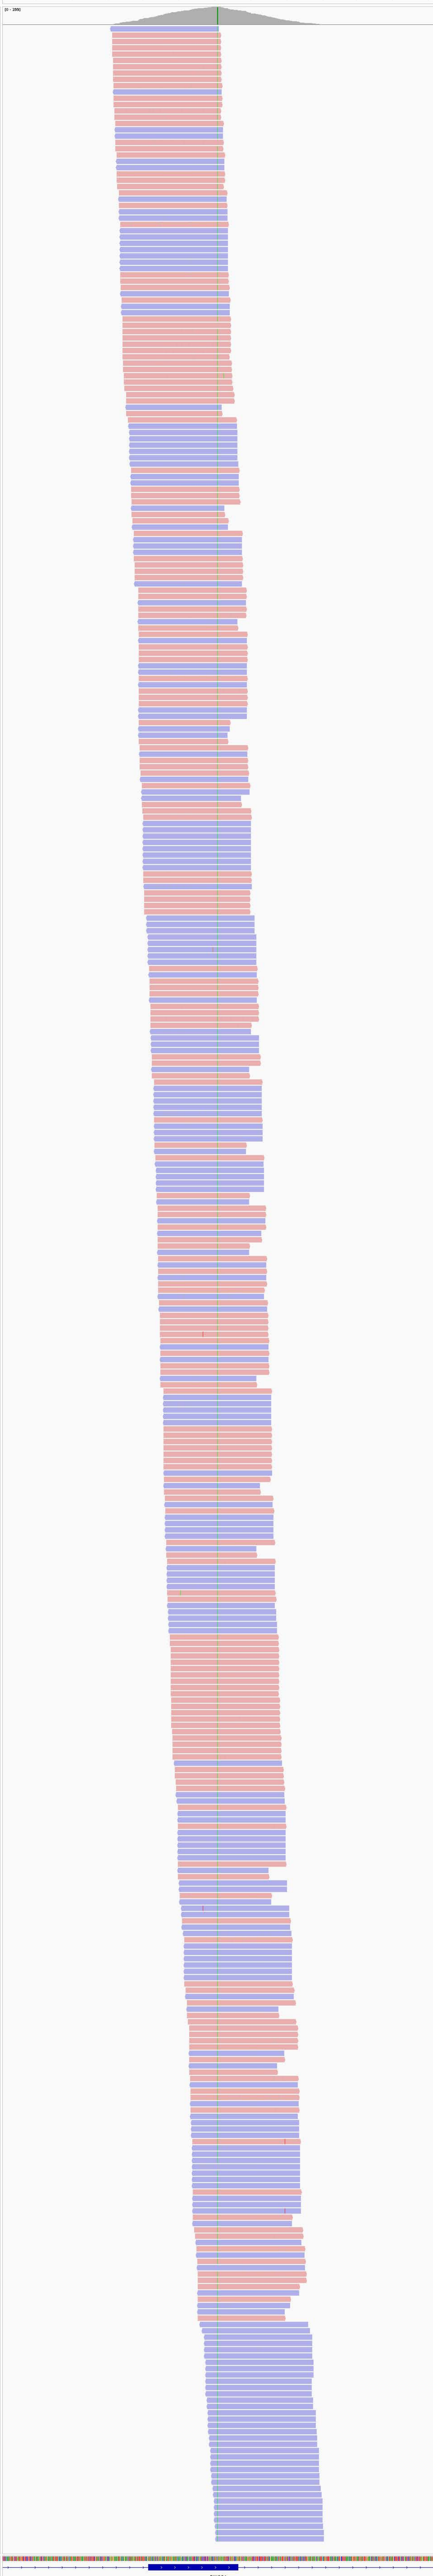



chr3:179,217,995-179,218,594  
p26.1 p24.3 p23 p22.1 p21.2 p14.2 p13 p12.2 q11.1 q12.3 q13.2 q21.1 q22.2 q24 q25.2 q26.1 q26.32 q27.3 q29

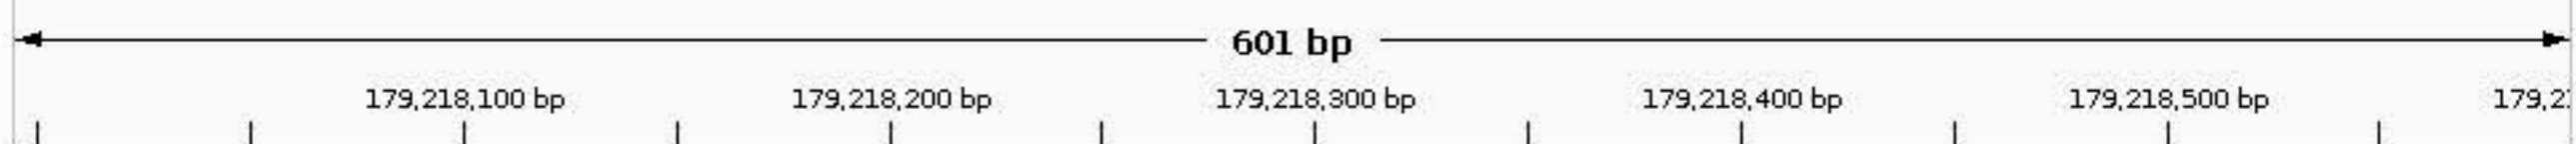

SL\_0015\_LN\_39\_mut.bam Coverage

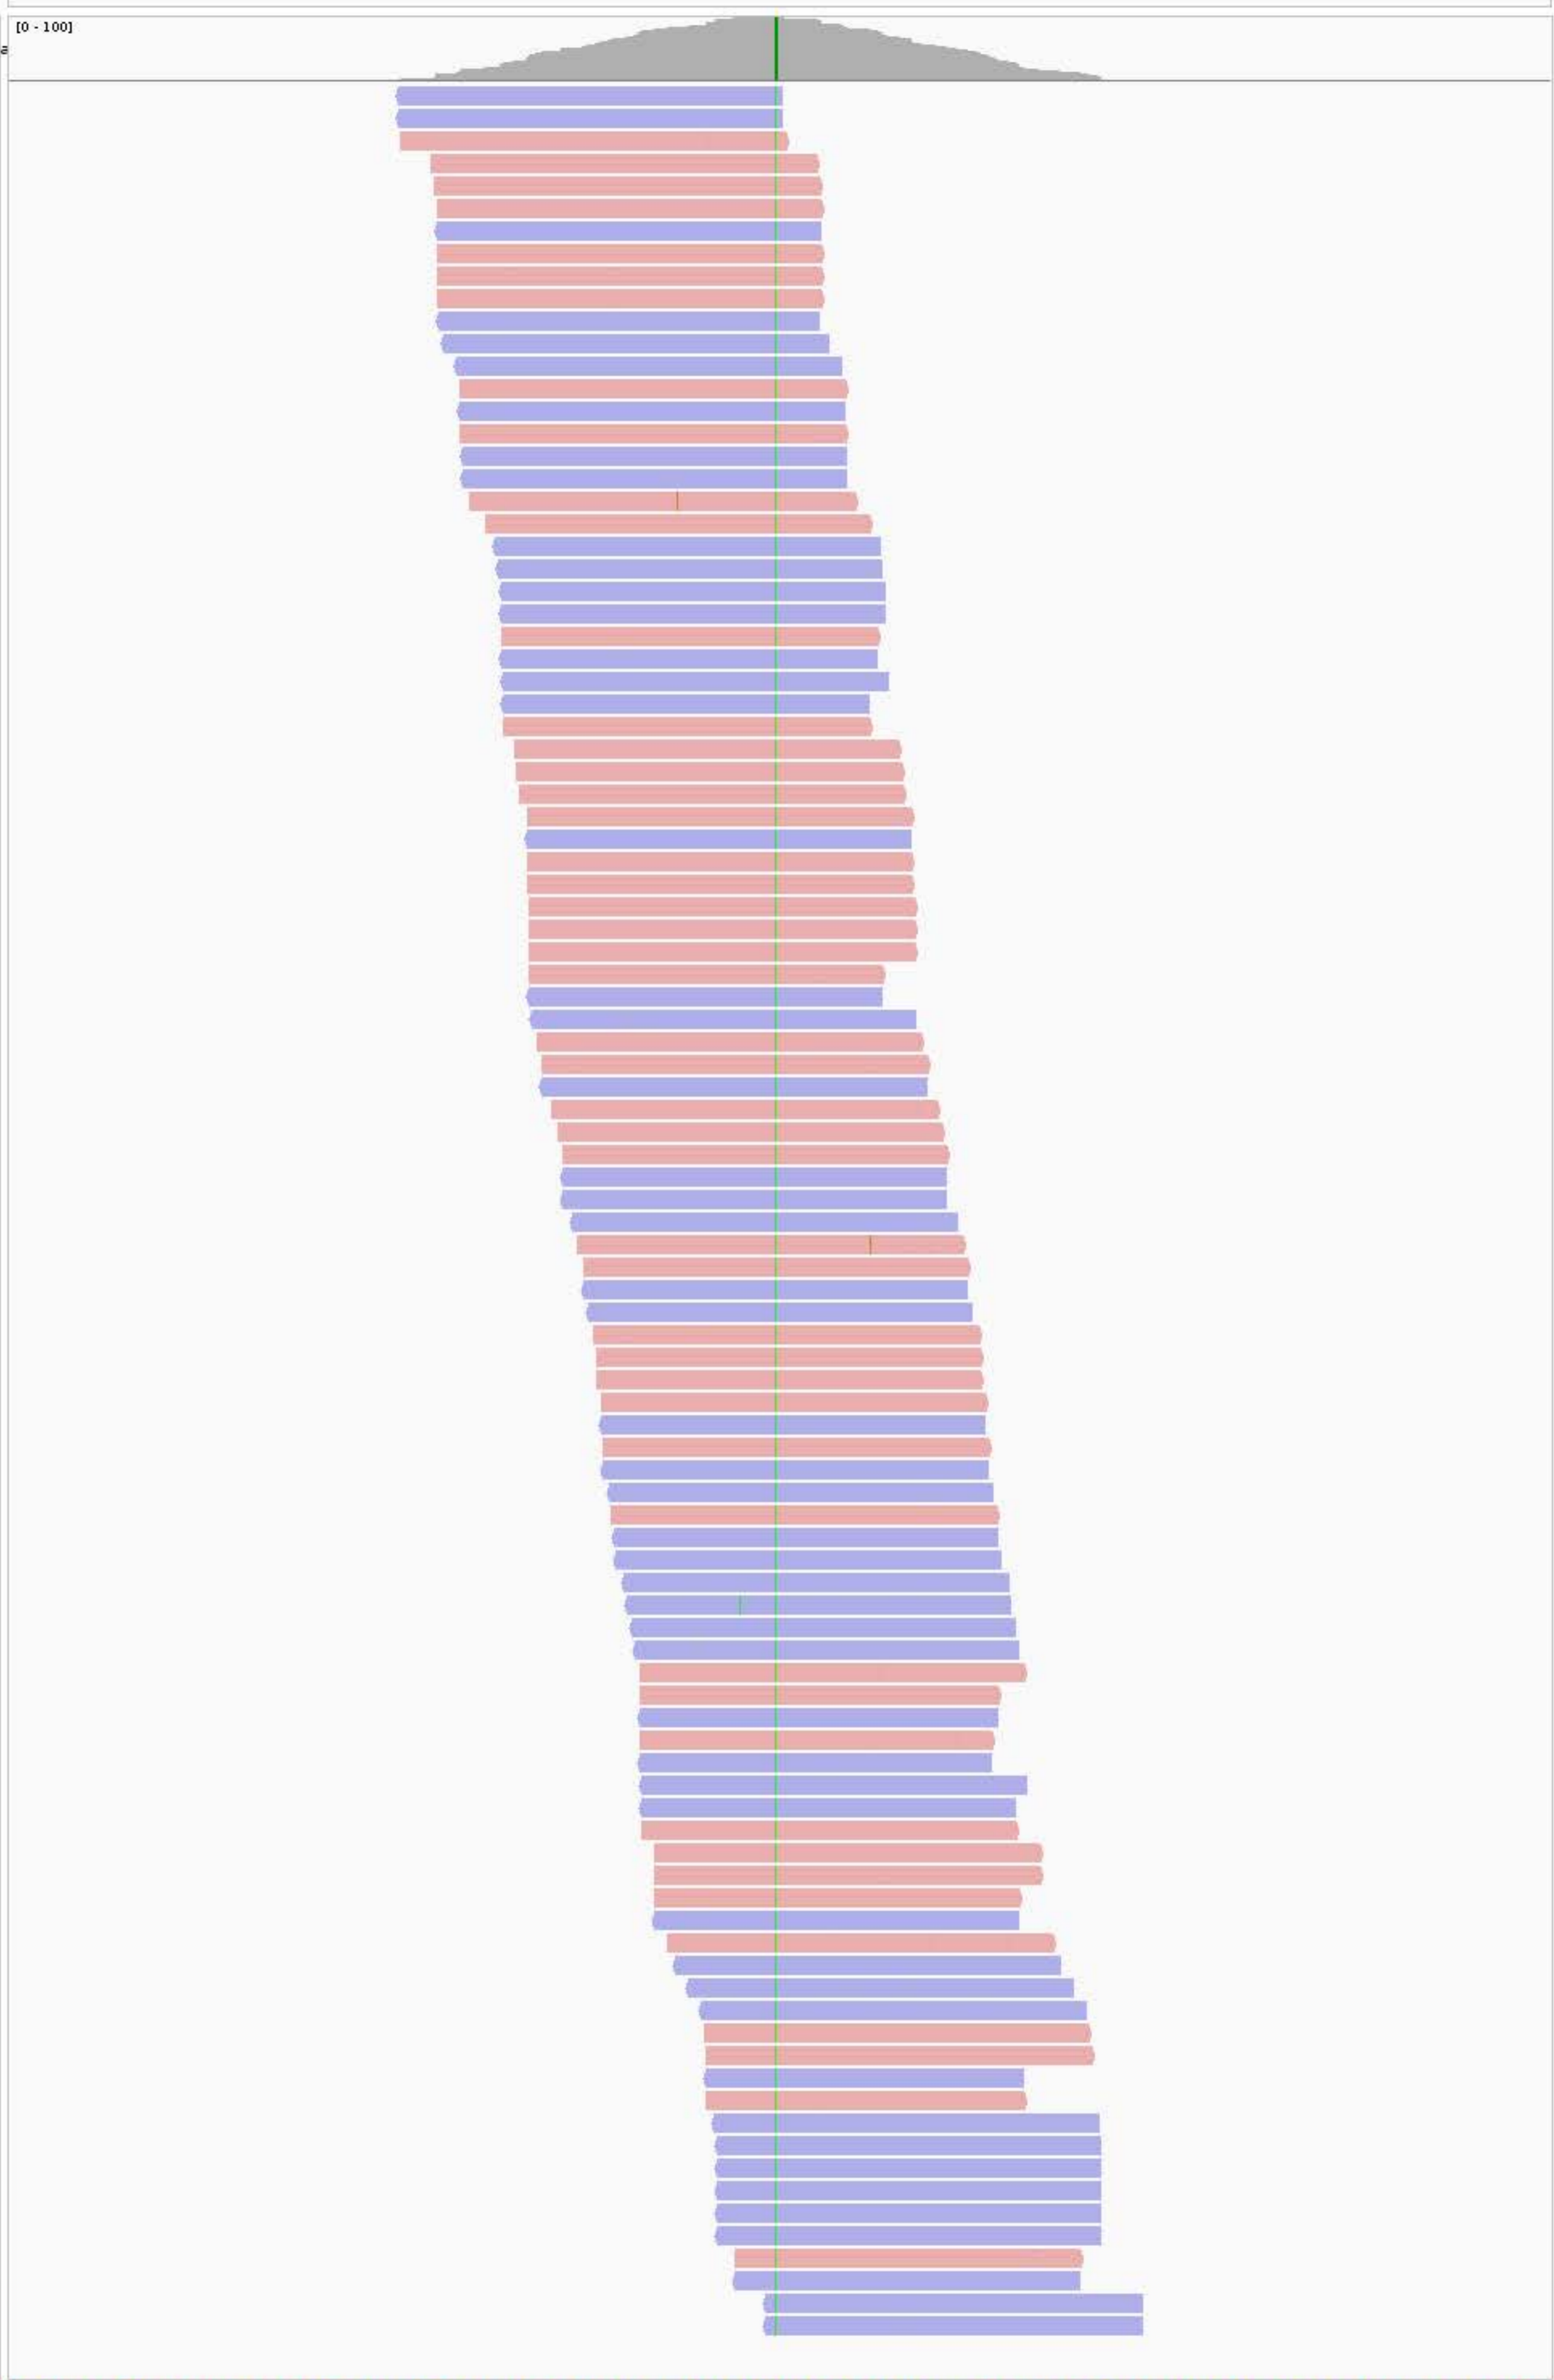

SL\_0015\_LN\_39\_mut.bam

Sequence

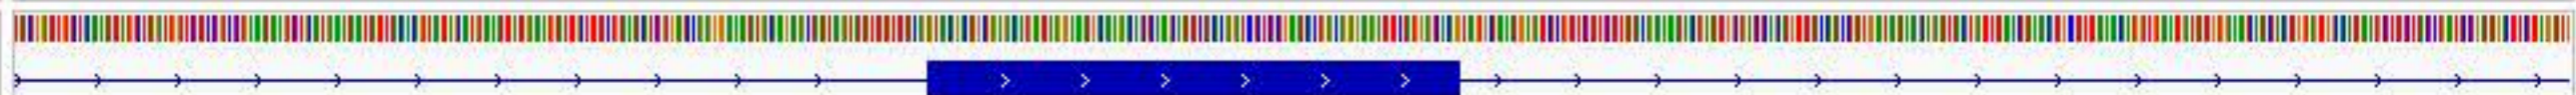

Refseq Genes

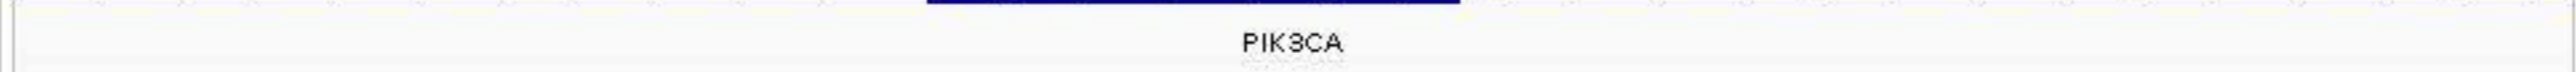

PIK3CA

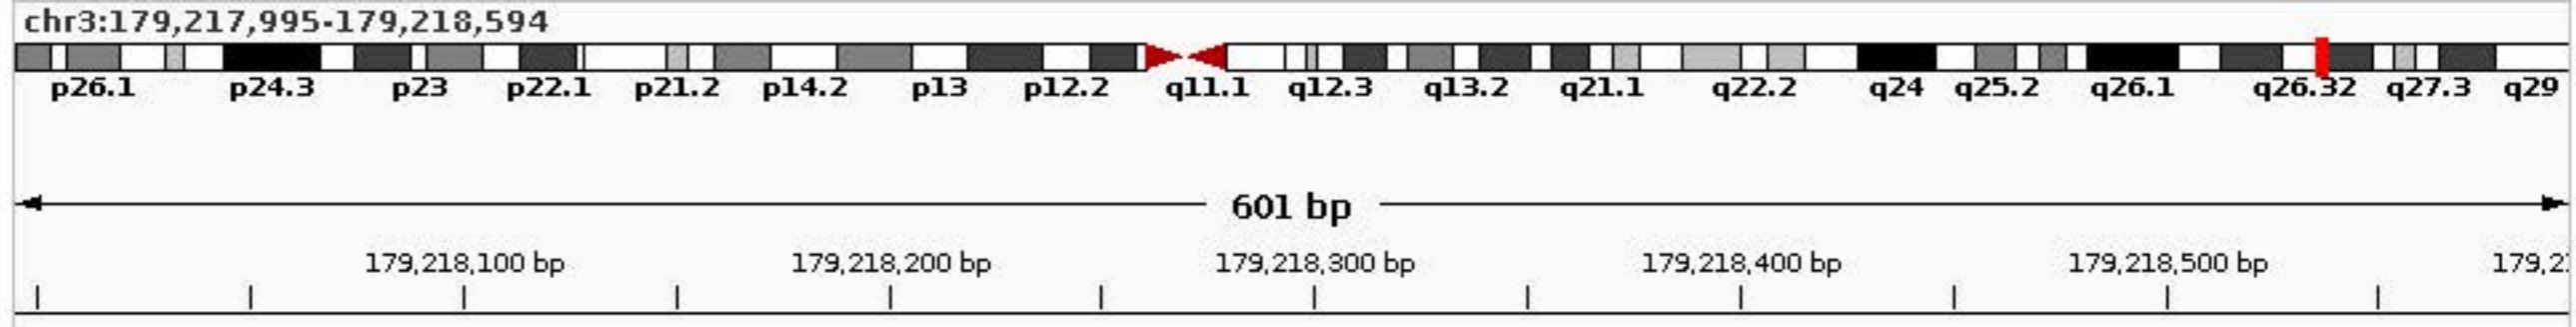

SL\_0015\_RN\_10\_mut.bam Coverage

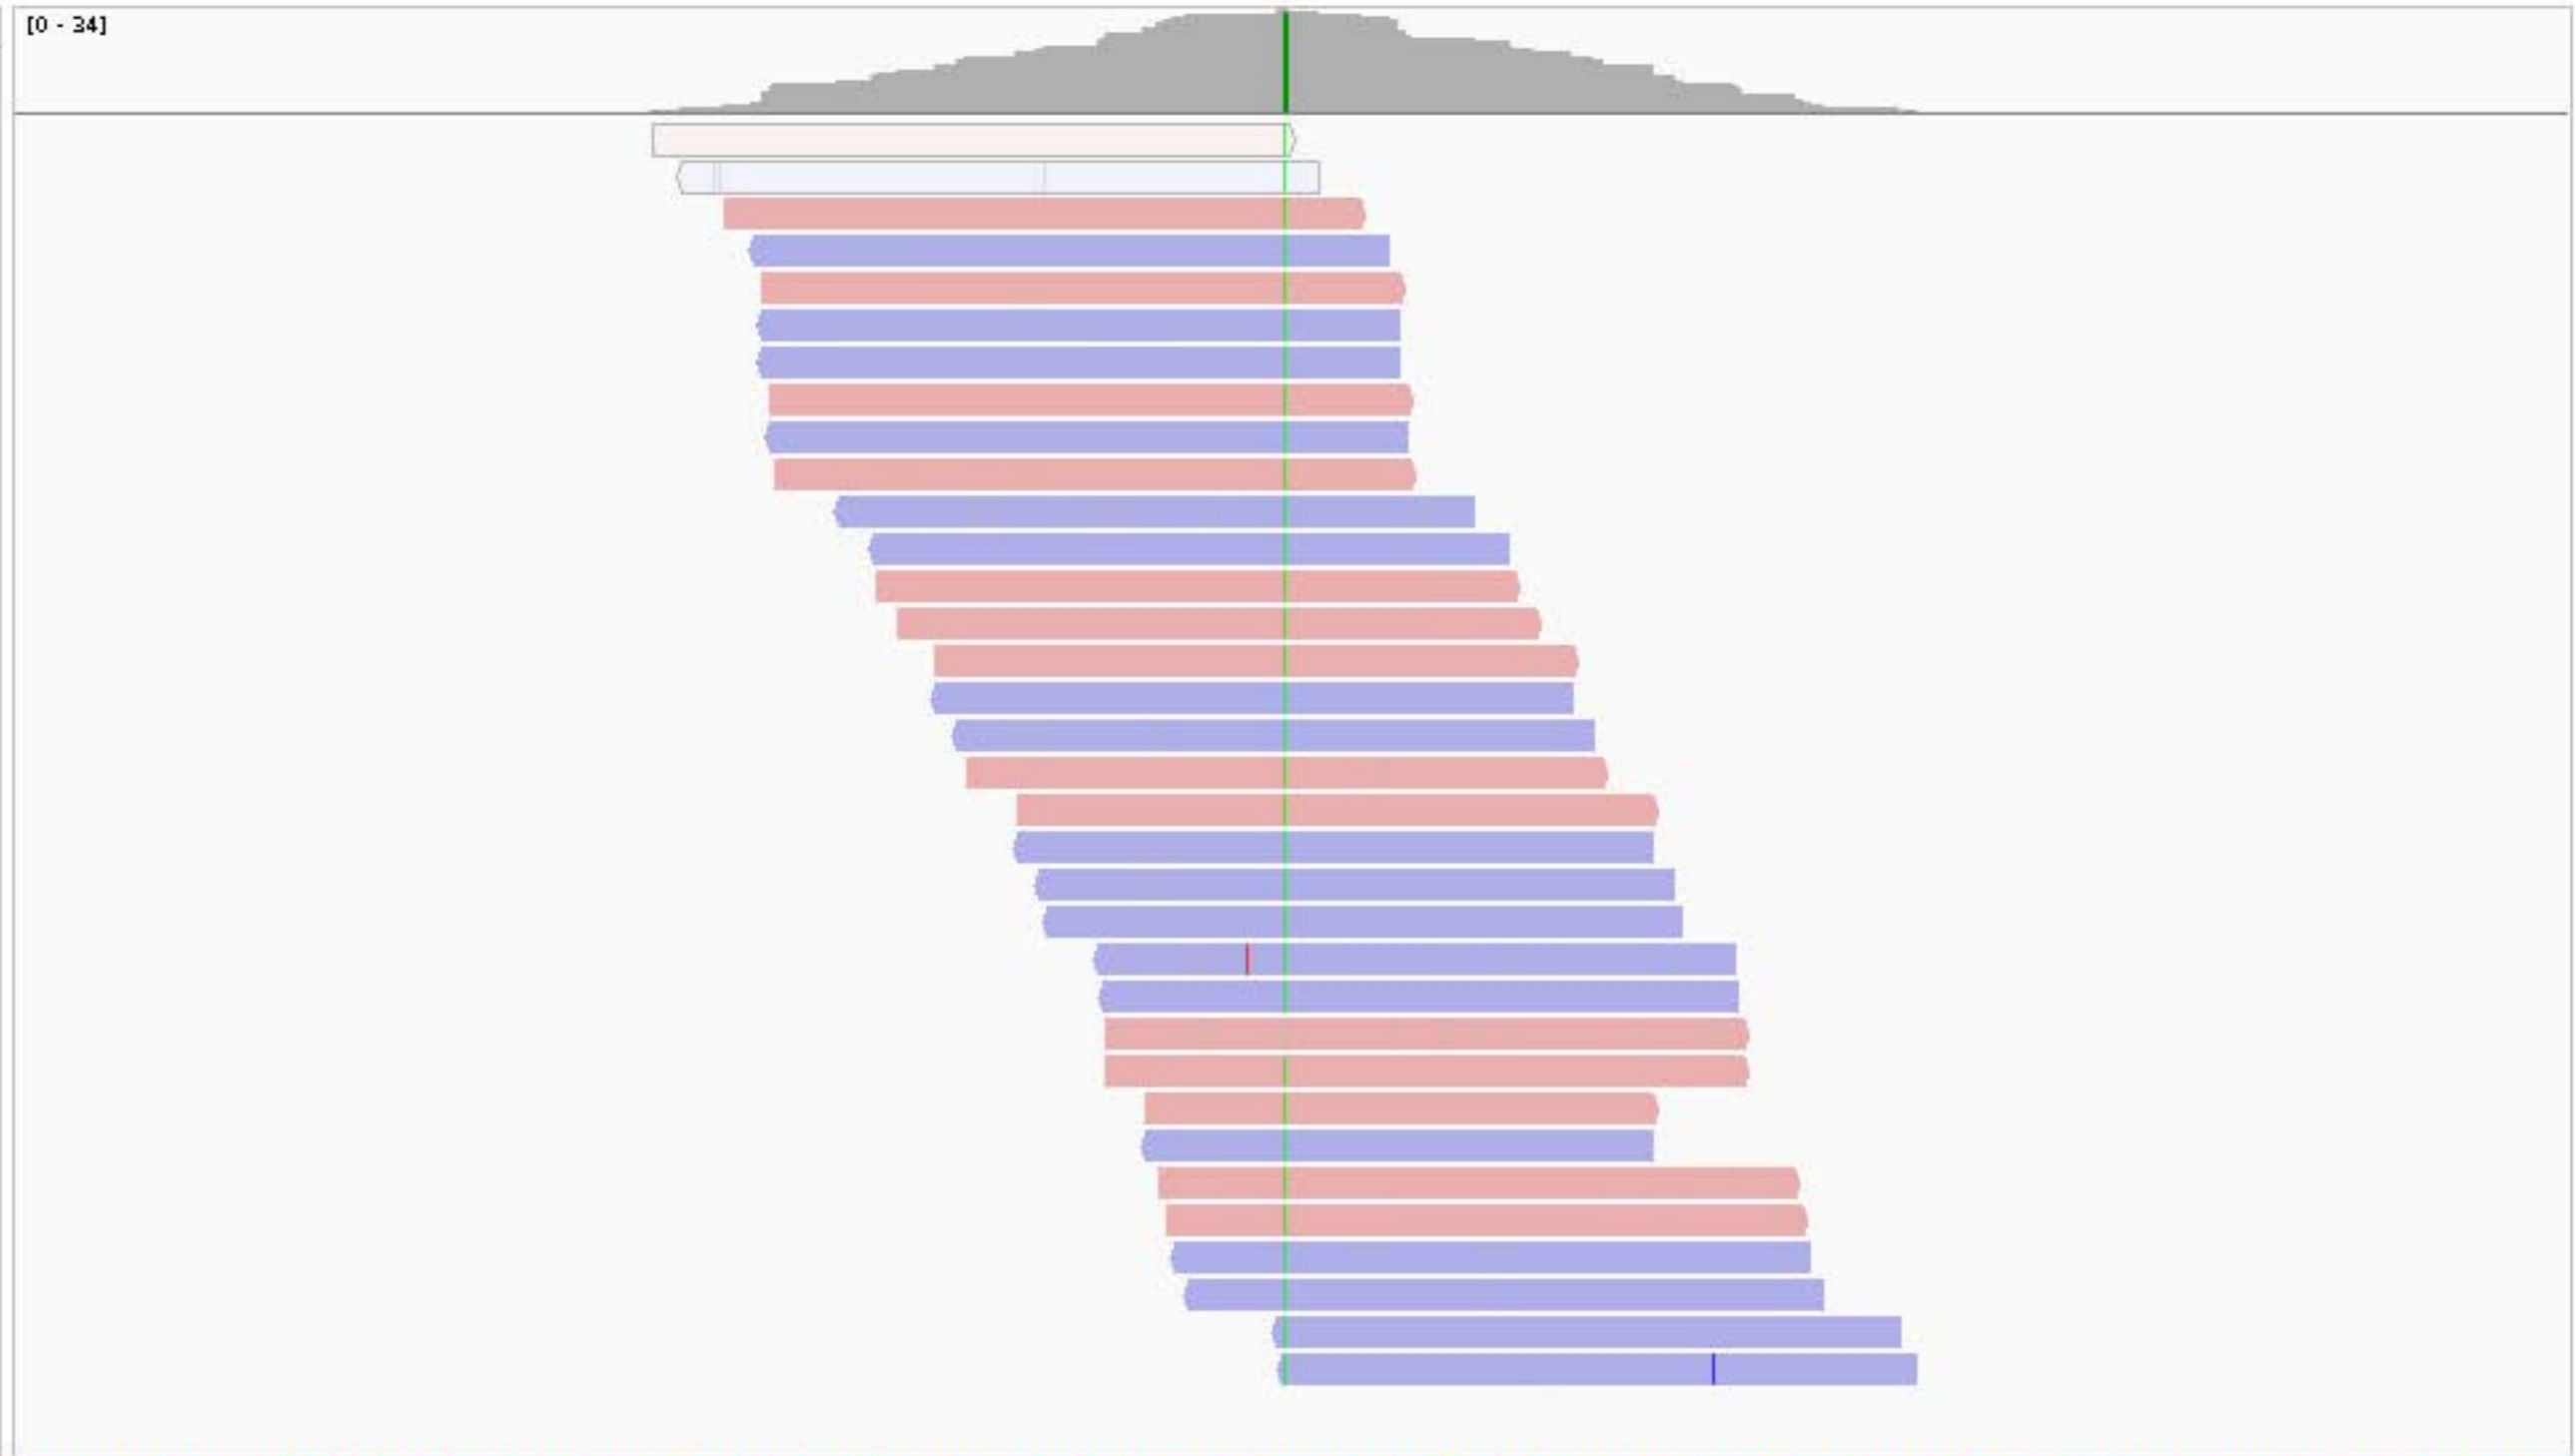

SL\_0015\_RN\_10\_mut.bam

Sequence

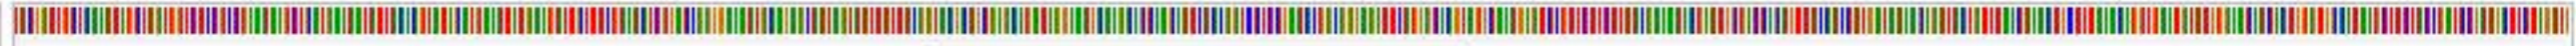

Refseq Genes

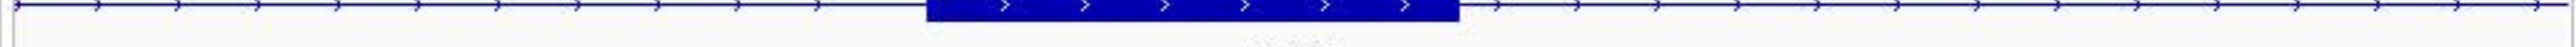

PIK3CA

chr3:179,217,995-179,218,594

p26.1 p24.3 p23 p22.1 p21.2 p14.2 p13 p12.2 q11.1 q12.3 q13.2 q21.1 q22.2 q24 q25.2 q26.1 q26.32 q27.3 q29

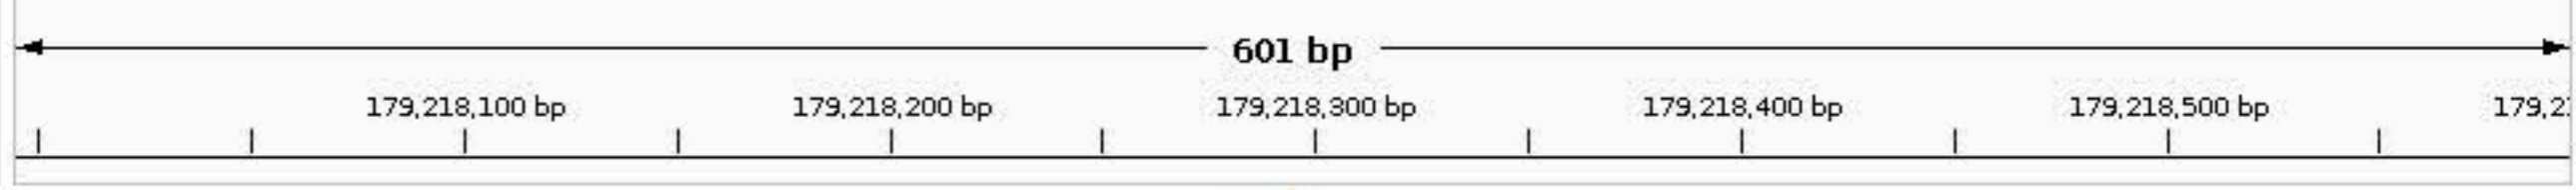

SL\_0017\_RN\_48\_mut.bam Coverage

SL\_0017\_RN\_48\_mut.bam

Sequence

Refseq Genes

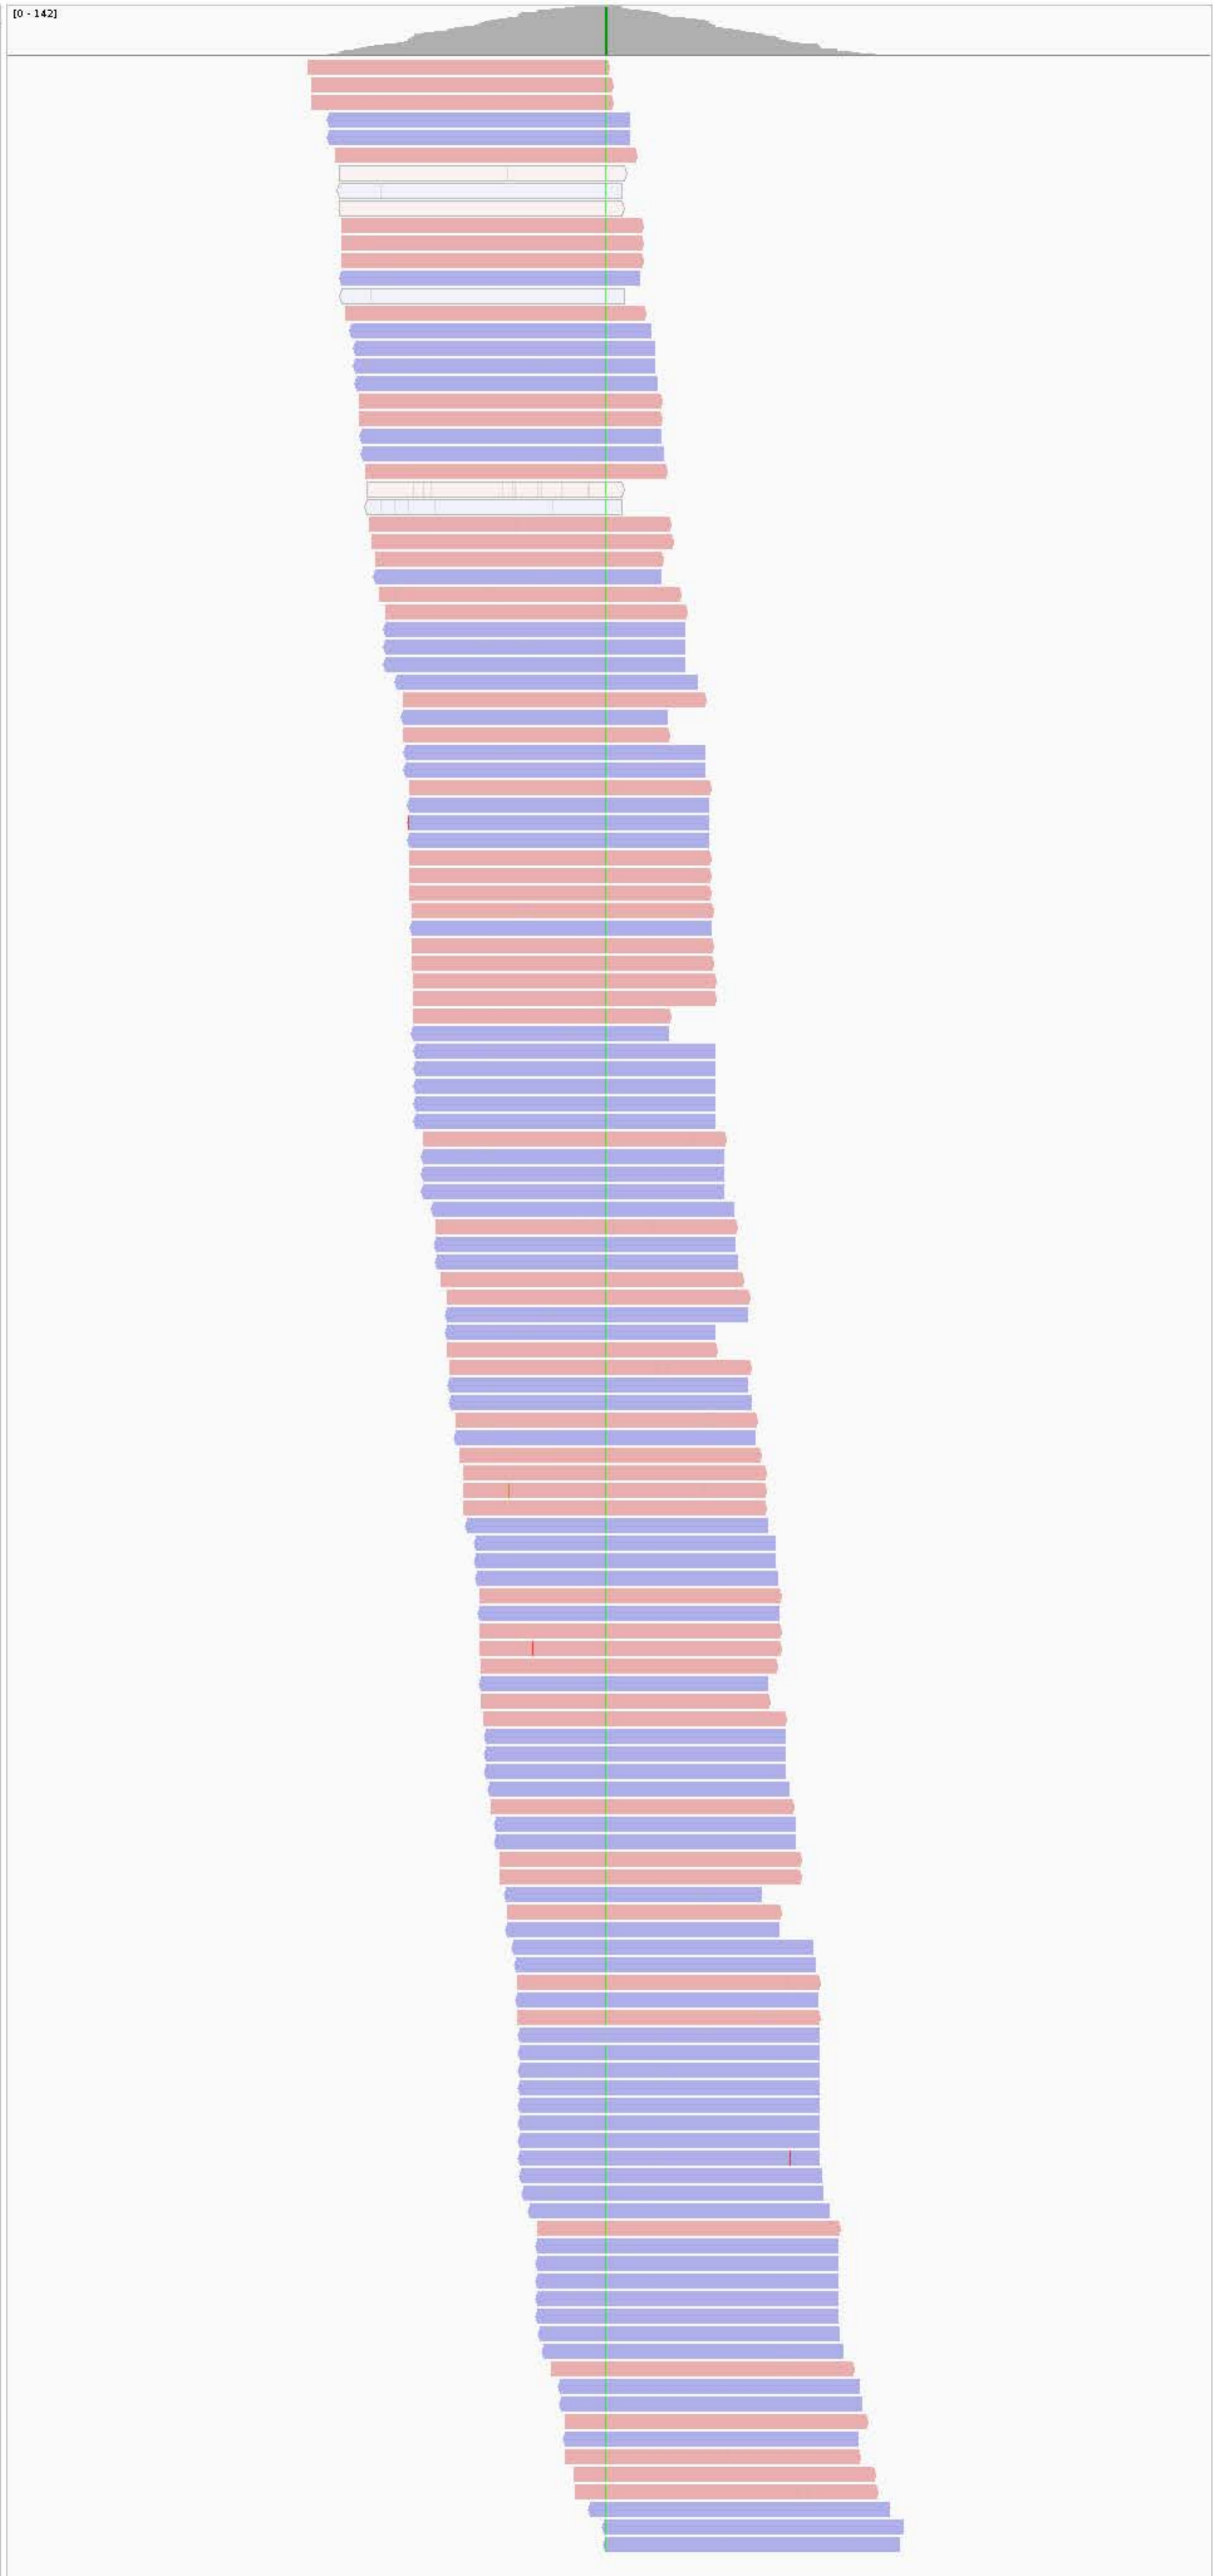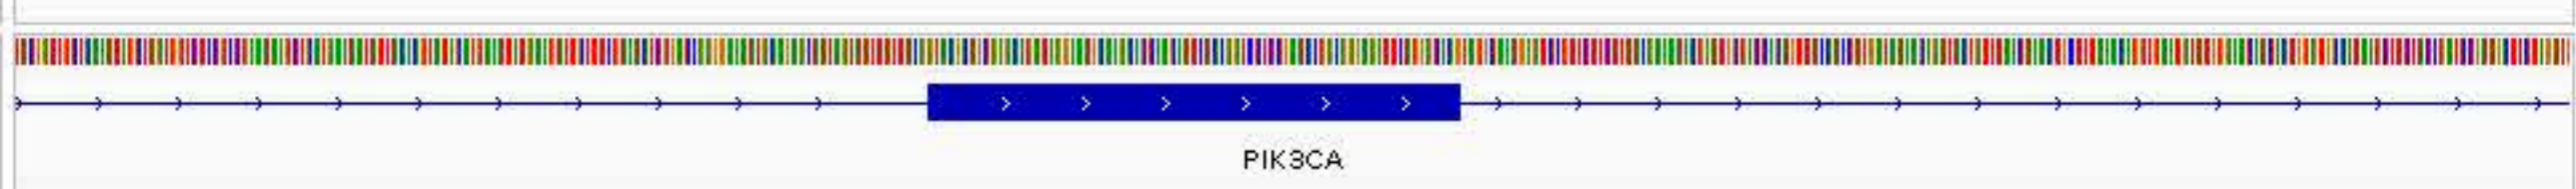



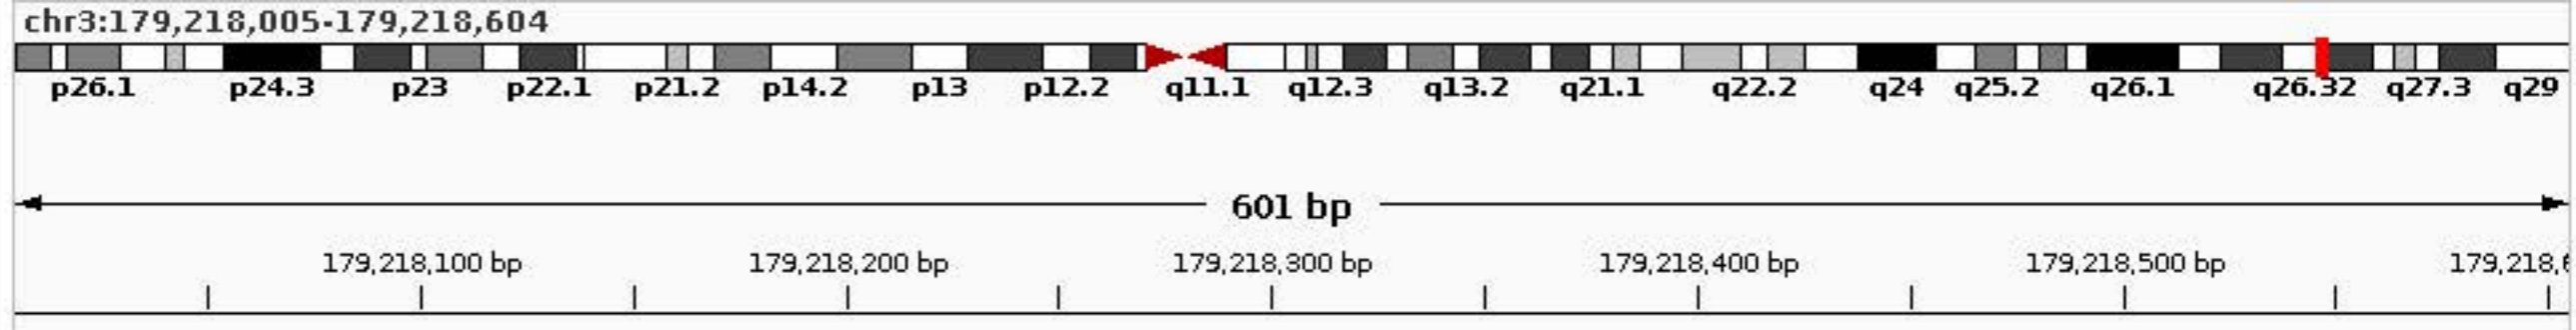

SL\_0001\_LN\_38\_mut.bam Coverage

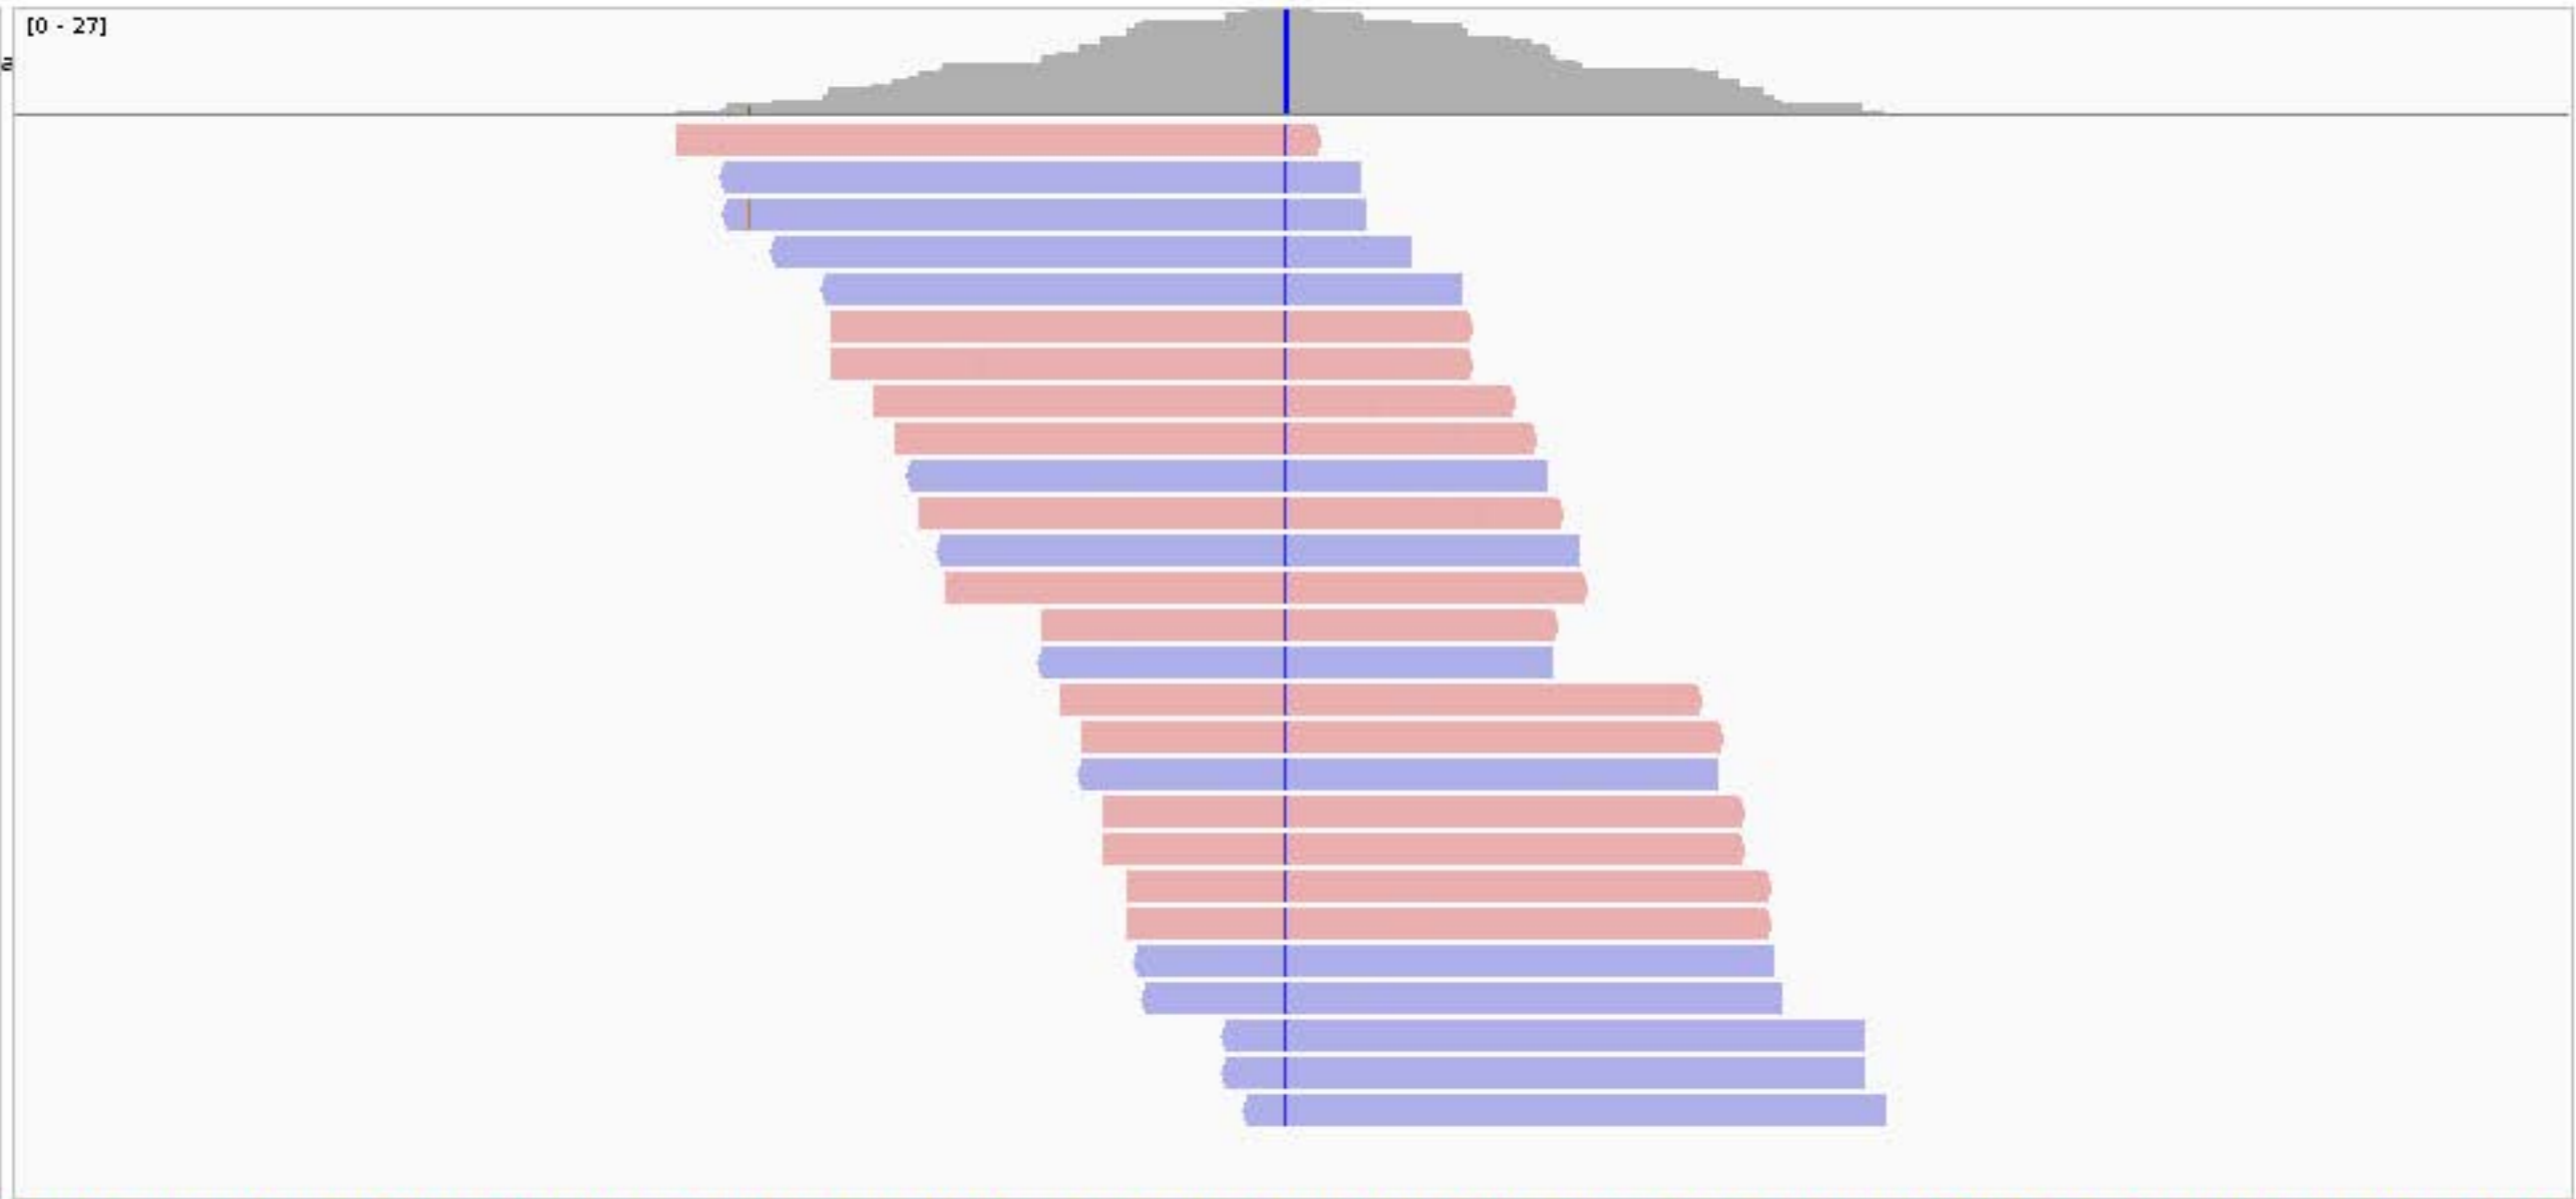

SL\_0001\_LN\_38\_mut.bam

Sequence →

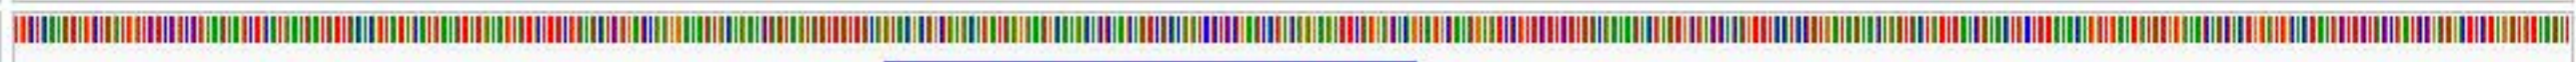

Refseq Genes

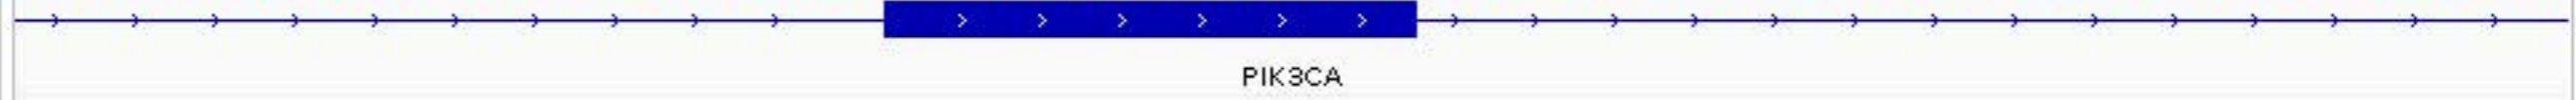

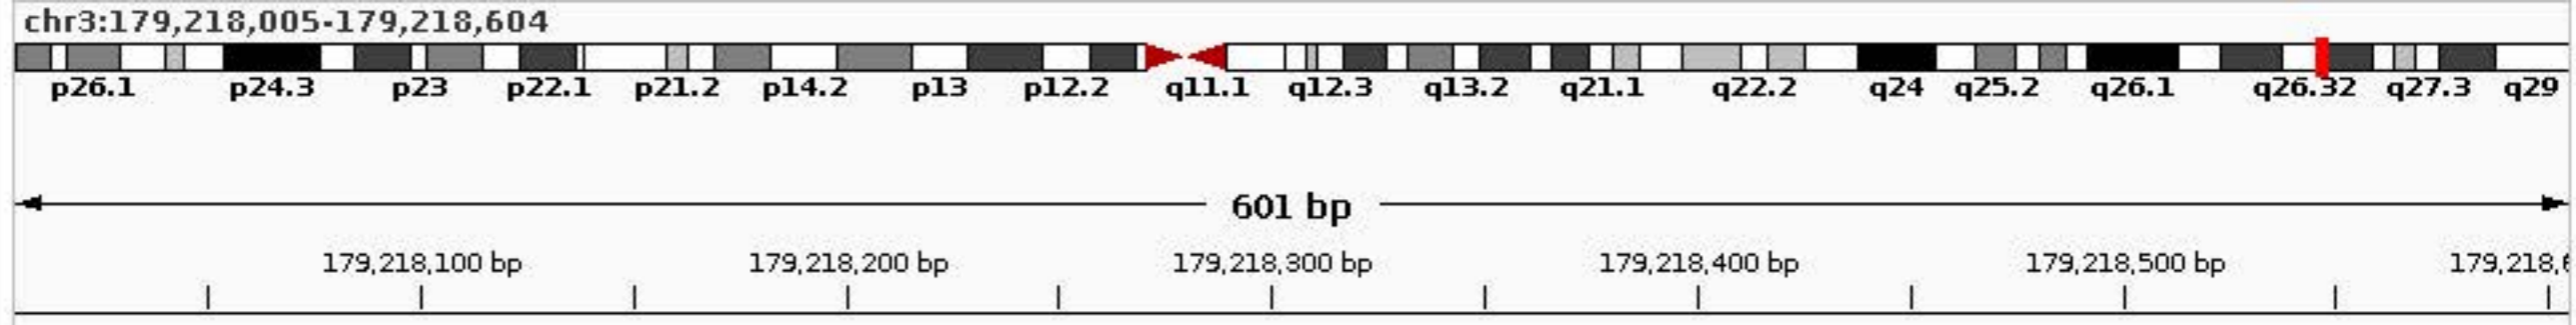

SL\_0002\_RN\_60\_mut.bam Coverage

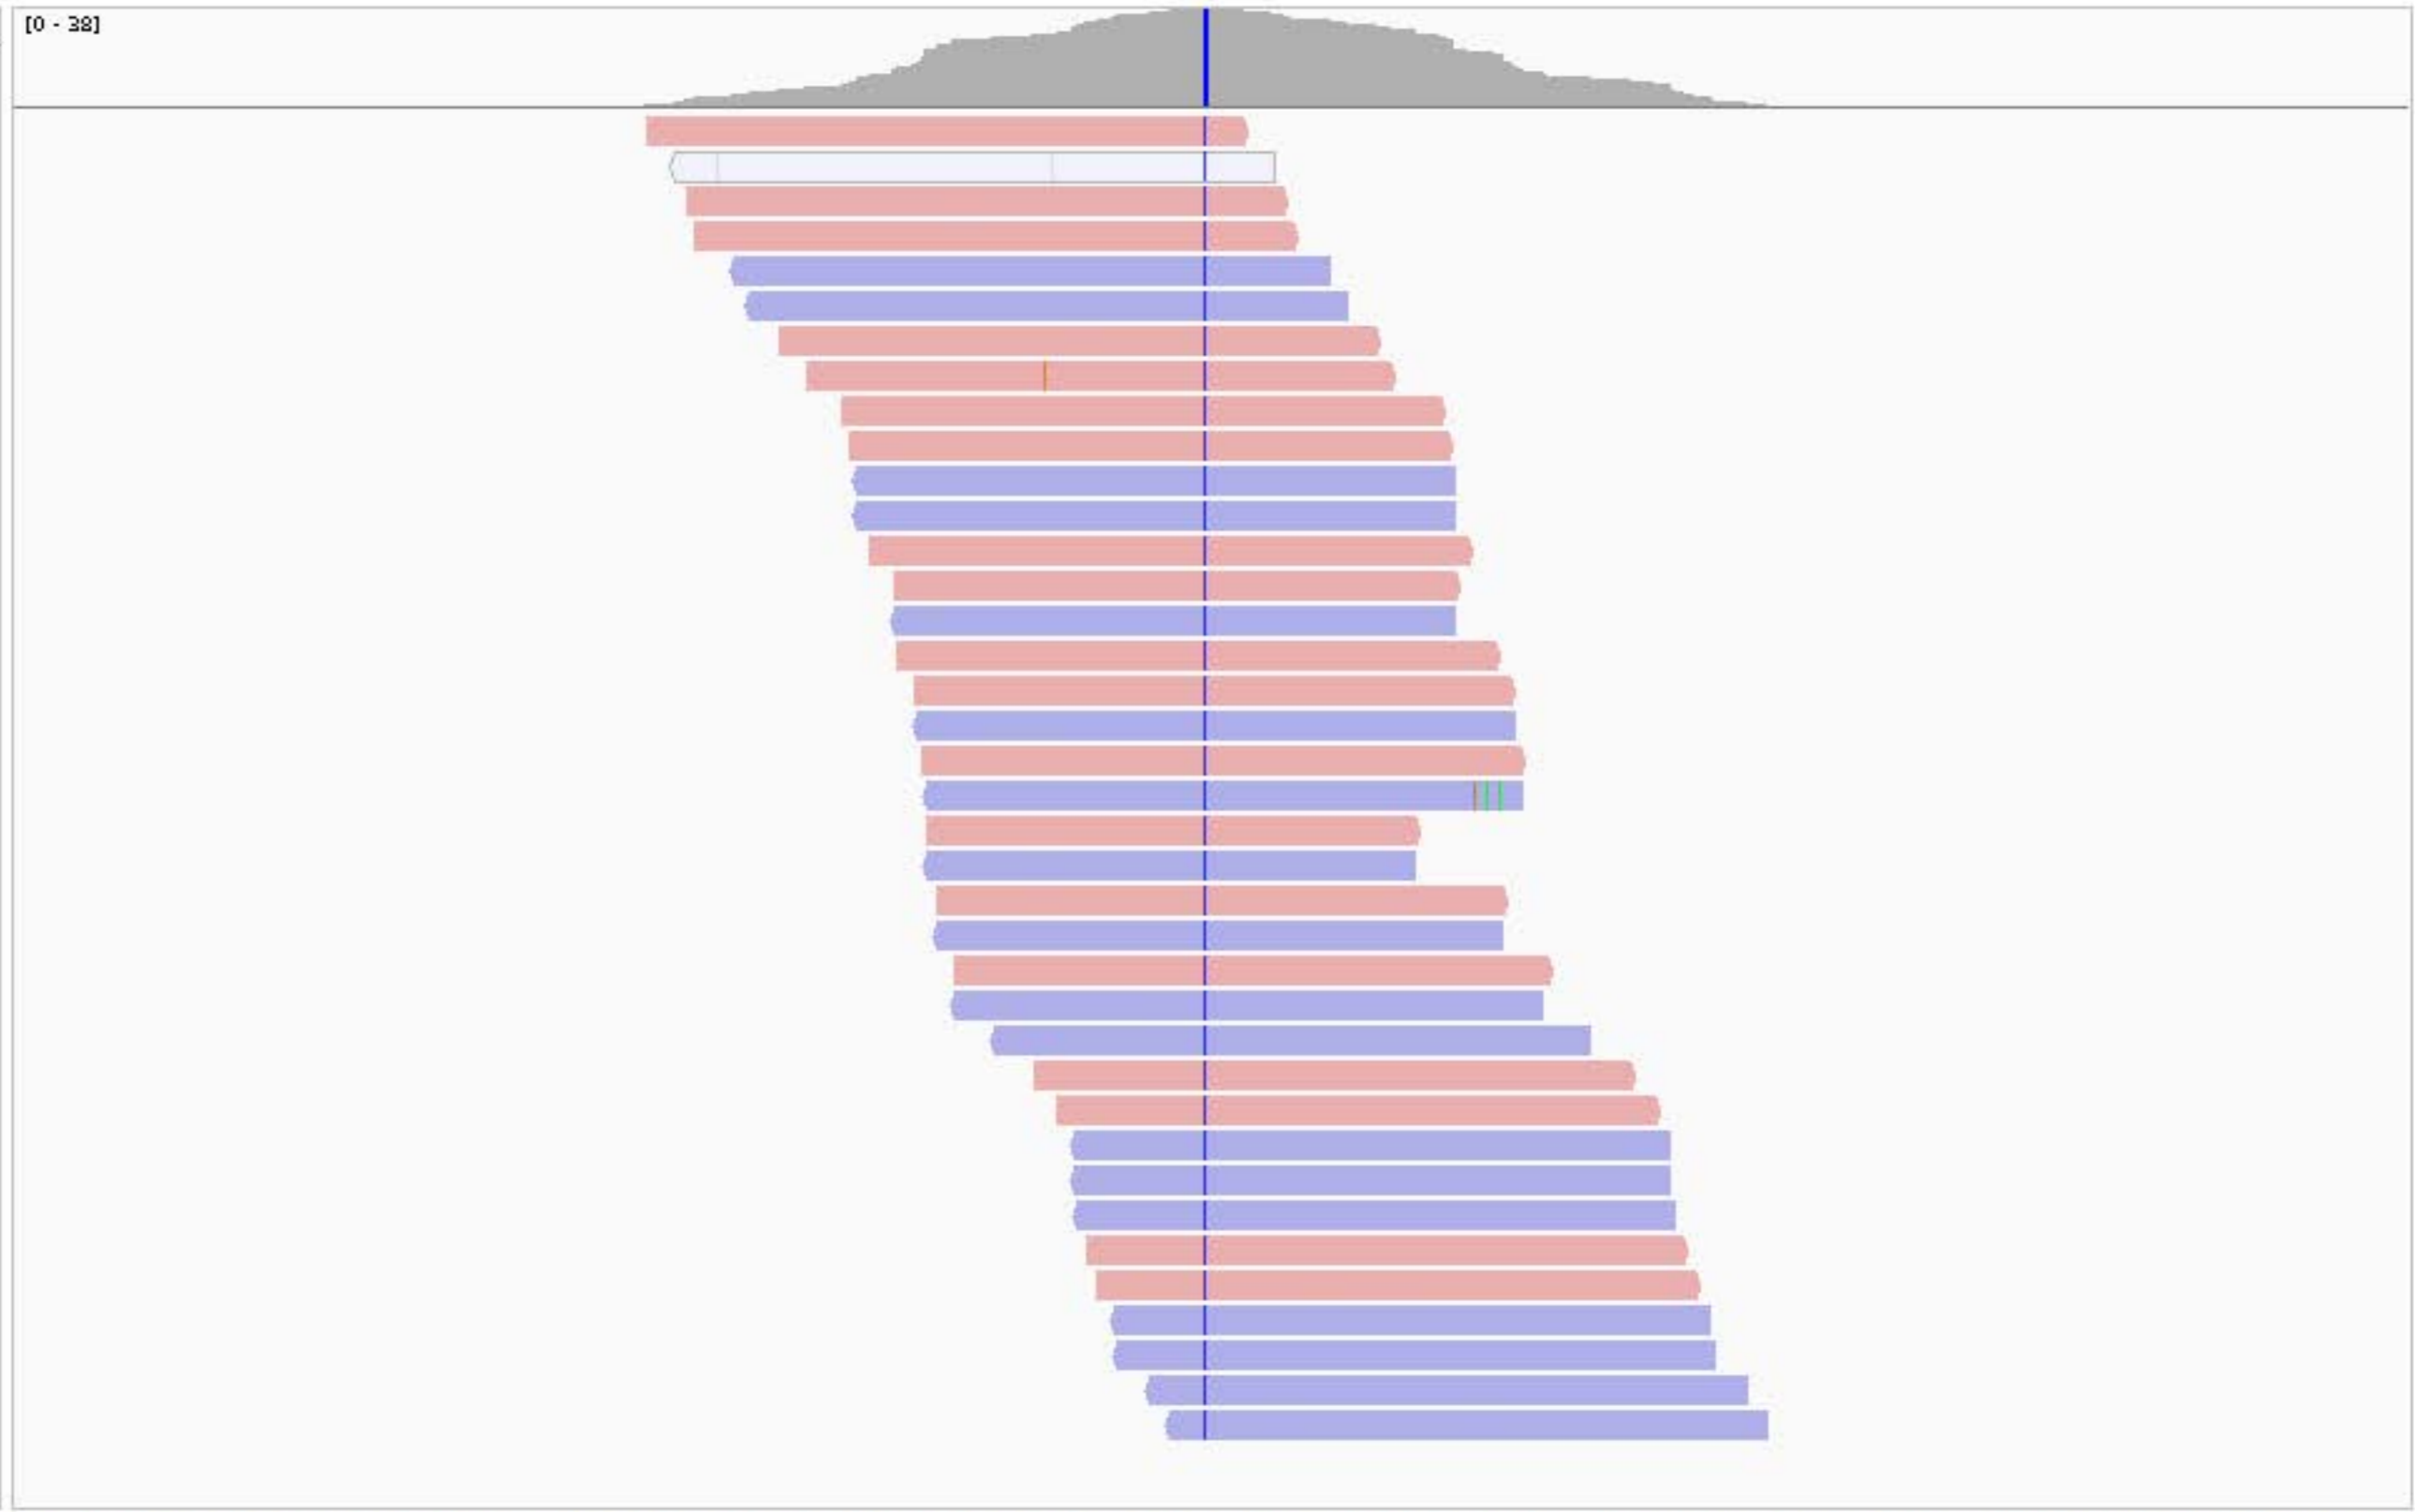

SL\_0002\_RN\_60\_mut.bam

Sequence →

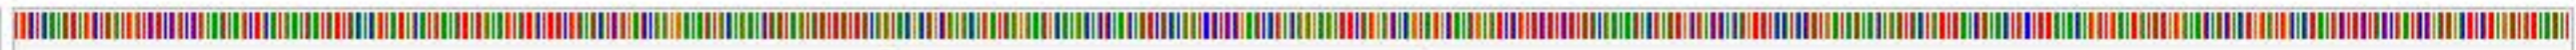

Refseq Genes

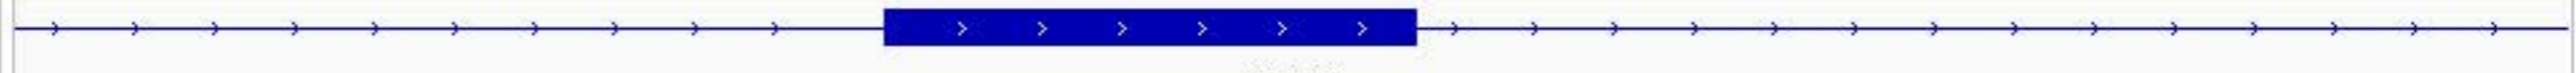

PIK3CA

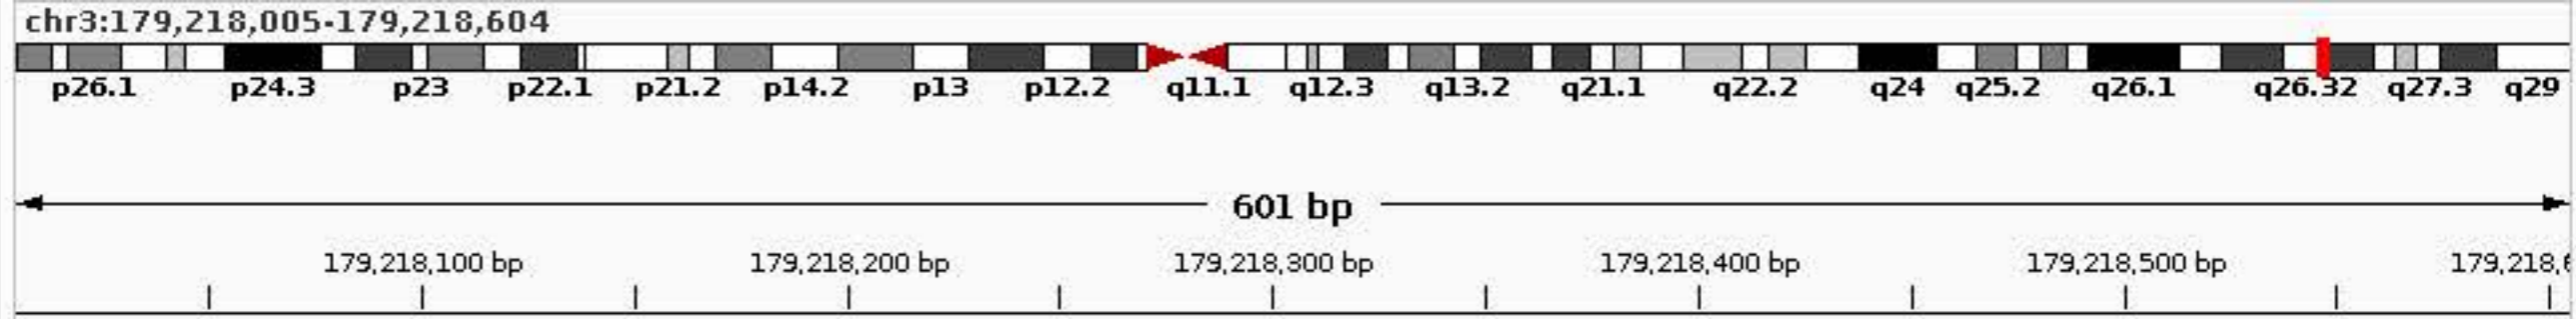

SL\_0015\_LN\_47\_mut.bam Coverage

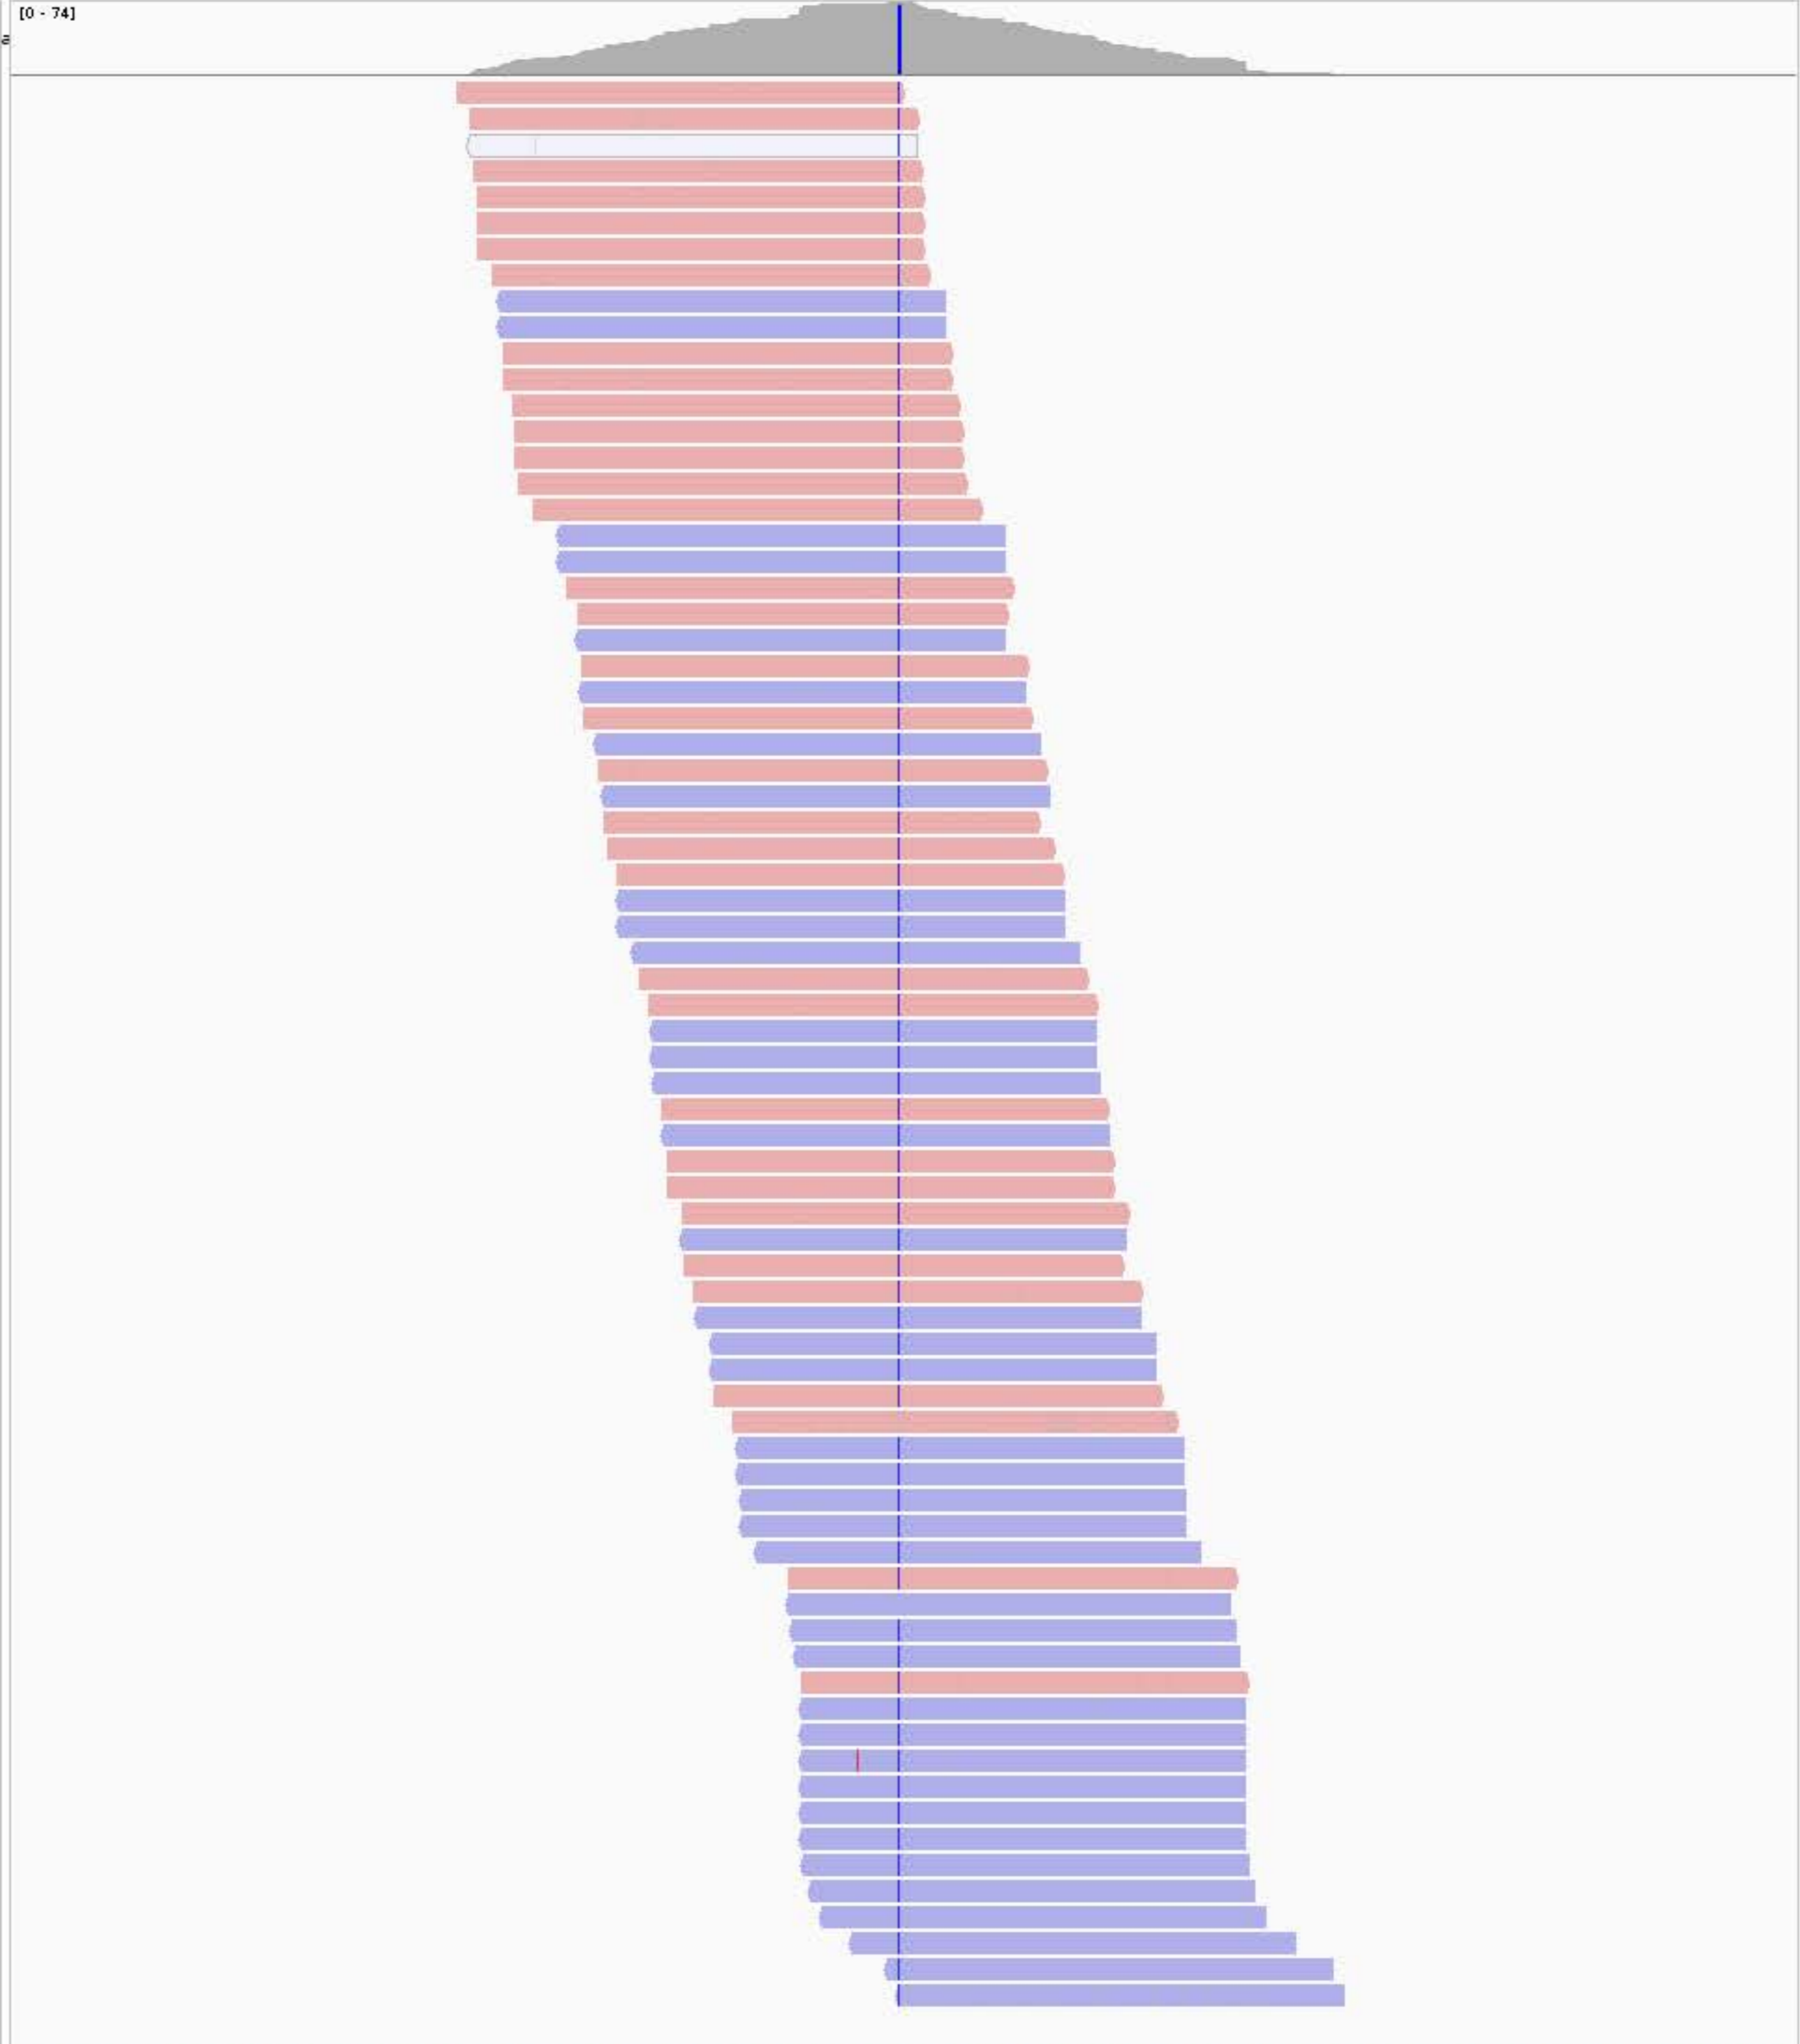

SL\_0015\_LN\_47\_mut.bam

Sequence →

Refseq Genes

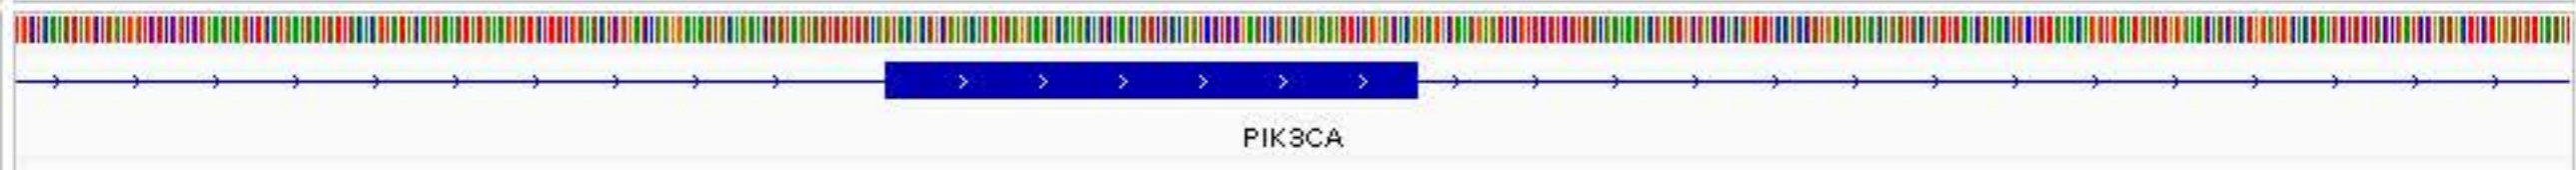

PIK3CA



chr3:179,218,005-179,218,604  
p26.1 p24.3 p23 p22.1 p21.2 p14.2 p13 p12.2 q11.1 q12.3 q13.2 q21.1 q22.2 q24 q25.2 q26.1 q26.32 q27.3 q29

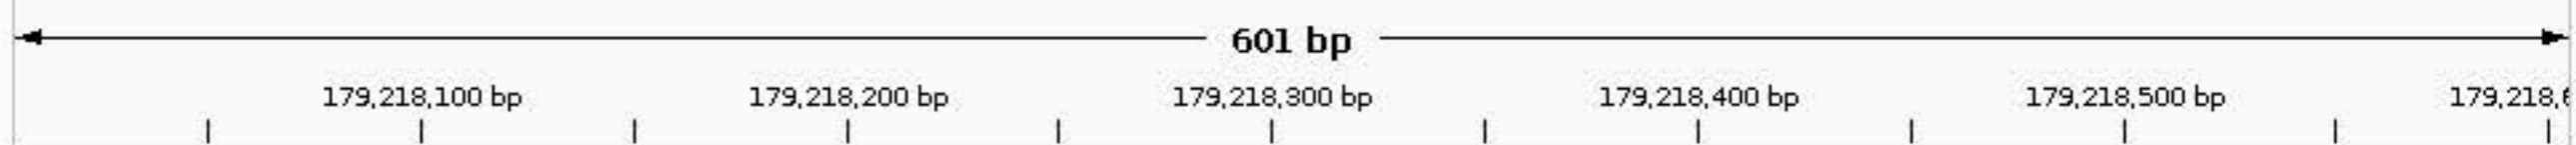

SL\_0016\_RN\_56\_mut.bam Coverage

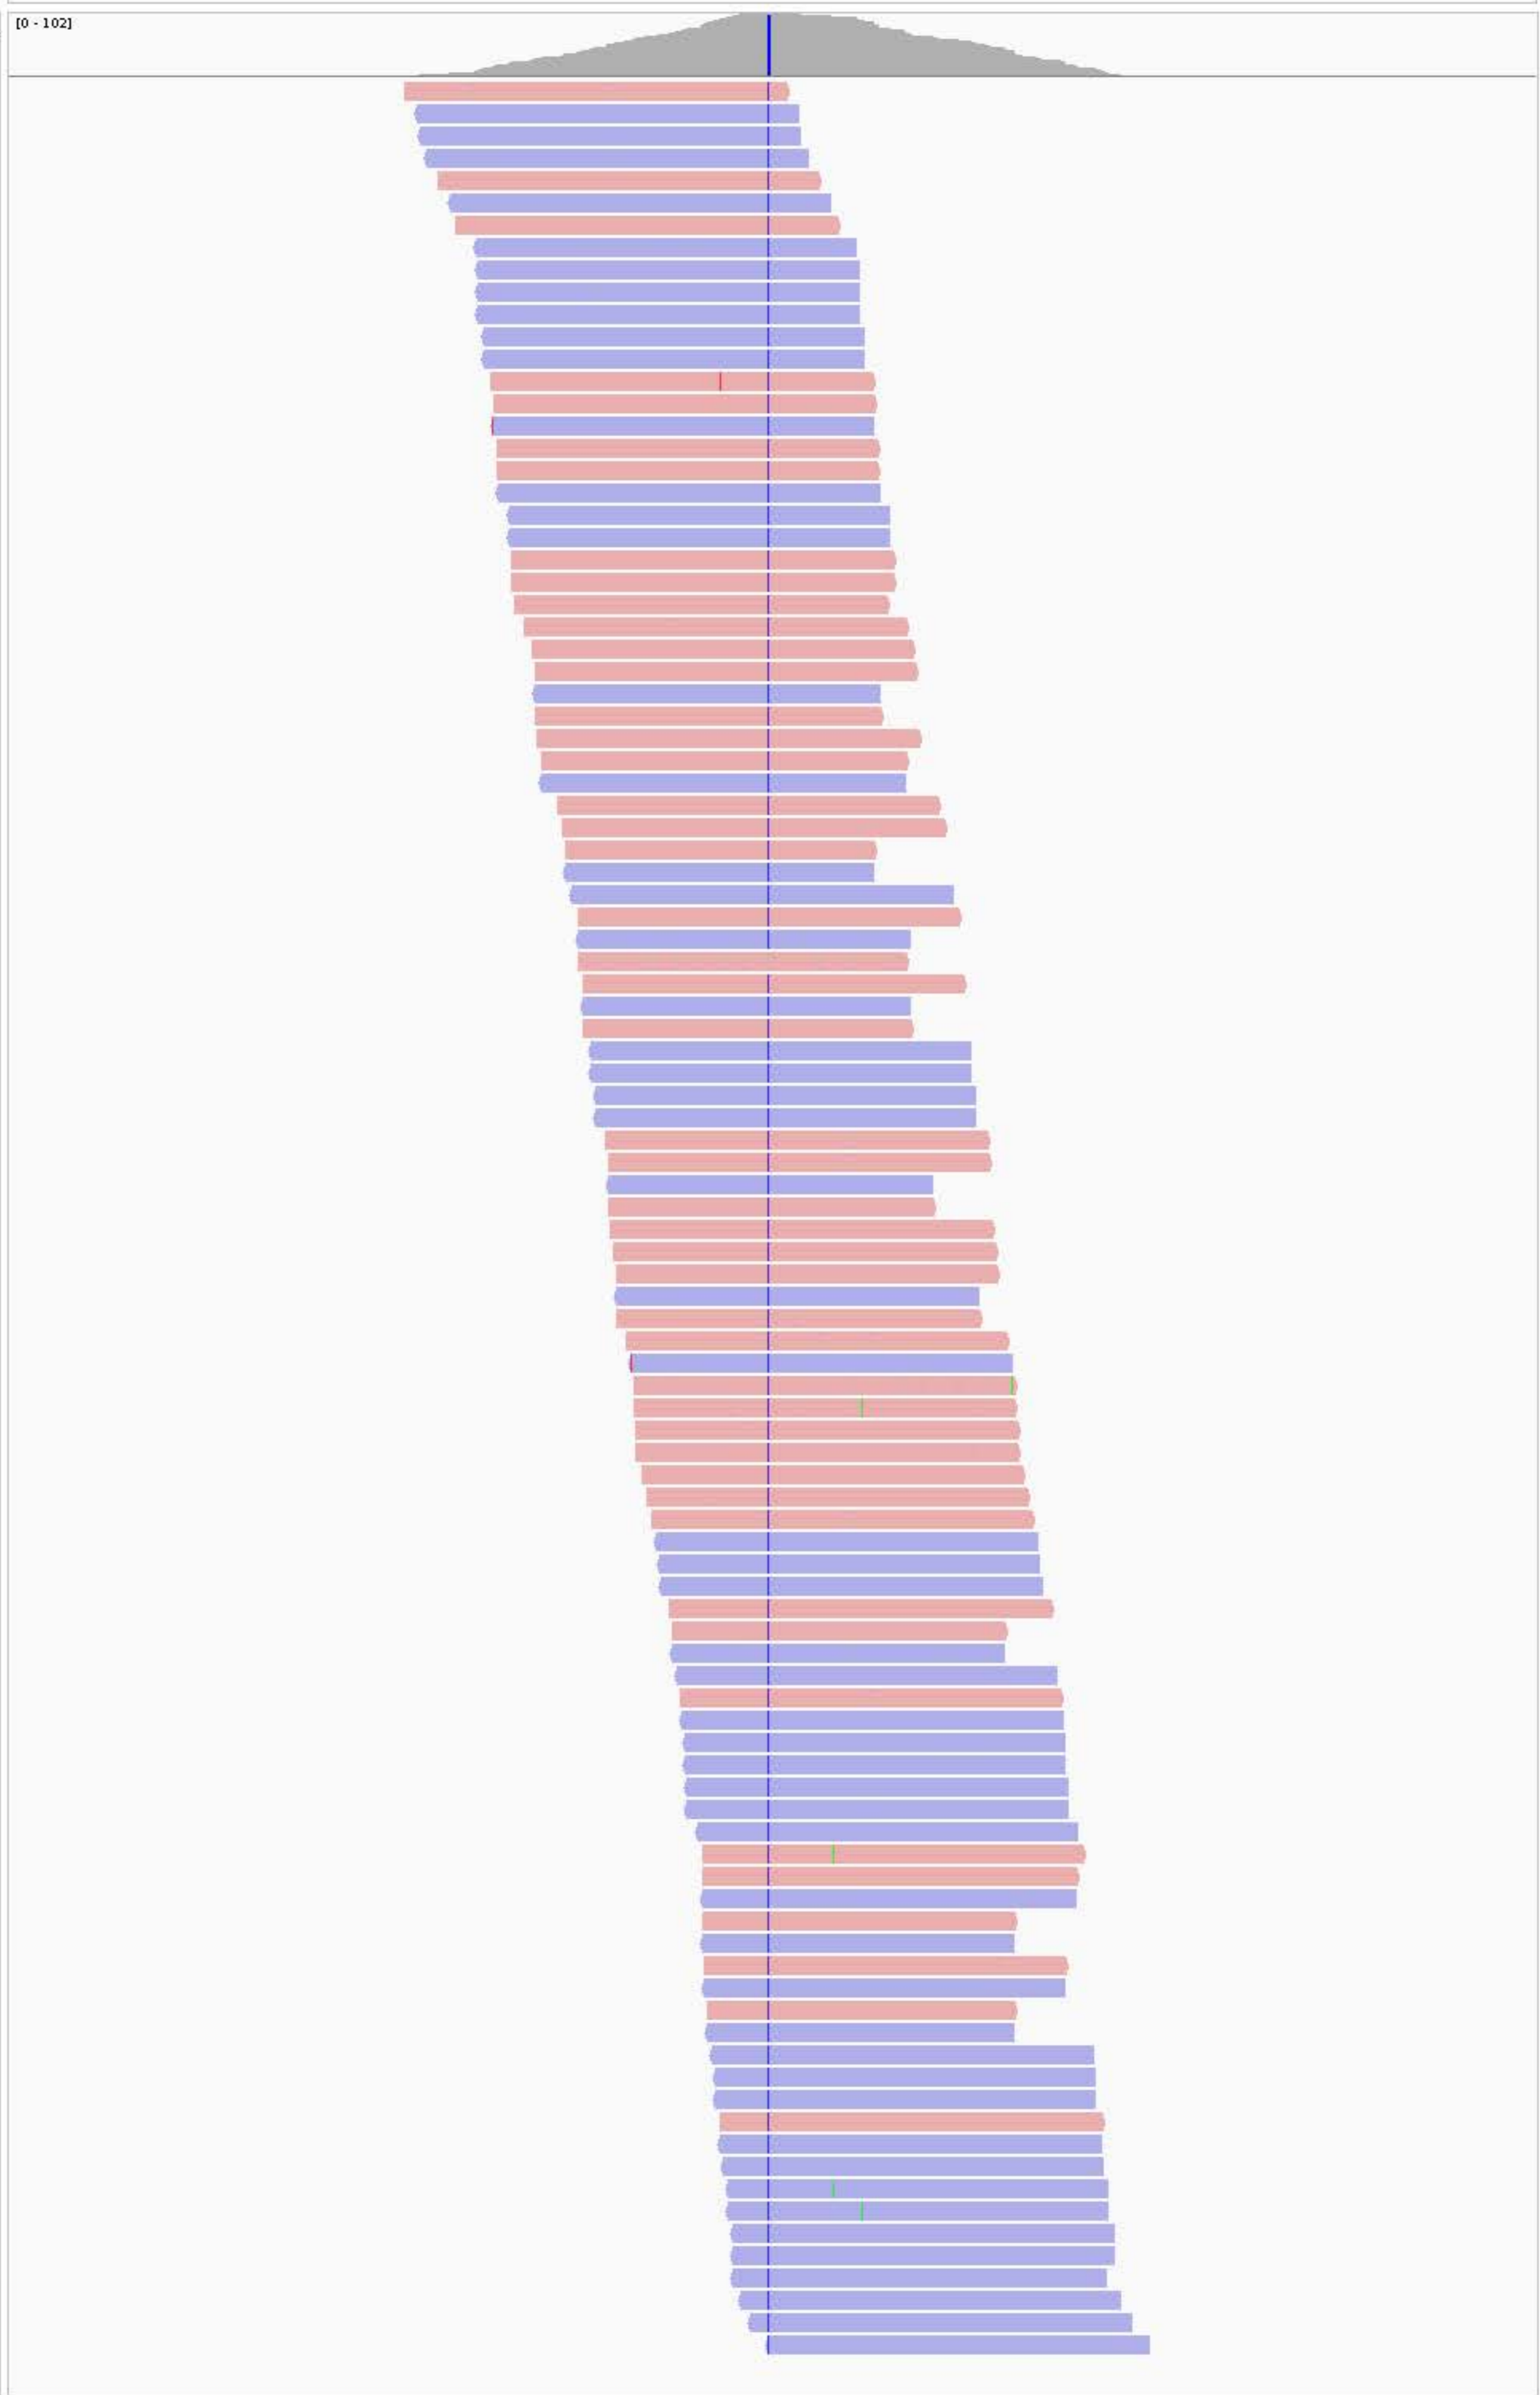

SL\_0016\_RN\_56\_mut.bam

Sequence

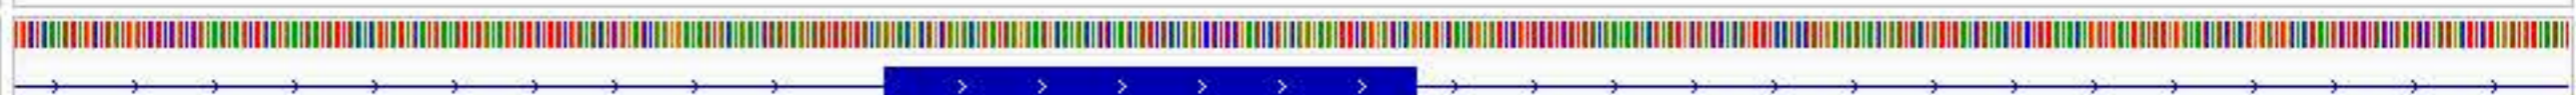

Refseq Genes

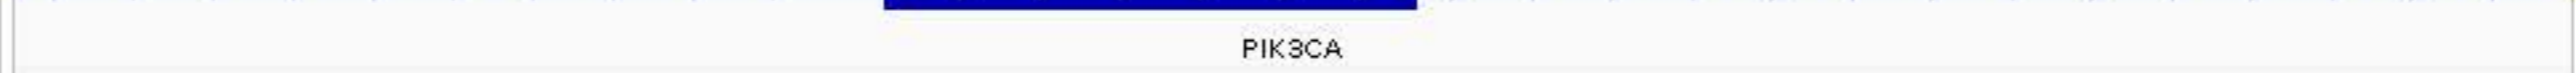

PIK3CA

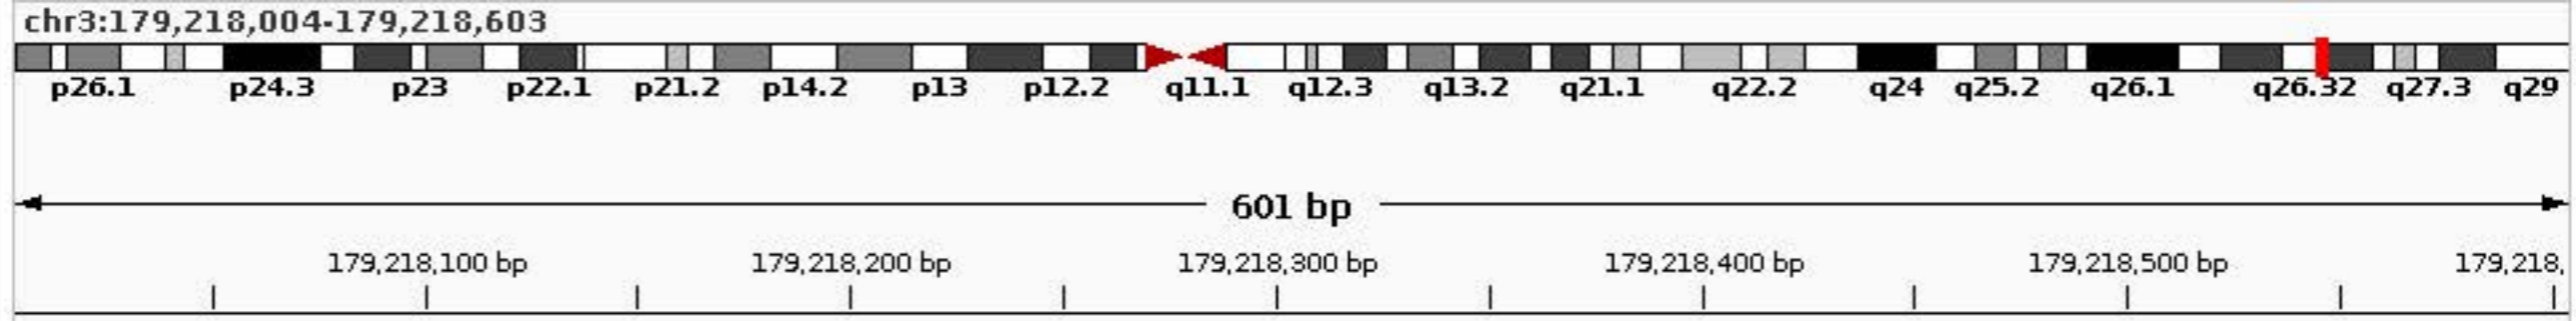

SL\_0001\_LN\_15\_mut.bam Coverage

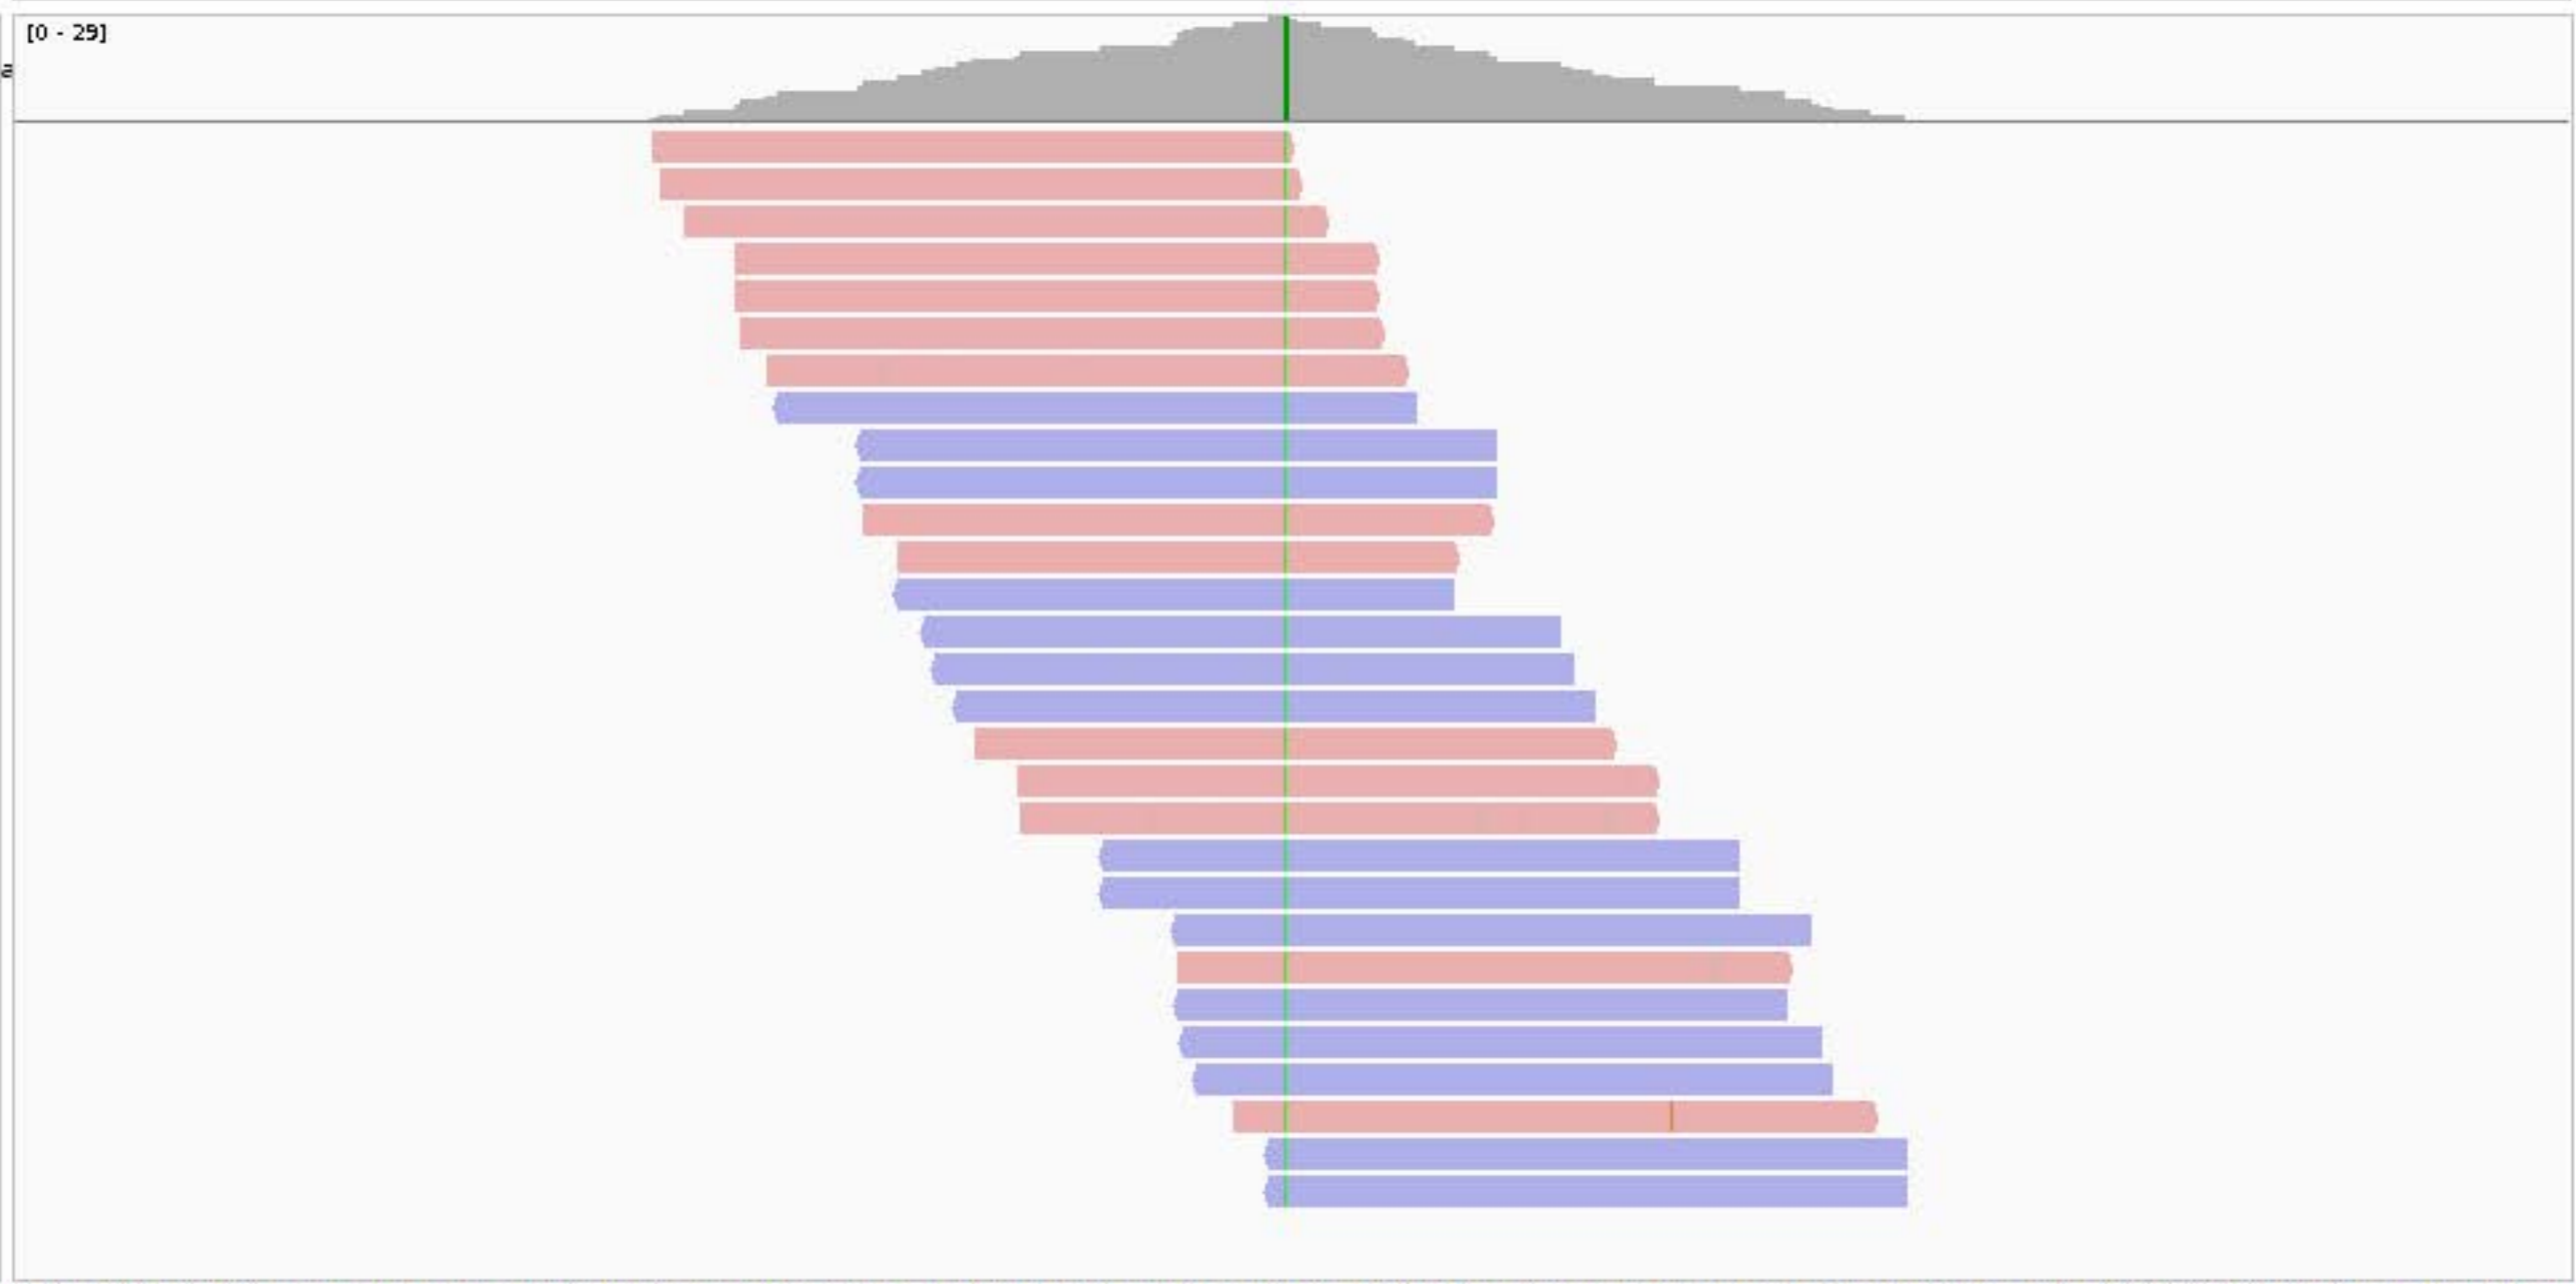

SL\_0001\_LN\_15\_mut.bam

Sequence →

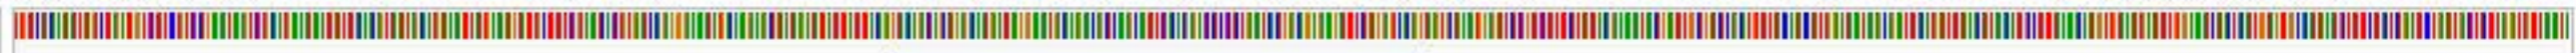

Refseq Genes

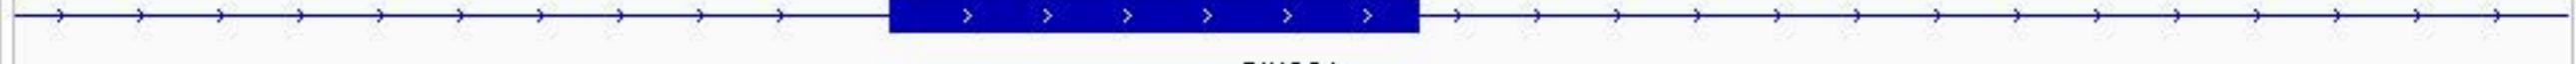

PIK3CA

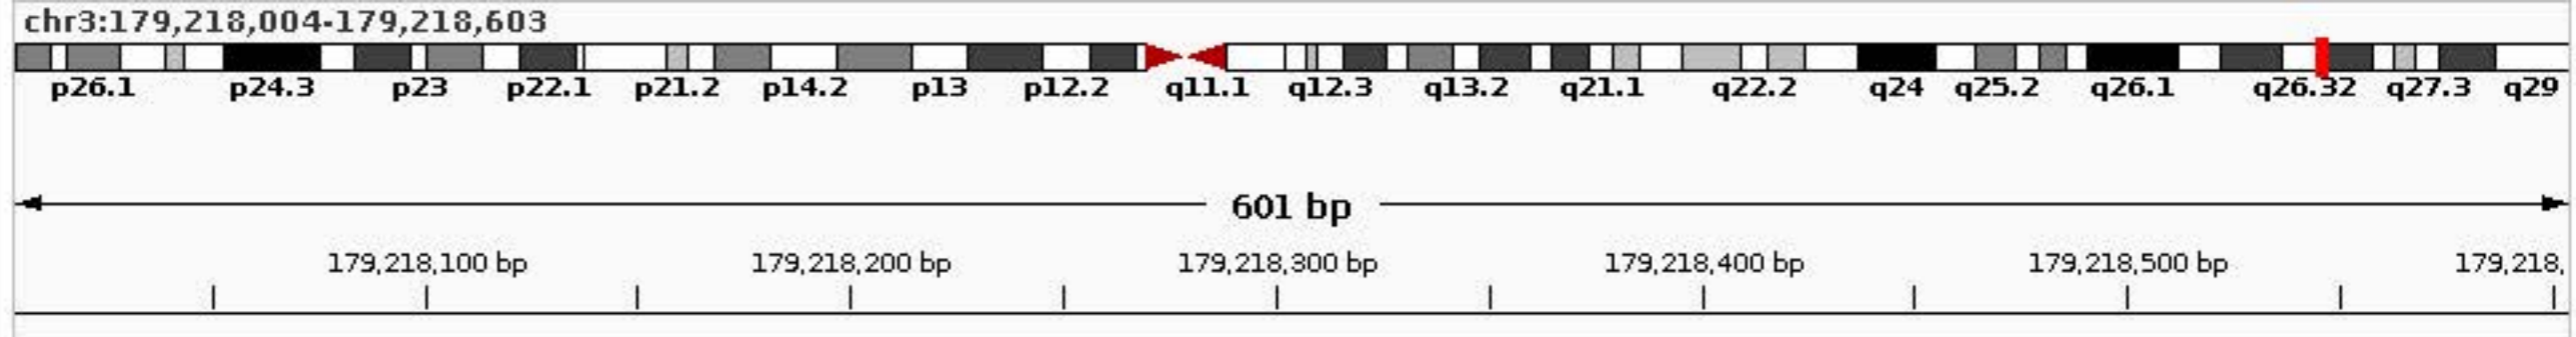

SL\_0015\_LN\_69\_mut.bam Coverage

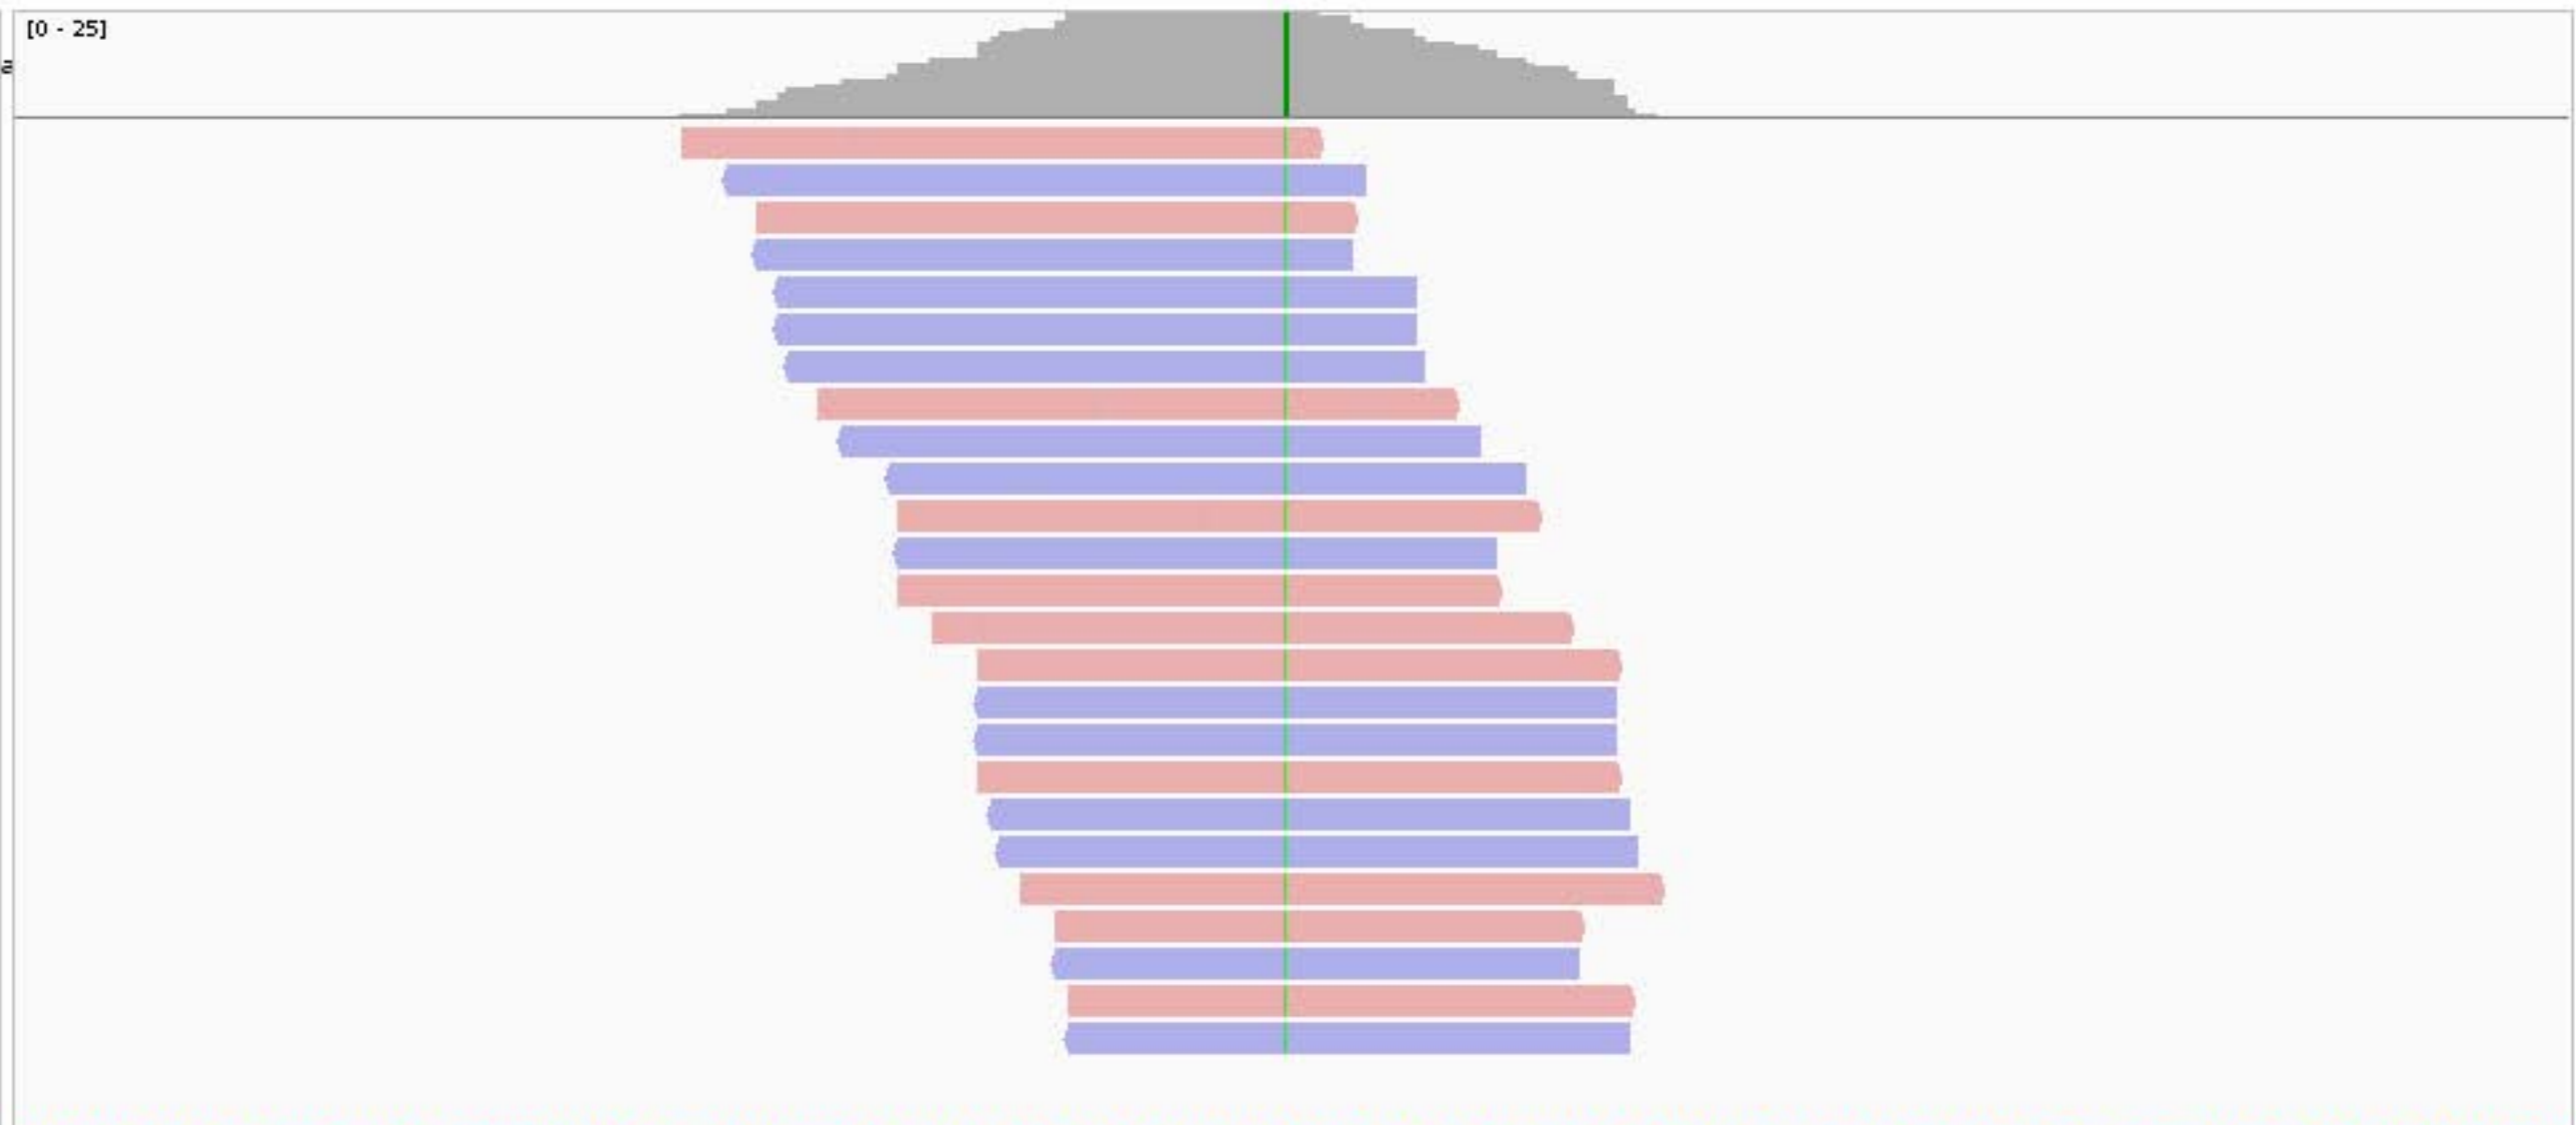

Sequence →

Refseq Genes

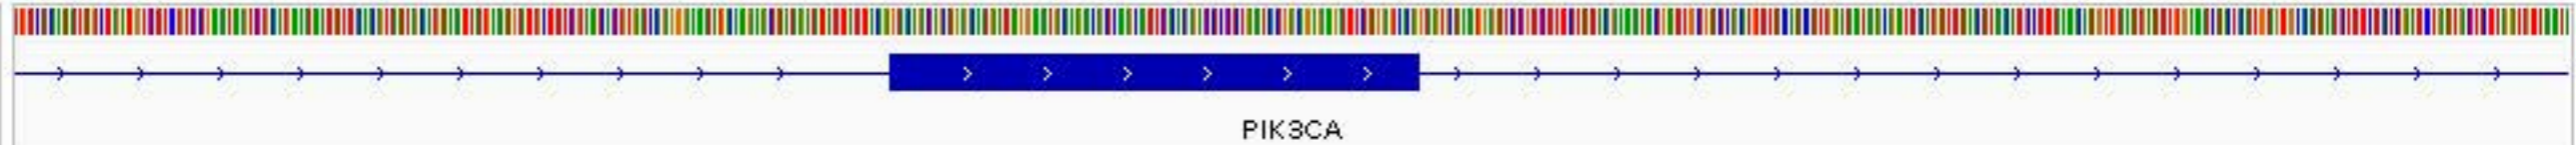



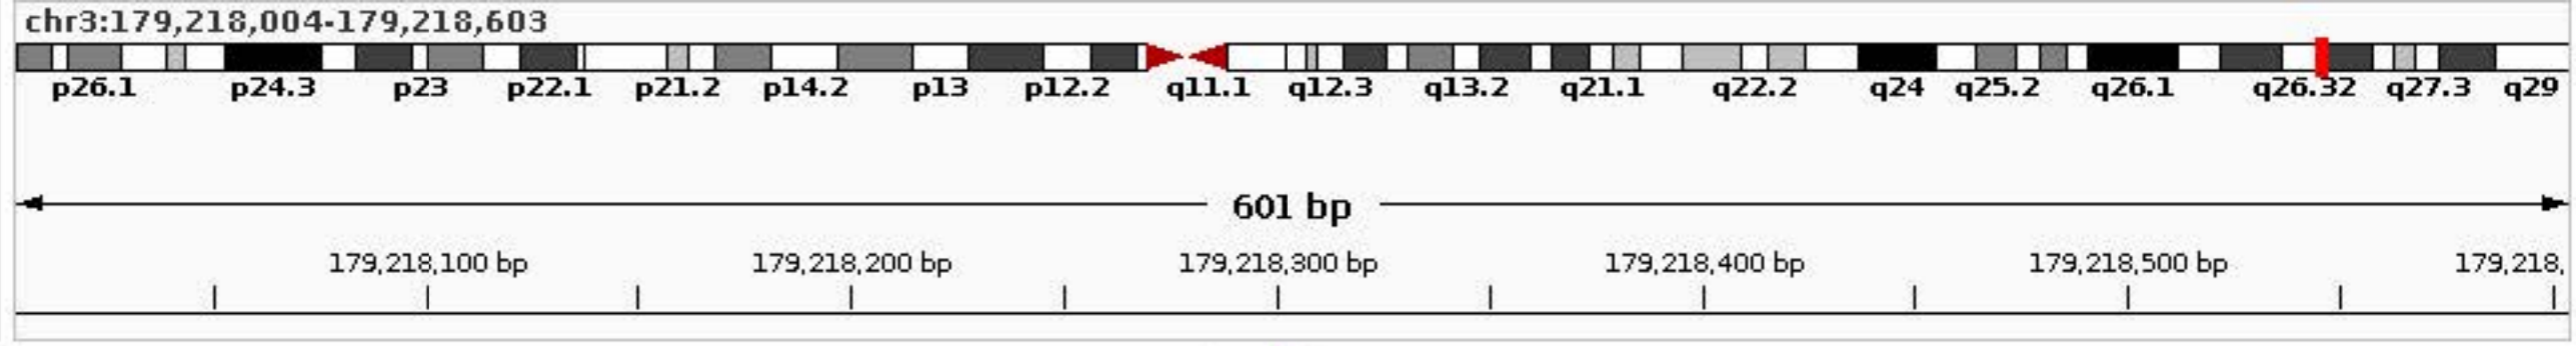

SL\_0016\_RN\_15\_mut.bam Coverage

SL\_0016\_RN\_15\_mut.bam

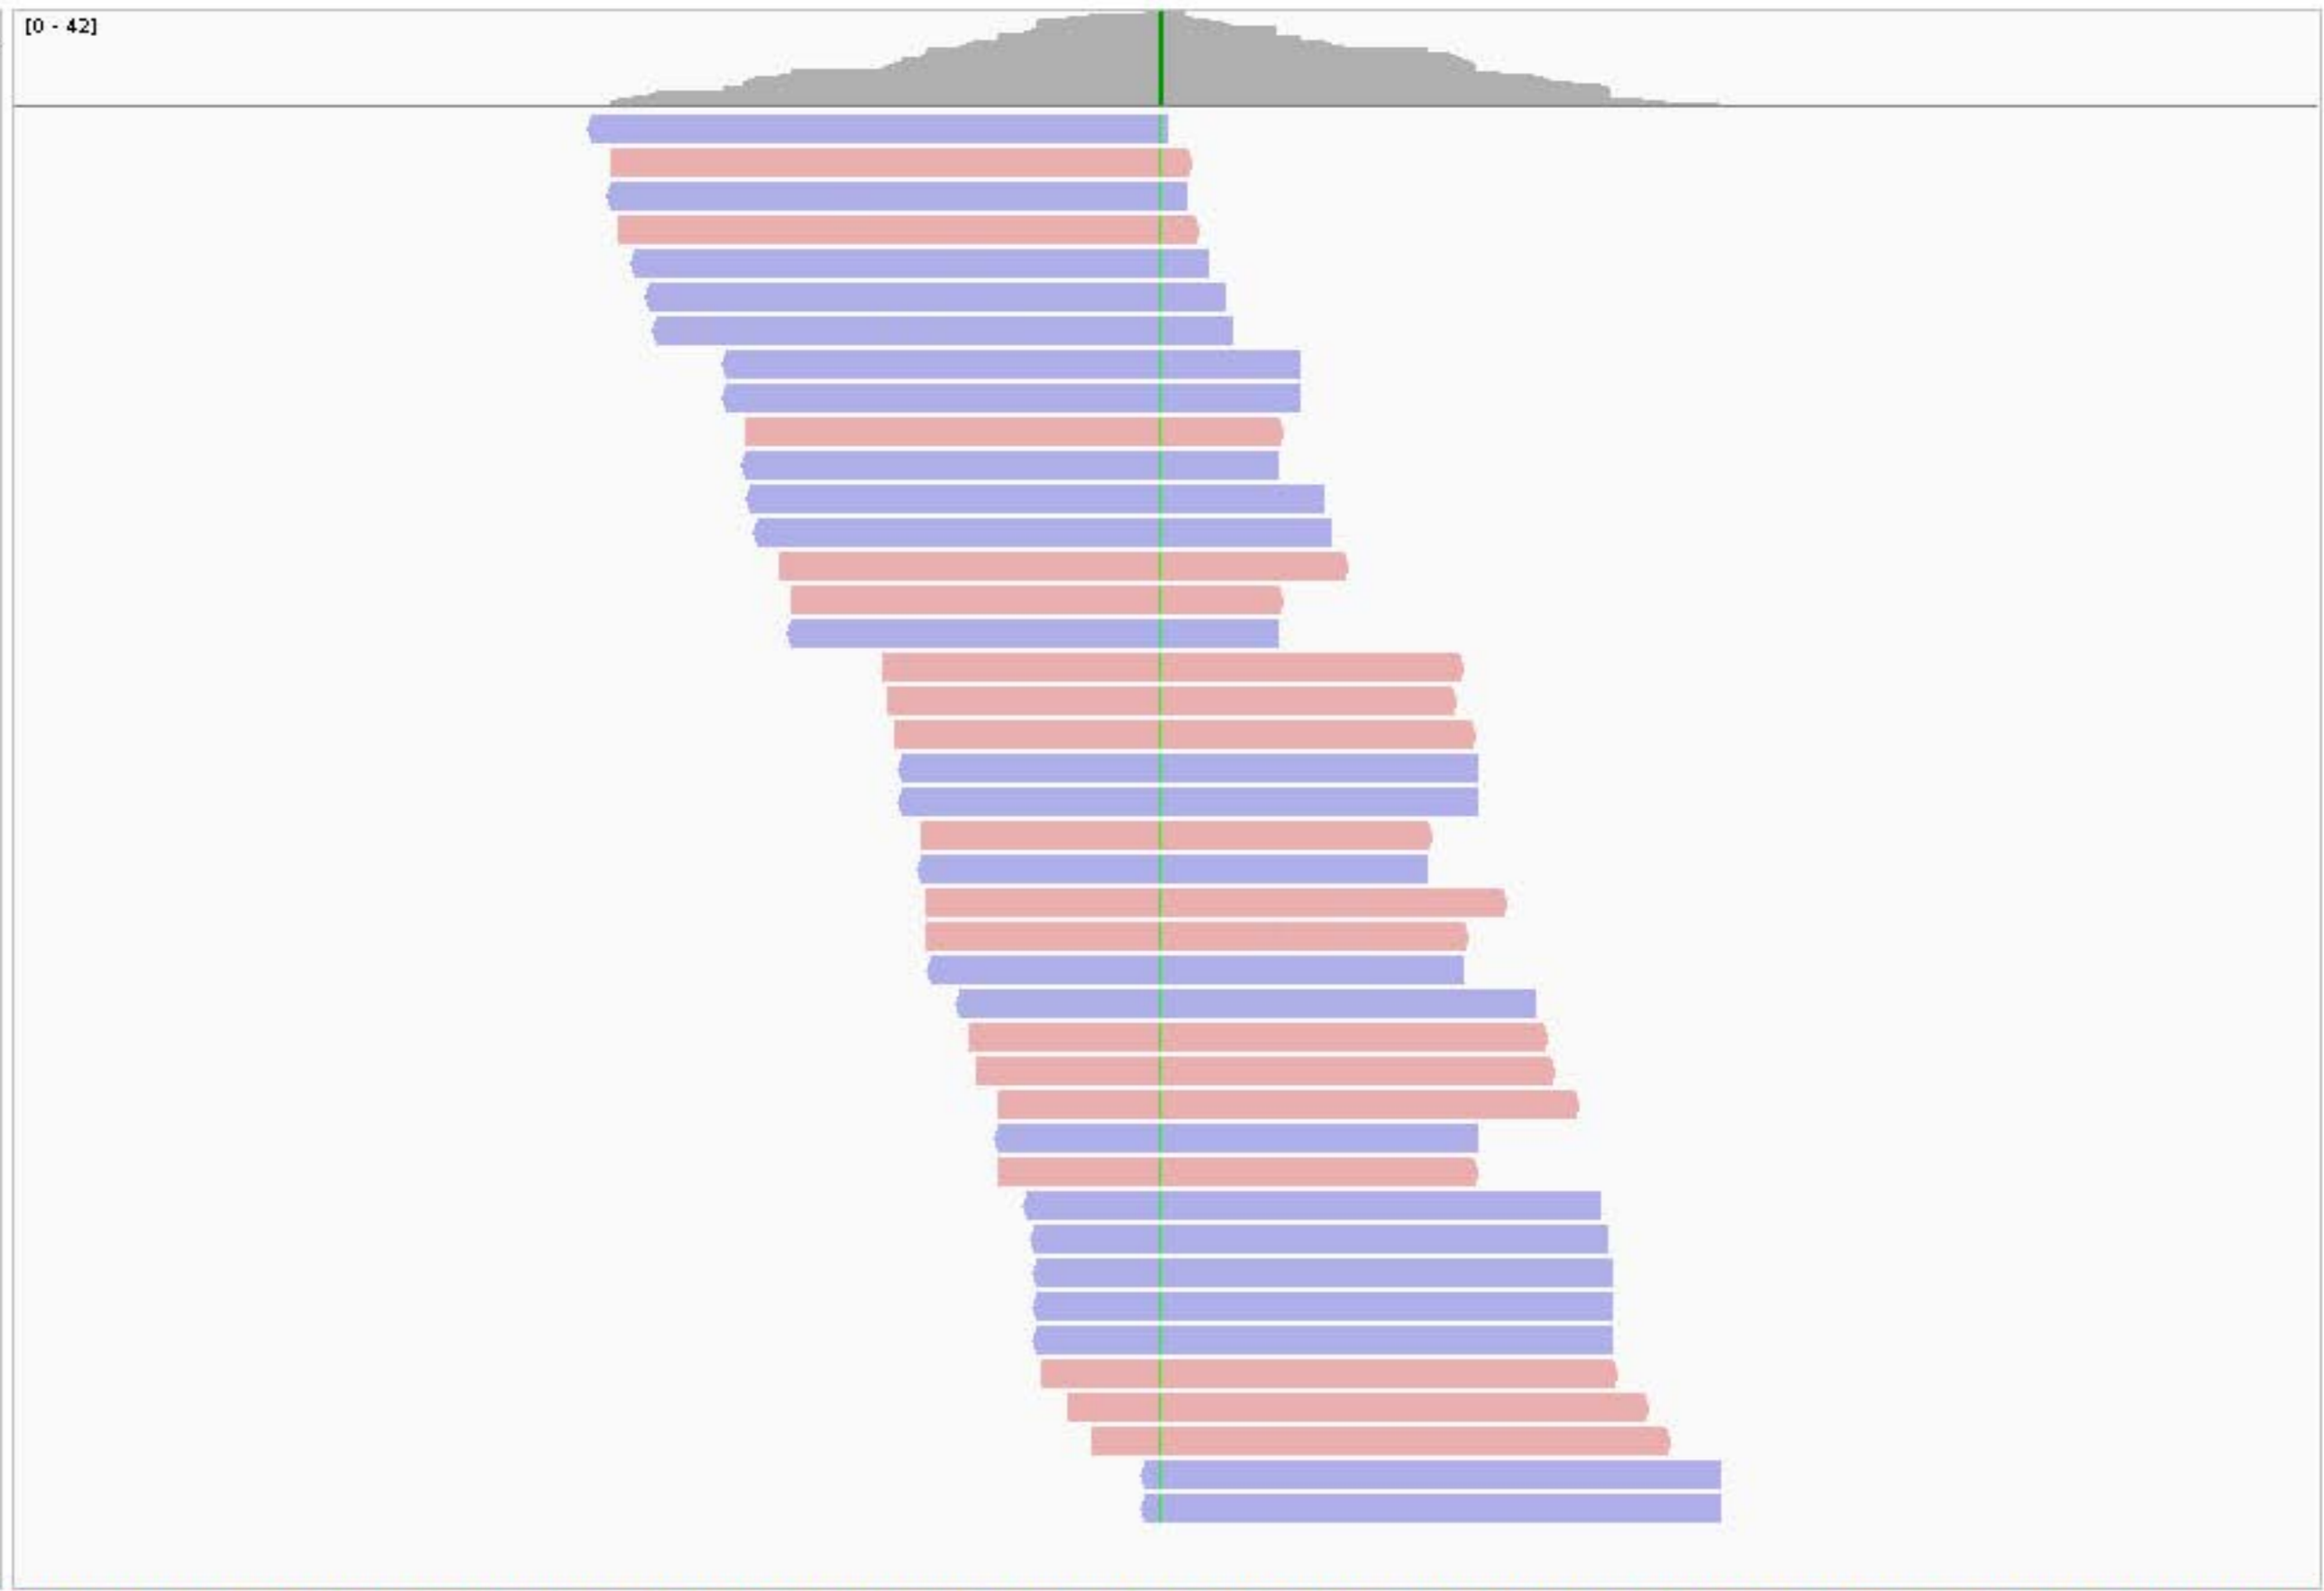

Sequence

Refseq Genes

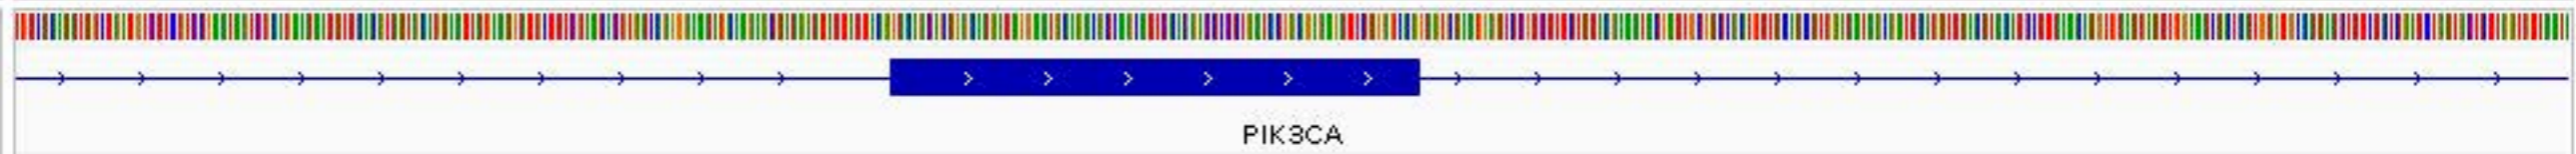

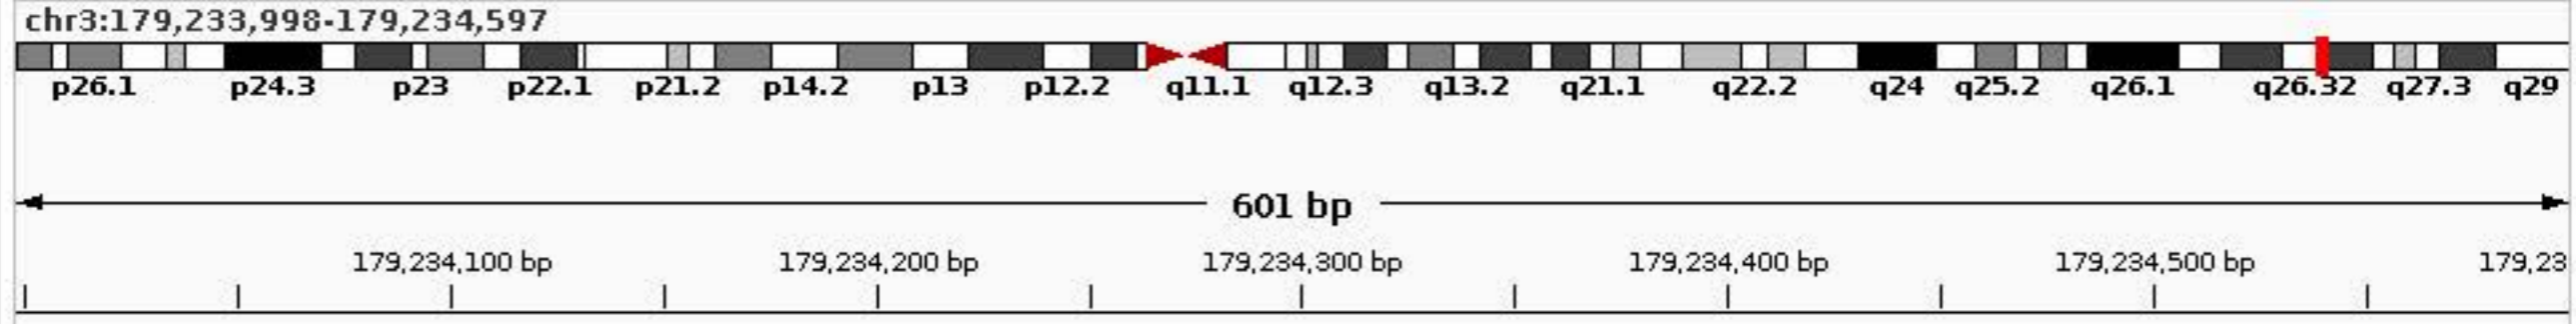

SL\_0001\_LN\_3\_mut.bam Coverage

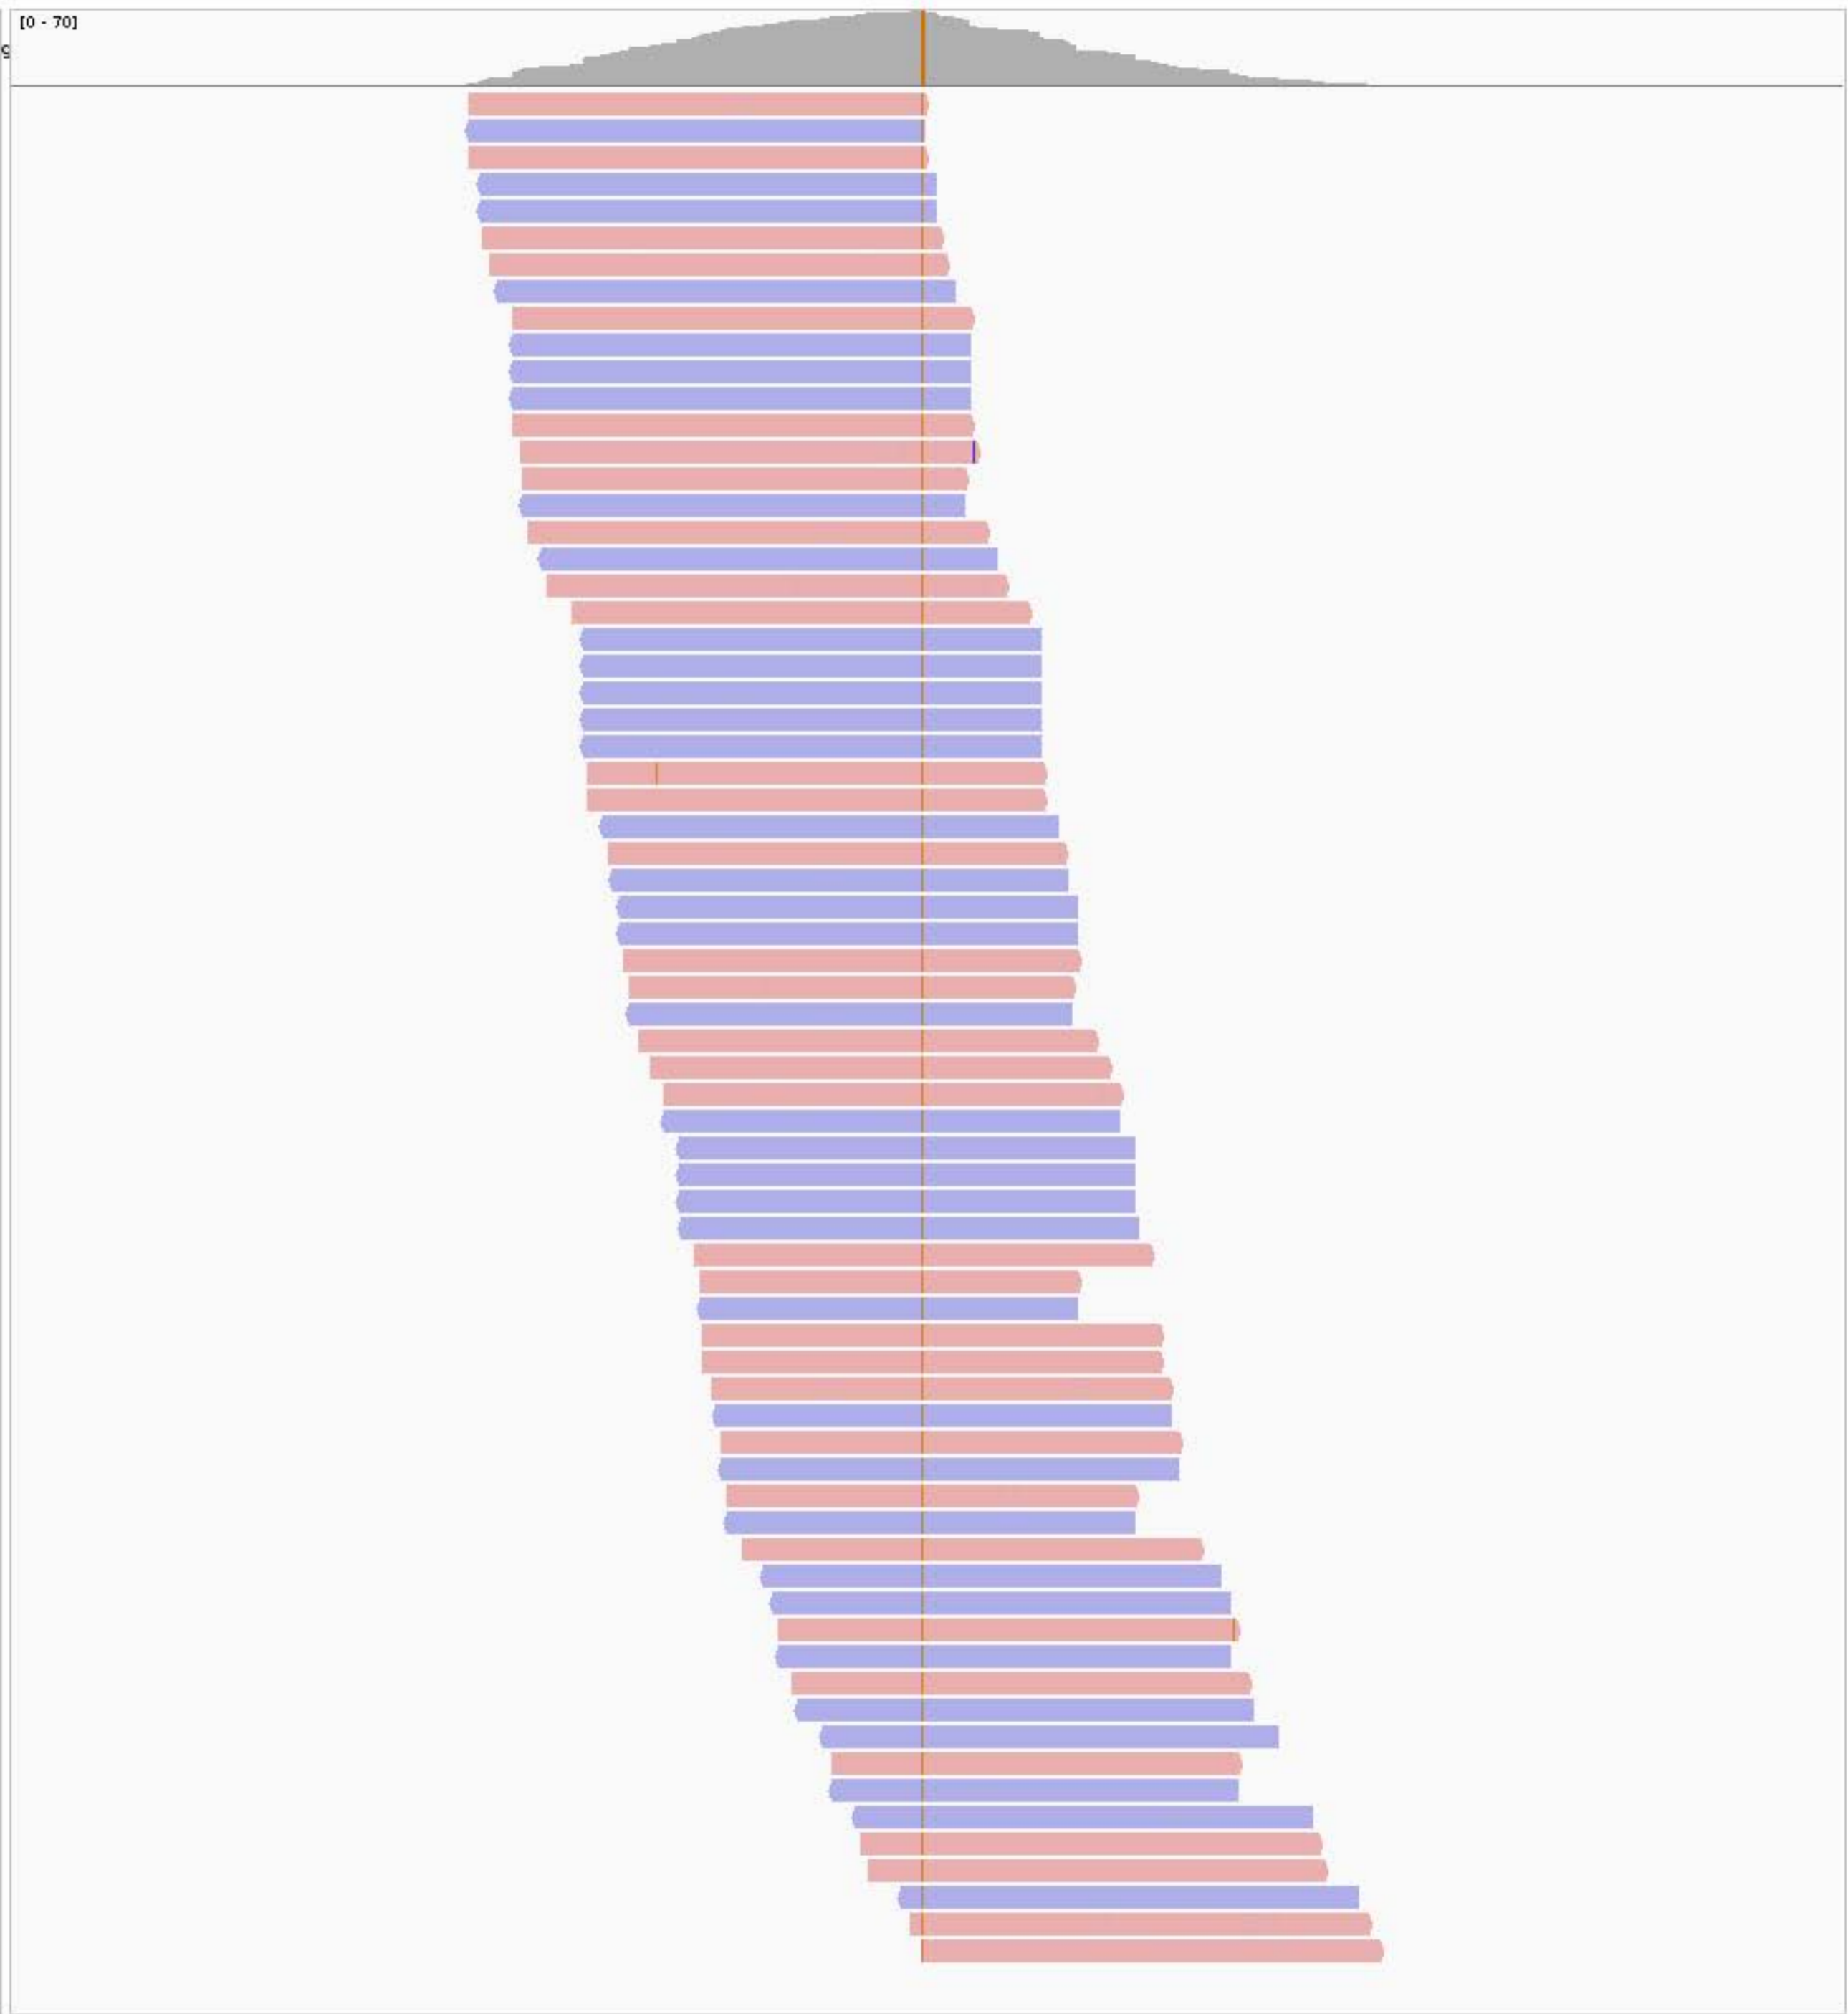

Sequence  
Refseq Genes

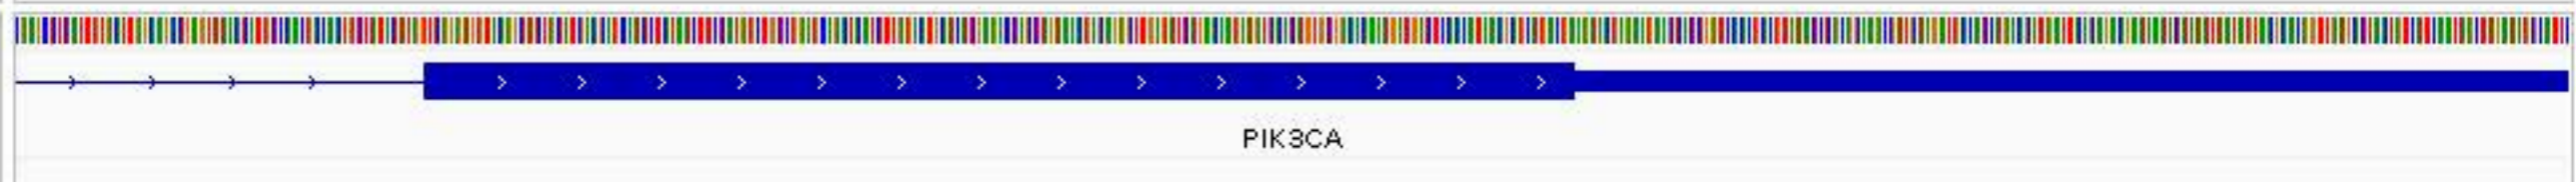

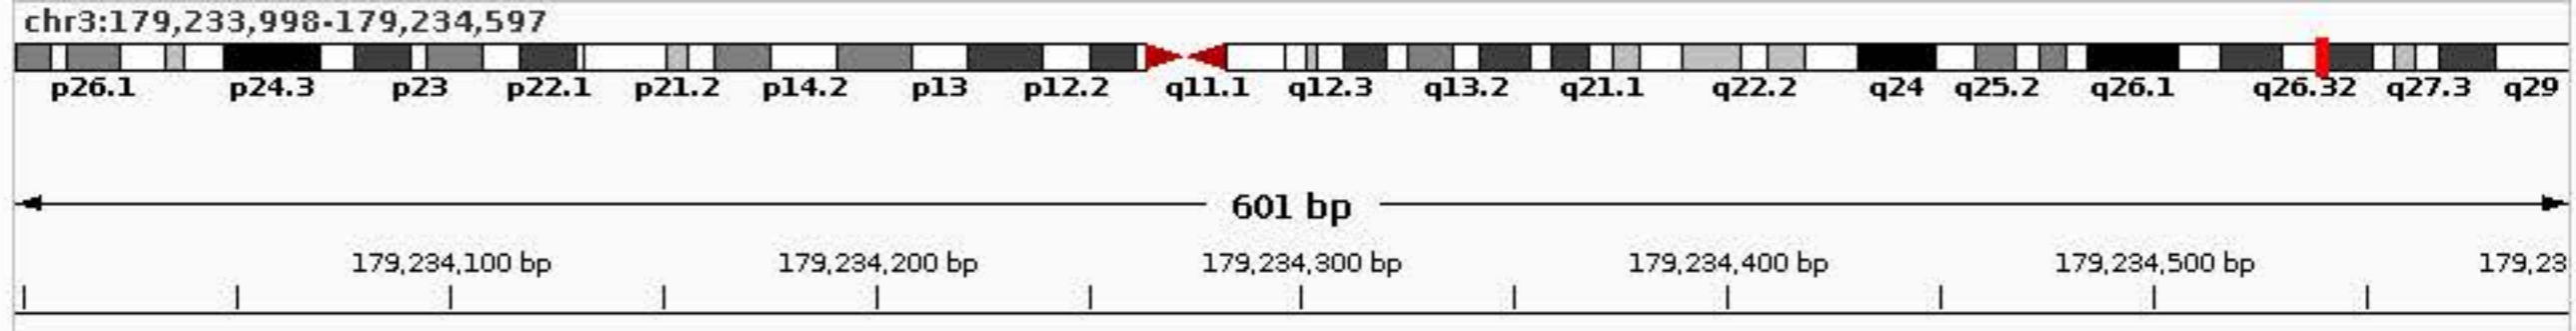

SL\_0001\_LN\_4\_mut.bam Coverage

SL\_0001\_LN\_4\_mut.bam

Sequence →

Refseq Genes

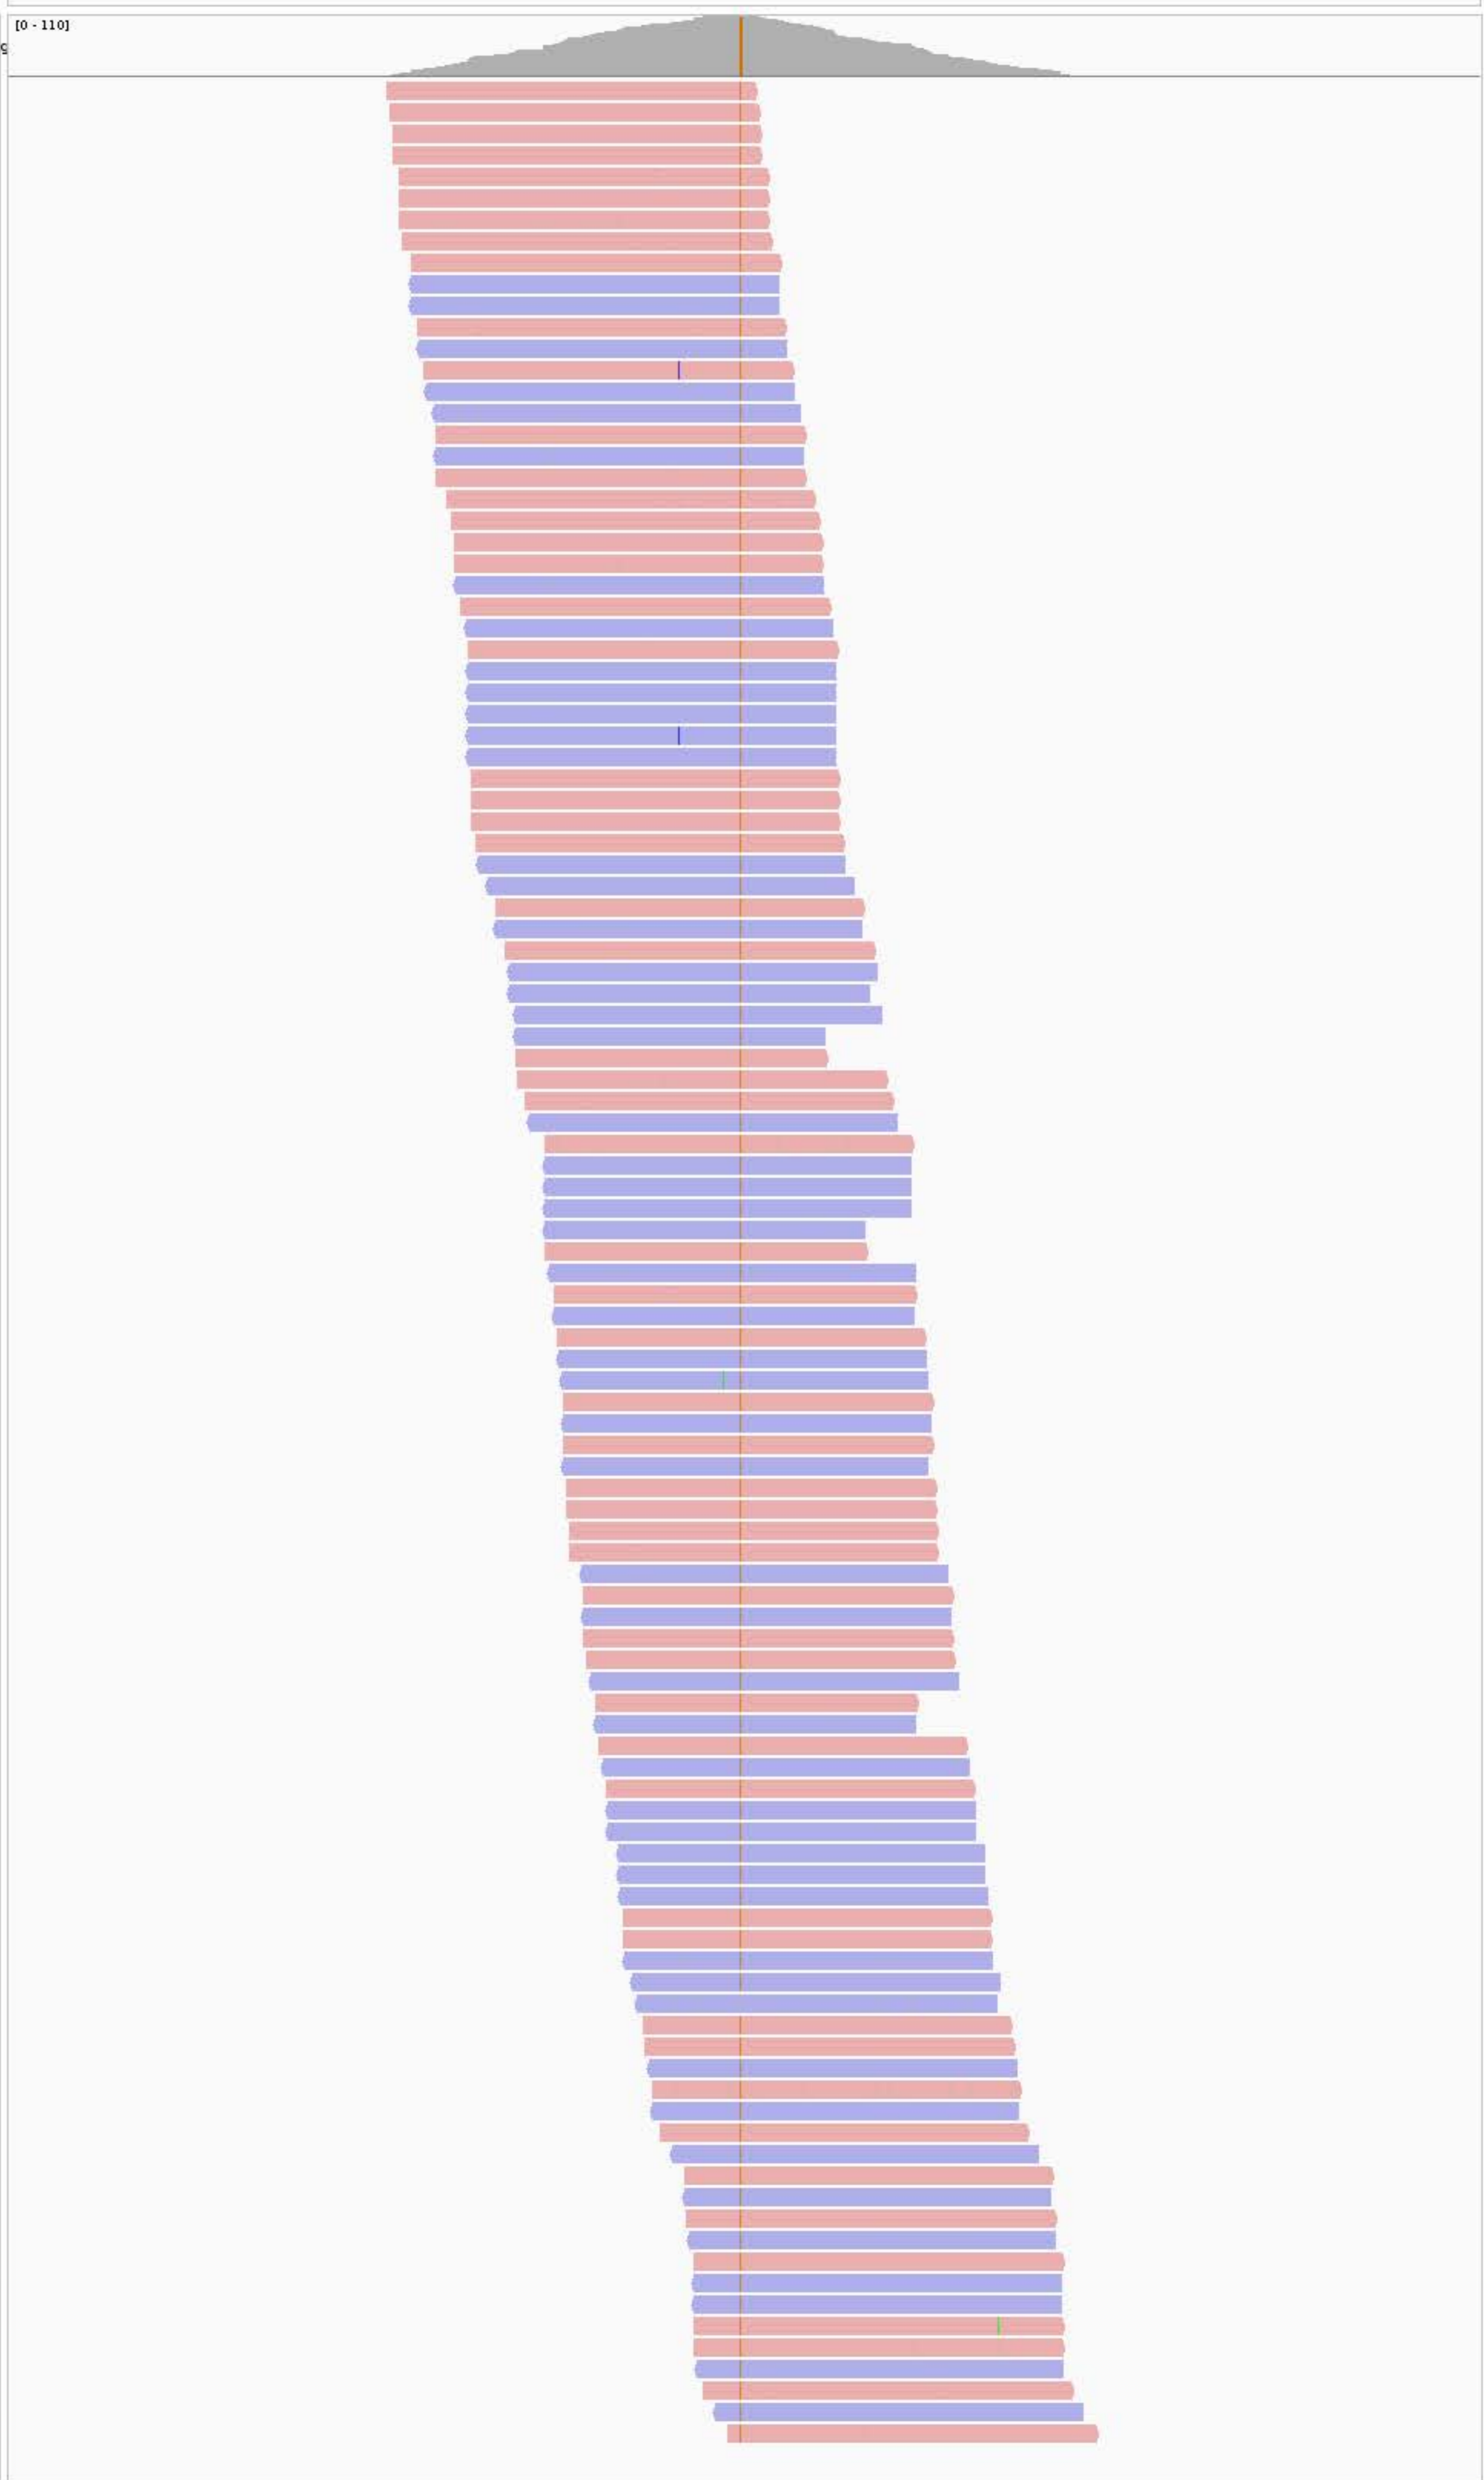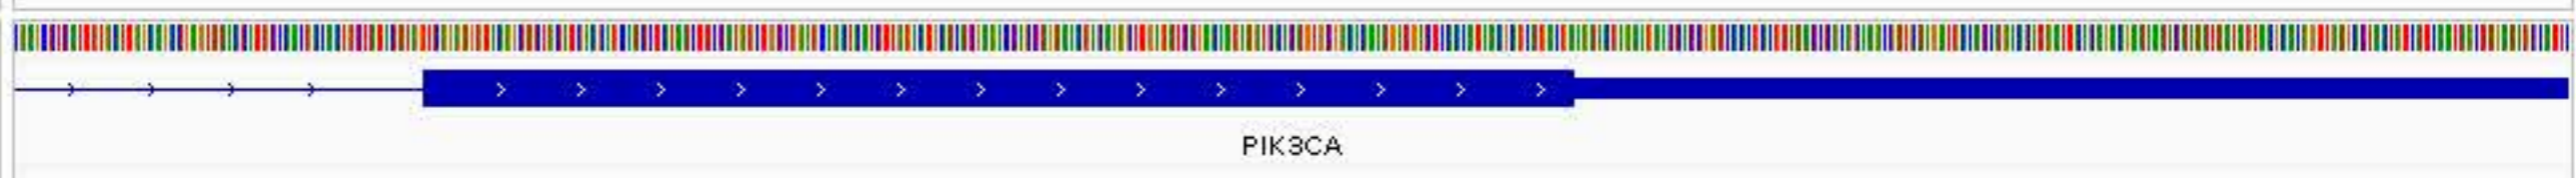



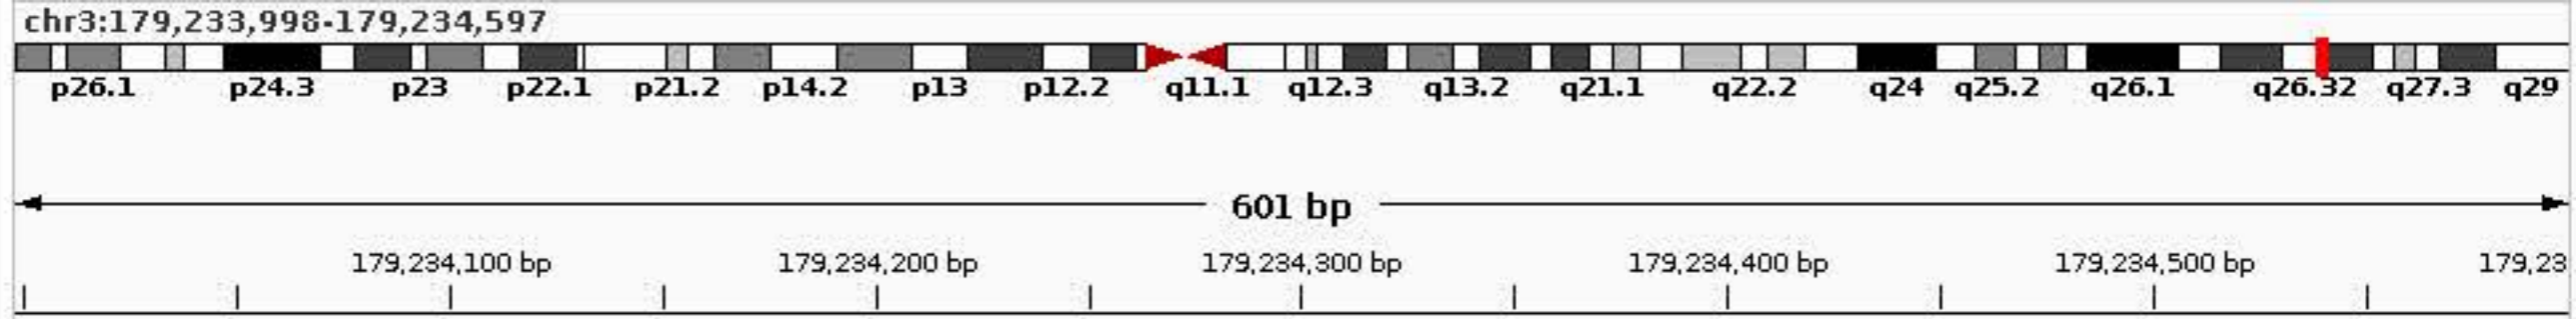

SL\_0001\_LN\_10\_mut.bam Coverage

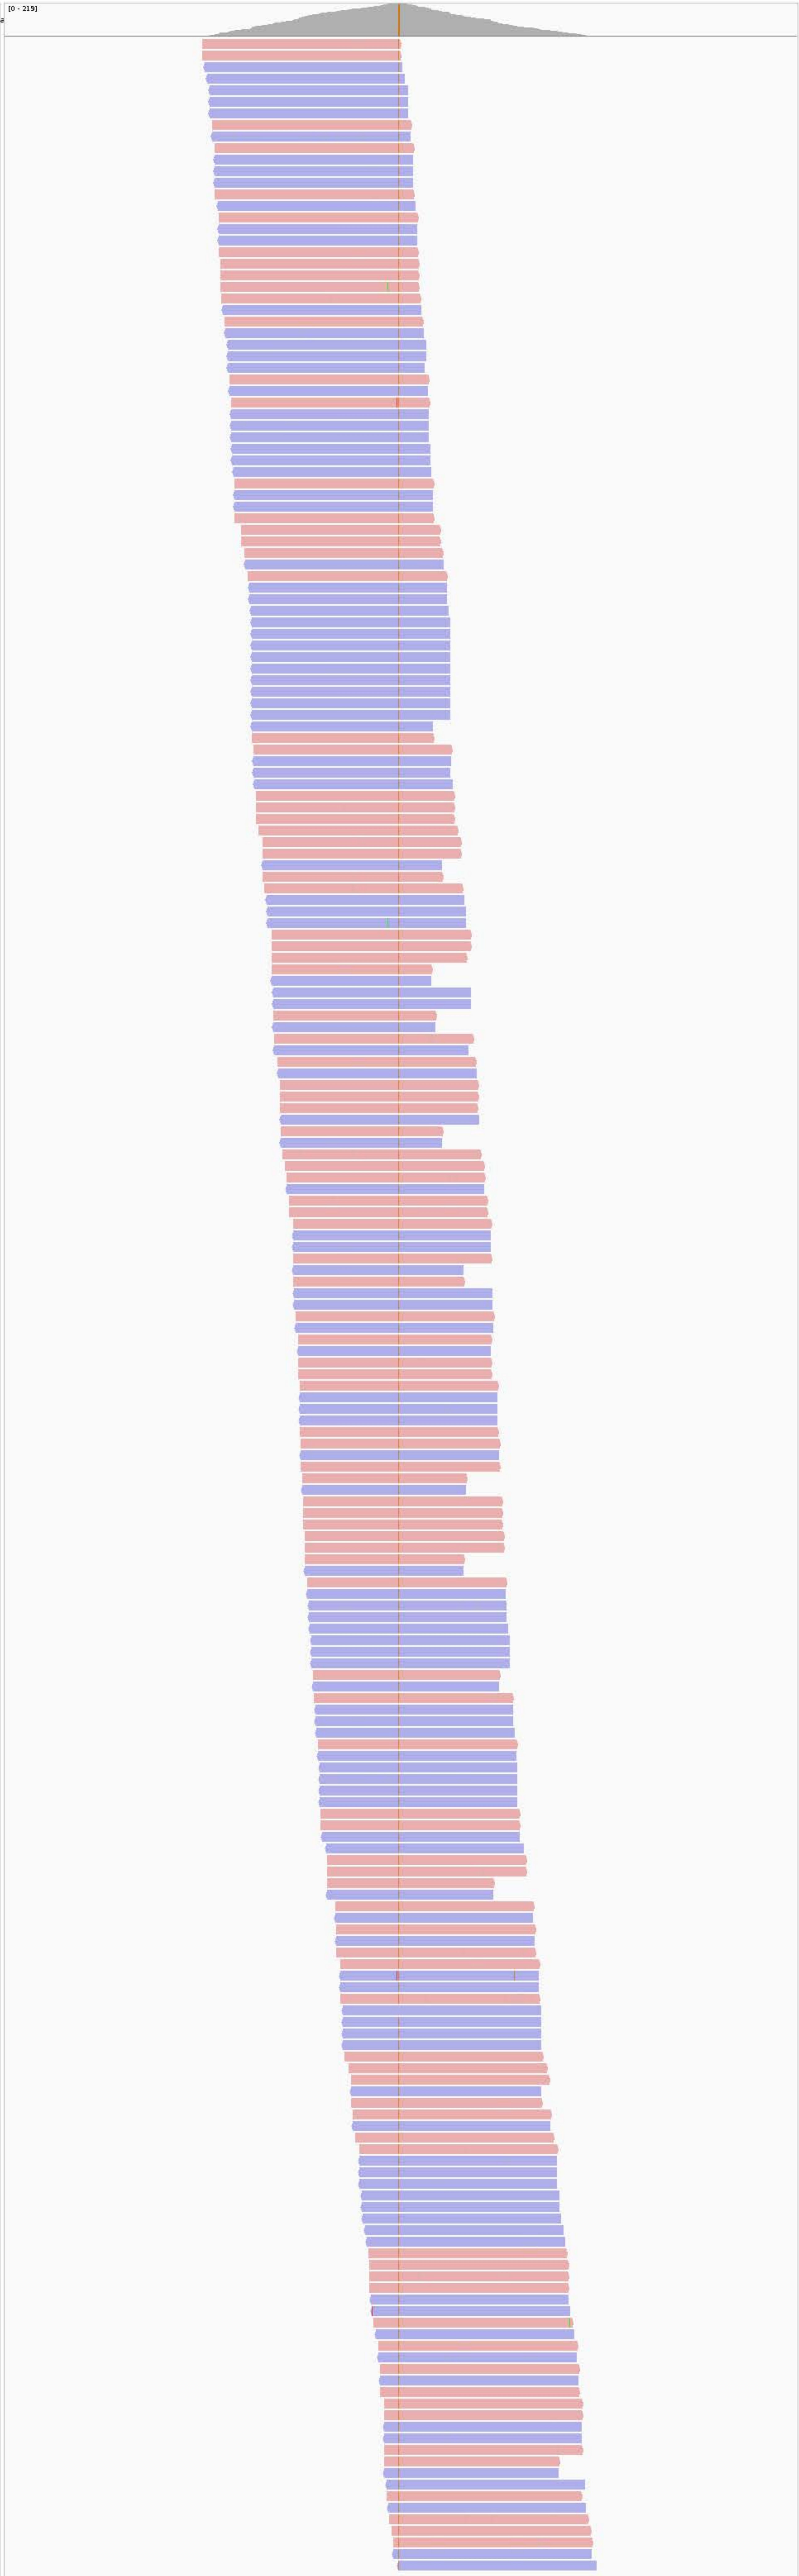

SL\_0001\_LN\_10\_mut.bam

Sequence  
Refseq Genes

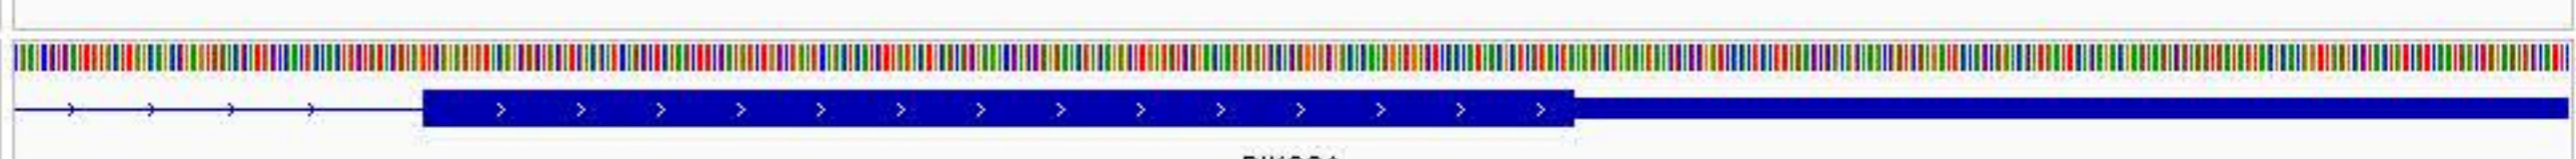

PIK3CA

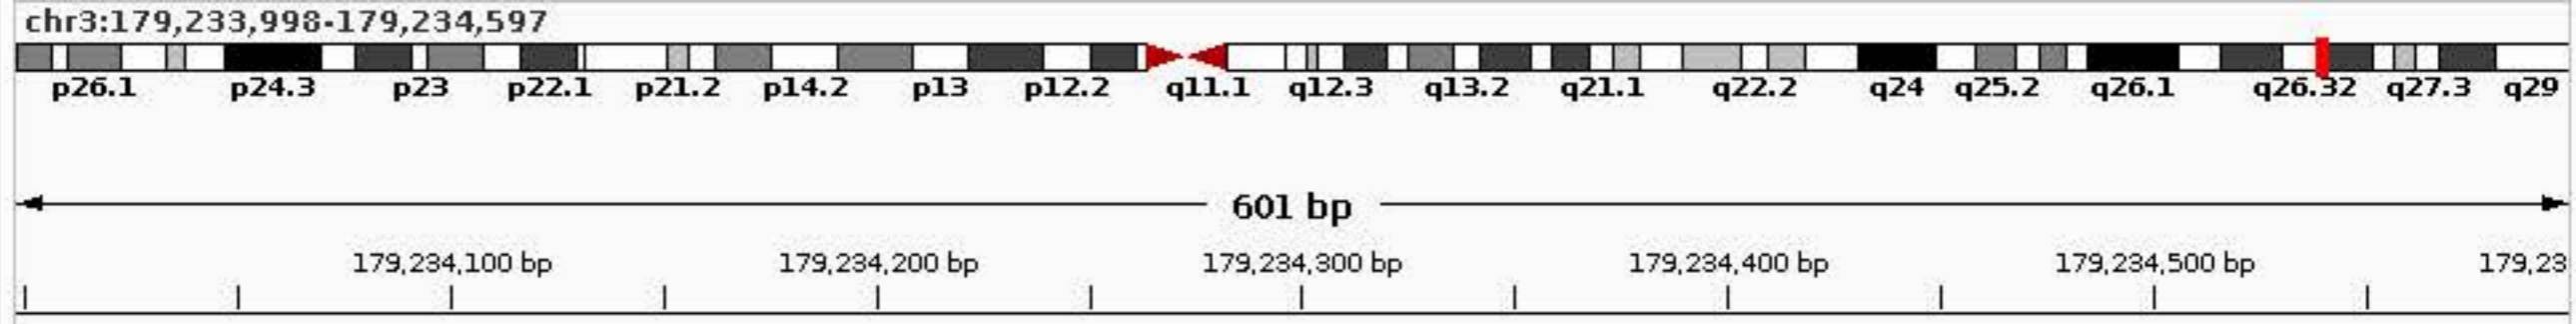

SL\_0001\_LN\_44\_mut.bam Coverage

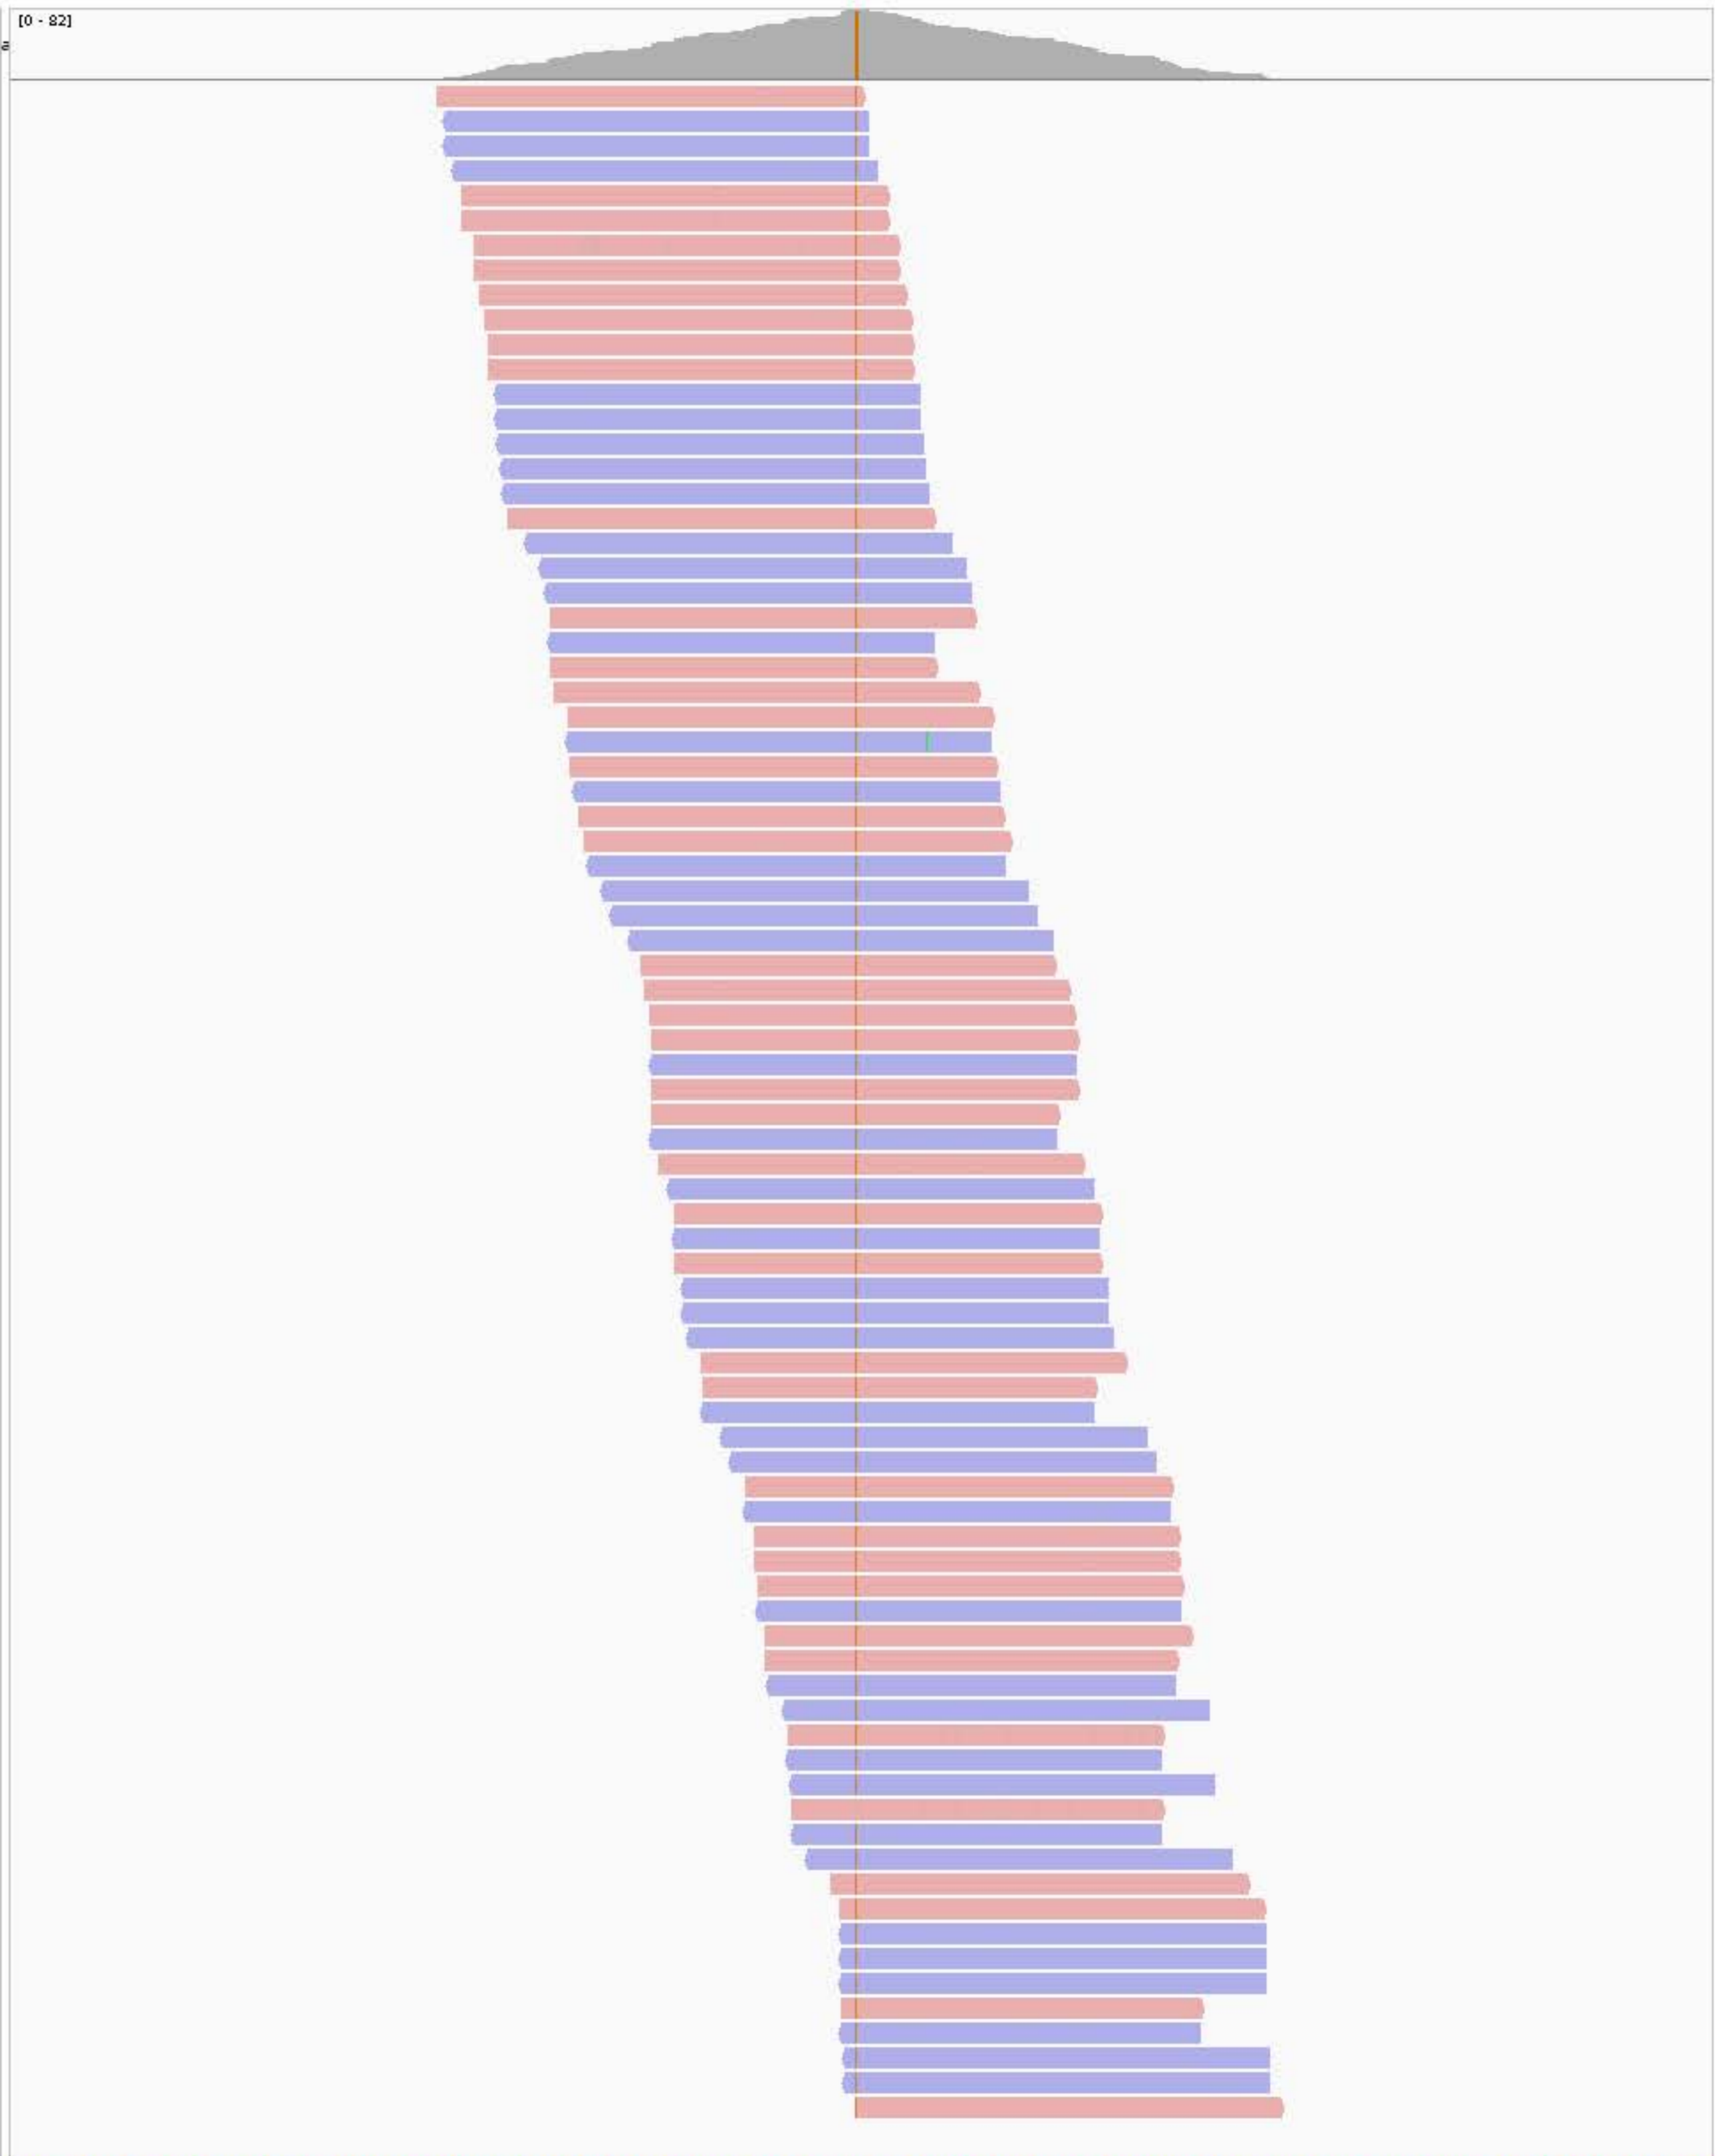

Sequence →  
Refseq Genes

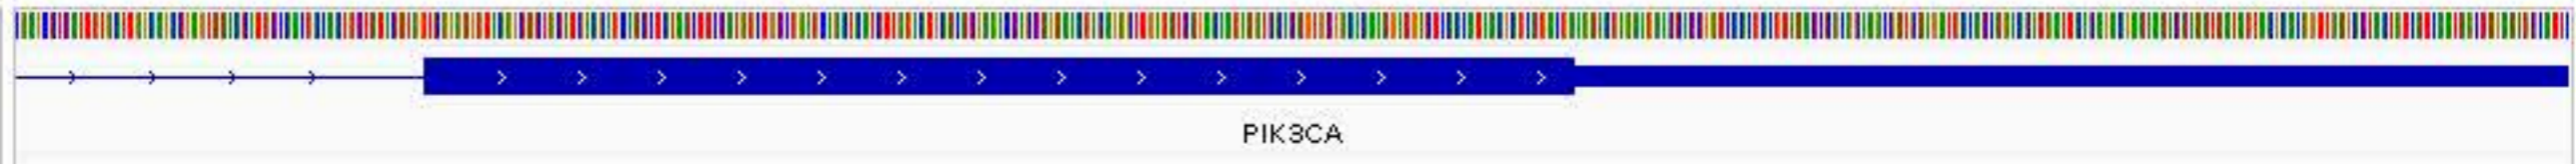



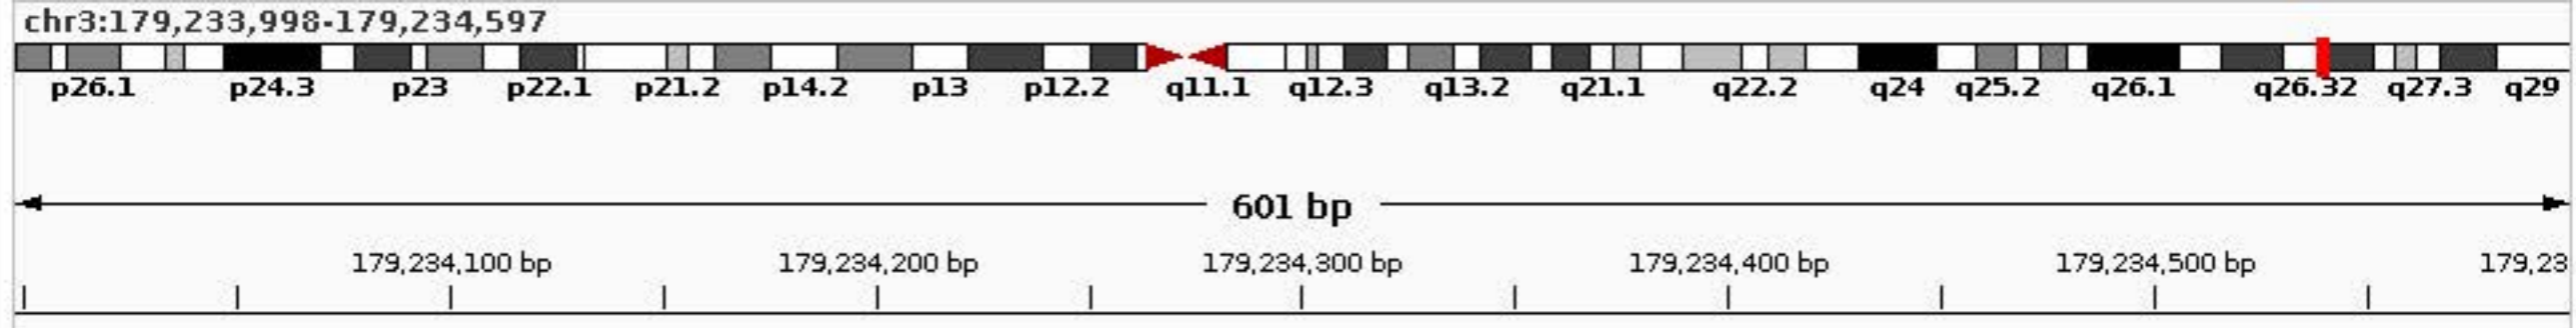

SL\_0001\_RN\_7\_mut.bam Coverage

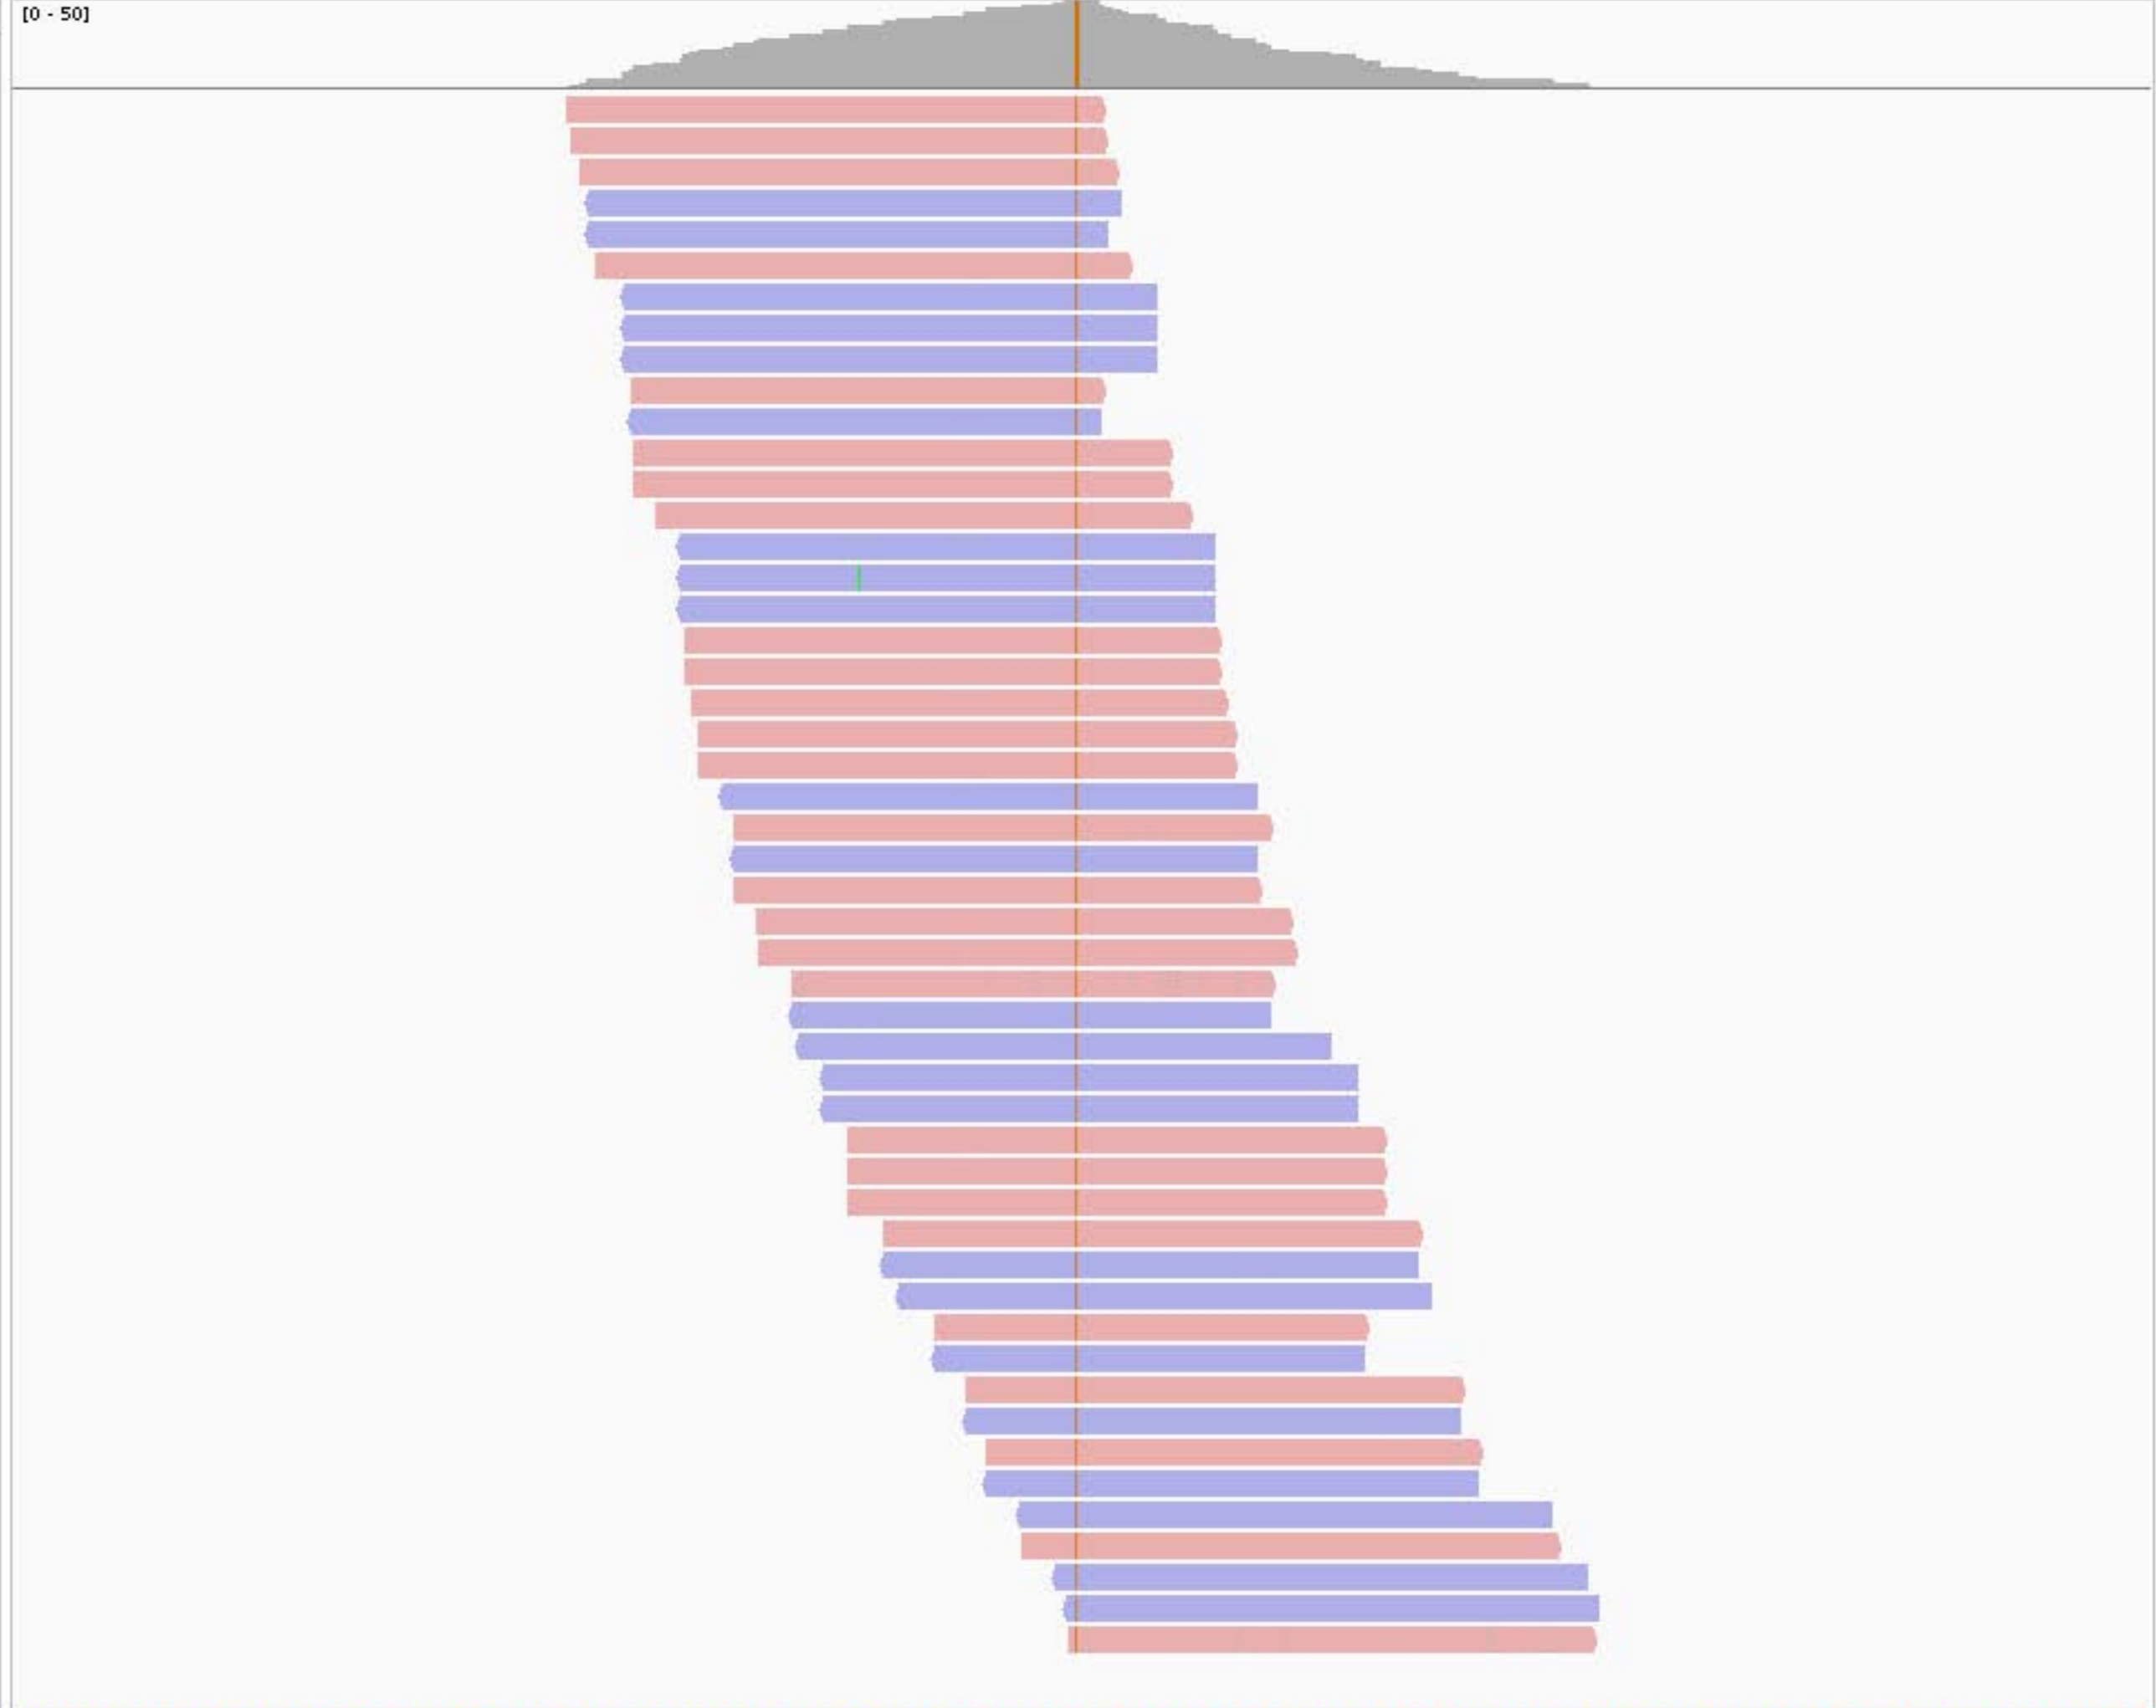

Sequence

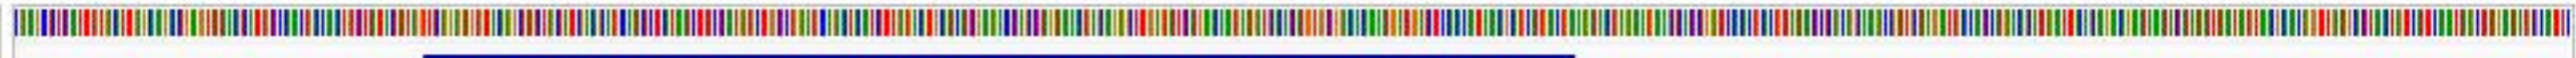

Refseq Genes

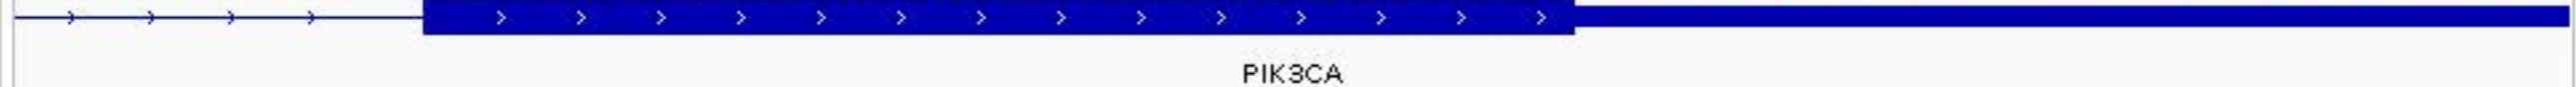



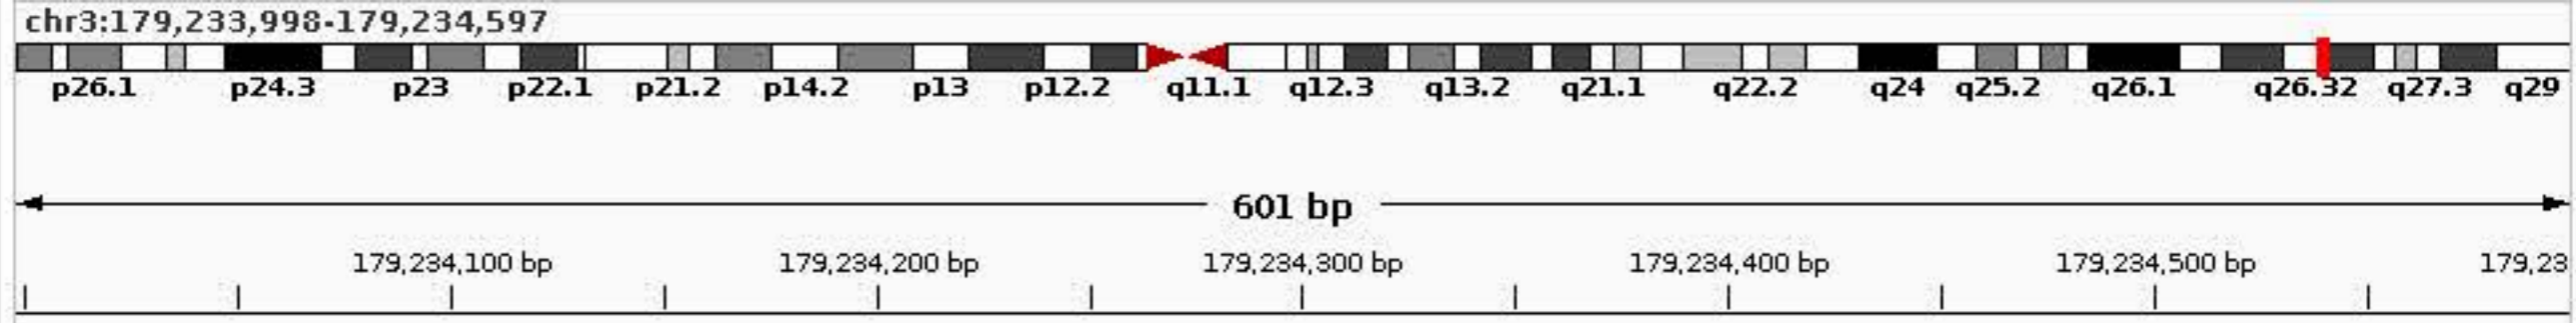

SL\_0001\_RN\_25\_mut.bam Coverage

SL\_0001\_RN\_25\_mut.bam

Sequence

Refseq Genes

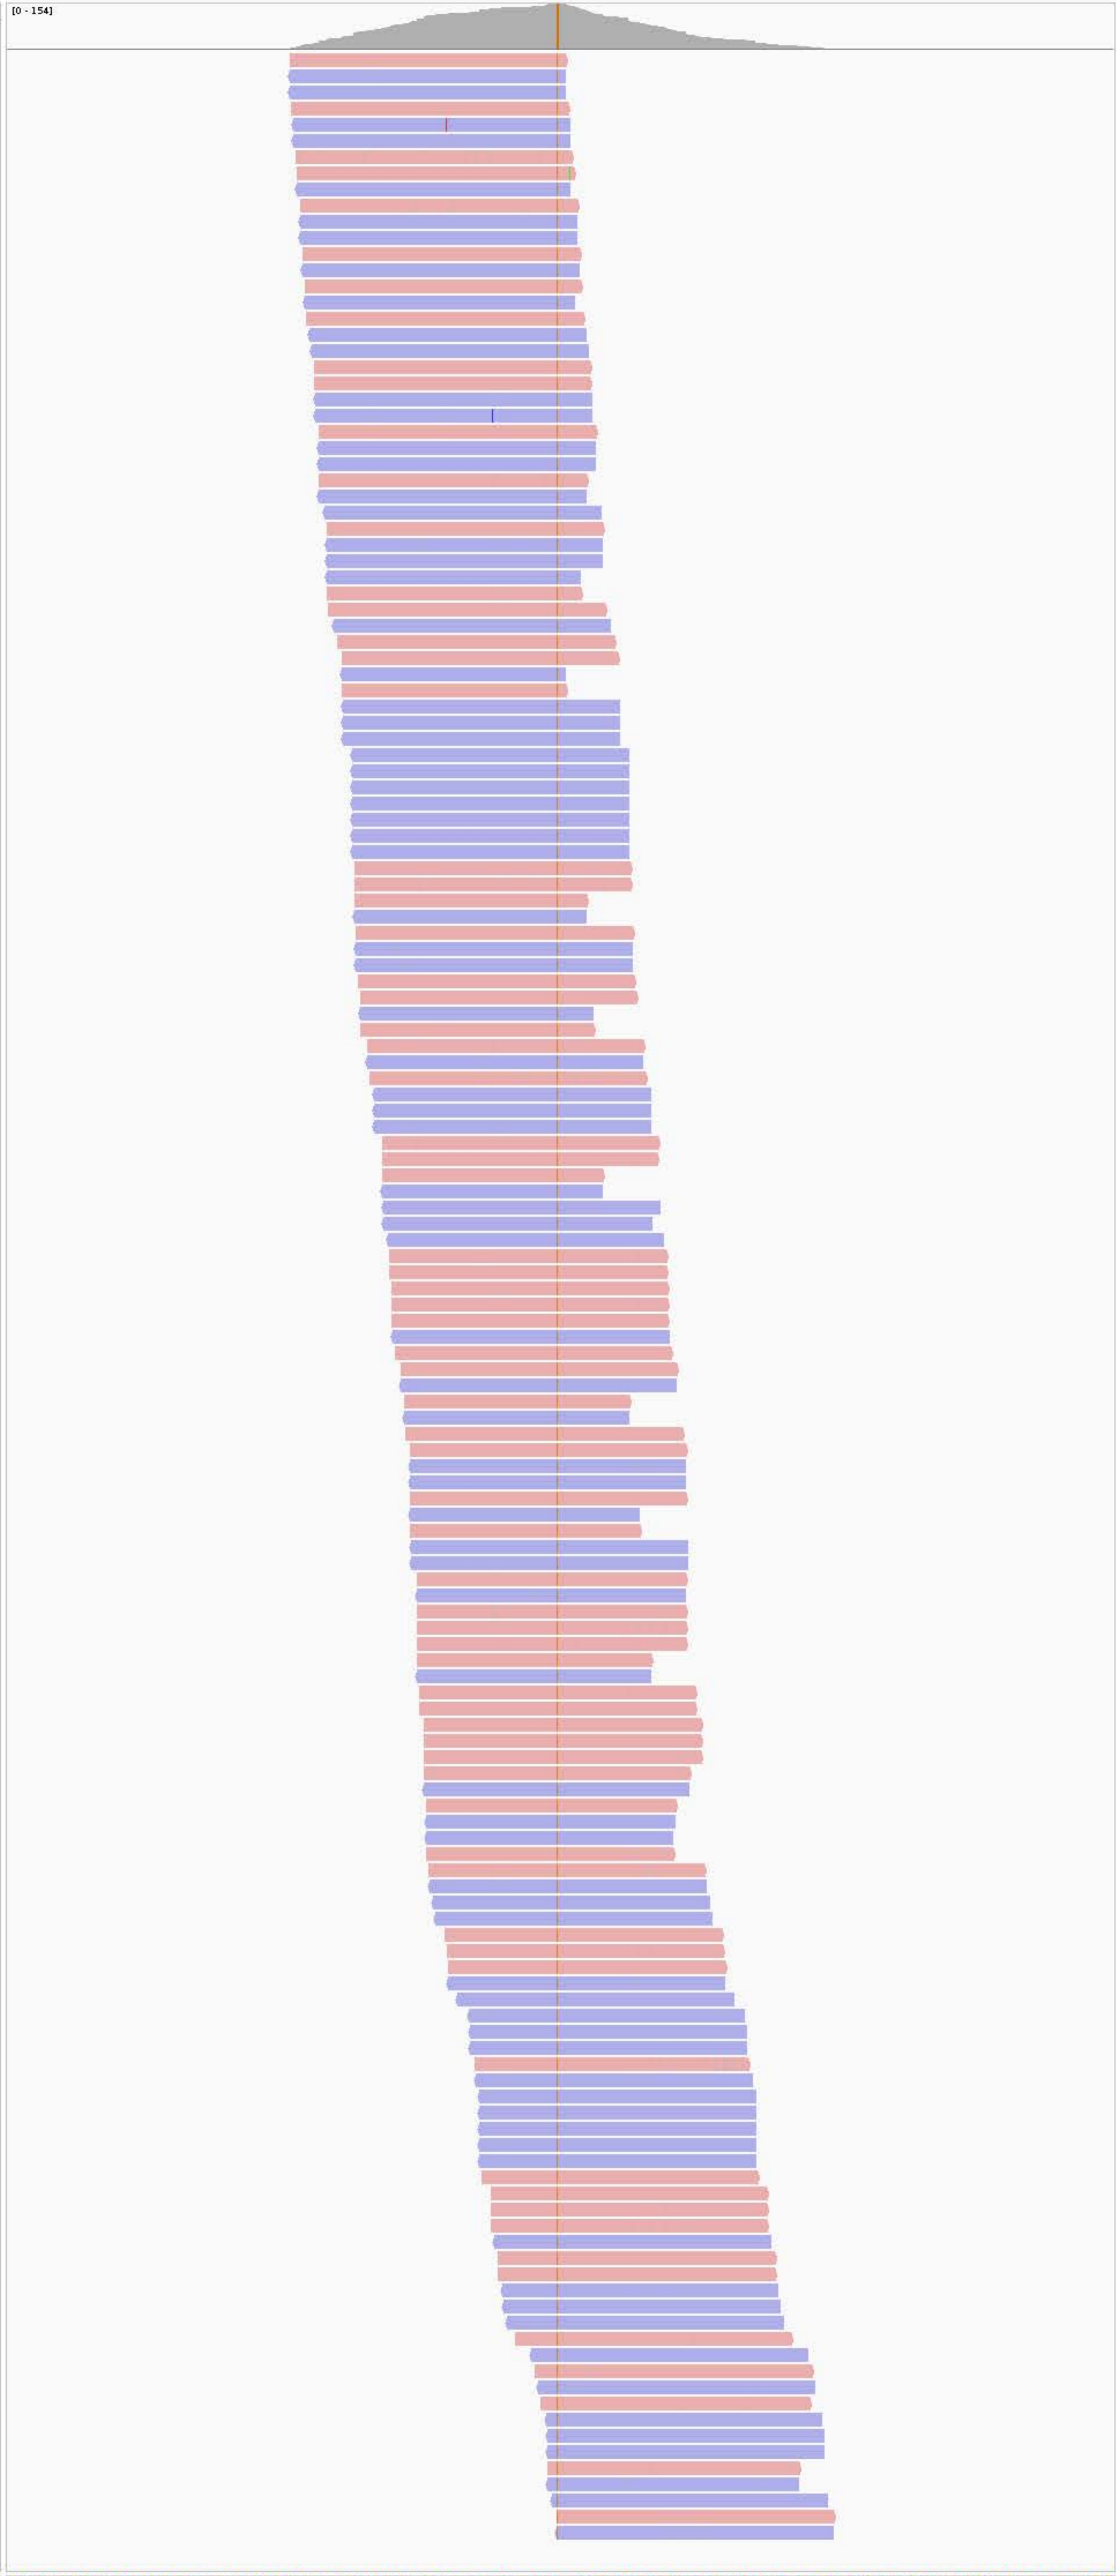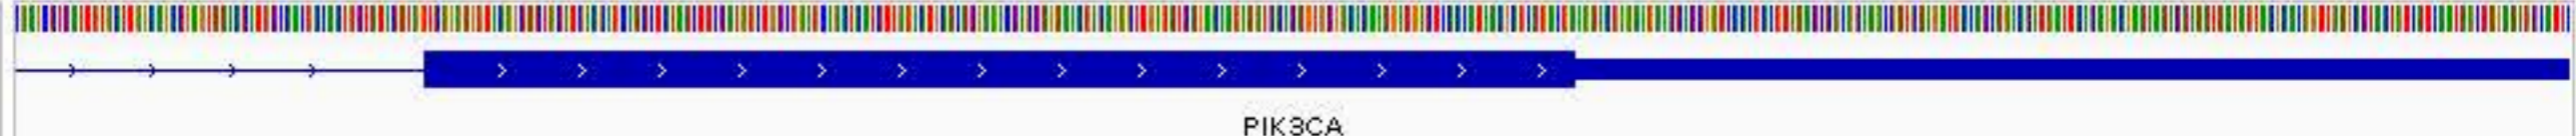

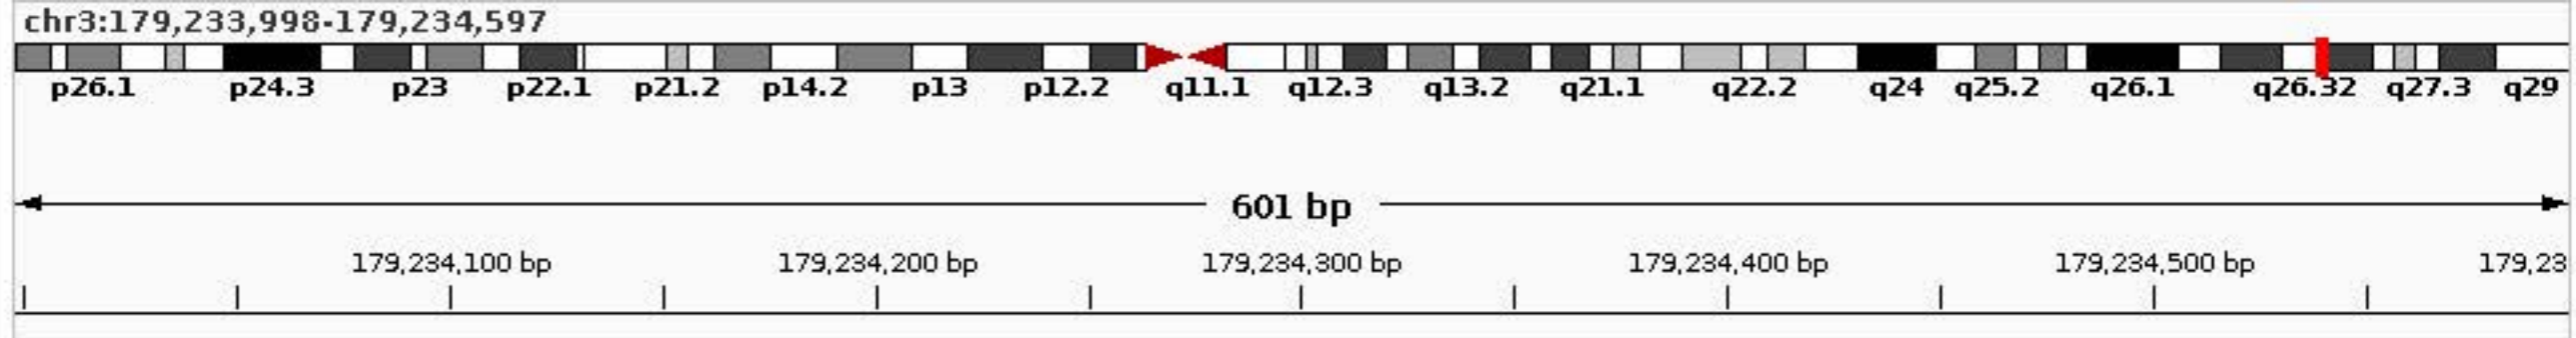

SL\_0001\_RN\_38\_mut.bam Coverage

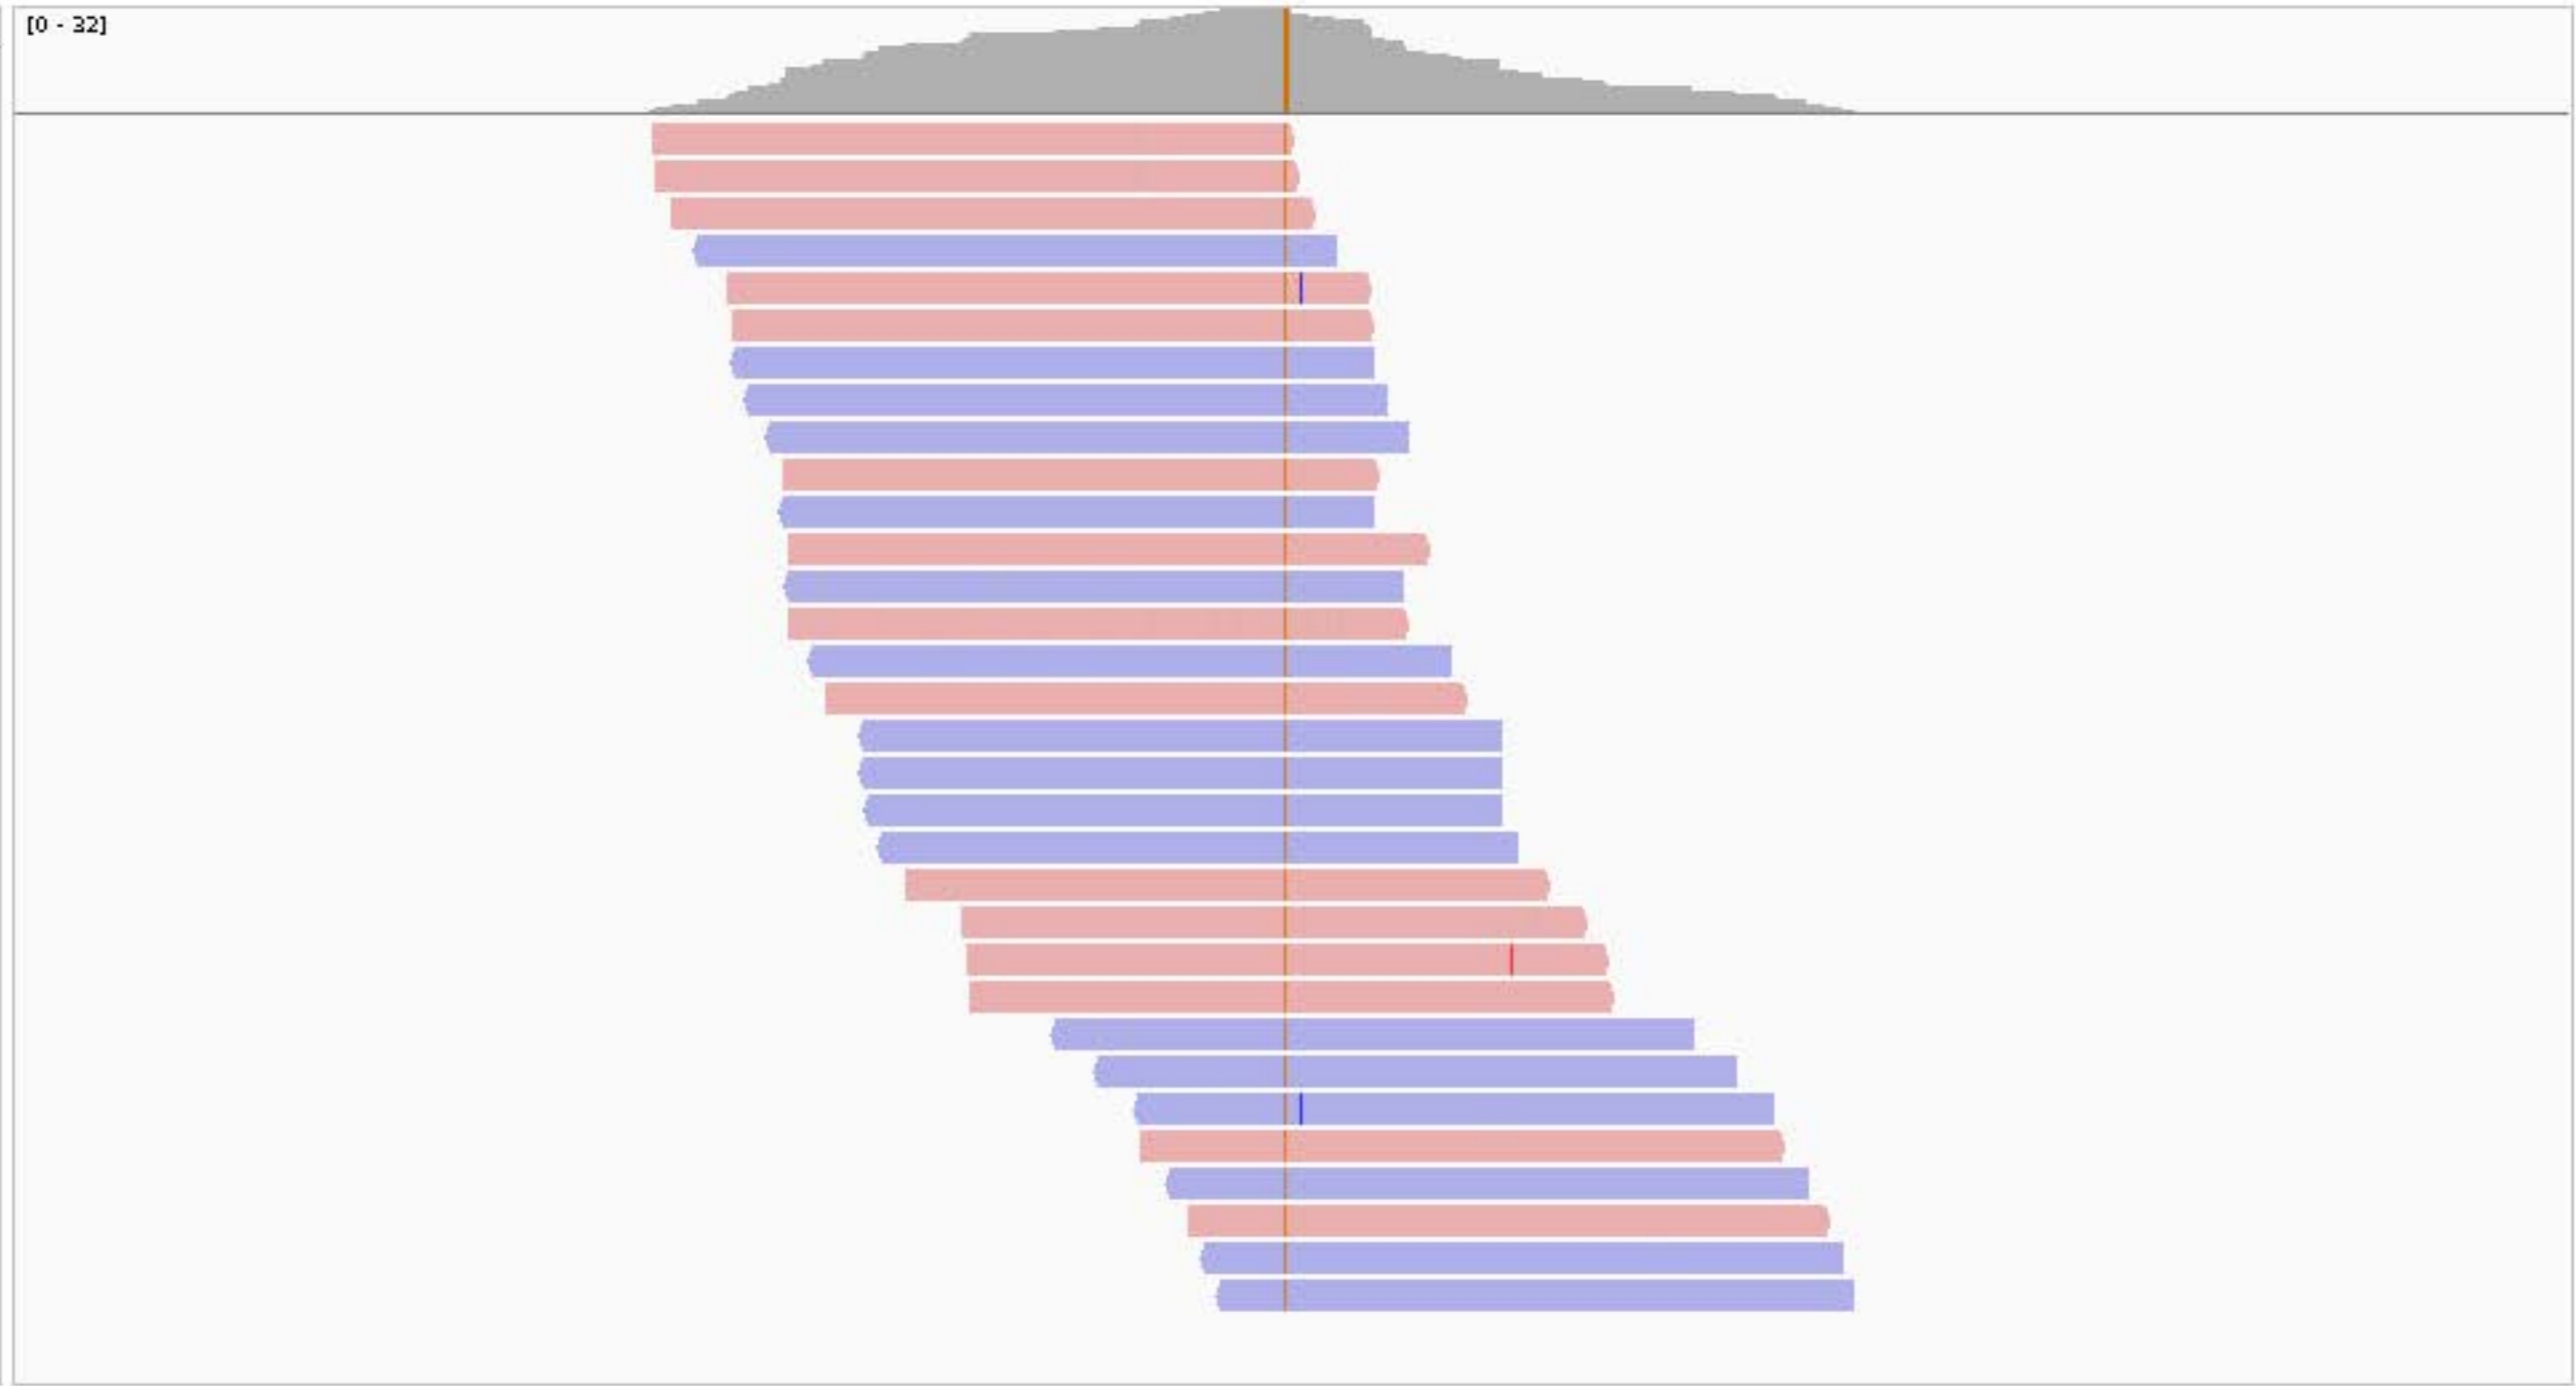

SL\_0001\_RN\_38\_mut.bam

Sequence

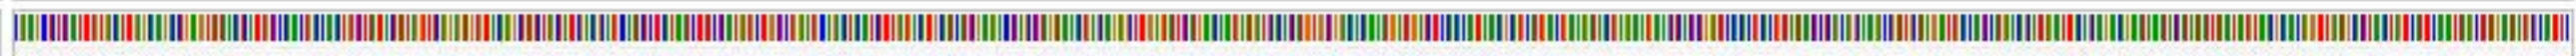

Refseq Genes

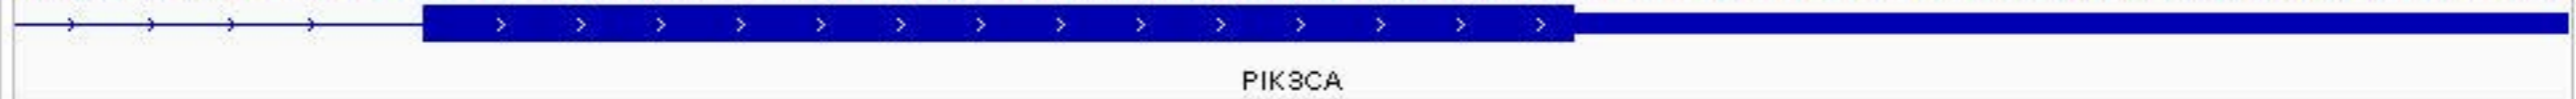

PIK3CA

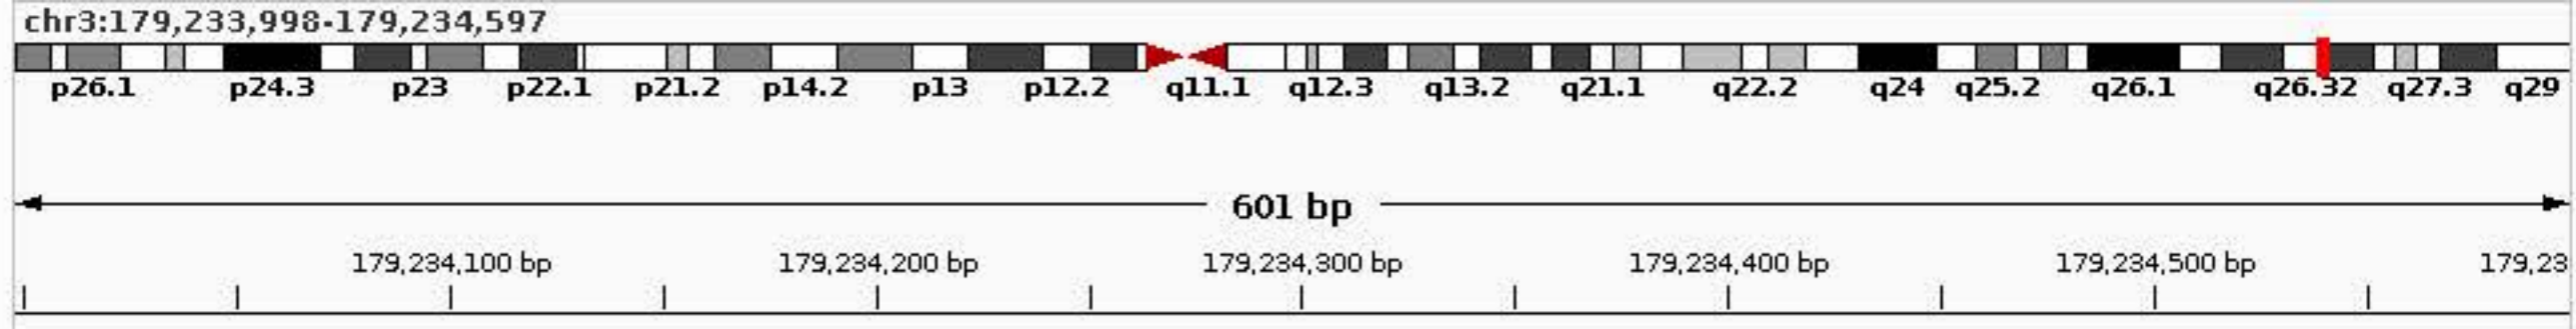

SL\_0002\_RN\_8\_mut.bam Coverage

SL\_0002\_RN\_8\_mut.bam

Sequence →

Refseq Genes

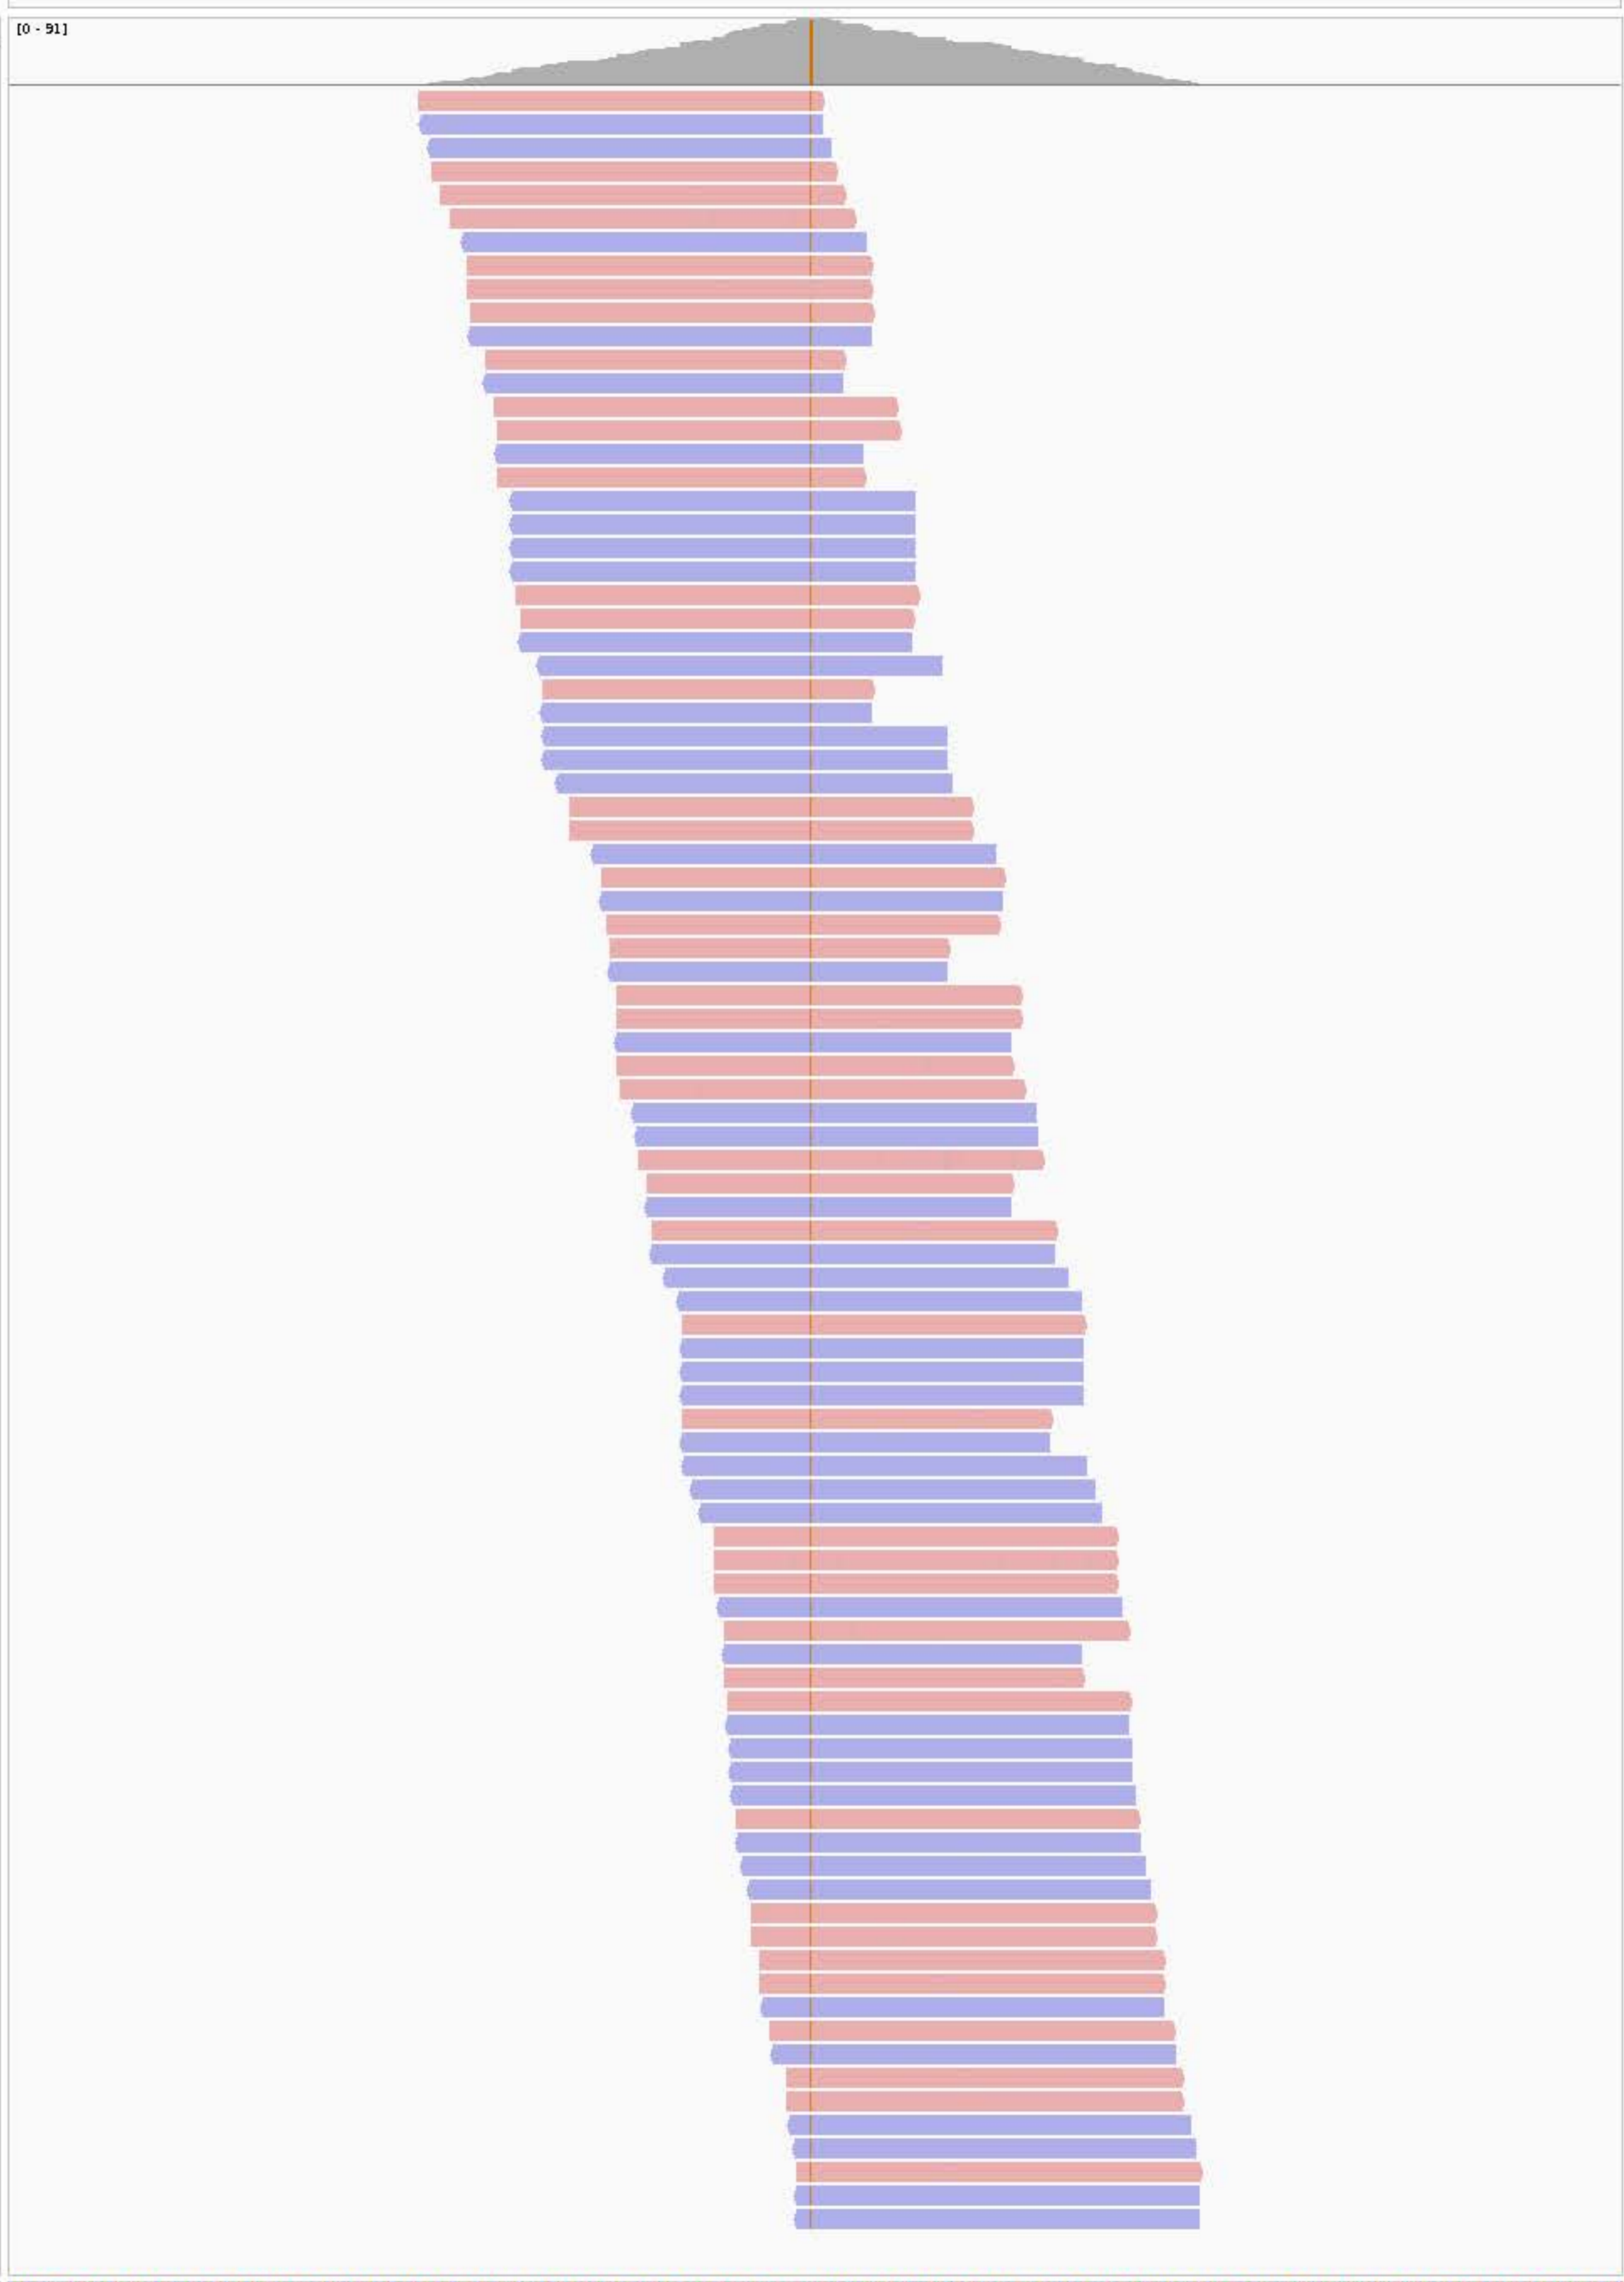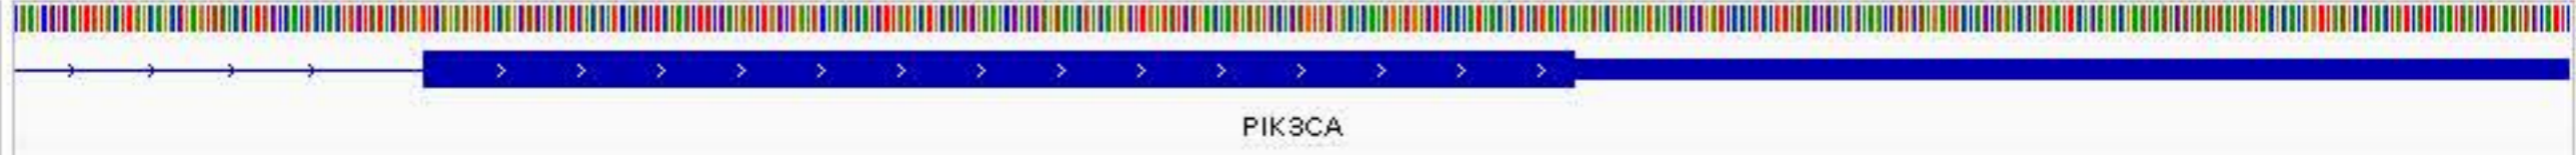



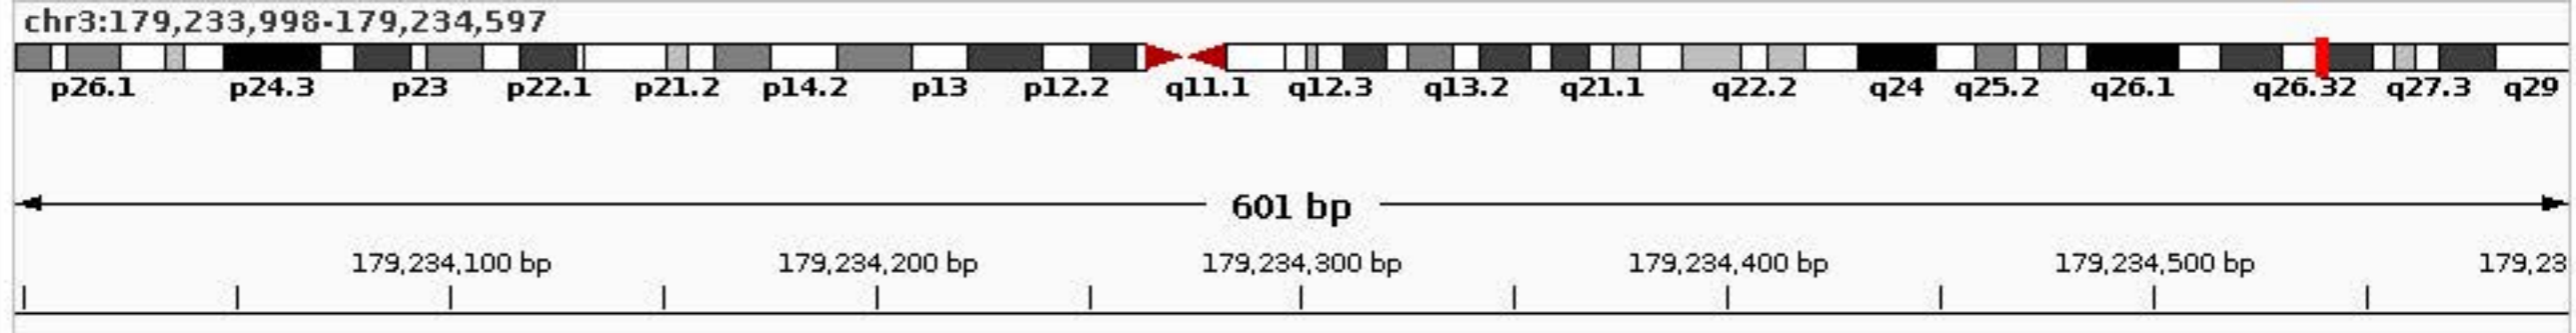

SL\_0003\_LN\_12\_mut.bam Coverage

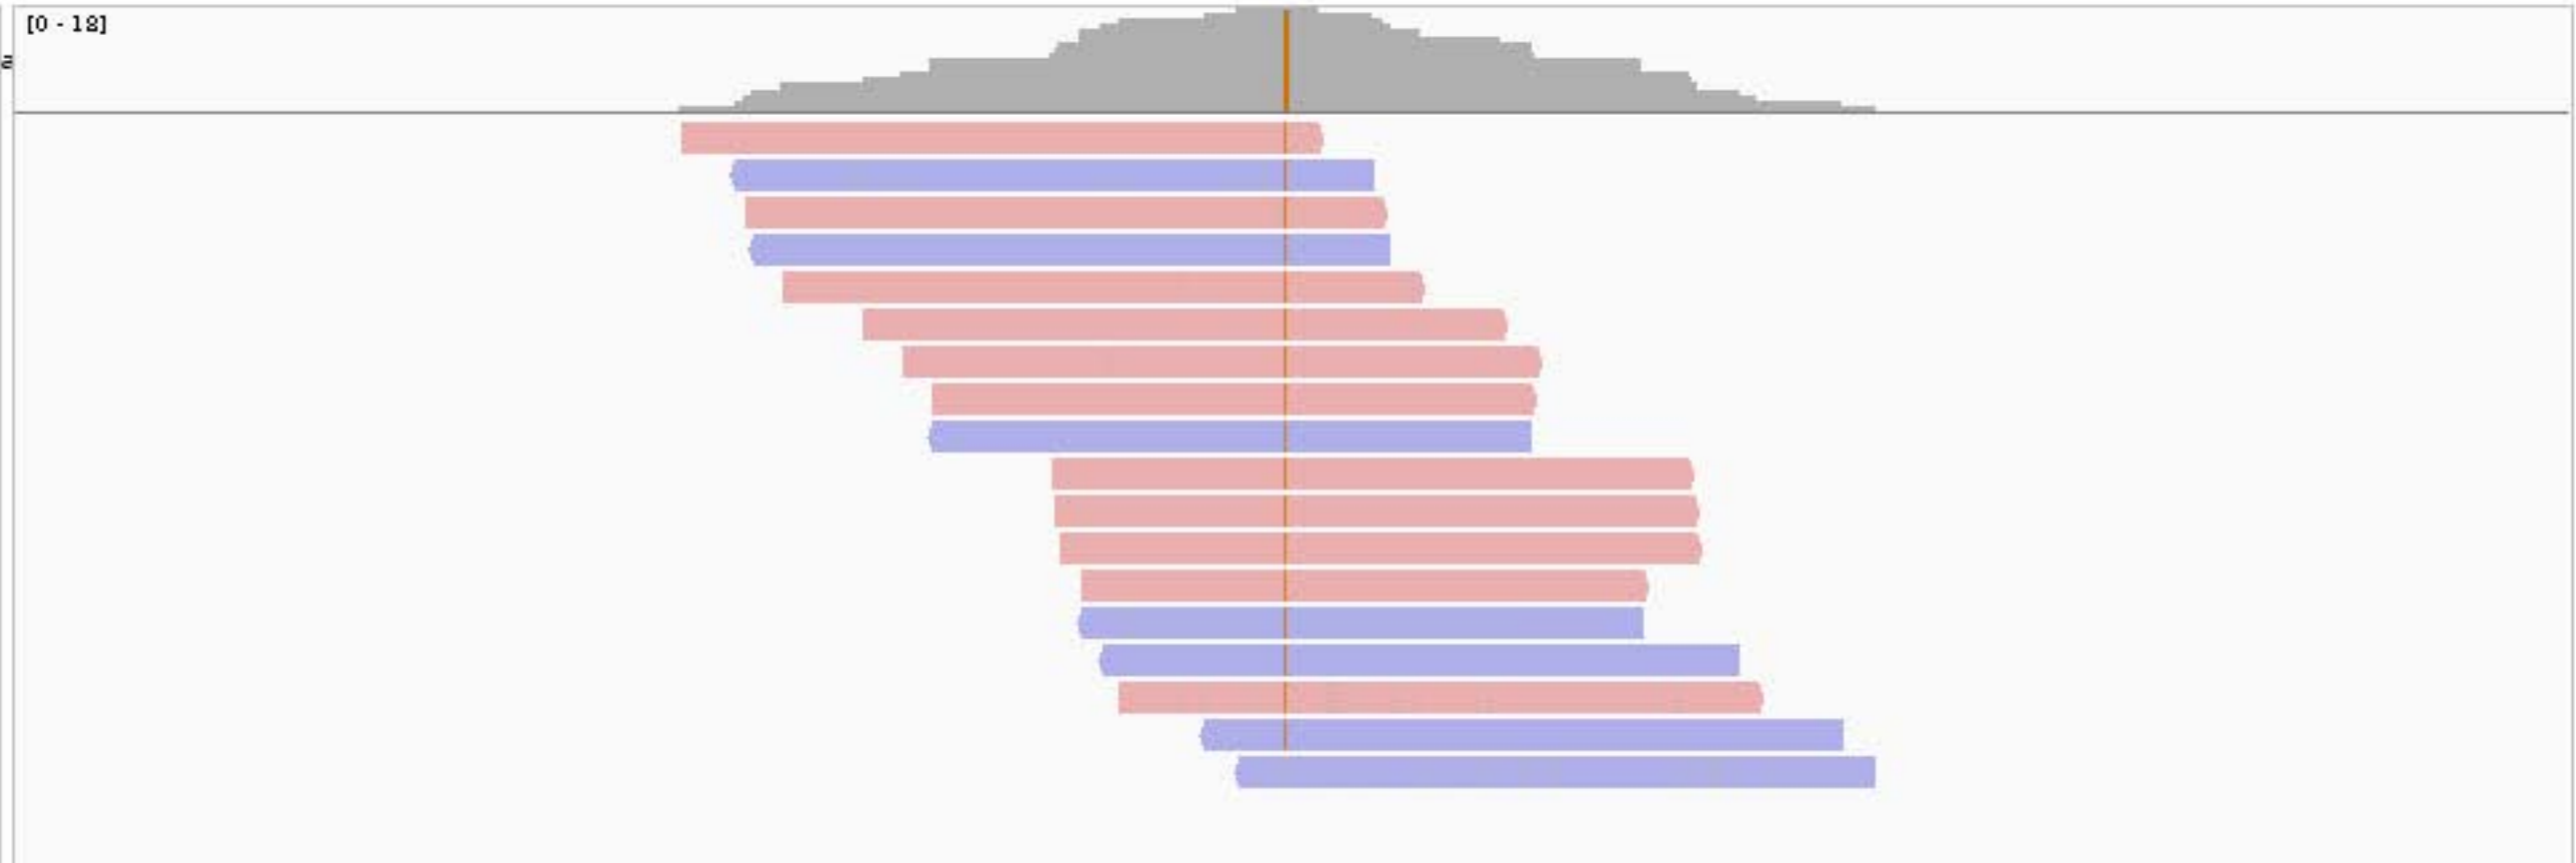

SL\_0003\_LN\_12\_mut.bam

Sequence

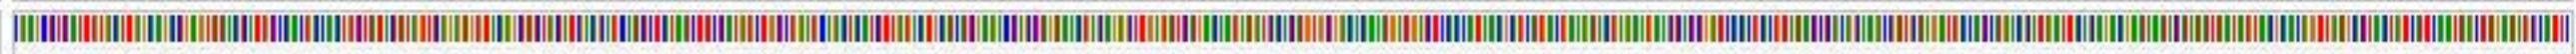

Refseq Genes

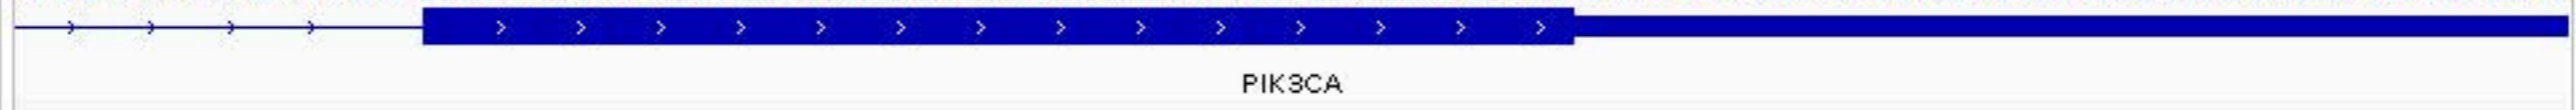

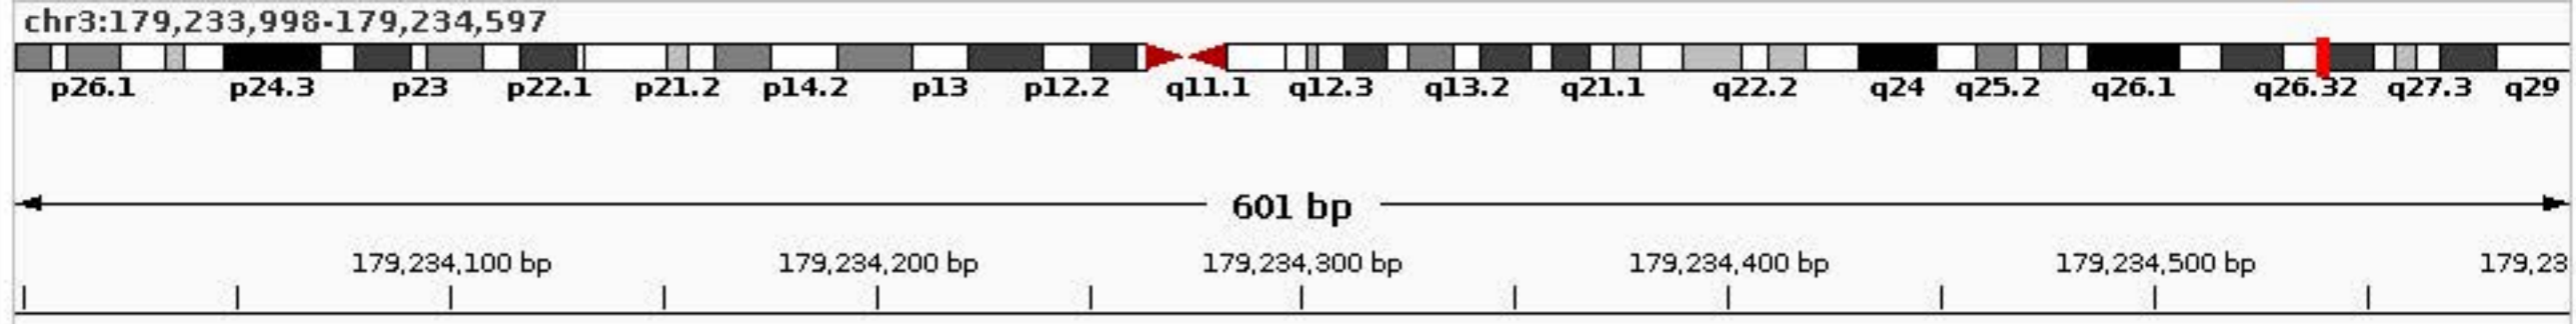

SL\_0003\_LN\_14\_mut.bam Coverage

SL\_0003\_LN\_14\_mut.bam

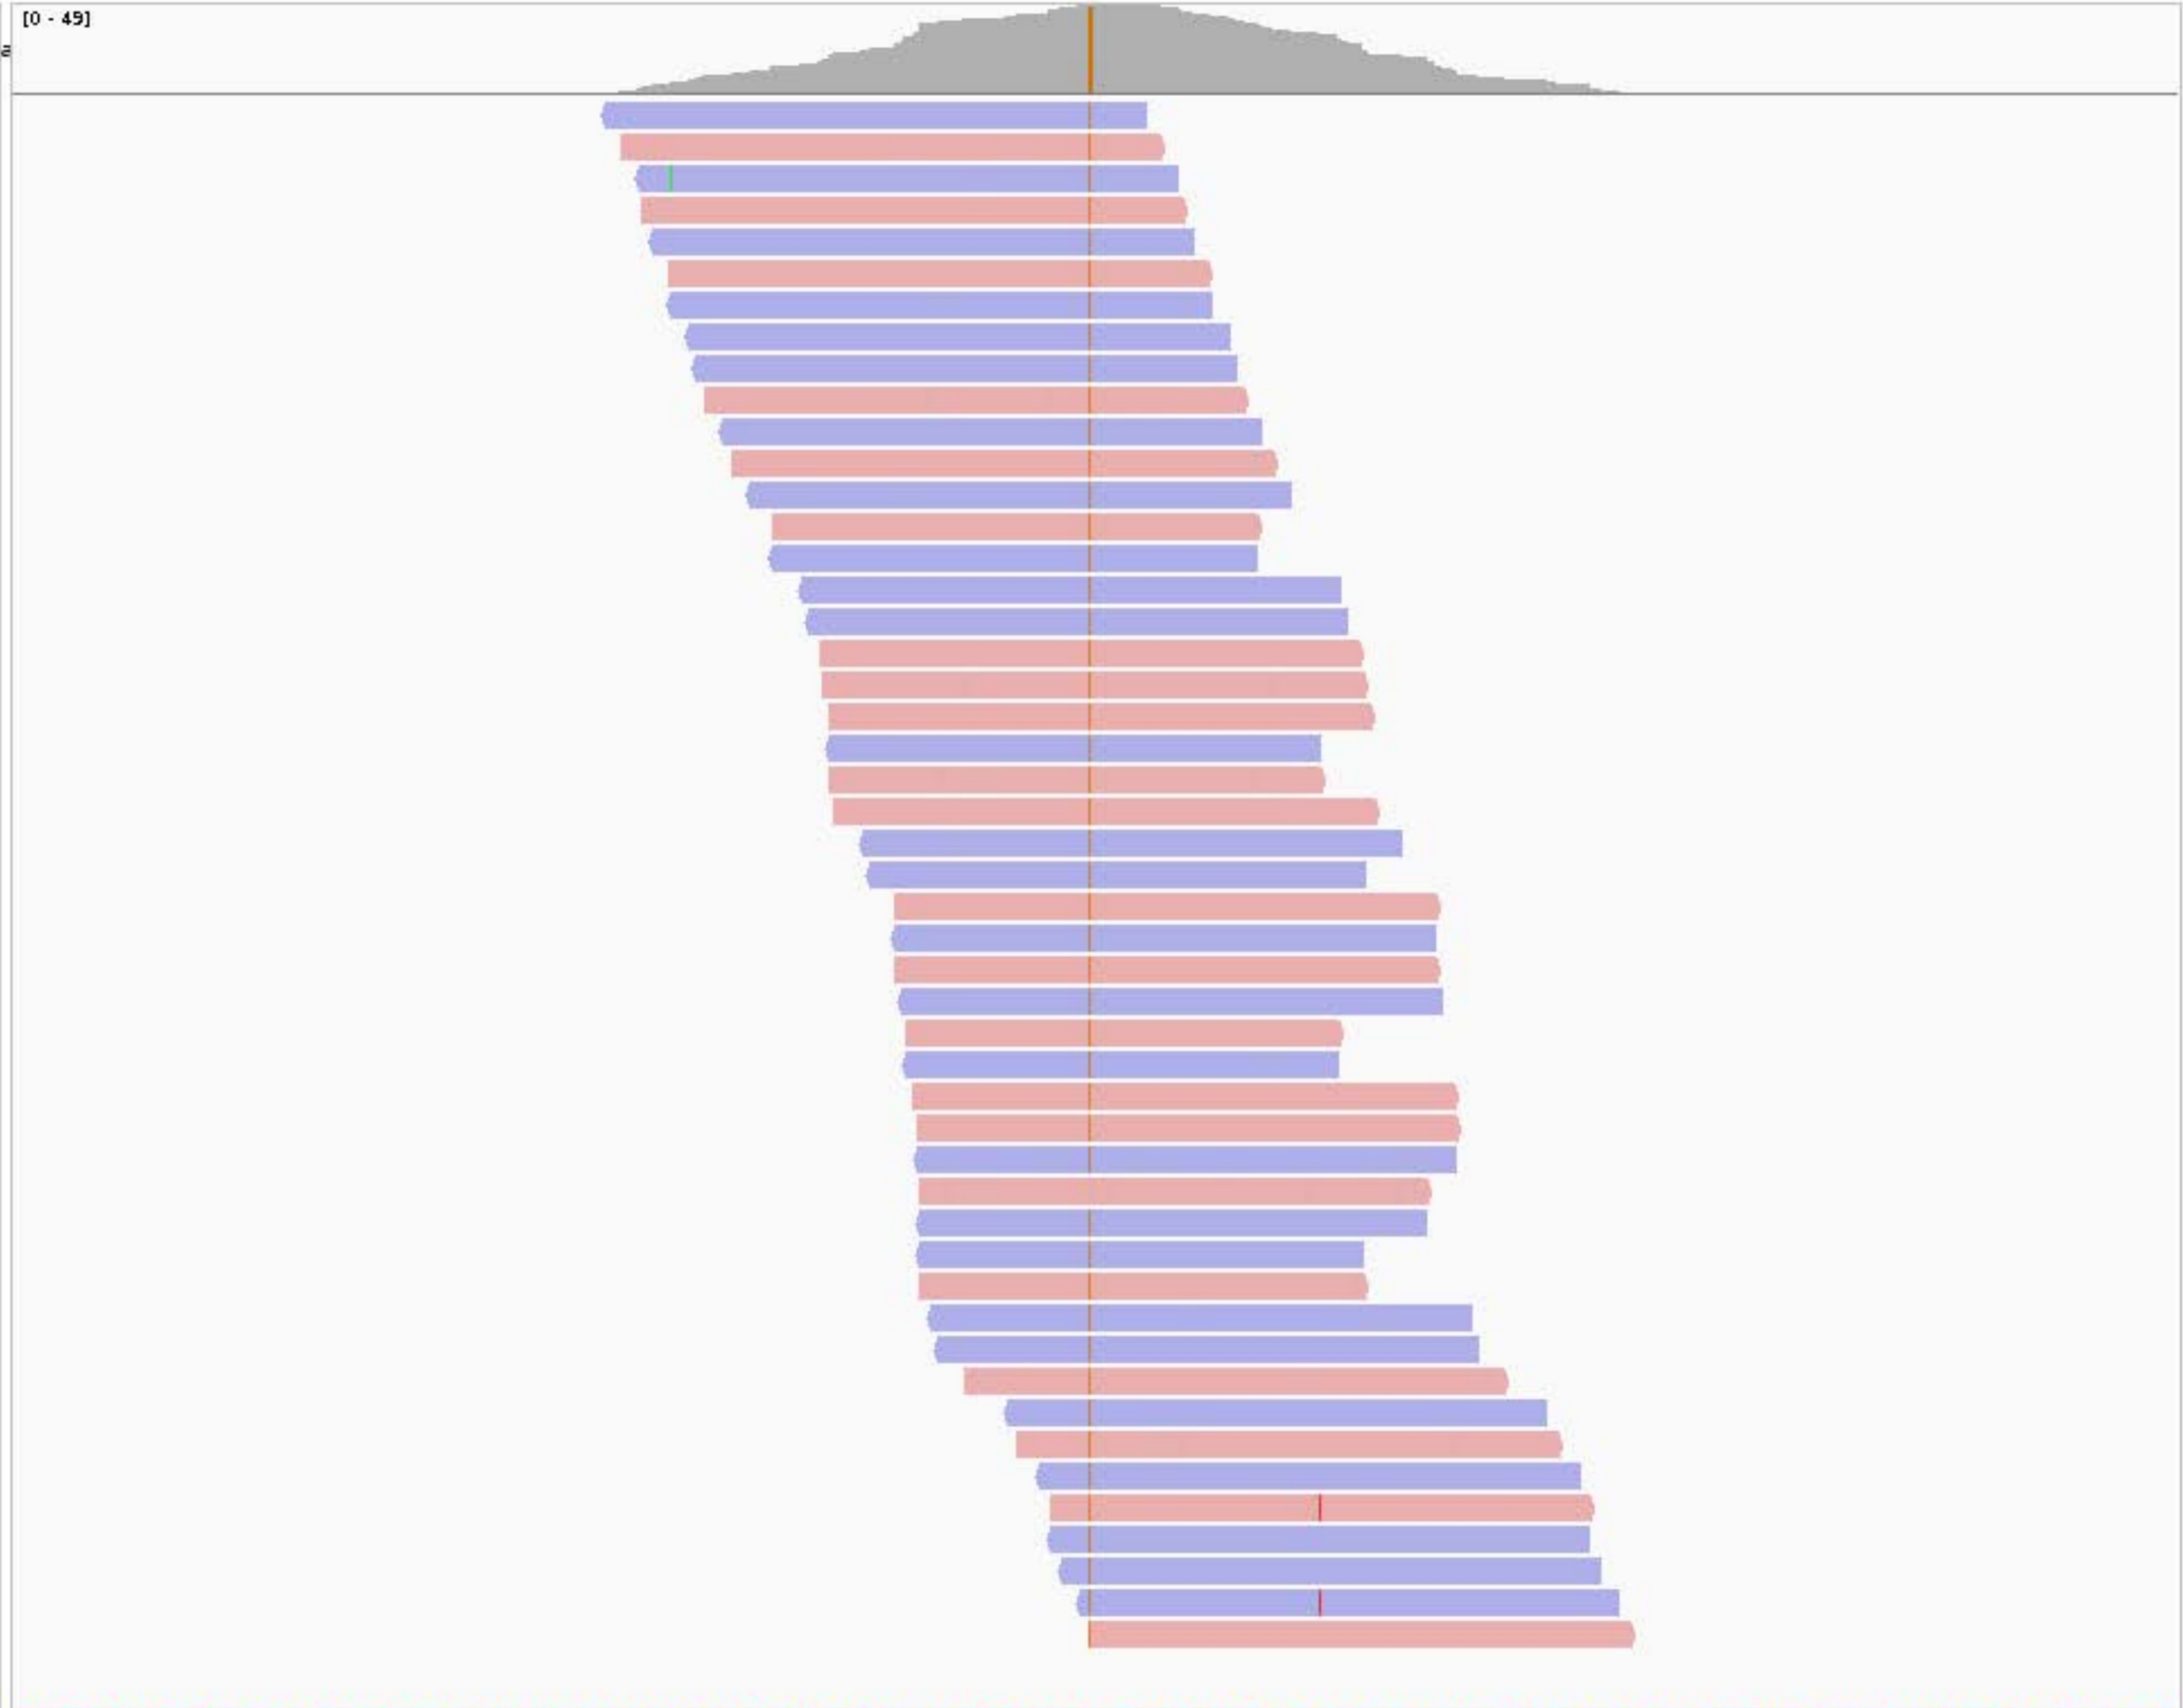

Sequence

Refseq Genes

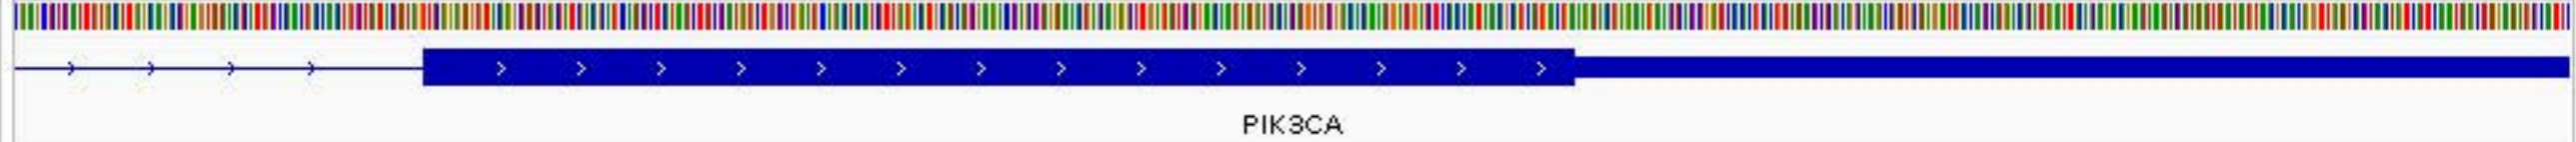

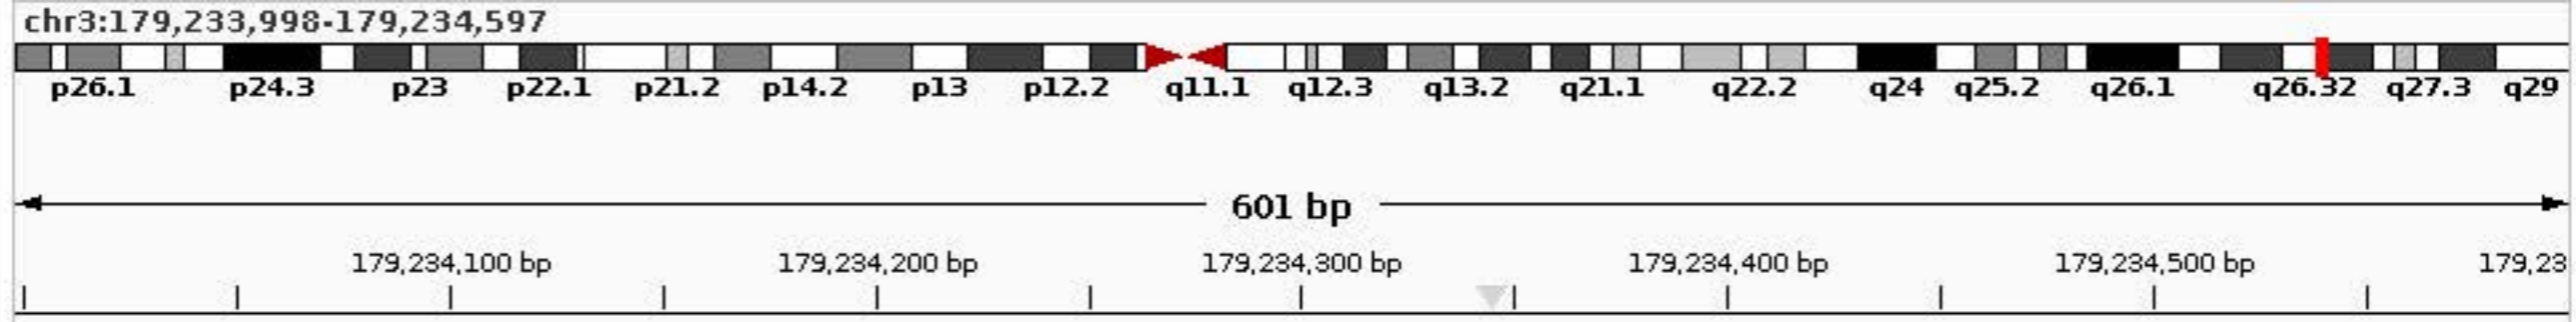

SL\_0004\_RN\_07\_mut.bam Coverage

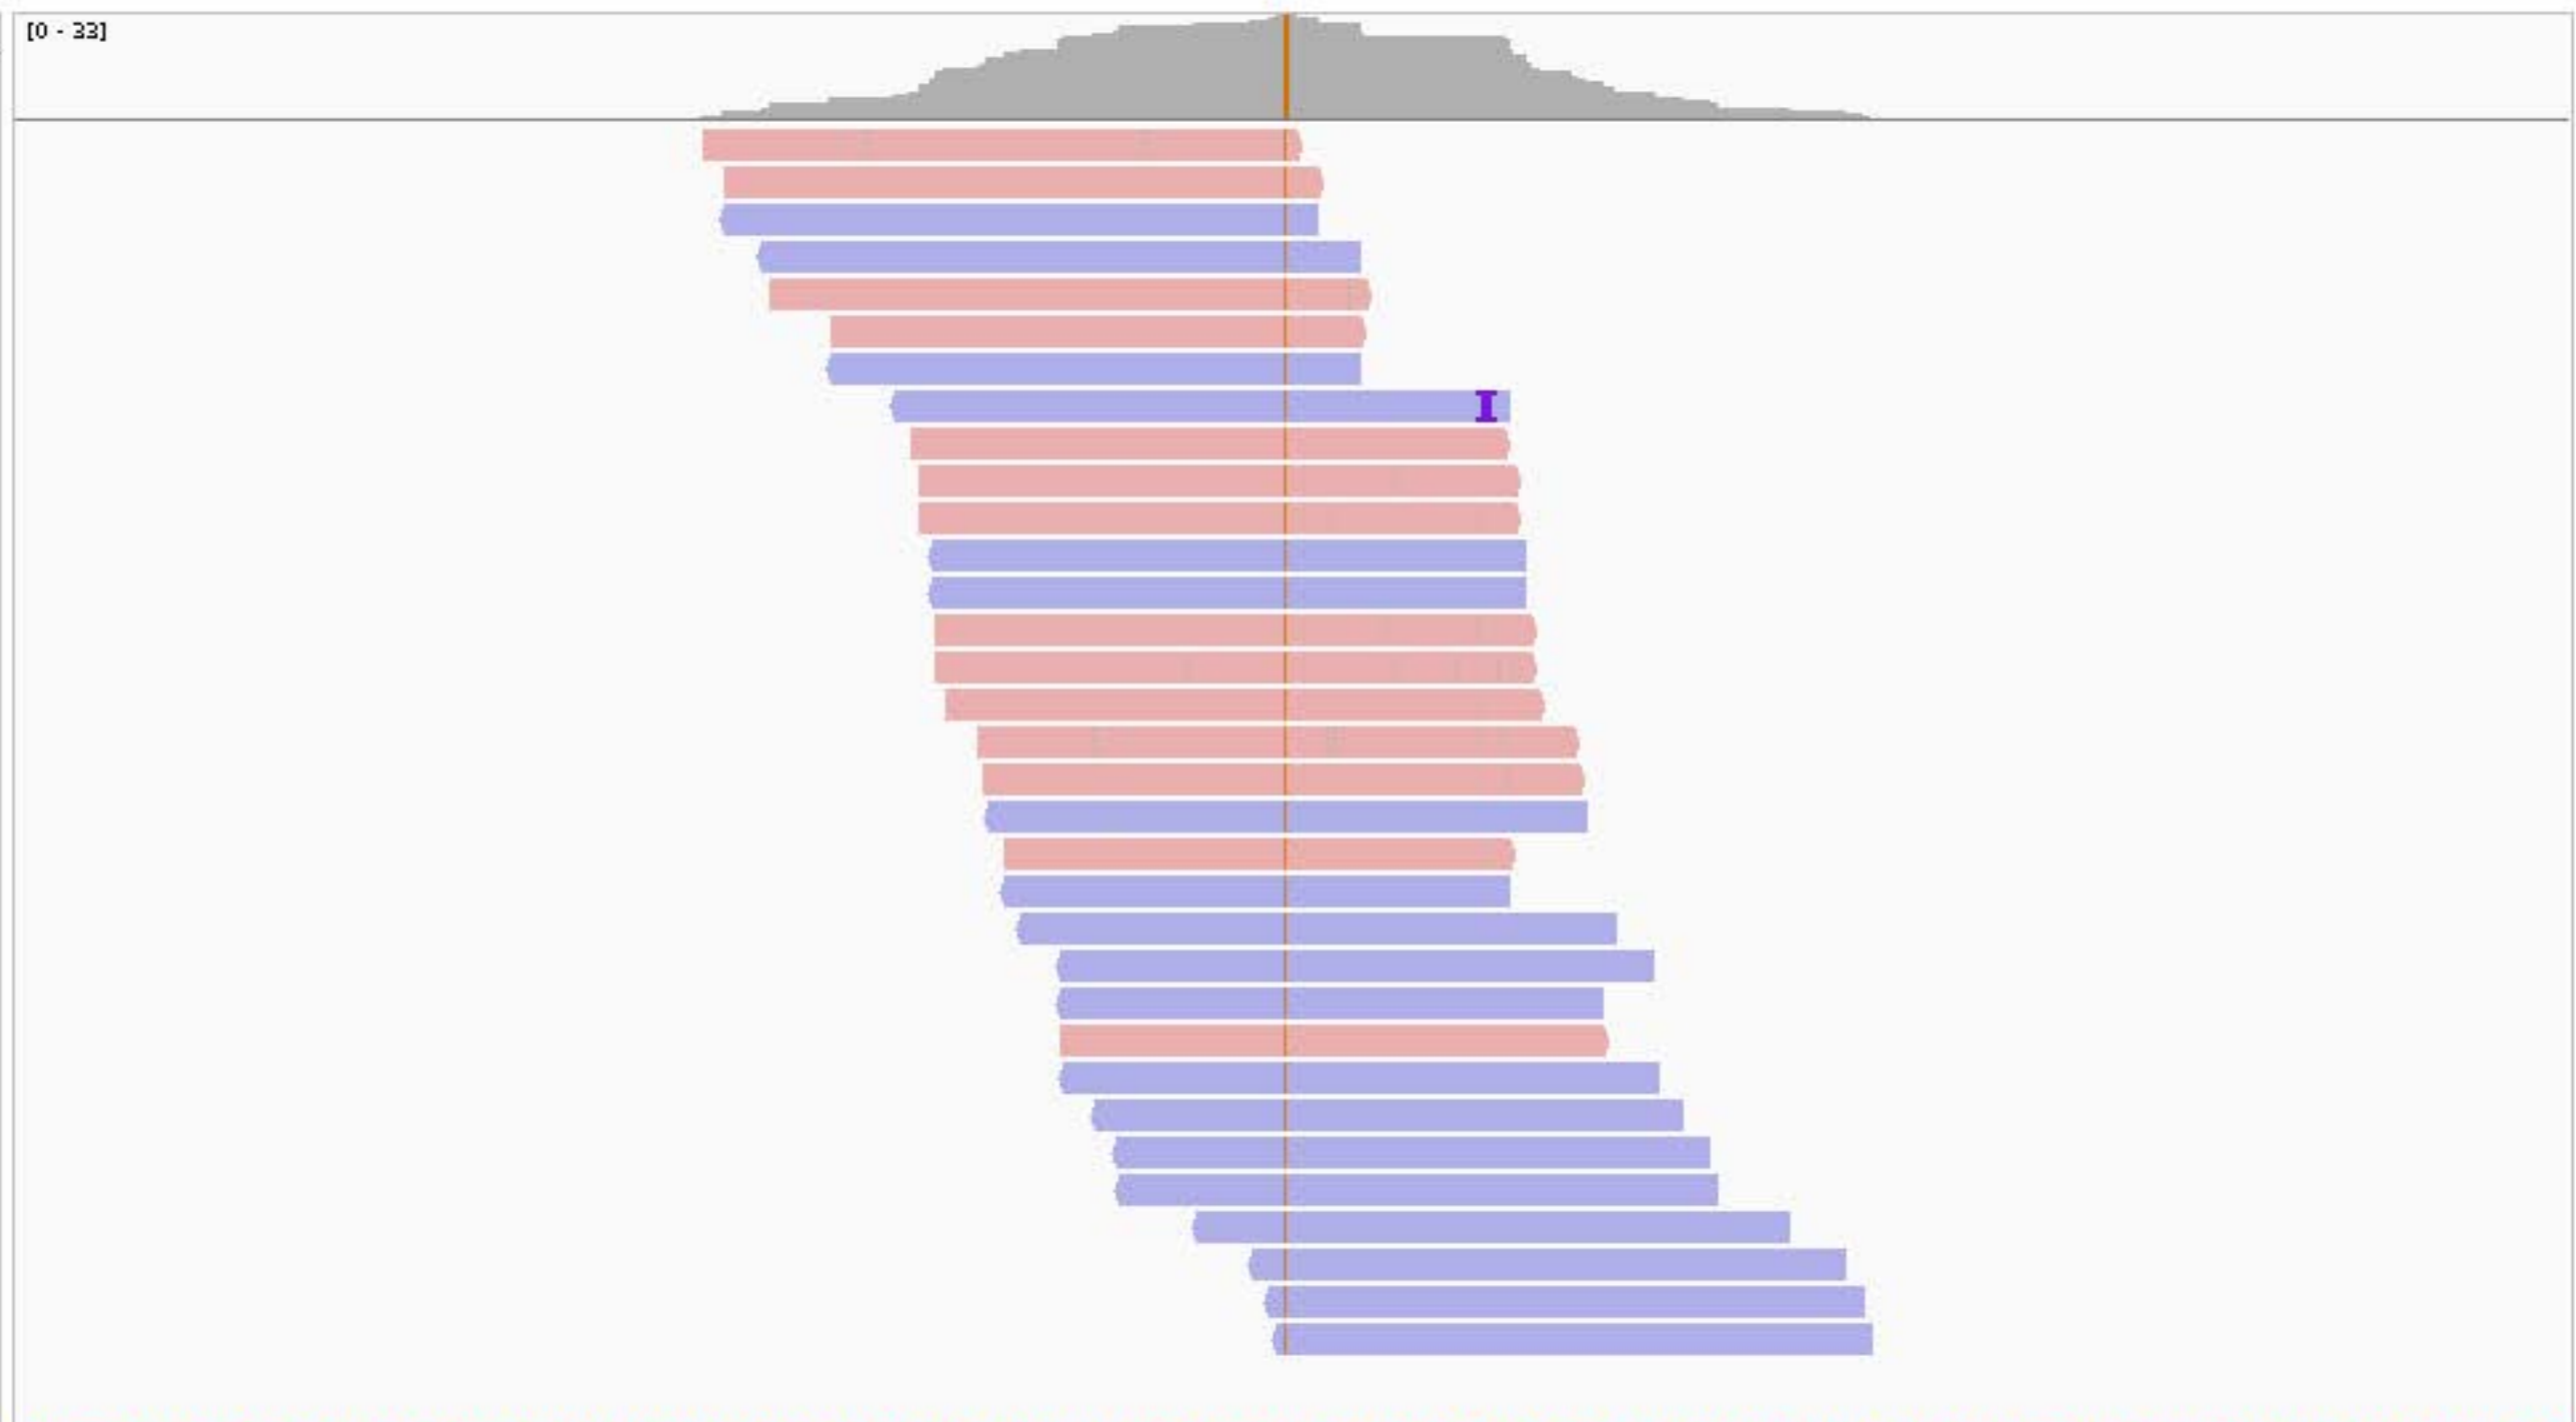

Sequence →

Refseq Genes

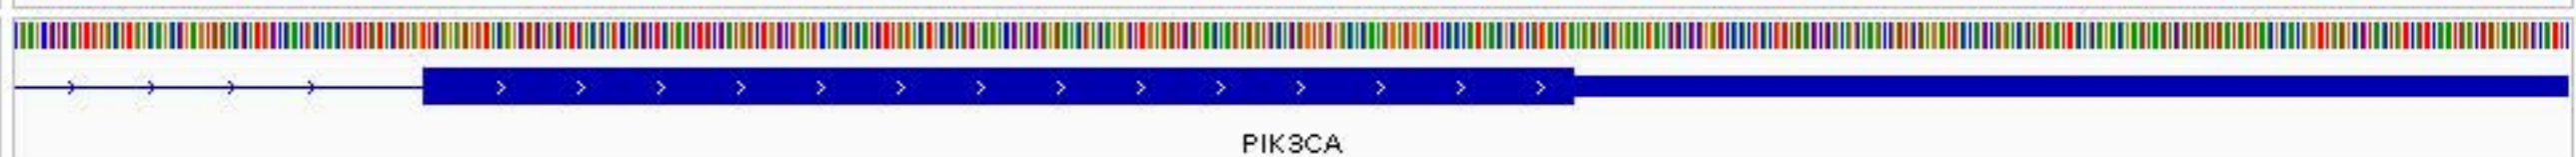



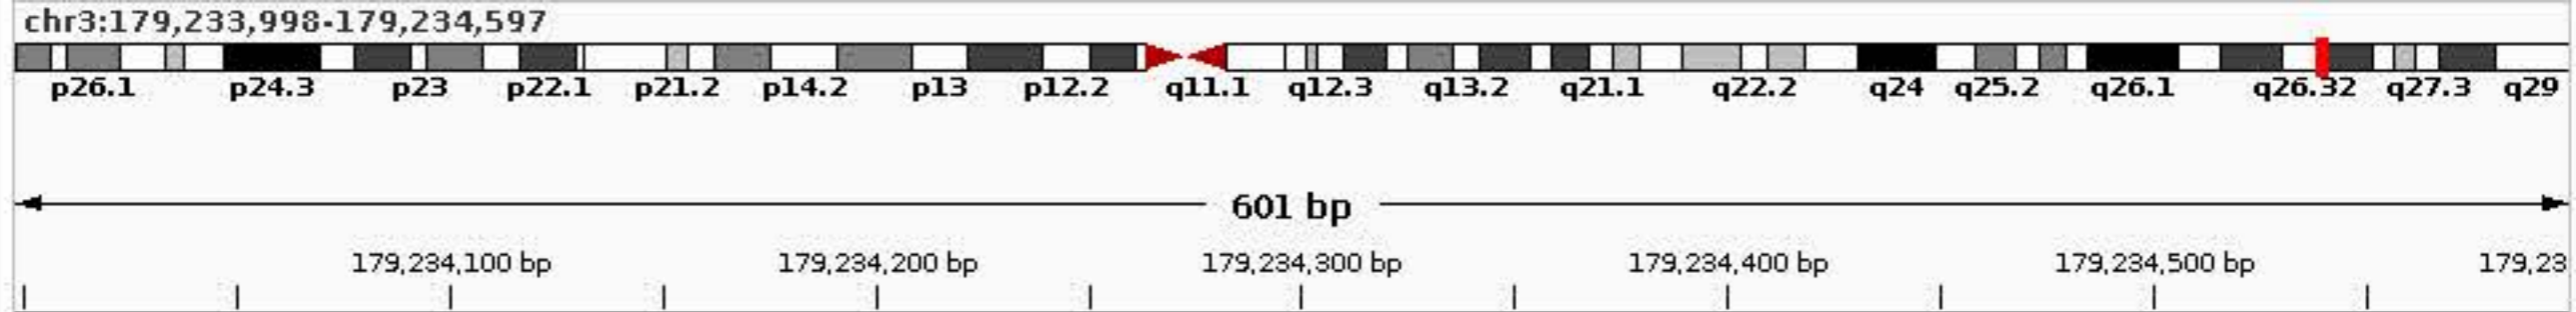

SL\_0004\_RN\_19\_mut.bam Coverage

SL\_0004\_RN\_19\_mut.bam

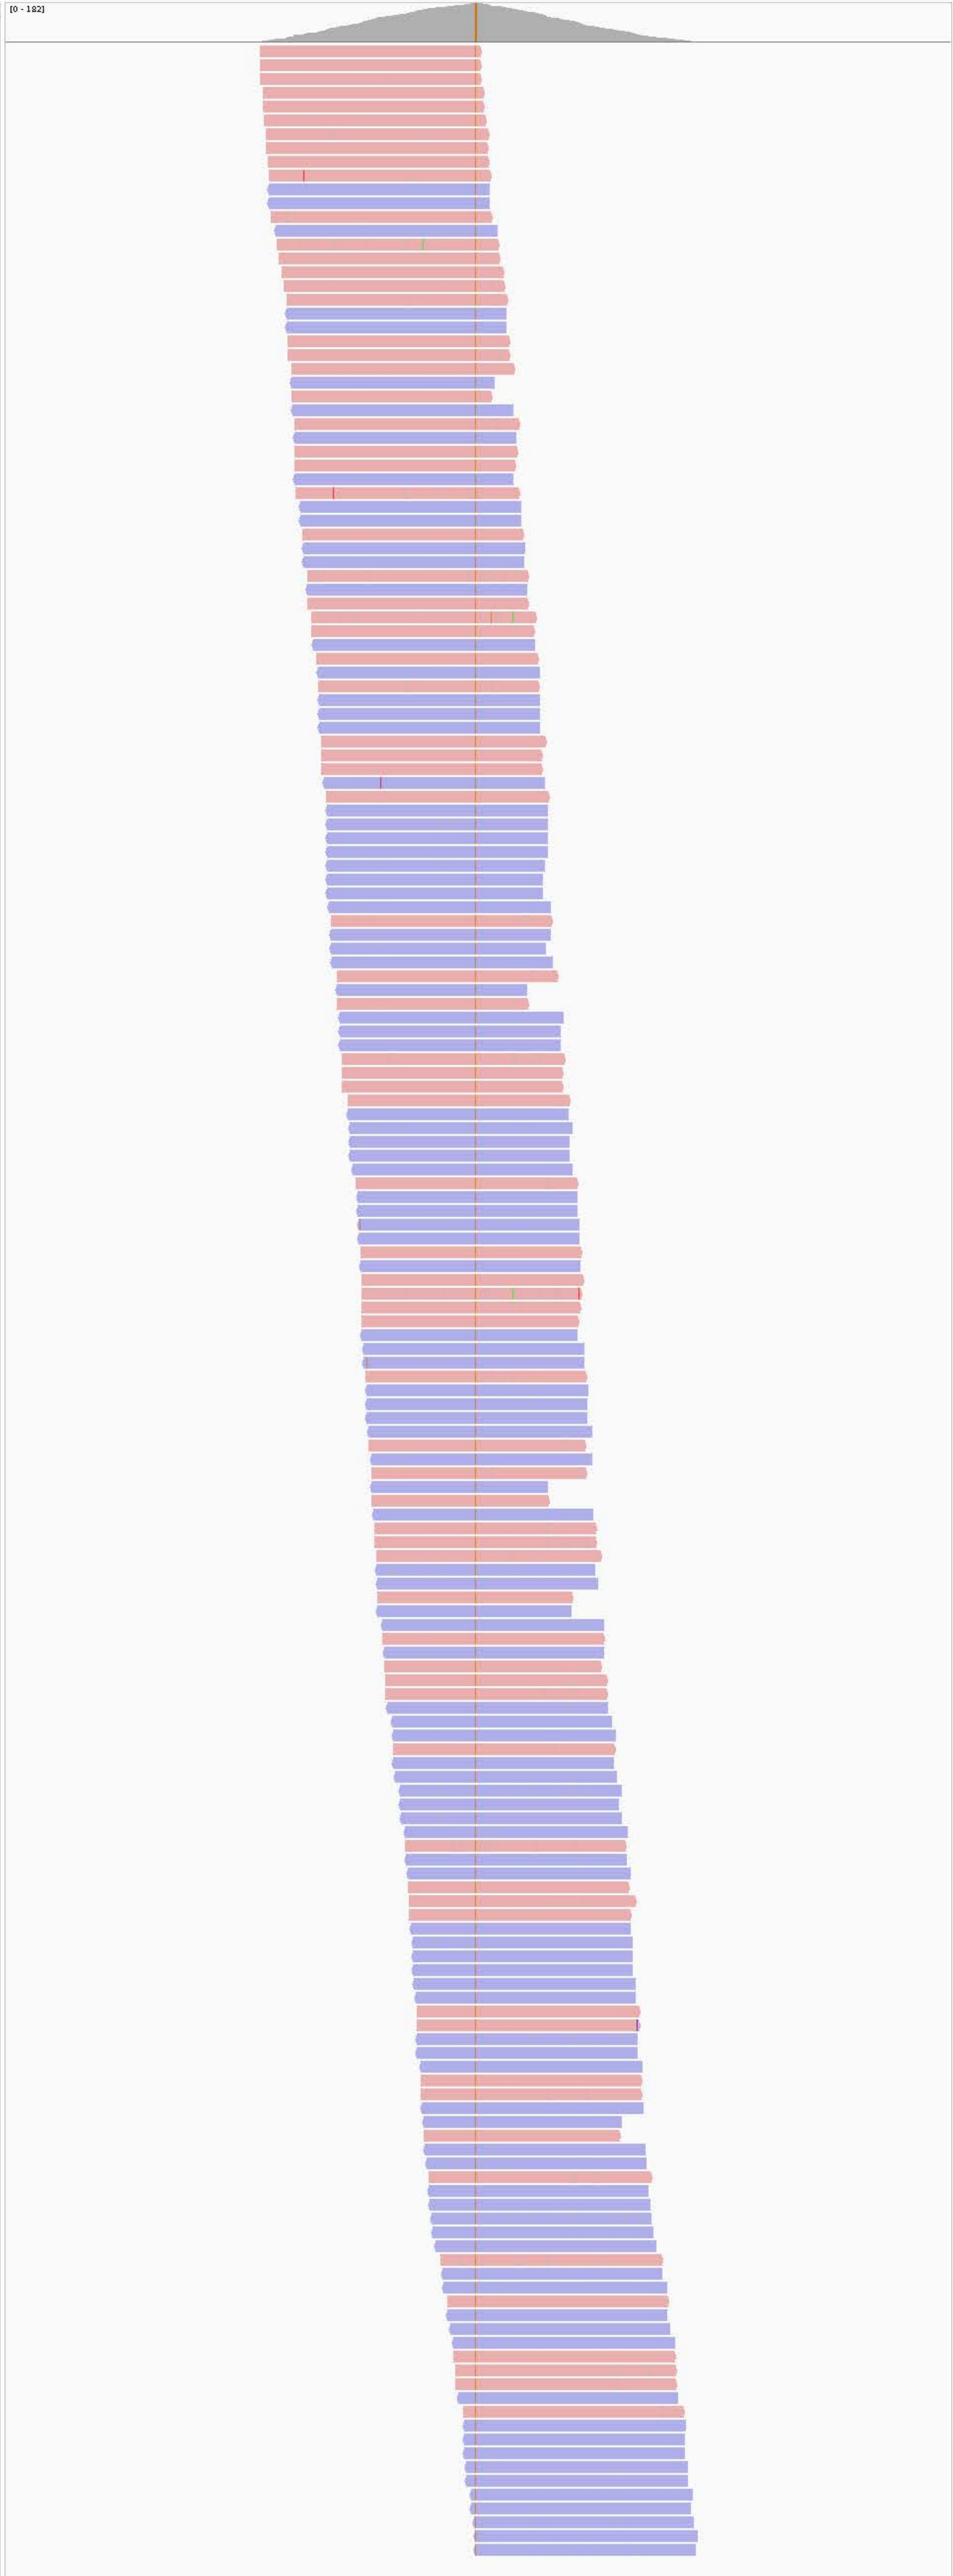

Sequence

Refseq Genes

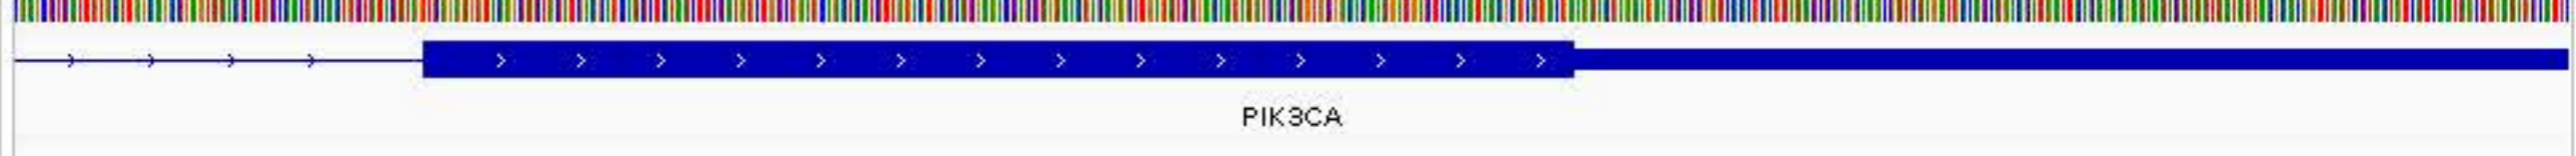



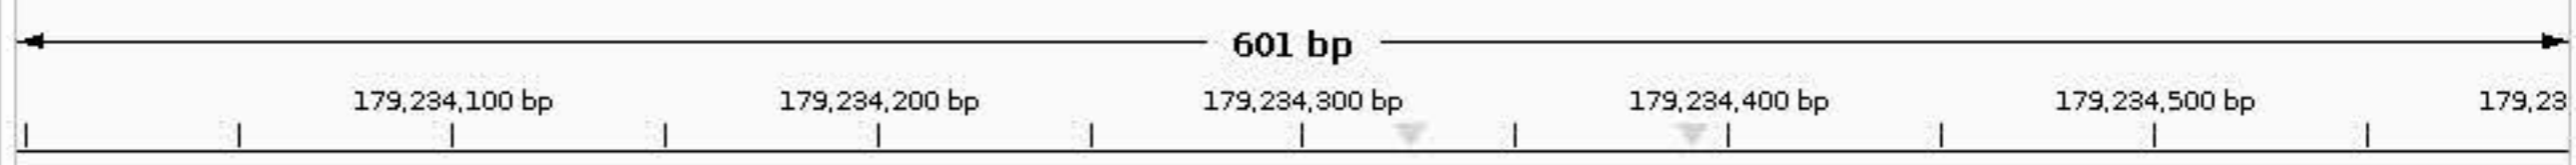

SL\_0004\_RN\_24\_mut.bam Coverage

SL\_0004\_RN\_24\_mut.bam

Sequence

Refseq Genes

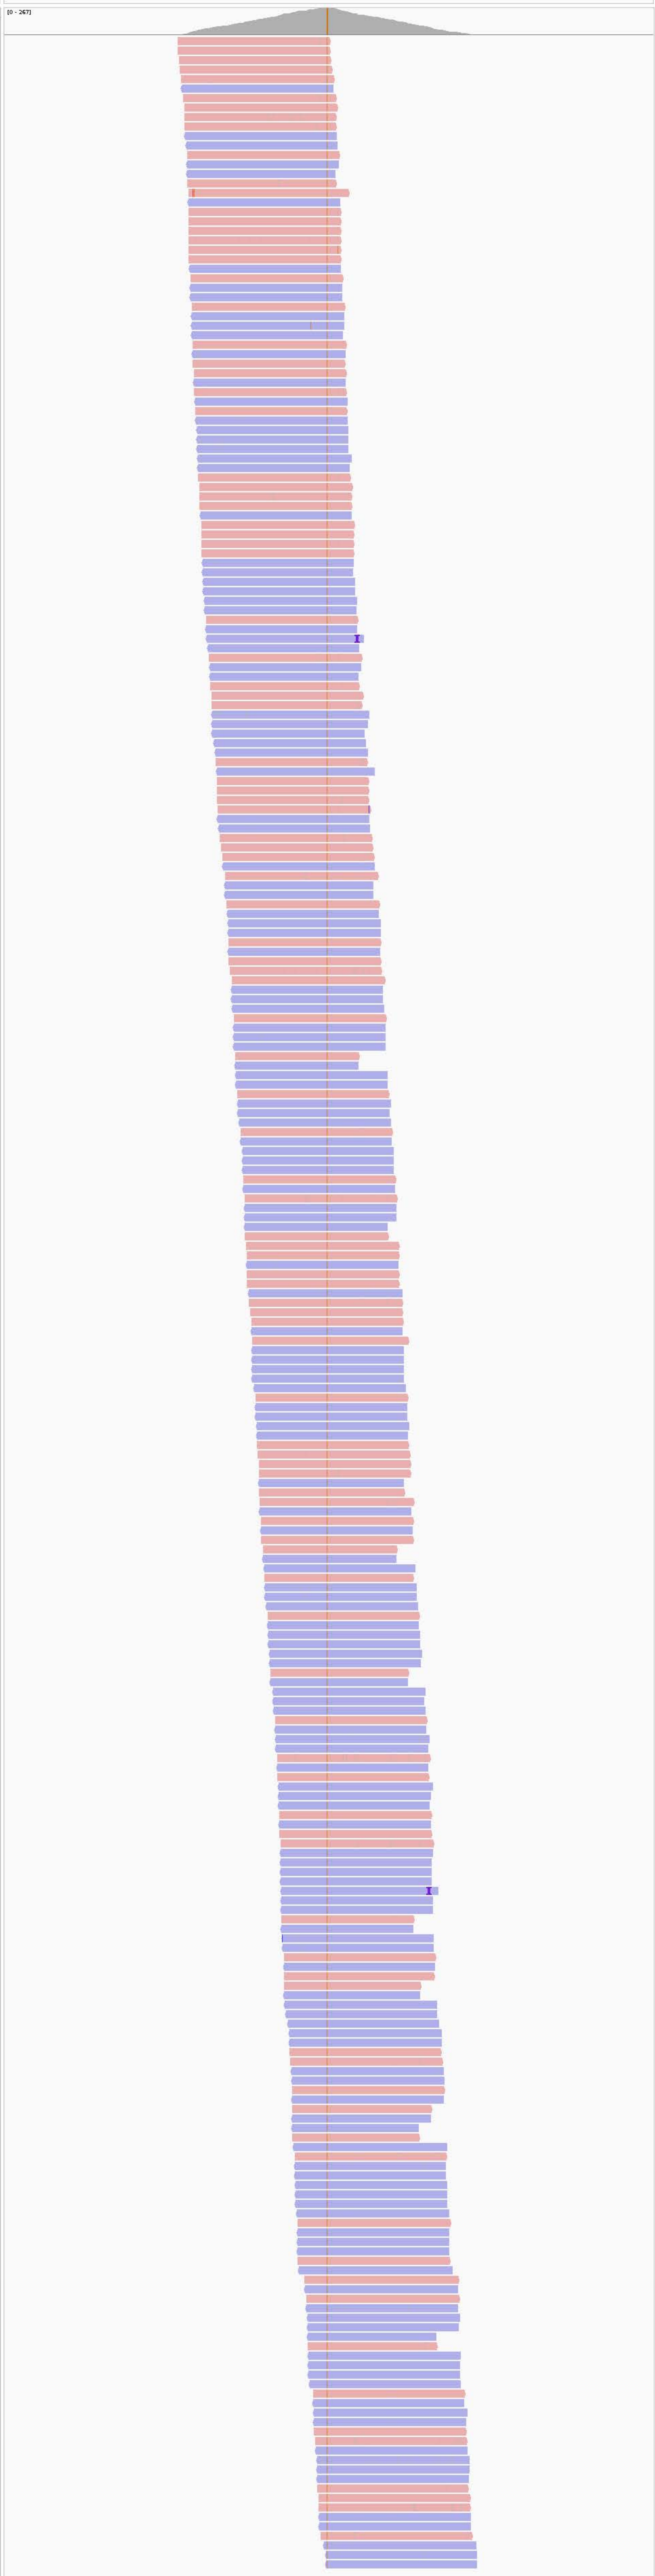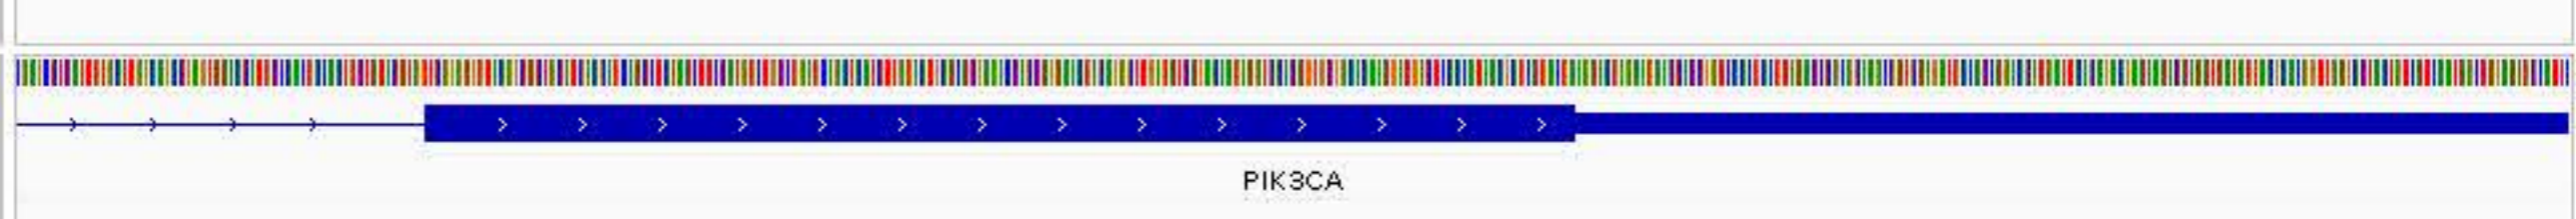



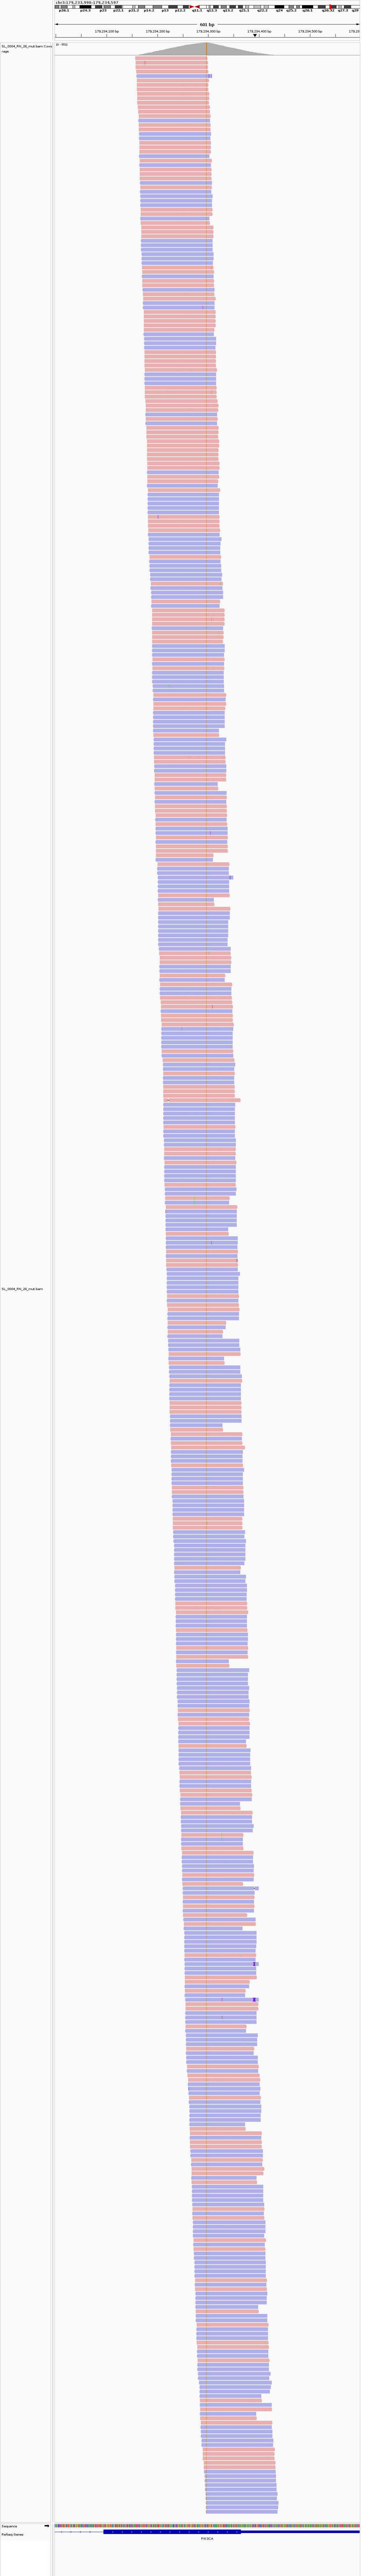



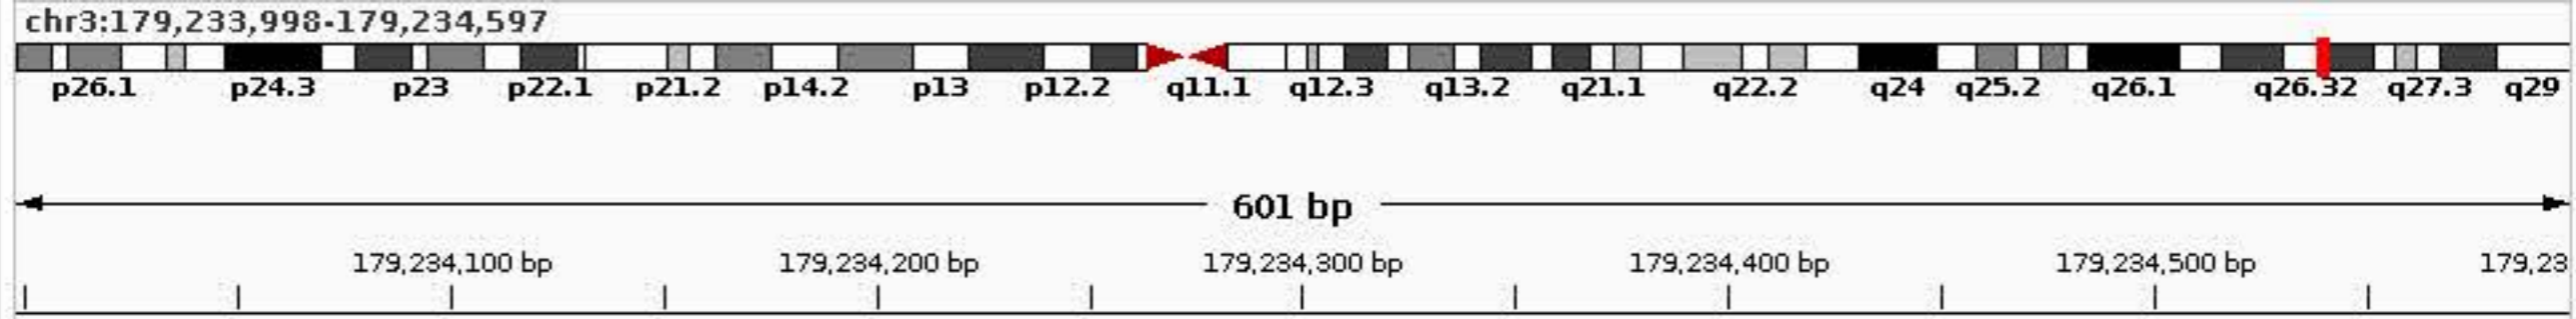

SL\_0006\_RN\_36\_mut.bam Coverage

SL\_0006\_RN\_36\_mut.bam

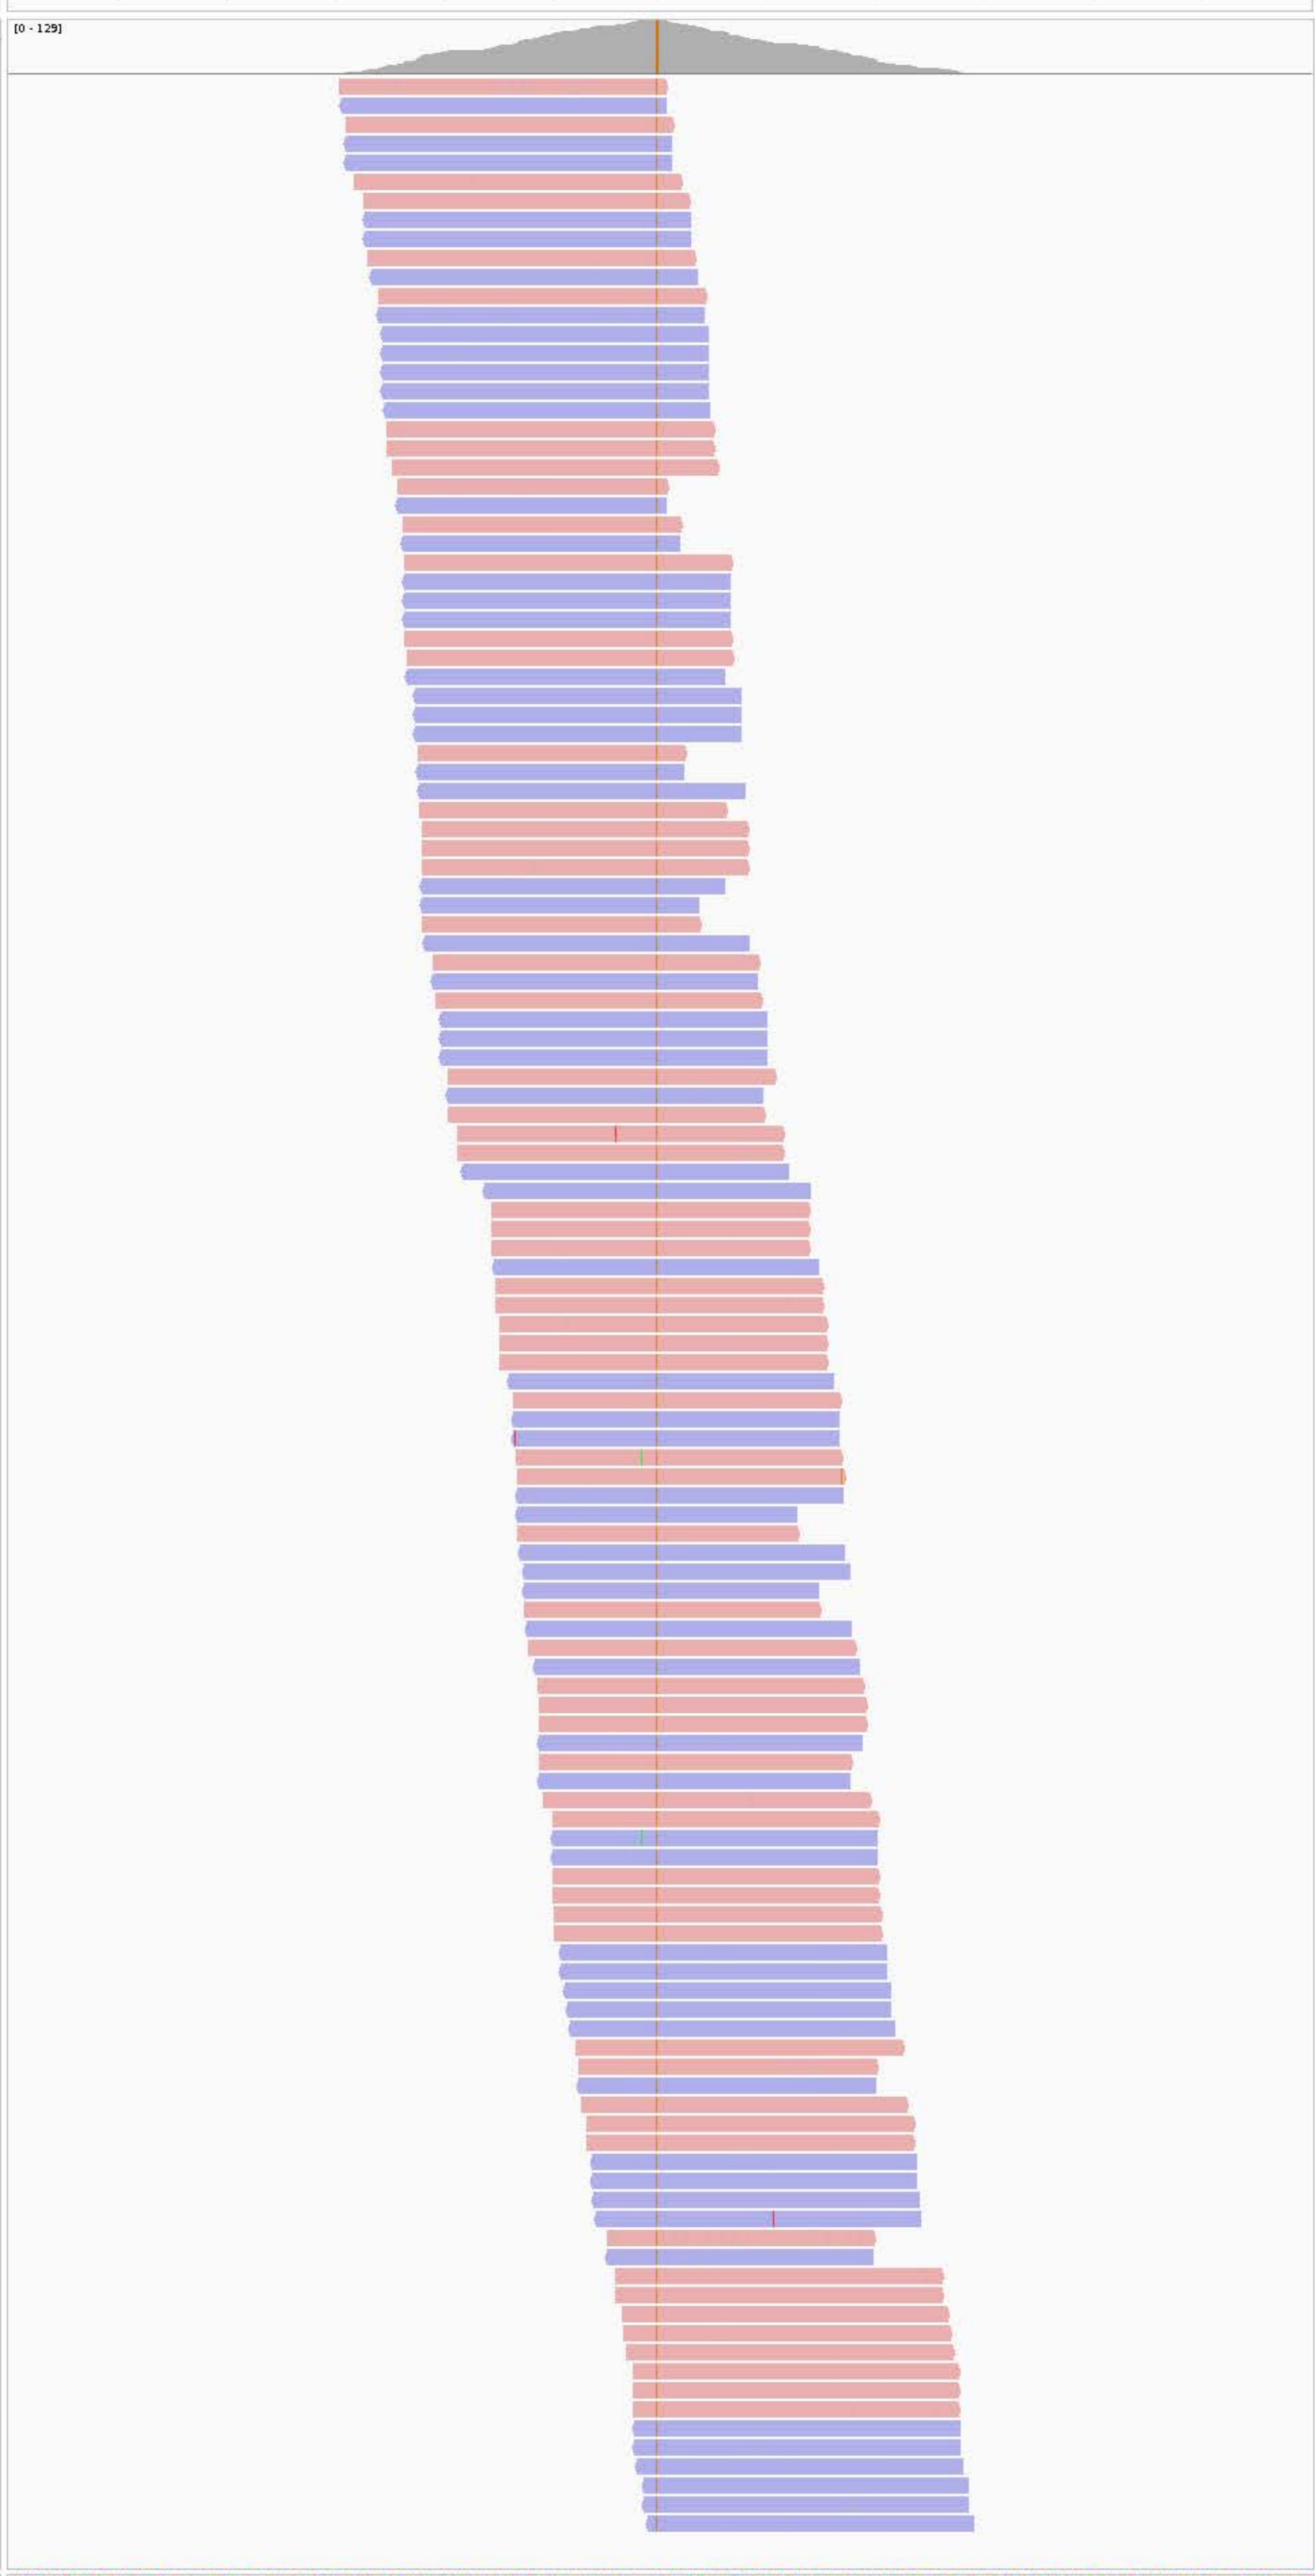

Sequence

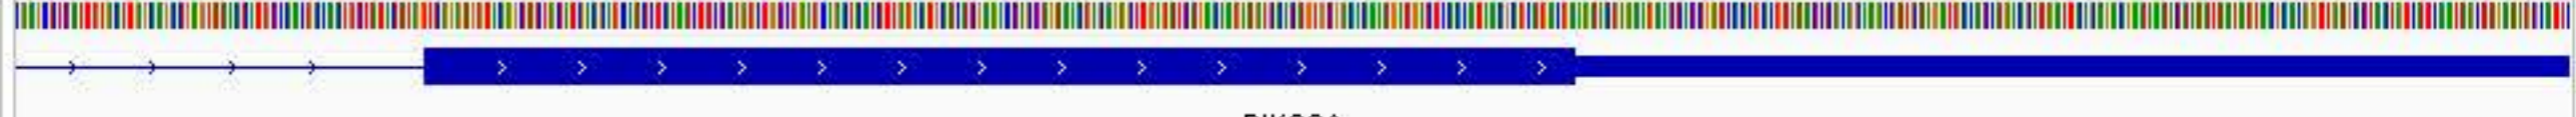

Refseq Genes

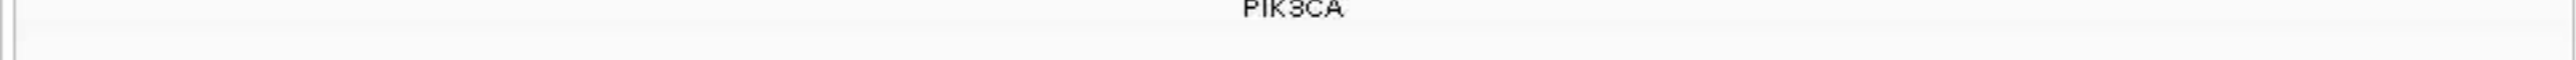

PIK3CA

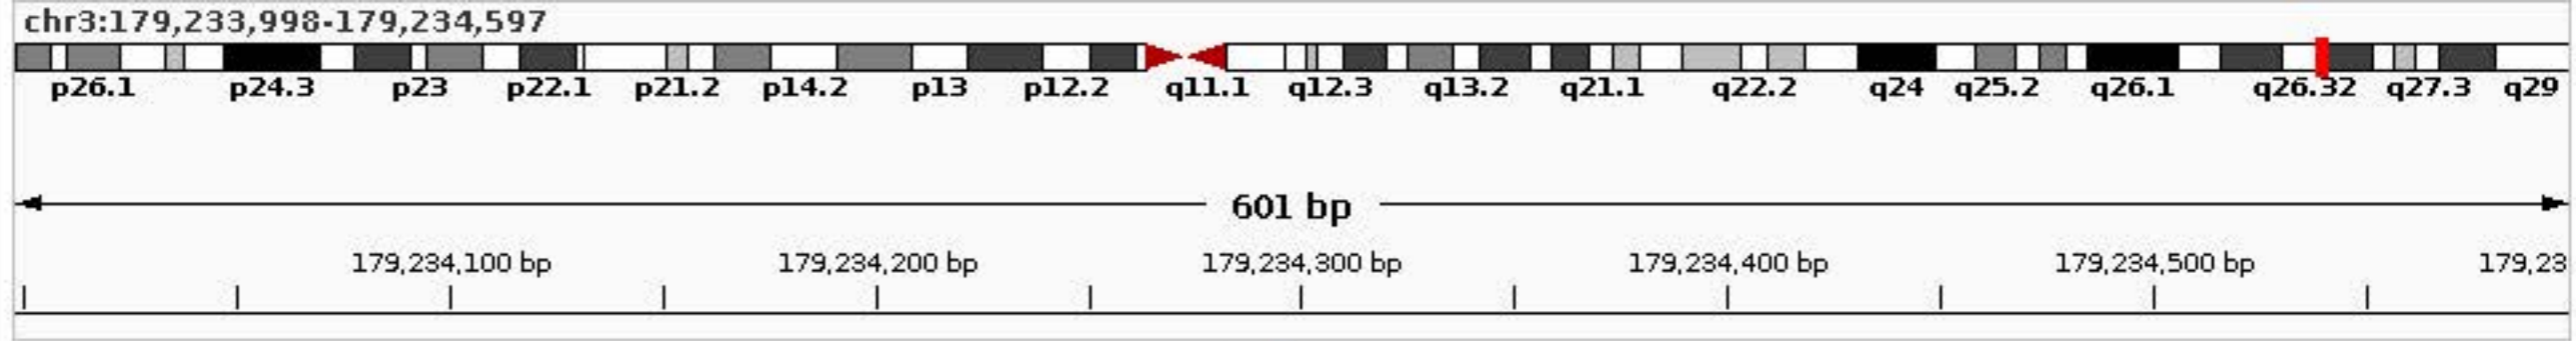

SL\_0006\_RN\_42\_mut.bam Coverage

SL\_0006\_RN\_42\_mut.bam

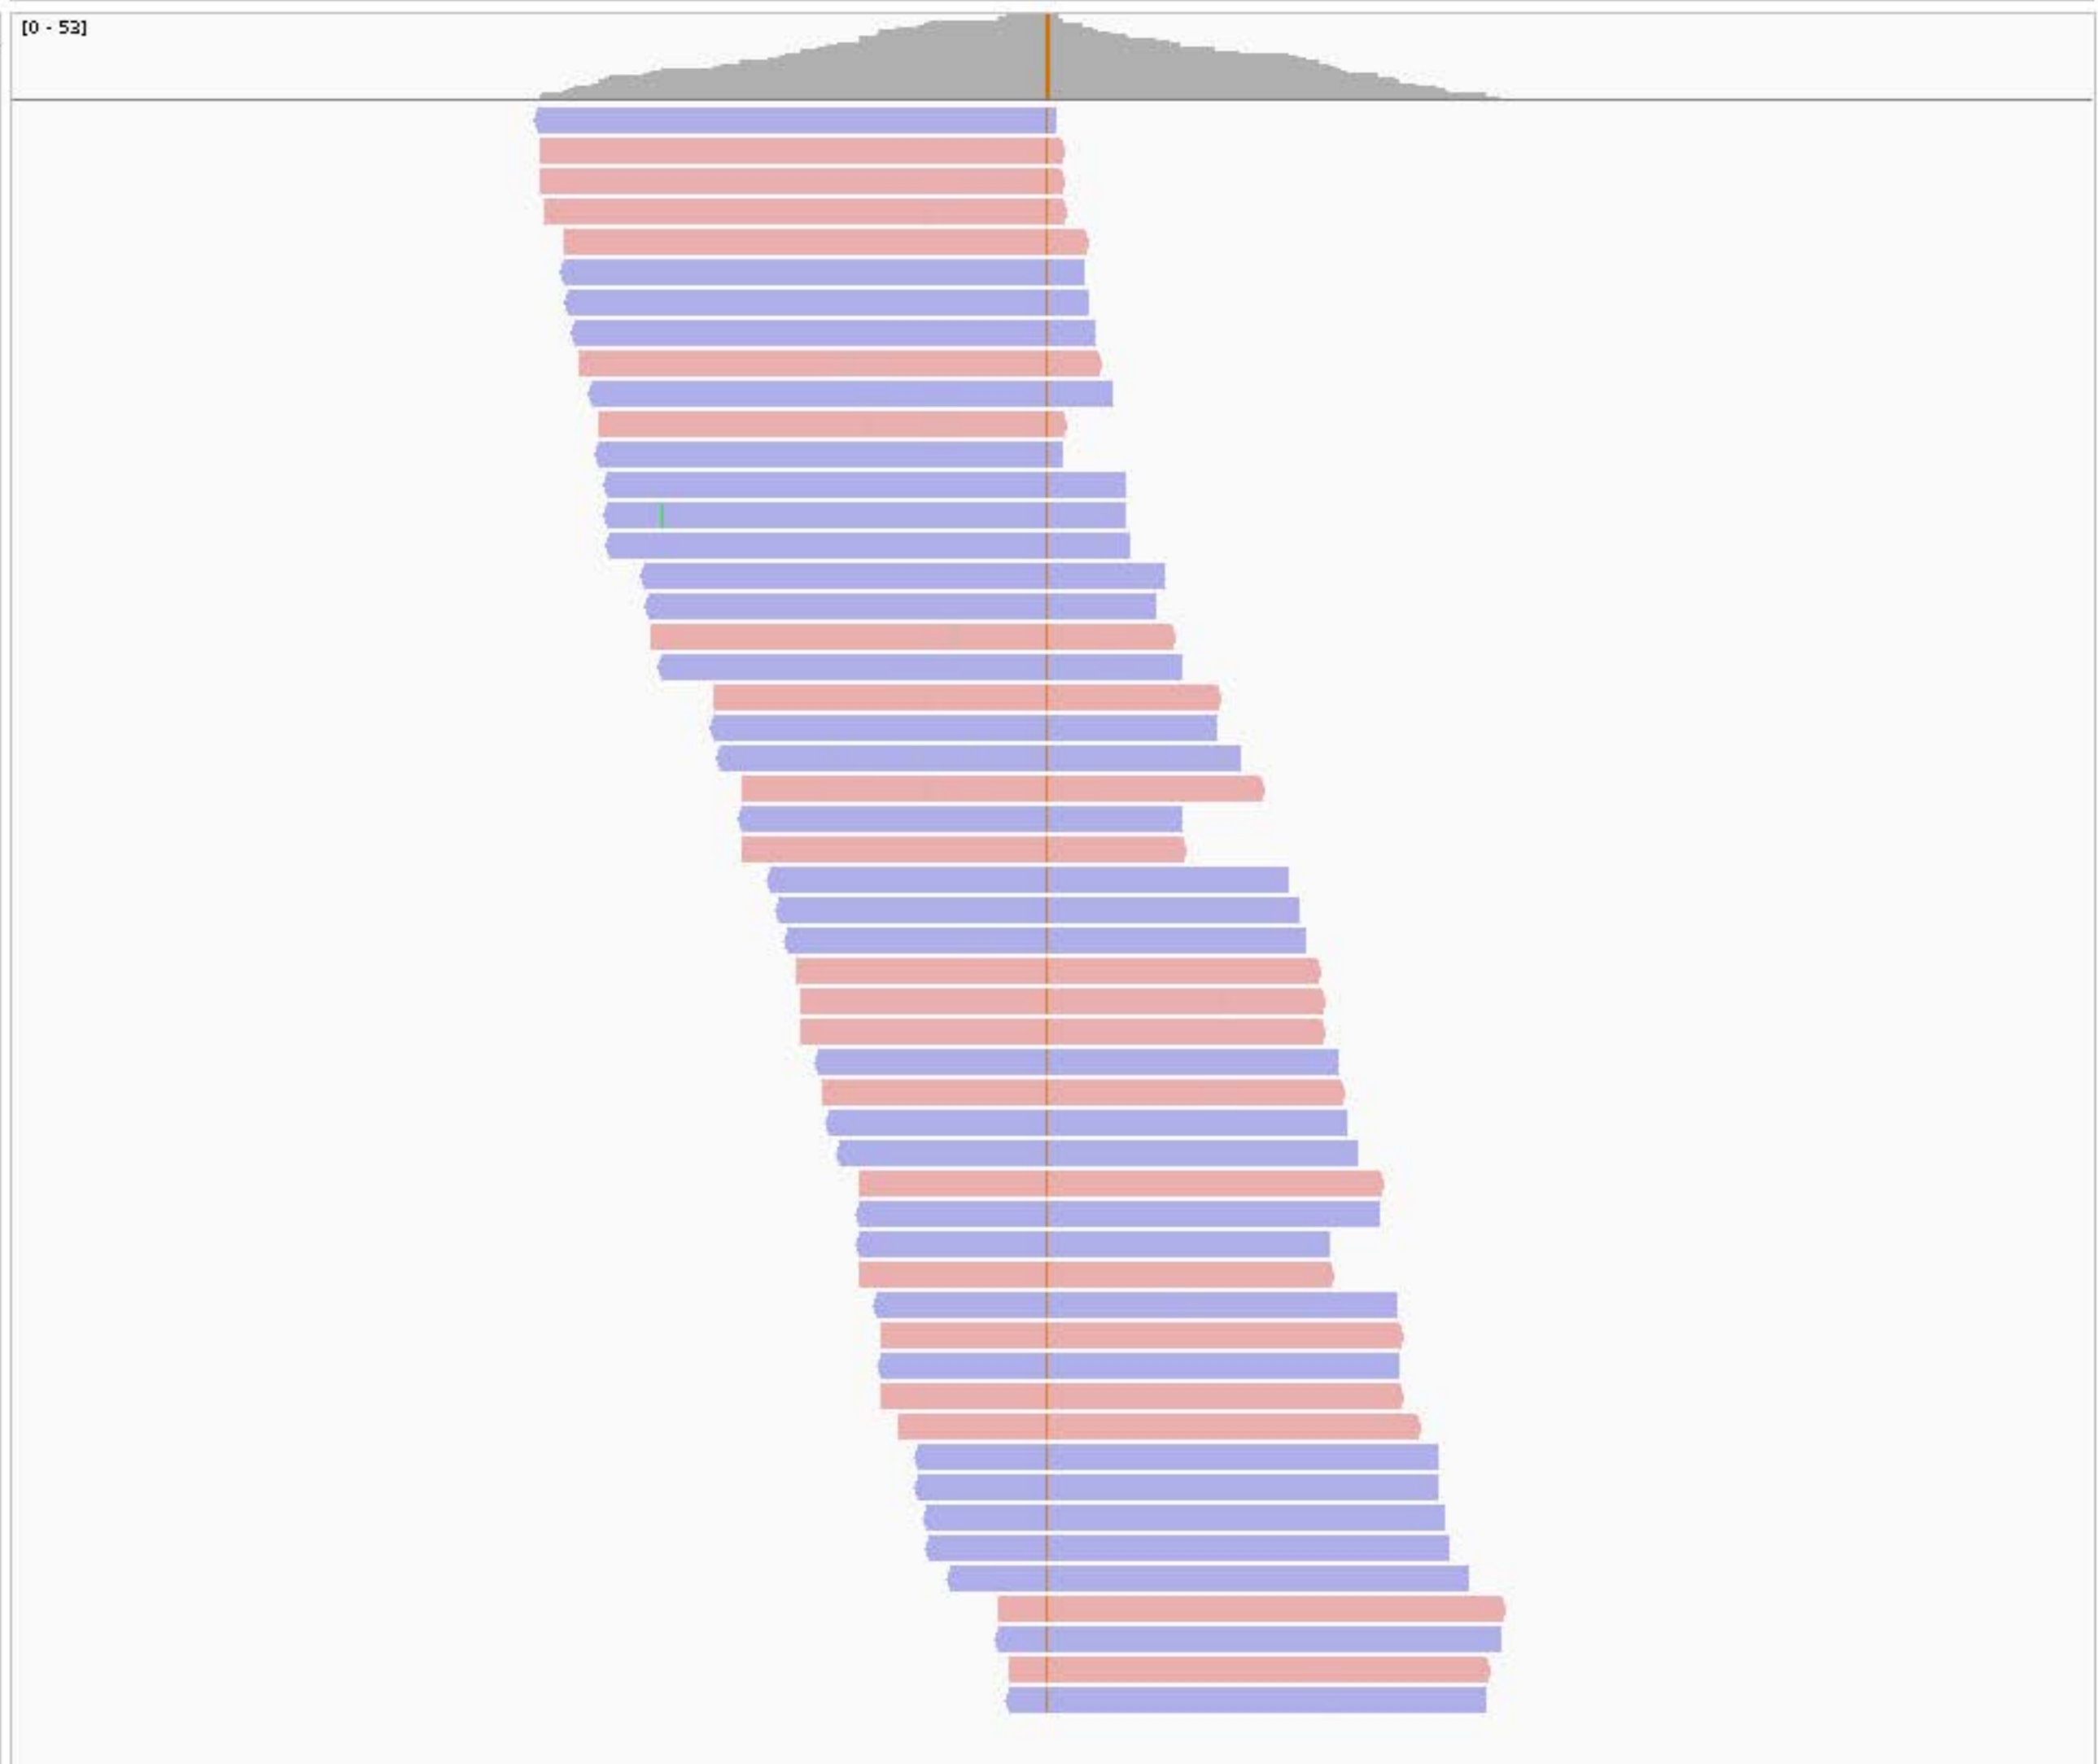

Sequence

Refseq Genes

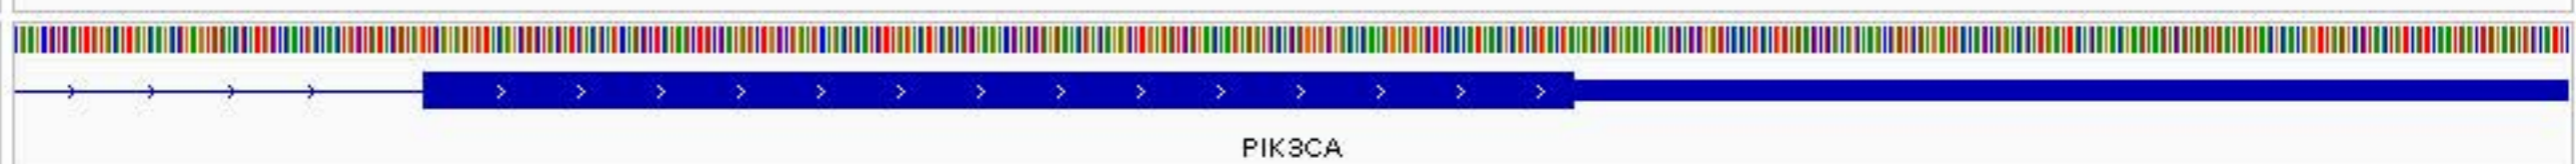



SL\_0006\_RN\_59\_mut.bam Coverage

SL\_0006\_RN\_59\_mut.bam

Sequence →

Refseq Genes

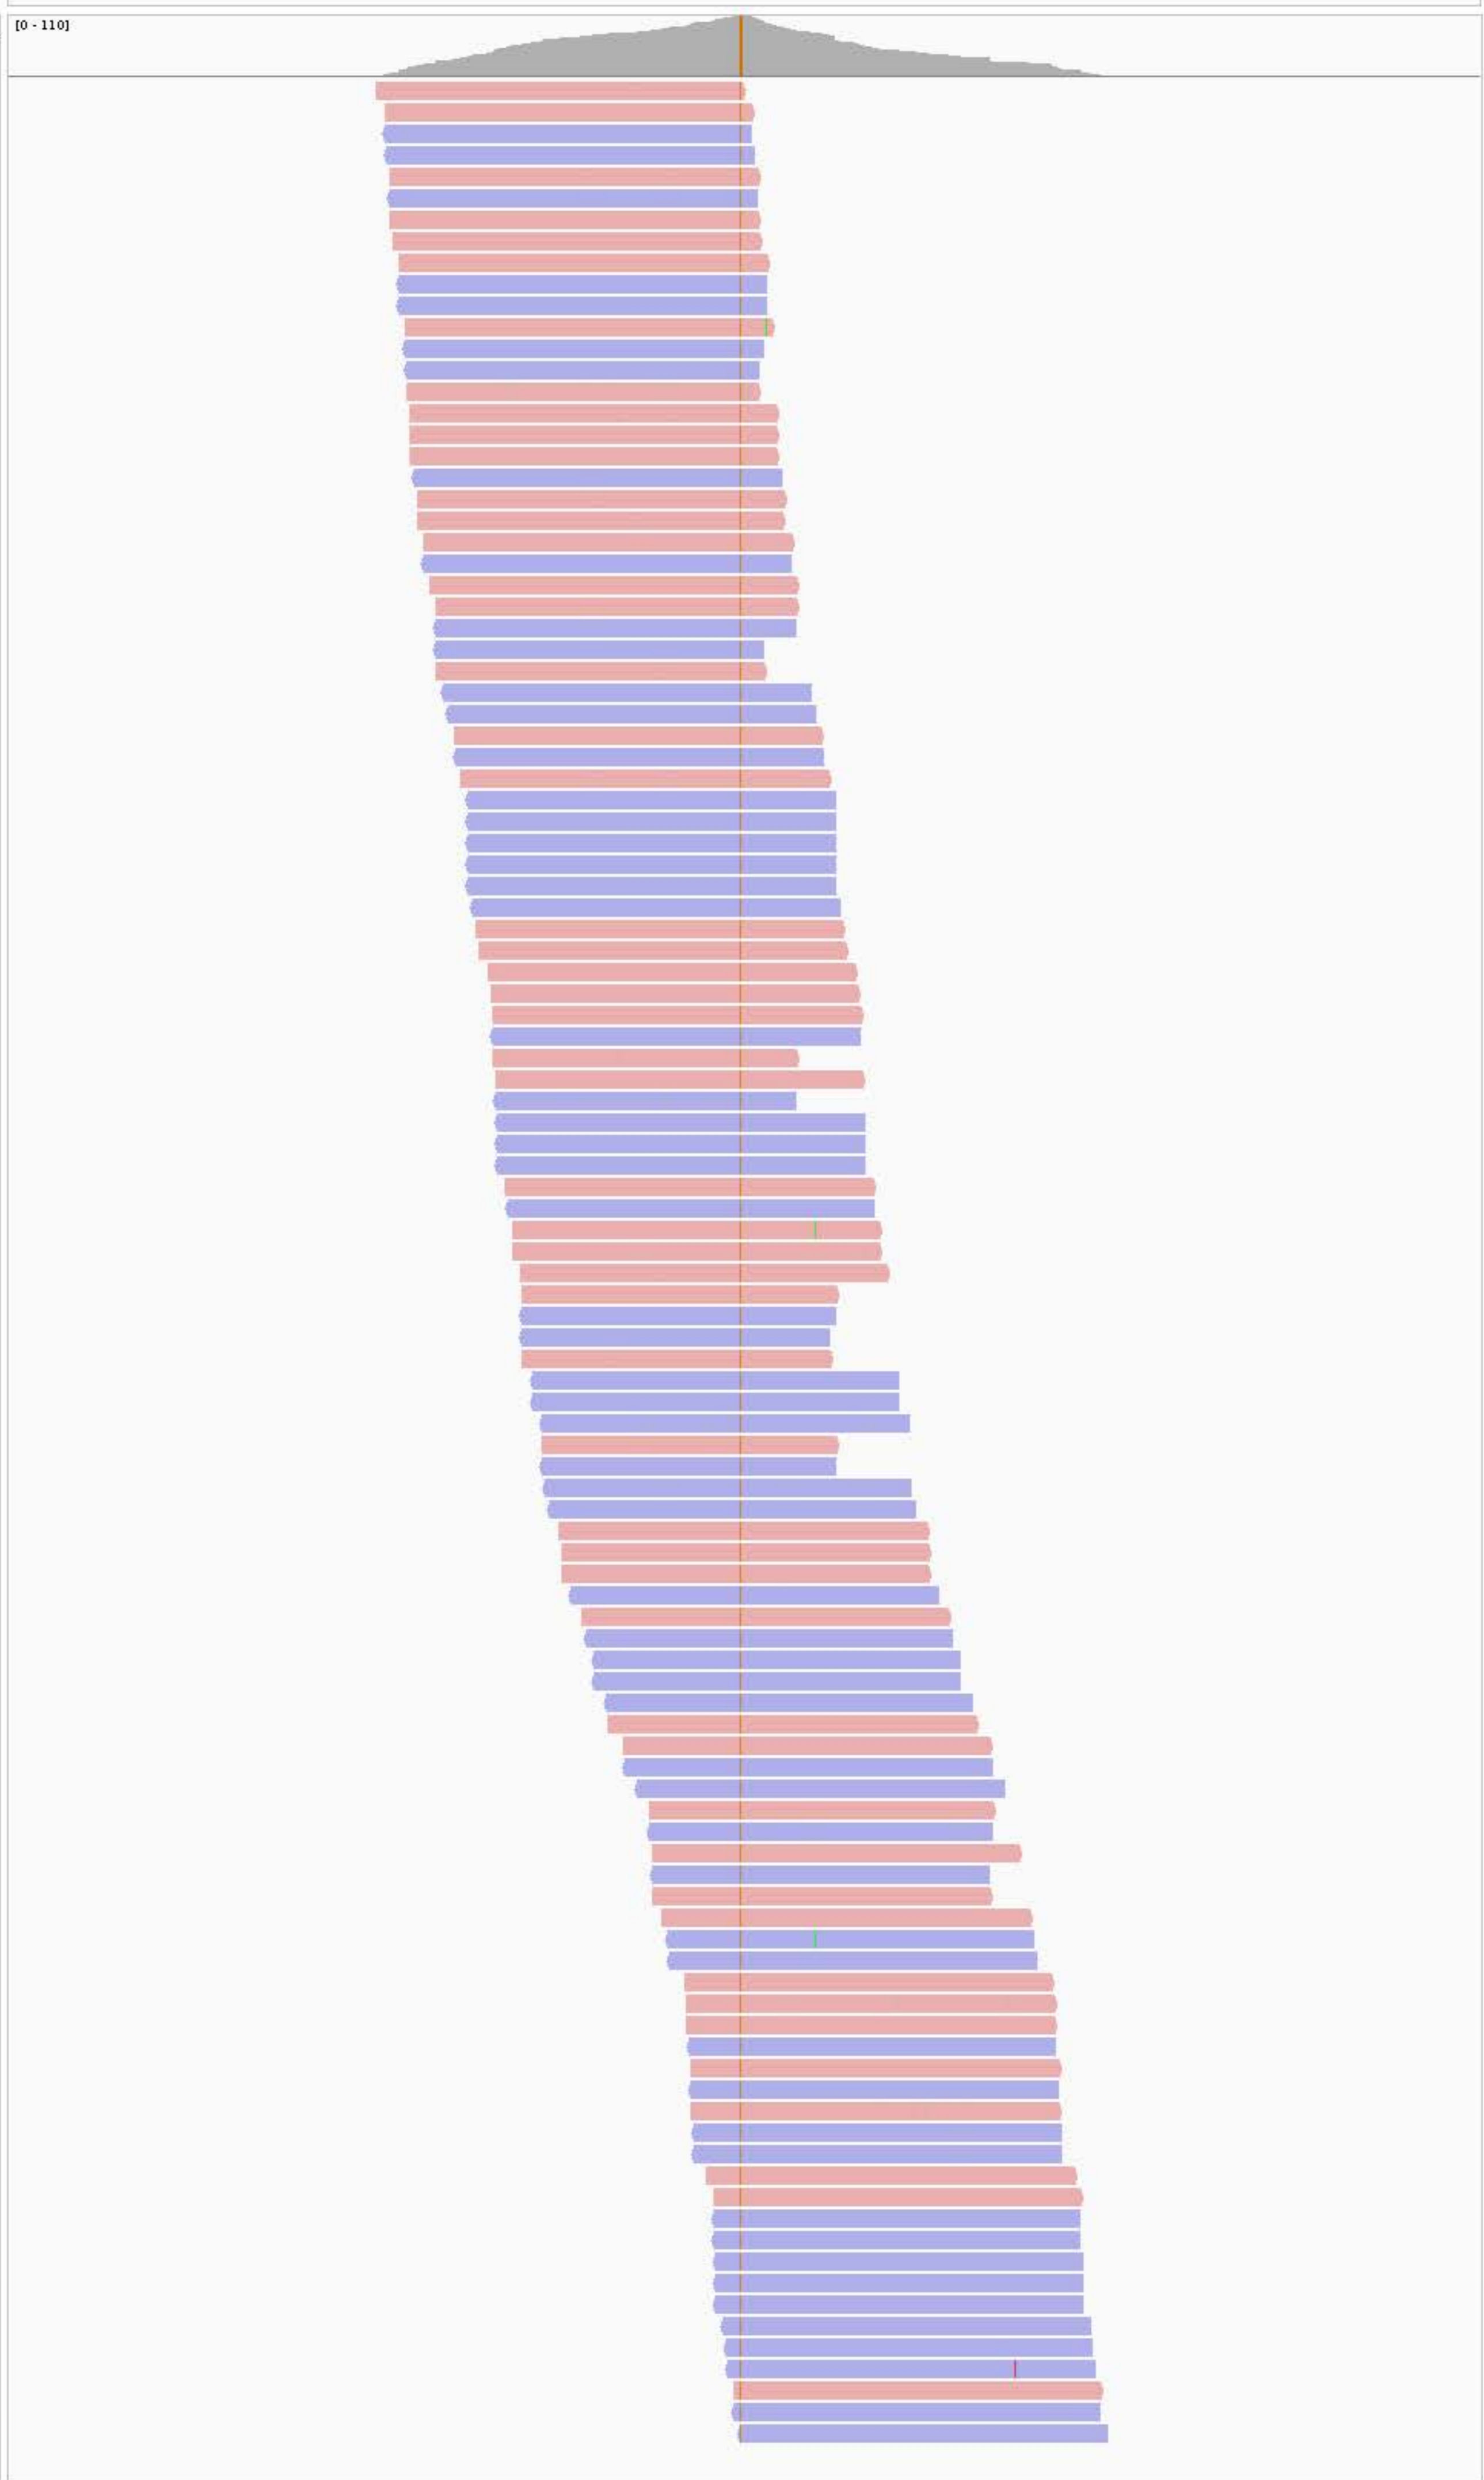



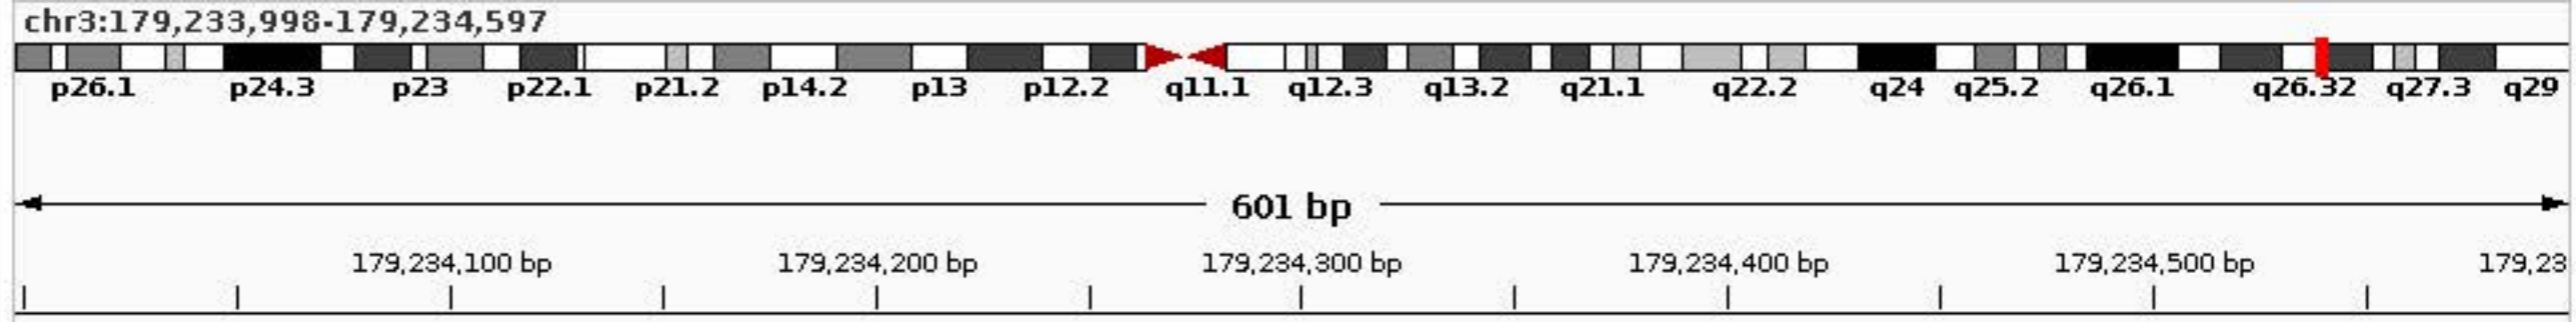

SL\_0006\_RN\_60\_mut.bam Coverage

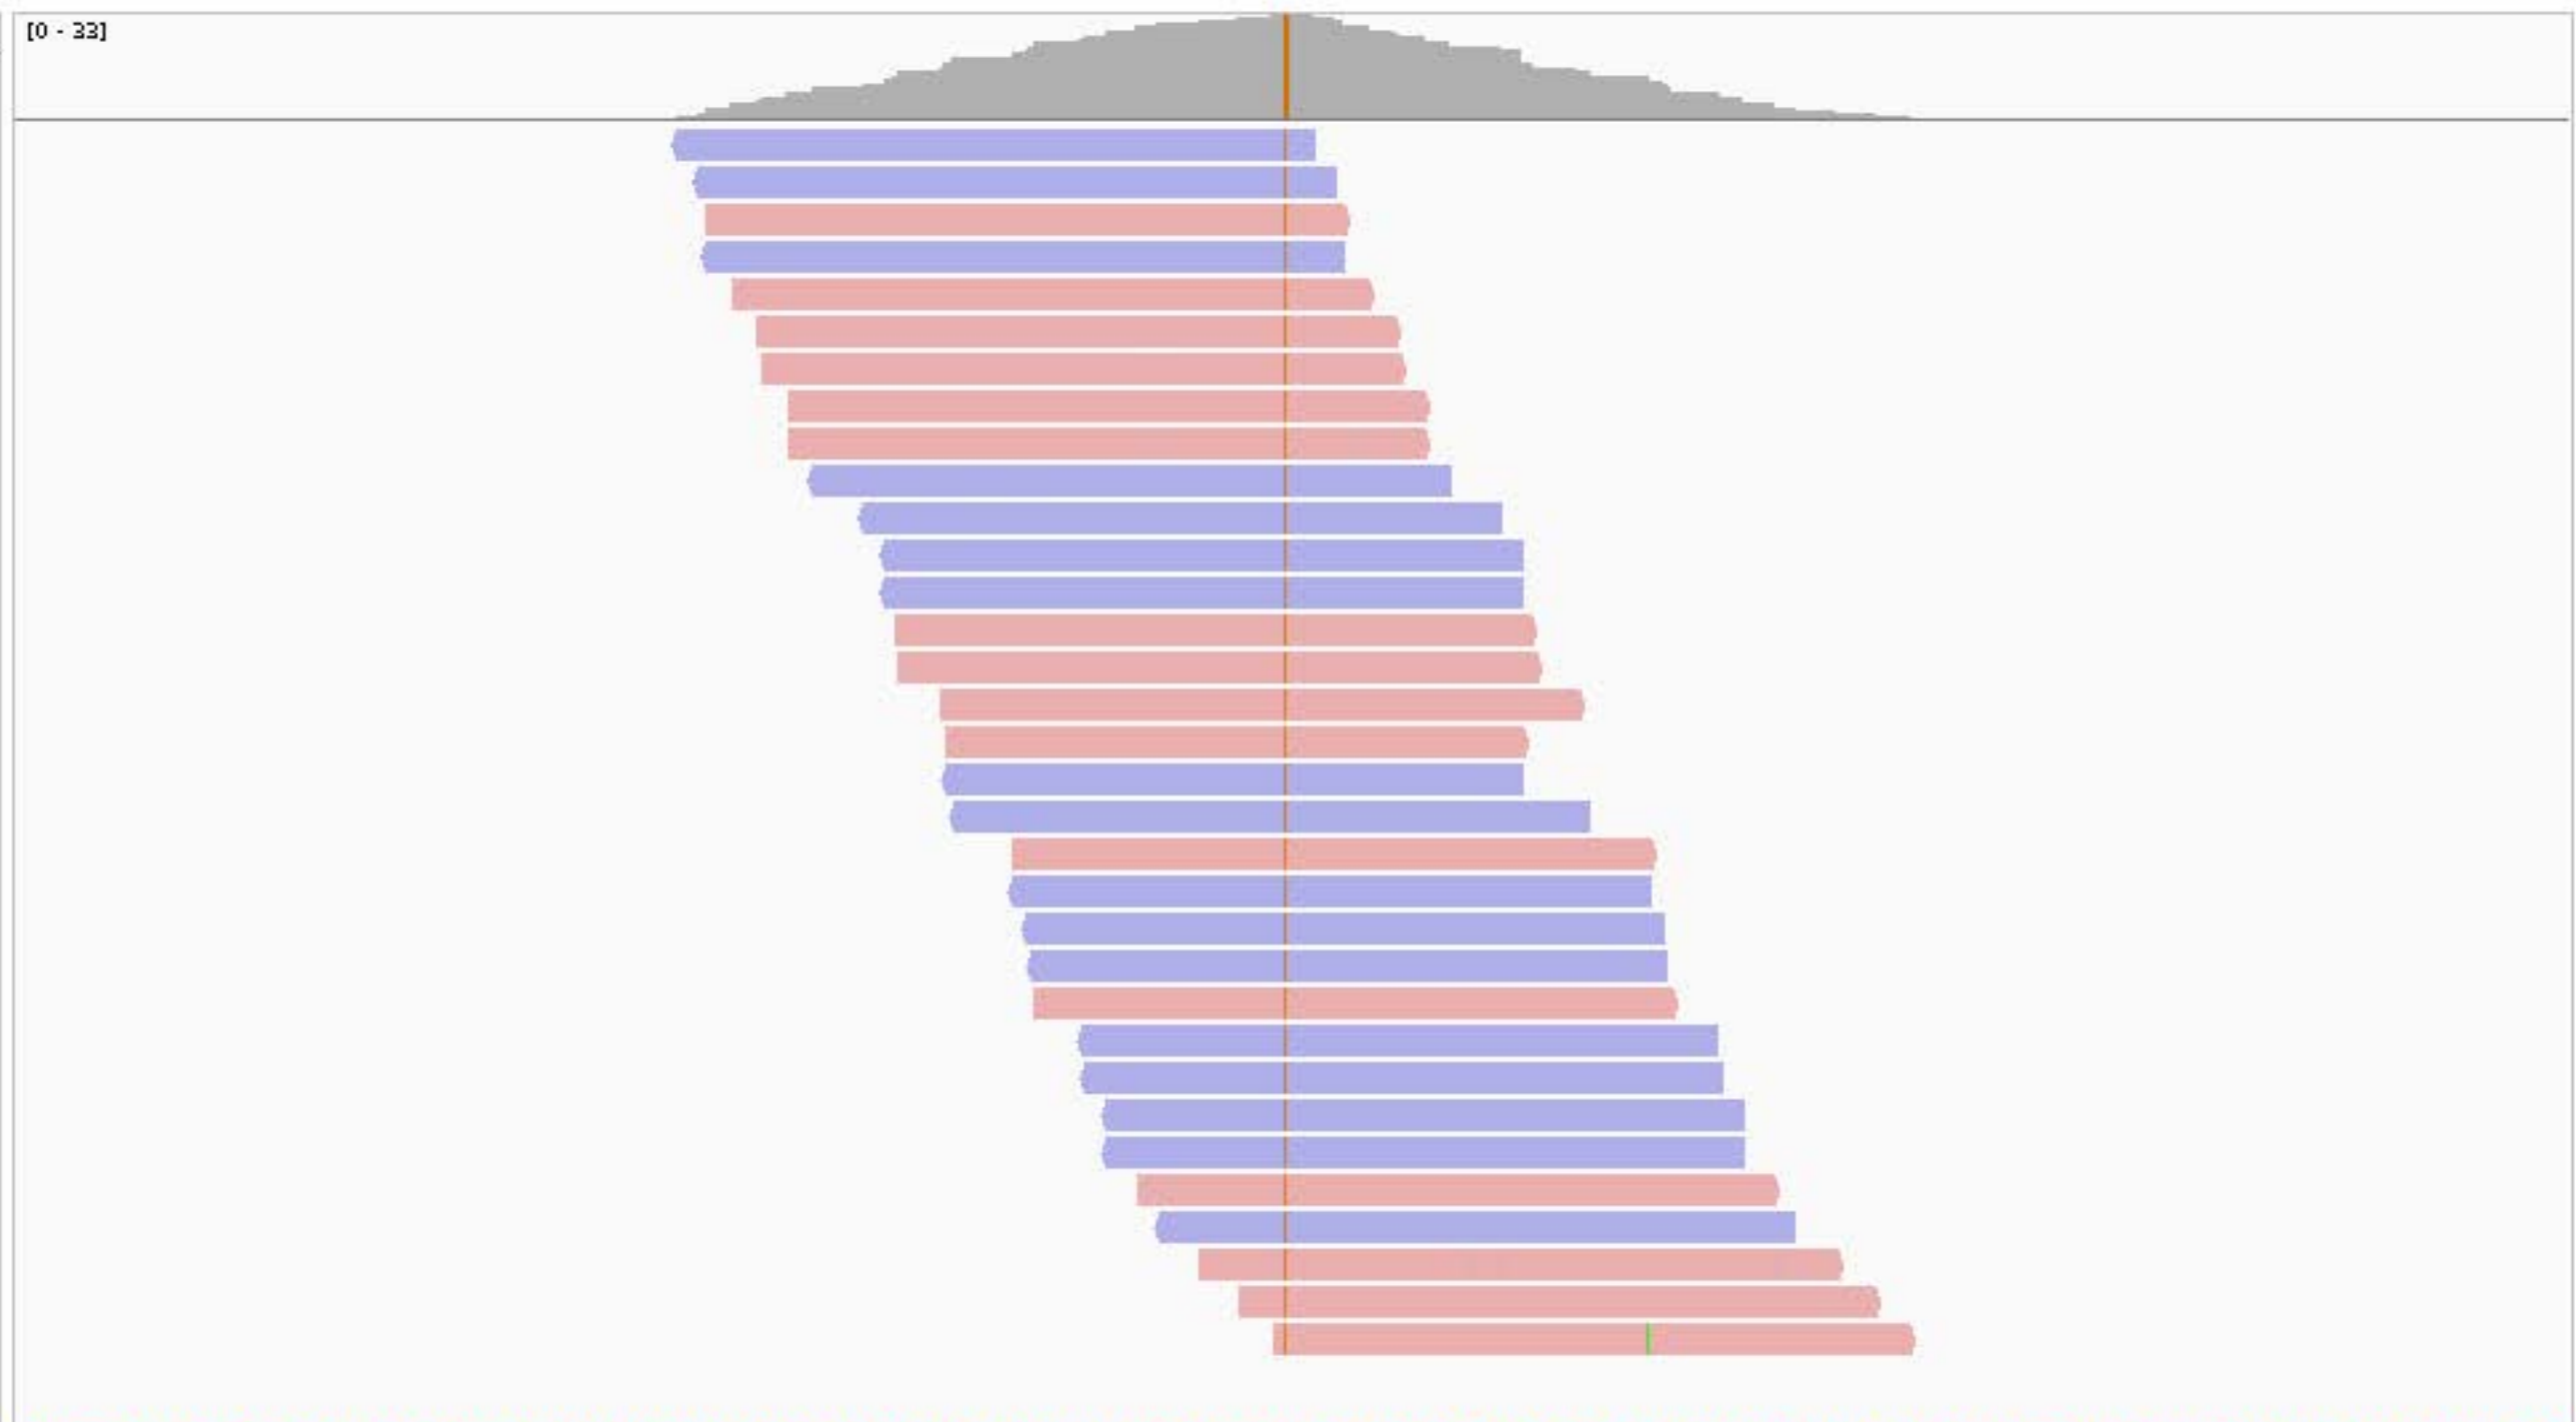

SL\_0006\_RN\_60\_mut.bam

Sequence

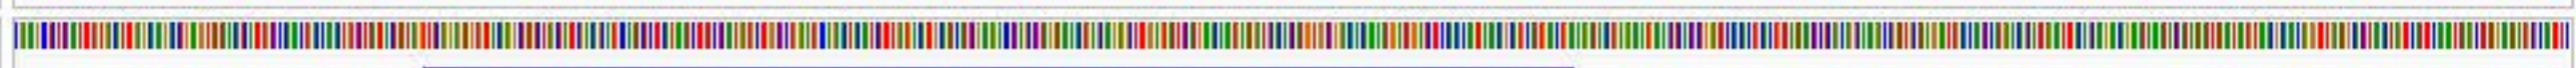

Refseq Genes

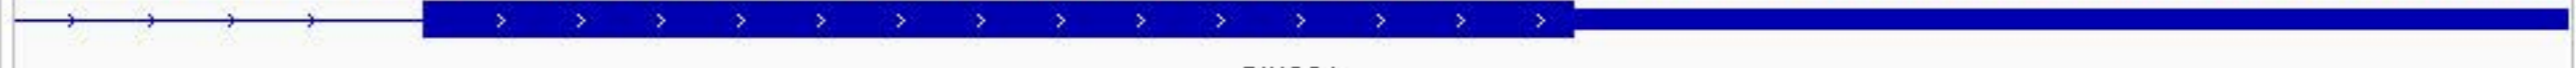

PIK3CA



SL\_0007\_RN\_33\_mut.bam Coverage  
SL\_0007\_RN\_33\_mut.bam

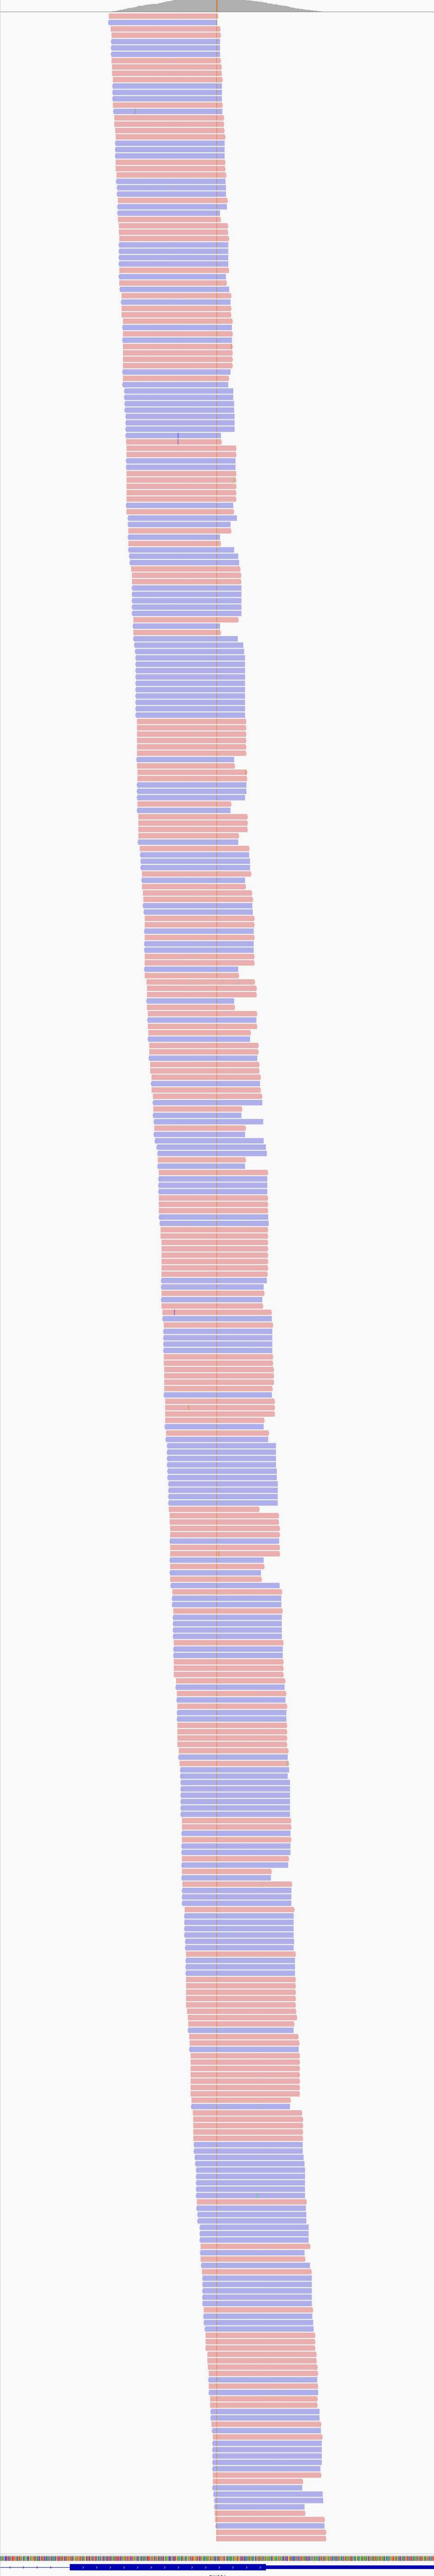



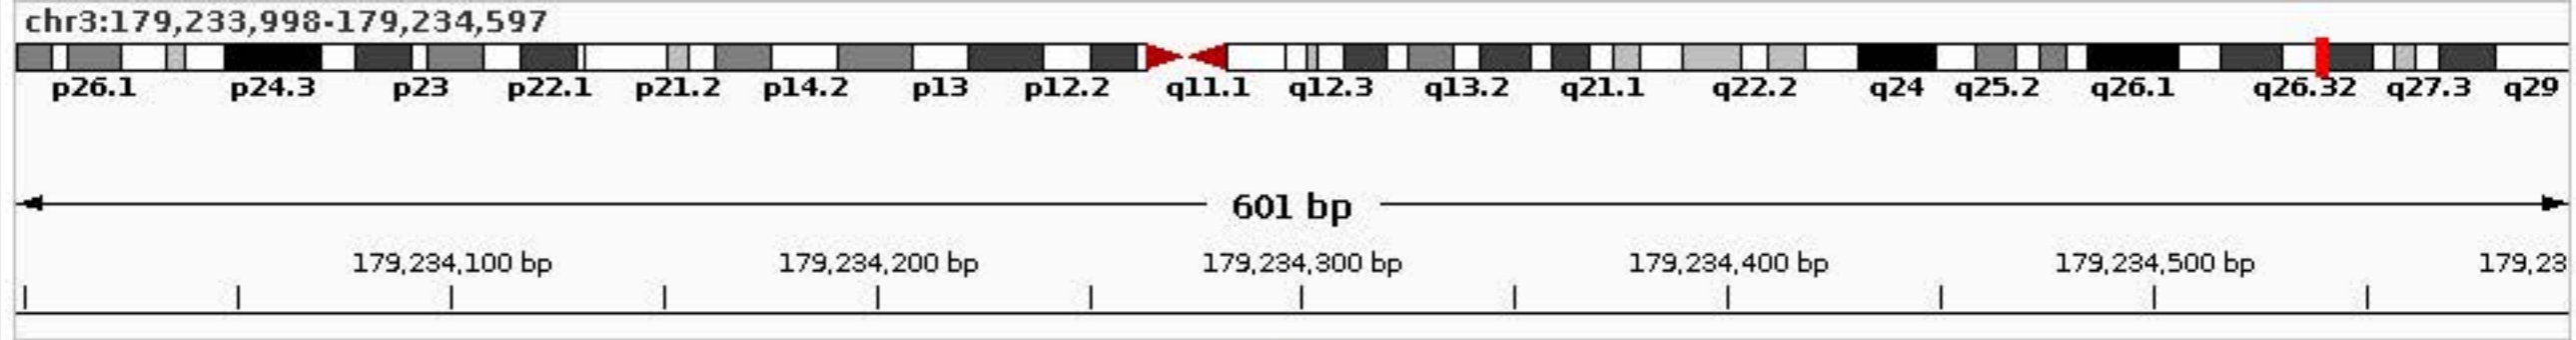

SL\_0010\_RN\_25\_mut.bam Coverage

SL\_0010\_RN\_25\_mut.bam

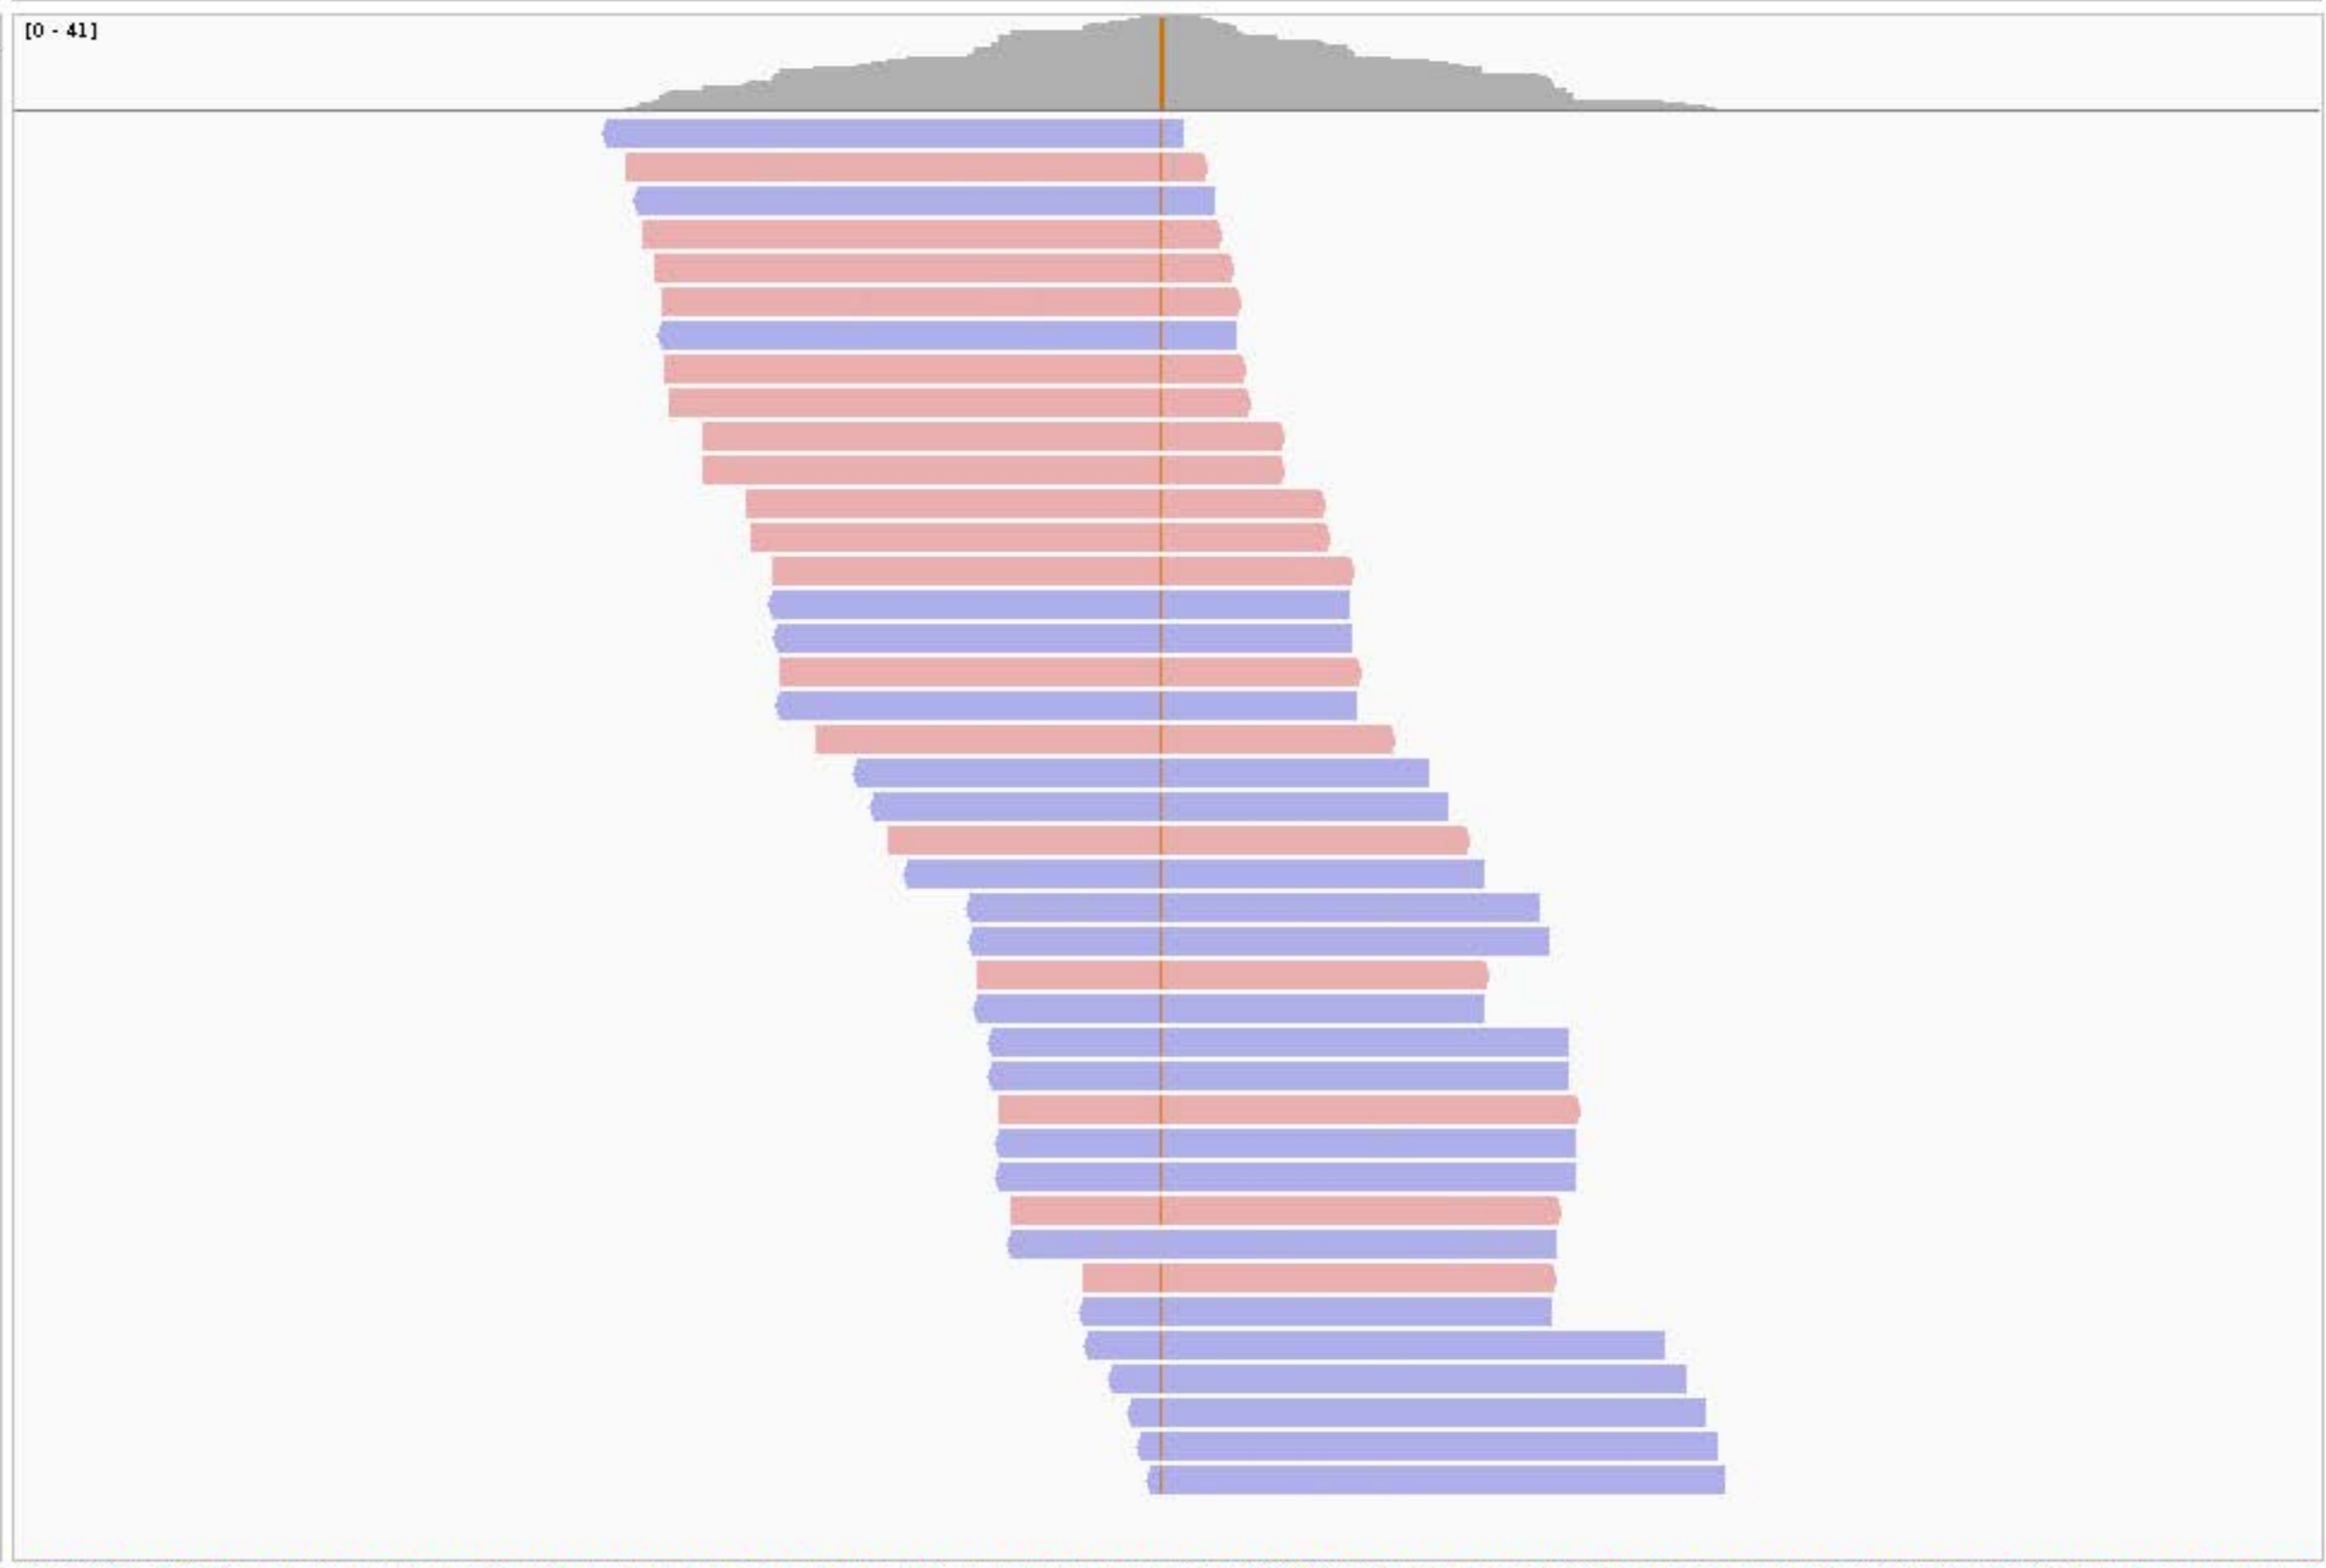

Sequence

Refseq Genes

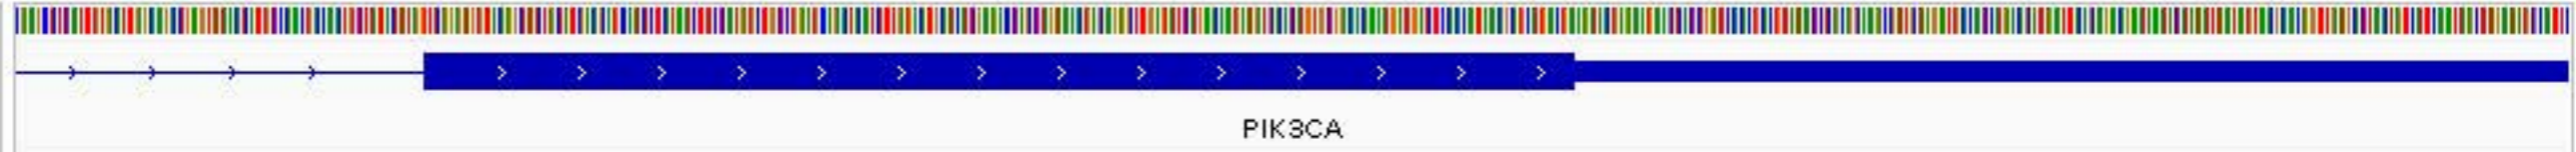



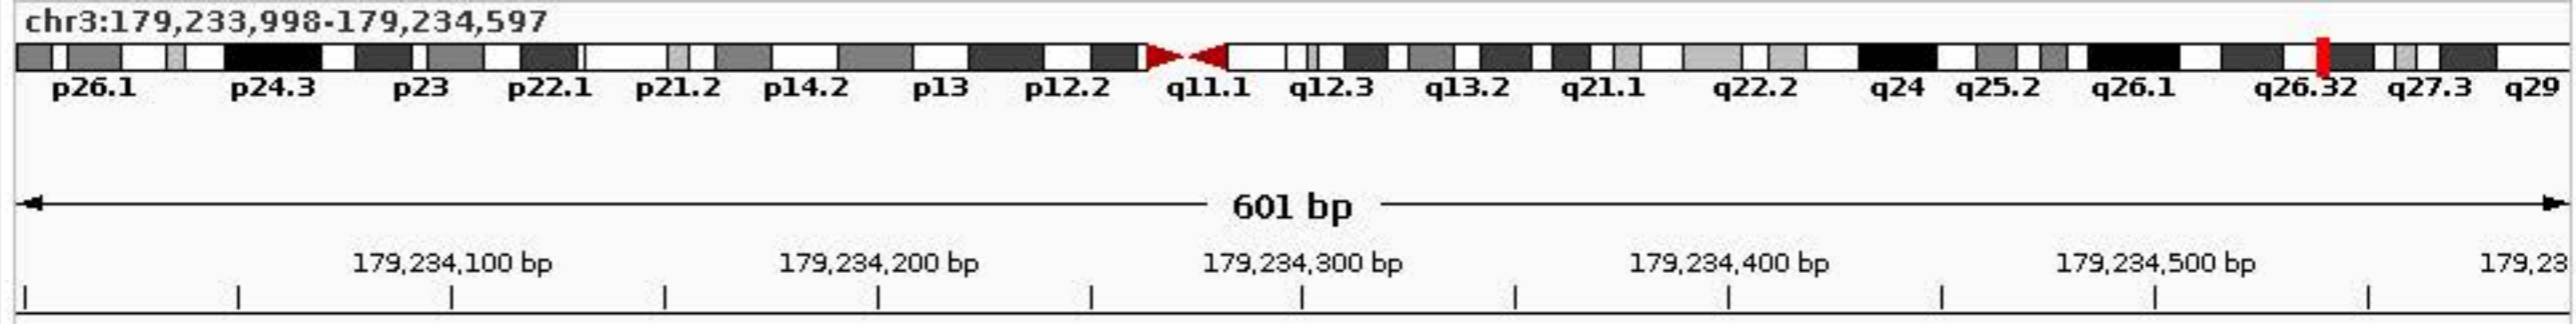

SL\_0010\_RN\_34\_mut.bam Coverage

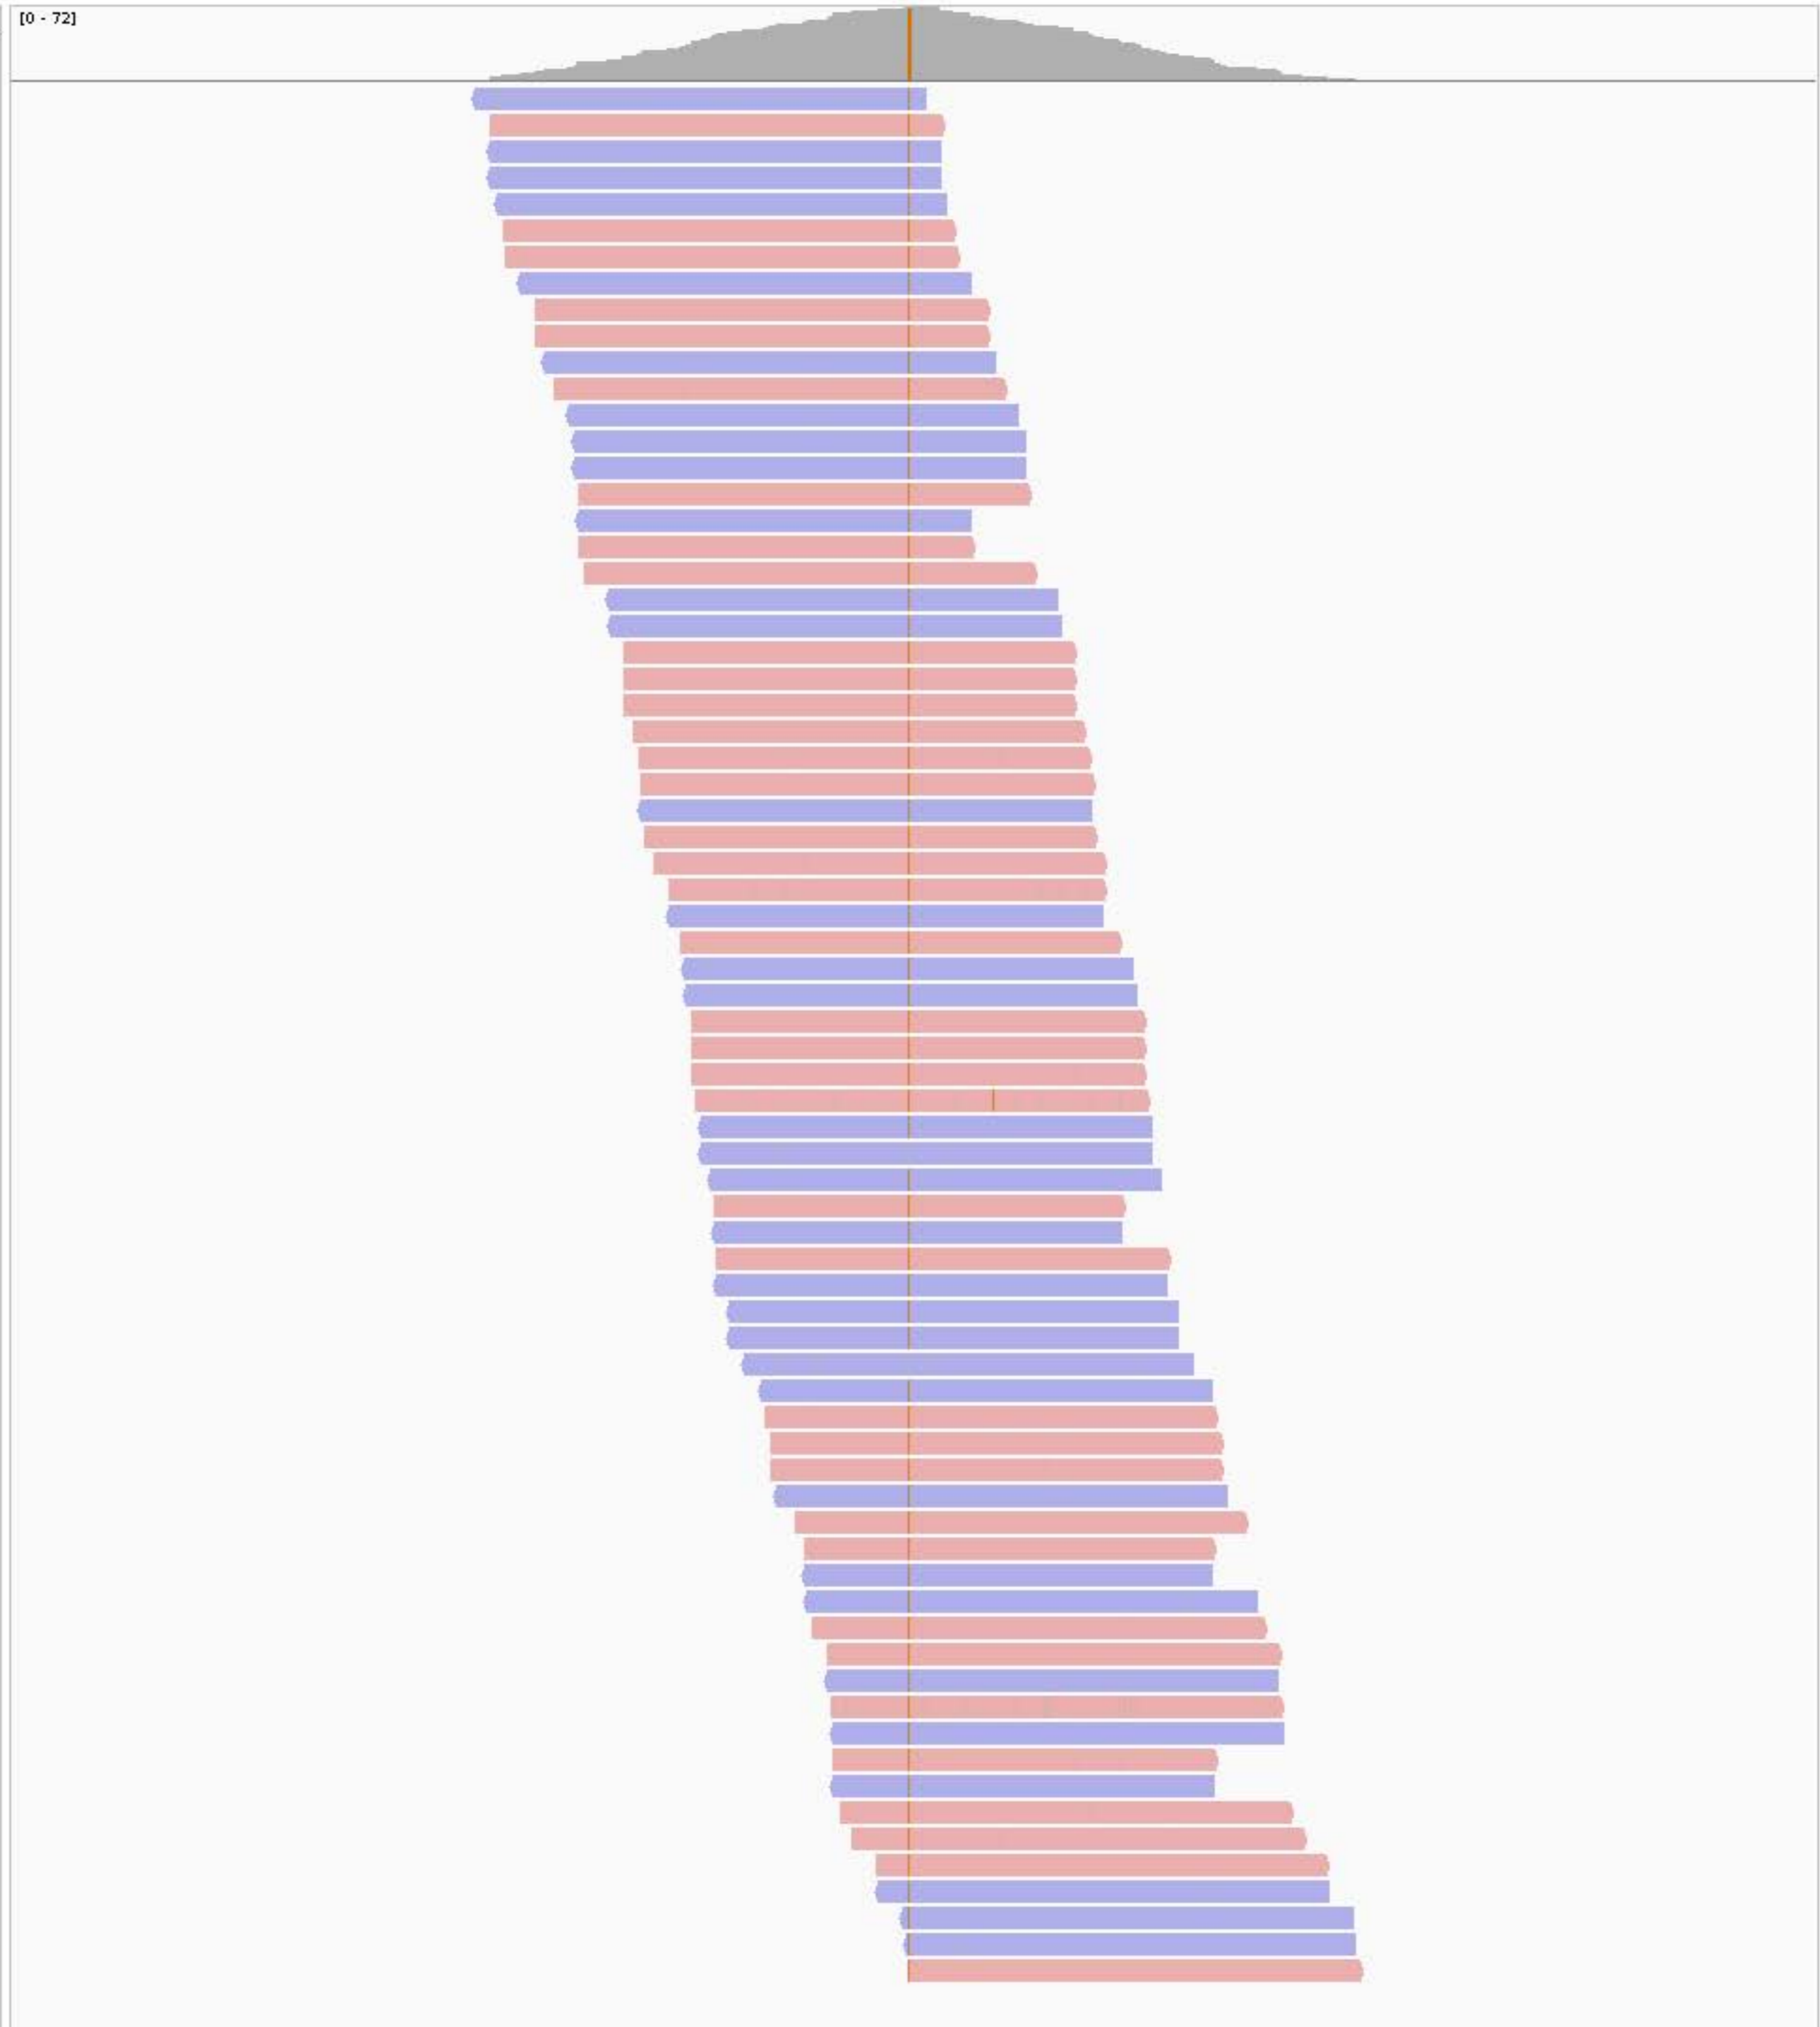

SL\_0010\_RN\_34\_mut.bam

Sequence →

Refseq Genes

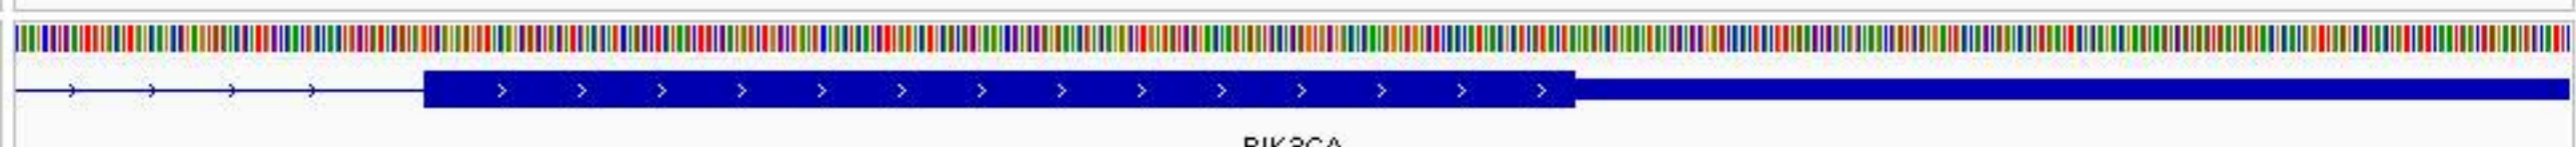

PIK3CA

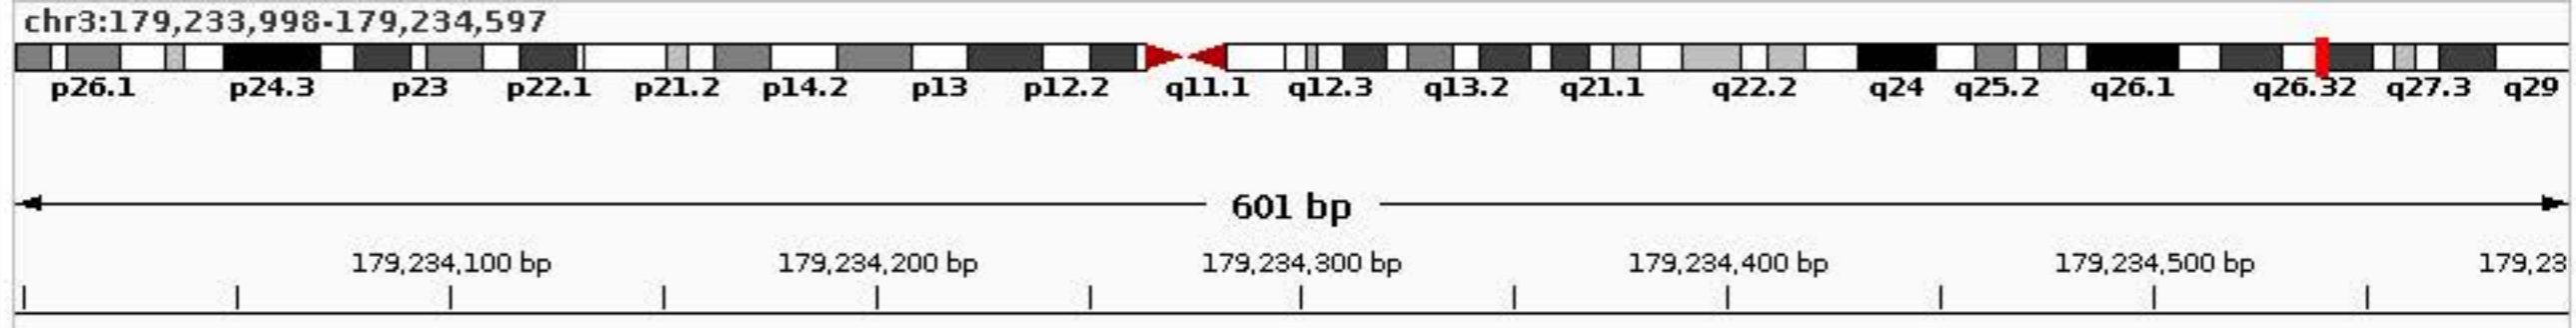

SL\_0015\_LN\_21\_mut.bam Coverage

SL\_0015\_LN\_21\_mut.bam

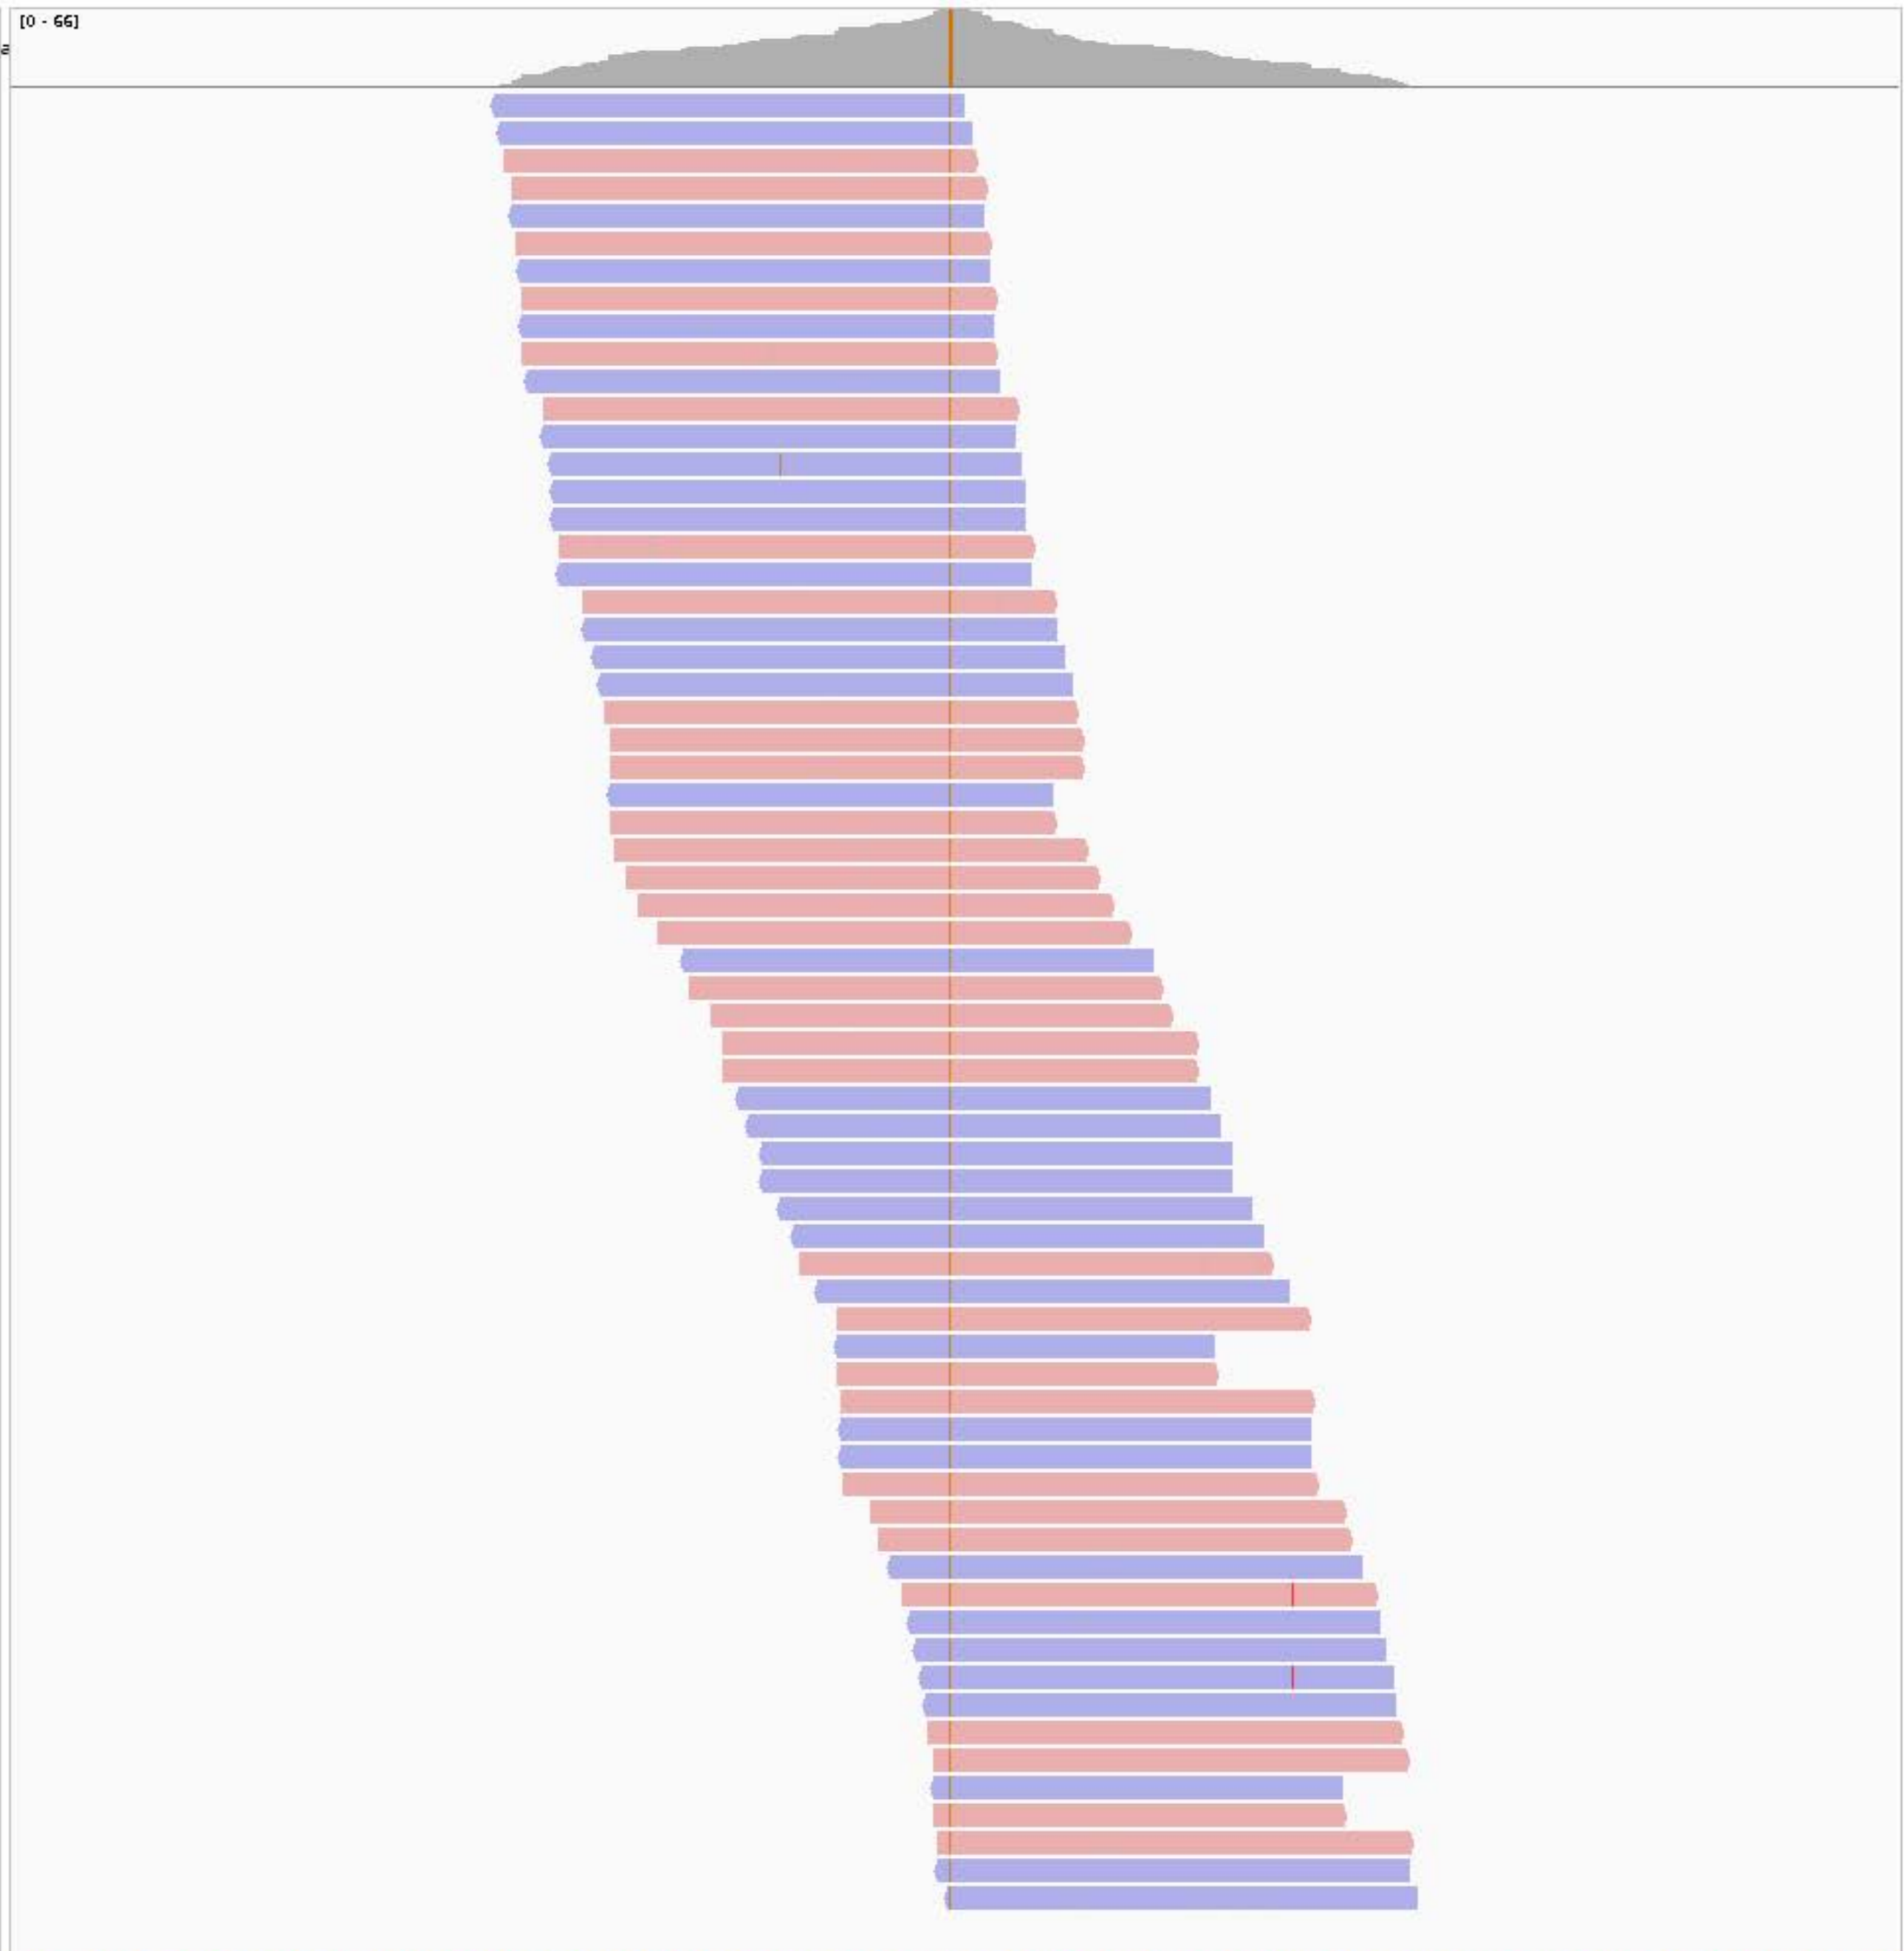

Sequence

Refseq Genes

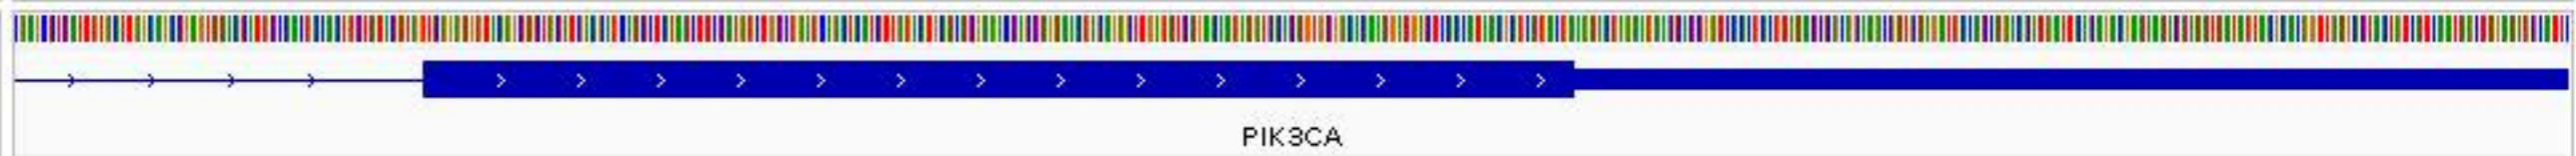

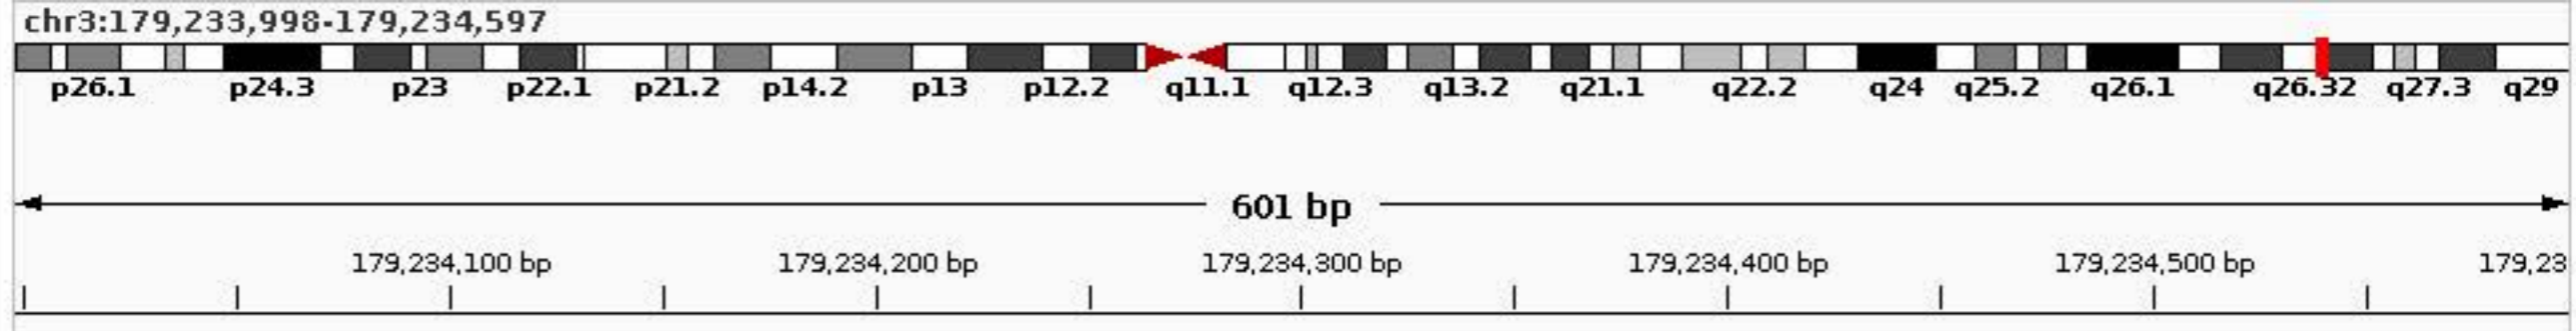

SL\_0015\_LN\_39\_mut.bam Coverage

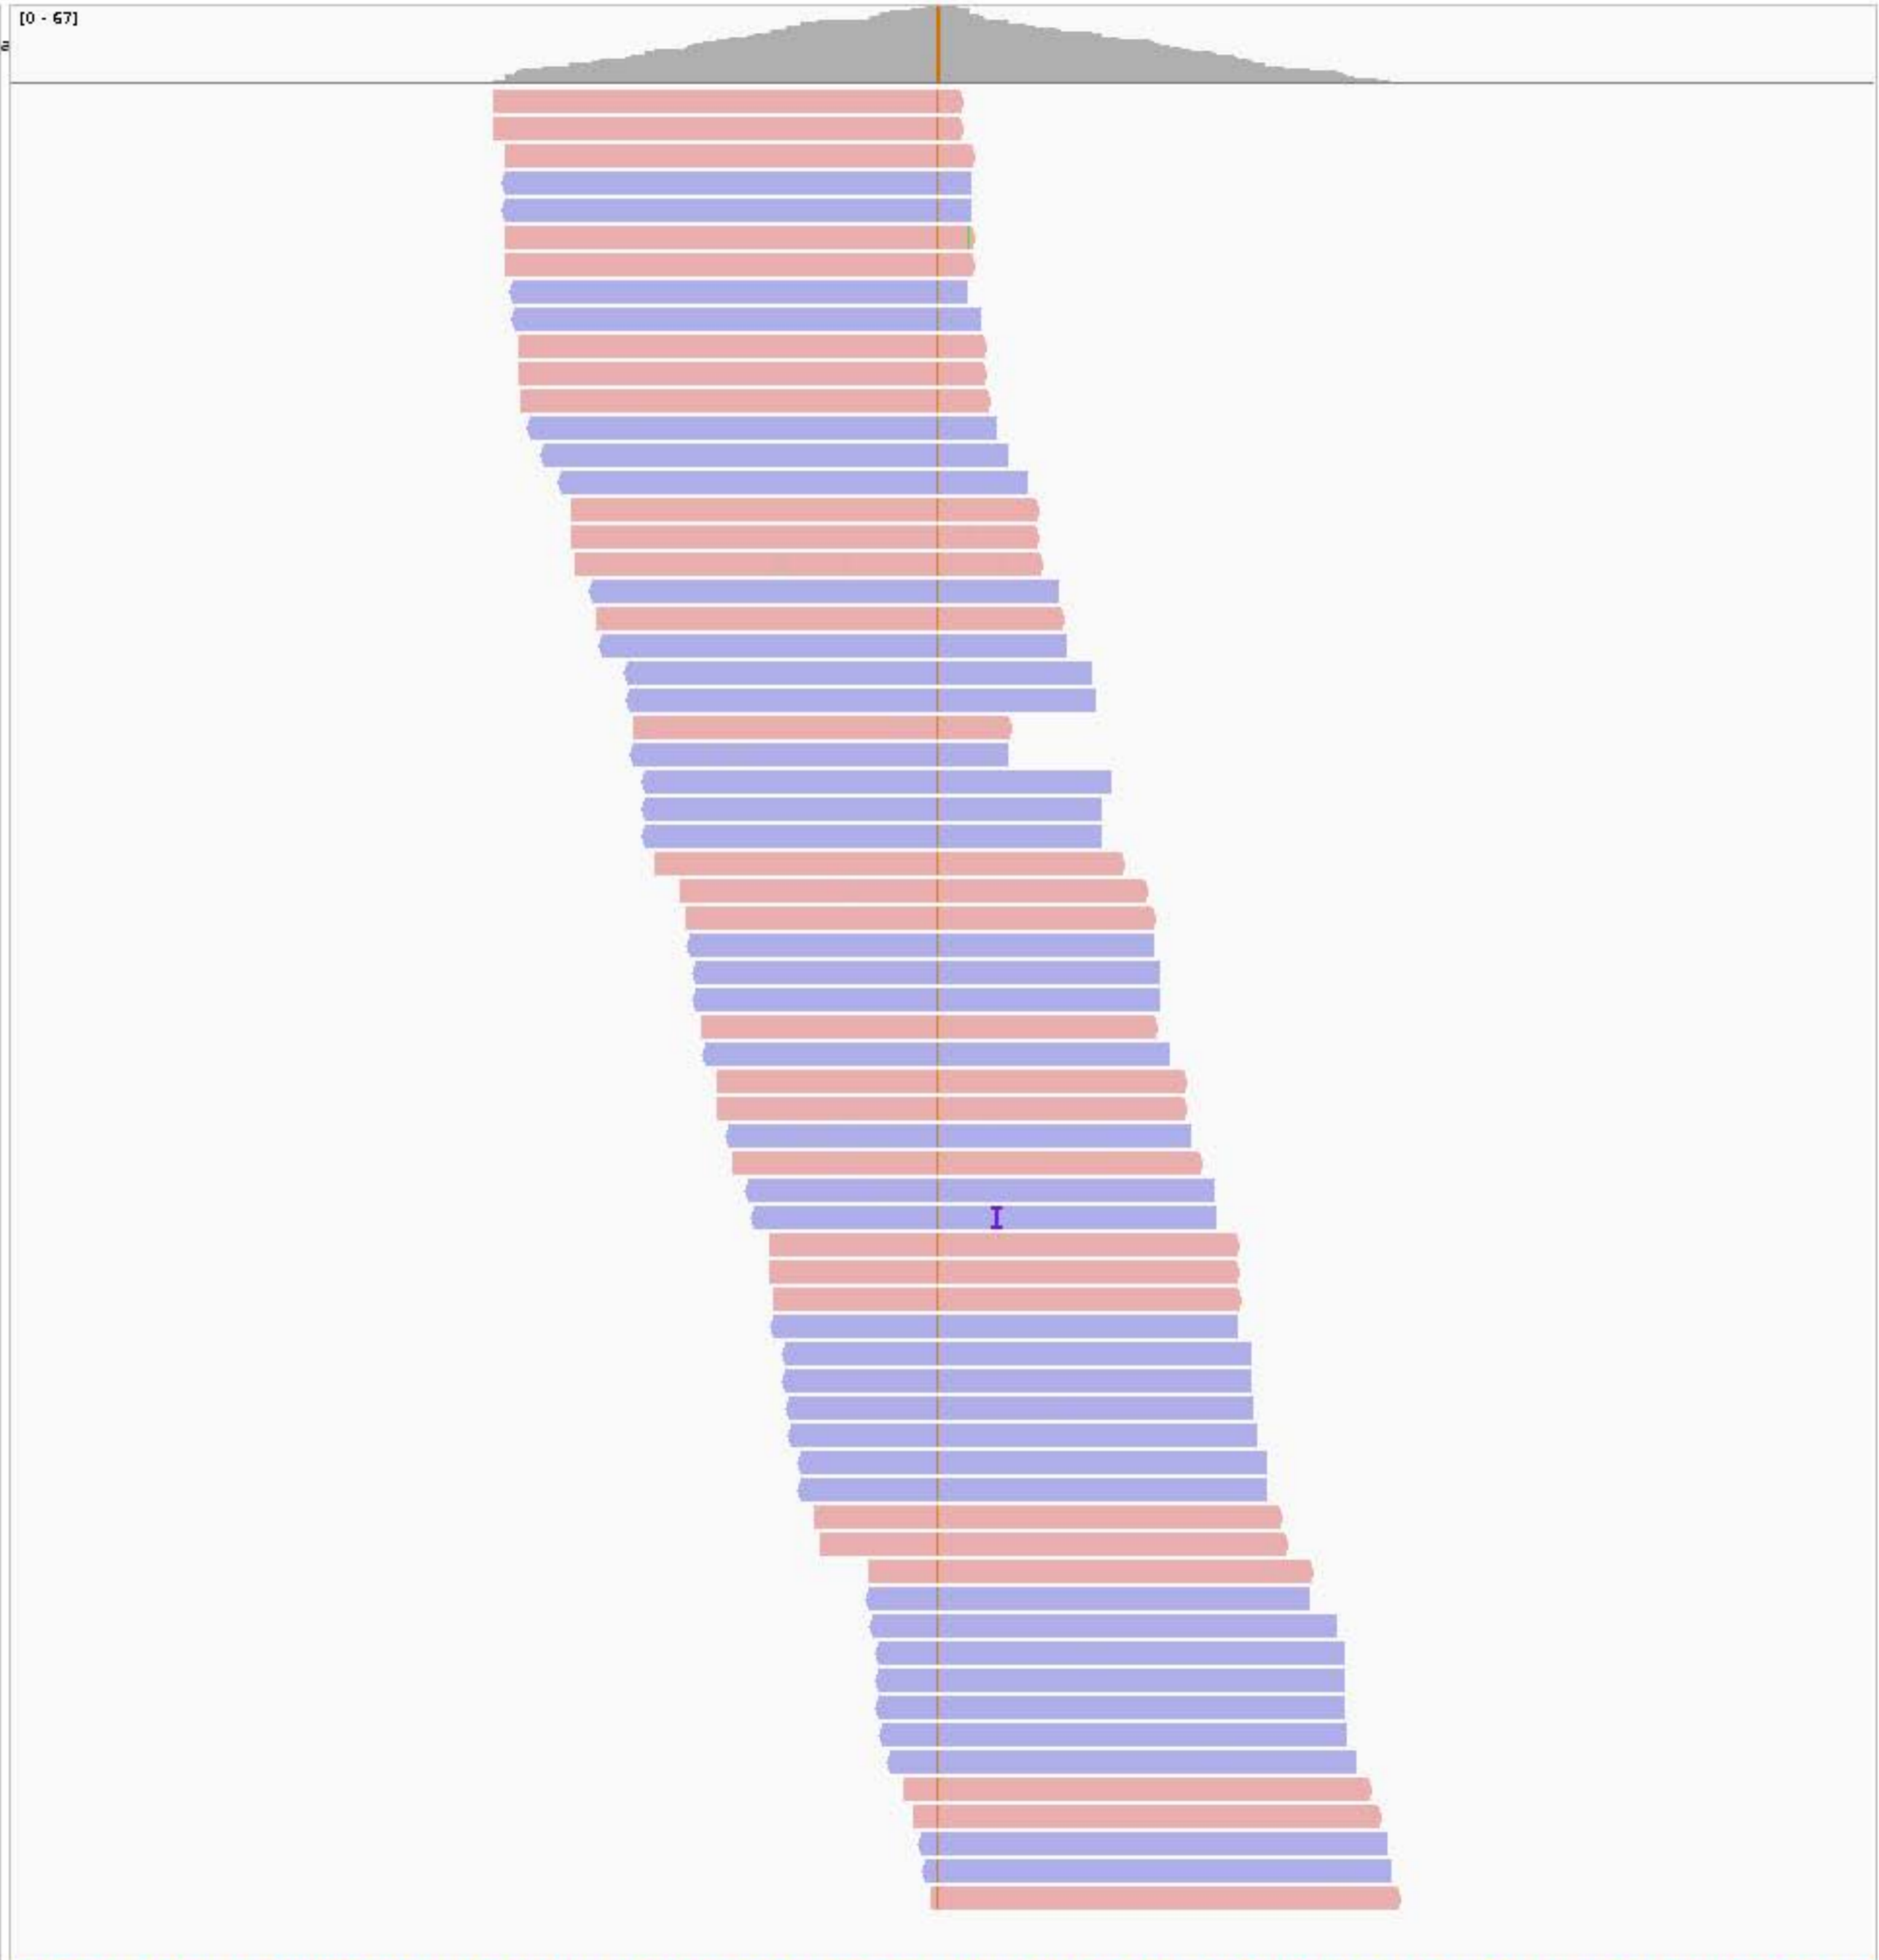

SL\_0015\_LN\_39\_mut.bam

Sequence →  
Refseq Genes

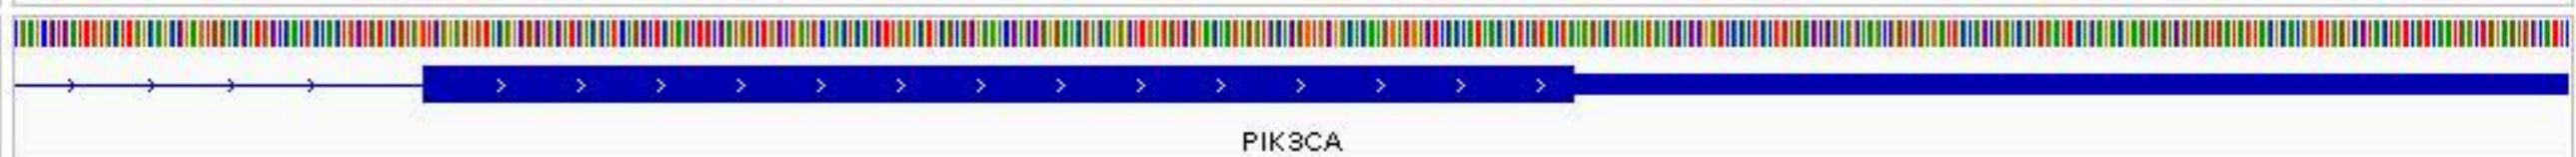

PIK3CA



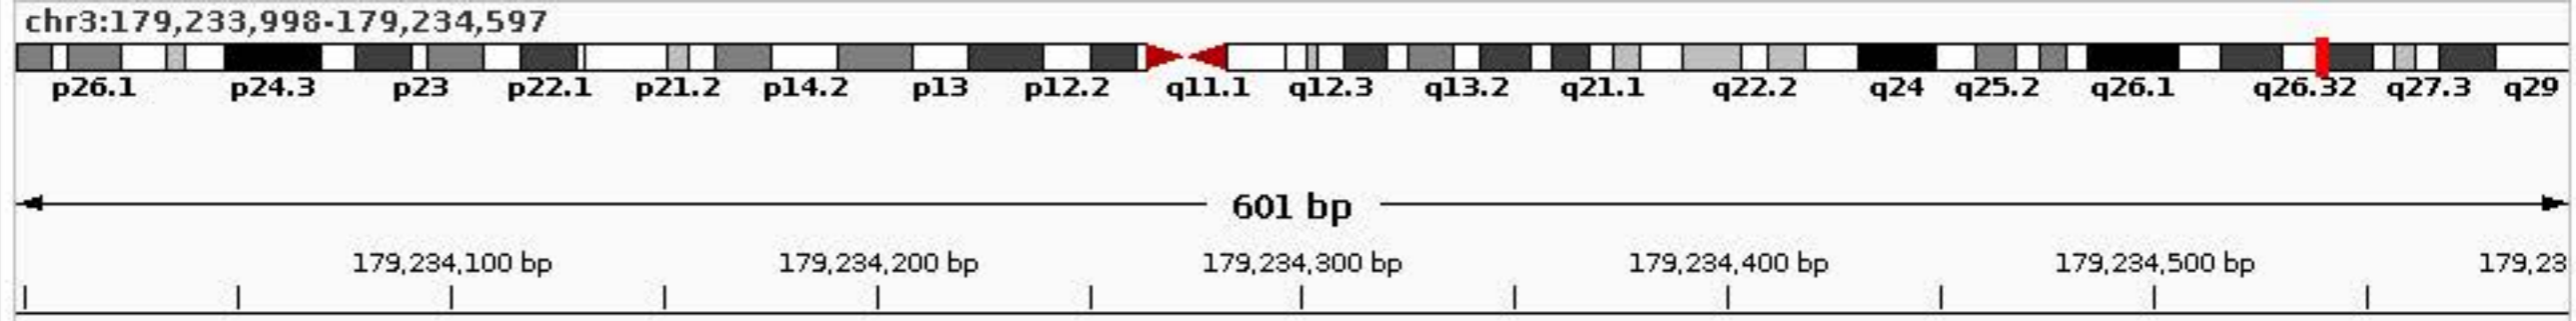

SL\_0015\_LN\_46\_mut.bam Coverage

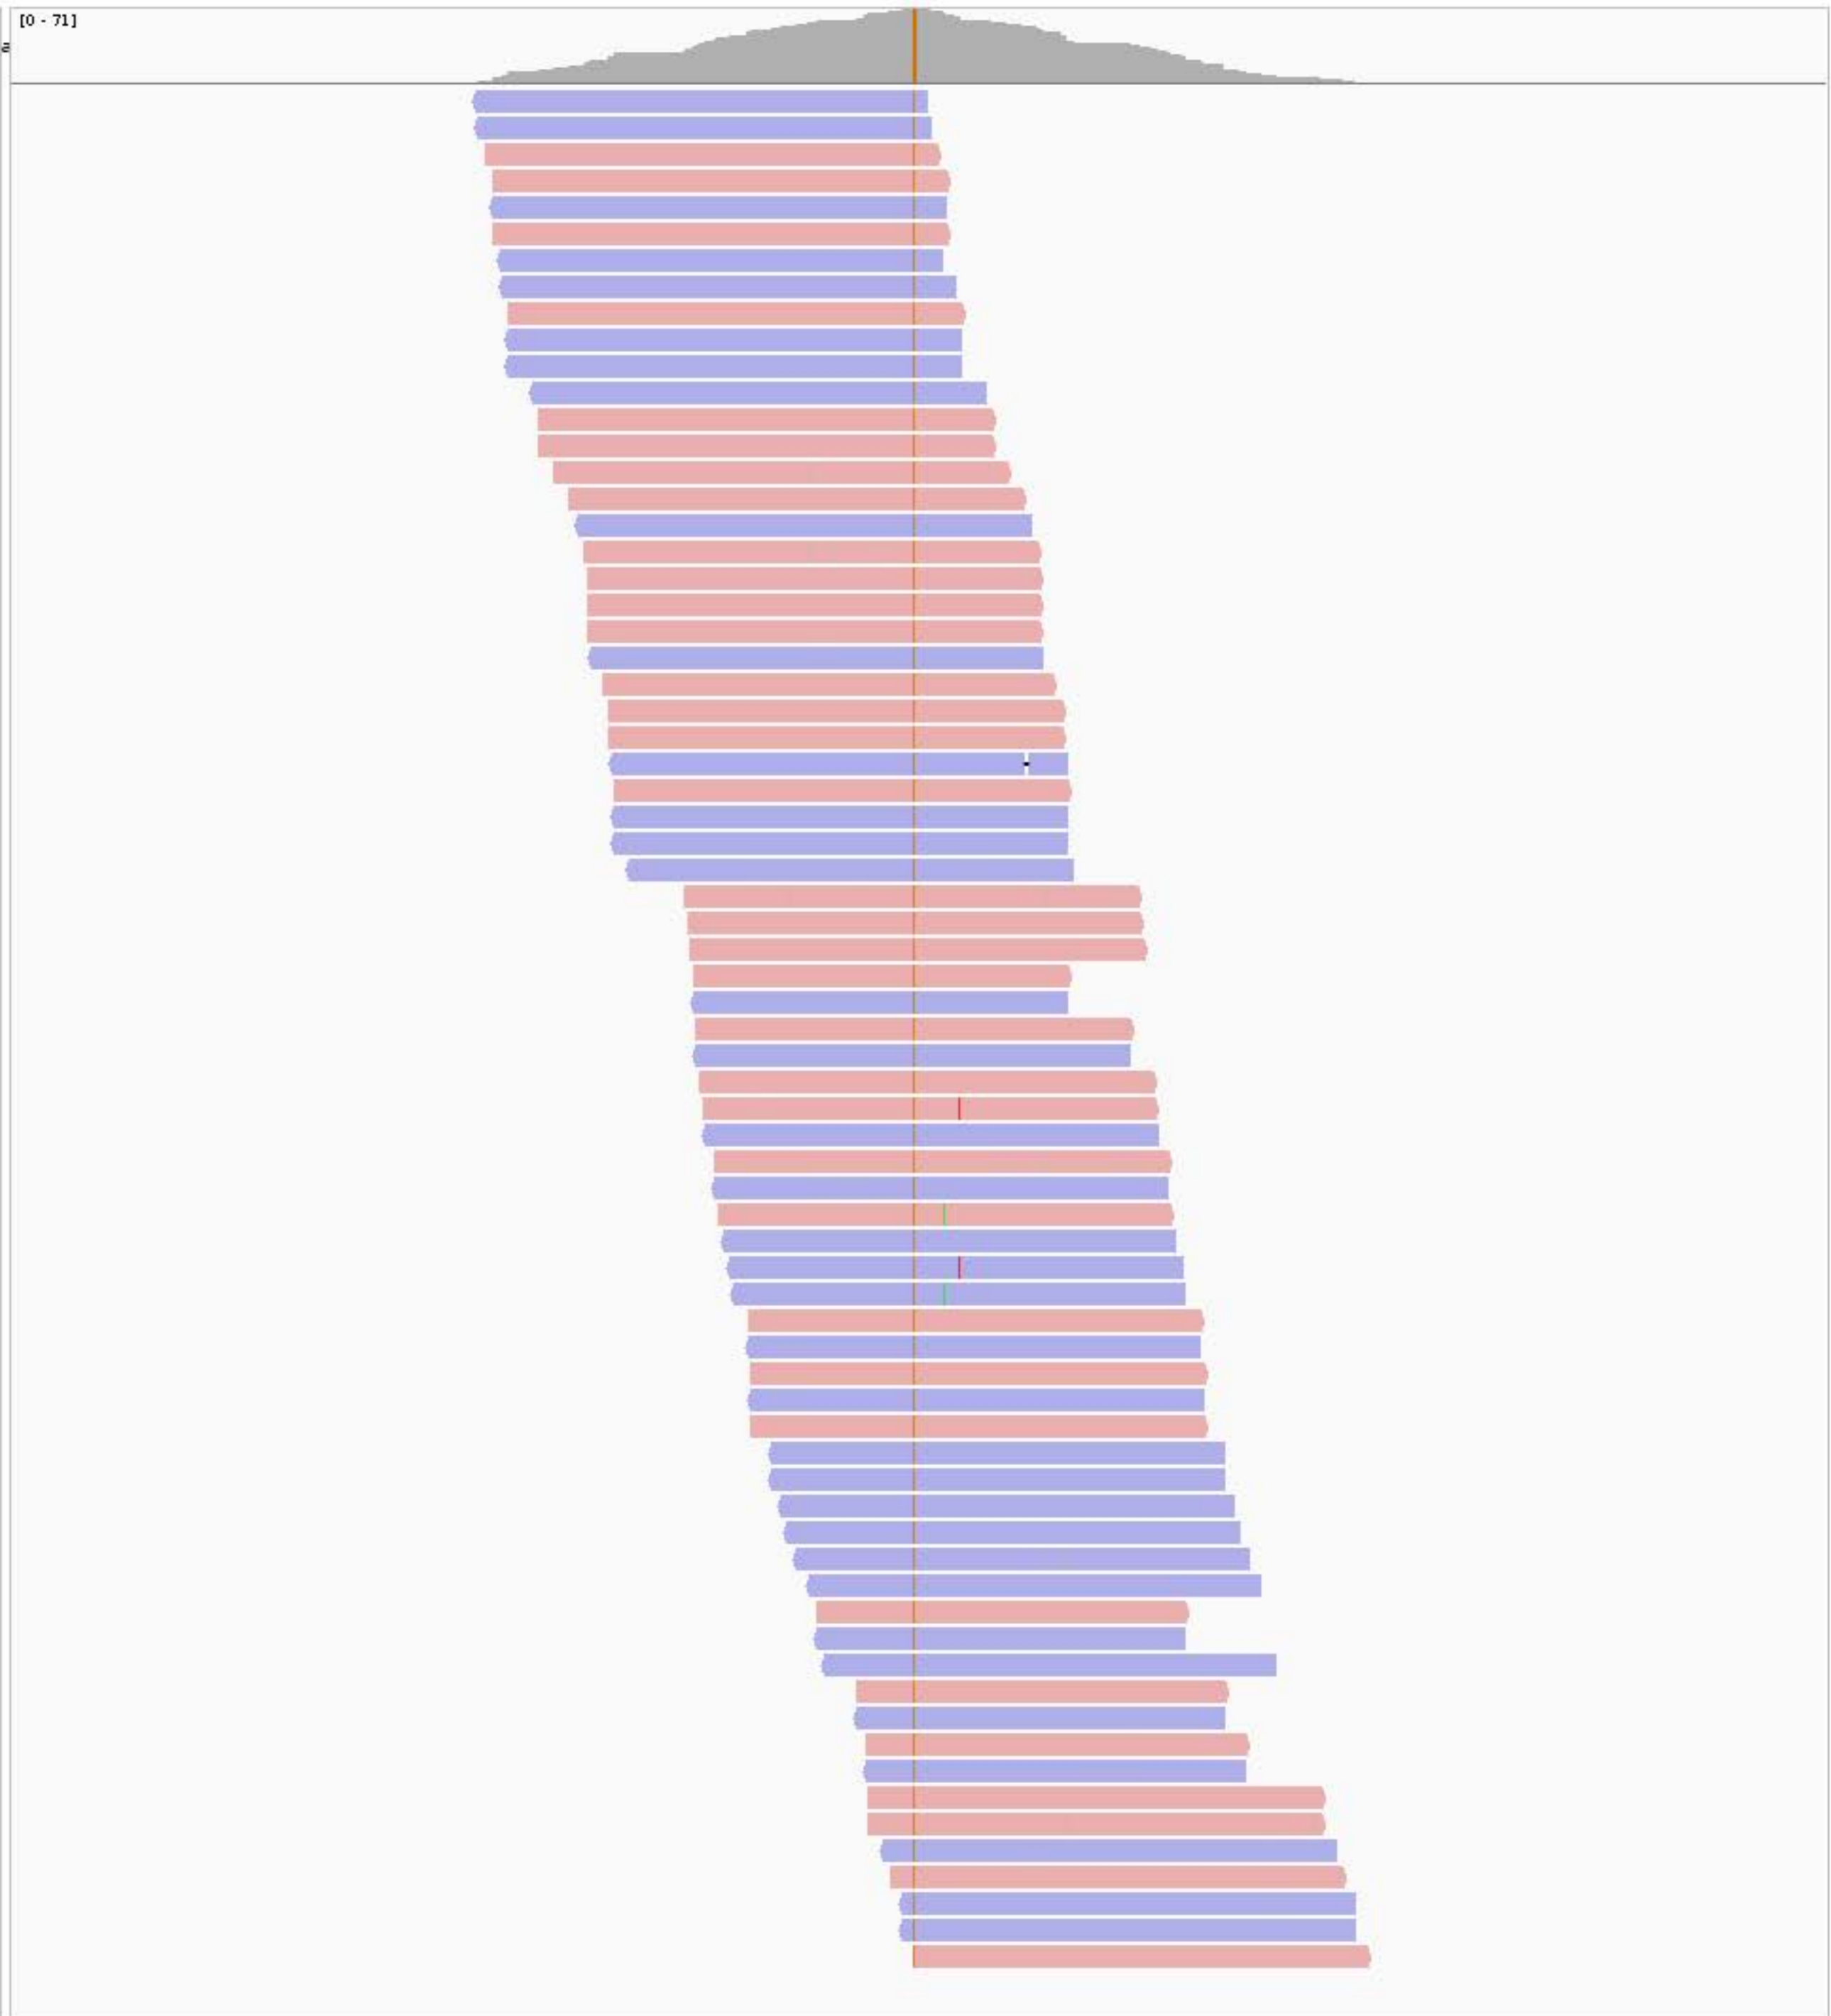

SL\_0015\_LN\_46\_mut.bam

Sequence

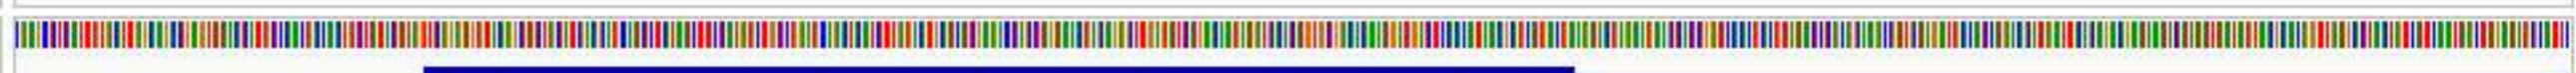

Refseq Genes

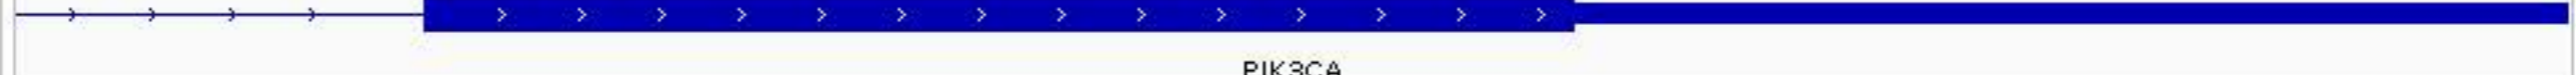

PIK3CA

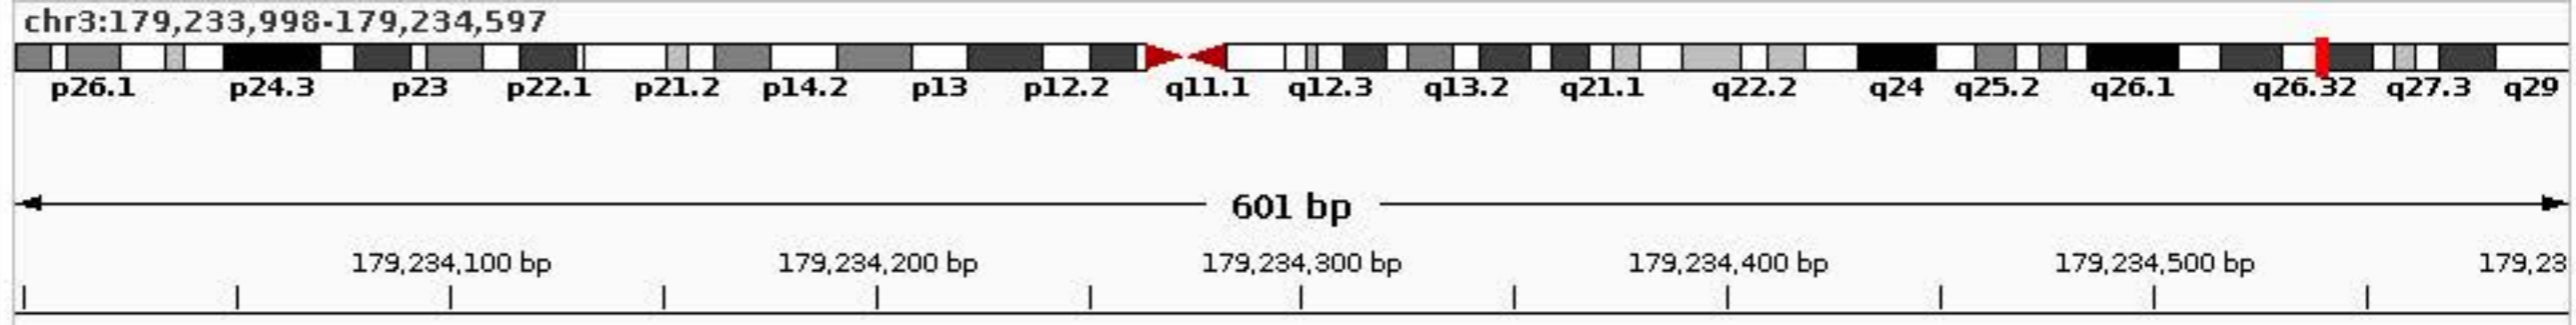

SL\_0015\_RN\_1\_mut.bam Coverage

SL\_0015\_RN\_1\_mut.bam

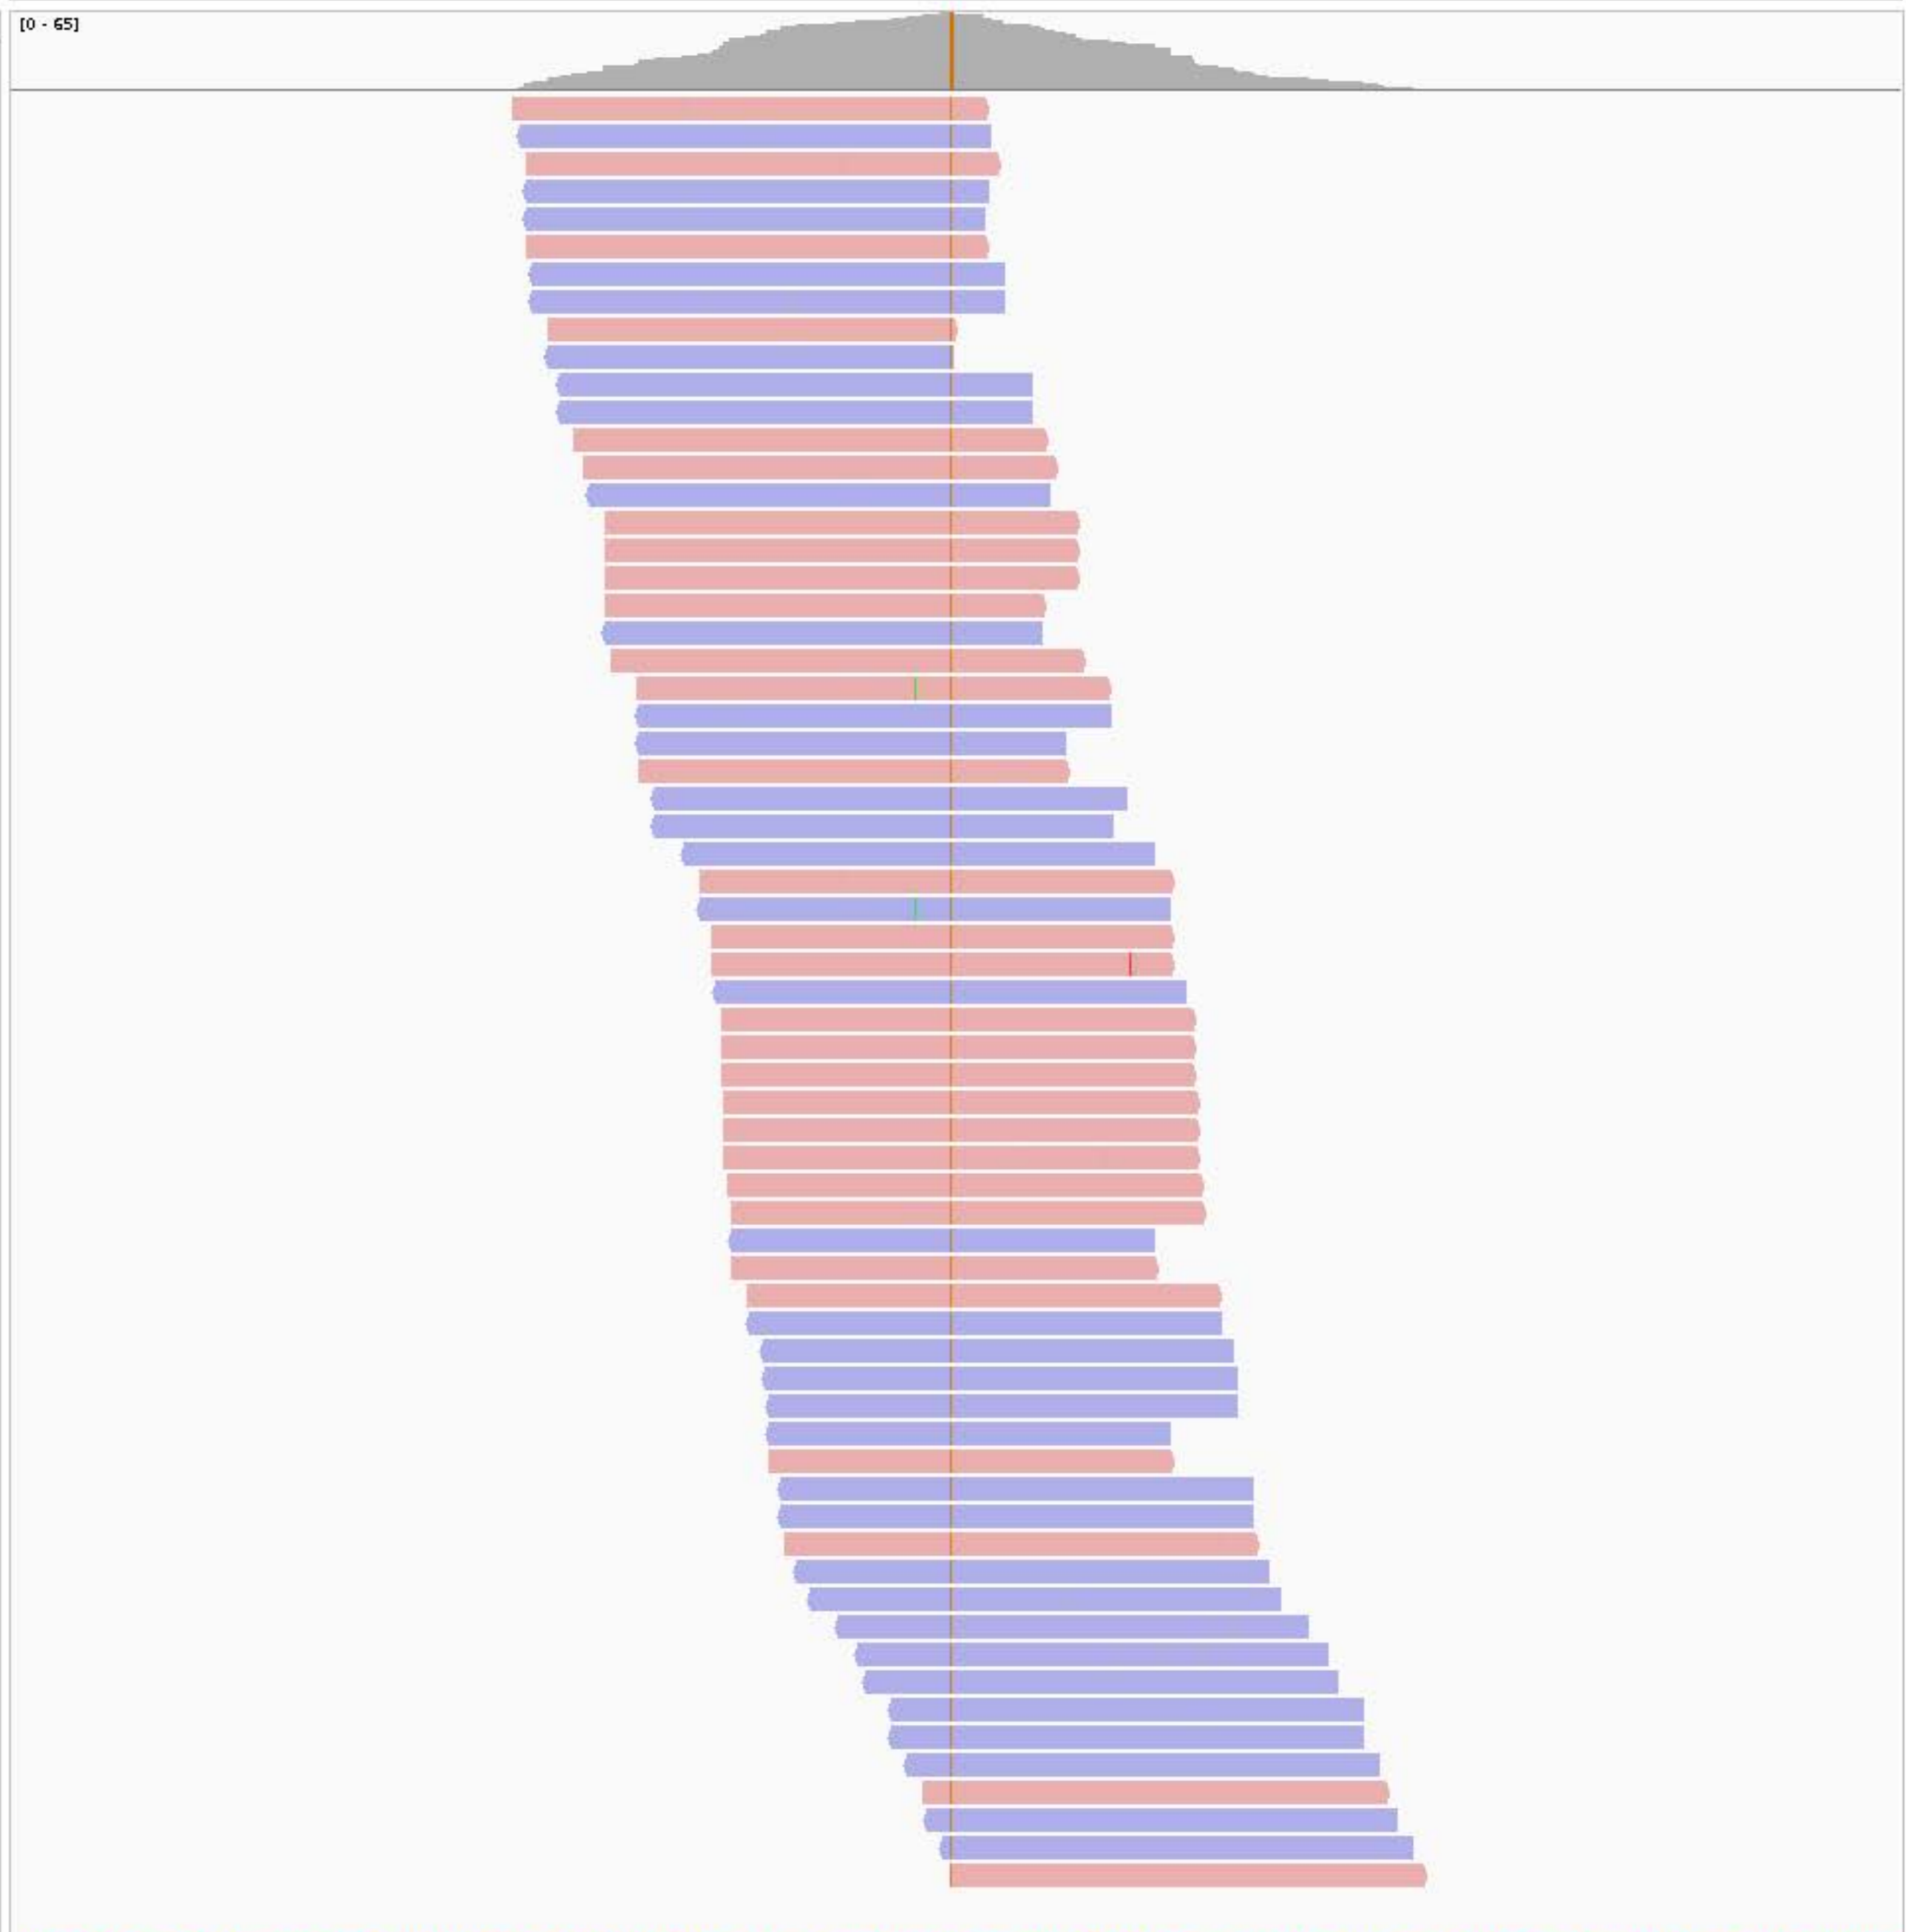

Sequence

Refseq Genes

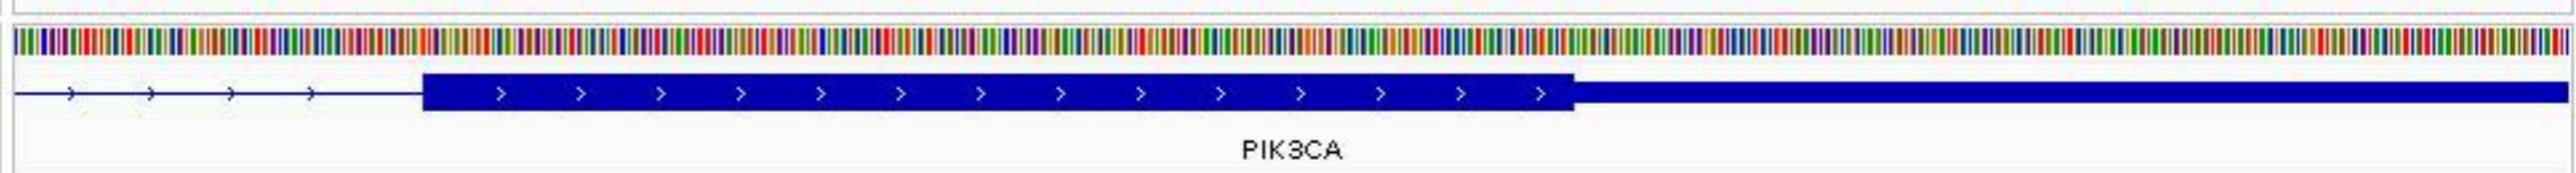



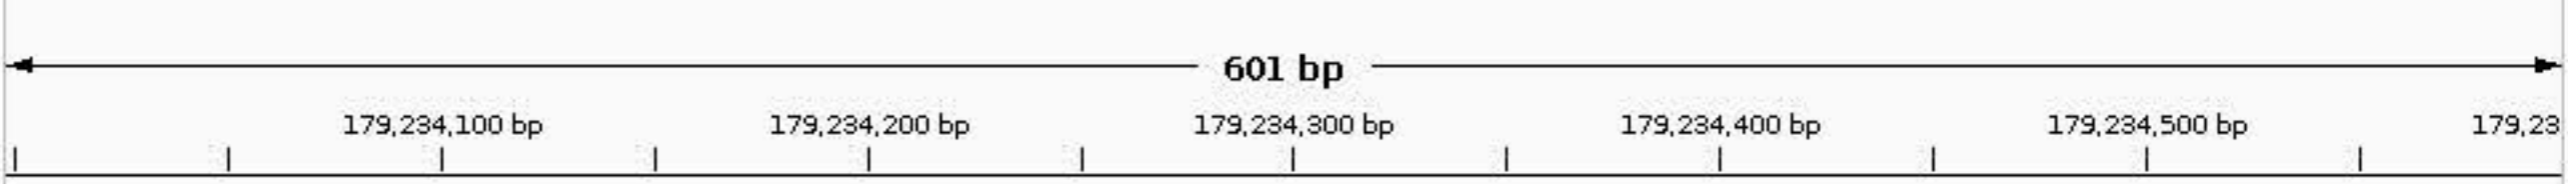

SL\_0015\_RN\_10\_mut.bam Coverage

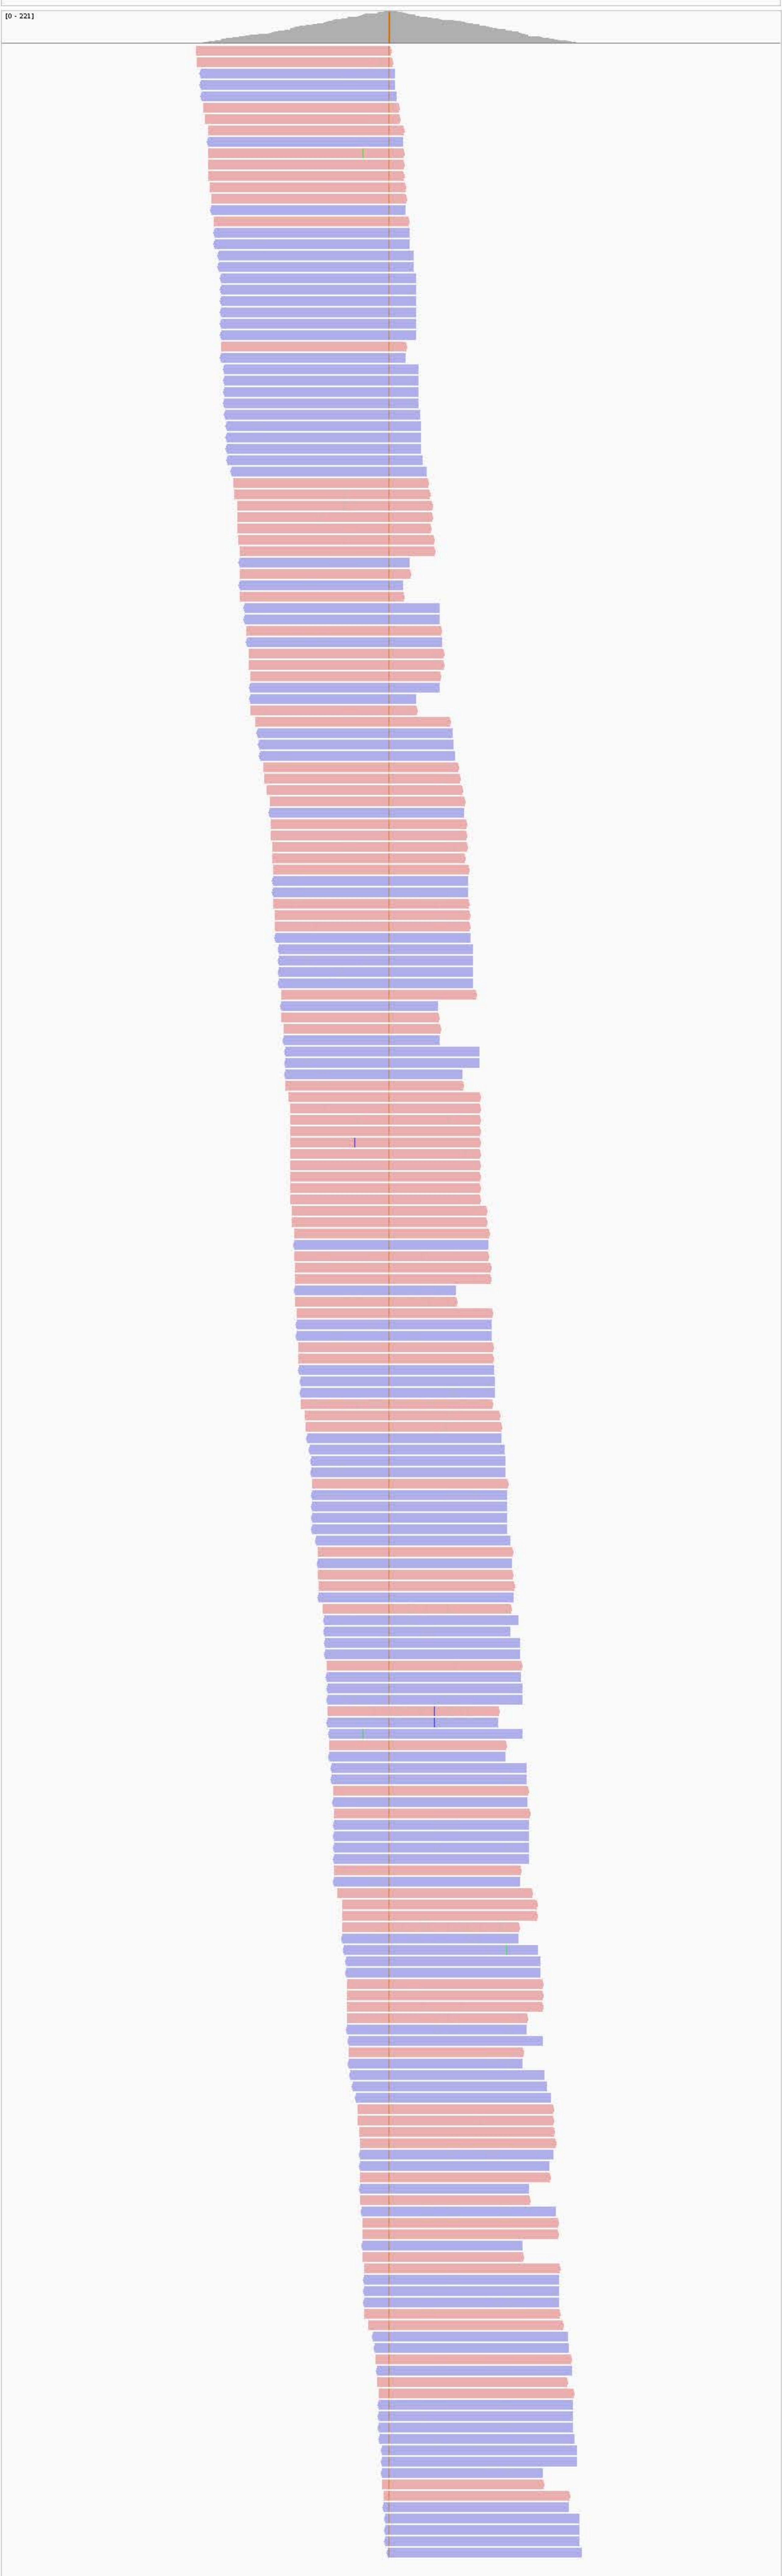

SL\_0015\_RN\_10\_mut.bam

Sequence

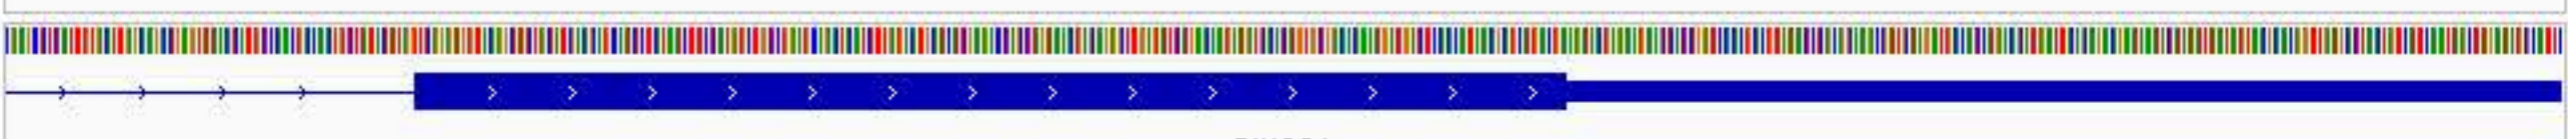

Refseq Genes

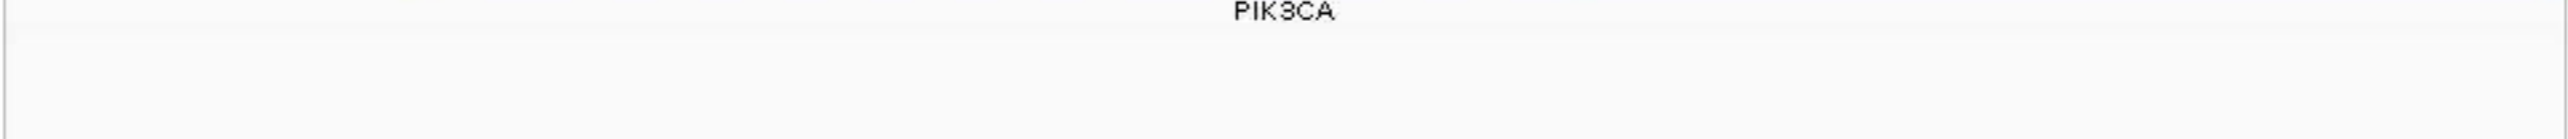



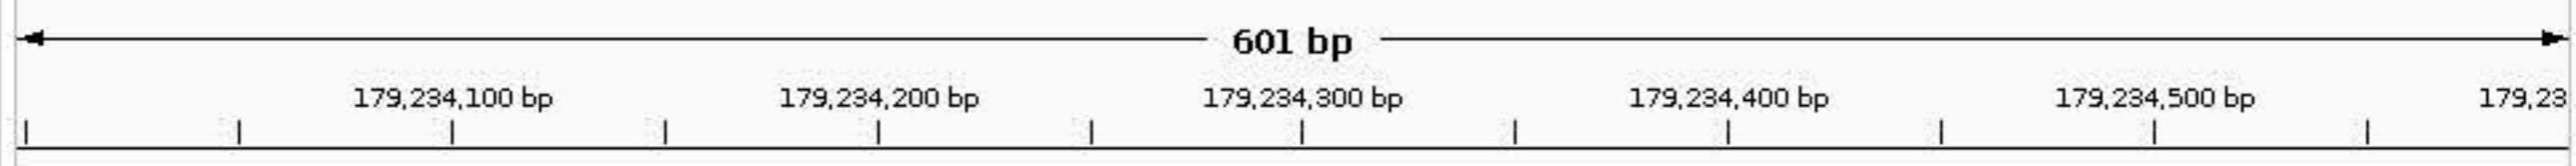

SL\_0015\_RN\_21\_mut.bam Coverage

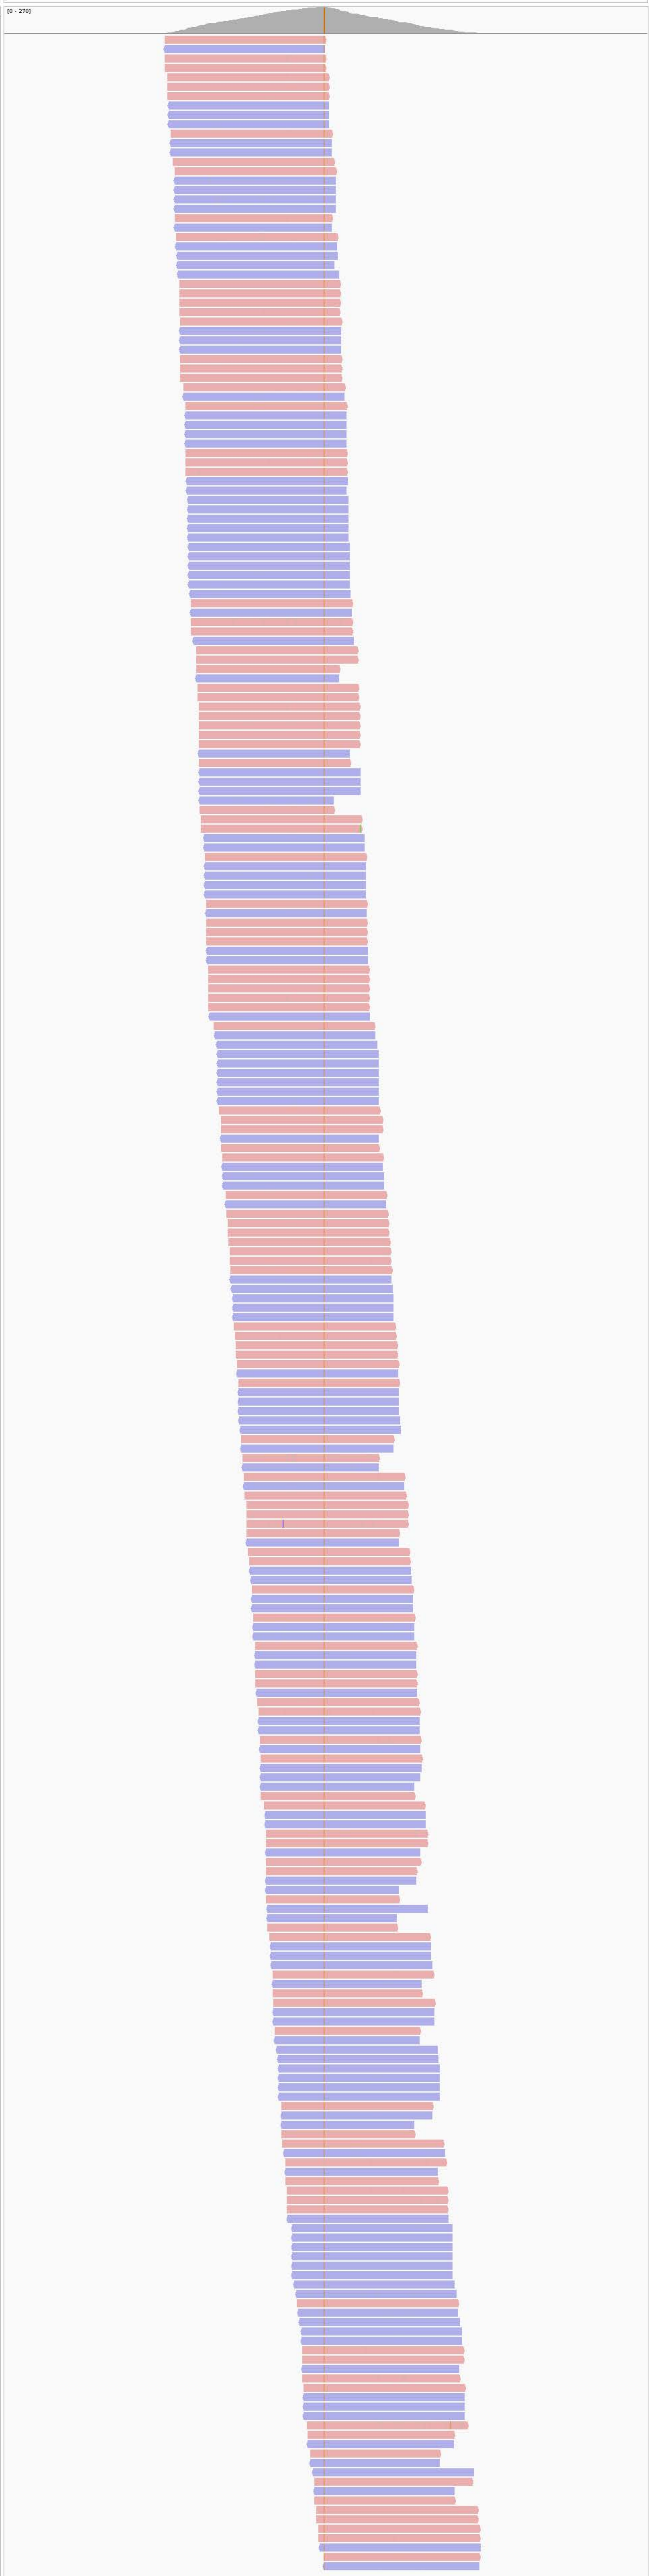

SL\_0015\_RN\_21\_mut.bam

Sequence  
Refseq Genes

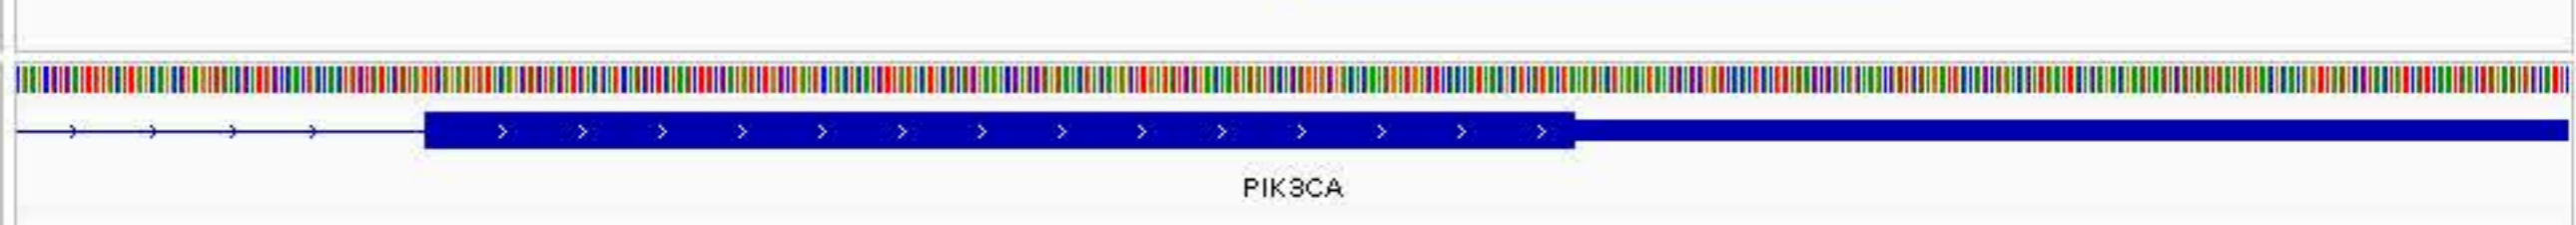



SL\_0016\_RN\_51\_mut.bam Coverage

SL\_0016\_RN\_51\_mut.bam

Sequence →

Refseq Genes

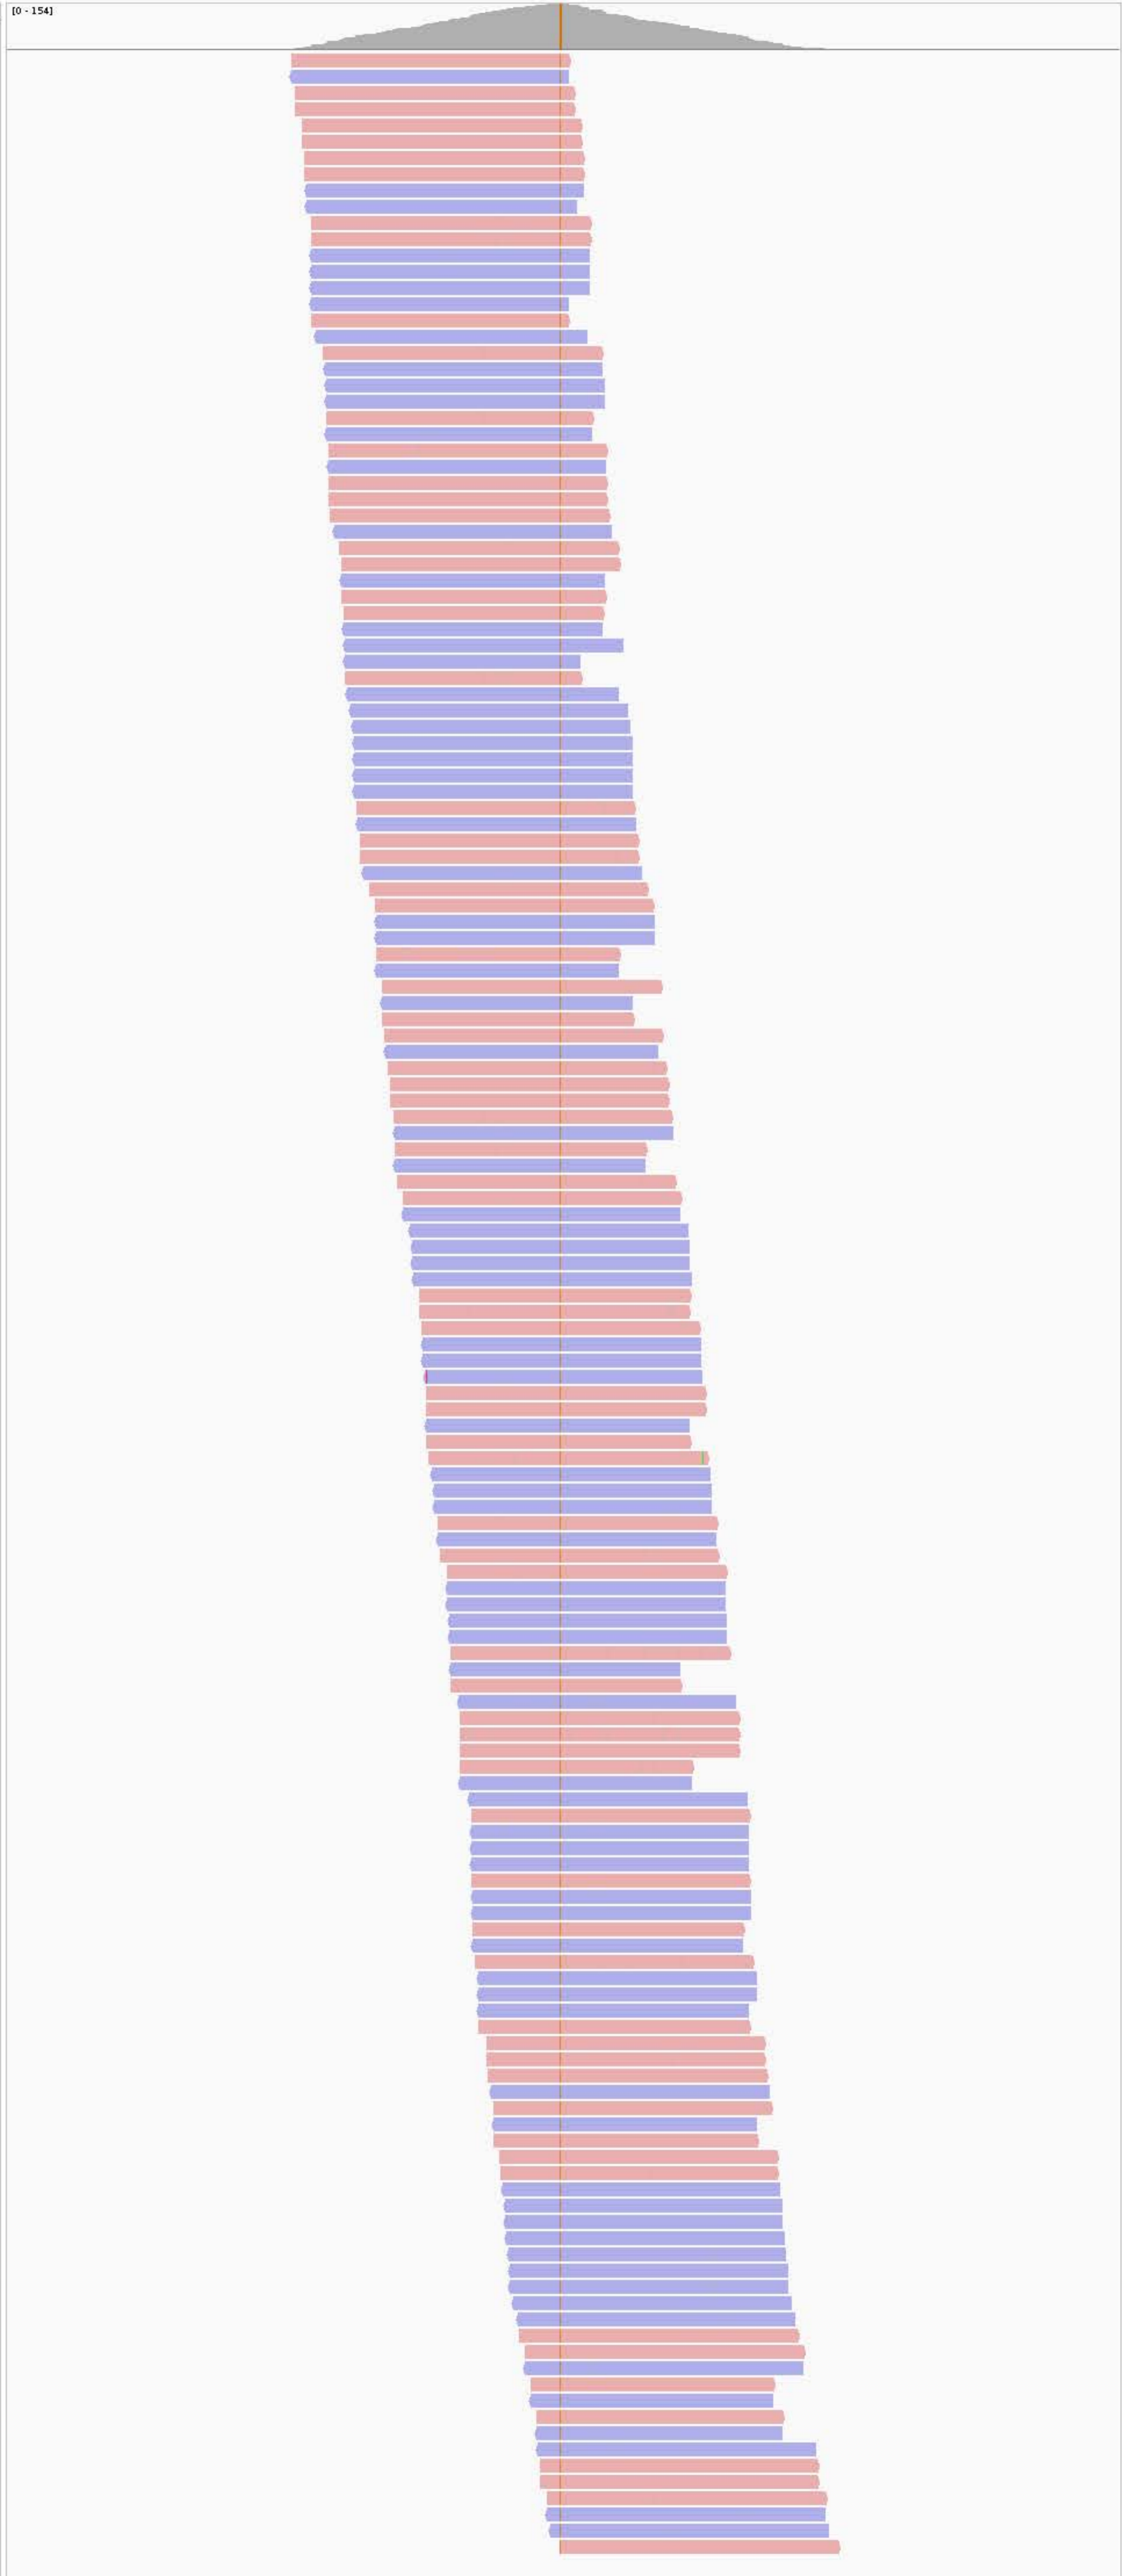



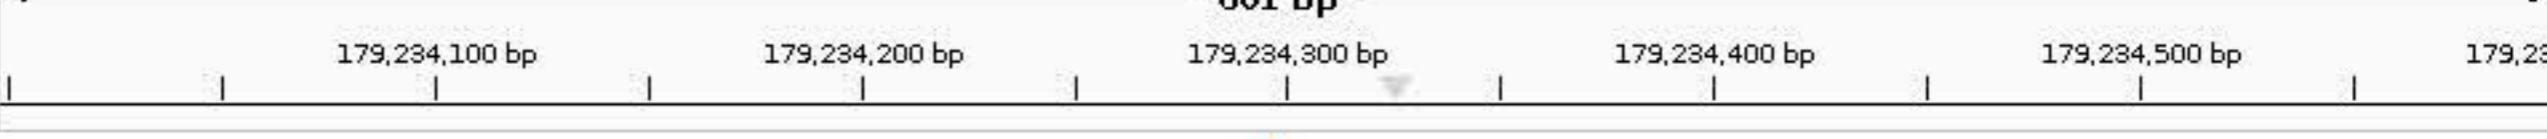

SL\_0004\_RN\_05\_mut.bam Coverage  
SL\_0004\_RN\_05\_mut.bam  
Sequence  
Refseq Genes

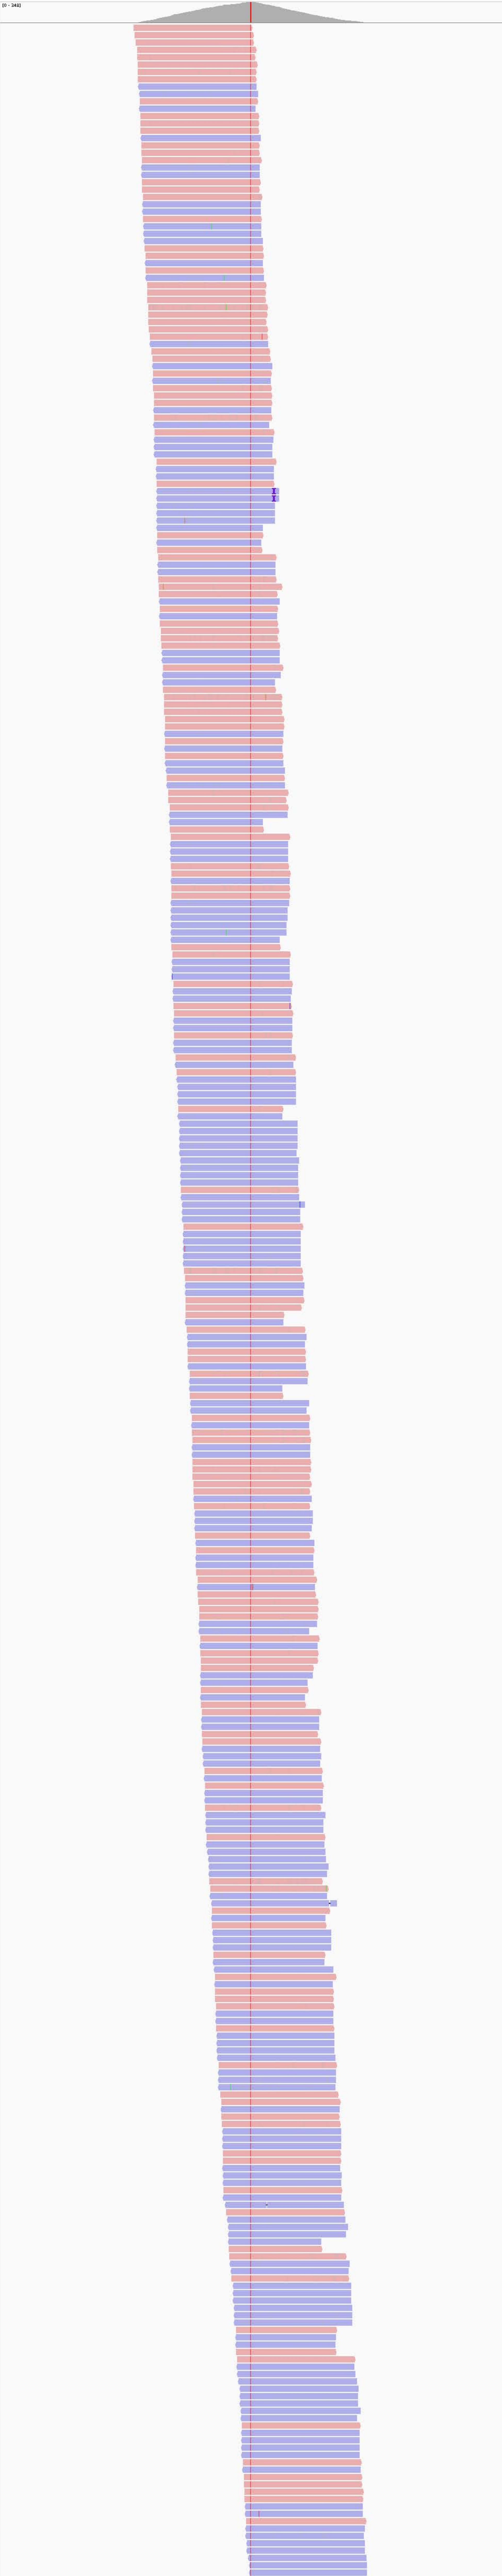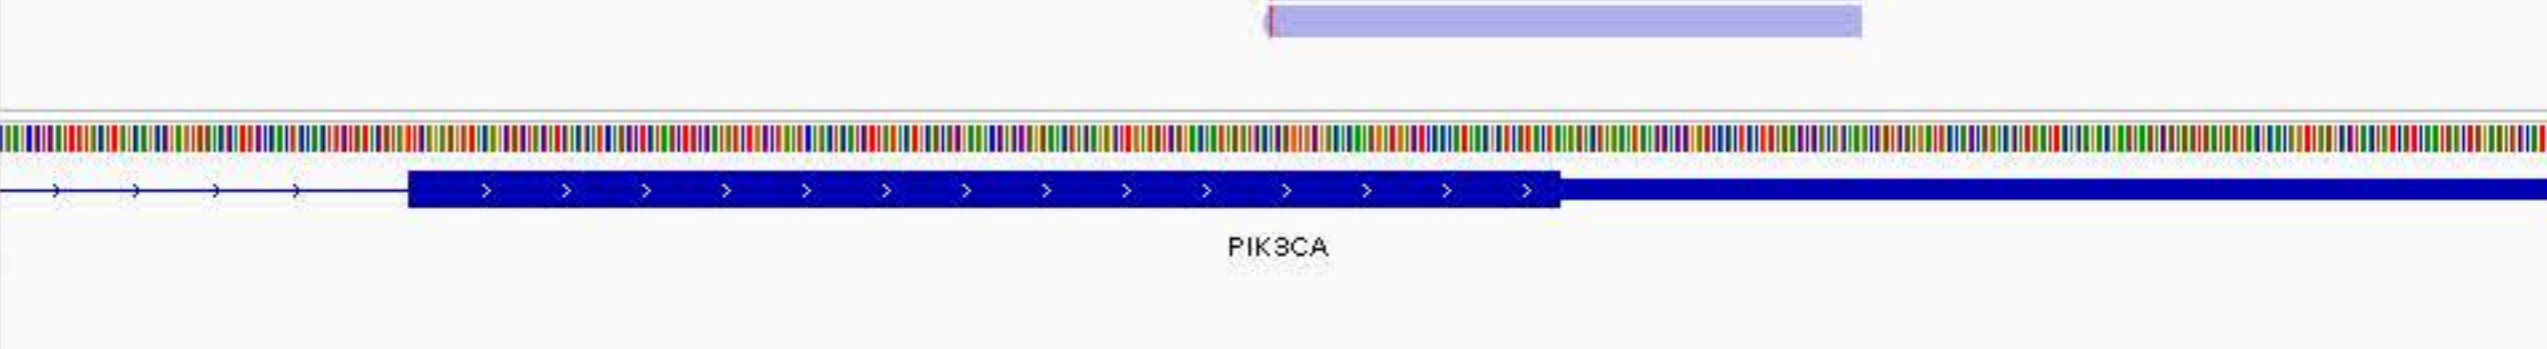



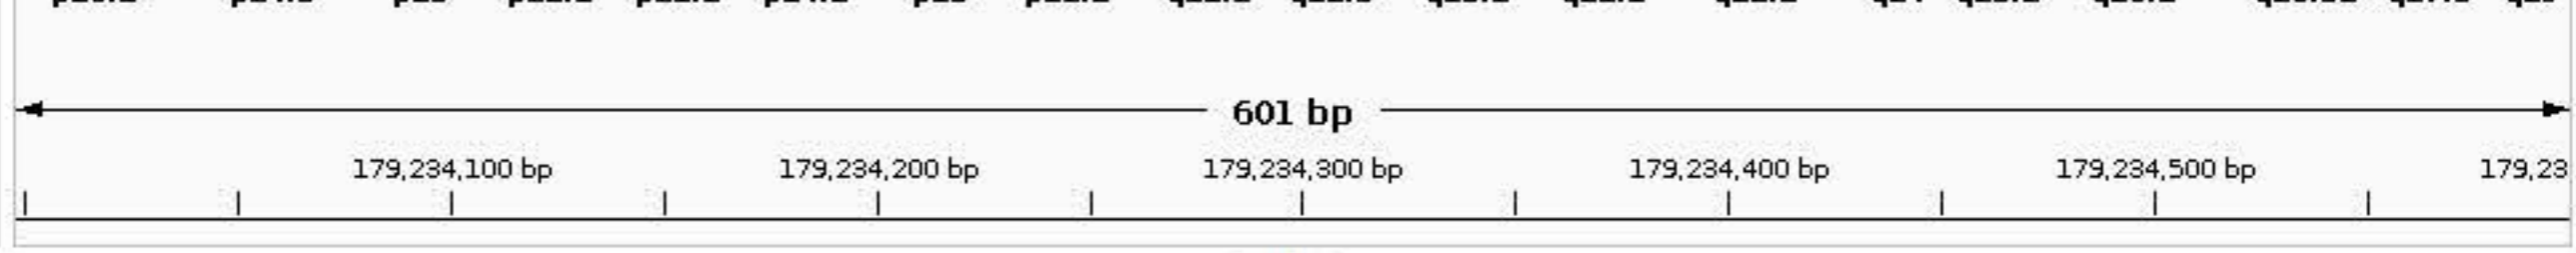

SL\_0017\_RN\_15\_mut.bam Coverage

SL\_0017\_RN\_15\_mut.bam

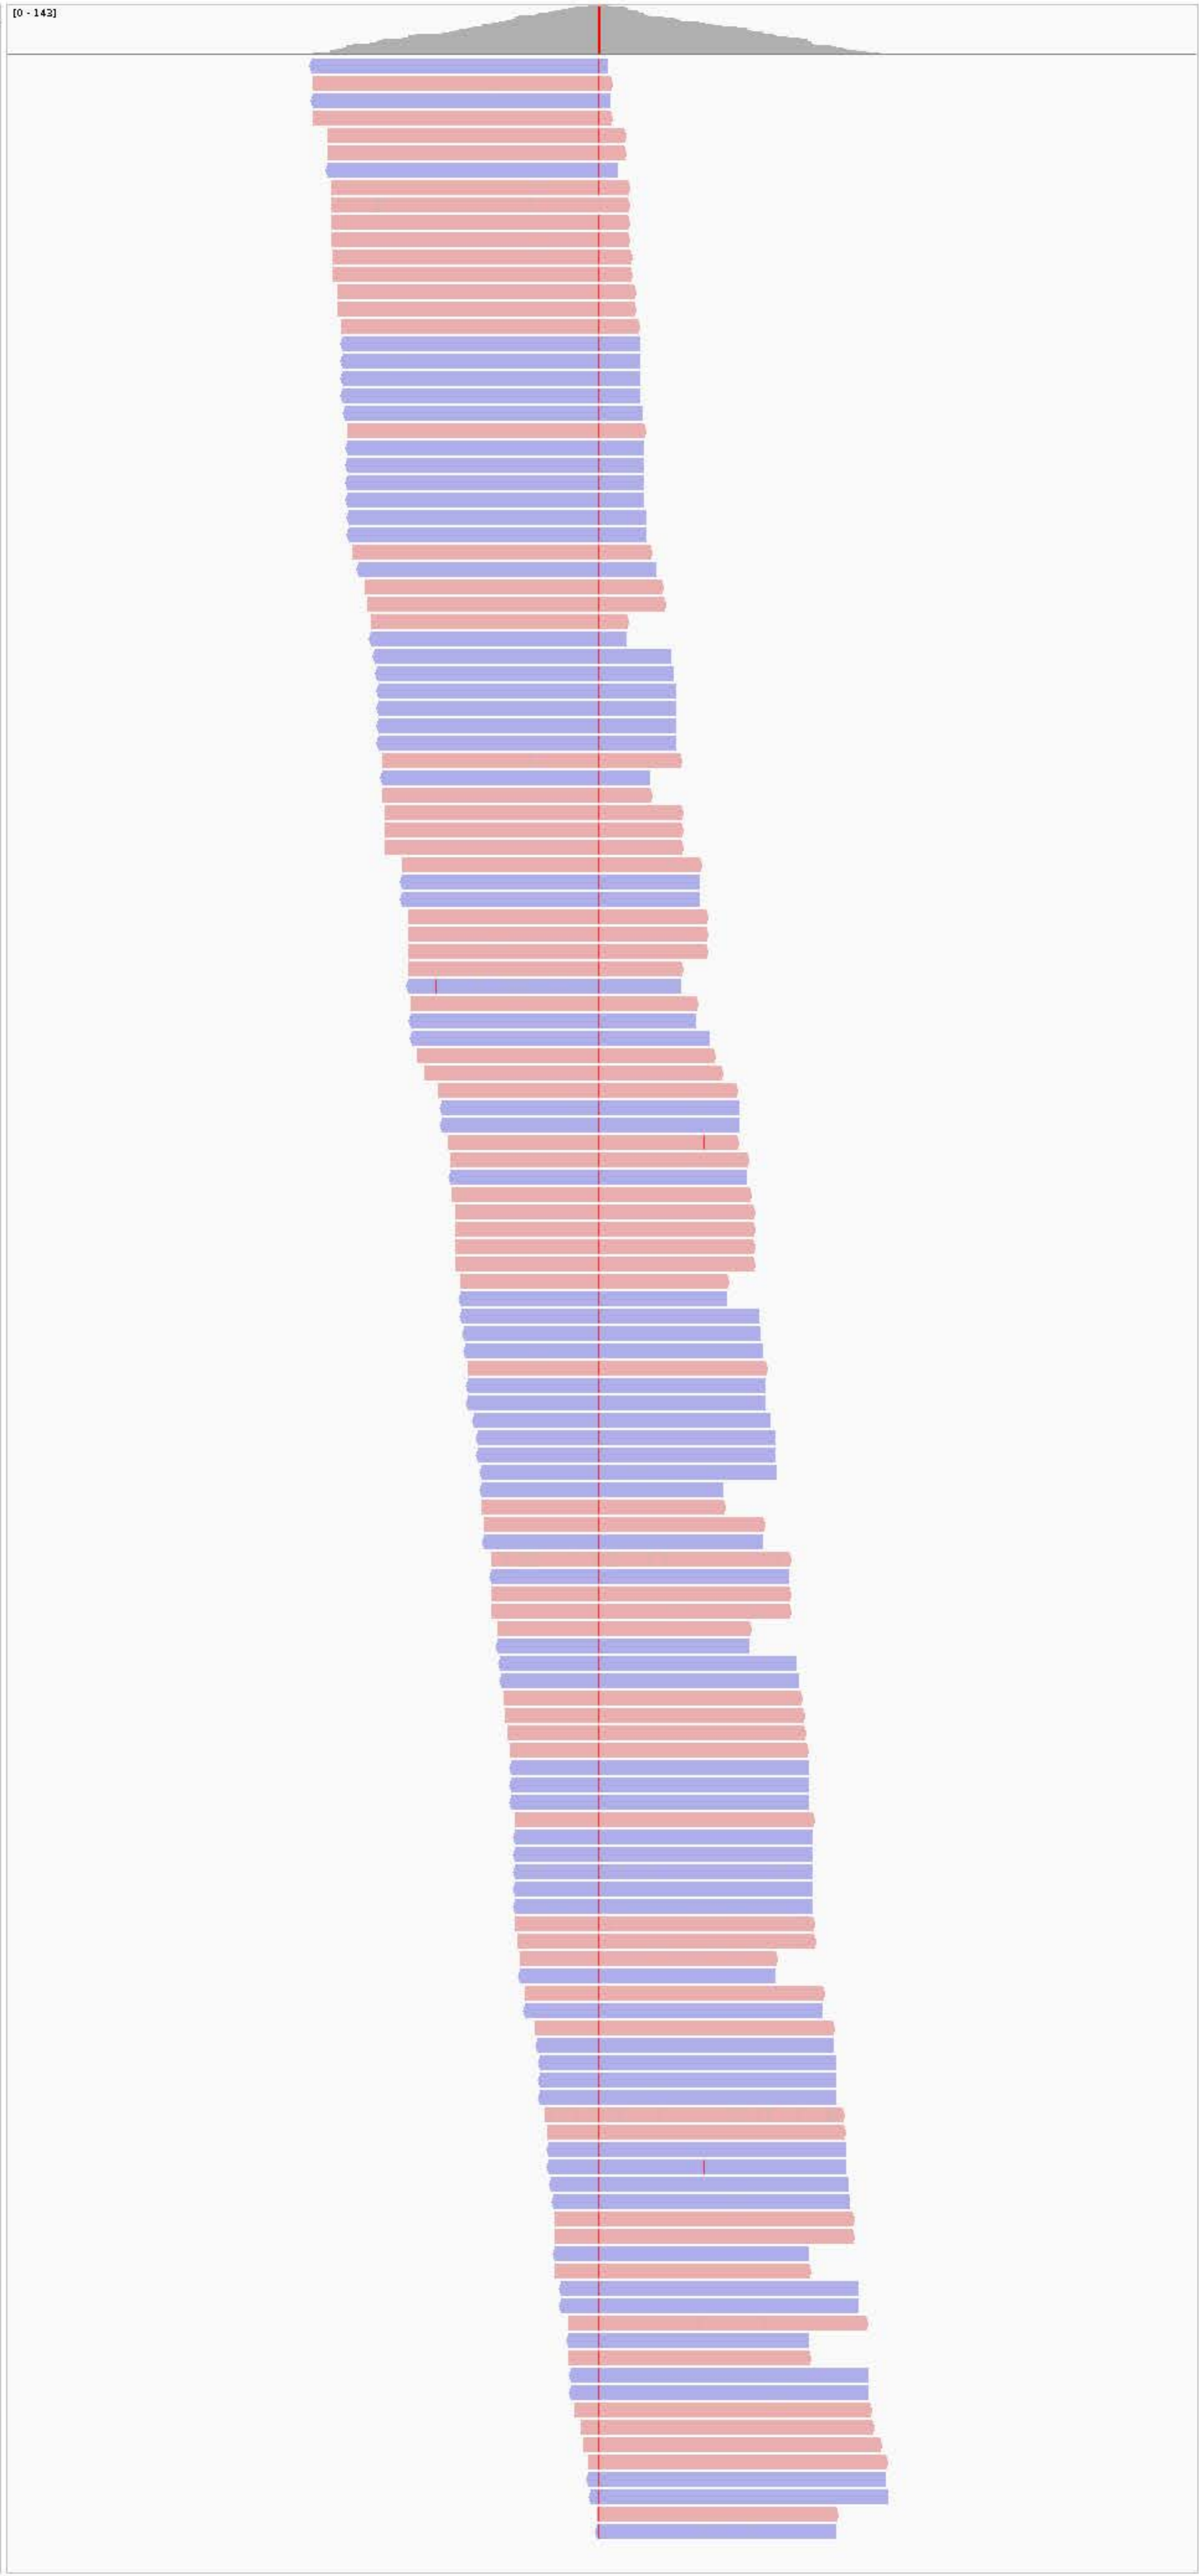

Sequence

Refseq Genes

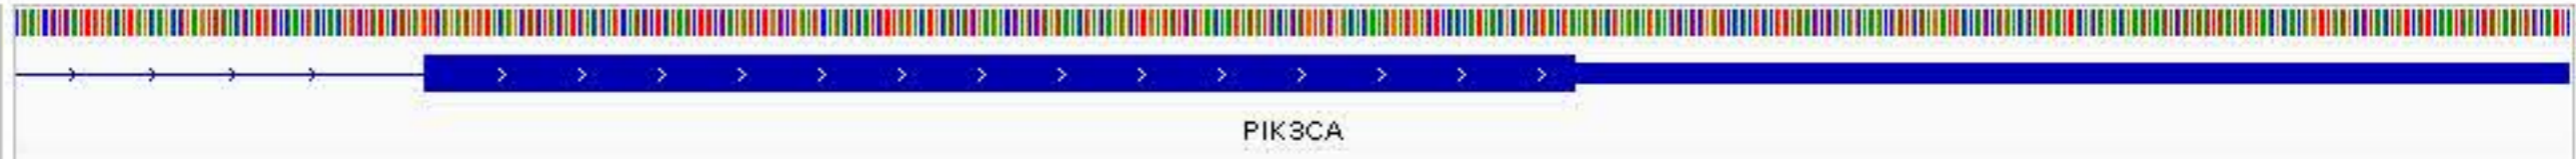

PIK3CA

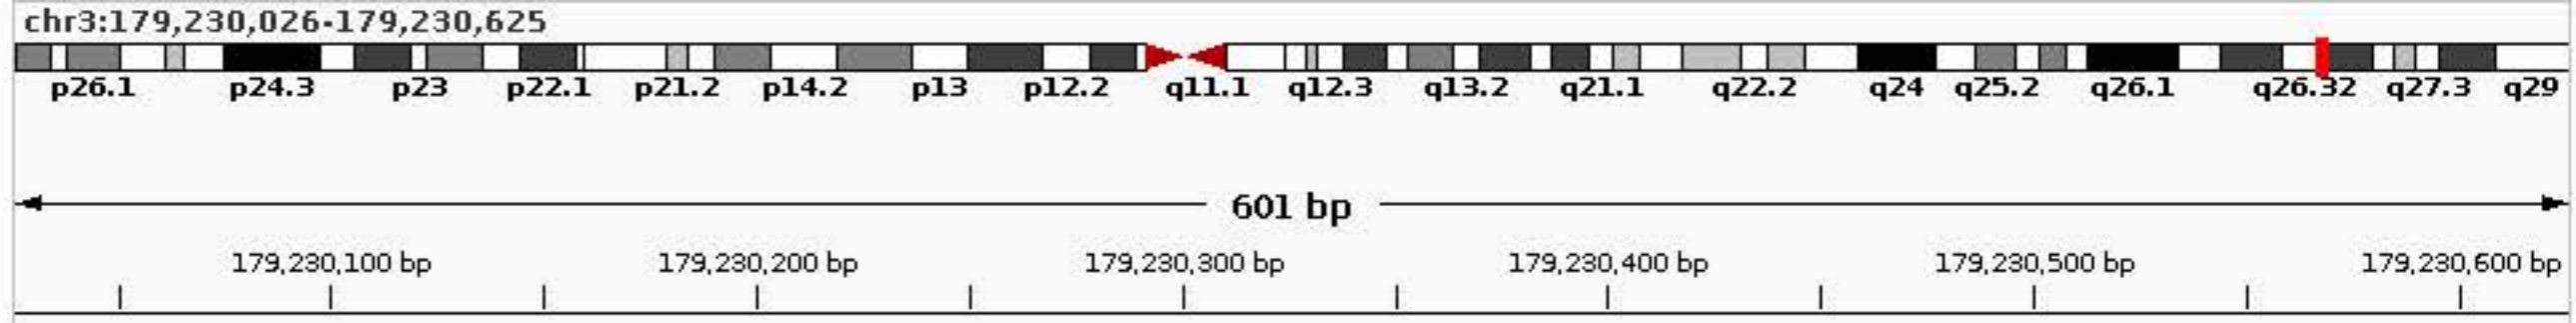

SL\_0002\_LN\_62\_mut.bam Covers

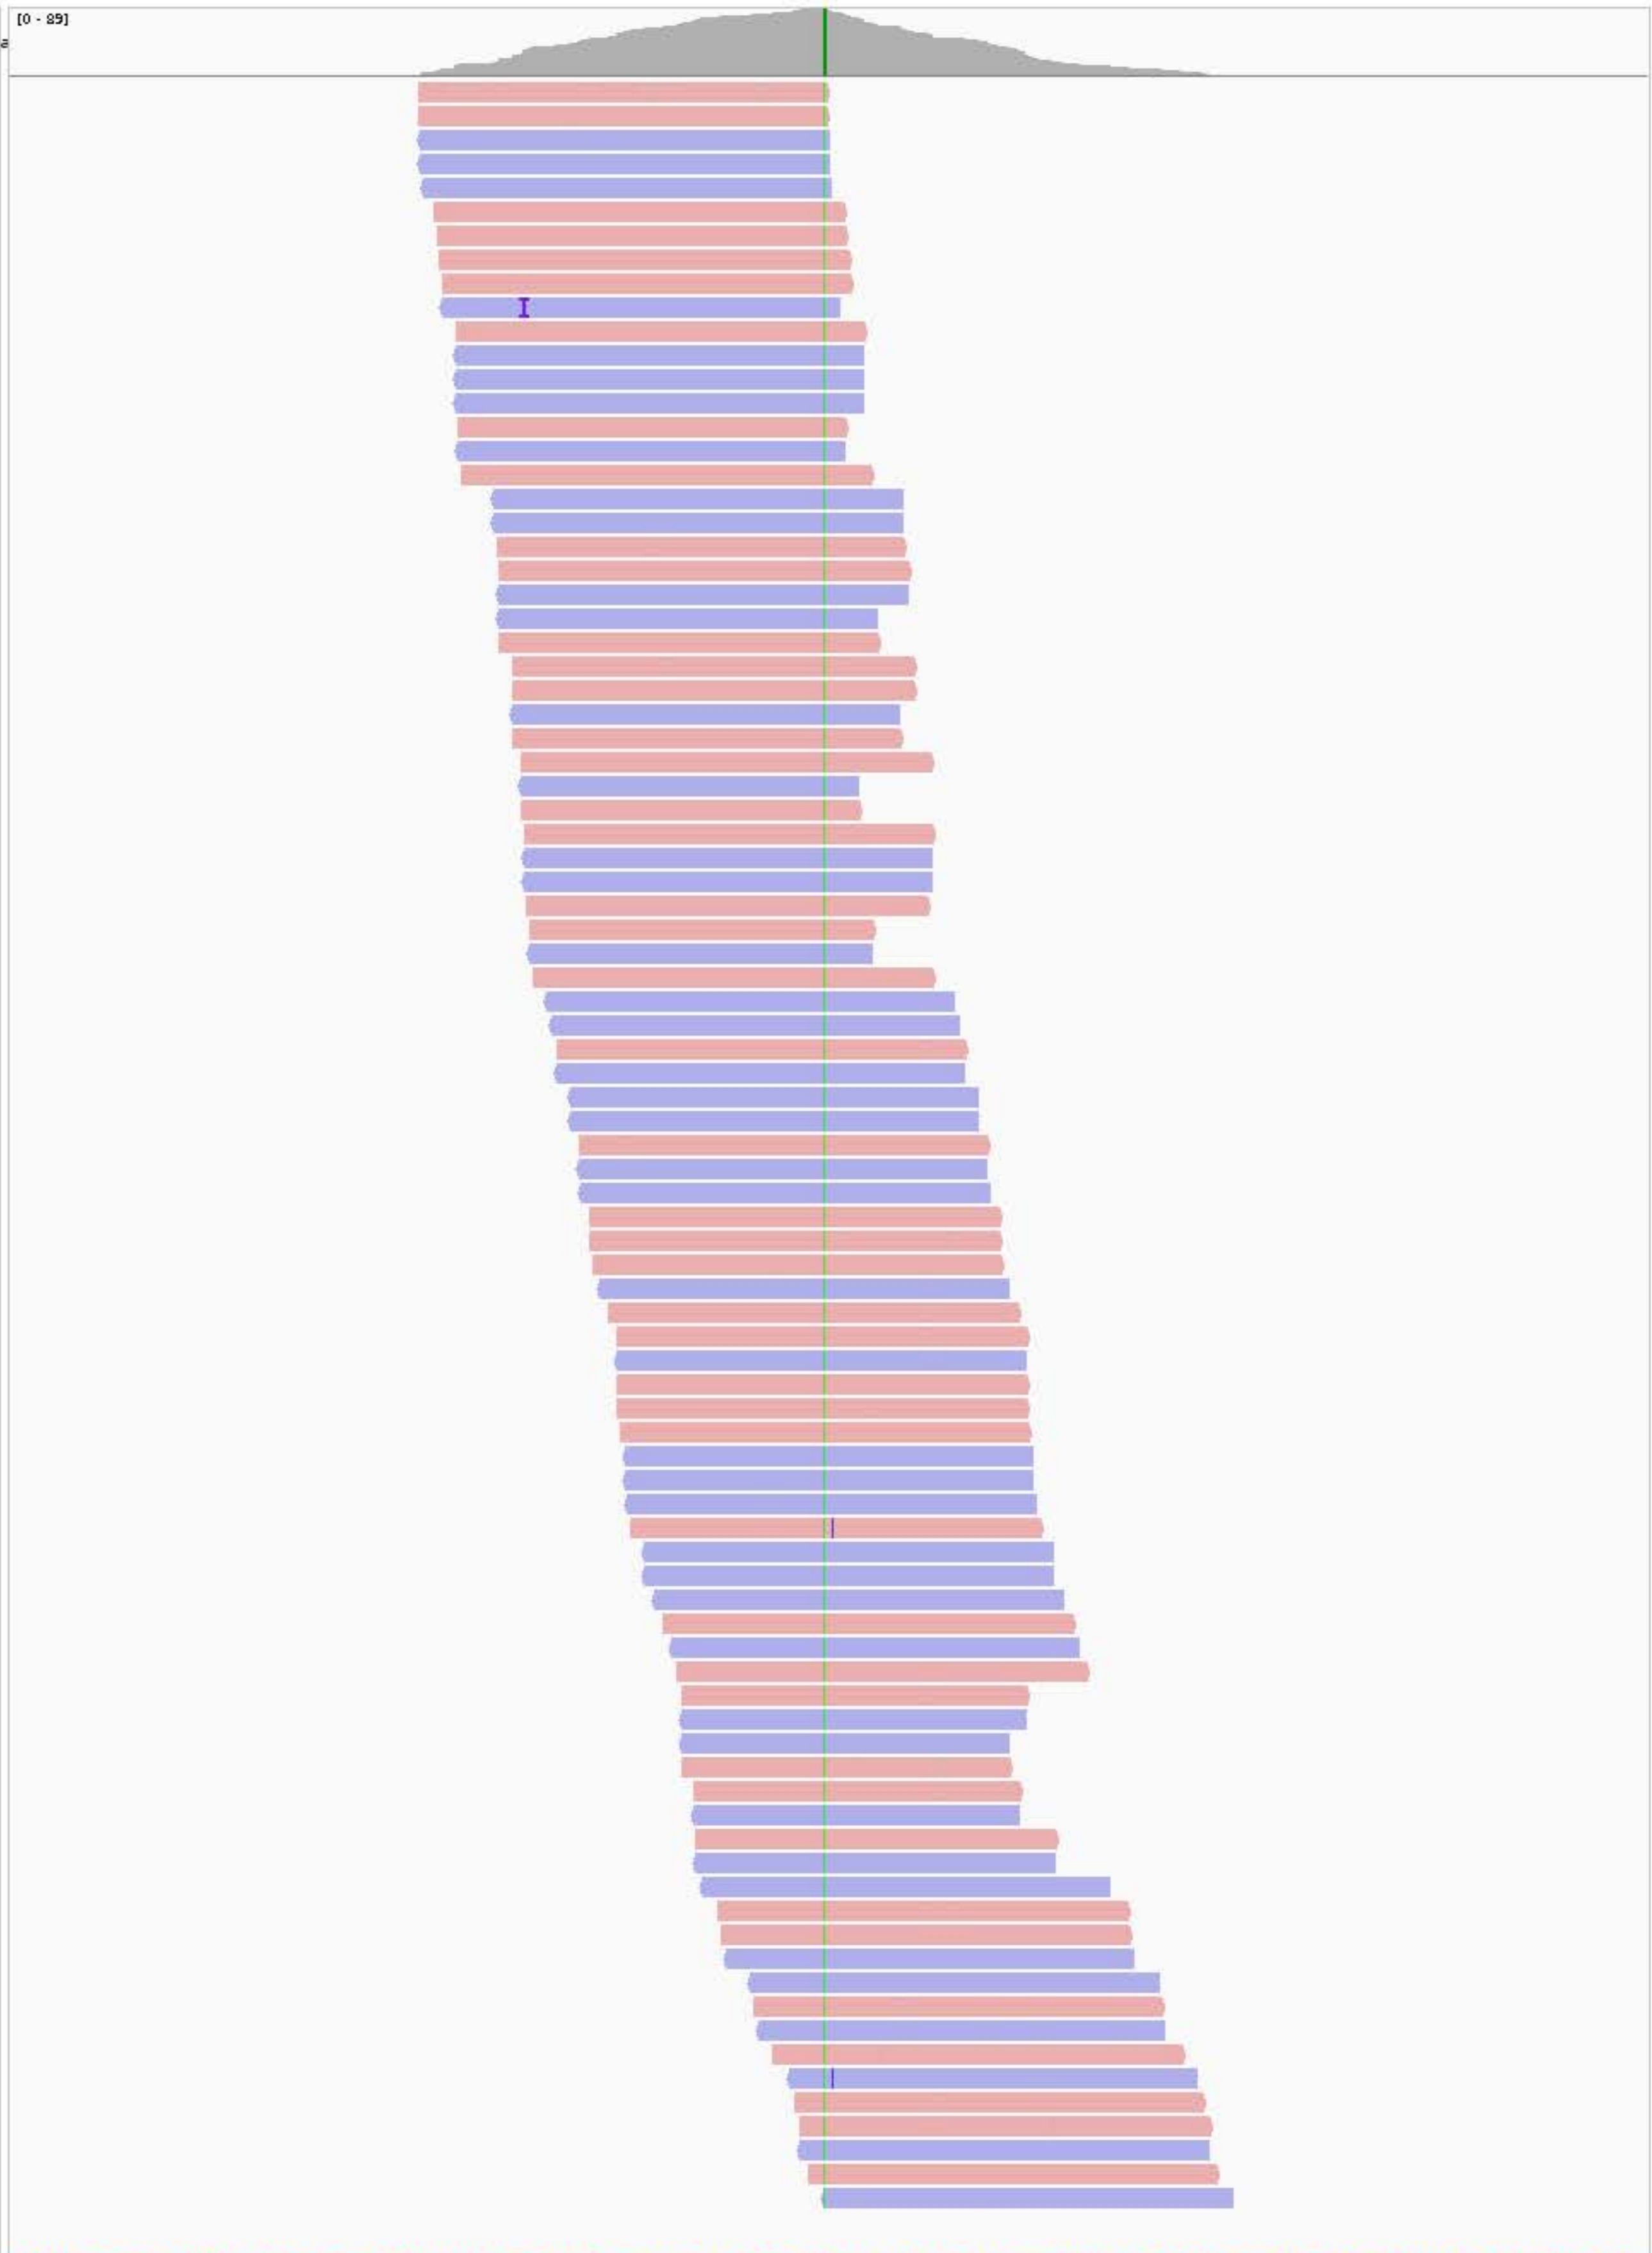

SL\_0002\_LN\_62\_mut.bam

Sequence →

Refseq Genes

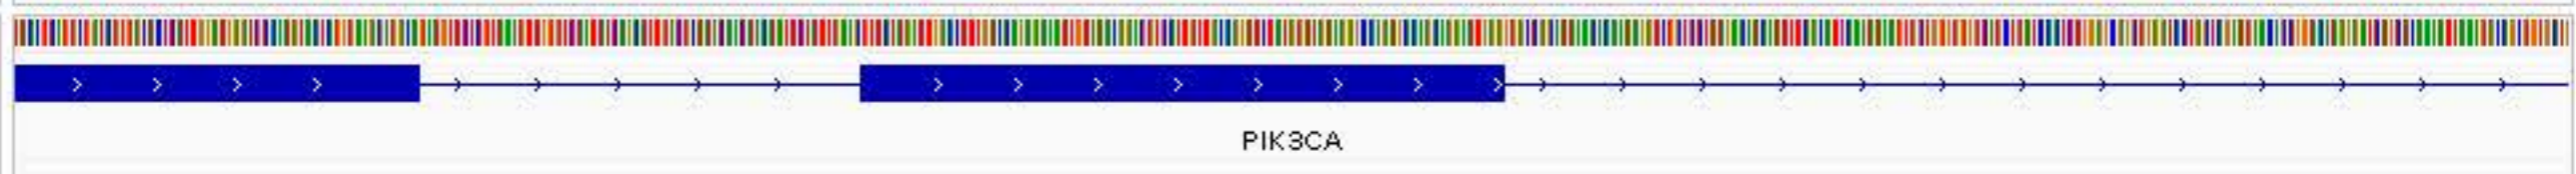

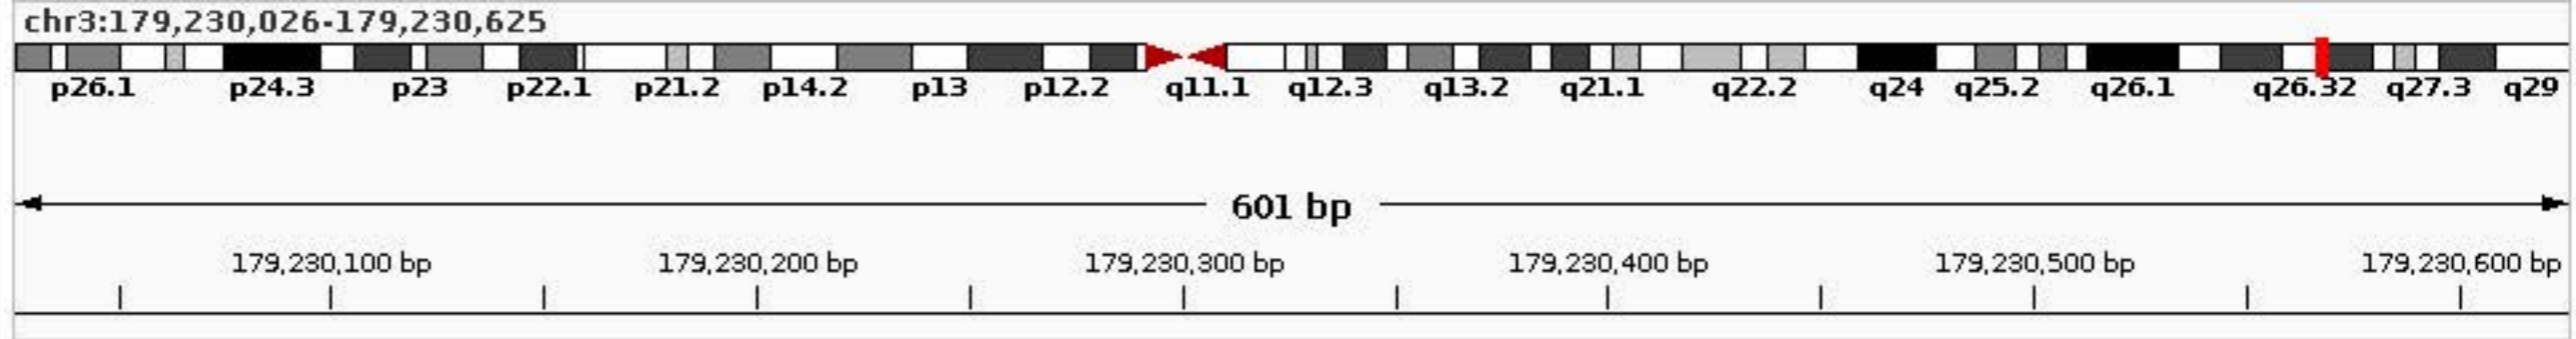

SL\_0002\_LN\_63\_mut.bam Coverage

SL\_0002\_LN\_63\_mut.bam

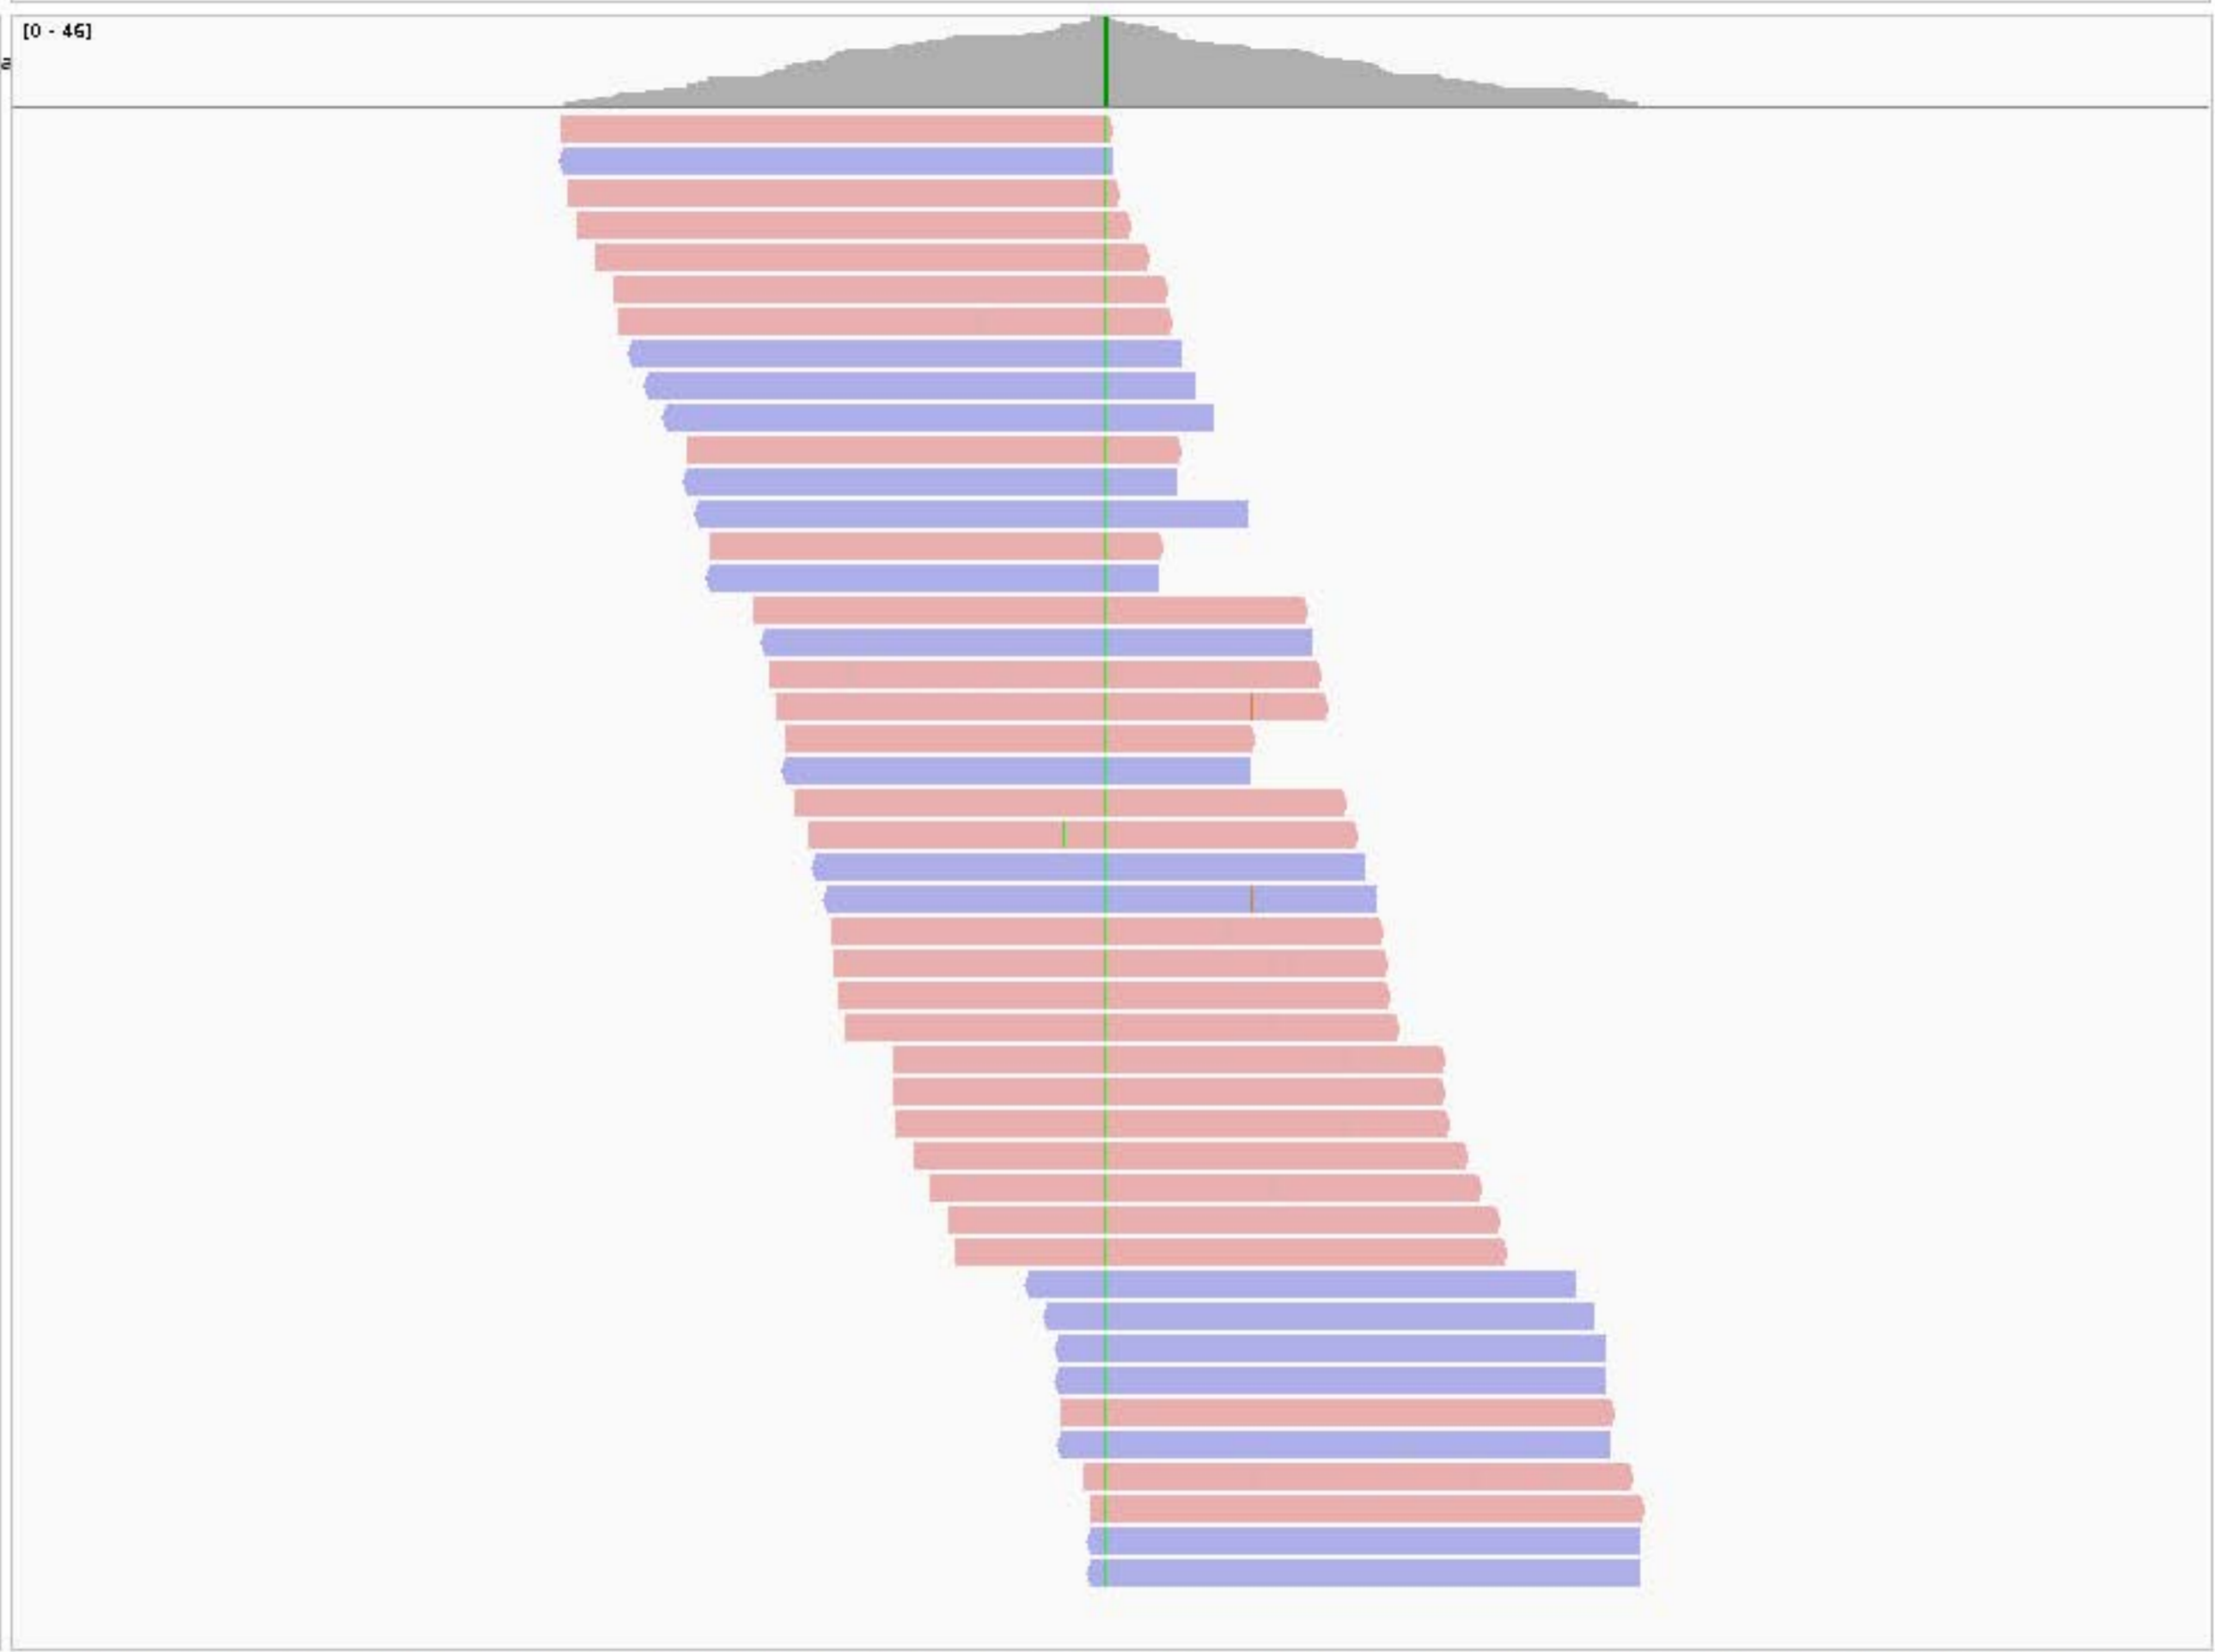

Sequence

Refseq Genes

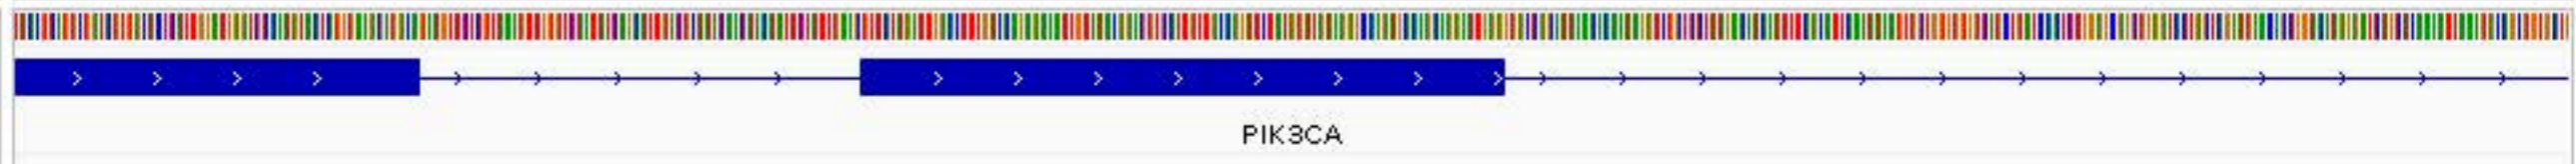



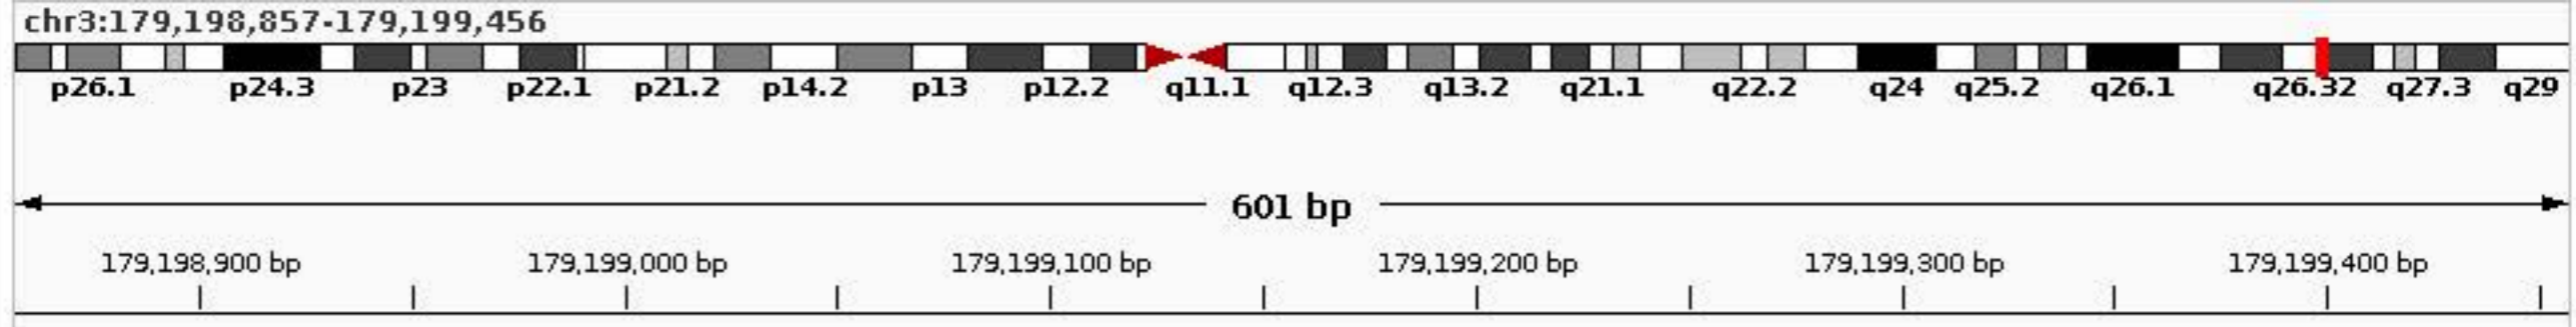

SL\_0003\_LN\_13\_mut.bam Covers

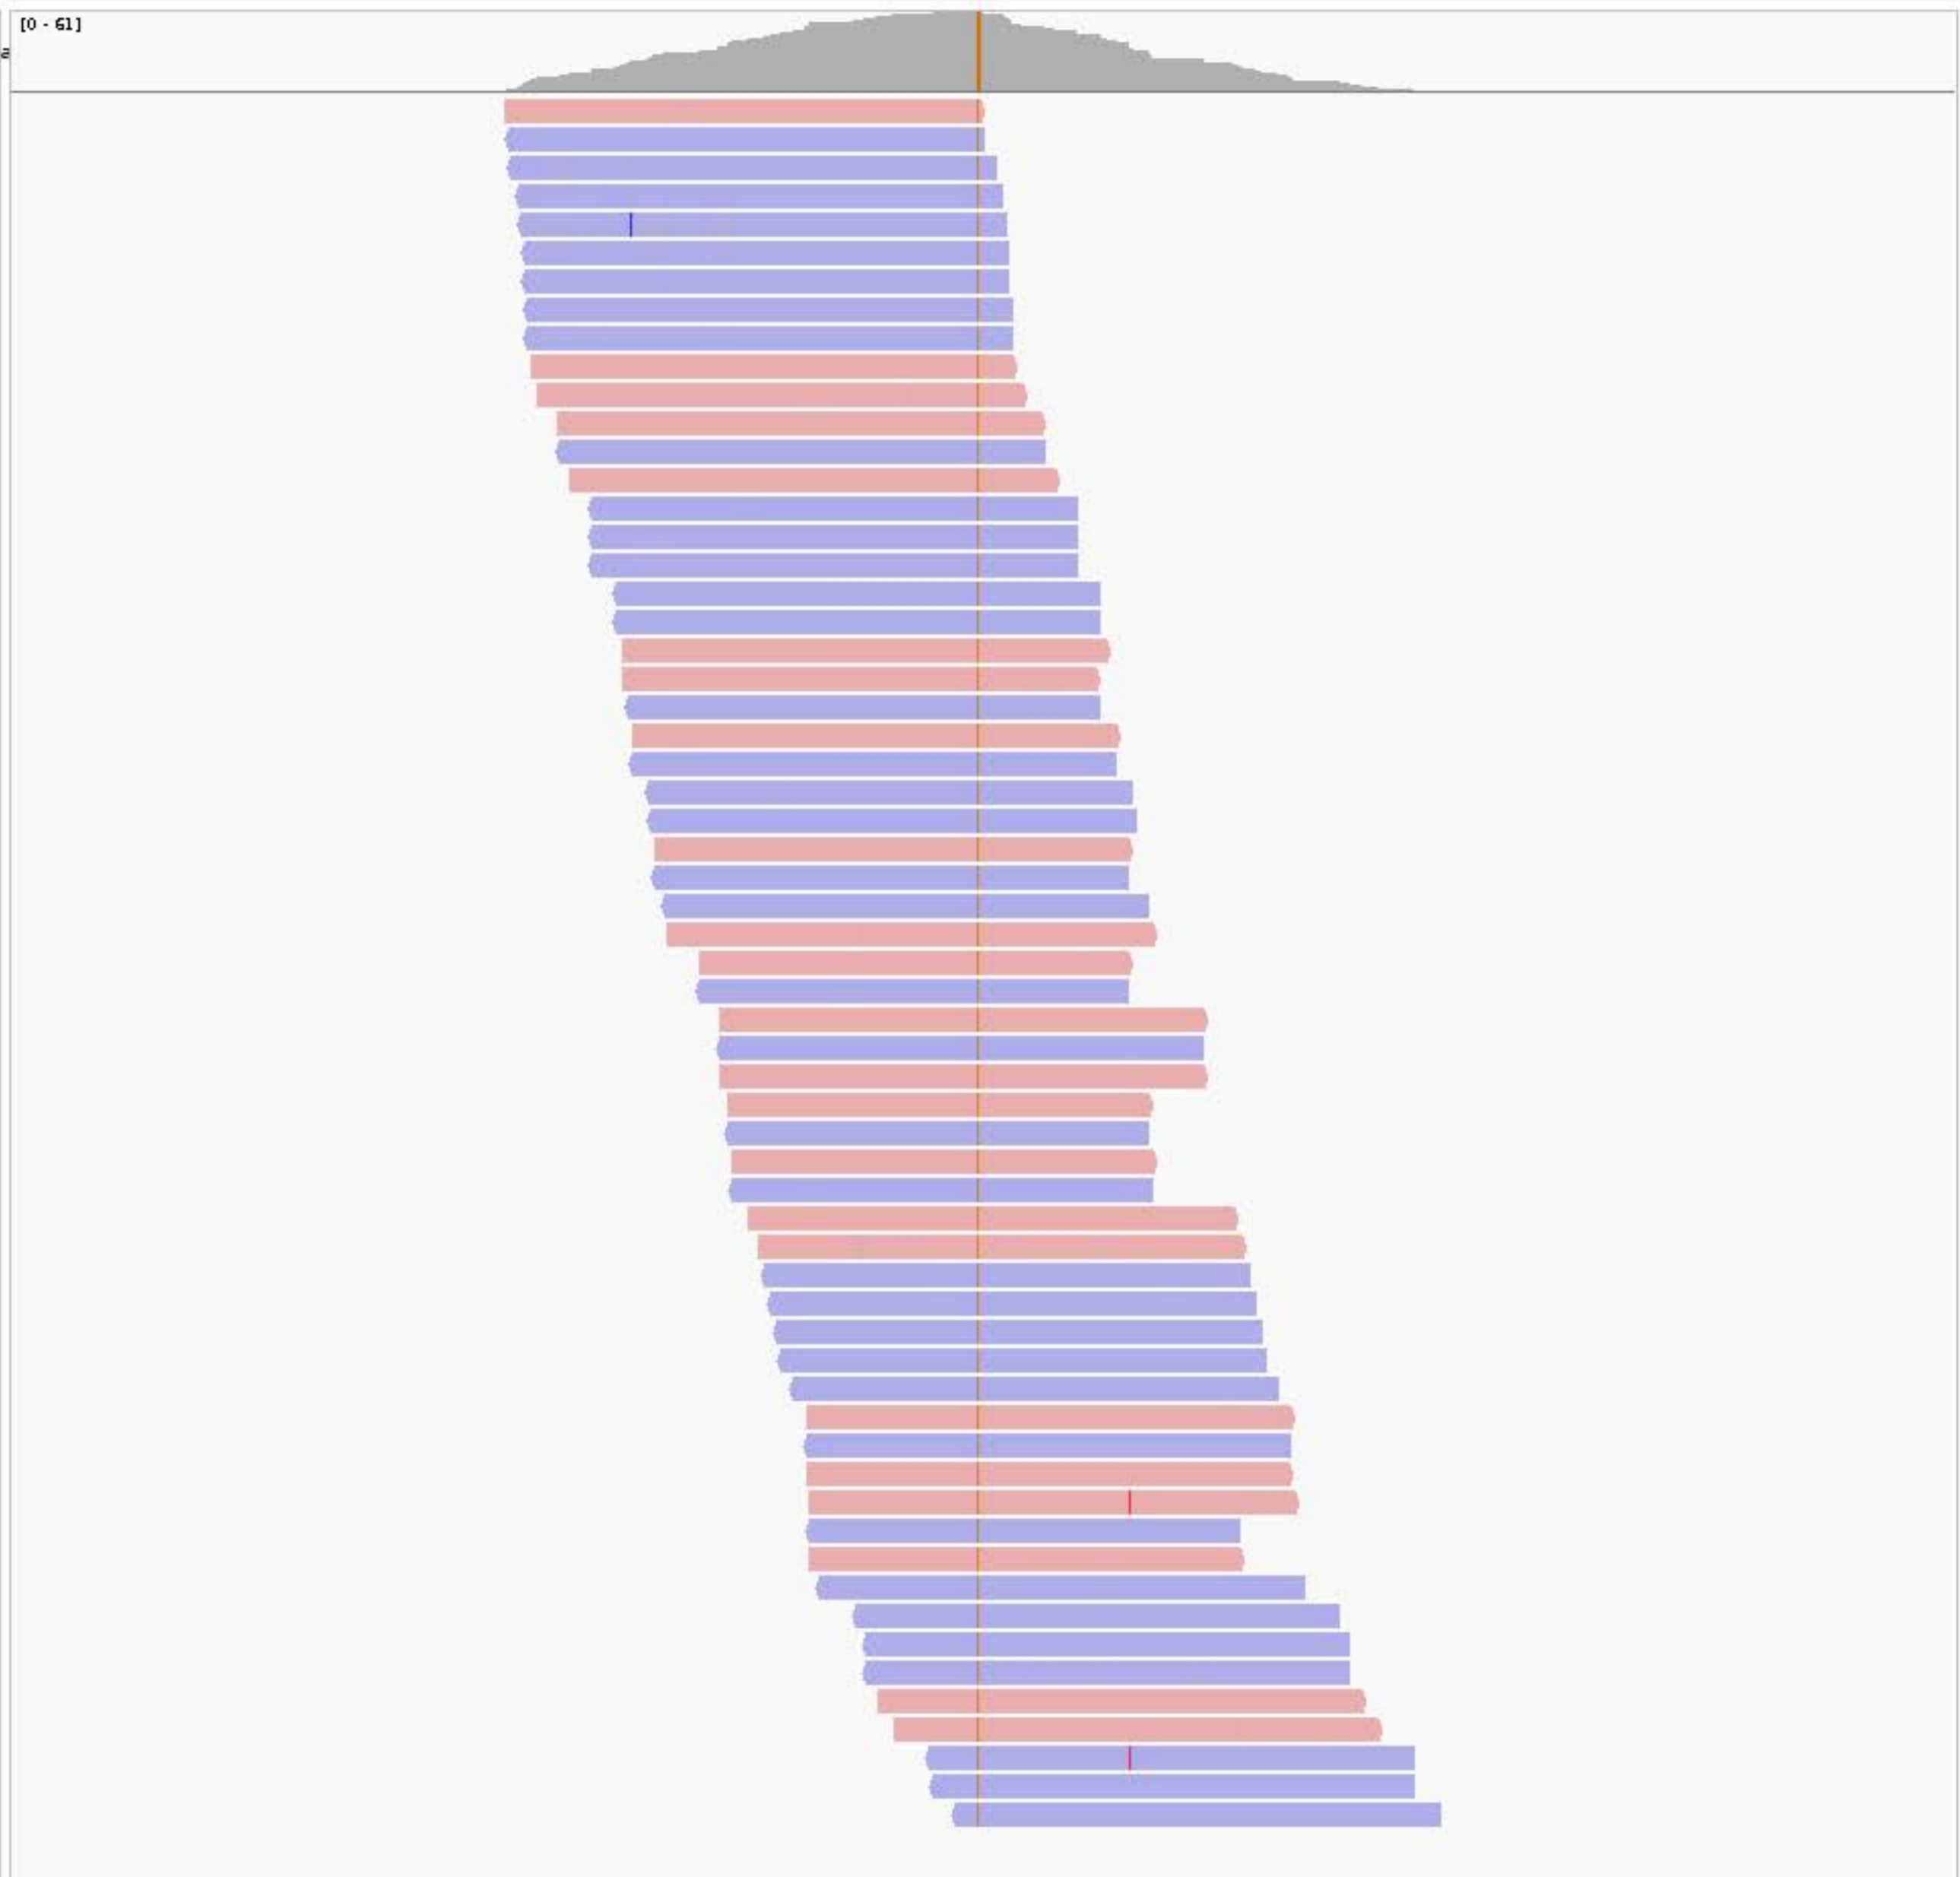

SL\_0003\_LN\_13\_mut.bam

Sequence →

Refseq Genes

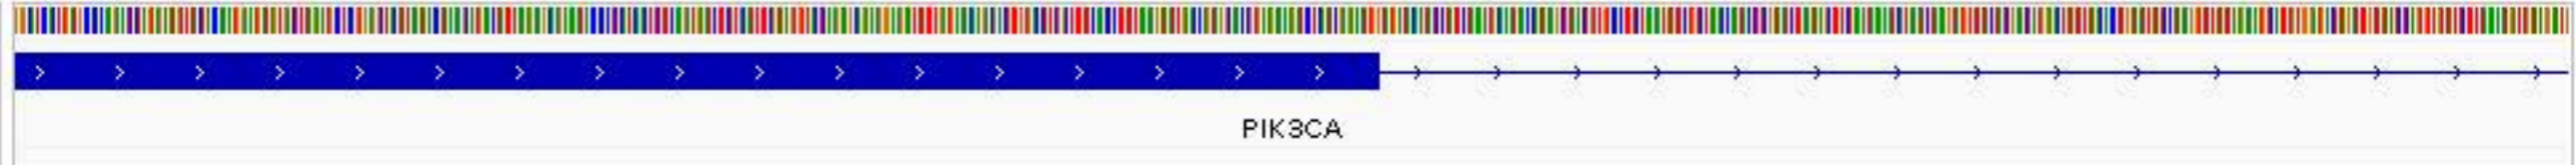

SL\_0015\_LN\_44\_mut.bam Coverage

SL\_0015\_LN\_44\_mut.bam

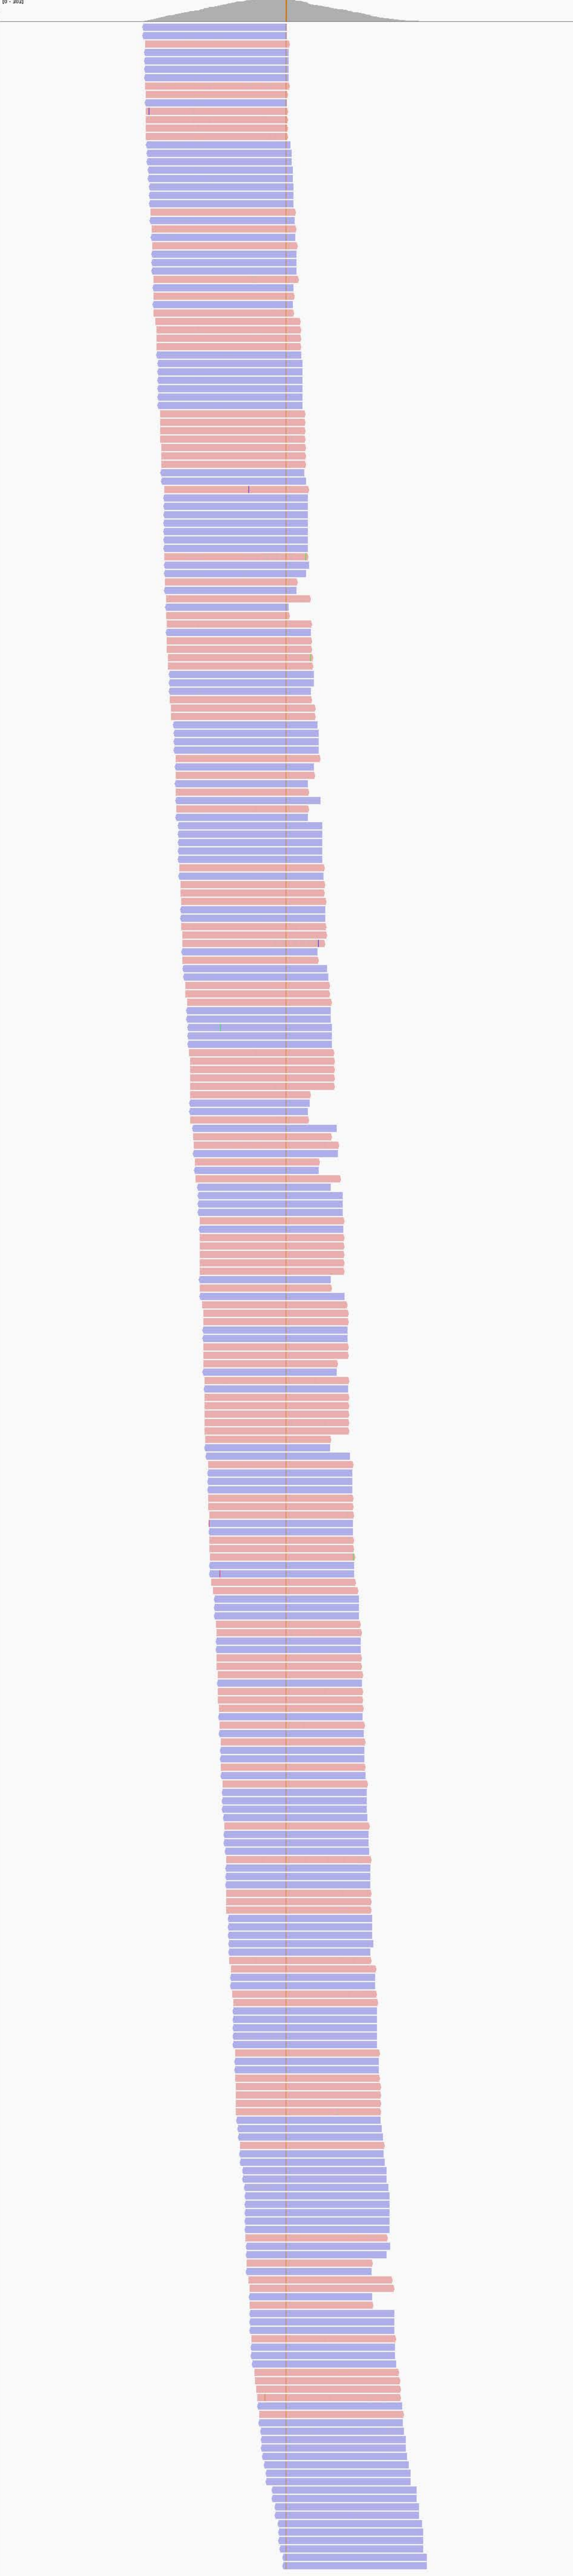

Sequence  
Refseq Genes

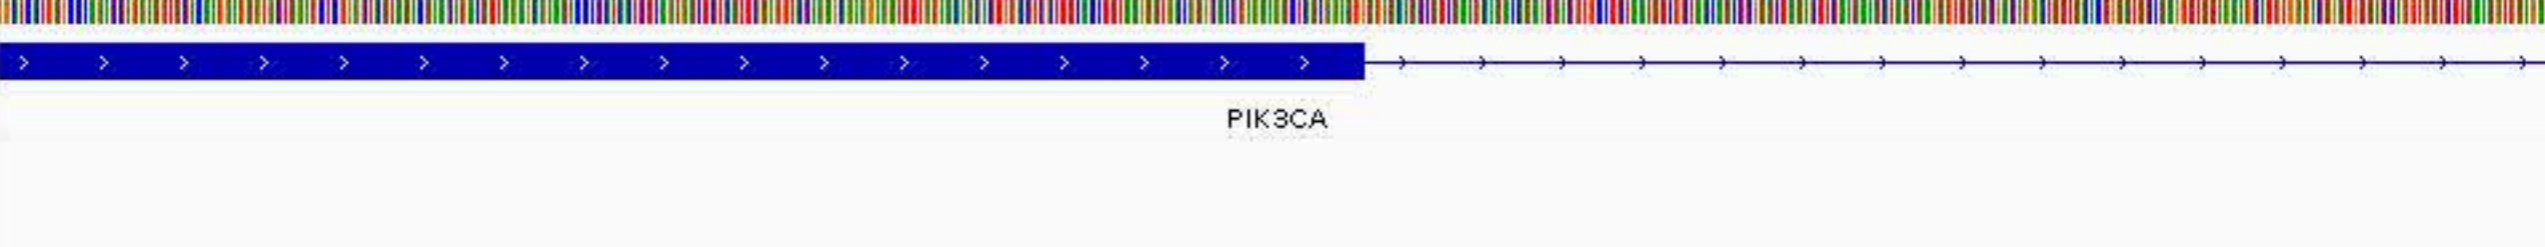

PIK3CA



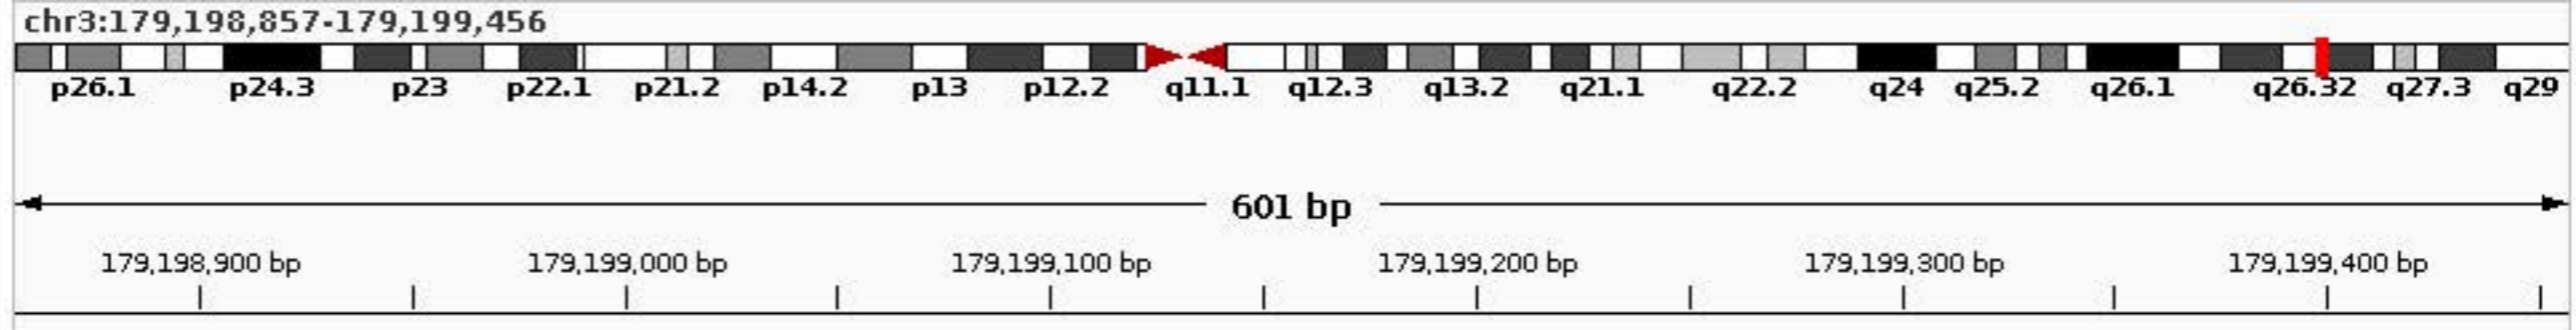

SL\_0015\_LN\_45\_mut.bam Coverage

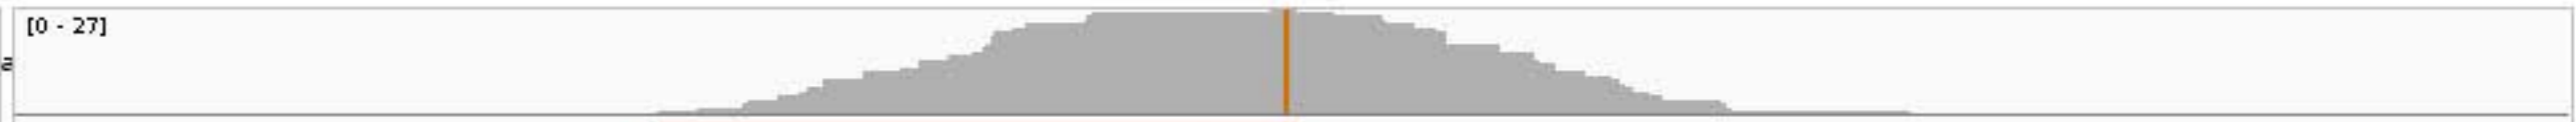

SL\_0015\_LN\_45\_mut.bam

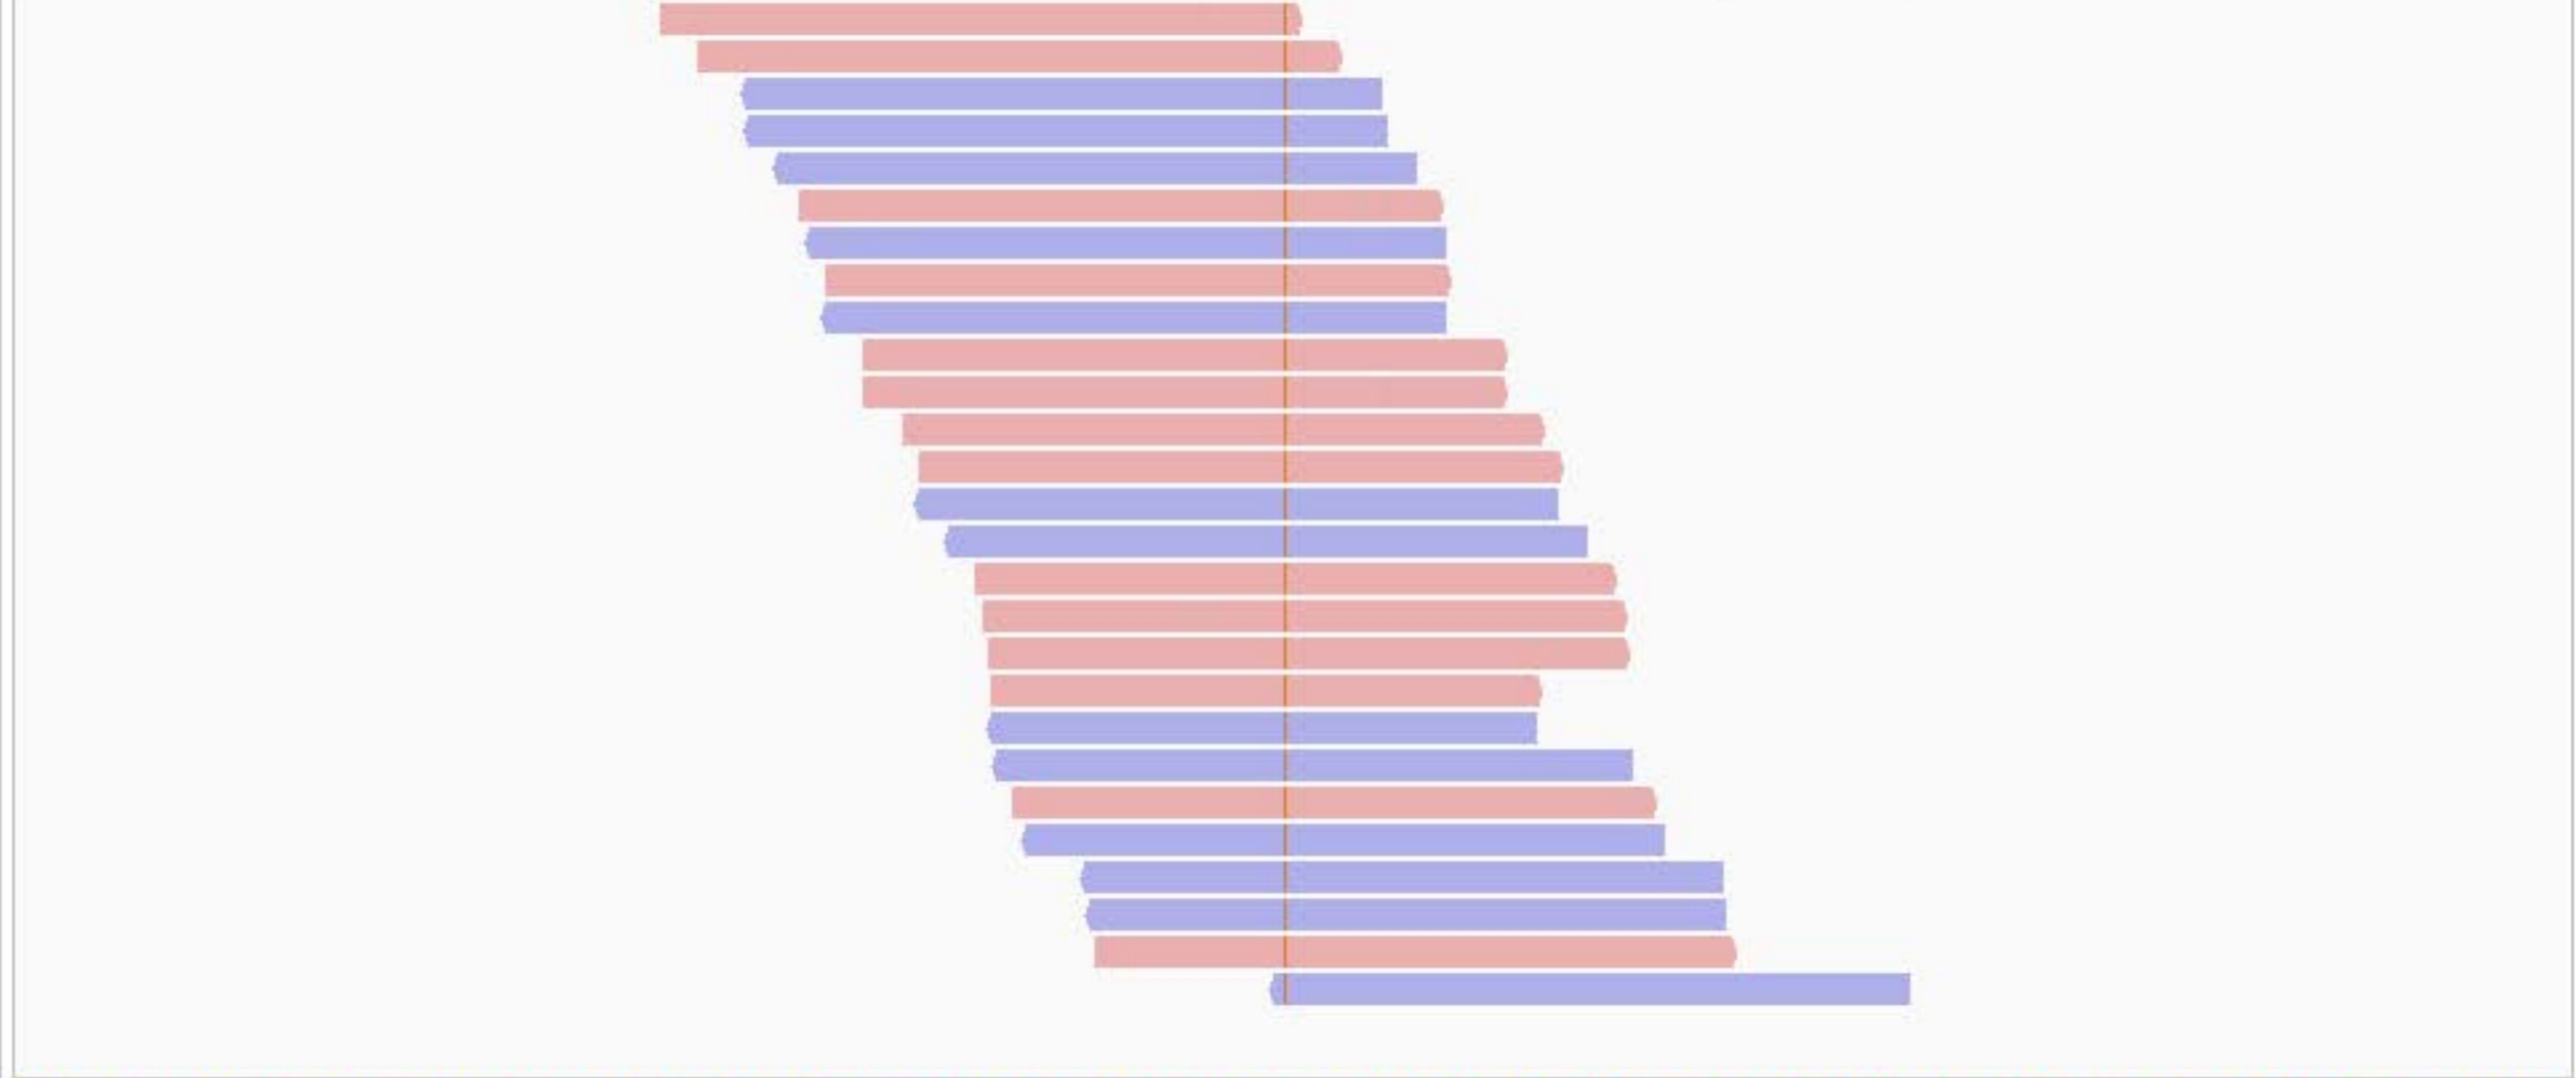

Sequence

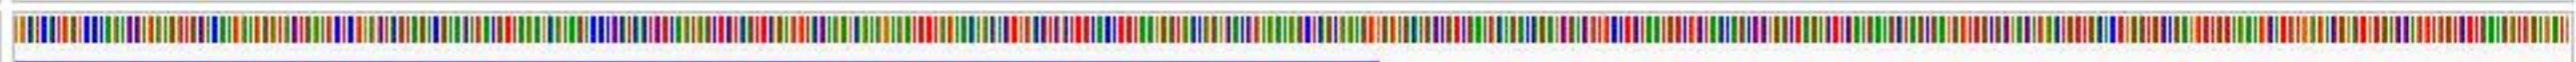

Refseq Genes

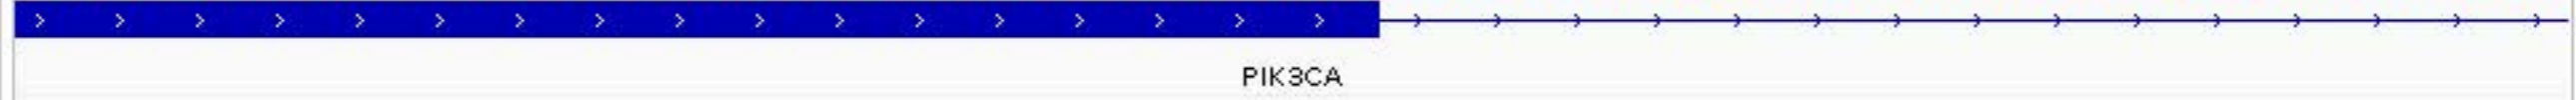



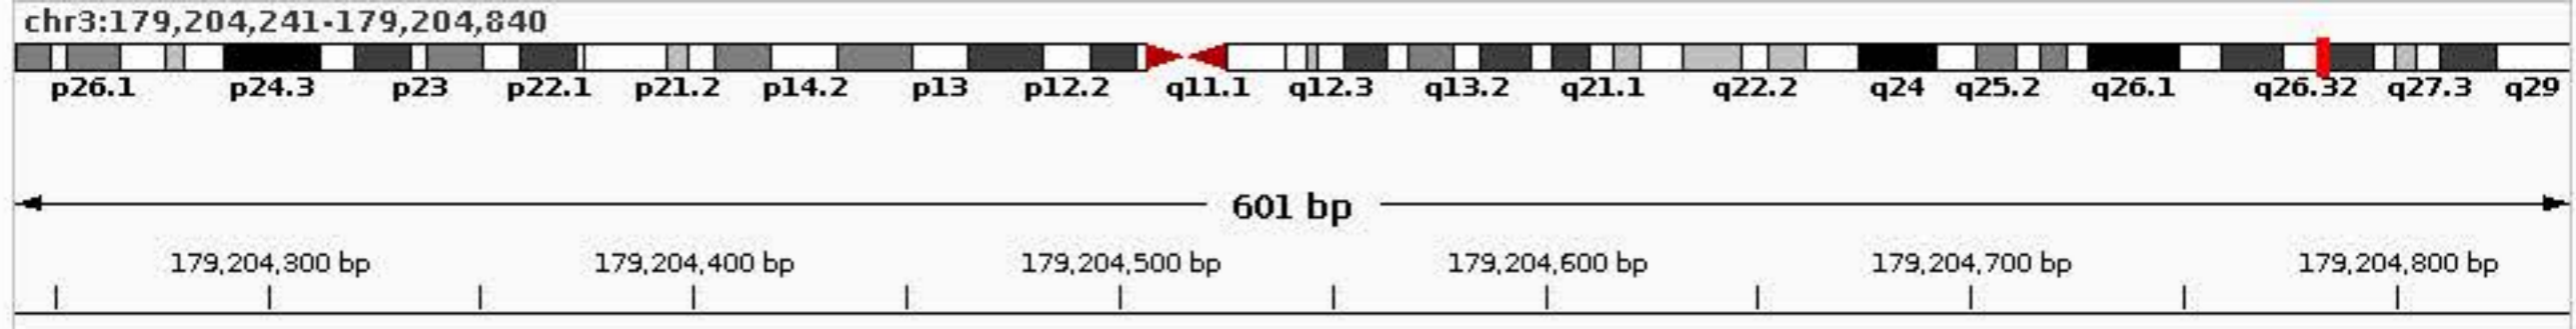

SL\_0015\_RN\_12\_mut.bam Coverage

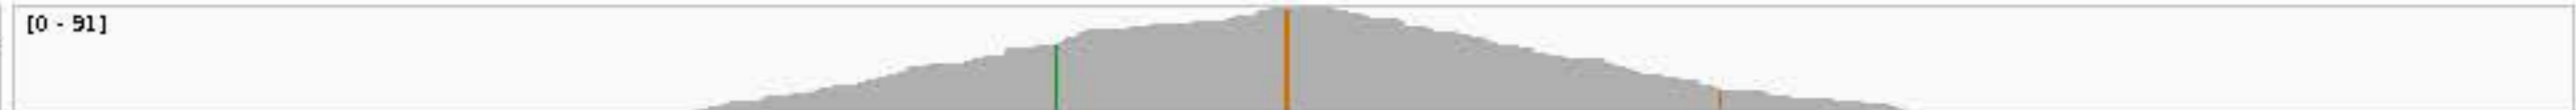

SL\_0015\_RN\_12\_mut.bam

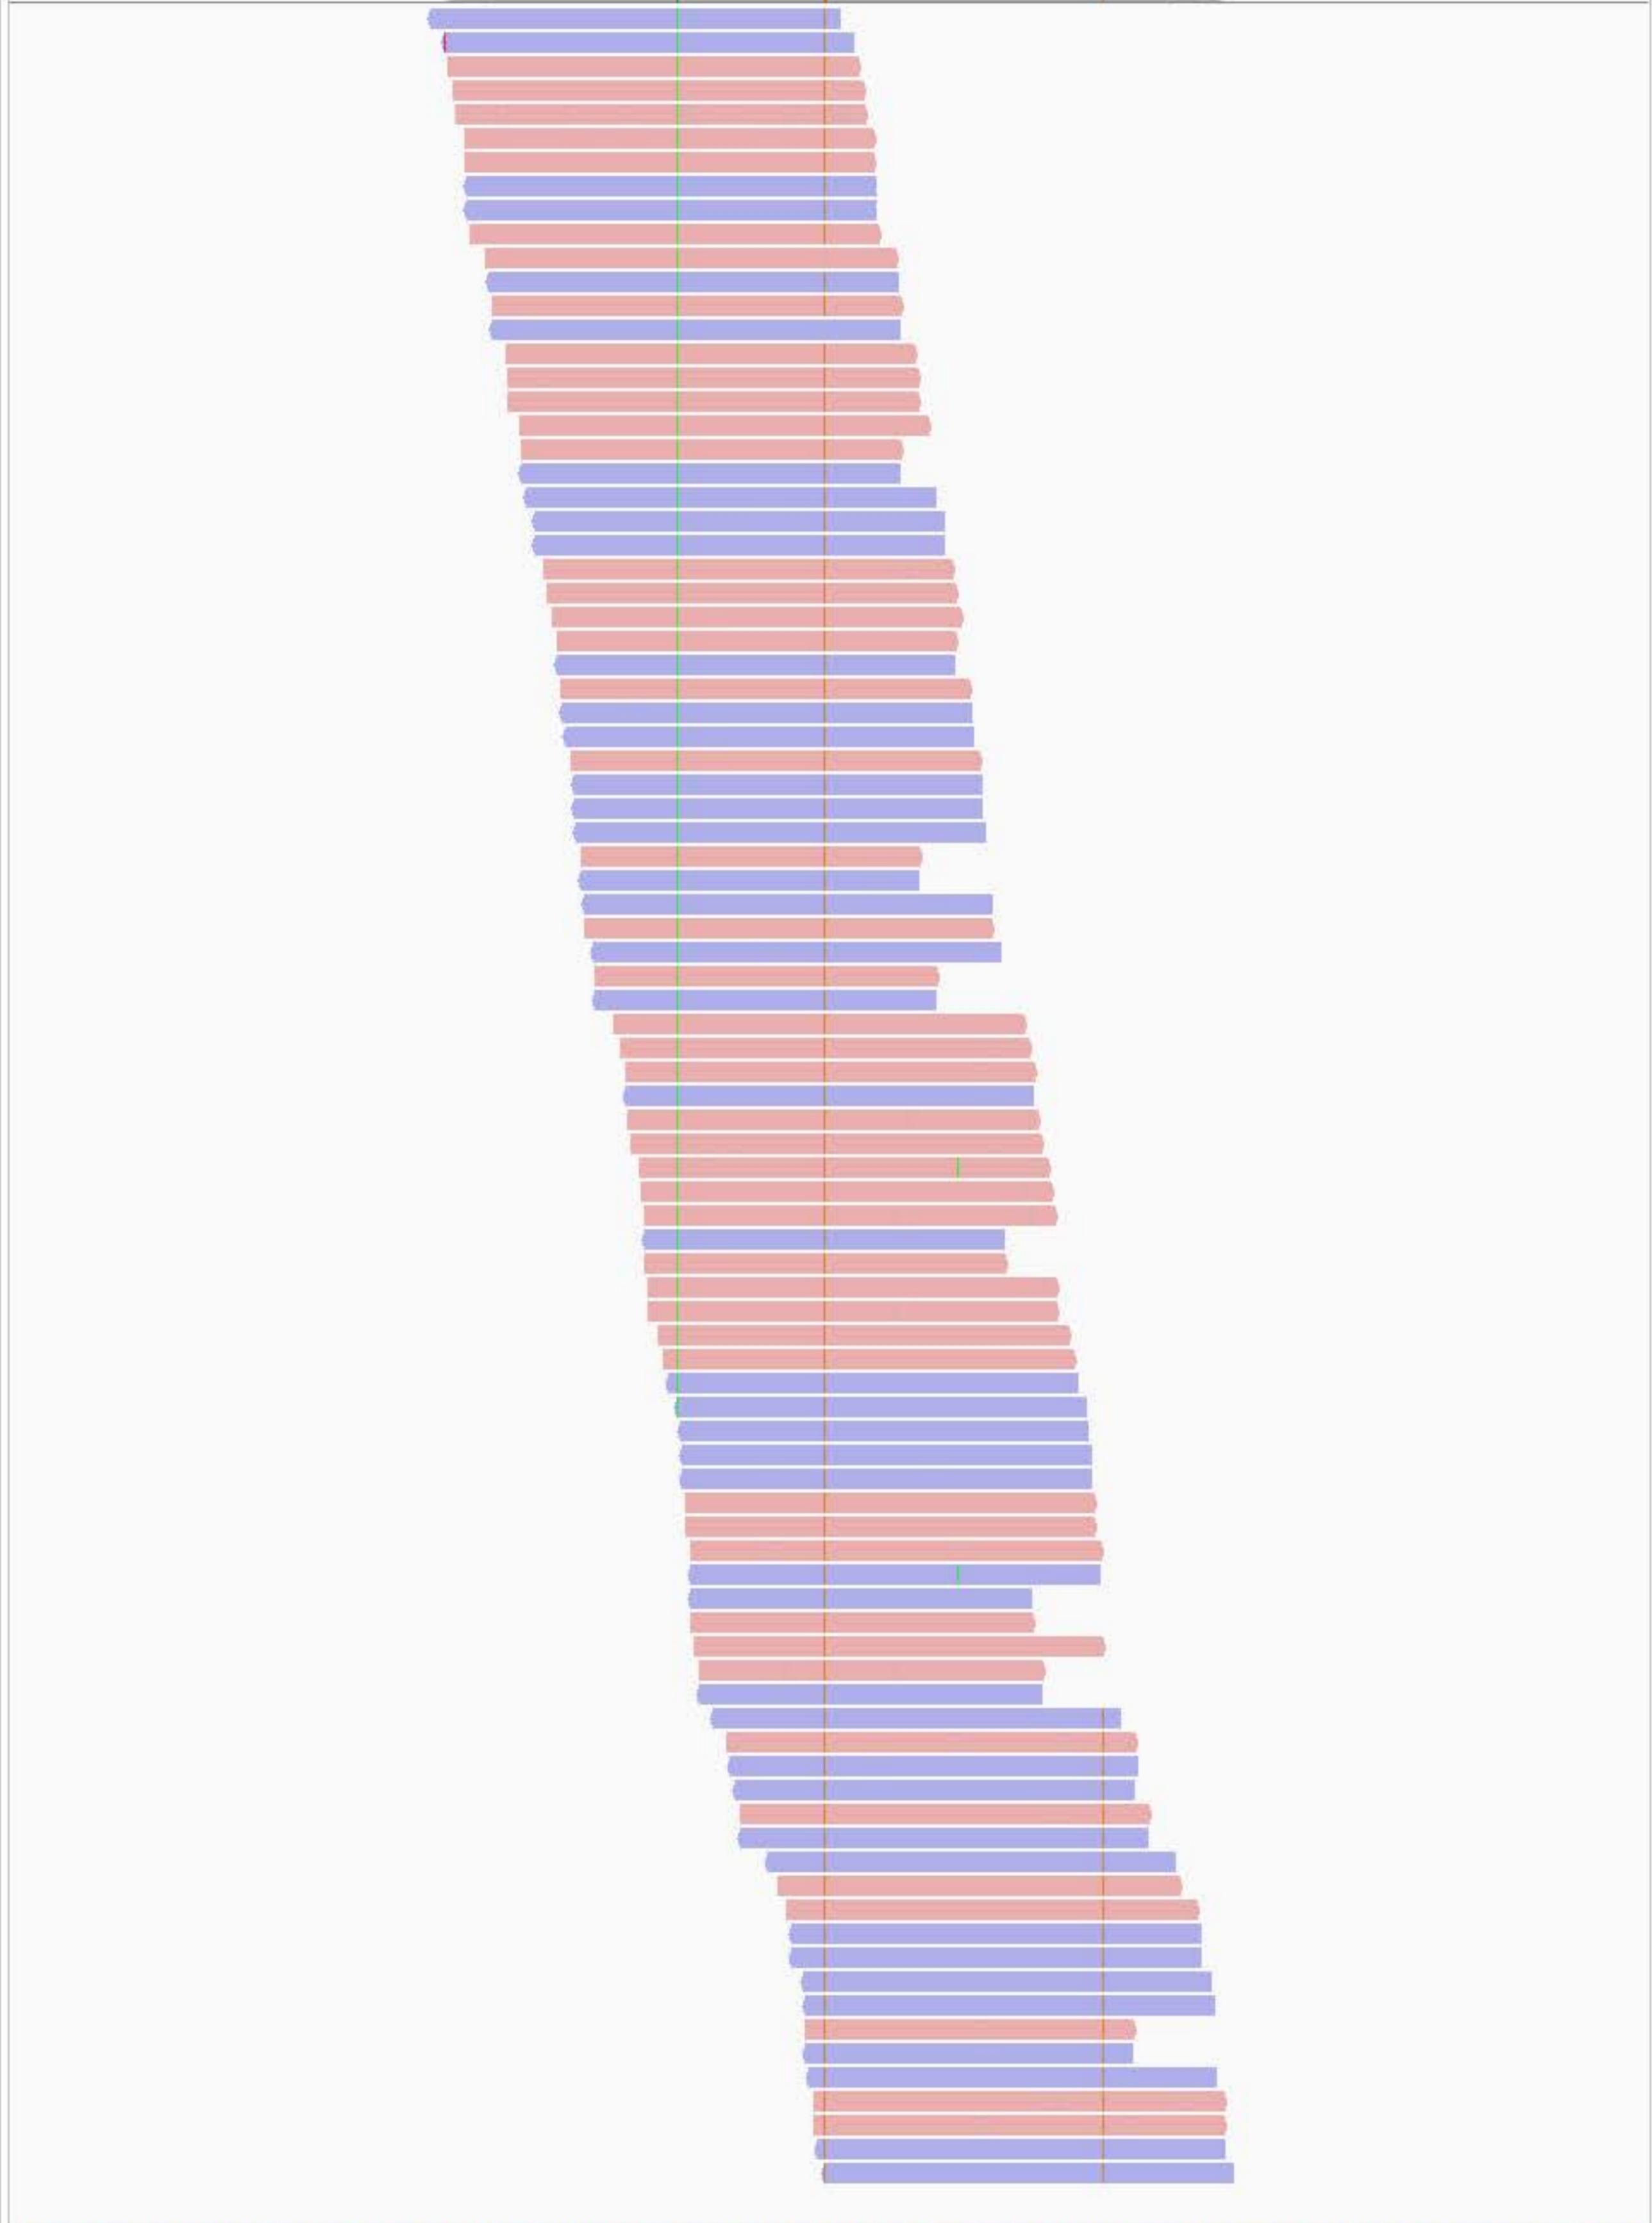

Sequence

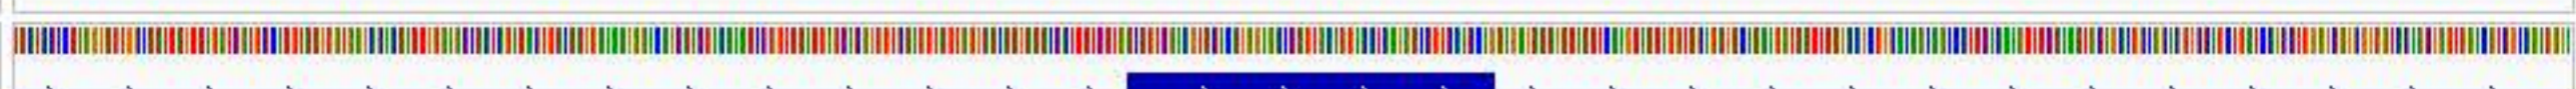

Refseq Genes

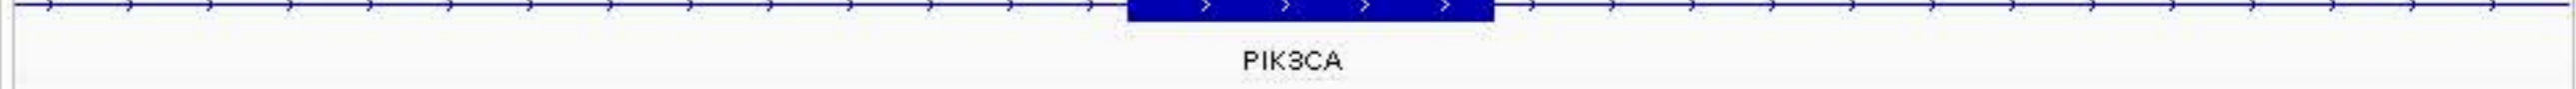

PIK3CA

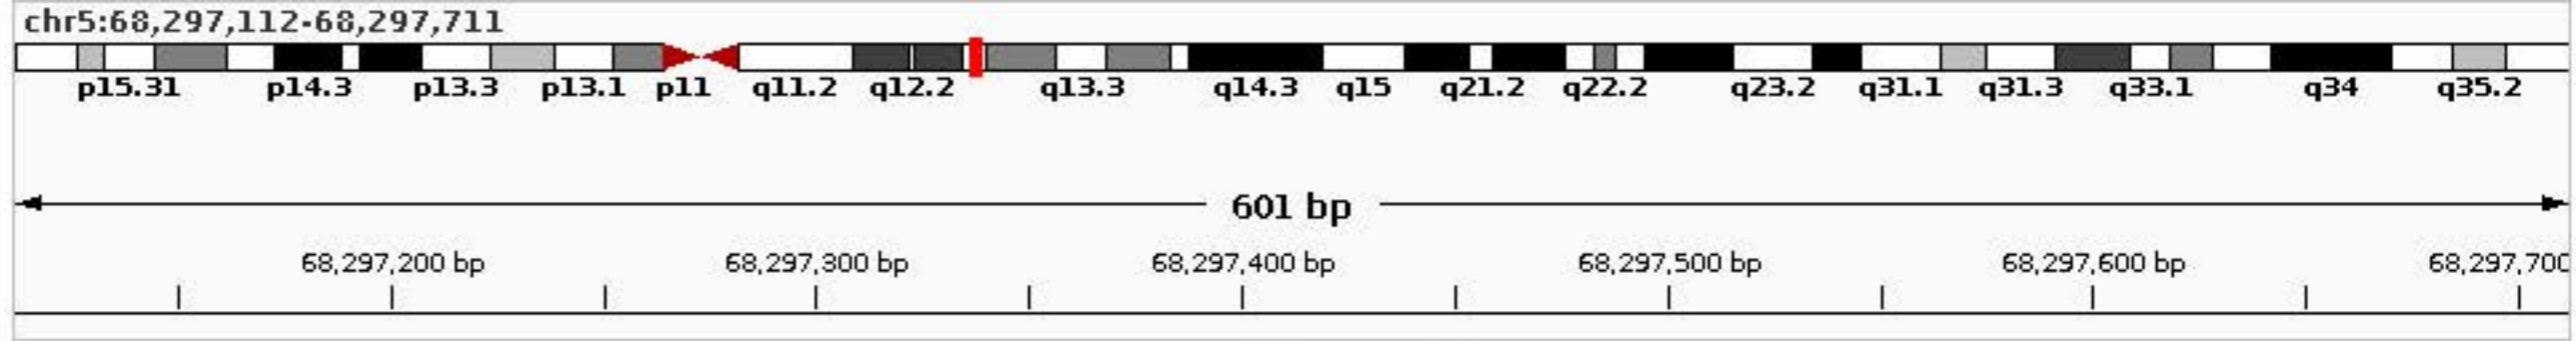

SL\_0004\_RN\_08\_mut.bam Coverage

SL\_0004\_RN\_08\_mut.bam

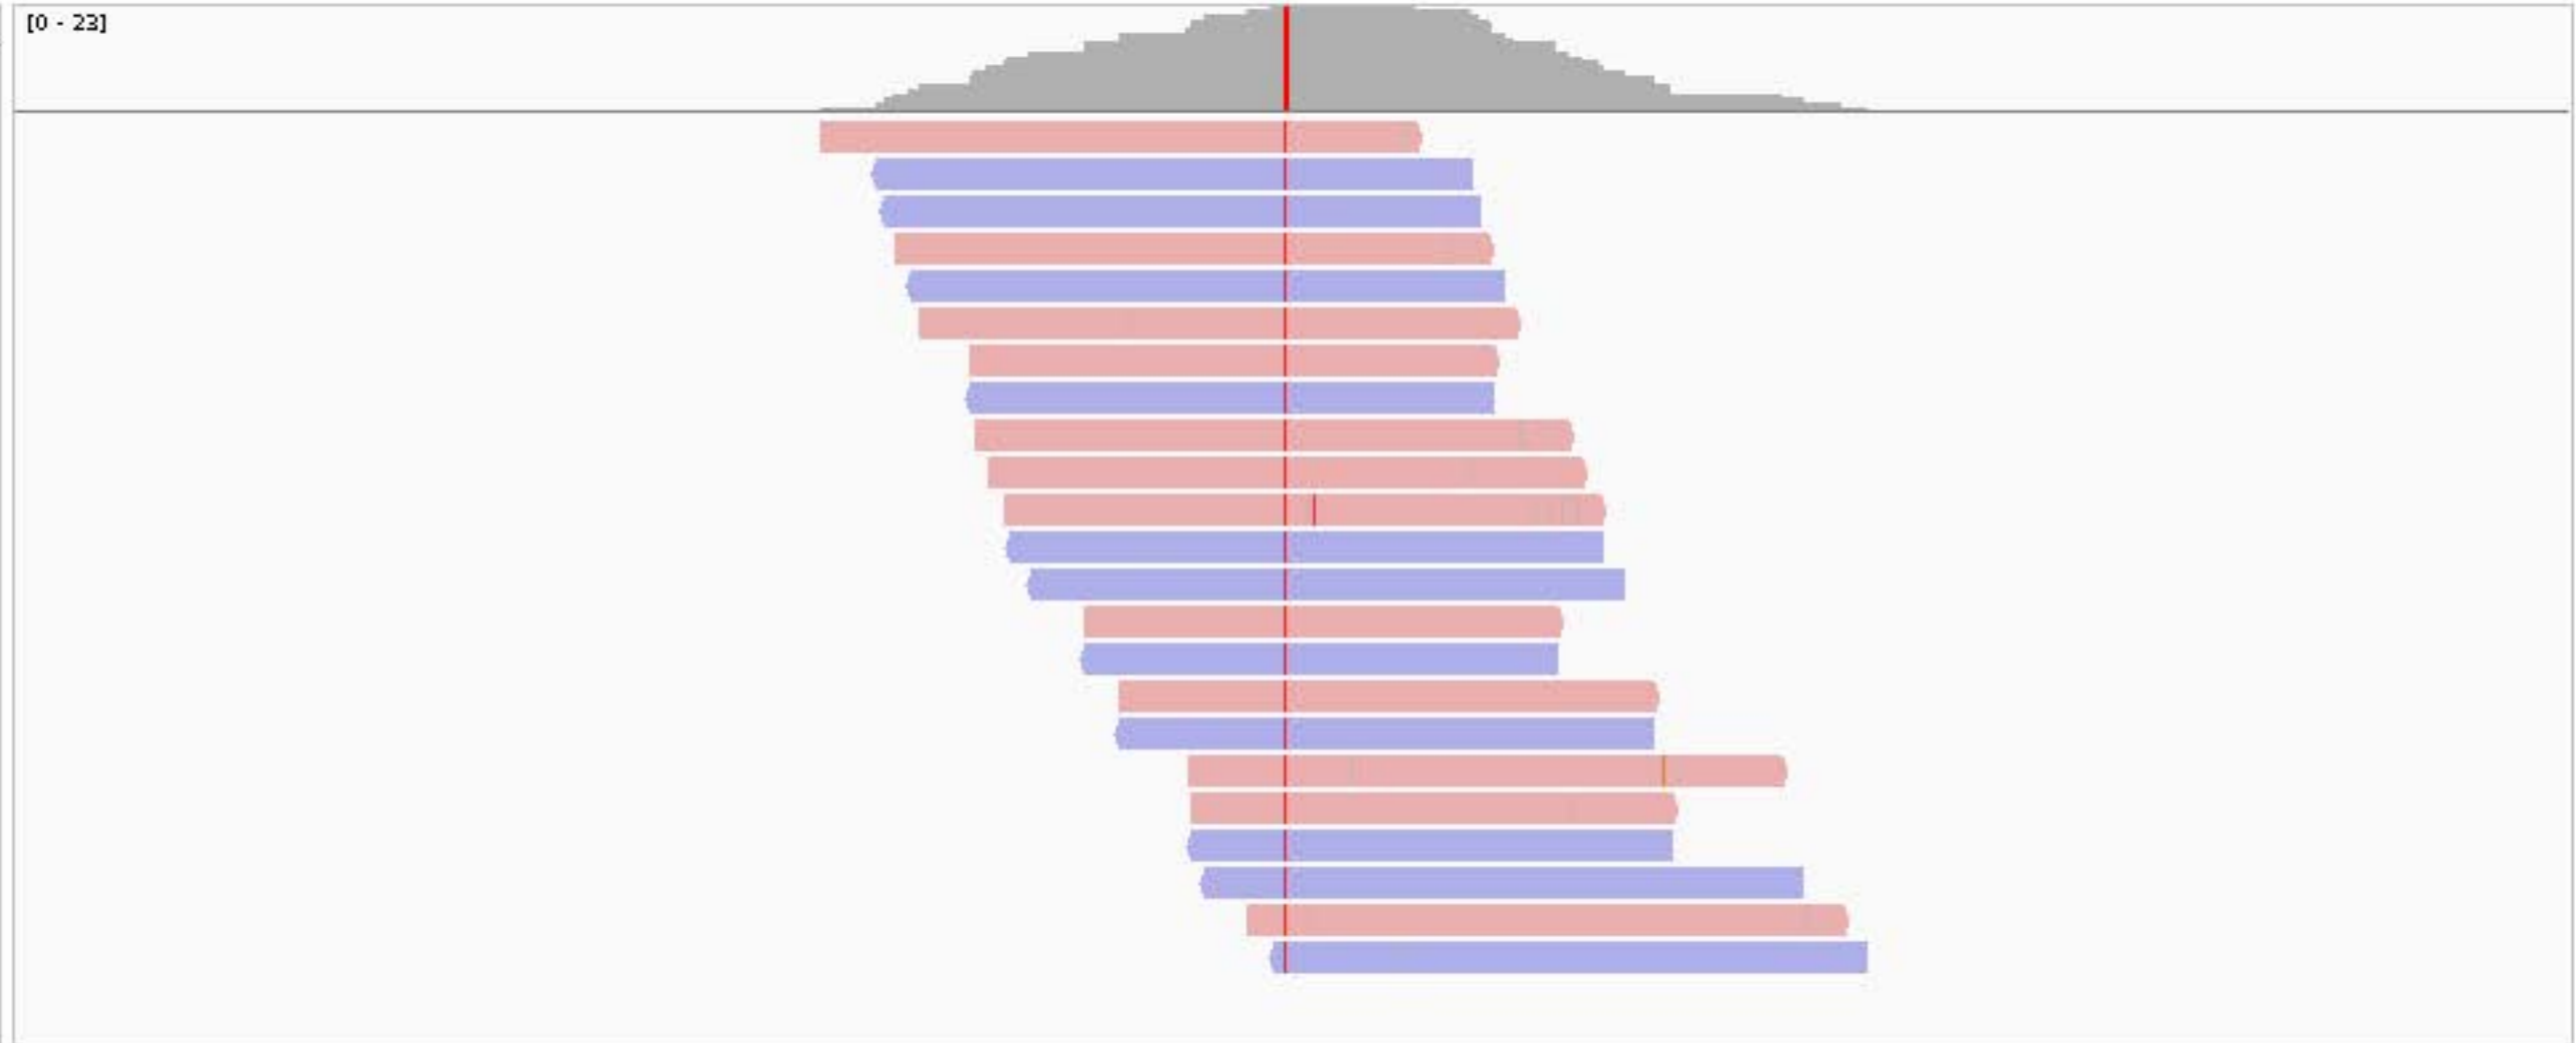

Sequence

Refseq Genes

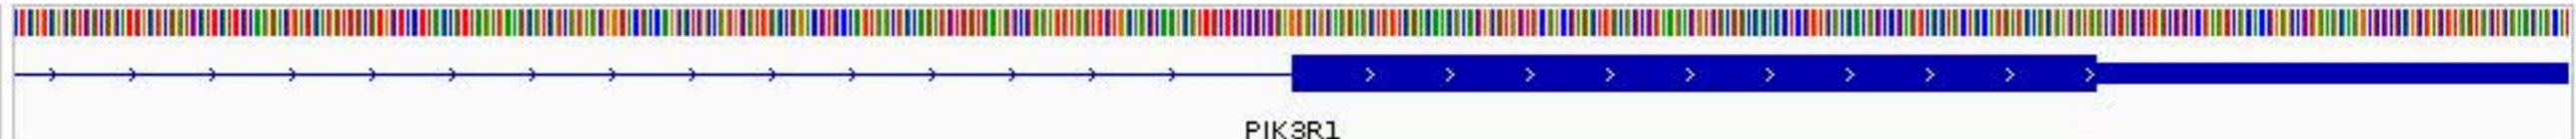

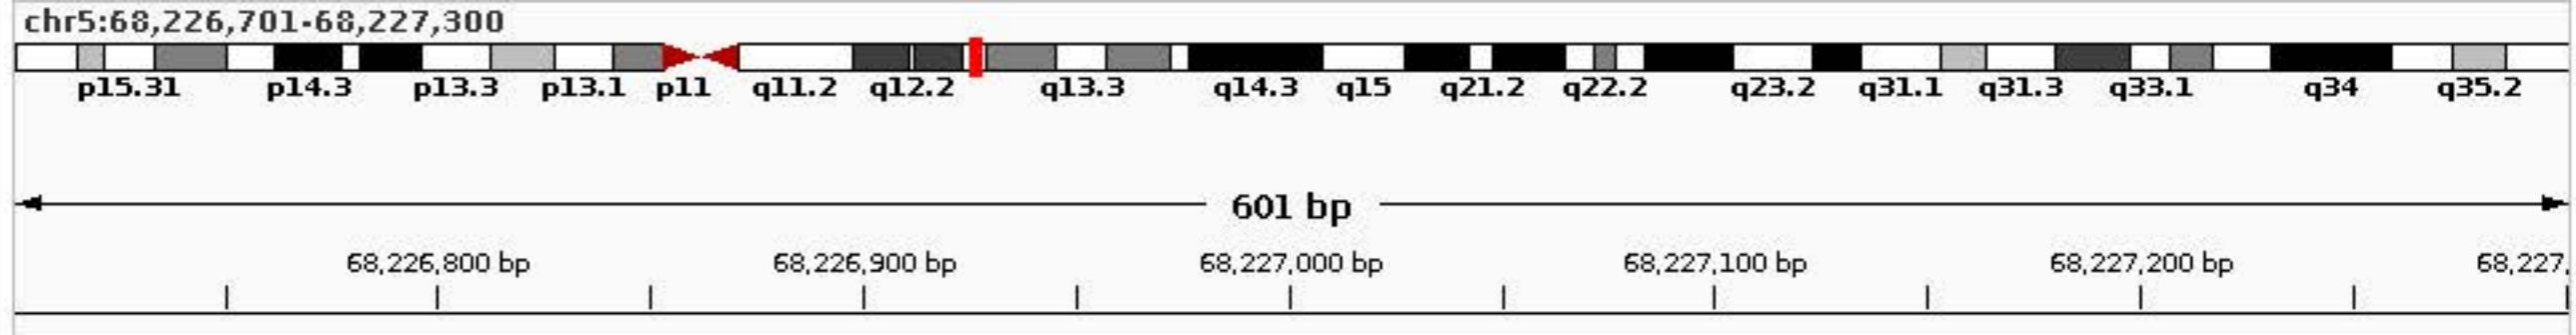

SL\_0004\_RN\_08\_mut.bam Coverage

SL\_0004\_RN\_08\_mut.bam

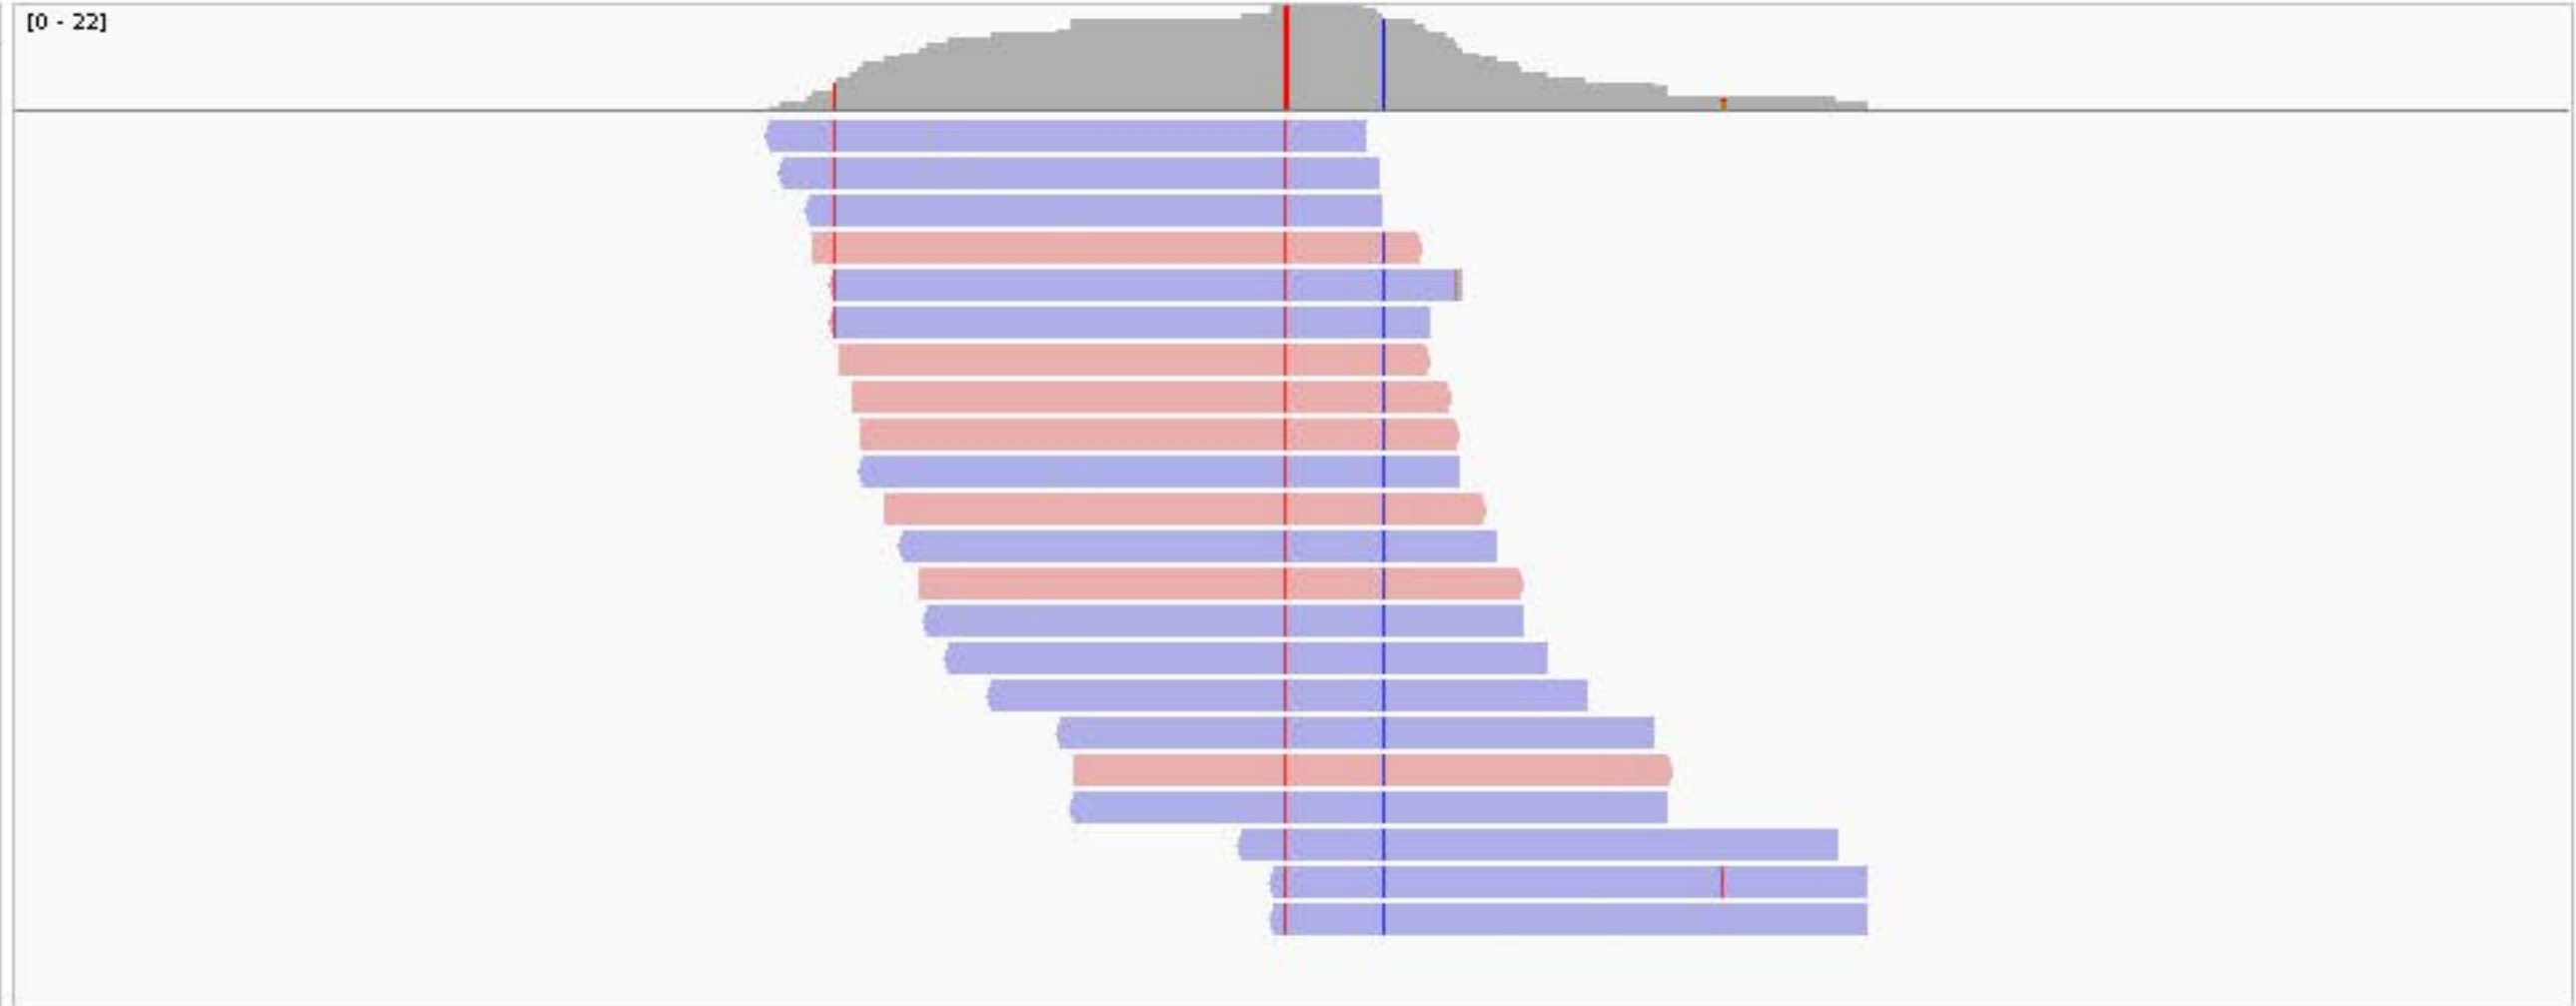

Sequence

Refseq Genes

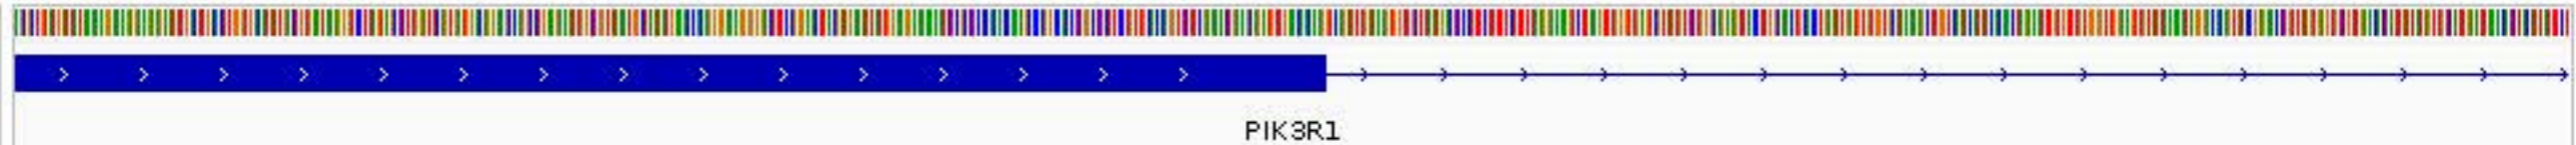



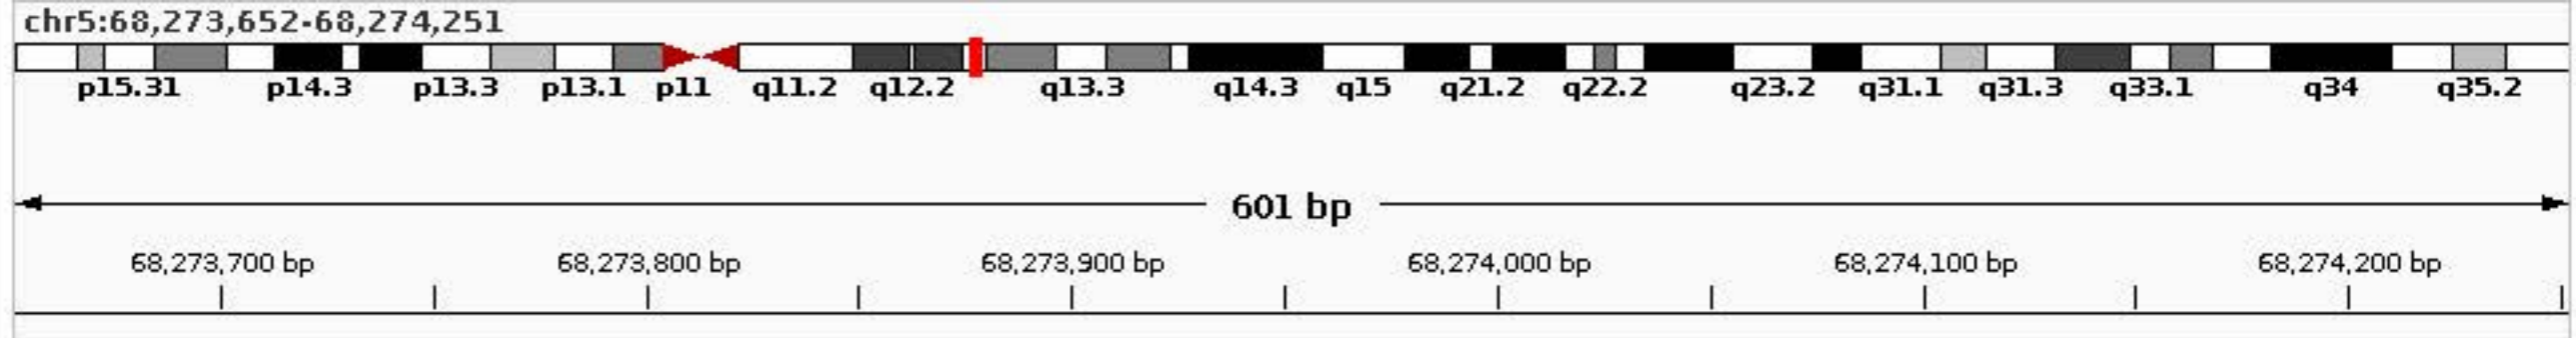

SL\_0004\_RN\_08\_mut.bam Coverage

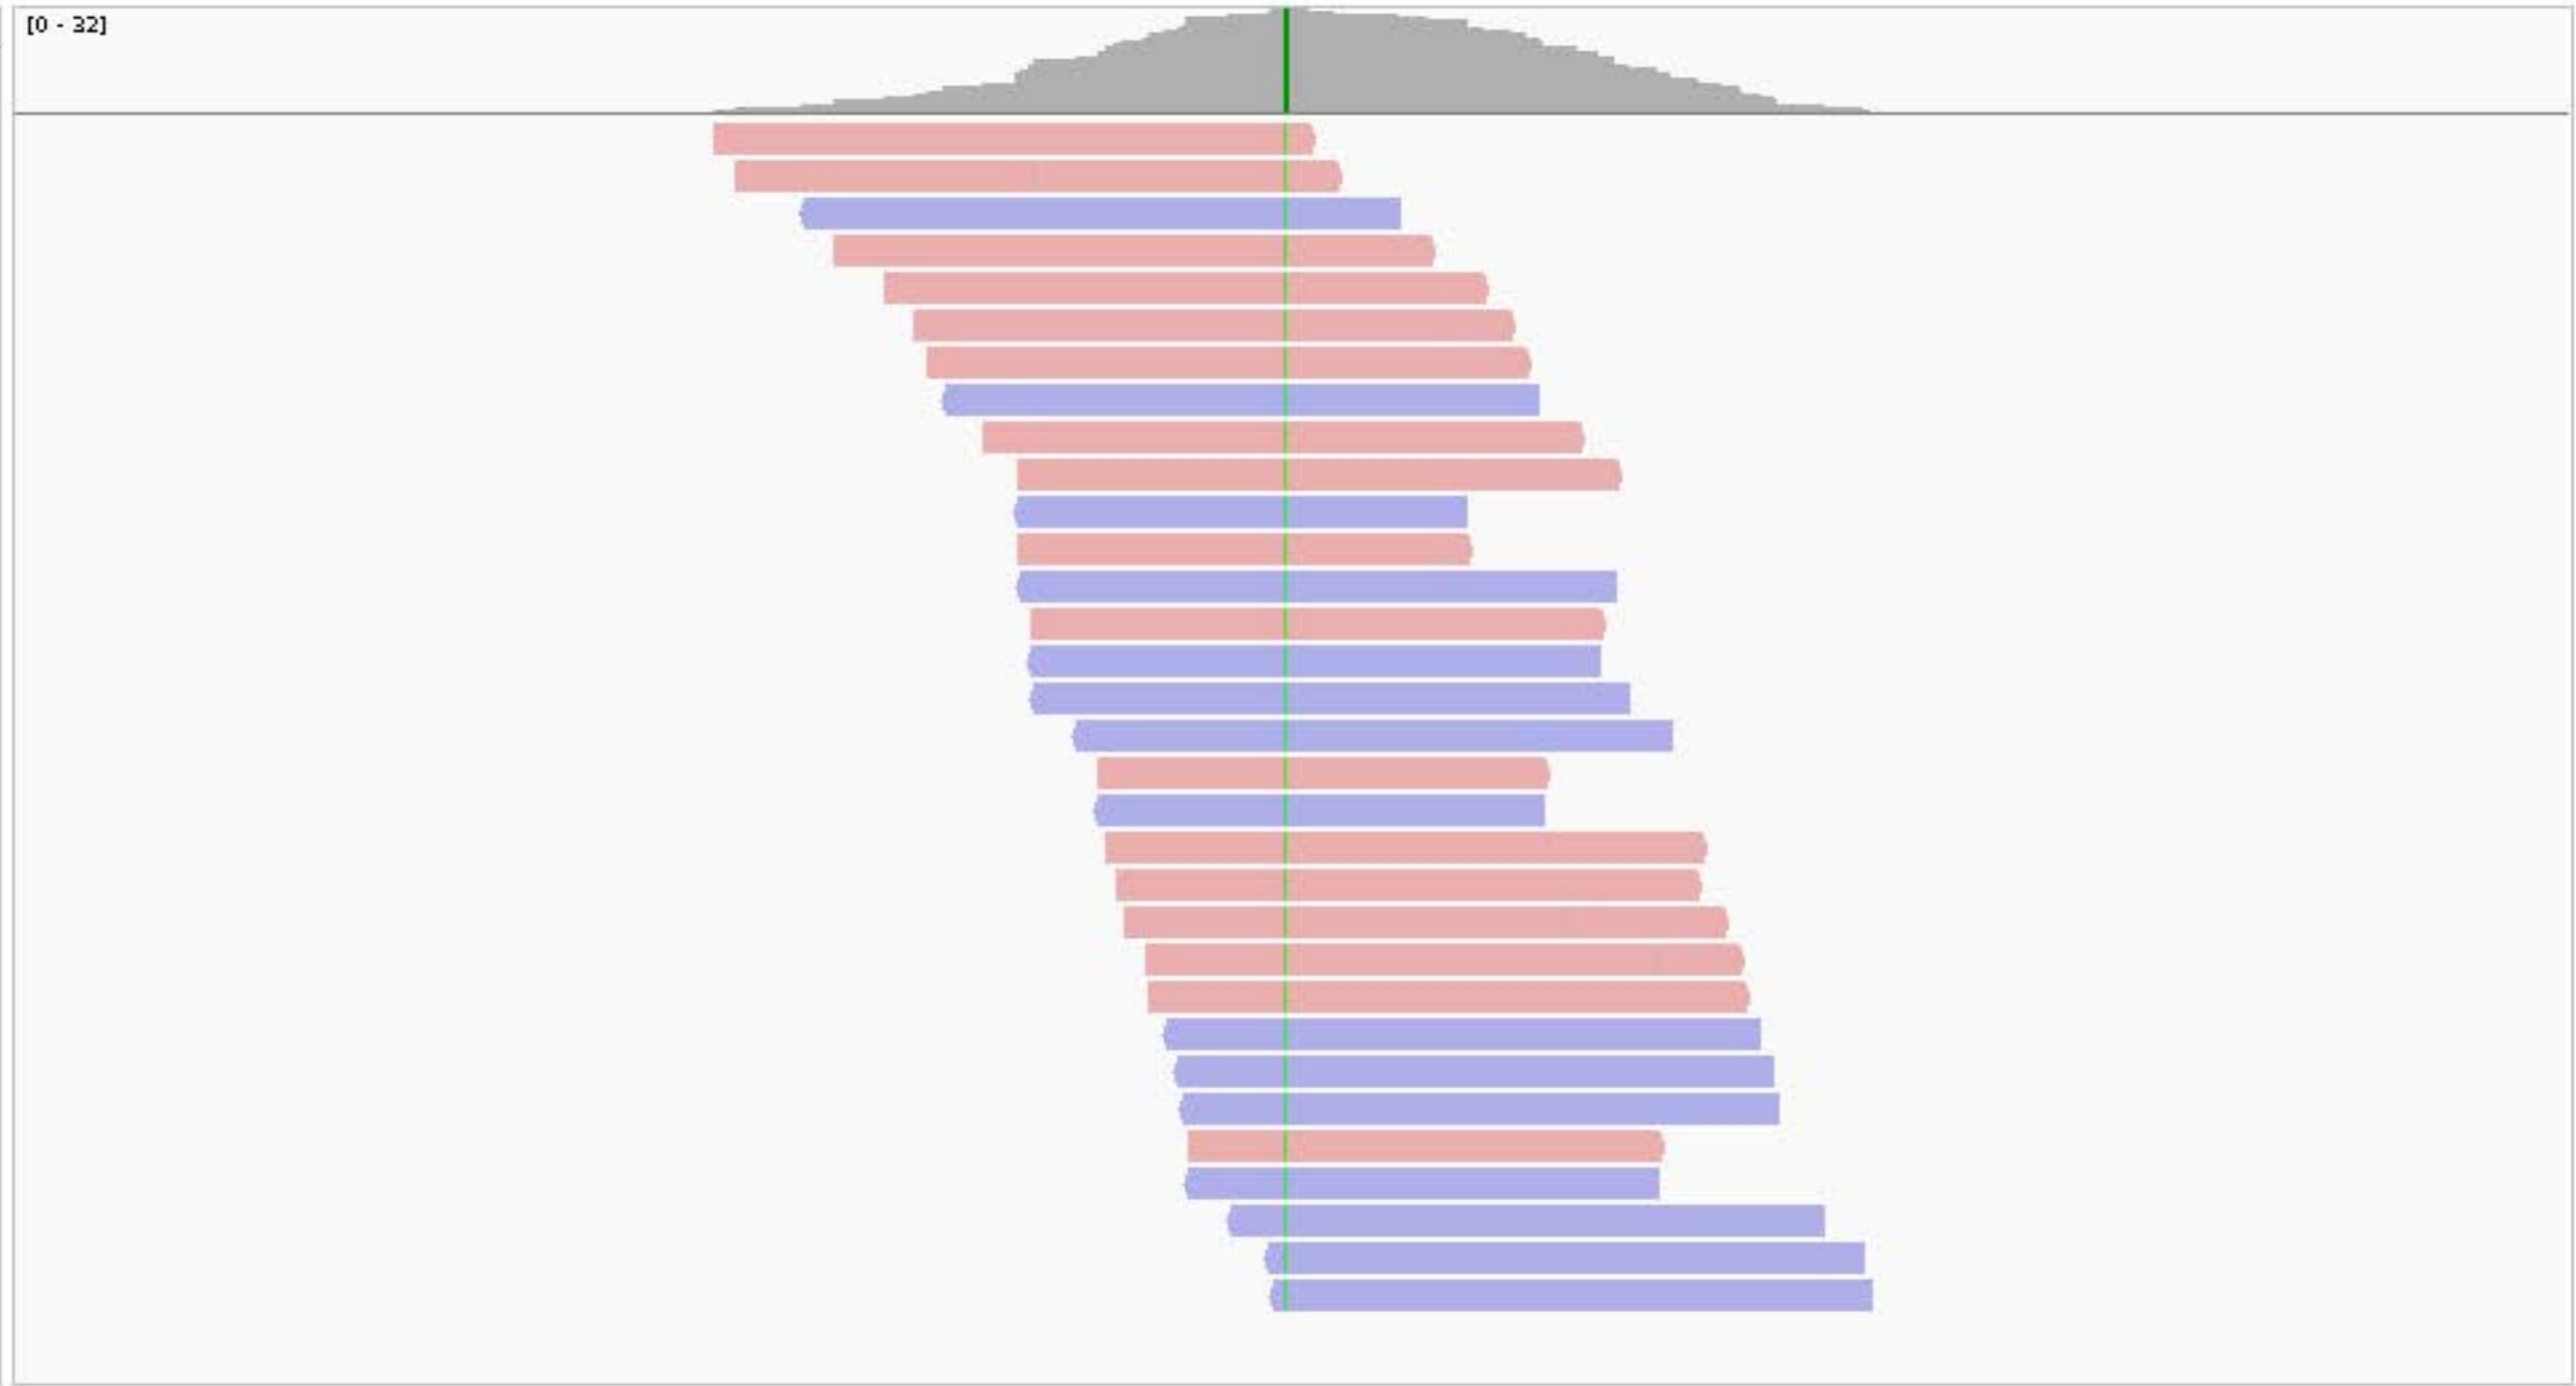

SL\_0004\_RN\_08\_mut.bam

Sequence

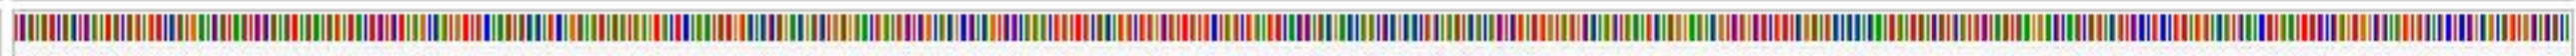

Refseq Genes

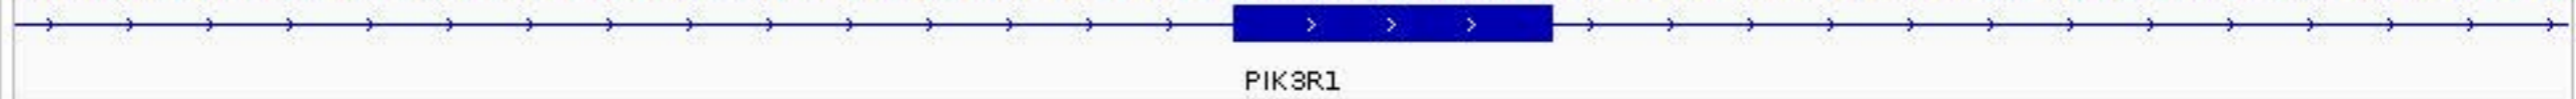

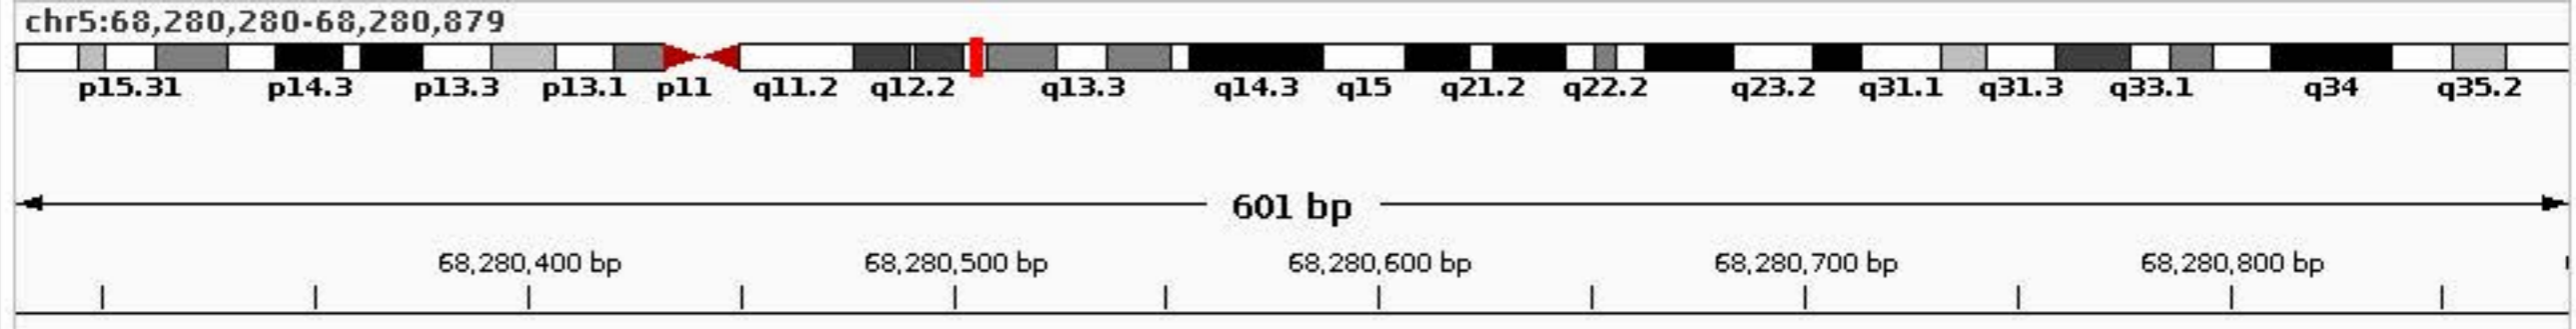

SL\_0004\_RN\_08\_mut.bam Coverage

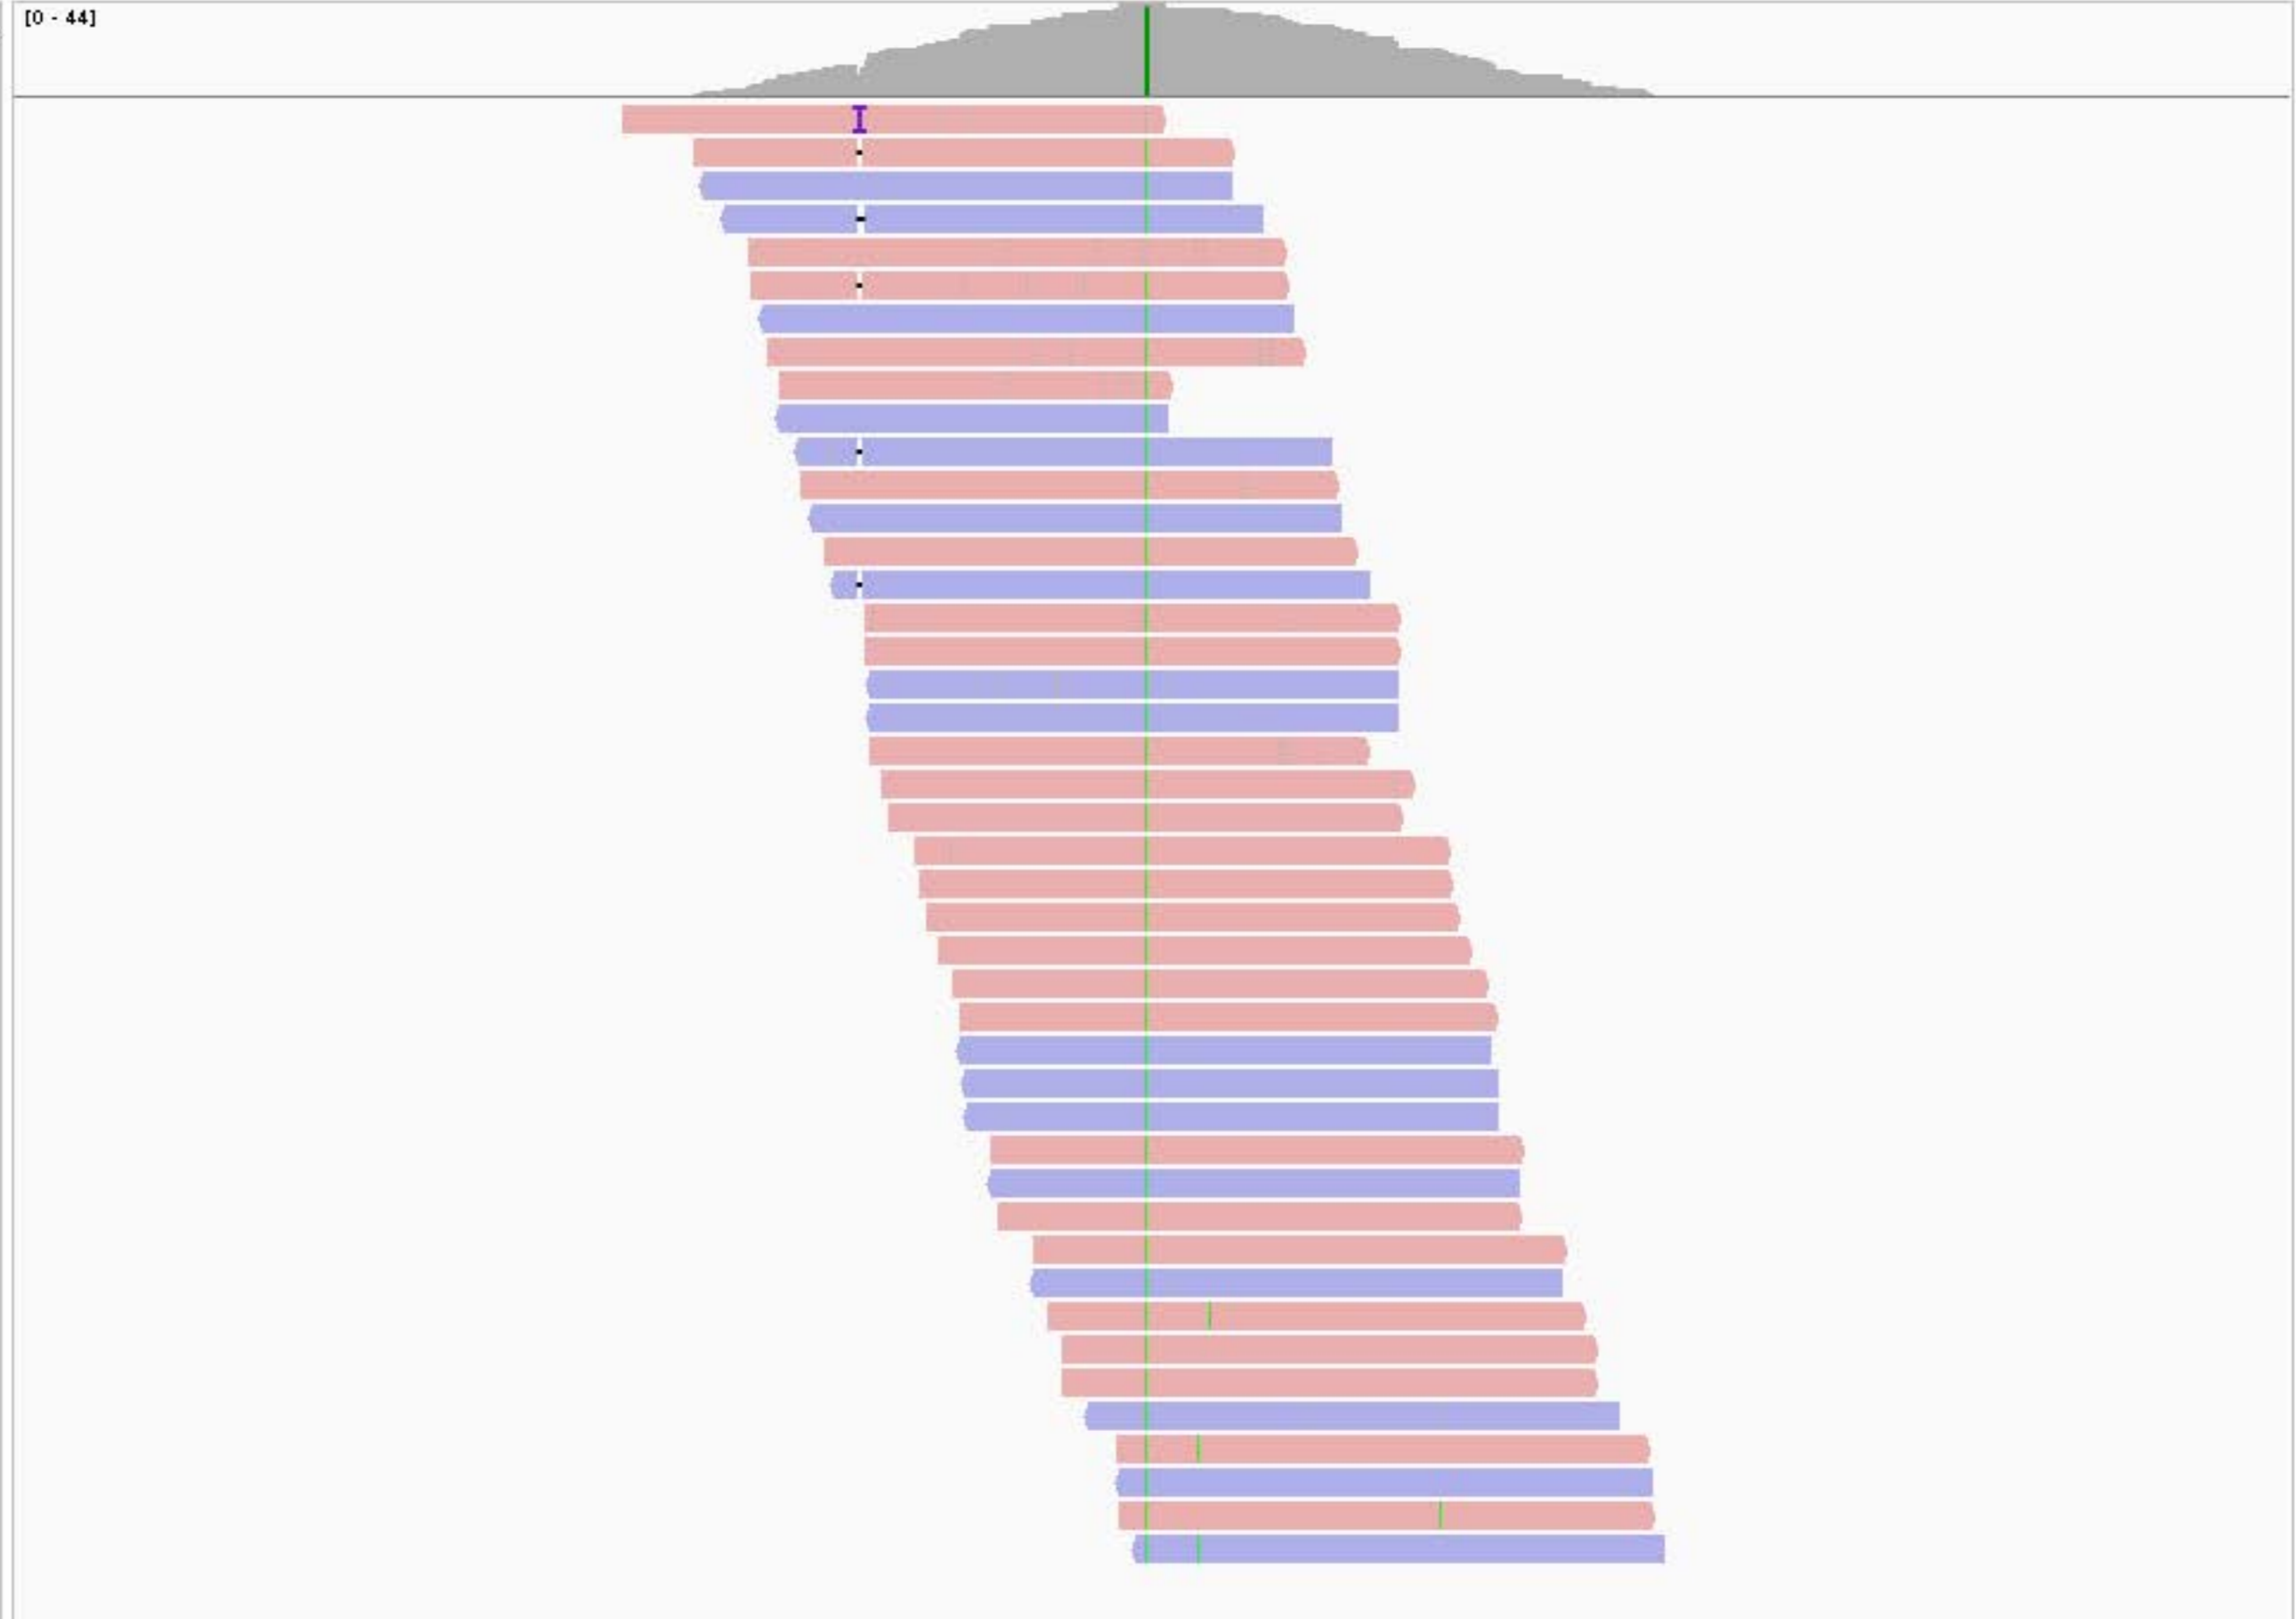

SL\_0004\_RN\_08\_mut.bam

Sequence

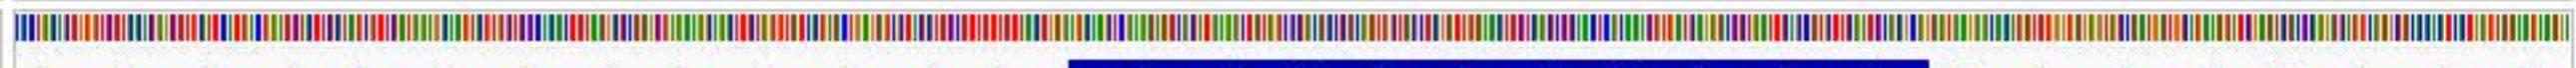

Refseq Genes

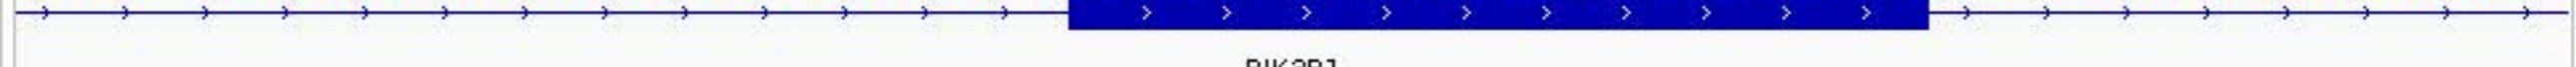

PIK3R1

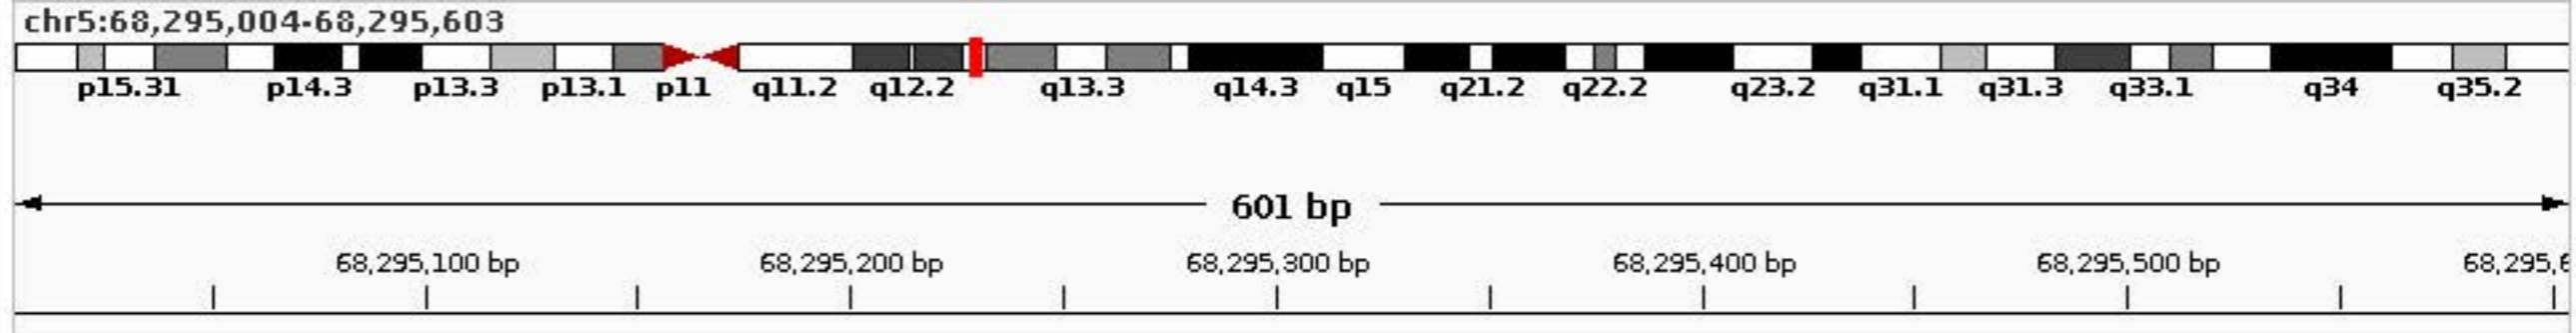

SL\_0004\_RN\_64\_mut.bam Coverage

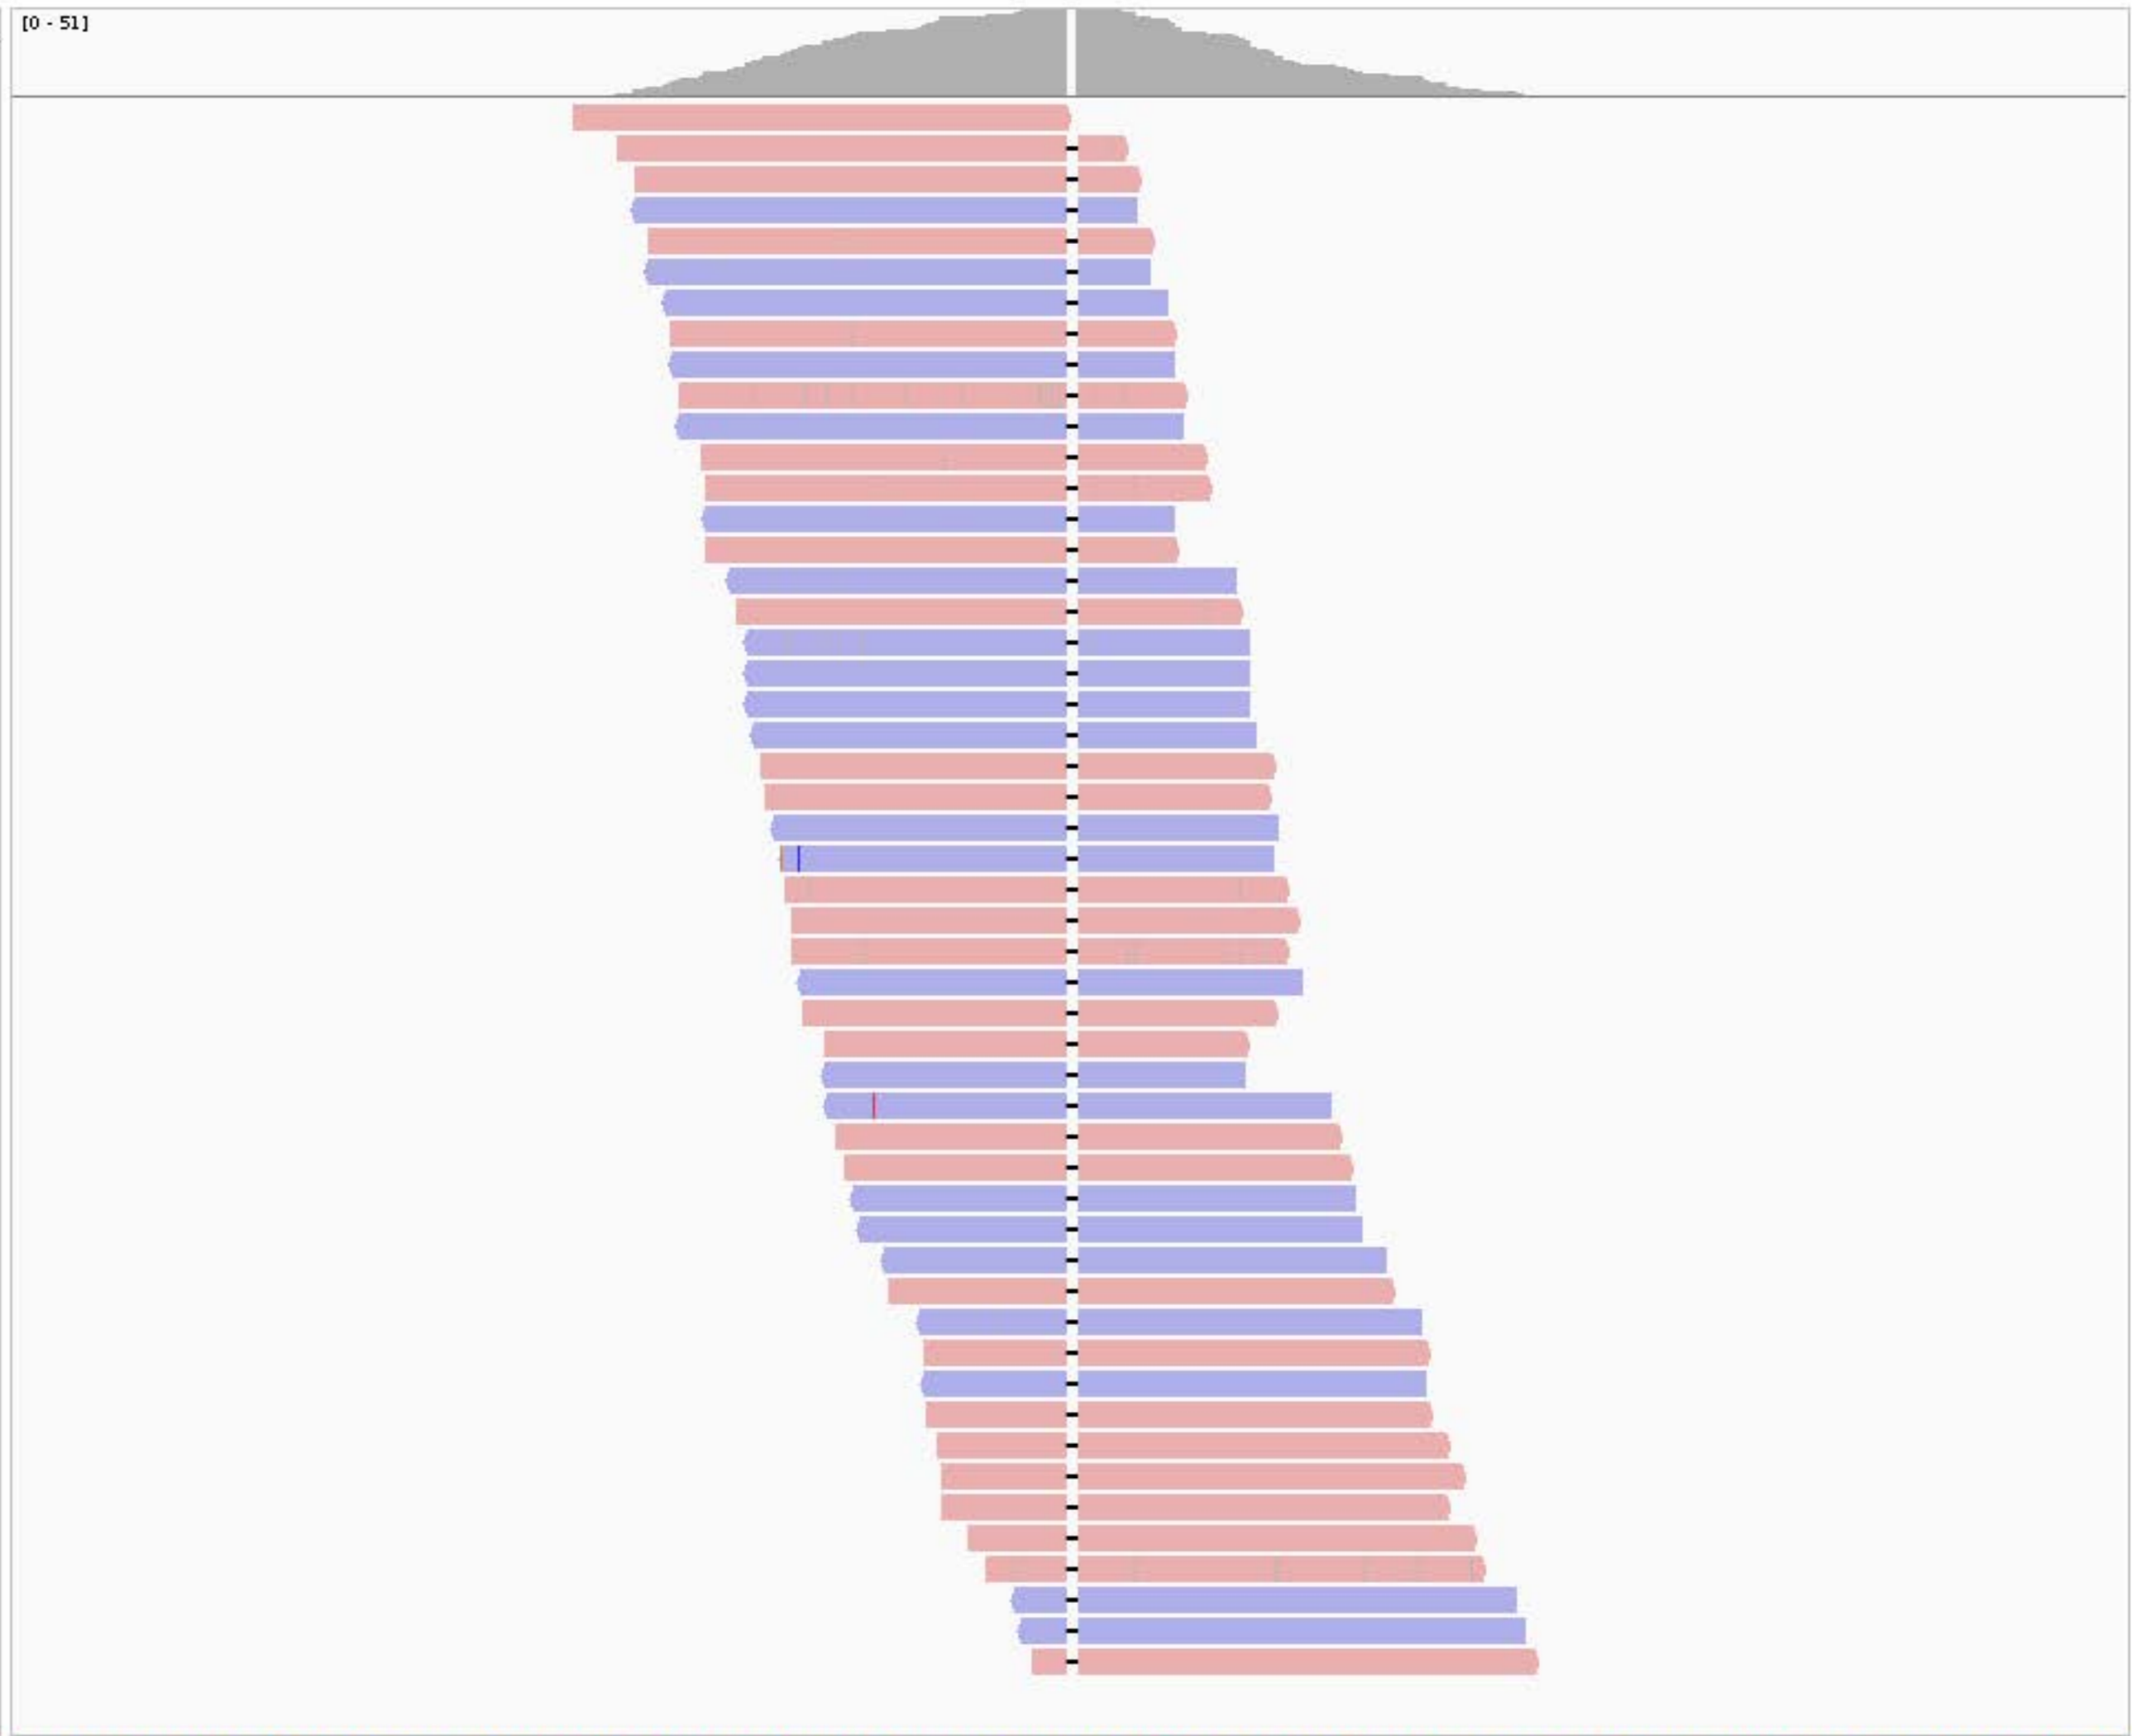

SL\_0004\_RN\_64\_mut.bam

Sequence

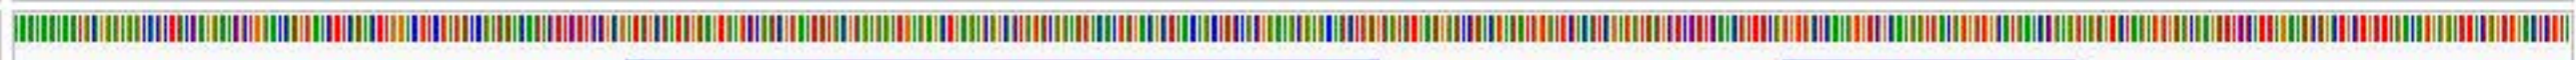

Refseq Genes

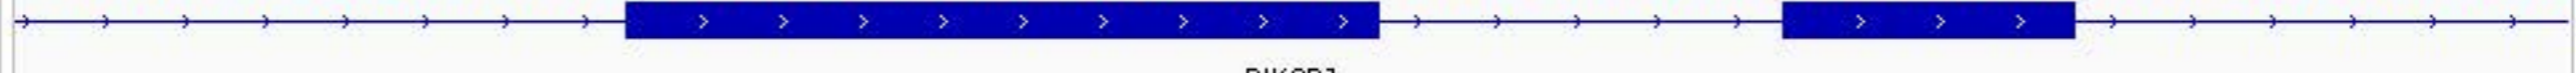

PIK3R1



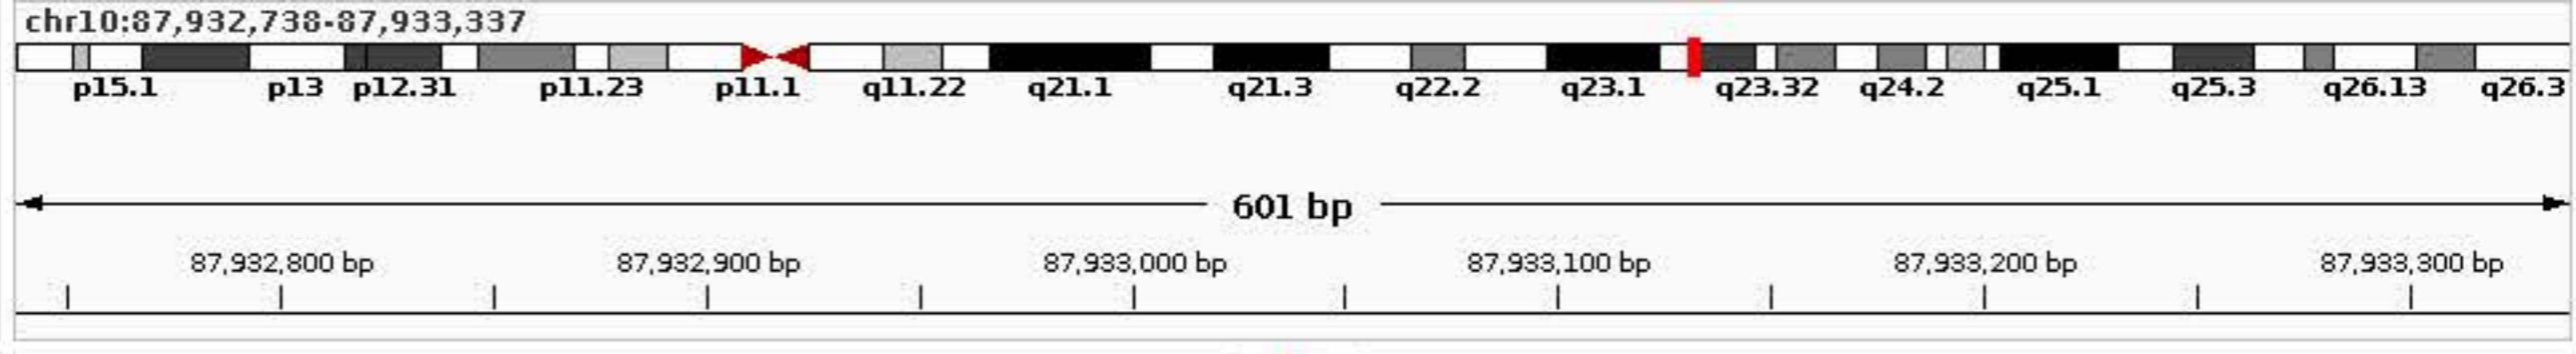

SL\_0004\_RN\_61\_mut.bam Coverage

SL\_0004\_RN\_61\_mut.bam

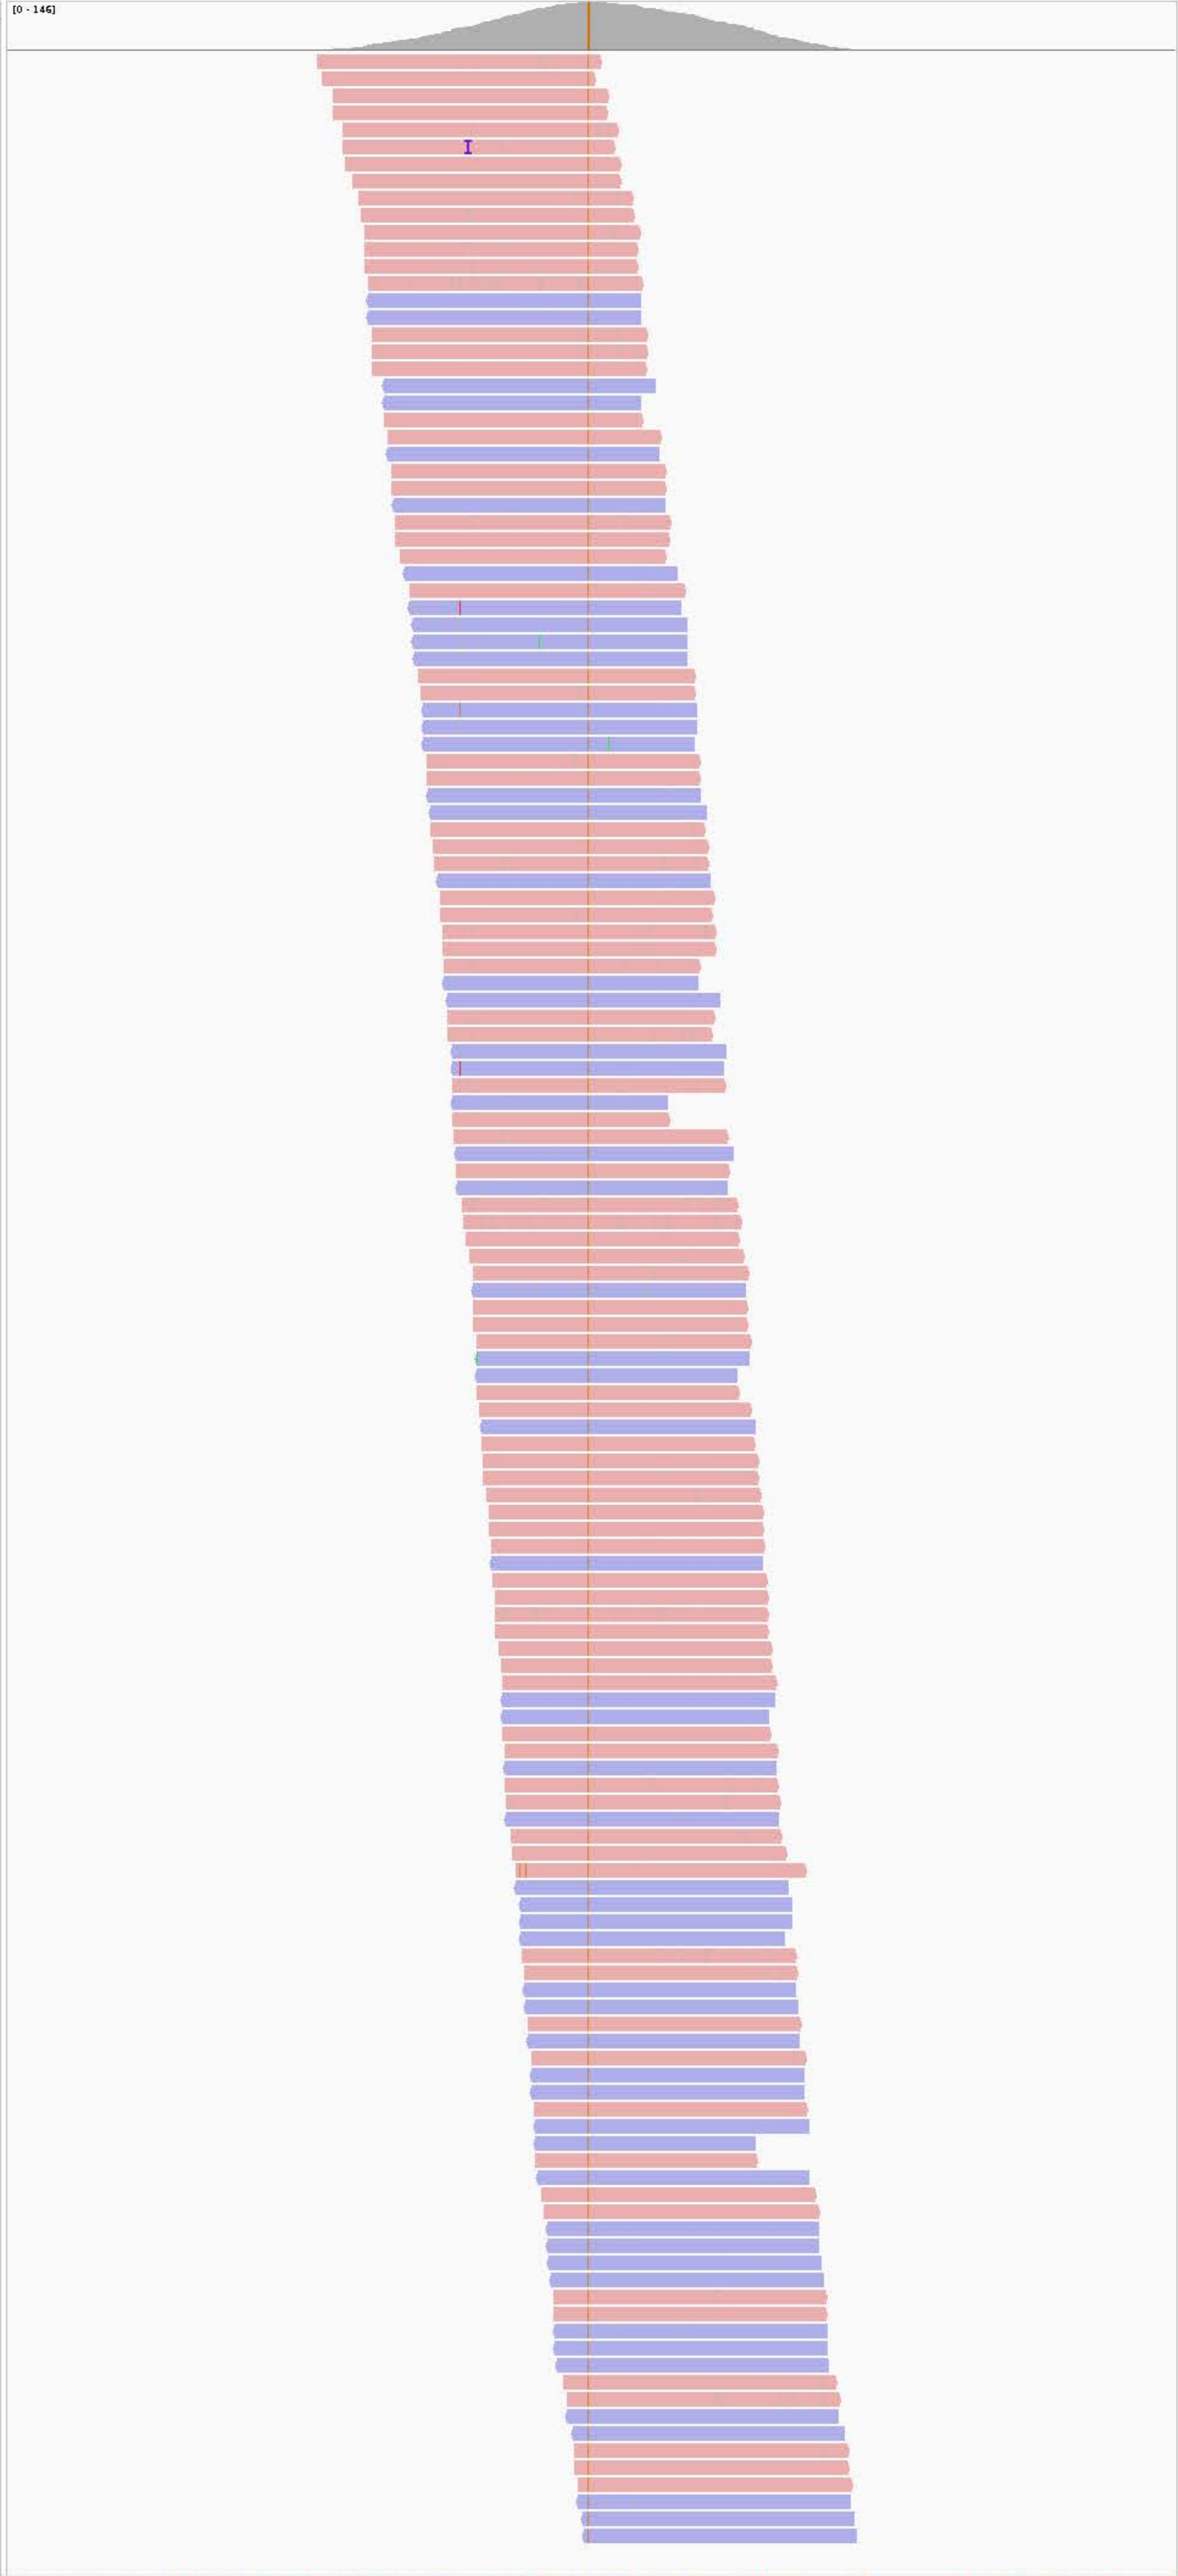

Sequence

Refseq Genes

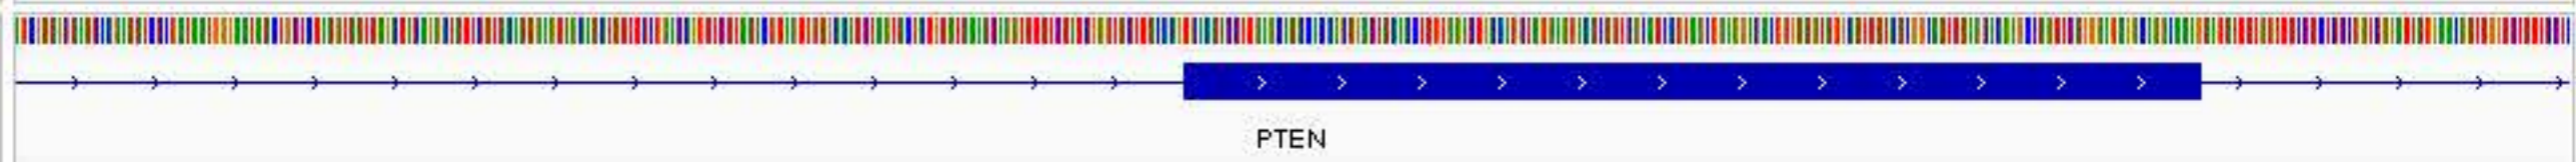

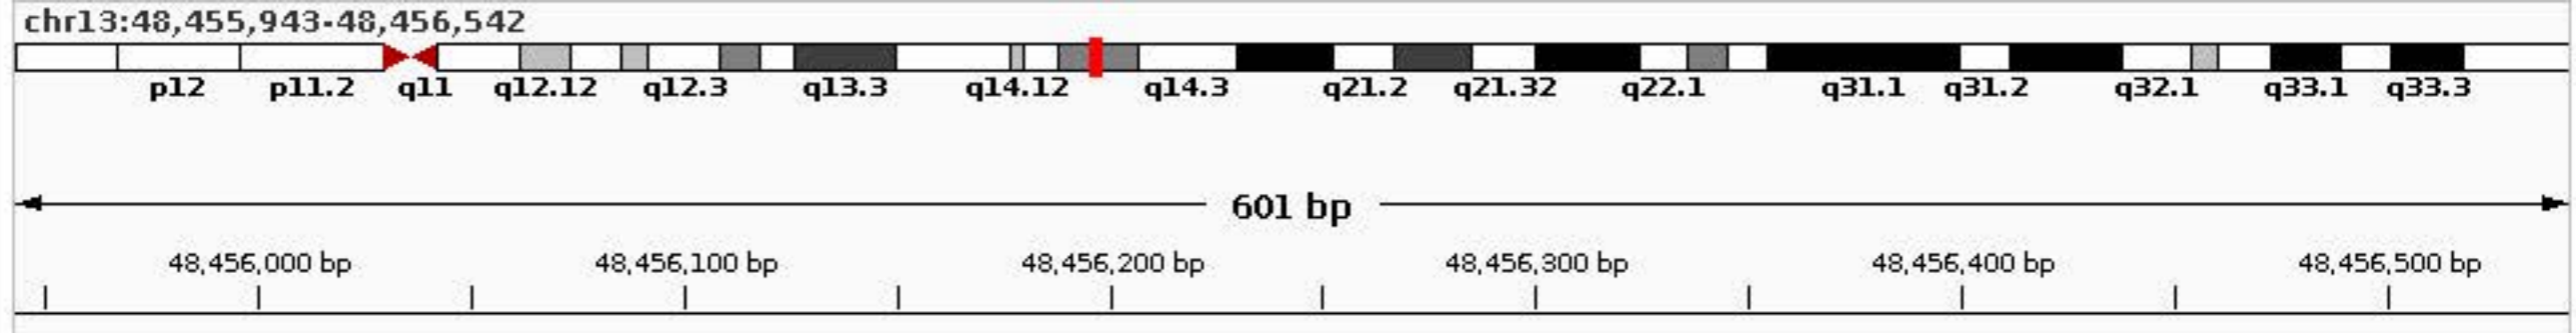

SL\_0004\_RN\_08\_mut.bam Coverage

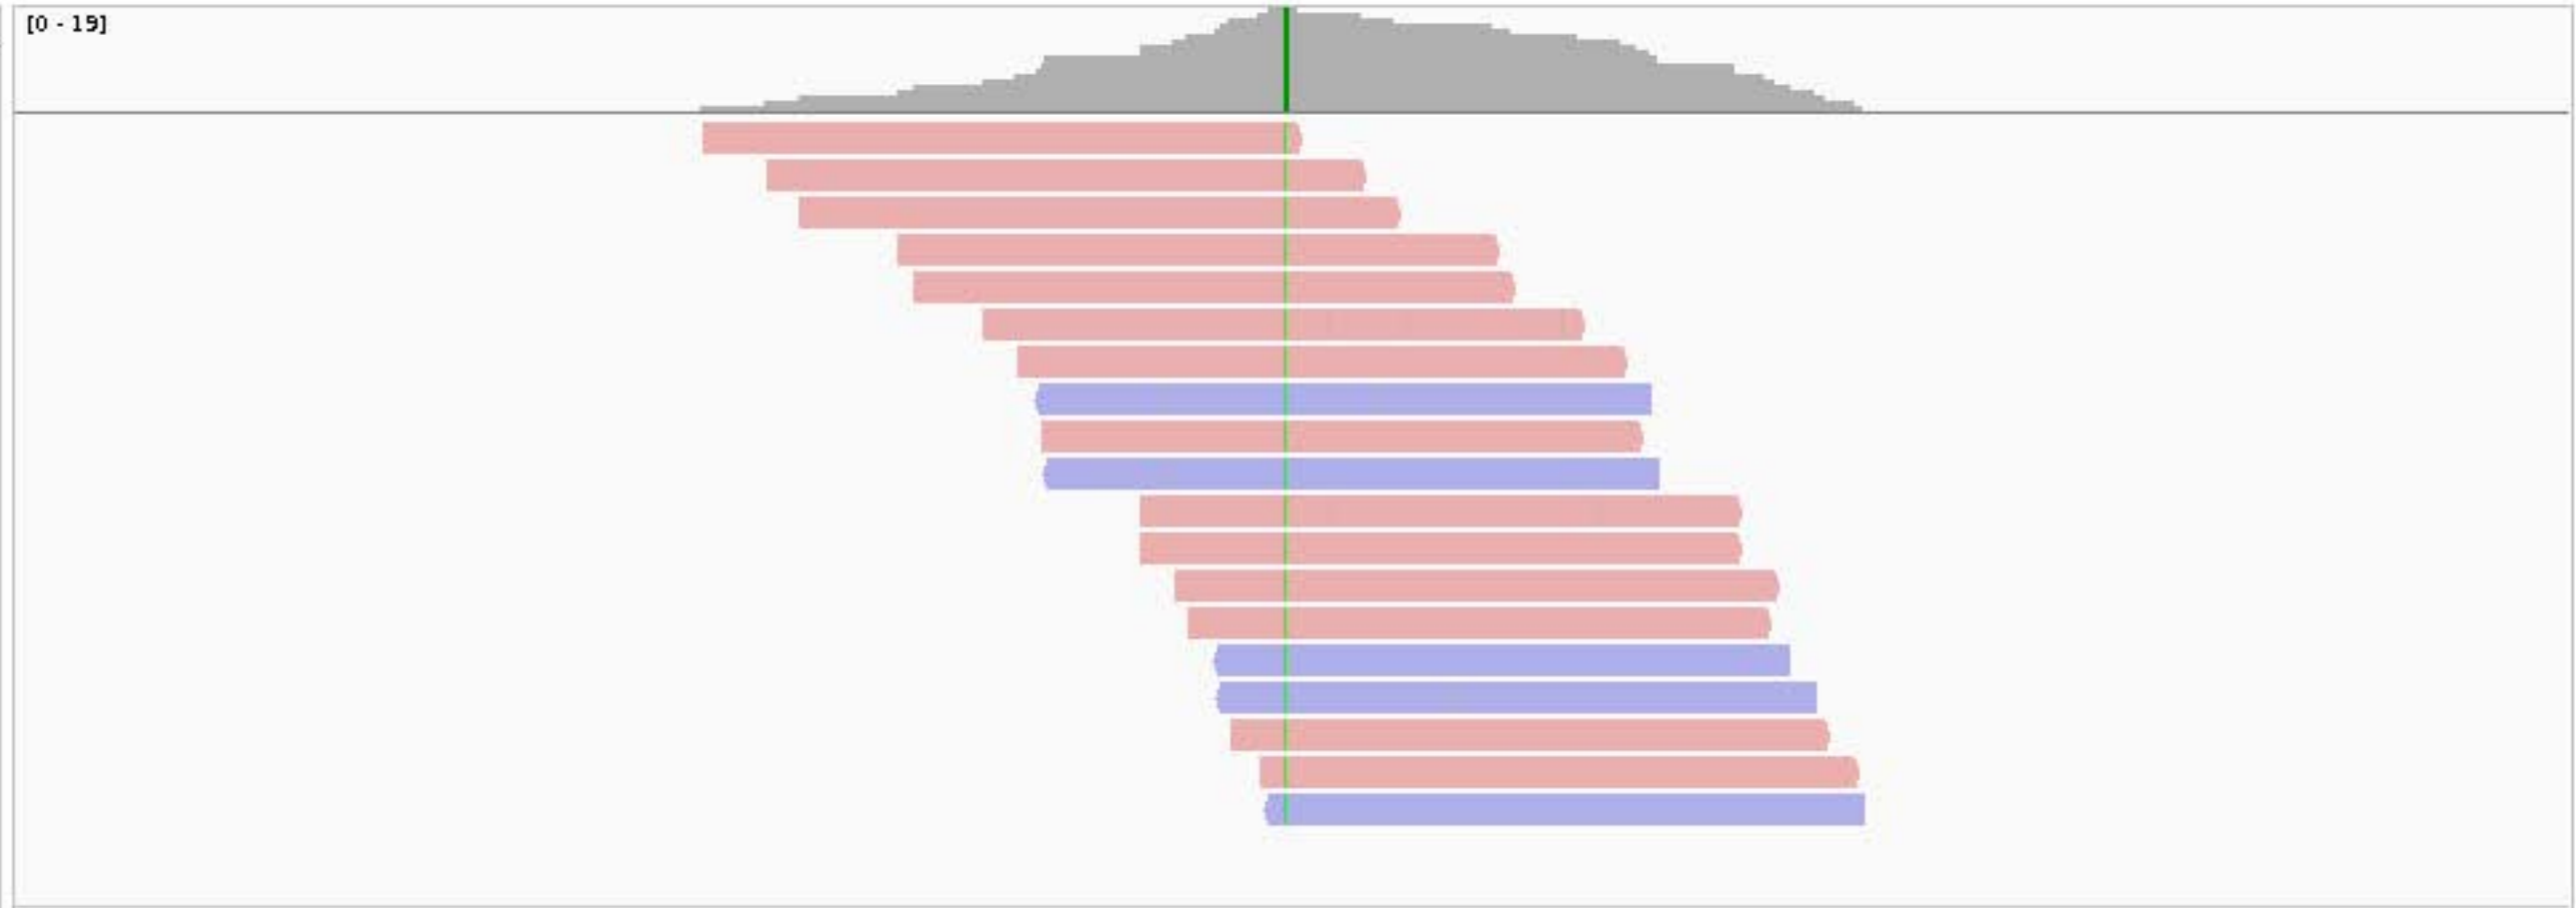

SL\_0004\_RN\_08\_mut.bam

Sequence

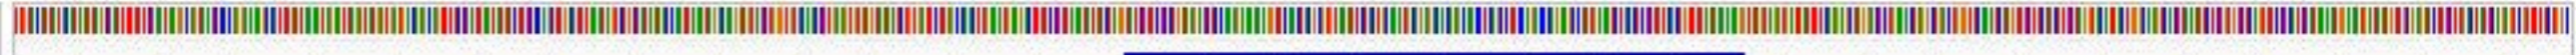

Refseq Genes

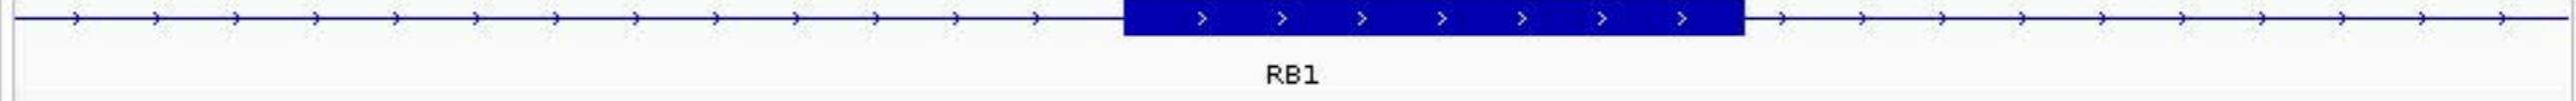

chr21:34,792,080-34,792,679

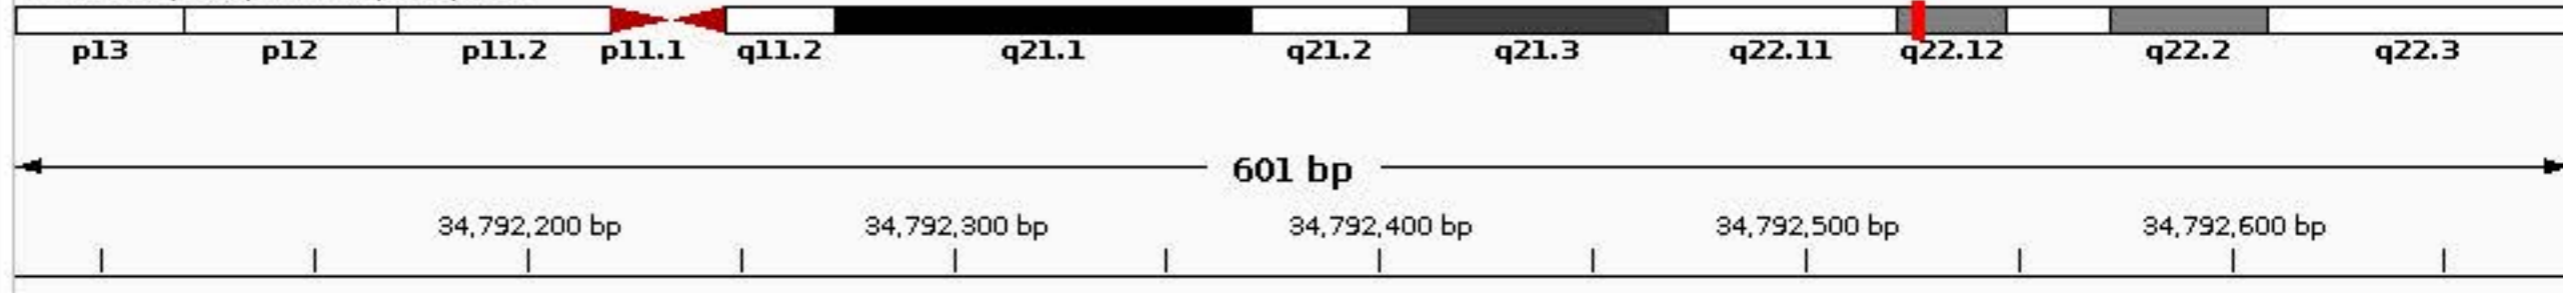

SL\_0004\_RN\_08\_mut.bam Coverage

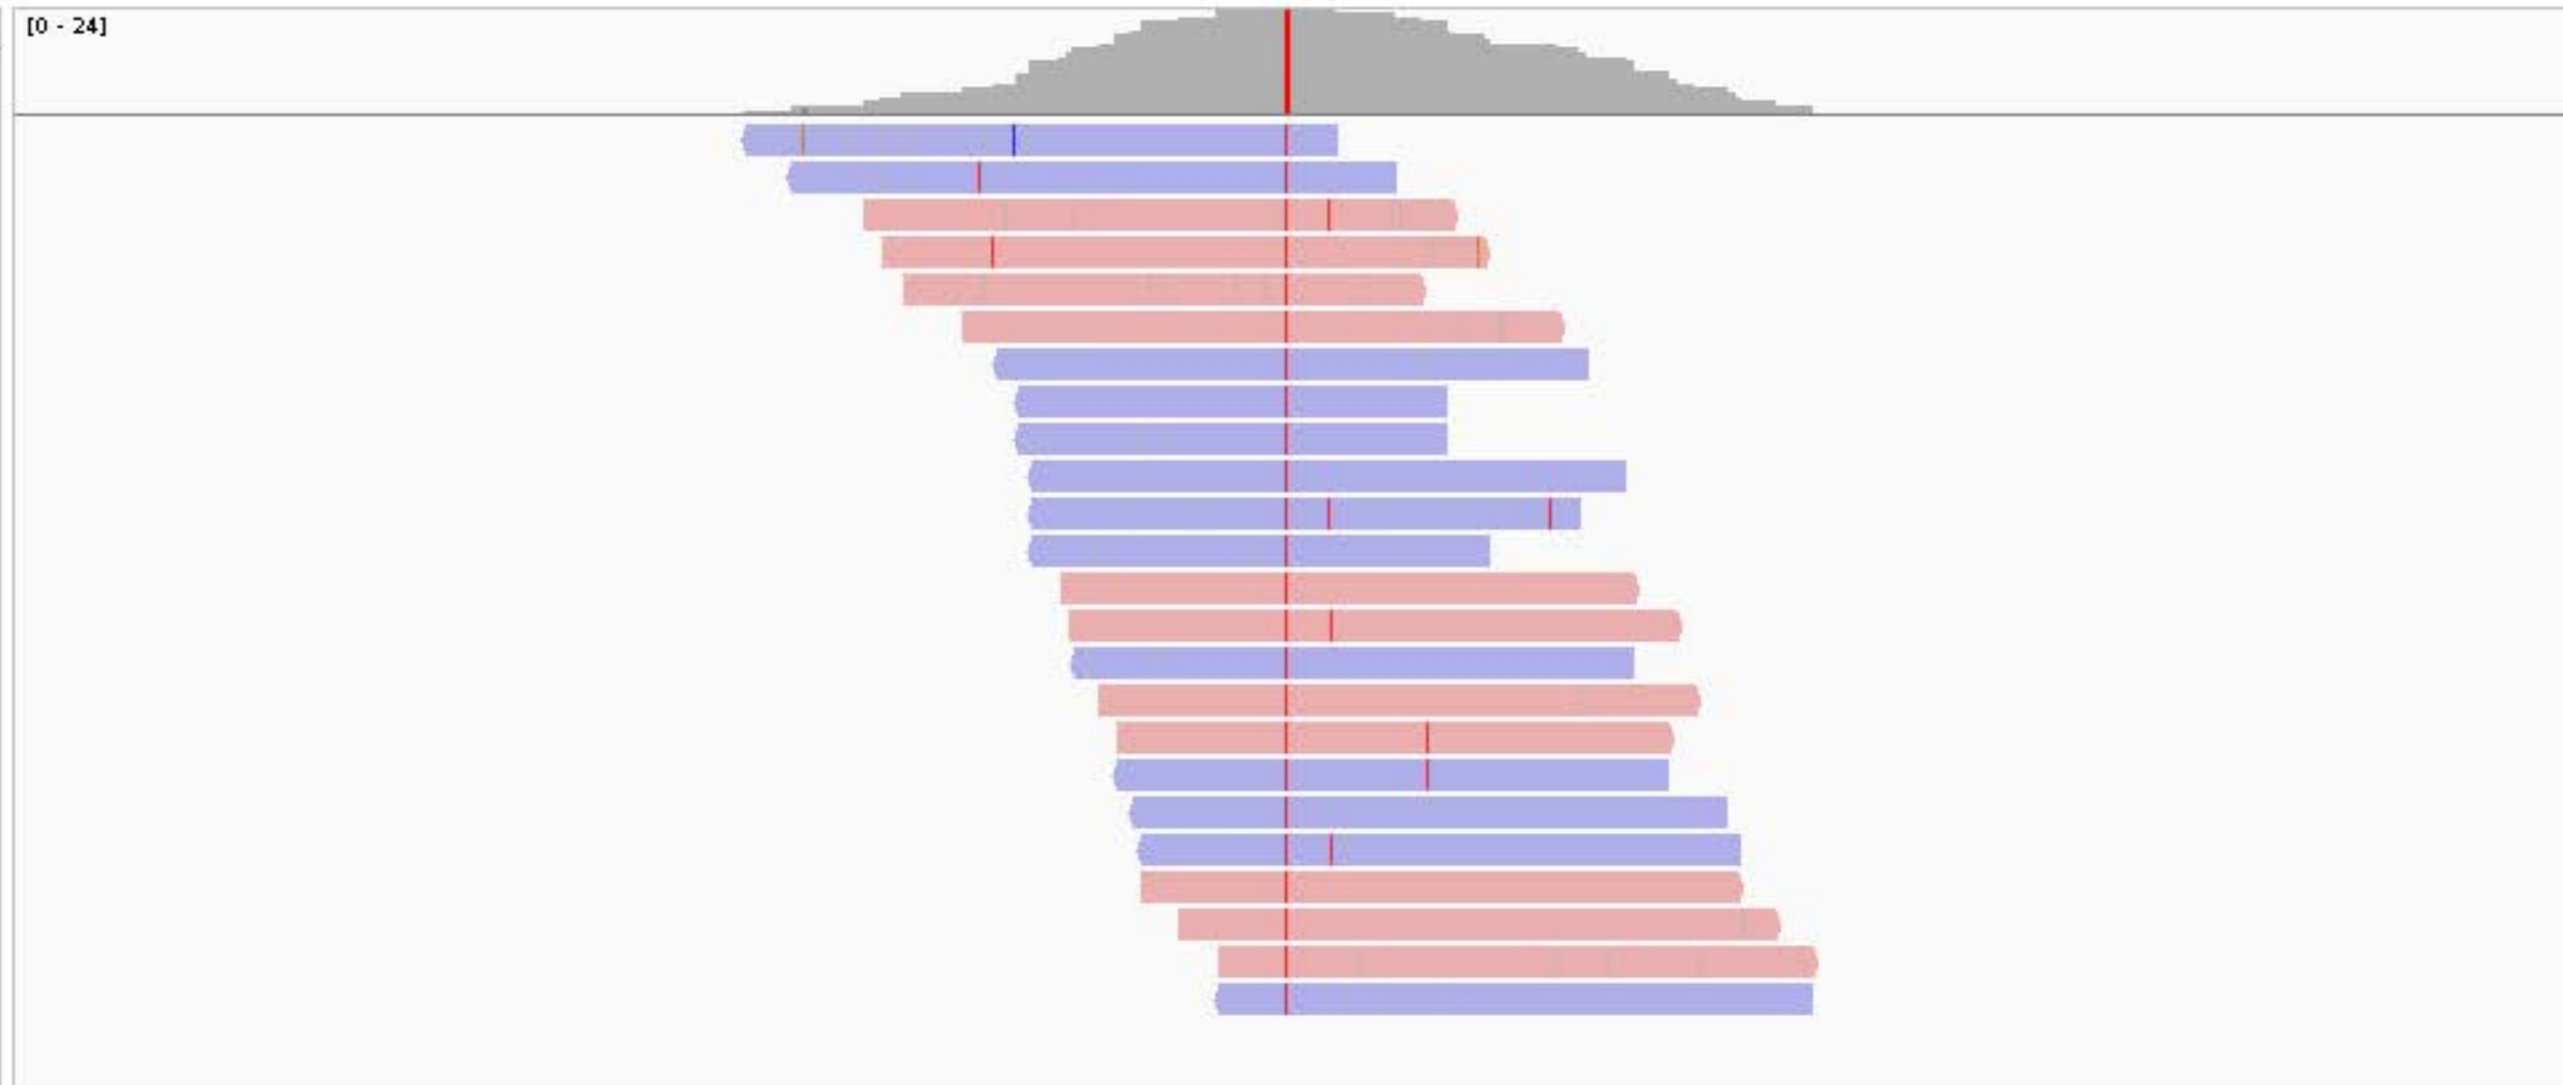

SL\_0004\_RN\_08\_mut.bam

Sequence

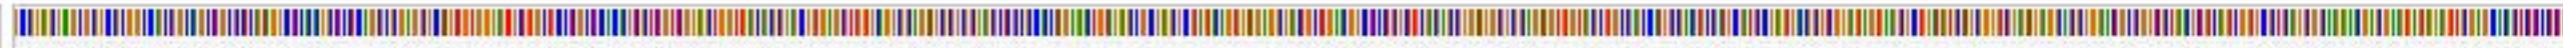

Refseq Genes

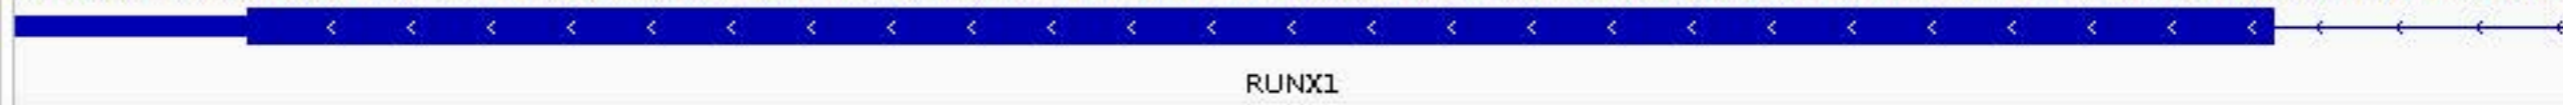

RUNX1



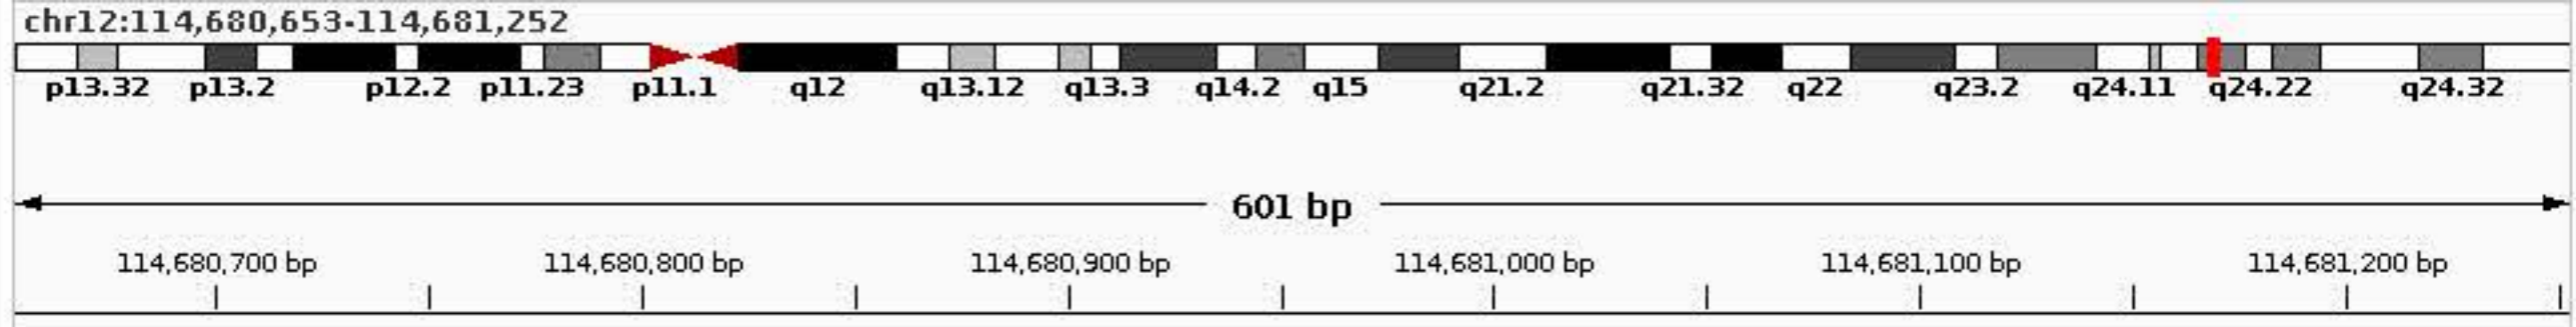

SL\_0003\_LN\_27\_mut.bam Coverage

SL\_0003\_LN\_27\_mut.bam

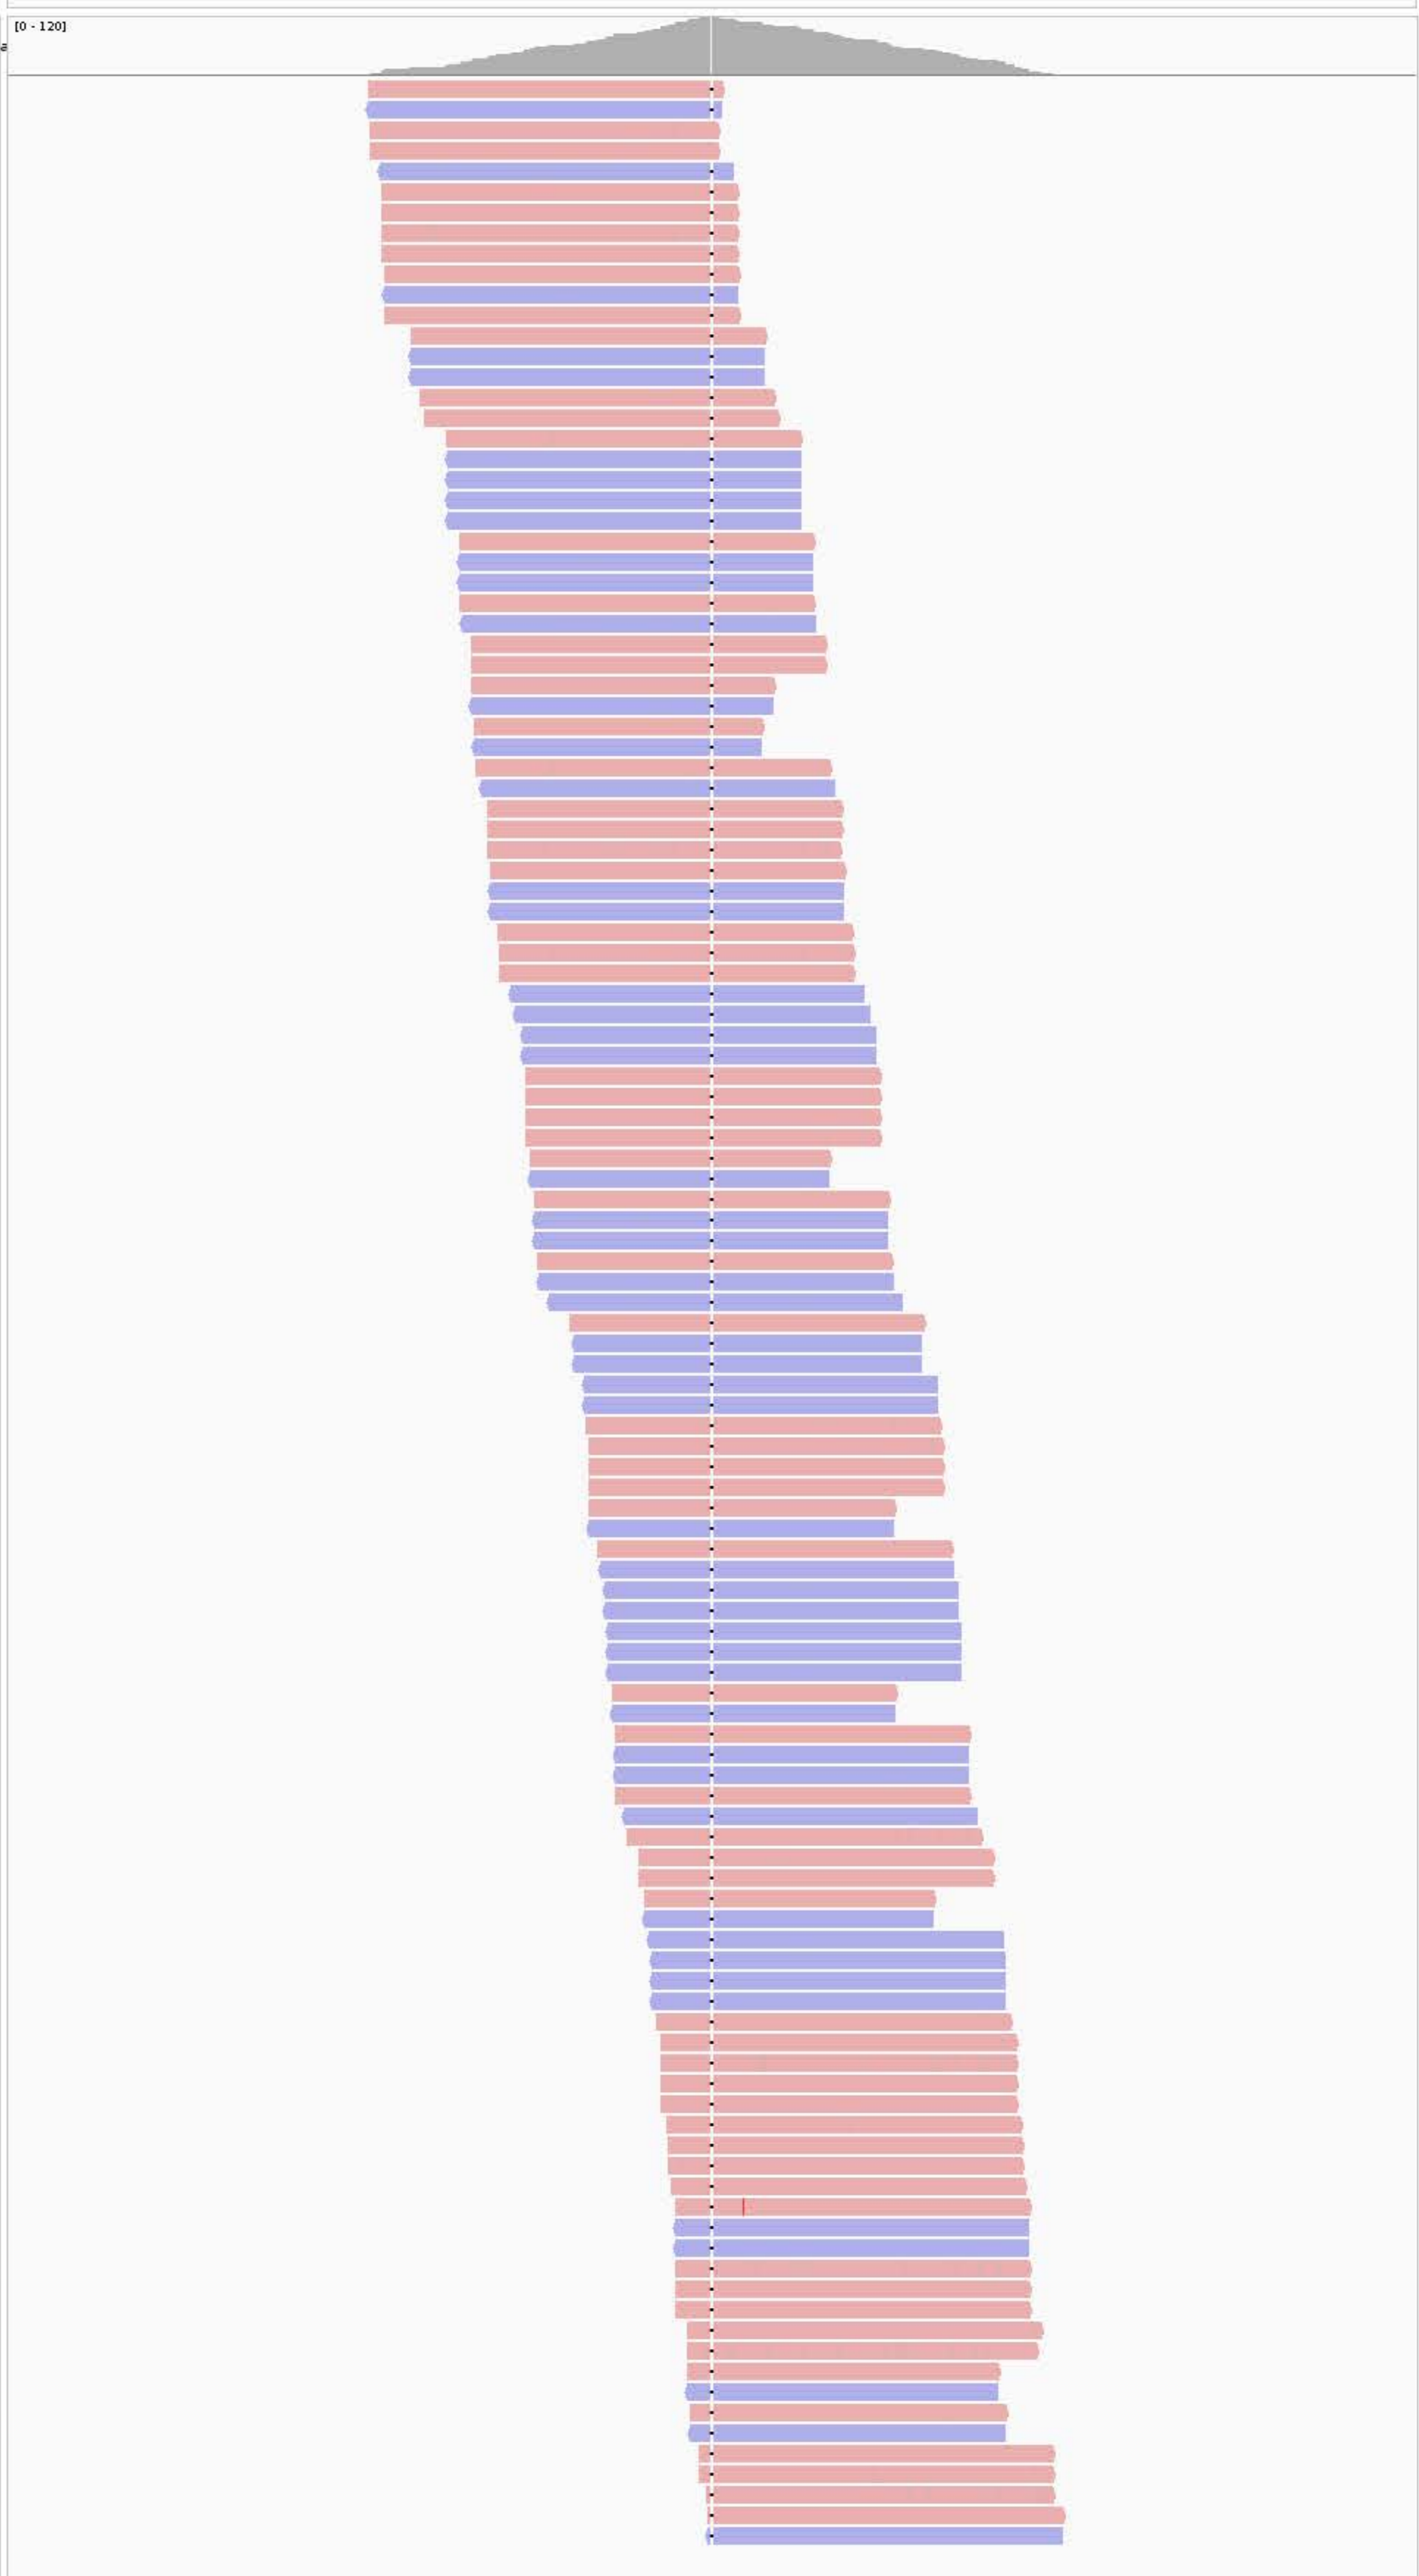

Sequence

Refseq Genes

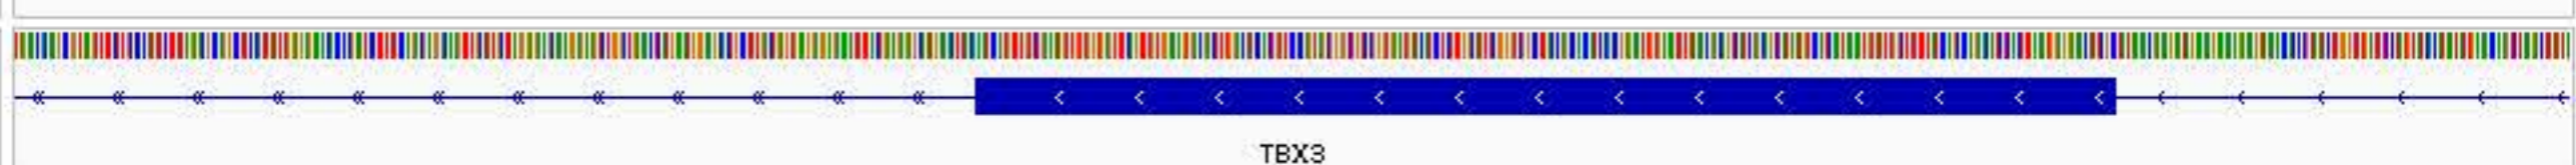

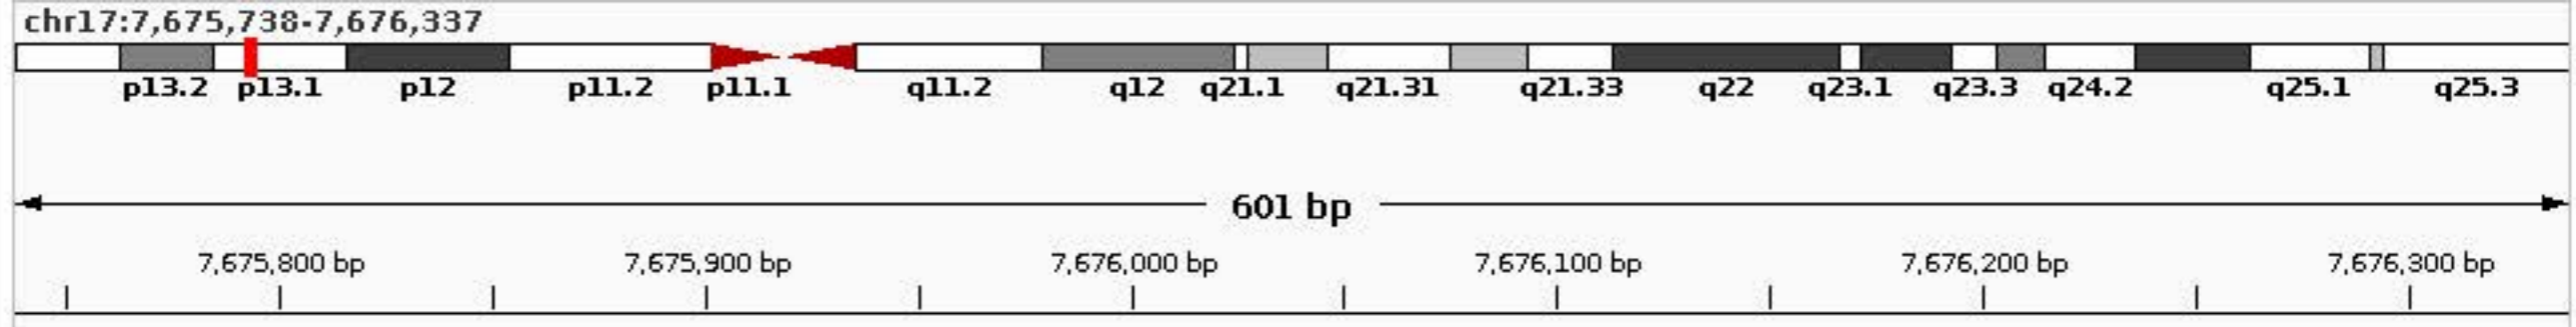

SL\_0015\_LN\_44\_mut.bam Coverage

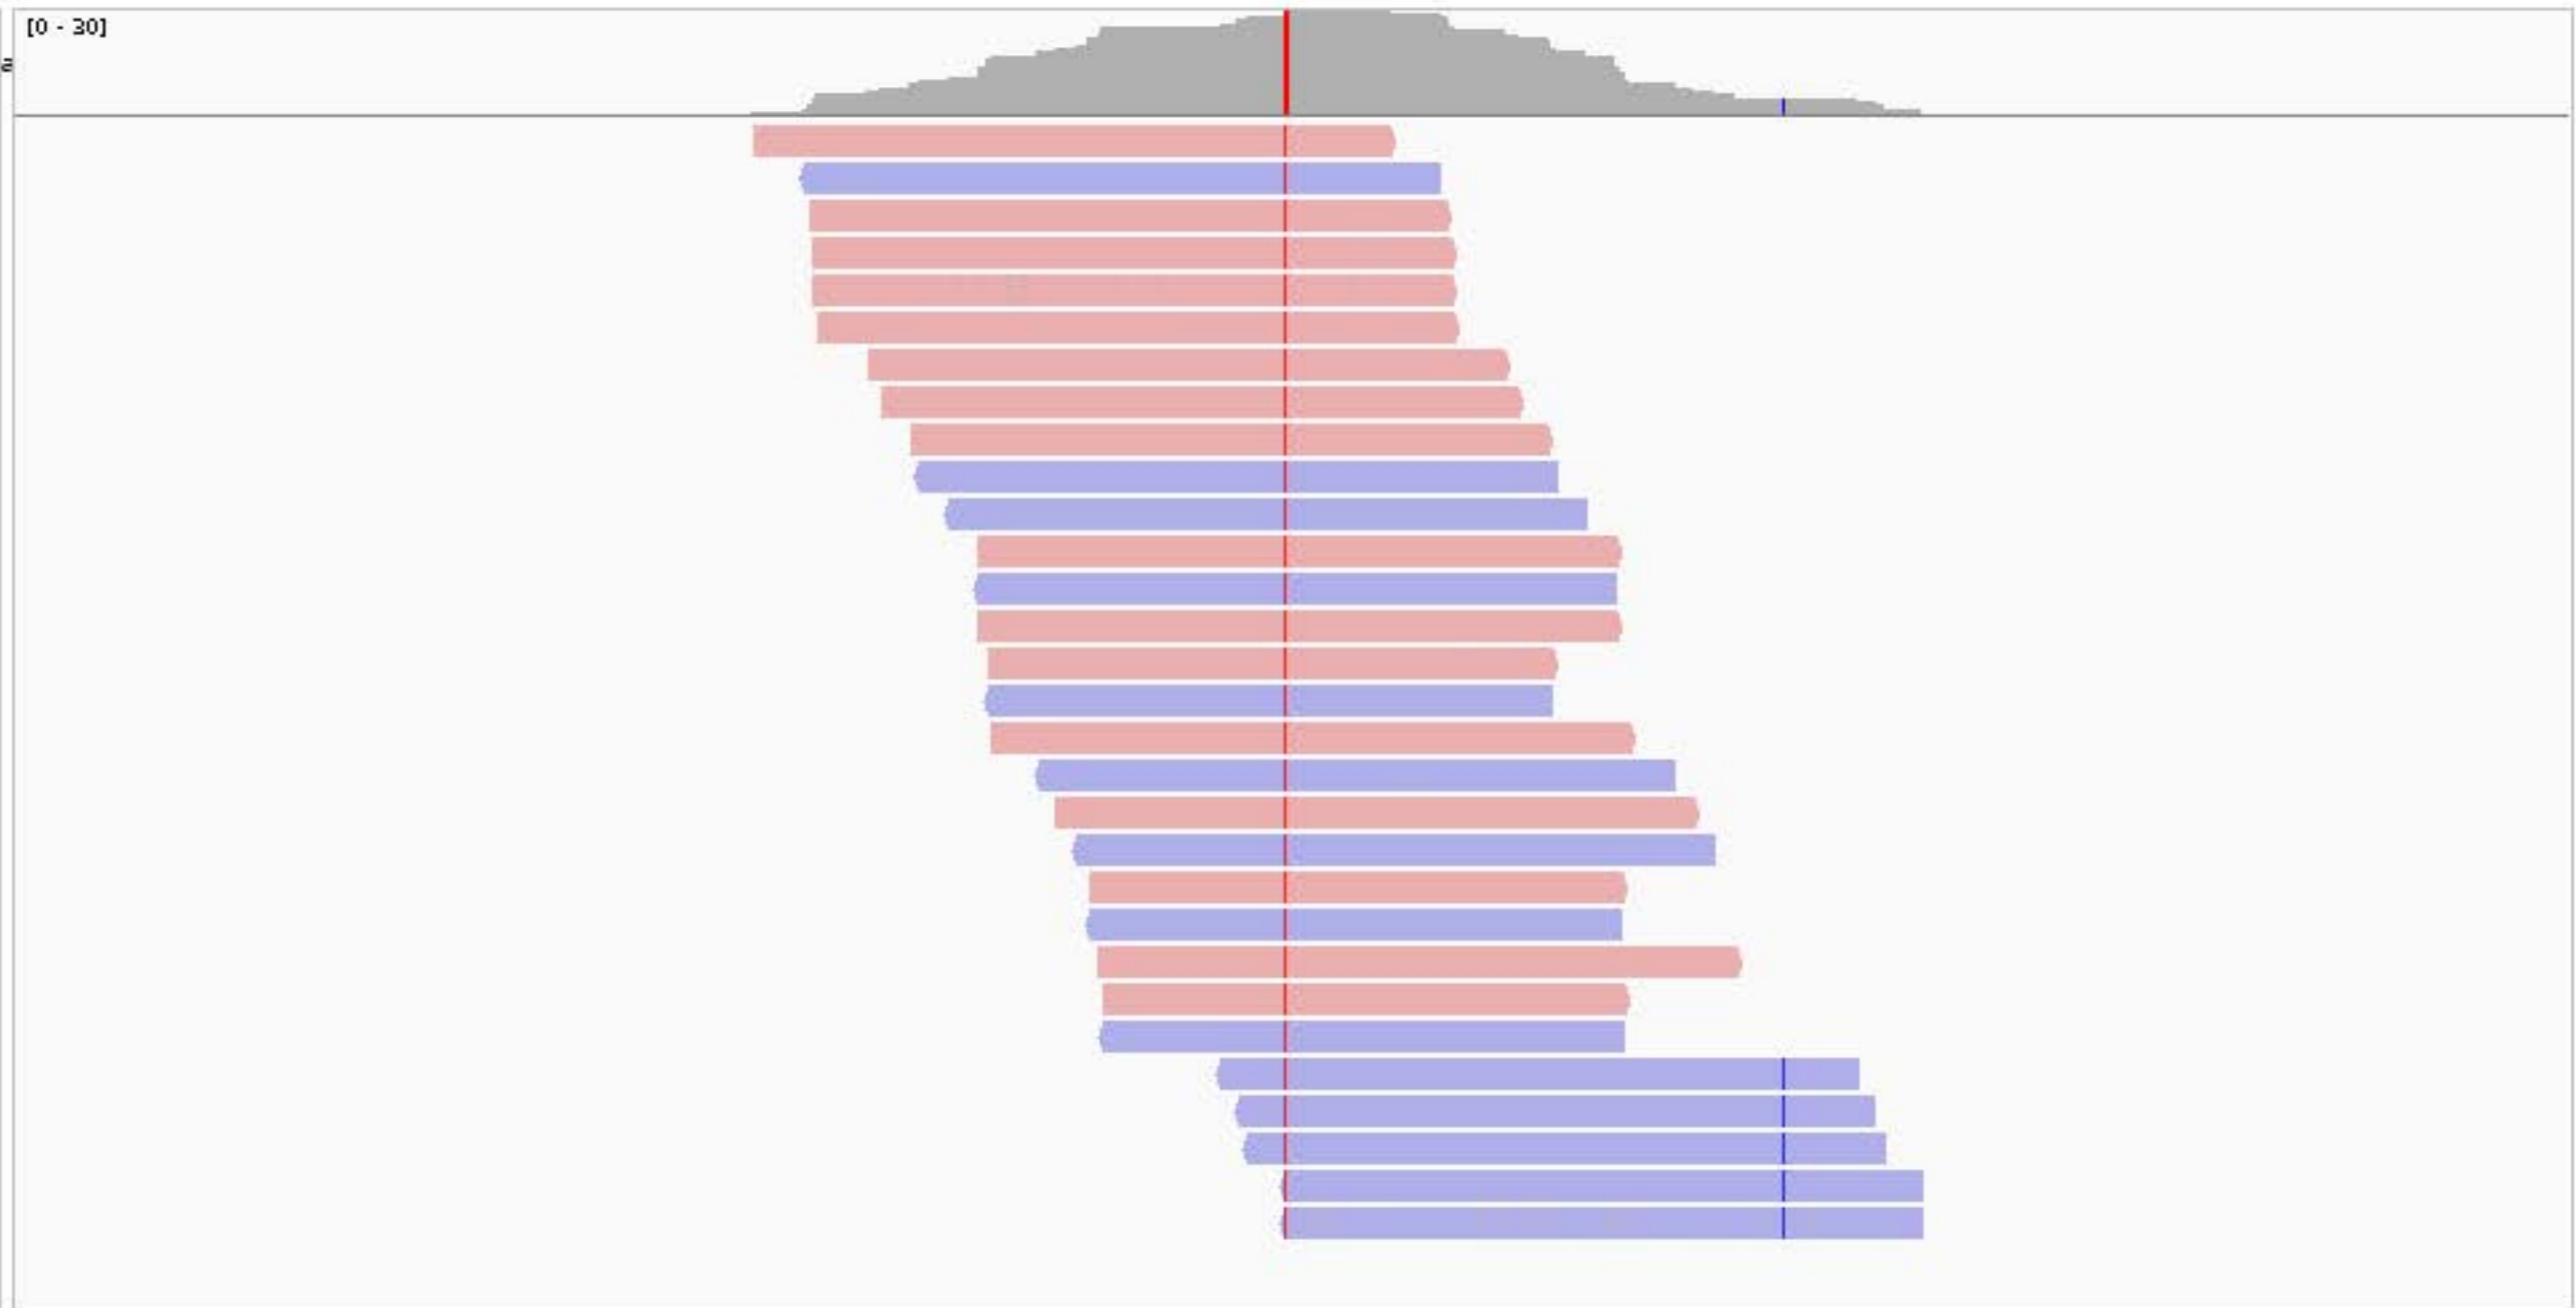

Sequence

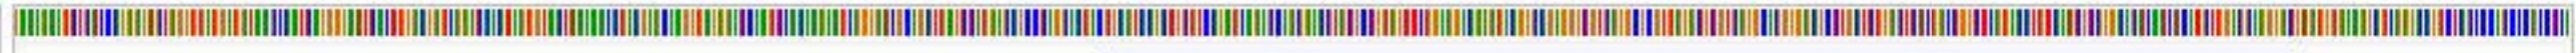

Refseq Genes

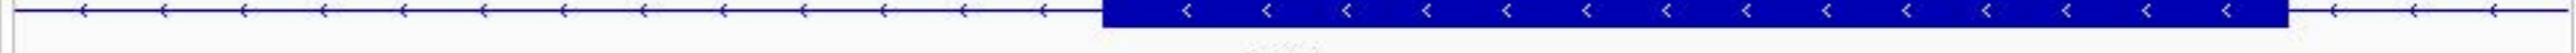

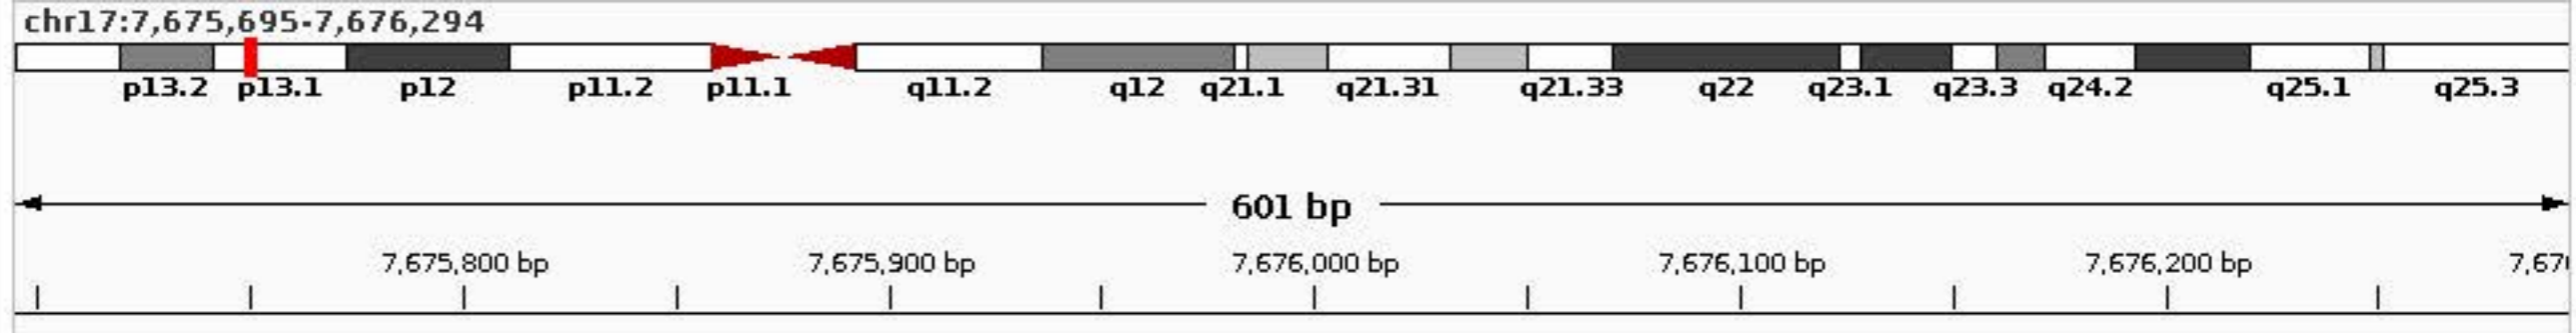

SL\_0004\_RN\_08\_mut.bam Coverage

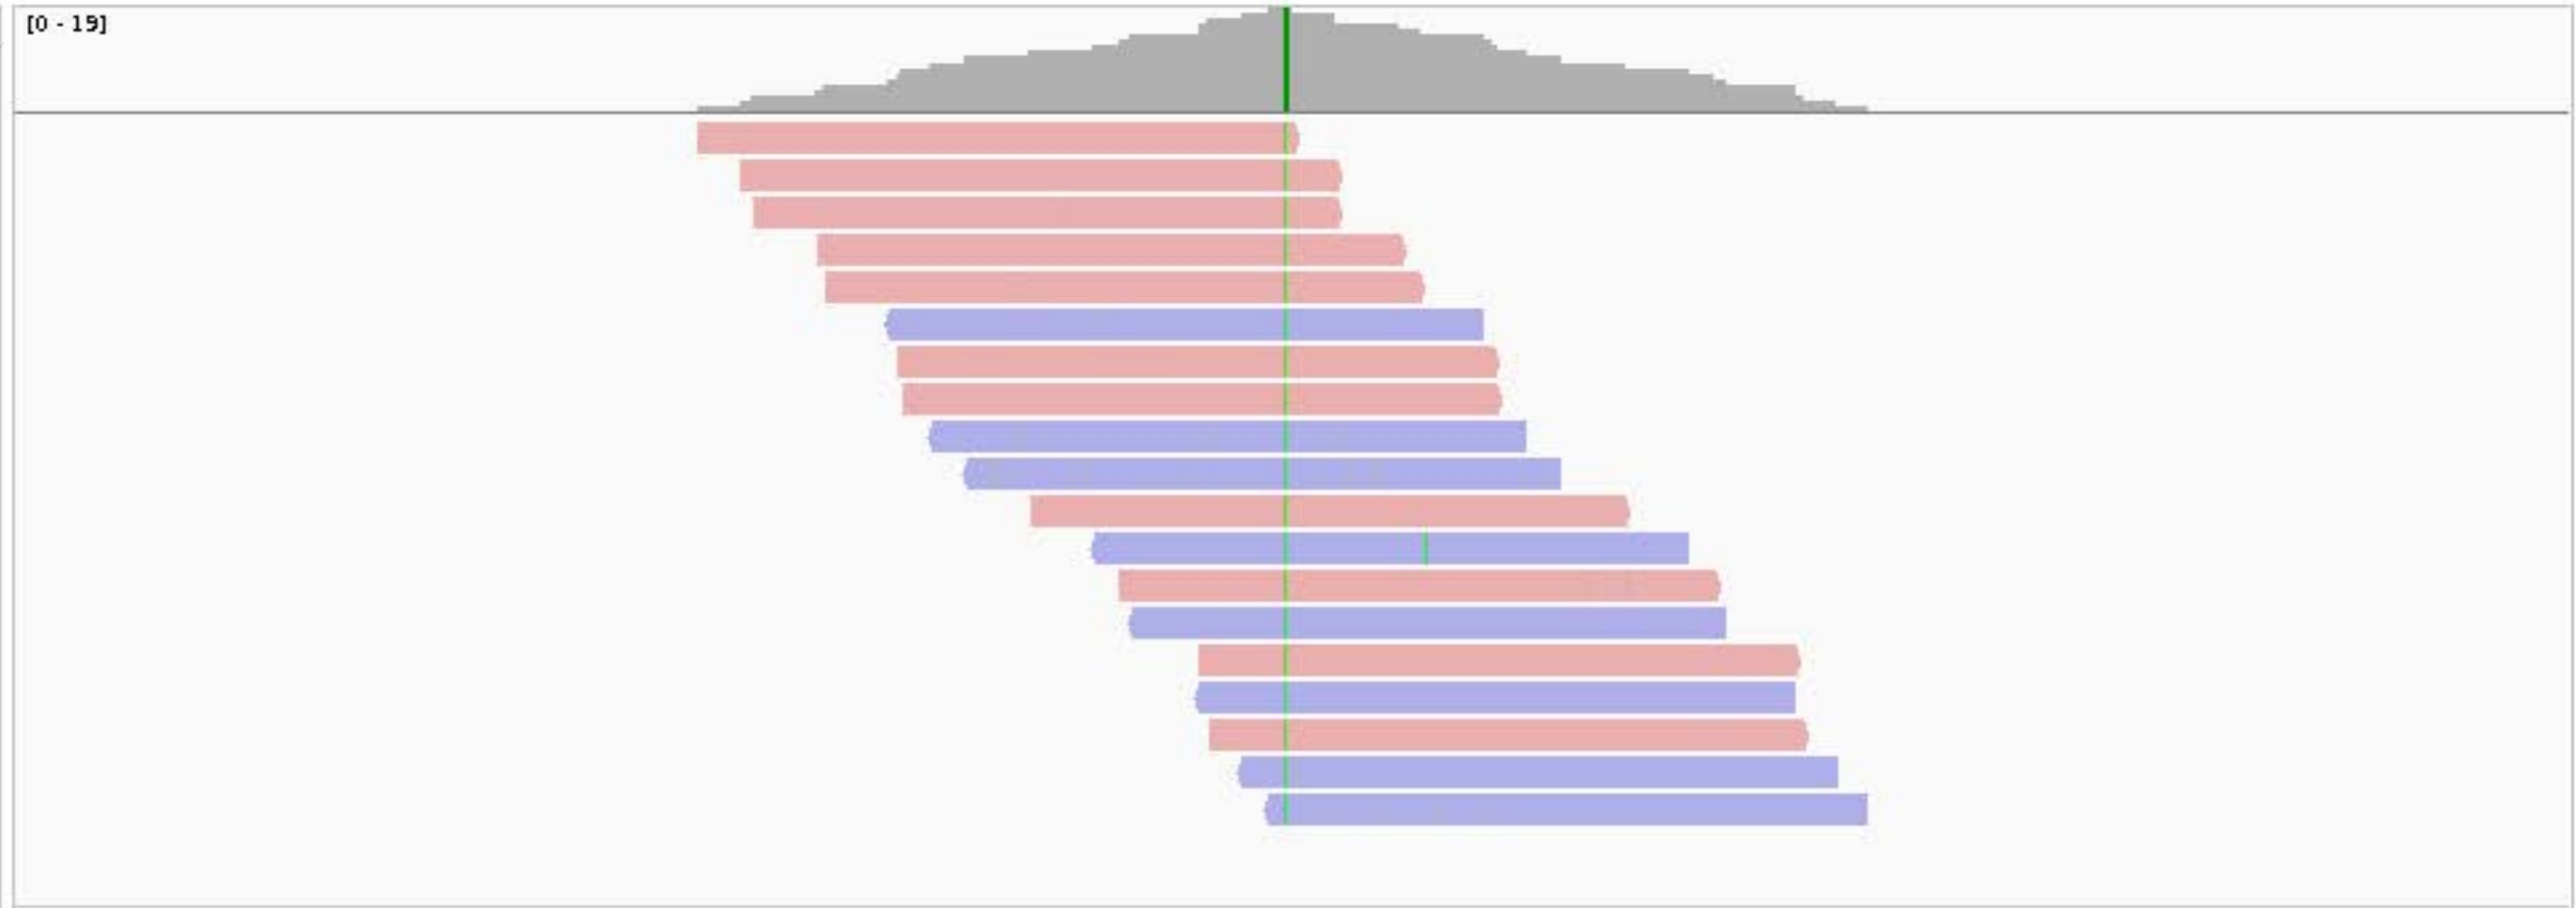

Sequence

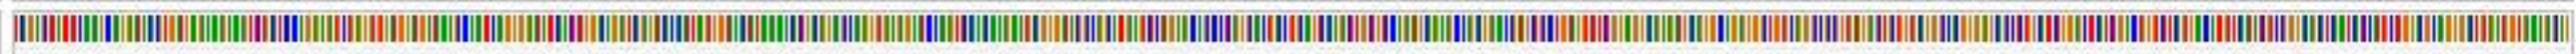

Refseq Genes

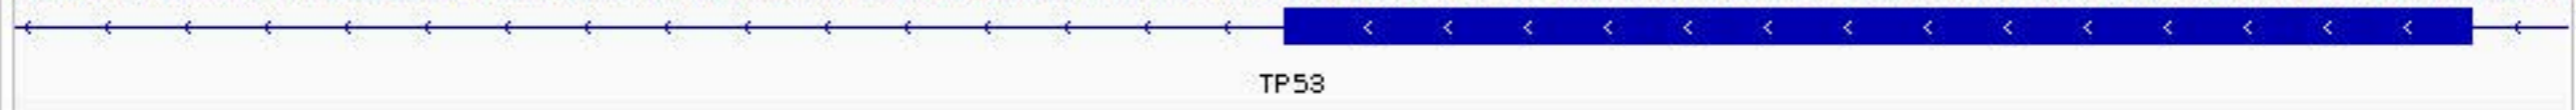

Supplement: 41523_2024_693_MOESM8_ESM.pdf [file 41523_2024_693_MOESM8_ESM.pdf]
