# Supplementary material for: Cancer risk assessment of premalignant breast tissues from patients with BRCA mutations by genome profiling
Source: PubMed Central journal article supplement — NPJ Breast Cancer. 2024 Oct 4;10:87. doi: 10.1038/s41523-024-00693-9 (PMC11452615; doi:10.1038/s41523-024-00693-9), 2024-10-04
Supplement: 41523_2024_693_MOESM9_ESM.pdf [file 41523_2024_693_MOESM9_ESM.pdf]

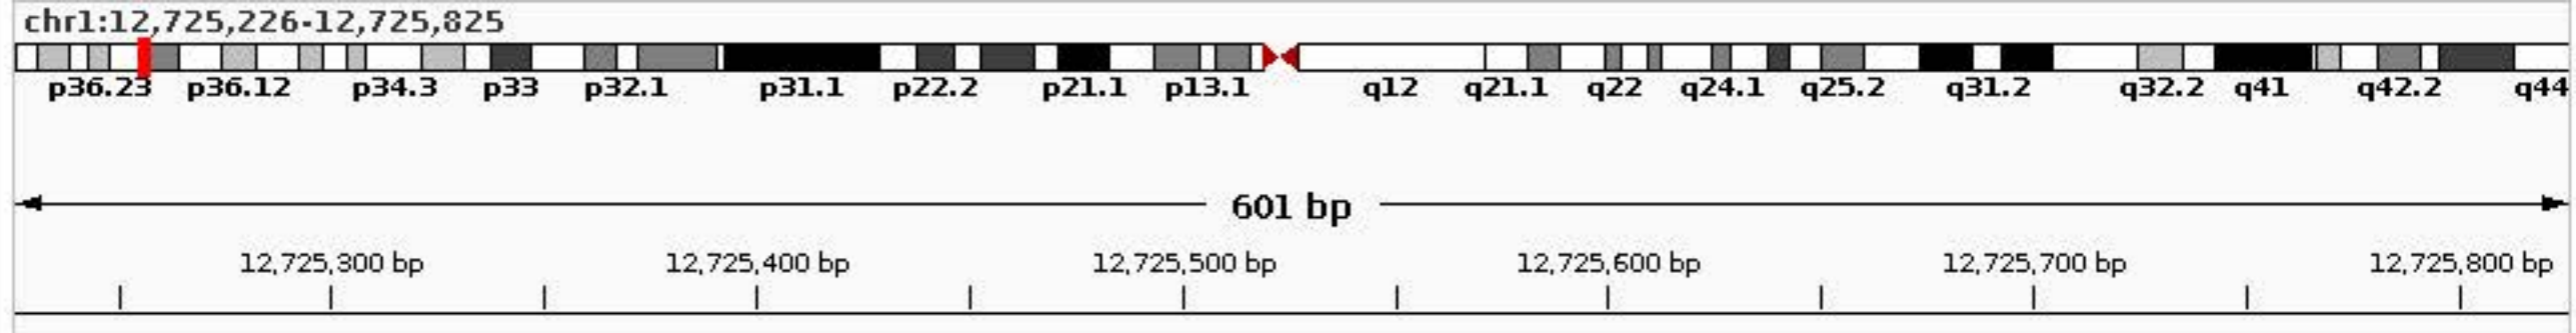

SL\_0015\_LN\_44\_mut.bam Coverage

SL\_0015\_LN\_44\_mut.bam

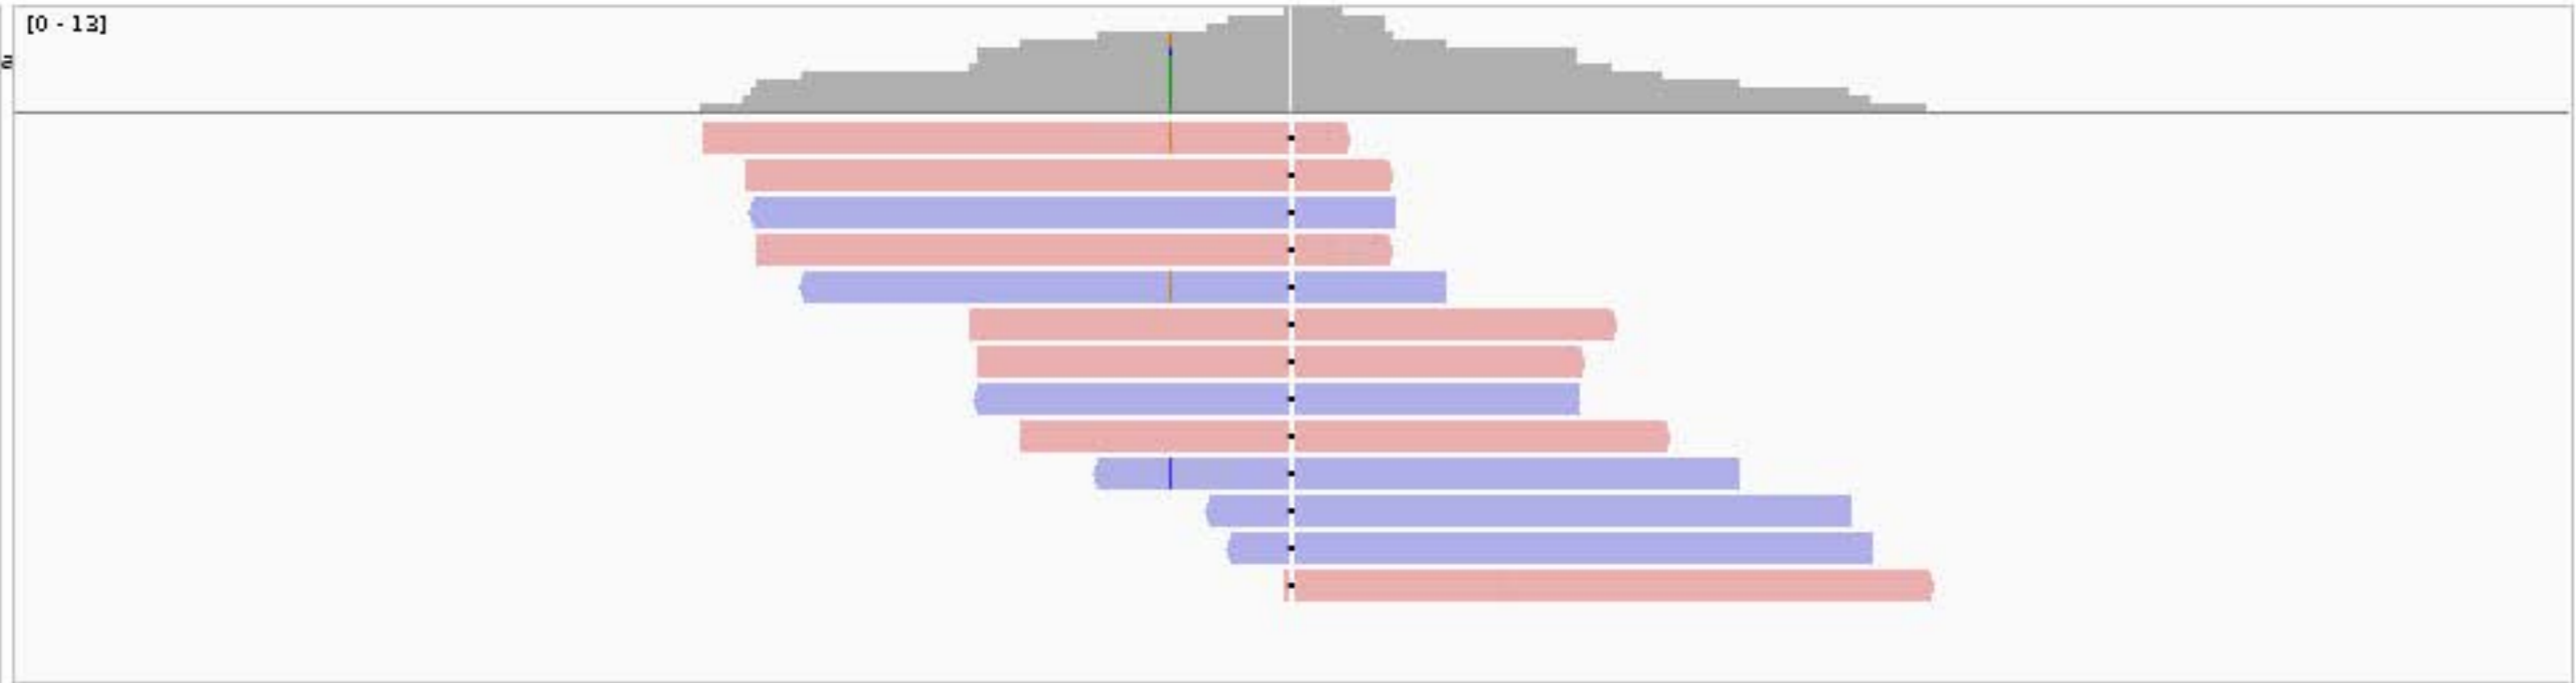

Sequence →

Refseq Genes

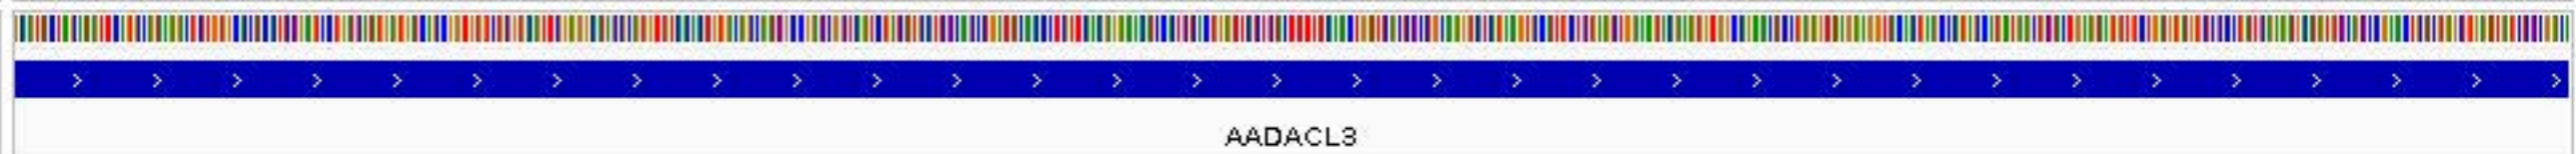

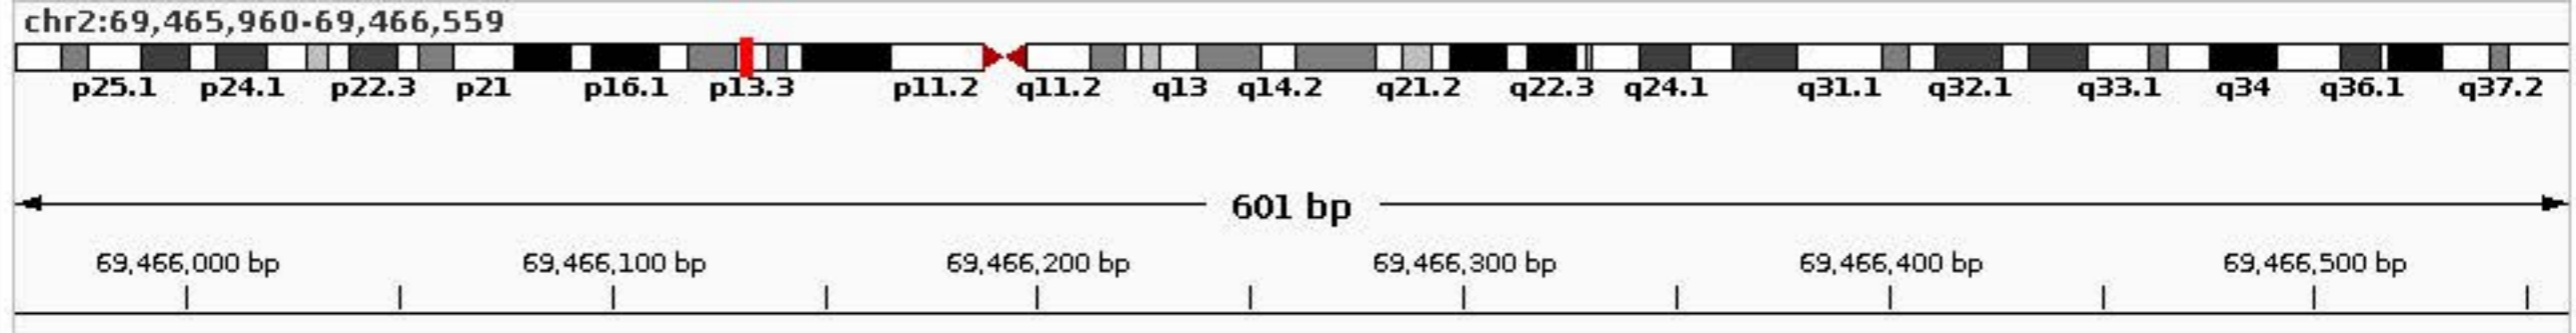

SL\_0004\_RN\_61\_mut.bam Coverage

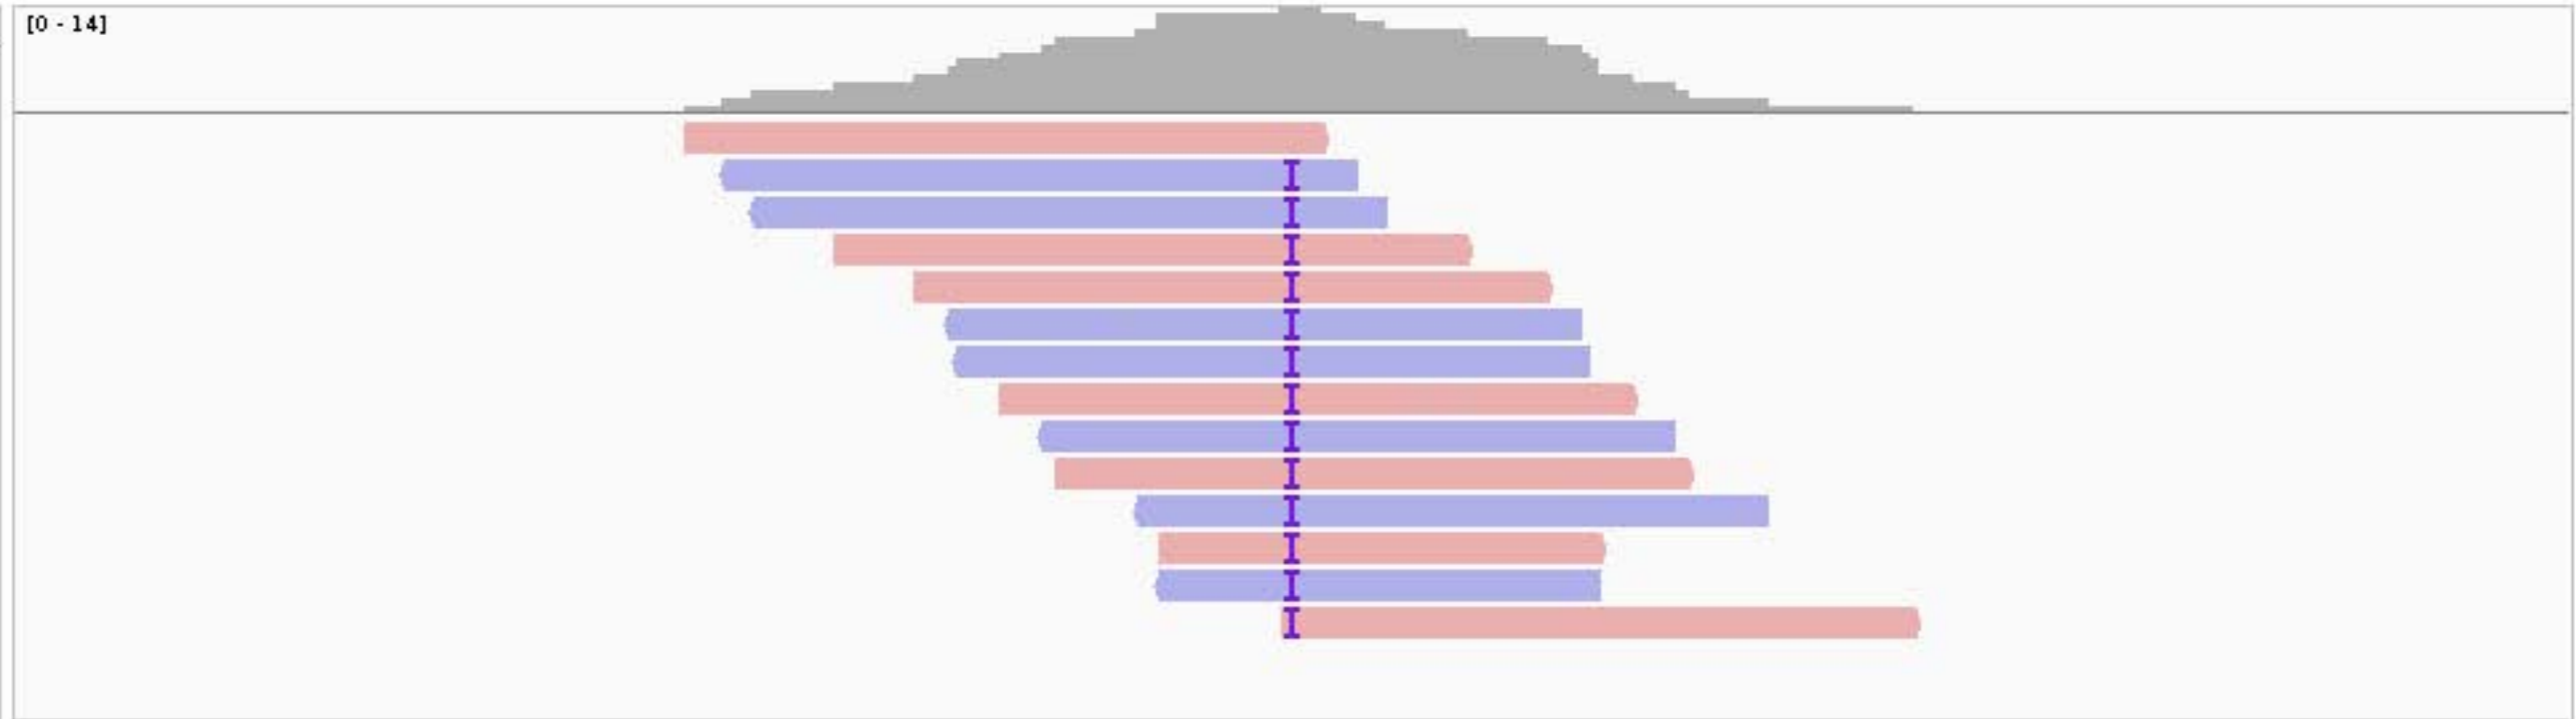

Sequence

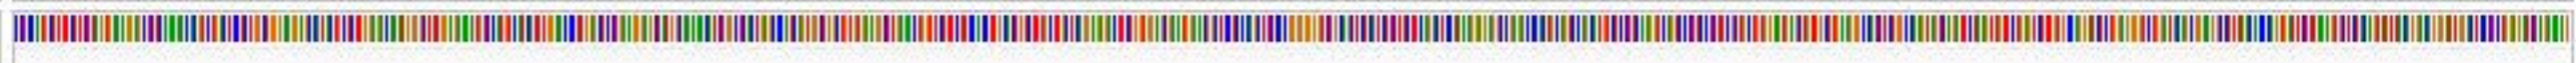

Refseq Genes

AAK1

chr17:69,312,971-69,313,570

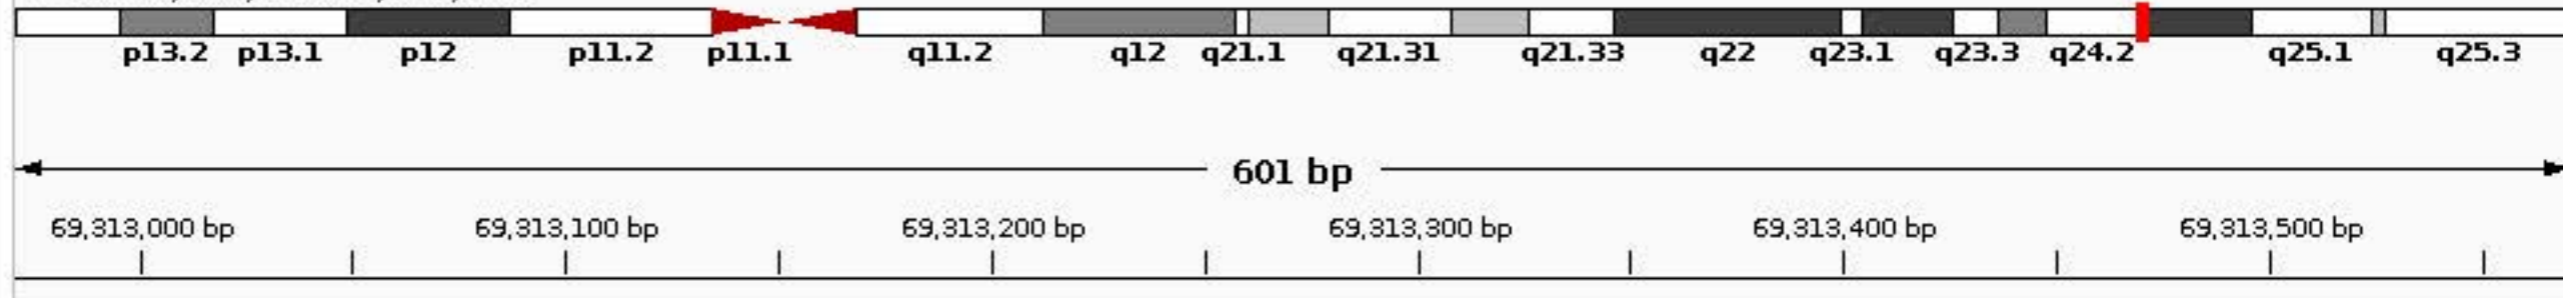

SL\_0001\_RN\_15\_mut.bam Coverage

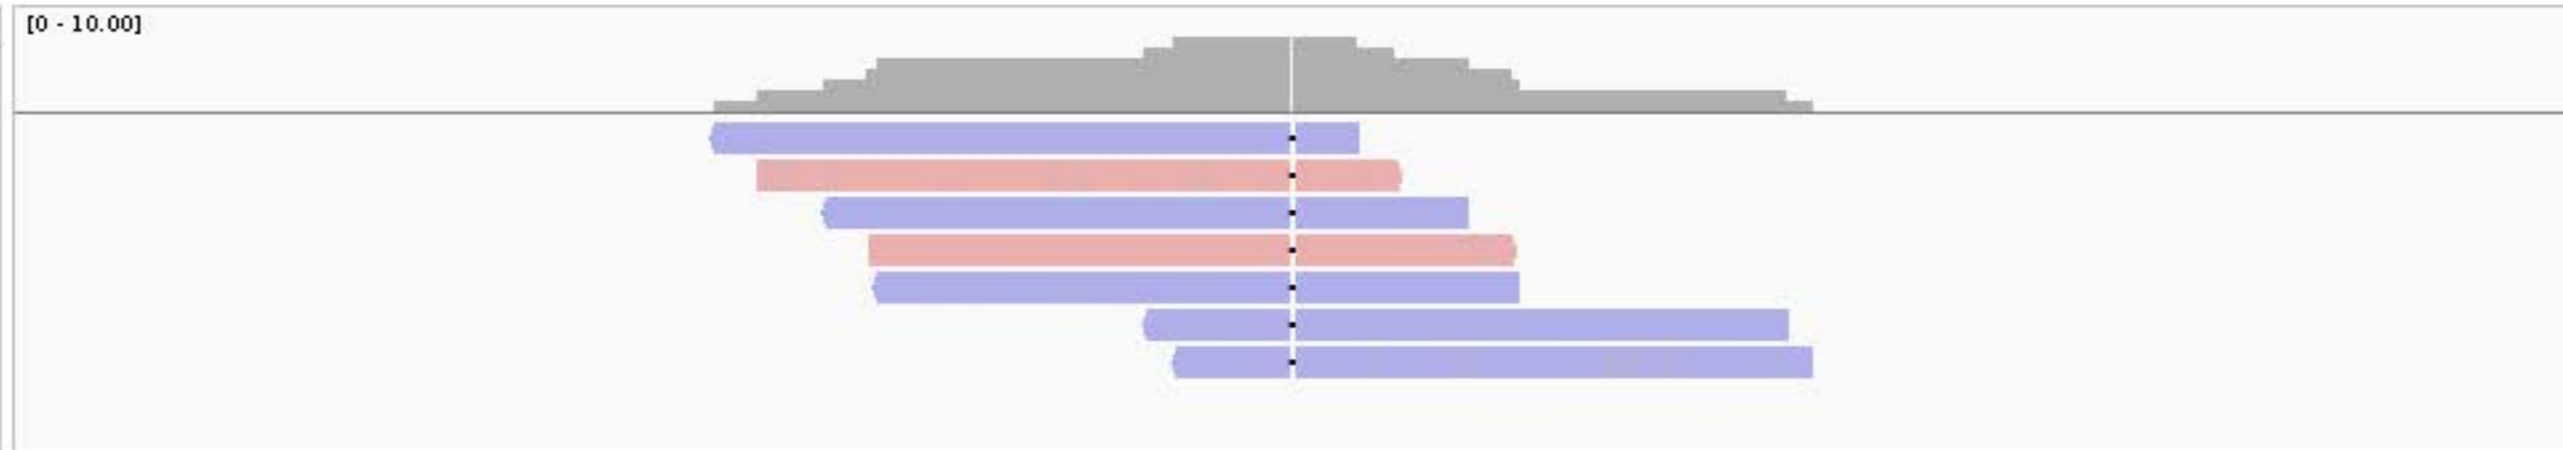

SL\_0001\_RN\_15\_mut.bam

Sequence

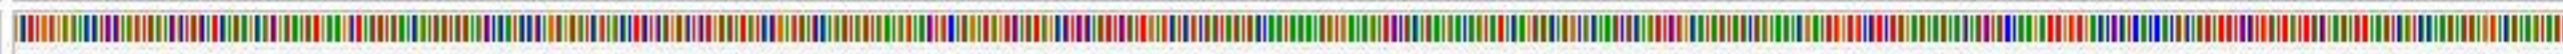

Refseq Genes

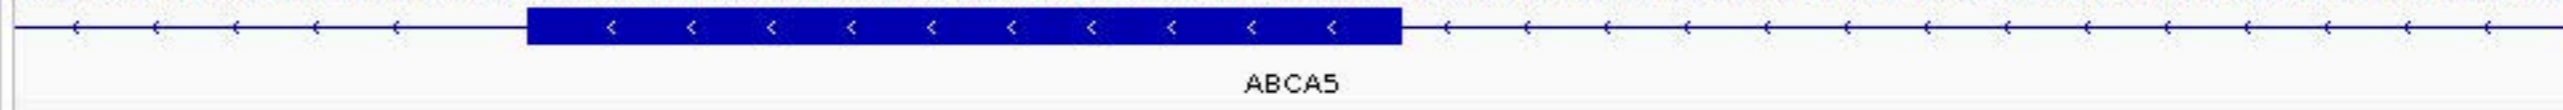

chr17:69,312,971-69,313,570



SL\_0017\_RN\_15\_mut.bam Coverage

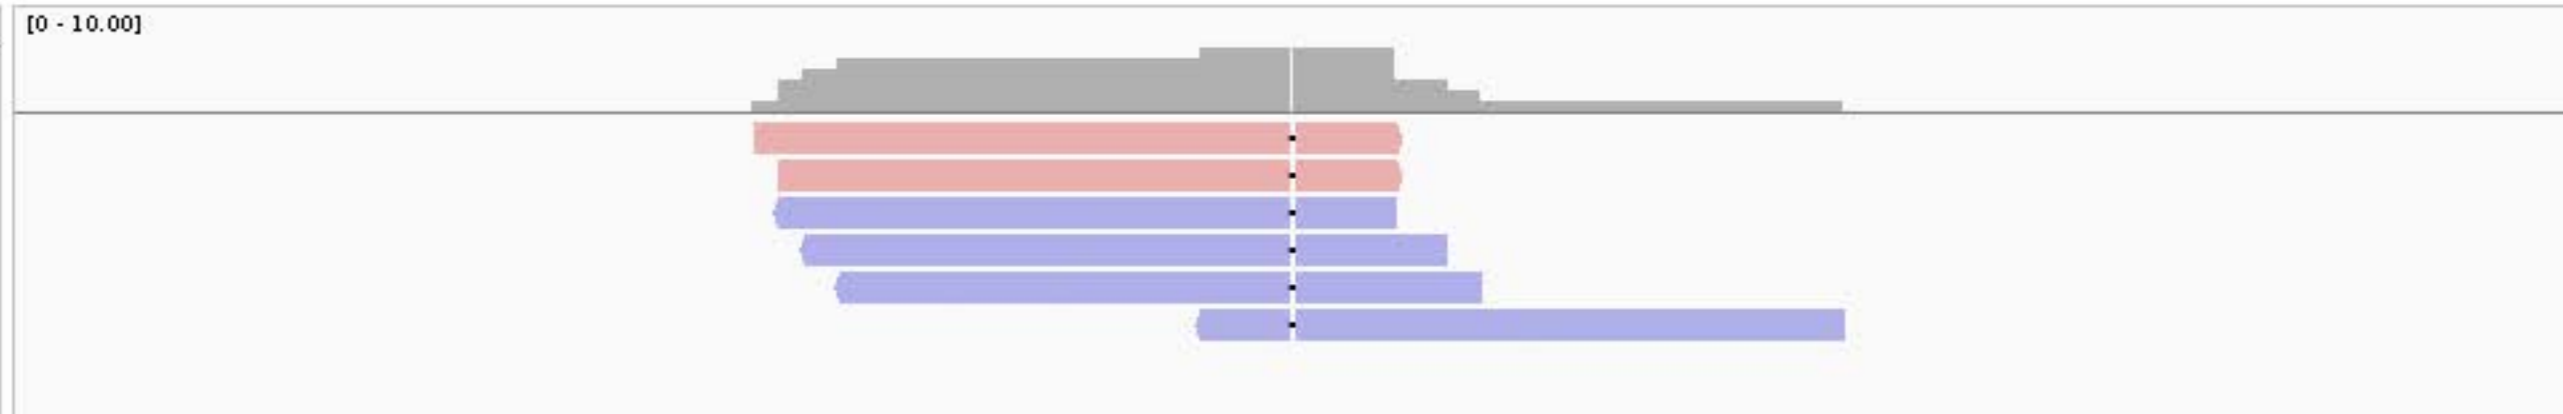

SL\_0017\_RN\_15\_mut.bam

Sequence



Refseq Genes





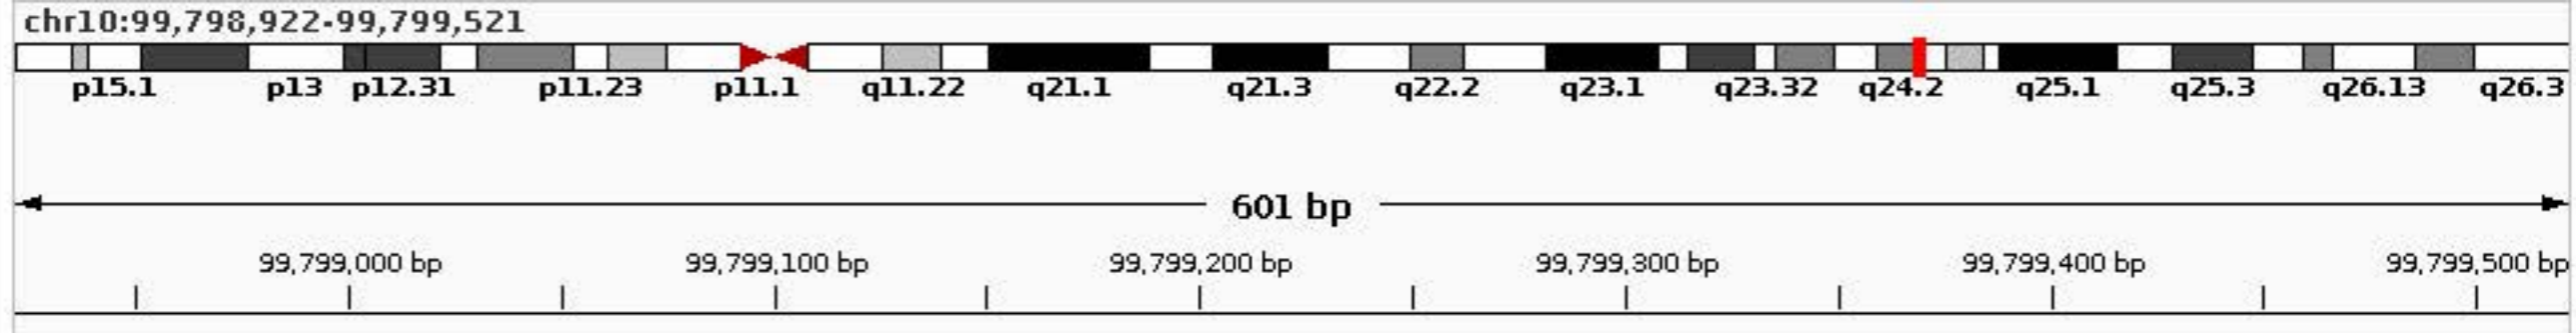

SL\_0007\_RN\_2\_mut.bam Coverage

SL\_0007\_RN\_2\_mut.bam

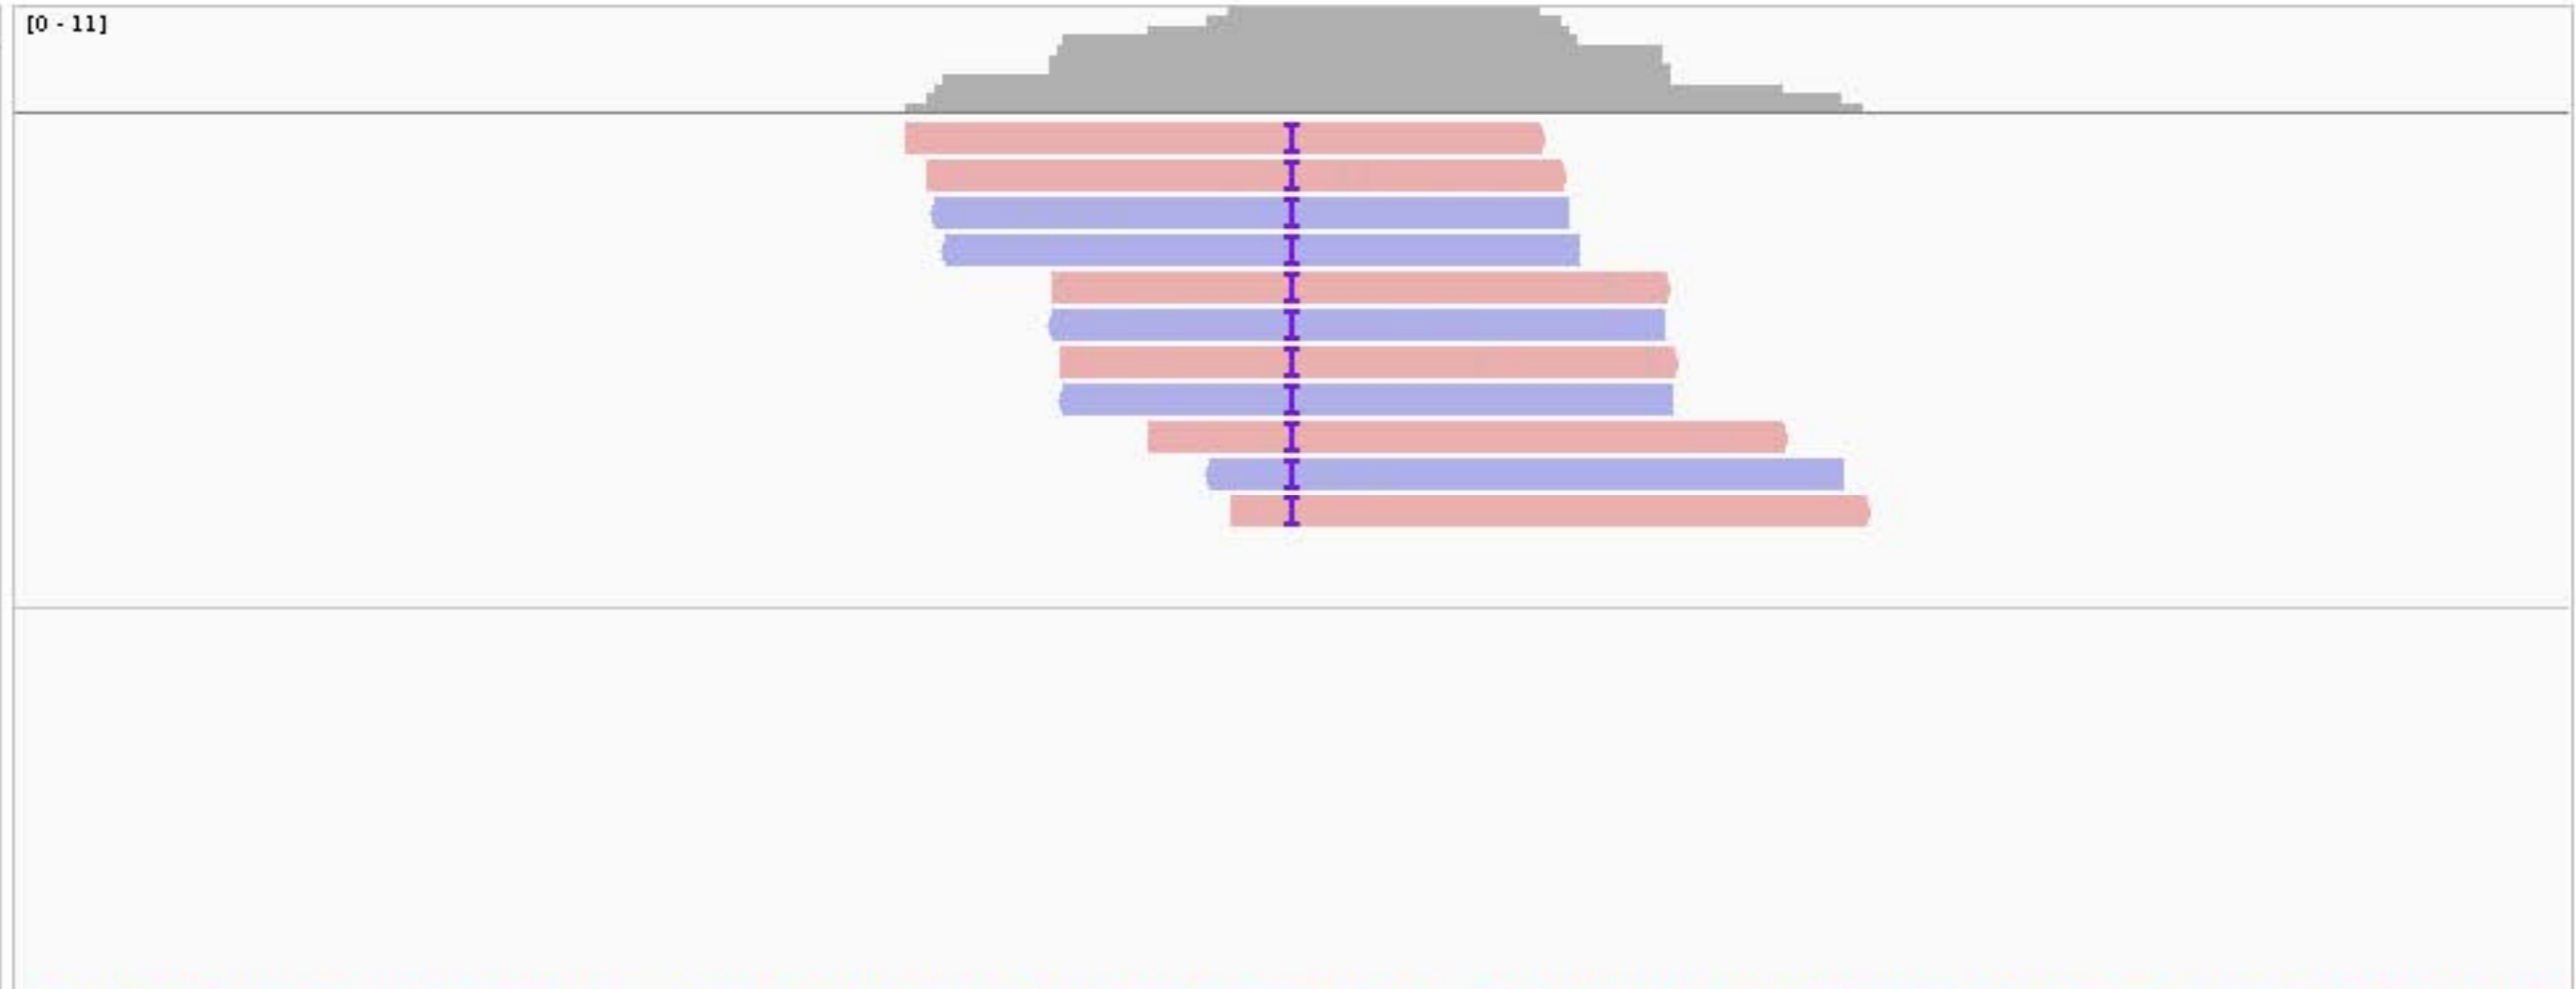

Sequence

Refseq Genes

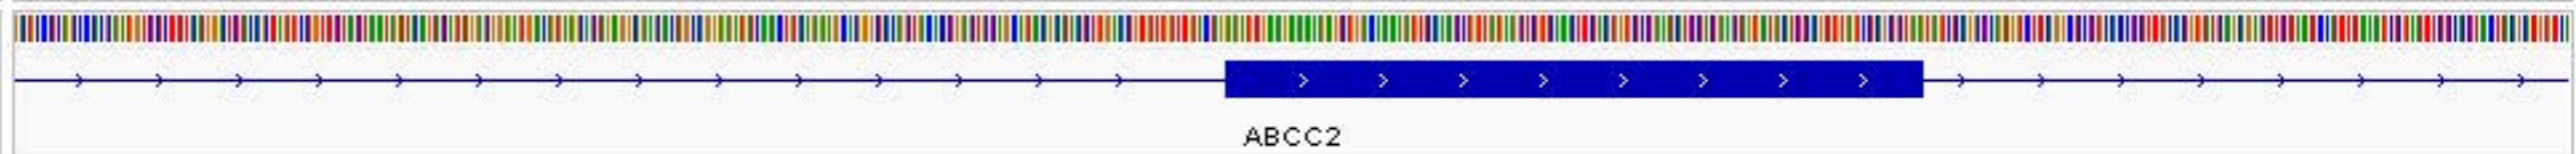

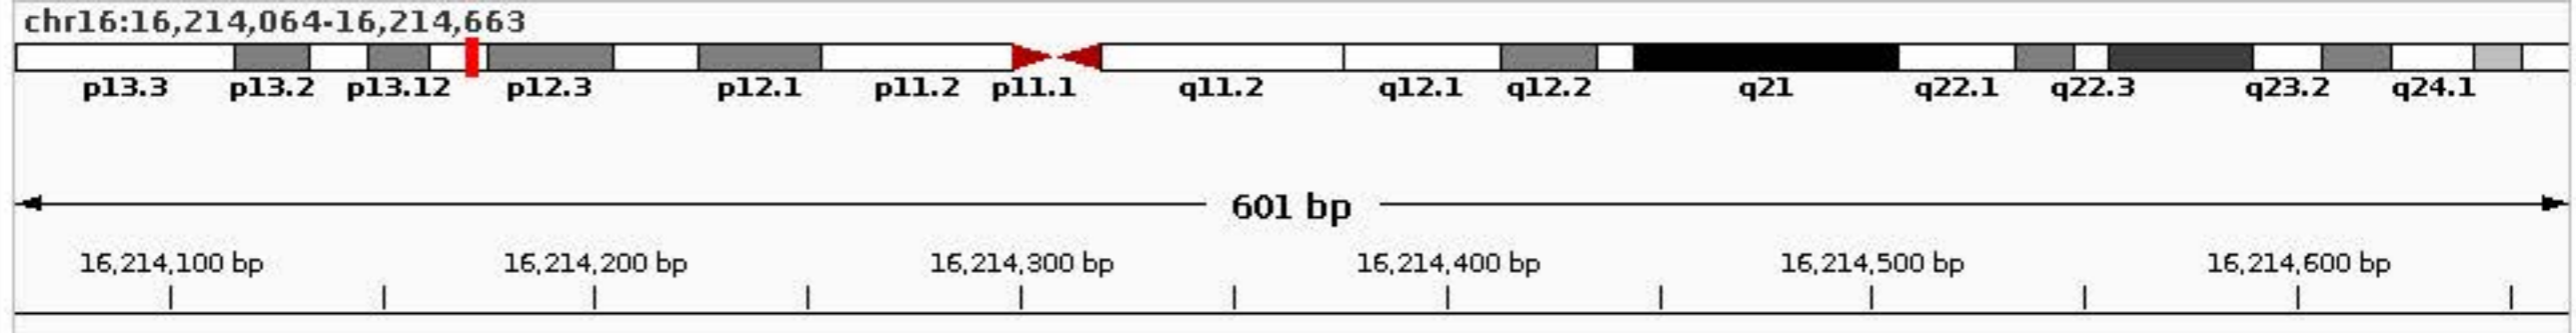

SL\_0004\_RN\_24\_mut.bam Coverage

SL\_0004\_RN\_24\_mut.bam

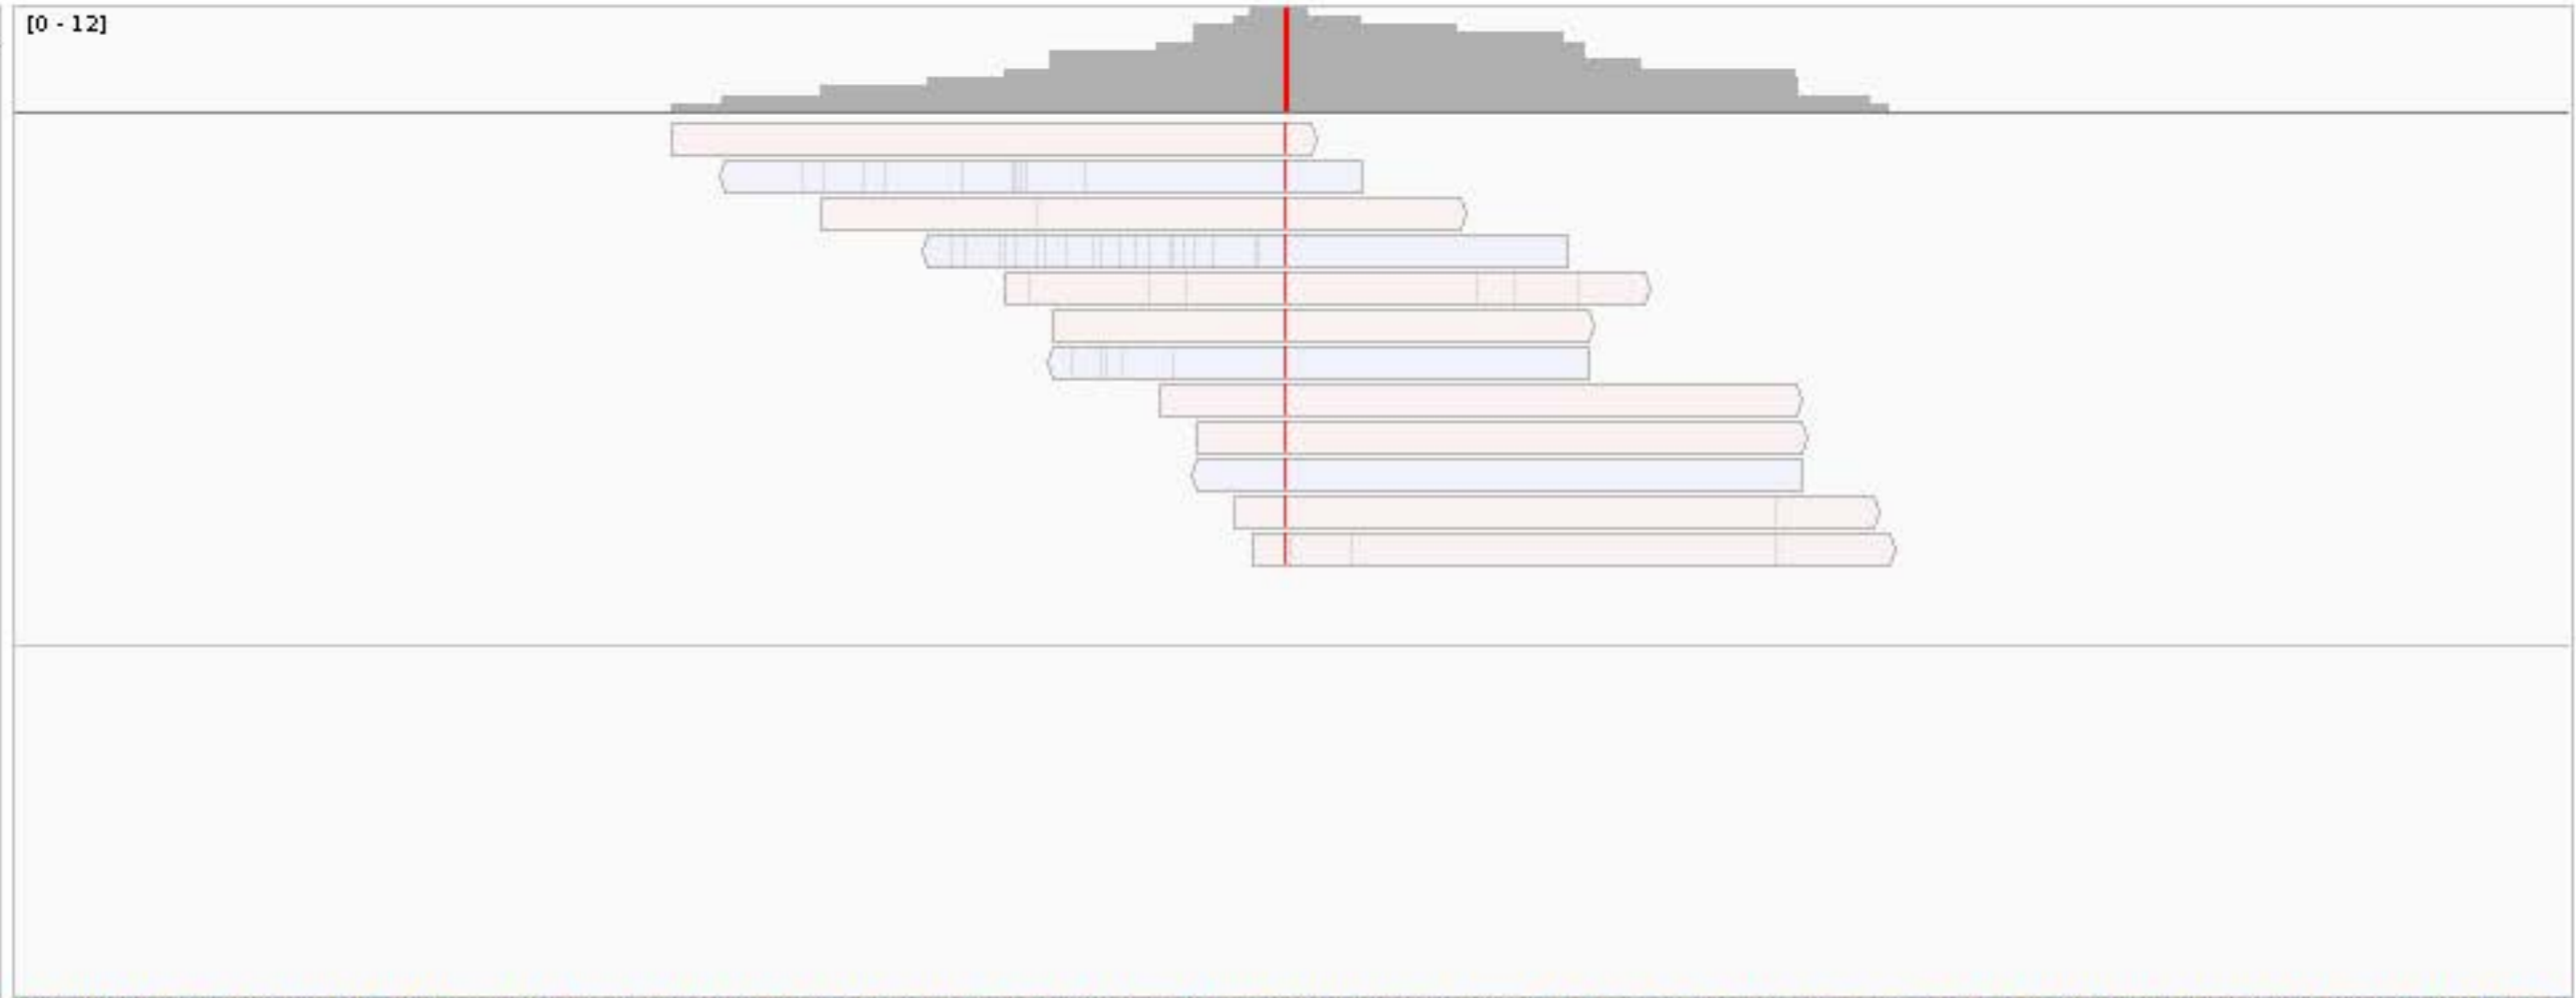

Sequence →

Refseq Genes

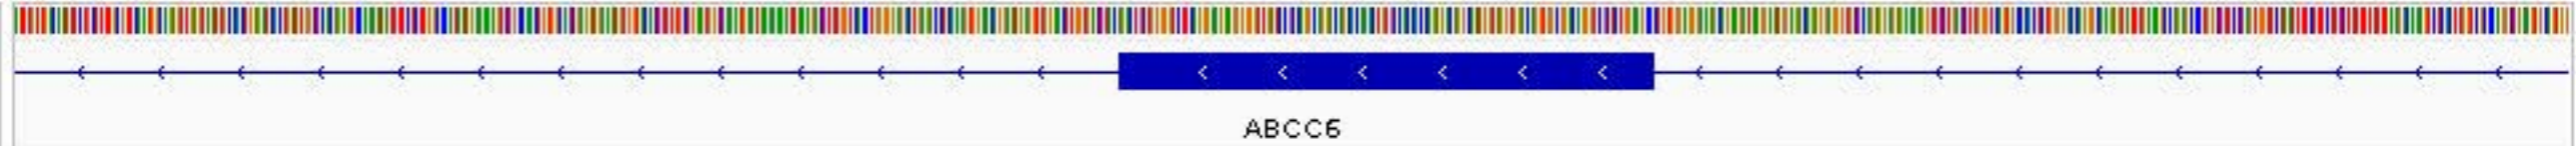

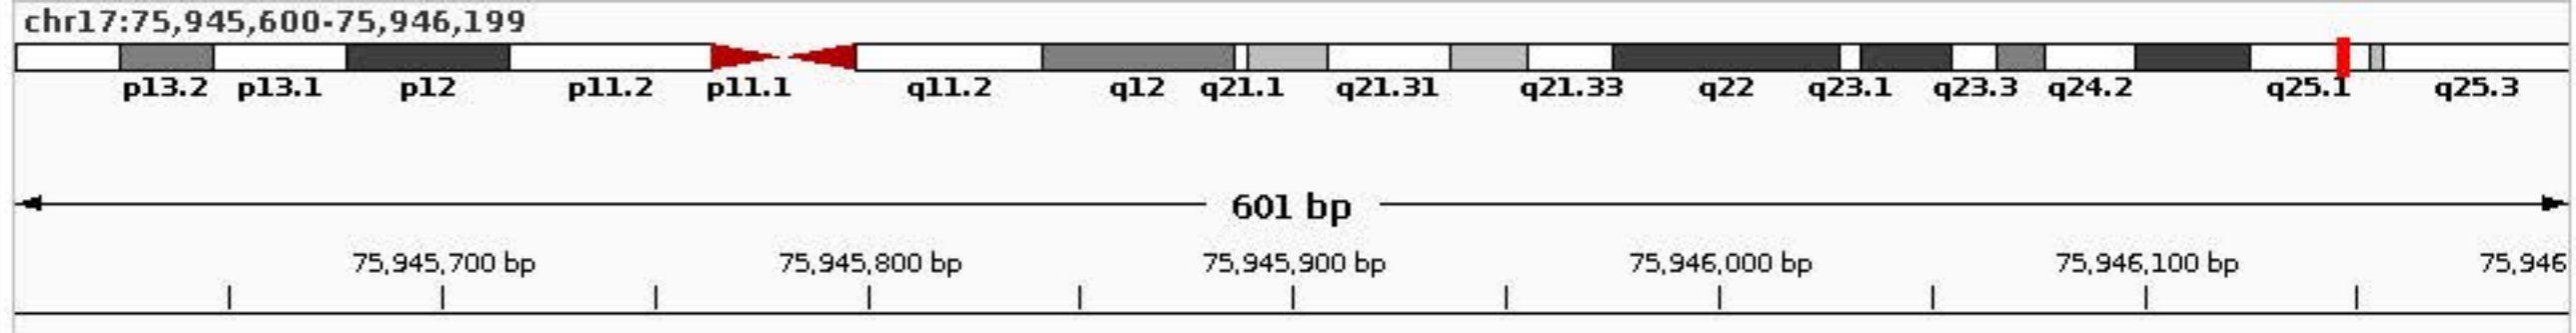

SL\_0004\_RN\_66\_mut.bam Coverage

SL\_0004\_RN\_66\_mut.bam

Sequence →

Refseq Genes

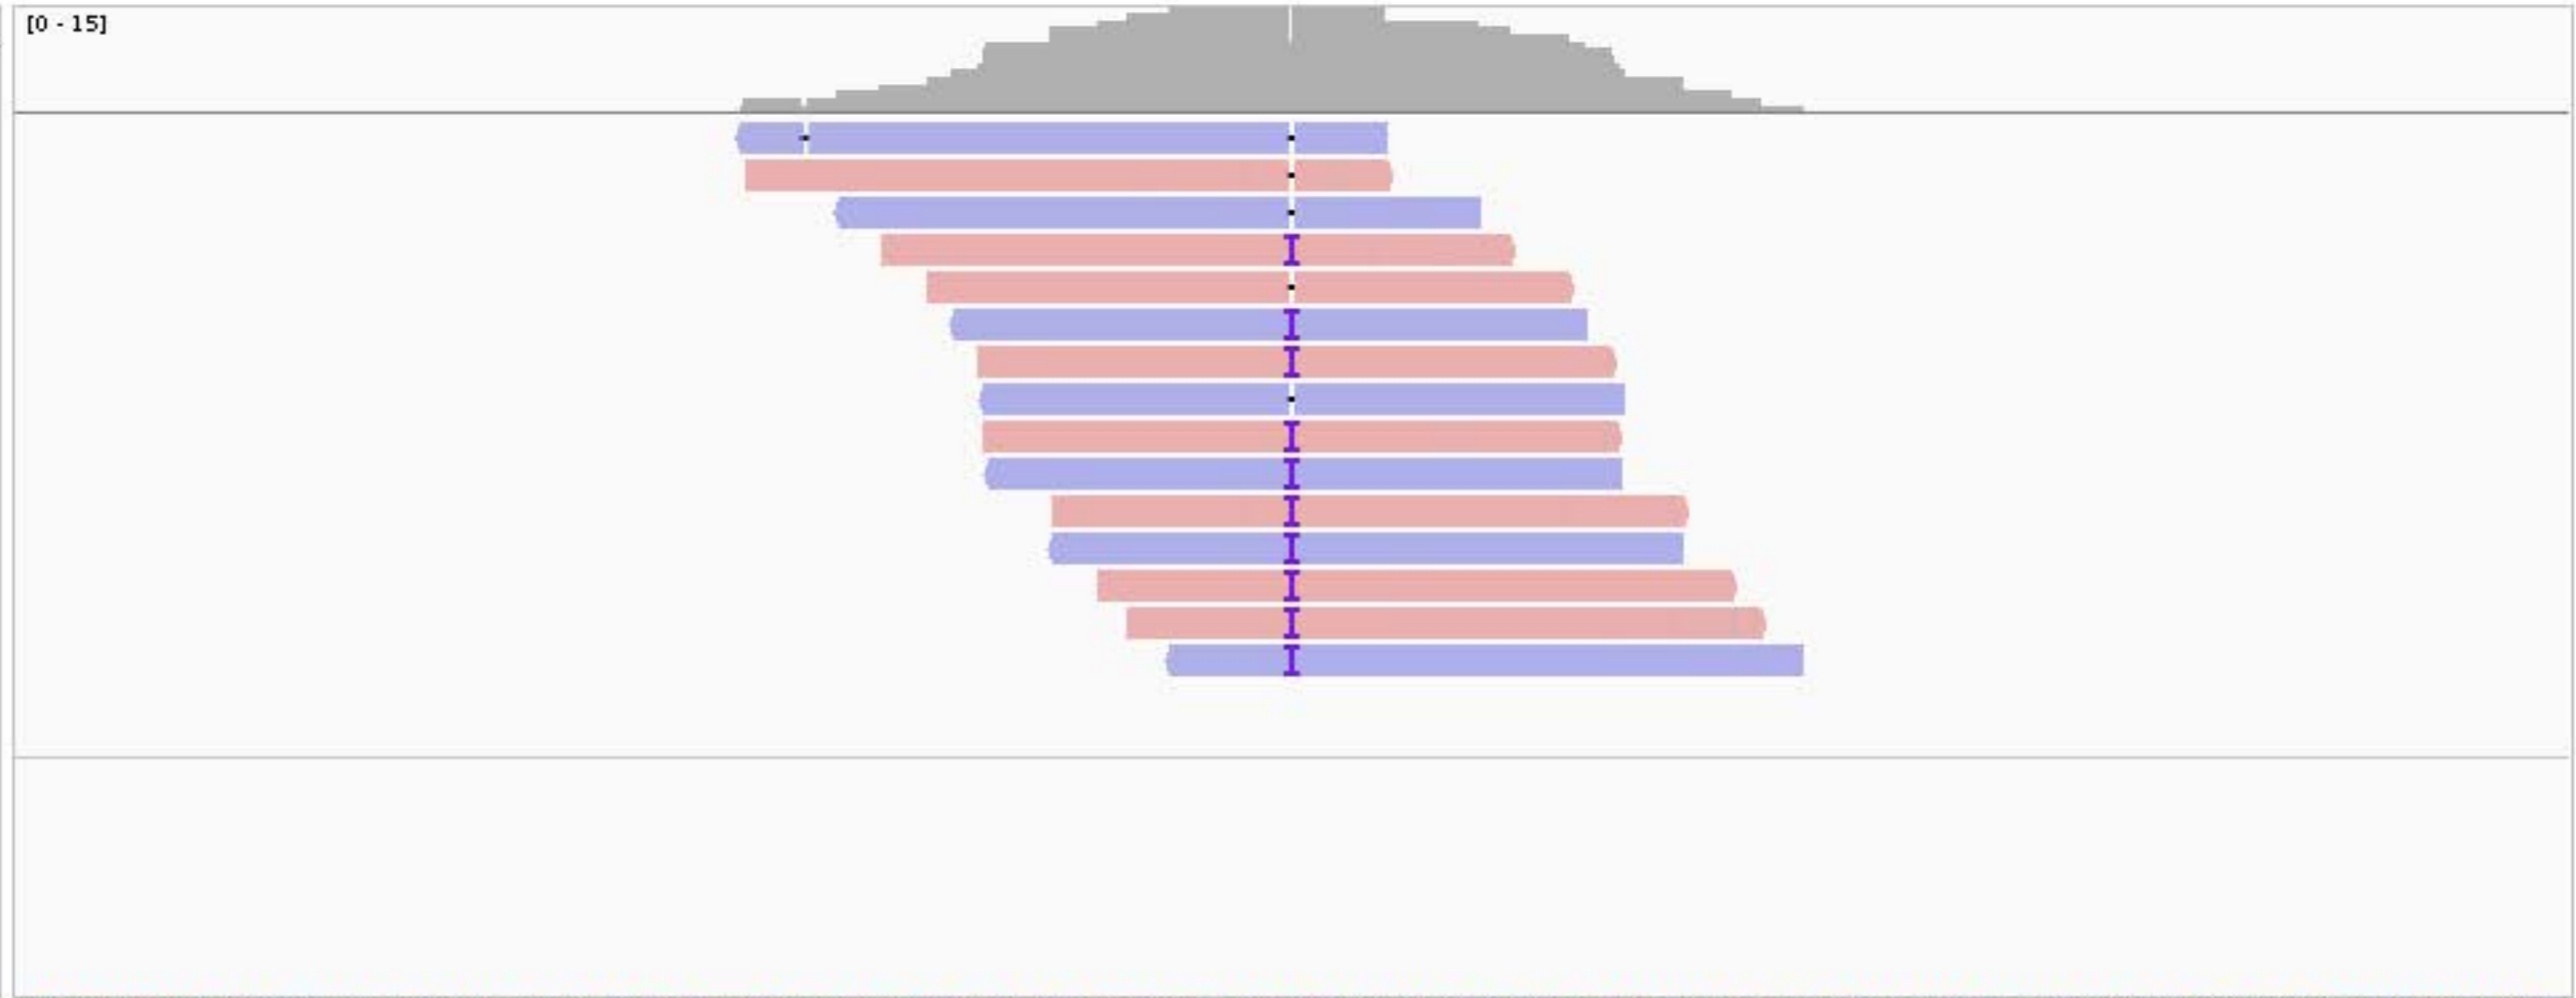

ACOX1



SL\_0004\_RN\_19\_mut.bam Coverage

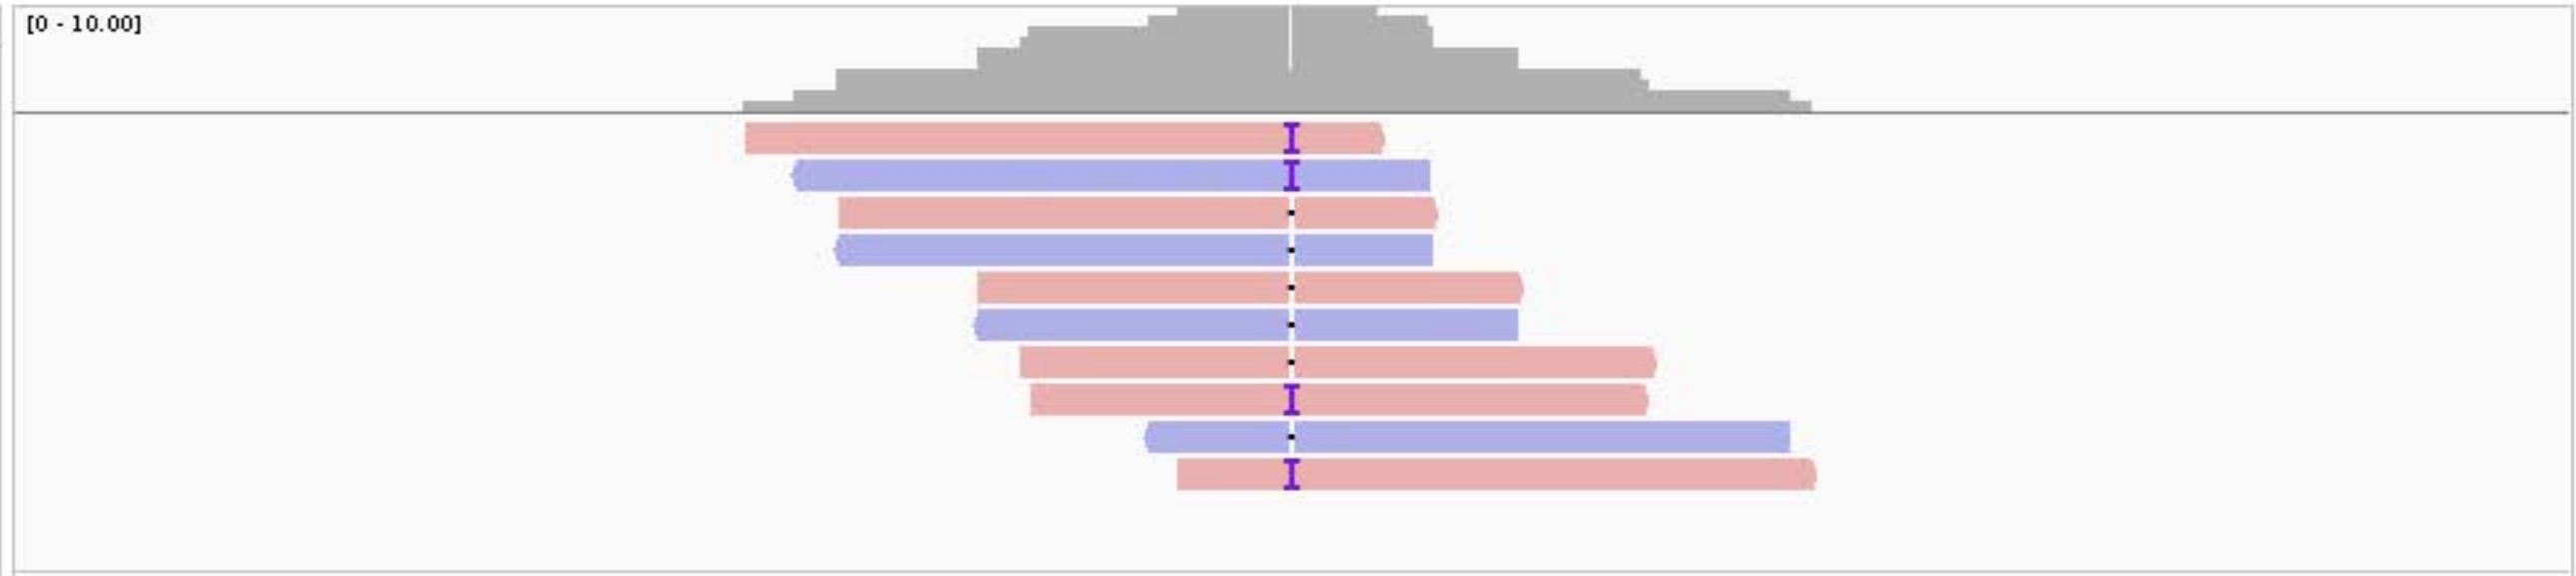

SL\_0004\_RN\_19\_mut.bam

Sequence →

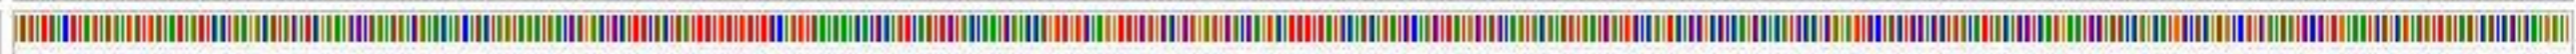

Refseq Genes

ACOX1



SL\_0004\_RN\_26\_mut.bam Coverage

SL\_0004\_RN\_26\_mut.bam

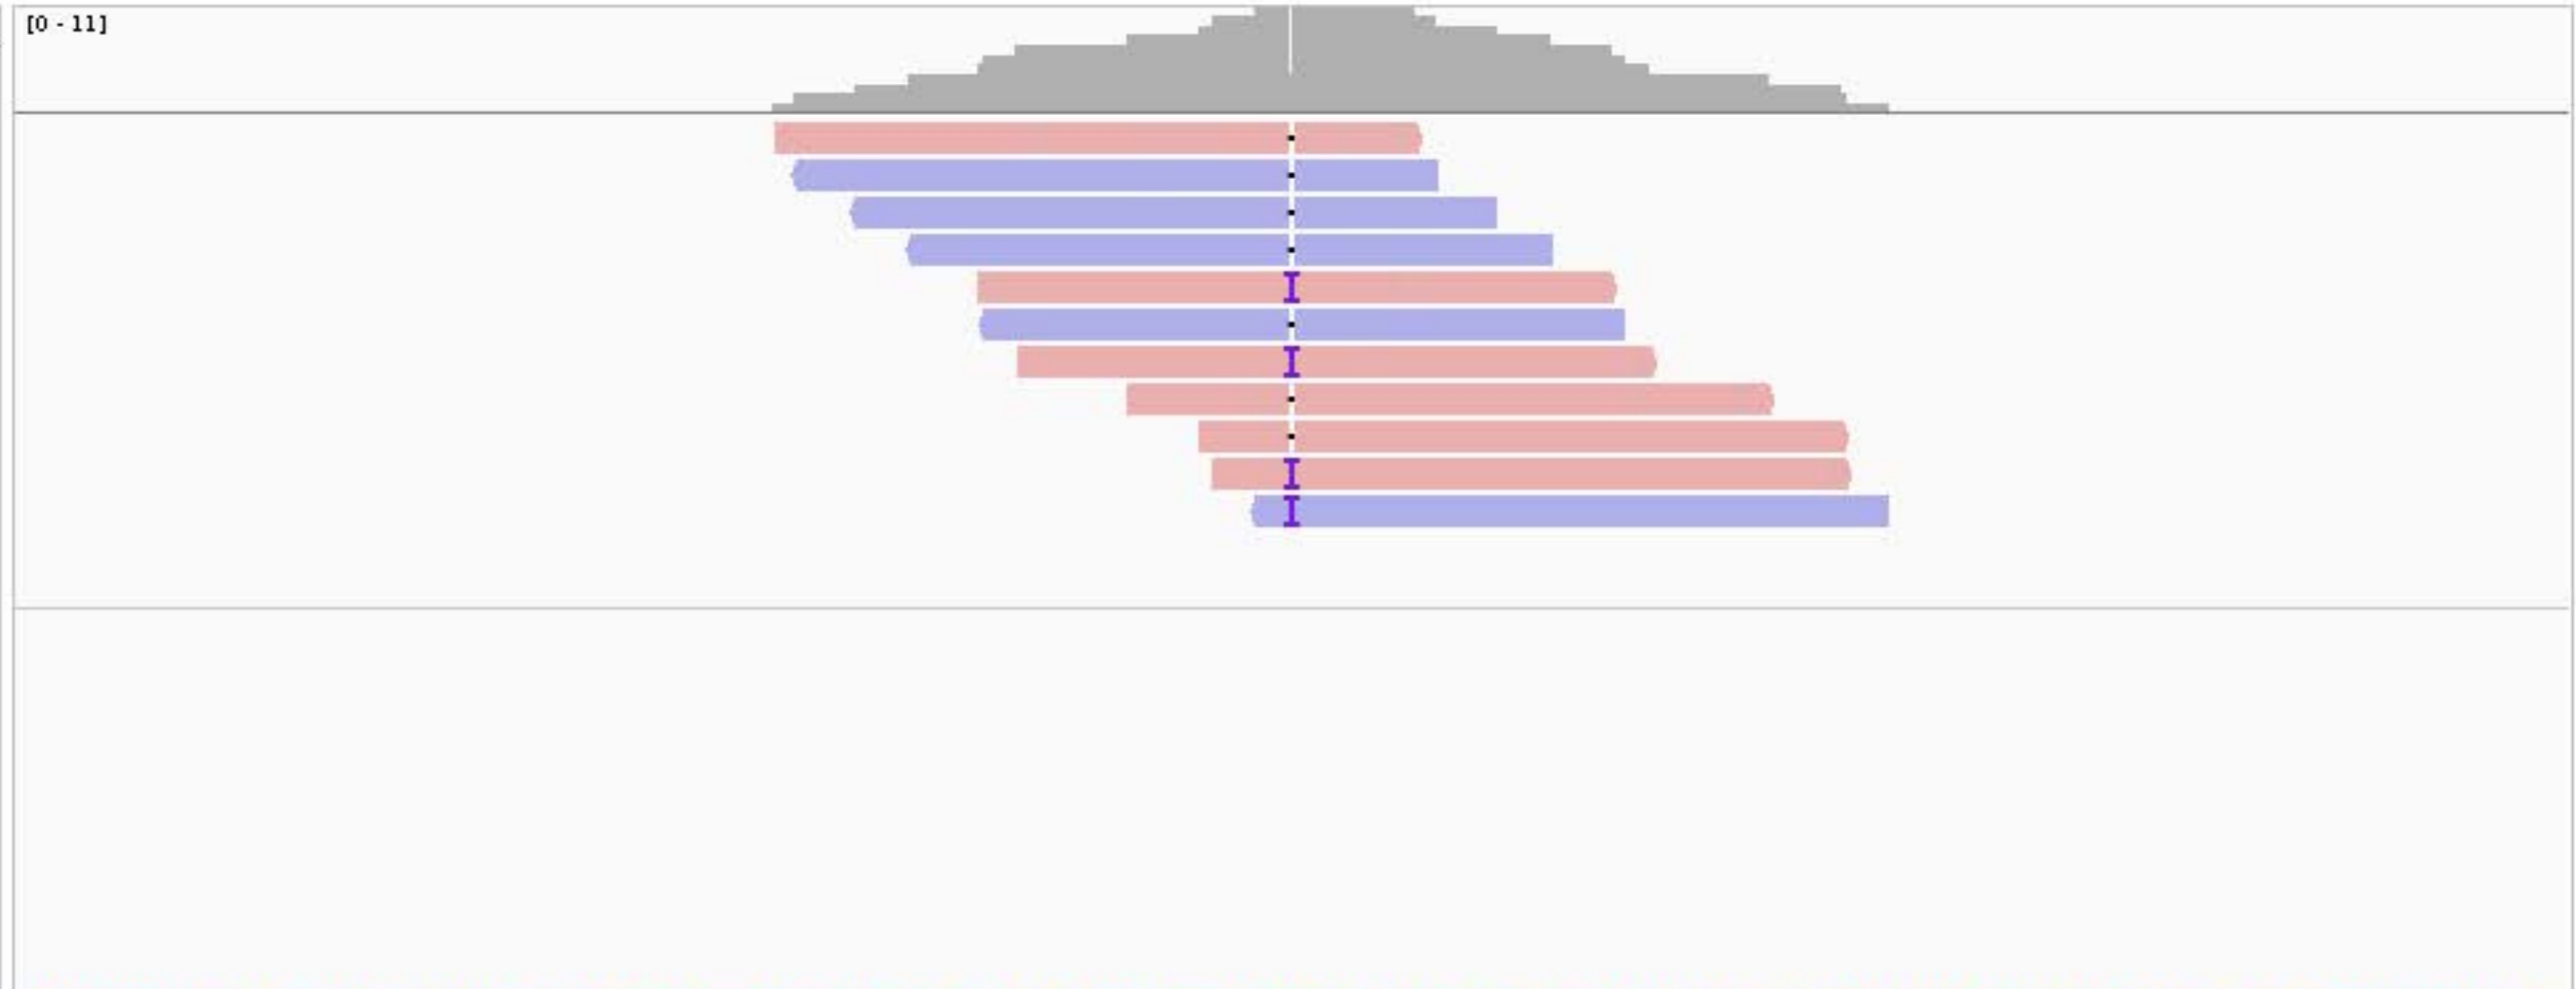

Sequence →

Refseq Genes

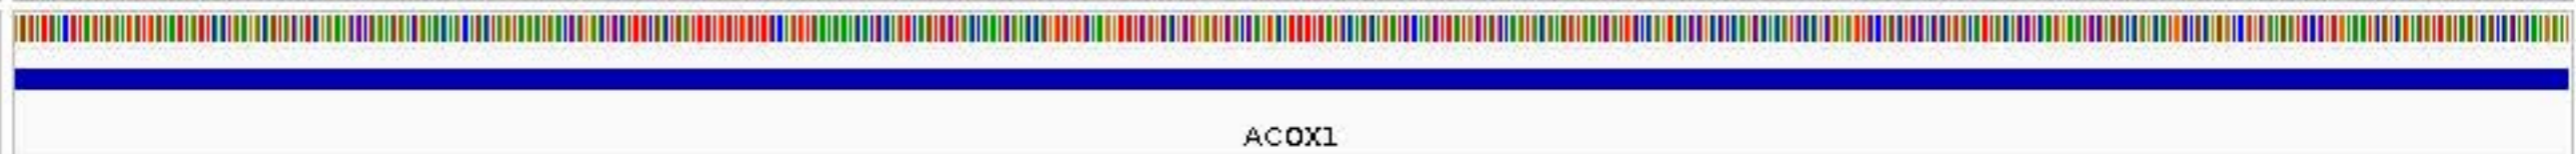





SL\_0004\_RN\_47\_mut.bam Coverage

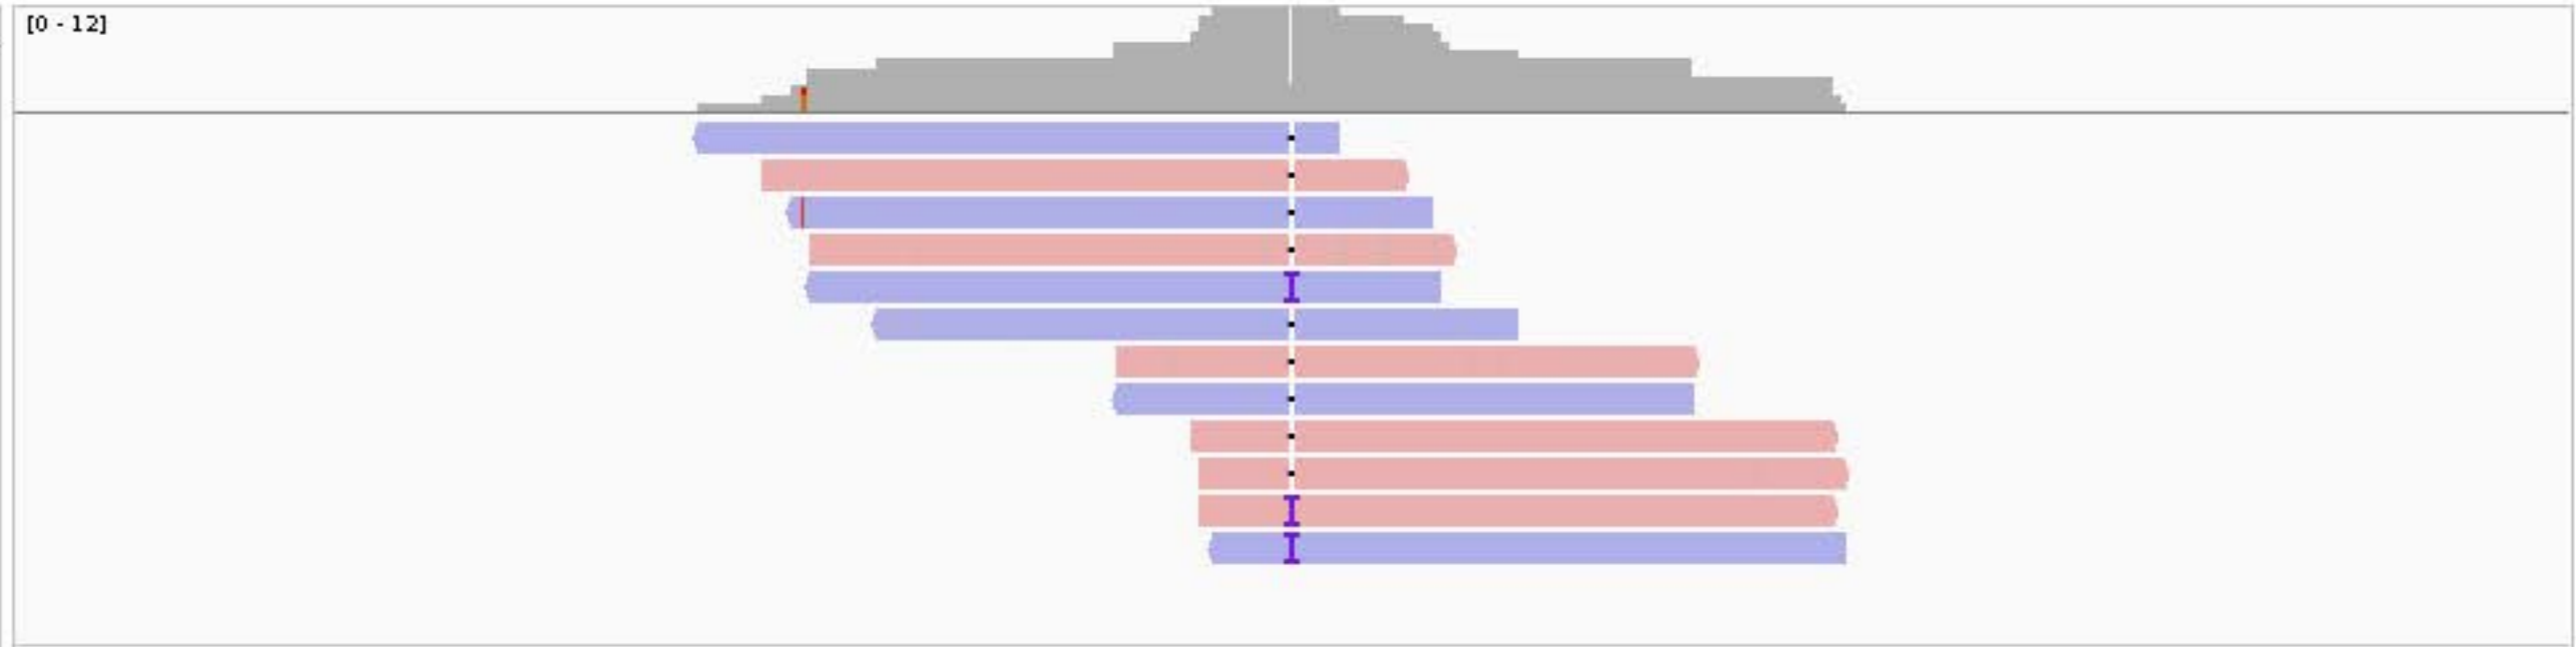

Sequence →



Refseq Genes

ACO1



SL\_0004\_RN\_61\_mut.bam Coverage

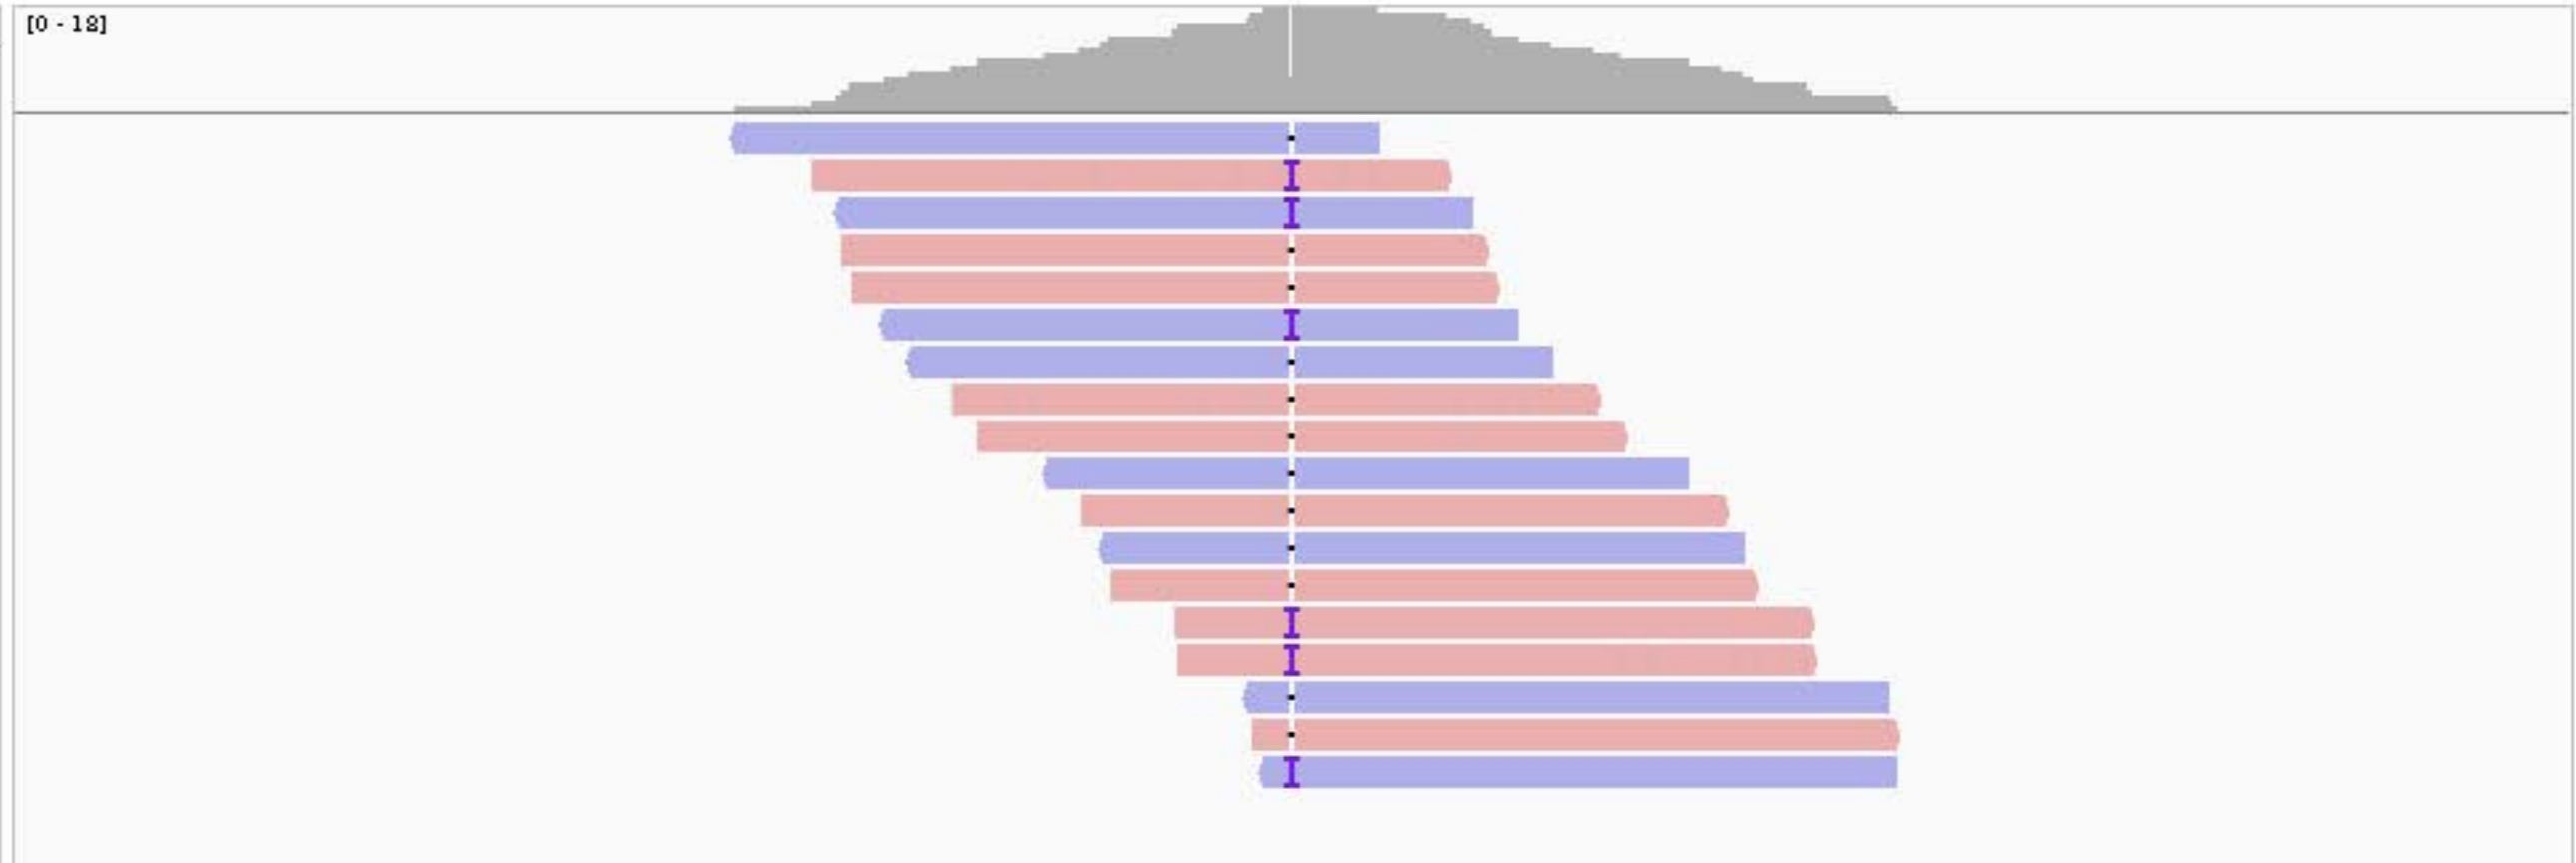

Sequence



Refseq Genes

ACOX1

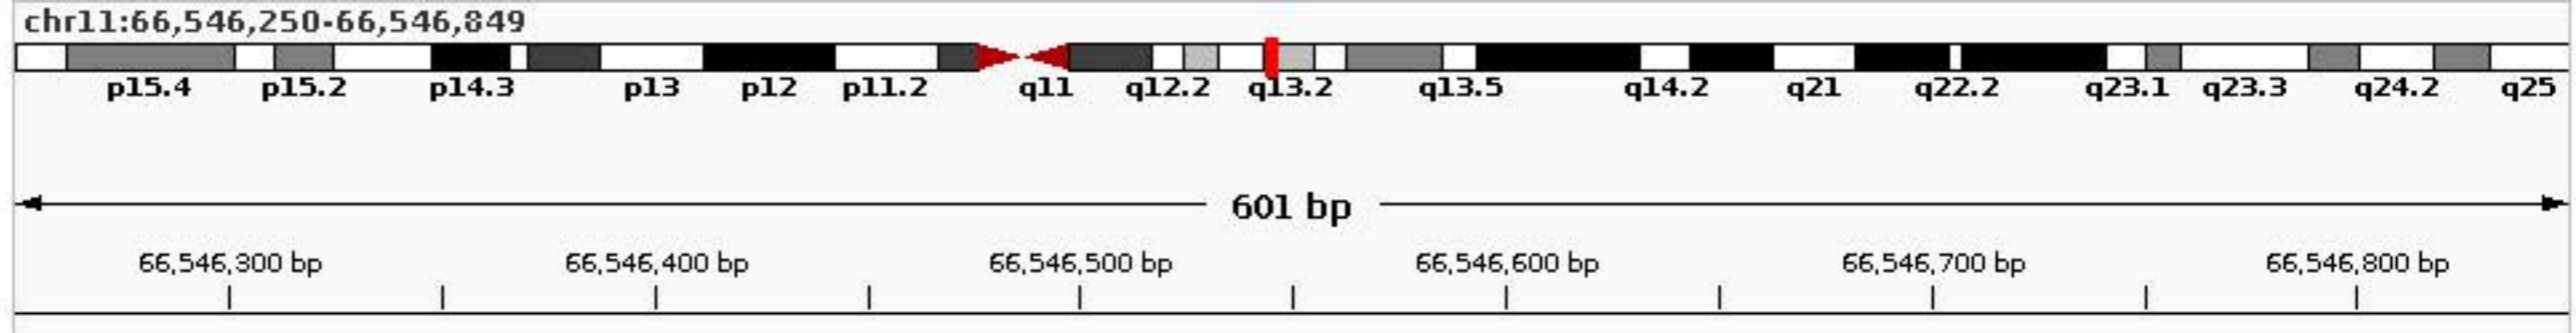

SL\_0004\_RN\_05\_mut.bam Coverage

SL\_0004\_RN\_05\_mut.bam

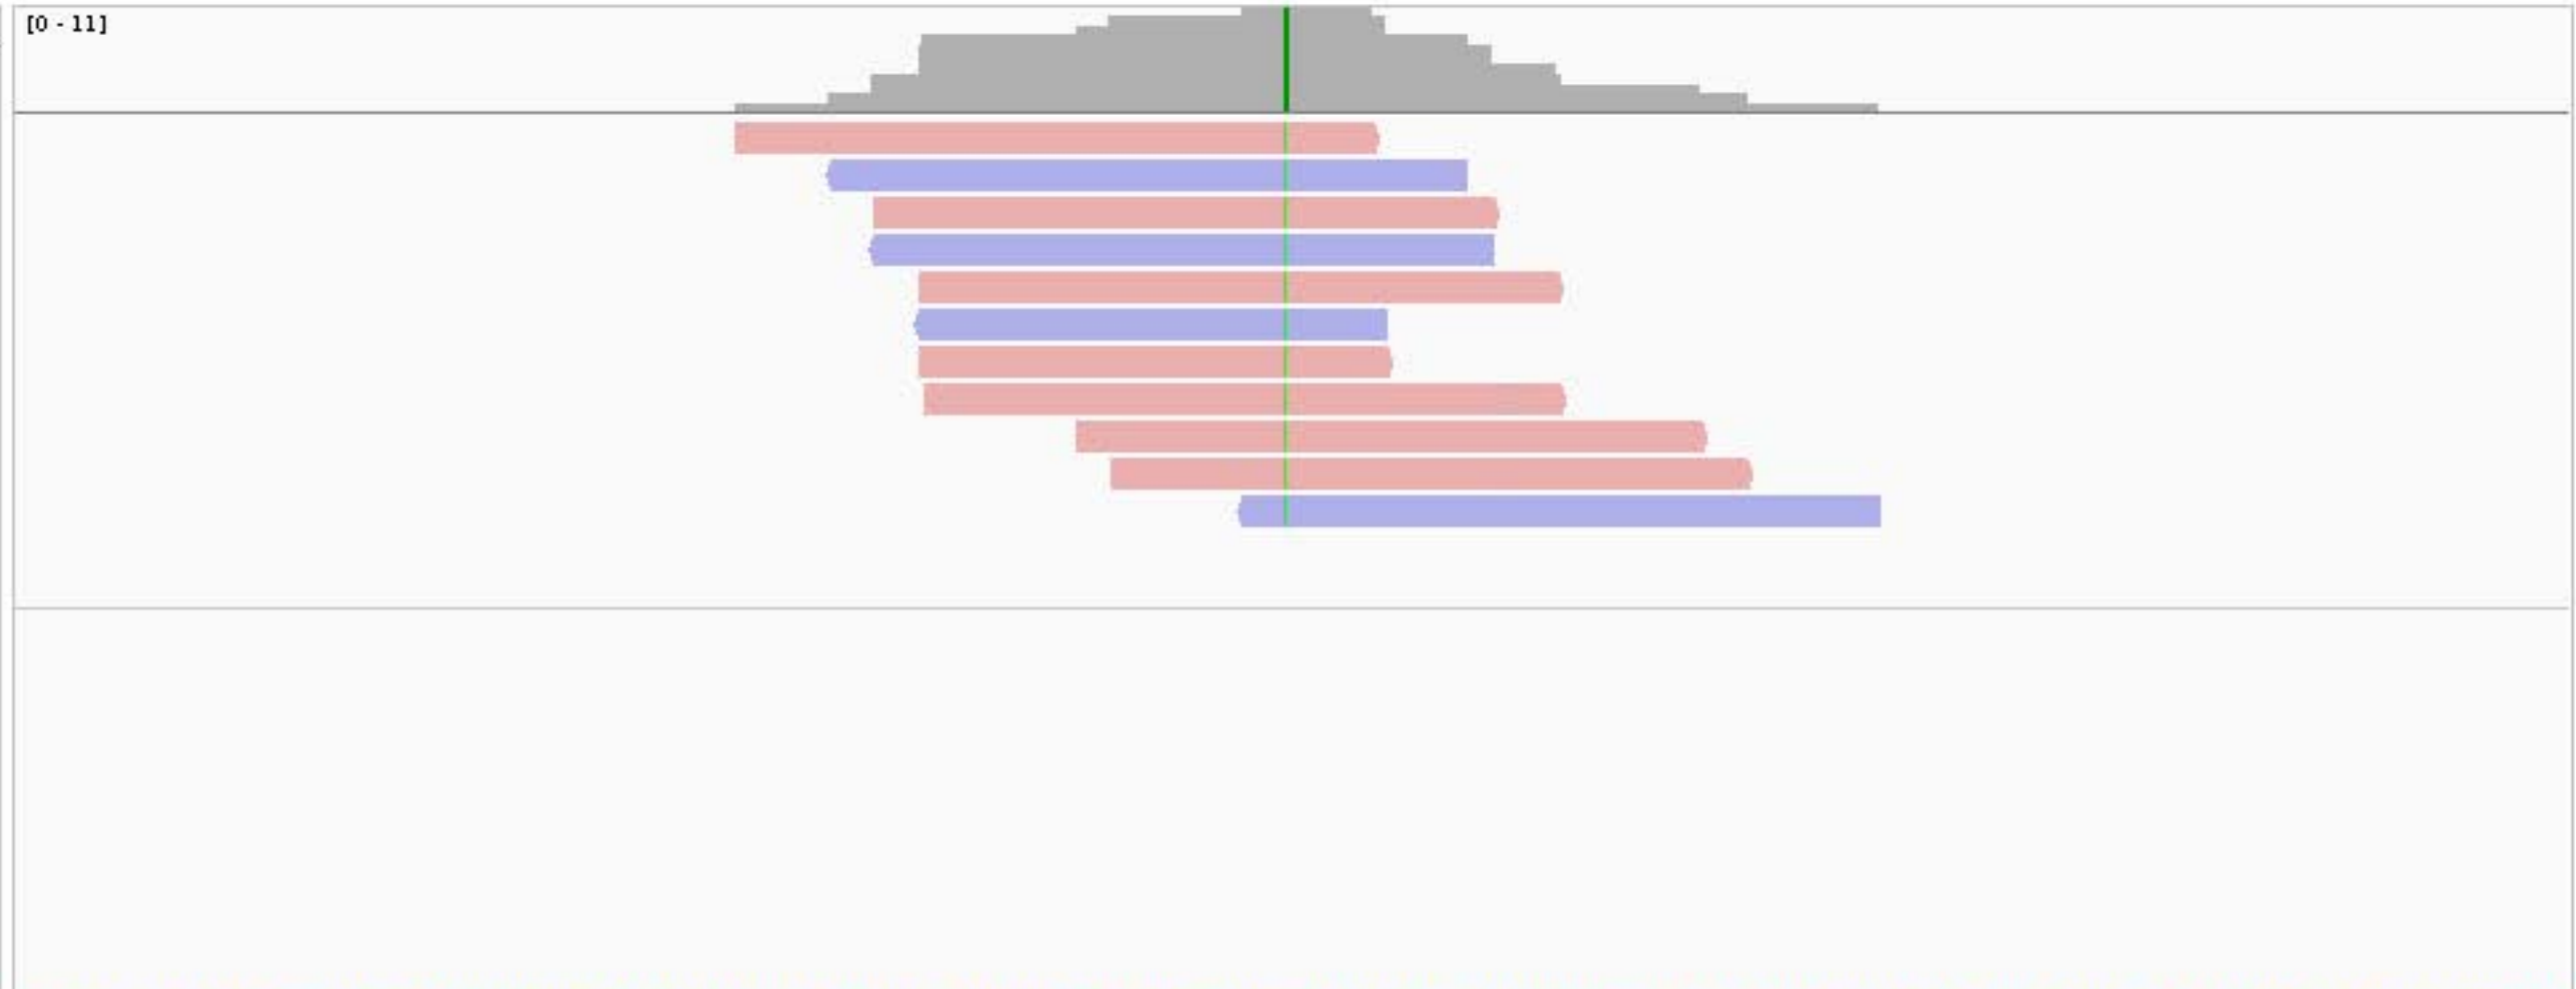

Sequence

Refseq Genes

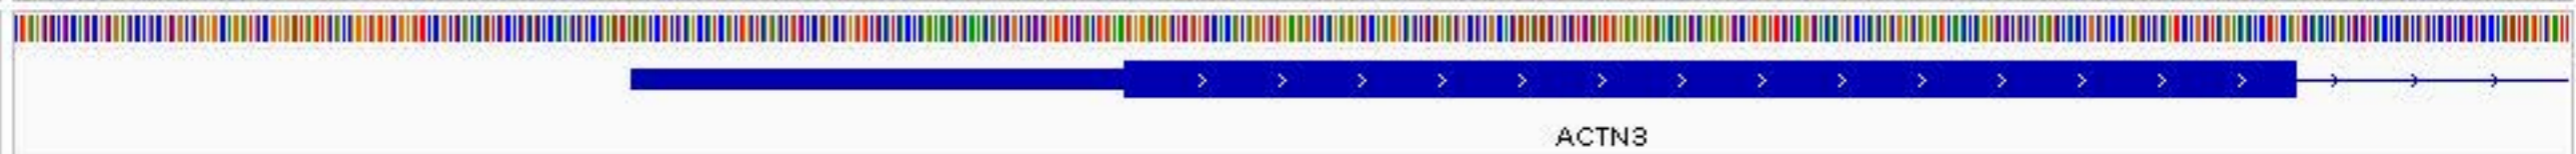

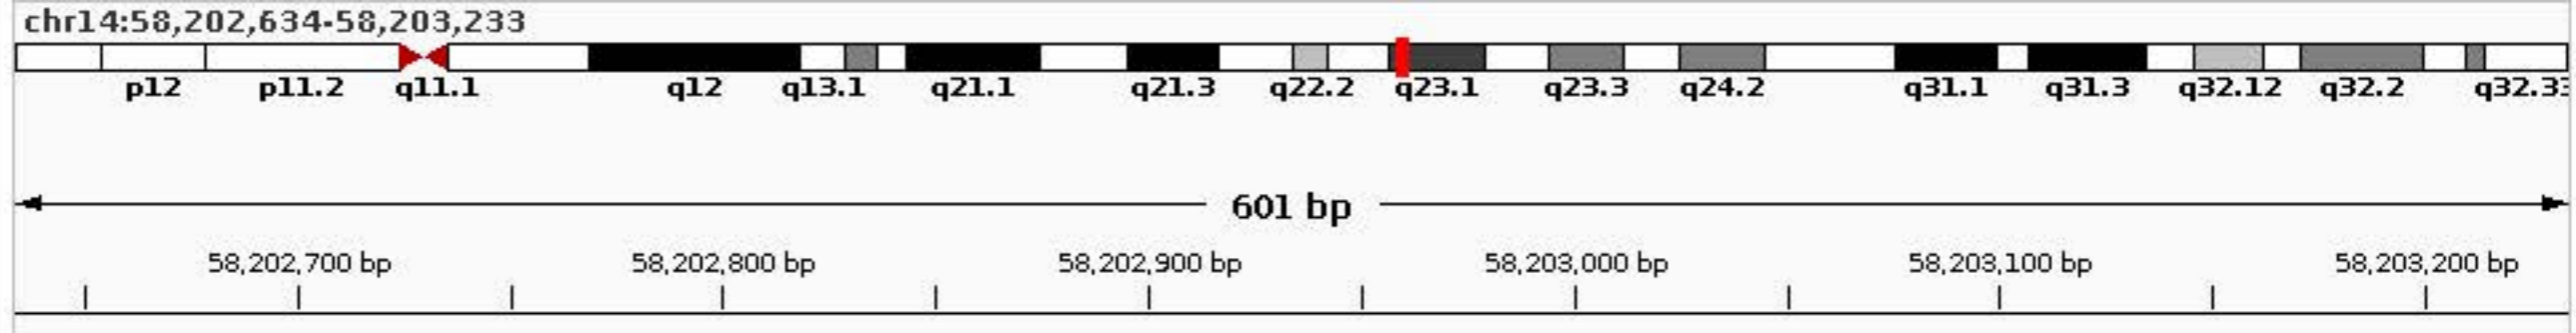

SL\_0002\_LN\_1\_mut.bam Coverage

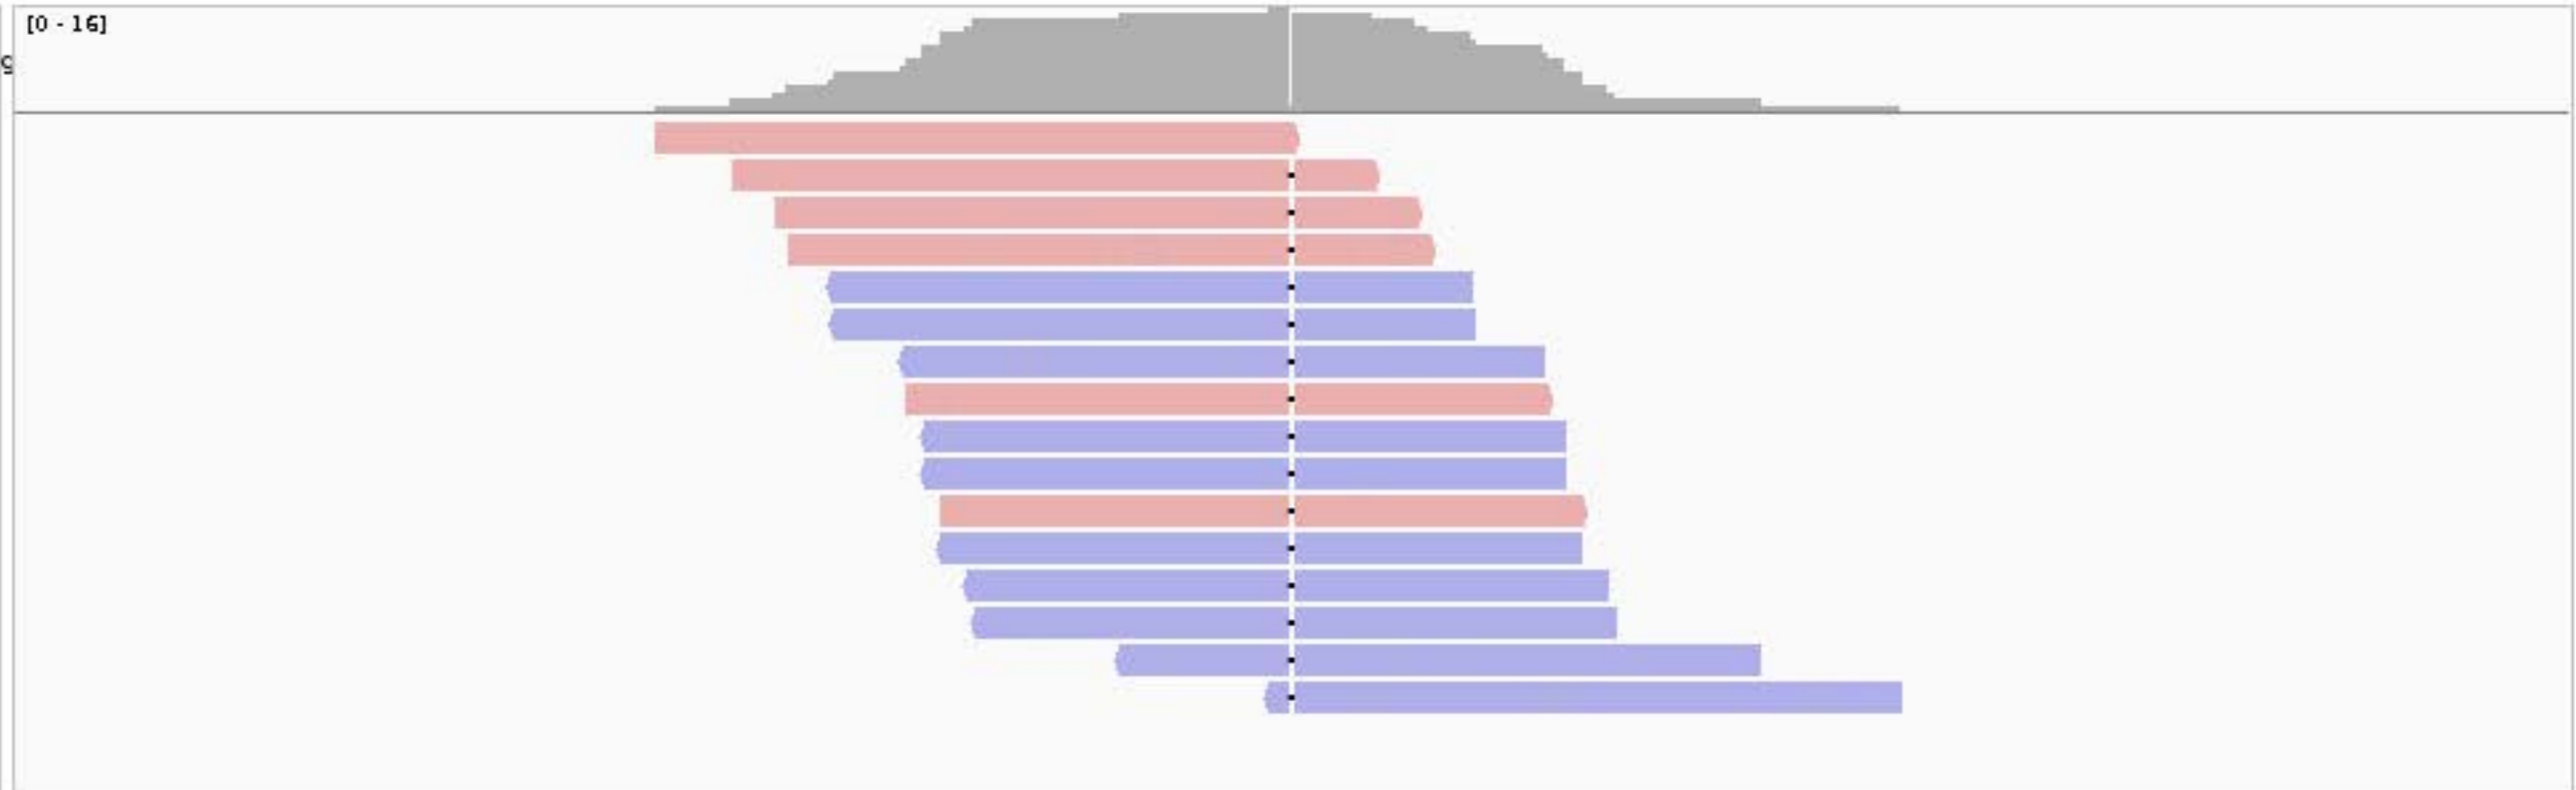

Sequence

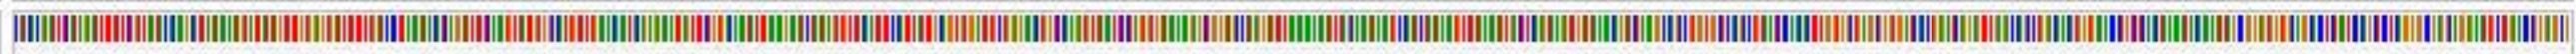

Refseq Genes

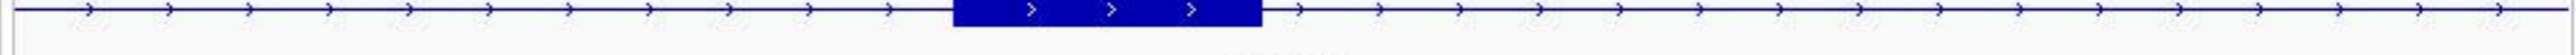

ACTR10

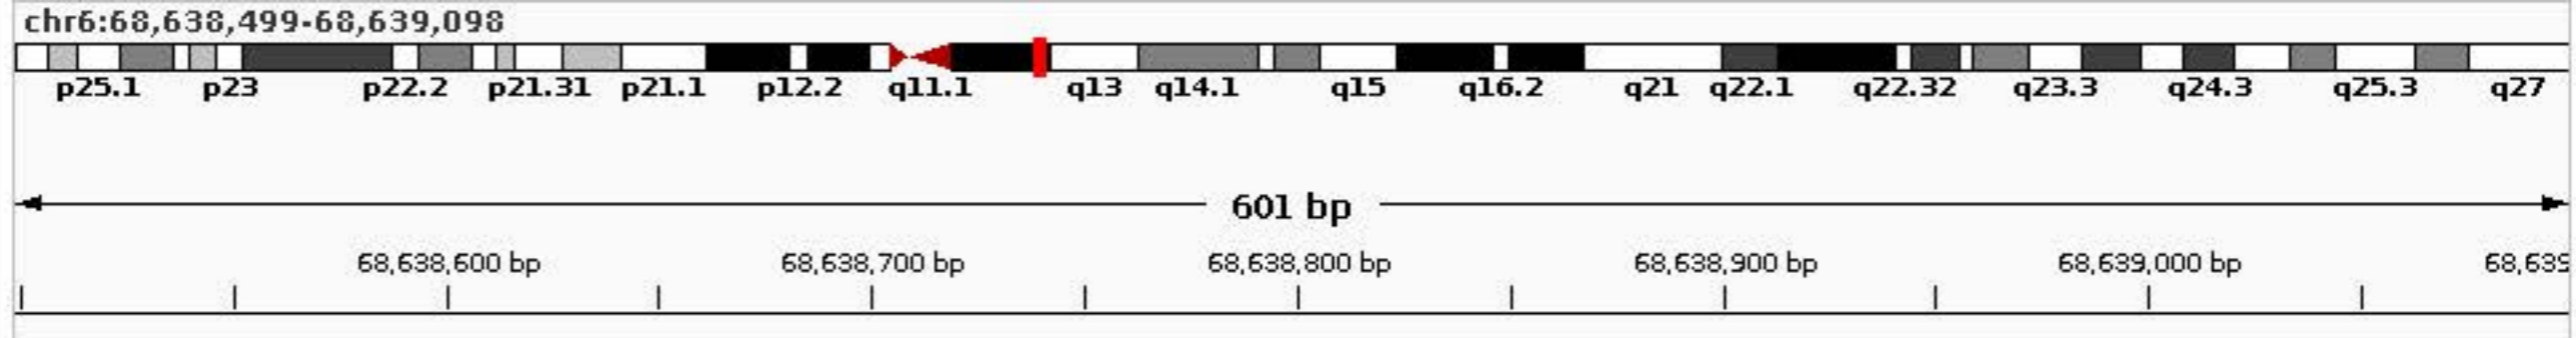

SL\_0004\_RN\_19\_mut.bam Coverage

SL\_0004\_RN\_19\_mut.bam

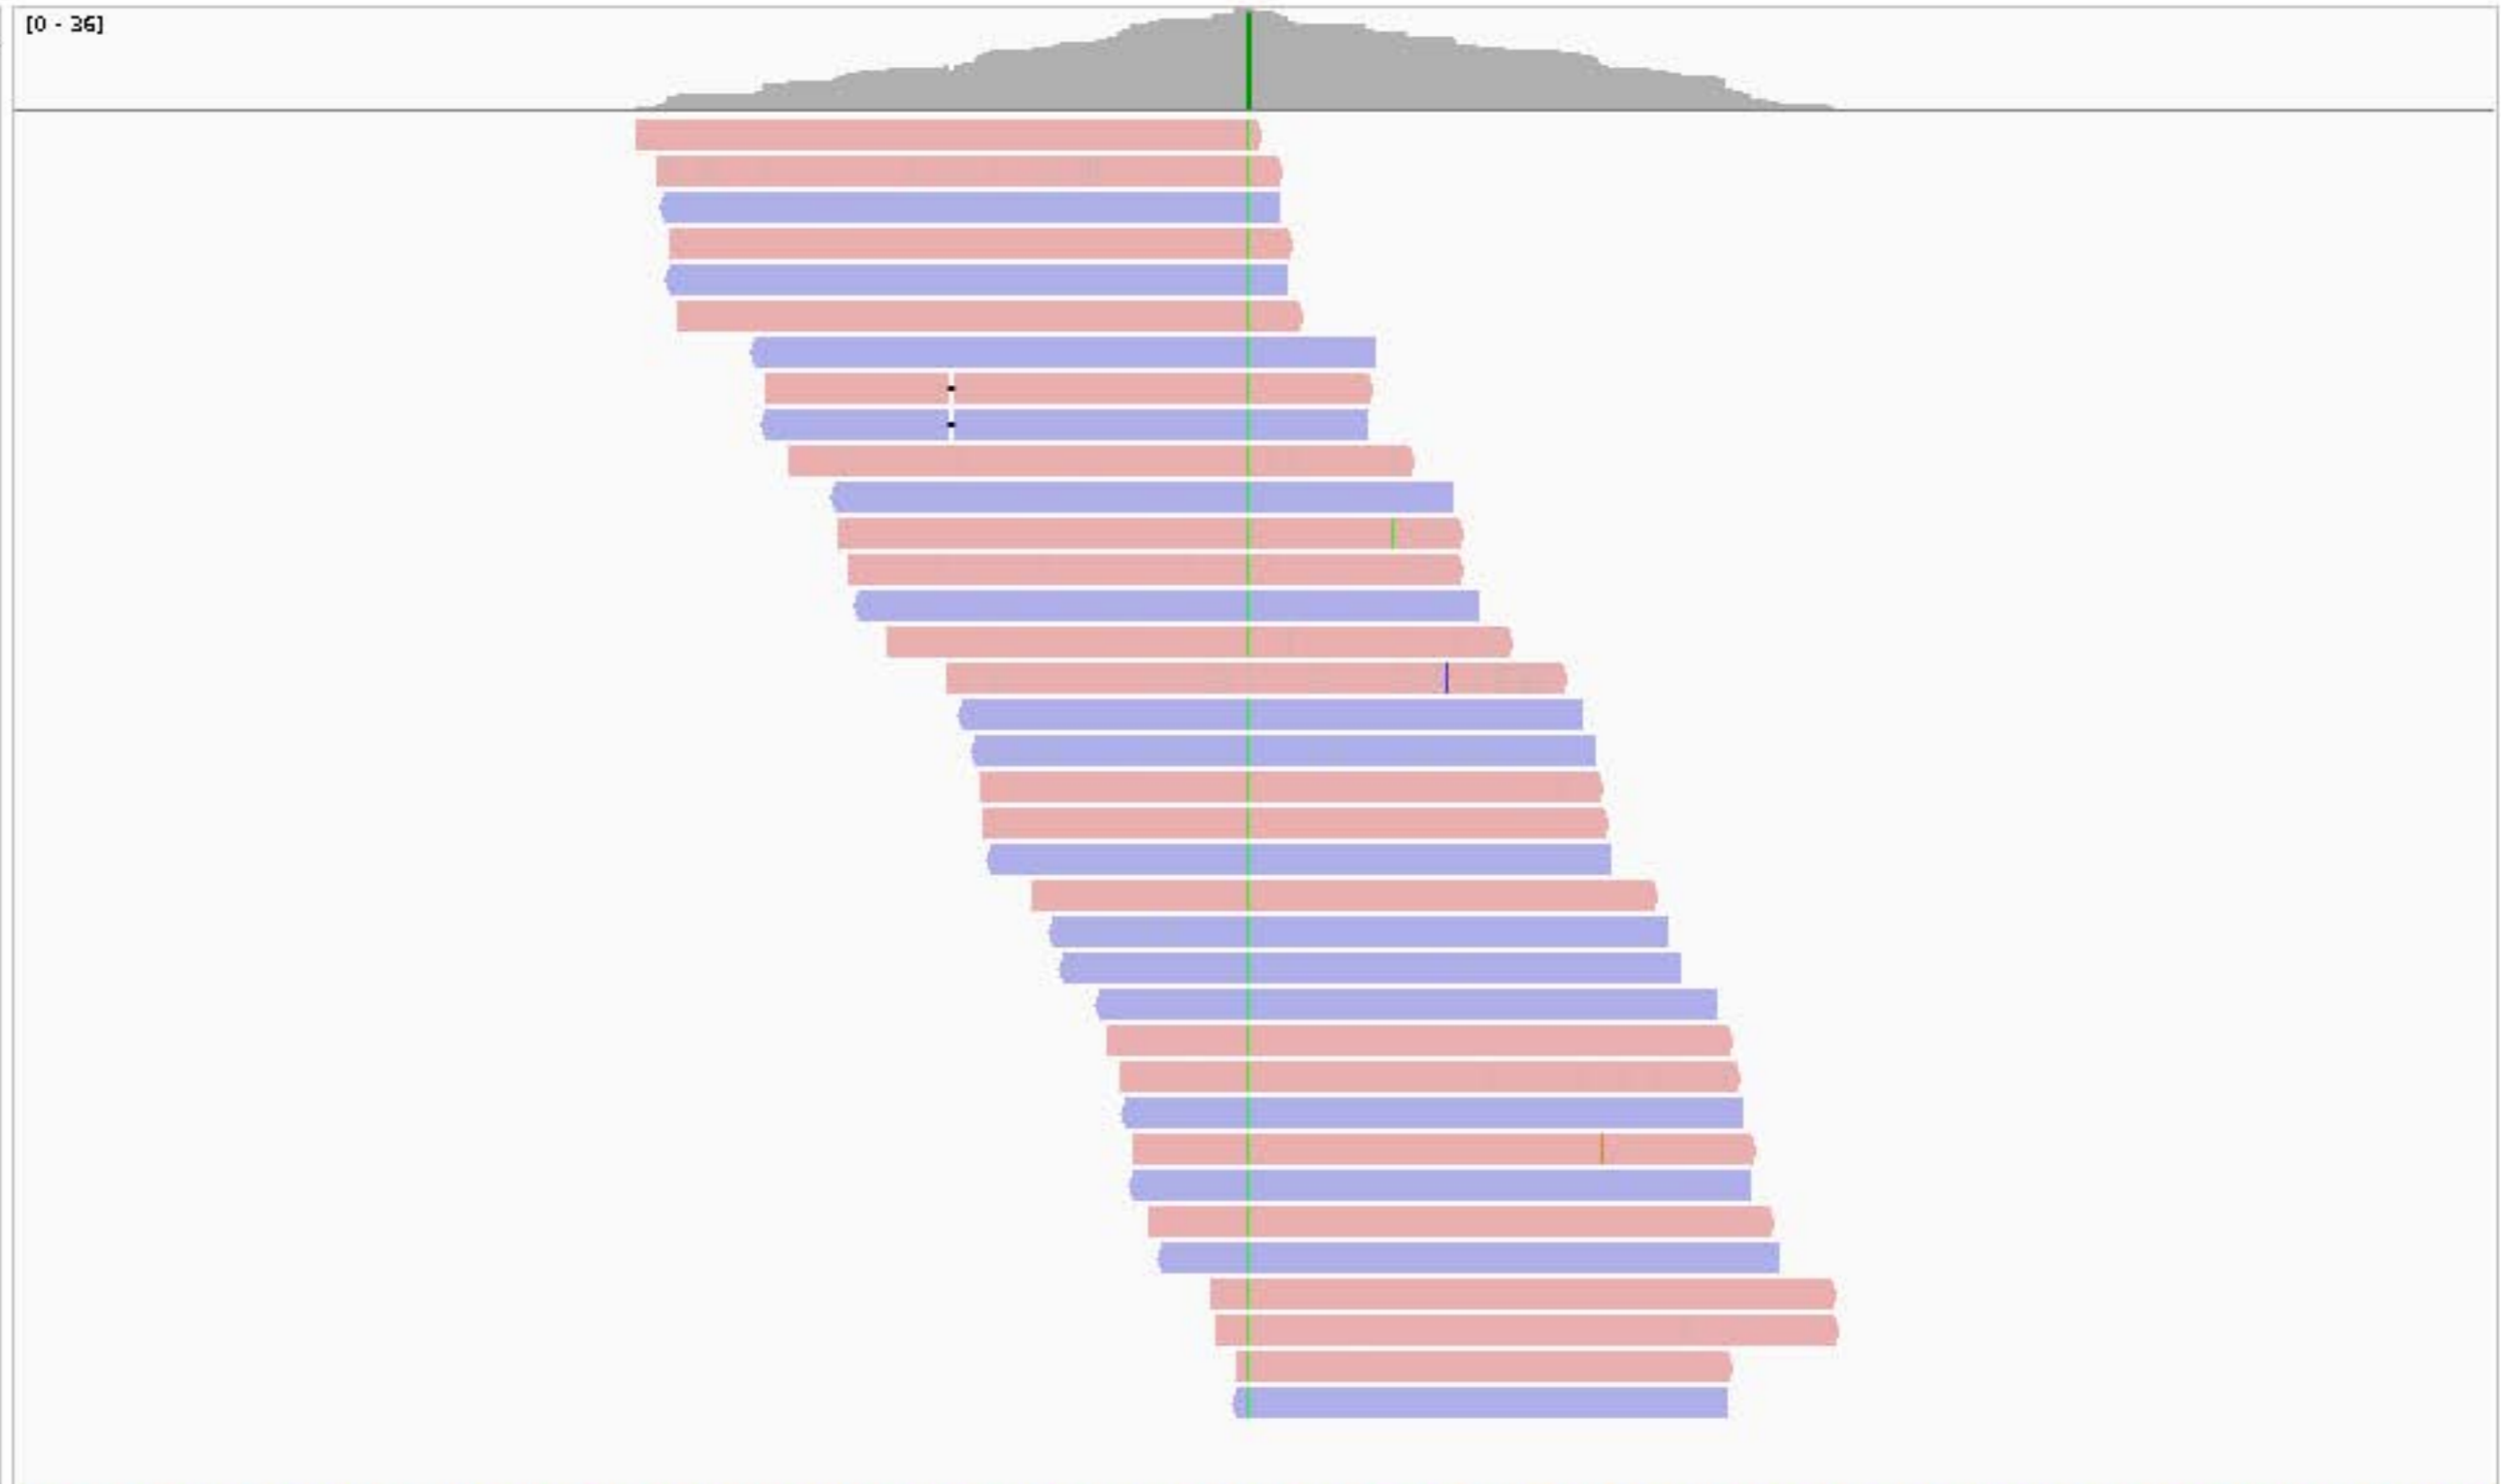

Sequence

Refseq Genes

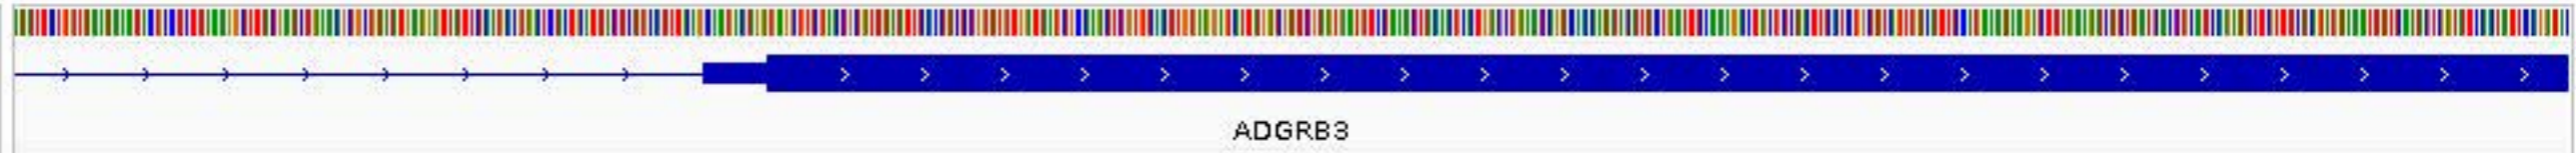



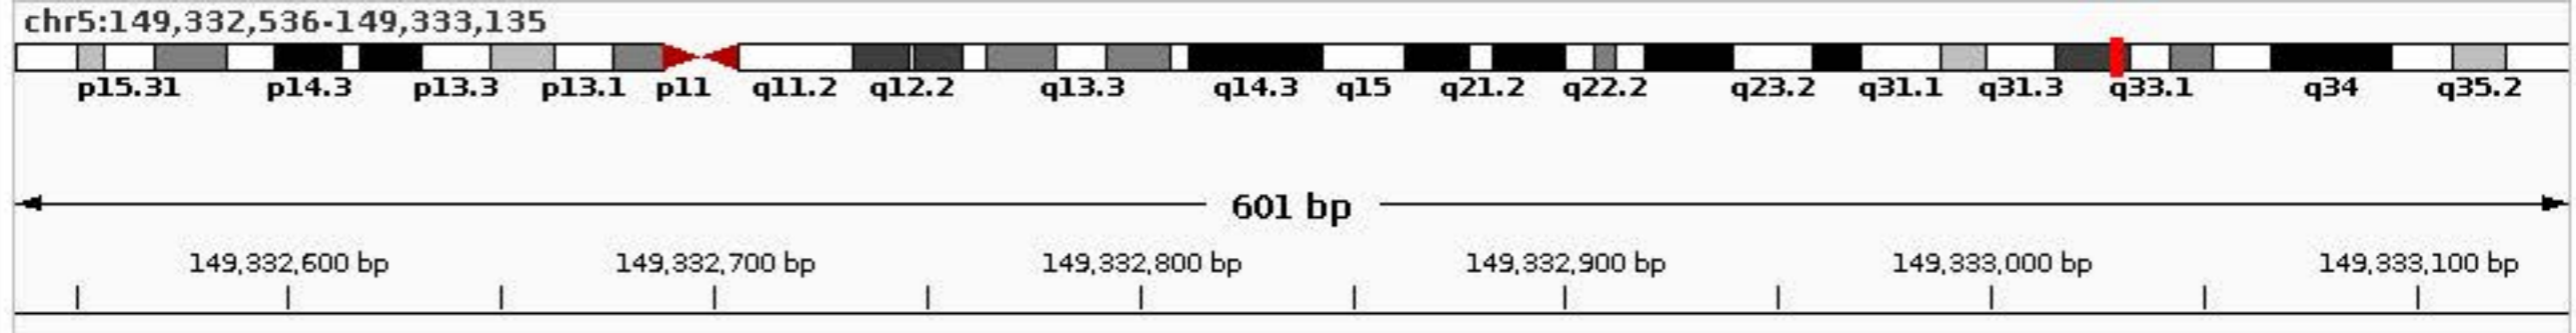

SL\_0015\_RN\_11\_mut.bam Coverage

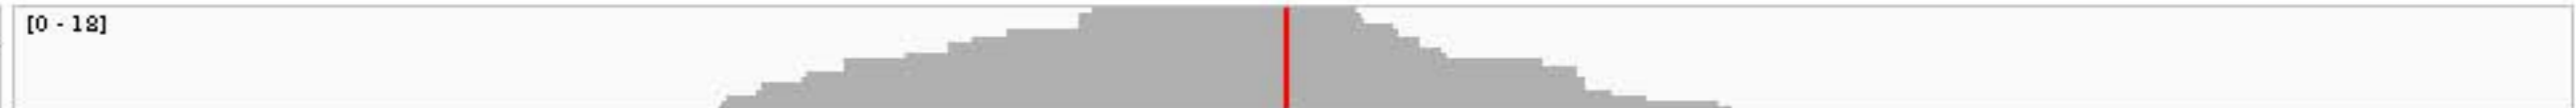

SL\_0015\_RN\_11\_mut.bam

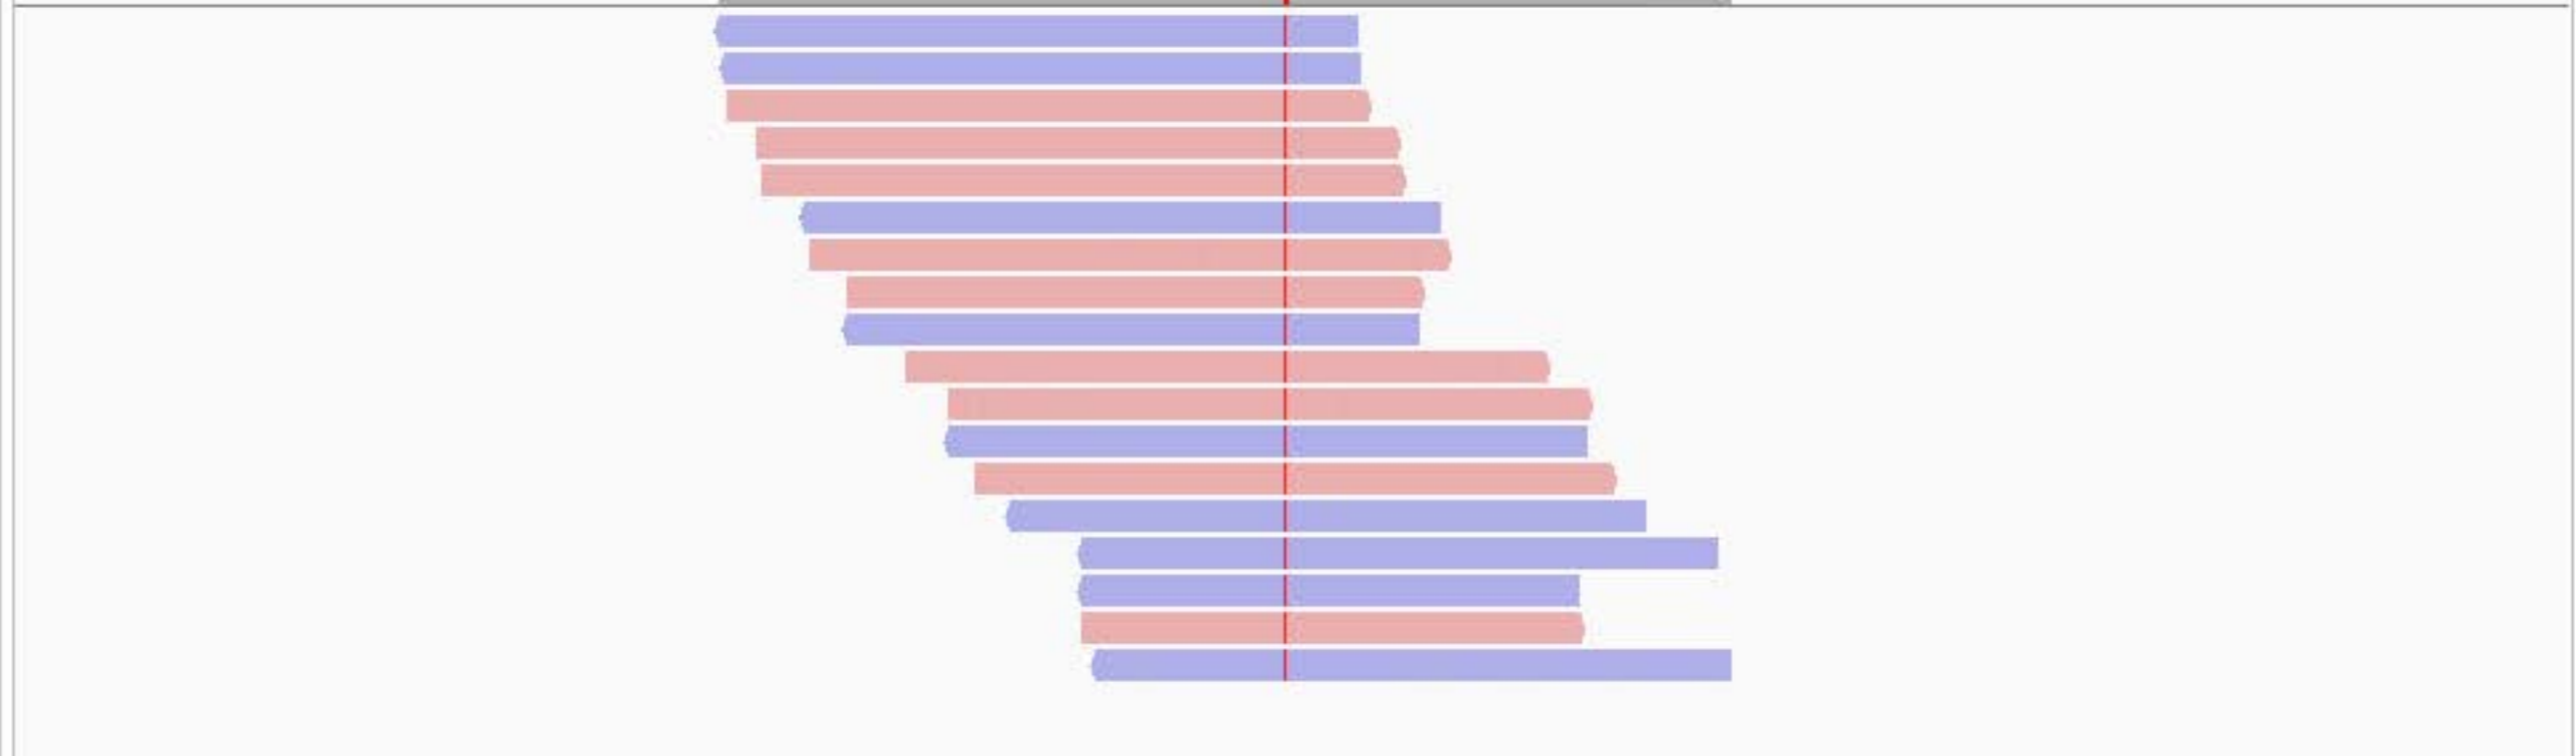

Sequence

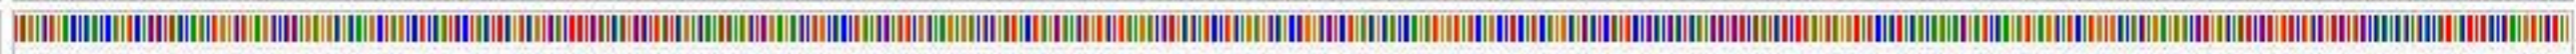

Refseq Genes

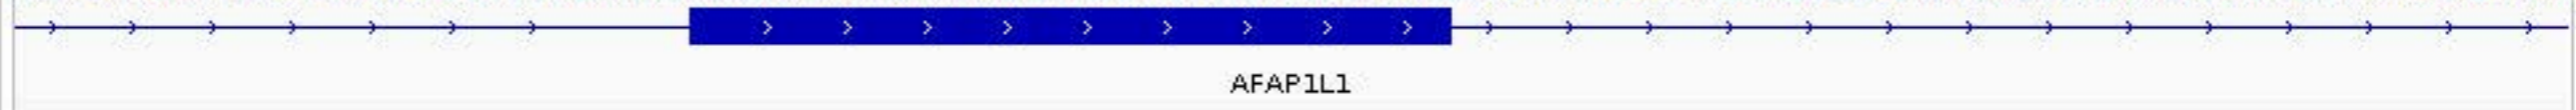

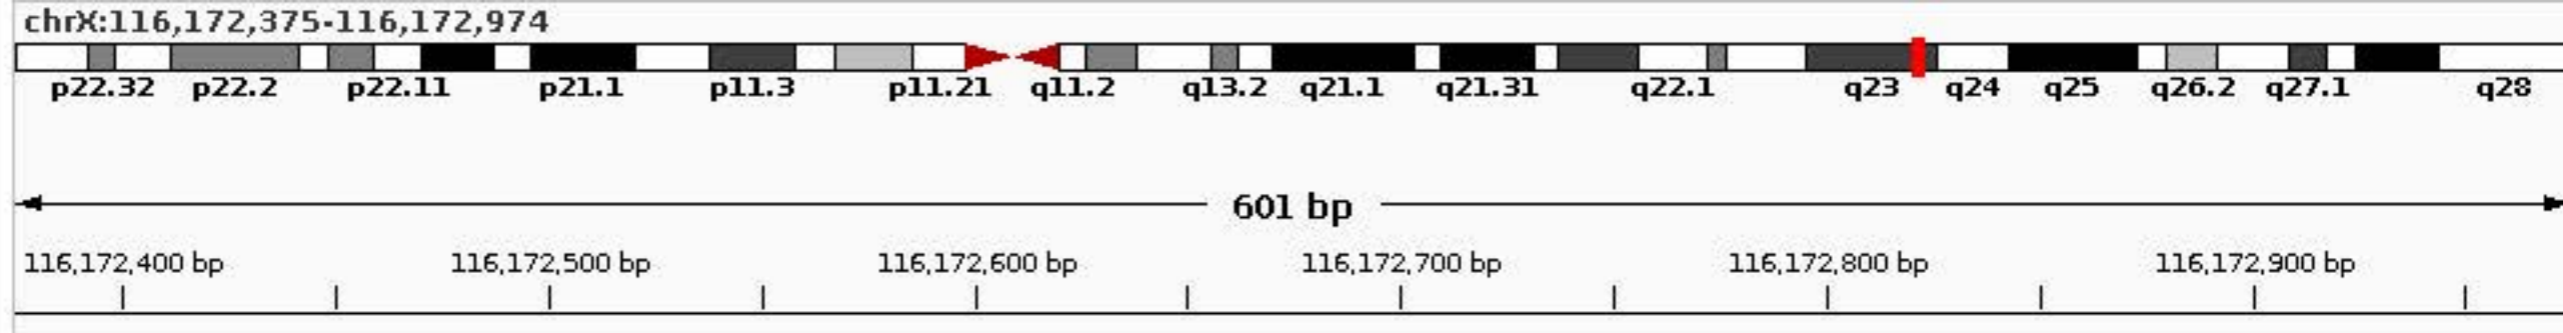

SL\_0004\_RN\_26\_mut.bam Coverage

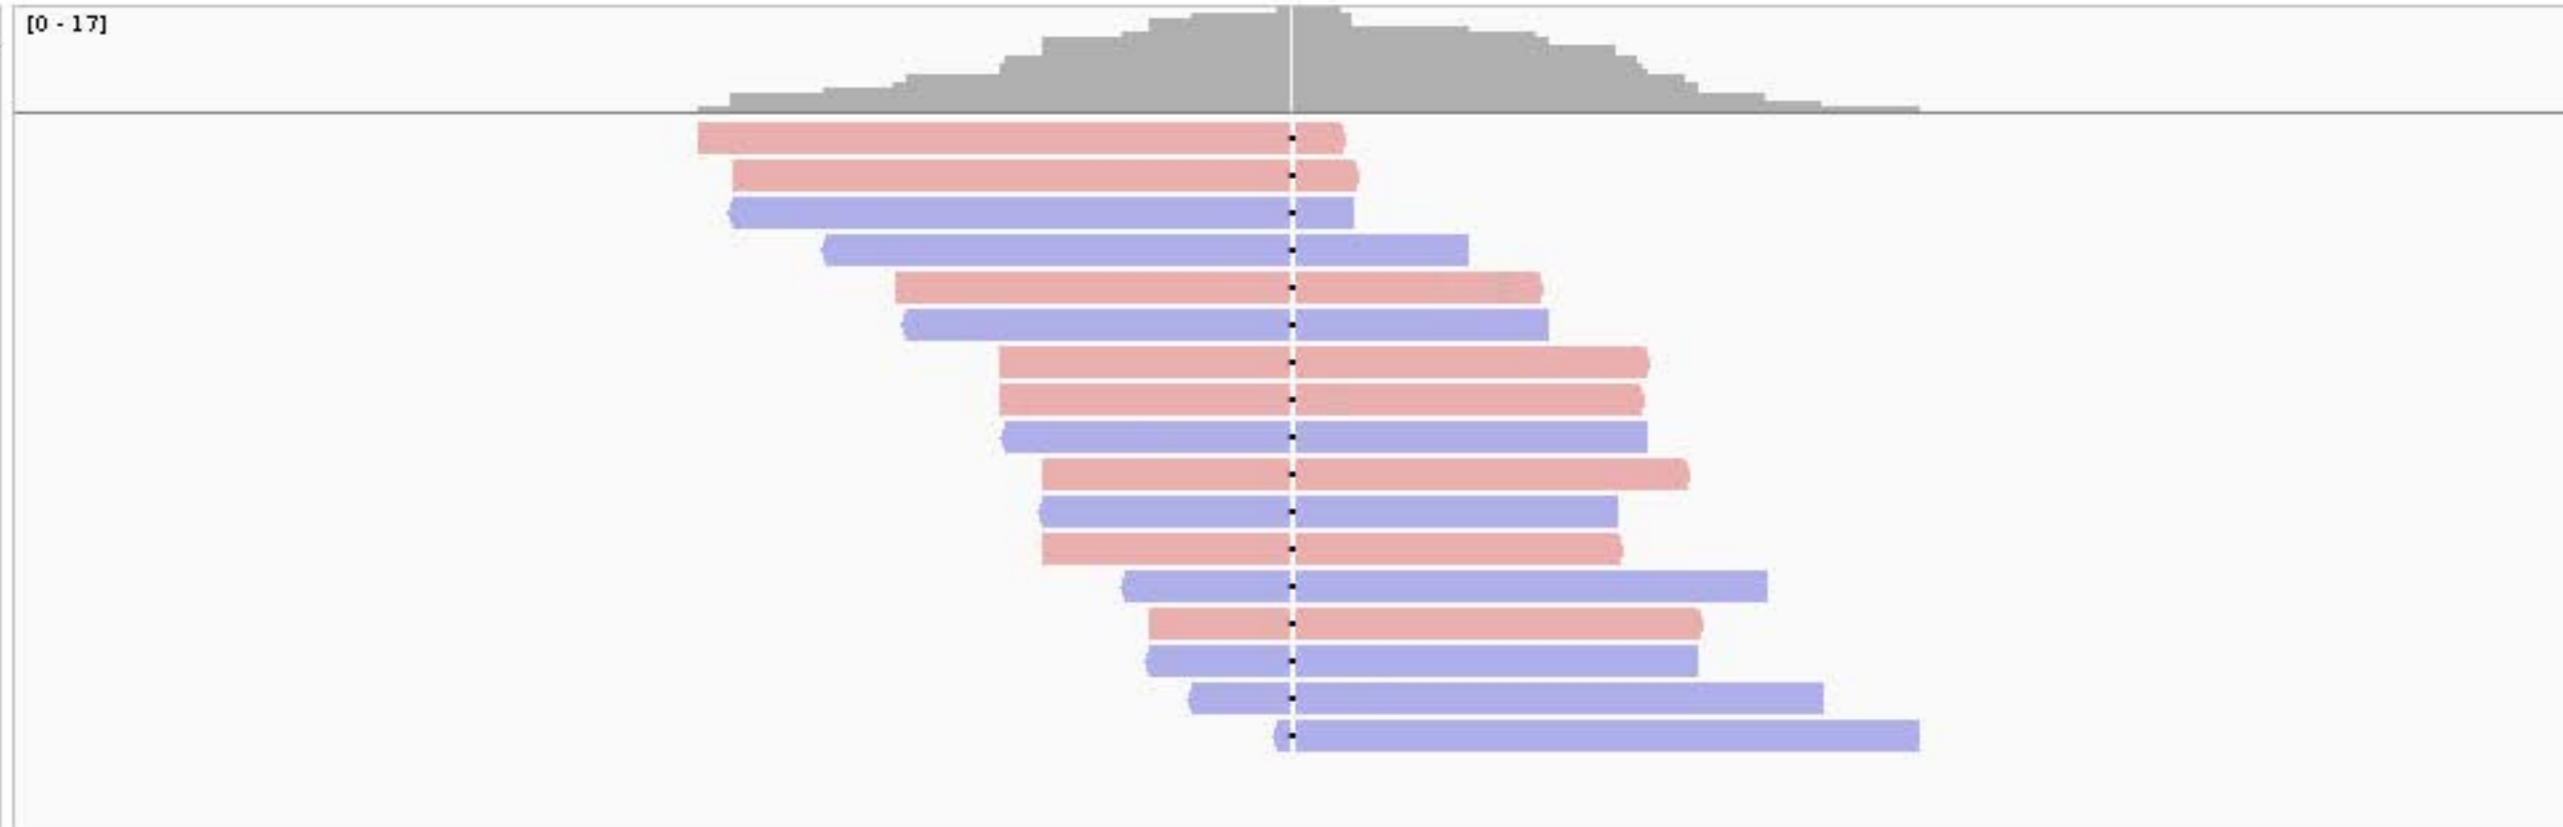

SL\_0004\_RN\_26\_mut.bam

Sequence

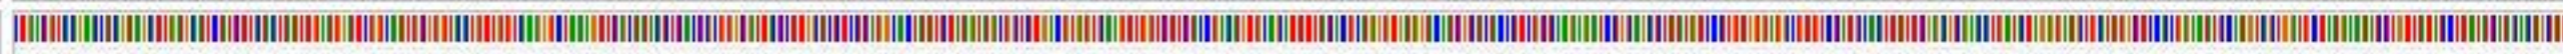

Refseq Genes

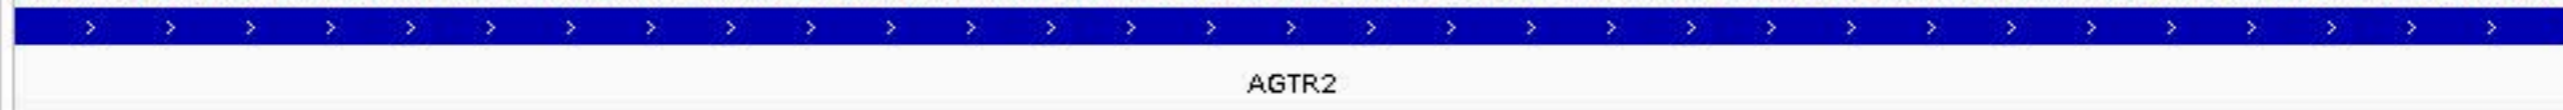

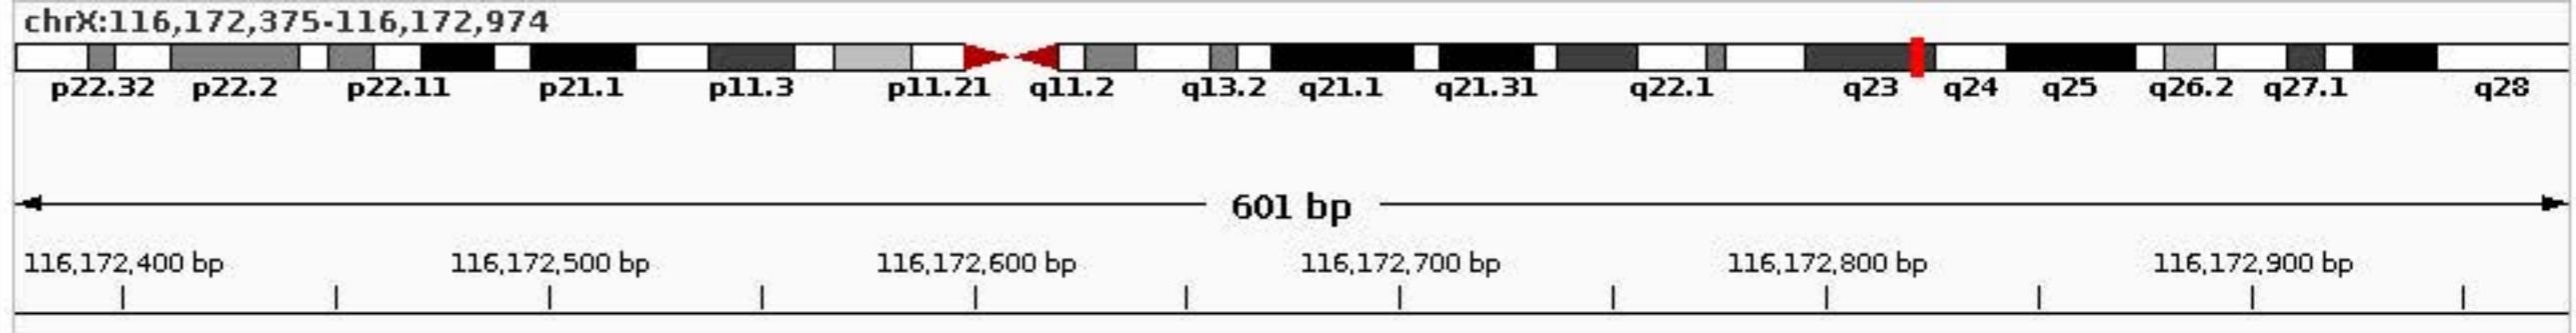

SL\_0006\_RN\_59\_mut.bam Coverage

SL\_0006\_RN\_59\_mut.bam

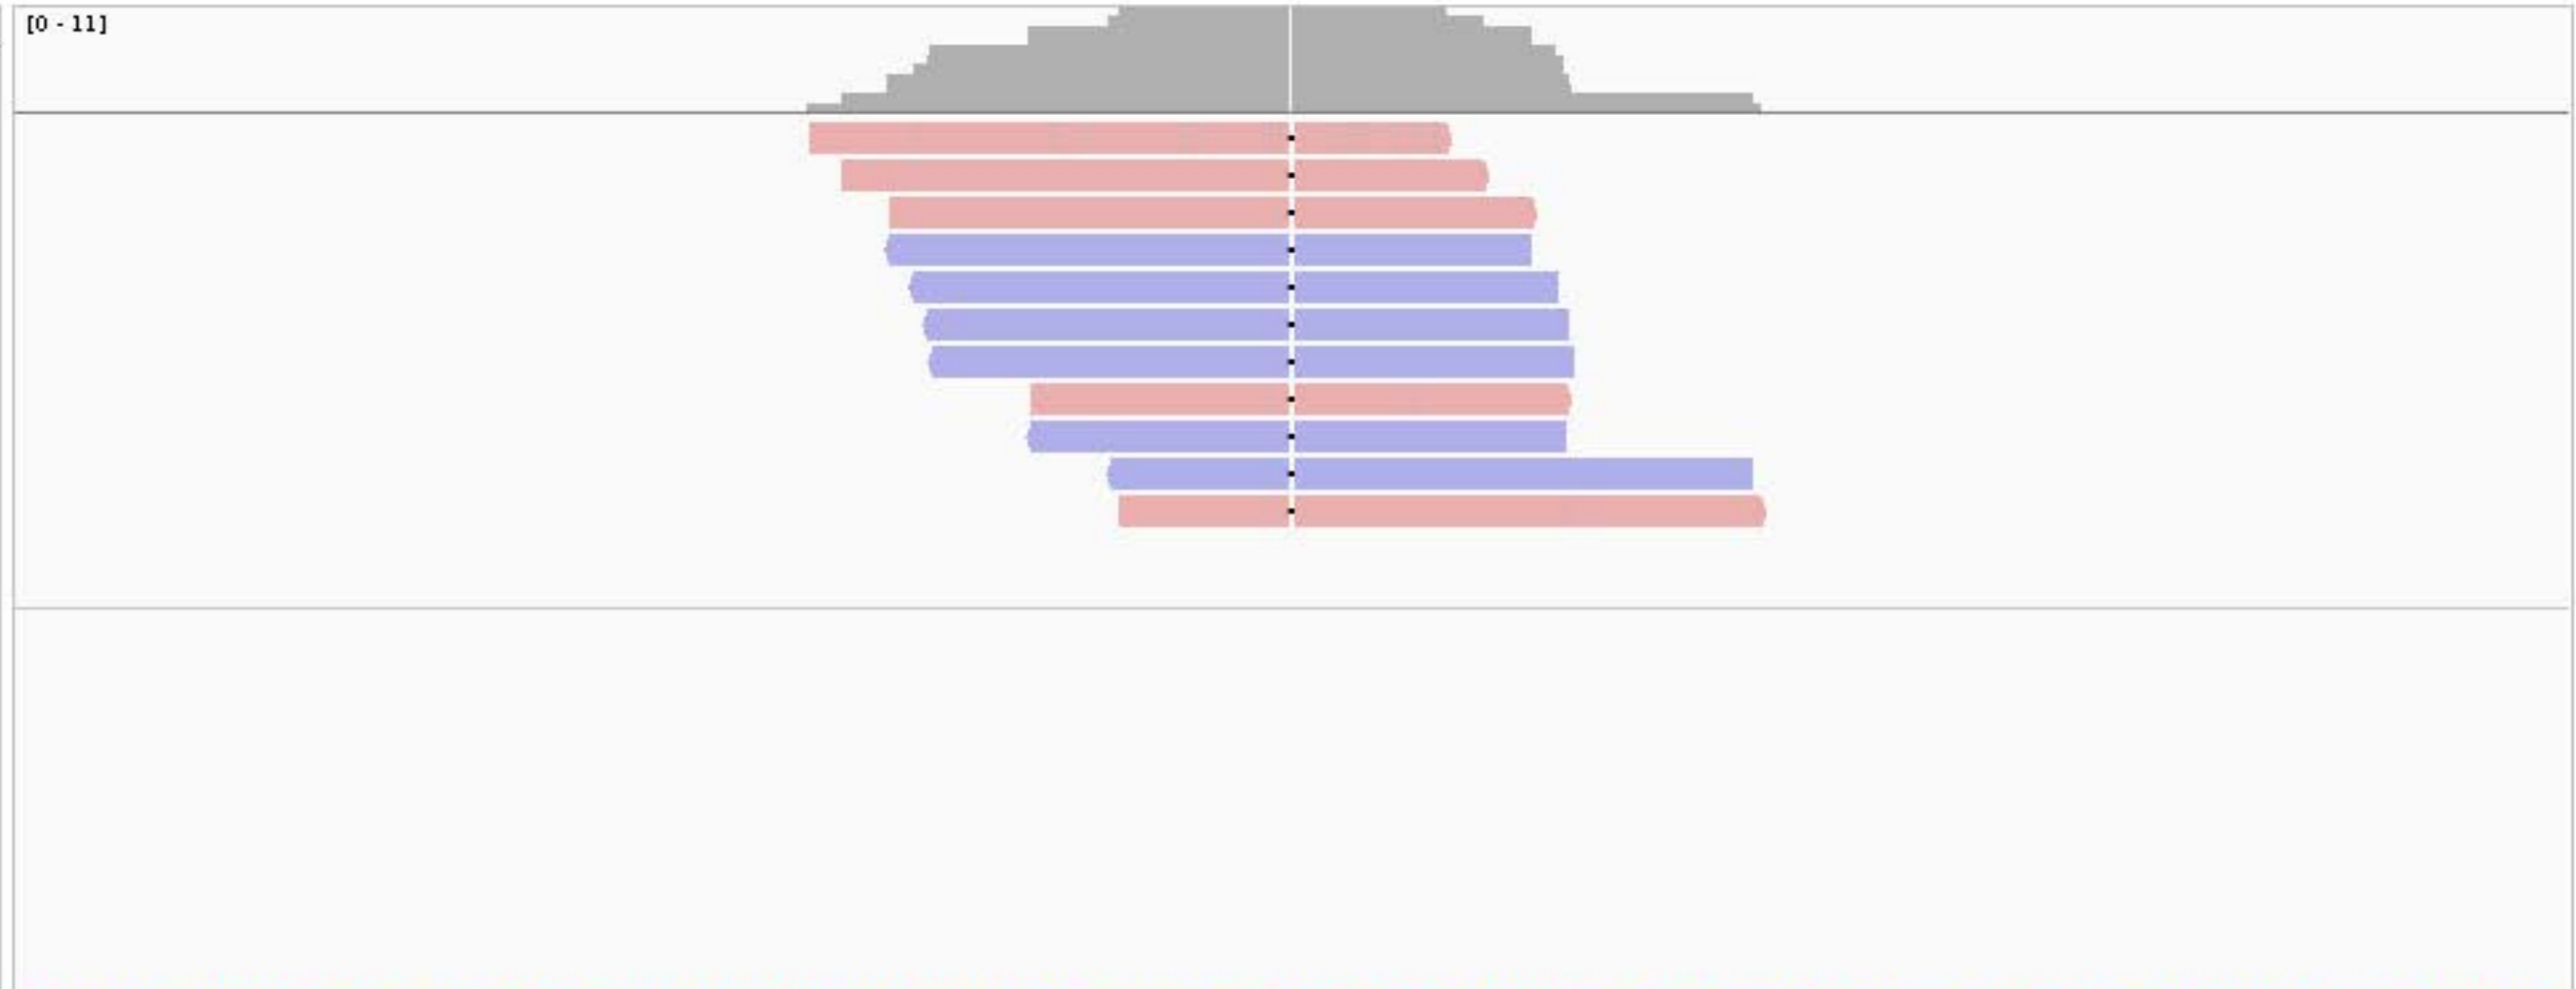

Sequence

Refseq Genes

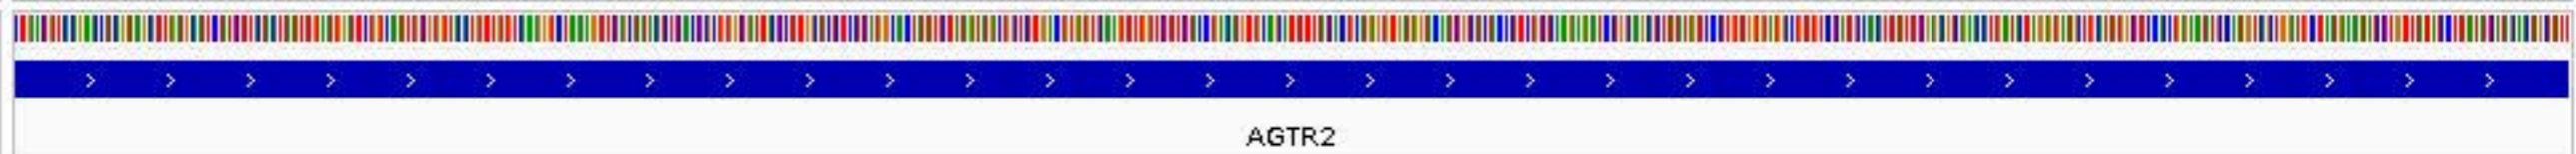

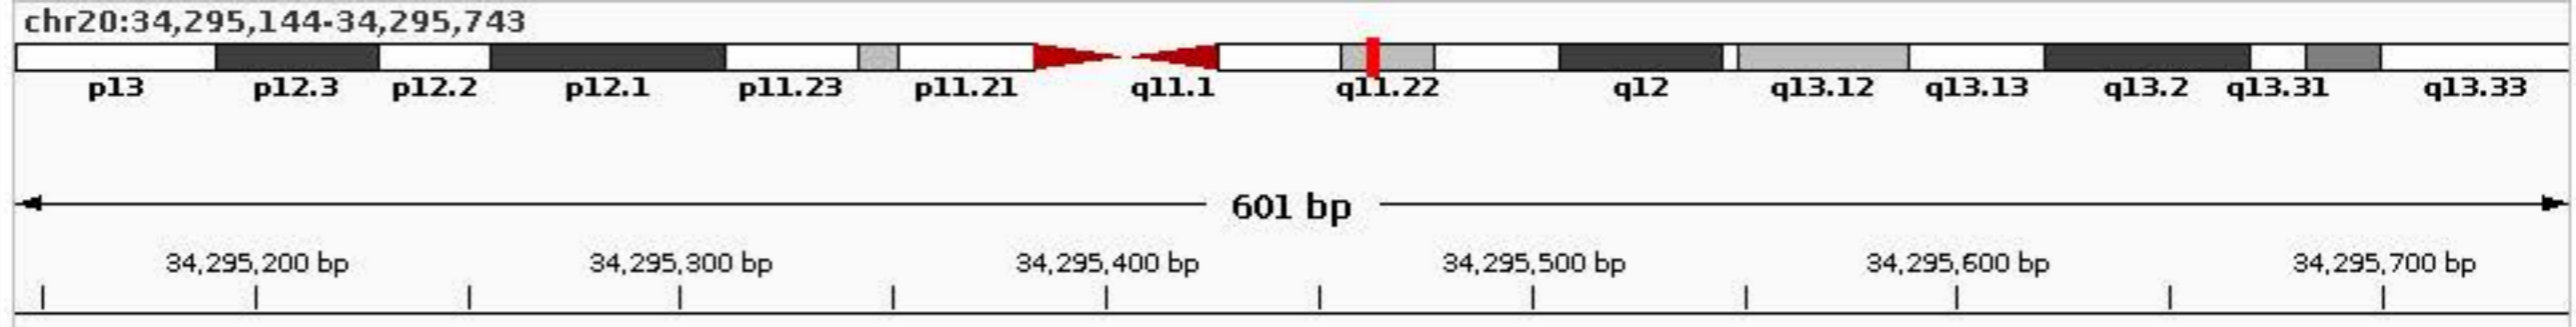

SL\_0015\_RN\_21\_mut.bam Coverage

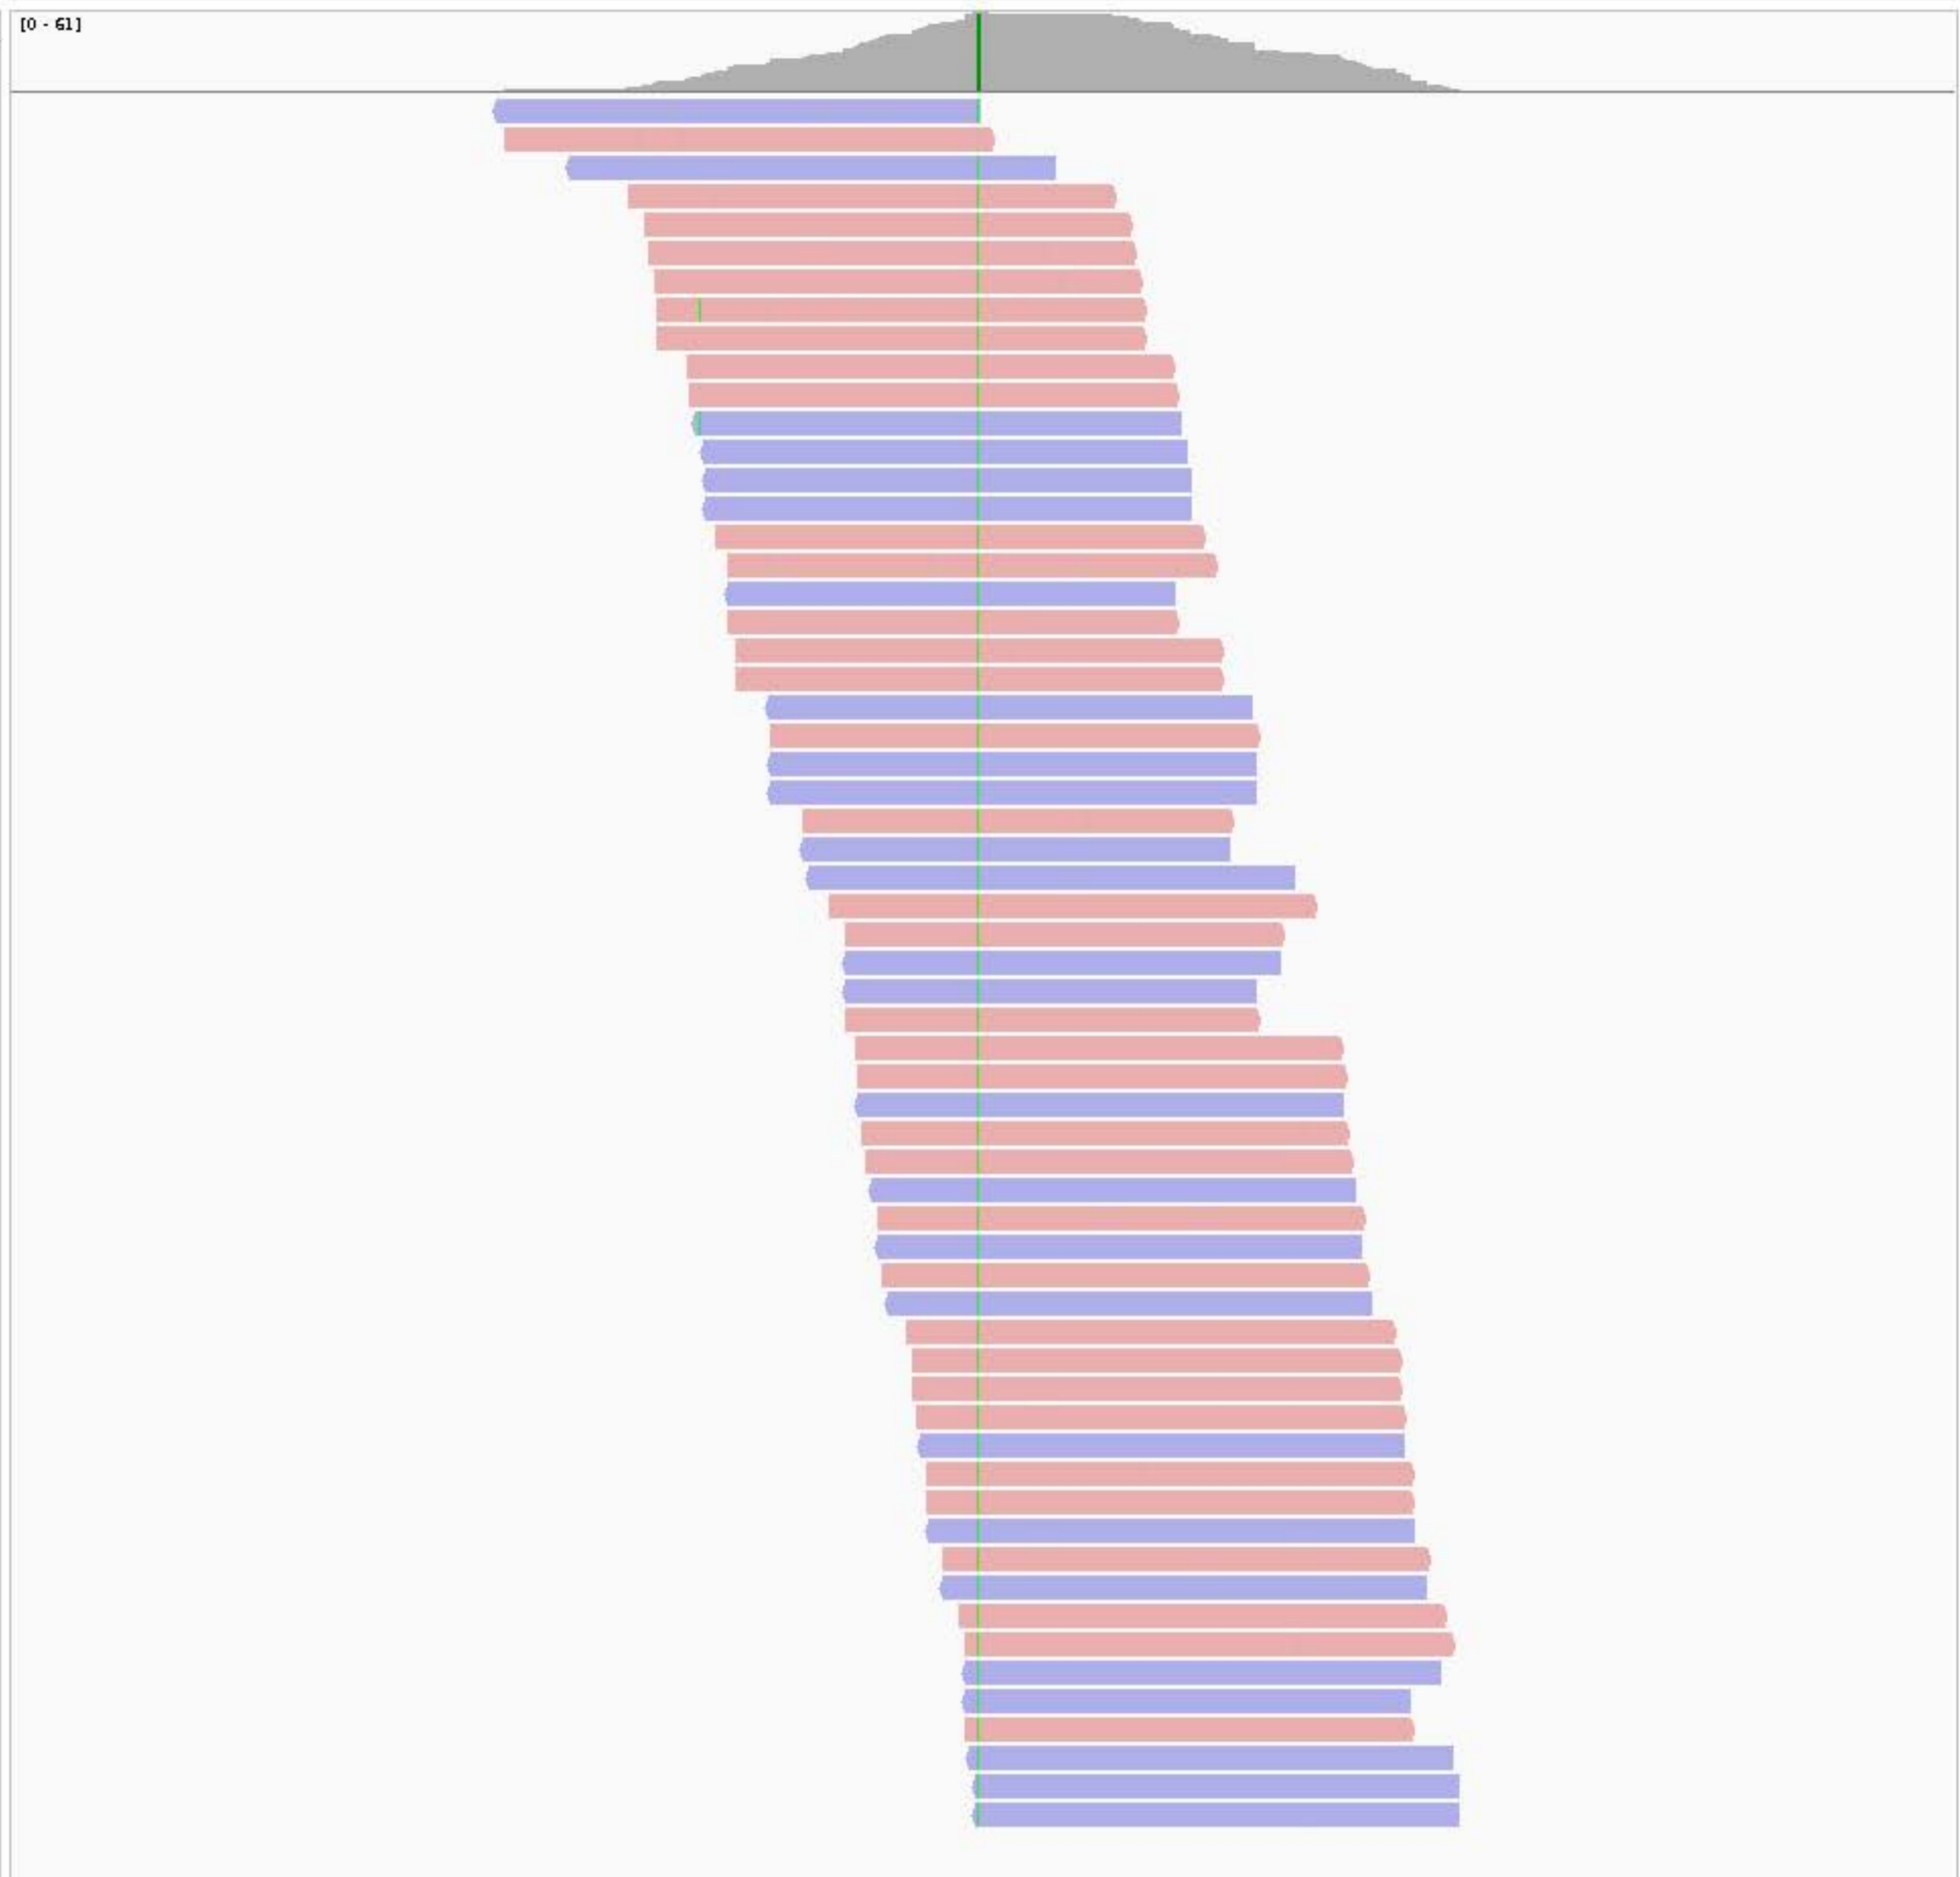

SL\_0015\_RN\_21\_mut.bam

Sequence

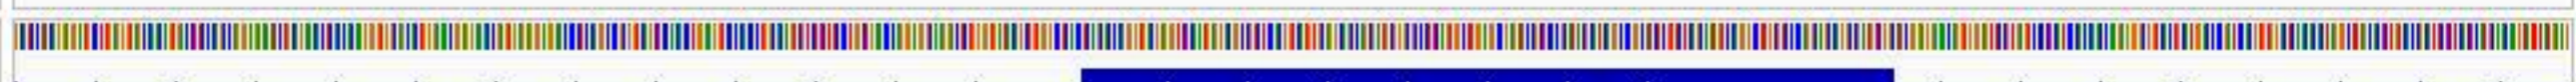

Refseq Genes

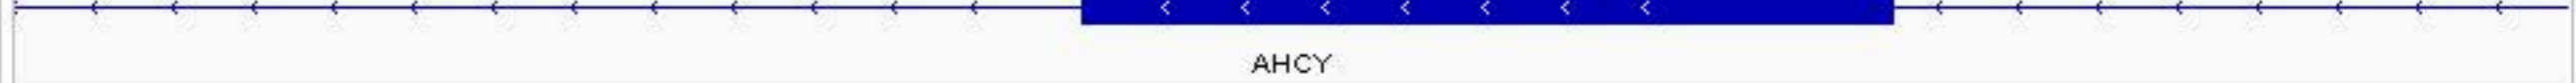



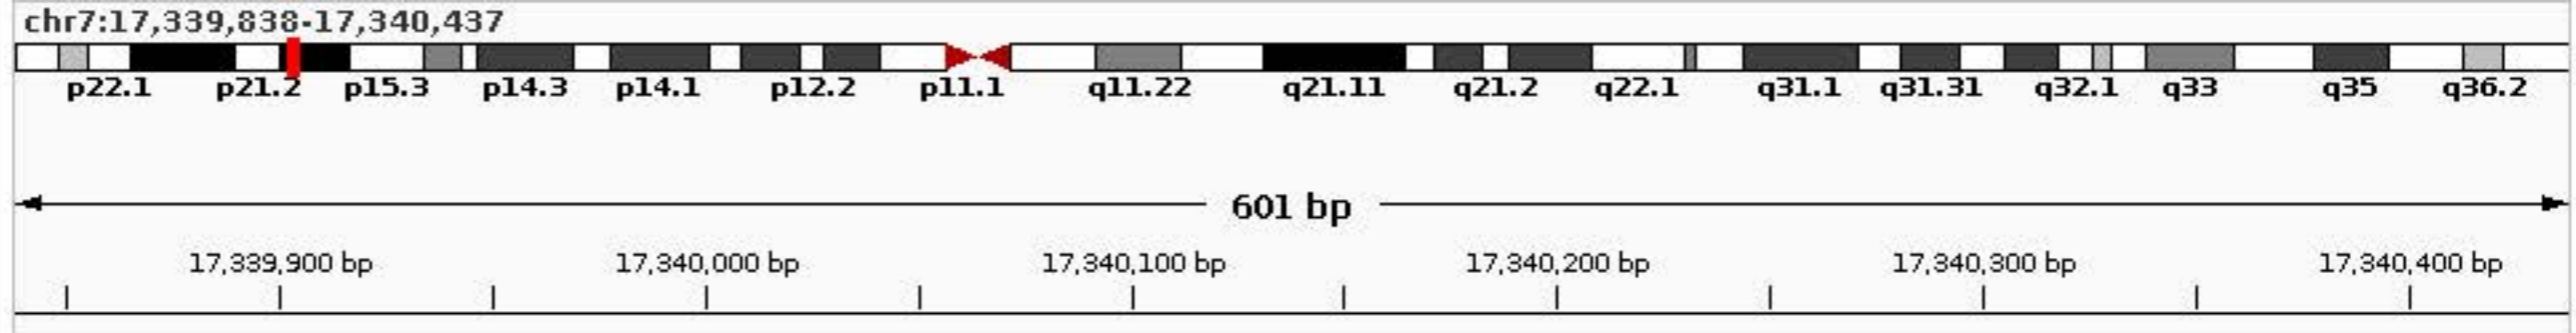

SL\_0015\_RN\_12\_mut.bam Coverage

SL\_0015\_RN\_12\_mut.bam

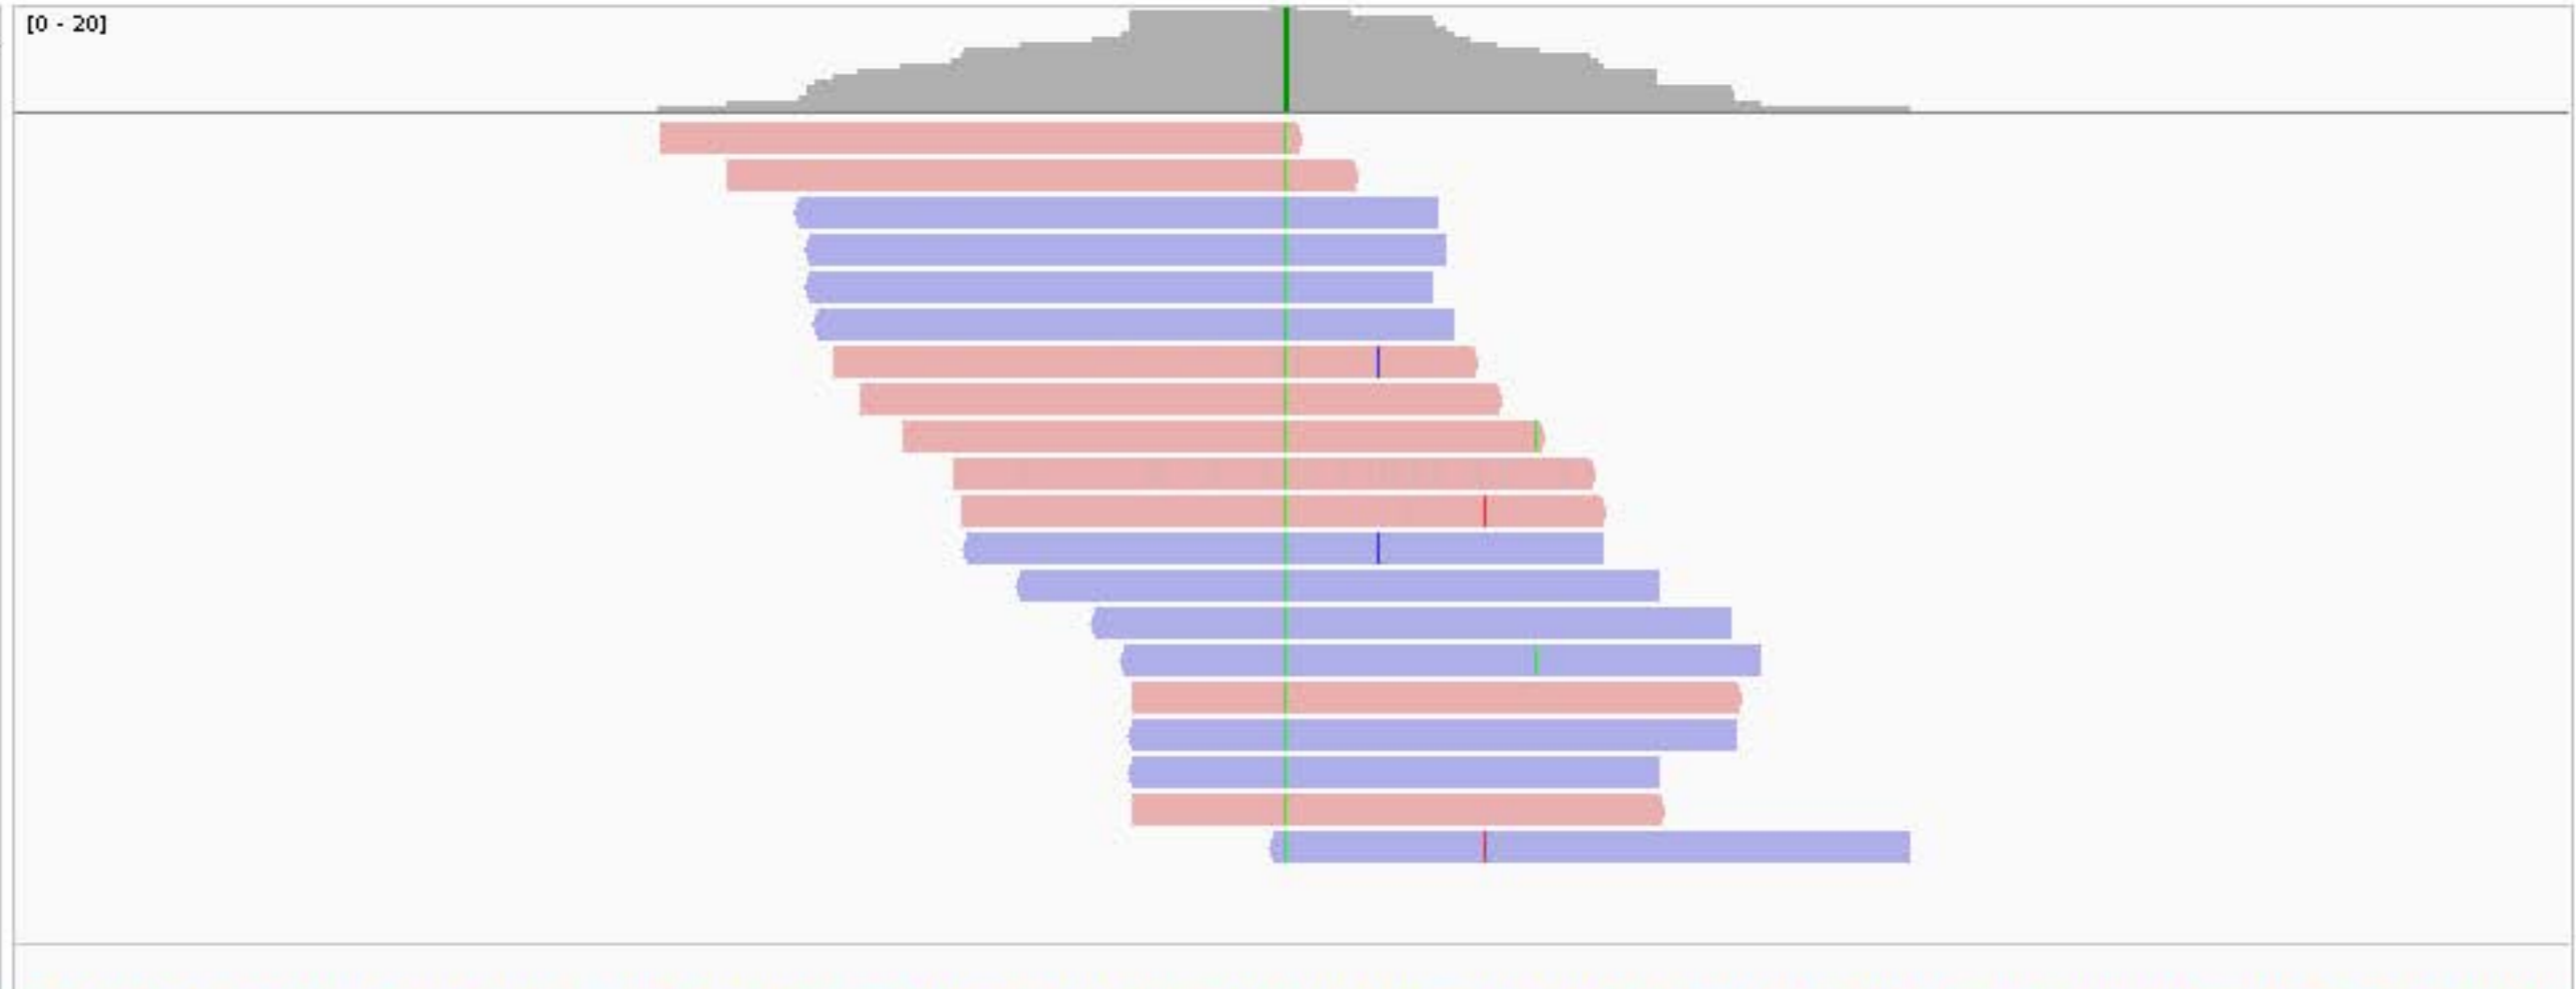

Sequence

Refseq Genes

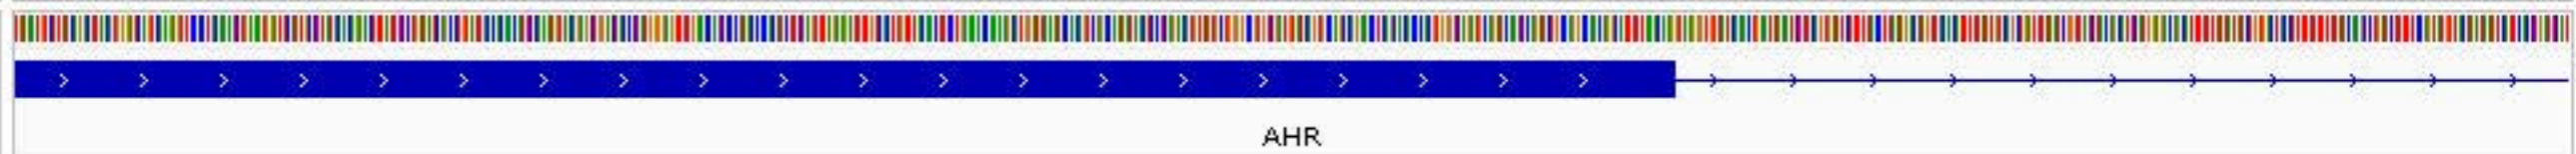



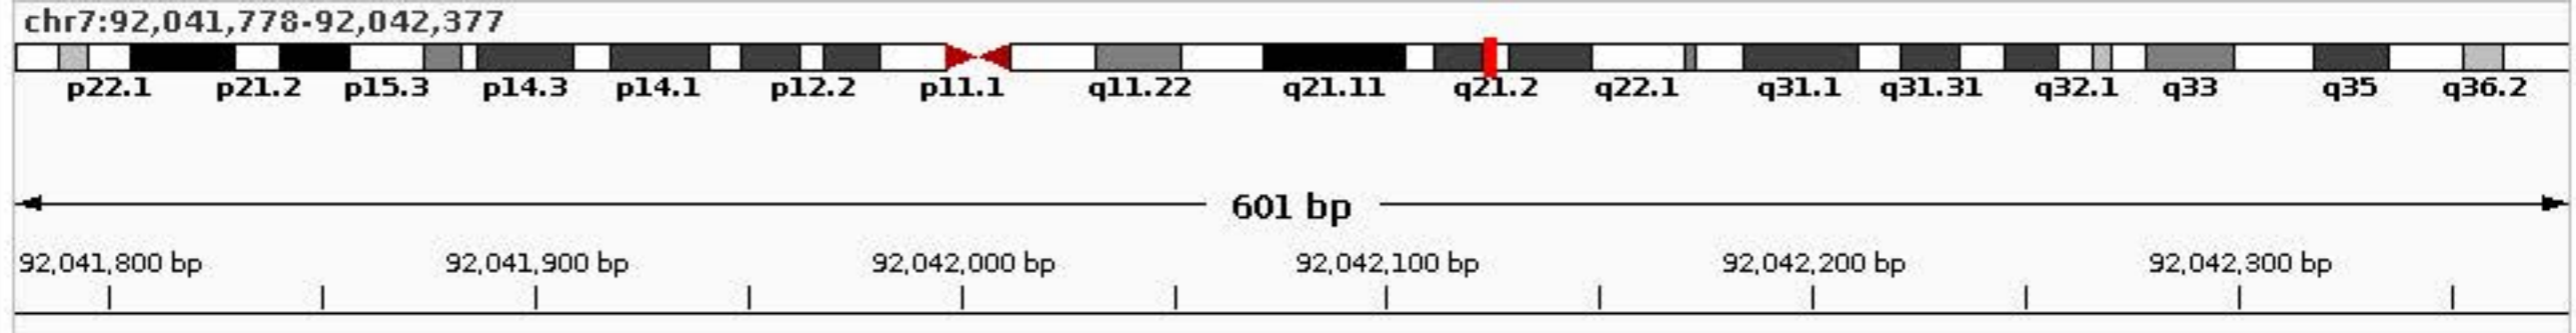

SL\_0006\_RN\_36\_mut.bam Coverage

SL\_0006\_RN\_36\_mut.bam

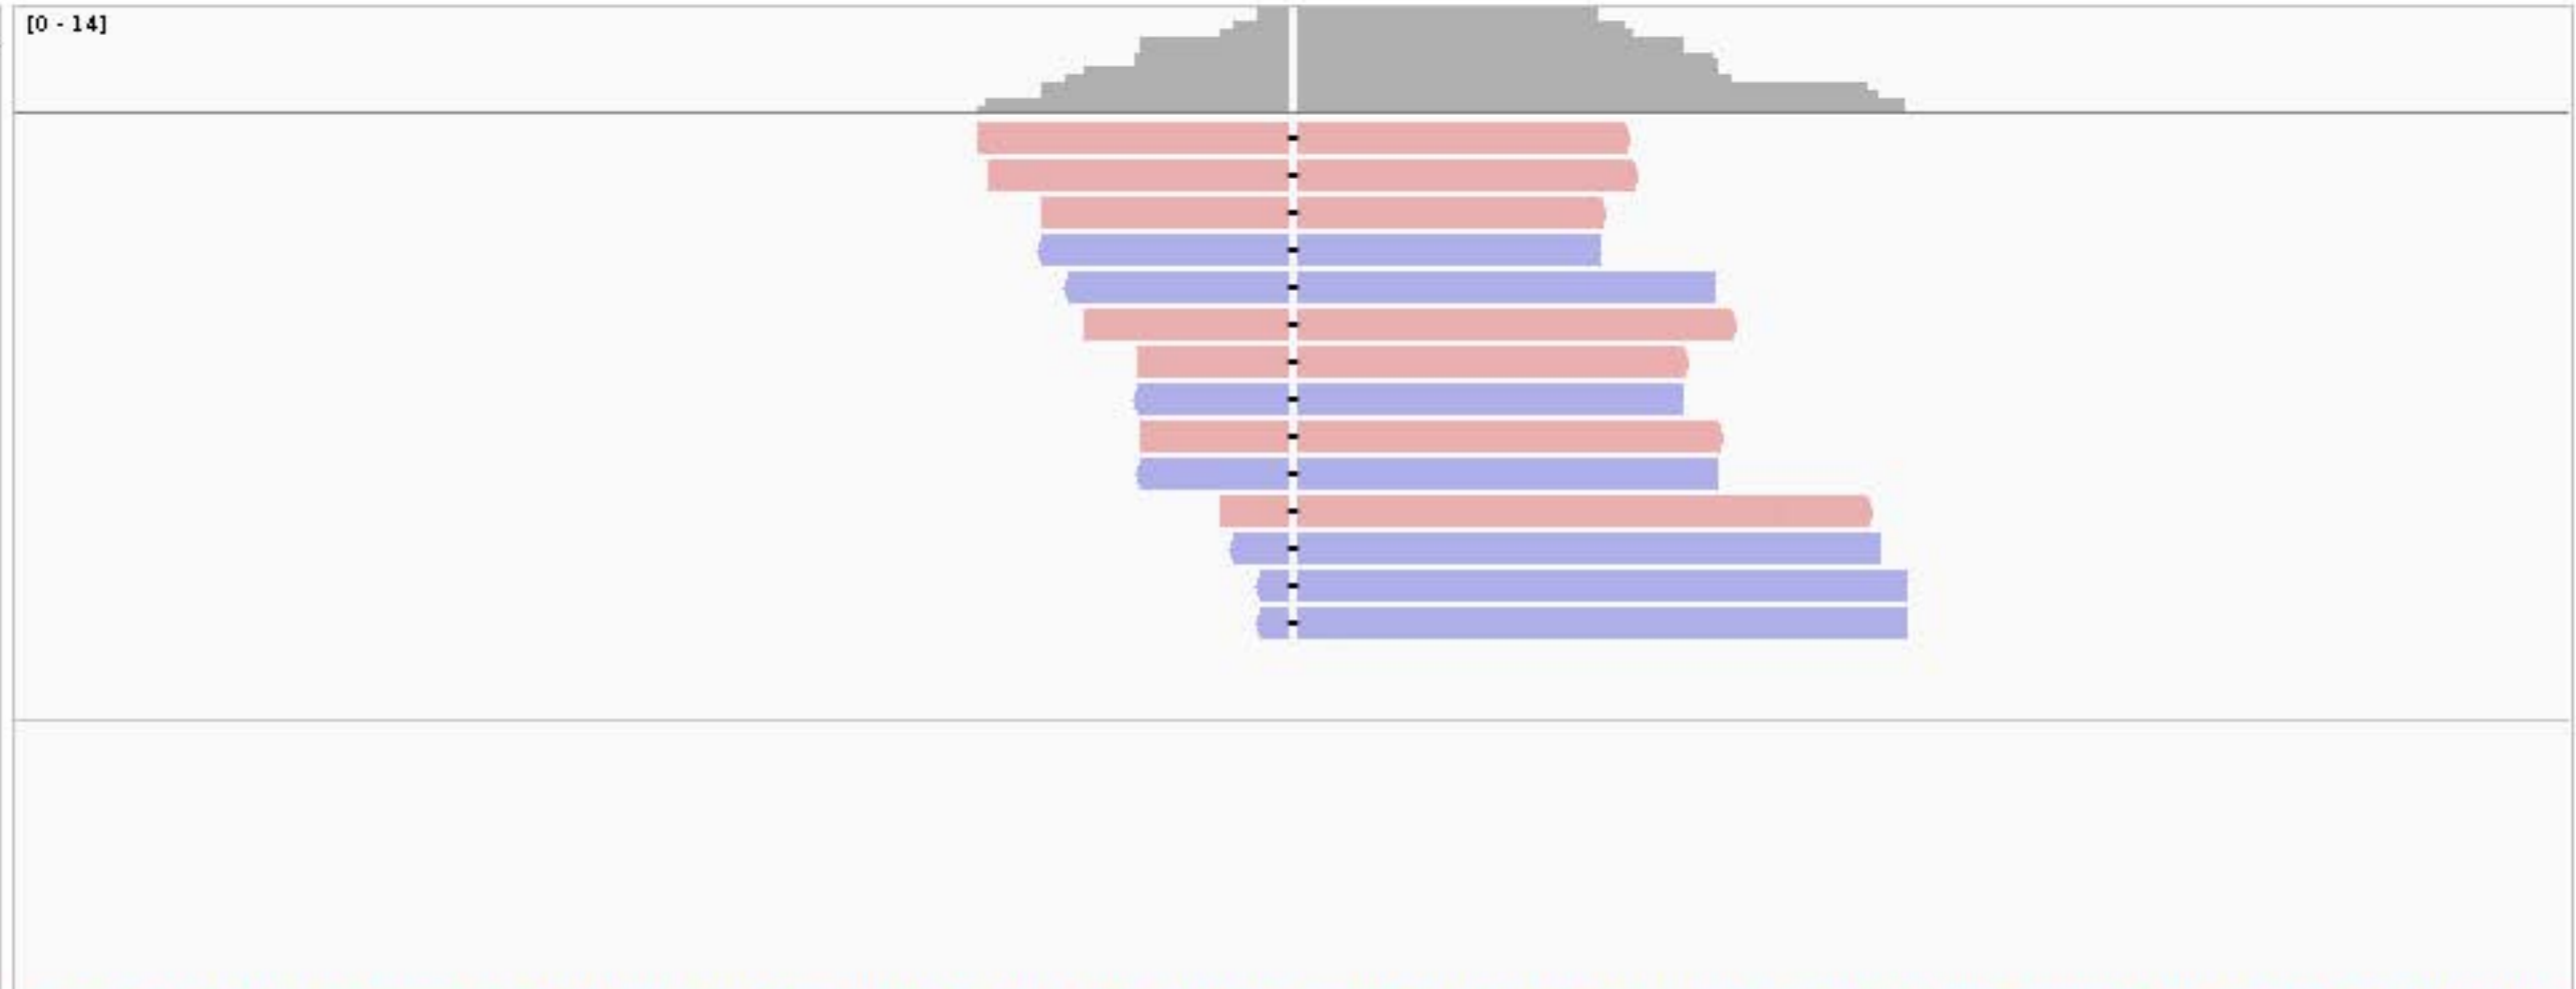

Sequence

Refseq Genes

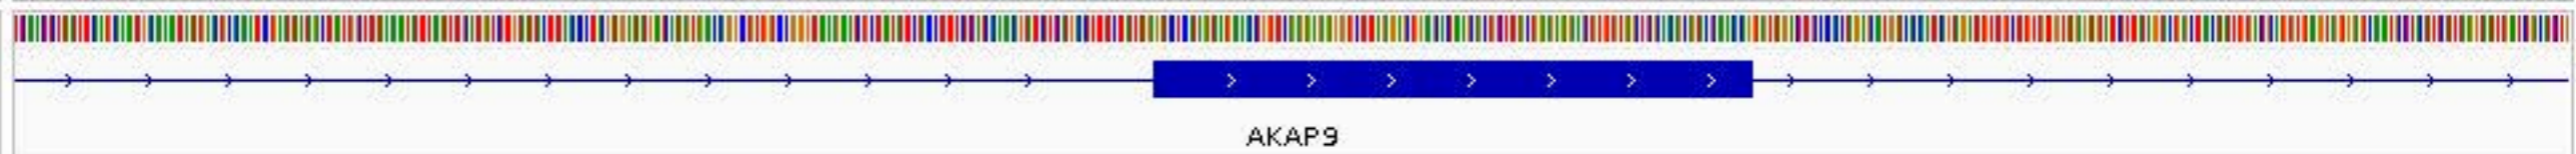

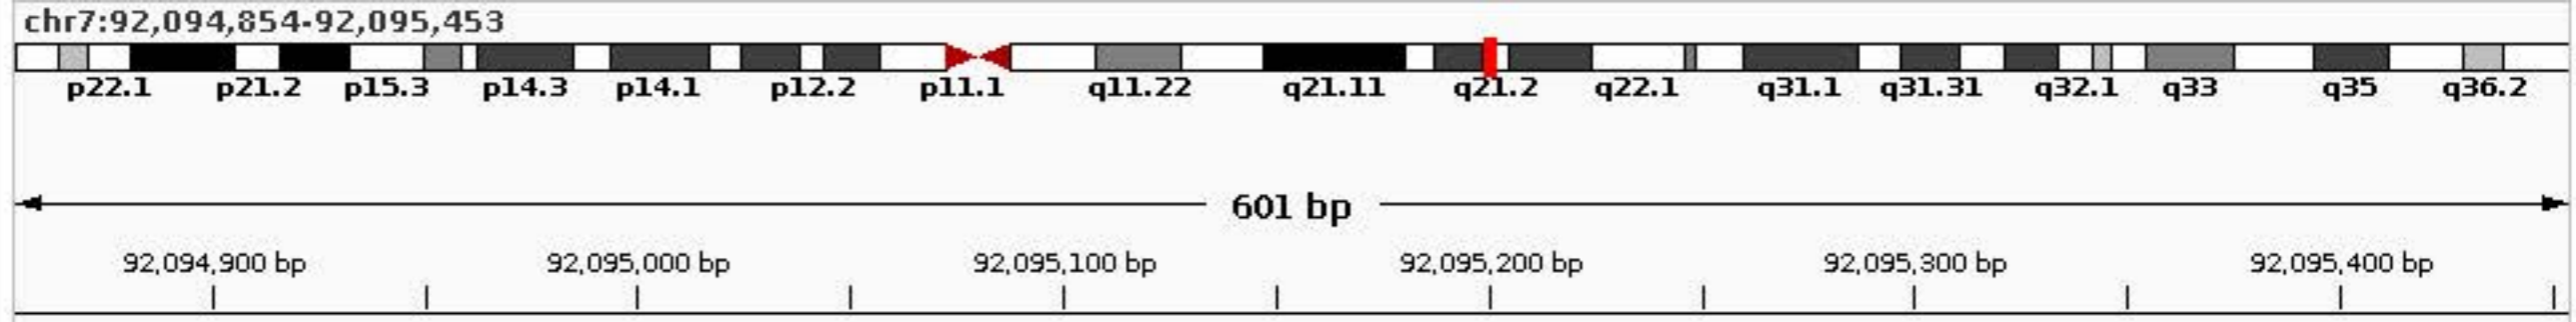

SL\_0015\_RN\_11\_mut.bam Coverage

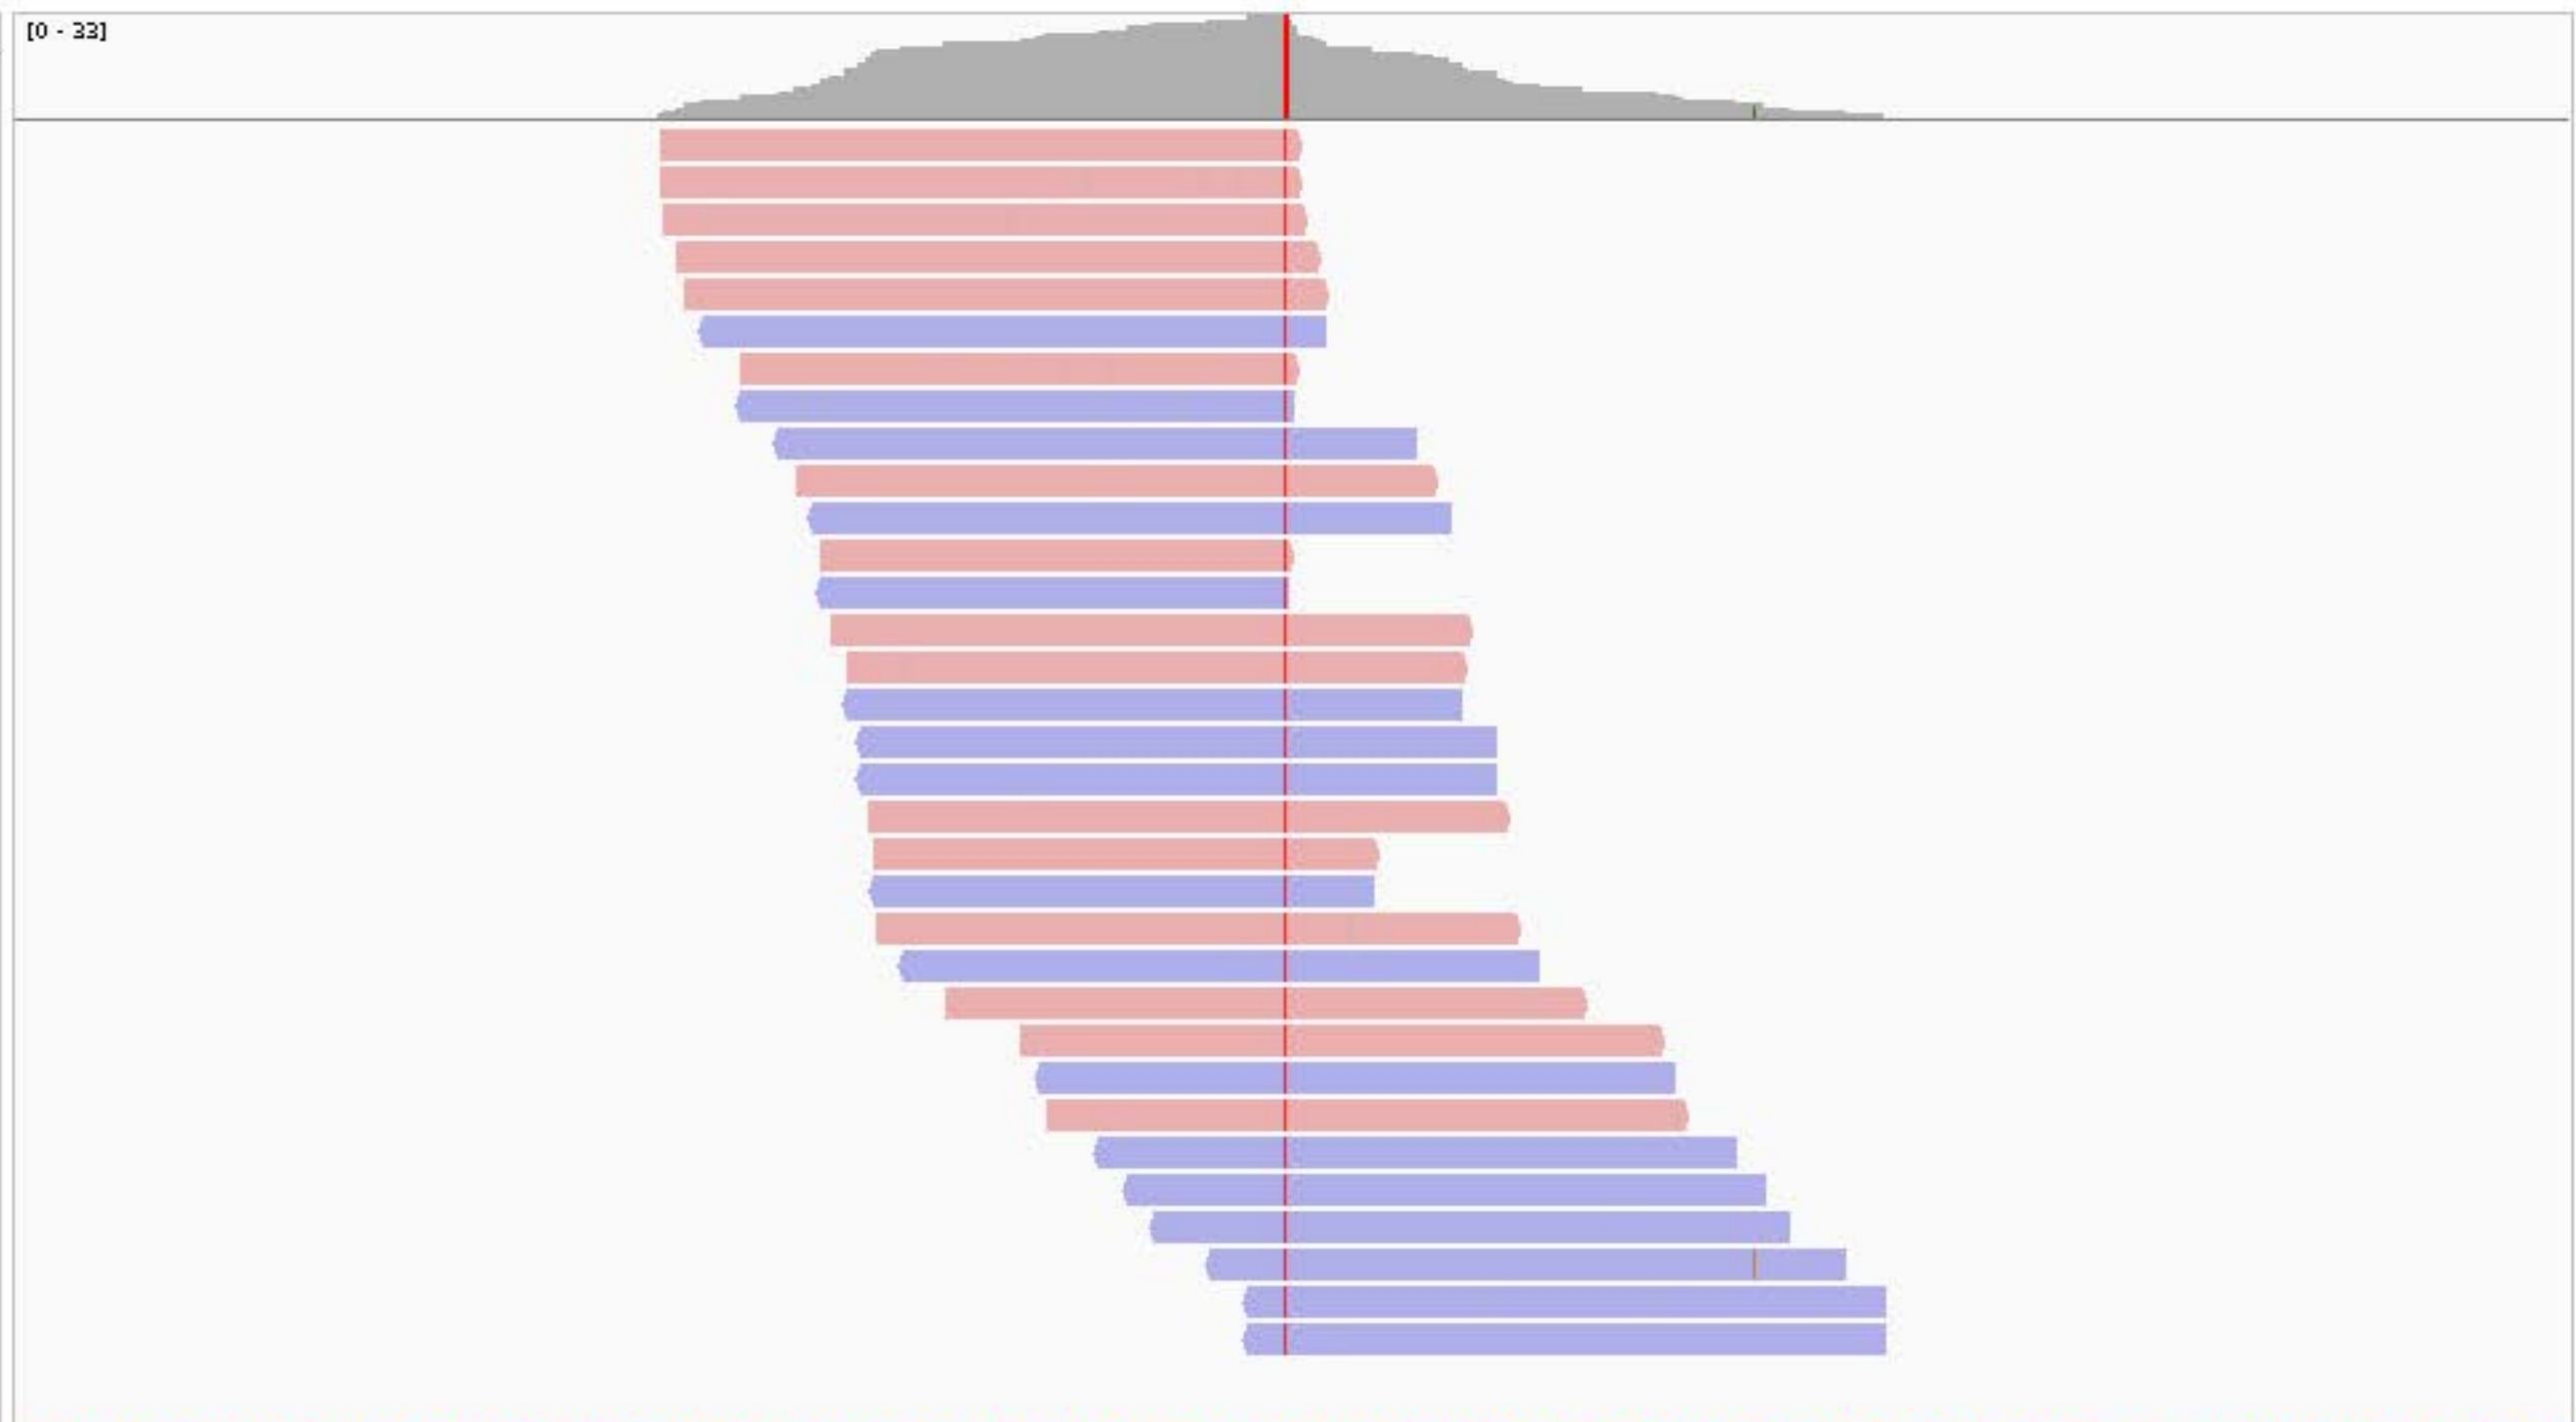

SL\_0015\_RN\_11\_mut.bam

Sequence

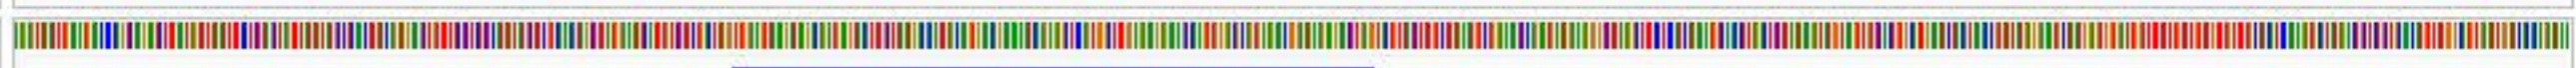

Refseq Genes

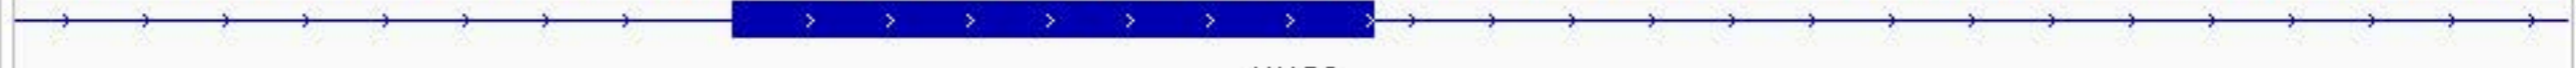

AKAP9

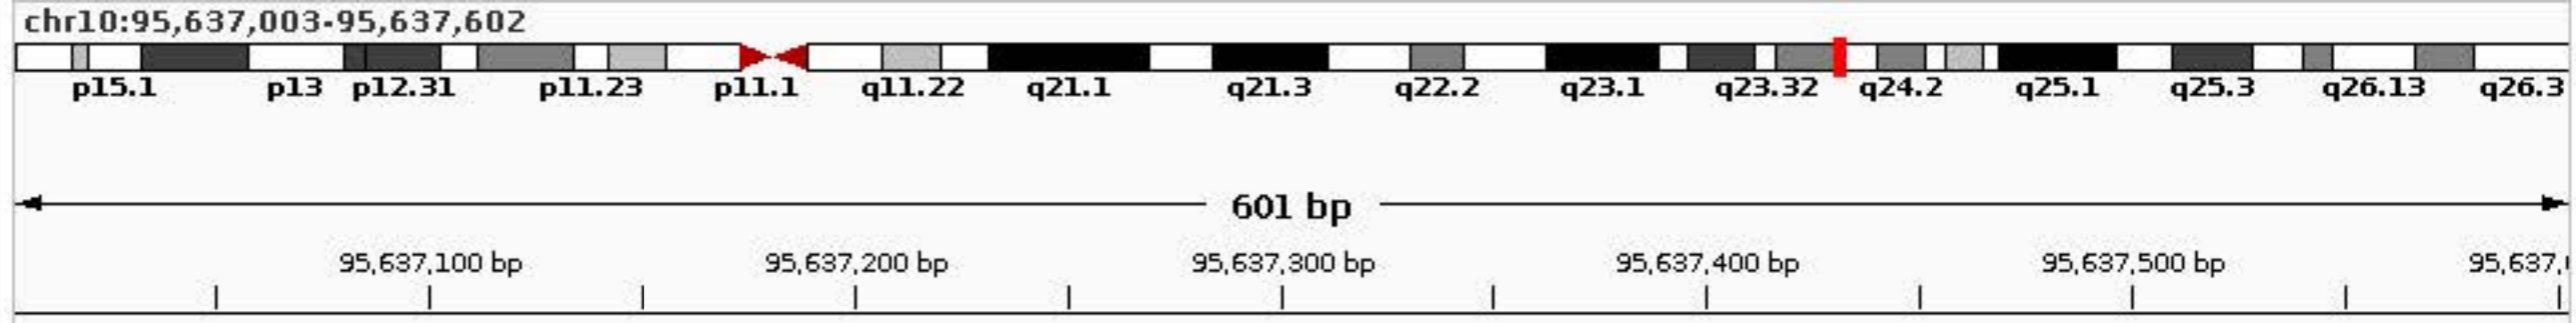

SL\_0006\_RN\_67\_mut.bam Coverage

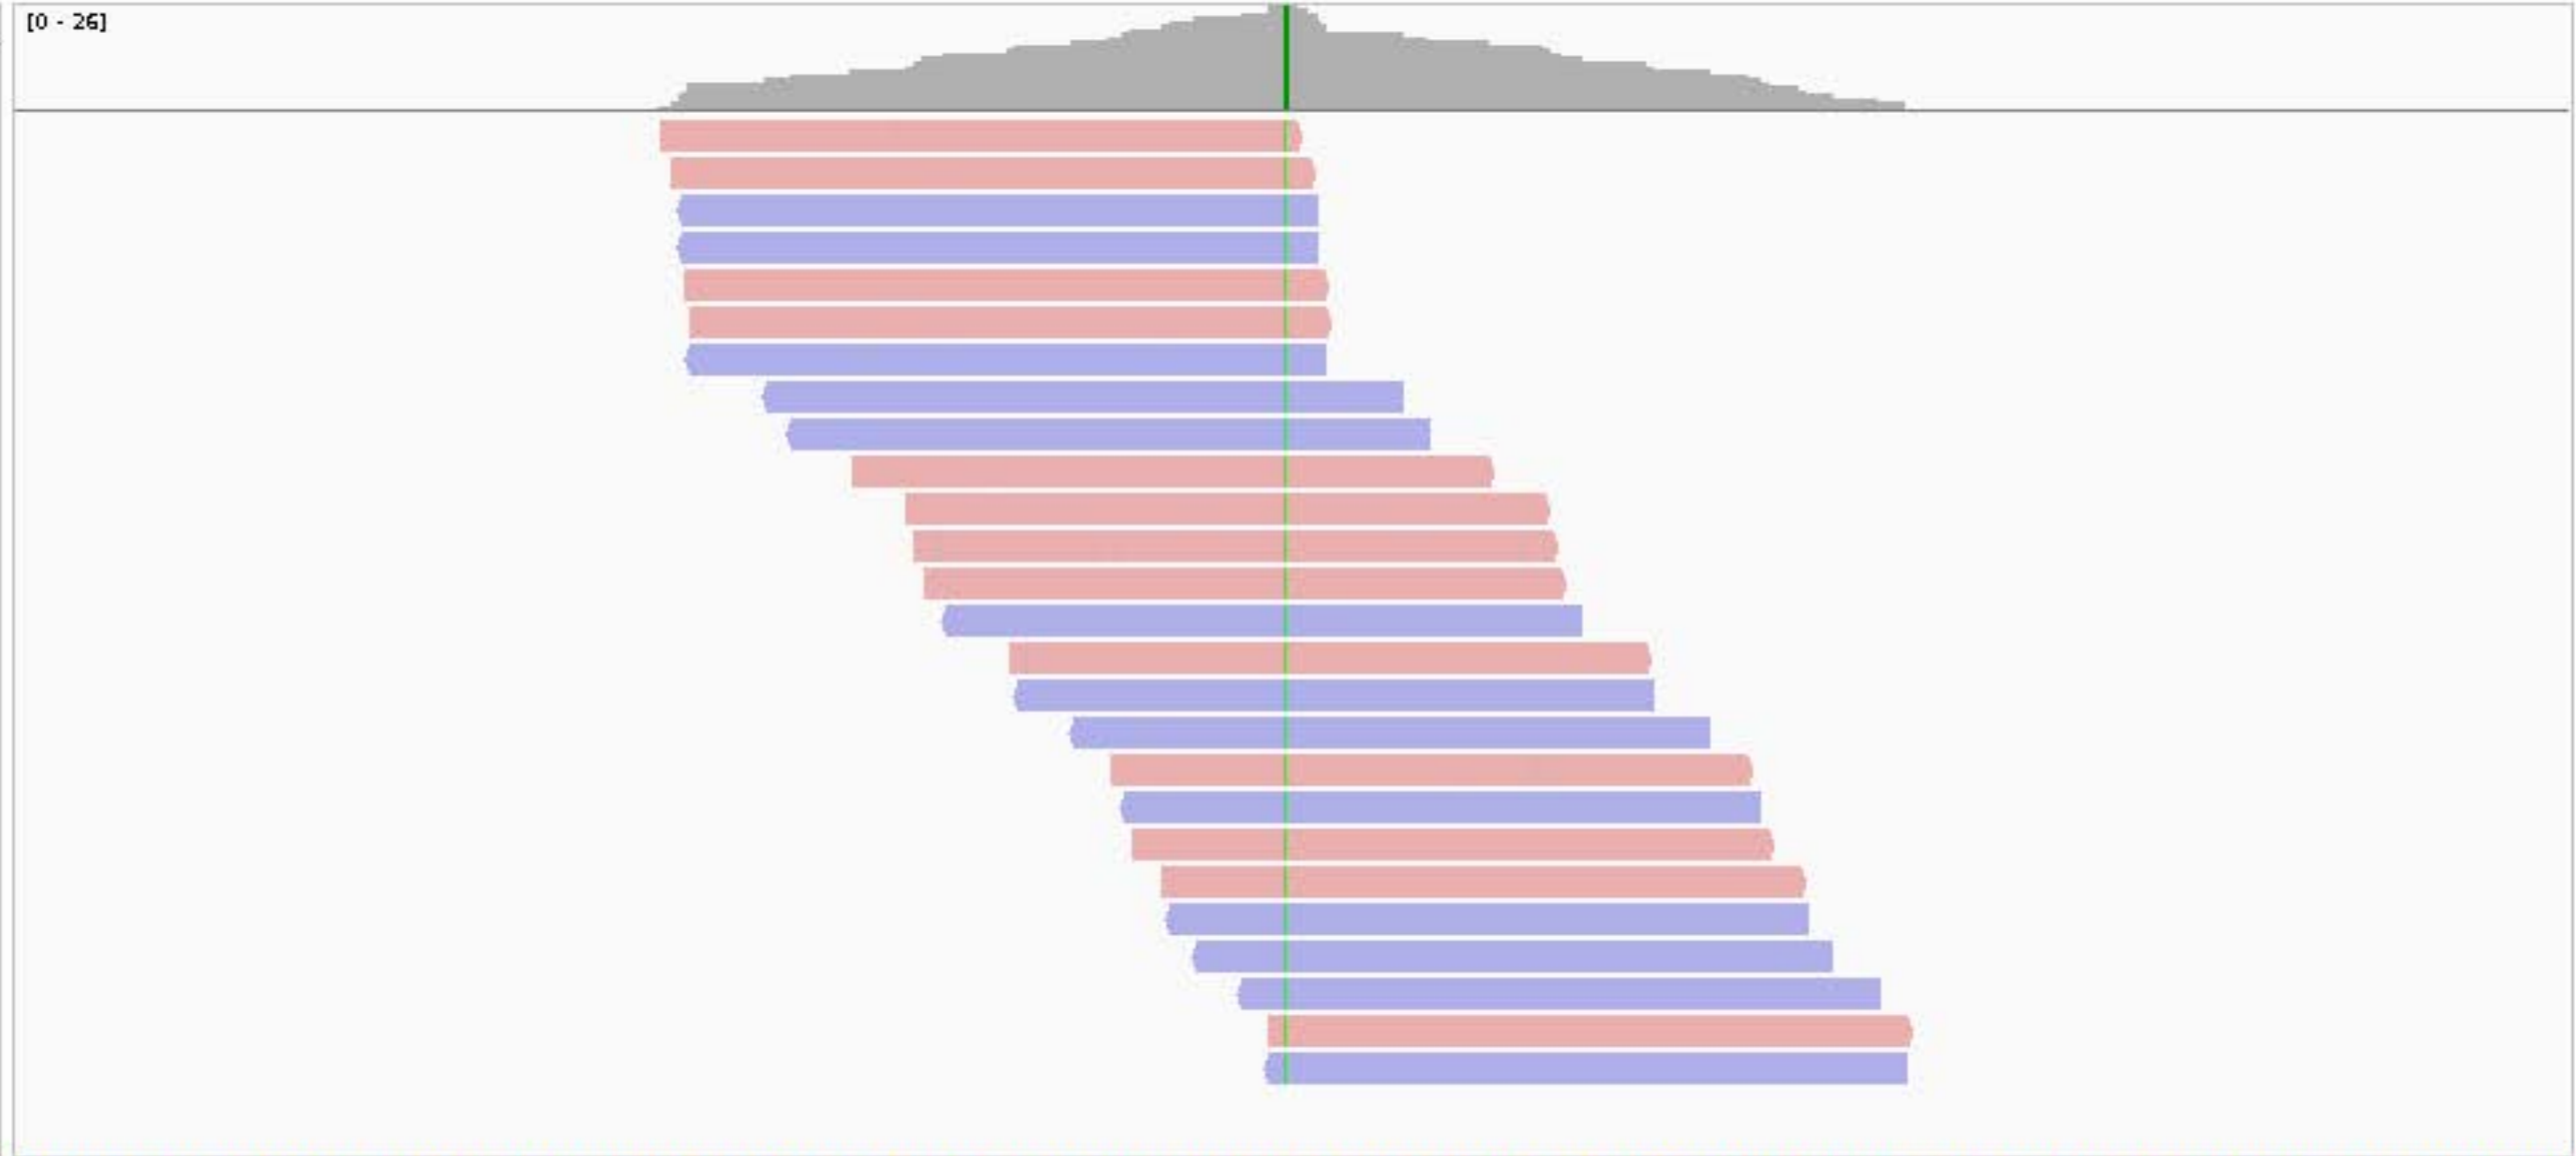

SL\_0006\_RN\_67\_mut.bam

Sequence →

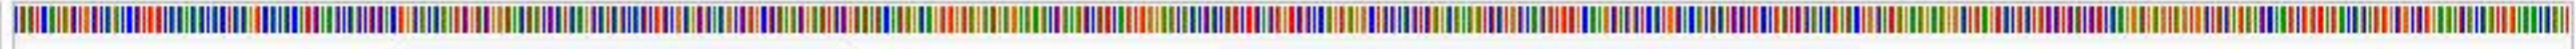

Refseq Genes

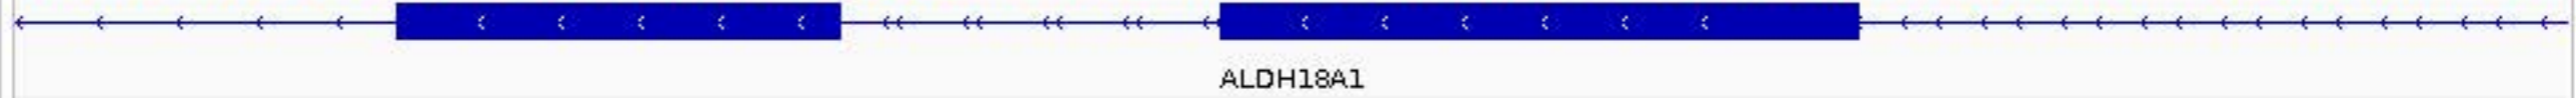

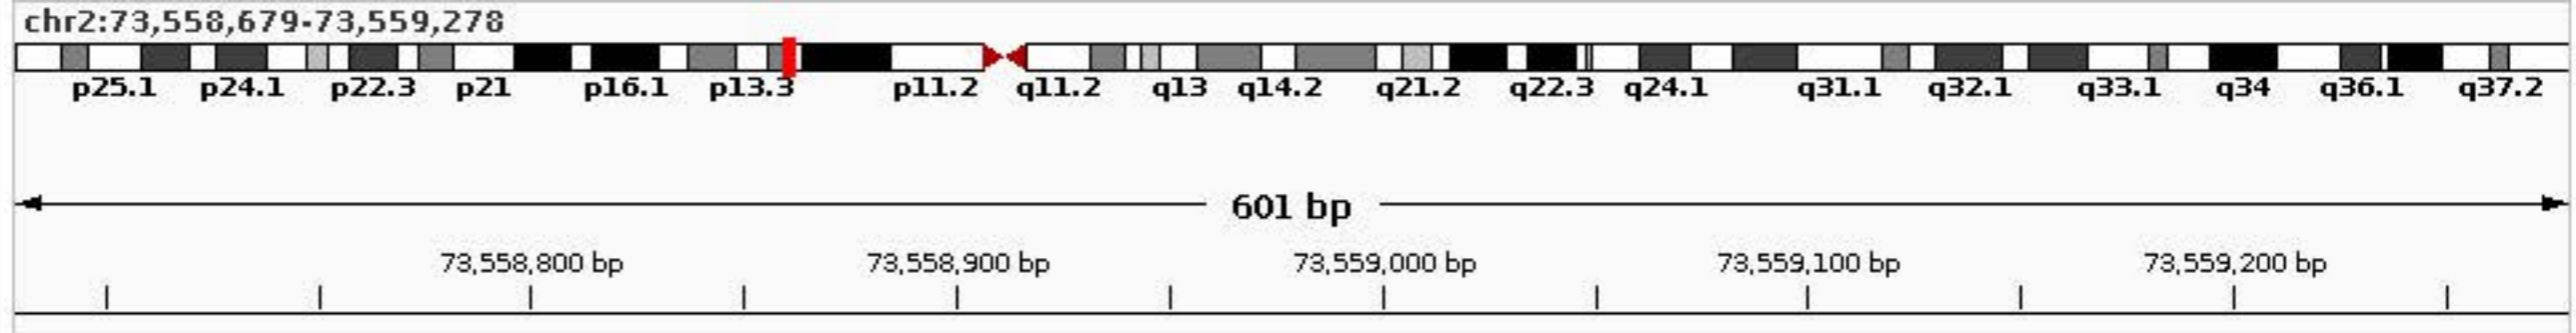

SL\_0002\_LN\_1\_mut.bam Coverage

SL\_0002\_LN\_1\_mut.bam

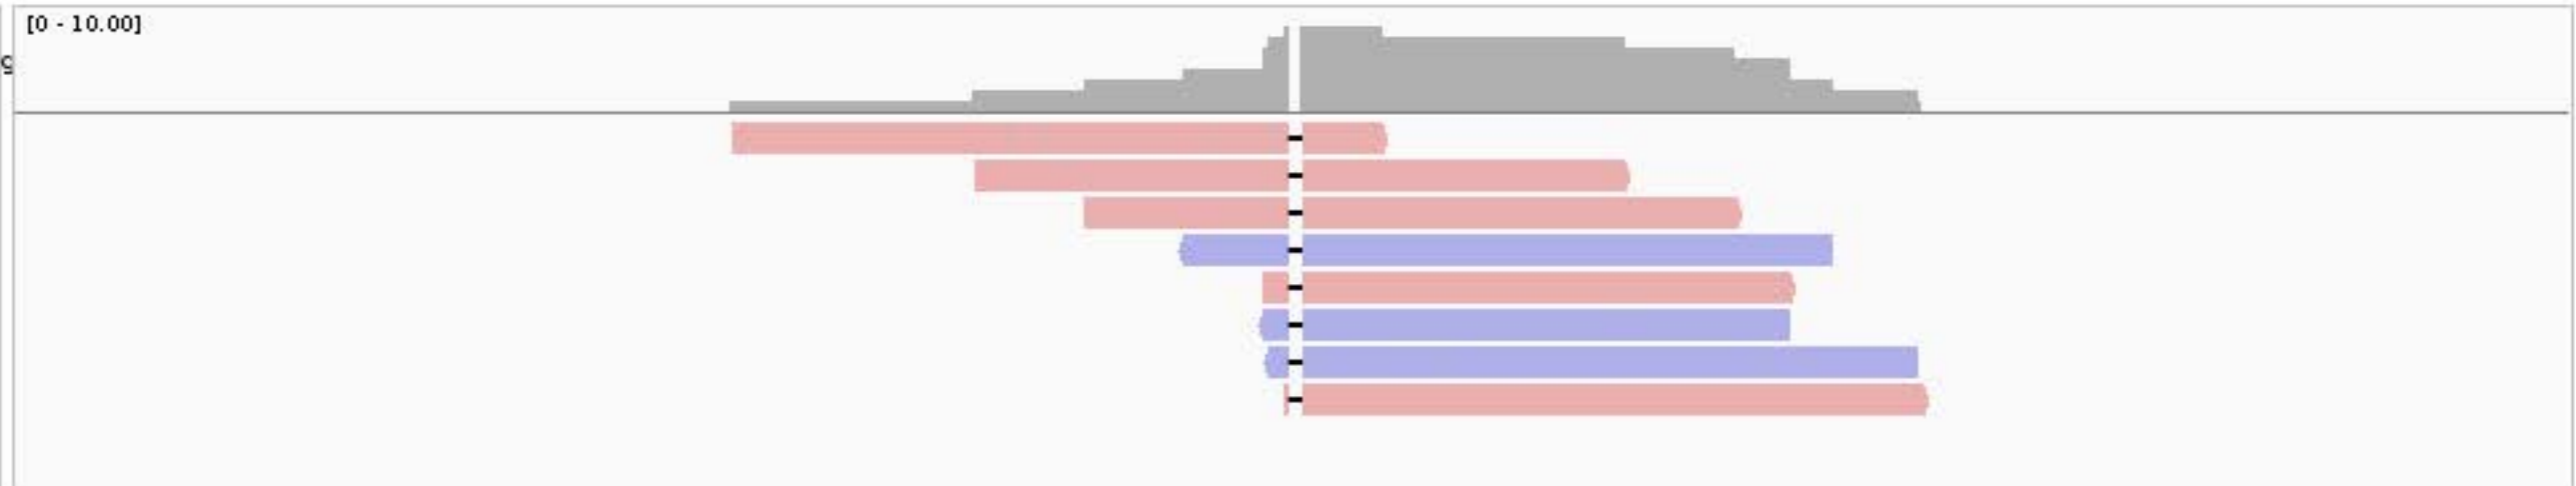

Sequence

Refseq Genes

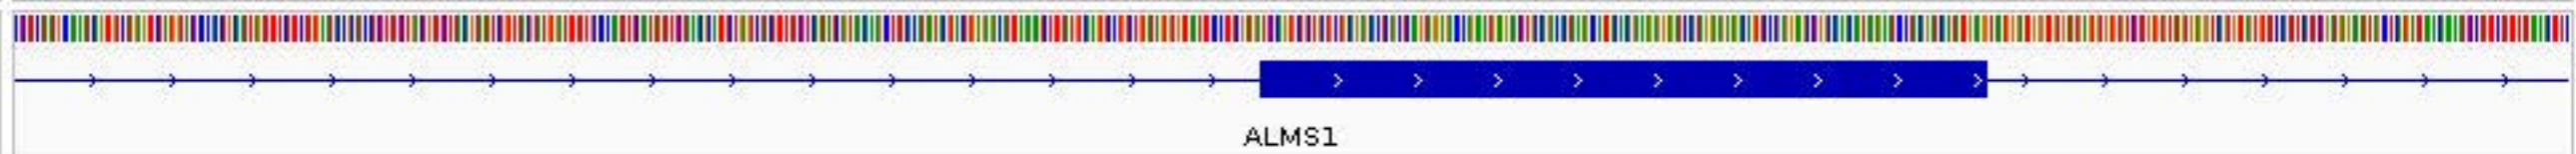

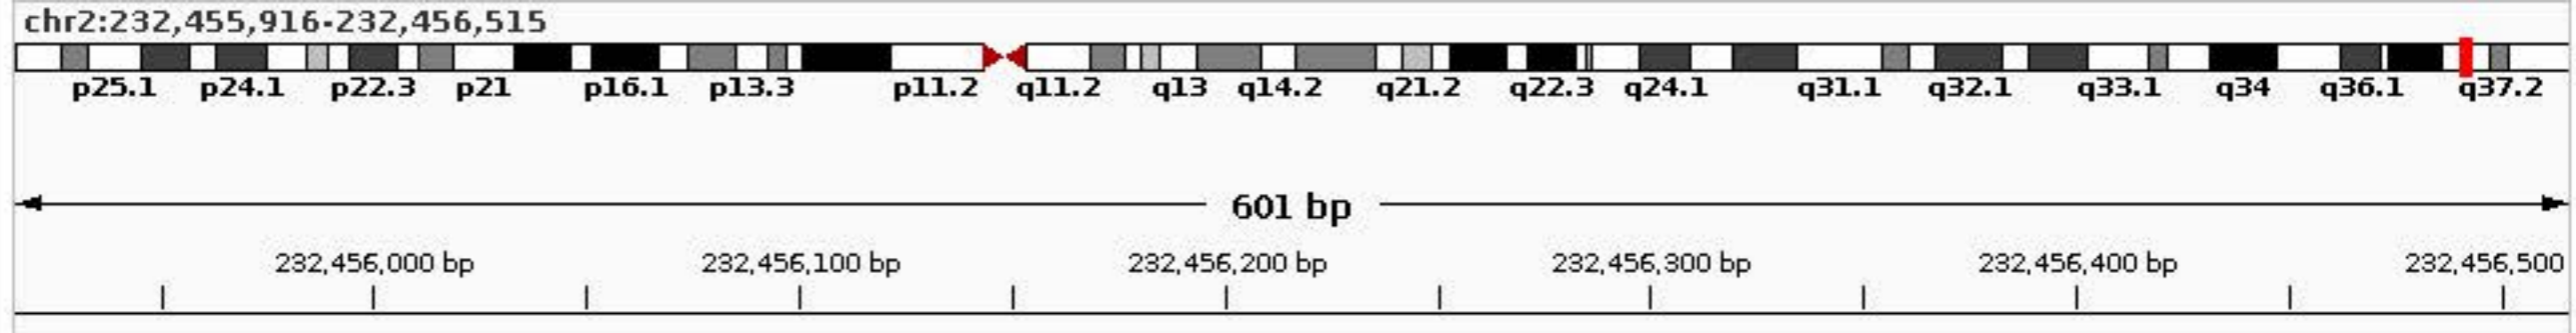

SL\_0001\_LN\_10\_mut.bam Coverage

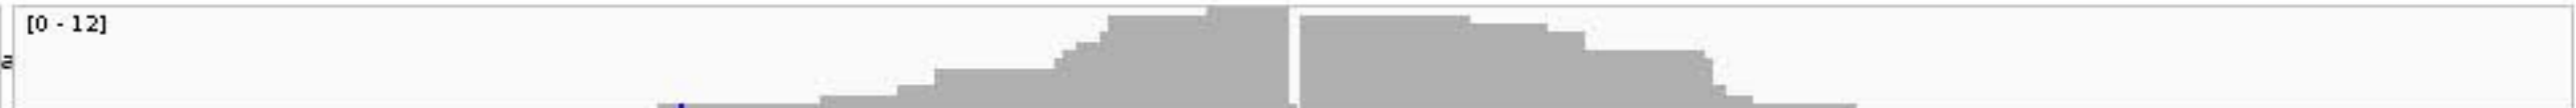

SL\_0001\_LN\_10\_mut.bam

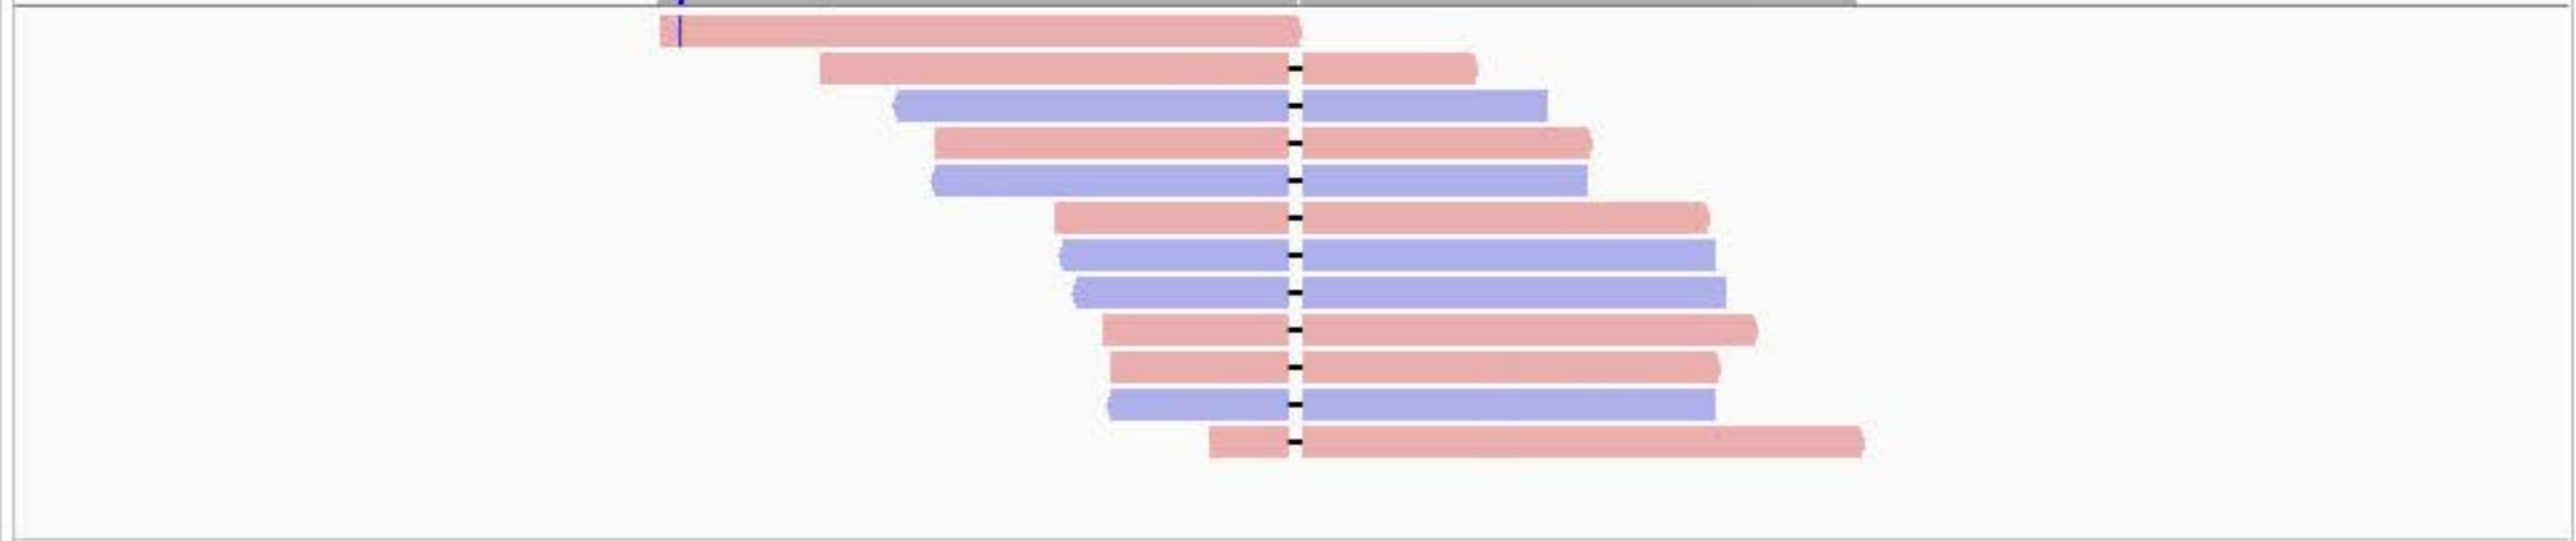

Sequence

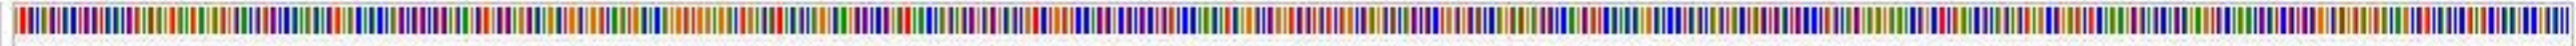

Refseq Genes

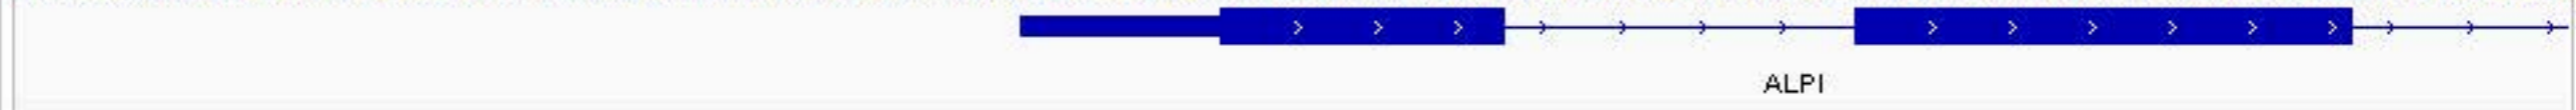



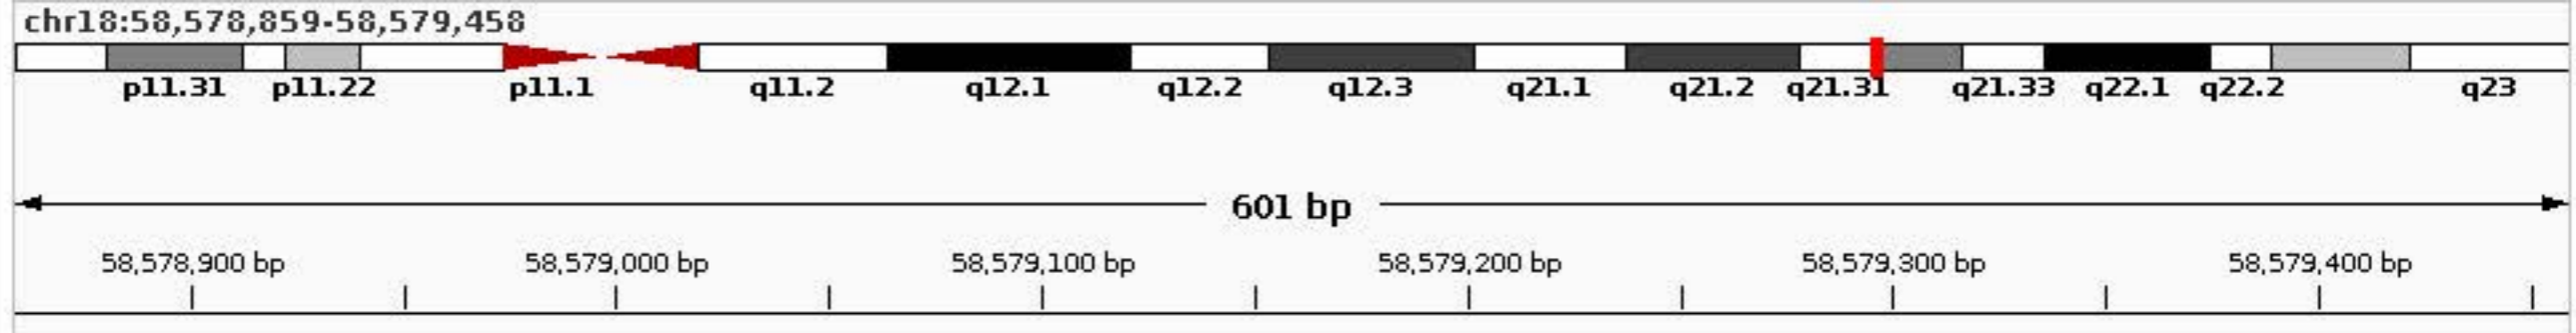

SL\_0015\_RN\_10\_mut.bam Coverage

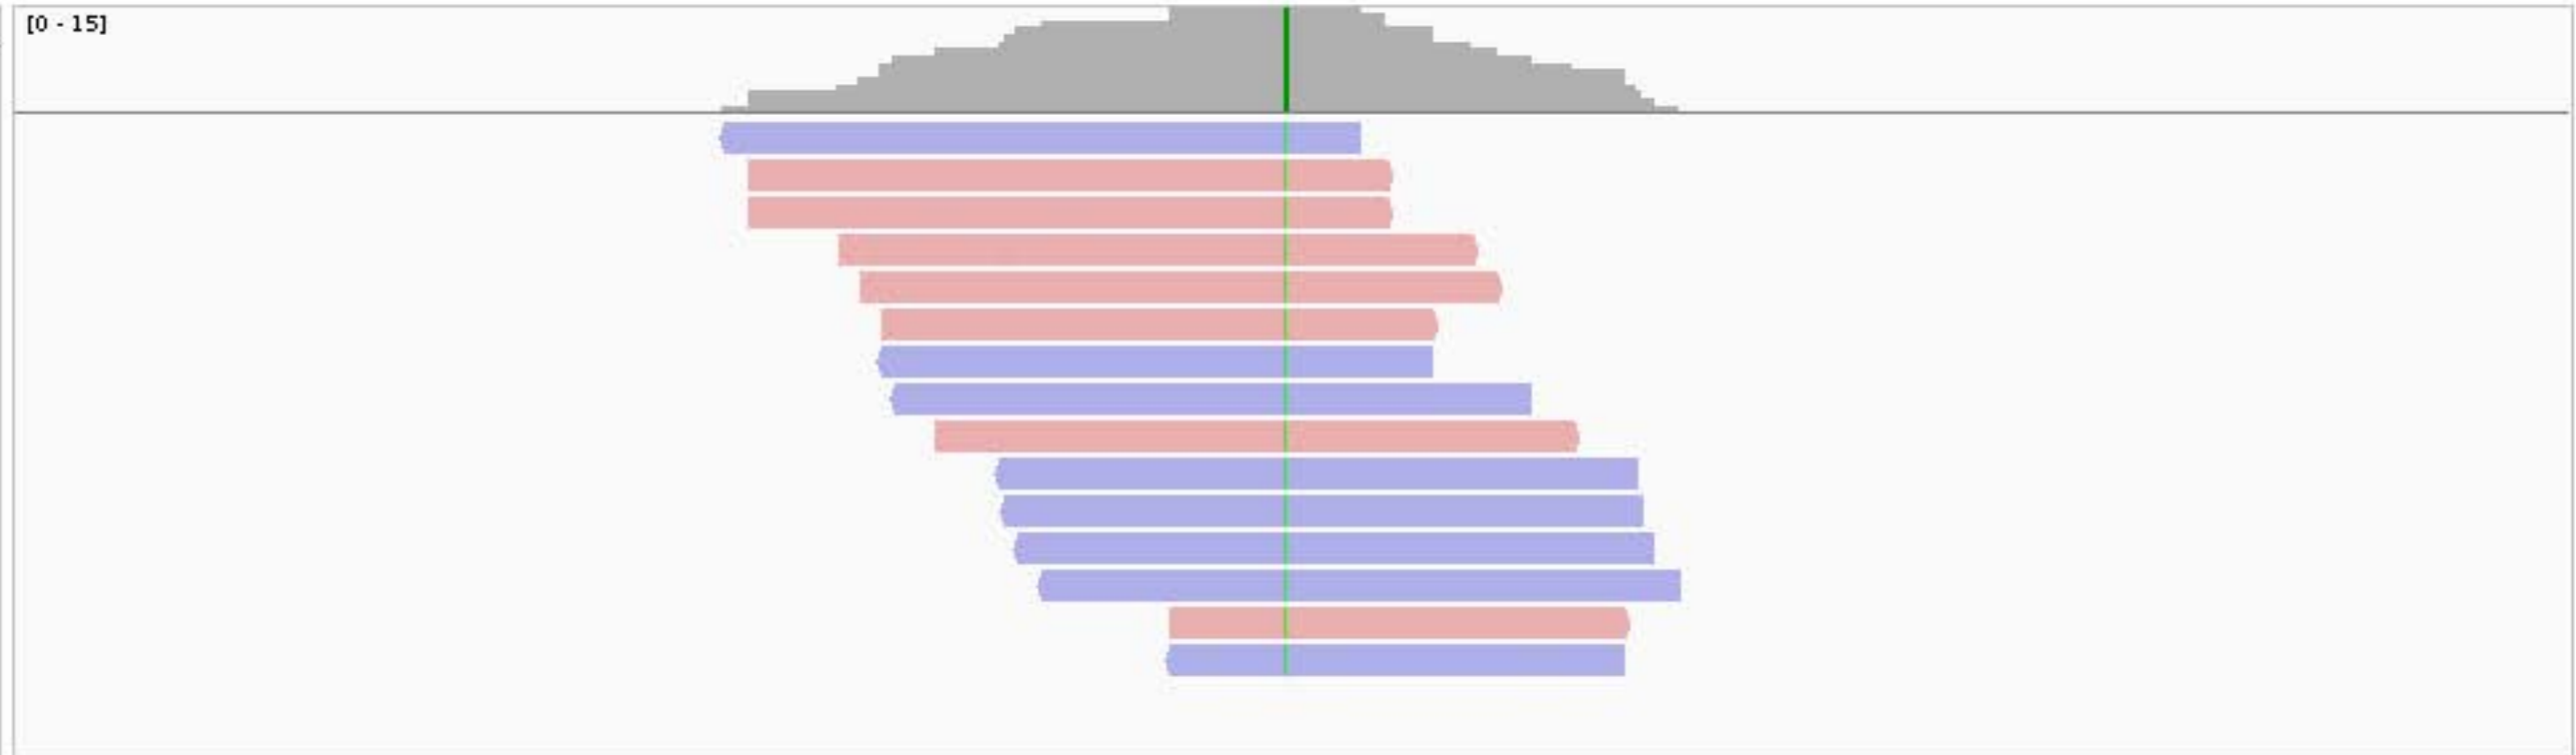

Sequence

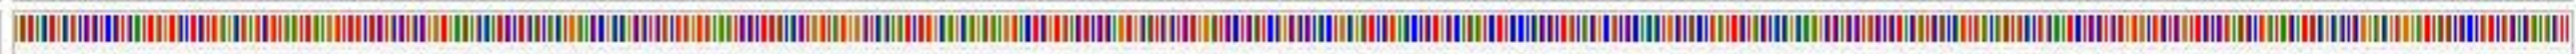

Refseq Genes

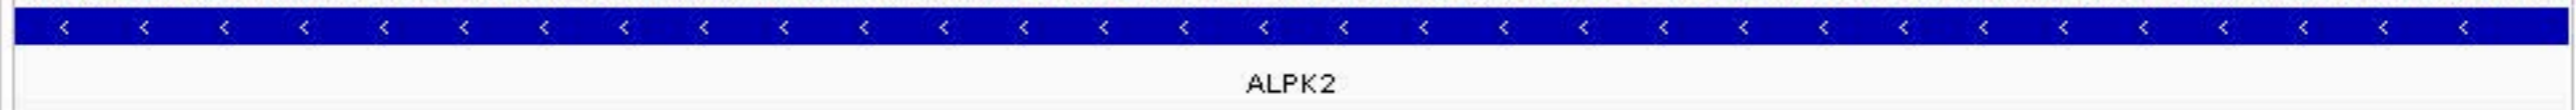

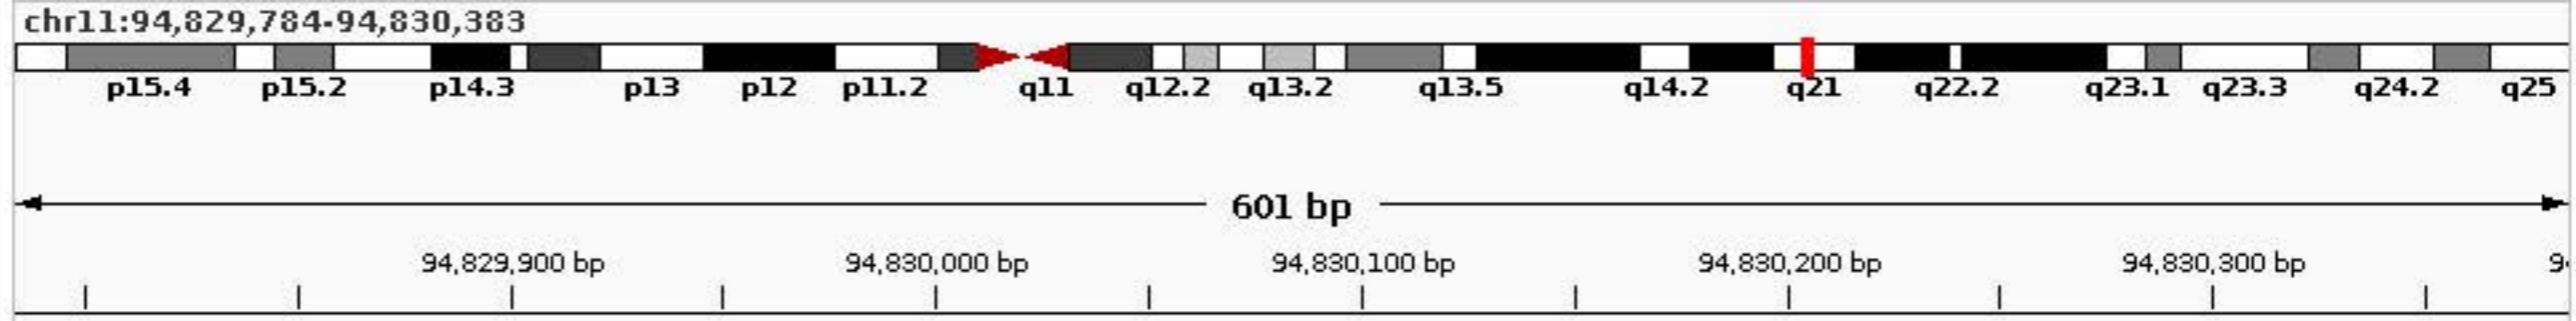

SL\_0004\_RN\_66\_mut.bam Coverage

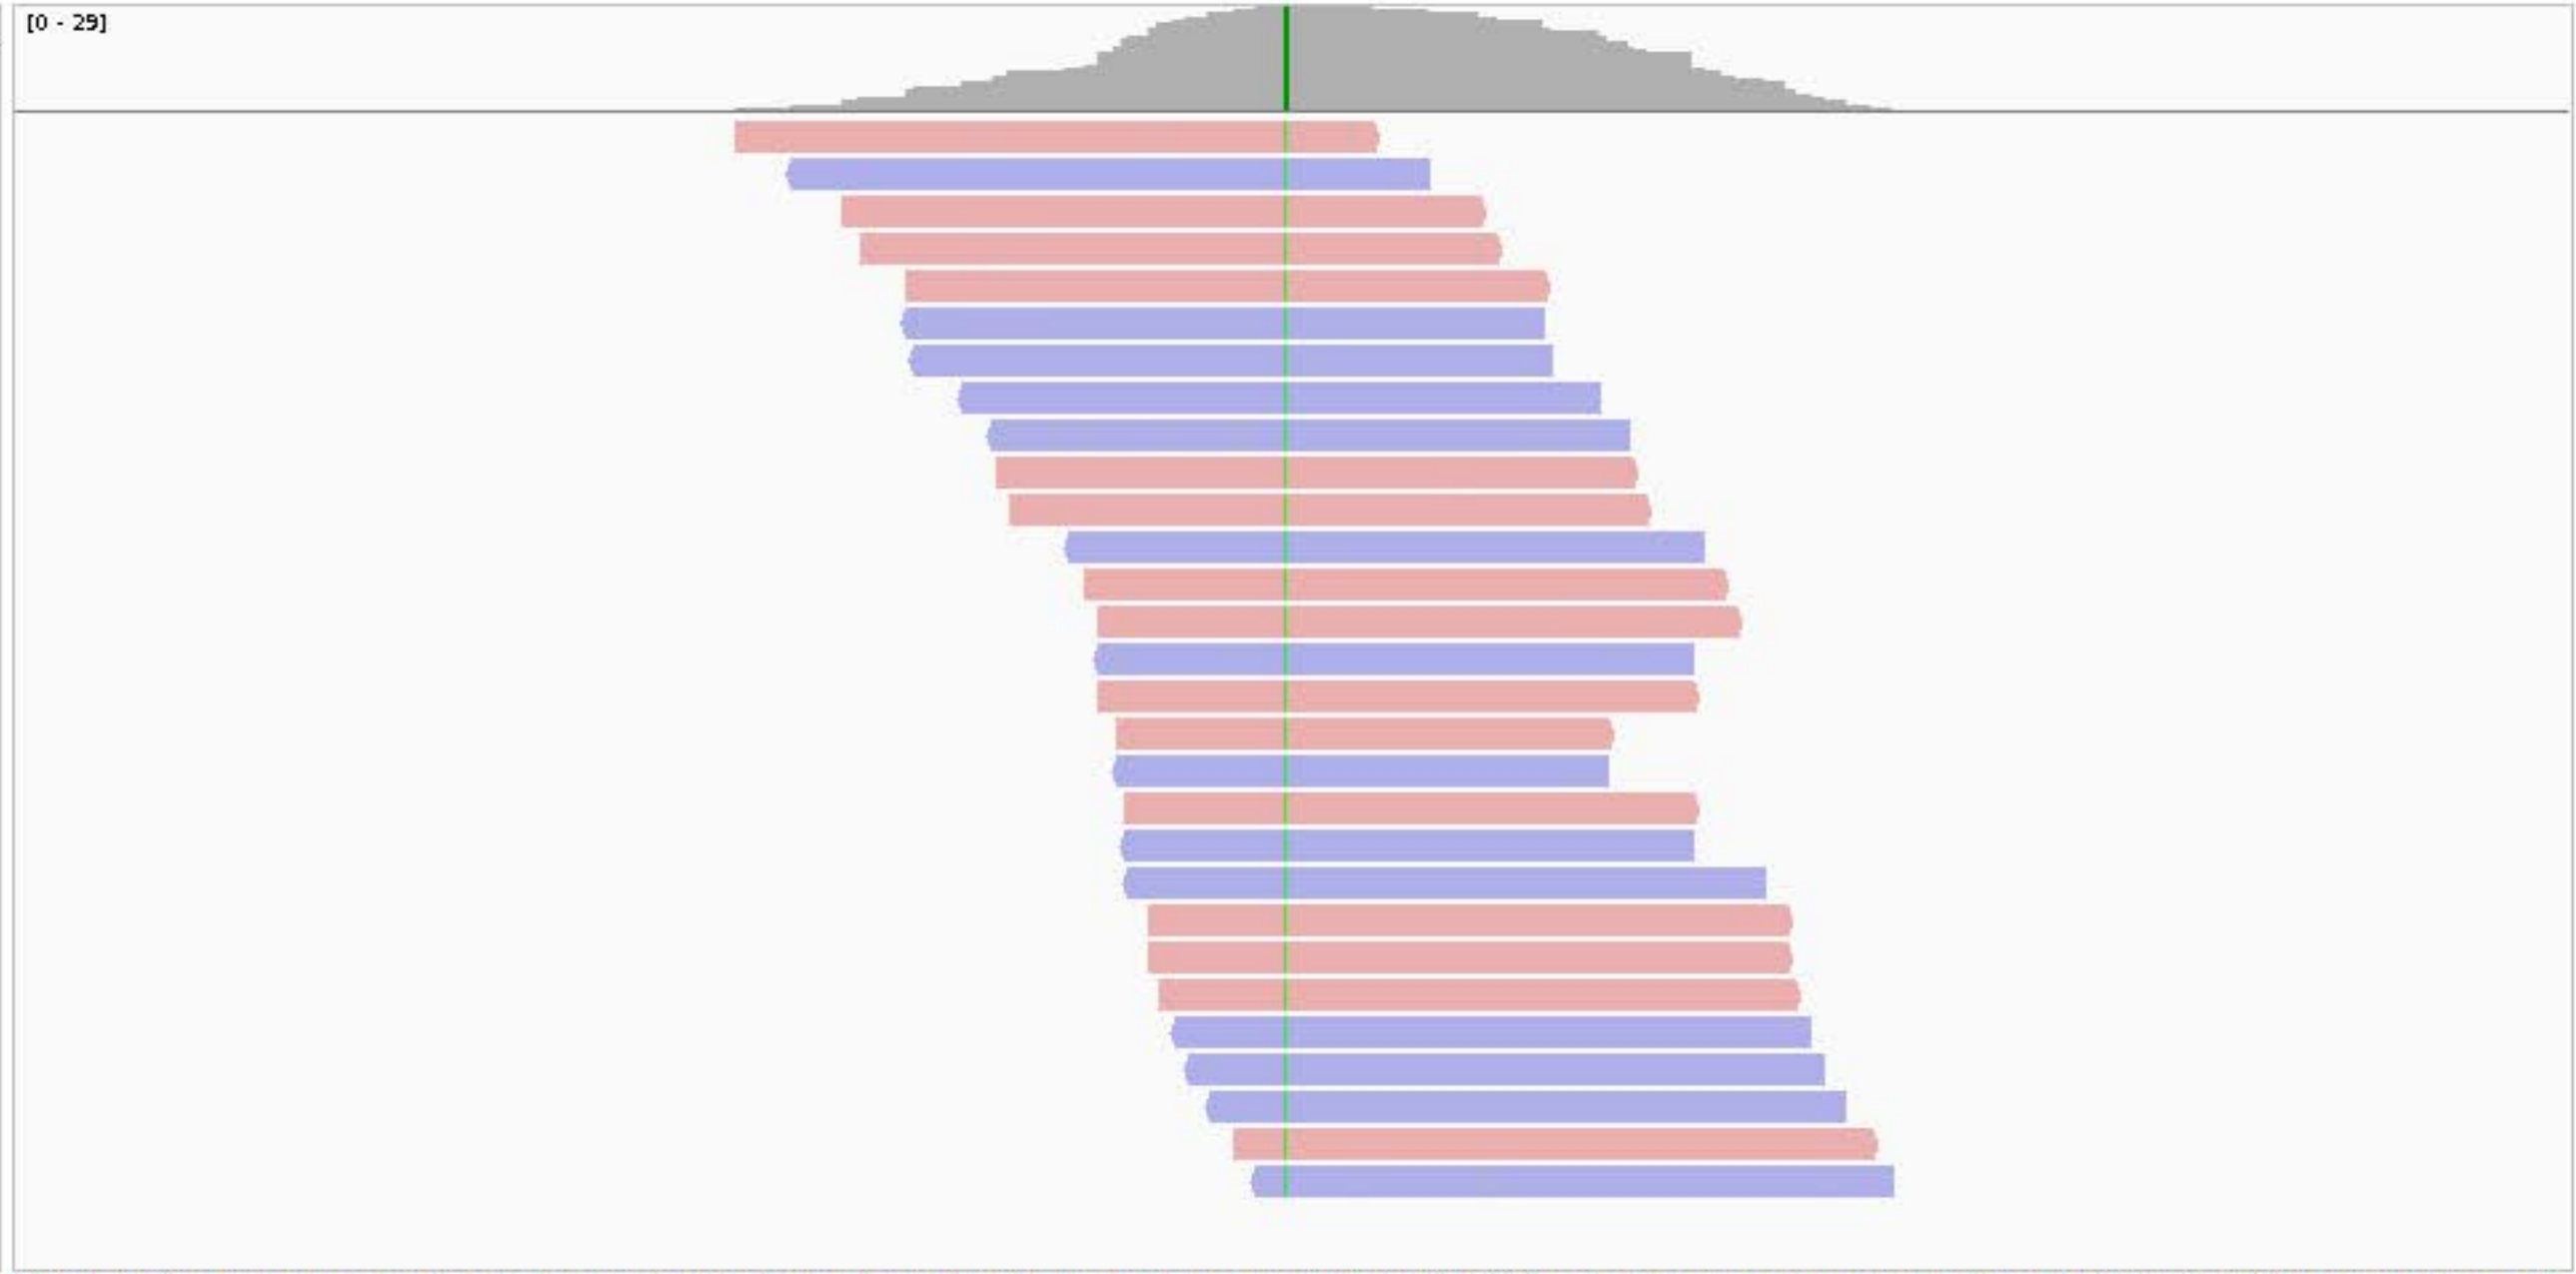

Sequence

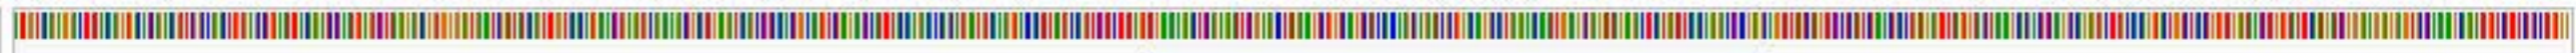

Refseq Genes

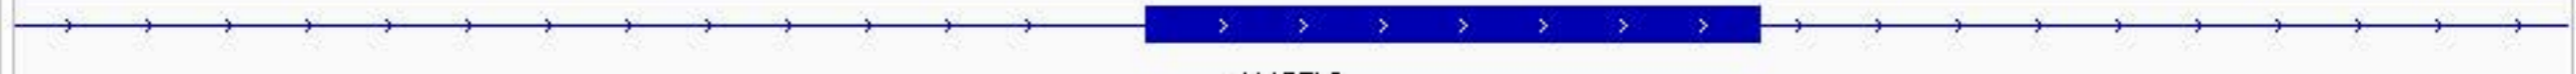

AMOTL1

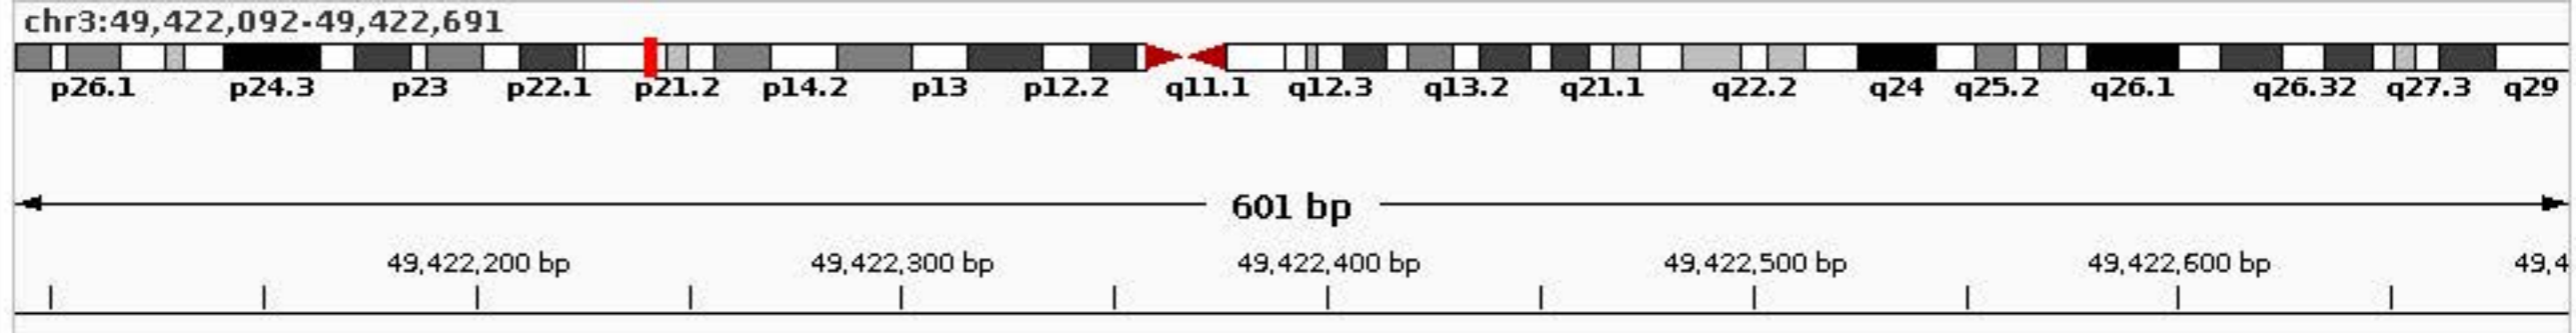

SL\_0006\_RN\_59\_mut.bam Coverage

SL\_0006\_RN\_59\_mut.bam

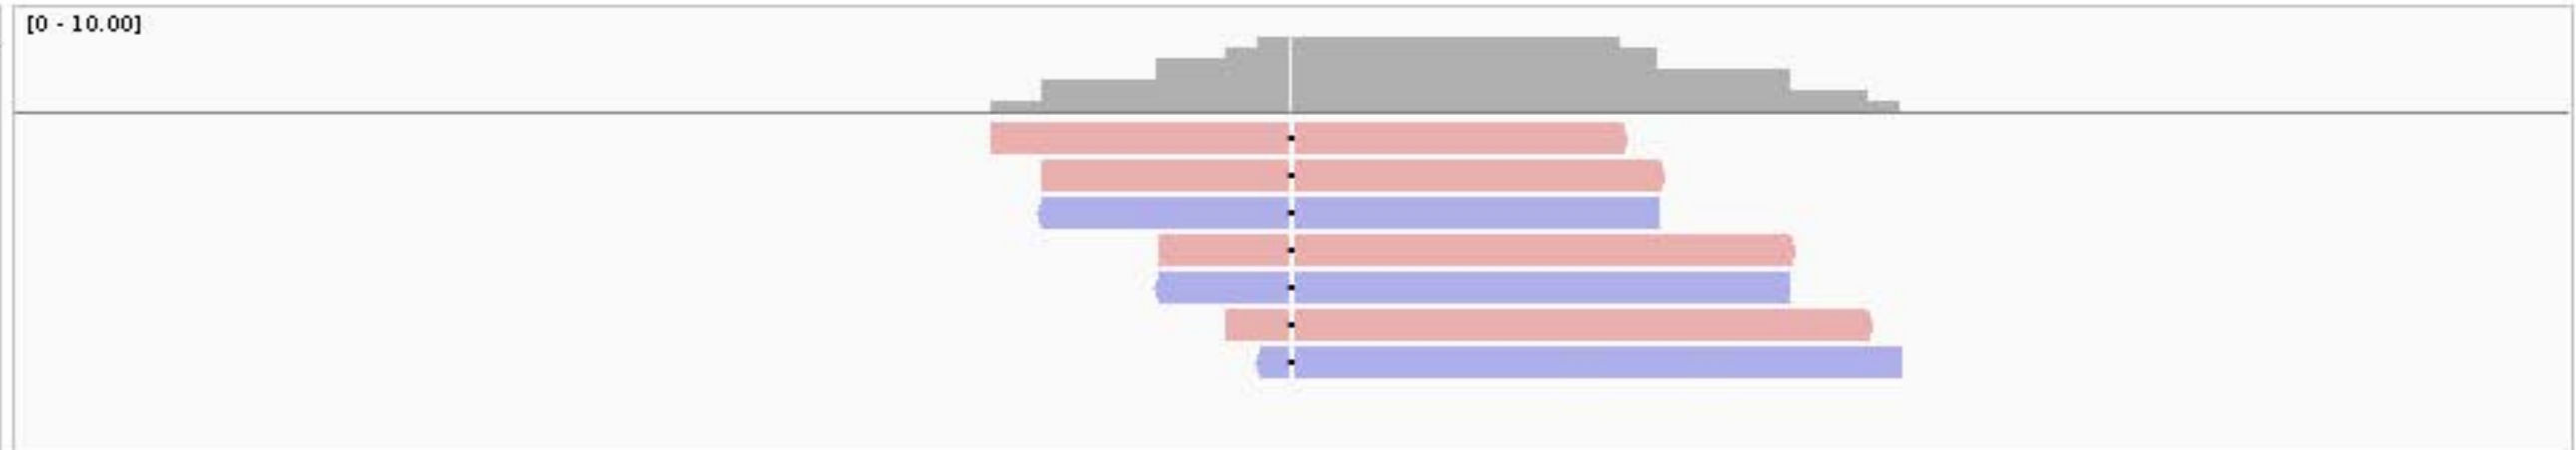

Sequence

Refseq Genes

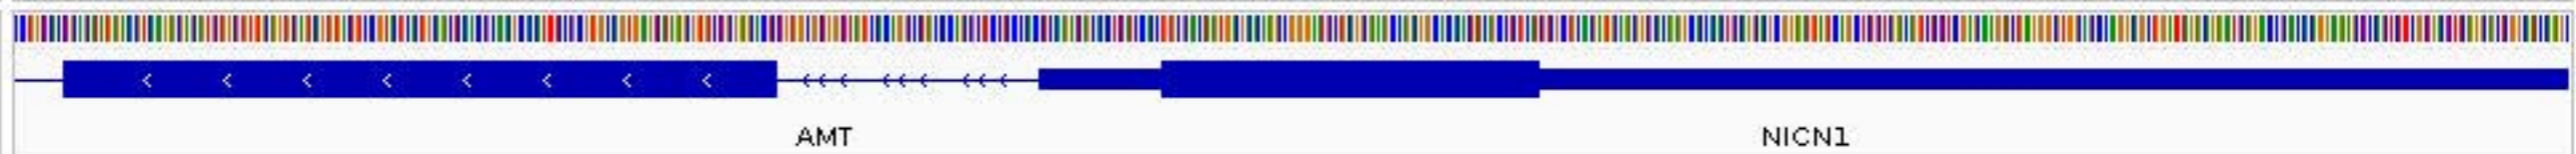

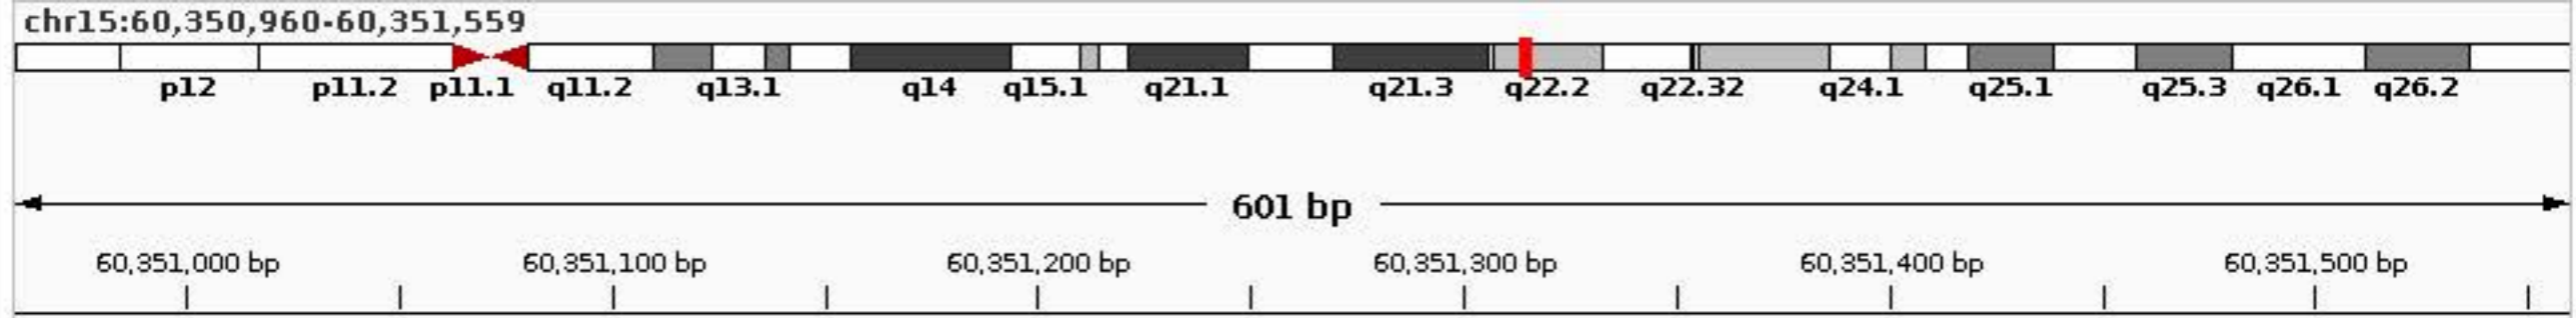

SL\_0010\_RN\_34\_mut.bam Coverage

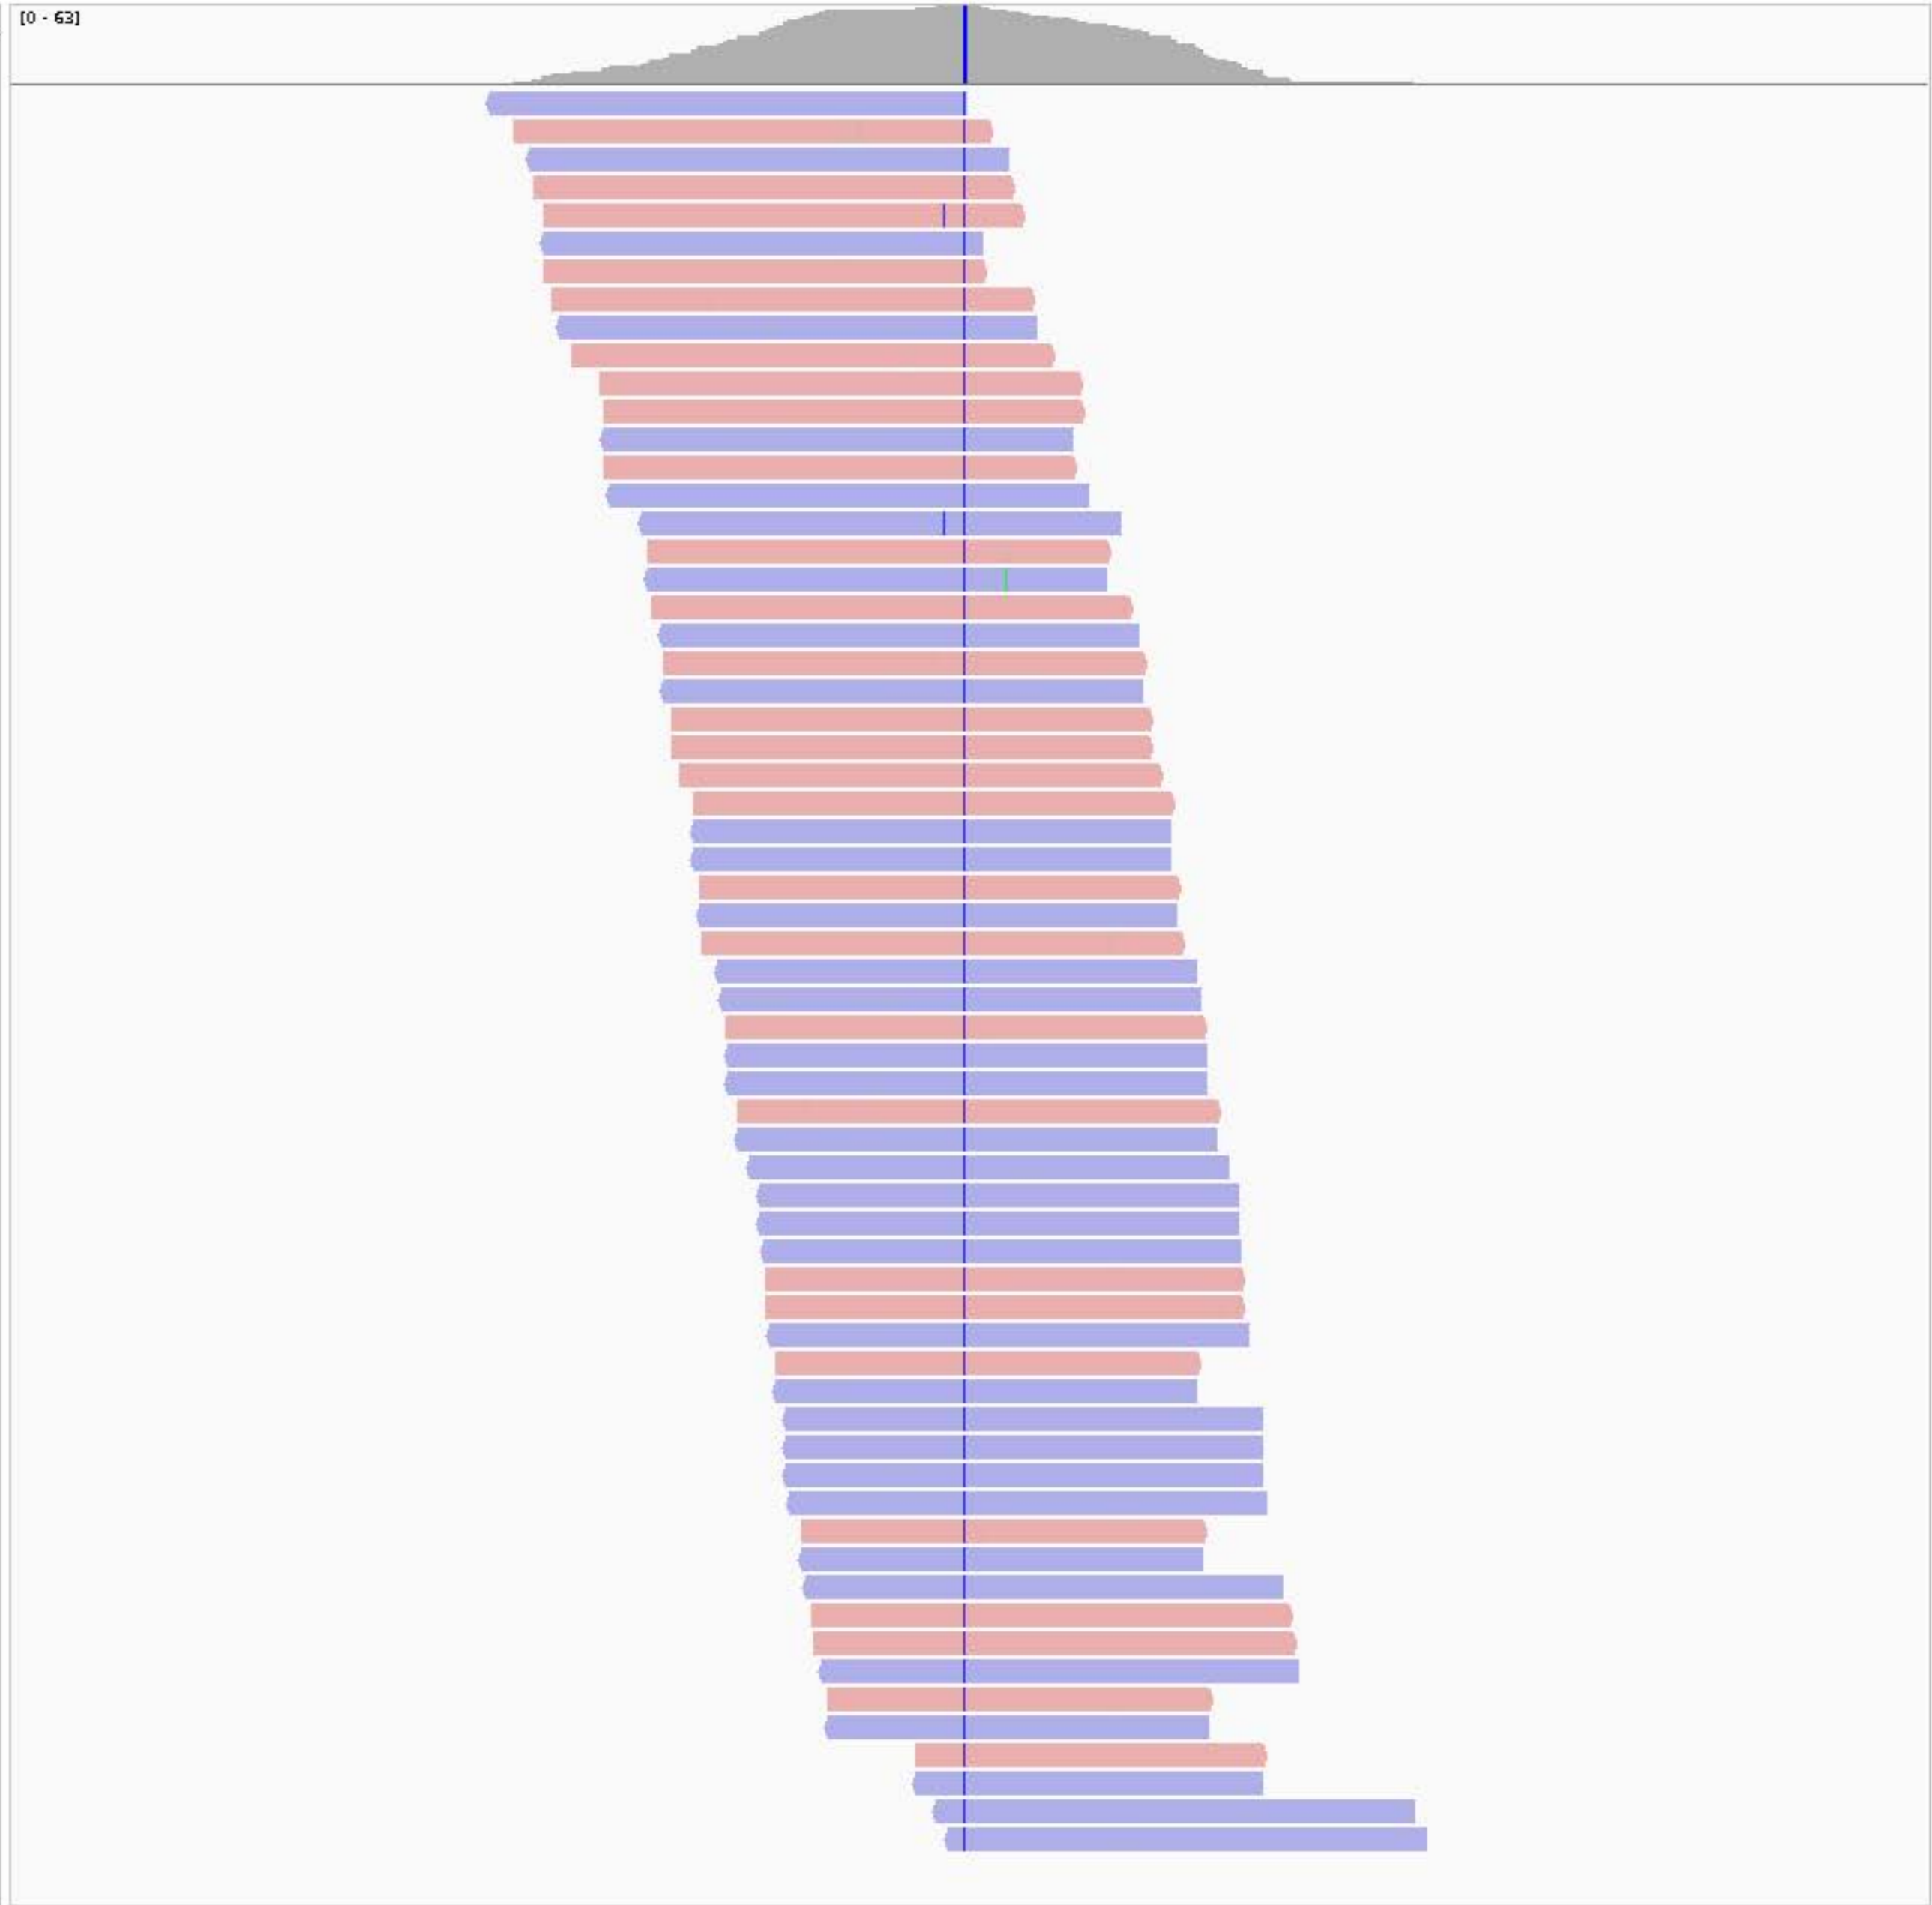

SL\_0010\_RN\_34\_mut.bam

Sequence →

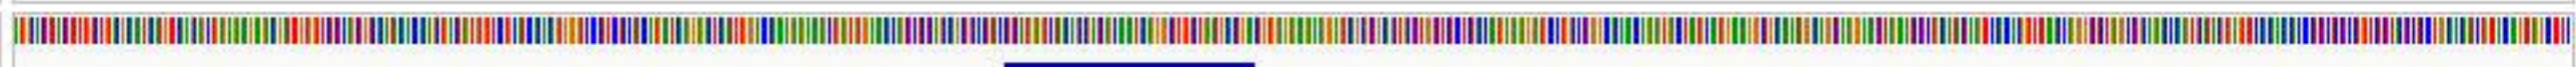

Refseq Genes

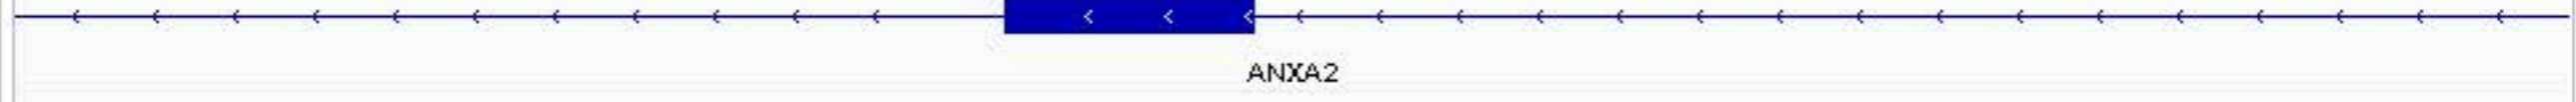

ANXA2



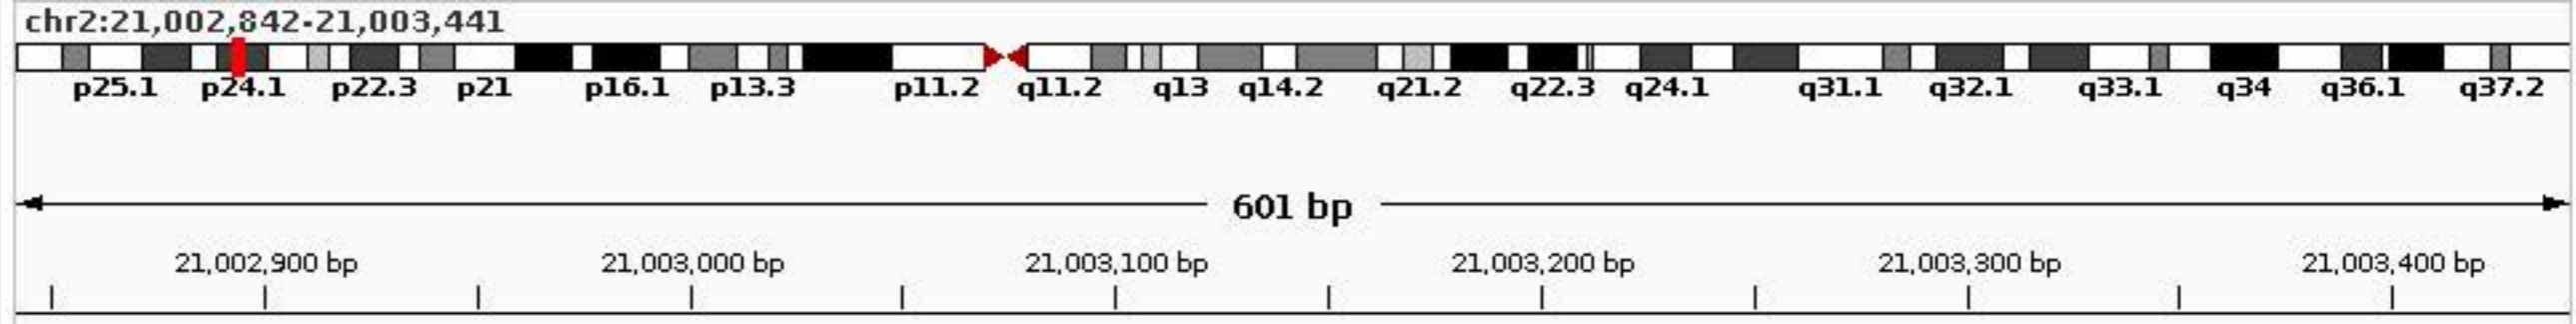

SL\_0007\_RN\_33\_mut.bam Coverage

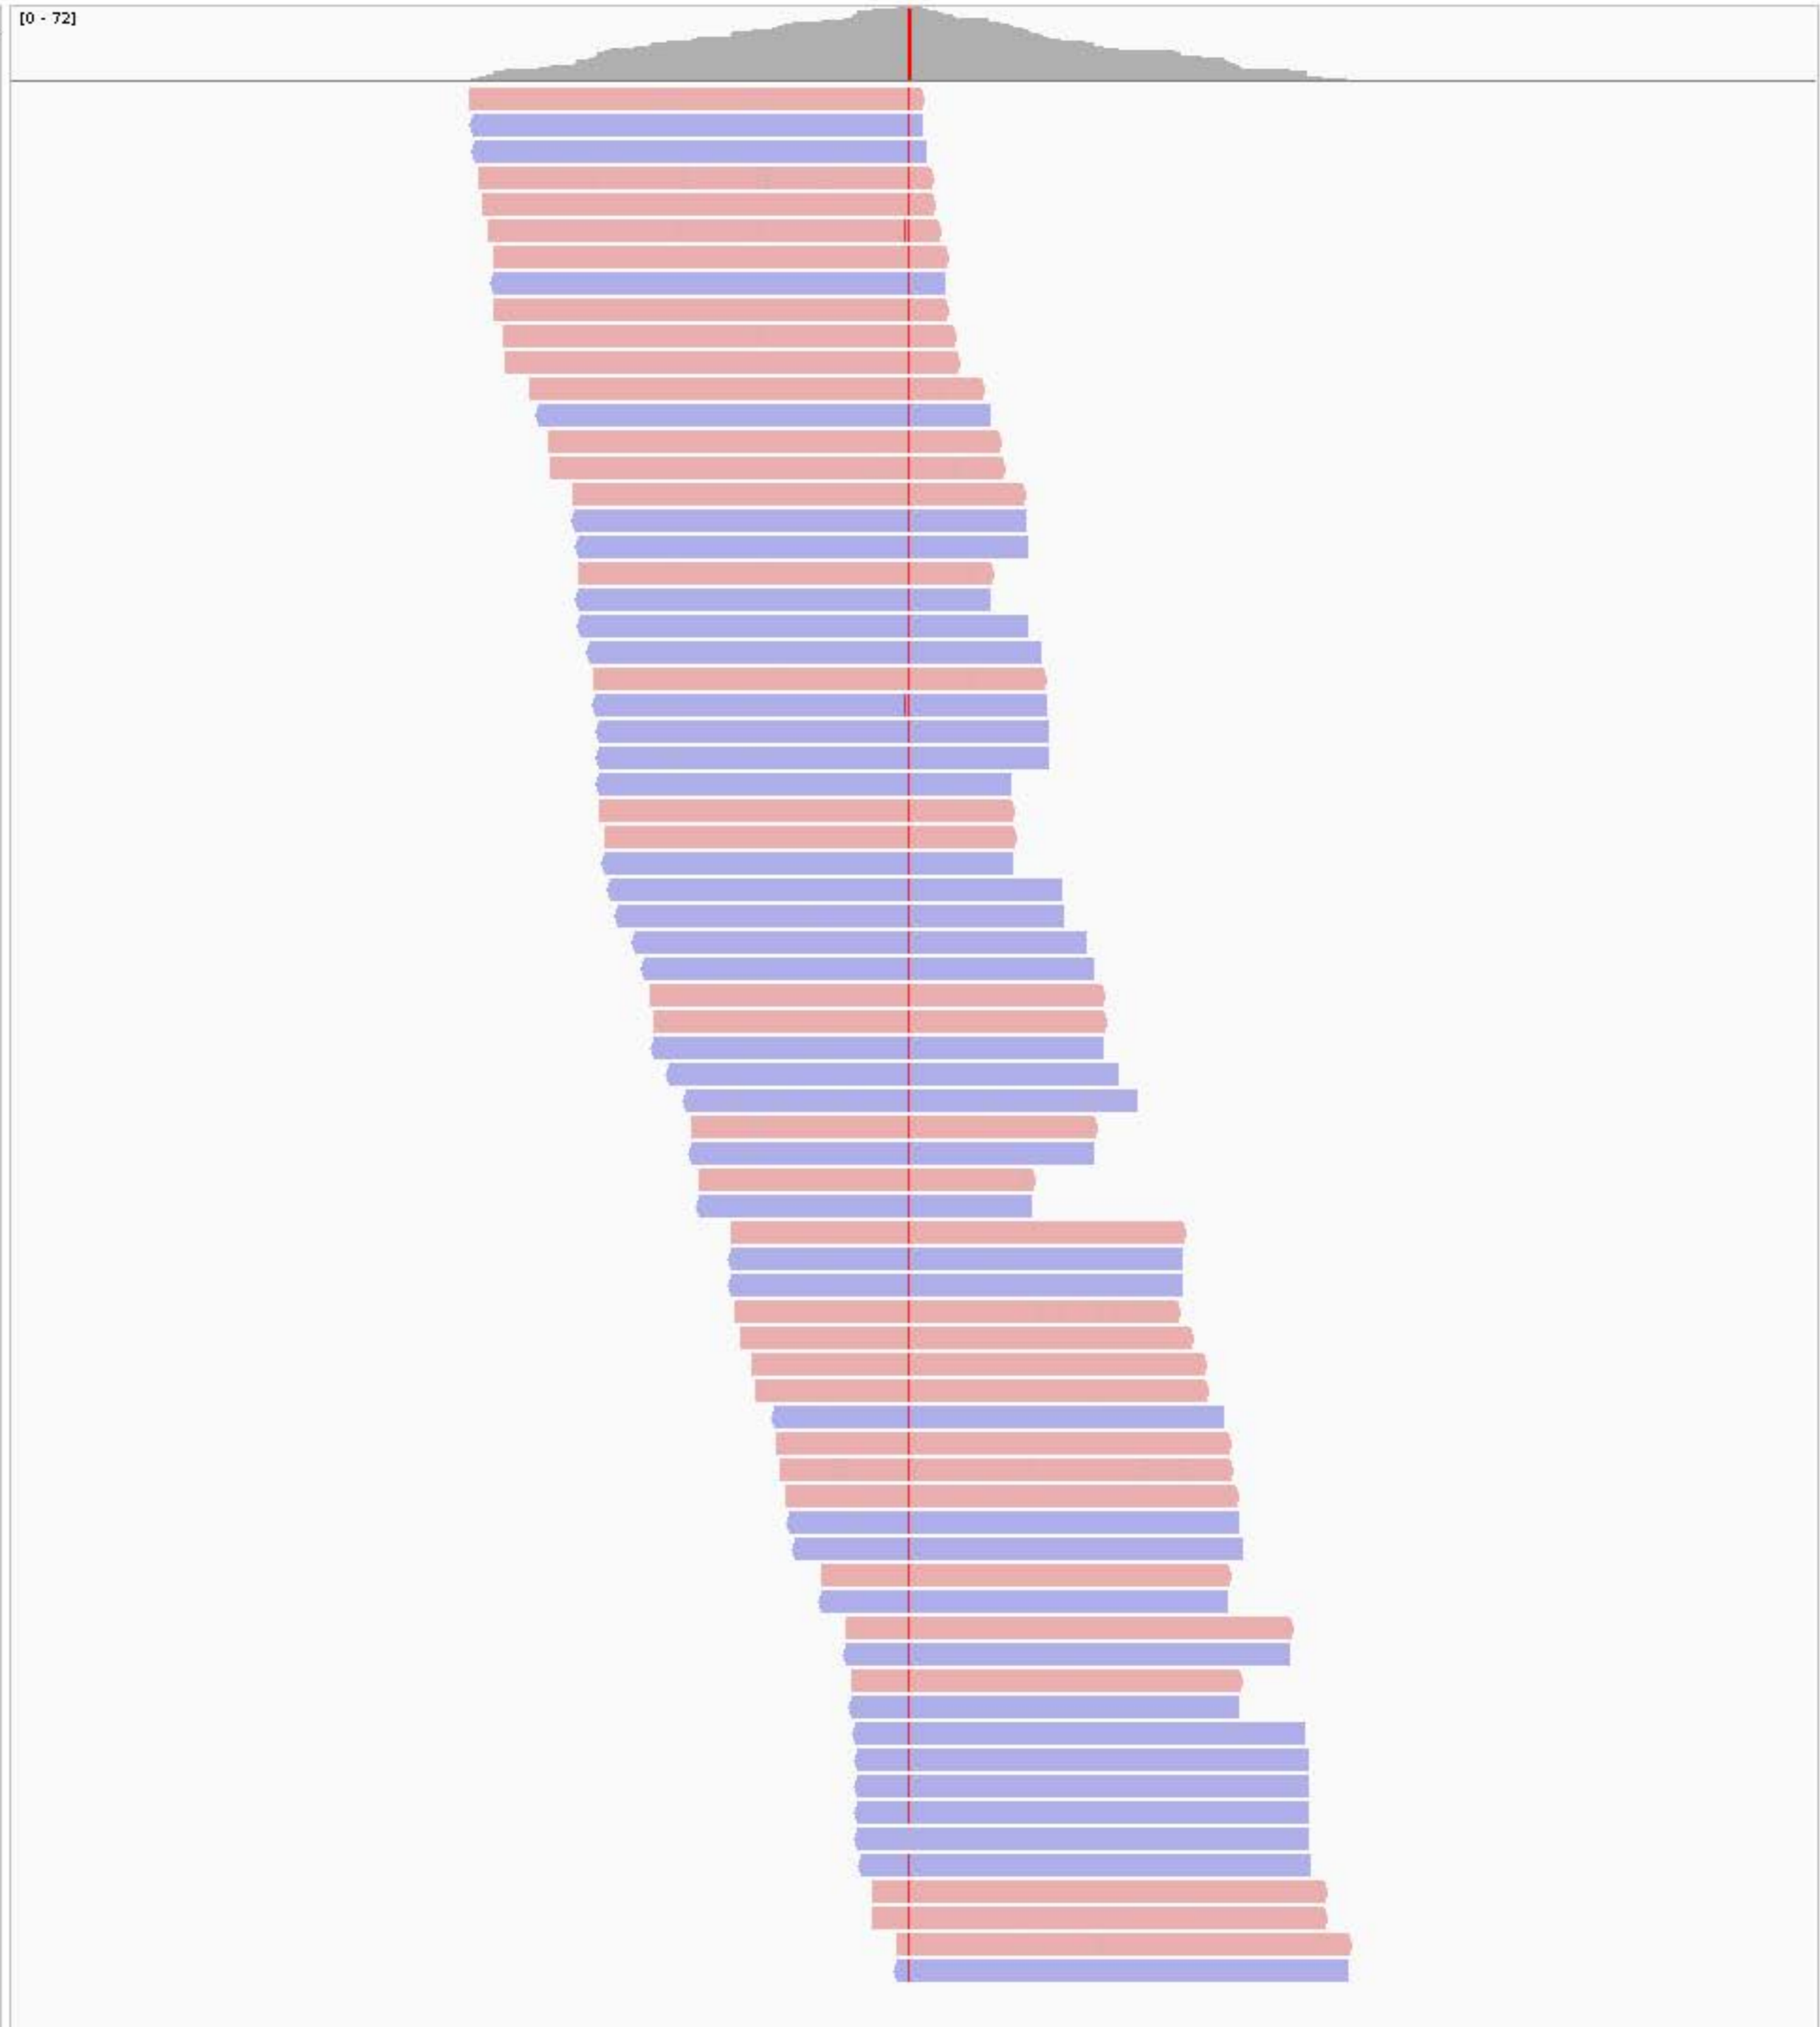

SL\_0007\_RN\_33\_mut.bam

Sequence →  
Refseq Genes

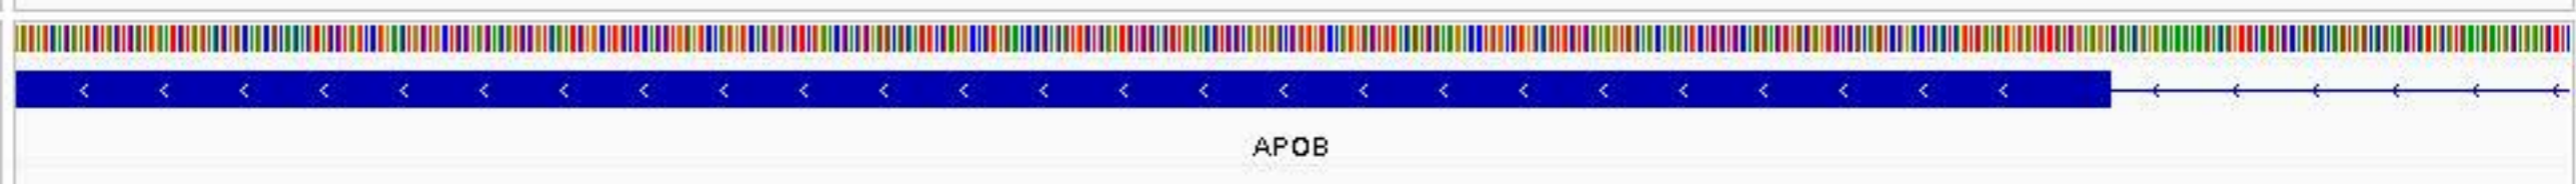



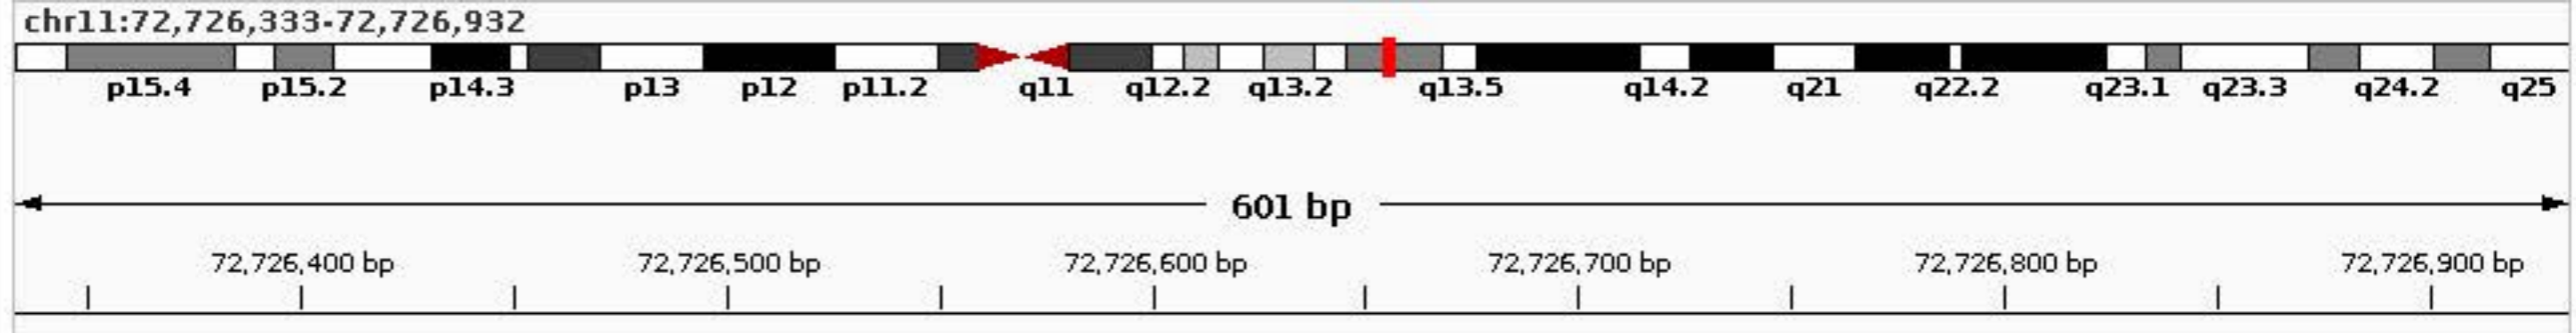

SL\_0015\_LN\_44\_mut.bam Coverage

SL\_0015\_LN\_44\_mut.bam

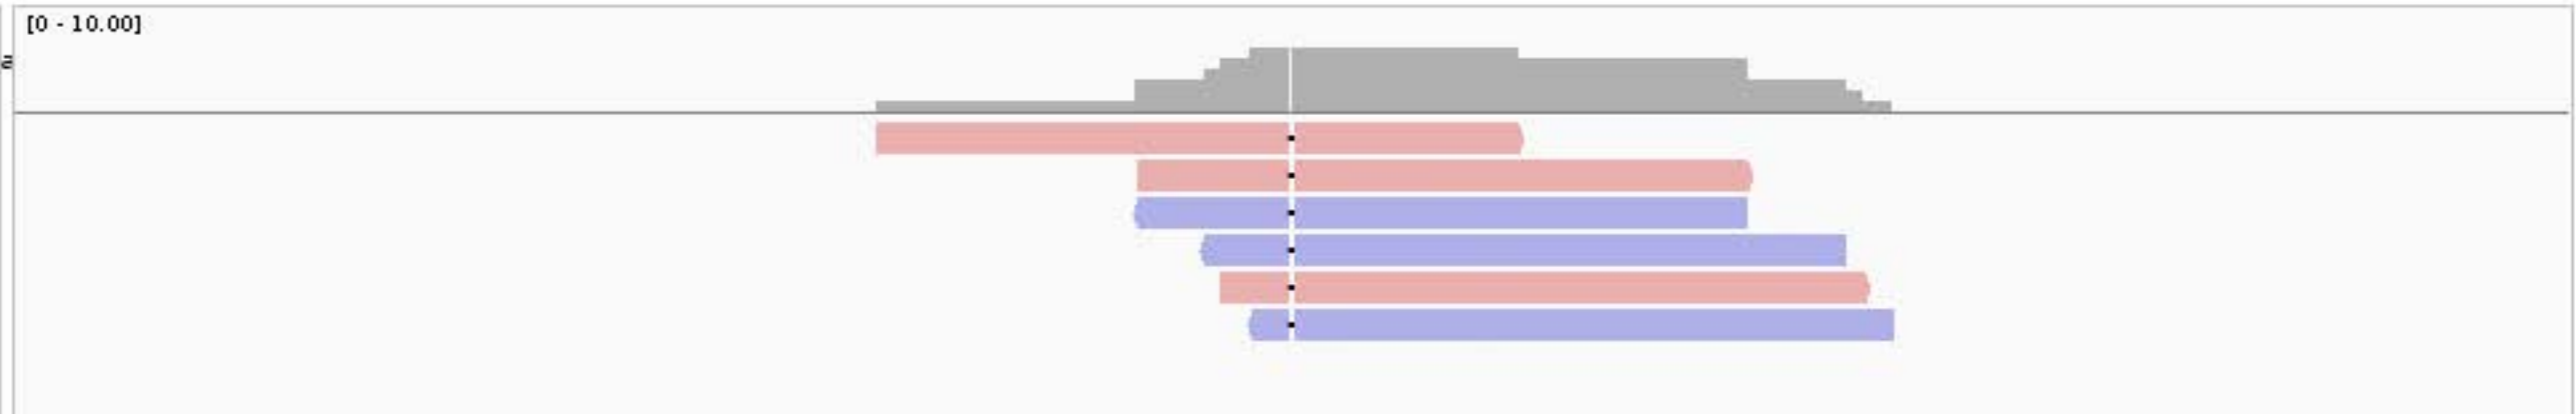

Sequence

Refseq Genes

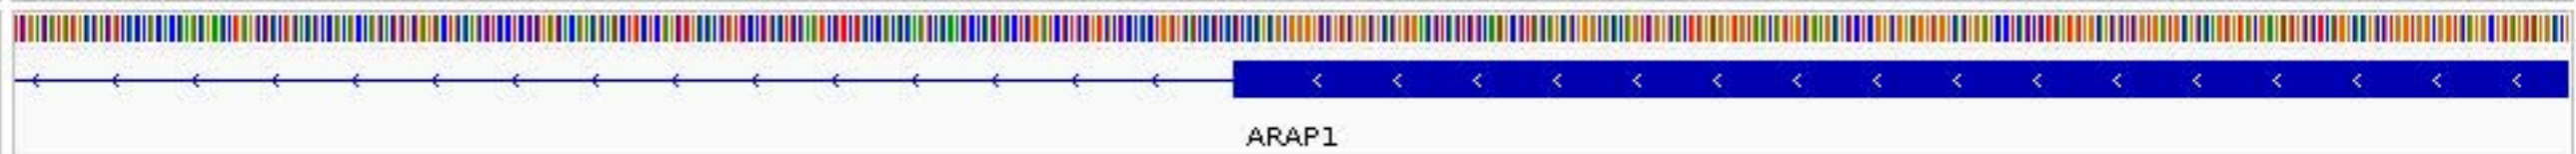

chr10:97,234,942-97,235,541

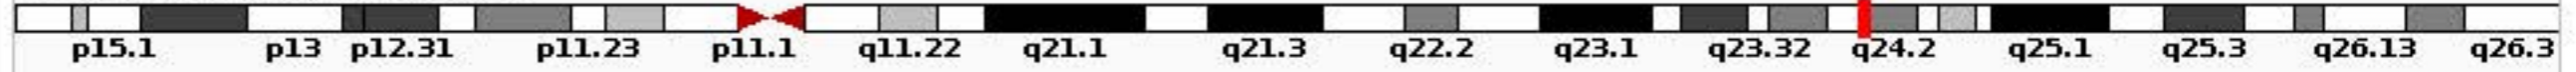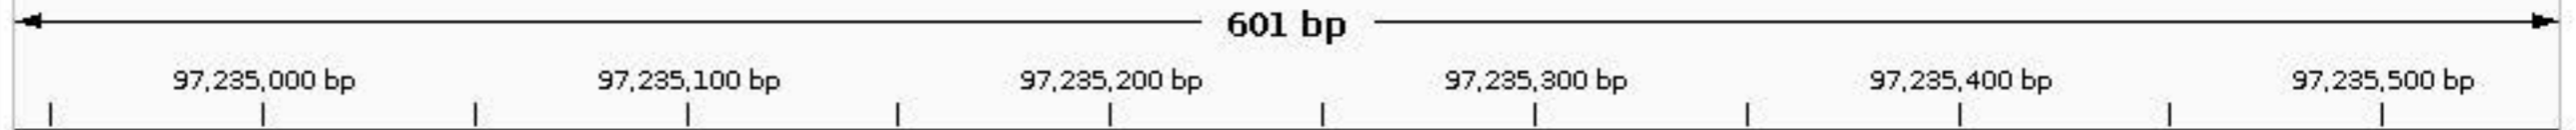

SL\_0001\_RN\_28\_mut.bam Coverage

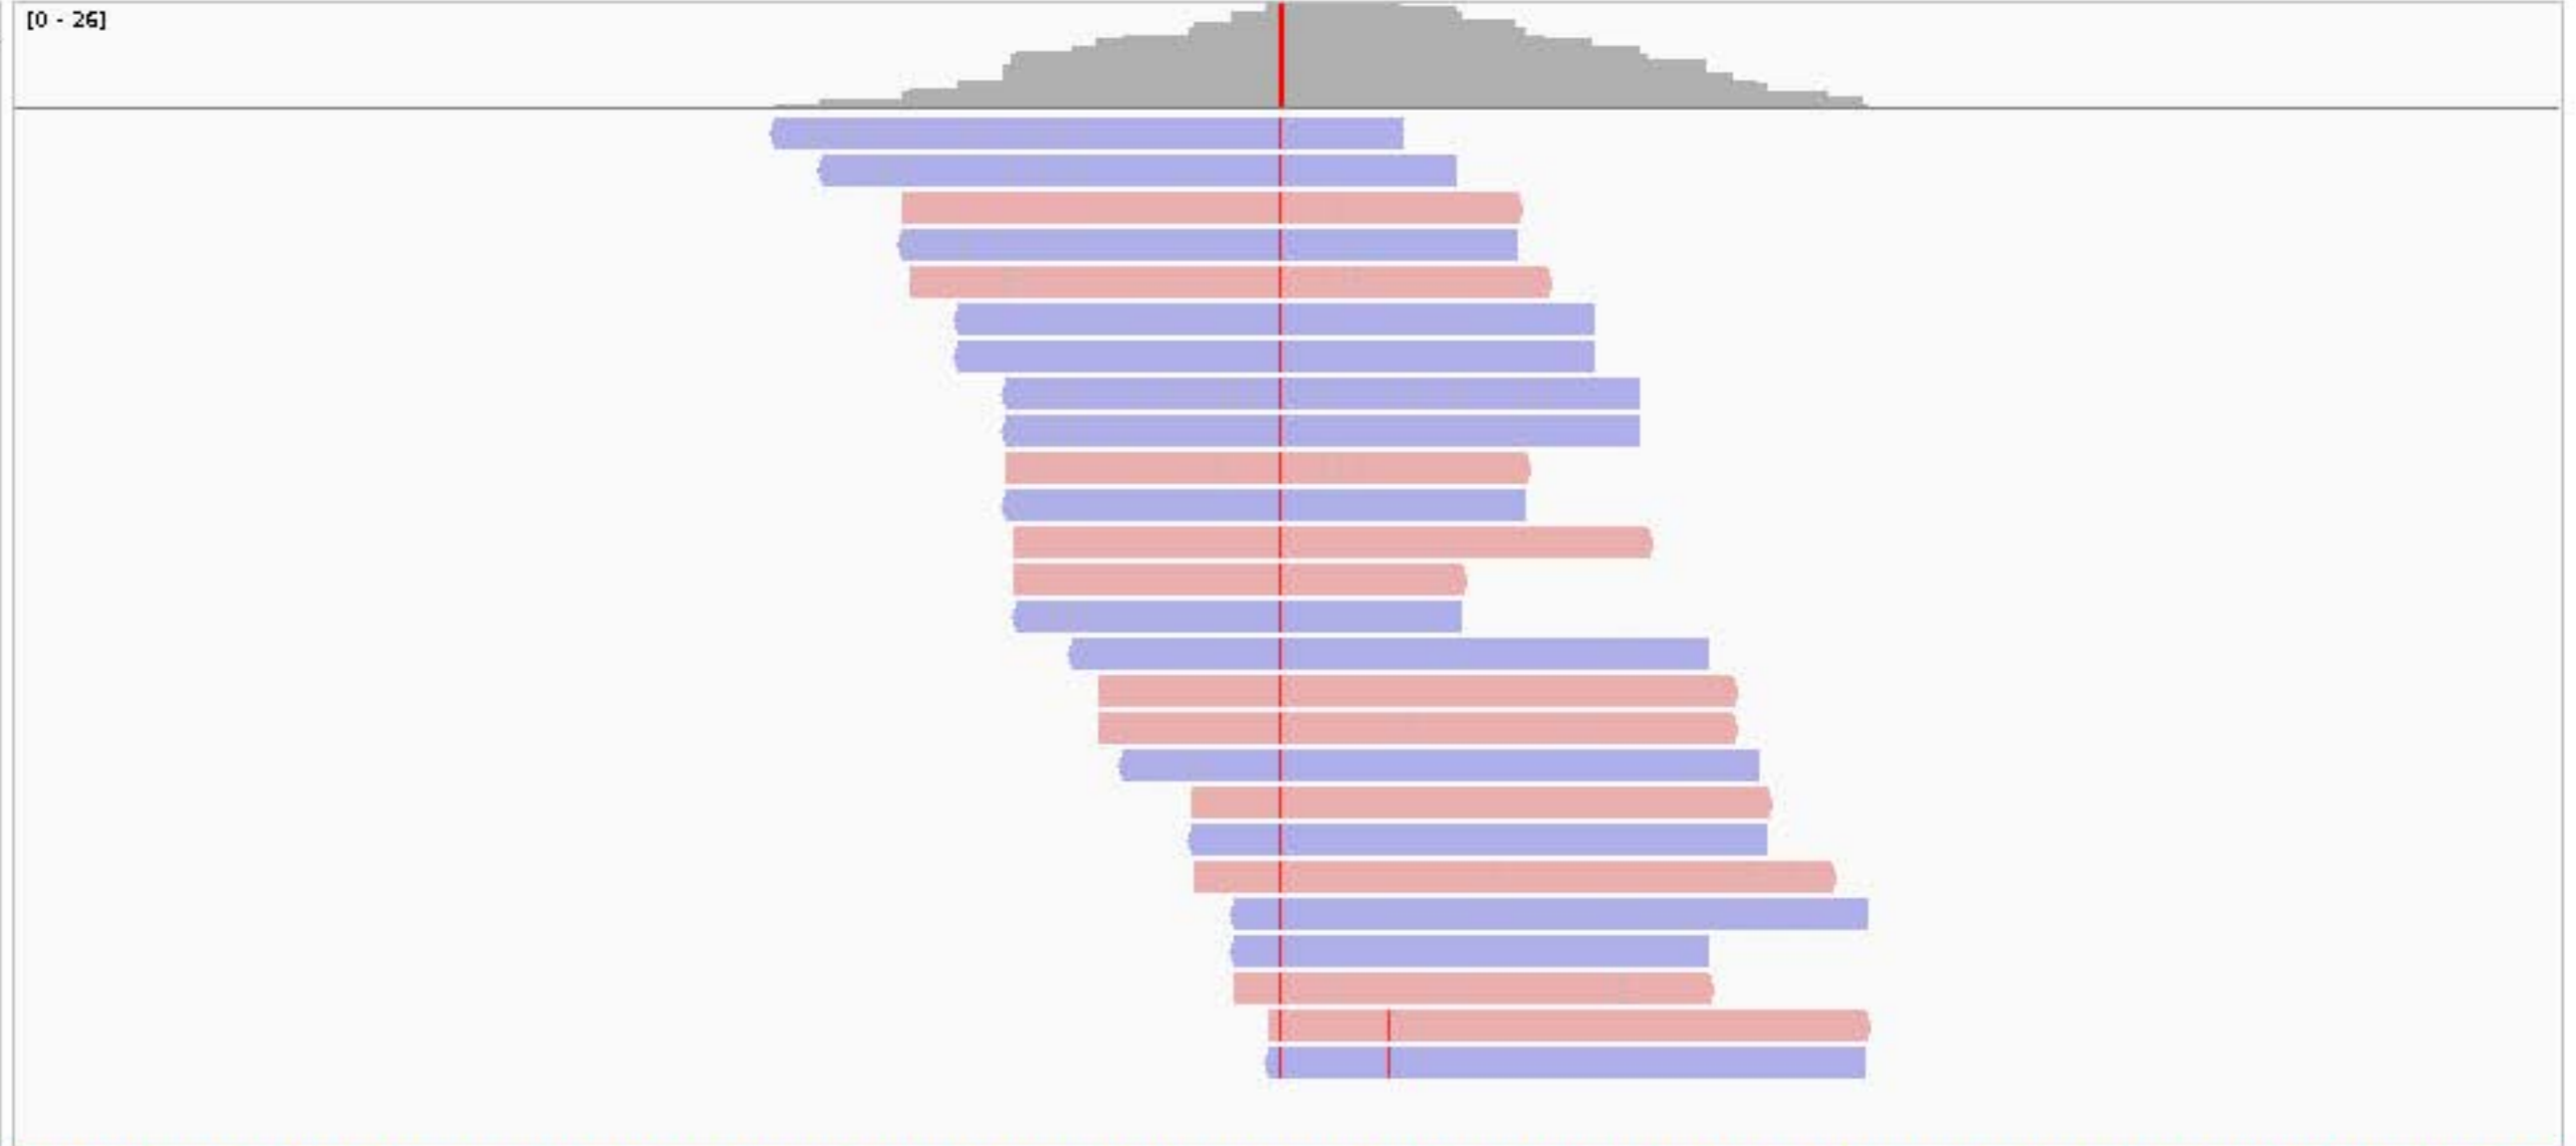

SL\_0001\_RN\_28\_mut.bam

Sequence

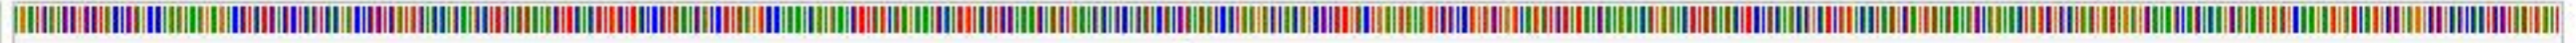

Refseq Genes

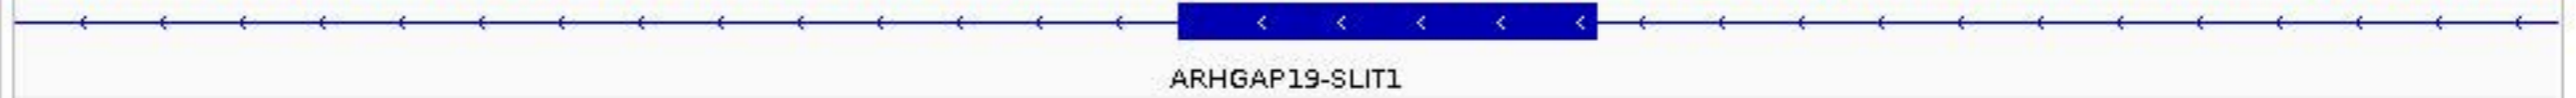

ARHGAP19-SLIT1

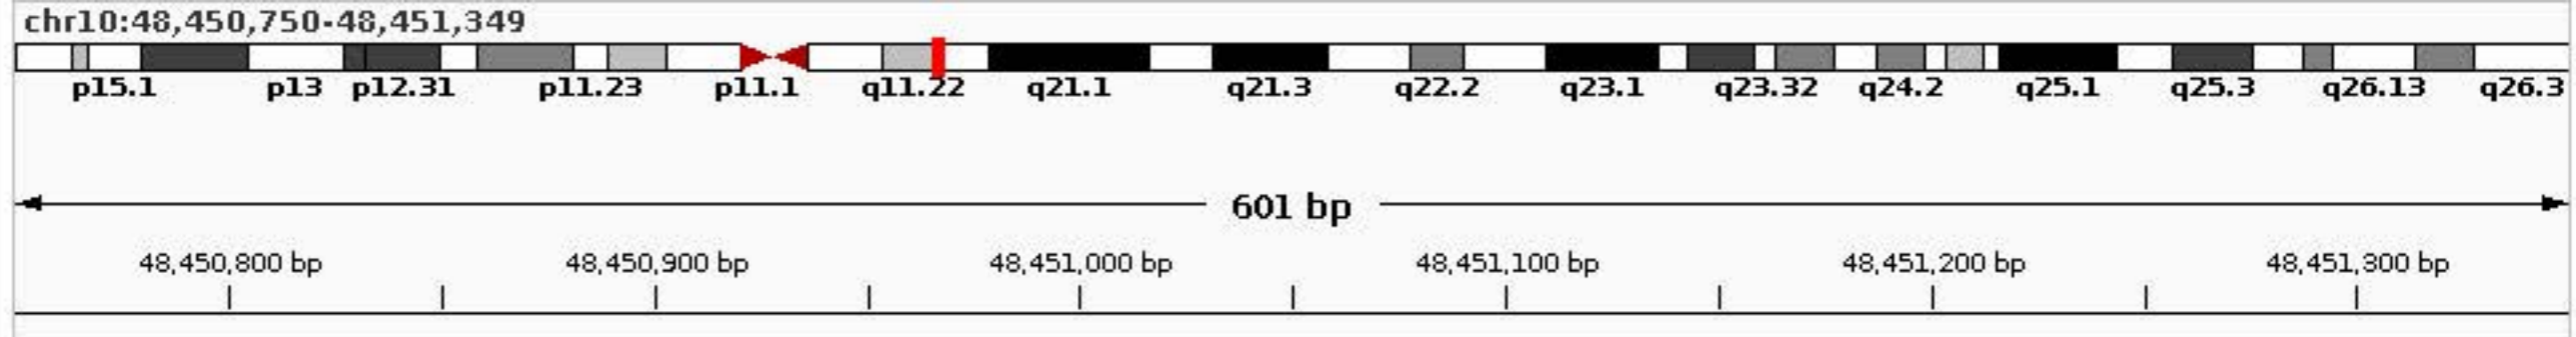

SL\_0004\_RN\_19\_mut.bam Coverage

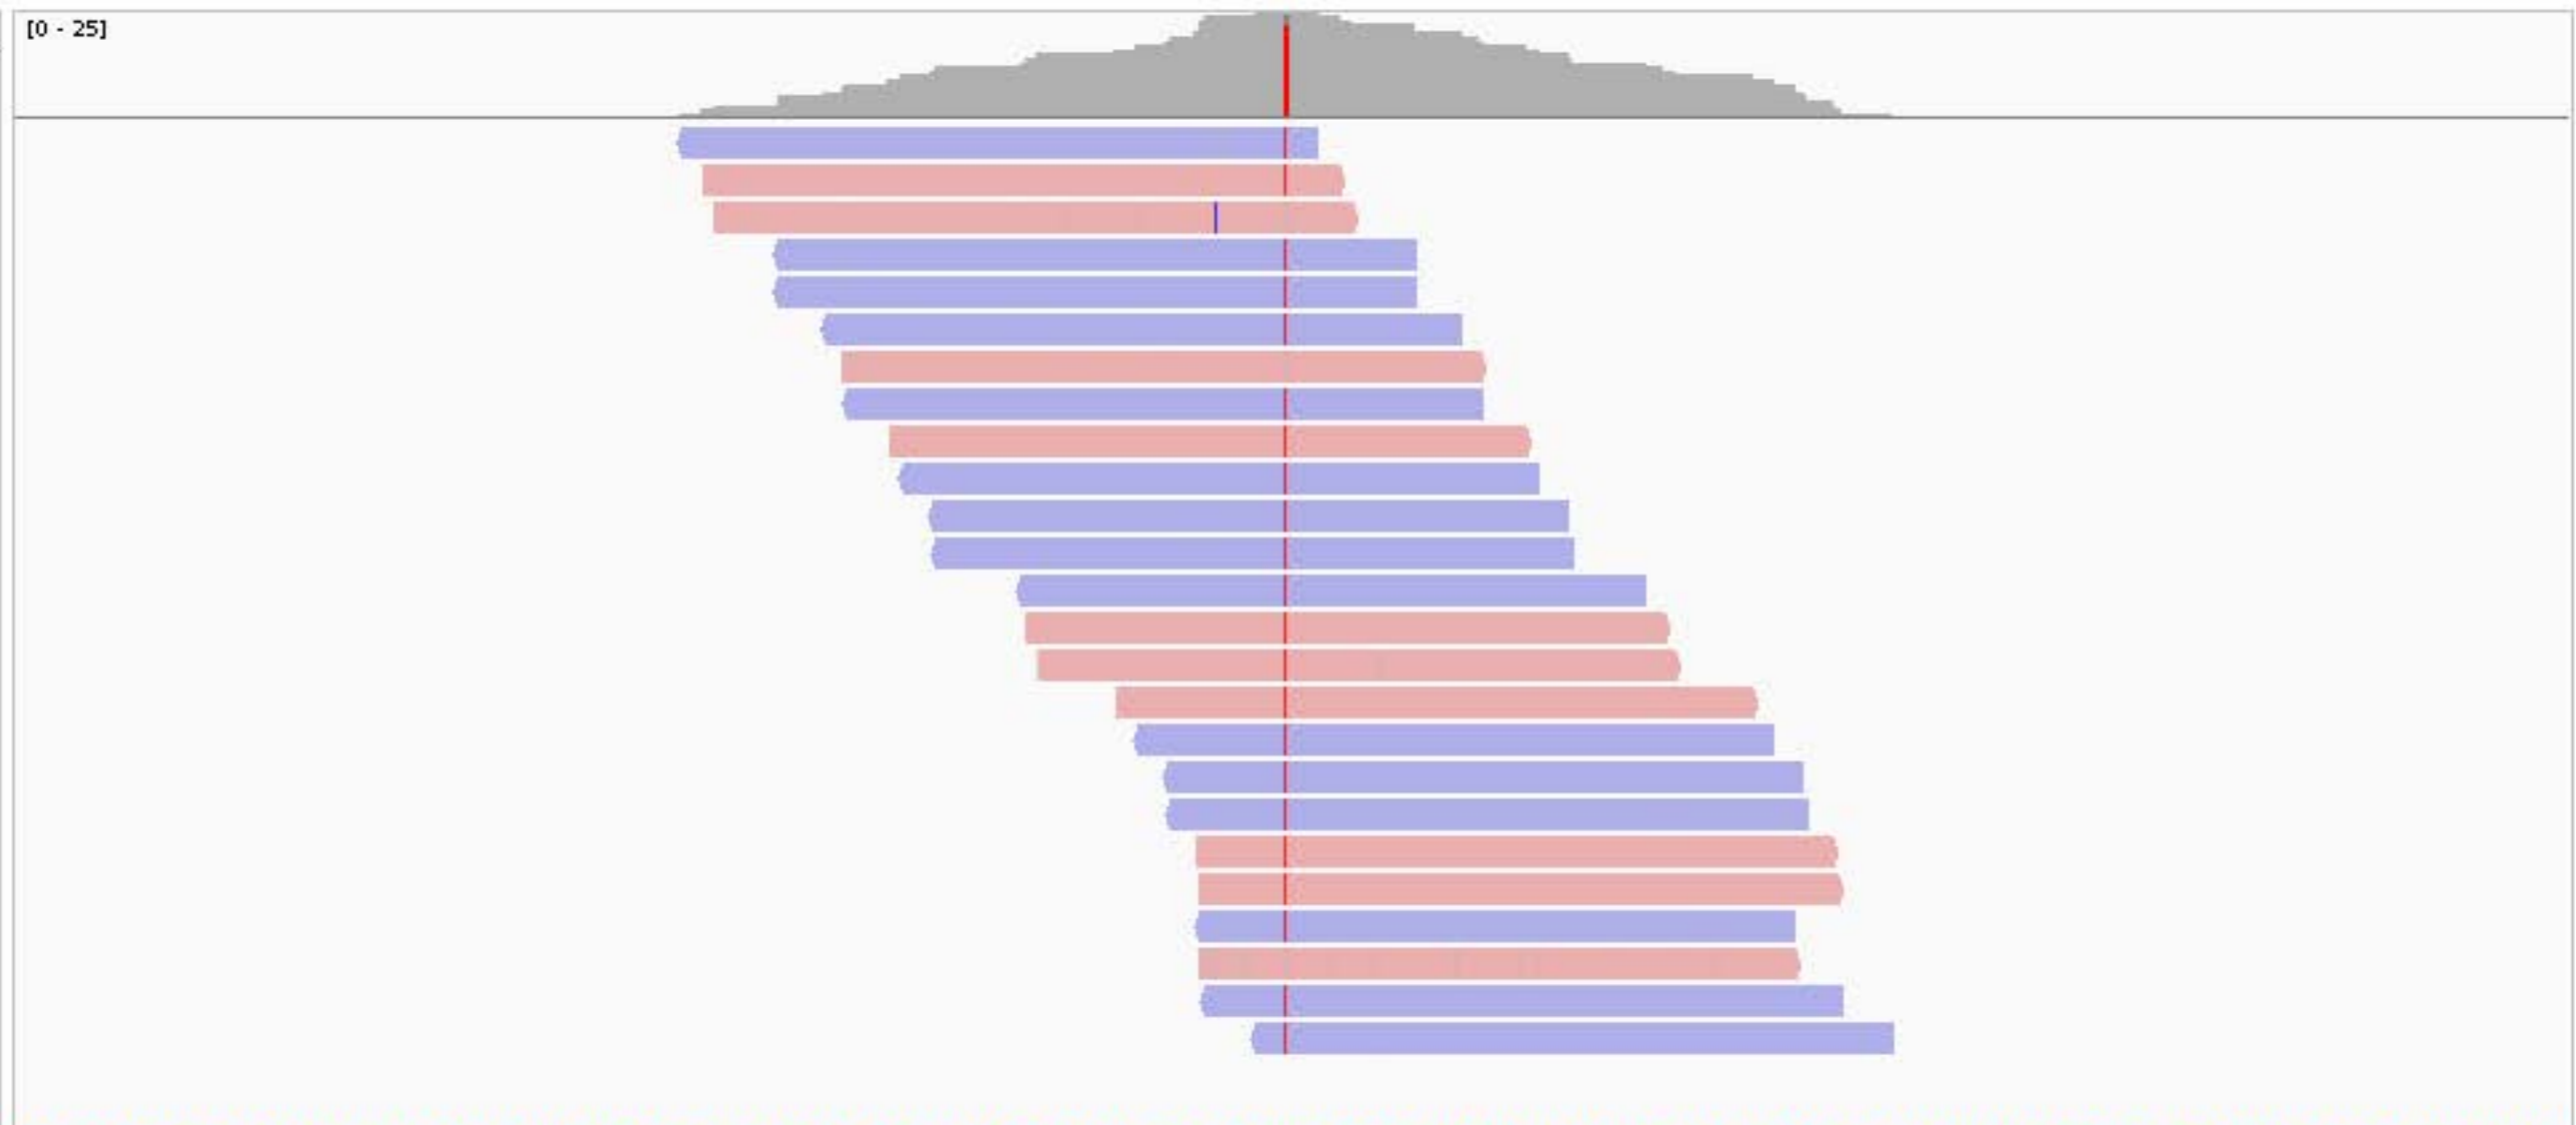

Sequence →

Refseq Genes

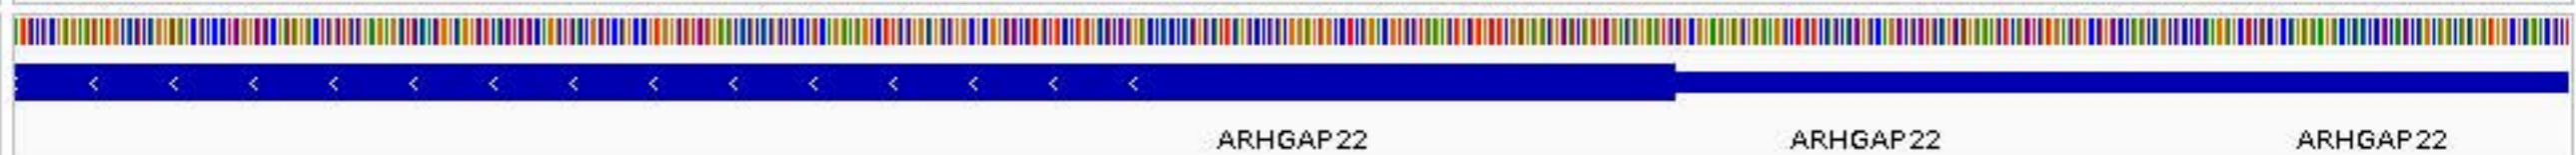

chr19:46,921,203-46,921,802

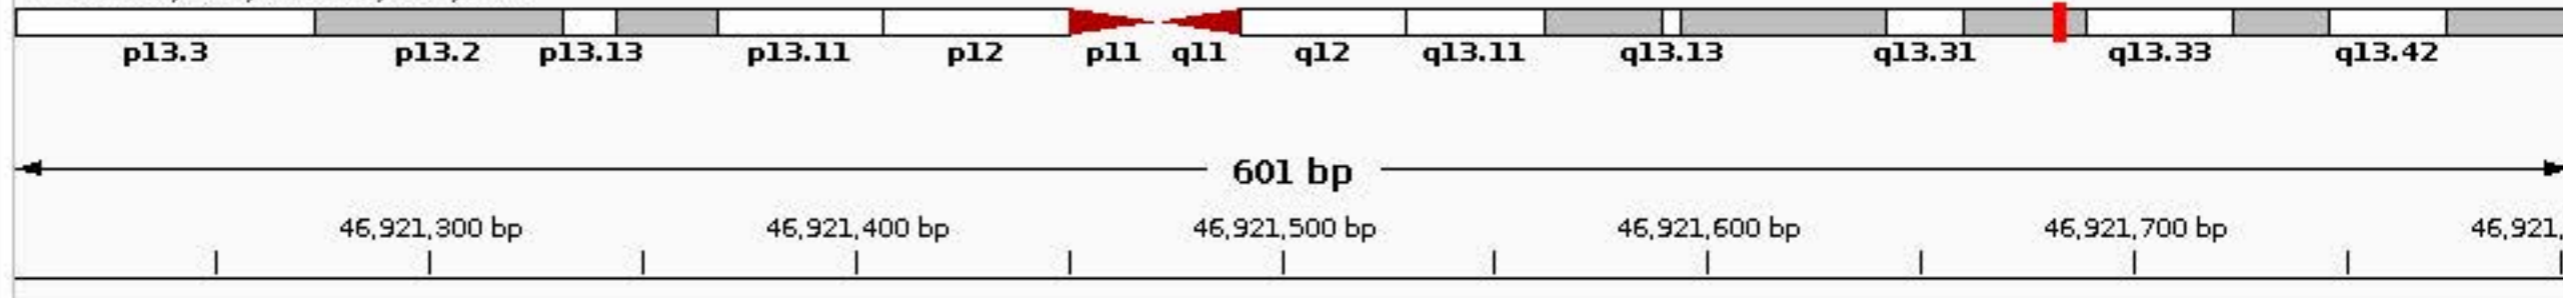

SL\_0002\_LN\_1\_mut.bam Coverage

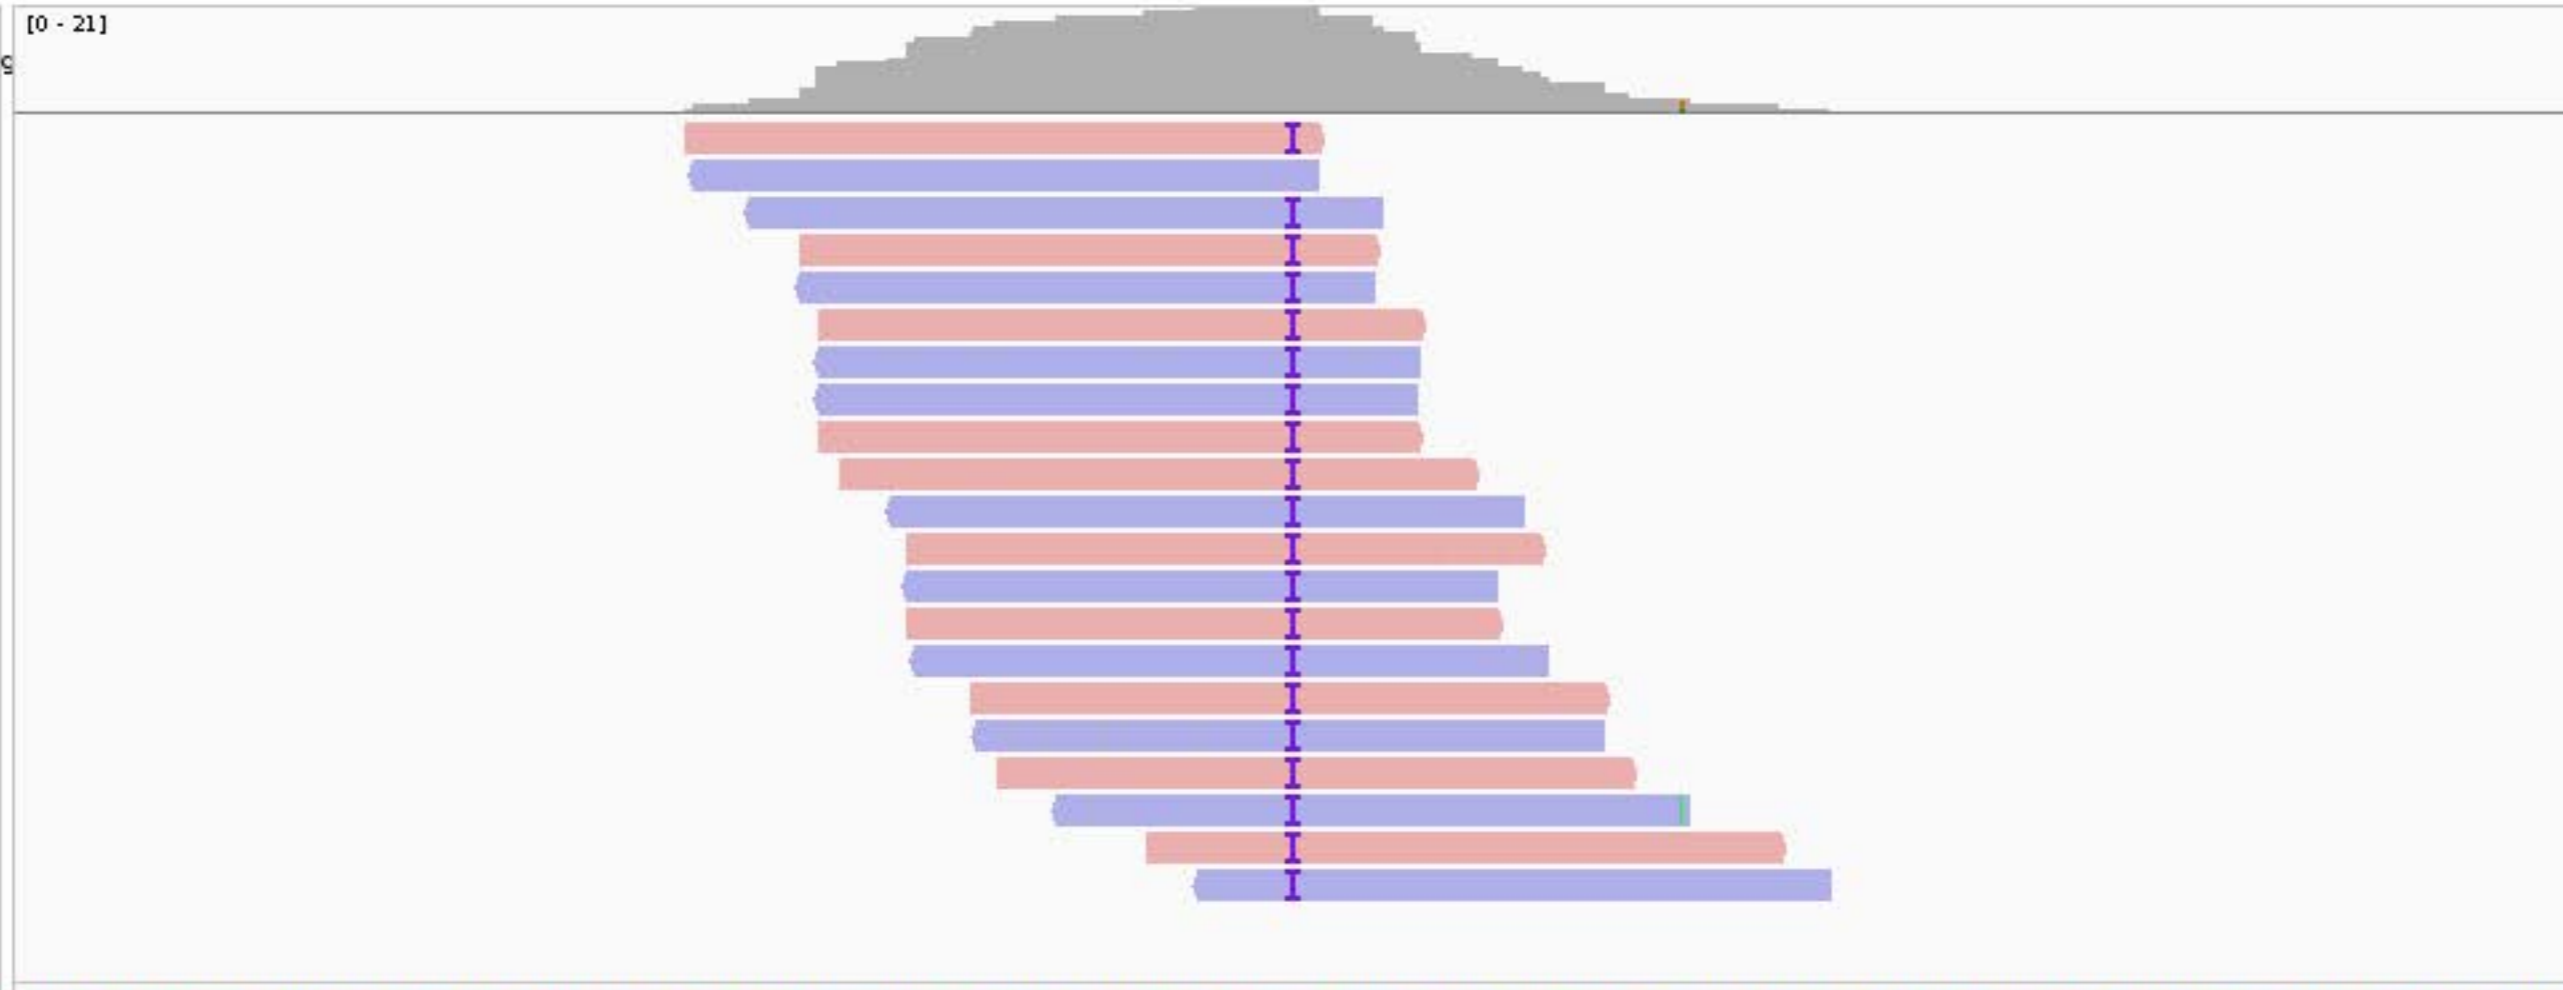

SL\_0002\_LN\_1\_mut.bam

Sequence

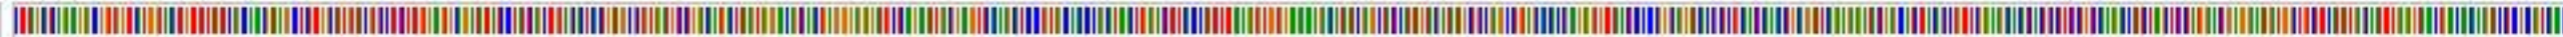

Refseq Genes

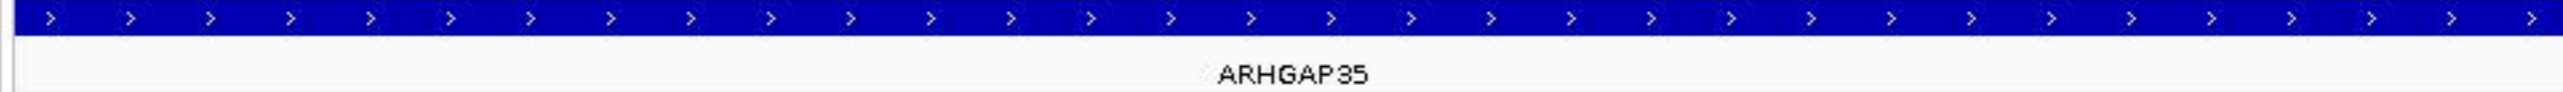

ARHGAP35



chr19:46,920,602-46,921,201

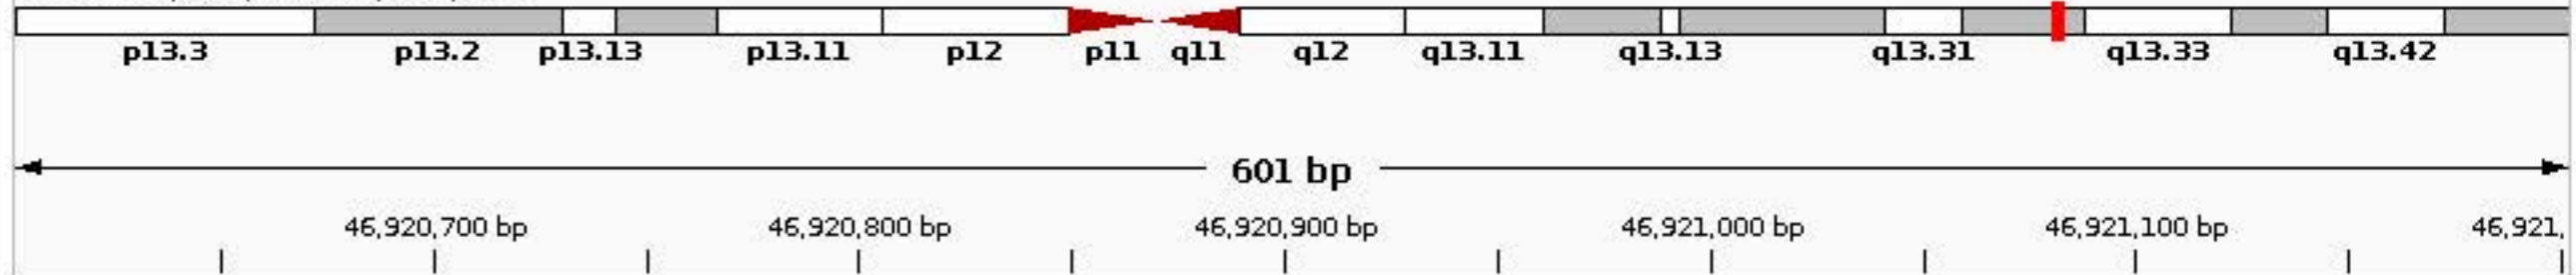

SL\_0001\_RN\_27\_mut.bam Coverage

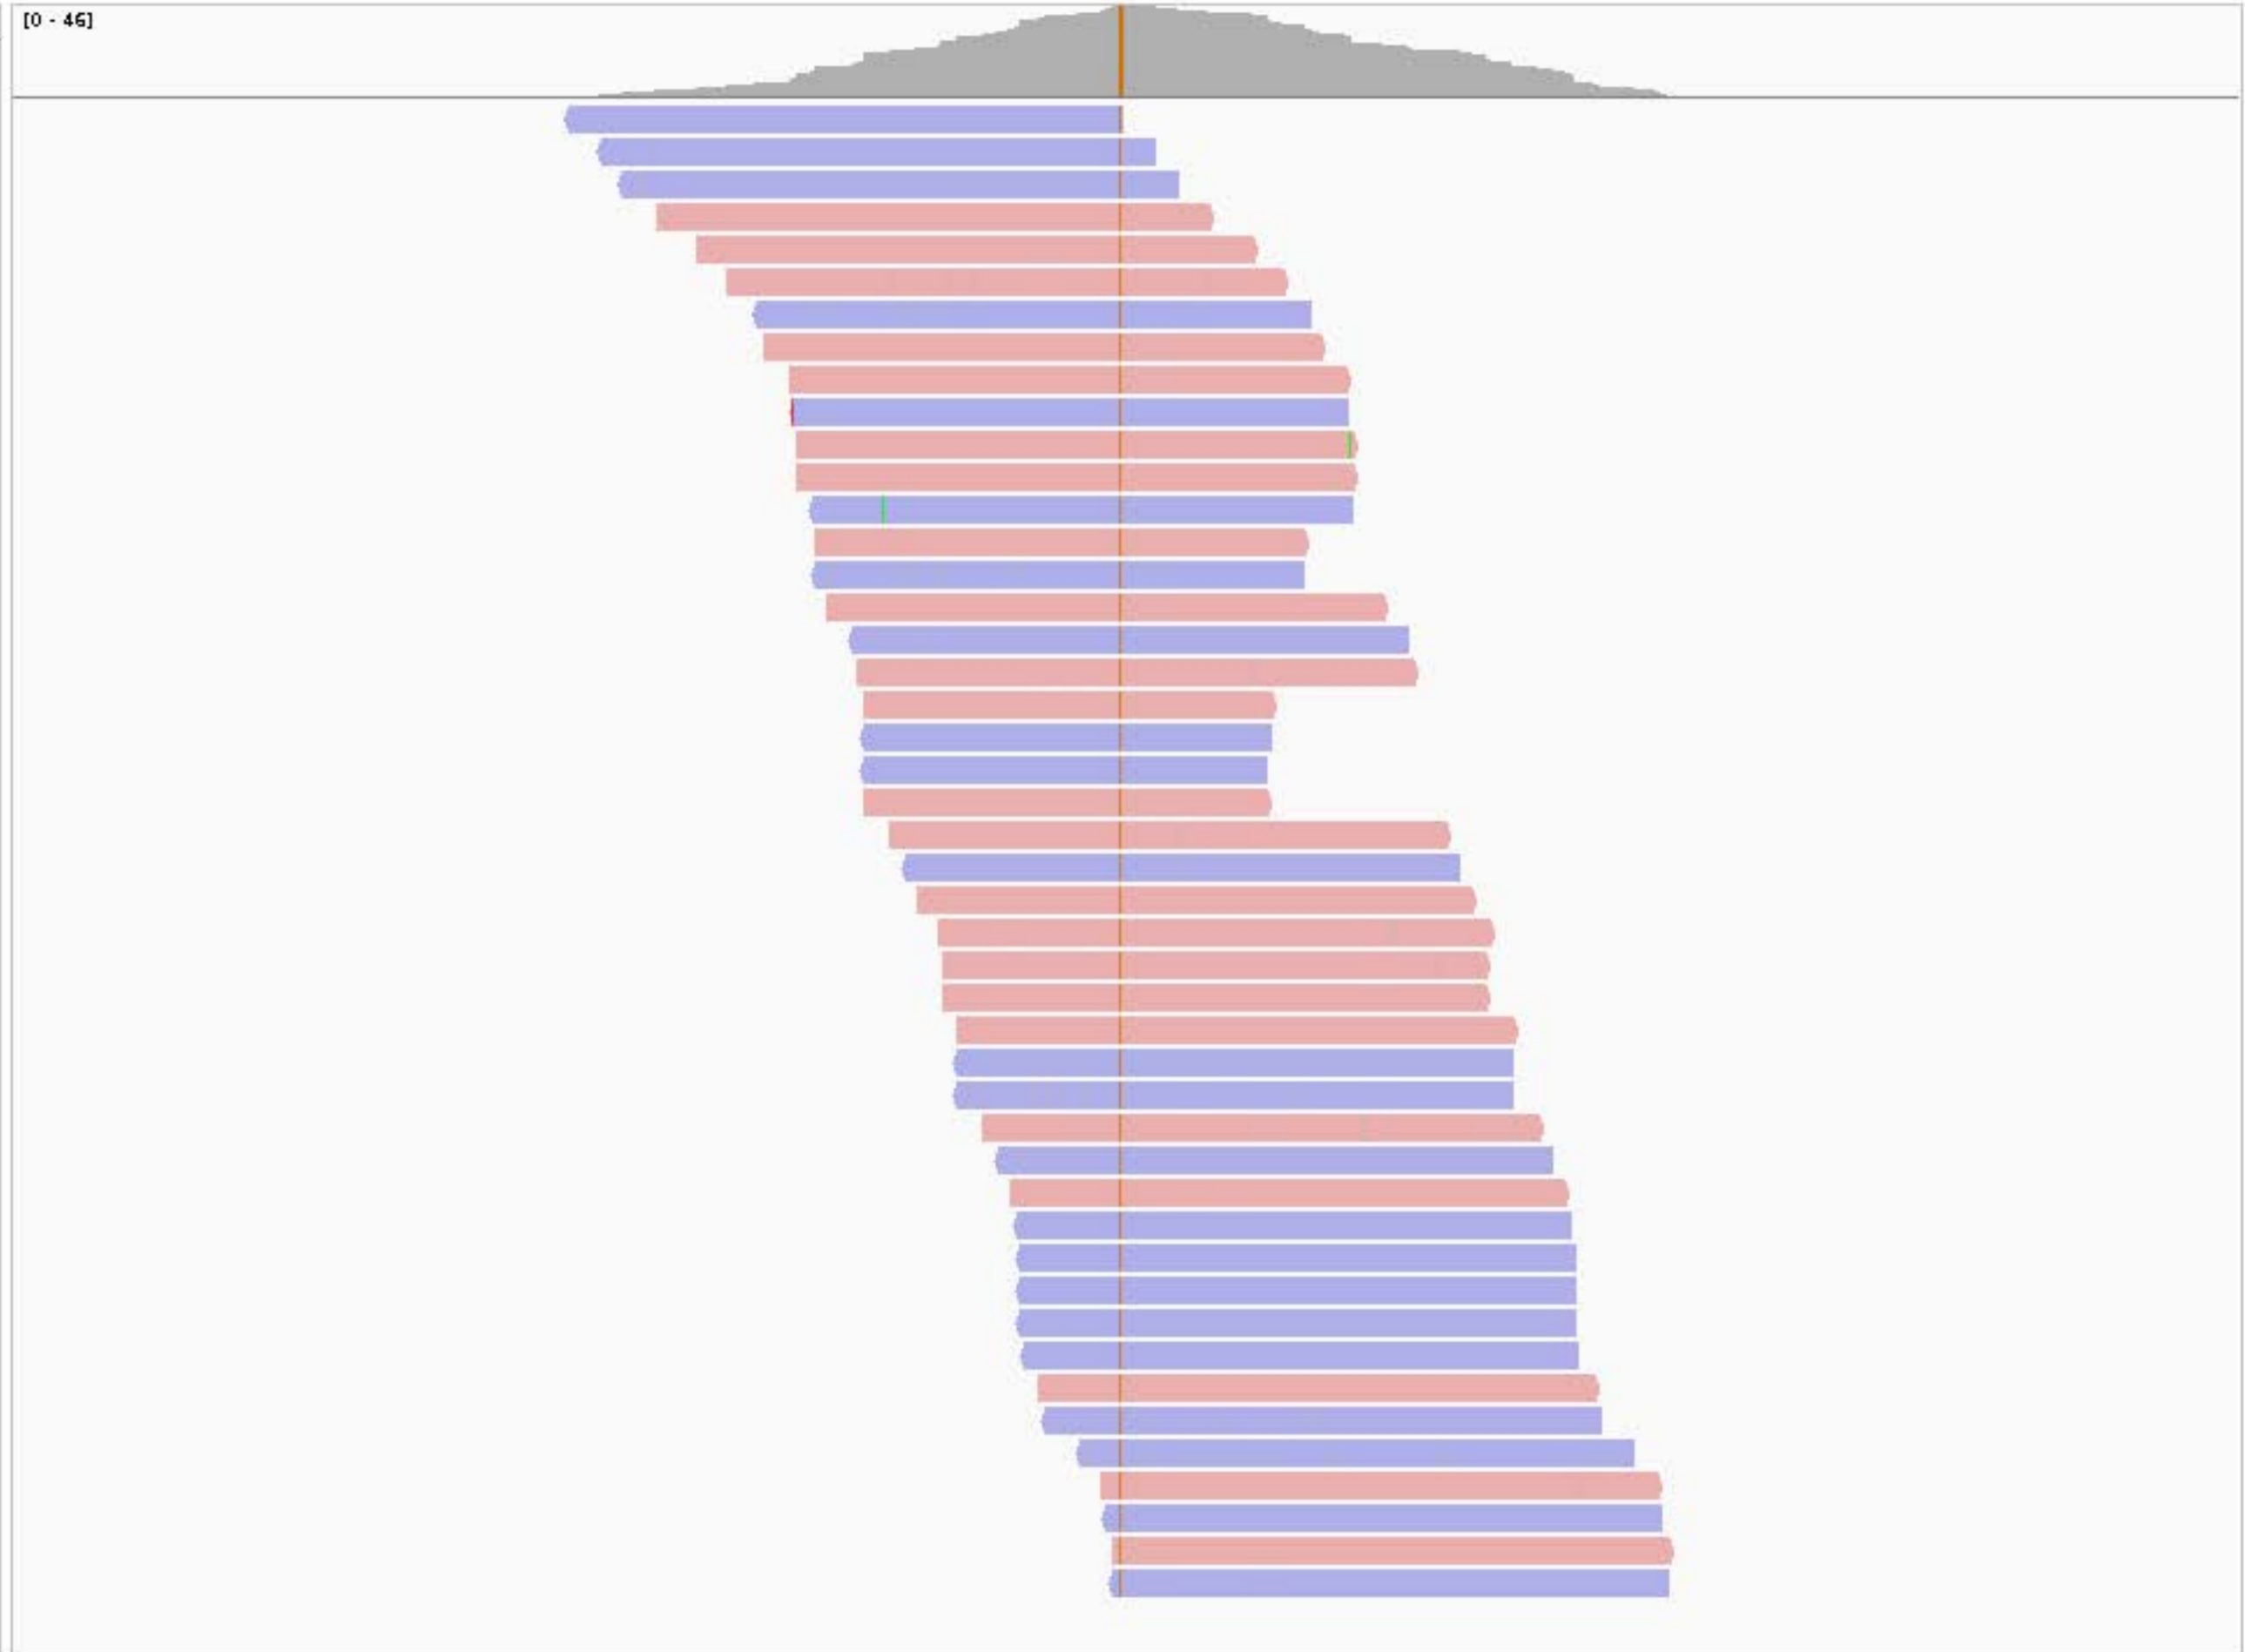

SL\_0001\_RN\_27\_mut.bam

Sequence

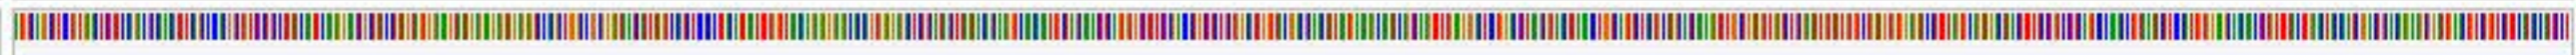

Refseq Genes

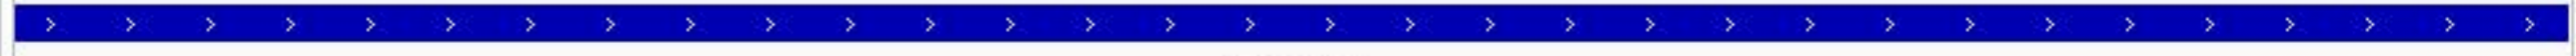

ARHGAP35



chr19:46,920,602-46,921,201

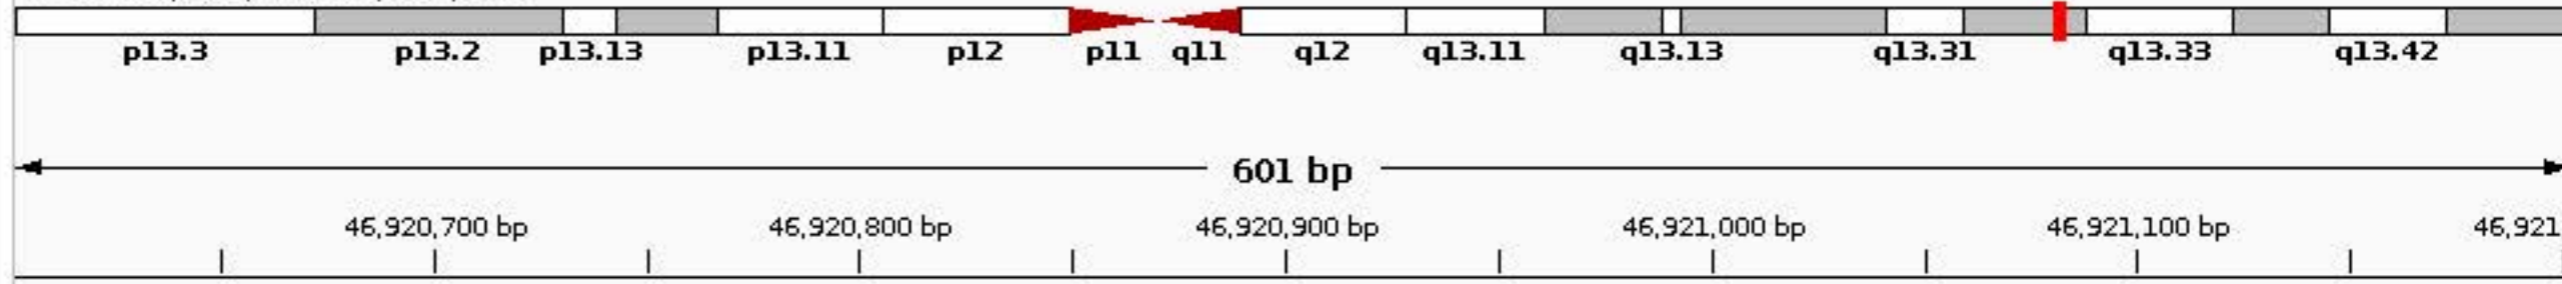

SL\_0001\_RN\_31\_mut.bam Coverage

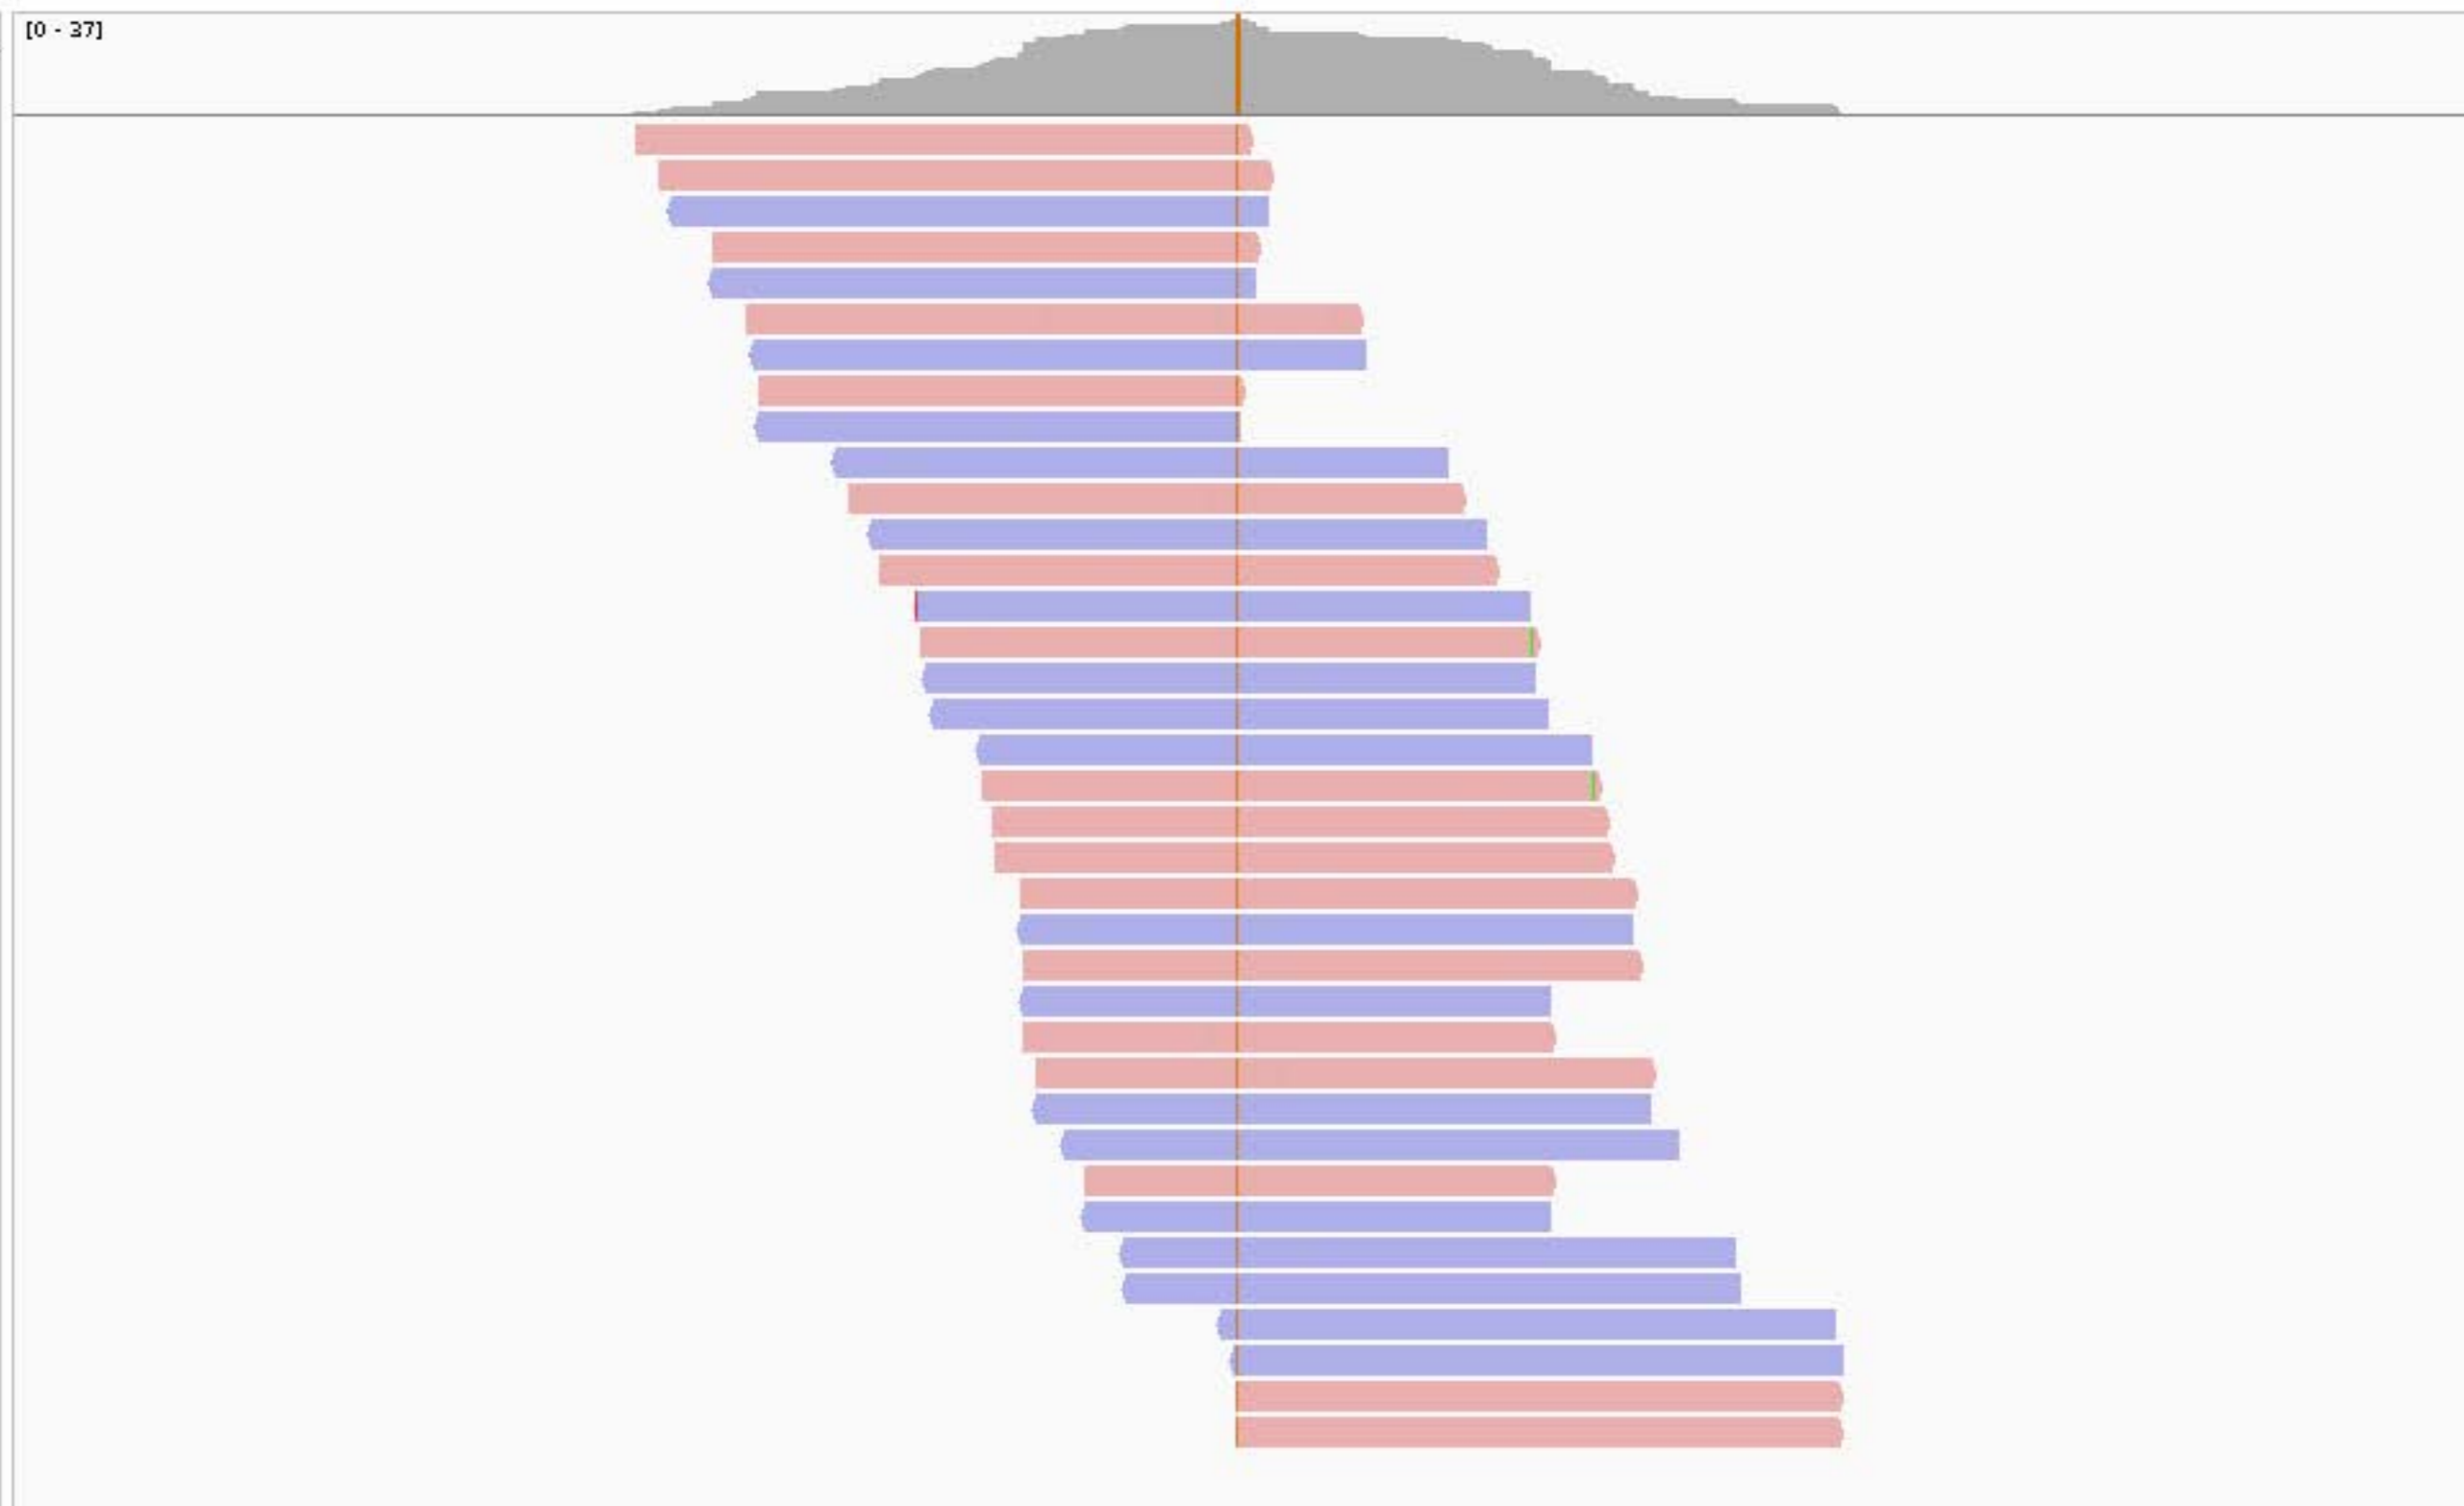

SL\_0001\_RN\_31\_mut.bam

Sequence

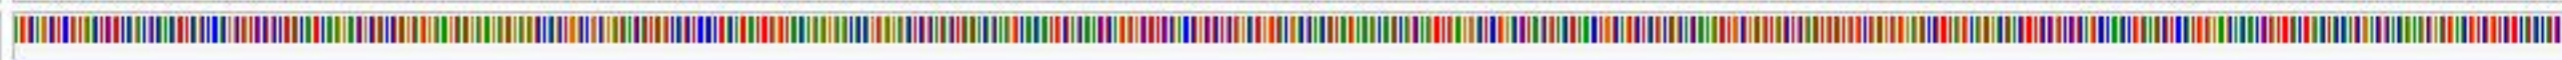

Refseq Genes

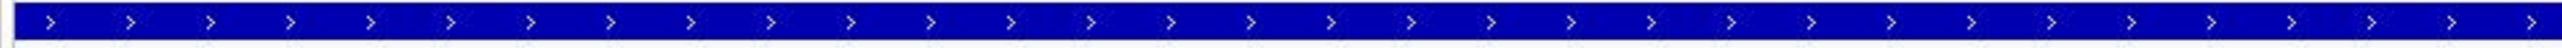

ARHGAP35

chr19:46,920,602-46,921,201

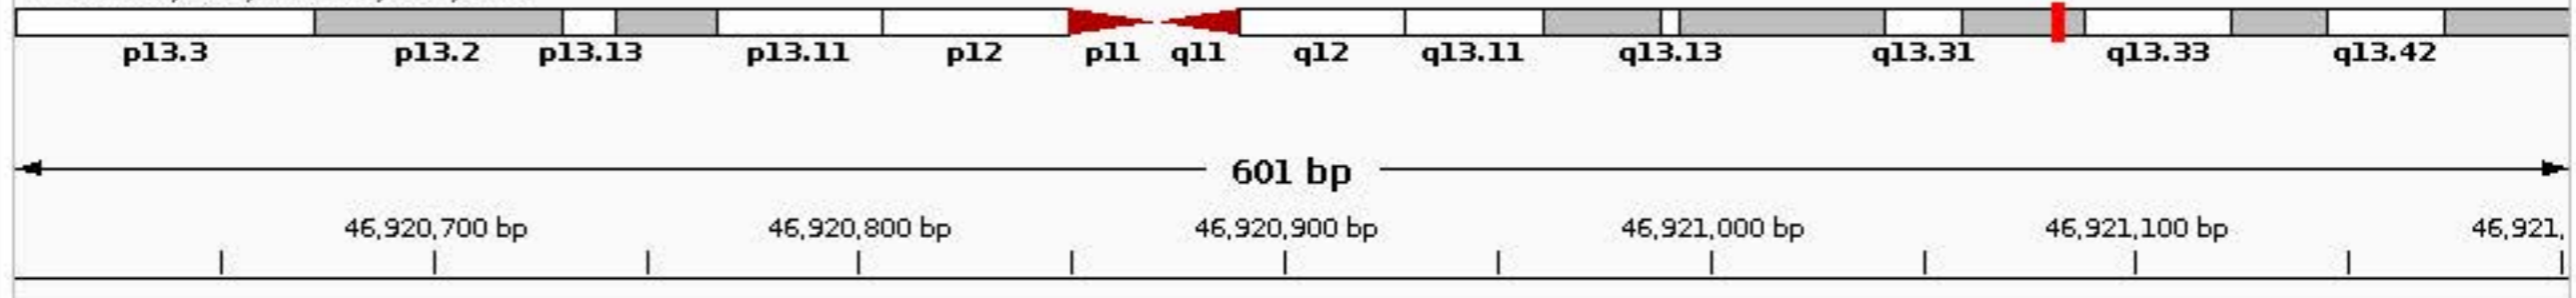

SL\_0001\_RN\_33\_mut.bam Coverage

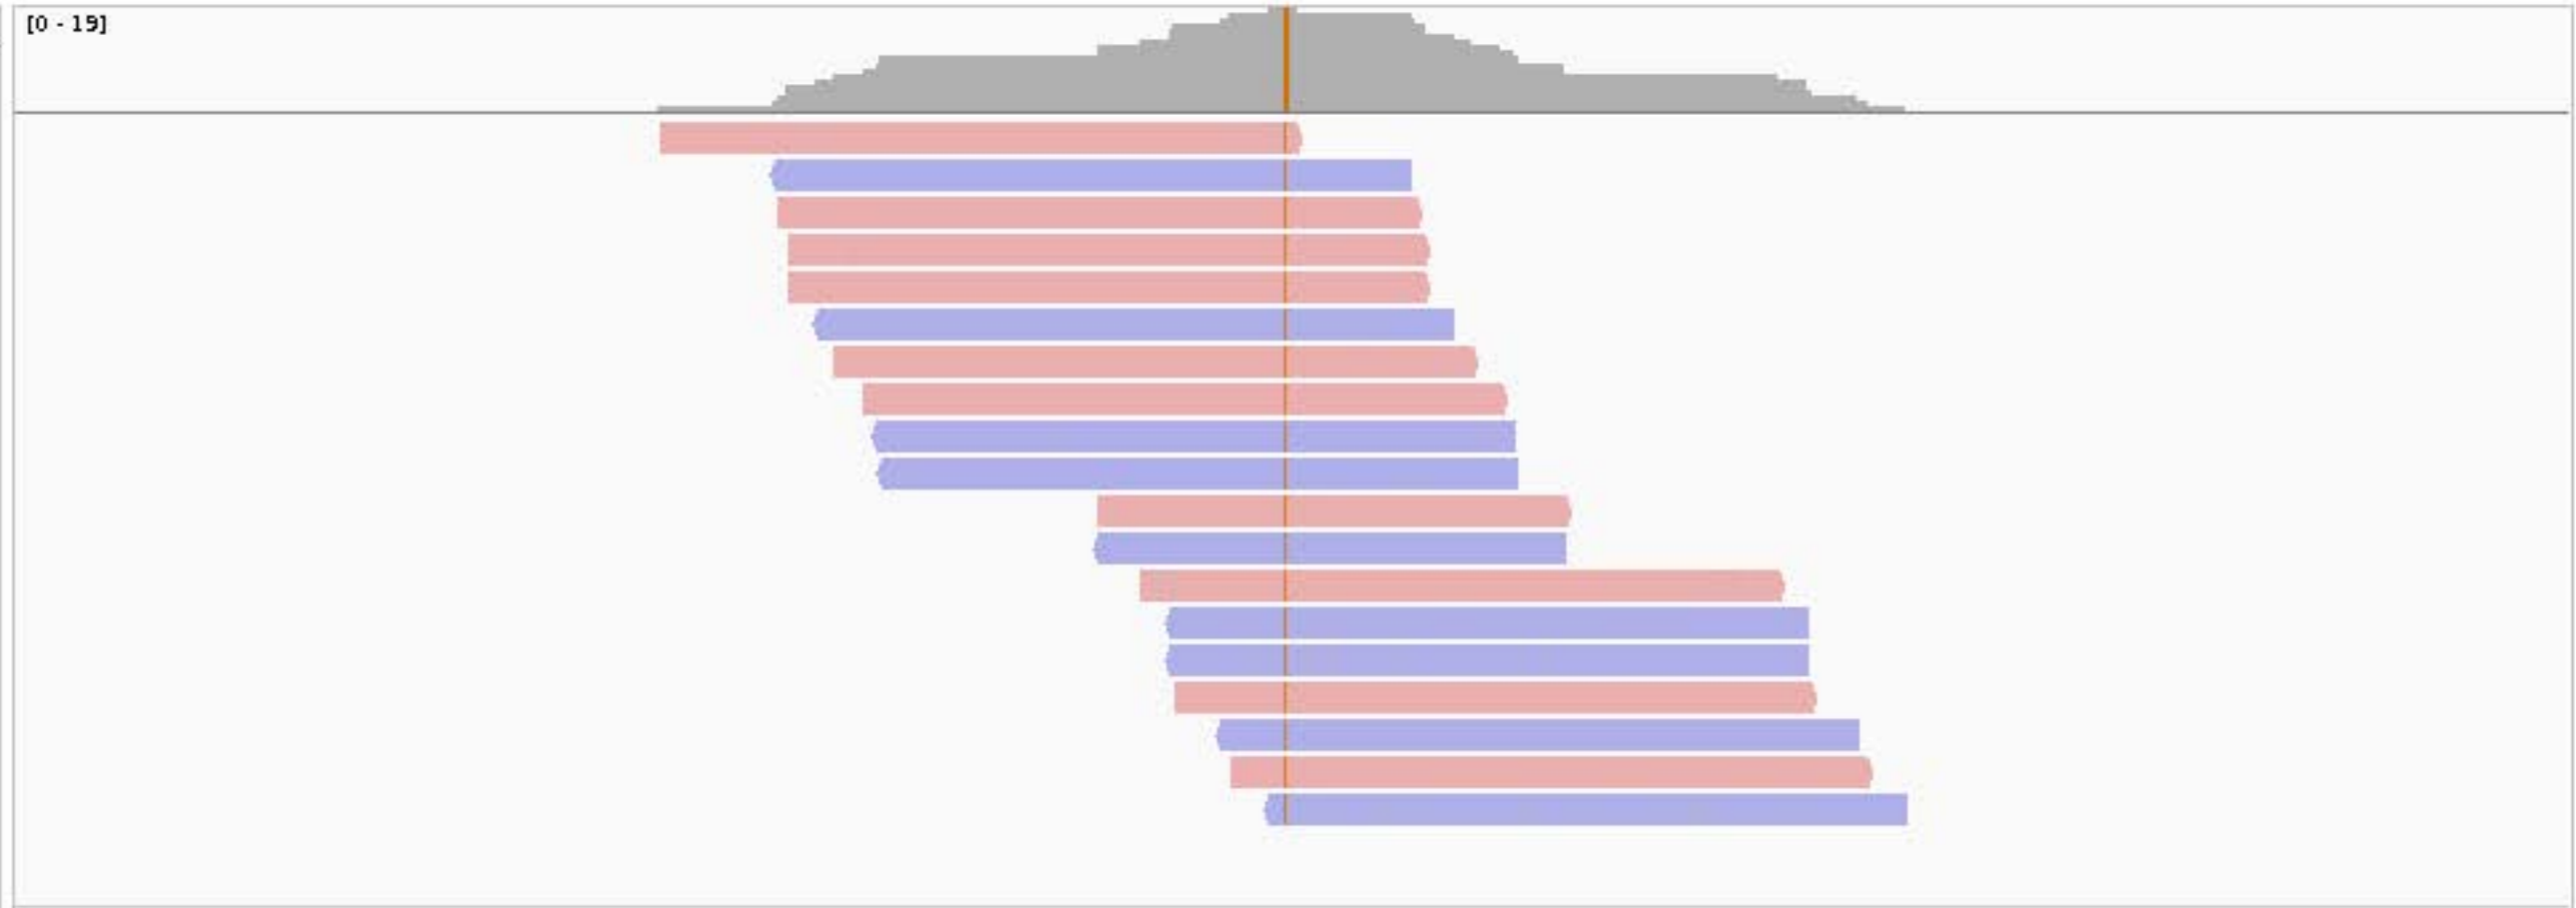

SL\_0001\_RN\_33\_mut.bam

Sequence

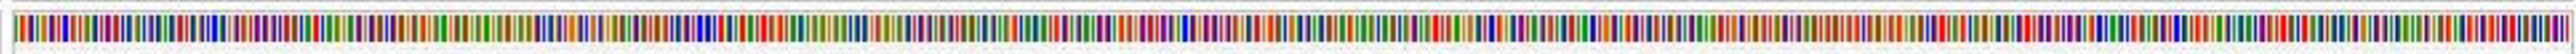

Refseq Genes

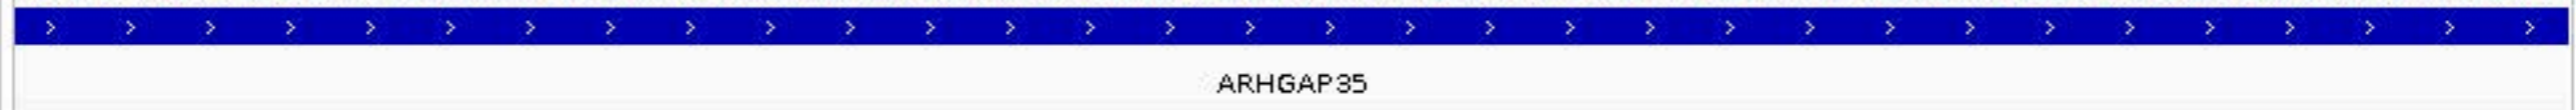

ARHGAP35

chr19:46,920,602-46,921,201

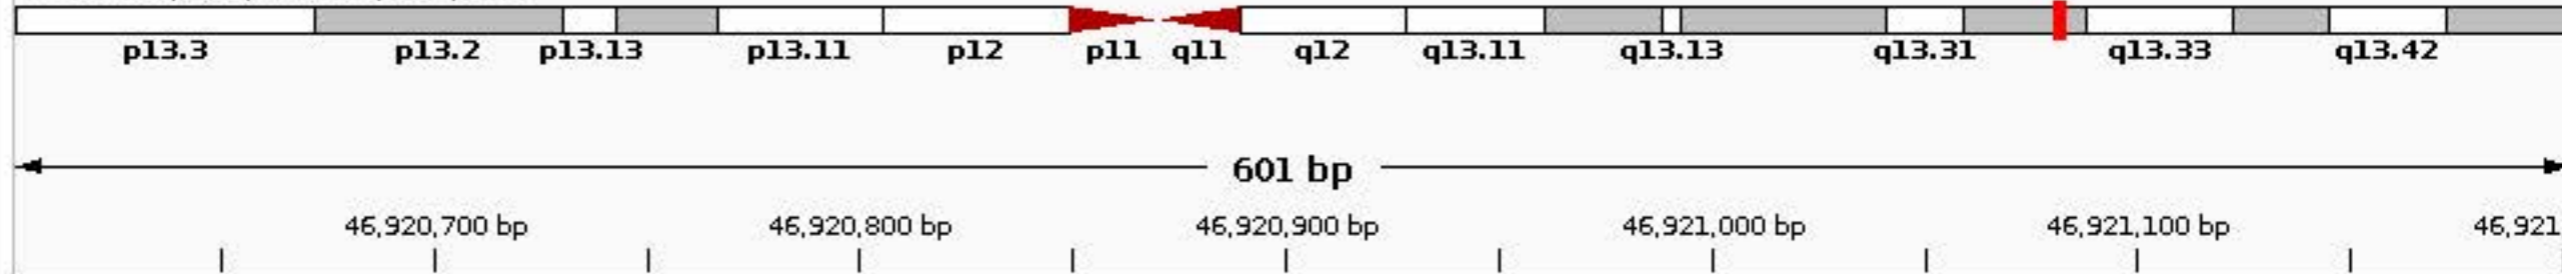

SL\_0001\_RN\_37\_mut.bam Coverage

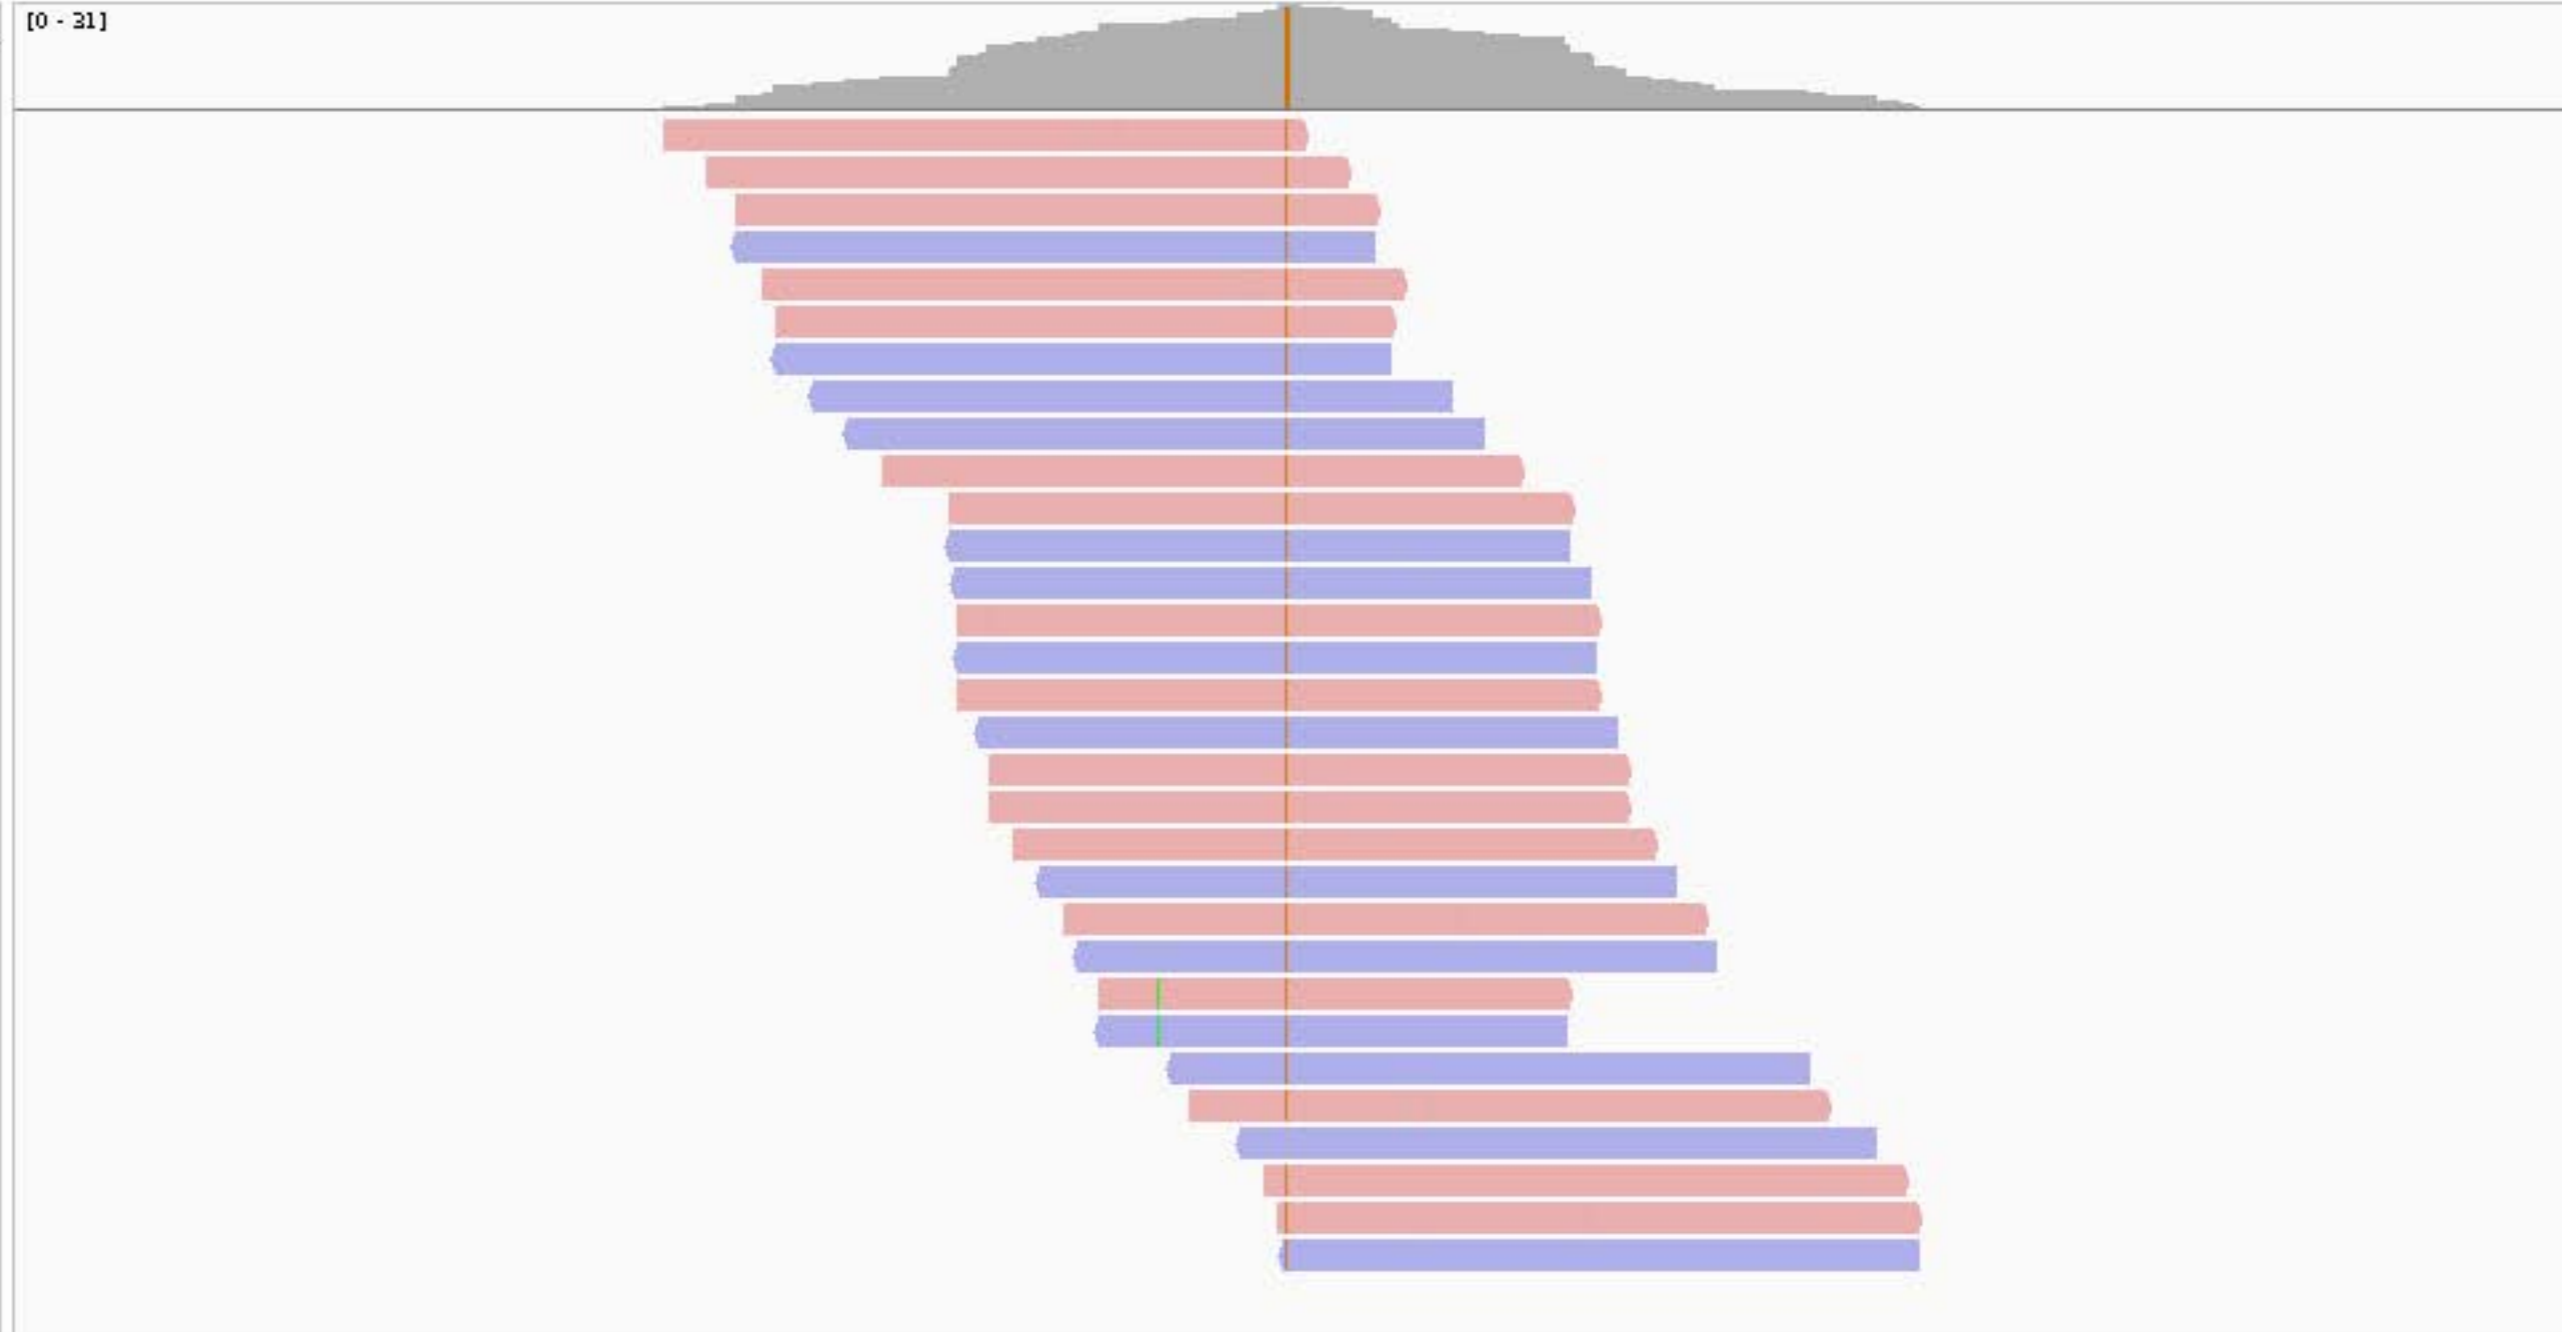

SL\_0001\_RN\_37\_mut.bam

Sequence

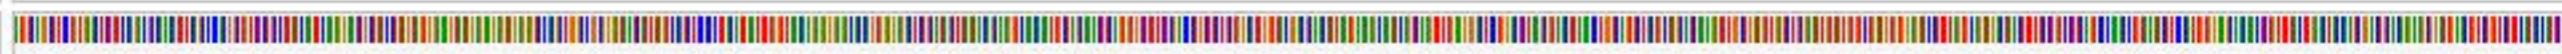

Refseq Genes

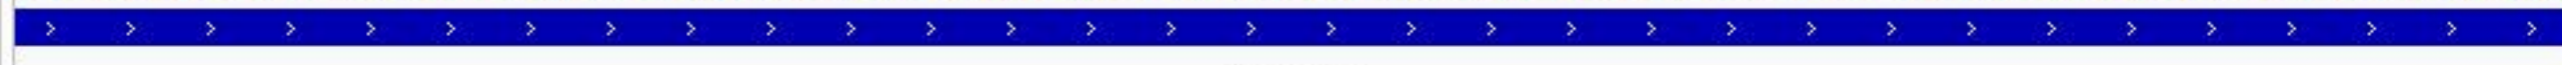

ARHGAP35

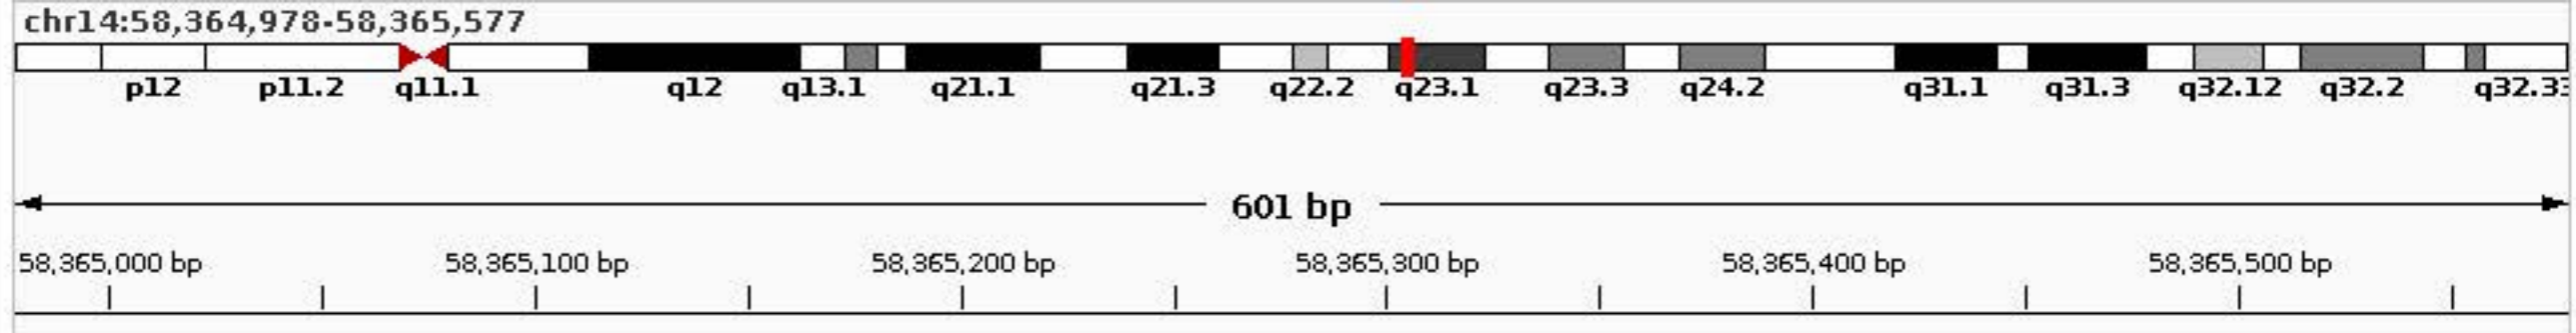

SL\_0015\_RN\_21\_mut.bam Coverage

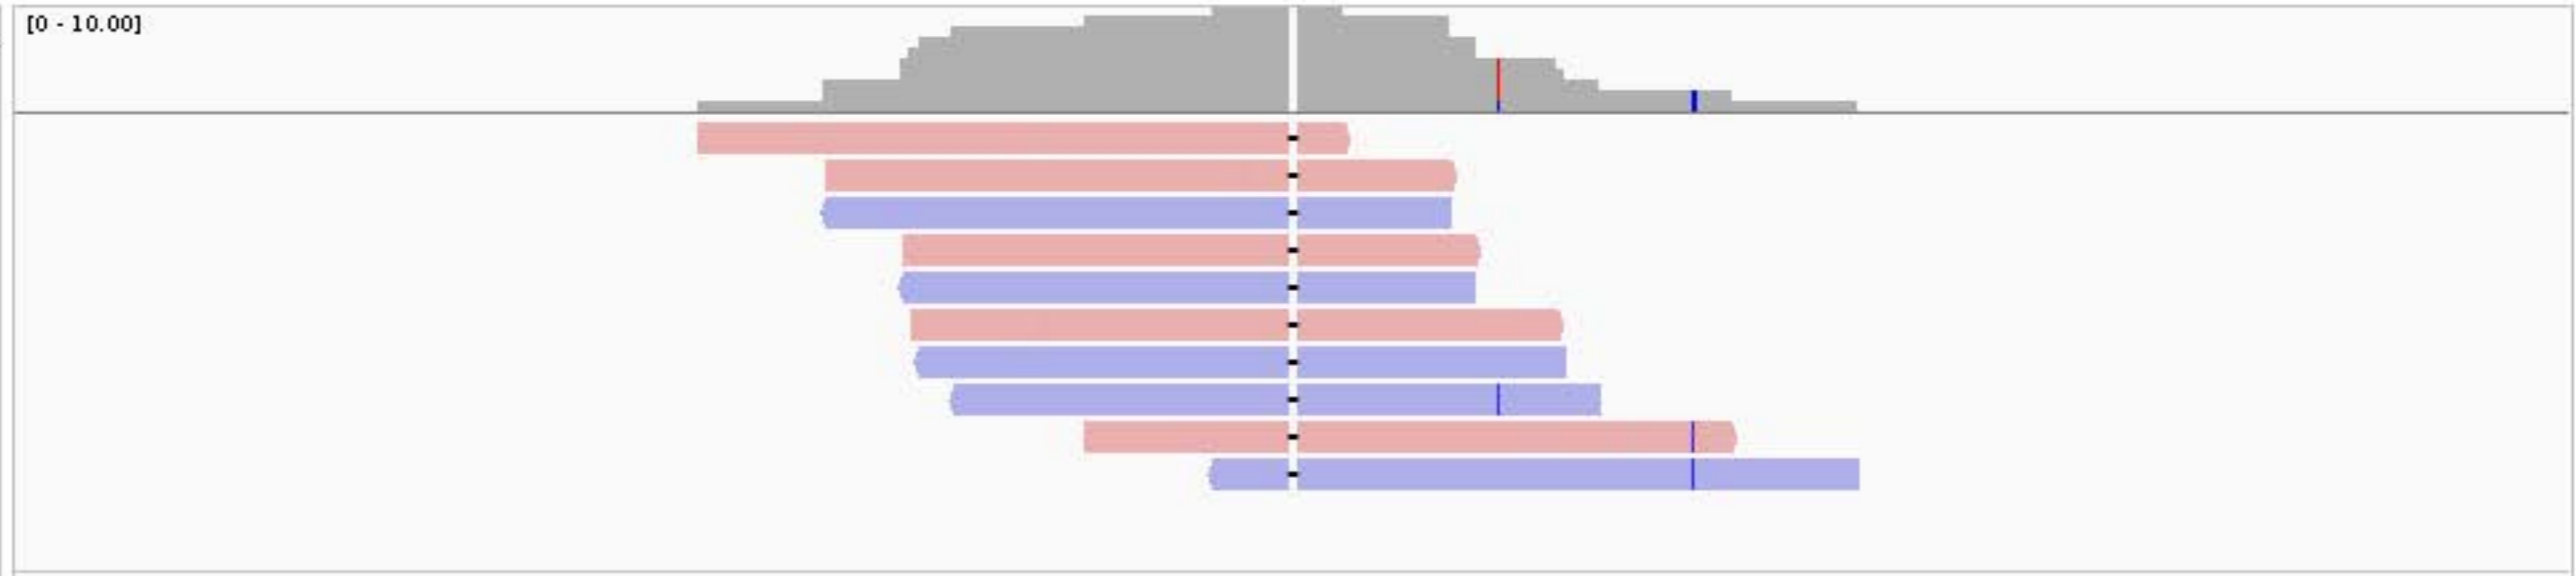

Sequence

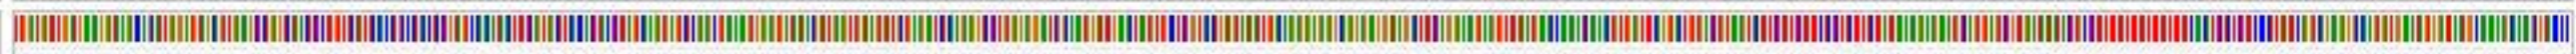

Refseq Genes

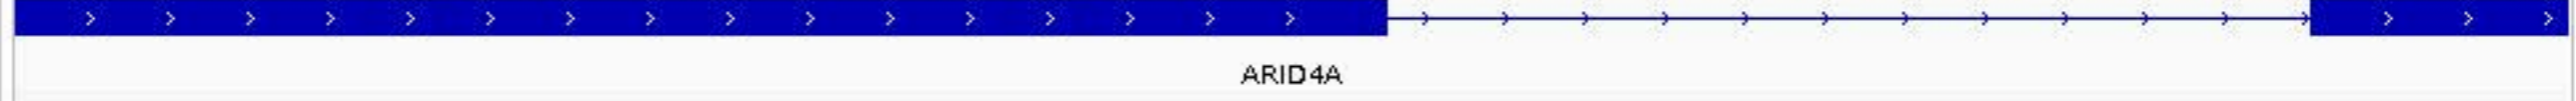

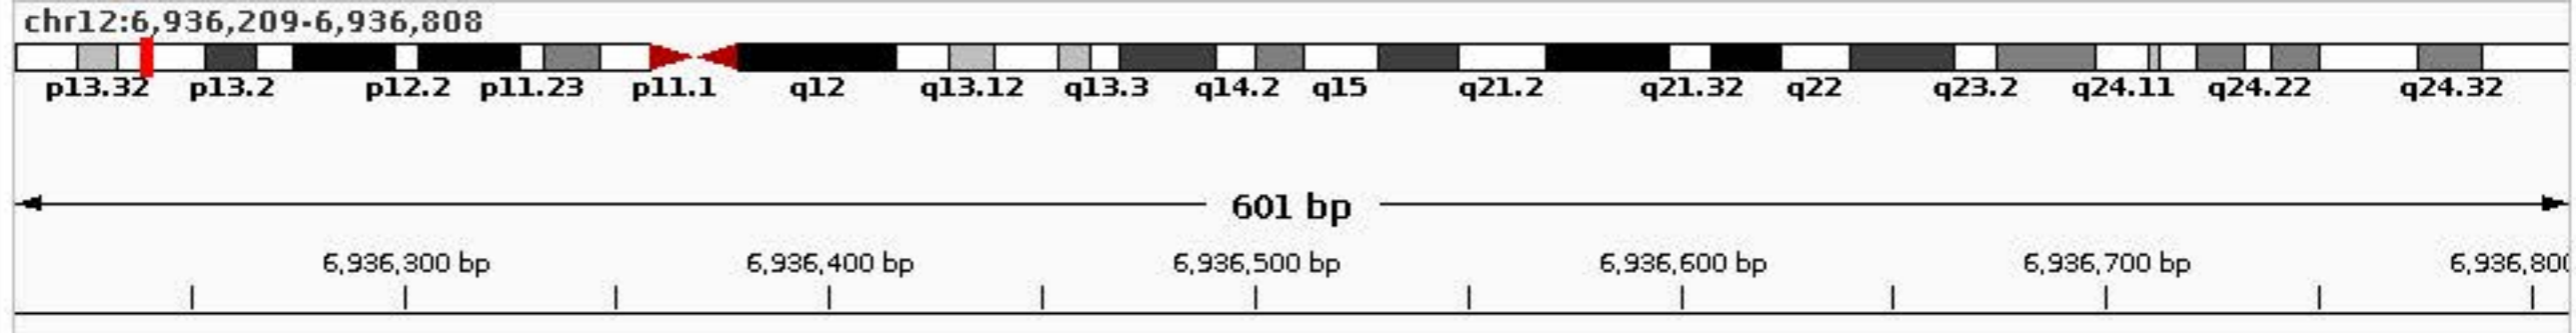

SL\_0003\_LN\_51\_mut.bam Coverage

SL\_0003\_LN\_51\_mut.bam

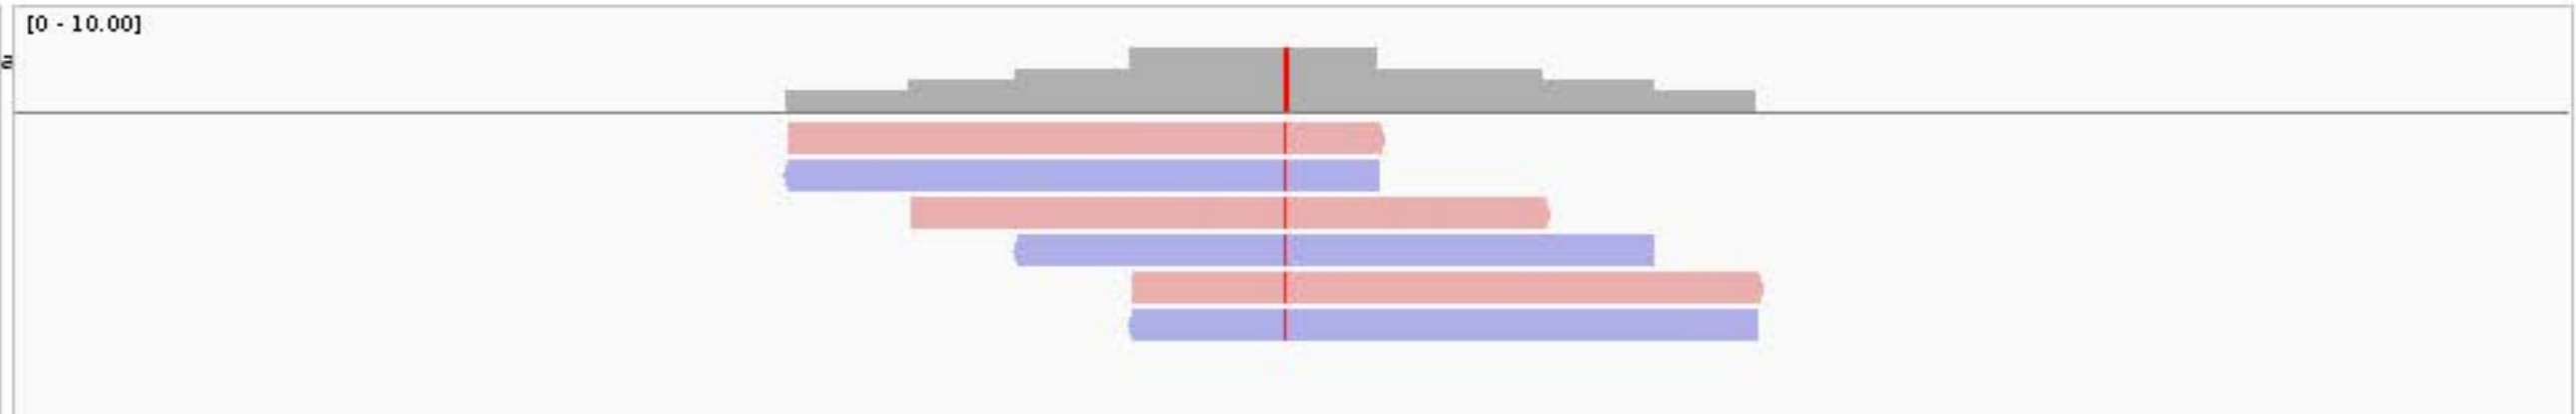

Sequence →

Refseq Genes

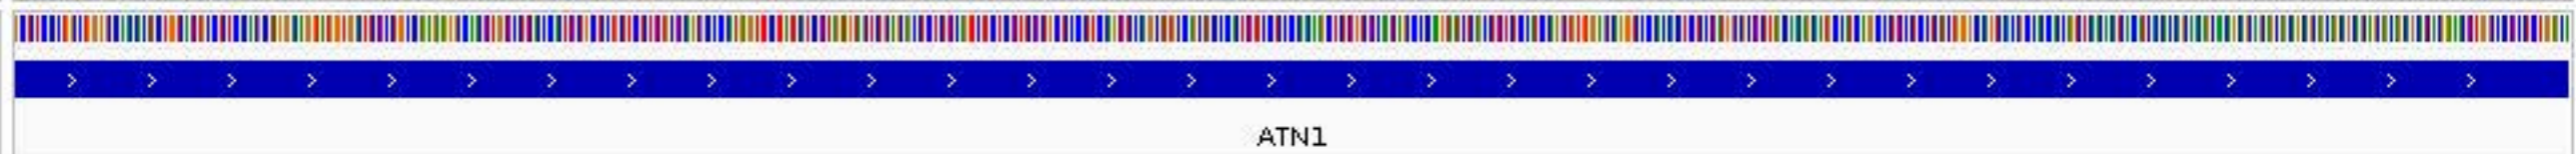



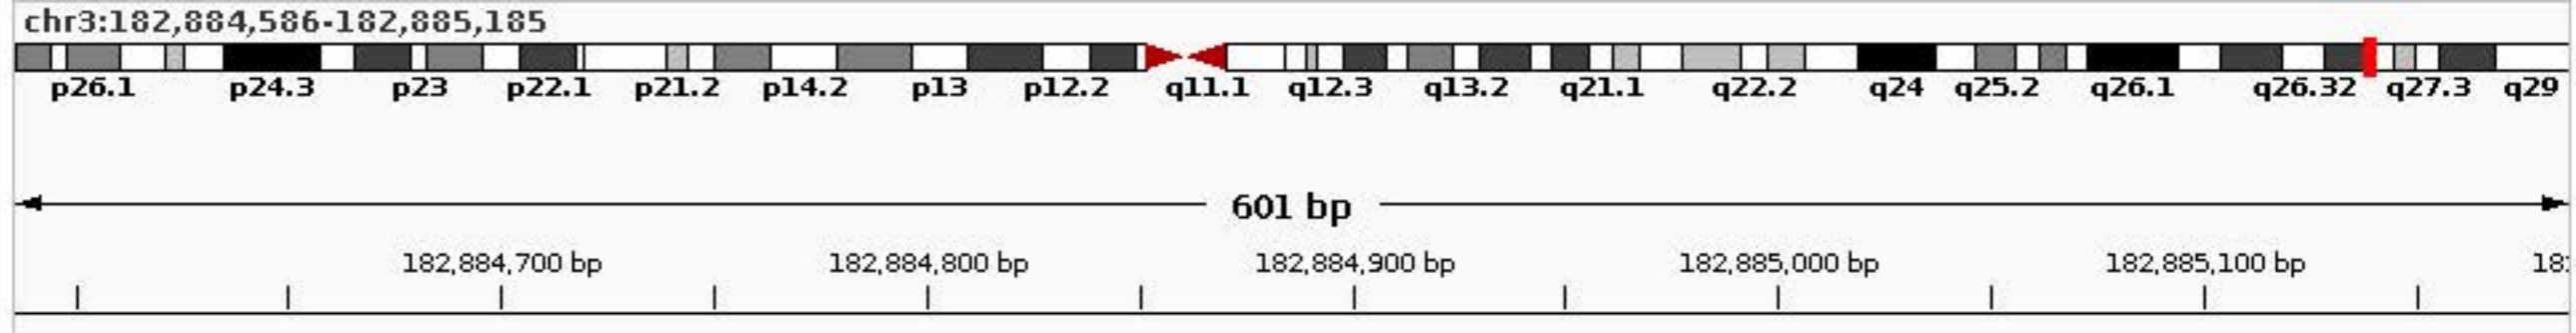

SL\_0004\_RN\_19\_mut.bam Coverage

SL\_0004\_RN\_19\_mut.bam

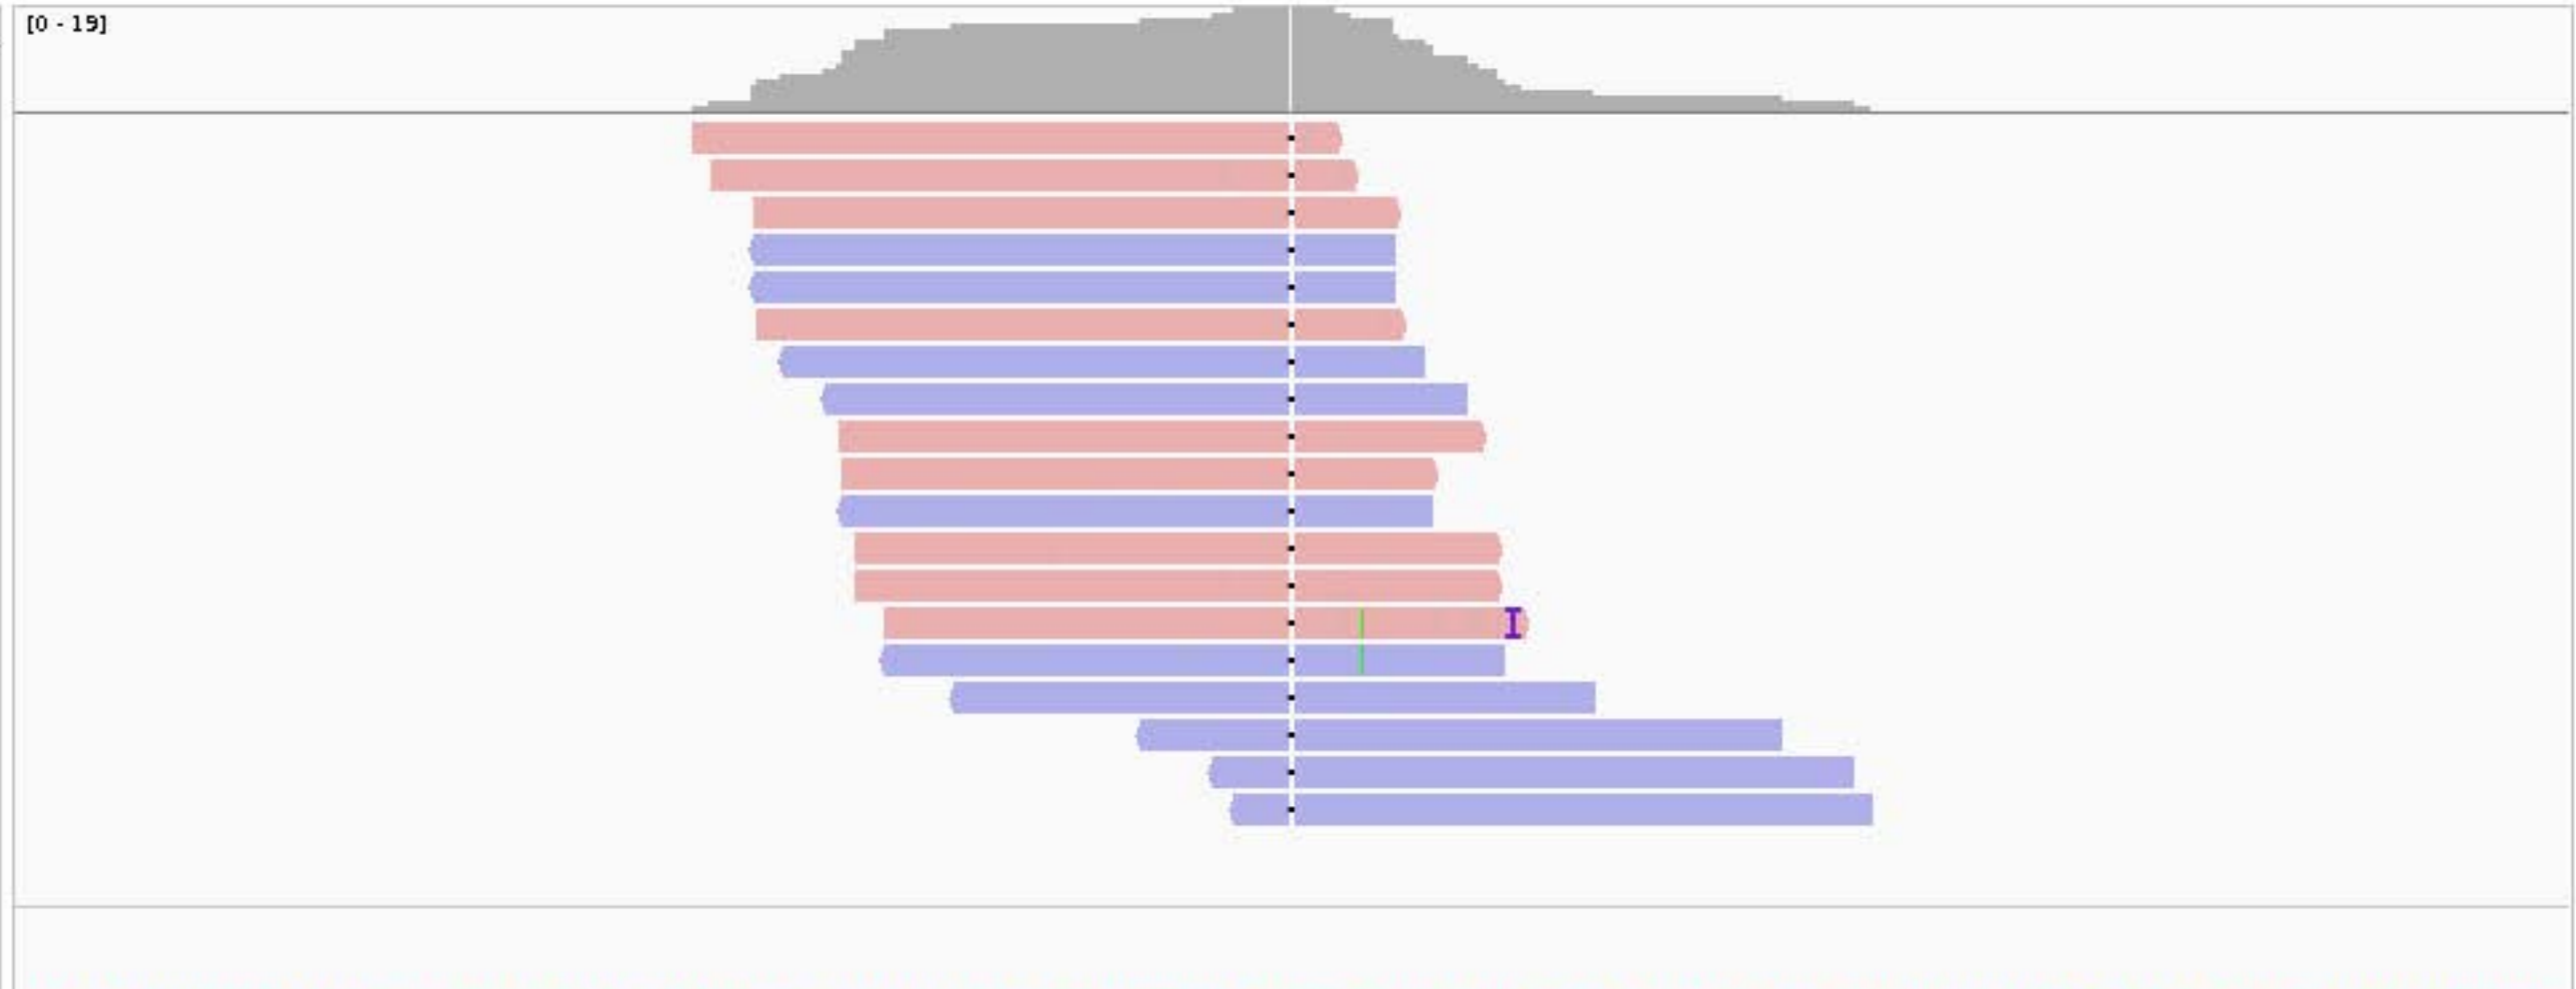

Sequence

Refseq Genes

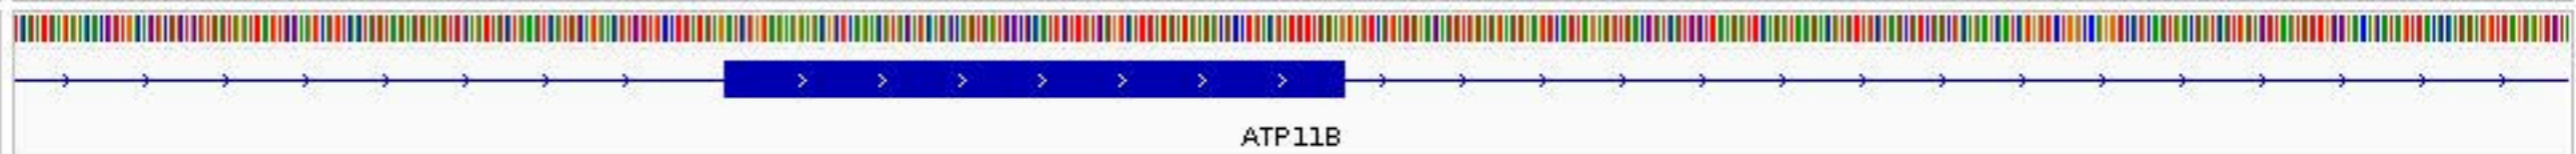

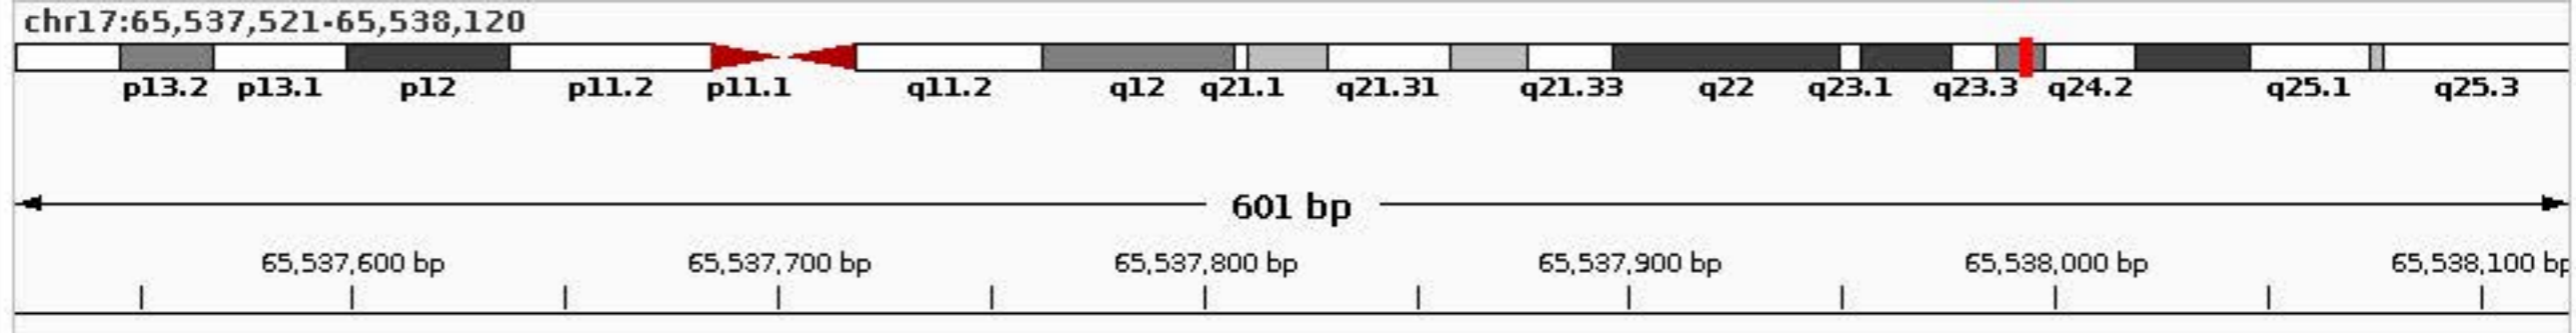

SL\_0007\_RN\_33\_mut.bam Coverage

SL\_0007\_RN\_33\_mut.bam

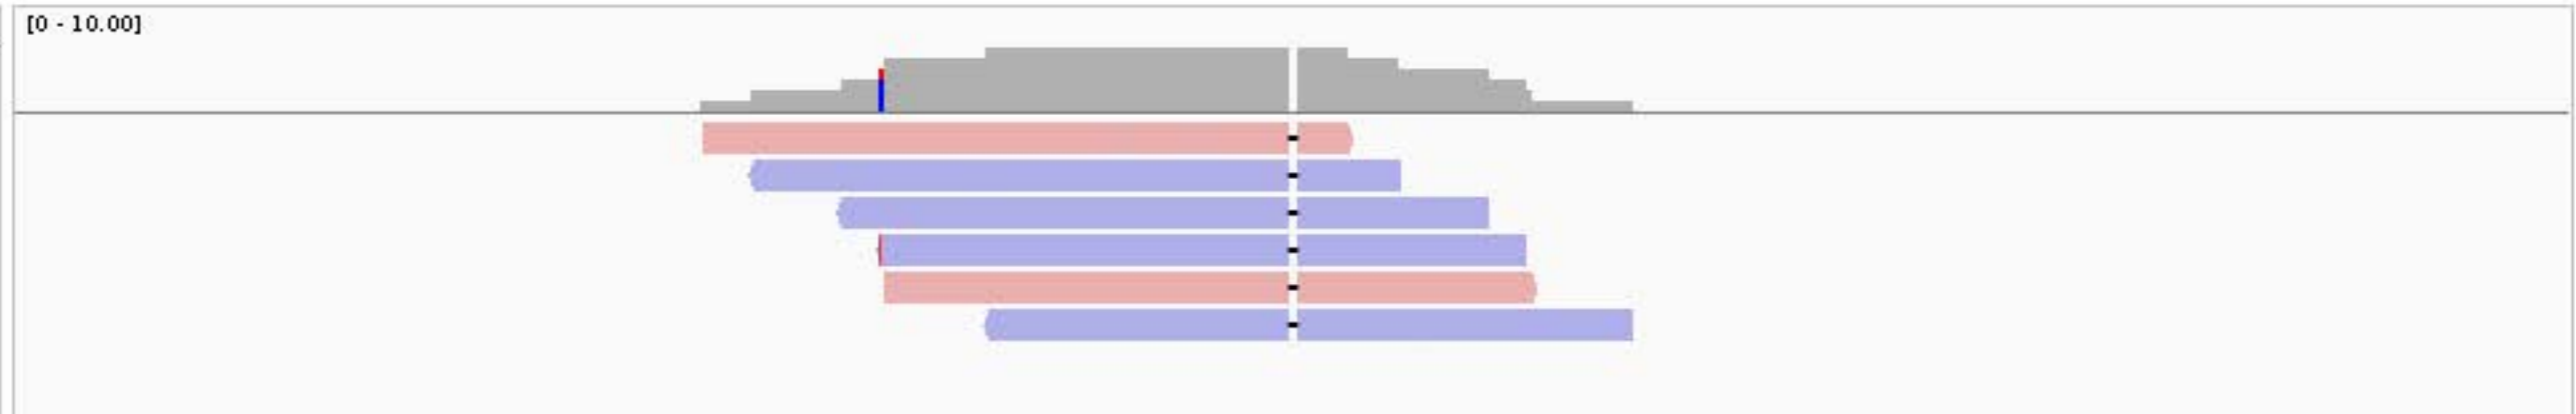

Sequence

Refseq Genes

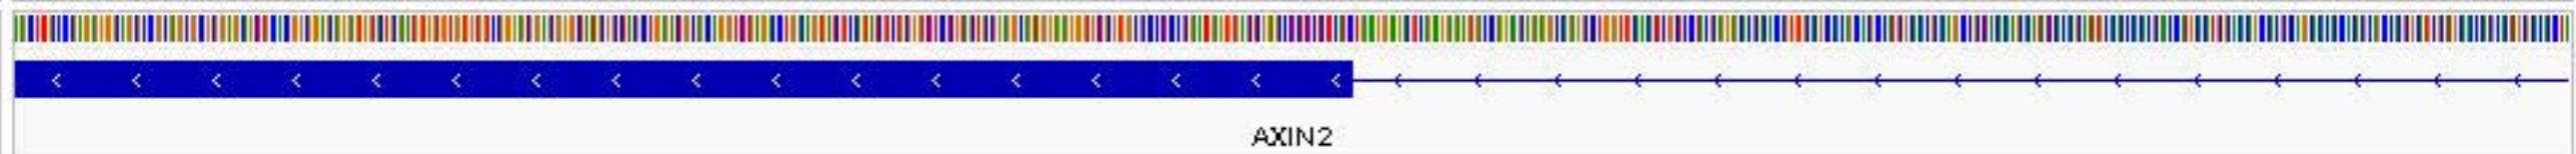

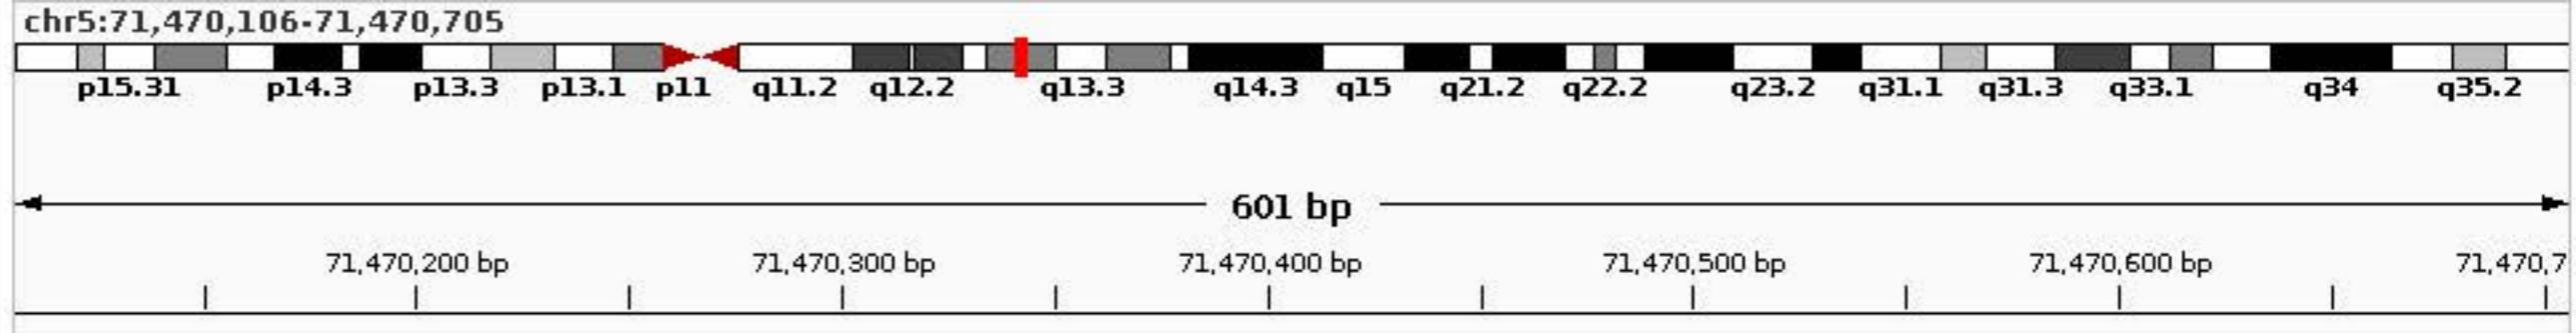

SL\_0015\_LN\_44\_mut.bam Coverage

SL\_0015\_LN\_44\_mut.bam

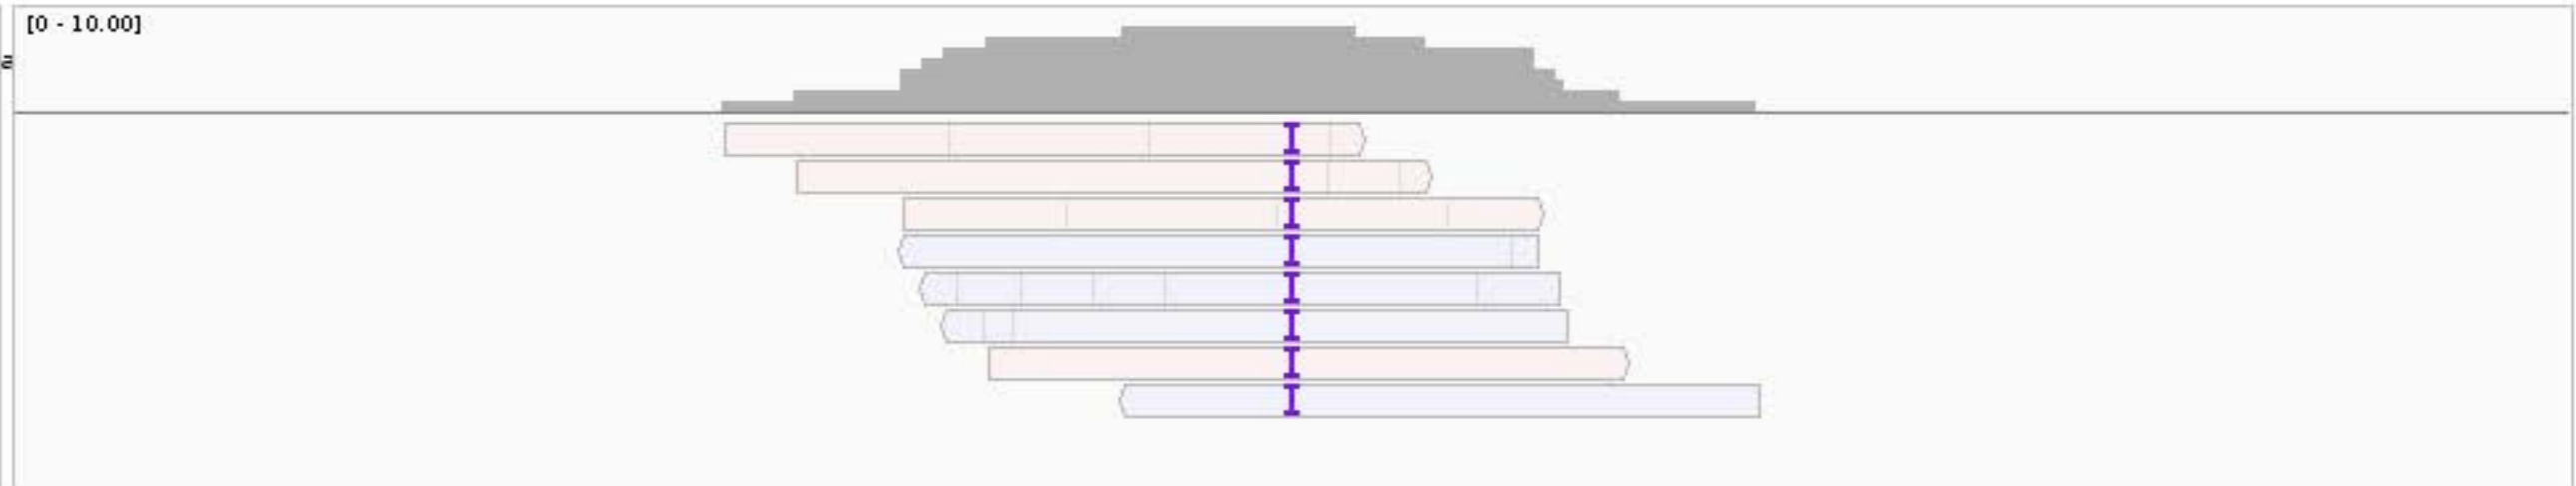

Sequence

Refseq Genes

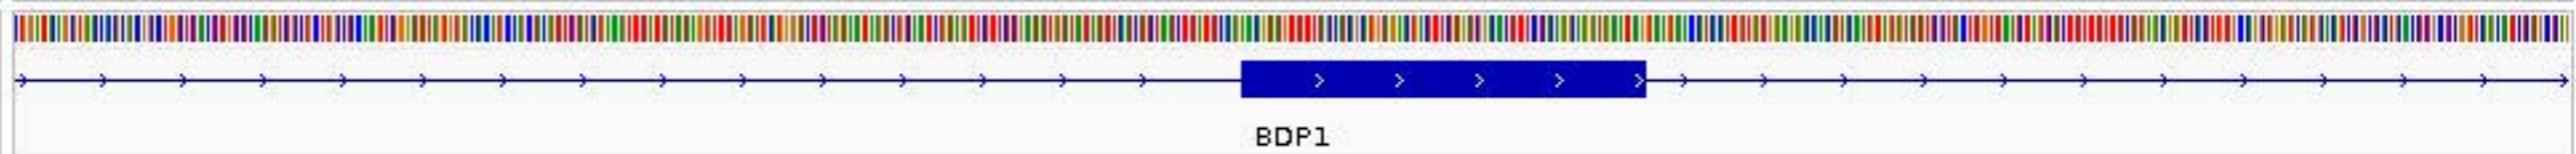

chr14:100,537,893-100,538,492

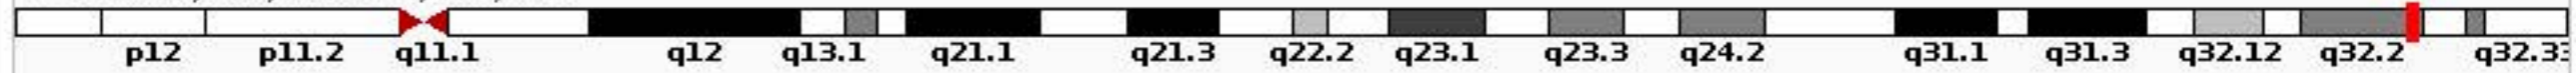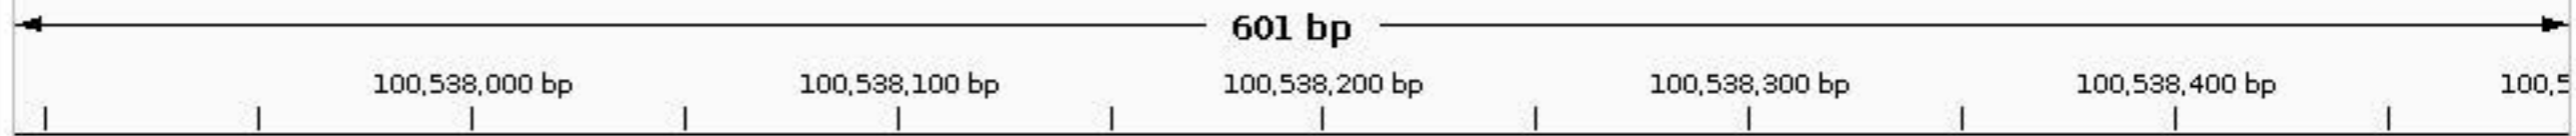

SL\_0017\_RN\_15\_mut.bam Coverage

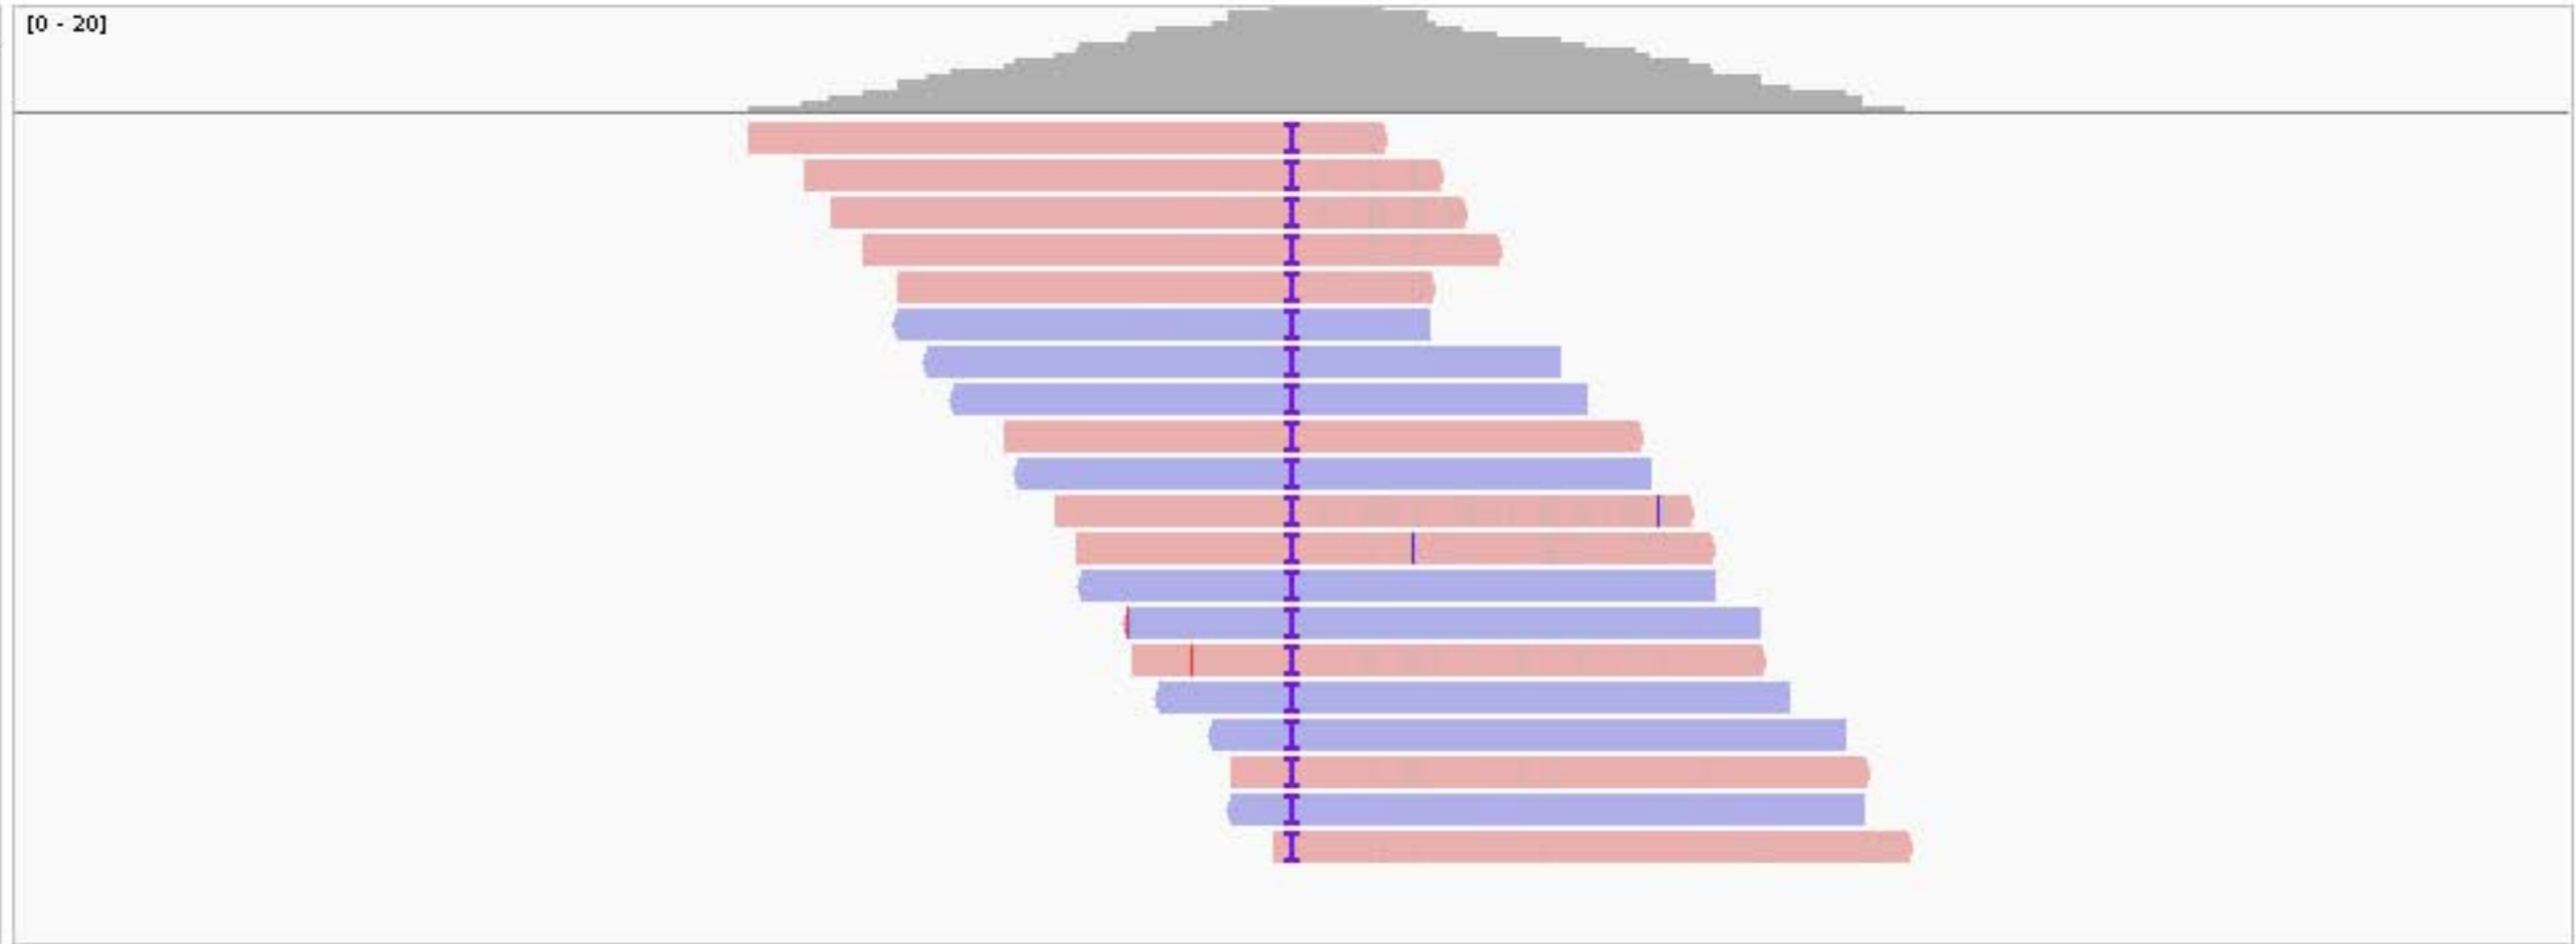

SL\_0017\_RN\_15\_mut.bam

Sequence

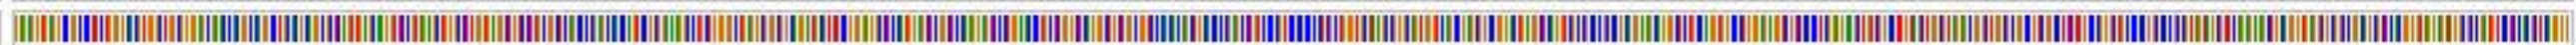

Refseq Genes

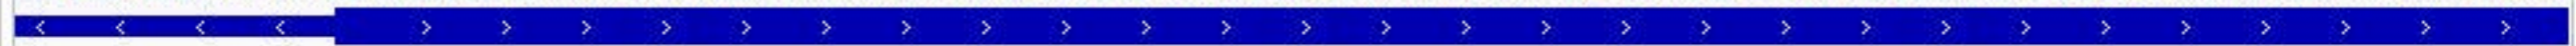

BEGAIN

chr15:90,749,244-90,749,843

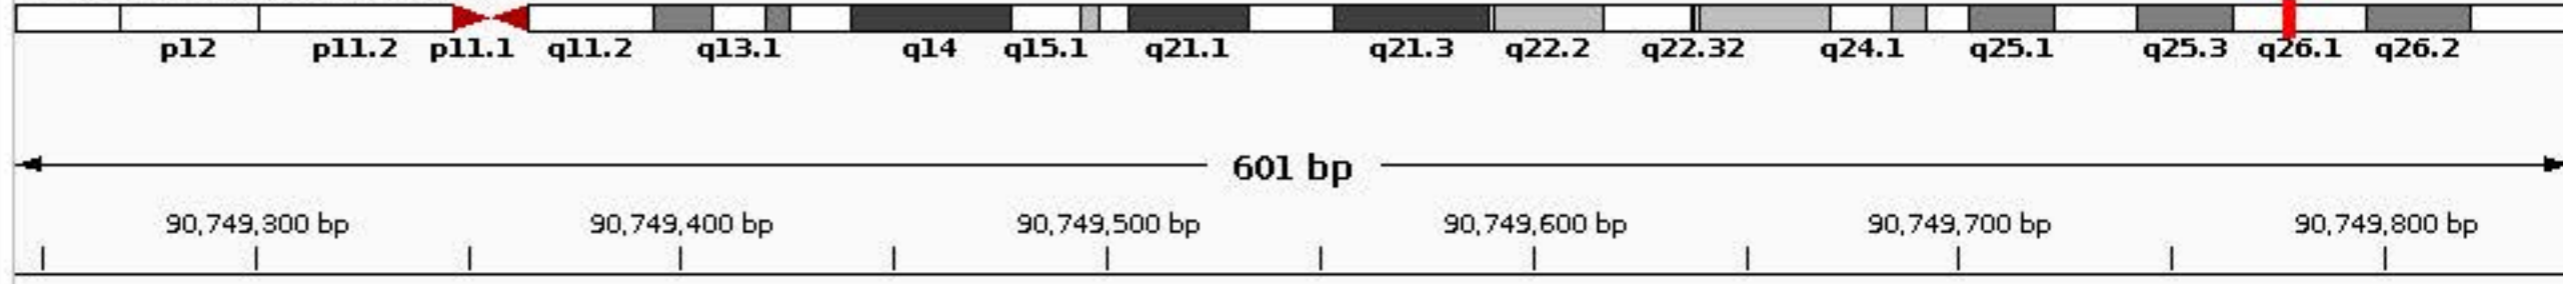

SL\_0001\_RN\_25\_mut.bam Coverage

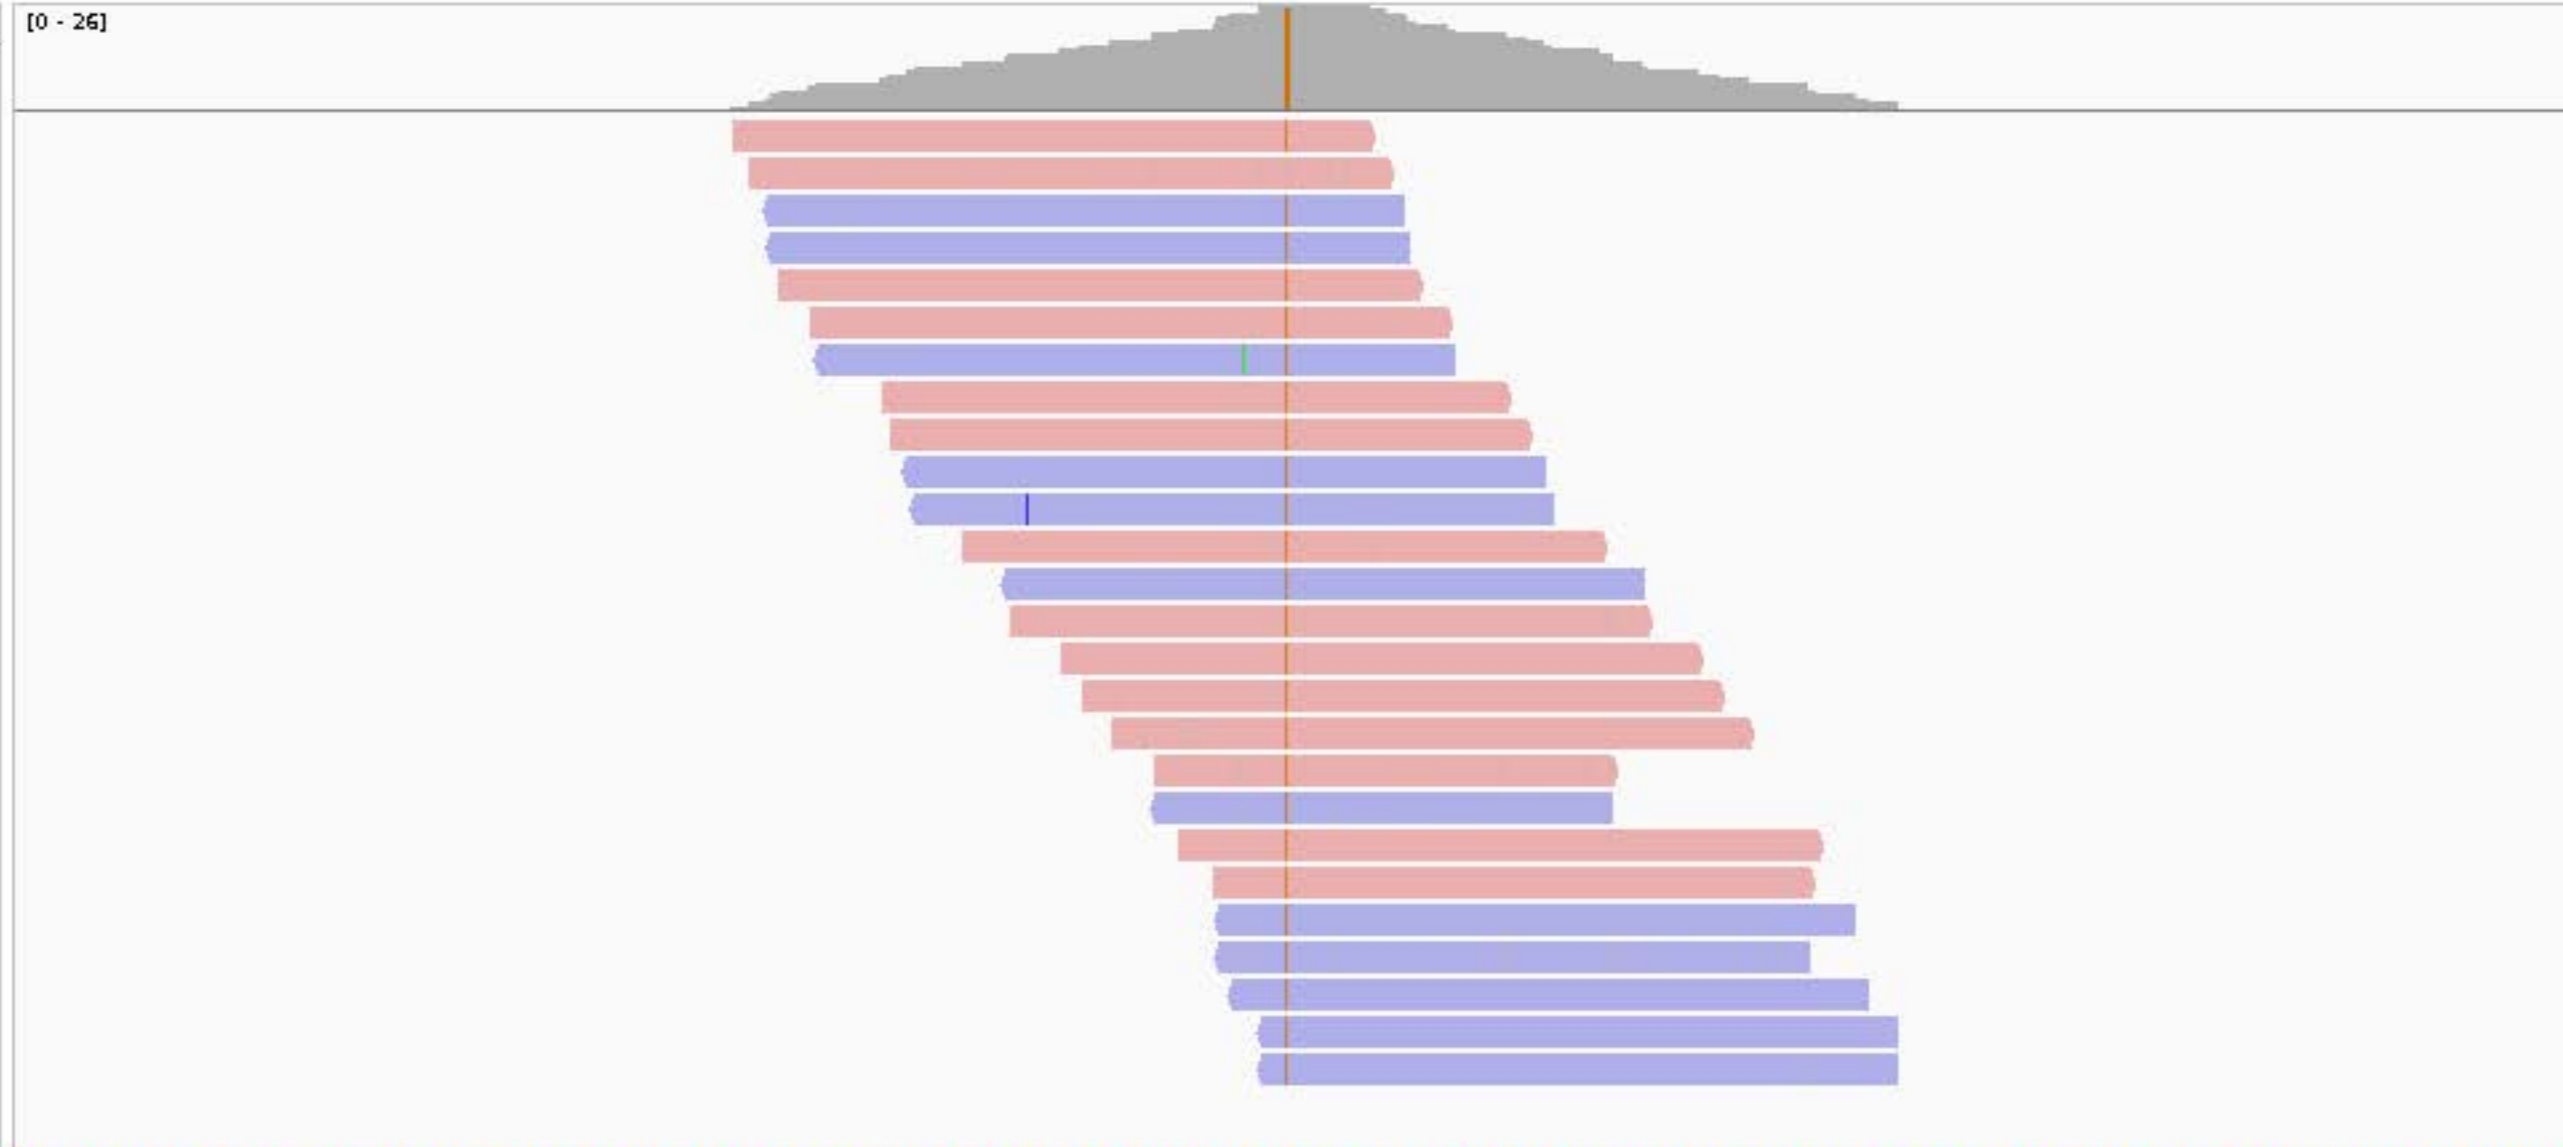

SL\_0001\_RN\_25\_mut.bam

Sequence

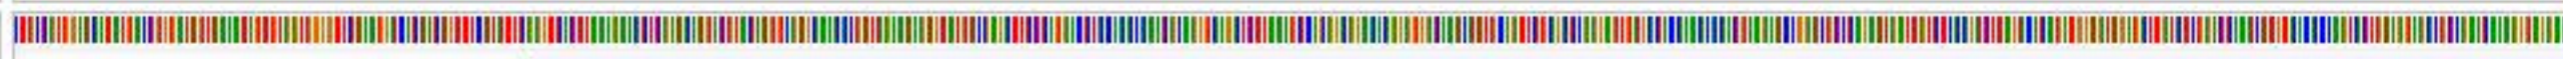

Refseq Genes

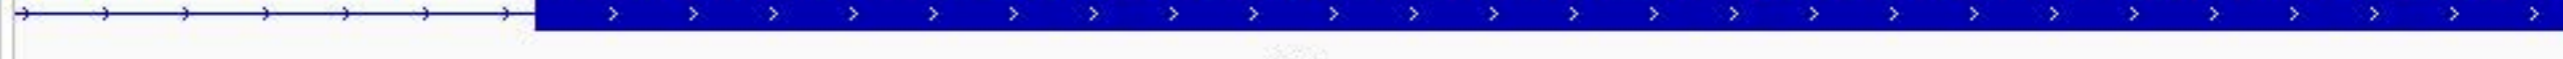

BLM



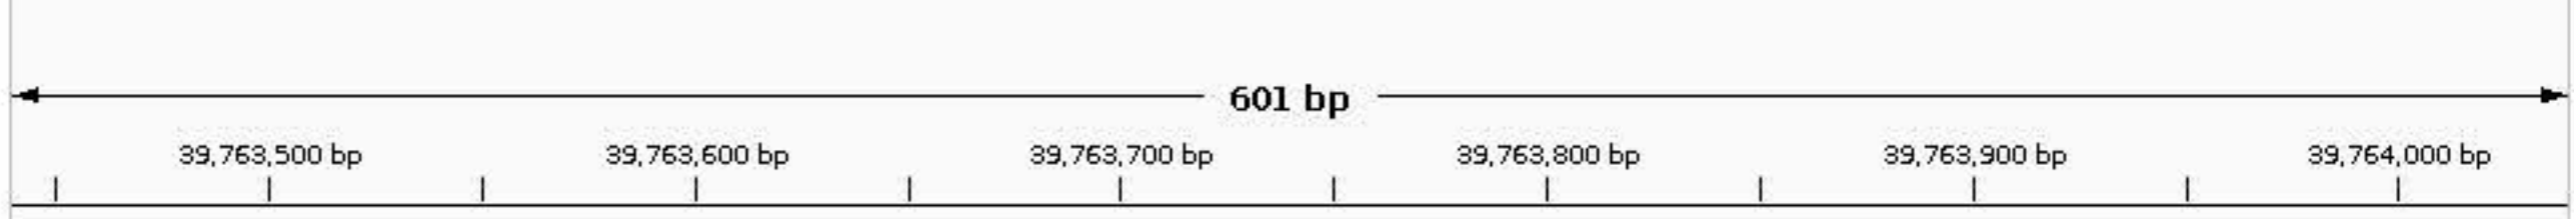

SL\_0004\_RN\_26\_mut.bam Coverage  
SL\_0004\_RN\_26\_mut.bam

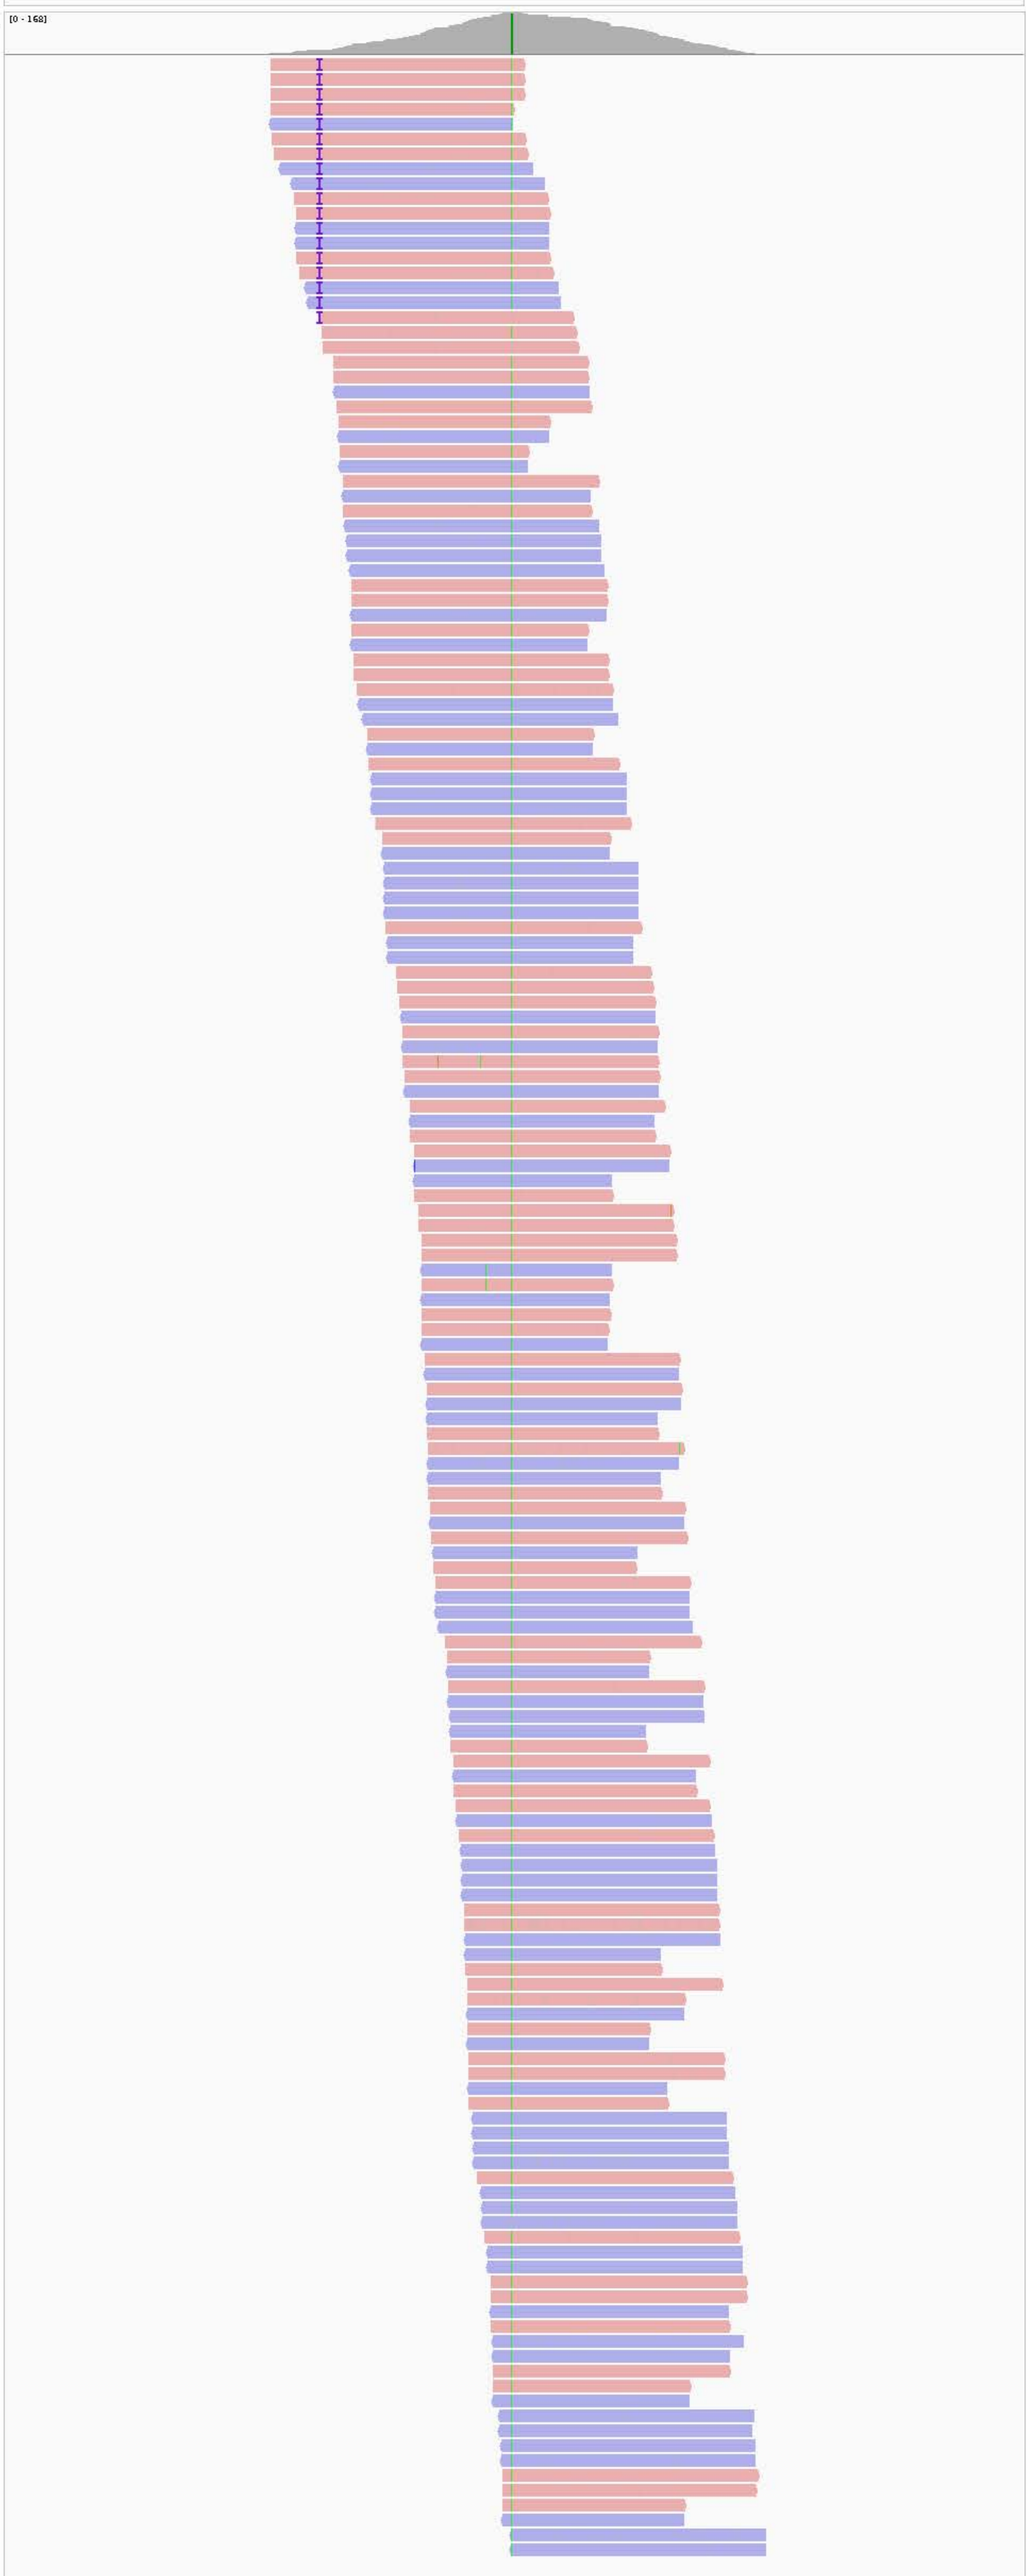

Sequence  
Refseq Genes

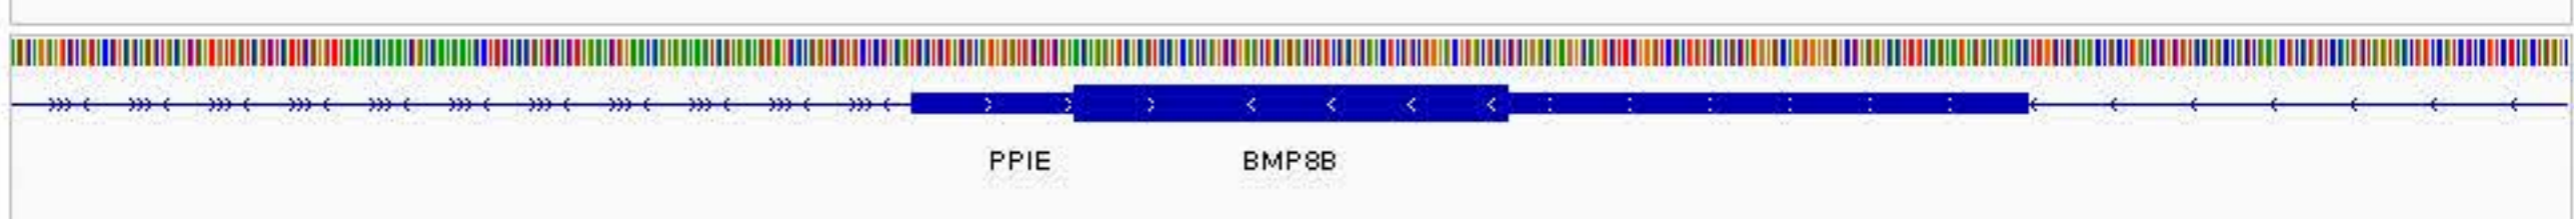

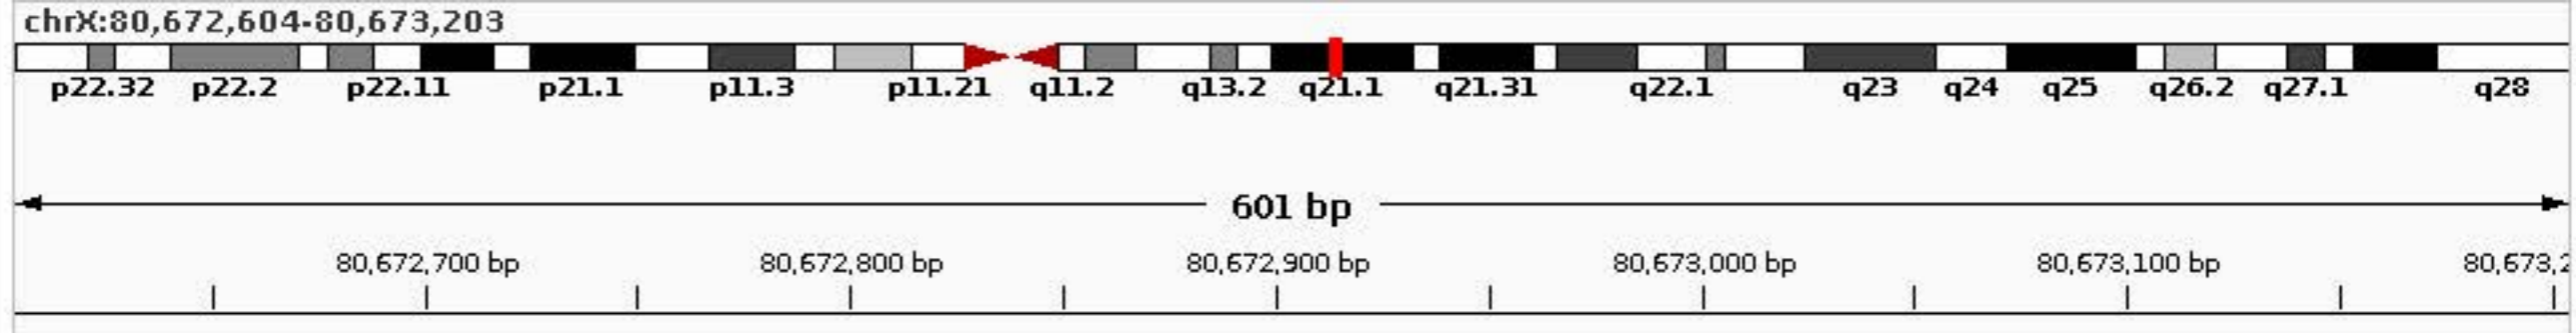

SL\_0015\_RN\_12\_mut.bam Coverage

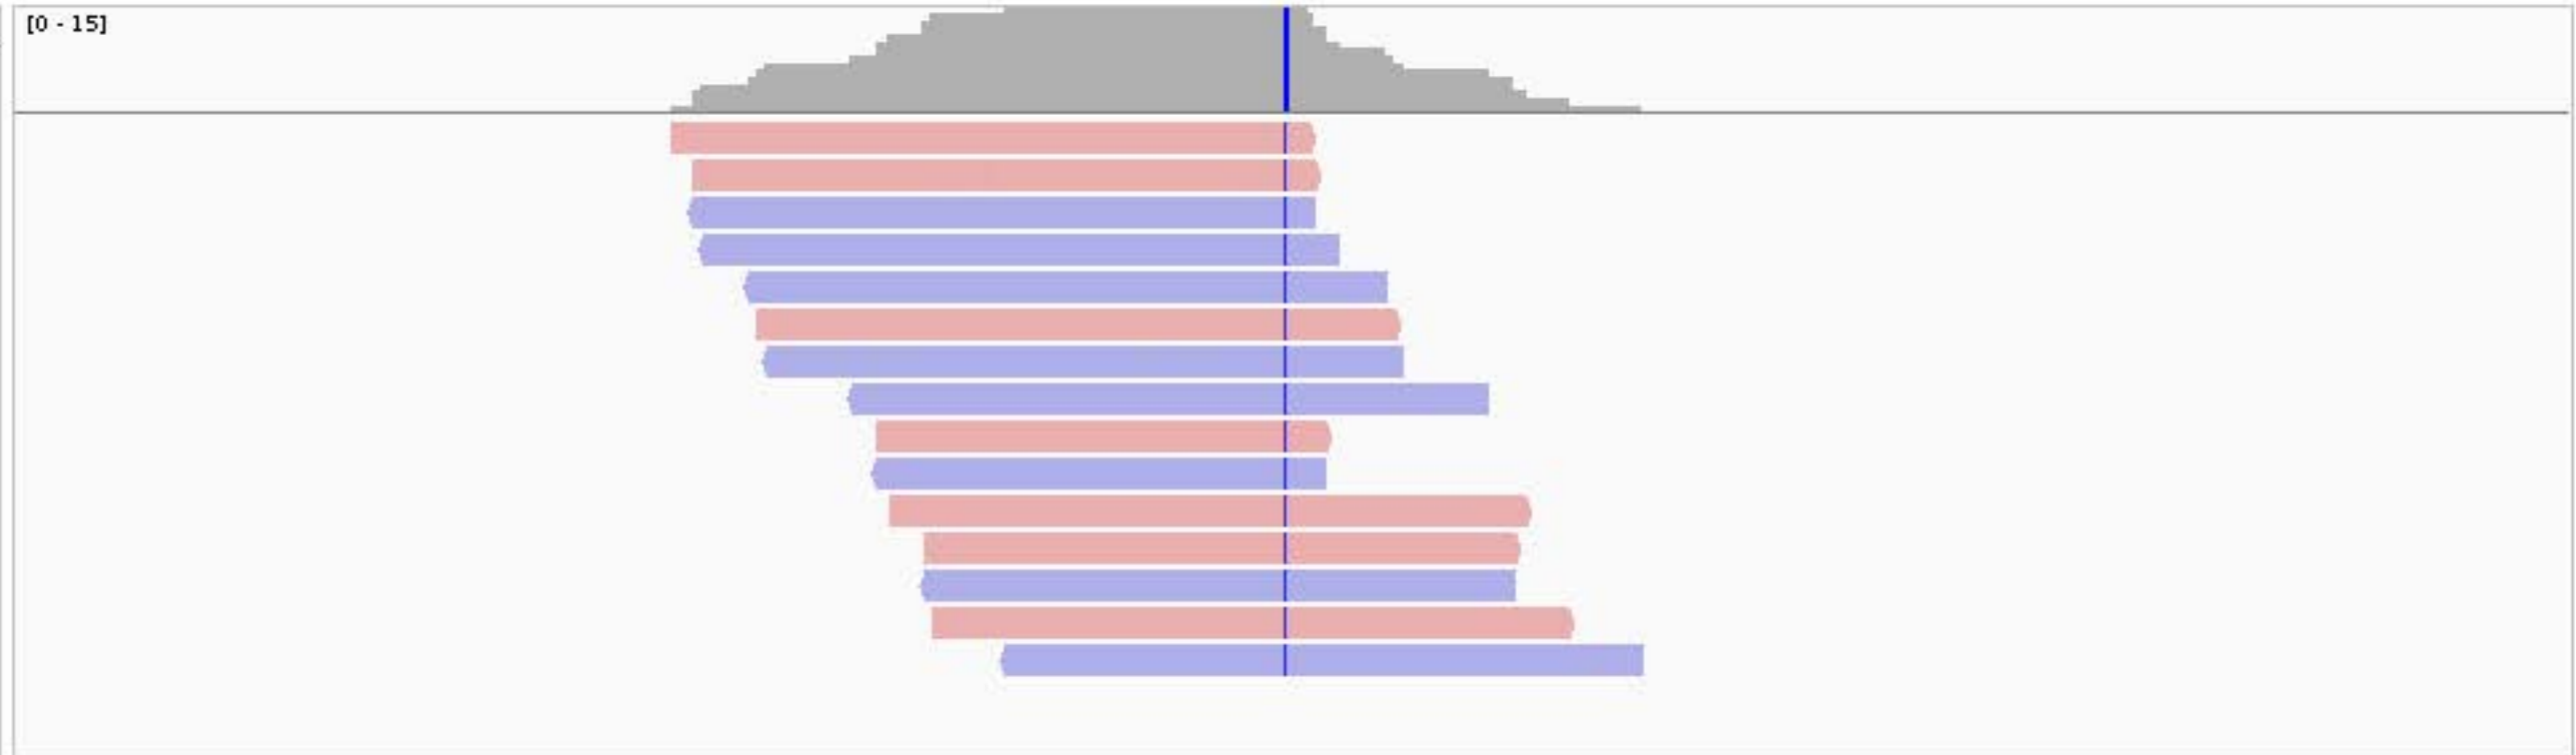

Sequence

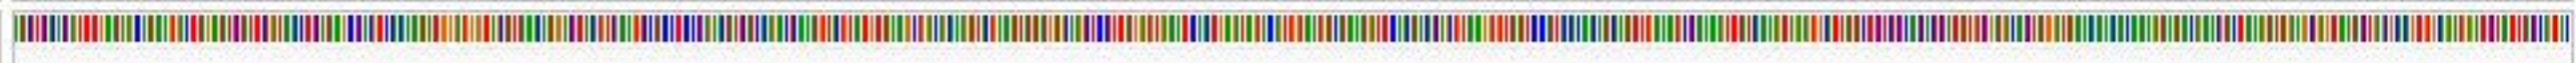

Refseq Genes

BRWD3

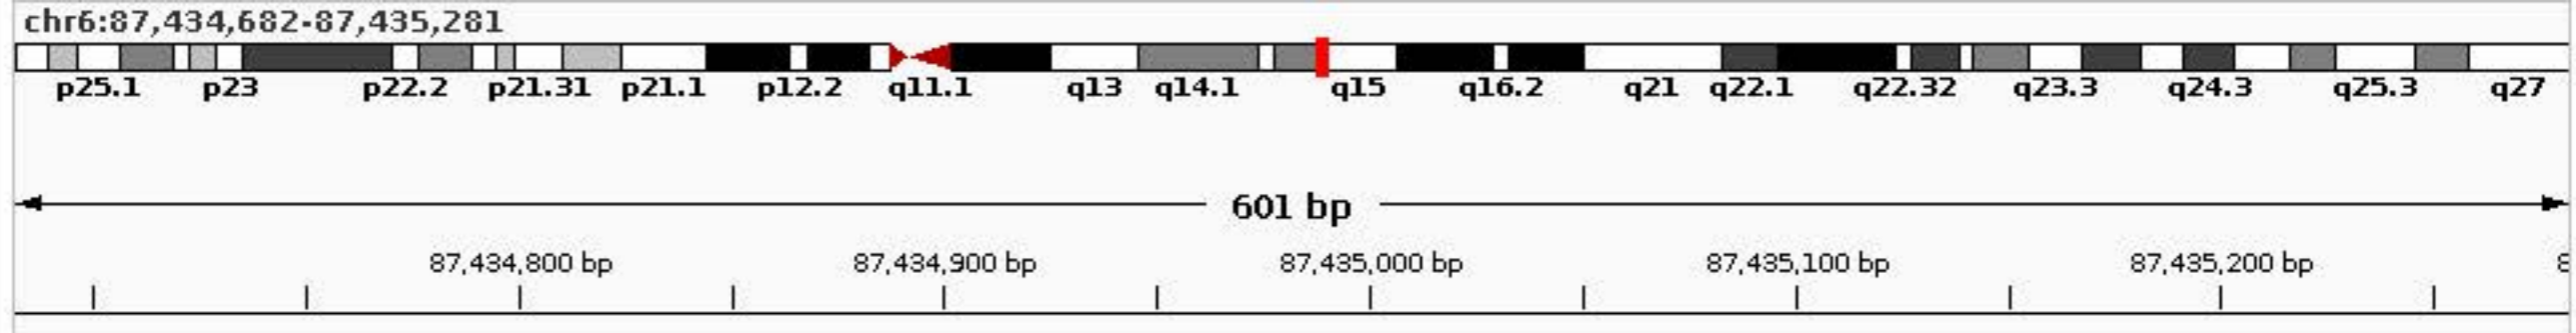

SL\_0006\_RN\_67\_mut.bam Coverage

SL\_0006\_RN\_67\_mut.bam

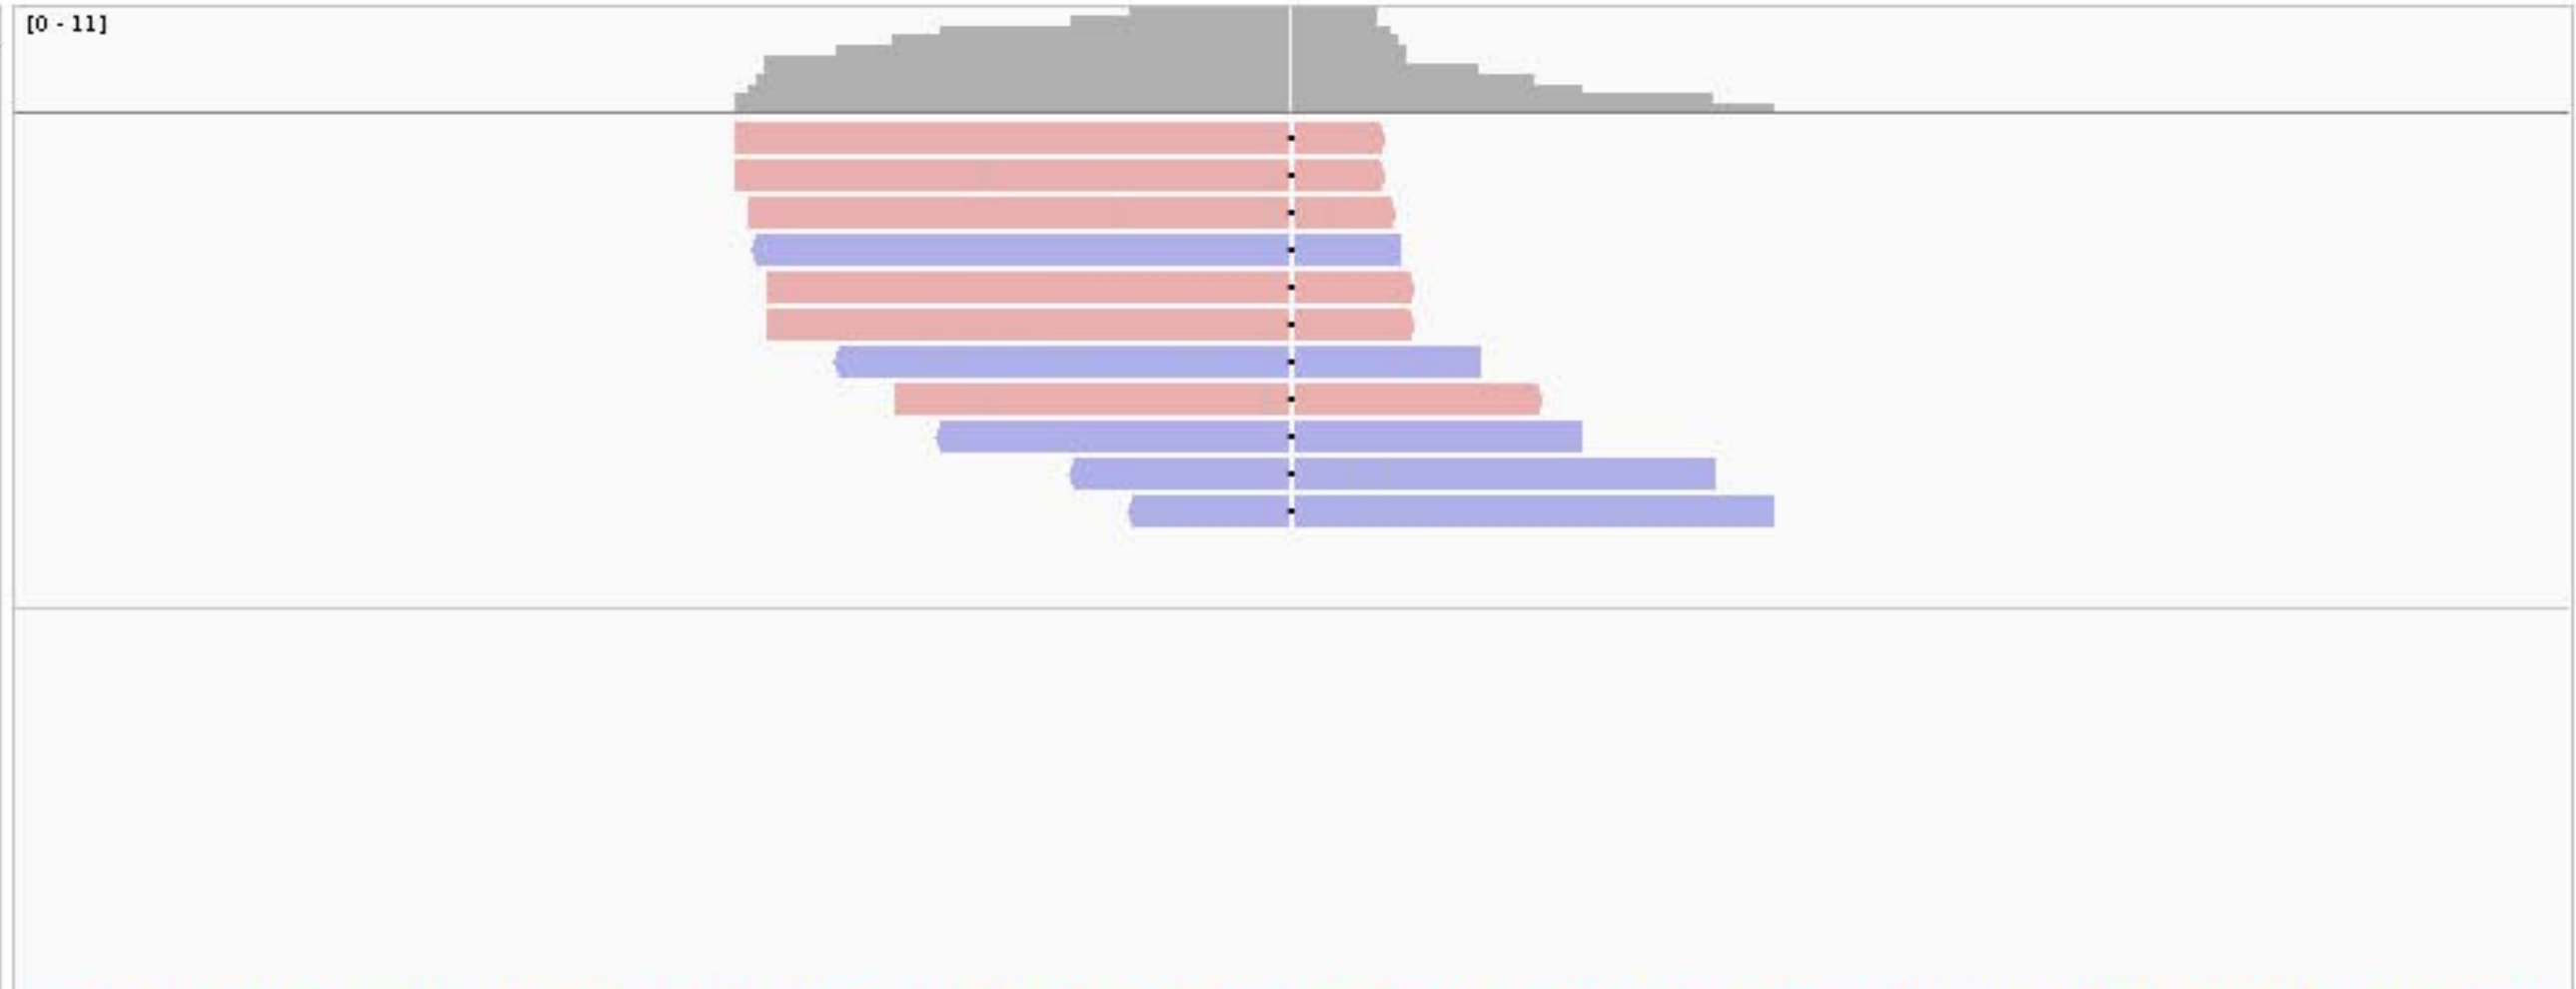

Sequence

Refseq Genes

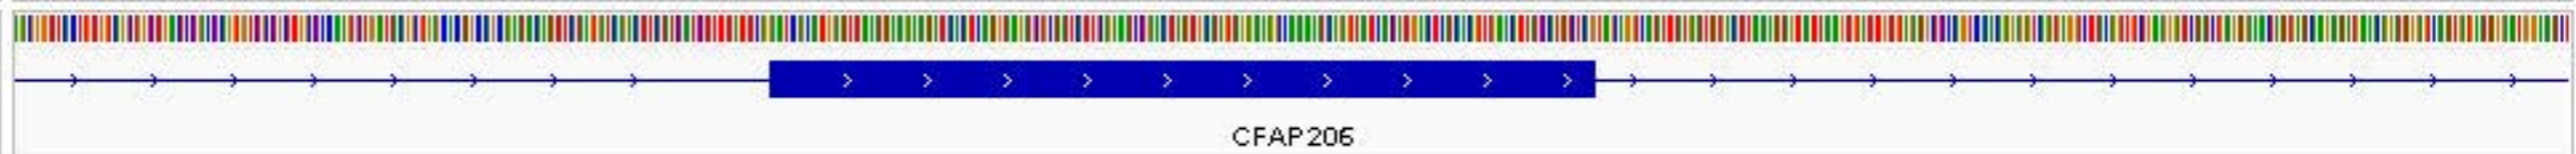



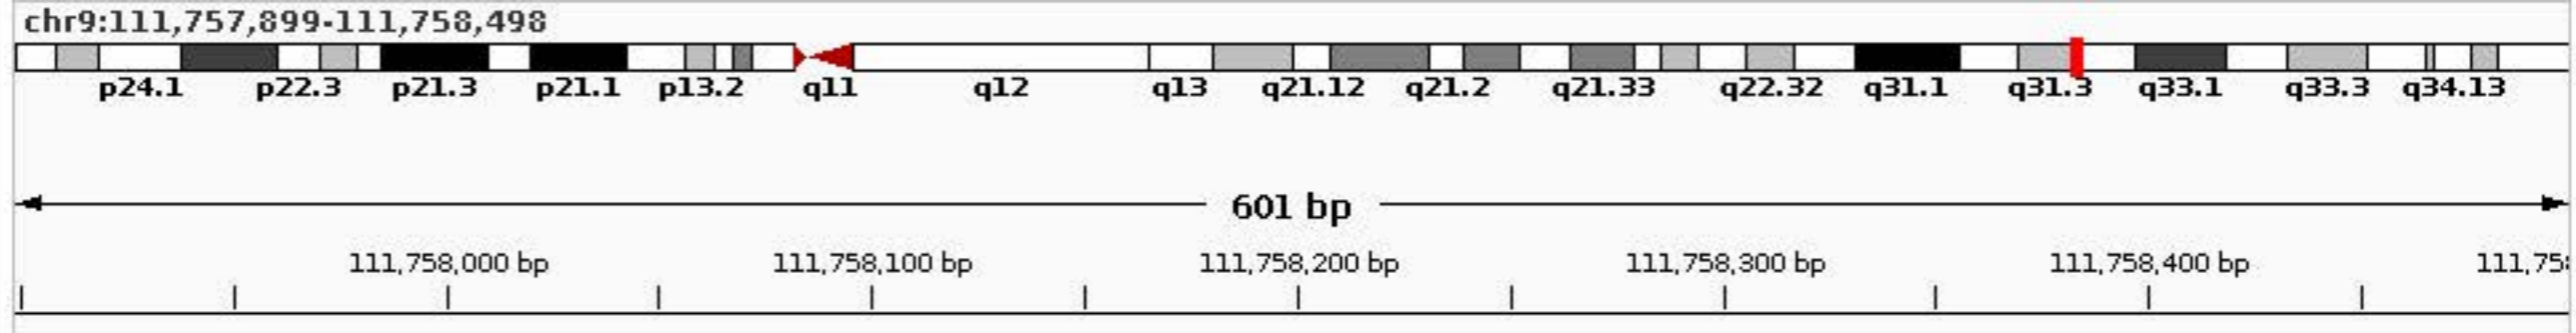

SL\_0016\_RN\_56\_mut.bam Coverage

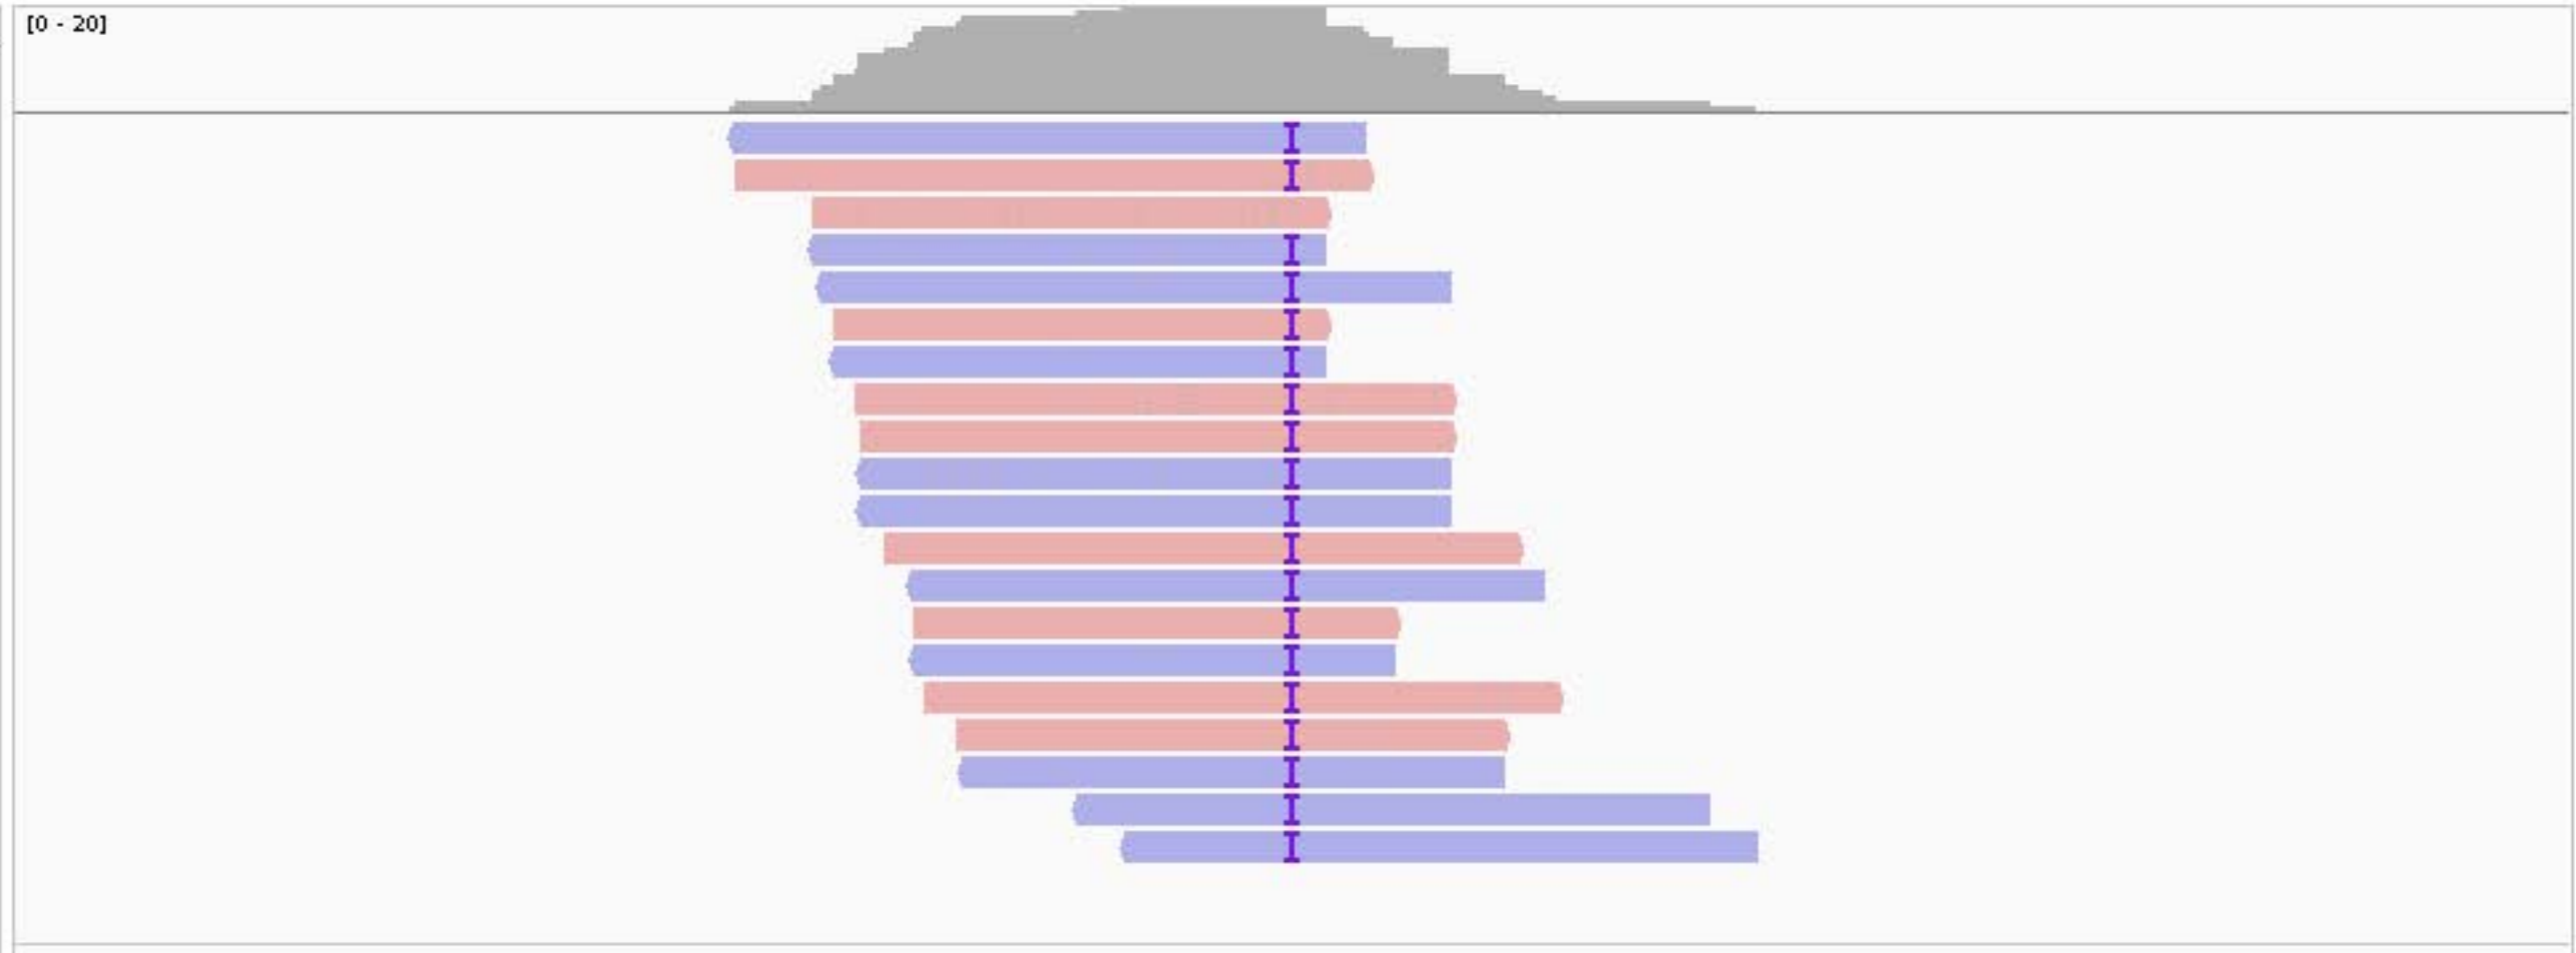

Sequence →

Refseq Genes

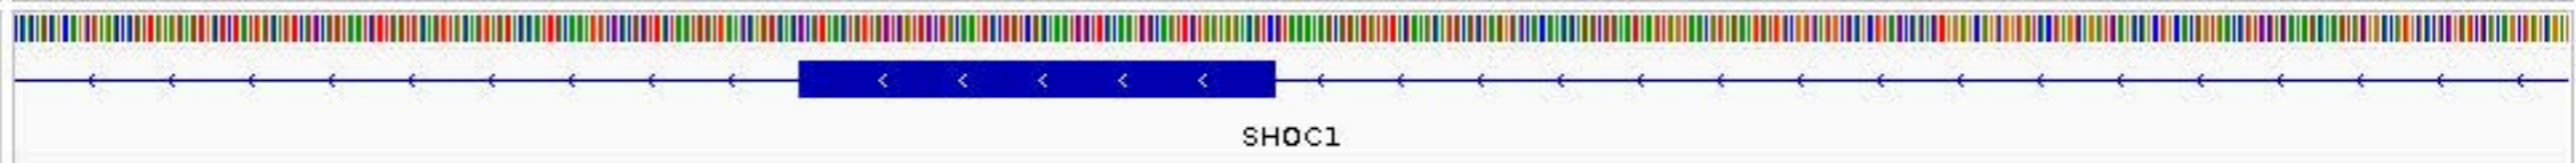

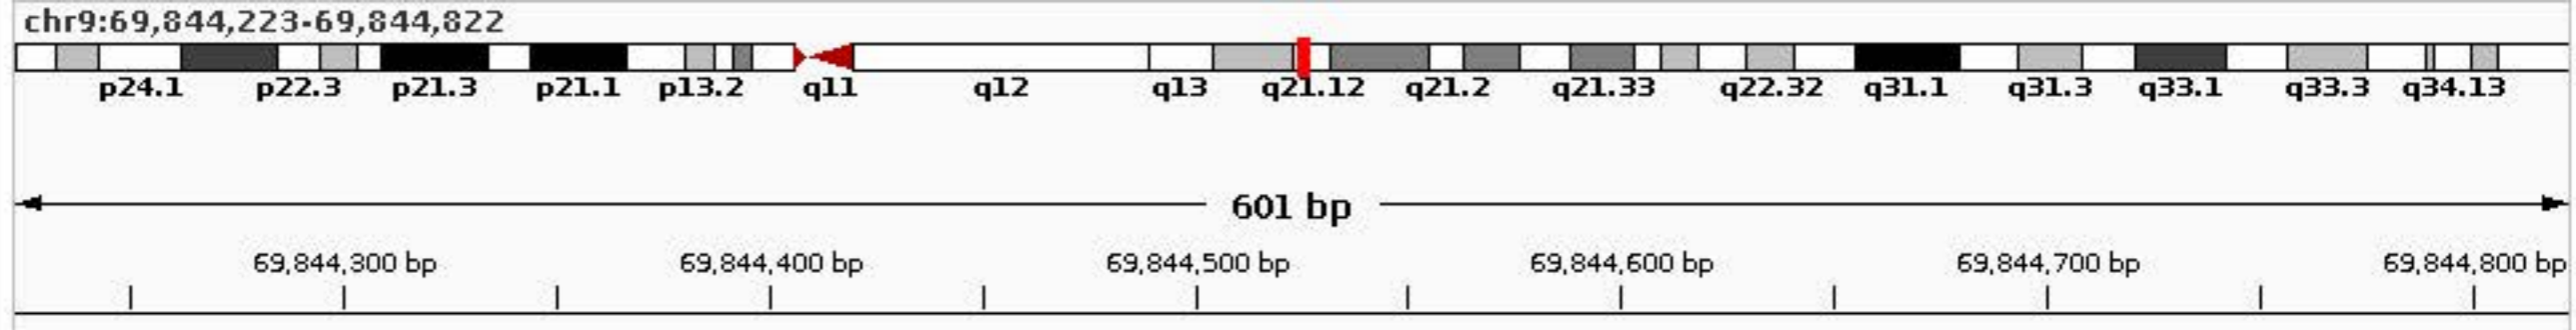

SL\_0004\_RN\_66\_mut.bam Coverage

SL\_0004\_RN\_66\_mut.bam

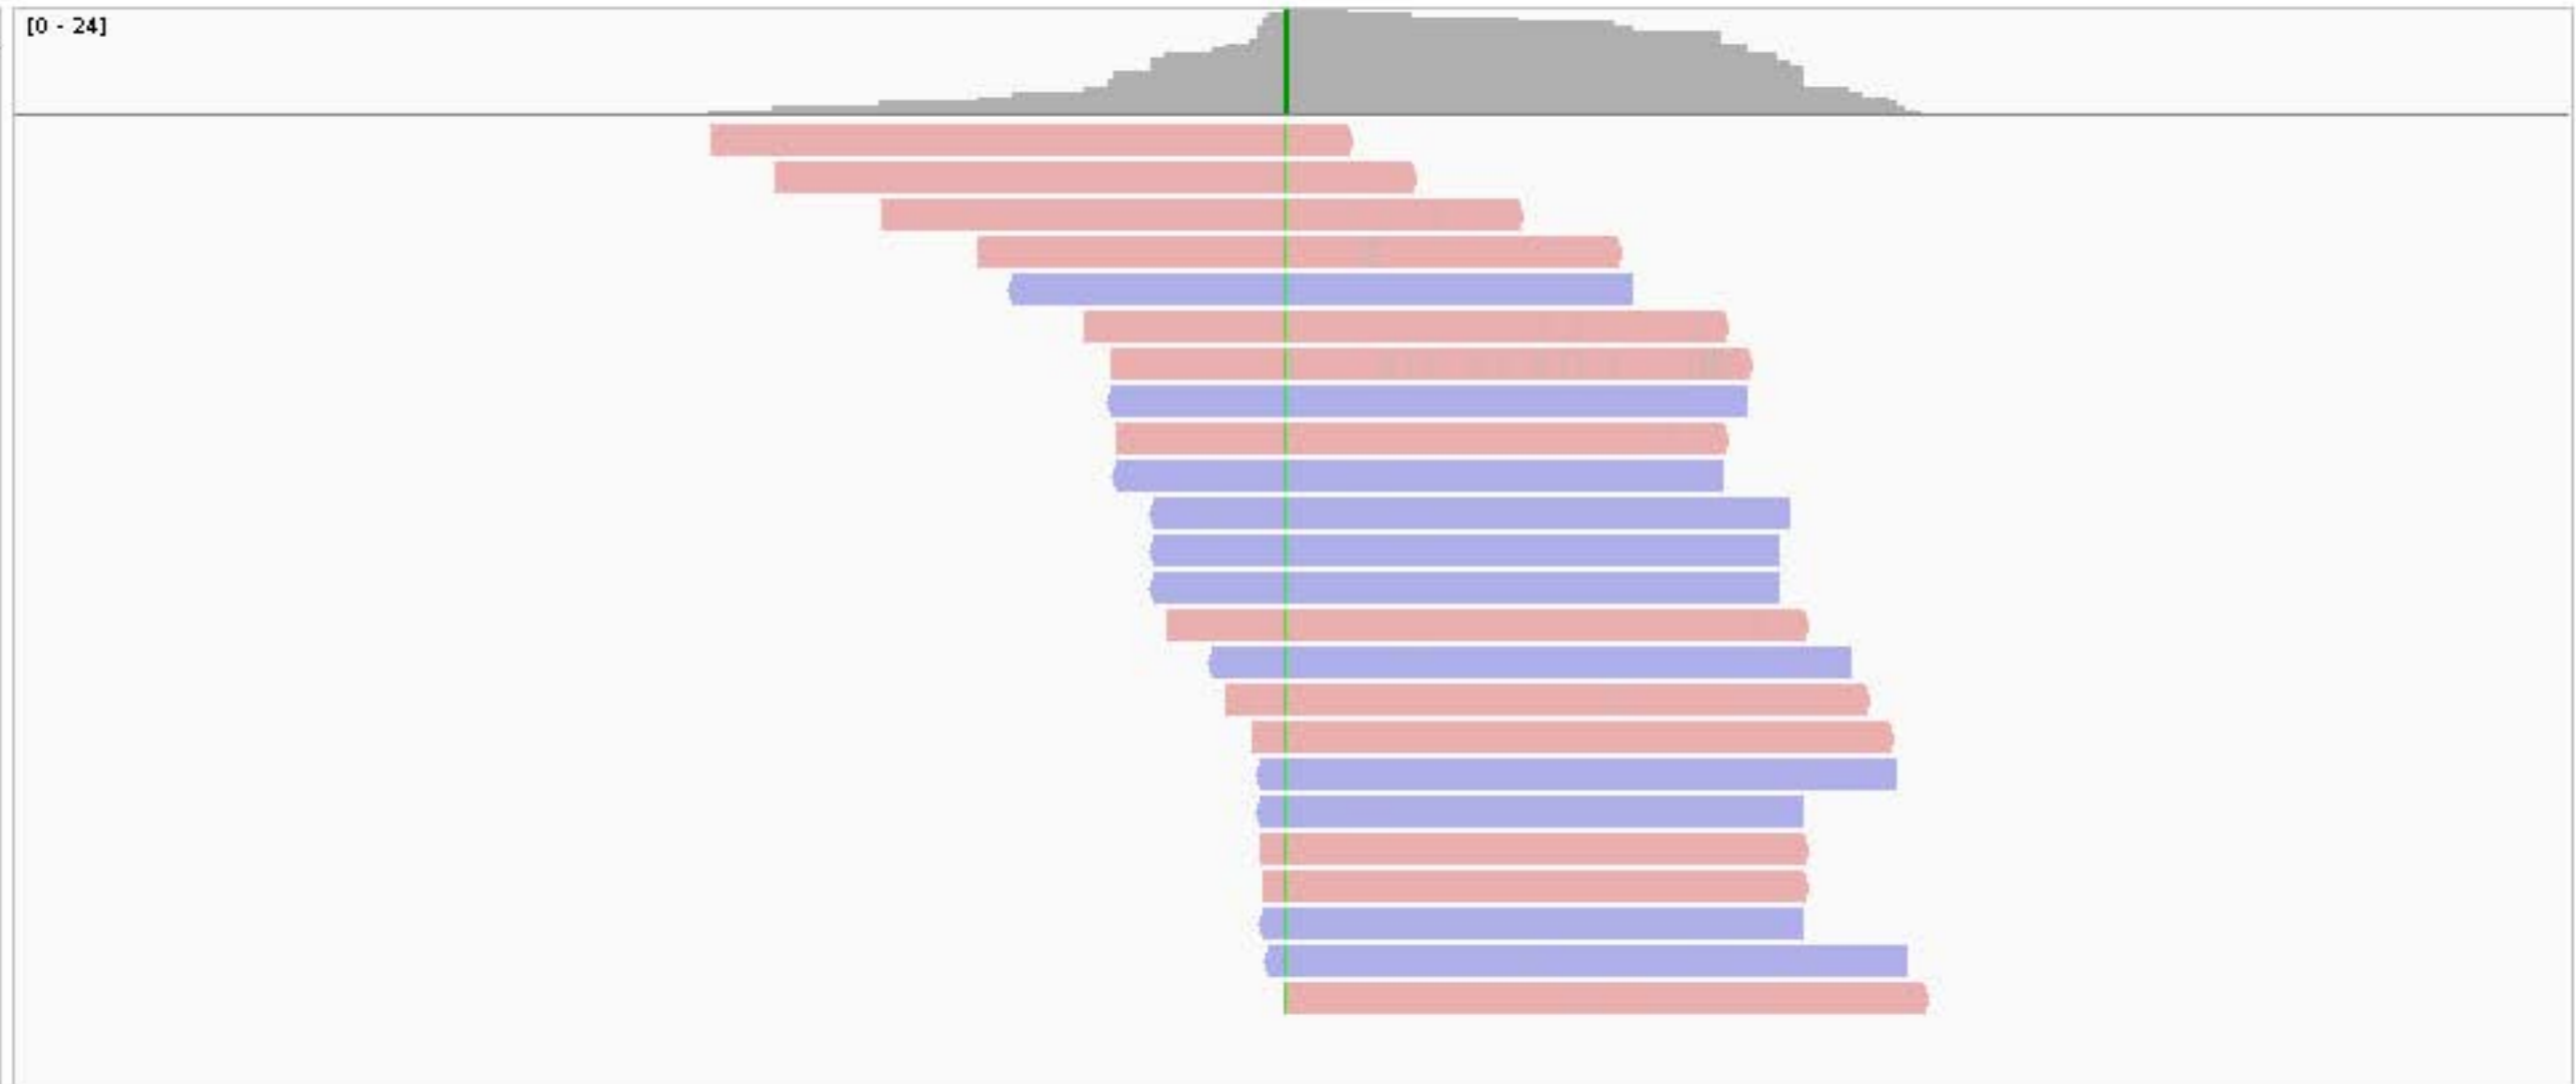

Sequence

Refseq Genes

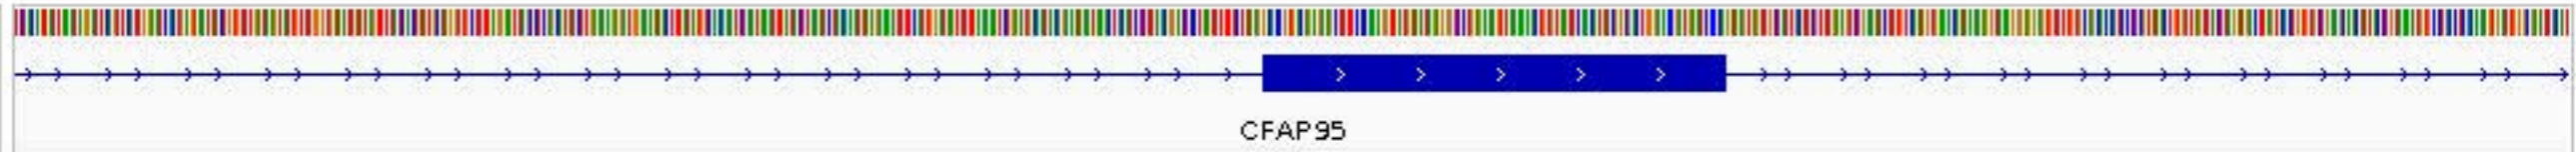



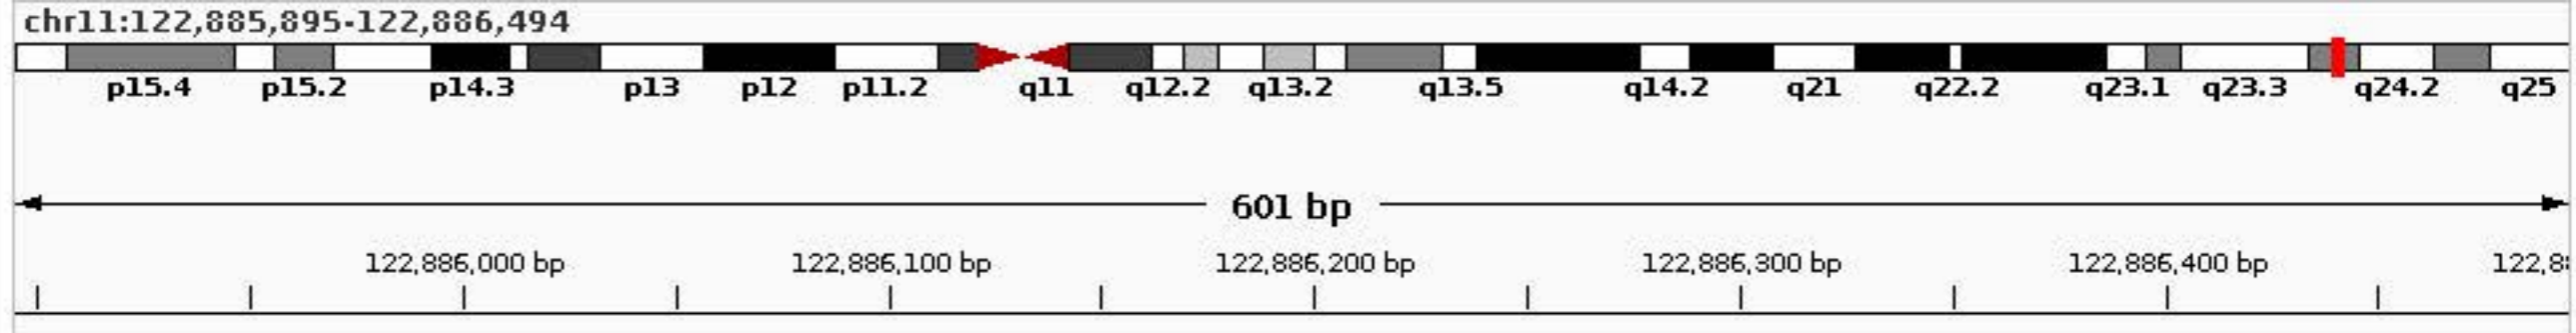

SL\_0004\_RN\_26\_mut.bam Coverage

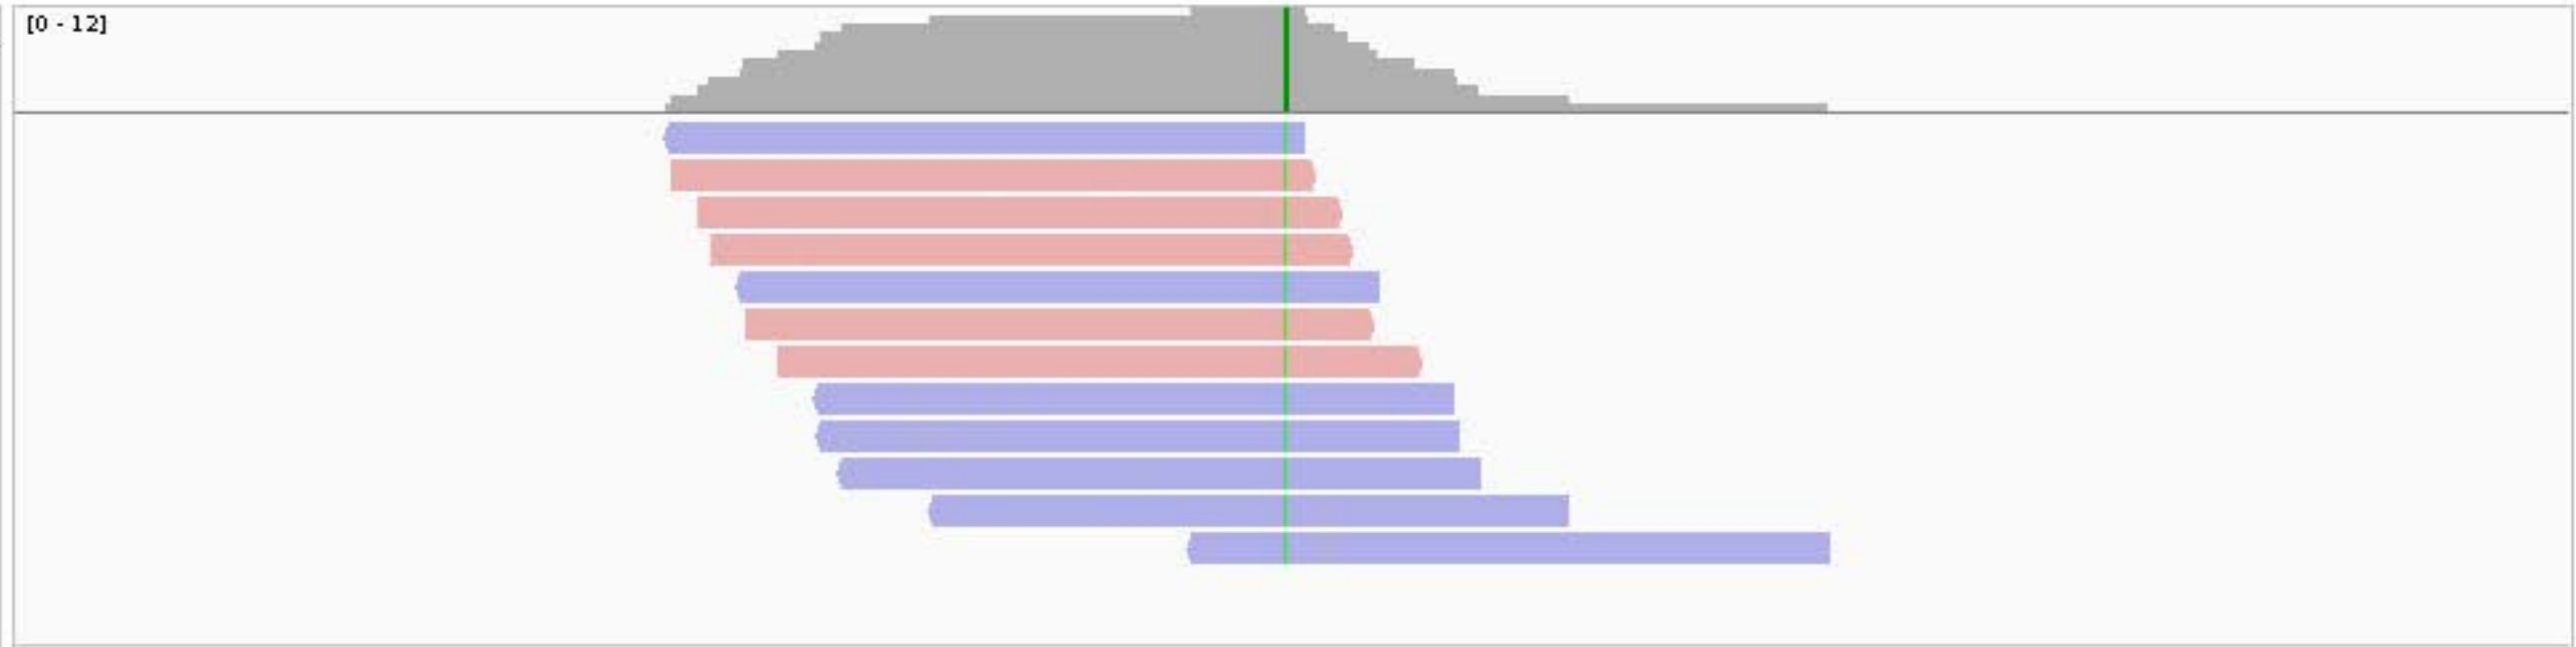

SL\_0004\_RN\_26\_mut.bam

Sequence

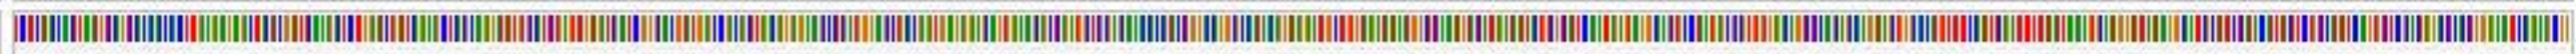

Refseq Genes

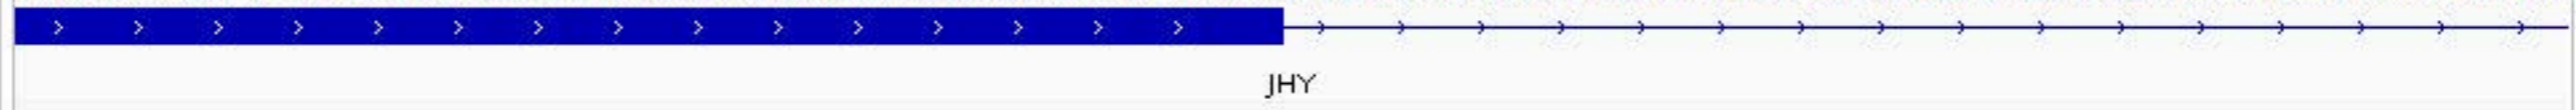

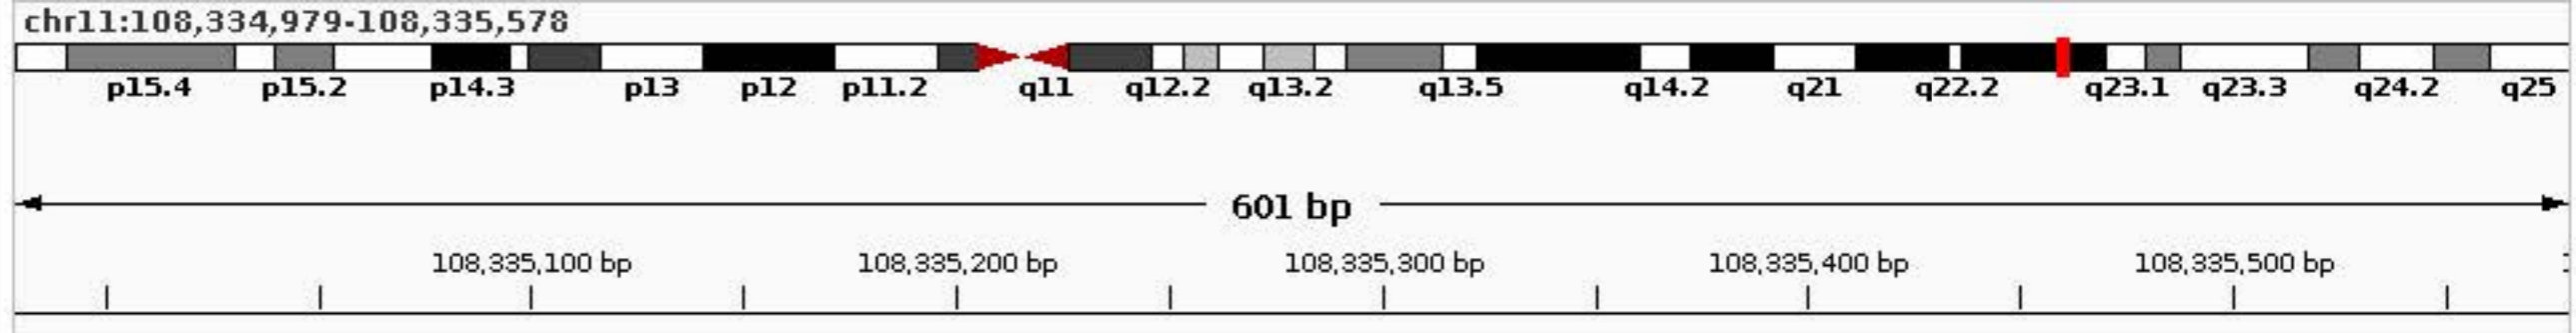

SL\_0006\_RN\_36\_mut.bam Coverage

SL\_0006\_RN\_36\_mut.bam

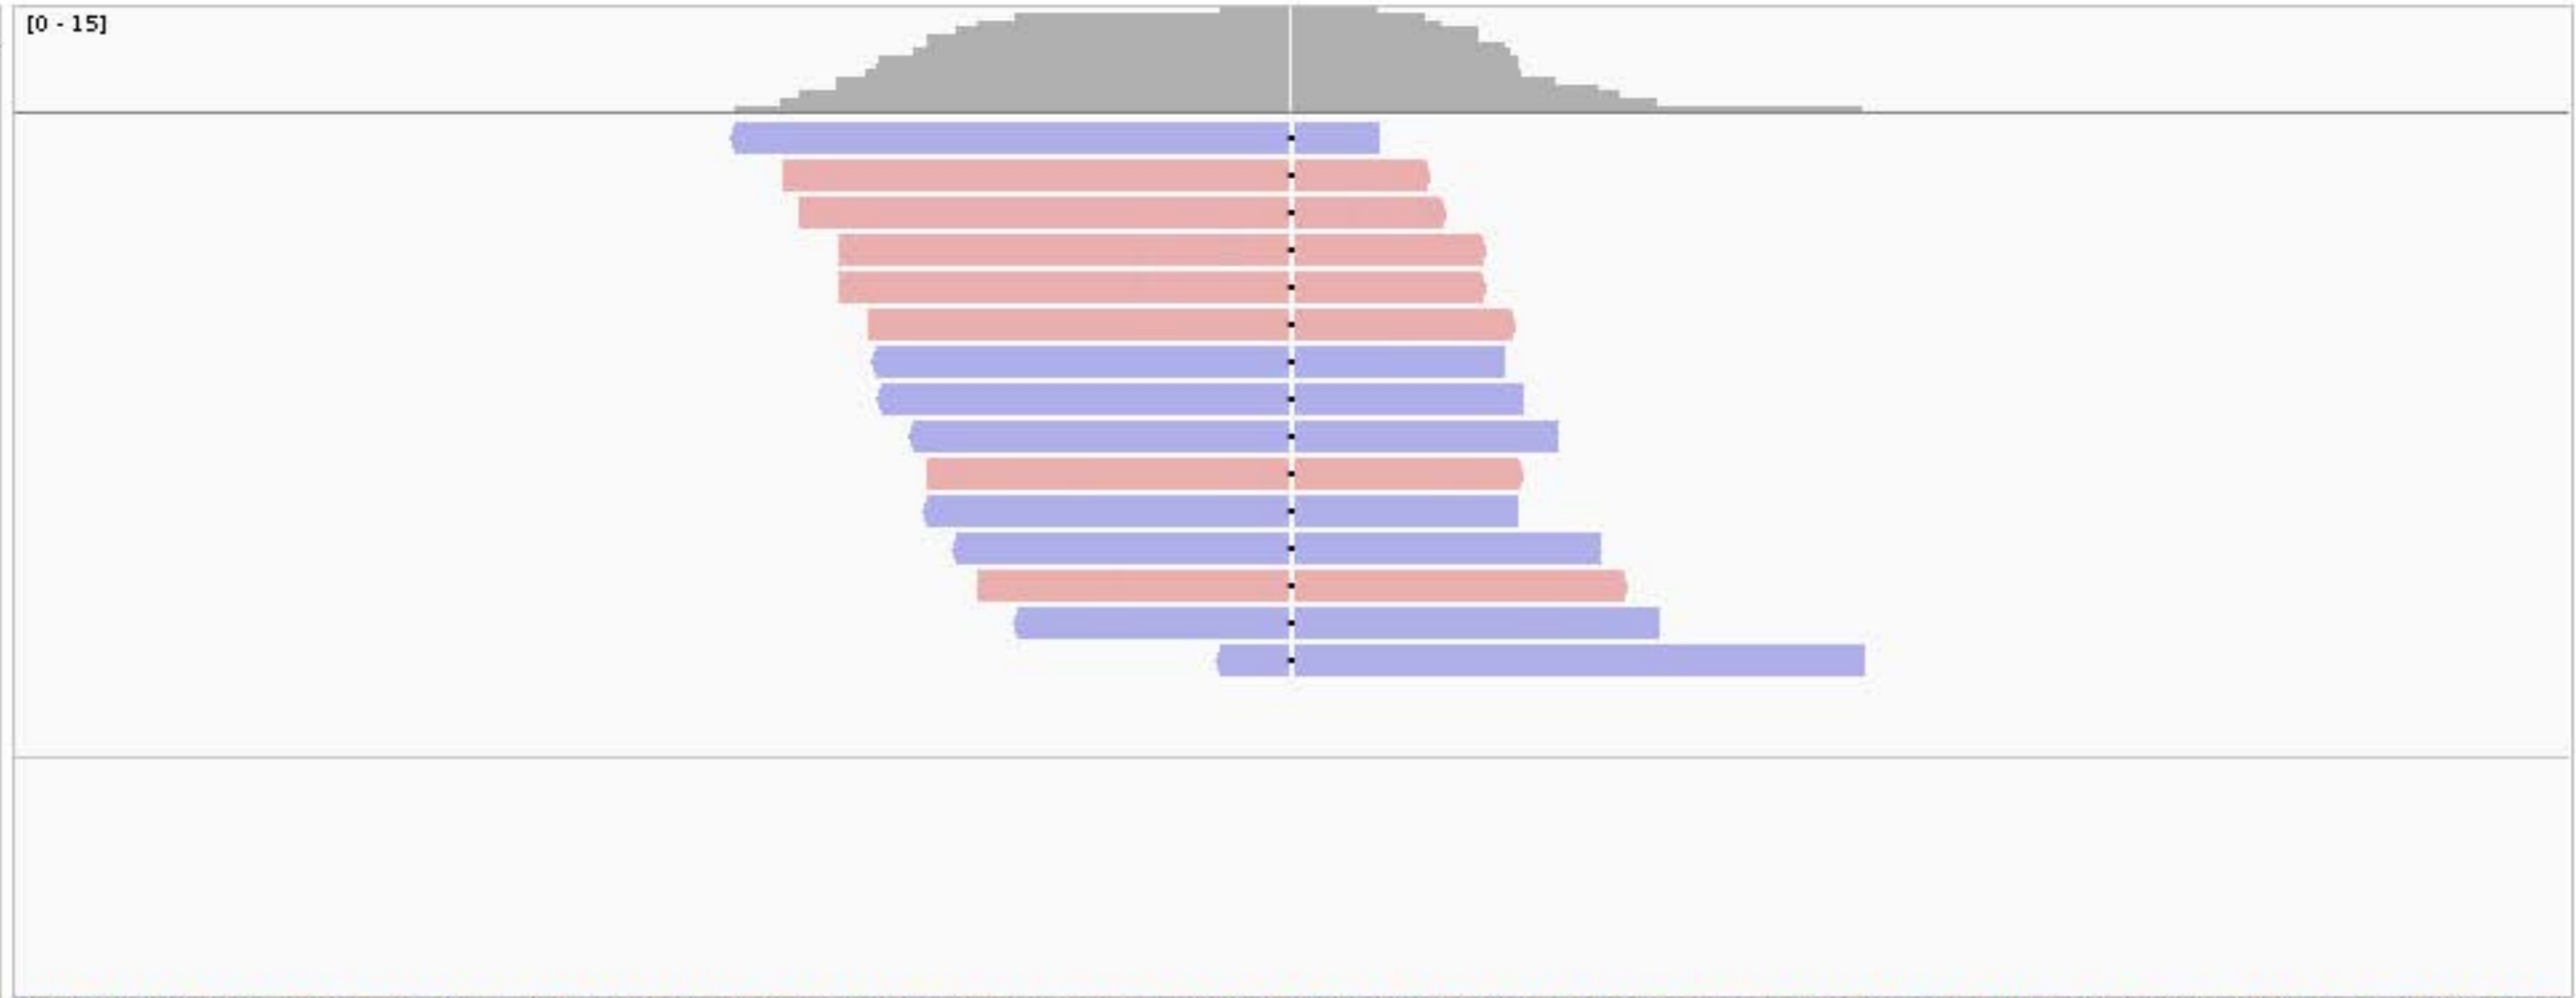

Sequence

Refseq Genes

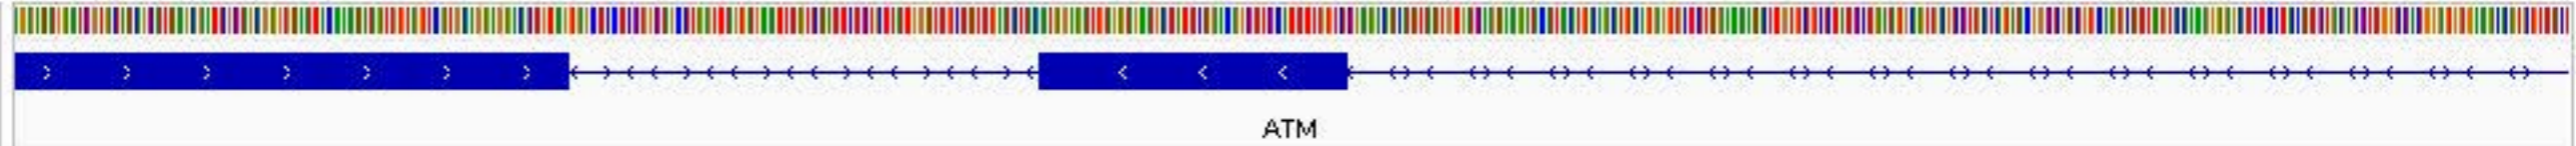



SL\_0015\_RN\_11\_mut.bam Coverage

SL\_0015\_RN\_11\_mut.bam

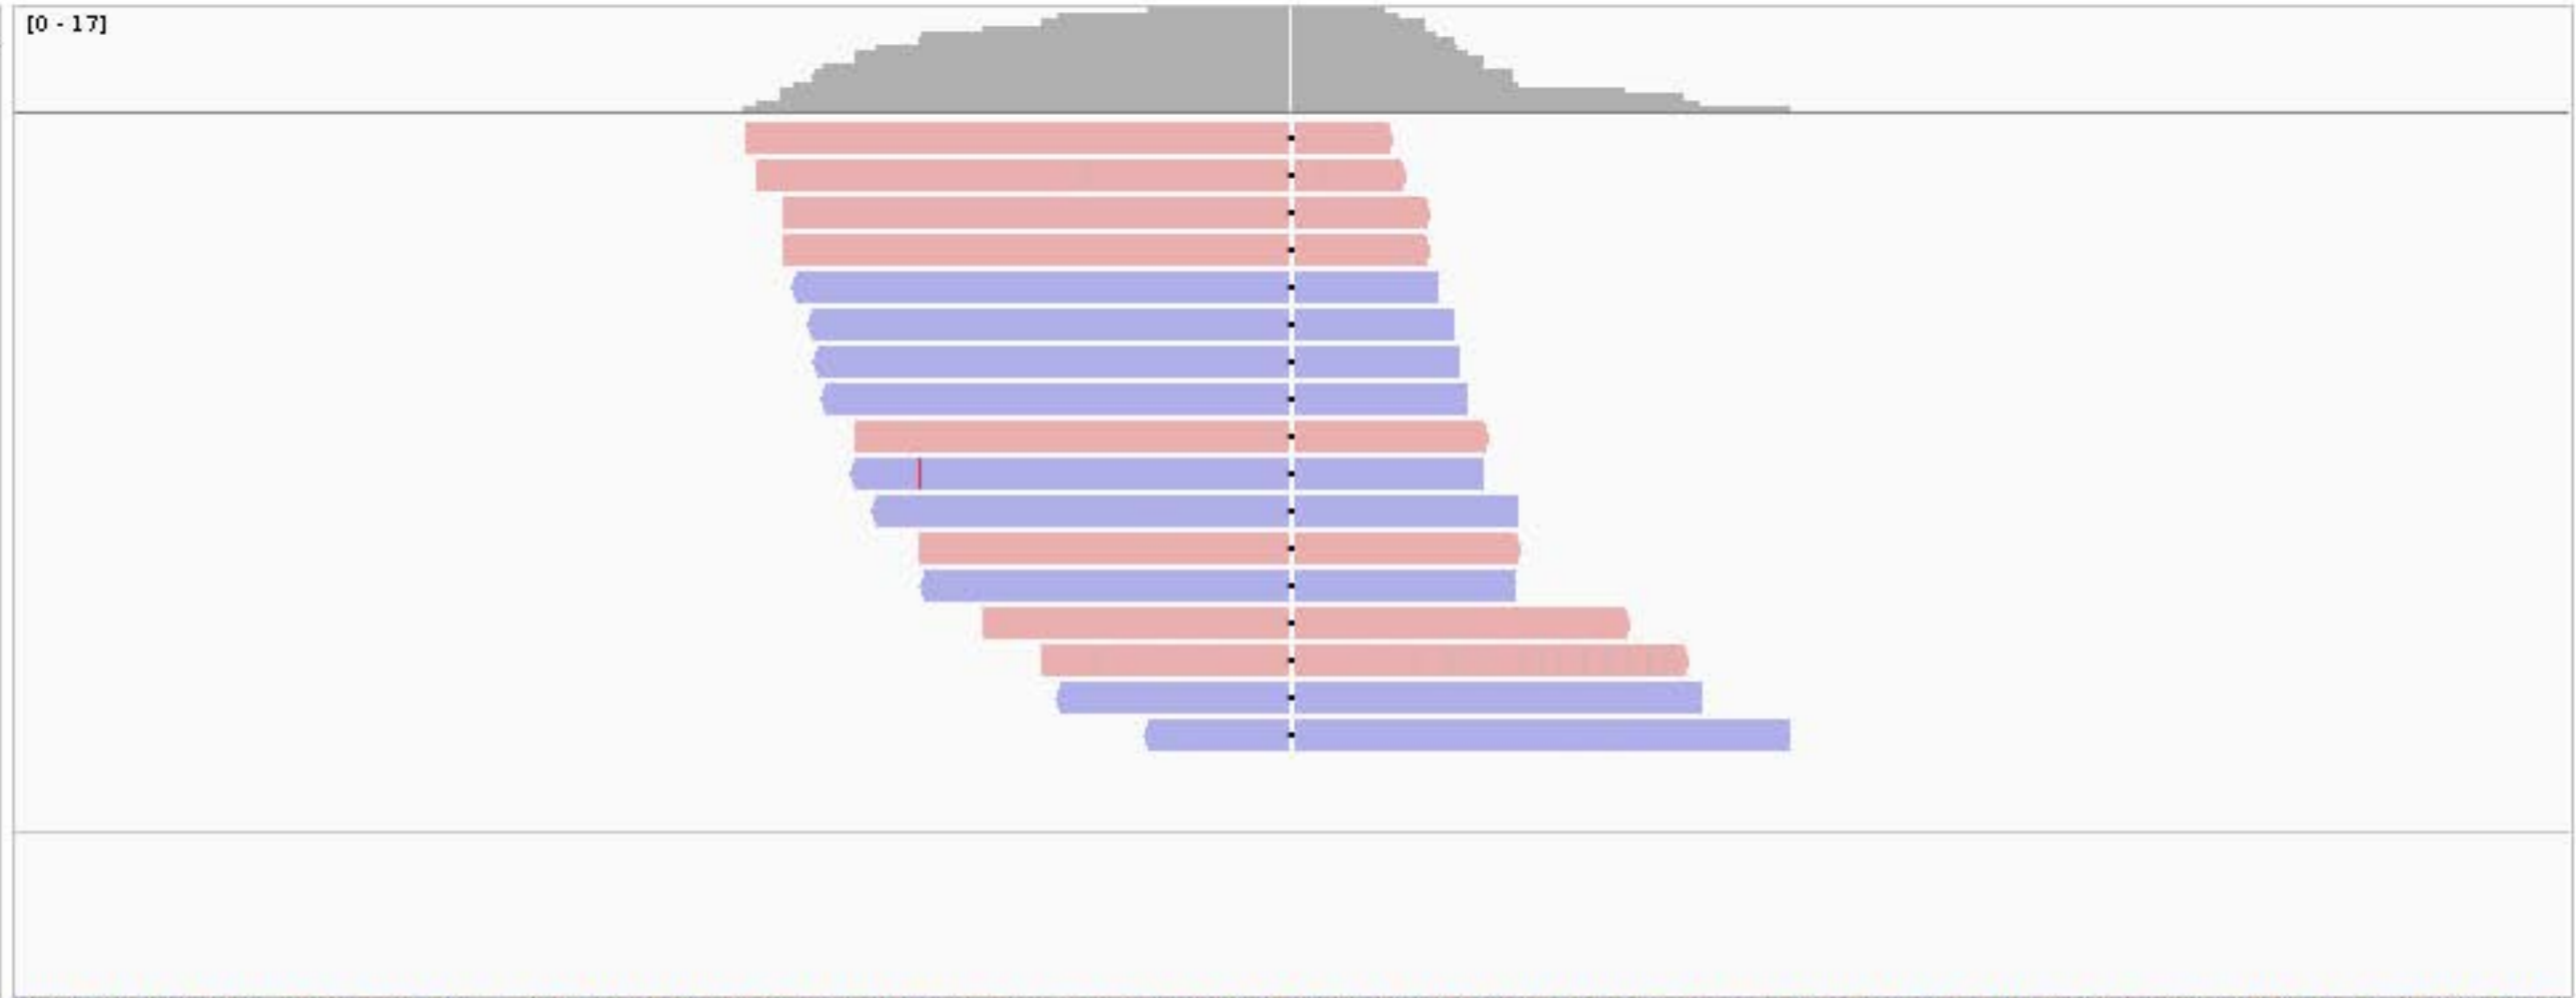

Sequence

Refseq Genes



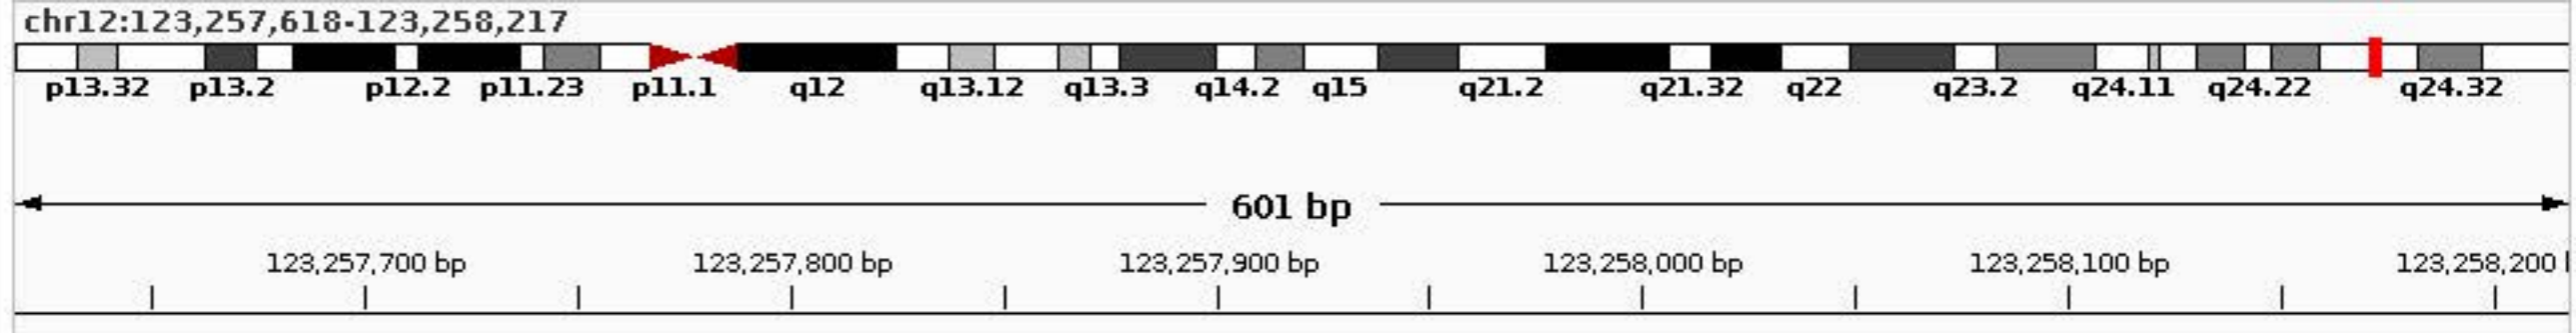

SL\_0006\_RN\_36\_mut.bam Coverage

SL\_0006\_RN\_36\_mut.bam

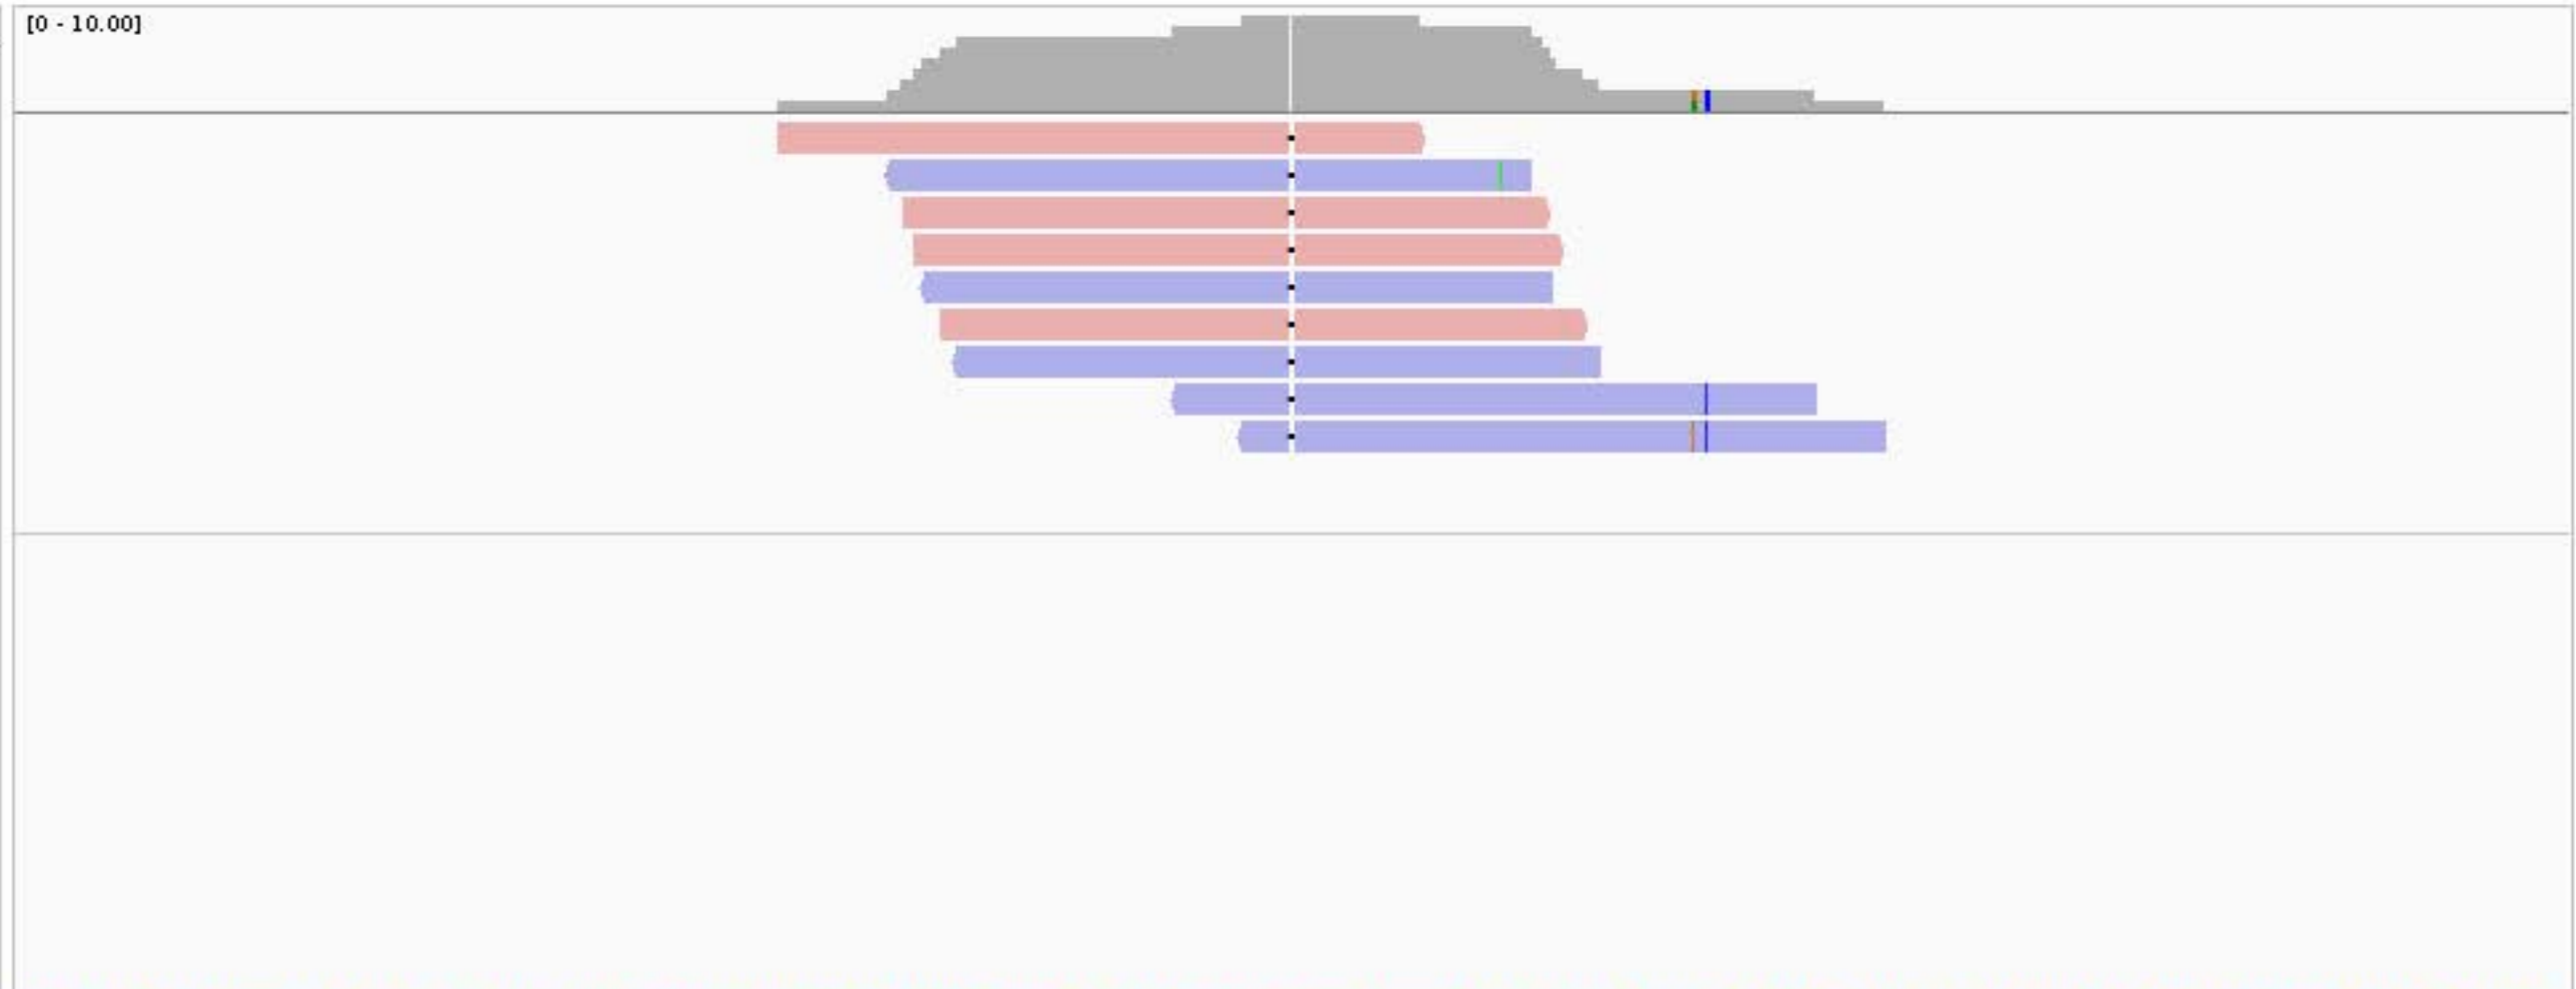

Sequence

Refseq Genes

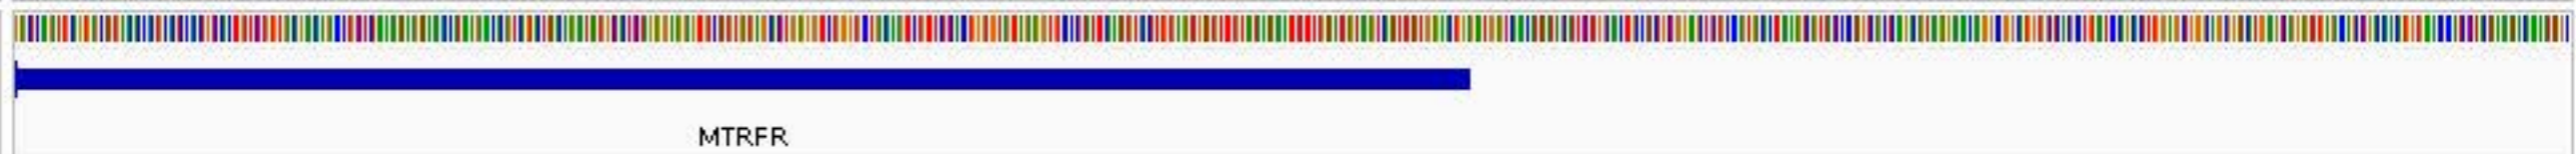

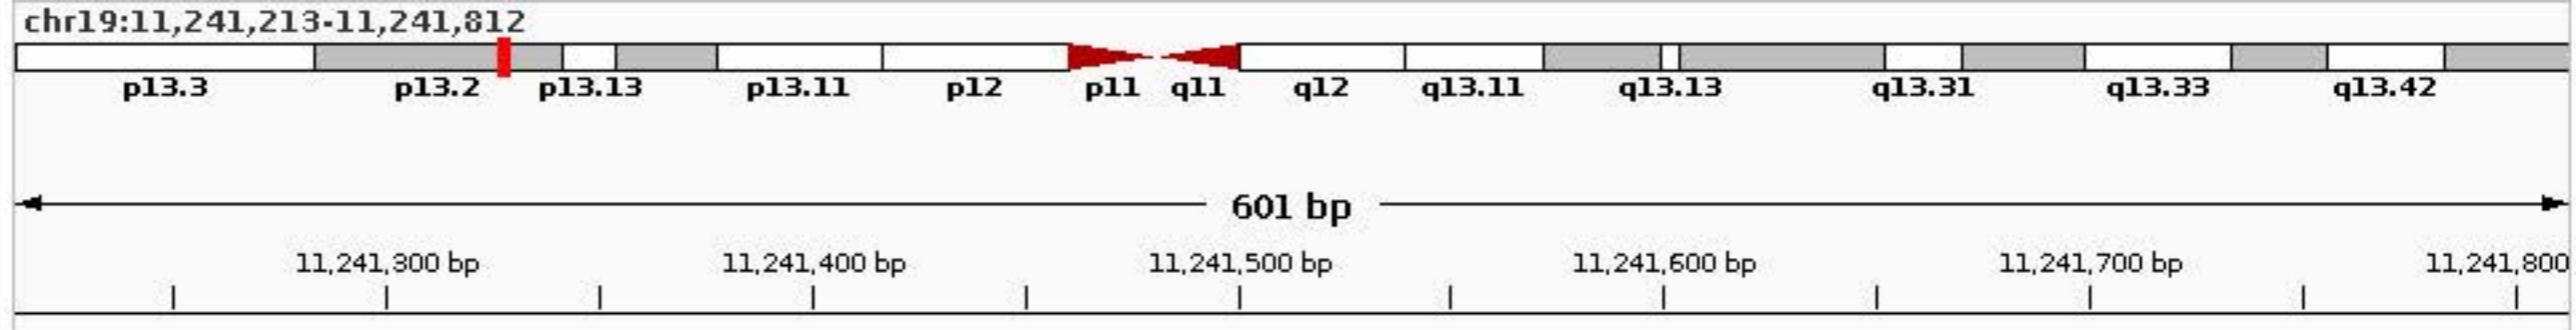

SL\_0006\_RN\_36\_mut.bam Coverage

SL\_0006\_RN\_36\_mut.bam

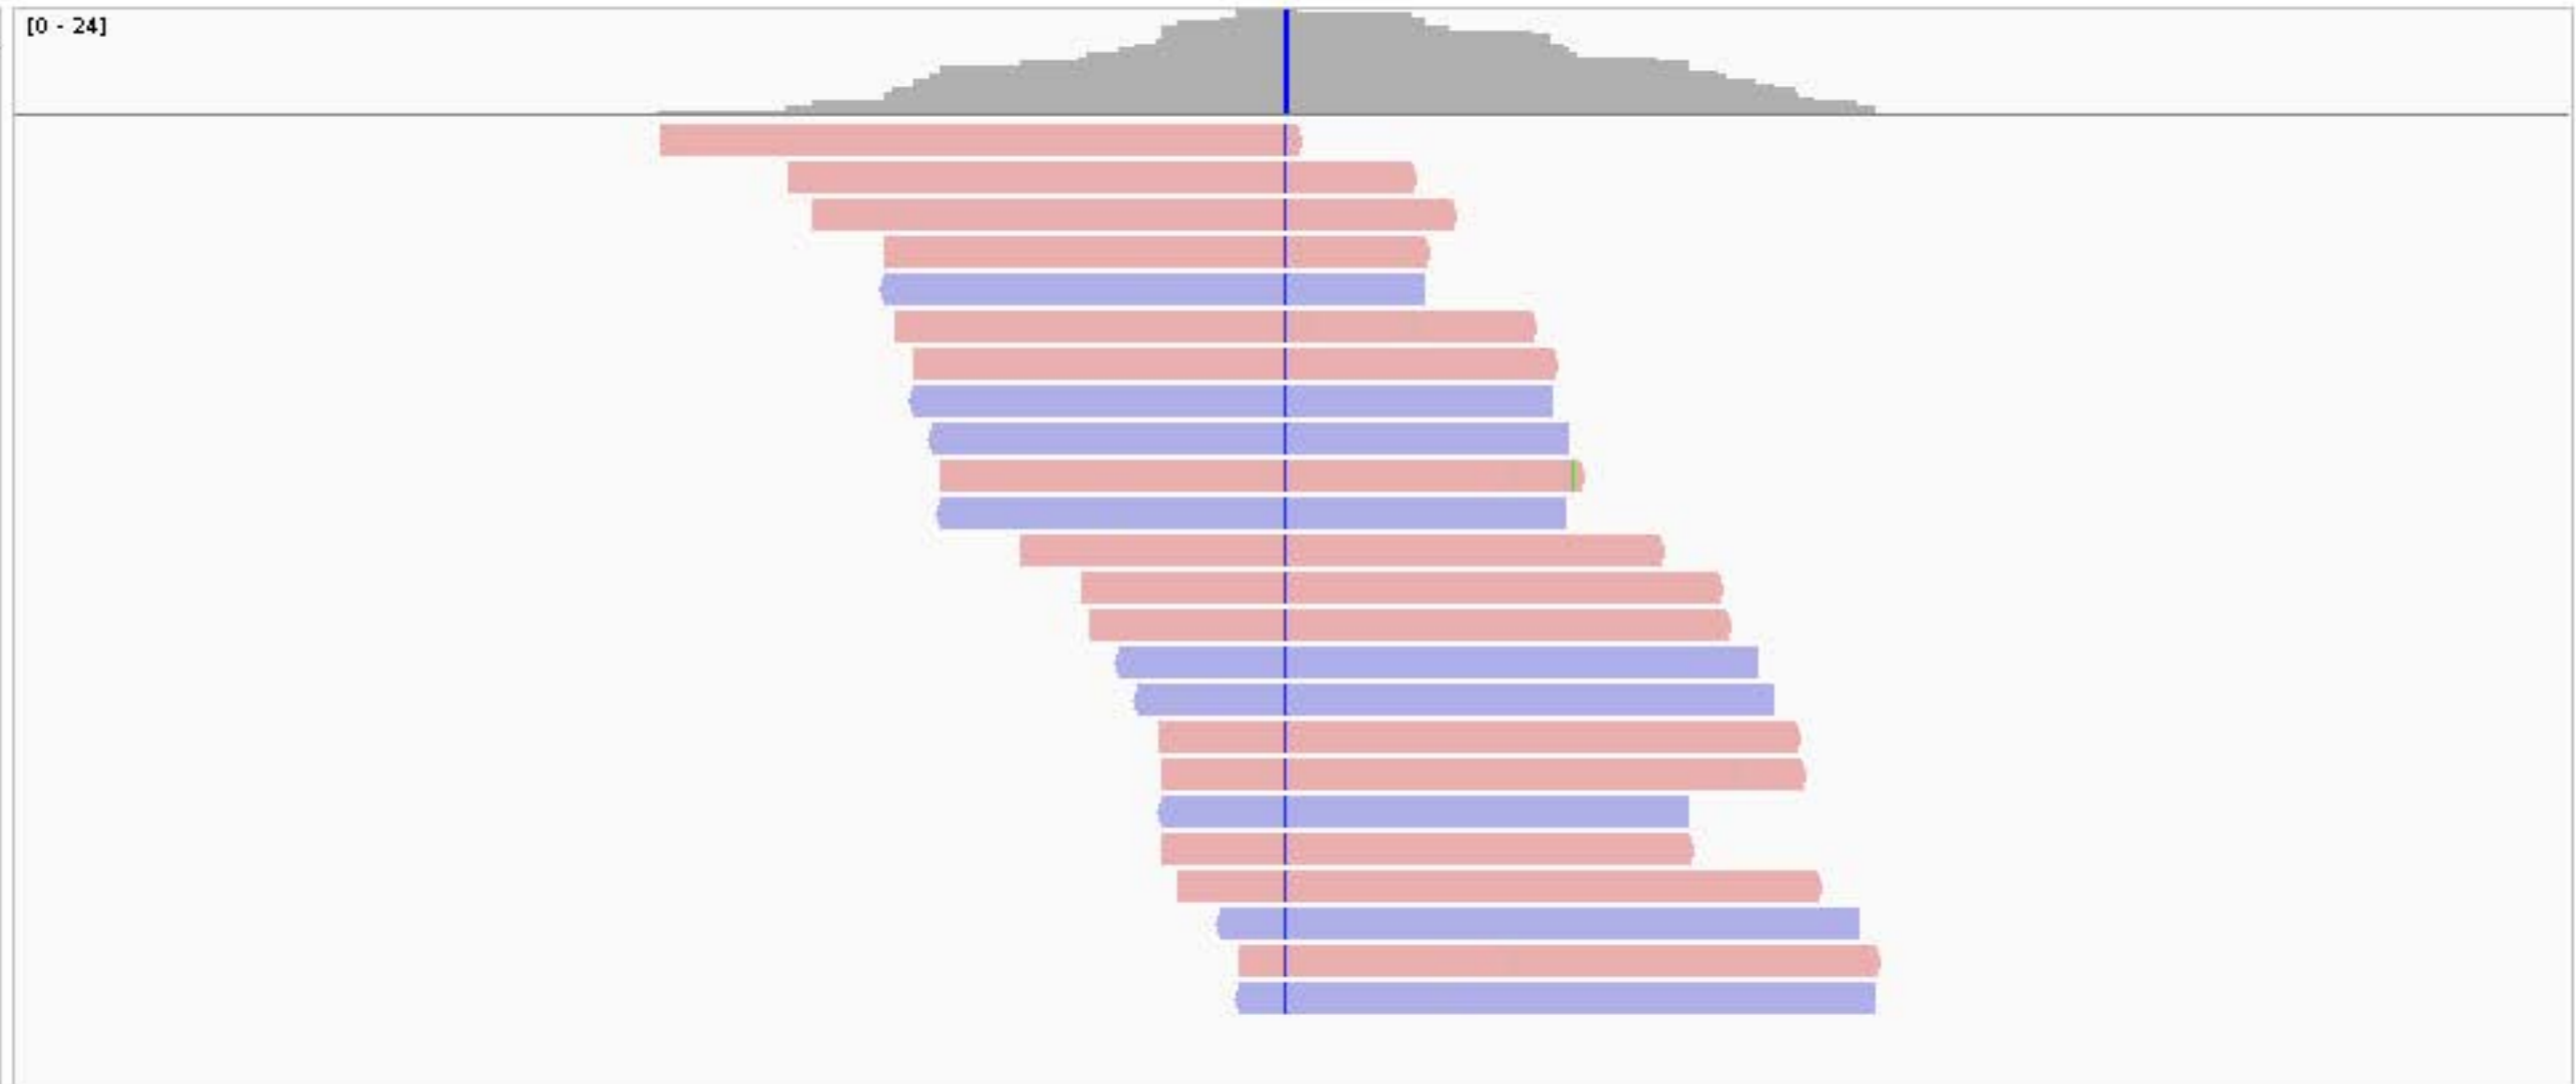

Sequence

Refseq Genes

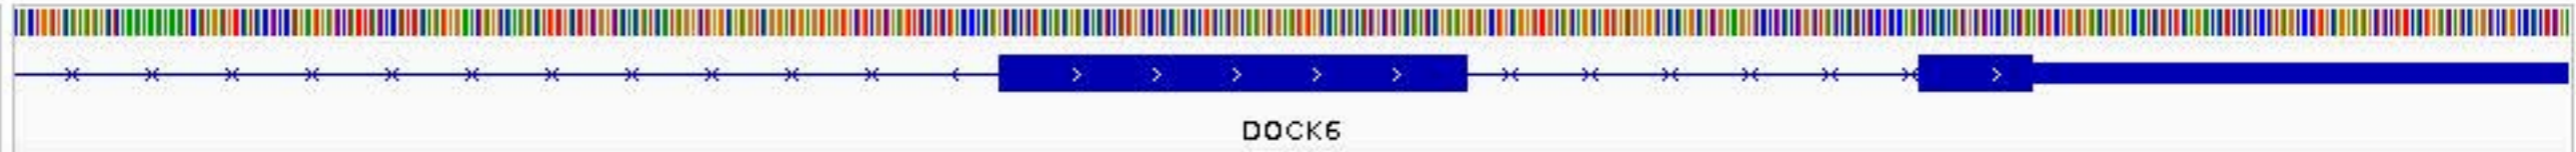



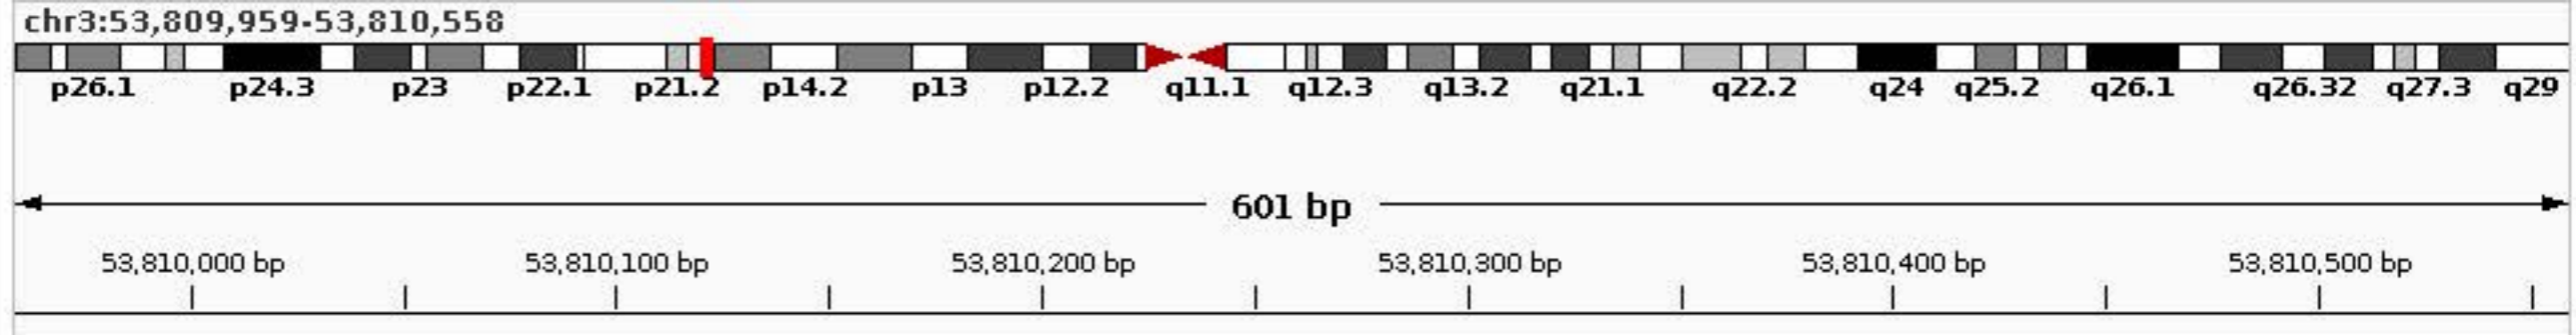

SL\_0004\_RN\_19\_mut.bam Coverage

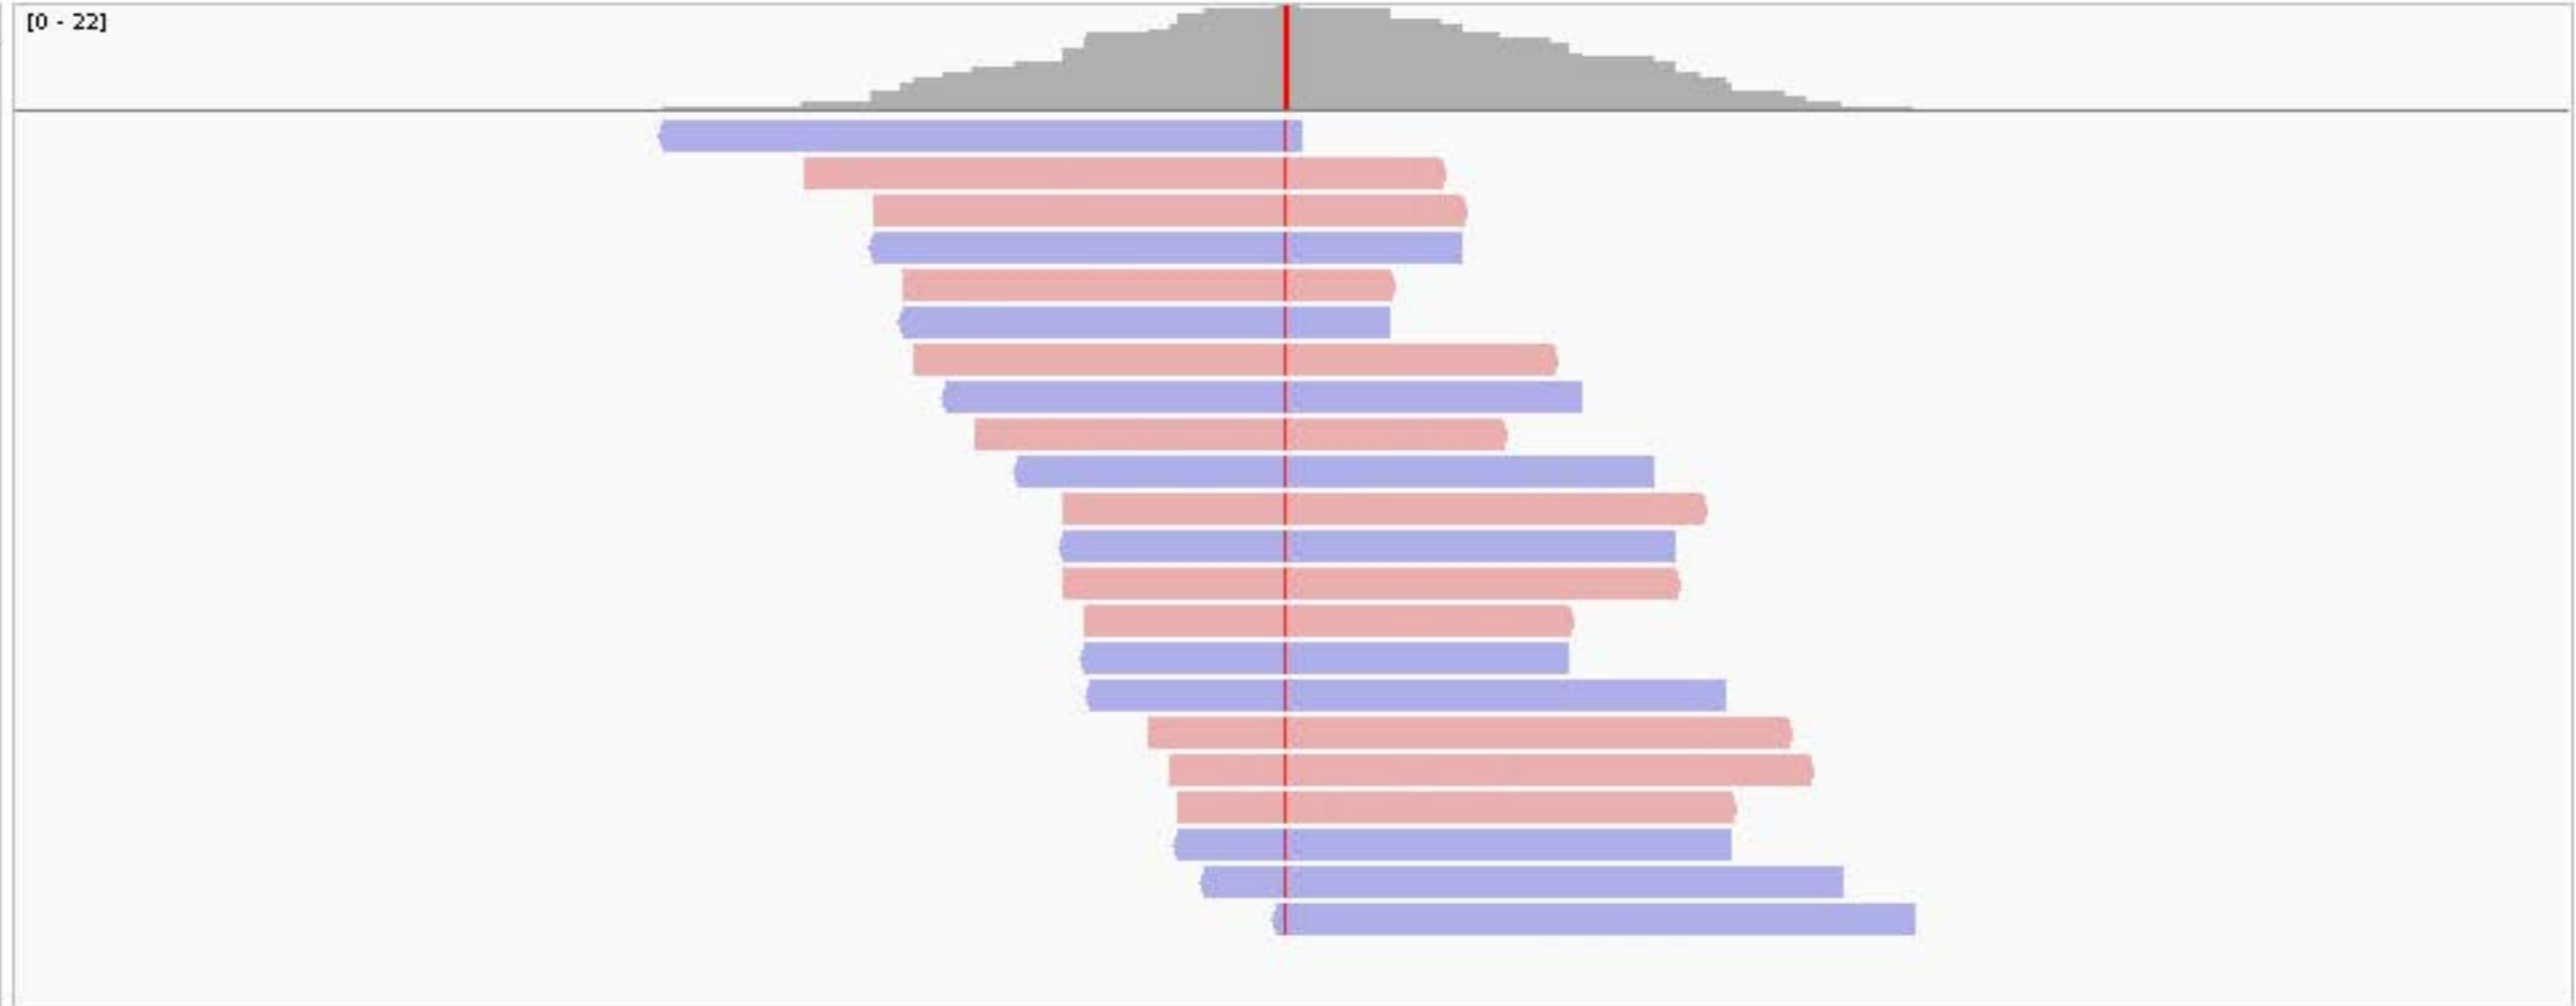

Sequence →

Refseq Genes

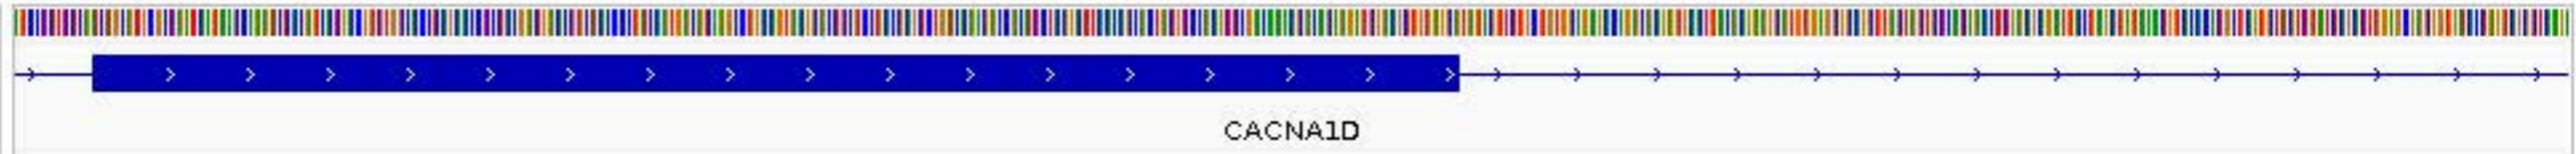

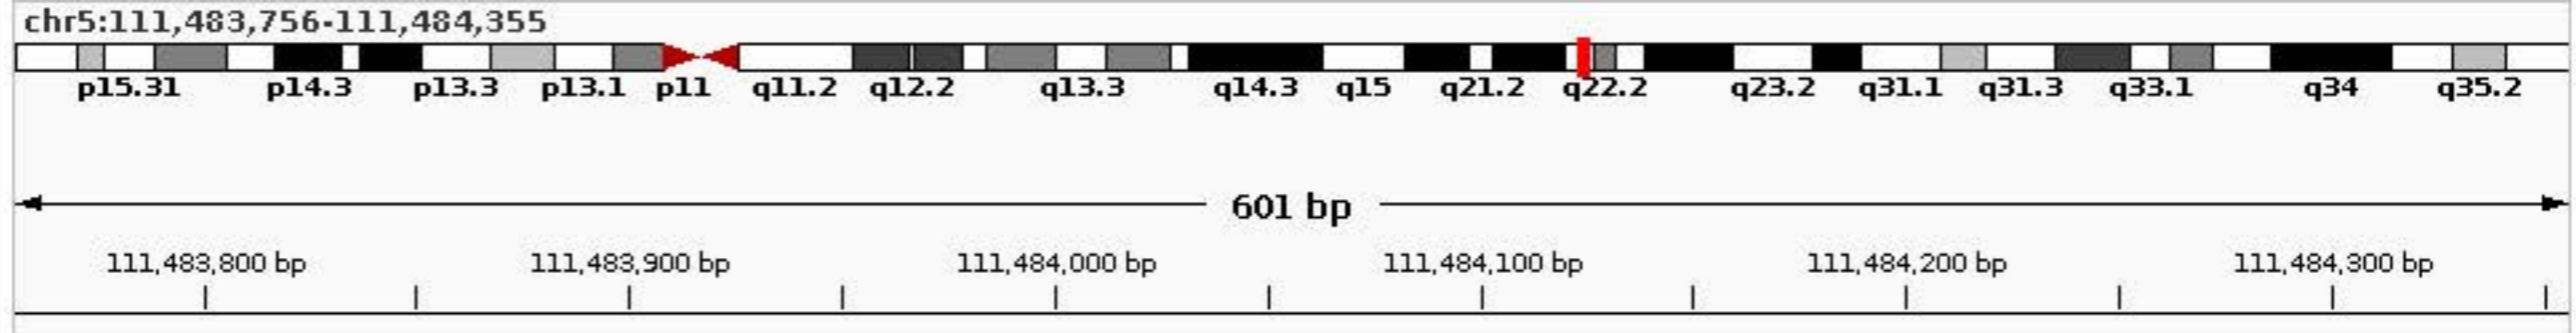

SL\_0002\_RN\_8\_mut.bam Coverage

SL\_0002\_RN\_8\_mut.bam

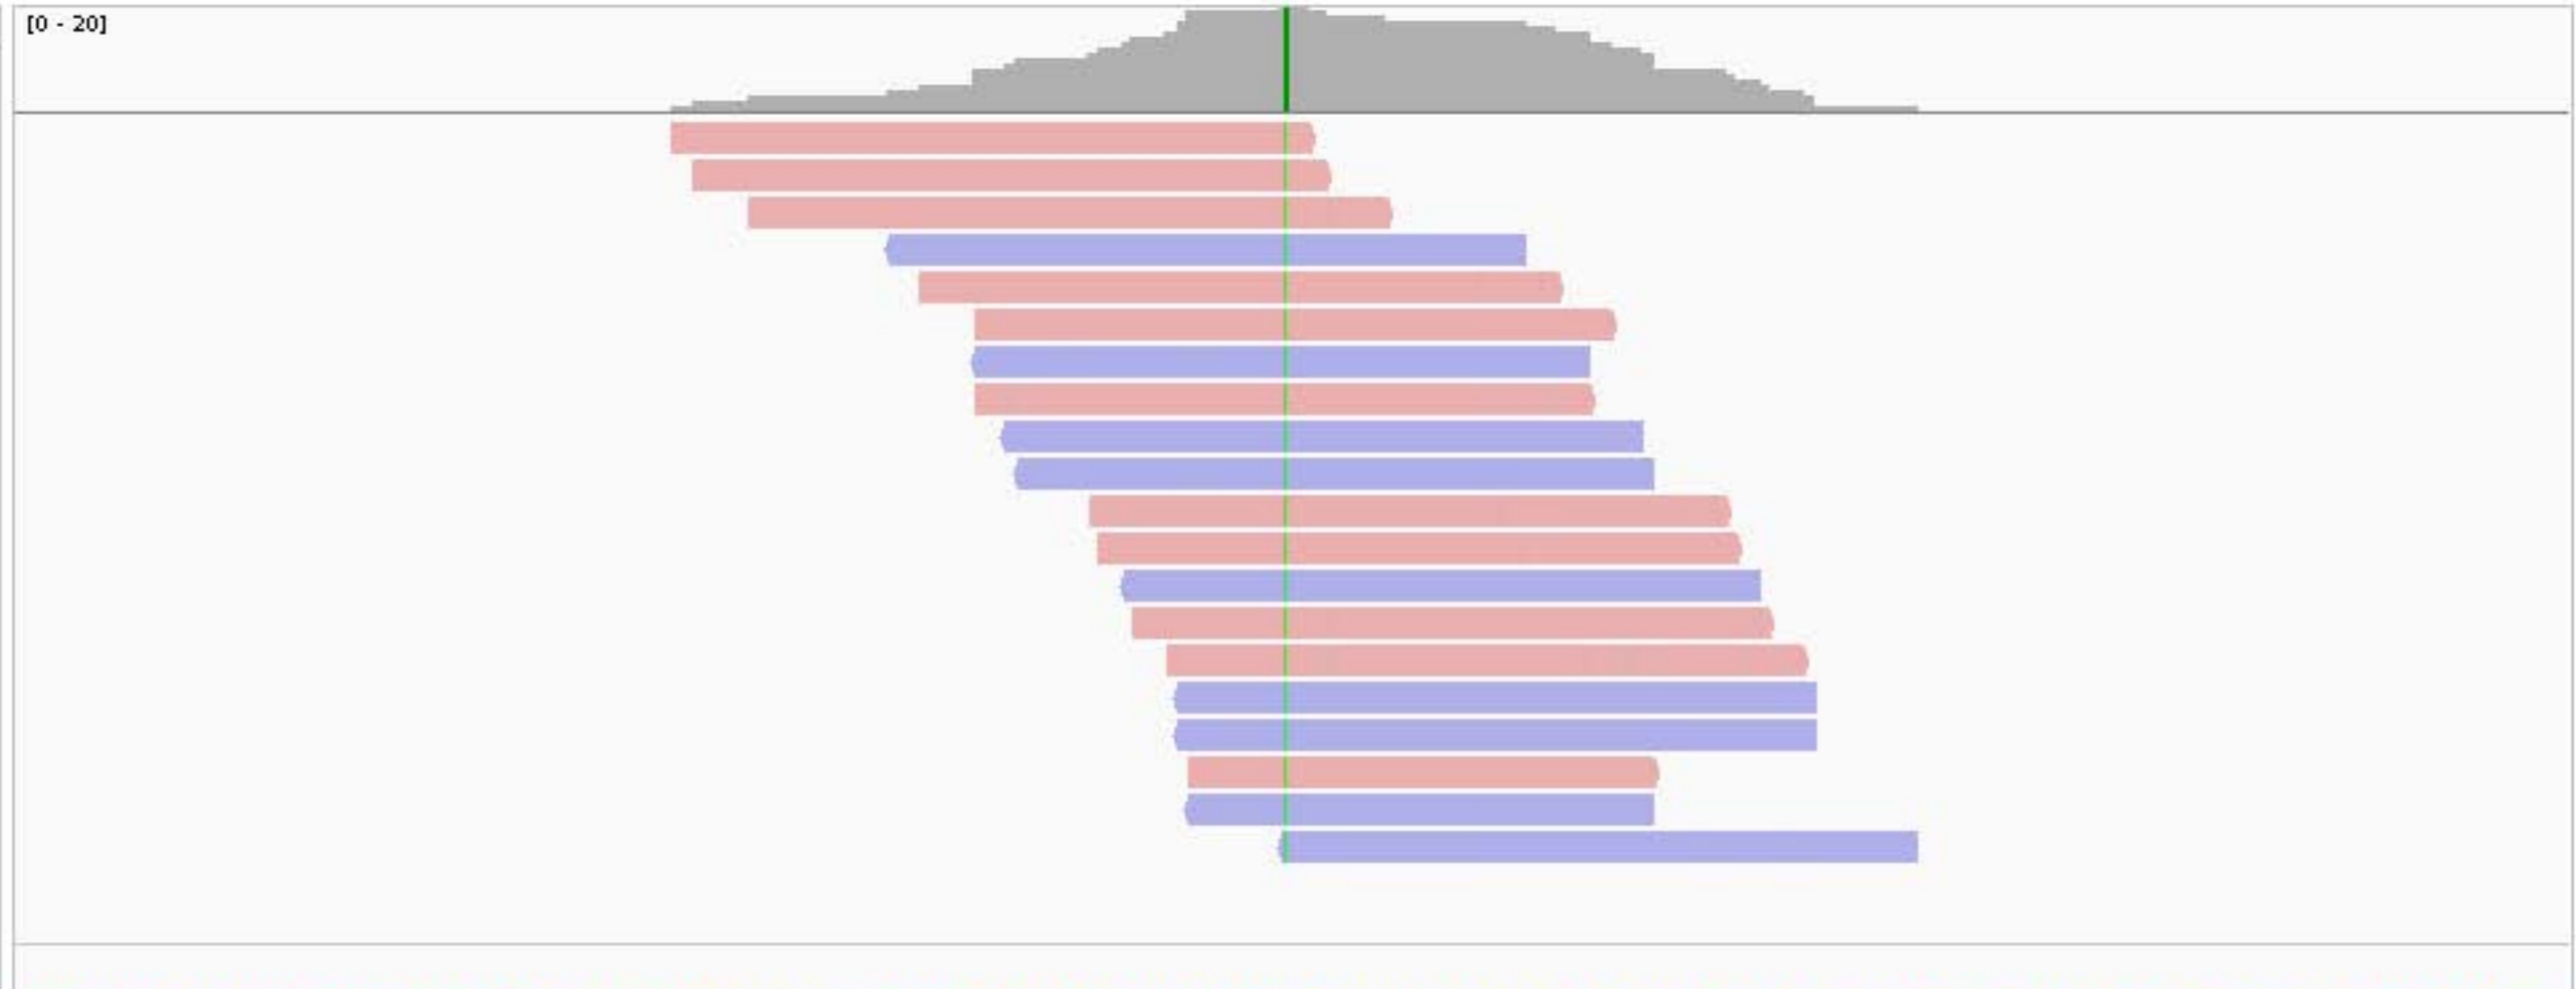

Sequence

Refseq Genes

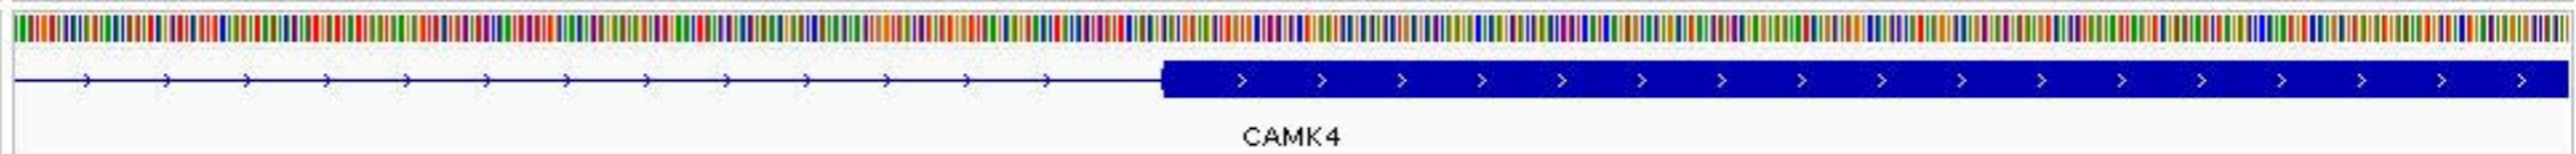

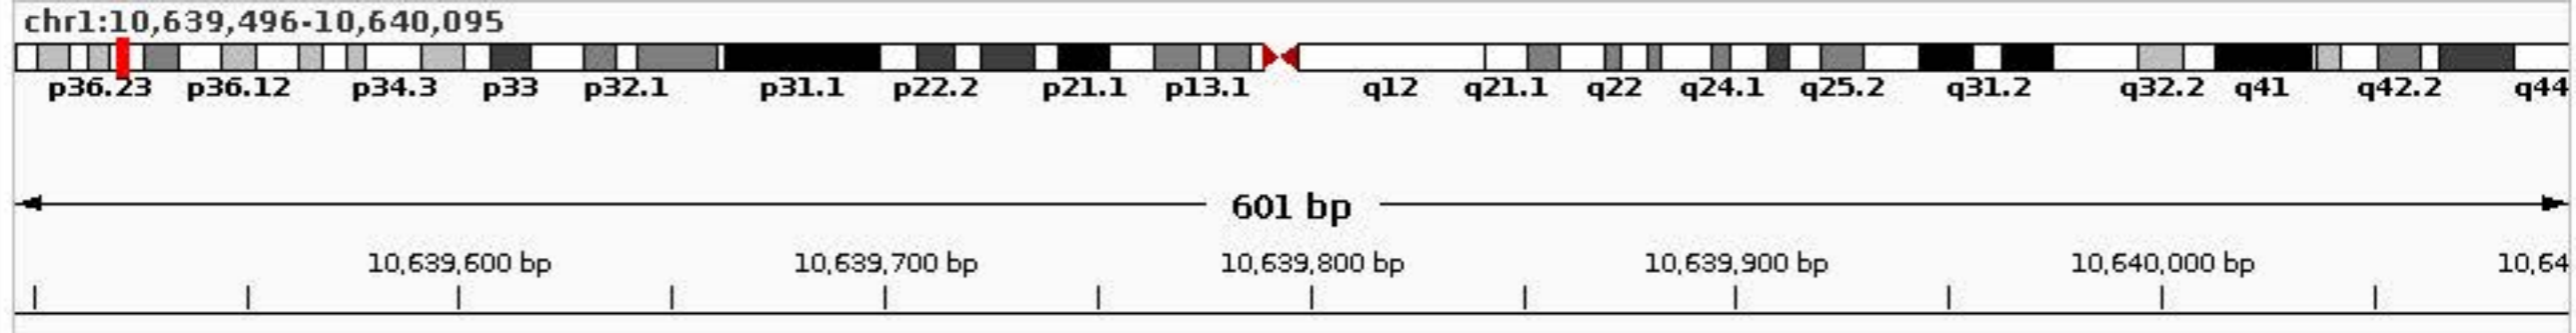

SL\_0001\_RN\_15\_mut.bam Coverage

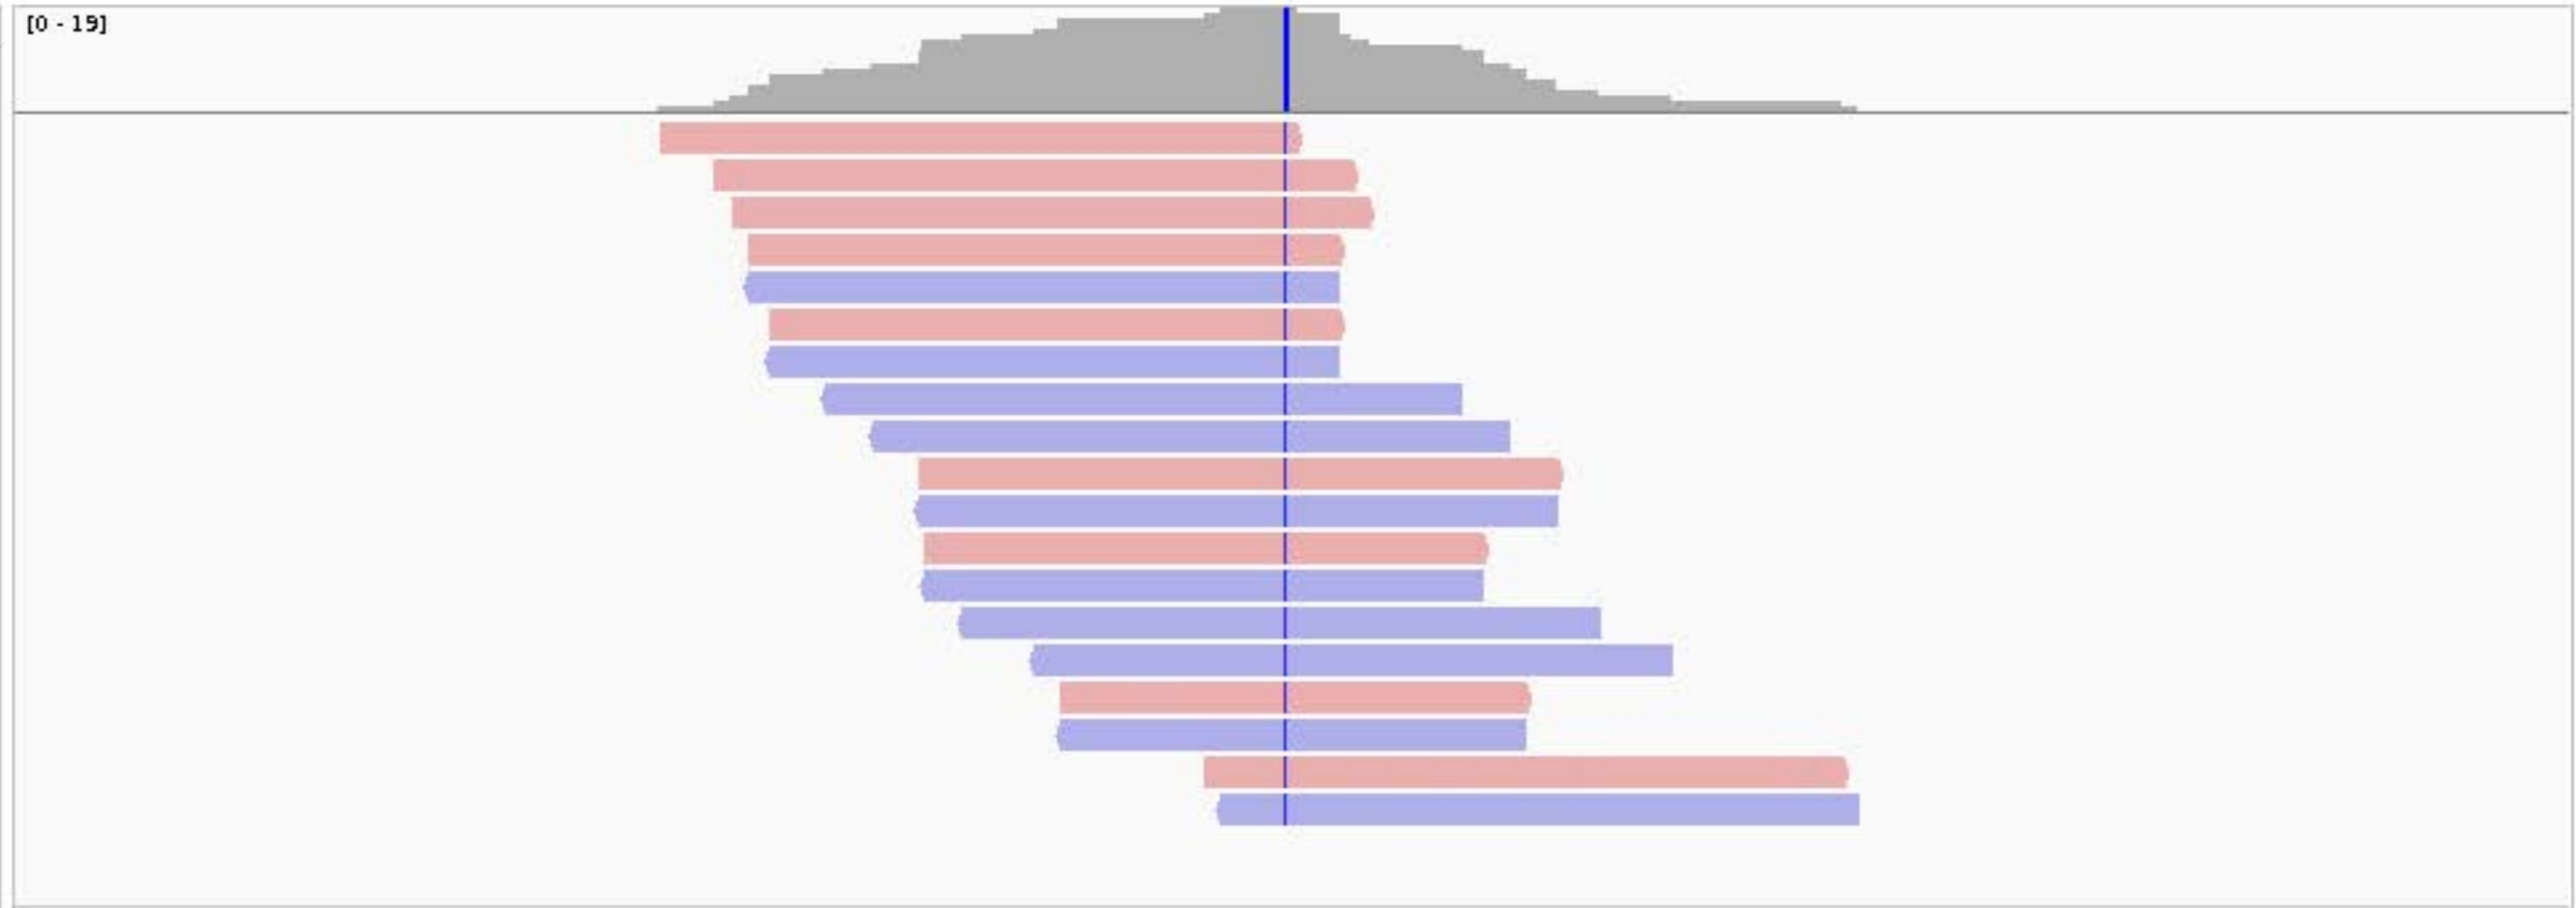

SL\_0001\_RN\_15\_mut.bam

Sequence

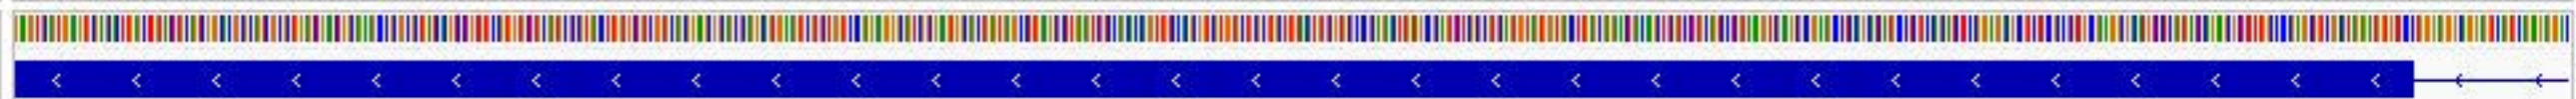

Refseq Genes

CASZ1

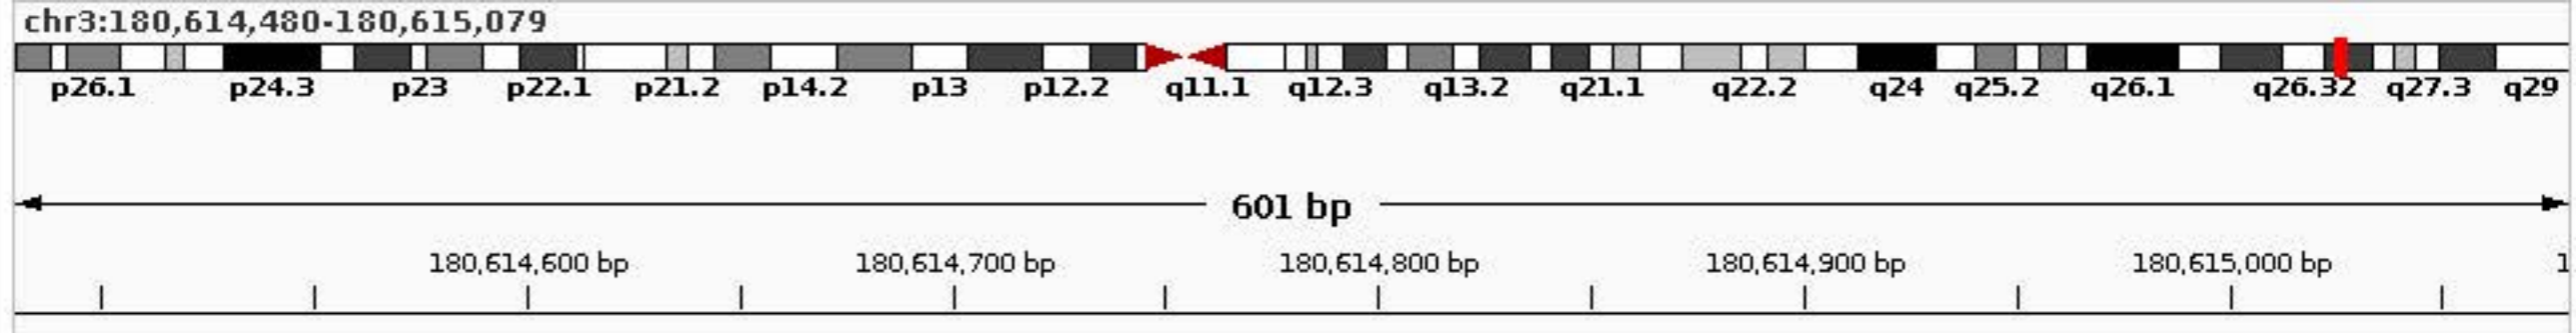

SL\_0017\_RN\_15\_mut.bam Coverage

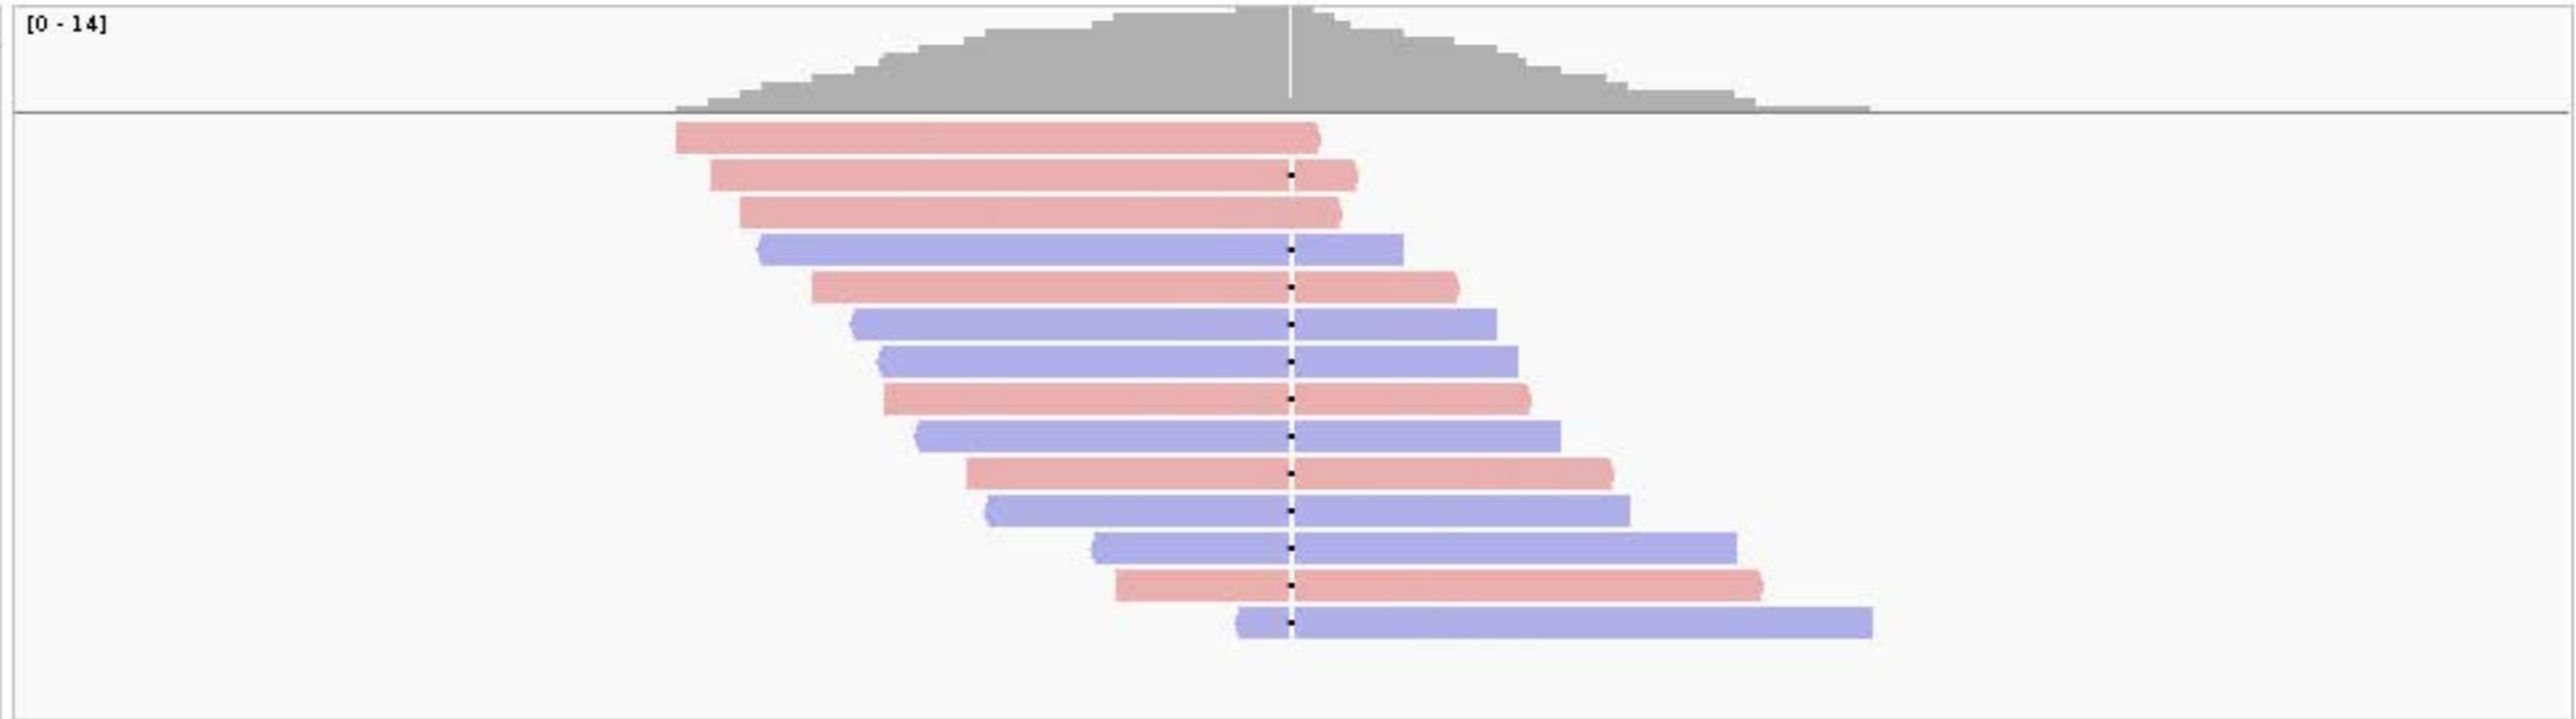

Sequence

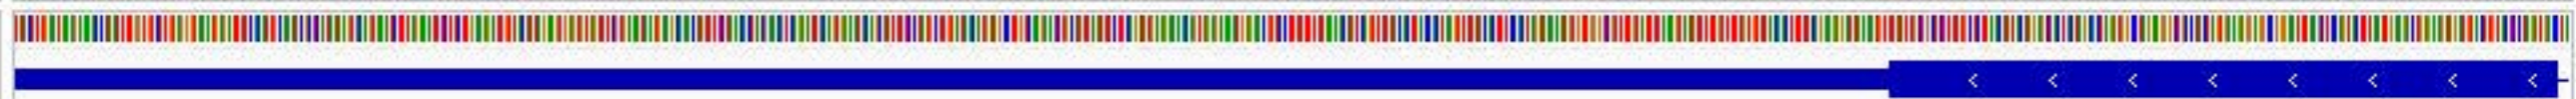

TTC14

chr17:82,201,281-82,201,880

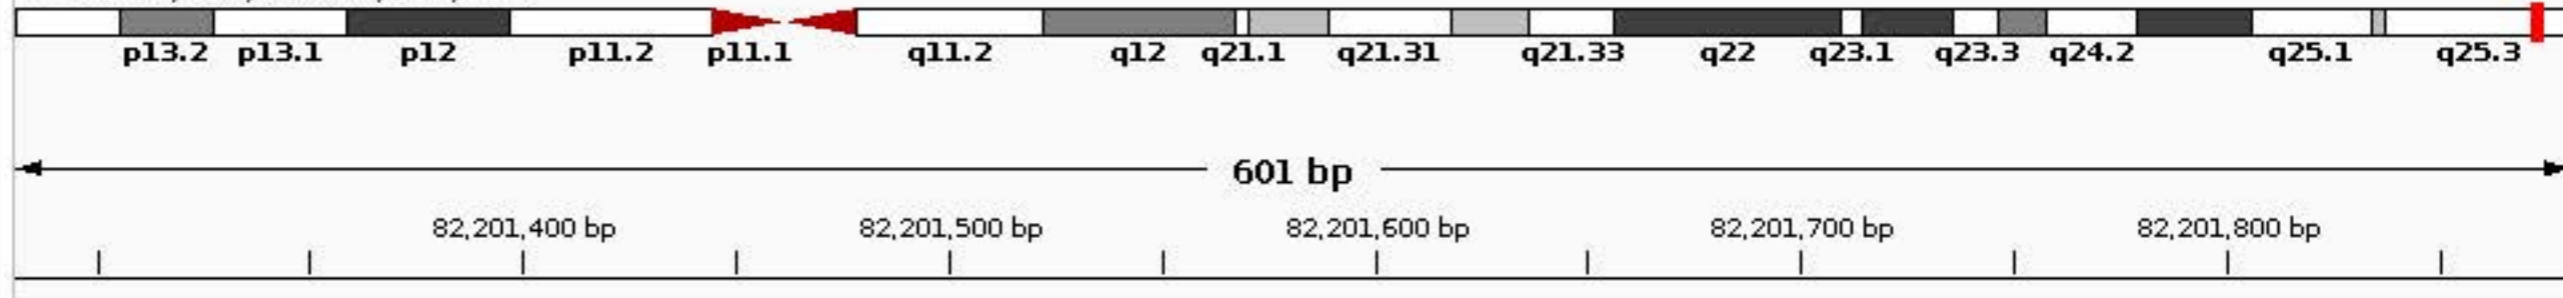

SL\_0006\_RN\_67\_mut.bam Coverage

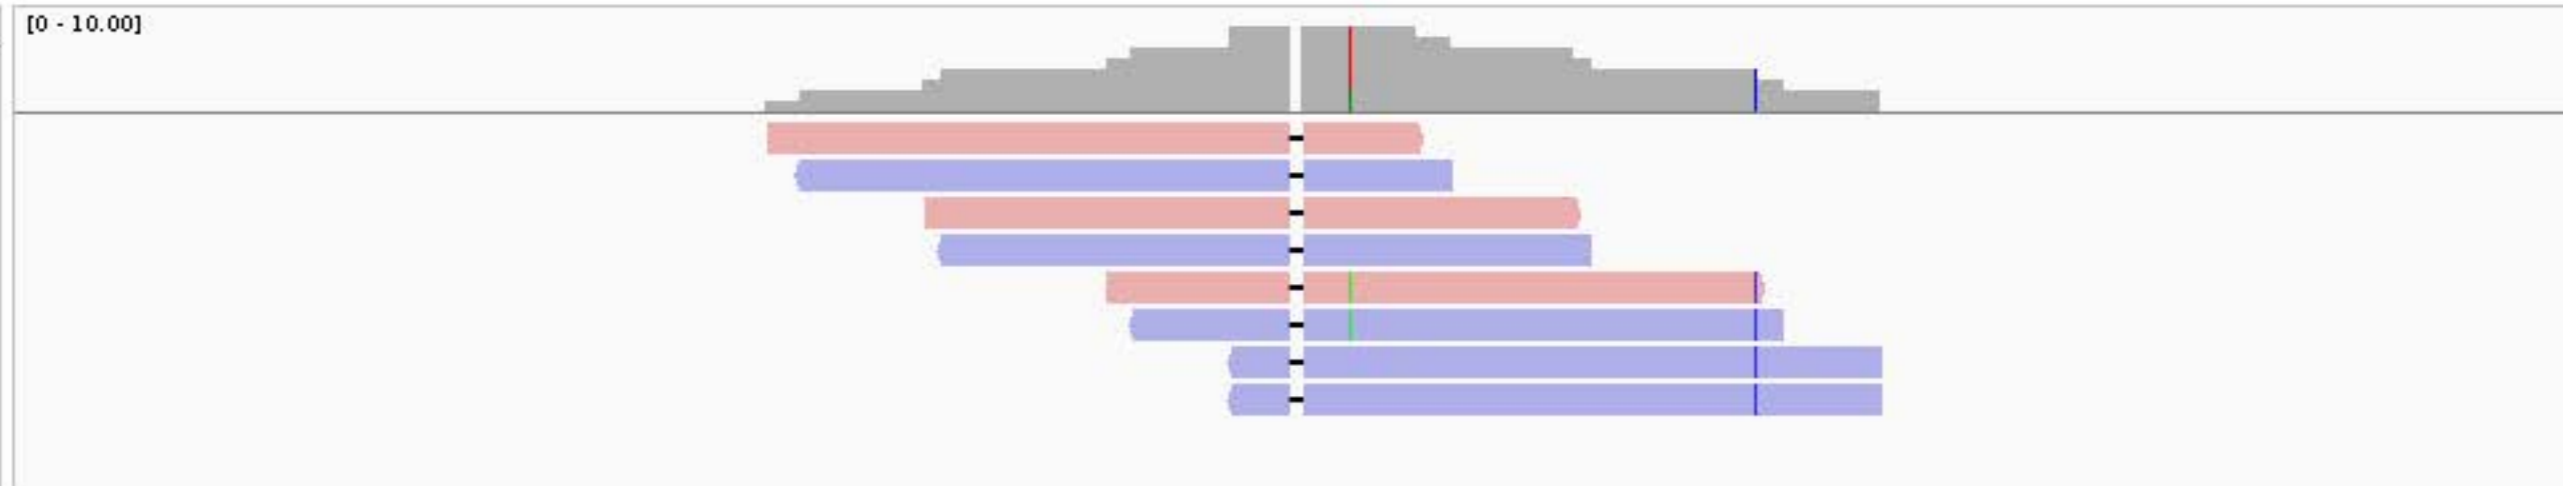

SL\_0006\_RN\_67\_mut.bam

Sequence

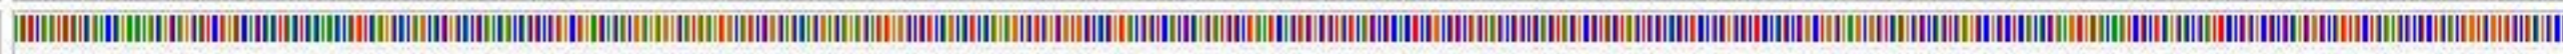

Refseq Genes

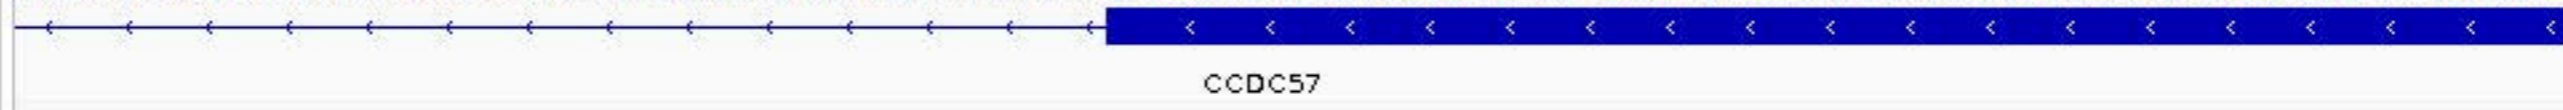

CCDC57



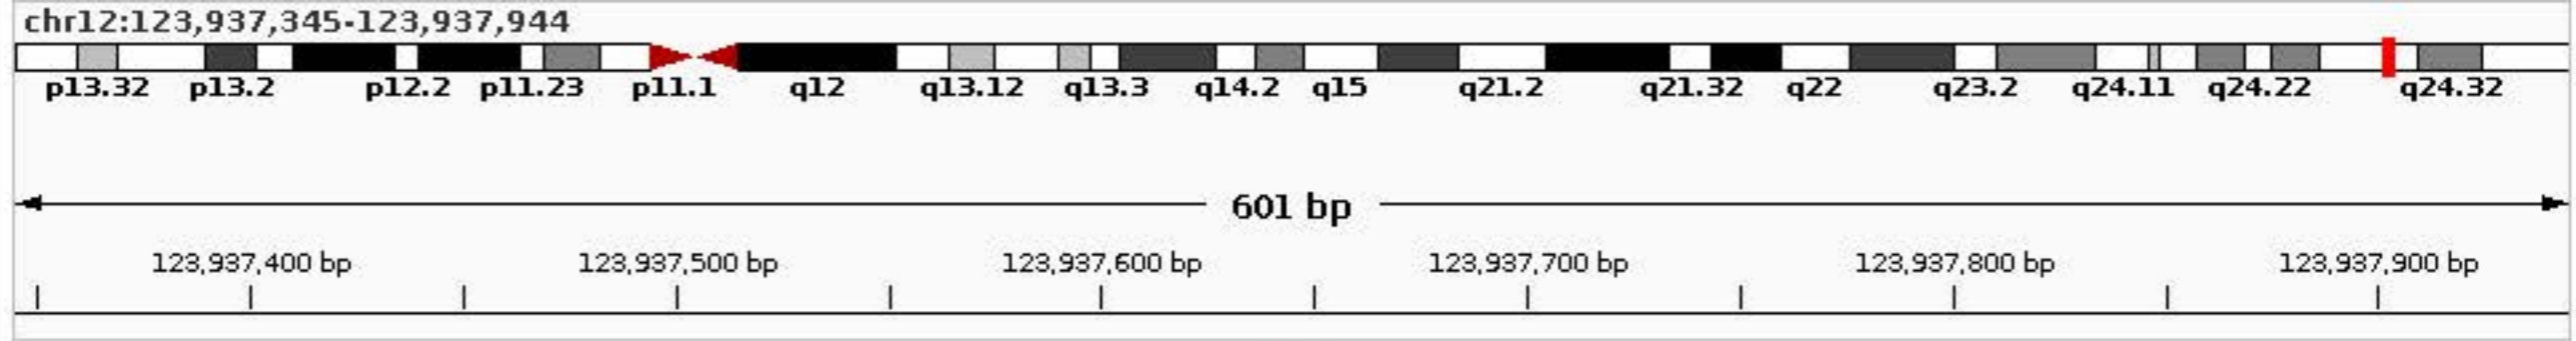

SL\_0004\_RN\_24\_mut.bam Coverage

SL\_0004\_RN\_24\_mut.bam

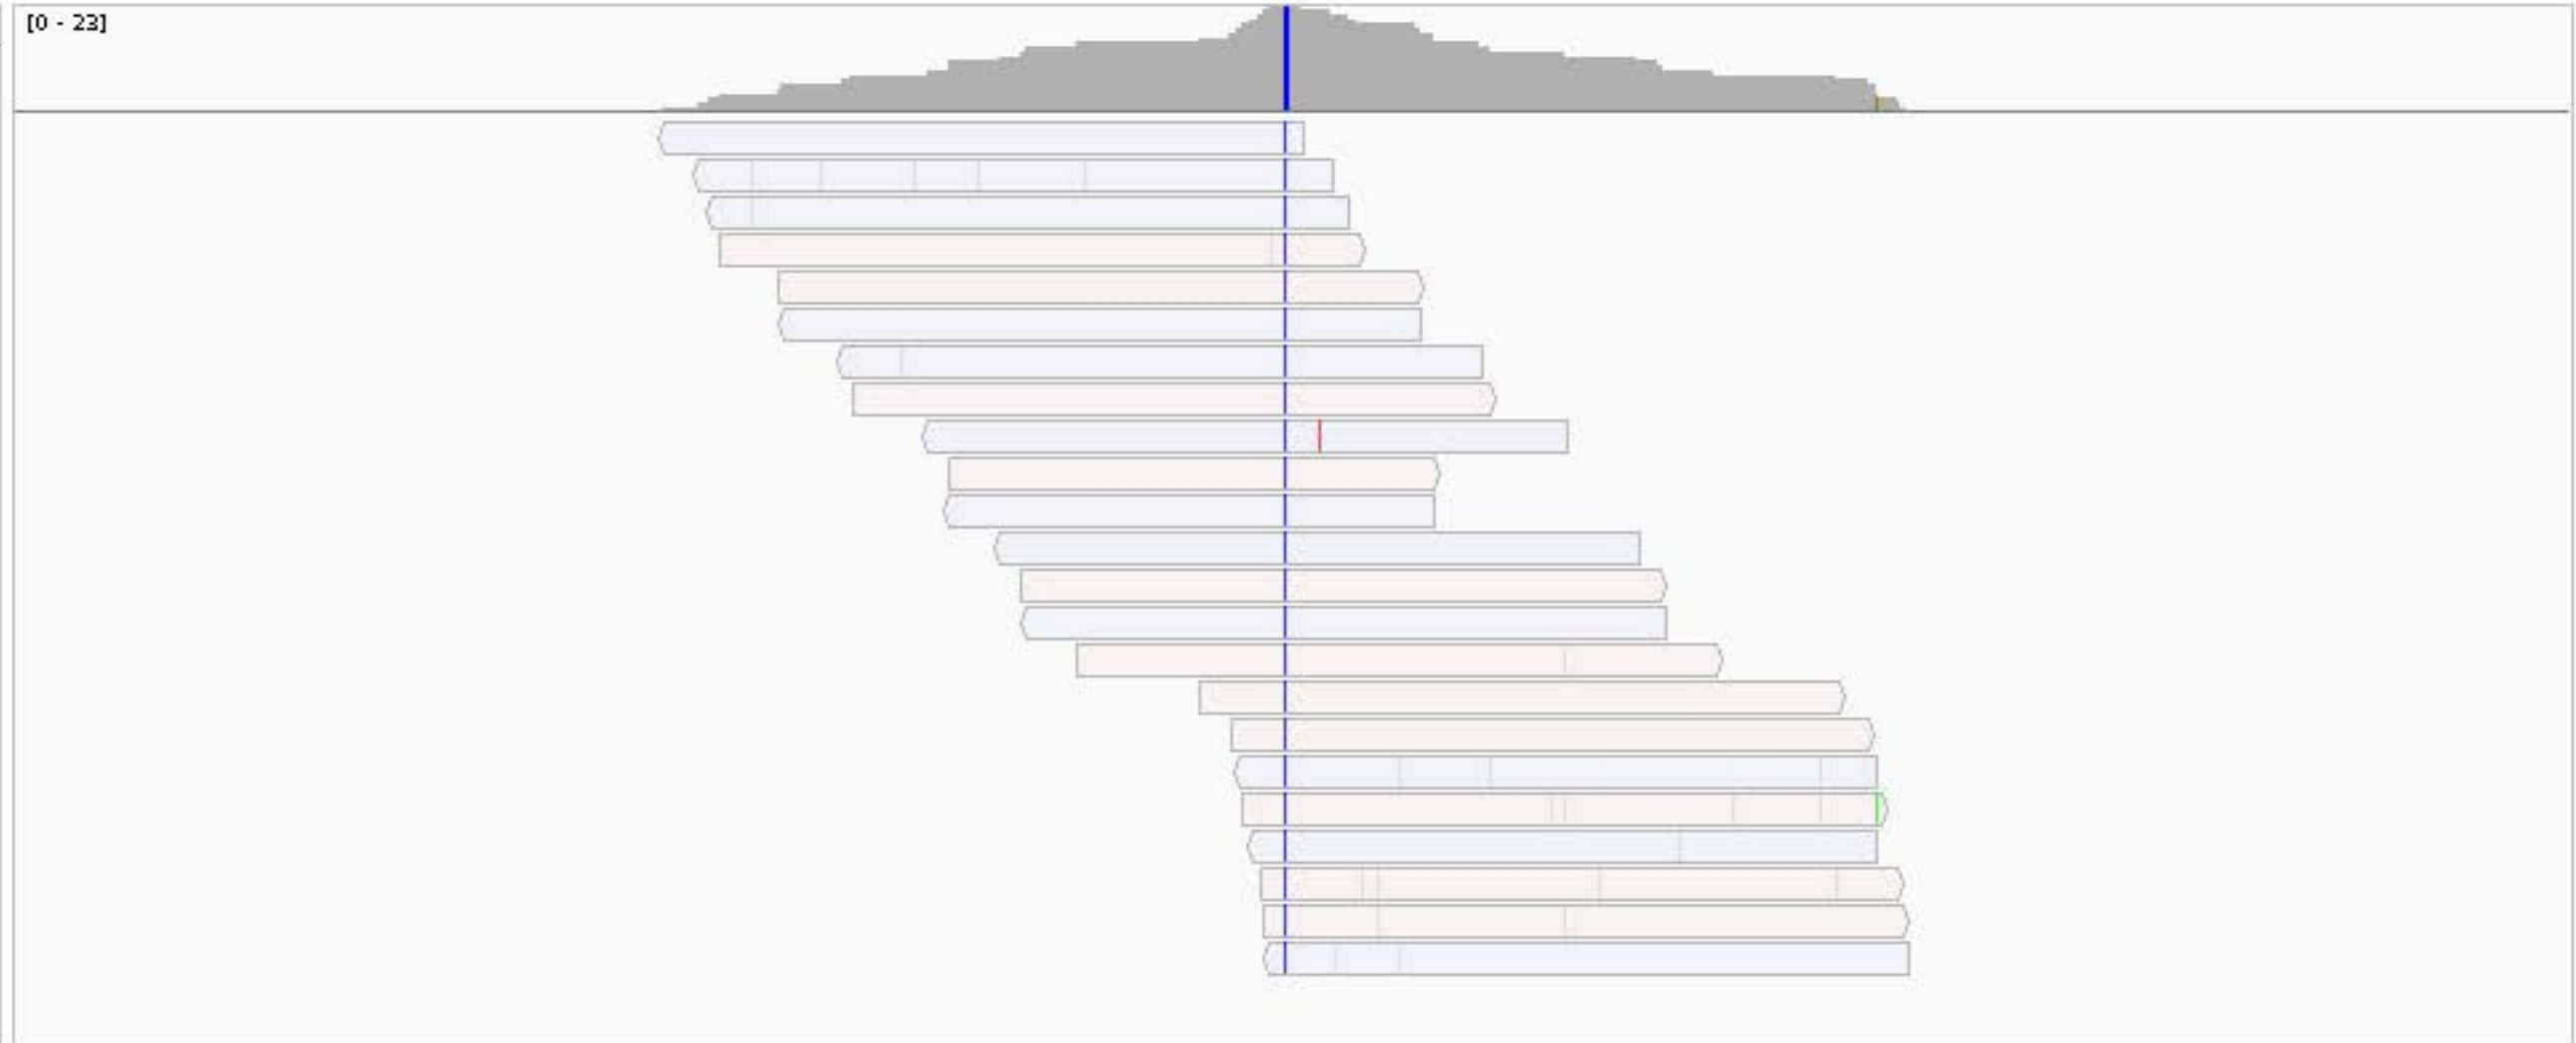

Sequence

Refseq Genes

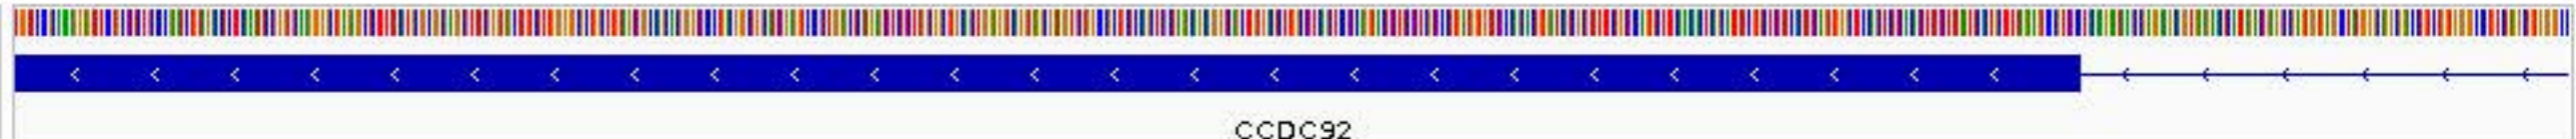

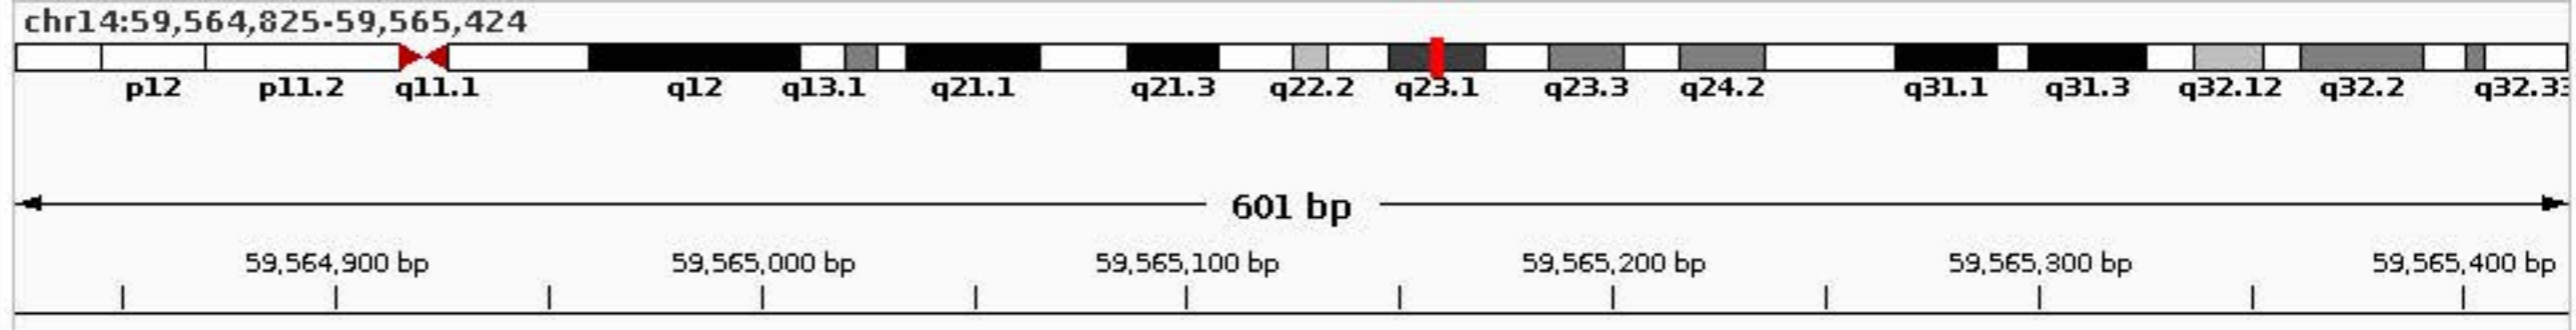

SL\_0001\_LN\_4\_mut.bam Coverage

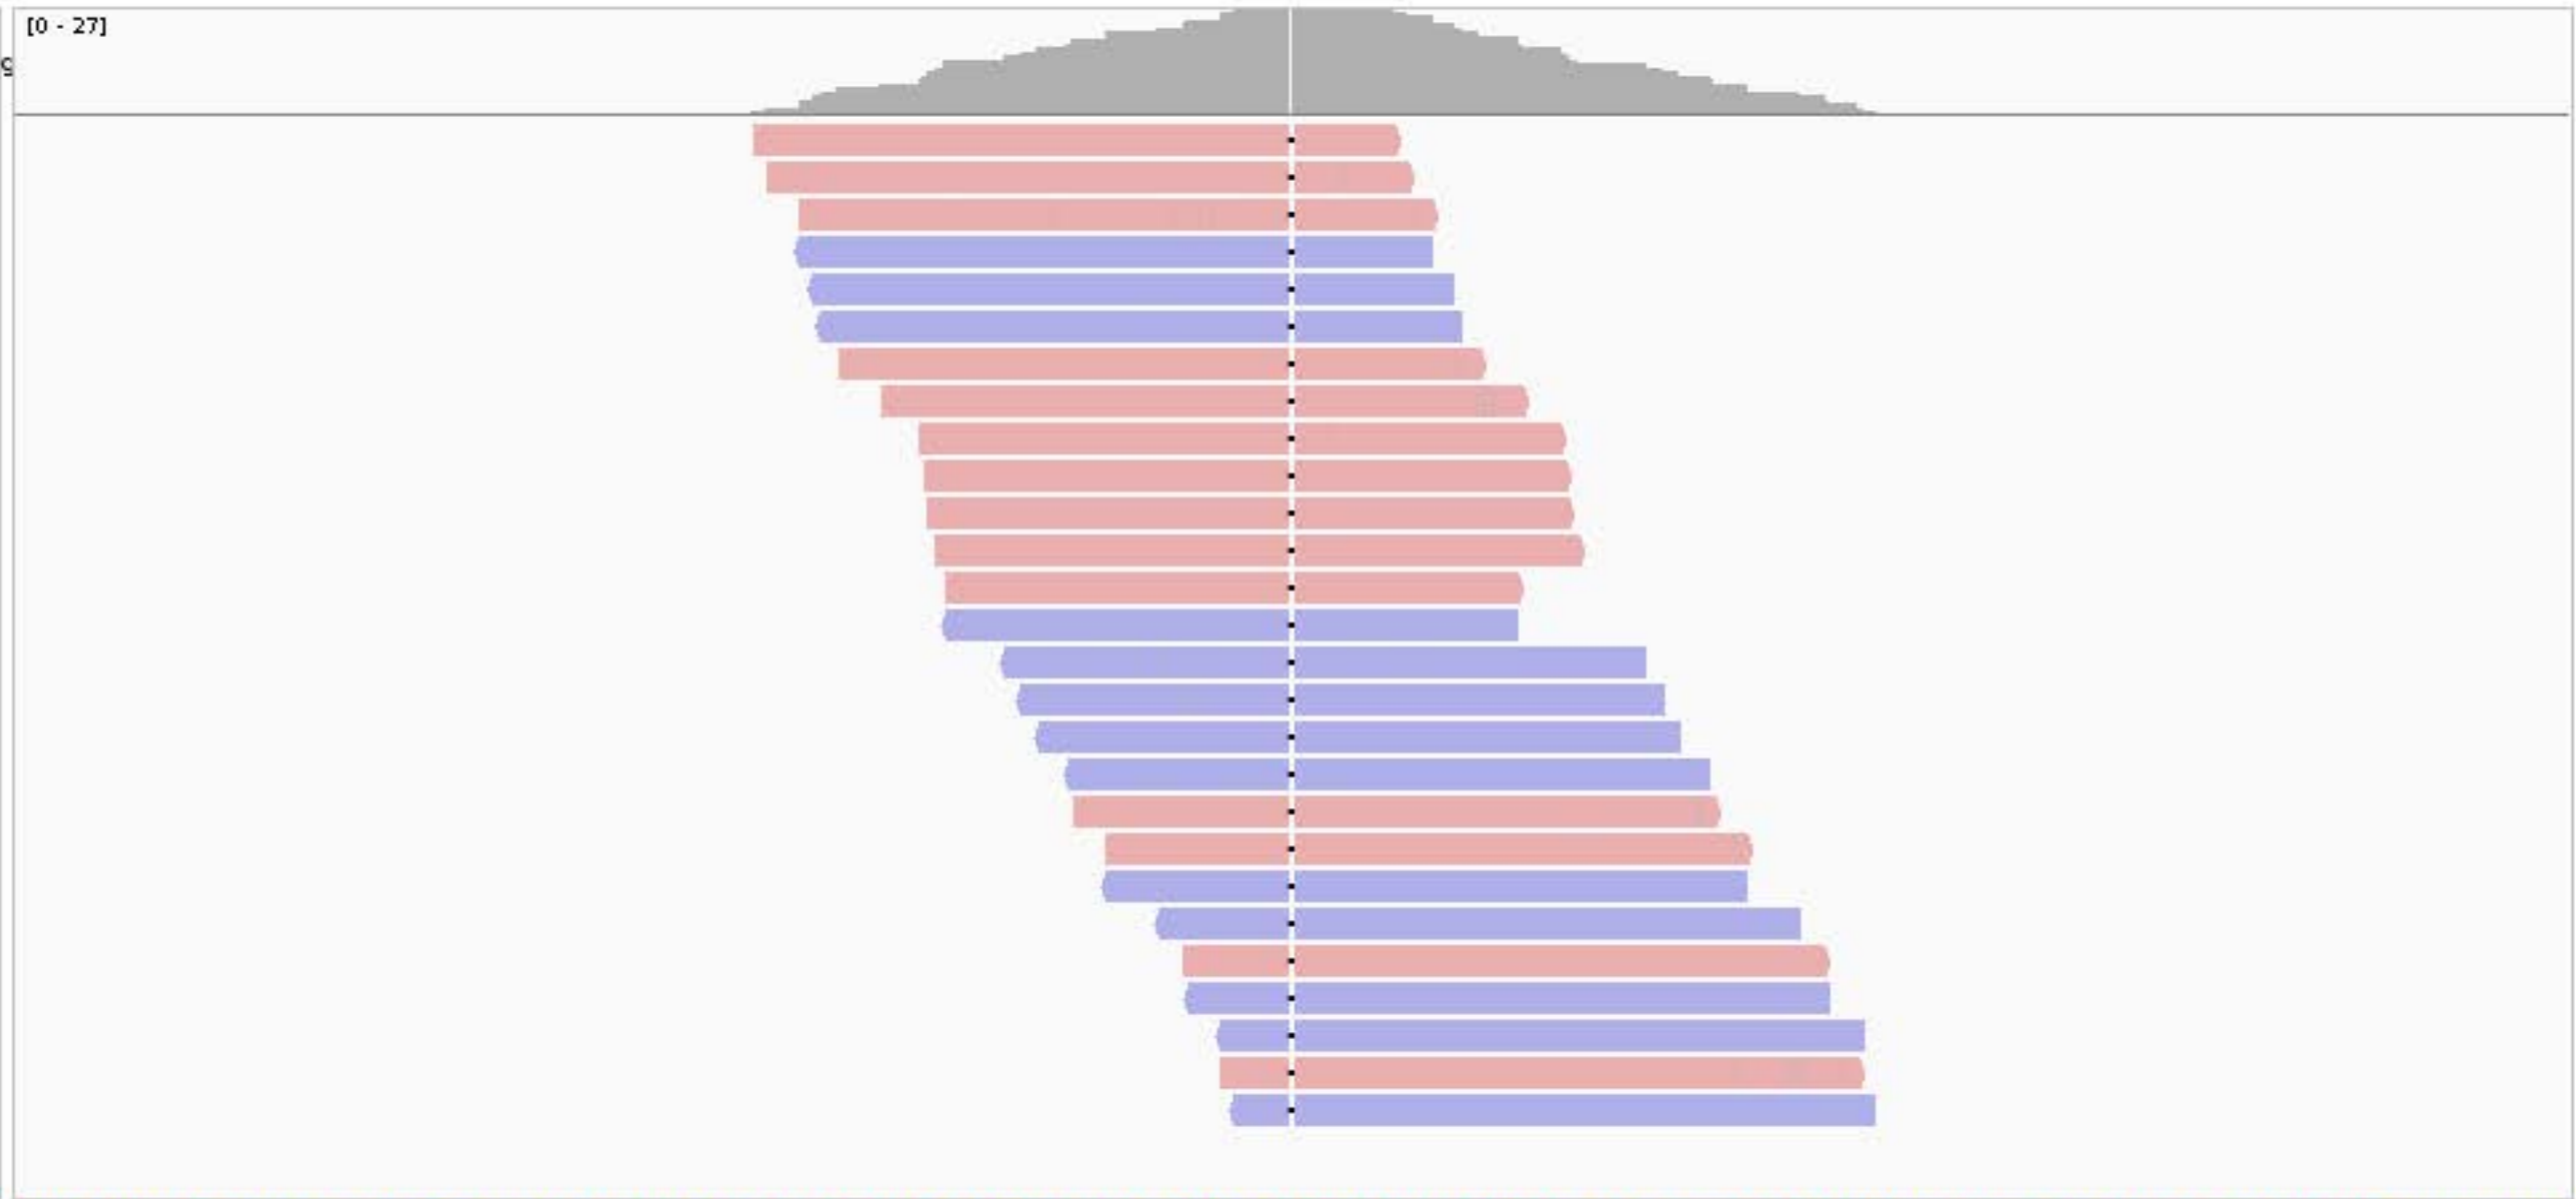

Sequence →

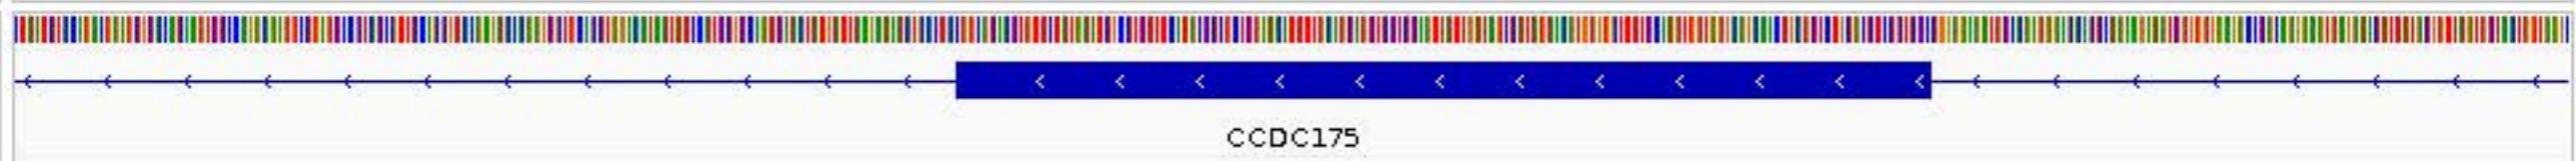

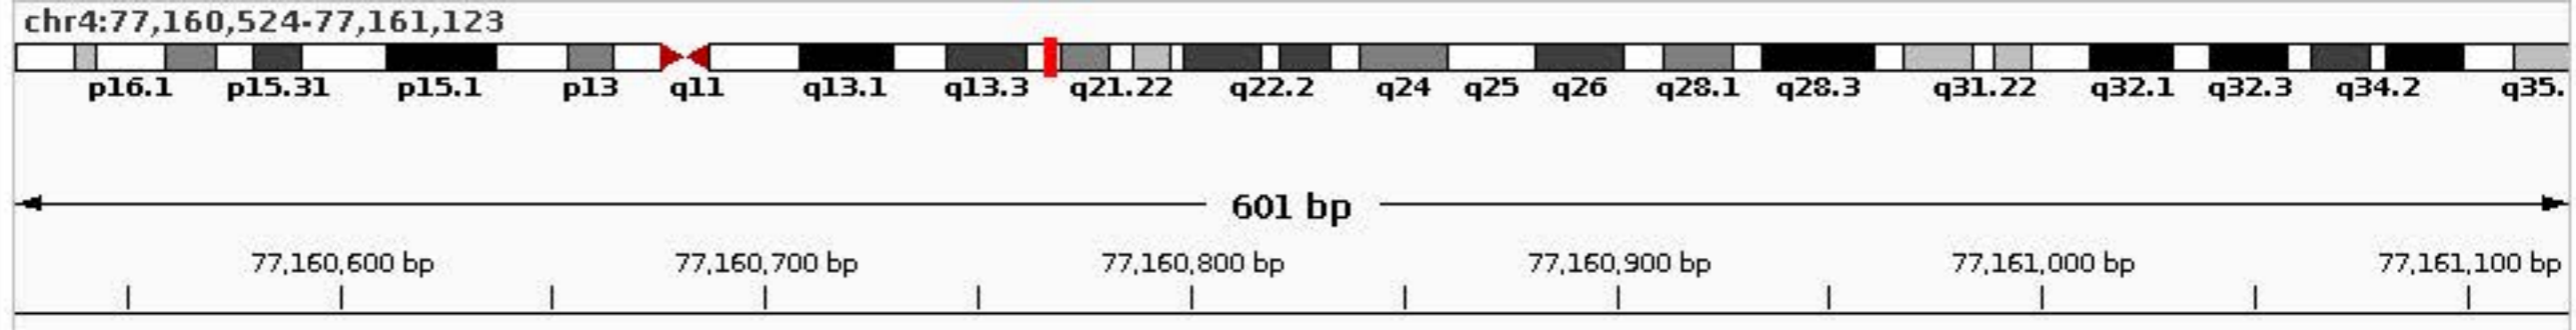

SL\_0003\_LN\_27\_mut.bam Coverage

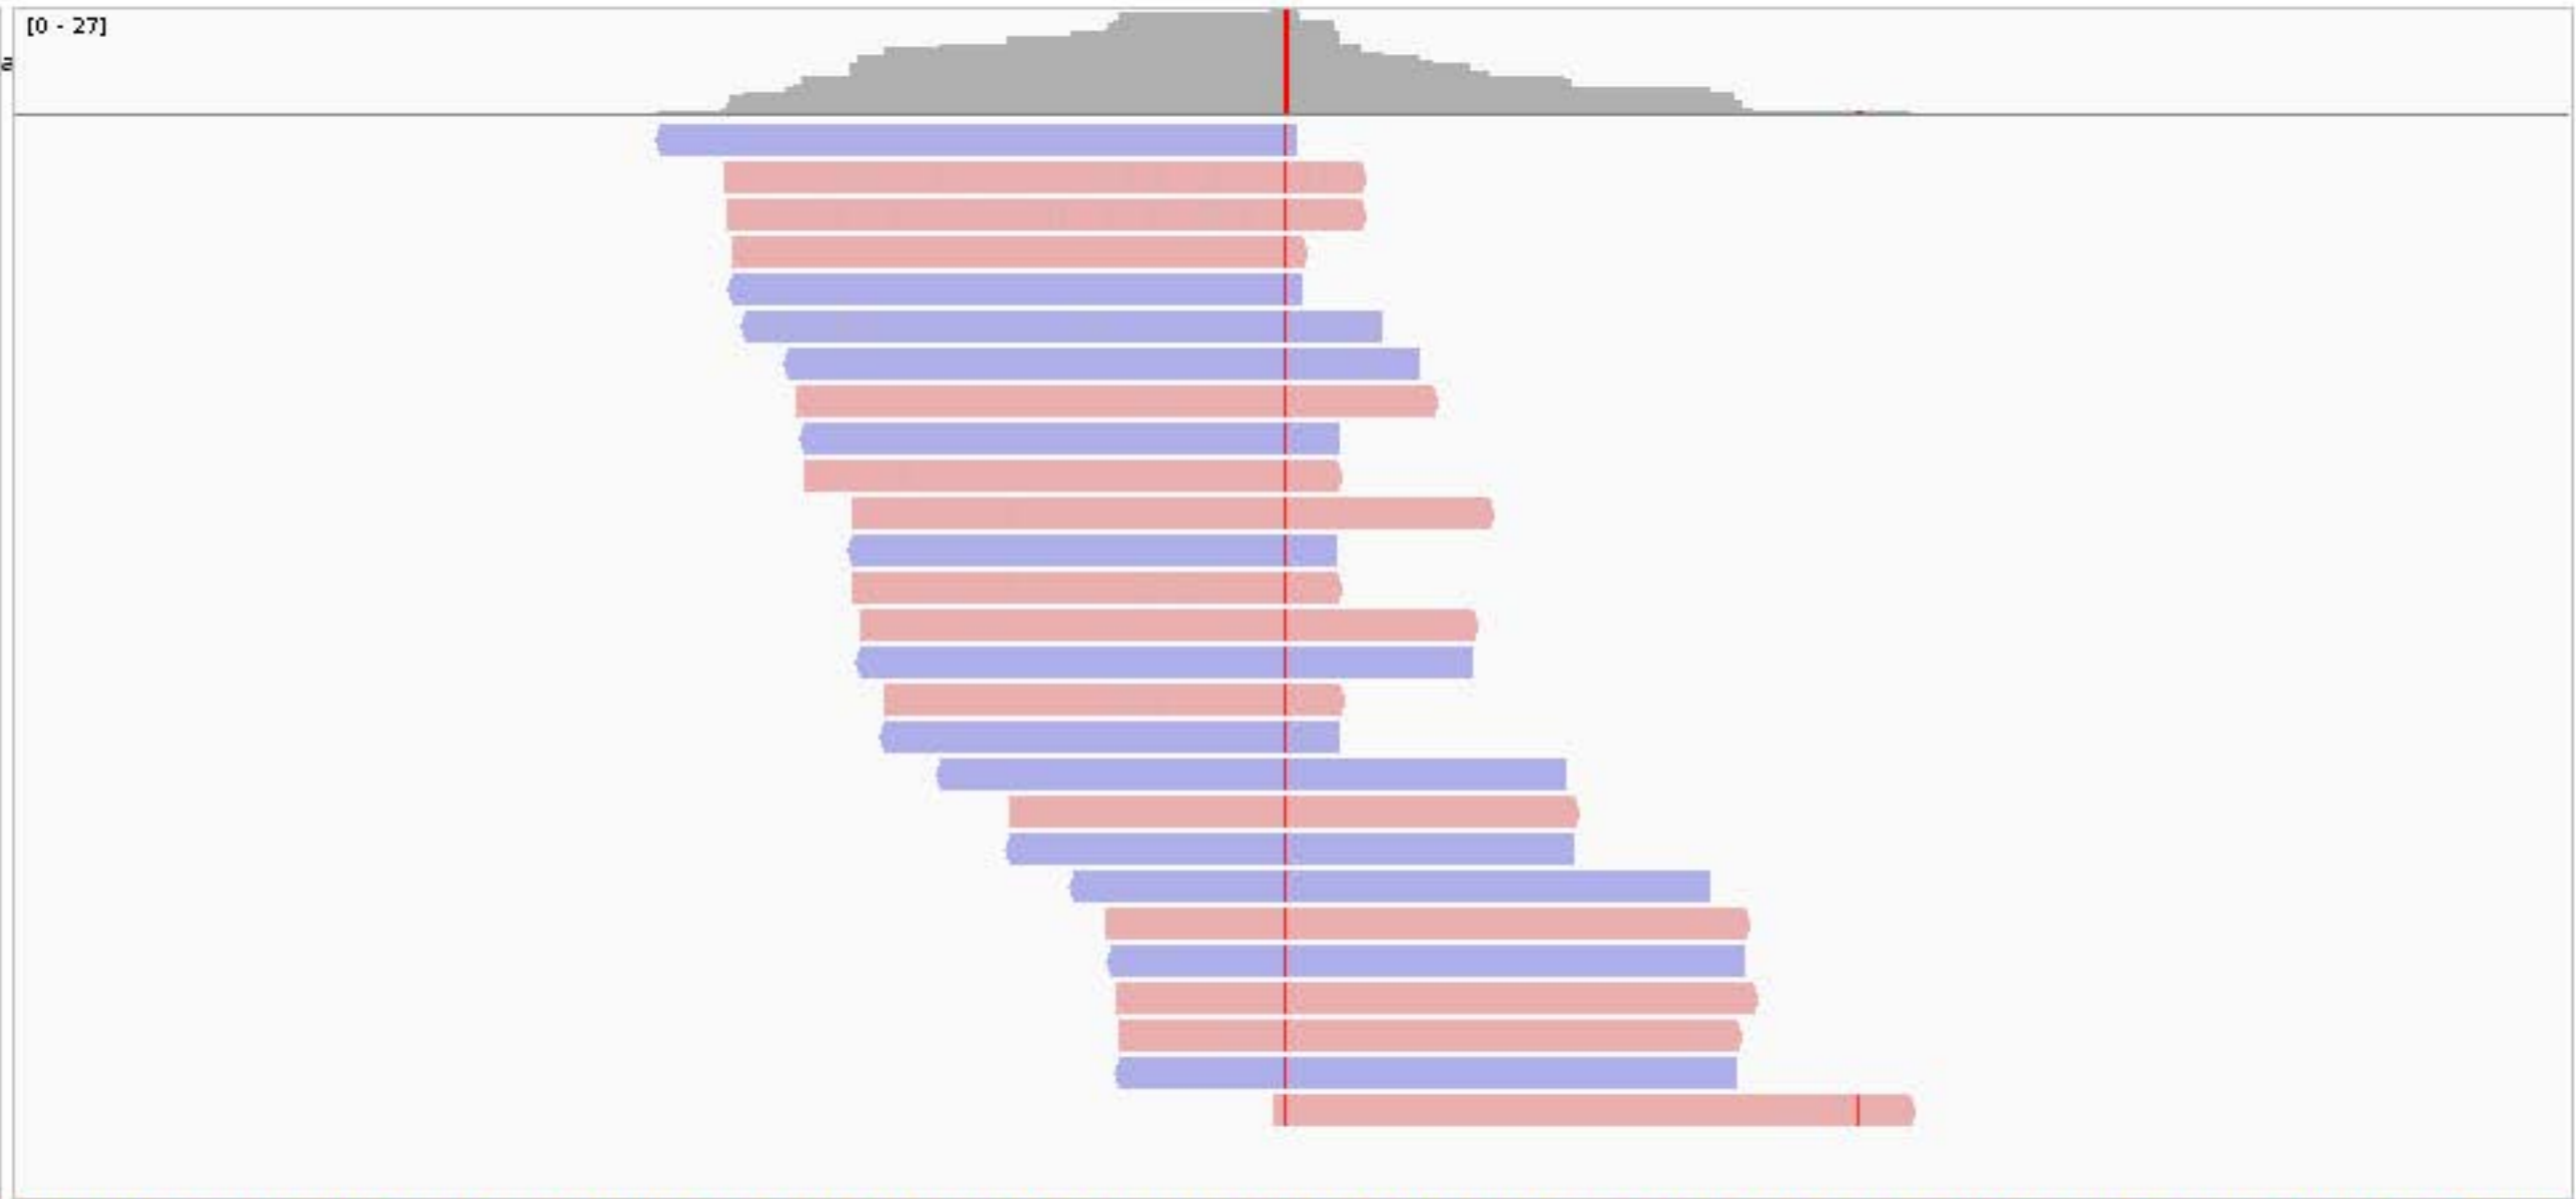

SL\_0003\_LN\_27\_mut.bam

Sequence →

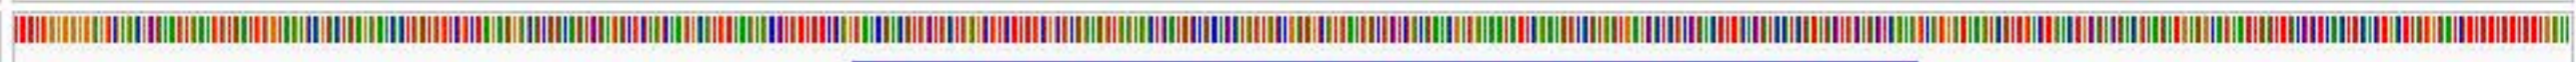

Refseq Genes

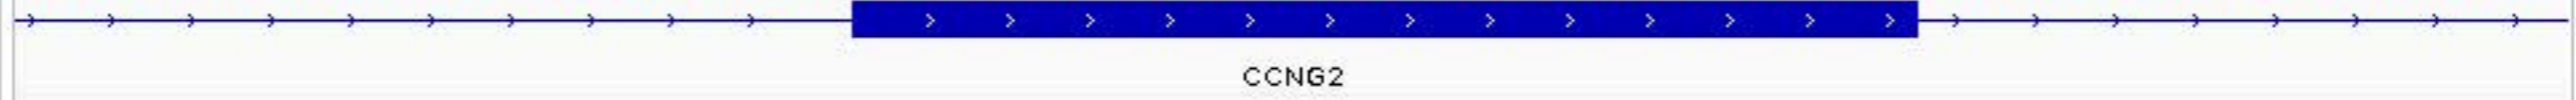

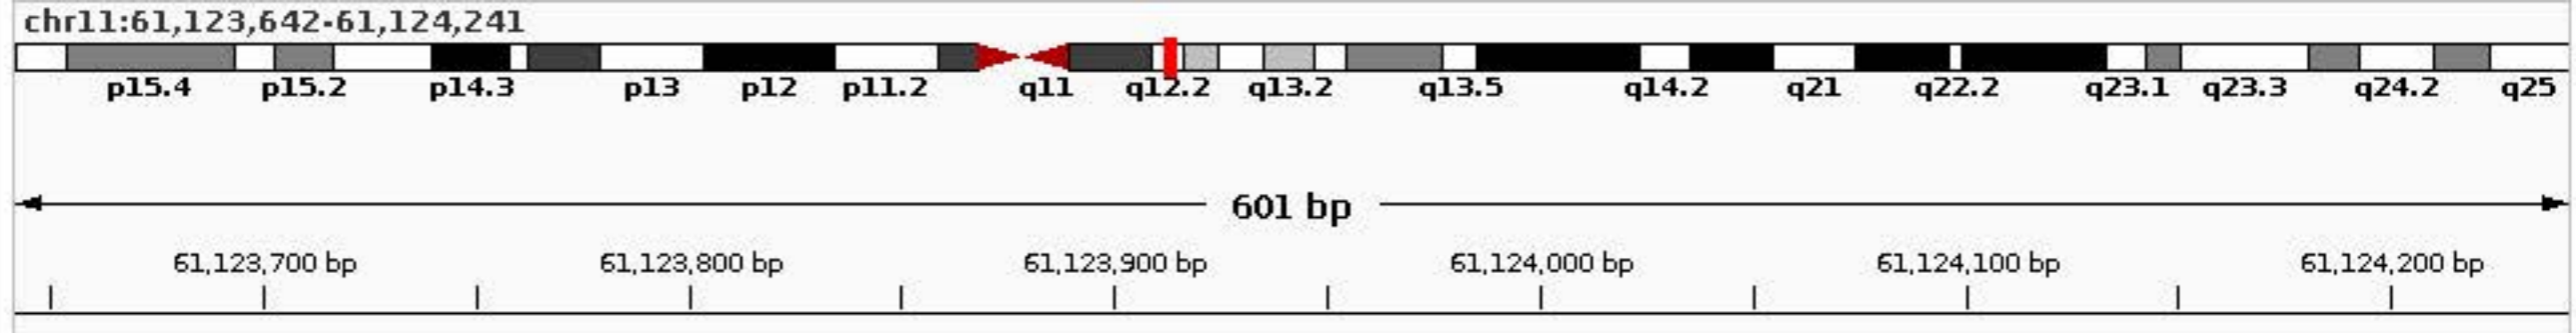

SL\_0017\_RN\_48\_mut.bam Coverage

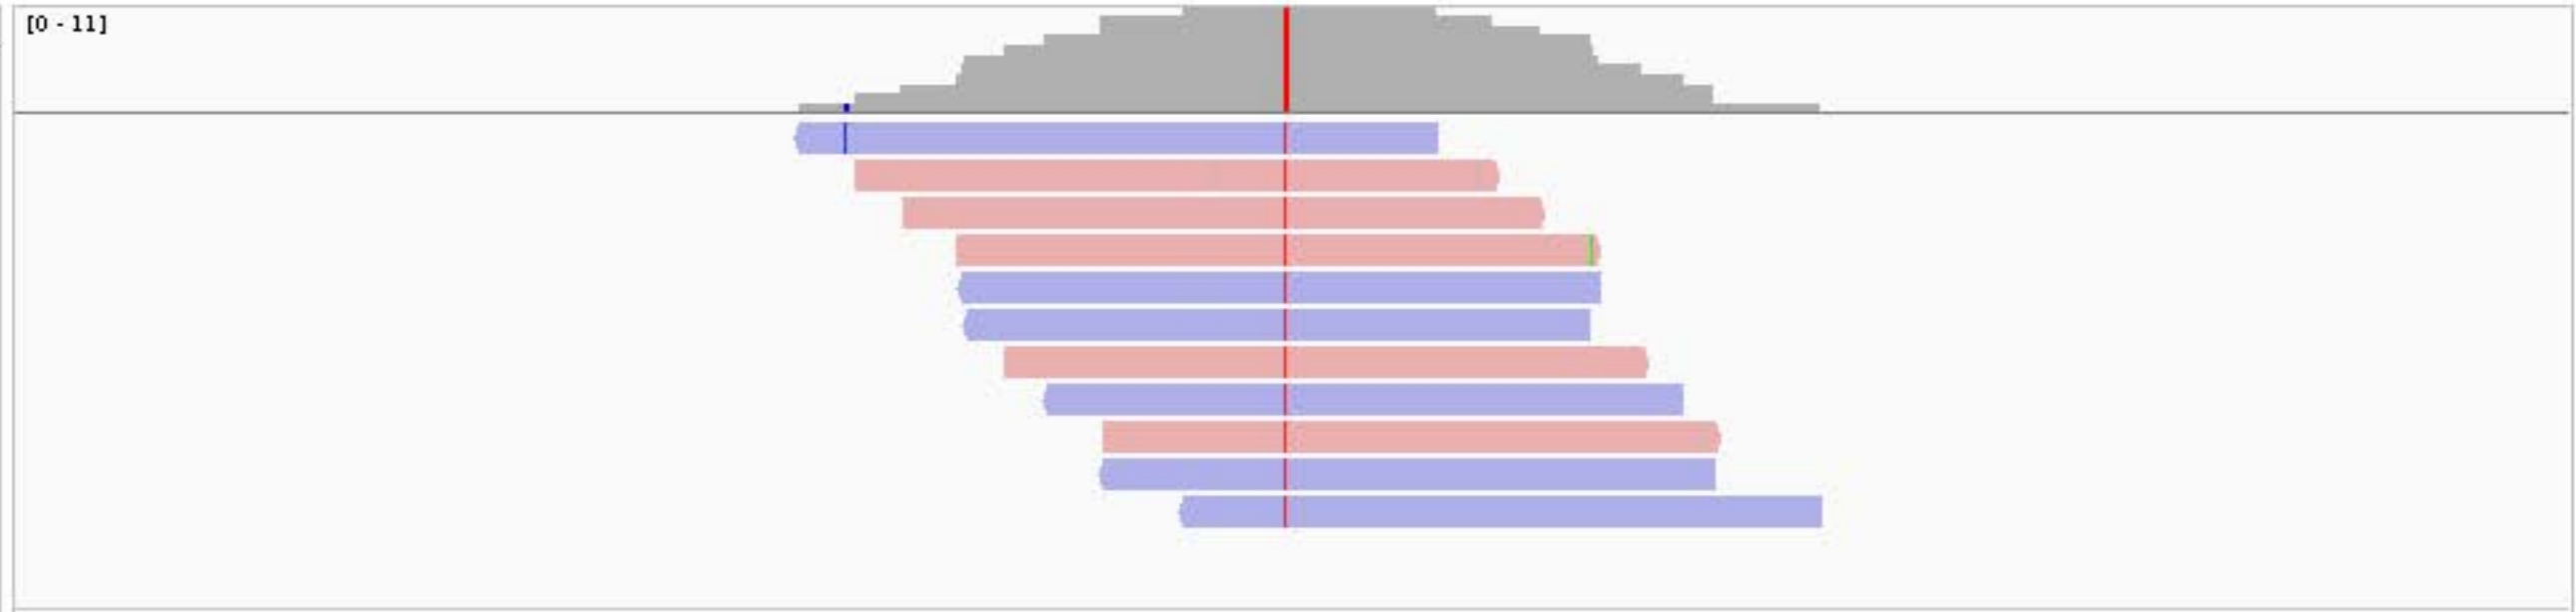

SL\_0017\_RN\_48\_mut.bam

Sequence →

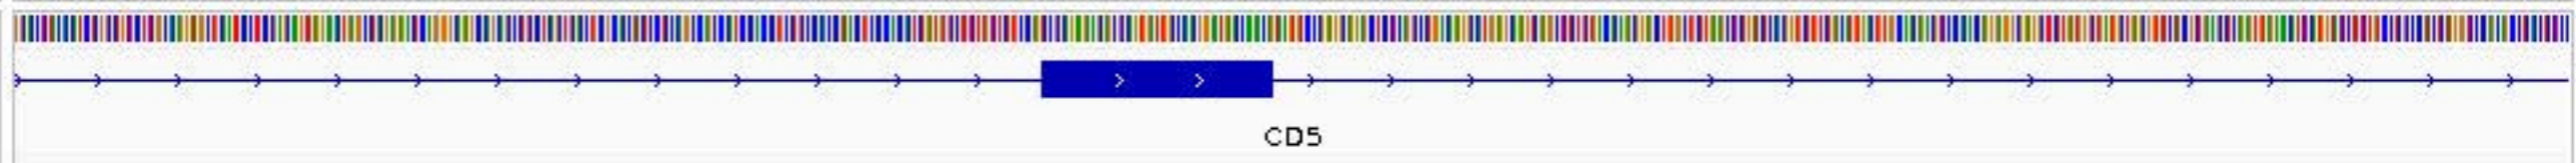

Refseq Genes

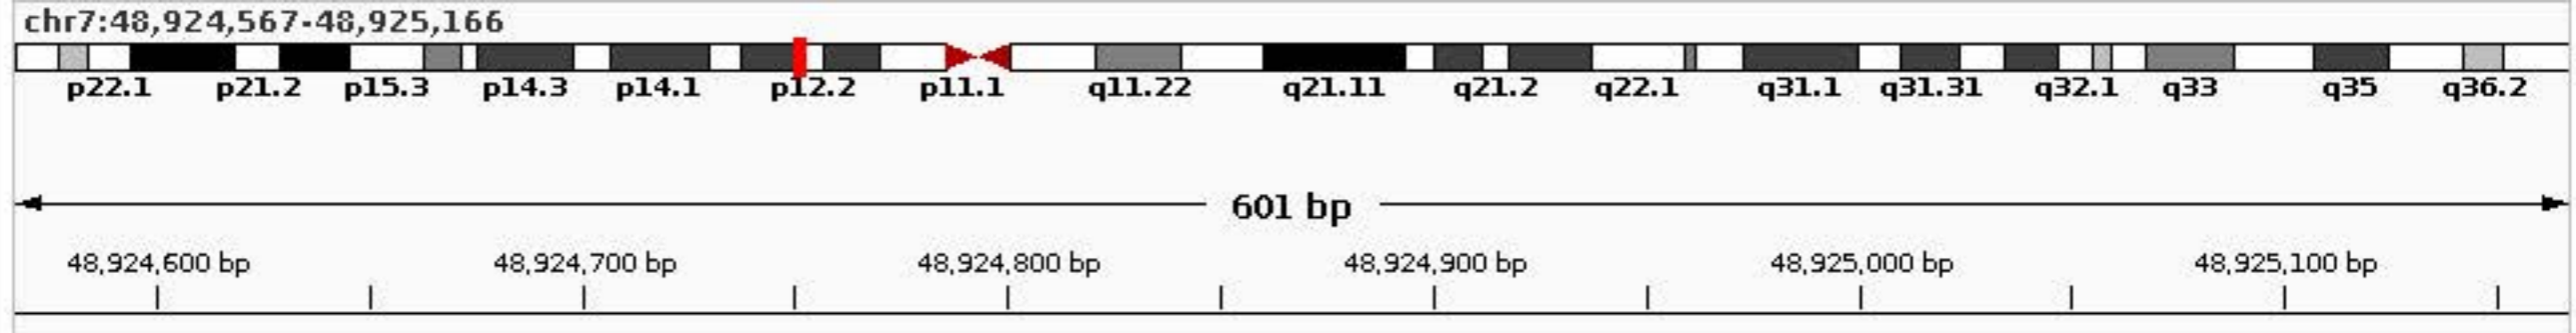

SL\_0004\_RN\_05\_mut.bam Coverage

SL\_0004\_RN\_05\_mut.bam

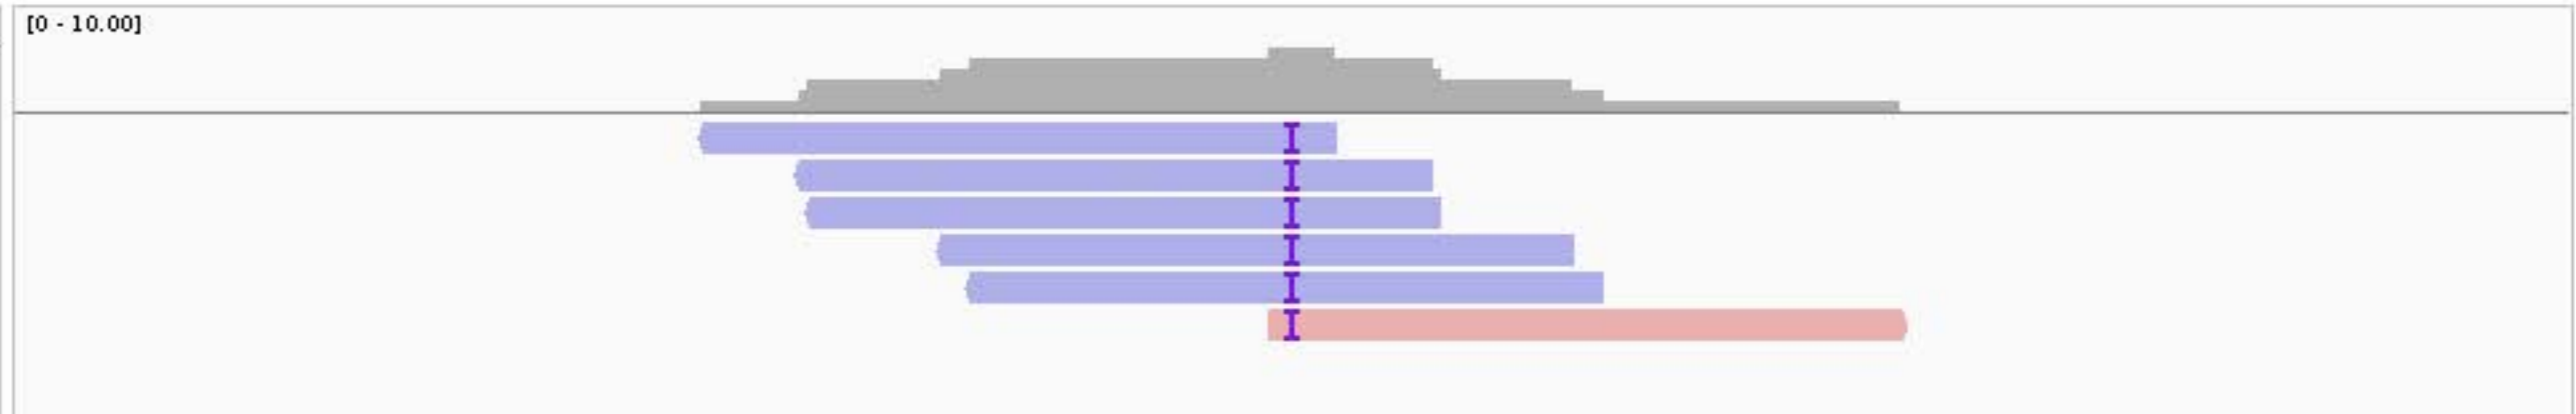

Sequence

Refseq Genes

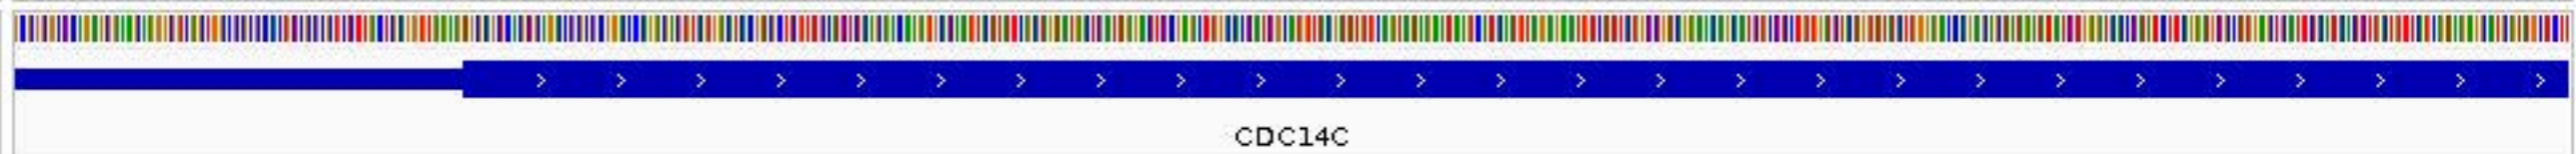



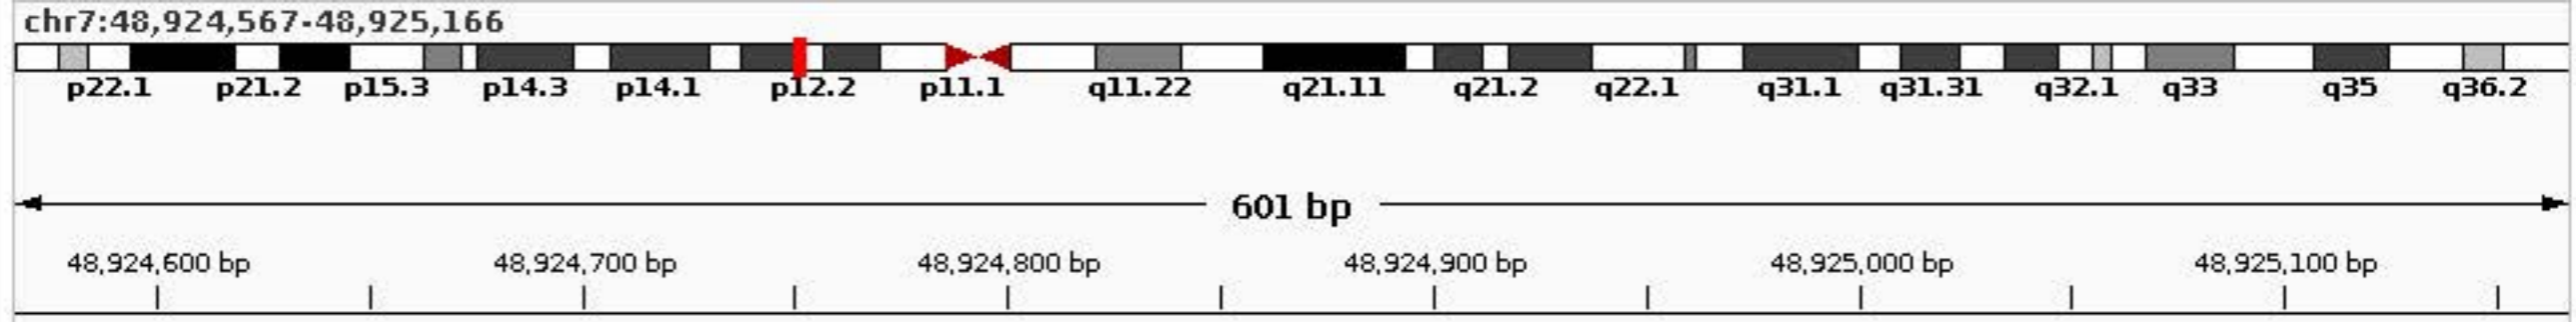

SL\_0004\_RN\_24\_mut.bam Coverage

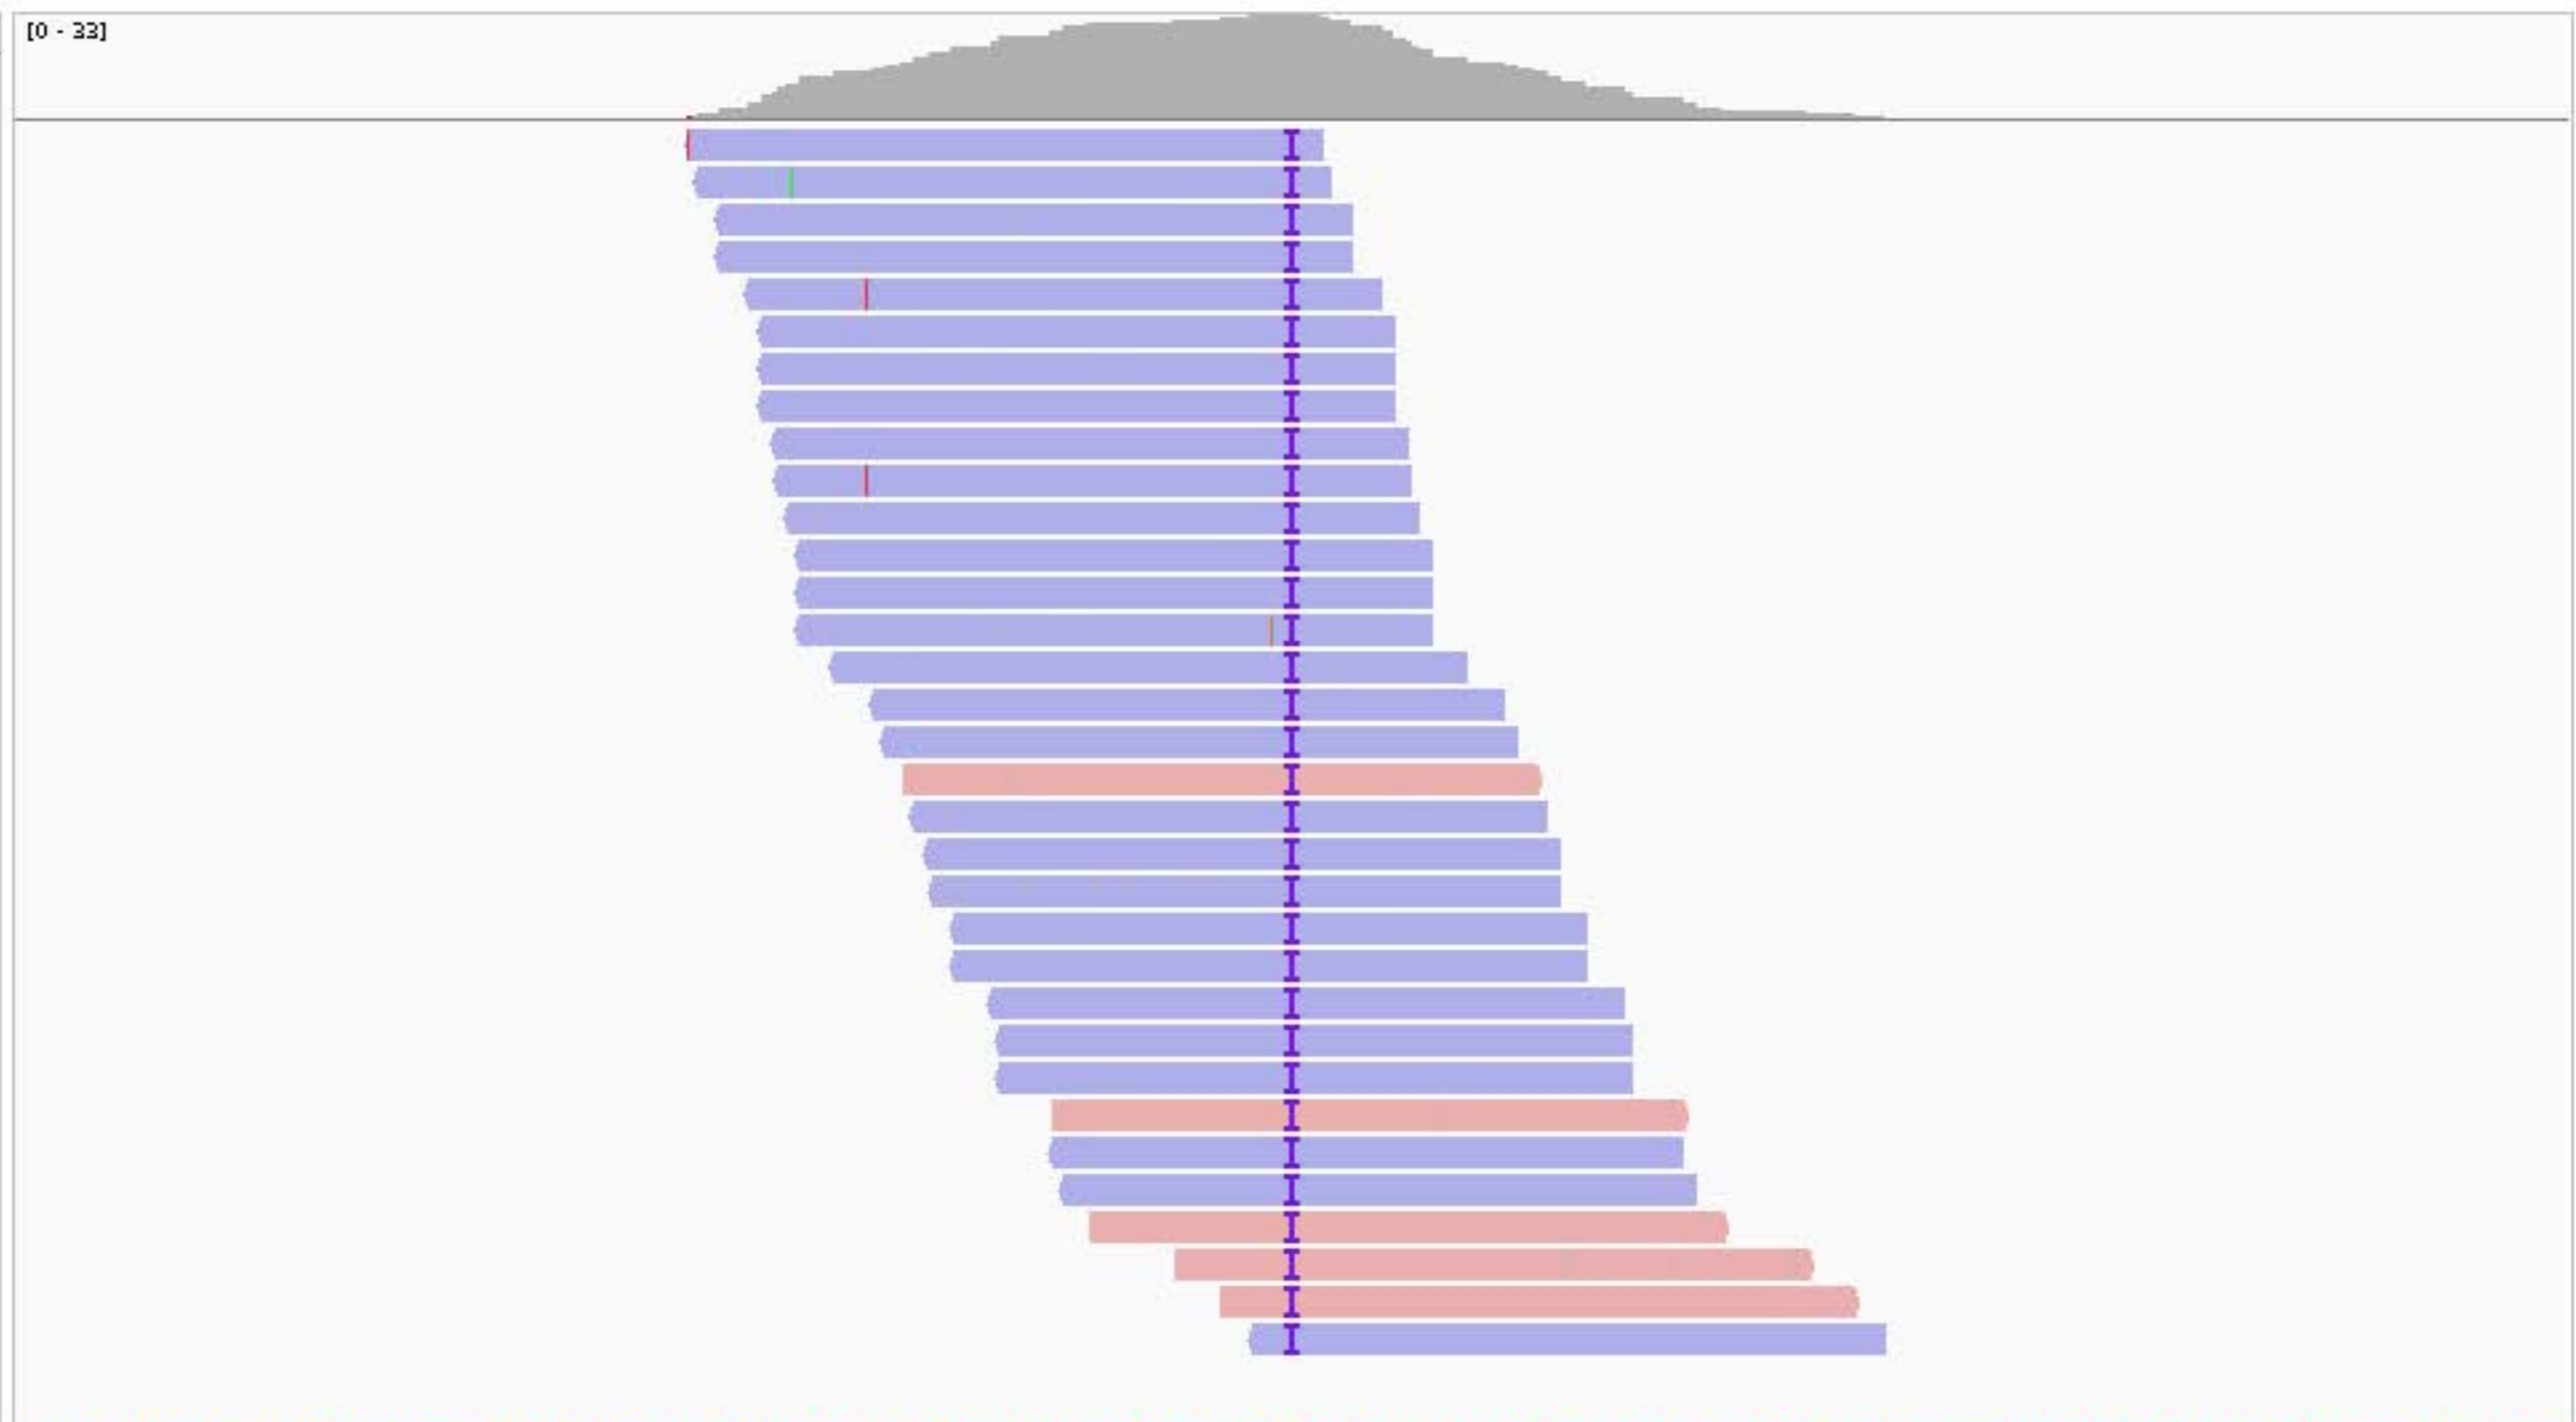

SL\_0004\_RN\_24\_mut.bam

Sequence →

Refseq Genes

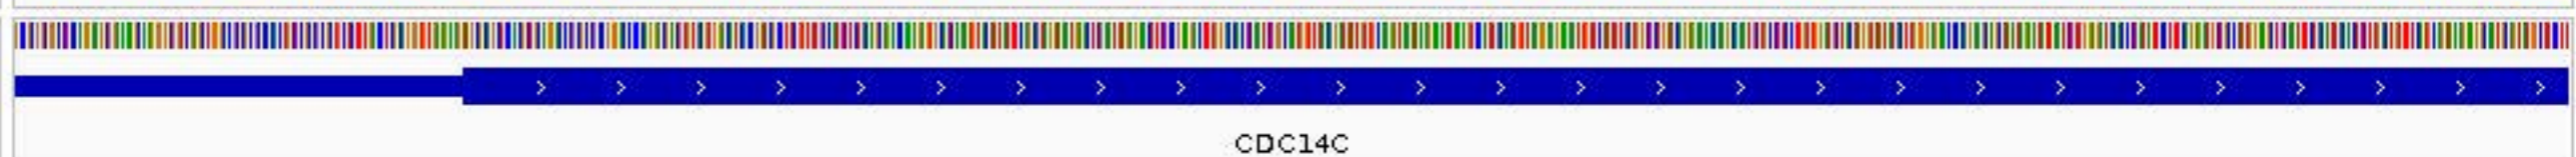

chr7:48,924,567-48,925,166

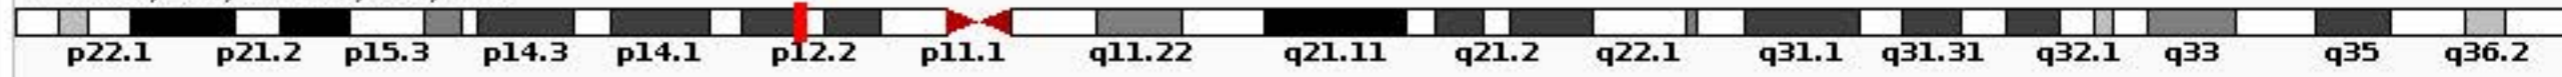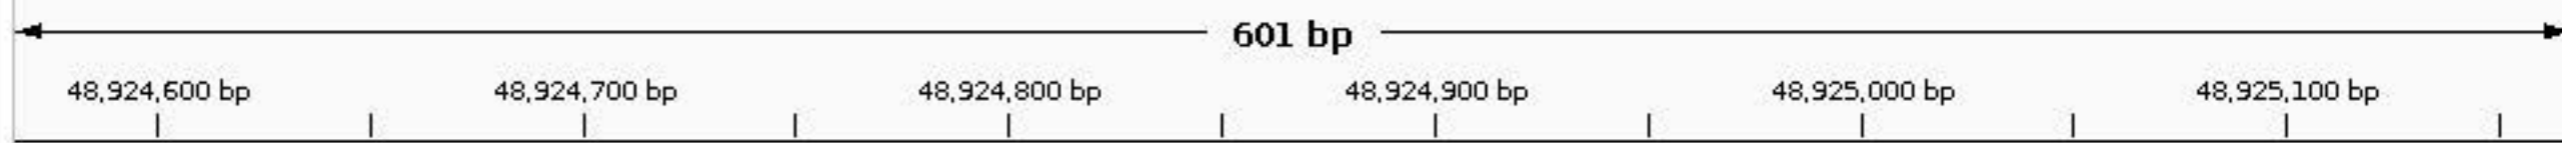

SL\_0004\_RN\_26\_mut.bam Coverage

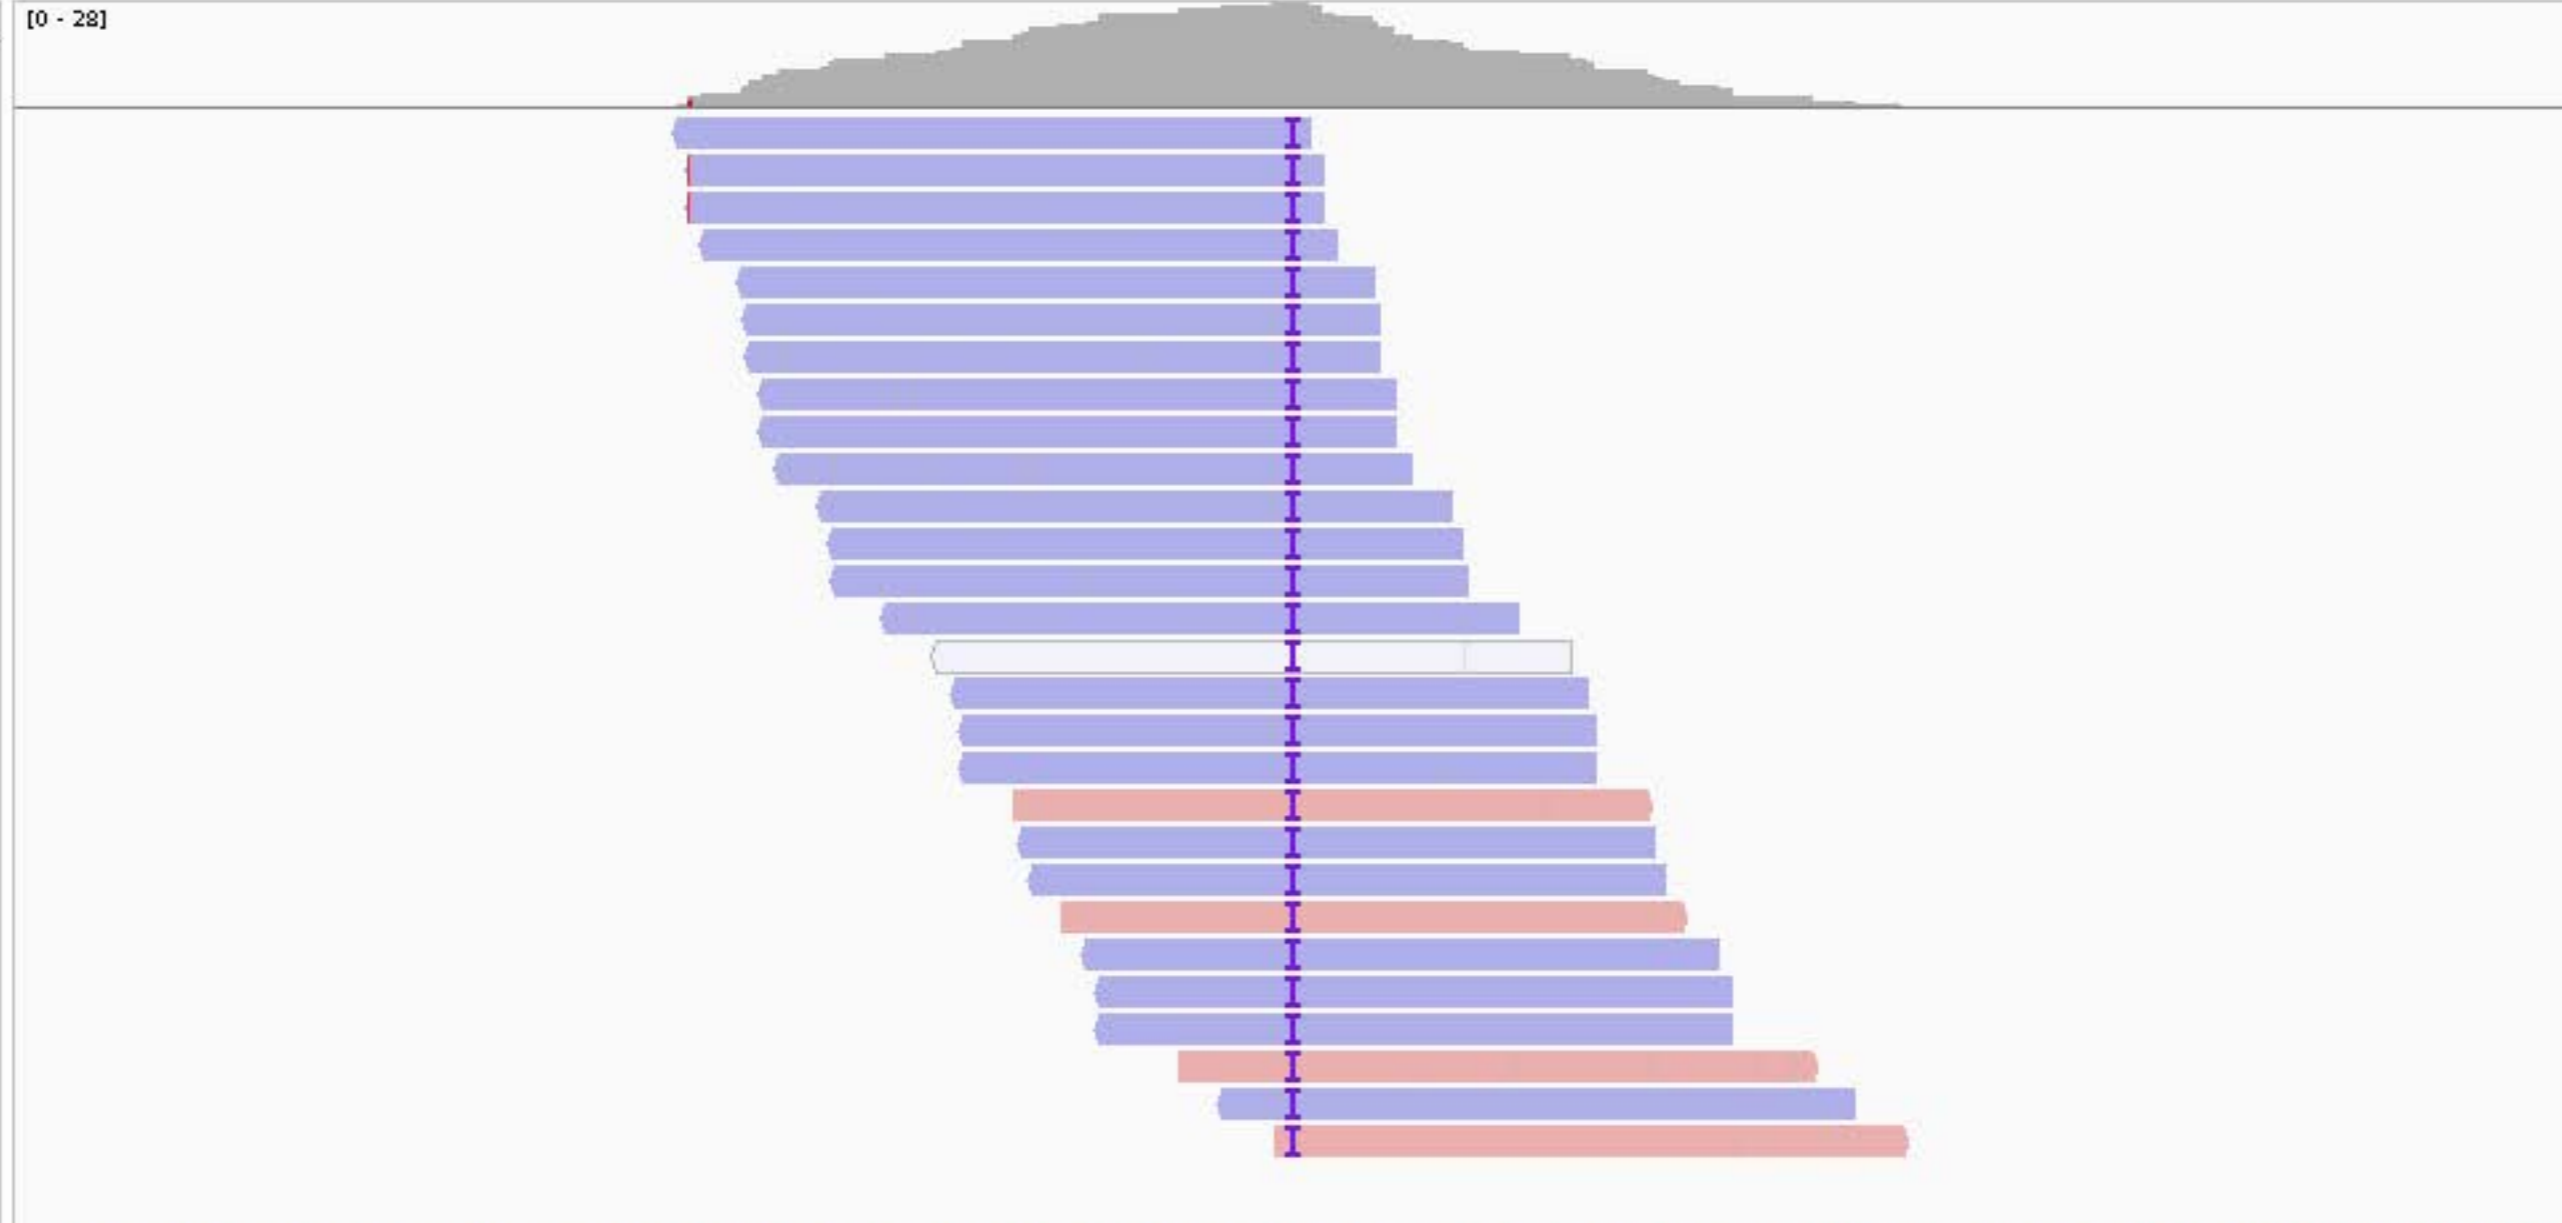

SL\_0004\_RN\_26\_mut.bam

Sequence

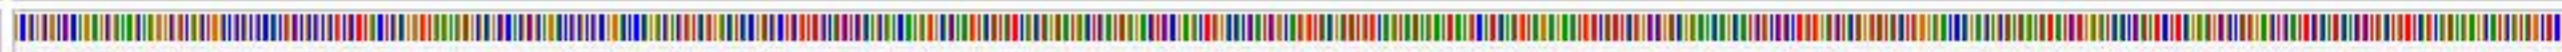

Refseq Genes

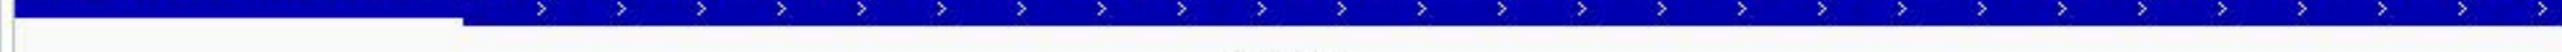

CDC14C



SL\_0004\_RN\_47\_mut.bam Coverage

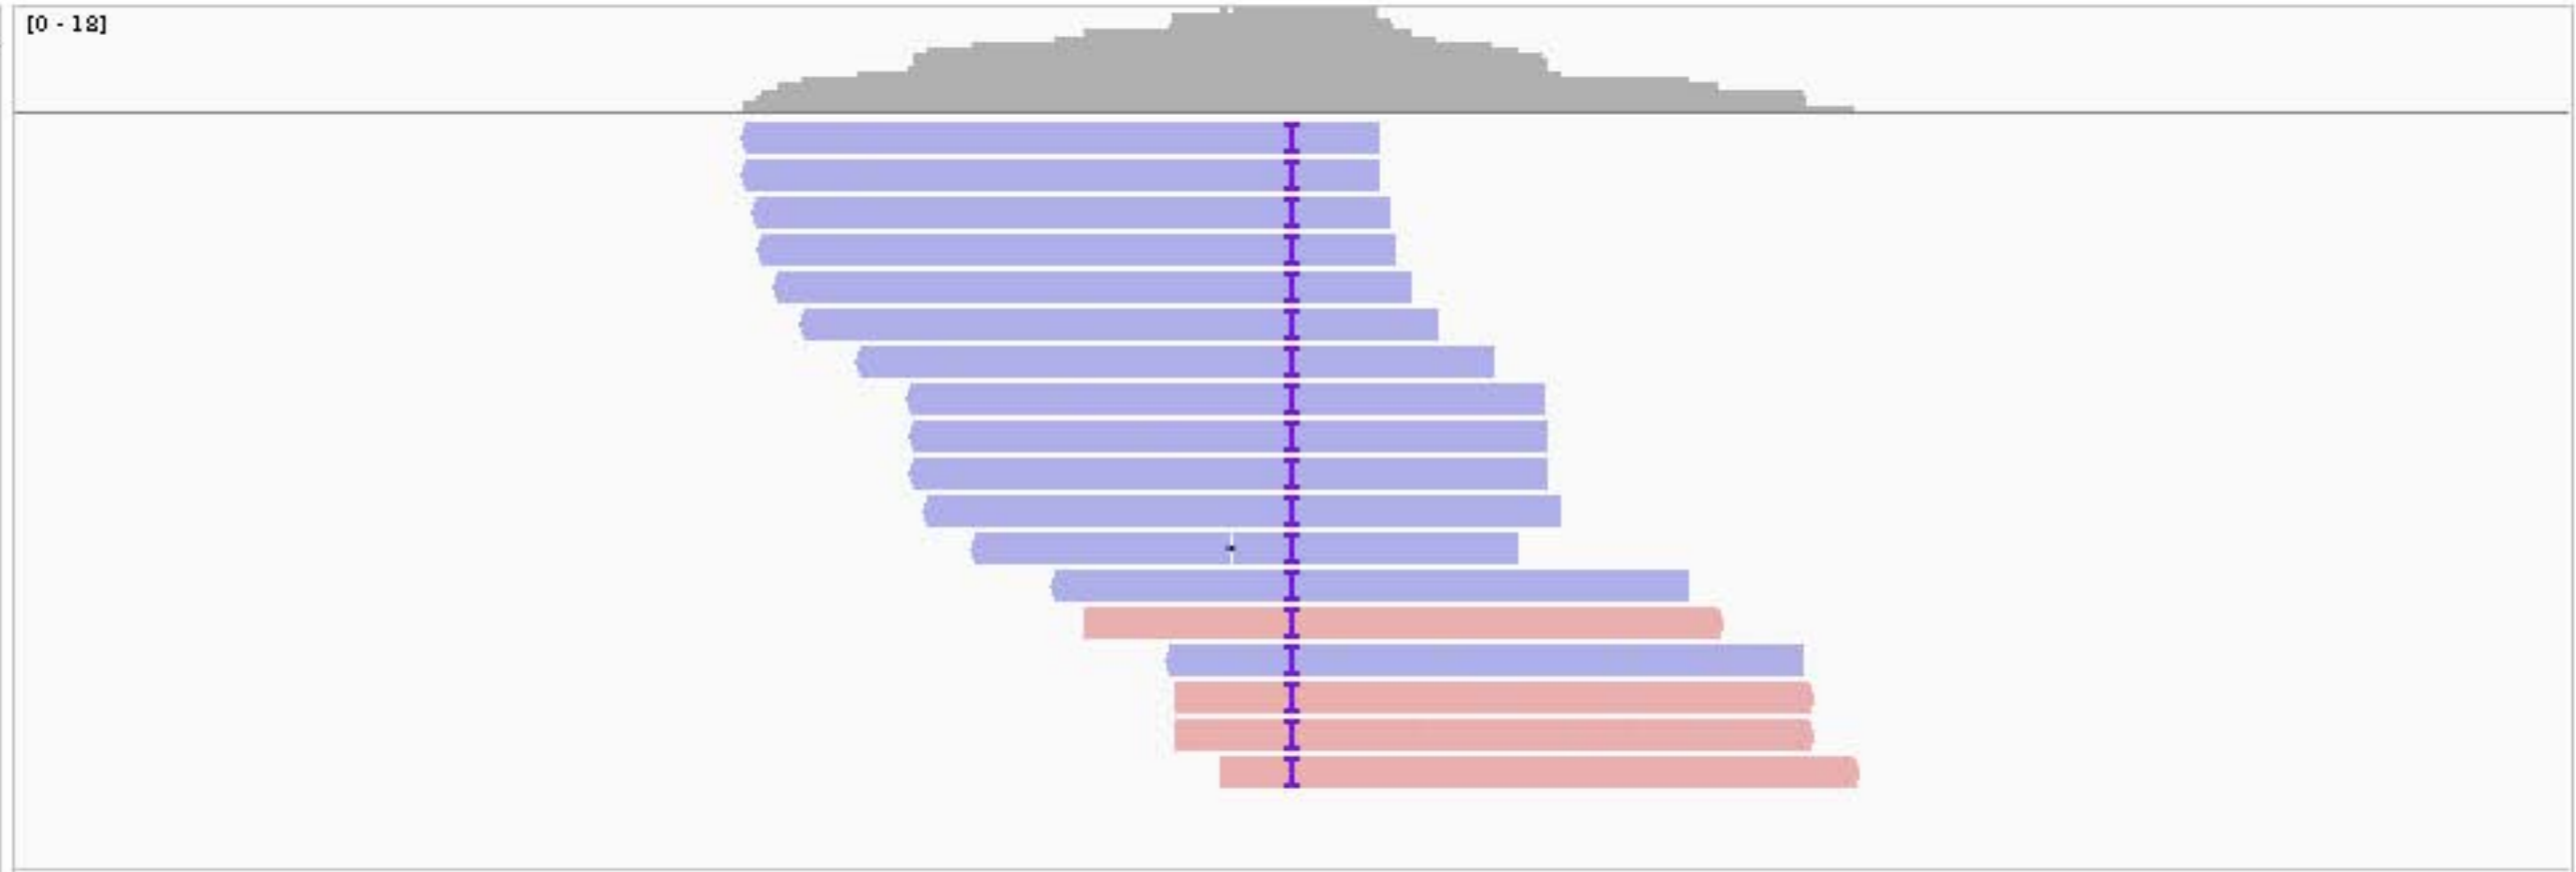

Sequence

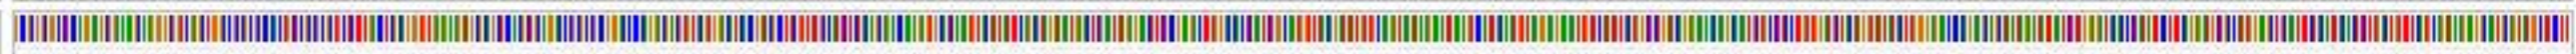

Refseq Genes

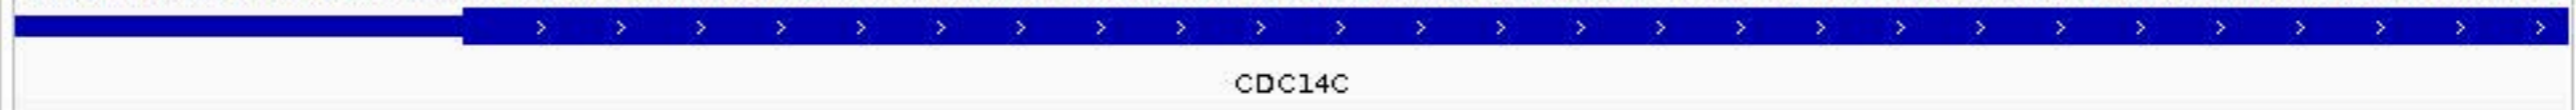



SL\_0004\_RN\_61\_mut.bam Coverage

SL\_0004\_RN\_61\_mut.bam

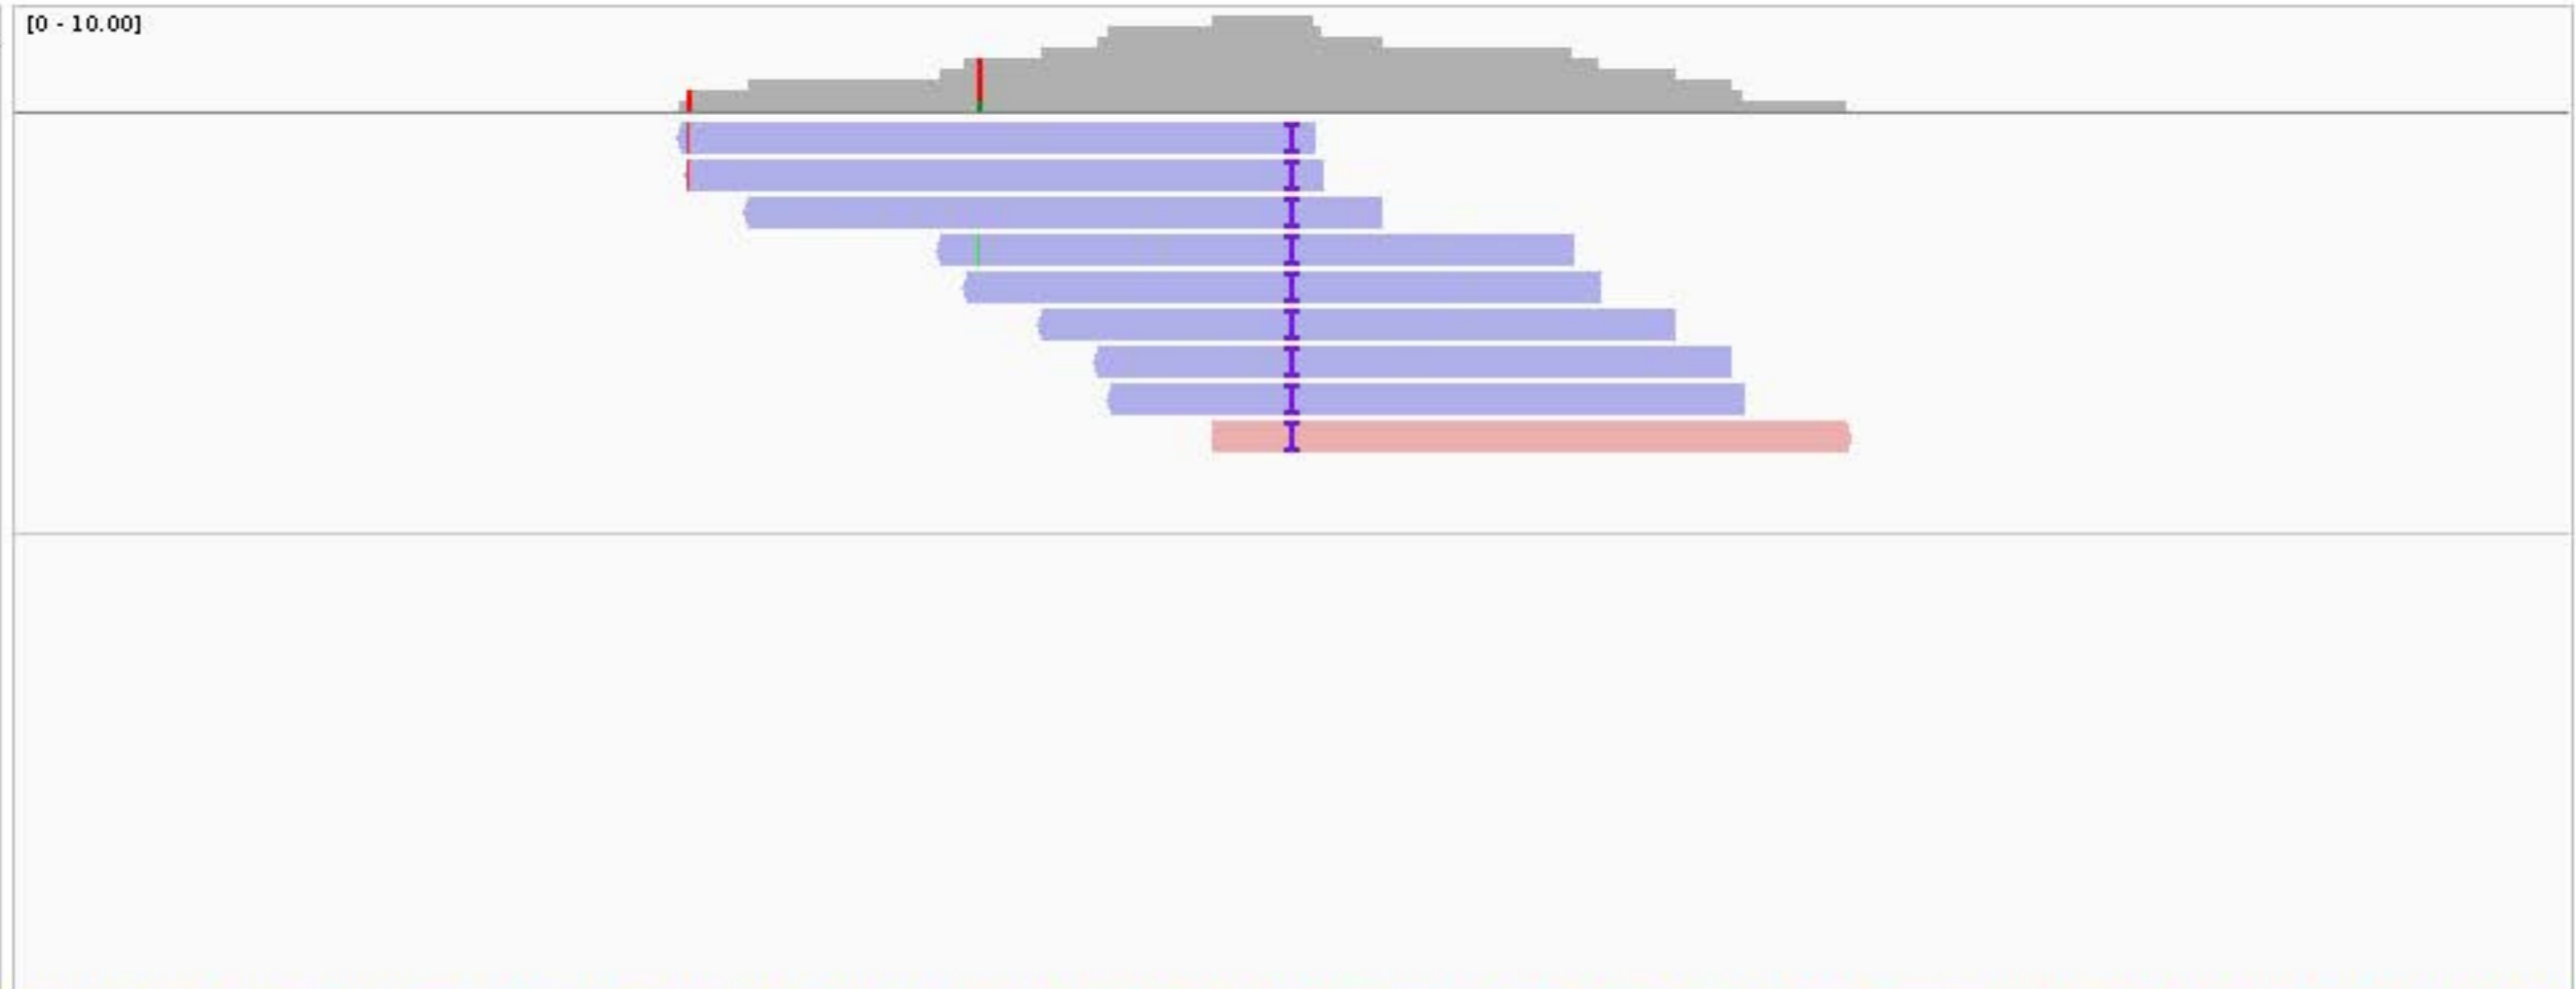

Sequence

Refseq Genes





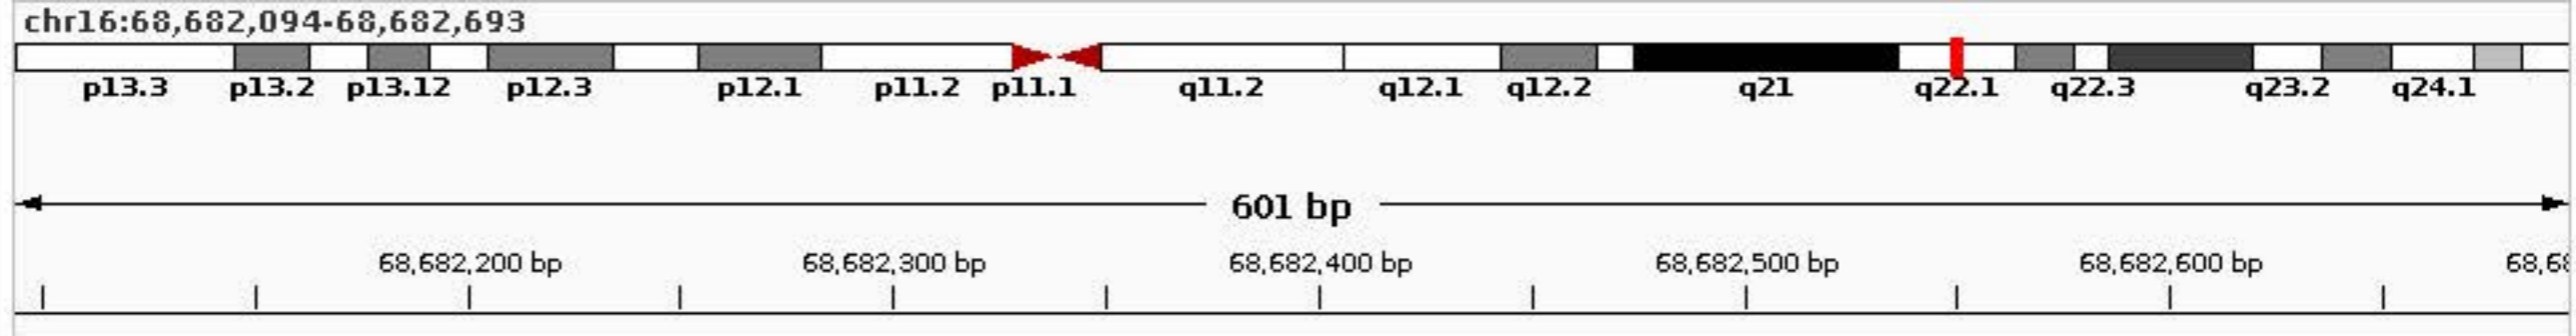

SL\_0006\_RN\_36\_mut.bam Coverage

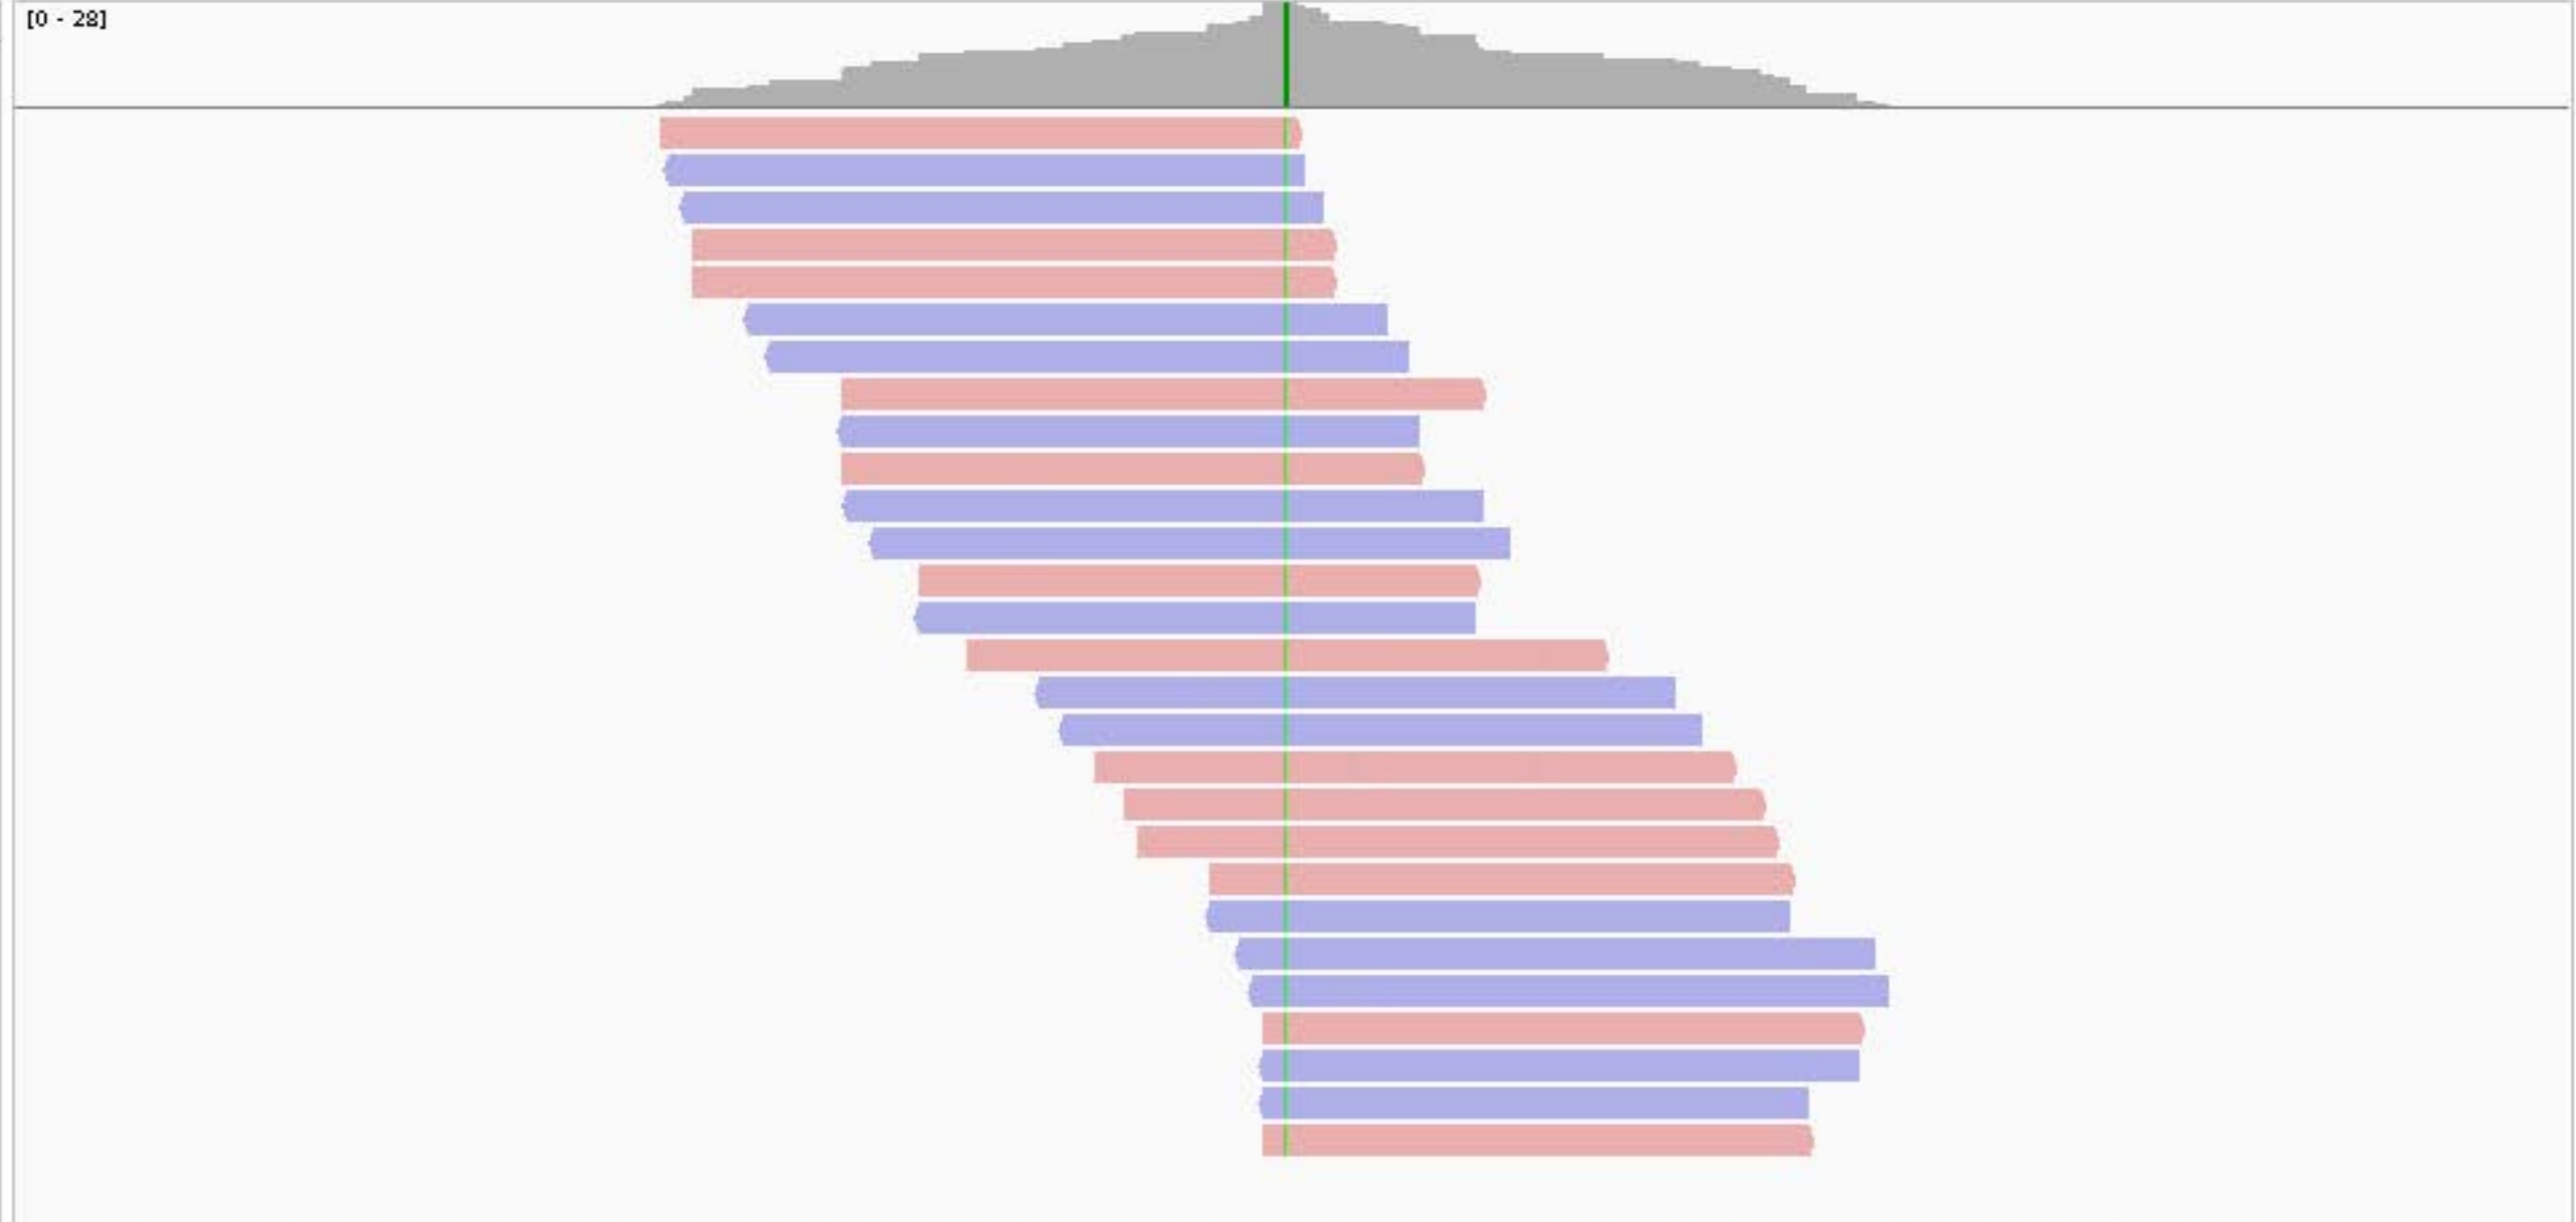

SL\_0006\_RN\_36\_mut.bam

Sequence →

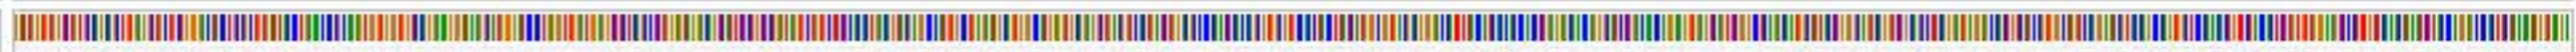

Refseq Genes

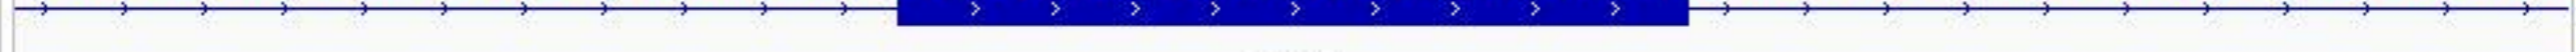

CDH3



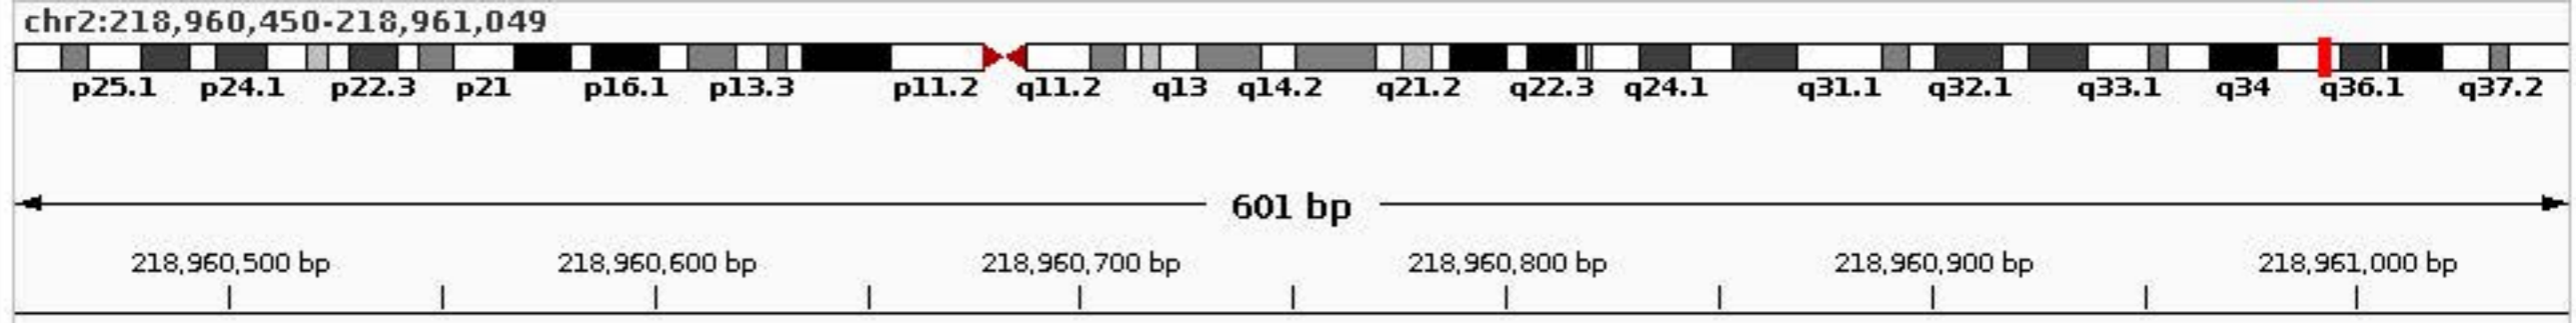

SL\_0001\_RN\_25\_mut.bam Coverage

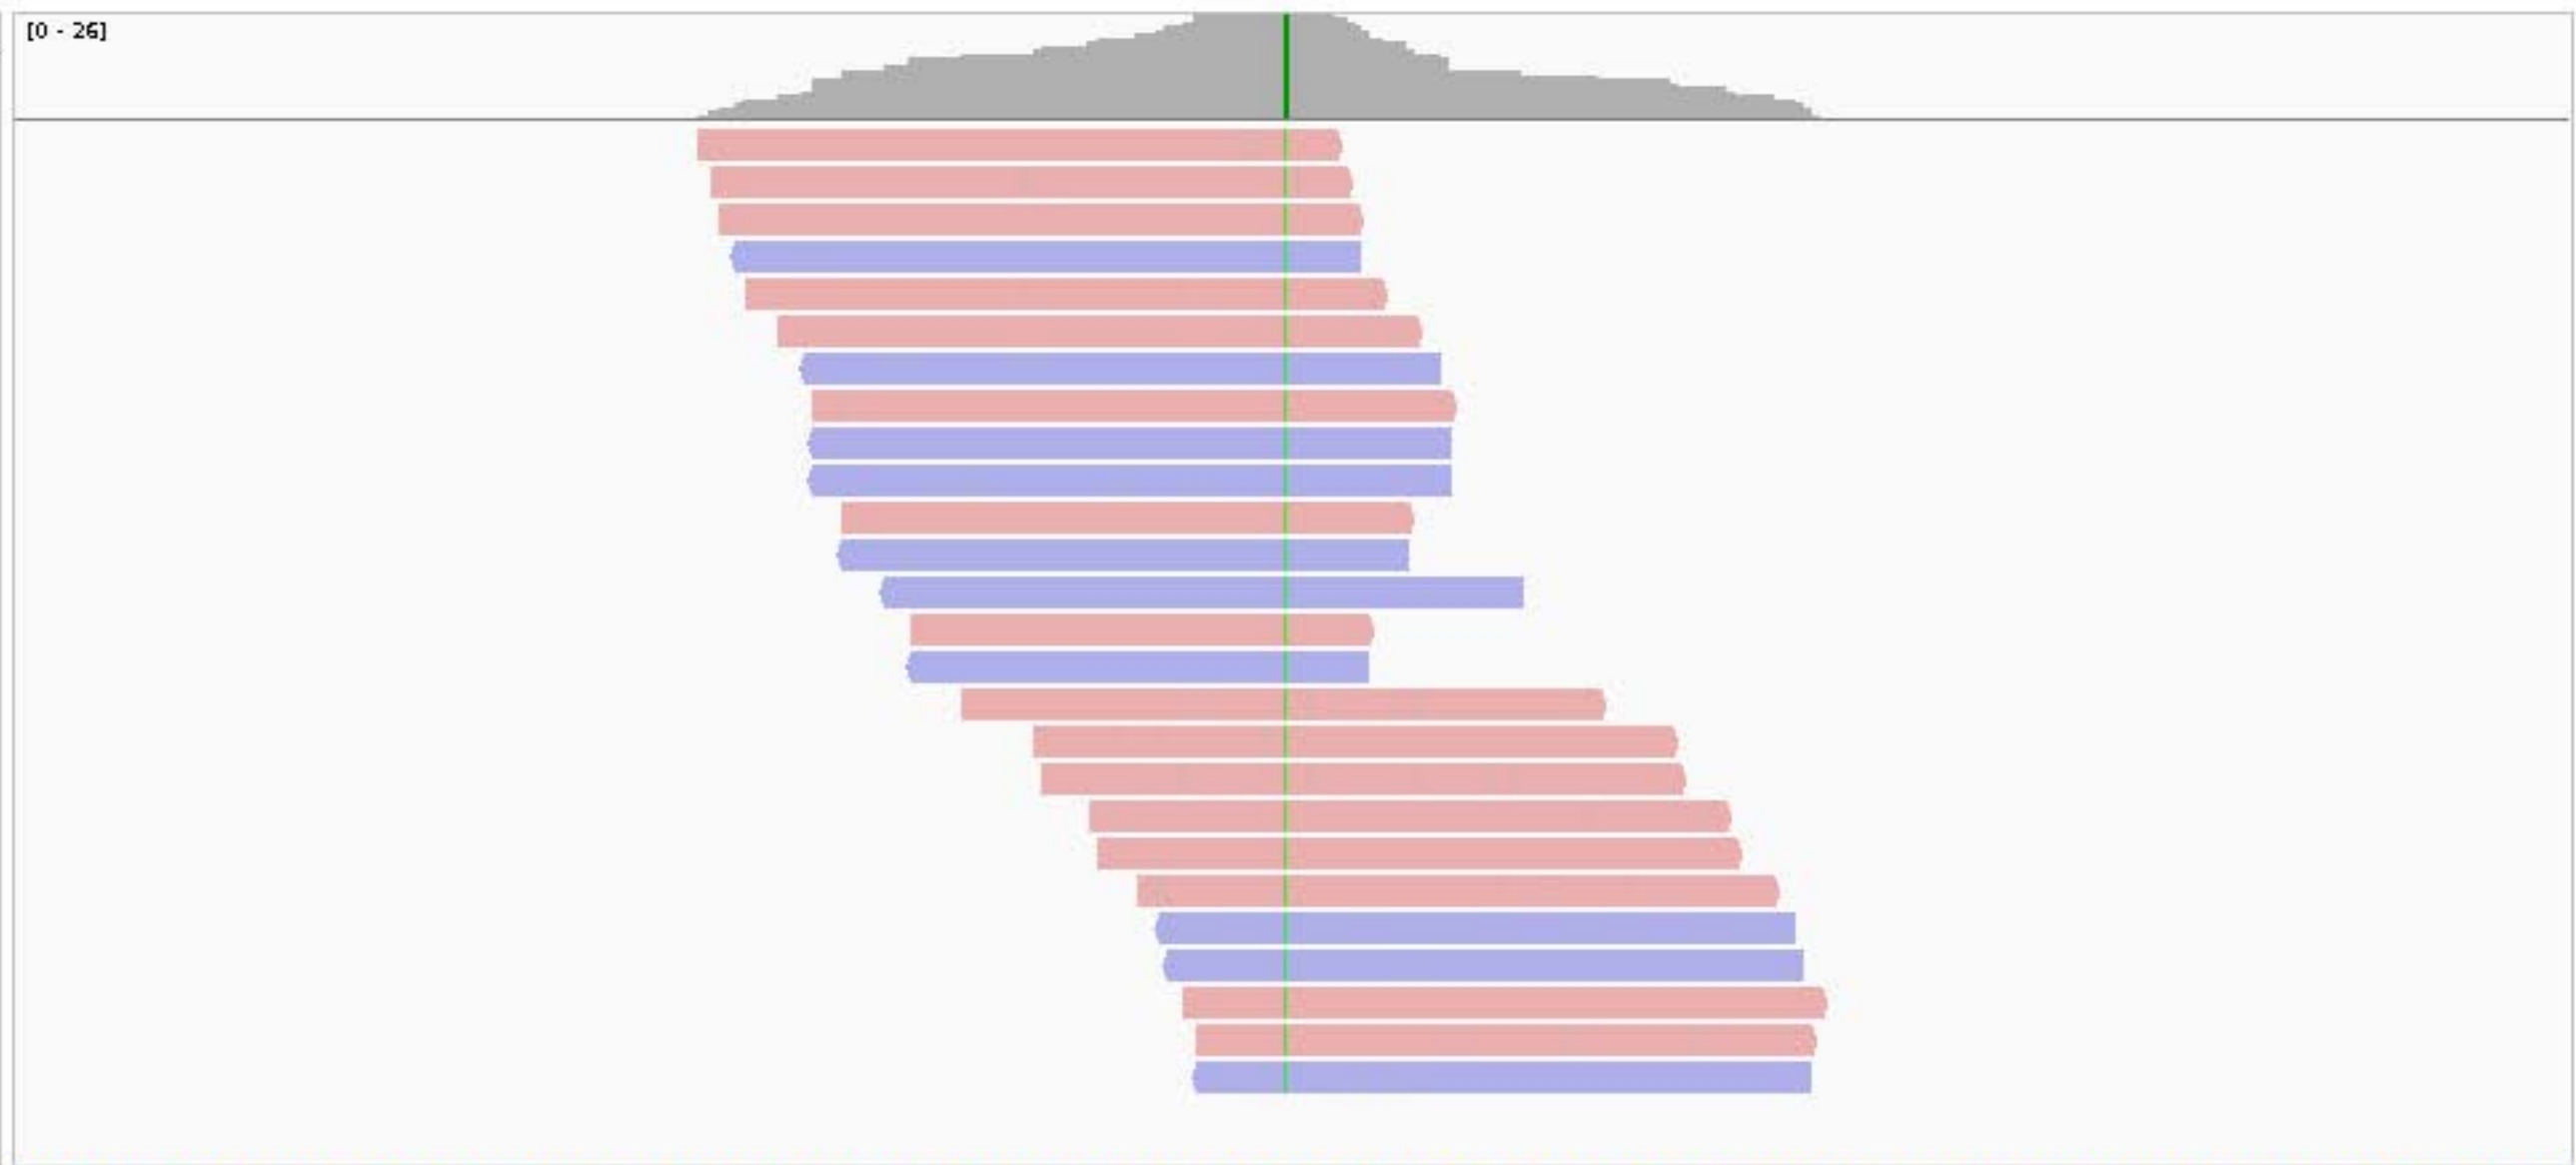

SL\_0001\_RN\_25\_mut.bam

Sequence

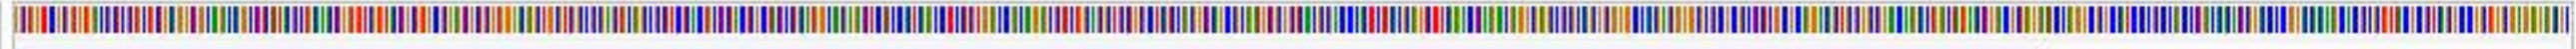

Refseq Genes

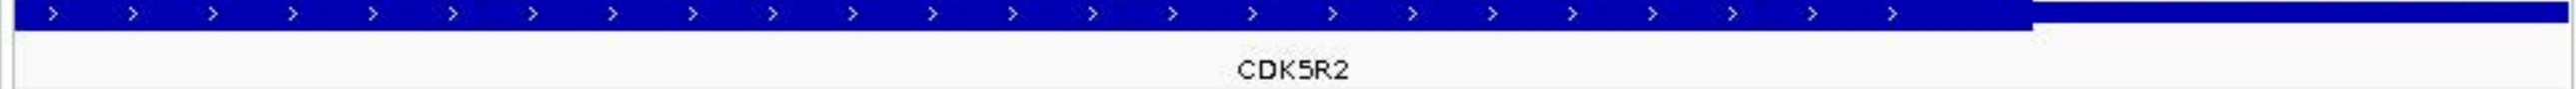

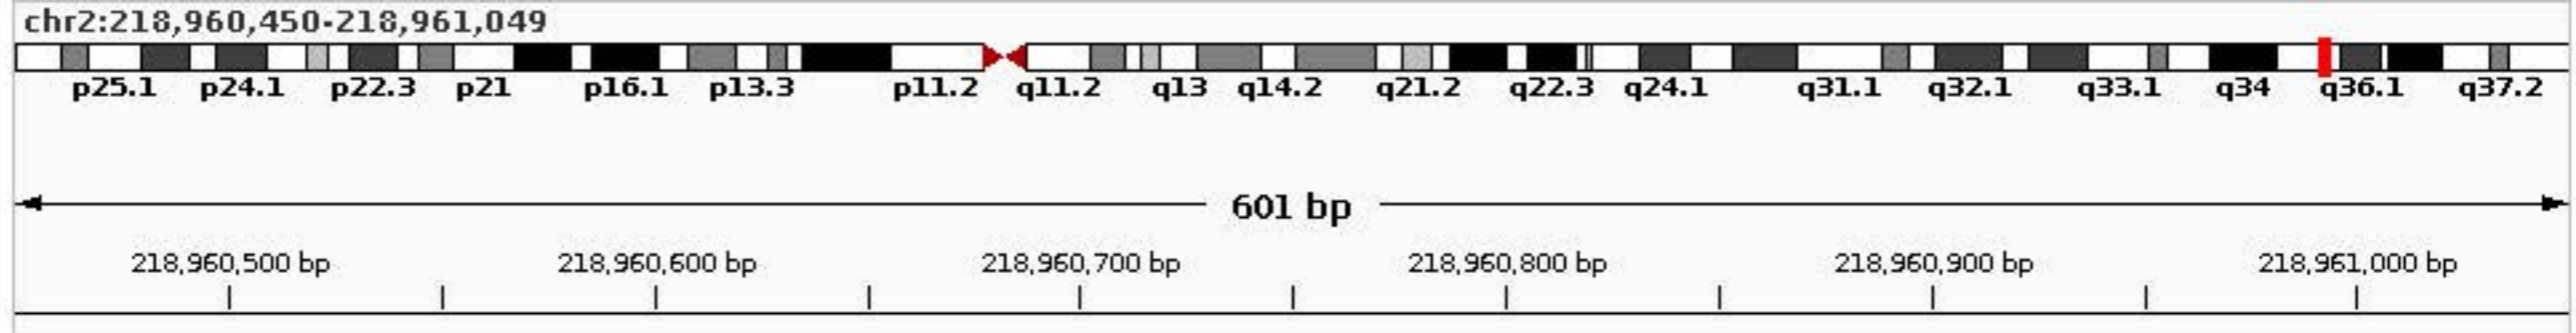

SL\_0001\_RN\_32\_mut.bam Coverage

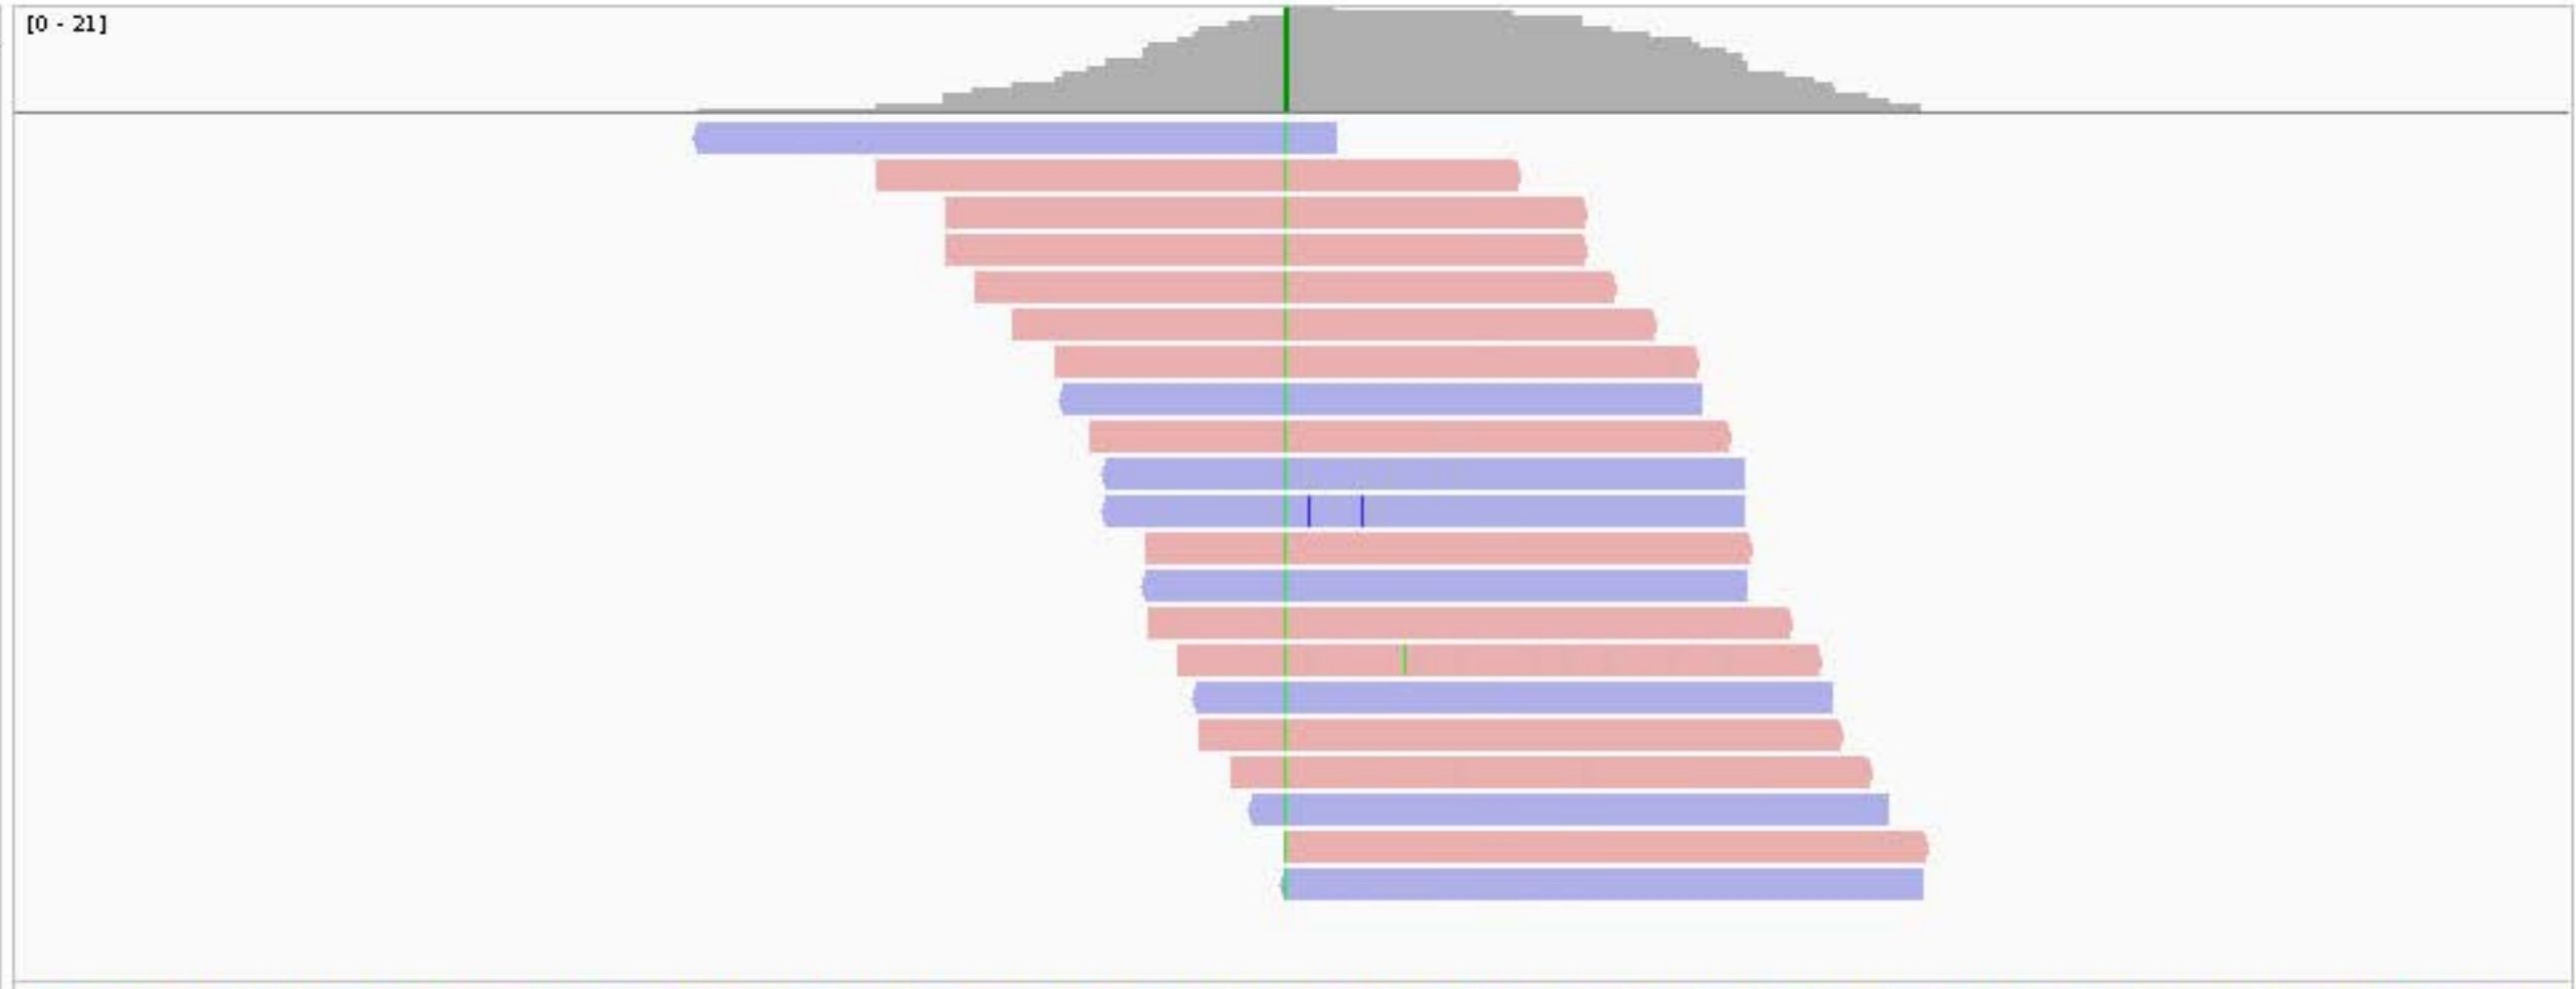

SL\_0001\_RN\_32\_mut.bam

Sequence

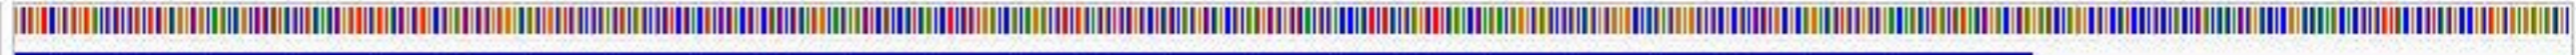

Refseq Genes

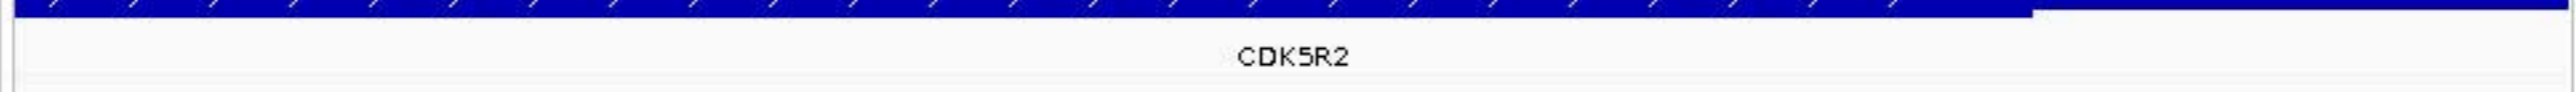

CDK5R2

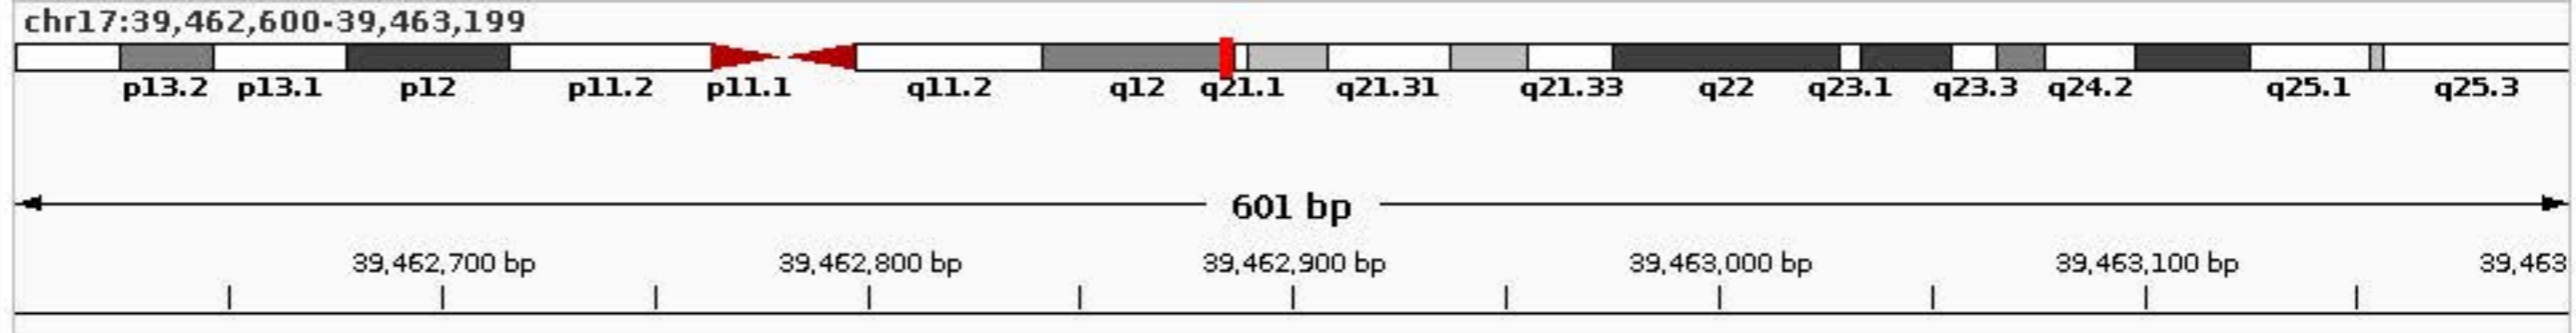

SL\_0006\_RN\_67\_mut.bam Coverage

SL\_0006\_RN\_67\_mut.bam

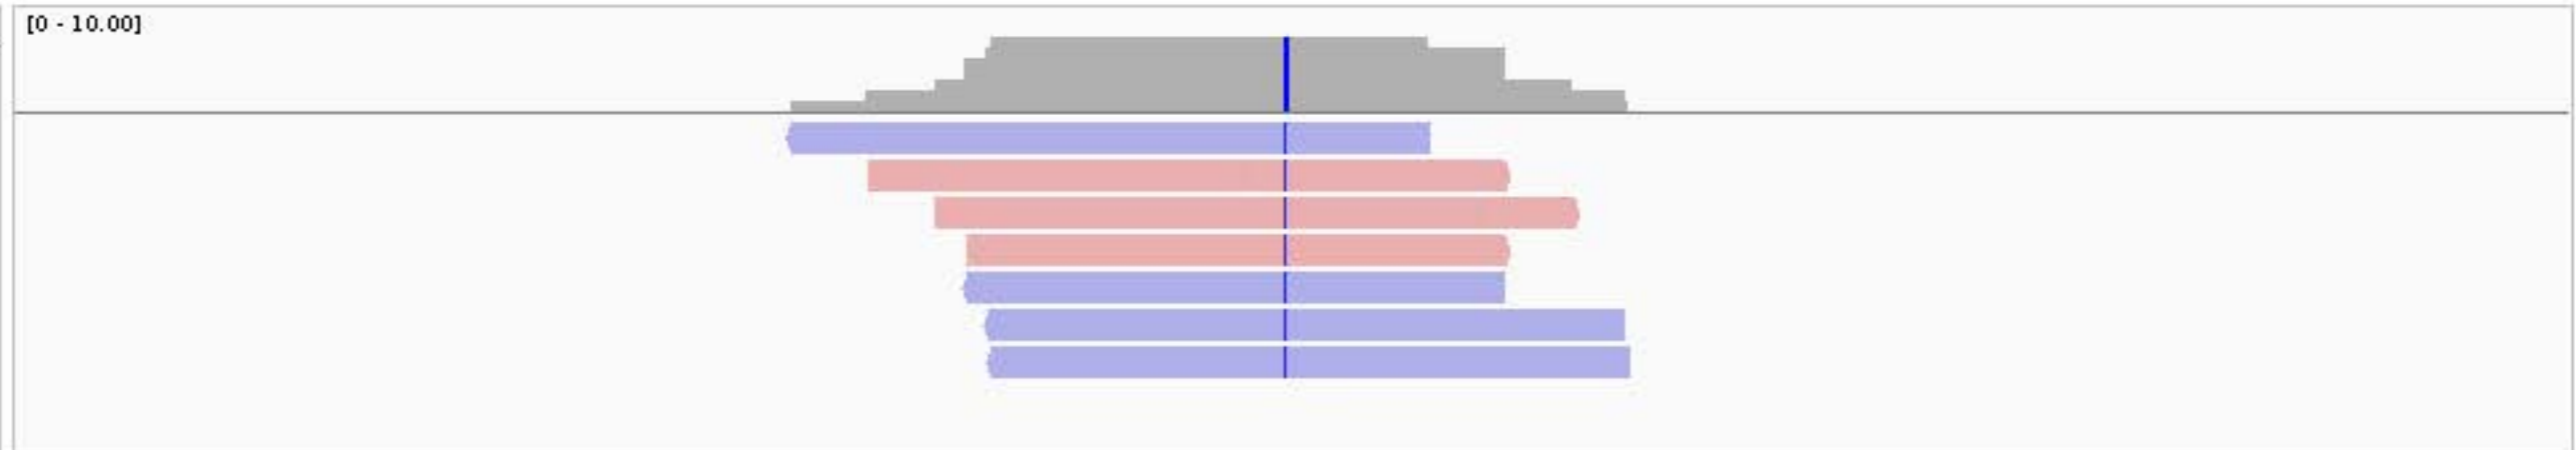

Sequence

Refseq Genes

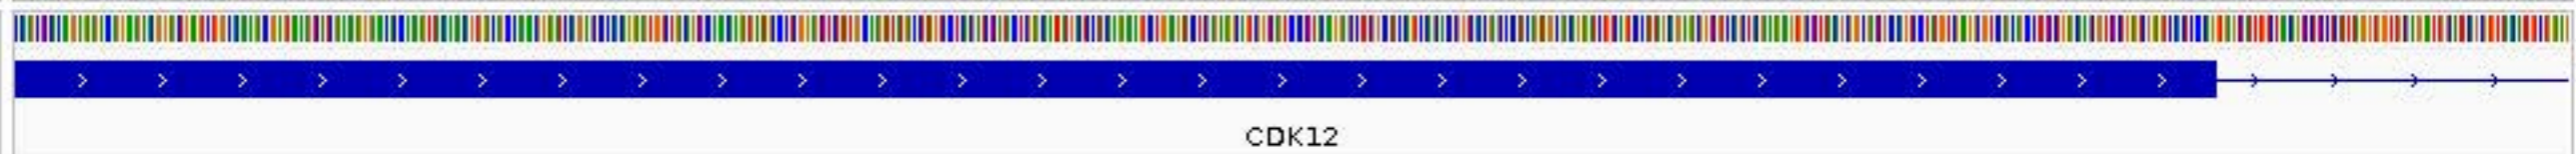

chr4:183,446,493-183,447,092

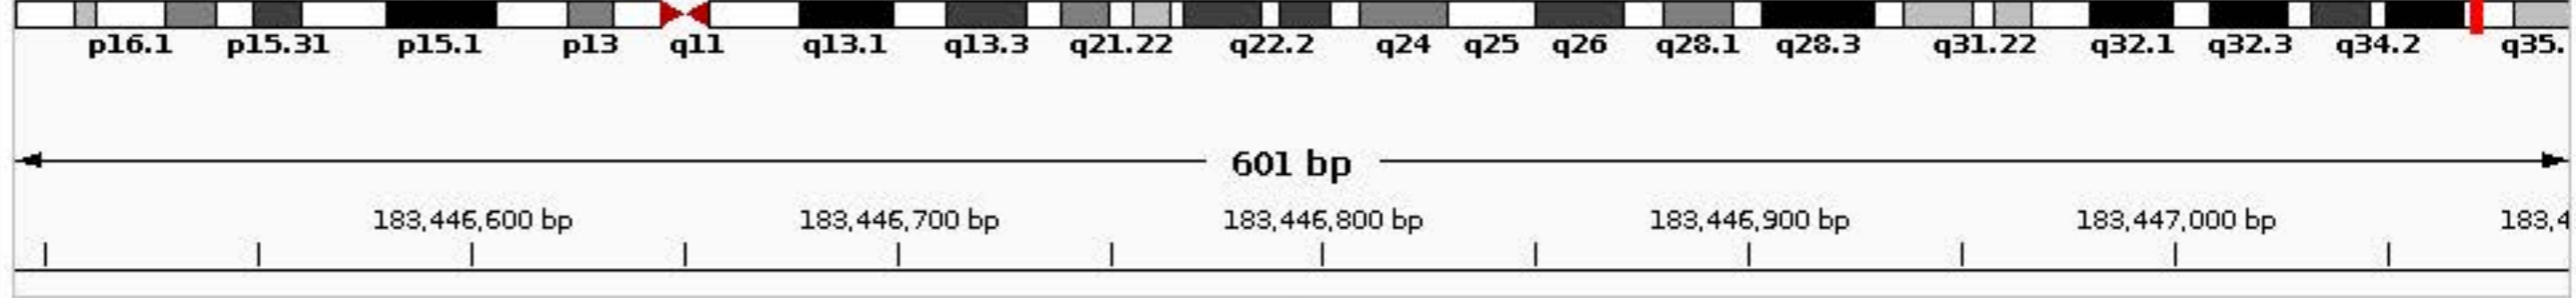

SL\_0015\_LN\_39\_mut.bam Coverage

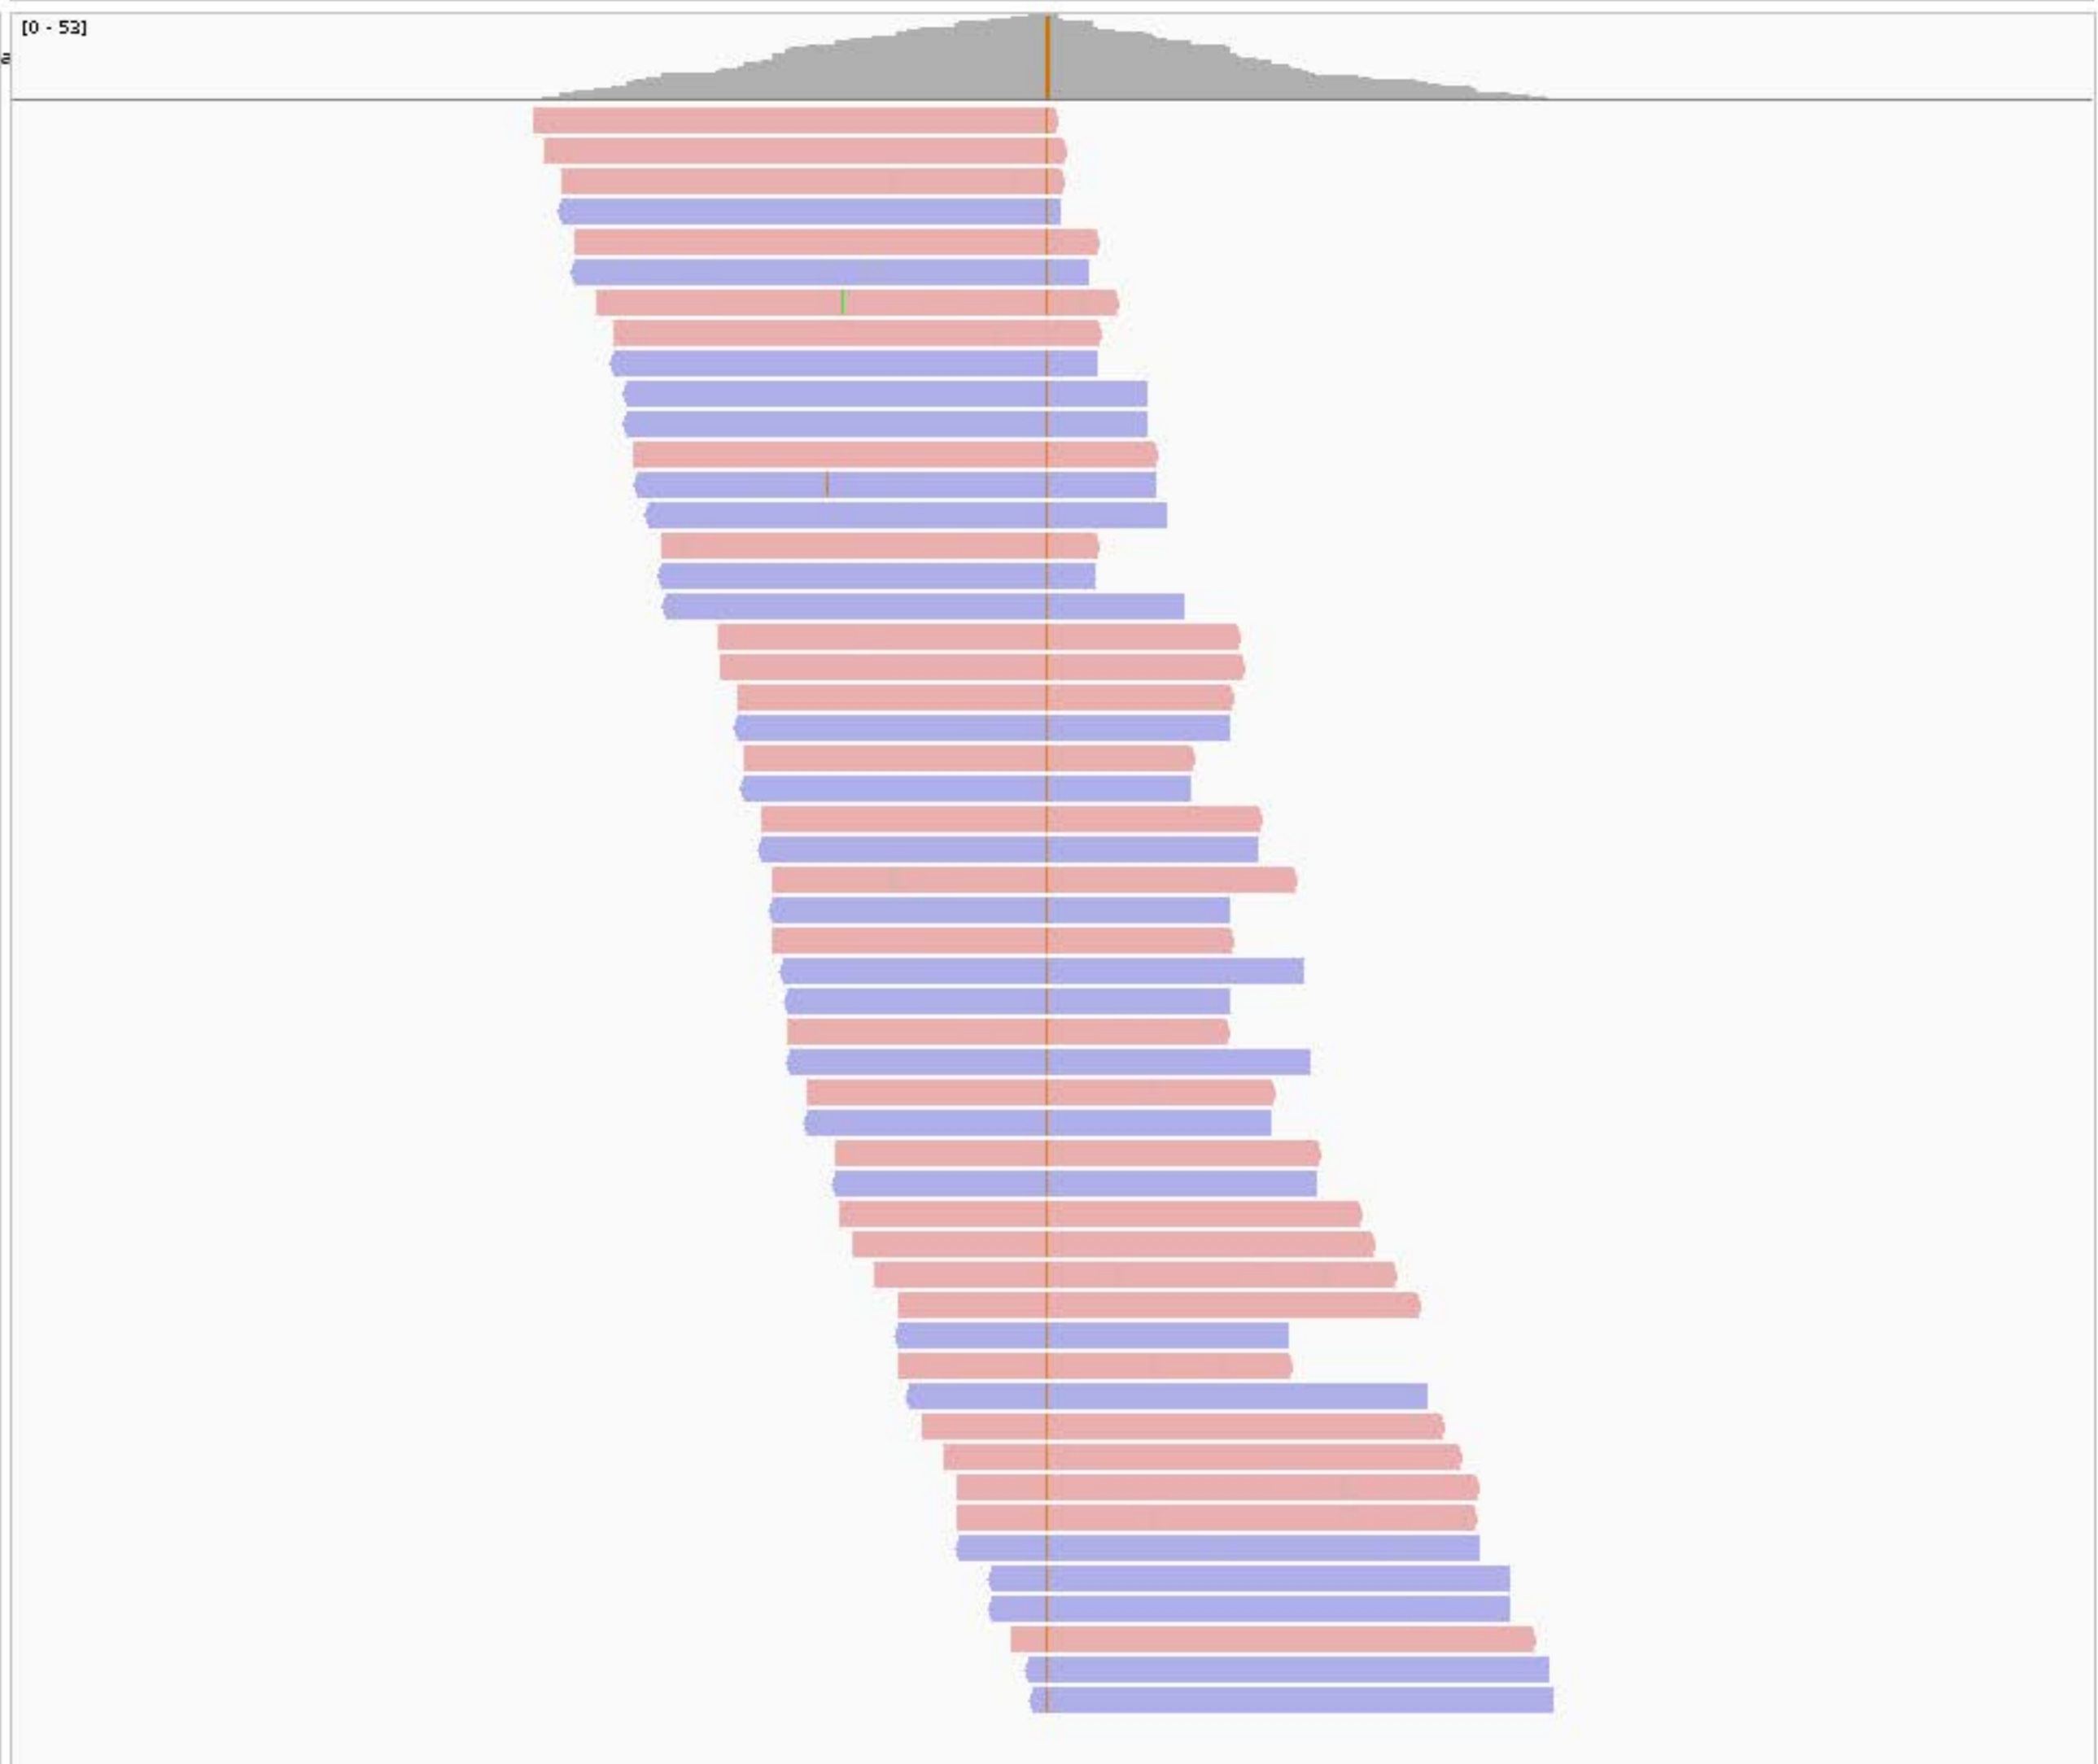

SL\_0015\_LN\_39\_mut.bam

Sequence

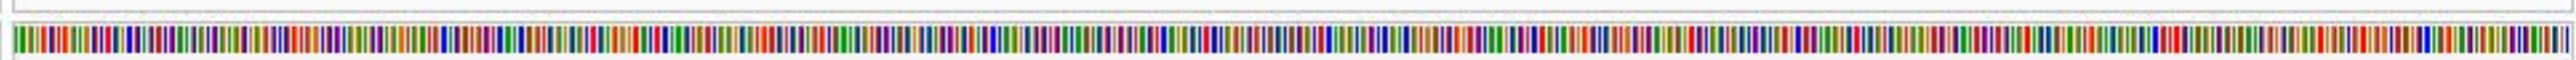

Refseq Genes

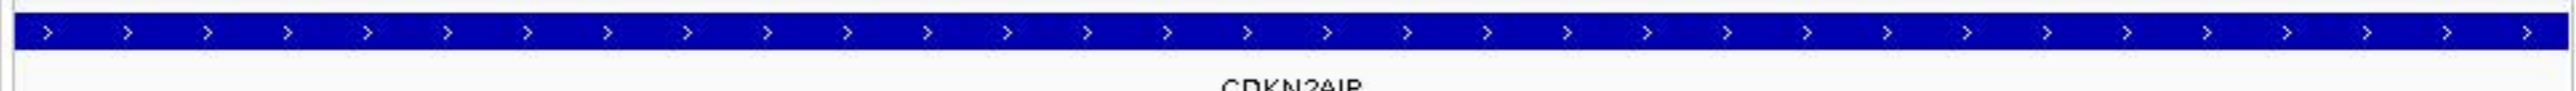

CDKN2AIP



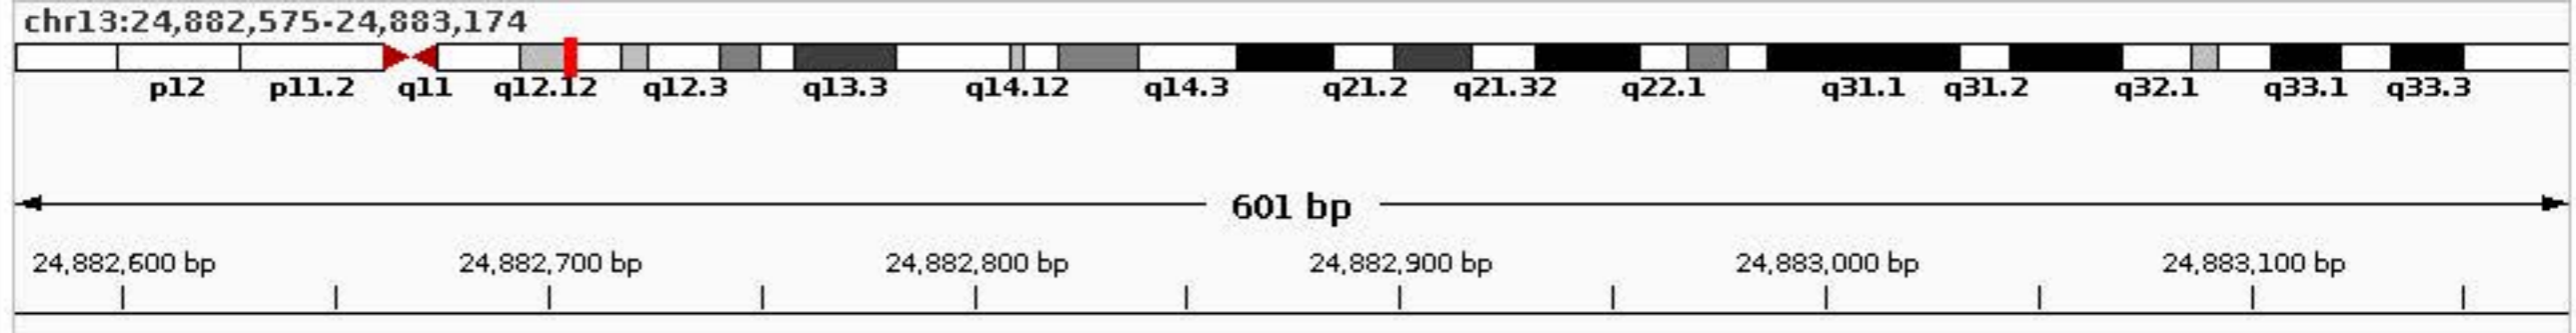

SL\_0006\_RN\_36\_mut.bam Coverage

SL\_0006\_RN\_36\_mut.bam

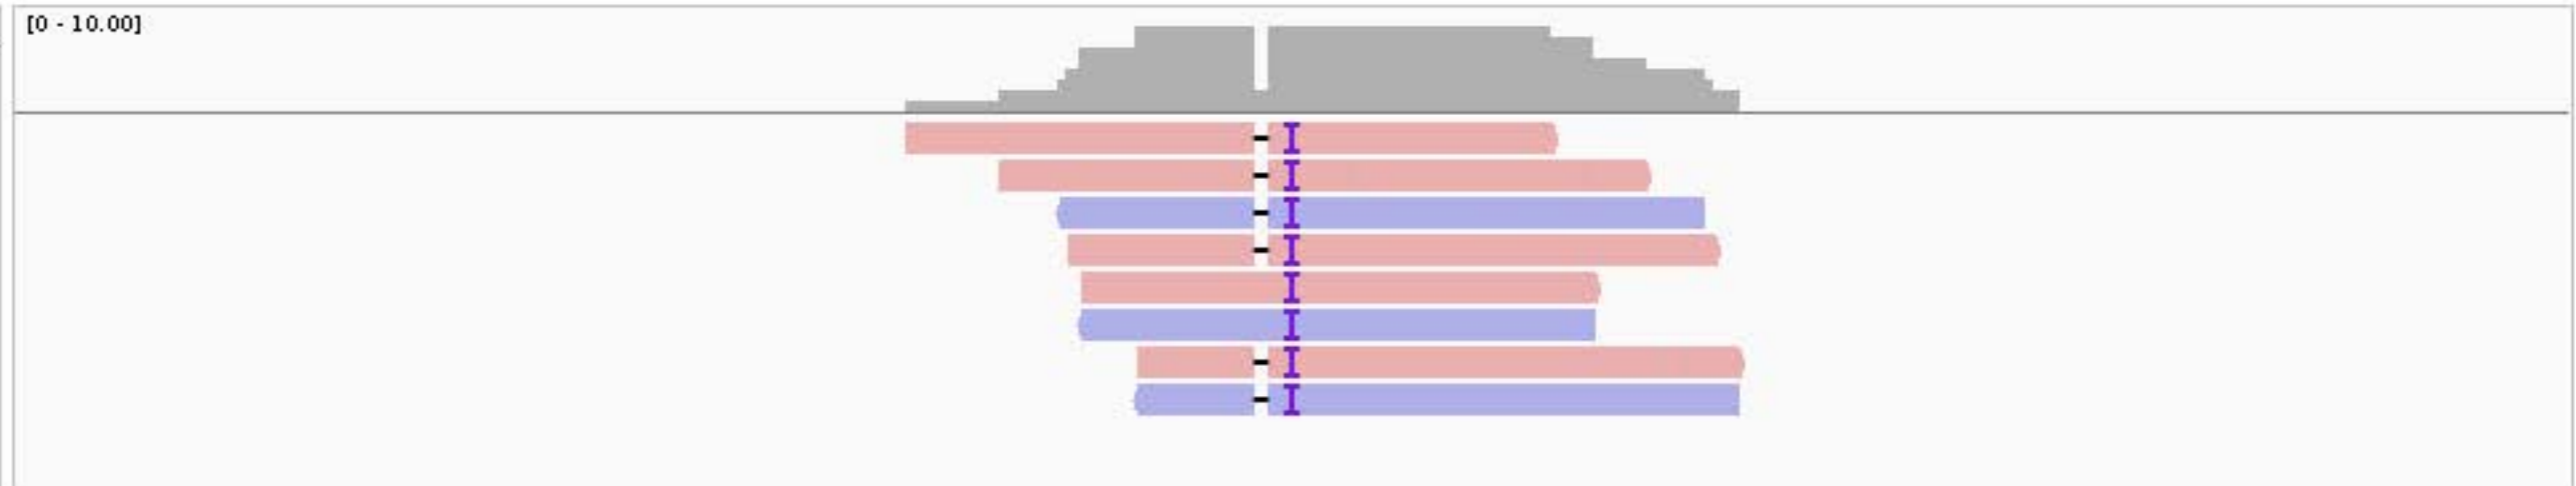

Sequence

Refseq Genes

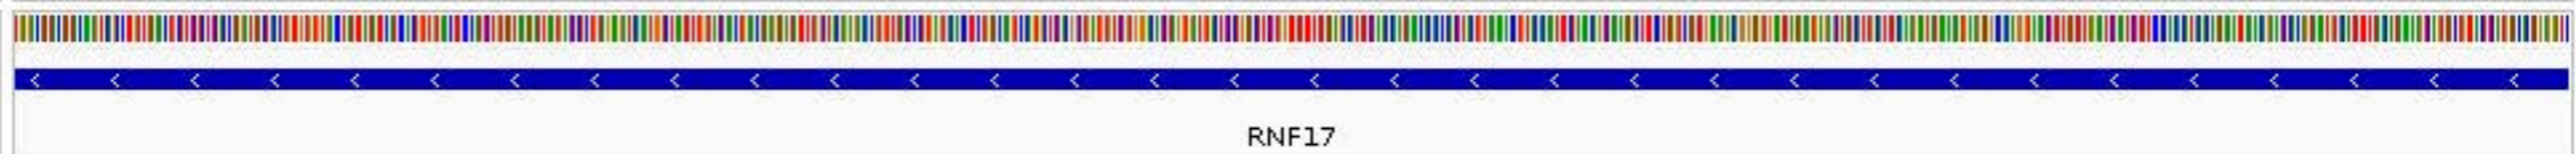



chr17:64,509,863-64,510,462

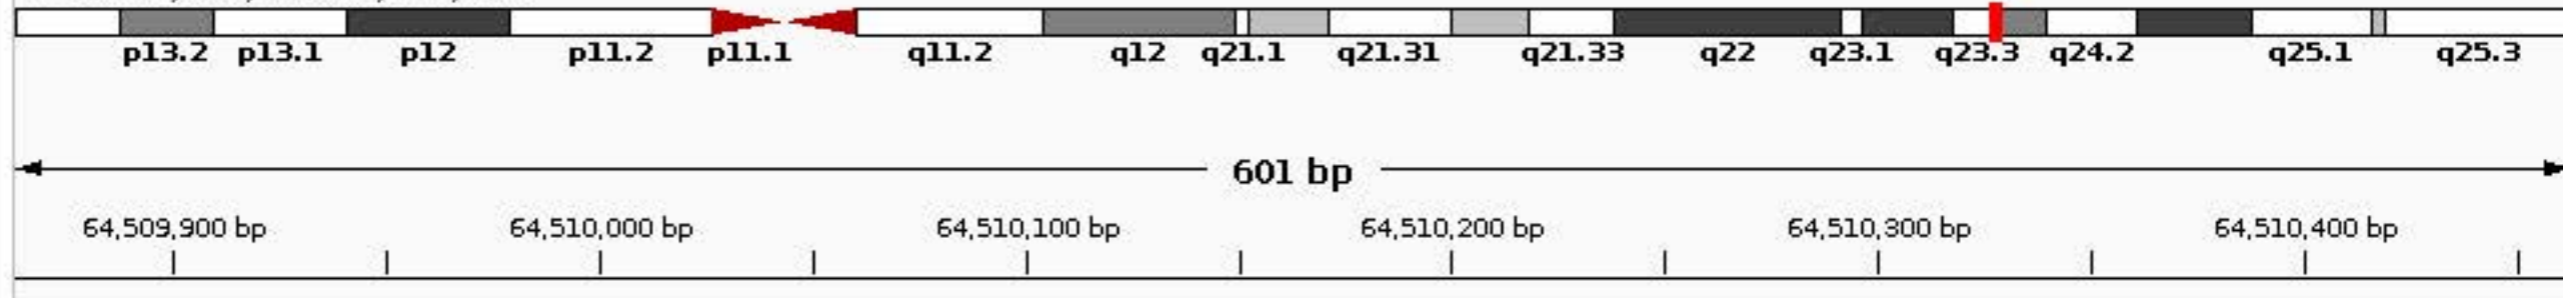

SL\_0001\_RN\_25\_mut.bam Coverage

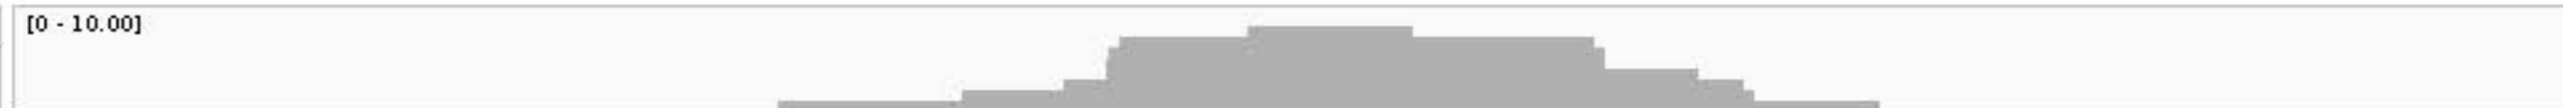

SL\_0001\_RN\_25\_mut.bam

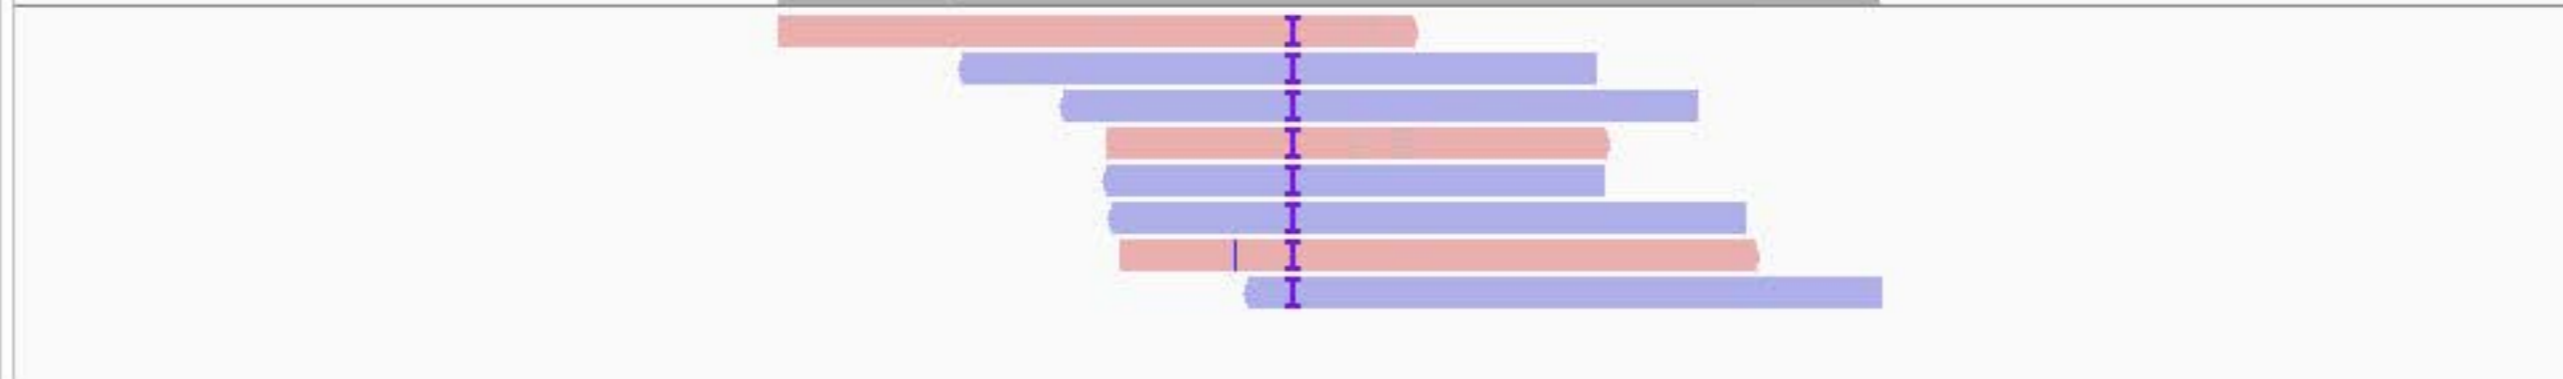

Sequence

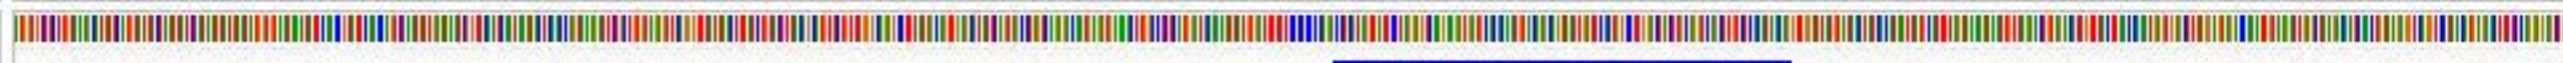

Refseq Genes

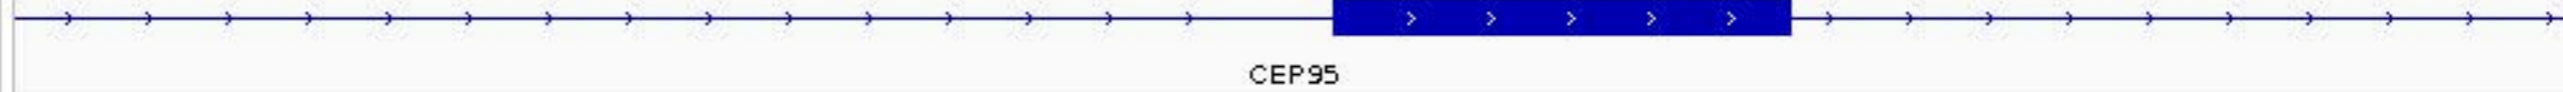

CEP95

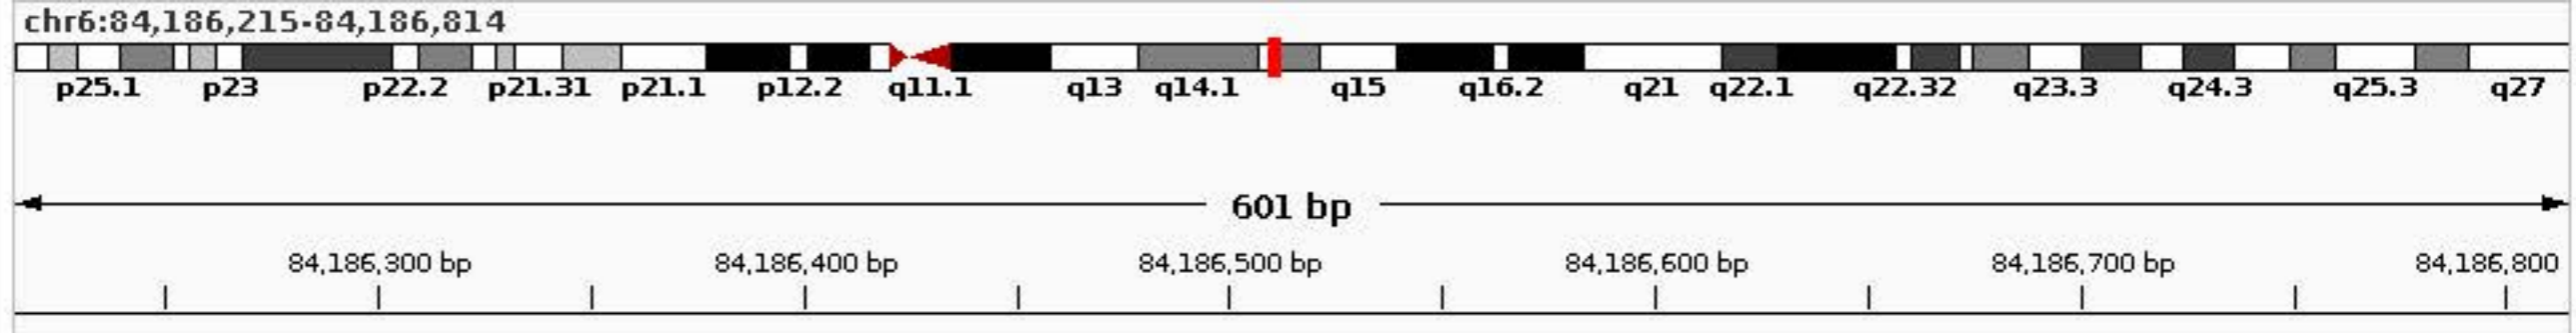

SL\_0001\_LN\_4\_mut.bam Coverage

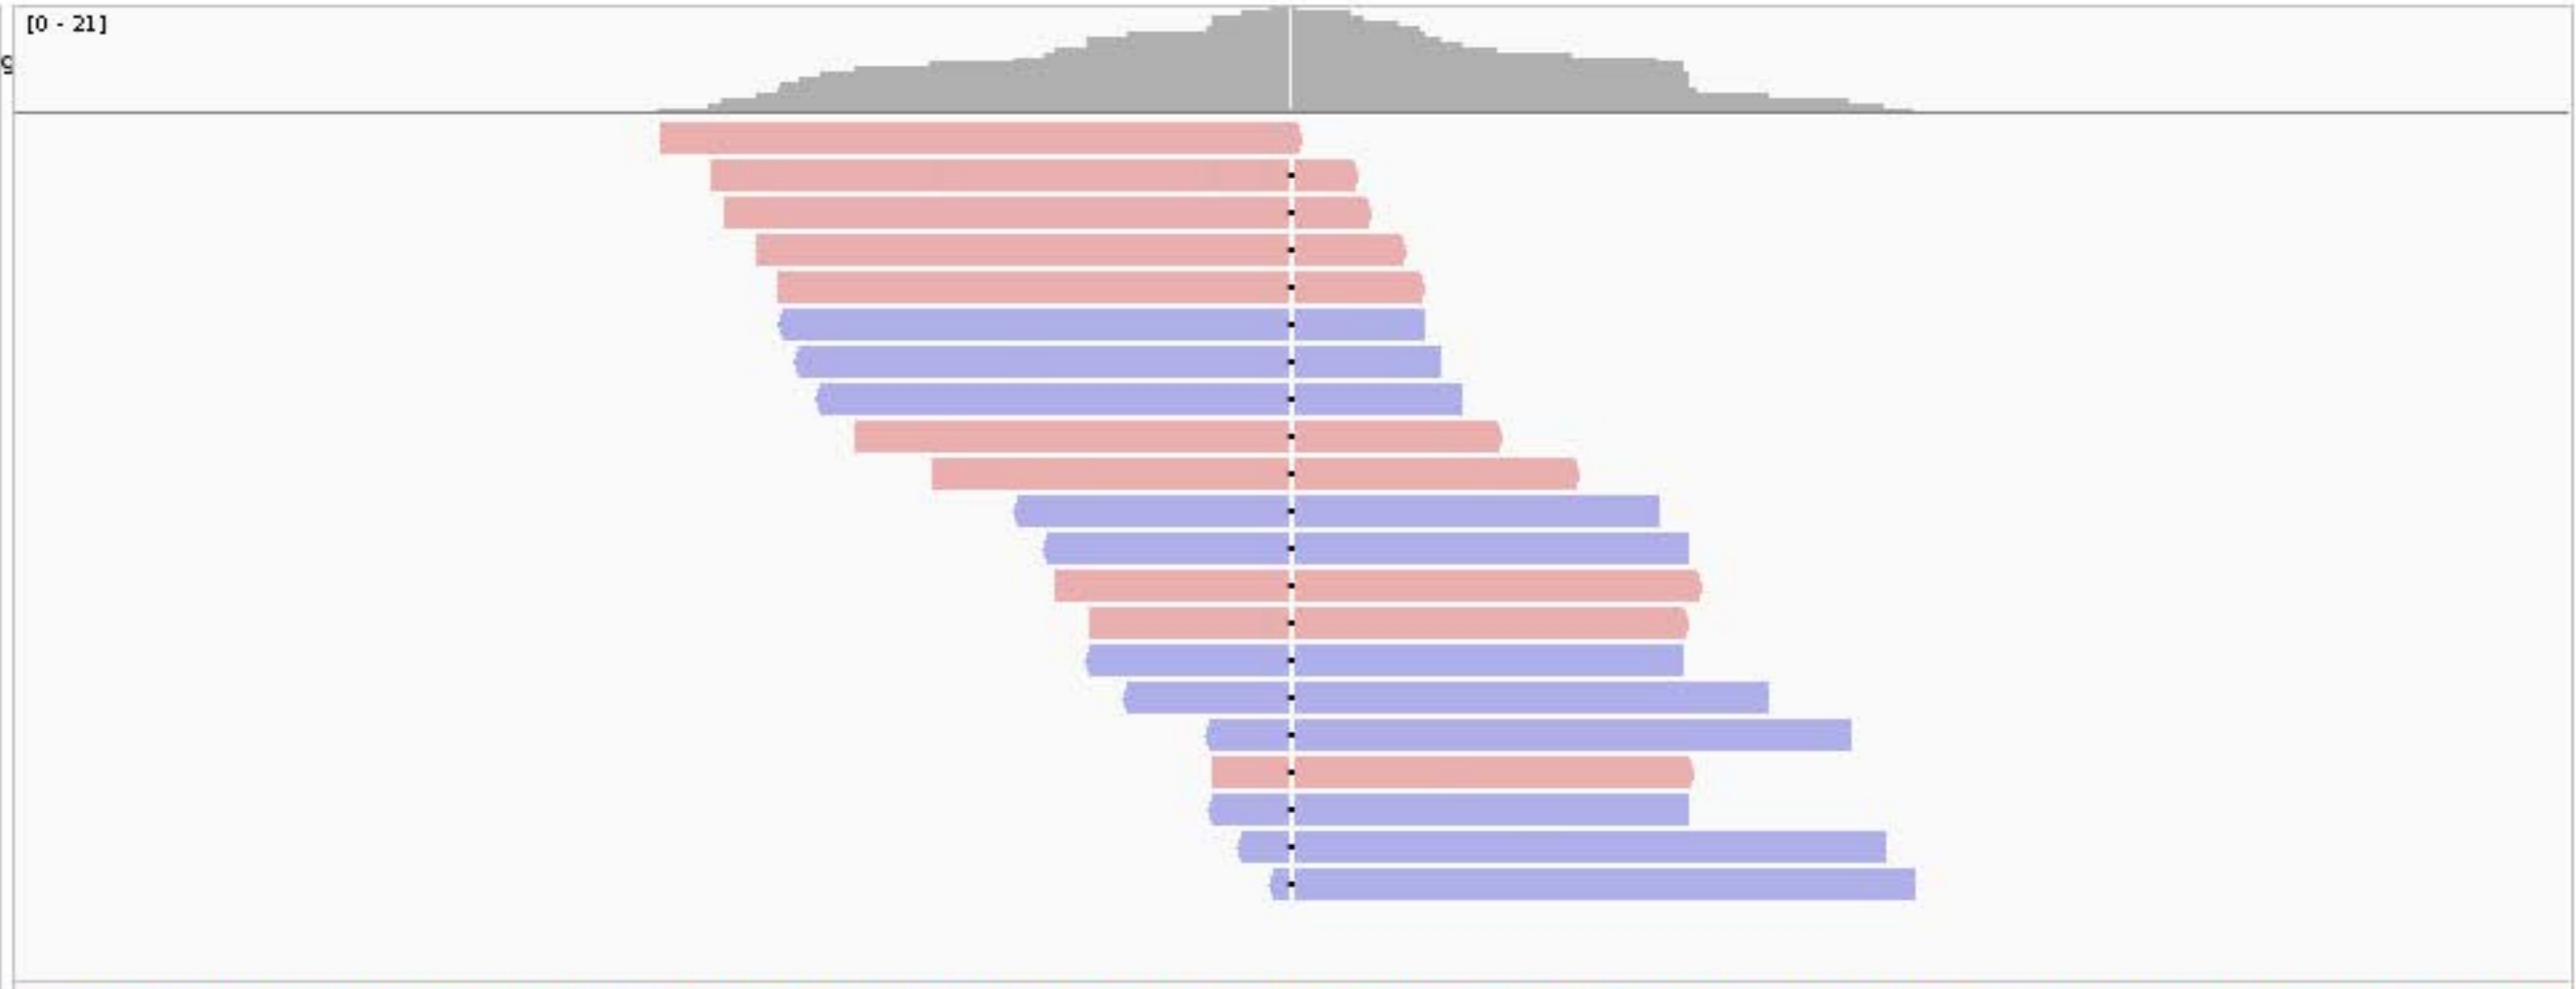

Sequence

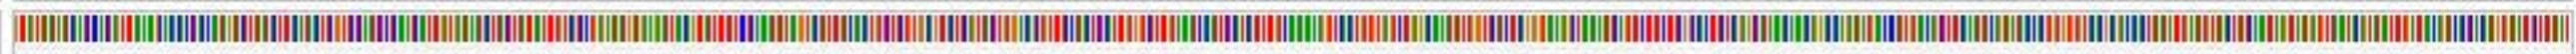

Refseq Genes

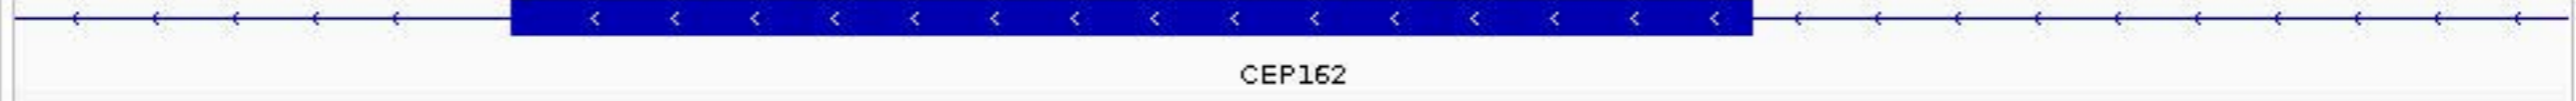

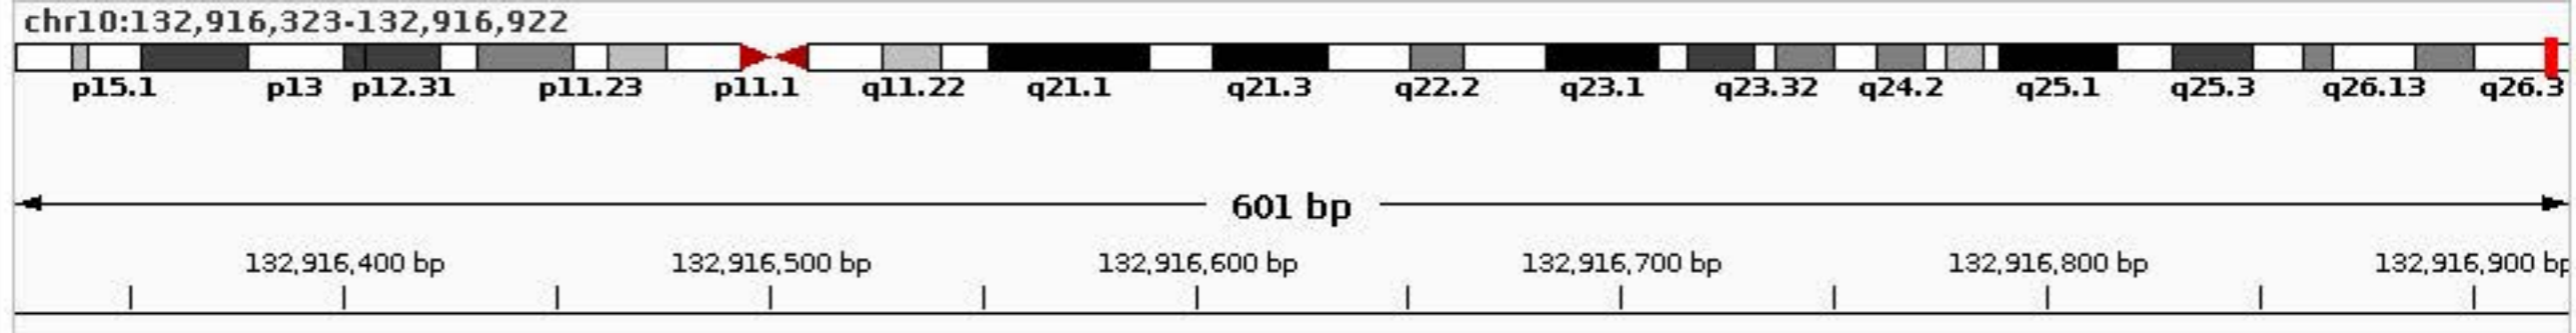

SL\_0006\_RN\_67\_mut.bam Coverage

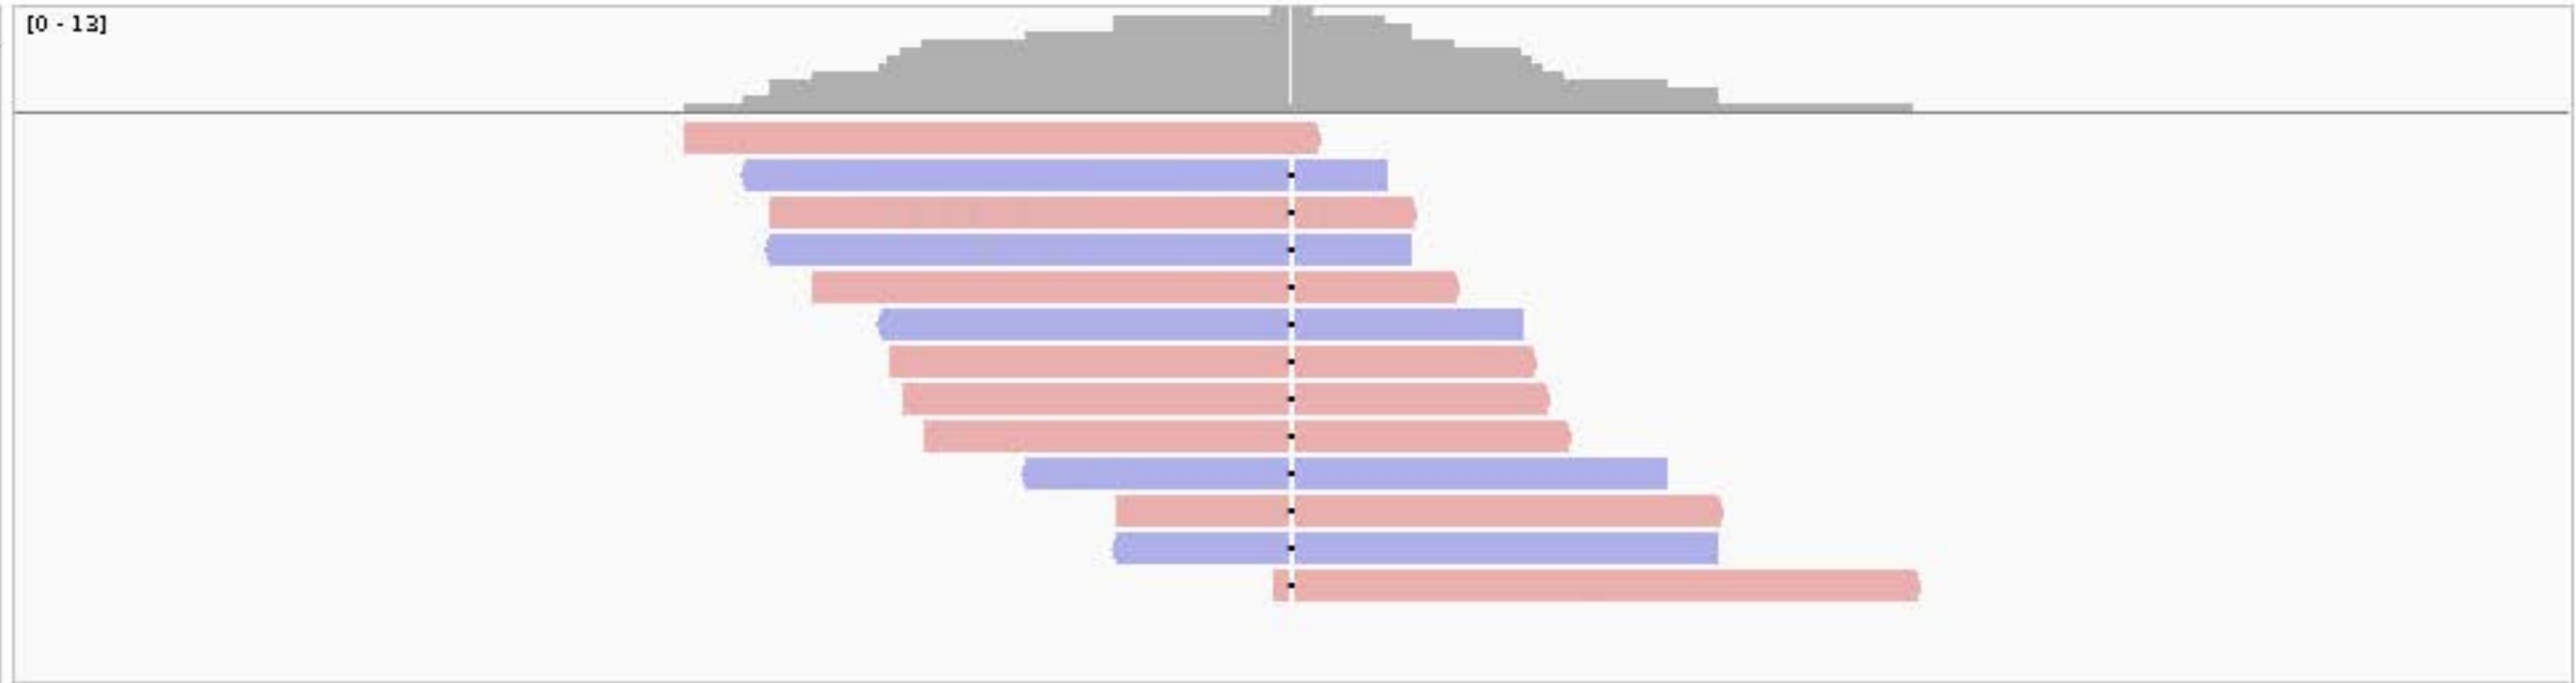

SL\_0006\_RN\_67\_mut.bam

Sequence

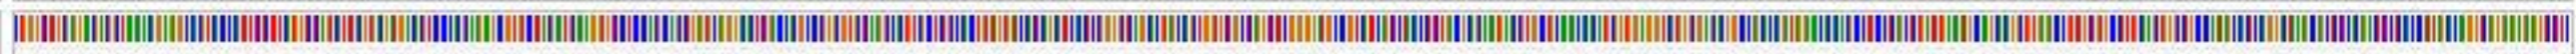

Refseq Genes

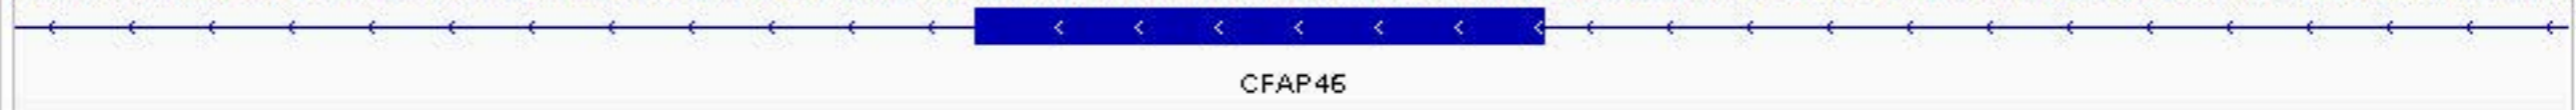

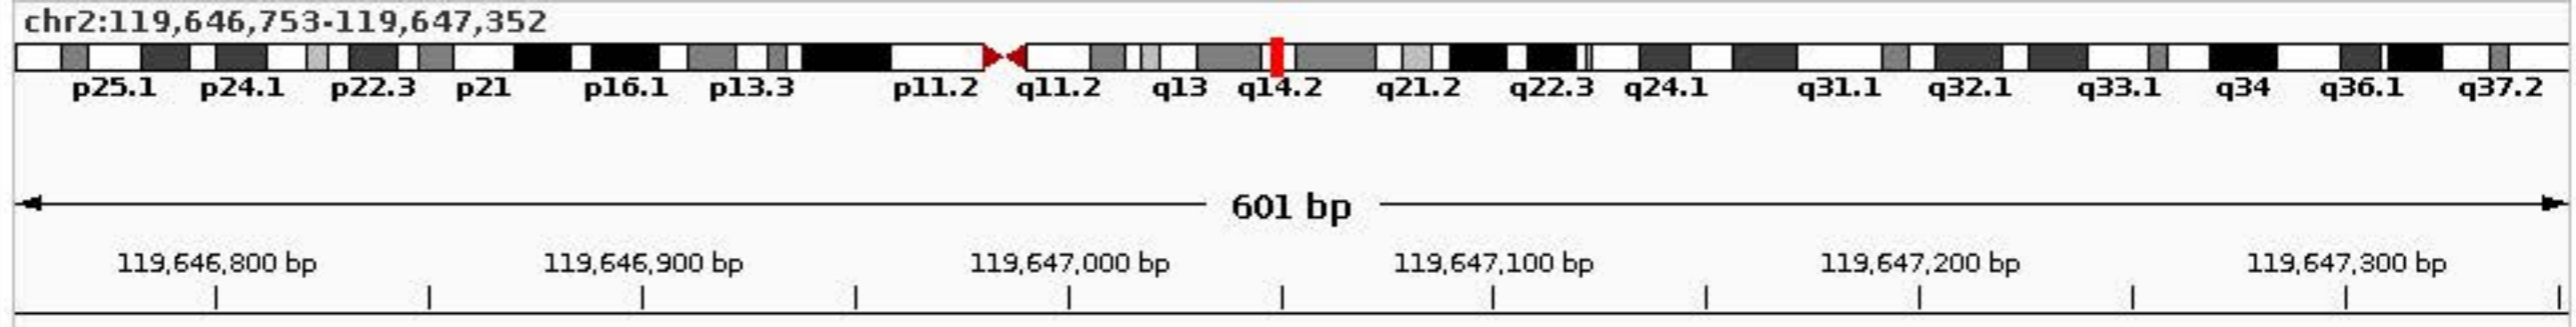

SL\_0001\_RN\_15\_mut.bam Coverage

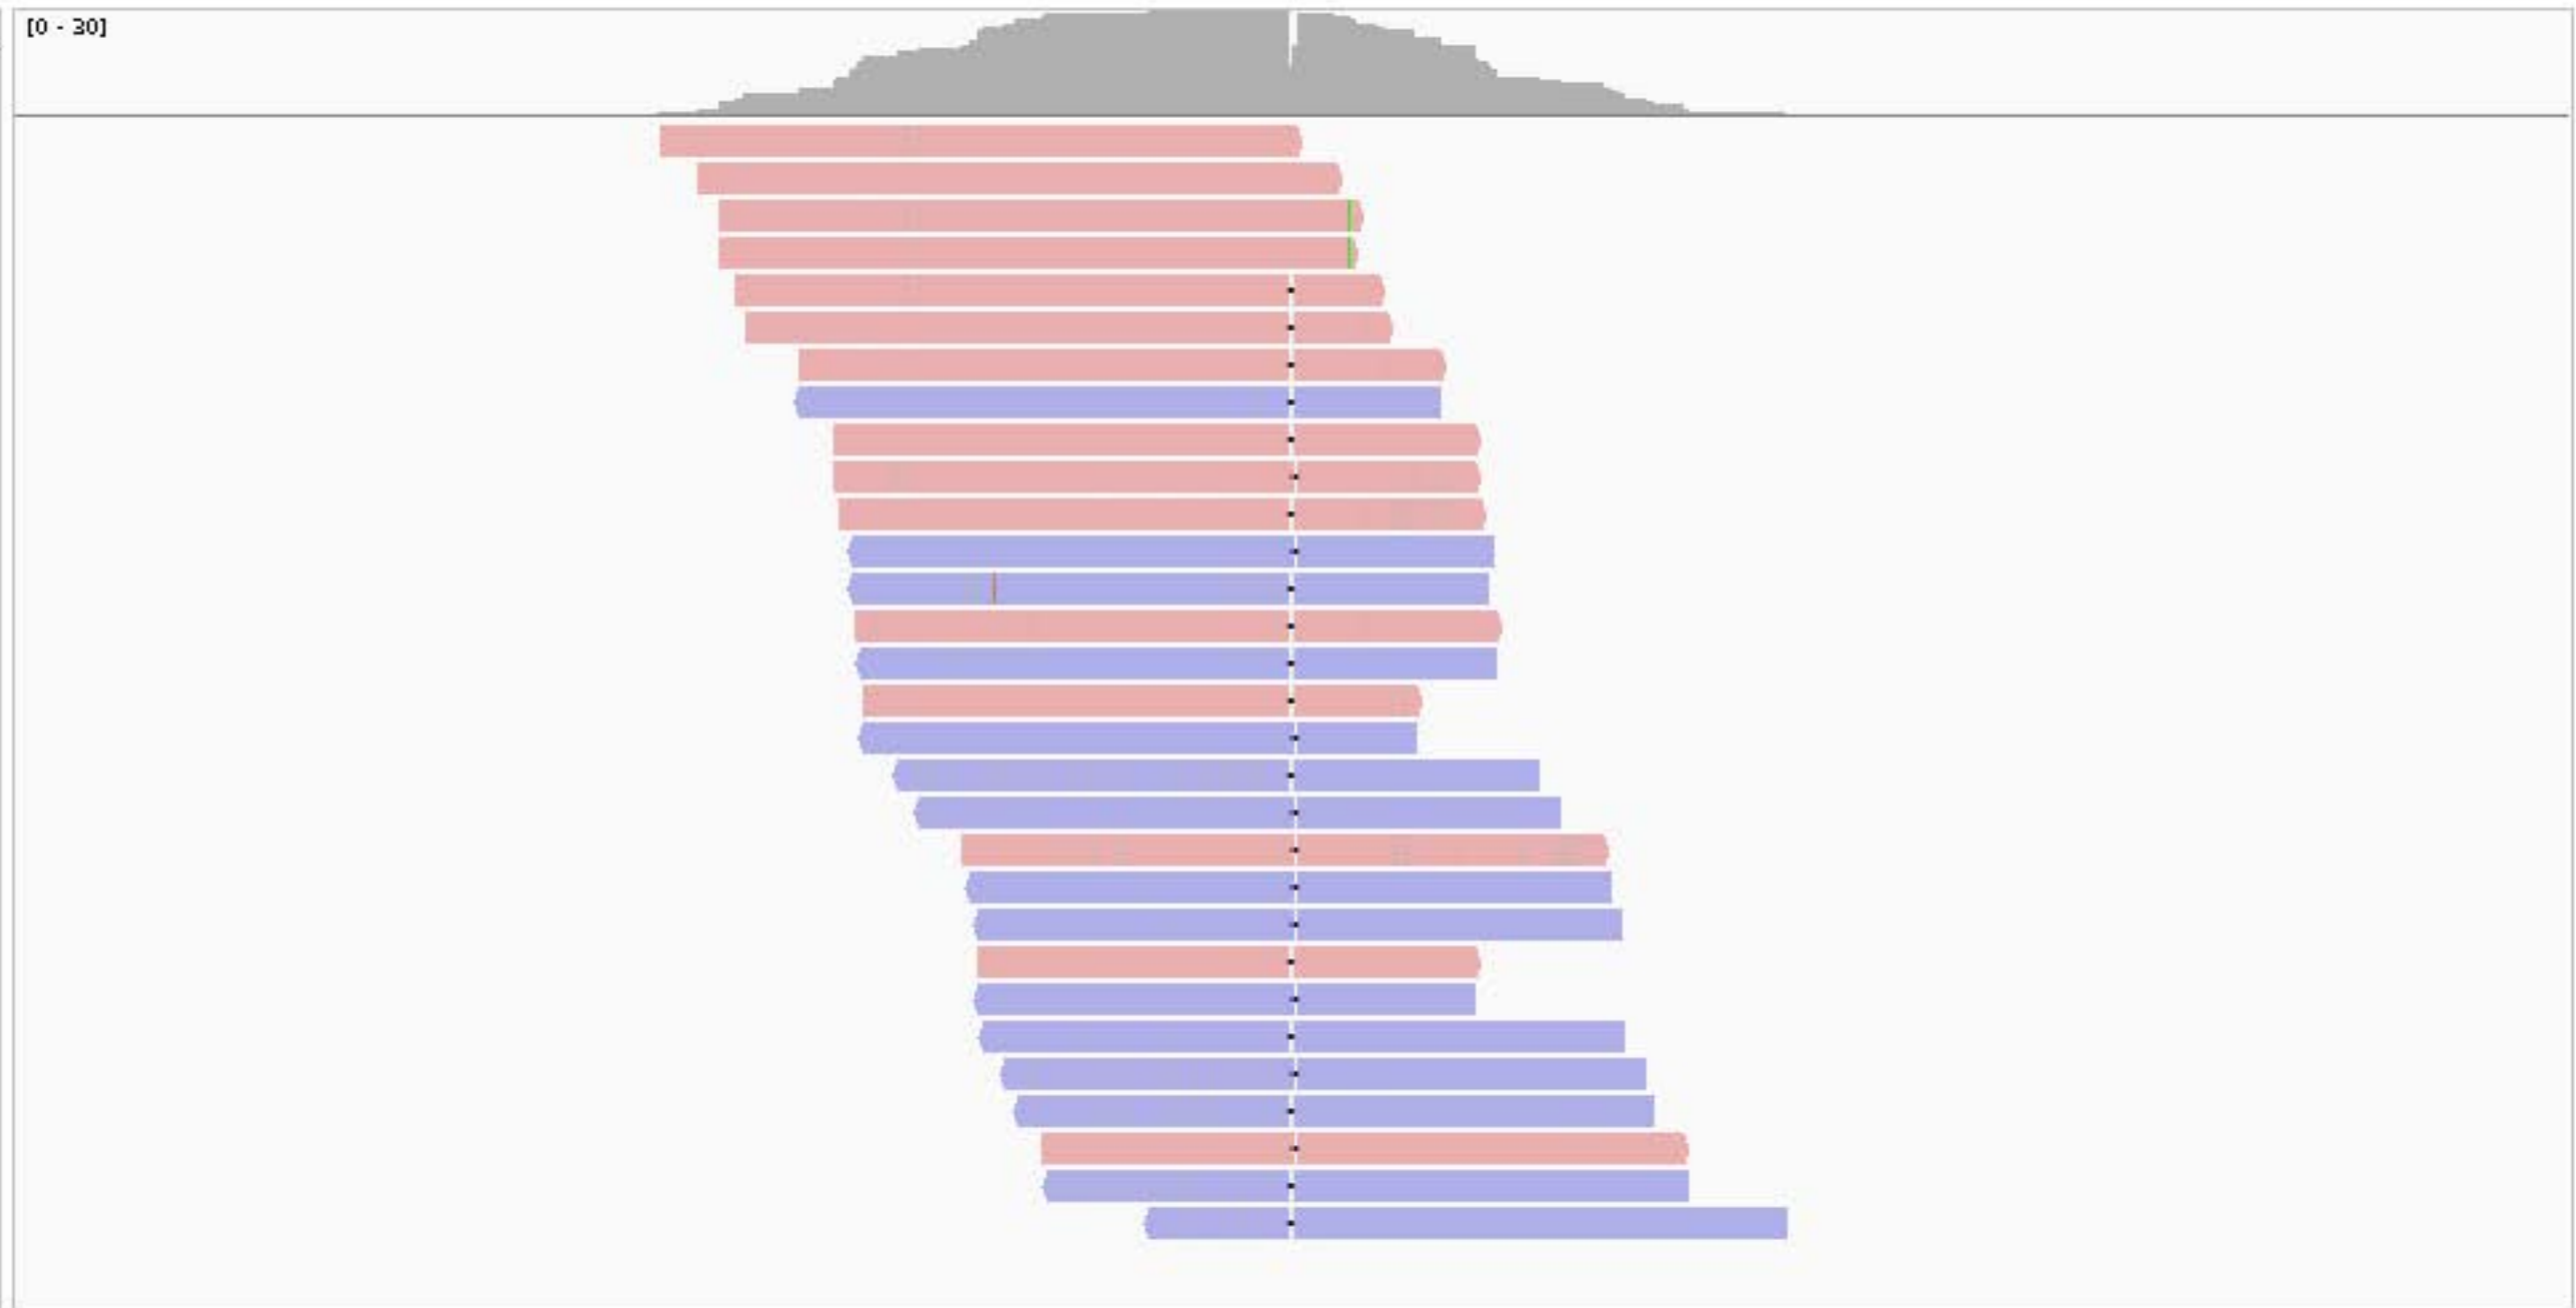

Sequence

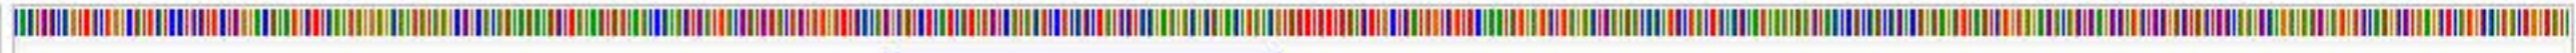

Refseq Genes

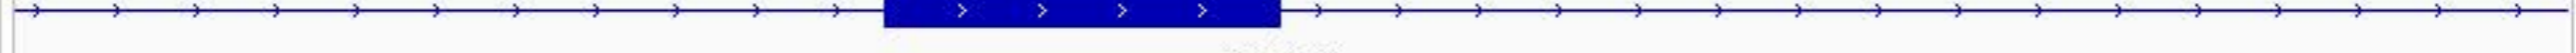

CFAP221



chr19:19,545,319-19,545,918

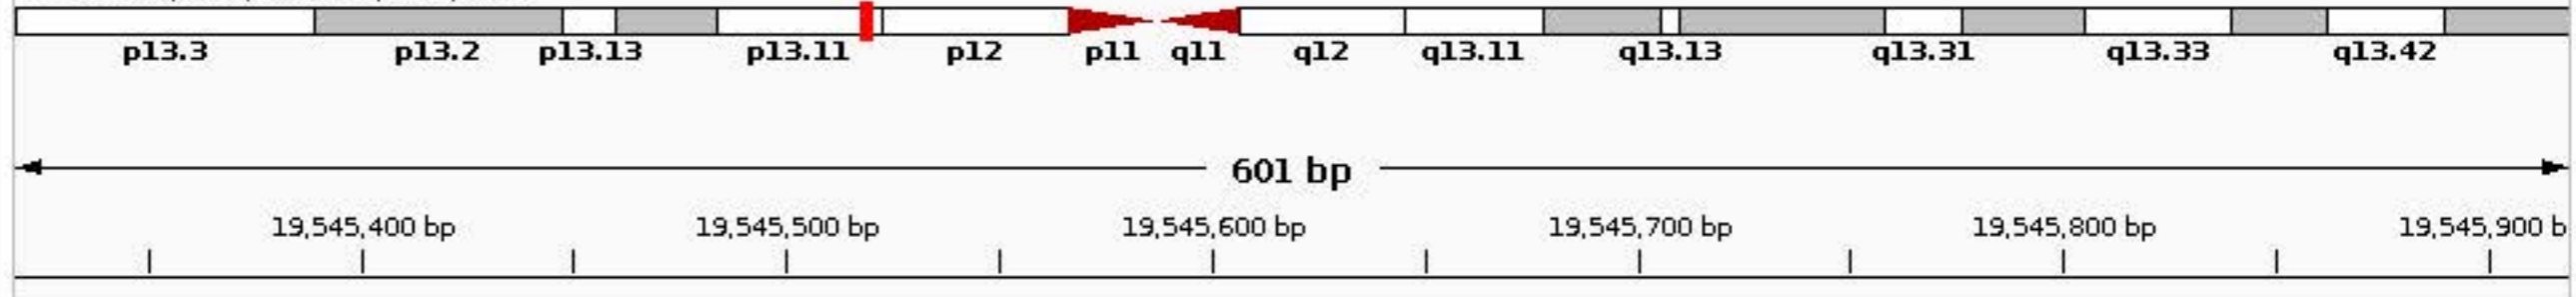

SL\_0001\_RN\_37\_mut.bam Coverage

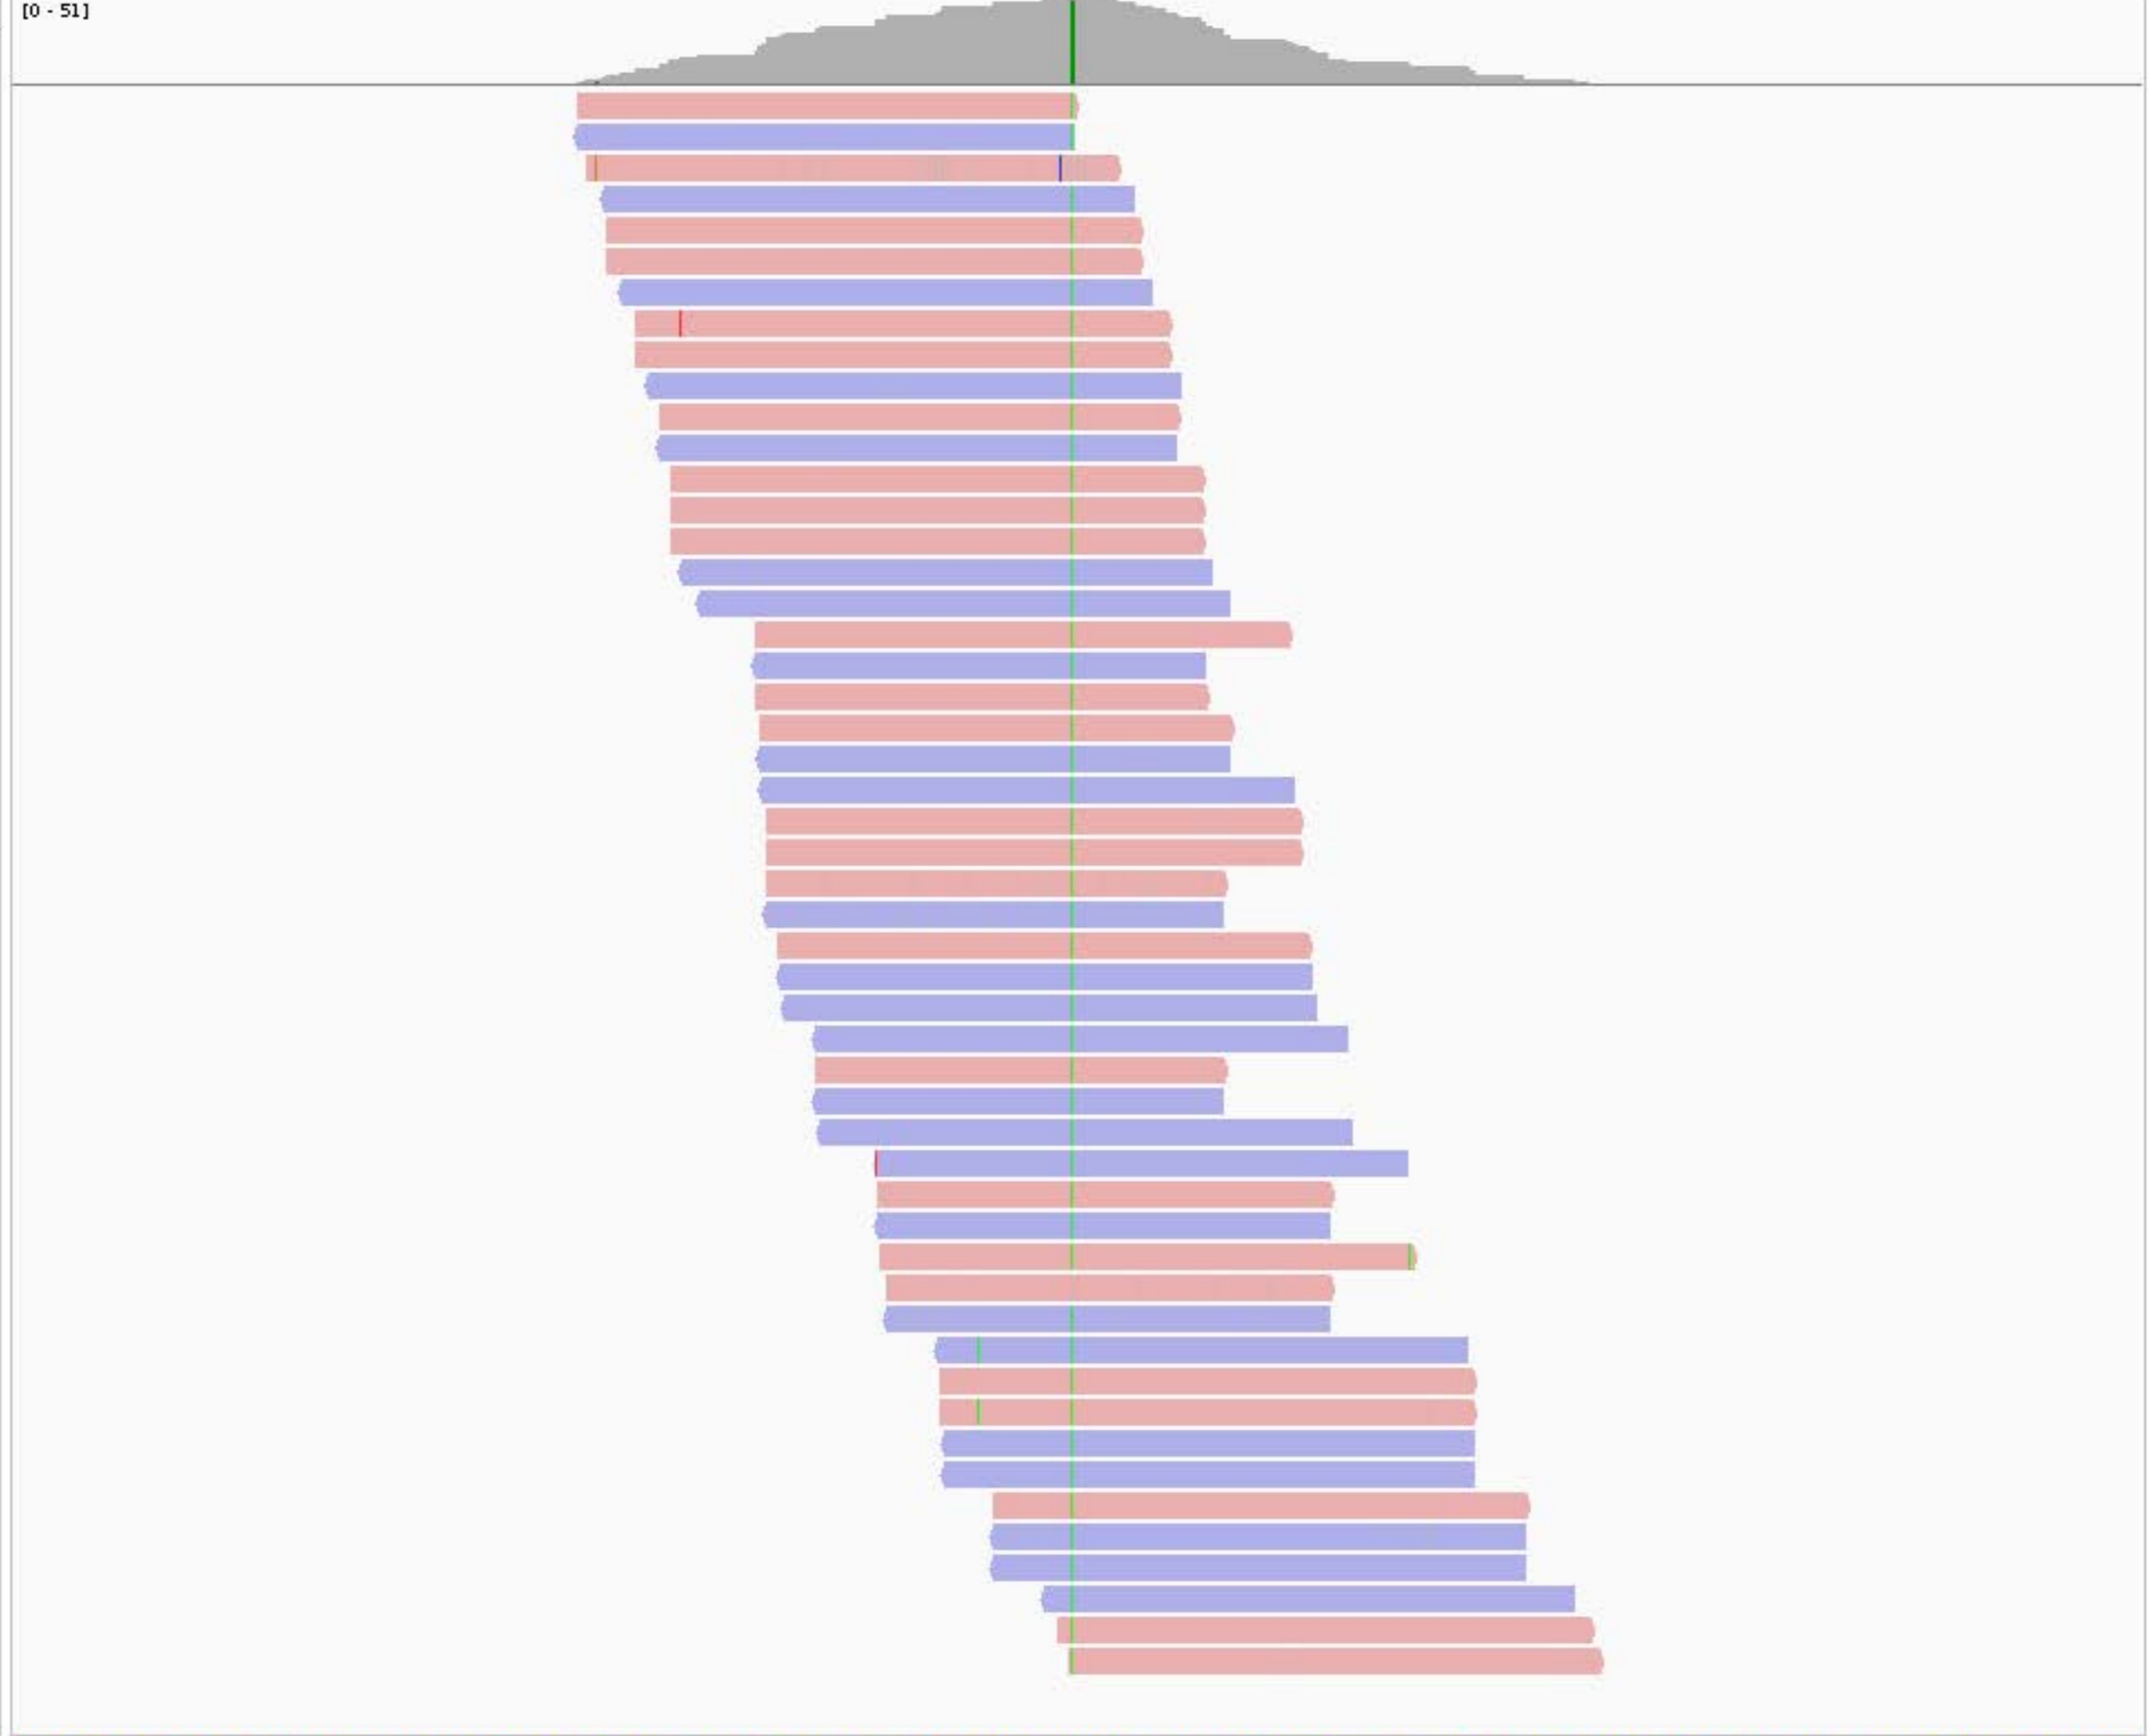

SL\_0001\_RN\_37\_mut.bam

Sequence

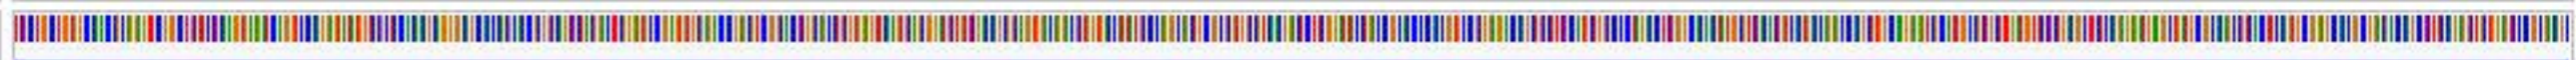

Refseq Genes

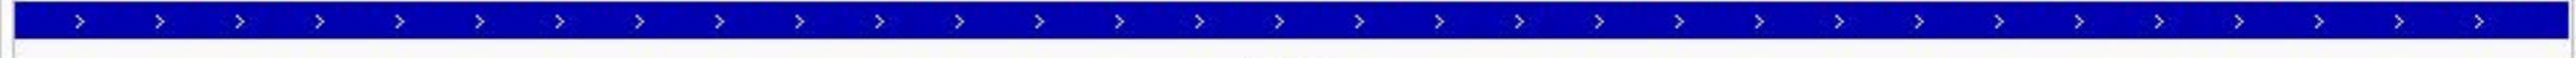

CILP2



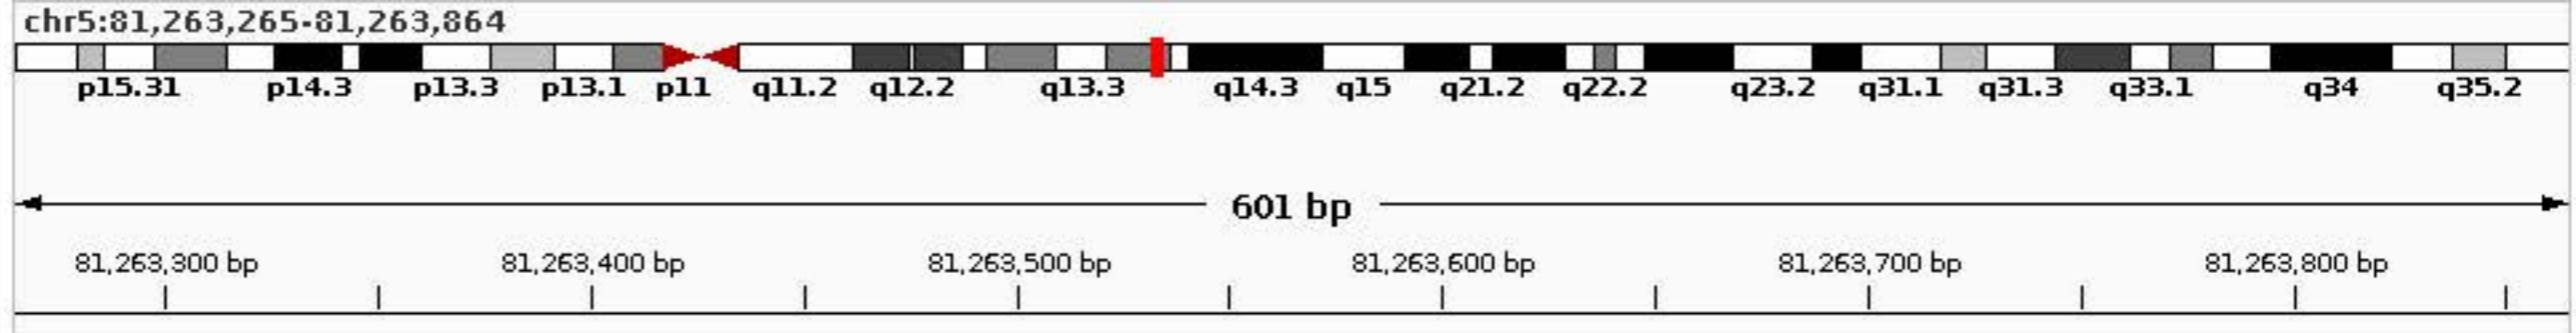

SL\_0001\_RN\_25\_mut.bam Coverage

SL\_0001\_RN\_25\_mut.bam

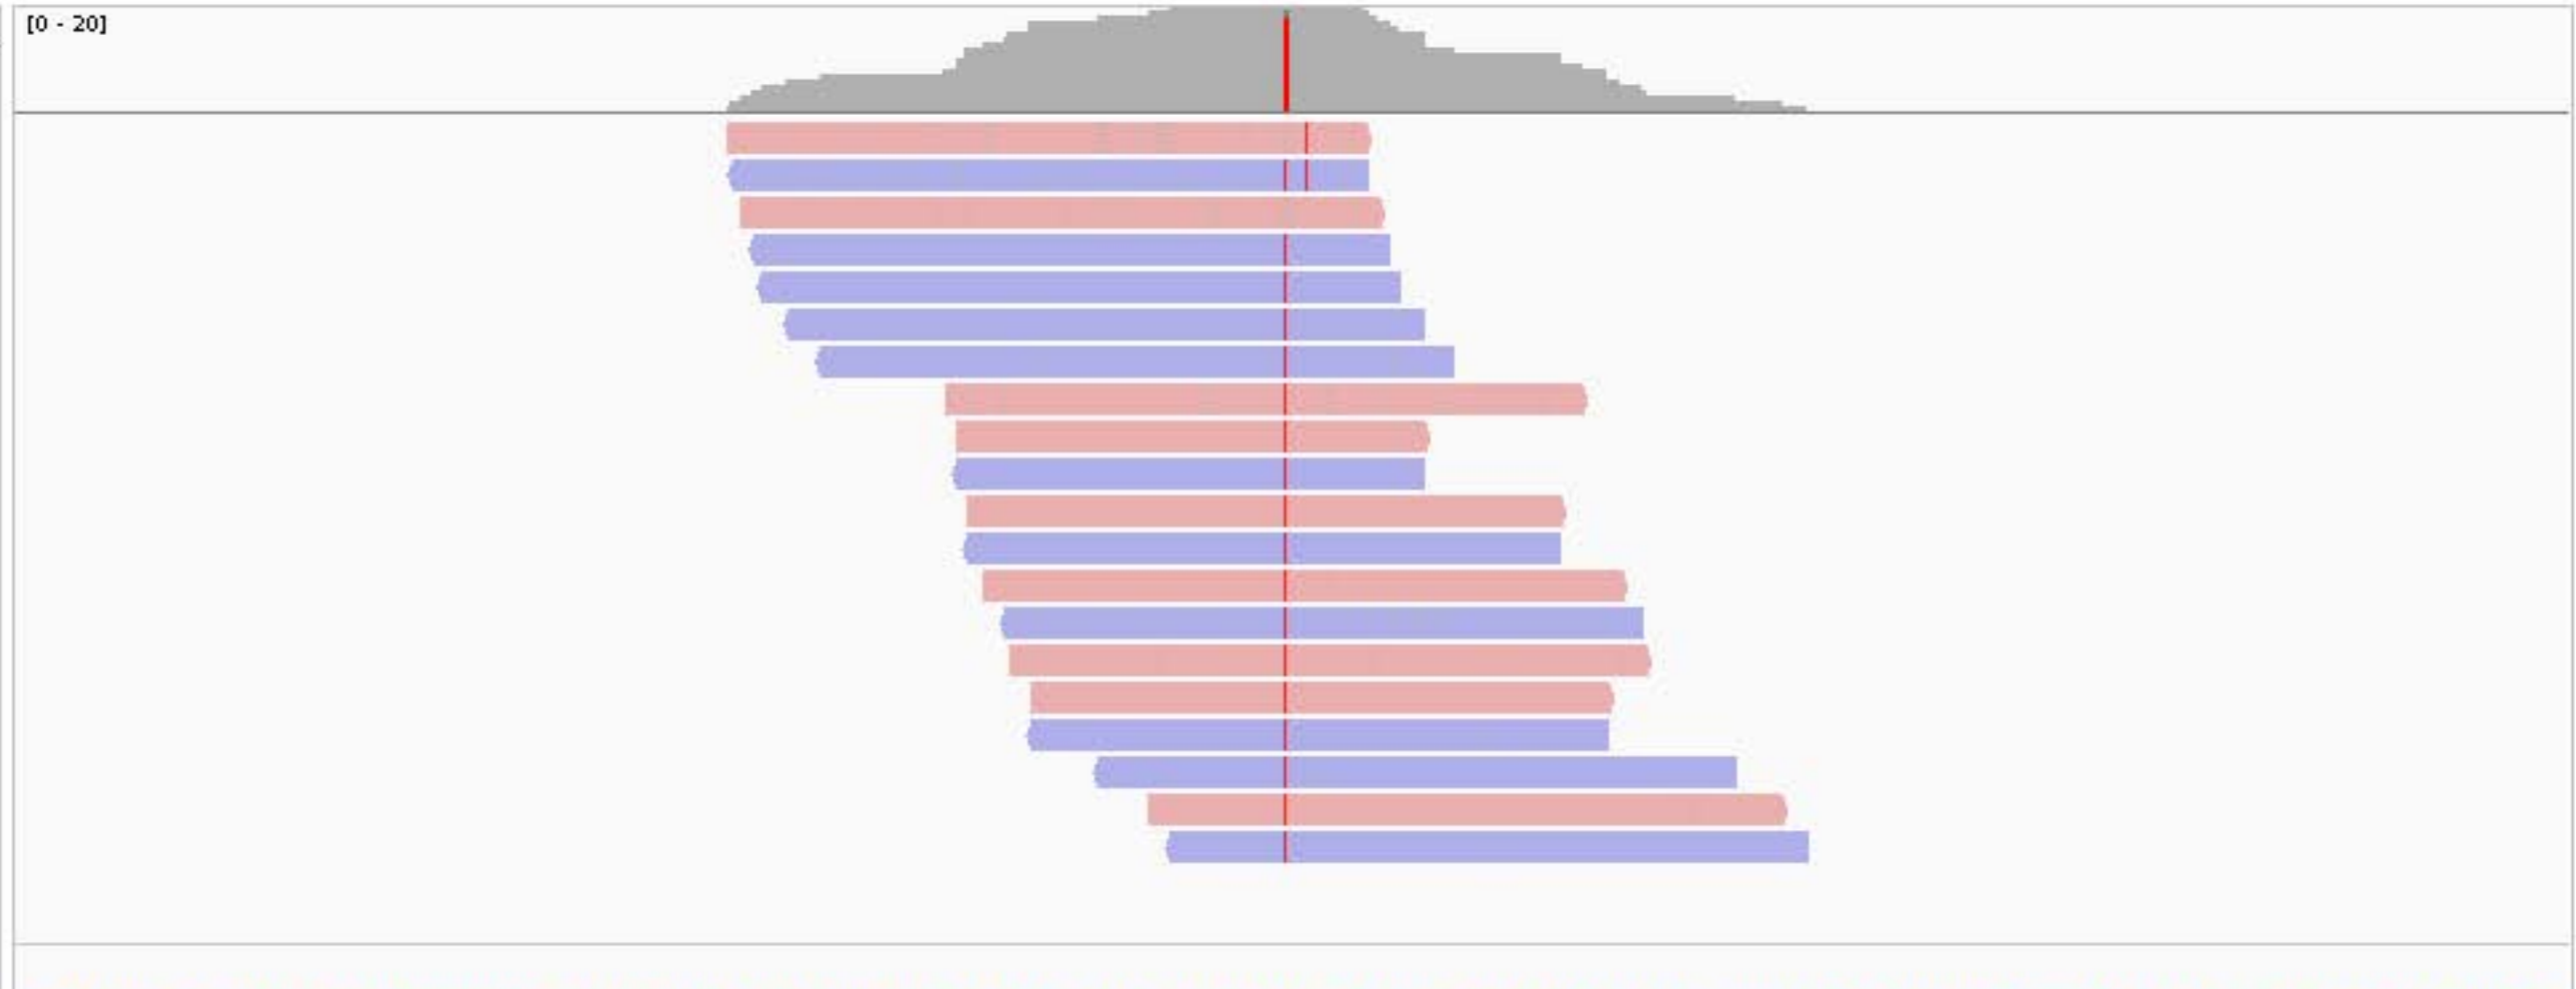

Sequence

Refseq Genes

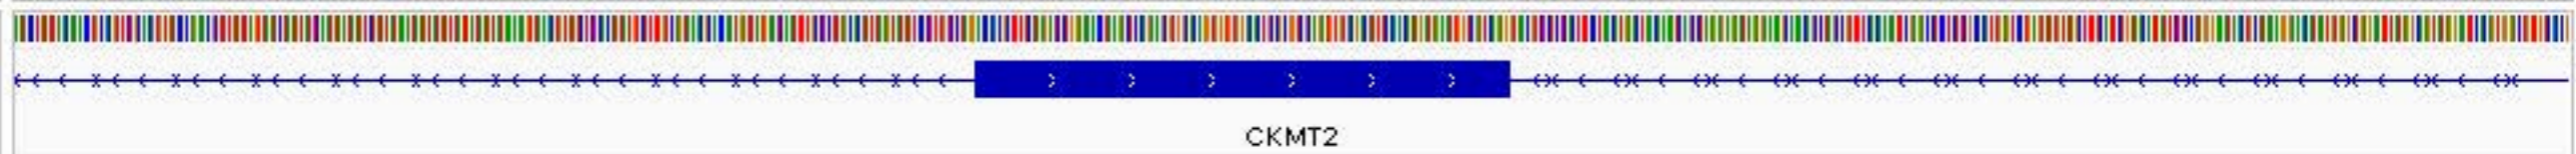

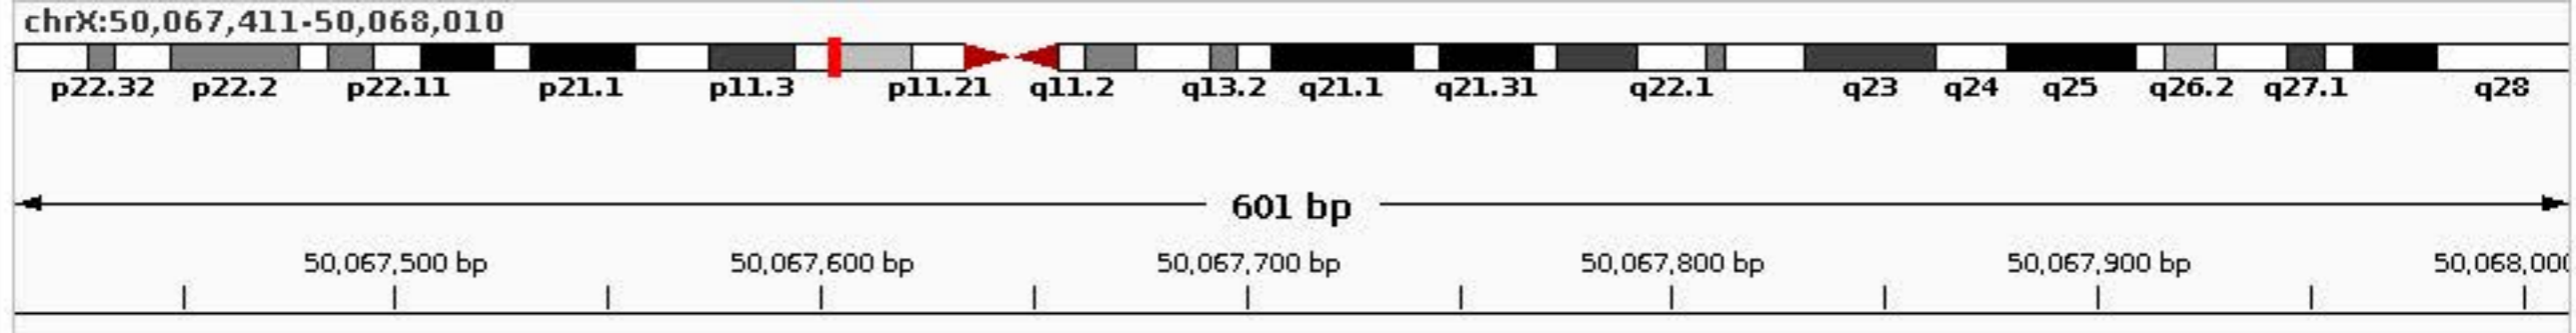

SL\_0004\_RN\_05\_mut.bam Coverage

SL\_0004\_RN\_05\_mut.bam

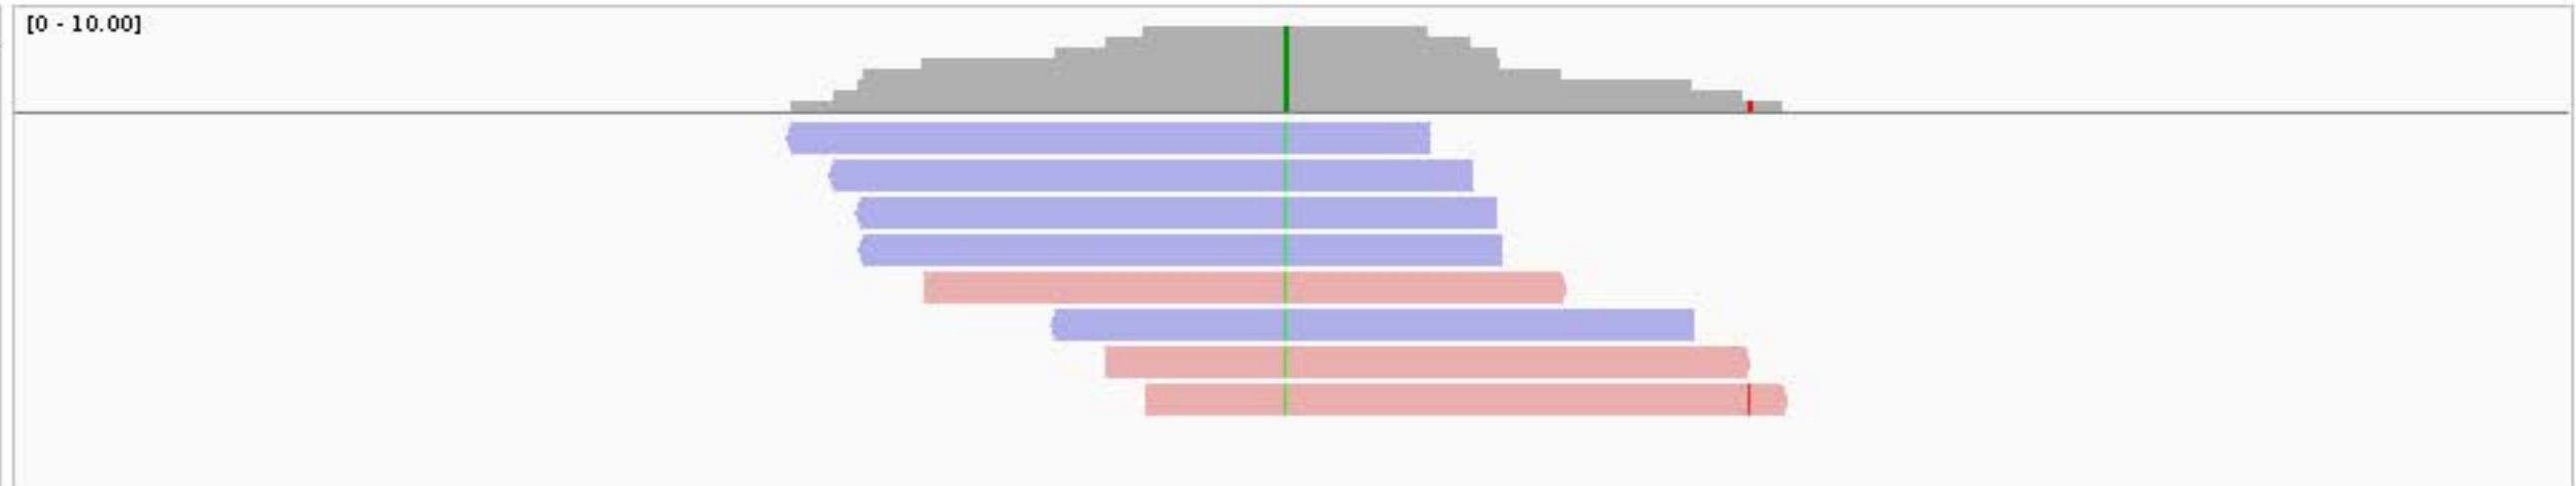

Sequence

Refseq Genes

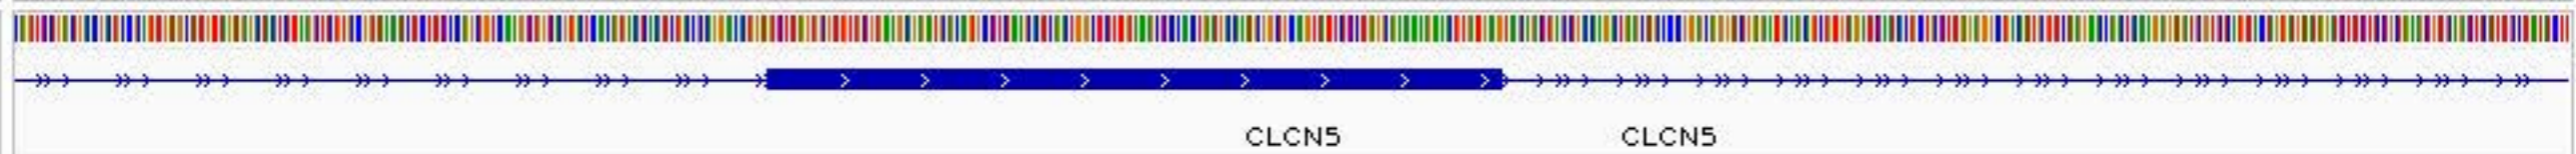

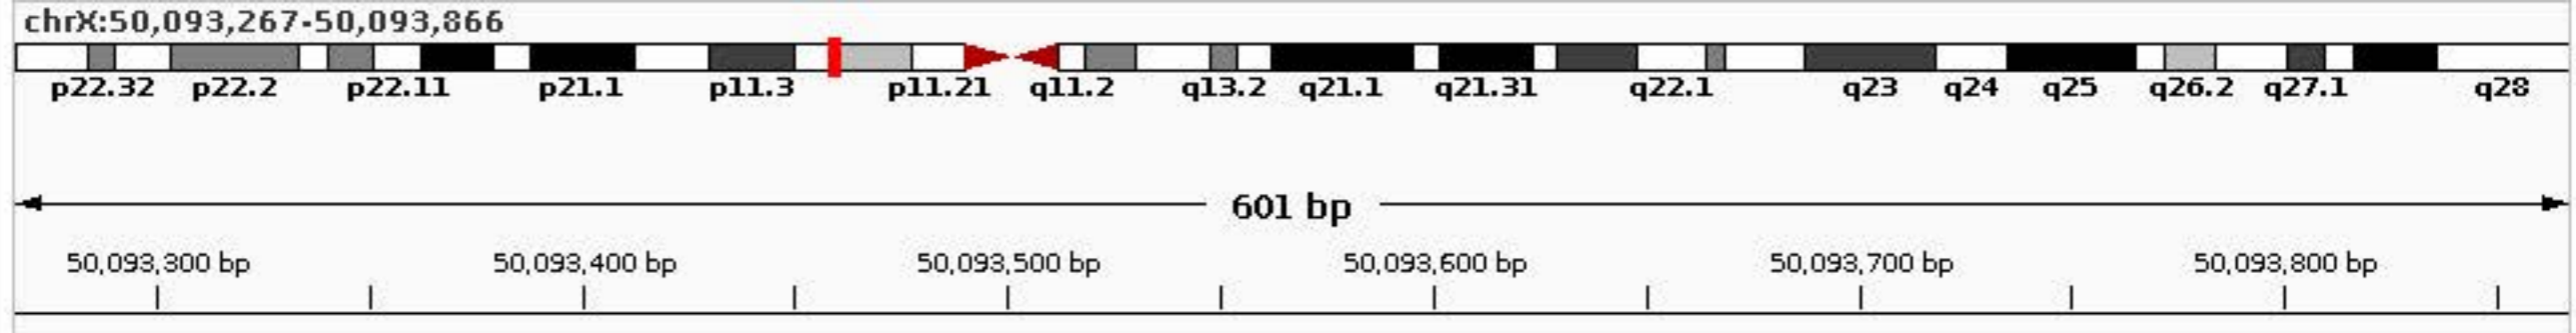

SL\_0004\_RN\_47\_mut.bam Coverage

SL\_0004\_RN\_47\_mut.bam

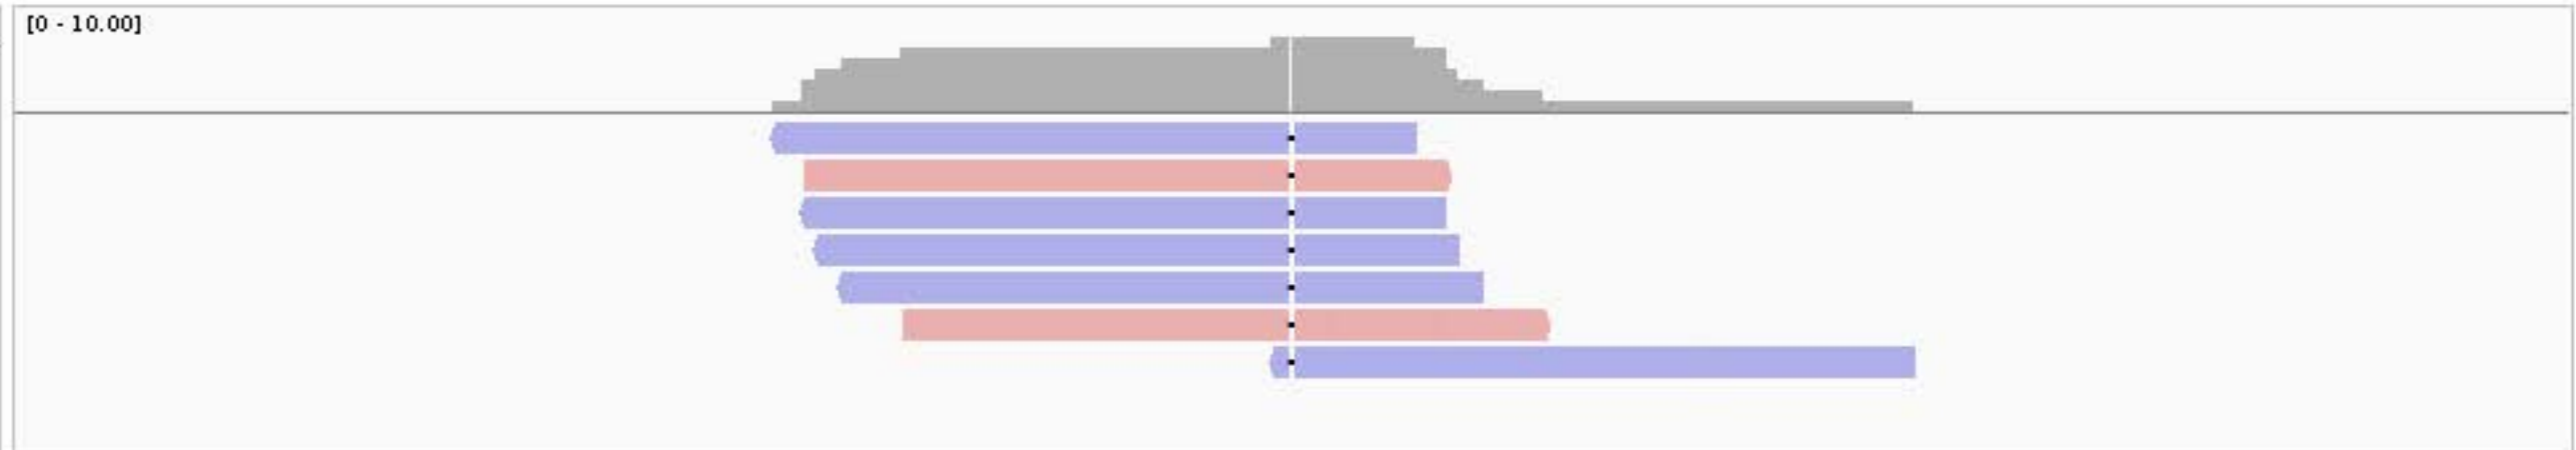

Sequence

Refseq Genes

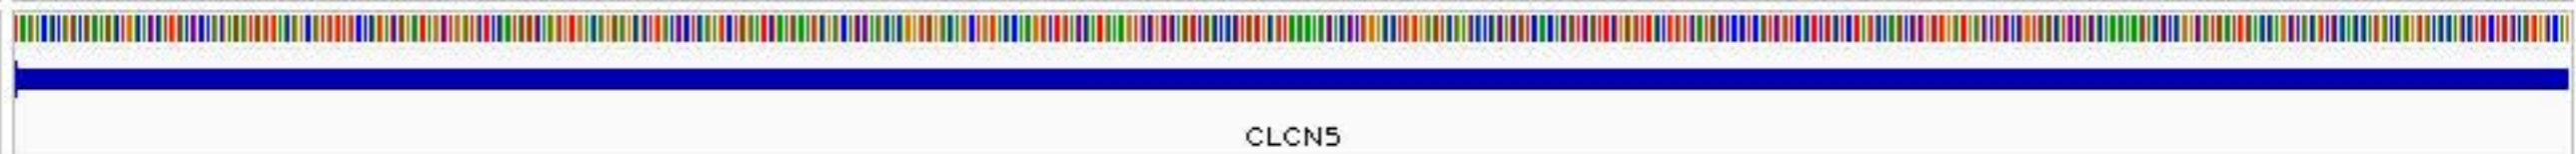



SL\_0004\_RN\_66\_mut.bam Coverage

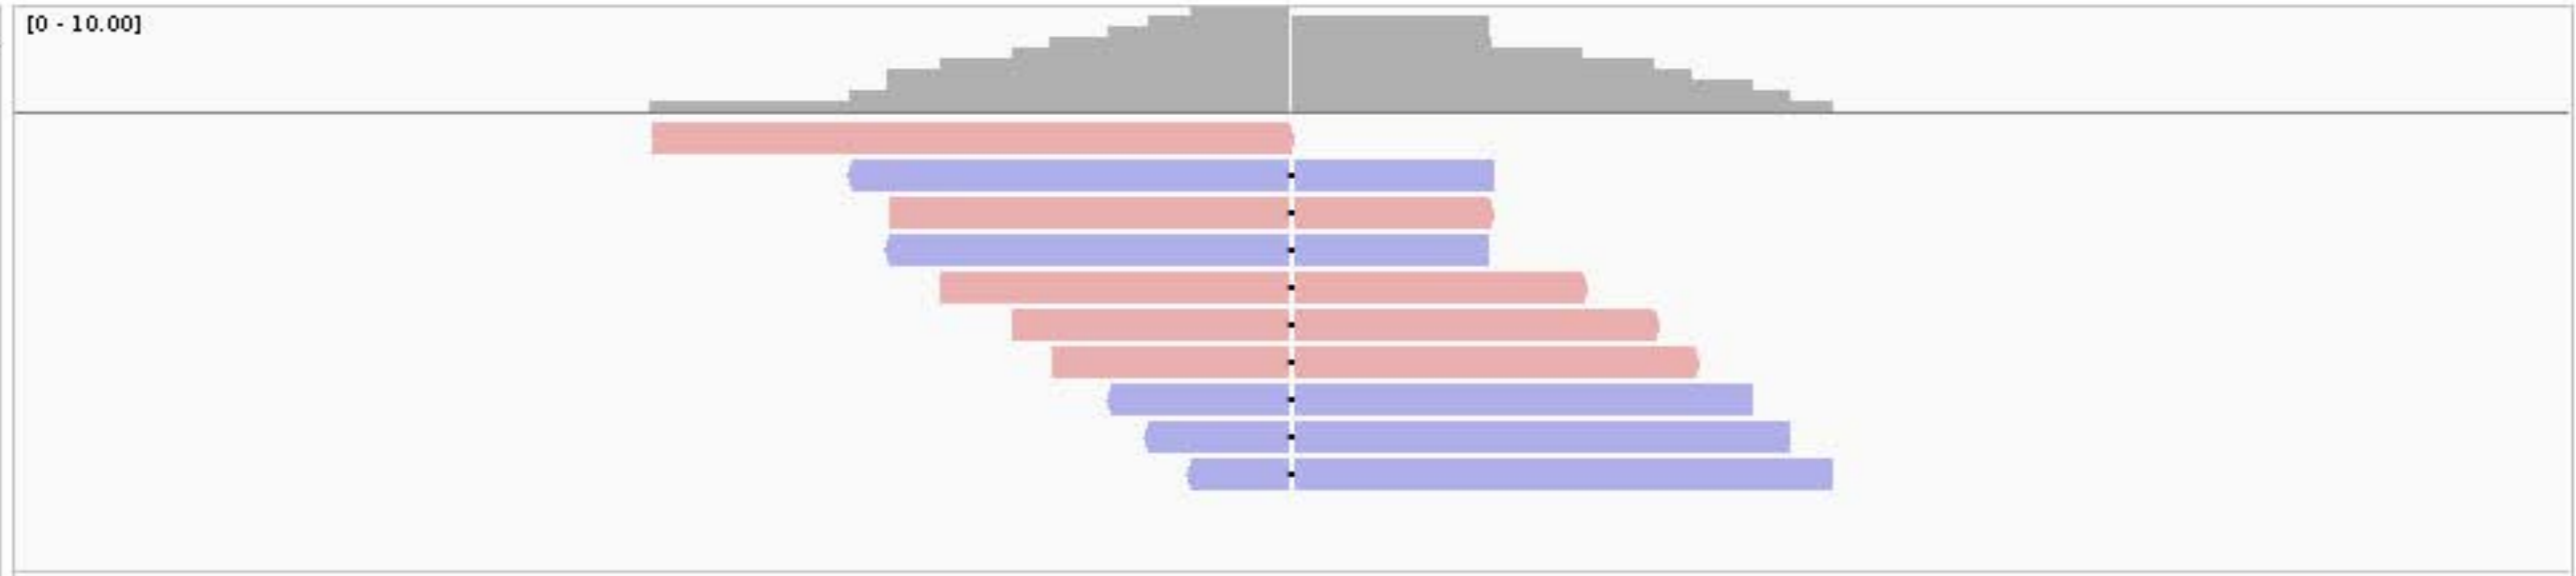

SL\_0004\_RN\_66\_mut.bam

Sequence →

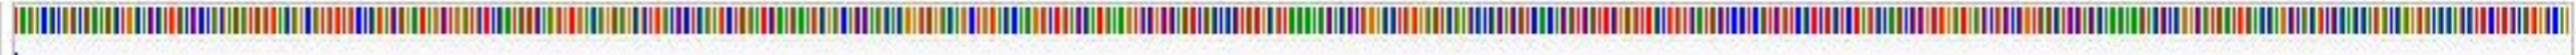

Refseq Genes

CLCN5

chr21:36,460,462-36,461,061

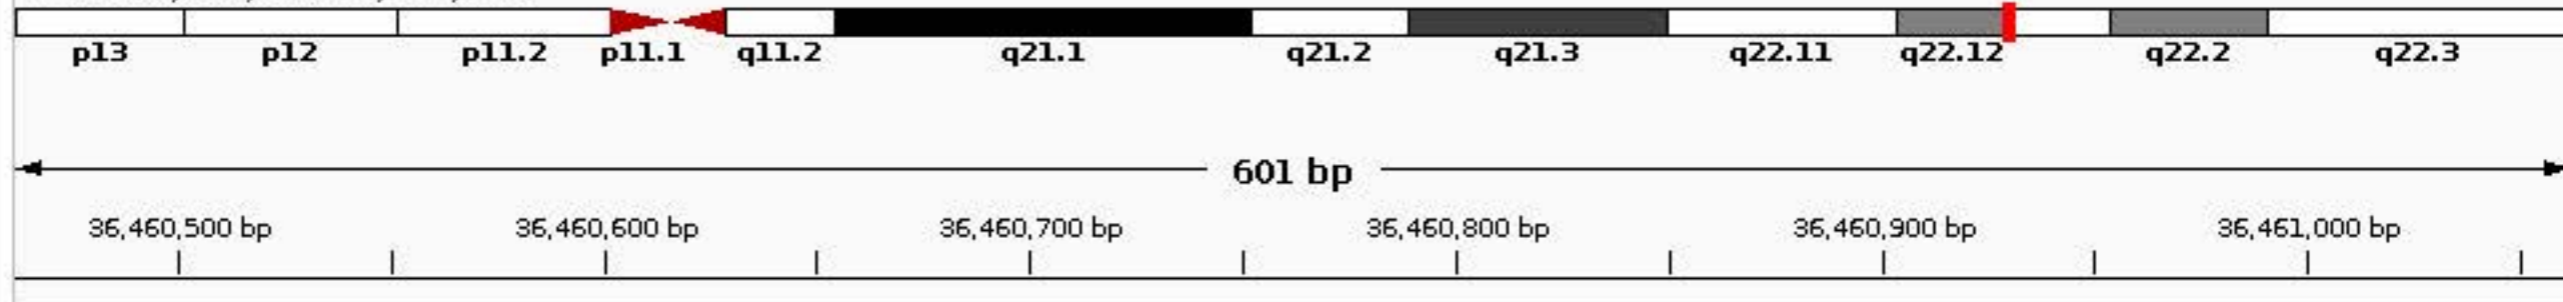

SL\_0015\_LN\_46\_mut.bam Coverage

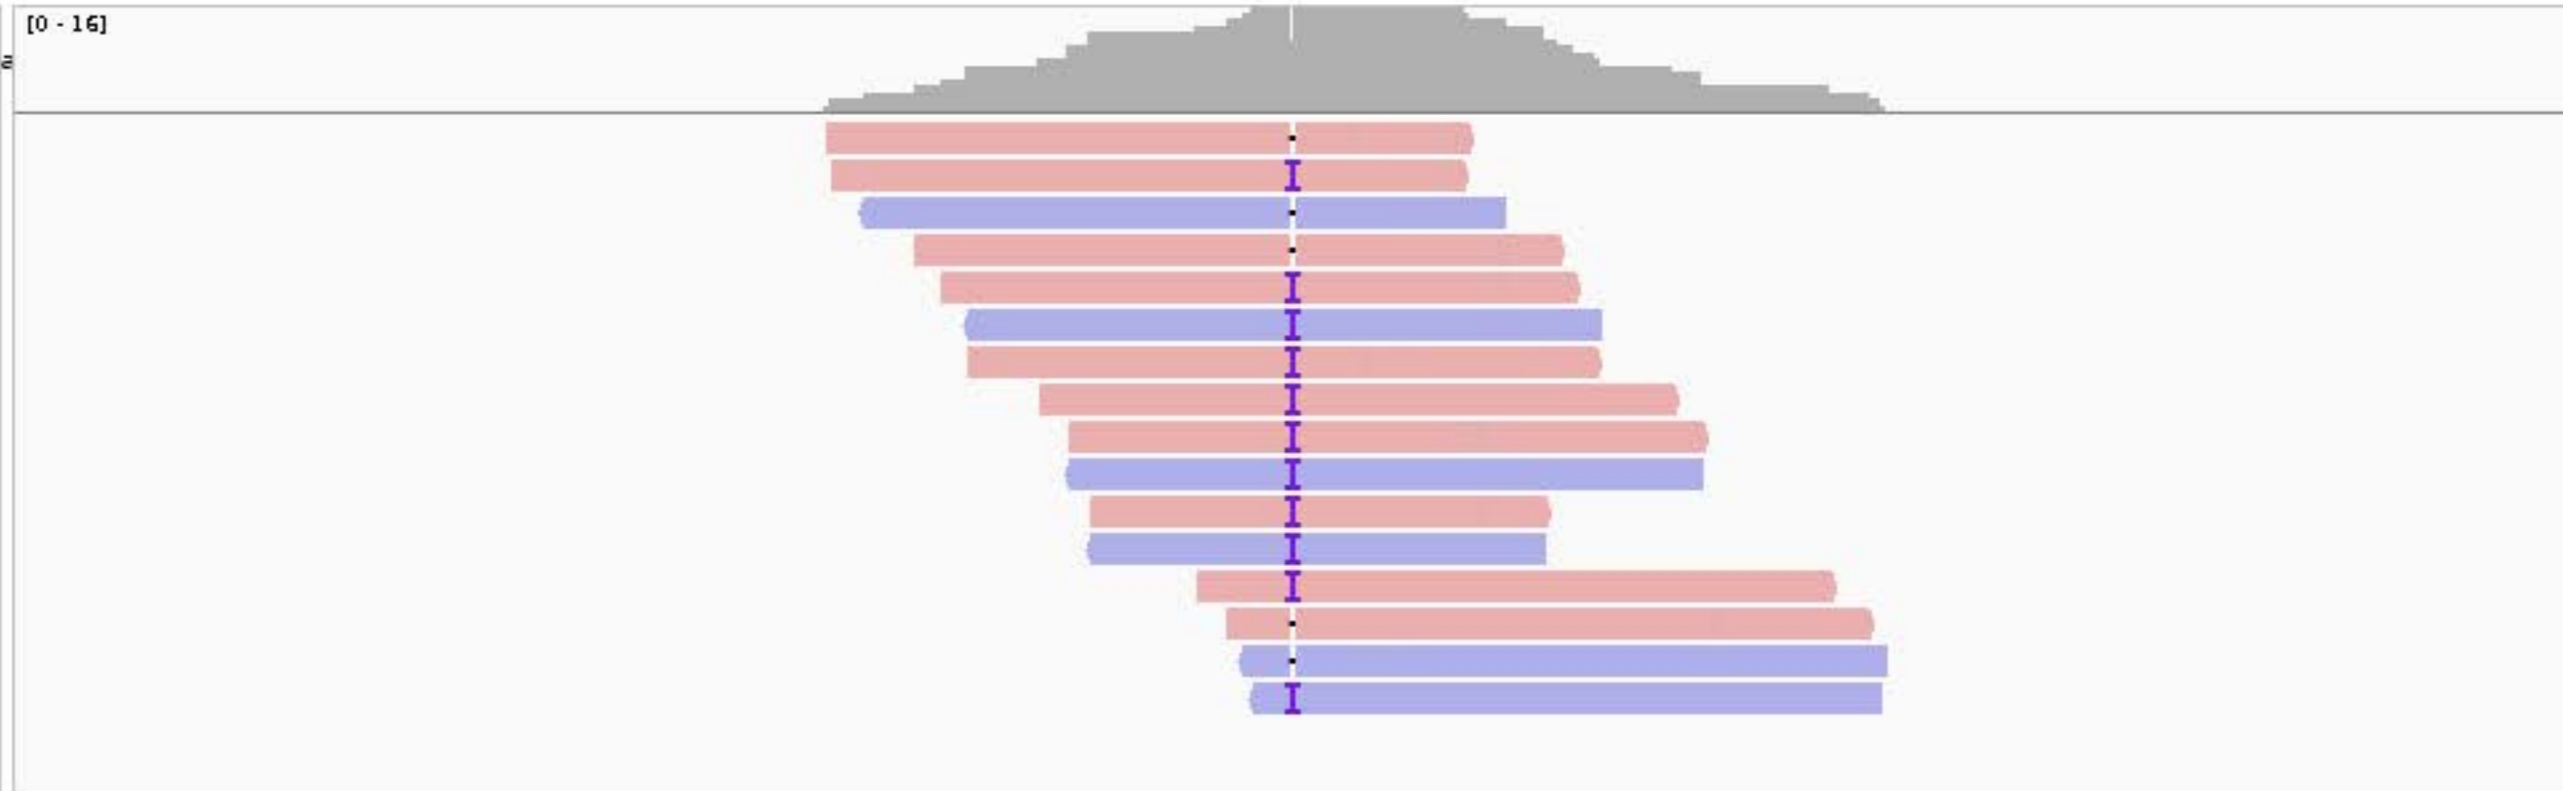

SL\_0015\_LN\_46\_mut.bam

Sequence →

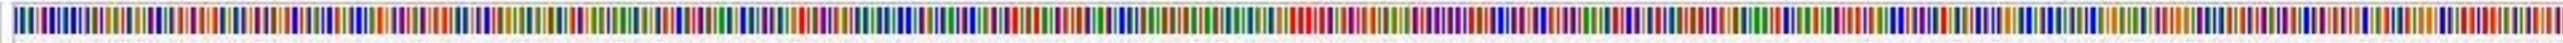

Refseq Genes

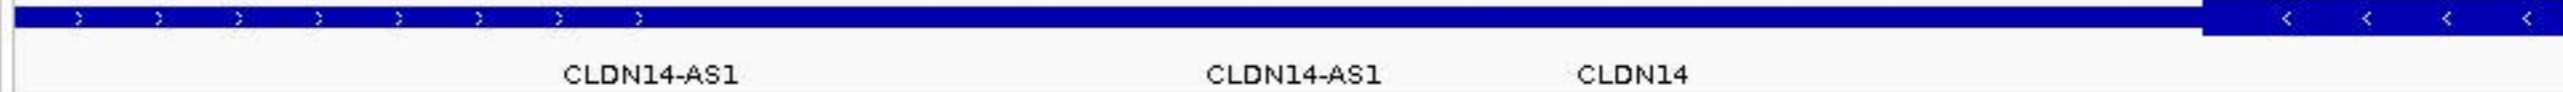

CLDN14-AS1

CLDN14-AS1

CLDN14



chr21:36,460,462-36,461,061

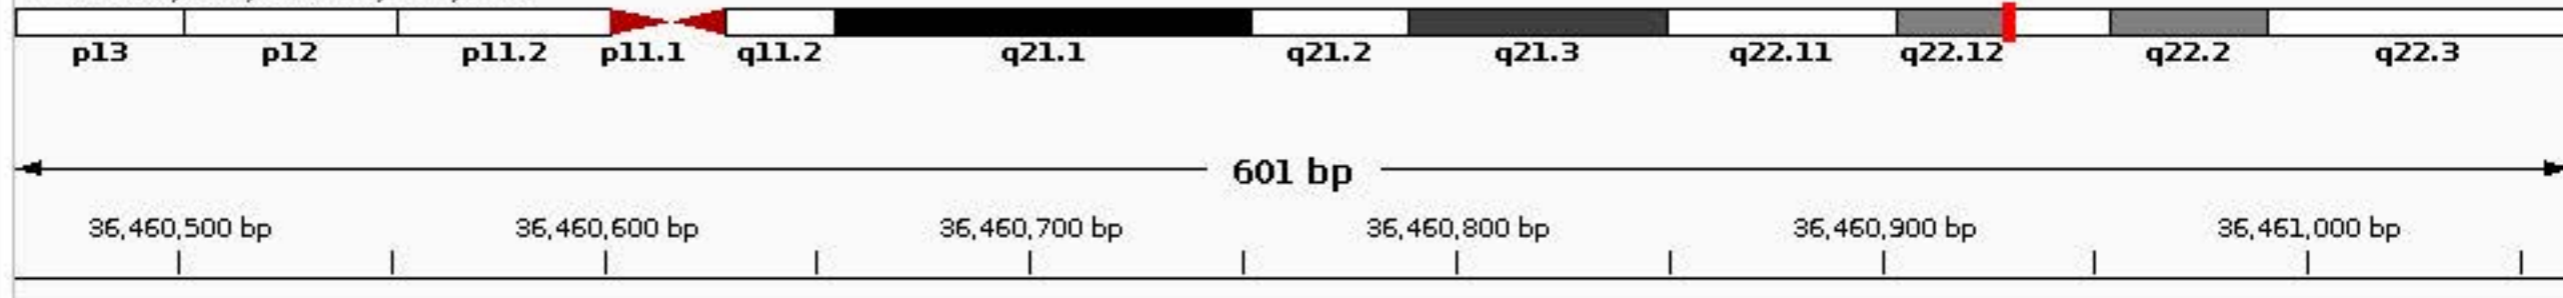

SL\_0015\_RN\_21\_mut.bam Coverage

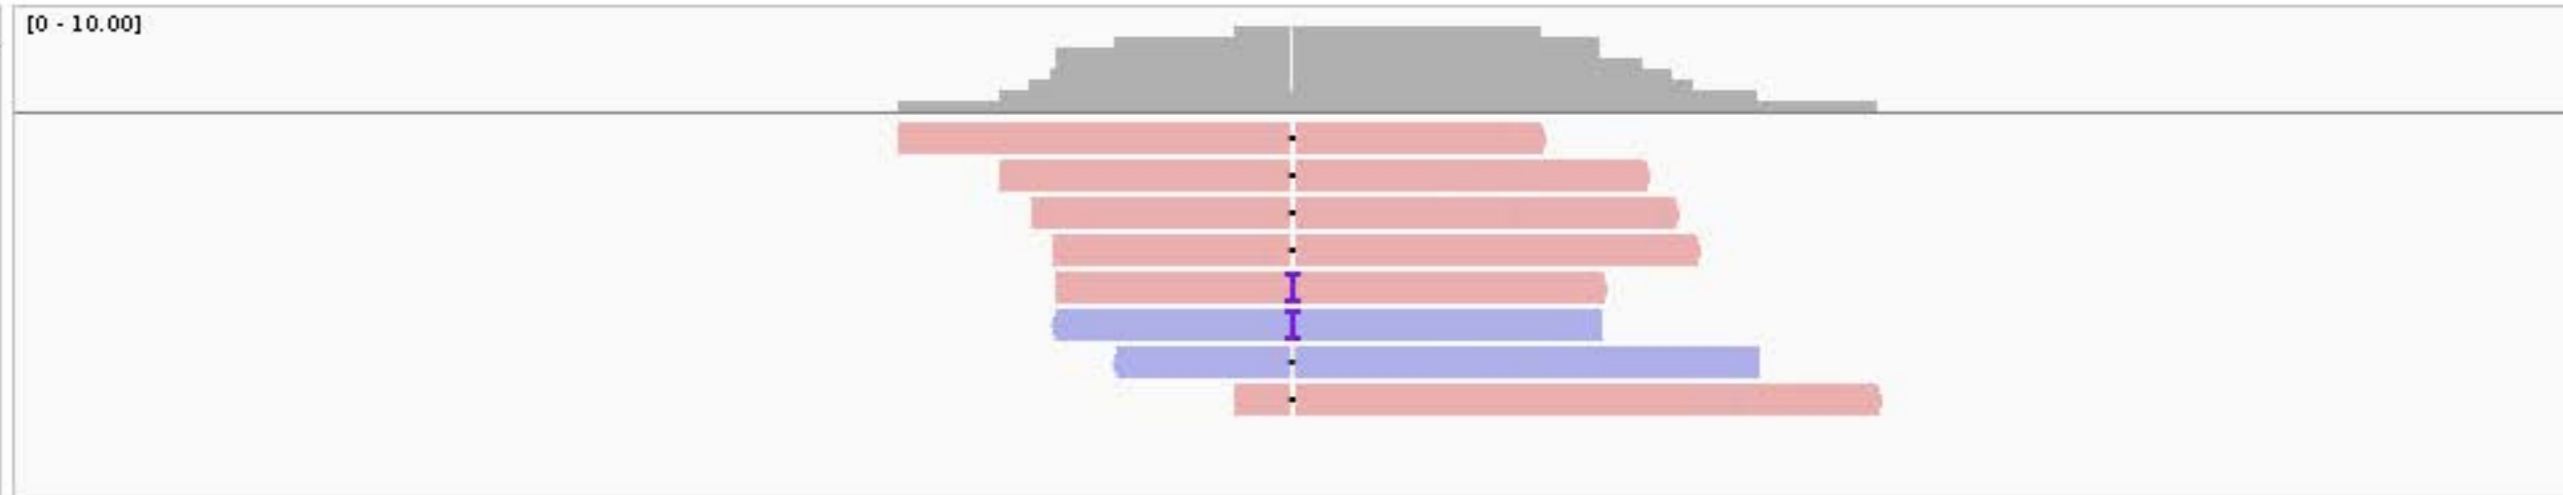

SL\_0015\_RN\_21\_mut.bam

Sequence

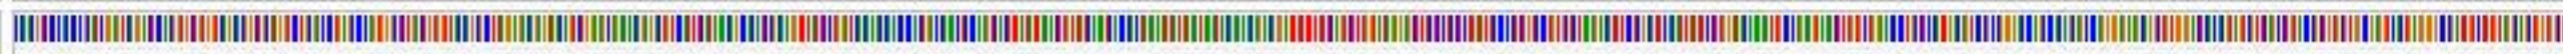

Refseq Genes

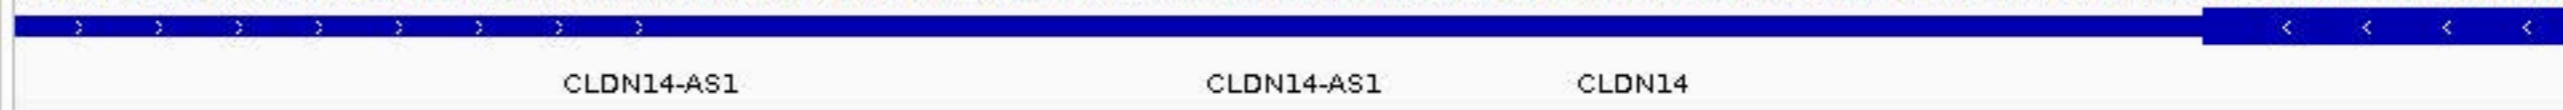

CLDN14-AS1

CLDN14-AS1

CLDN14

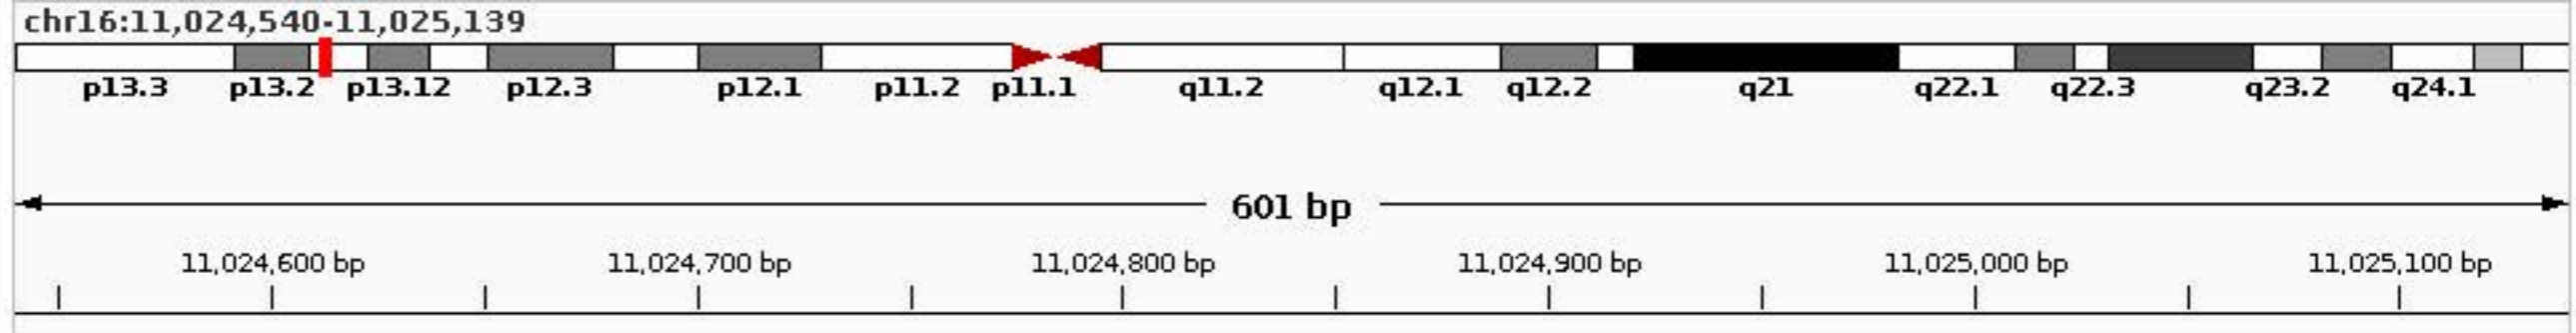

SL\_0001\_RN\_15\_mut.bam Coverage

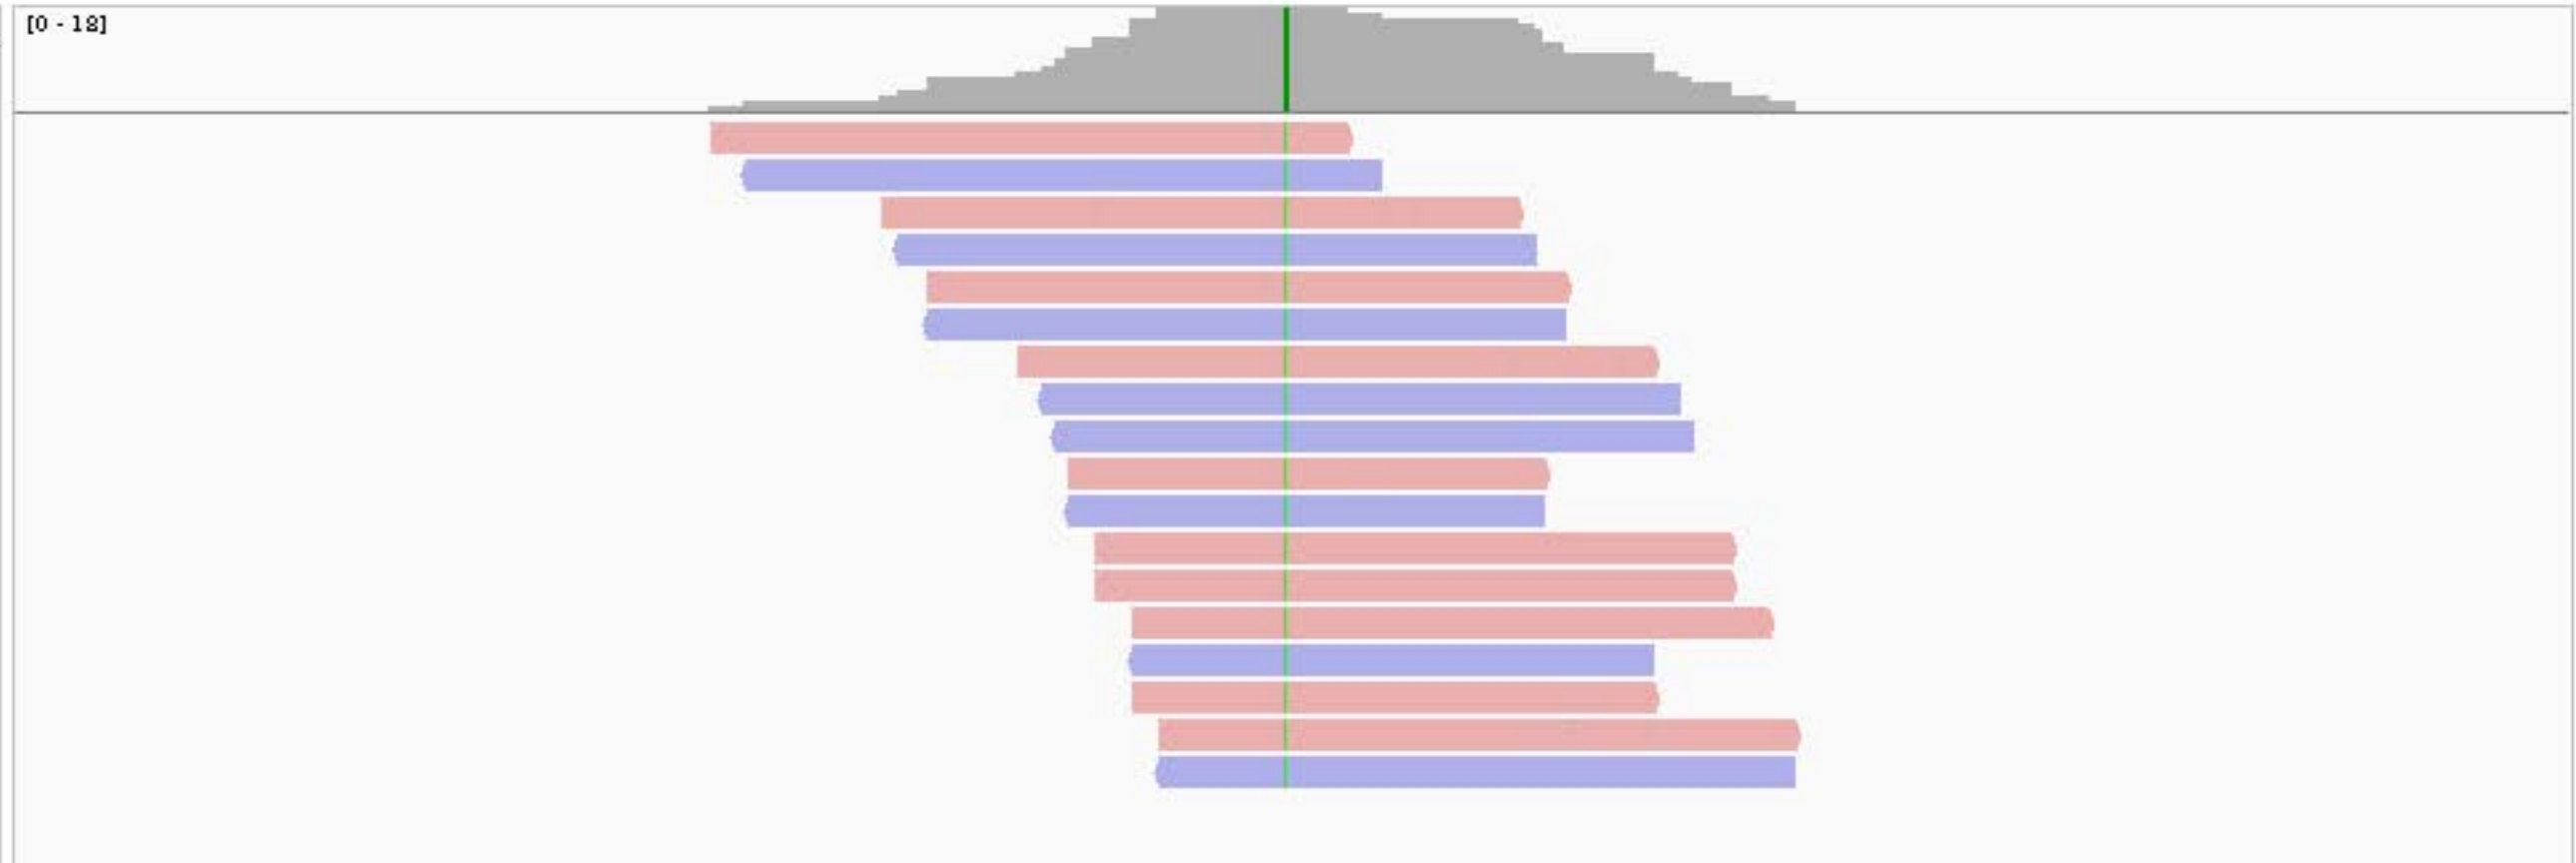

Sequence

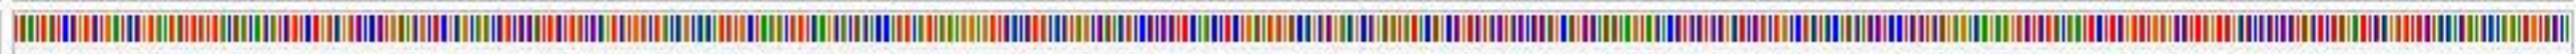

Refseq Genes

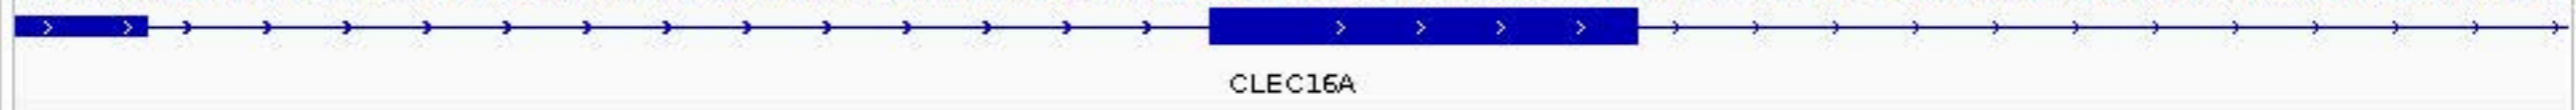

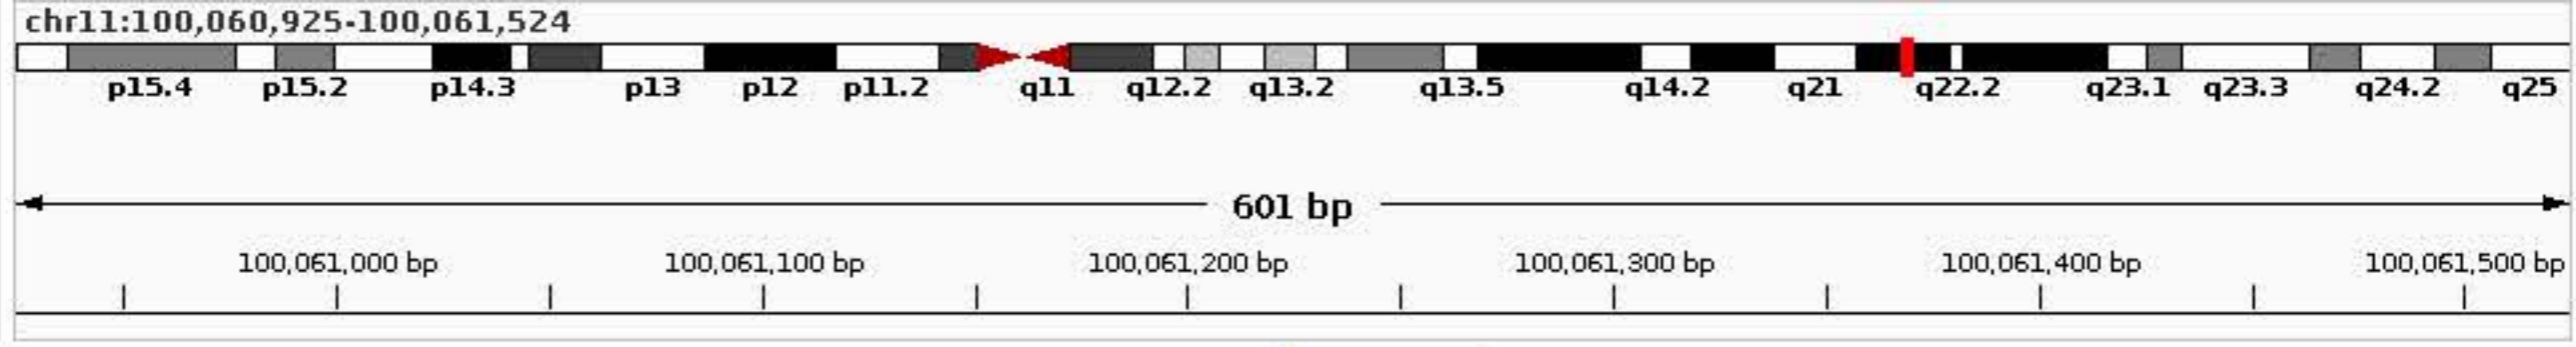

SL\_0004\_RN\_26\_mut.bam Coverage

SL\_0004\_RN\_26\_mut.bam

Sequence

Refseq Genes

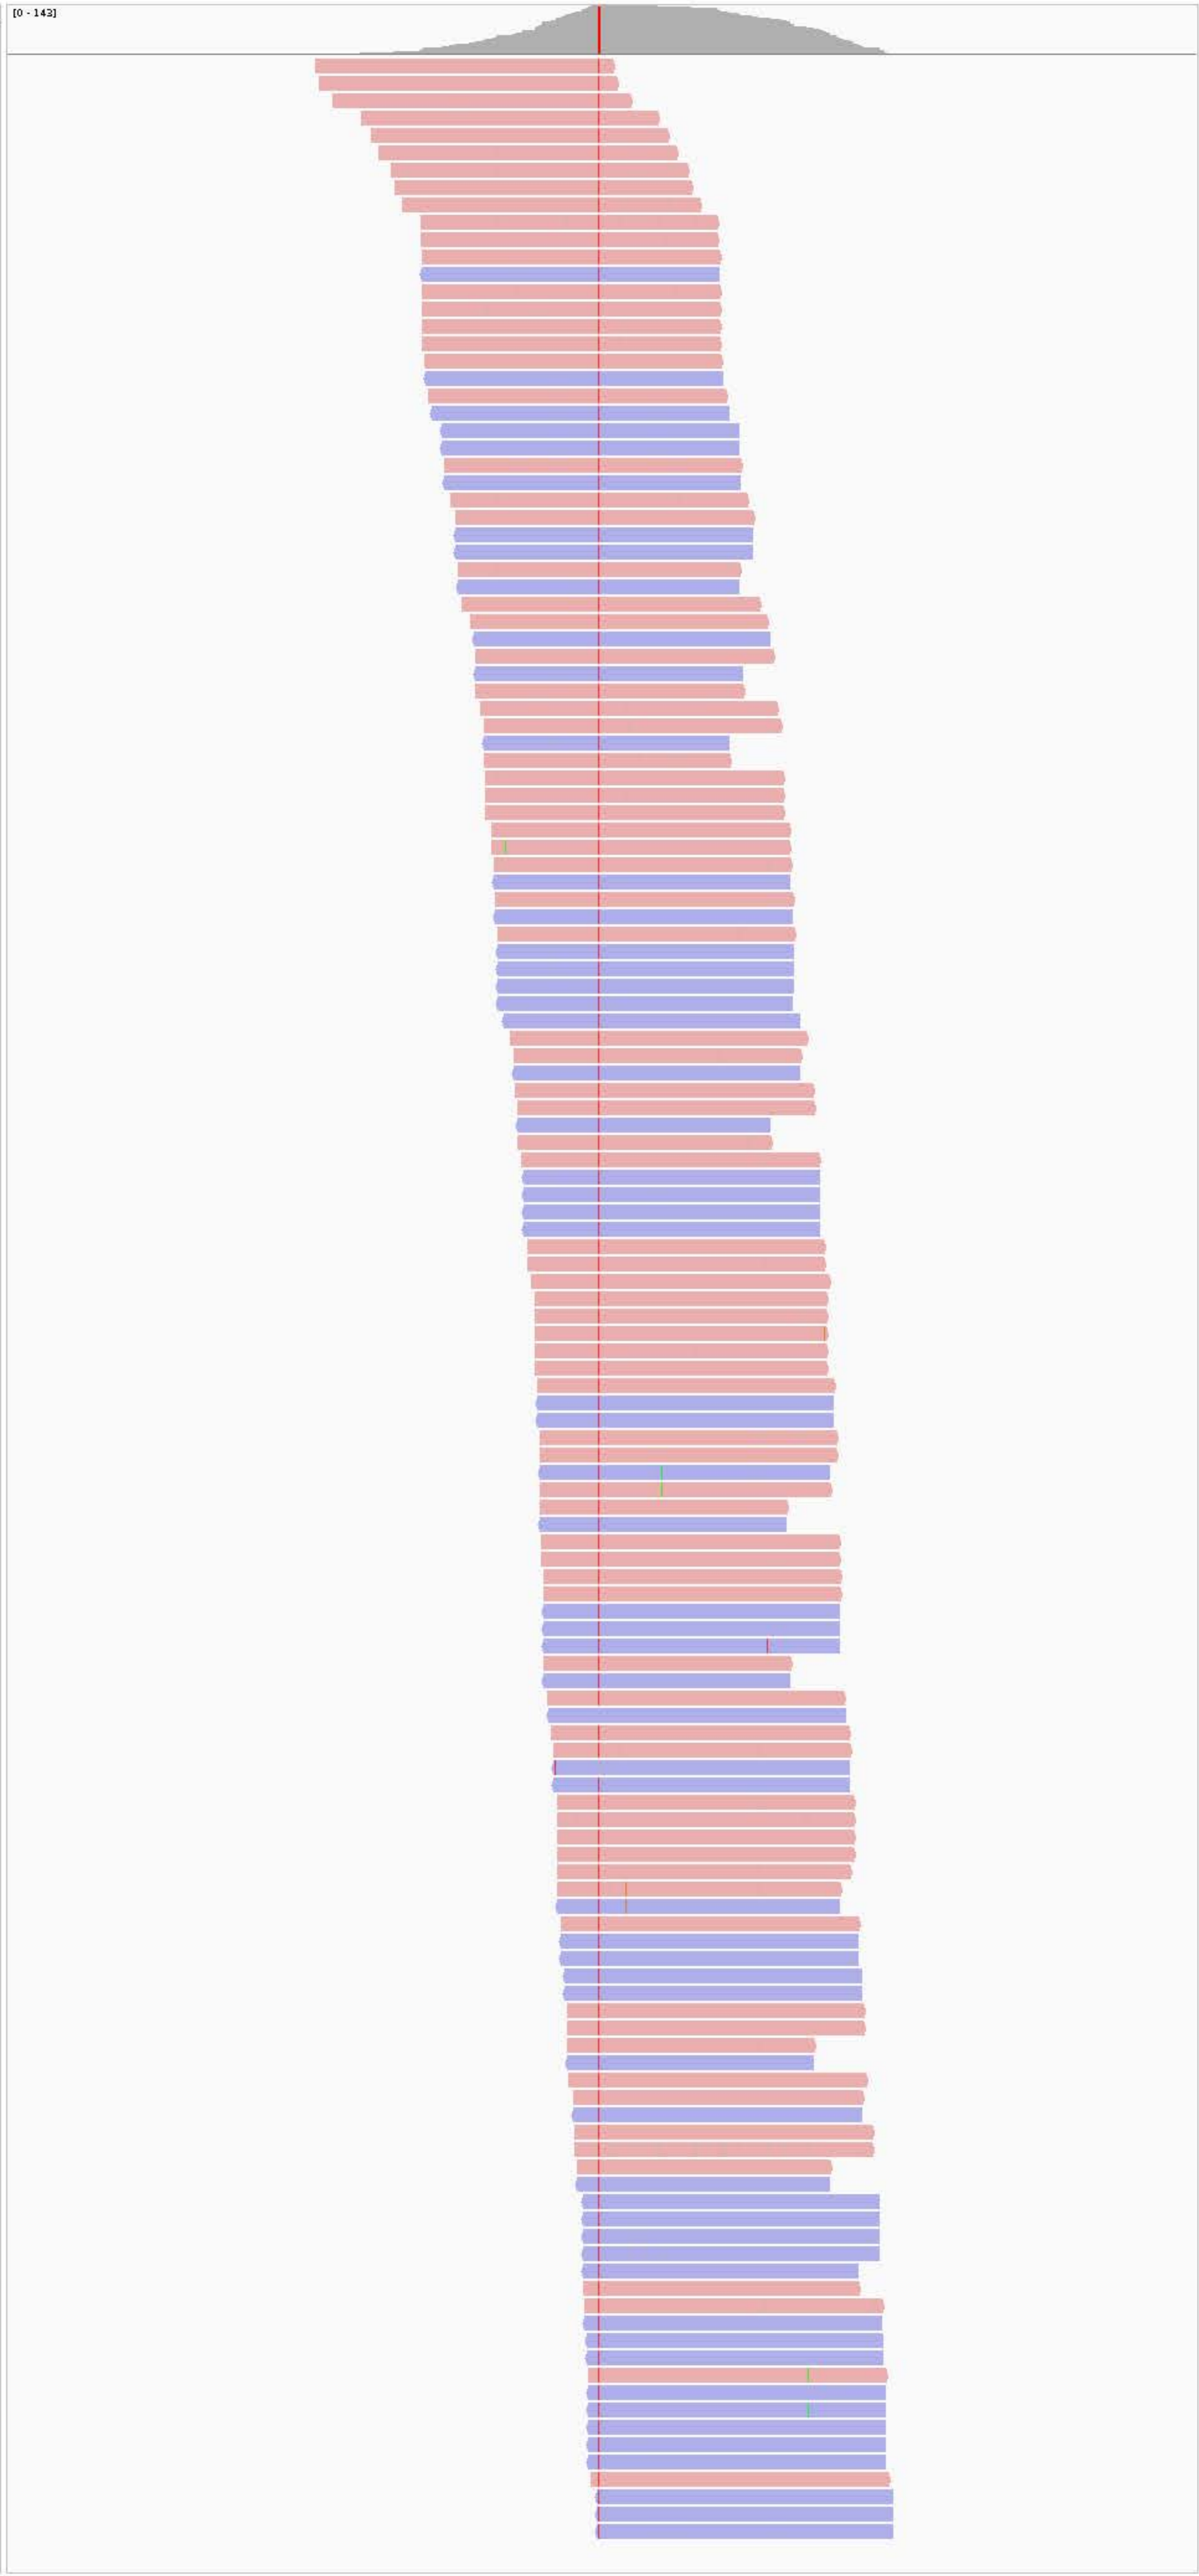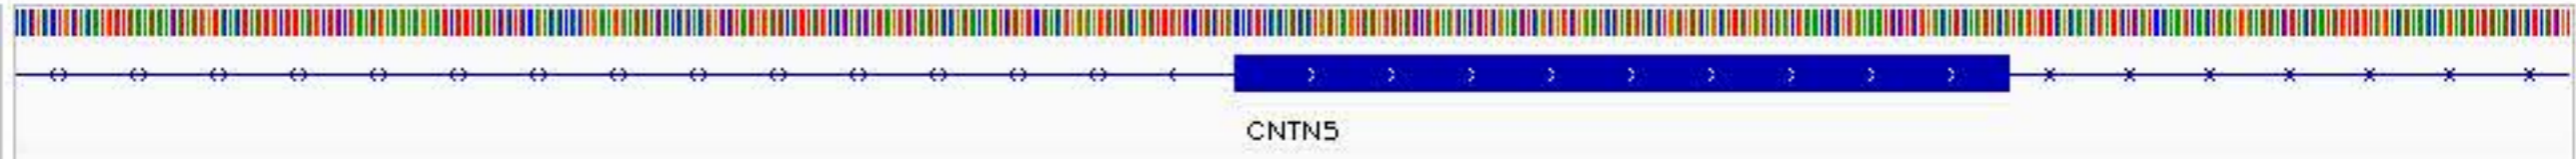

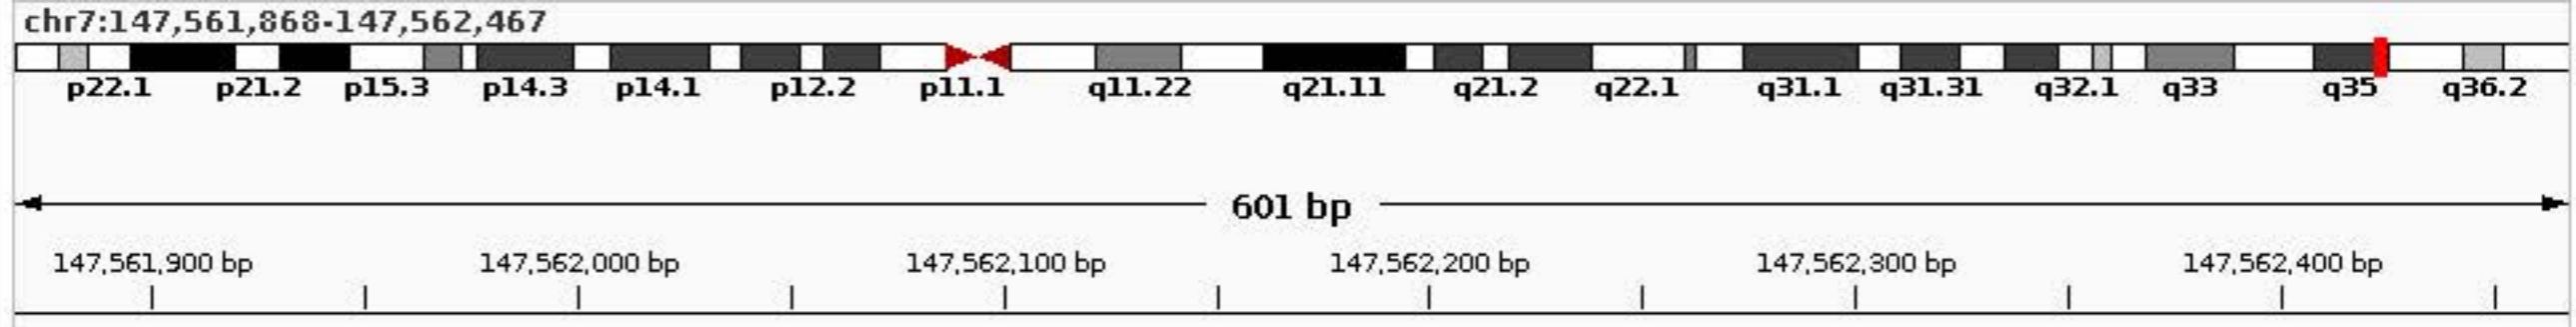

SL\_0015\_RN\_21\_mut.bam Coverage

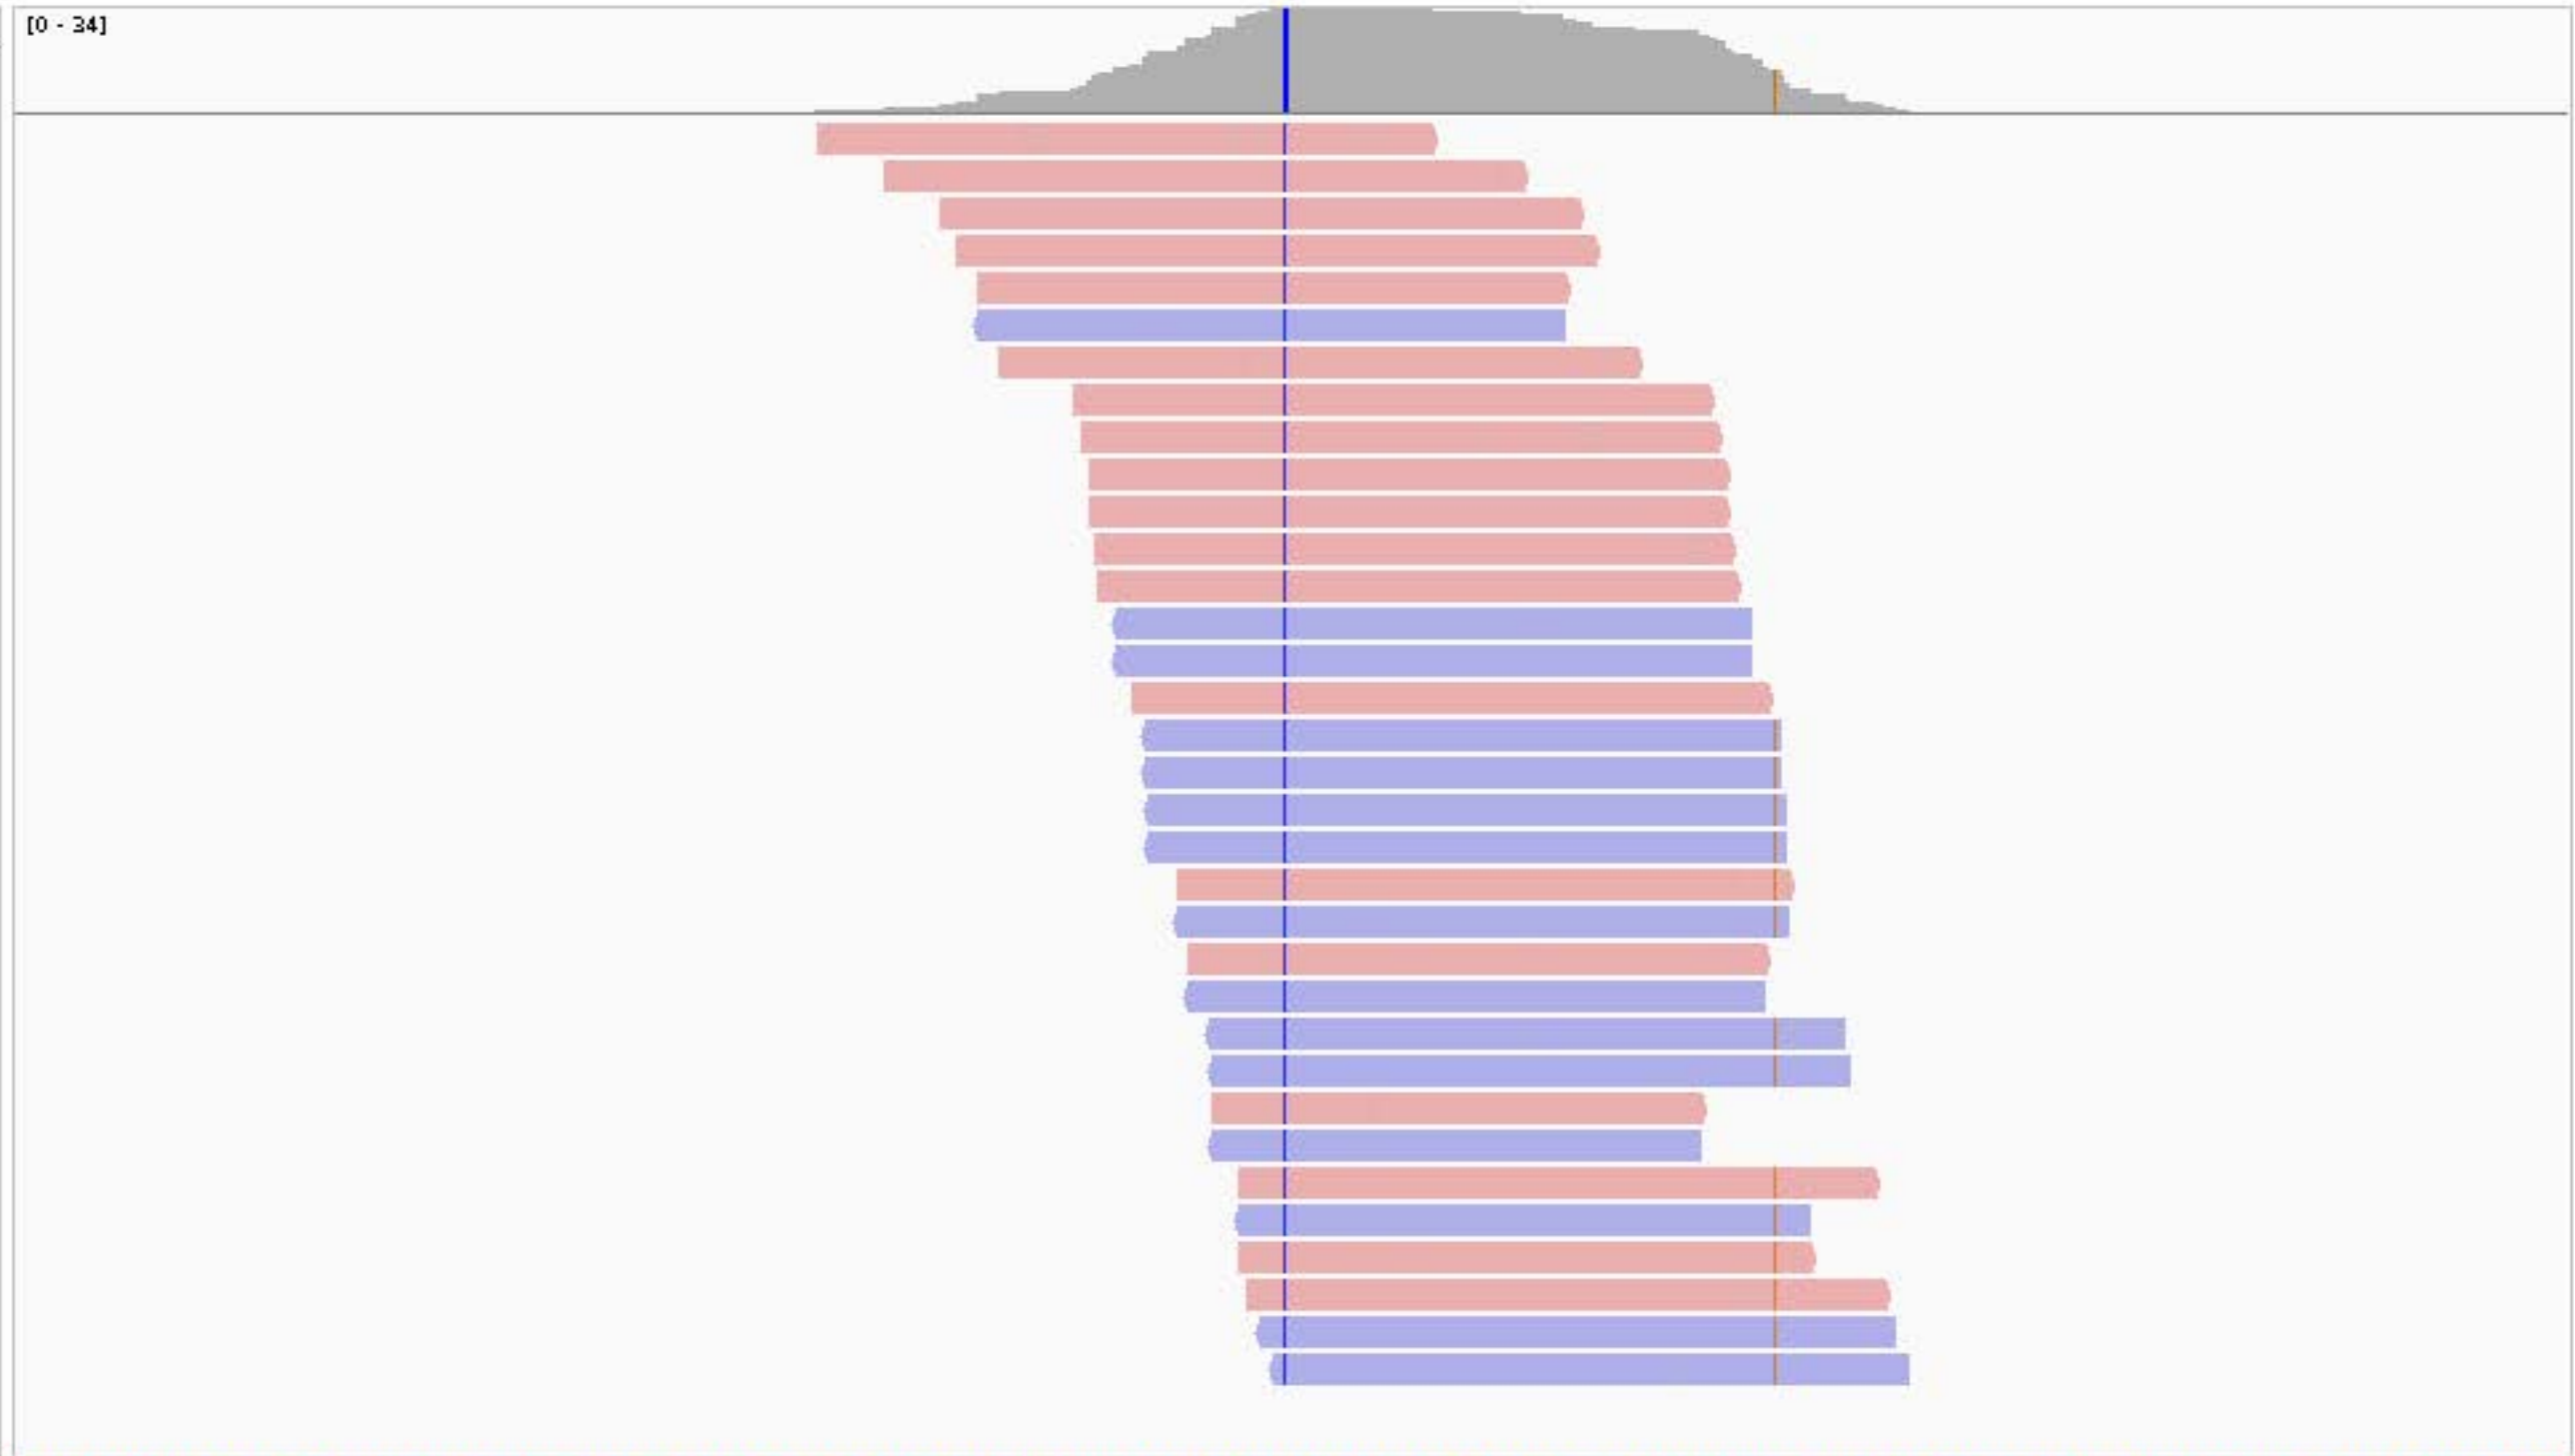

SL\_0015\_RN\_21\_mut.bam

Sequence

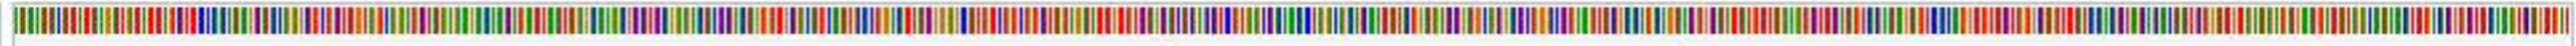

Refseq Genes

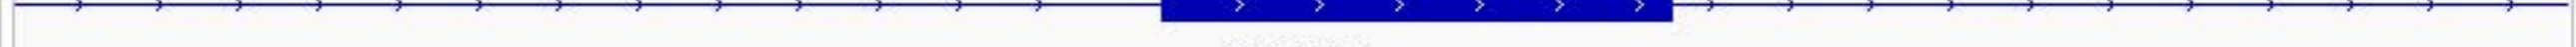

CNTNAP2



chr17:50,184,522-50,185,121

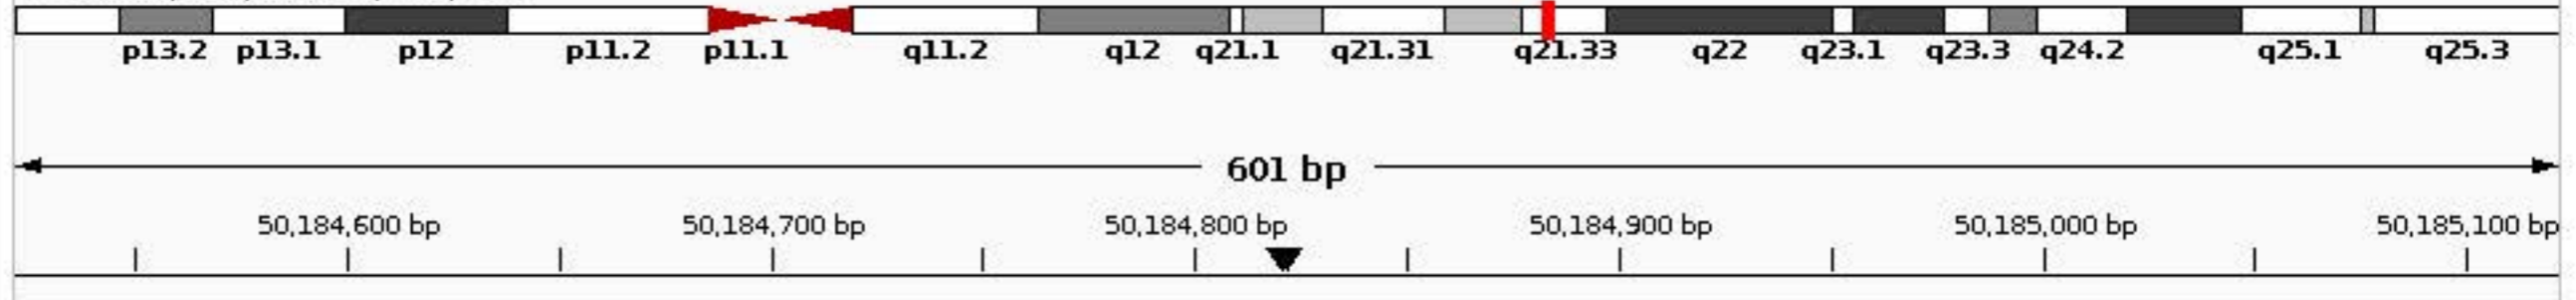

SL\_0010\_RN\_34\_mut.bam Coverage

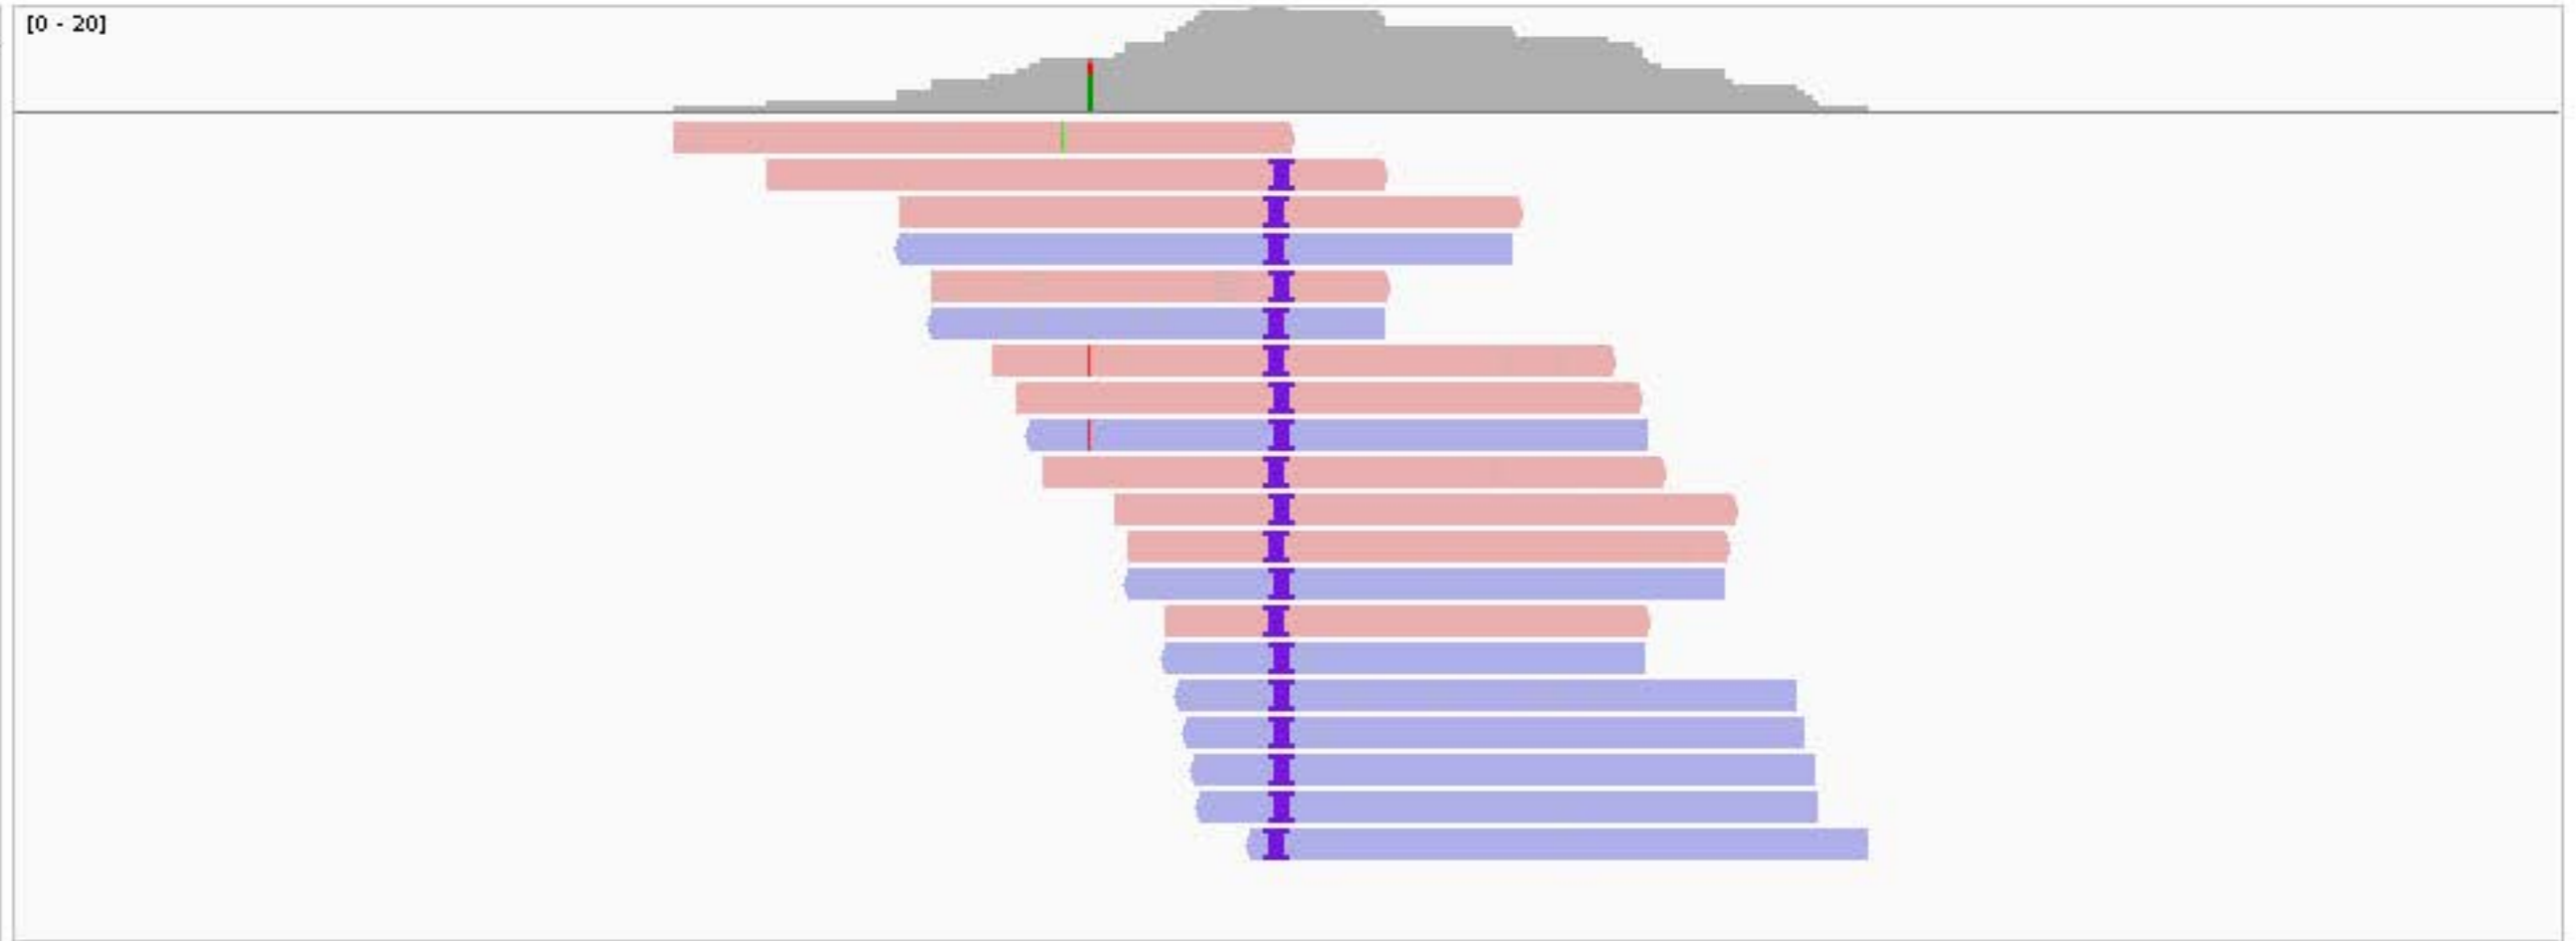

SL\_0010\_RN\_34\_mut.bam

Sequence

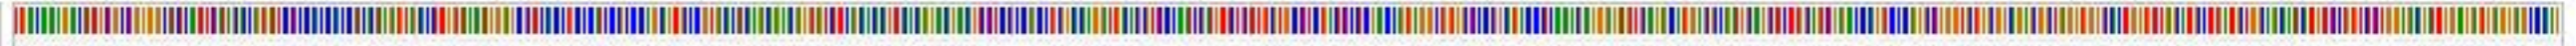

Refseq Genes

COL1A1



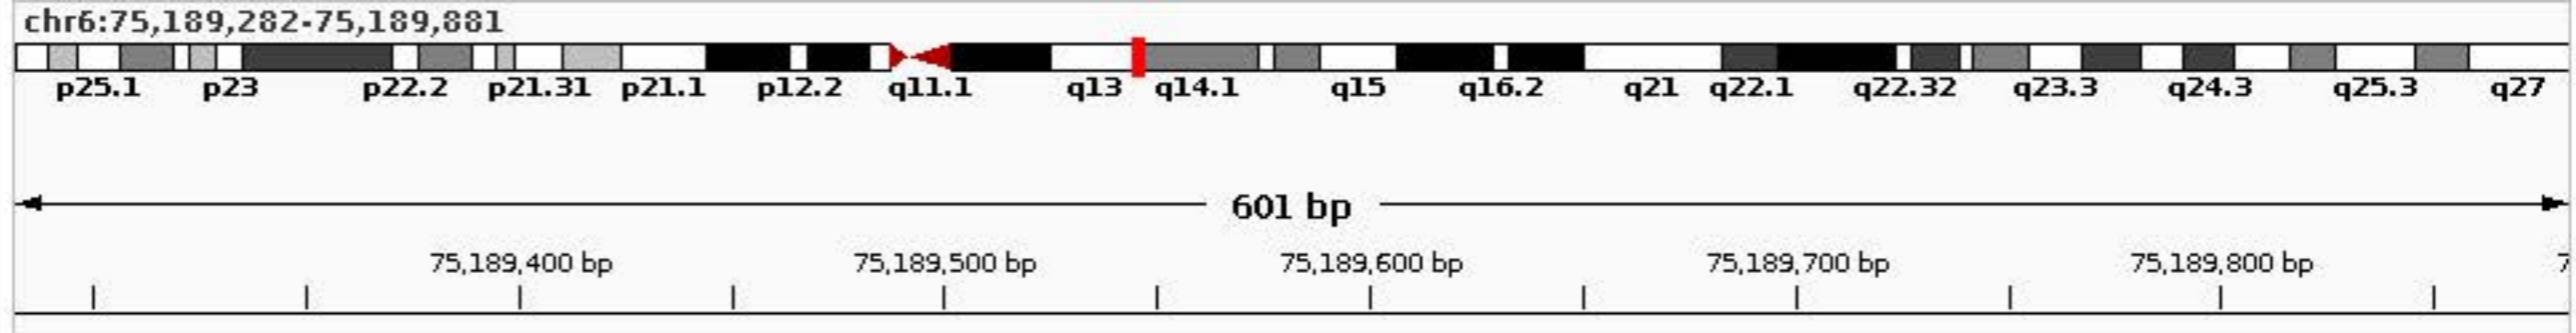

SL\_0015\_LN\_44\_mut.bam Coverage

SL\_0015\_LN\_44\_mut.bam

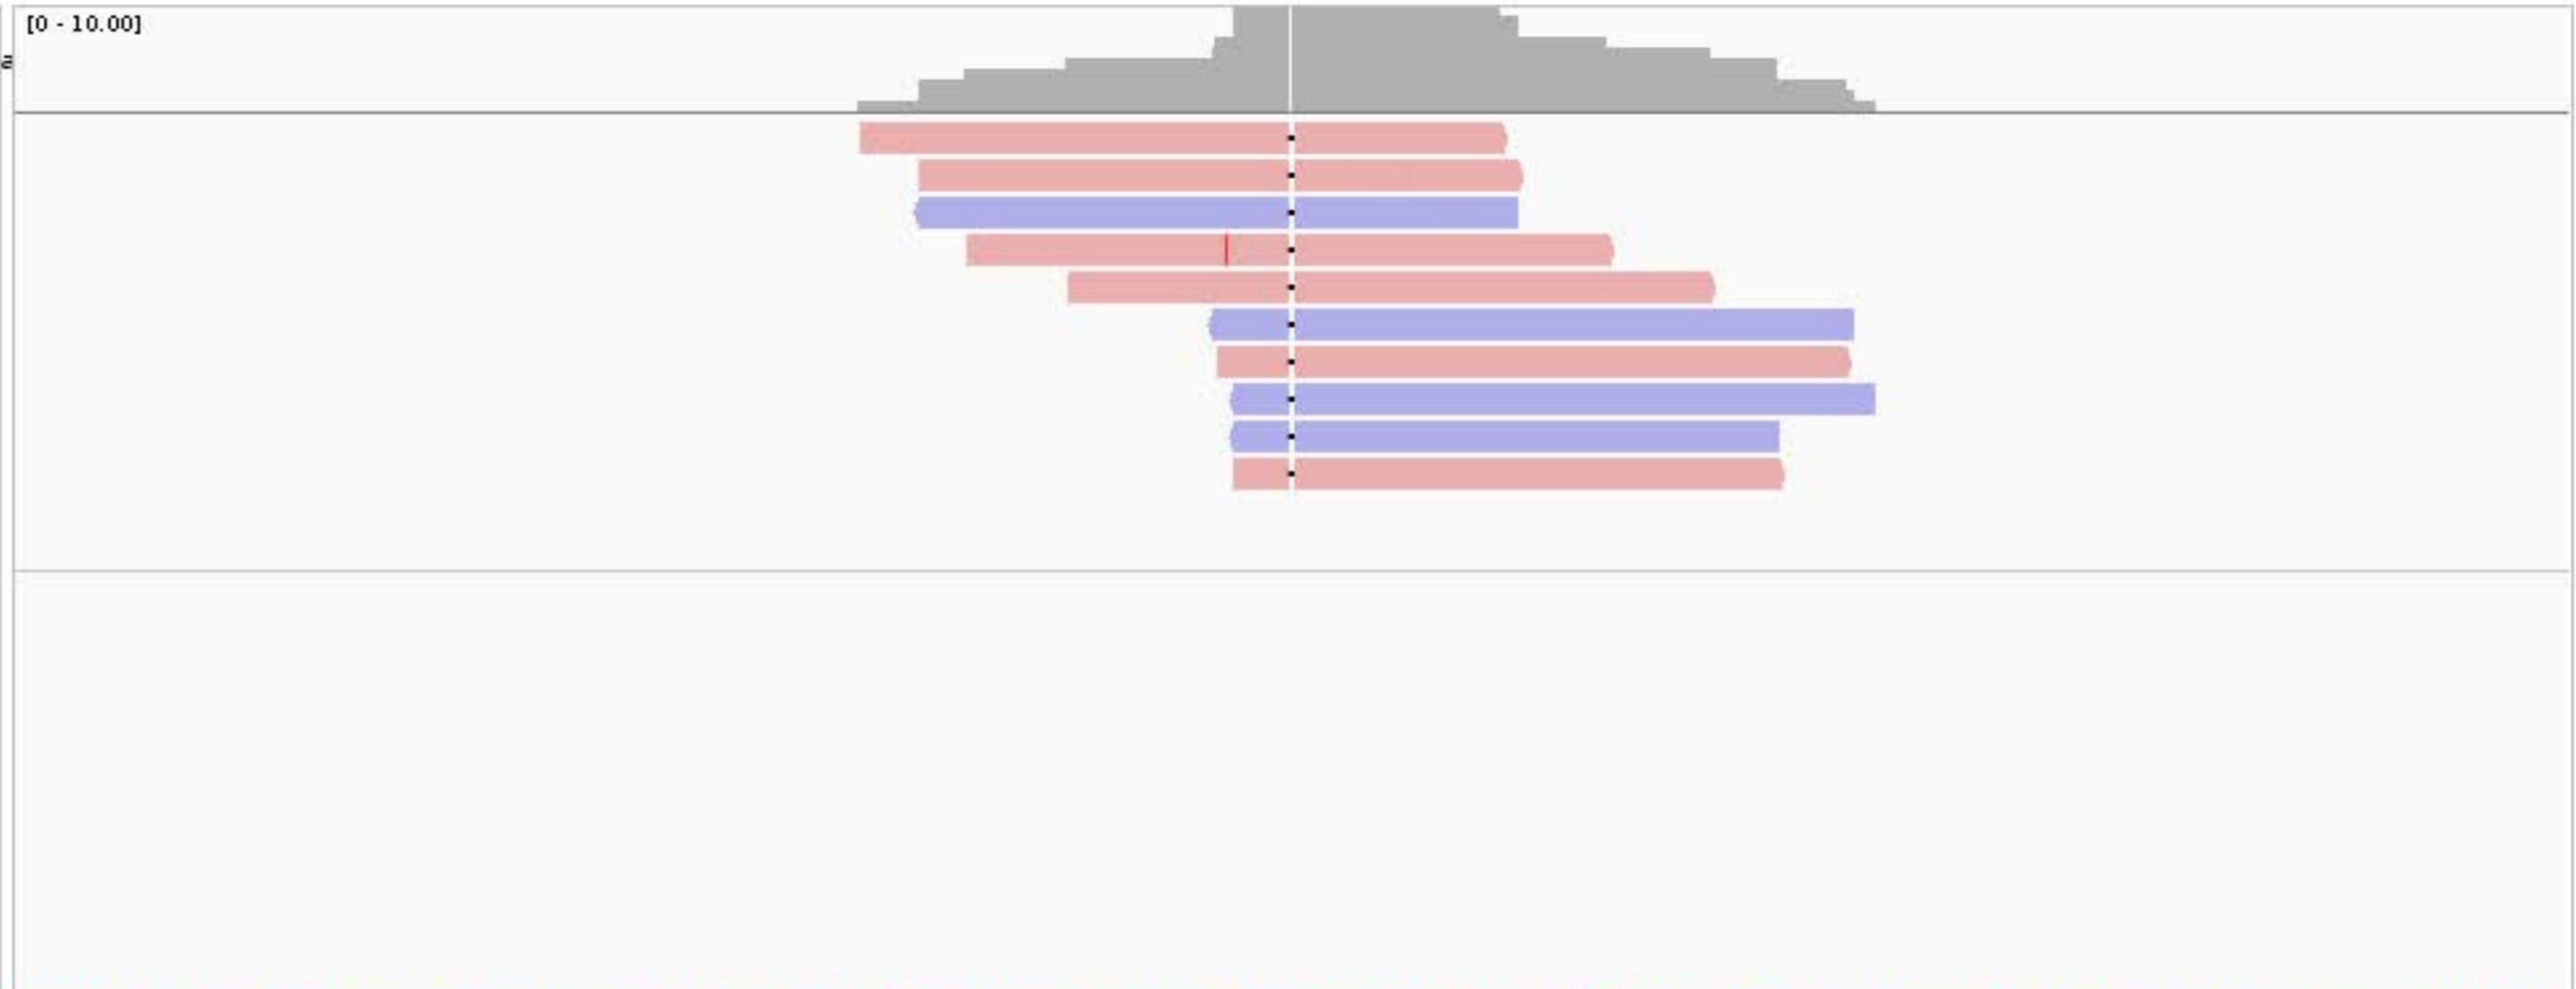

Sequence

Refseq Genes

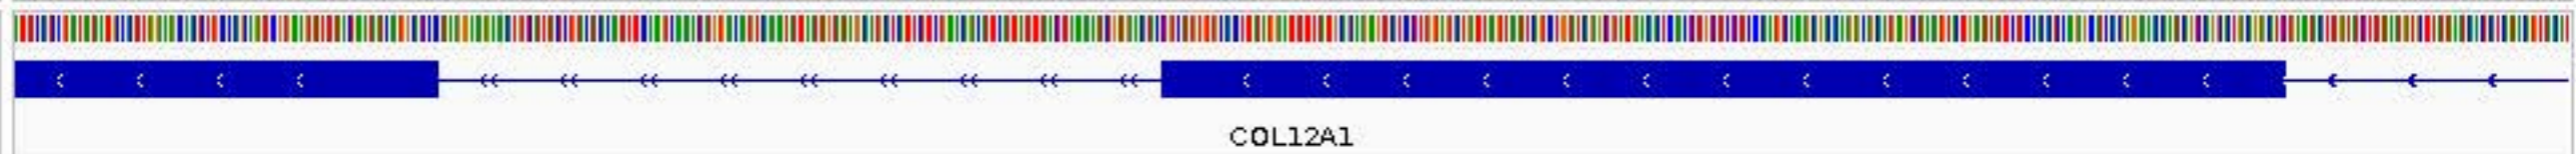

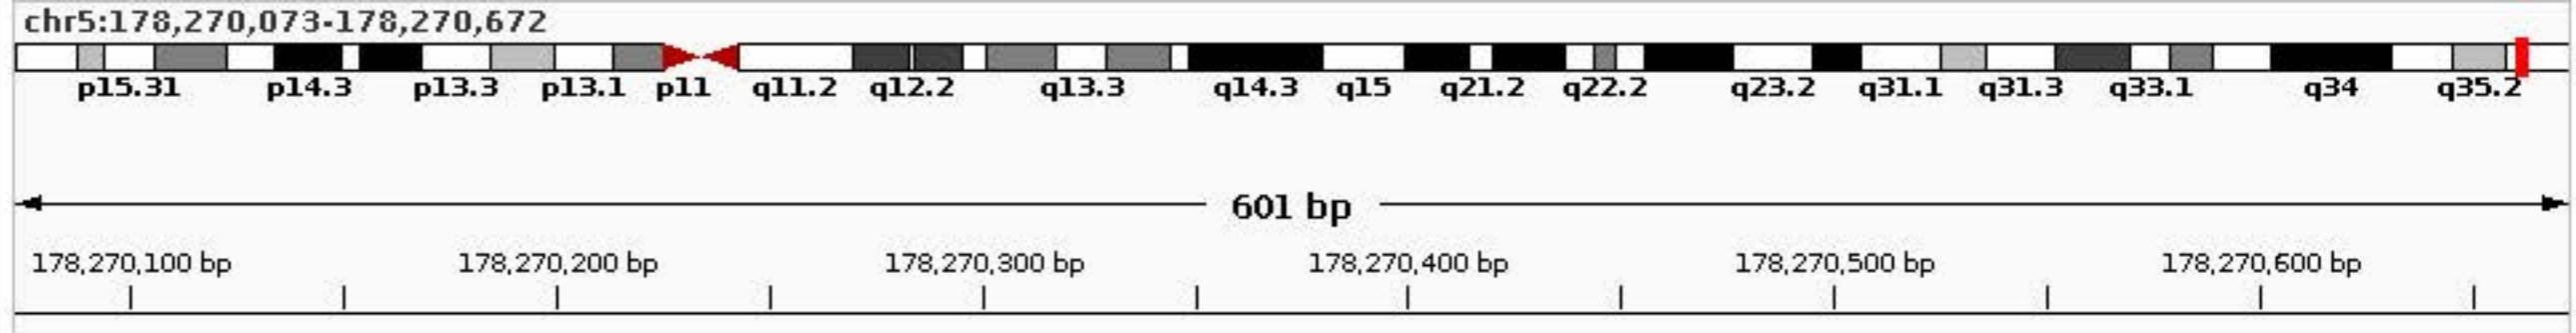

SL\_0015\_LN\_46\_mut.bam Coverage

SL\_0015\_LN\_46\_mut.bam

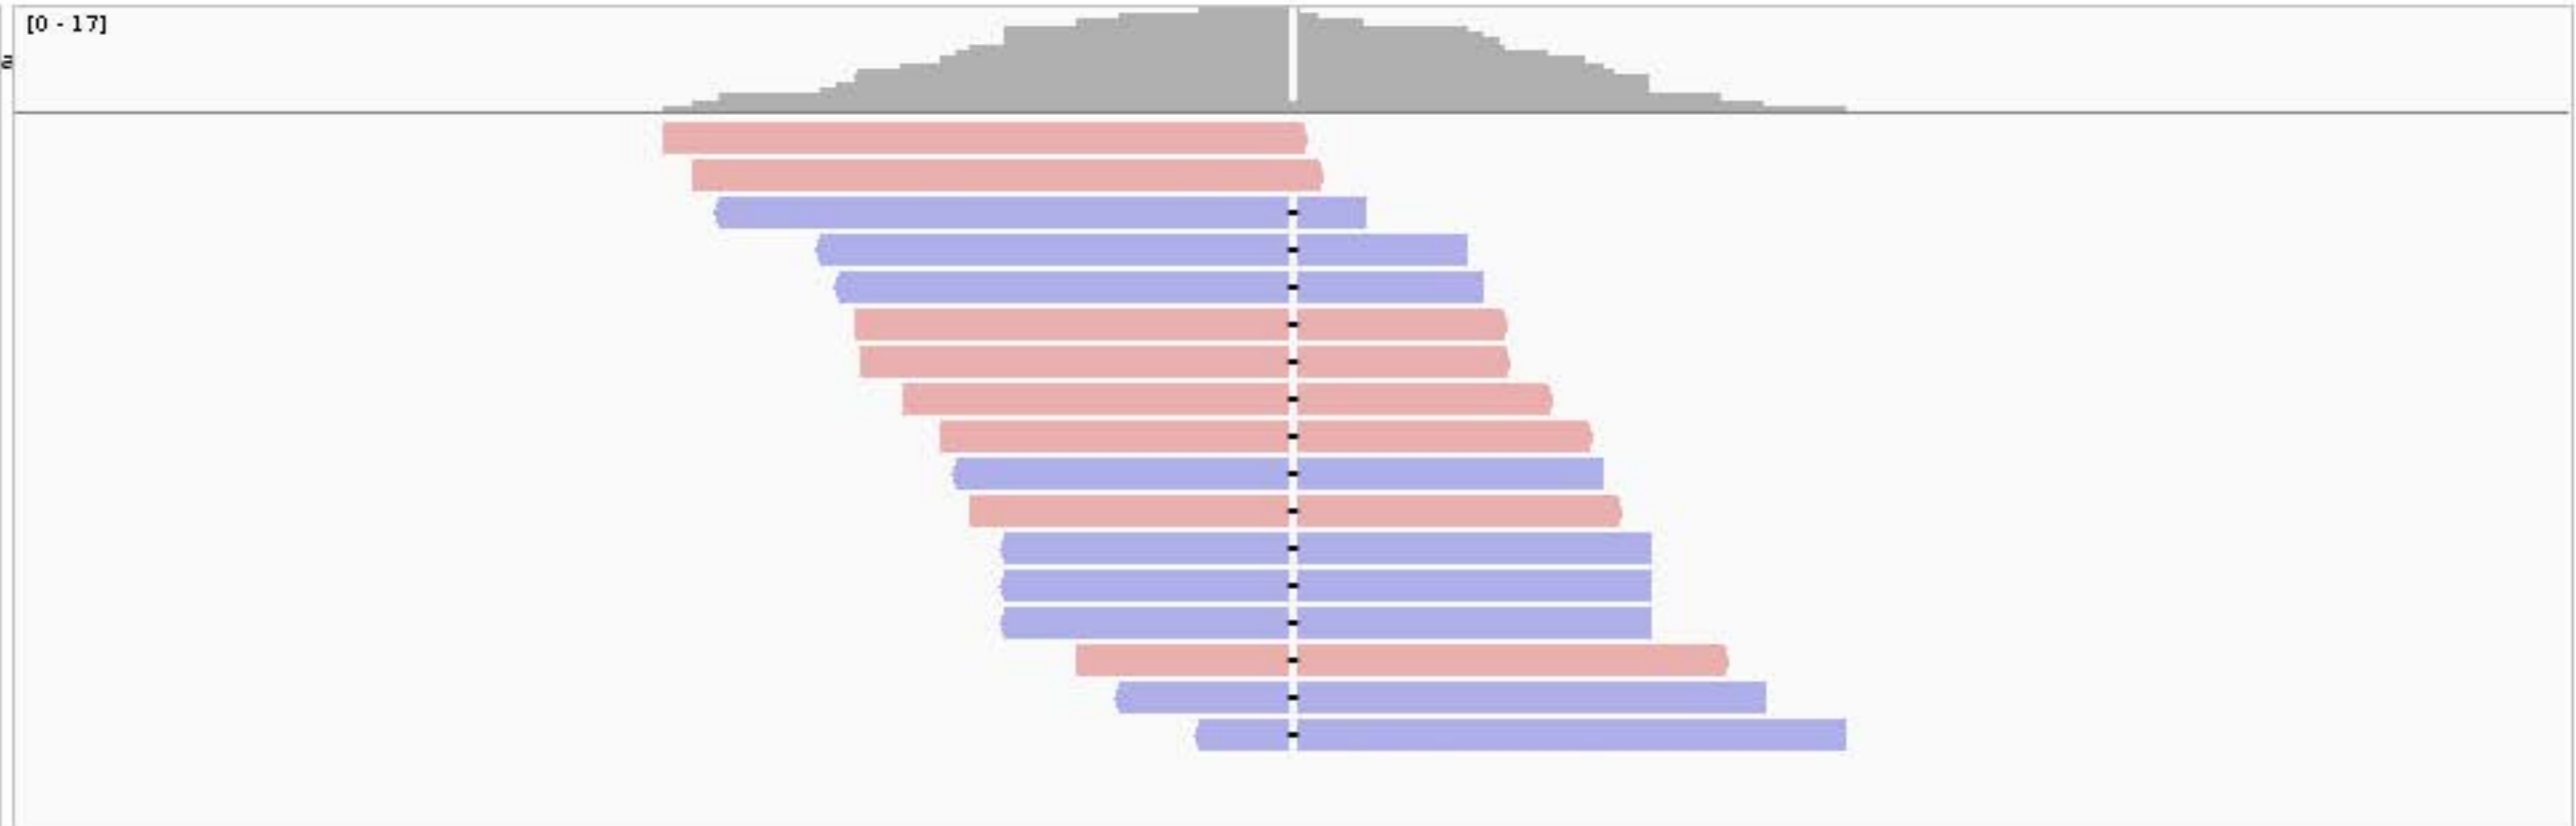

Sequence →

Refseq Genes

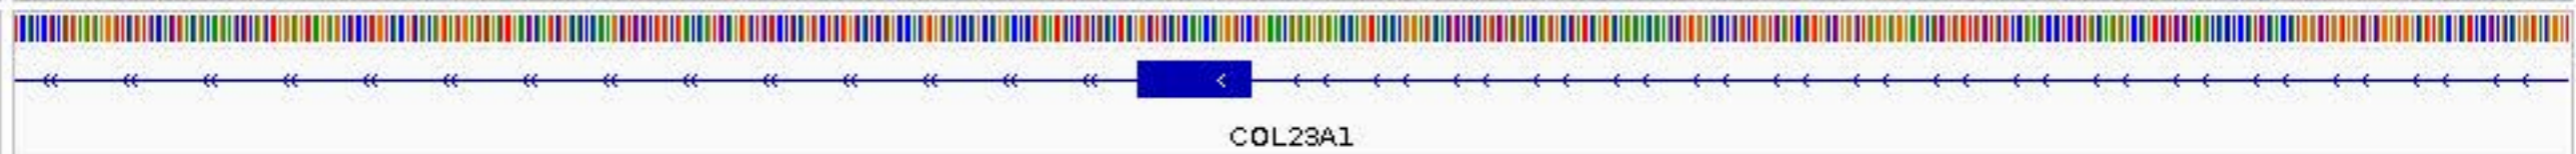

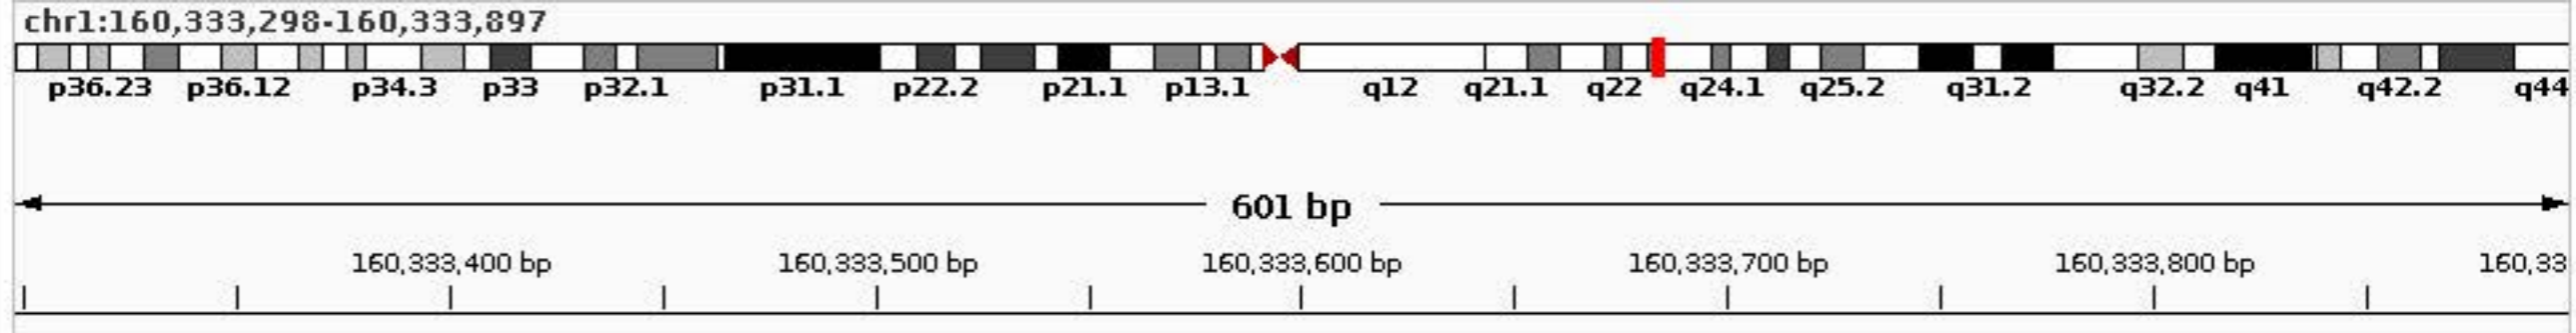

SL\_0002\_LN\_1\_mut.bam Coverage

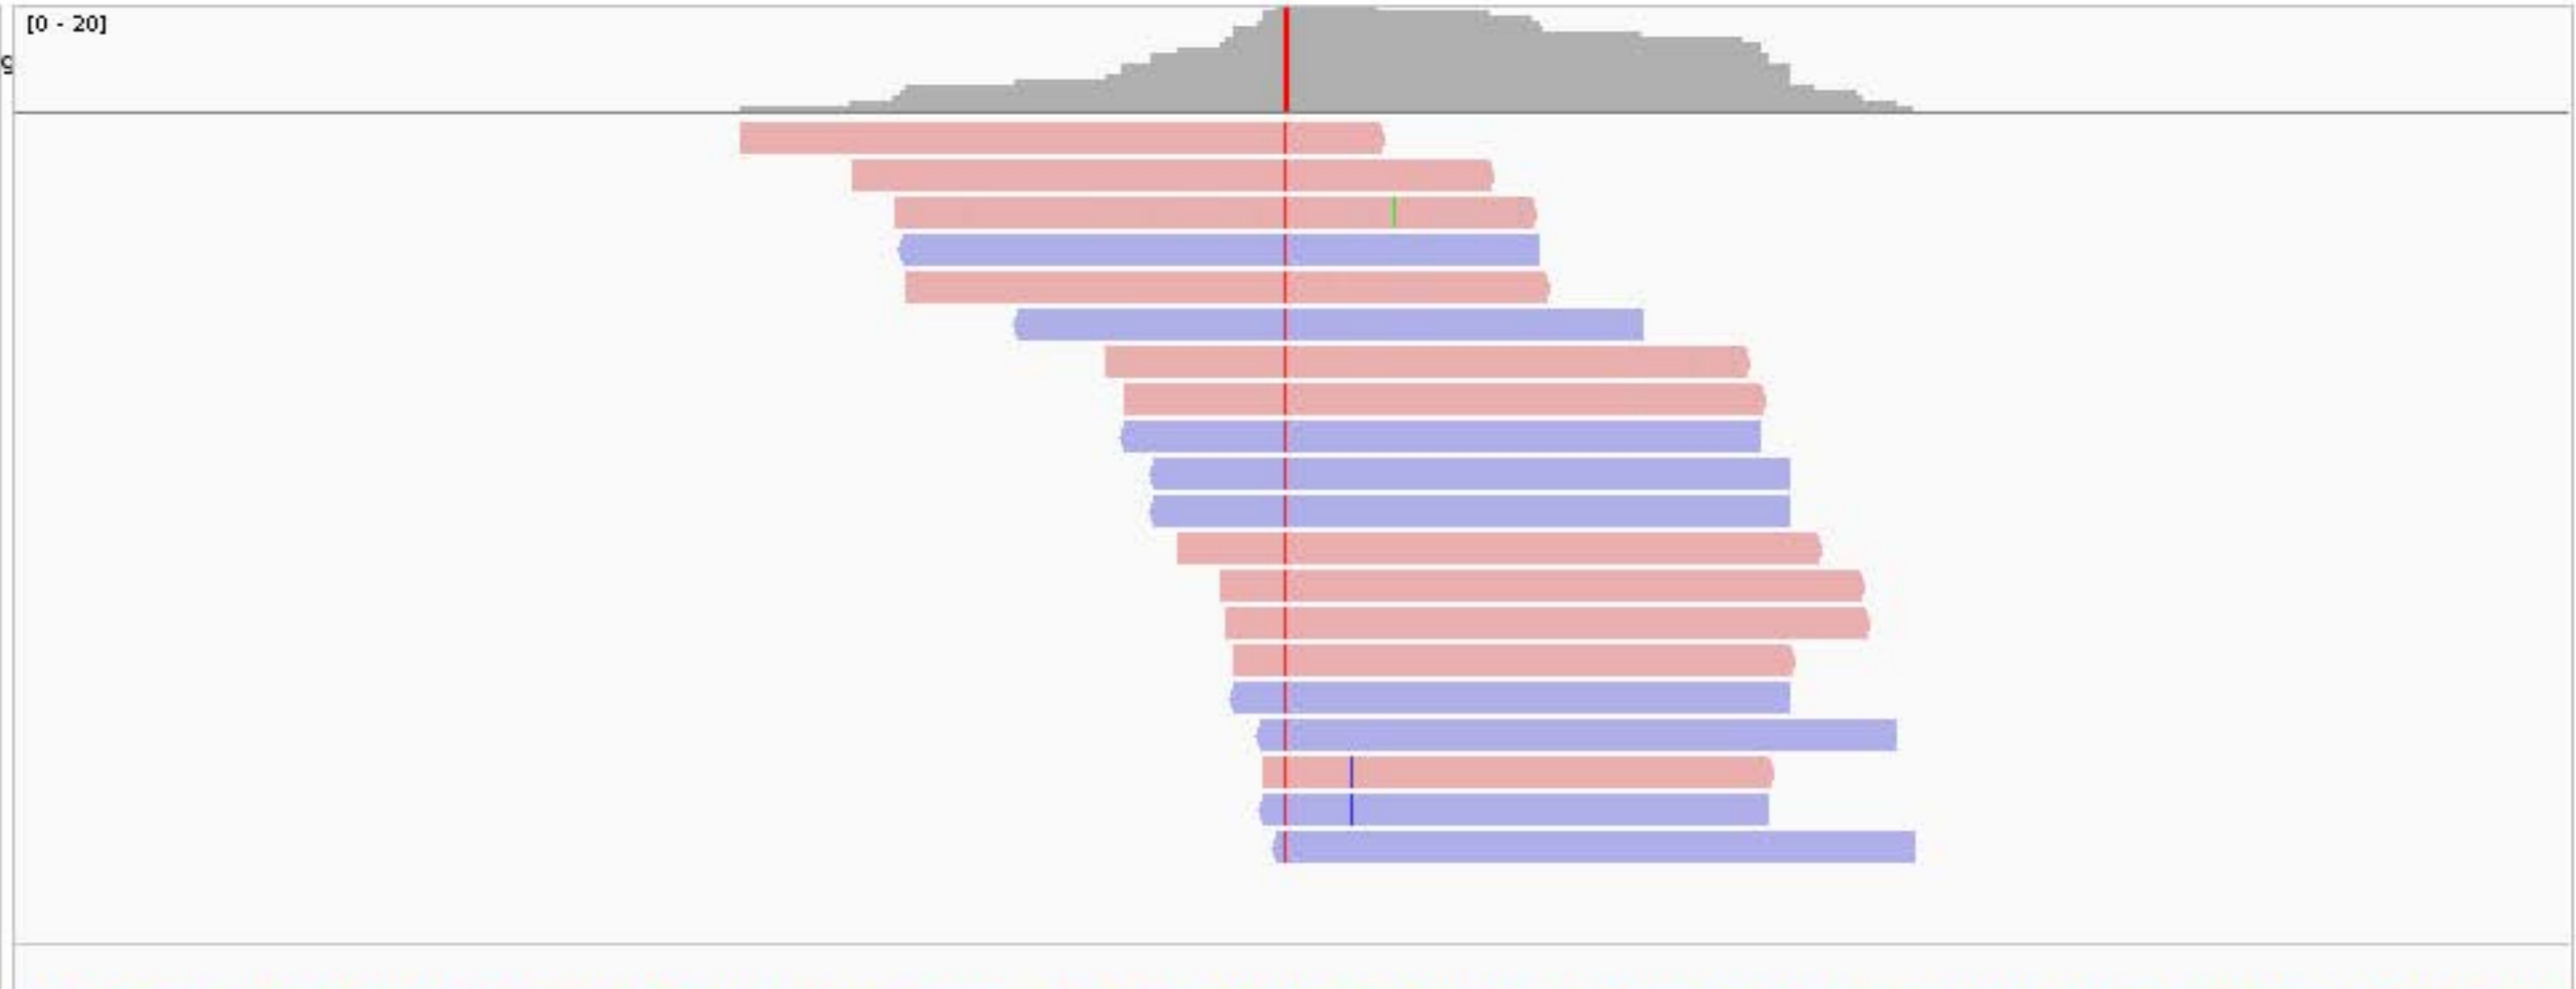

Sequence

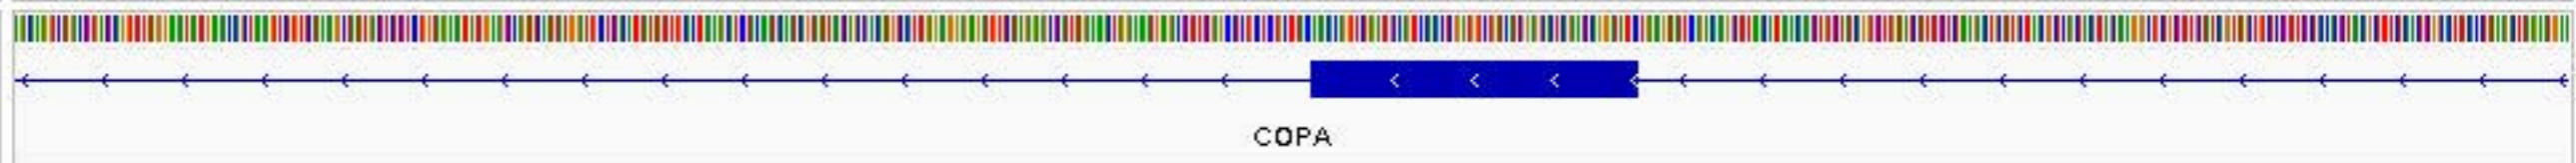

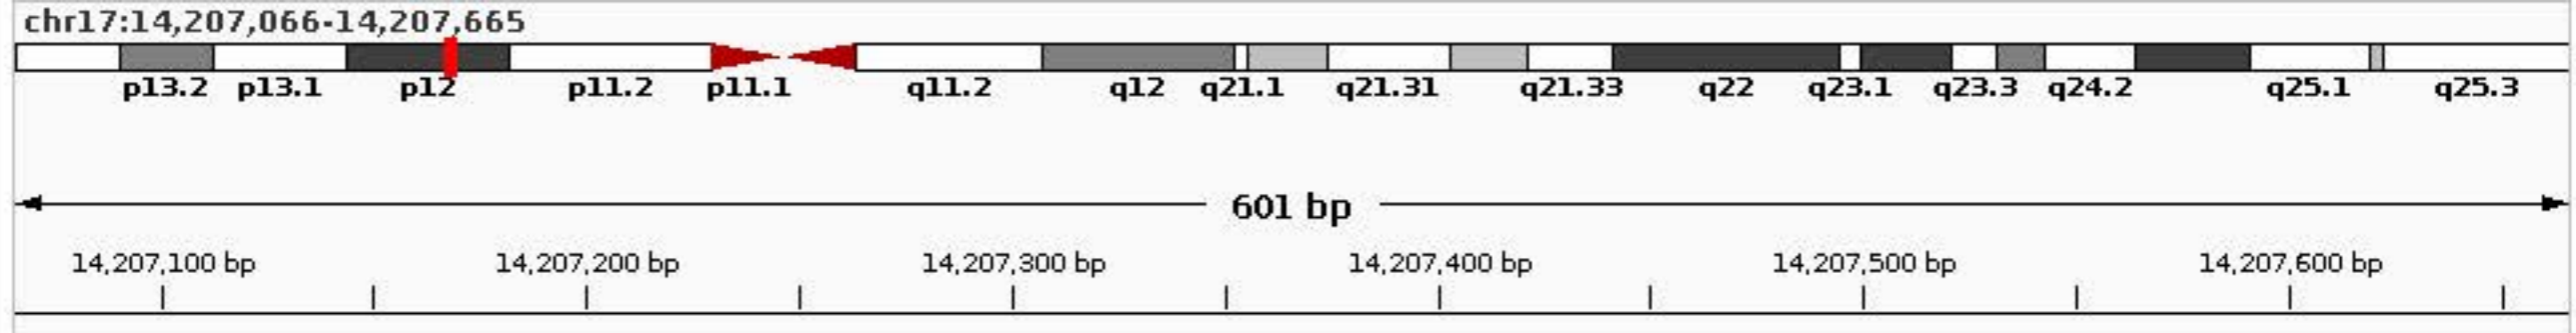

SL\_0015\_LN\_46\_mut.bam Coverage

SL\_0015\_LN\_46\_mut.bam

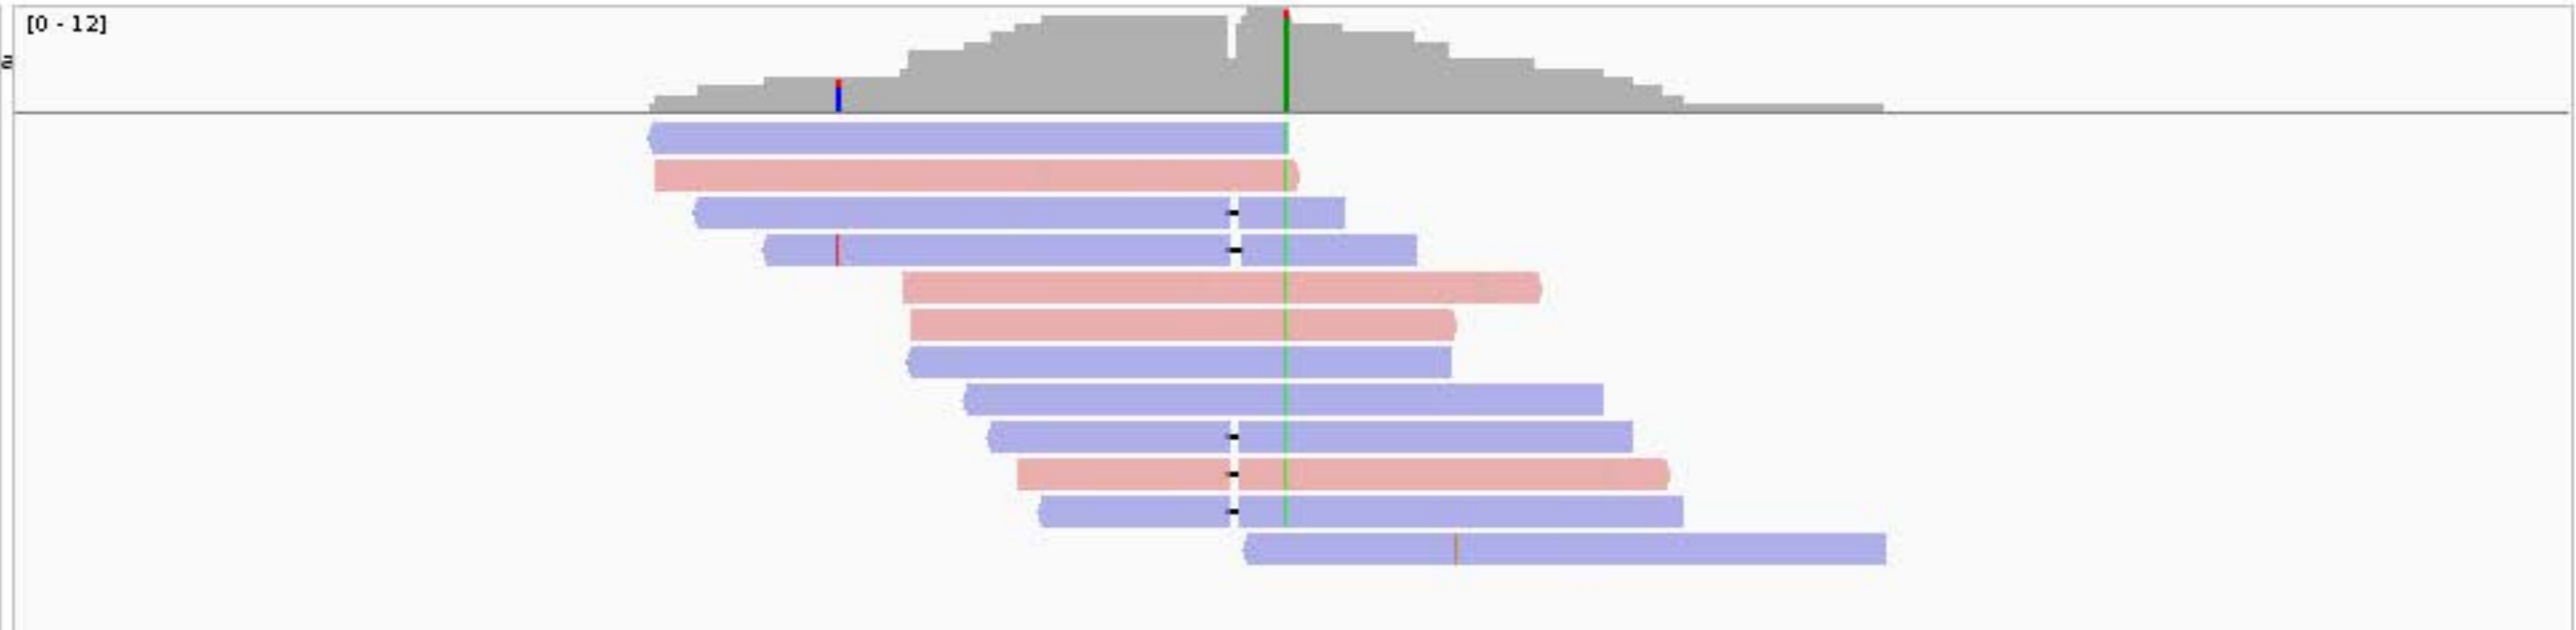

Sequence →

Refseq Genes

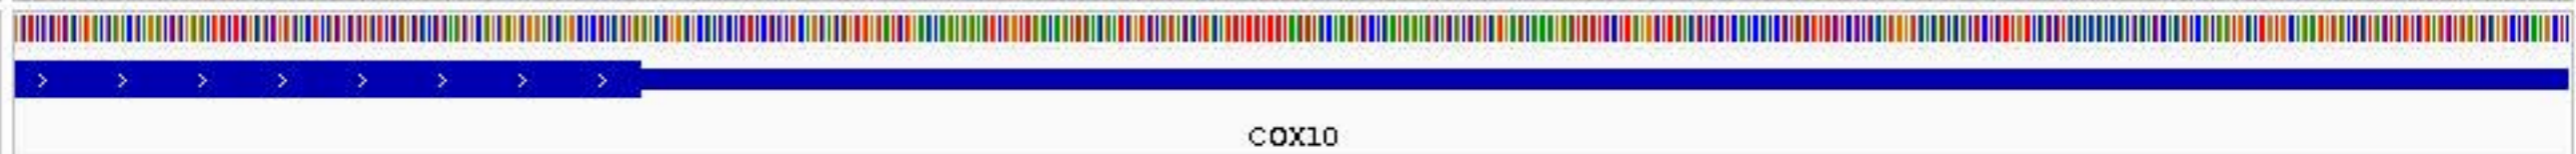

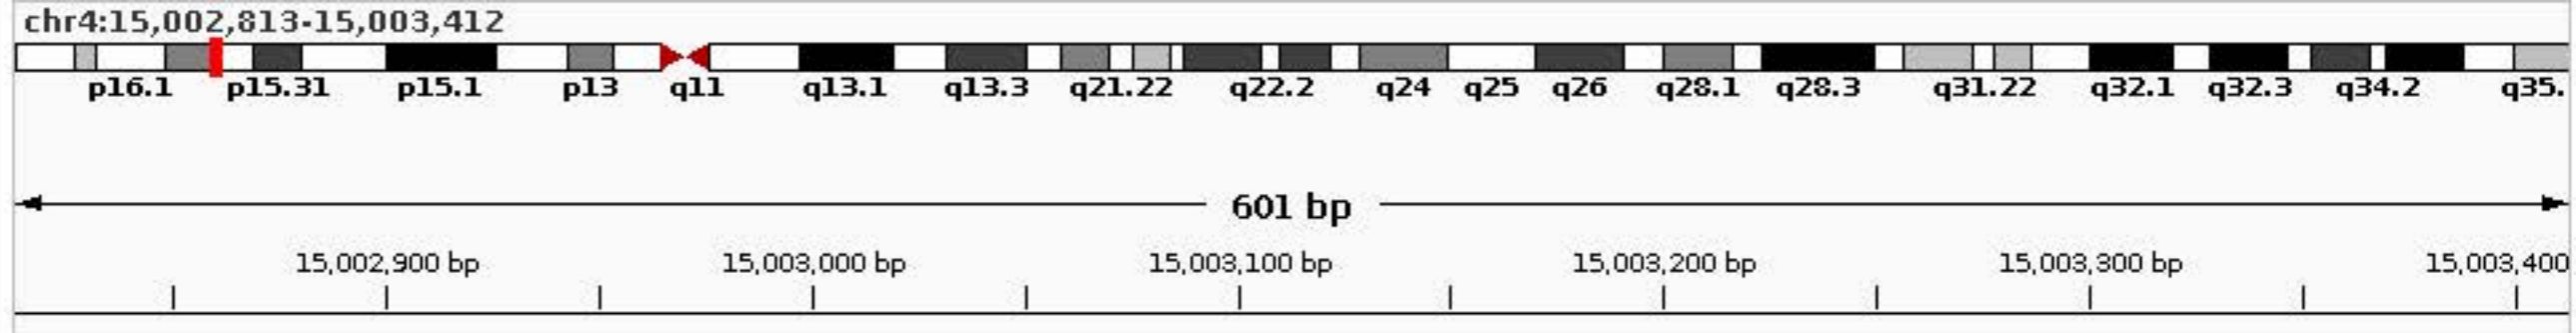

SL\_0015\_LN\_44\_mut.bam Coverage

SL\_0015\_LN\_44\_mut.bam

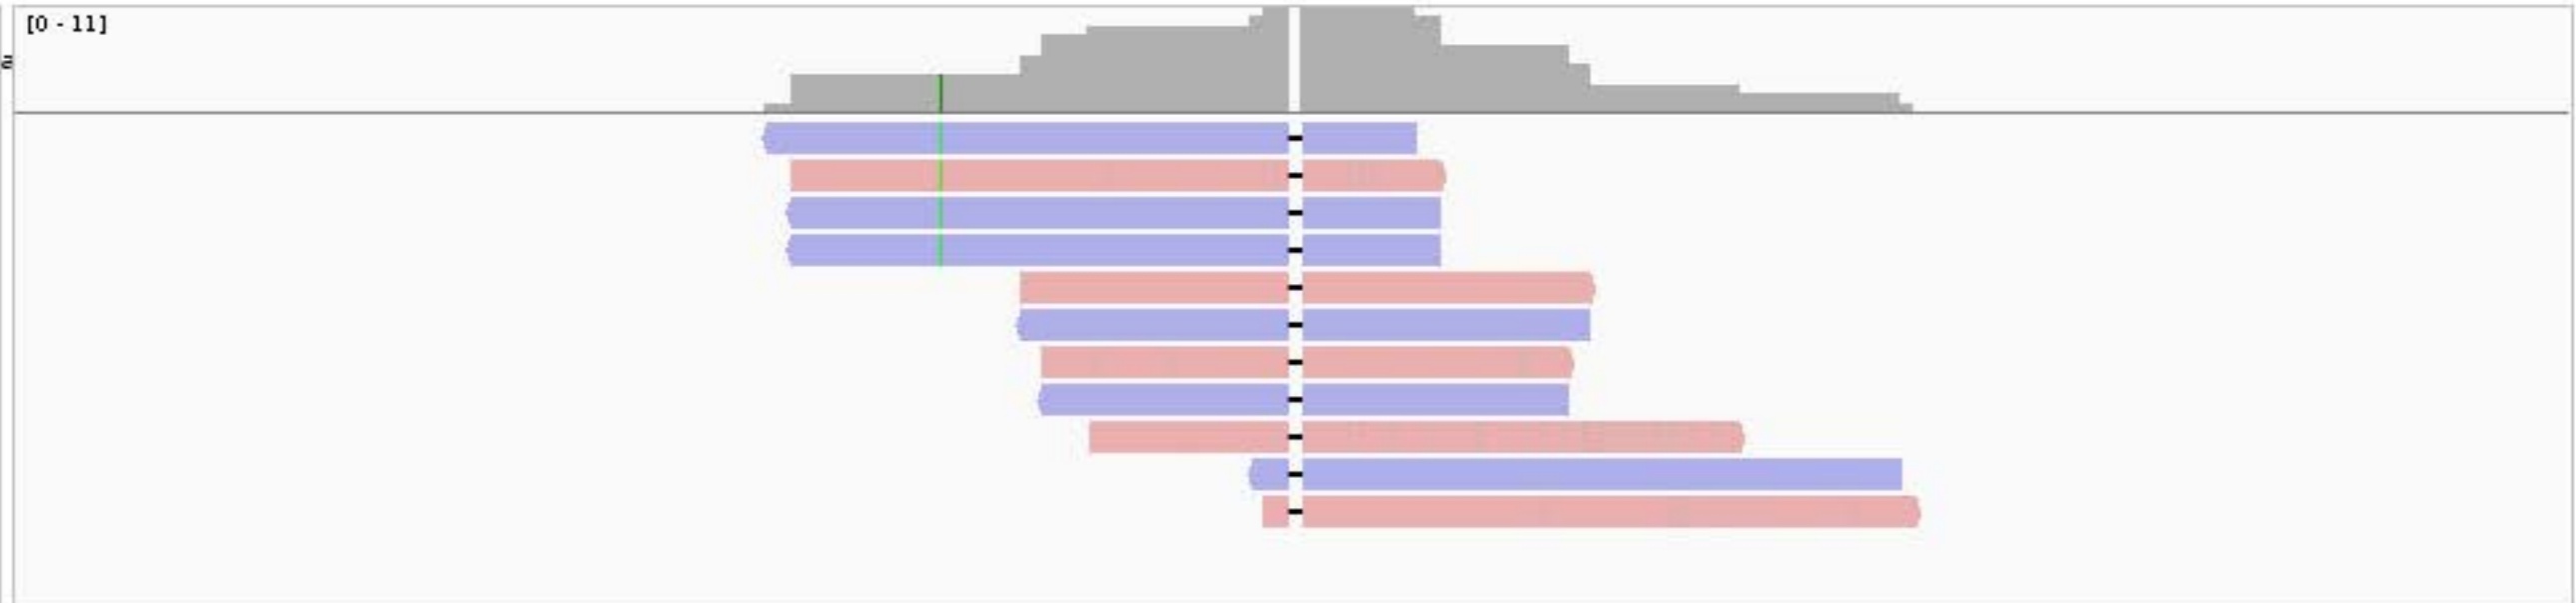

Sequence

Refseq Genes

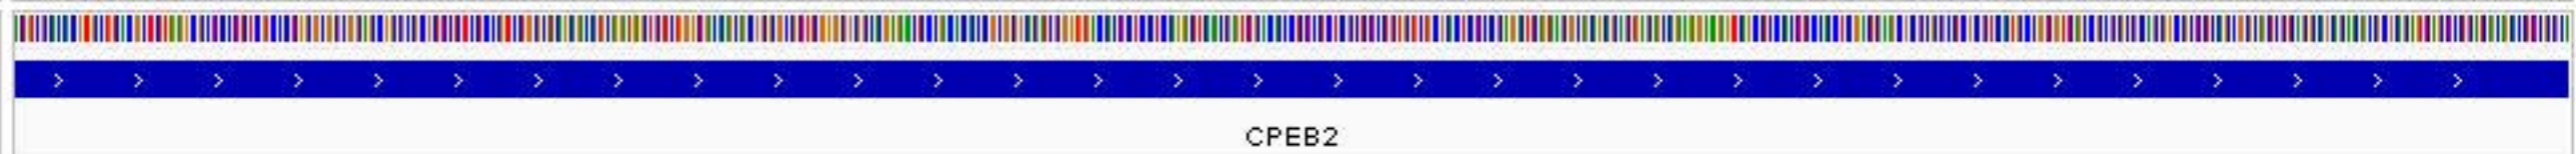



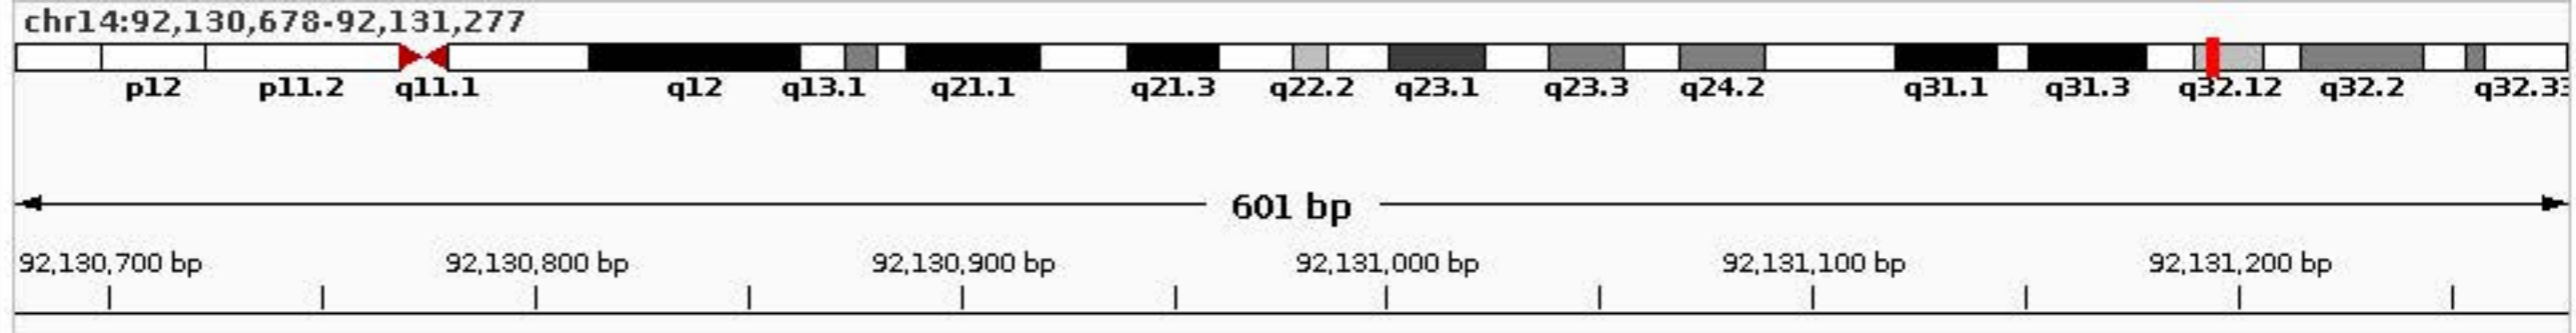

SL\_0001\_LN\_4\_mut.bam Coverage

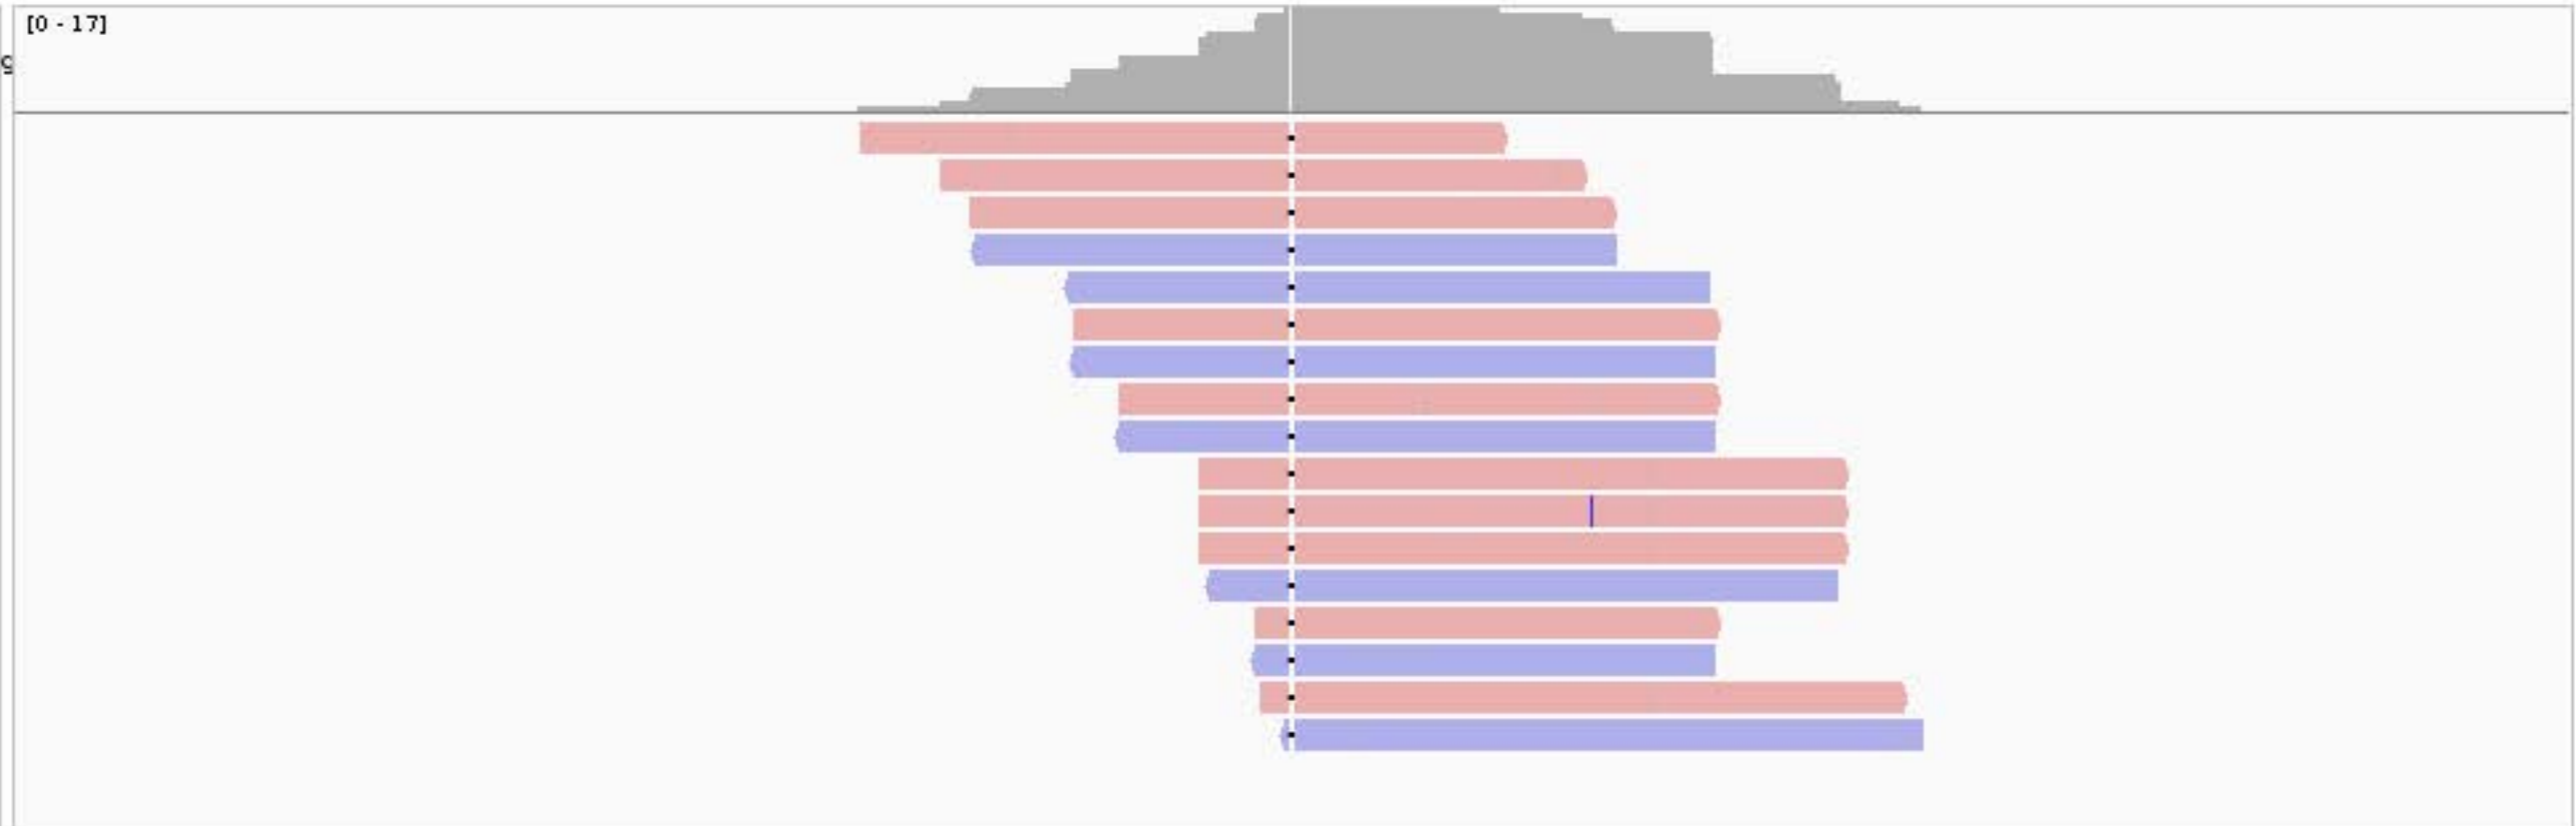

SL\_0001\_LN\_4\_mut.bam

Sequence →

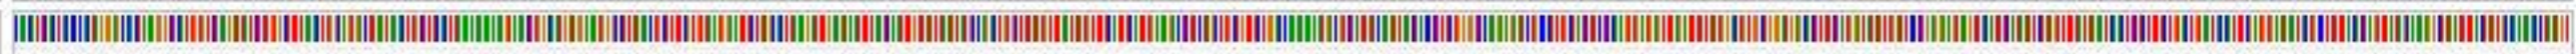

Refseq Genes

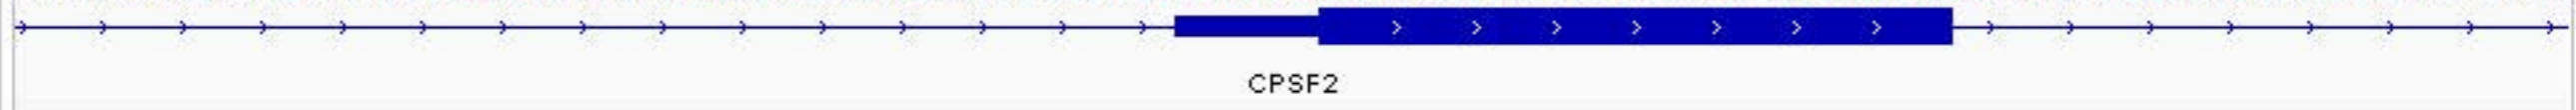

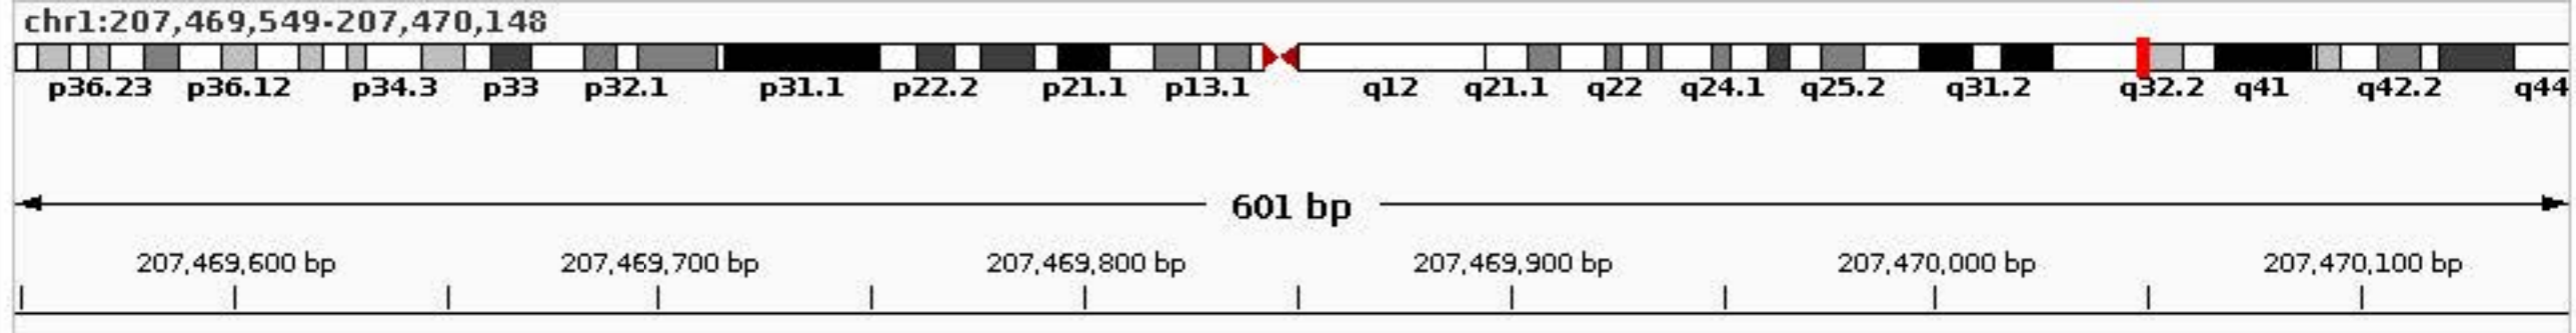

SL\_0001\_LN\_3\_mut.bam Coverage

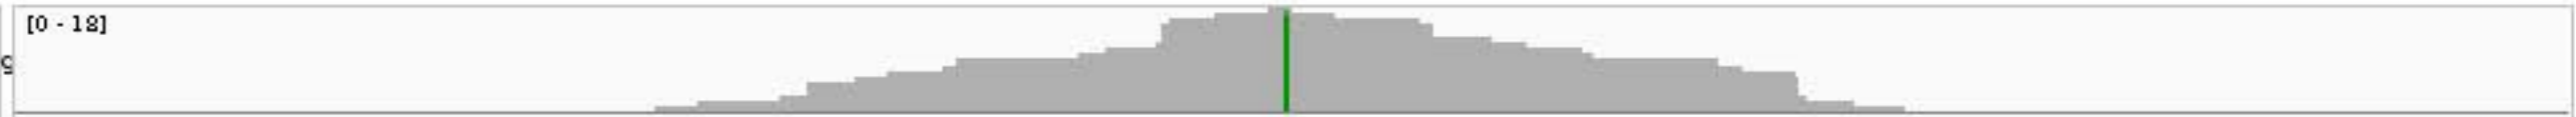

SL\_0001\_LN\_3\_mut.bam

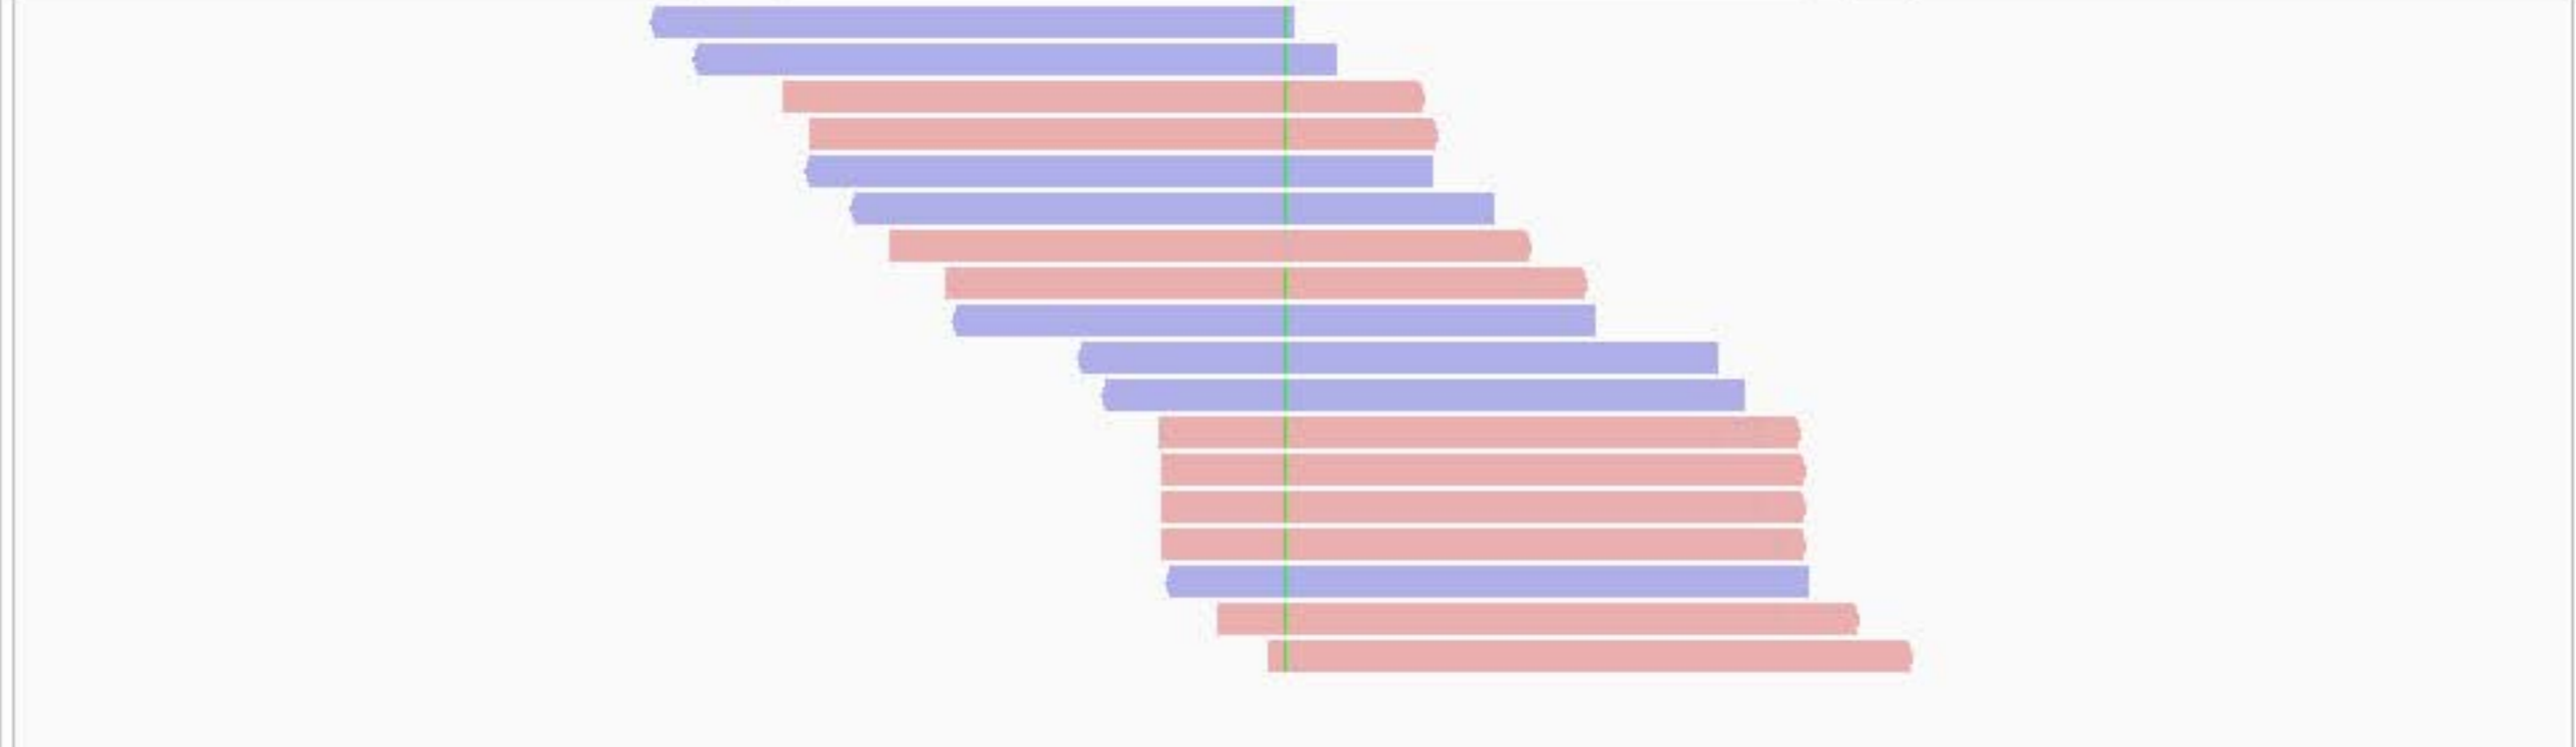

Sequence

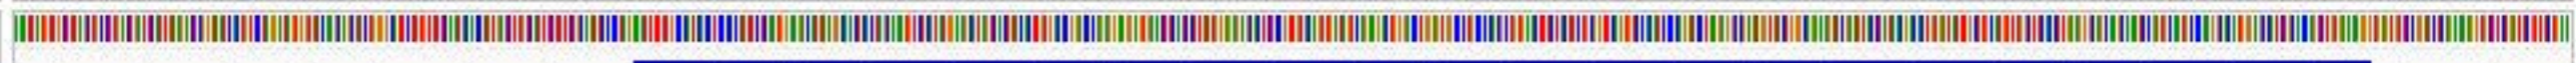

Refseq Genes

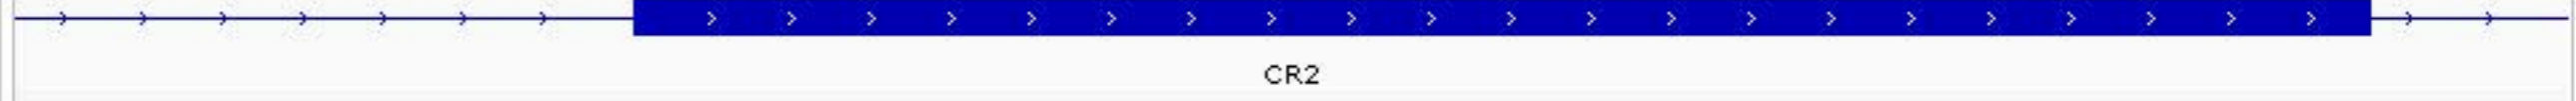

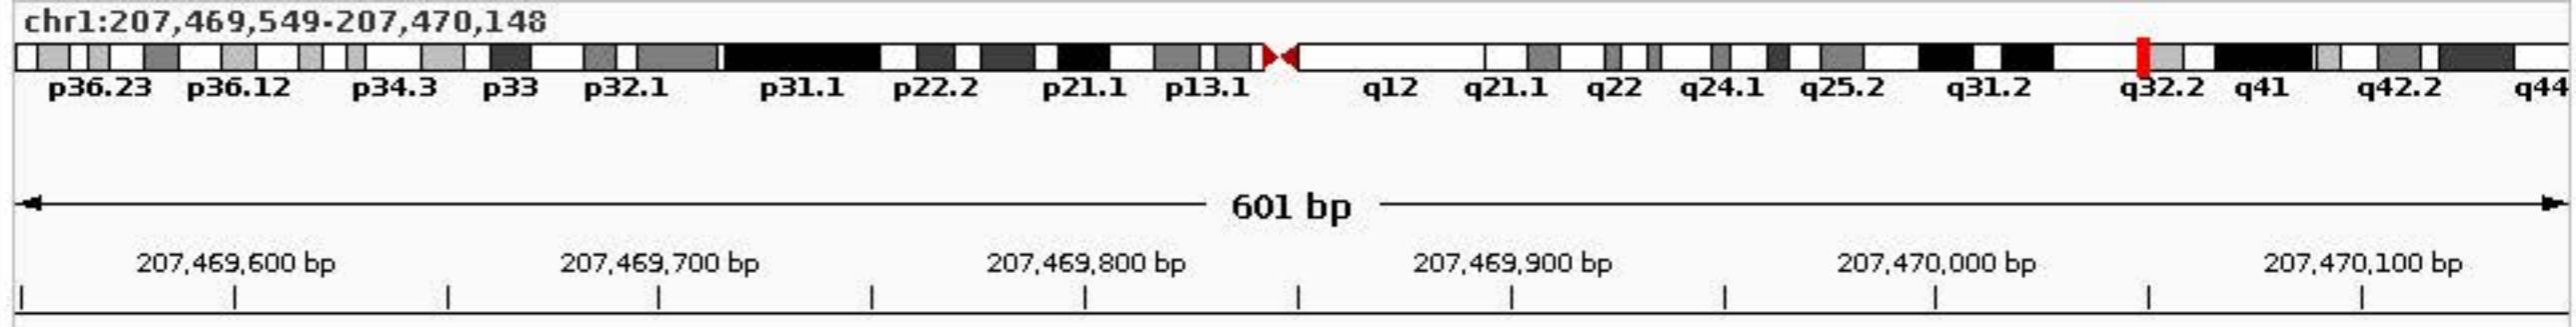

SL\_0001\_LN\_4\_mut.bam Coverage

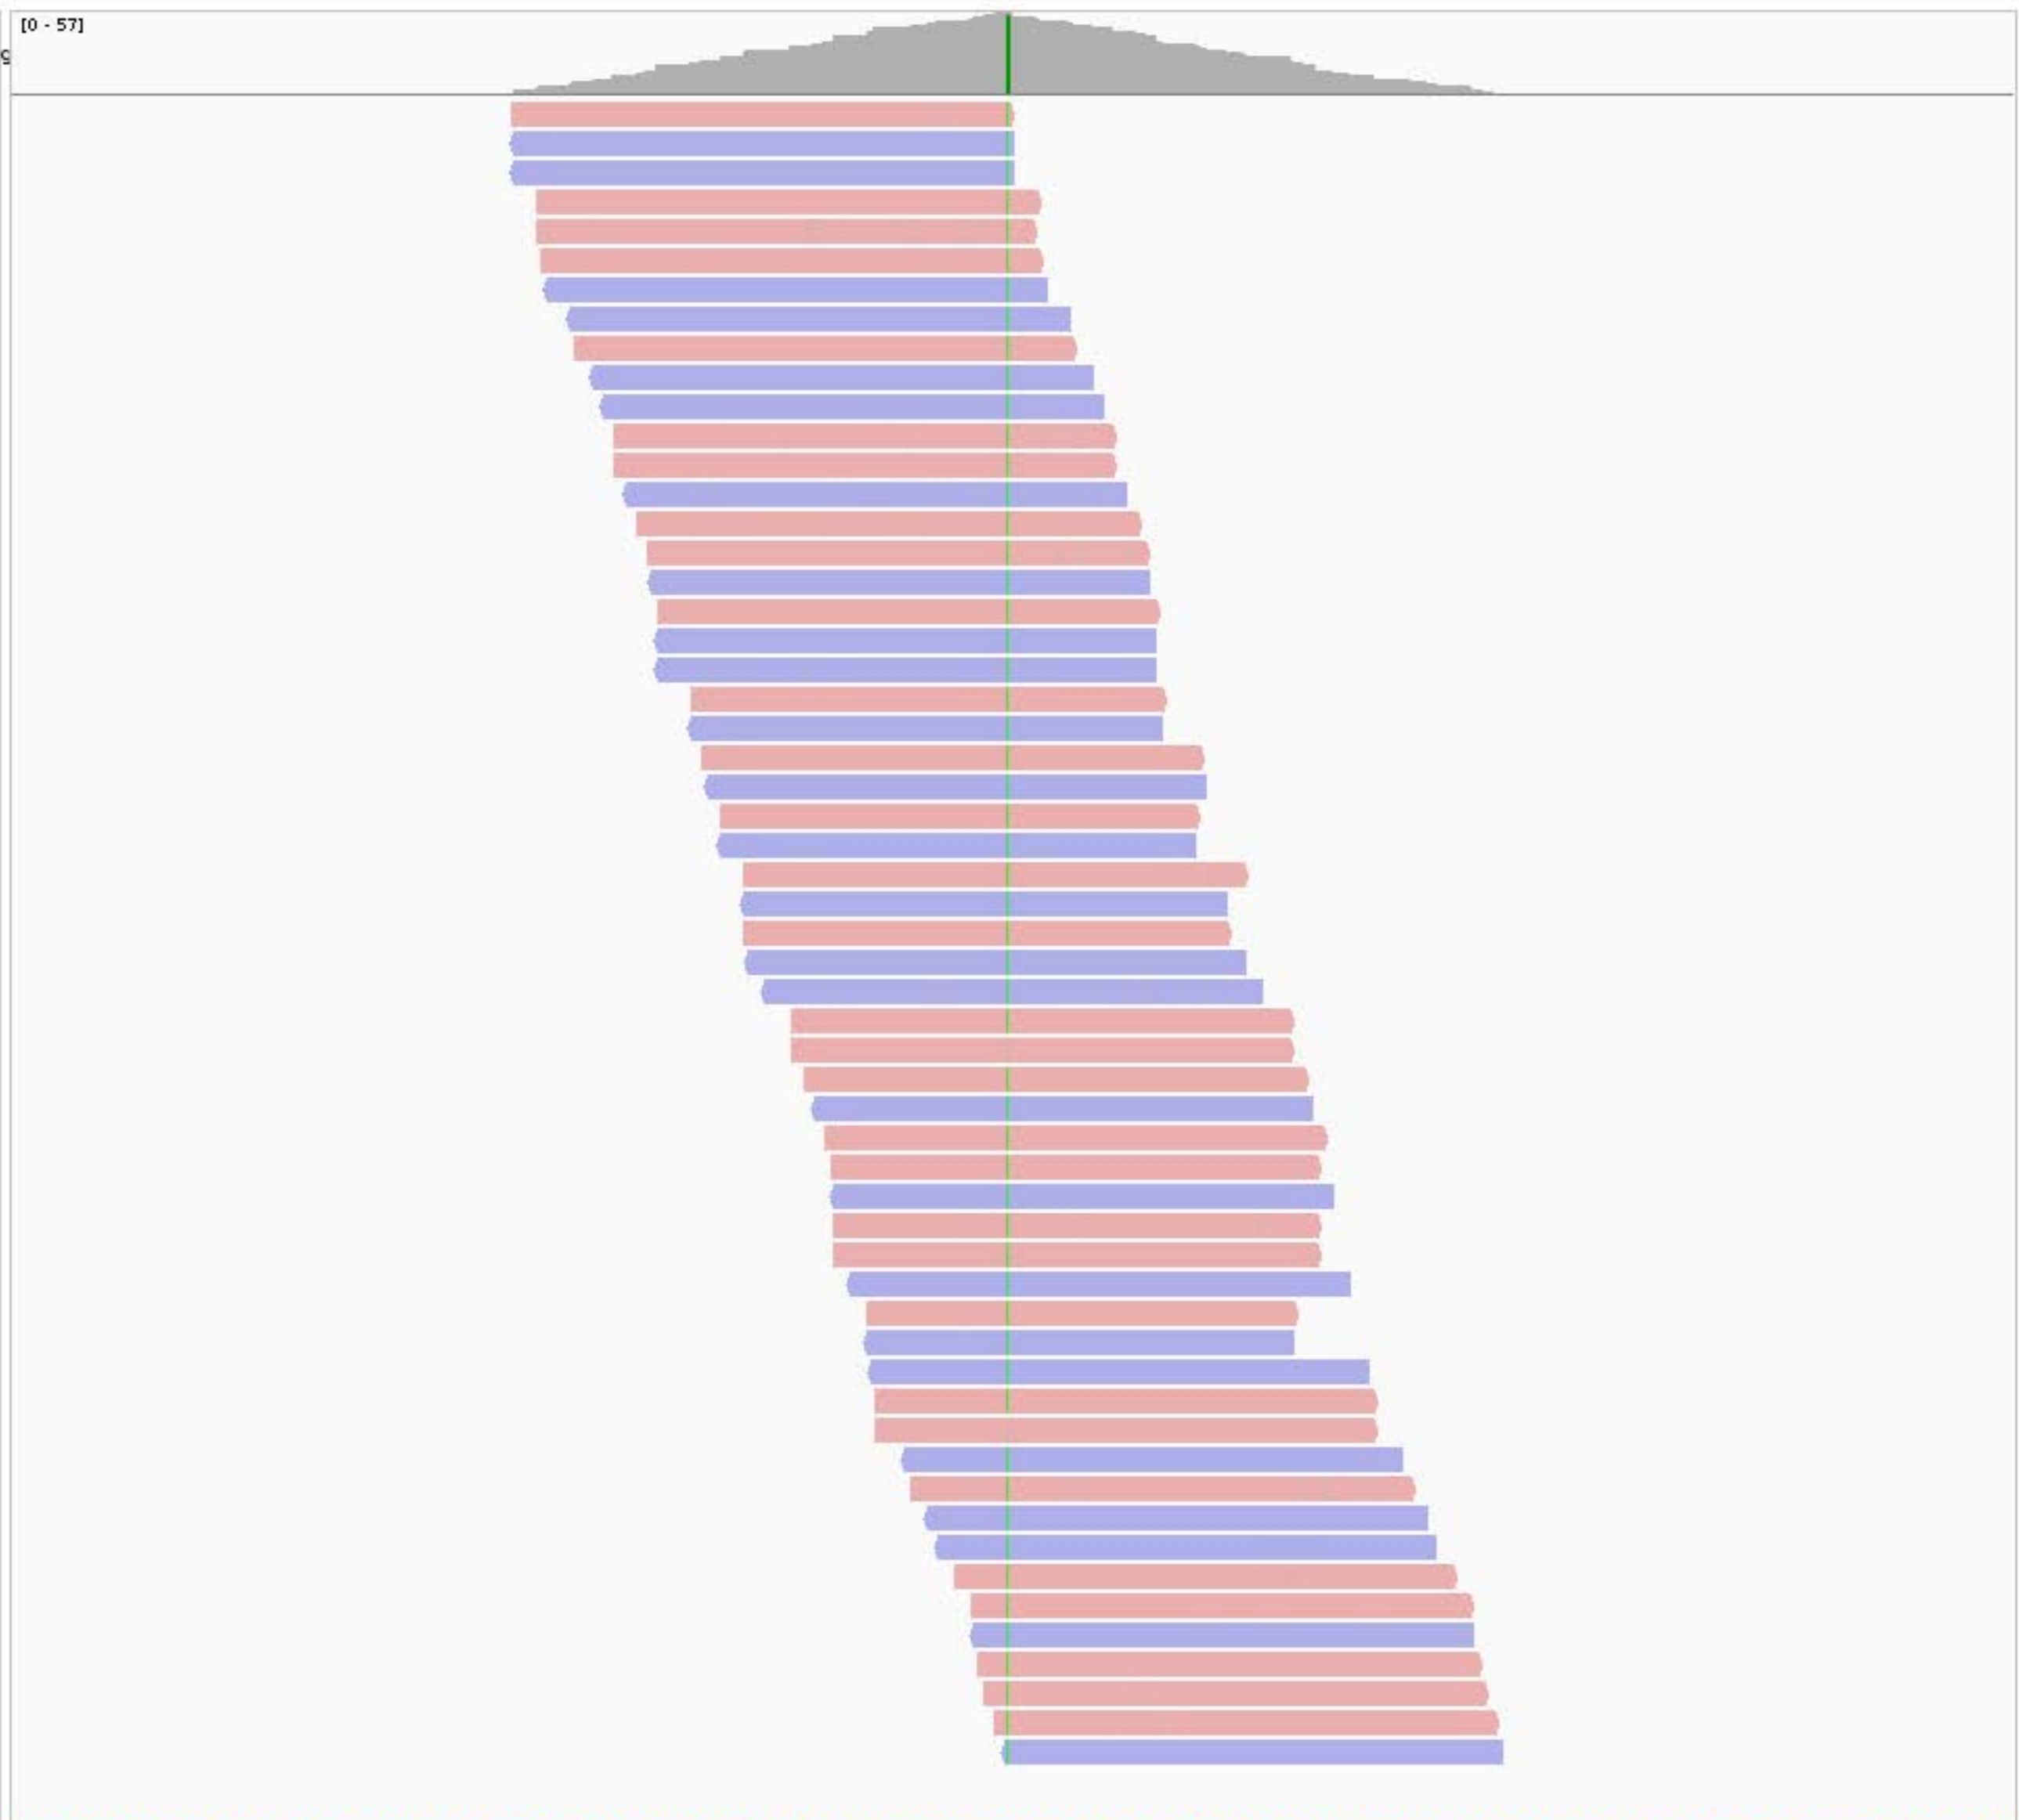

SL\_0001\_LN\_4\_mut.bam

Sequence

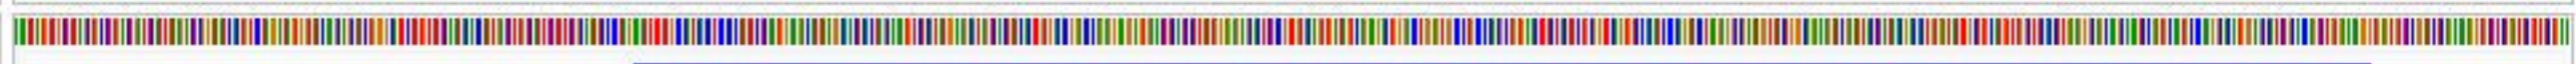

Refseq Genes

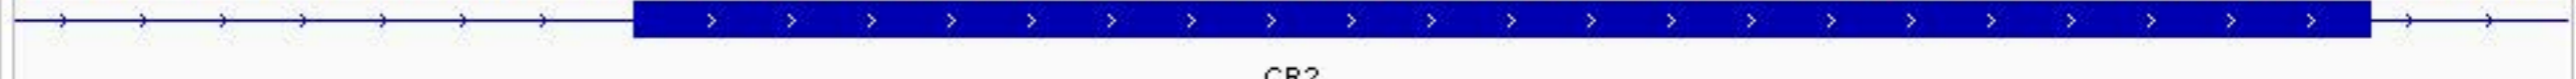

CR2

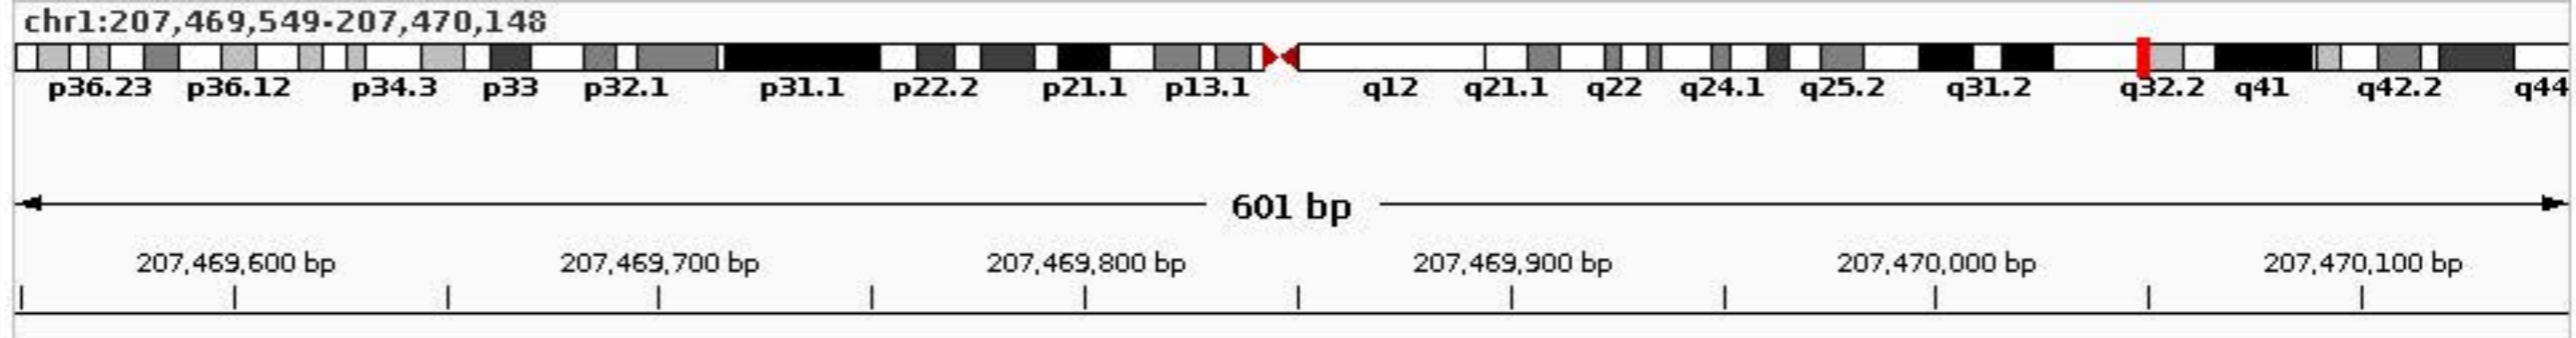

SL\_0001\_LN\_10\_mut.bam Coverage

SL\_0001\_LN\_10\_mut.bam

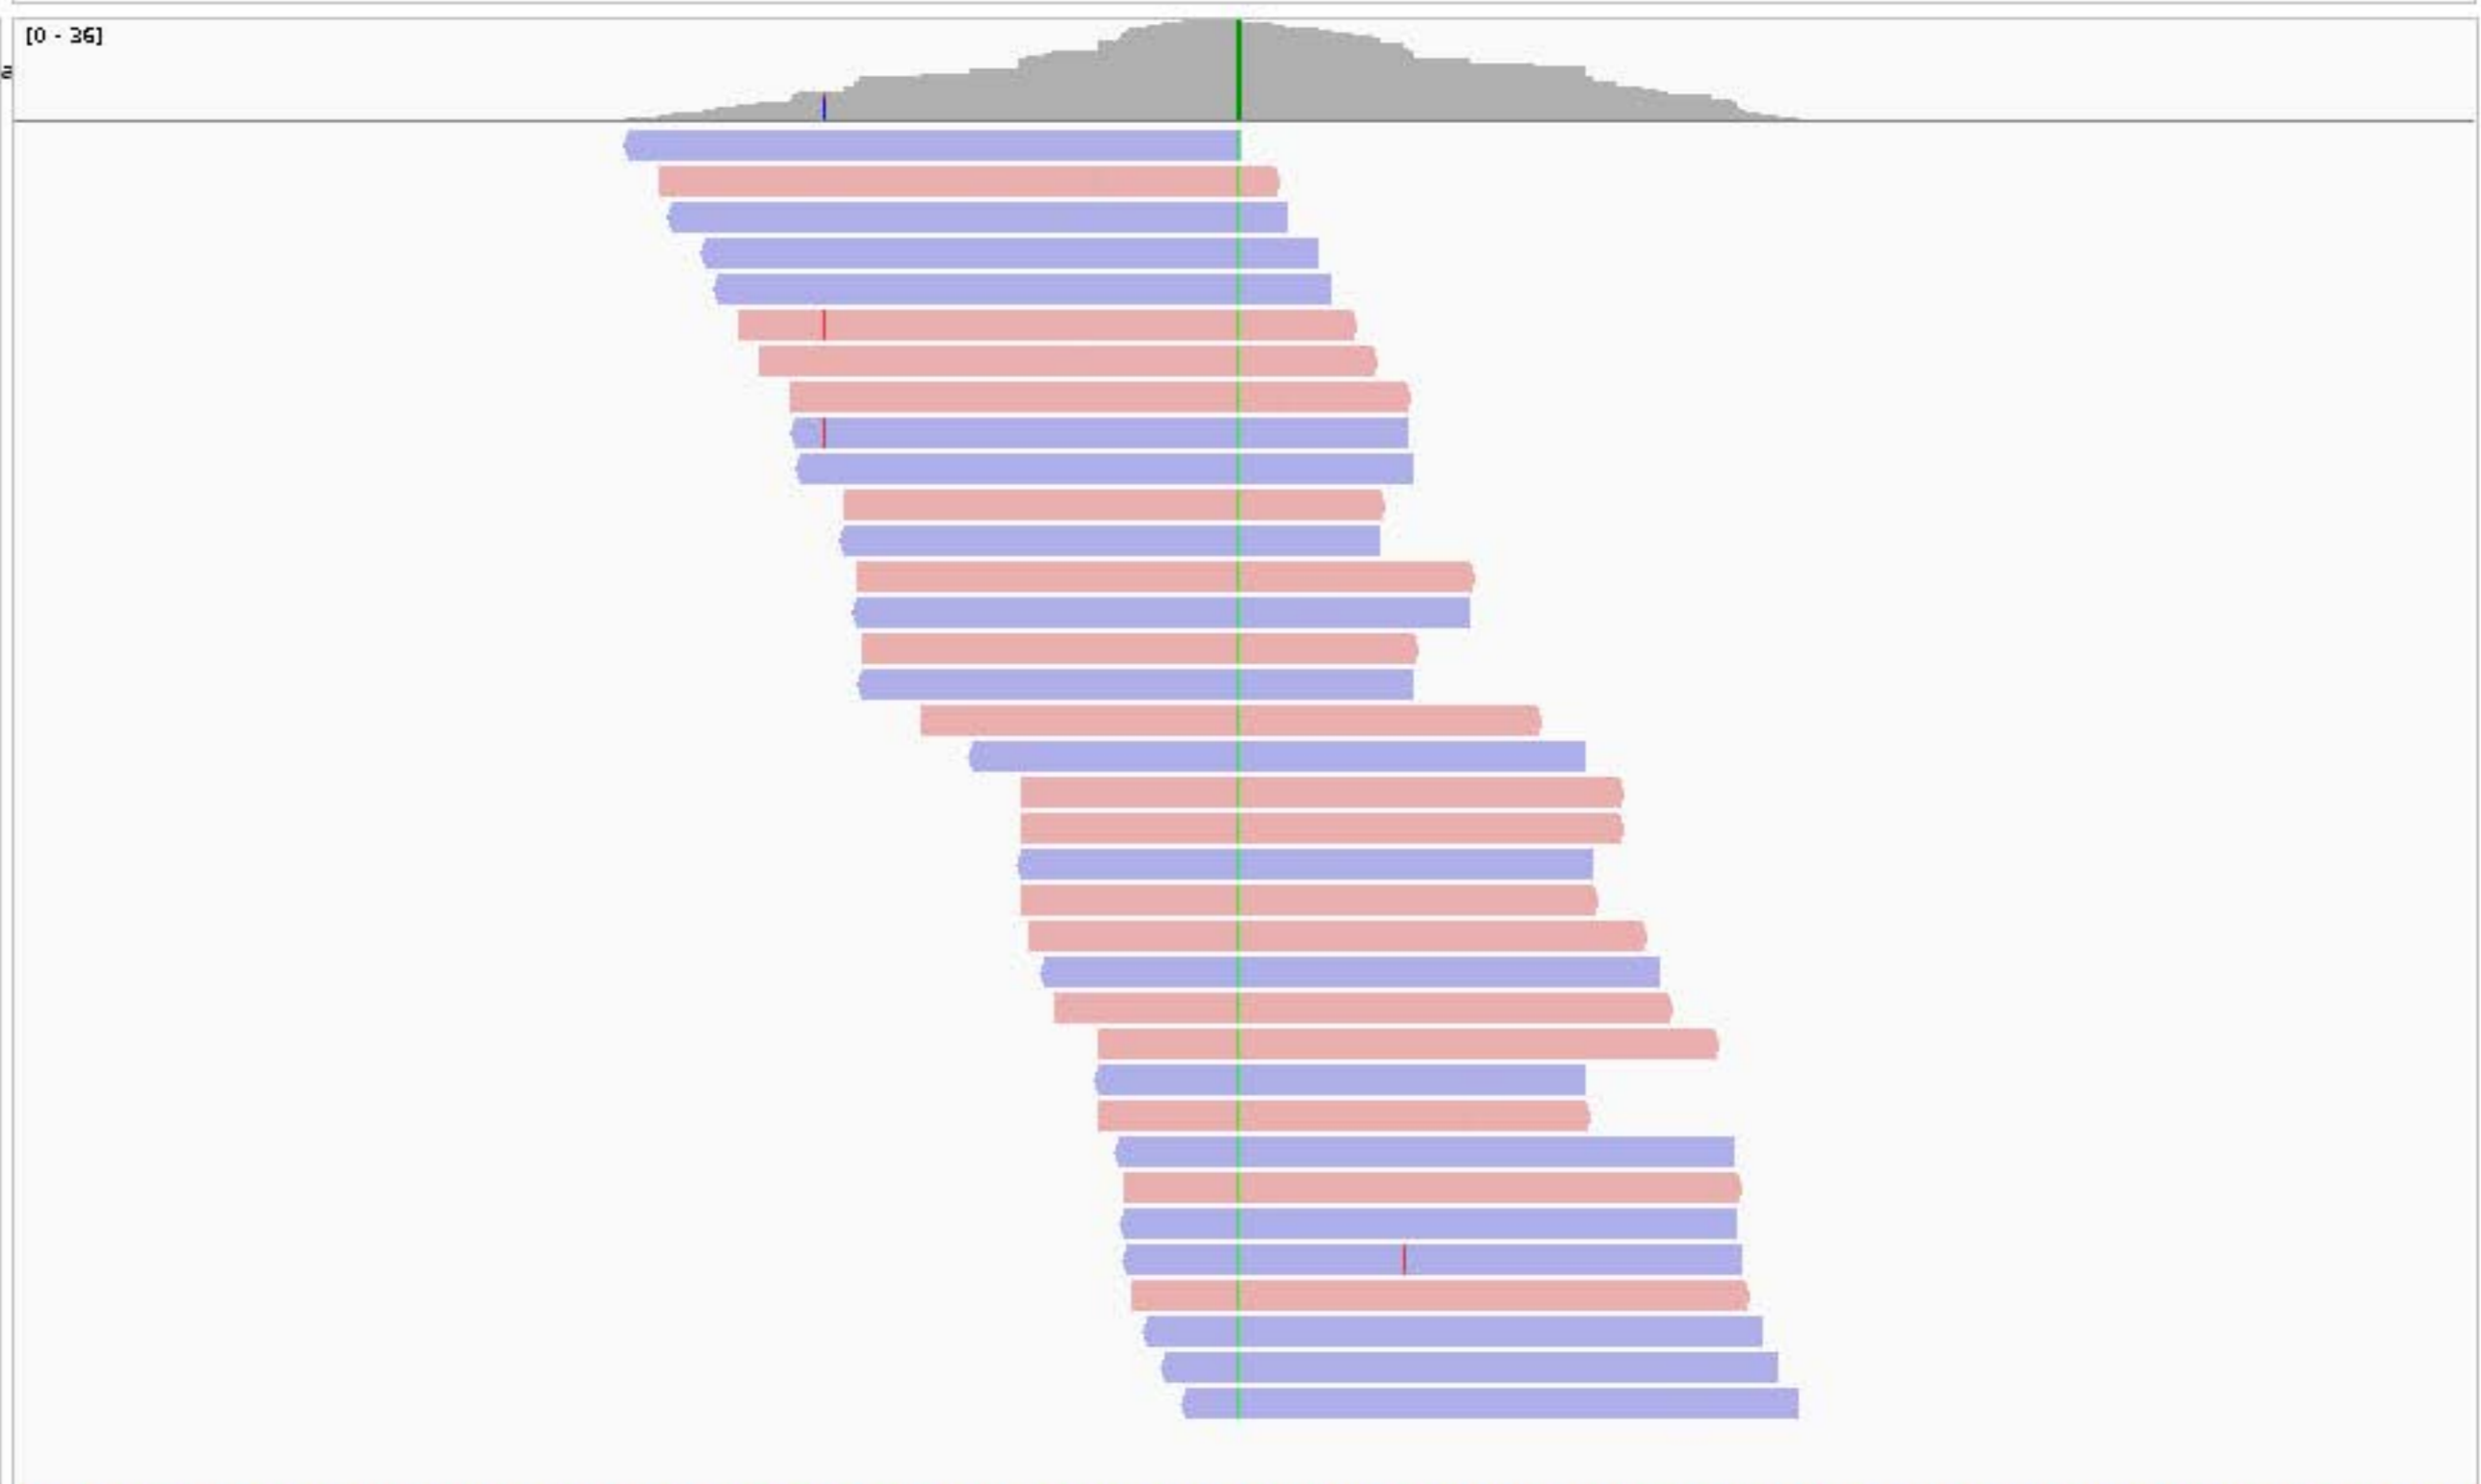

Sequence

Refseq Genes

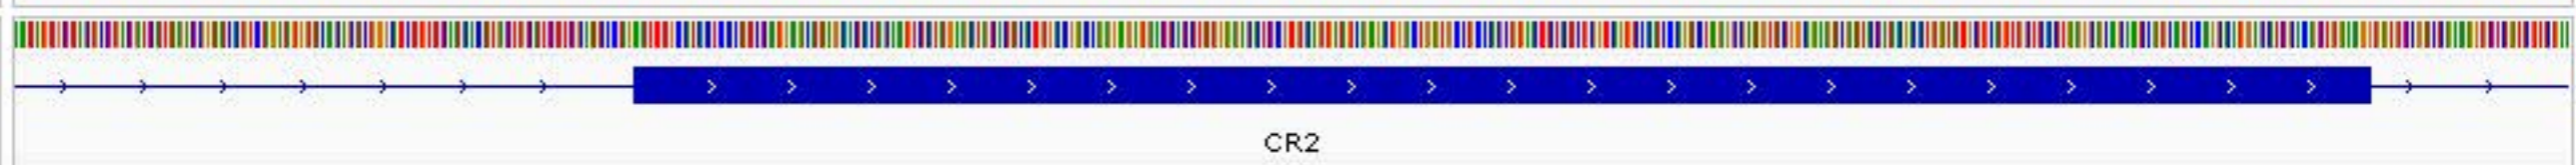



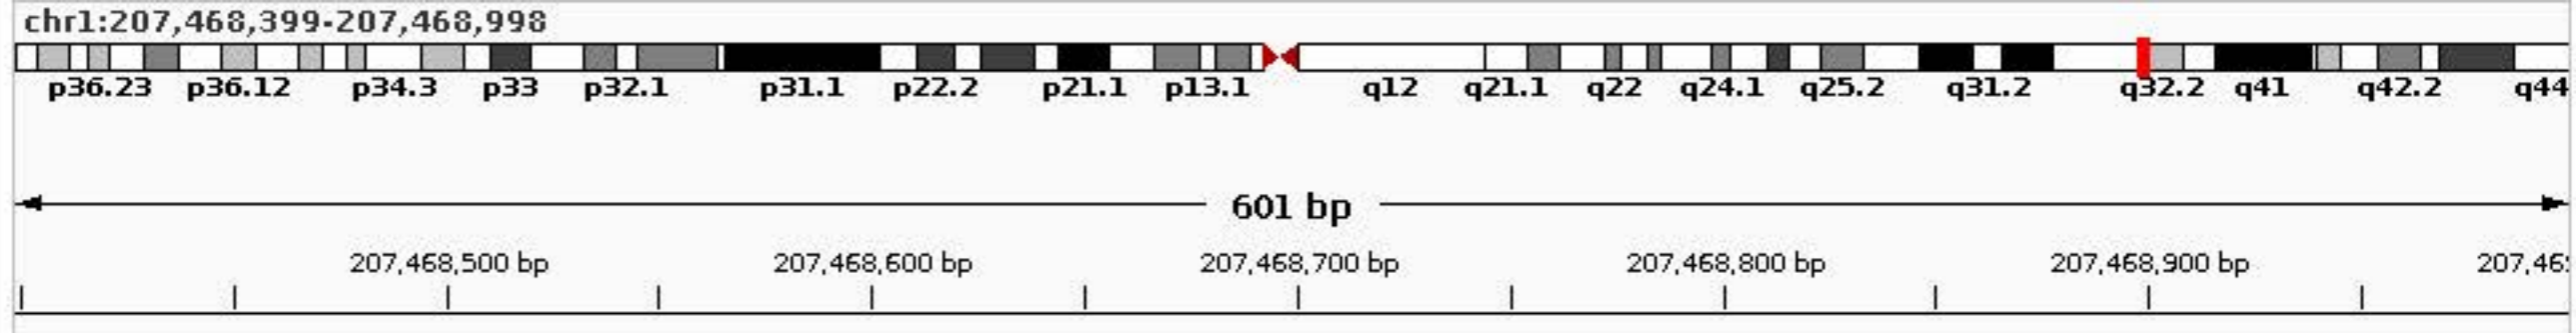

SL\_0003\_LN\_51\_mut.bam Coverage

SL\_0003\_LN\_51\_mut.bam

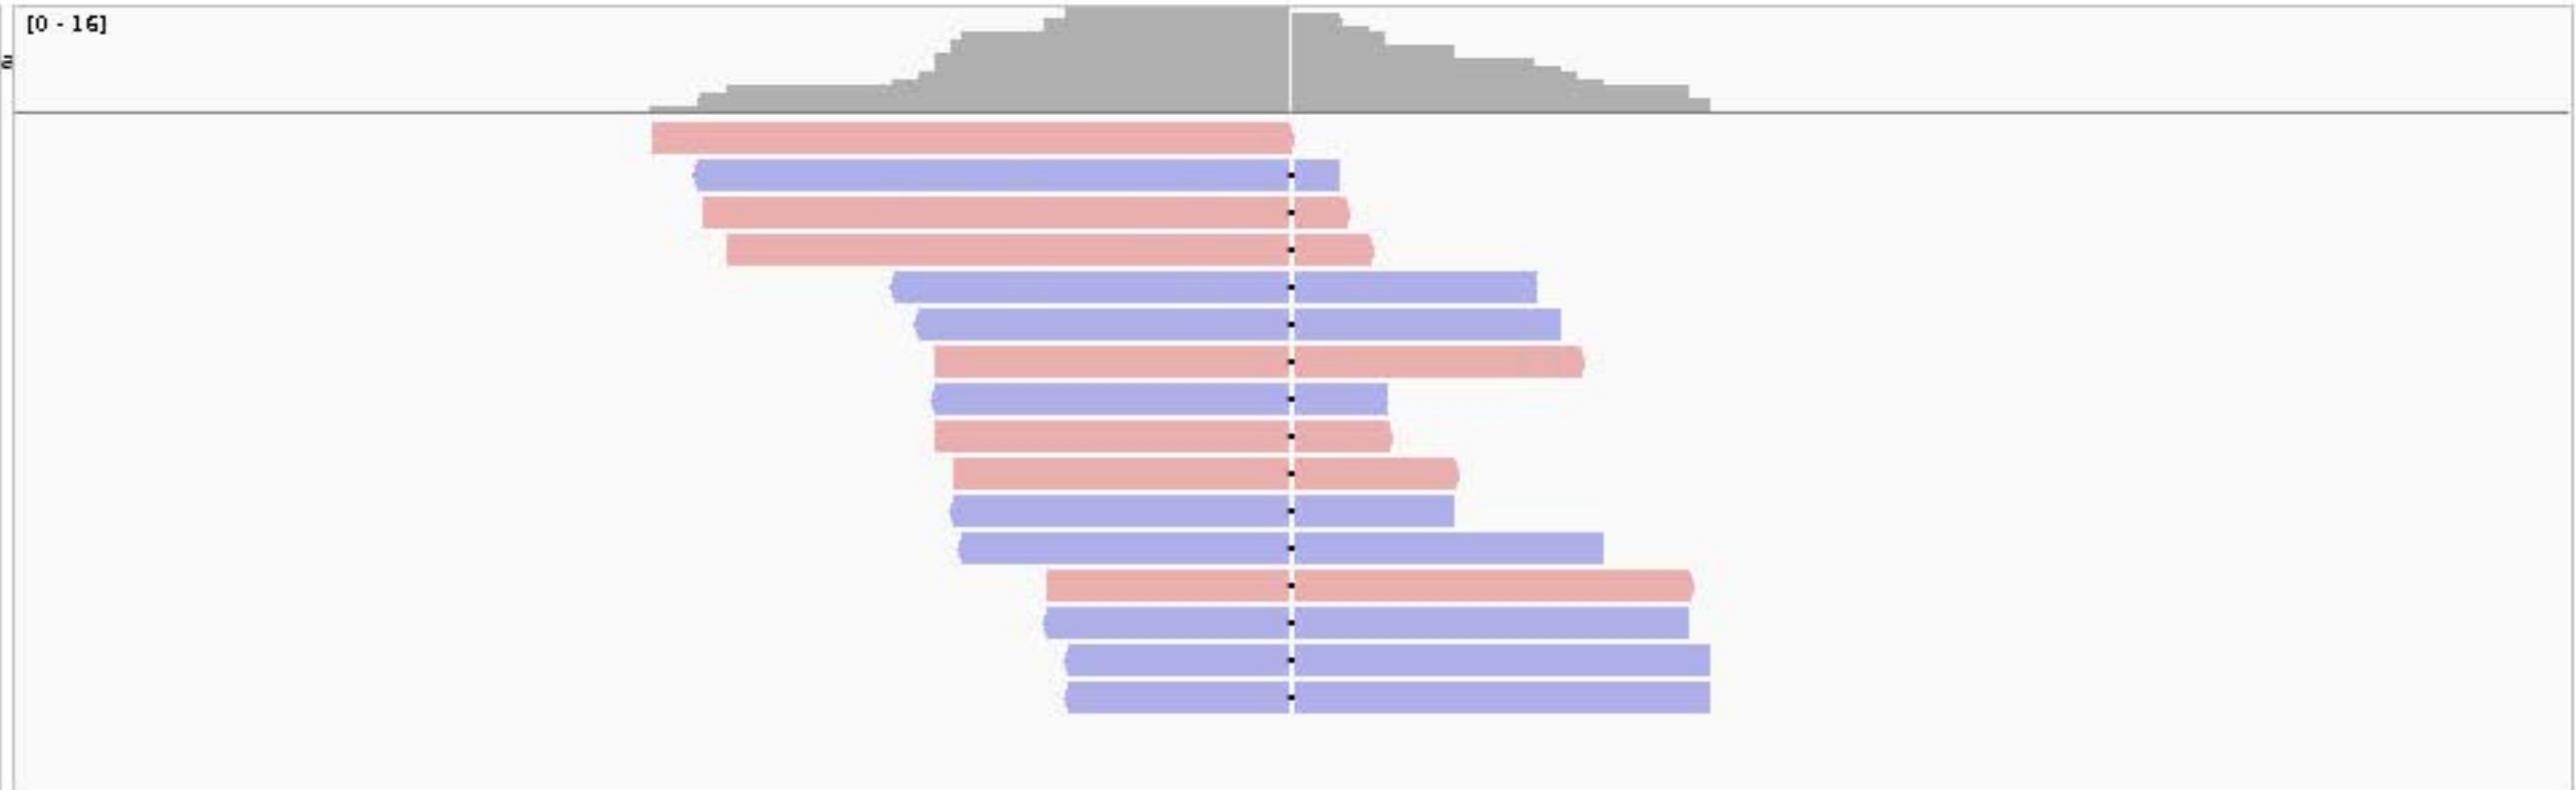

Sequence

Refseq Genes

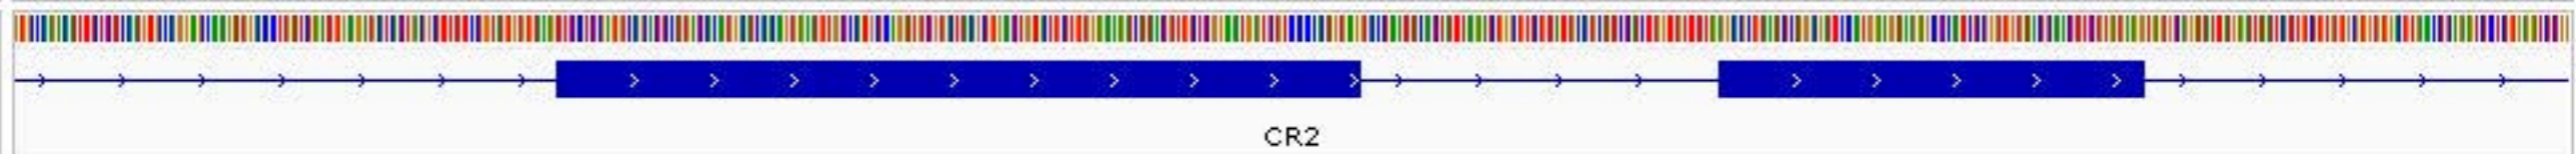



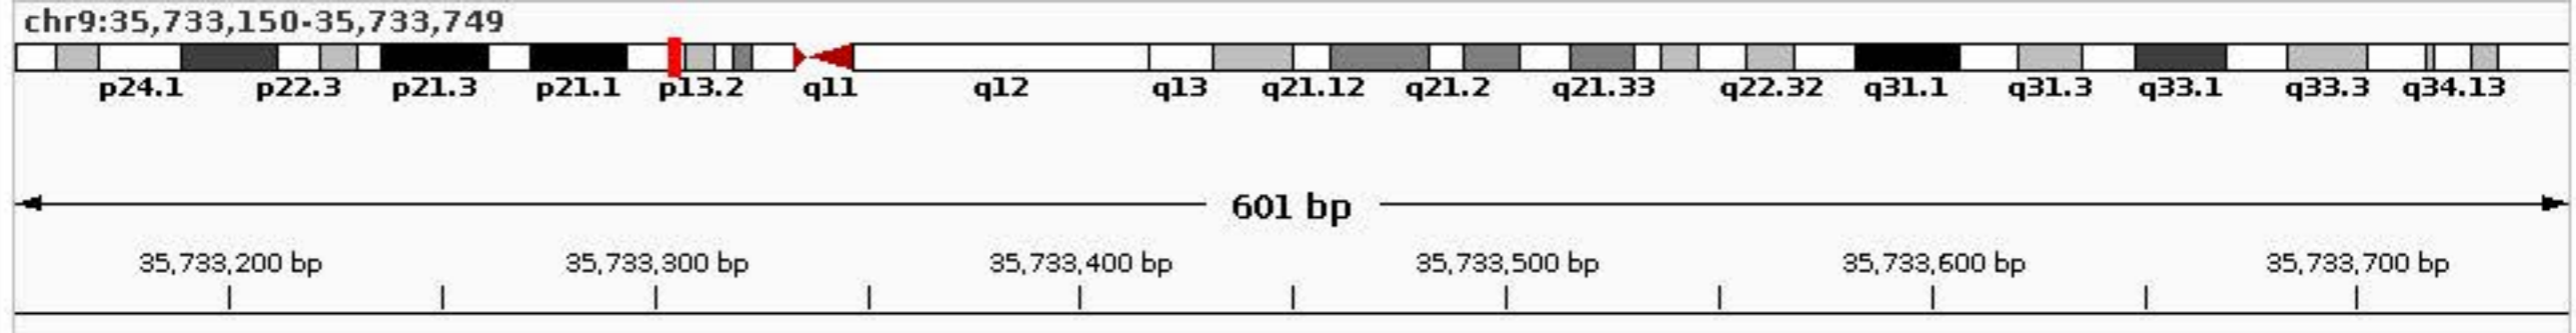

SL\_0001\_RN\_15\_mut.bam Coverage

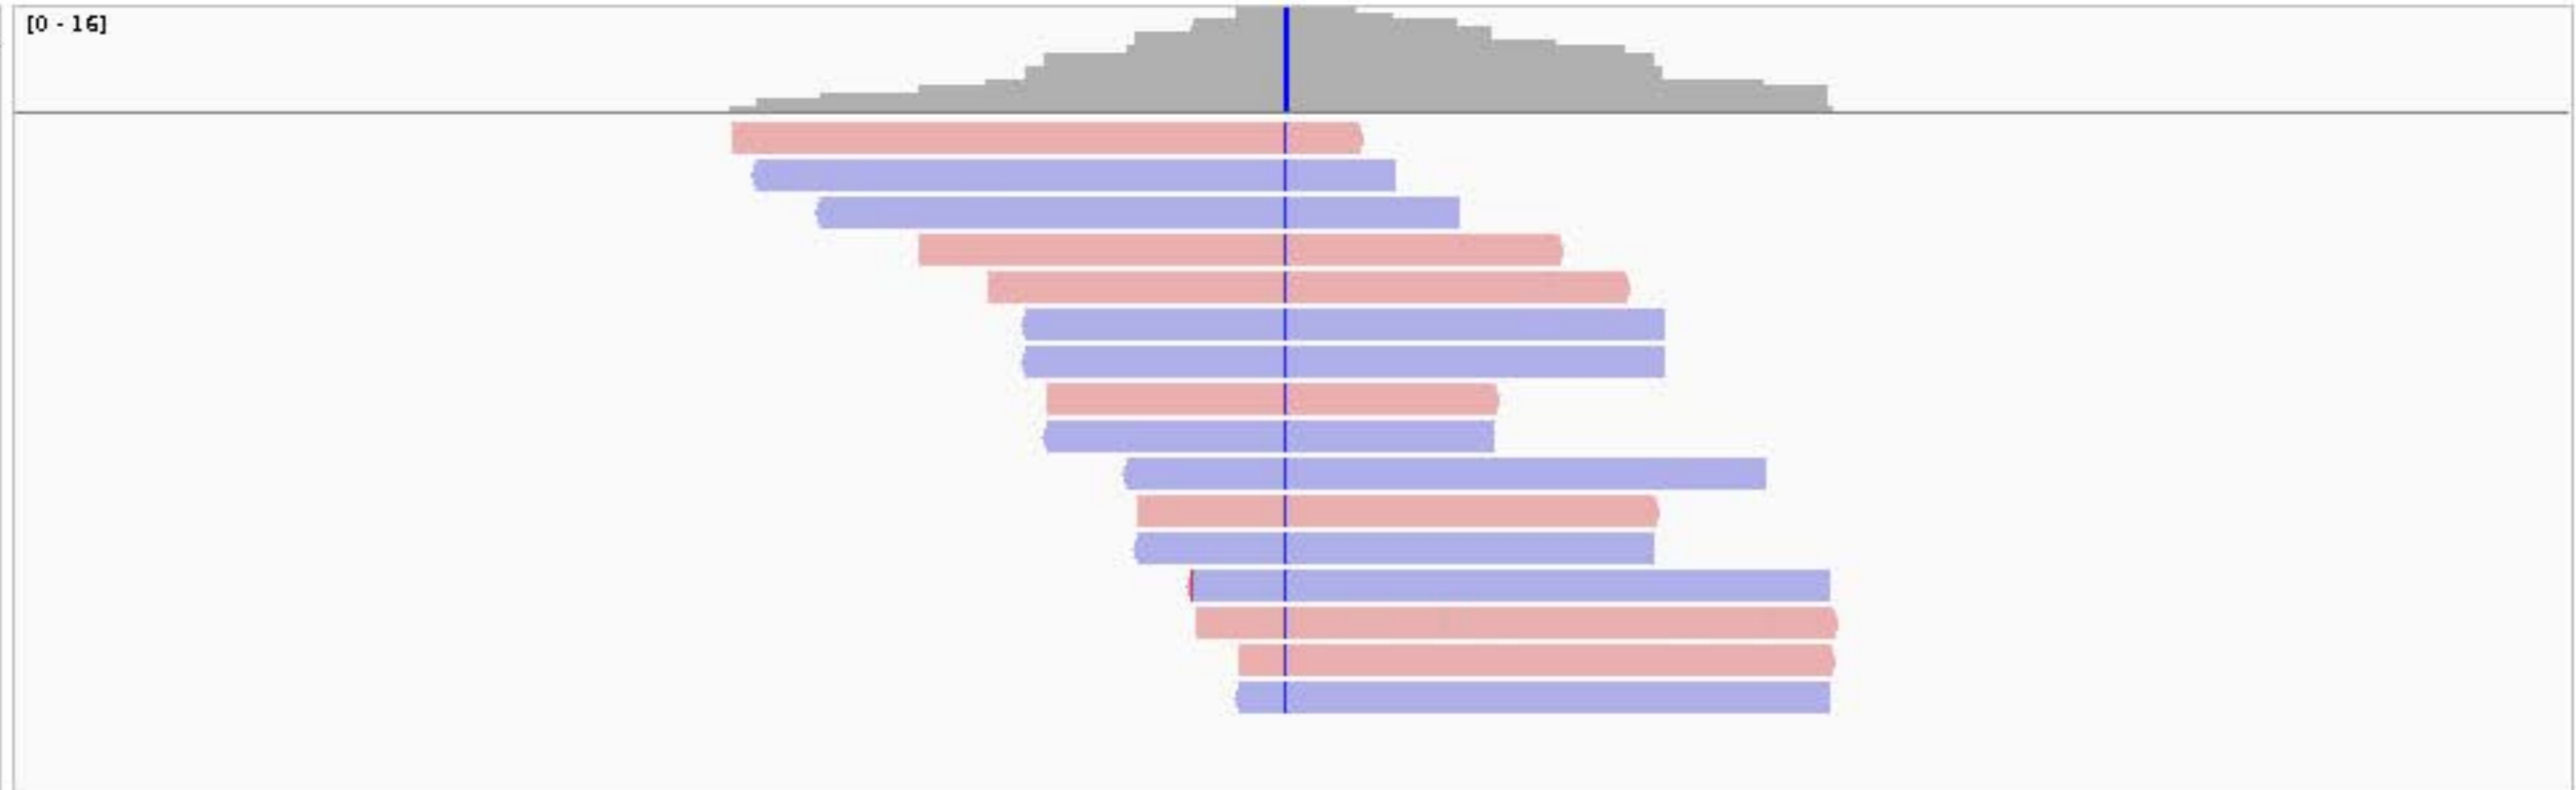

Sequence

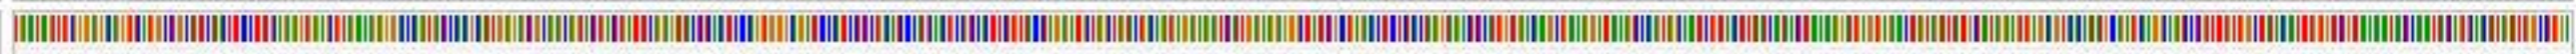

Refseq Genes

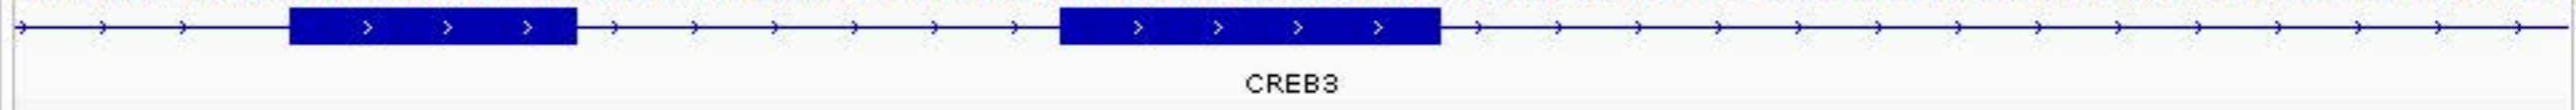

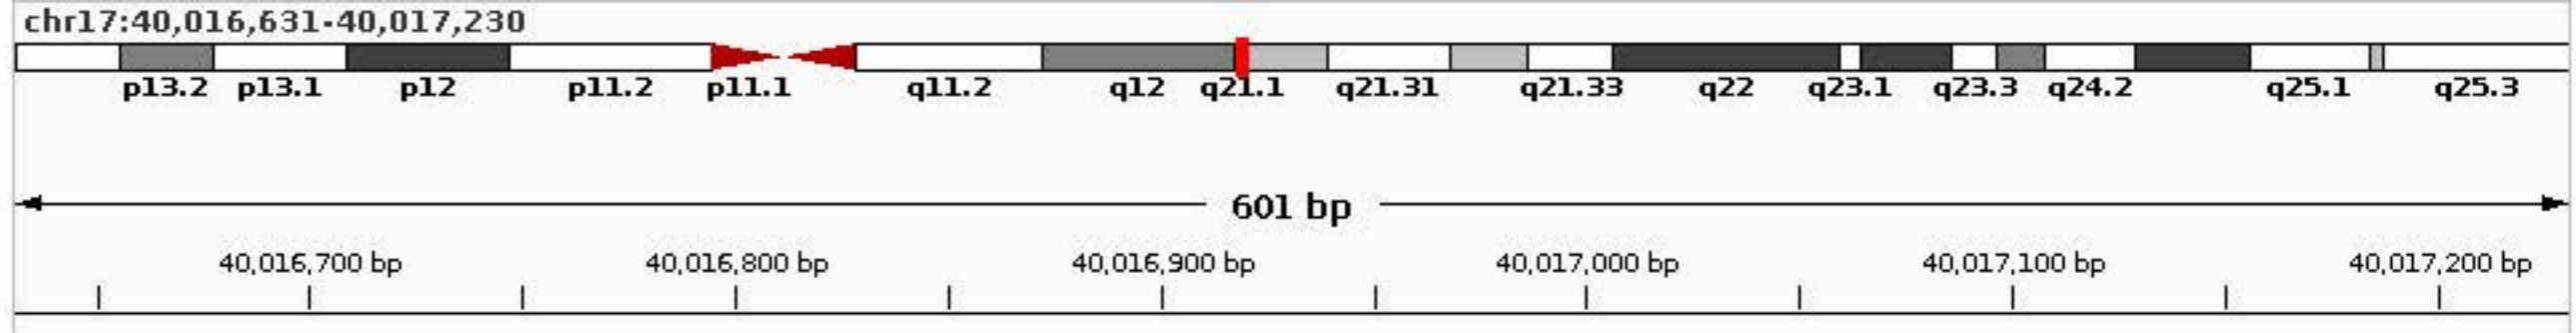

SL\_0007\_RN\_2\_mut.bam Coverage

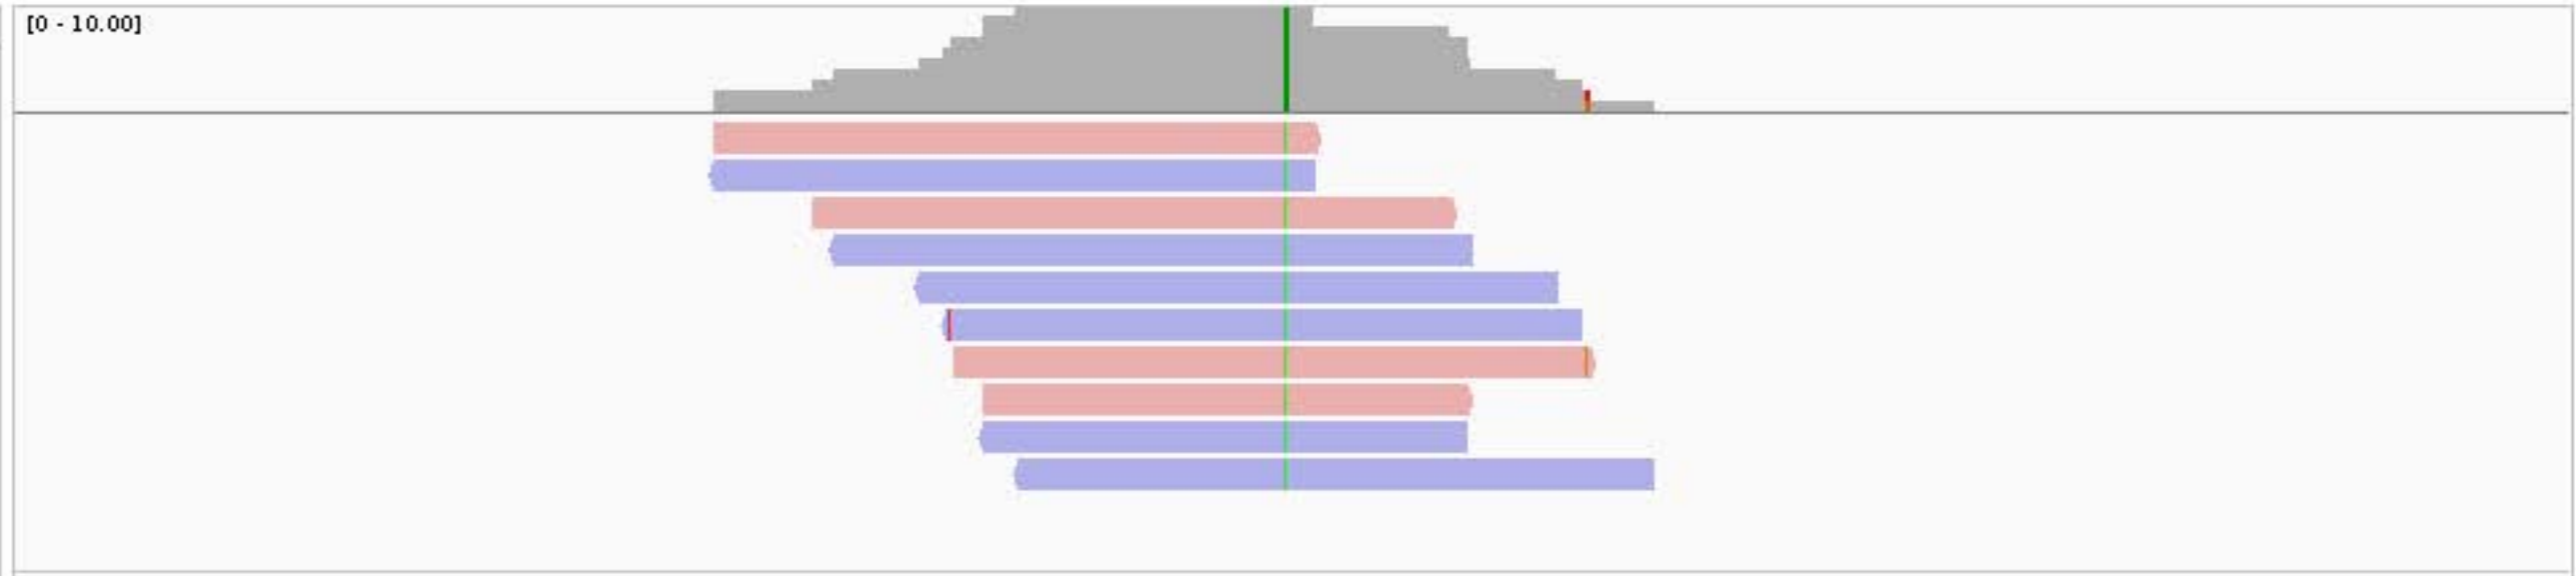

Sequence

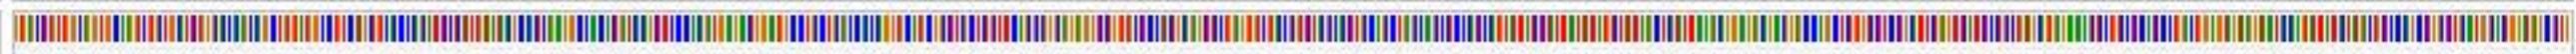

Refseq Genes

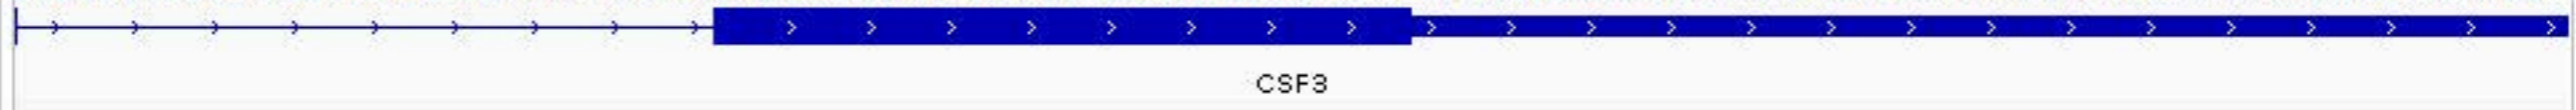

chrX:120,973,861-120,974,460

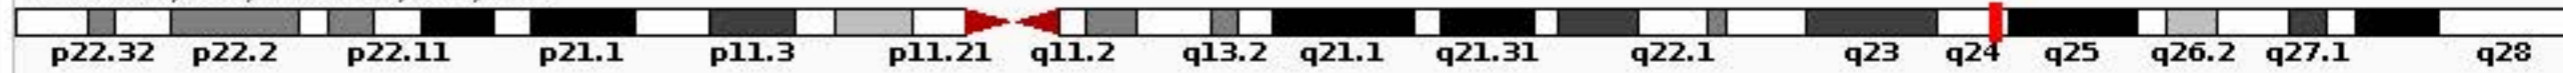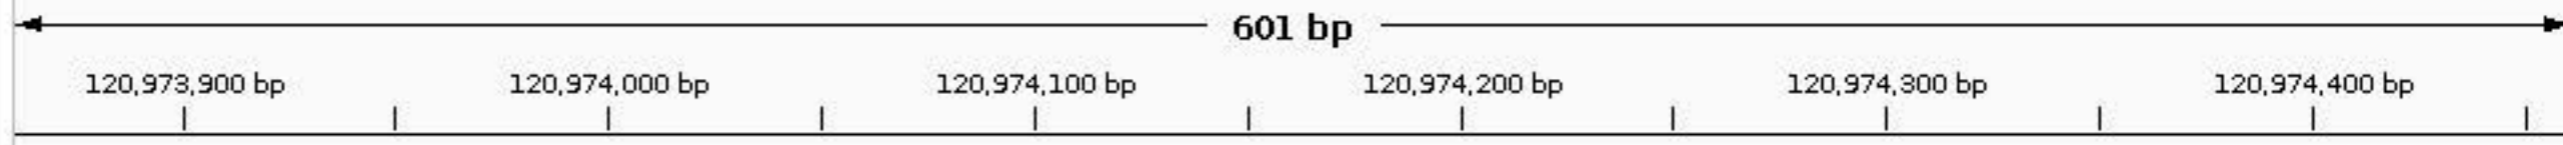

SL\_0006\_RN\_67\_mut.bam Coverage

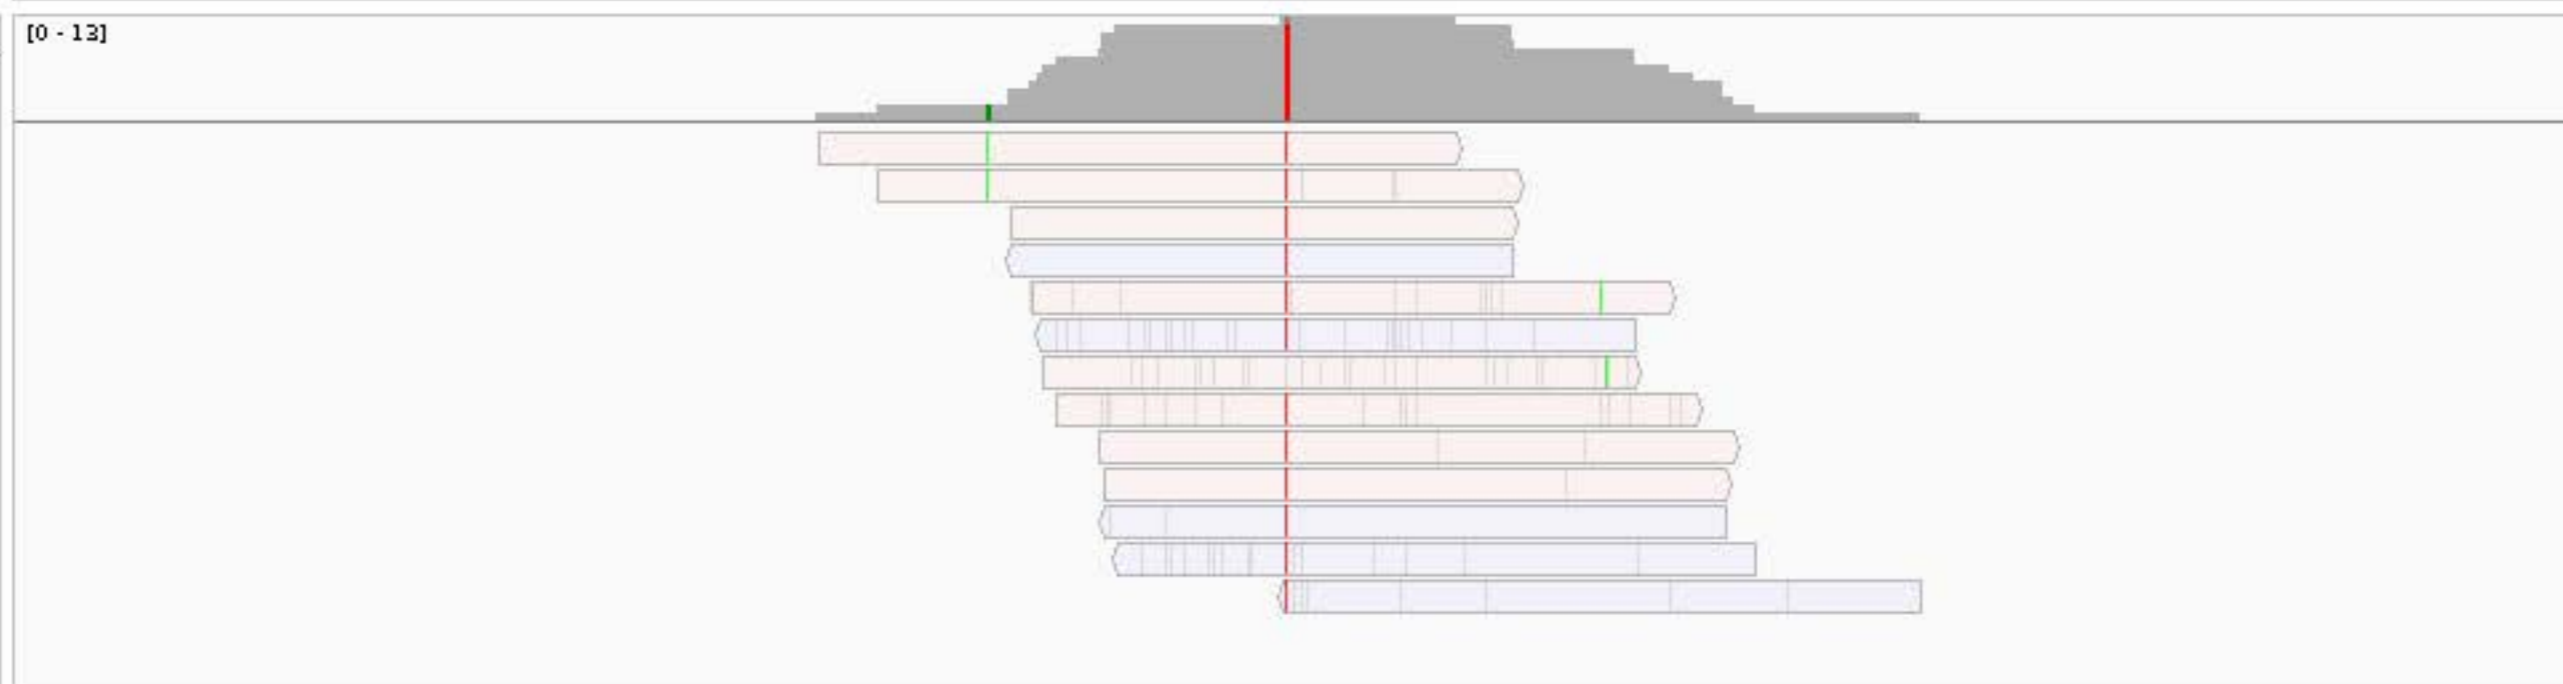

SL\_0006\_RN\_67\_mut.bam

Sequence

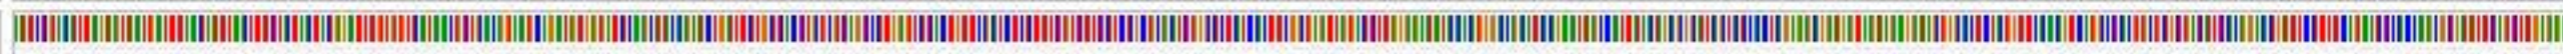

Refseq Genes

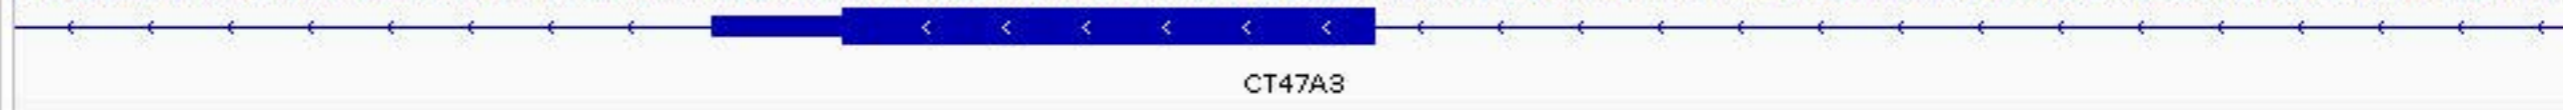

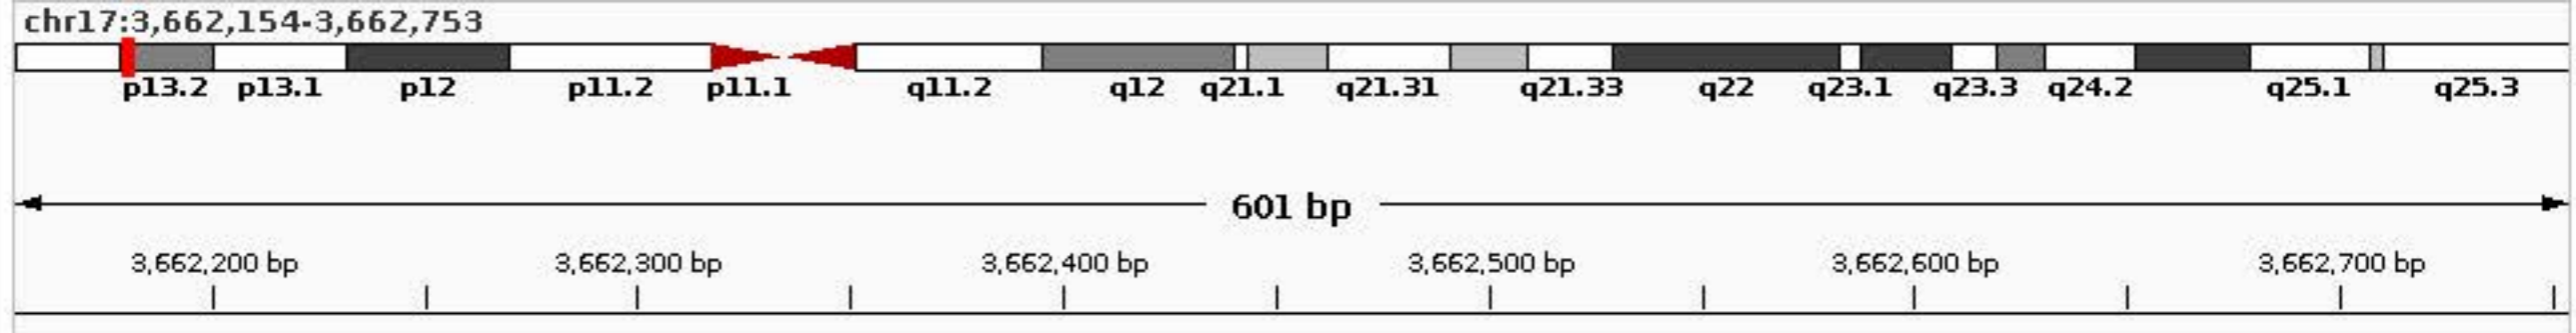

SL\_0006\_RN\_67\_mut.bam Coverage

SL\_0006\_RN\_67\_mut.bam

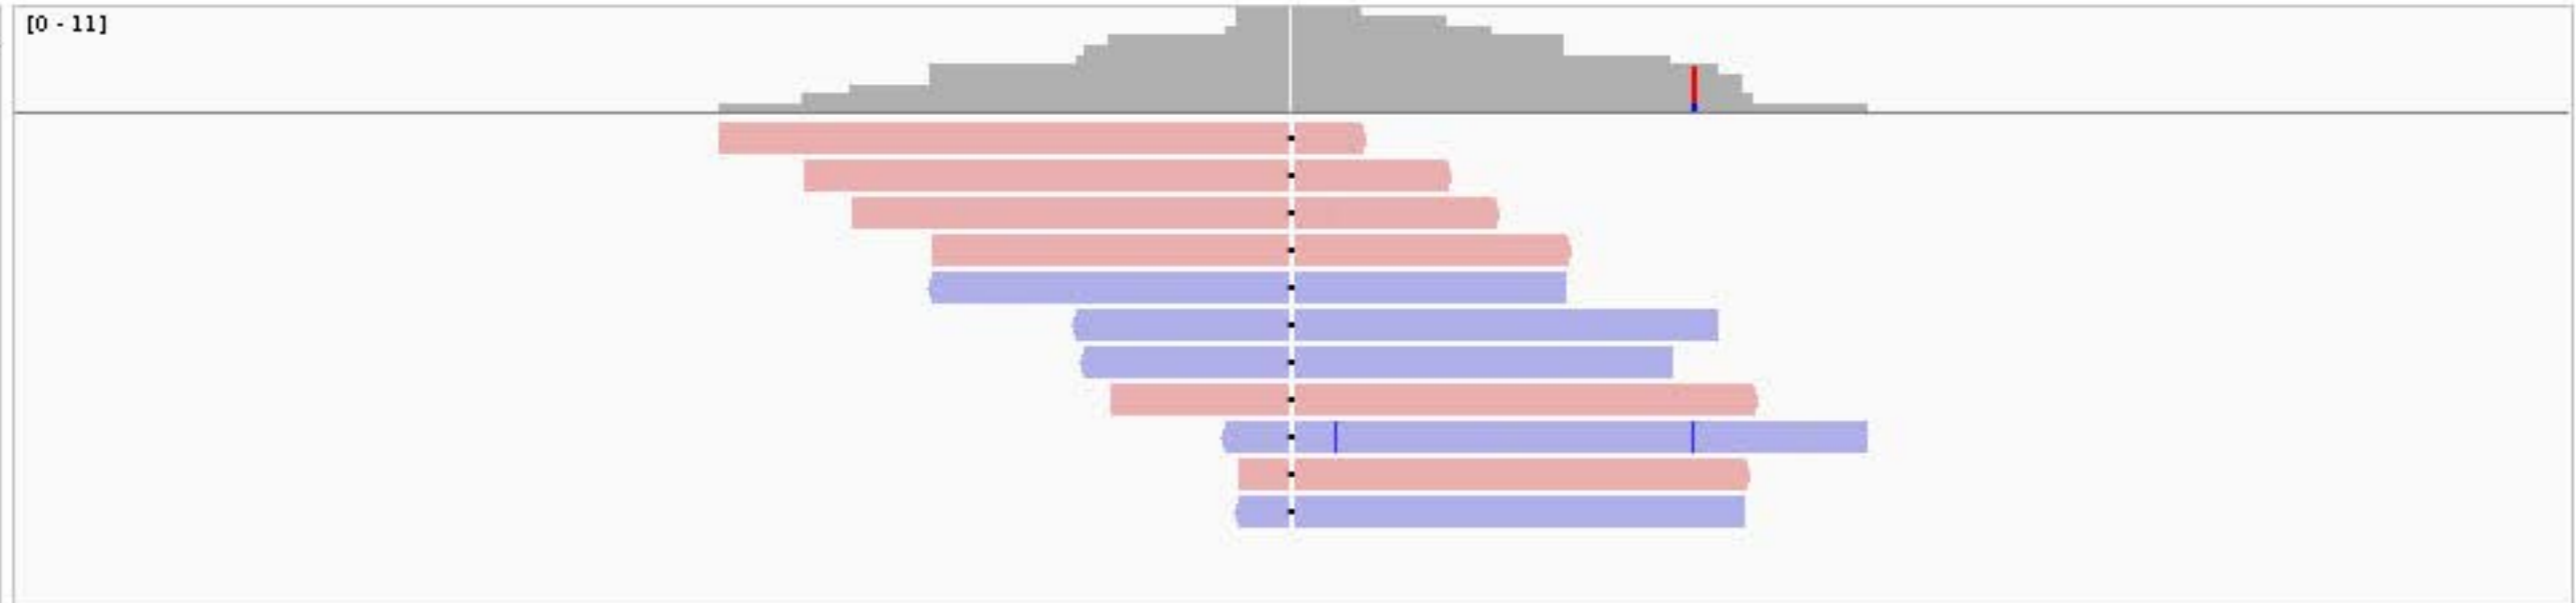

Sequence

Refseq Genes

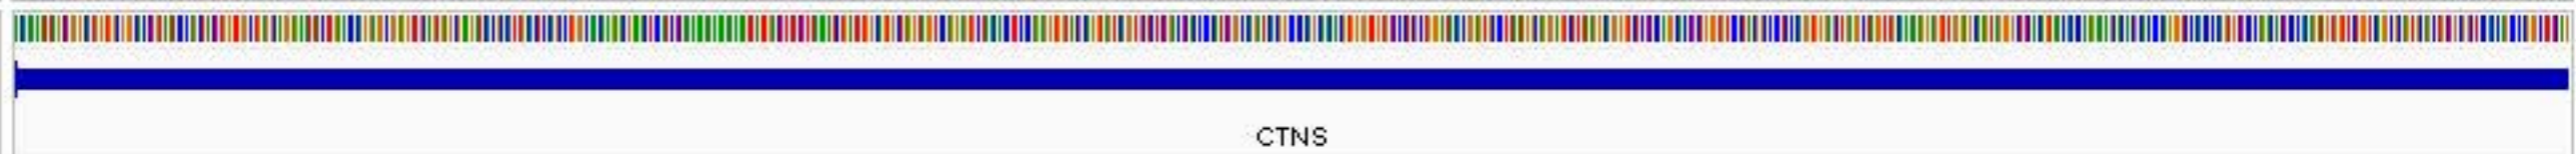



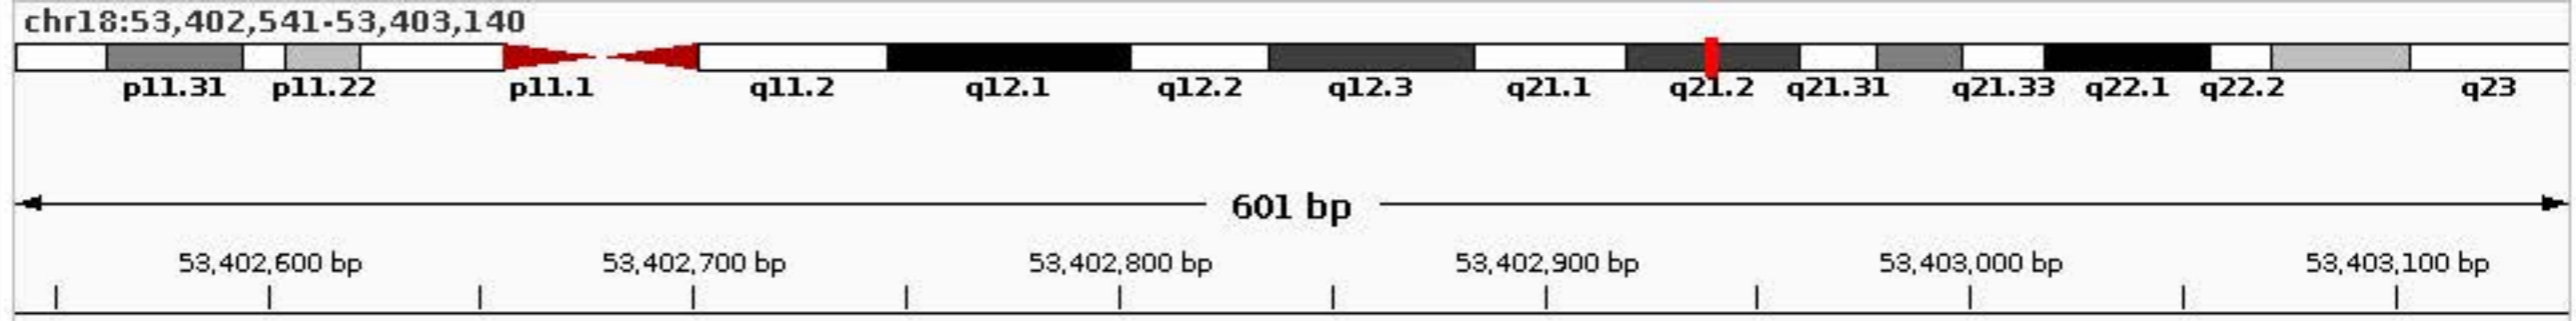

SL\_0001\_RN\_31\_mut.bam Coverage

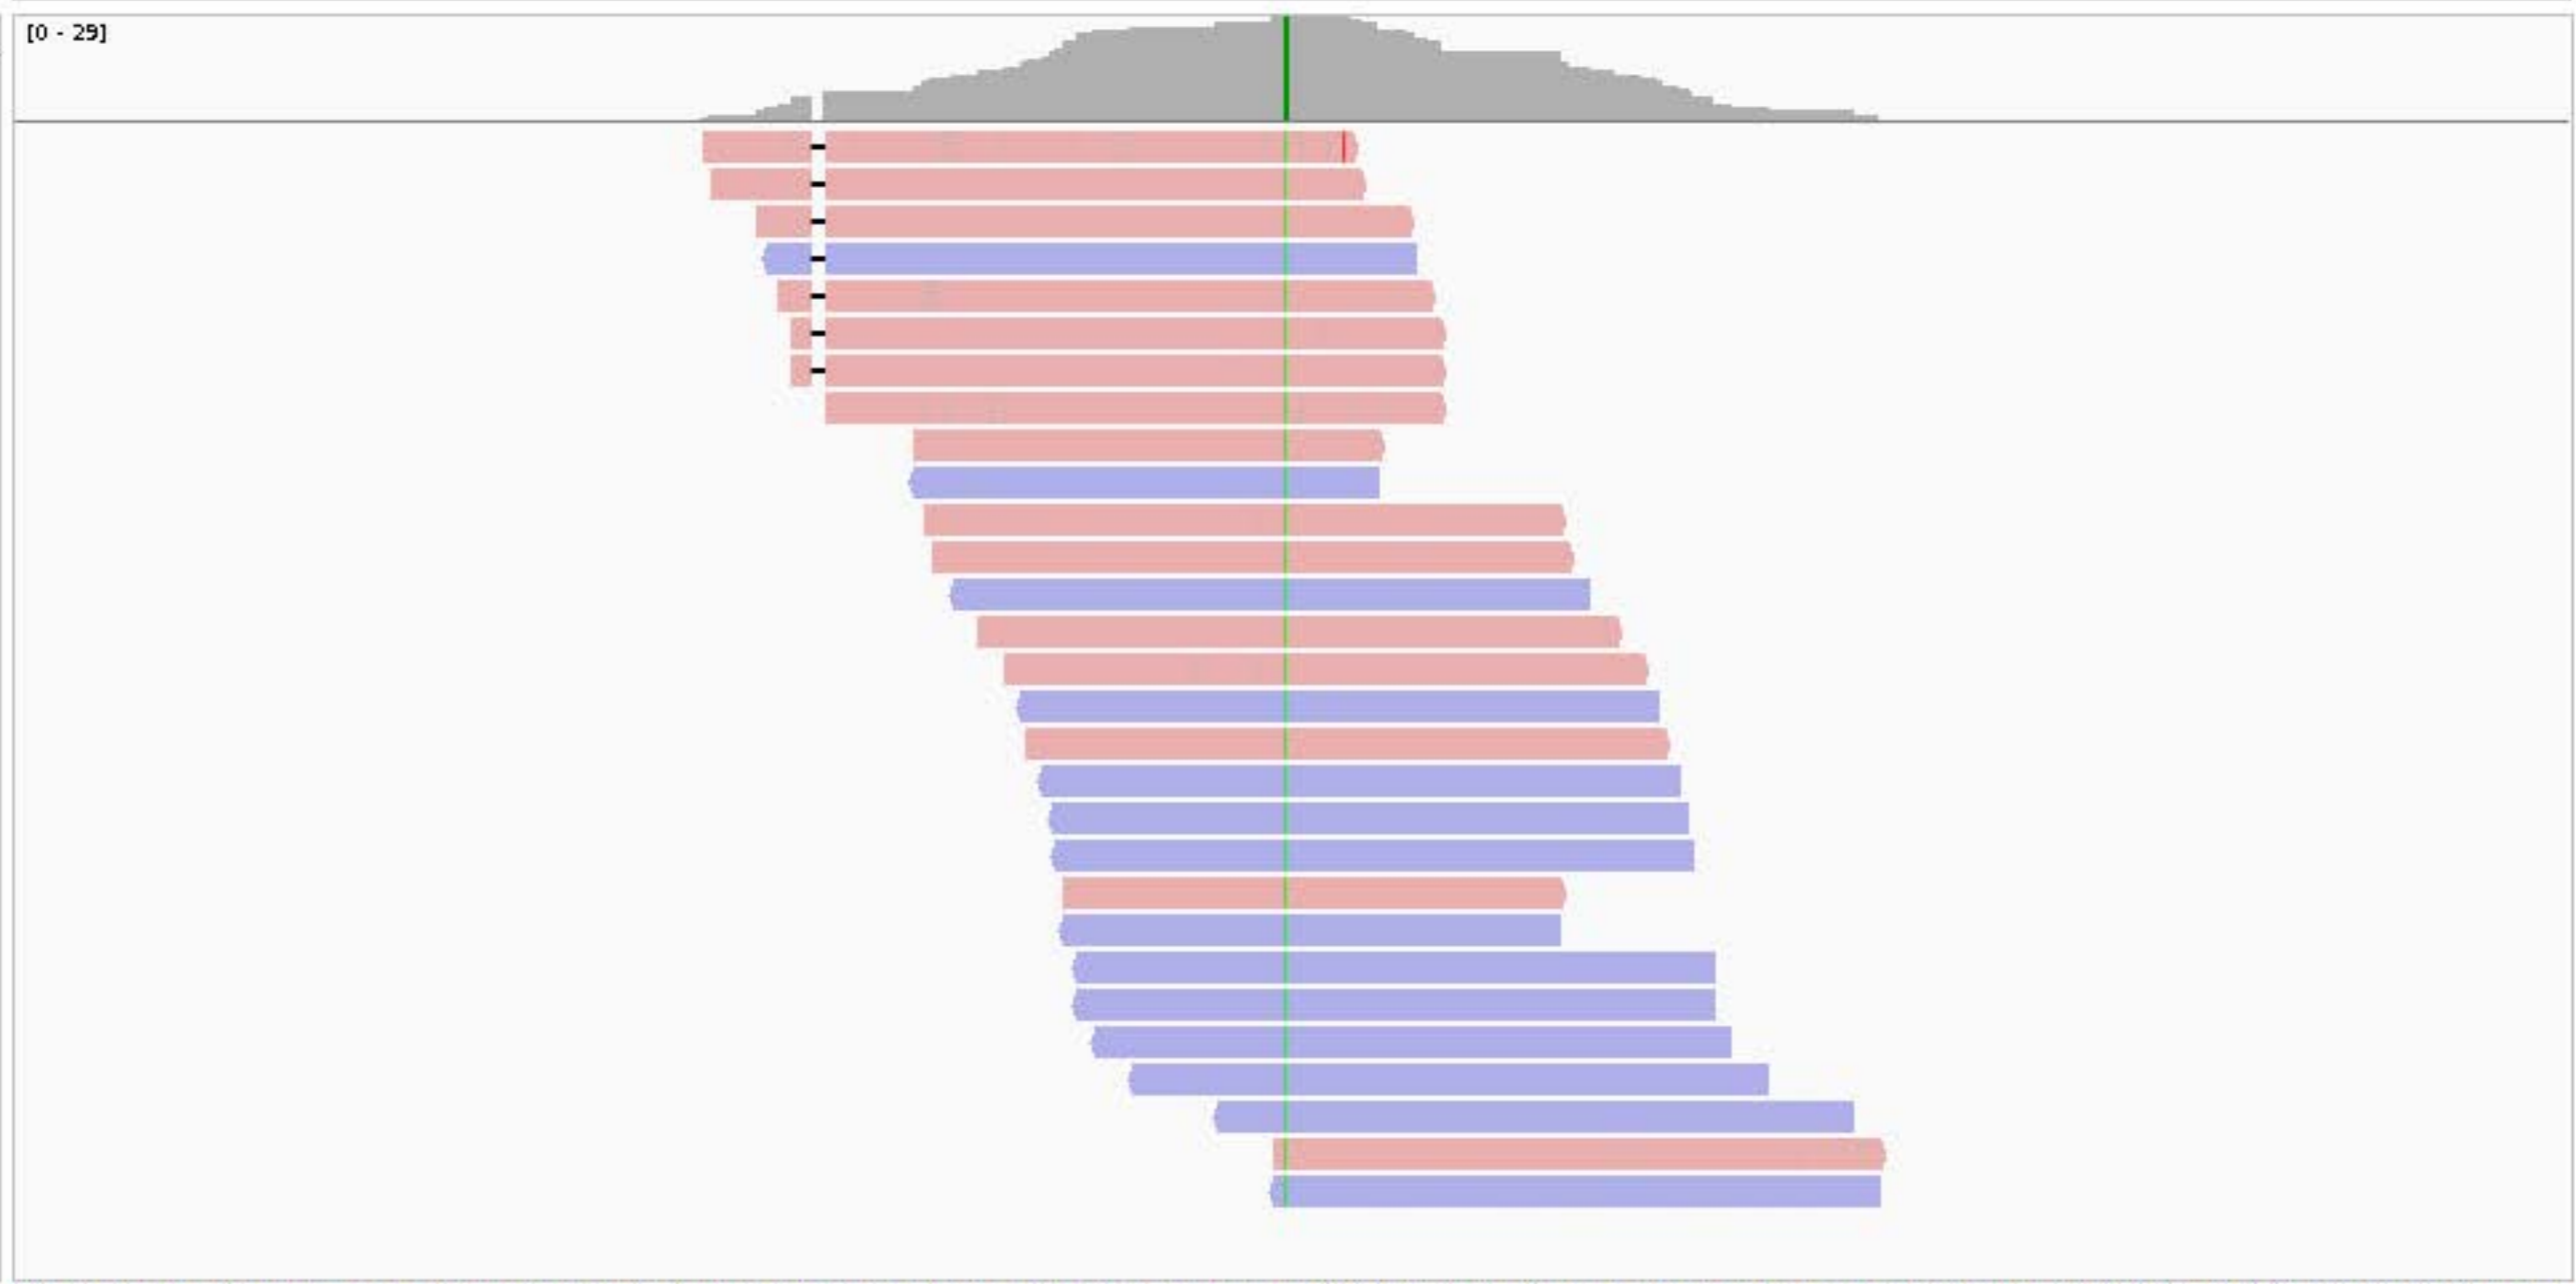

SL\_0001\_RN\_31\_mut.bam

Sequence →

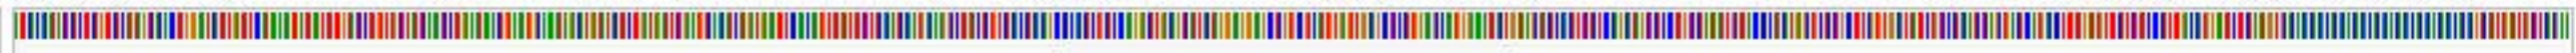

Refseq Genes

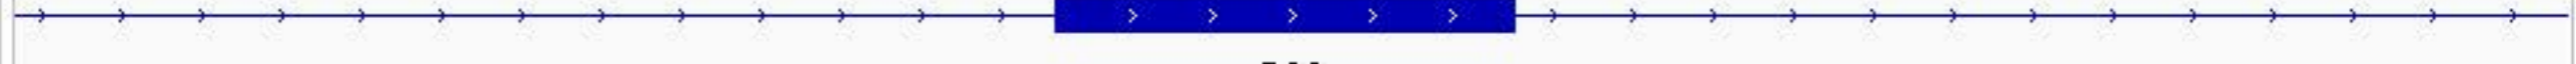

DCC

chr22:38,500,906-38,501,505

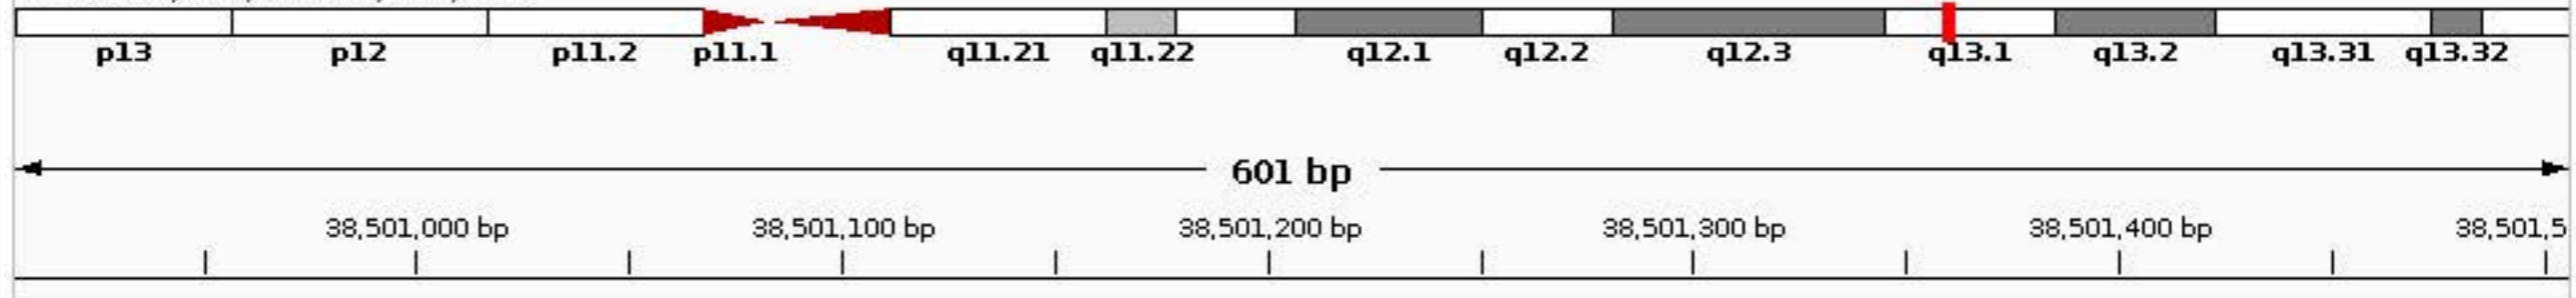

SL\_0015\_LN\_44\_mut.bam Coverage

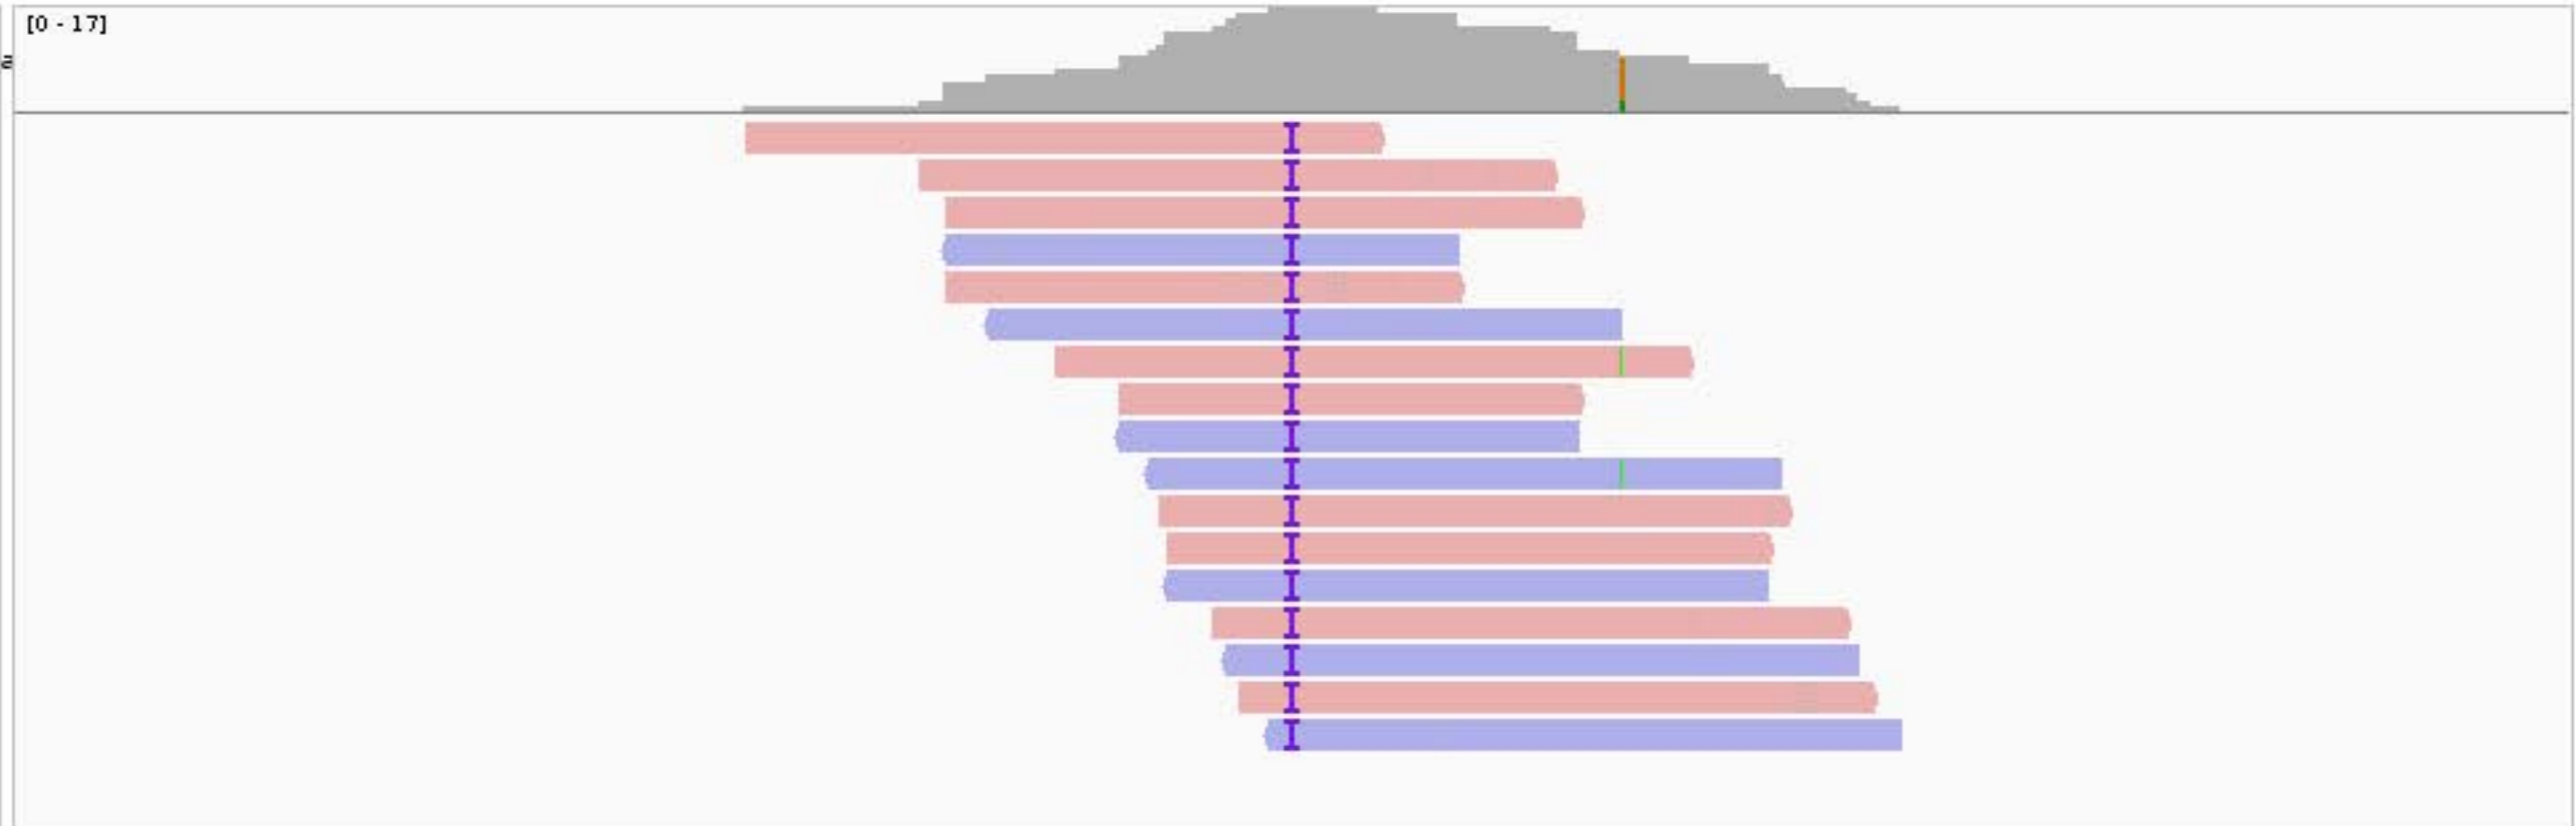

SL\_0015\_LN\_44\_mut.bam

Sequence →

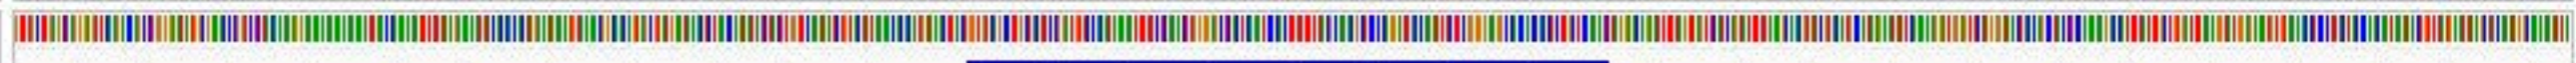

Refseq Genes

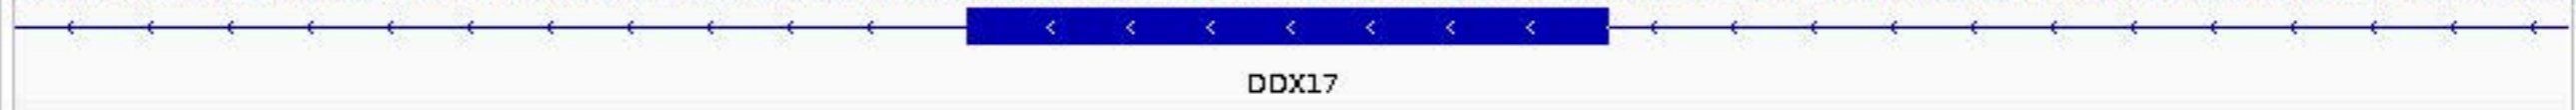

DDX17

chrX:135,546,092-135,546,691

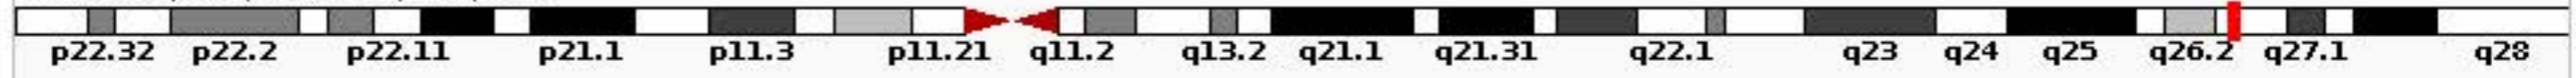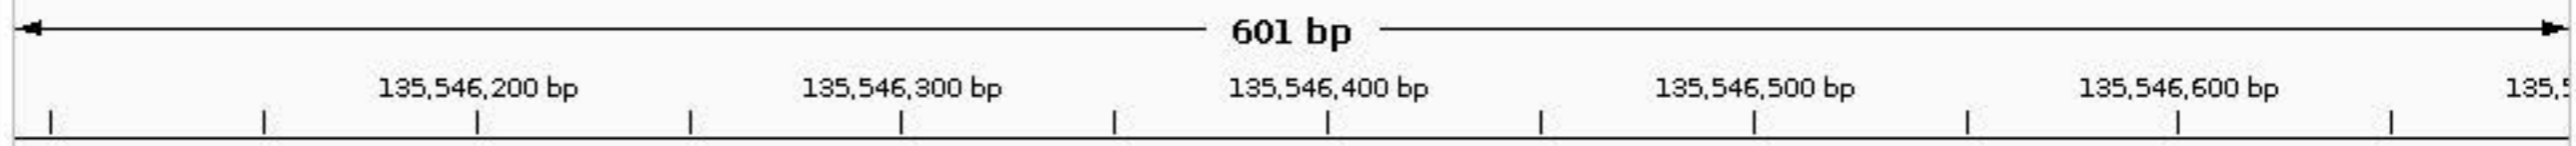

SL\_0010\_RN\_34\_mut.bam Coverage

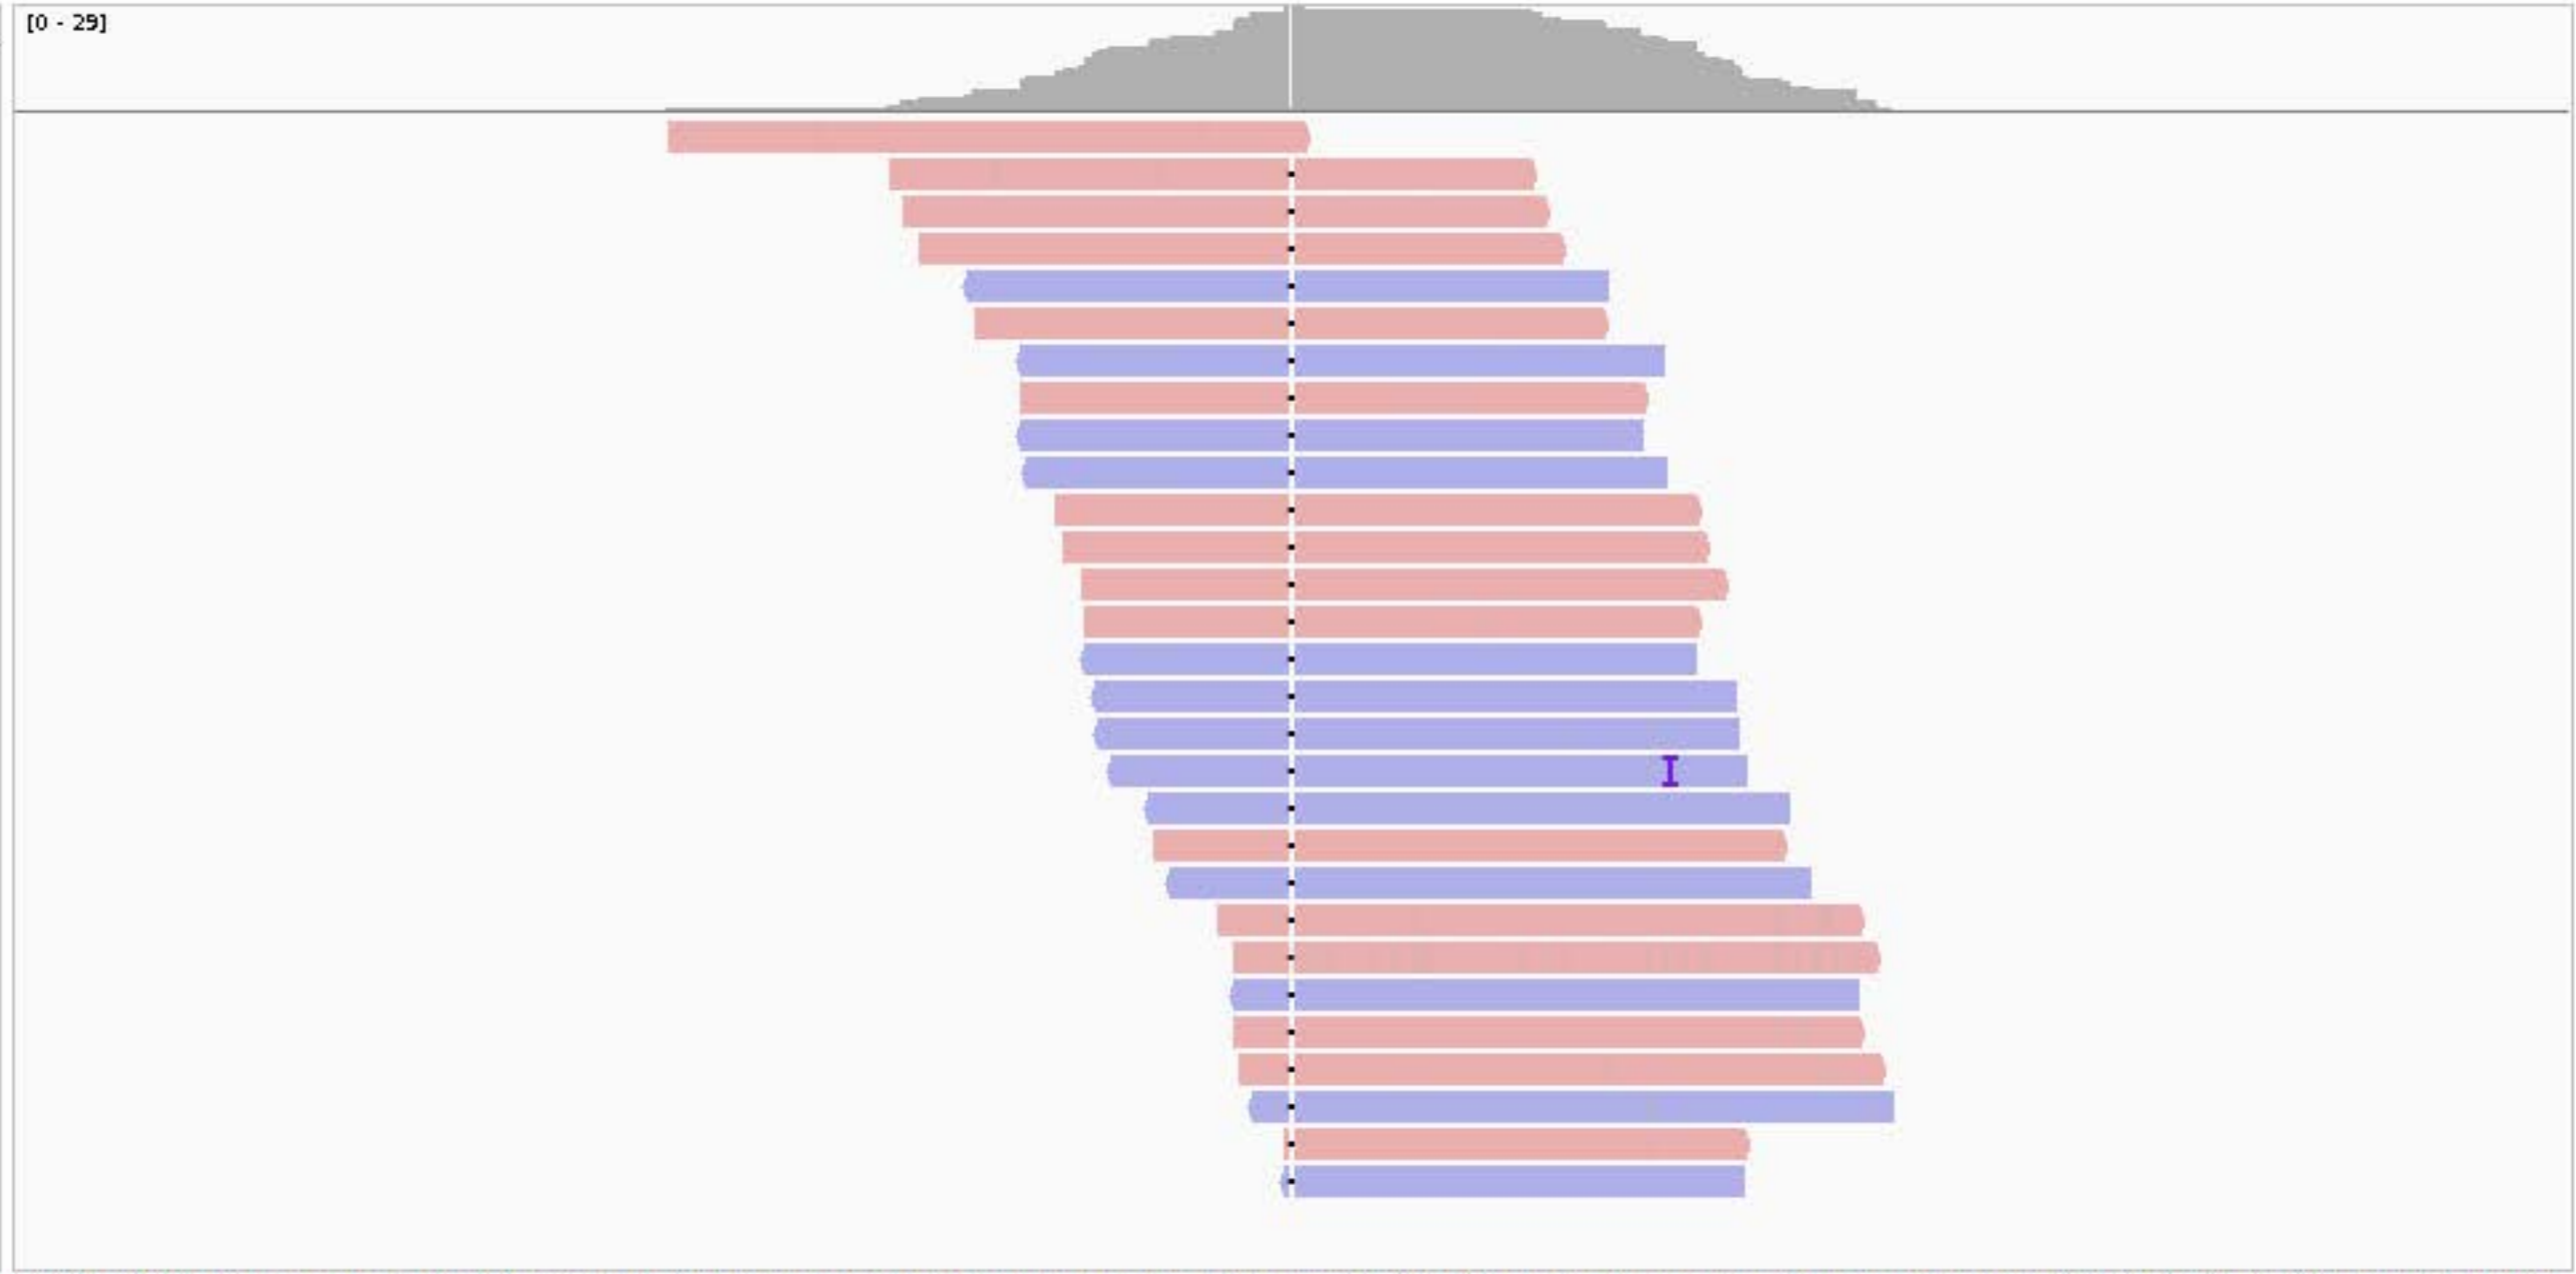

SL\_0010\_RN\_34\_mut.bam

Sequence

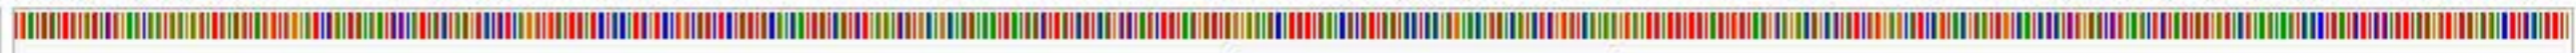

Refseq Genes

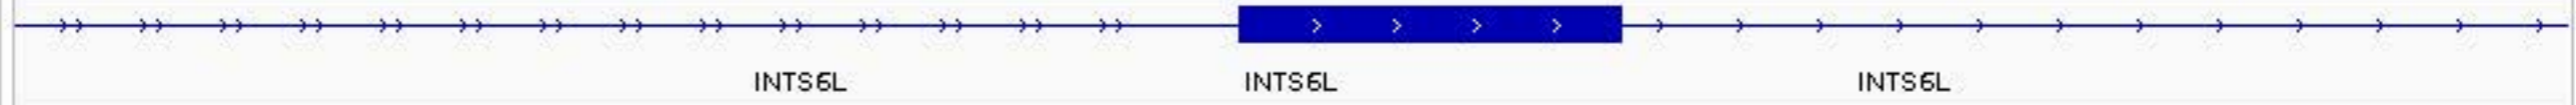

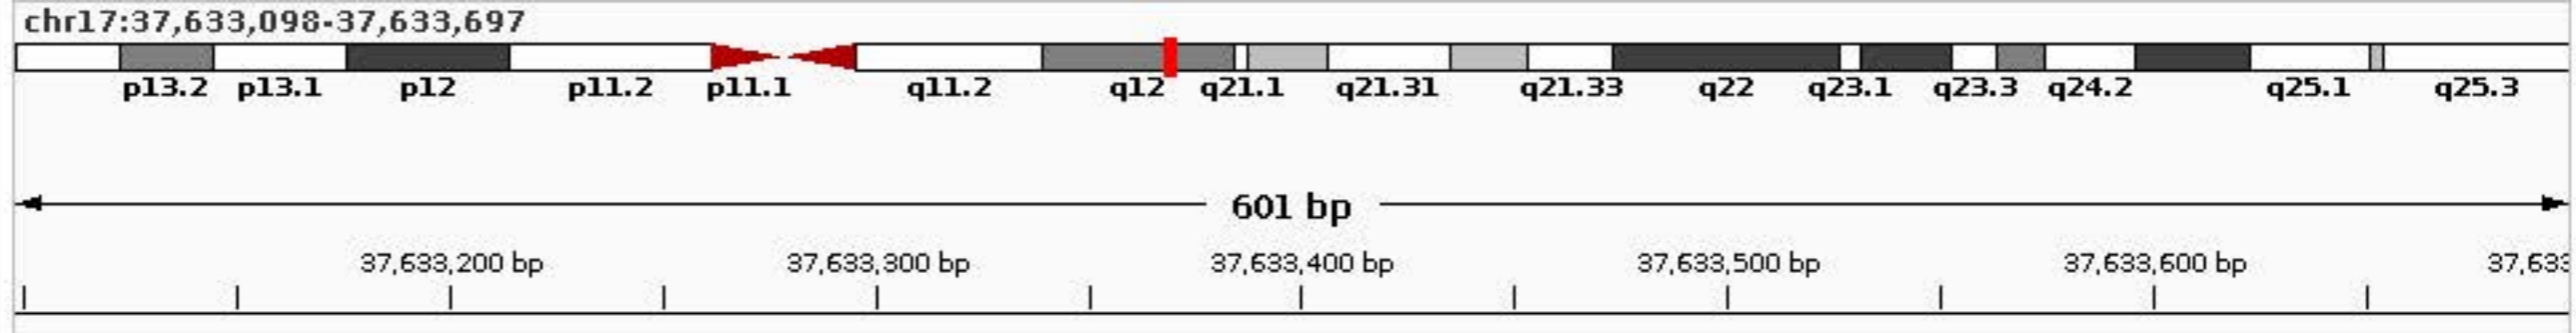

SL\_0004\_RN\_24\_mut.bam Coverage

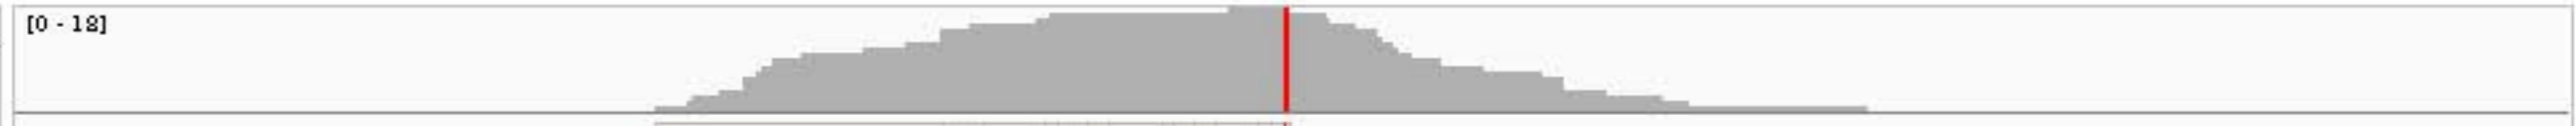

SL\_0004\_RN\_24\_mut.bam

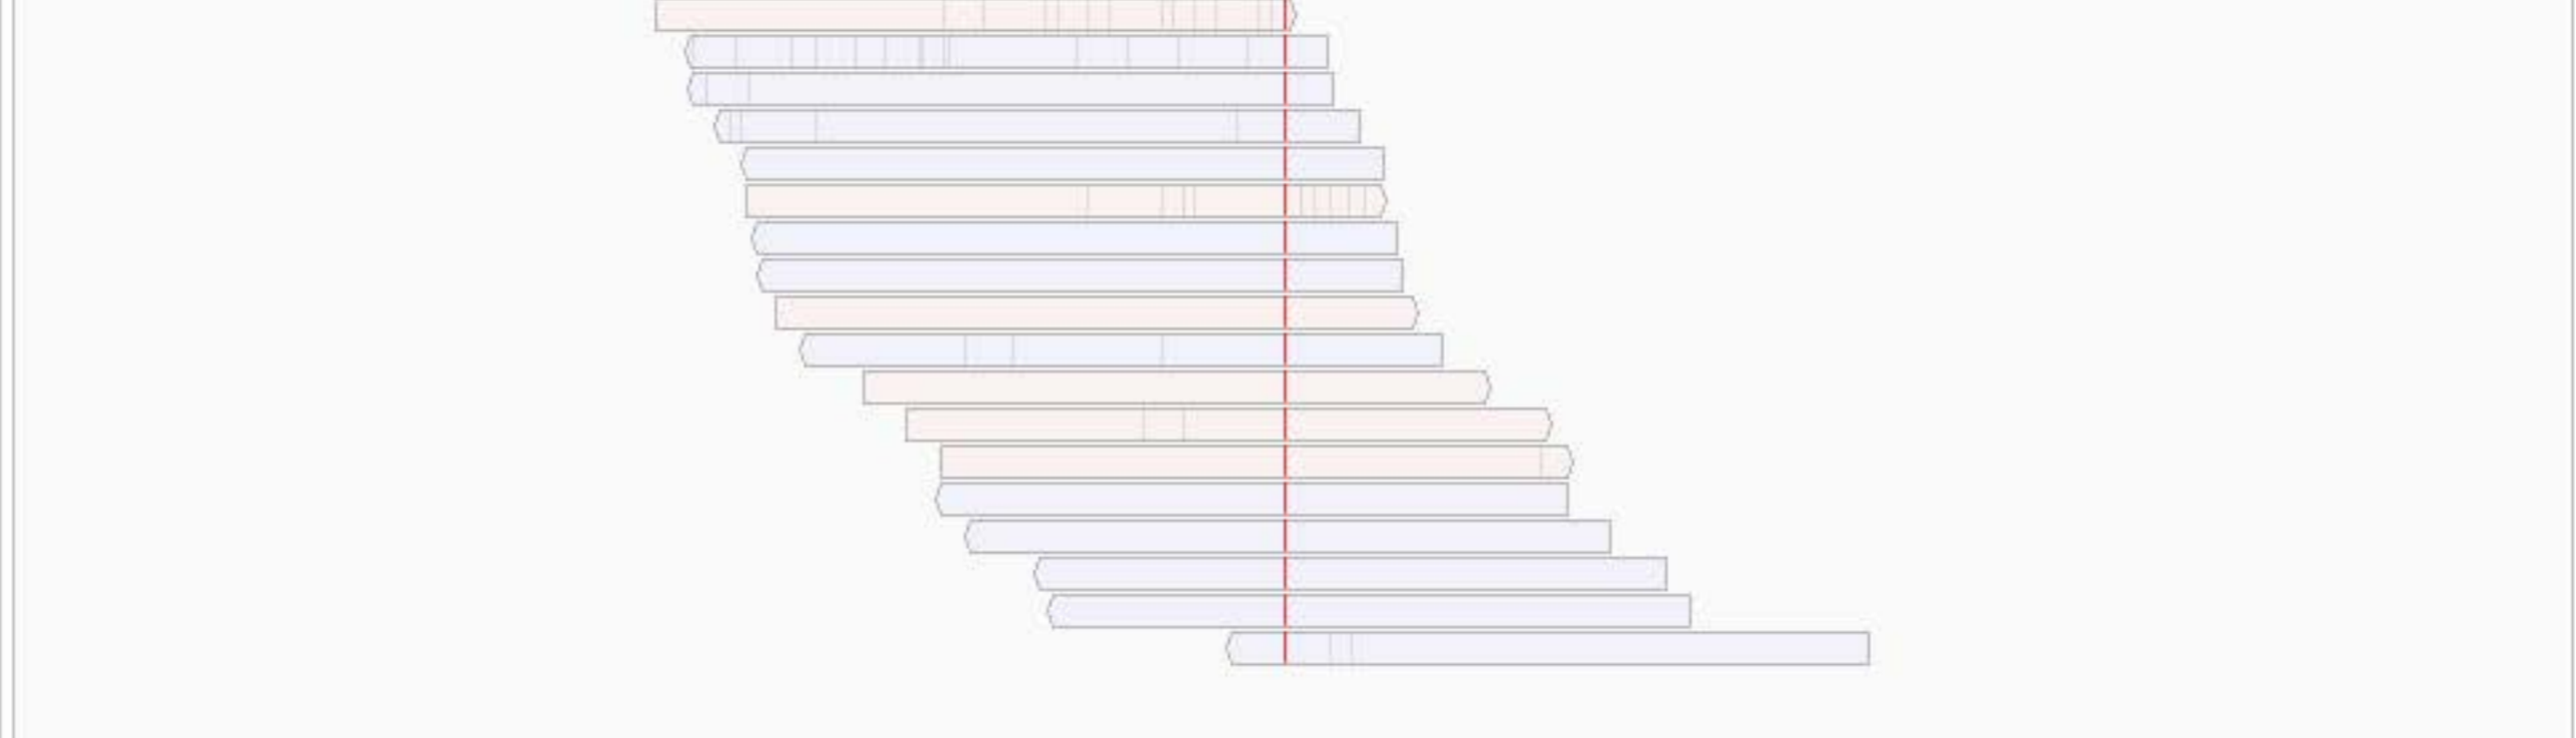

Sequence

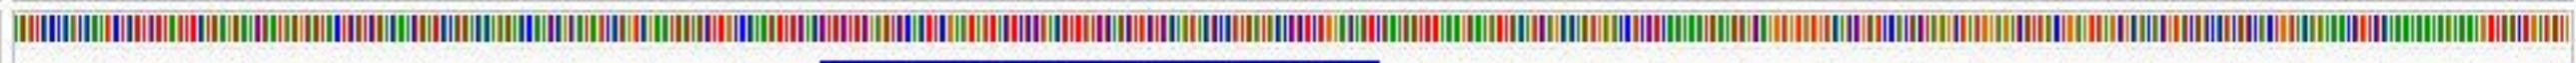

Refseq Genes

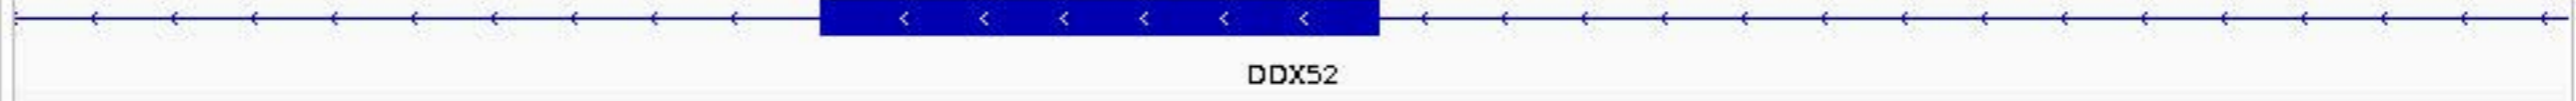



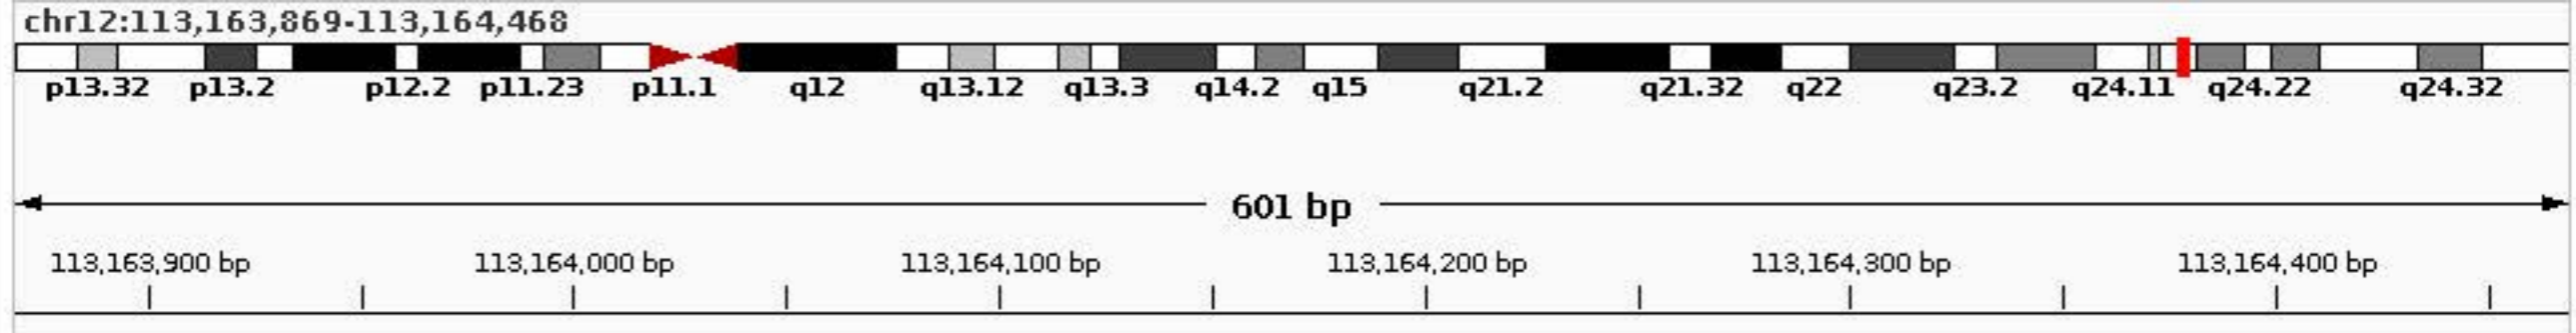

SL\_0001\_RN\_15\_mut.bam Coverage

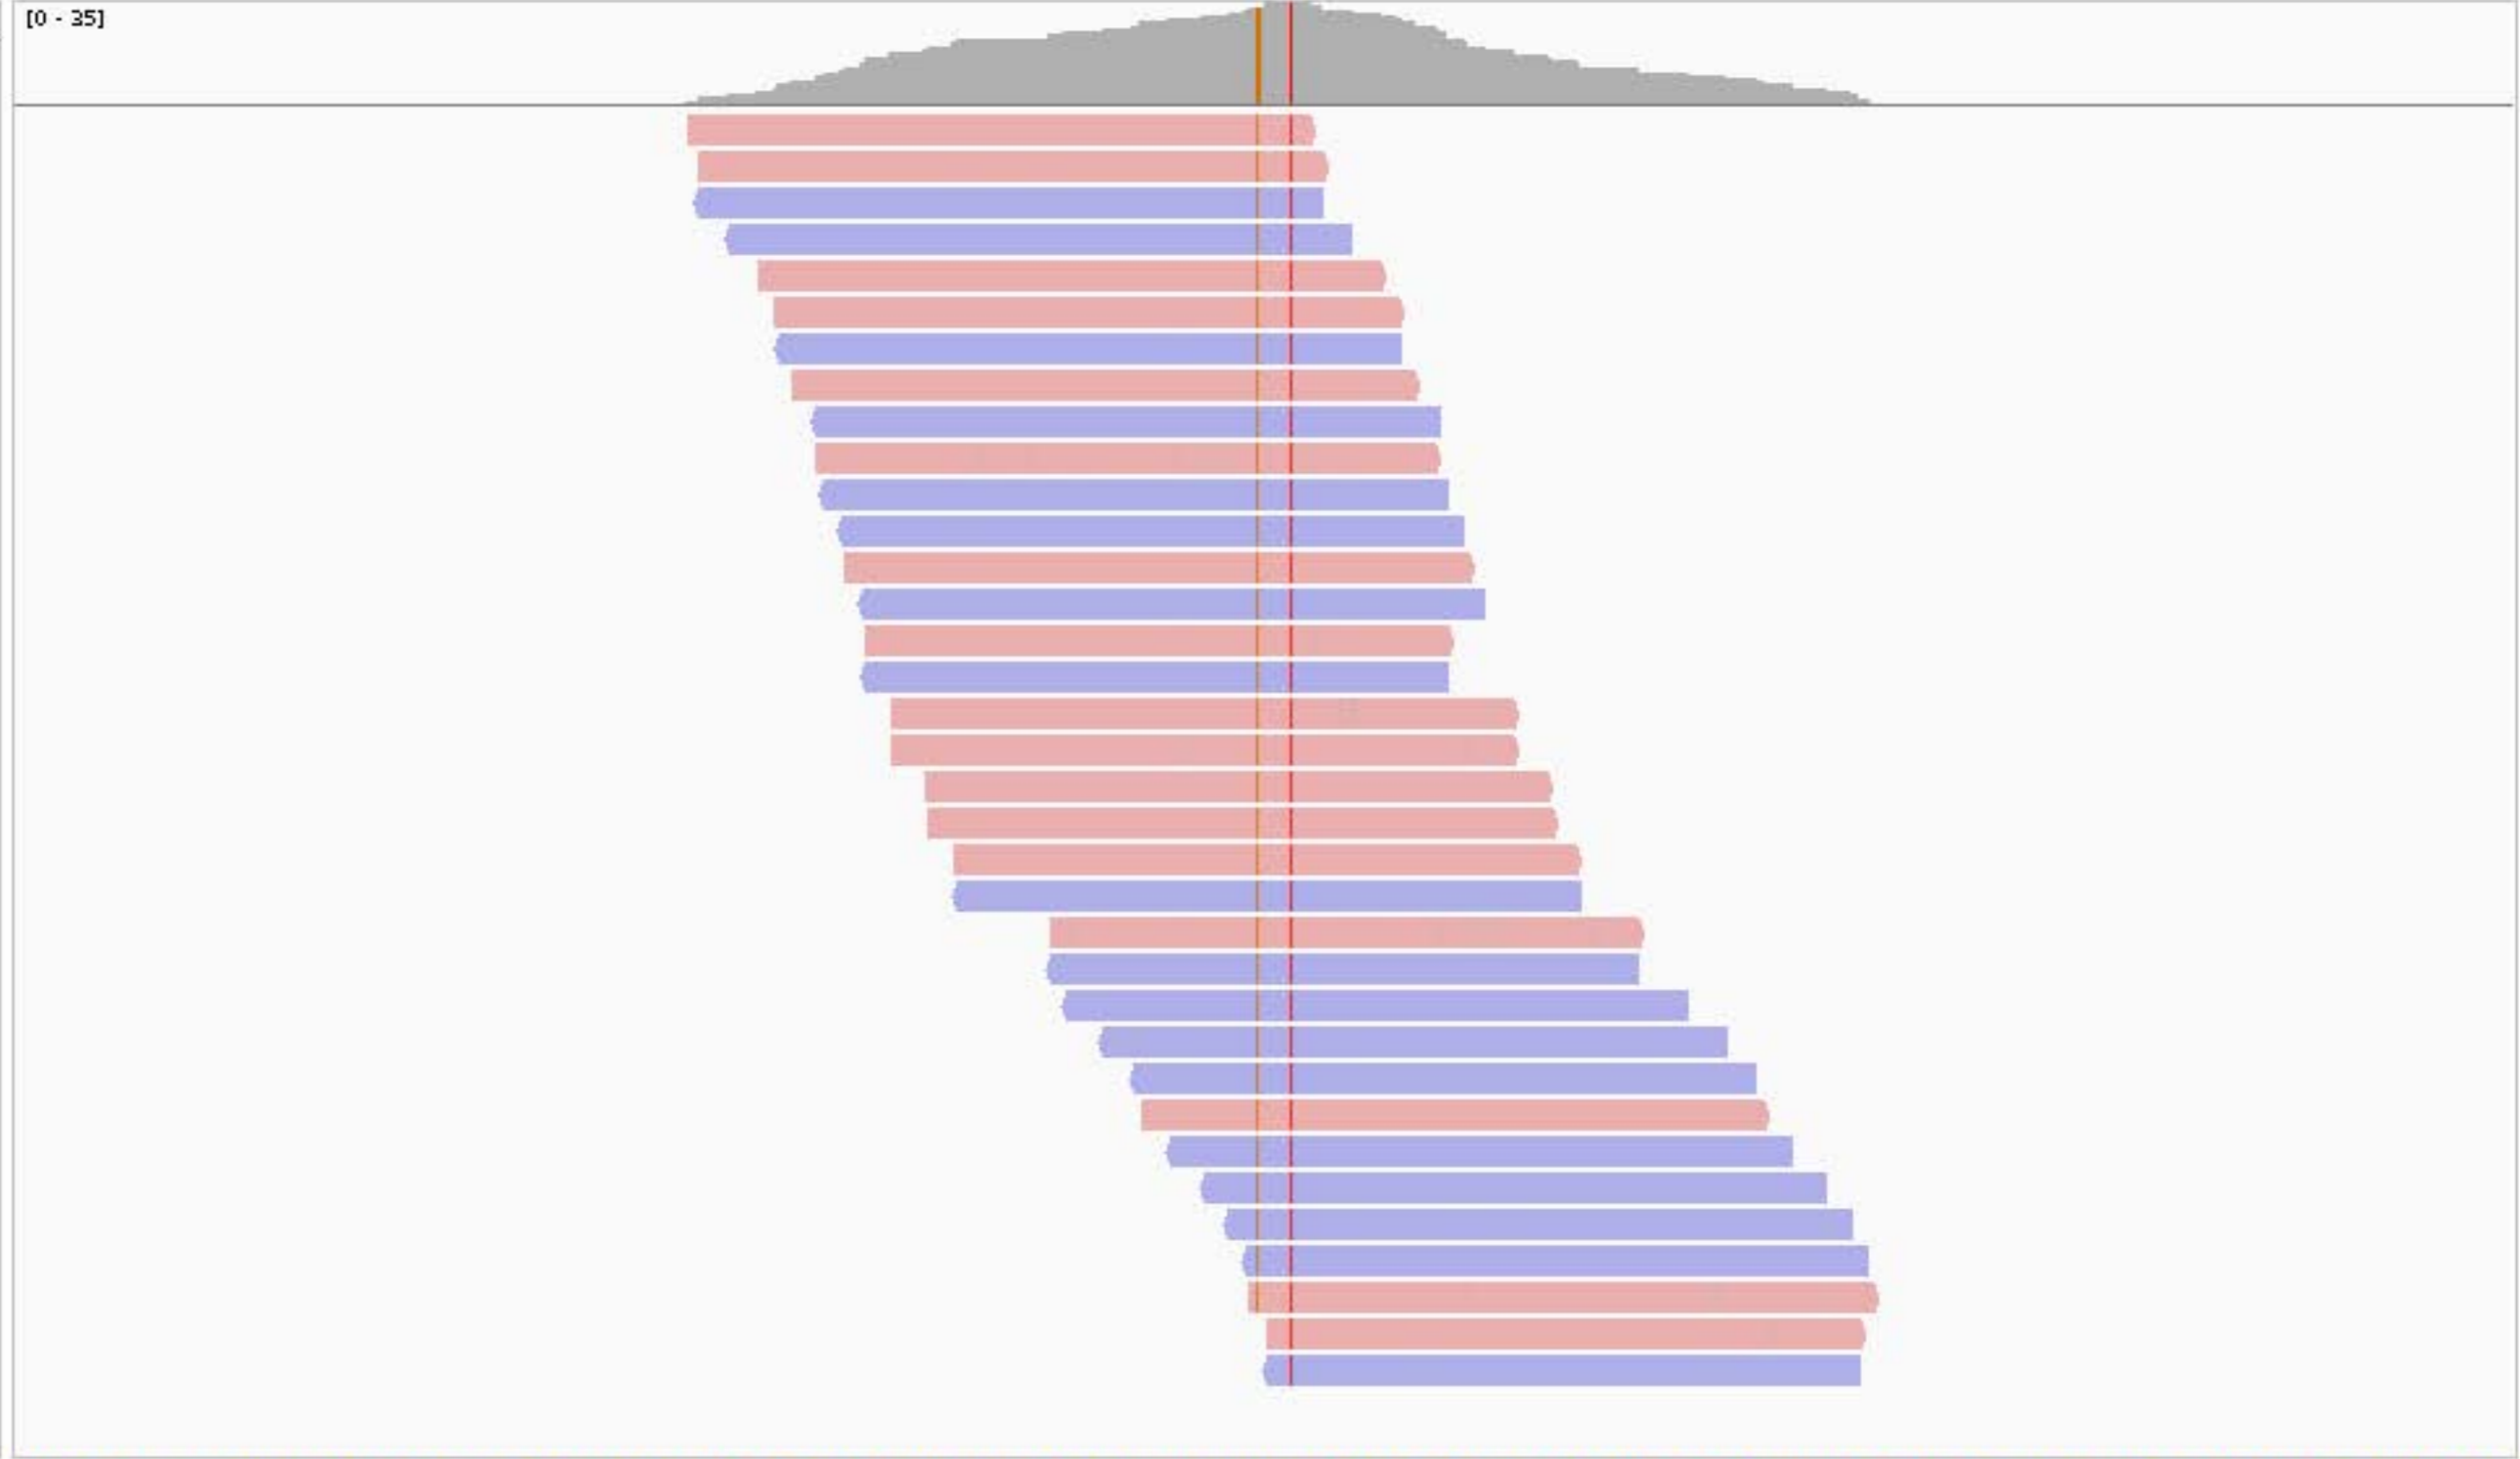

SL\_0001\_RN\_15\_mut.bam

Sequence →

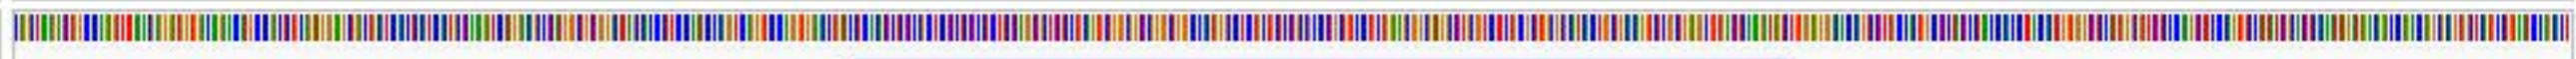

Refseq Genes

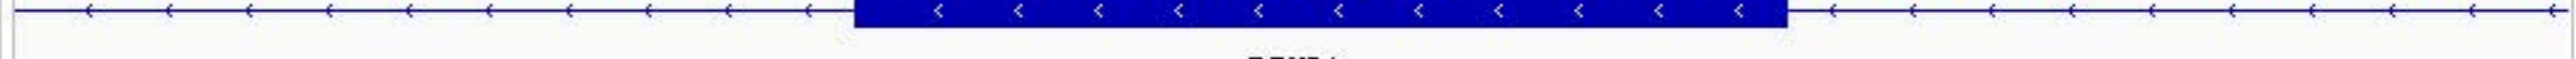

DDX54



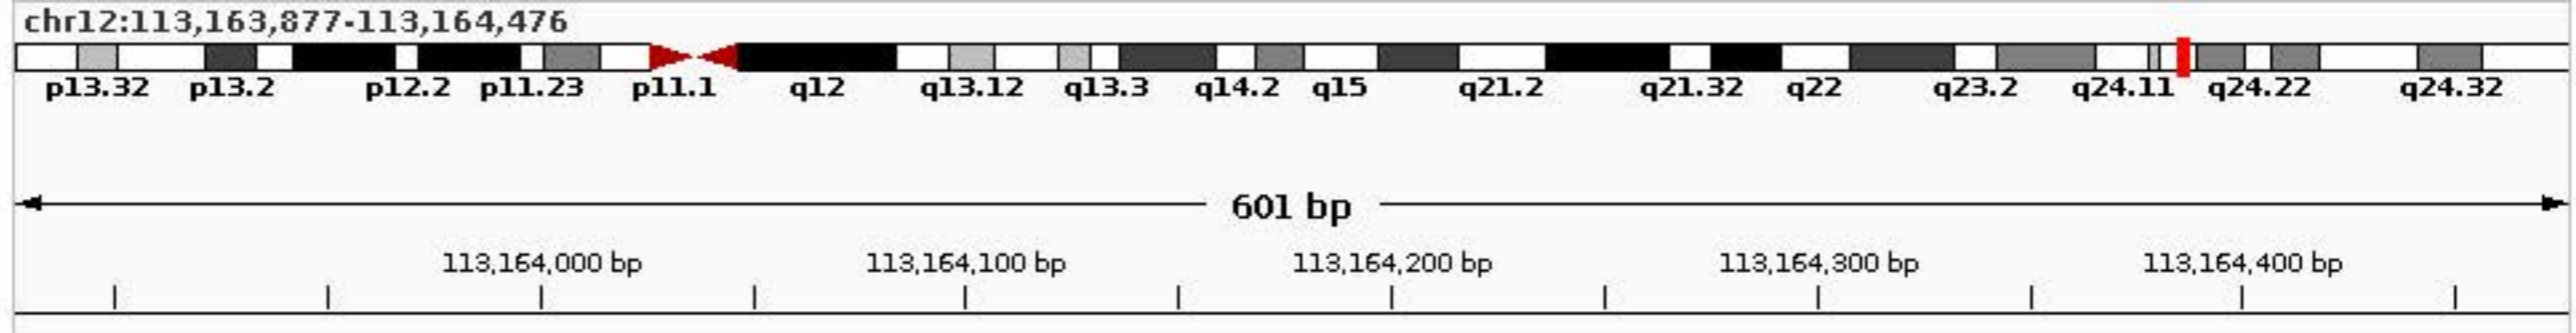

SL\_0001\_RN\_15\_mut.bam Coverage

SL\_0001\_RN\_15\_mut.bam

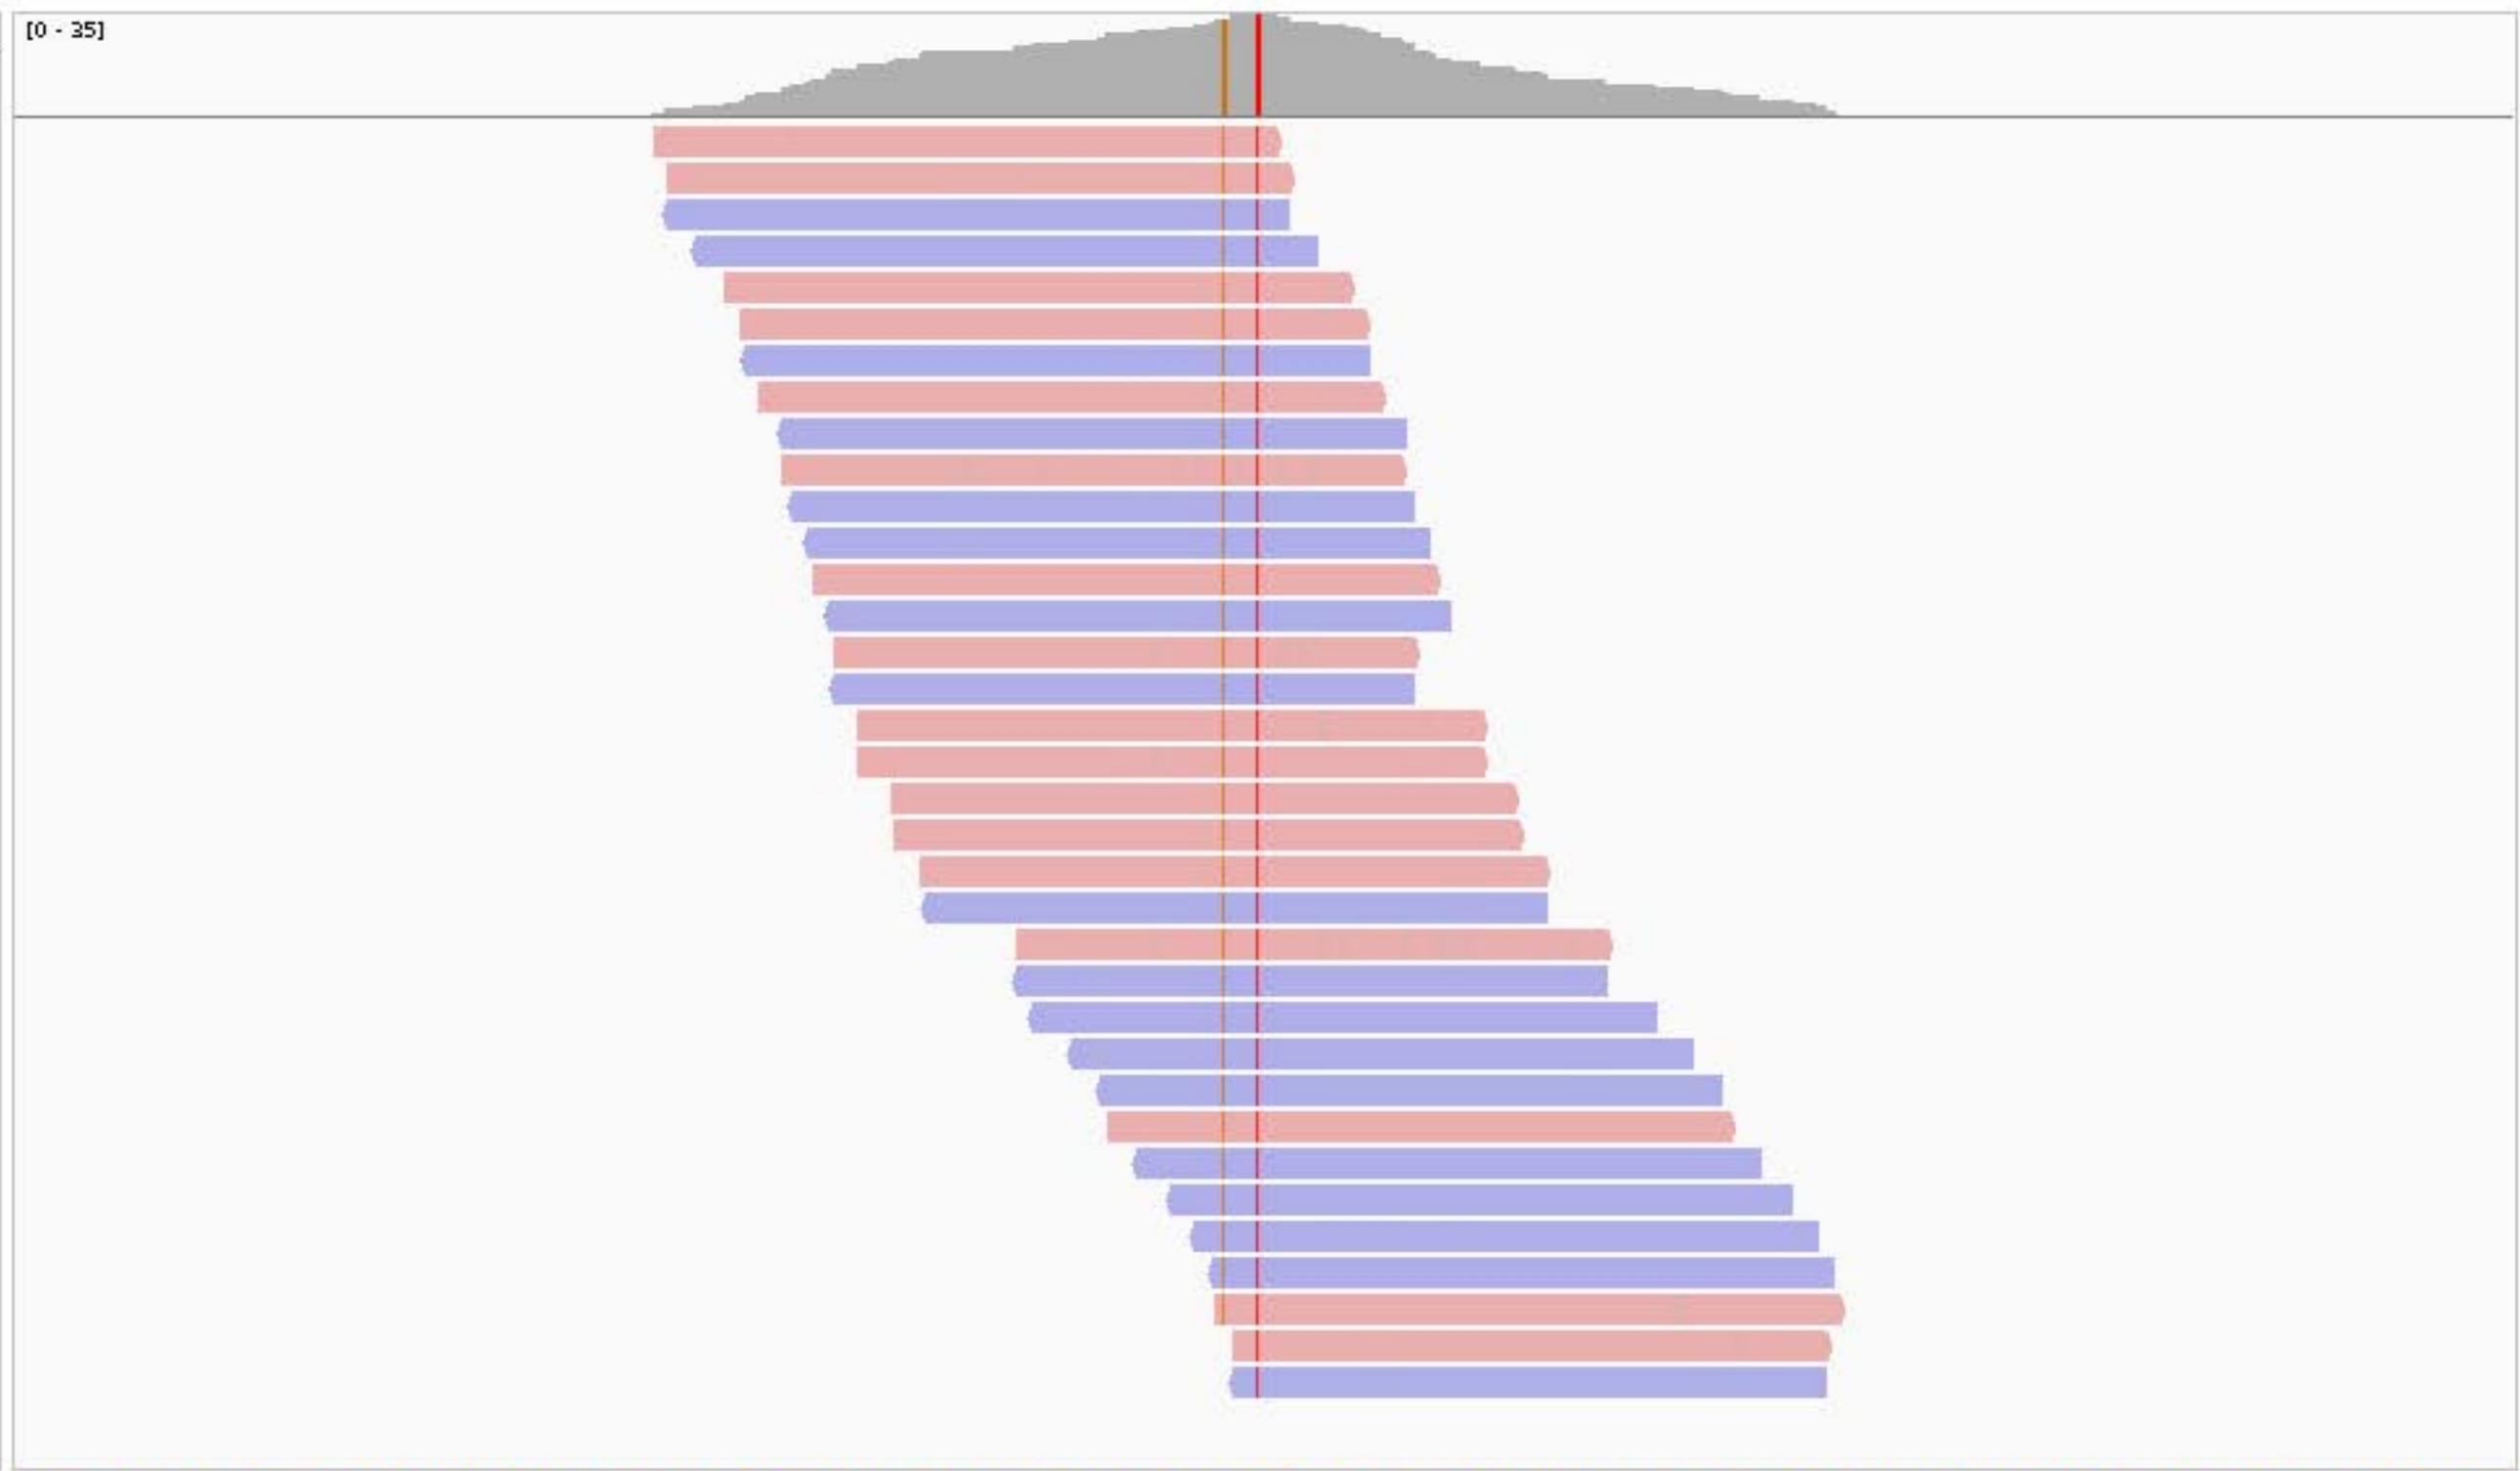

Sequence →

Refseq Genes

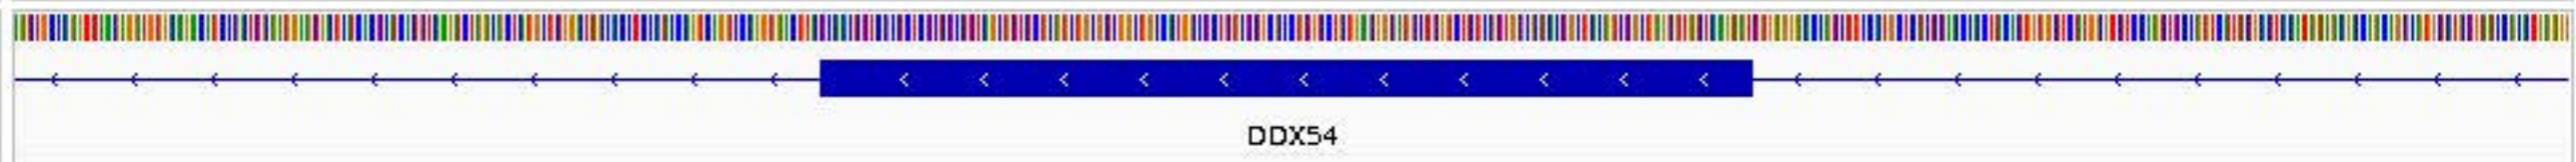

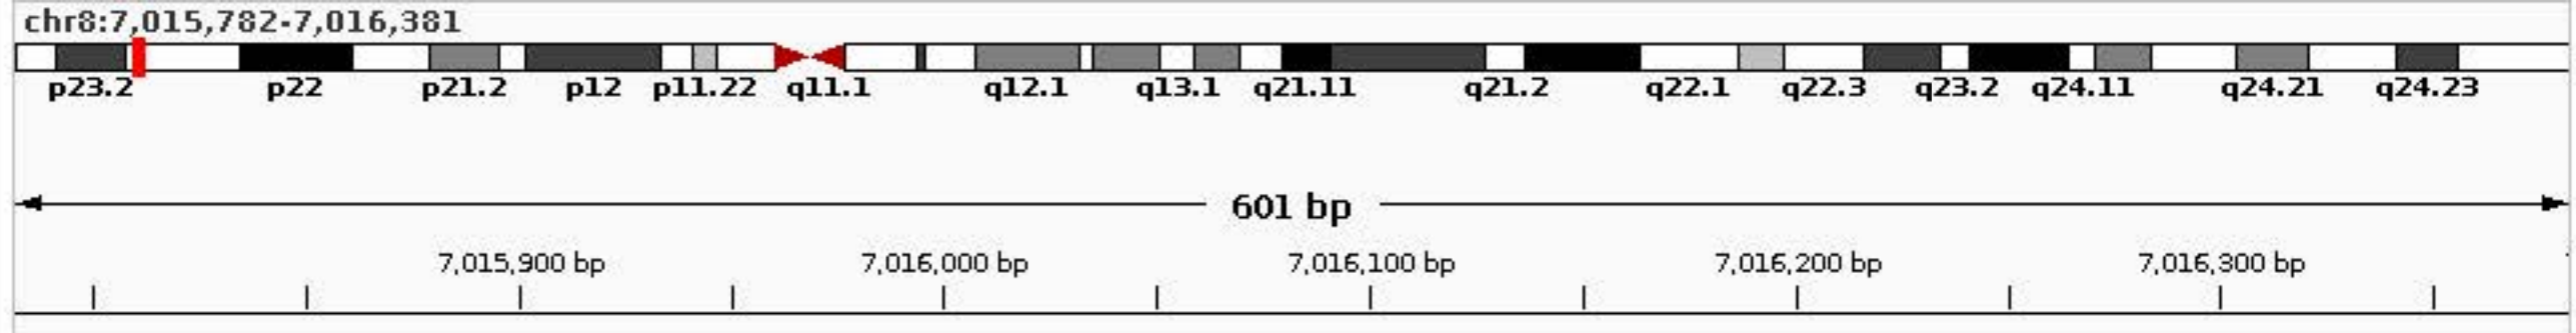

SL\_0017\_RN\_15\_mut.bam Coverage

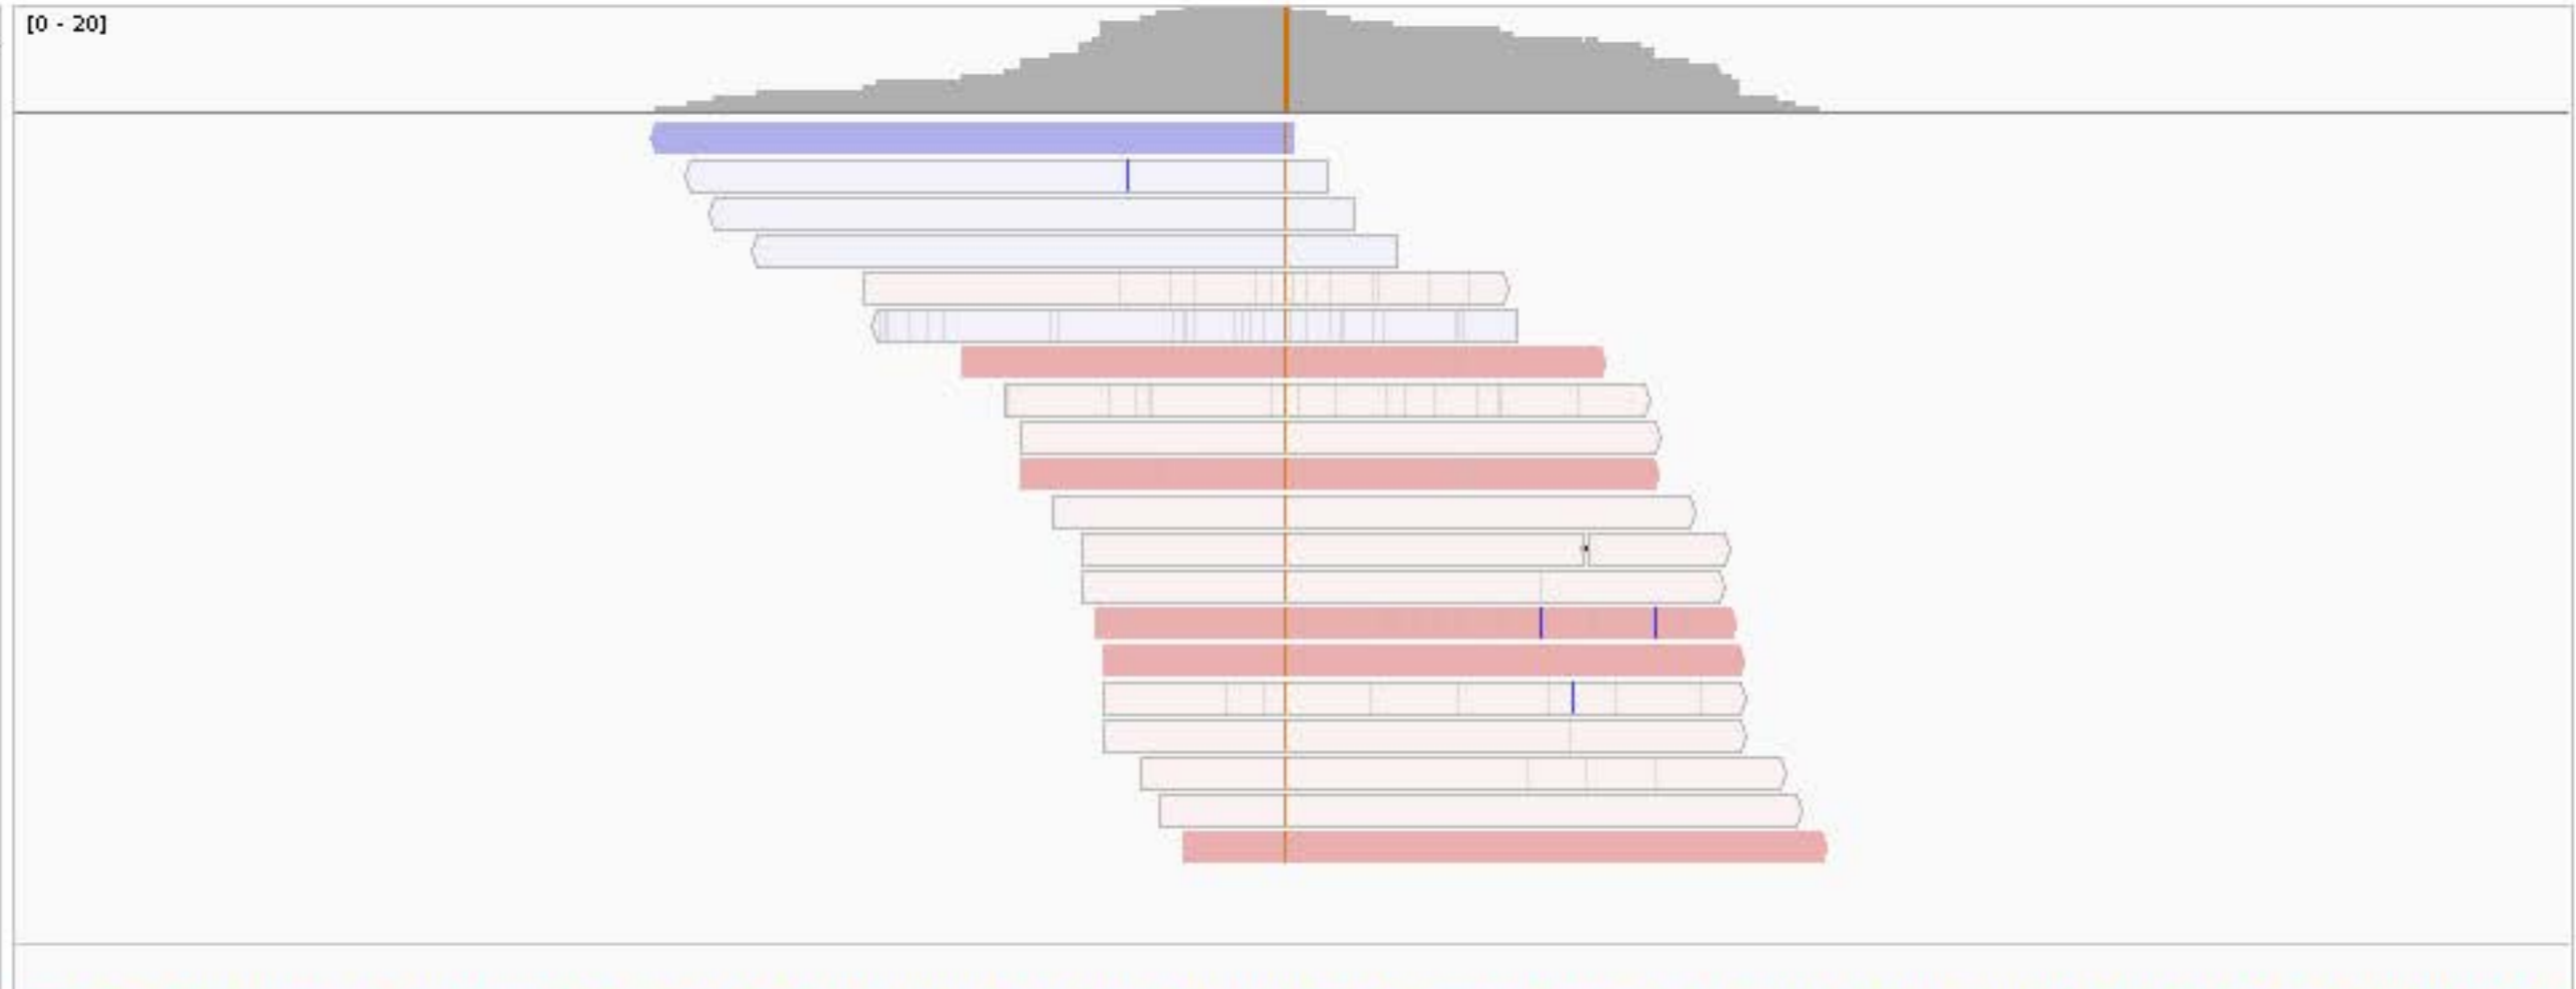

Sequence

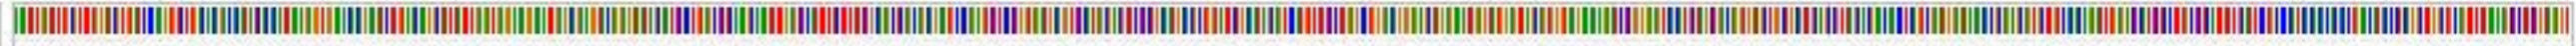

Refseq Genes

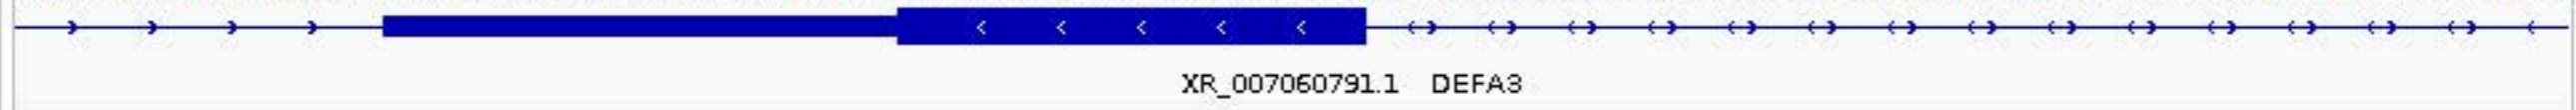

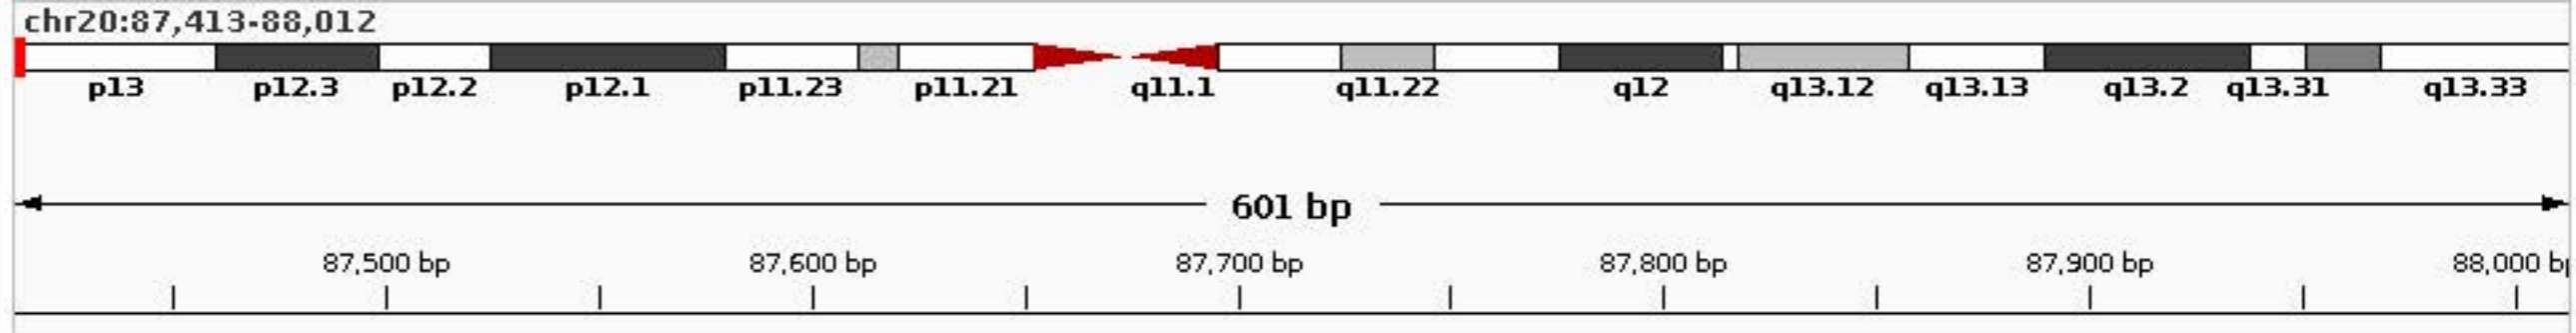

SL\_0006\_RN\_67\_mut.bam Coverage

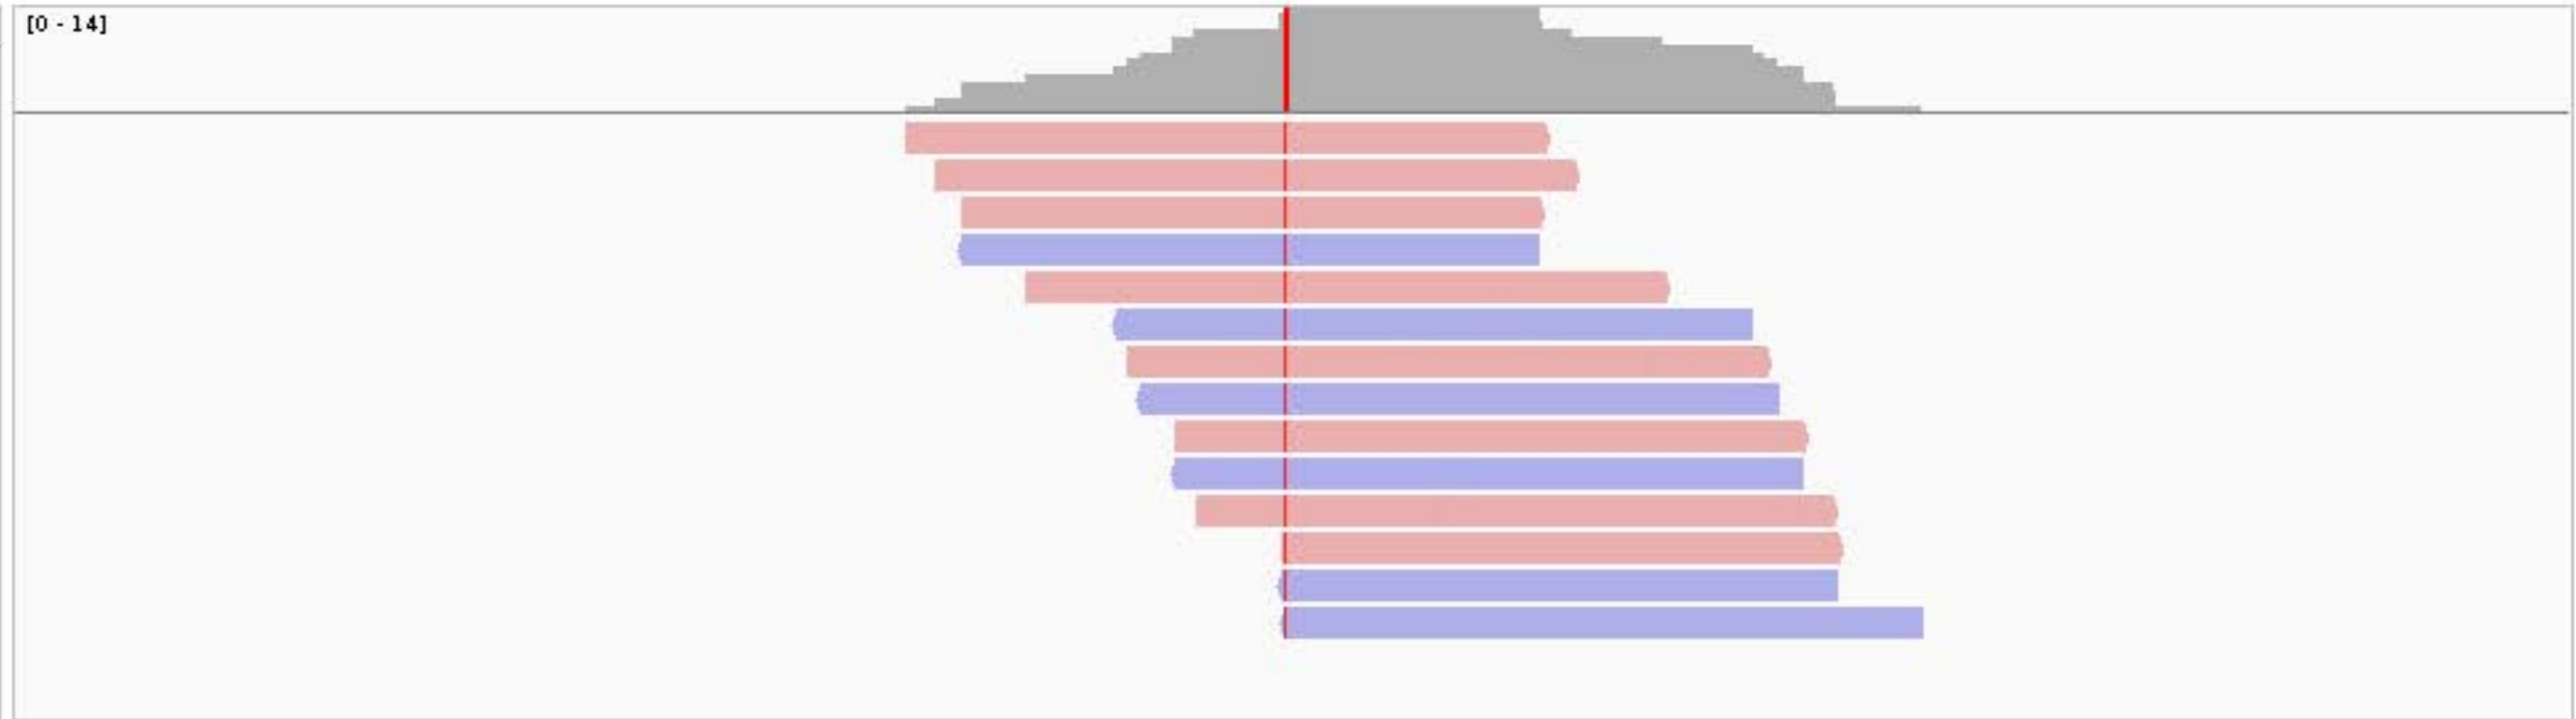

SL\_0006\_RN\_67\_mut.bam

Sequence →

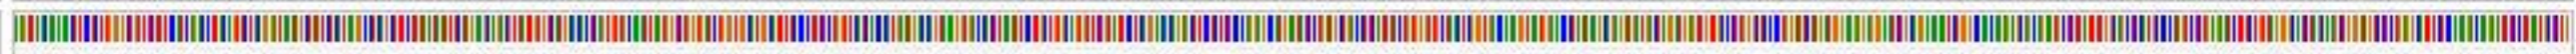

Refseq Genes

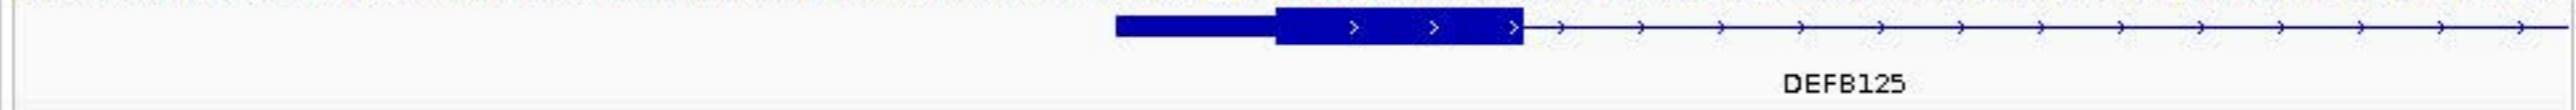

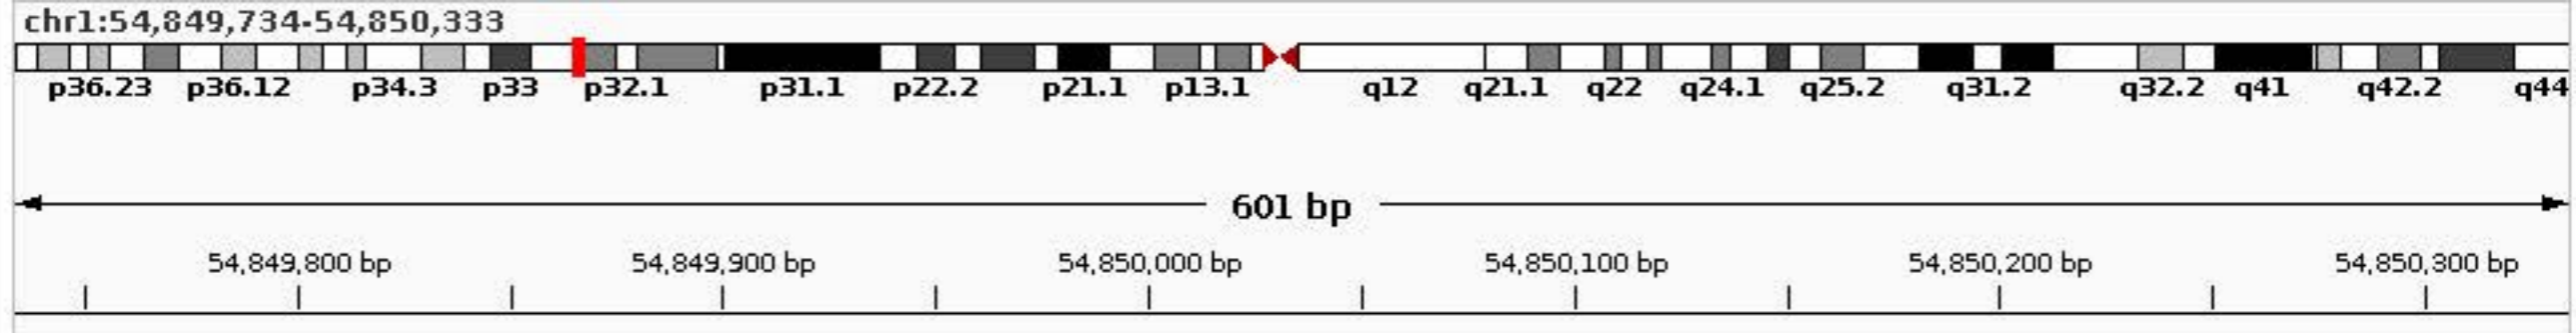

SL\_0004\_RN\_47\_mut.bam Coverage

SL\_0004\_RN\_47\_mut.bam

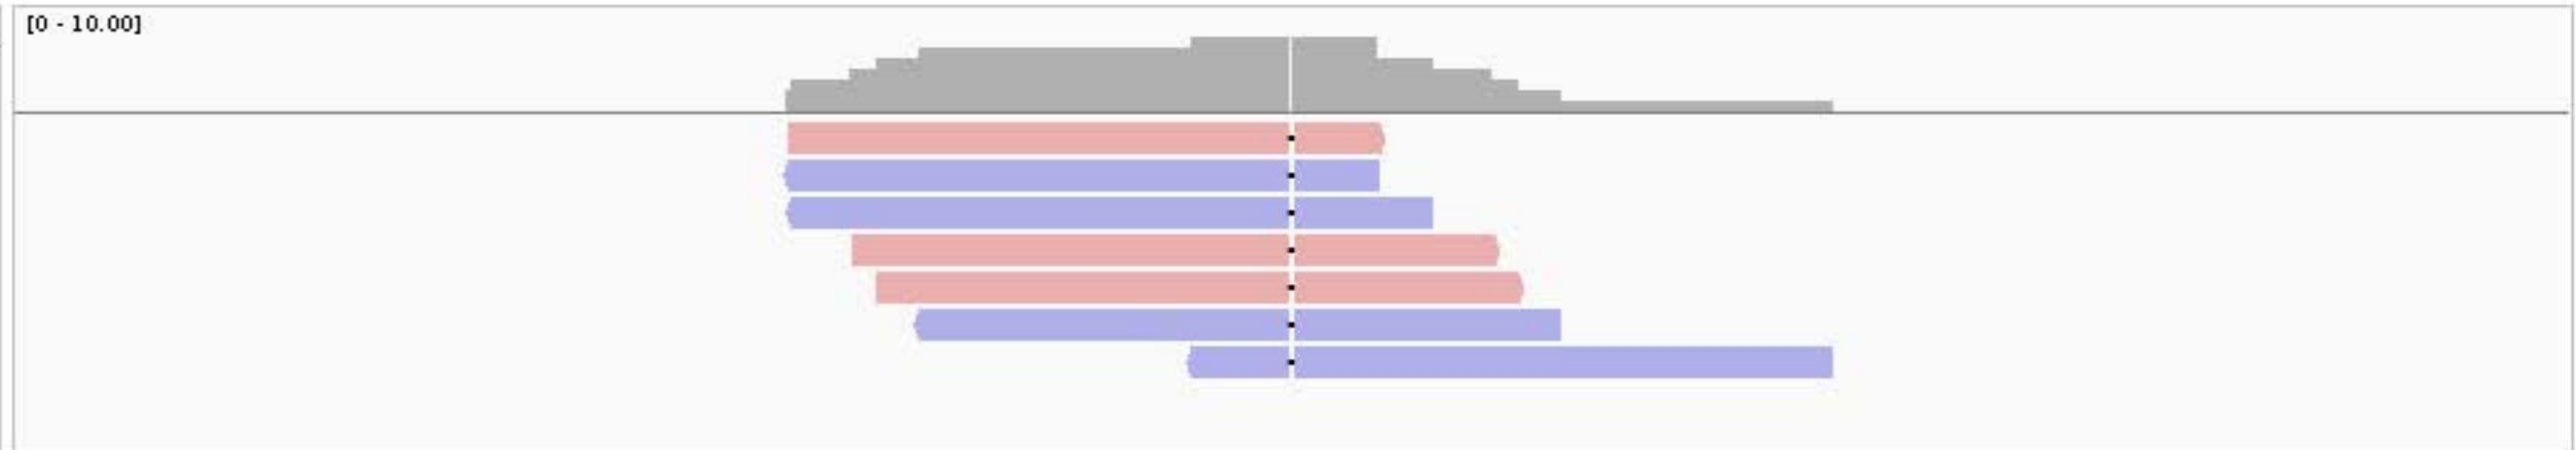

Sequence

Refseq Genes

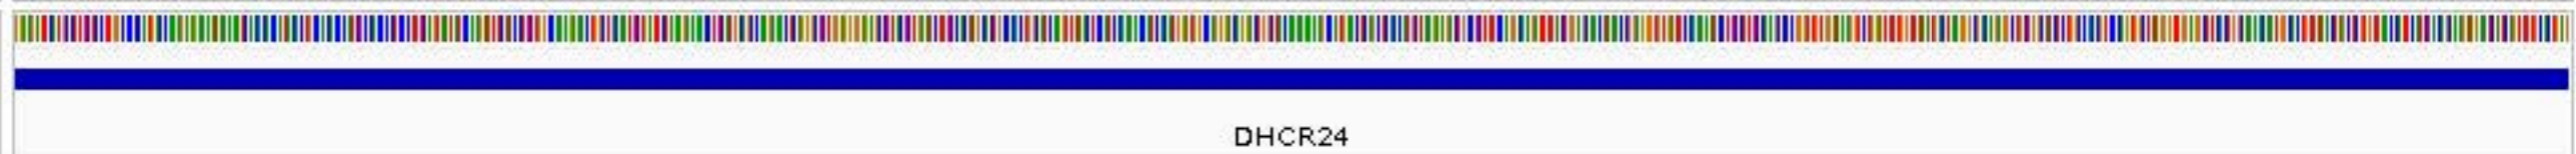

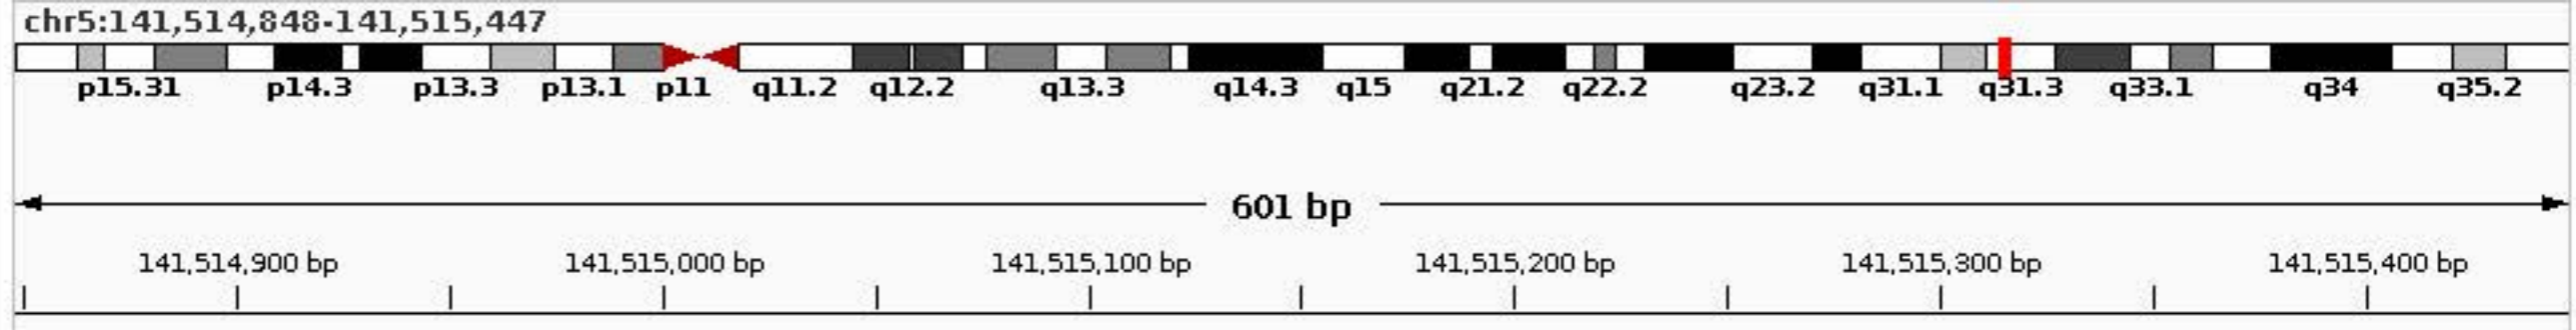

SL\_0016\_RN\_51\_mut.bam Coverage

SL\_0016\_RN\_51\_mut.bam

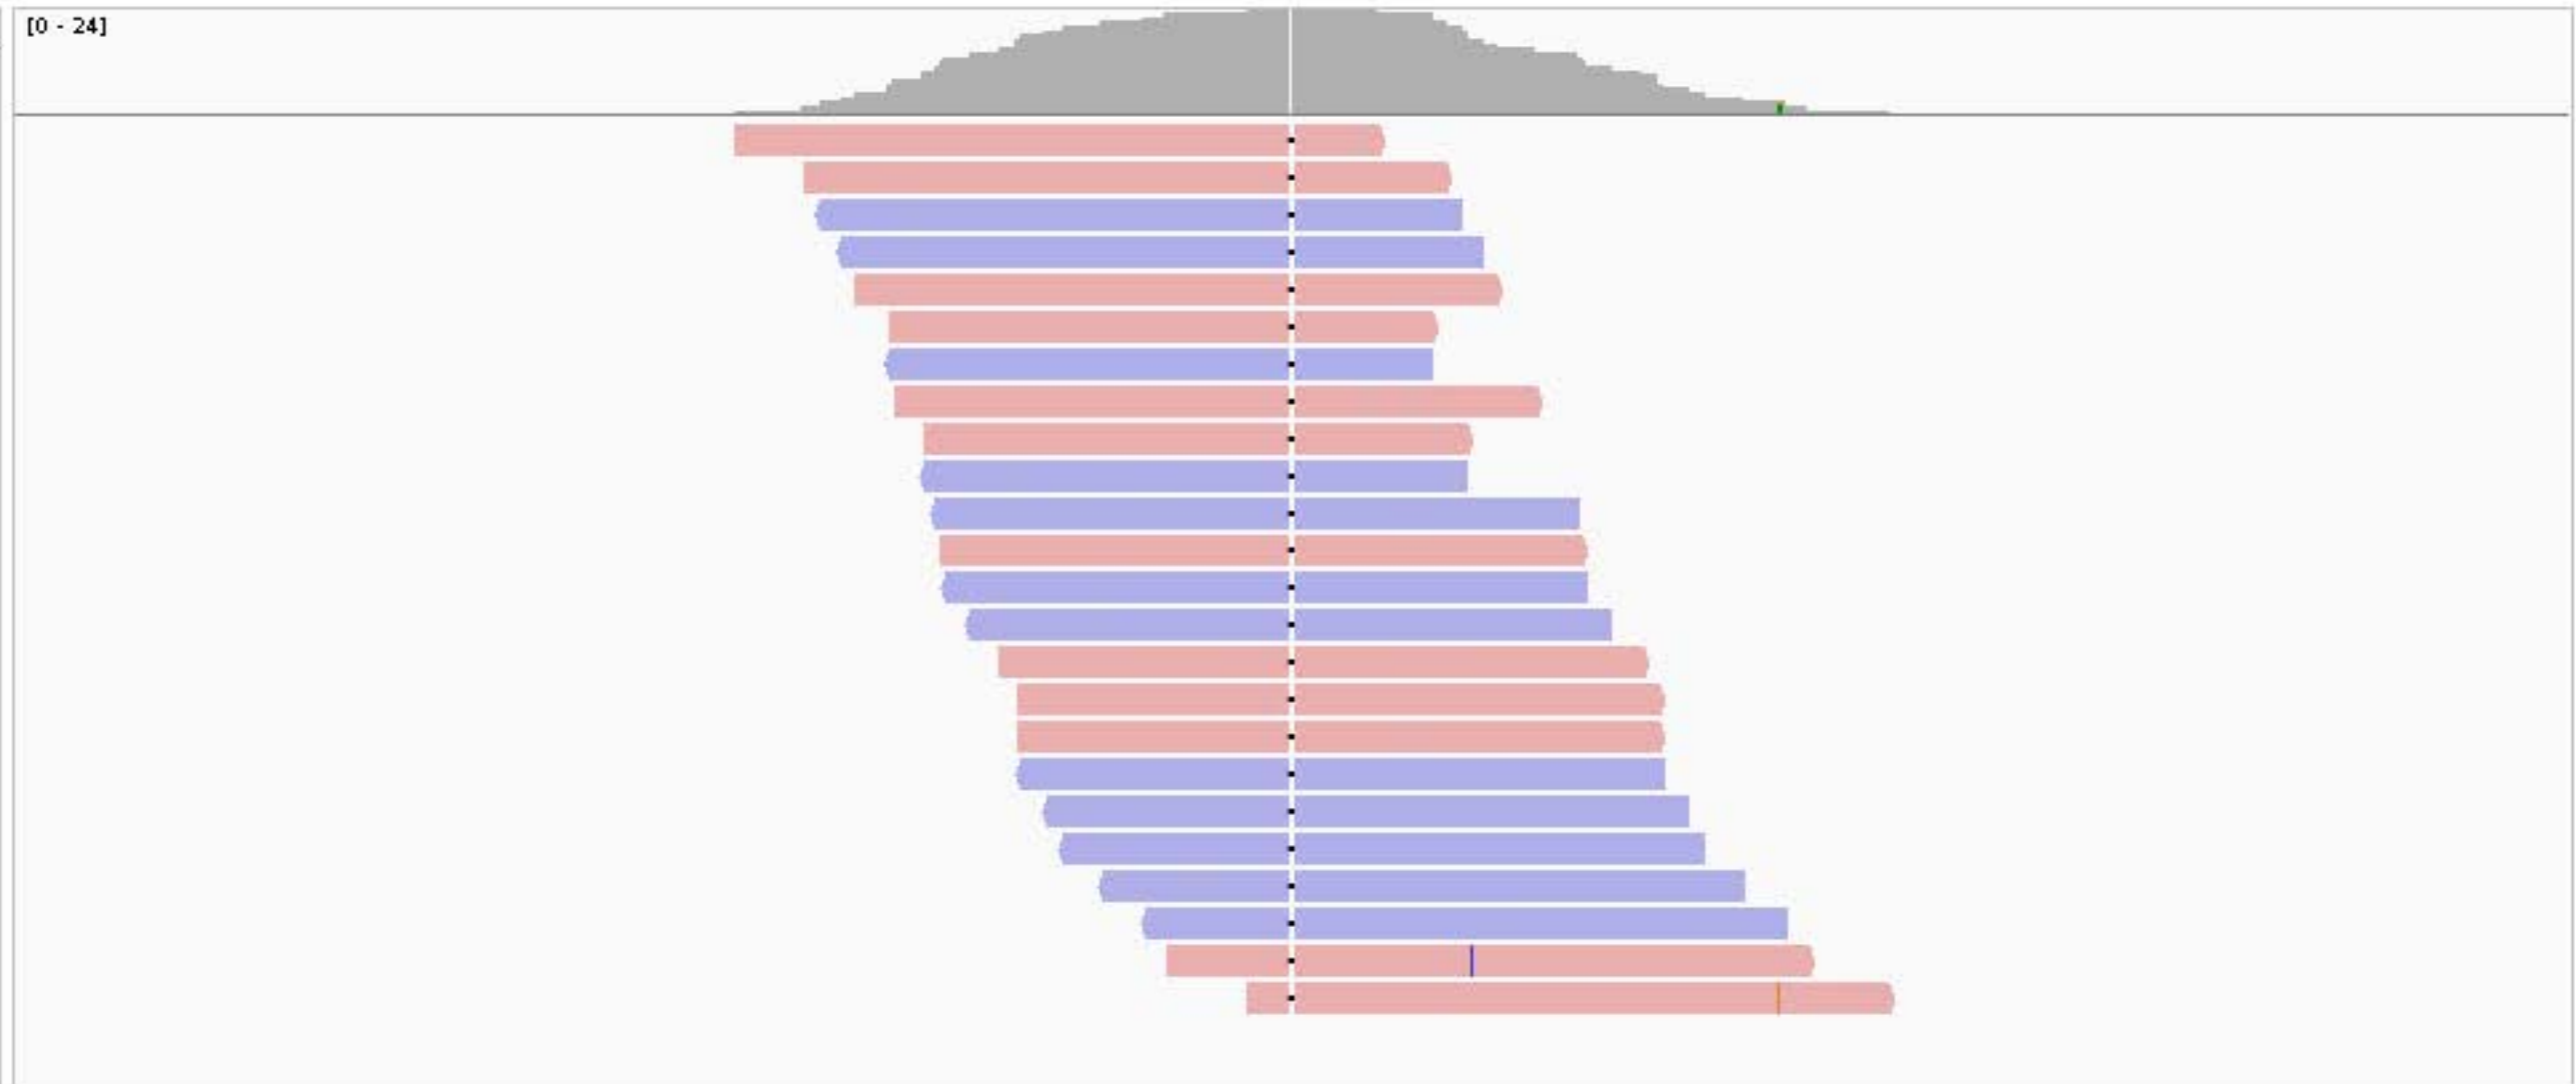

Sequence →

Refseq Genes

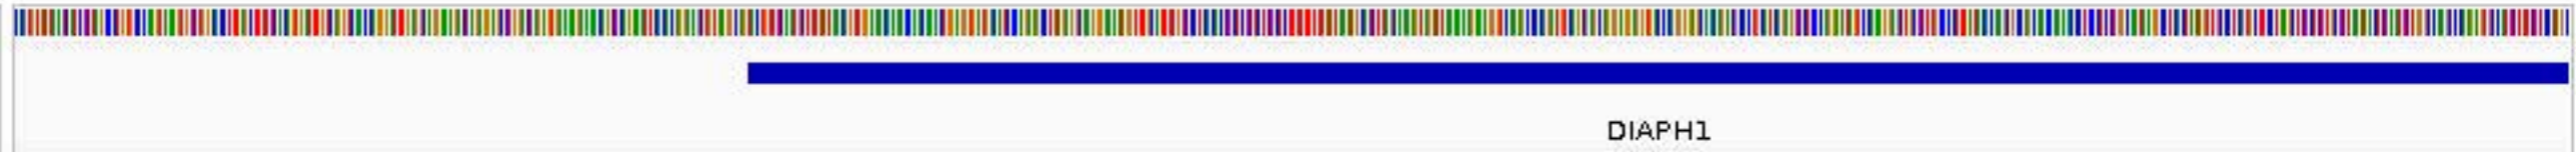



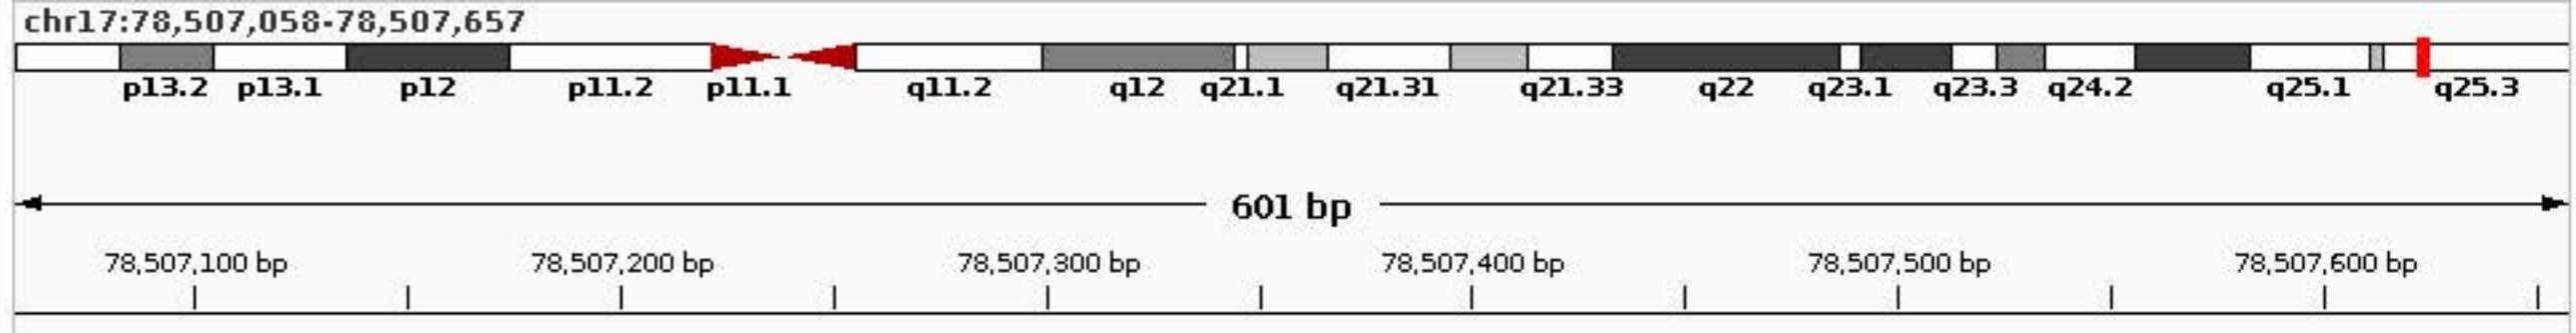

SL\_0004\_RN\_26\_mut.bam Coverage

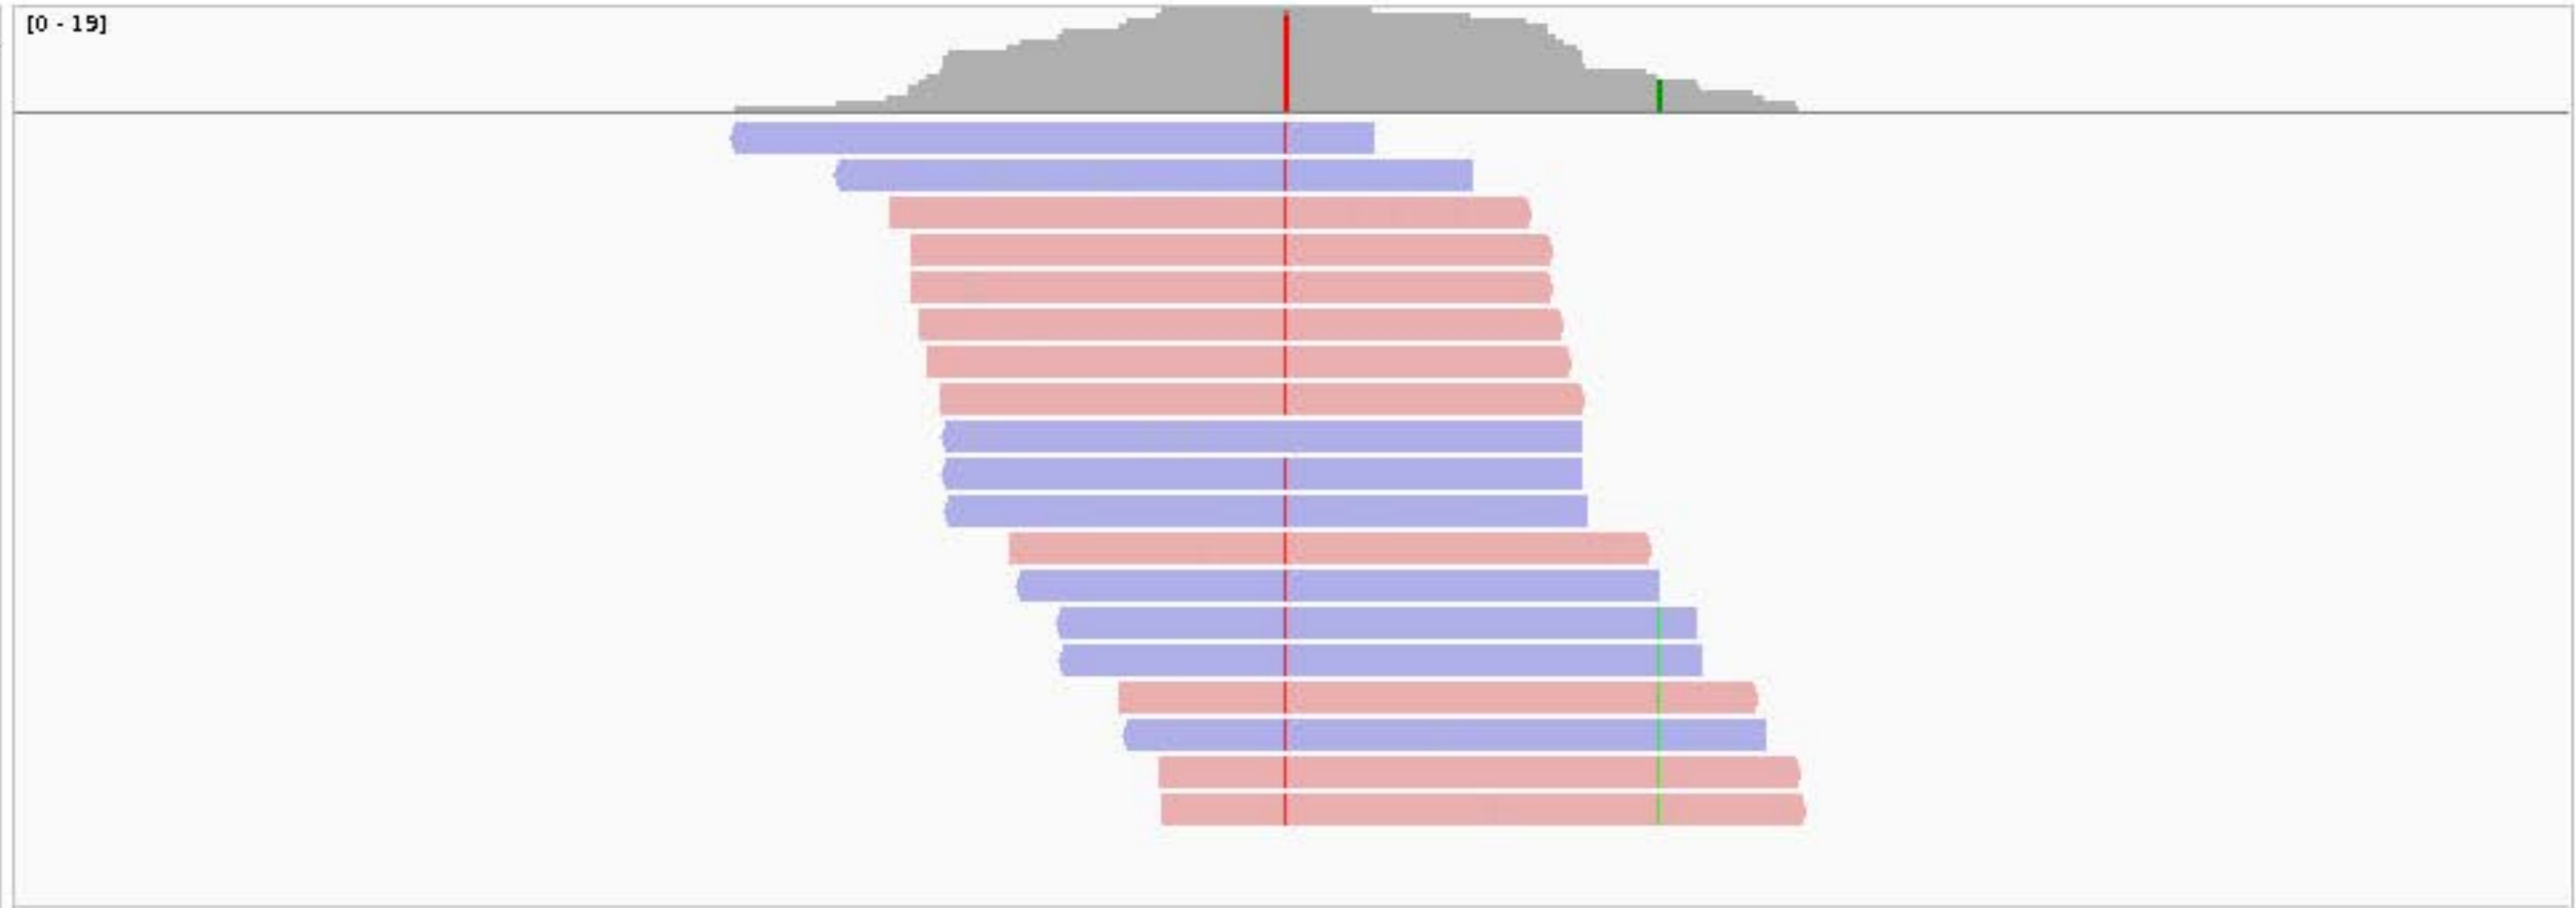

SL\_0004\_RN\_26\_mut.bam

Sequence →

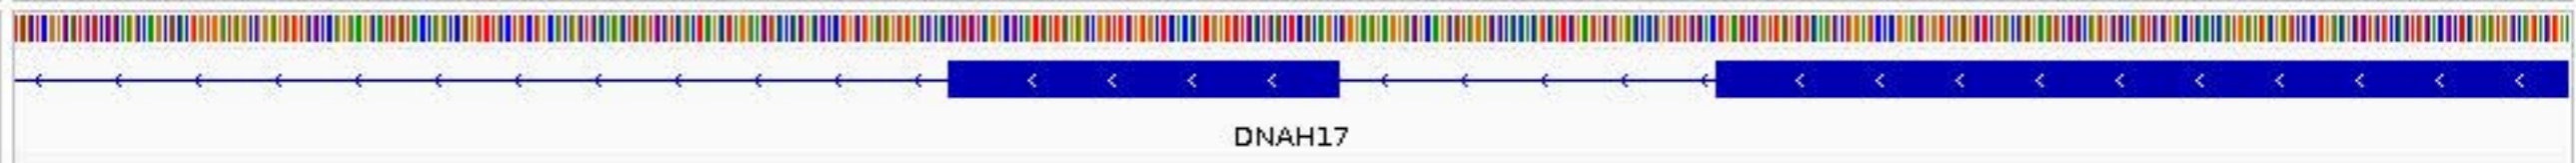

Refseq Genes

chr21:33,579,141-33,579,740

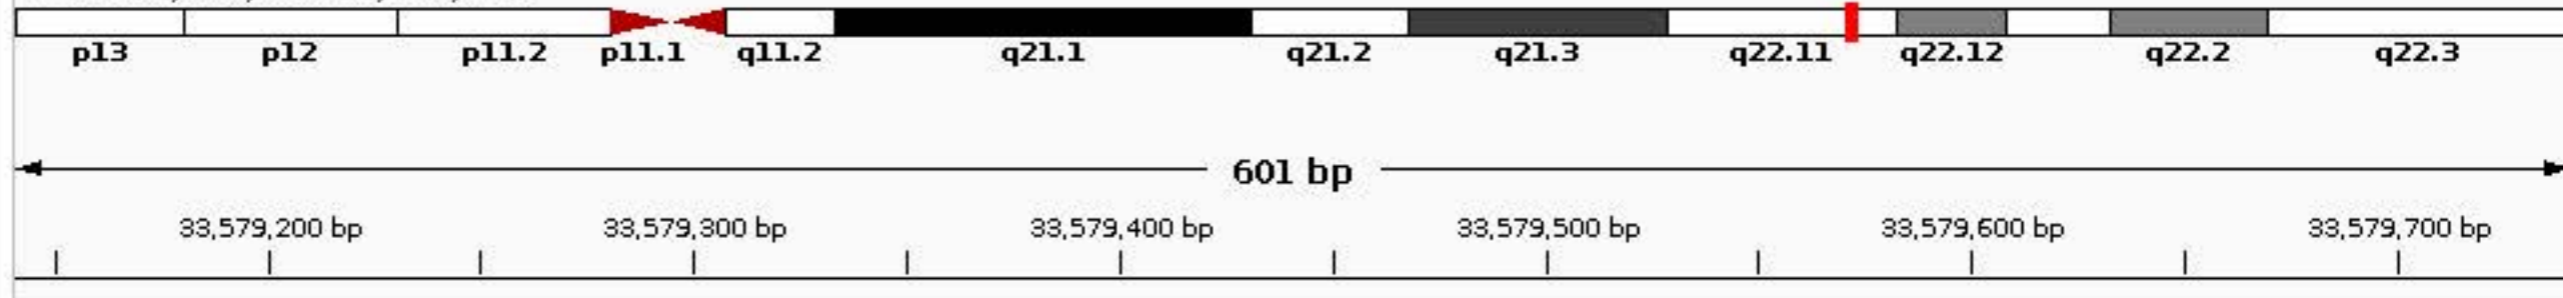

SL\_0004\_RN\_05\_mut.bam Coverage

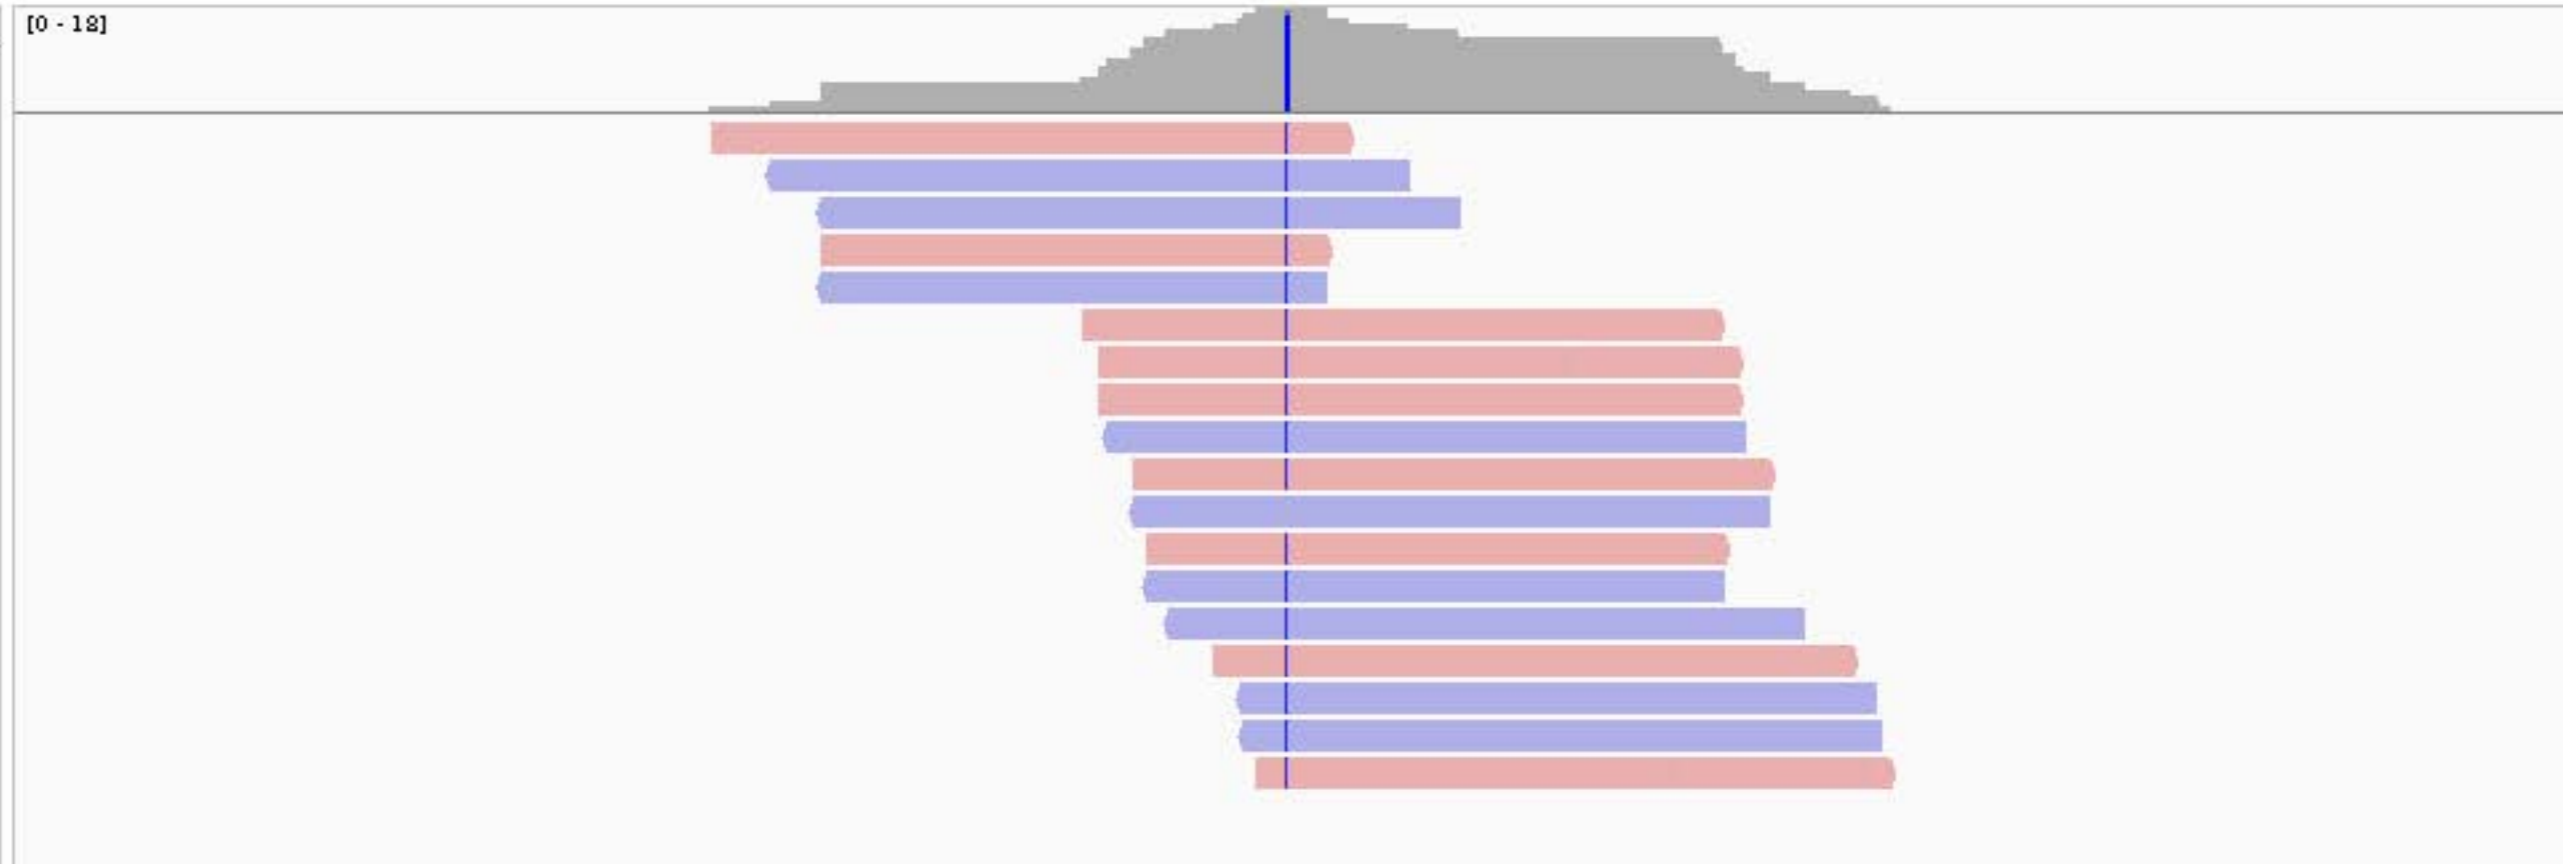

SL\_0004\_RN\_05\_mut.bam

Sequence

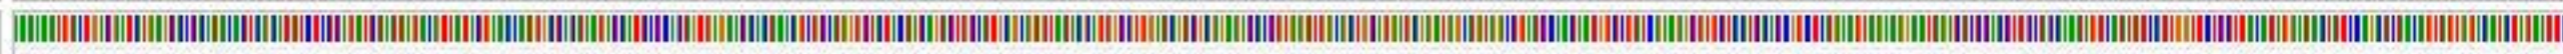

Refseq Genes

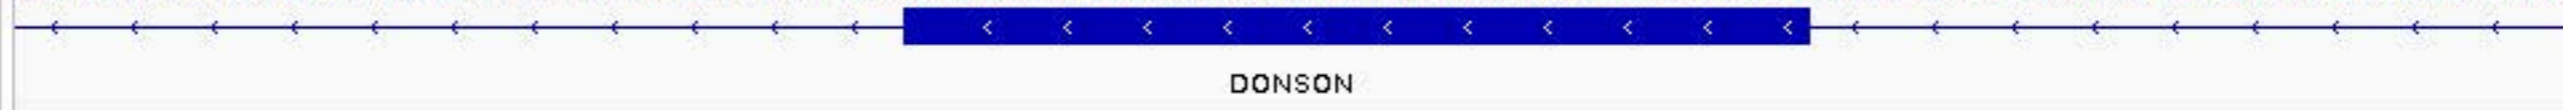

DONSON

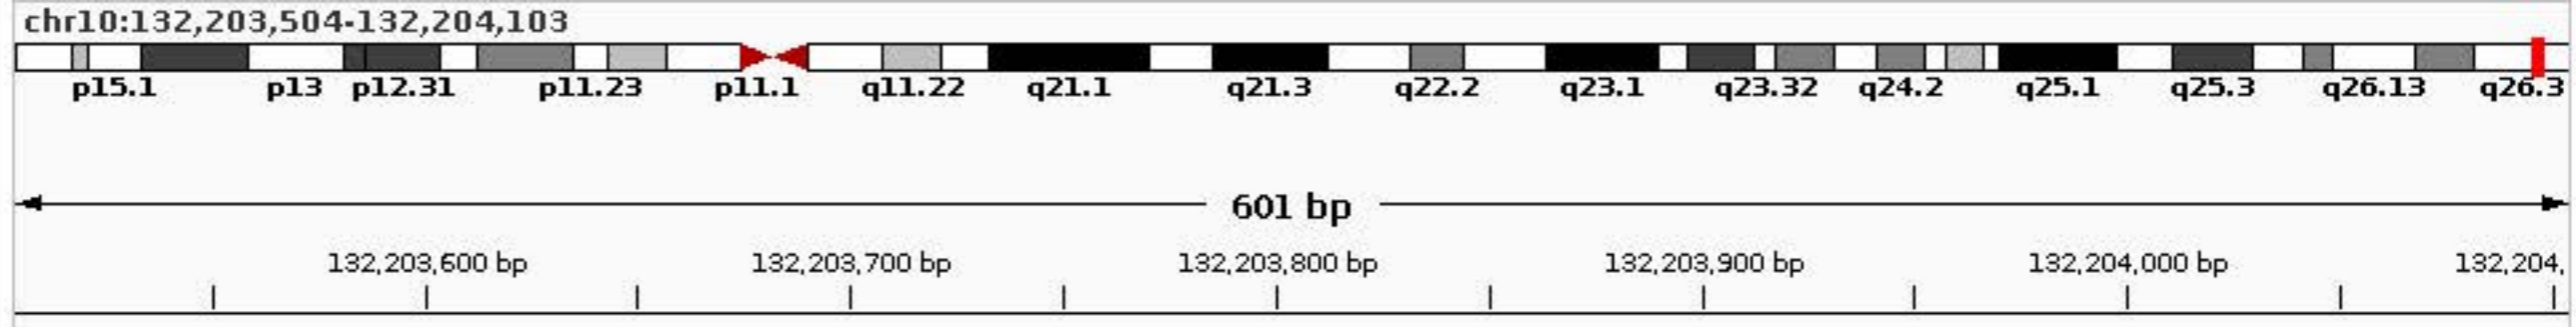

SL\_0016\_RN\_51\_mut.bam Coverage

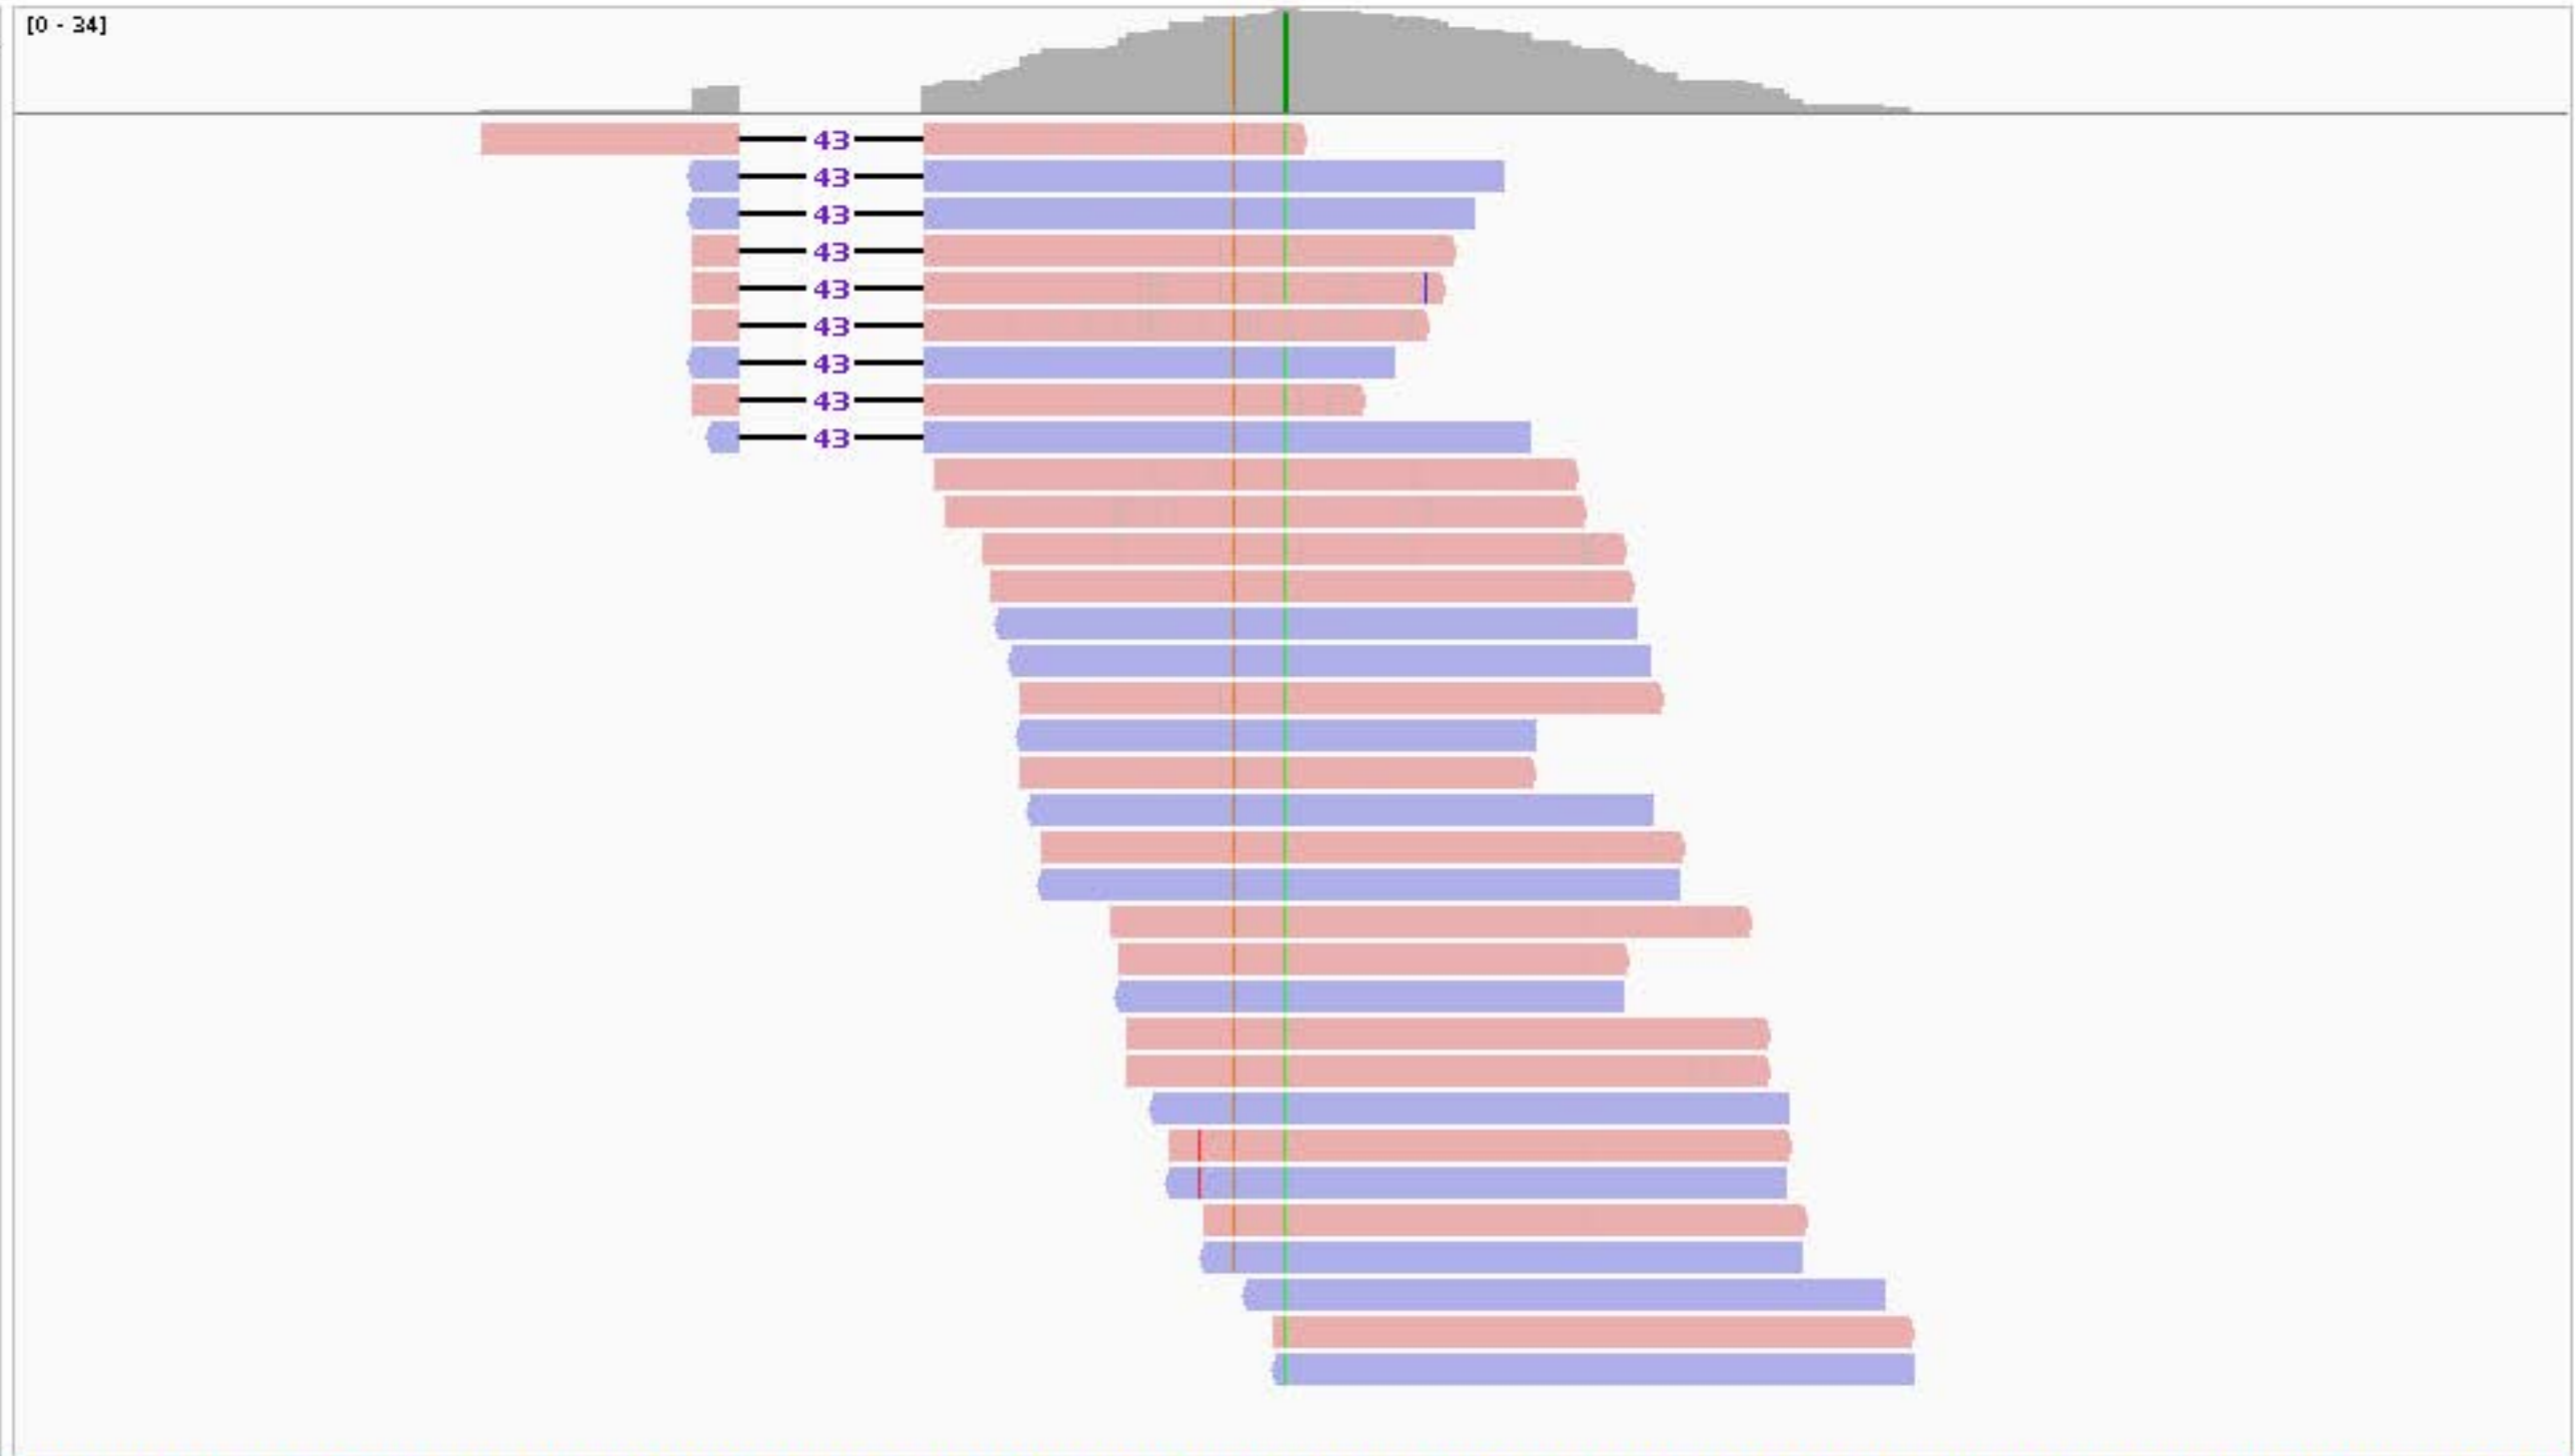

SL\_0016\_RN\_51\_mut.bam

Sequence

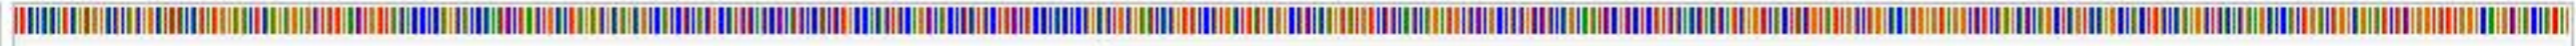

Refseq Genes

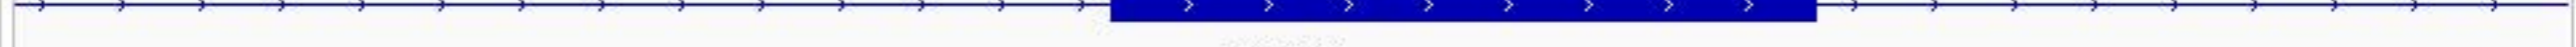

DPYSL4

chr21:40,311,871-40,312,470

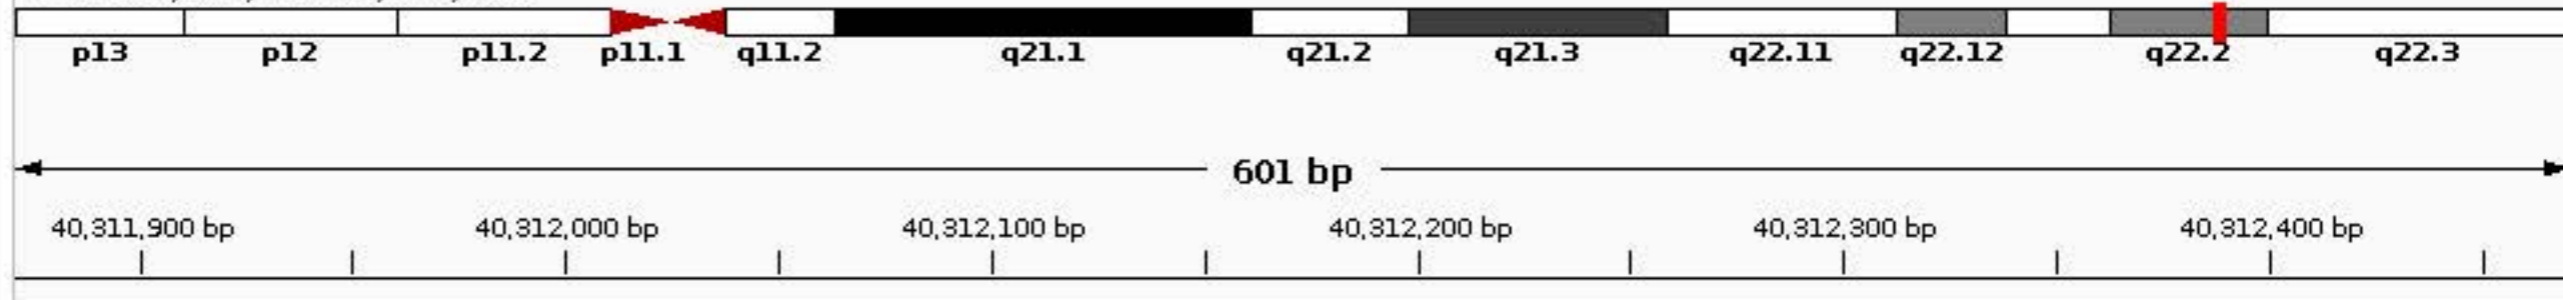

SL\_0015\_LN\_46\_mut.bam Coverage

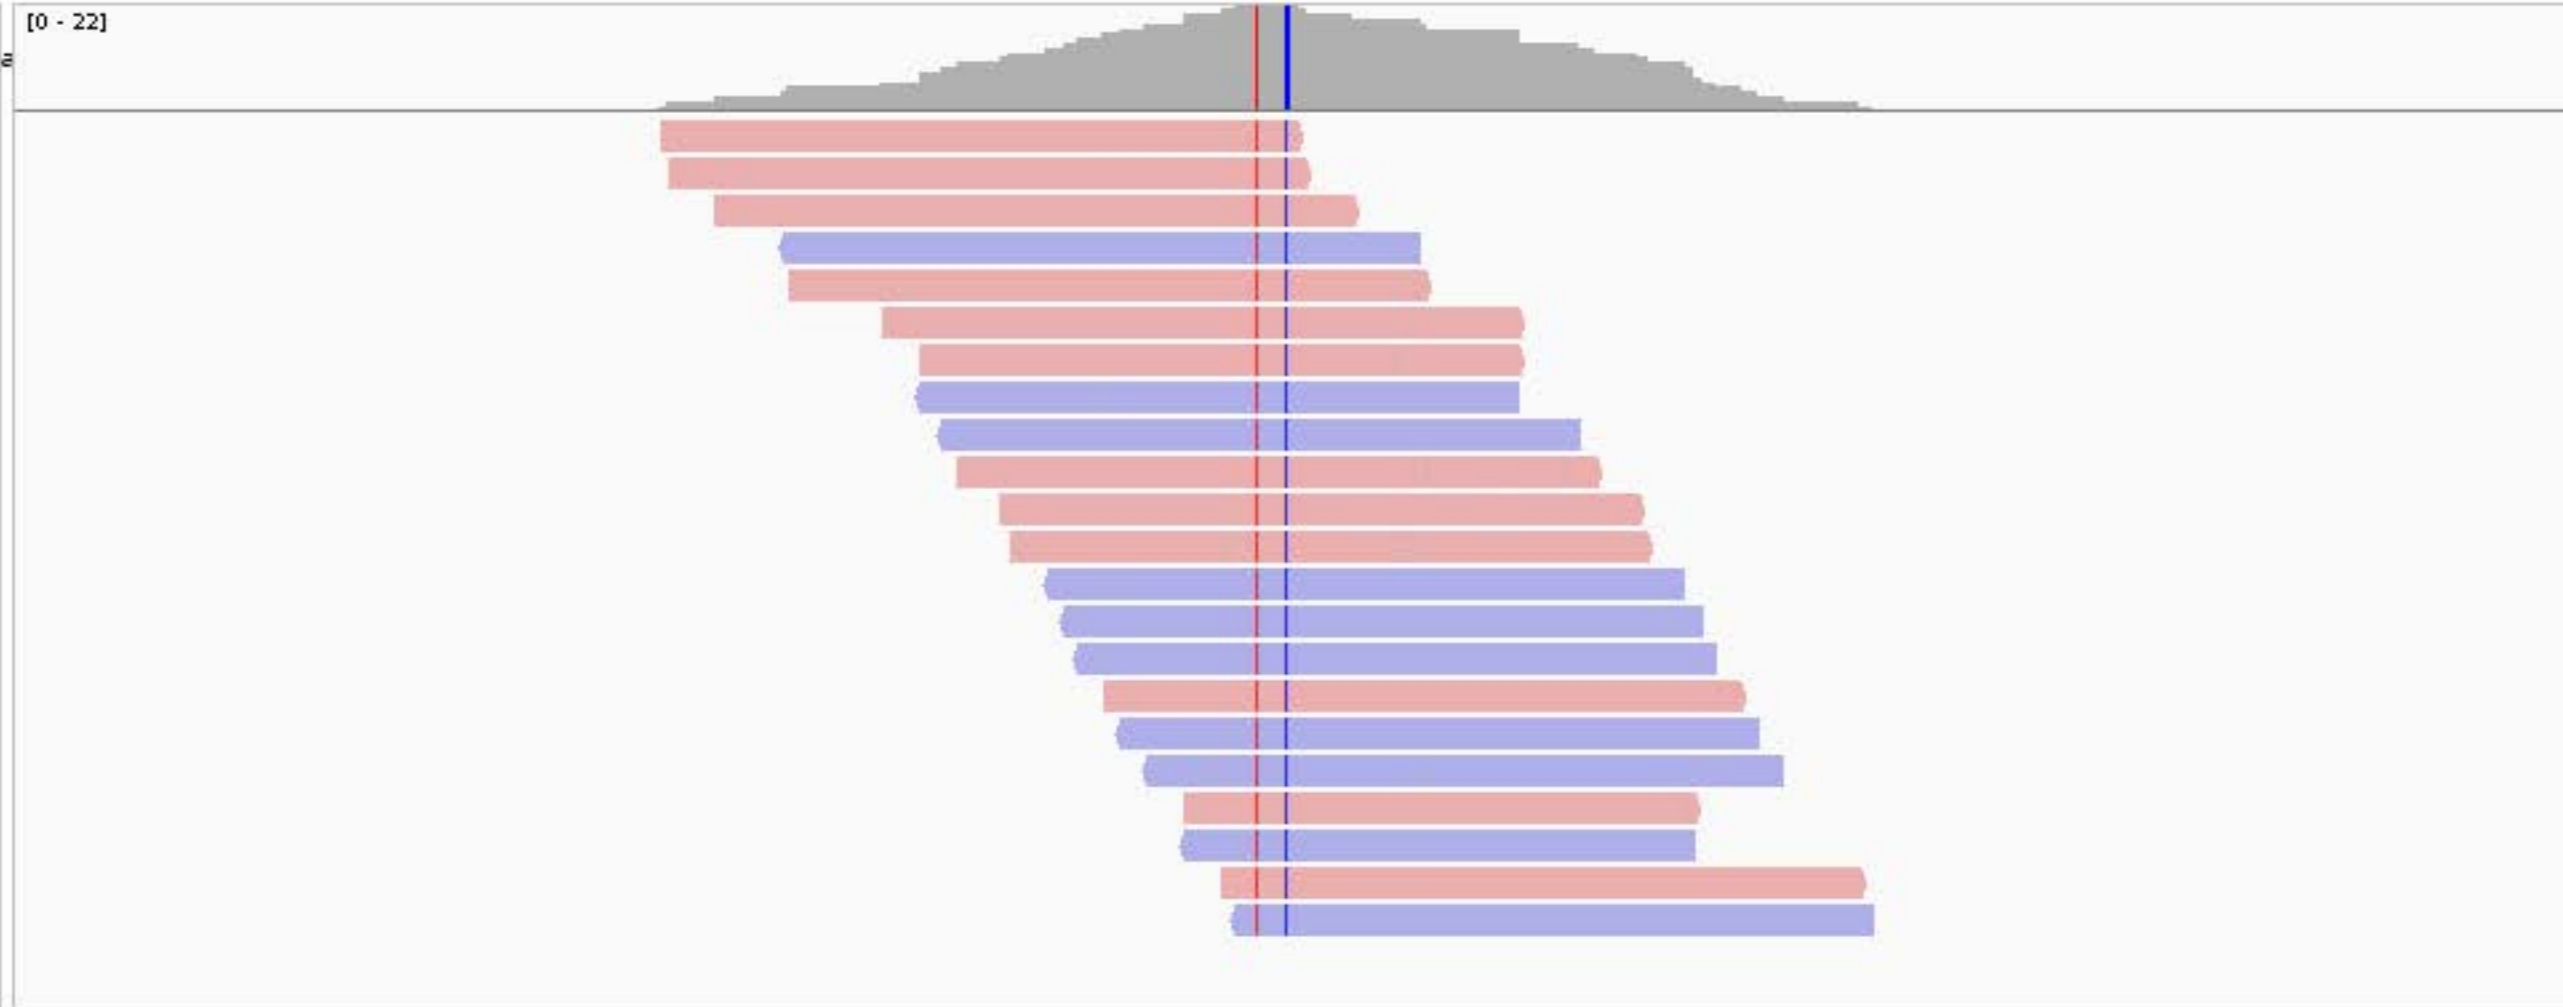

SL\_0015\_LN\_46\_mut.bam

Sequence

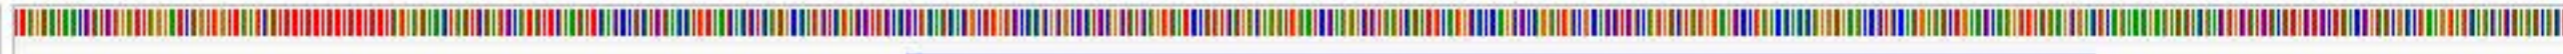

Refseq Genes

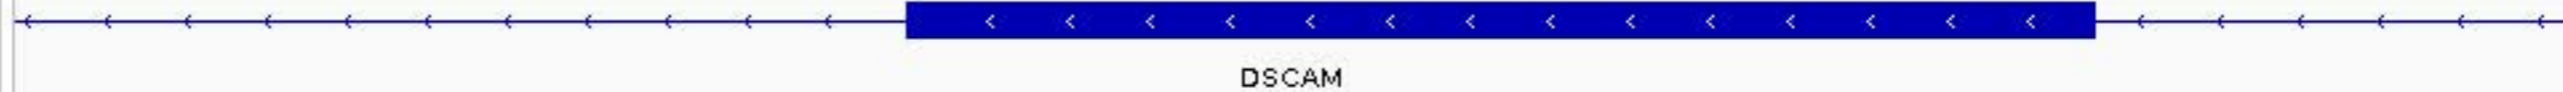

DSCAM



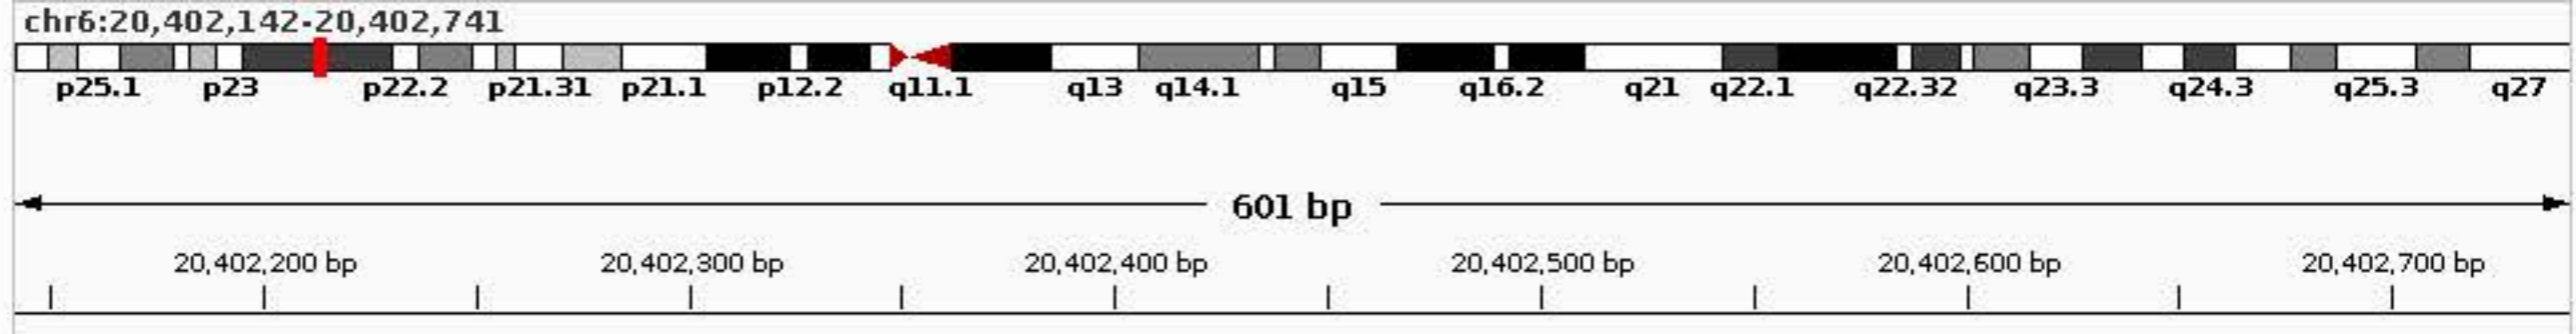

SL\_0002\_LN\_1\_mut.bam Coverage

SL\_0002\_LN\_1\_mut.bam

Sequence

Refseq Genes

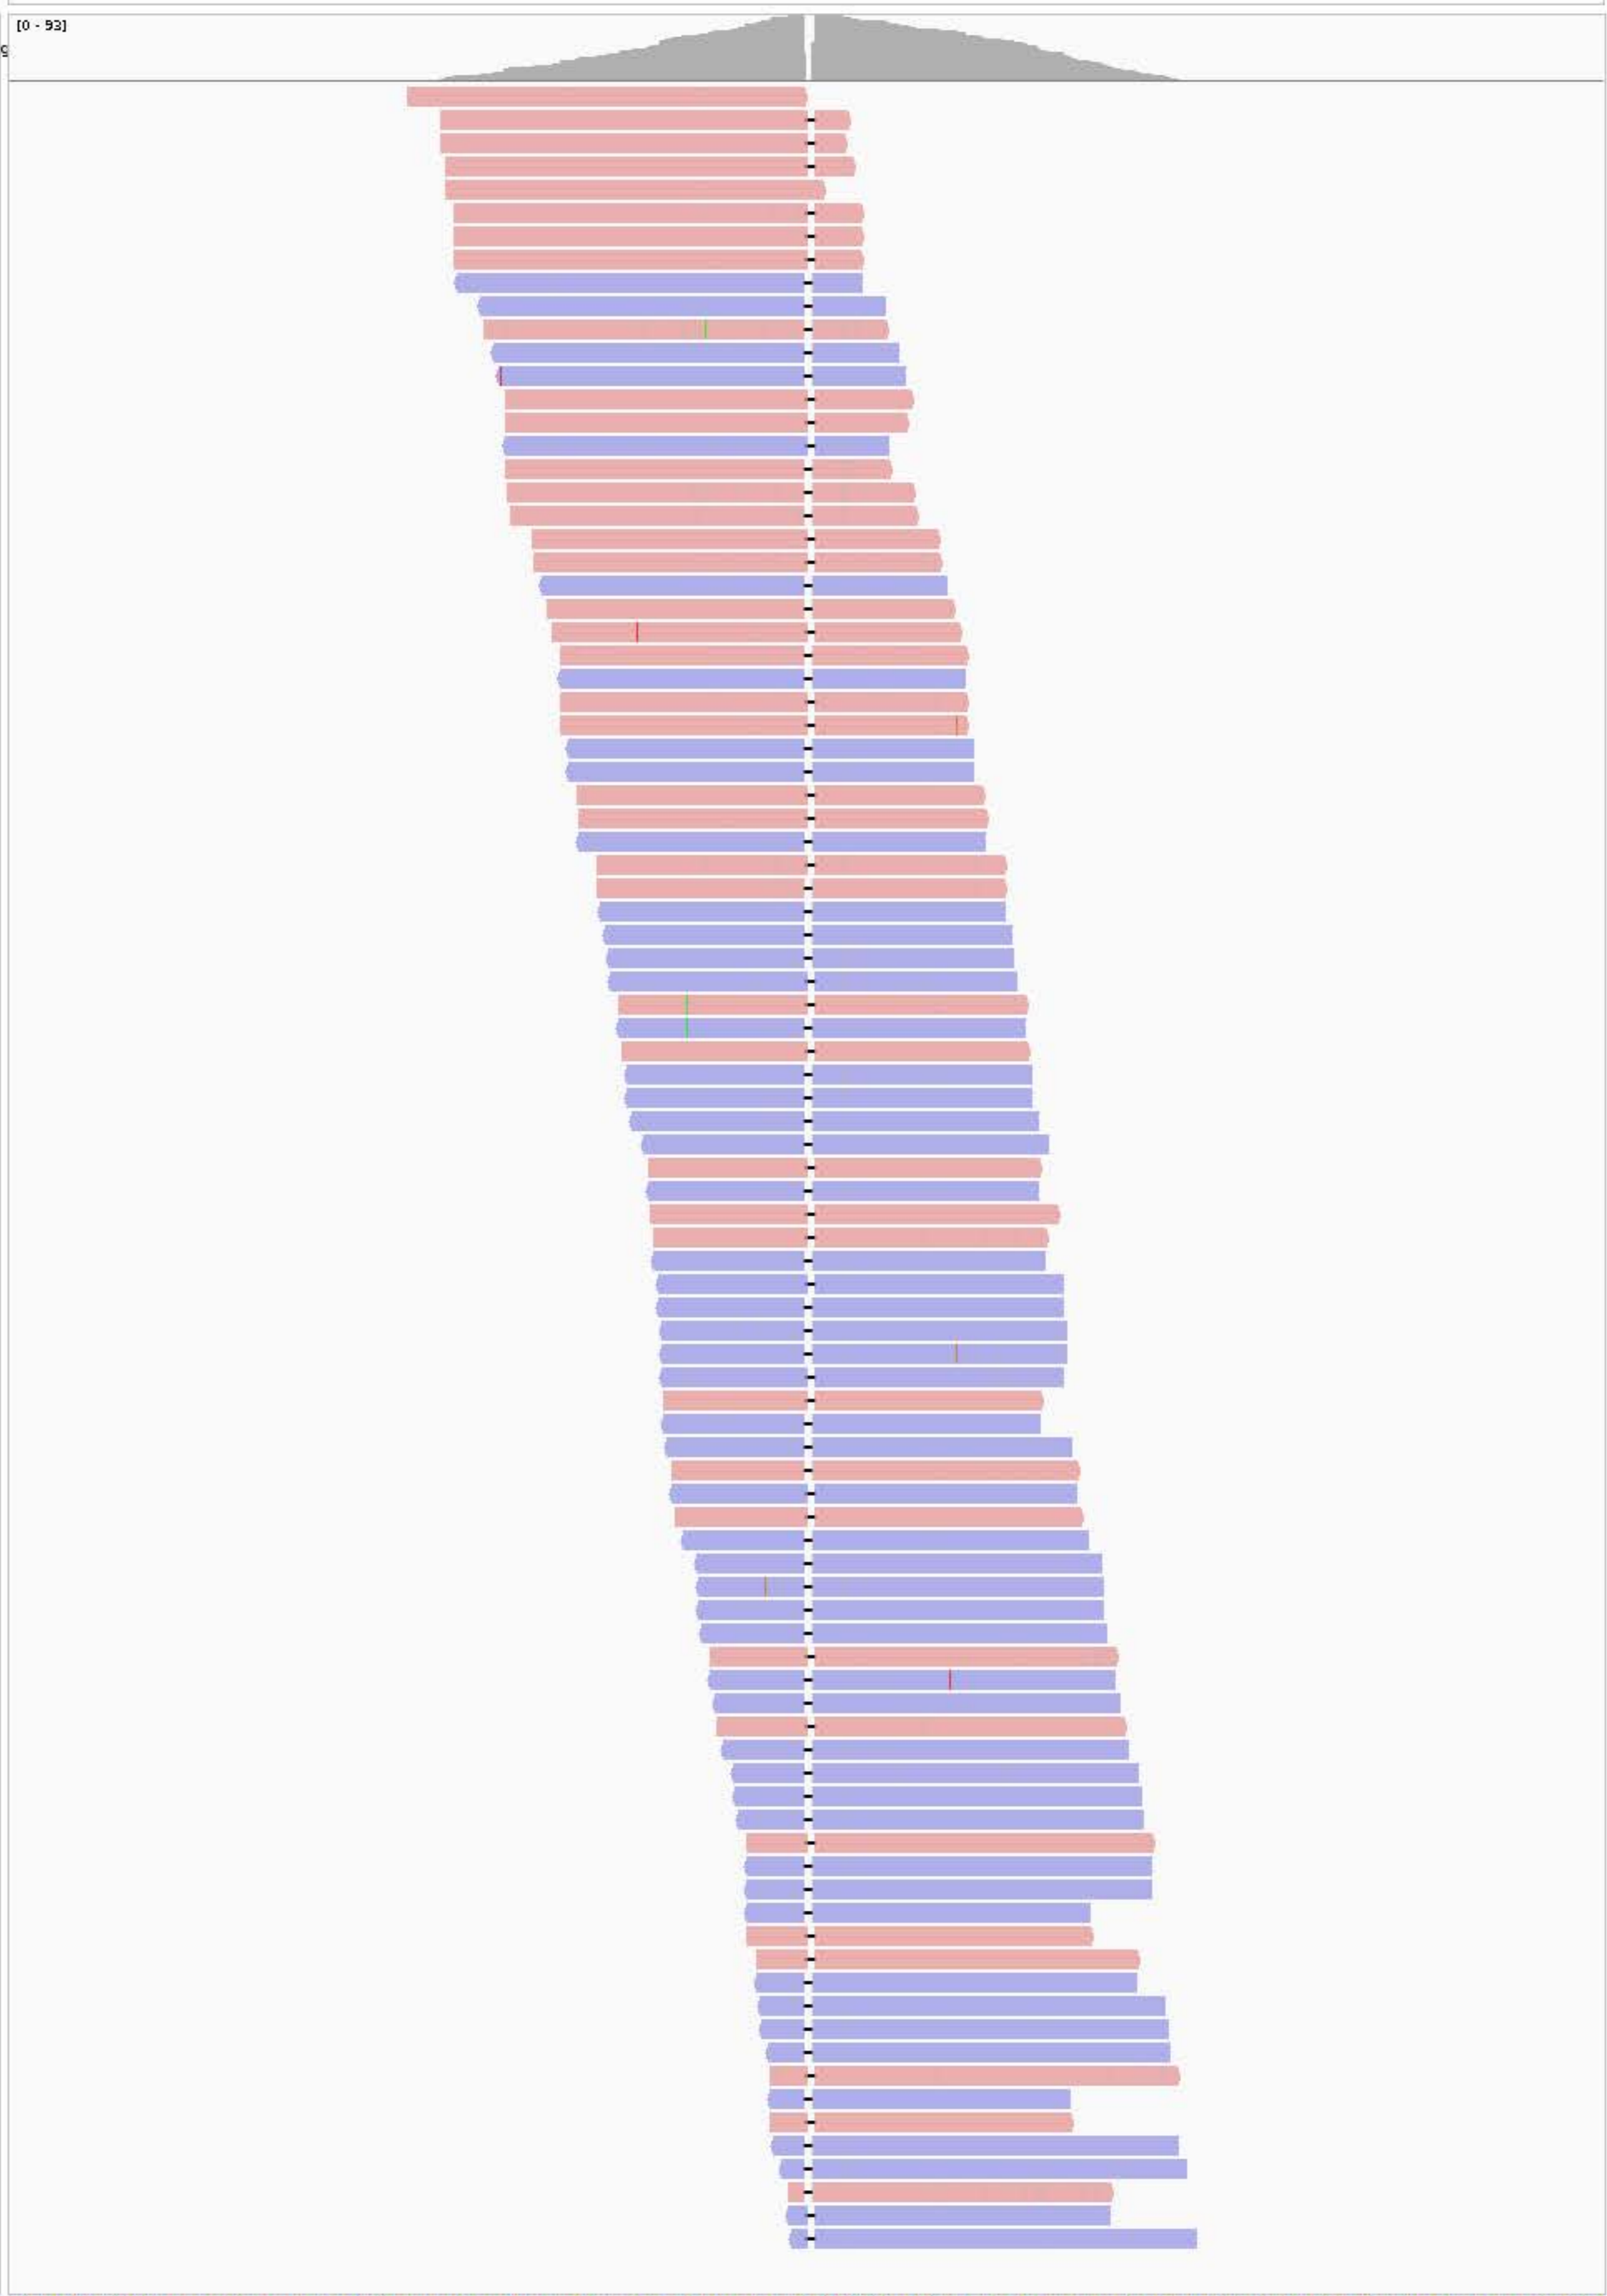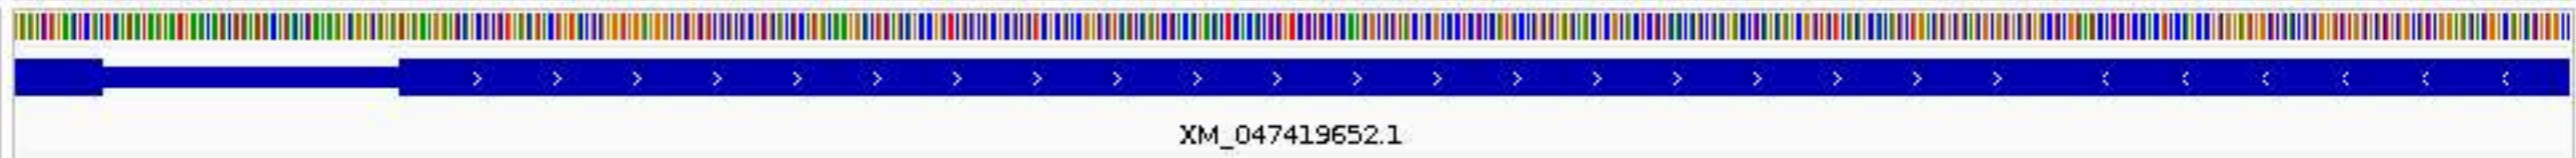

XM\_047419652.1



chr19:11,507,706-11,508,305

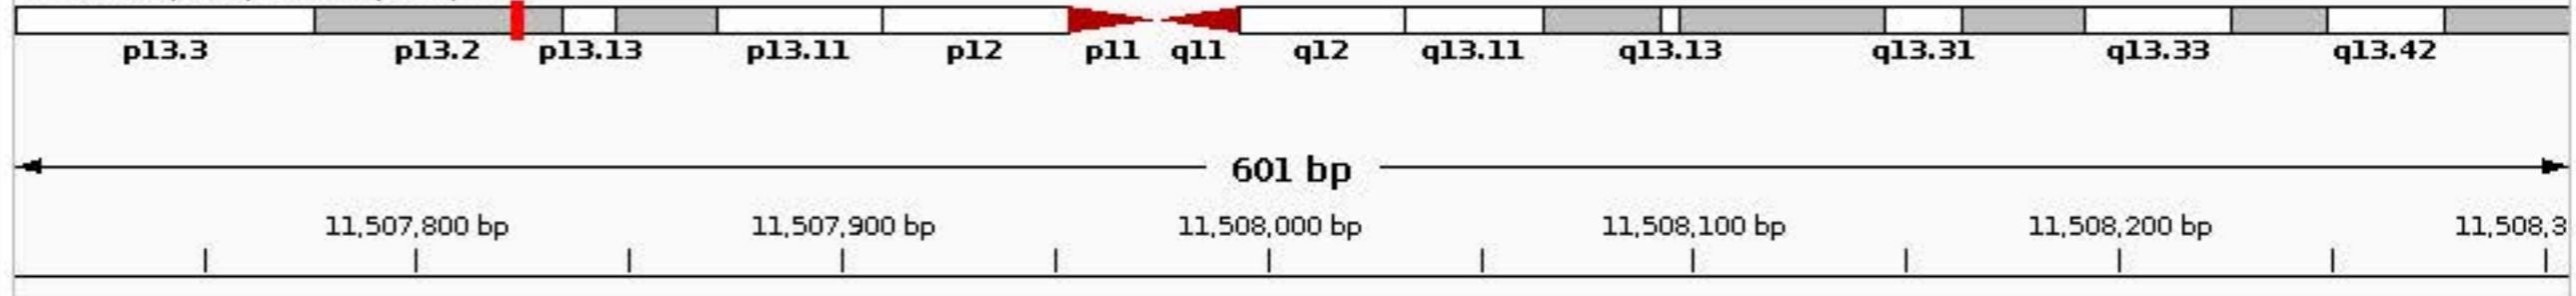

SL\_0006\_RN\_67\_mut.bam Coverage

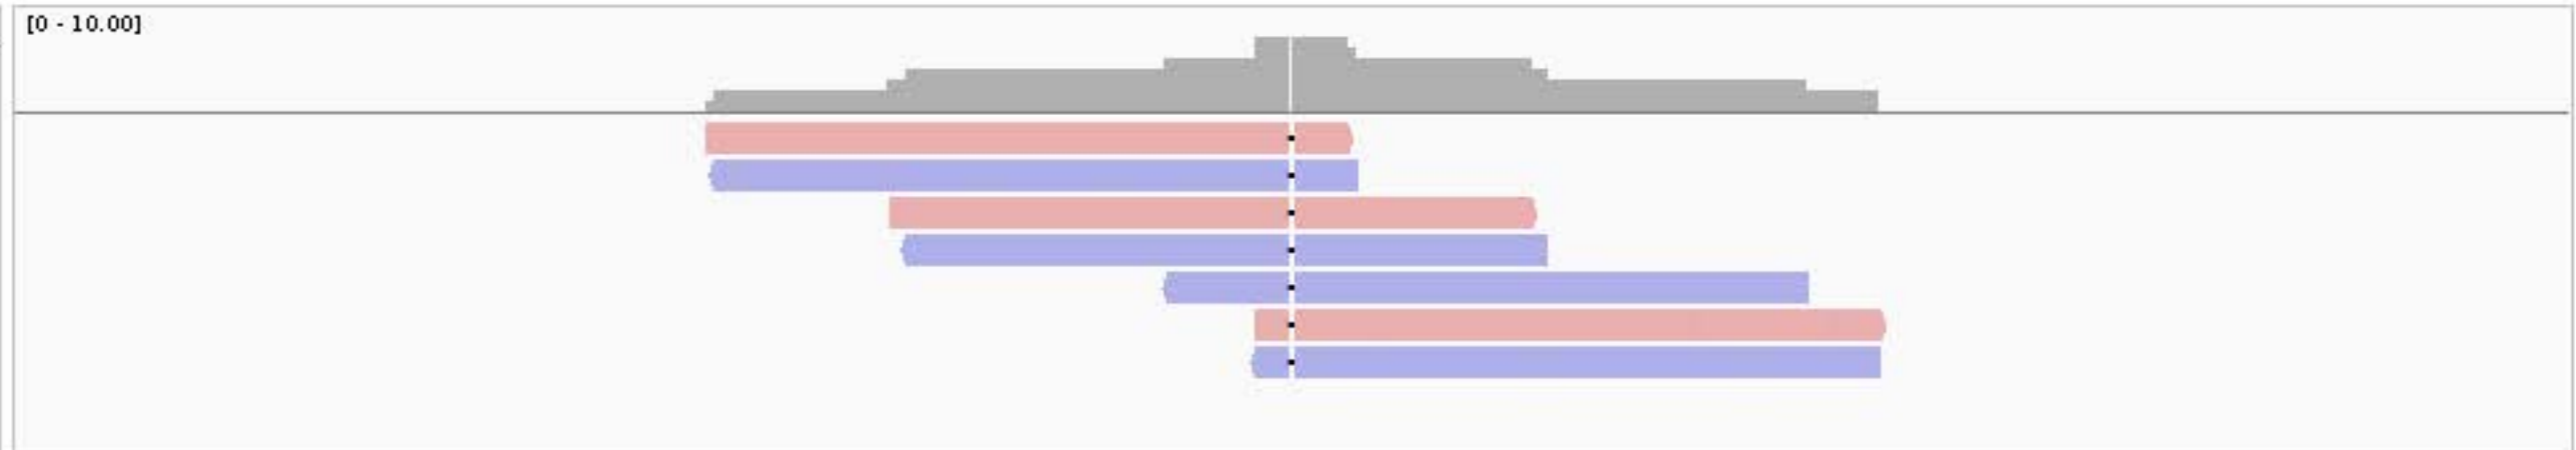

SL\_0006\_RN\_67\_mut.bam

Sequence

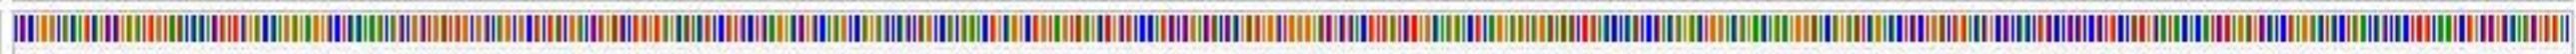

Refseq Genes

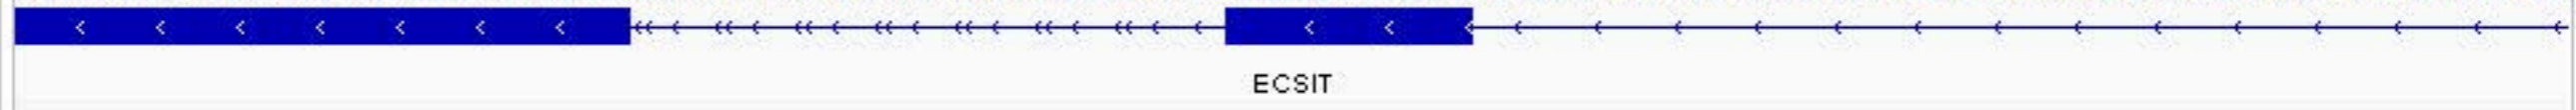

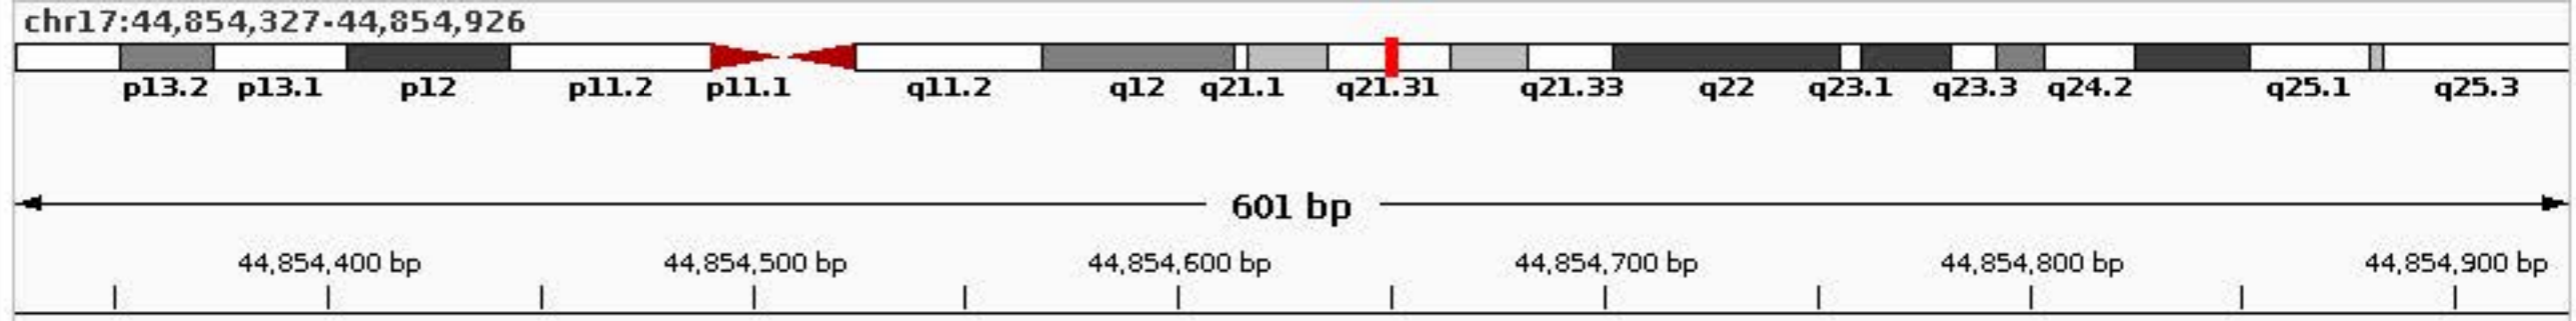

SL\_0004\_RN\_19\_mut.bam Coverage

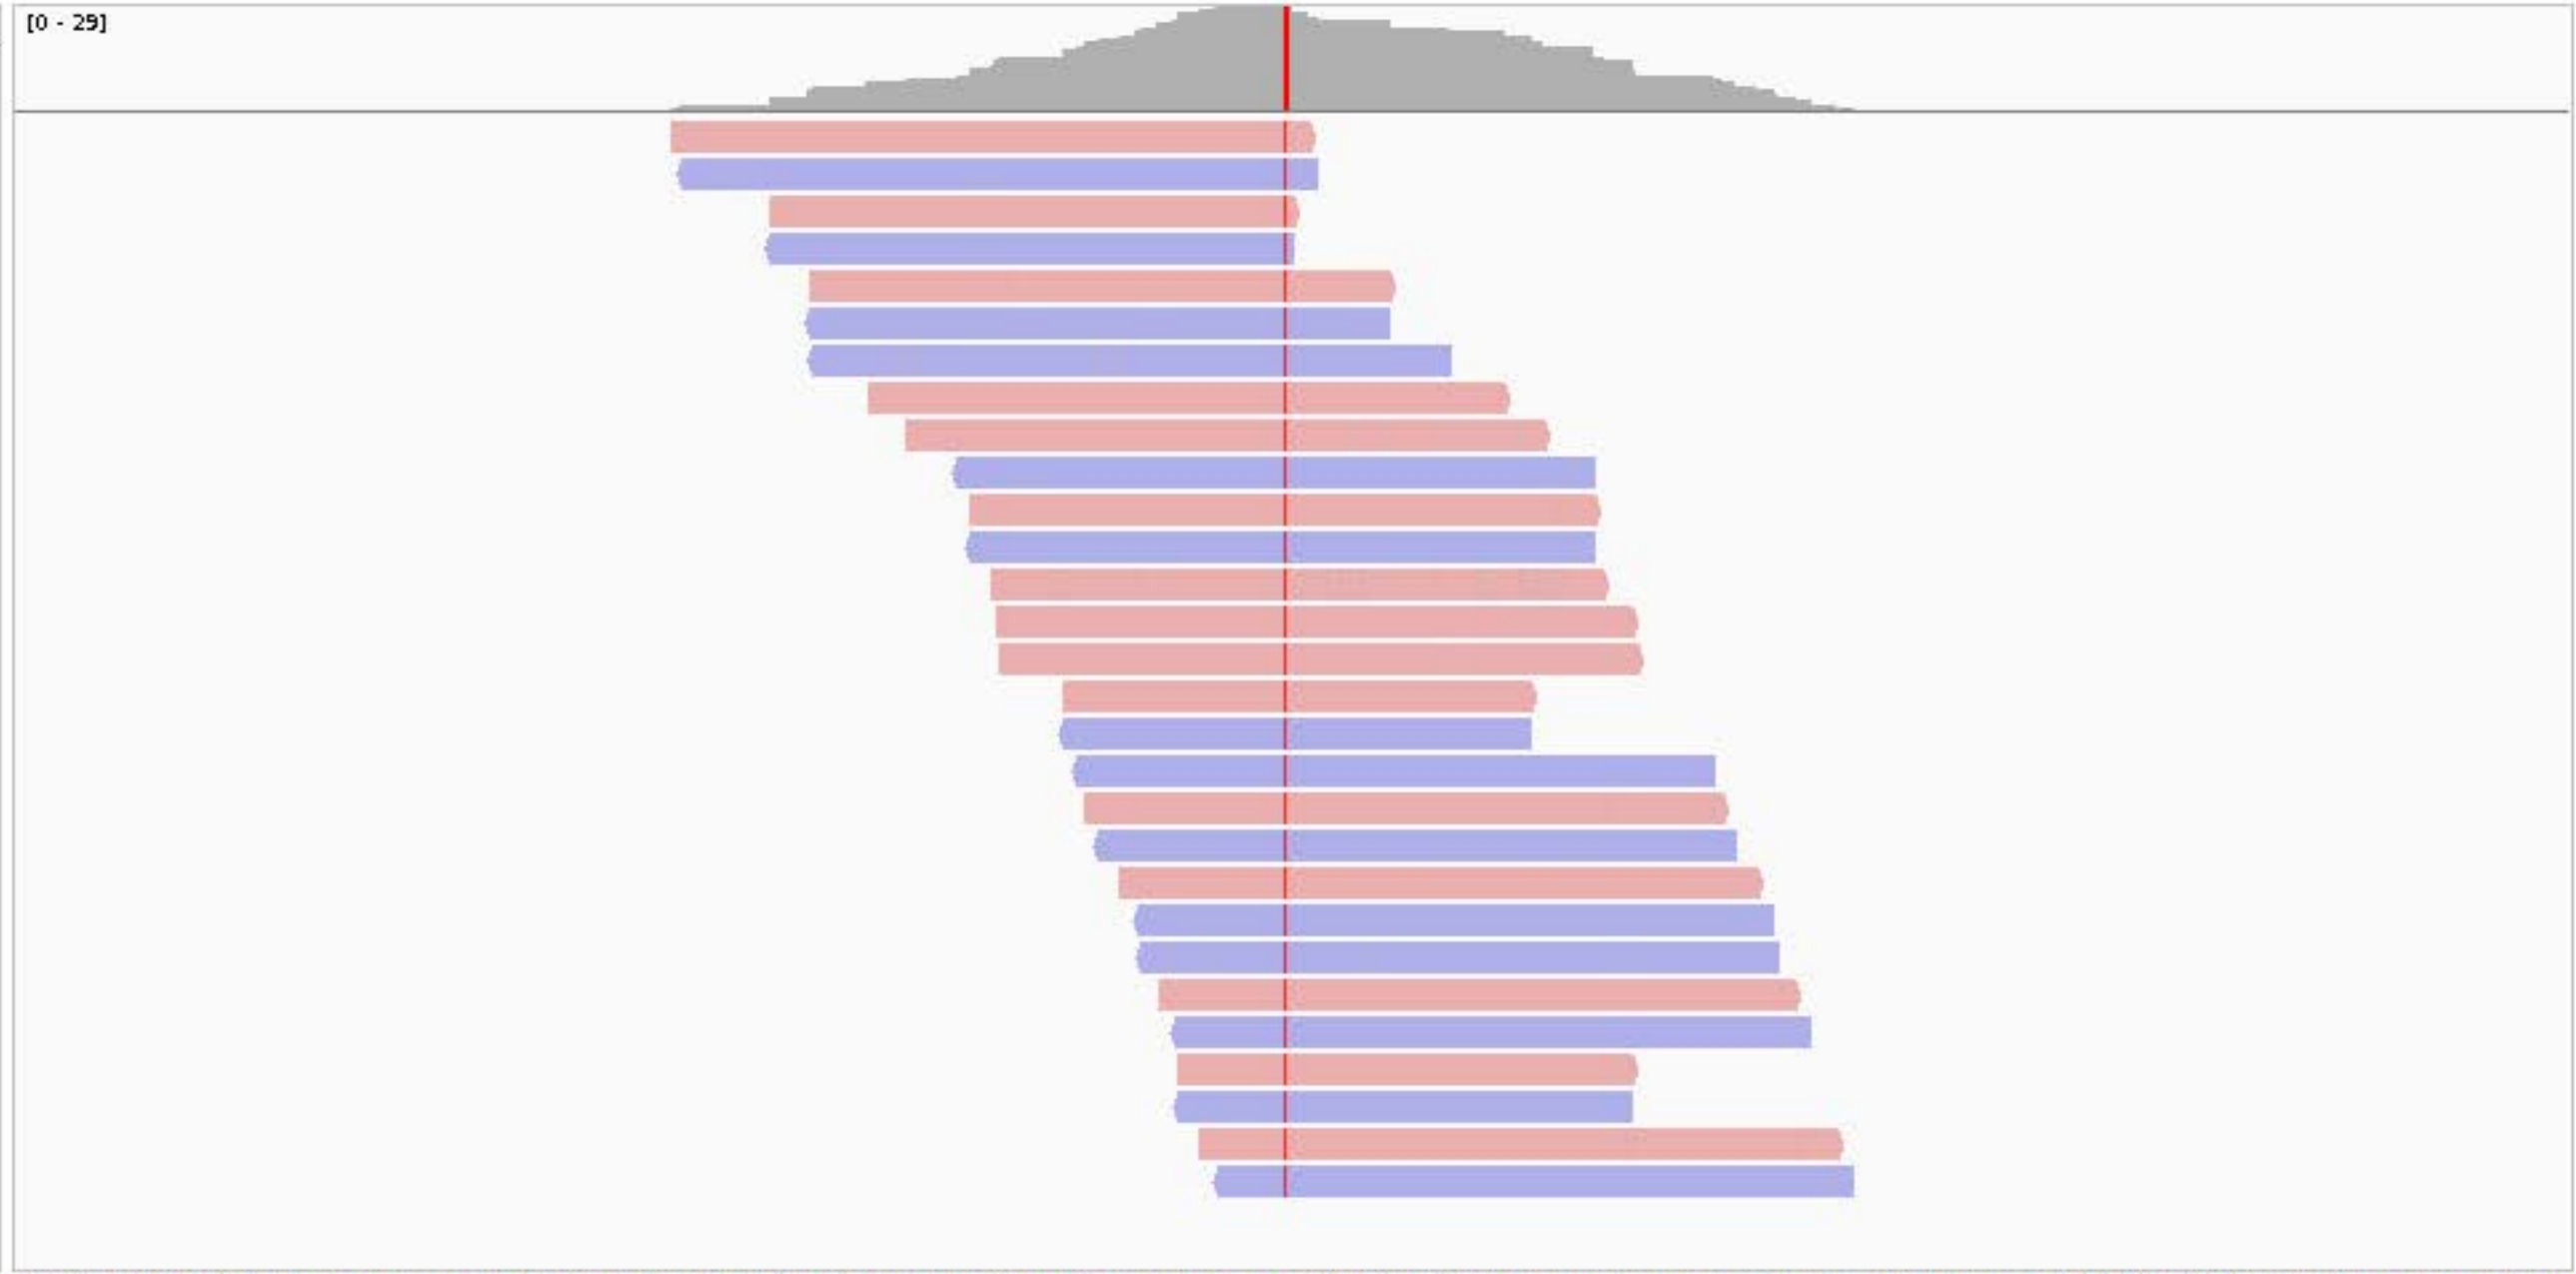

SL\_0004\_RN\_19\_mut.bam

Sequence →

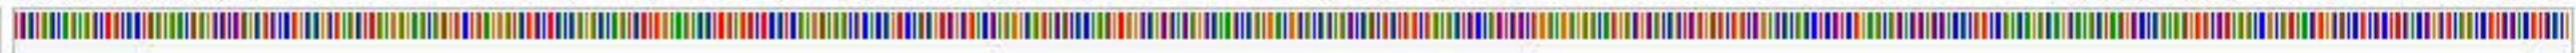

Refseq Genes

EFTUD2

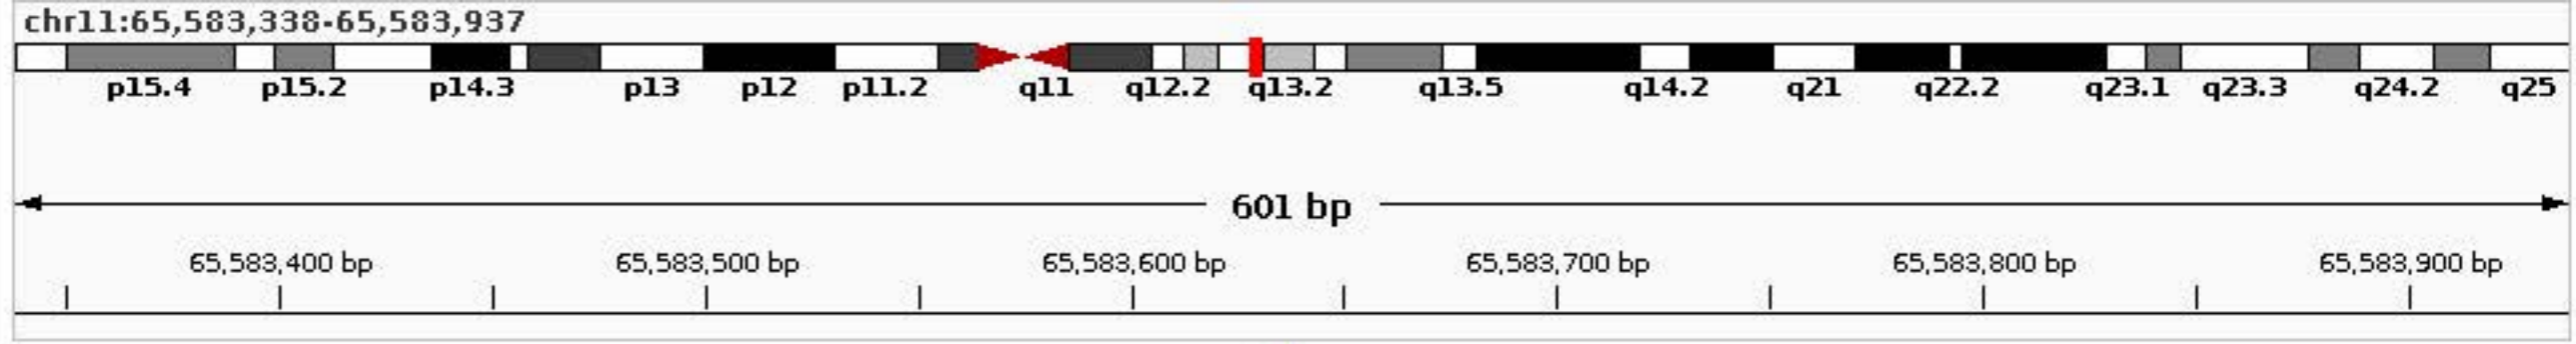

SL\_0017\_RN\_15\_mut.bam Coverage

SL\_0017\_RN\_15\_mut.bam

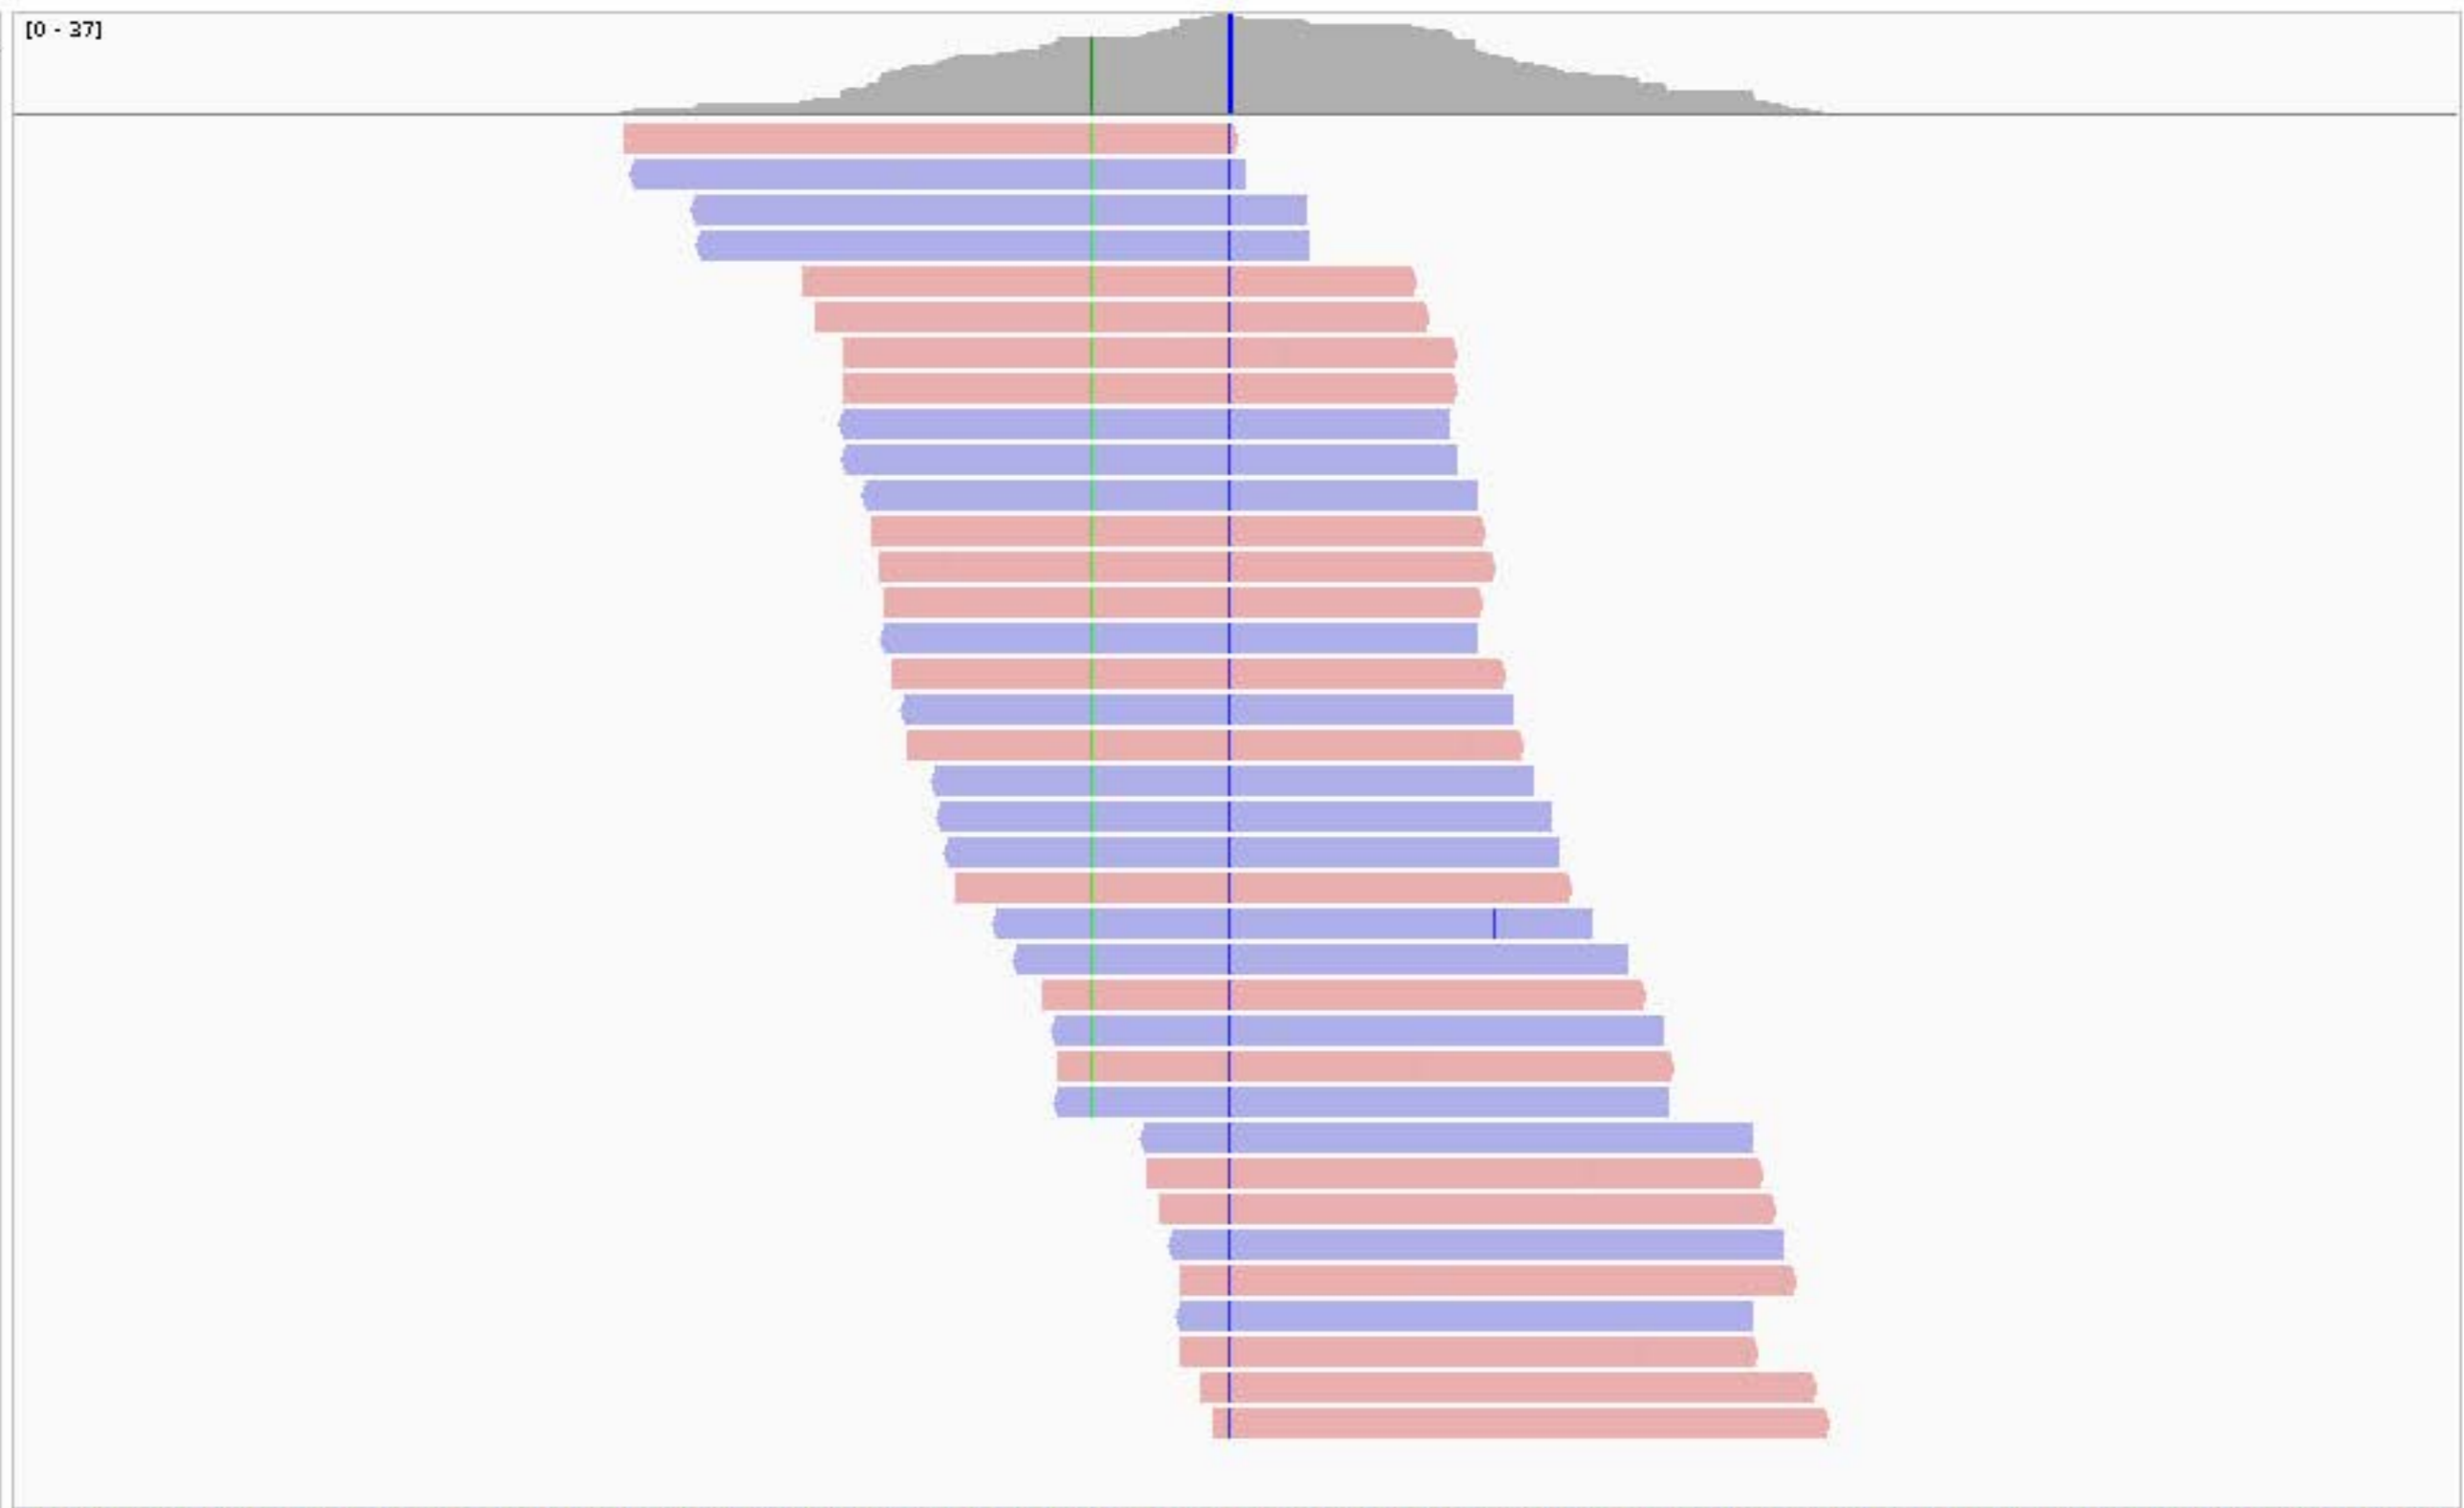

Sequence

Refseq Genes

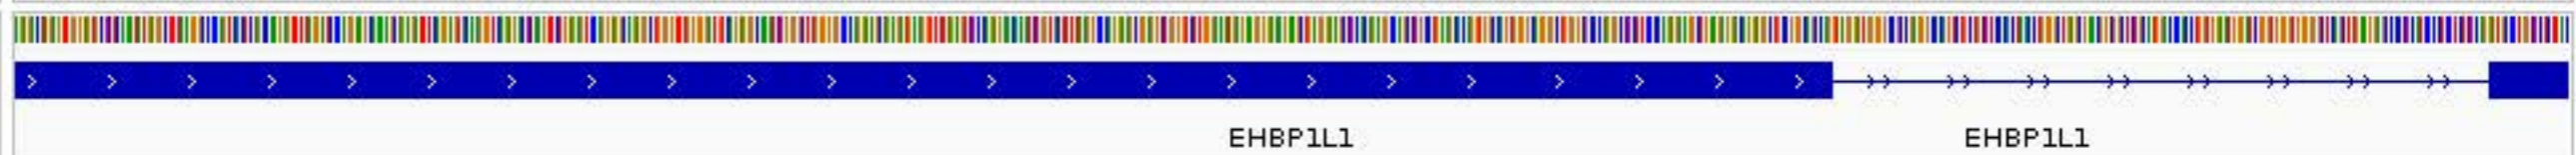

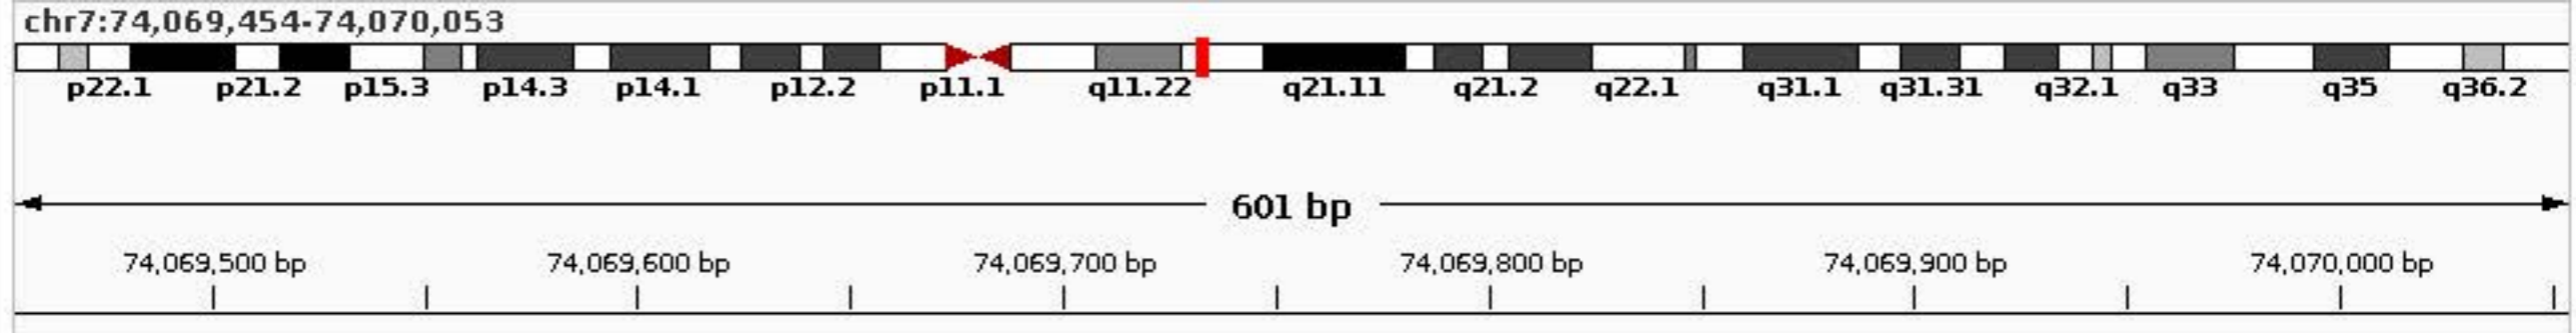

SL\_0001\_LN\_10\_mut.bam Coverage

SL\_0001\_LN\_10\_mut.bam

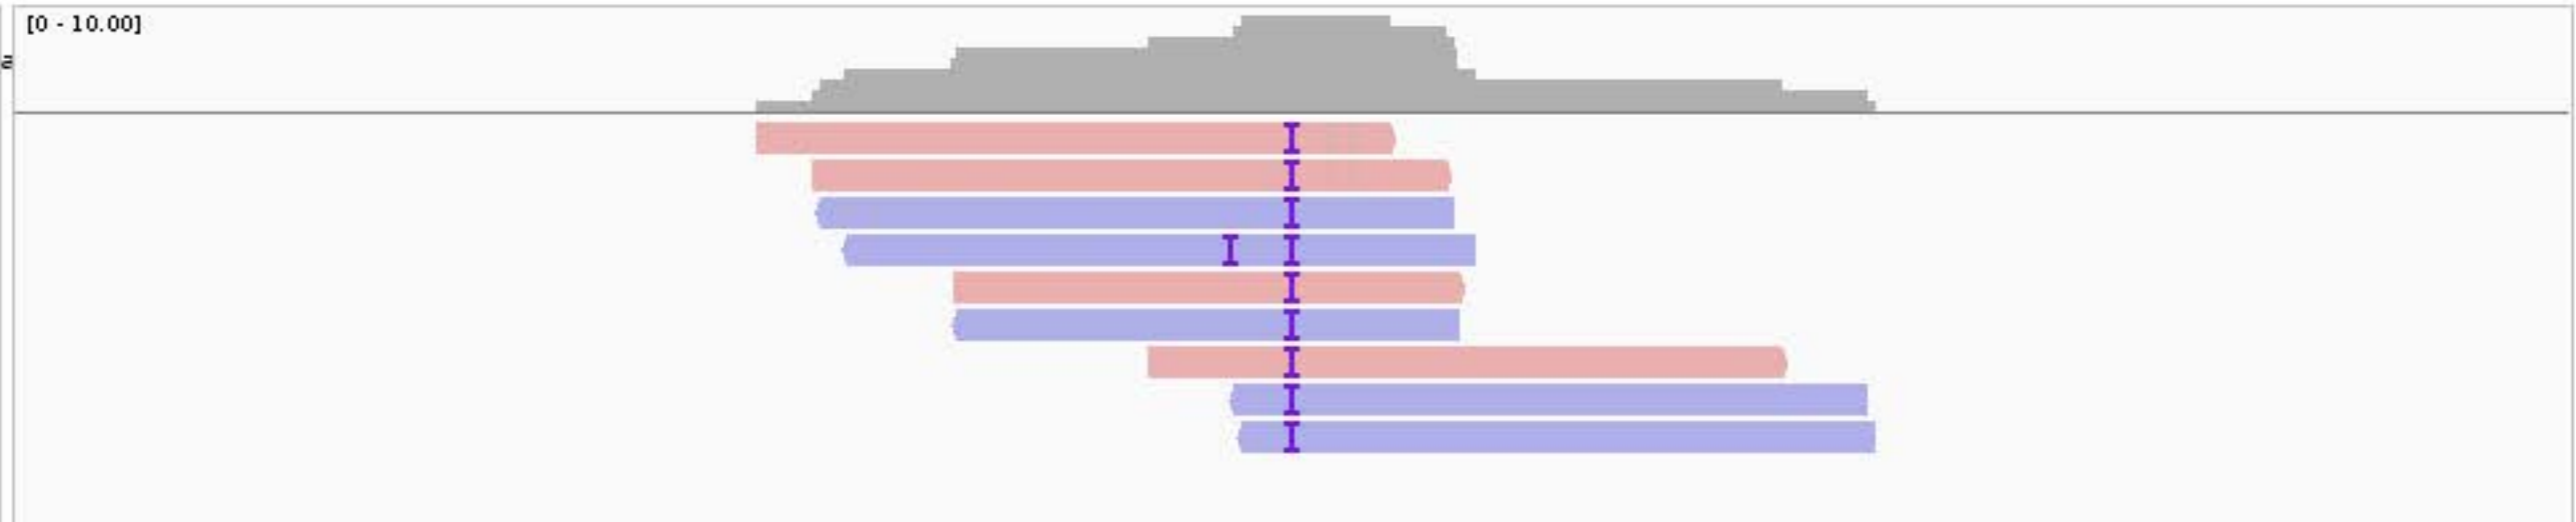

Sequence

Refseq Genes

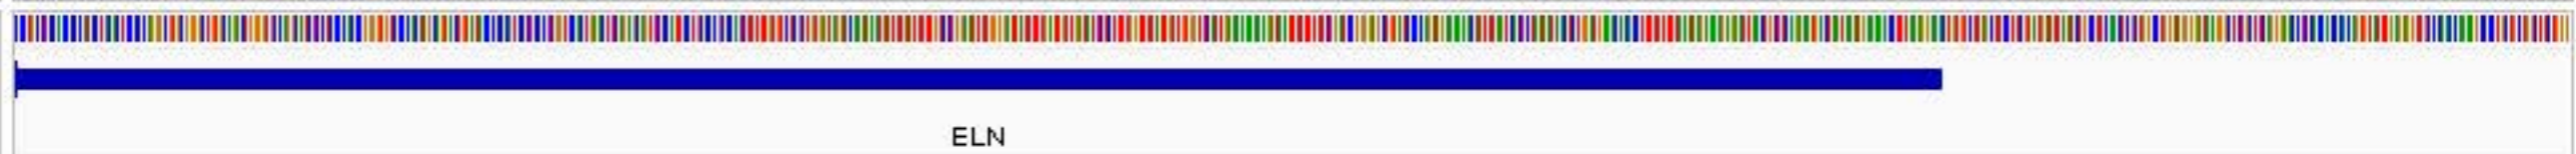



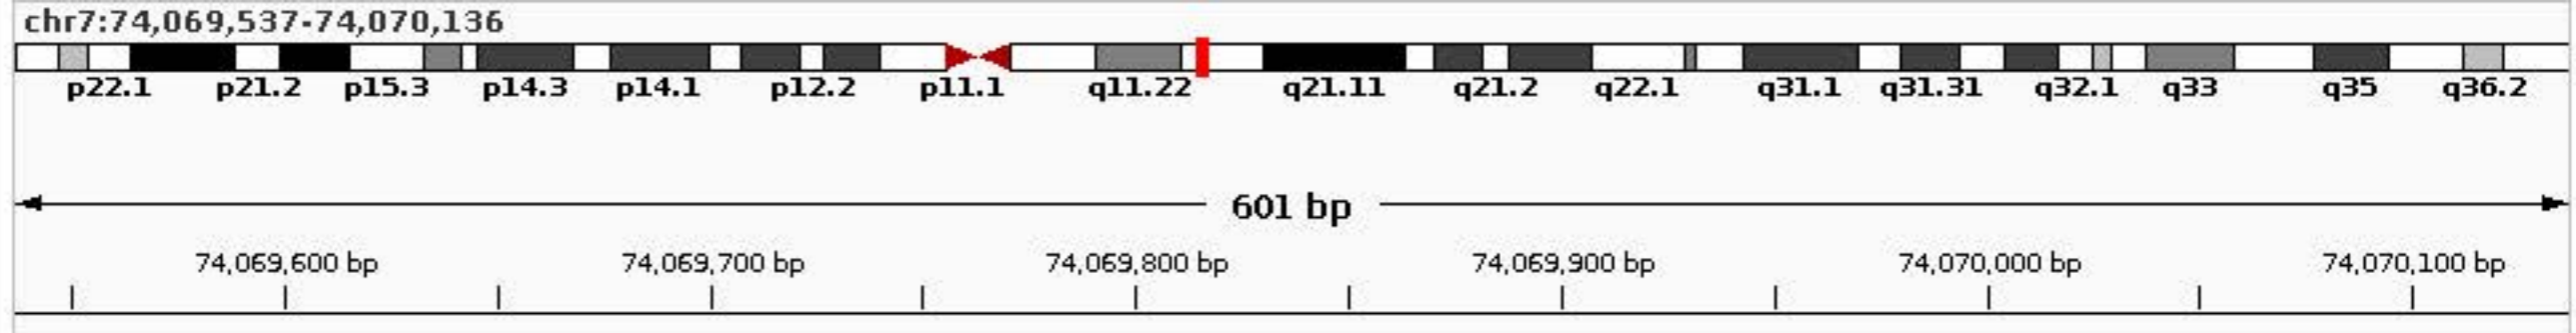

SL\_0015\_LN\_44\_mut.bam Coverage

SL\_0015\_LN\_44\_mut.bam

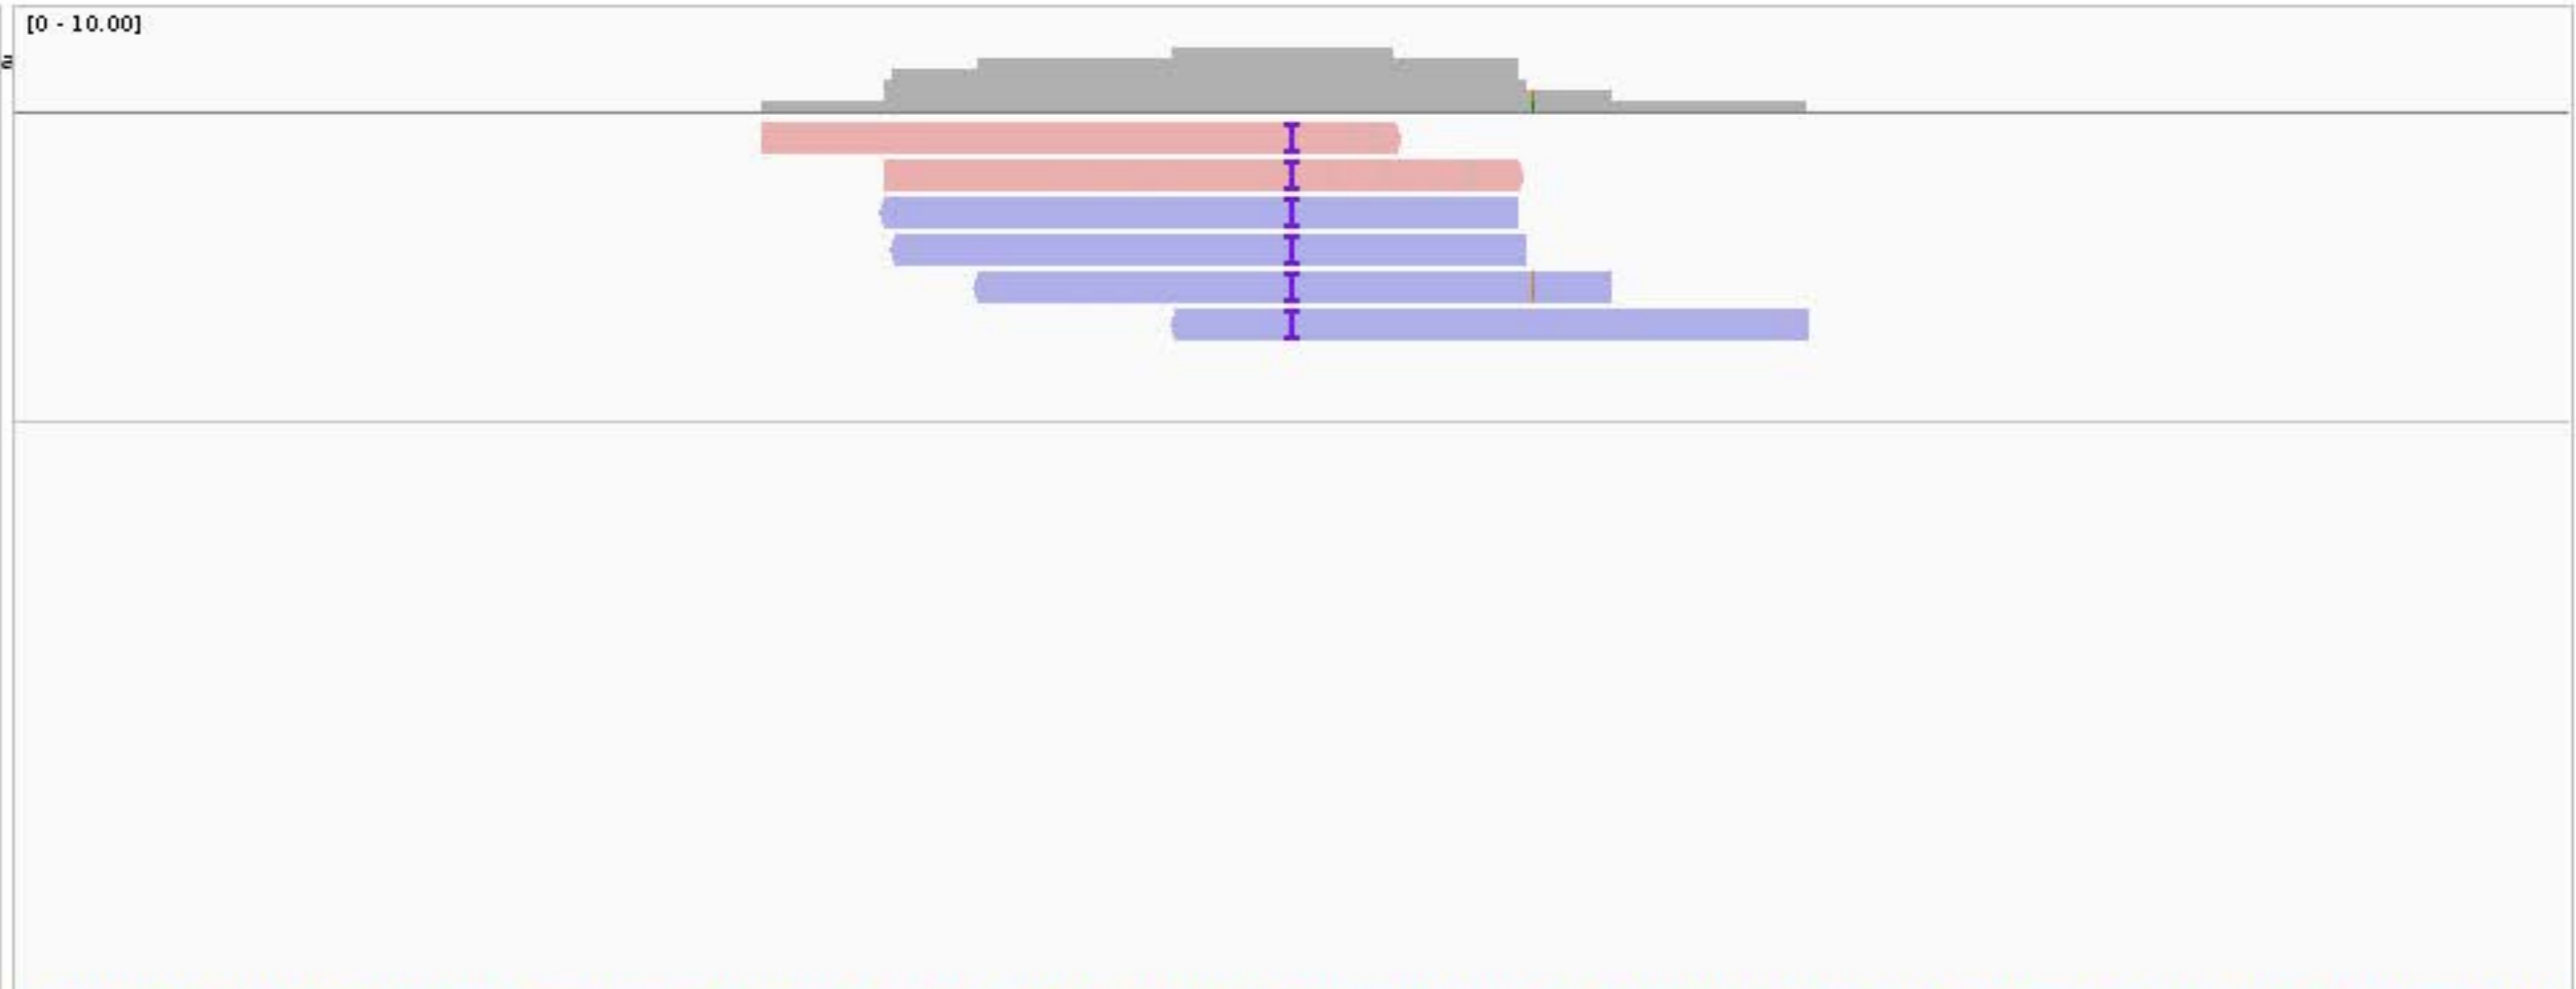

Sequence

Refseq Genes

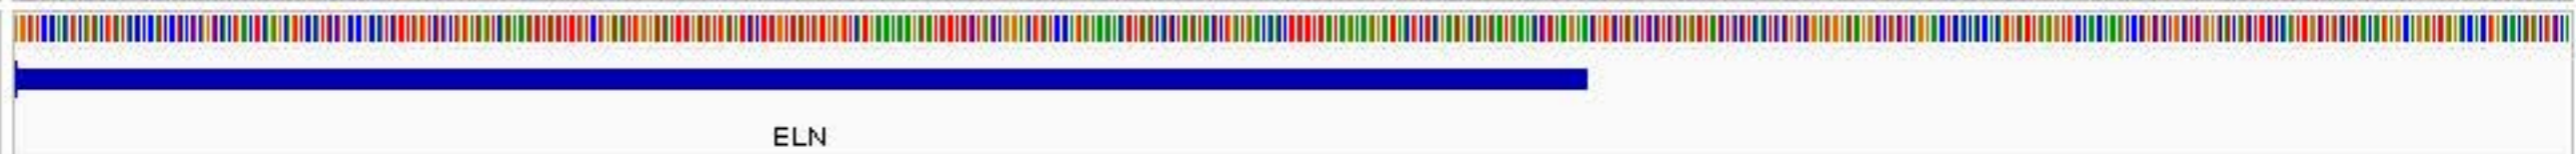

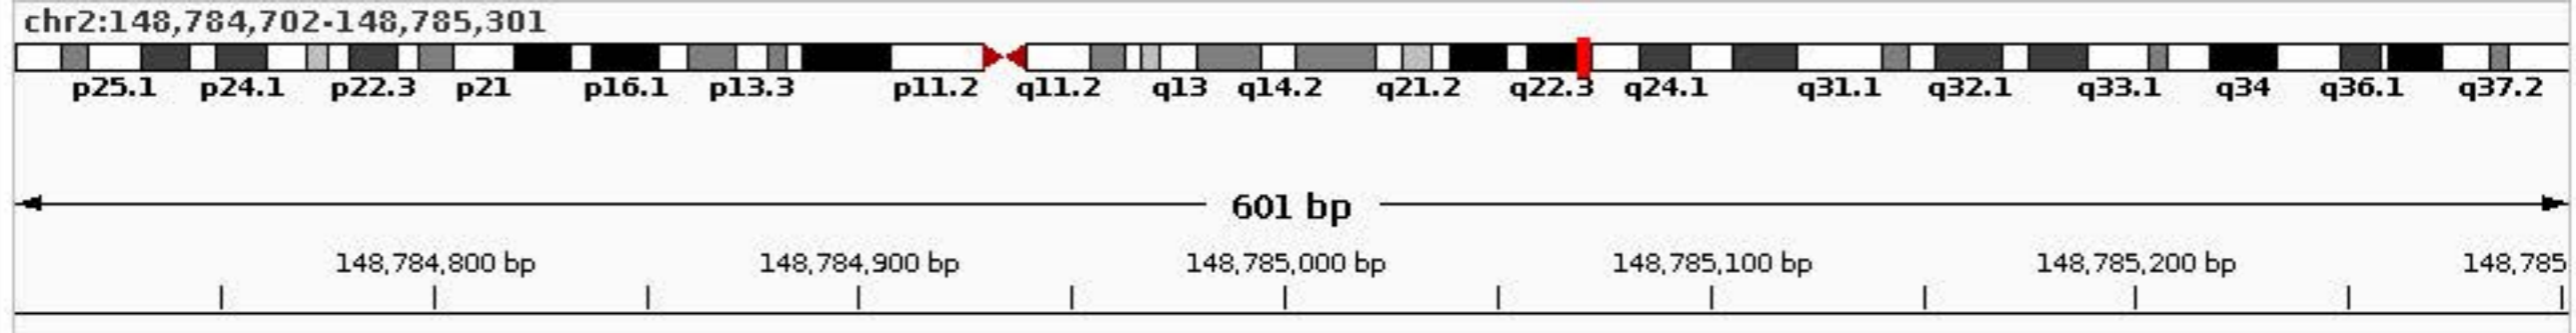

SL\_0002\_LN\_11\_mut.bam Coverage

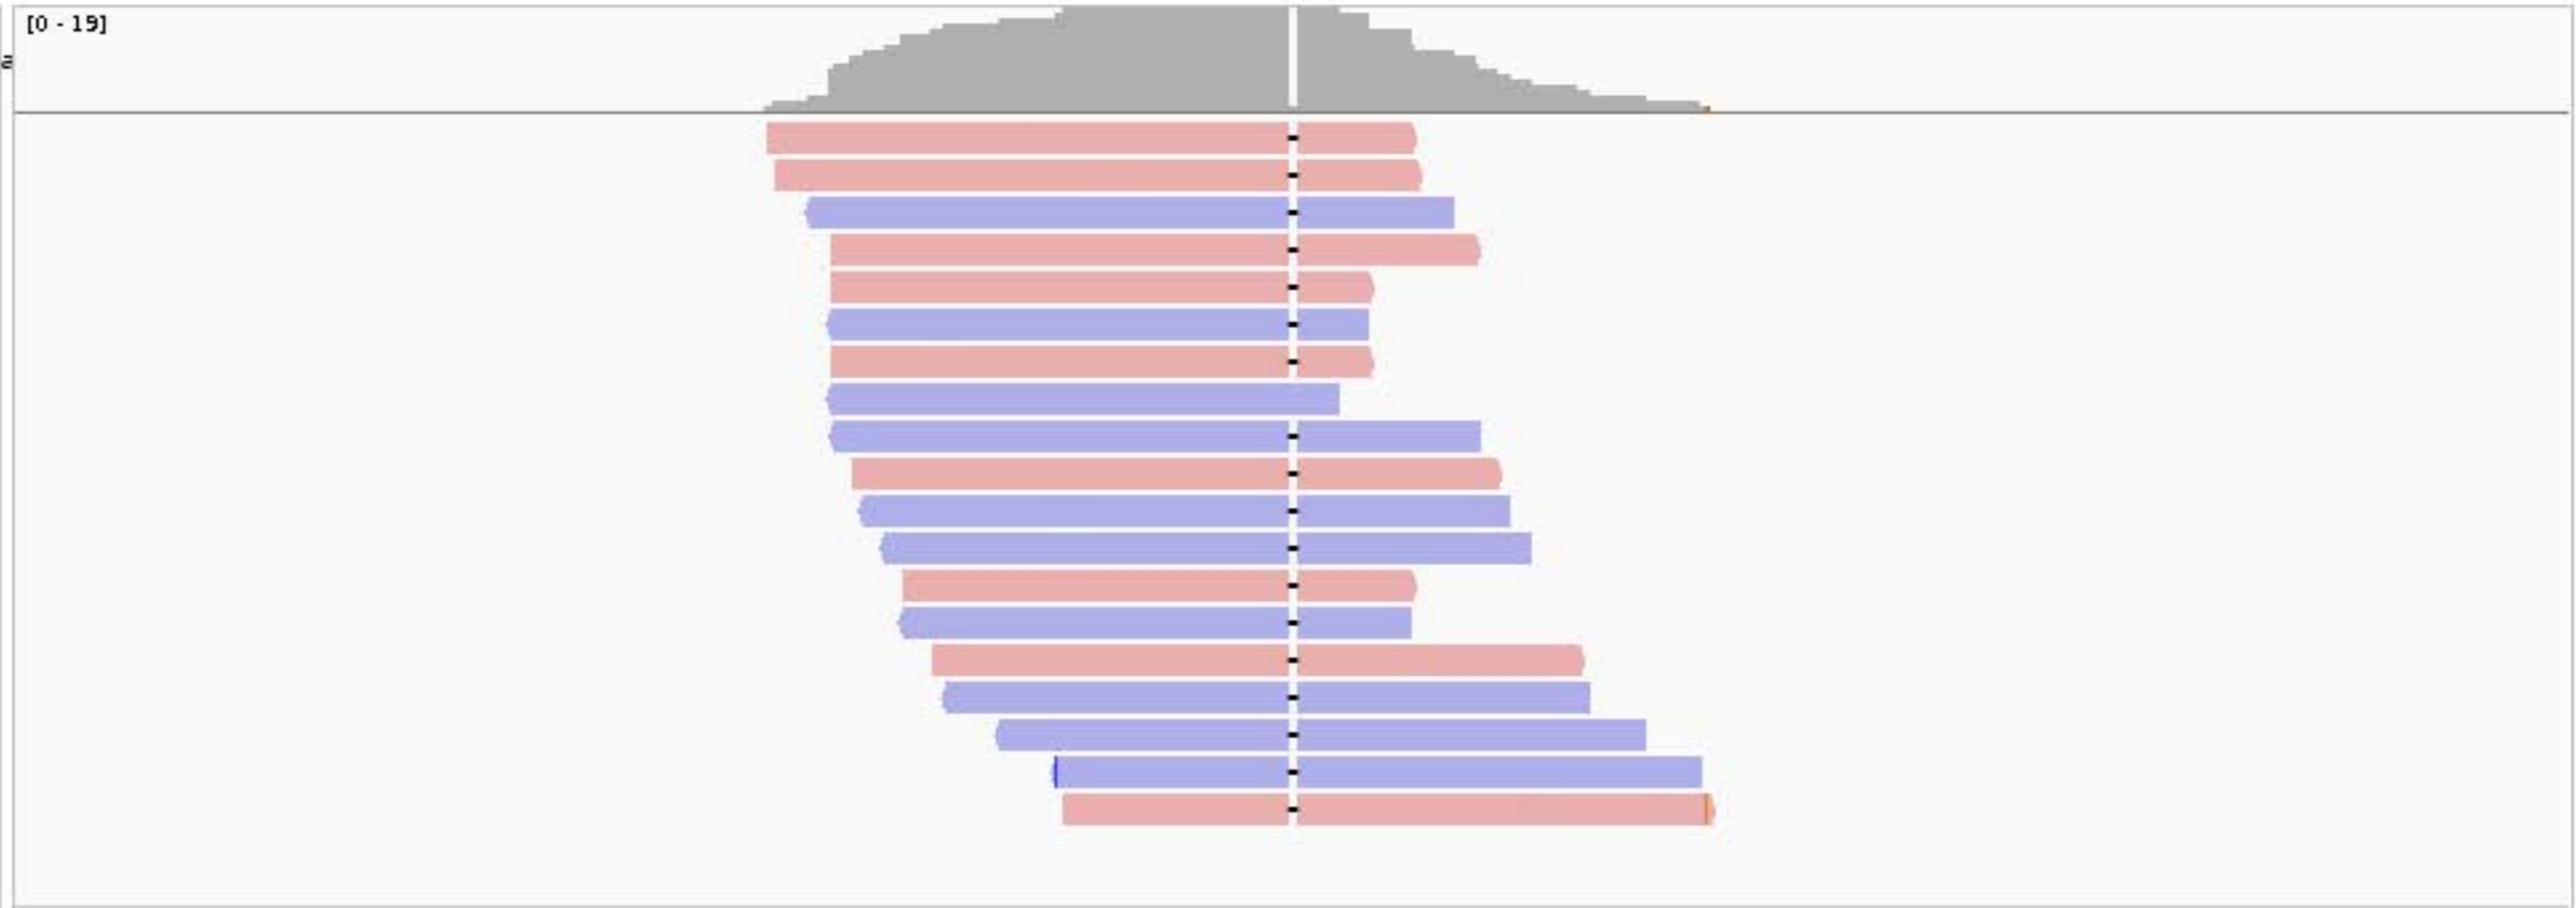

Sequence

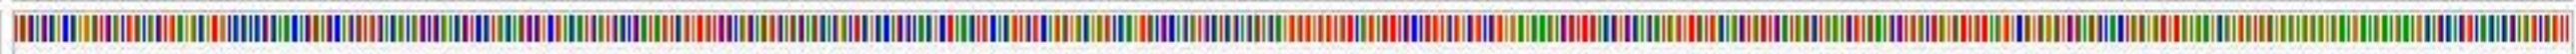

Refseq Genes

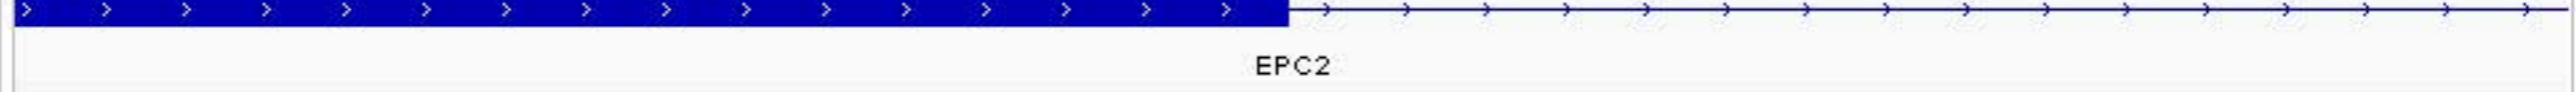

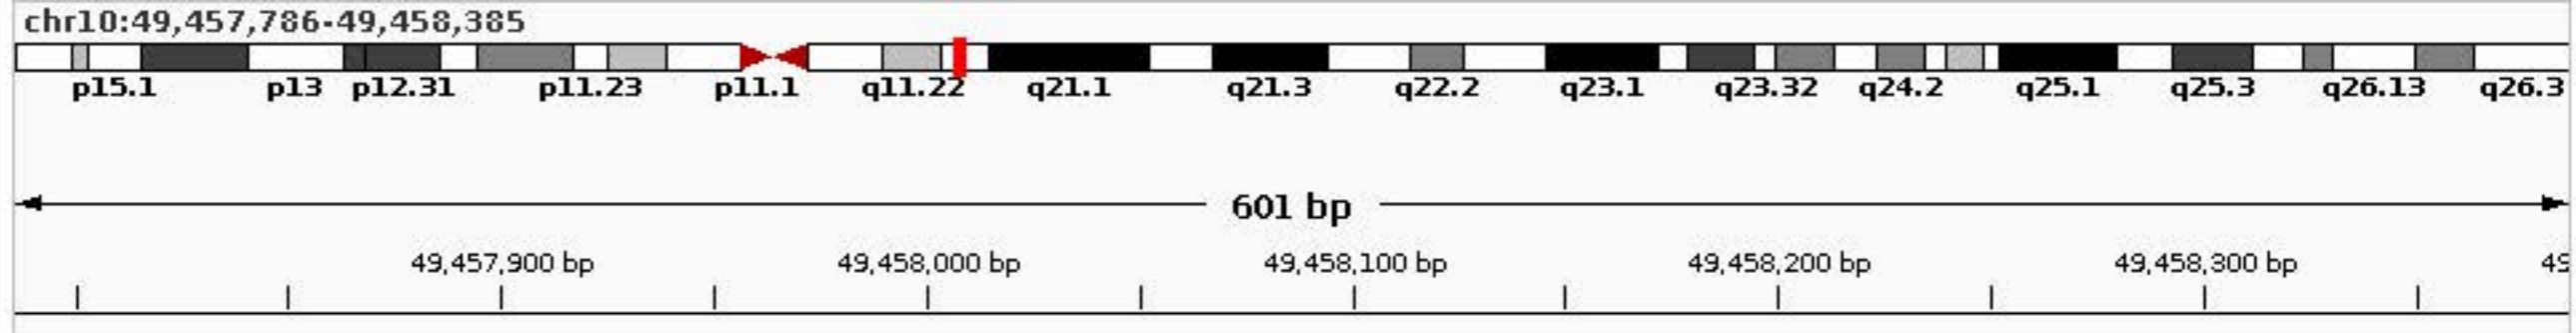

SL\_0006\_RN\_36\_mut.bam Coverage

SL\_0006\_RN\_36\_mut.bam

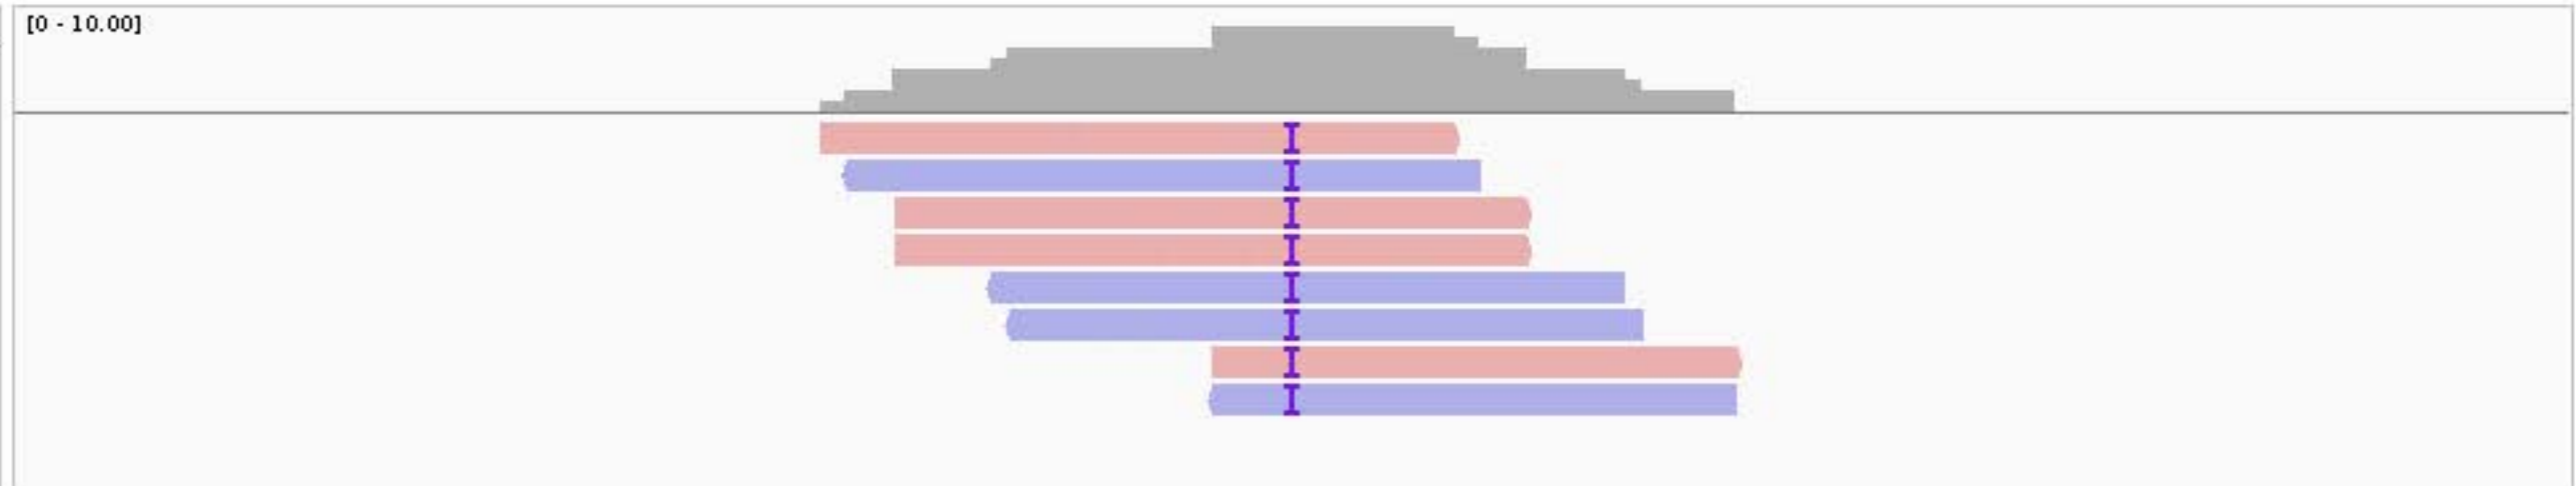

Sequence

Refseq Genes

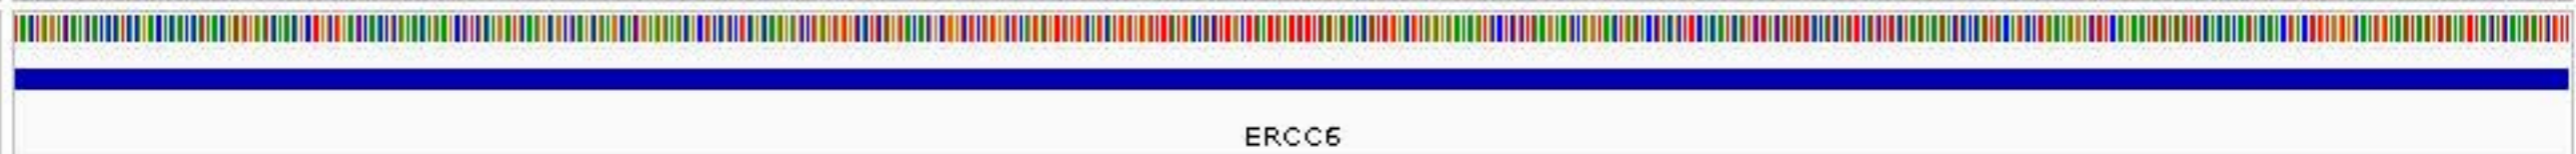

chr19:41,443,801-41,444,400

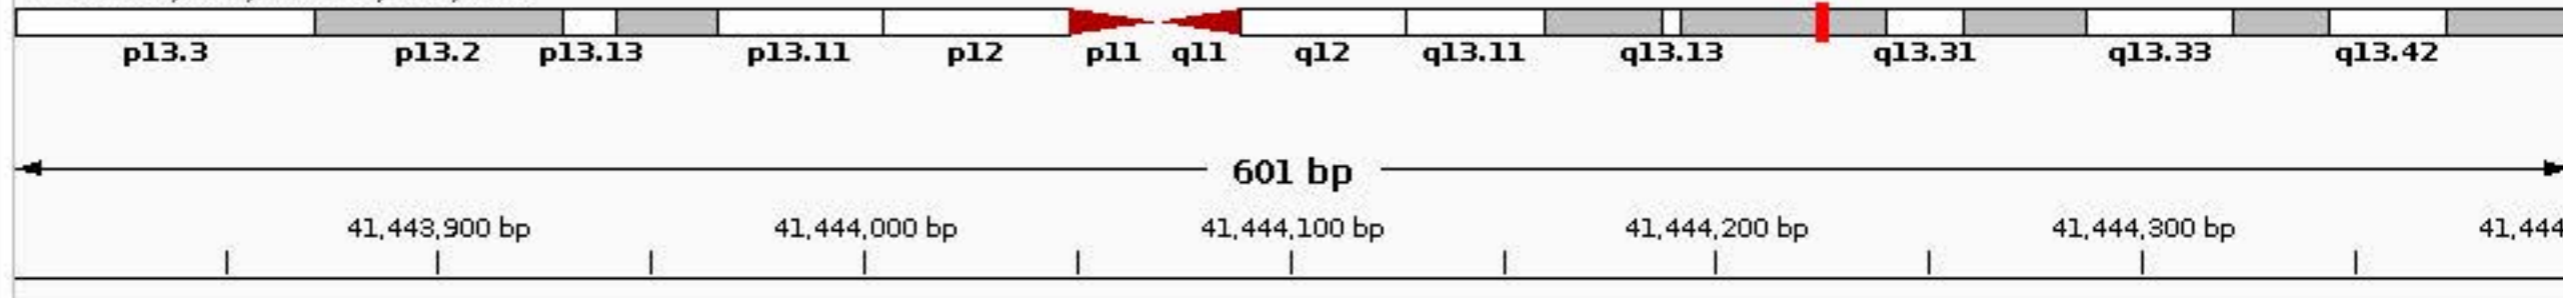

SL\_0007\_RN\_33\_mut.bam Coverage

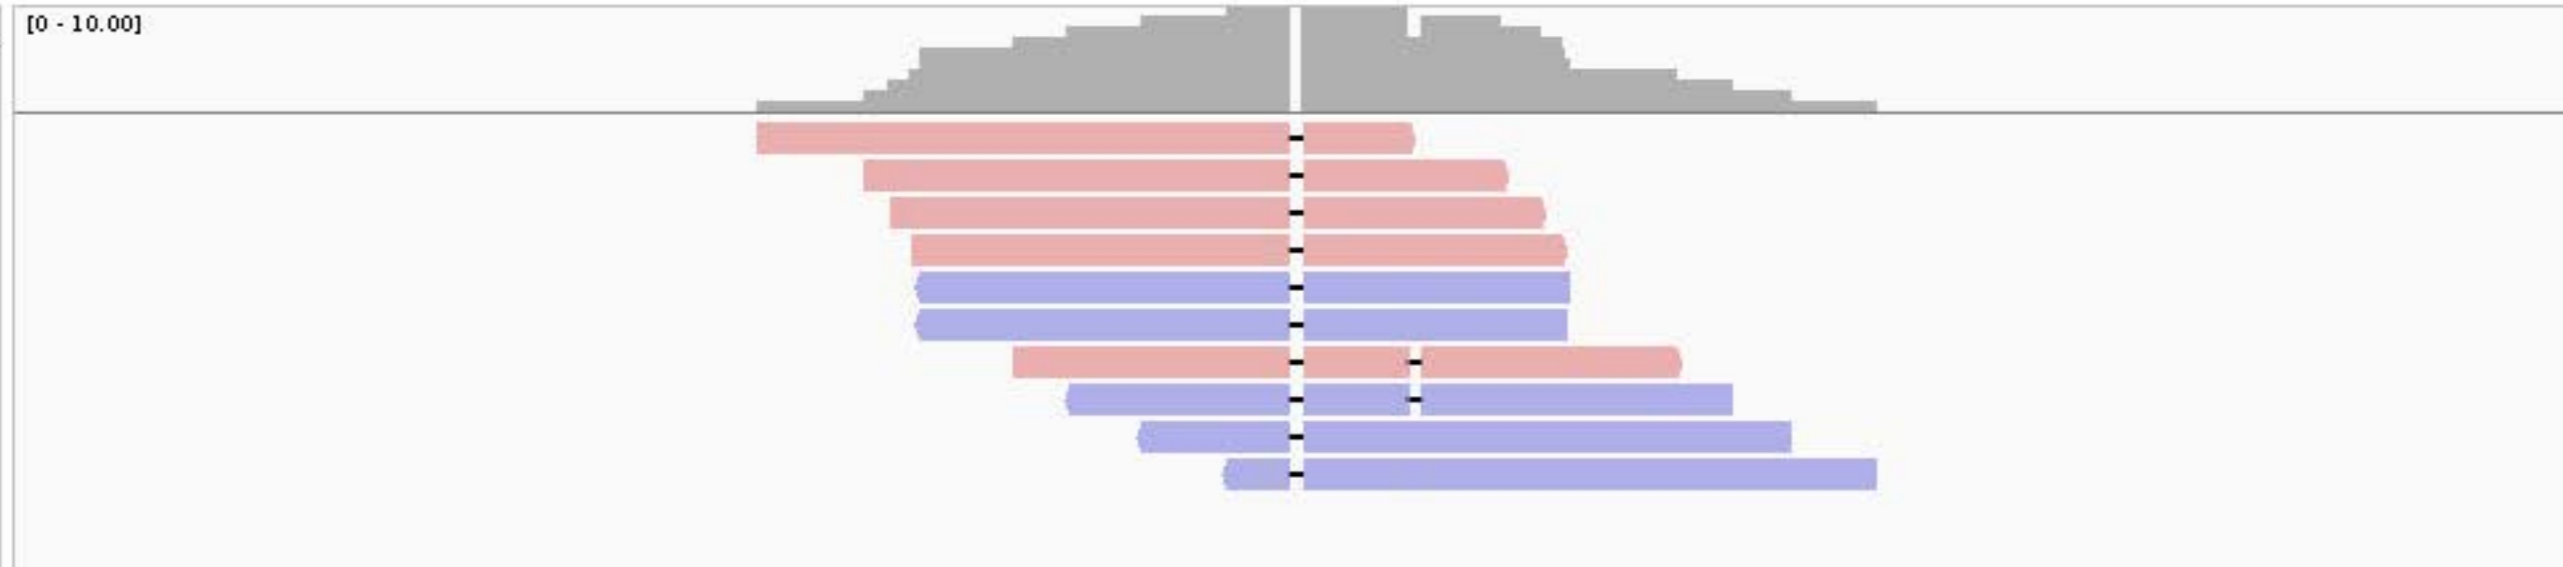

SL\_0007\_RN\_33\_mut.bam

Sequence

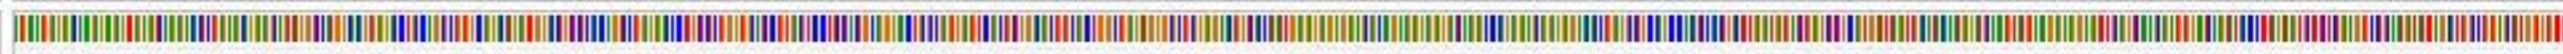

Refseq Genes

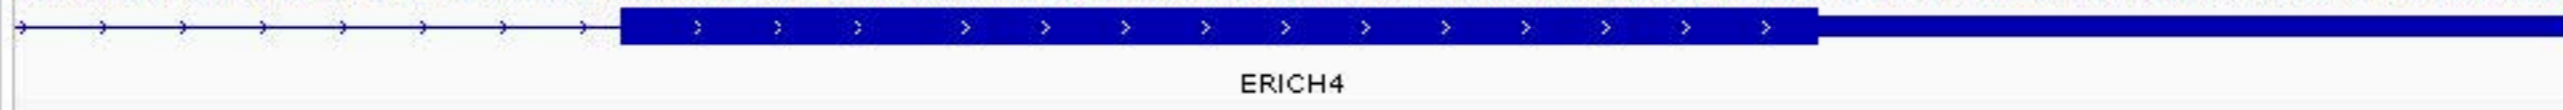

ERICH4



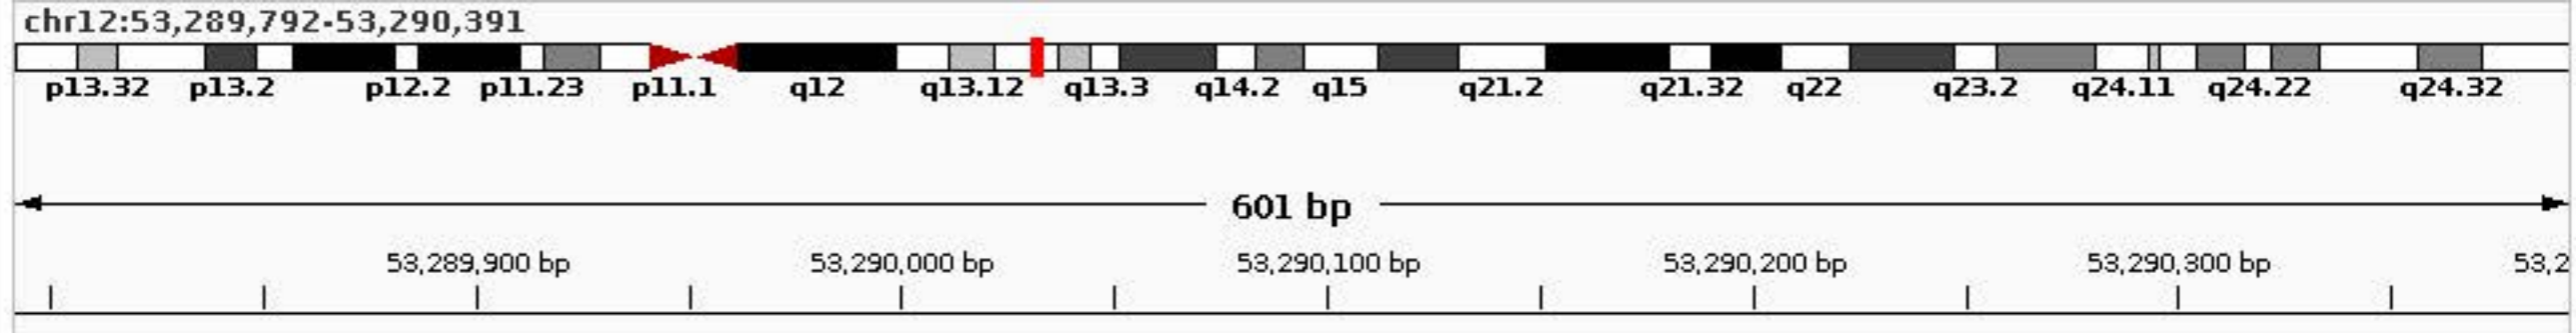

SL\_0004\_RN\_47\_mut.bam Coverage

SL\_0004\_RN\_47\_mut.bam

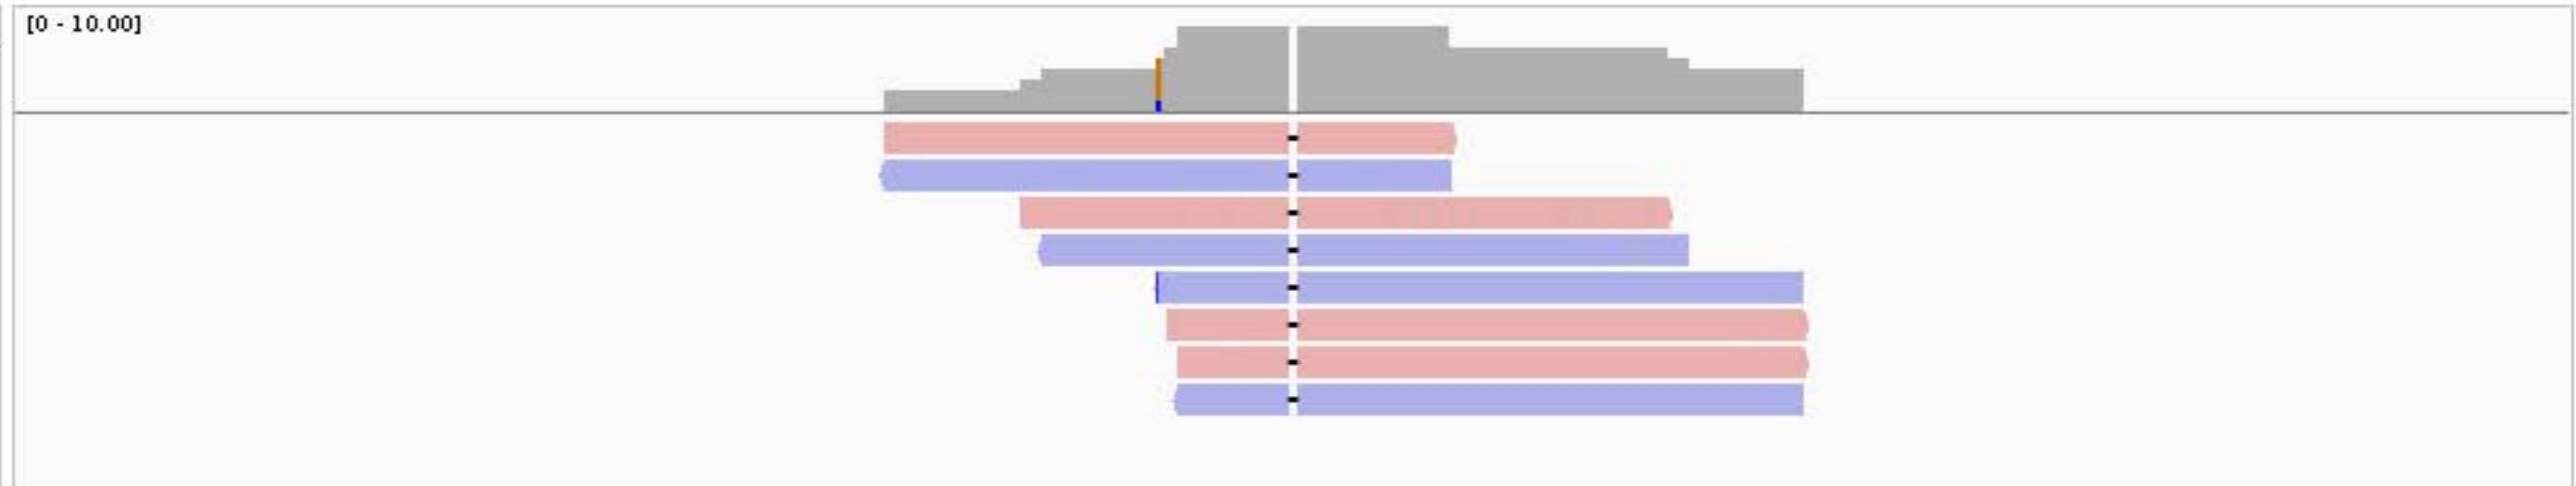

Sequence

Refseq Genes

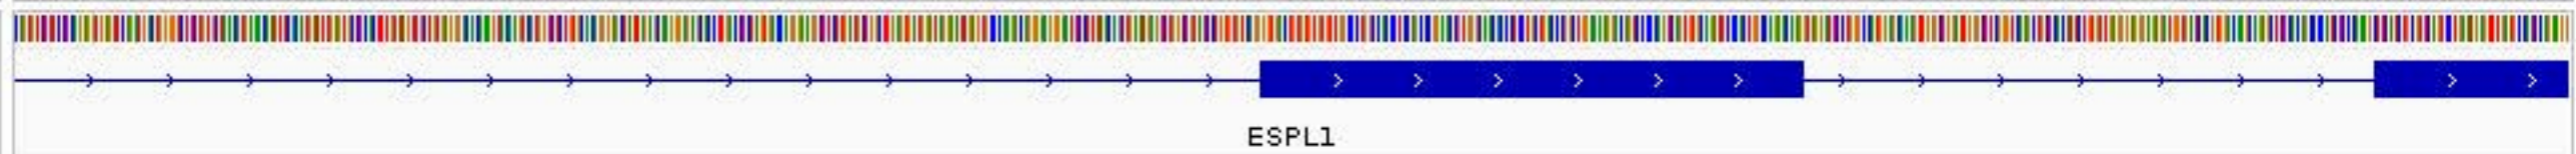

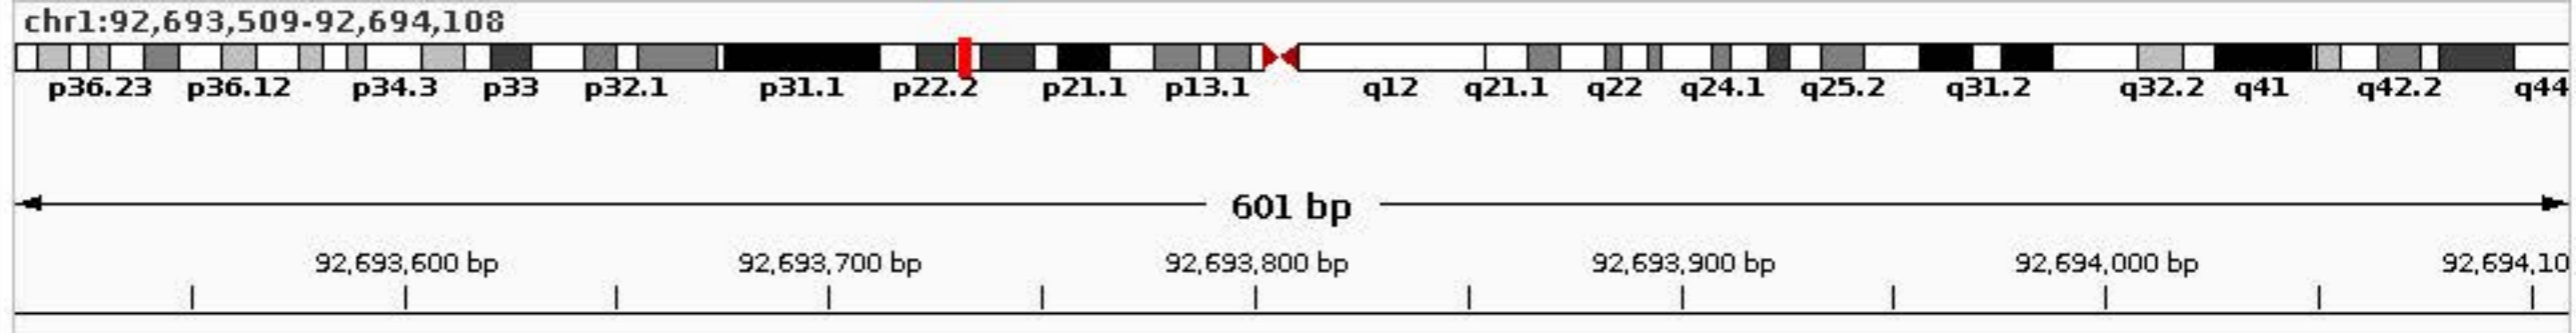

SL\_0006\_RN\_67\_mut.bam Coverage

SL\_0006\_RN\_67\_mut.bam

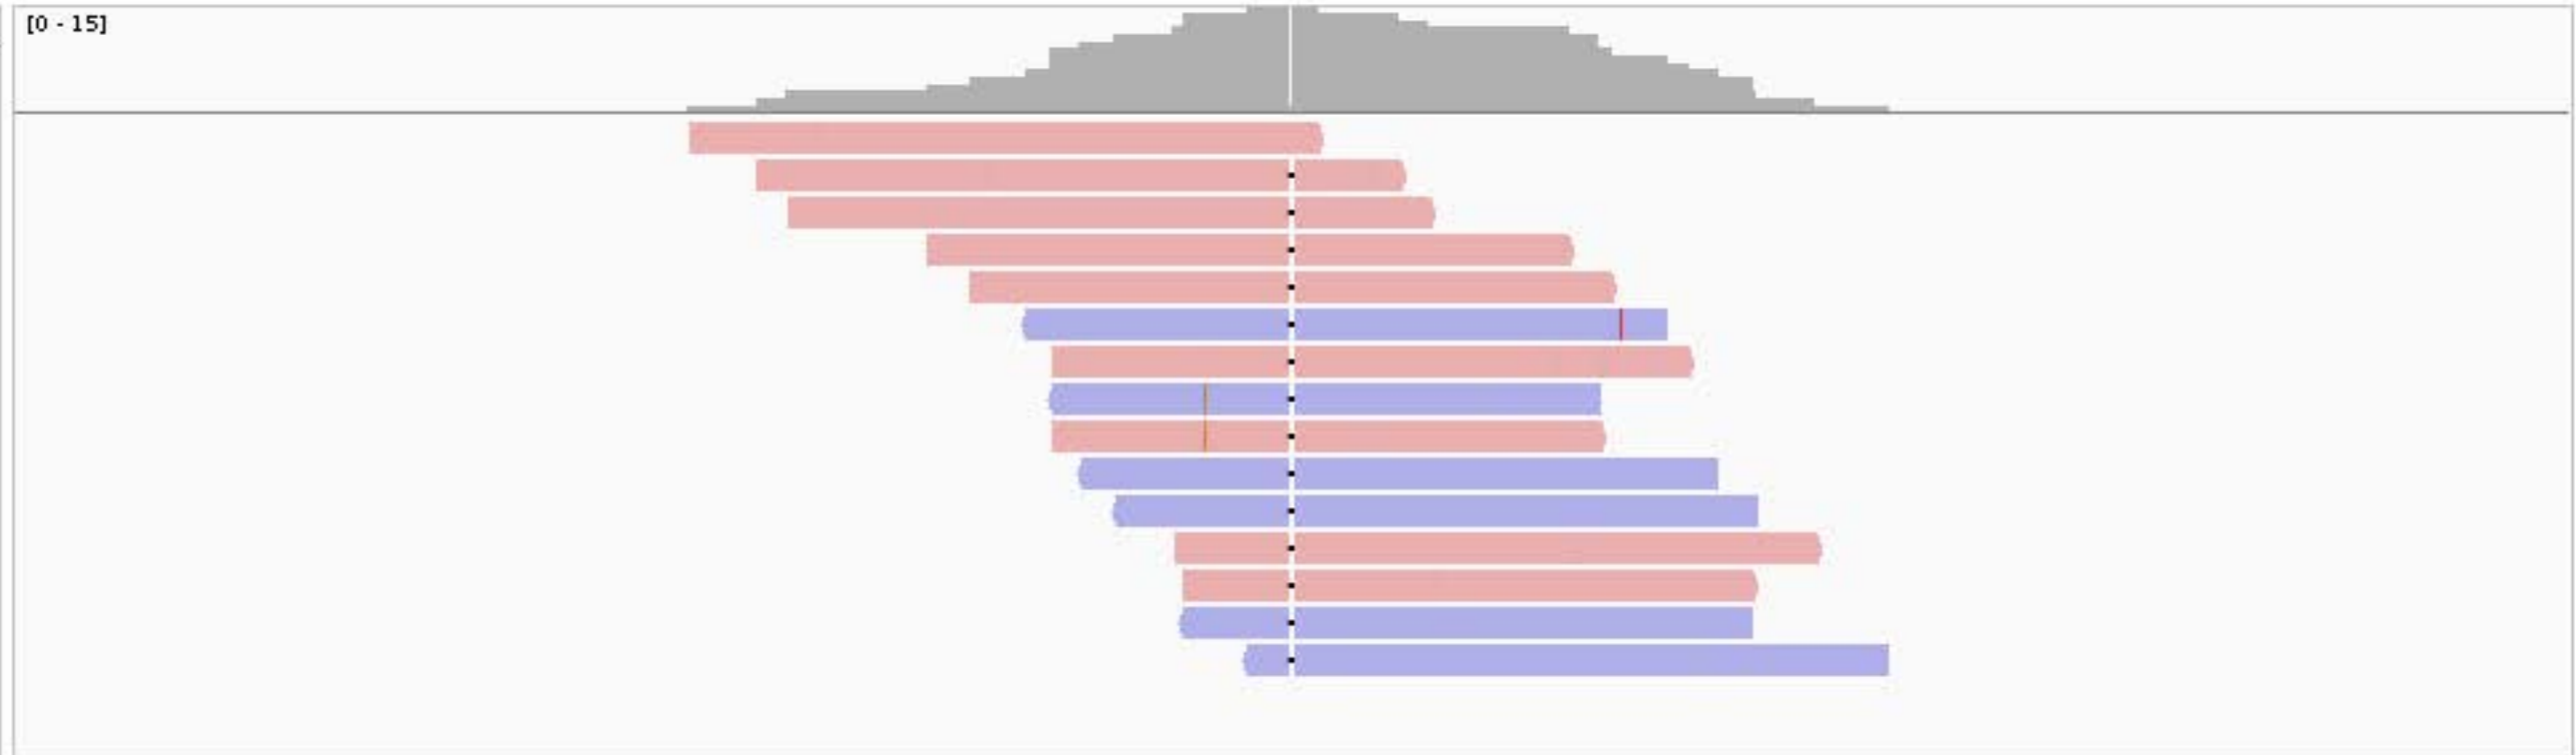

Sequence

Refseq Genes

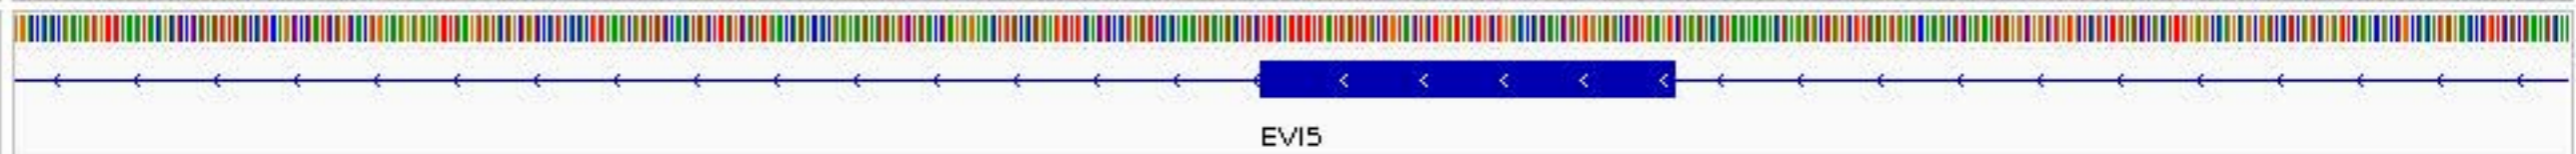

chr13:37,008,511-37,009,110

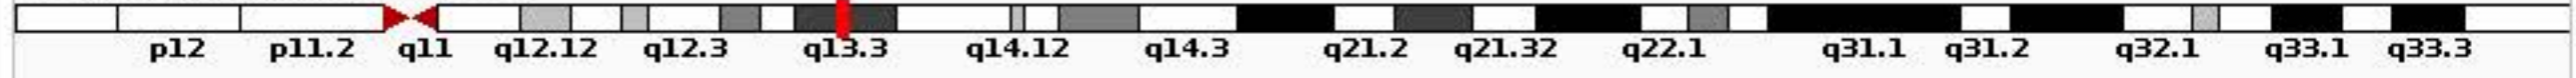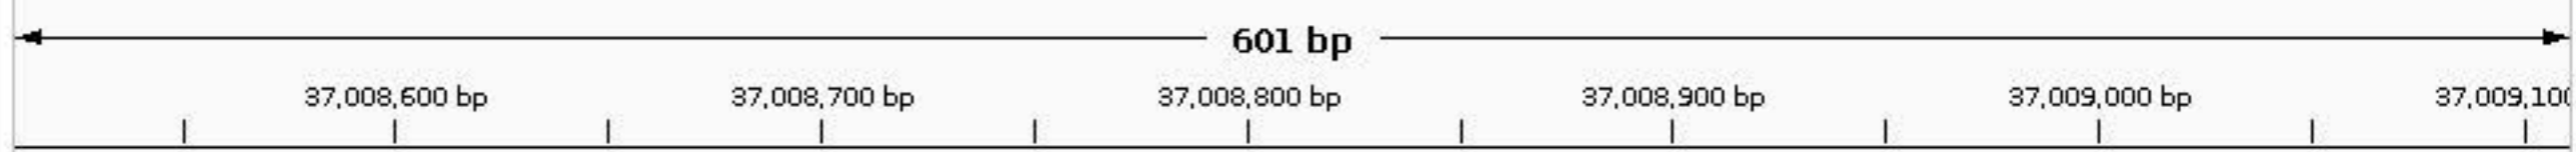

SL\_0015\_RN\_10\_mut.bam Coverage

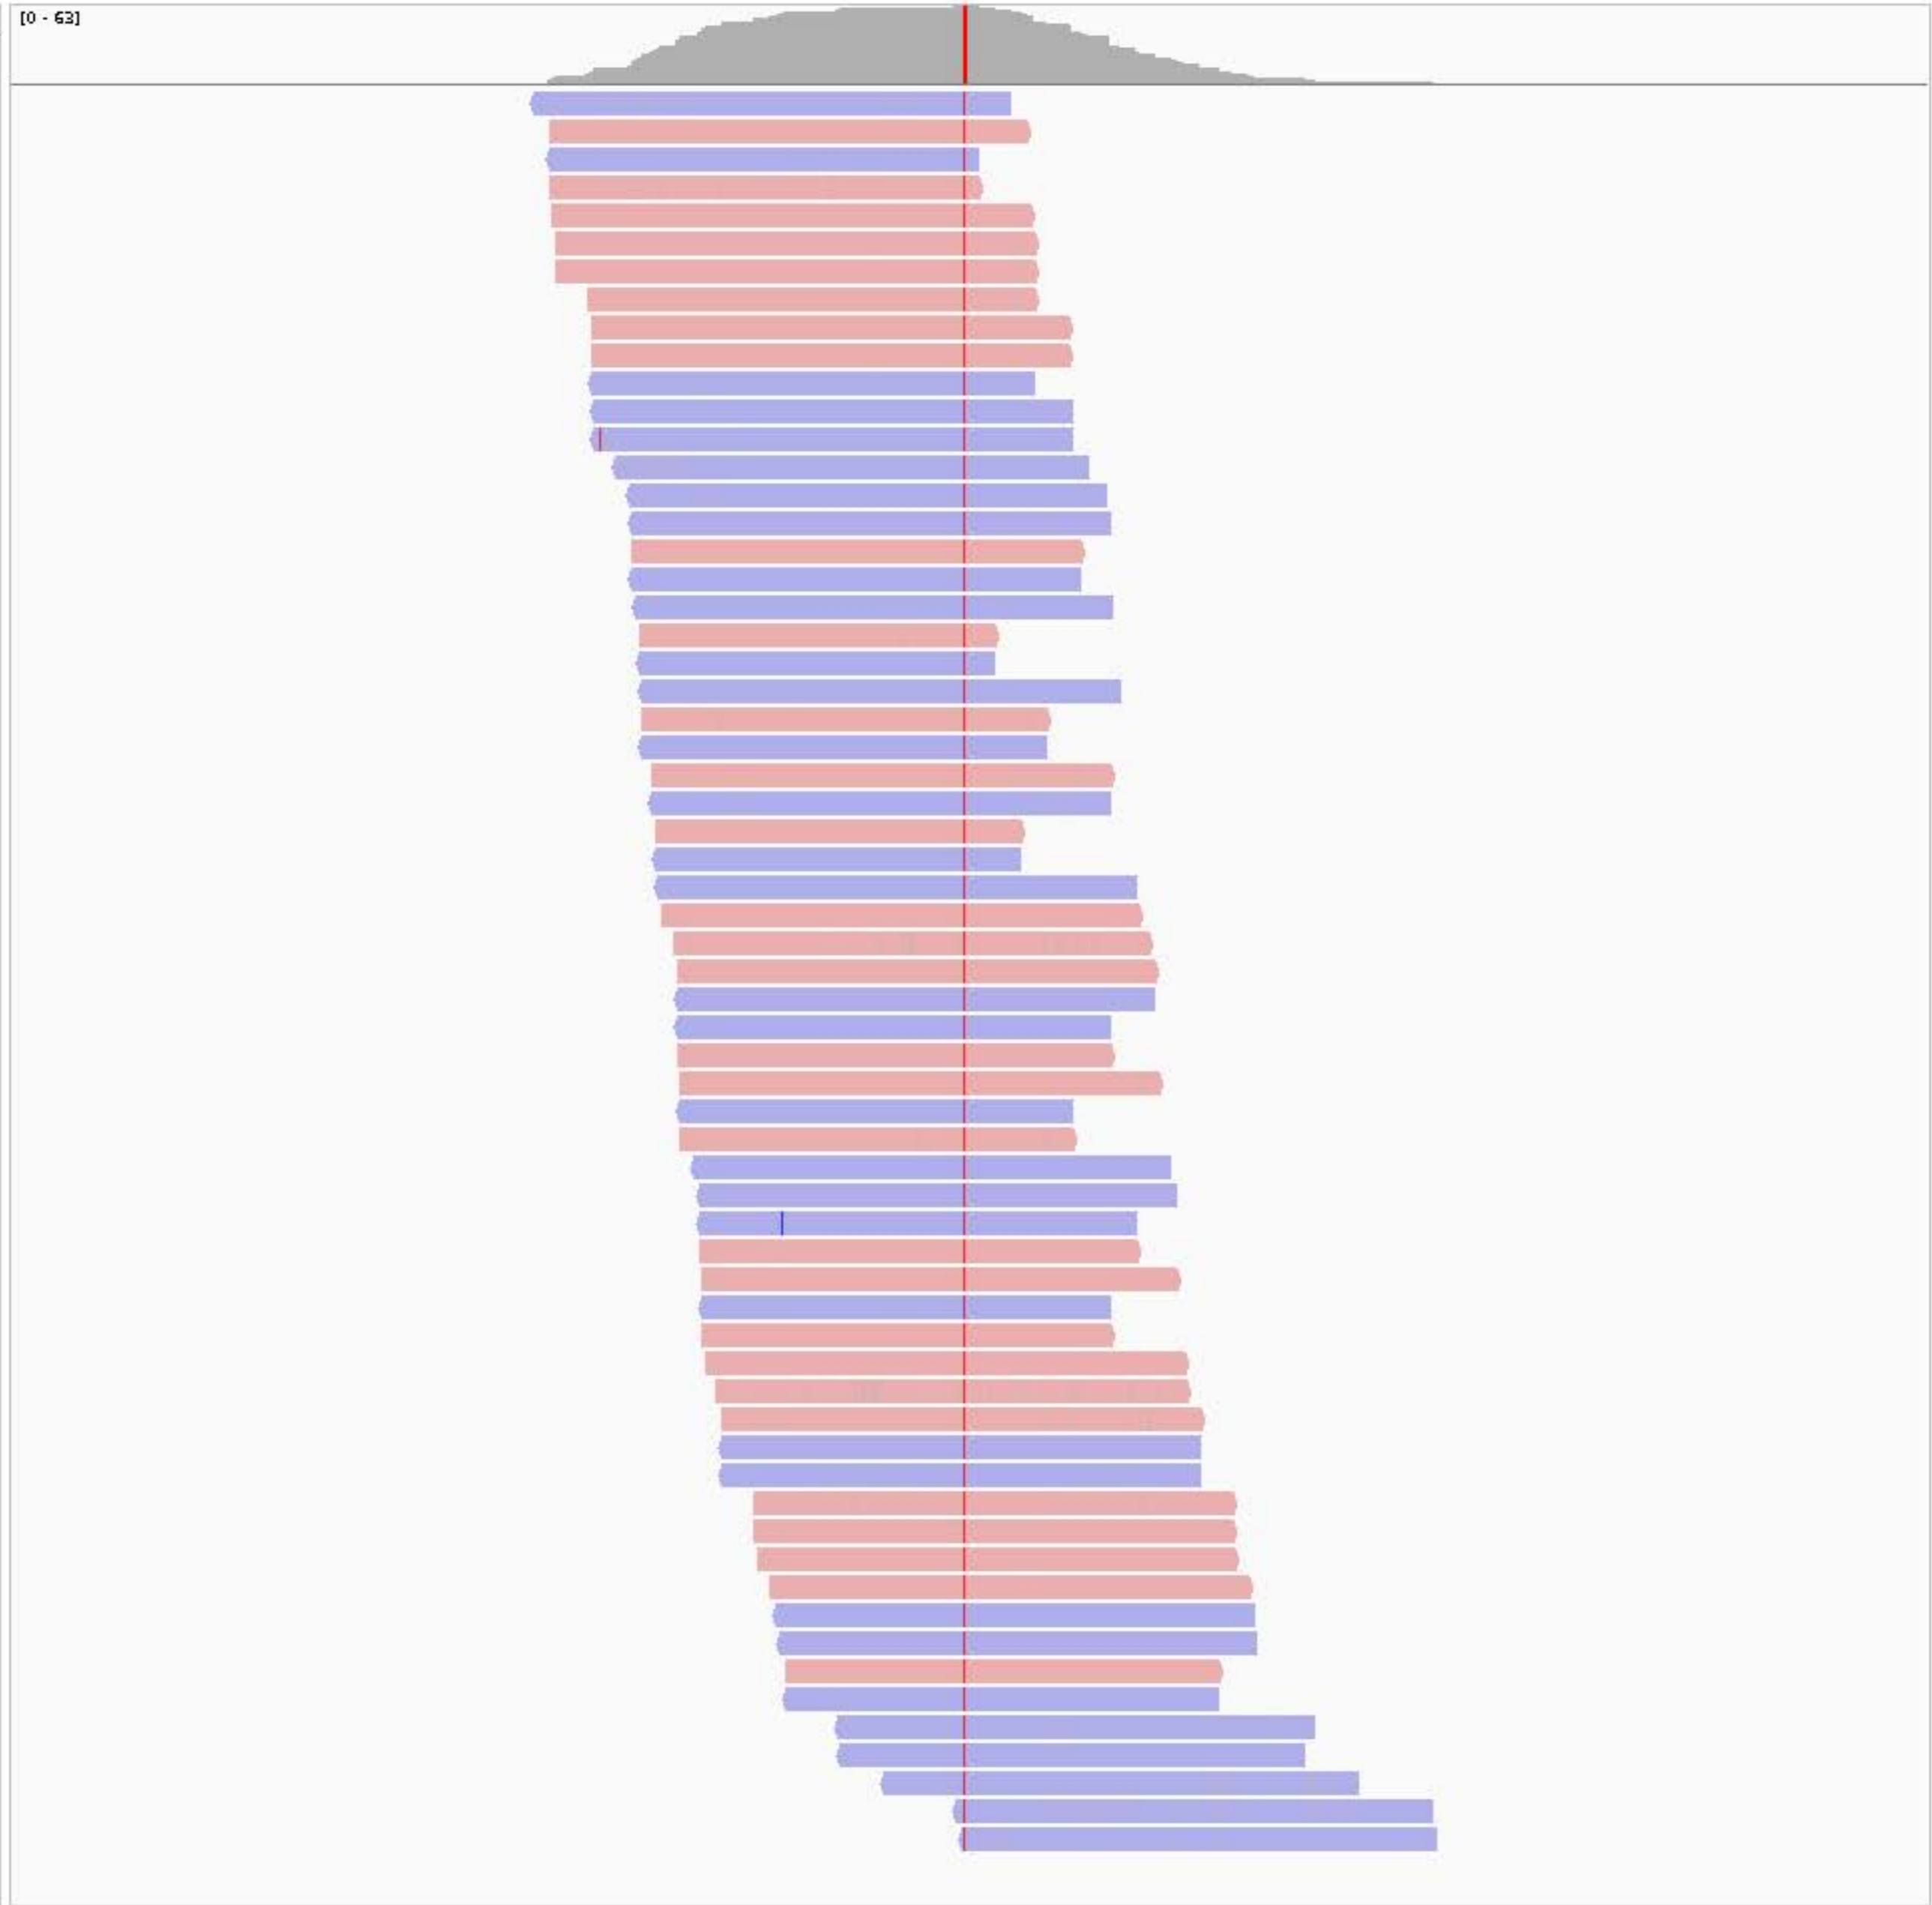

SL\_0015\_RN\_10\_mut.bam

Sequence

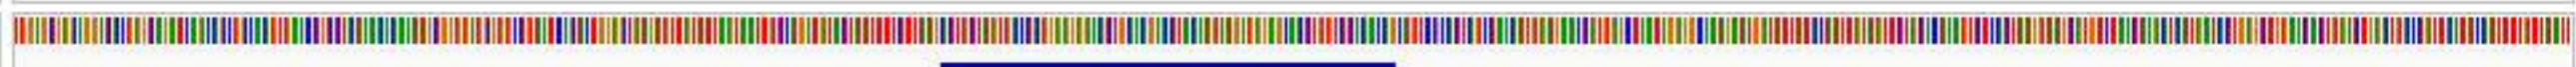

Refseq Genes

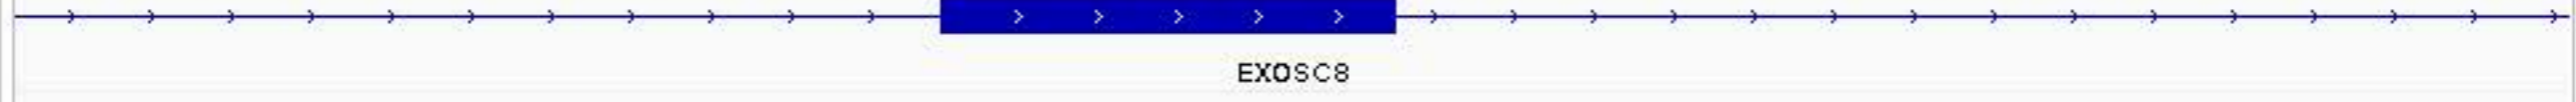

EXOSC8

chr8:143,728,976-143,729,575

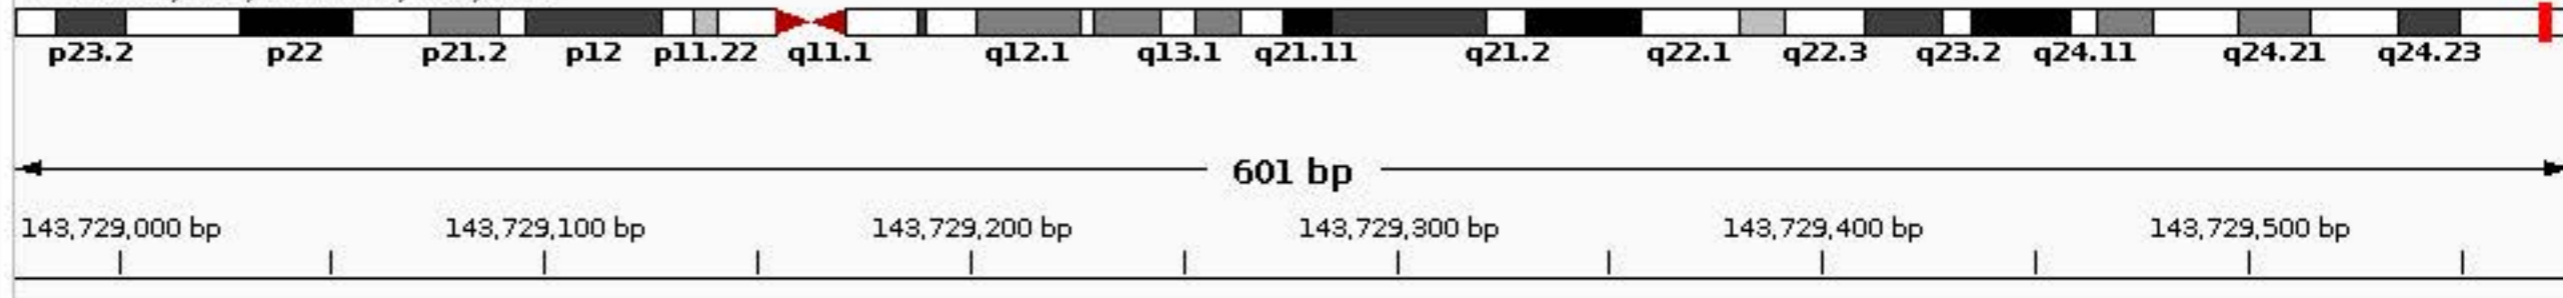

SL\_0015\_LN\_46\_mut.bam Coverage

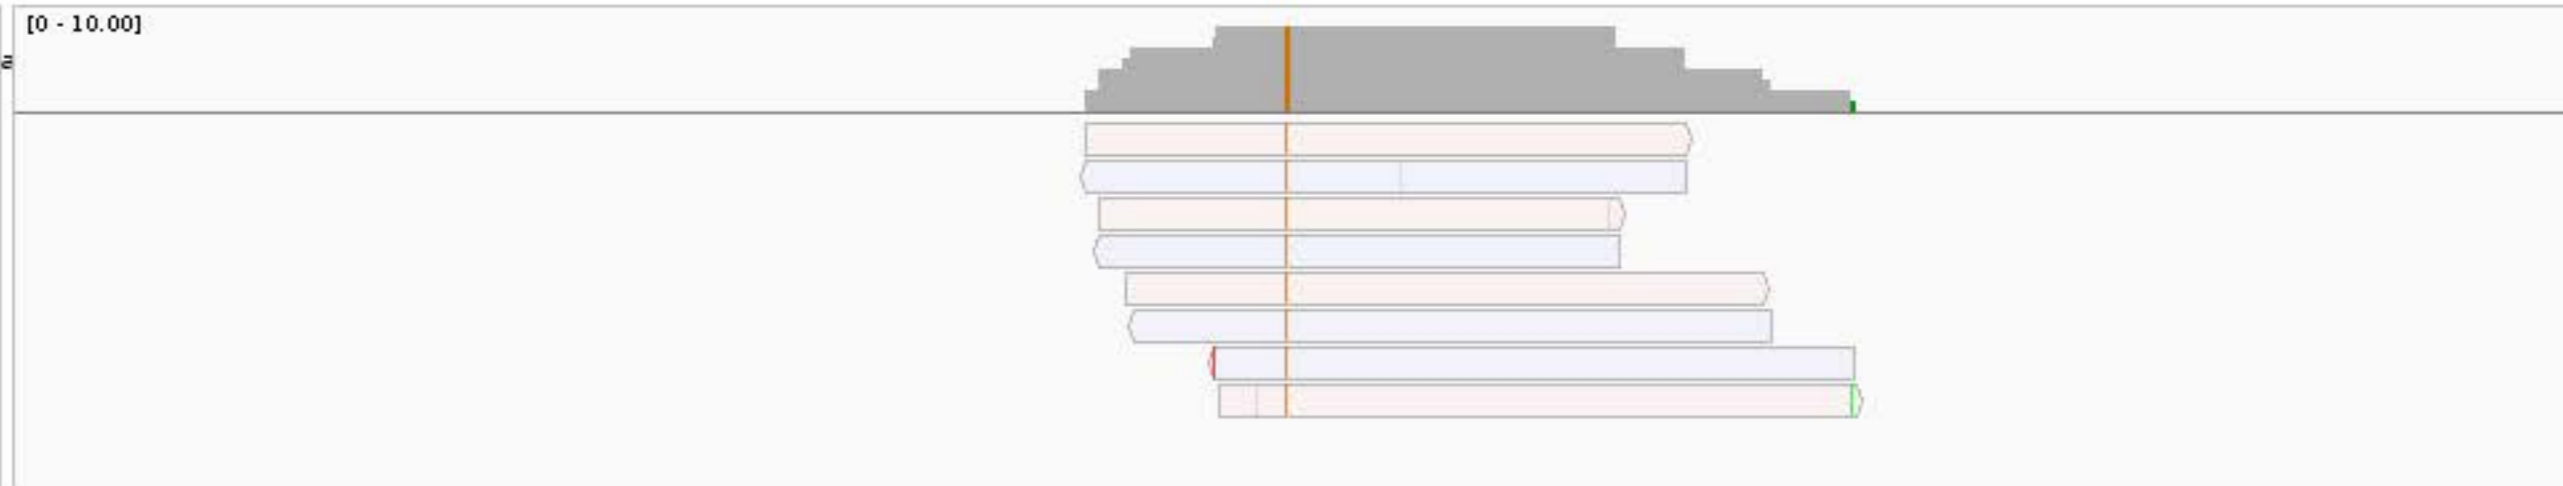

SL\_0015\_LN\_46\_mut.bam

Sequence

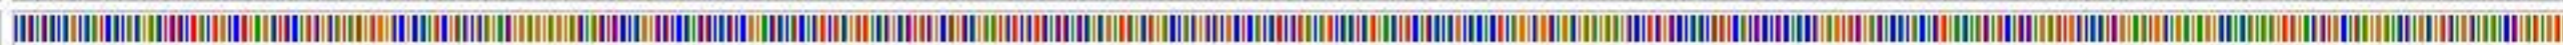

Refseq Genes

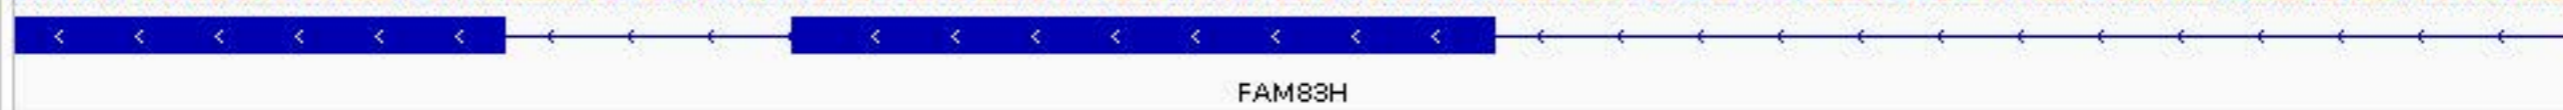



chr9:137,244,883-137,245,482

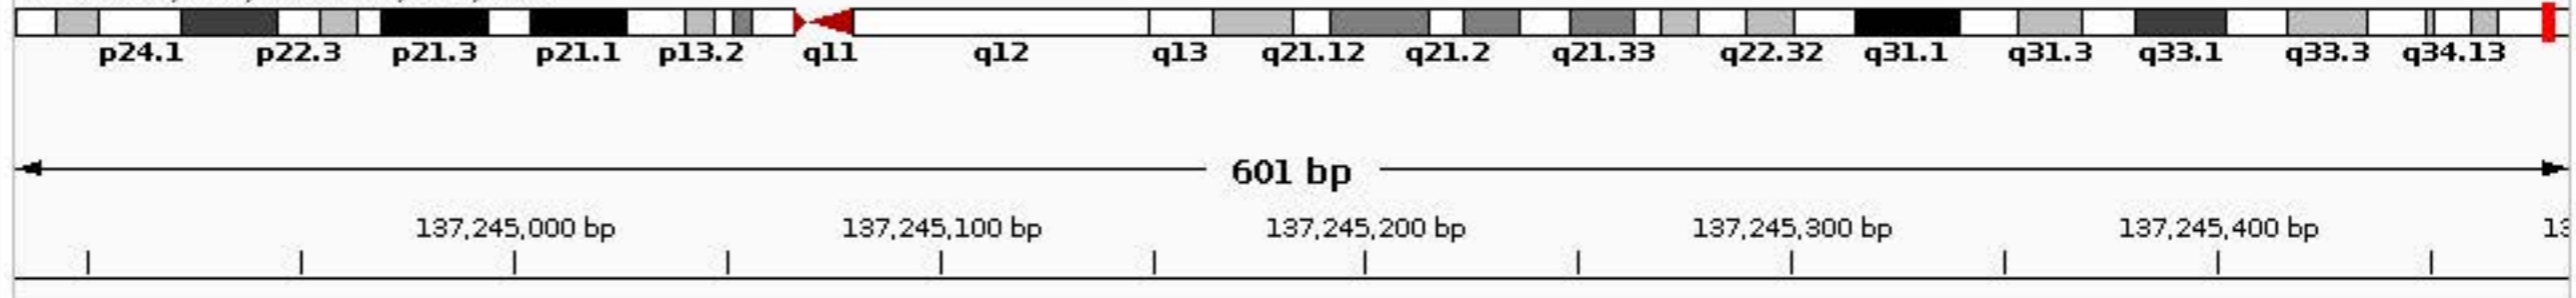

SL\_0002\_LN\_1\_mut.bam Coverage

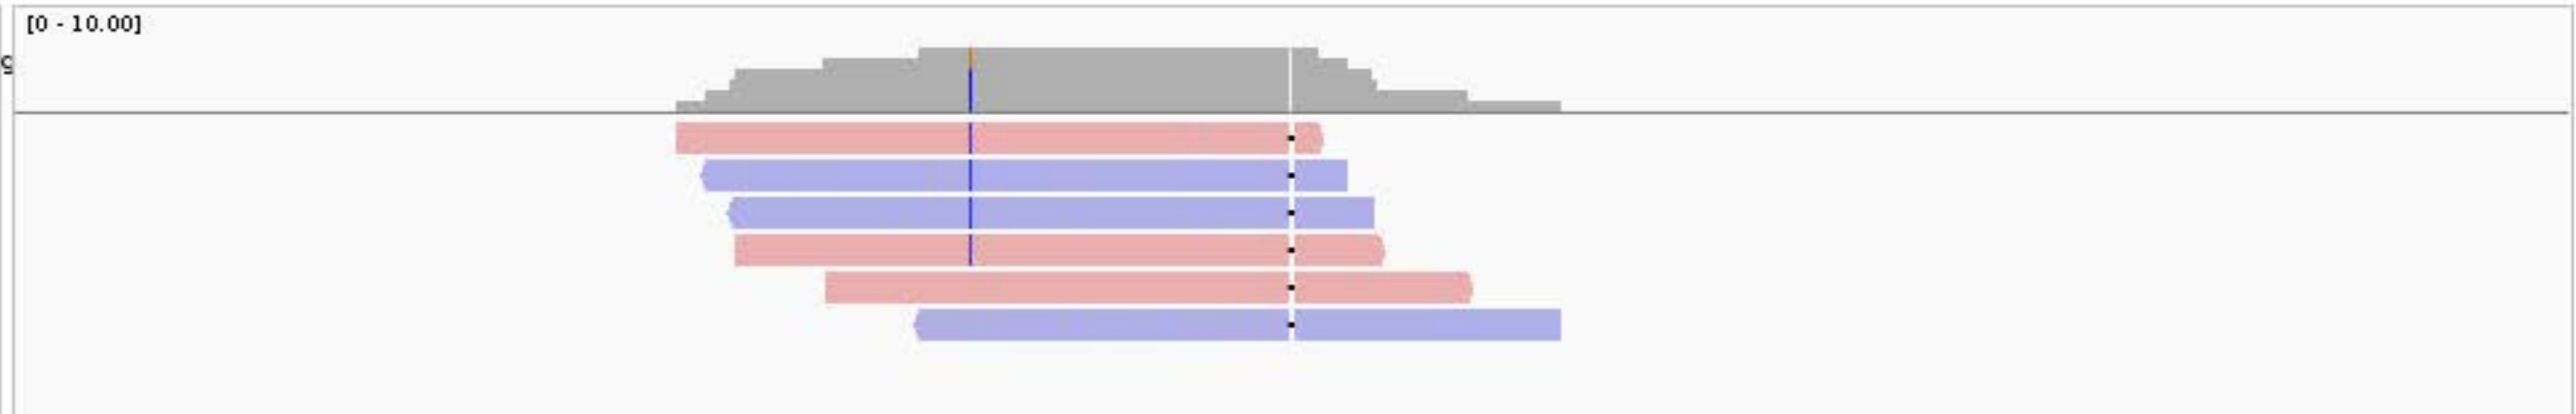

SL\_0002\_LN\_1\_mut.bam

Sequence

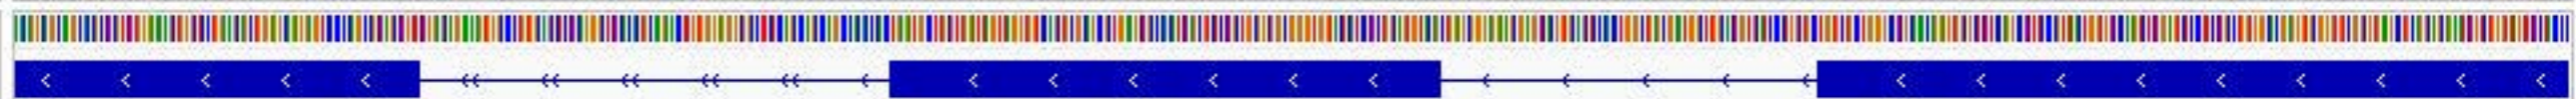

Refseq Genes

CIMIP2A



chr15:52,608,572-52,609,171

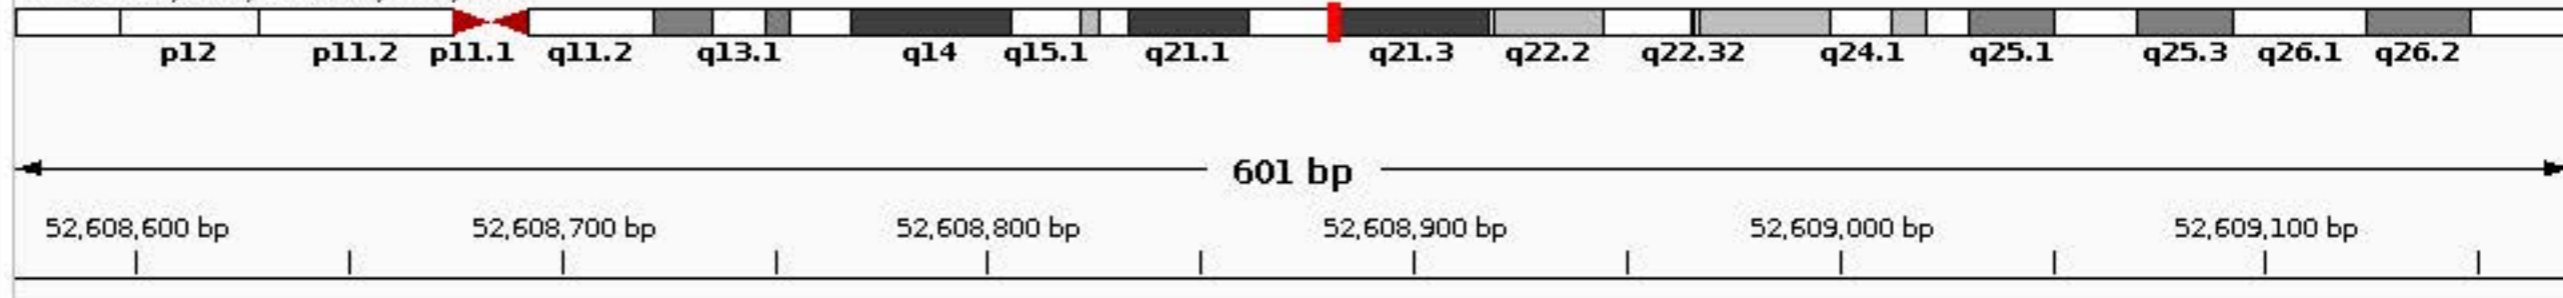

SL\_0017\_RN\_15\_mut.bam Coverage

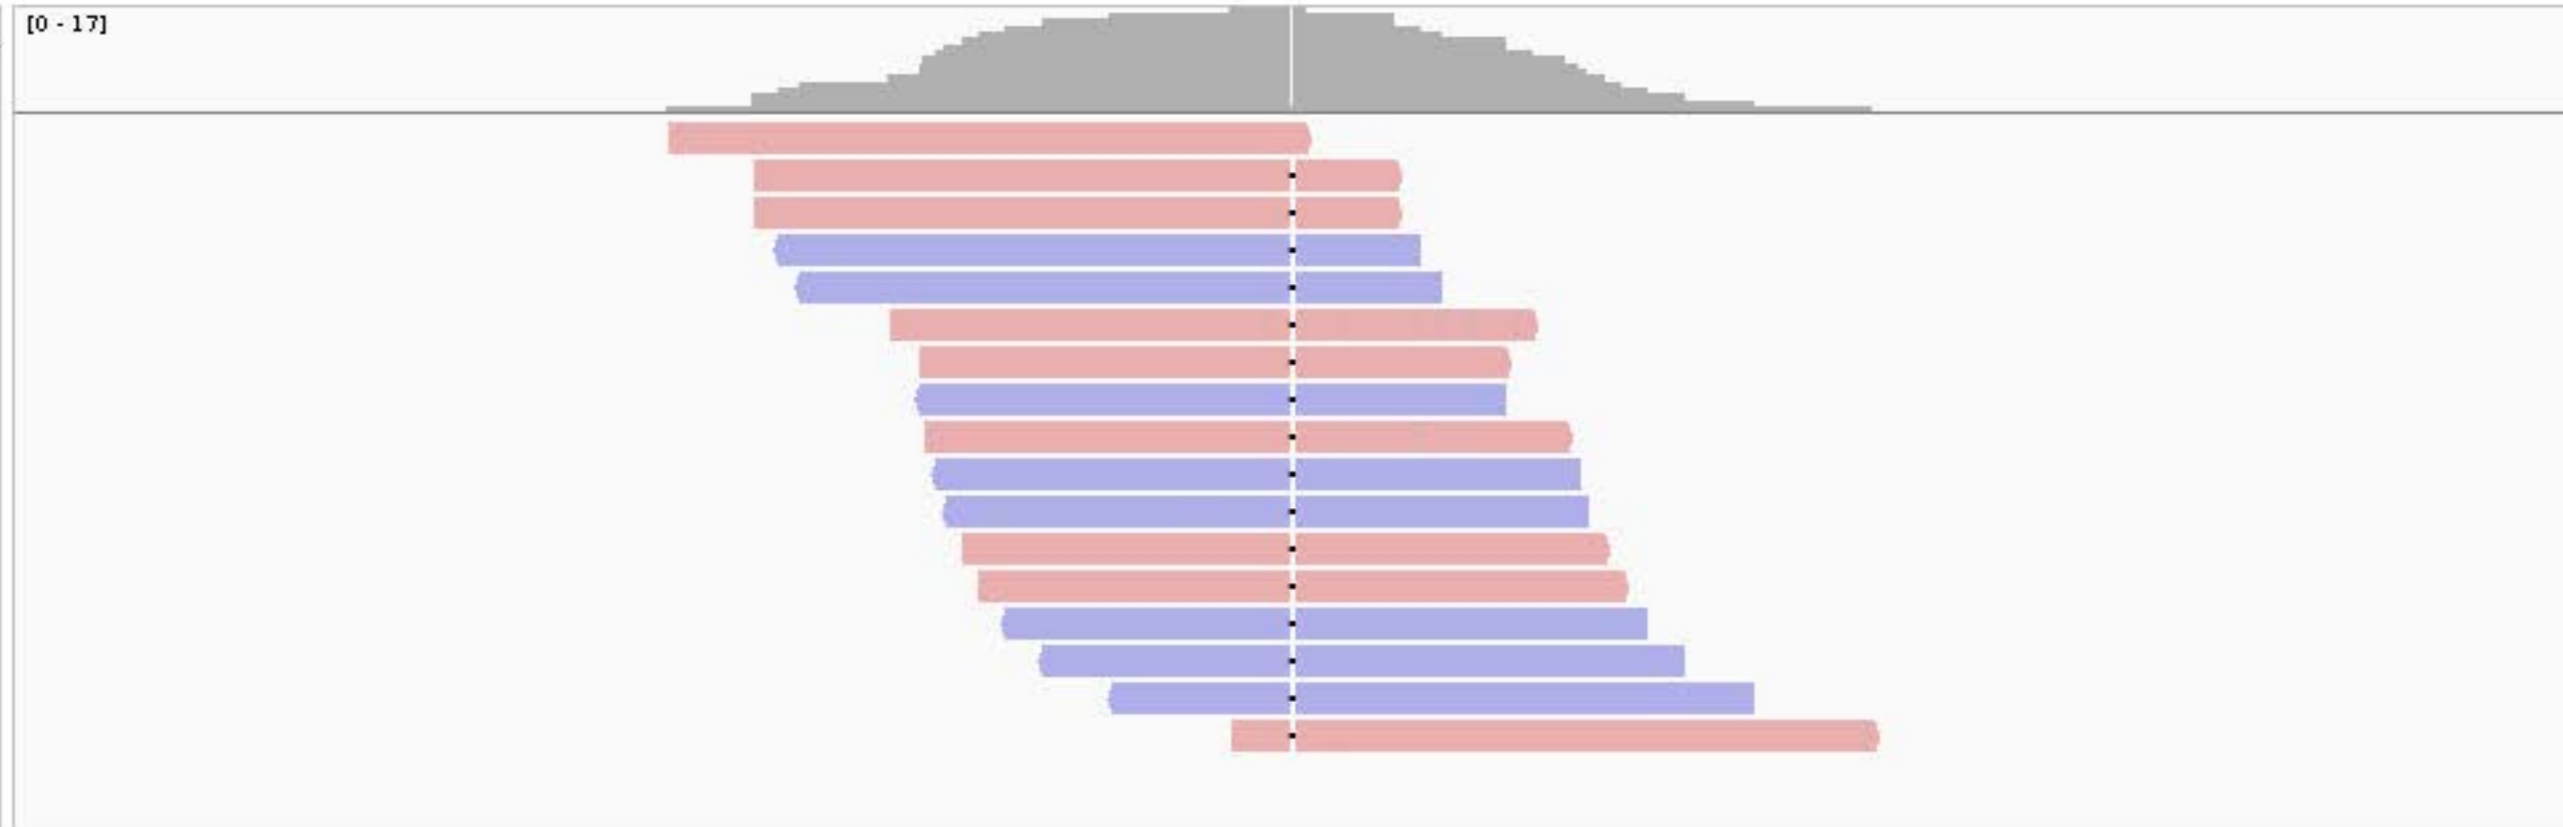

SL\_0017\_RN\_15\_mut.bam

Sequence

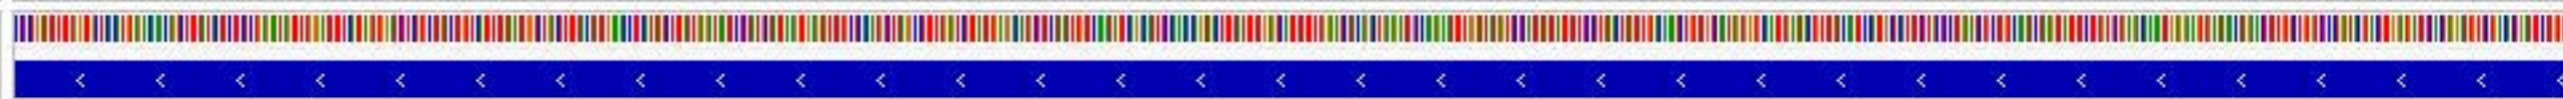

Refseq Genes

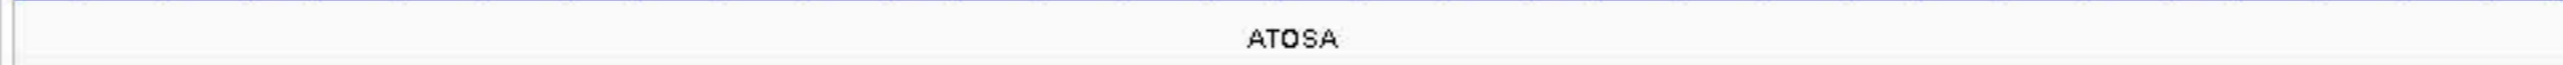

ATOSA

chr2:206,771,702-206,772,301

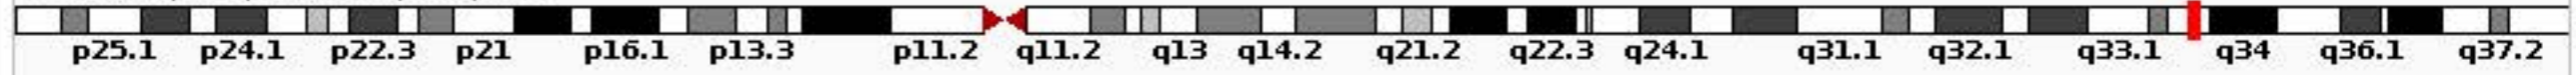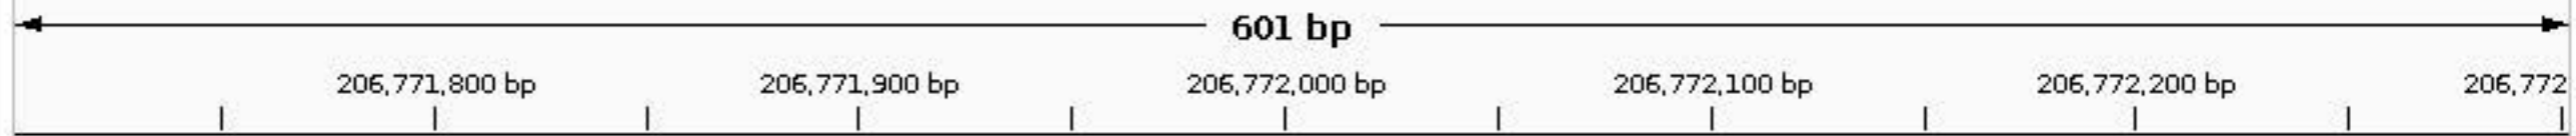

SL\_0004\_RN\_05\_mut.bam Coverage

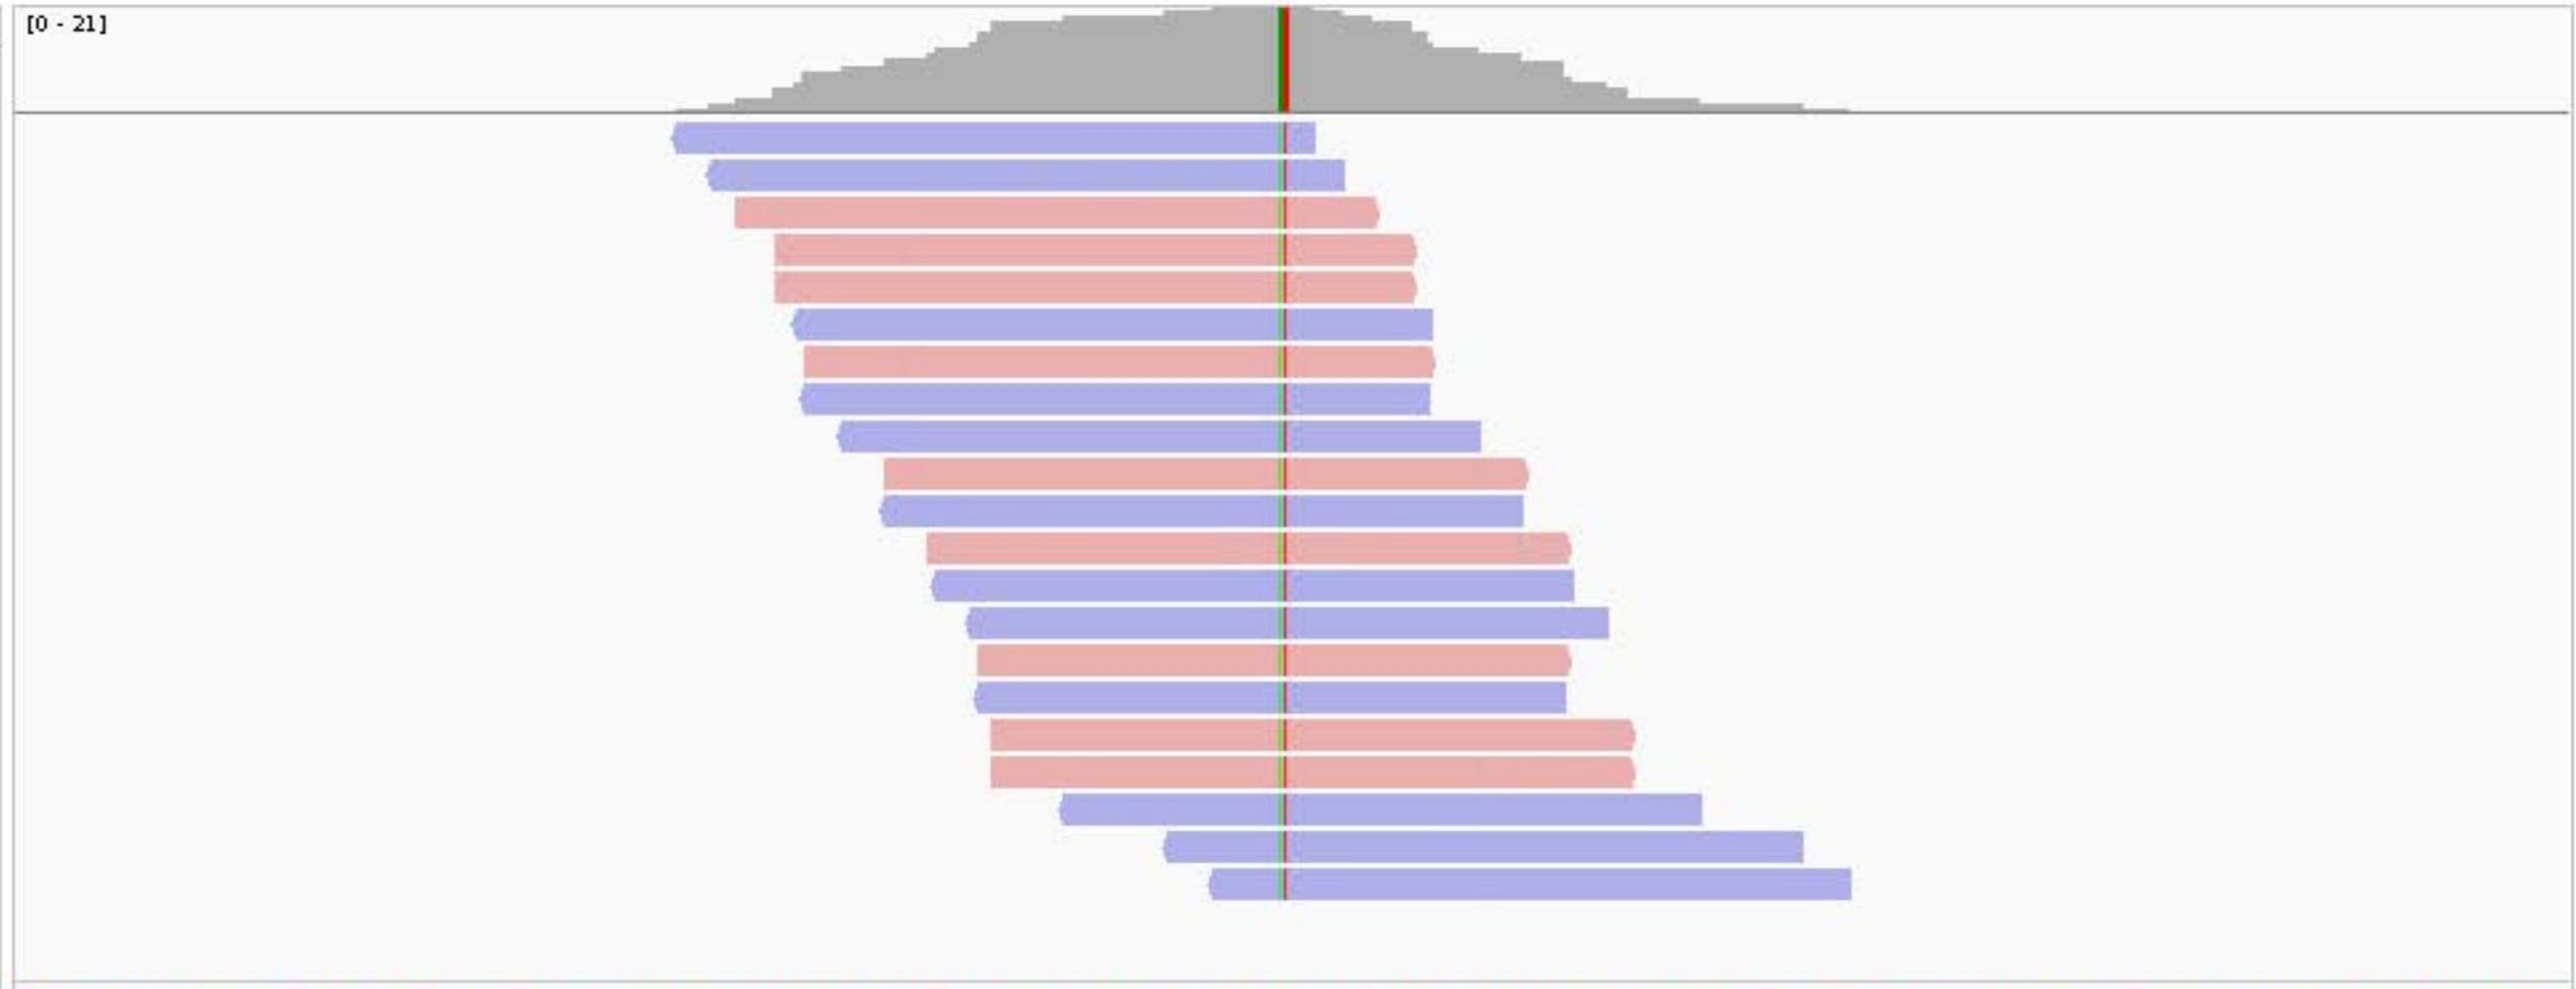

SL\_0004\_RN\_05\_mut.bam

Sequence

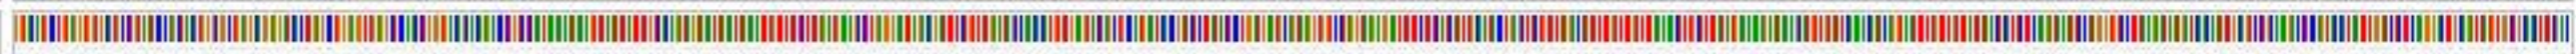

Refseq Genes

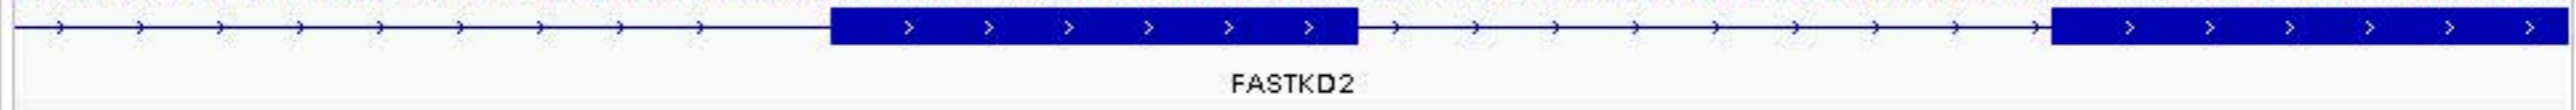

FASTKD2

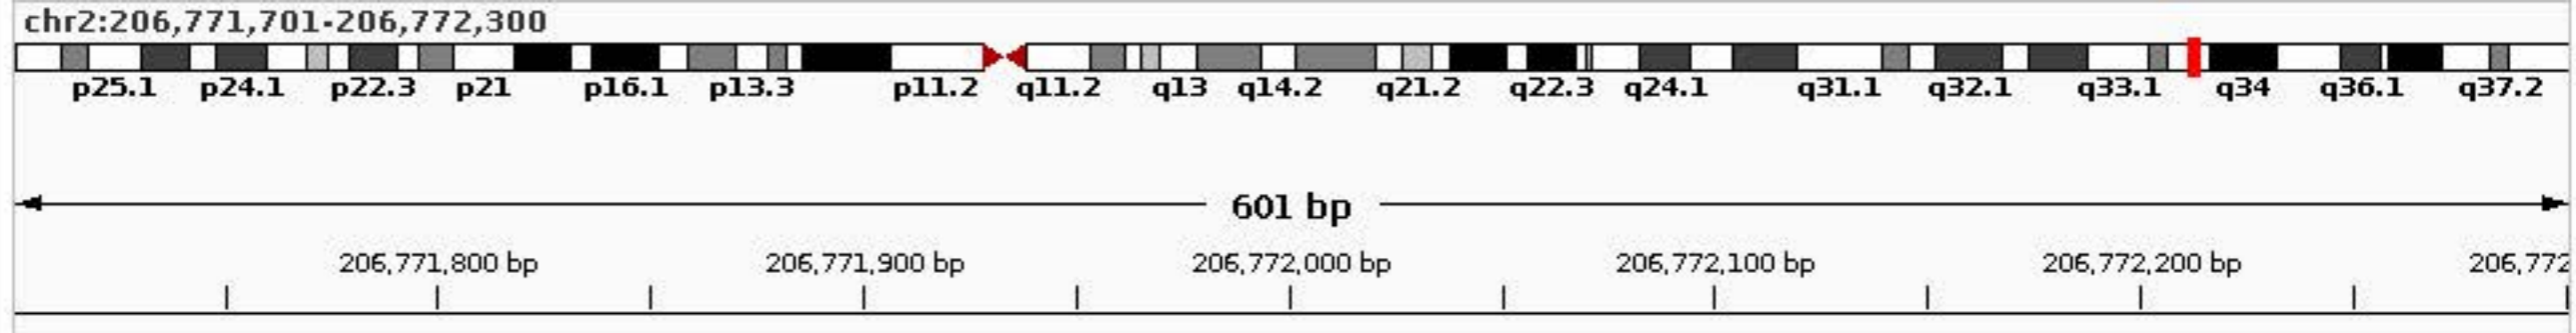

SL\_0004\_RN\_05\_mut.bam Coverage

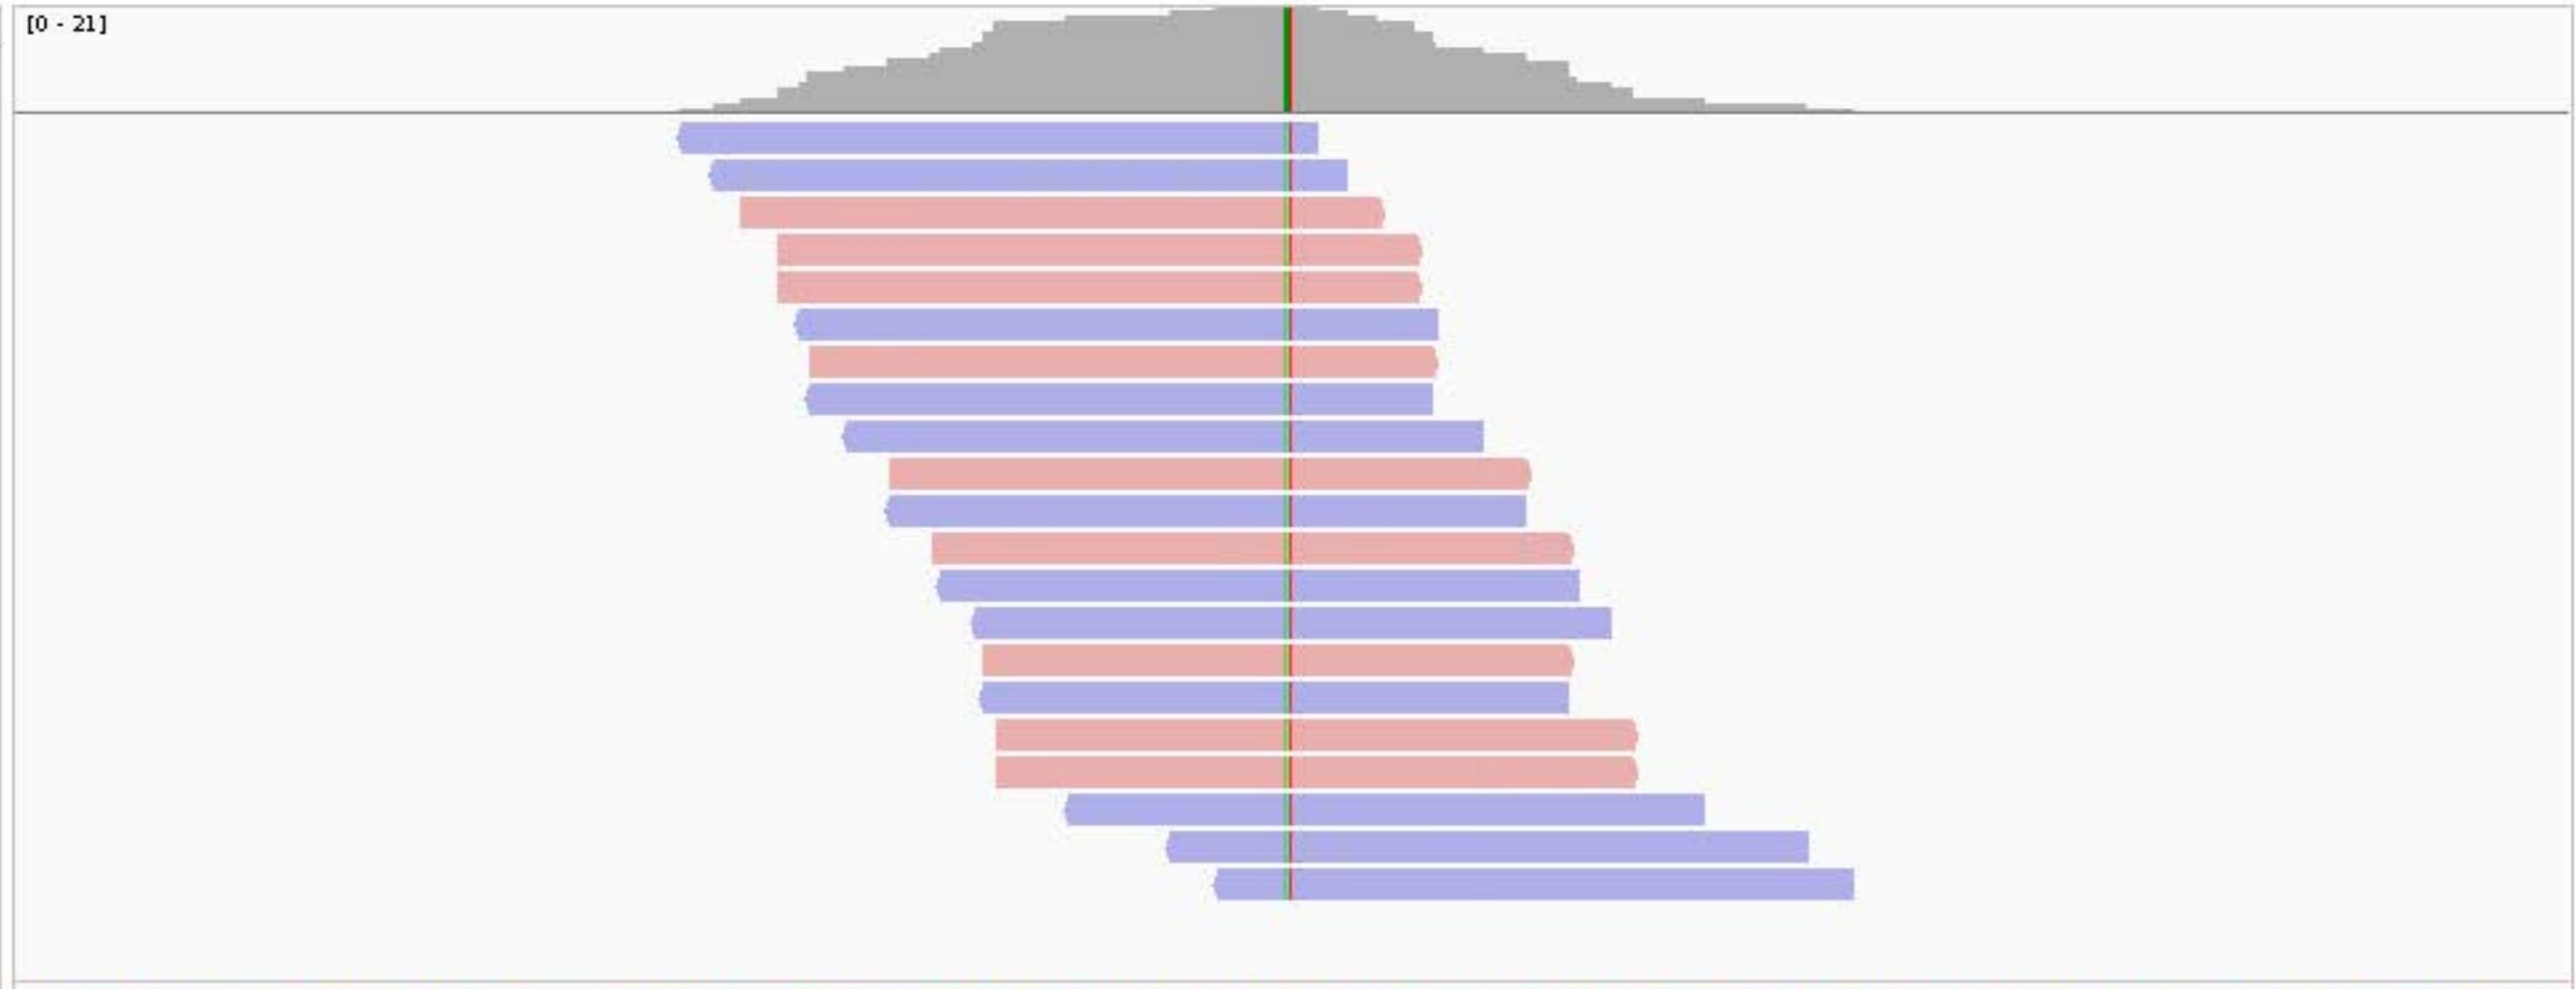

SL\_0004\_RN\_05\_mut.bam

Sequence

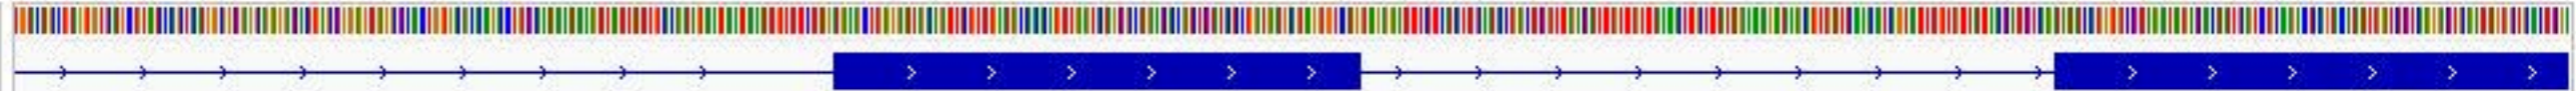

Refseq Genes

FASTKD2

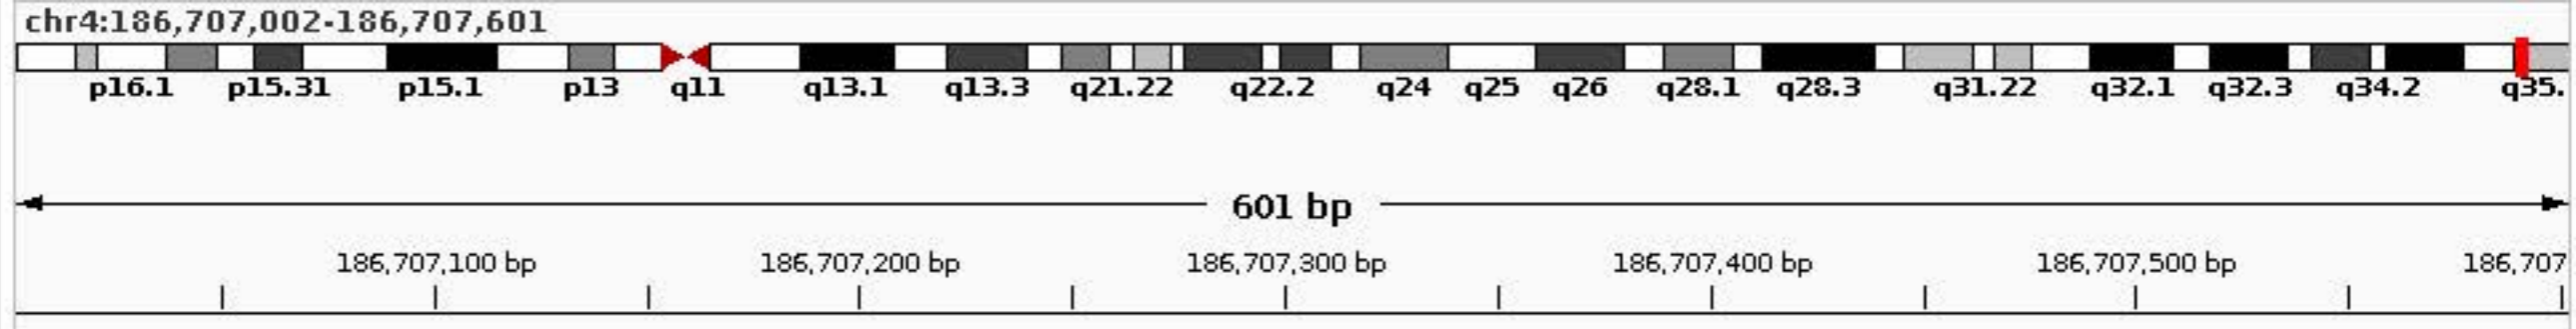

SL\_0015\_RN\_10\_mut.bam Coverage

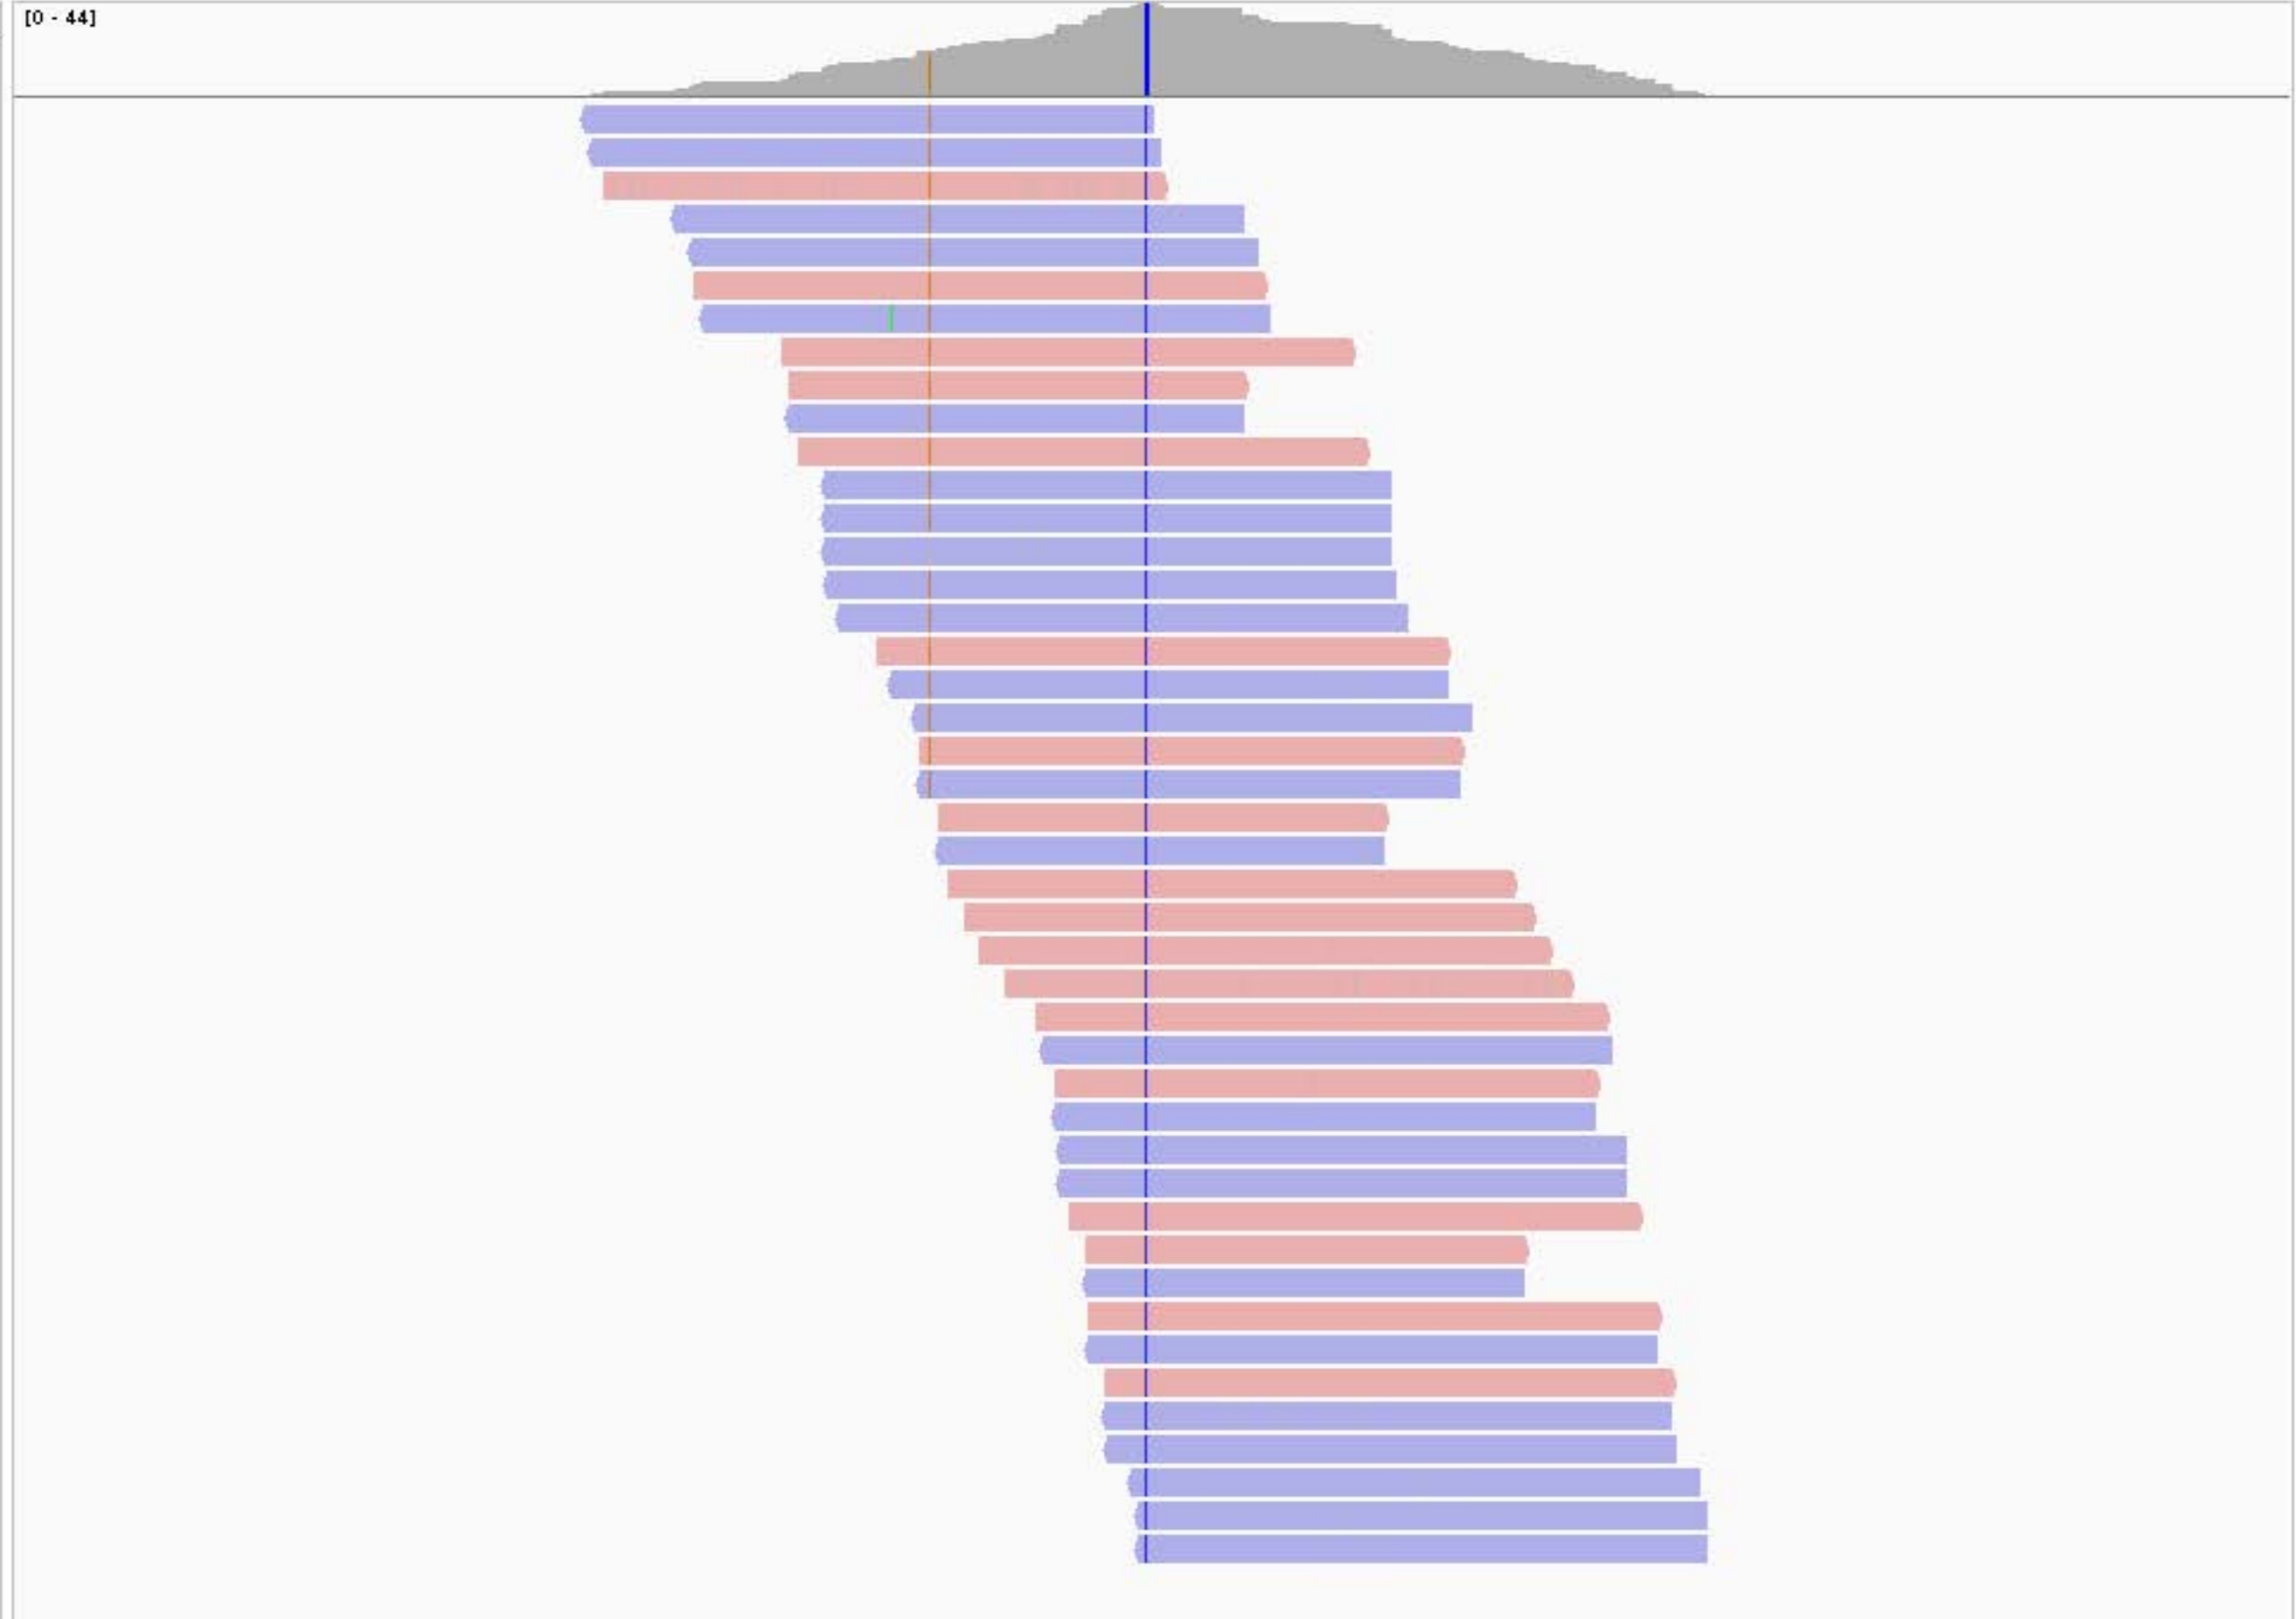

SL\_0015\_RN\_10\_mut.bam

Sequence

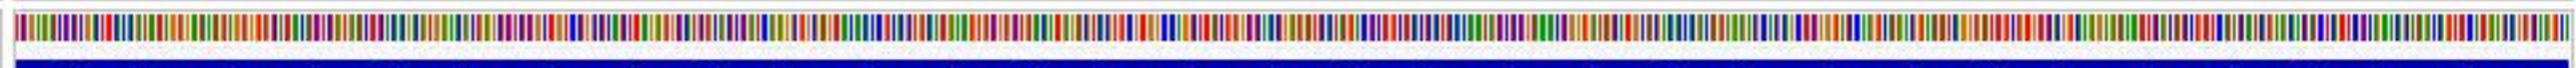

Refseq Genes

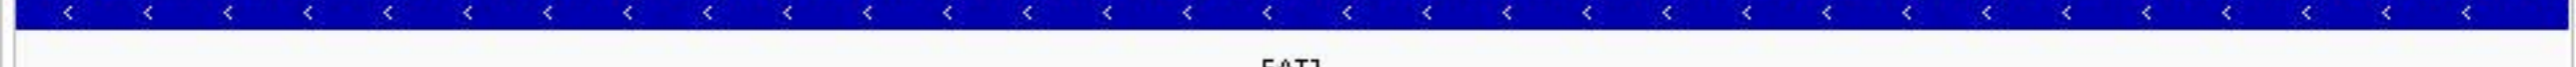

FAT1



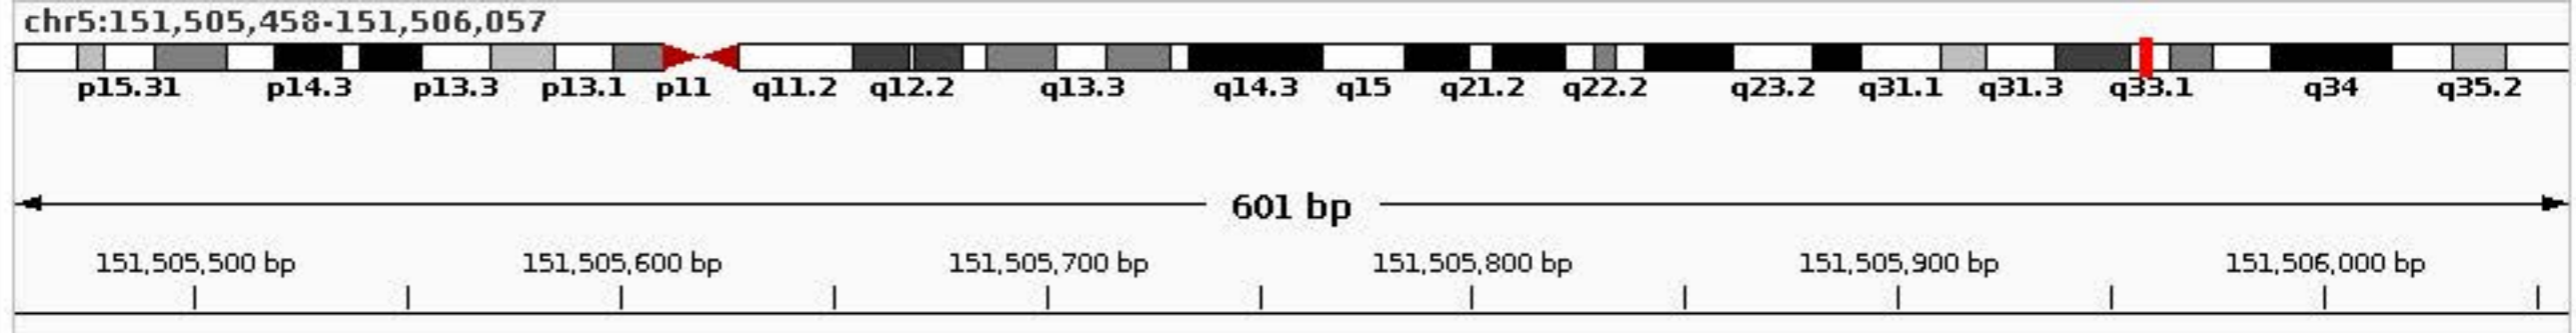

SL\_0006\_RN\_59\_mut.bam Coverage

SL\_0006\_RN\_59\_mut.bam

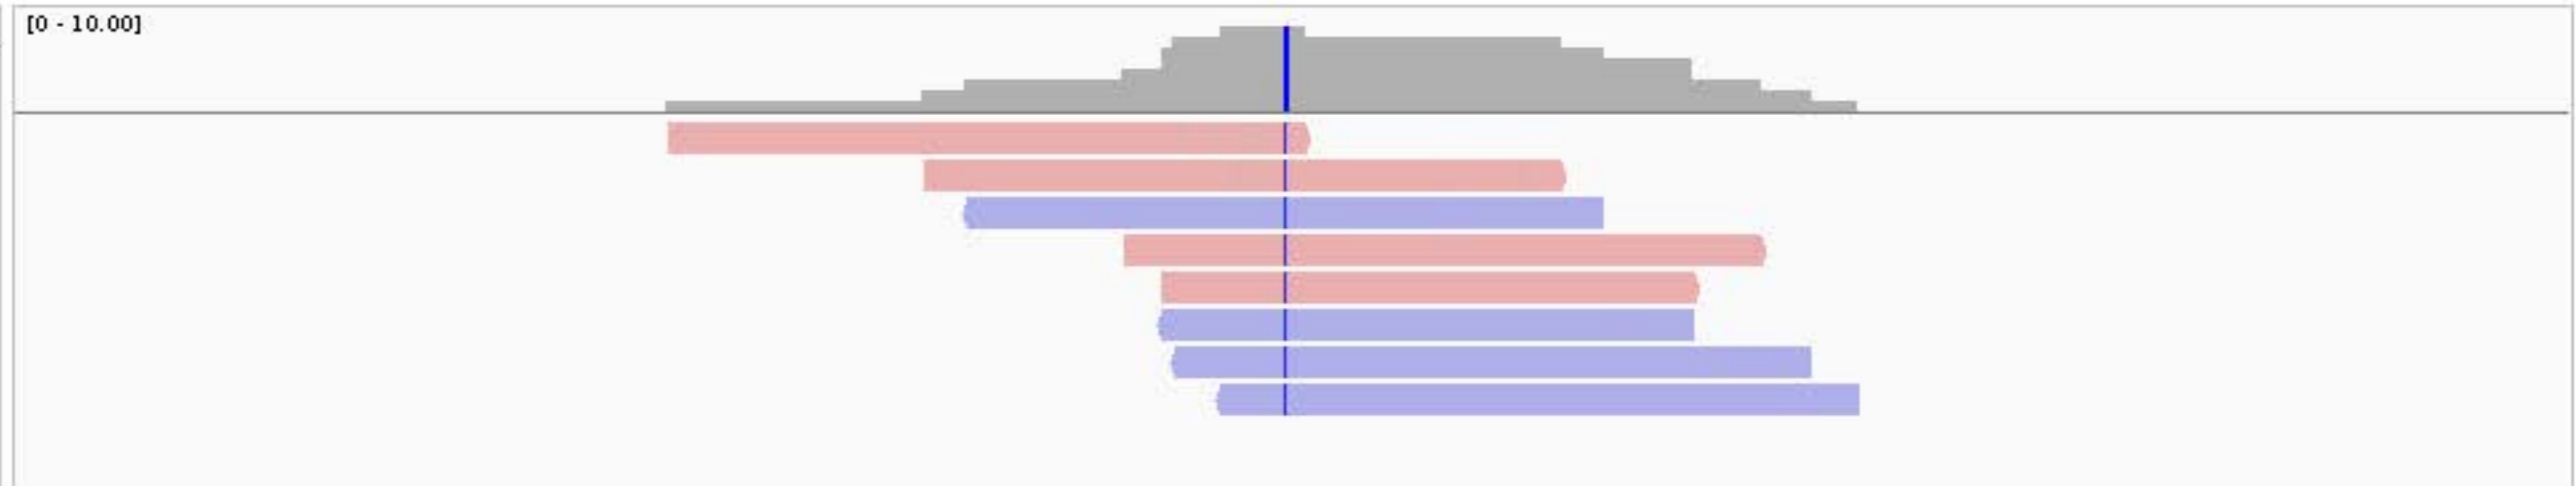

Sequence

Refseq Genes

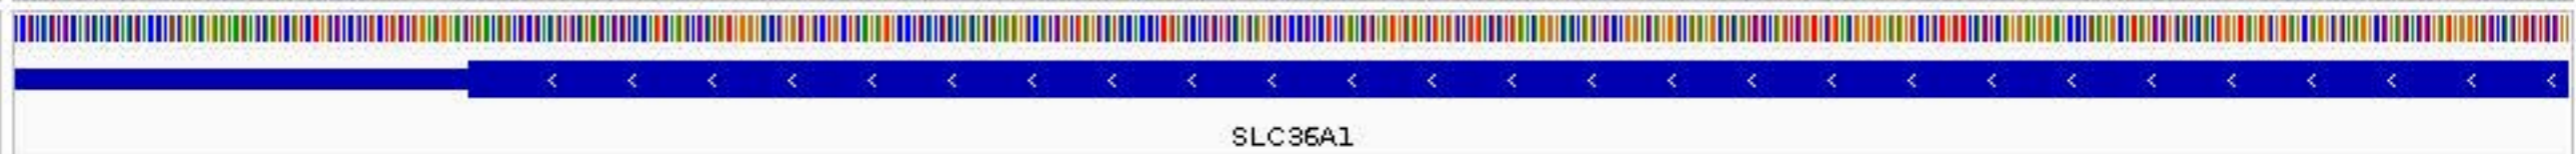



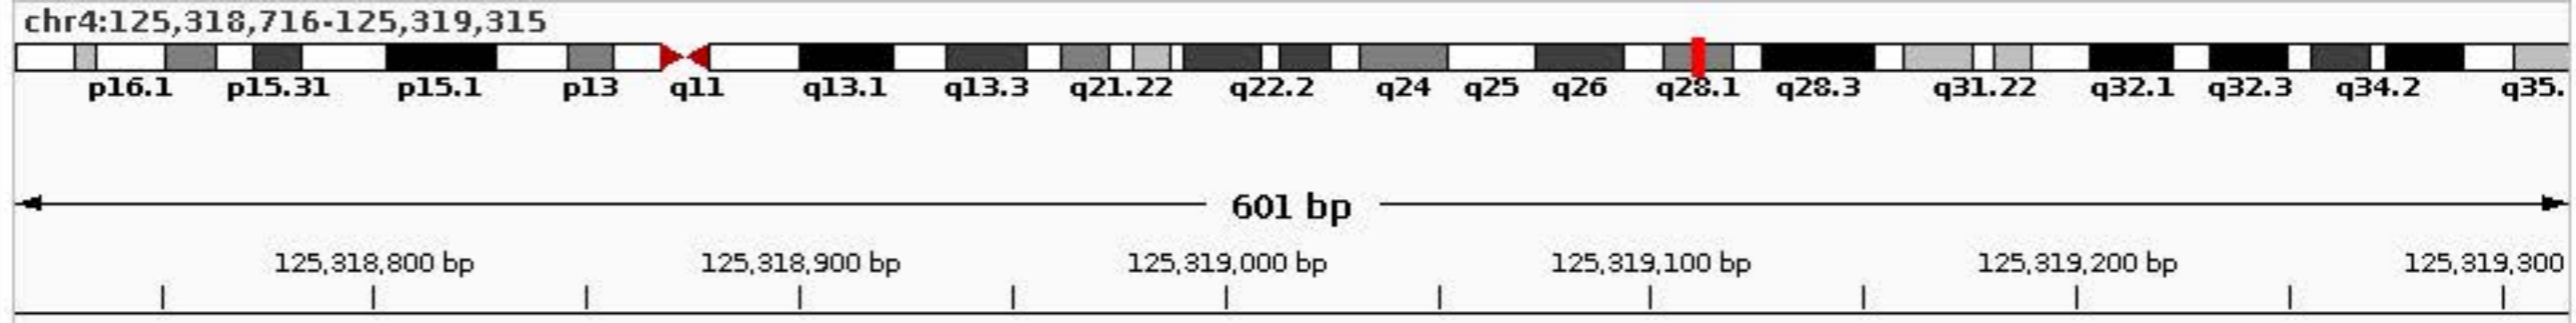

SL\_0015\_LN\_44\_mut.bam Coverage

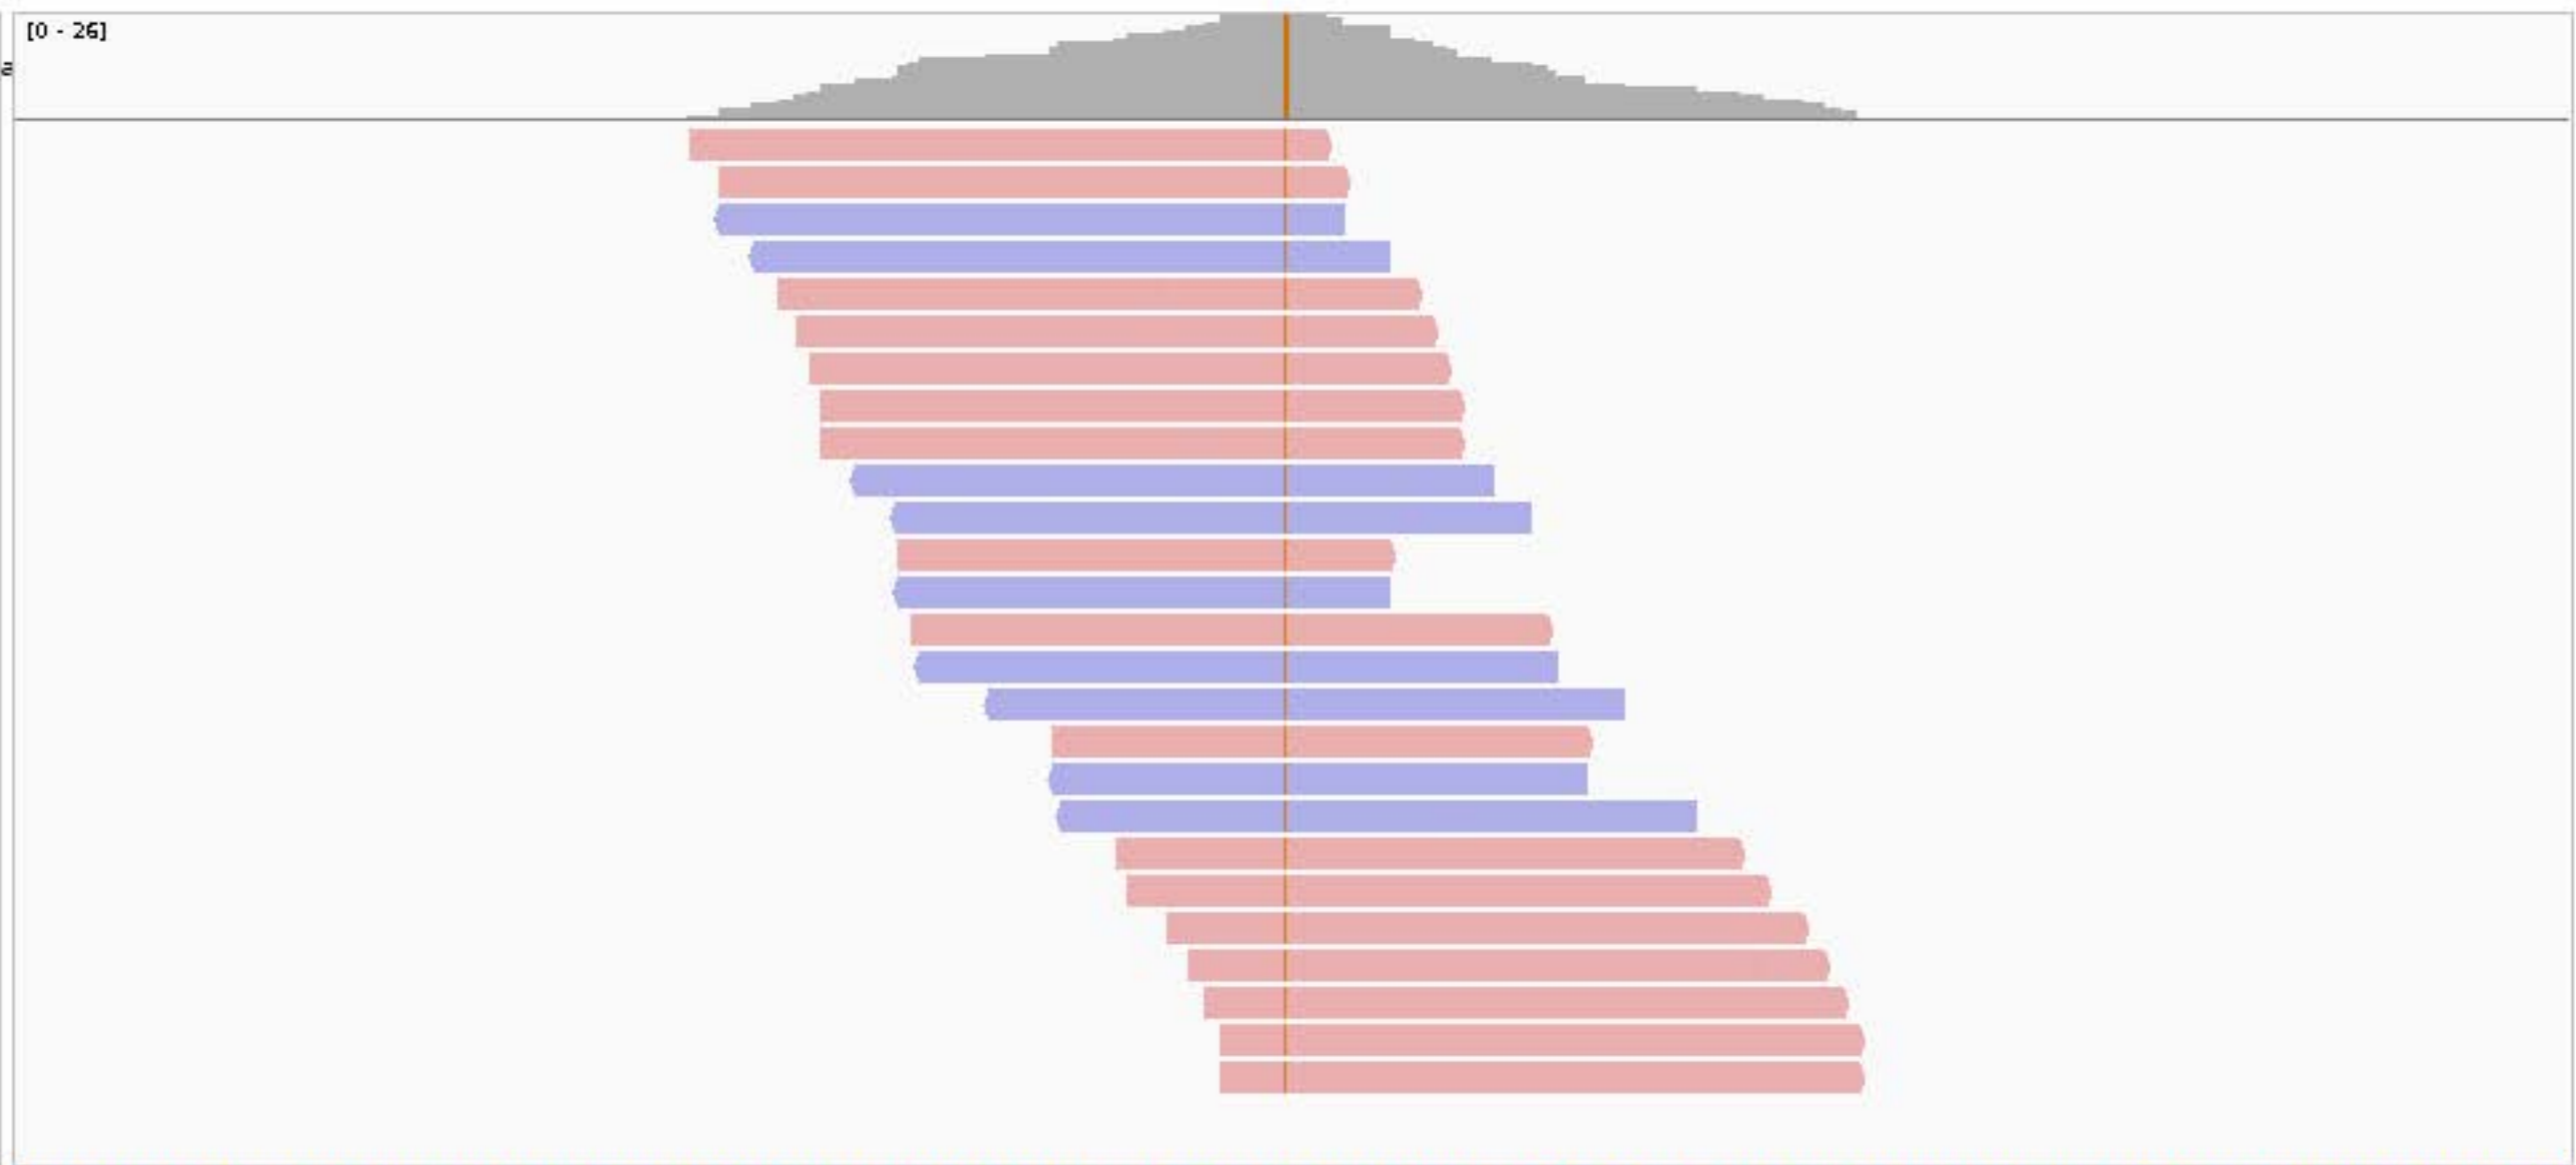

SL\_0015\_LN\_44\_mut.bam

Sequence →

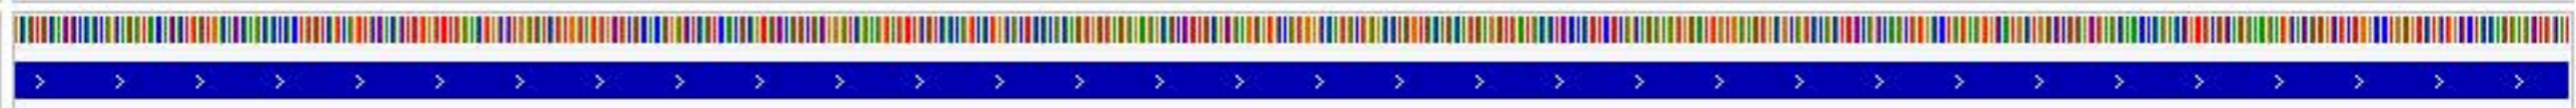

Refseq Genes

FAT4

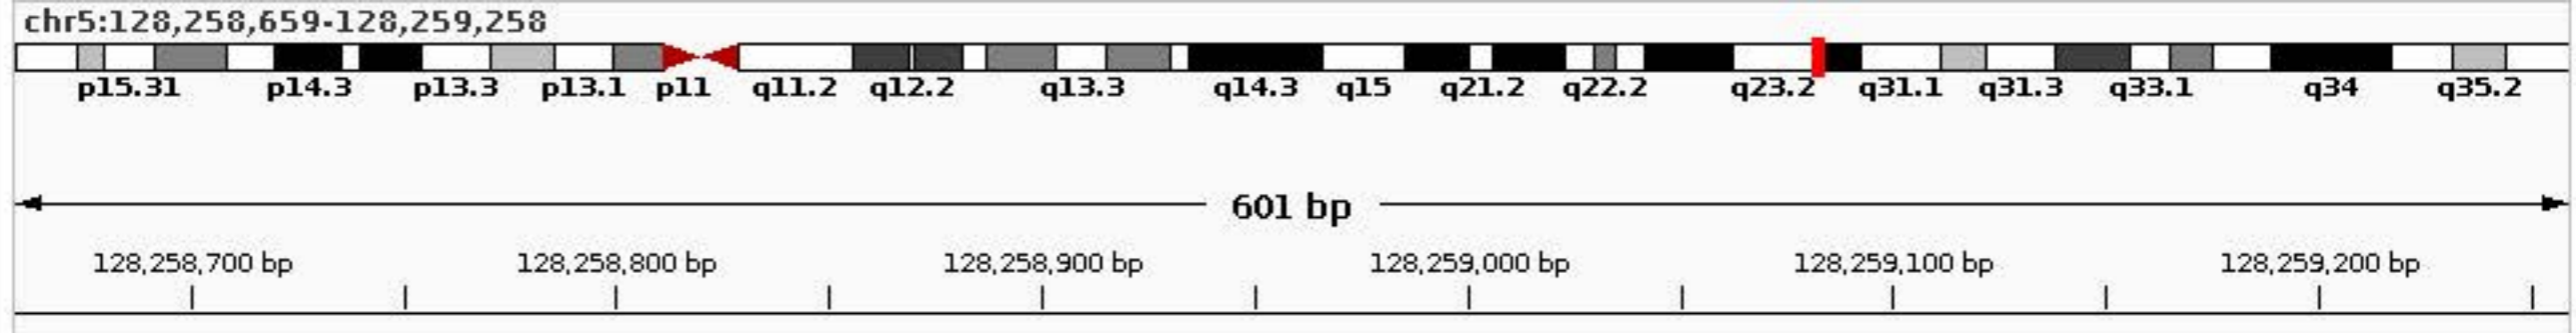

SL\_0017\_RN\_15\_mut.bam Coverage

SL\_0017\_RN\_15\_mut.bam

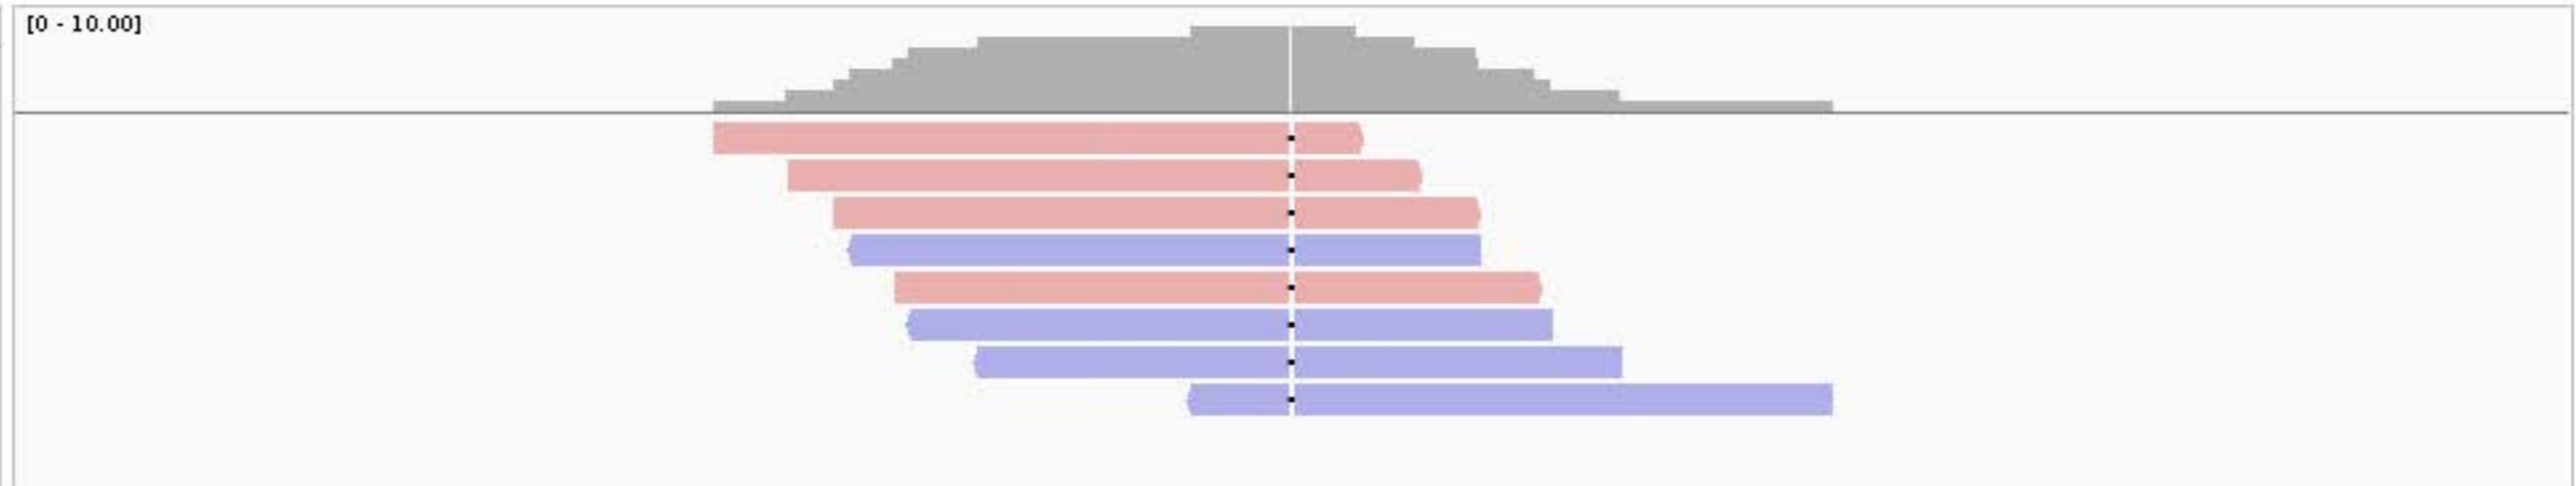

Sequence →

Refseq Genes

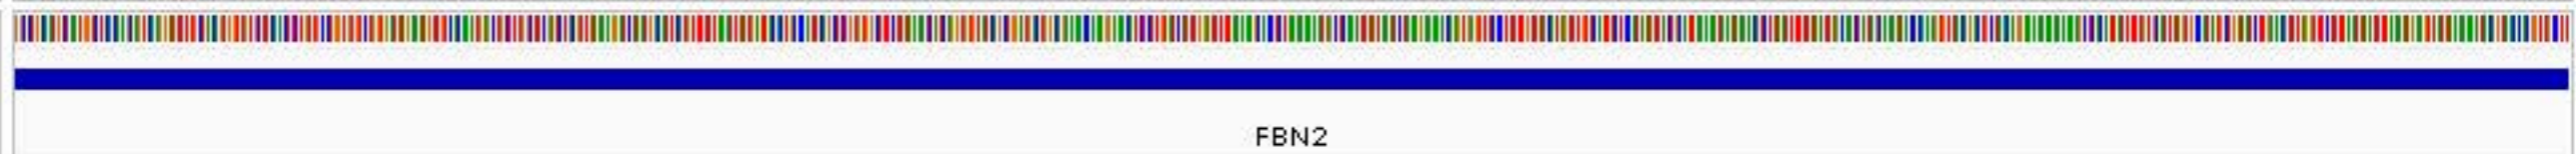

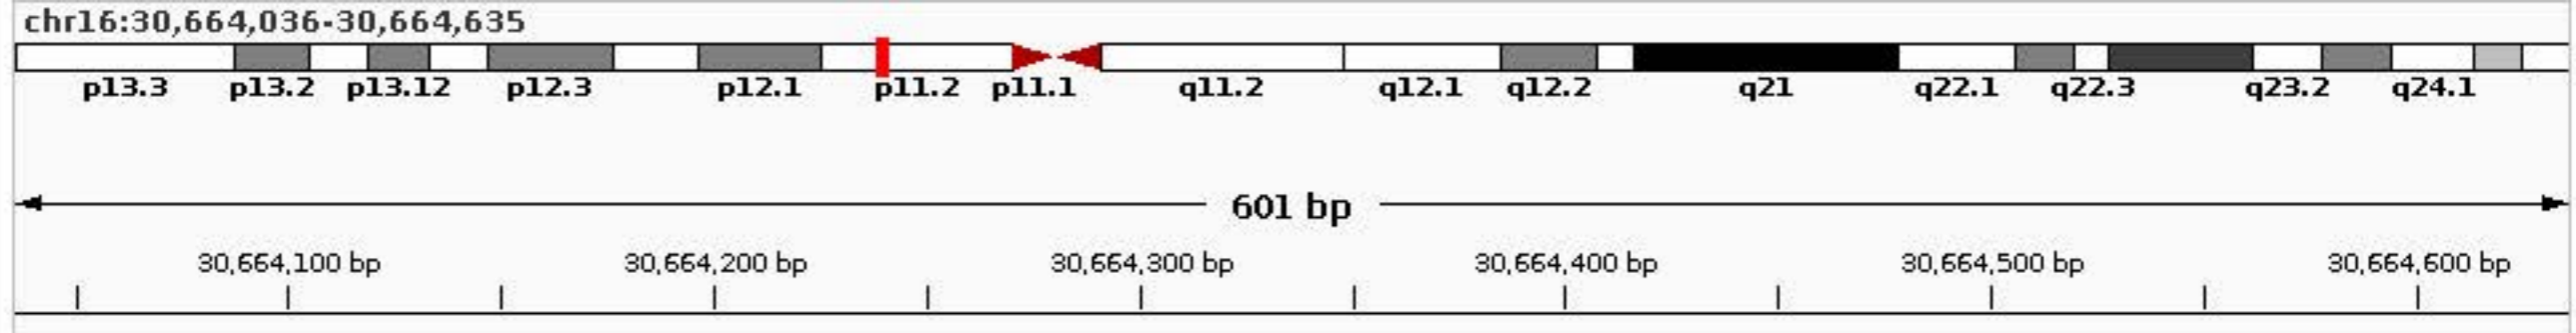

SL\_0007\_RN\_2\_mut.bam Coverage

SL\_0007\_RN\_2\_mut.bam

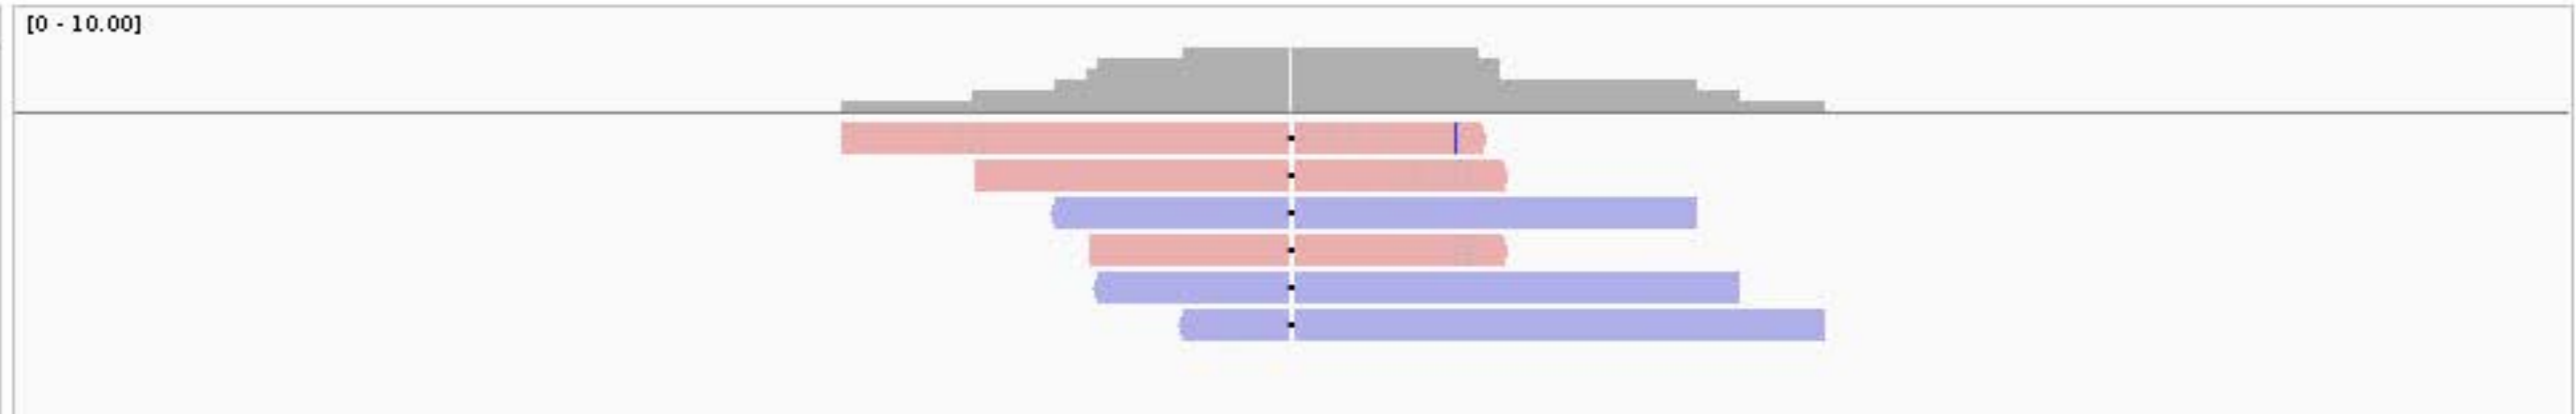

Sequence

Refseq Genes

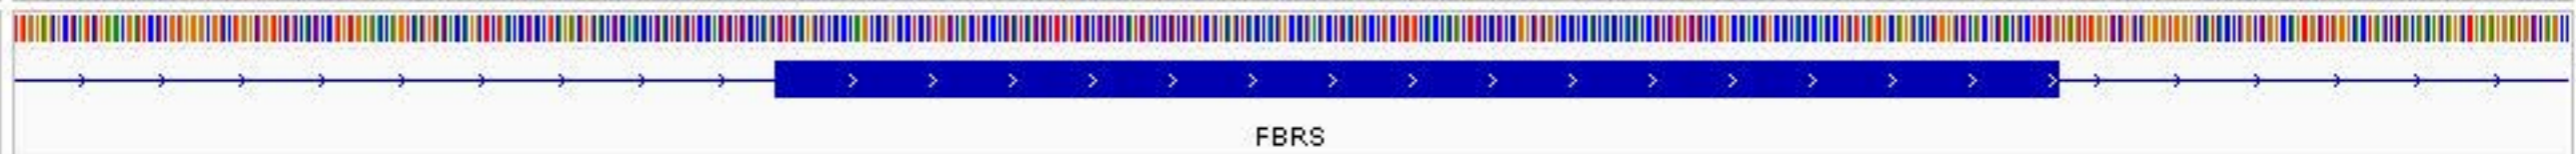

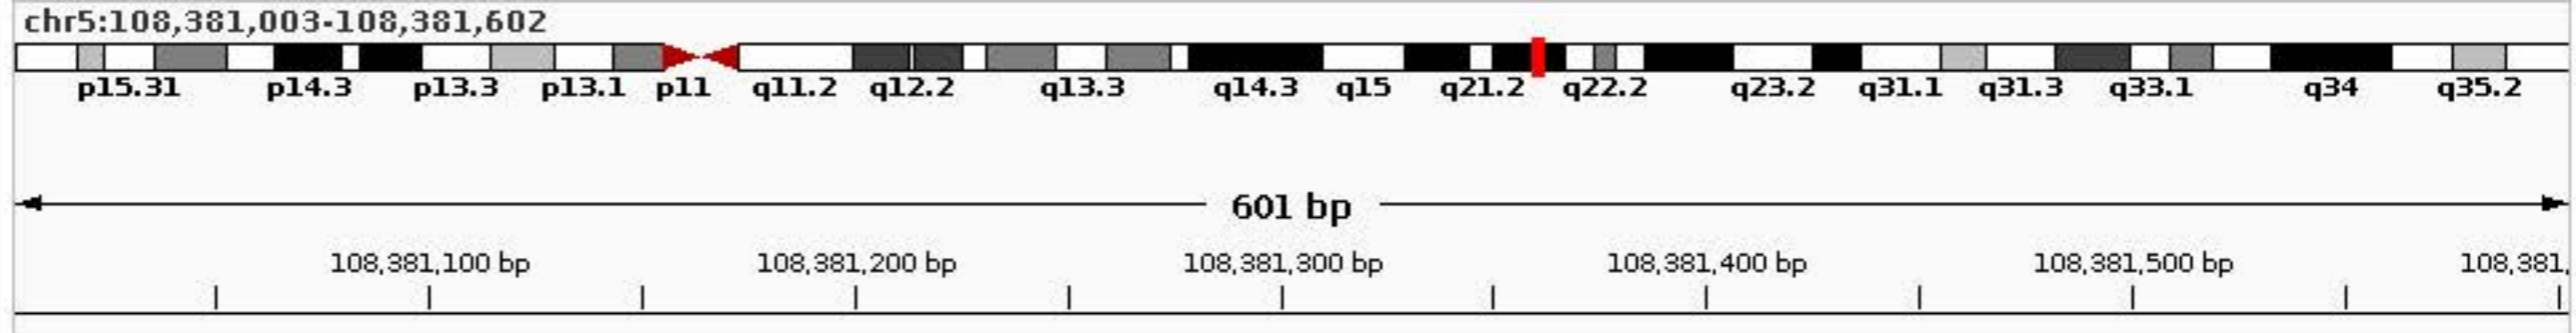

SL\_0001\_LN\_10\_mut.bam Coverage

SL\_0001\_LN\_10\_mut.bam

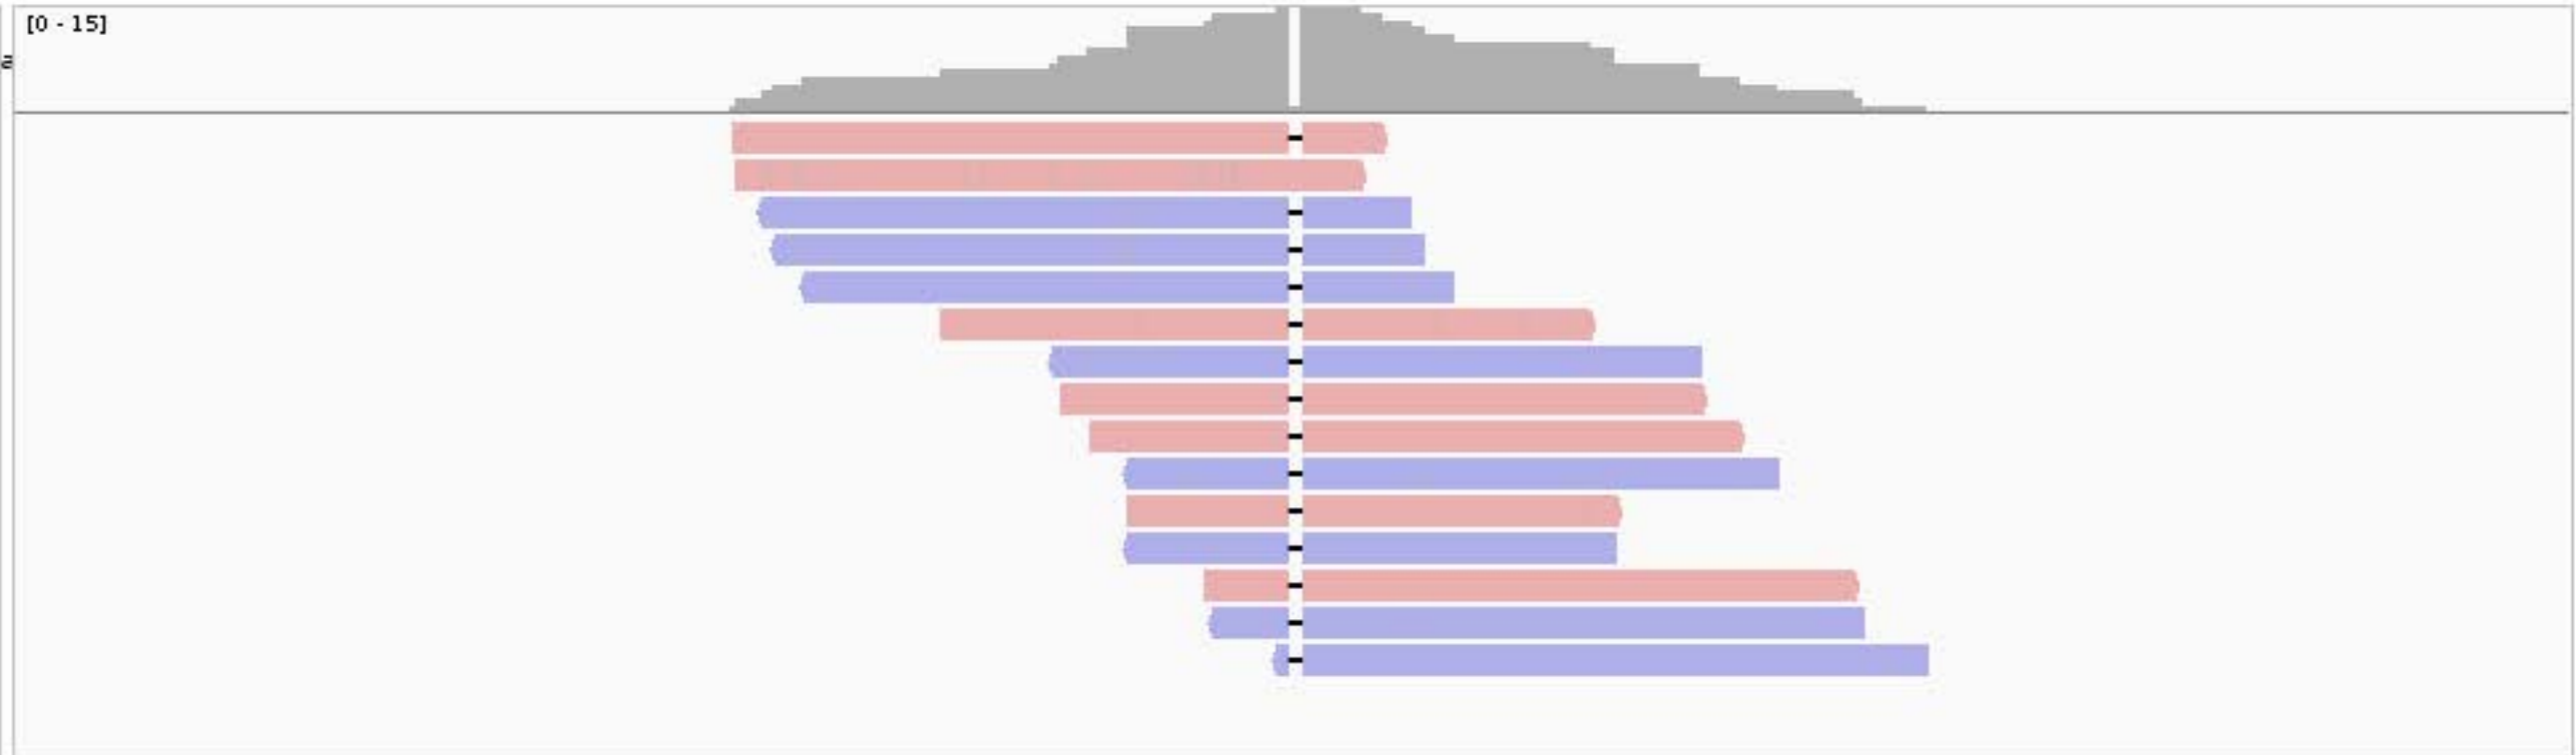

Sequence →

Refseq Genes

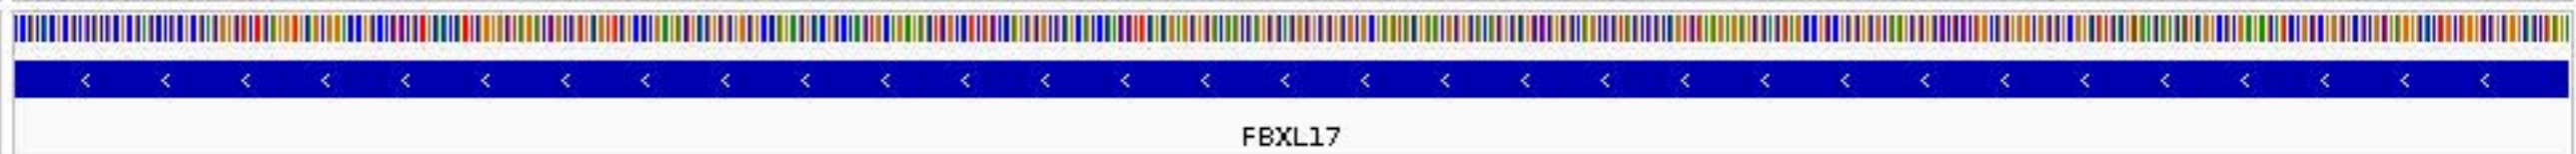



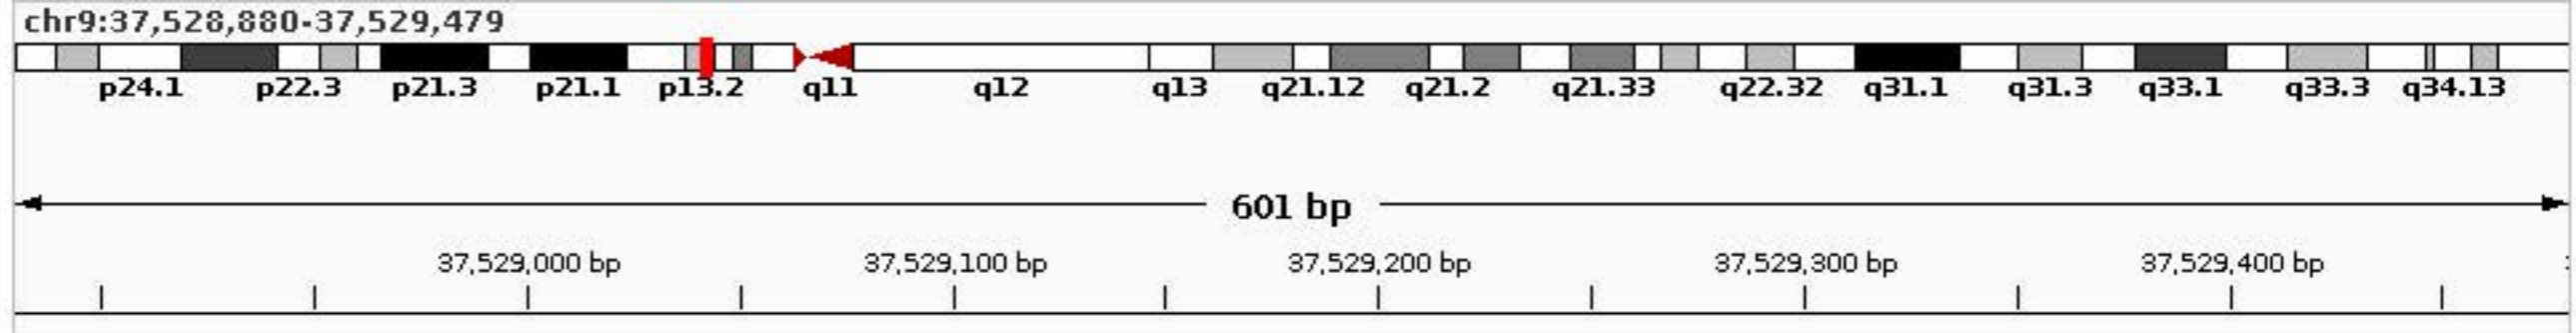

SL\_0007\_RN\_2\_mut.bam Coverage

SL\_0007\_RN\_2\_mut.bam

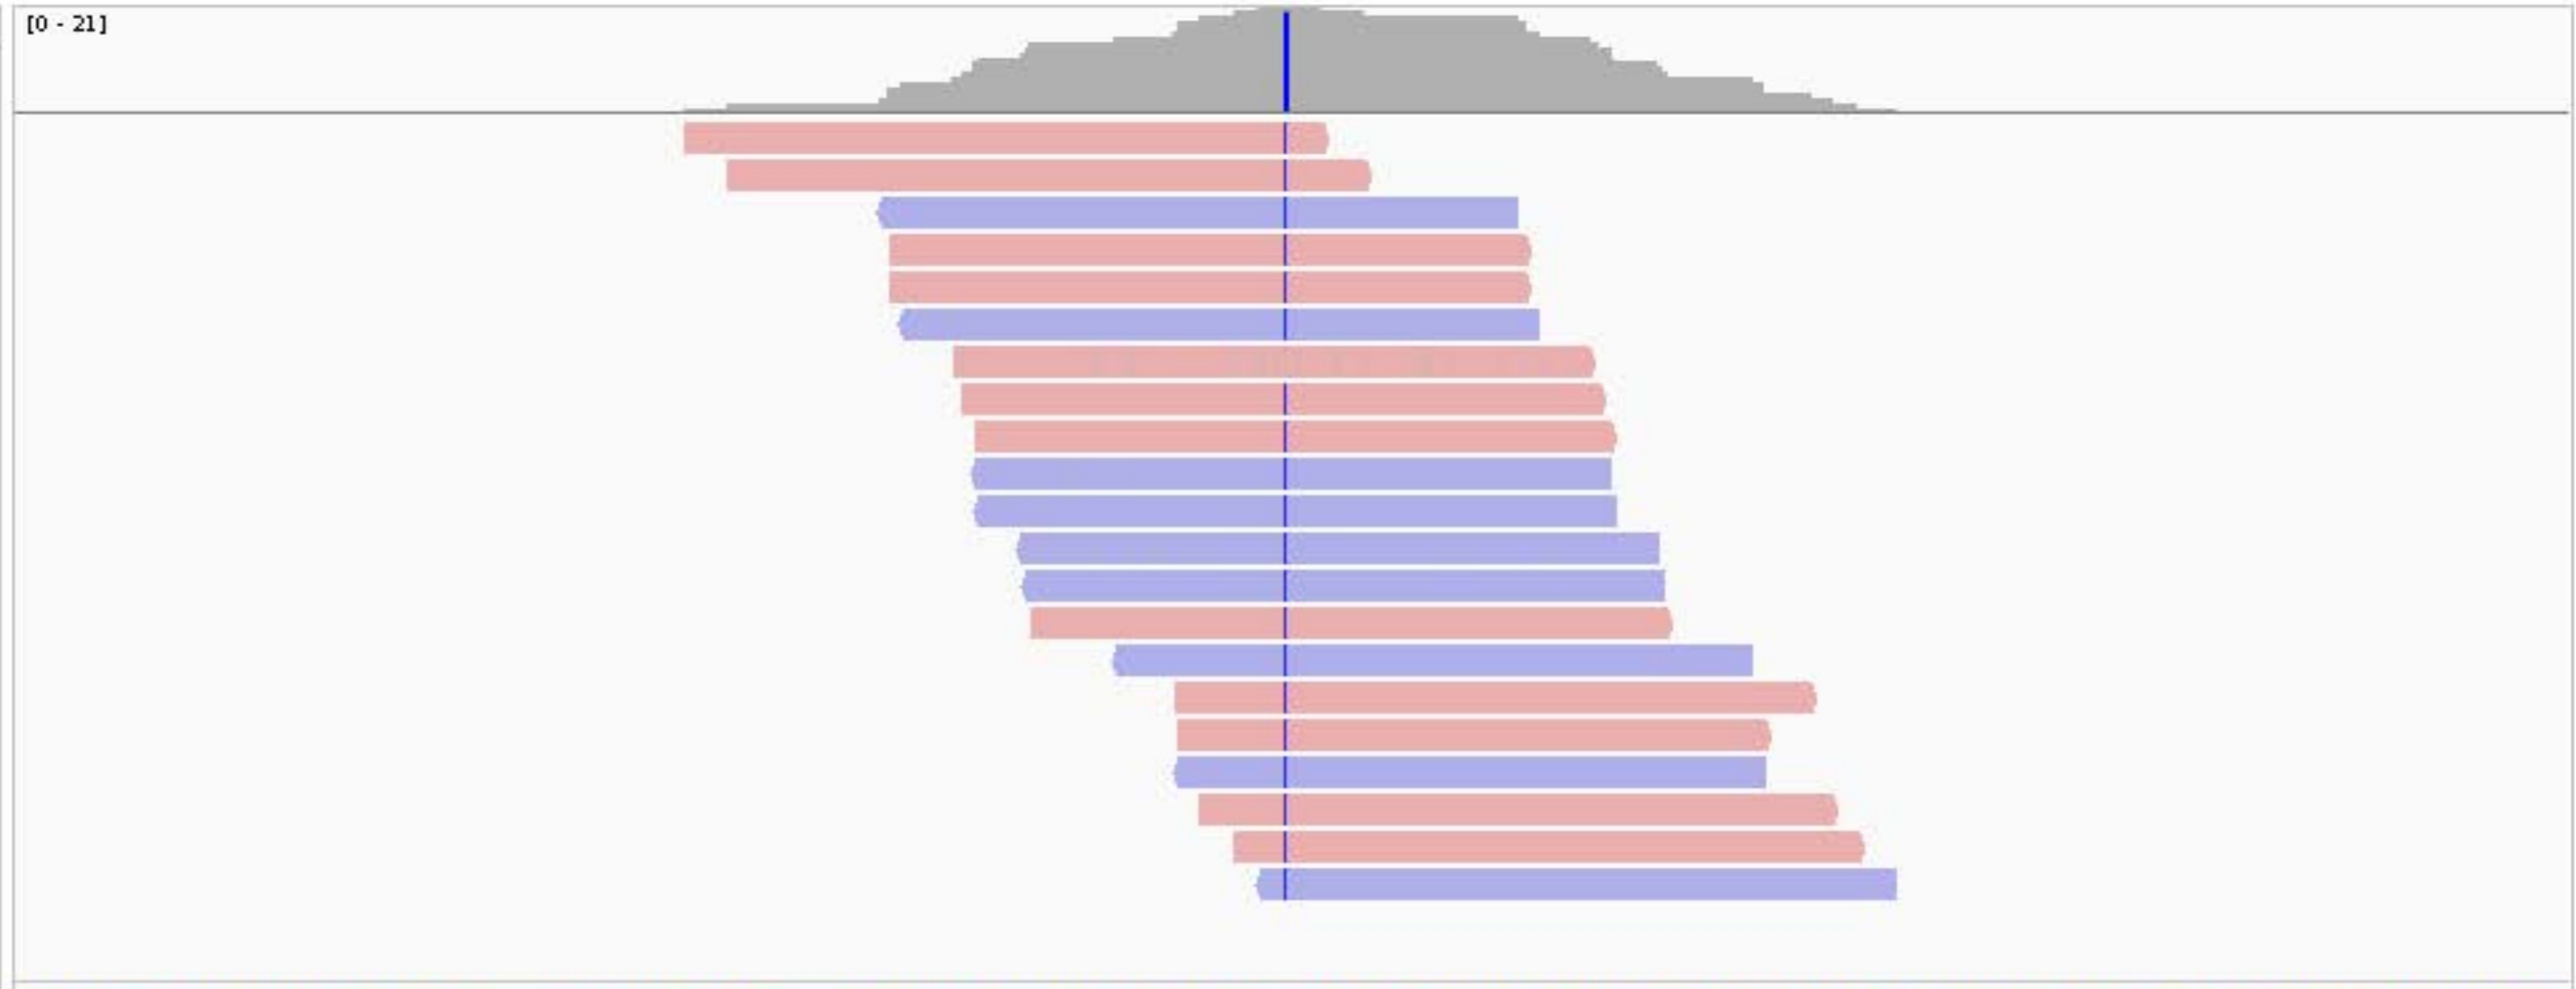

Sequence →

Refseq Genes

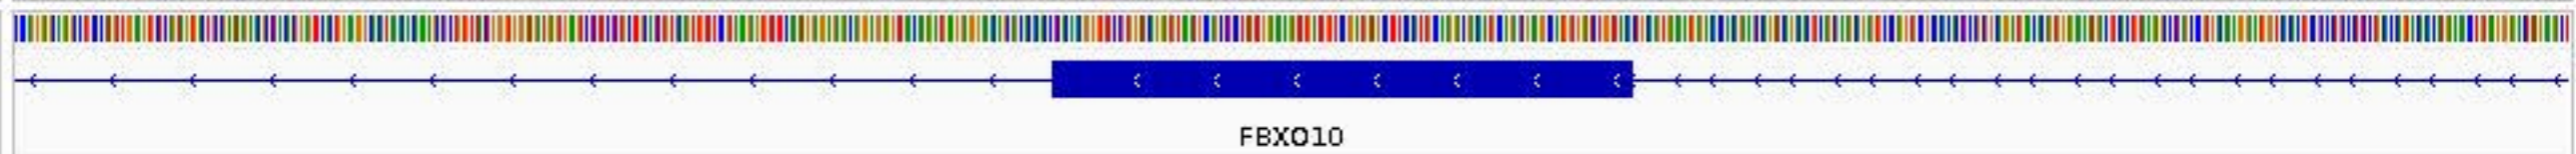

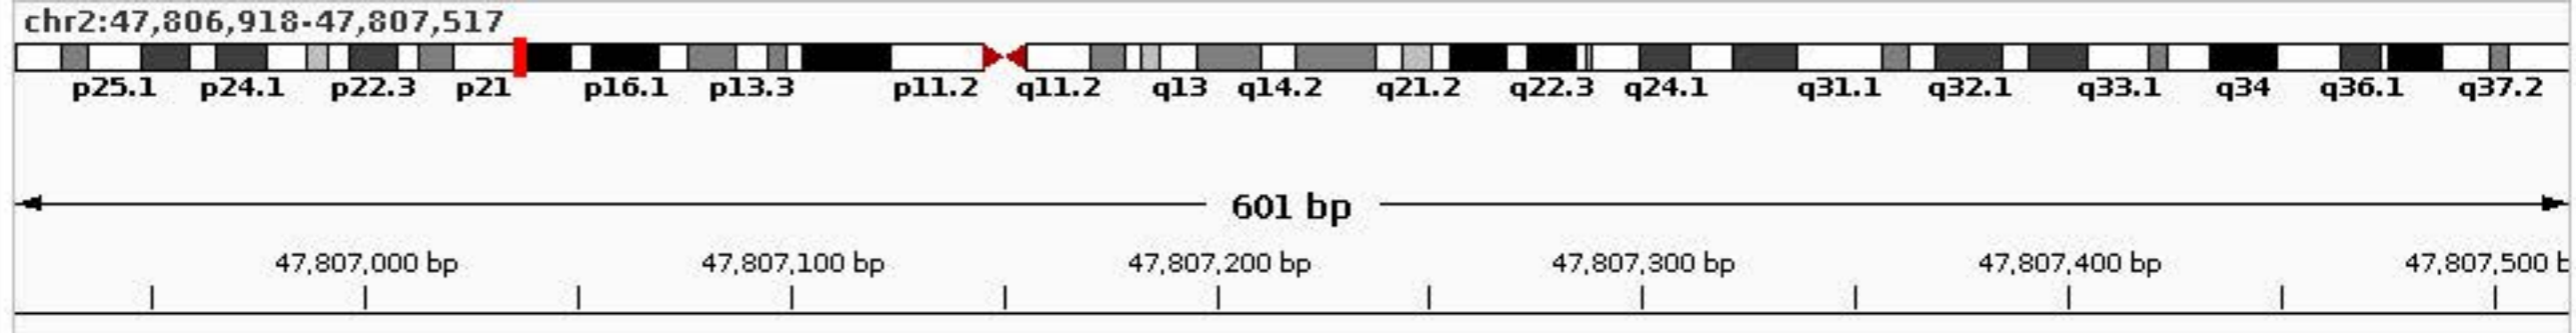

SL\_0001\_LN\_10\_mut.bam Coverage

SL\_0001\_LN\_10\_mut.bam

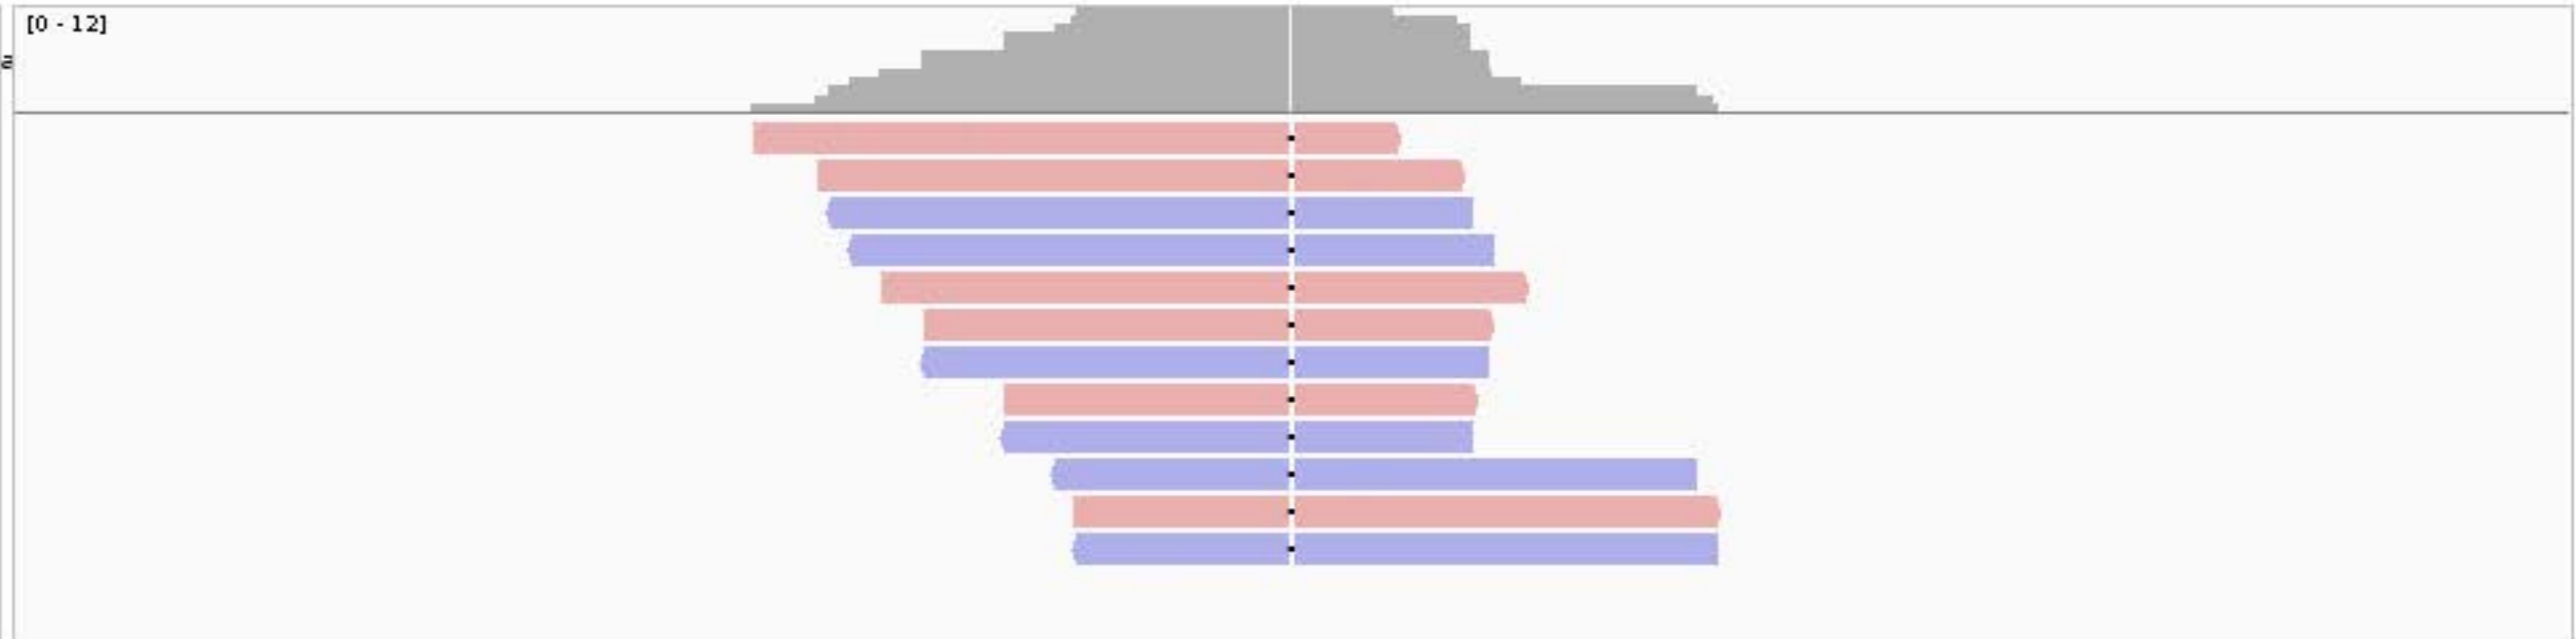

Sequence →

Refseq Genes

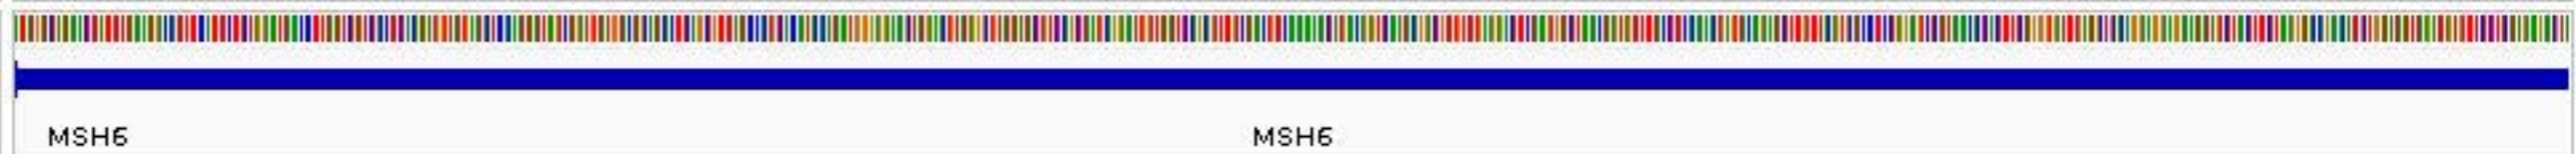

chr19:12,689,860-12,690,459

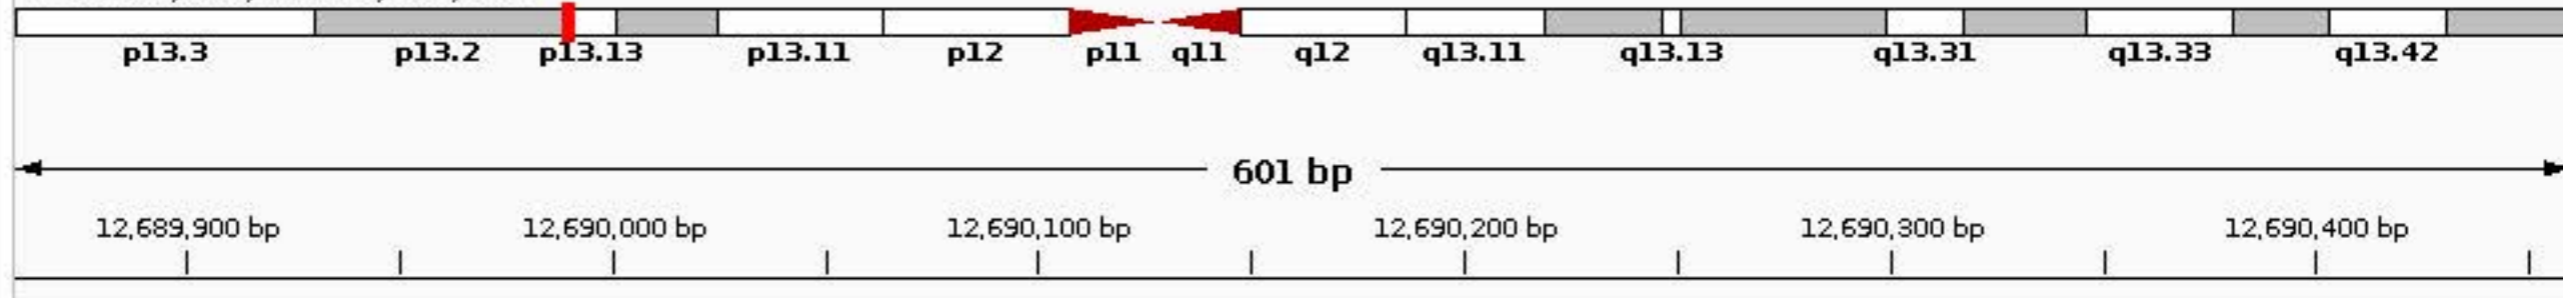

SL\_0001\_RN\_25\_mut.bam Coverage

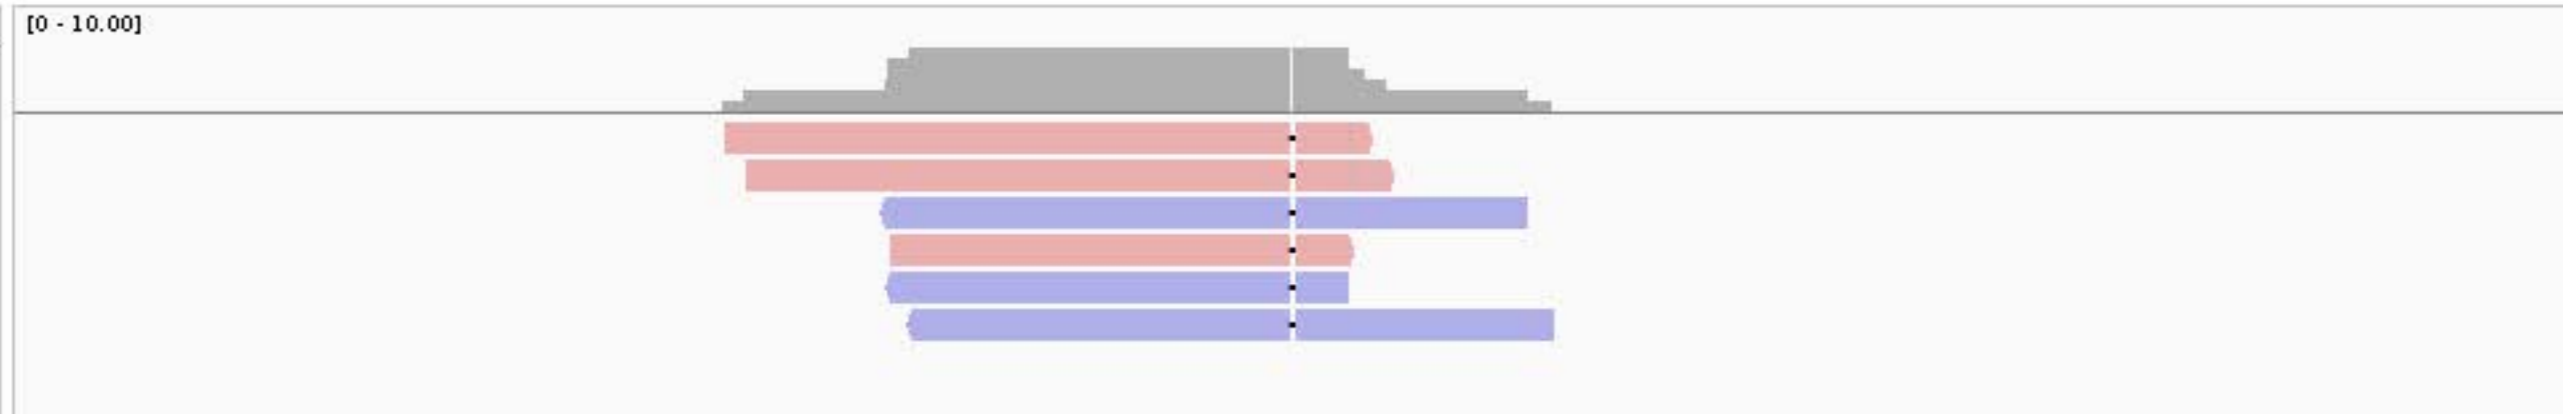

SL\_0001\_RN\_25\_mut.bam

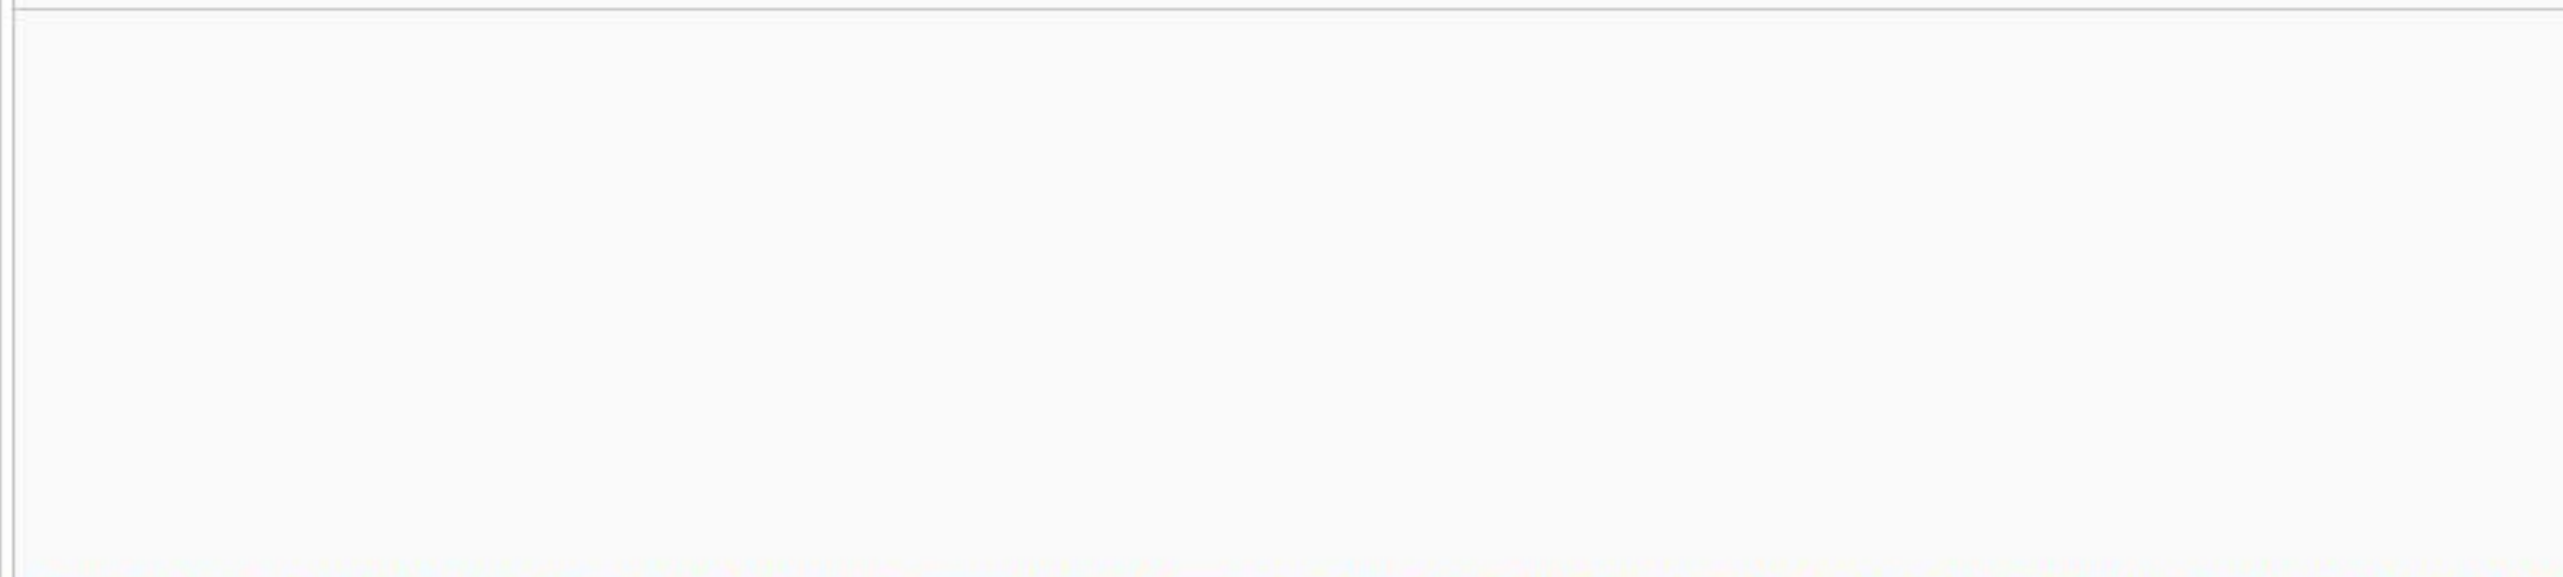

Sequence

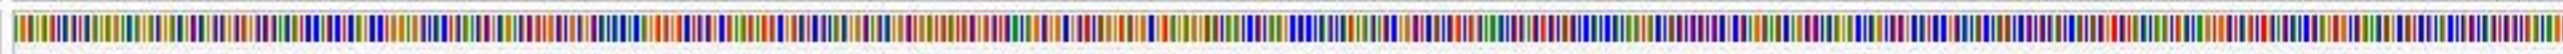

Refseq Genes

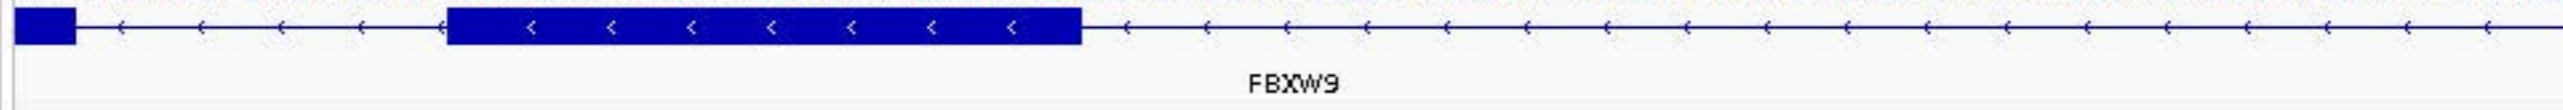

FBXW9

chr19:12,689,860-12,690,459



SL\_0001\_RN\_32\_mut.bam Coverage

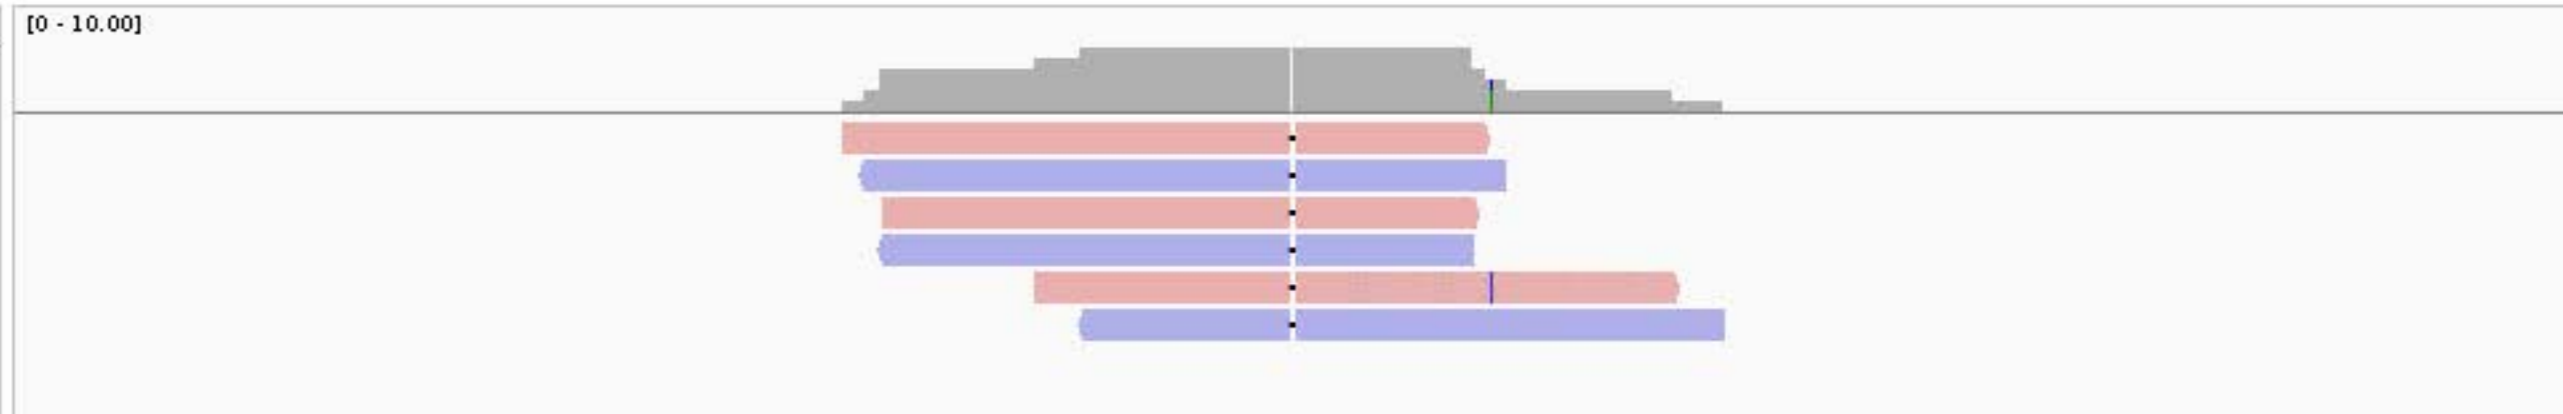

SL\_0001\_RN\_32\_mut.bam

Sequence



Refseq Genes



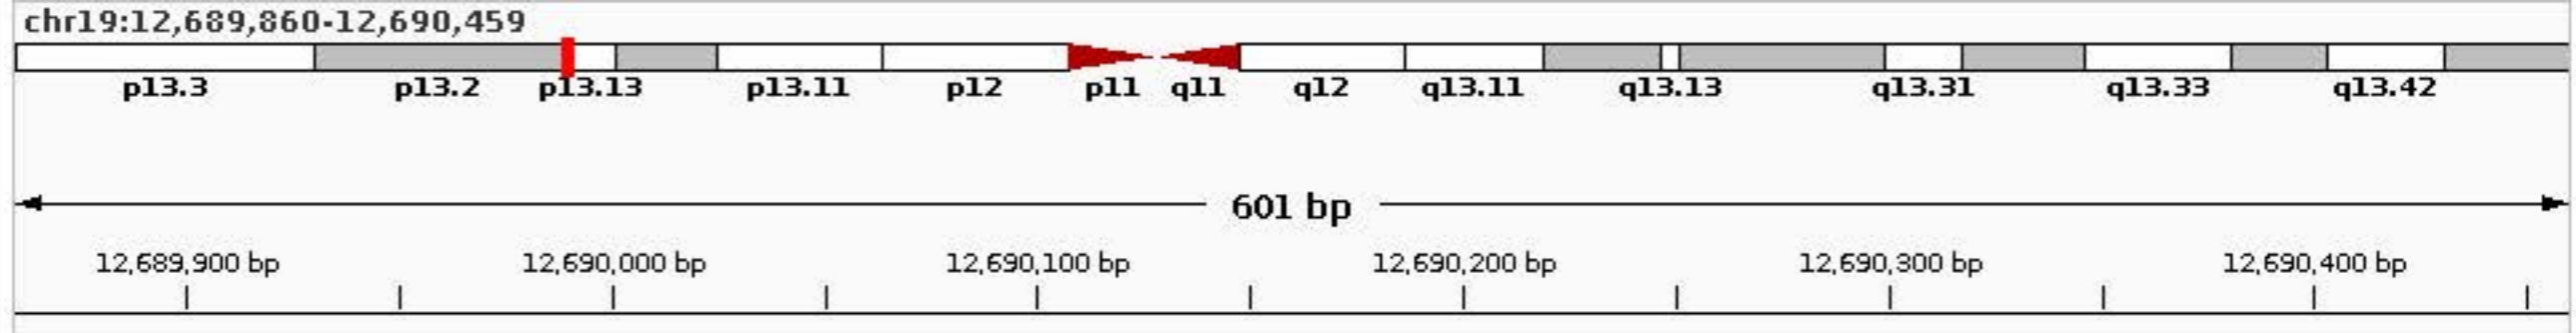

SL\_0002\_LN\_1\_mut.bam Coverage

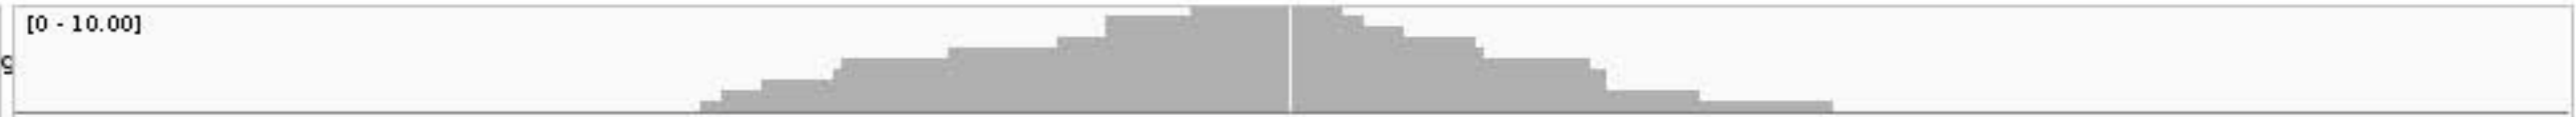

SL\_0002\_LN\_1\_mut.bam

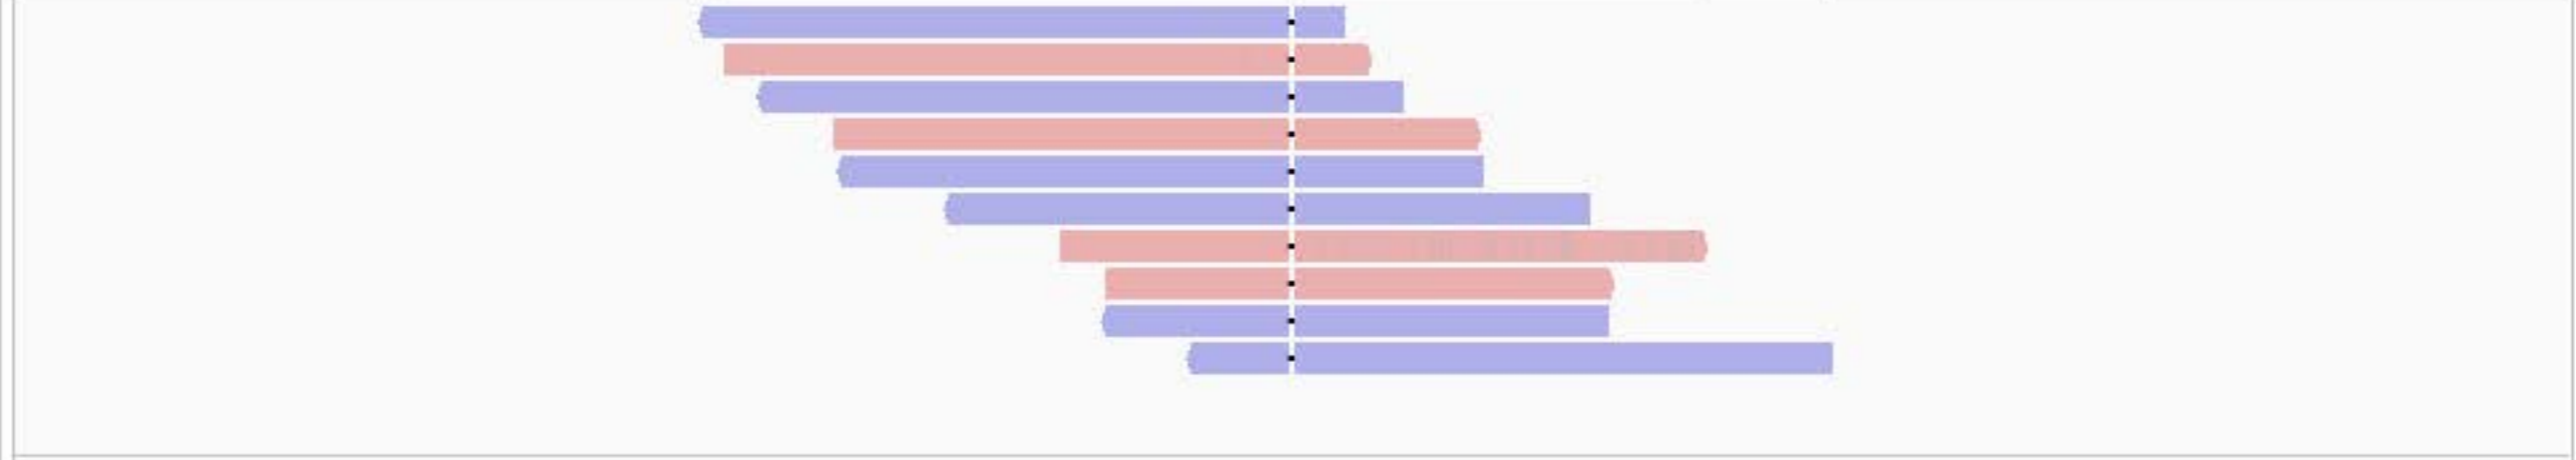

Sequence

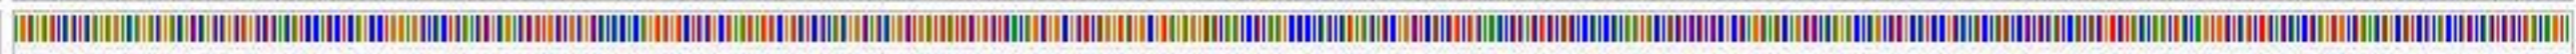

Refseq Genes

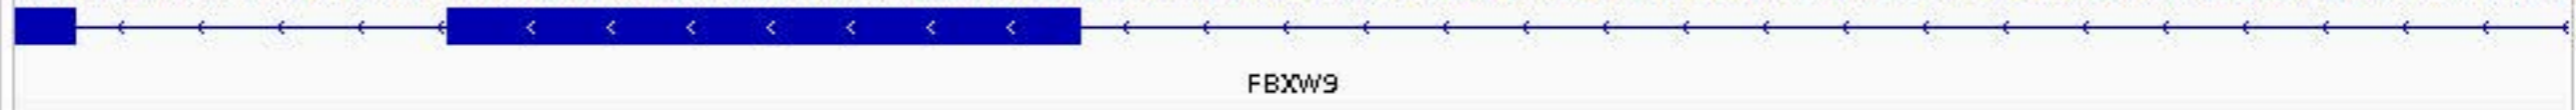



chr19:12,689,860-12,690,459



SL\_0006\_RN\_59\_mut.bam Coverage

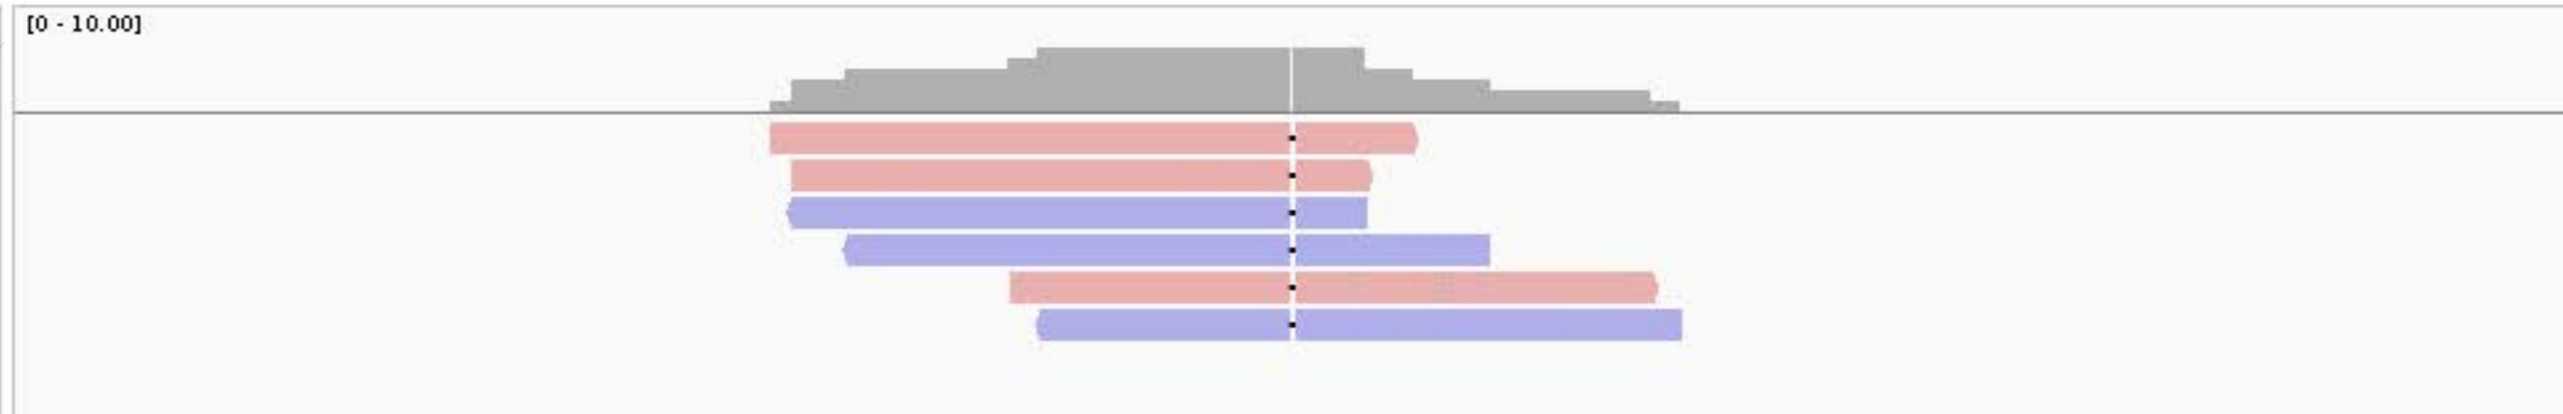

SL\_0006\_RN\_59\_mut.bam

Sequence



Refseq Genes



FBXW9

chr19:12,689,860-12,690,459

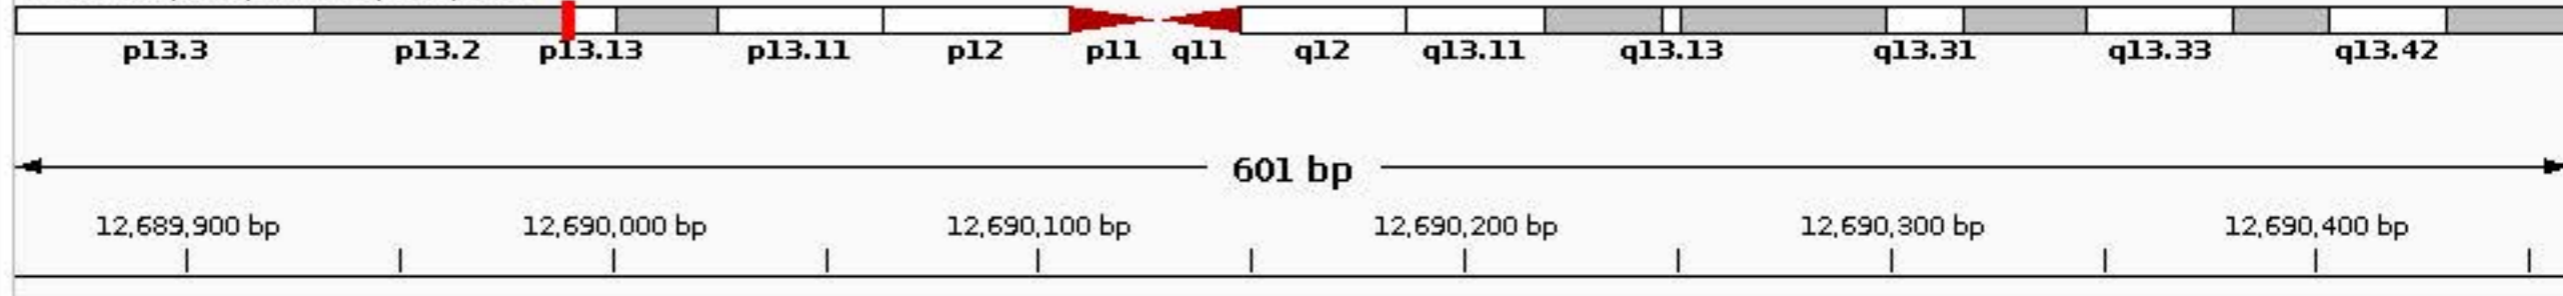

SL\_0007\_RN\_2\_mut.bam Coverage

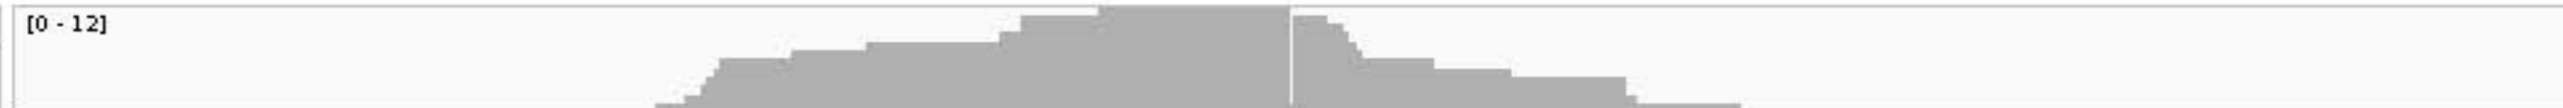

SL\_0007\_RN\_2\_mut.bam

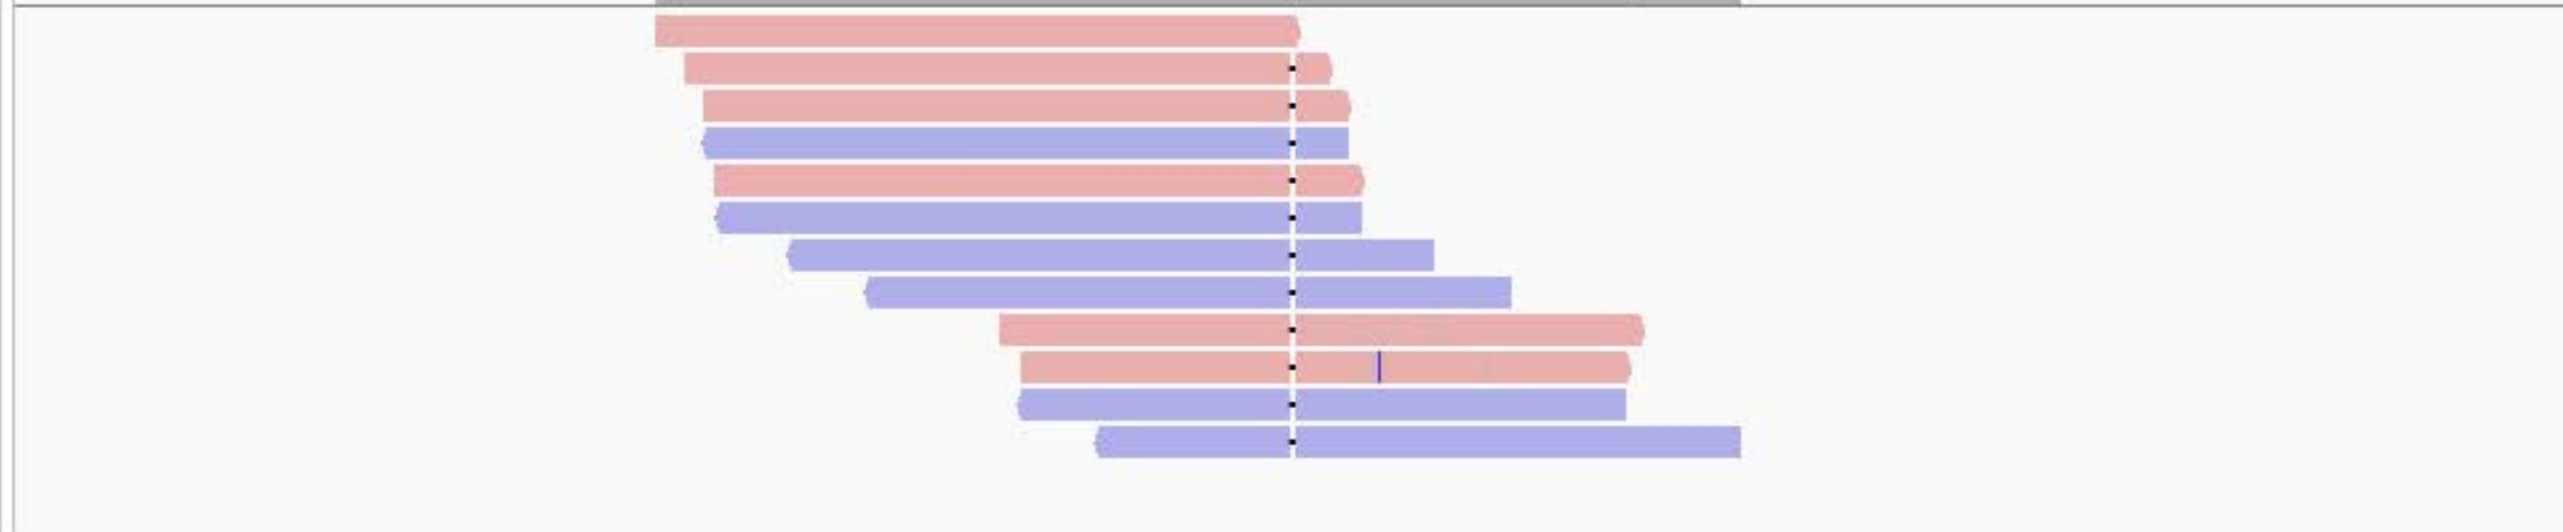

Sequence

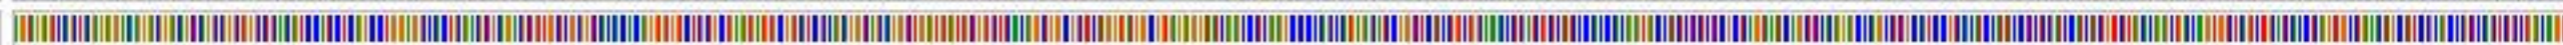

Refseq Genes

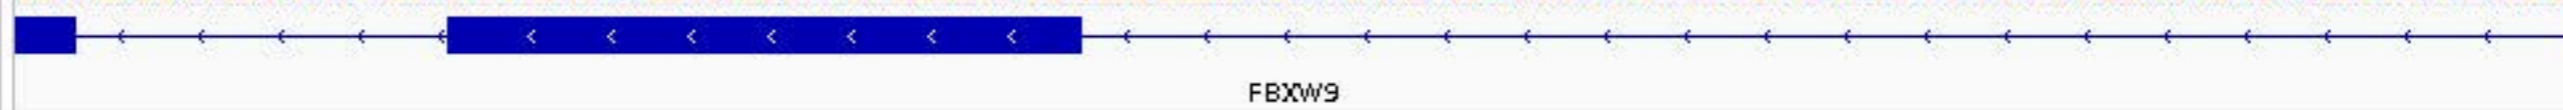

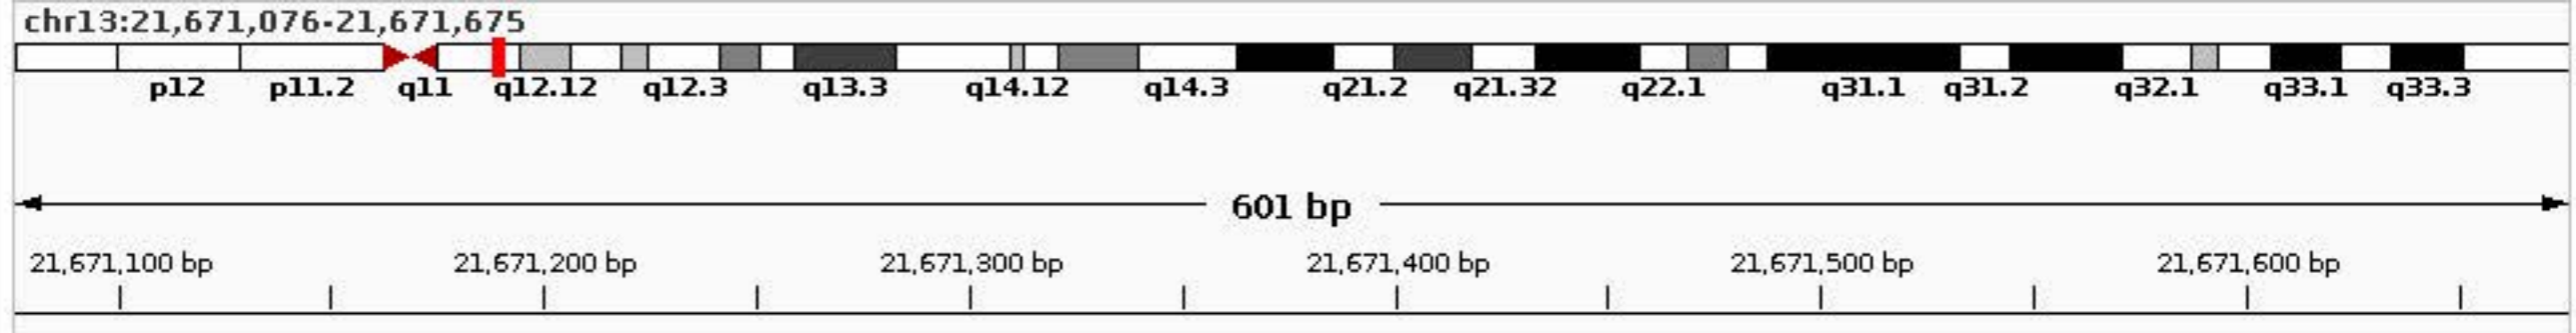

SL\_0004\_RN\_26\_mut.bam Coverage

SL\_0004\_RN\_26\_mut.bam

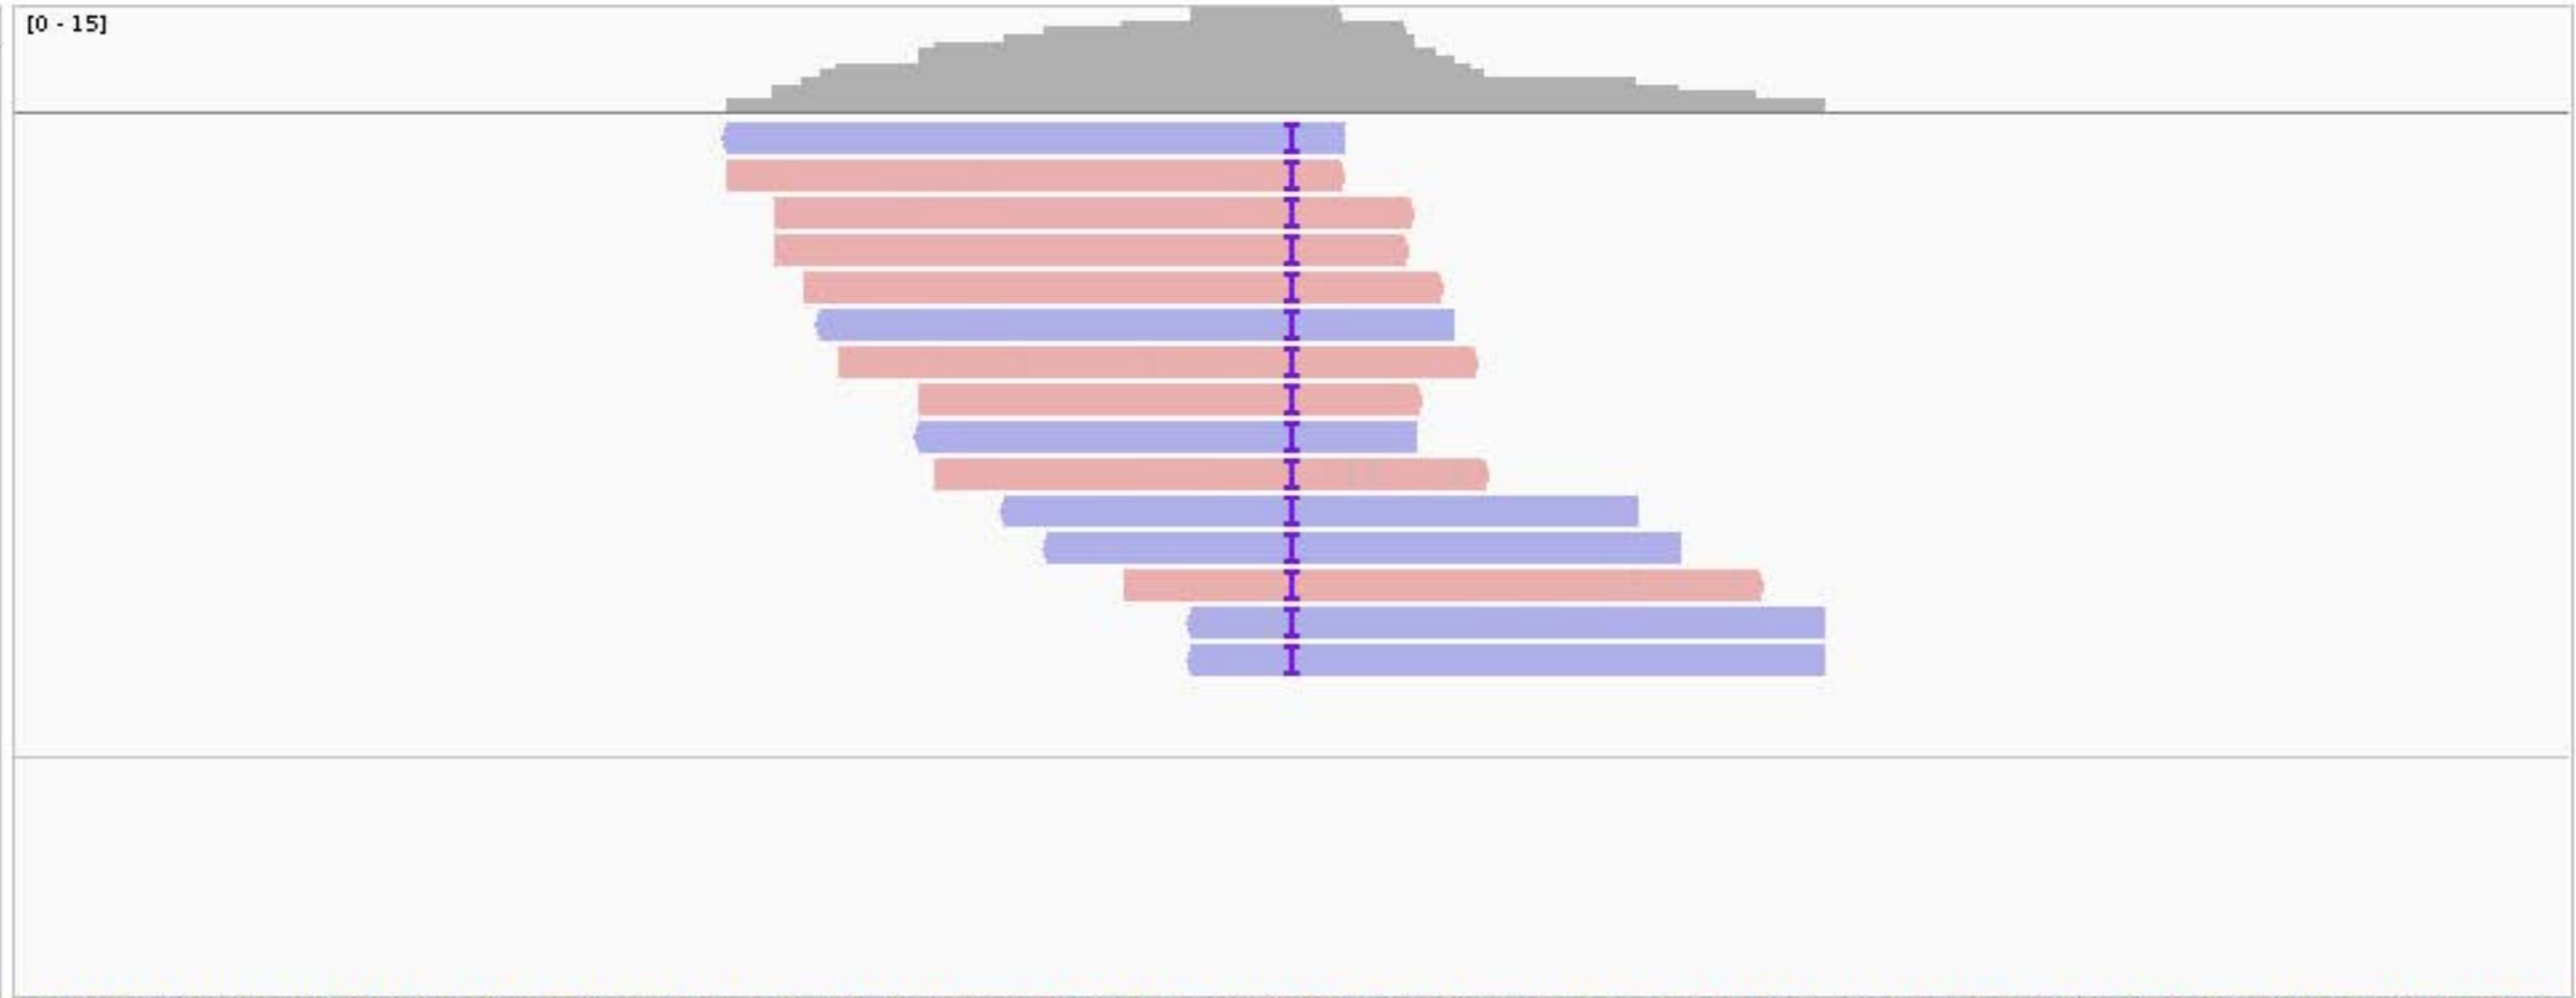

Sequence

Refseq Genes

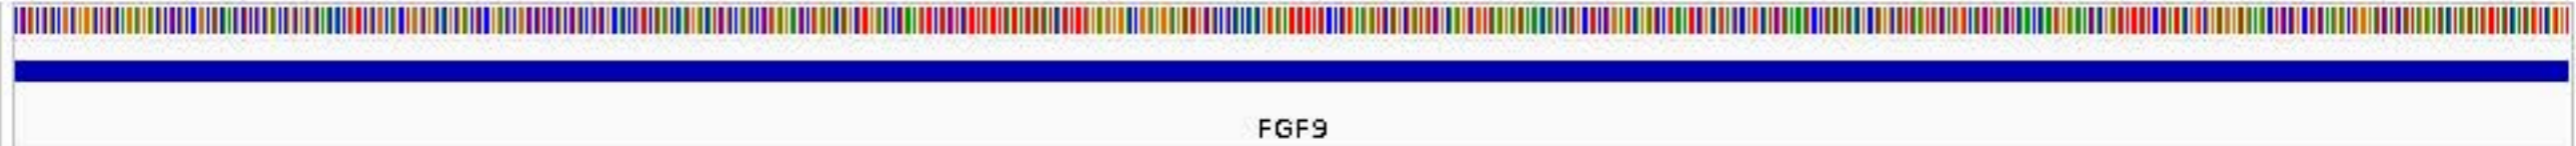

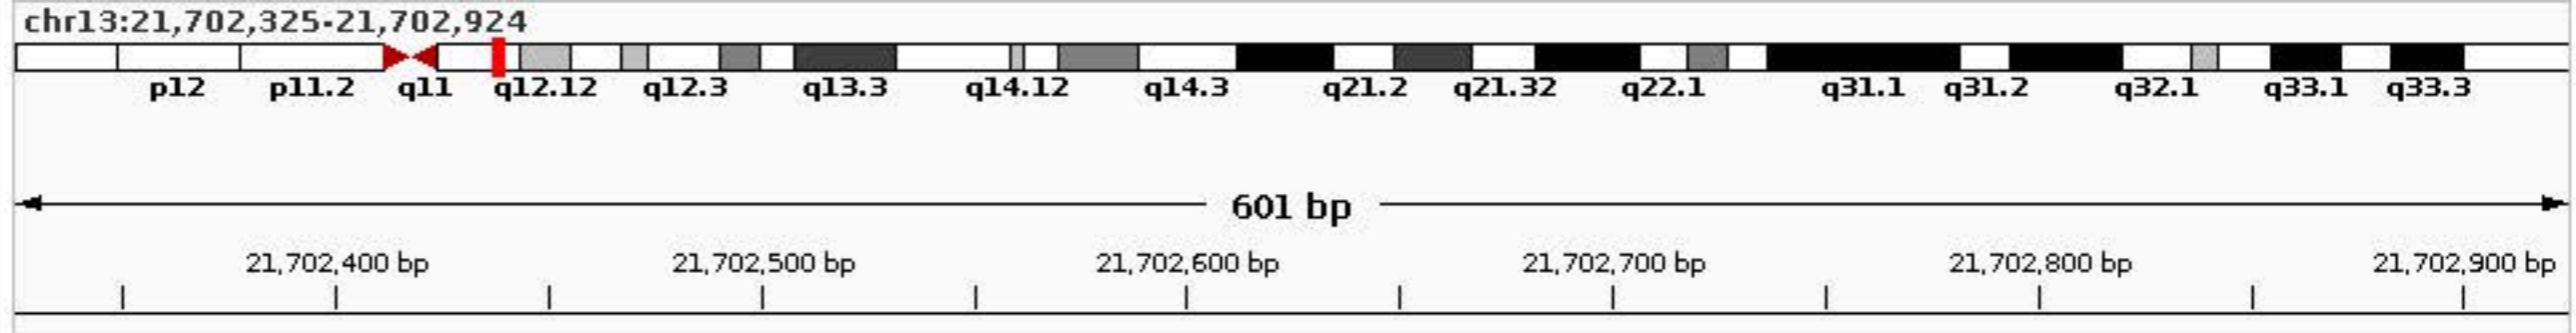

SL\_0001\_RN\_32\_mut.bam Coverage

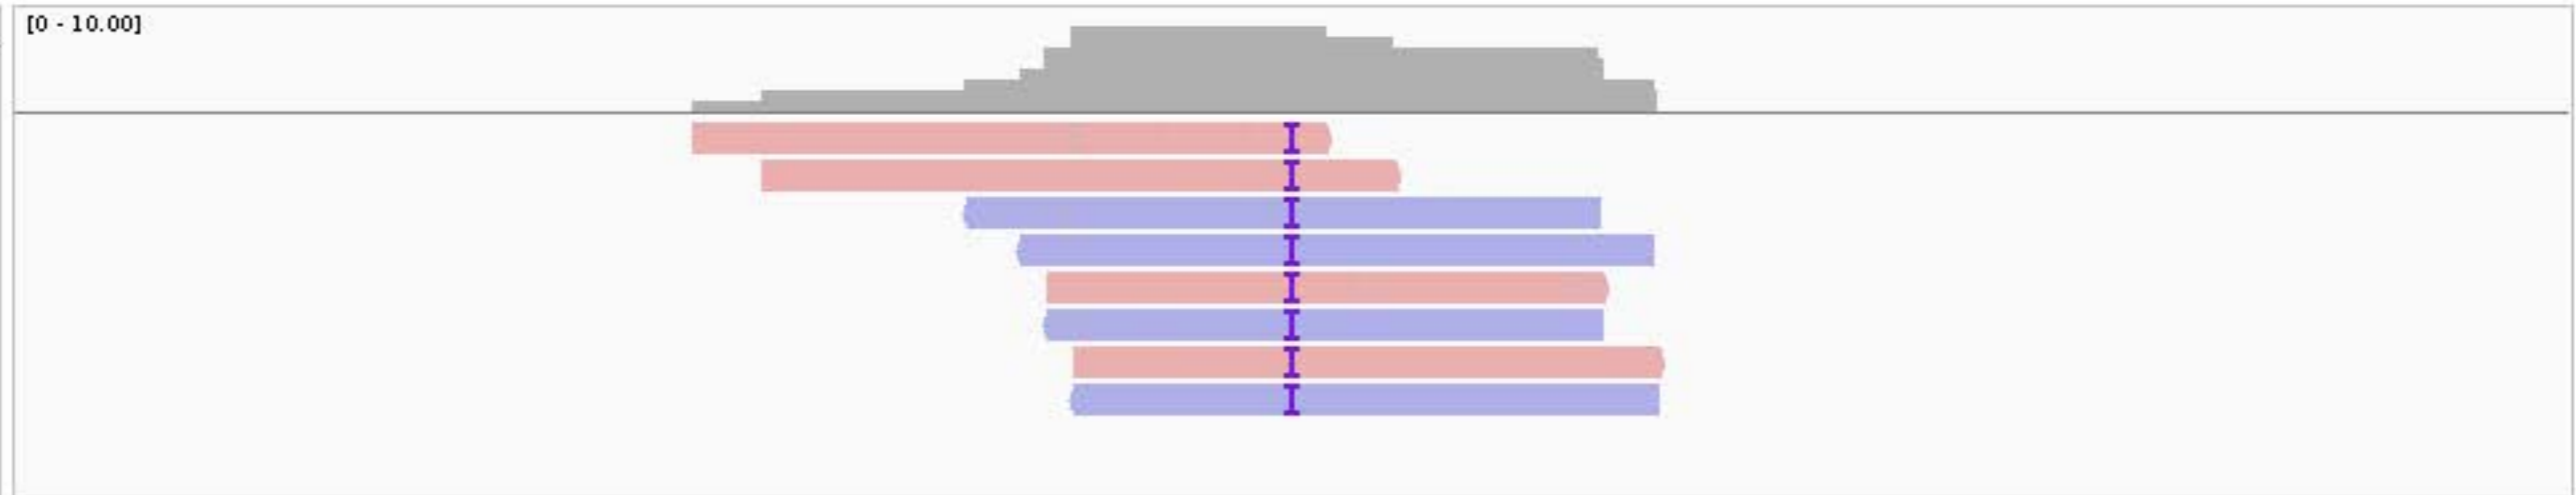

Sequence

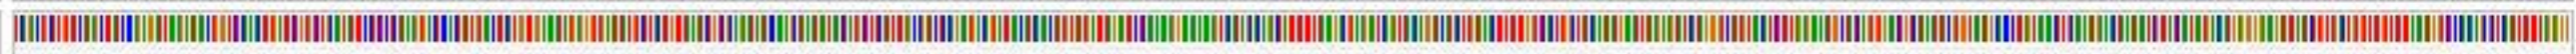

Refseq Genes

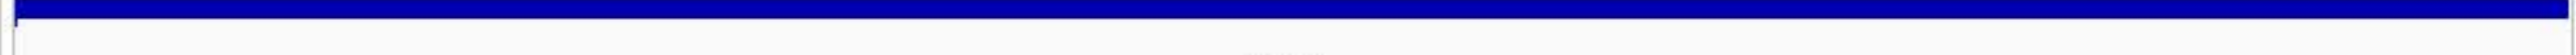

FGF9

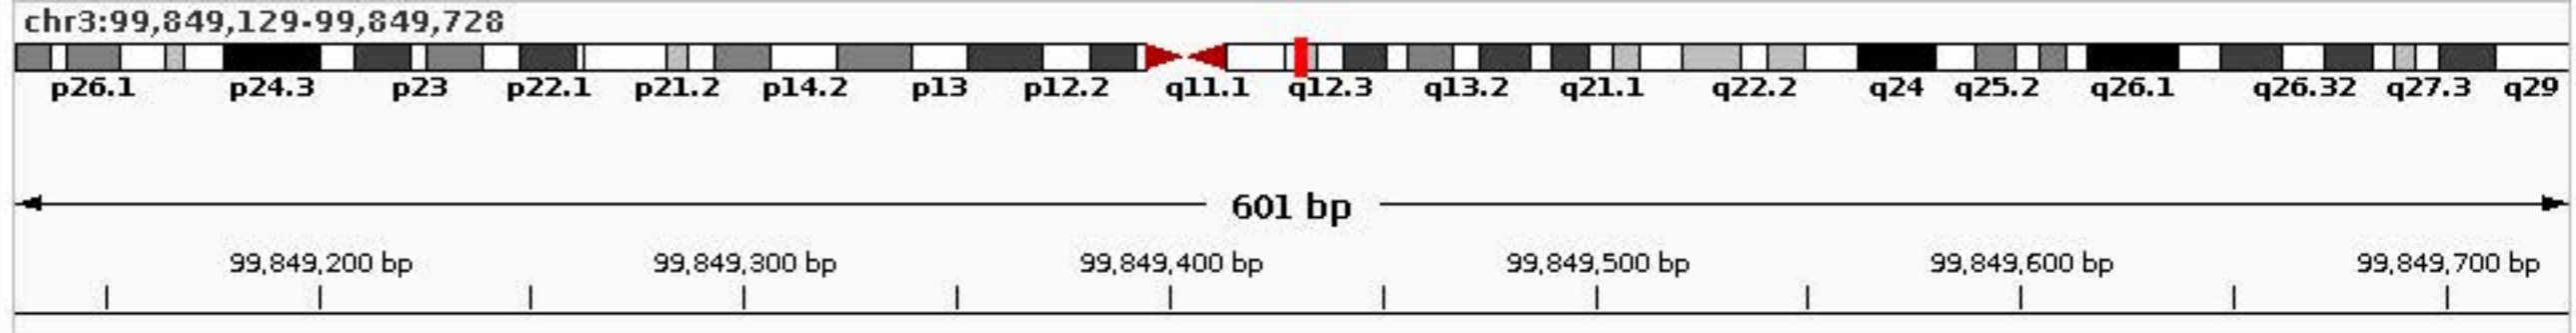

SL\_0015\_LN\_46\_mut.bam Coverage

SL\_0015\_LN\_46\_mut.bam

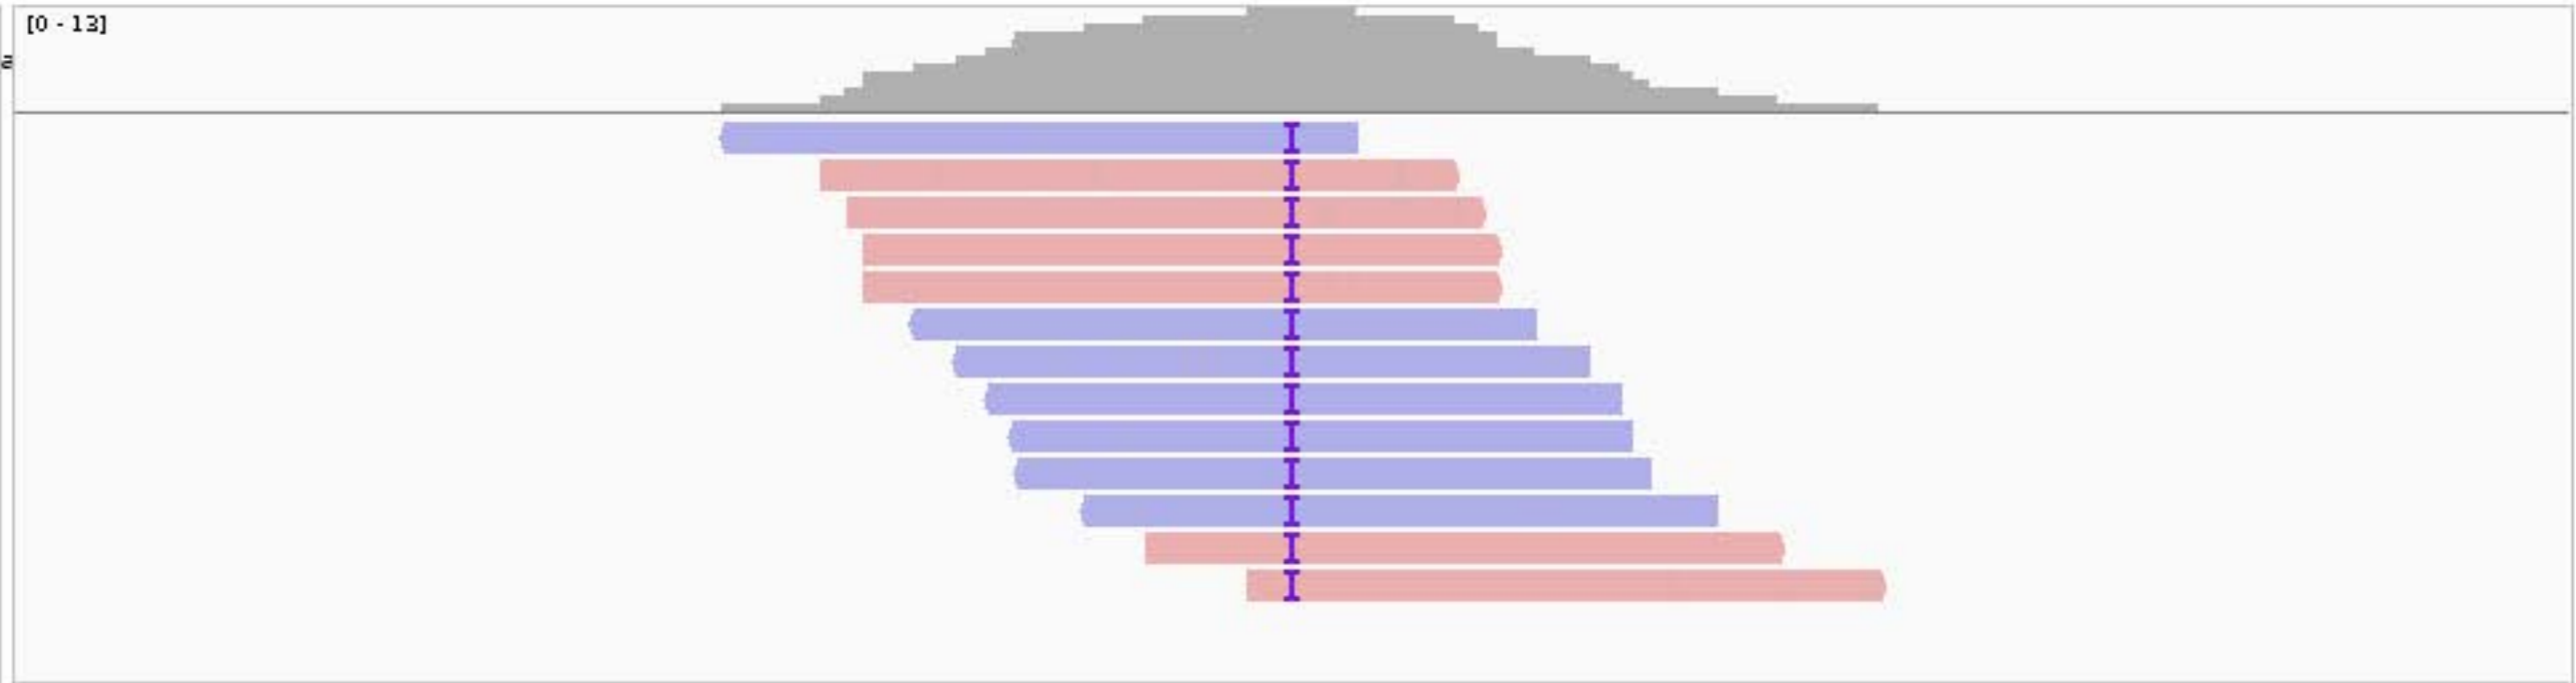

Sequence →

Refseq Genes

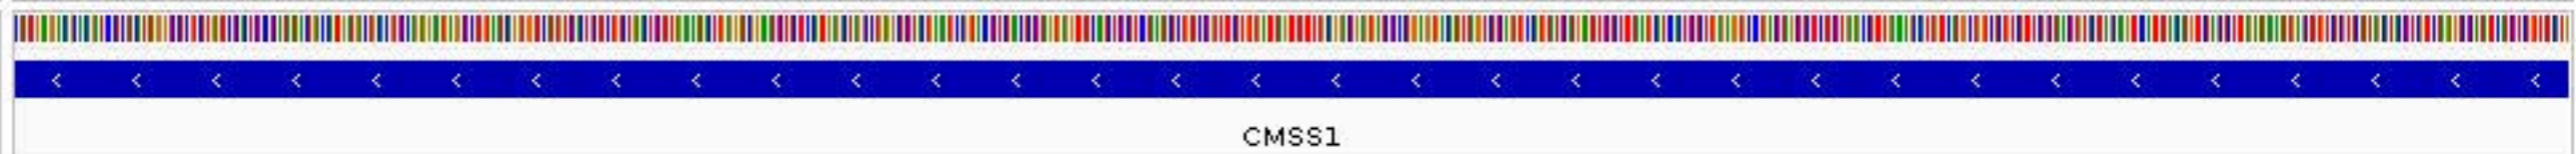



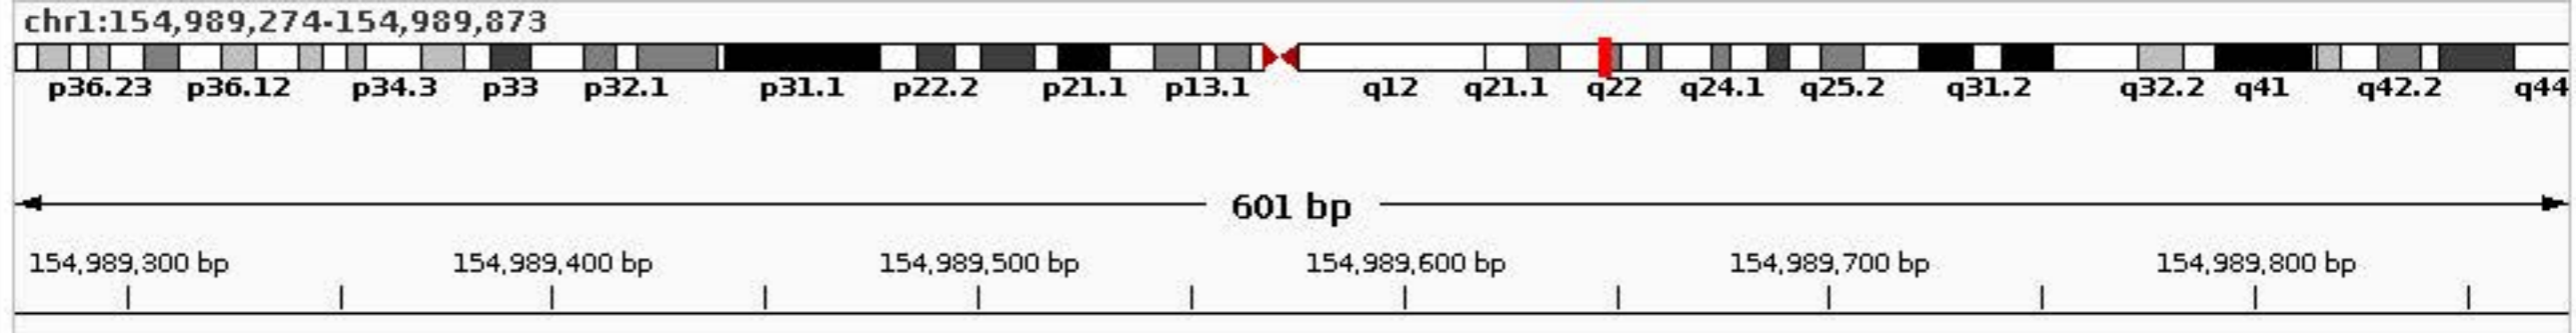

SL\_0006\_RN\_67\_mut.bam Coverage

SL\_0006\_RN\_67\_mut.bam

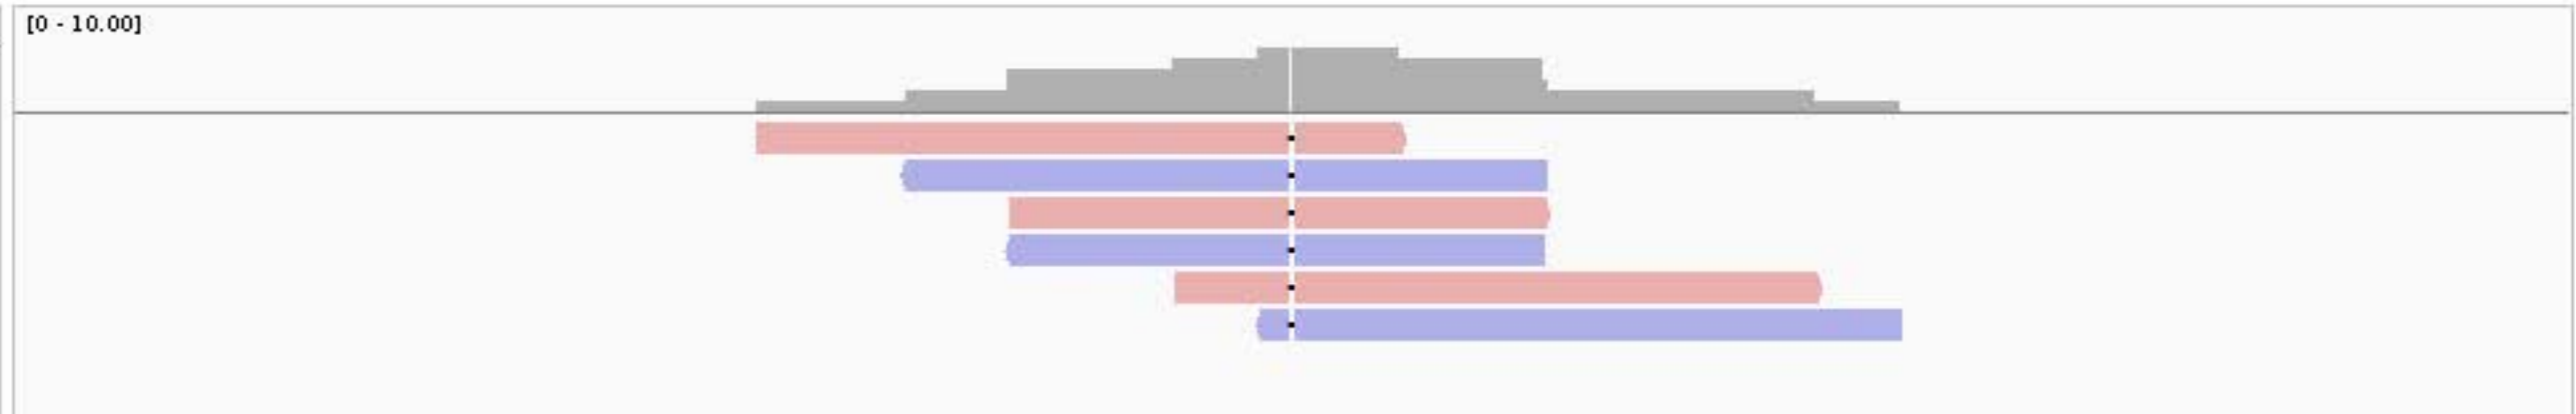

Sequence

Refseq Genes

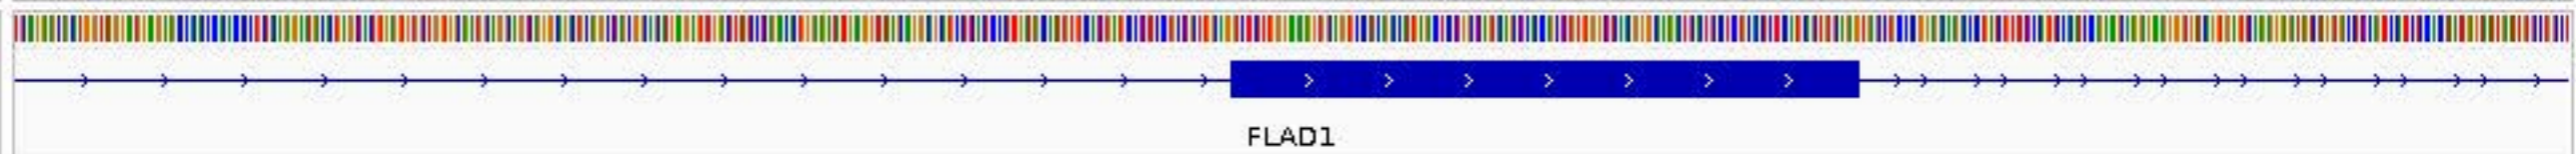

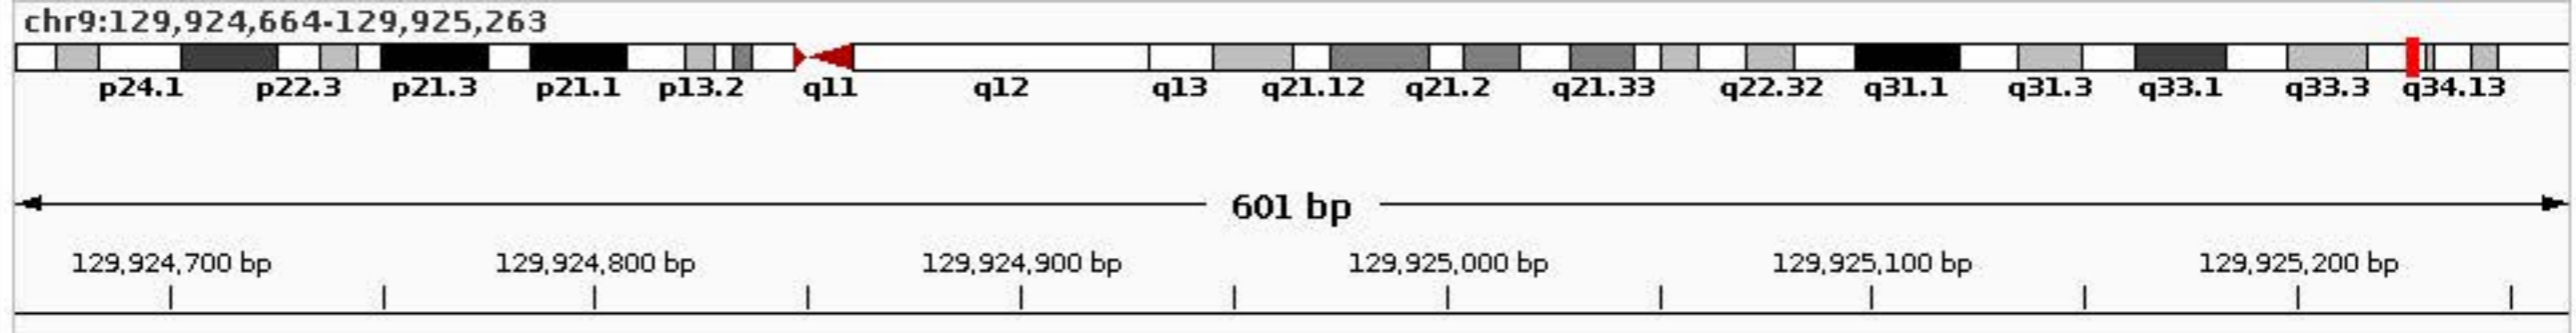

SL\_0001\_RN\_25\_mut.bam Coverage

SL\_0001\_RN\_25\_mut.bam

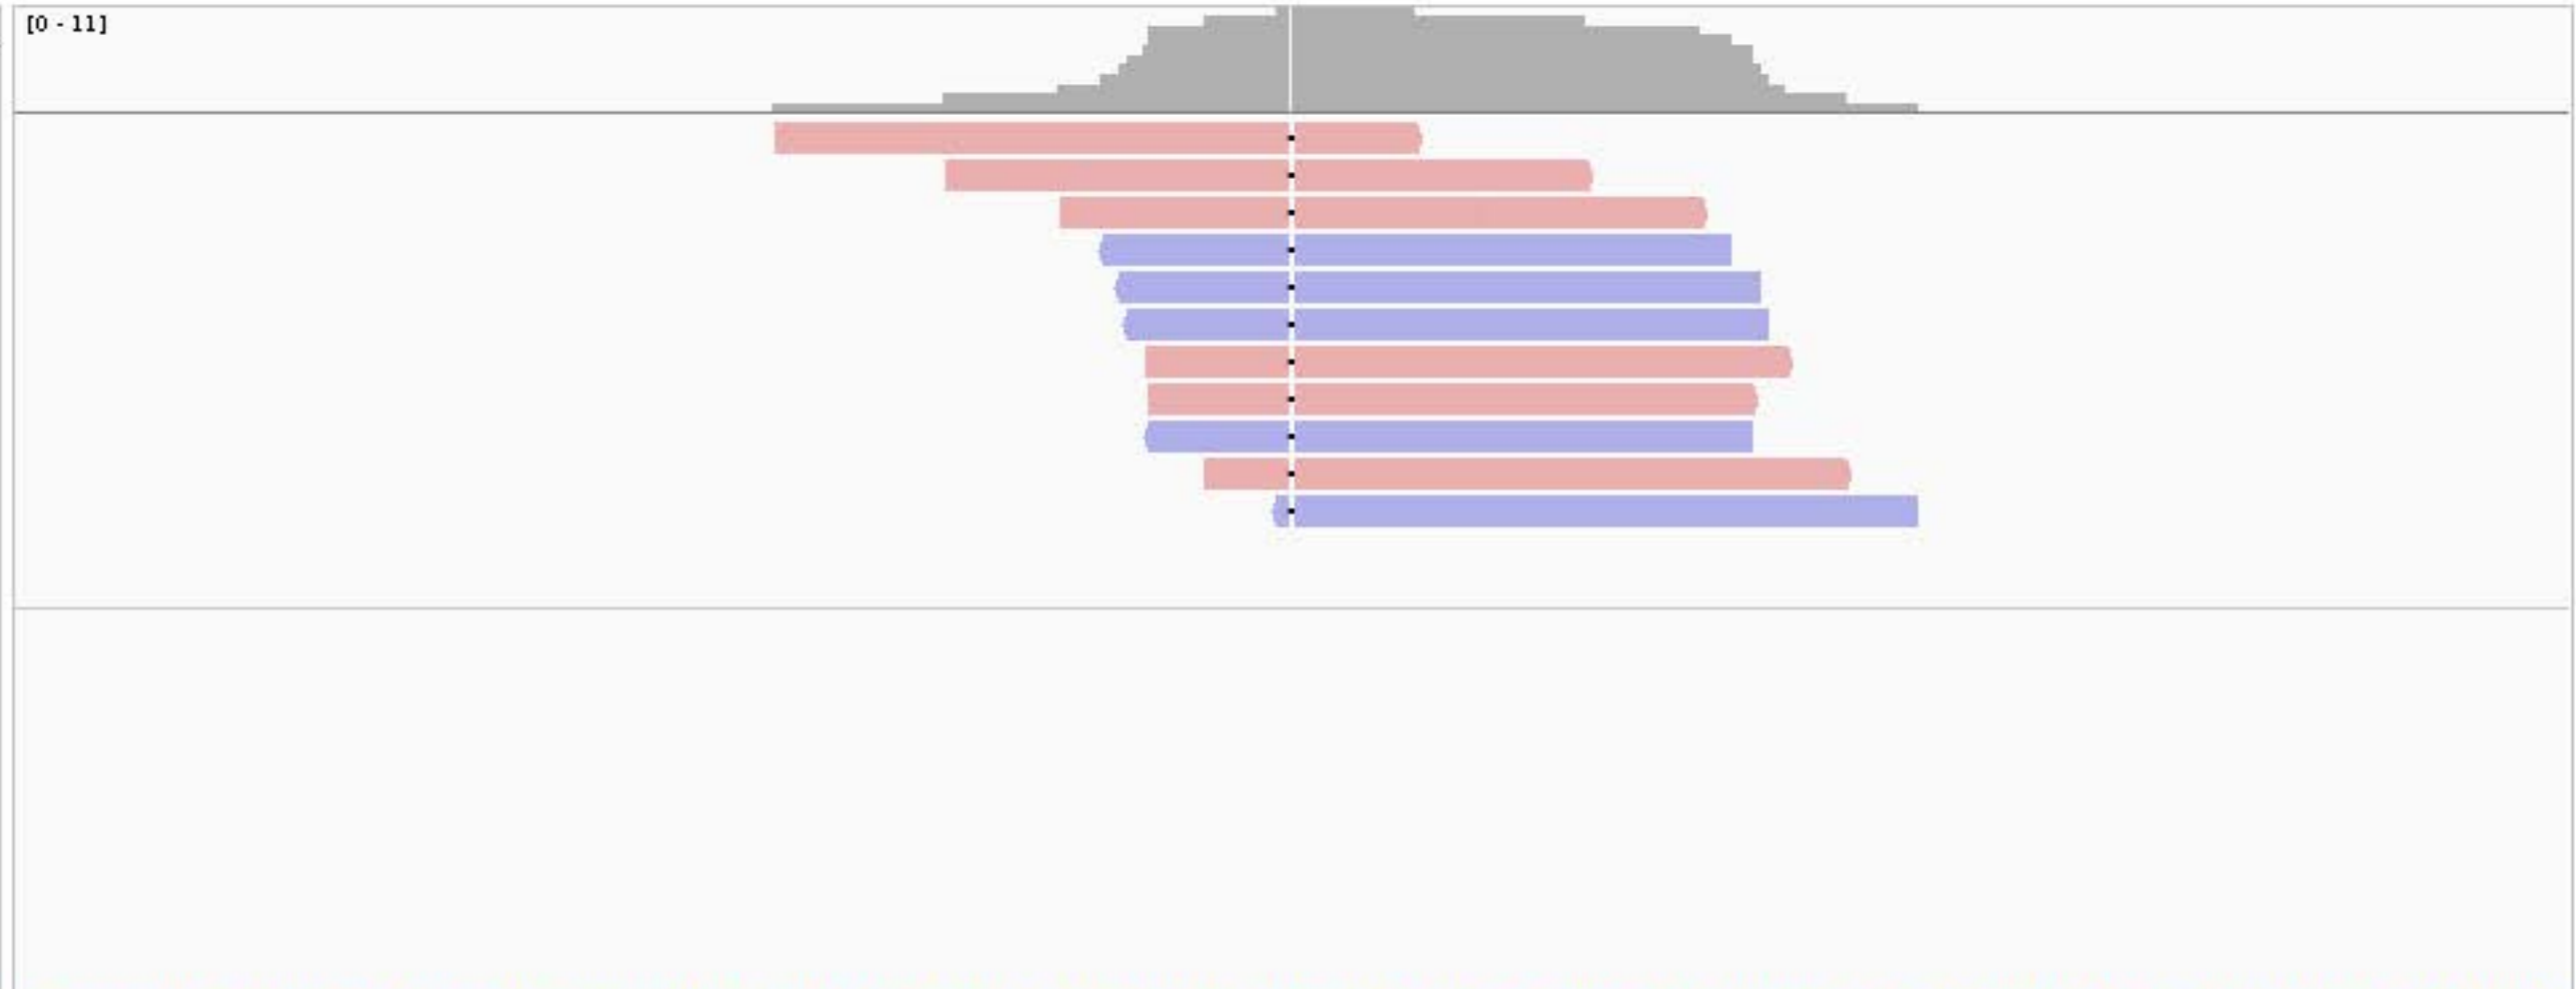

Sequence

Refseq Genes

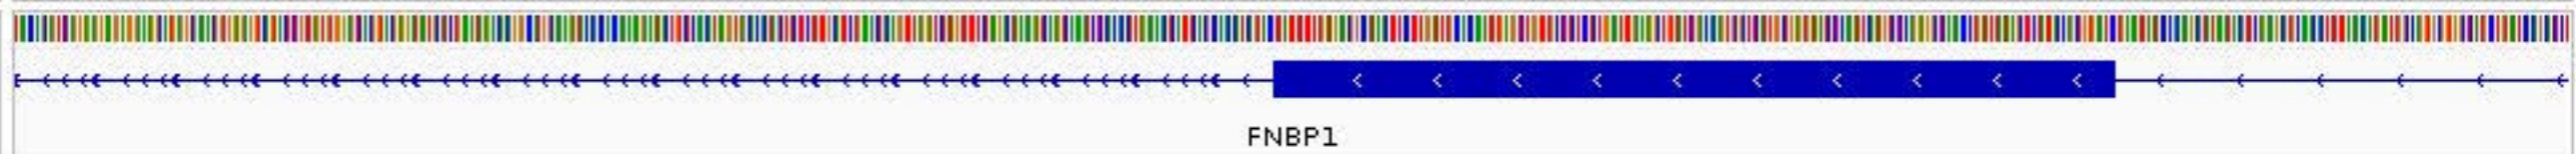

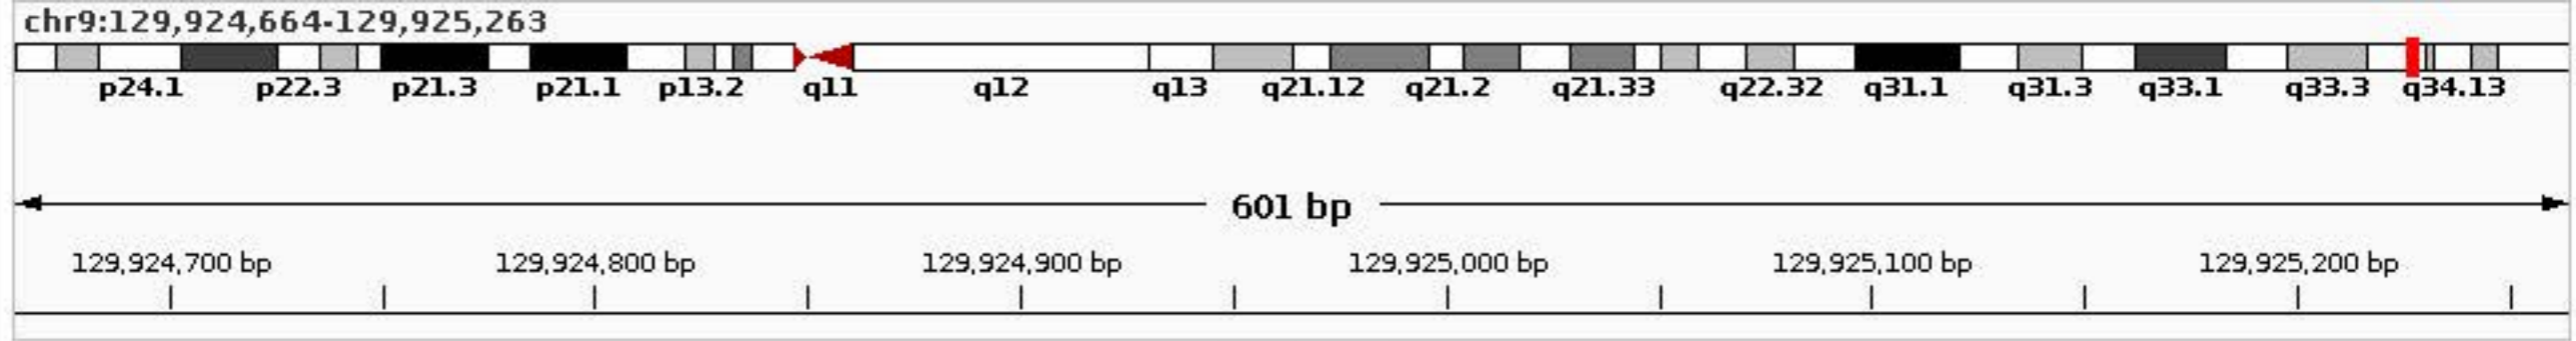

SL\_0001\_RN\_27\_mut.bam Coverage

SL\_0001\_RN\_27\_mut.bam

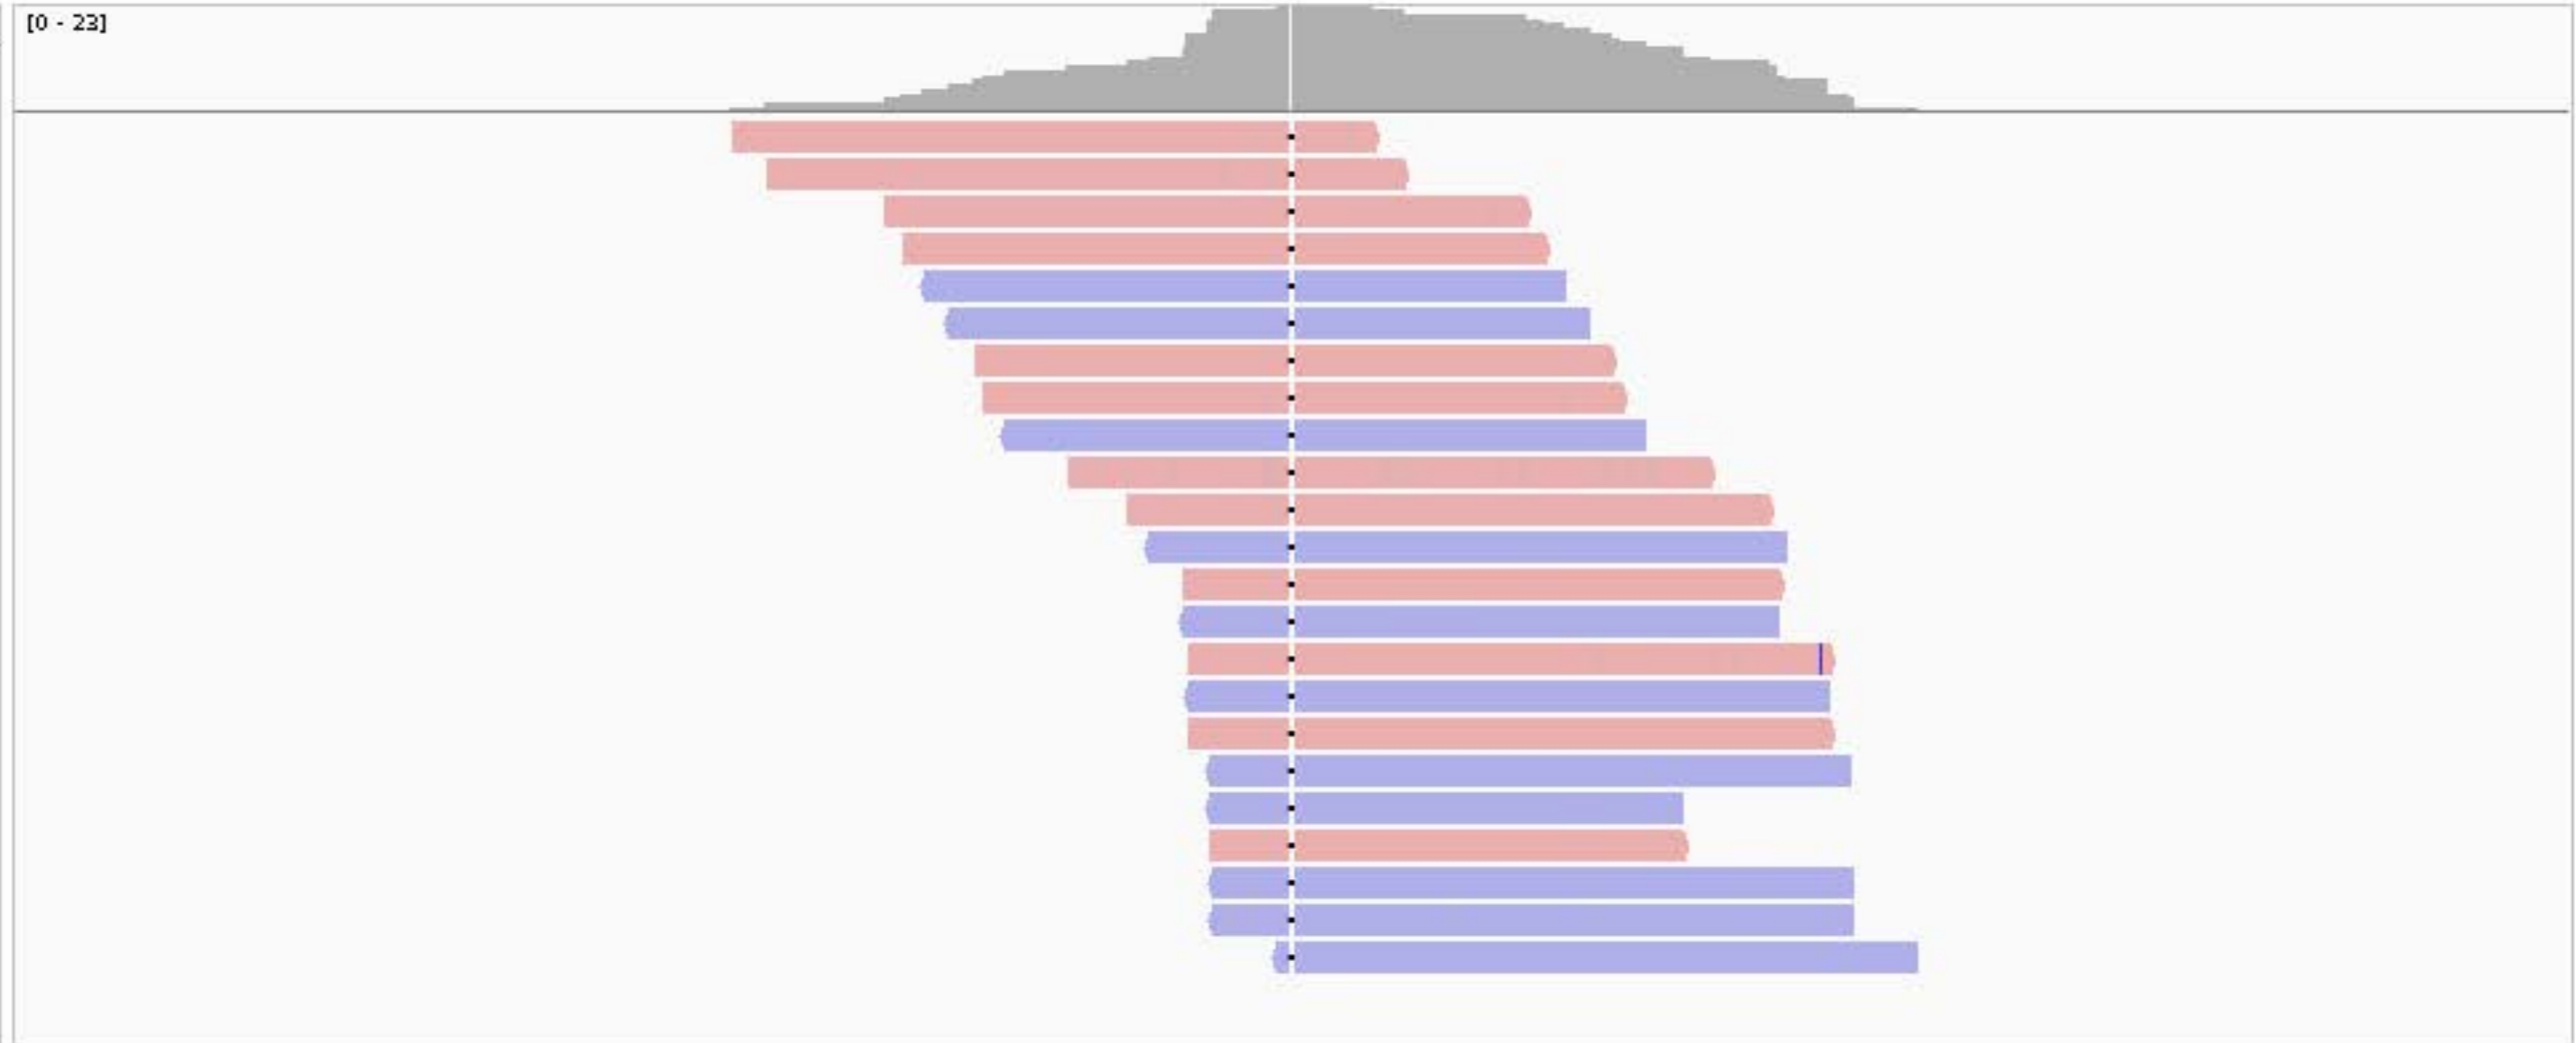

Sequence

Refseq Genes

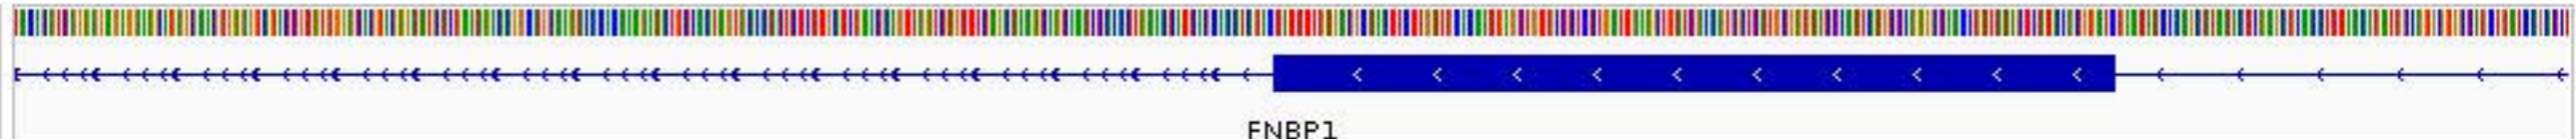

FBNP1



SL\_0001\_RN\_28\_mut.bam Coverage

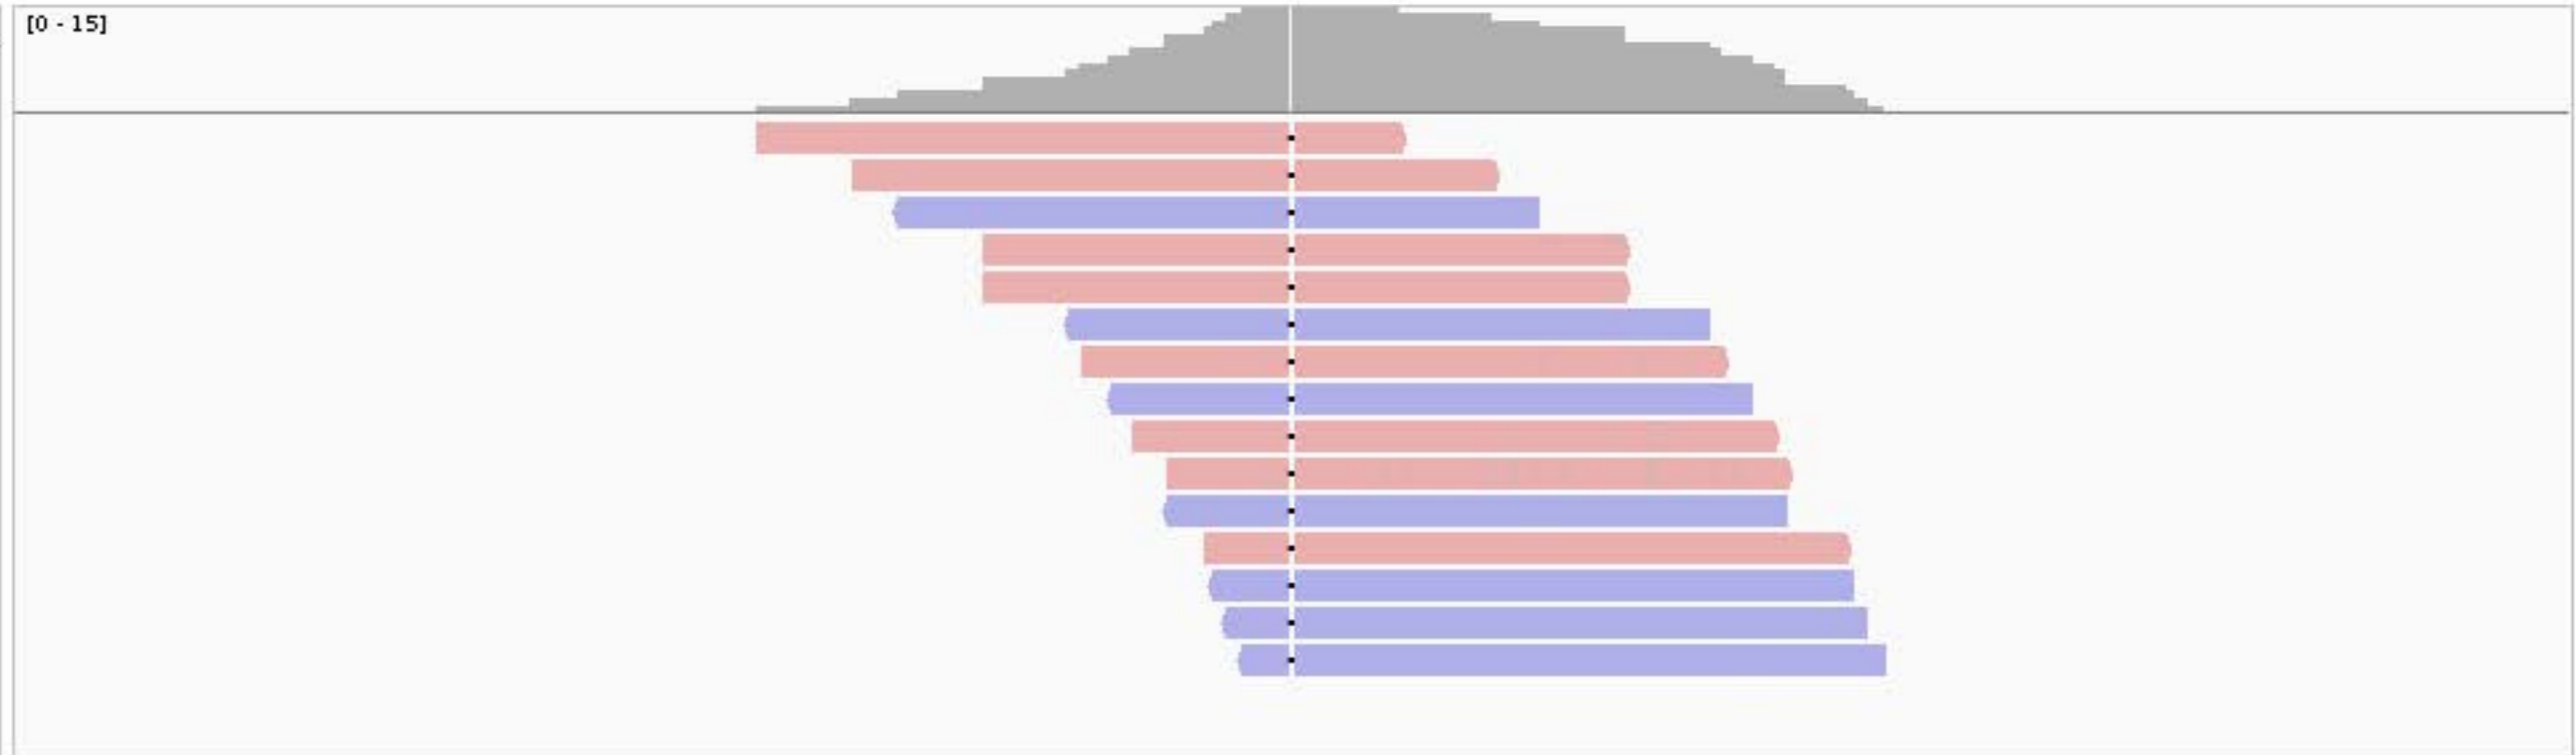

SL\_0001\_RN\_28\_mut.bam

Sequence

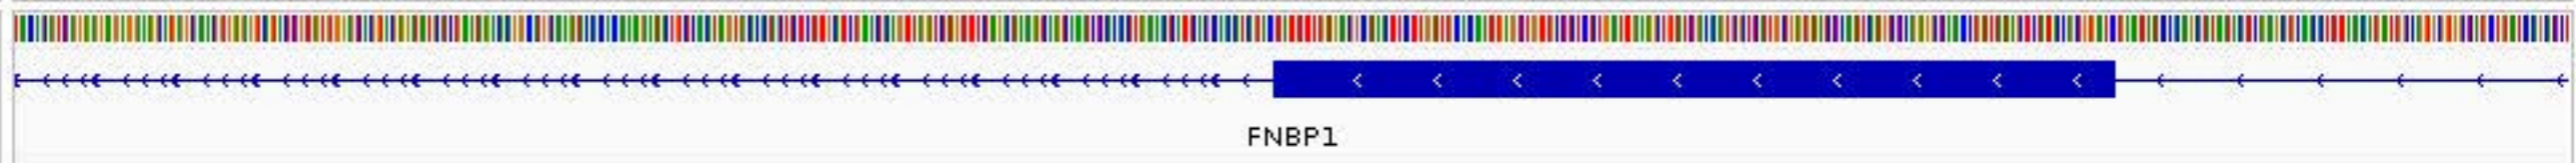

Refseq Genes

FBNP1





SL\_0003\_LN\_51\_mut.bam Coverage

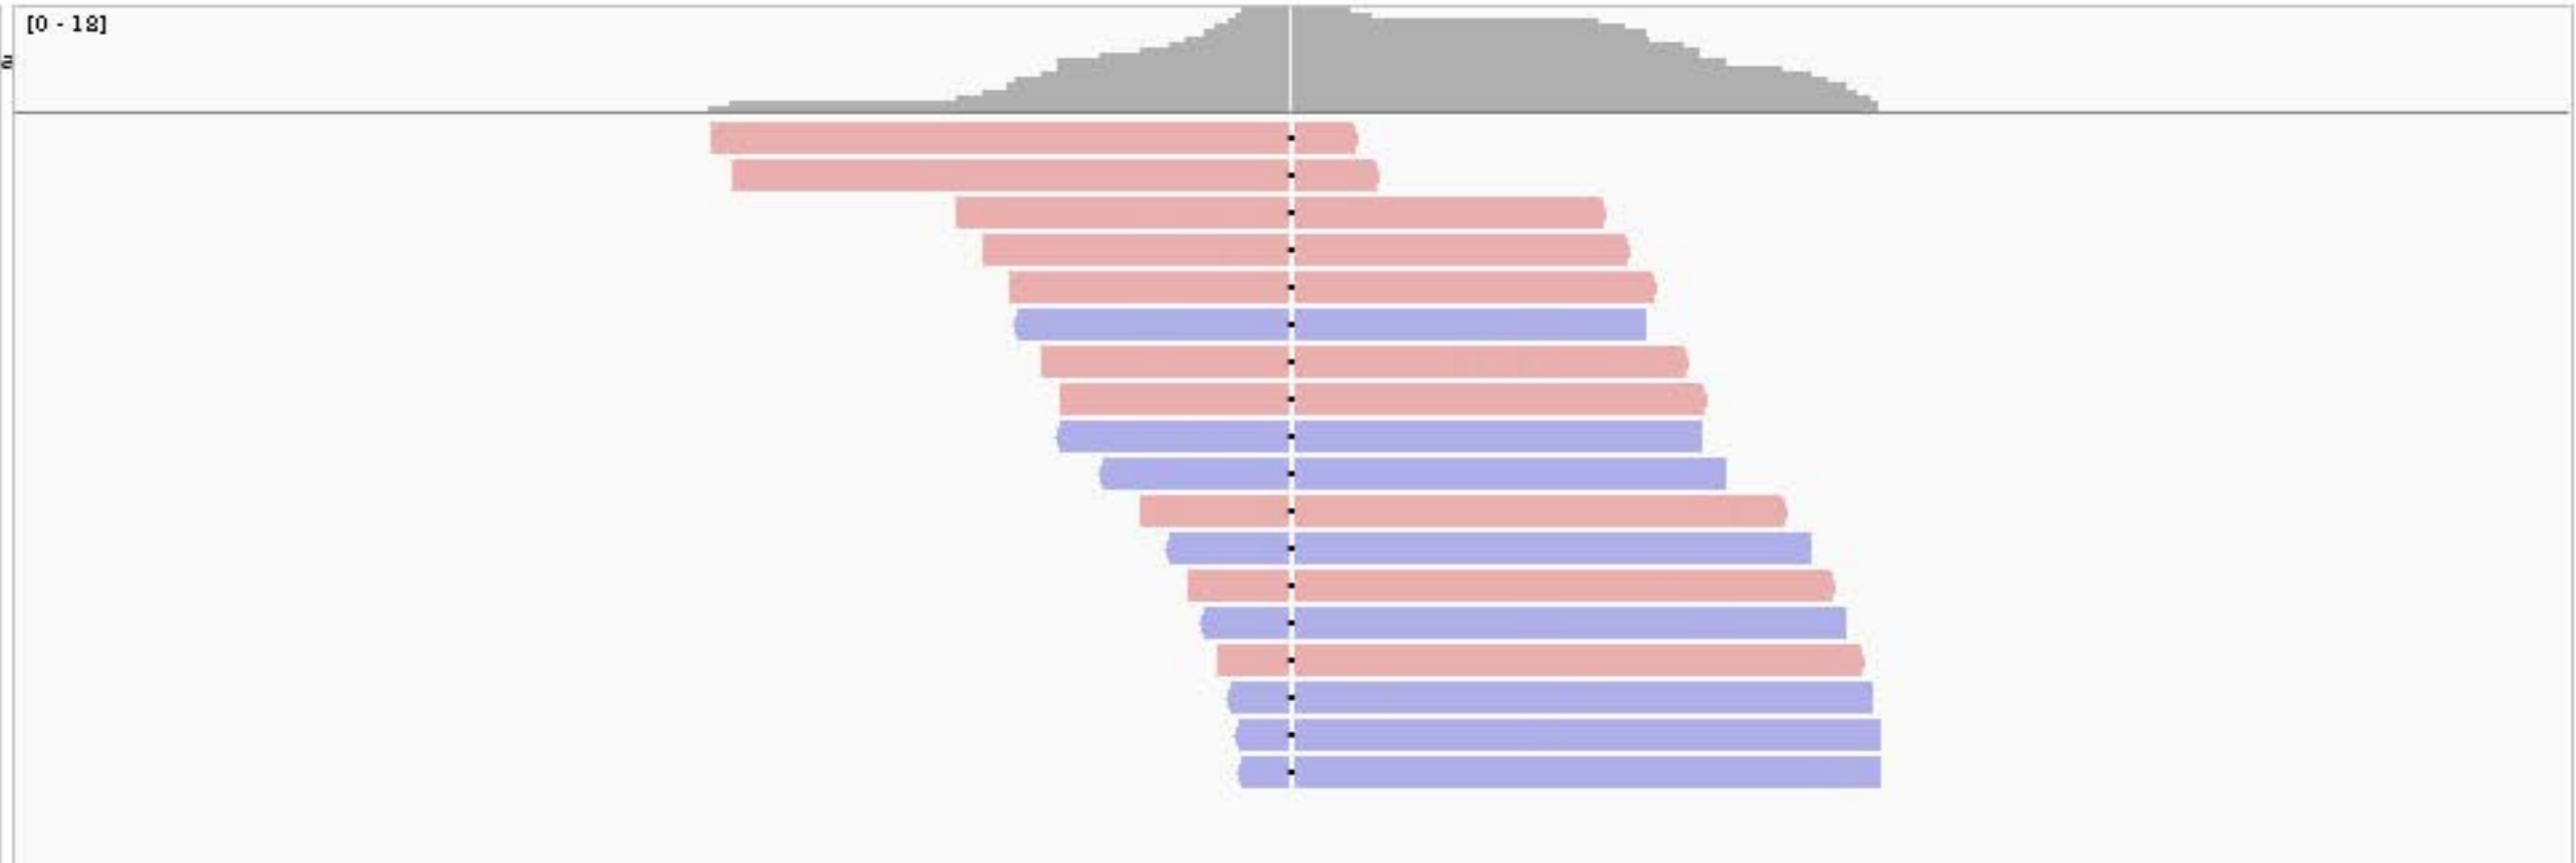

SL\_0003\_LN\_51\_mut.bam

Sequence

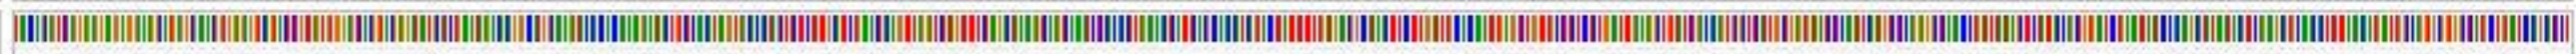

Refseq Genes

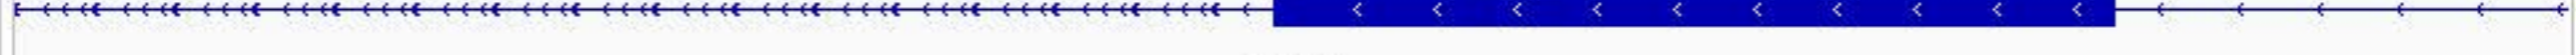

FNBP1



chr17:28,537,753-28,538,352

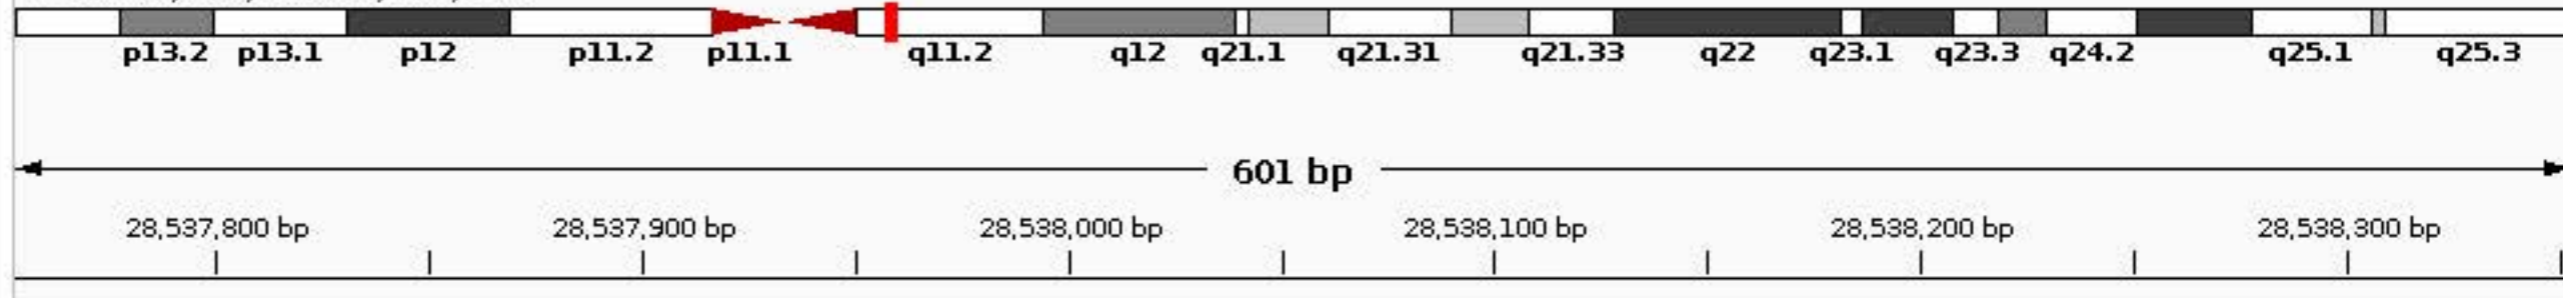

SL\_0017\_RN\_15\_mut.bam Coverage

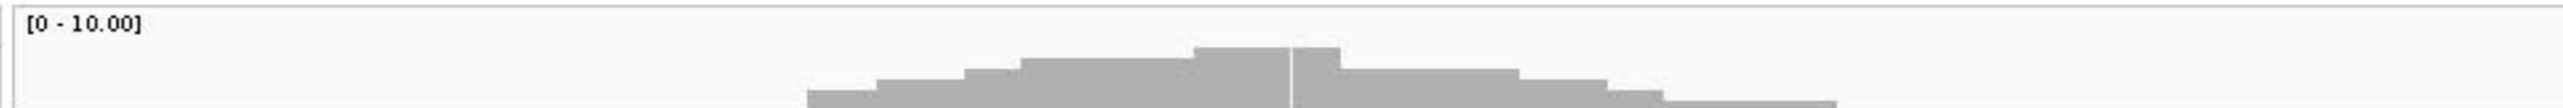

SL\_0017\_RN\_15\_mut.bam

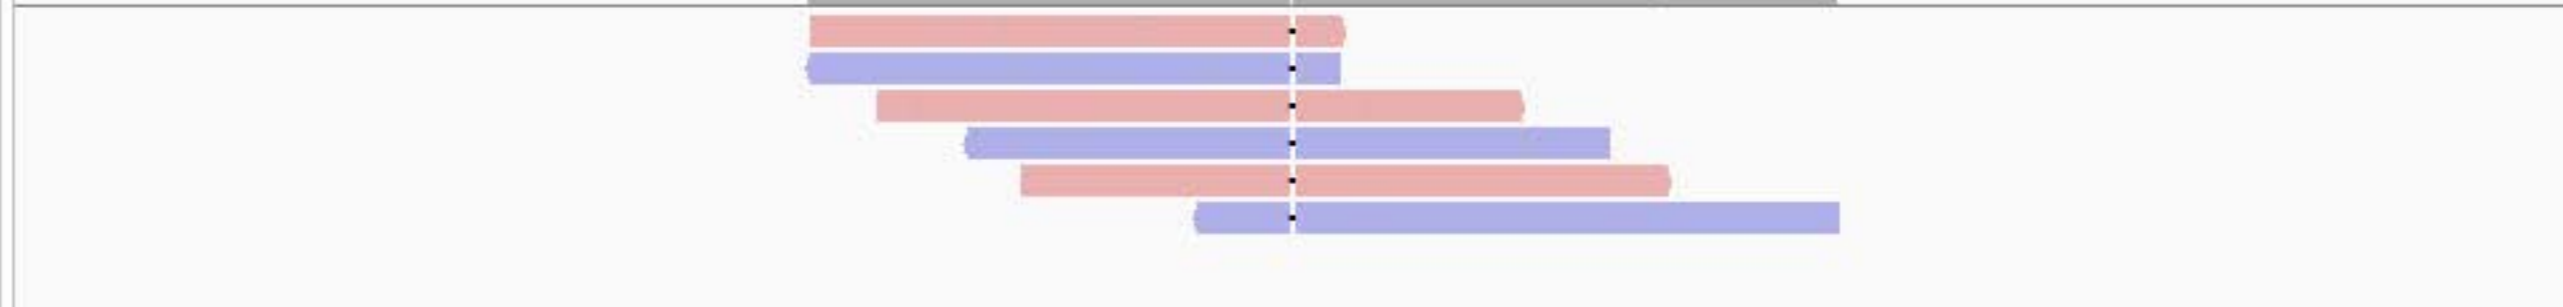

Sequence

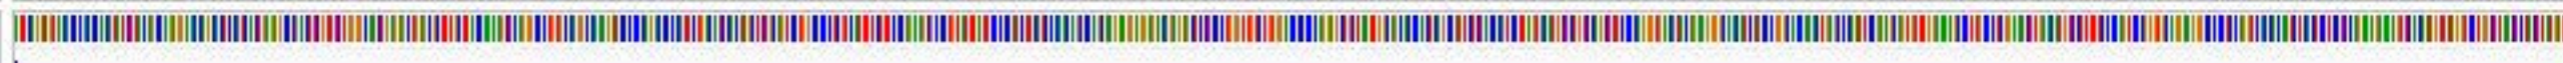

Refseq Genes

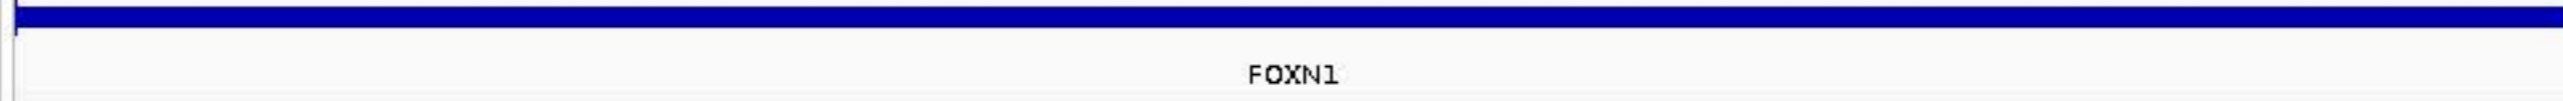

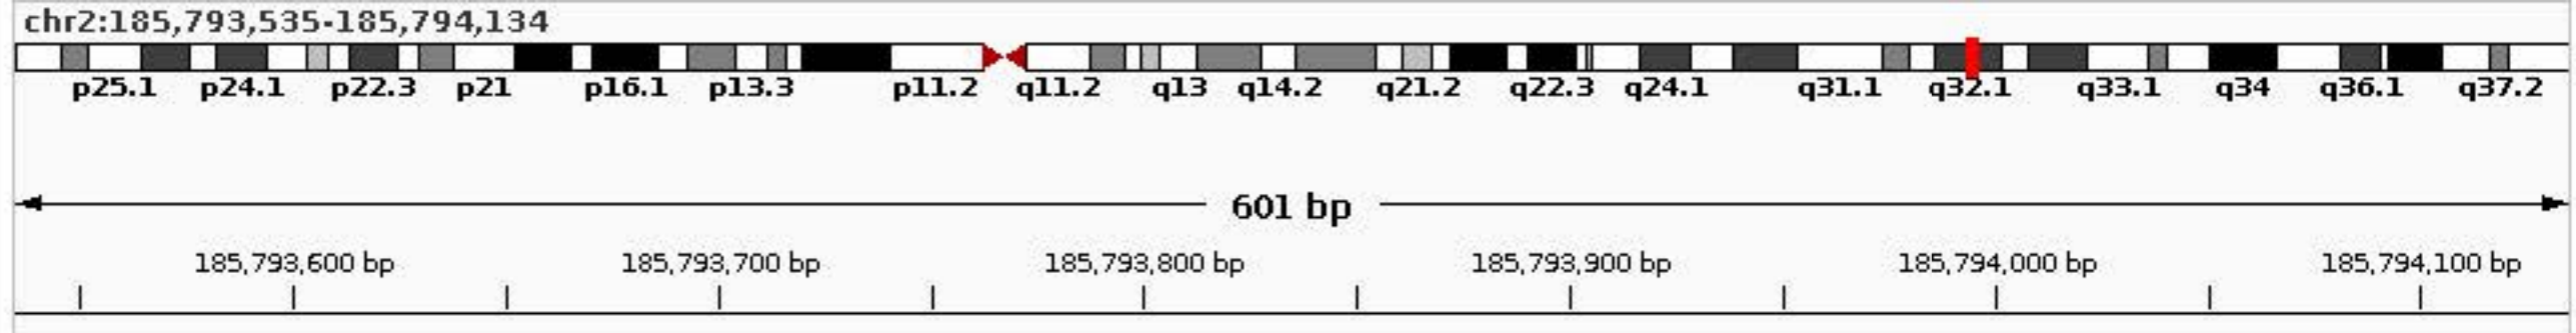

SL\_0004\_RN\_47\_mut.bam Coverage

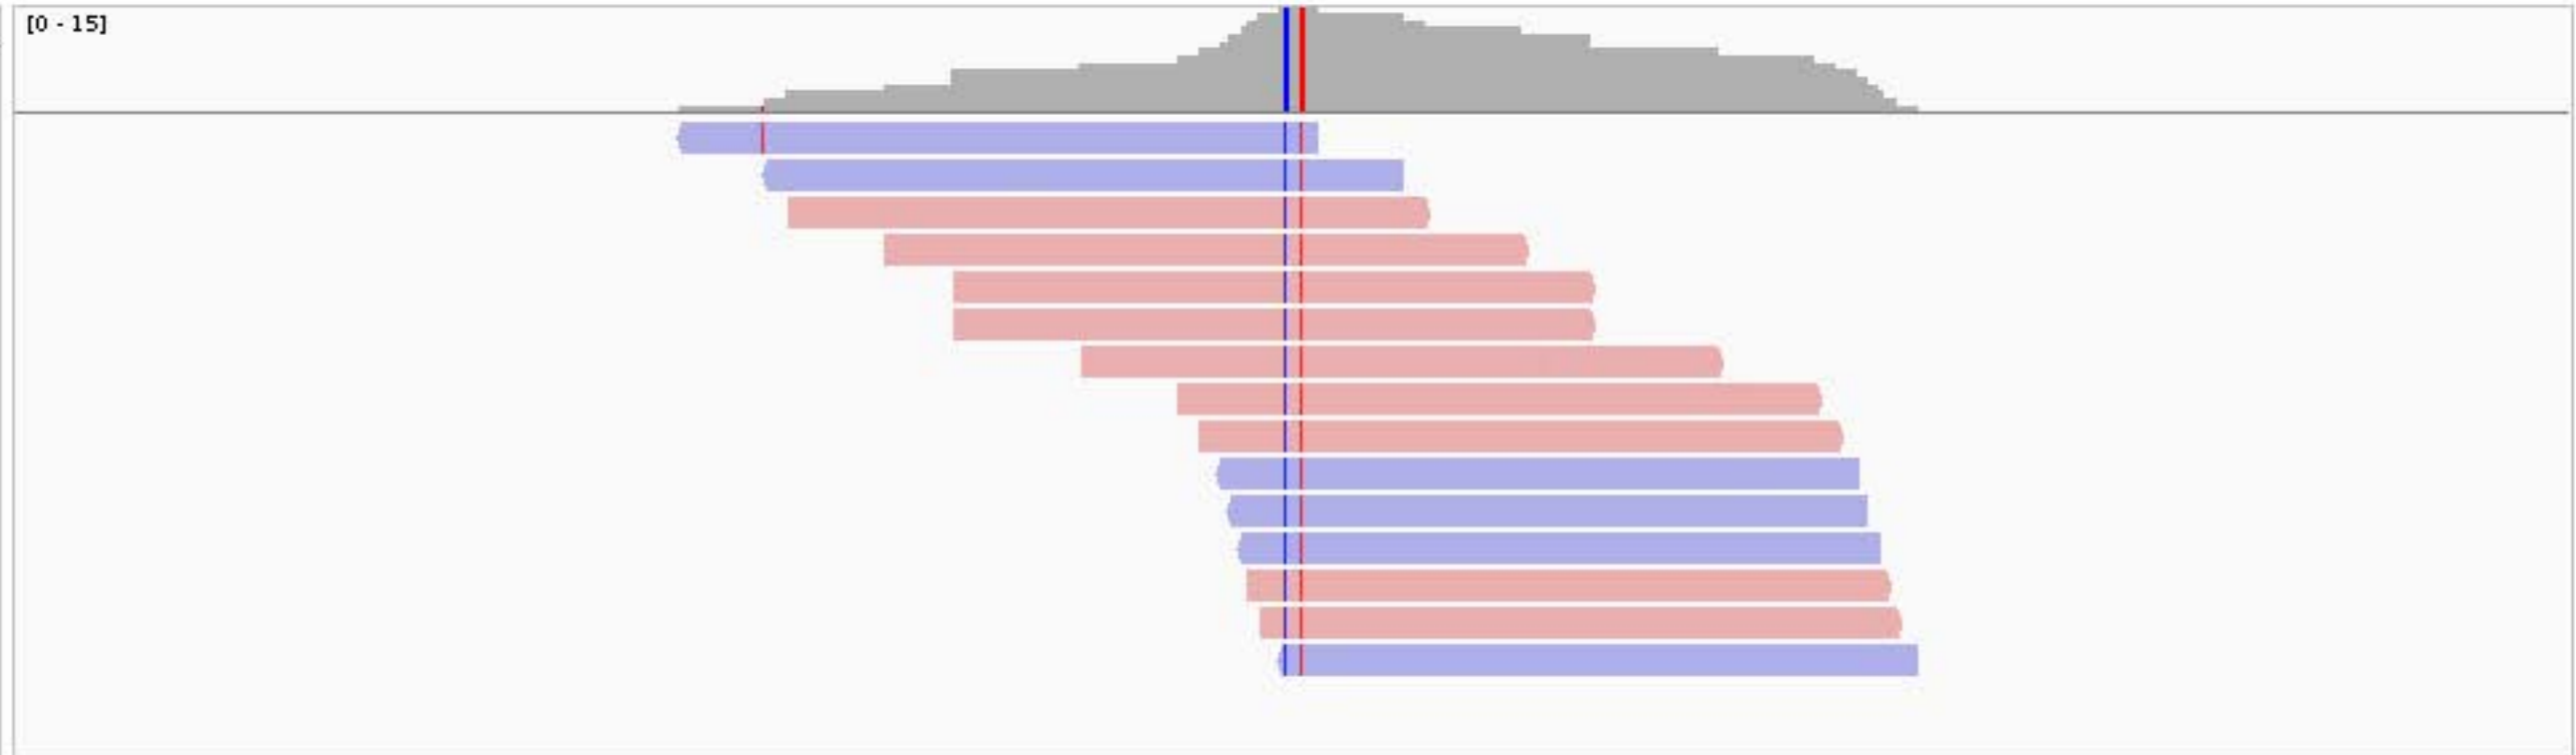

SL\_0004\_RN\_47\_mut.bam

Sequence

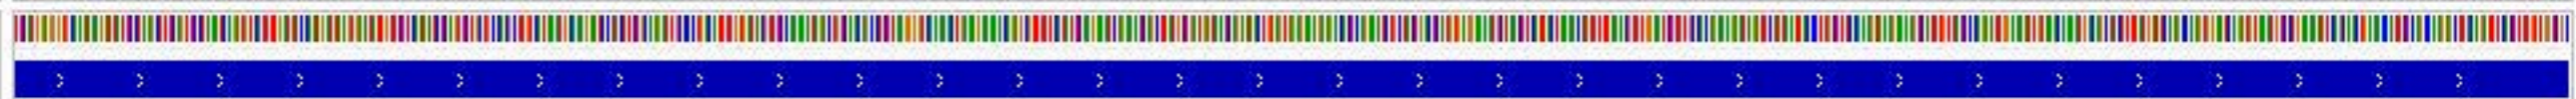

Refseq Genes

FSIP2

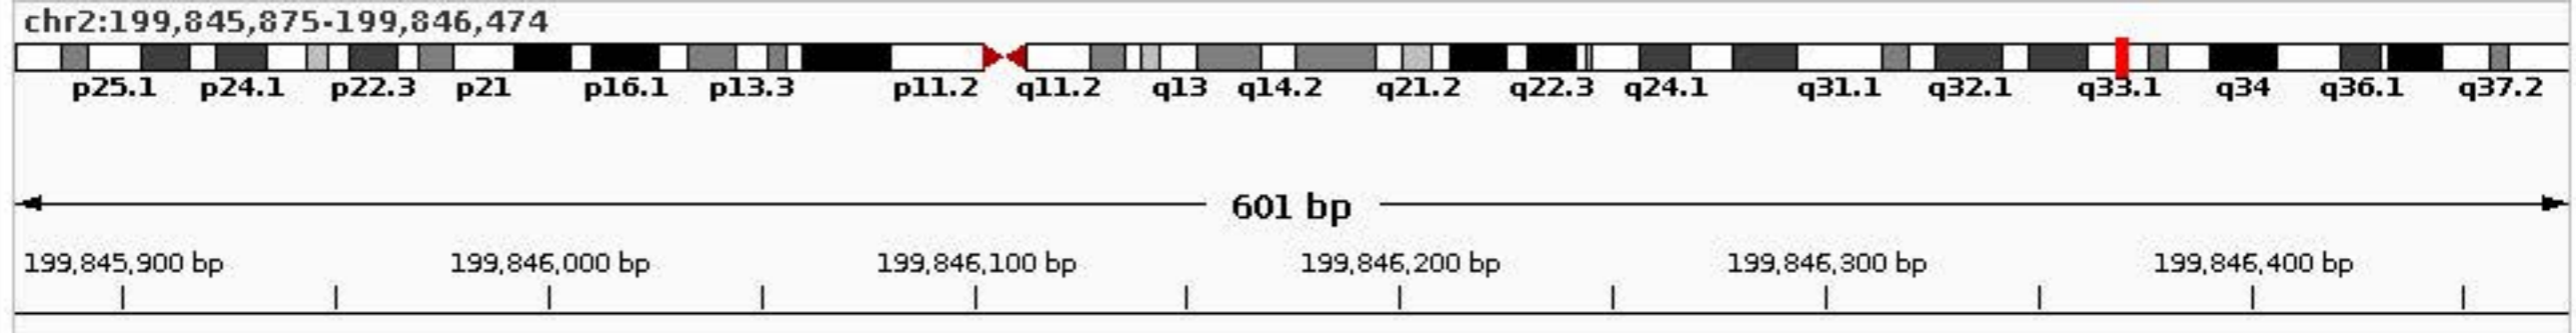

SL\_0004\_RN\_47\_mut.bam Coverage

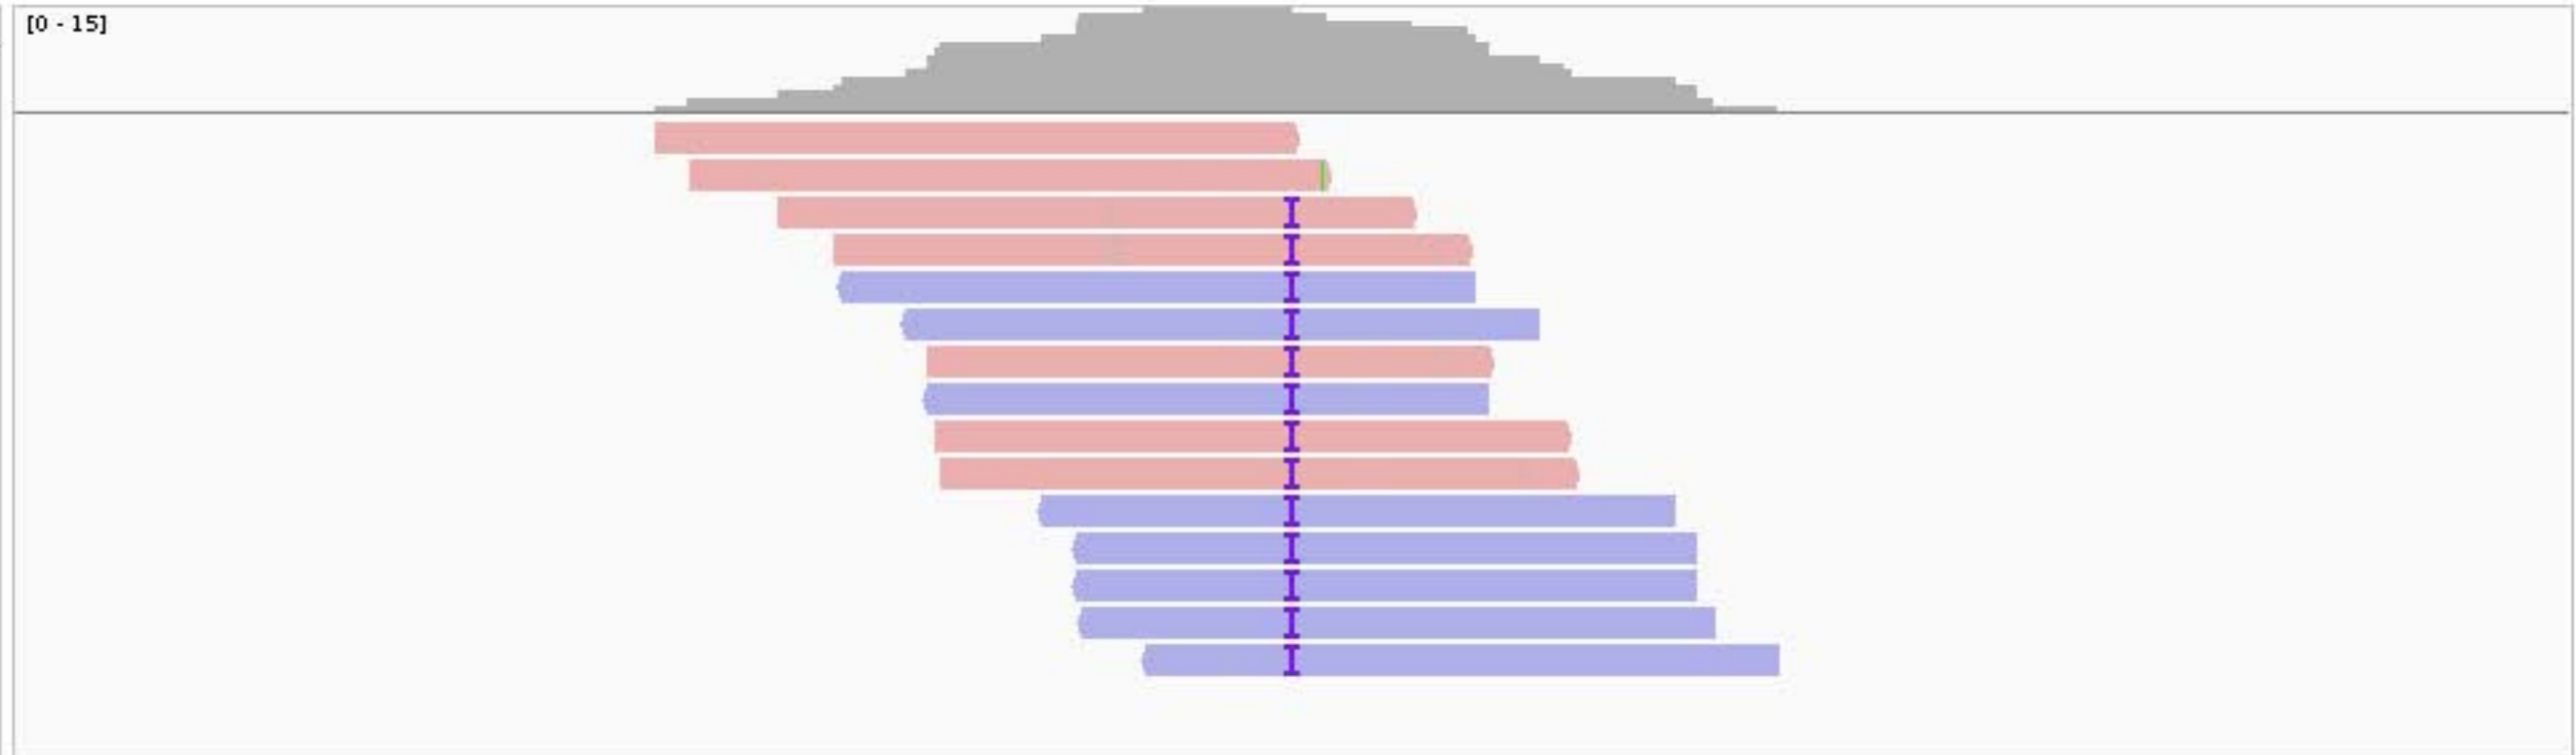

SL\_0004\_RN\_47\_mut.bam

Sequence

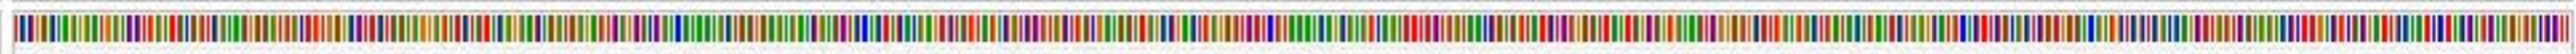

Refseq Genes

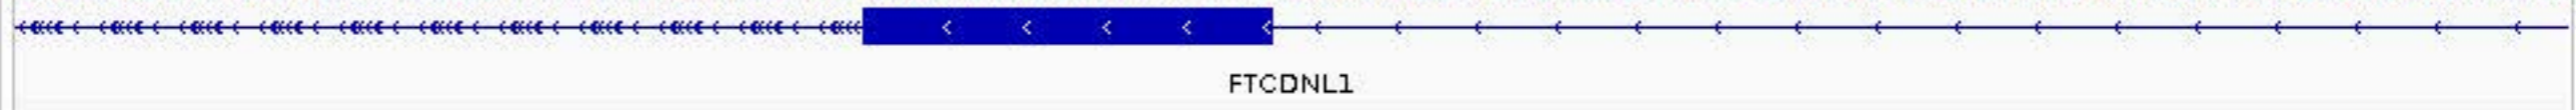

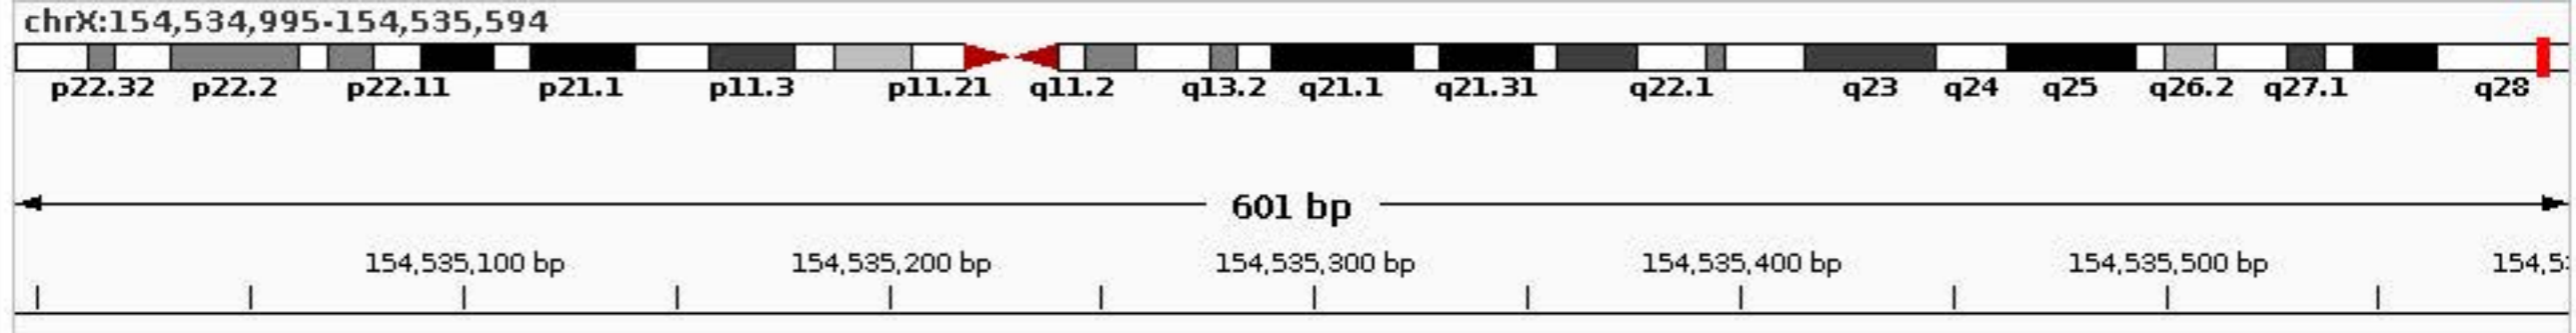

SL\_0001\_RN\_15\_mut.bam Coverage

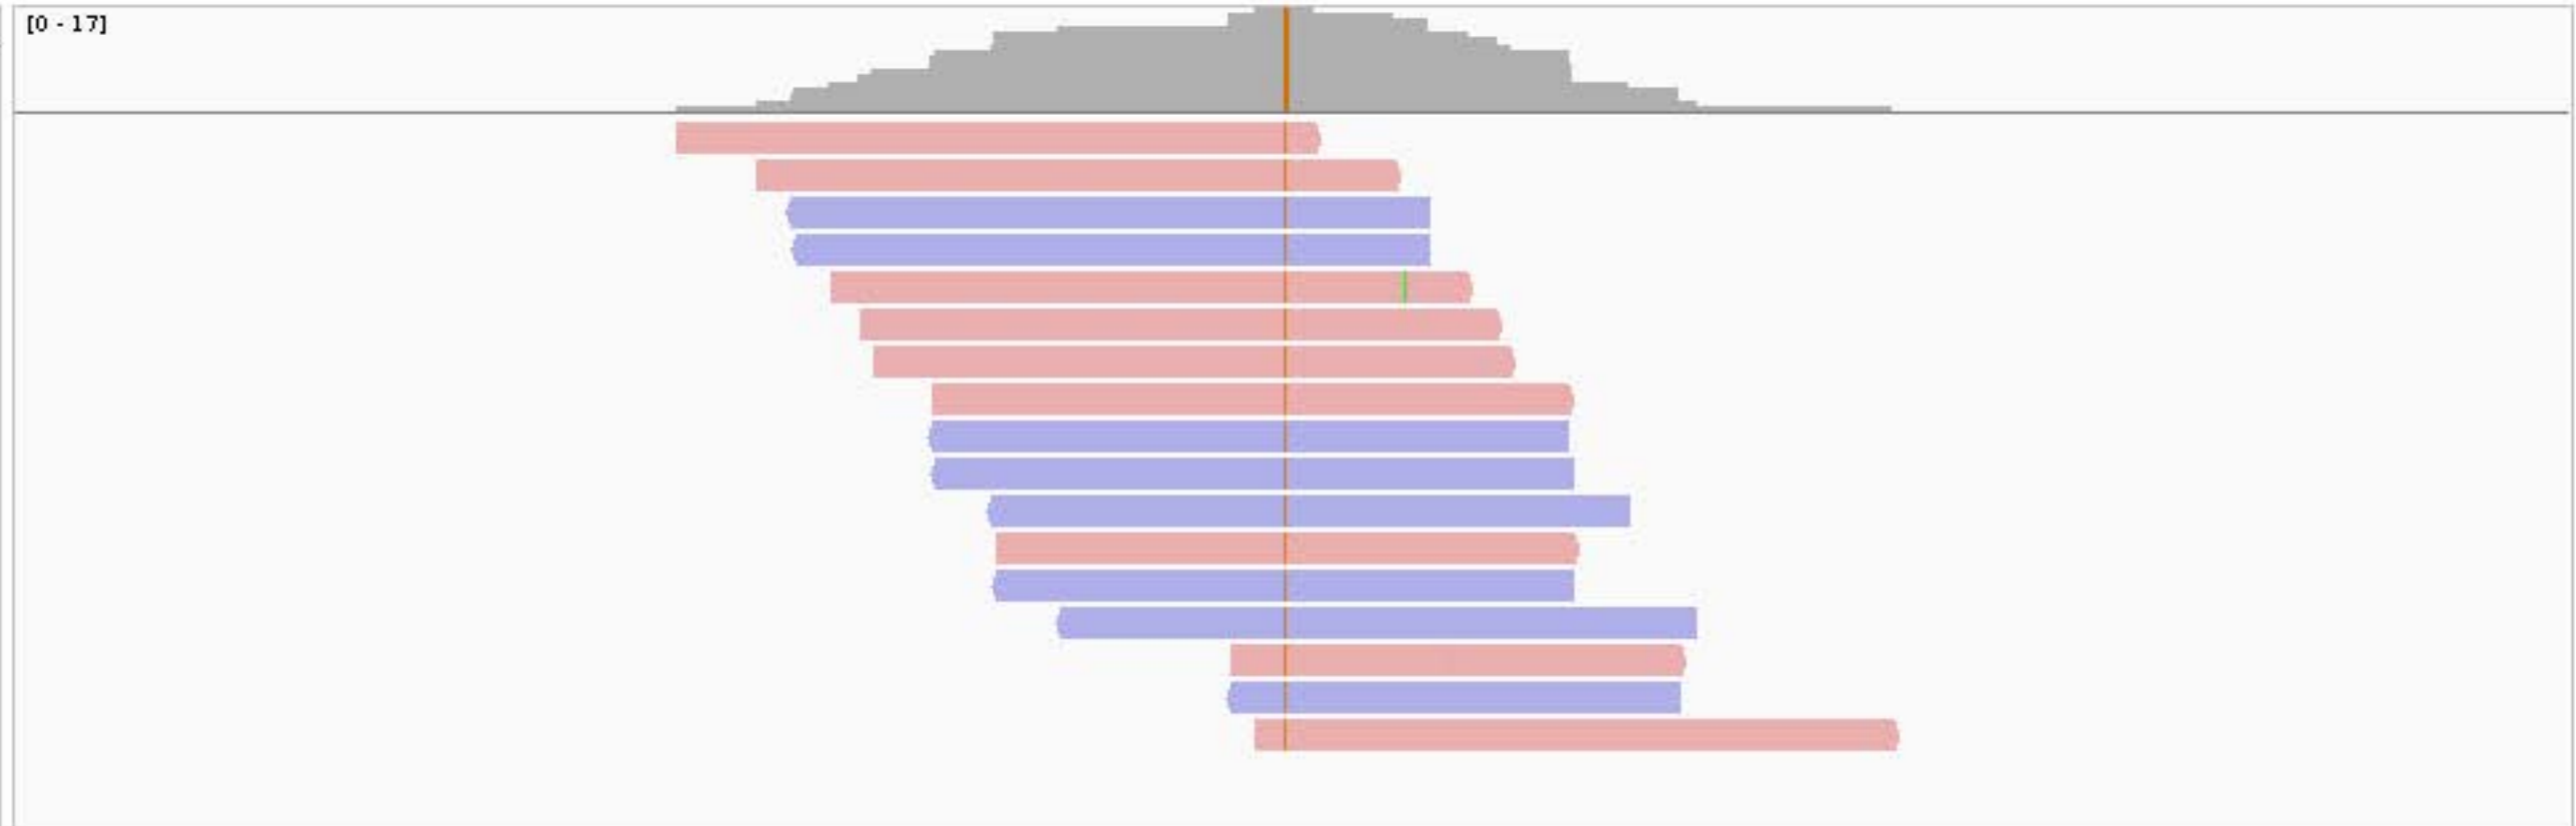

Sequence

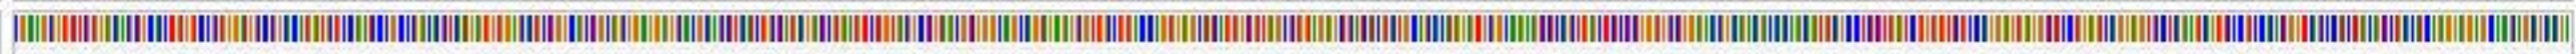

Refseq Genes

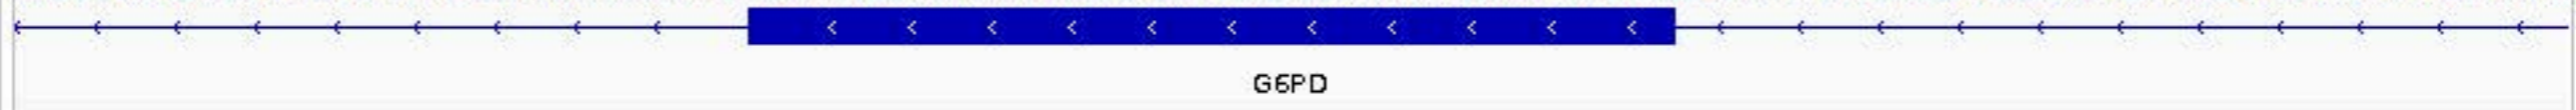

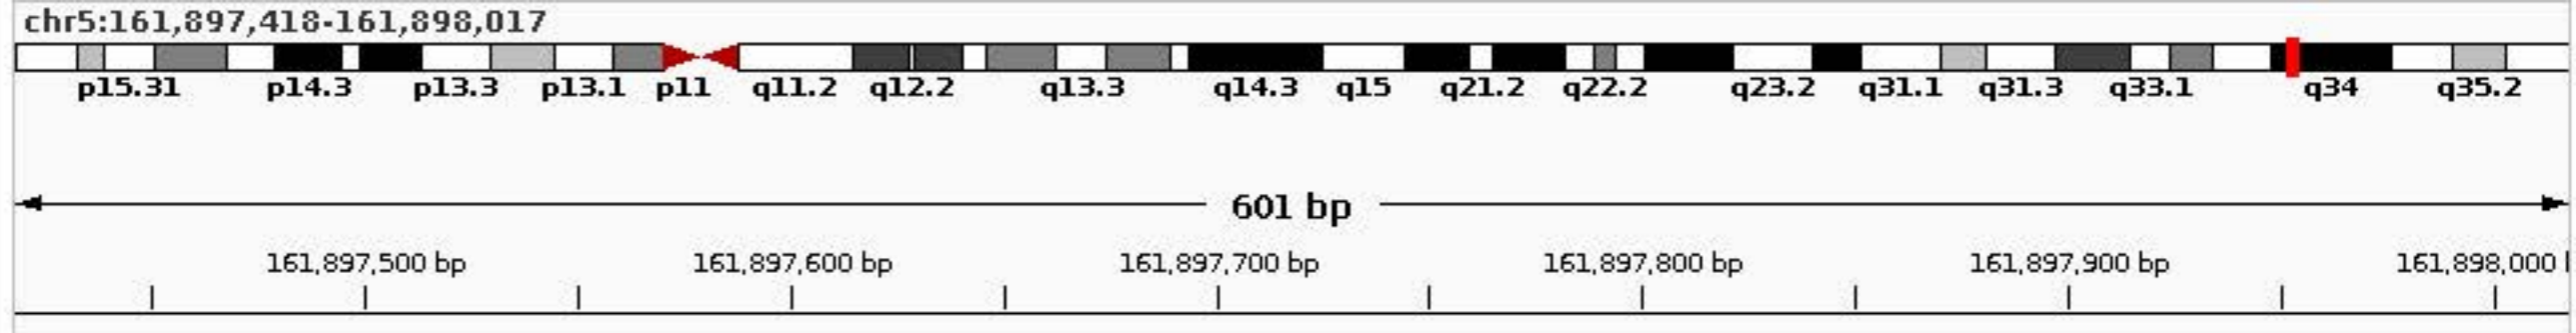

SL\_0015\_RN\_12\_mut.bam Coverage

SL\_0015\_RN\_12\_mut.bam

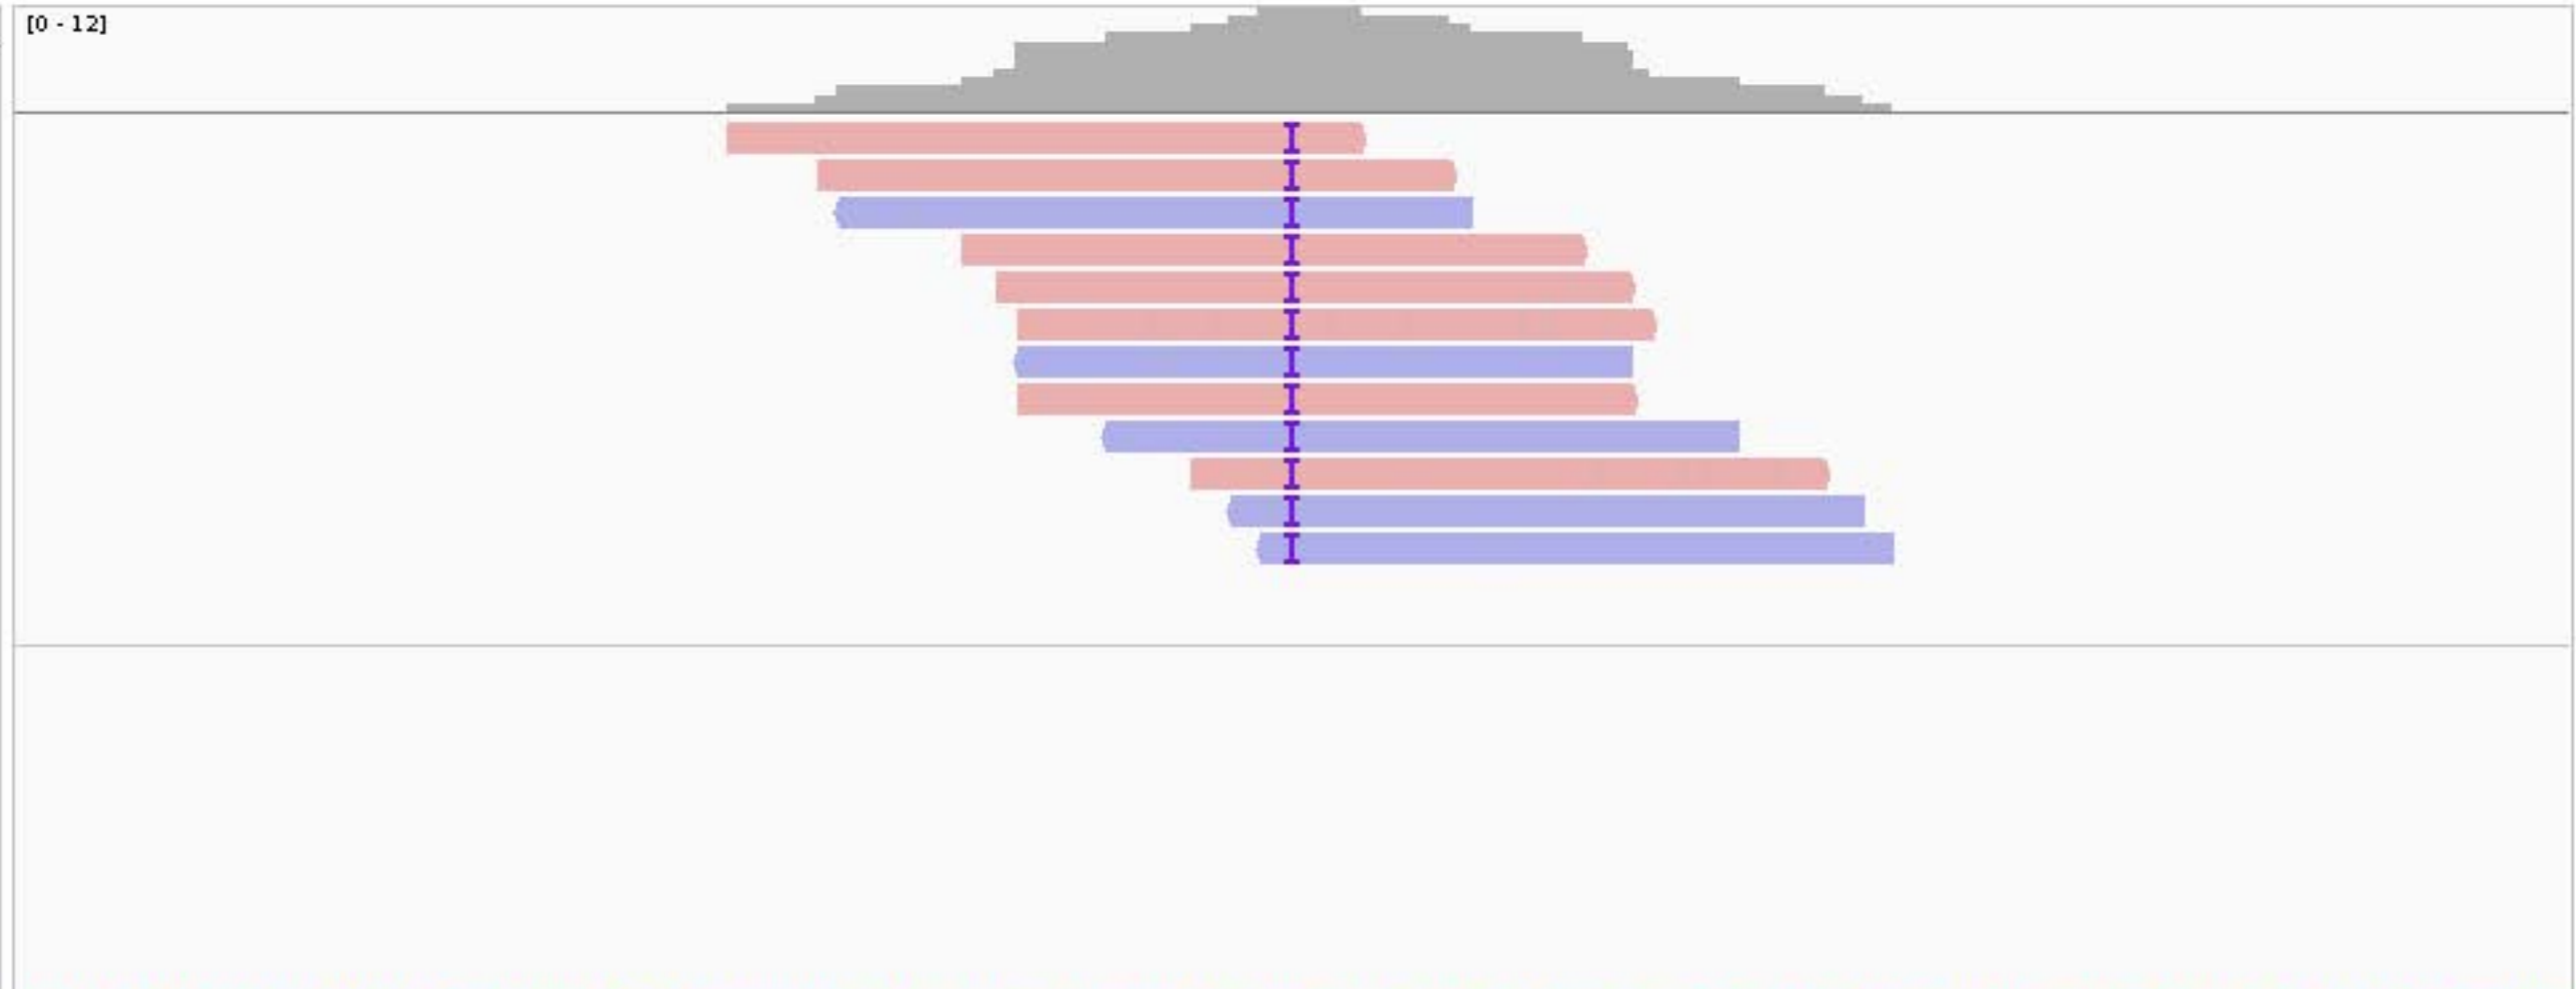

Sequence

Refseq Genes

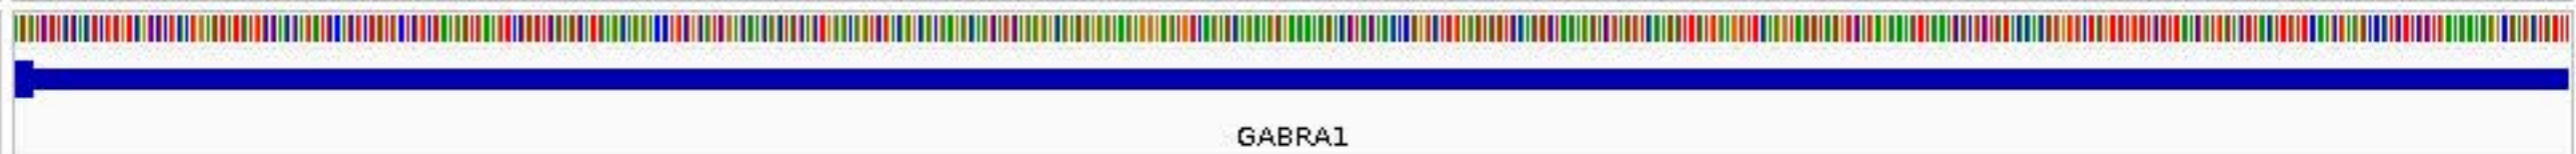



chr22:30,555,341-30,555,940

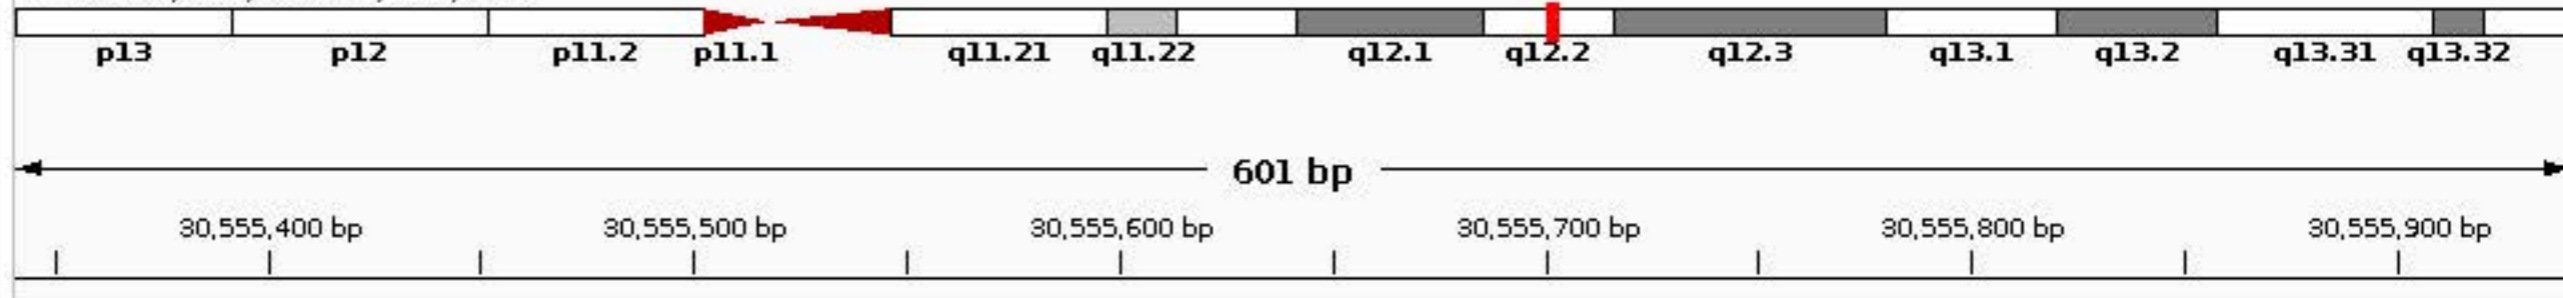

SL\_0007\_RN\_33\_mut.bam Coverage

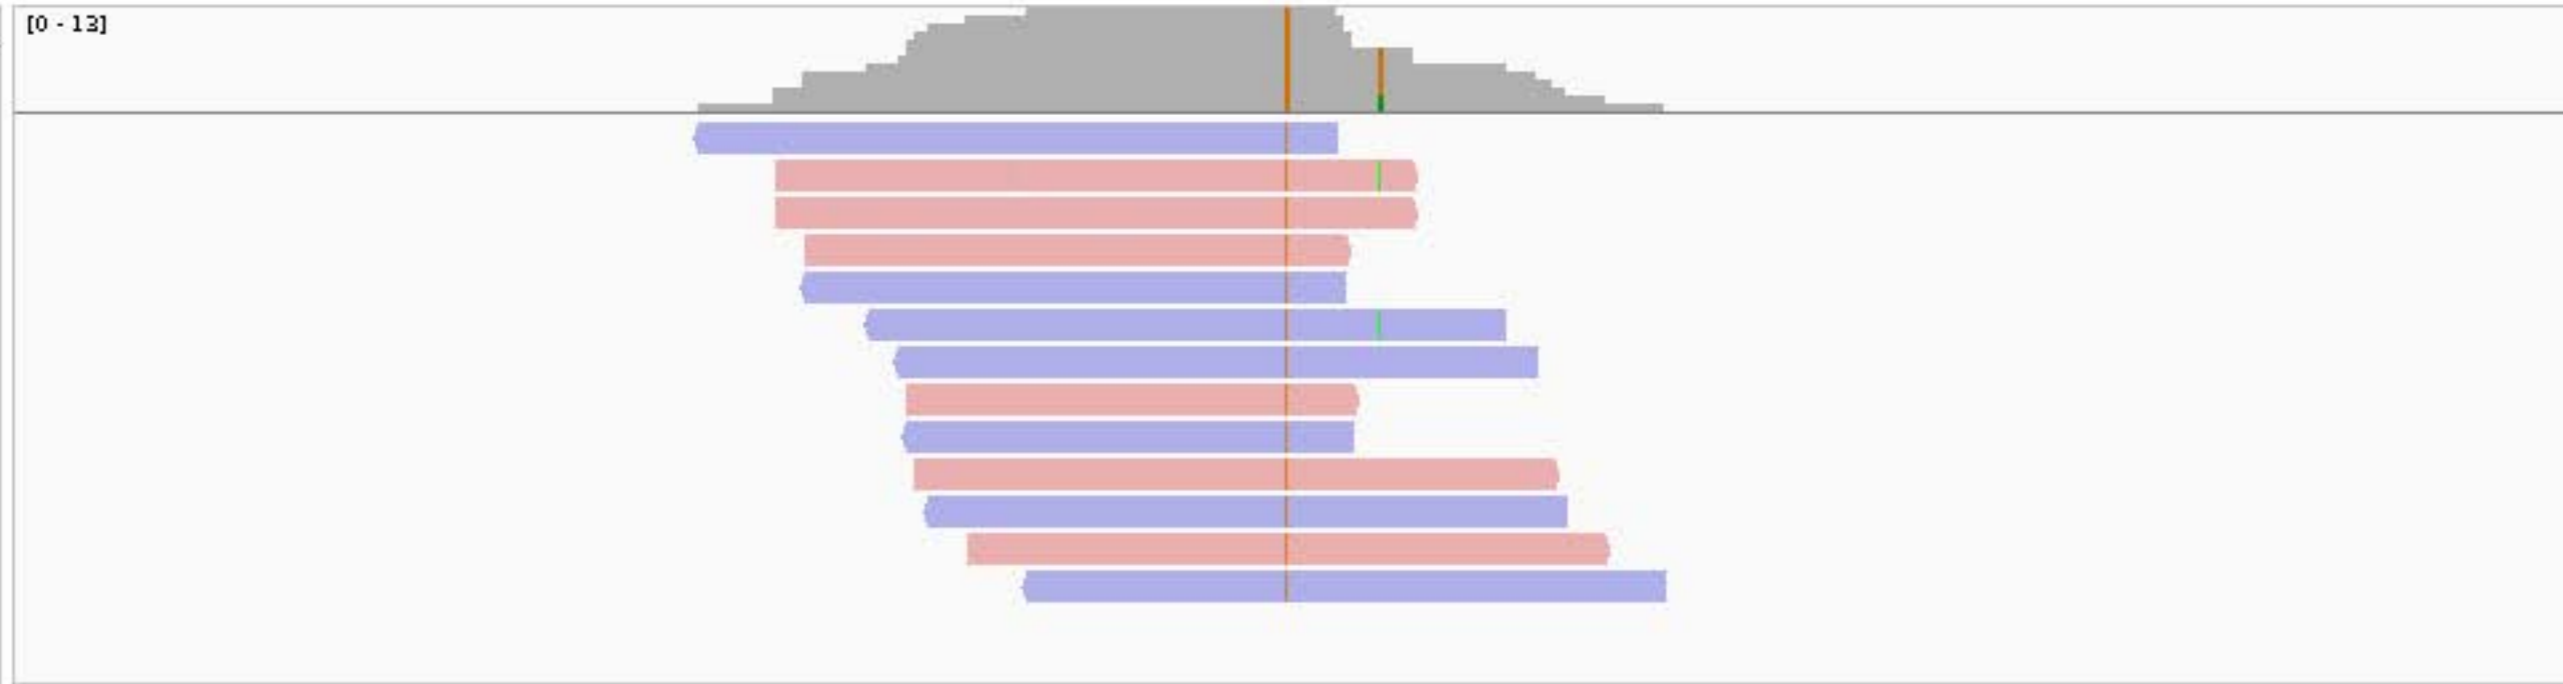

SL\_0007\_RN\_33\_mut.bam

Sequence

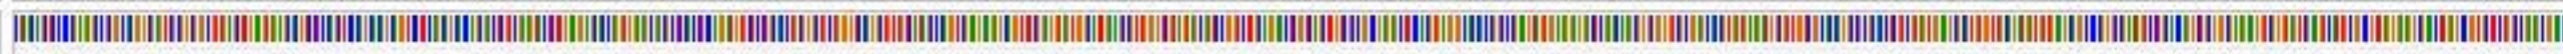

Refseq Genes

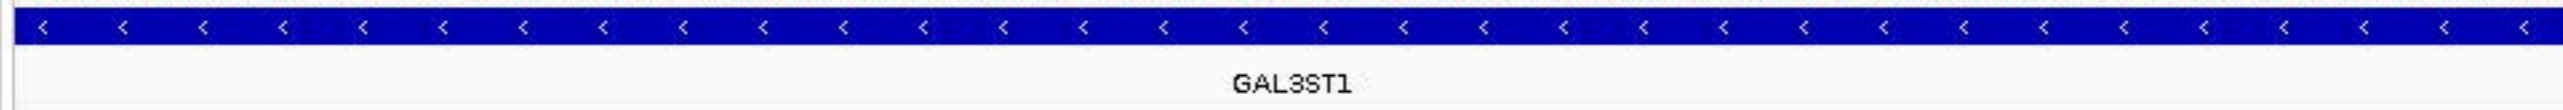

GAL3ST1

chr16:81,378,742-81,379,341

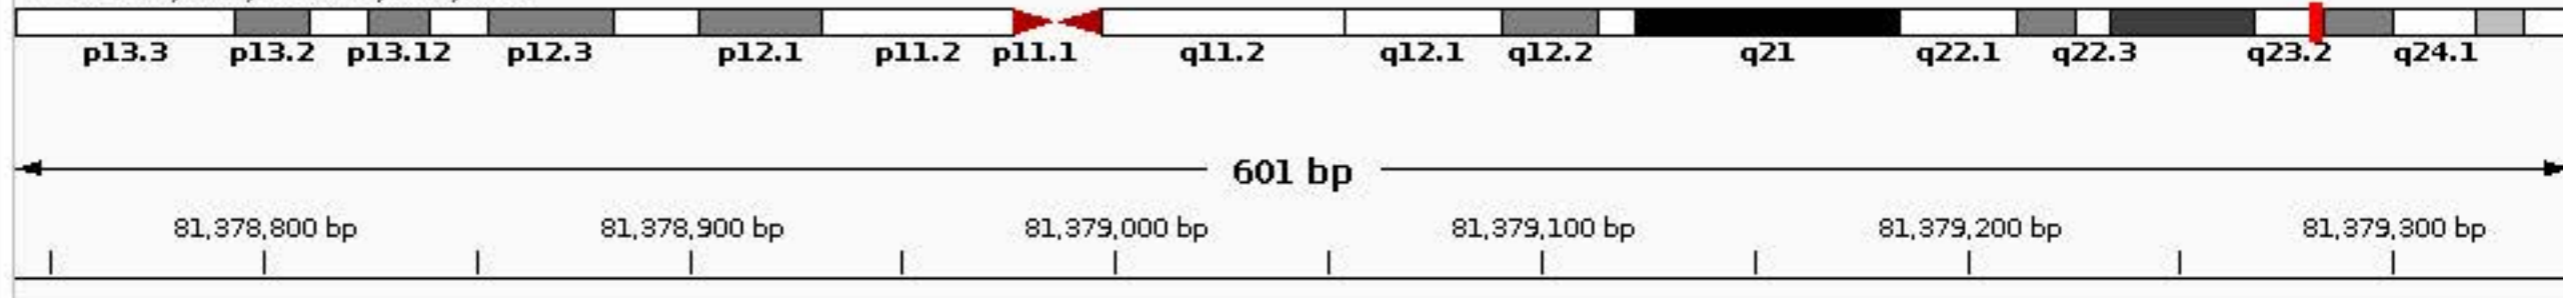

SL\_0017\_RN\_15\_mut.bam Coverage

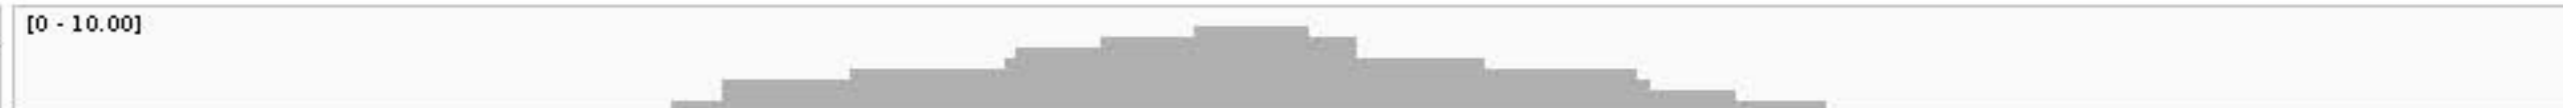

SL\_0017\_RN\_15\_mut.bam

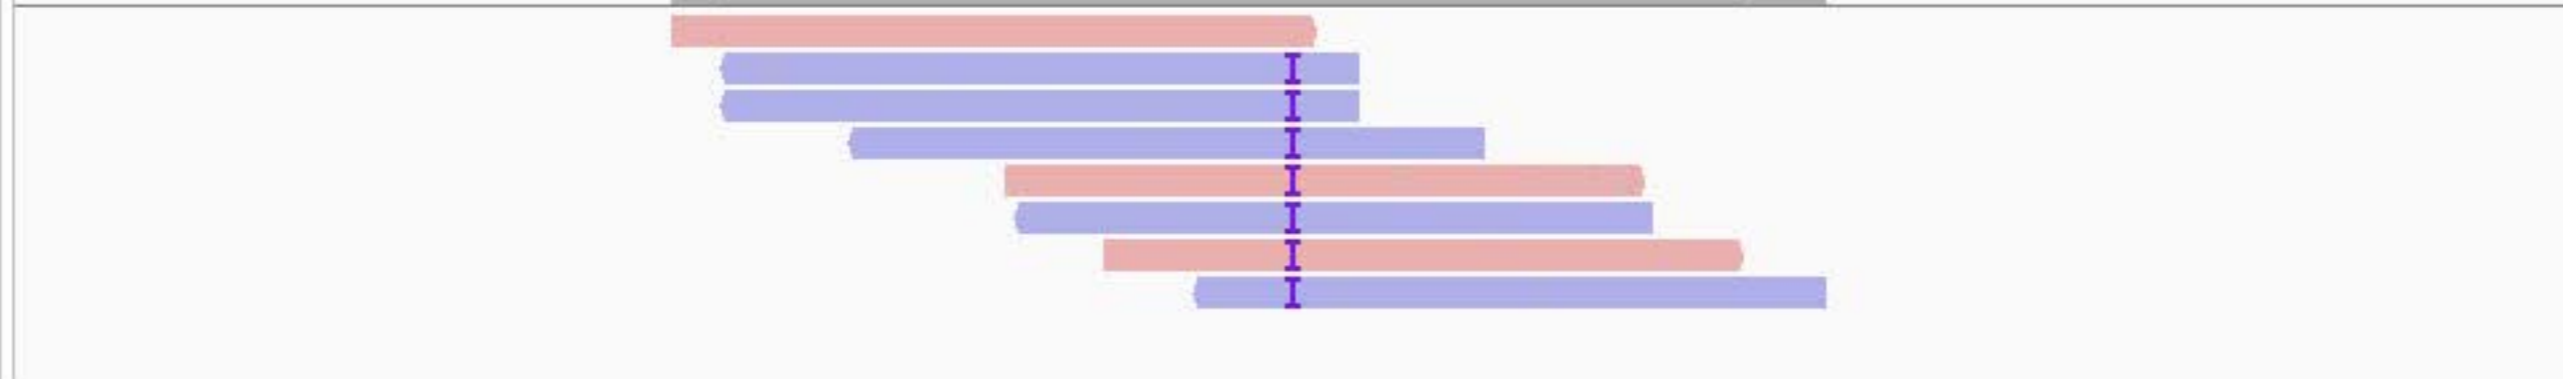

Sequence

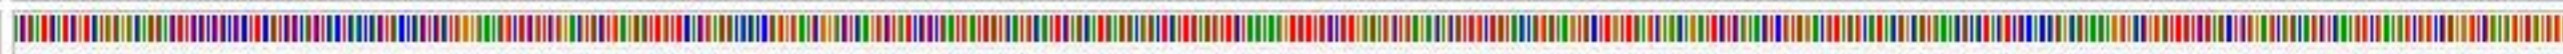

Refseq Genes

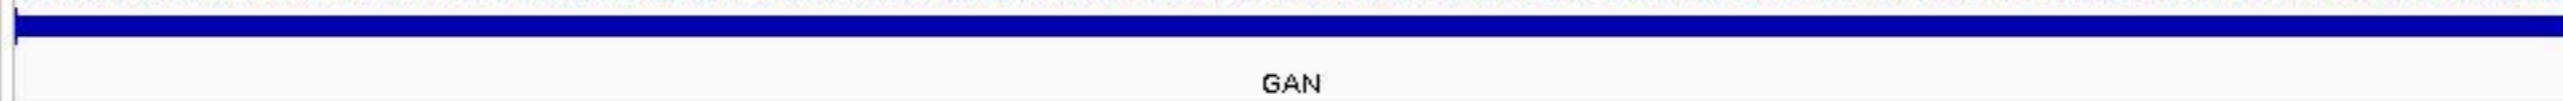

GAN

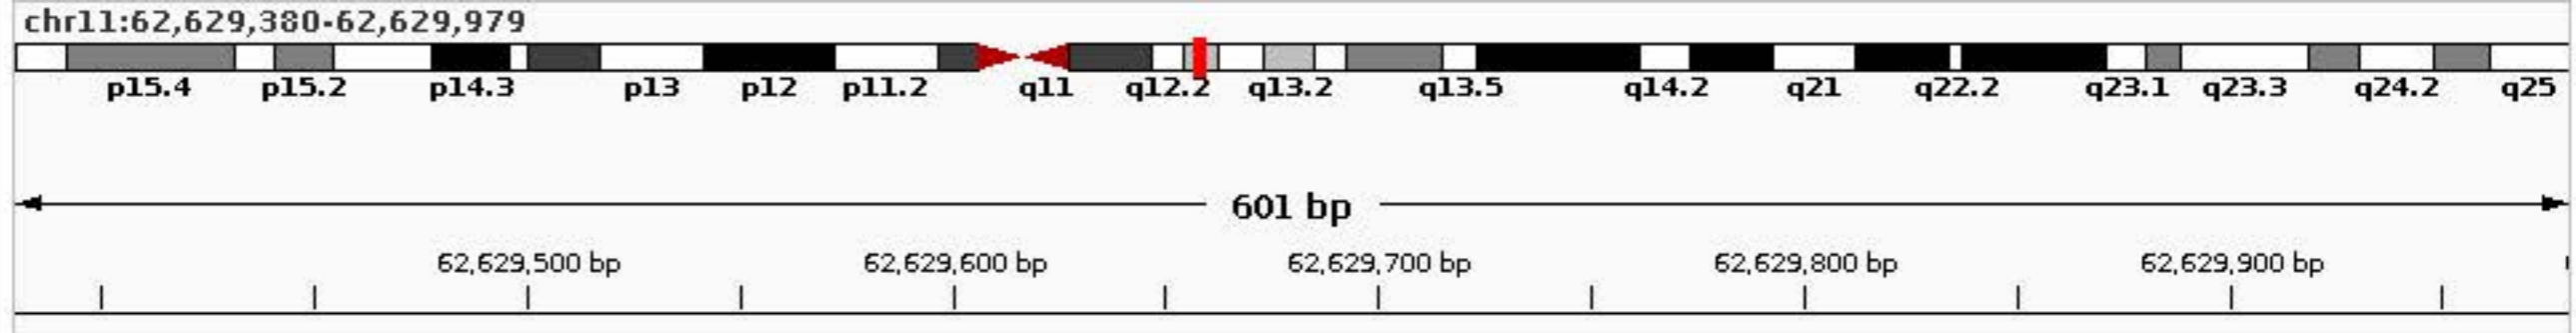

SL\_0001\_RN\_25\_mut.bam Coverage

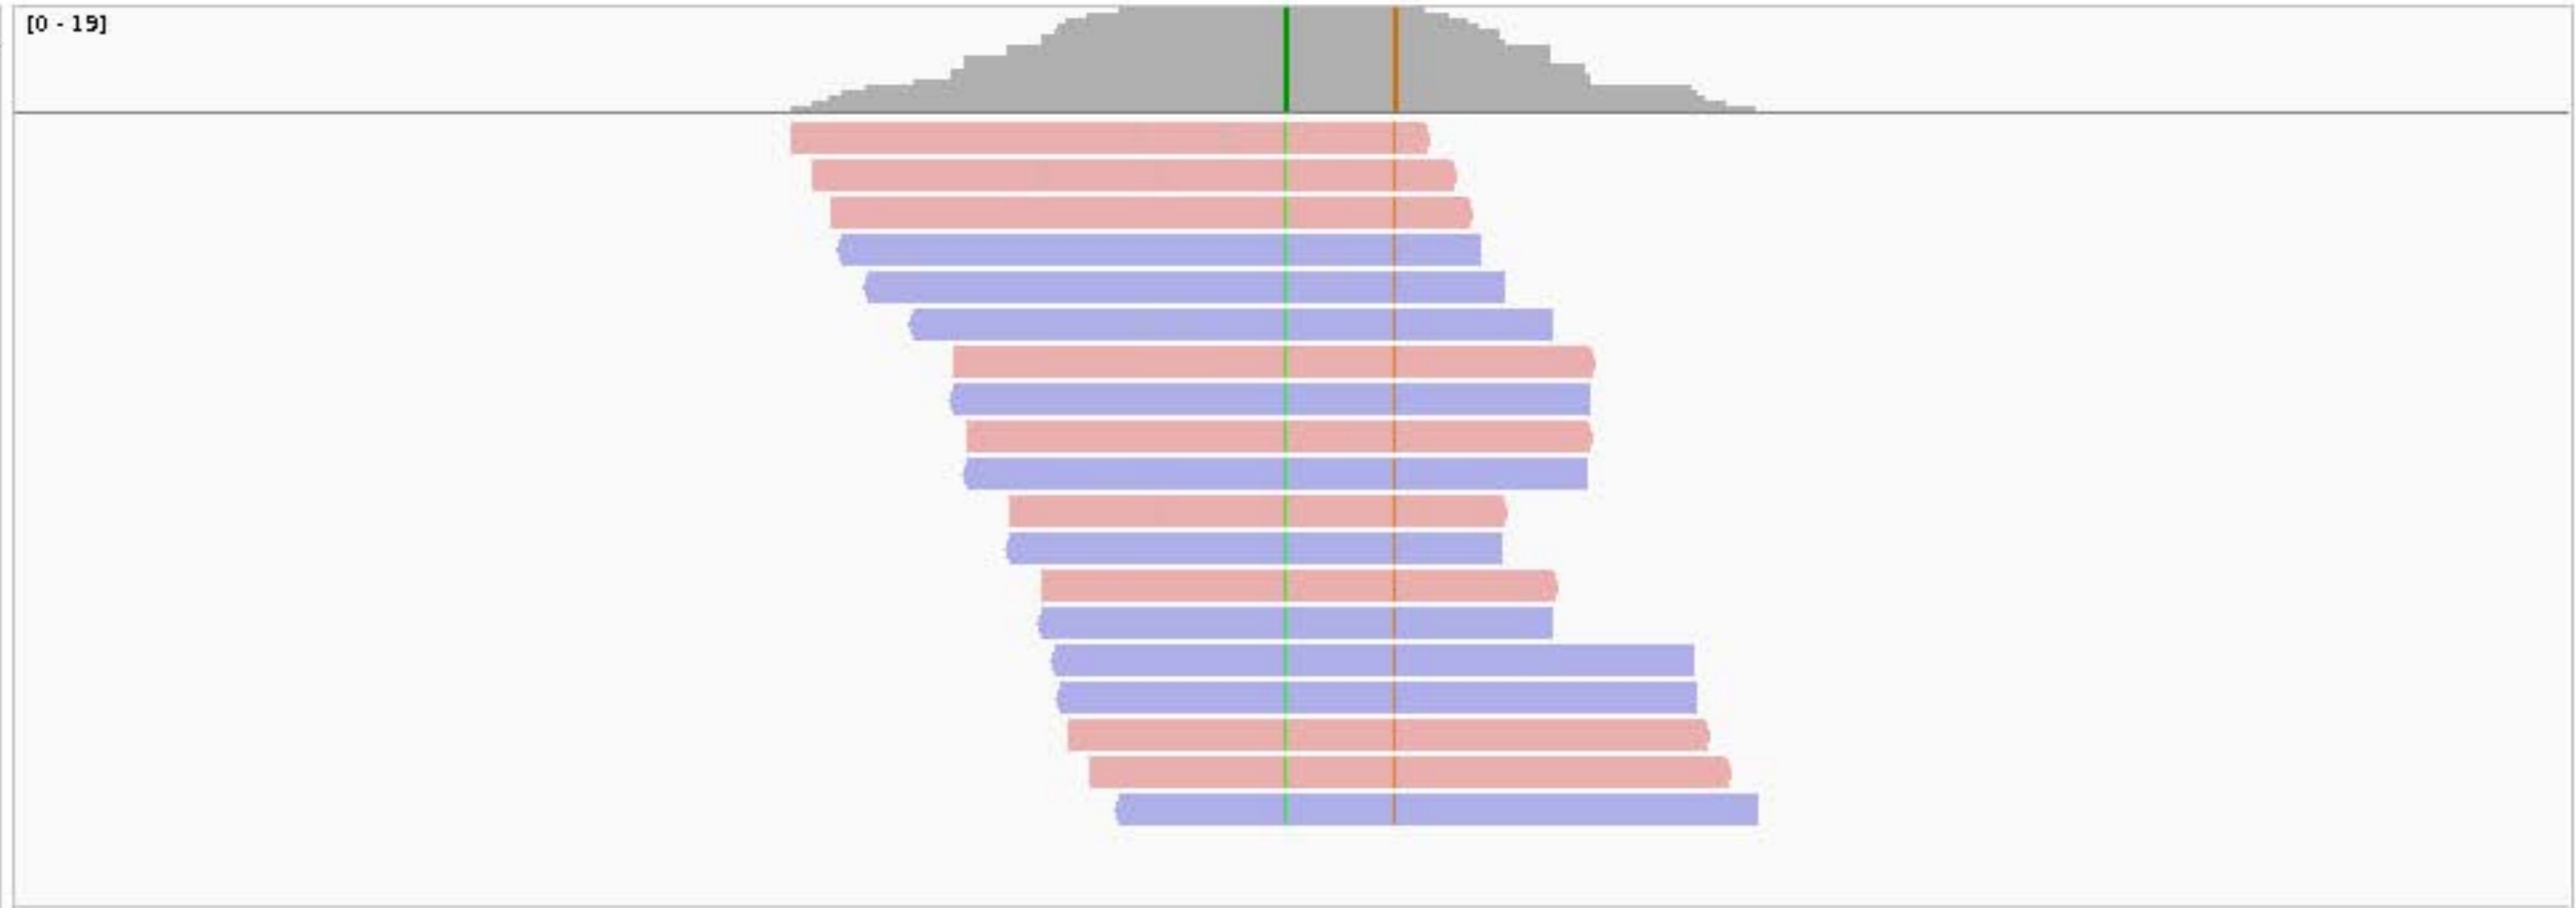

Sequence

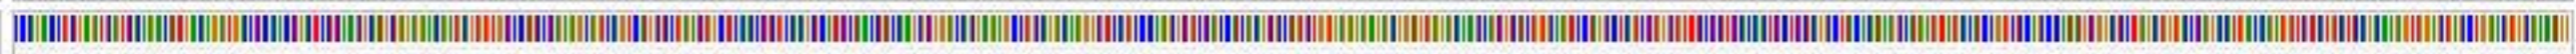

Refseq Genes

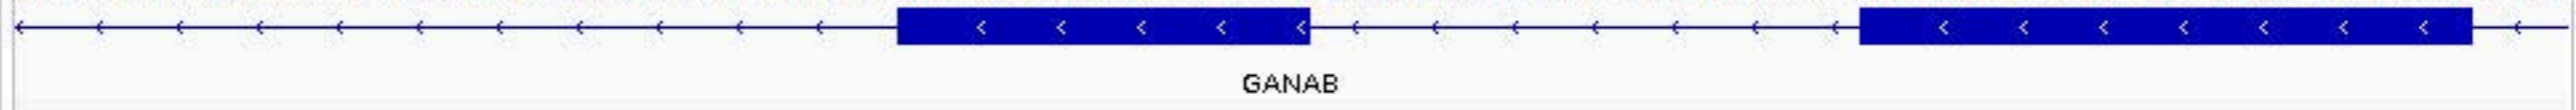

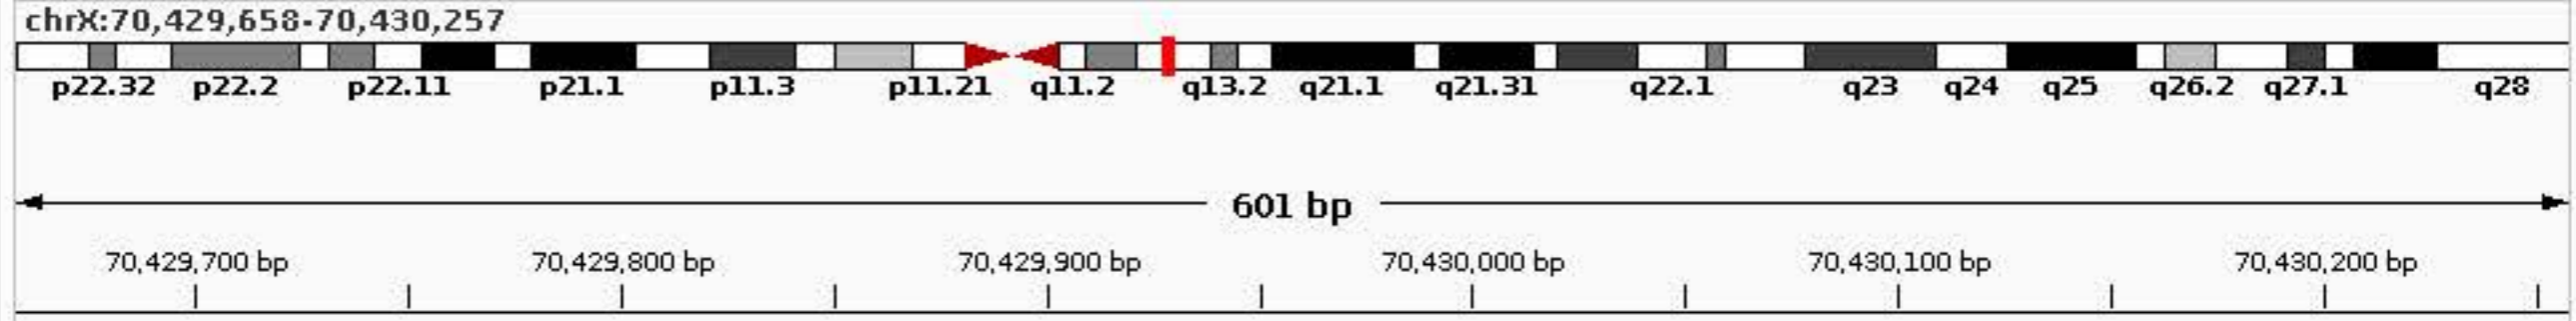

SL\_0004\_RN\_24\_mut.bam Coverage

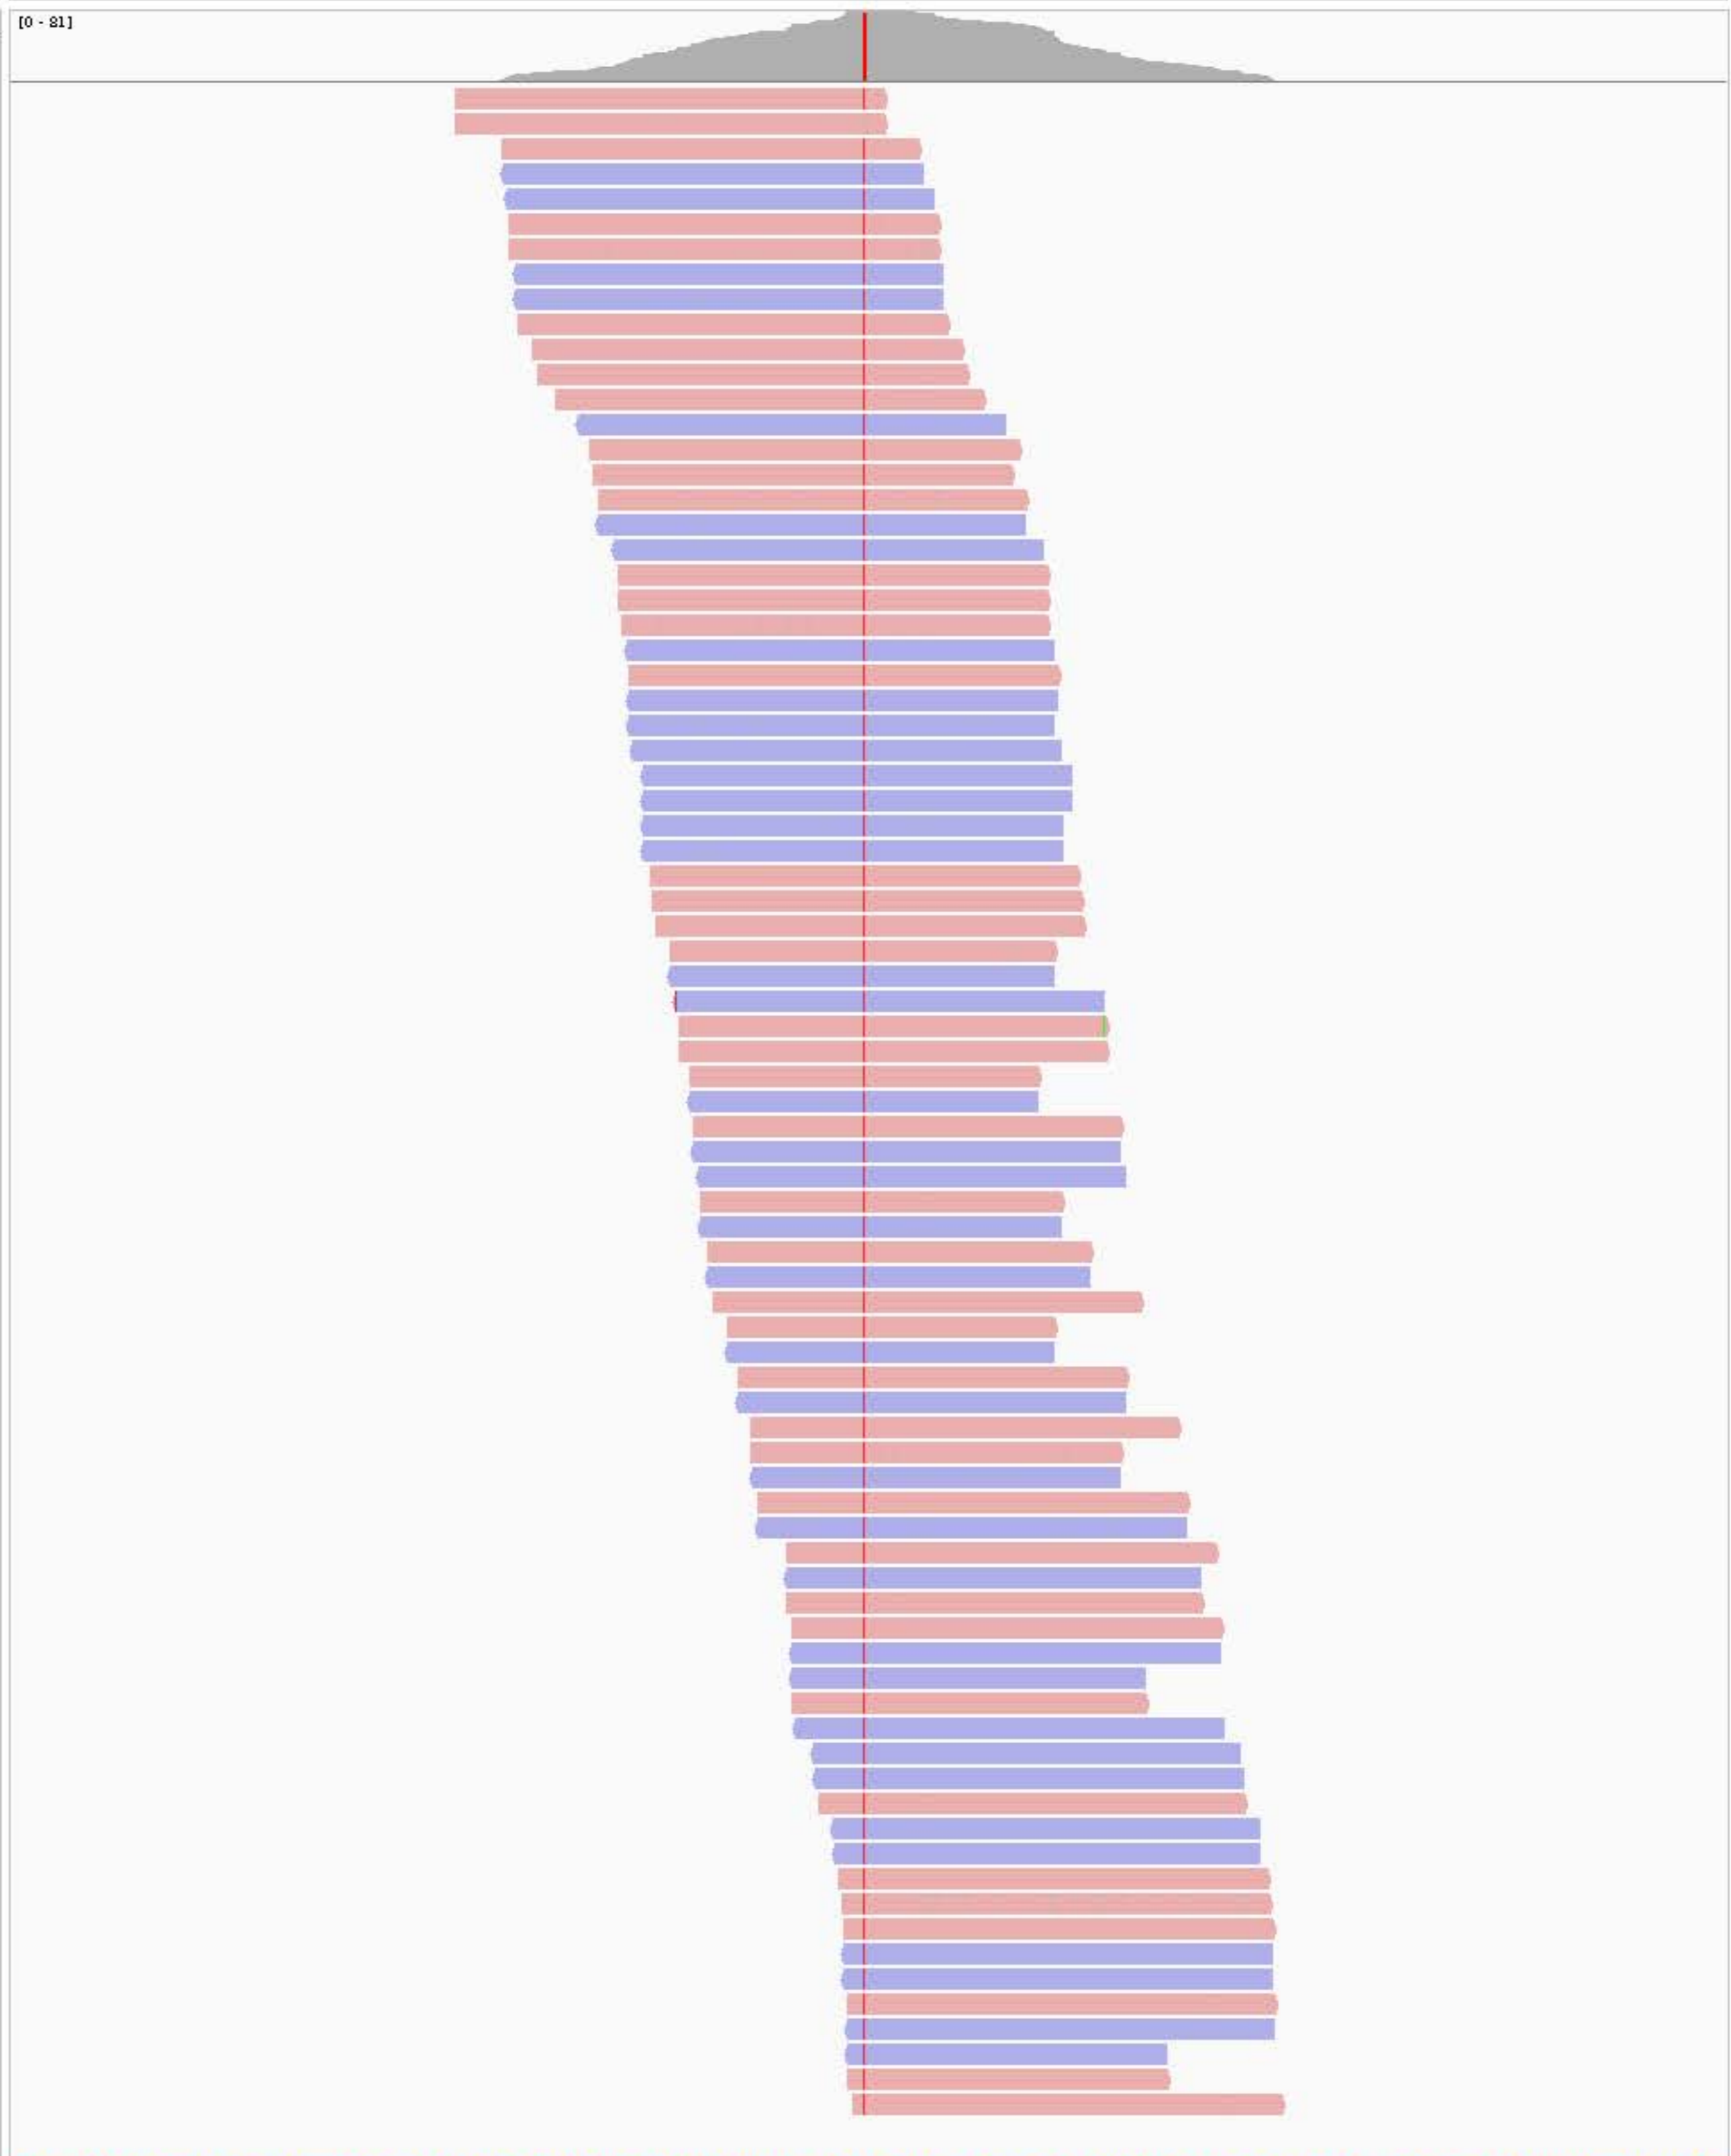

SL\_0004\_RN\_24\_mut.bam

Sequence →  
Refseq Genes

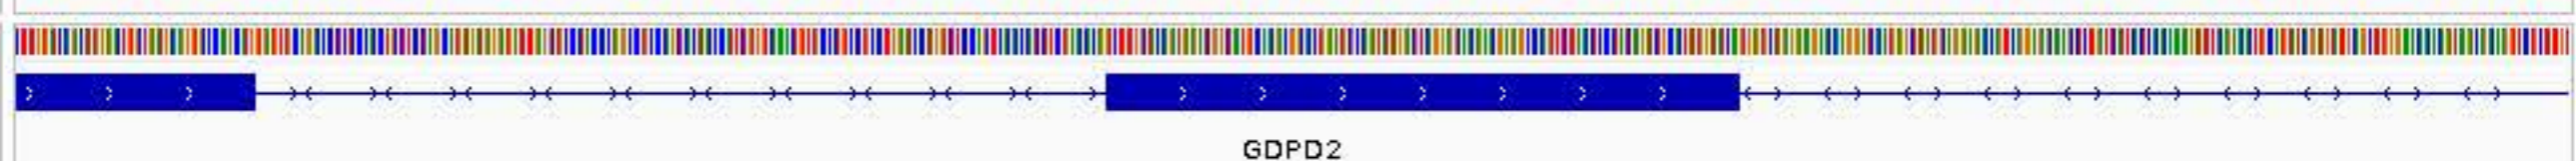



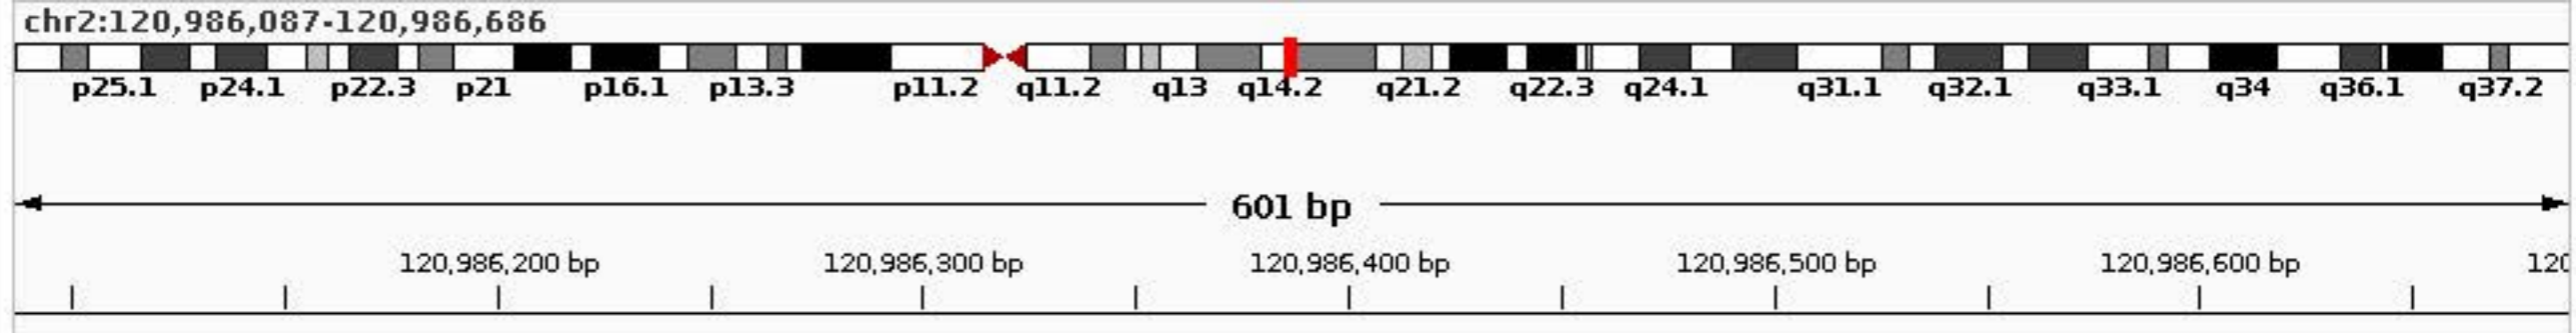

SL\_0015\_LN\_44\_mut.bam Coverage

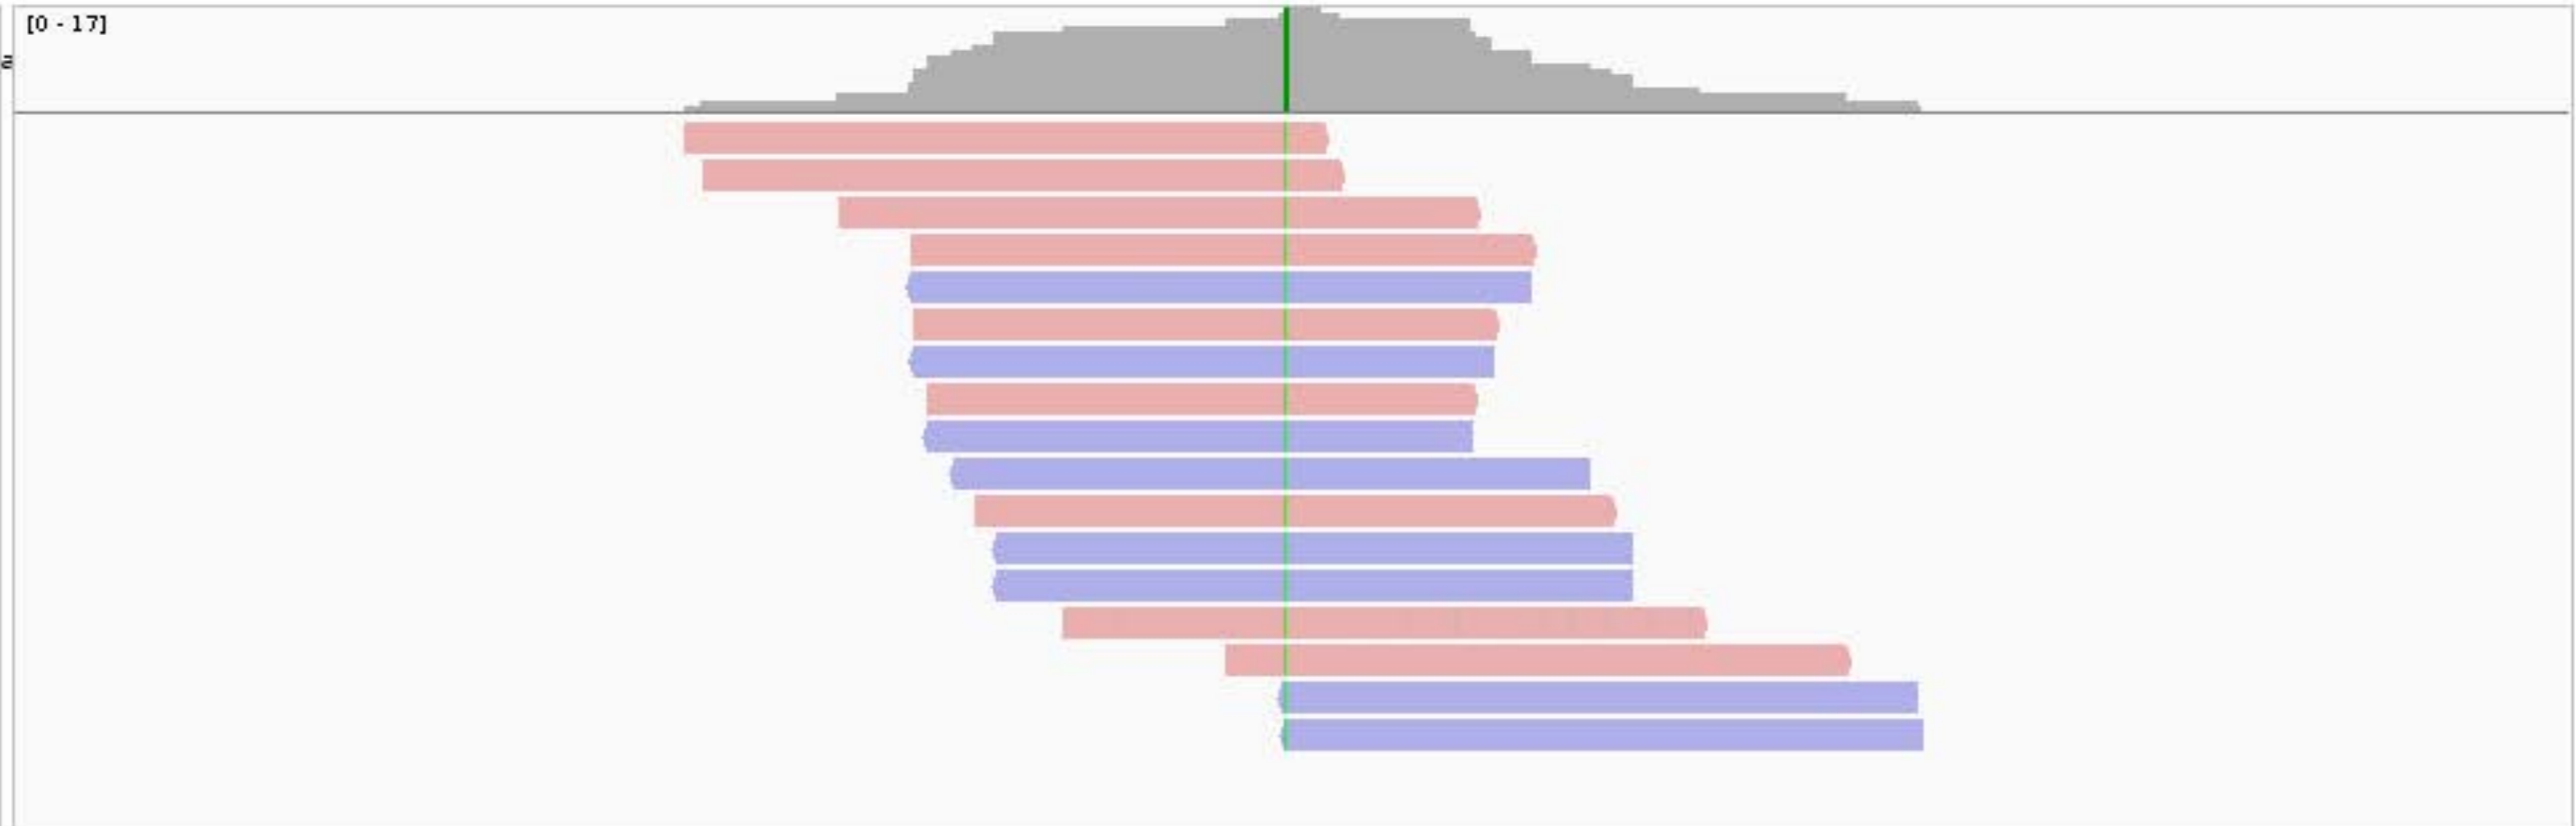

SL\_0015\_LN\_44\_mut.bam

Sequence

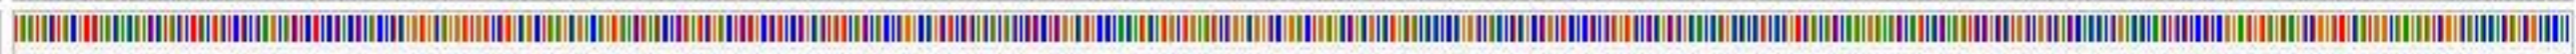

Refseq Genes

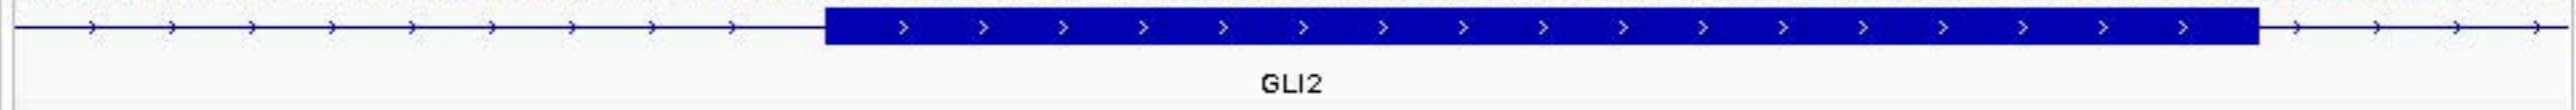



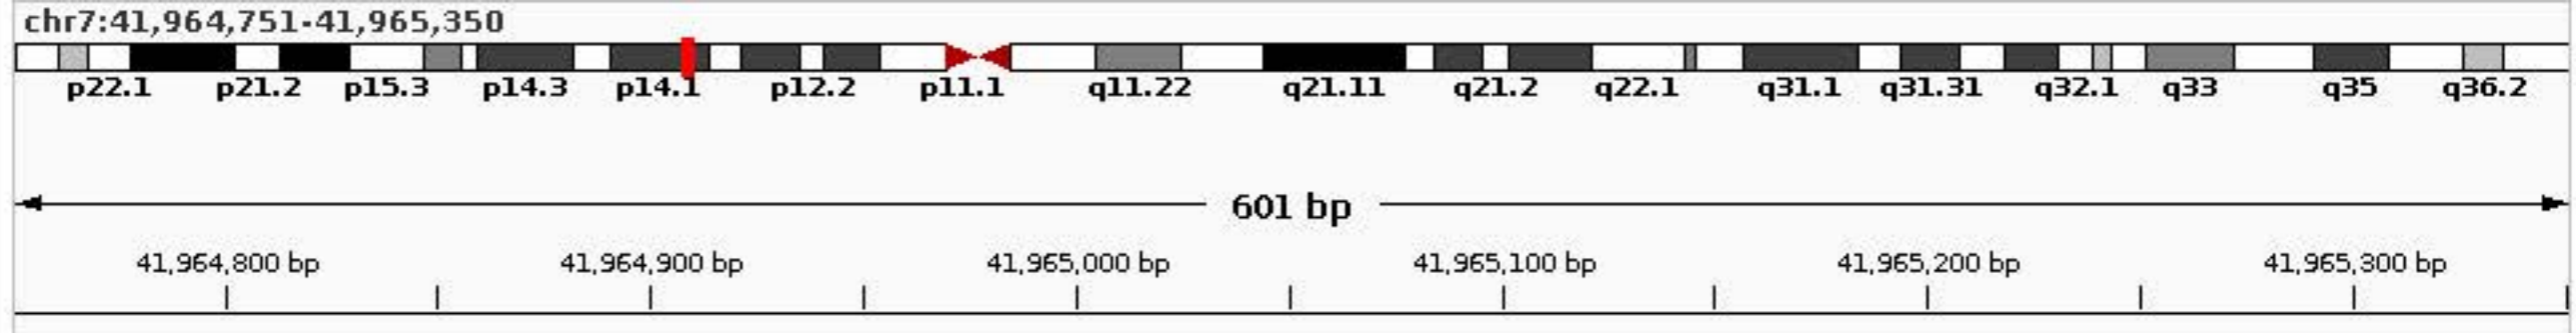

SL\_0015\_LN\_44\_mut.bam Coverage

SL\_0015\_LN\_44\_mut.bam

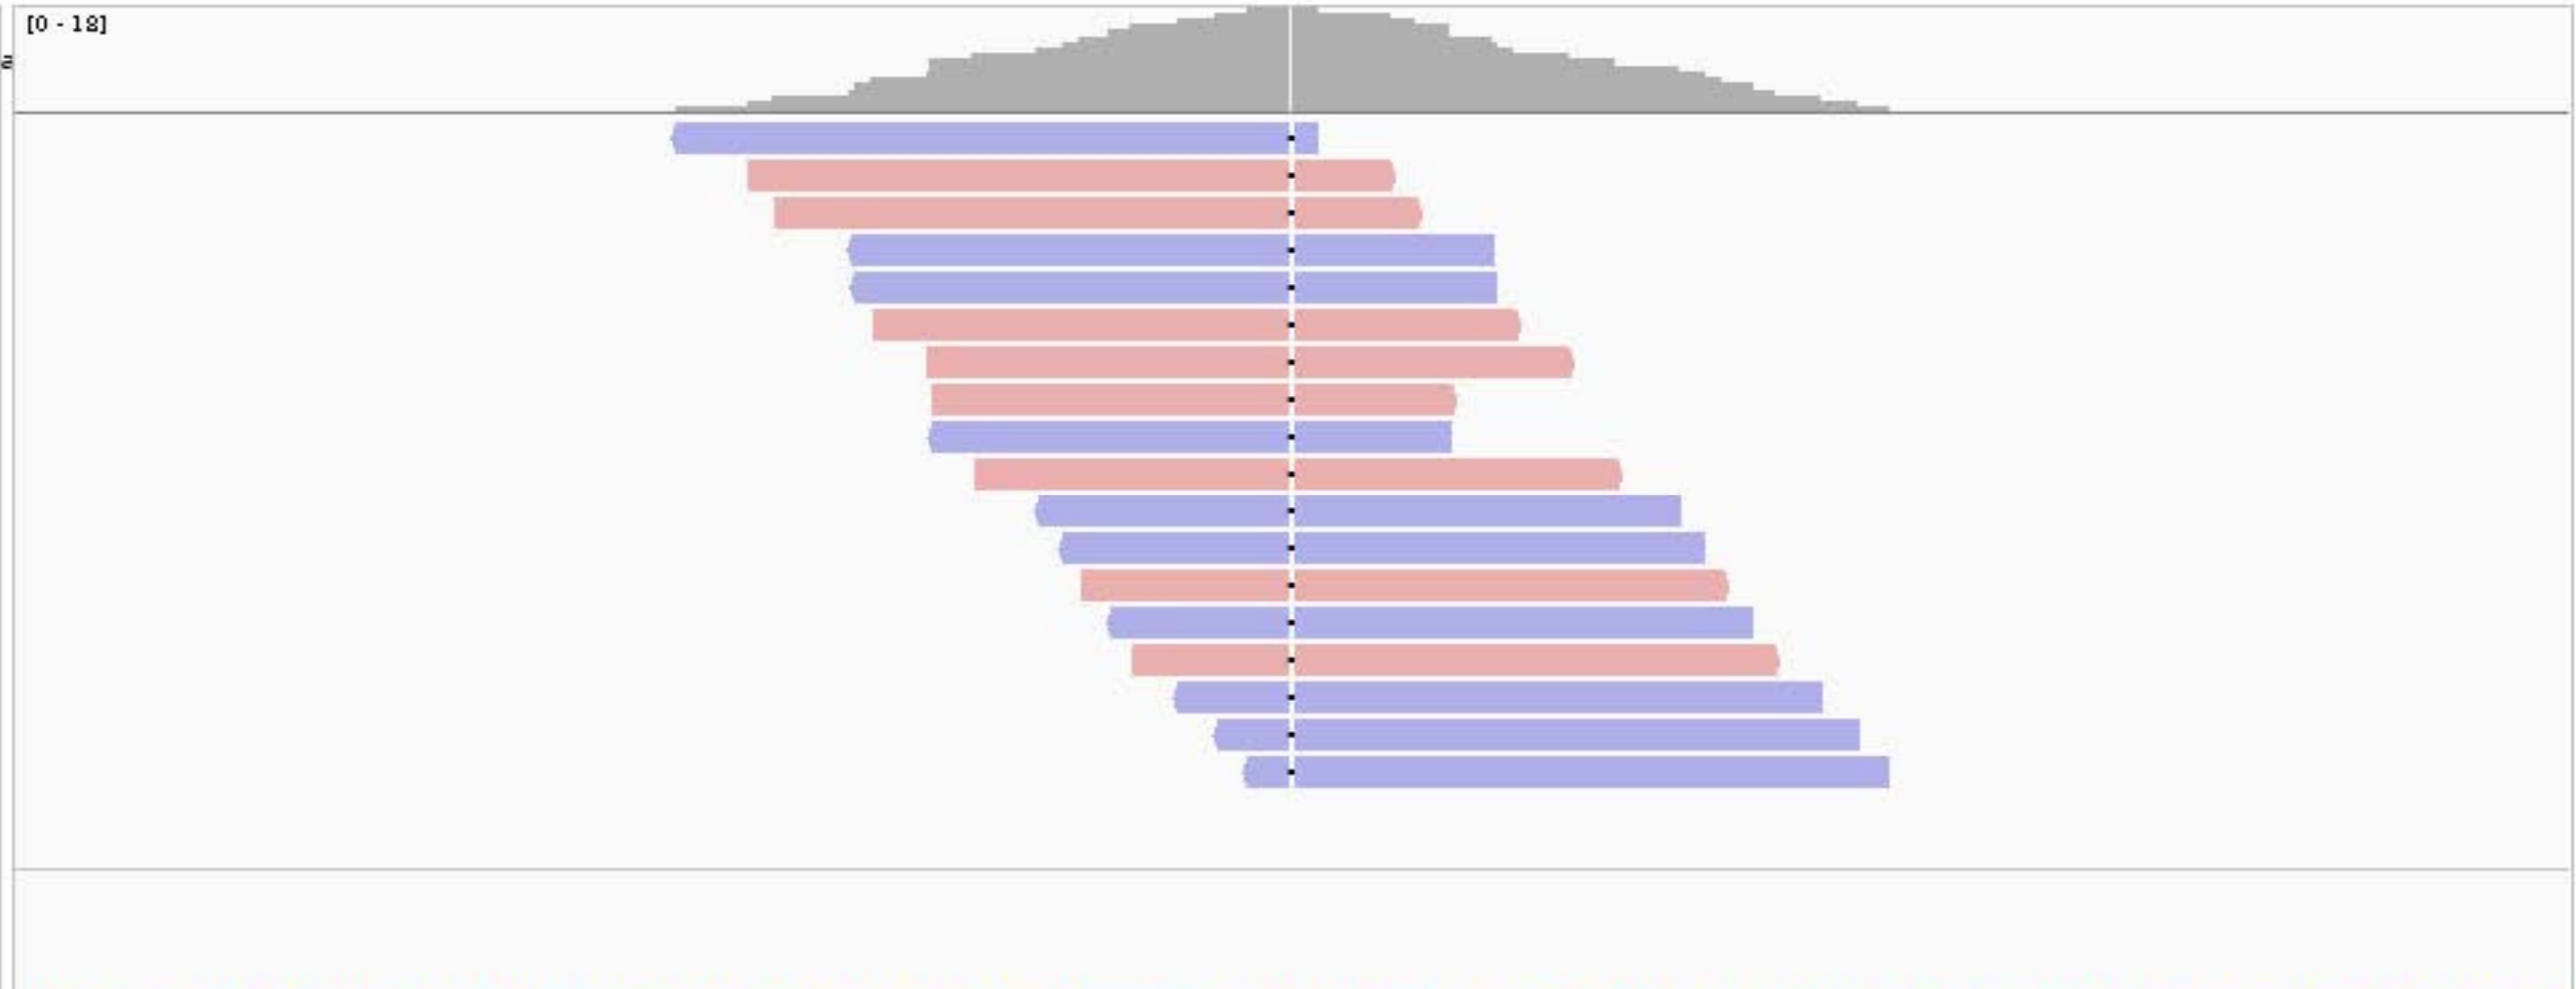

Sequence

Refseq Genes

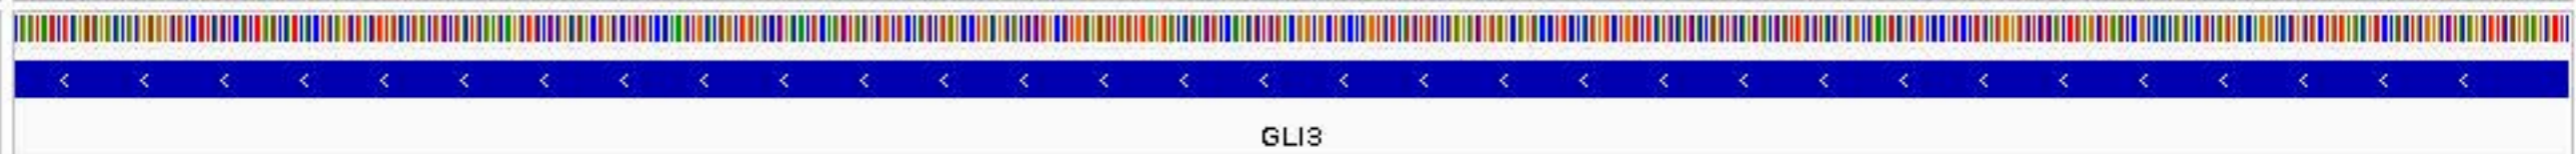

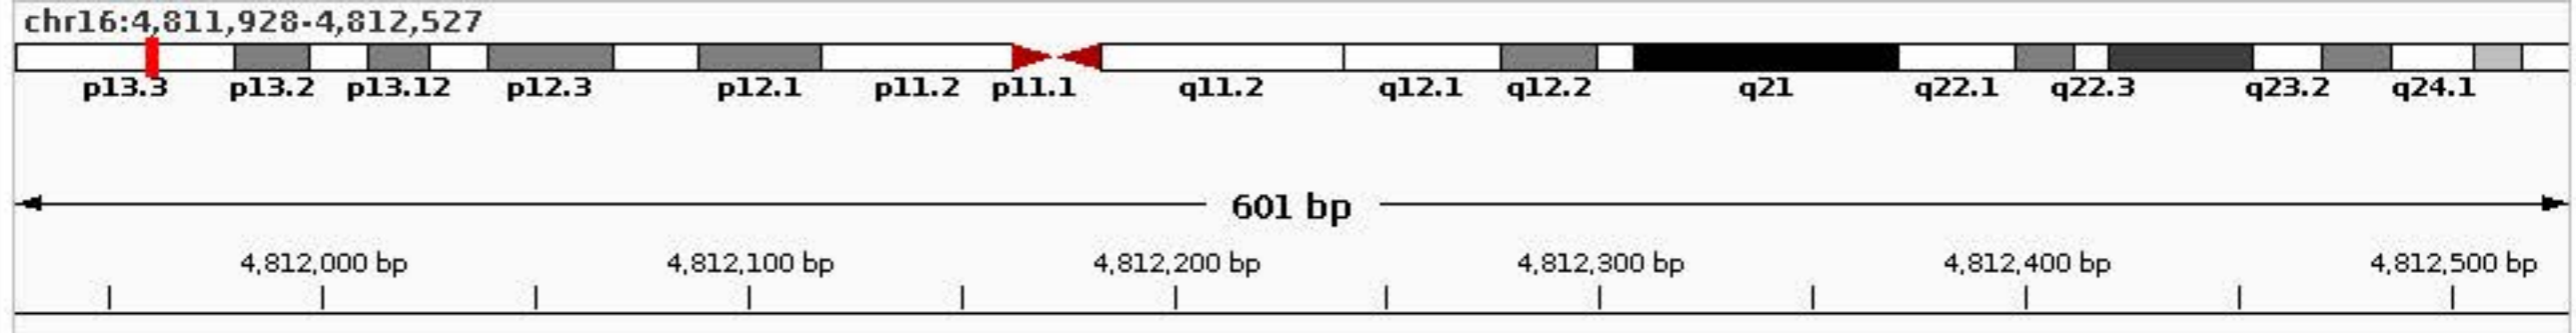

SL\_0015\_RN\_21\_mut.bam Coverage

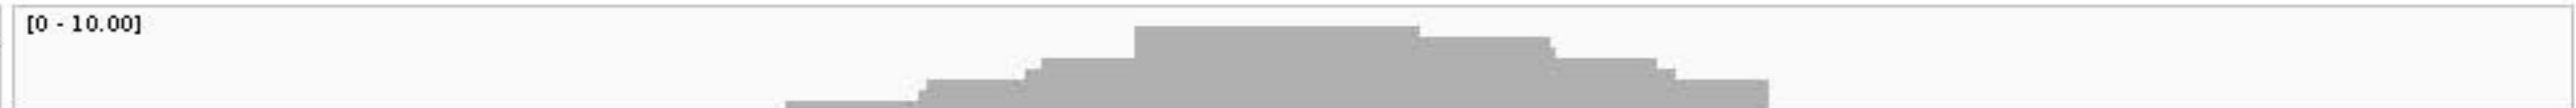

SL\_0015\_RN\_21\_mut.bam

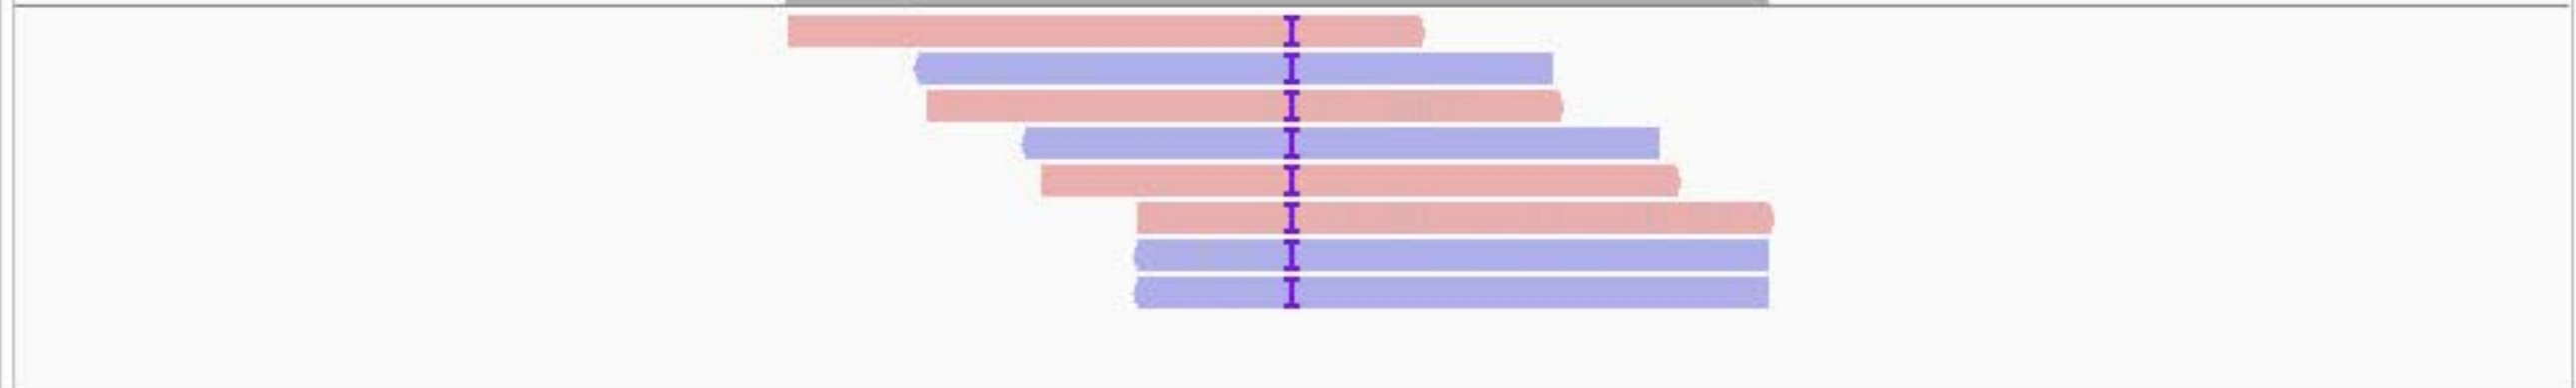

Sequence

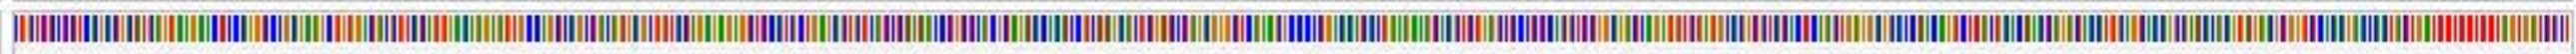

Refseq Genes

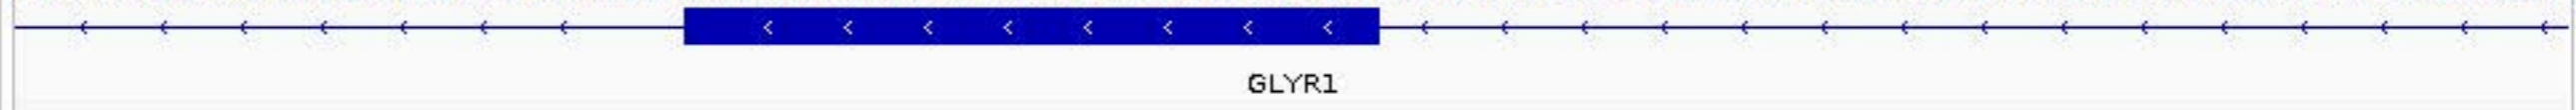

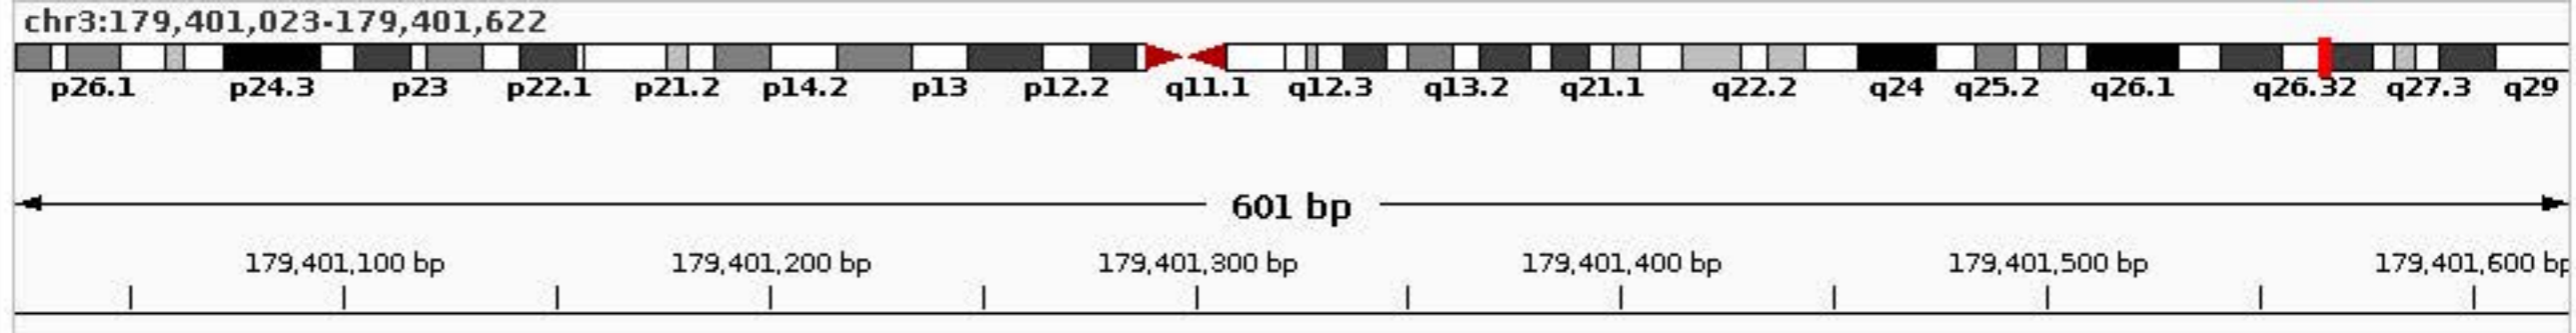

SL\_0016\_RN\_56\_mut.bam Coverage

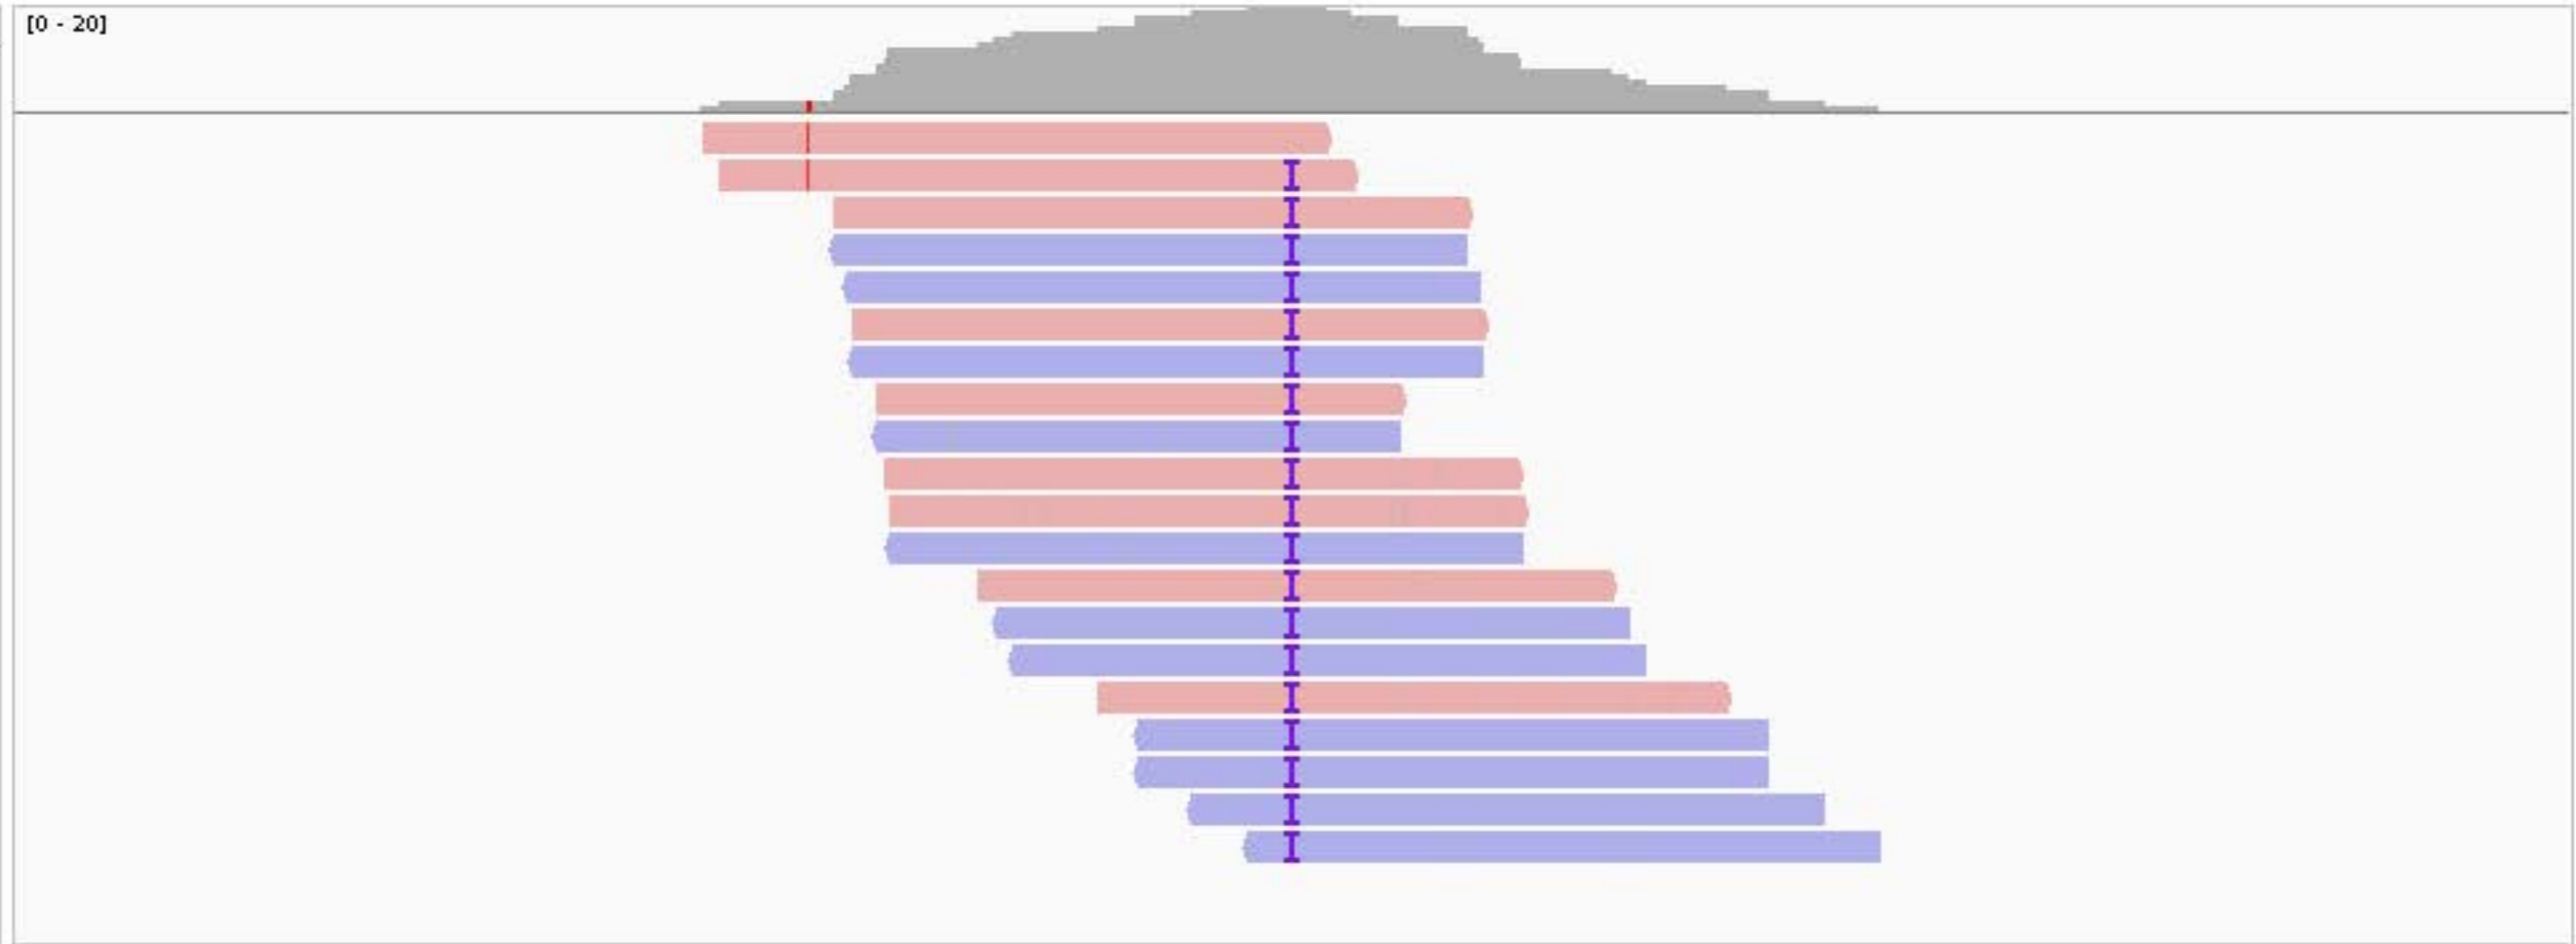

SL\_0016\_RN\_56\_mut.bam

Sequence

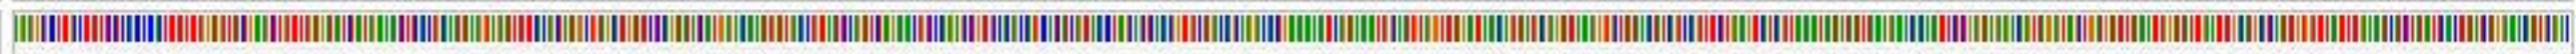

Refseq Genes

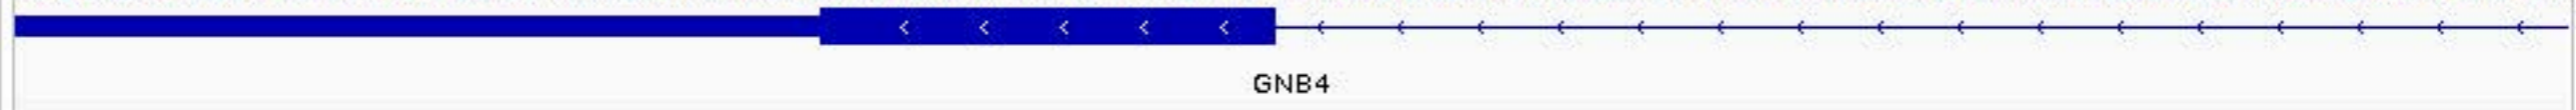

GNB4

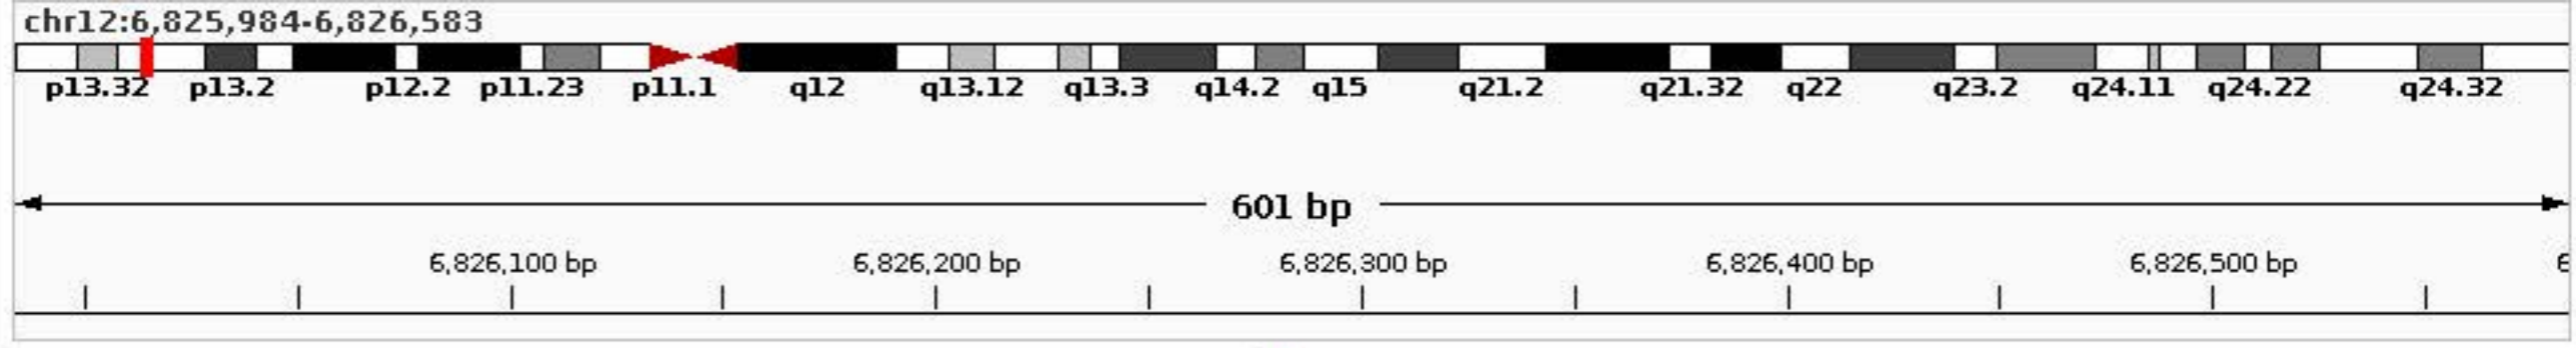

SL\_0015\_LN\_44\_mut.bam Coverage

SL\_0015\_LN\_44\_mut.bam

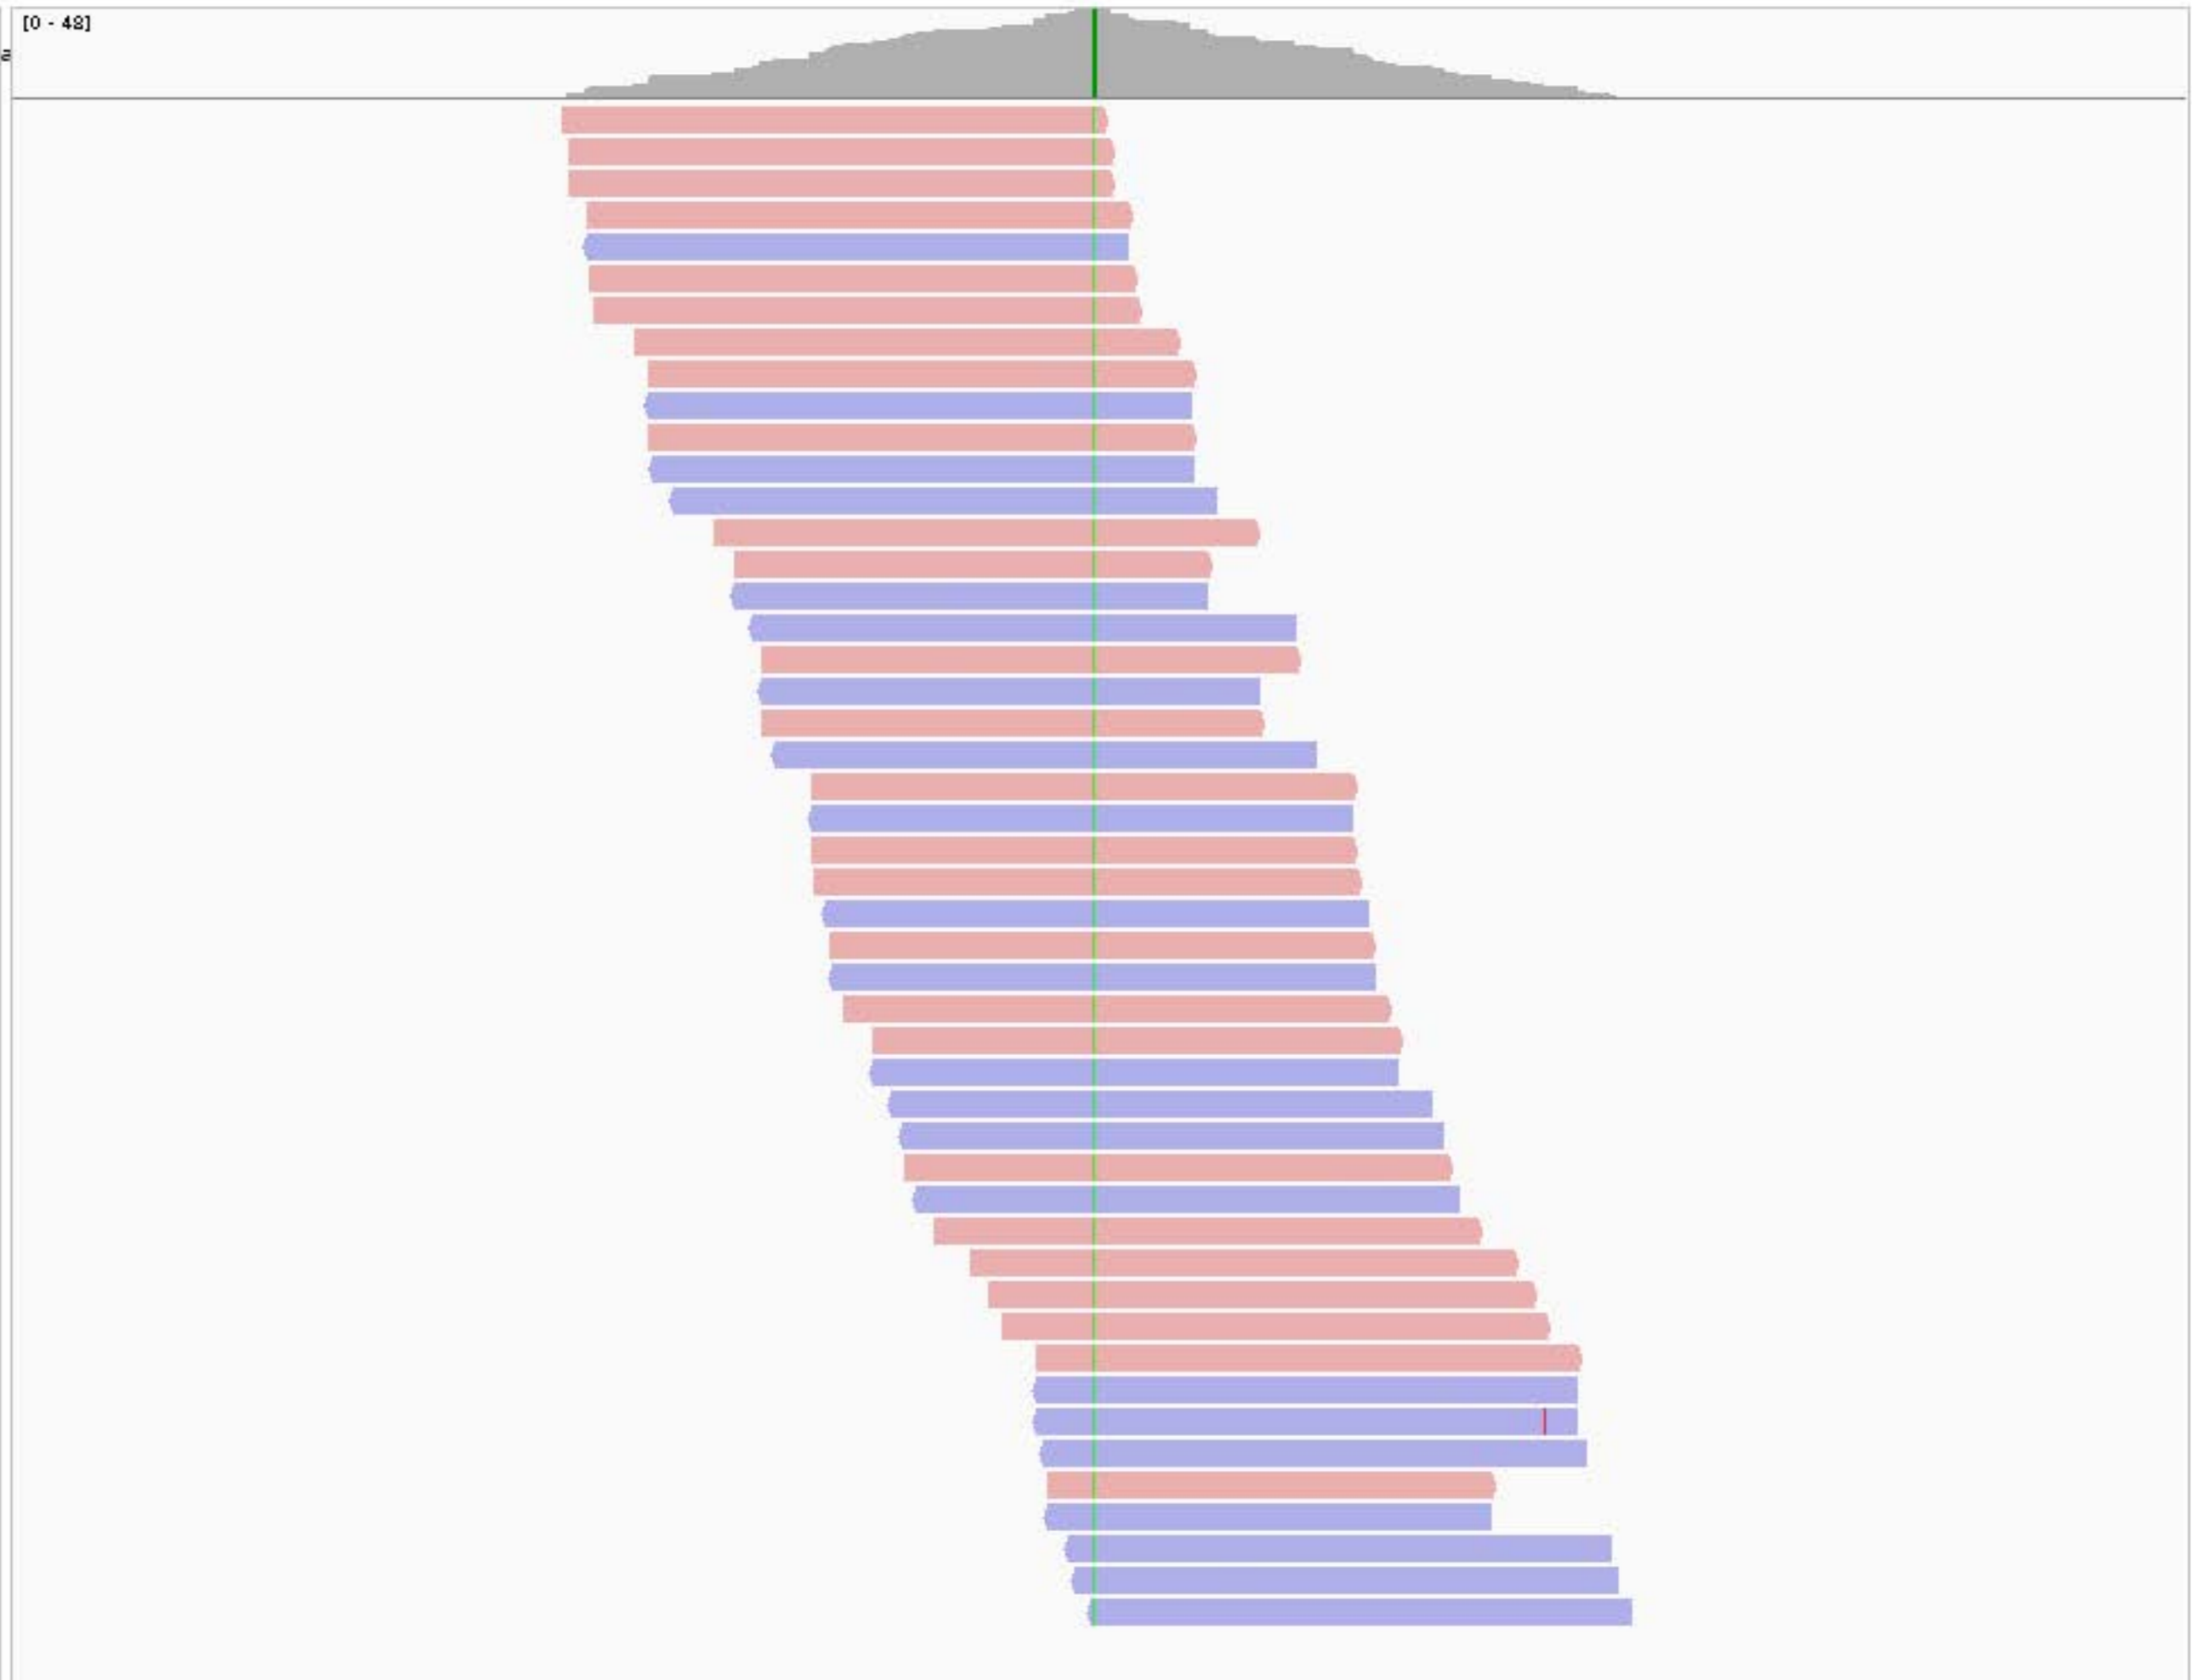

Sequence →

Refseq Genes

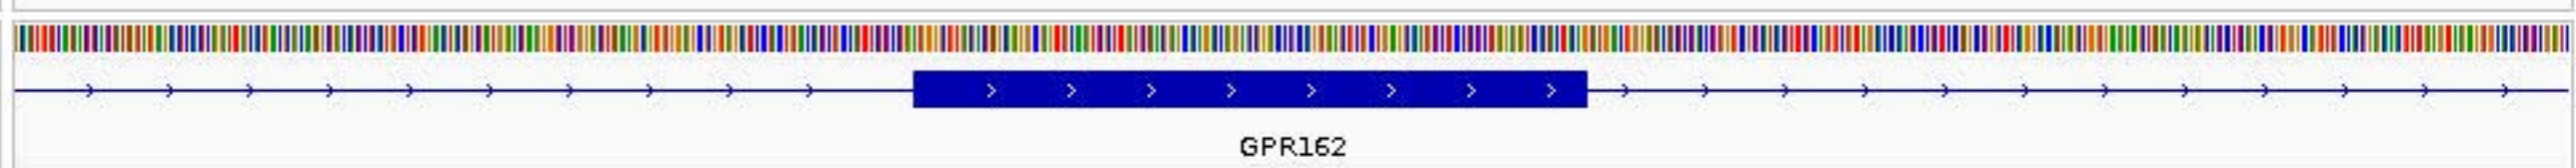



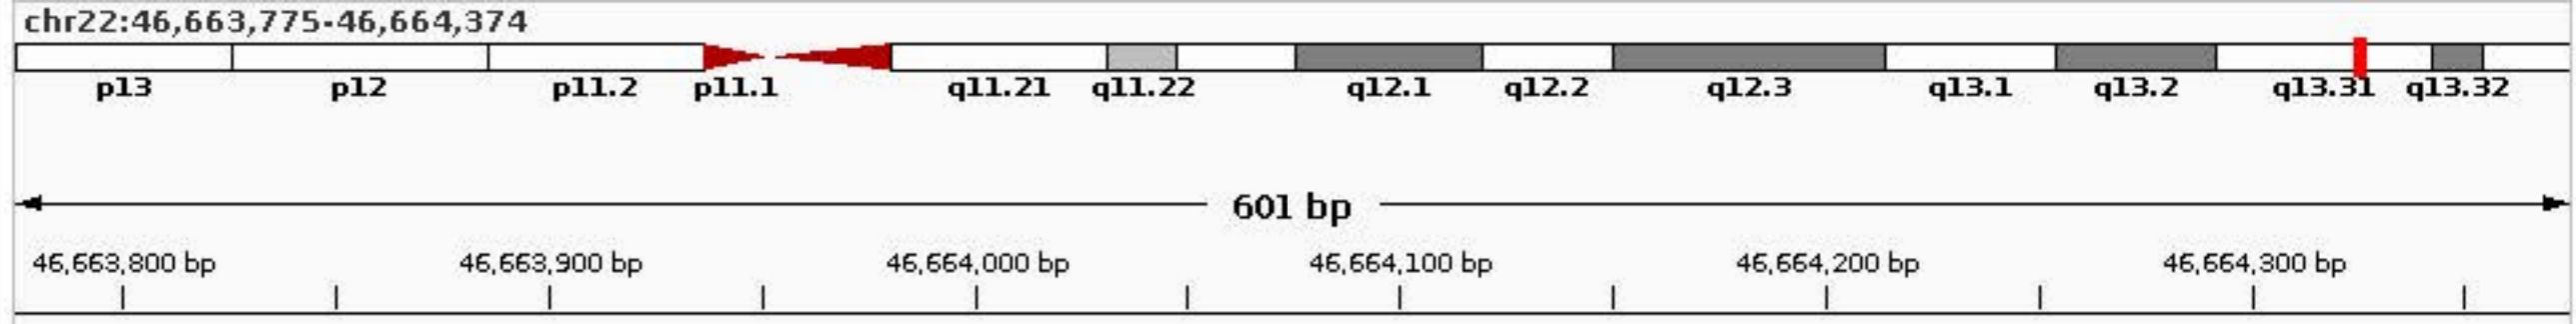

SL\_0015\_LN\_44\_mut.bam Coverage

SL\_0015\_LN\_44\_mut.bam

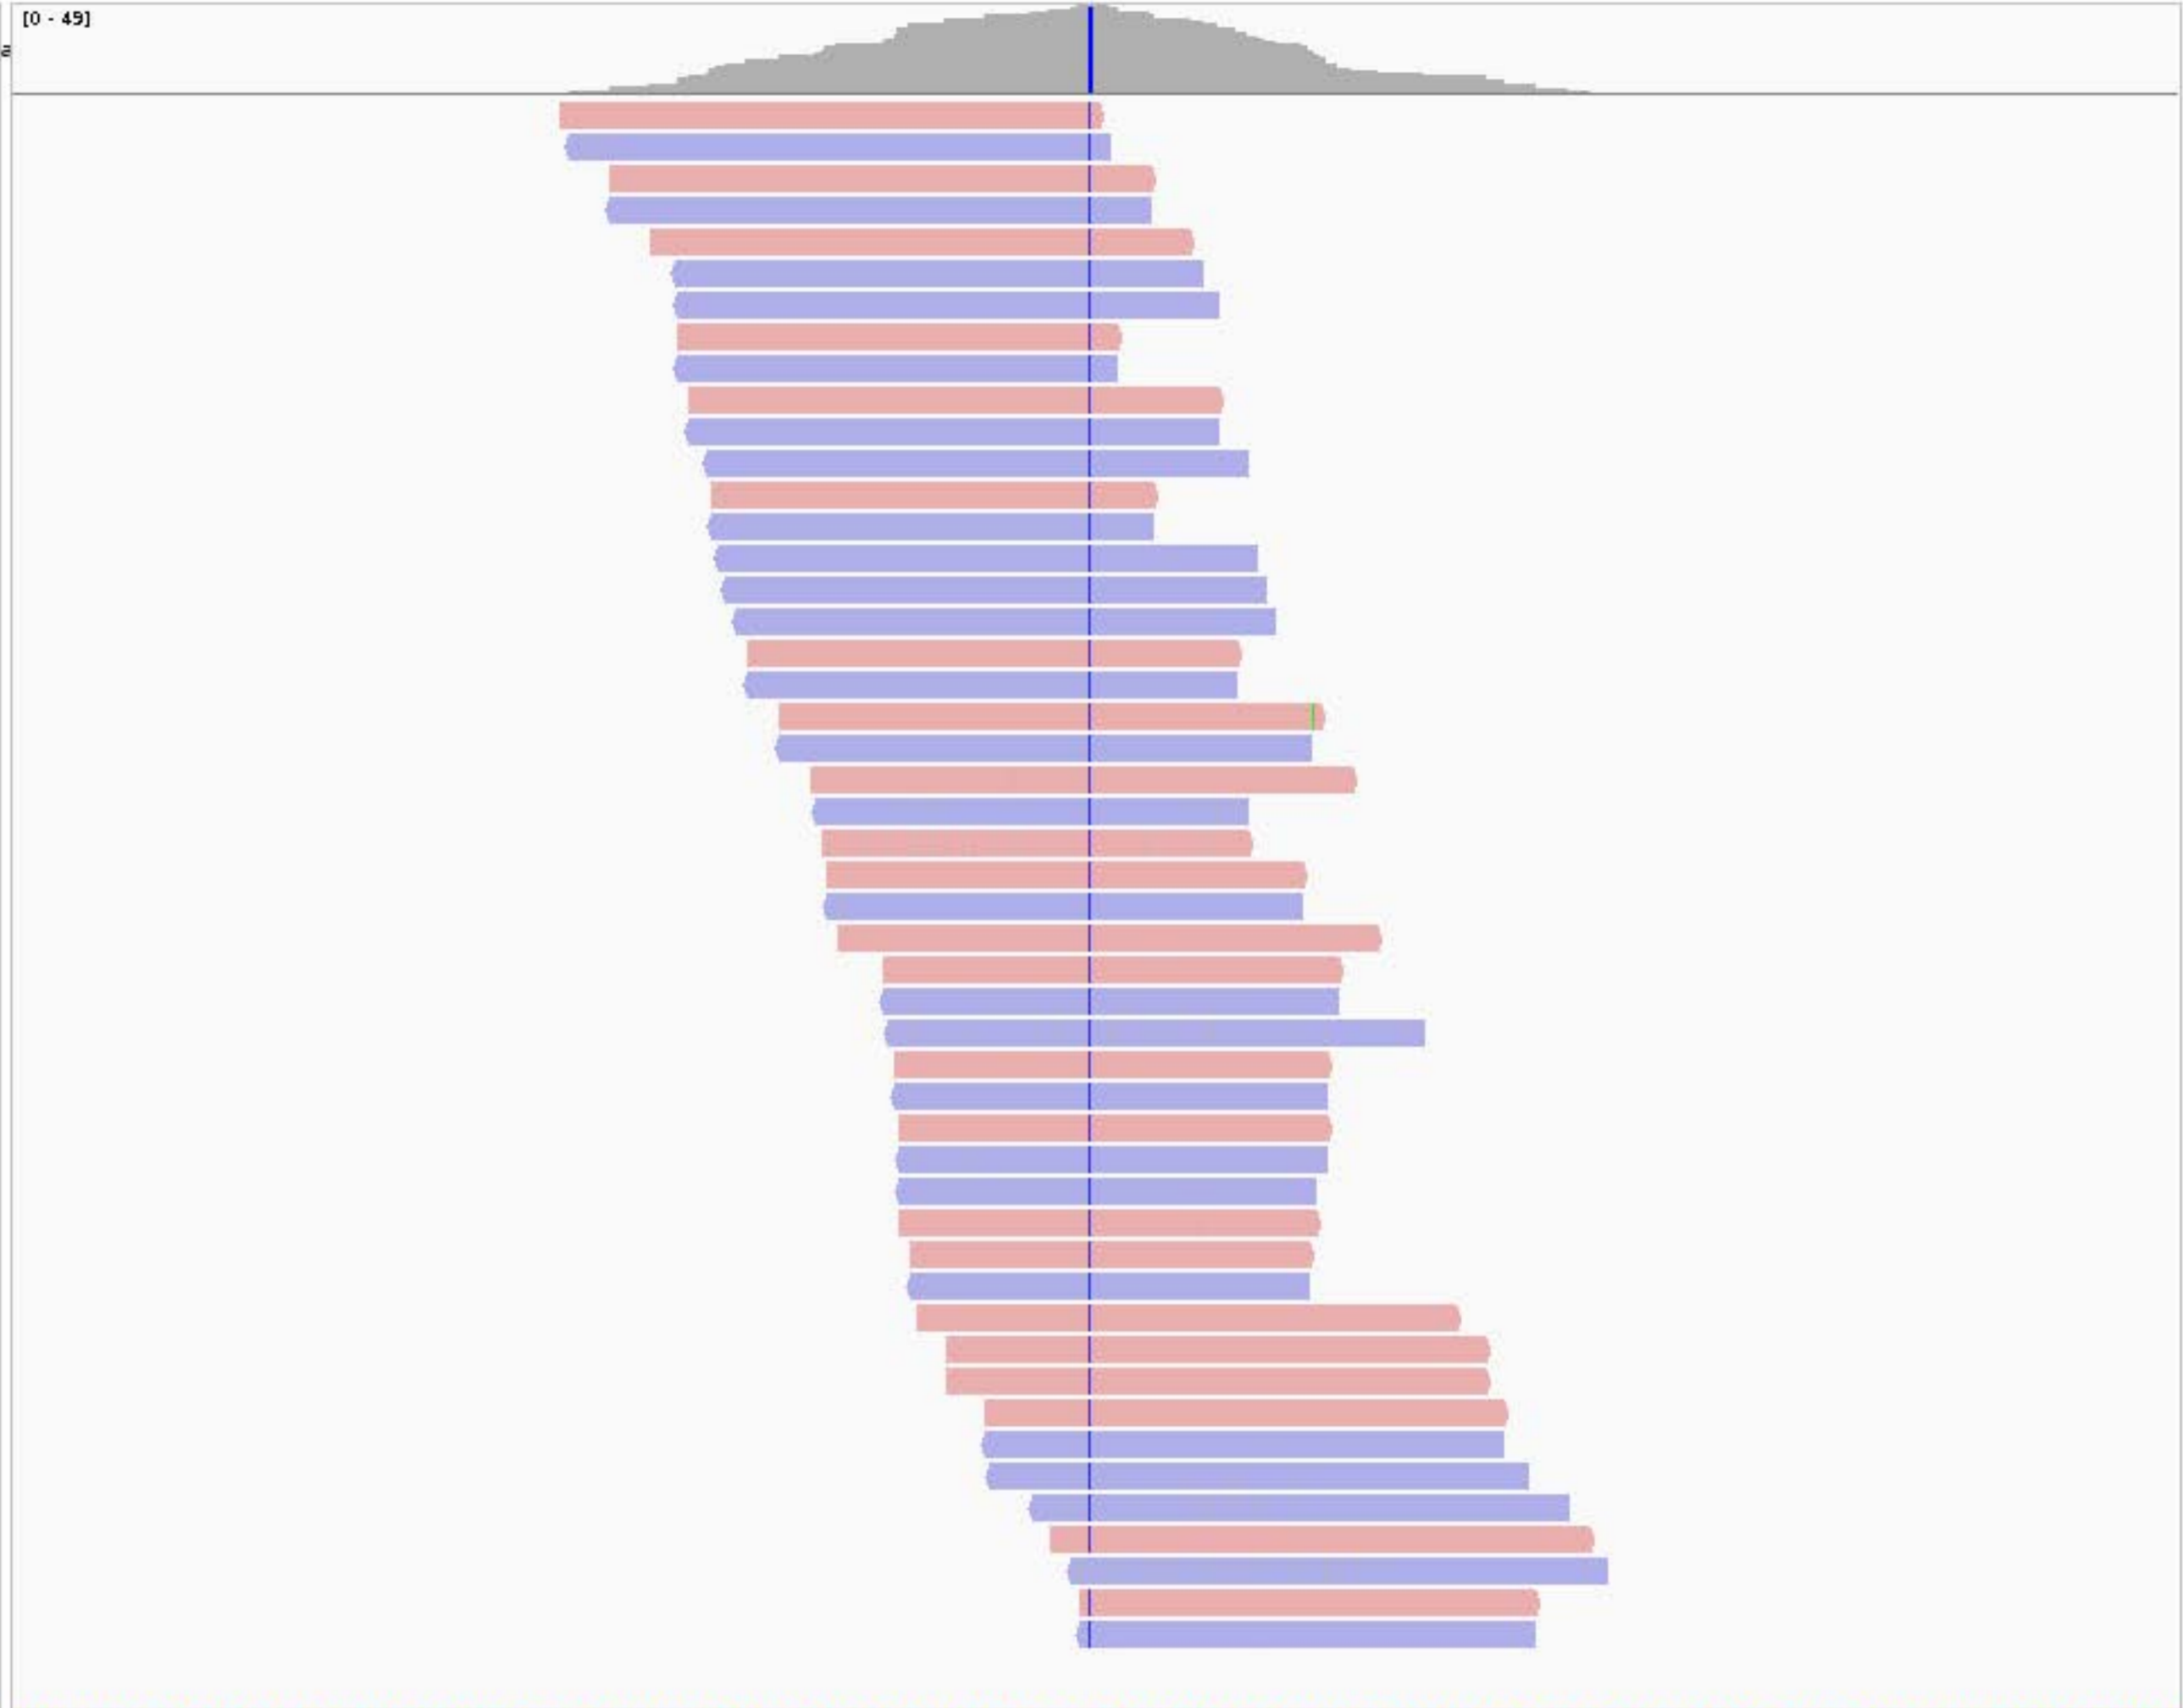

Sequence →

Refseq Genes

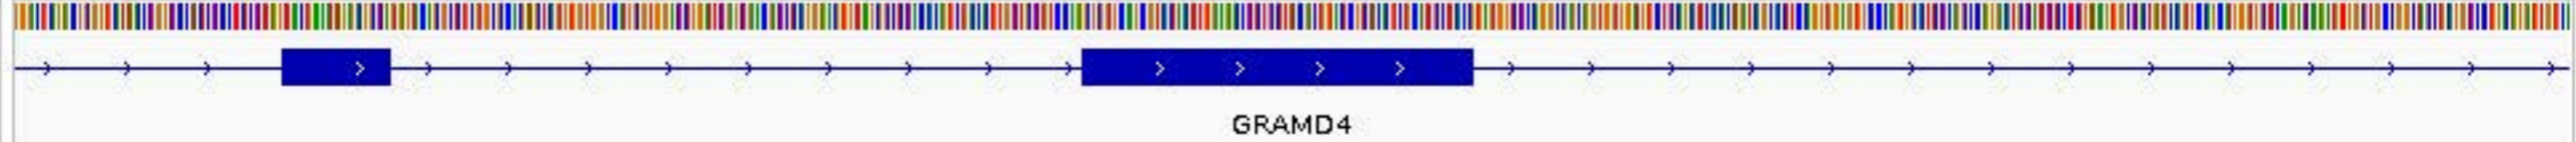



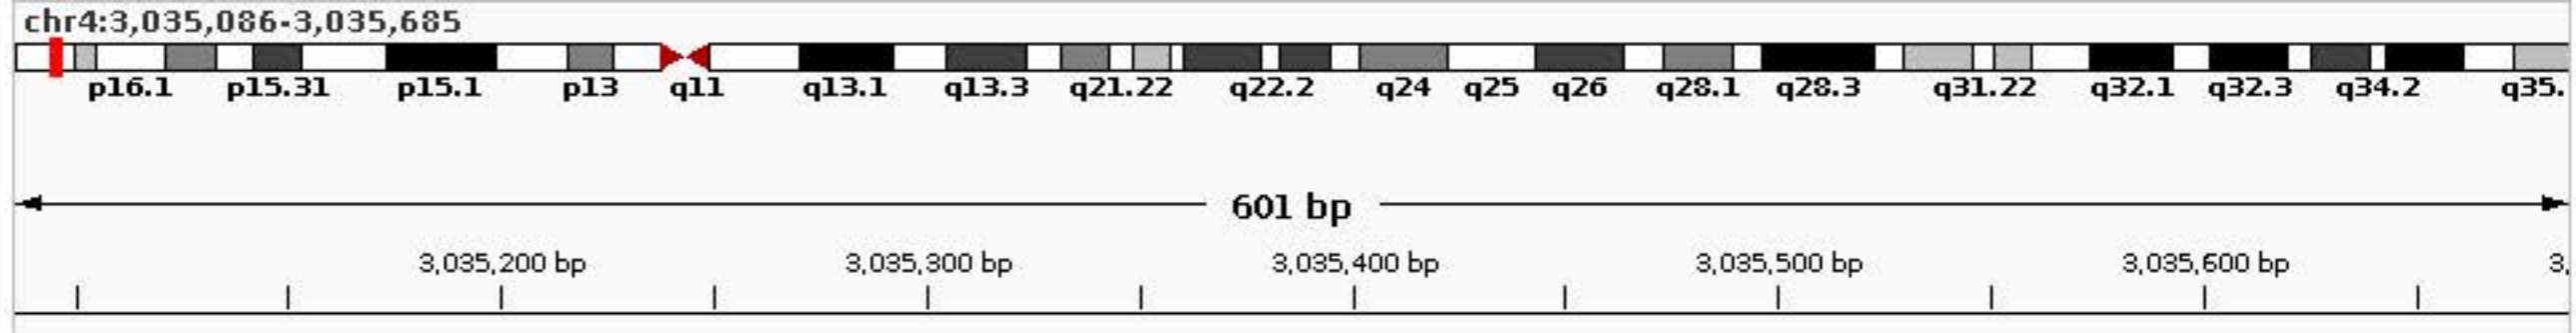

SL\_0015\_RN\_21\_mut.bam Coverage

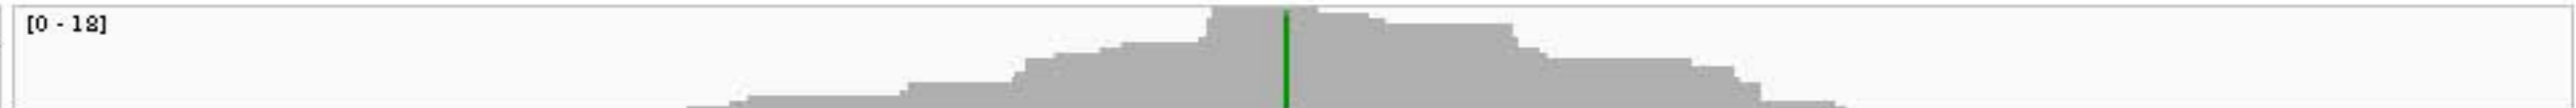

SL\_0015\_RN\_21\_mut.bam

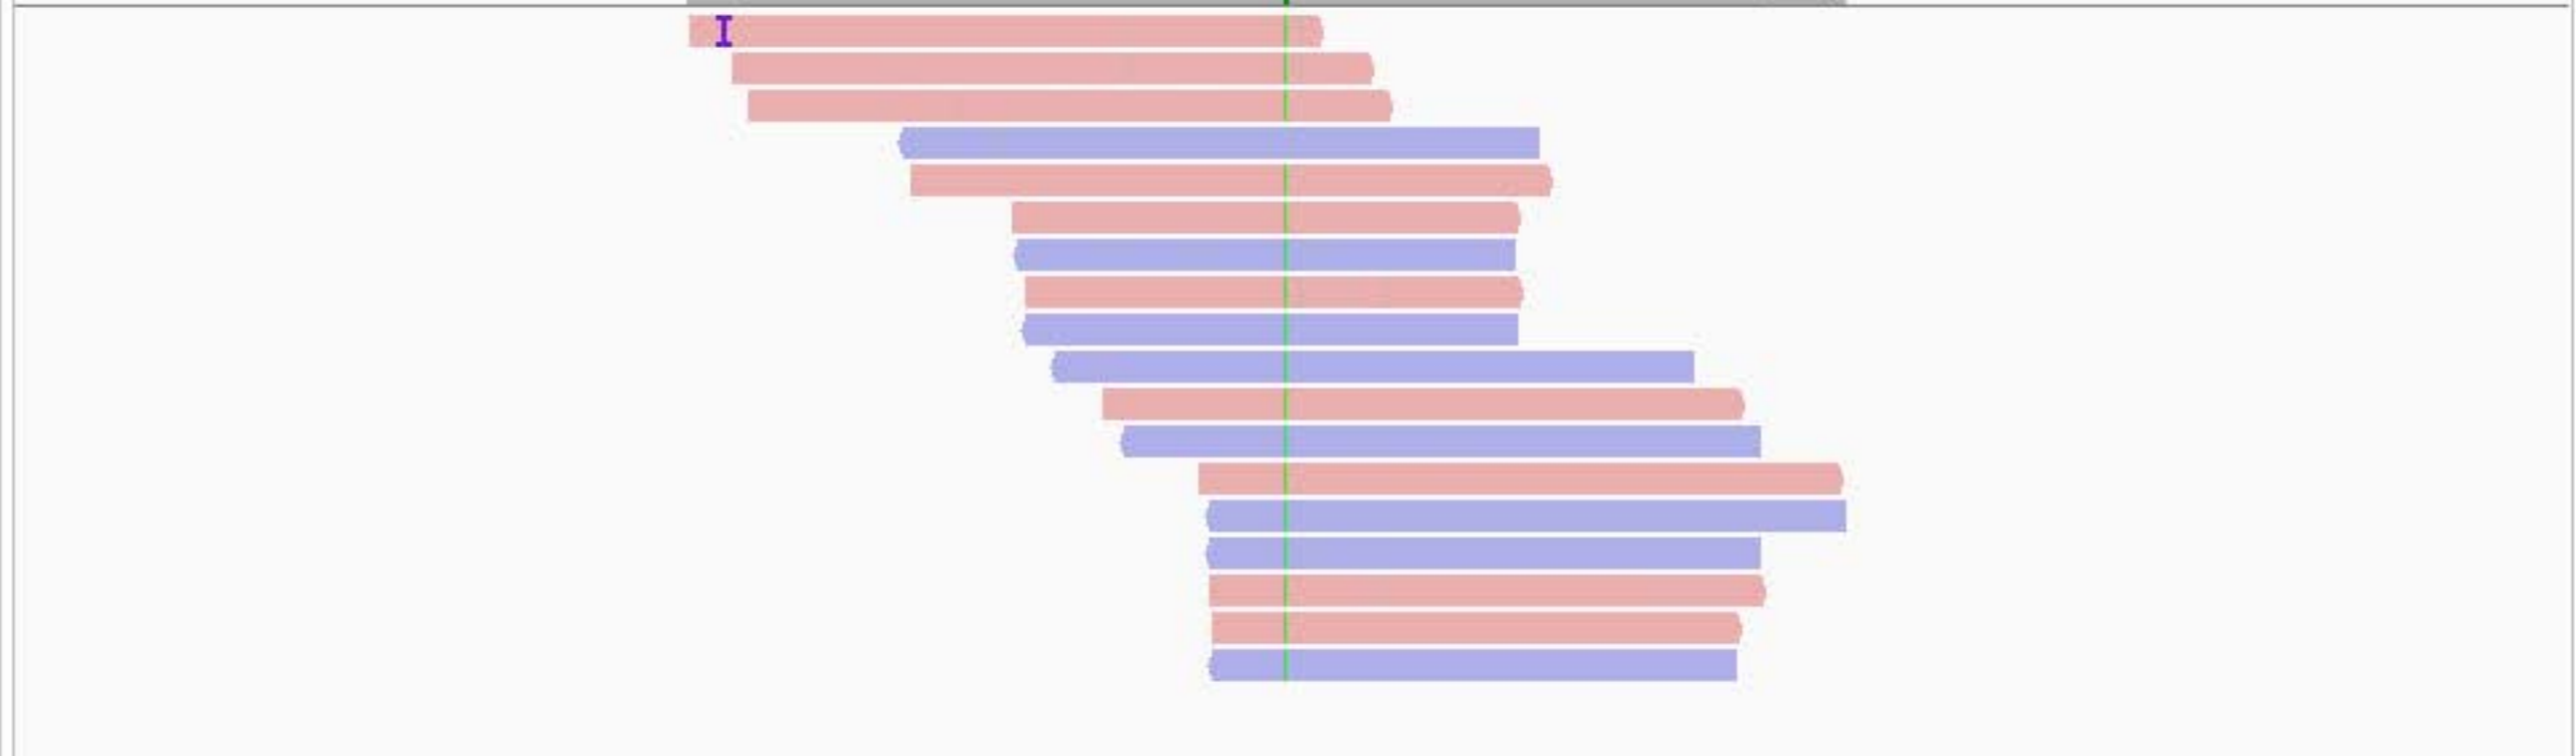

Sequence

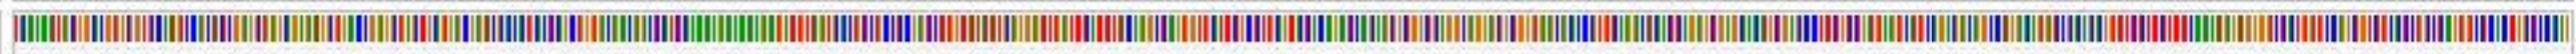

Refseq Genes

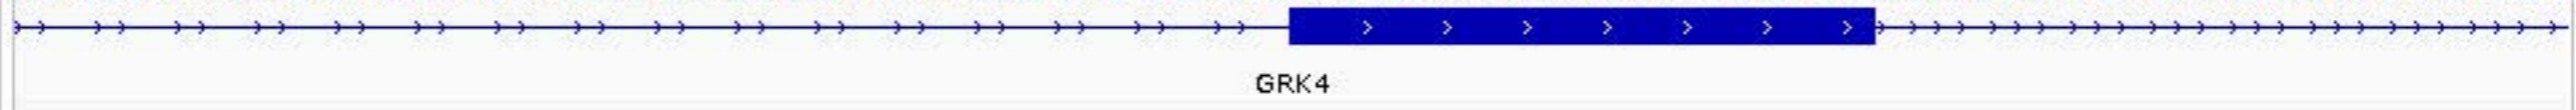

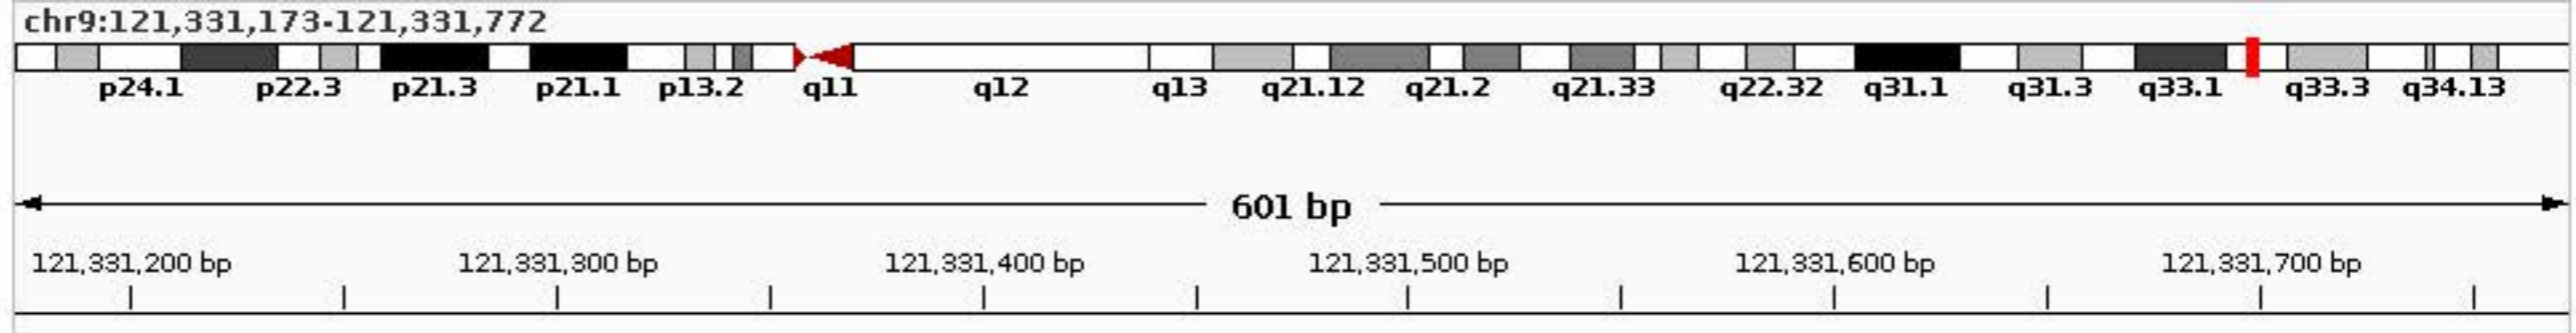

SL\_0015\_LN\_39\_mut.bam Coverage

SL\_0015\_LN\_39\_mut.bam

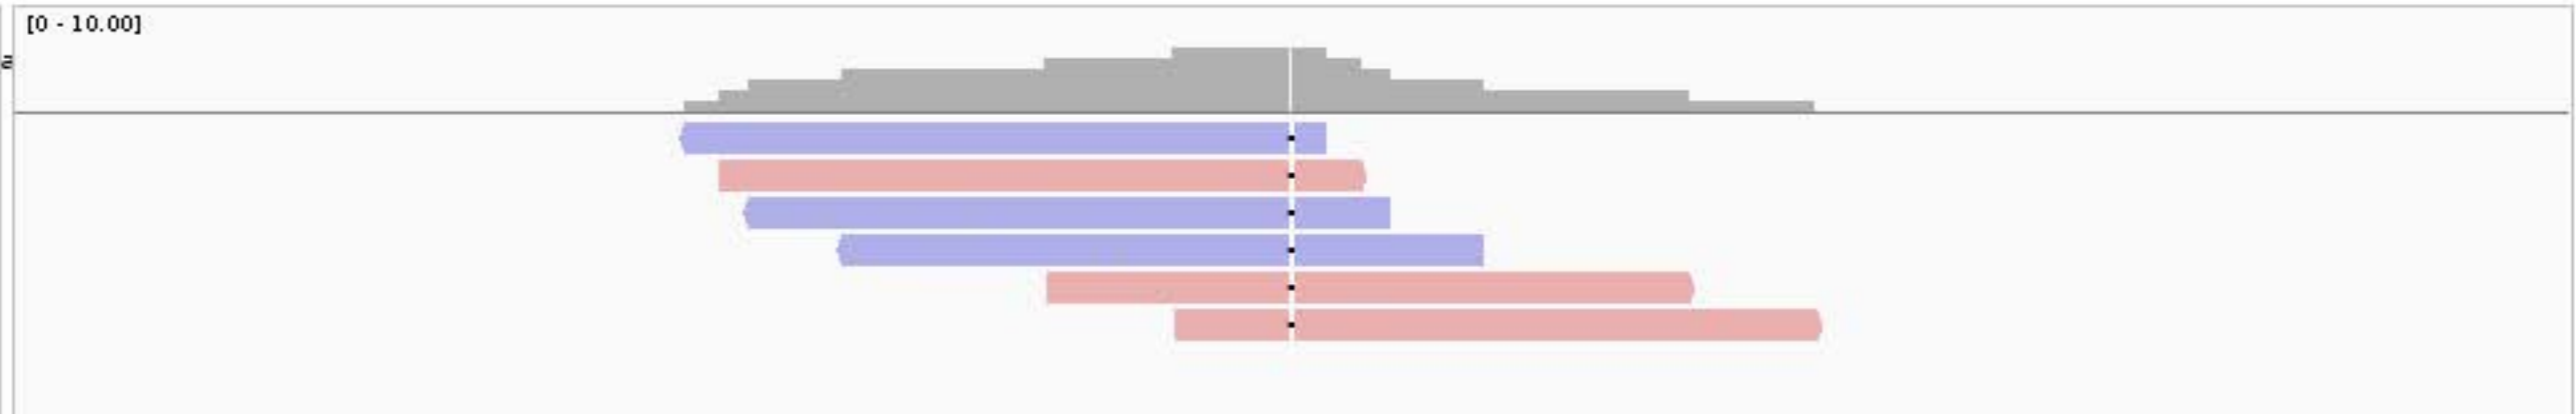

Sequence

Refseq Genes

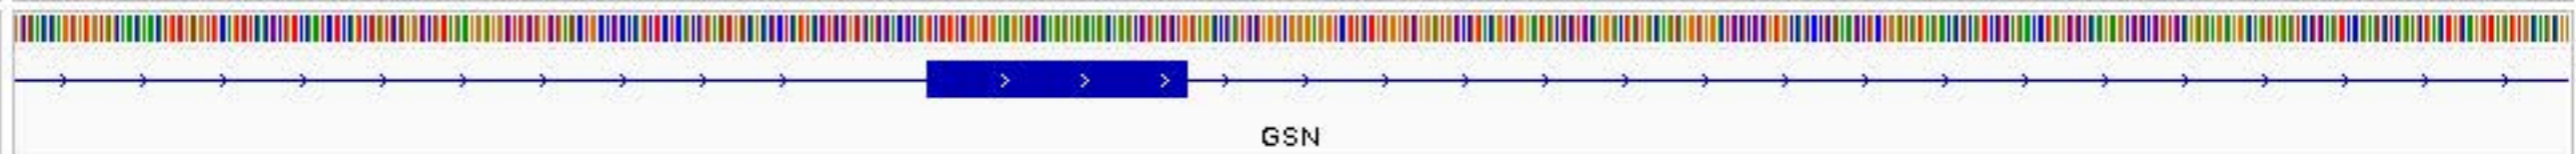



SL\_0015\_RN\_11\_mut.bam Coverage

SL\_0015\_RN\_11\_mut.bam

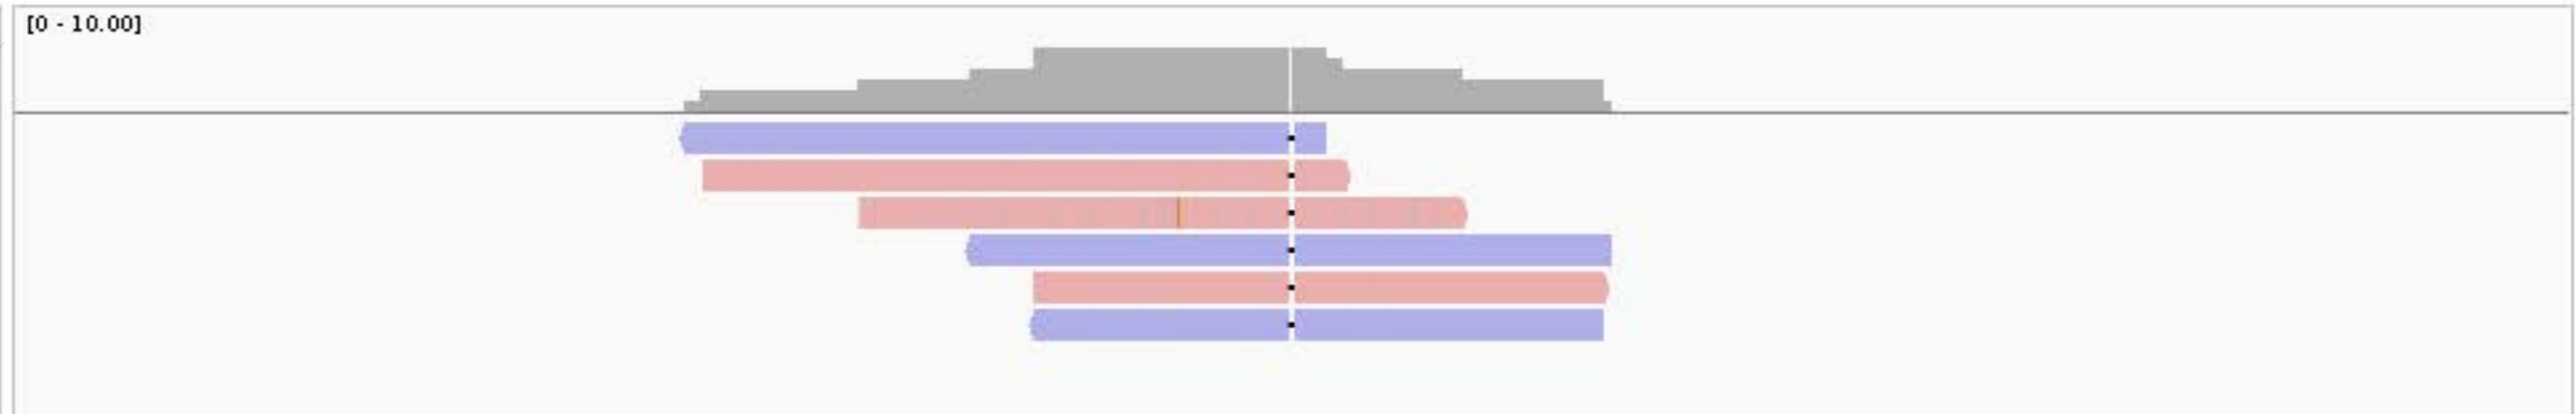

Sequence

Refseq Genes





SL\_0015\_RN\_47\_mut.bam Coverage

SL\_0015\_RN\_47\_mut.bam

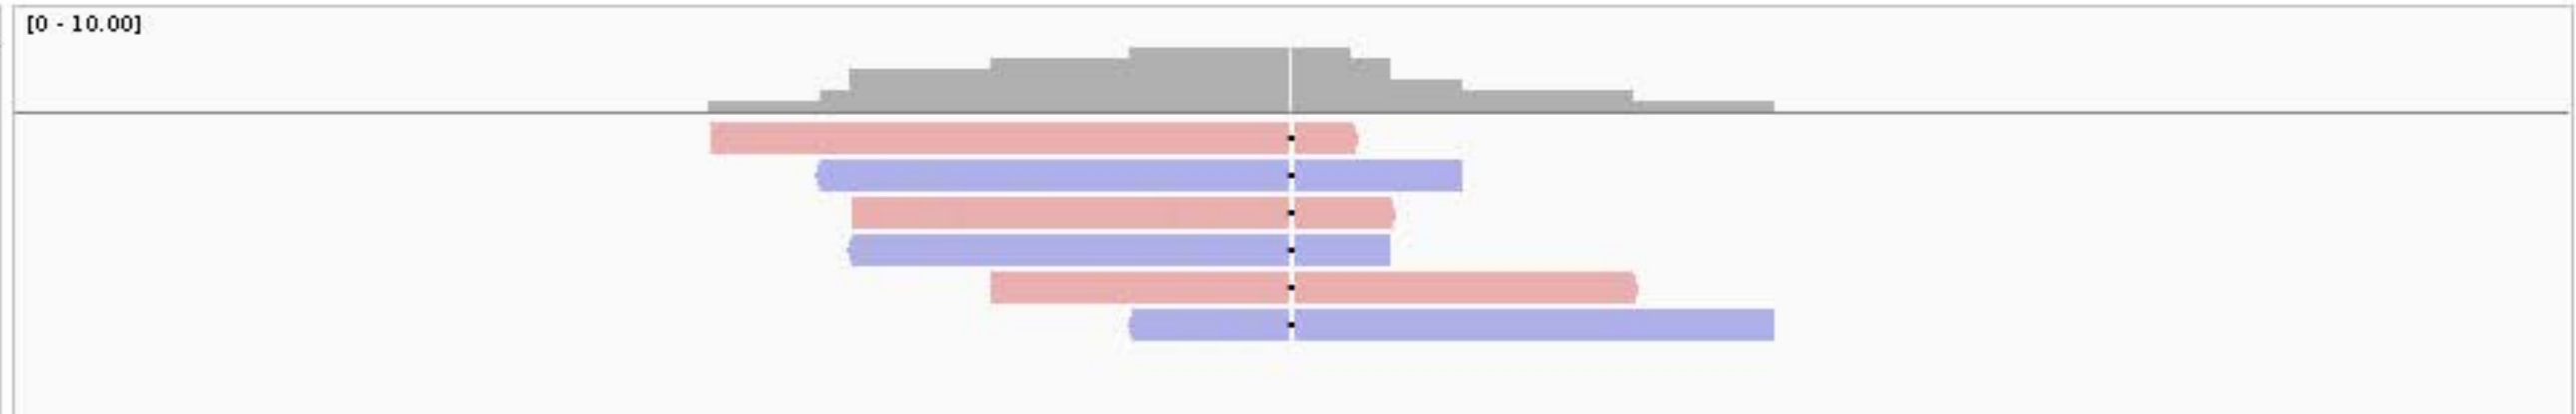

Sequence

Refseq Genes



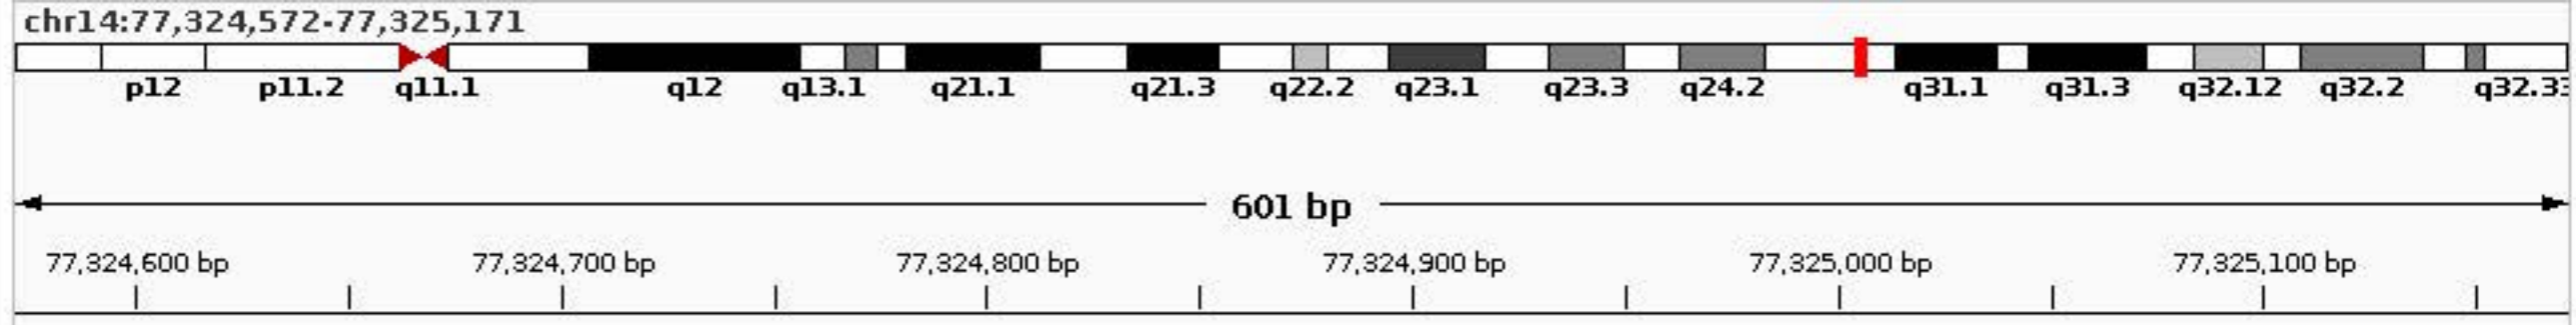

SL\_0001\_RN\_28\_mut.bam Coverage

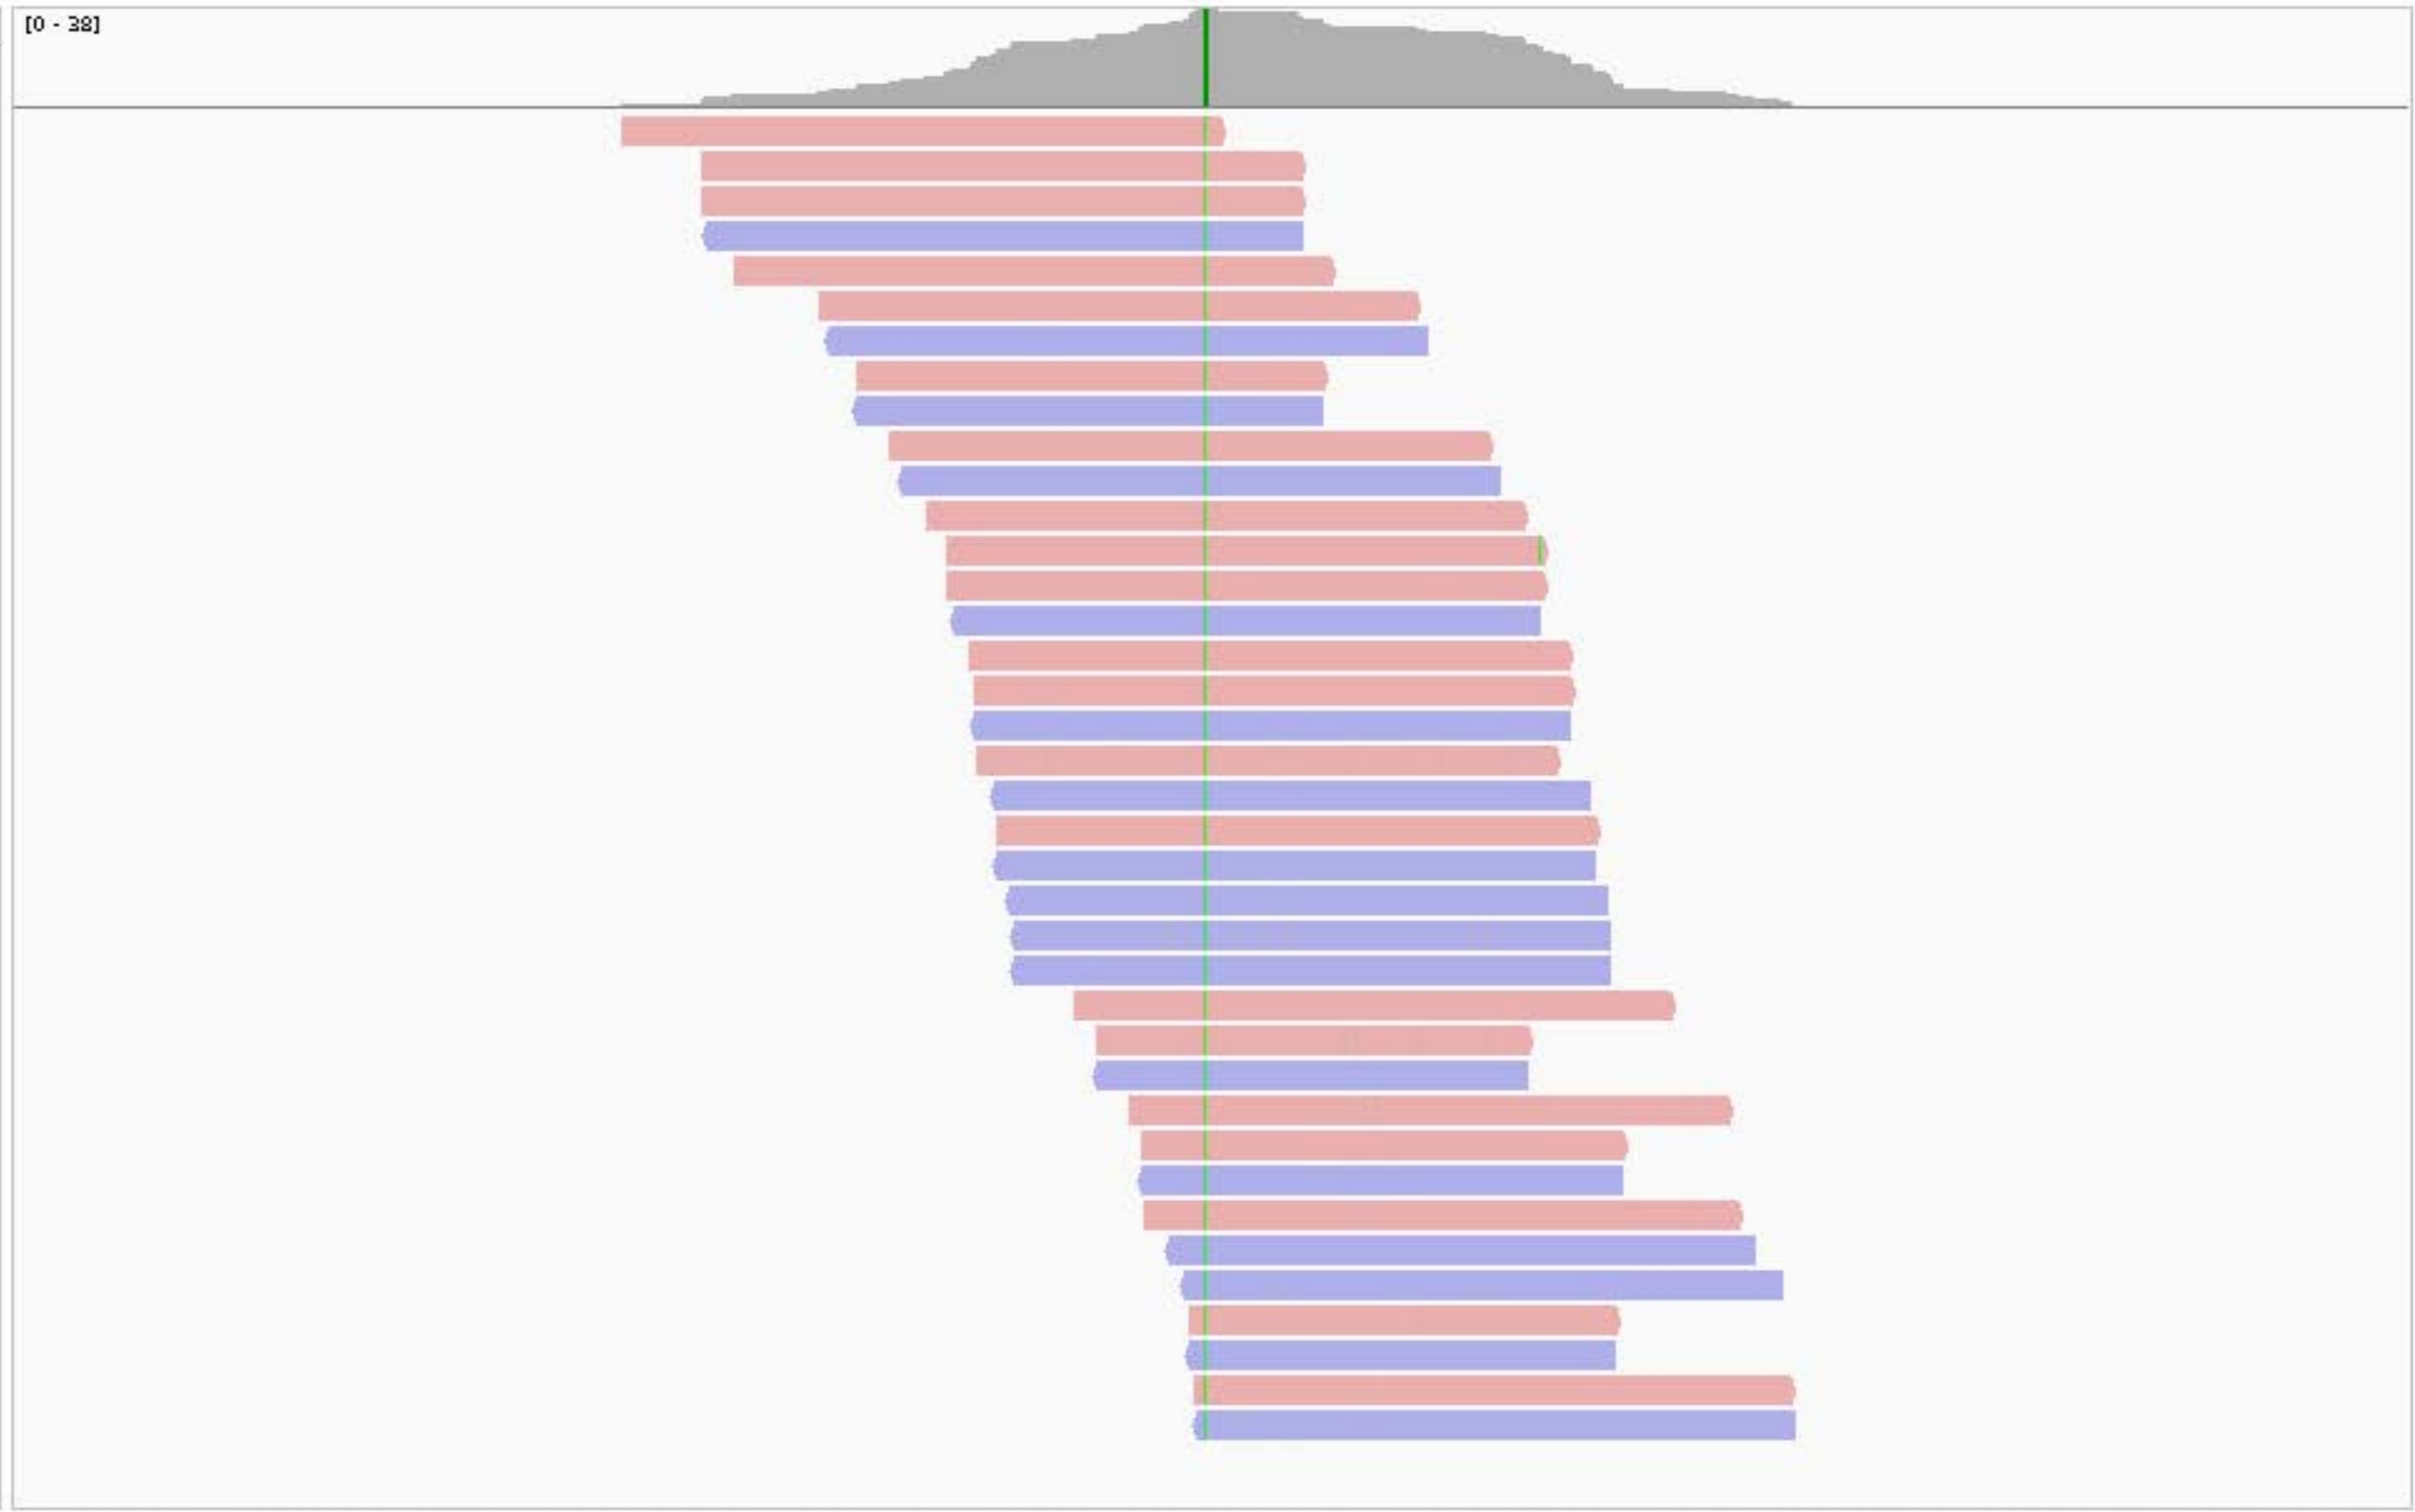

Sequence

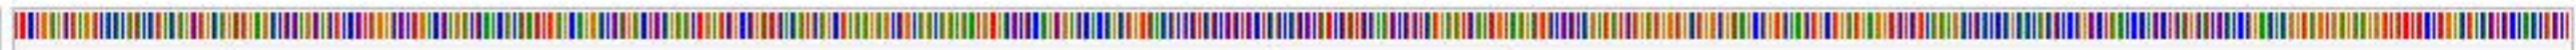

Refseq Genes

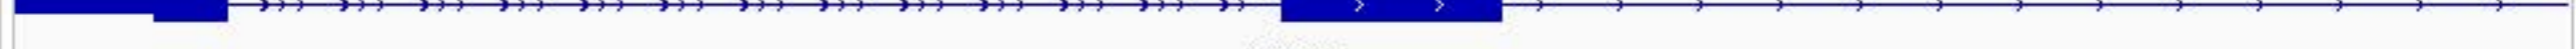

GSTZ1



chr7:74,732,312-74,732,911

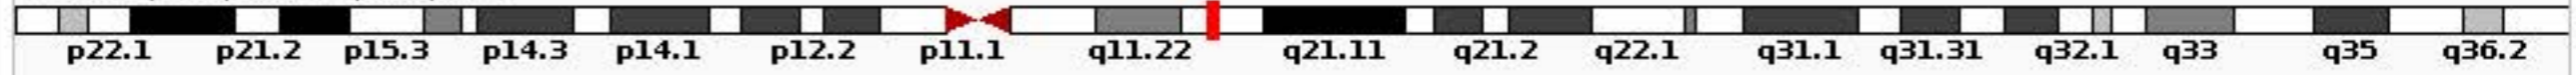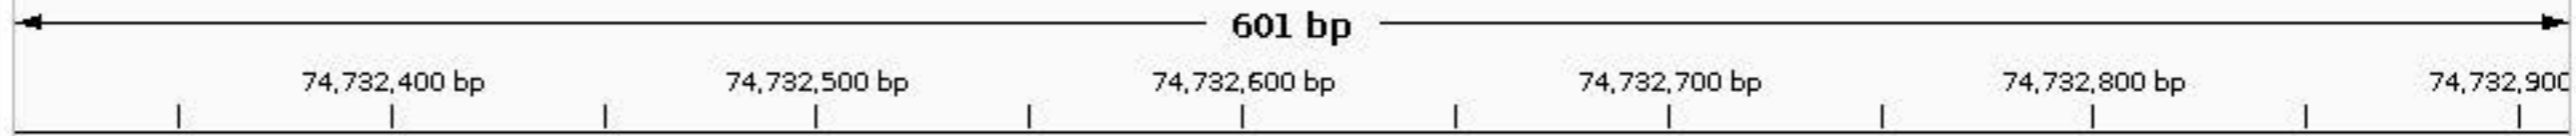

SL\_0016\_RN\_56\_mut.bam Coverage

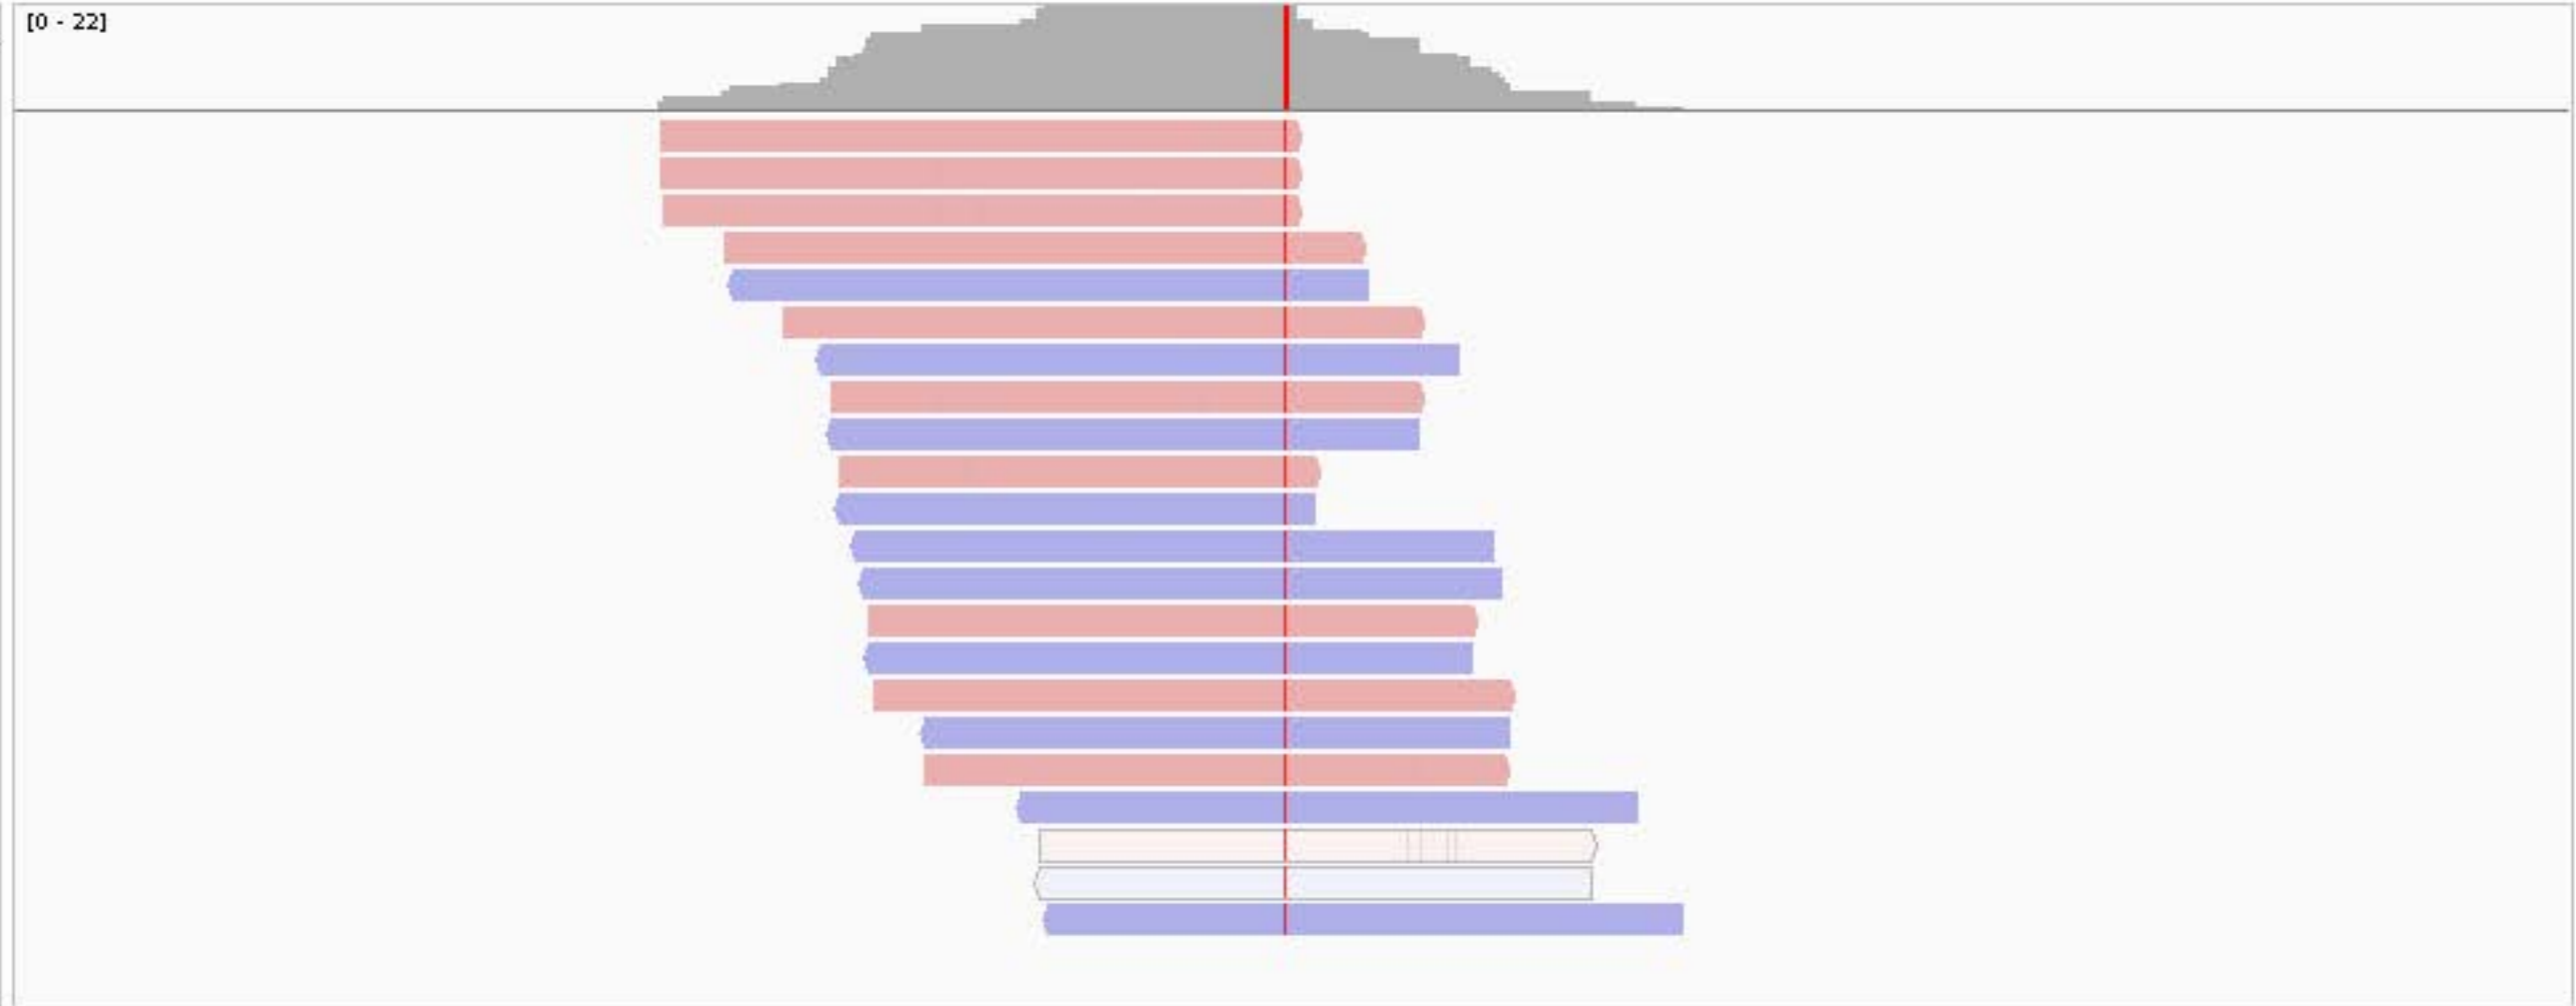

SL\_0016\_RN\_56\_mut.bam

Sequence

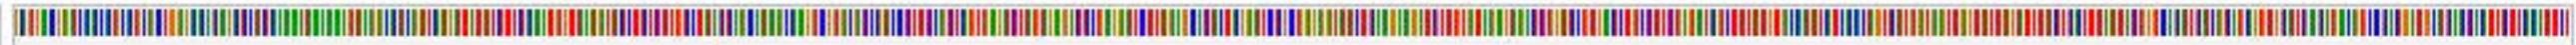

Refseq Genes

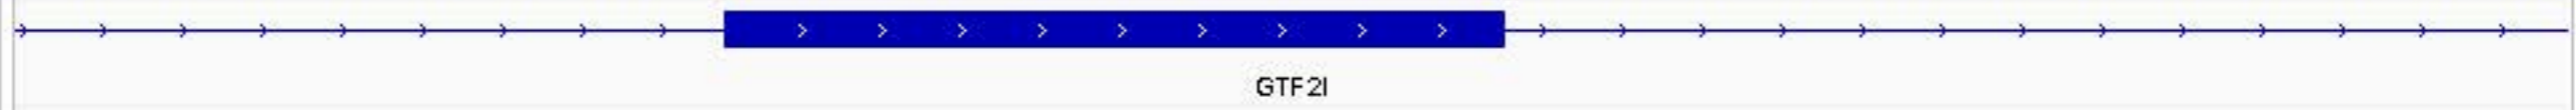

GTF2I

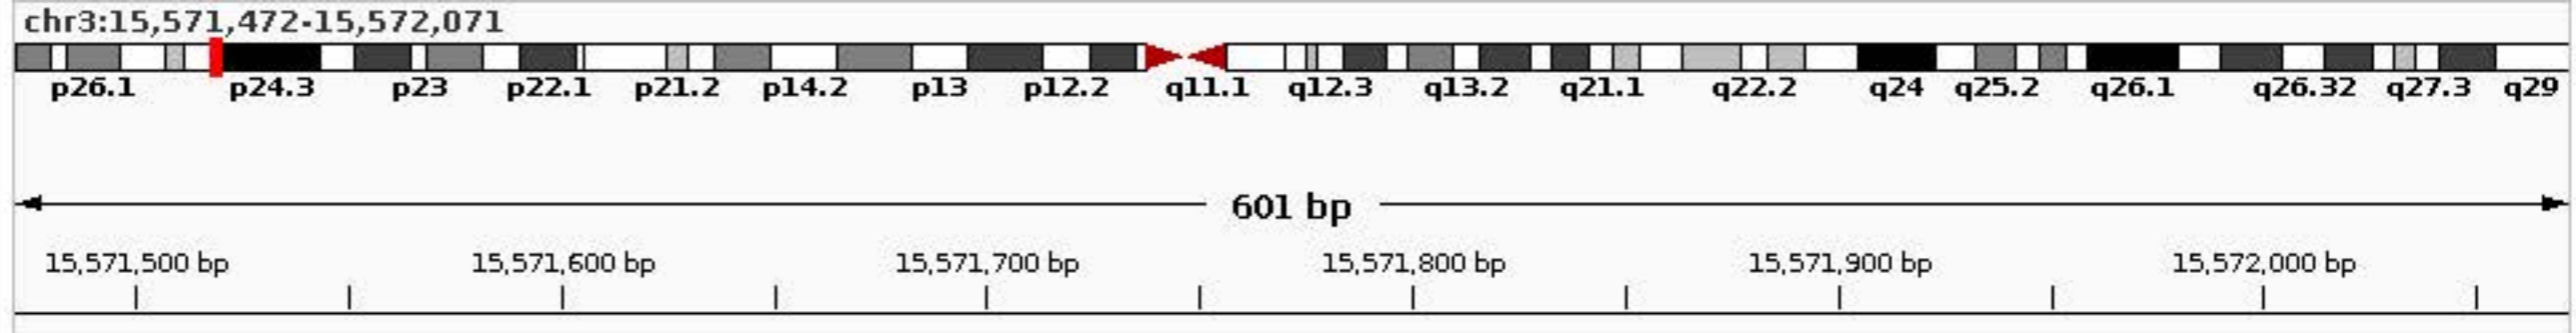

SL\_0015\_RN\_11\_mut.bam Coverage

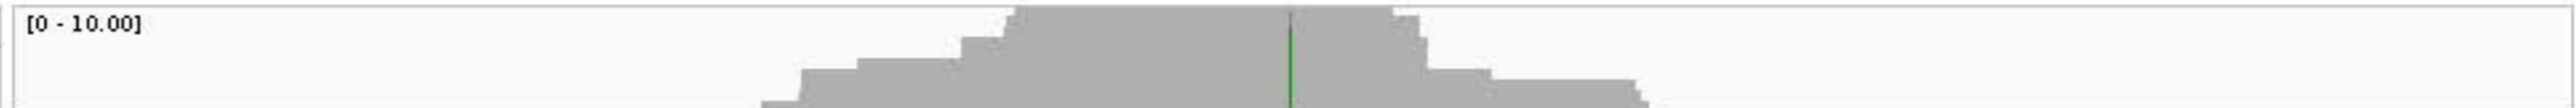

SL\_0015\_RN\_11\_mut.bam

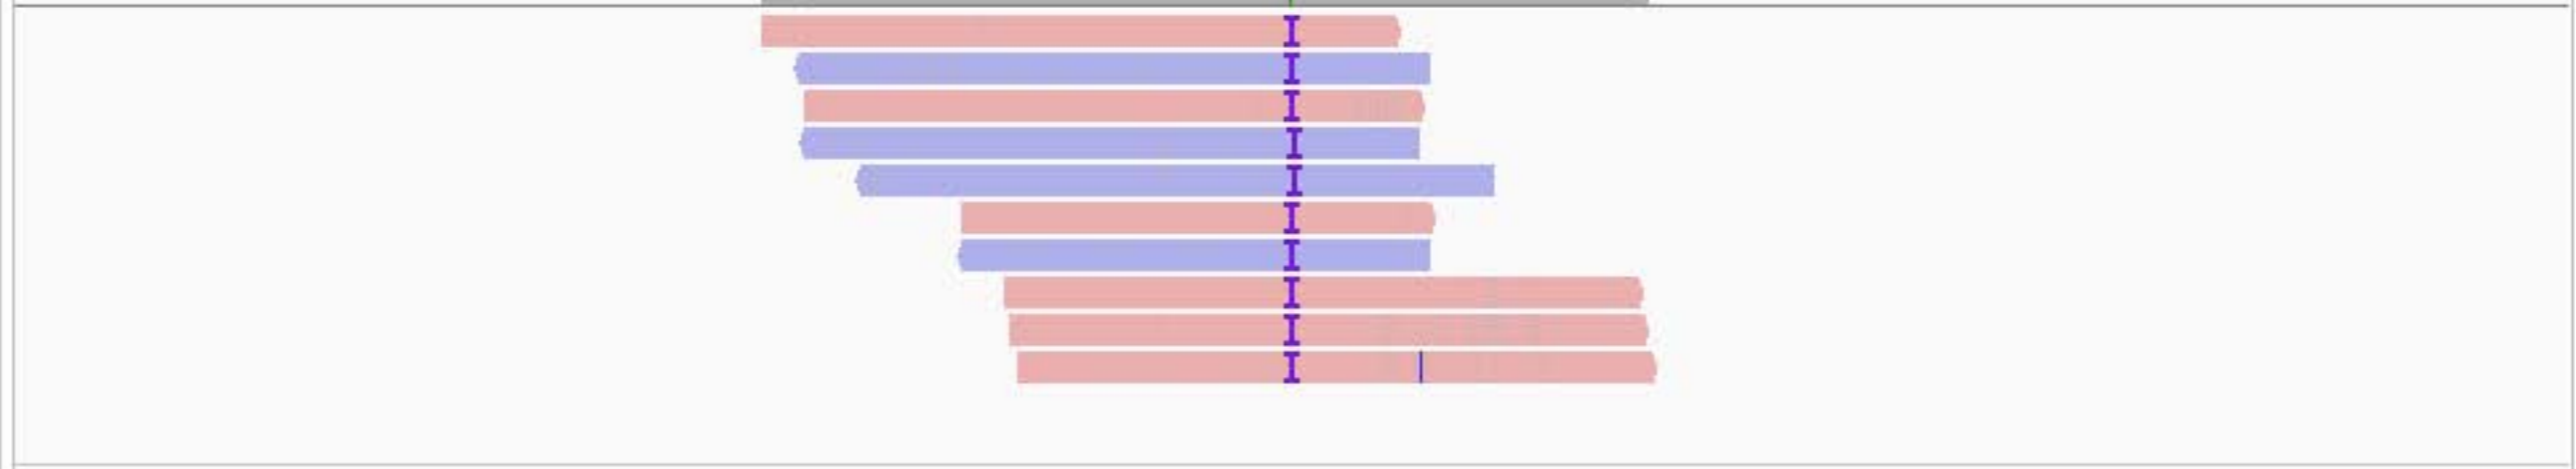

Sequence

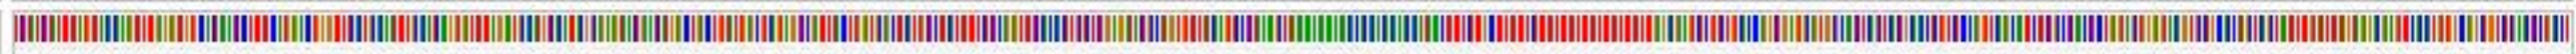

Refseq Genes

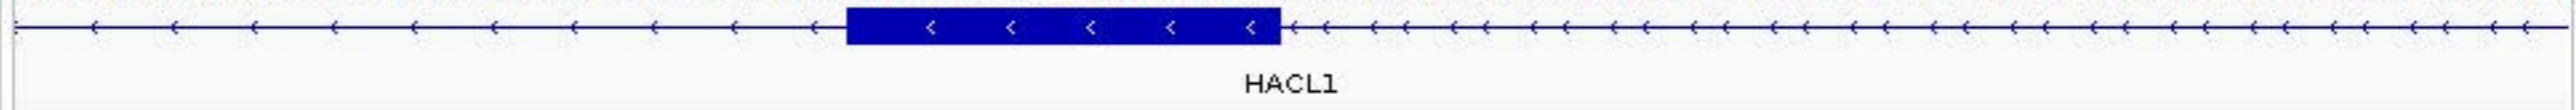

chr19:19,258,335-19,258,934

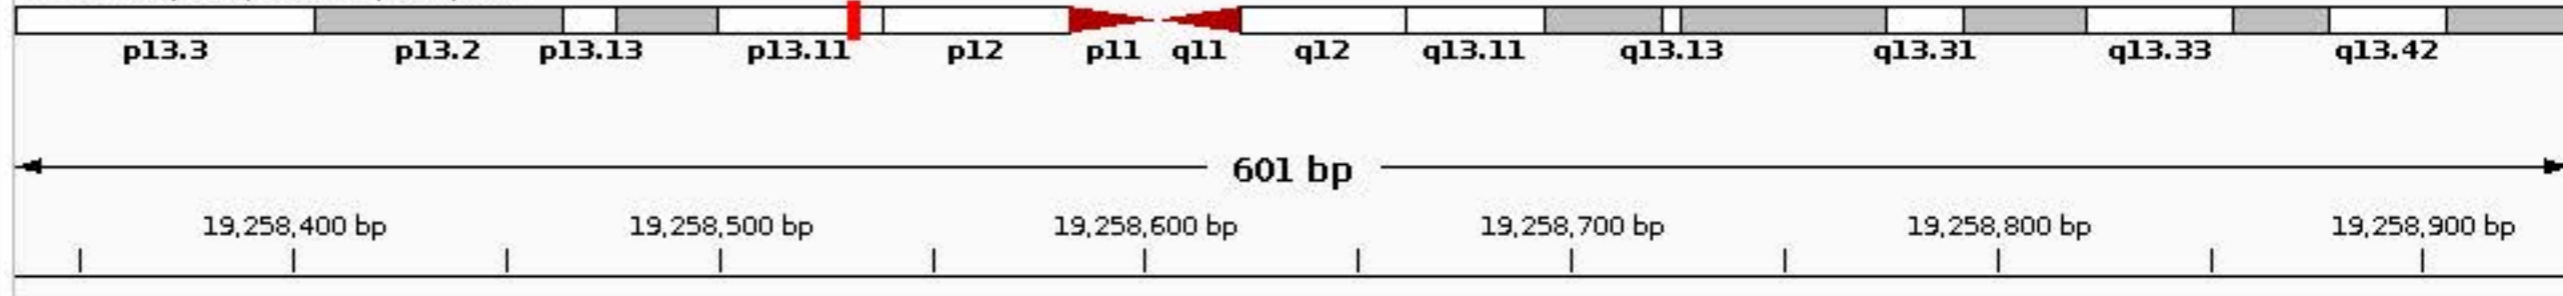

SL\_0015\_LN\_44\_mut.bam Coverage

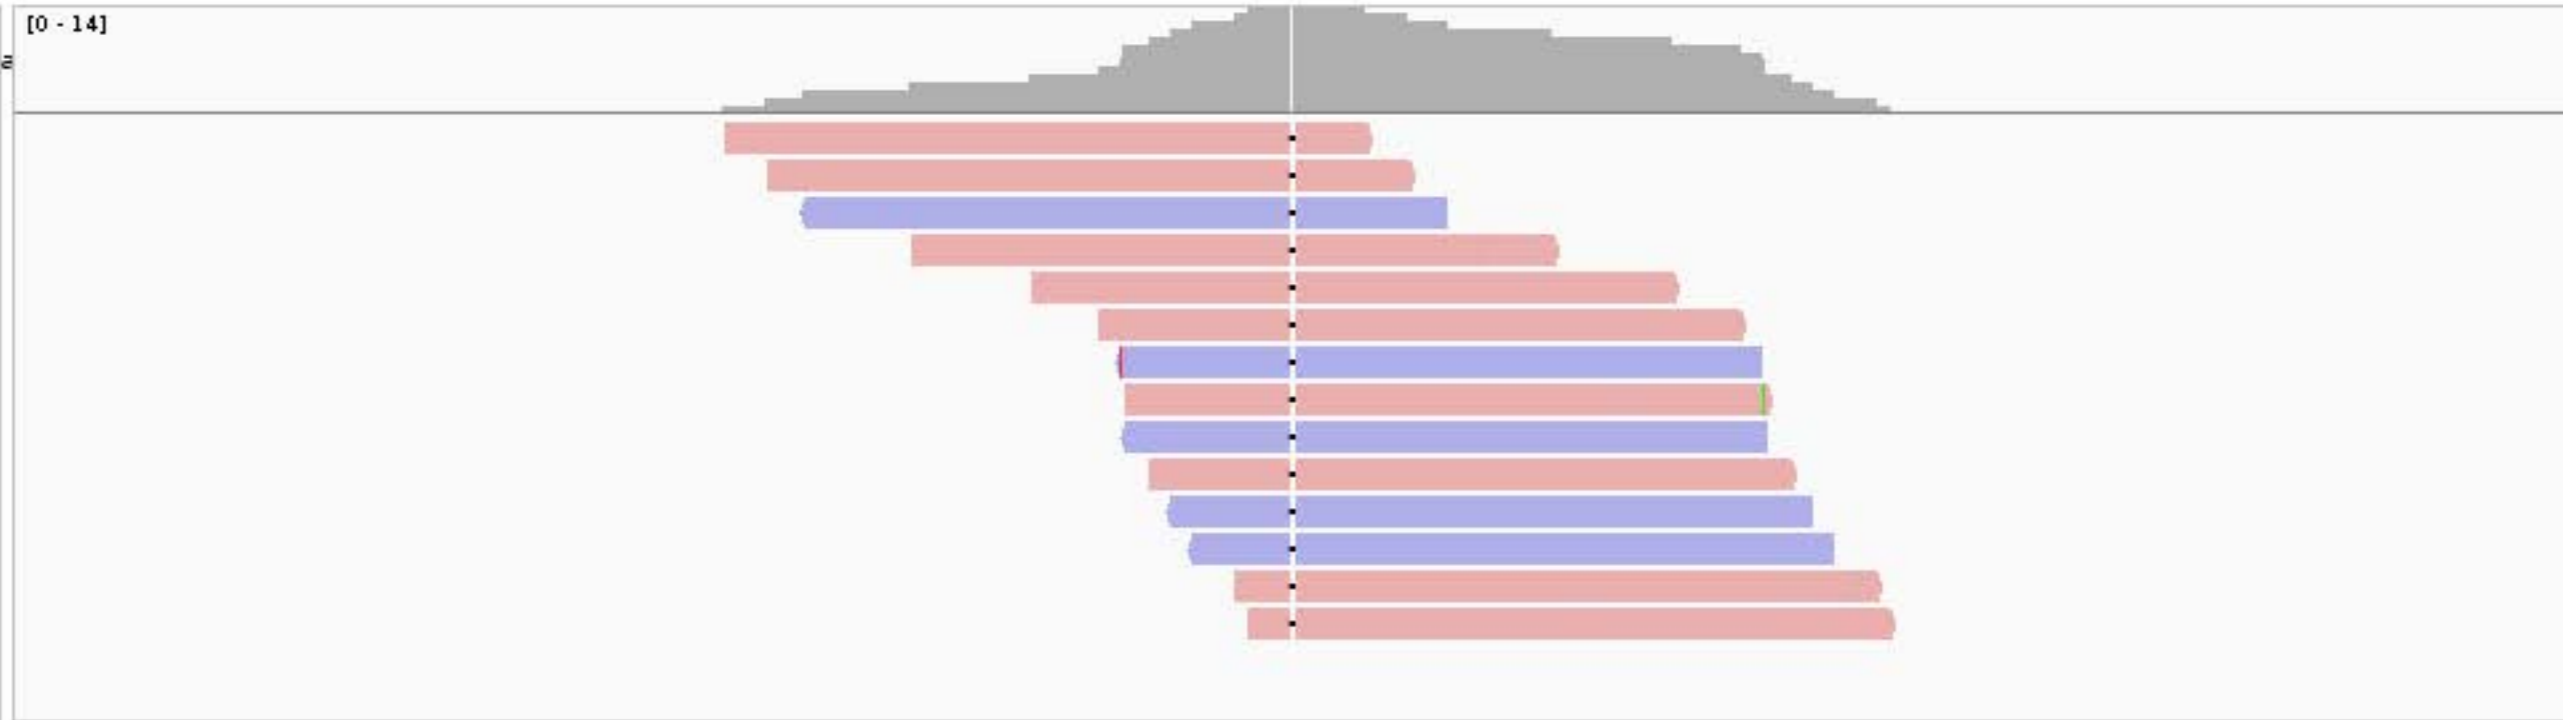

SL\_0015\_LN\_44\_mut.bam

Sequence

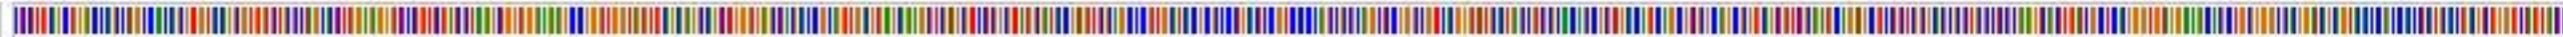

Refseq Genes

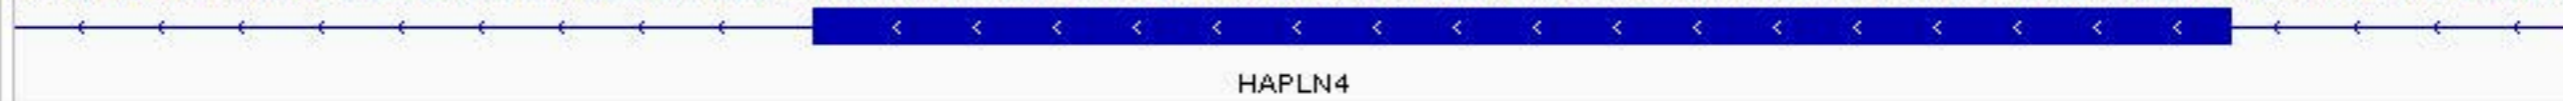

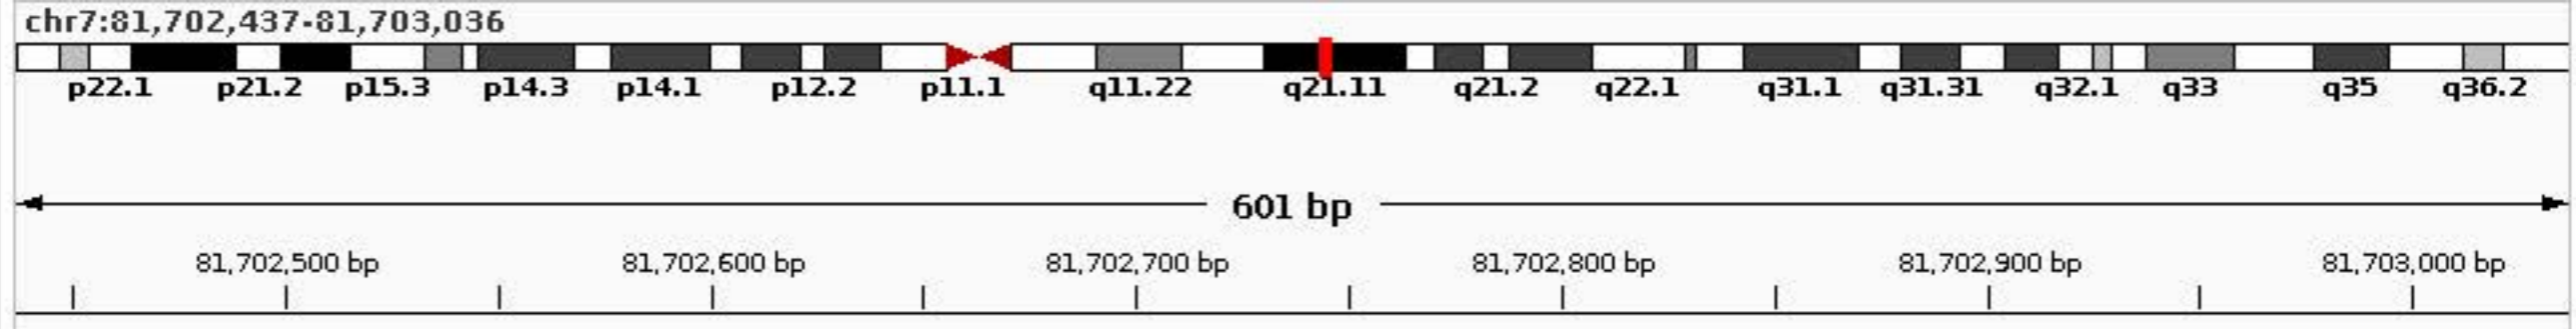

SL\_0015\_RN\_10\_mut.bam Coverage

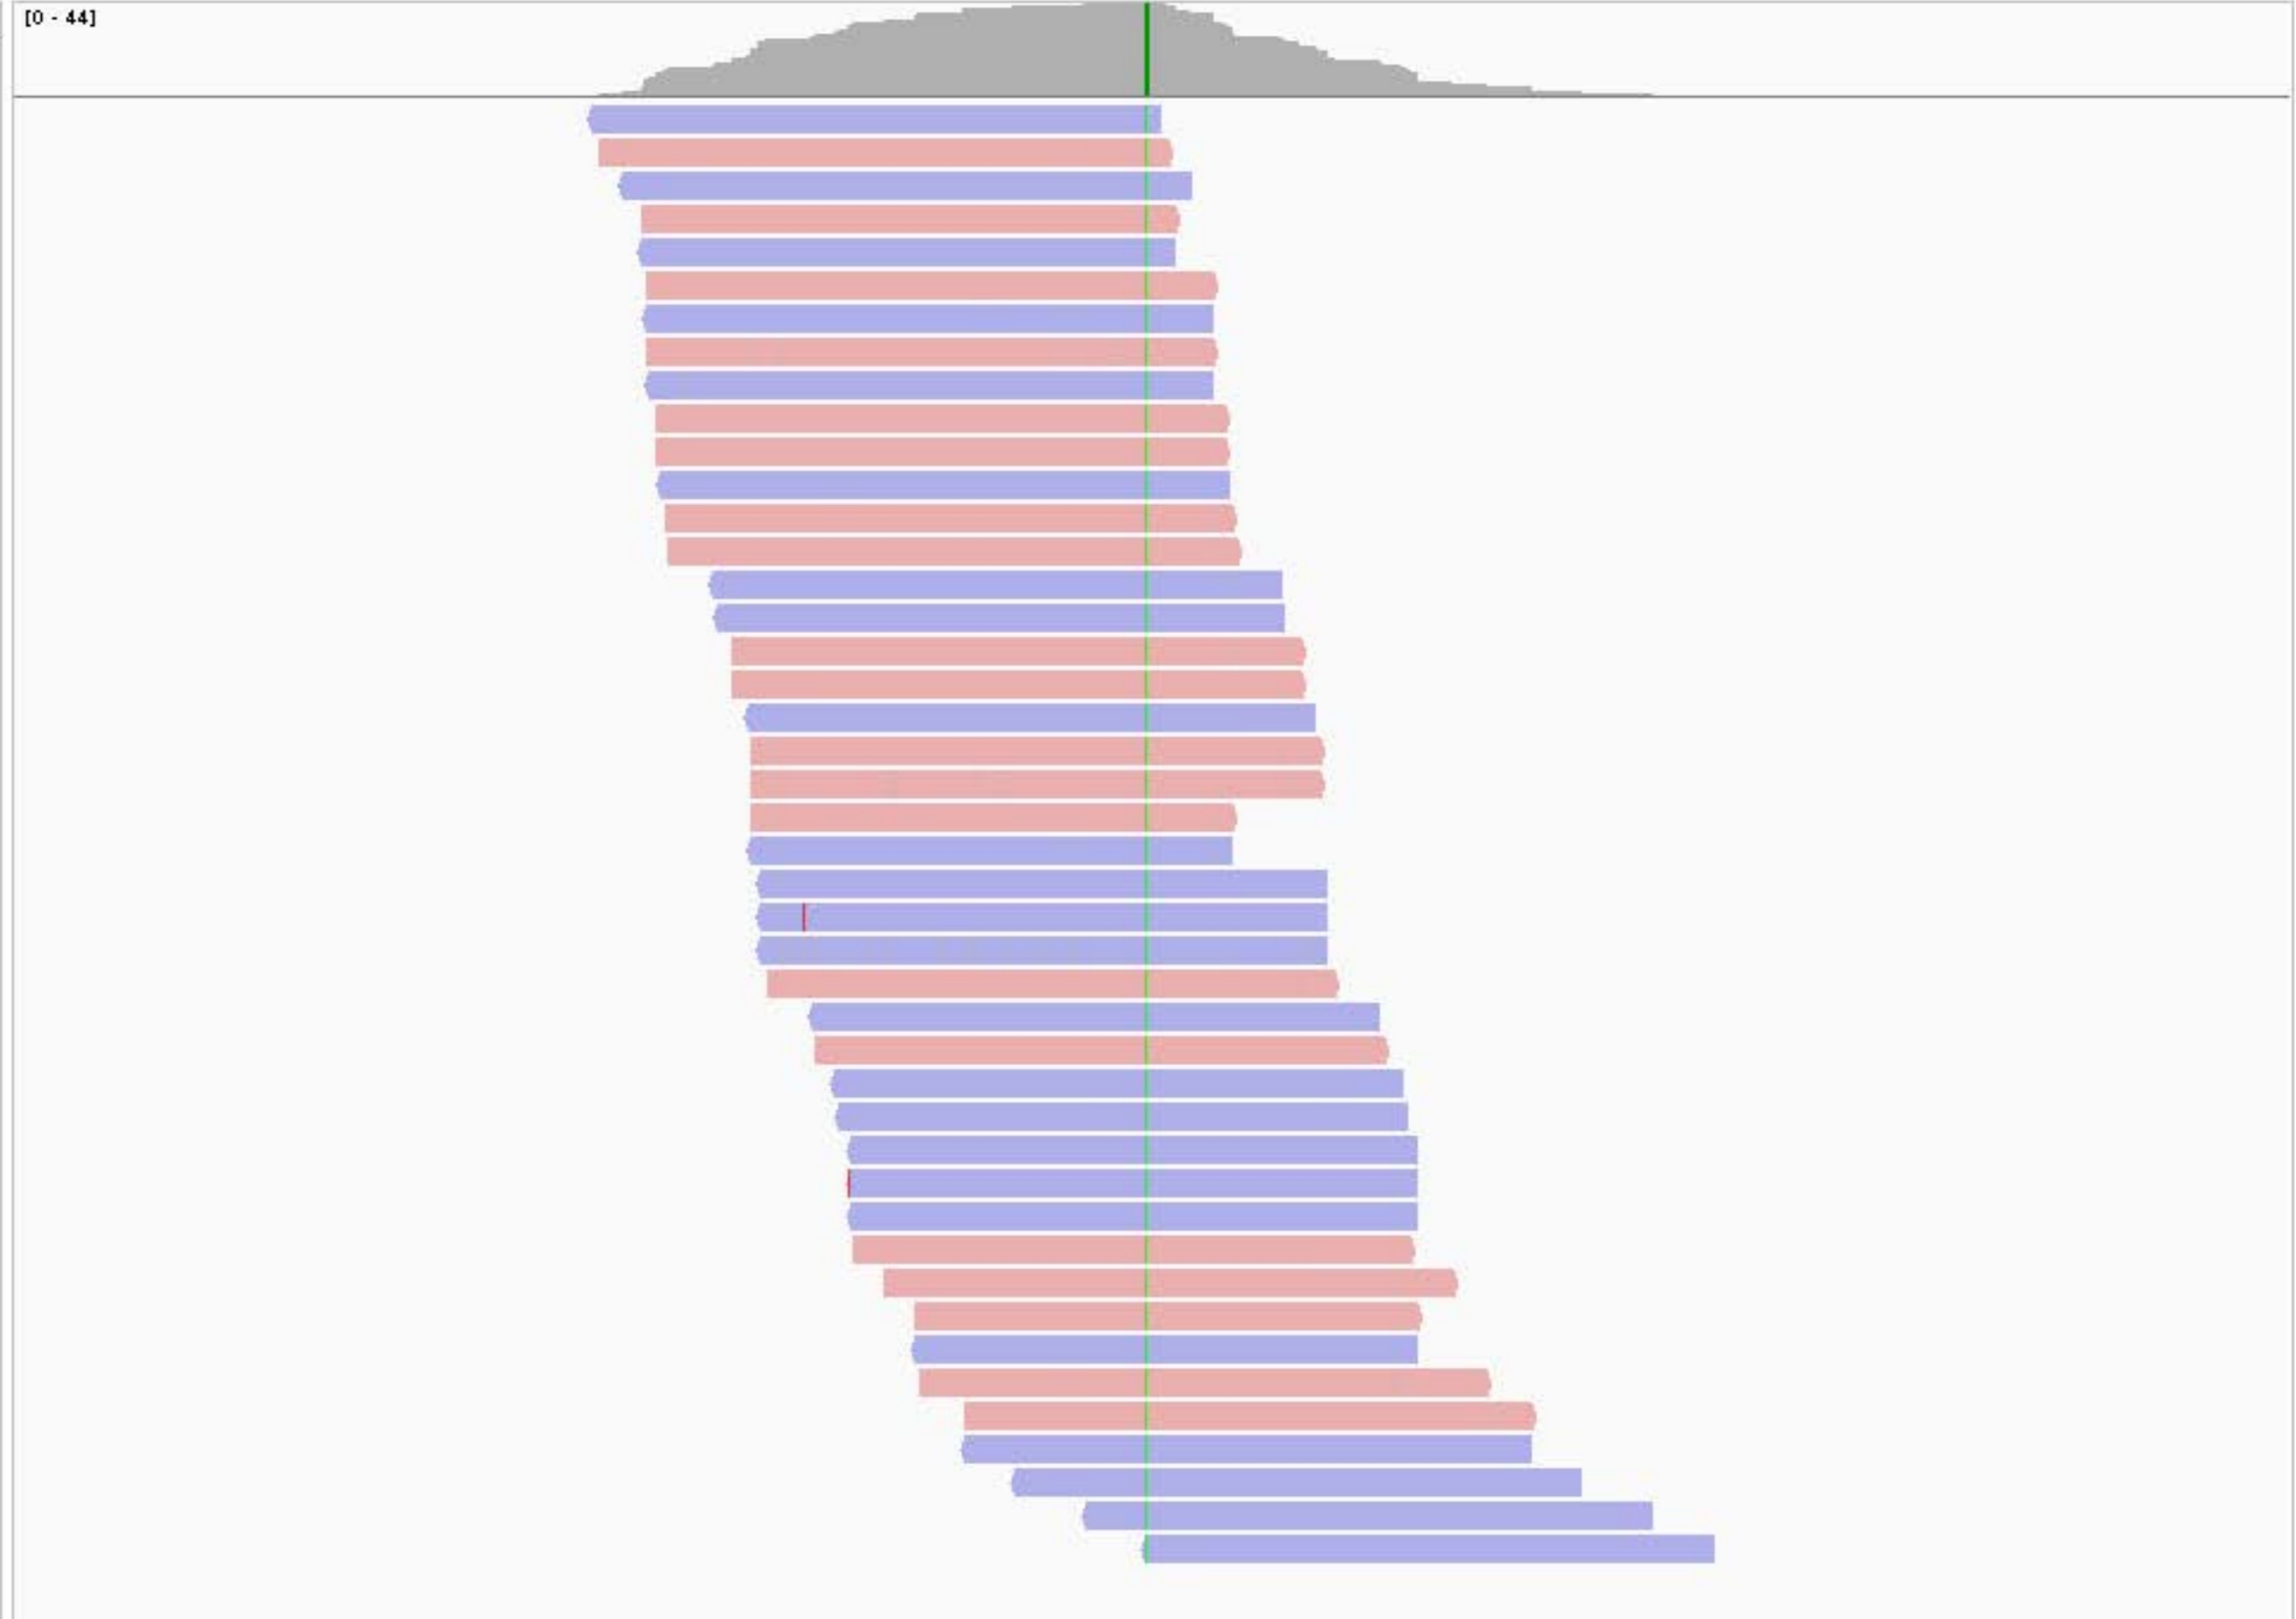

SL\_0015\_RN\_10\_mut.bam

Sequence →

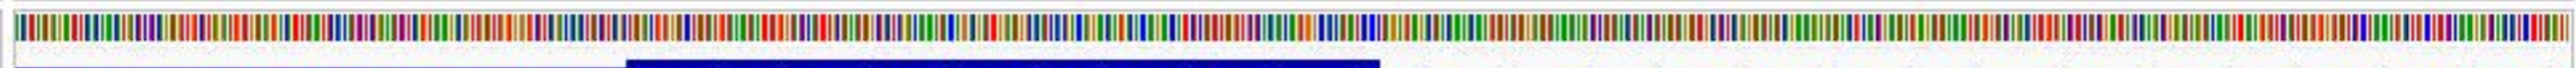

Refseq Genes

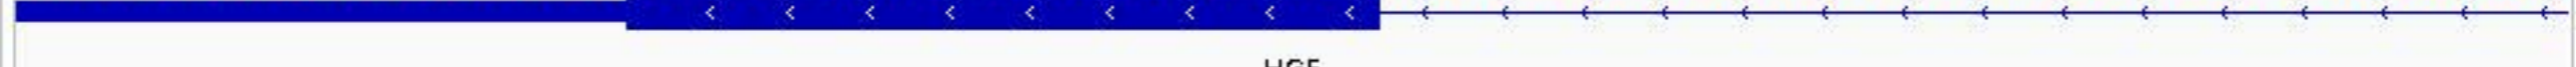

HGF

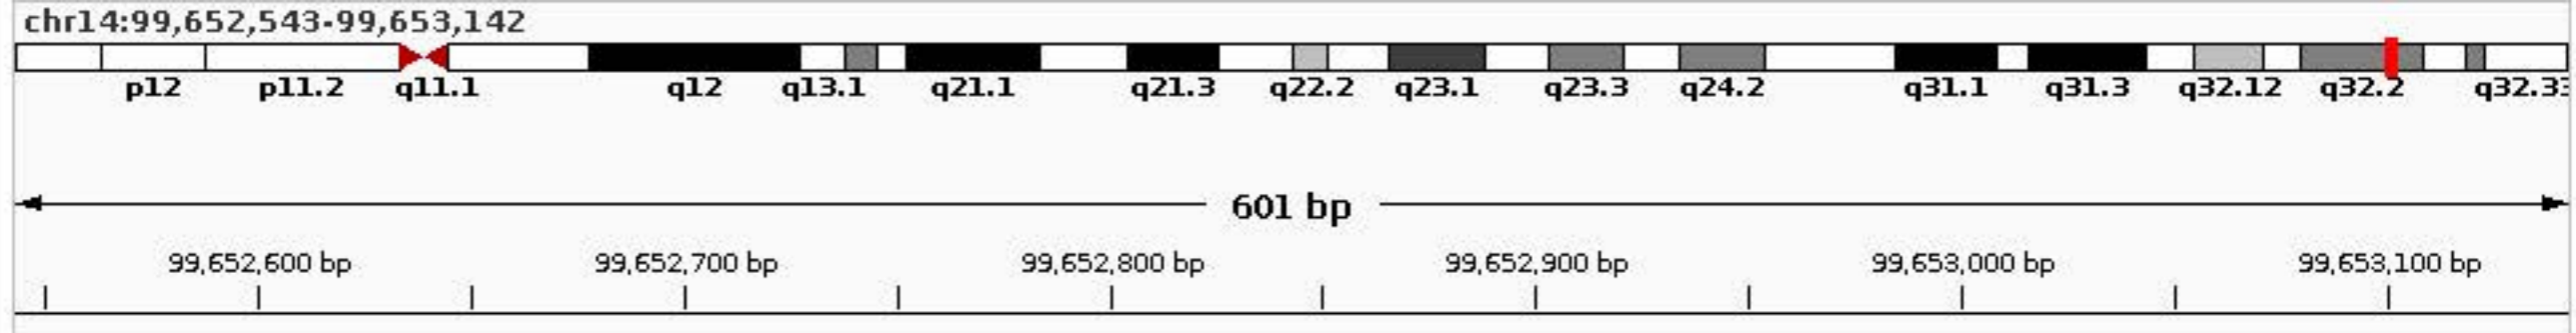

SL\_0004\_RN\_05\_mut.bam Coverage

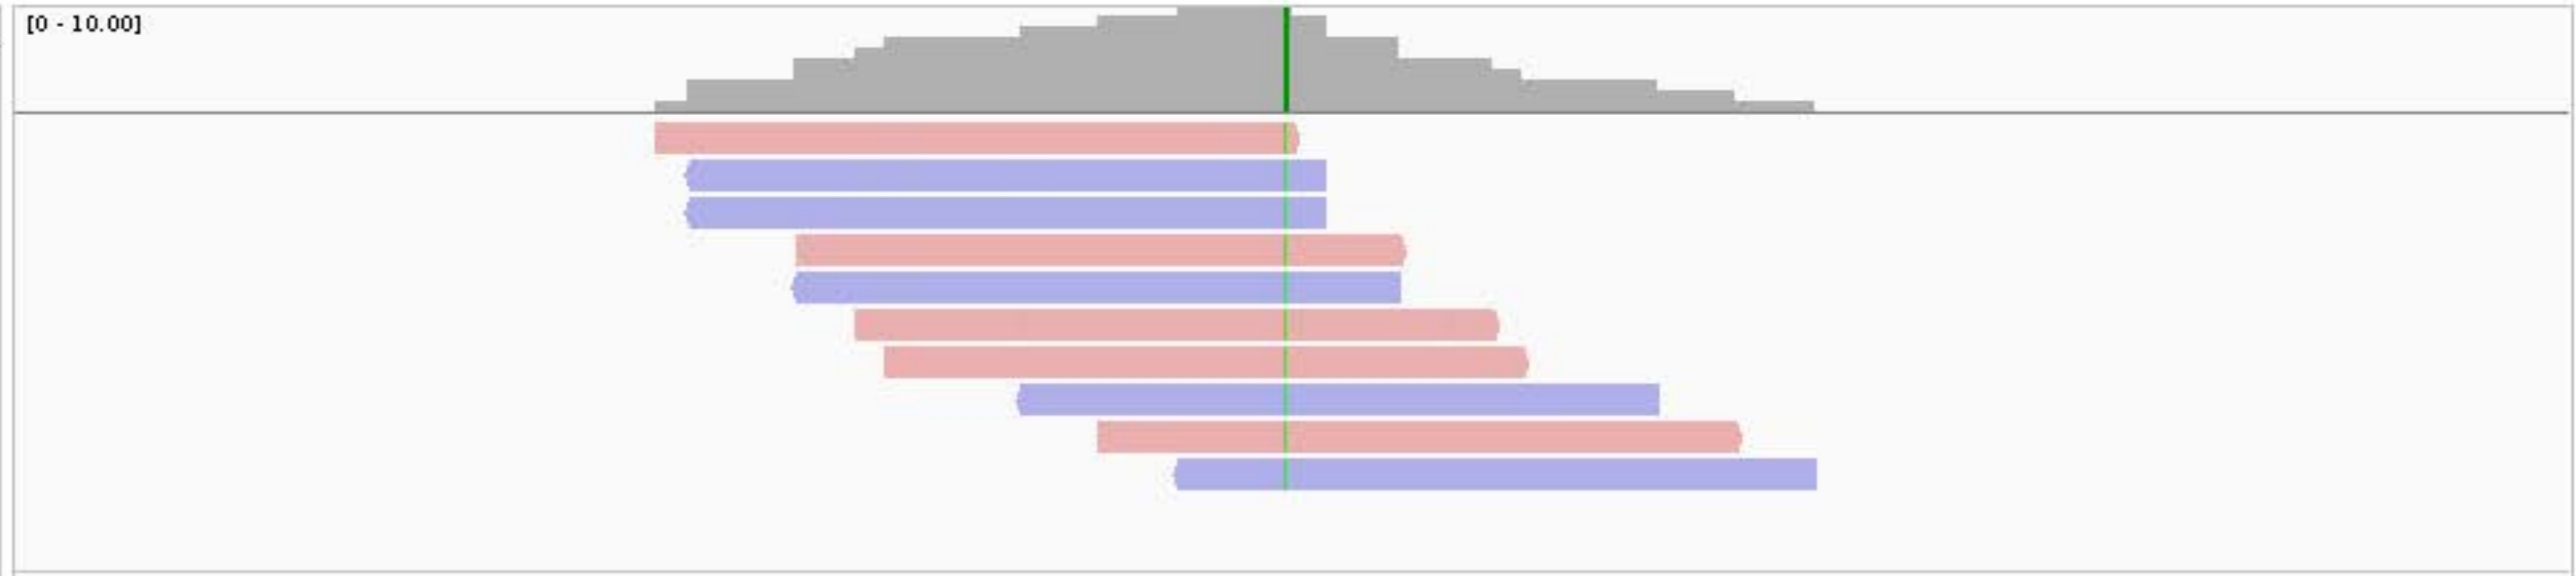

Sequence

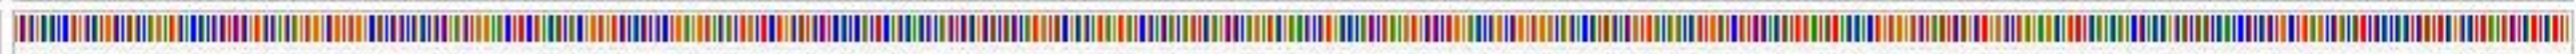

Refseq Genes

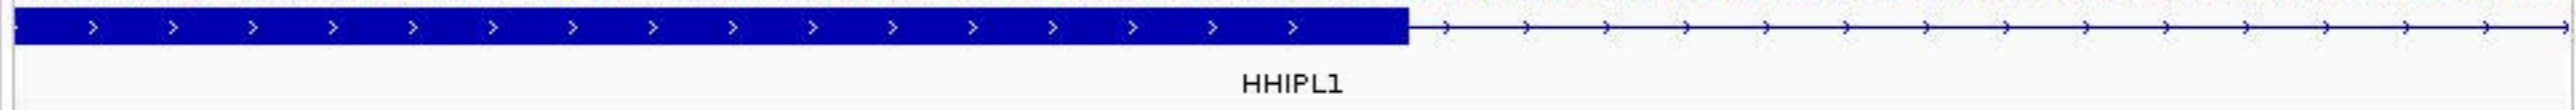



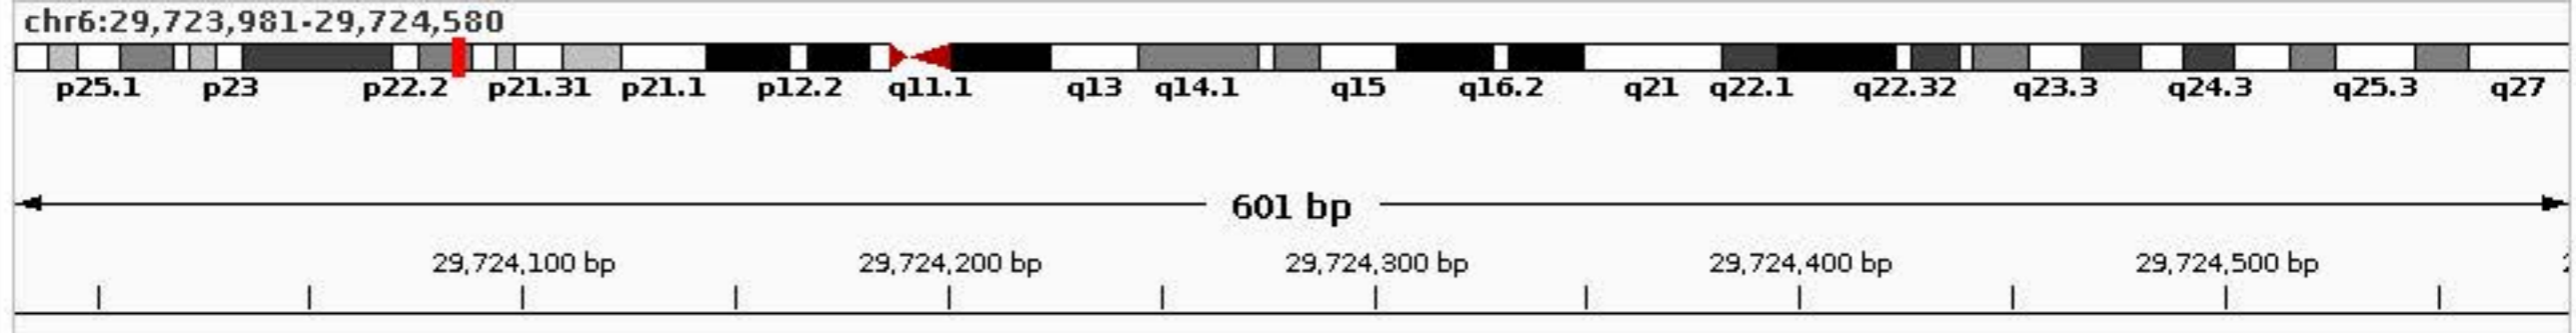

SL\_0016\_RN\_51\_mut.bam Coverage

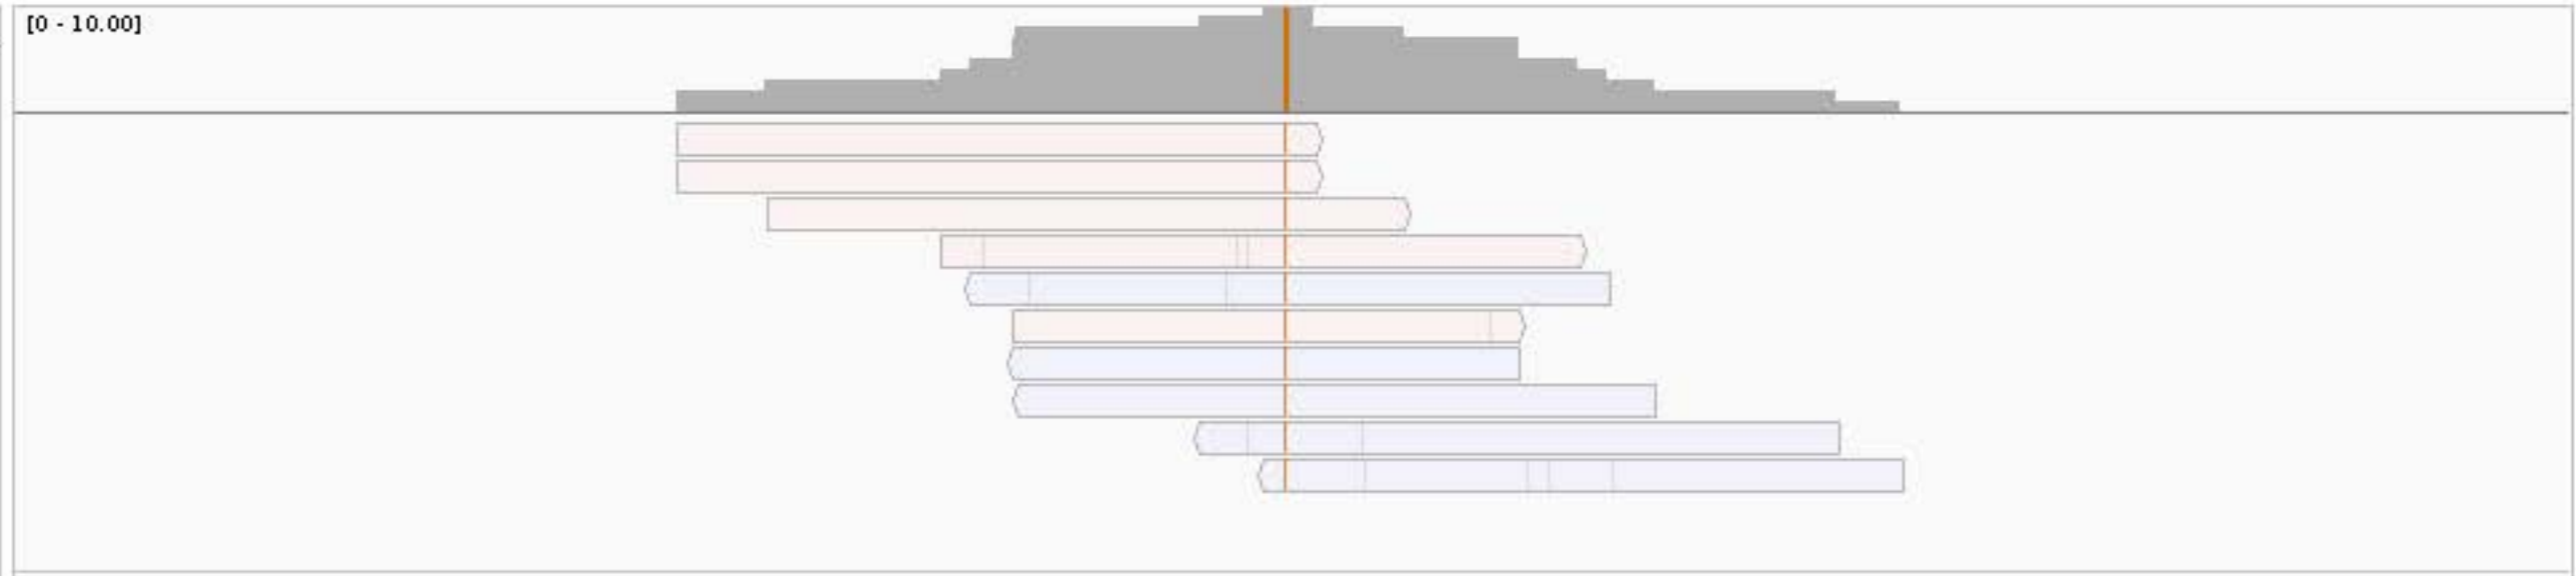

SL\_0016\_RN\_51\_mut.bam

Sequence

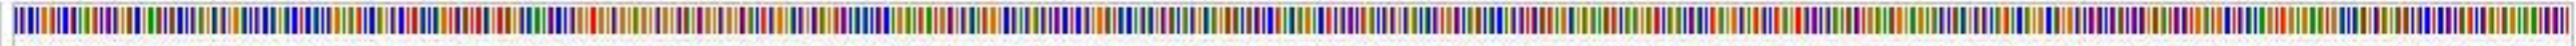

Refseq Genes

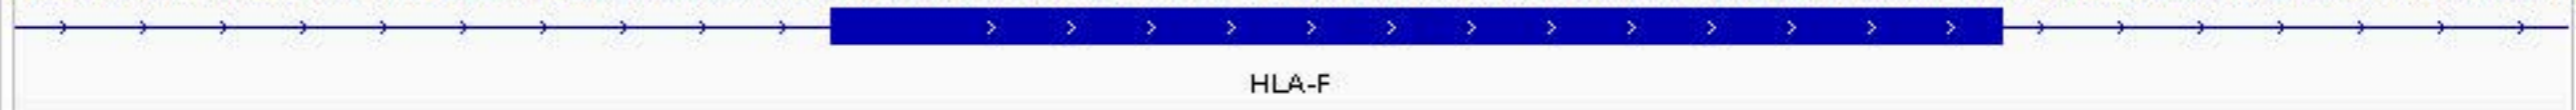

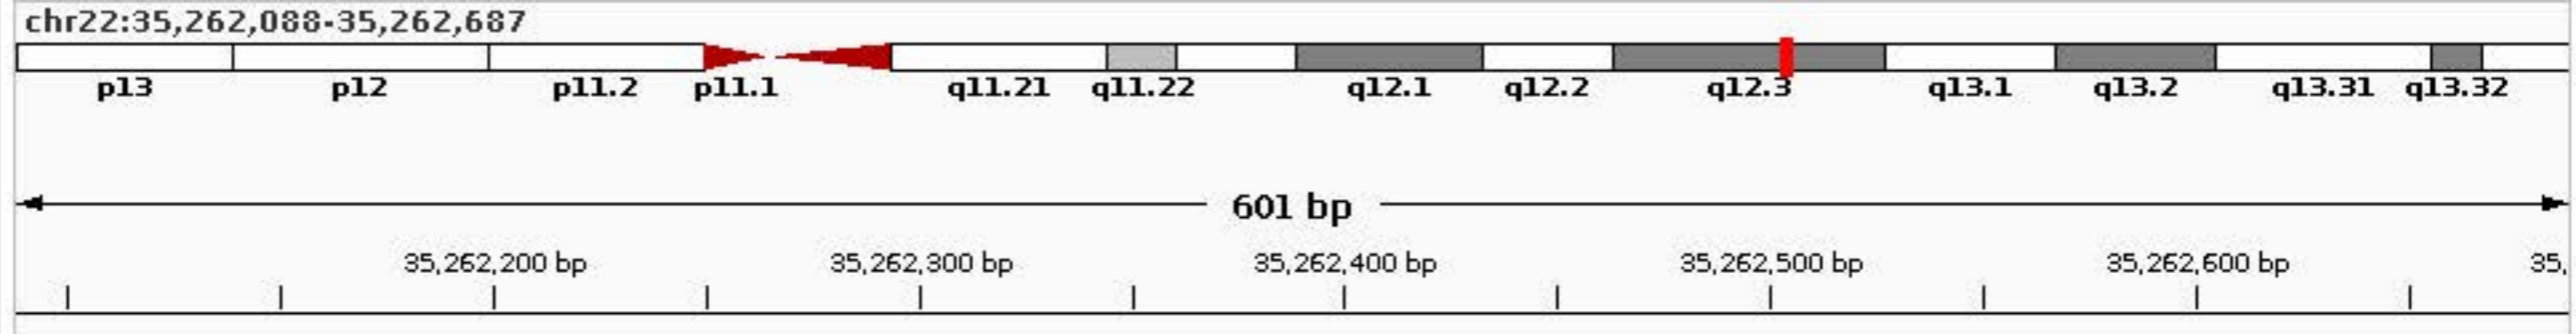

SL\_0015\_RN\_21\_mut.bam Coverage

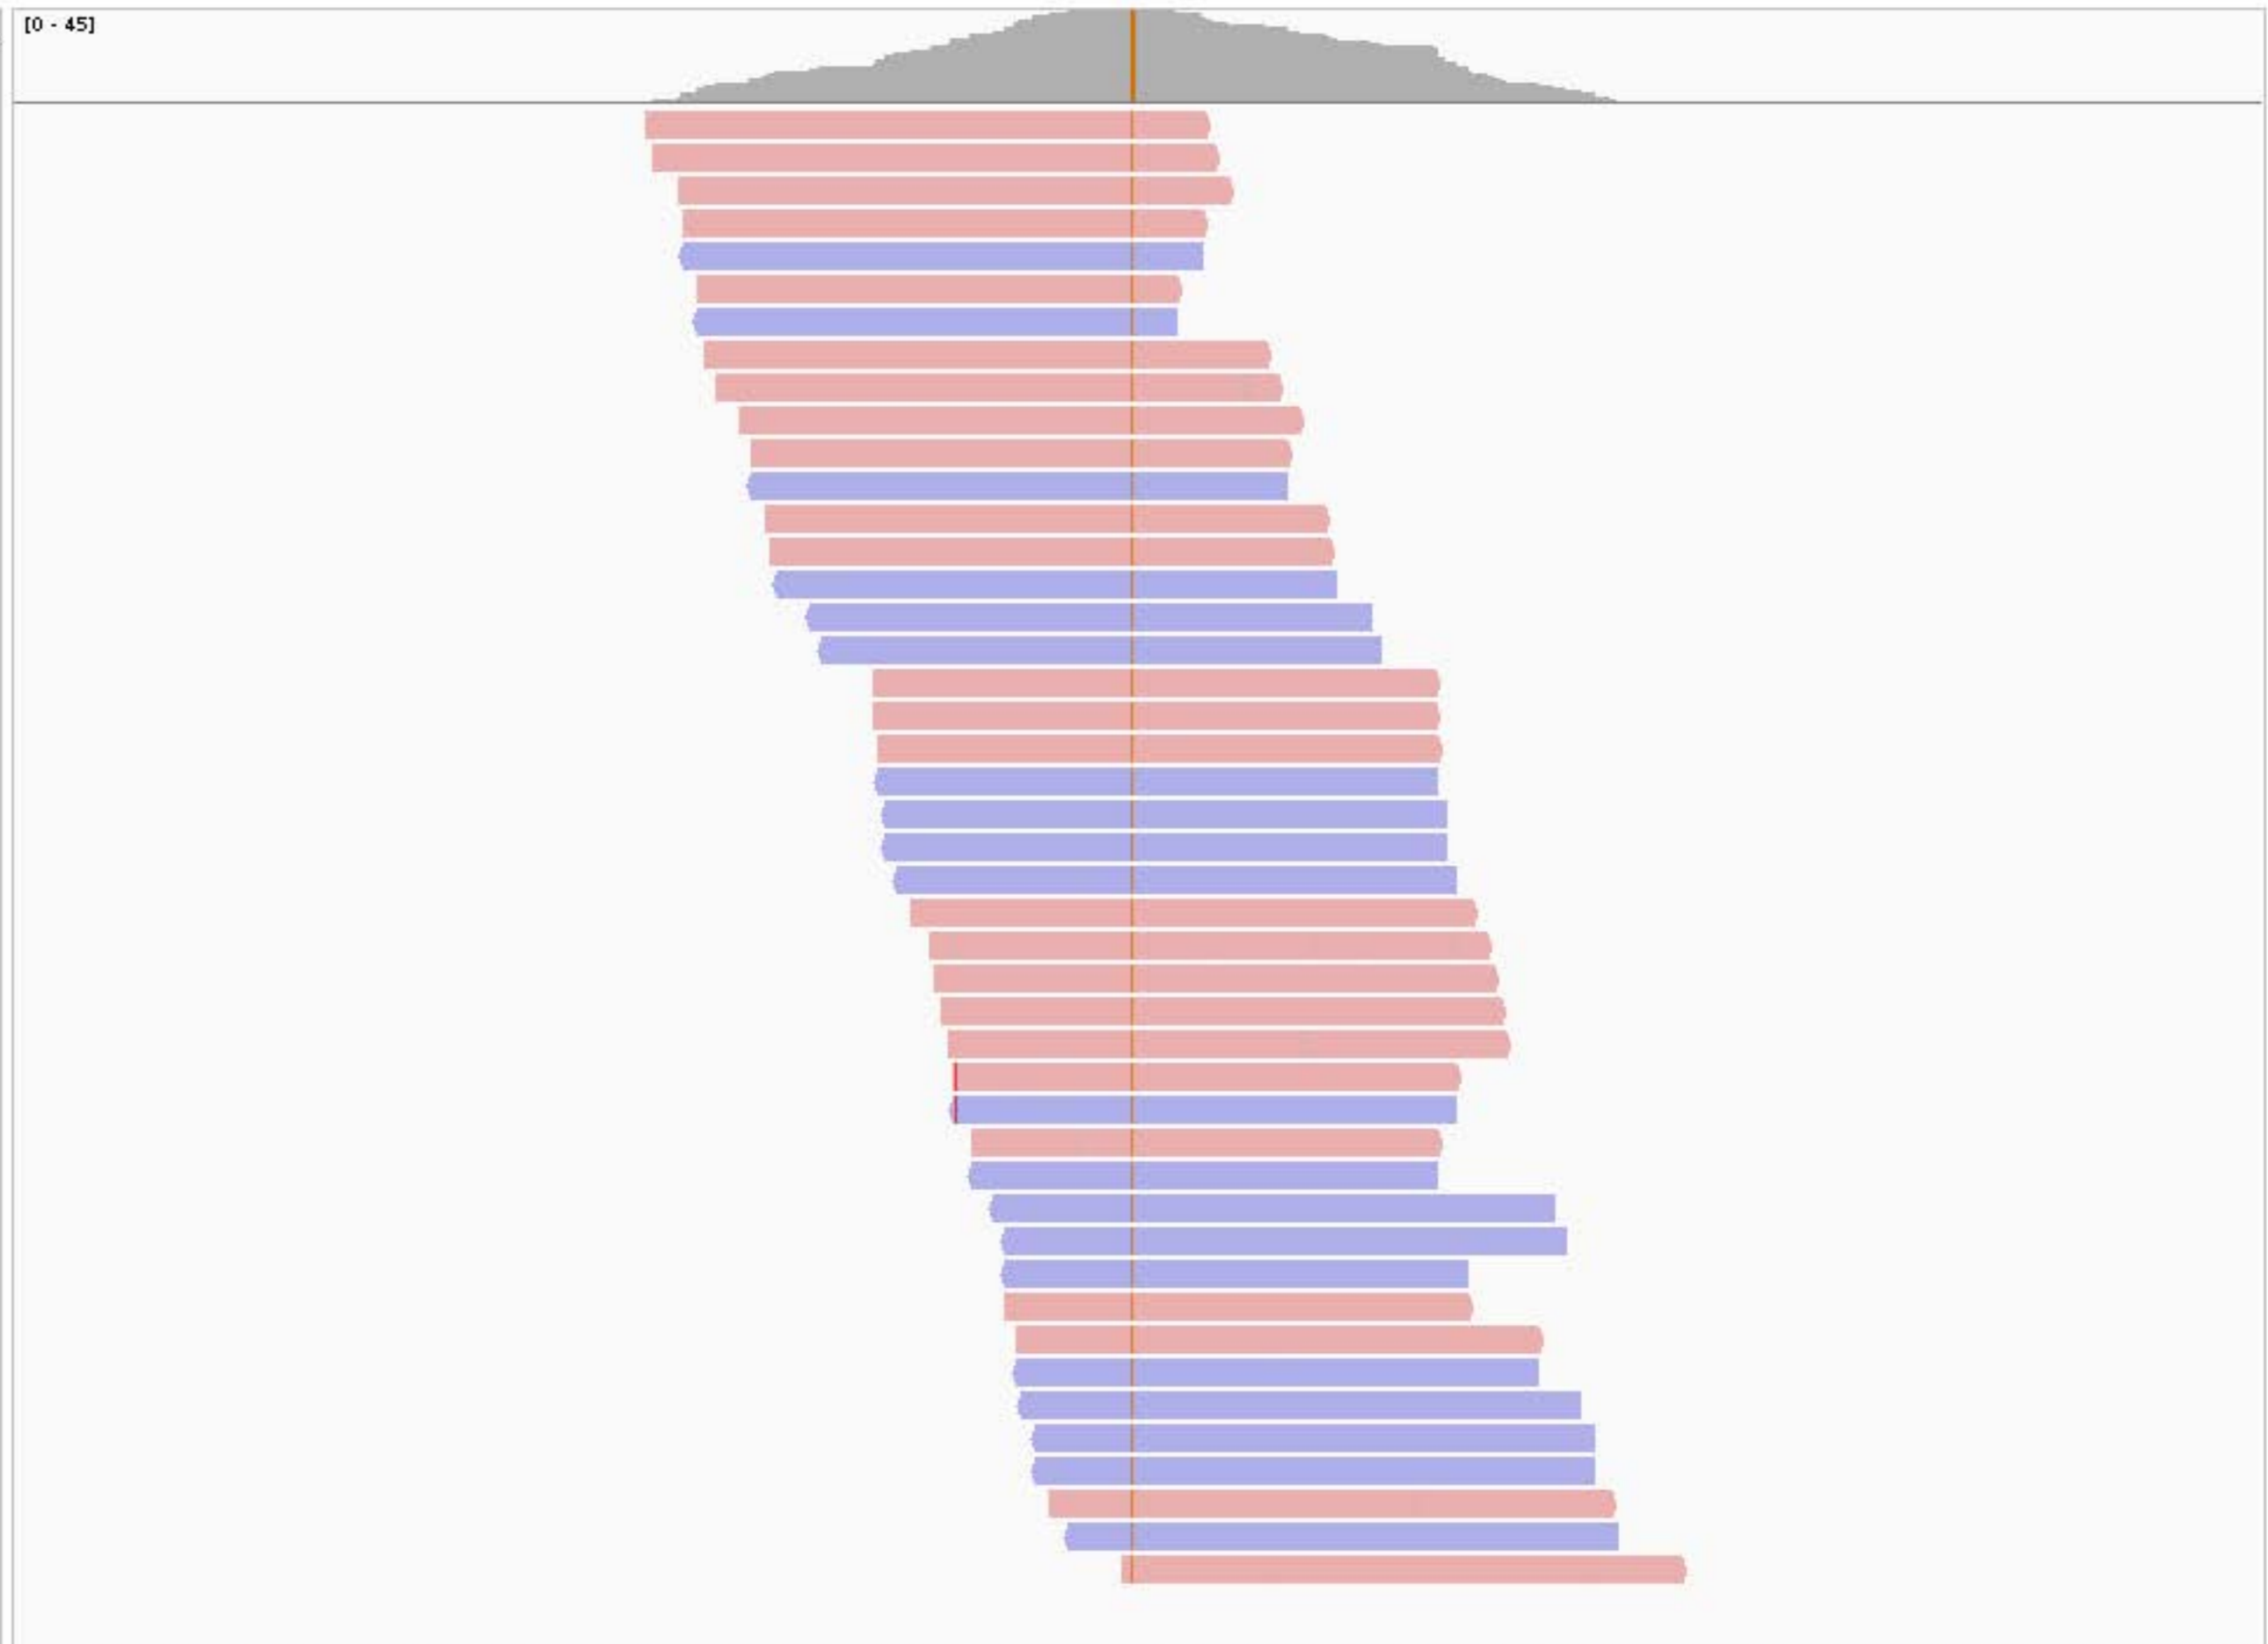

SL\_0015\_RN\_21\_mut.bam

Sequence

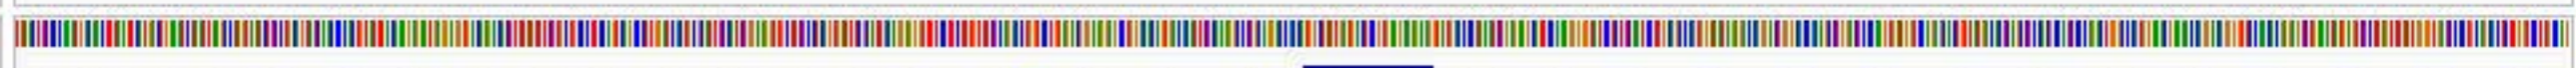

Refseq Genes

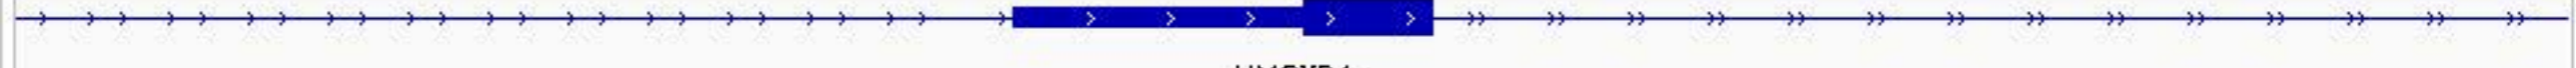

HMGXB4

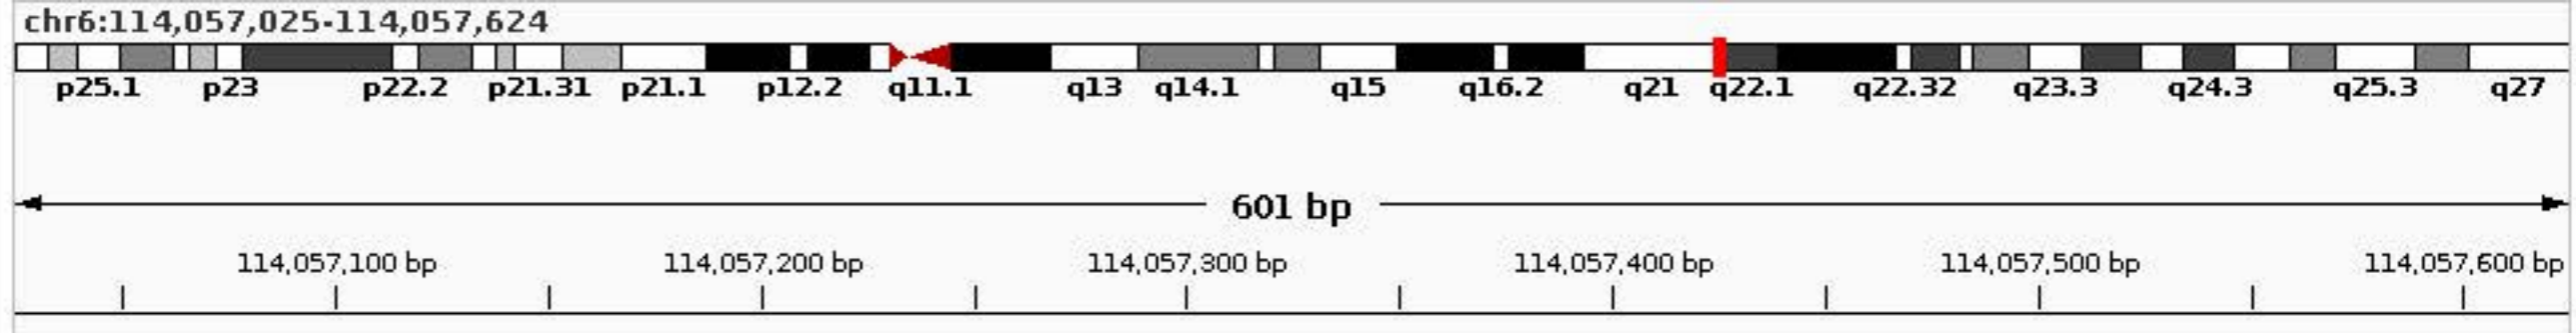

SL\_0004\_RN\_47\_mut.bam Coverage

SL\_0004\_RN\_47\_mut.bam

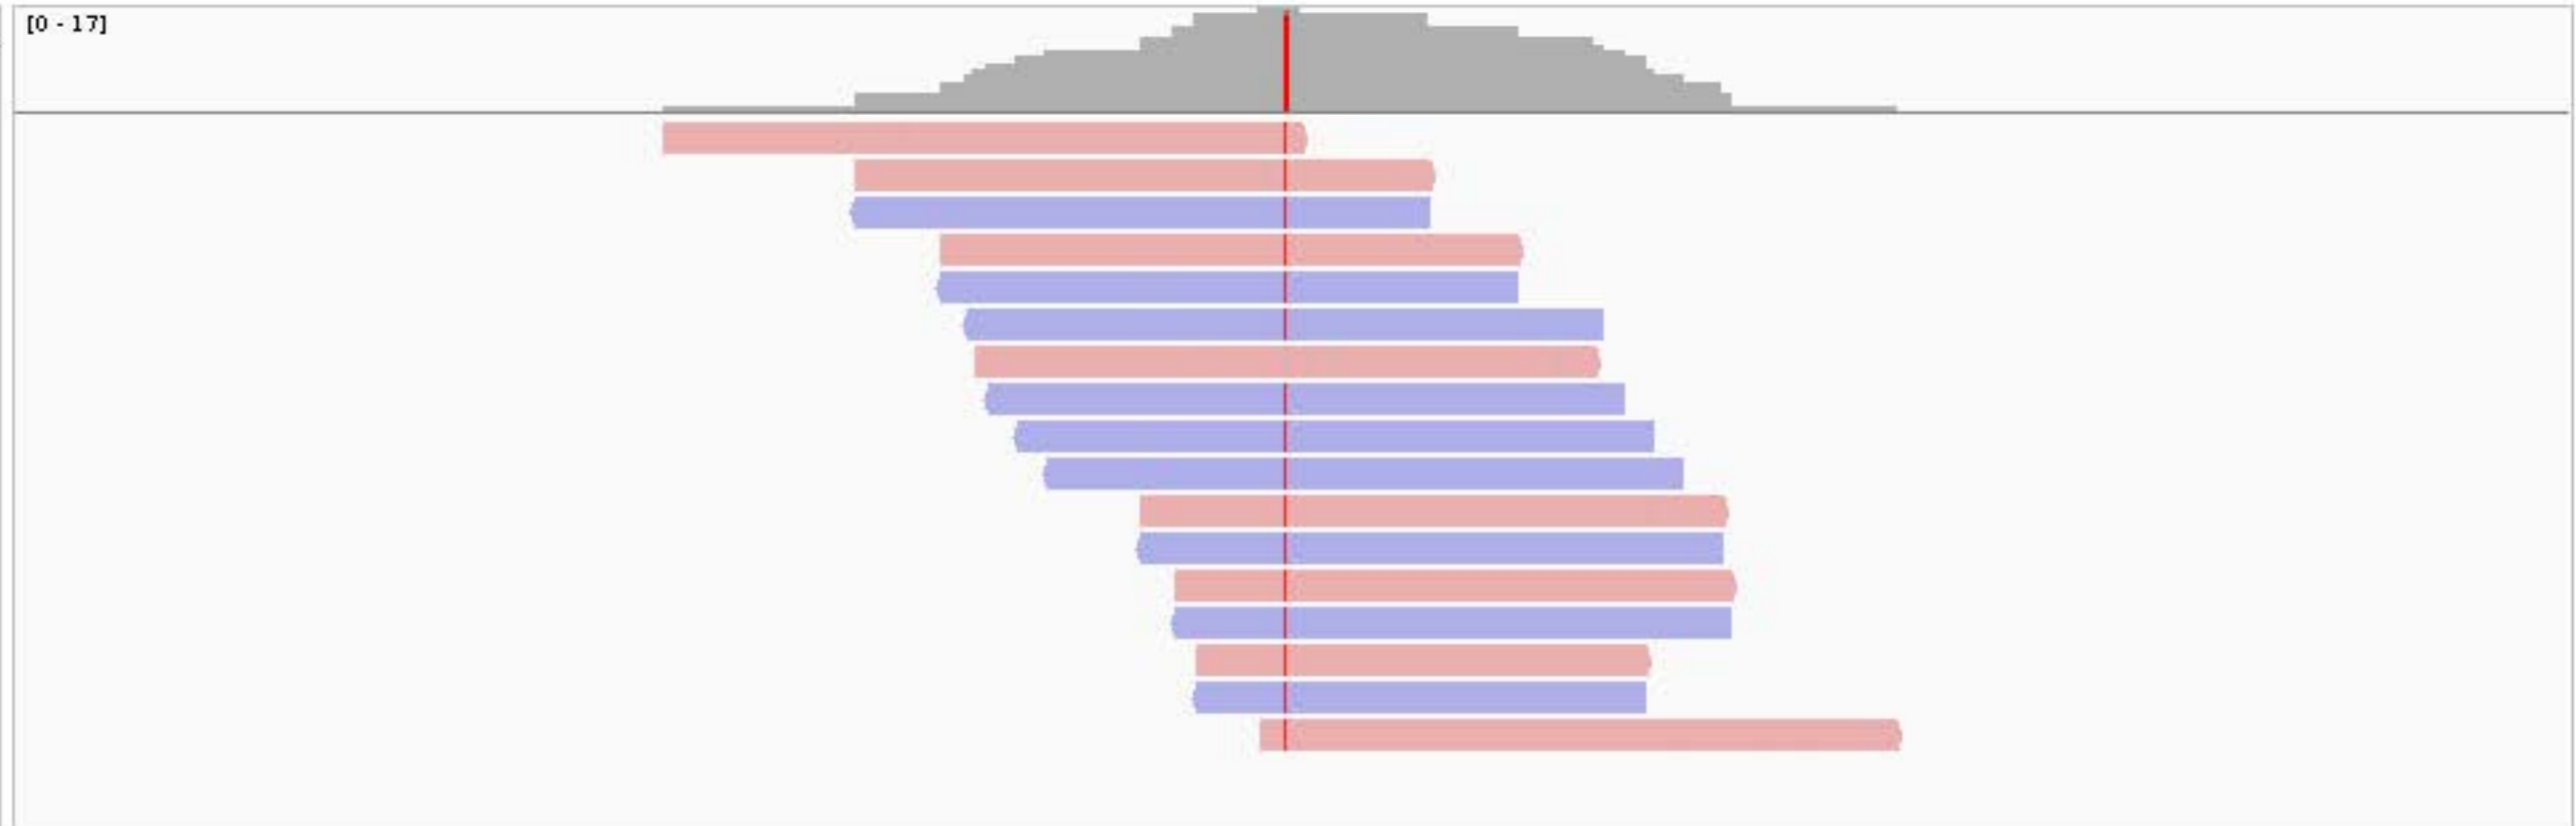

Sequence

Refseq Genes

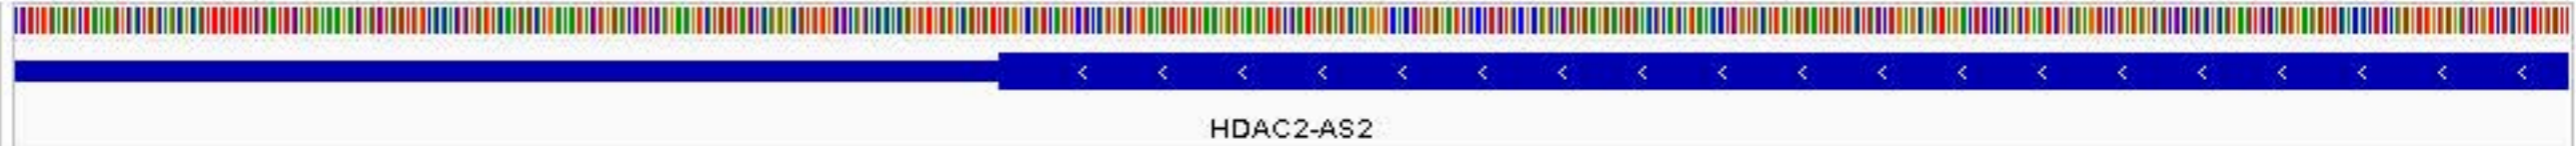

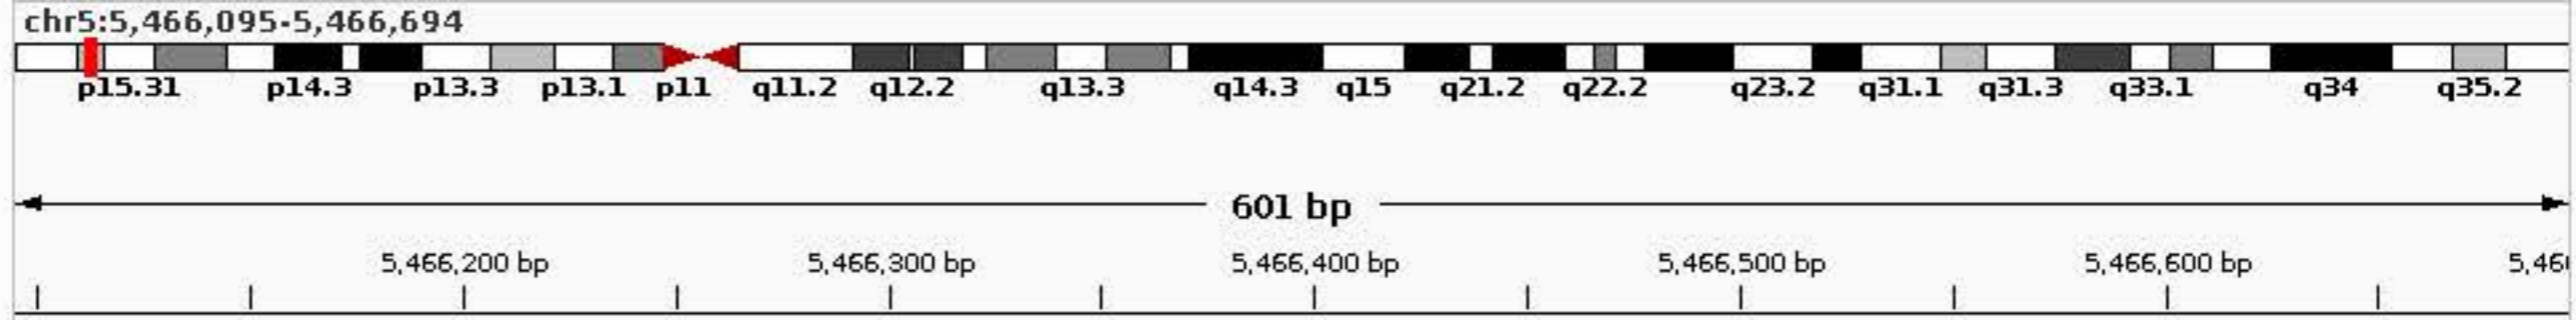

SL\_0007\_RN\_2\_mut.bam Coverage

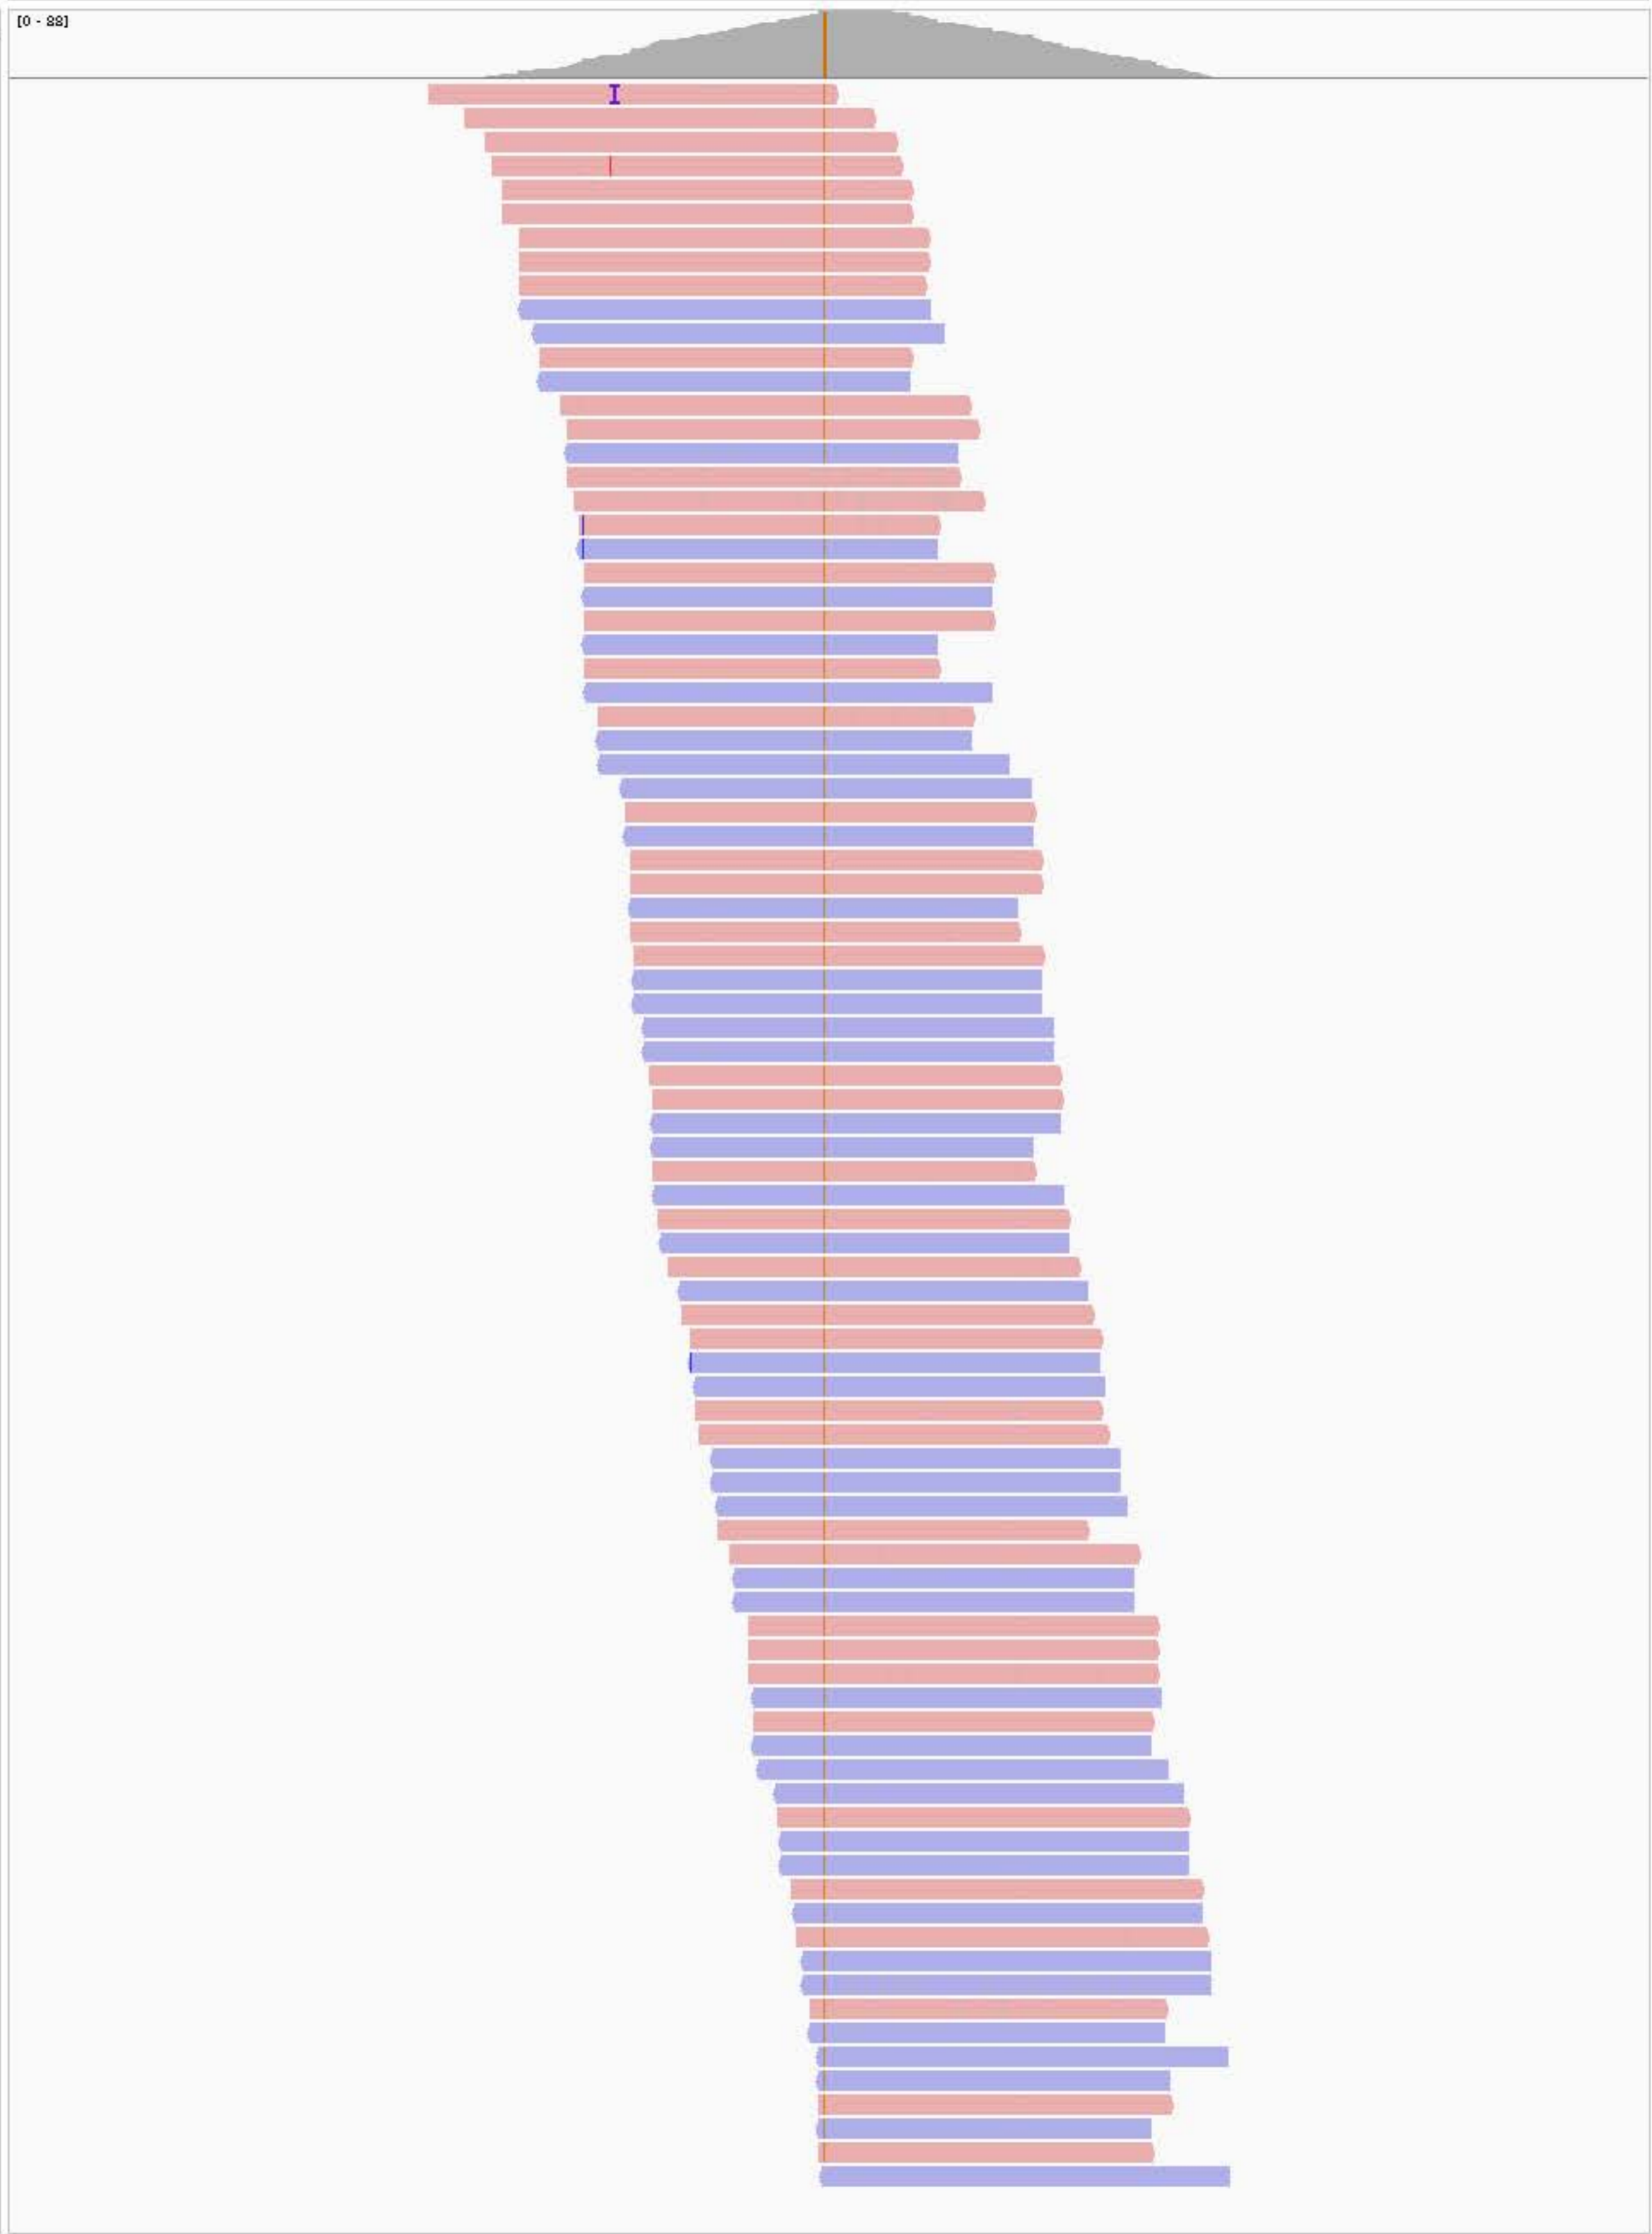

SL\_0007\_RN\_2\_mut.bam

Sequence

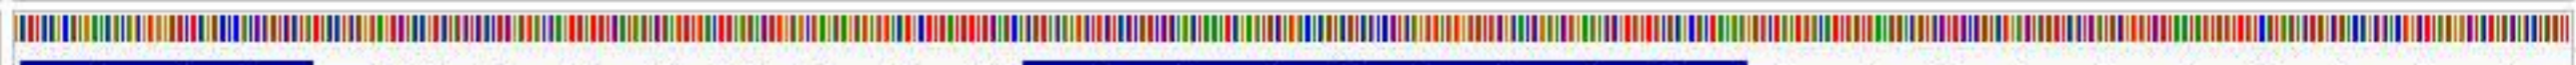

Refseq Genes

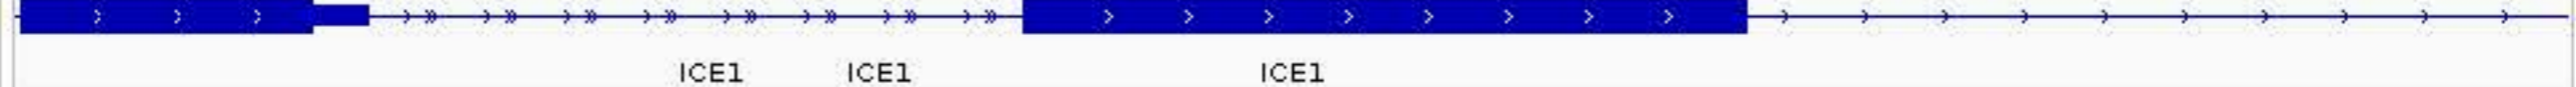



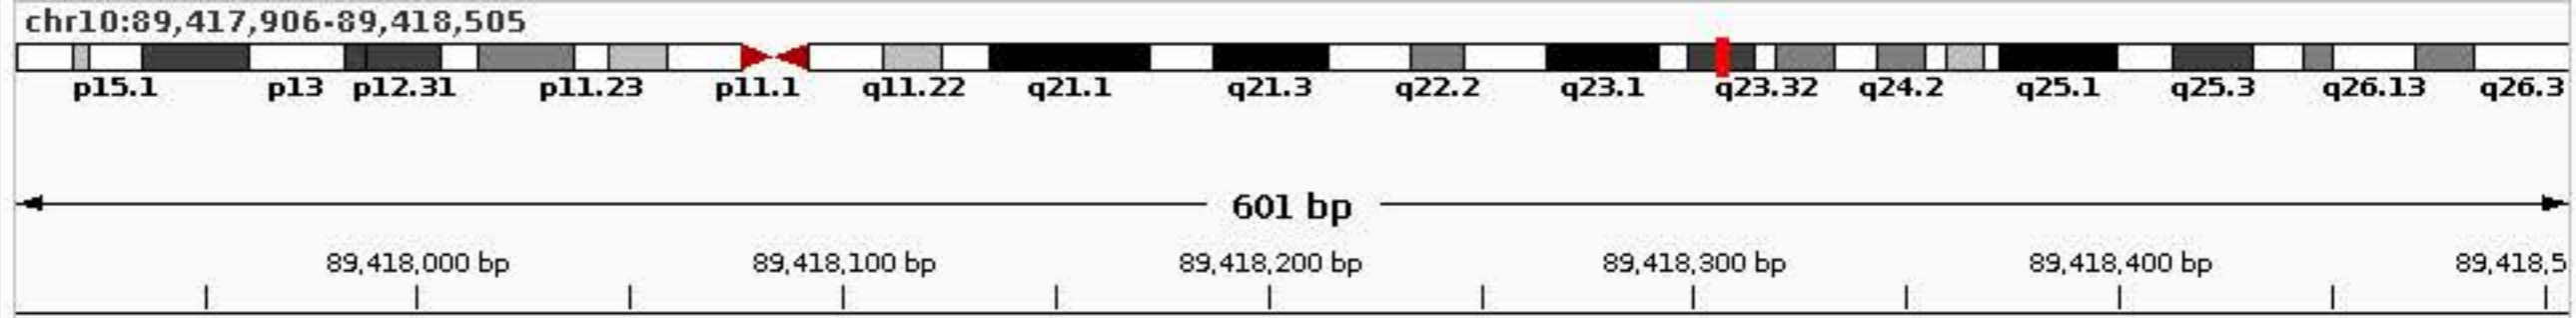

SL\_0007\_RN\_2\_mut.bam Coverage

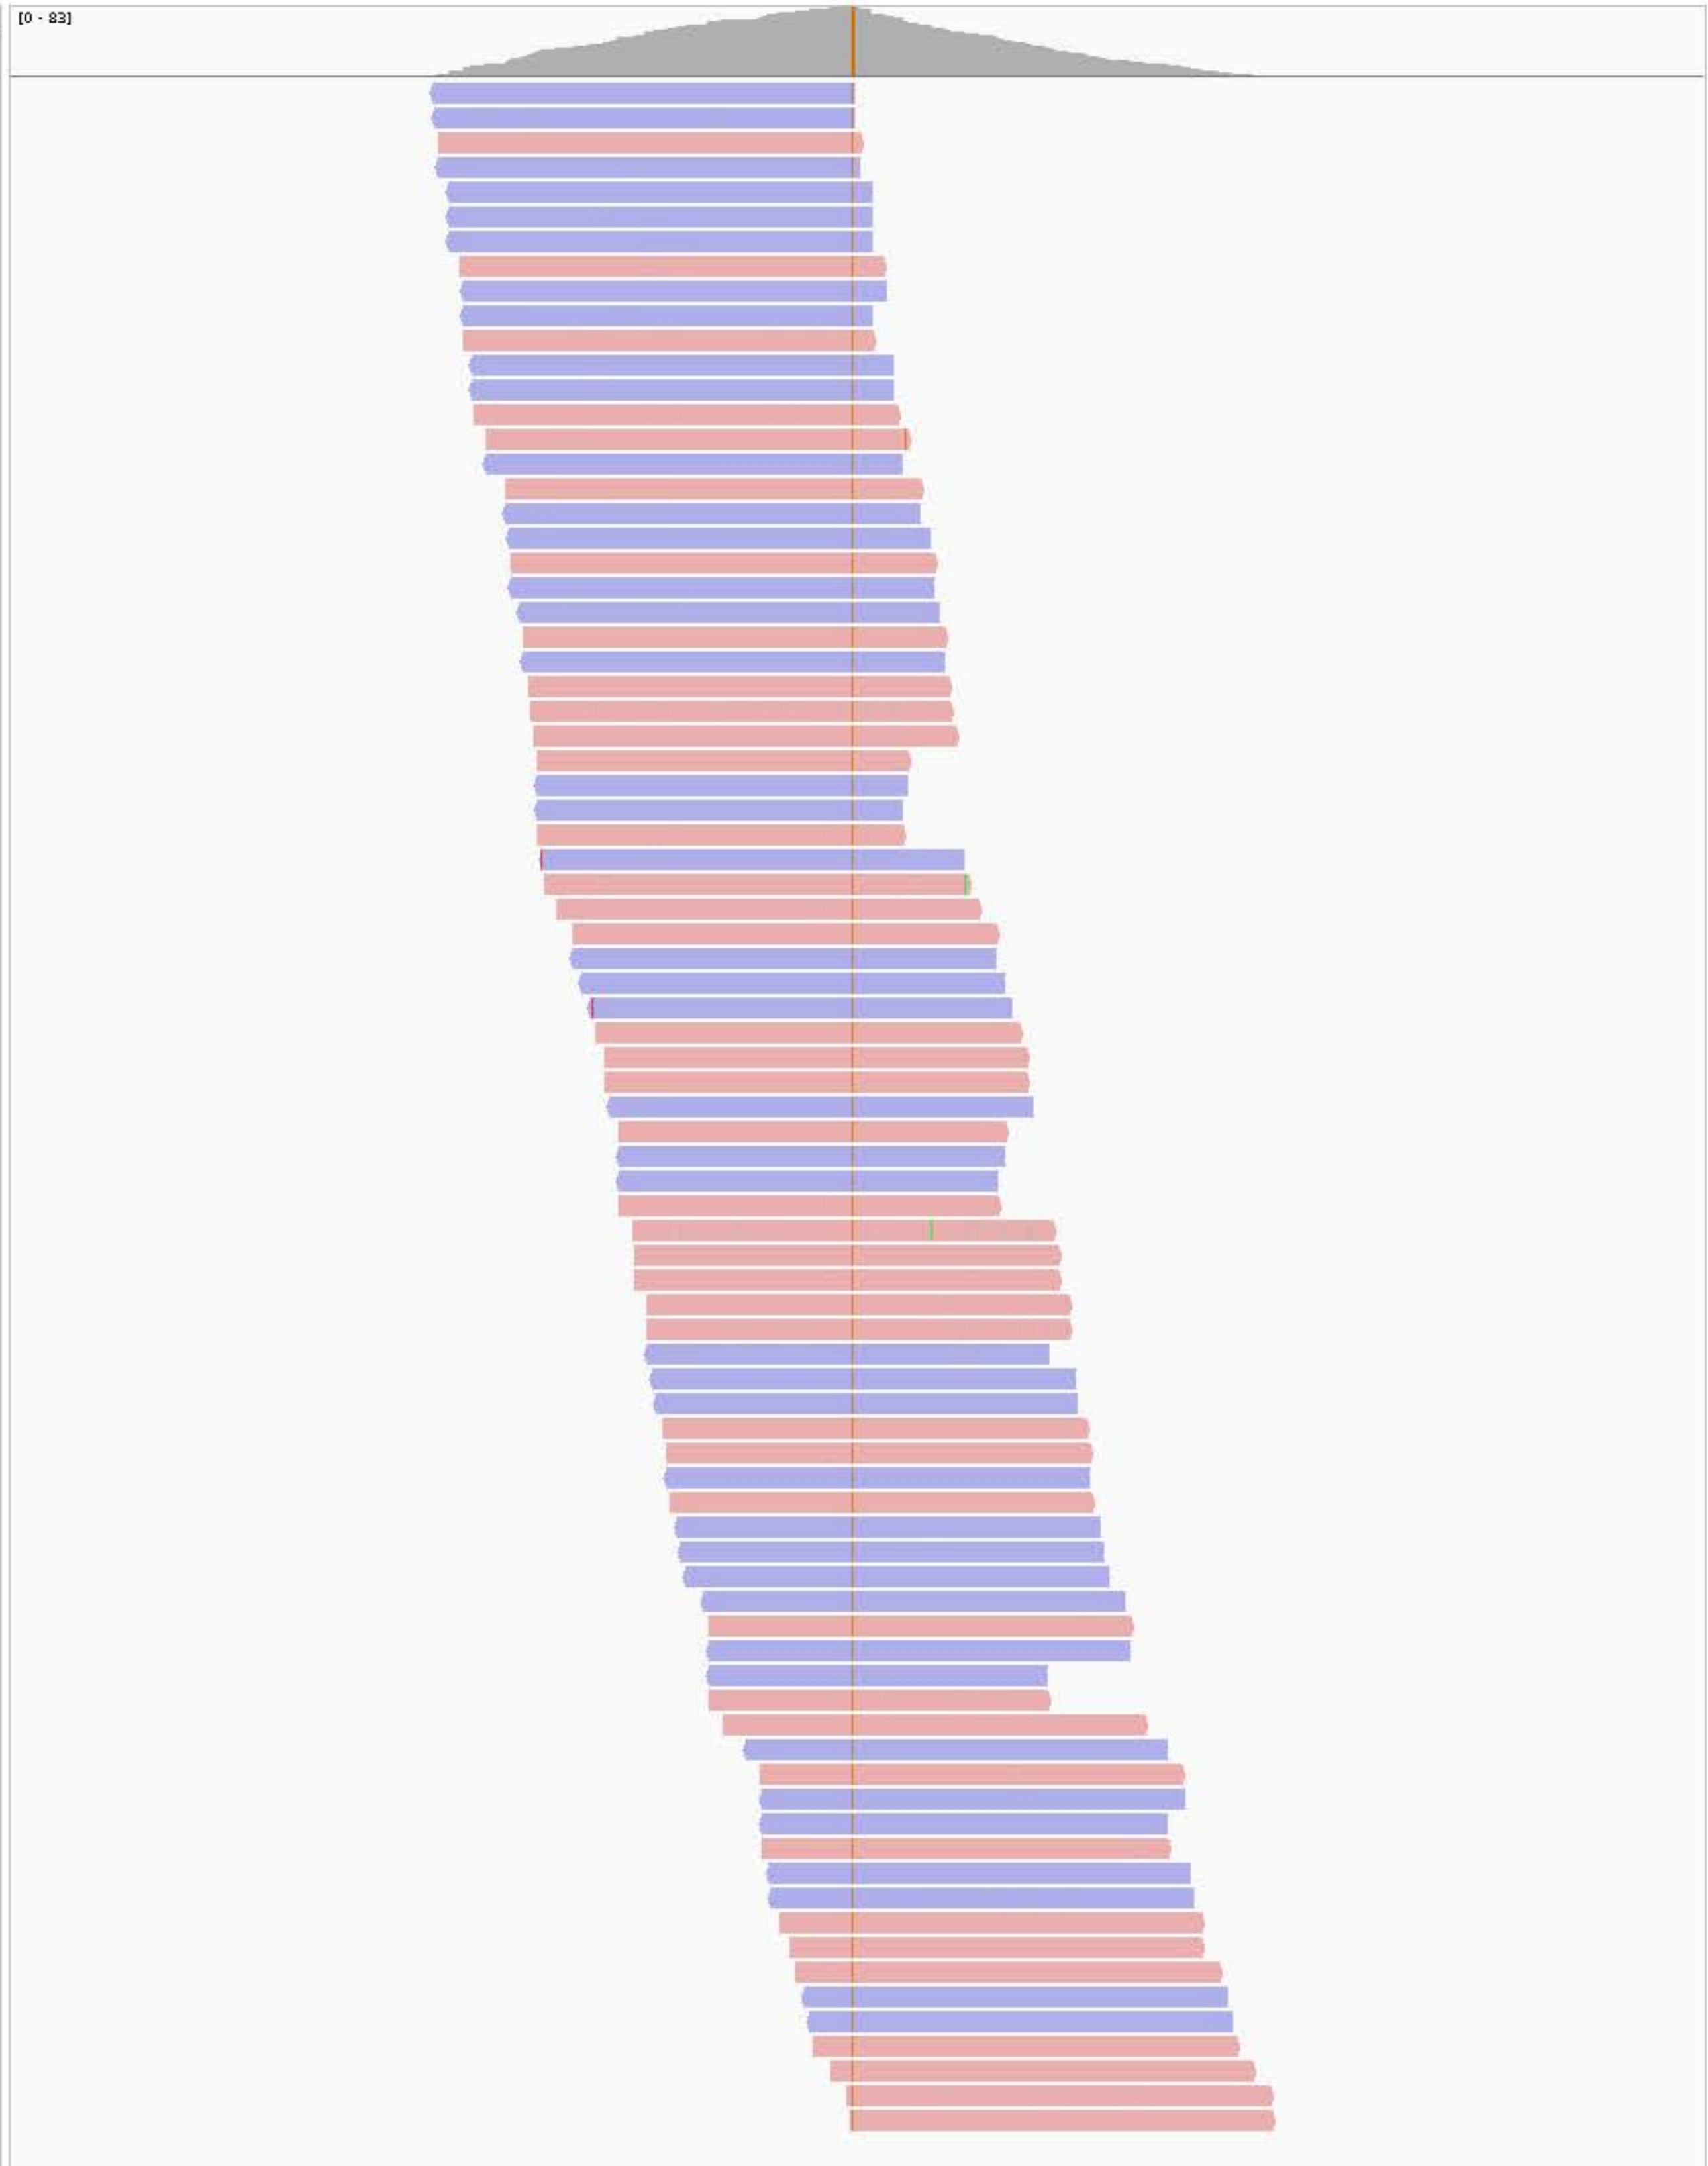

SL\_0007\_RN\_2\_mut.bam

Sequence →  
Refseq Genes

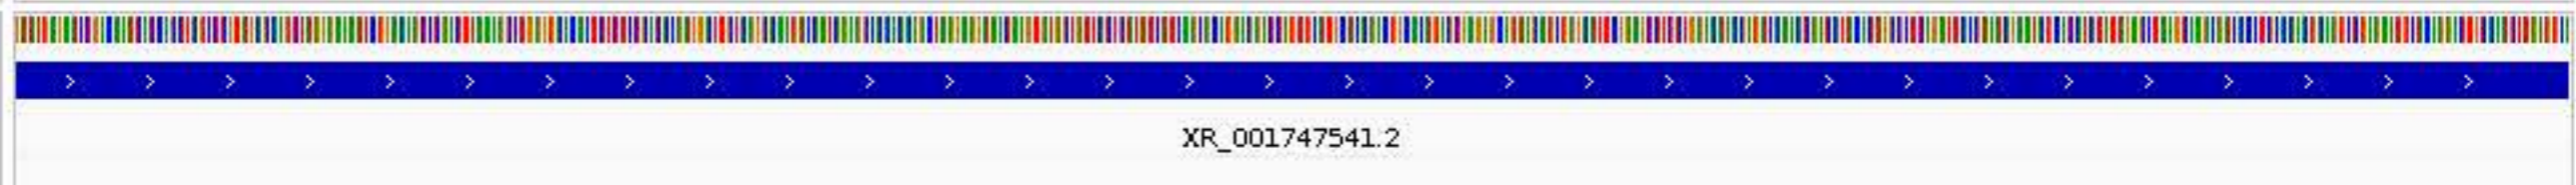



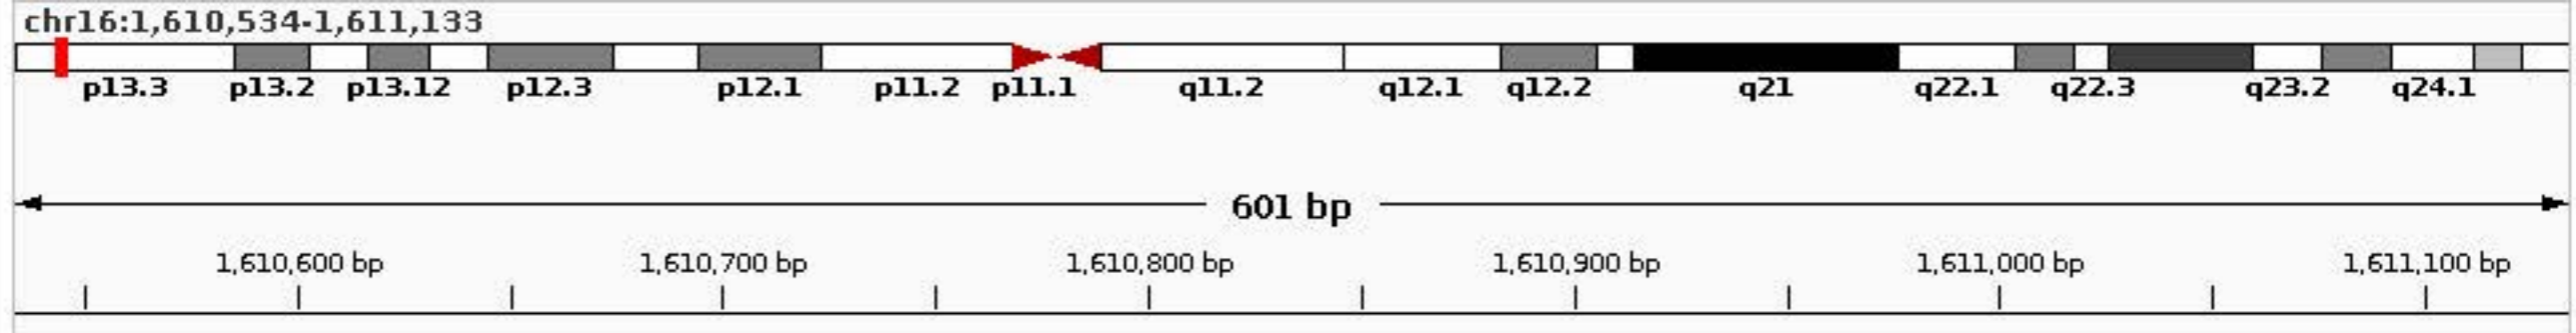

SL\_0006\_RN\_67\_mut.bam Coverage

SL\_0006\_RN\_67\_mut.bam

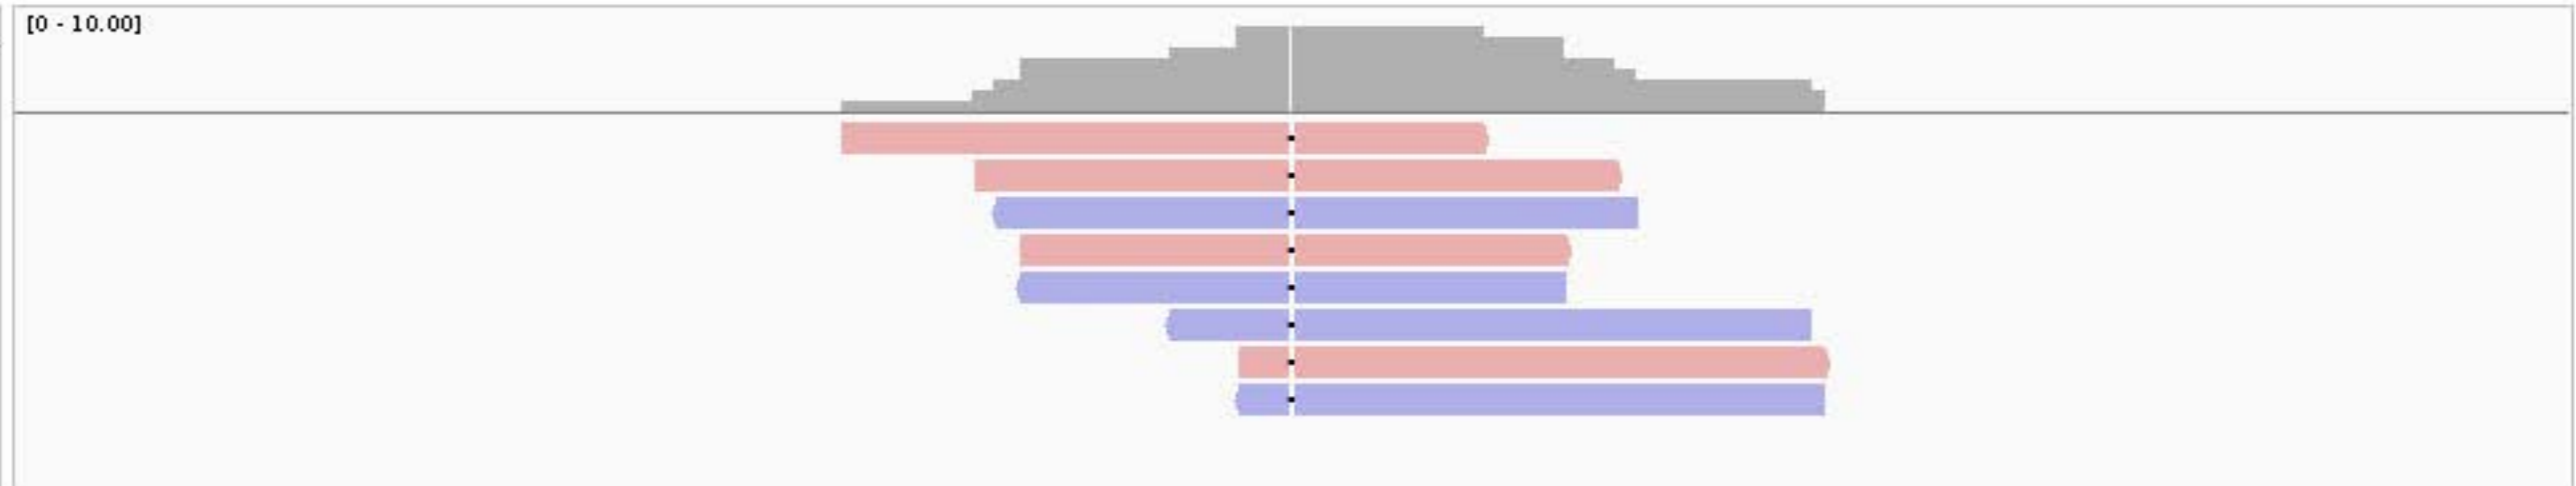

Sequence

Refseq Genes

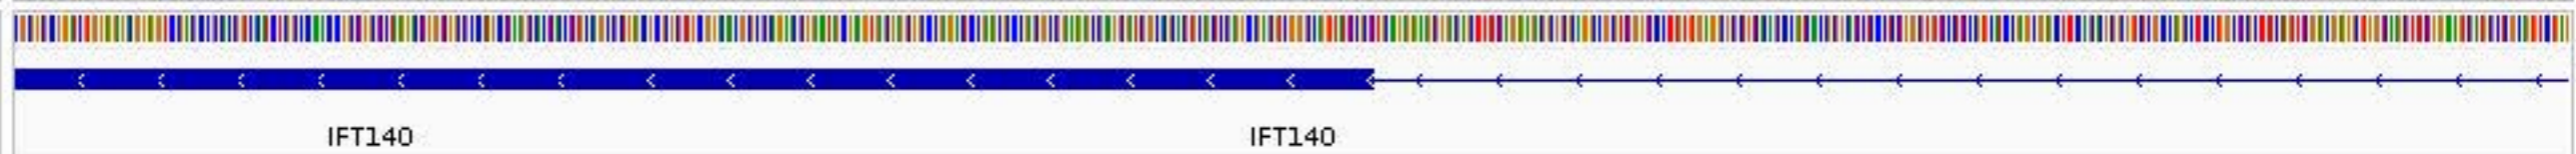

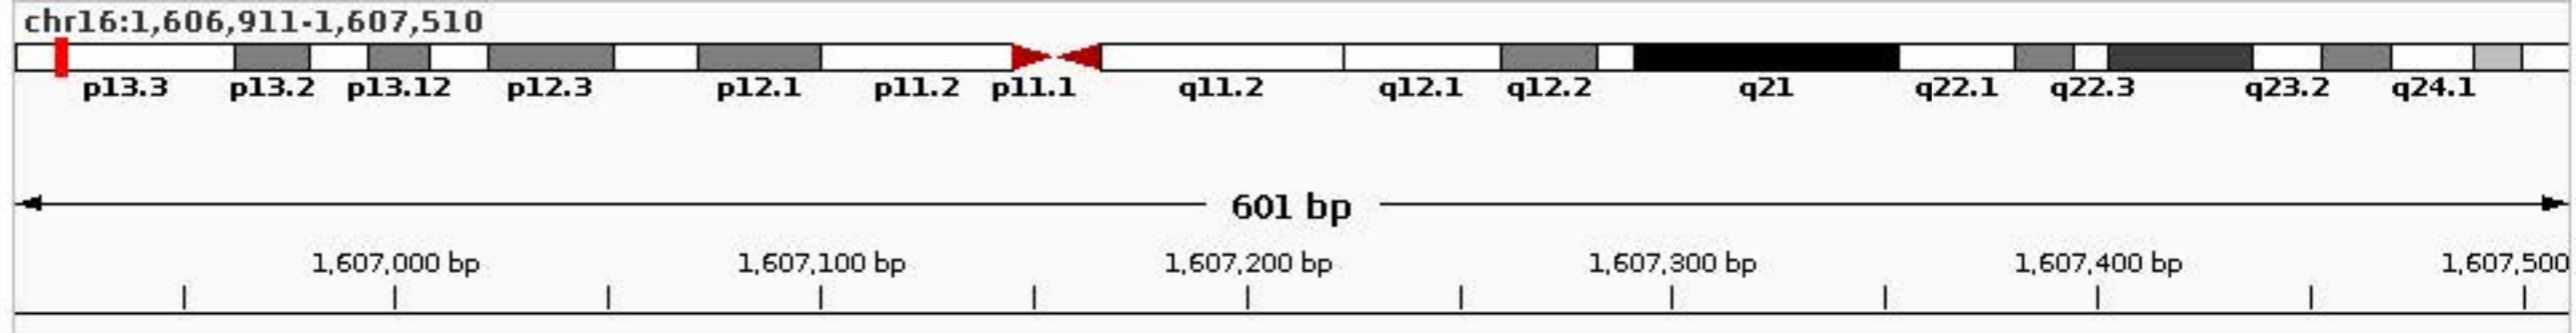

SL\_0006\_RN\_67\_mut.bam Coverage

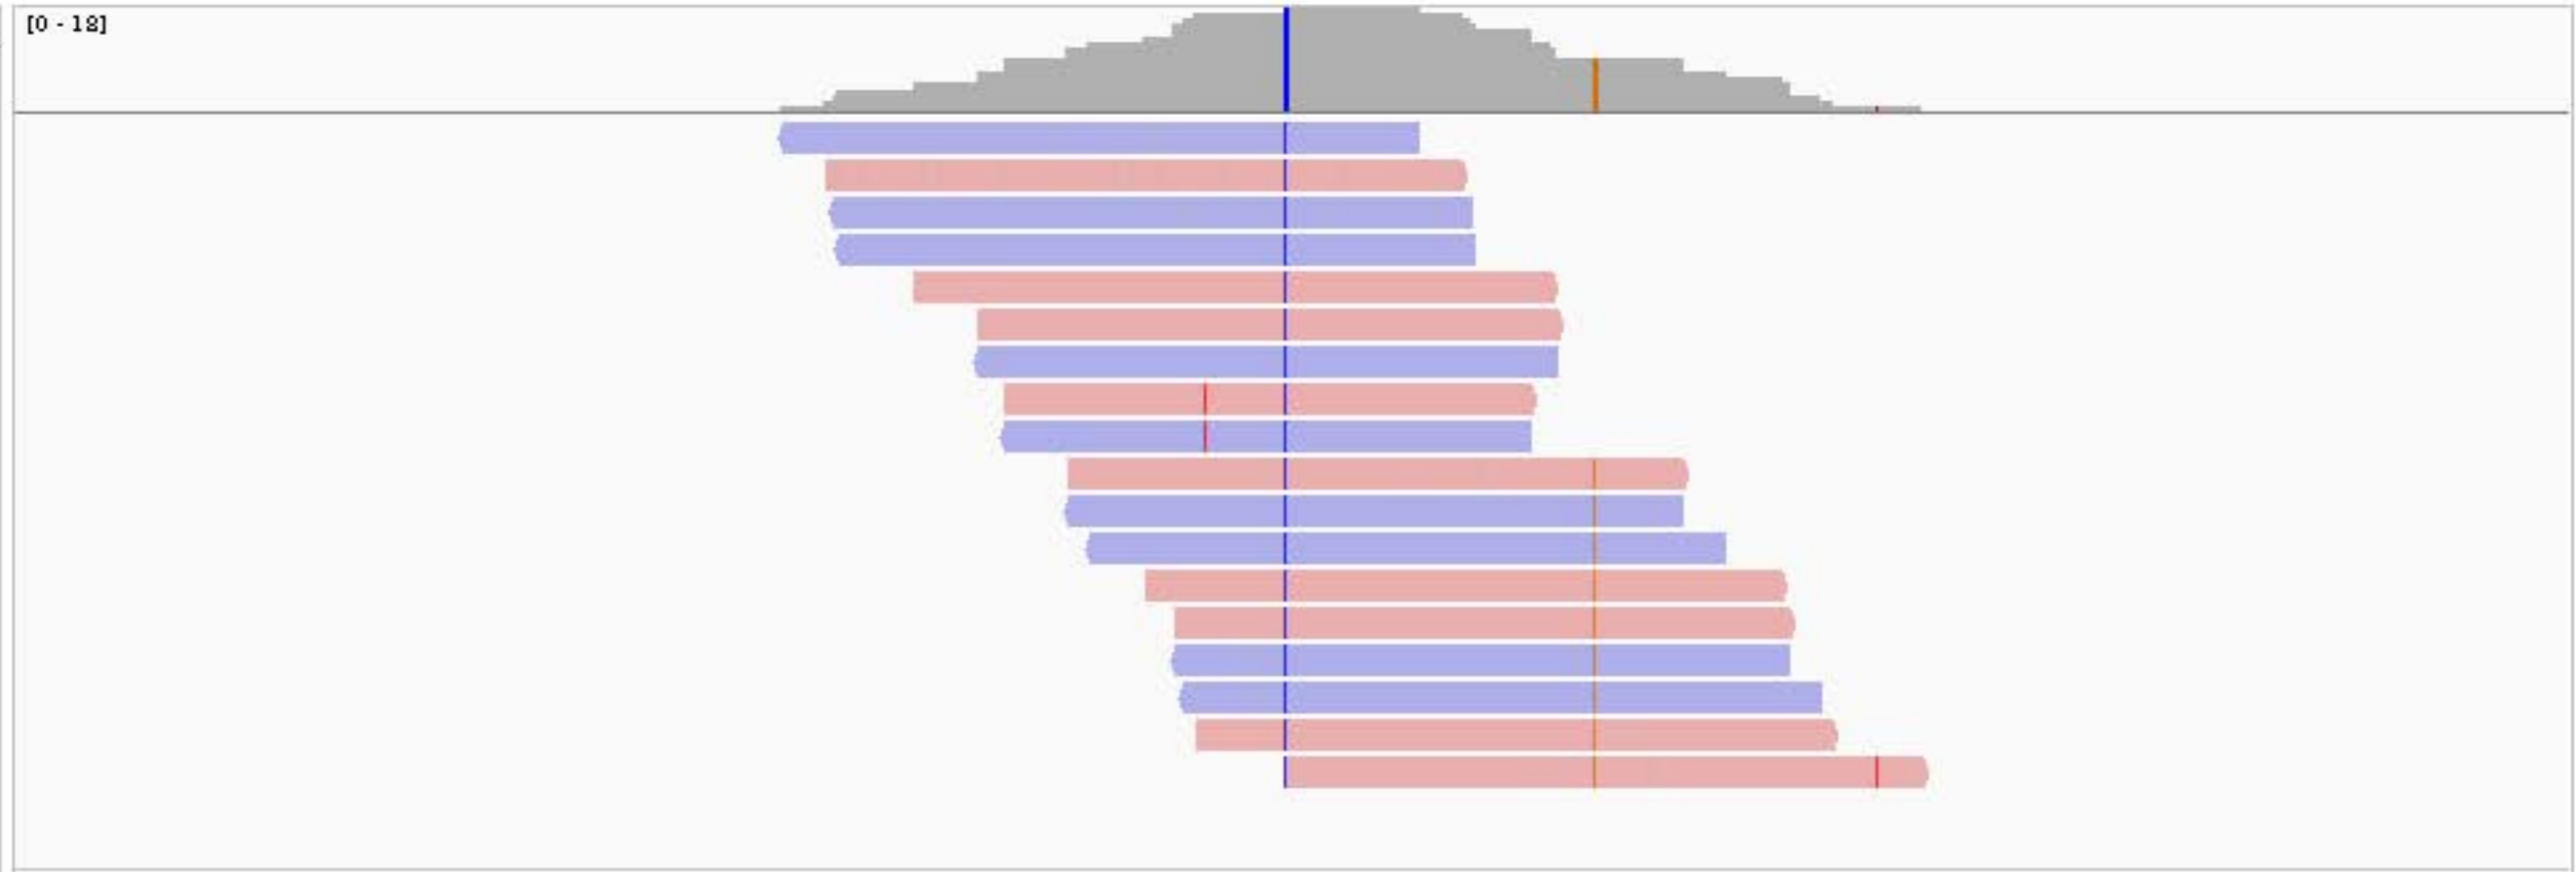

SL\_0006\_RN\_67\_mut.bam

Sequence

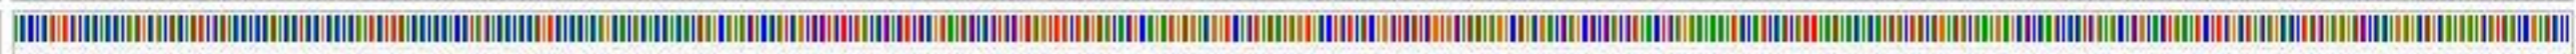

Refseq Genes

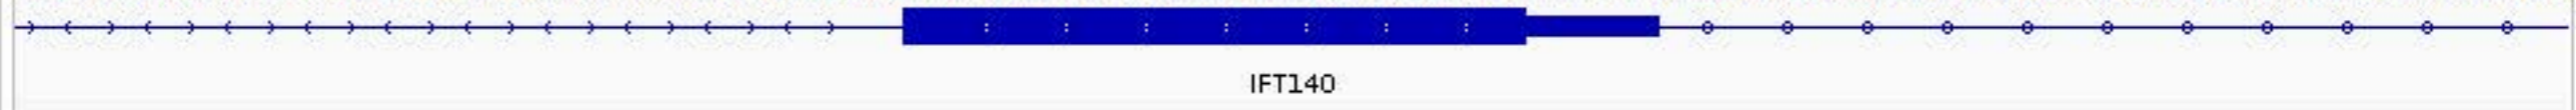

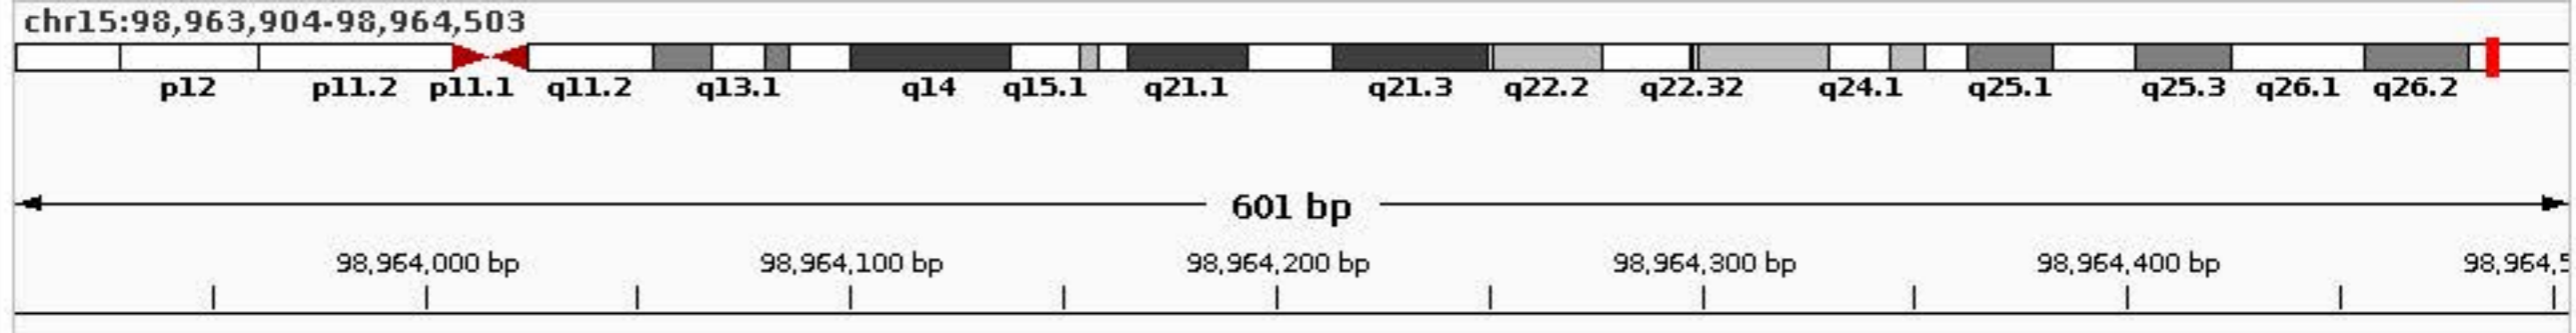

SL\_0017\_RN\_15\_mut.bam Coverage

SL\_0017\_RN\_15\_mut.bam

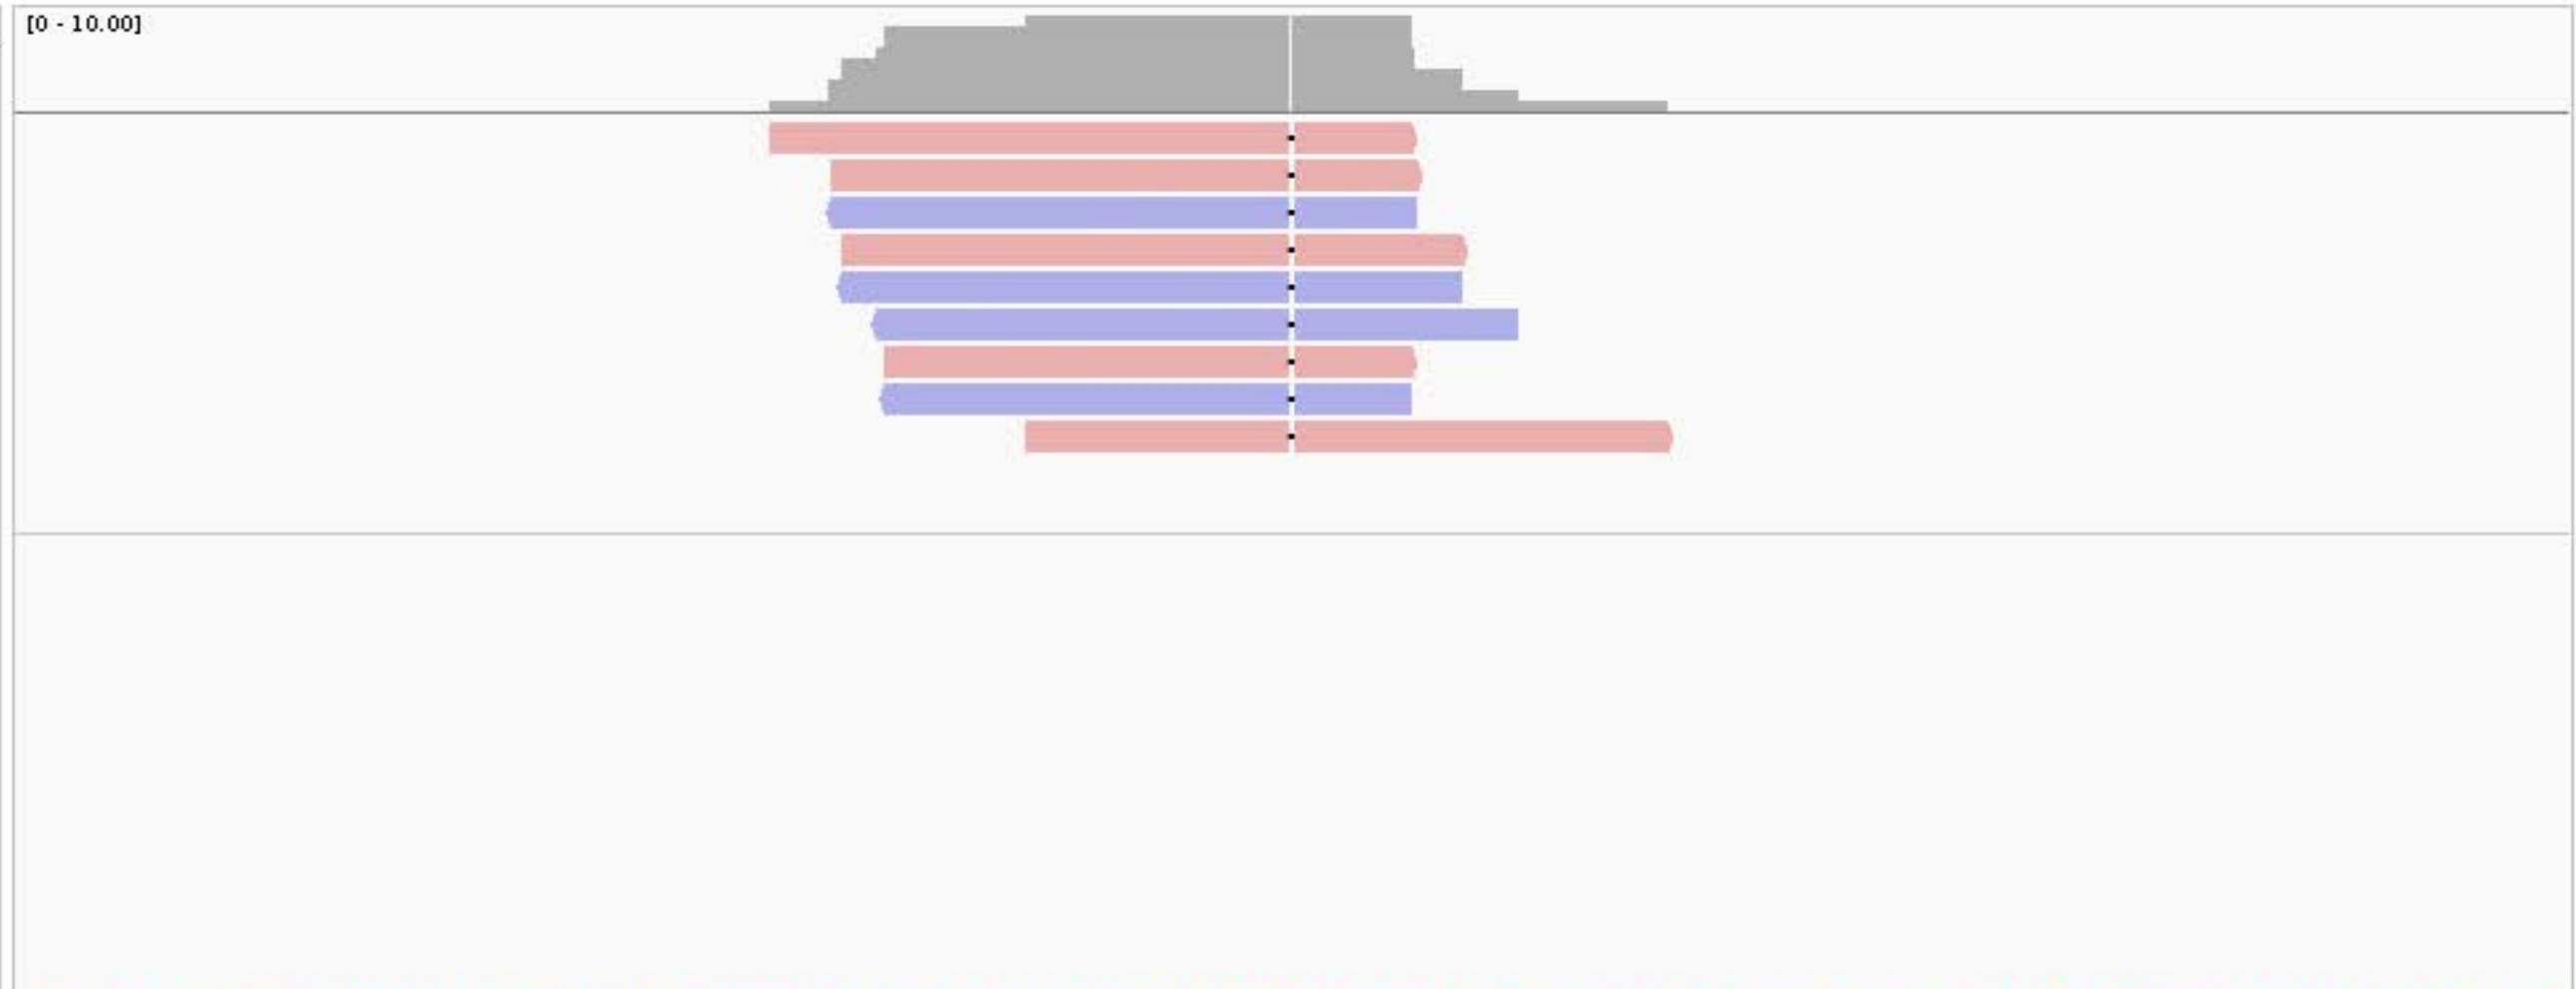

Sequence

Refseq Genes

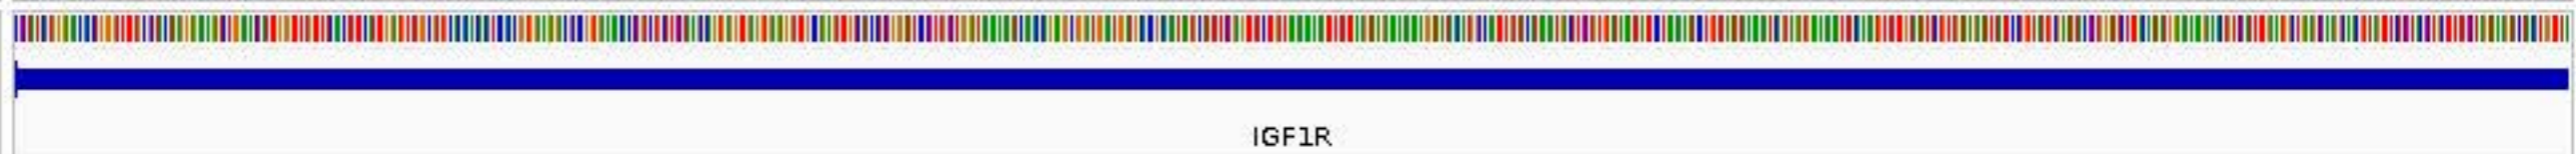

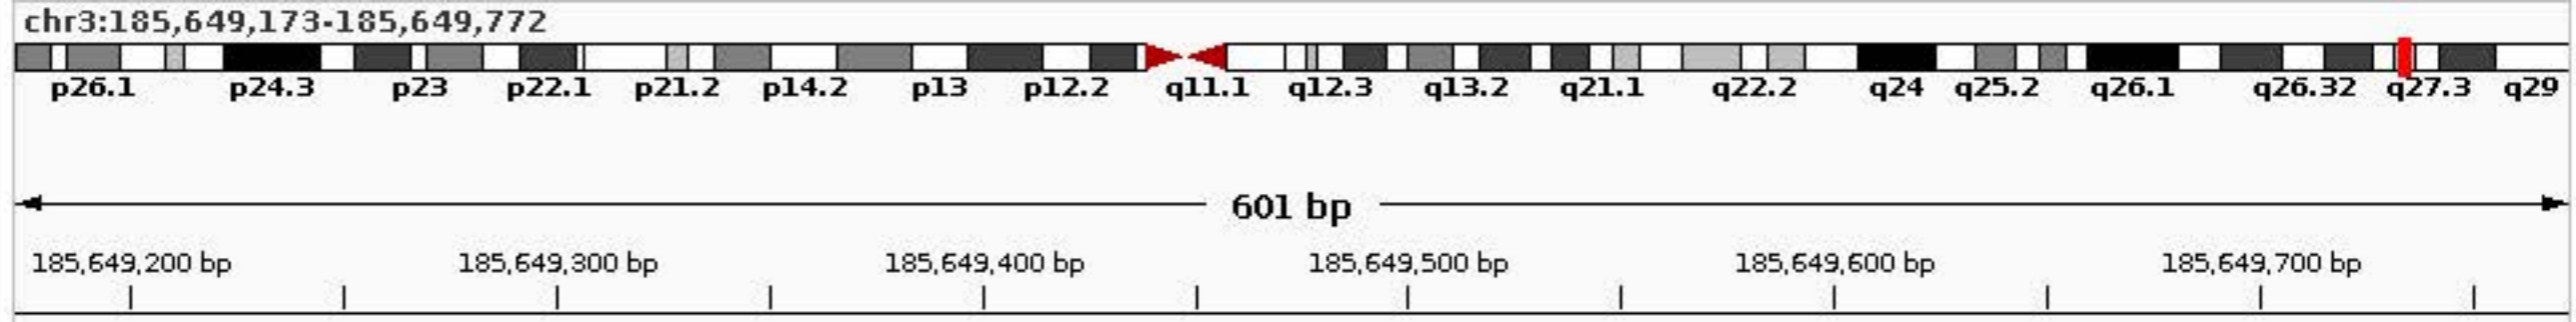

SL\_0017\_RN\_15\_mut.bam Coverage

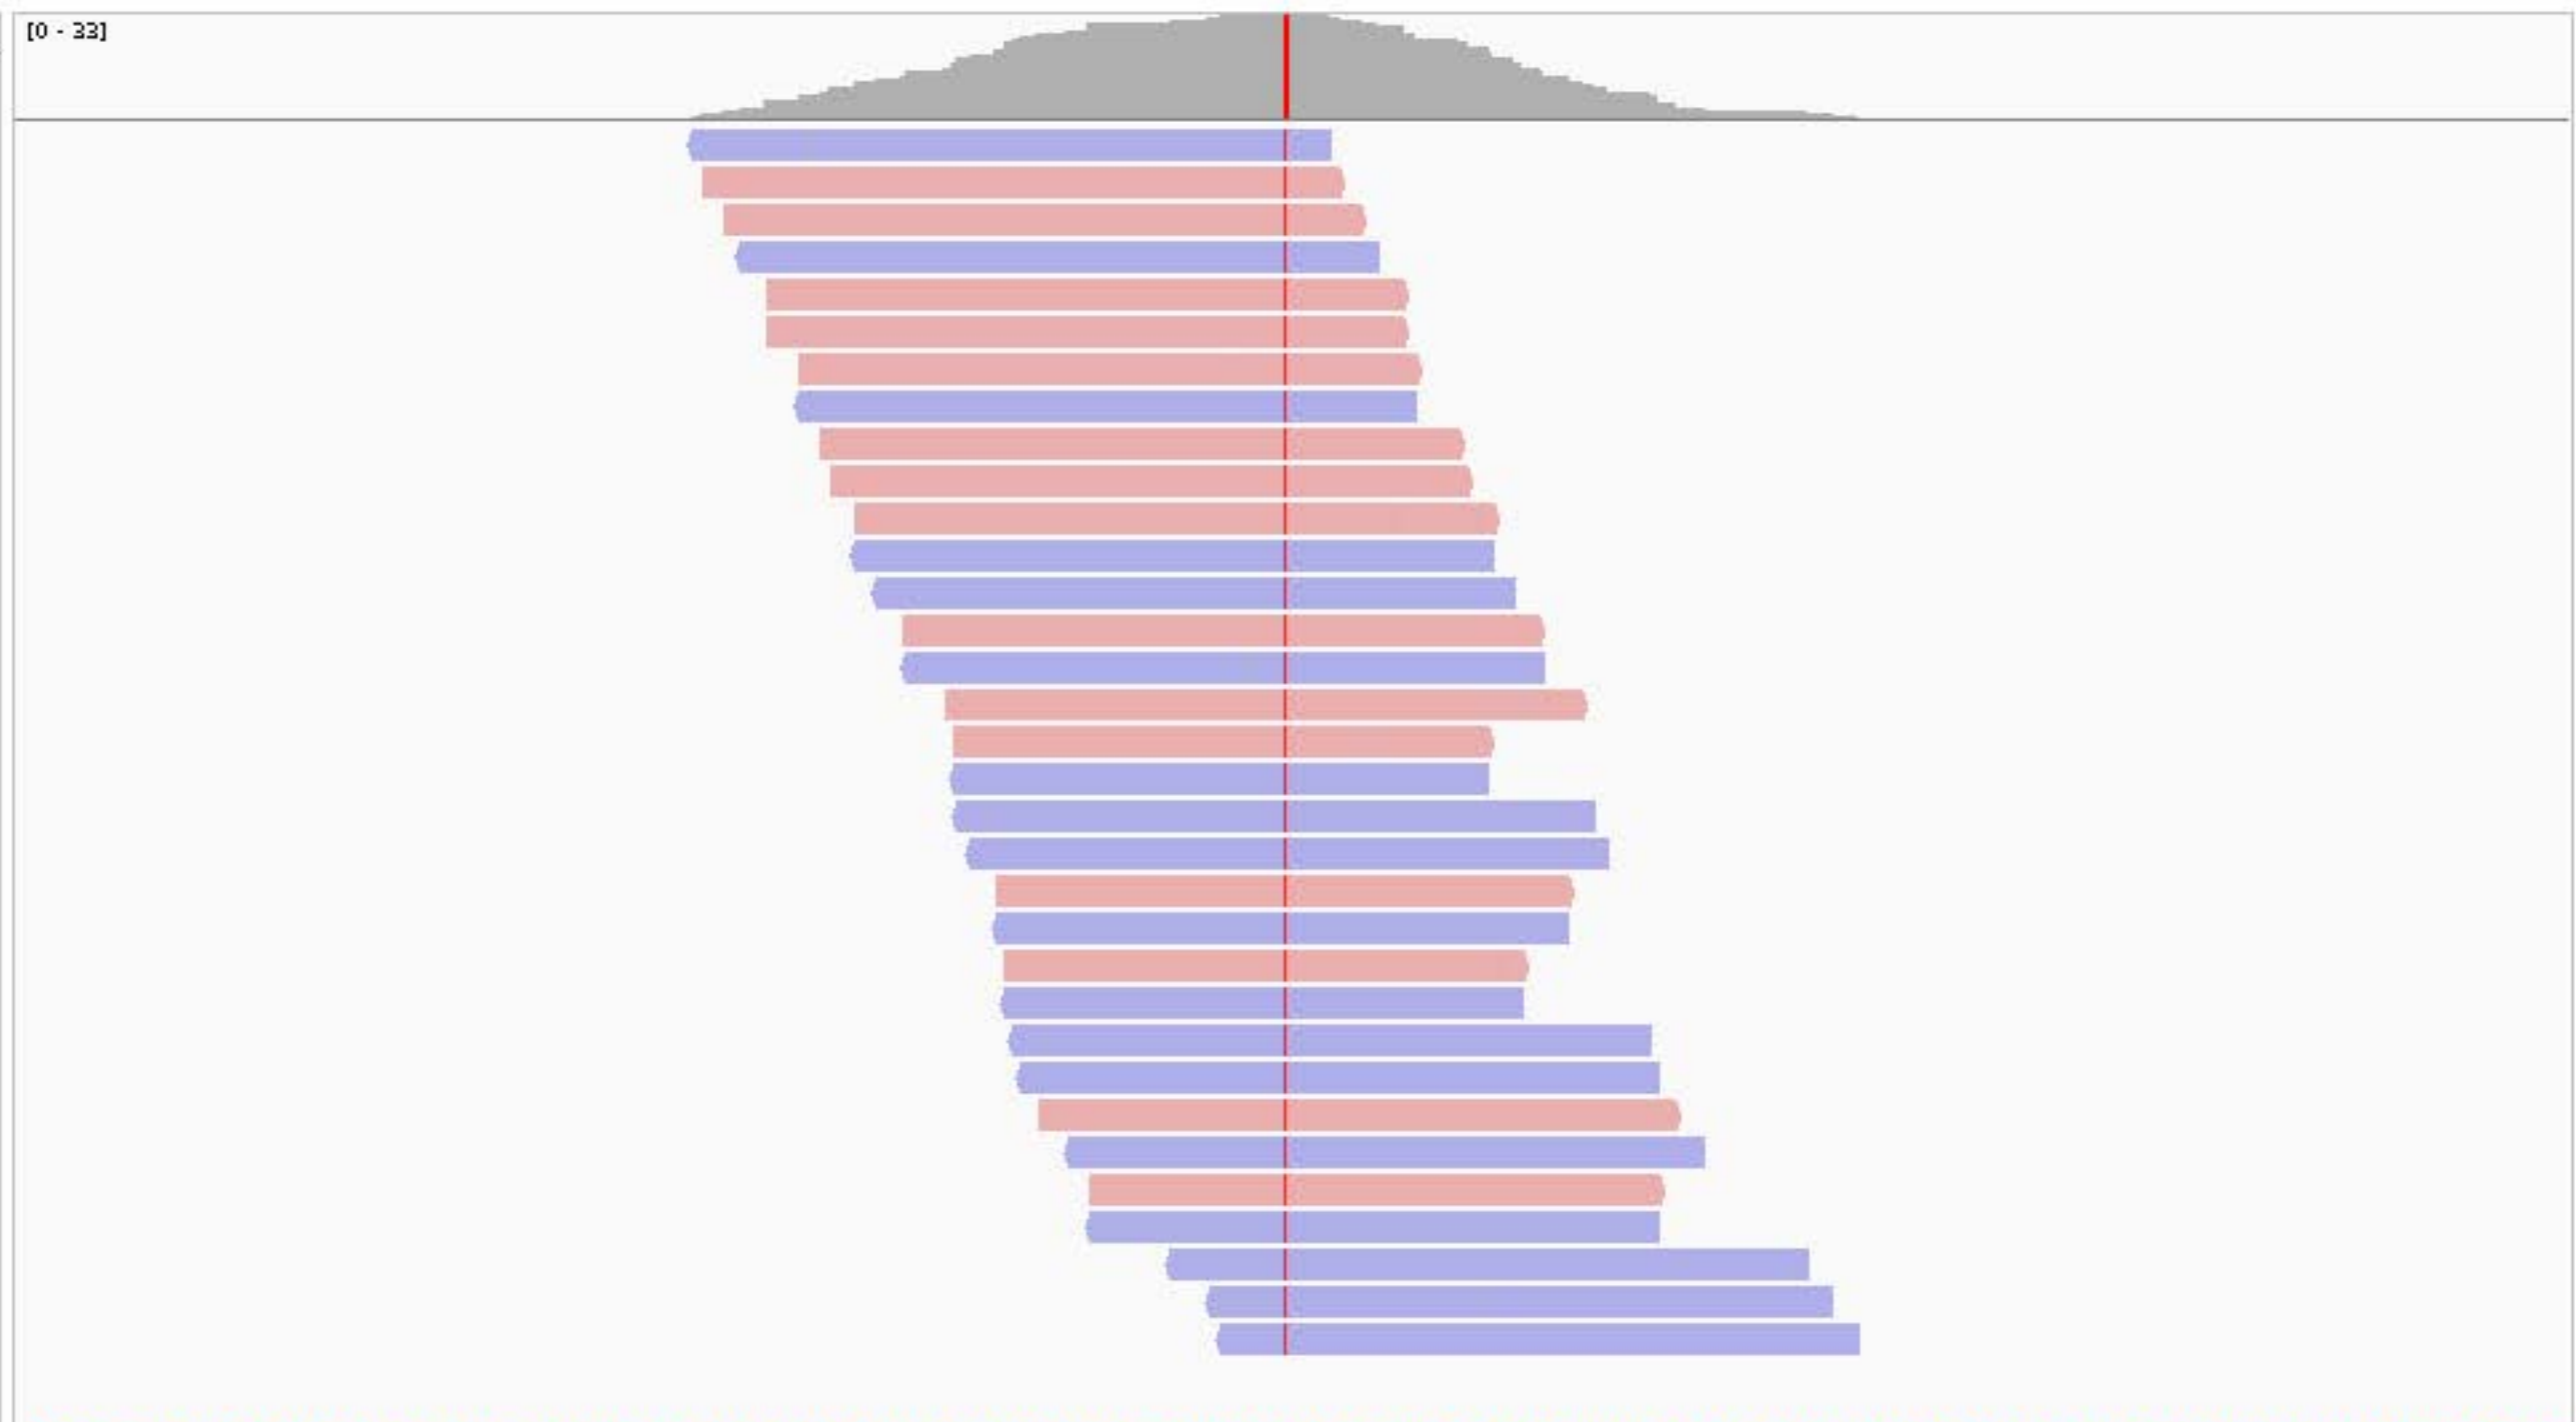

SL\_0017\_RN\_15\_mut.bam

Sequence →

Refseq Genes

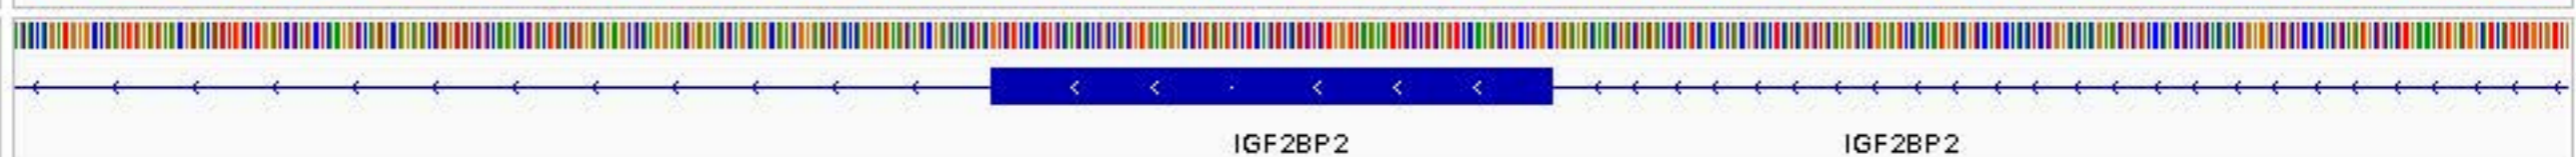

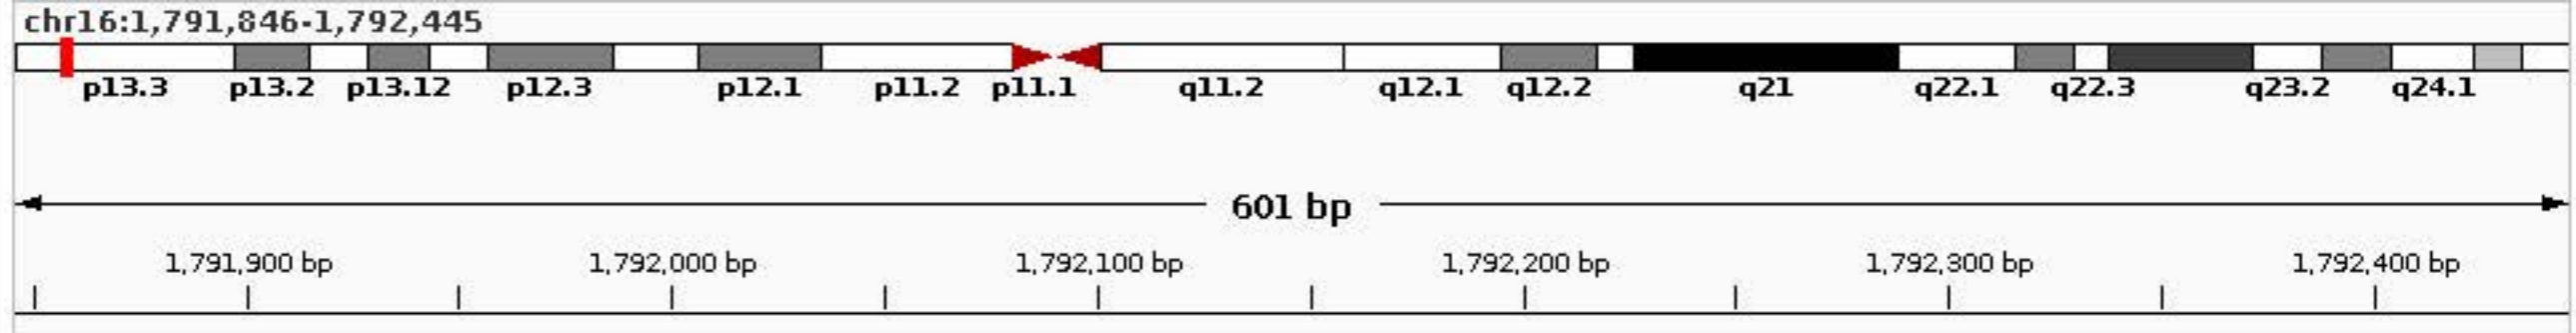

SL\_0015\_LN\_46\_mut.bam Coverage

SL\_0015\_LN\_46\_mut.bam

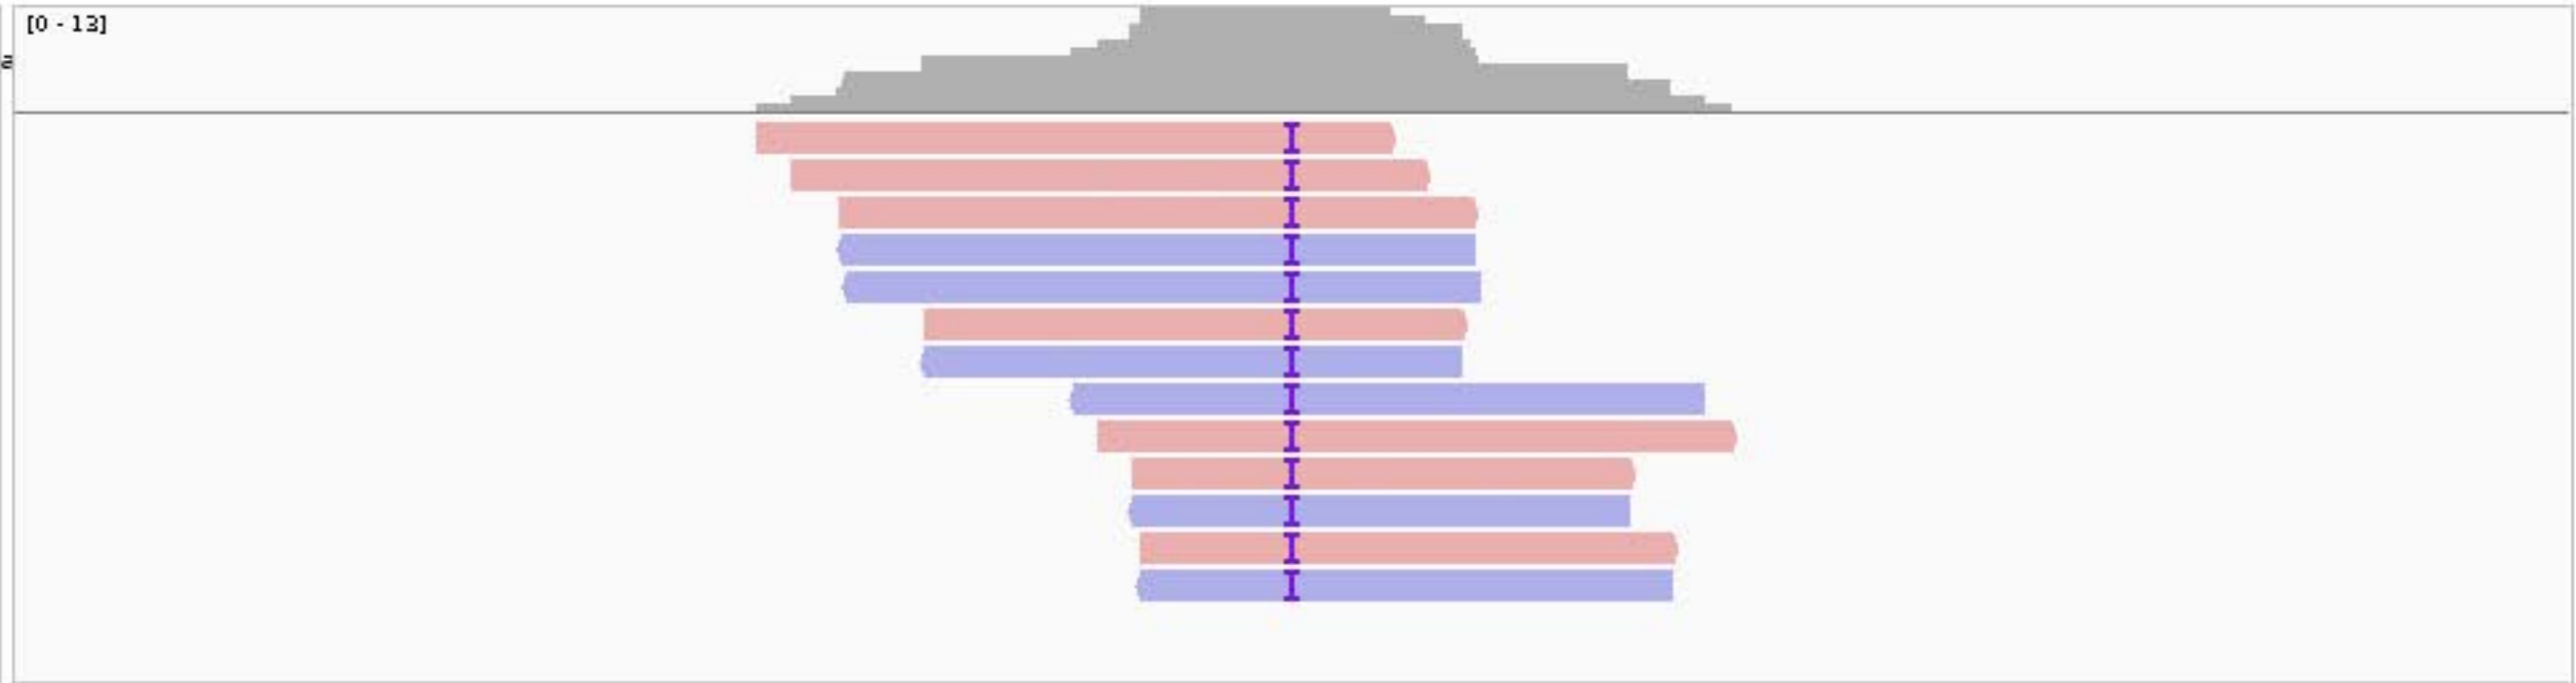

Sequence →

Refseq Genes

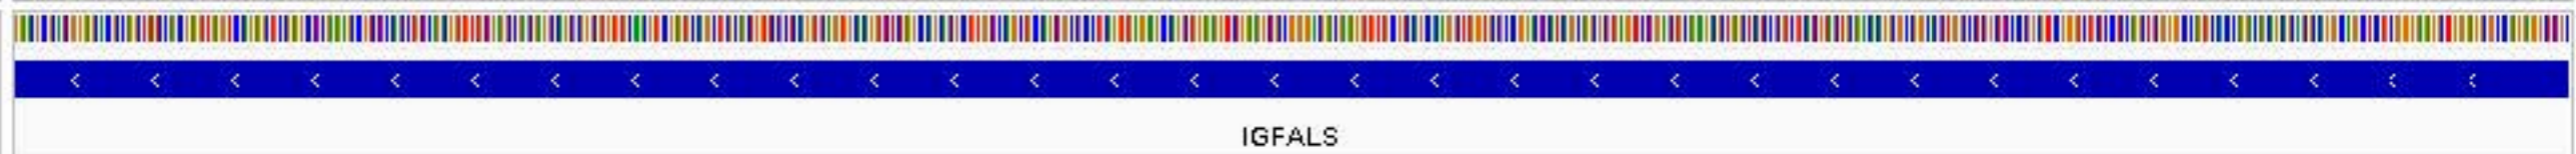



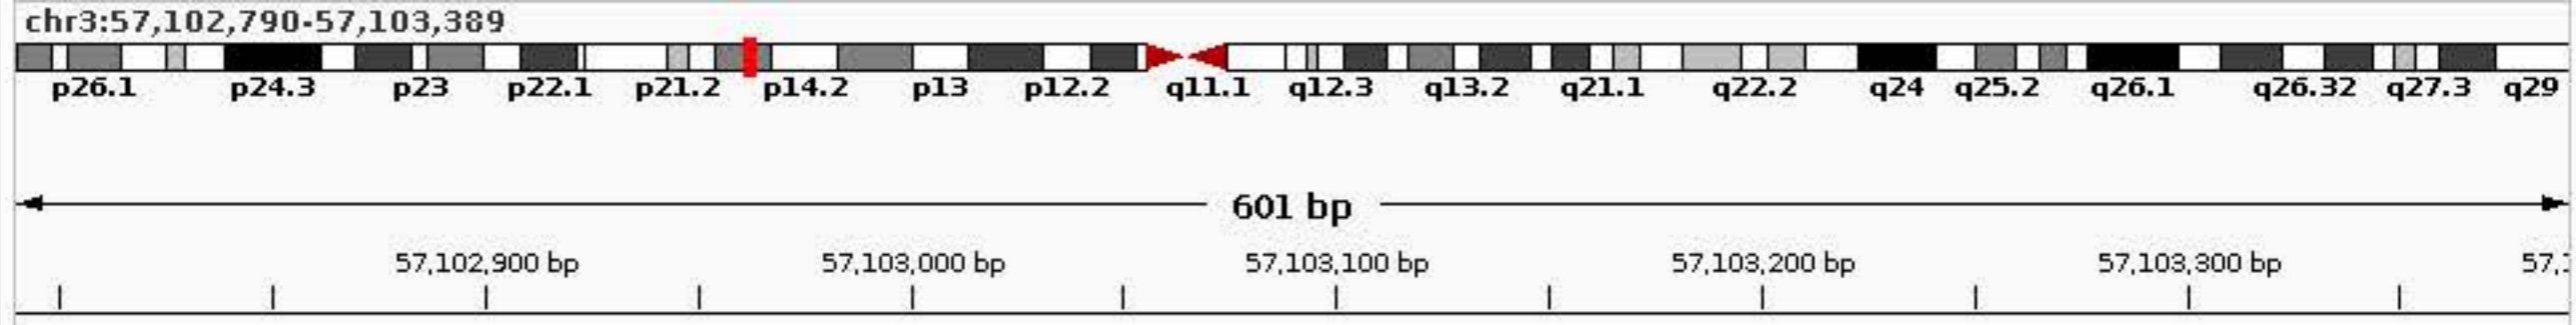

SL\_0007\_RN\_33\_mut.bam Coverage

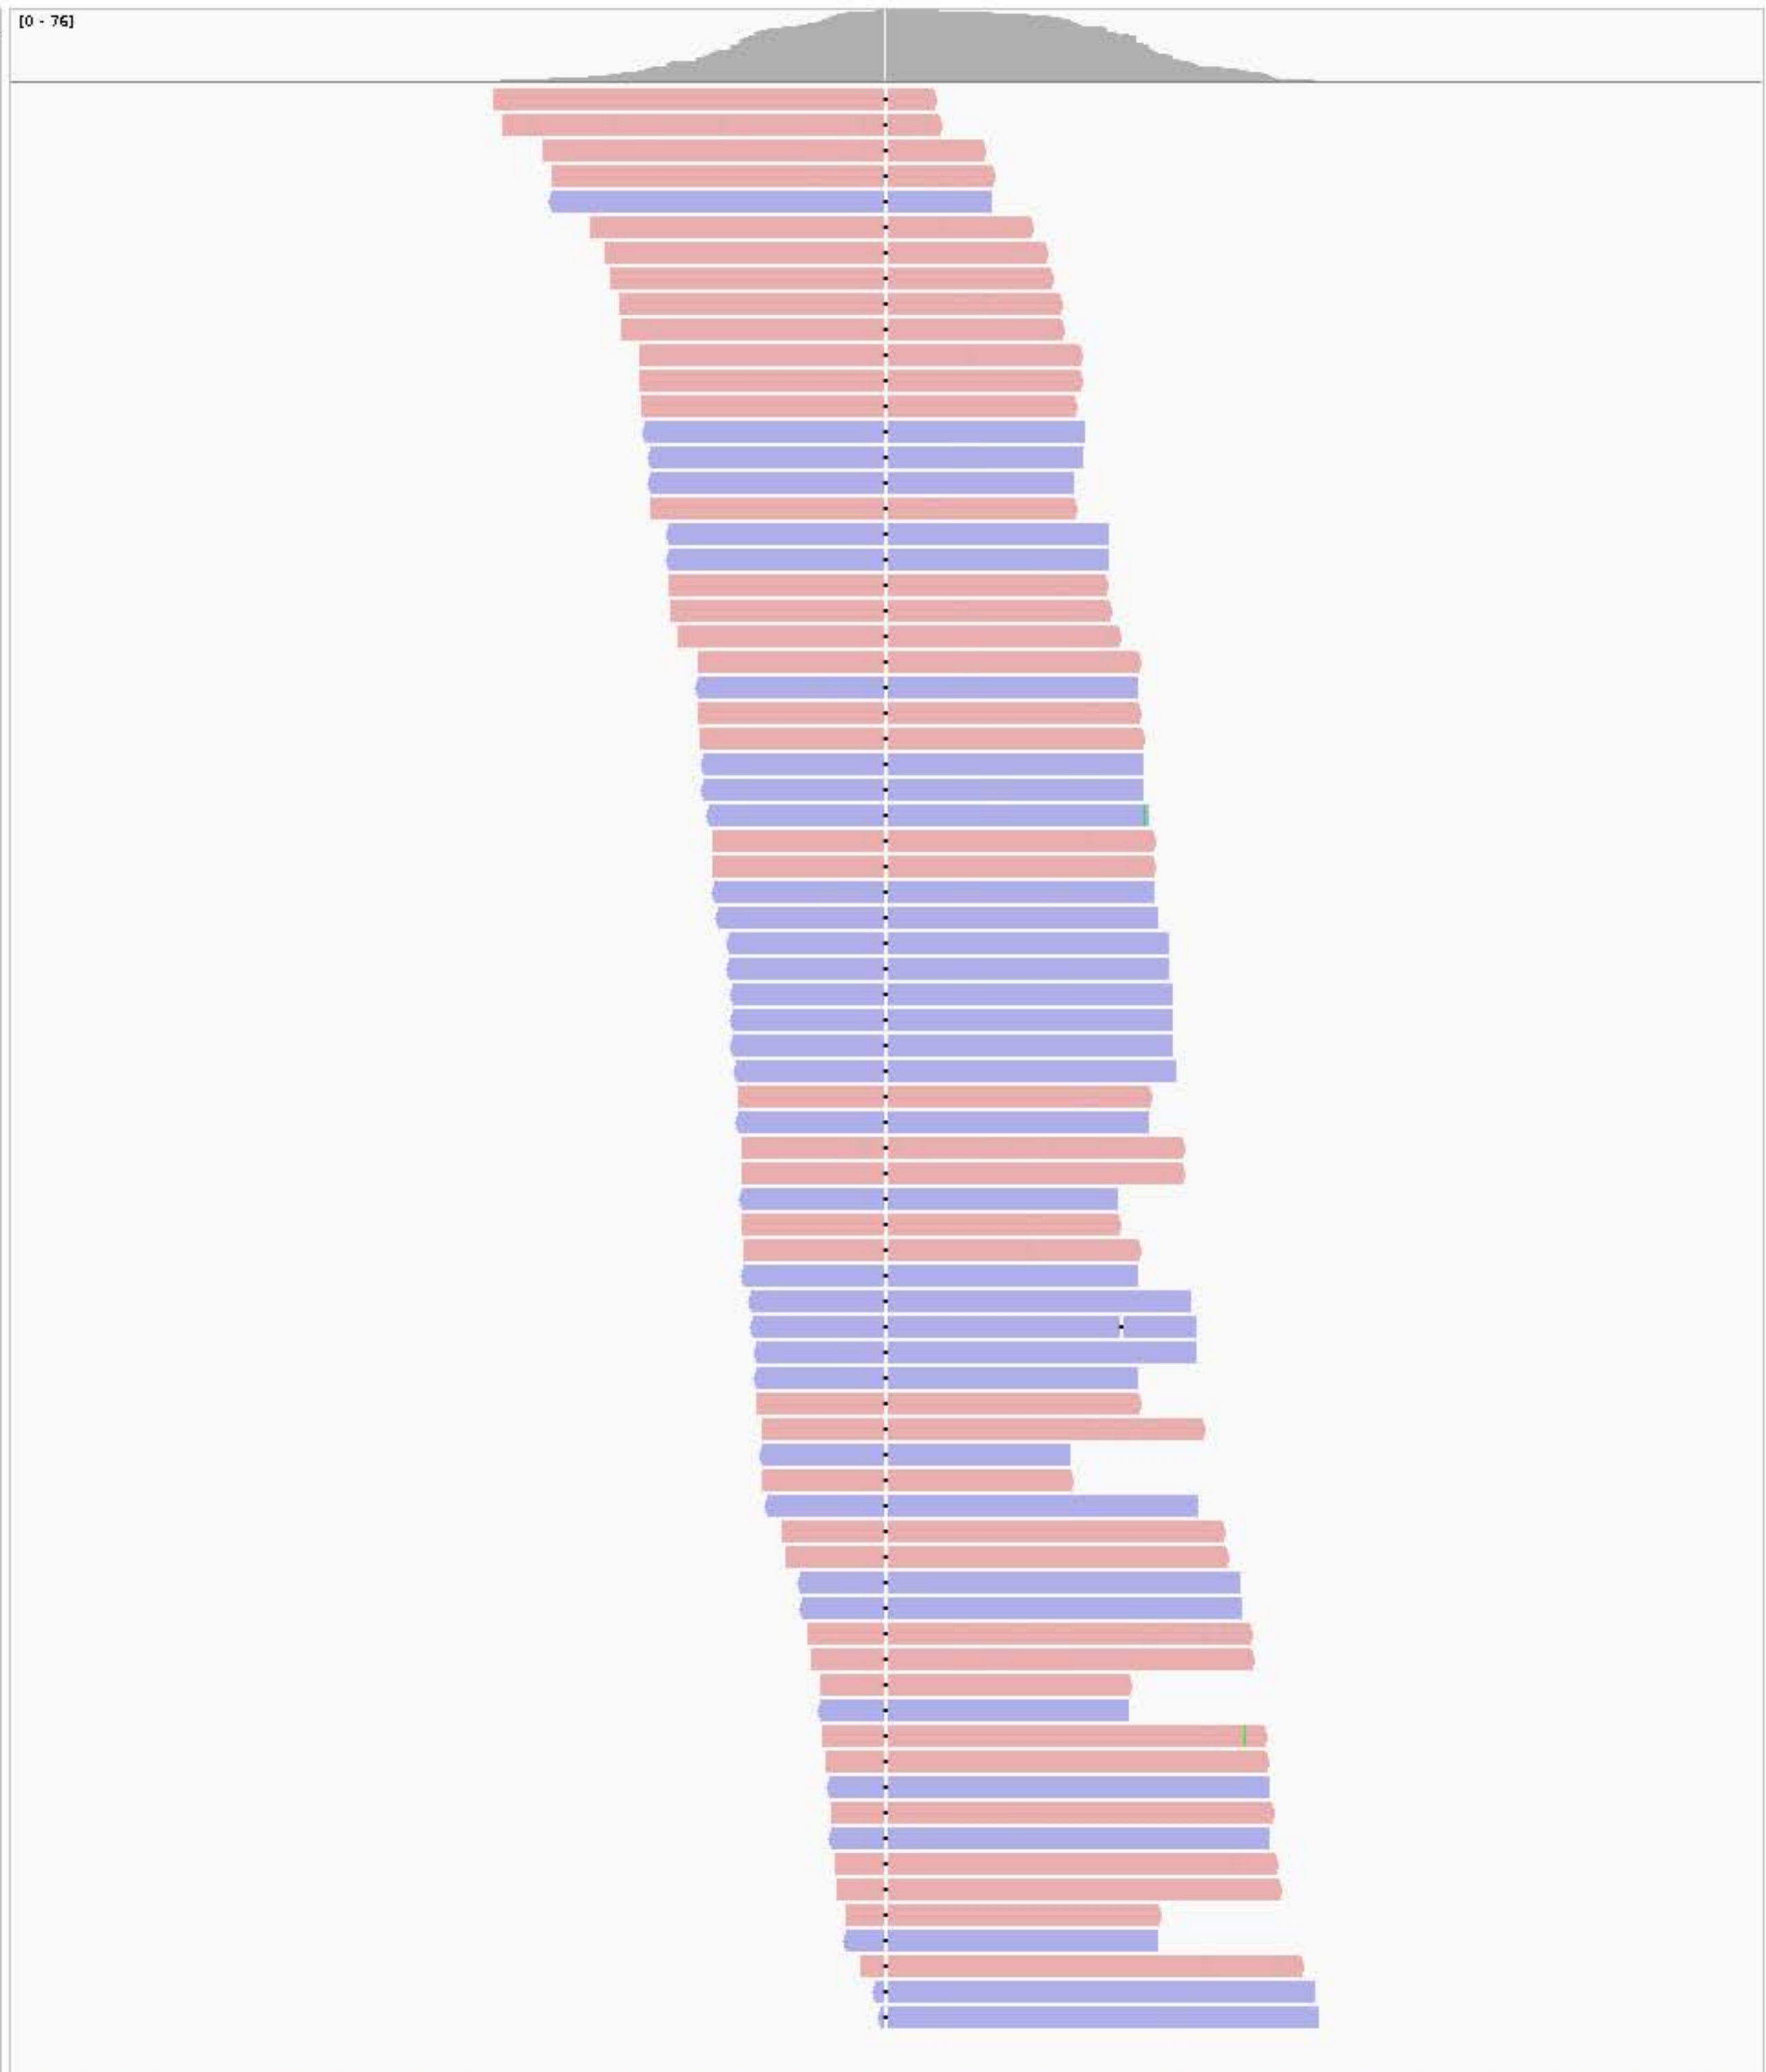

SL\_0007\_RN\_33\_mut.bam

Sequence →

Refseq Genes

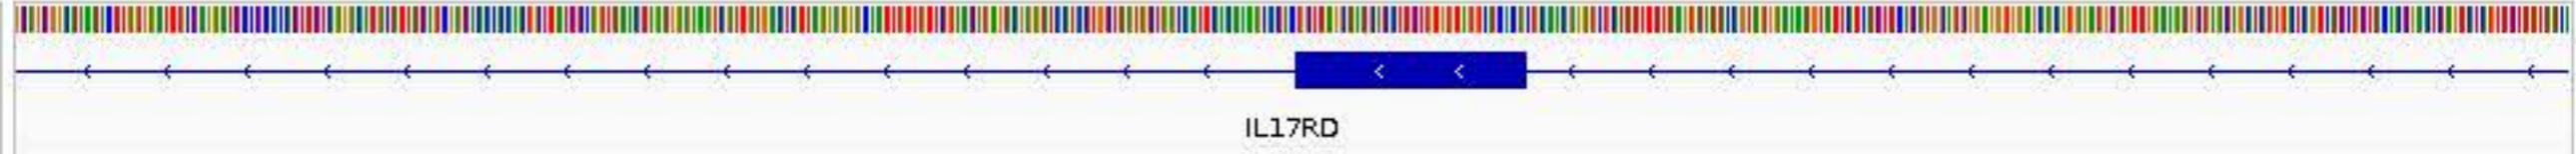

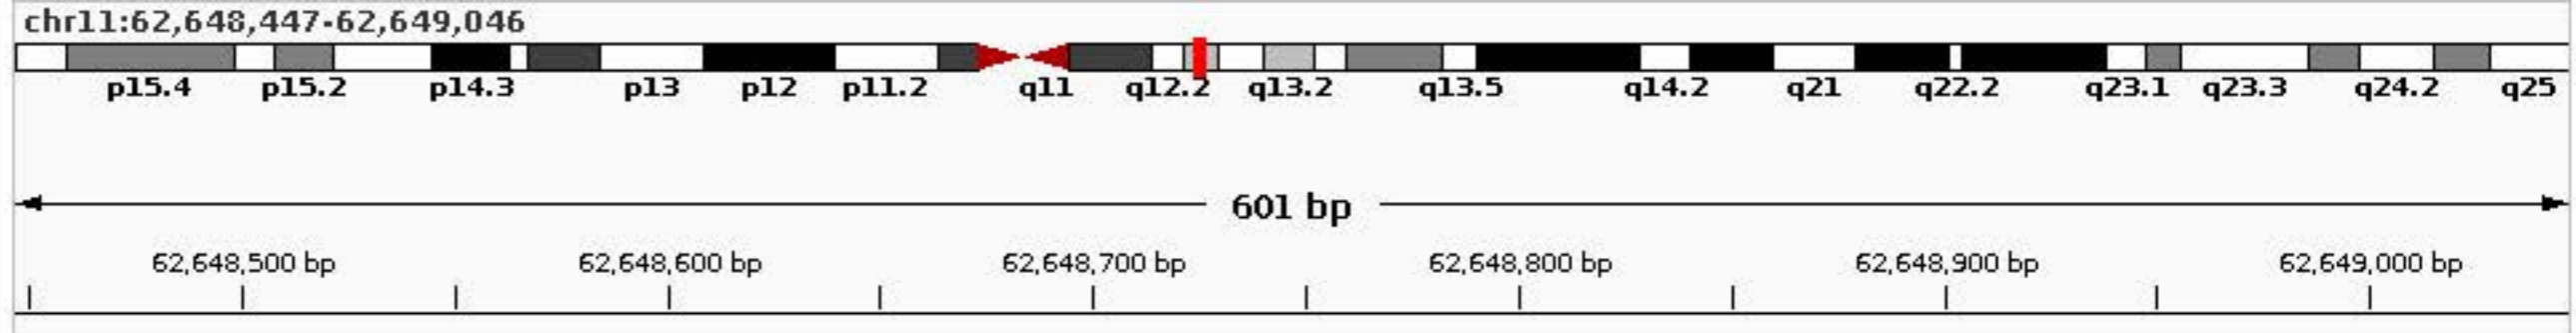

SL\_0015\_RN\_21\_mut.bam Coverage

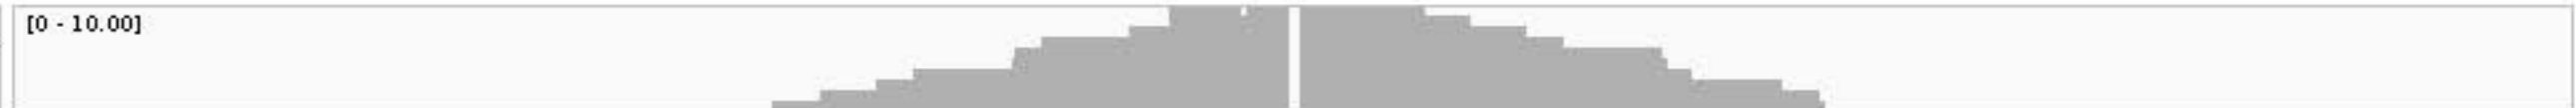

SL\_0015\_RN\_21\_mut.bam

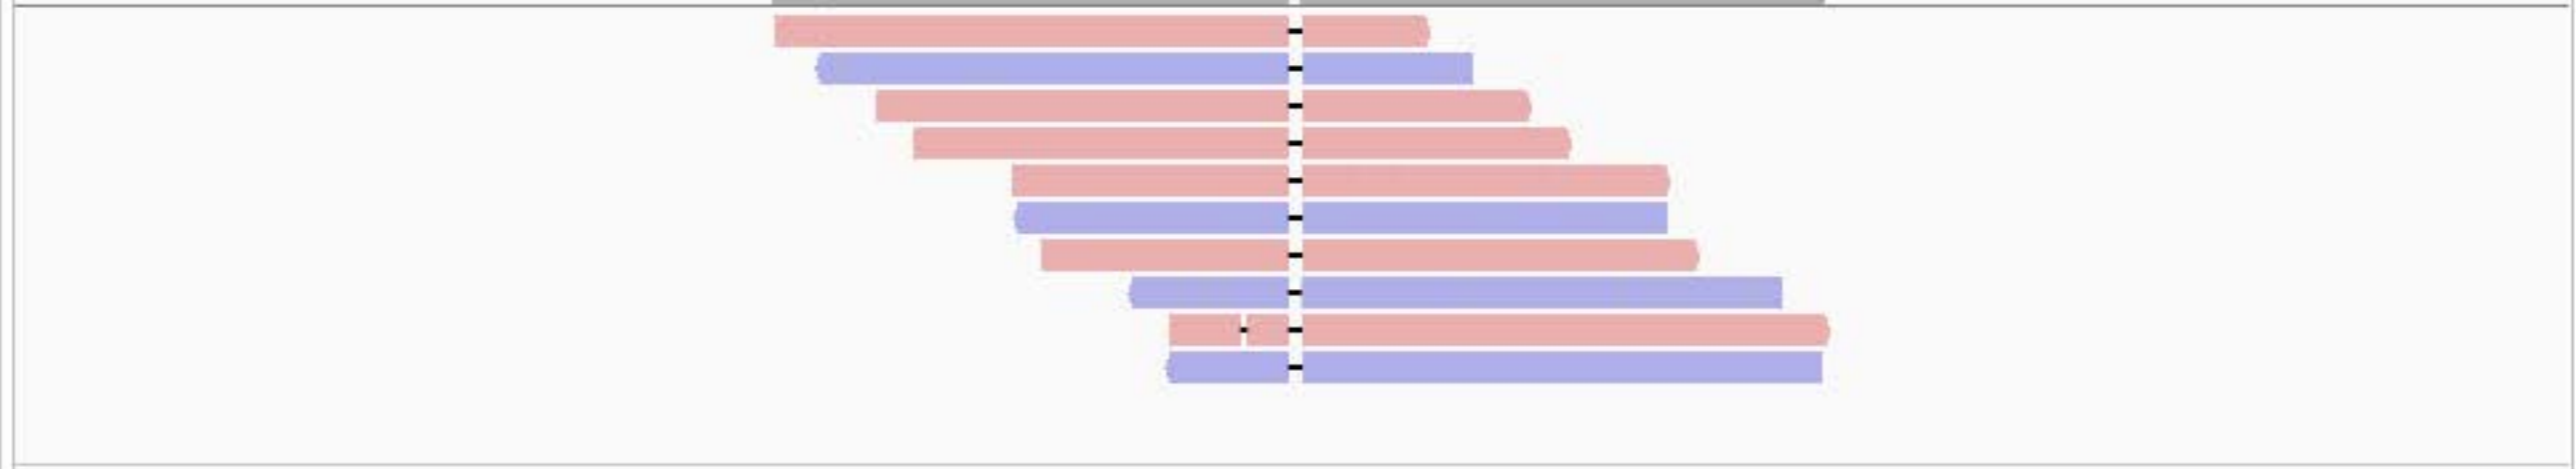

Sequence

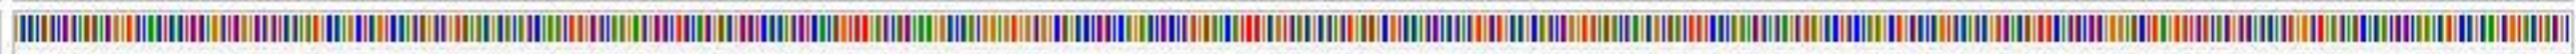

Refseq Genes

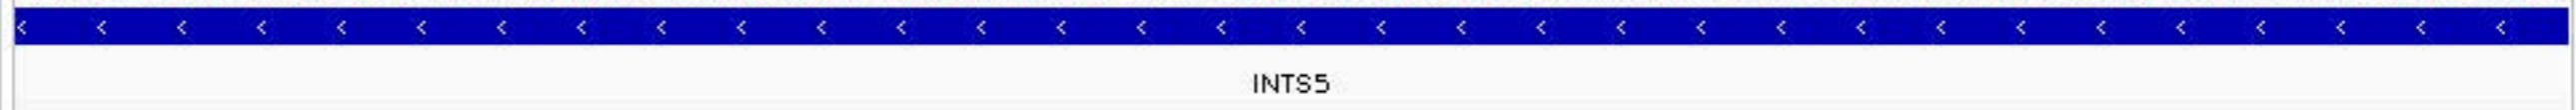

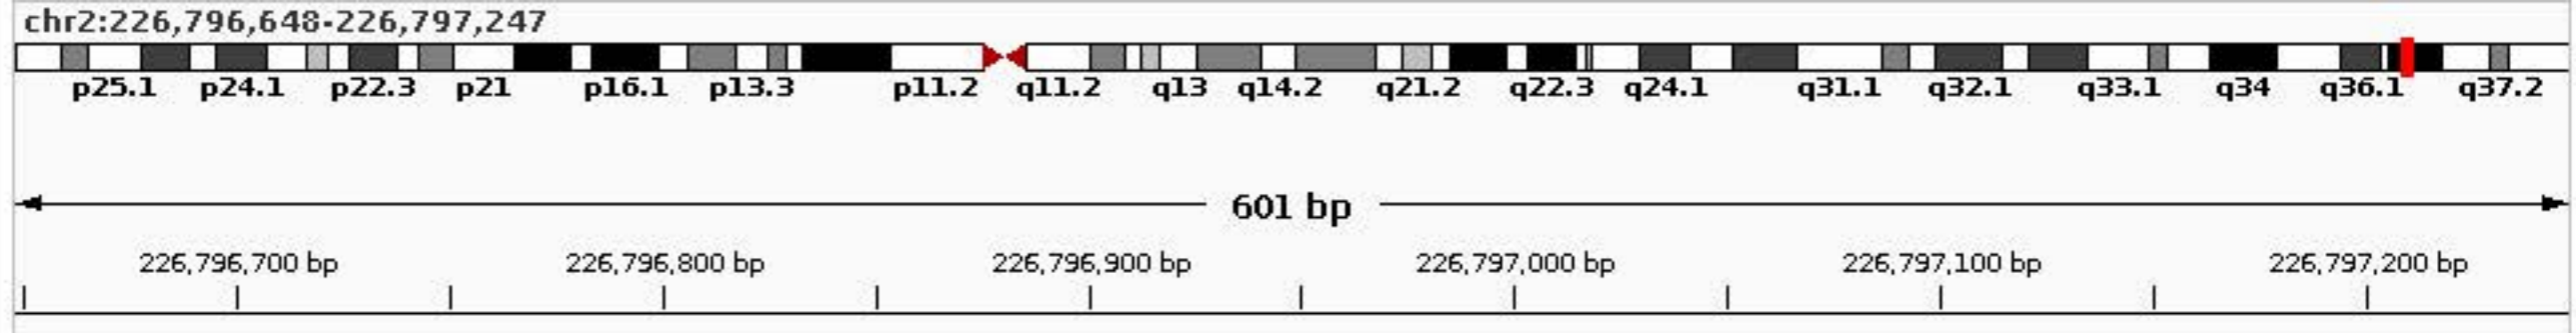

SL\_0006\_RN\_36\_mut.bam Coverage

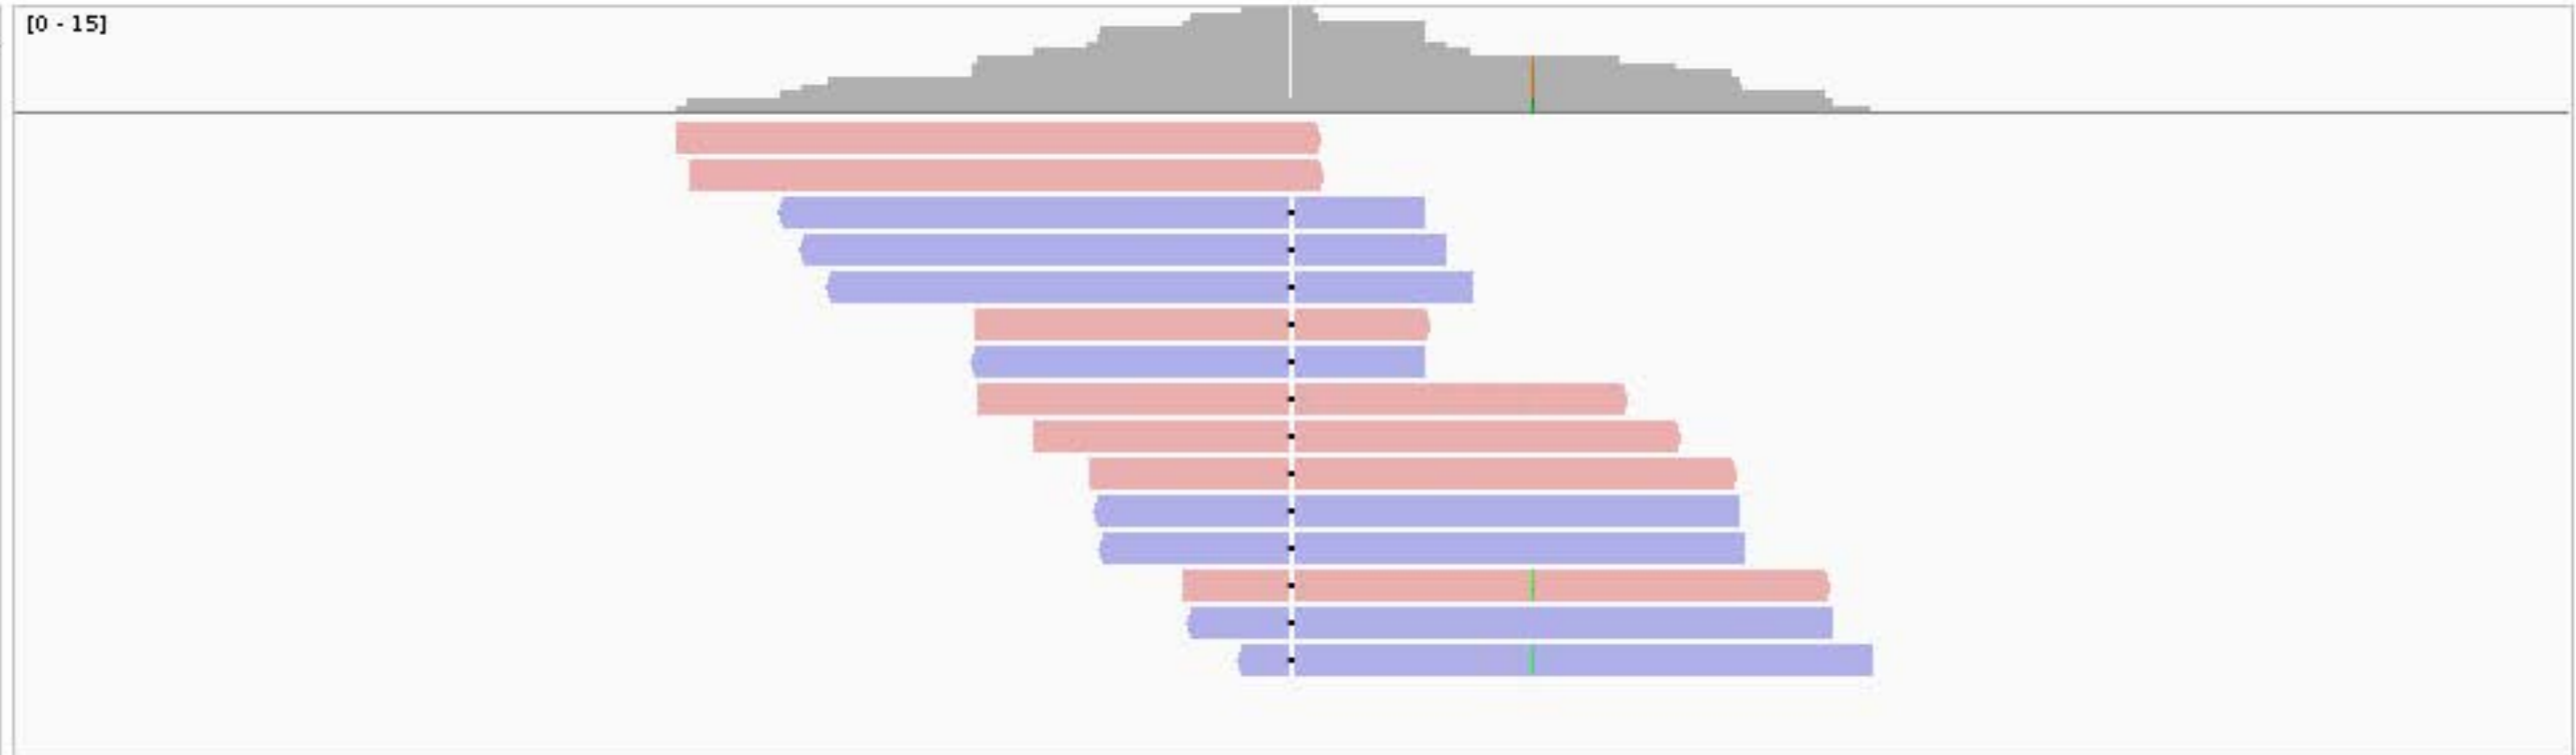

Sequence

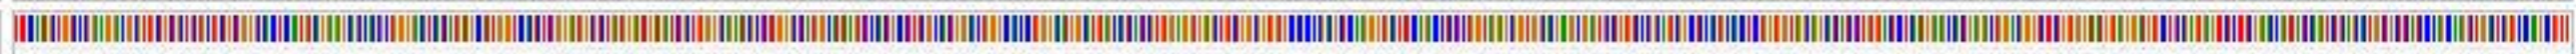

Refseq Genes

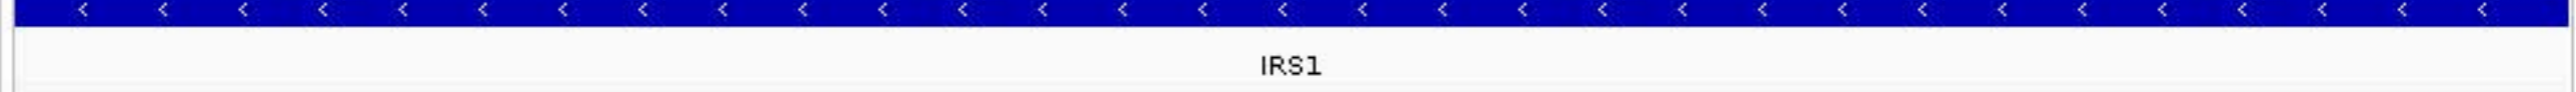

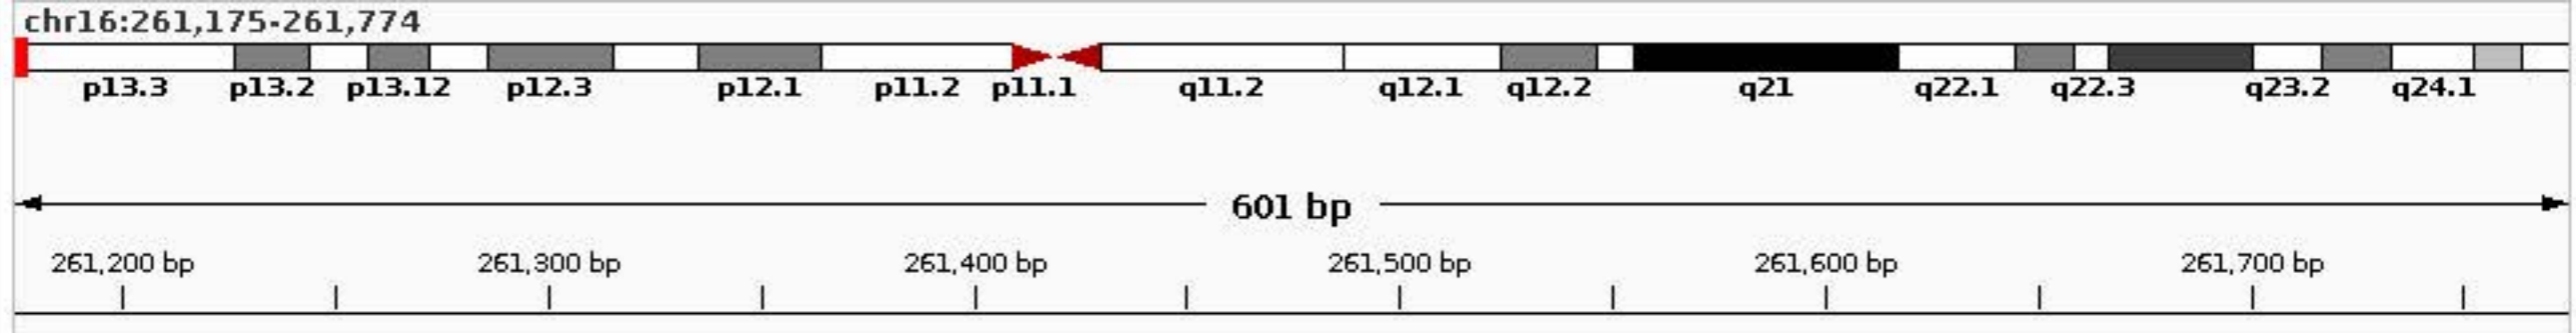

SL\_0007\_RN\_2\_mut.bam Coverage

SL\_0007\_RN\_2\_mut.bam

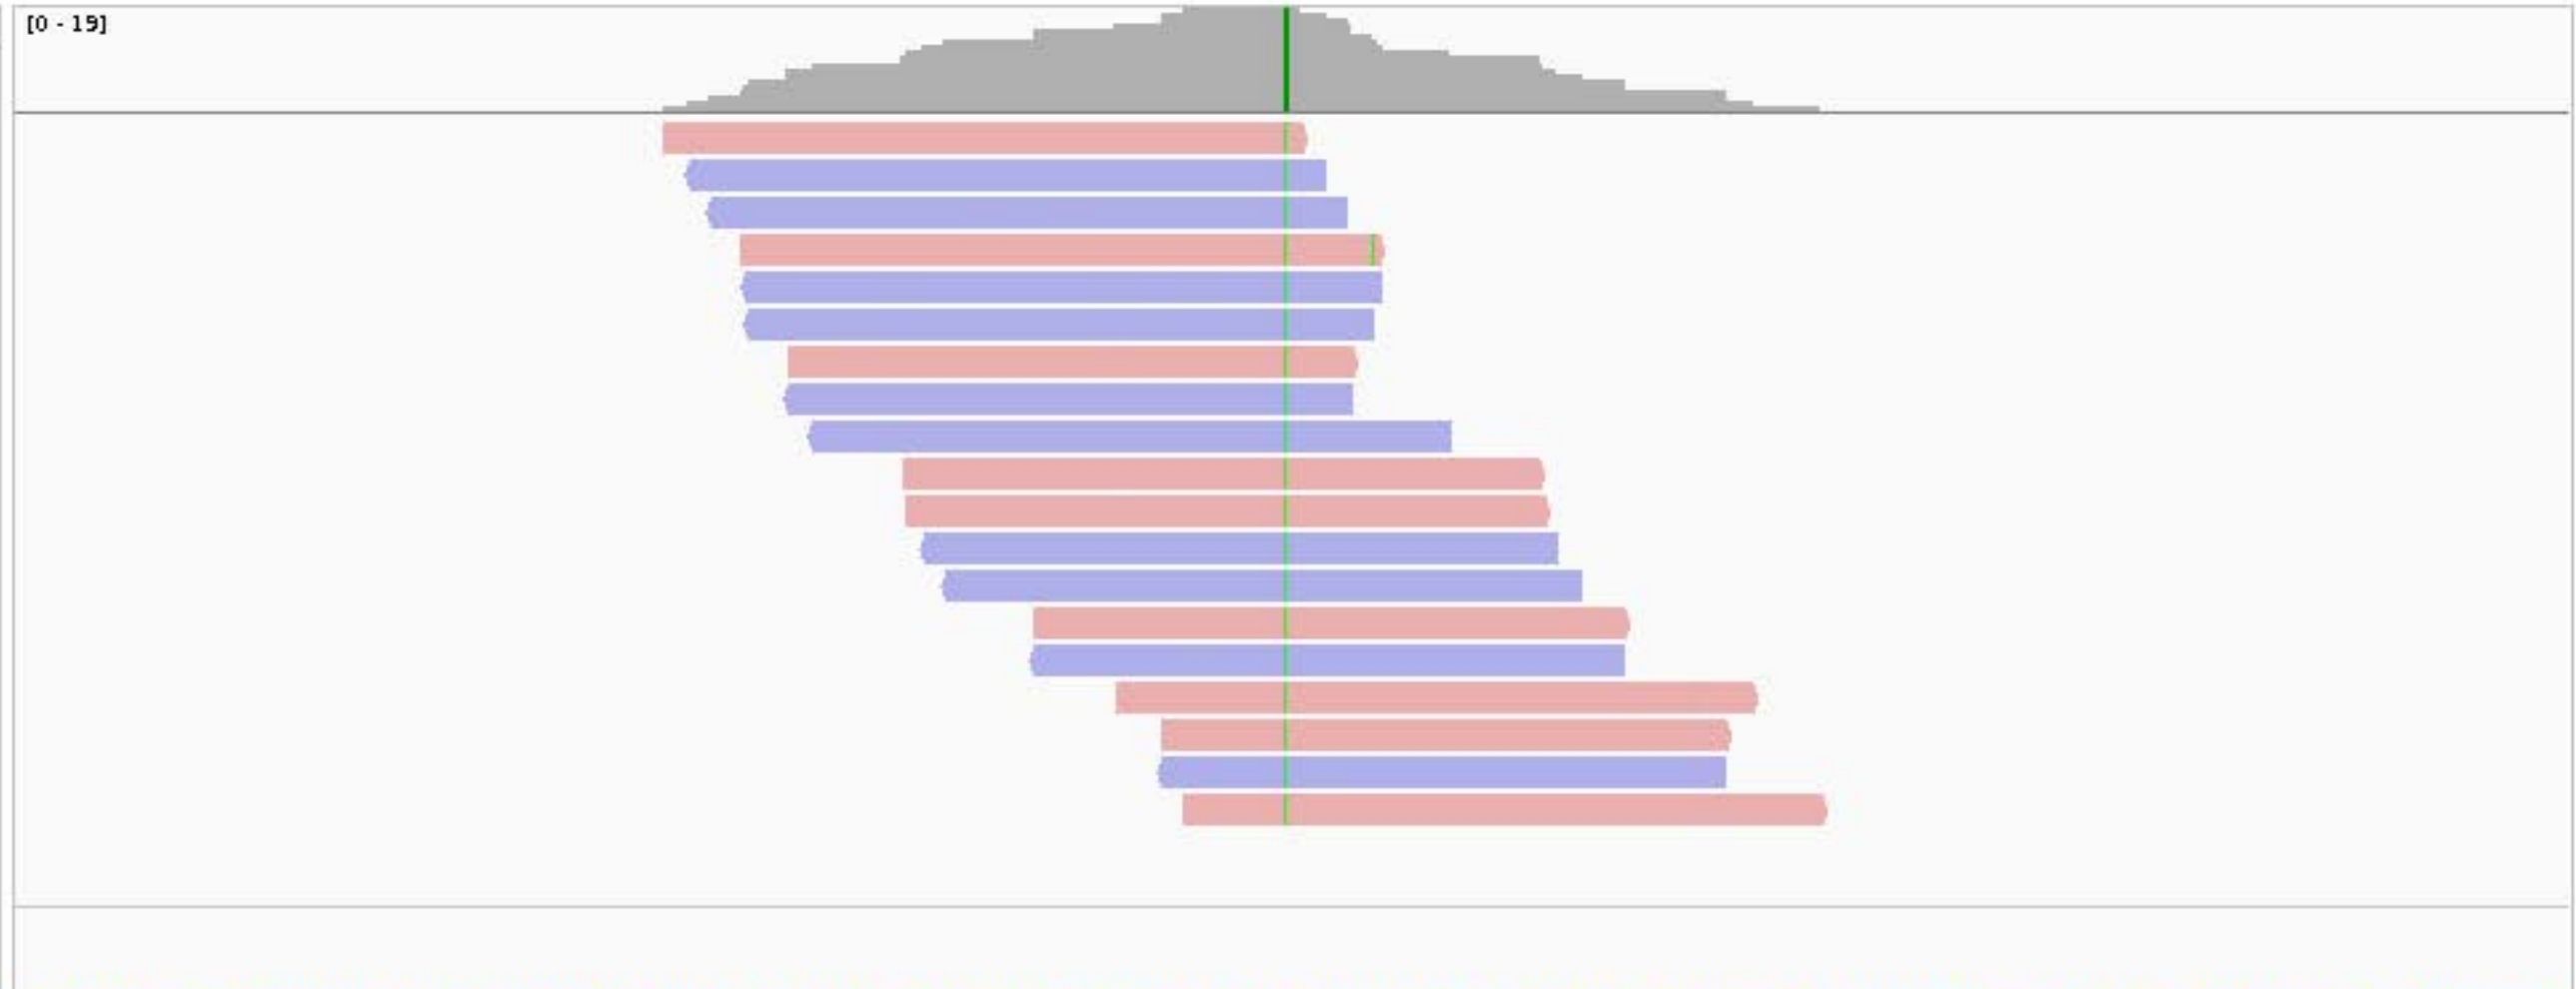

Sequence →

Refseq Genes

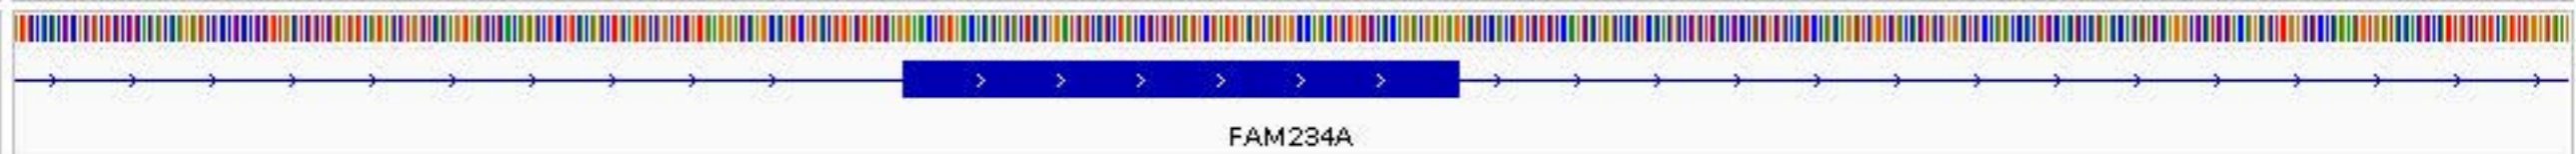



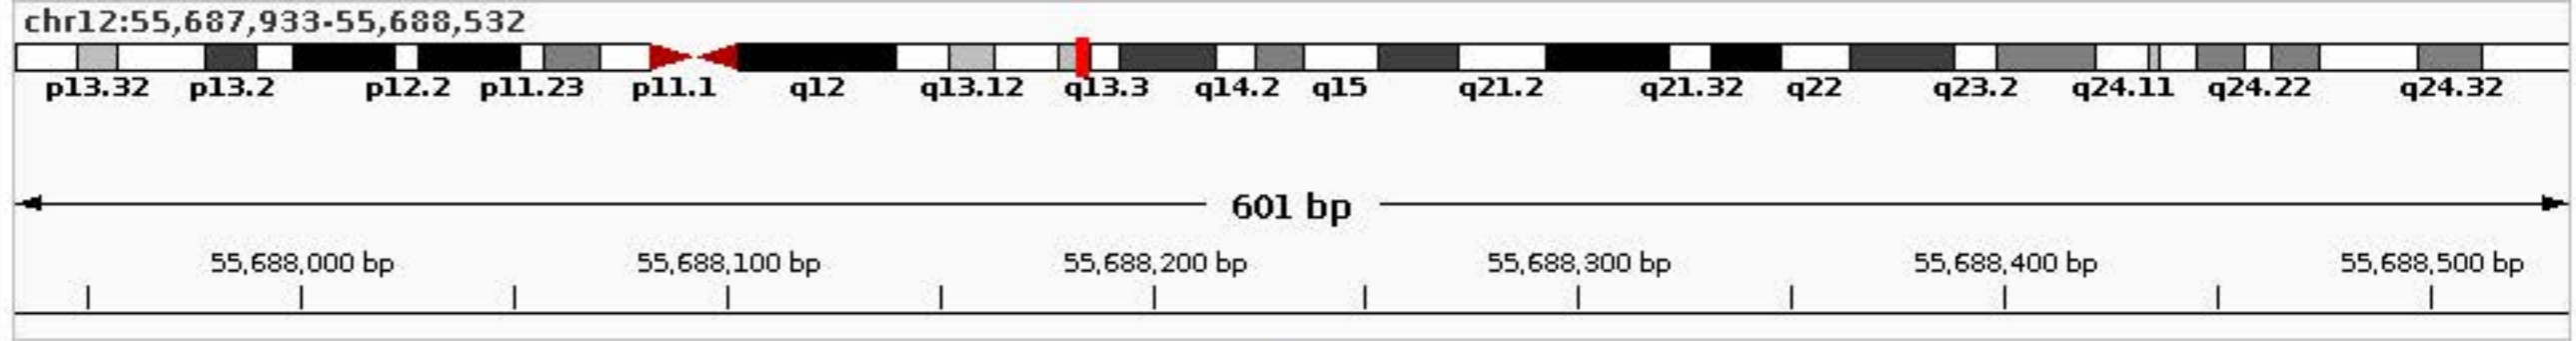

SL\_0017\_RN\_48\_mut.bam Coverage

SL\_0017\_RN\_48\_mut.bam

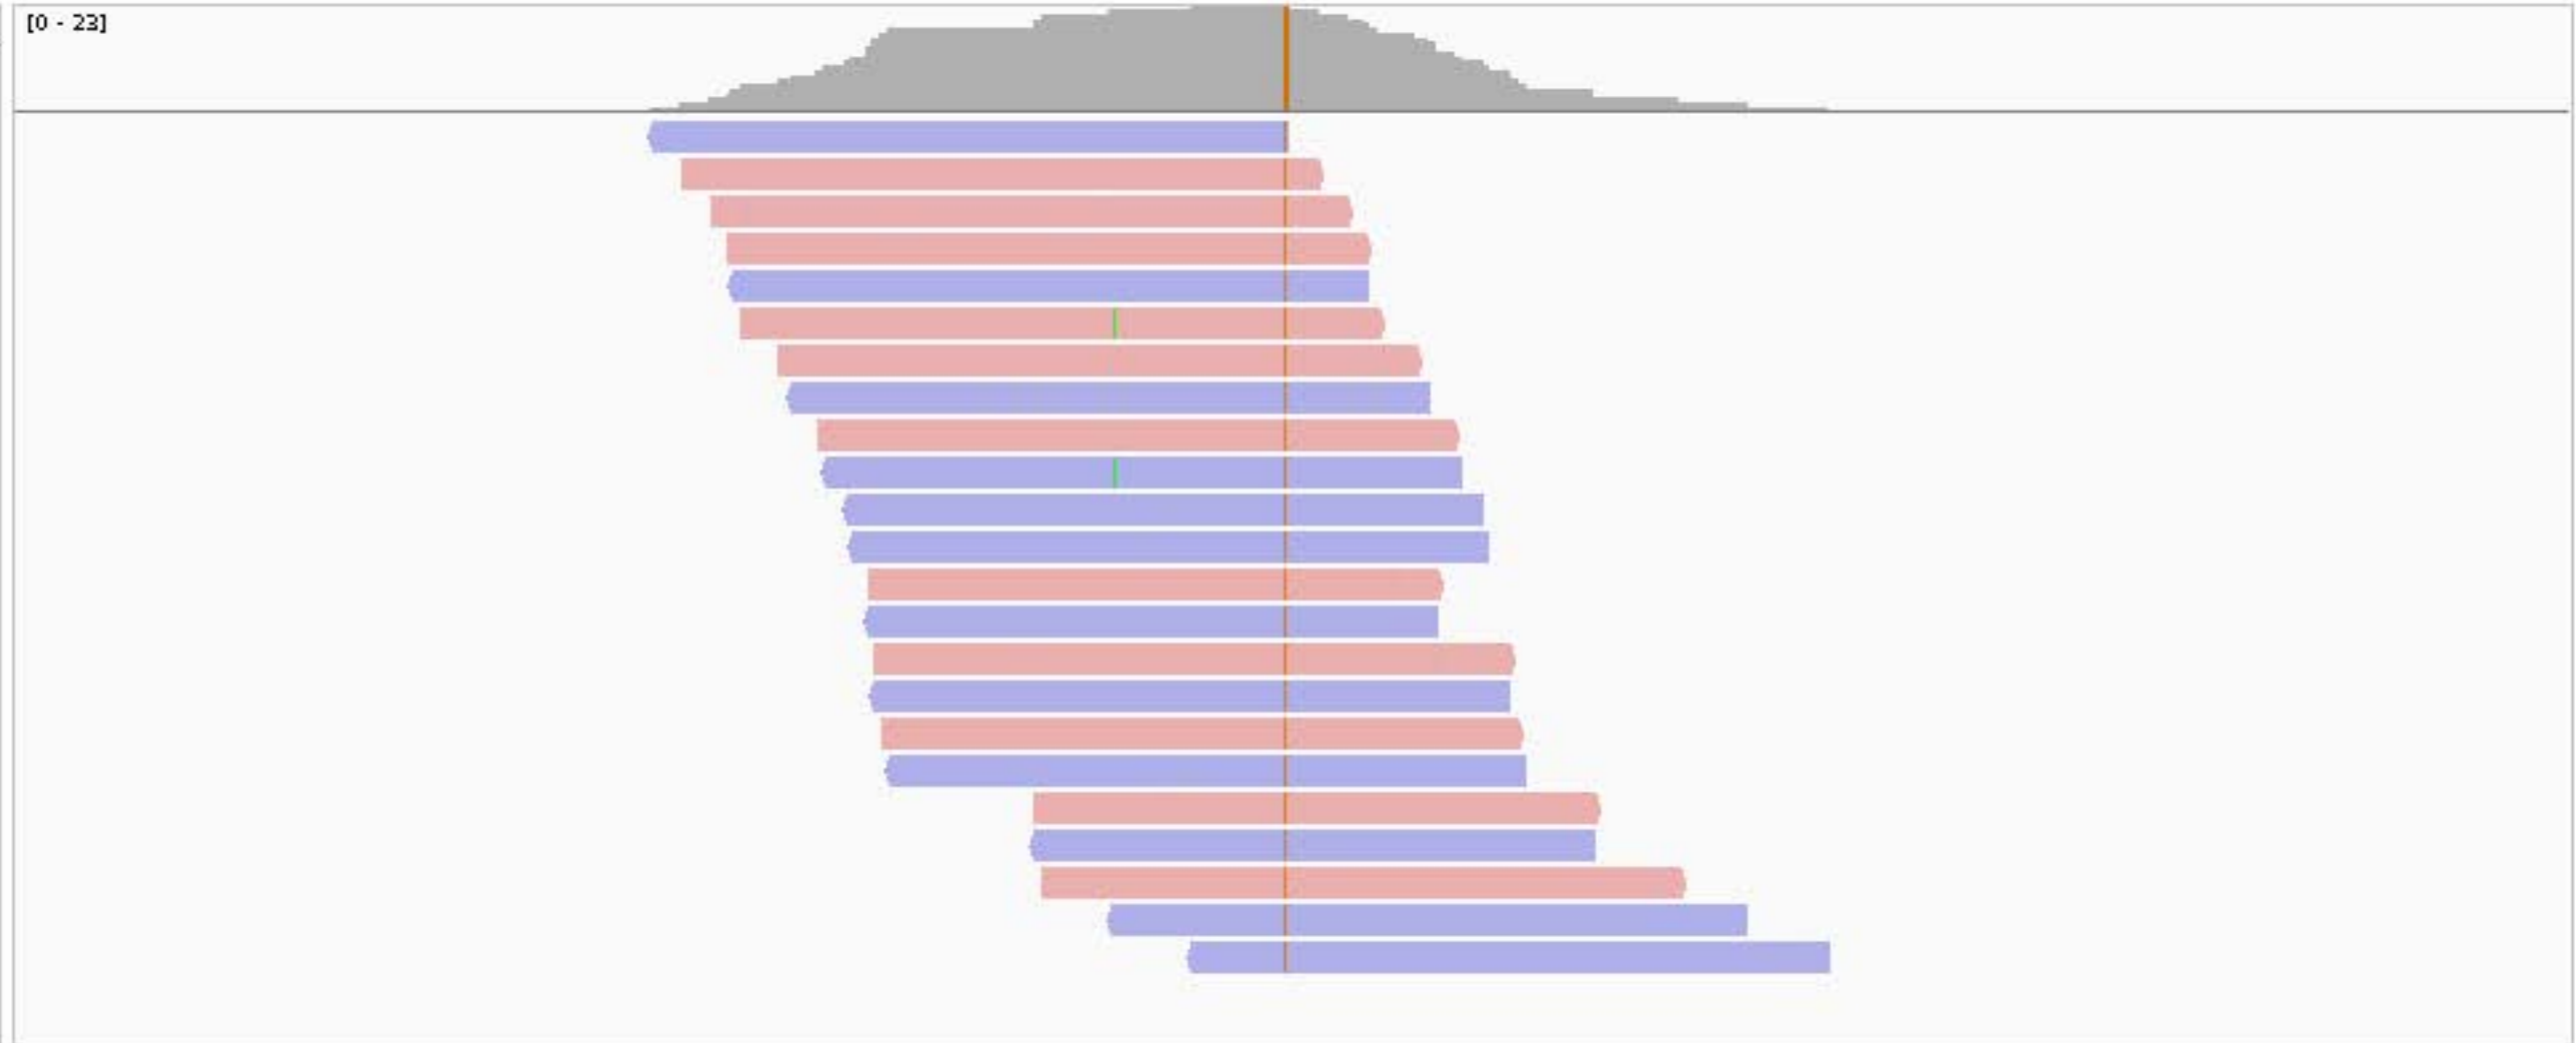

Sequence

Refseq Genes

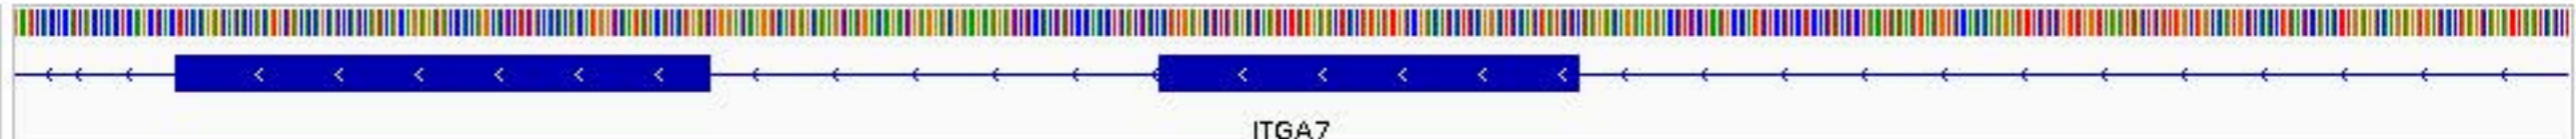



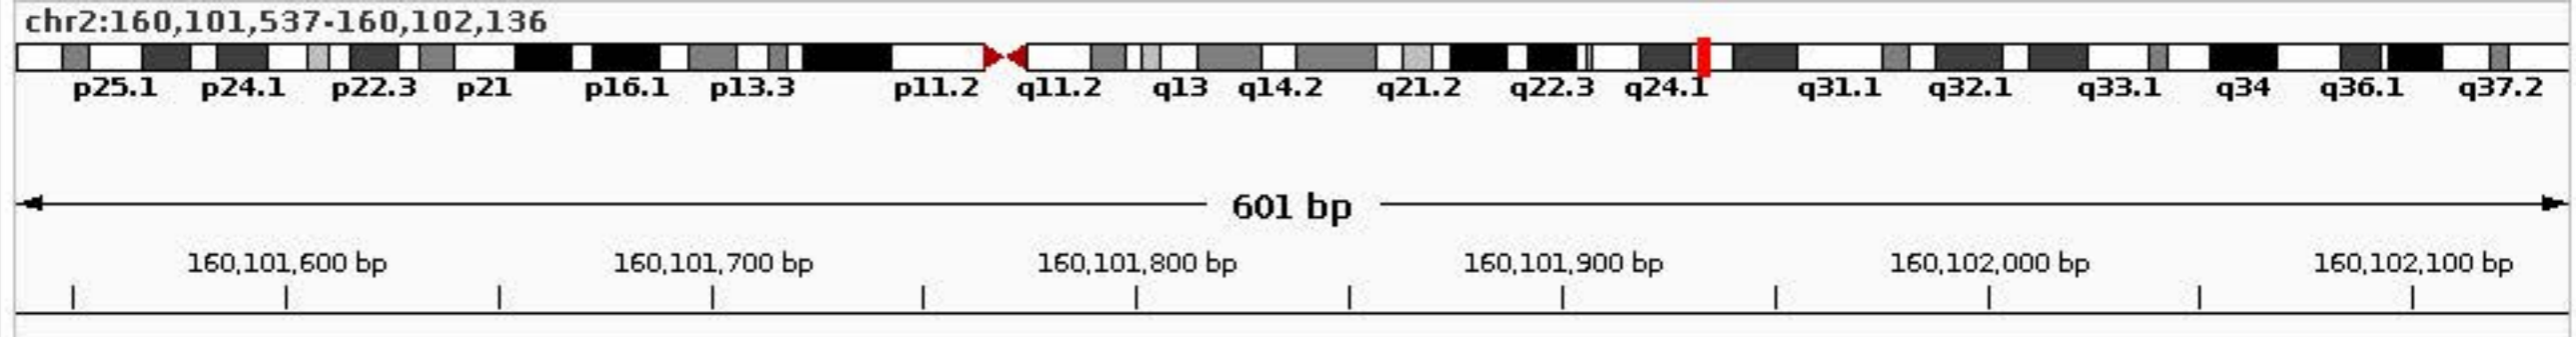

SL\_0006\_RN\_36\_mut.bam Coverage

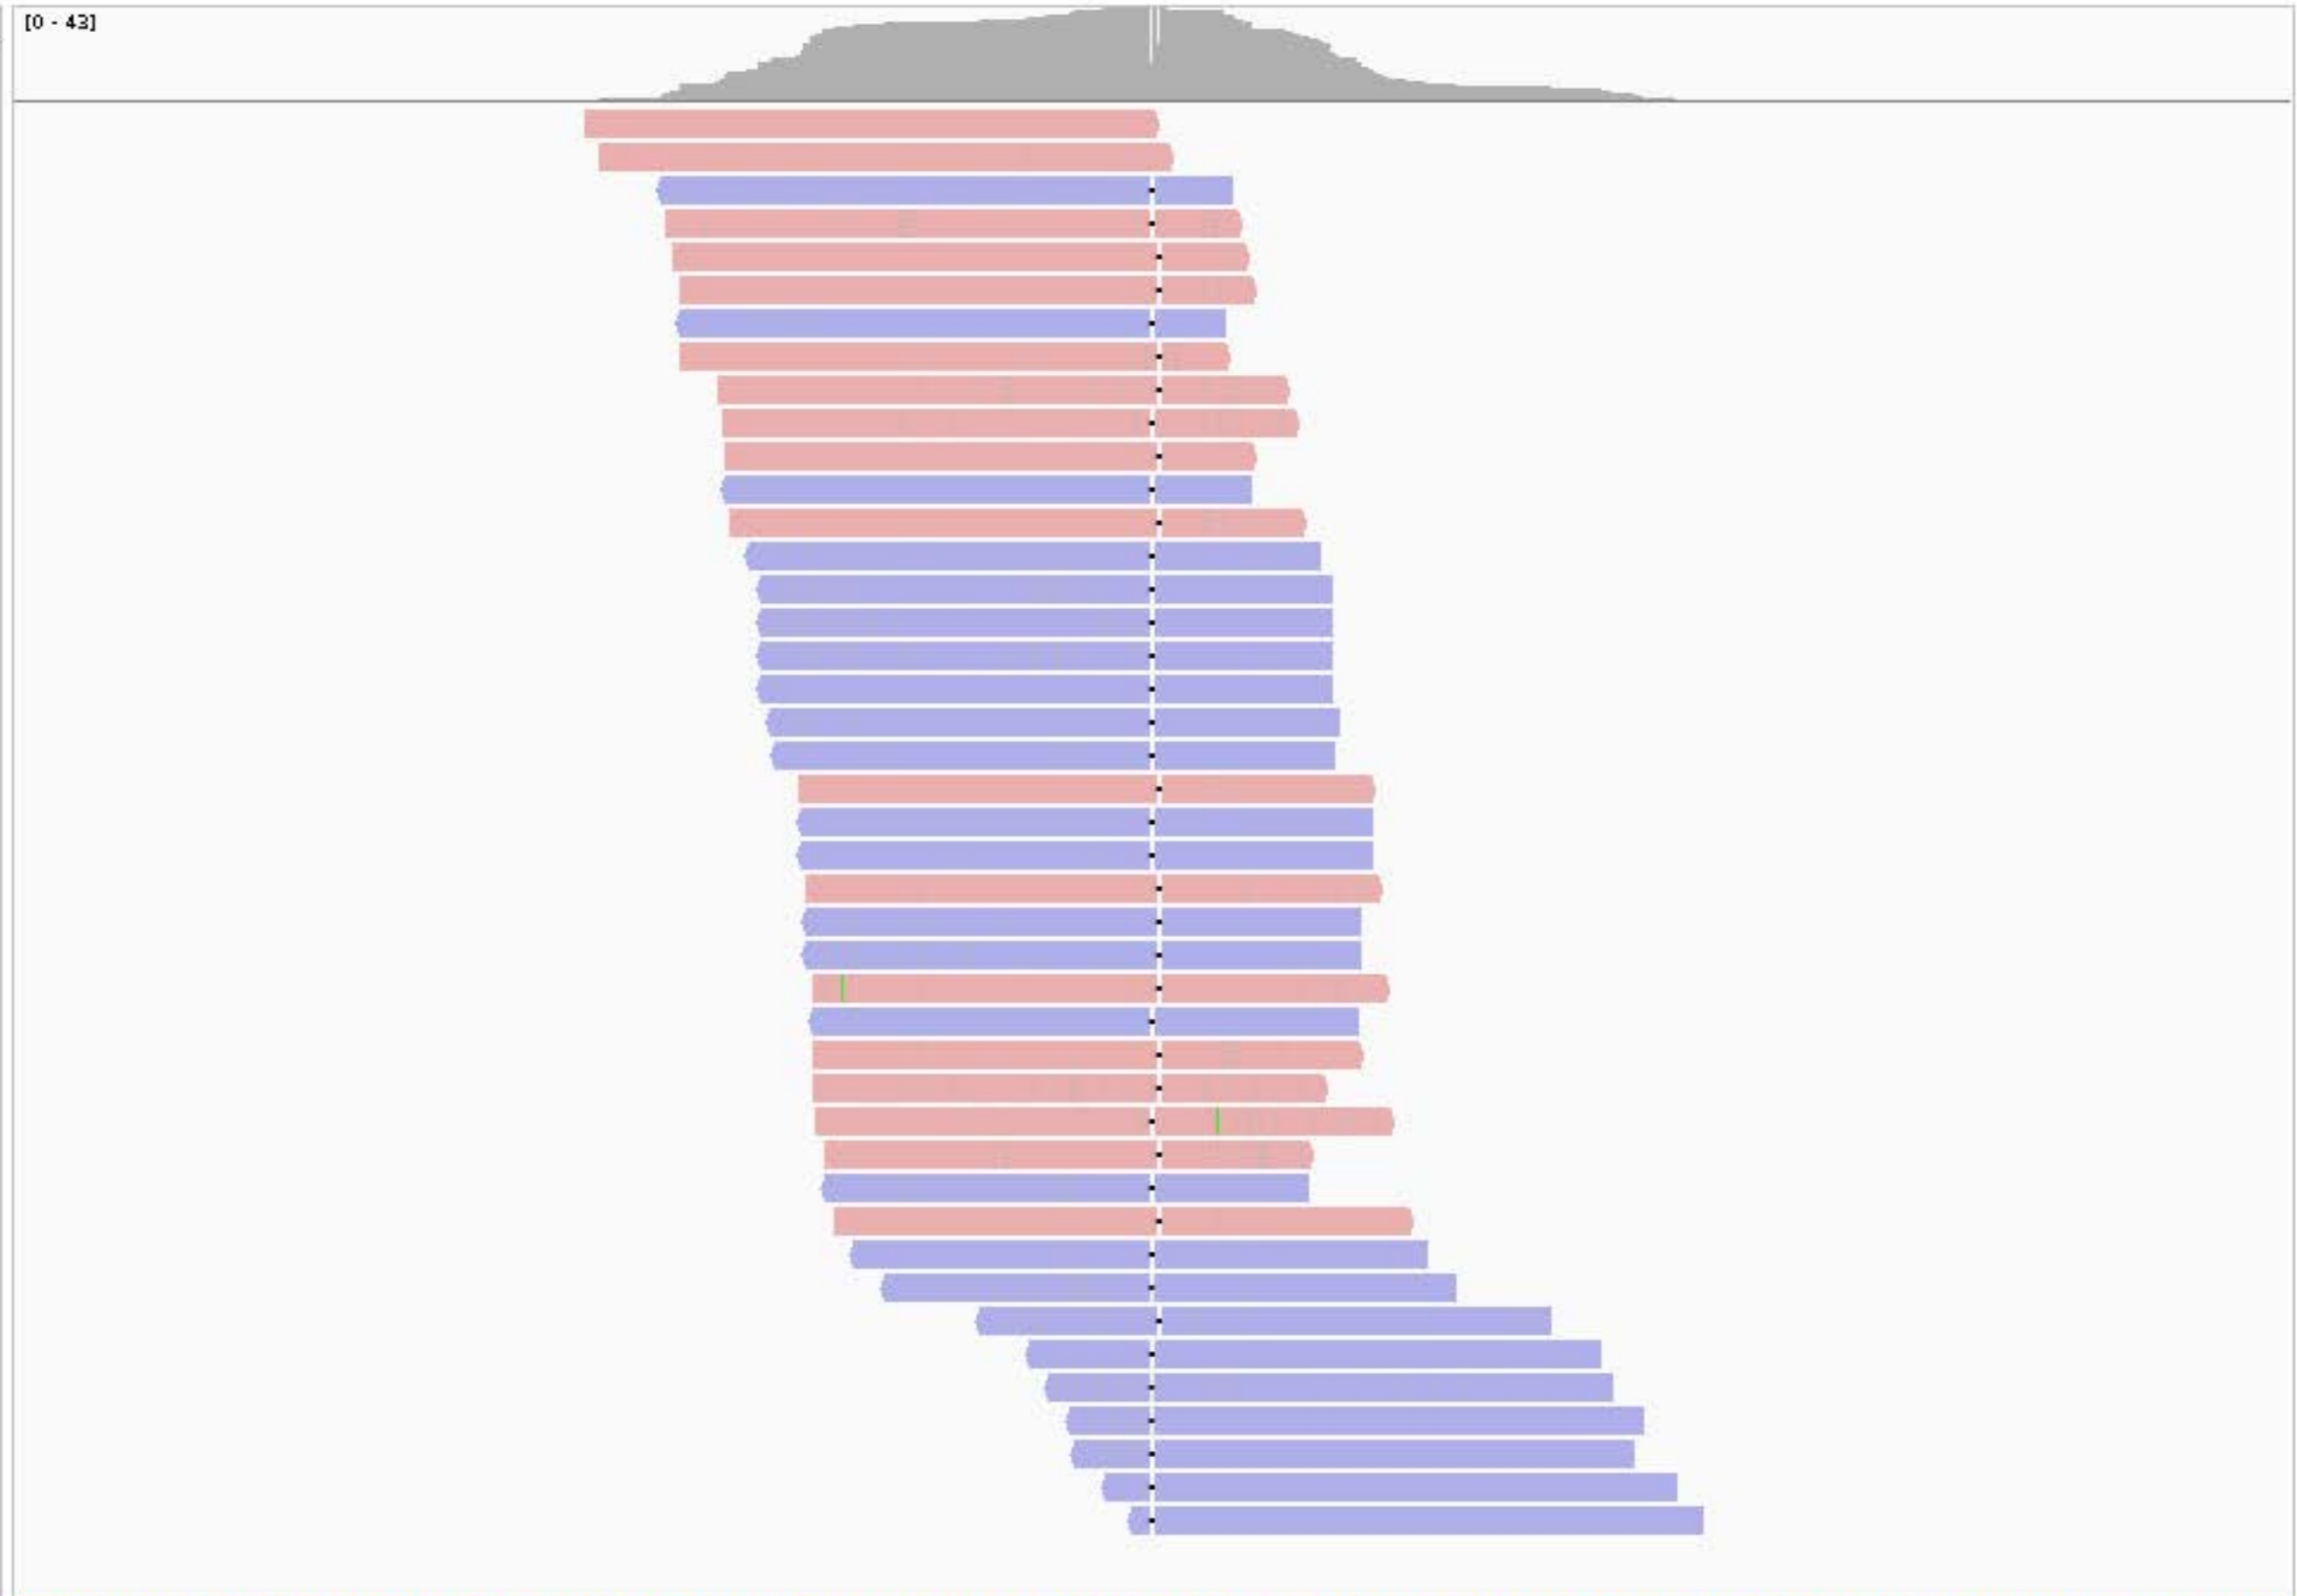

SL\_0006\_RN\_36\_mut.bam

Sequence

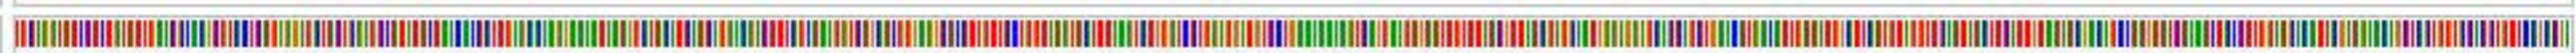

Refseq Genes

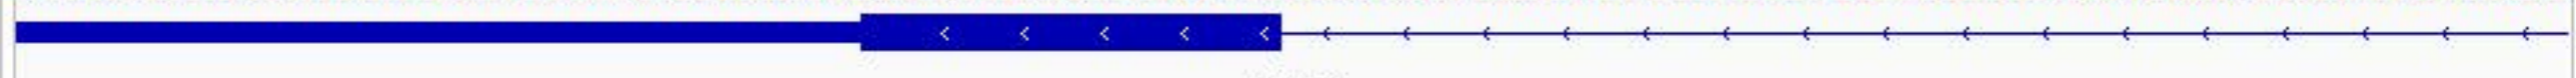

ITGB6

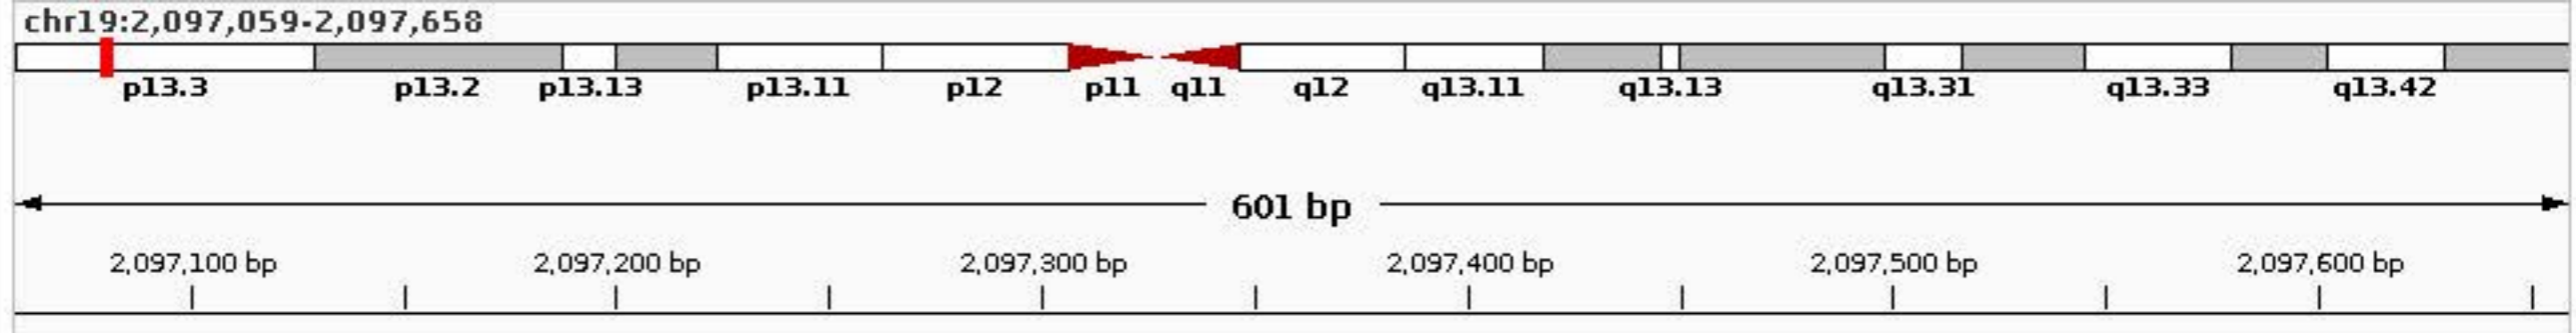

SL\_0017\_RN\_15\_mut.bam Coverage

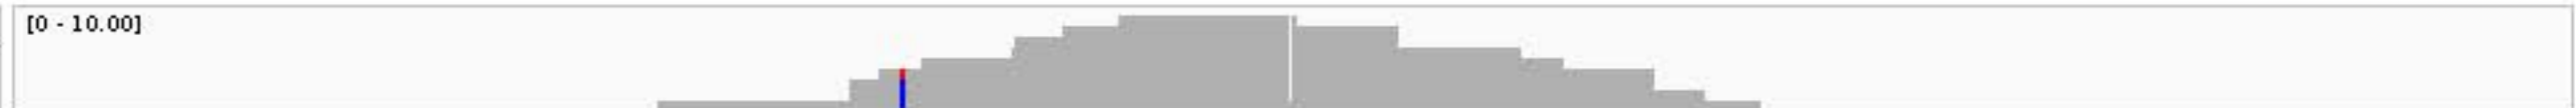

SL\_0017\_RN\_15\_mut.bam

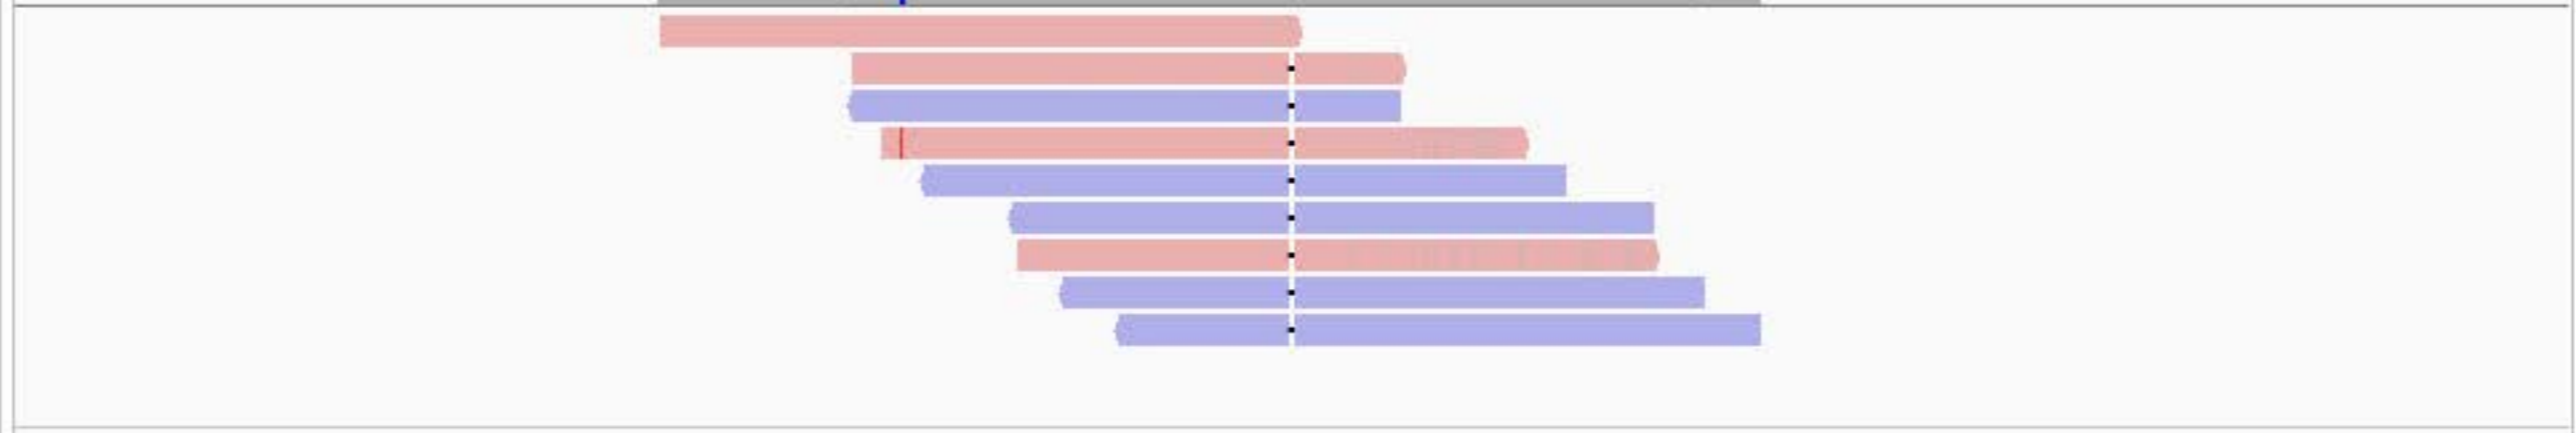

Sequence

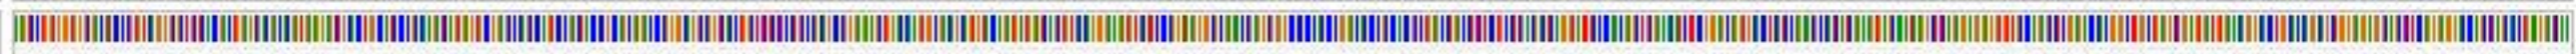

Refseq Genes

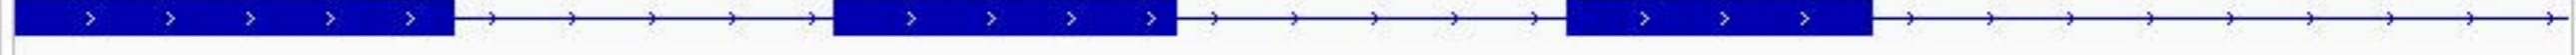

IZUM04

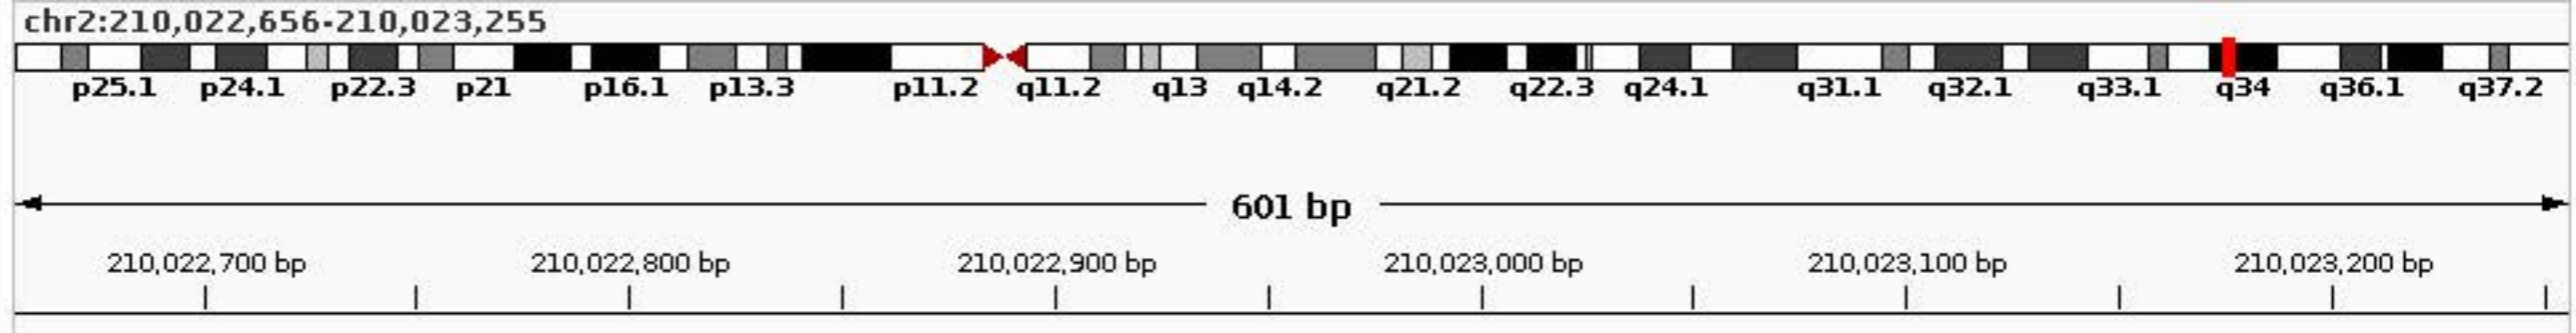

SL\_0006\_RN\_59\_mut.bam Coverage

SL\_0006\_RN\_59\_mut.bam

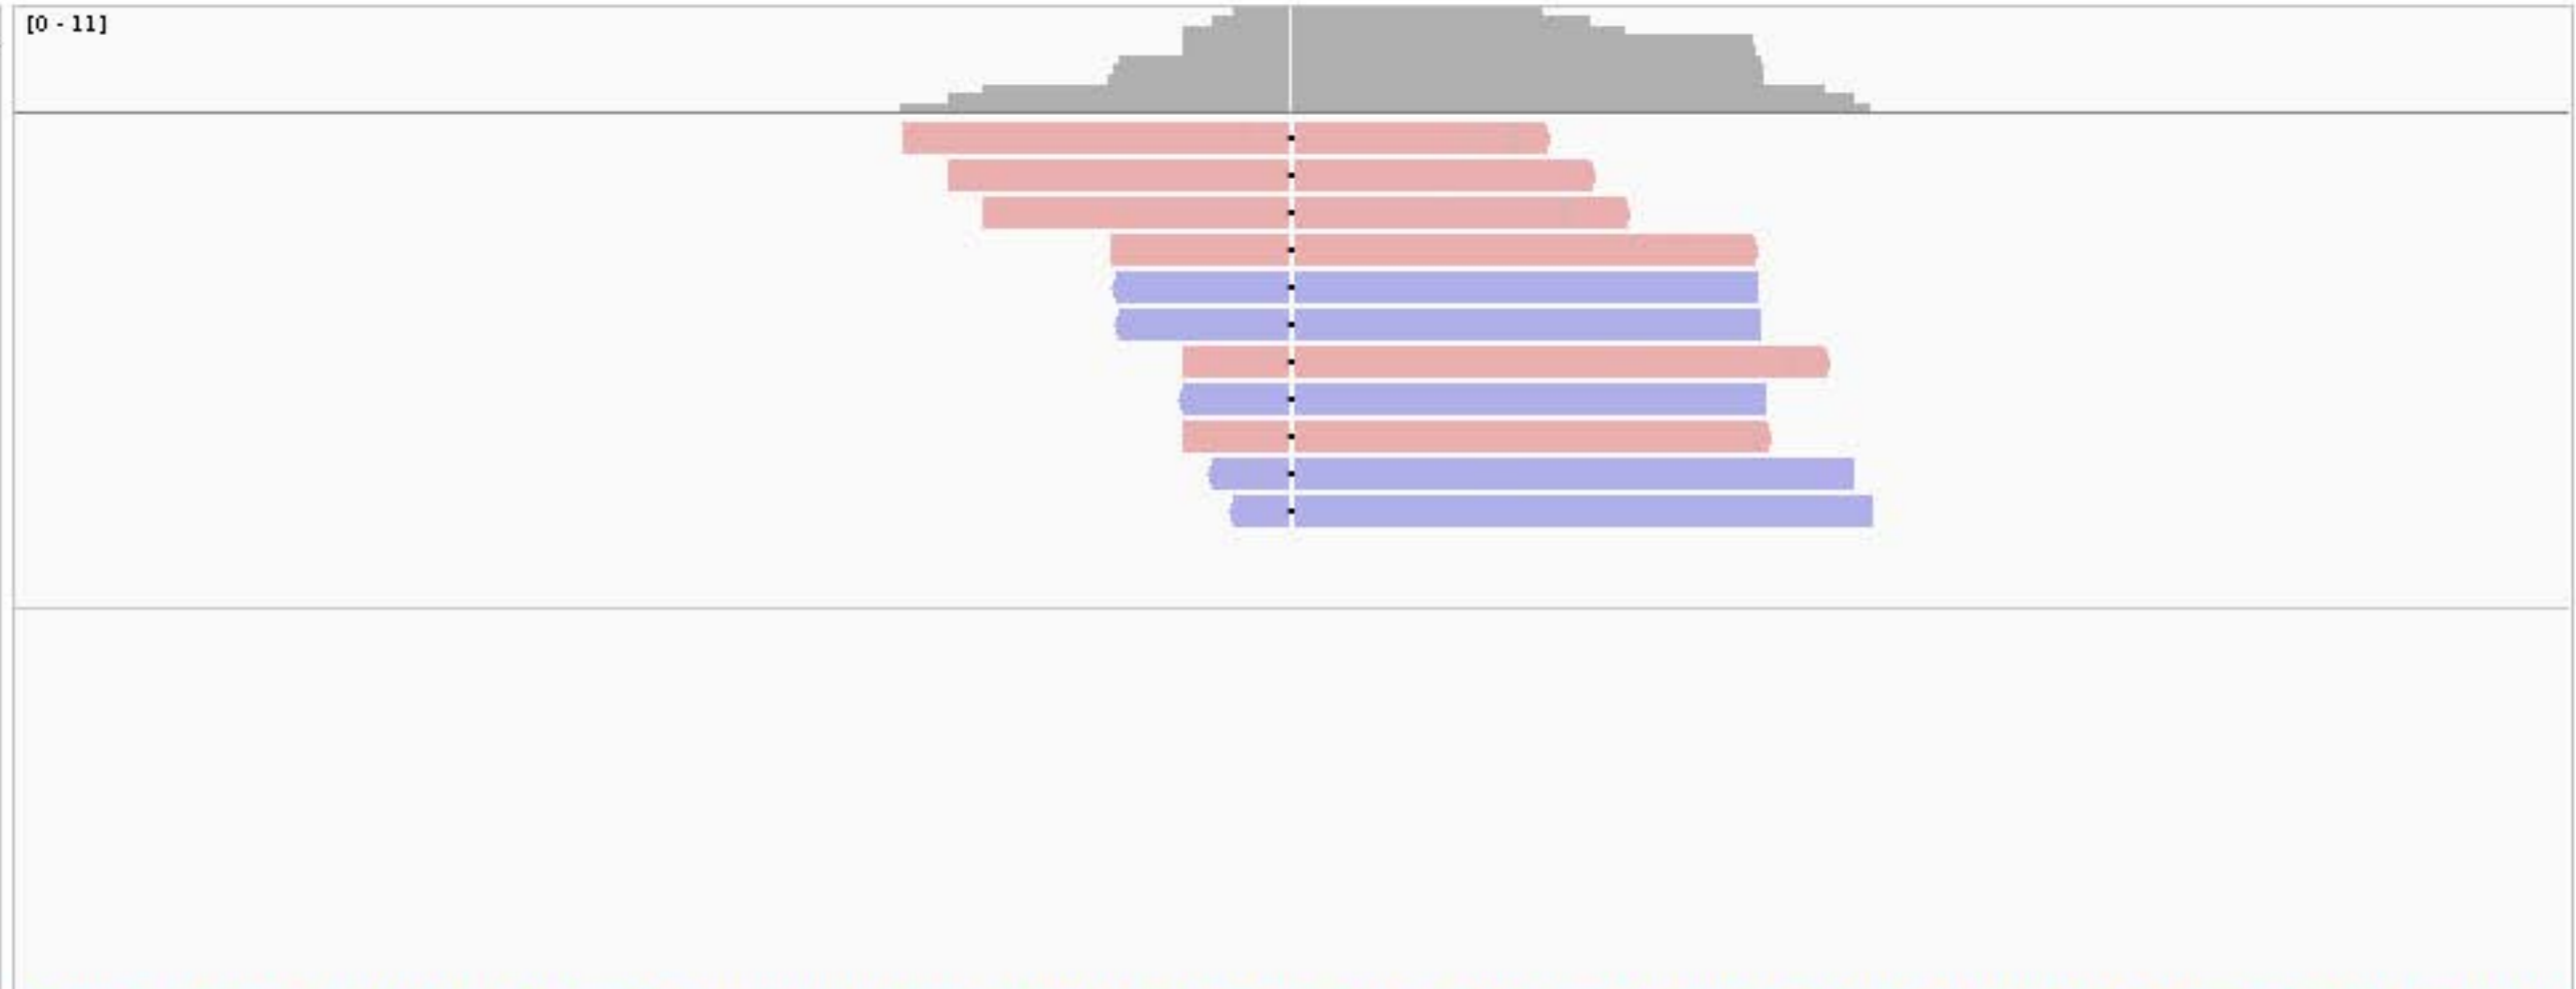

Sequence

Refseq Genes

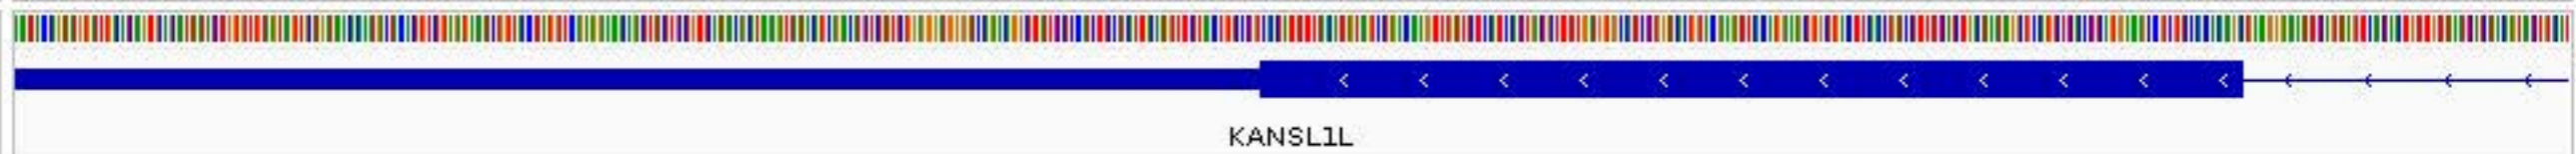



SL\_0006\_RN\_67\_mut.bam Coverage

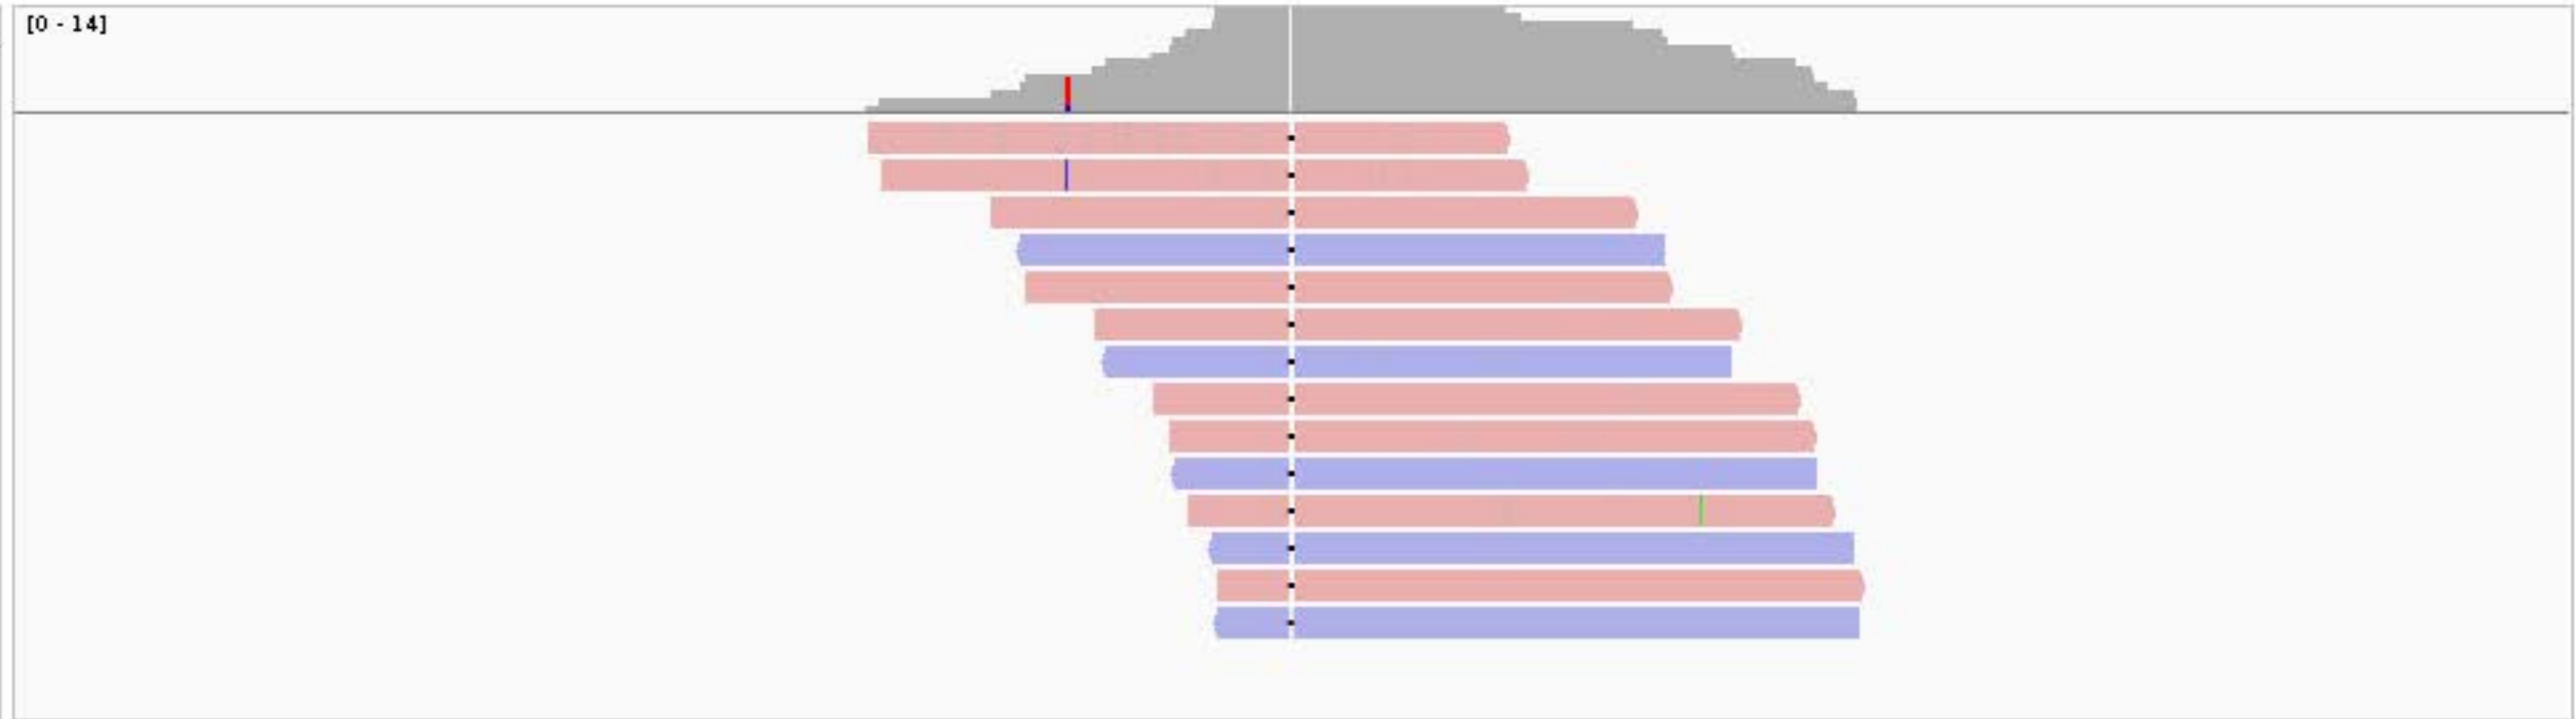

SL\_0006\_RN\_67\_mut.bam

Sequence

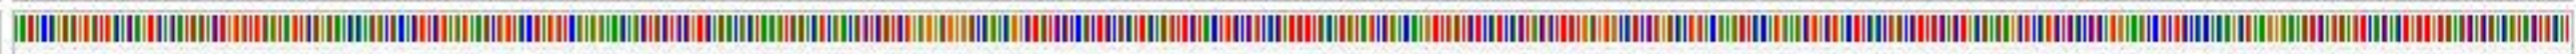

Refseq Genes

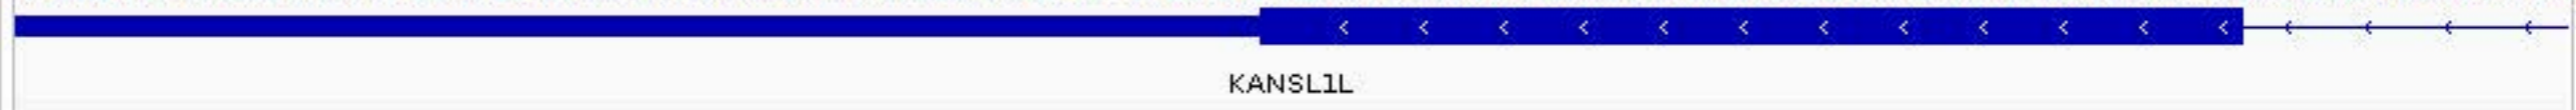



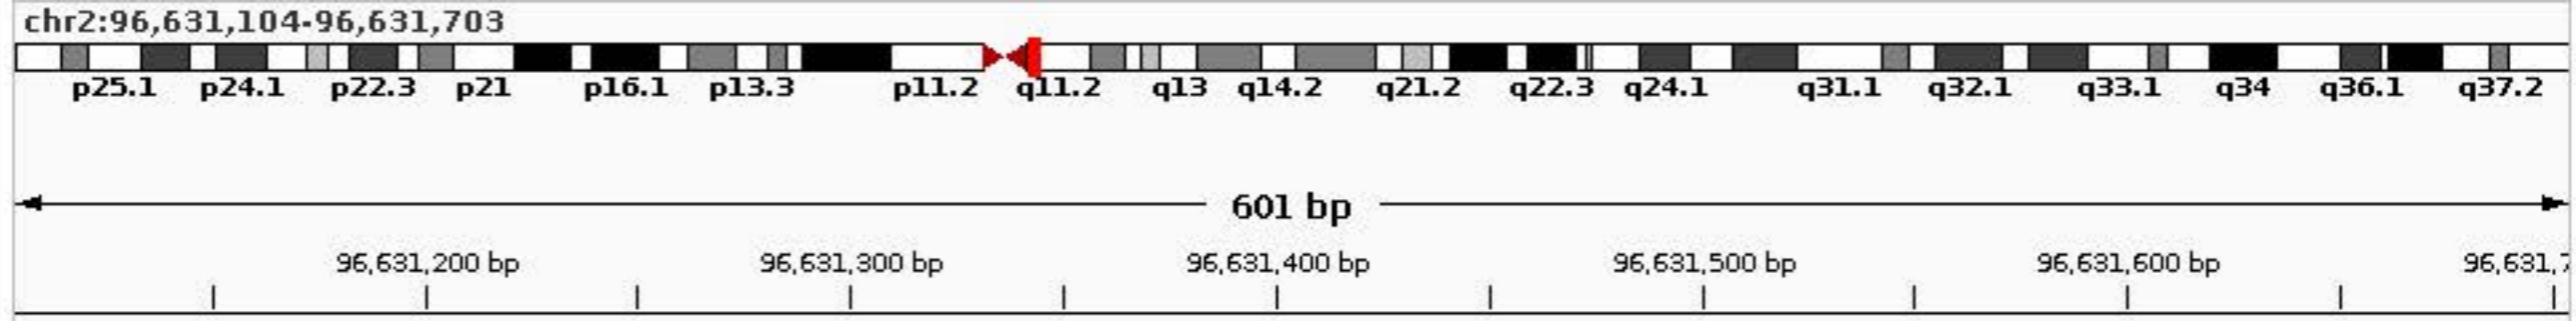

SL\_0004\_RN\_19\_mut.bam Coverage

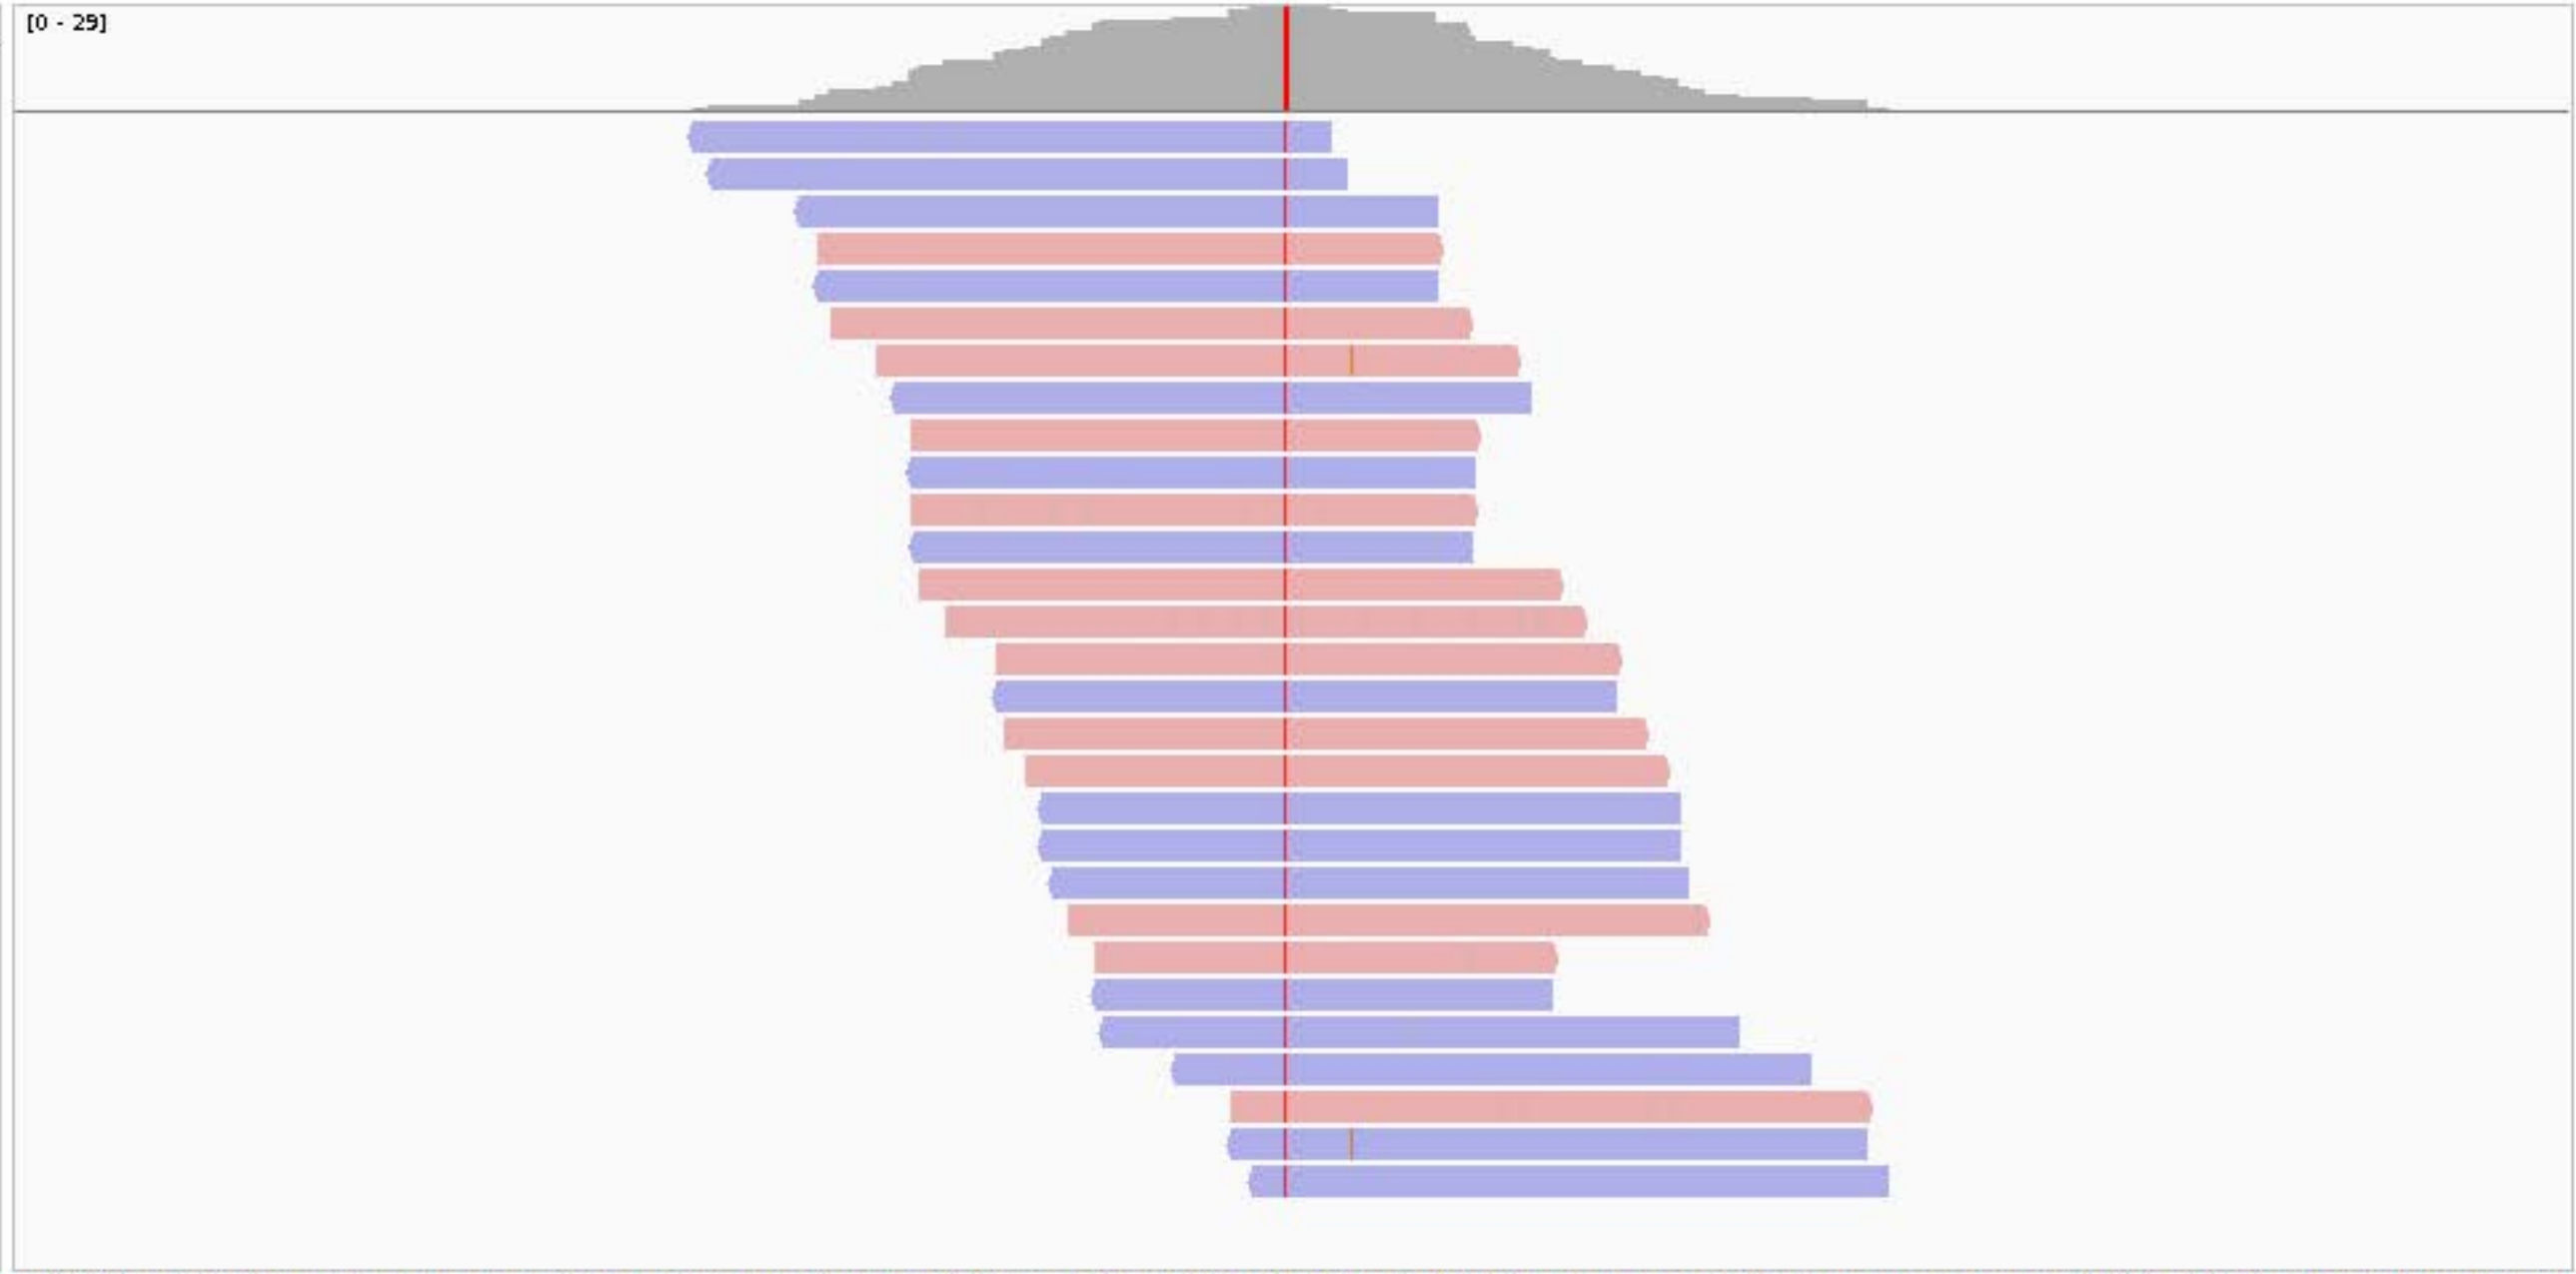

SL\_0004\_RN\_19\_mut.bam

Sequence

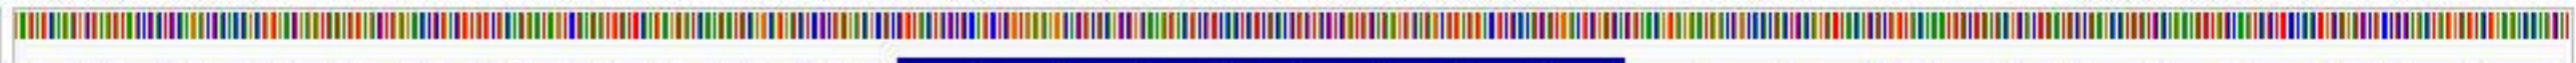

Refseq Genes

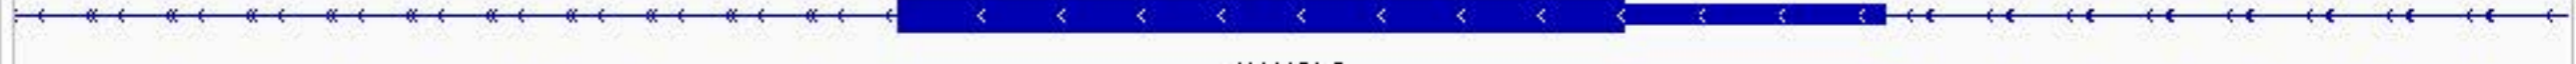

KANSL3



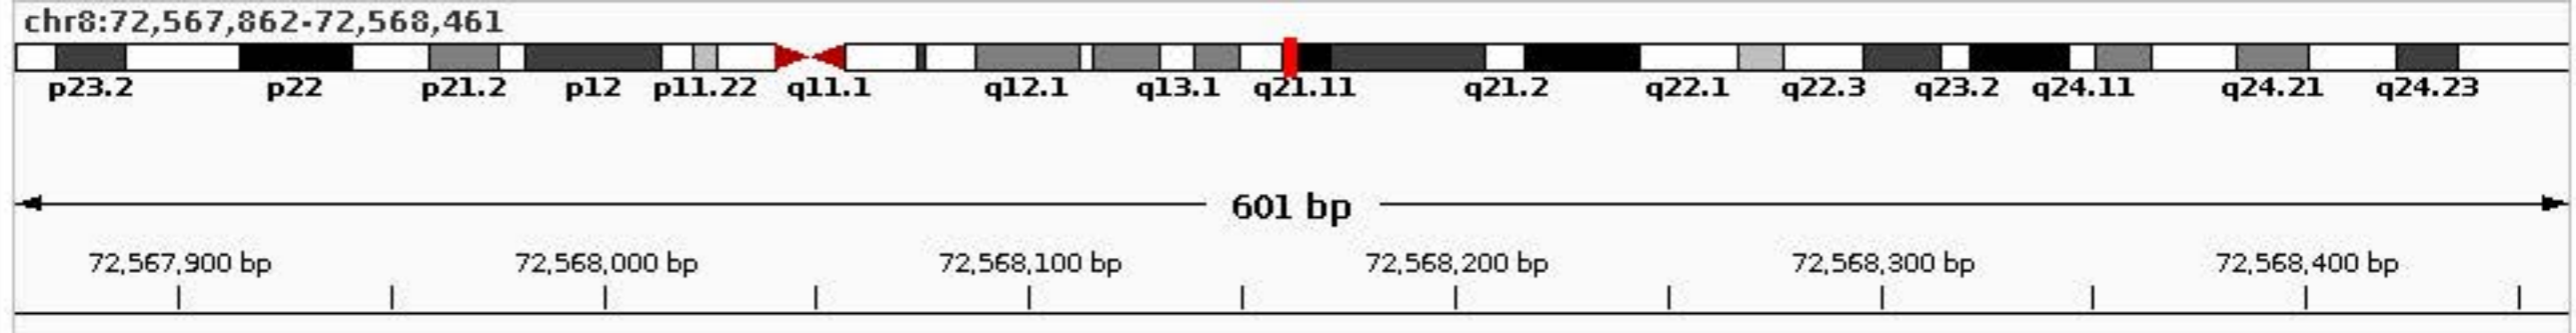

SL\_0006\_RN\_67\_mut.bam Coverage

SL\_0006\_RN\_67\_mut.bam

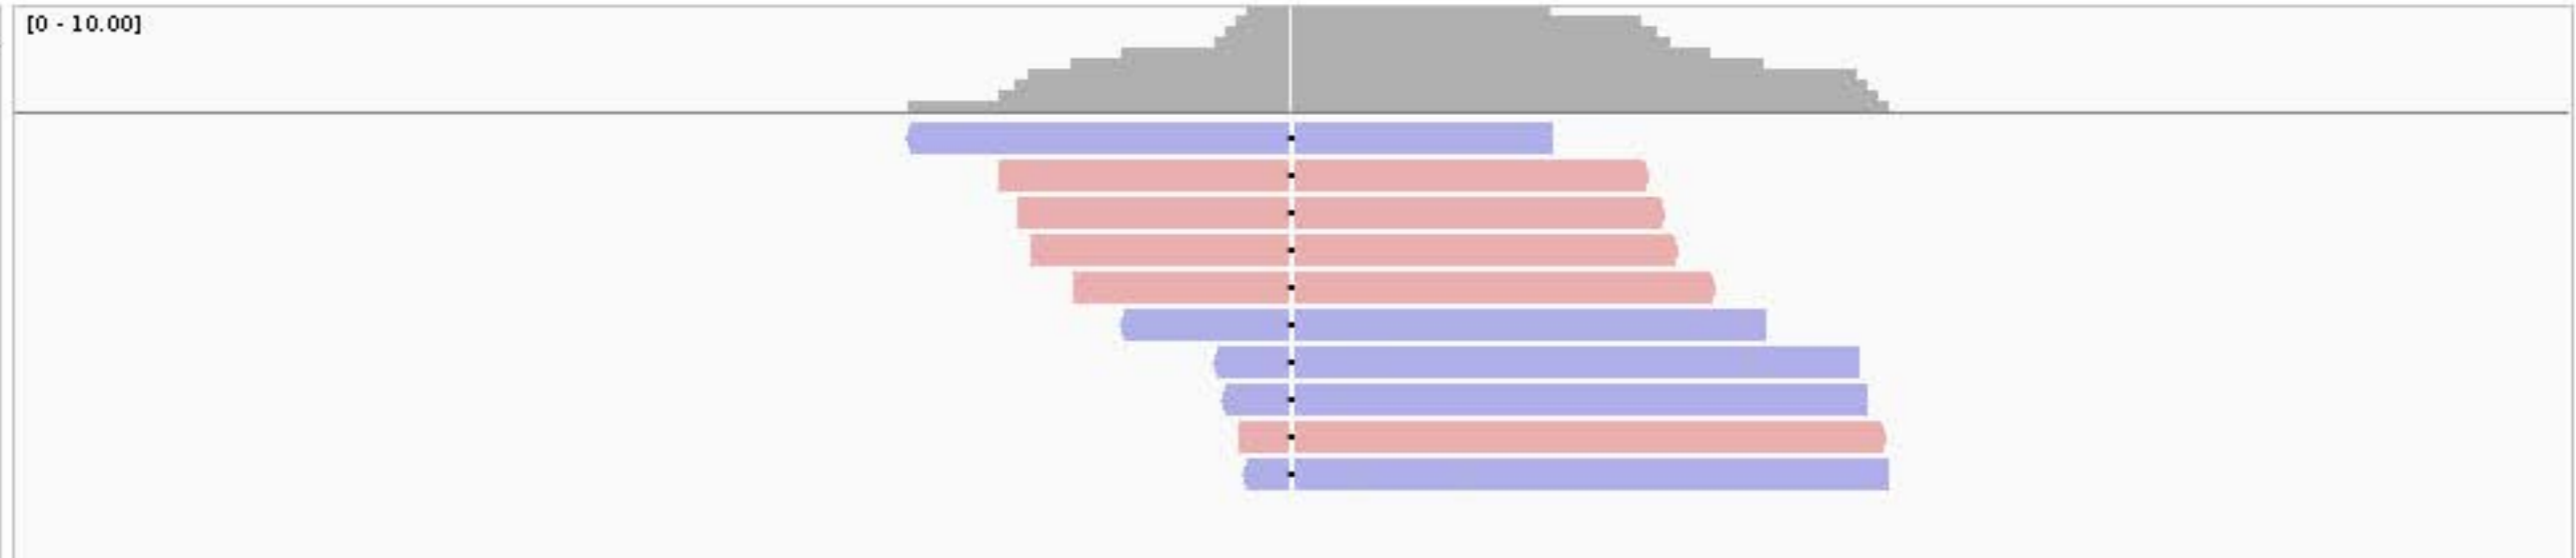

Sequence

Refseq Genes

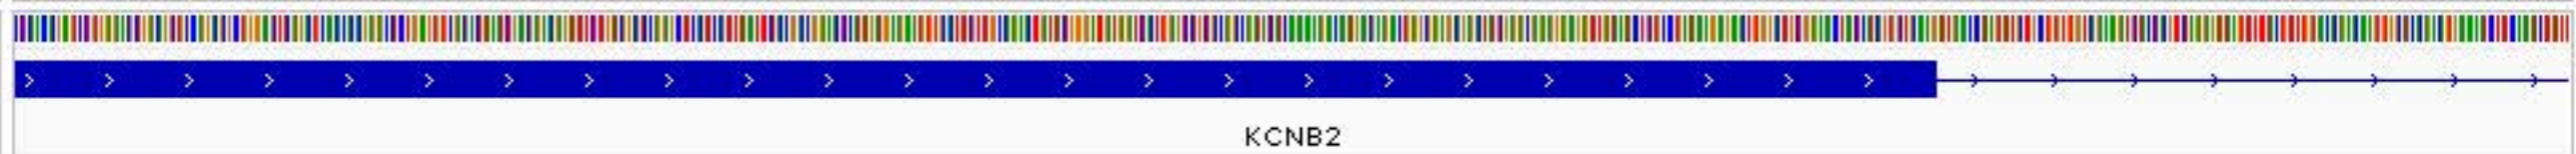

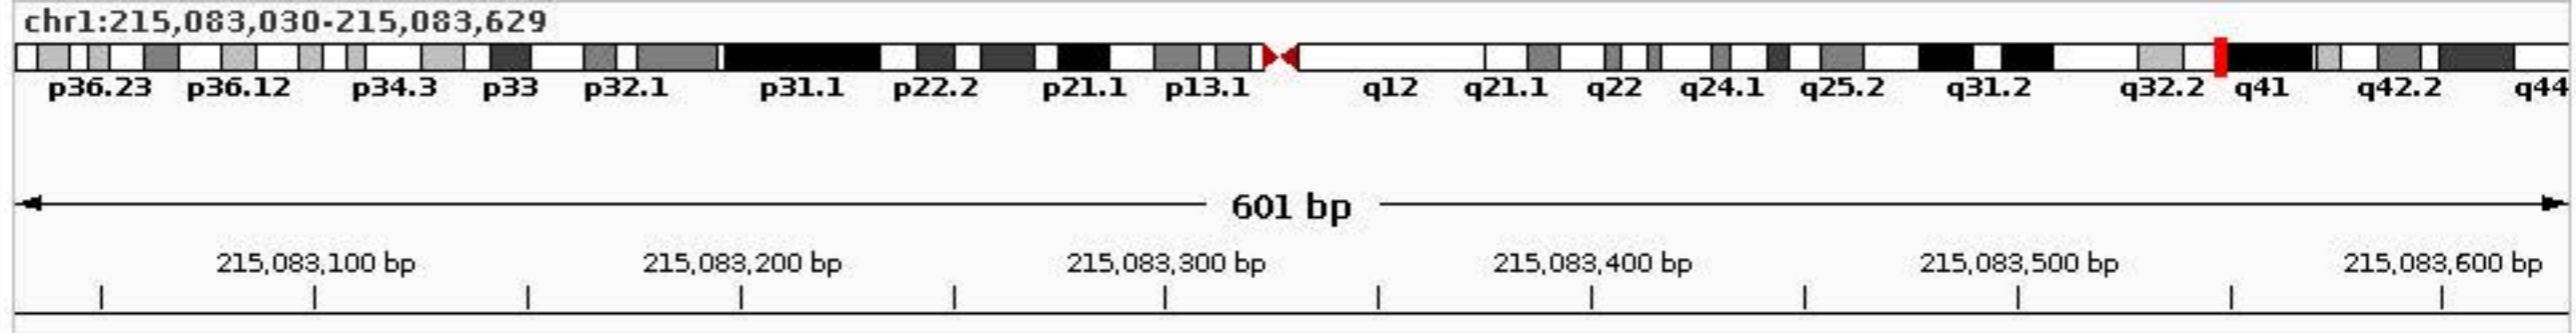

SL\_0004\_RN\_05\_mut.bam Coverage

SL\_0004\_RN\_05\_mut.bam

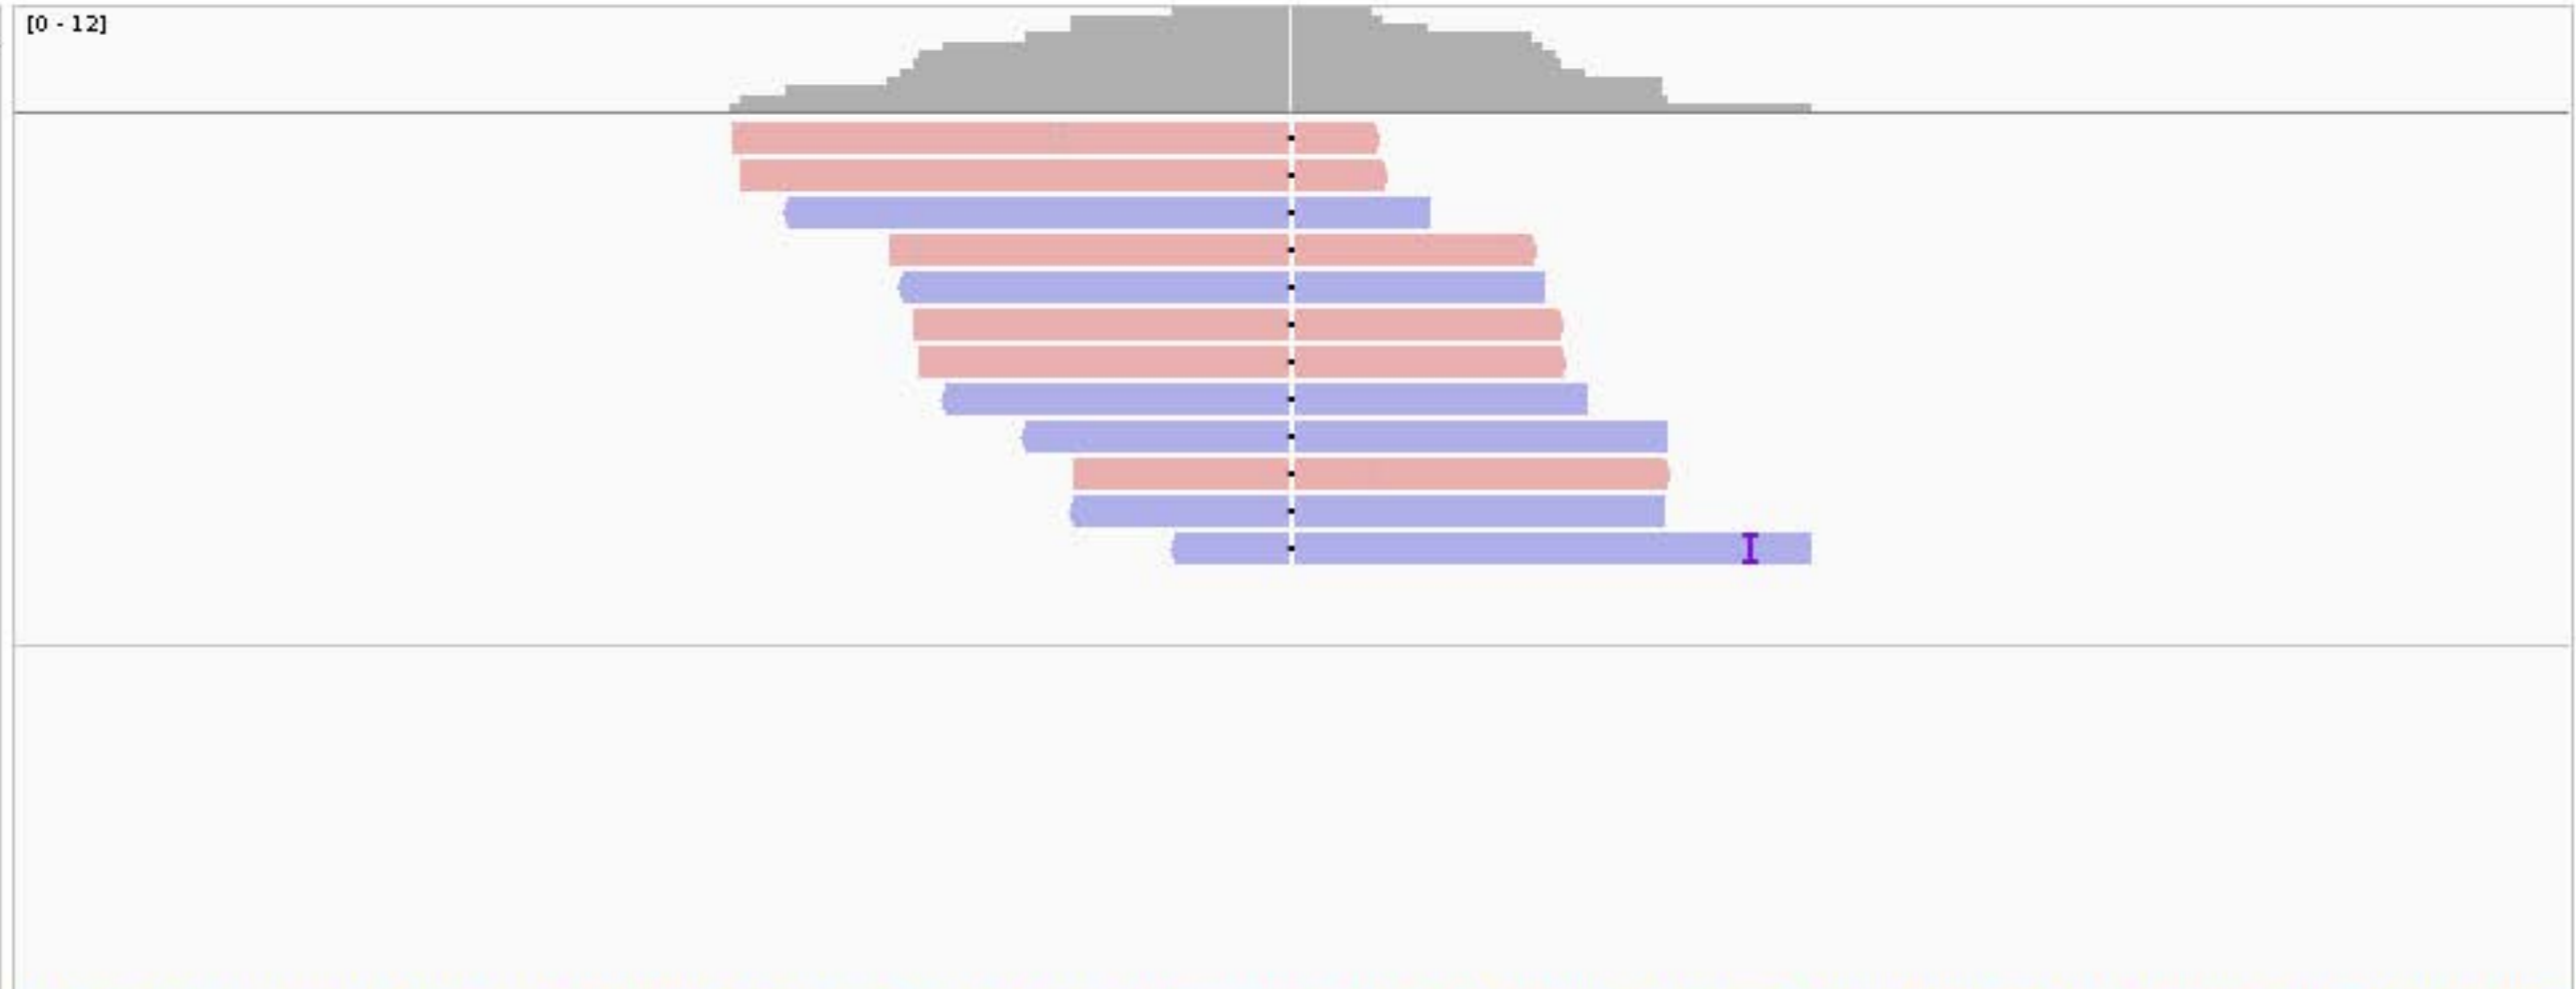

Sequence

Refseq Genes

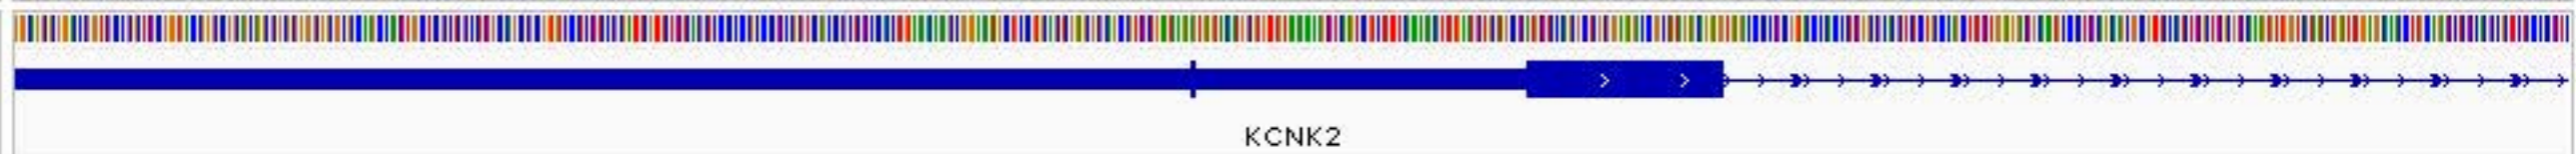

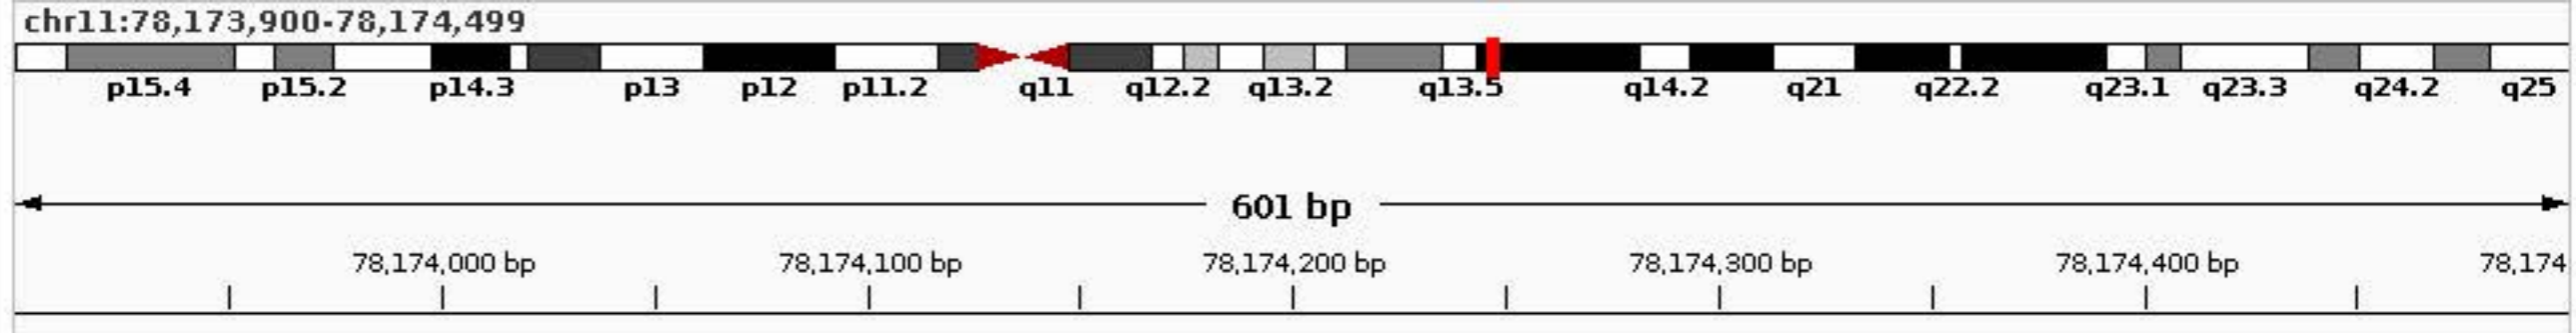

SL\_0002\_LN\_1\_mut.bam Coverage

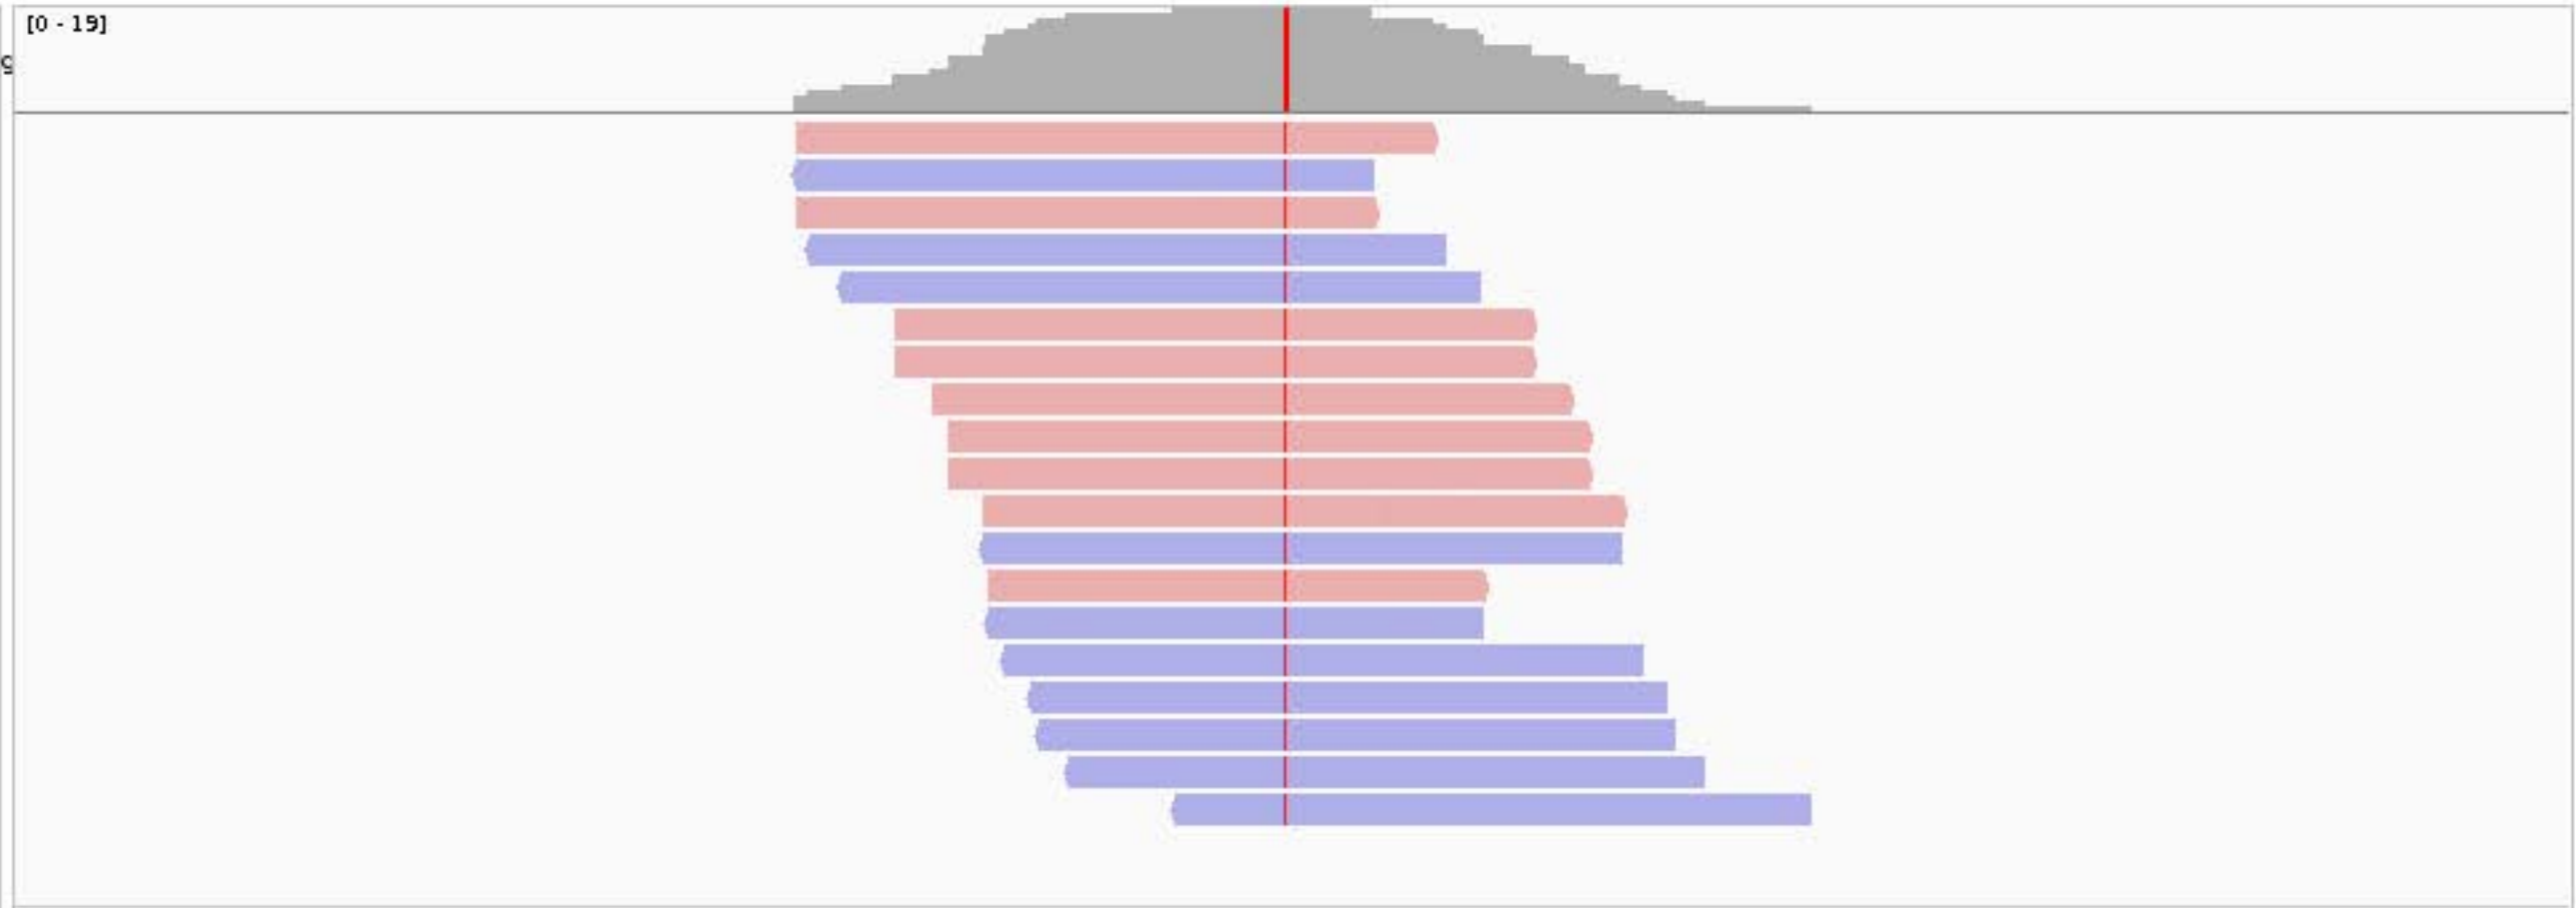

SL\_0002\_LN\_1\_mut.bam

Sequence →

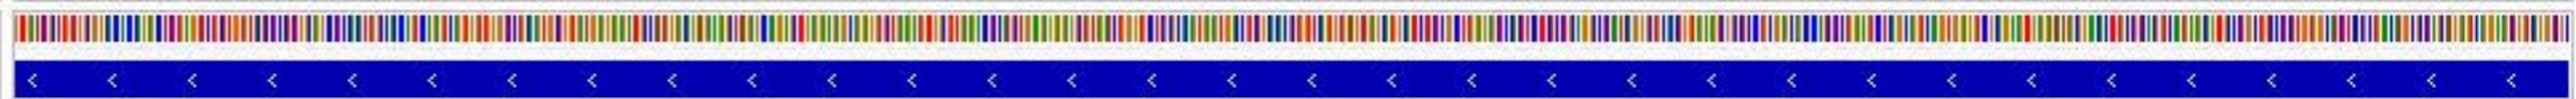

Refseq Genes

KCTD21-AS1 KCTD21

chr11:78,174,222-78,174,821

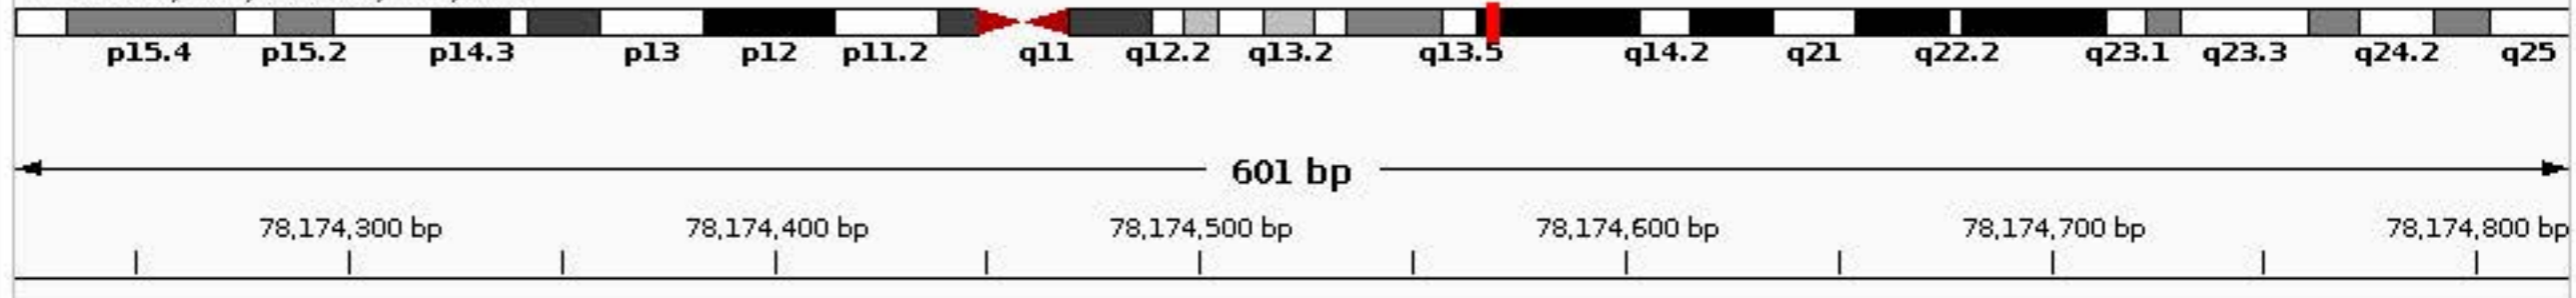

SL\_0004\_RN\_05\_mut.bam Coverage

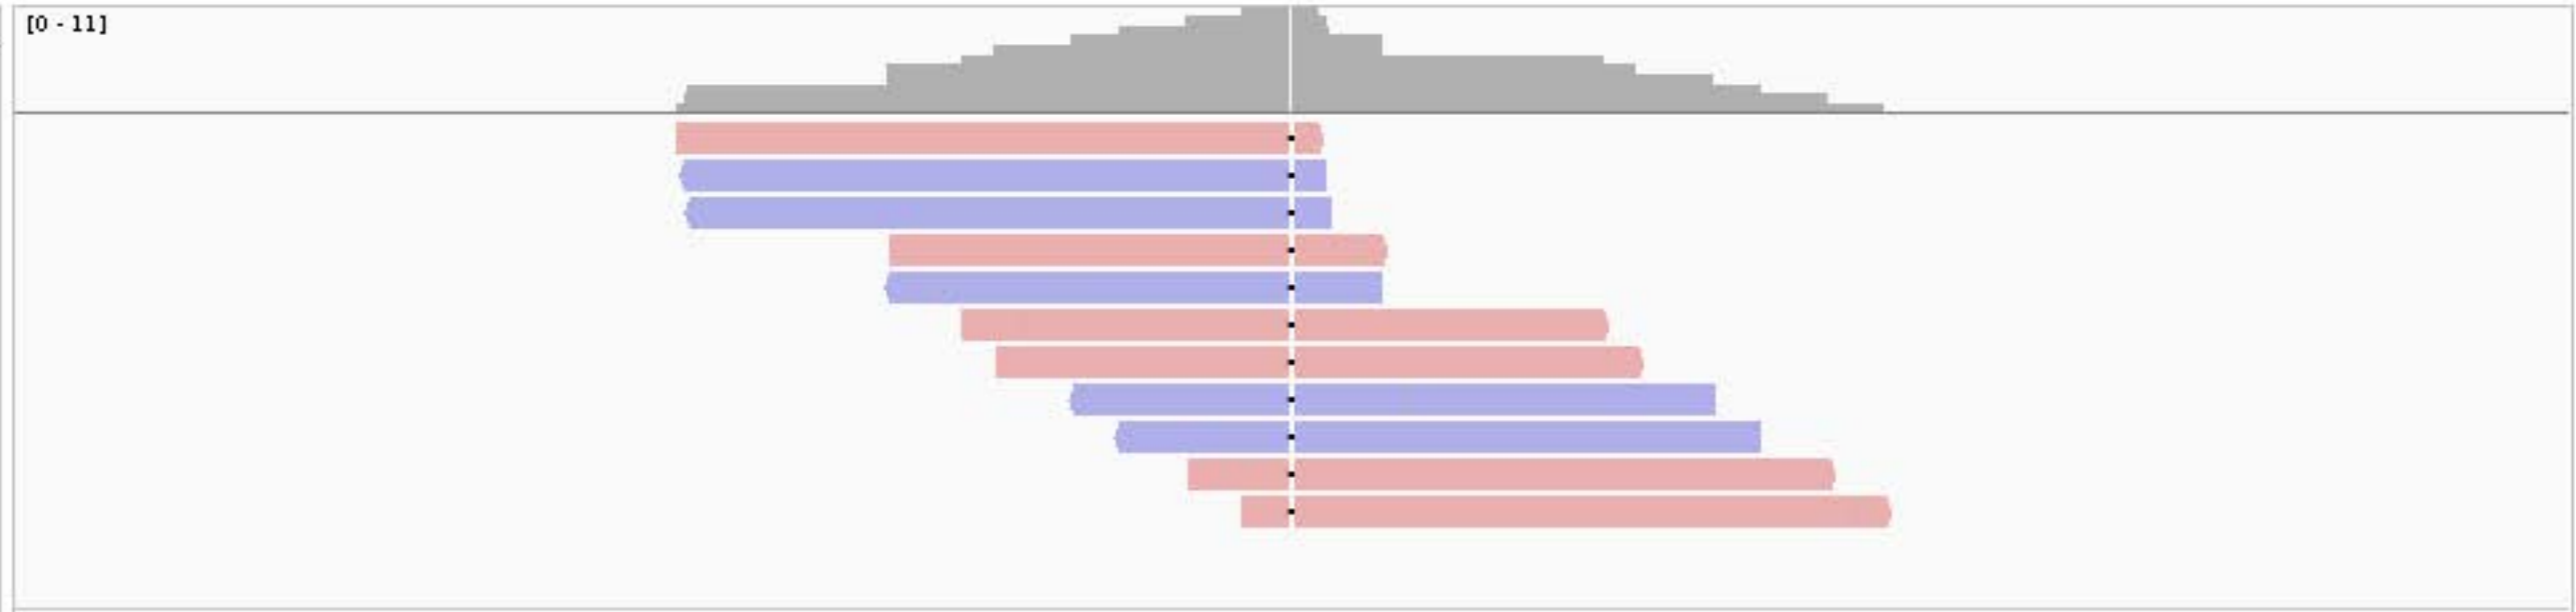

SL\_0004\_RN\_05\_mut.bam

Sequence

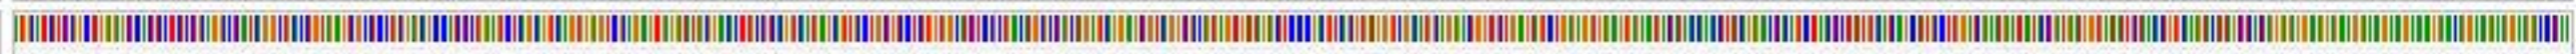

Refseq Genes

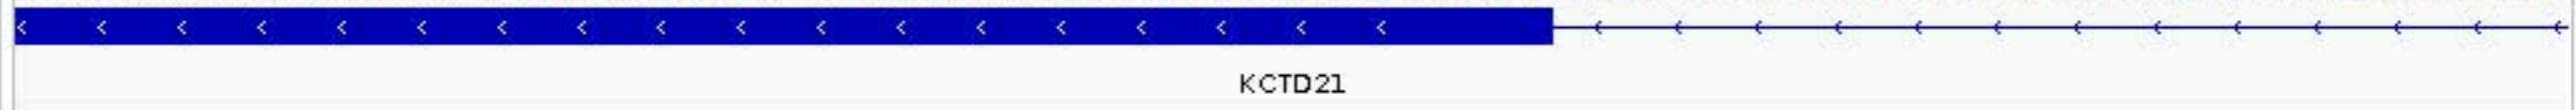

KCTD21

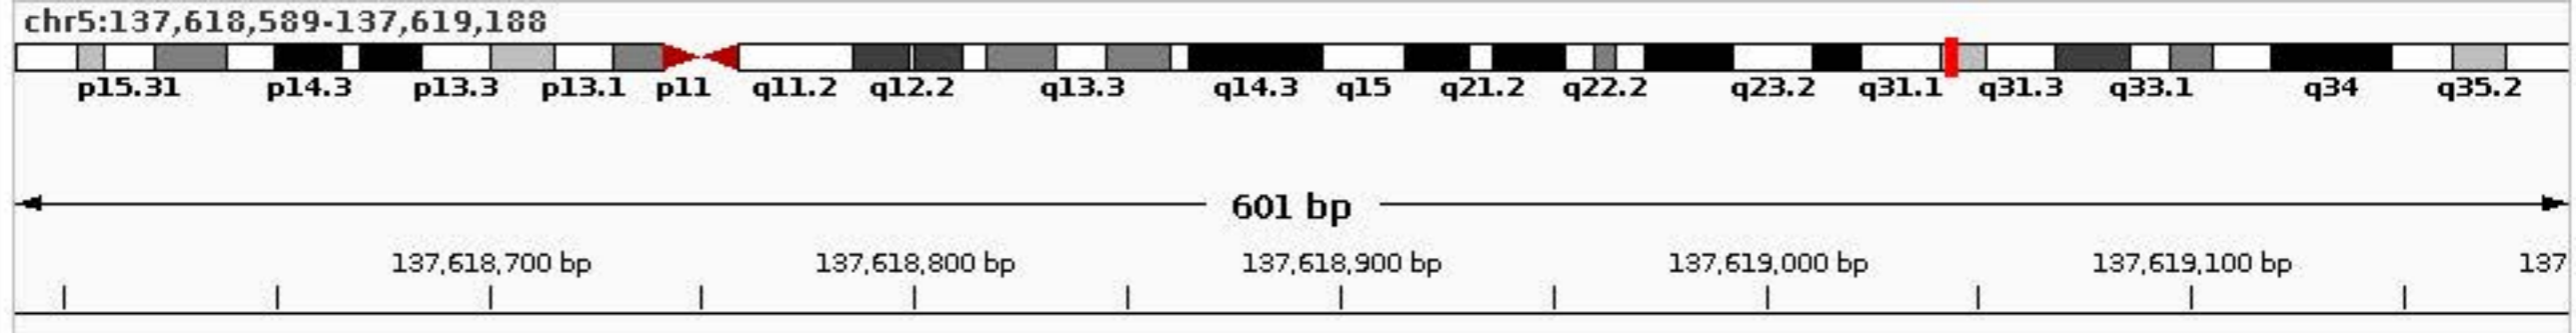

SL\_0015\_LN\_44\_mut.bam Coverage

SL\_0015\_LN\_44\_mut.bam

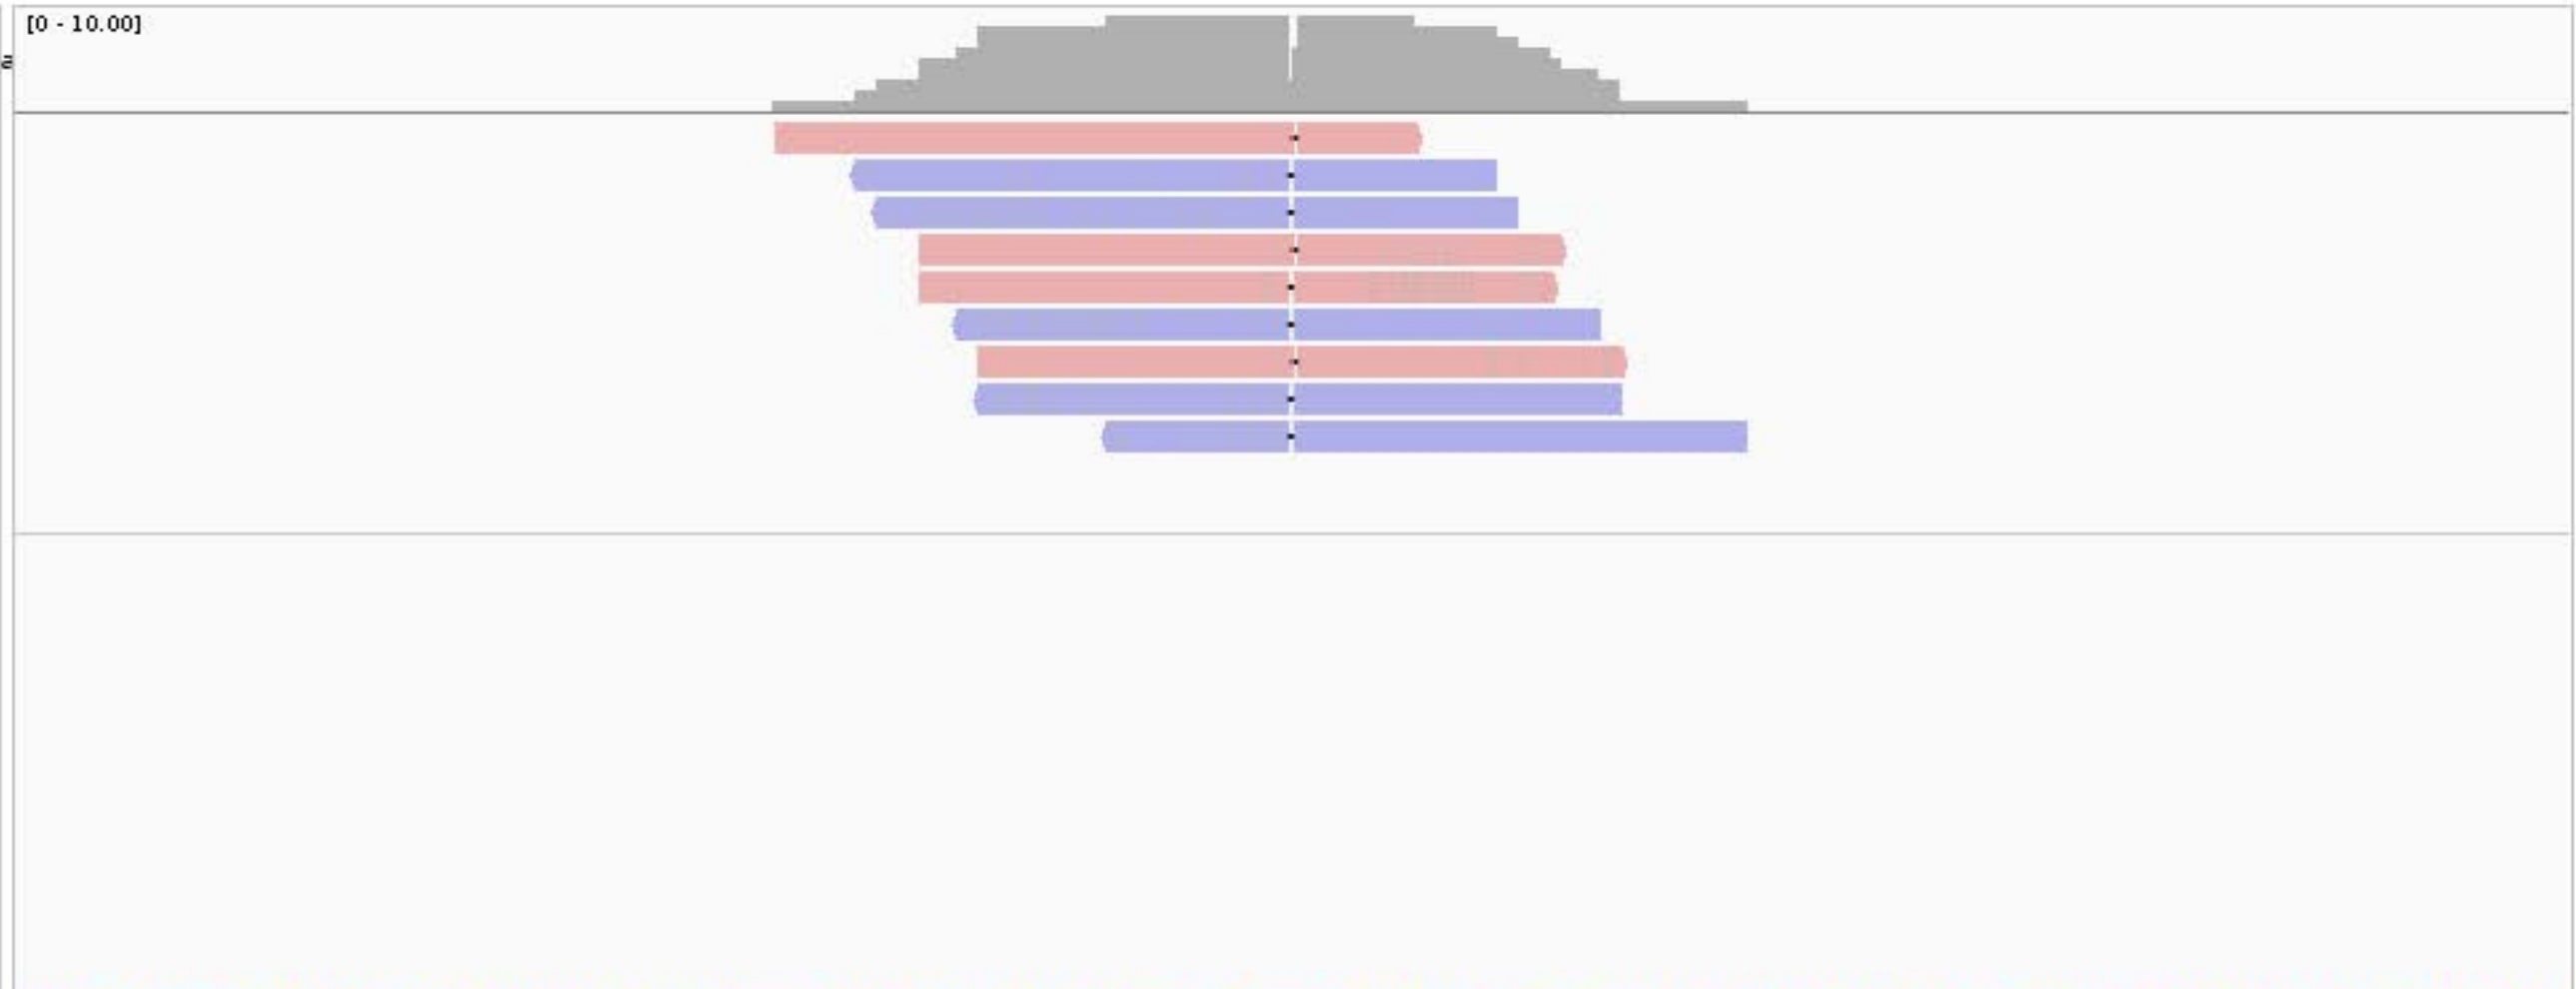

Sequence

Refseq Genes

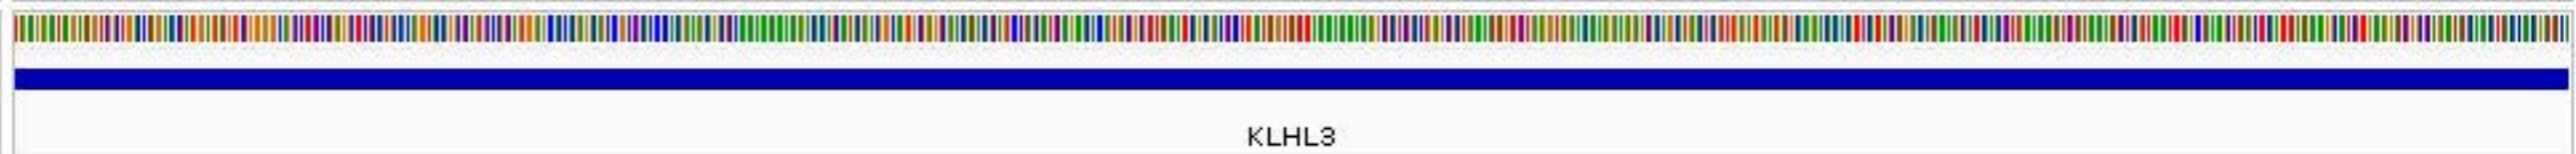

KLHL3



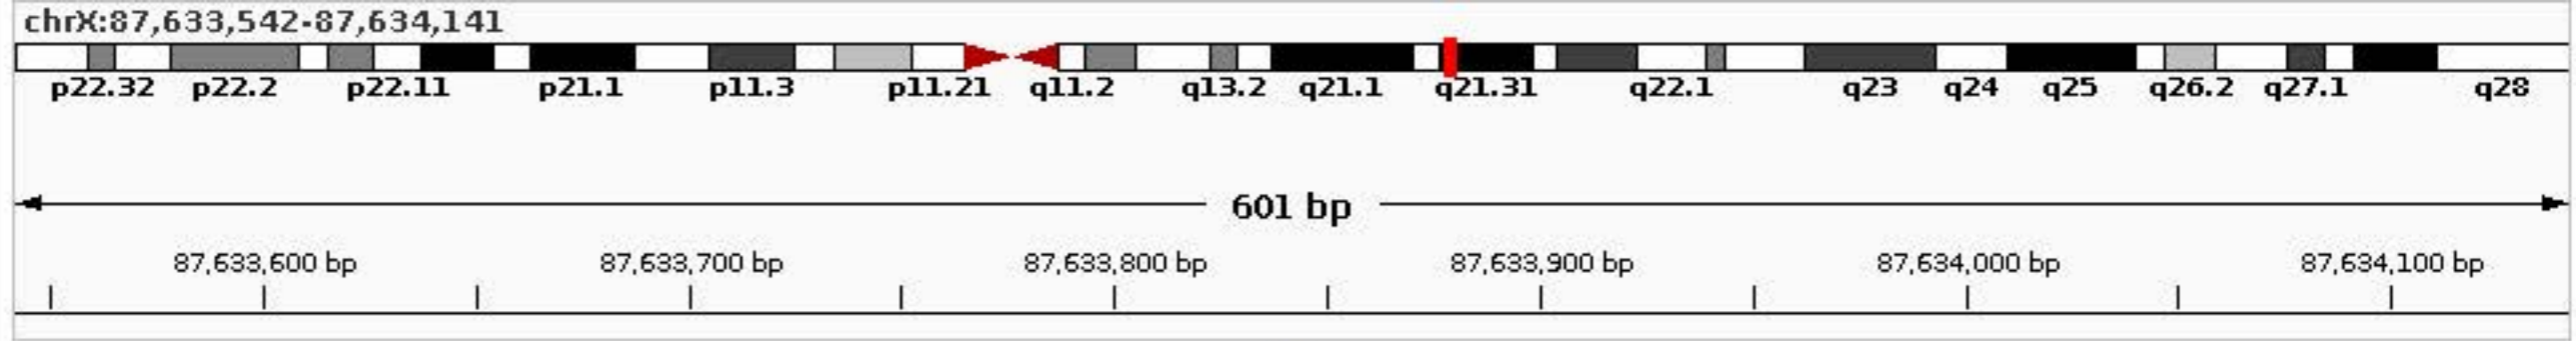

SL\_0004\_RN\_24\_mut.bam Coverage

SL\_0004\_RN\_24\_mut.bam

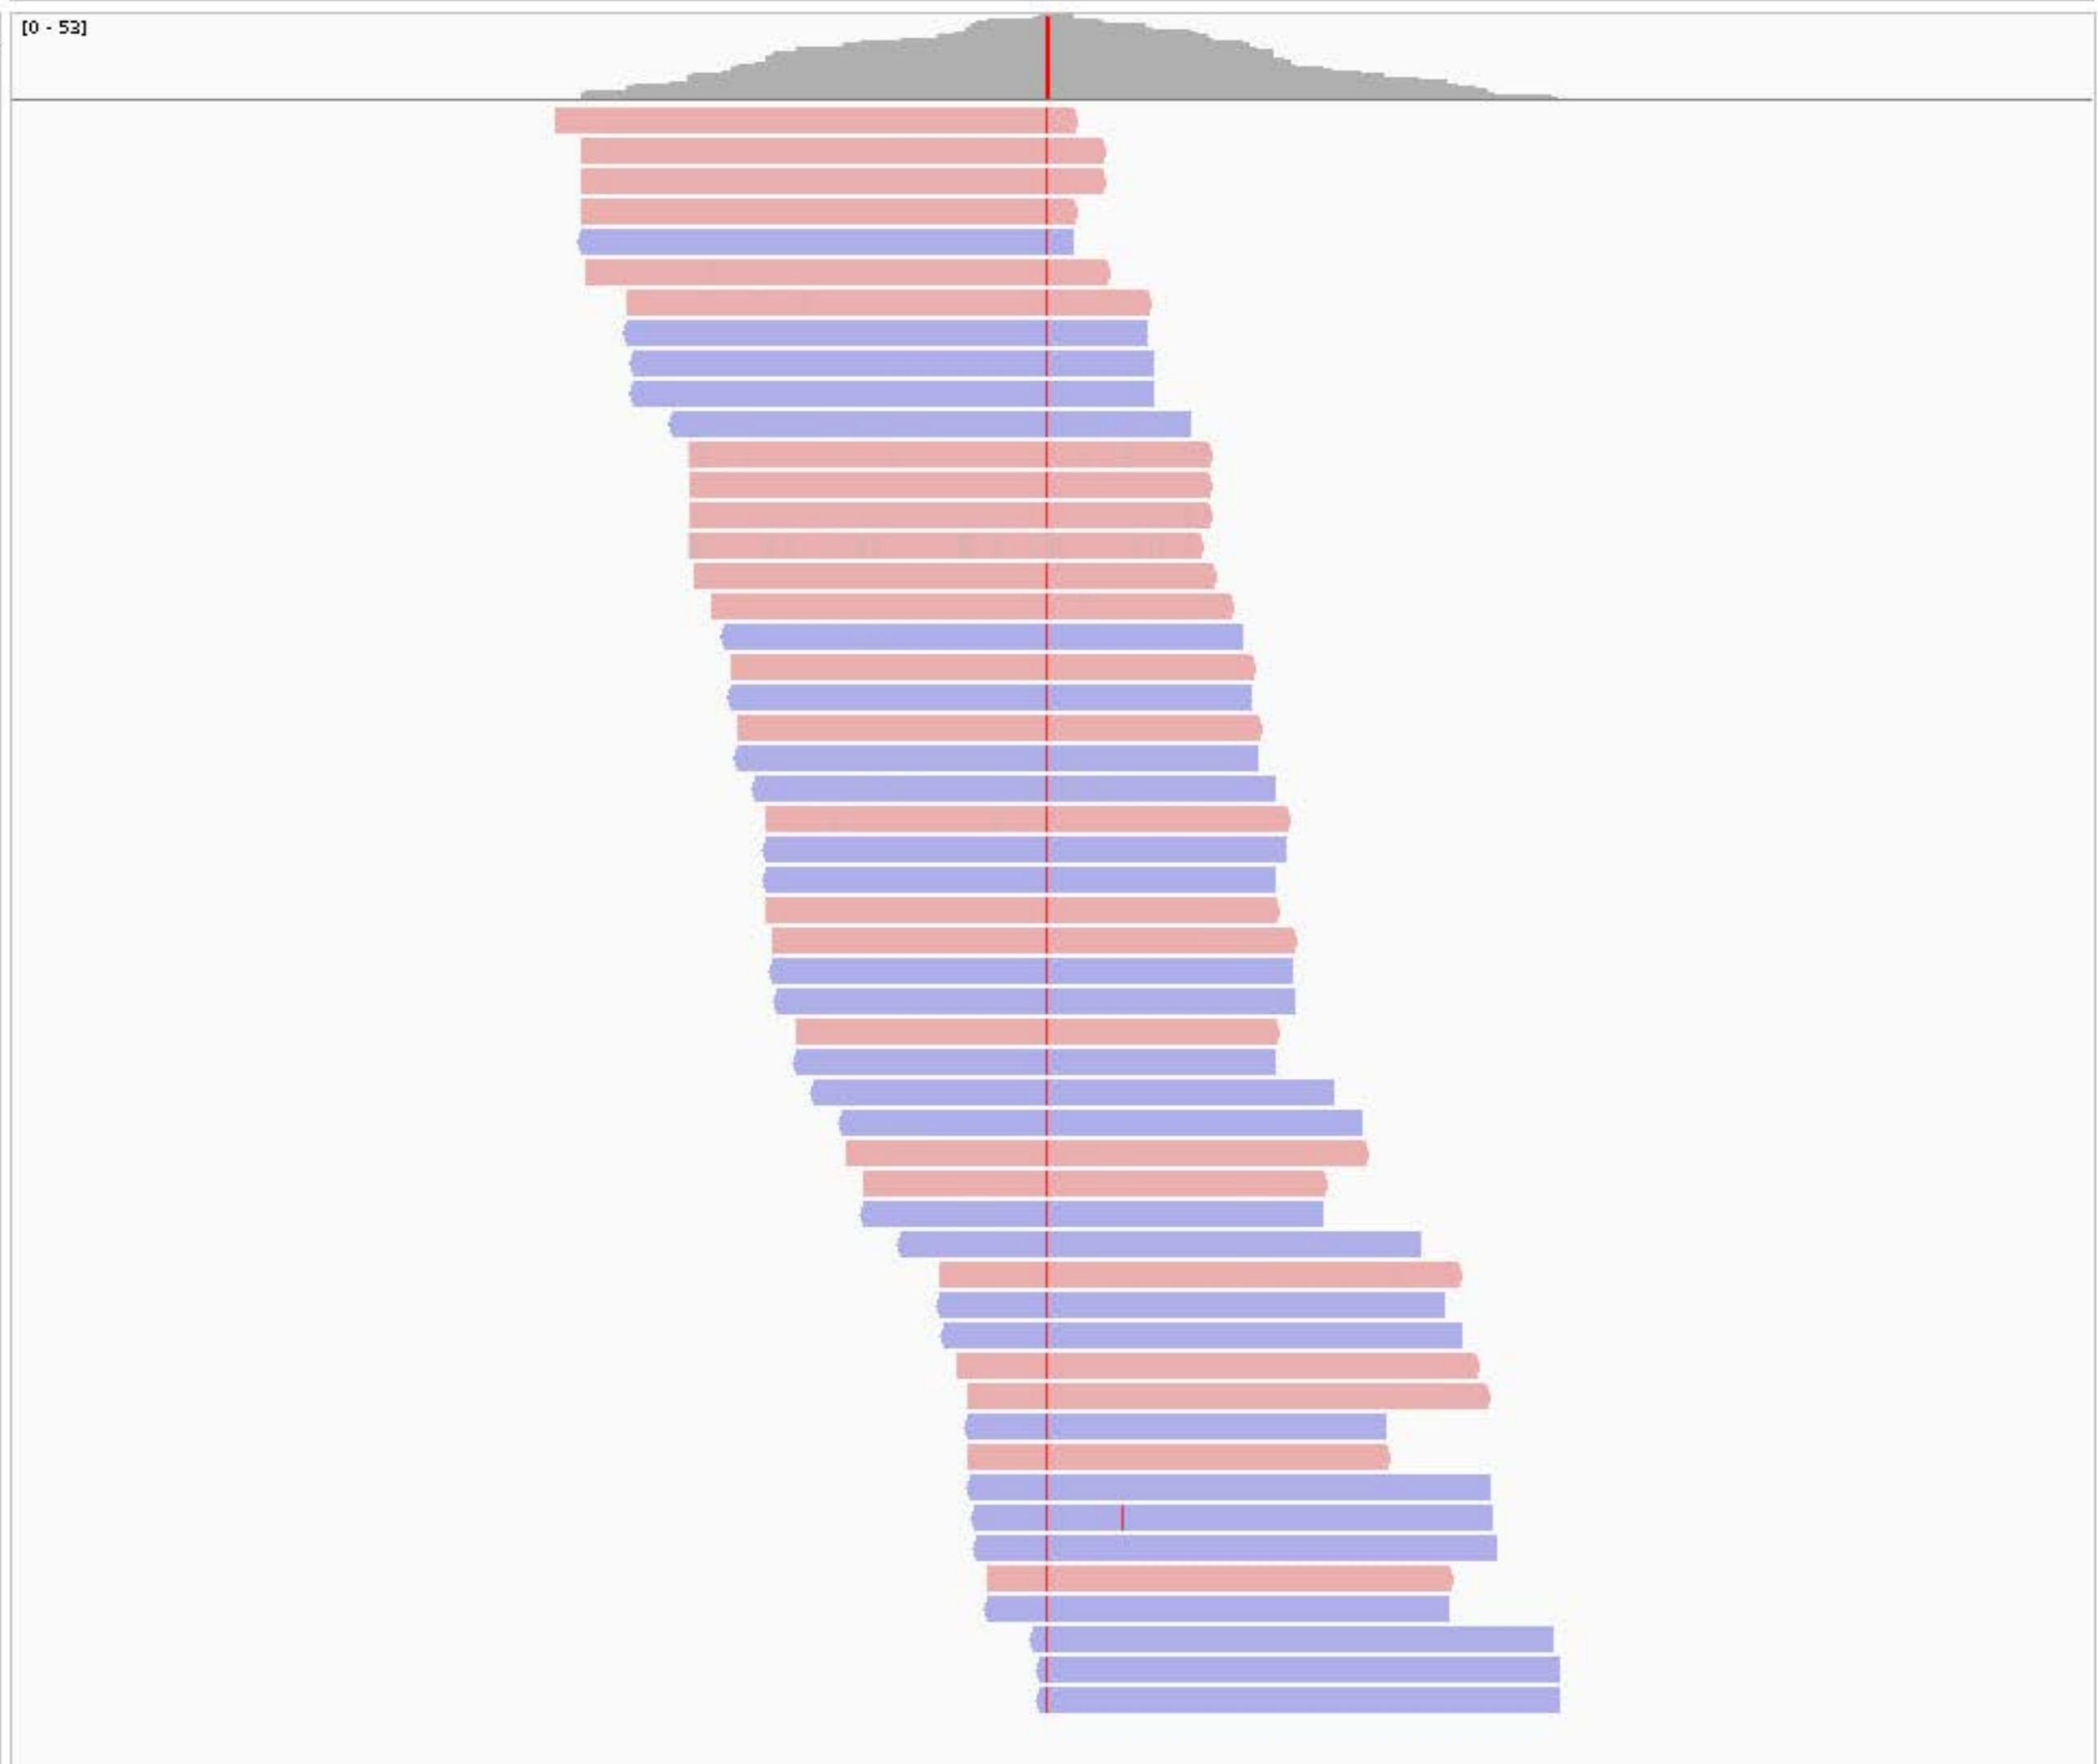

Sequence

Refseq Genes

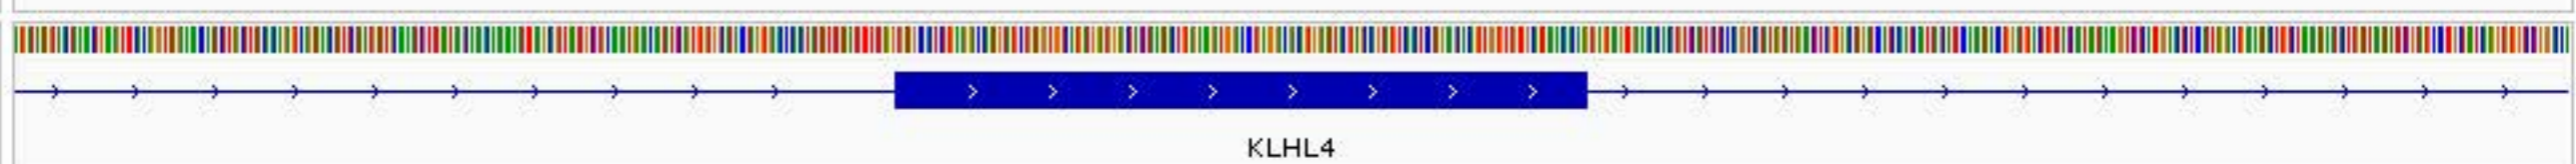

chr16:84,661,477-84,662,076

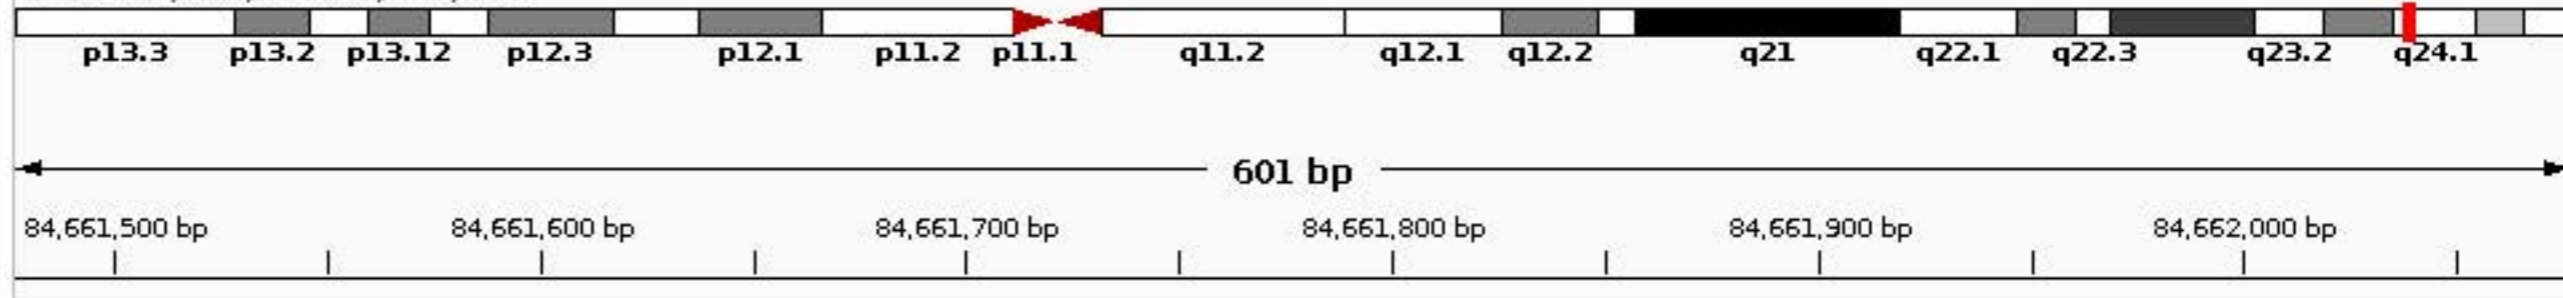

SL\_0007\_RN\_33\_mut.bam Coverage

SL\_0007\_RN\_33\_mut.bam

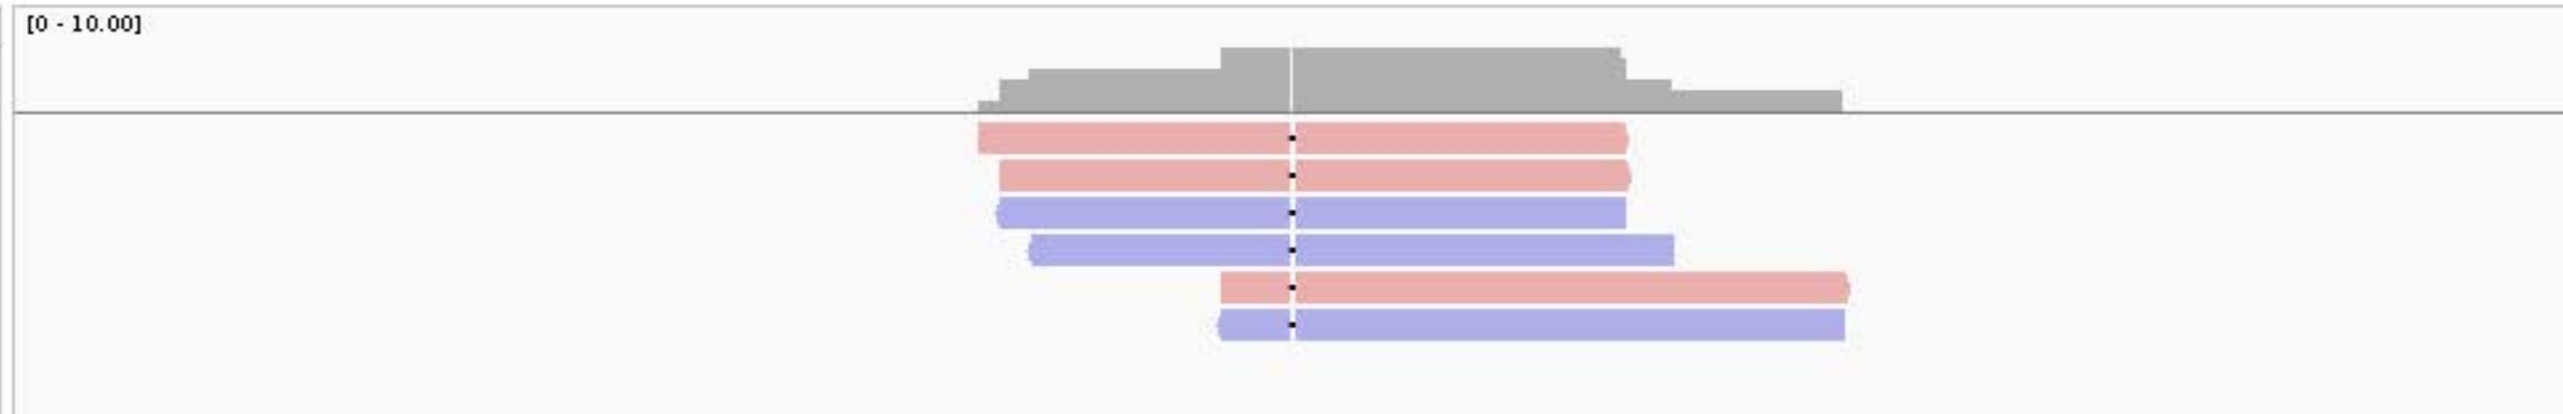

Sequence

Refseq Genes

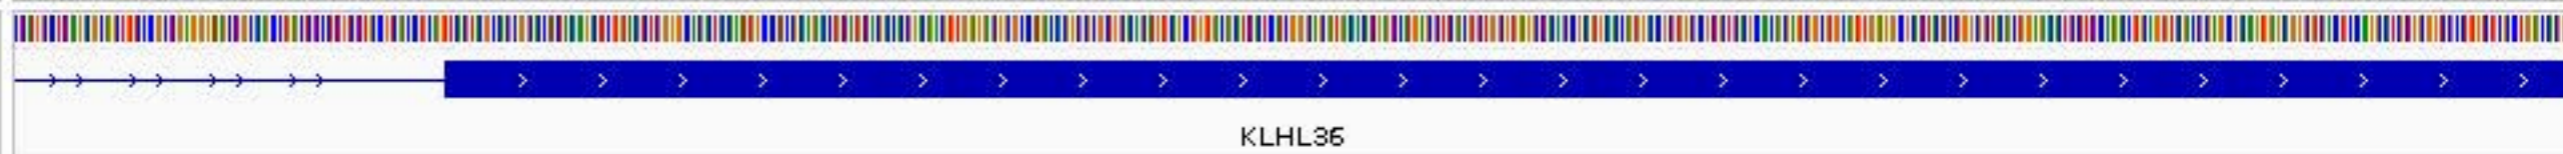

KLHL36

chr19:35,721,469-35,722,068

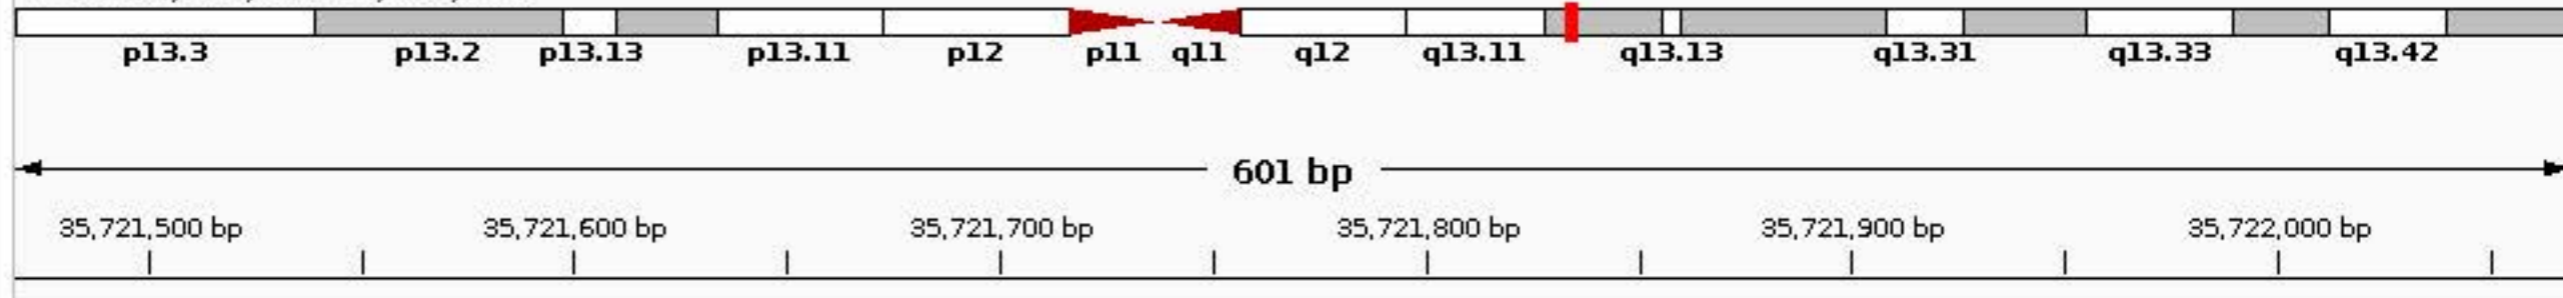

SL\_0004\_RN\_26\_mut.bam Coverage

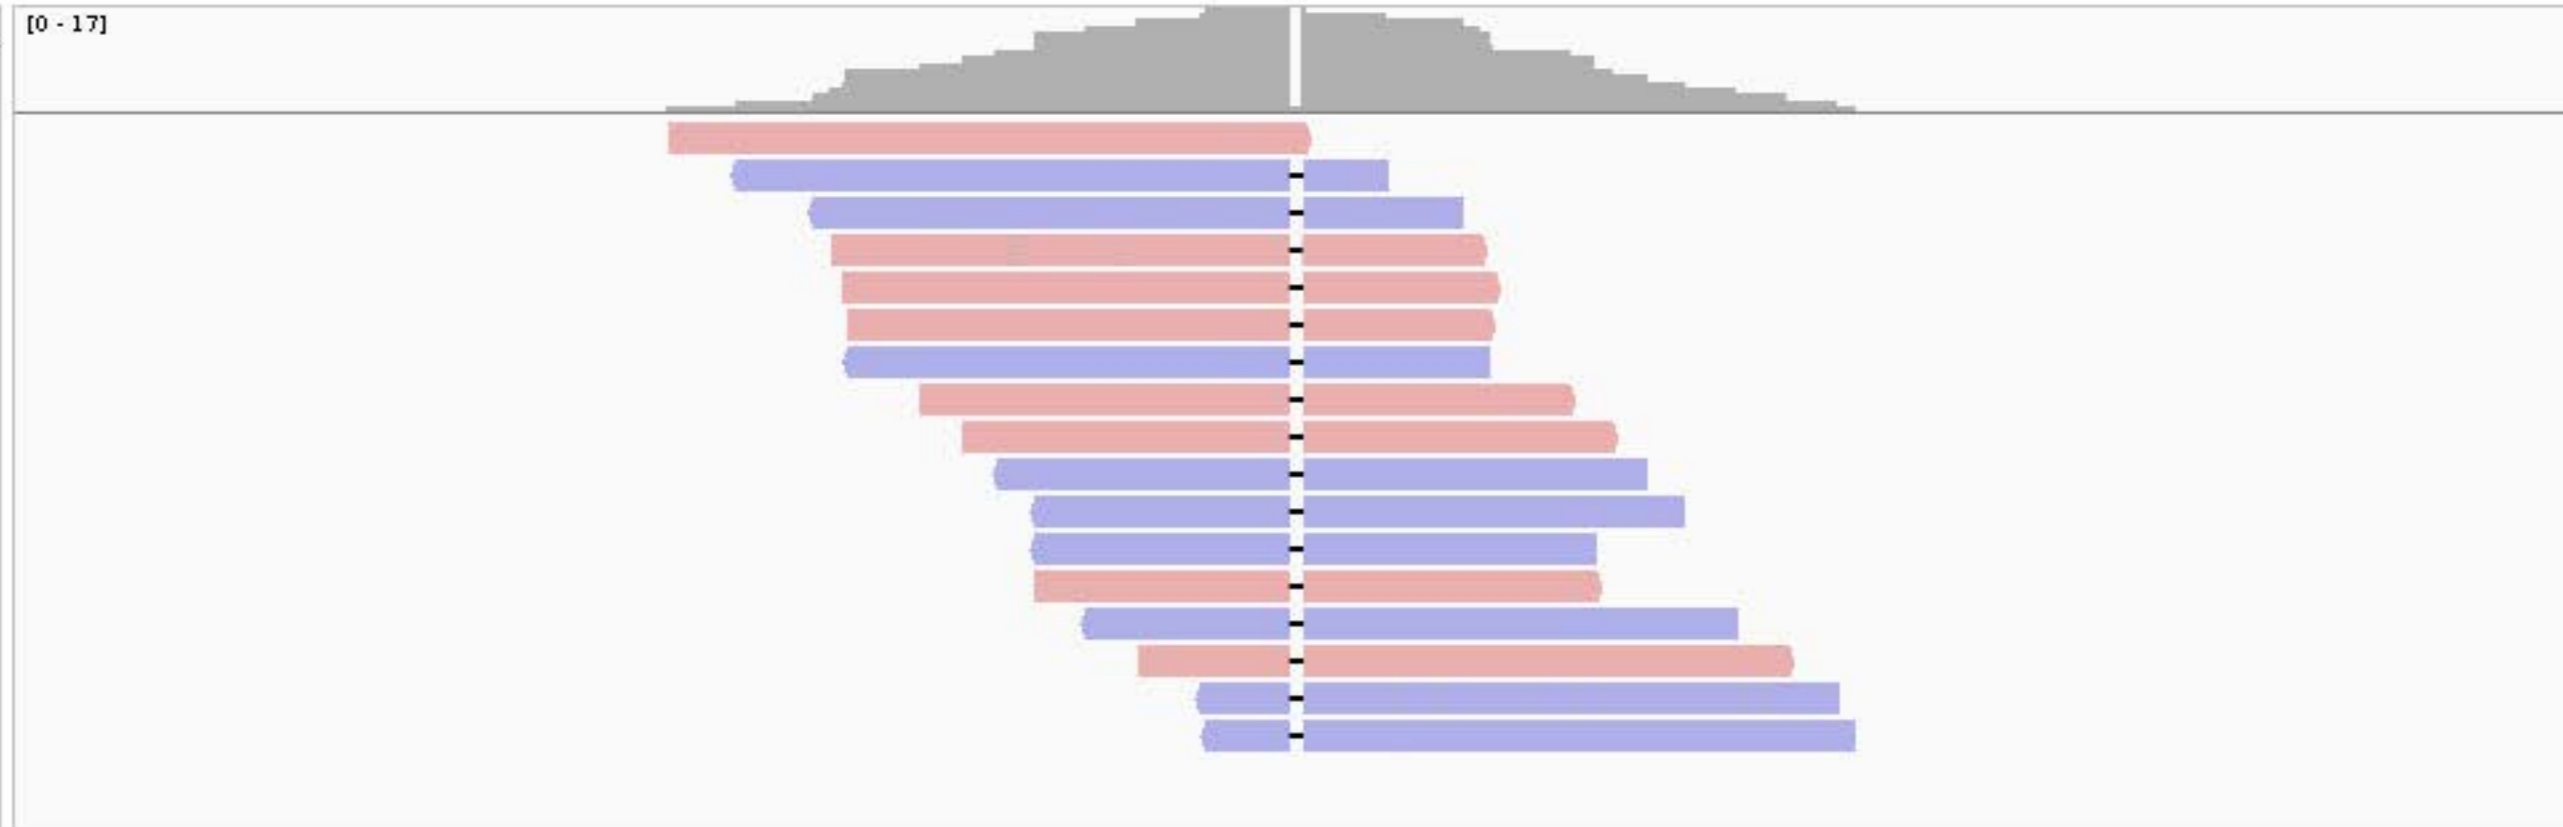

SL\_0004\_RN\_26\_mut.bam

Sequence

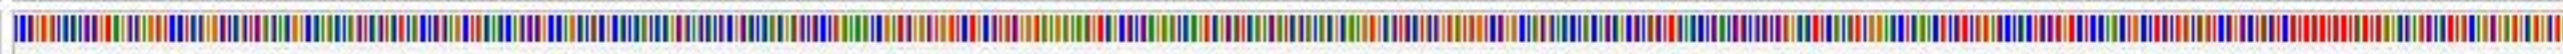

Refseq Genes

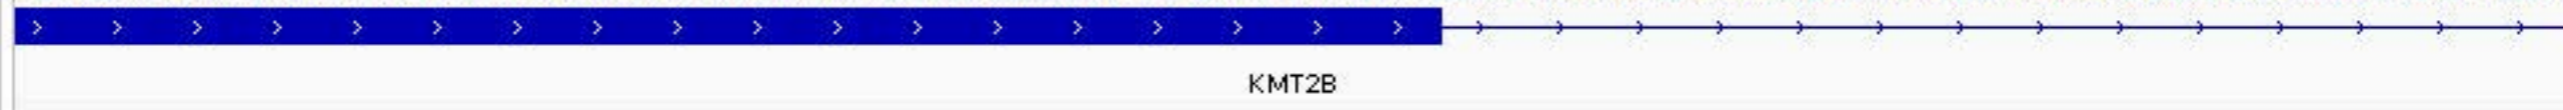

KMT2B

chr7:152,147,983-152,148,582

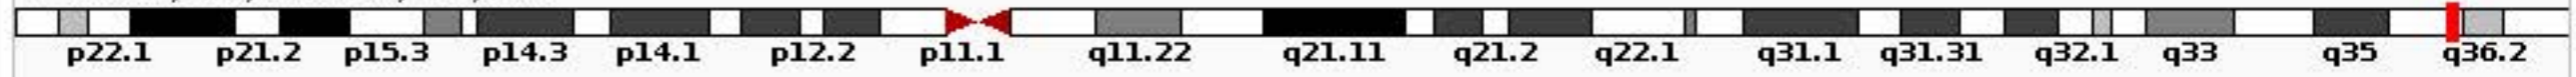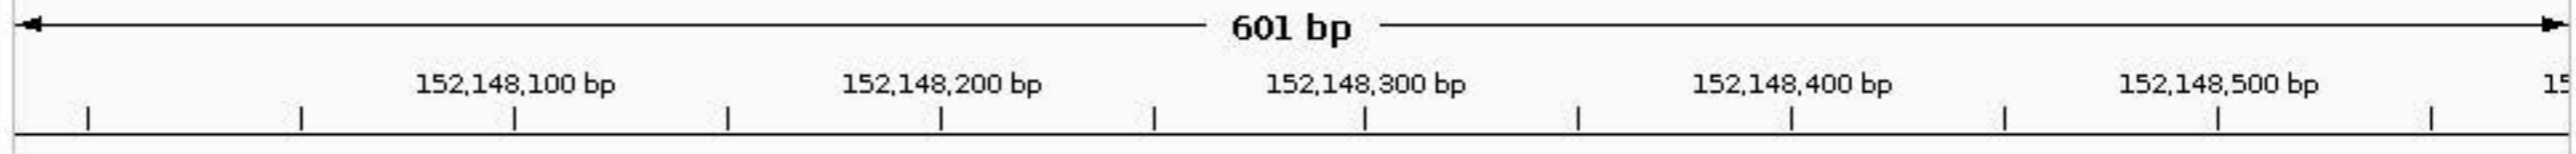

SL\_0001\_LN\_10\_mut.bam Coverage

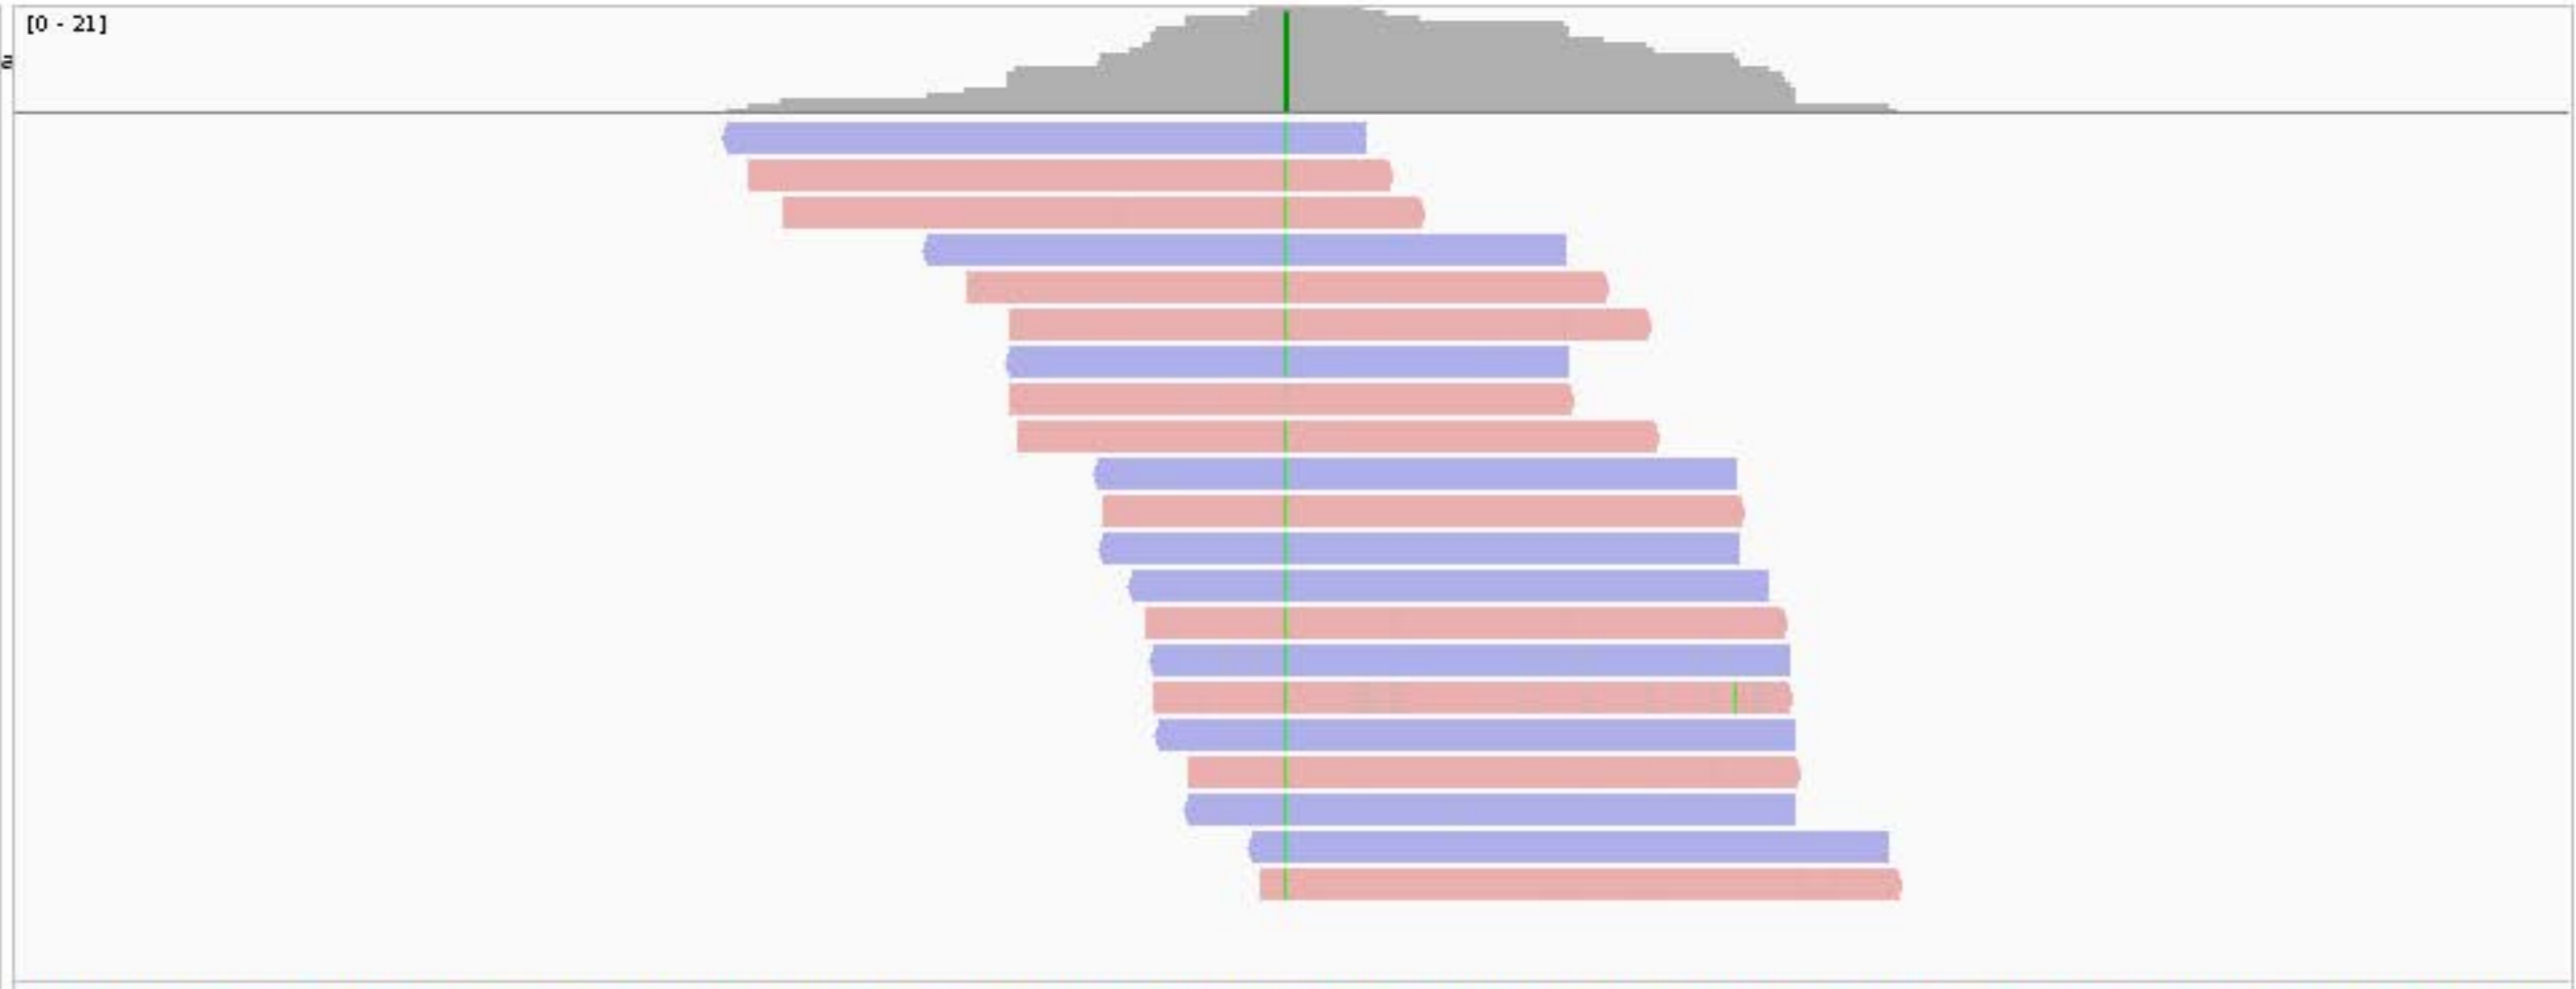

SL\_0001\_LN\_10\_mut.bam

Sequence

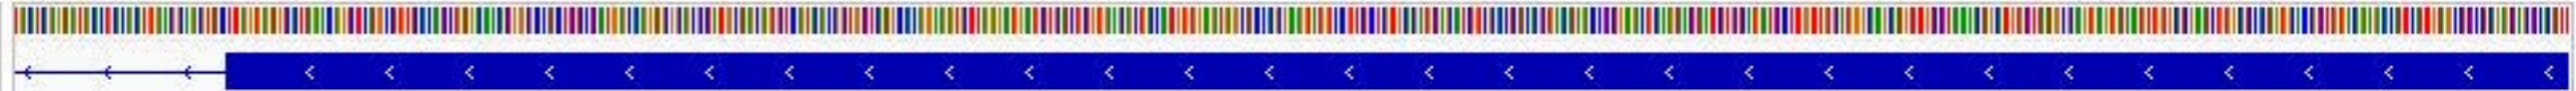

Refseq Genes

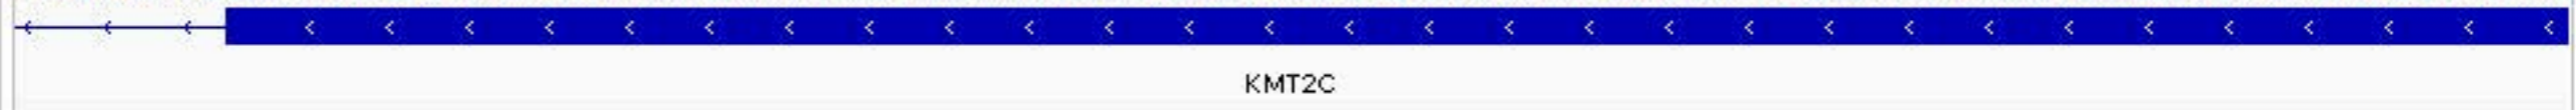



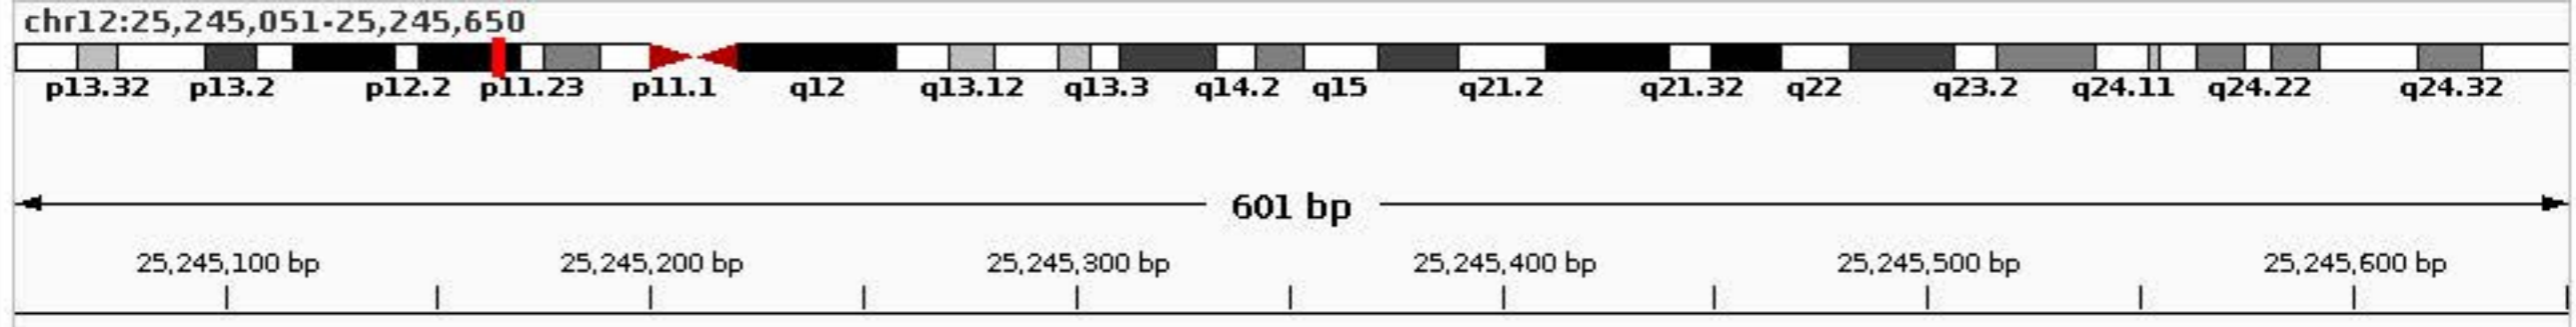

SL\_0004\_RN\_26\_mut.bam Coverage

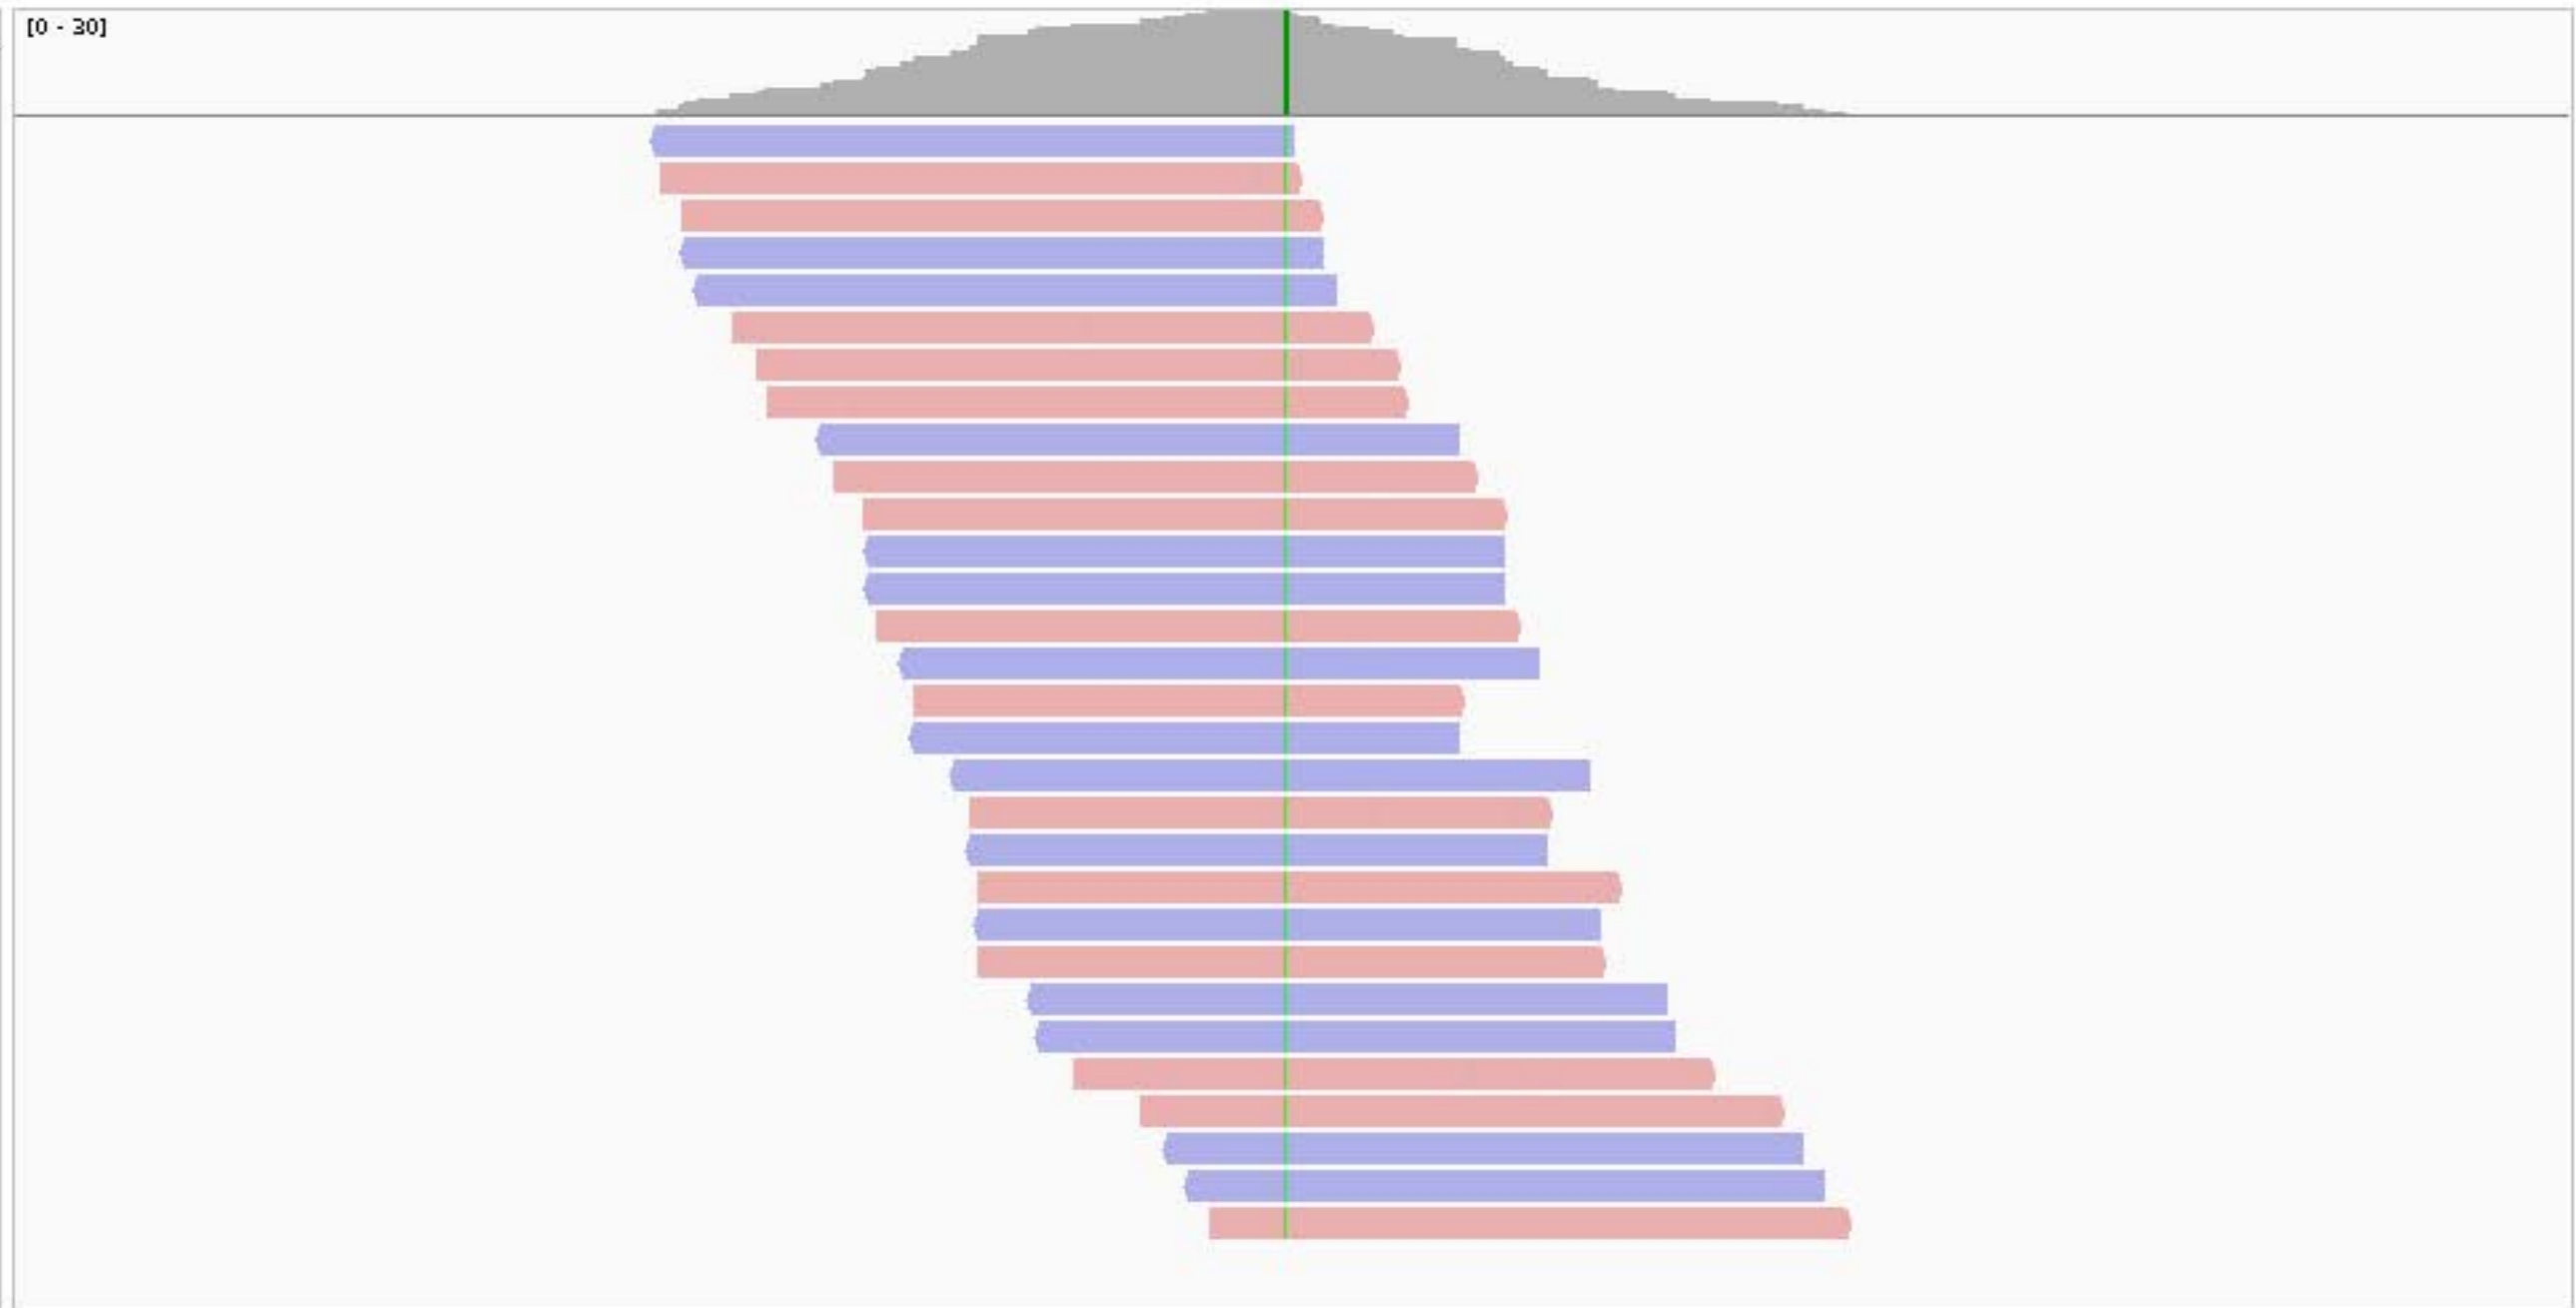

SL\_0004\_RN\_26\_mut.bam

Sequence →

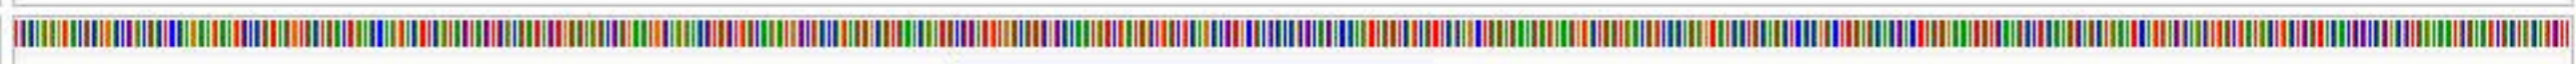

Refseq Genes

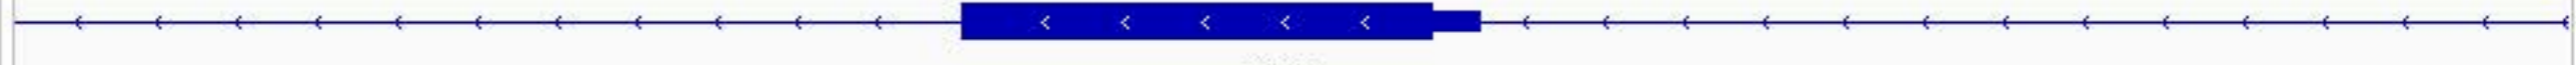

KRAS



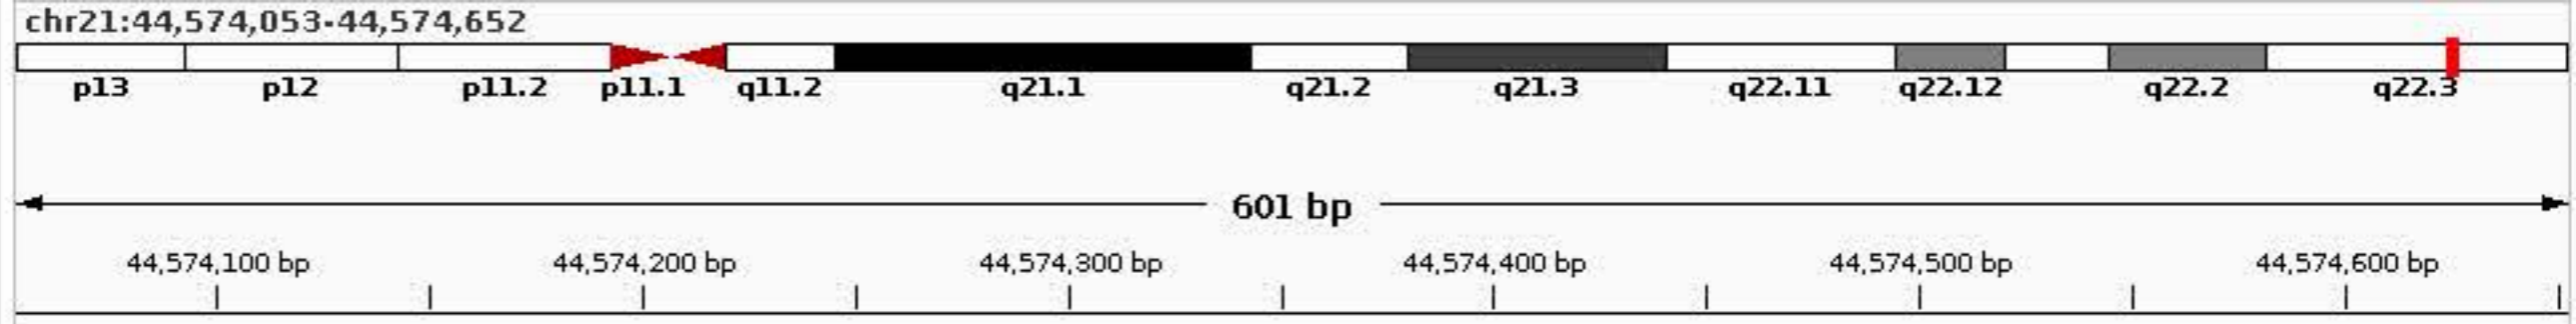

SL\_0007\_RN\_33\_mut.bam Coverage

SL\_0007\_RN\_33\_mut.bam

Sequence

Refseq Genes

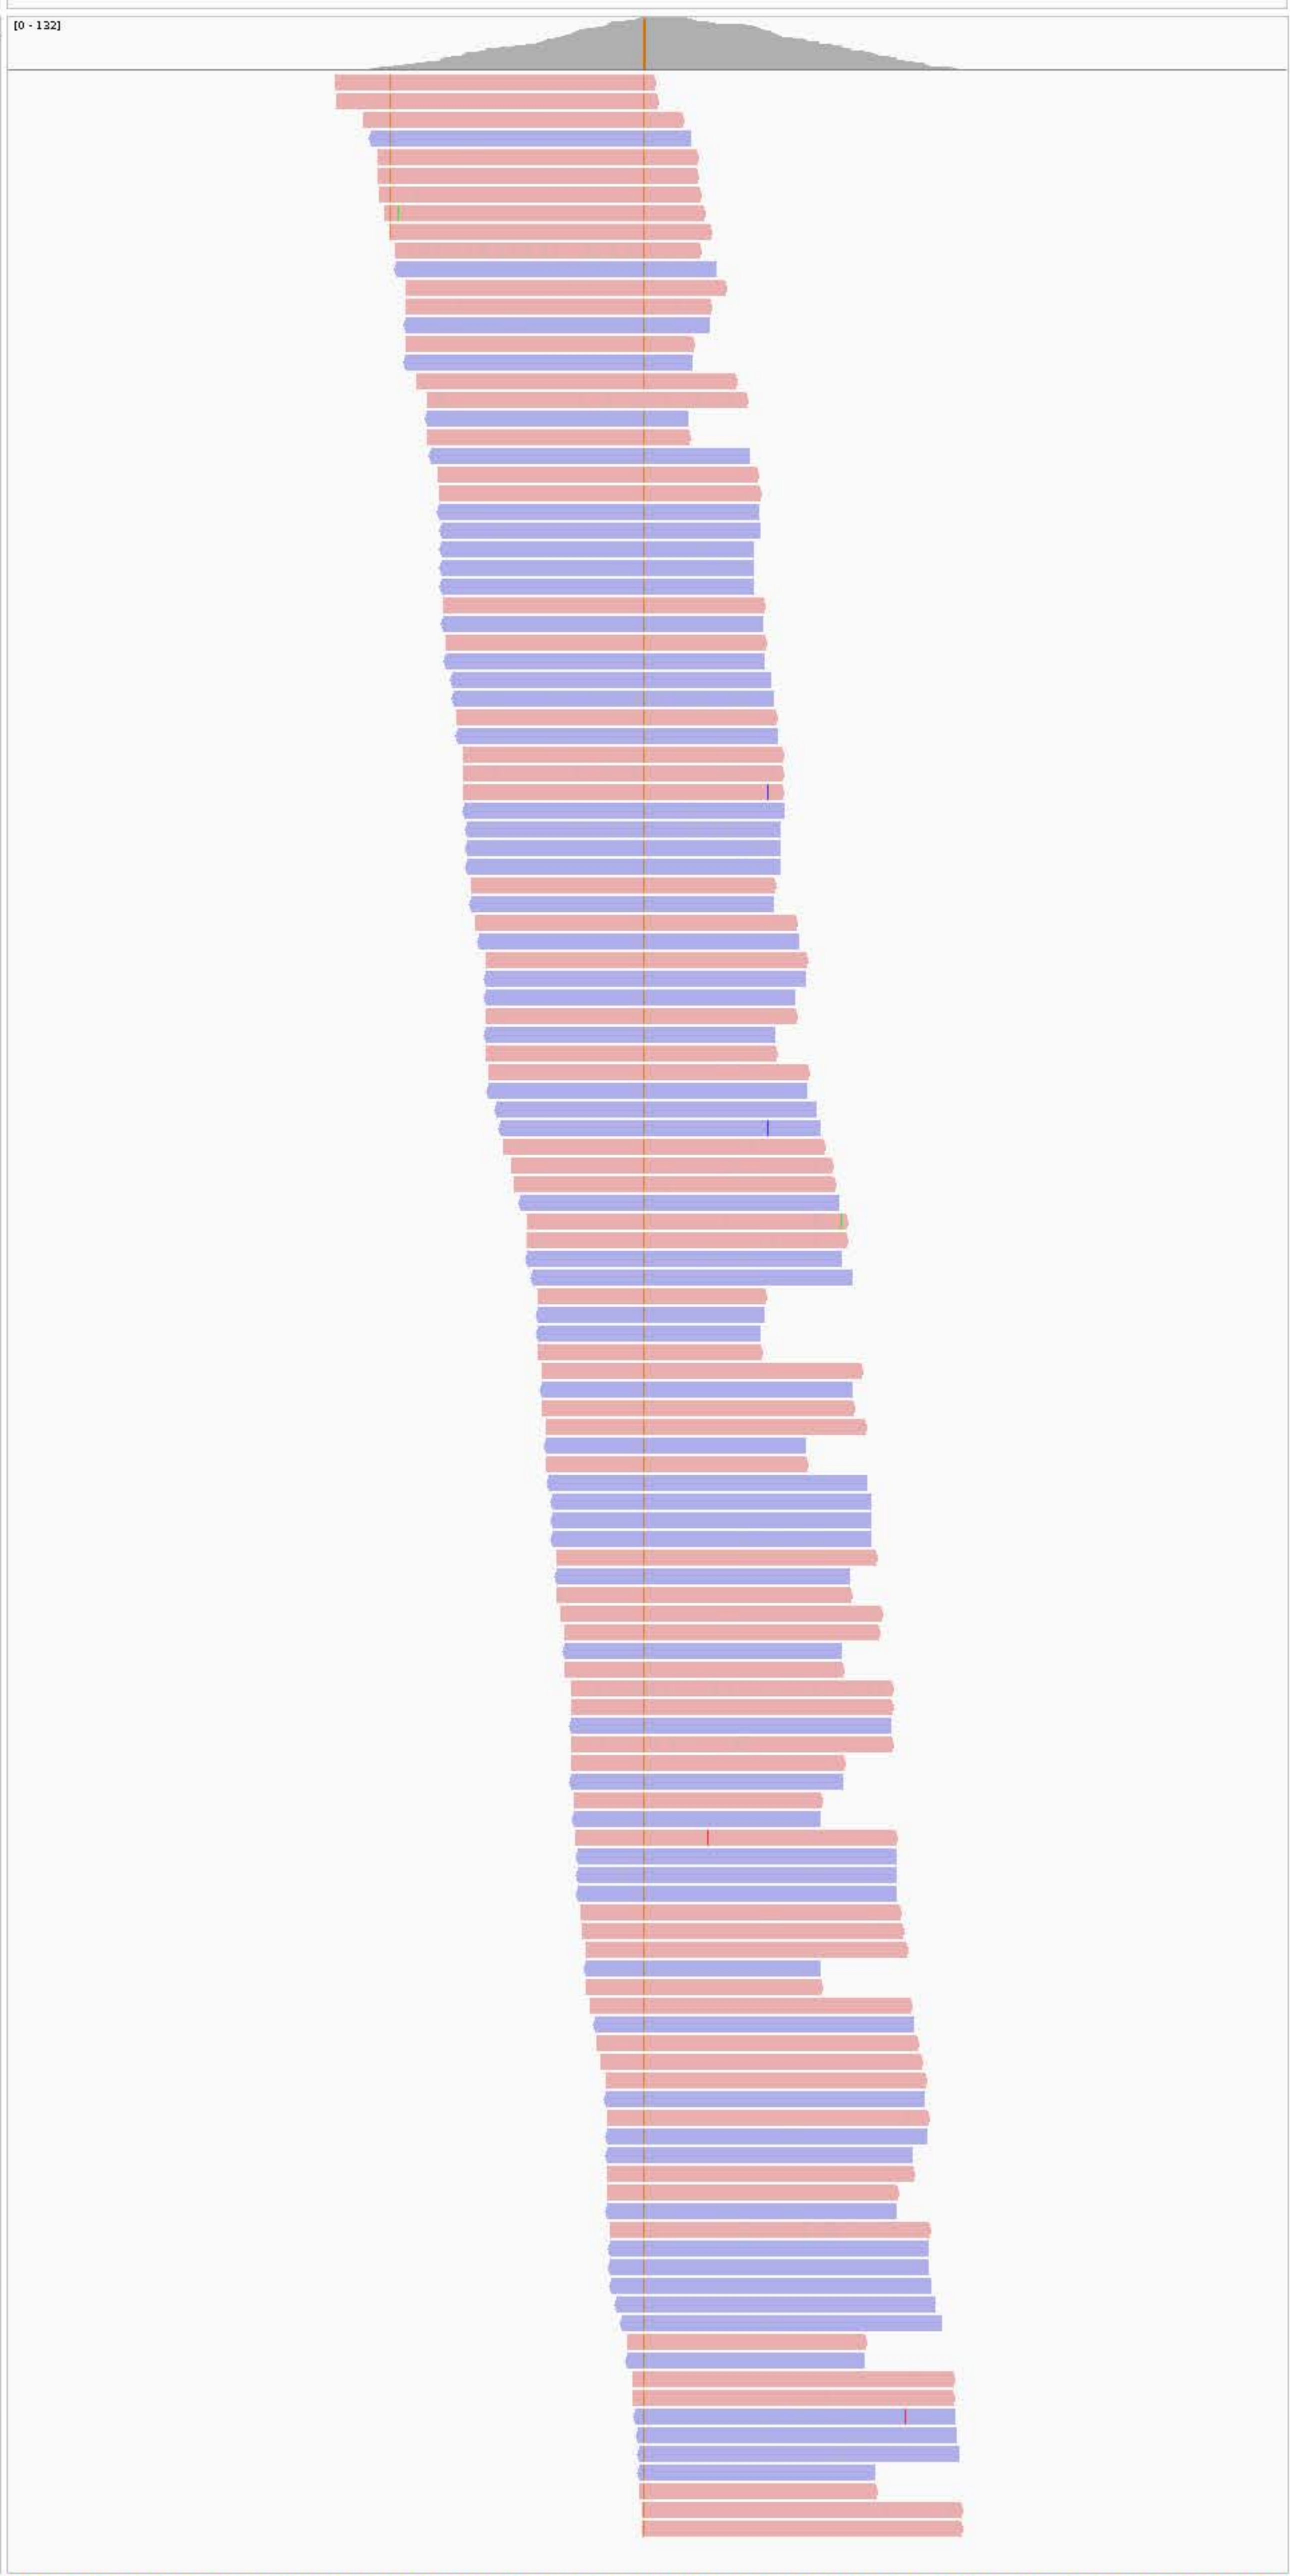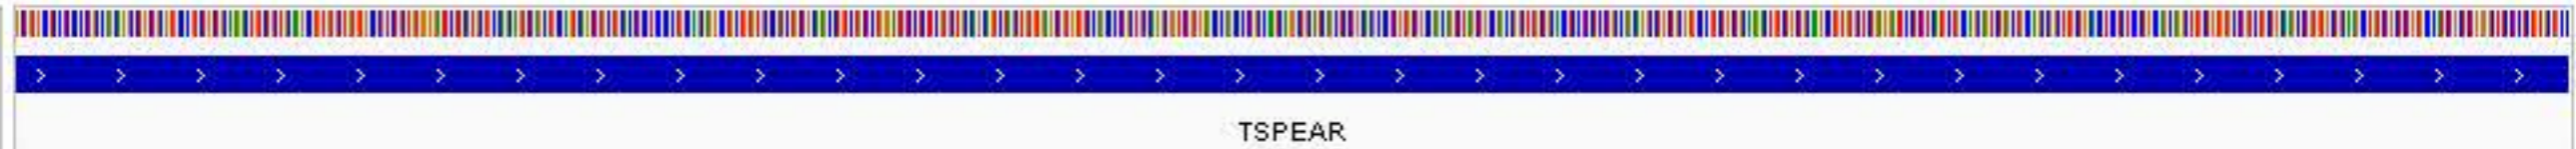

TSPEAR

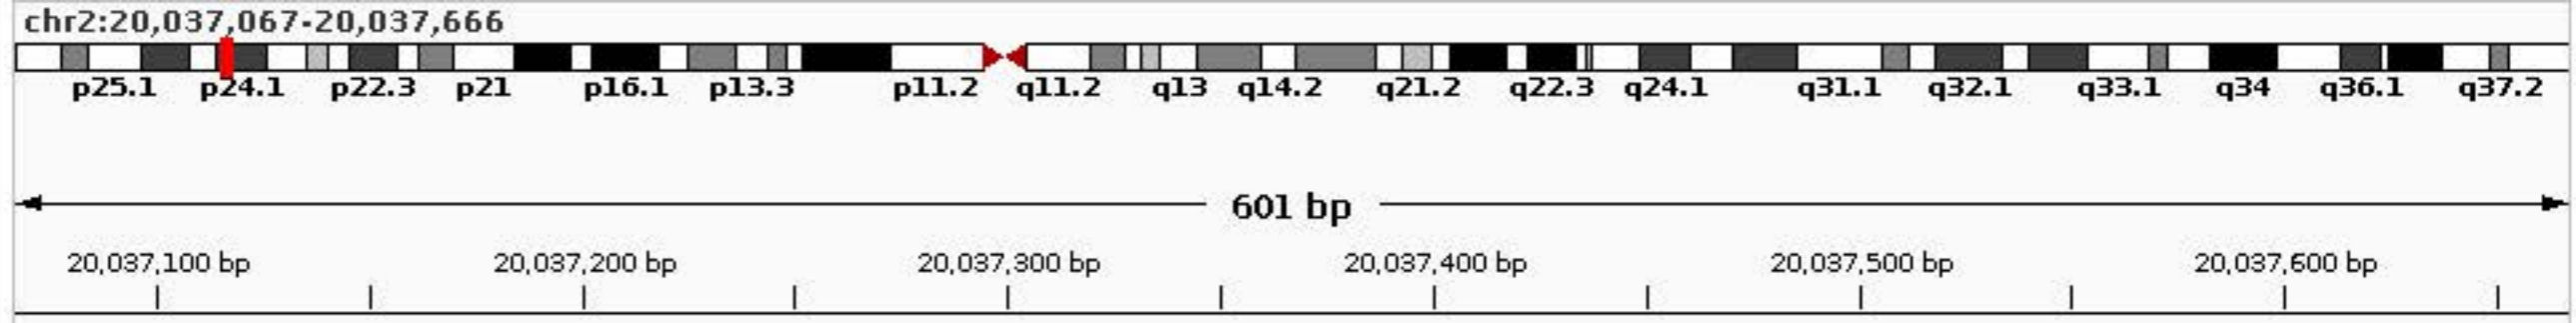

SL\_0004\_RN\_19\_mut.bam Coverage

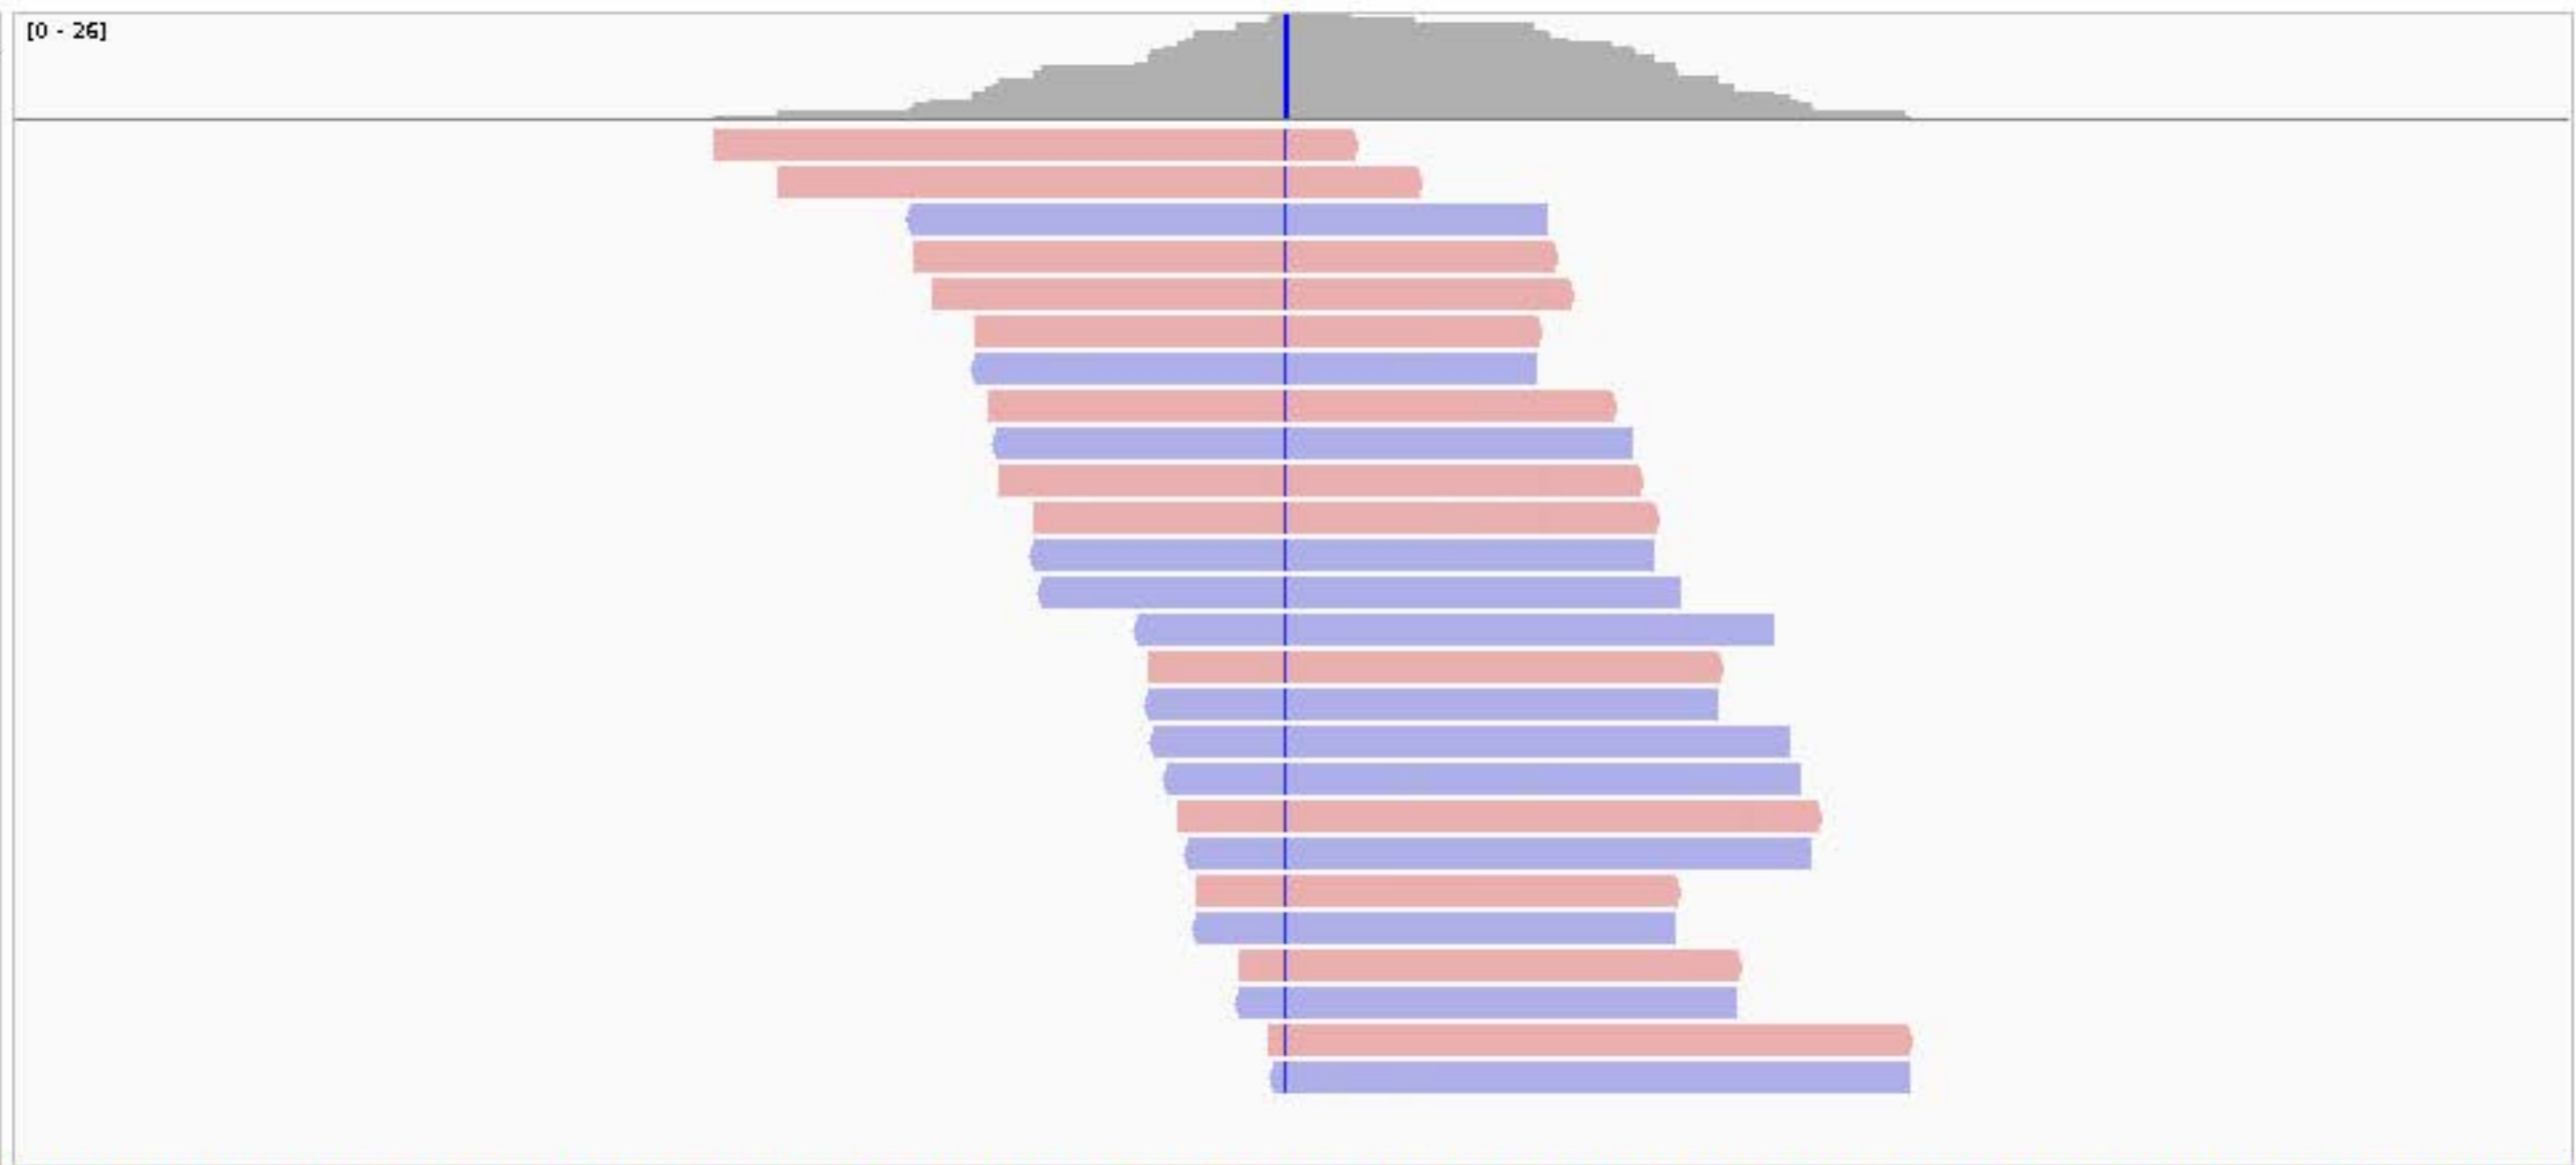

SL\_0004\_RN\_19\_mut.bam

Sequence →

Refseq Genes

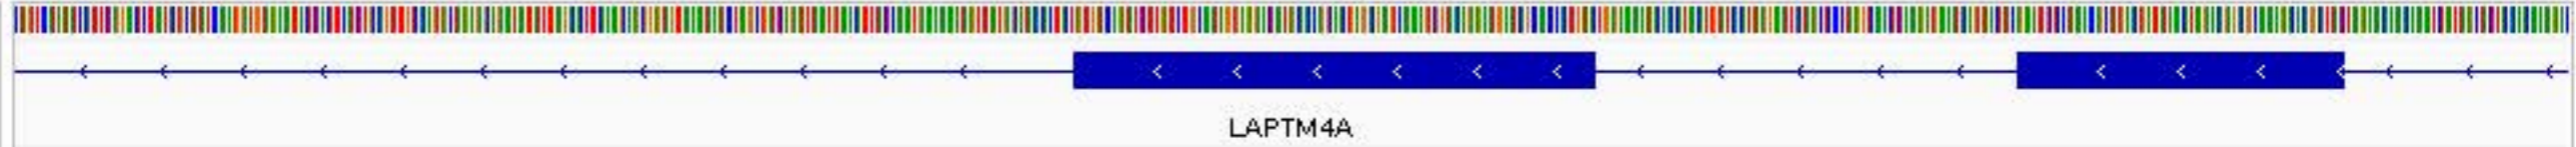

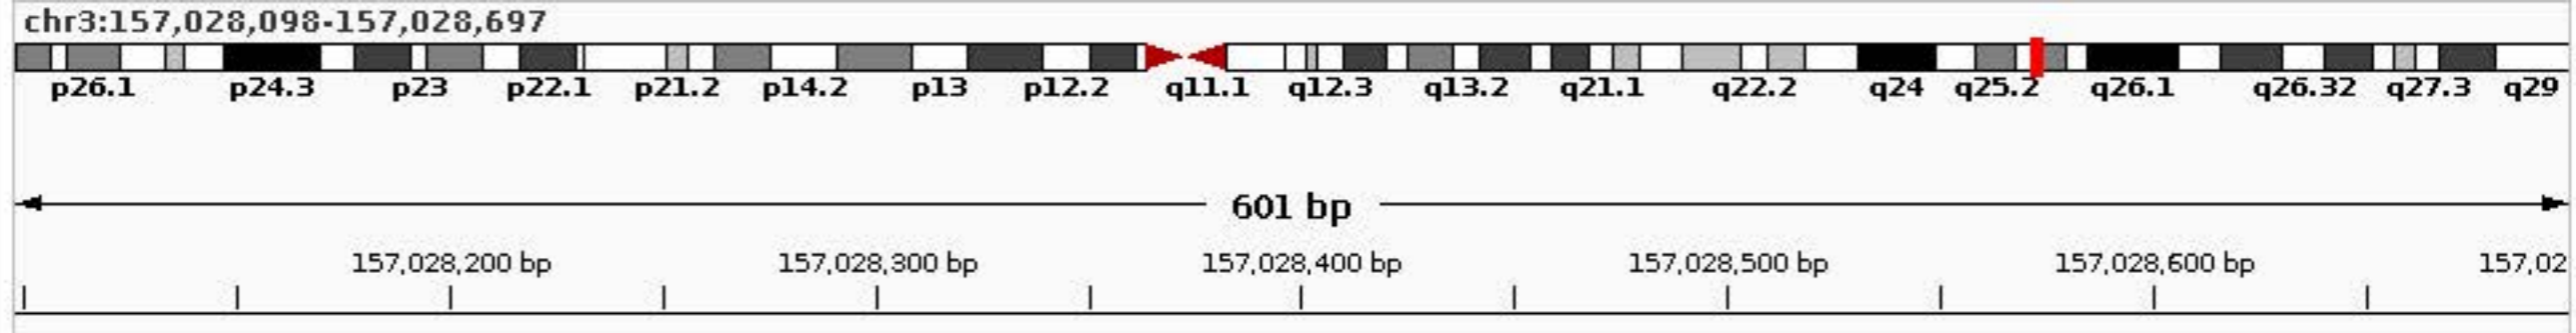

SL\_0004\_RN\_66\_mut.bam Coverage

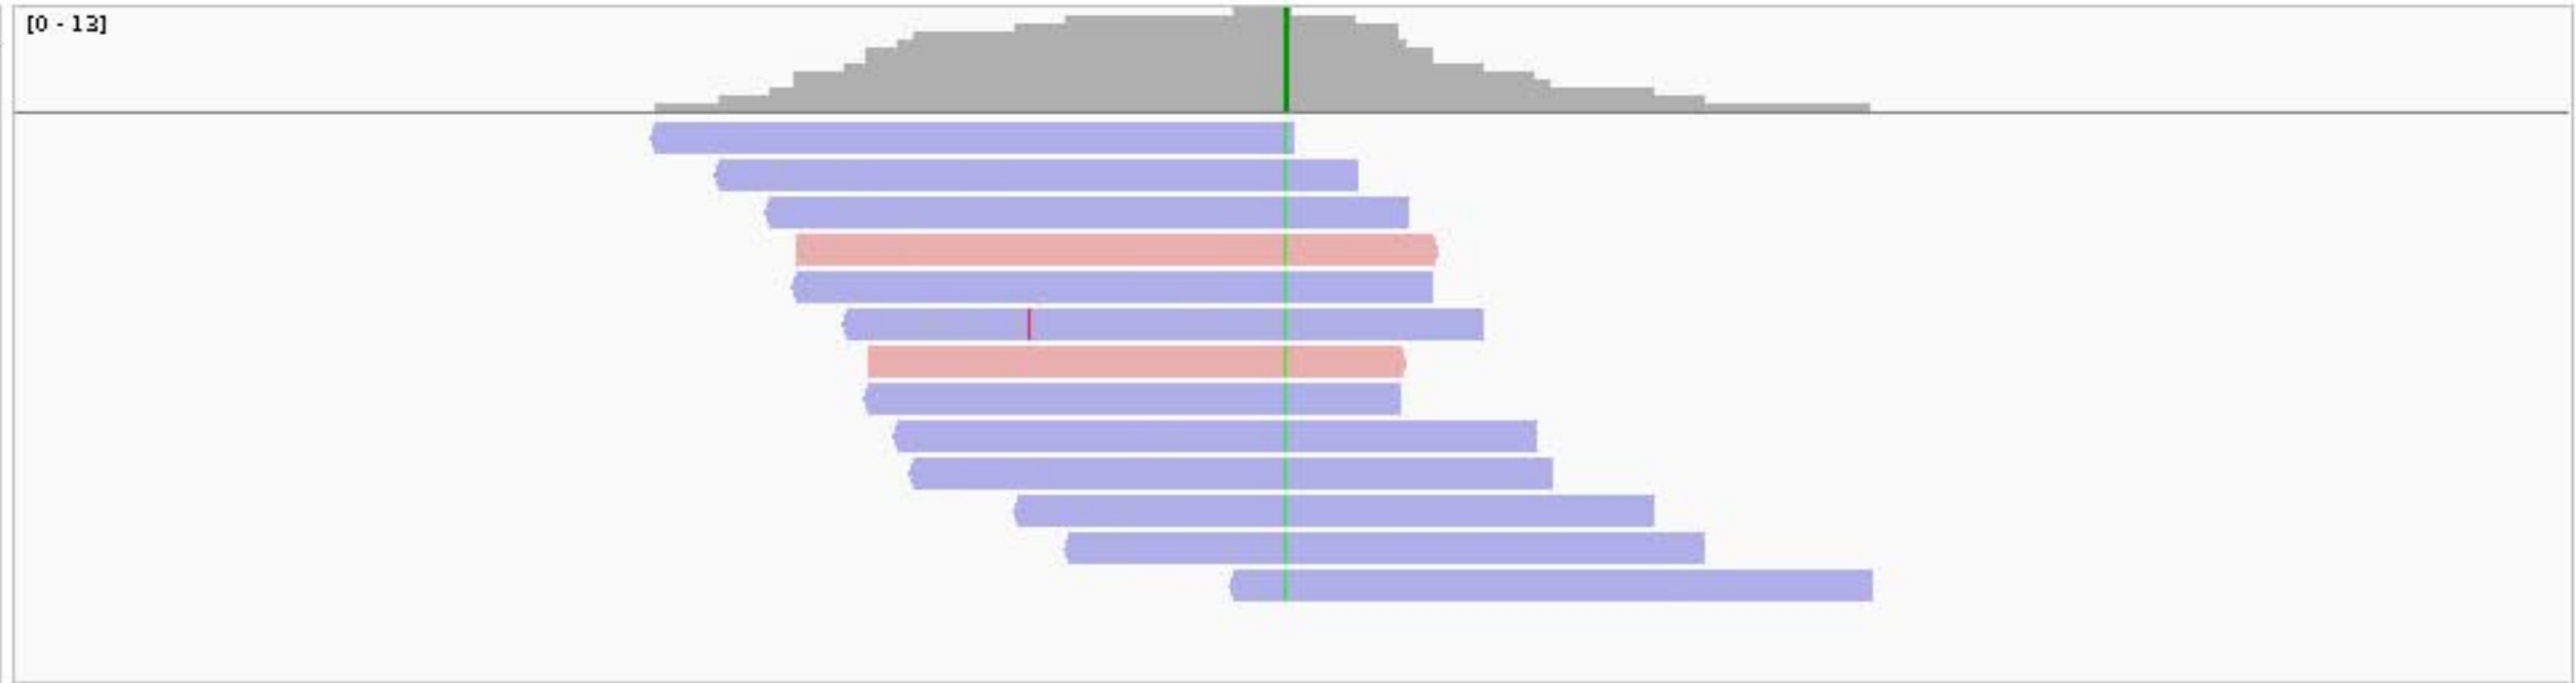

SL\_0004\_RN\_66\_mut.bam

Sequence

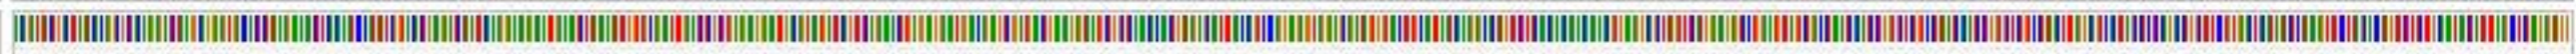

Refseq Genes

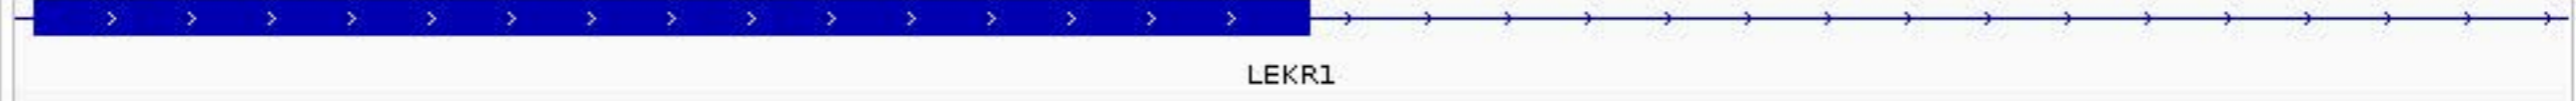

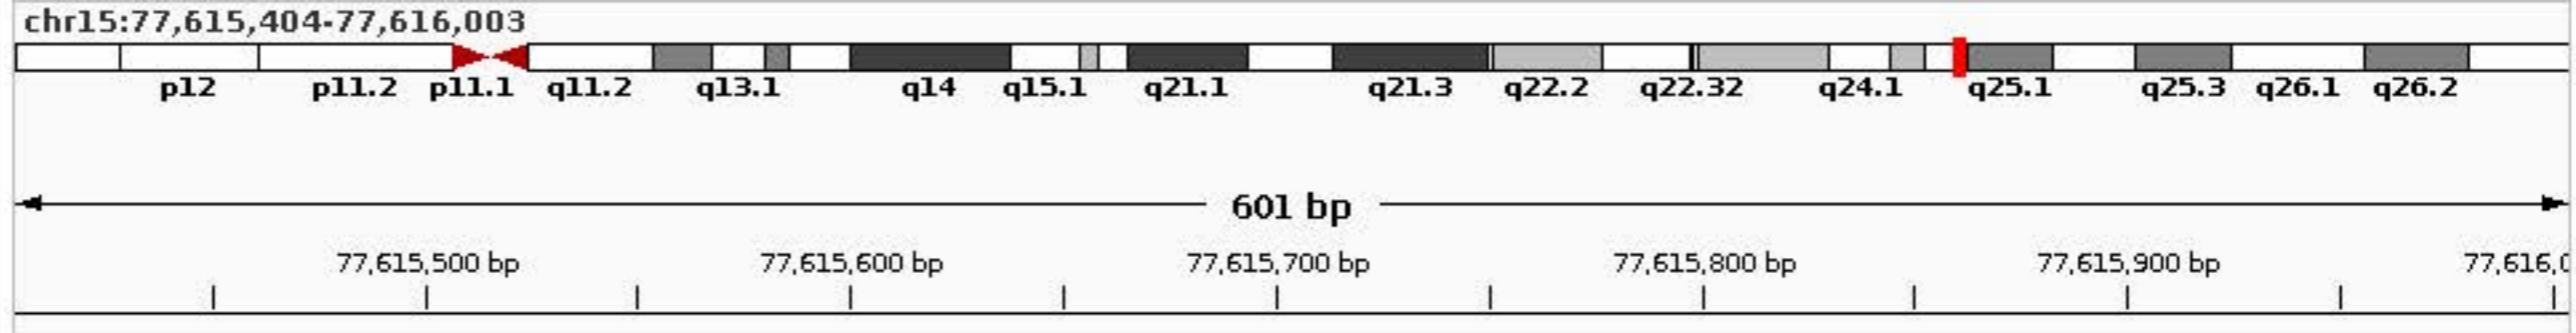

SL\_0001\_RN\_25\_mut.bam Coverage

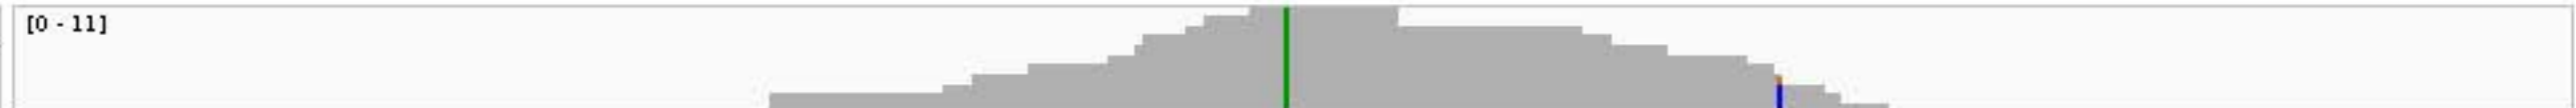

SL\_0001\_RN\_25\_mut.bam

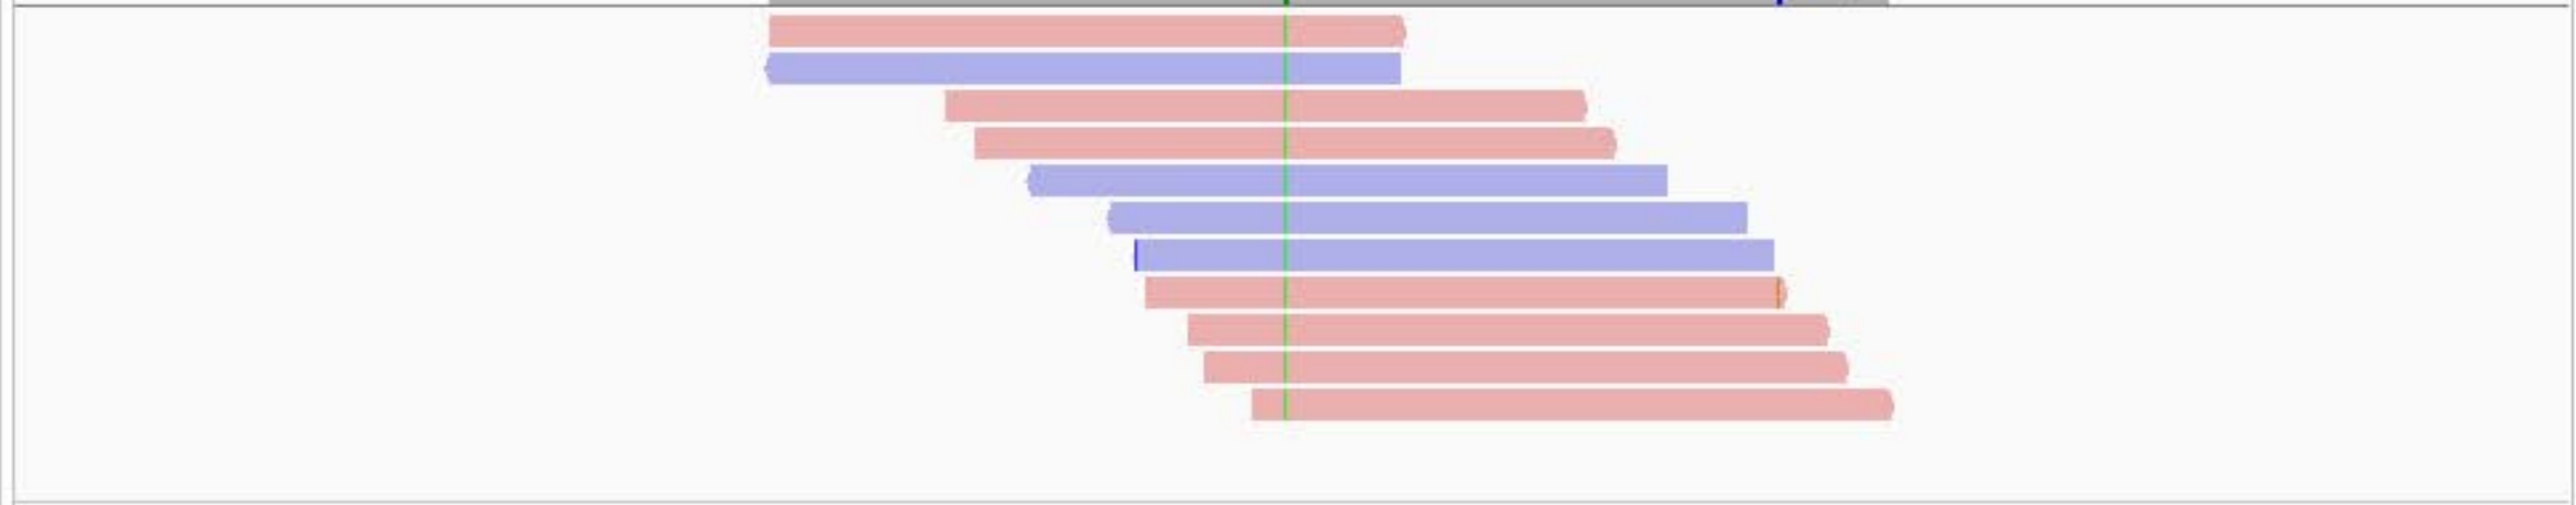

Sequence

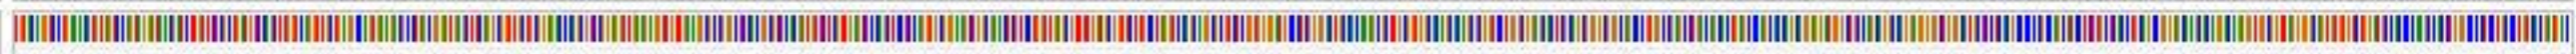

Refseq Genes

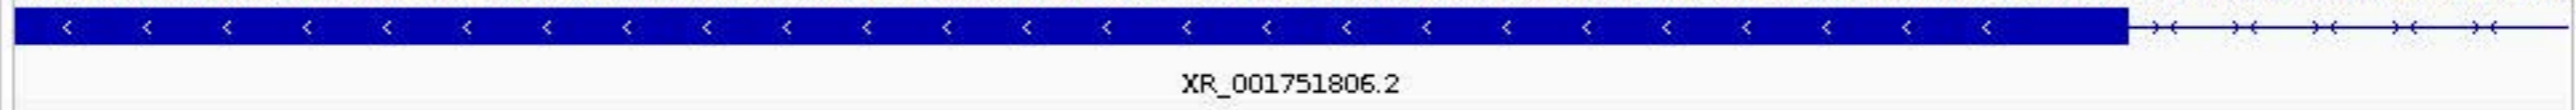



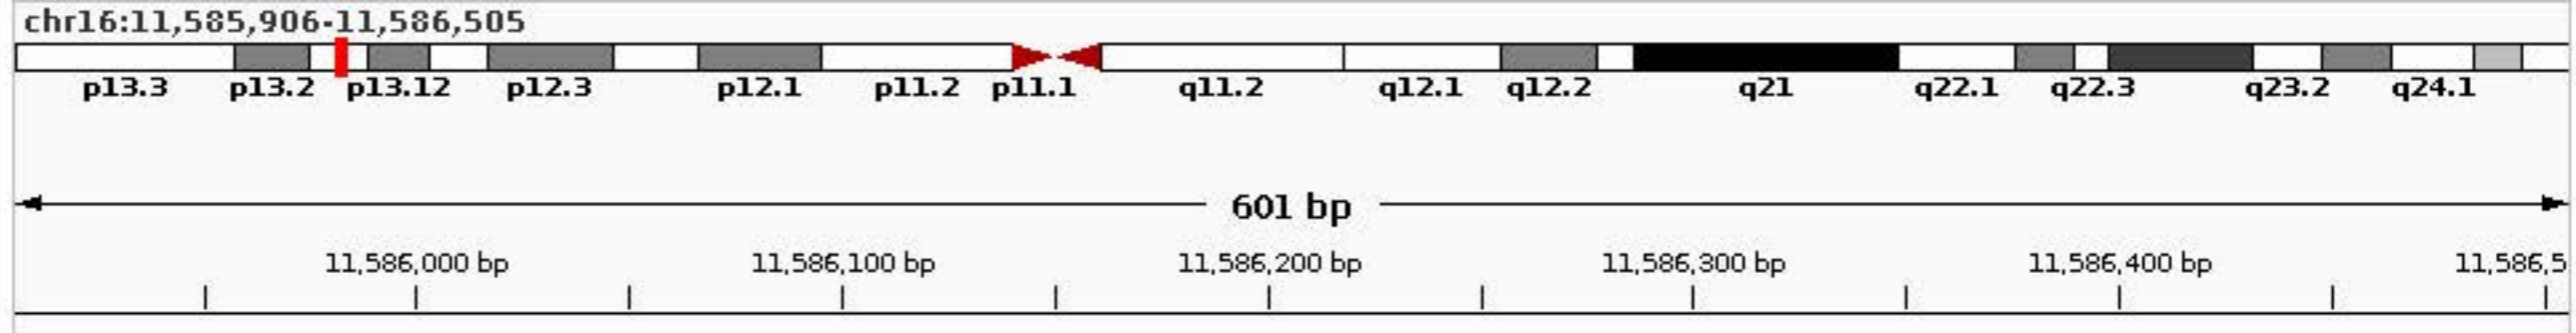

SL\_0007\_RN\_33\_mut.bam Coverage

SL\_0007\_RN\_33\_mut.bam

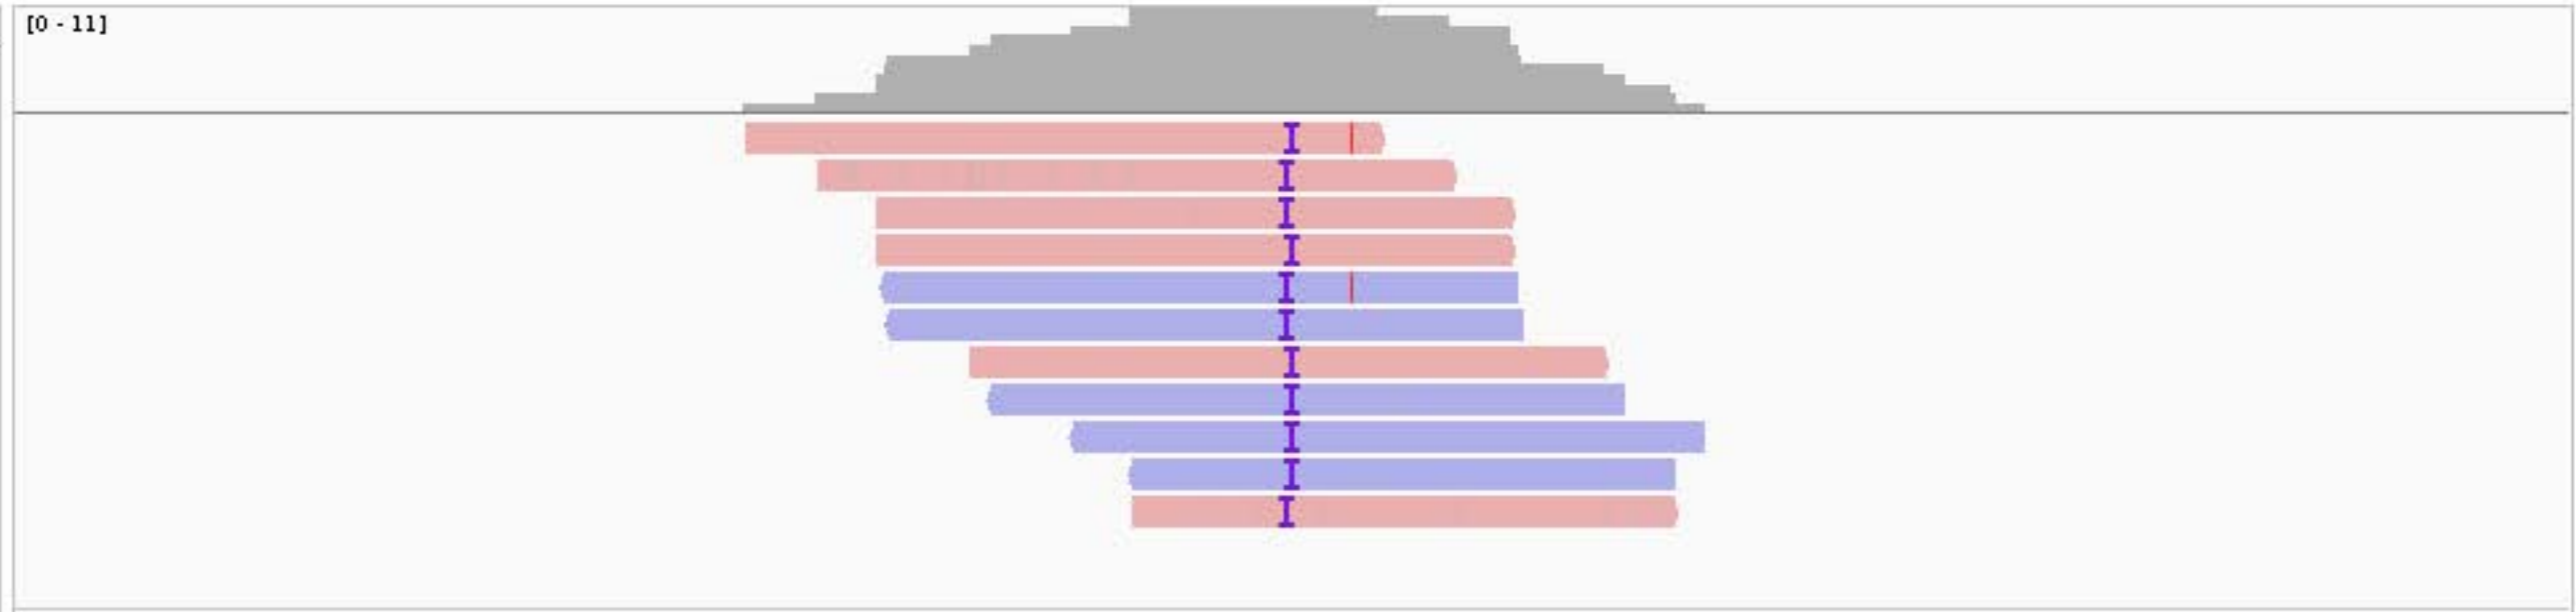

Sequence

Refseq Genes

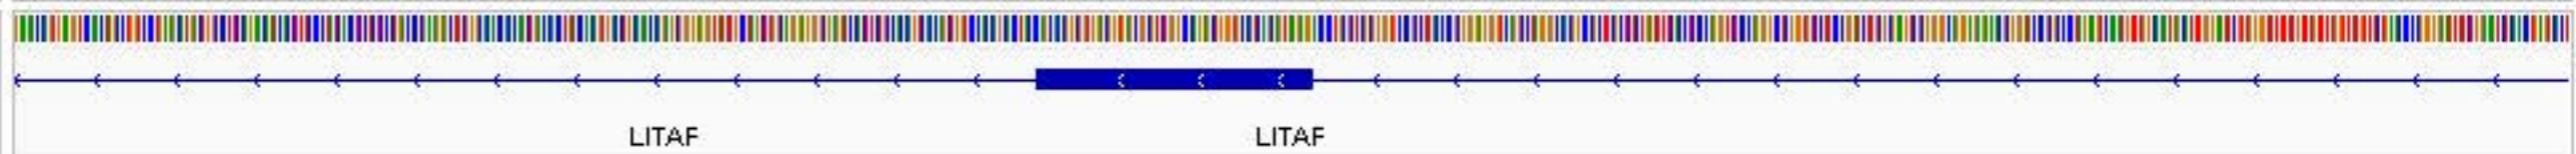



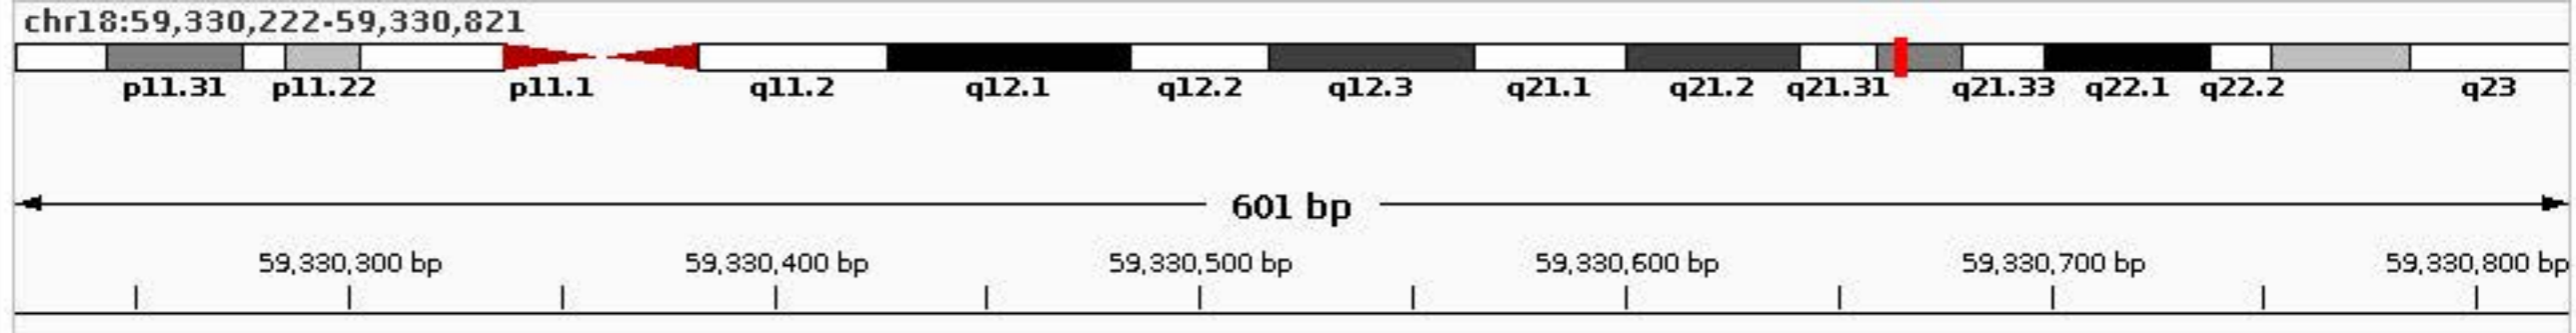

SL\_0004\_RN\_26\_mut.bam Coverage

SL\_0004\_RN\_26\_mut.bam

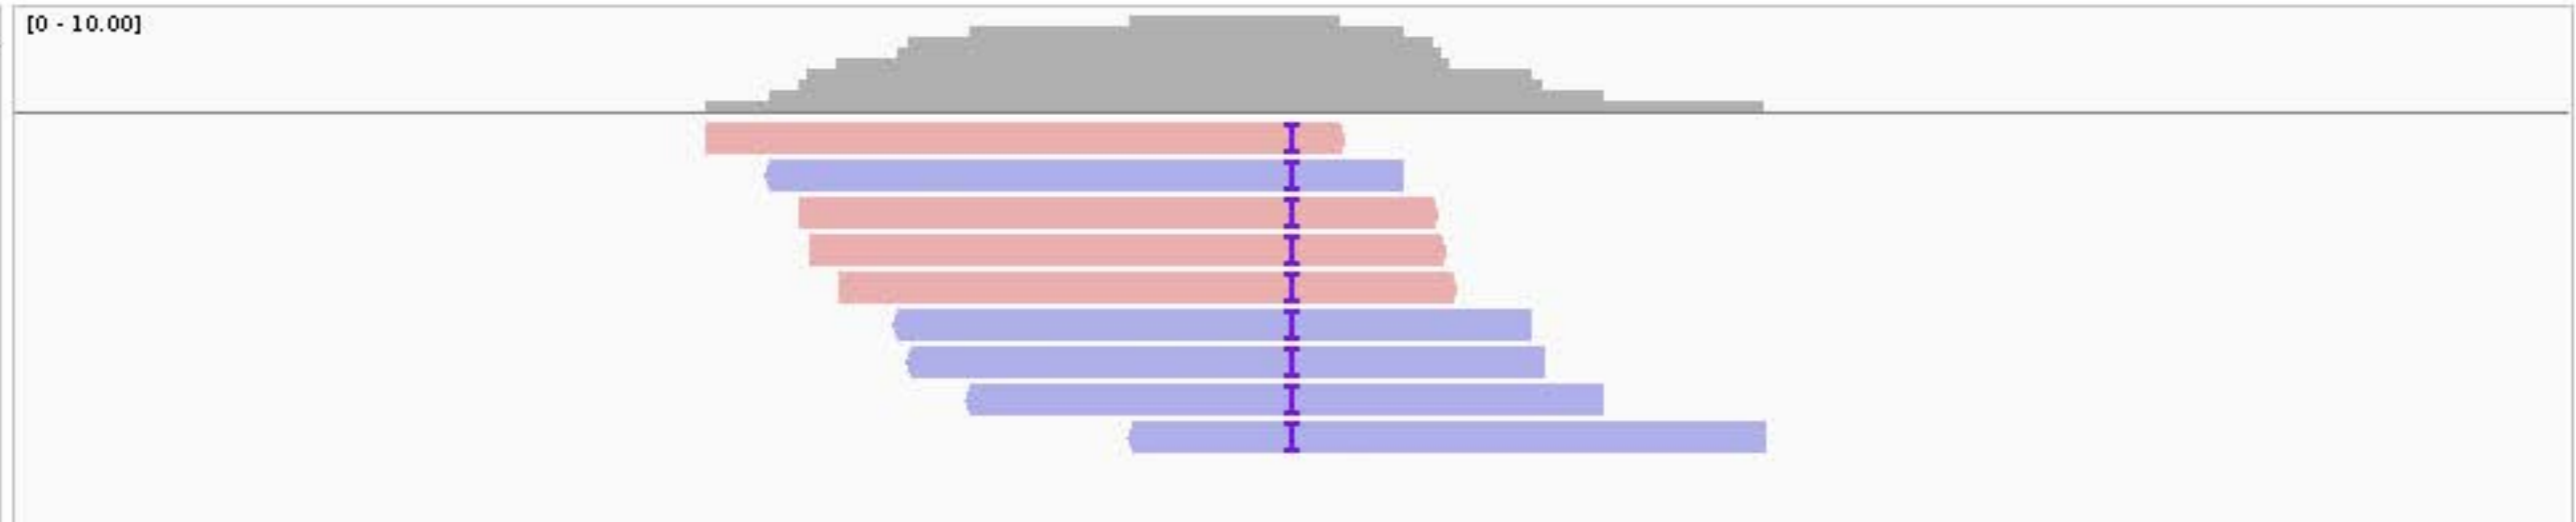

Sequence →

Refseq Genes

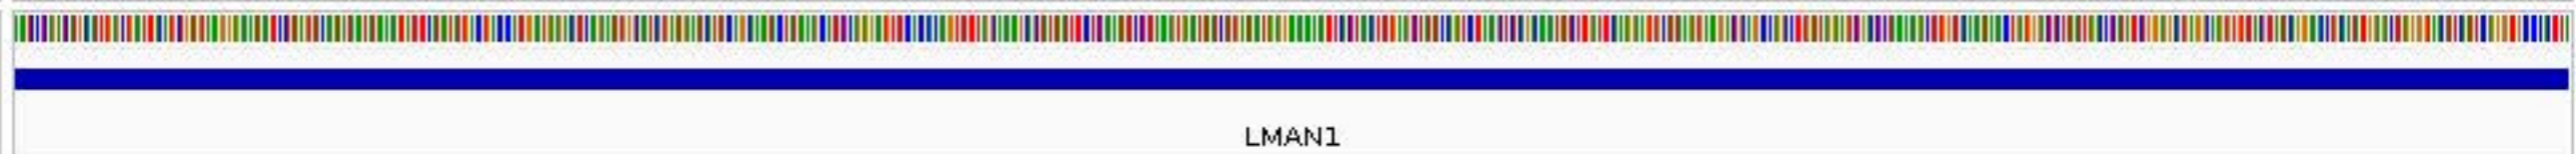

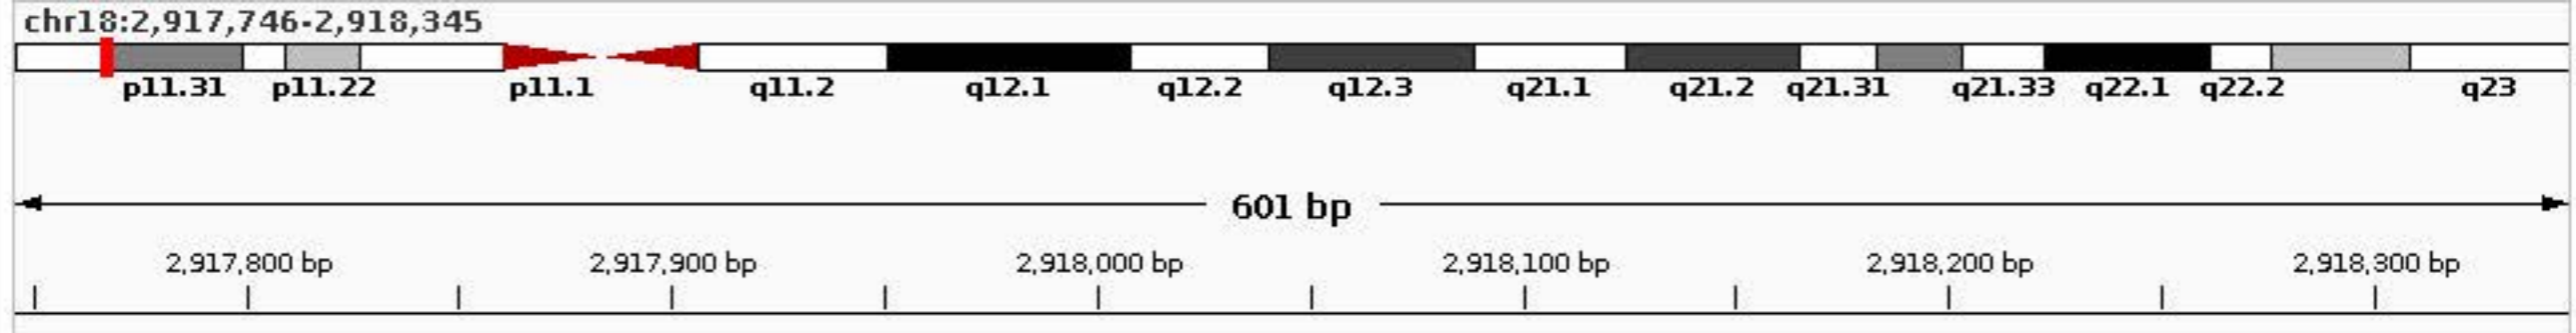

SL\_0001\_LN\_10\_mut.bam Coverage

SL\_0001\_LN\_10\_mut.bam

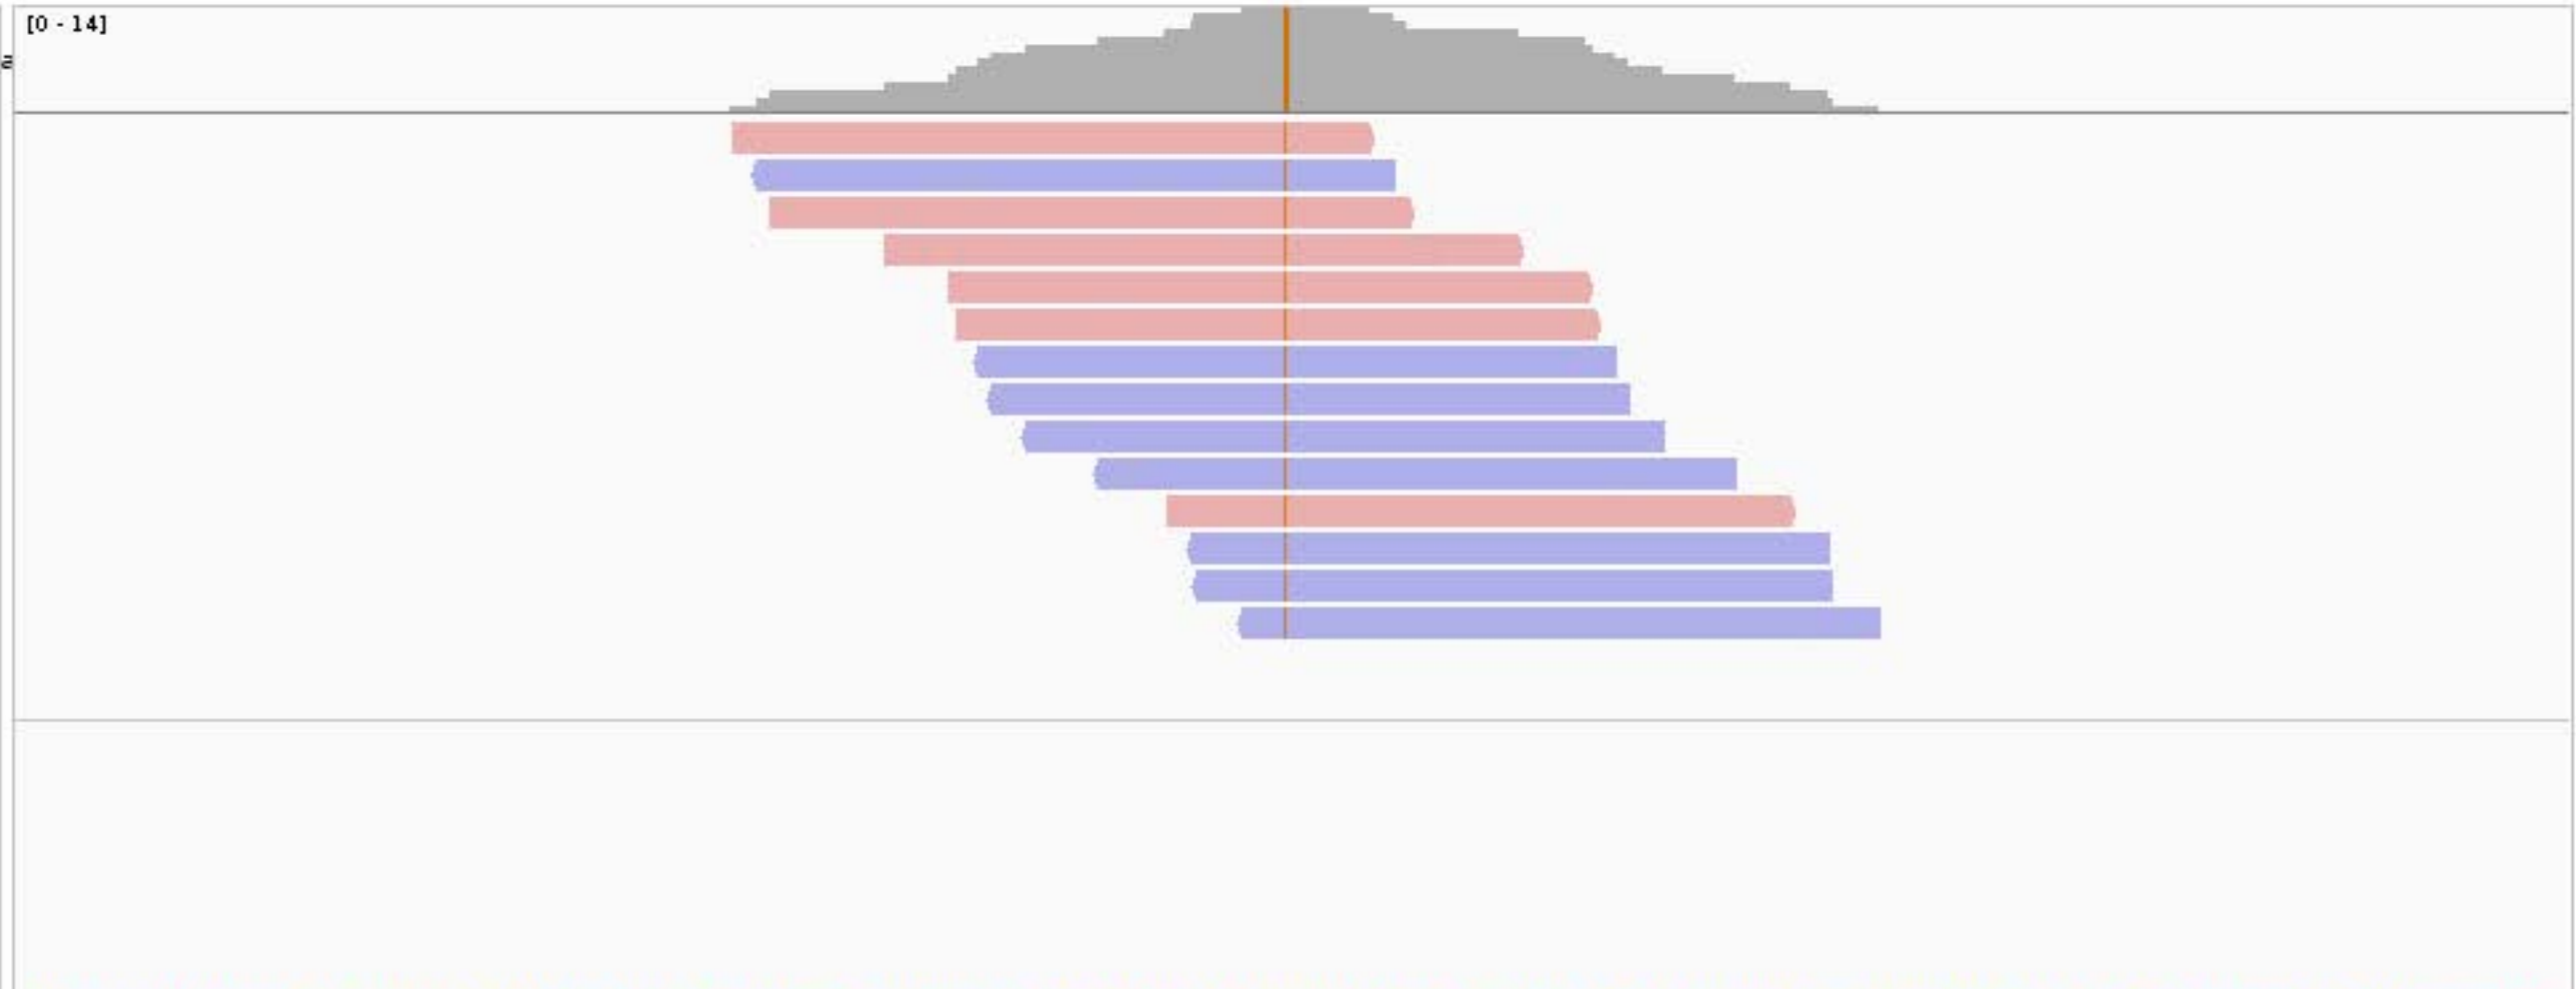

Sequence →

Refseq Genes

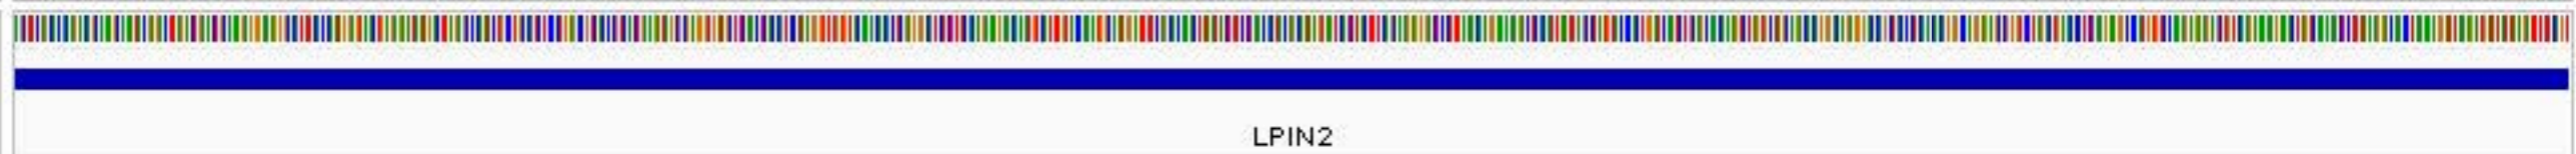

chr17:50,382,845-50,383,444

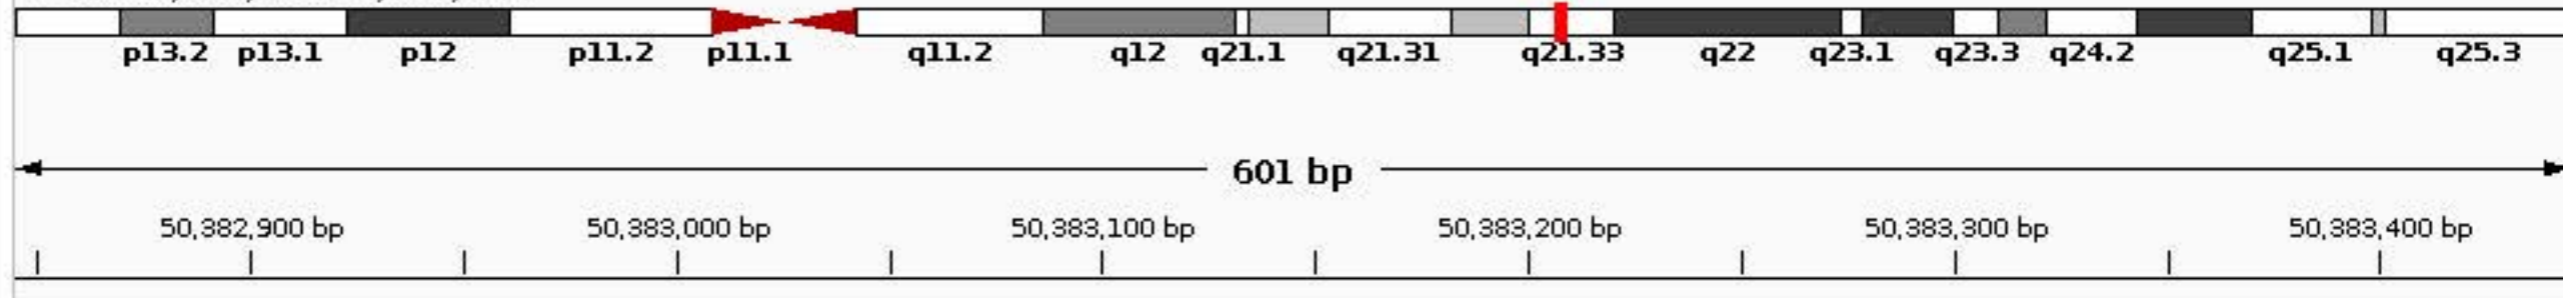

SL\_0007\_RN\_2\_mut.bam Coverage

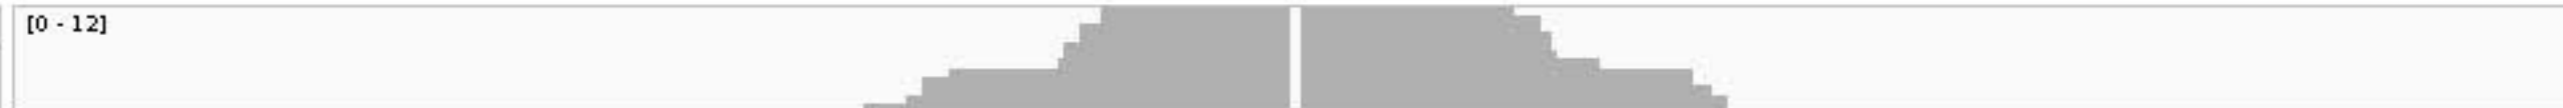

SL\_0007\_RN\_2\_mut.bam

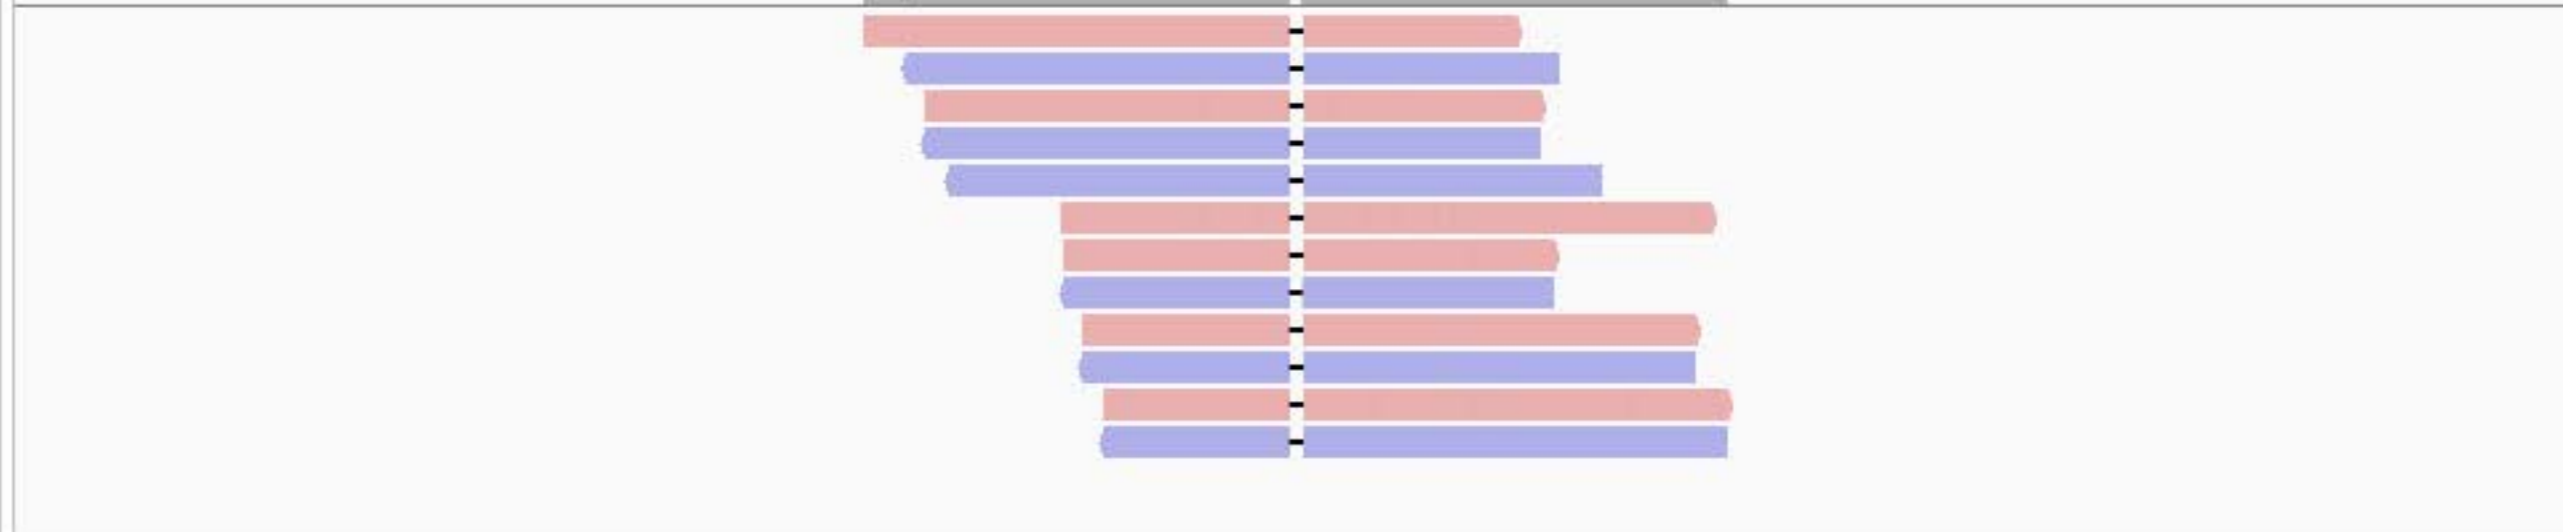

Sequence

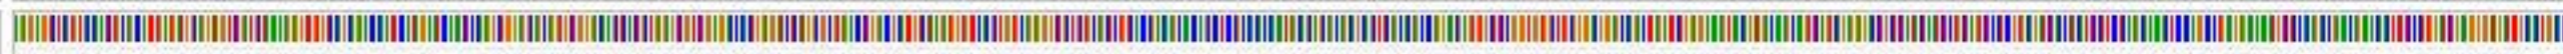

Refseq Genes

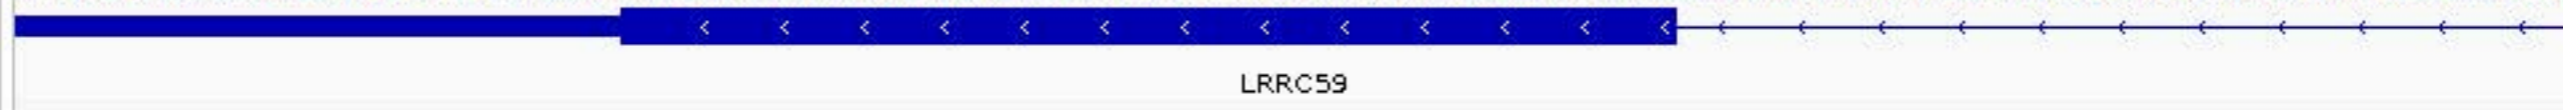

chr1:235,833,372-235,833,971

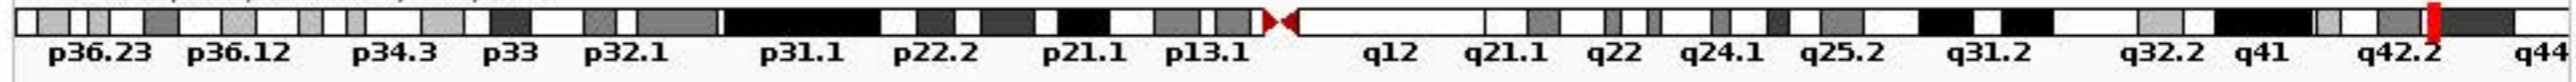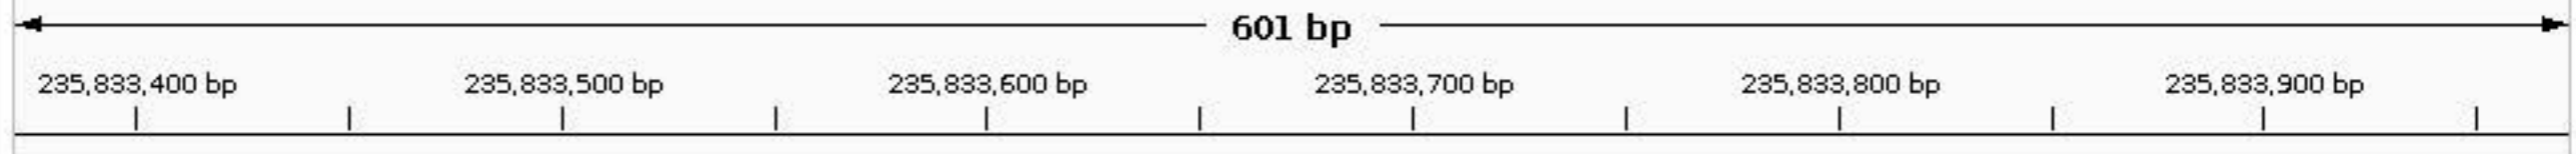

SL\_0015\_LN\_46\_mut.bam Coverage

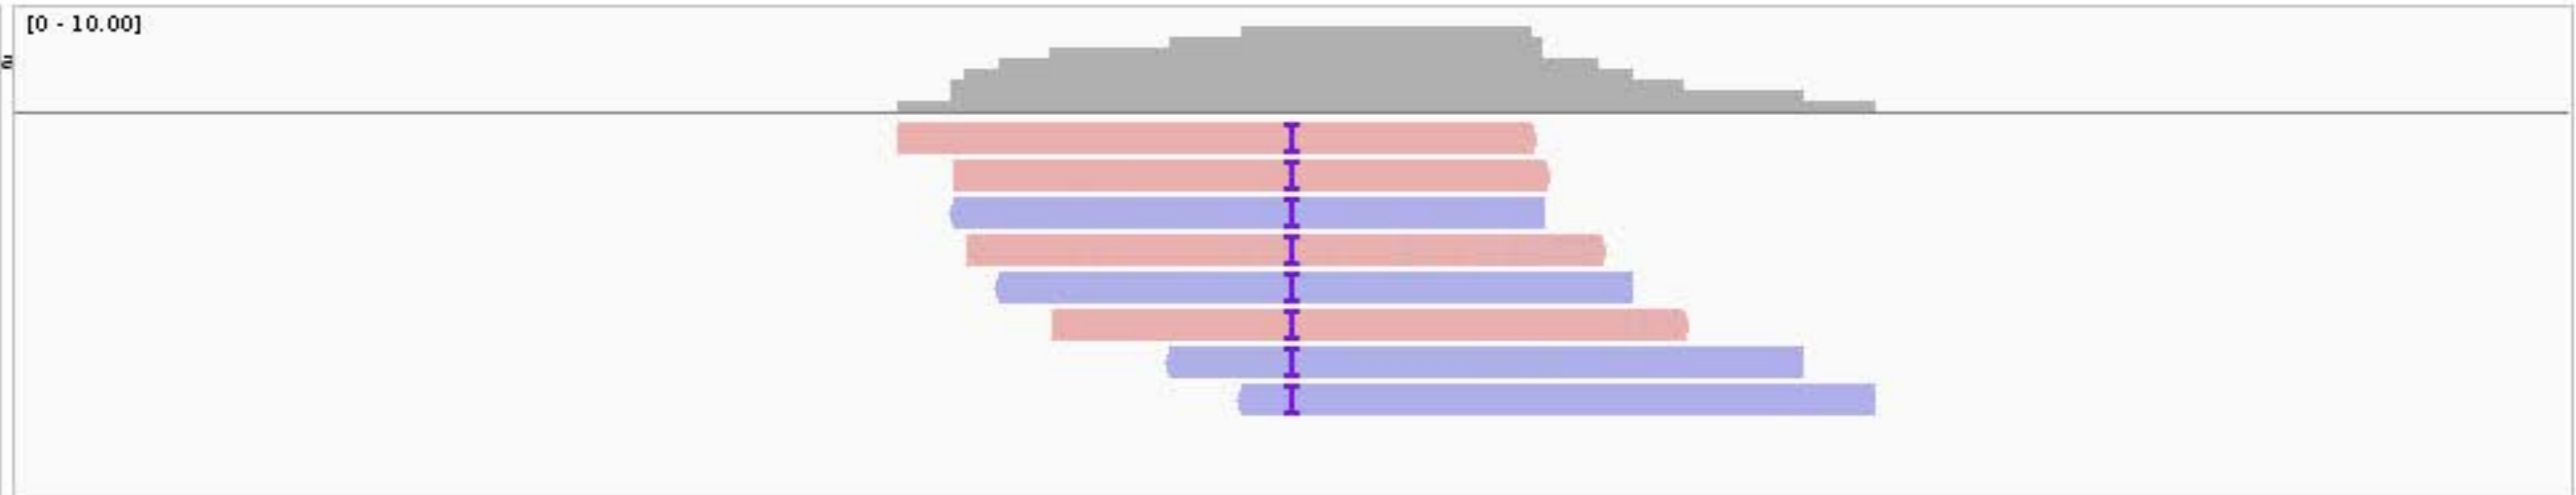

SL\_0015\_LN\_46\_mut.bam

Sequence

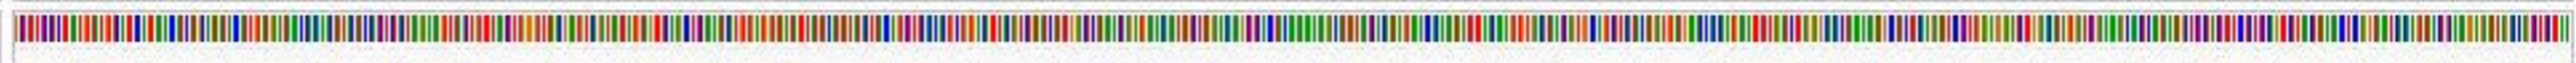

Refseq Genes

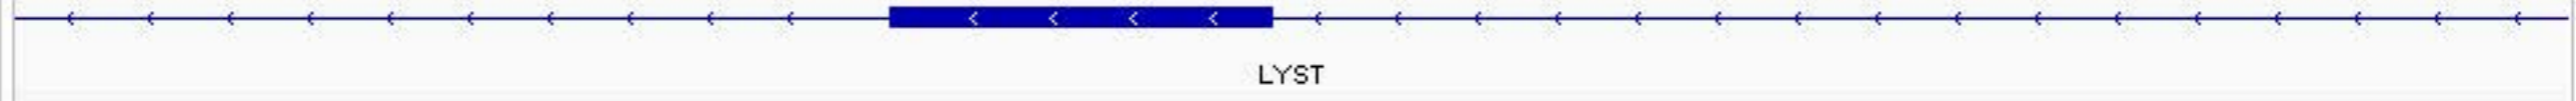



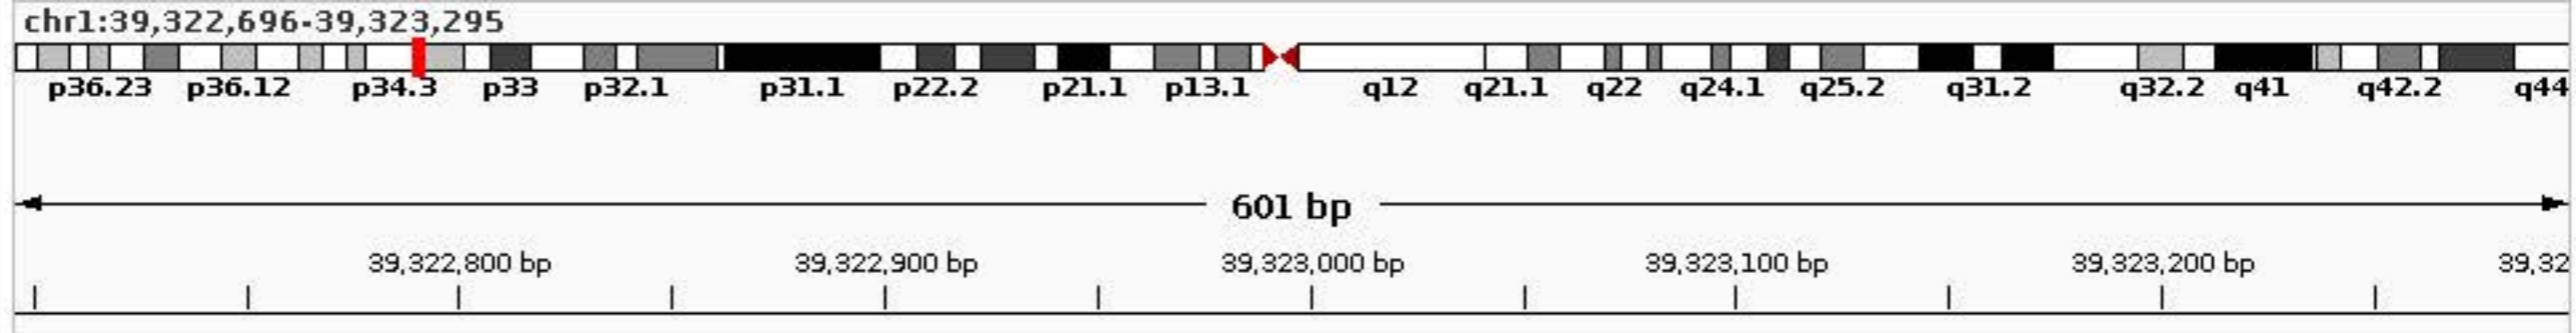

SL\_0004\_RN\_47\_mut.bam Coverage

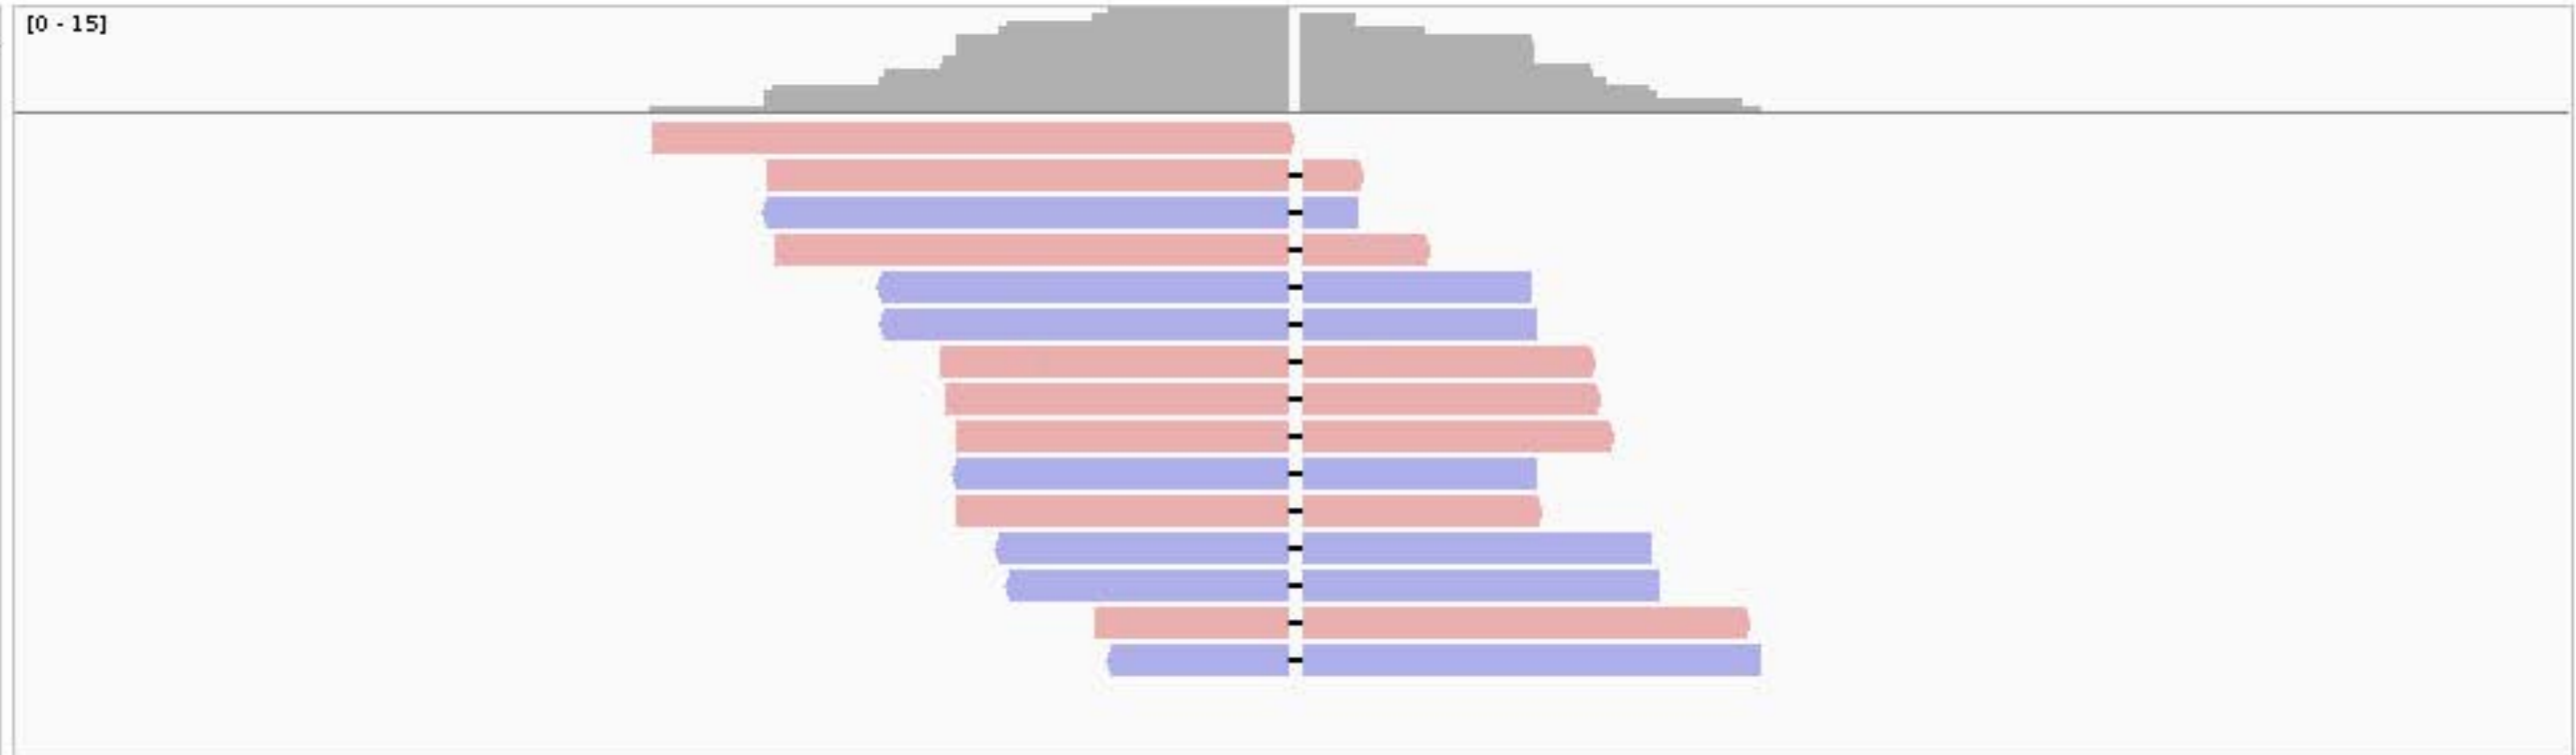

SL\_0004\_RN\_47\_mut.bam

Sequence

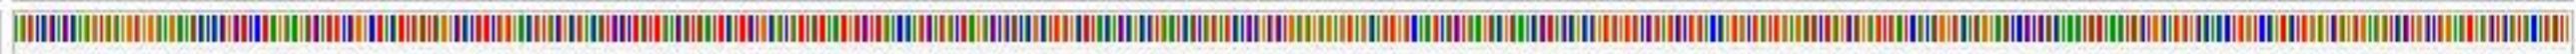

Refseq Genes

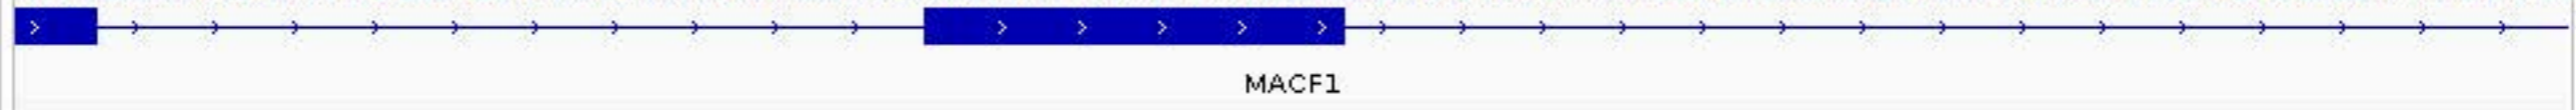

chr1:113,681,942-113,682,541

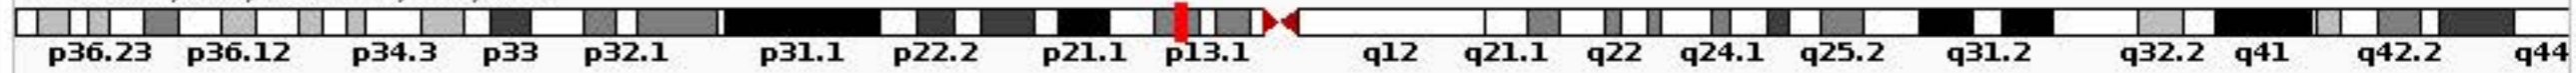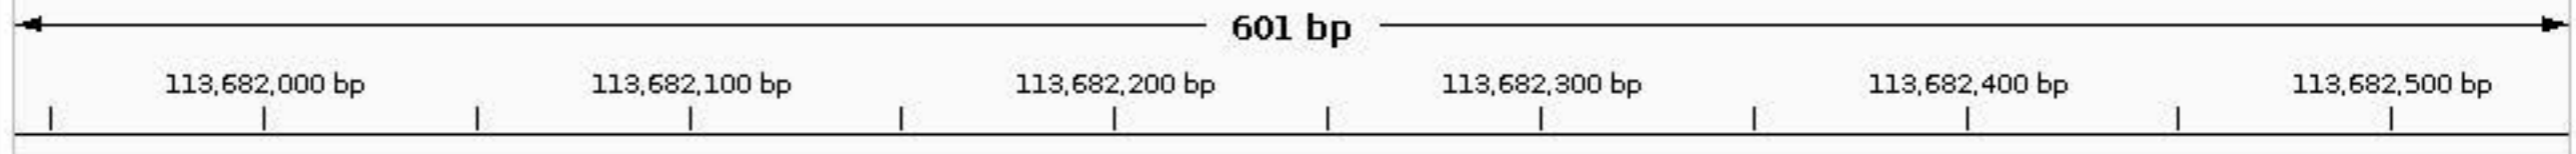

SL\_0001\_LN\_10\_mut.bam Coverage

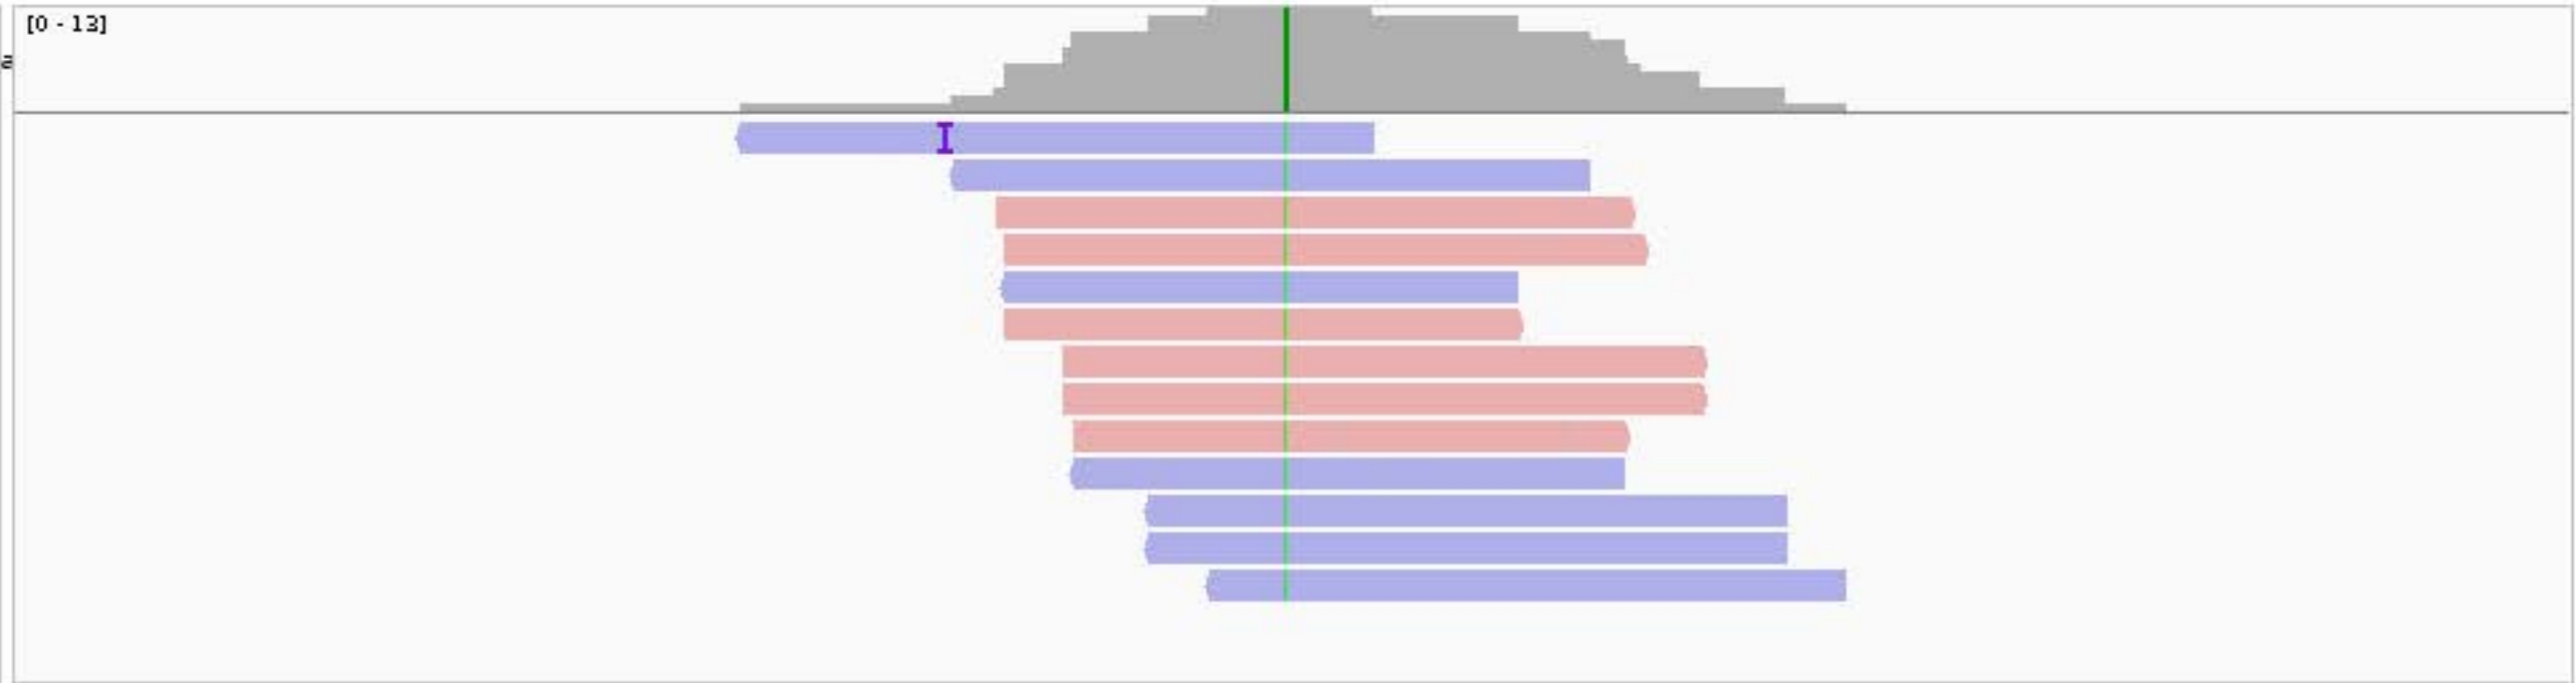

SL\_0001\_LN\_10\_mut.bam

Sequence

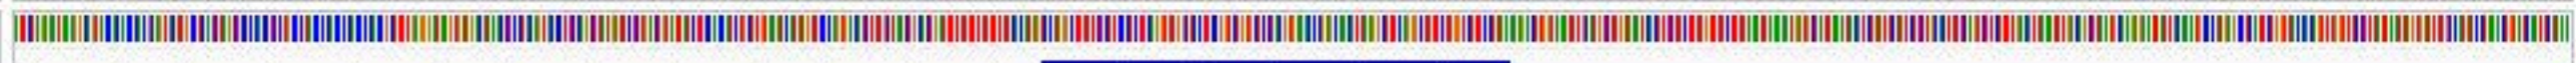

Refseq Genes

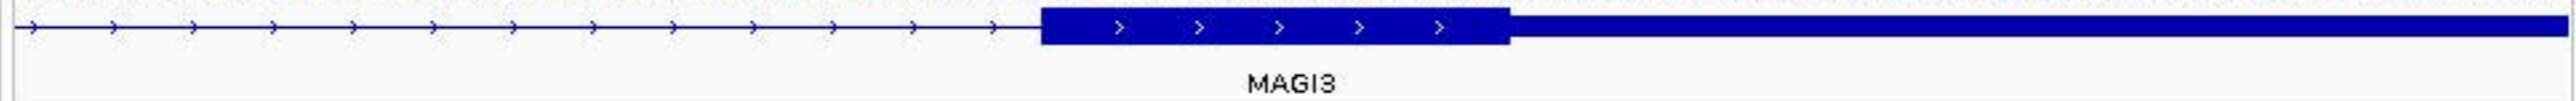

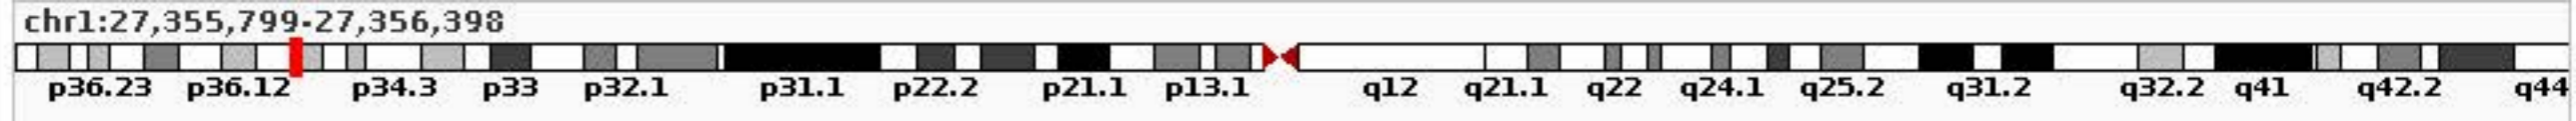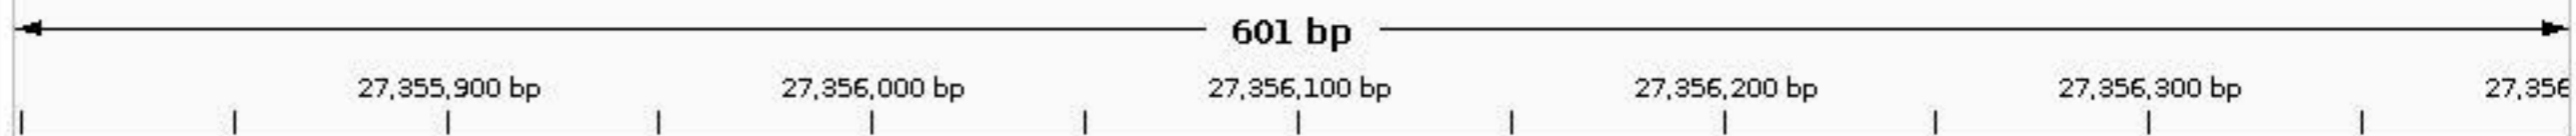

SL\_0004\_RN\_24\_mut.bam Coverage

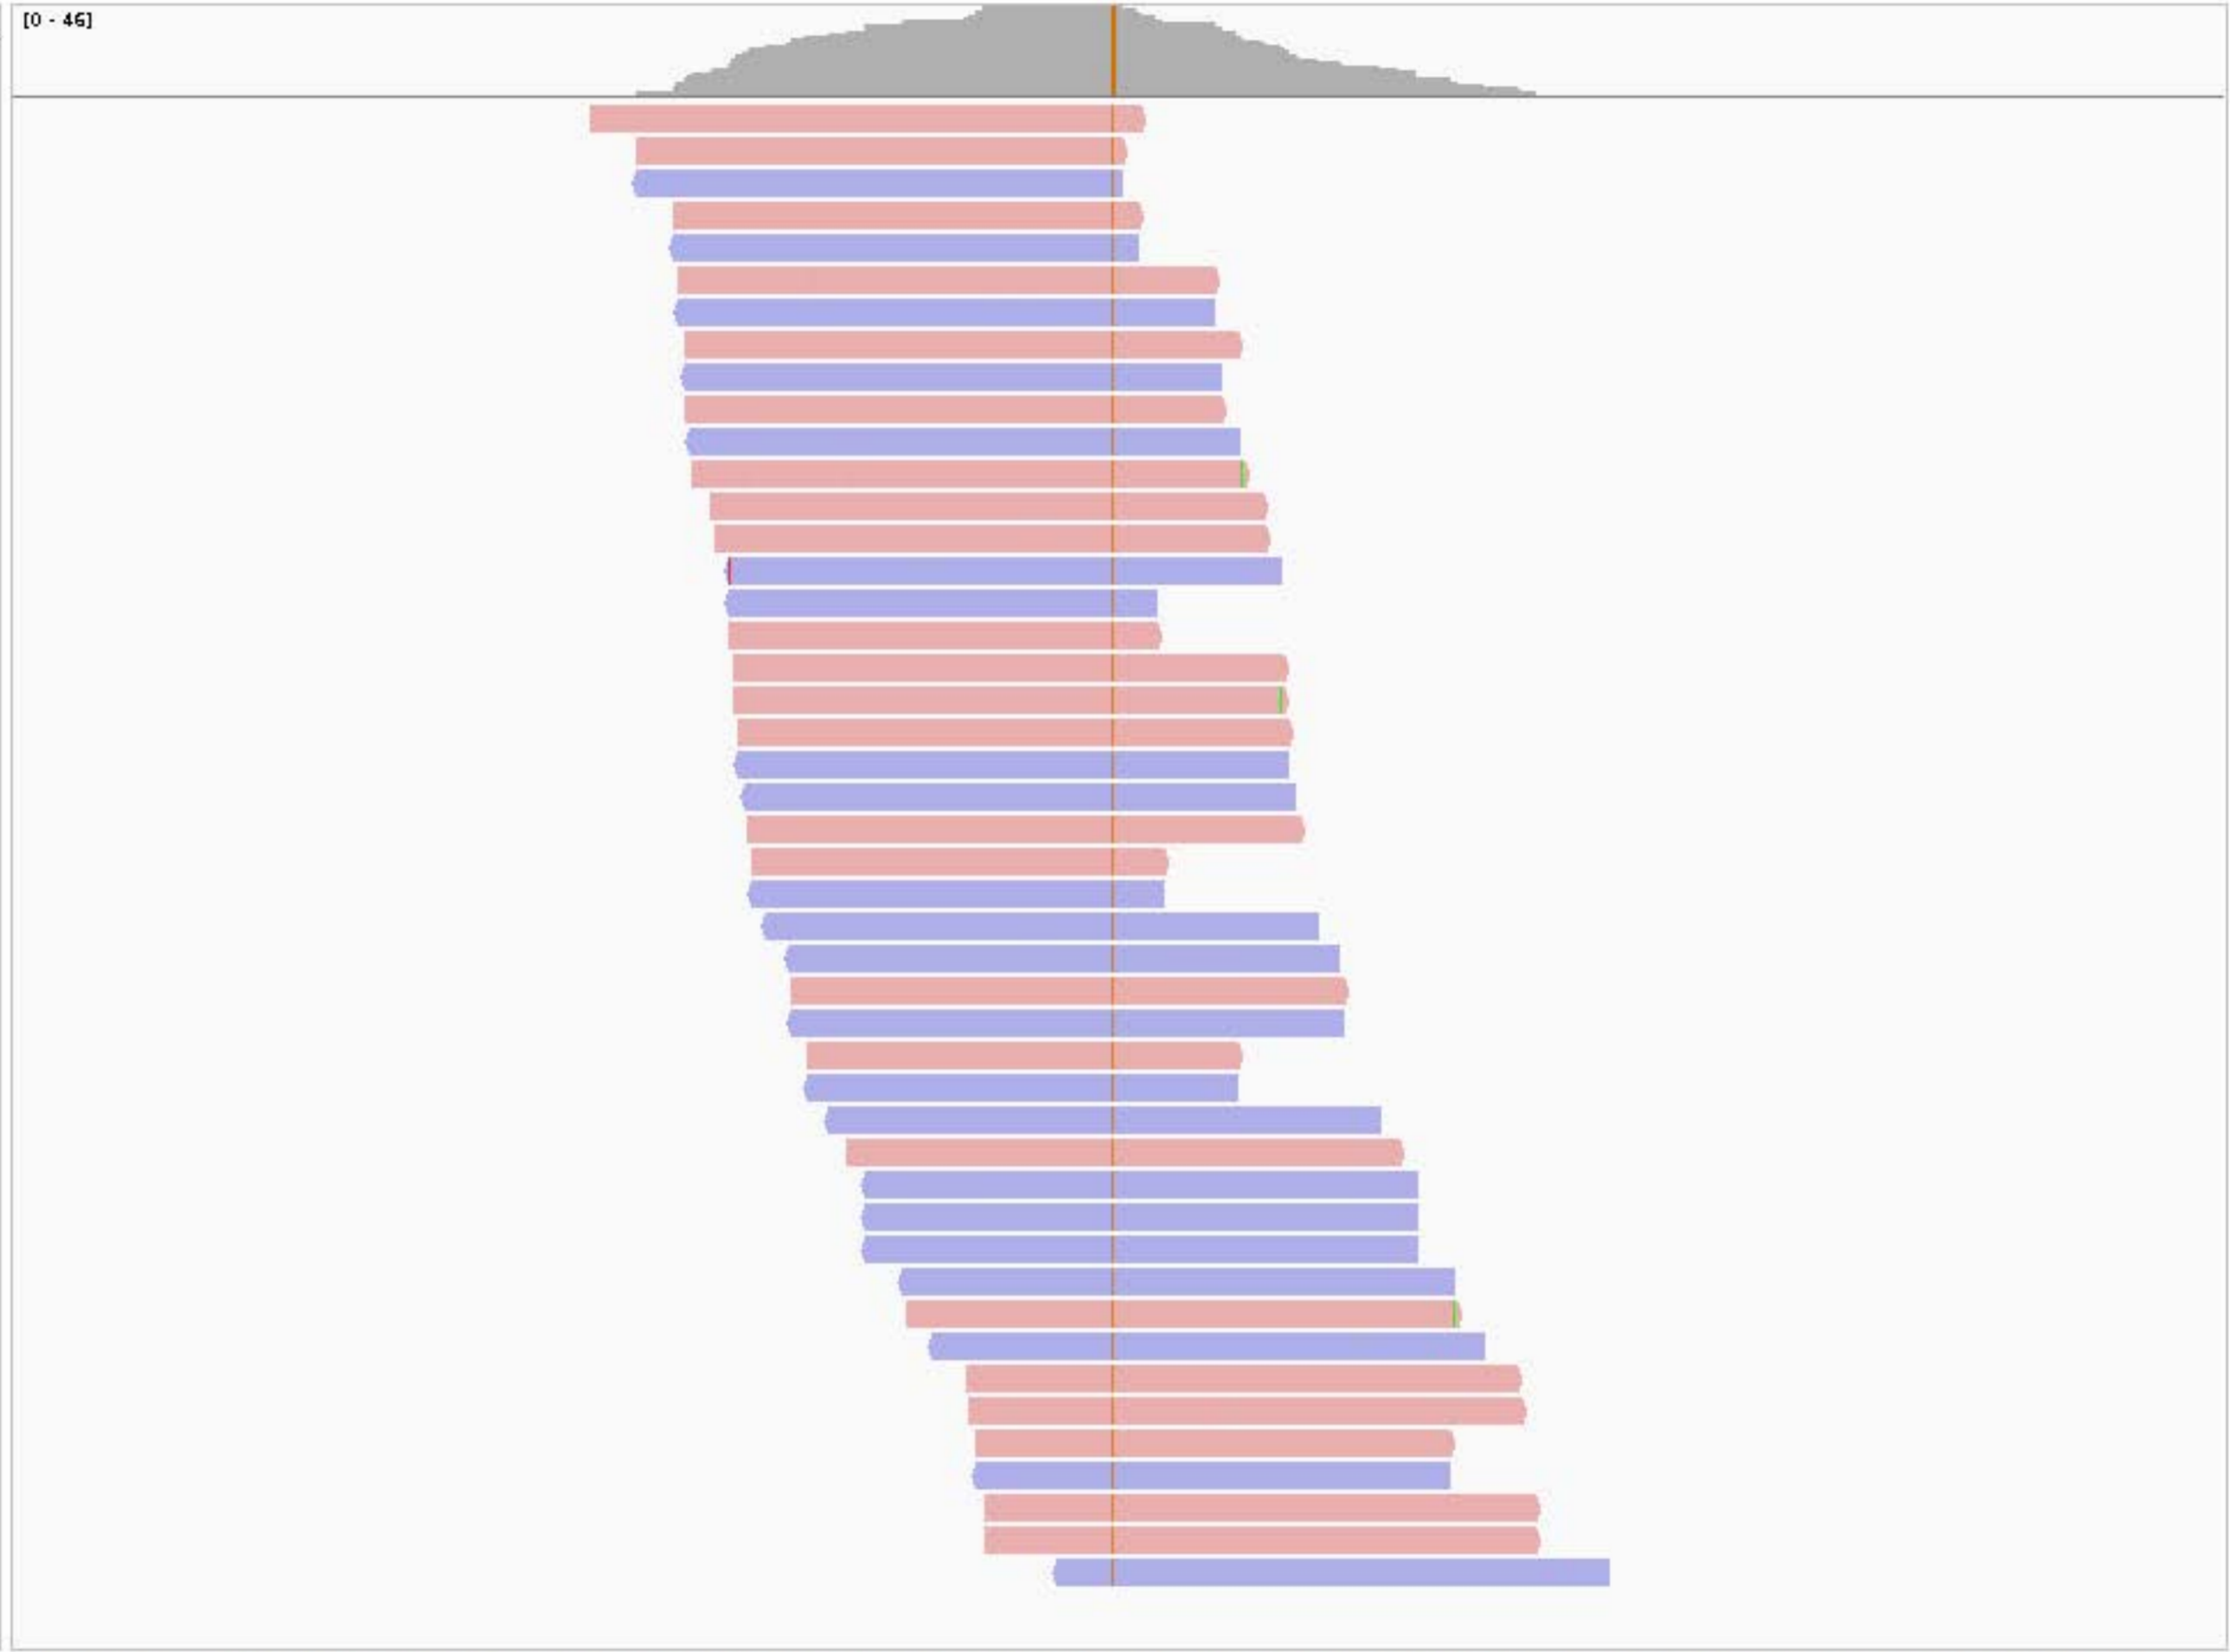

SL\_0004\_RN\_24\_mut.bam

Sequence

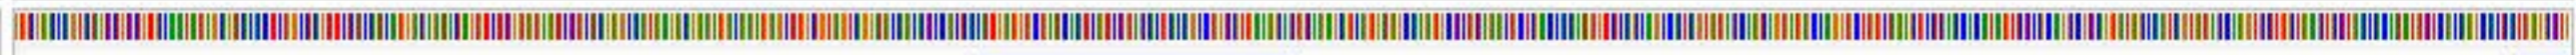

Refseq Genes

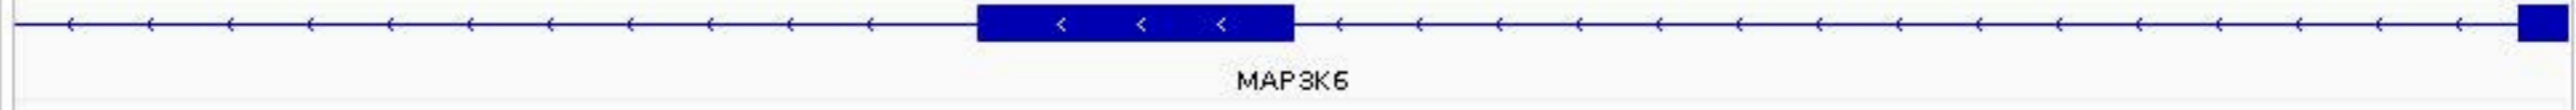

MAP3K6

chr16:29,807,120-29,807,719

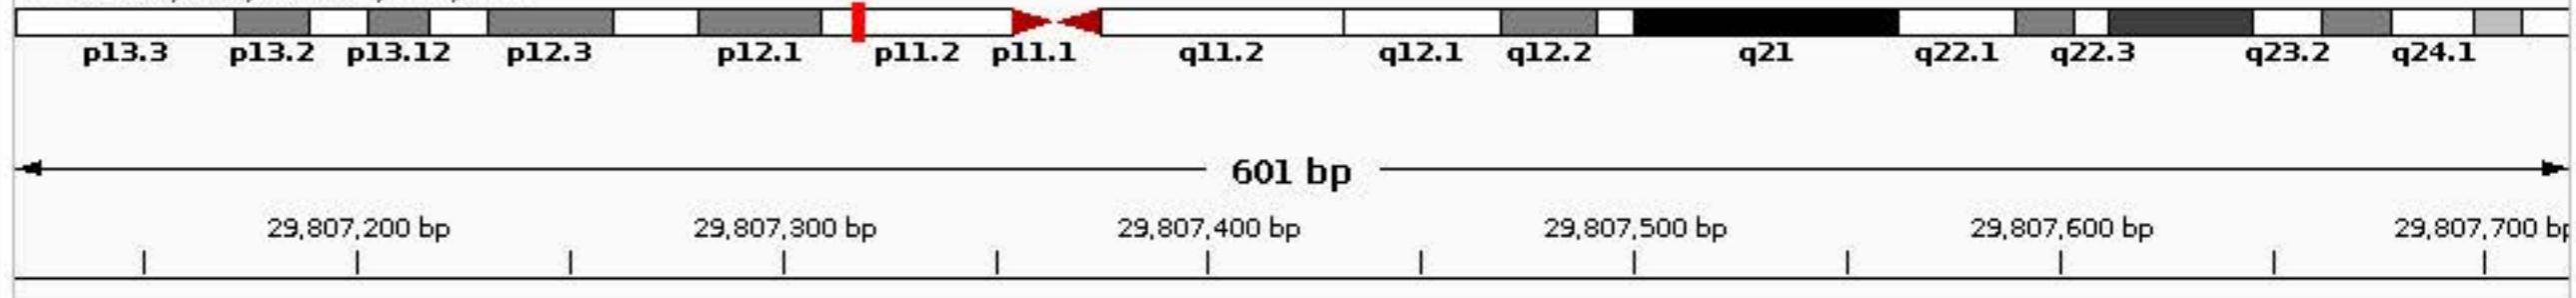

SL\_0001\_RN\_25\_mut.bam Coverage

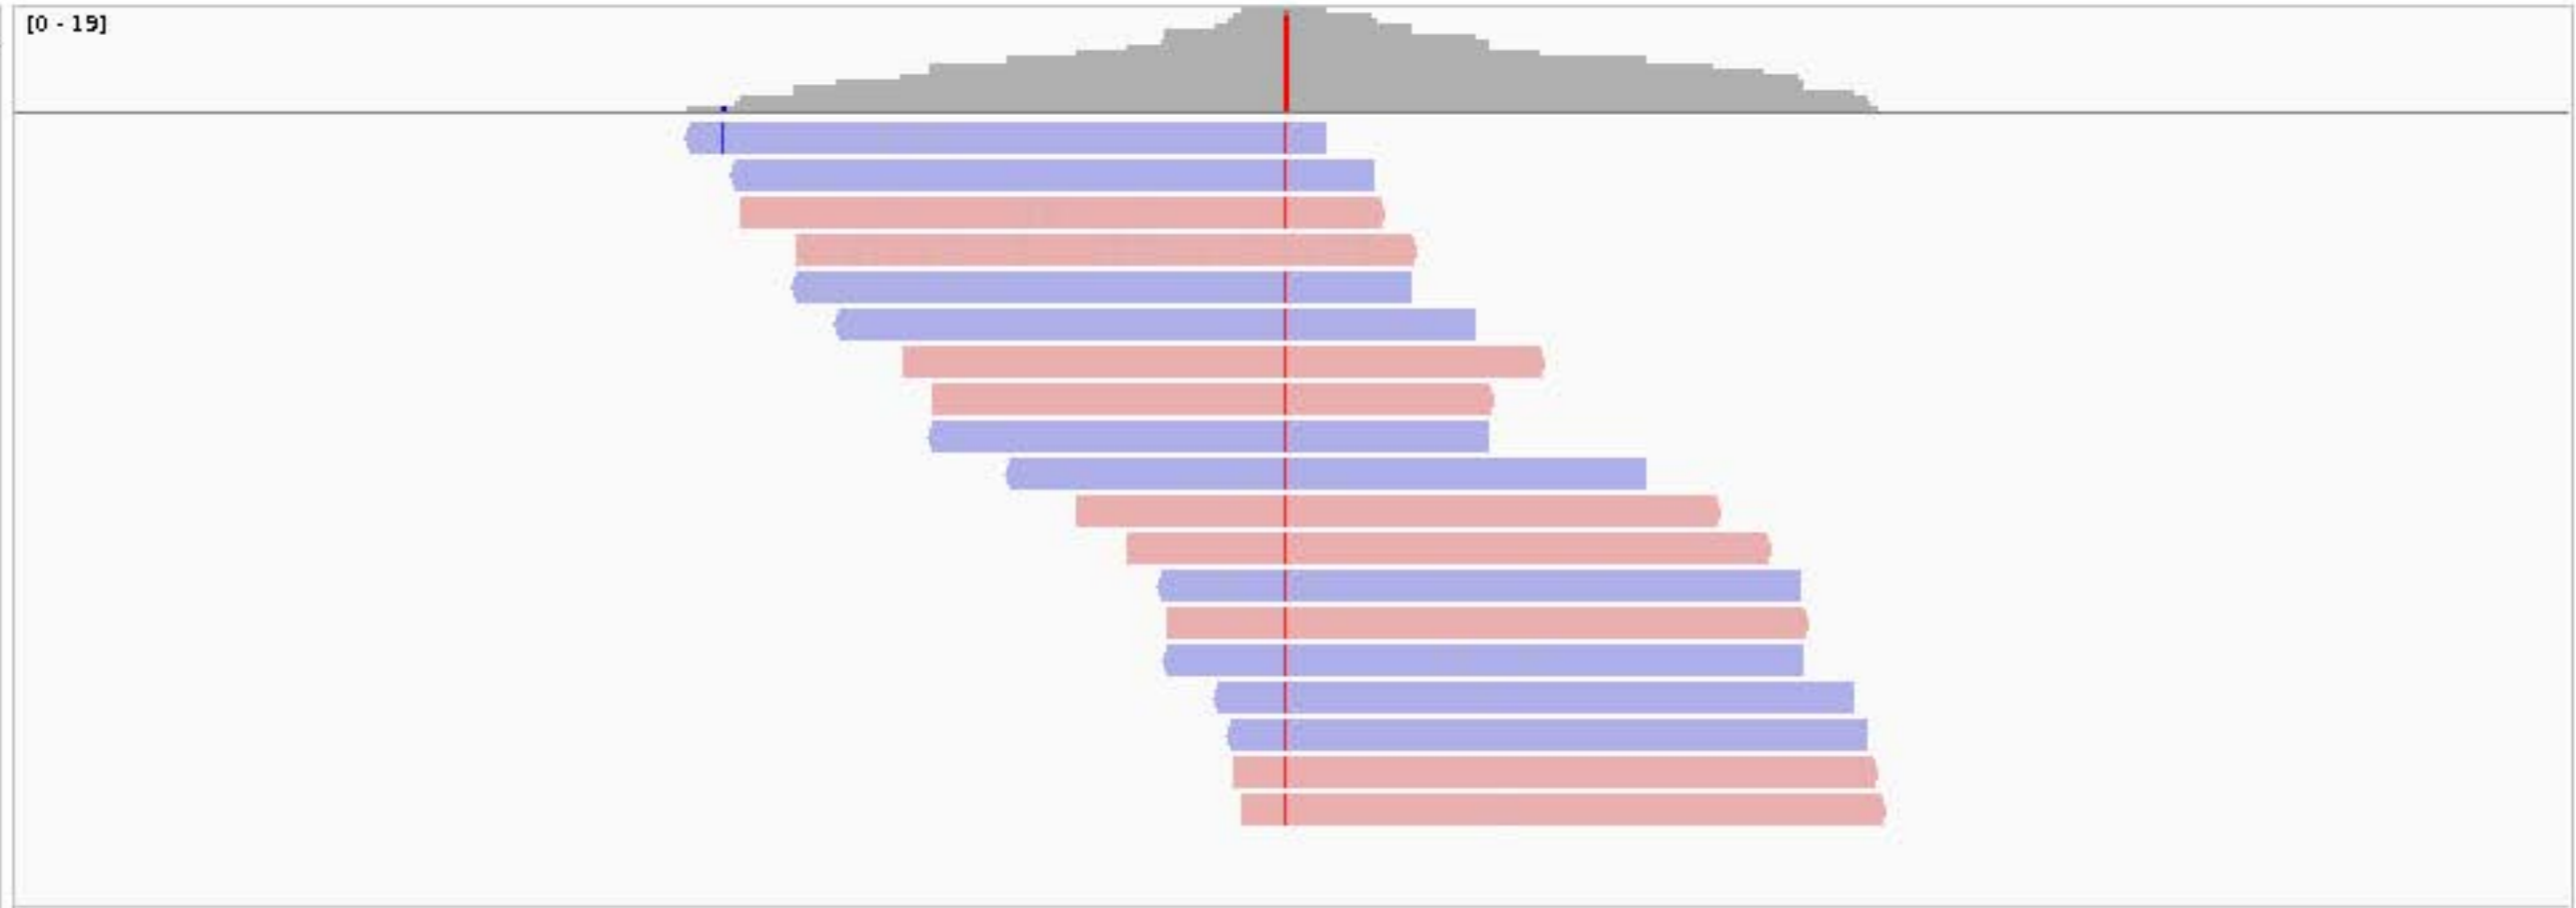

SL\_0001\_RN\_25\_mut.bam

Sequence

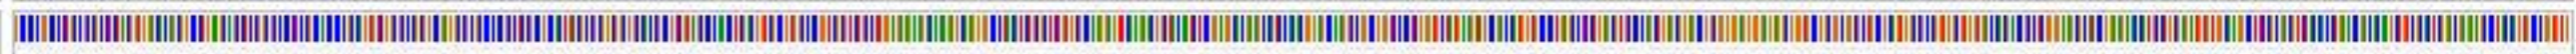

Refseq Genes

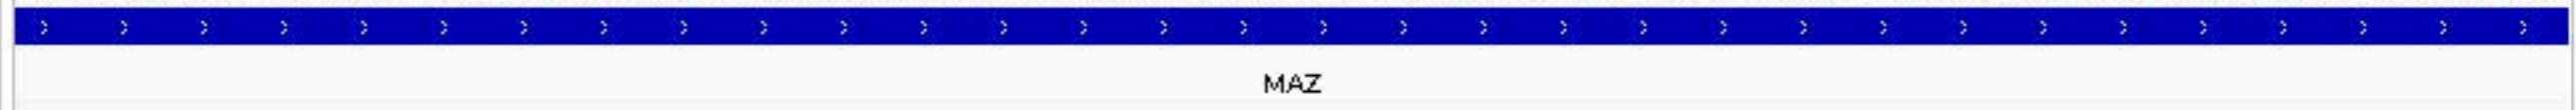

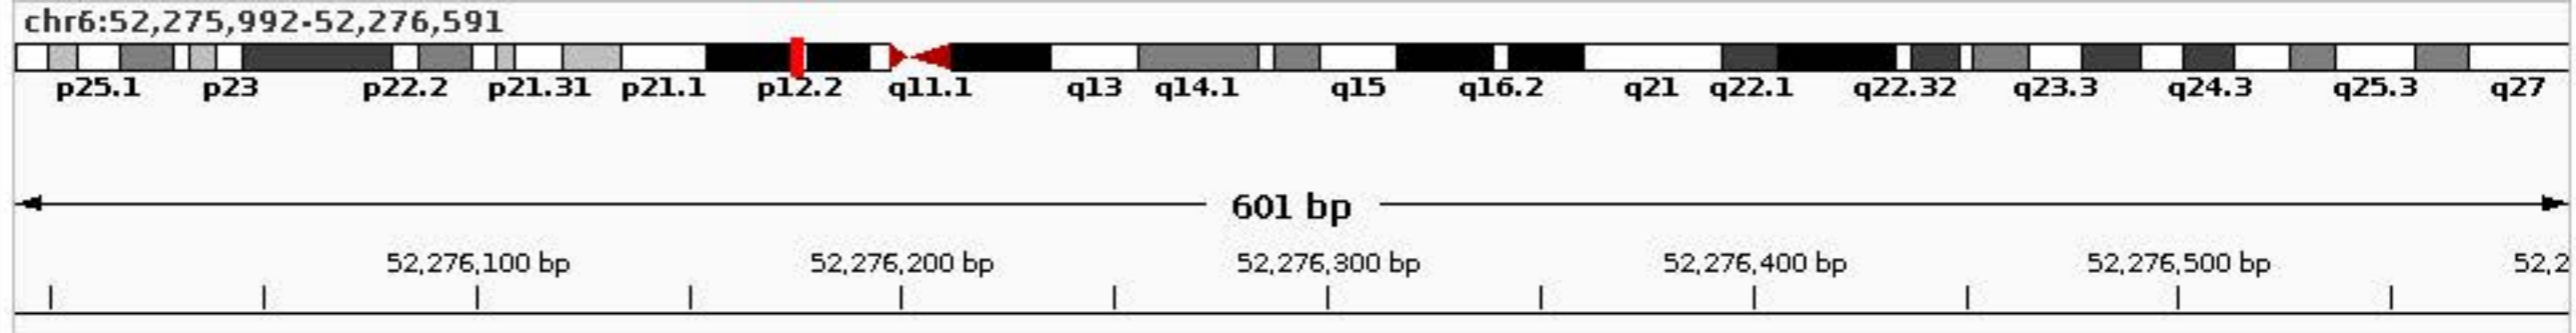

SL\_0004\_RN\_47\_mut.bam Coverage

SL\_0004\_RN\_47\_mut.bam

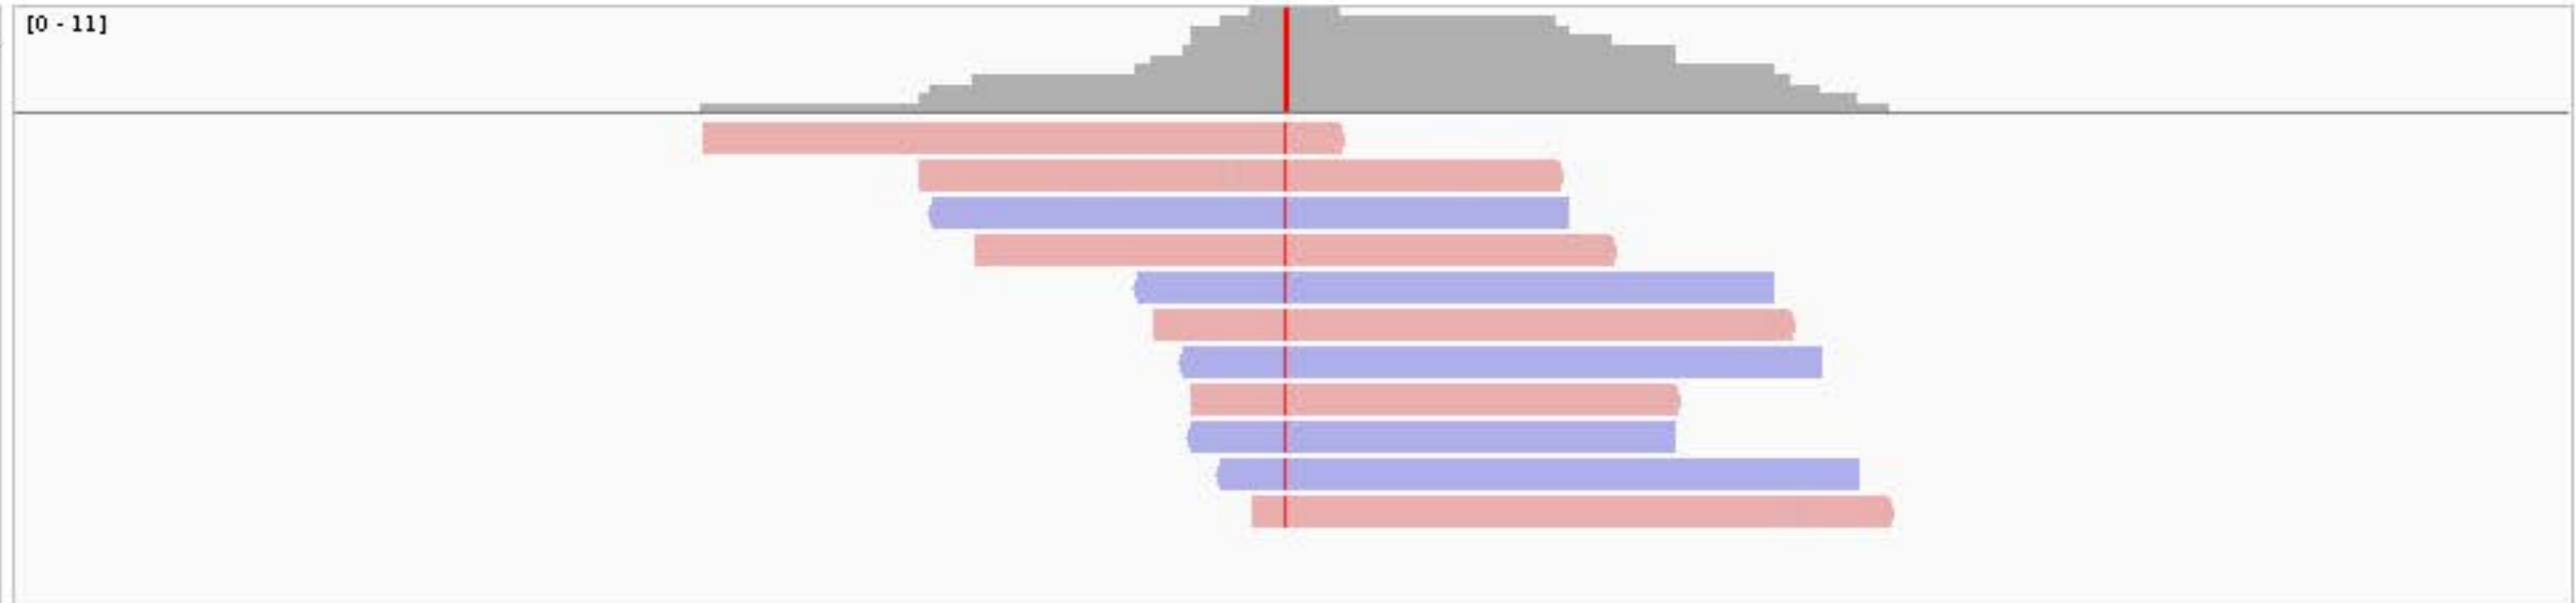

Sequence

Refseq Genes

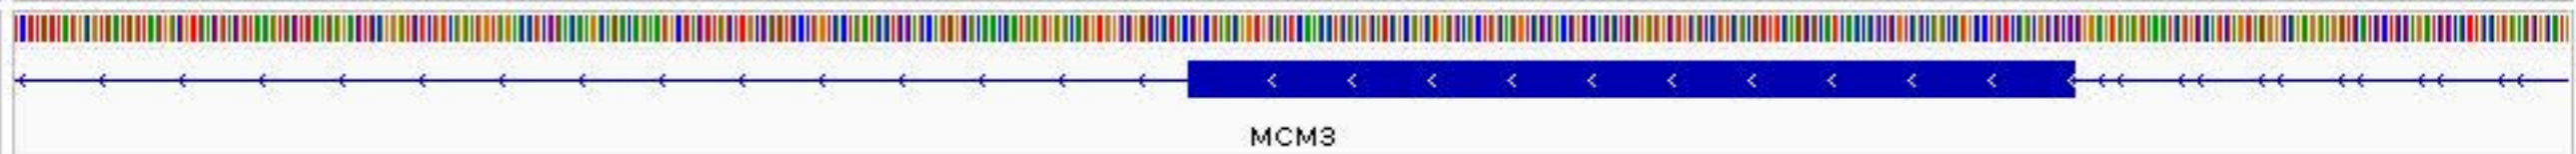

MCM3



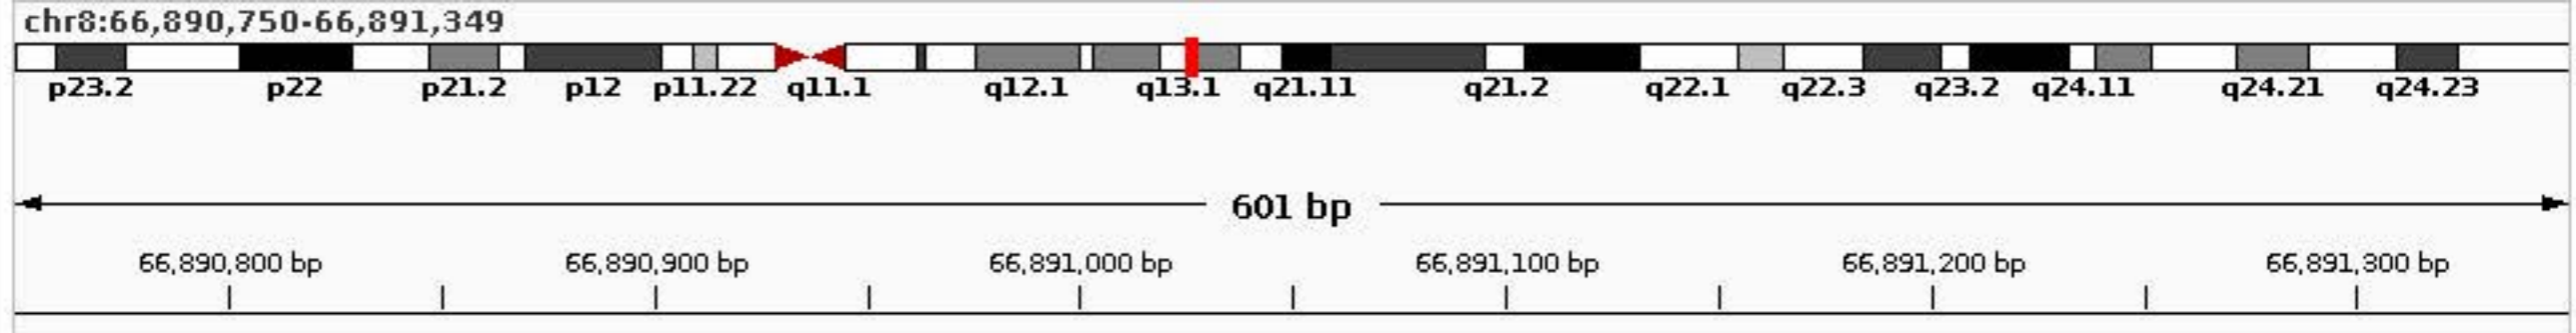

SL\_0004\_RN\_05\_mut.bam Coverage

SL\_0004\_RN\_05\_mut.bam

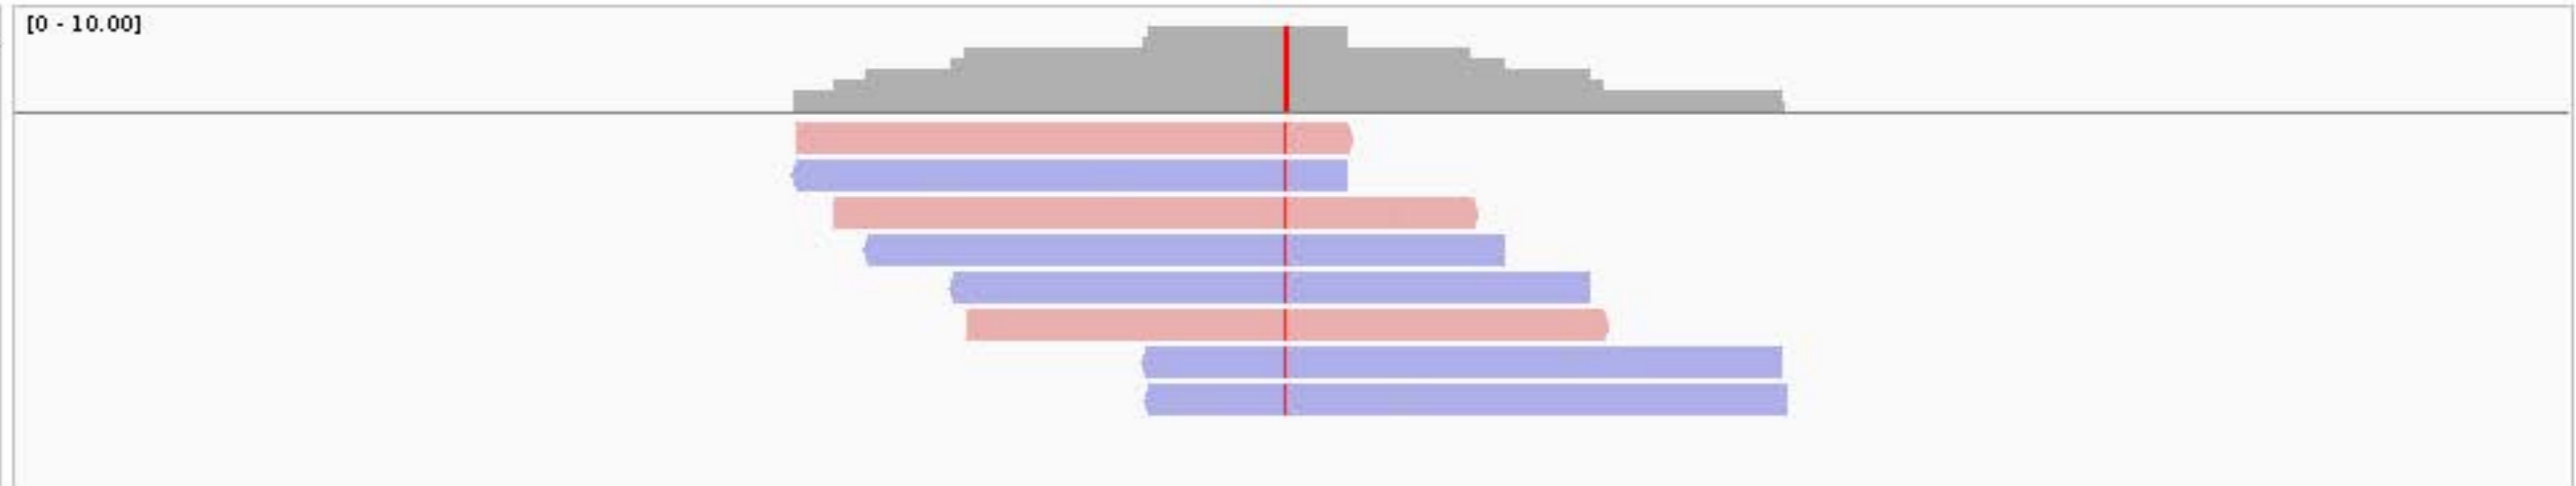

Sequence →

Refseq Genes

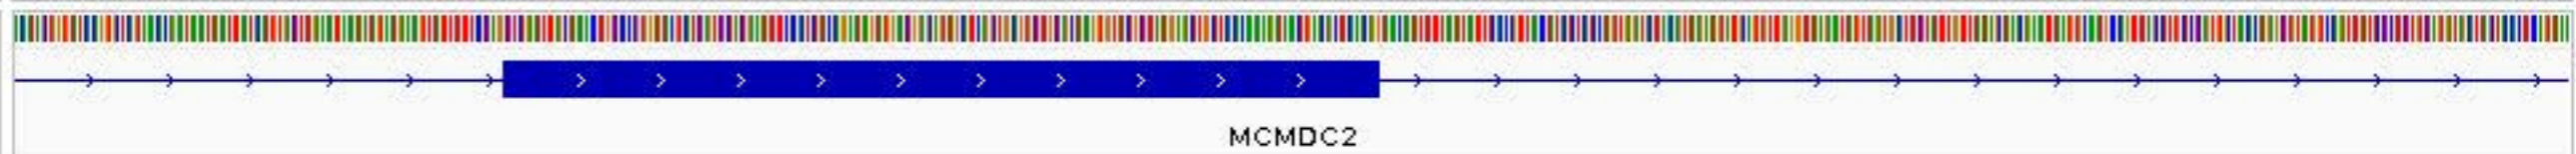

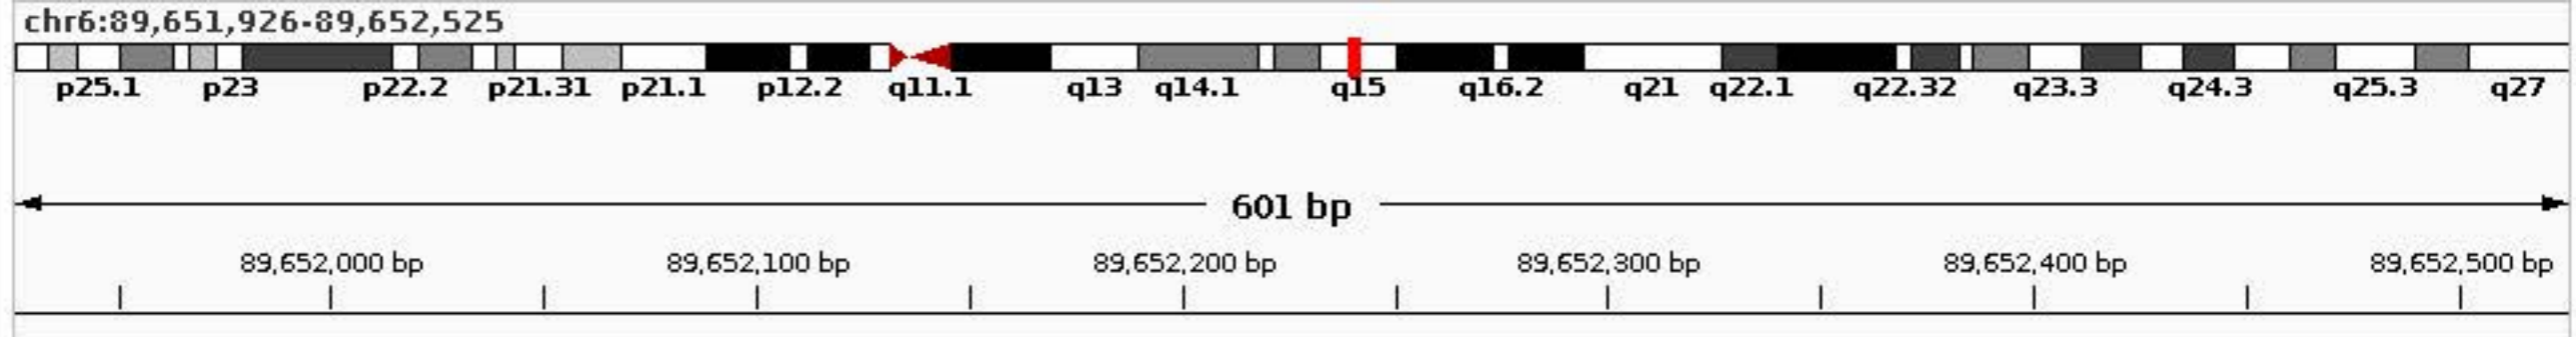

SL\_0015\_RN\_21\_mut.bam Coverage

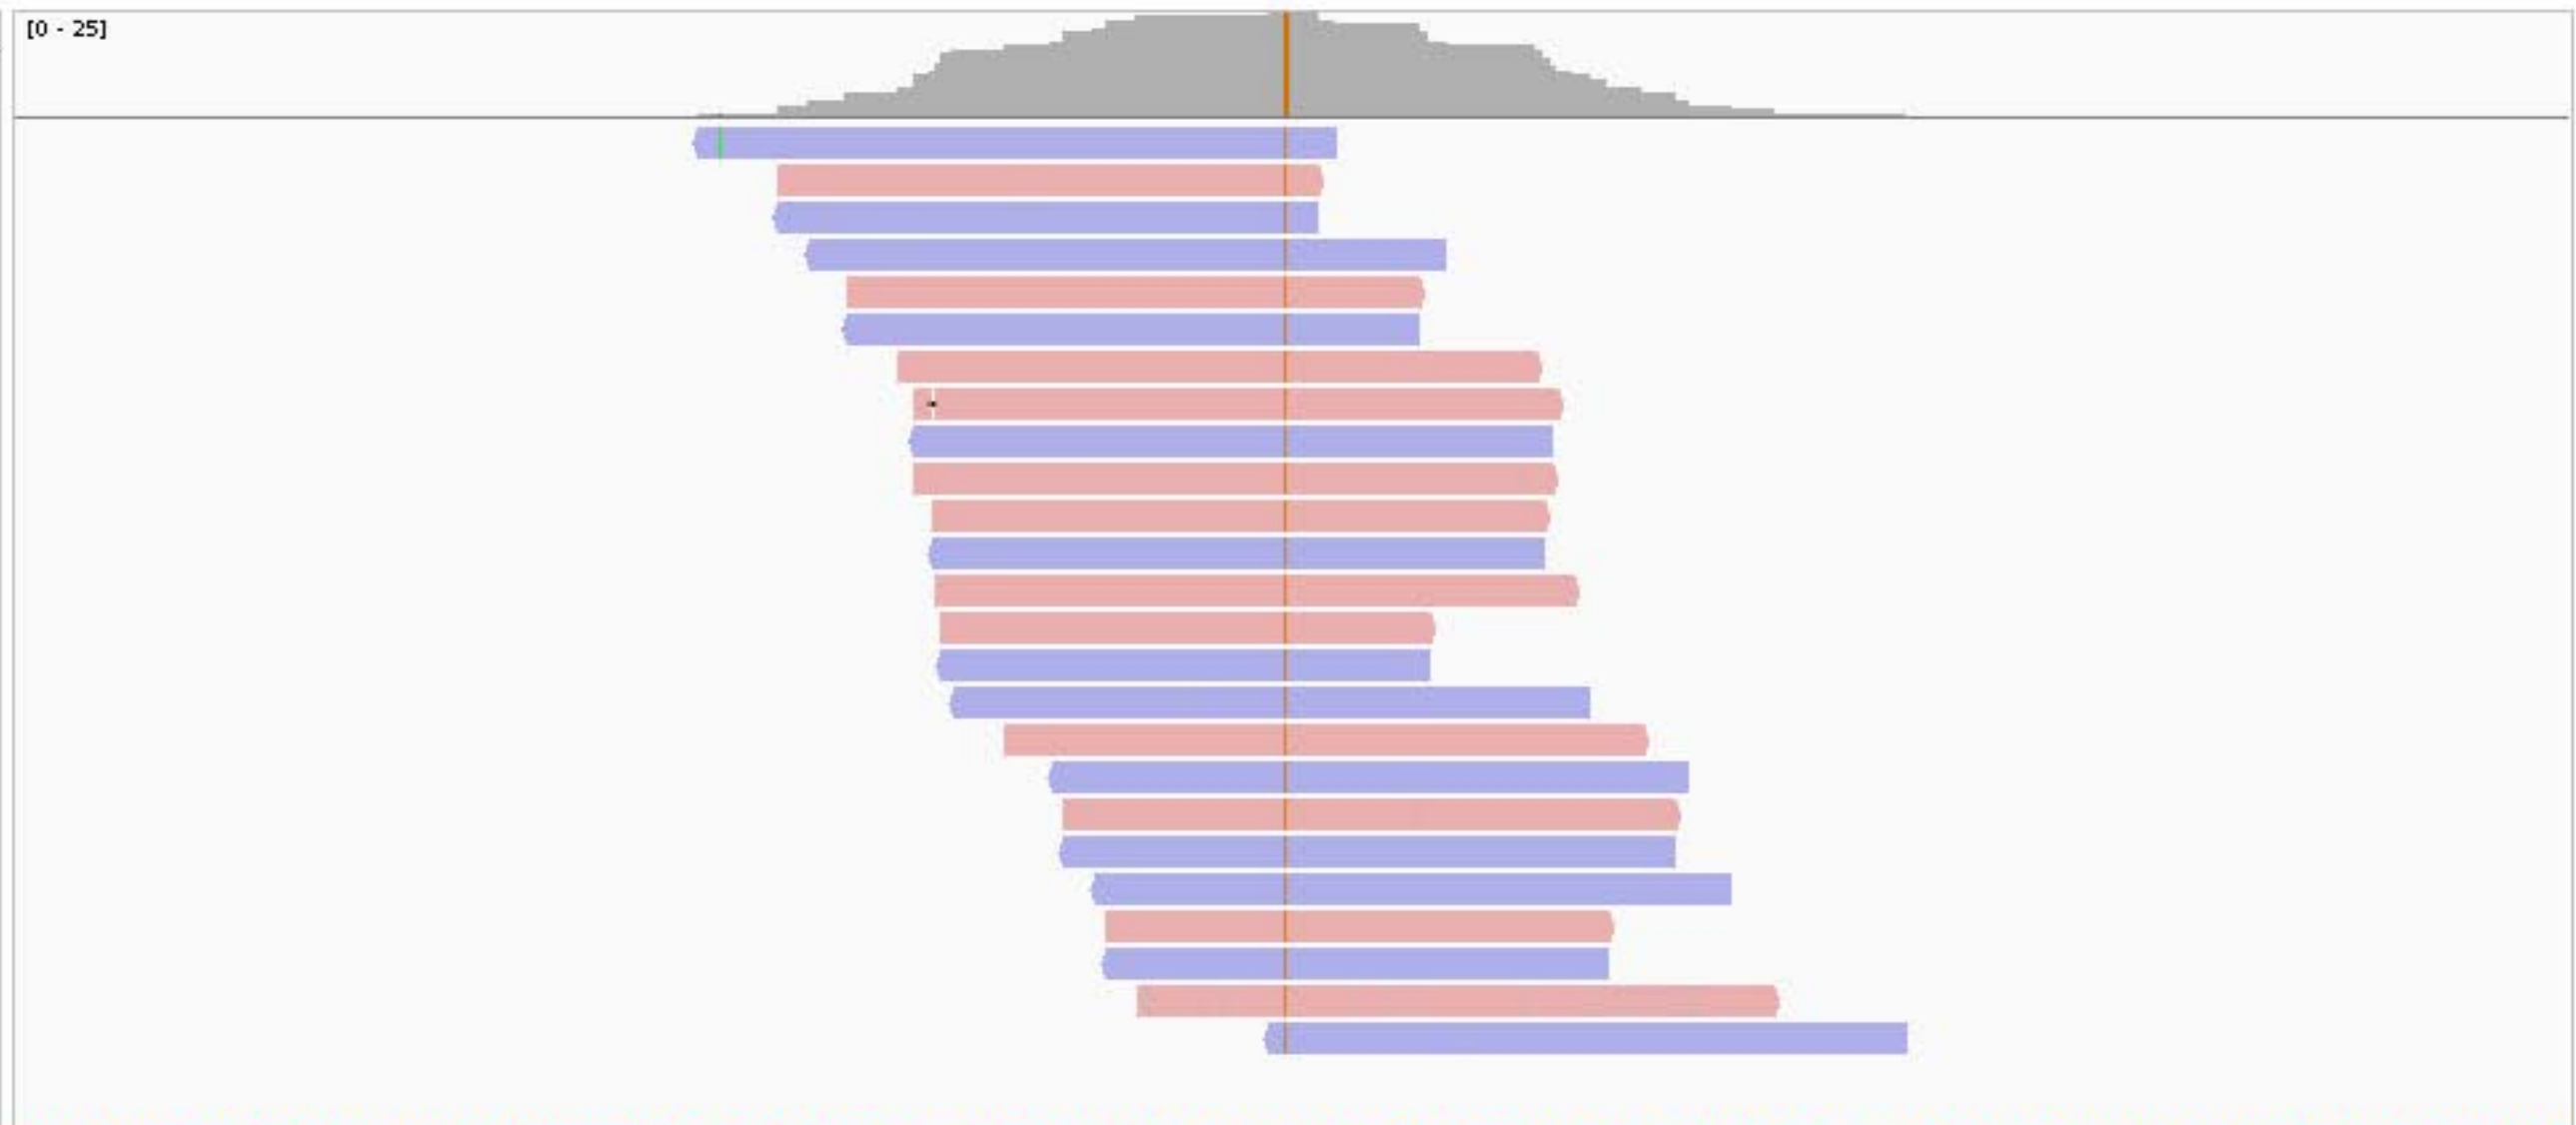

SL\_0015\_RN\_21\_mut.bam

Sequence →

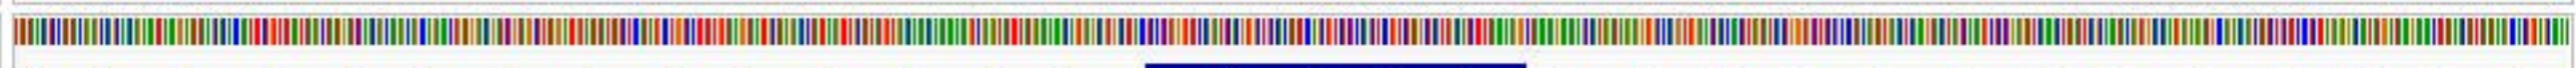

Refseq Genes

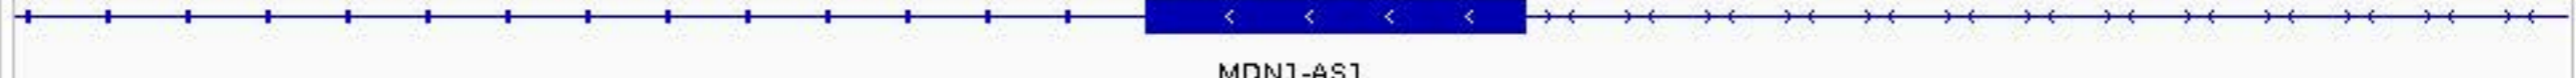

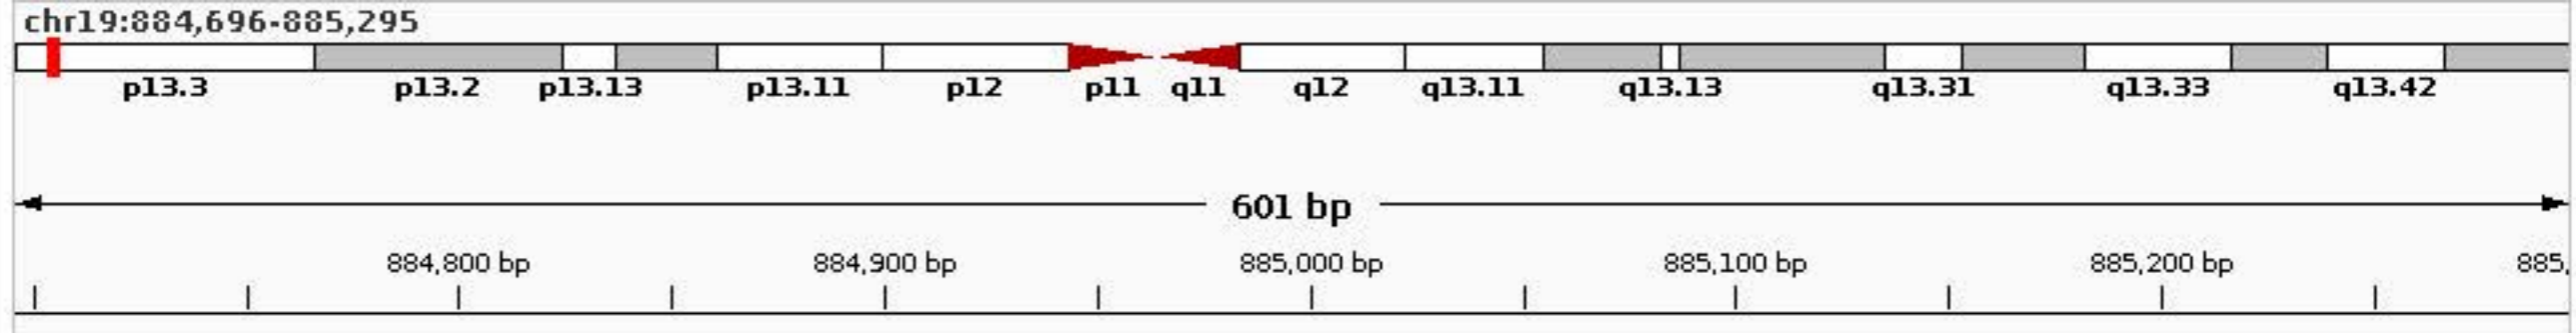

SL\_0001\_LN\_10\_mut.bam Coverage

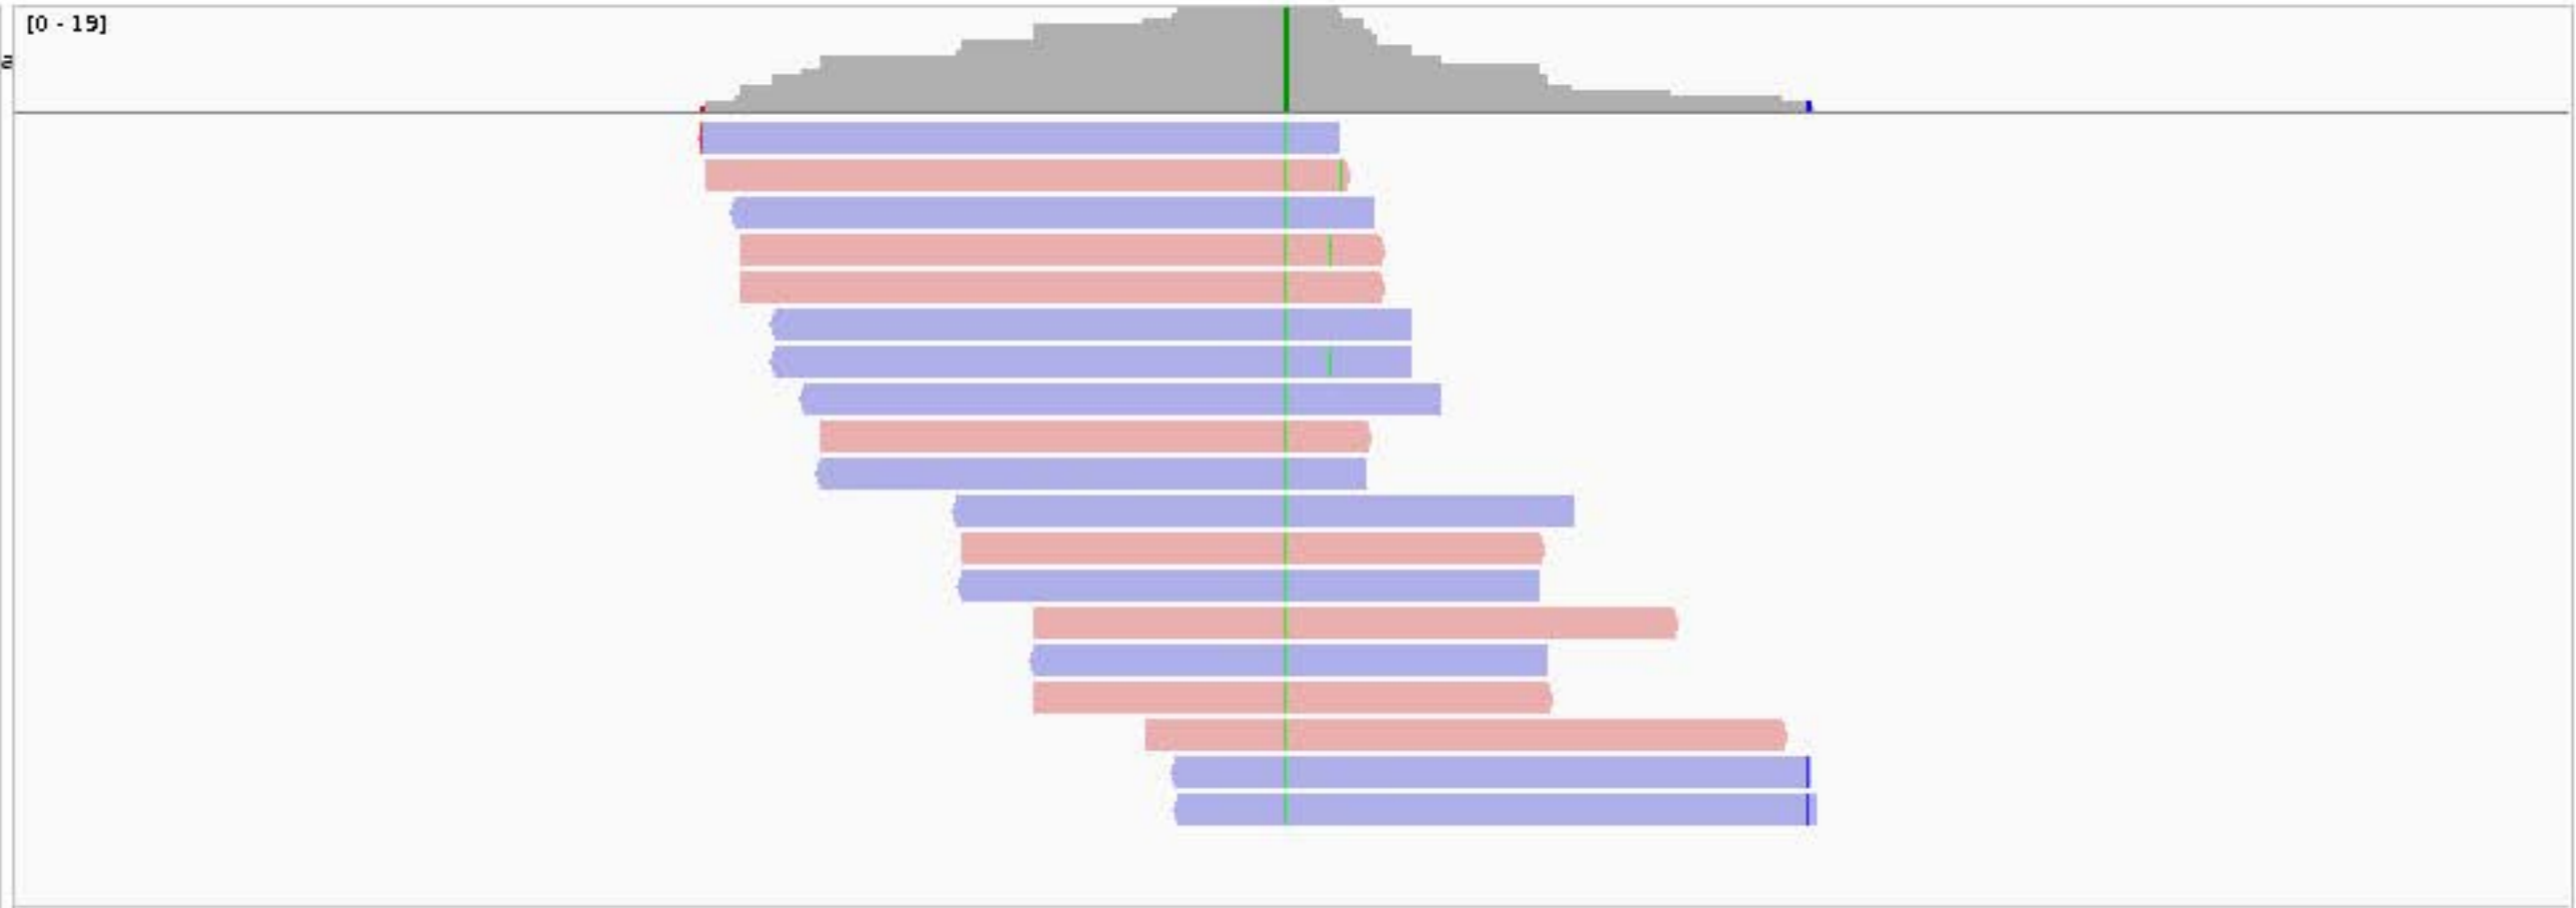

SL\_0001\_LN\_10\_mut.bam

Sequence

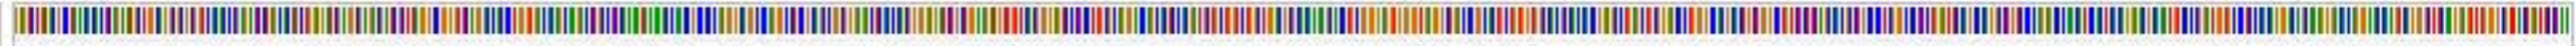

Refseq Genes

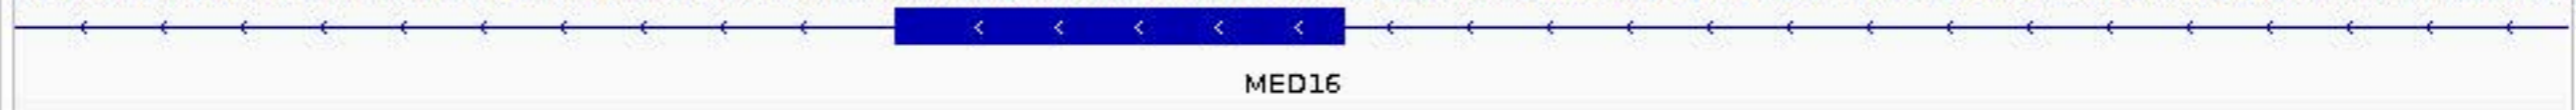

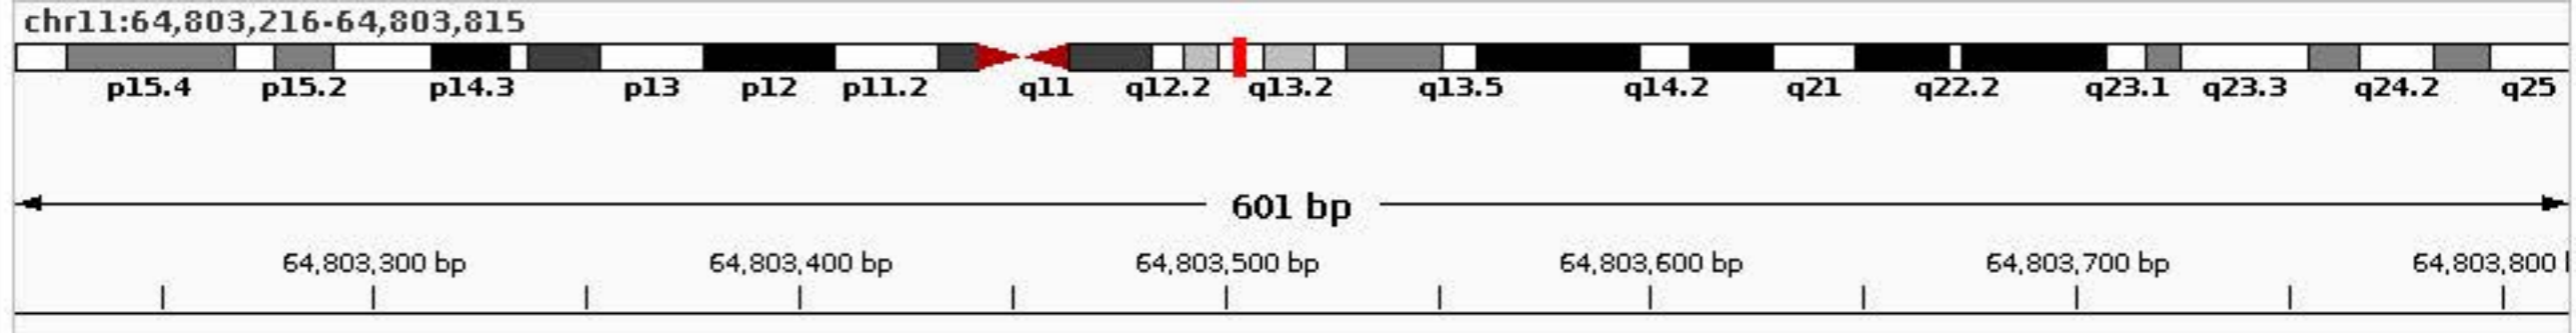

SL\_0007\_RN\_2\_mut.bam Coverage

SL\_0007\_RN\_2\_mut.bam

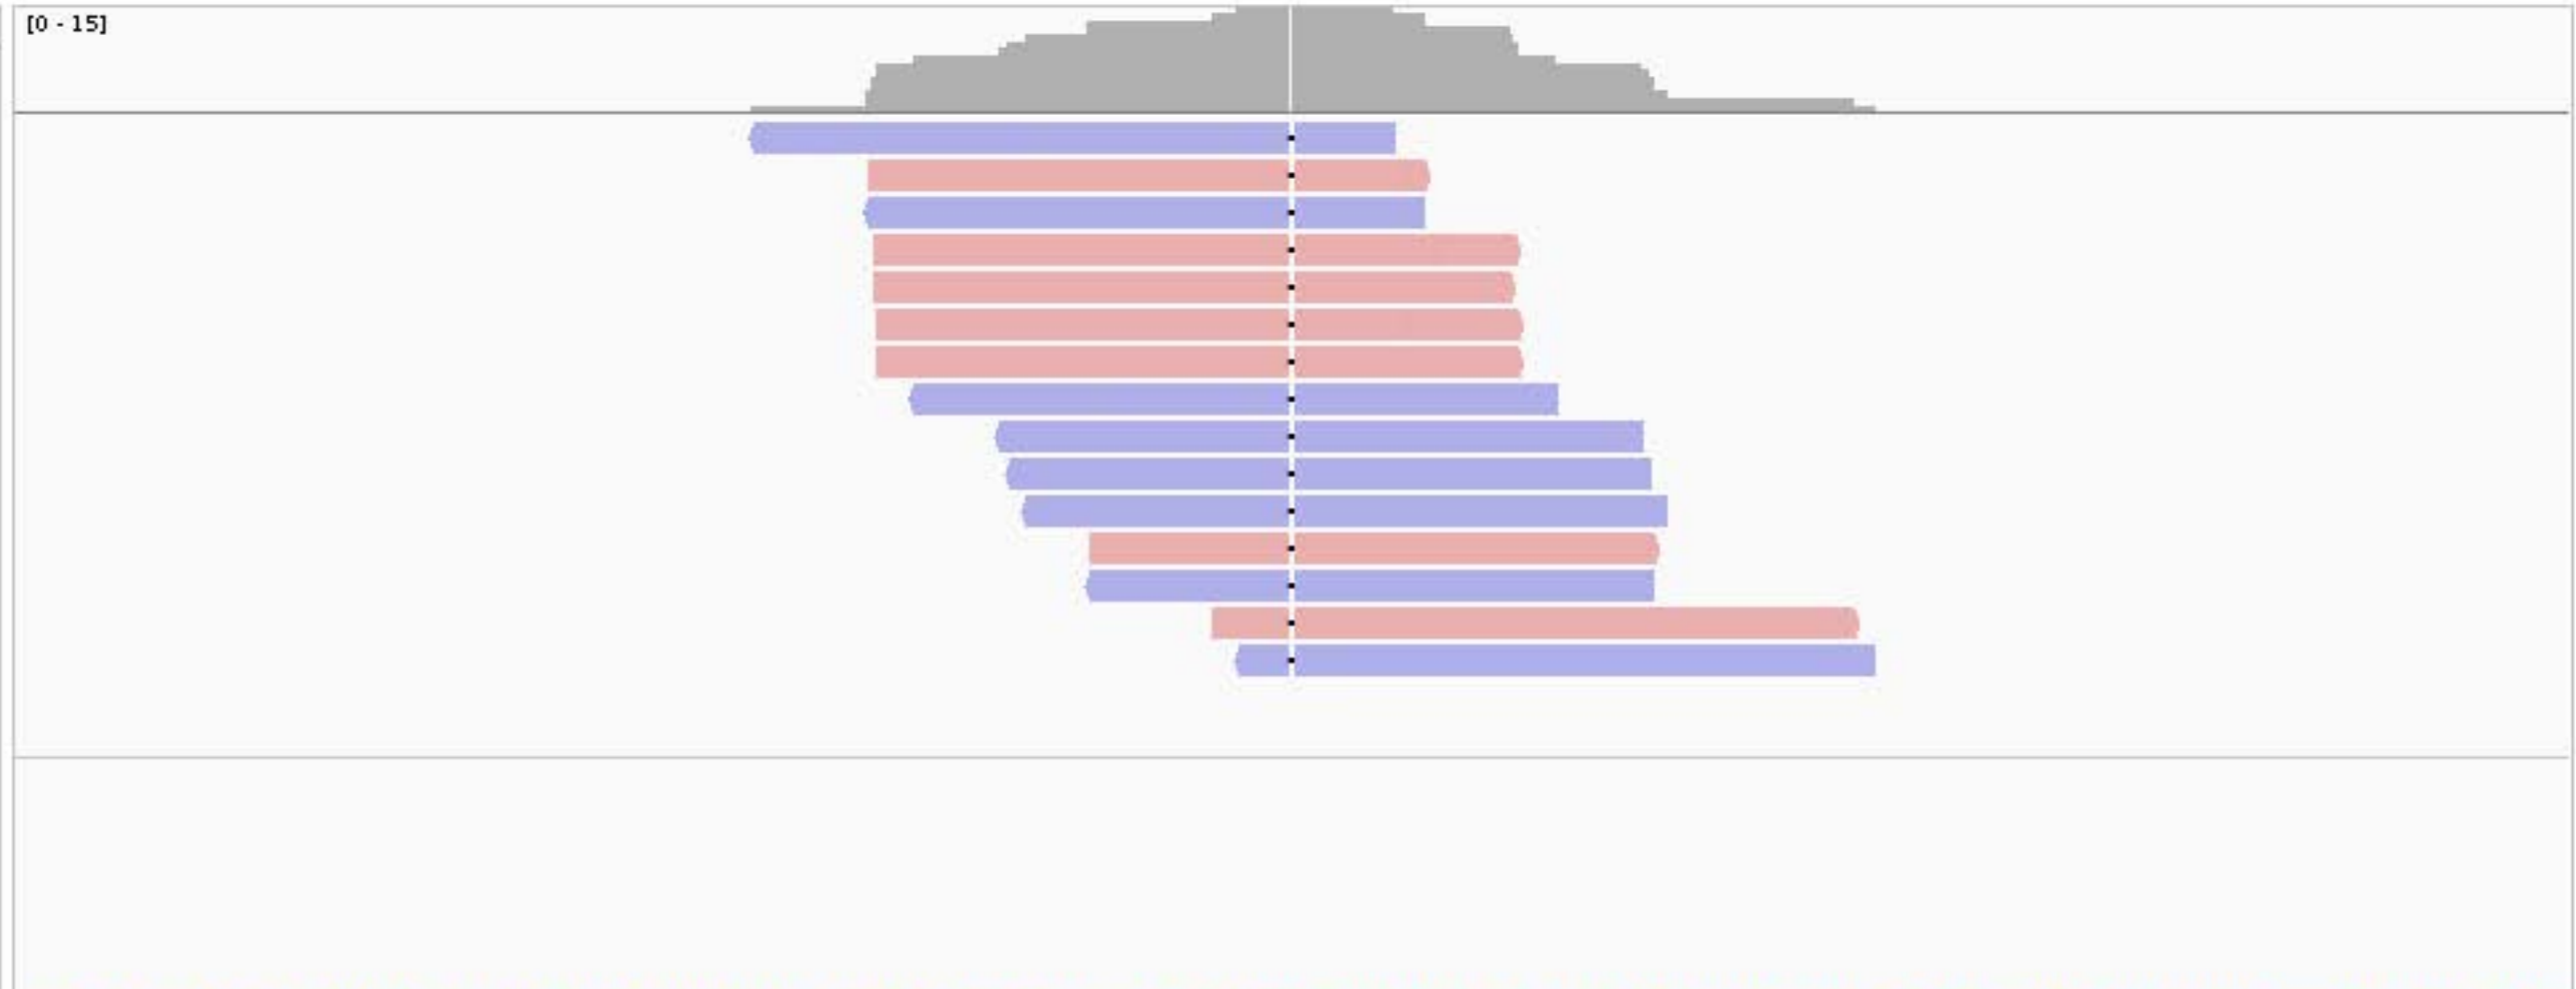

Sequence

Refseq Genes

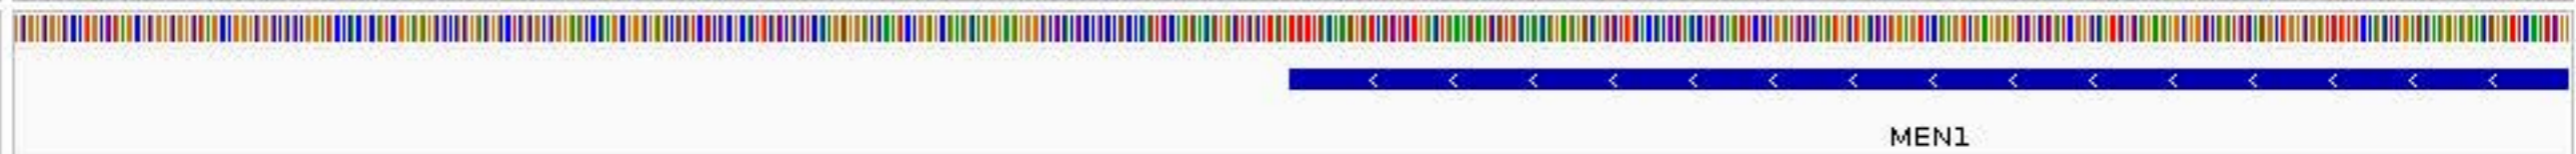

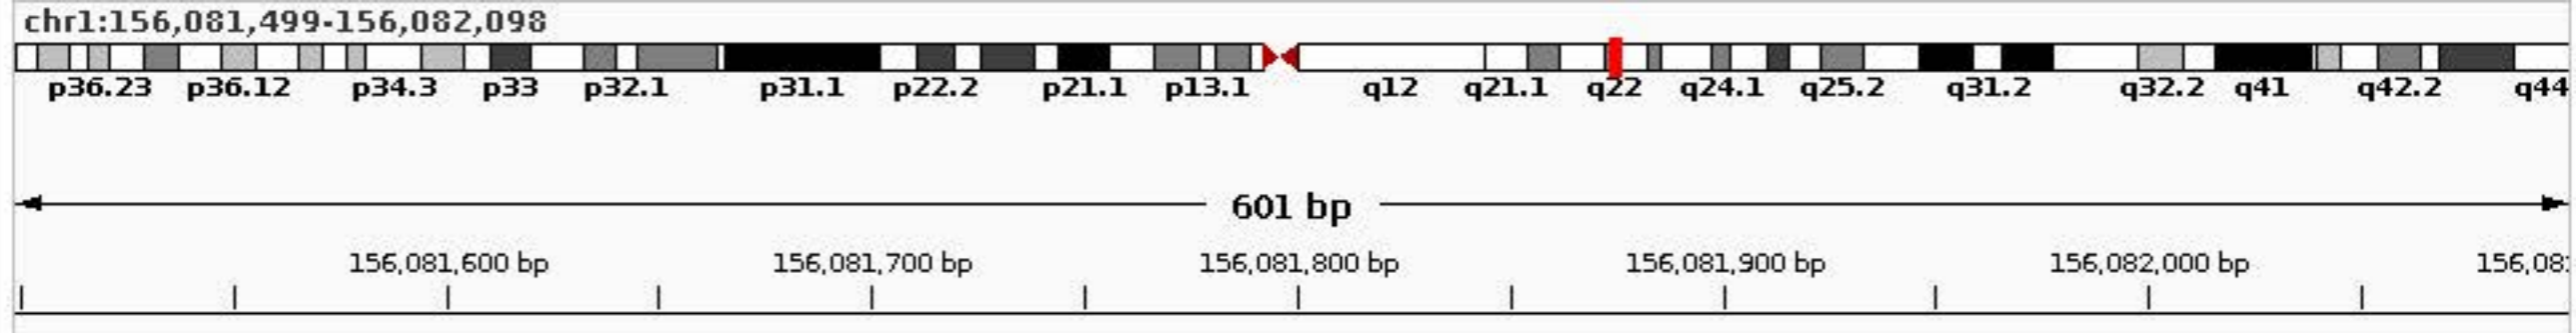

SL\_0002\_LN\_62\_mut.bam Coverage

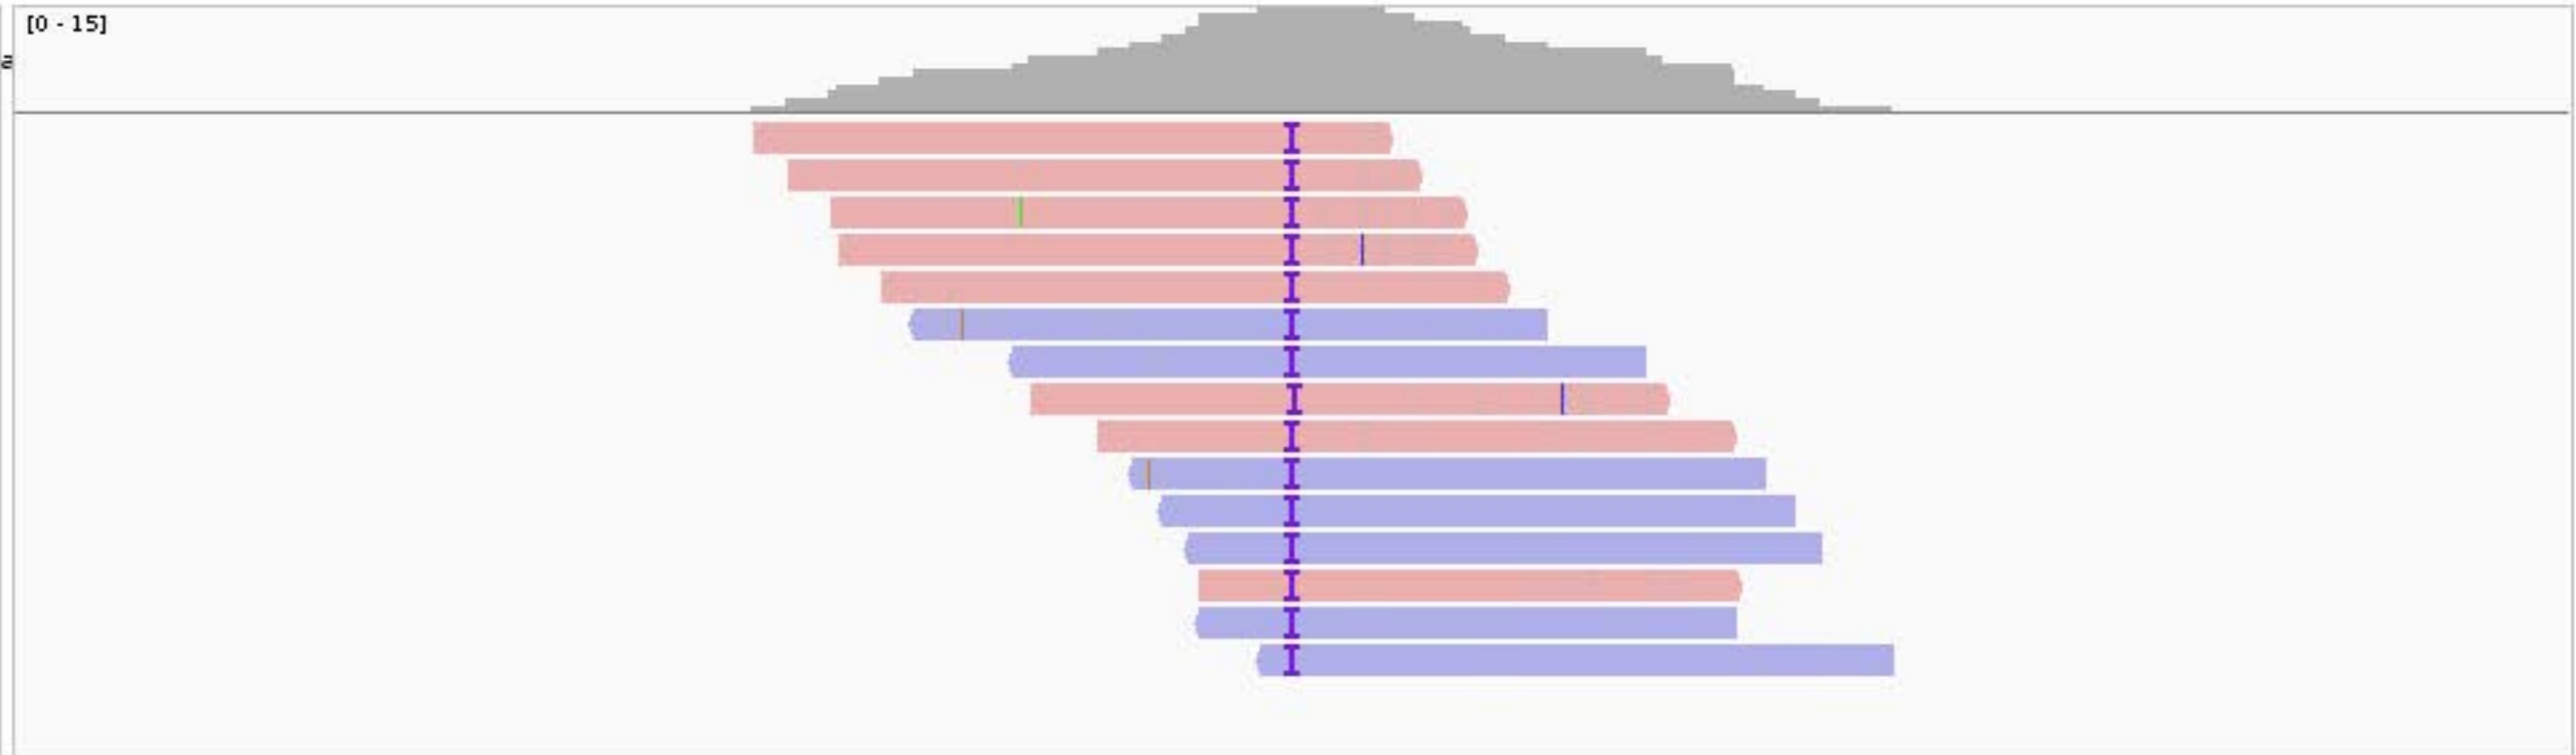

SL\_0002\_LN\_62\_mut.bam

Sequence →

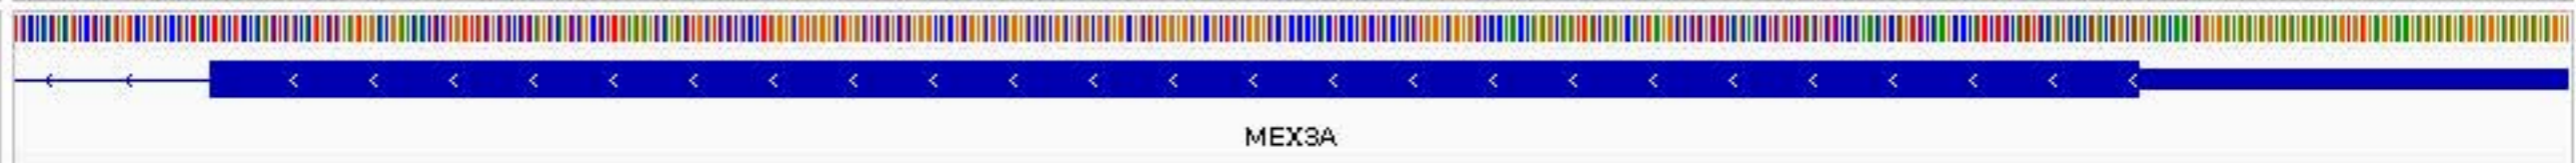

Refseq Genes



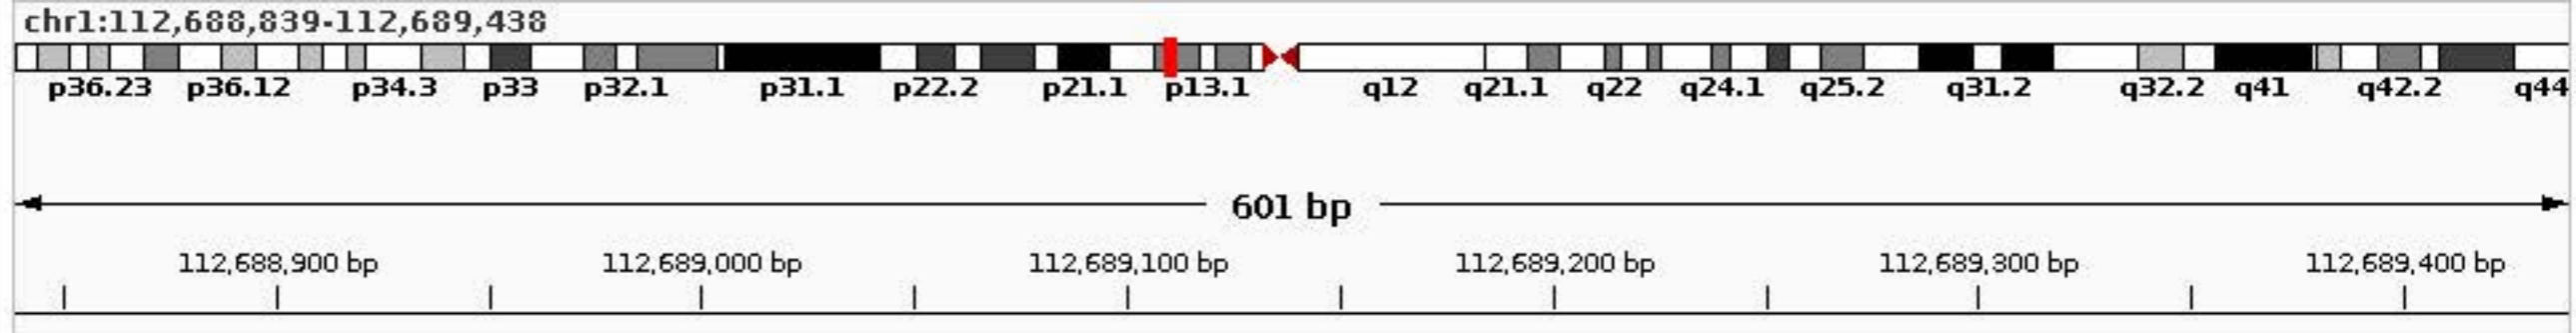

SL\_0007\_RN\_33\_mut.bam Coverage

SL\_0007\_RN\_33\_mut.bam

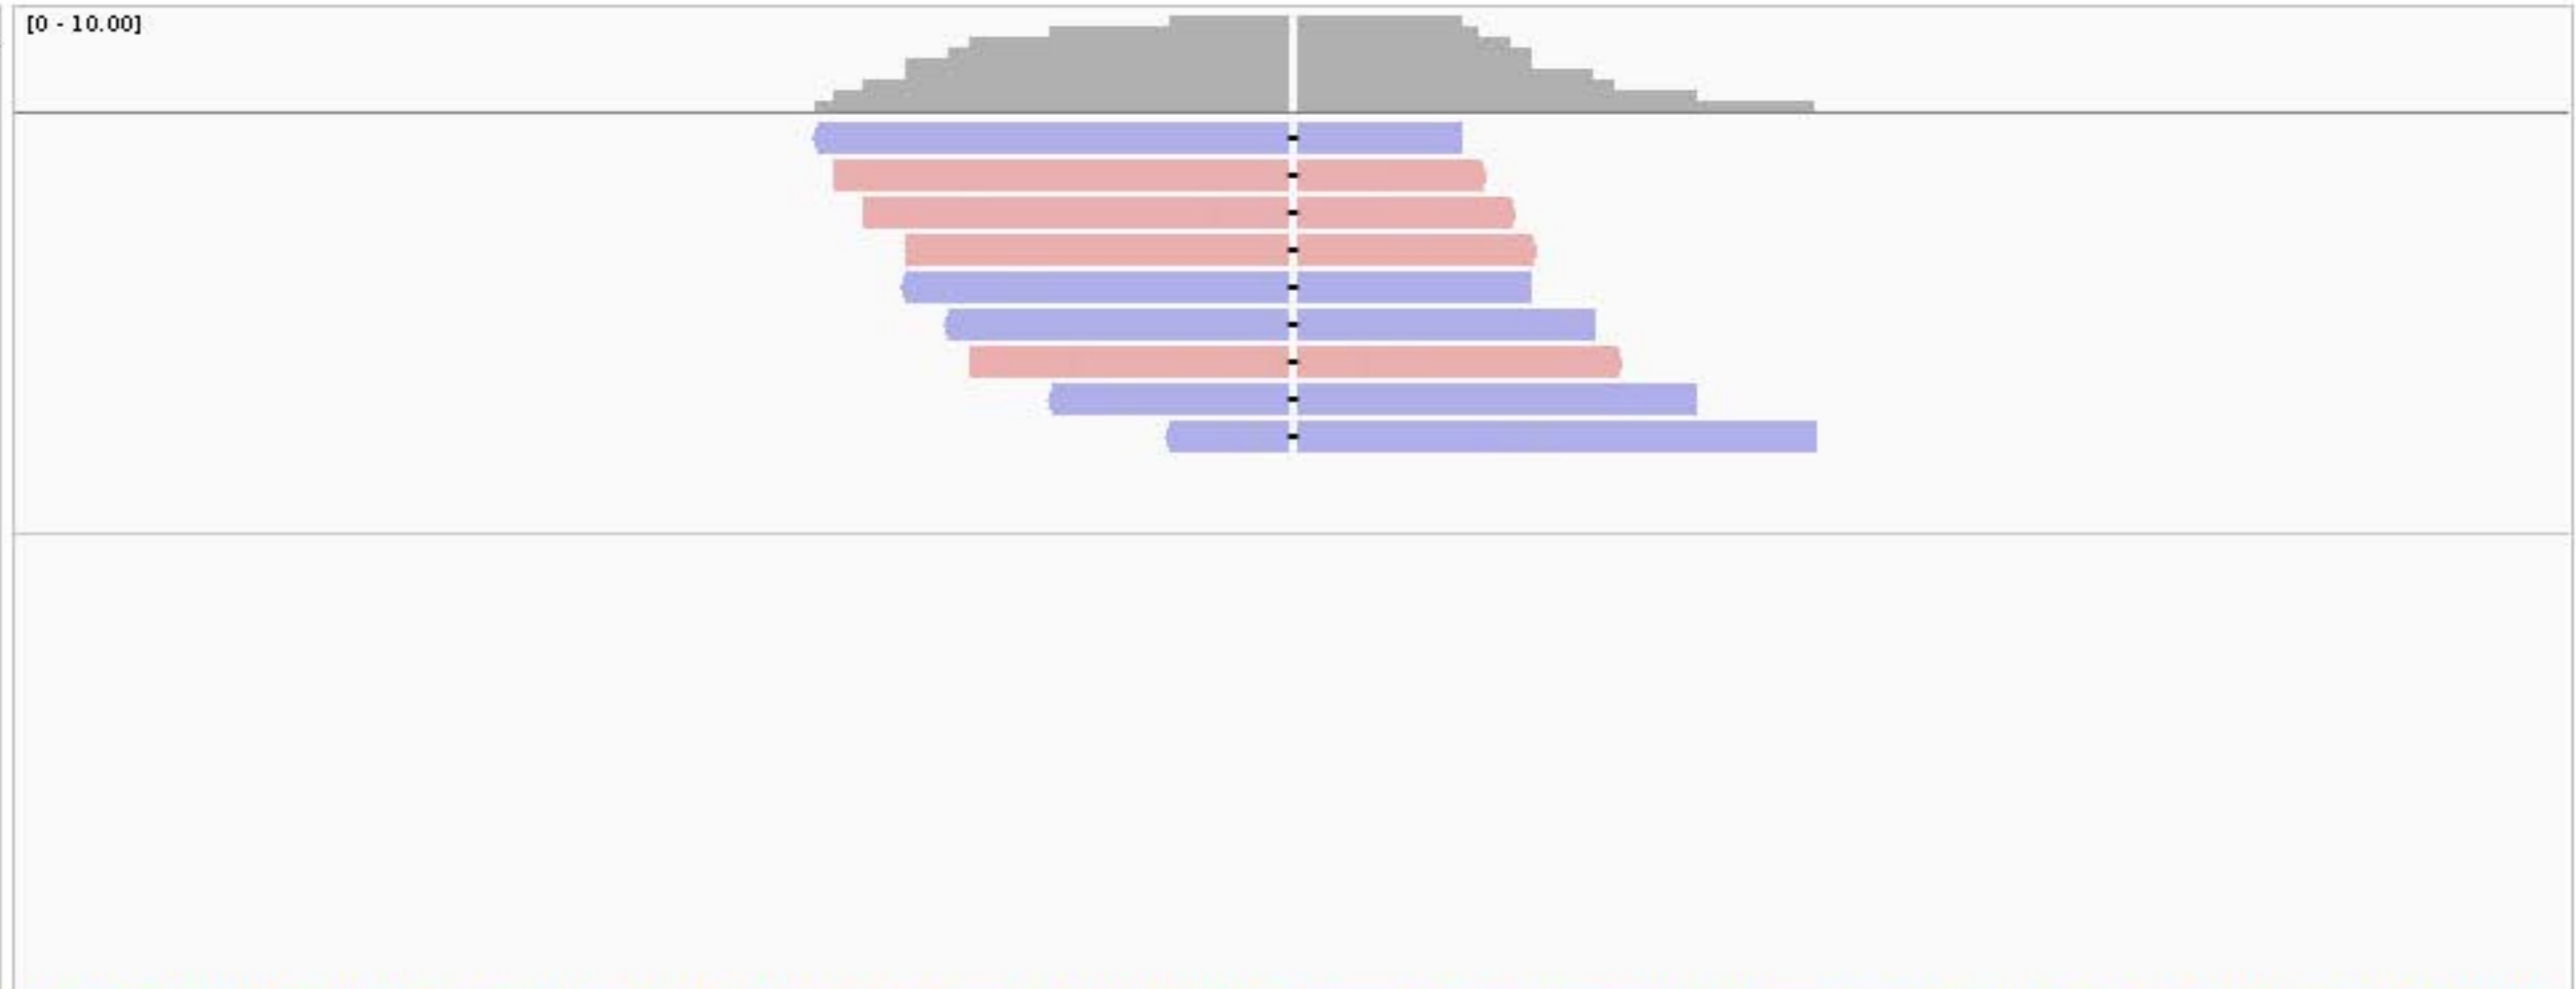

Sequence

Refseq Genes

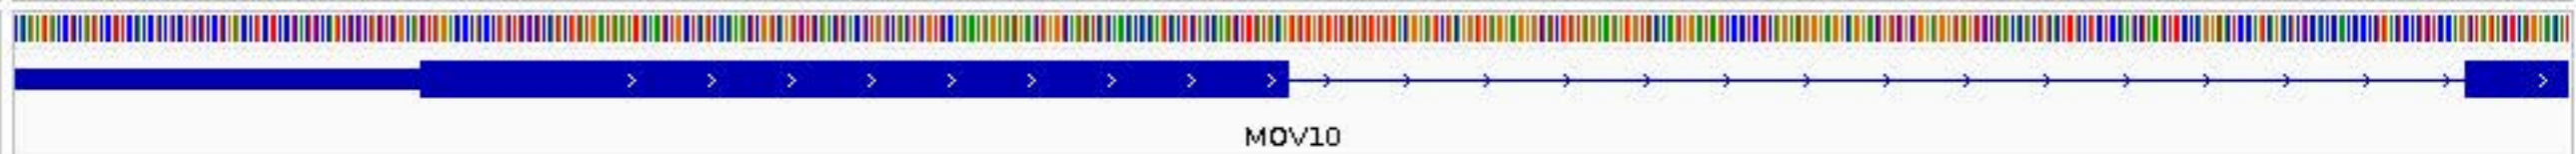

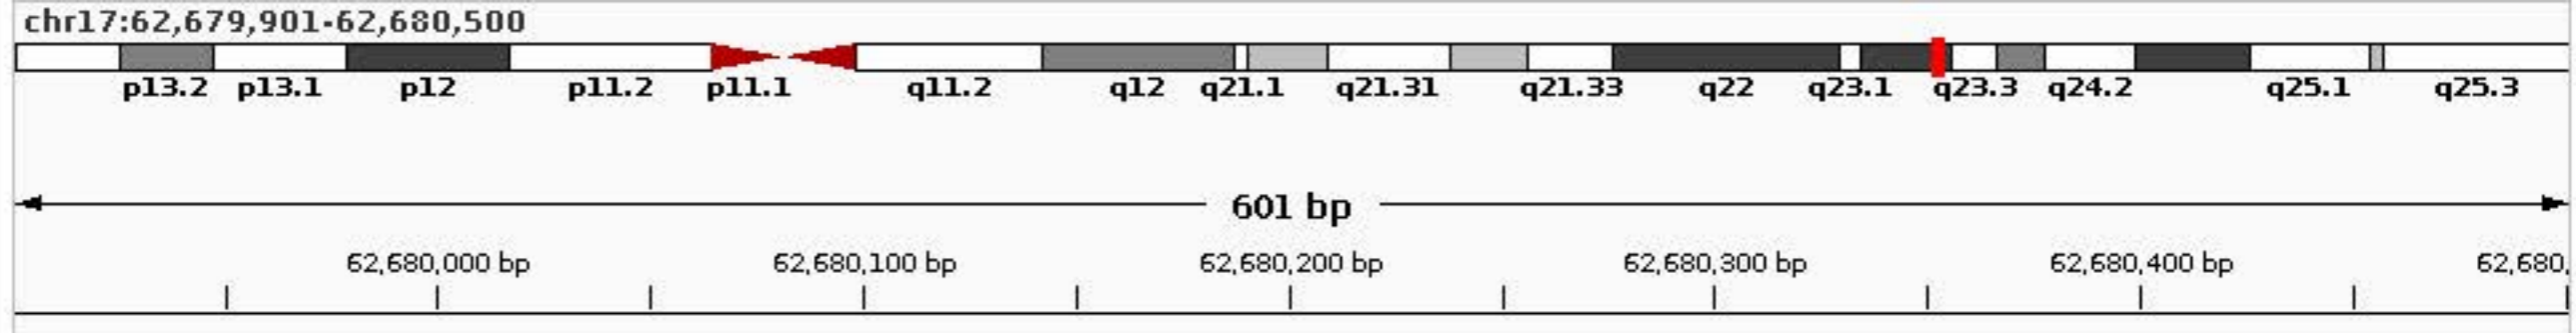

SL\_0001\_LN\_10\_mut.bam Coverage

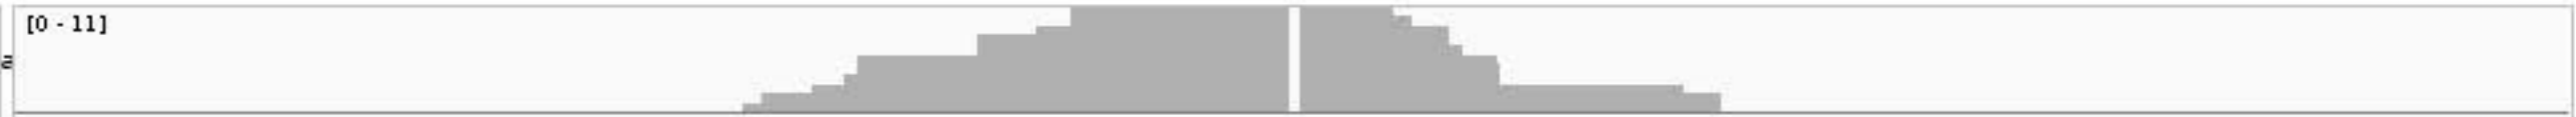

SL\_0001\_LN\_10\_mut.bam

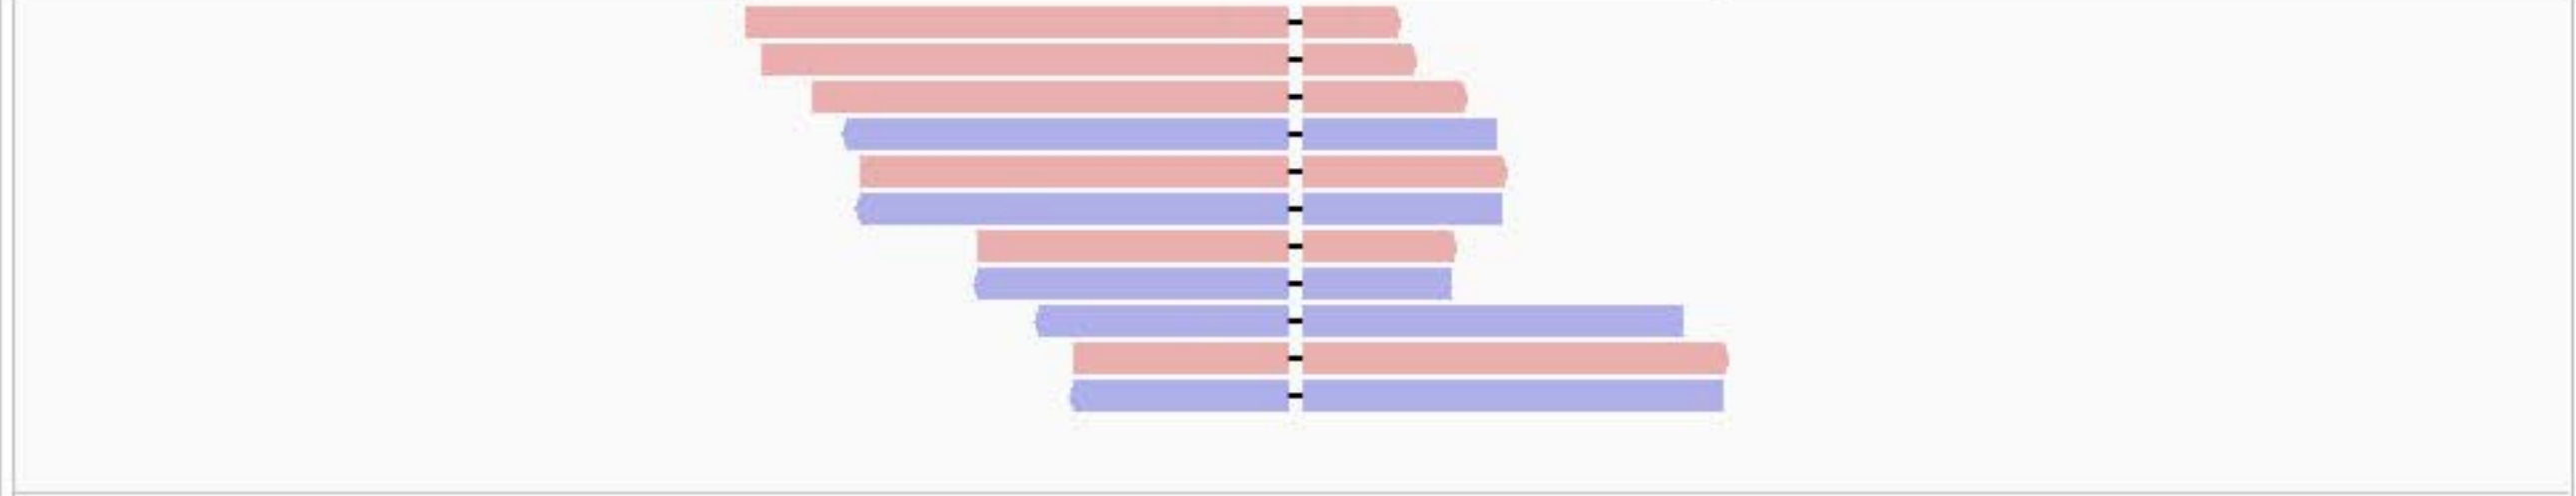

Sequence

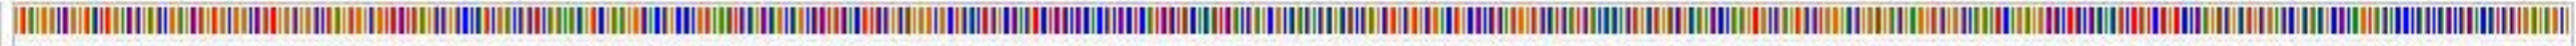

Refseq Genes

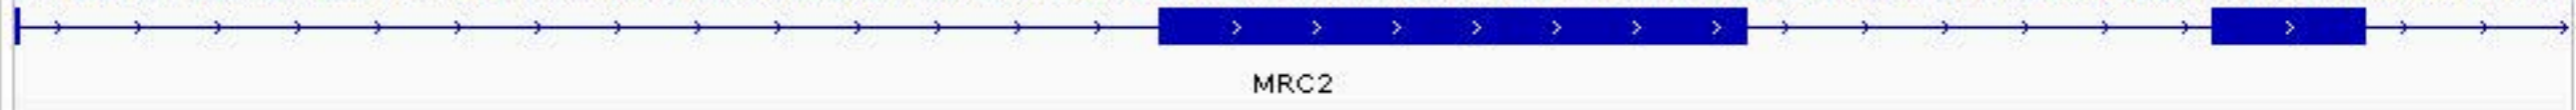

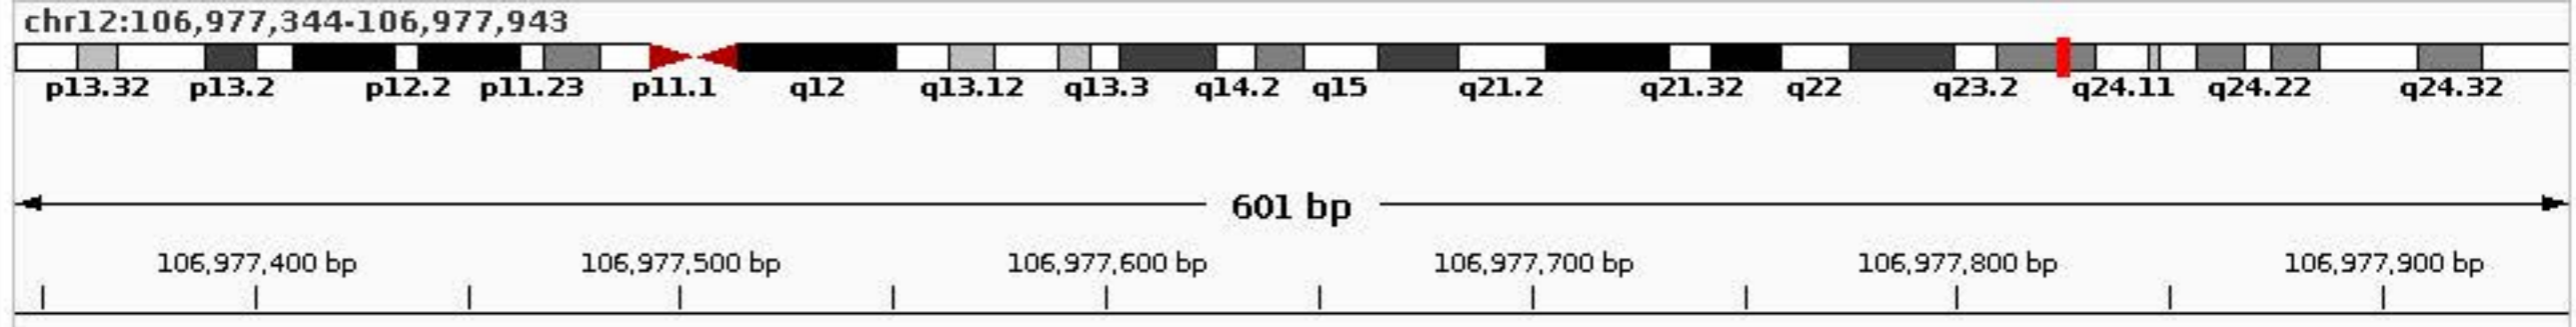

SL\_0004\_RN\_66\_mut.bam Coverage

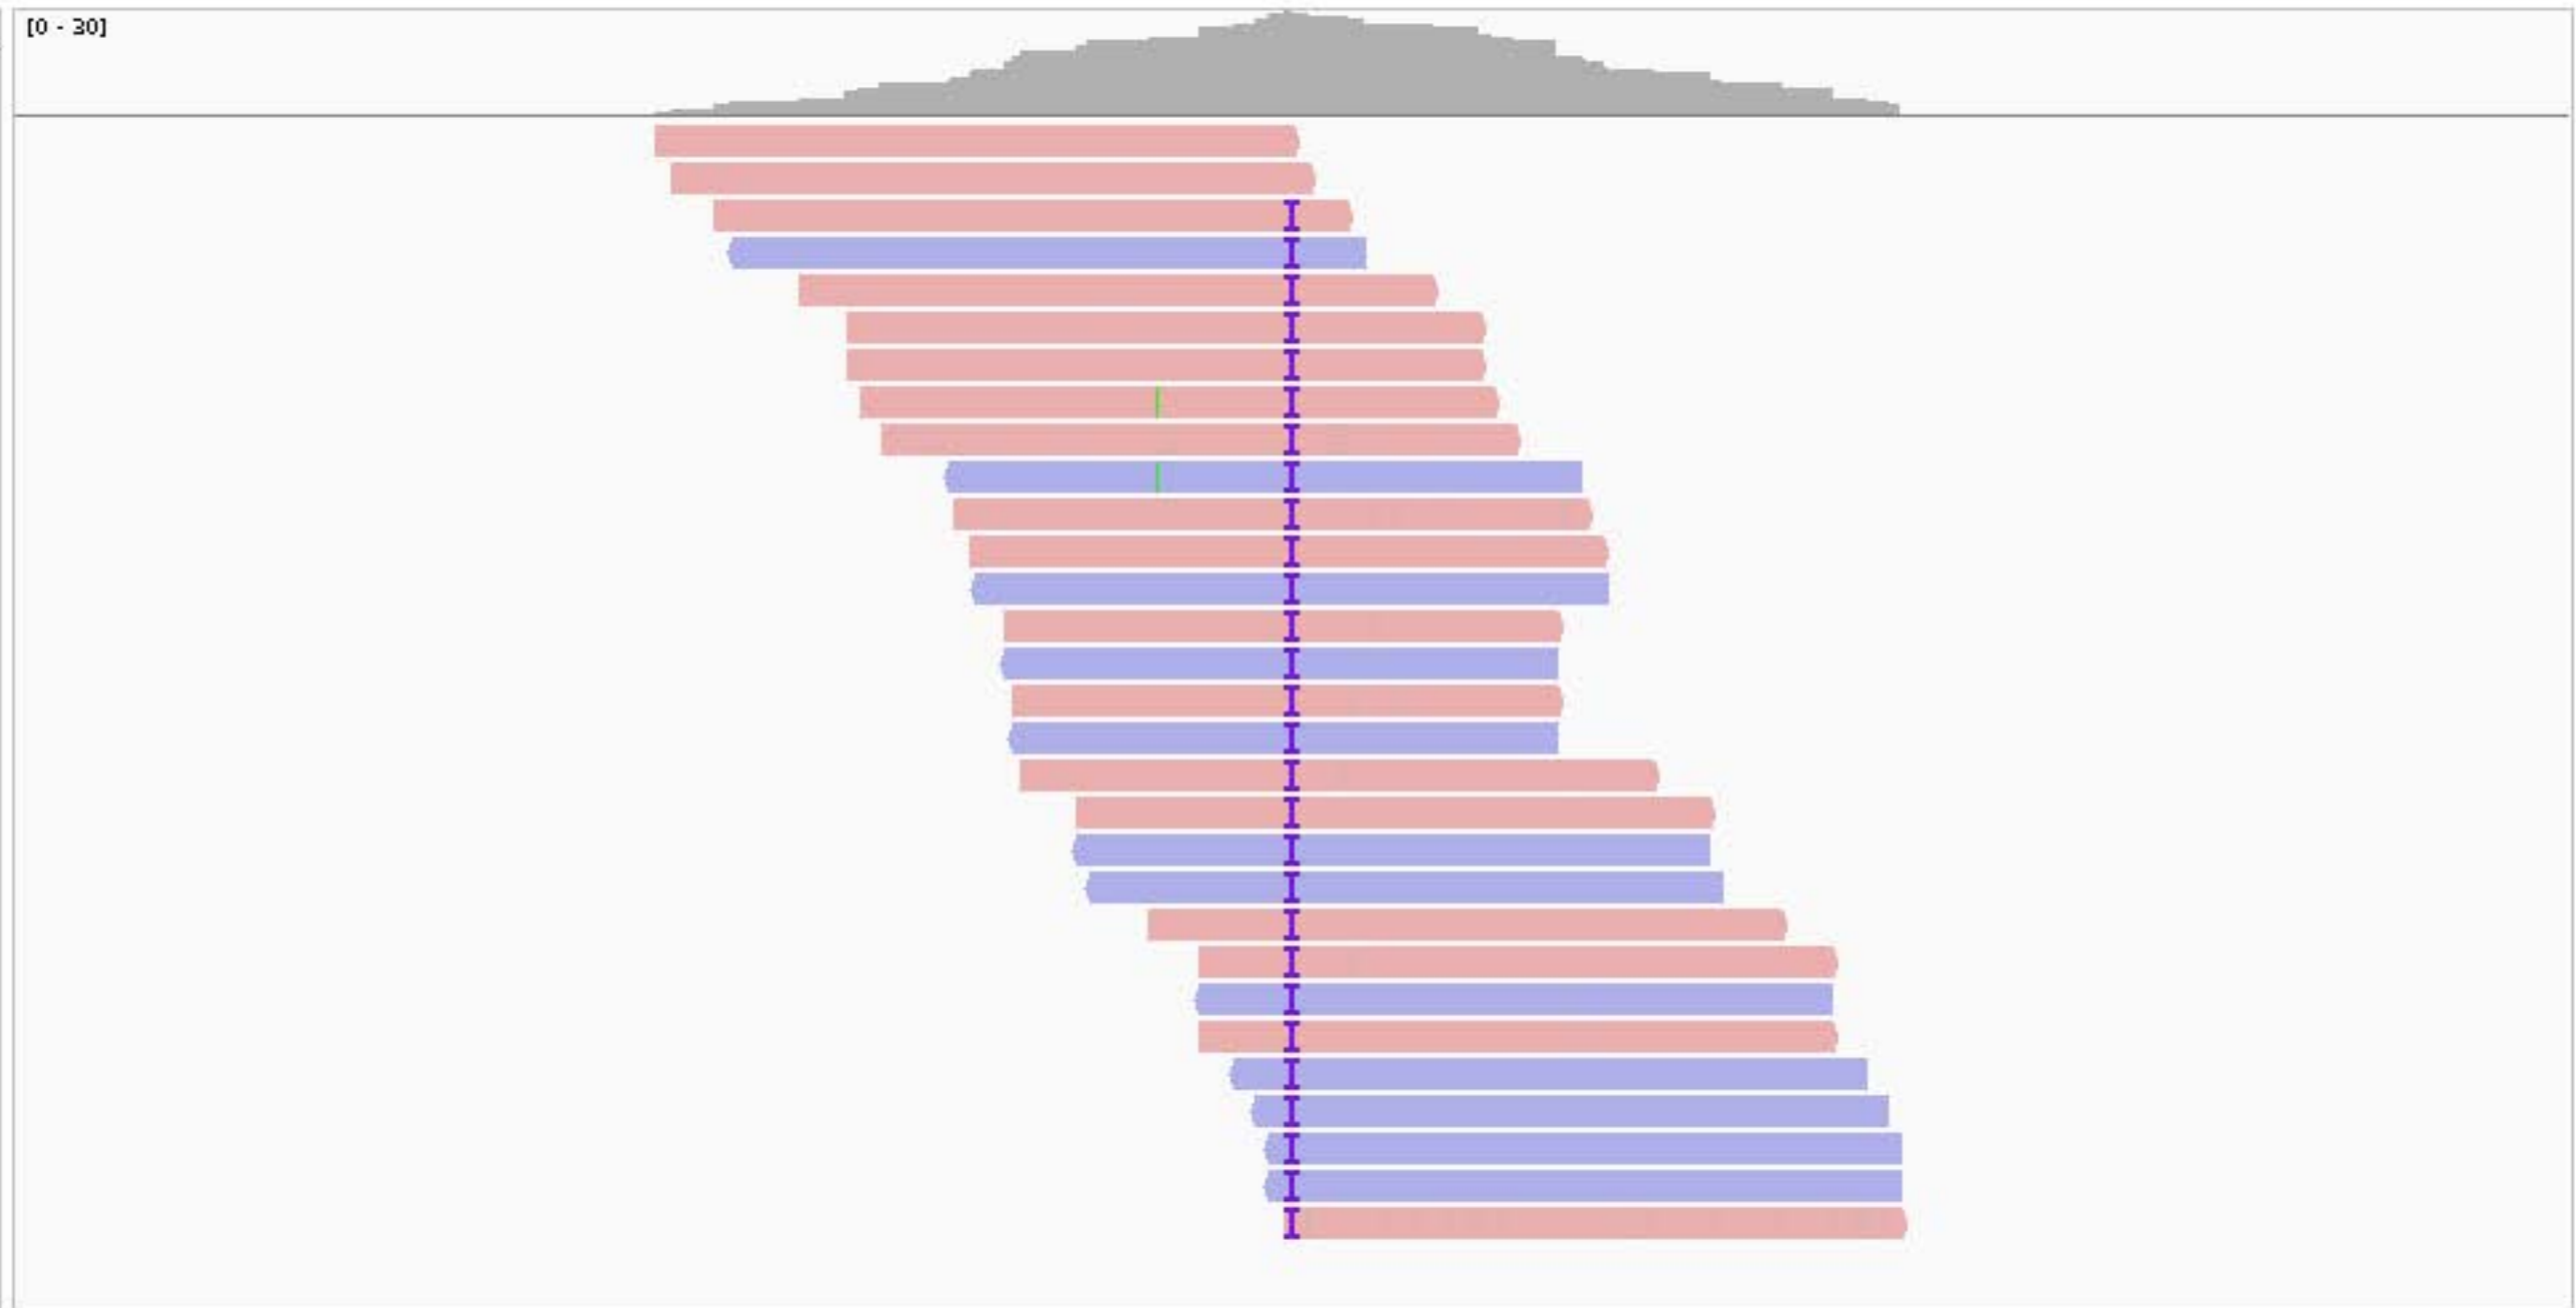

SL\_0004\_RN\_66\_mut.bam

Sequence →

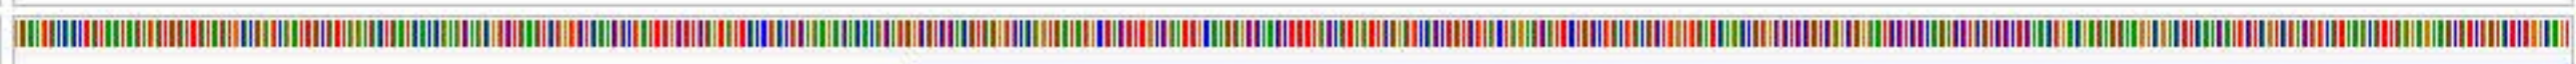

Refseq Genes

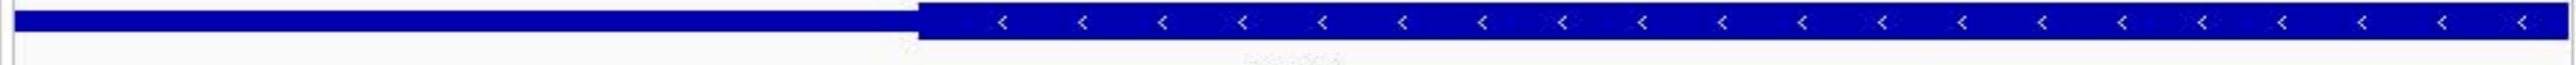

MTERF2

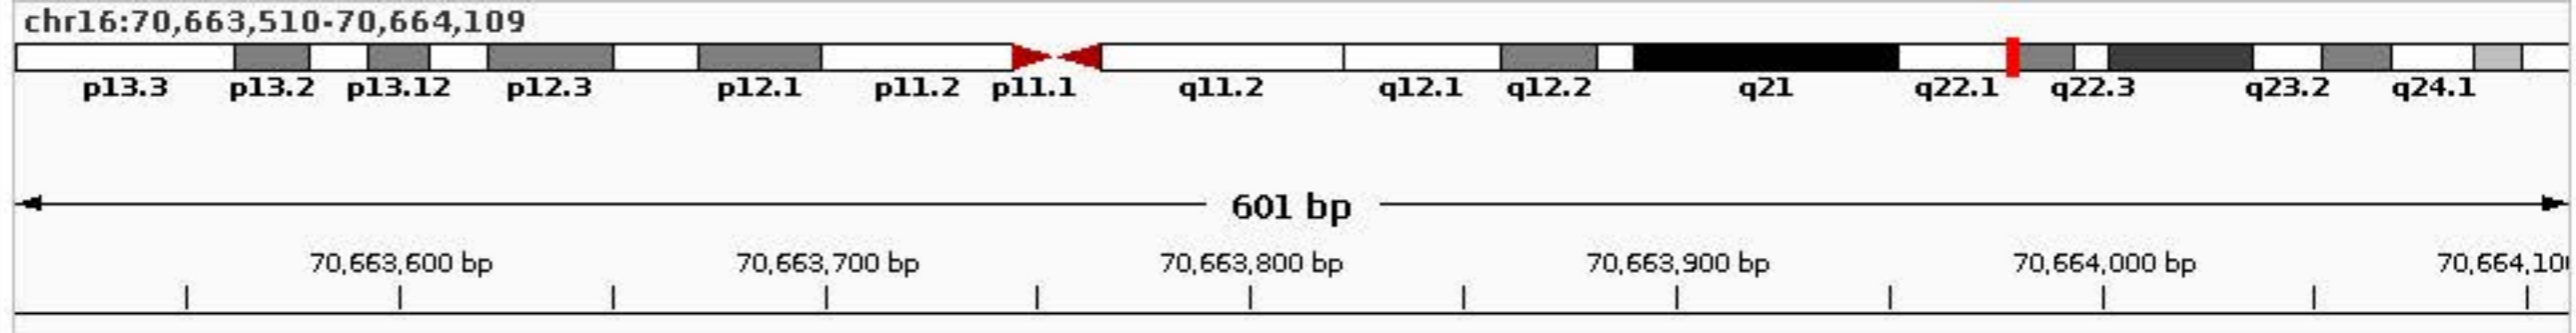

SL\_0006\_RN\_67\_mut.bam Coverage

SL\_0006\_RN\_67\_mut.bam

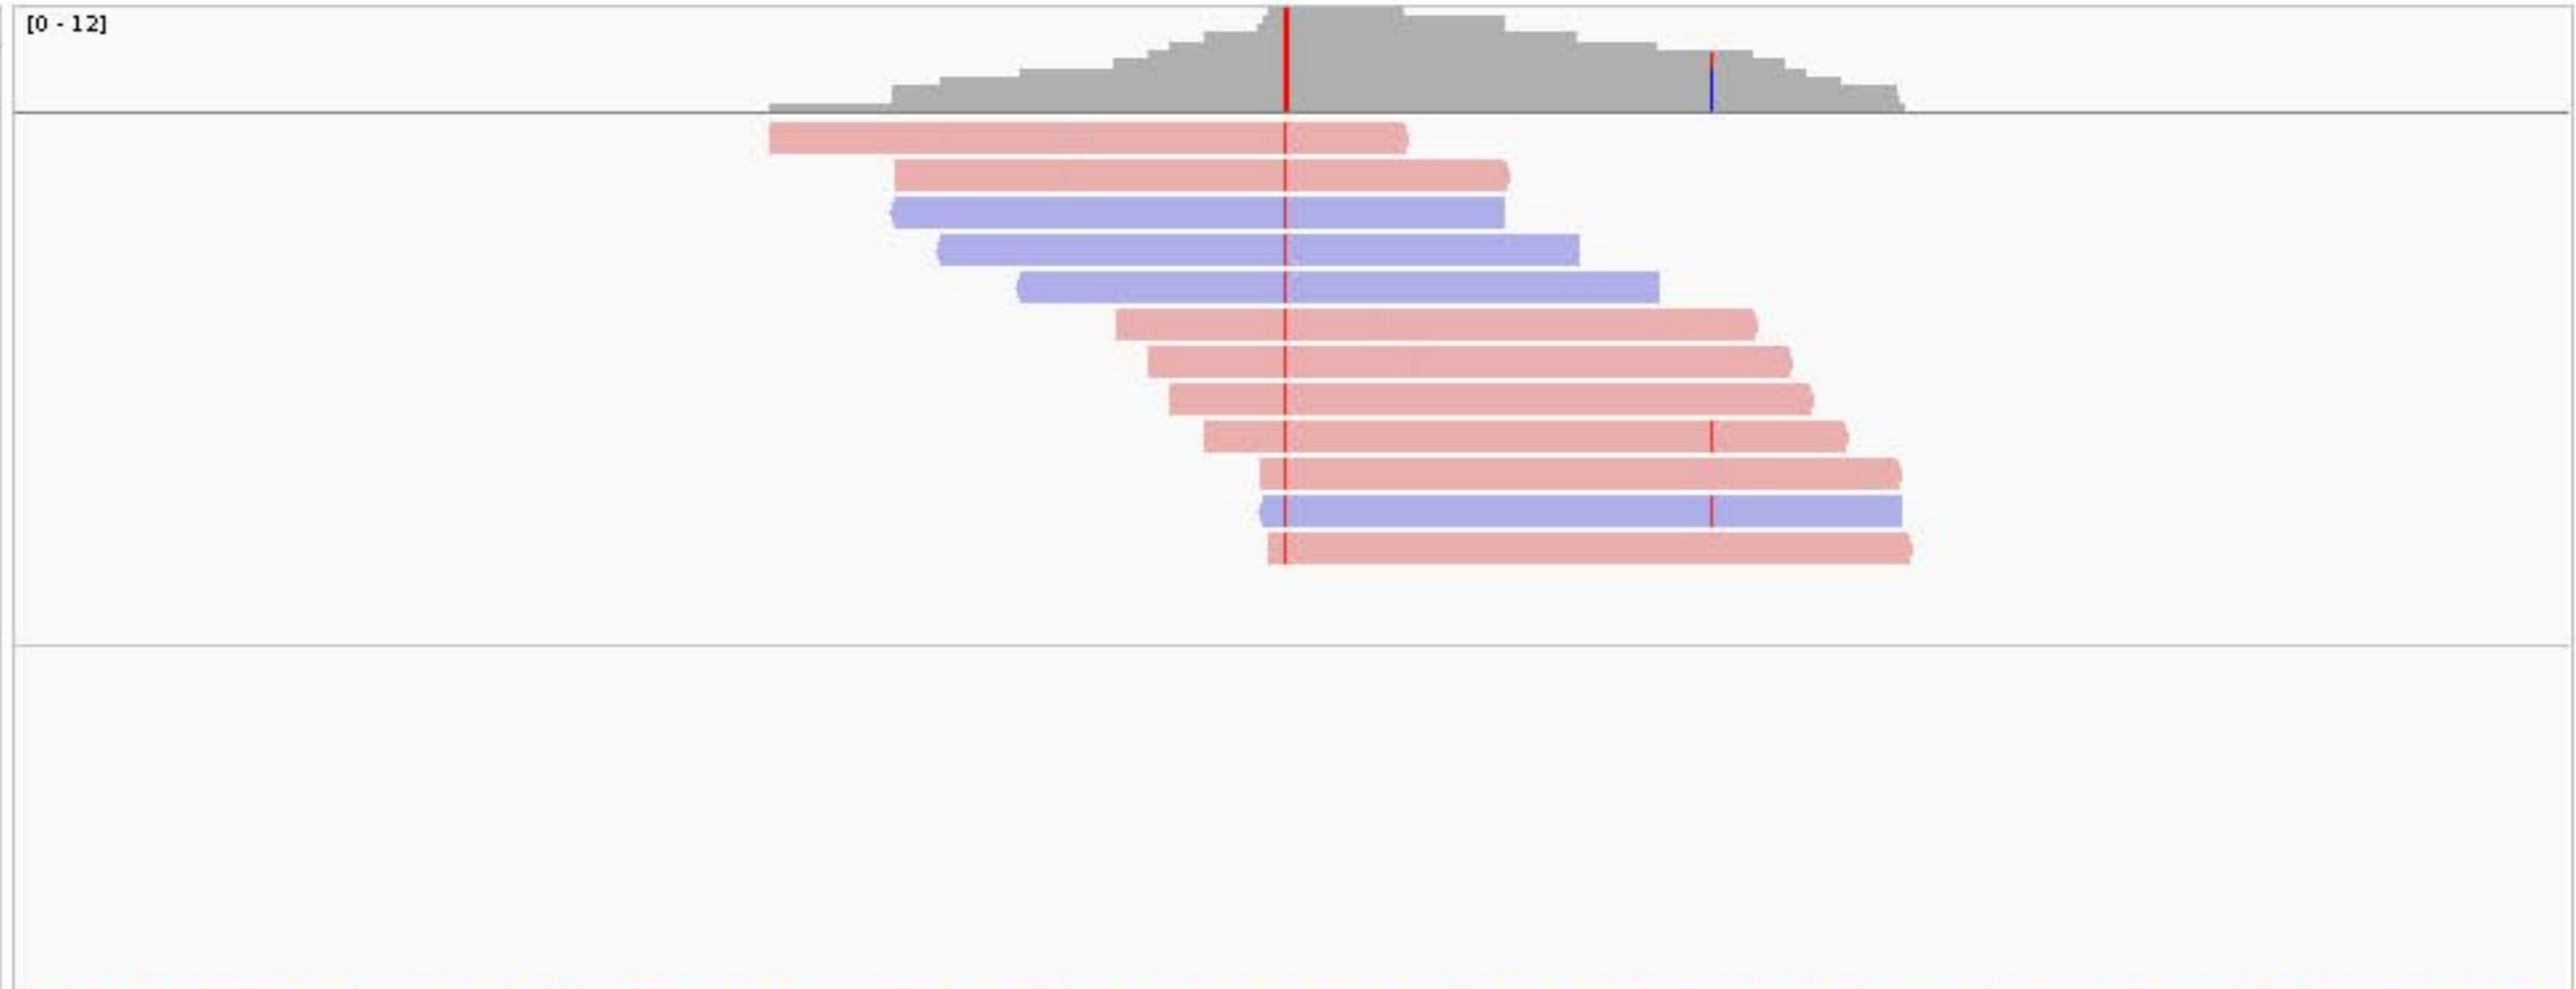

Sequence

Refseq Genes

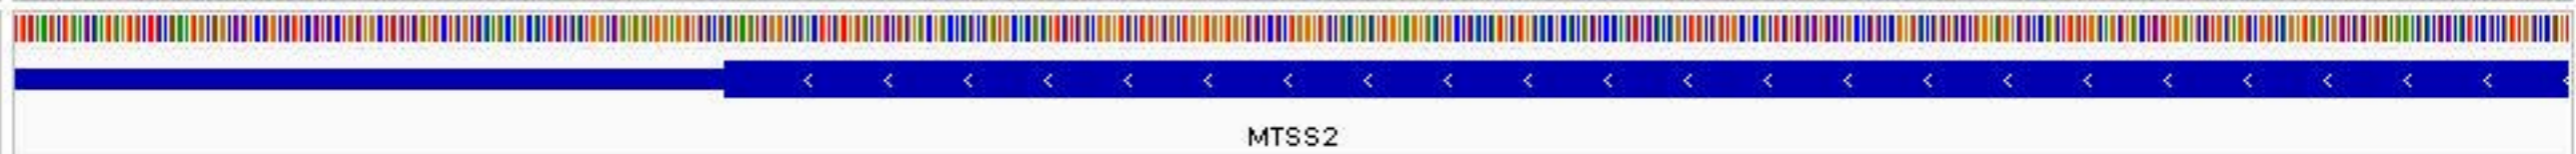



chr12:40,539,259-40,539,858

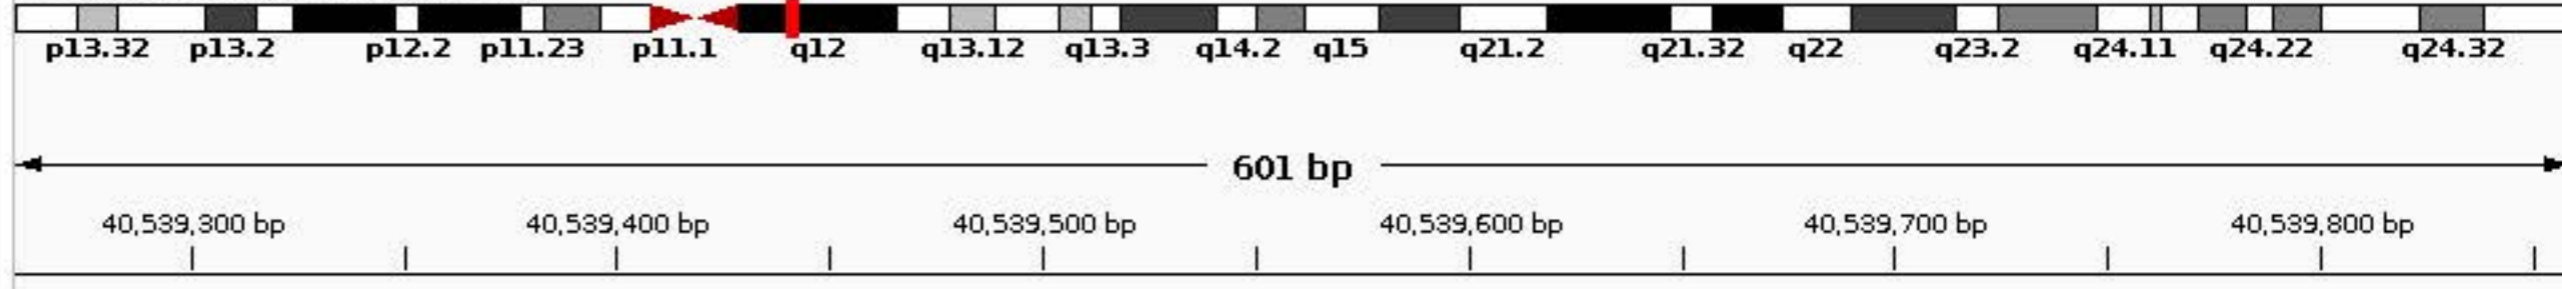

SL\_0007\_RN\_33\_mut.bam Coverage

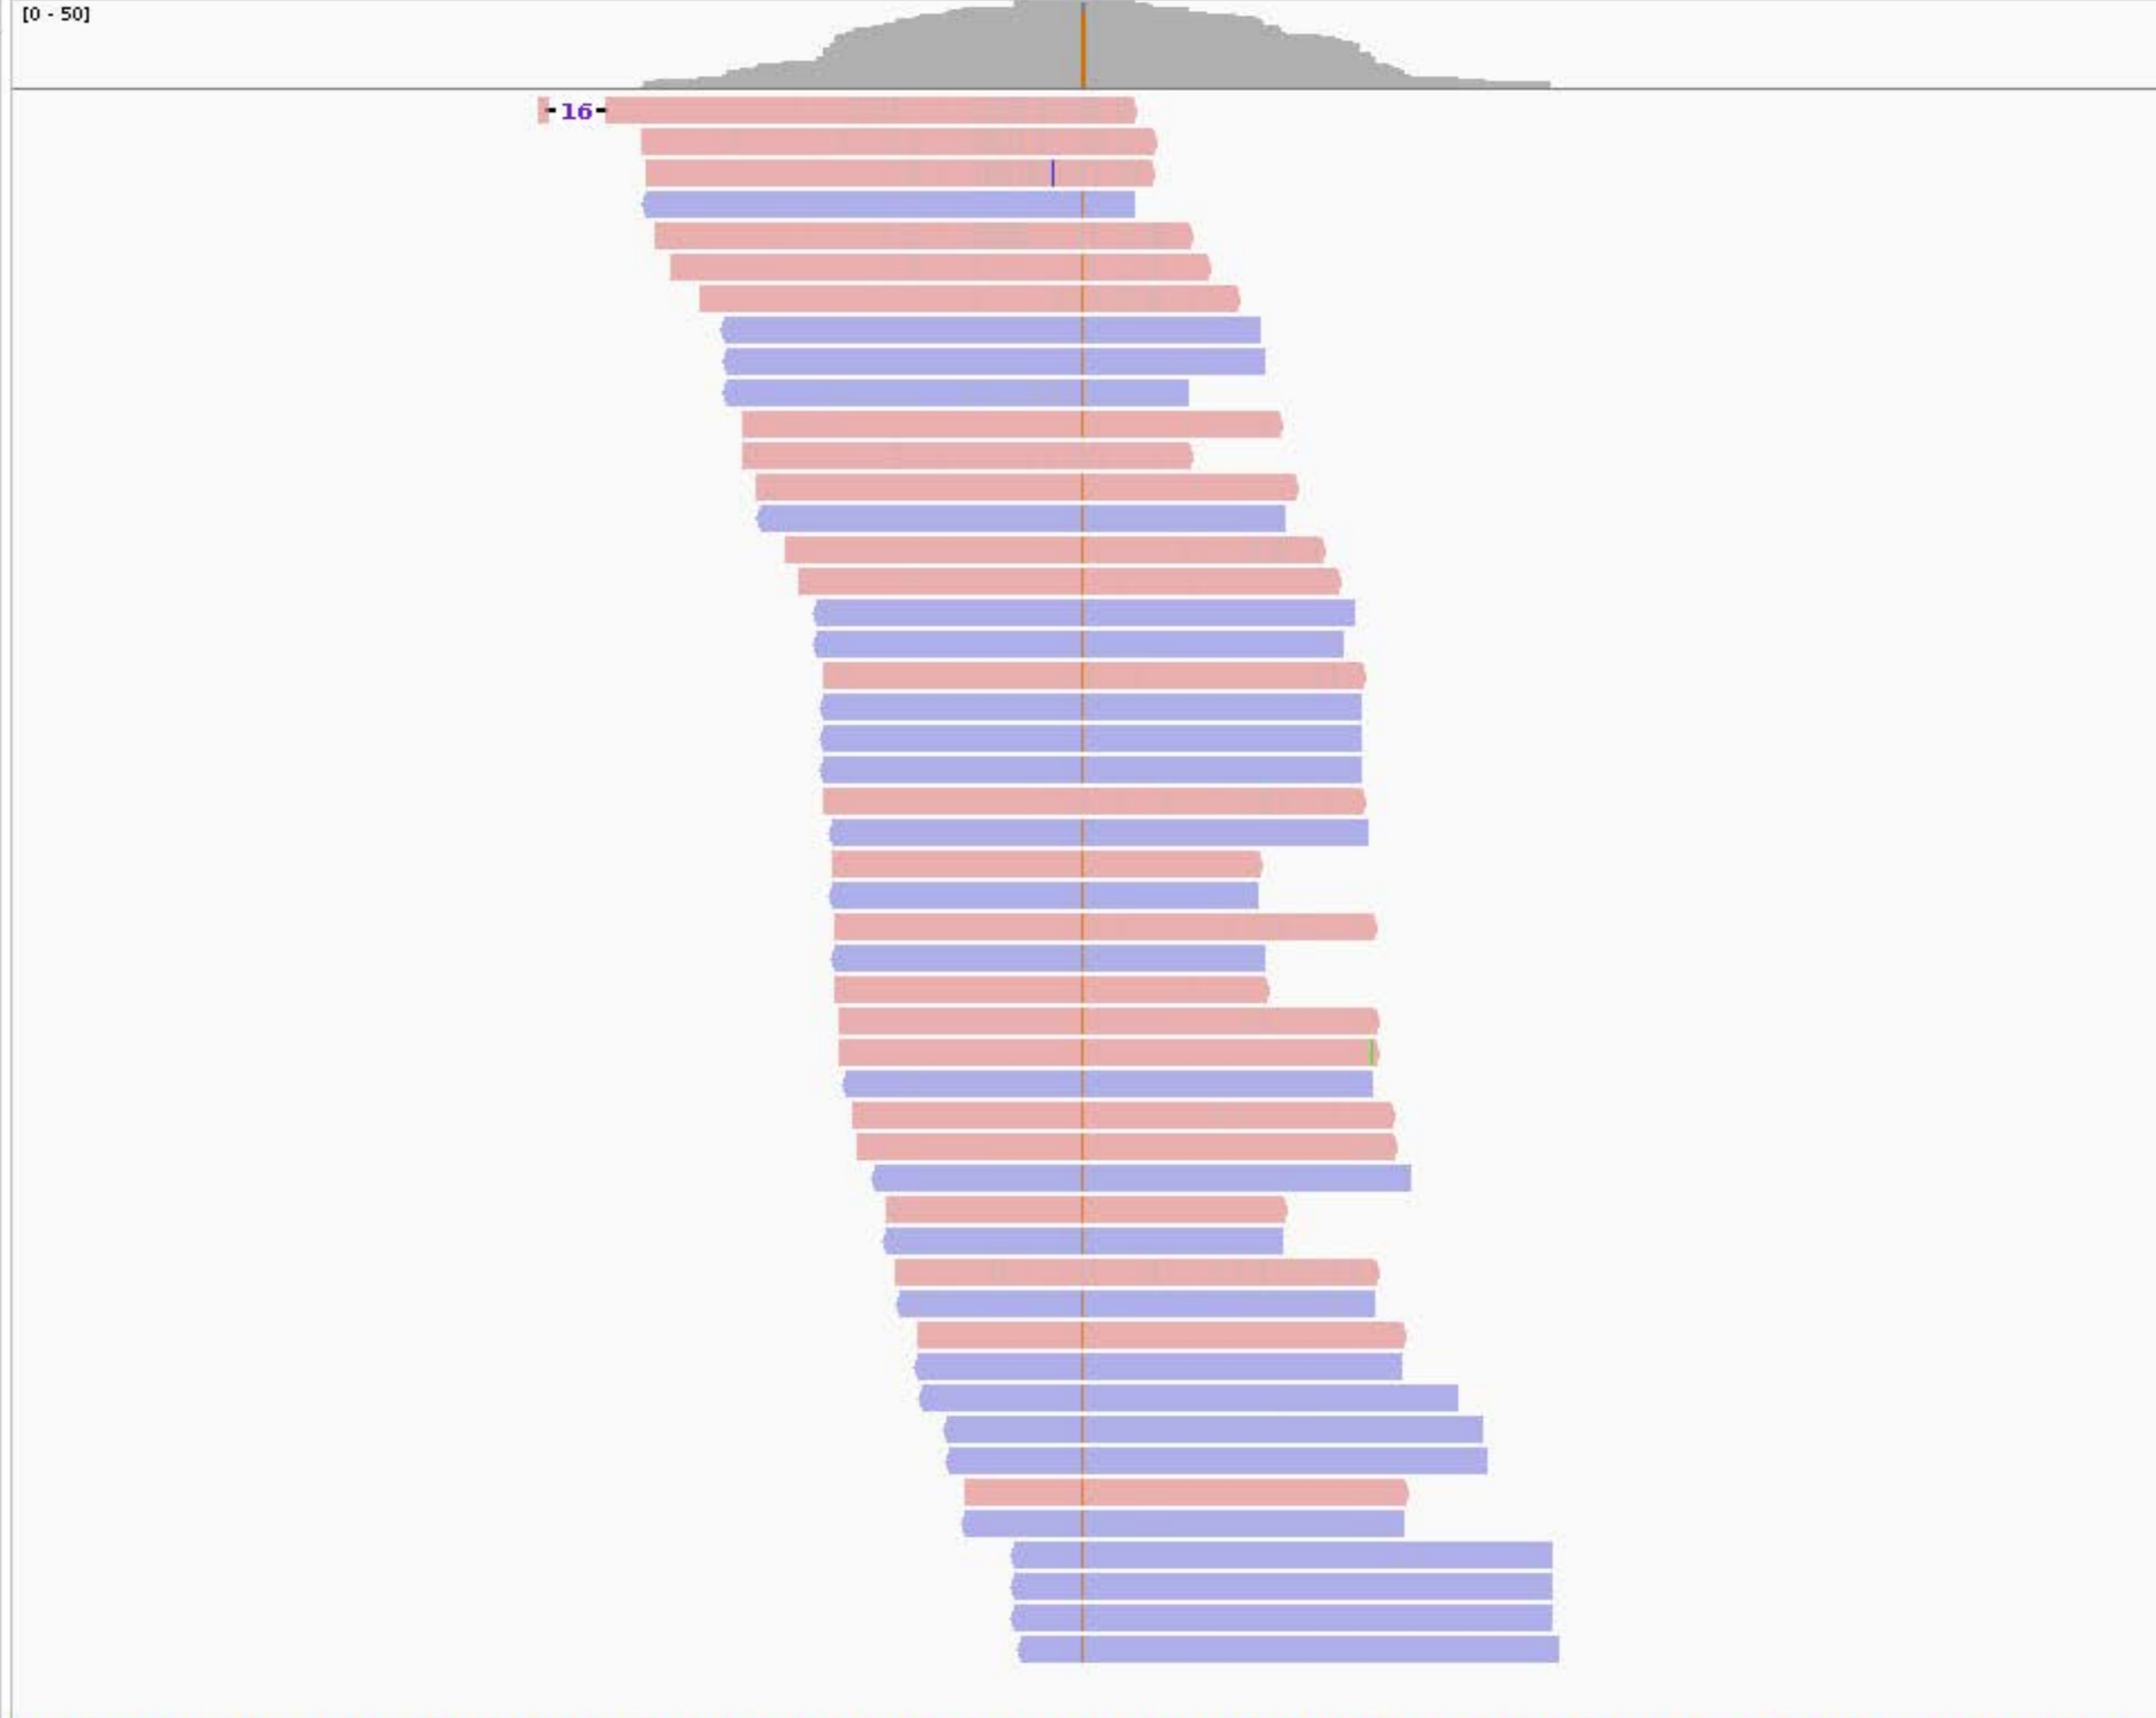

SL\_0007\_RN\_33\_mut.bam

Sequence

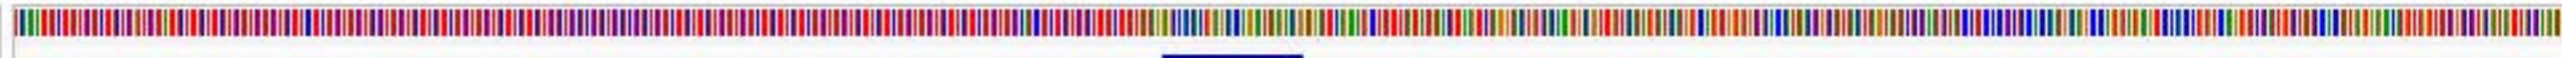

Refseq Genes

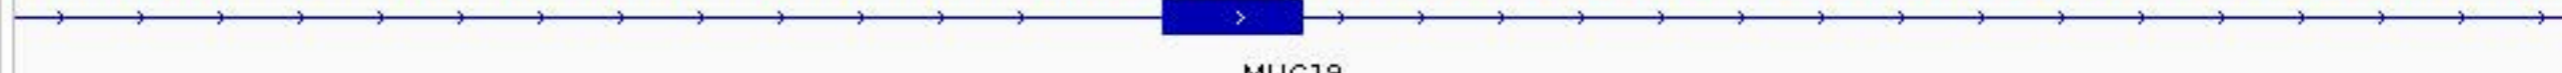

MUC19



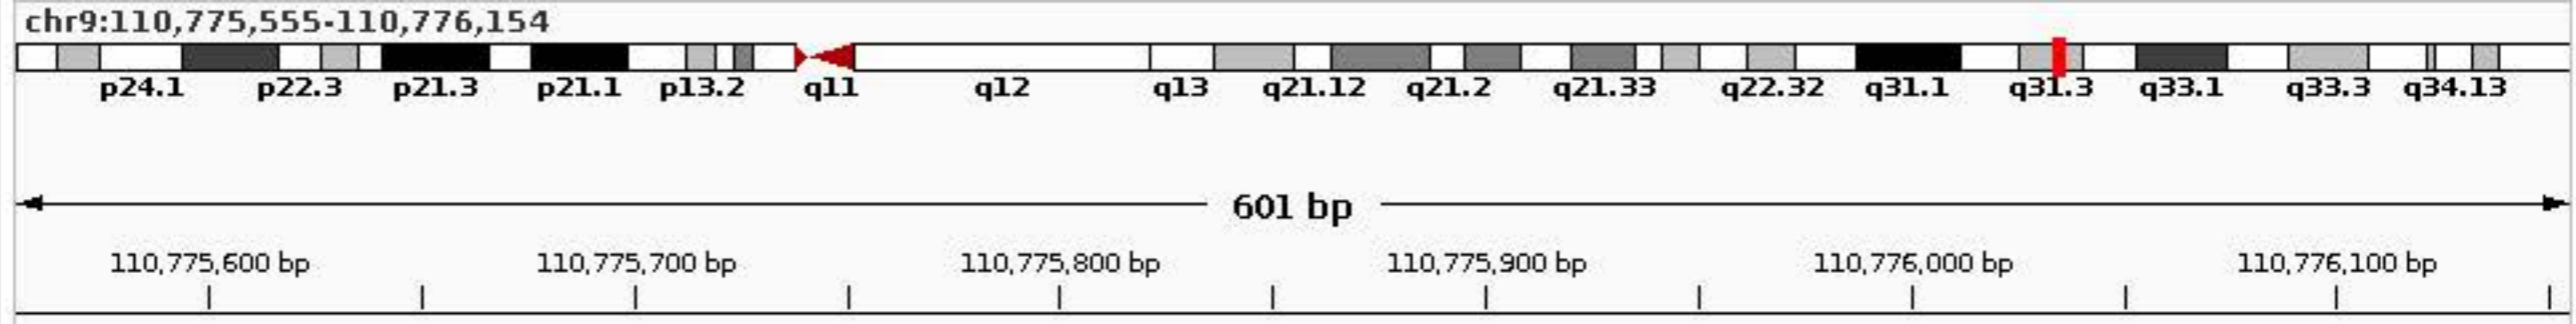

SL\_0004\_RN\_66\_mut.bam Coverage

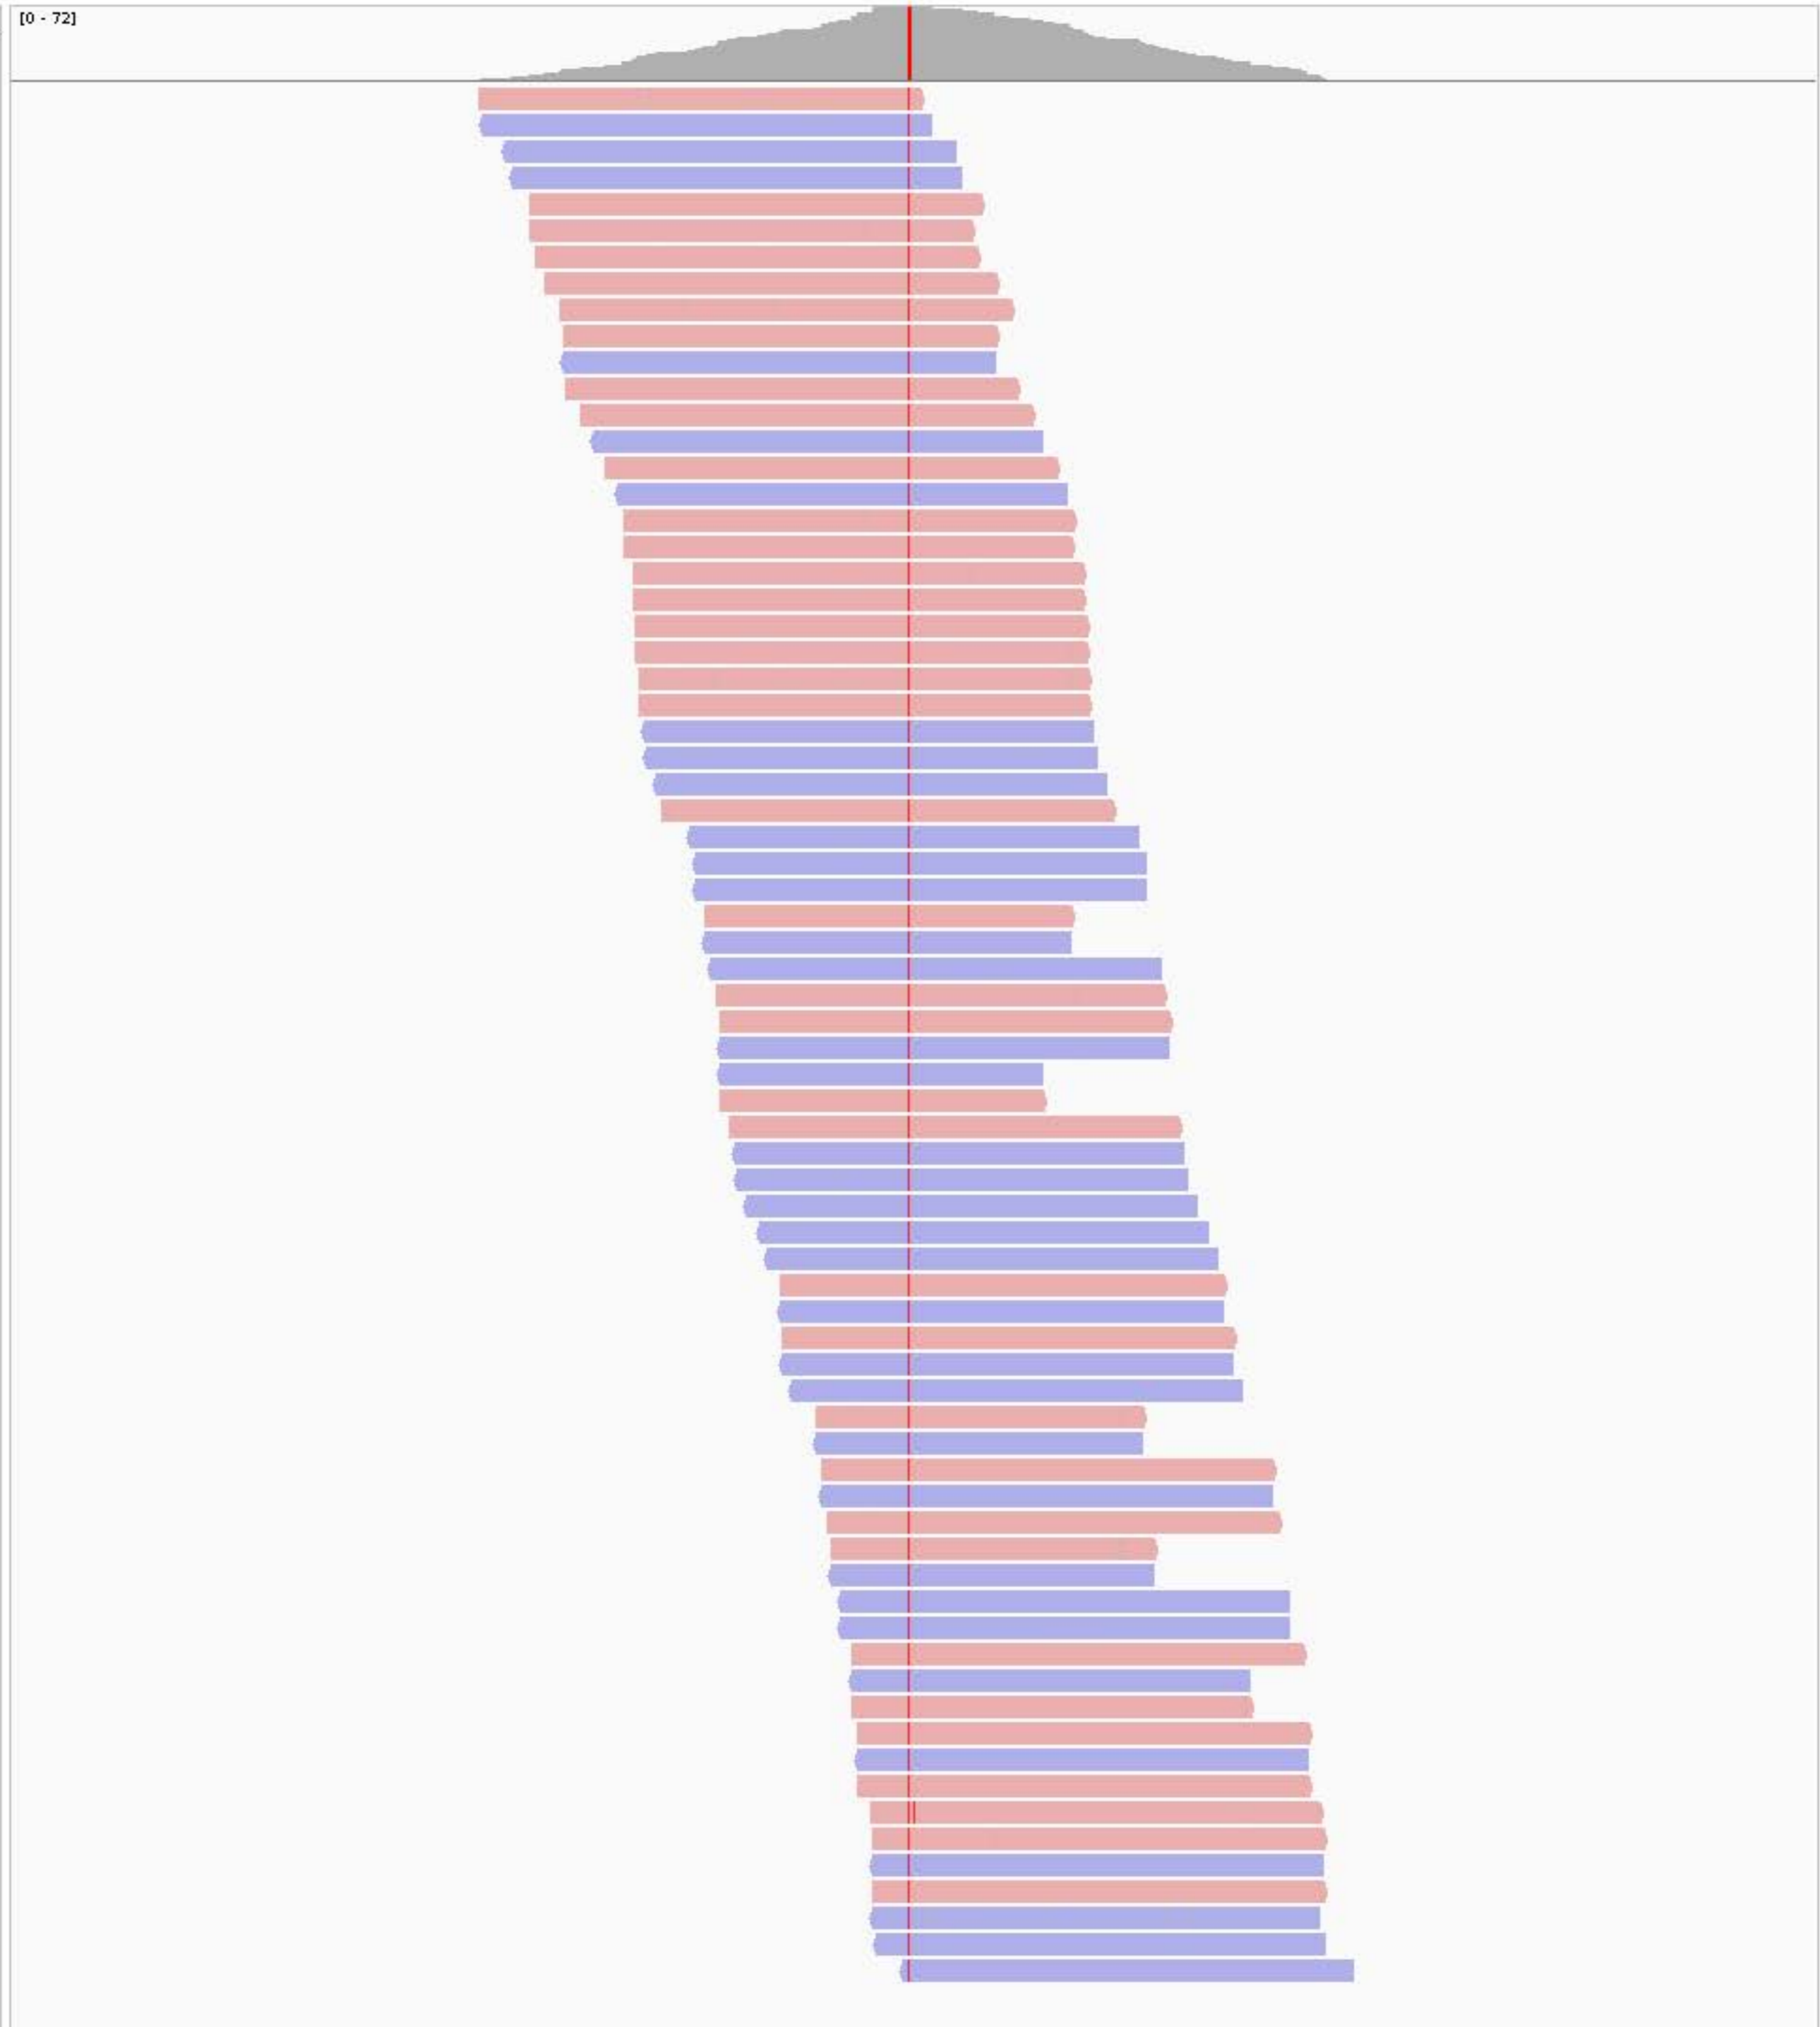

SL\_0004\_RN\_66\_mut.bam

Sequence →

Refseq Genes

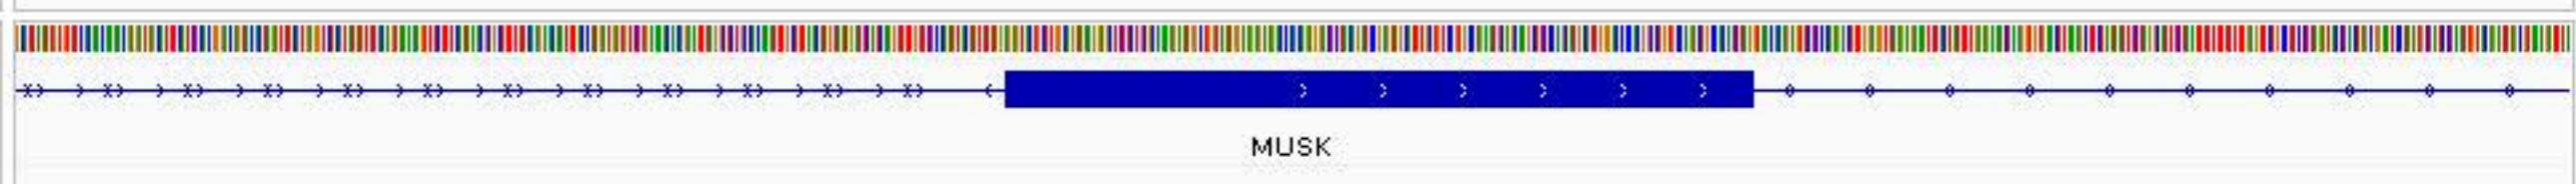

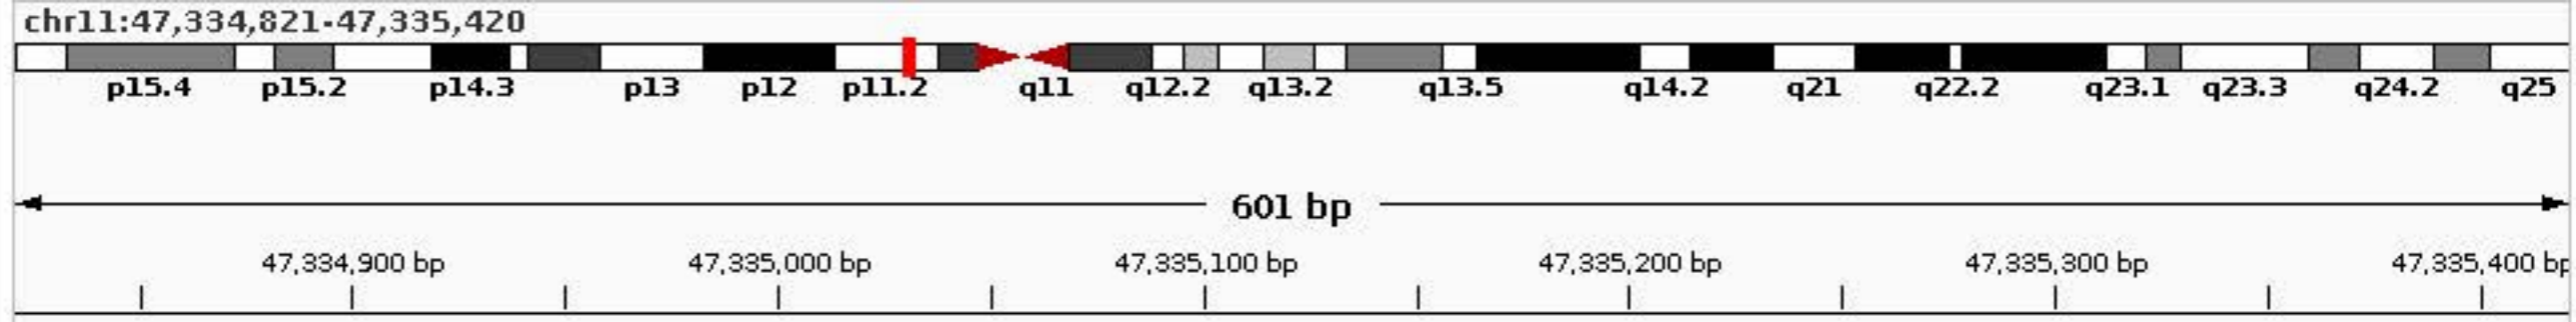

SL\_0015\_RN\_12\_mut.bam Coverage

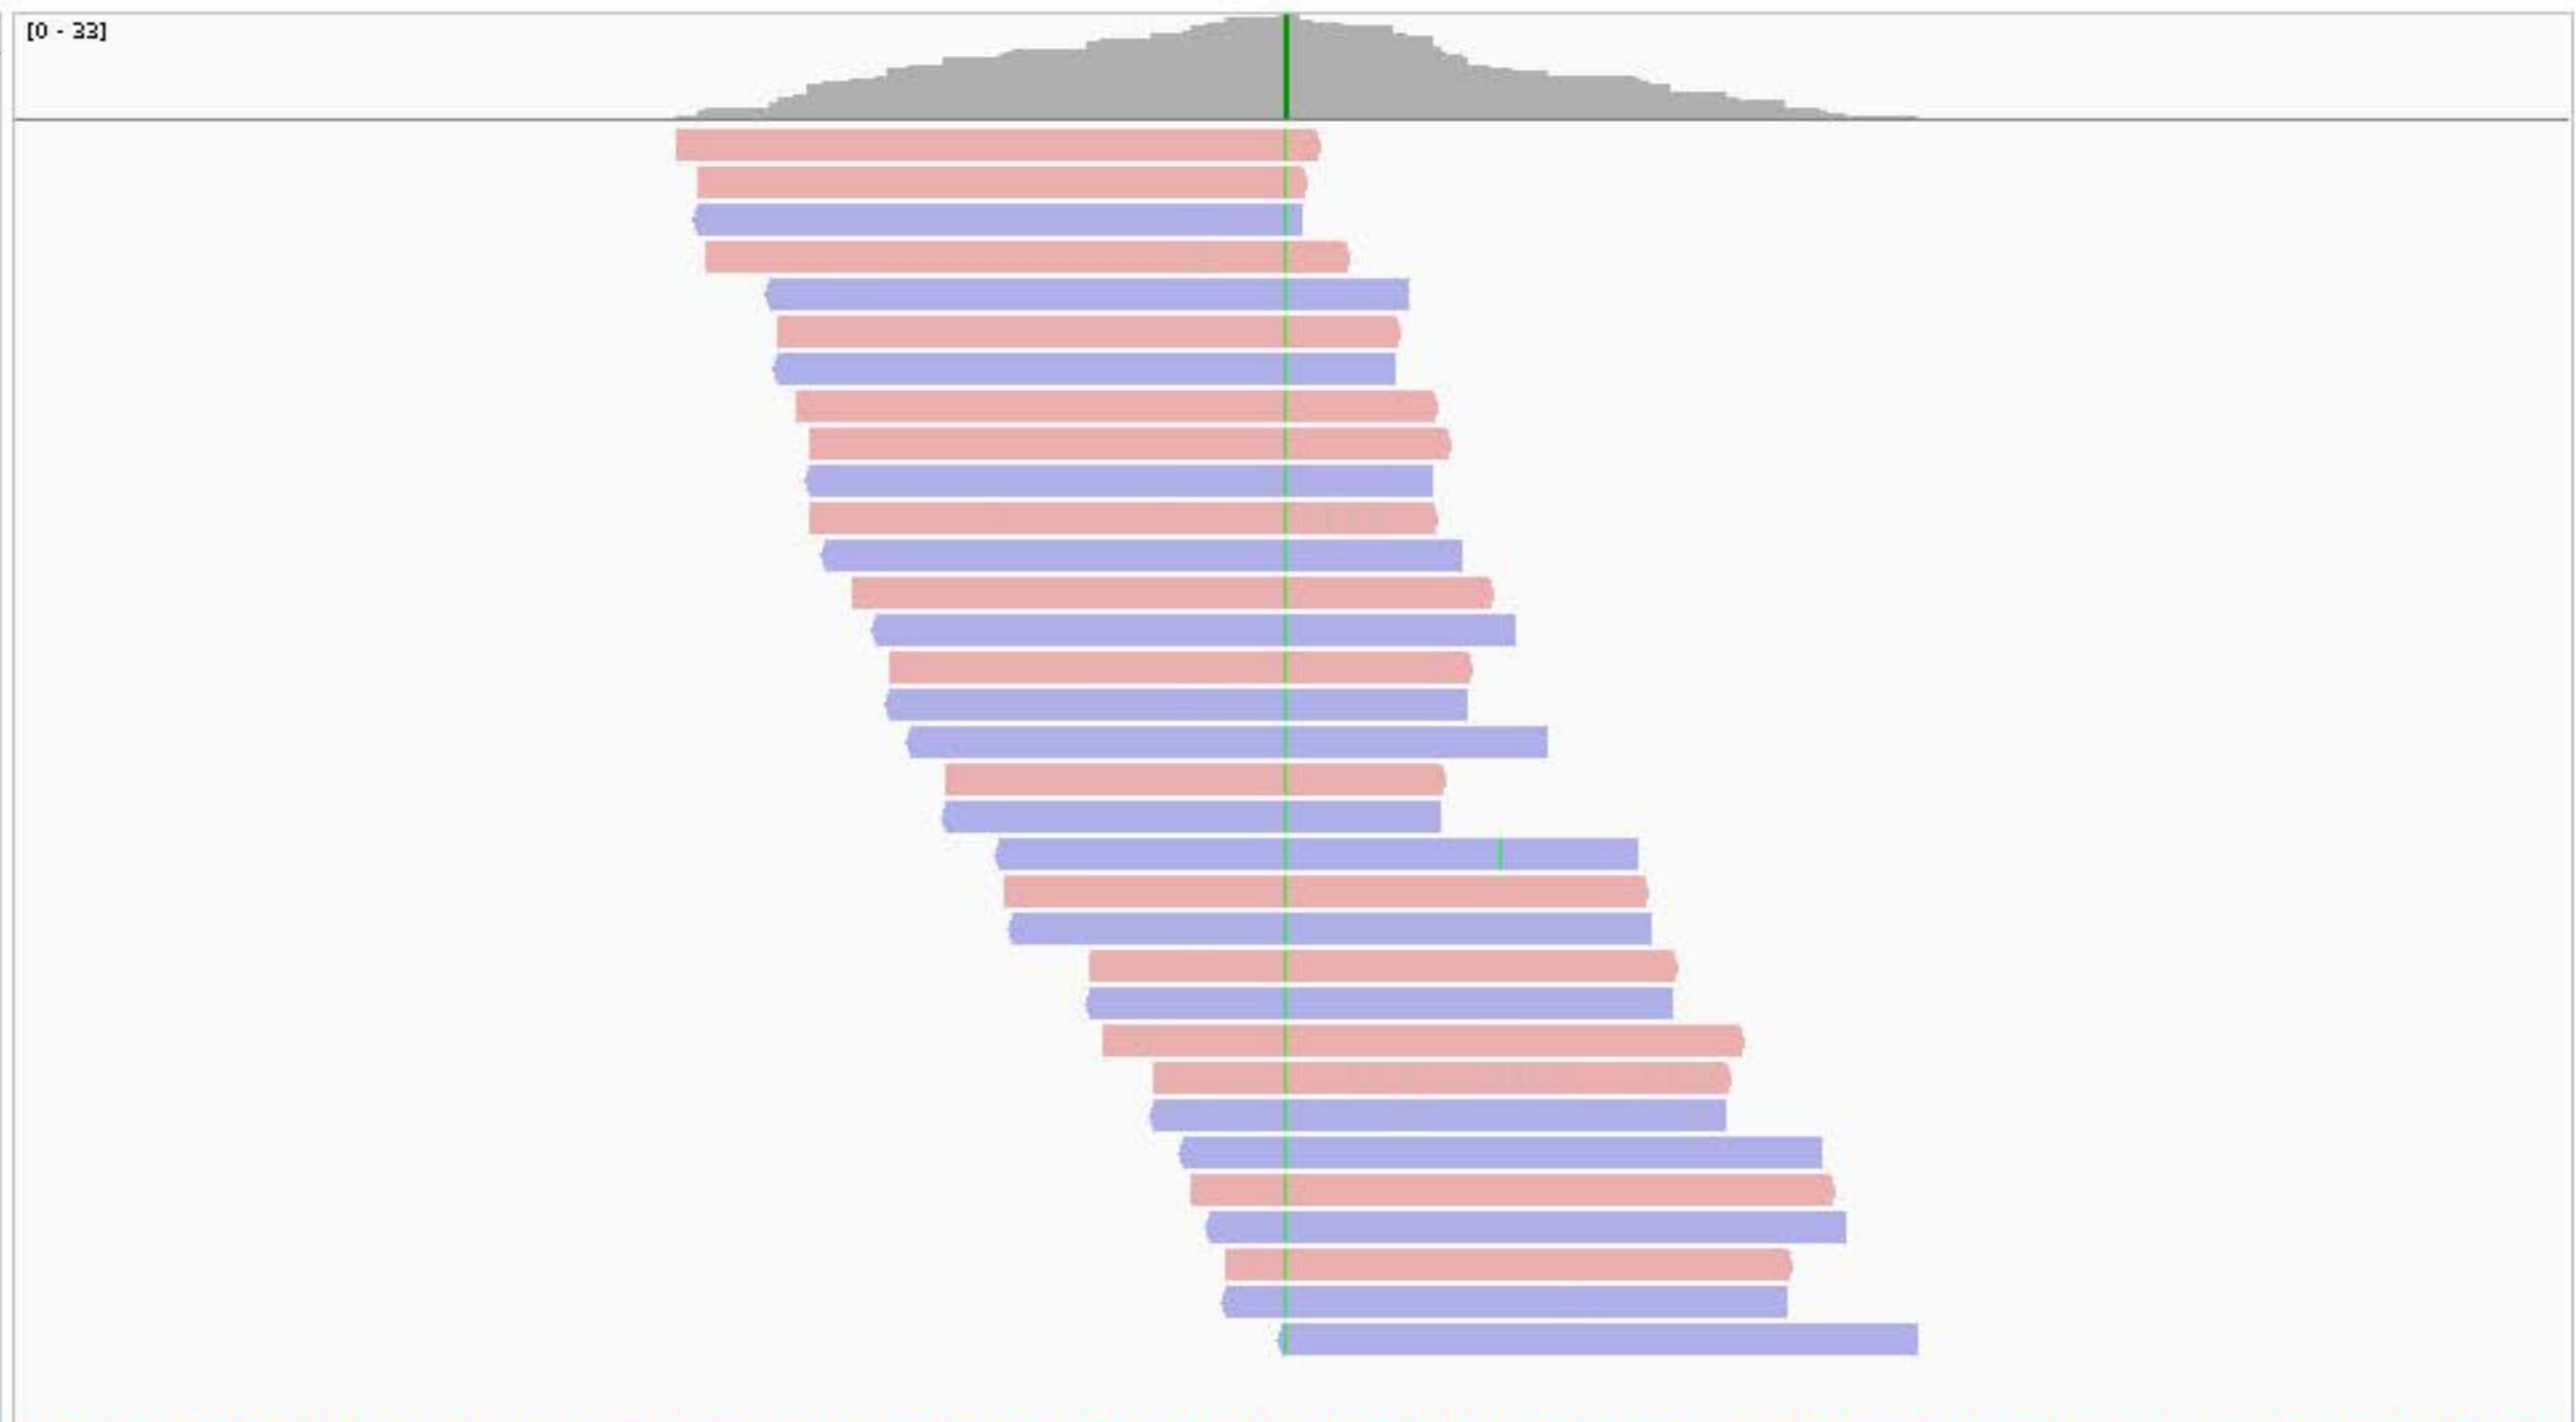

SL\_0015\_RN\_12\_mut.bam

Sequence

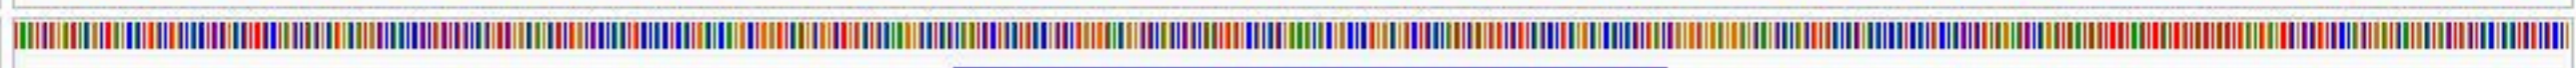

Refseq Genes

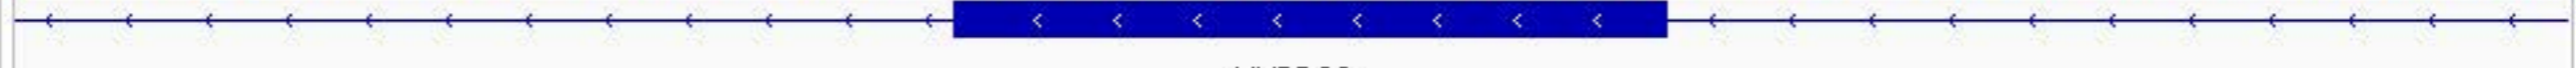

MYBPC3

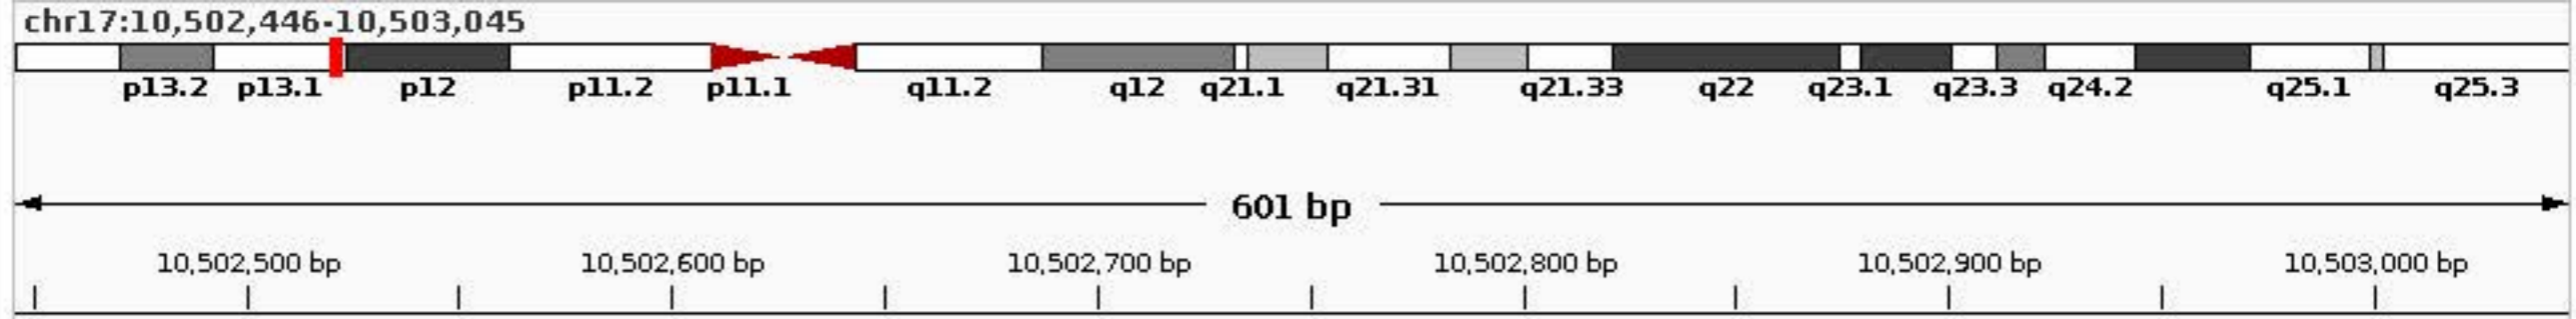

SL\_0007\_RN\_33\_mut.bam Coverage

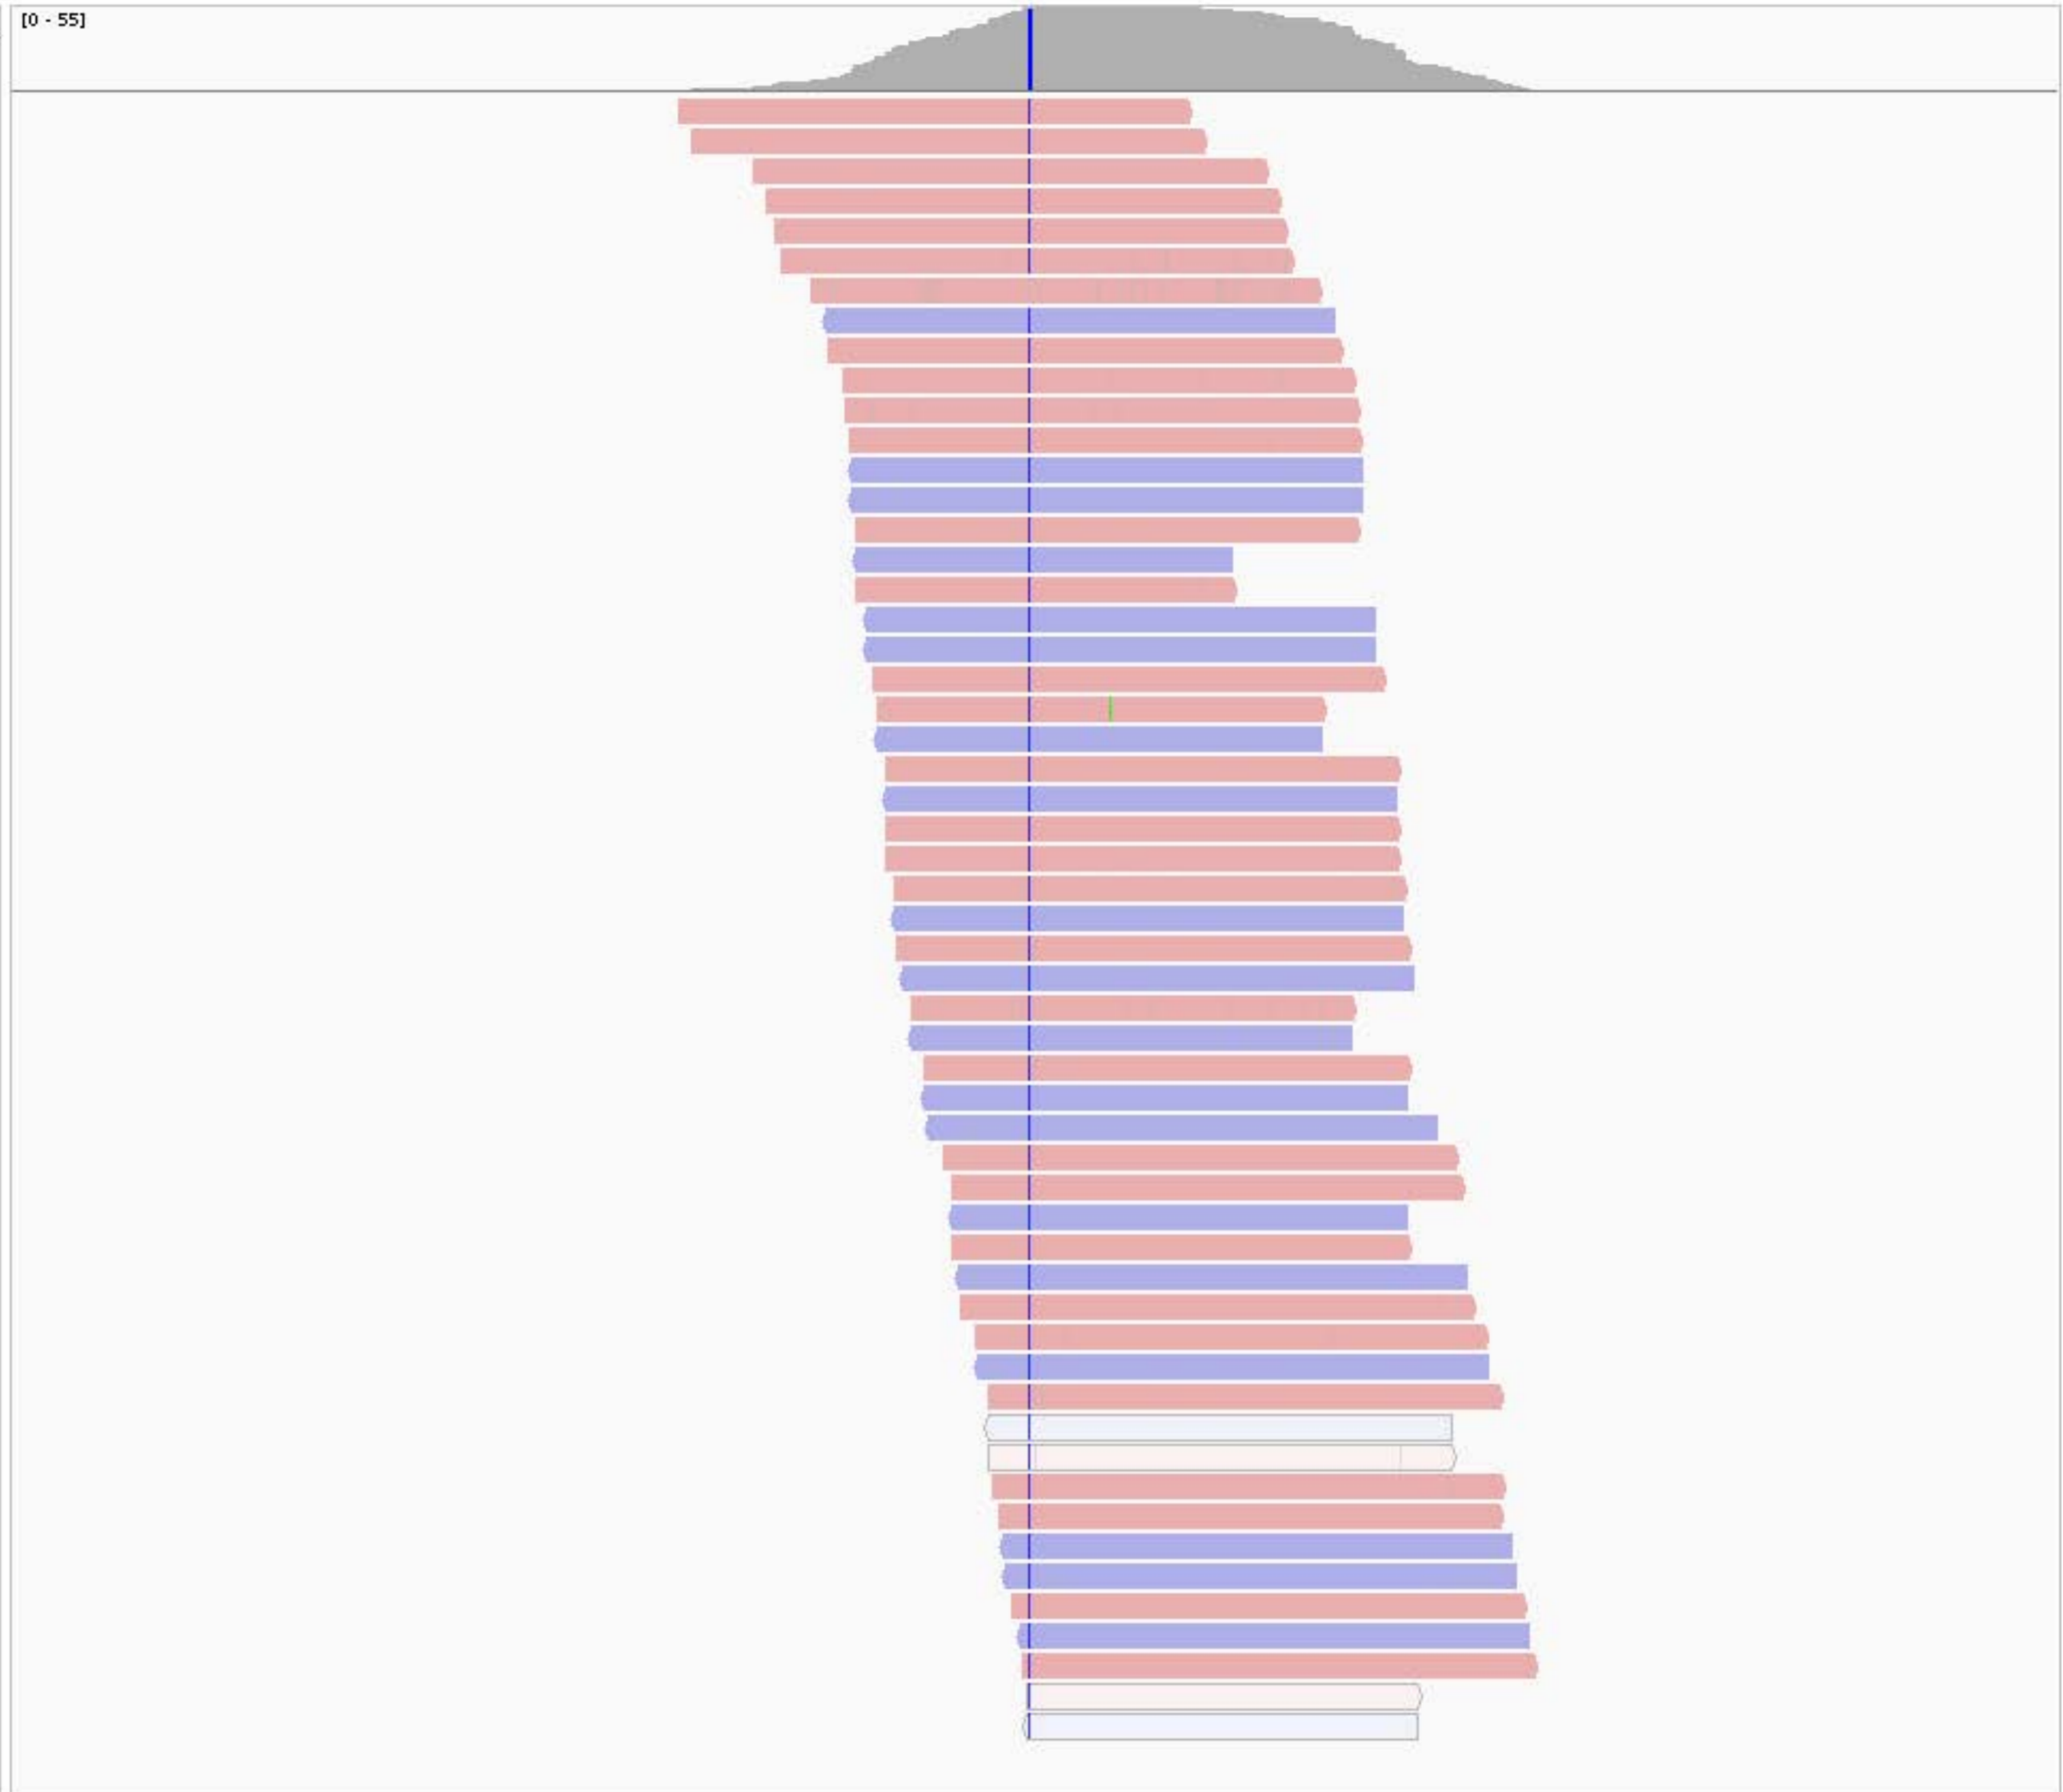

SL\_0007\_RN\_33\_mut.bam

Sequence

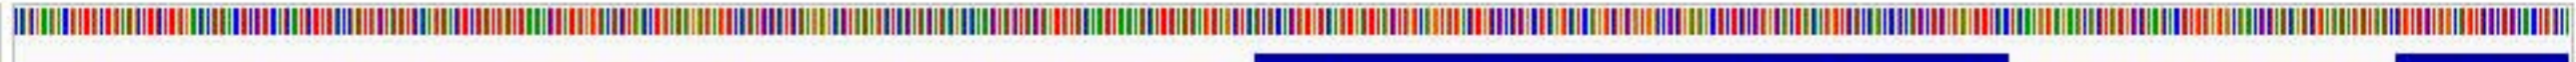

Refseq Genes

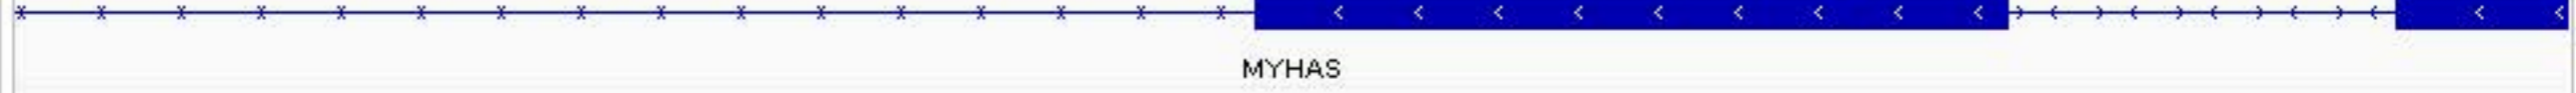

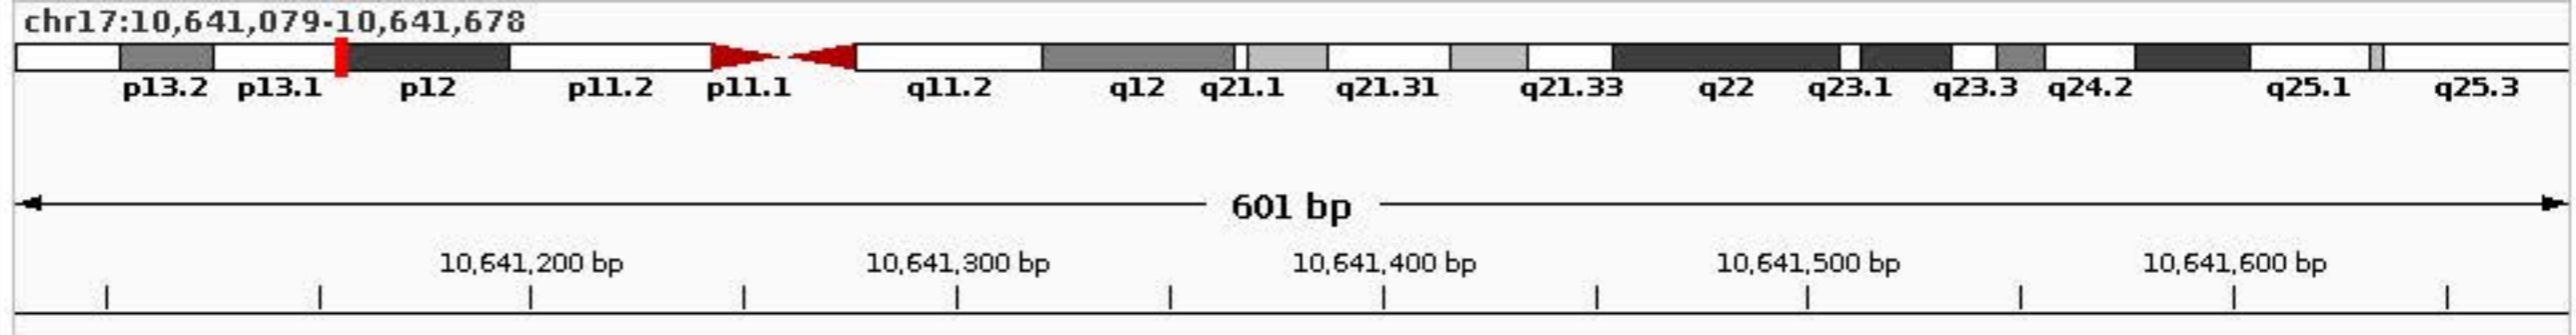

SL\_0002\_RN\_8\_mut.bam Coverage

SL\_0002\_RN\_8\_mut.bam

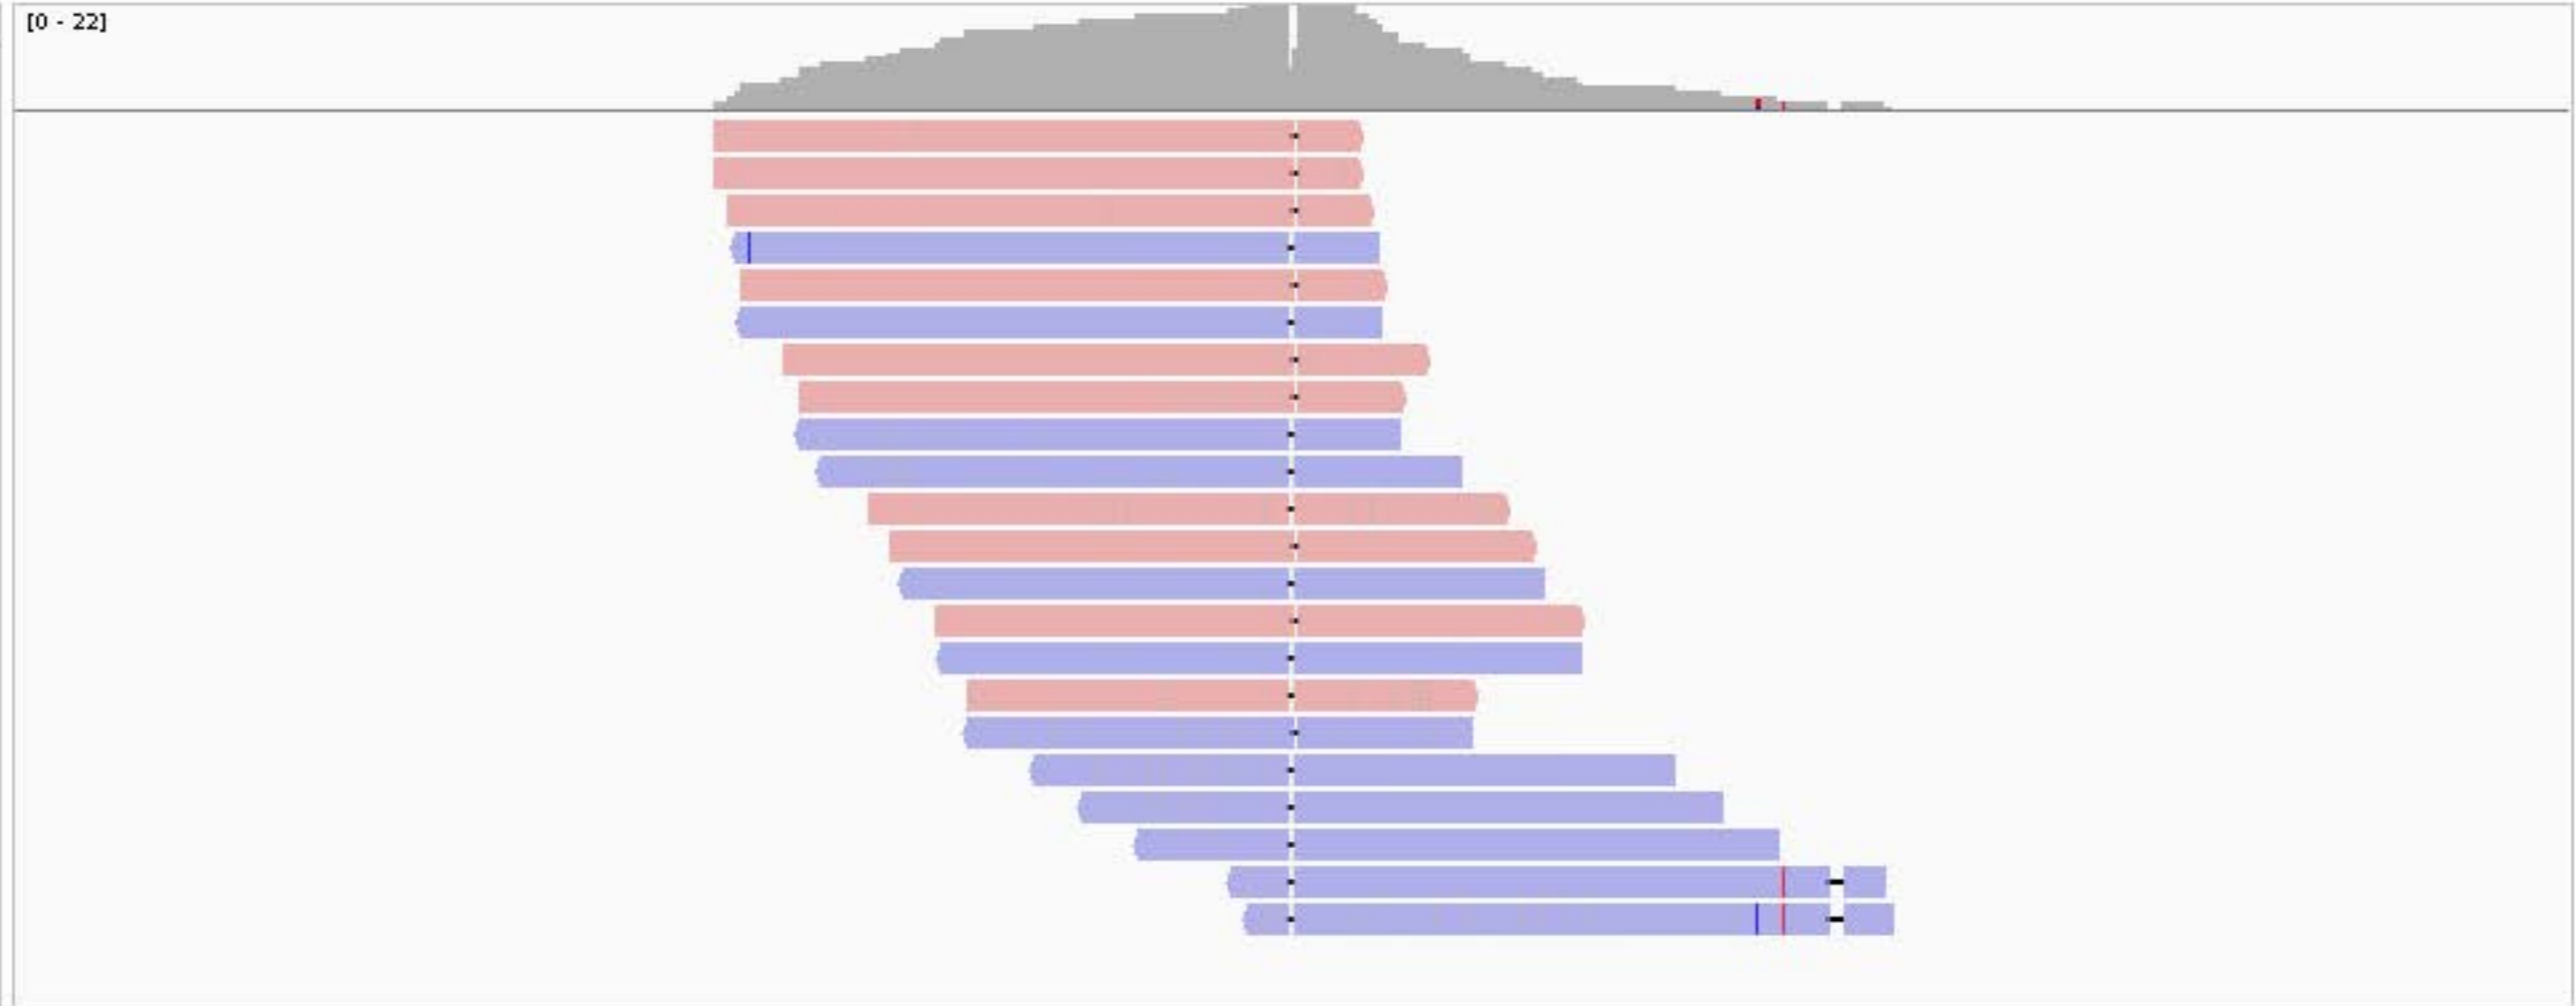

Sequence

Refseq Genes

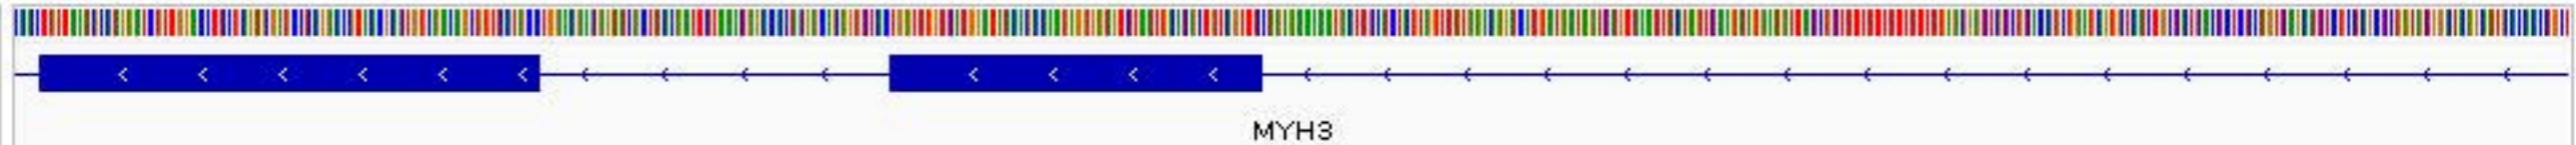



chr22:36,300,602-36,301,201

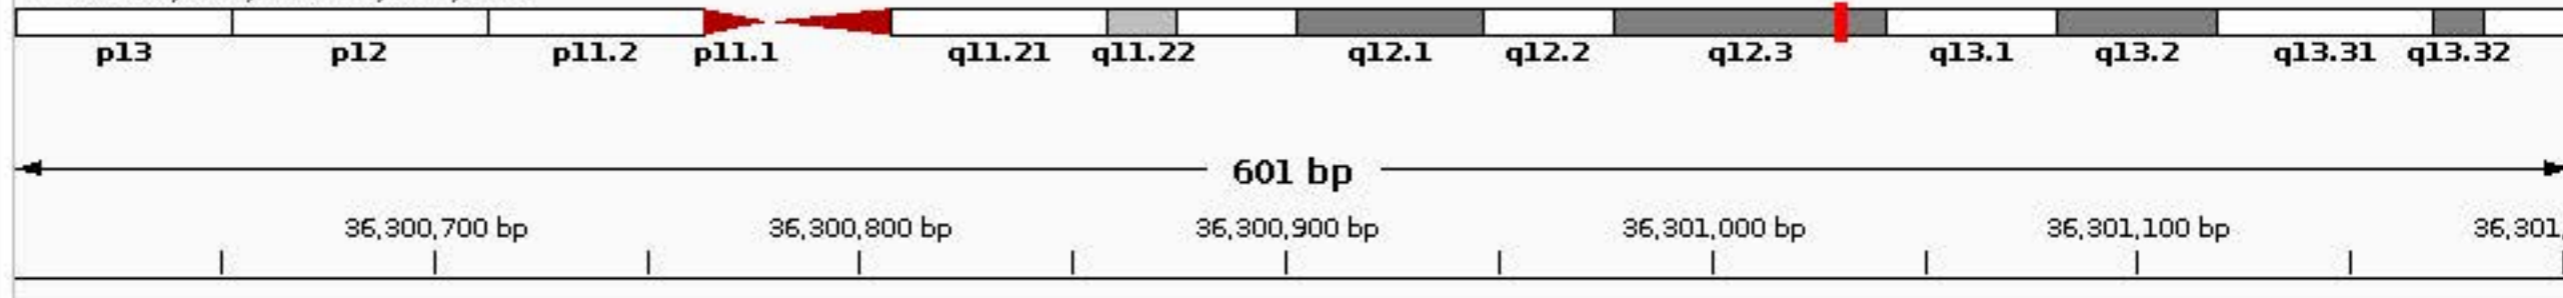

SL\_0003\_LN\_51\_mut.bam Coverage

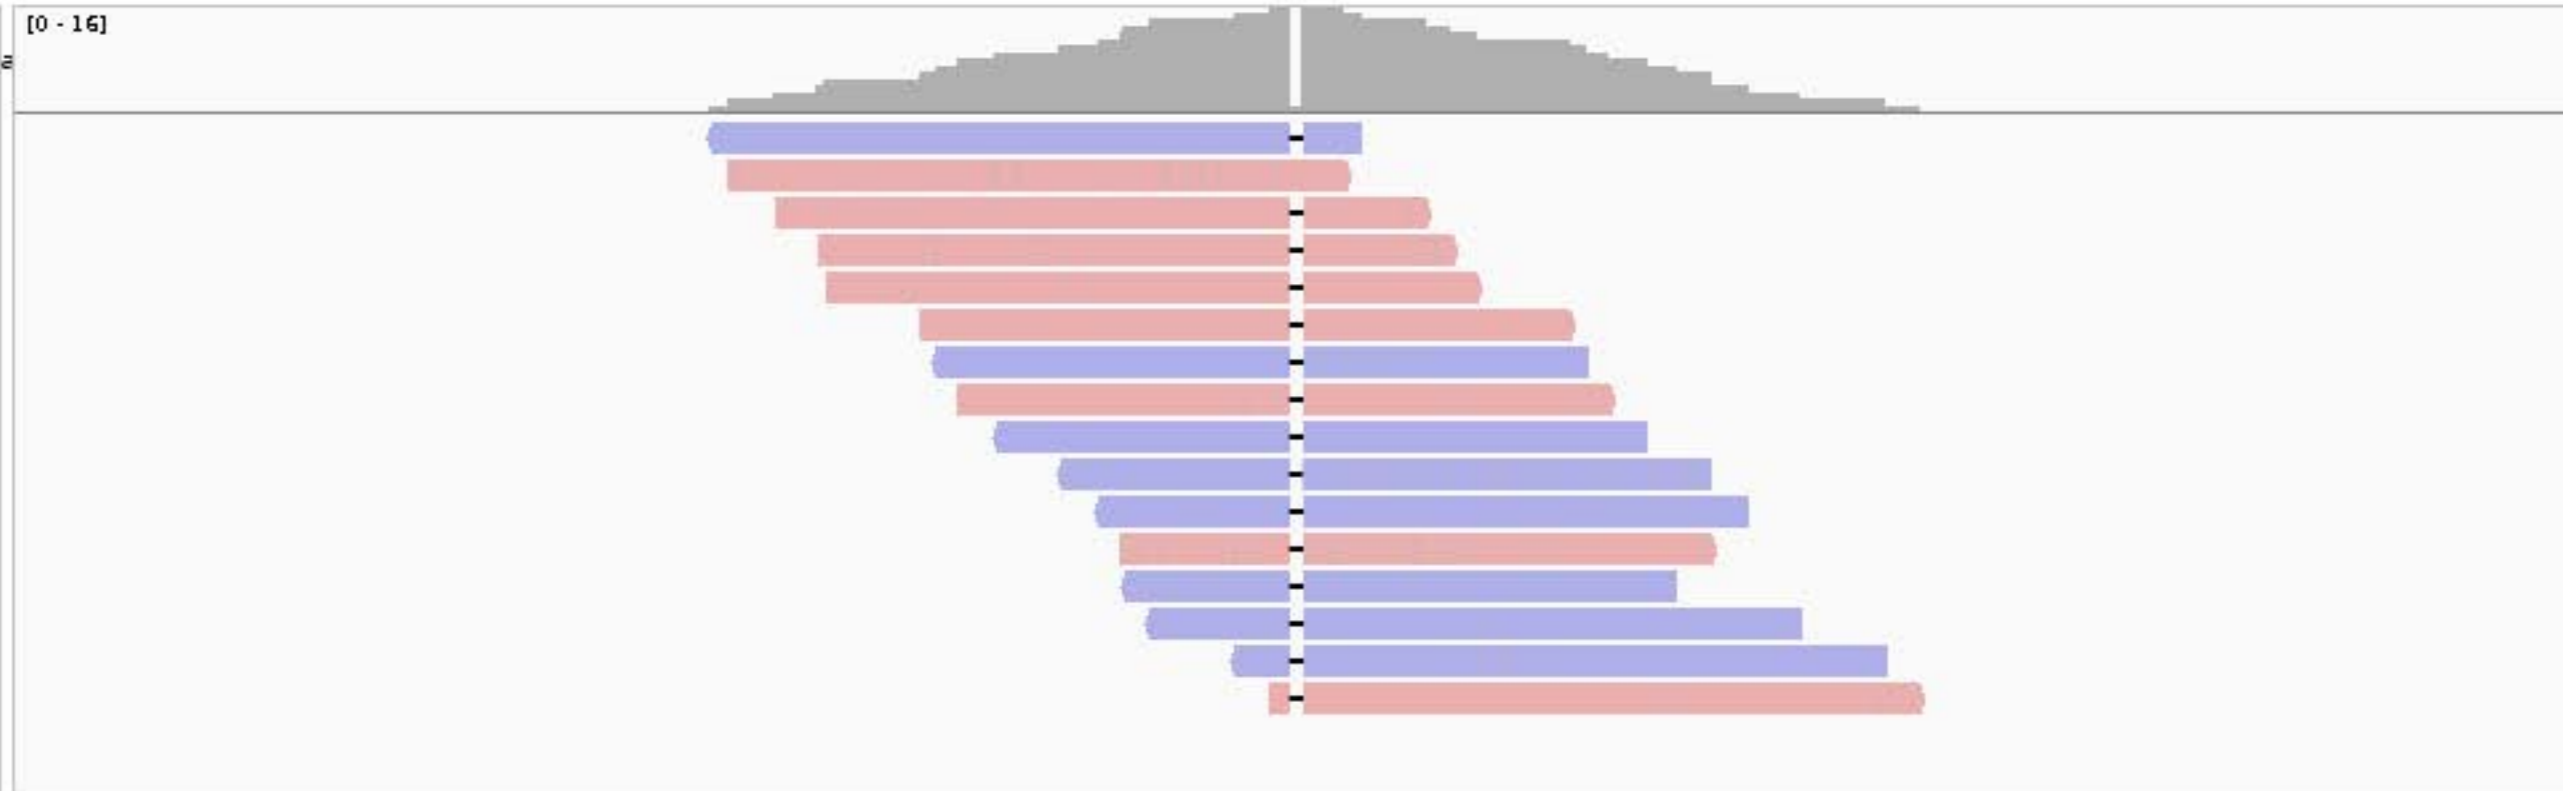

SL\_0003\_LN\_51\_mut.bam

Sequence →

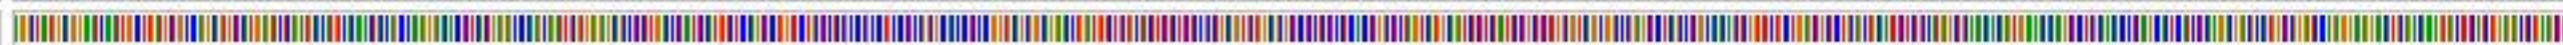

Refseq Genes

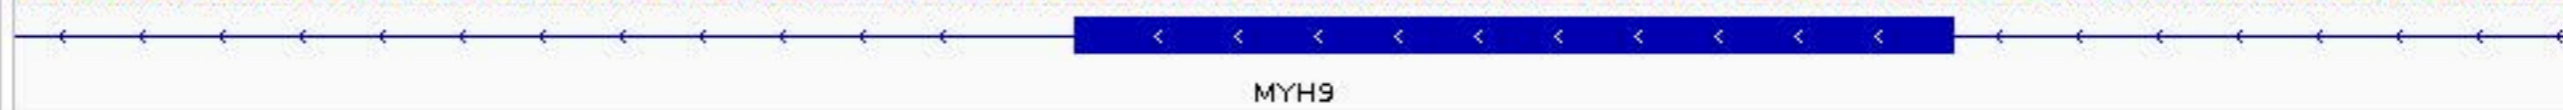



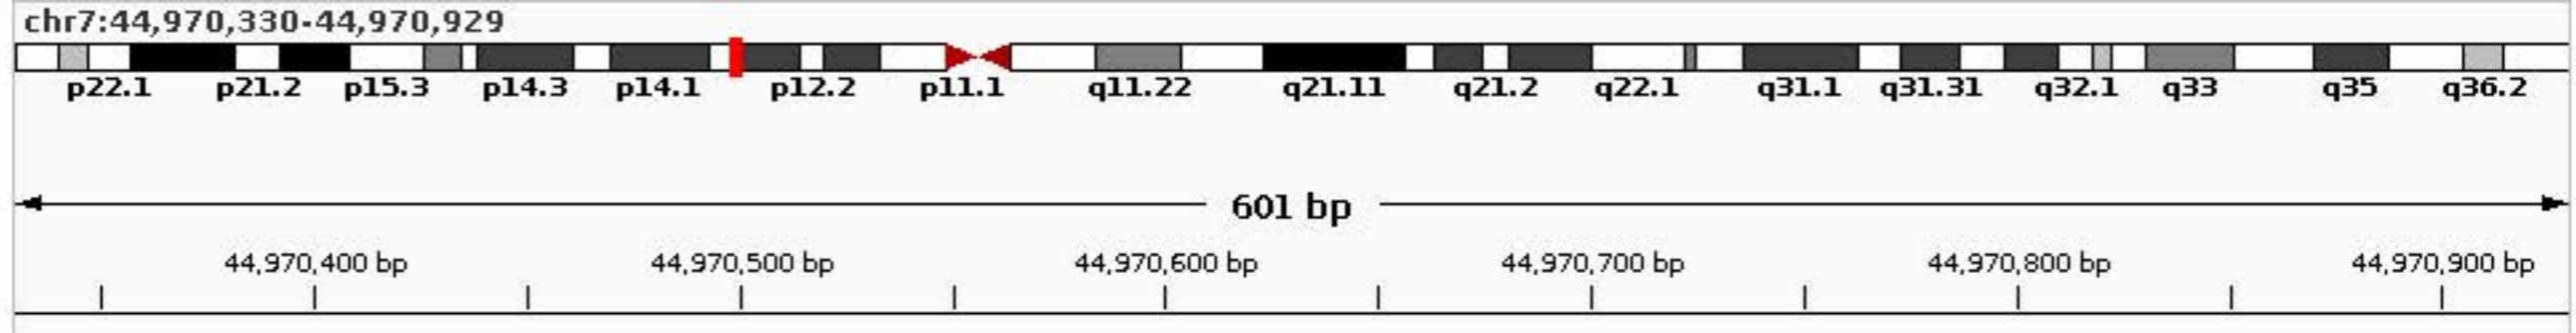

SL\_0007\_RN\_2\_mut.bam Coverage

SL\_0007\_RN\_2\_mut.bam

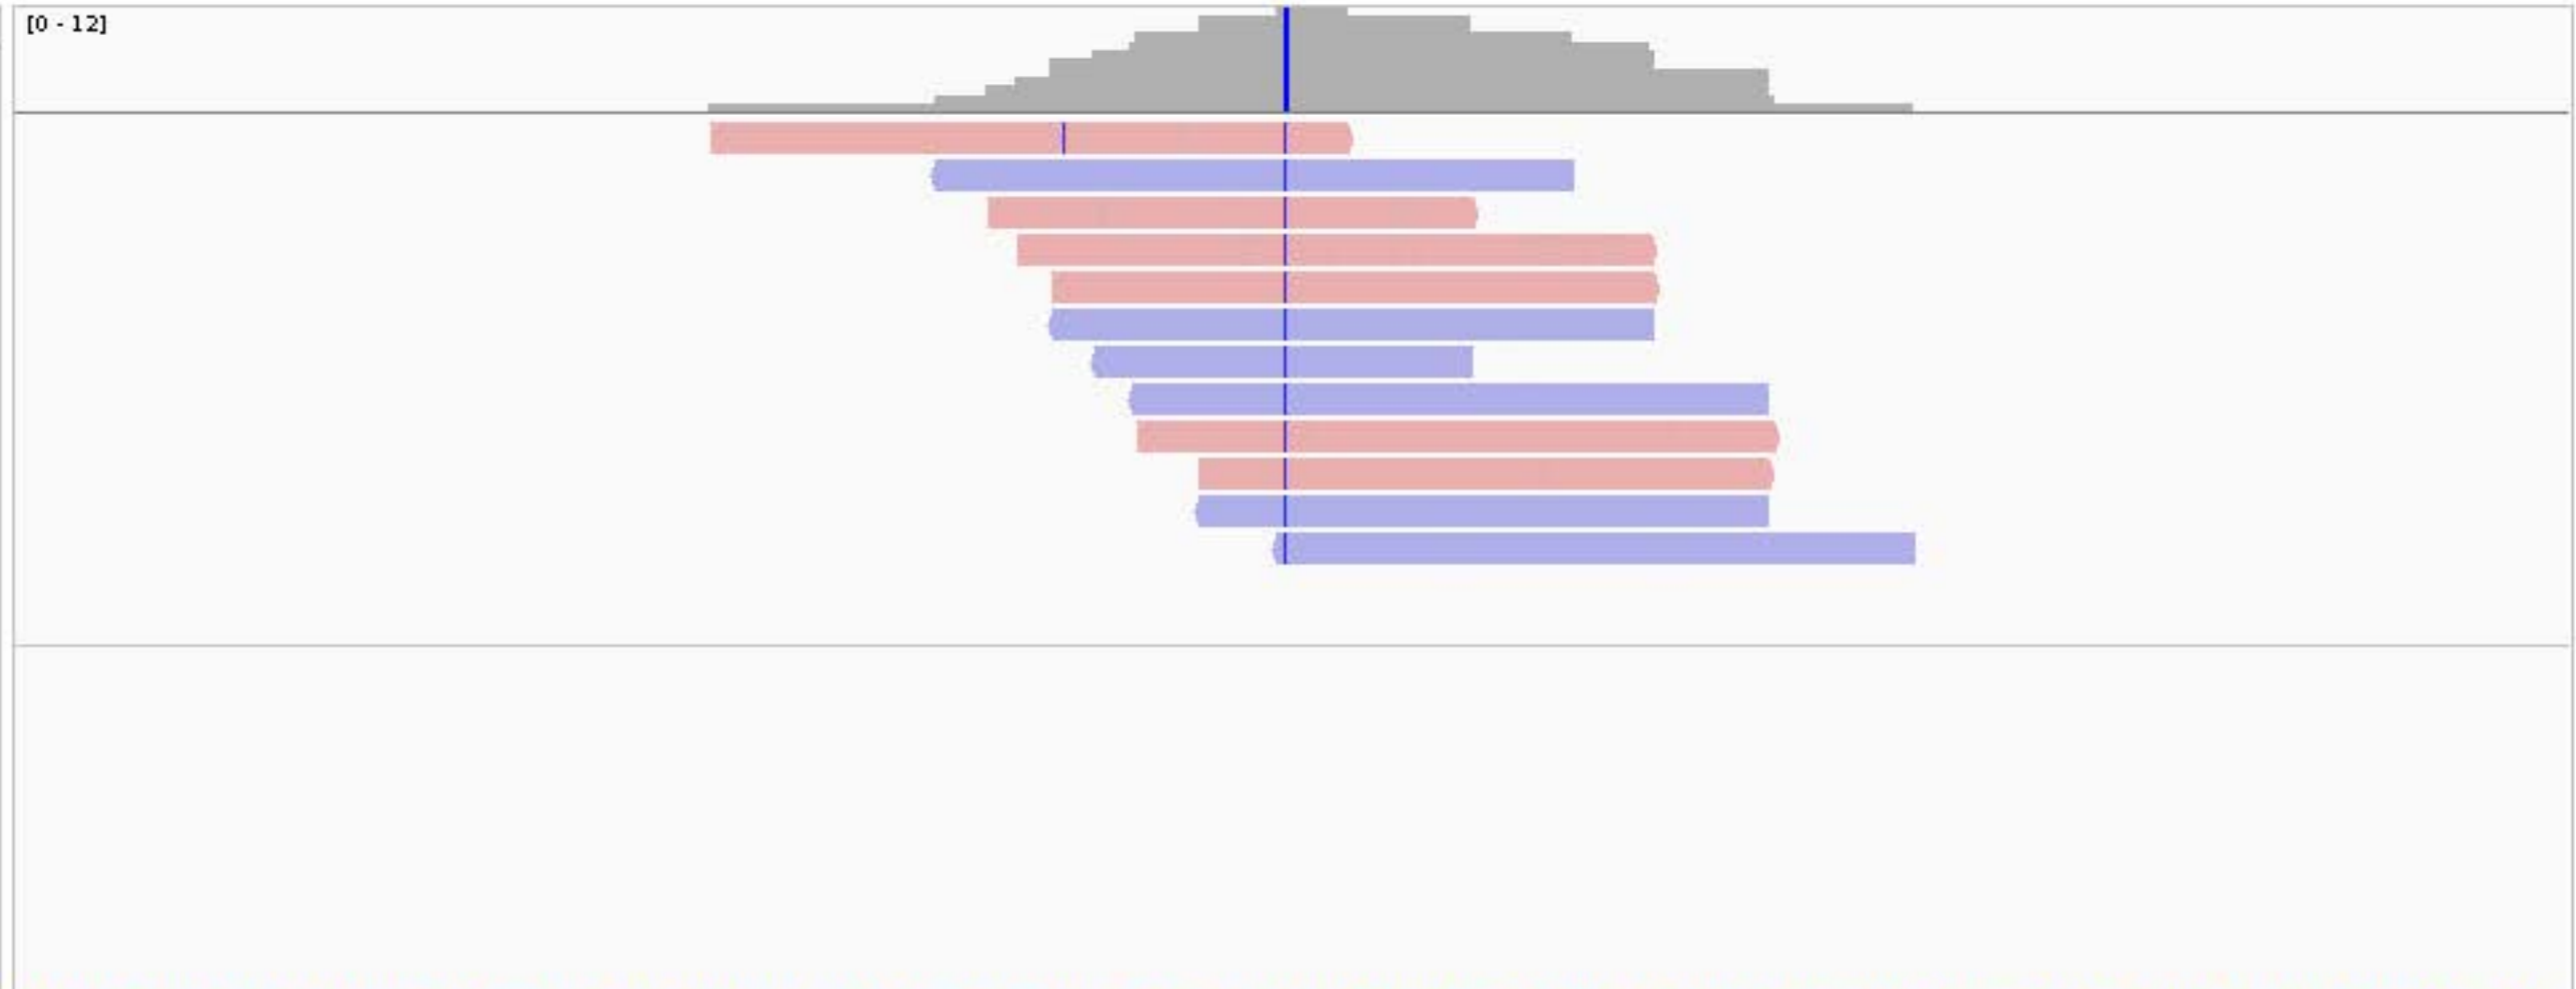

Sequence

Refseq Genes

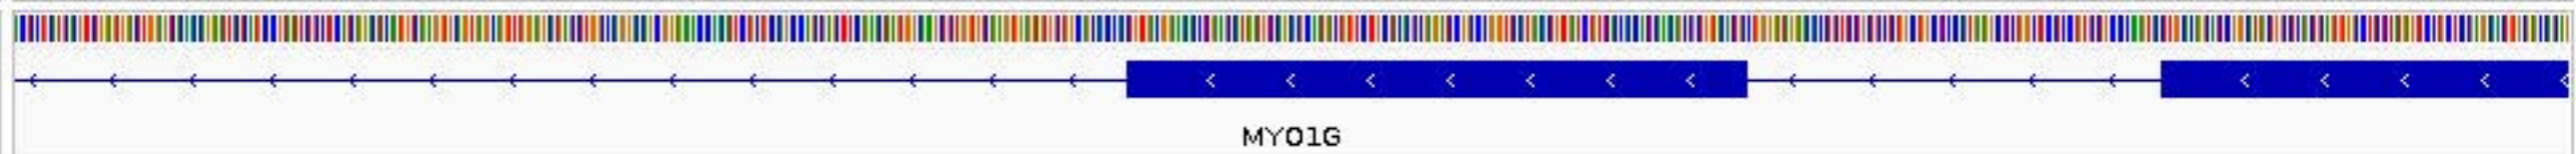

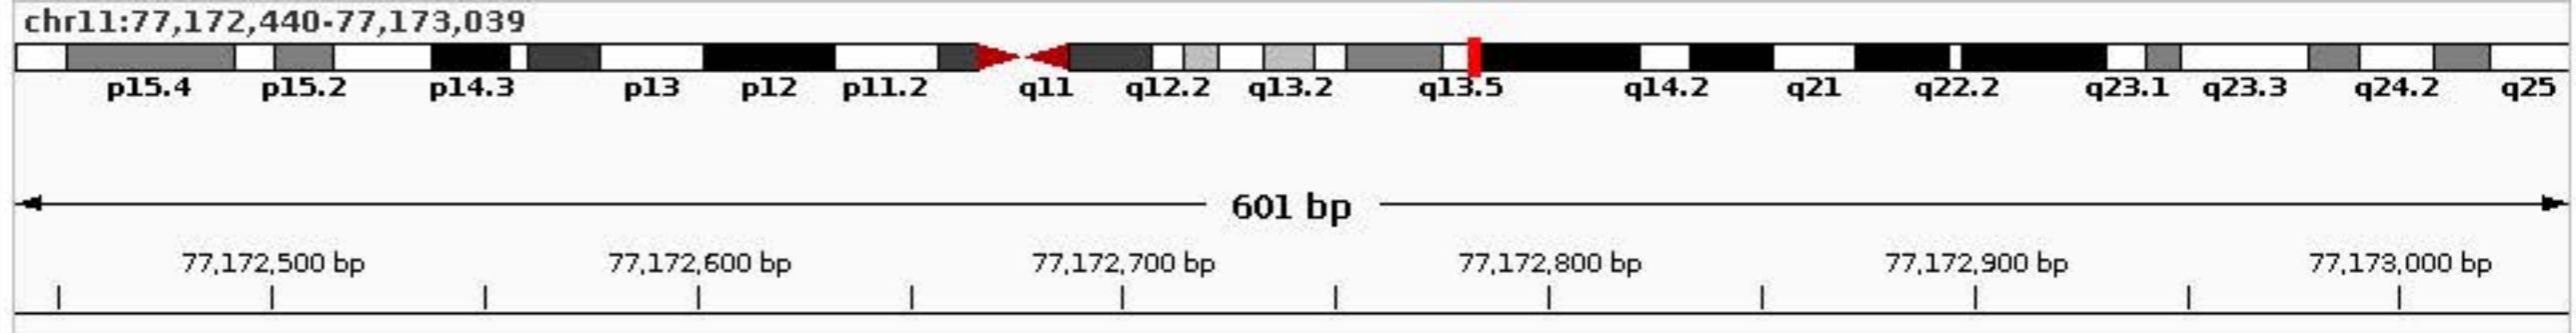

SL\_0002\_LN\_1\_mut.bam Coverage

SL\_0002\_LN\_1\_mut.bam

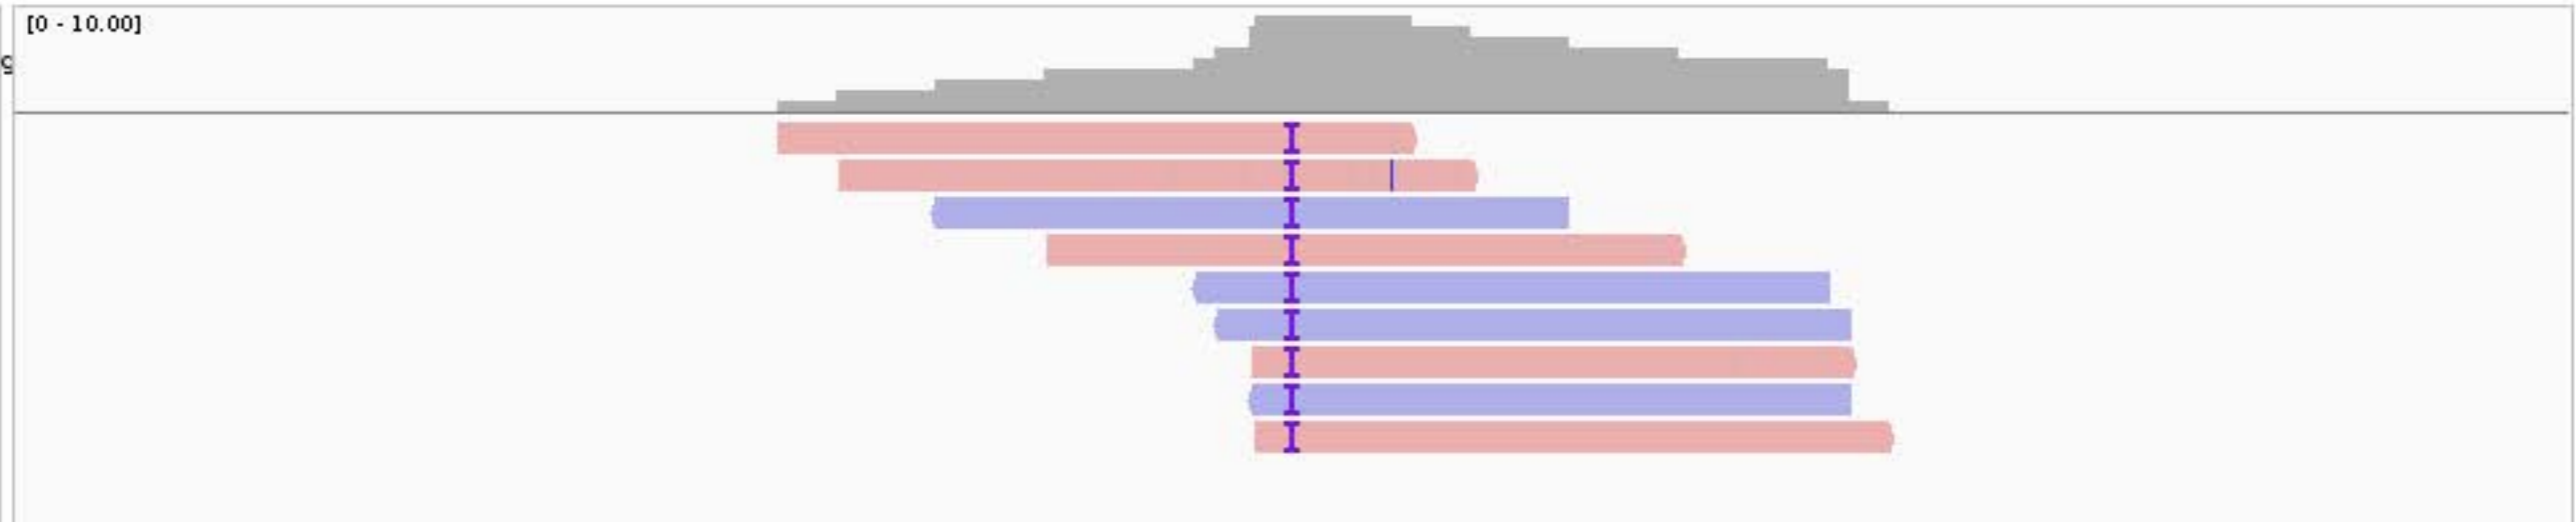

Sequence

Refseq Genes

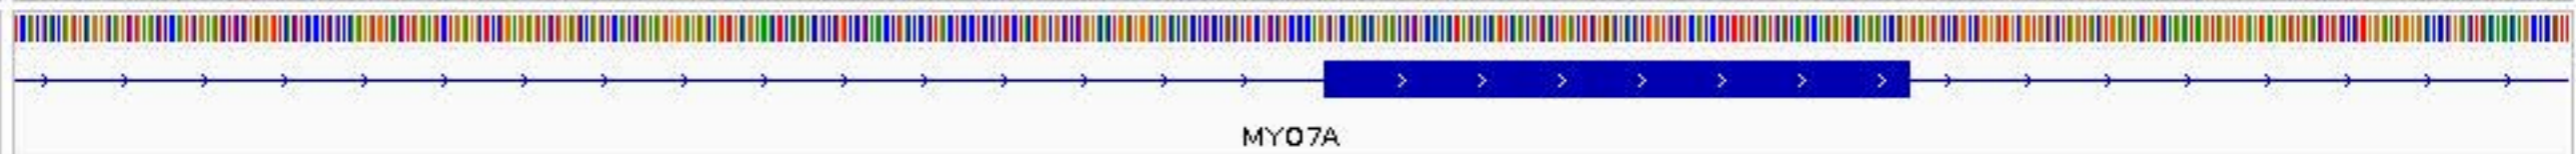

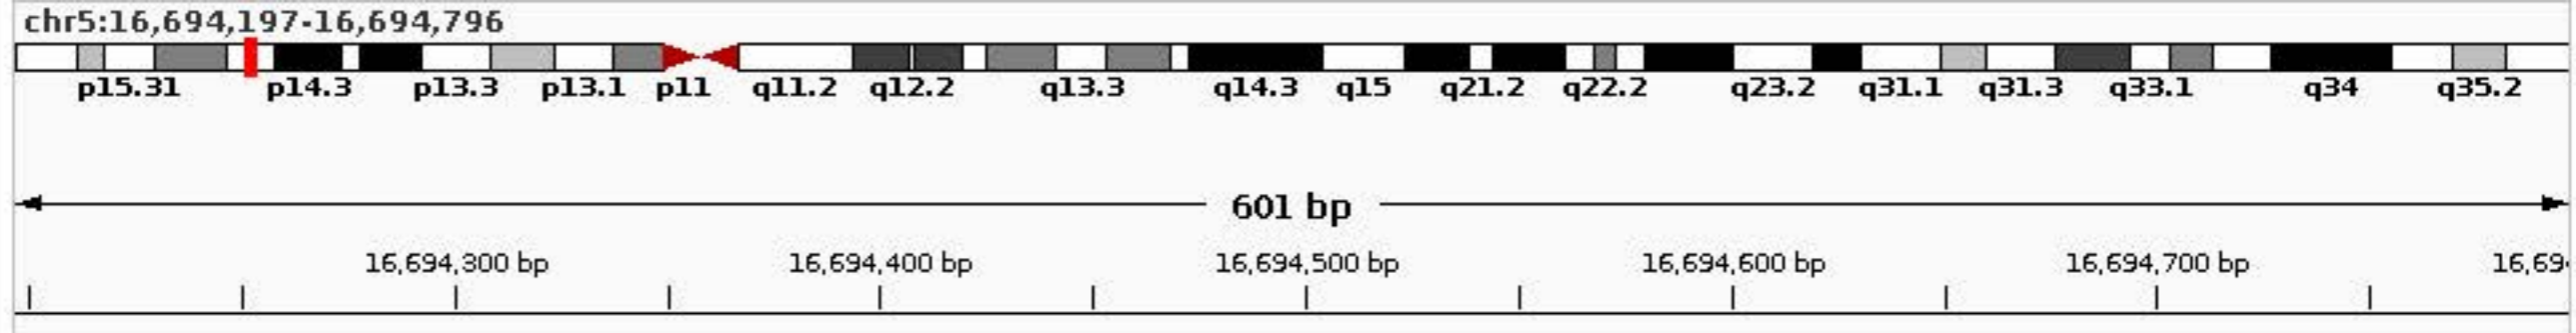

SL\_0006\_RN\_67\_mut.bam Coverage

SL\_0006\_RN\_67\_mut.bam

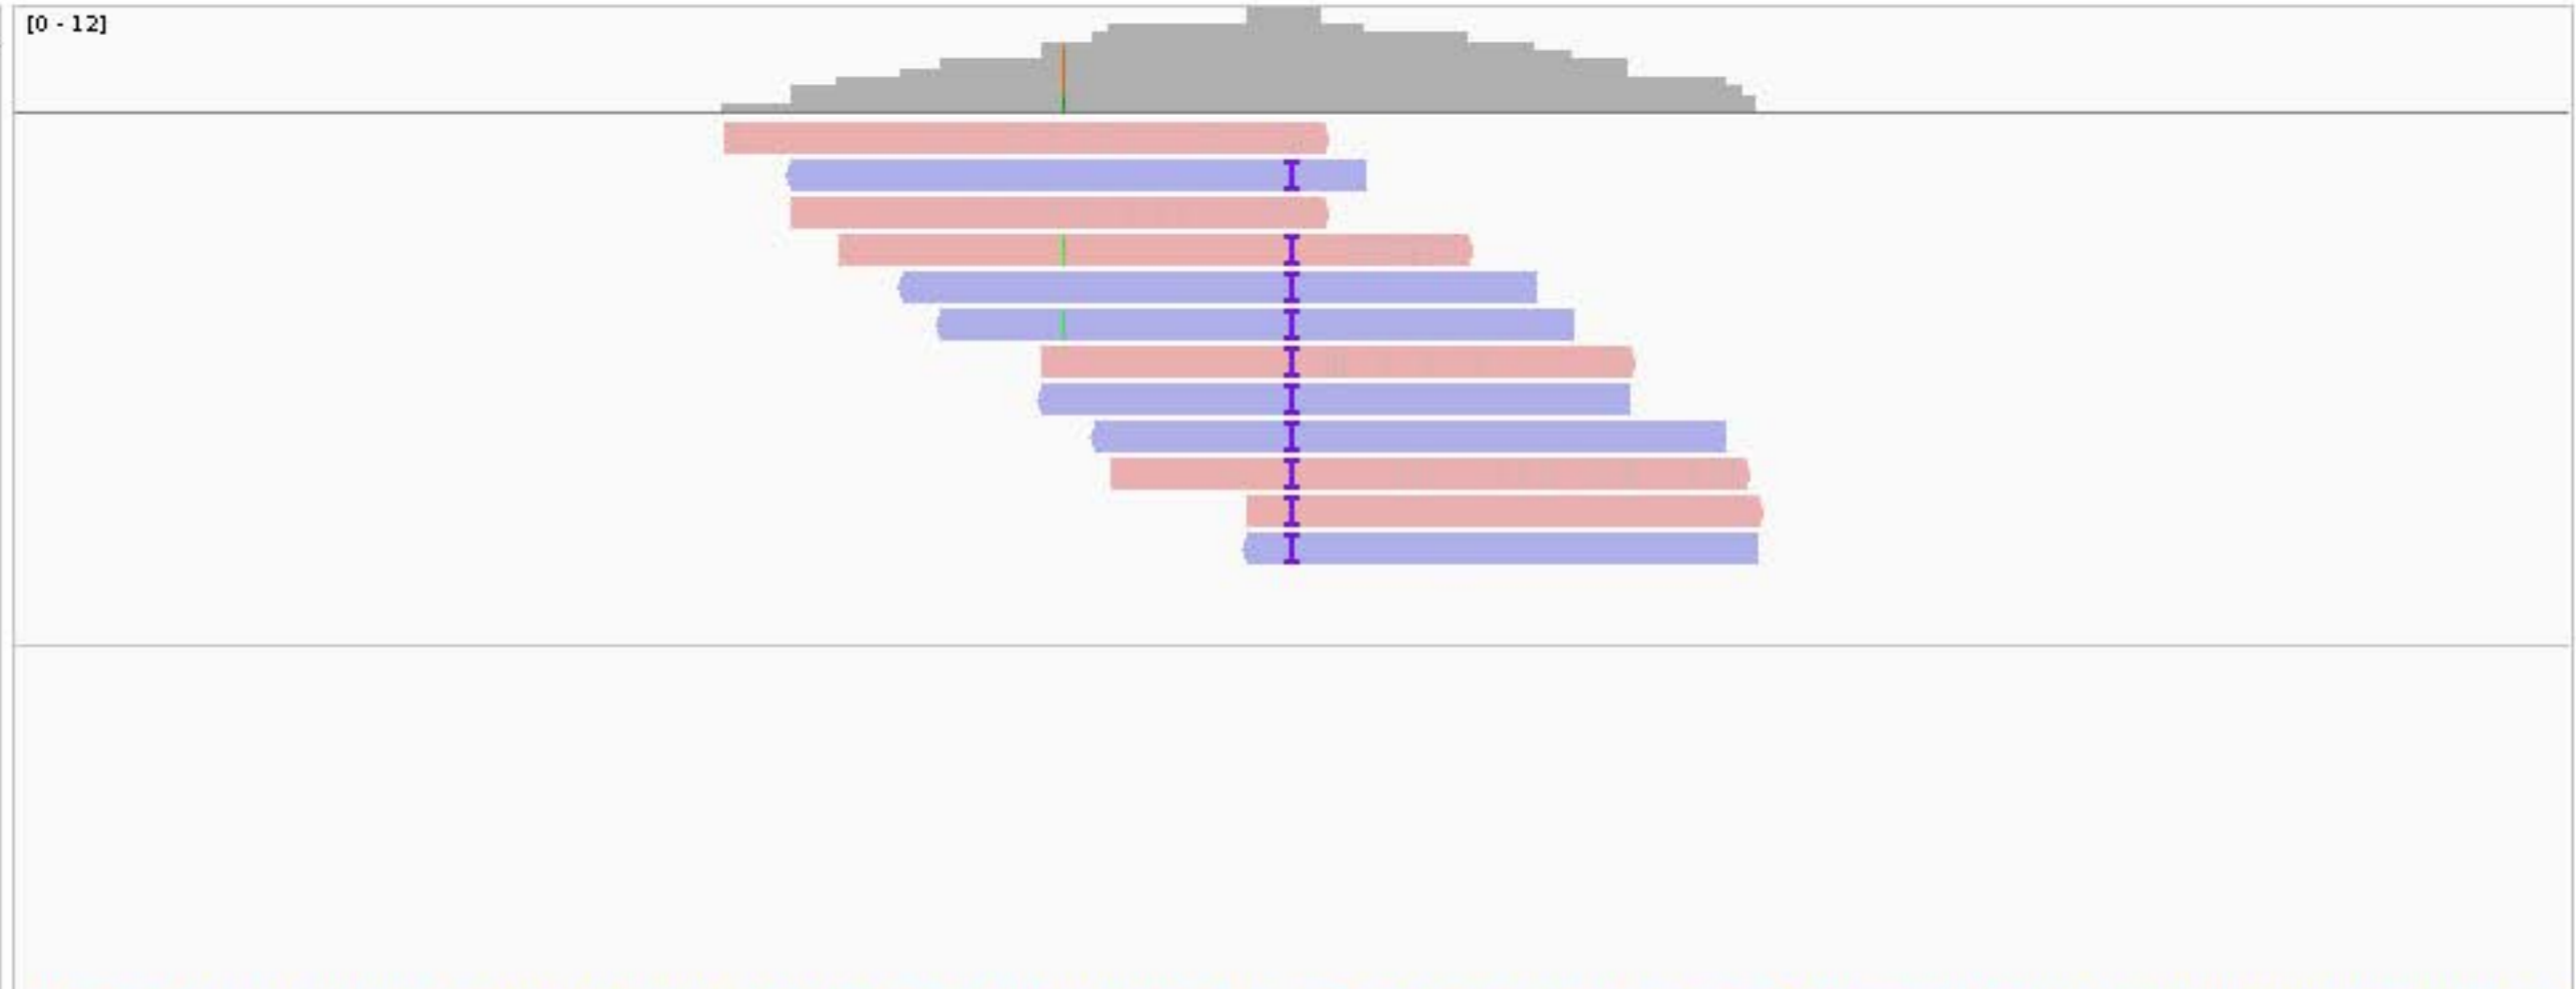

Sequence

Refseq Genes

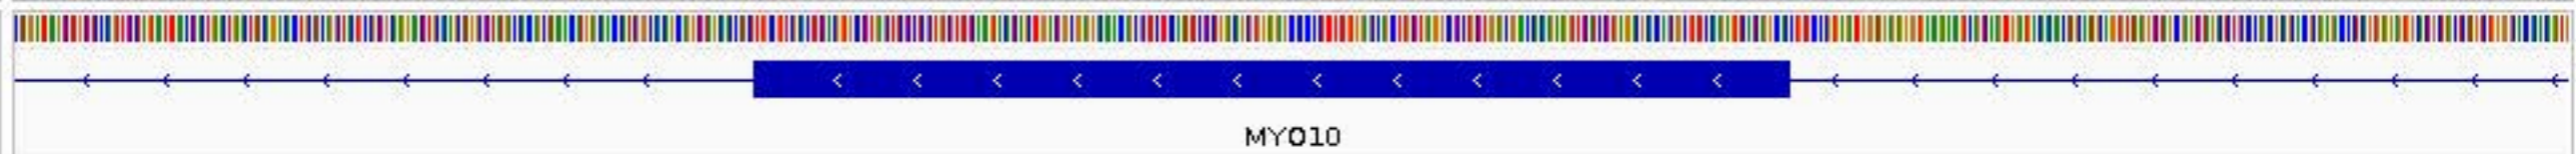

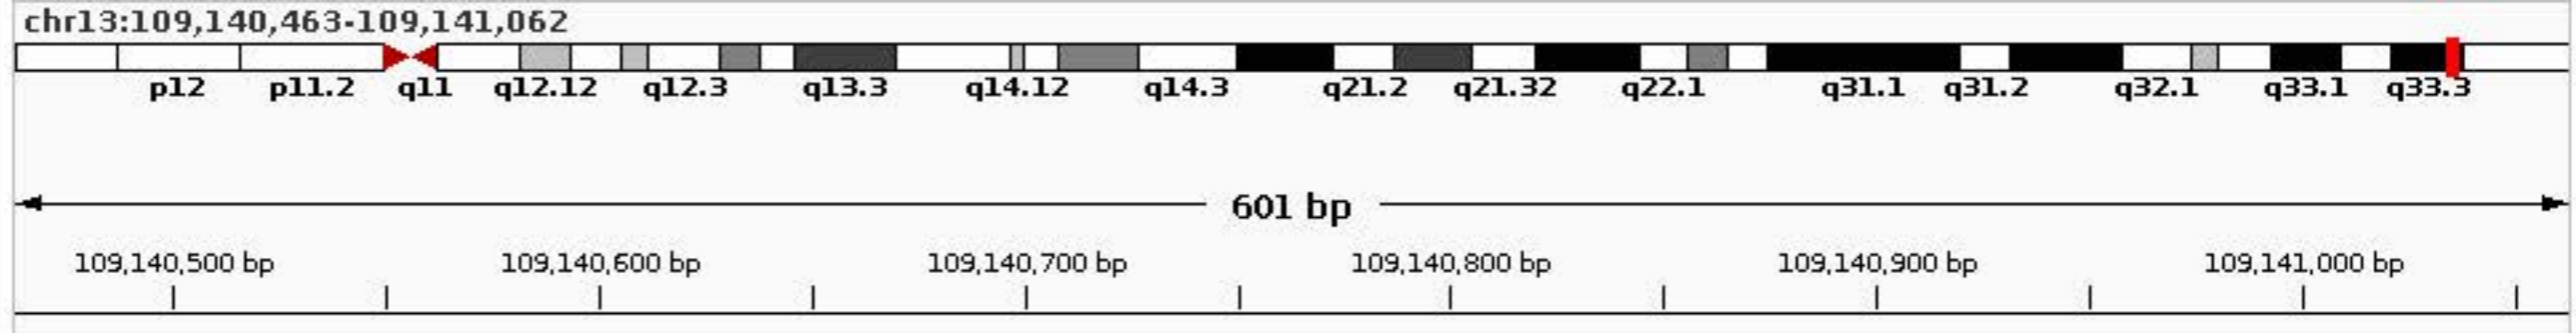

SL\_0006\_RN\_59\_mut.bam Coverage

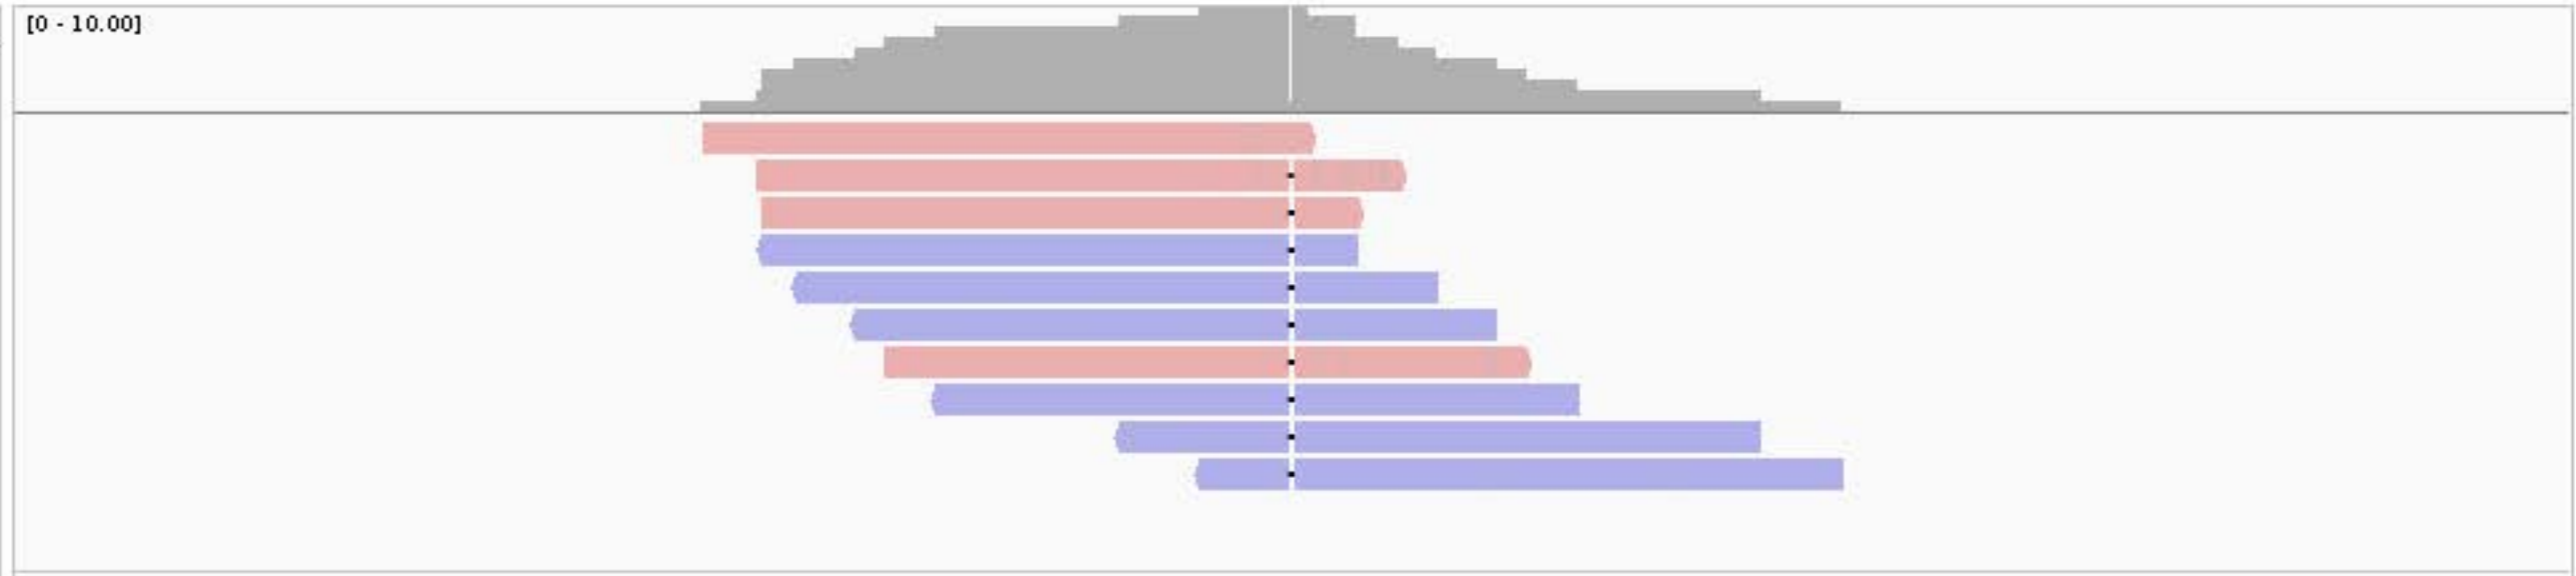

SL\_0006\_RN\_59\_mut.bam

Sequence

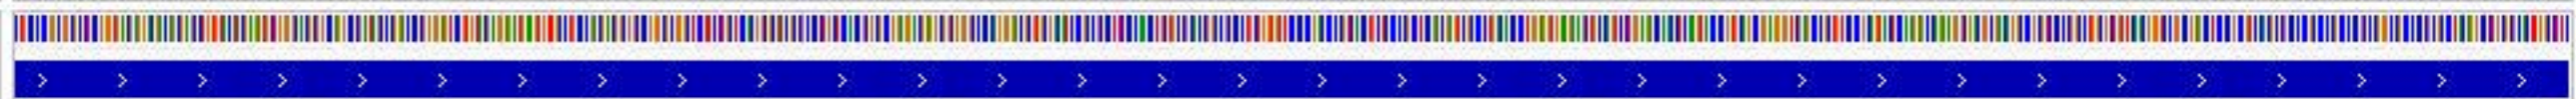

Refseq Genes

MYO16



chr19:45,913,998-45,914,597

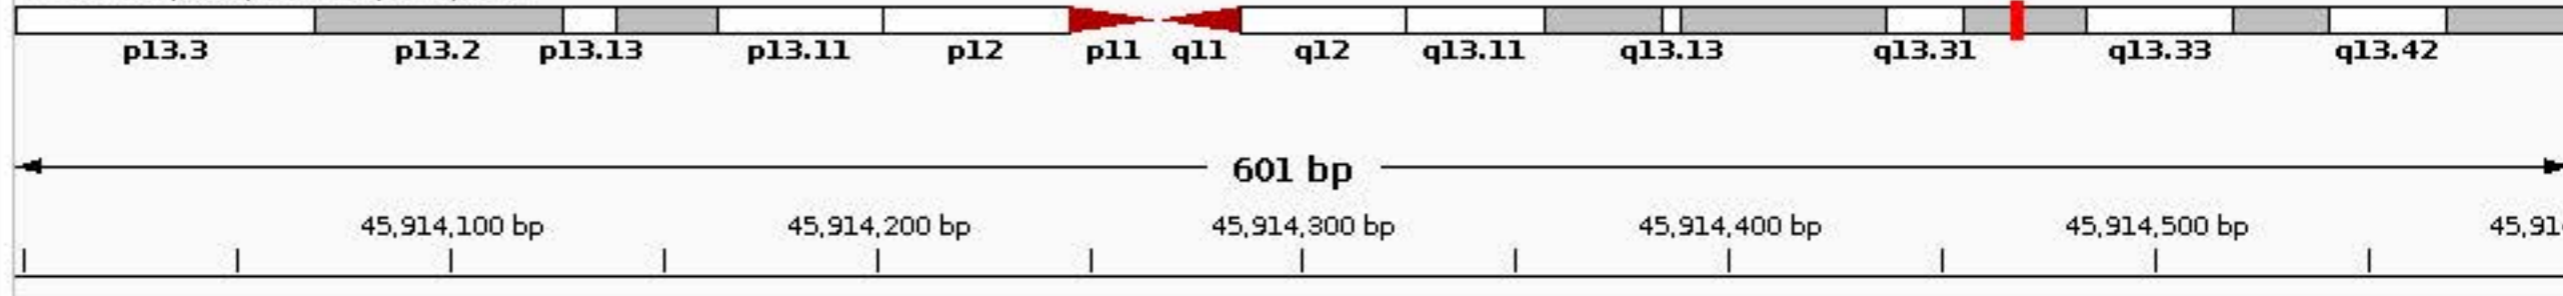

SL\_0004\_RN\_05\_mut.bam Coverage

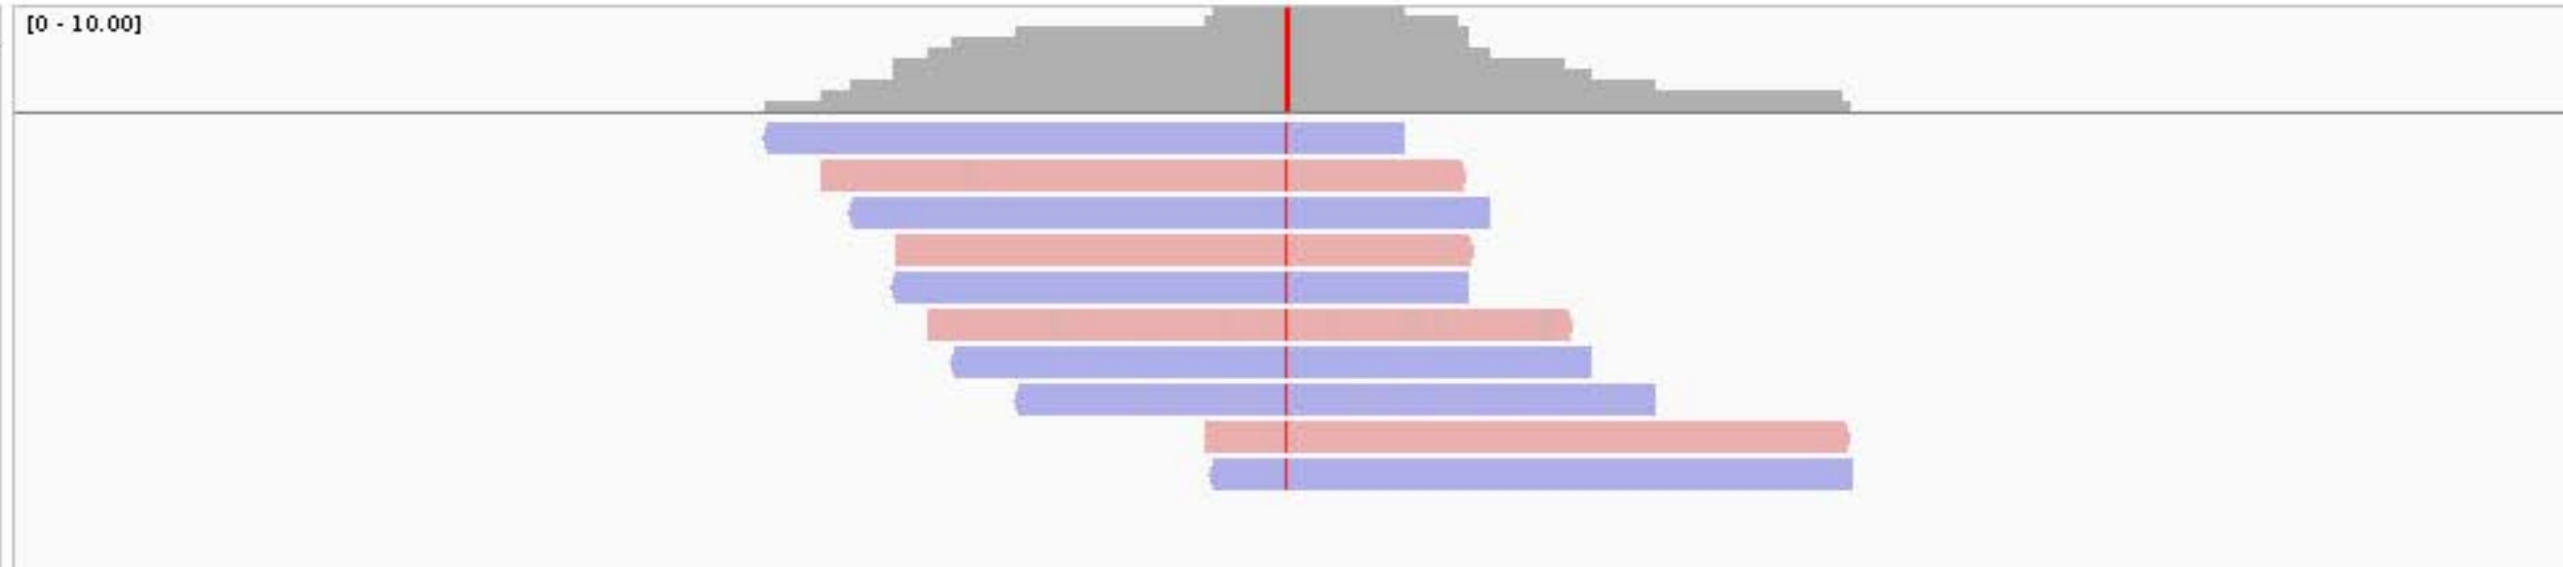

SL\_0004\_RN\_05\_mut.bam

Sequence

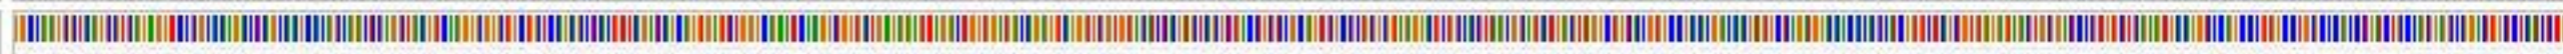

Refseq Genes

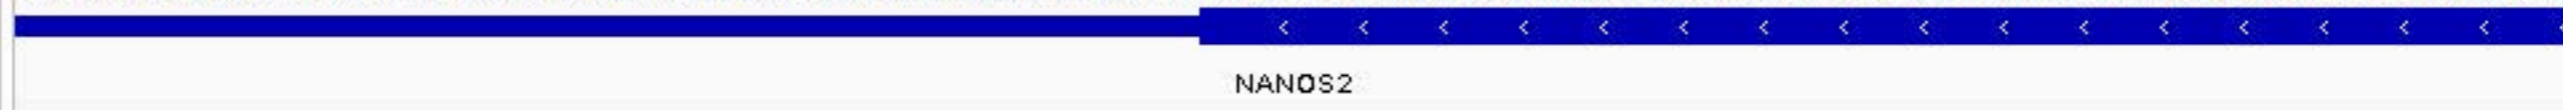

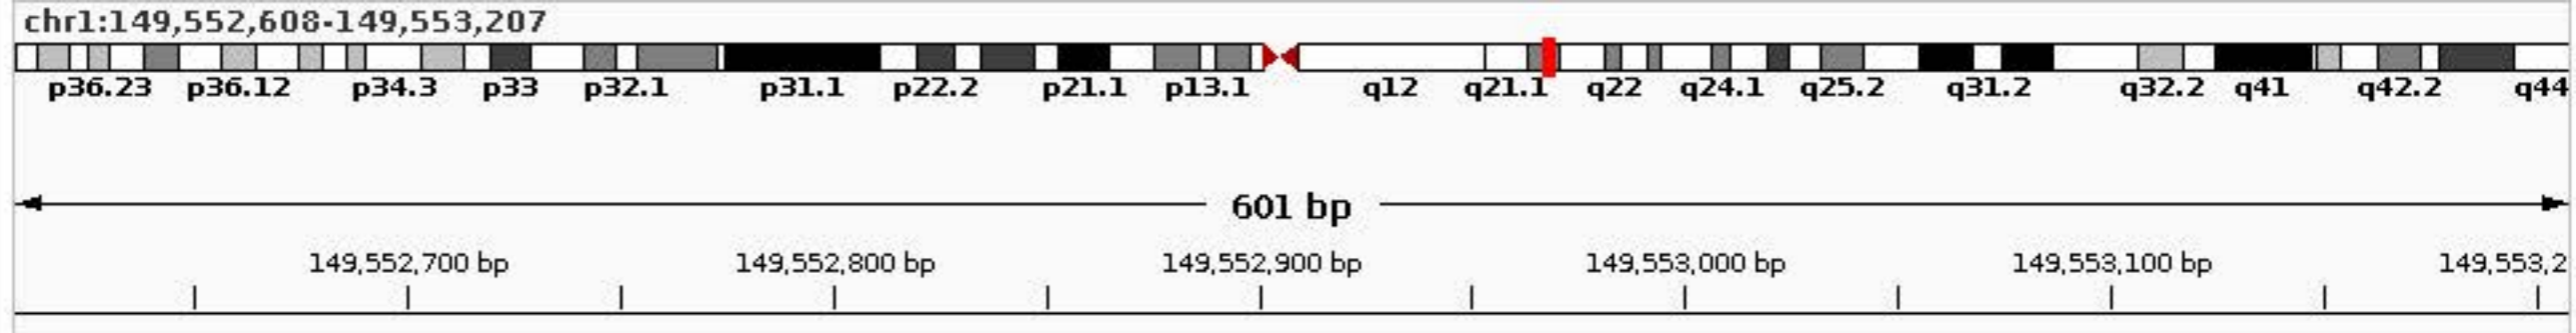

SL\_0016\_RN\_51\_mut.bam Coverage

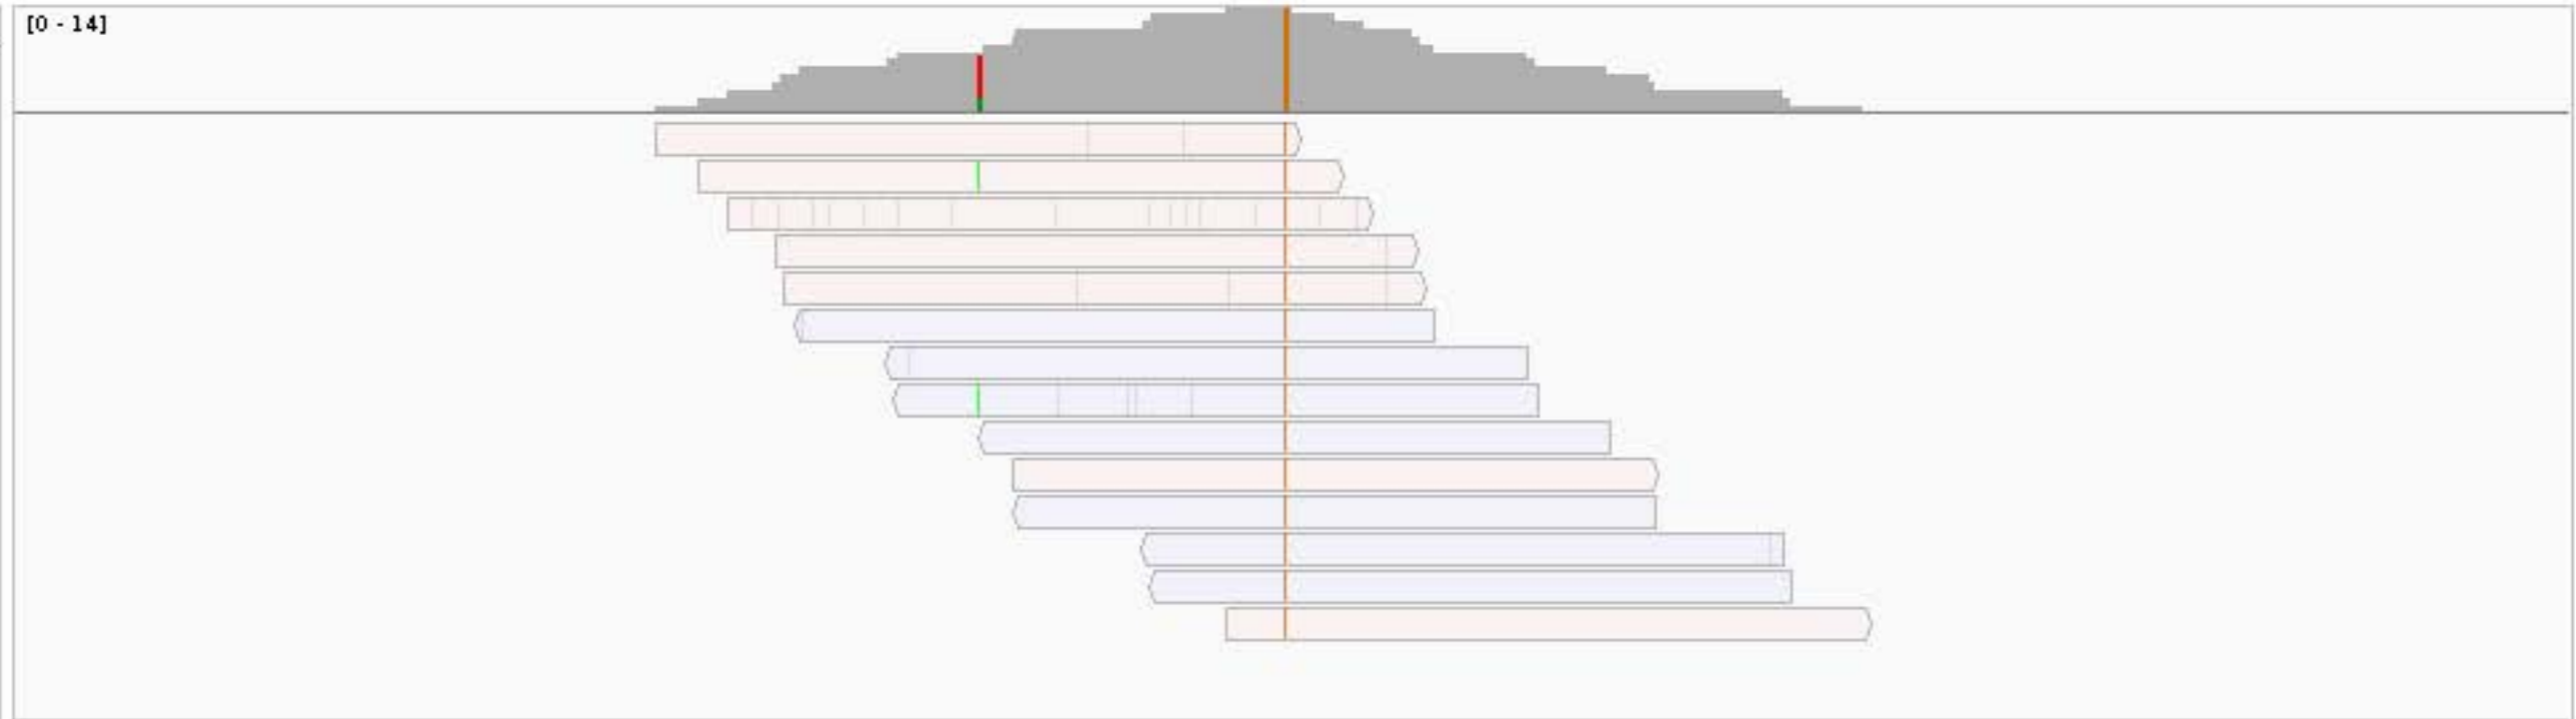

SL\_0016\_RN\_51\_mut.bam

Sequence

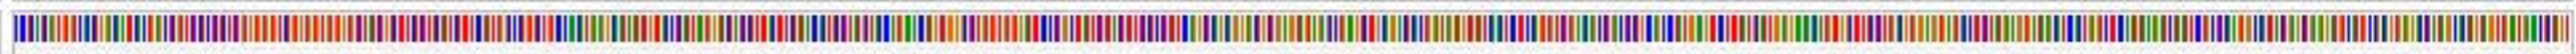

Refseq Genes

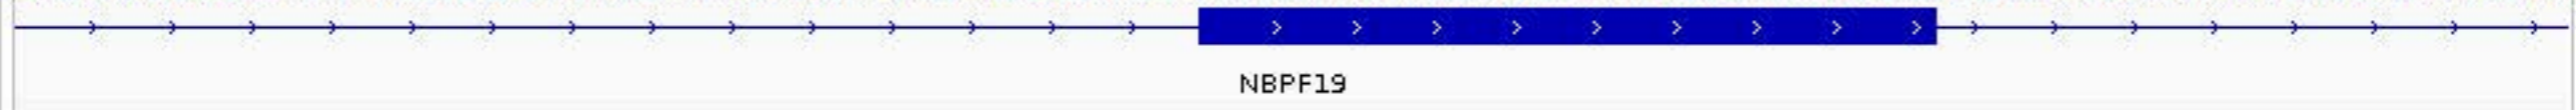

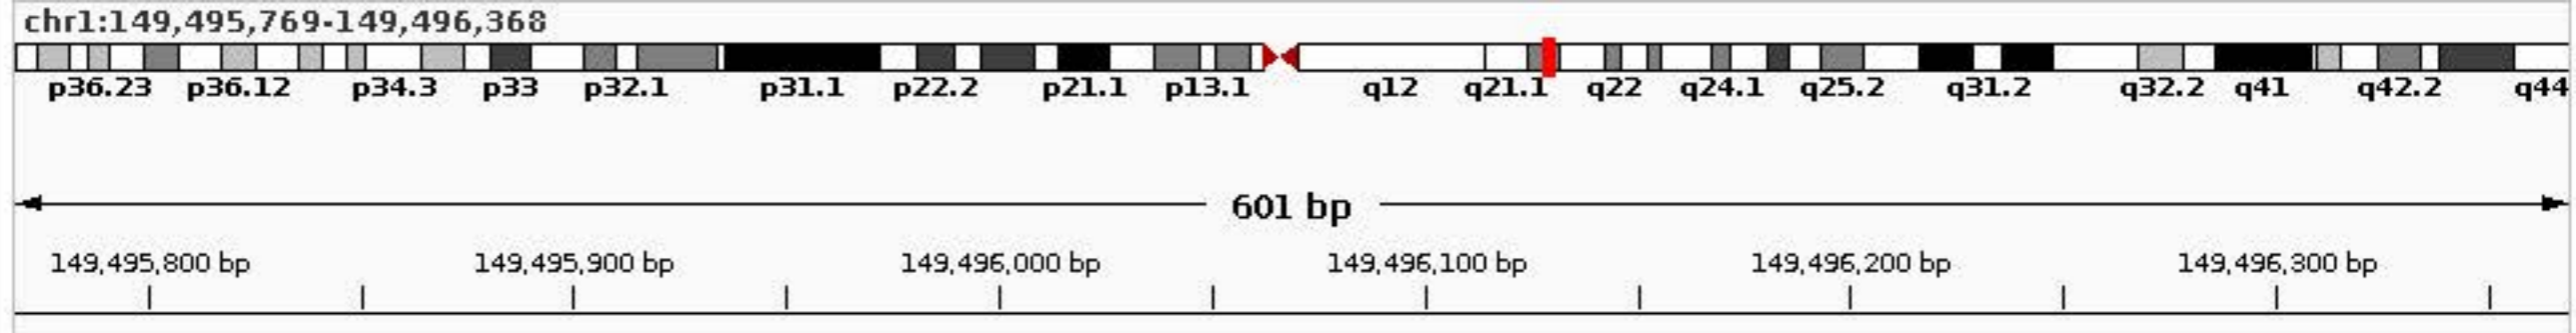

SL\_0004\_RN\_47\_mut.bam Coverage

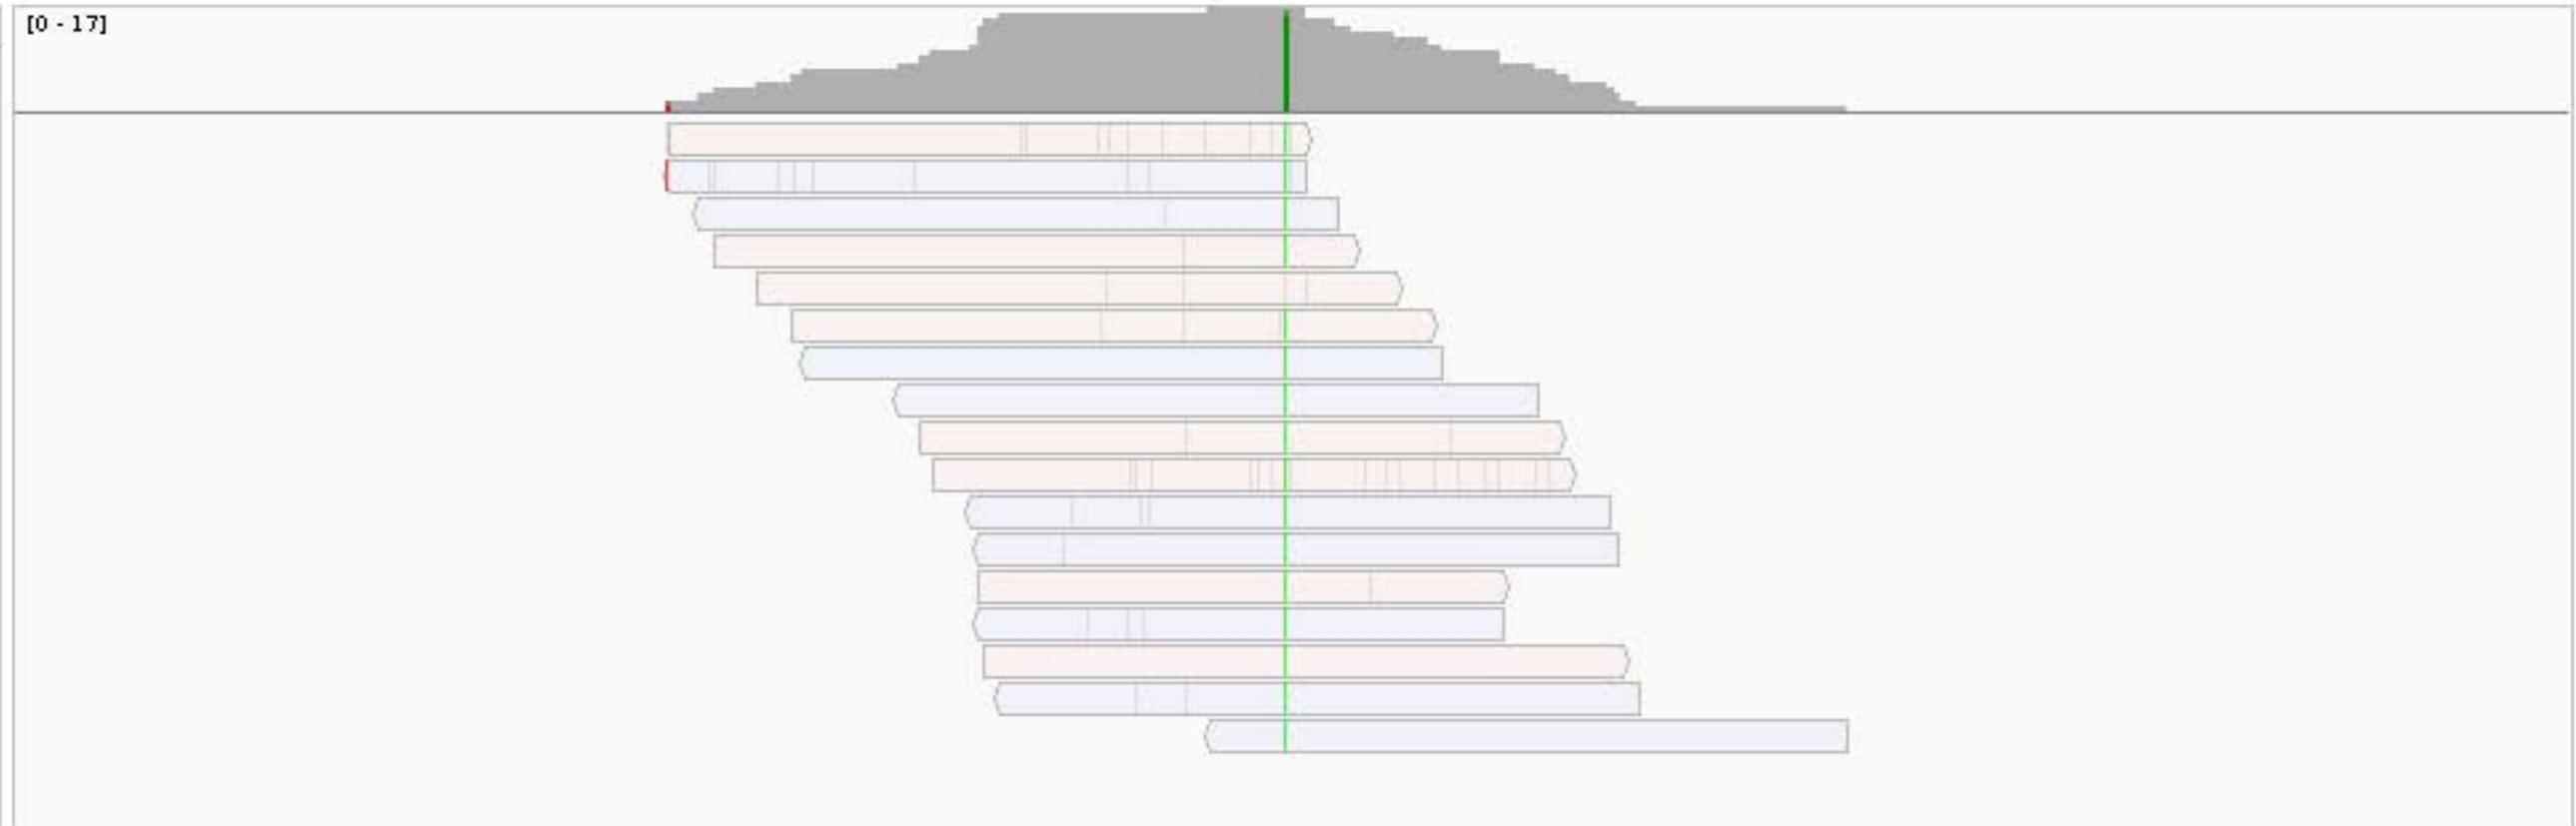

SL\_0004\_RN\_47\_mut.bam

Sequence

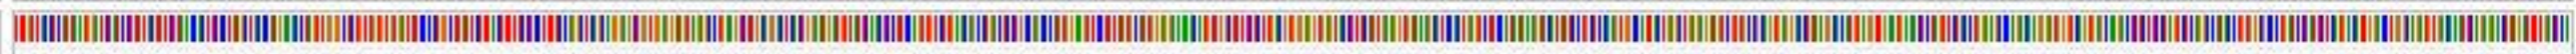

Refseq Genes

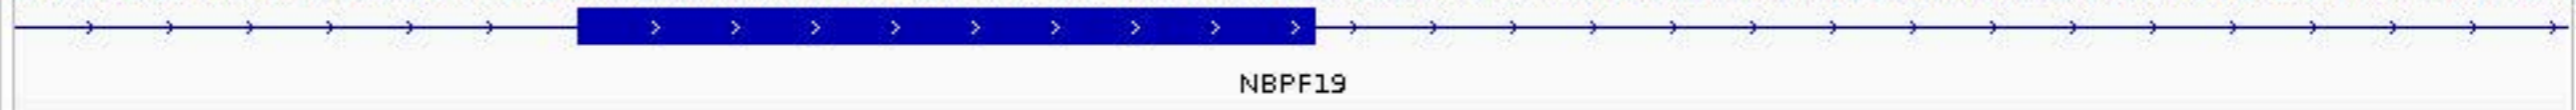

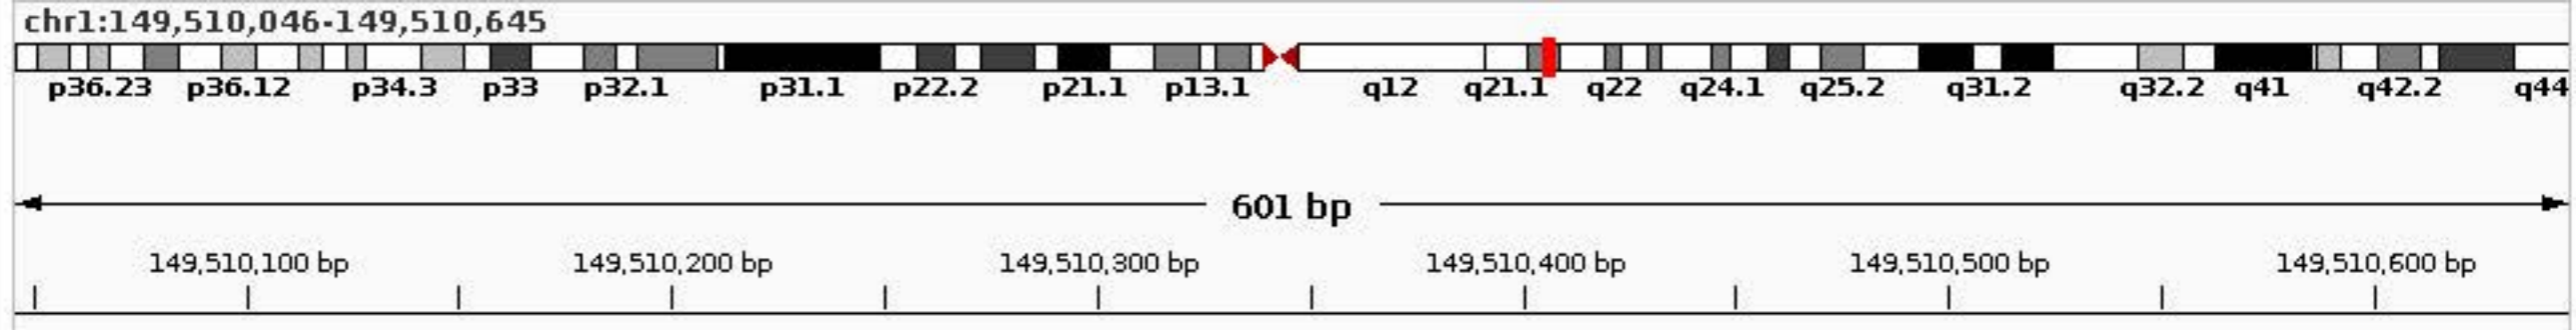

SL\_0004\_RN\_26\_mut.bam Coverage

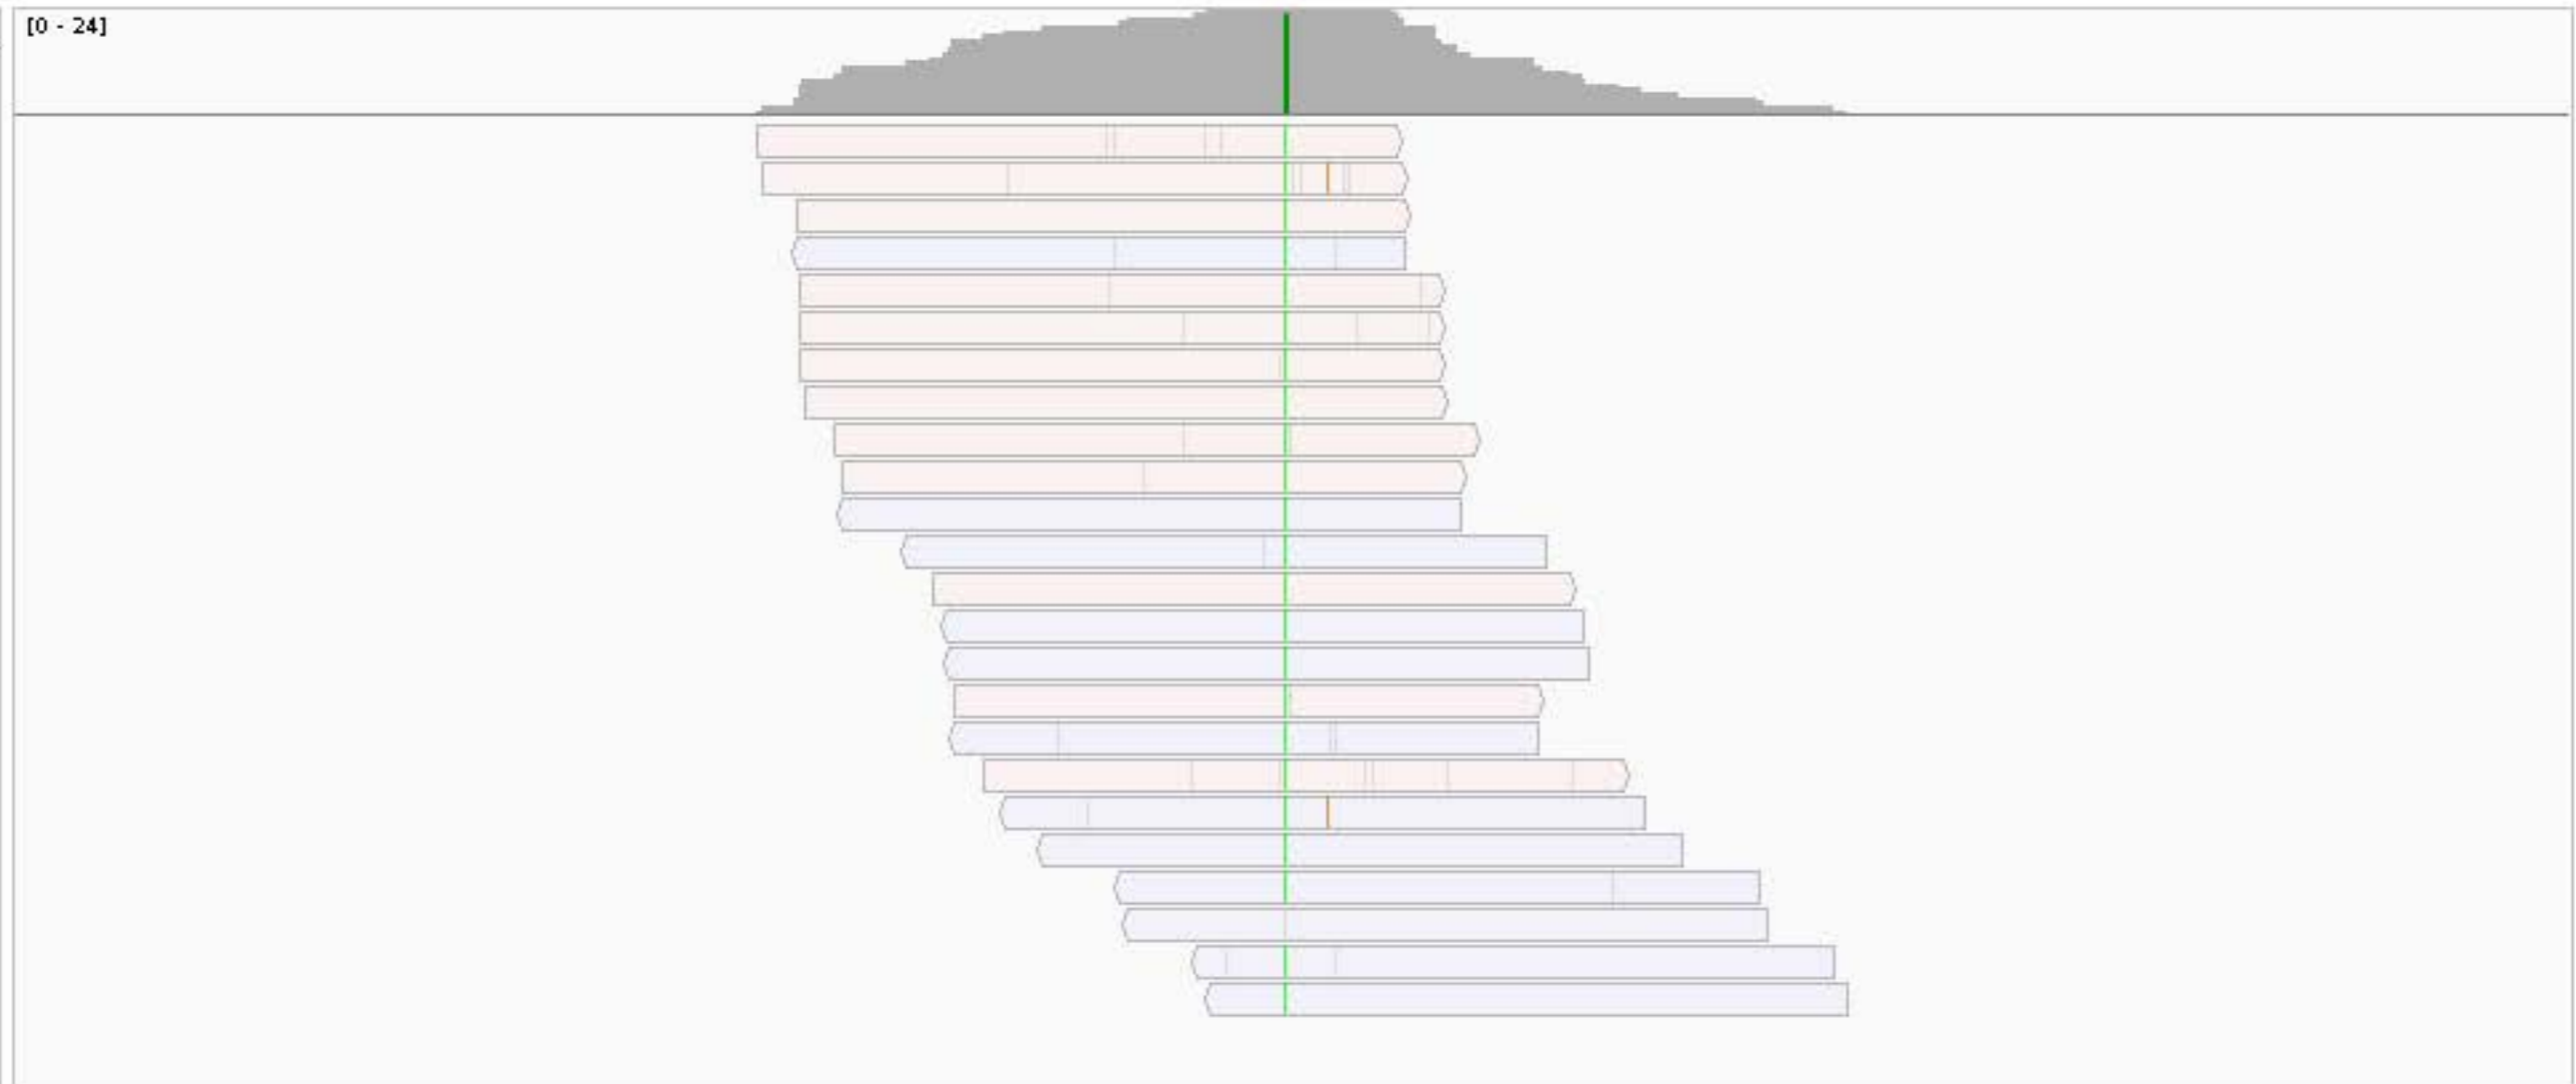

SL\_0004\_RN\_26\_mut.bam

Sequence

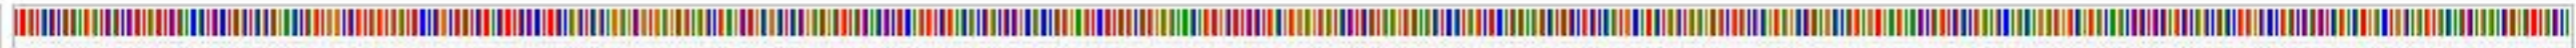

Refseq Genes

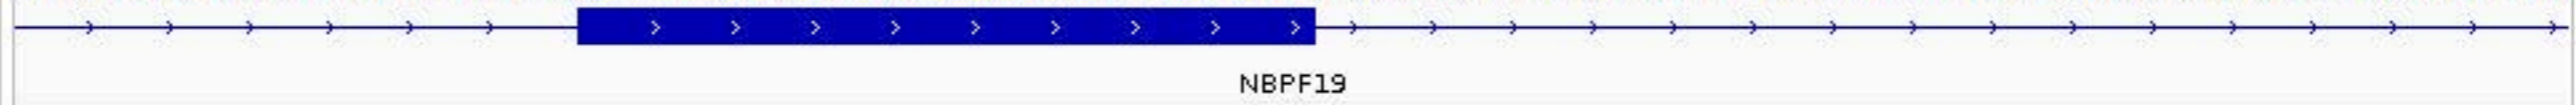

chr19:39,196,708-39,197,307

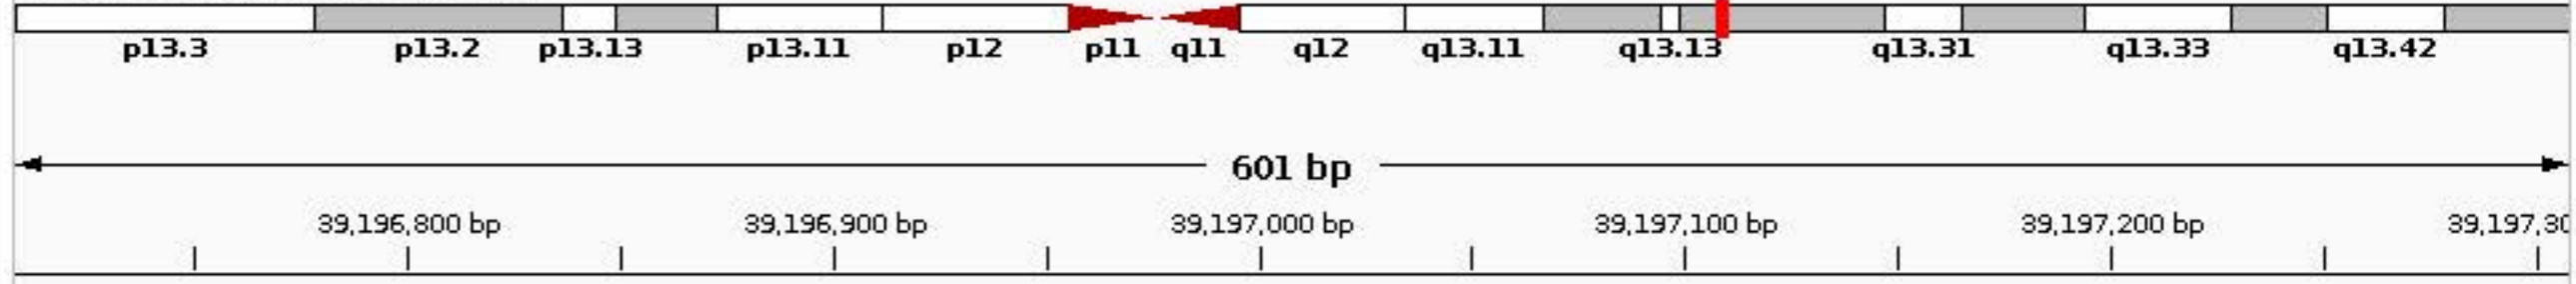

SL\_0006\_RN\_59\_mut.bam Coverage

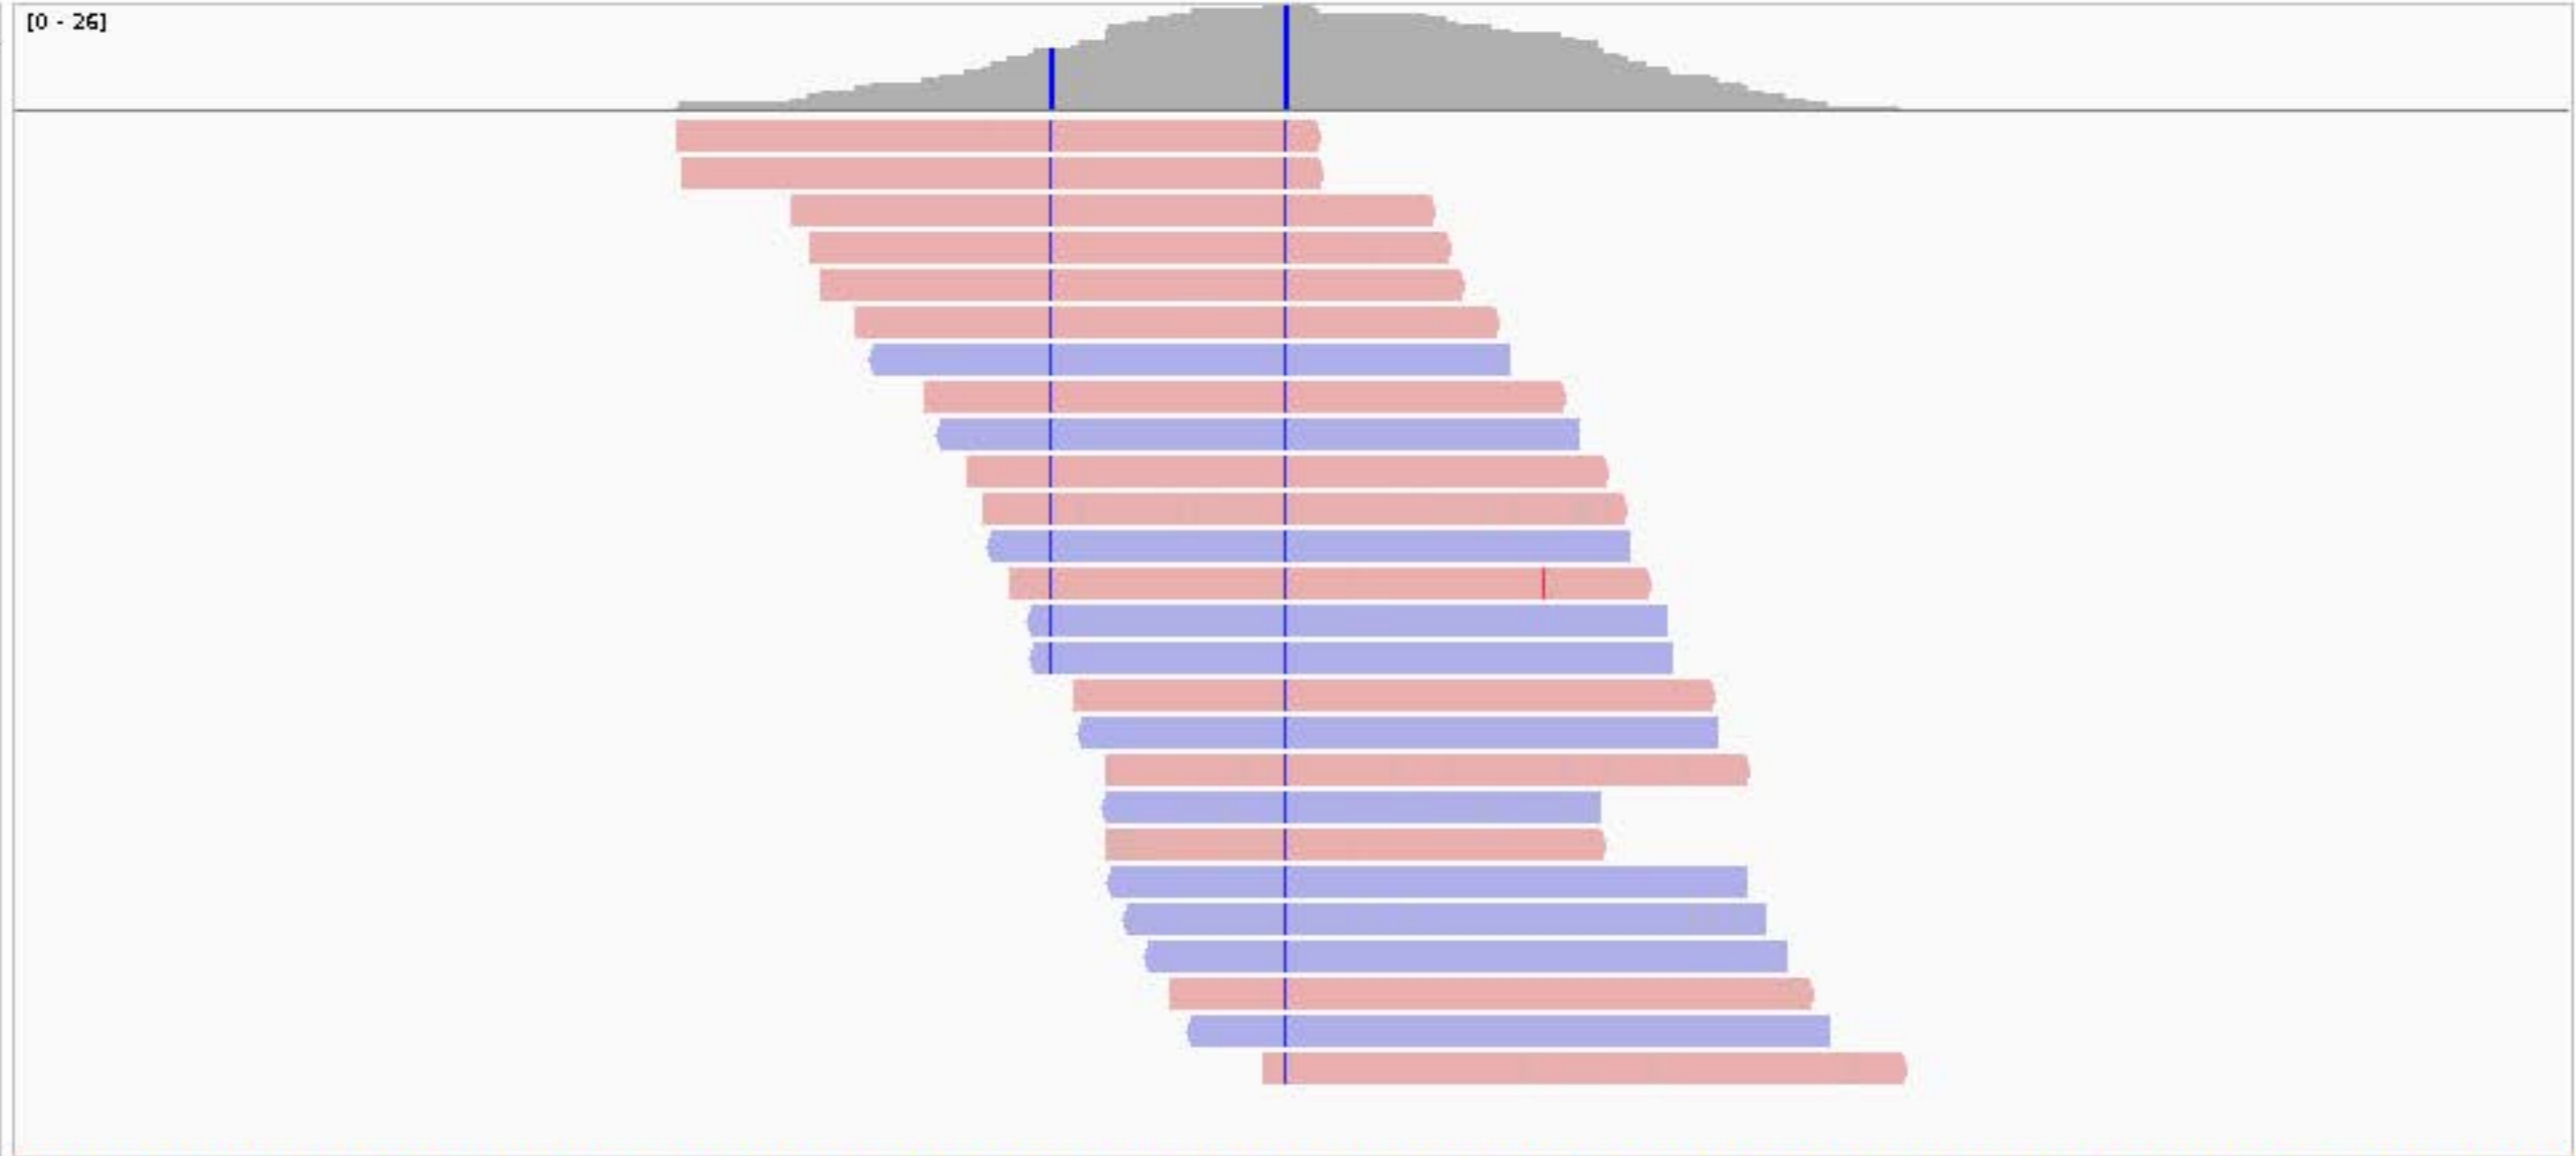

SL\_0006\_RN\_59\_mut.bam

Sequence

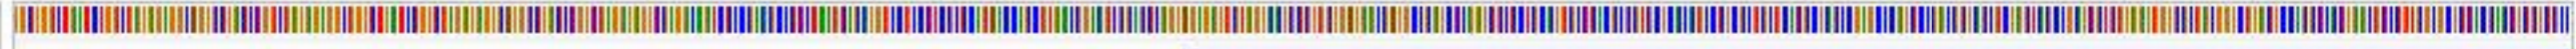

Refseq Genes

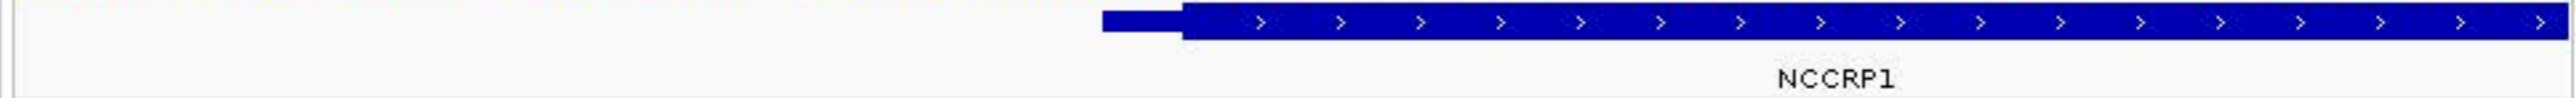

NCCR1



chr15:29,269,323-29,269,922

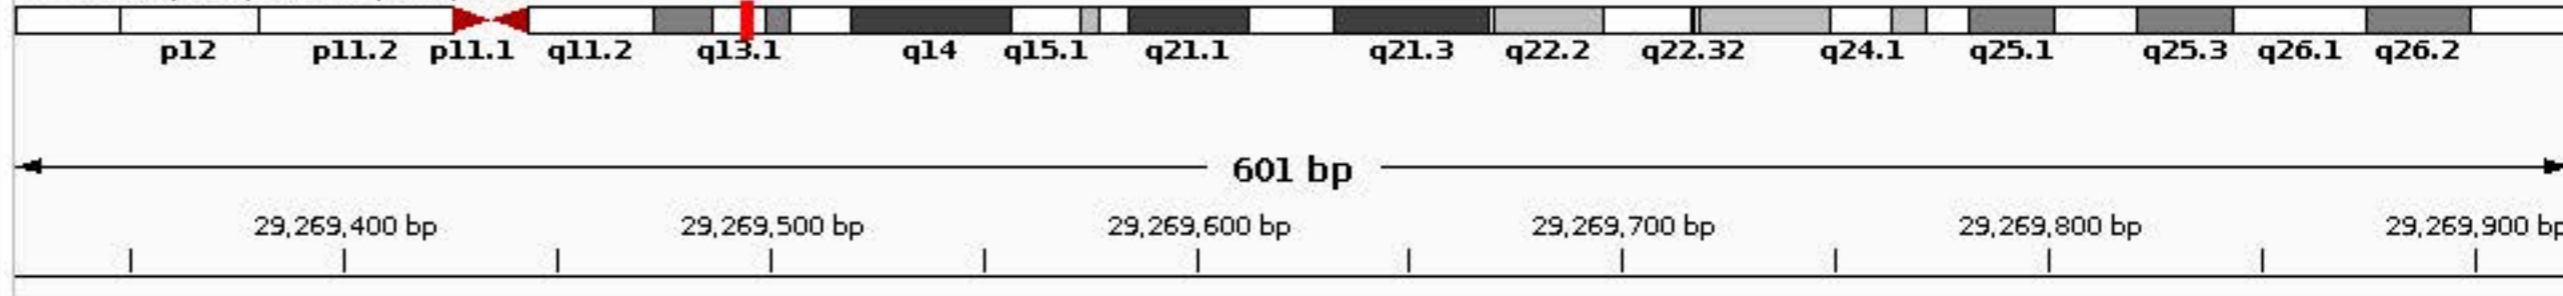

SL\_0007\_RN\_33\_mut.bam Coverage

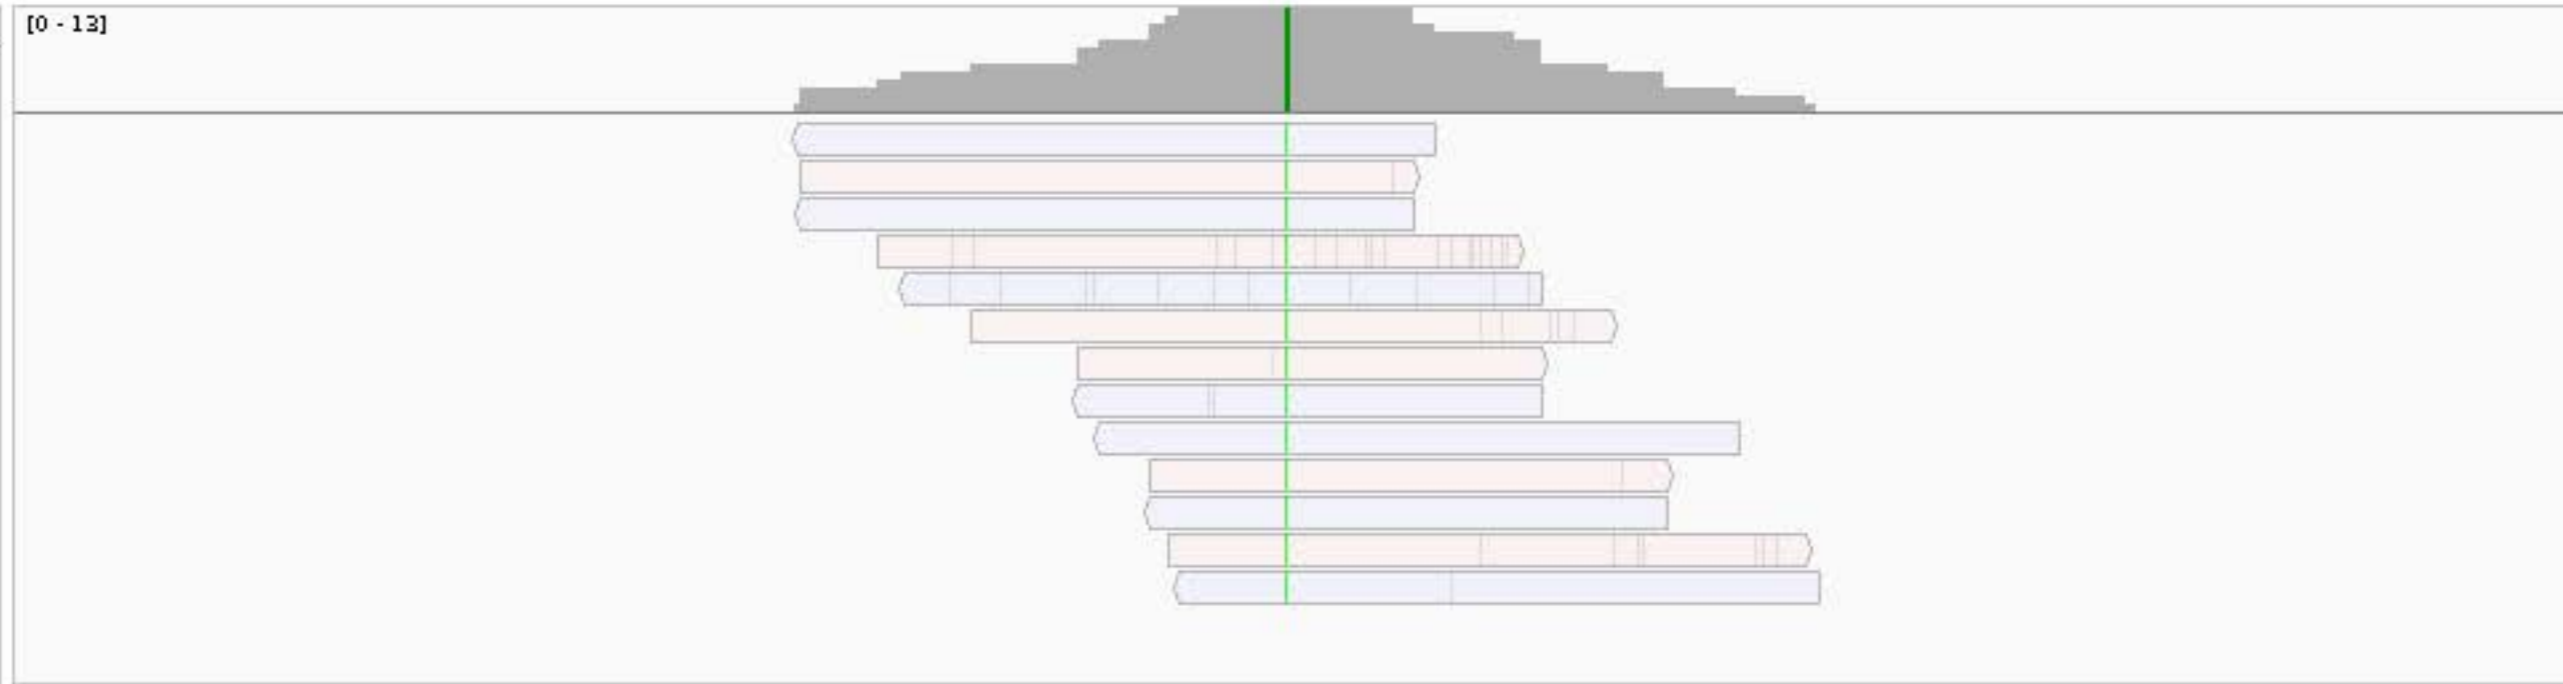

SL\_0007\_RN\_33\_mut.bam

Sequence

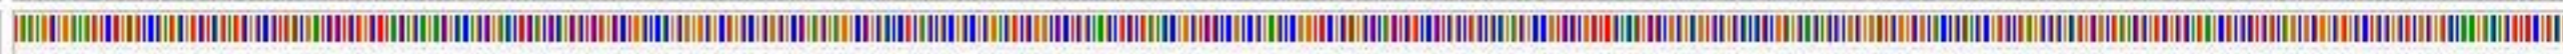

Refseq Genes

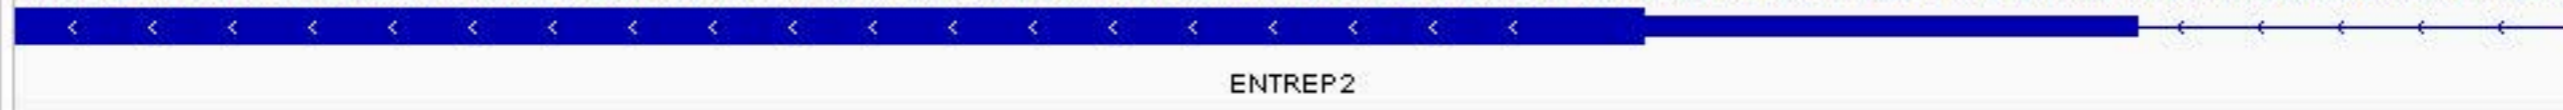

ENTREP2

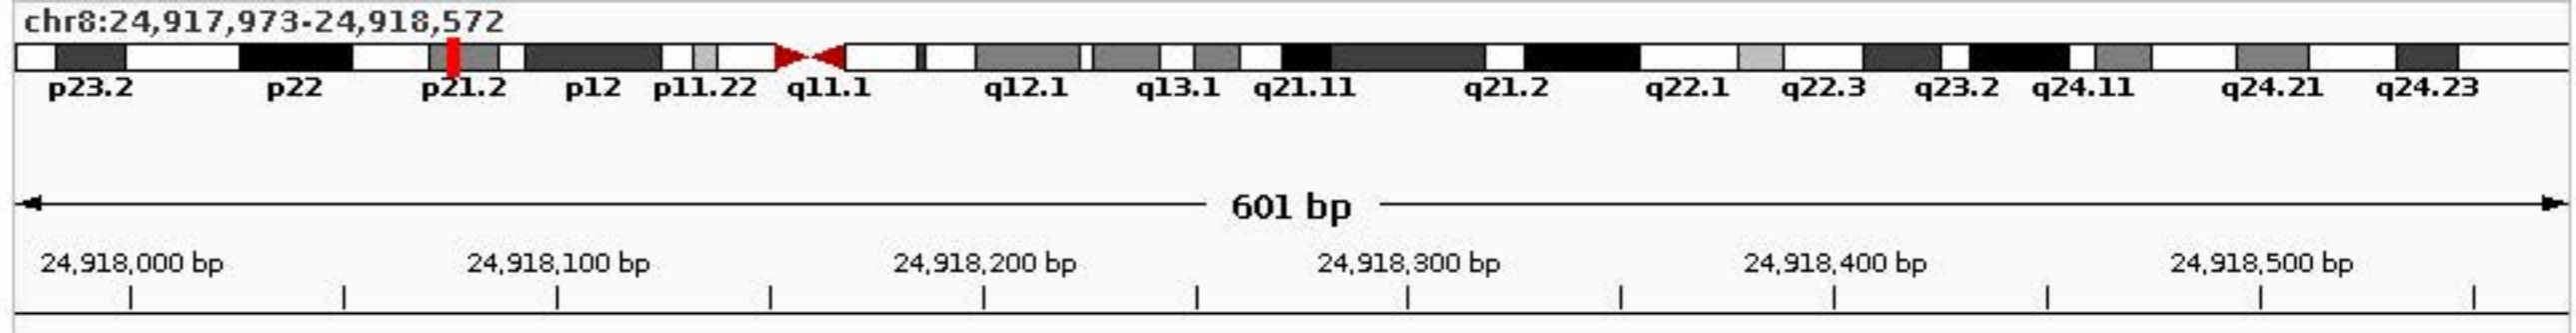

SL\_0004\_RN\_19\_mut.bam Coverage

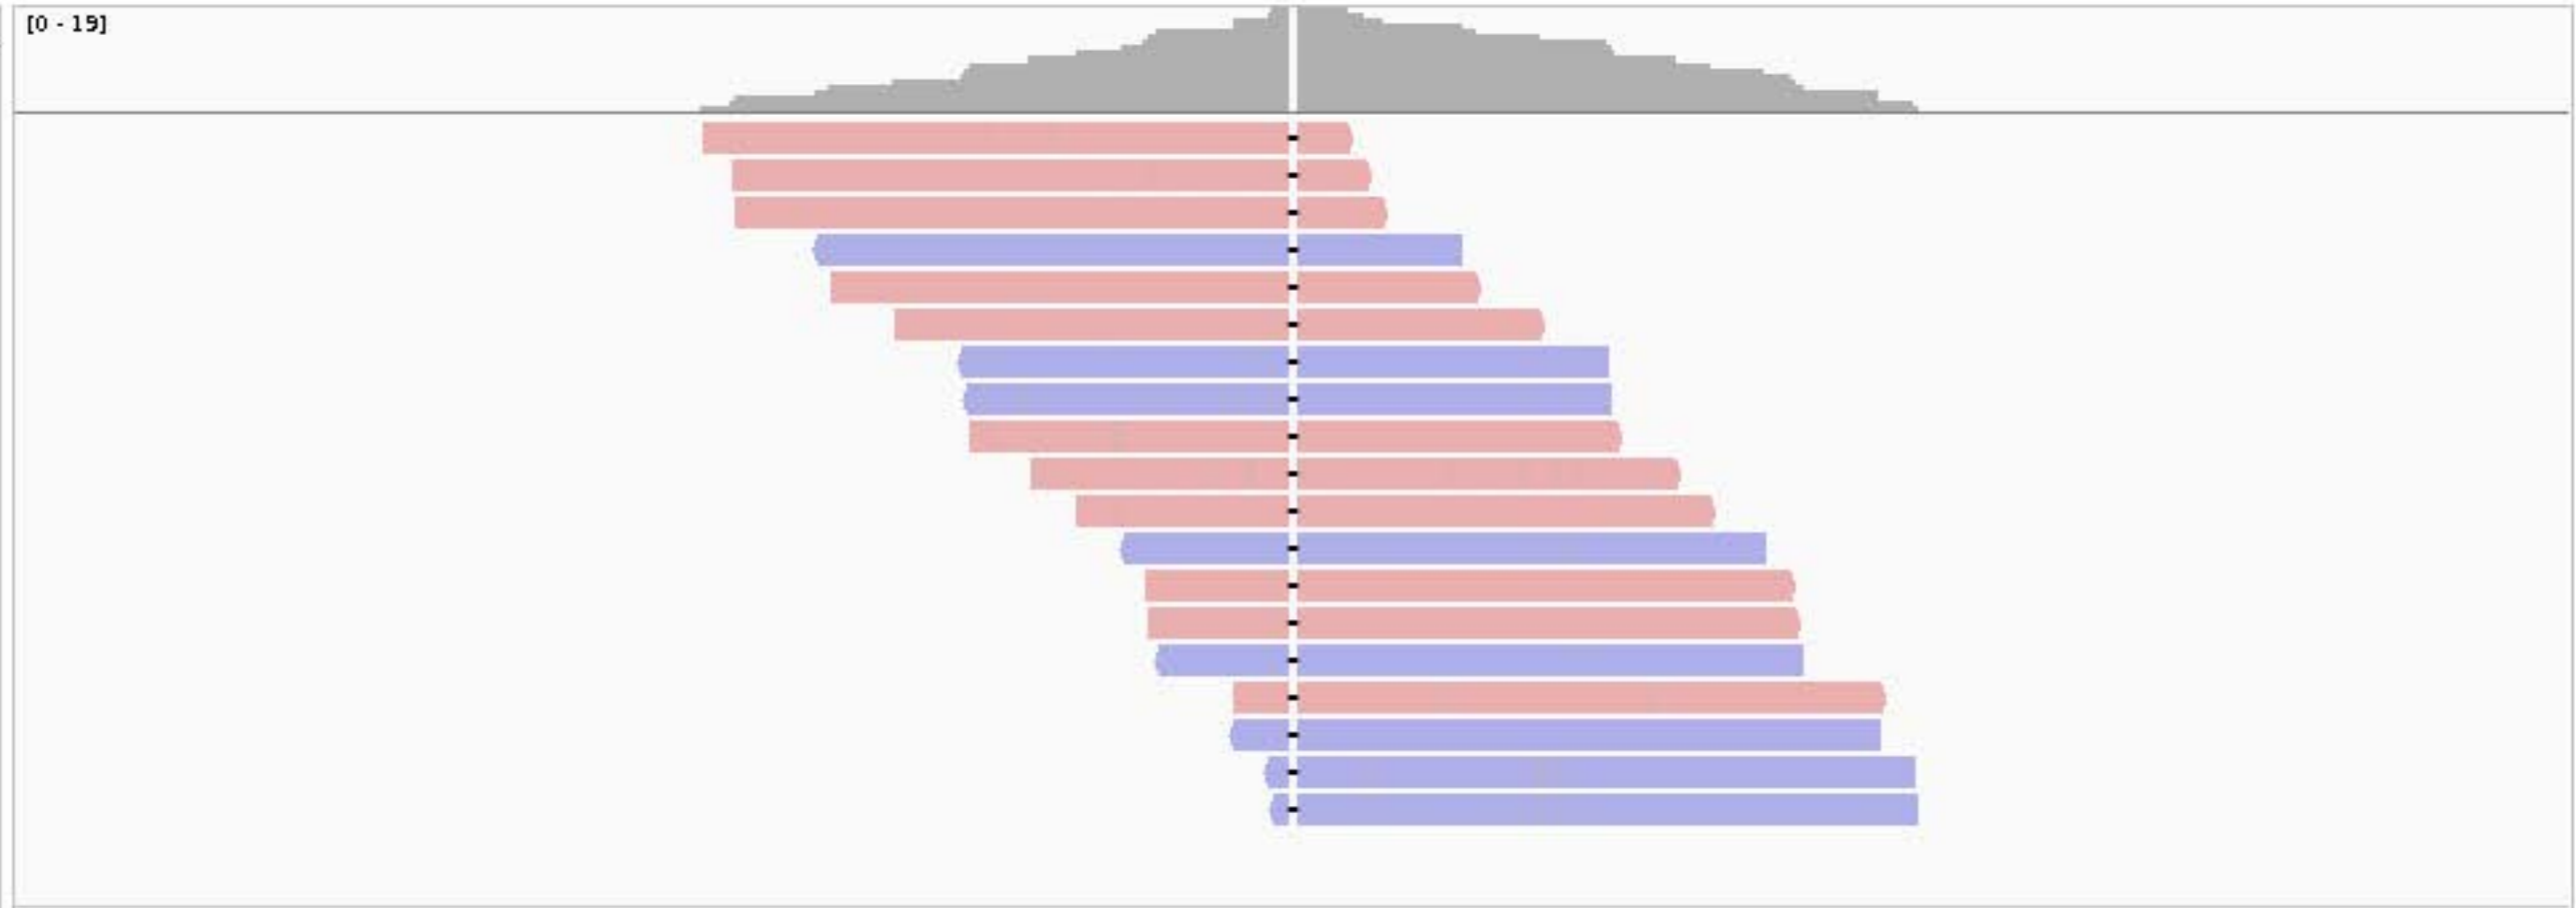

Sequence

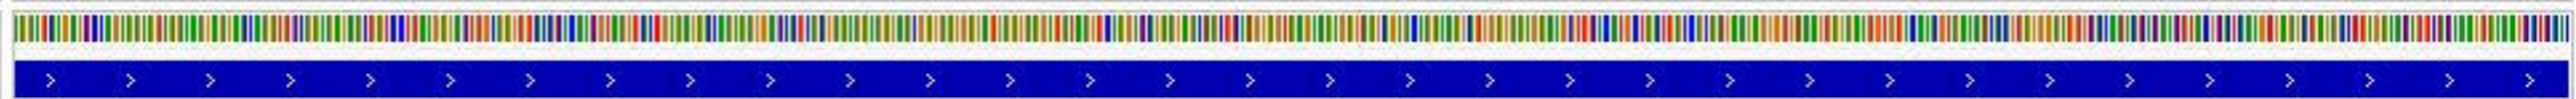

NEFM

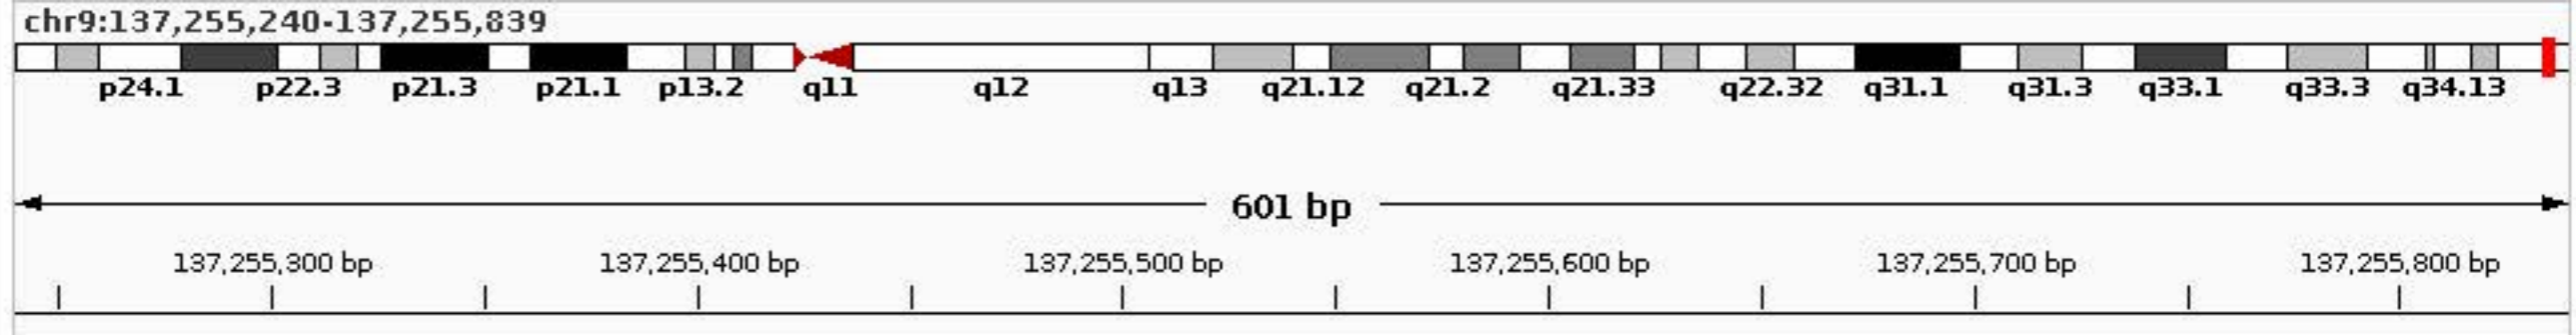

SL\_0004\_RN\_05\_mut.bam Coverage

SL\_0004\_RN\_05\_mut.bam

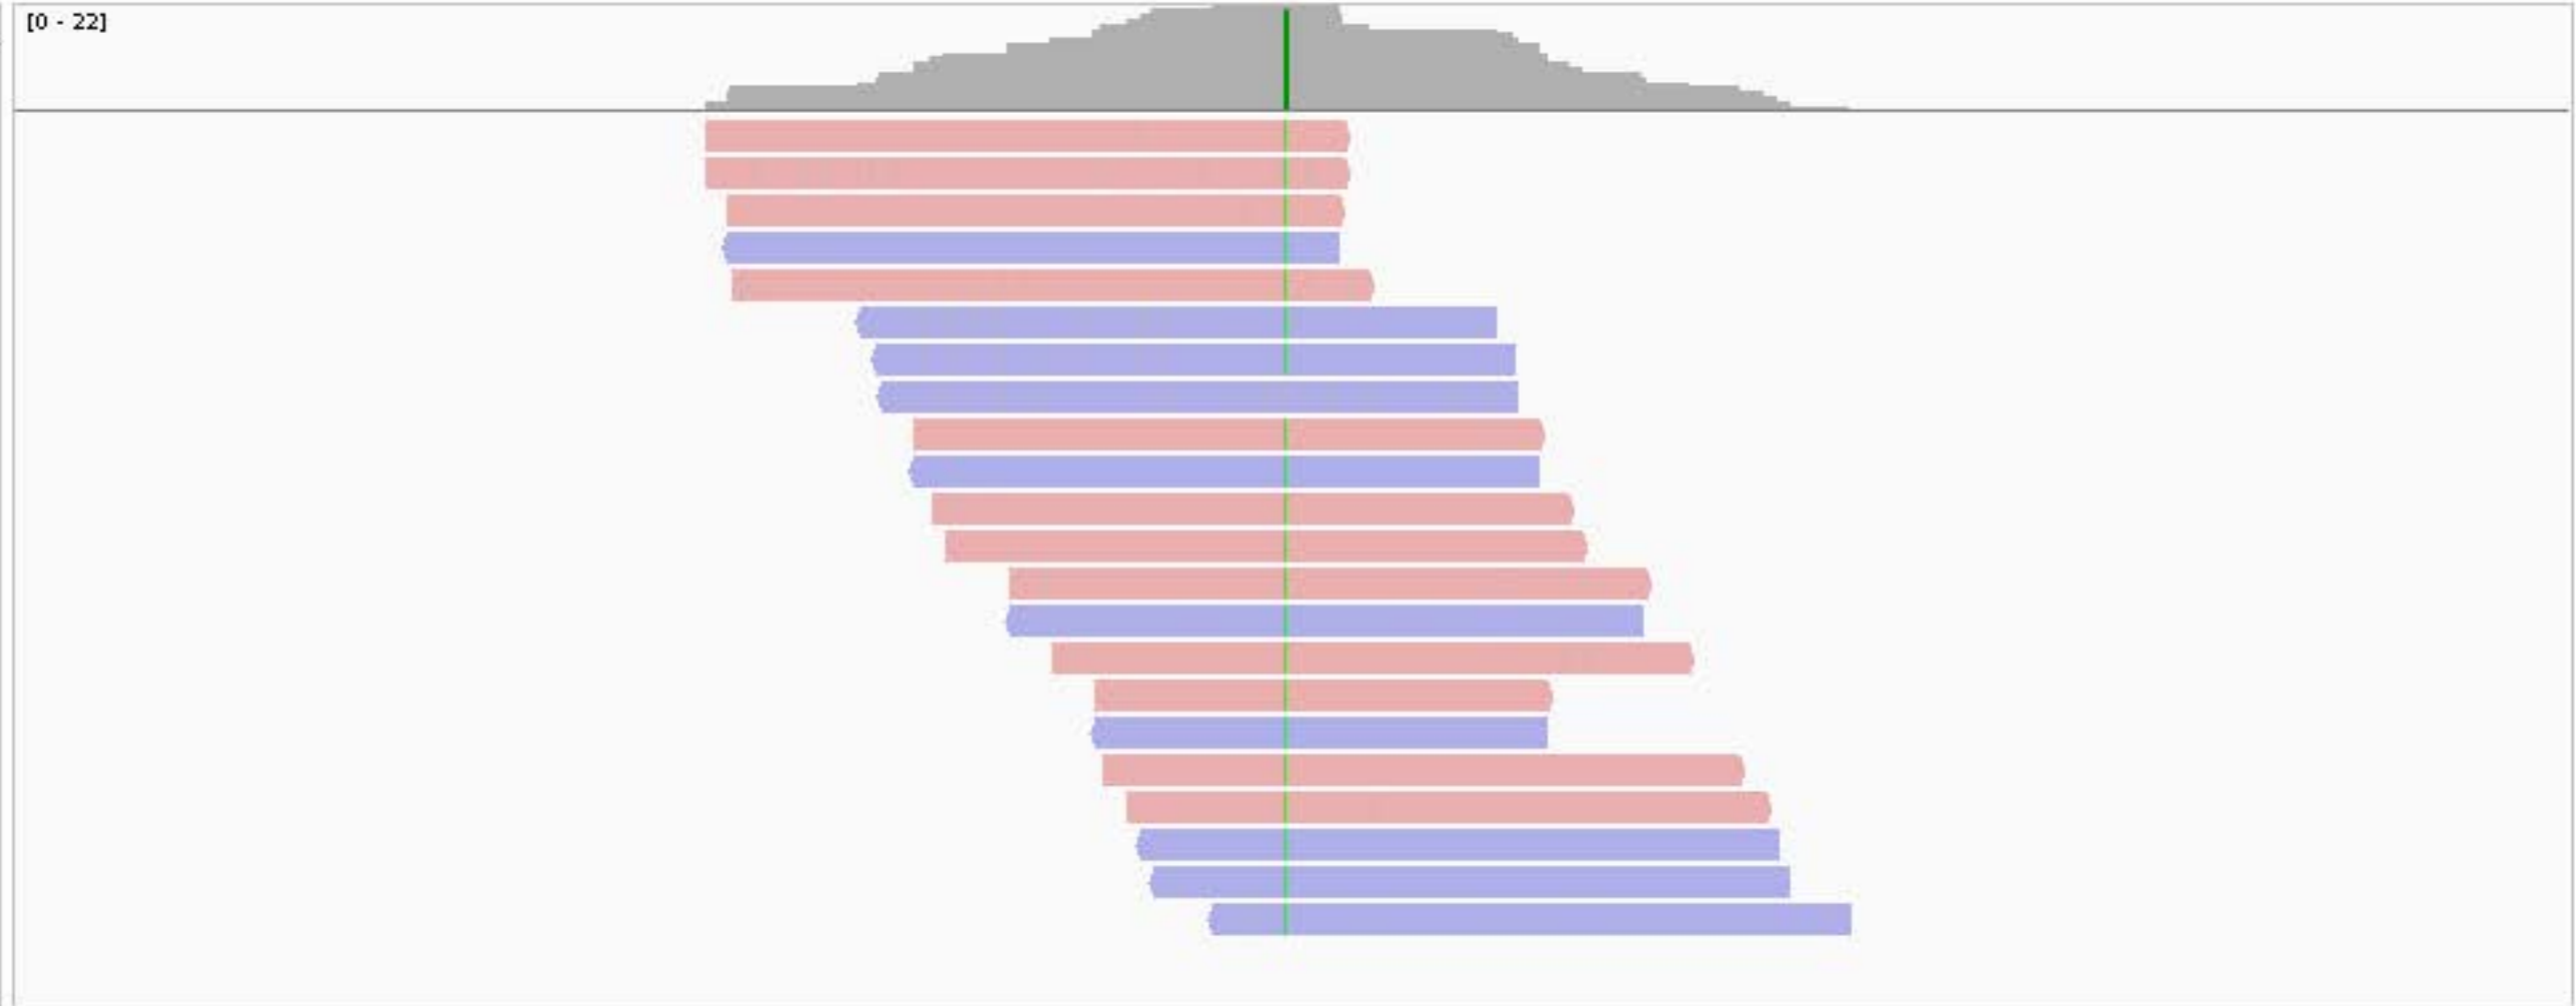

Sequence →

Refseq Genes

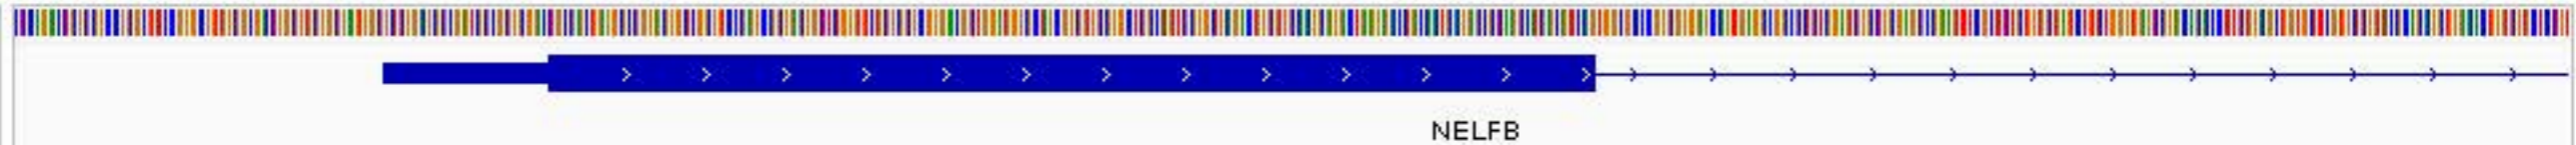

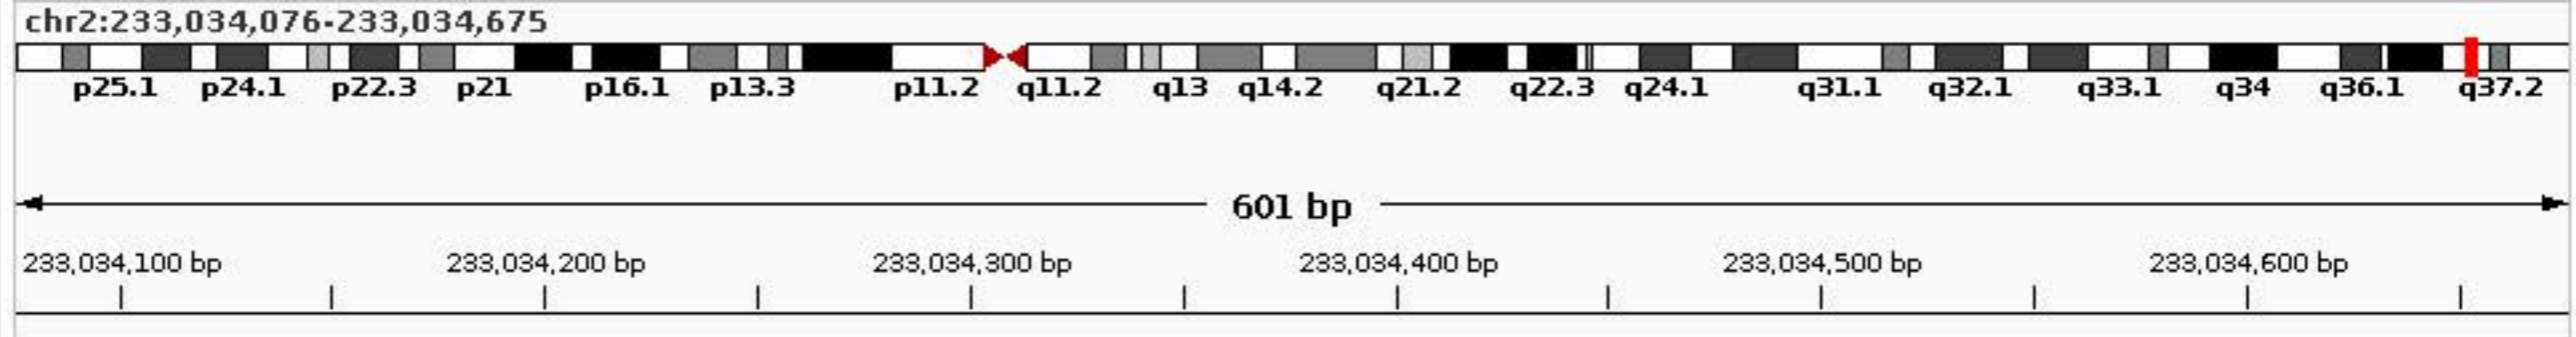

SL\_0007\_RN\_2\_mut.bam Coverage

SL\_0007\_RN\_2\_mut.bam

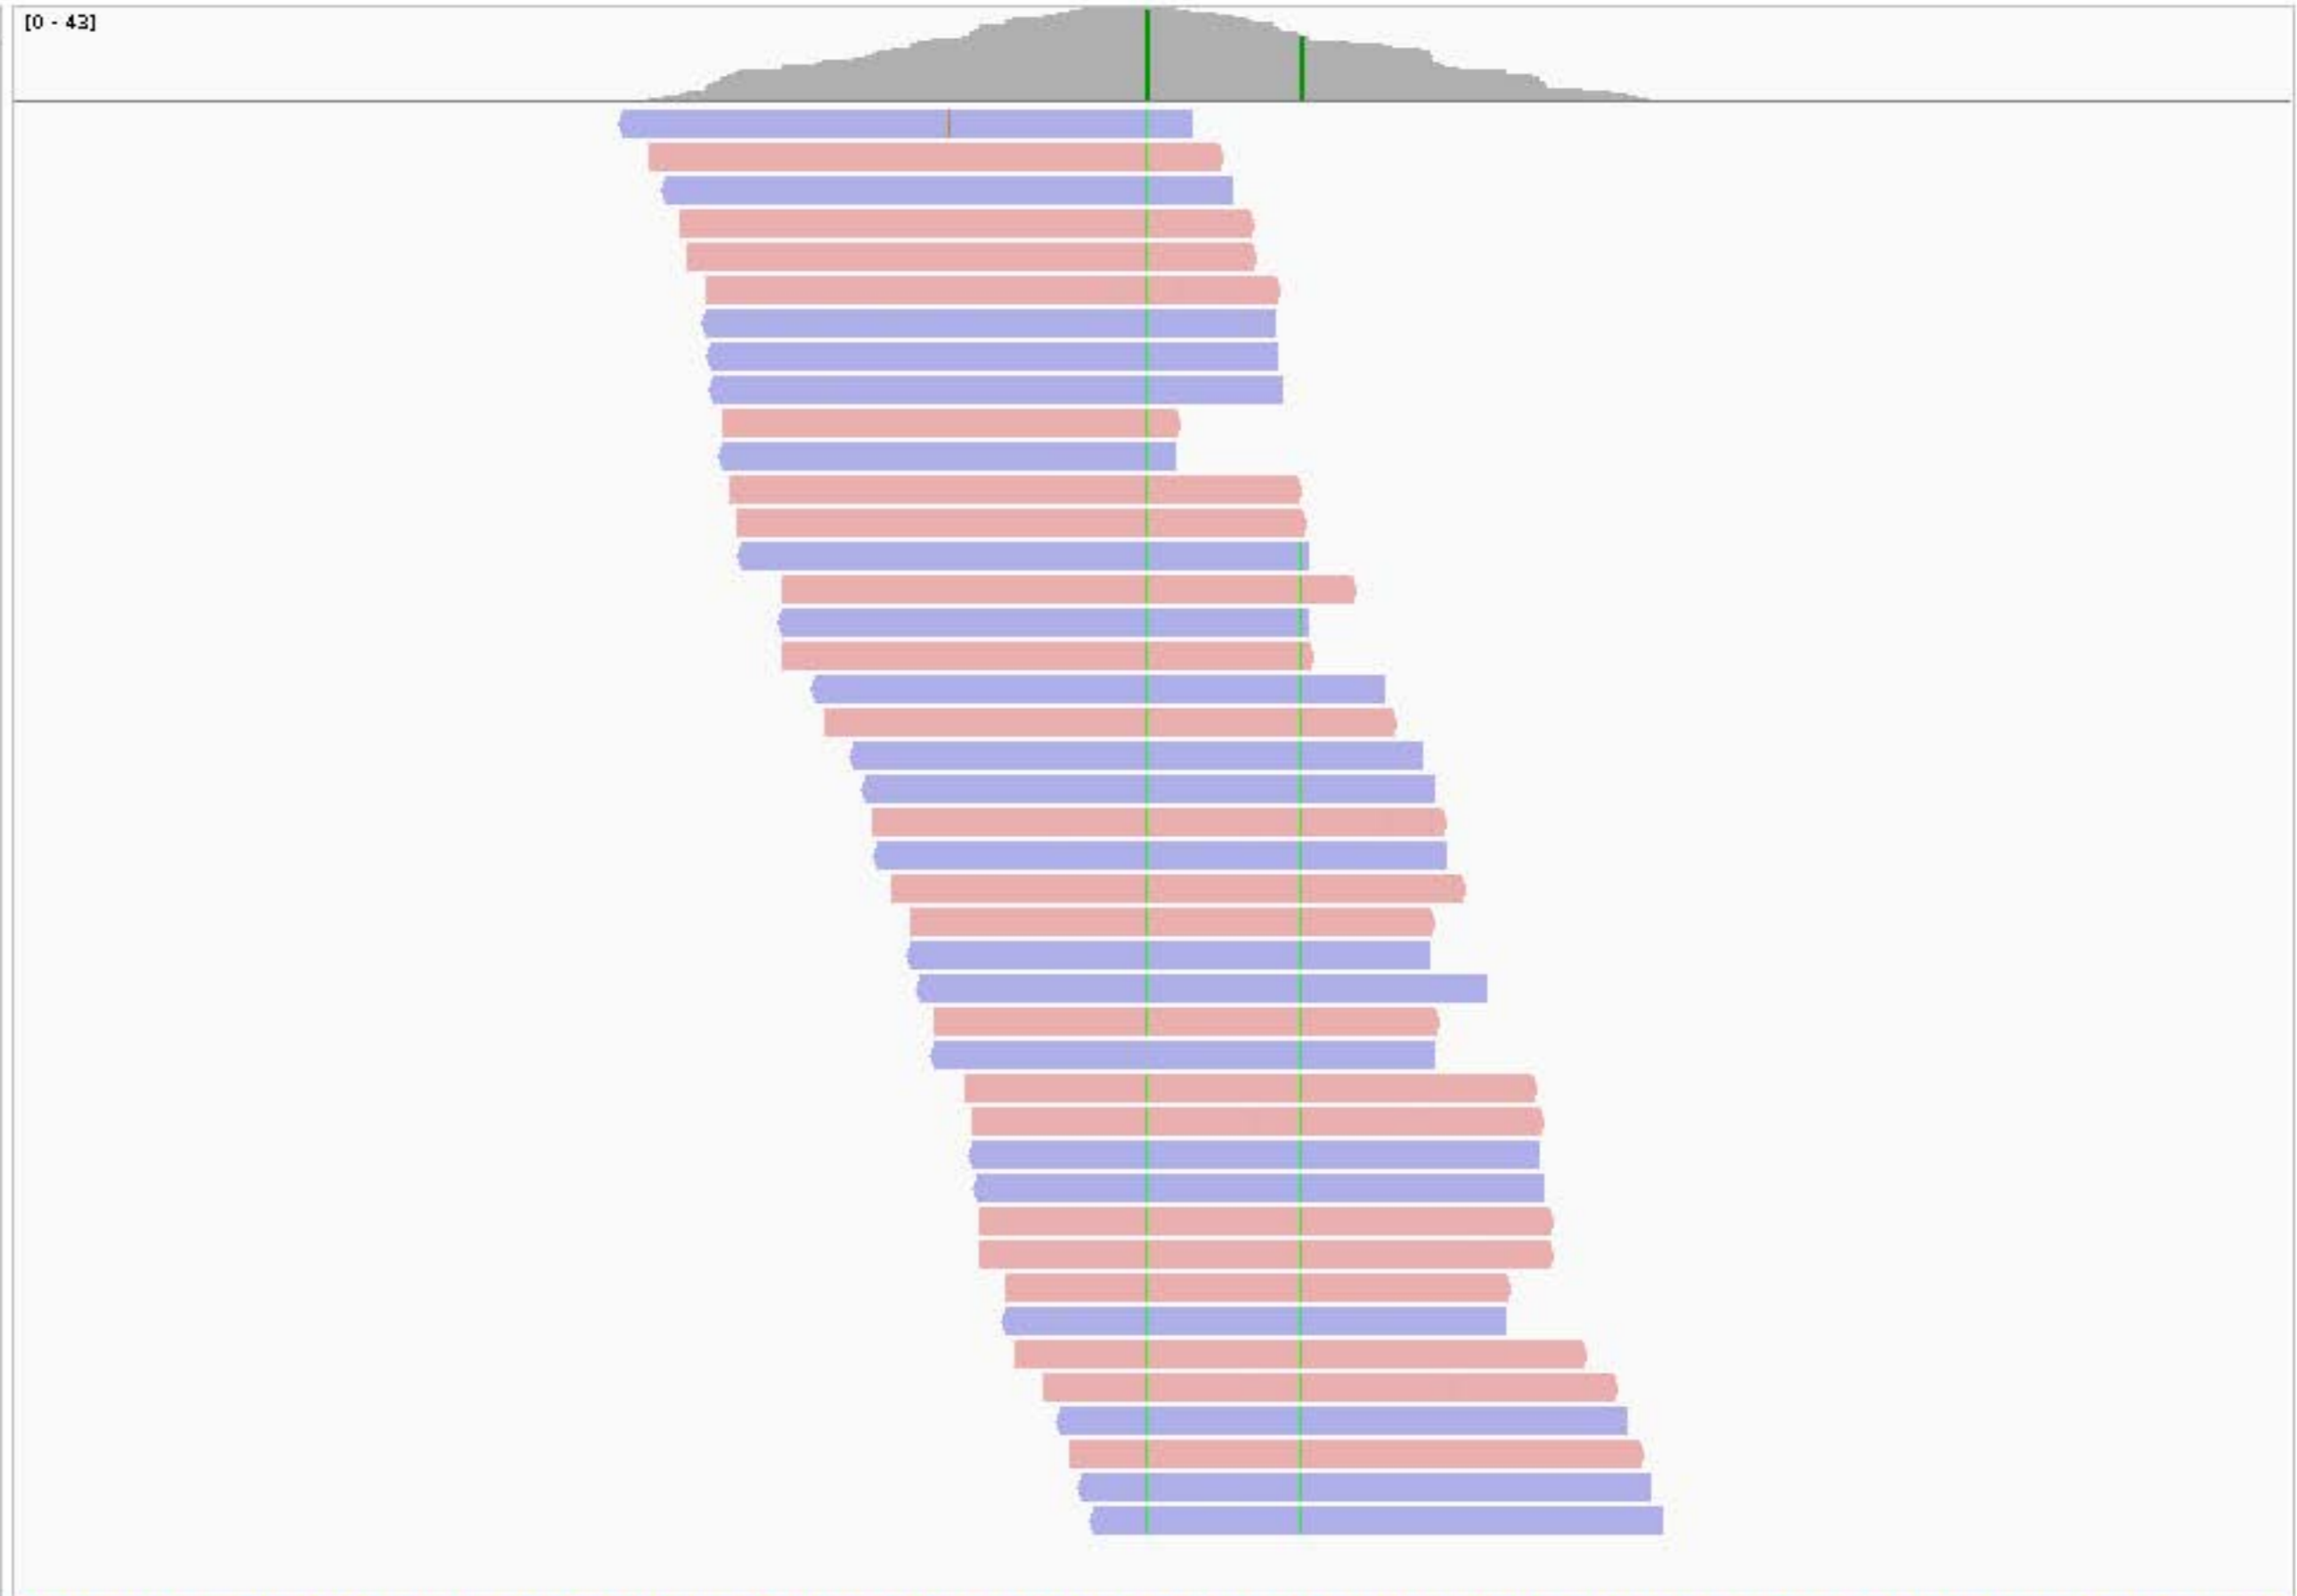

Sequence

Refseq Genes

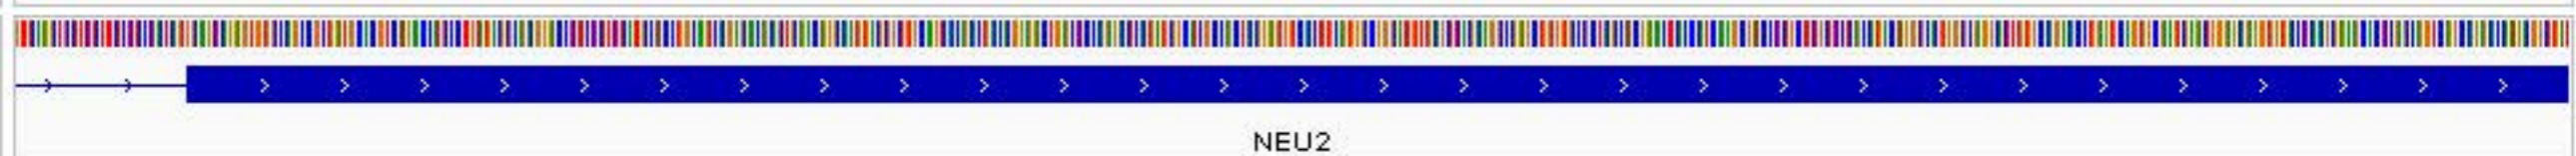



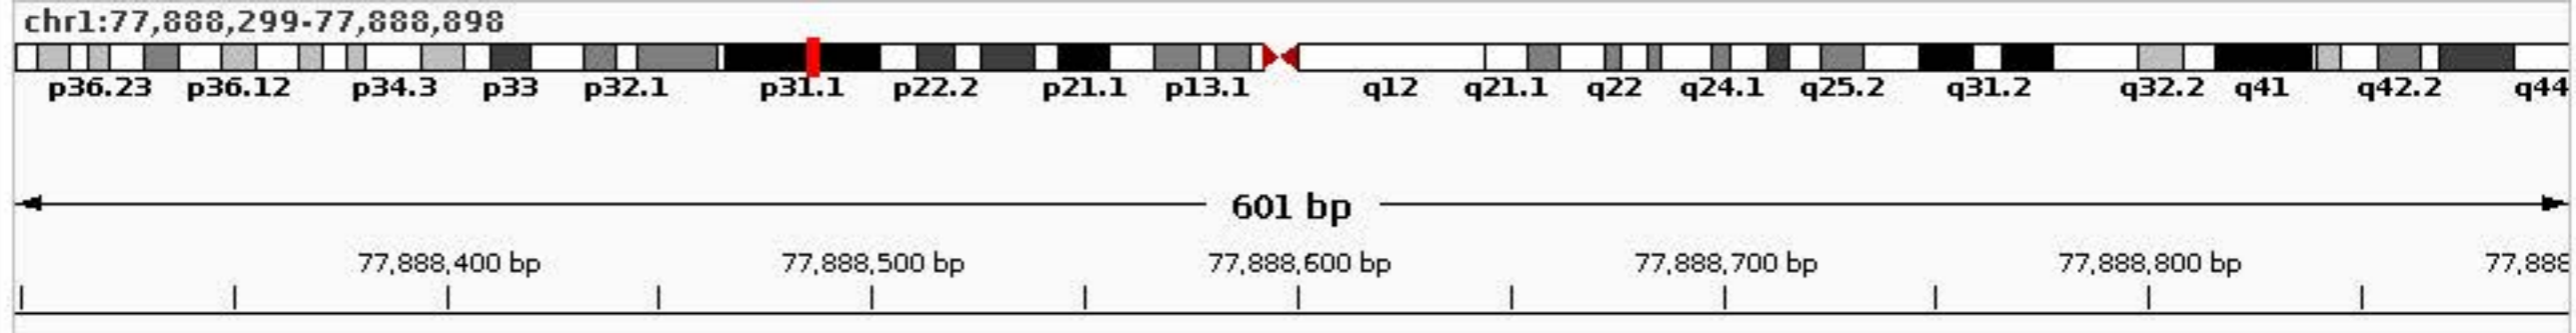

SL\_0001\_LN\_4\_mut.bam Coverage

SL\_0001\_LN\_4\_mut.bam

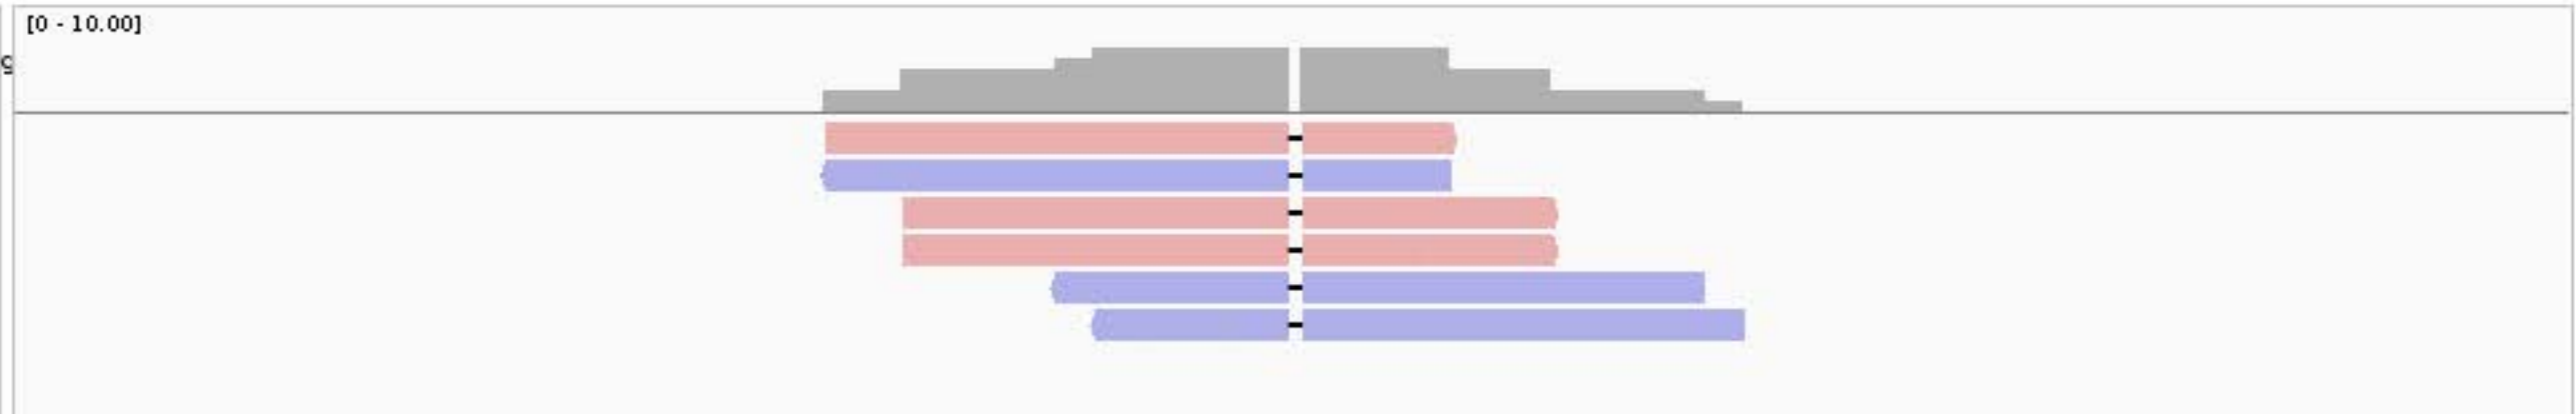

Sequence

Refseq Genes

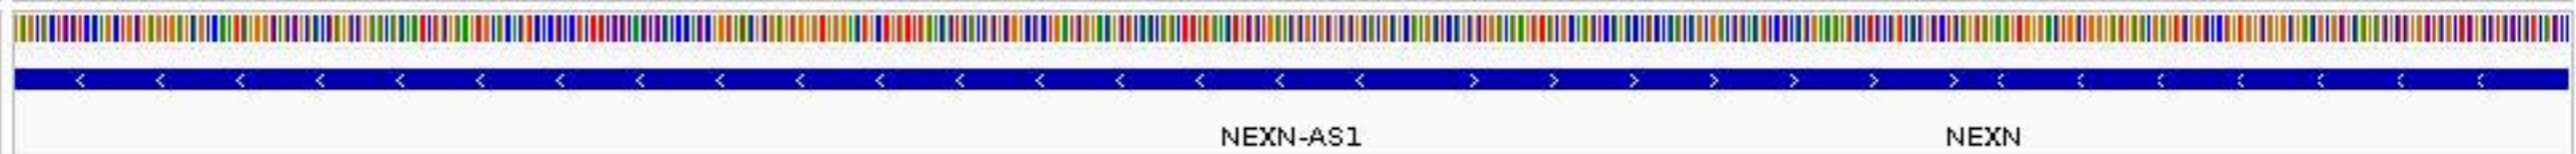



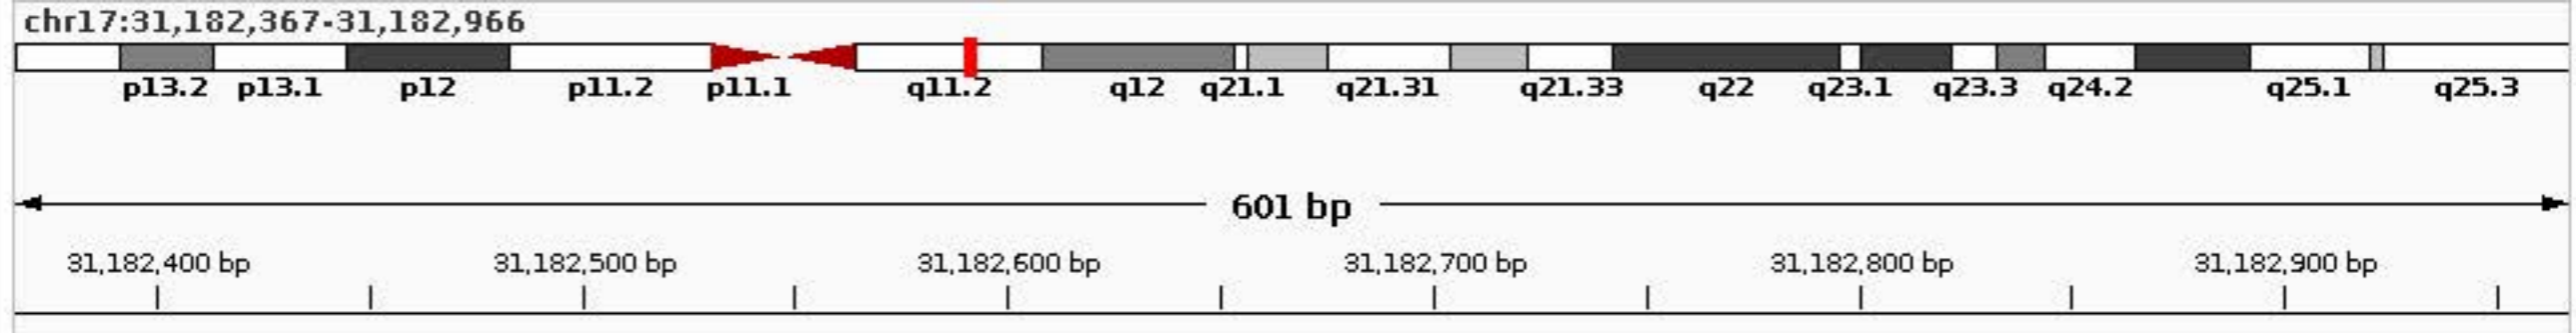

SL\_0006\_RN\_67\_mut.bam Coverage

SL\_0006\_RN\_67\_mut.bam

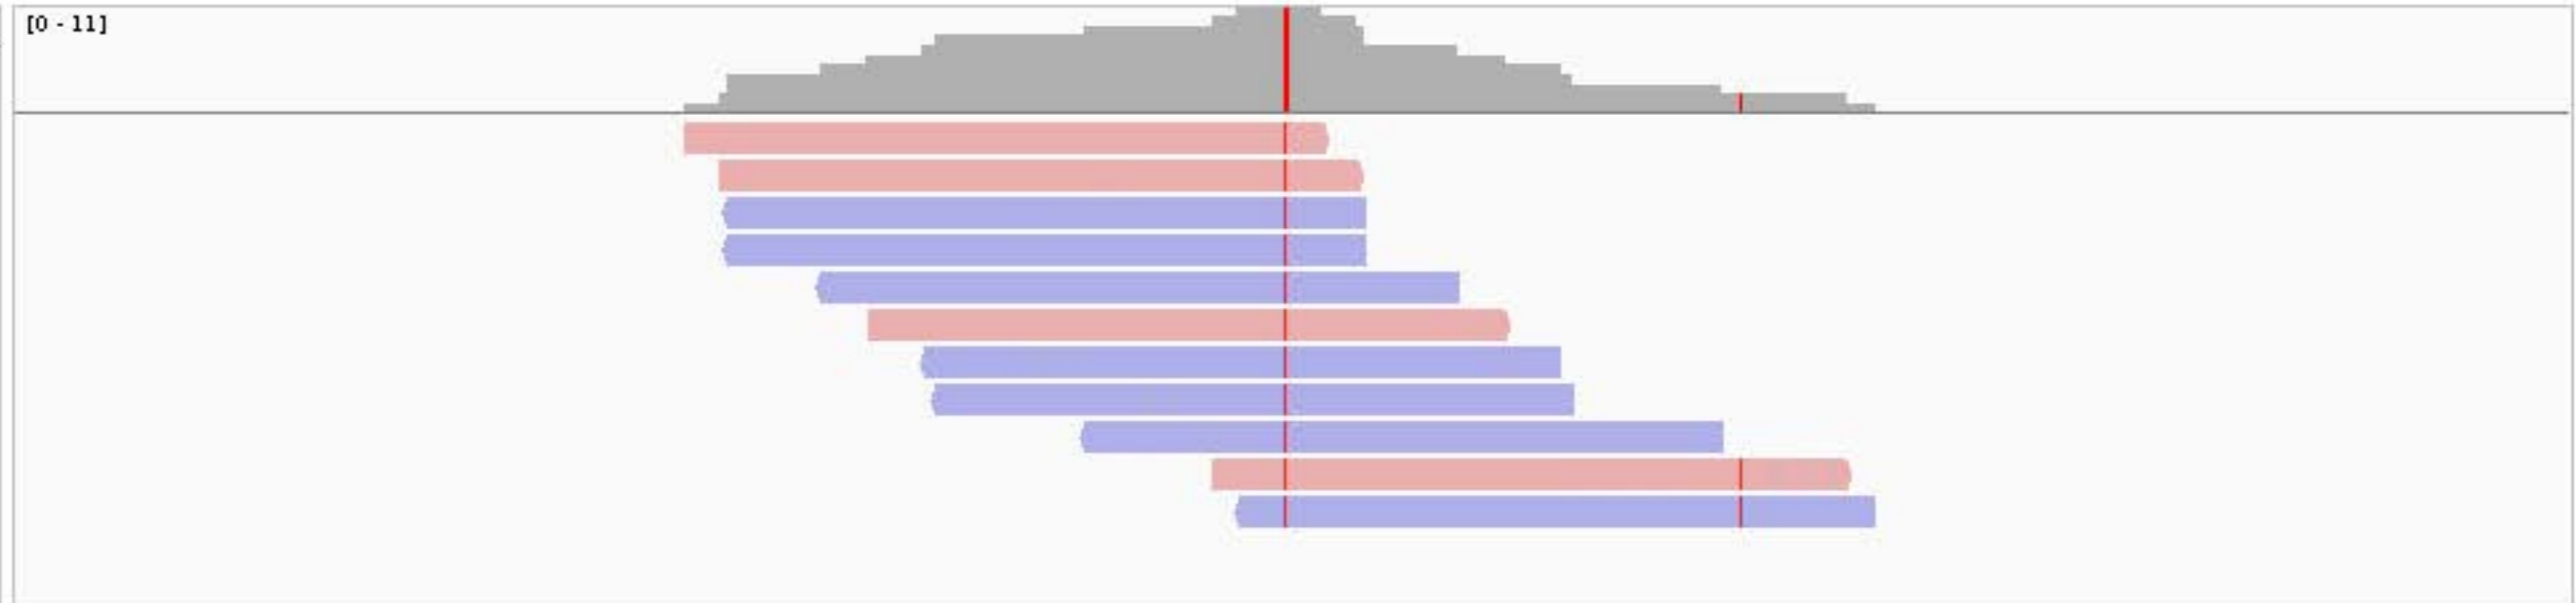

Sequence →

Refseq Genes

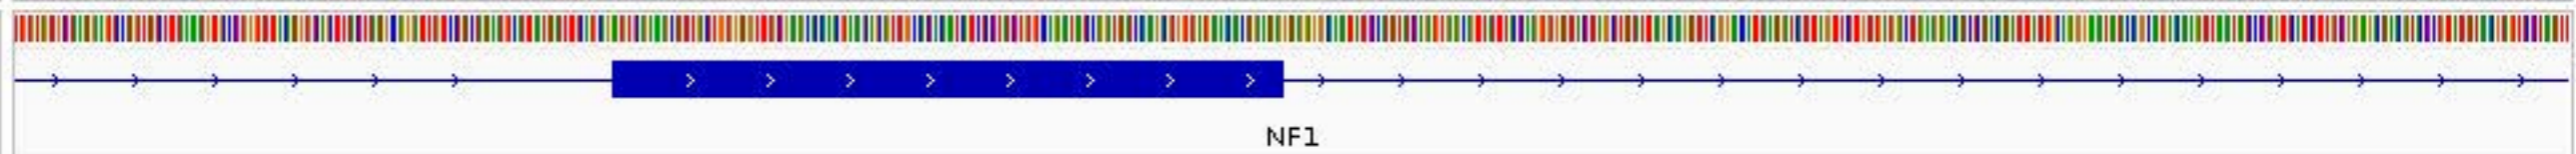

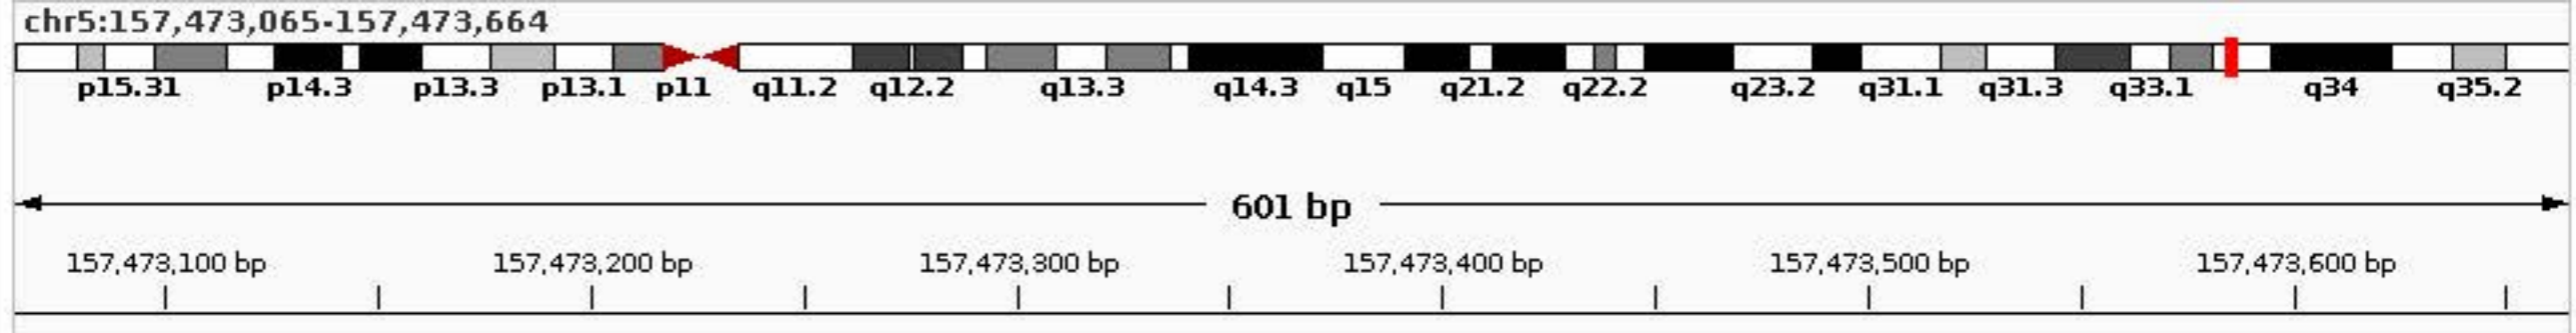

SL\_0017\_RN\_15\_mut.bam Coverage

SL\_0017\_RN\_15\_mut.bam

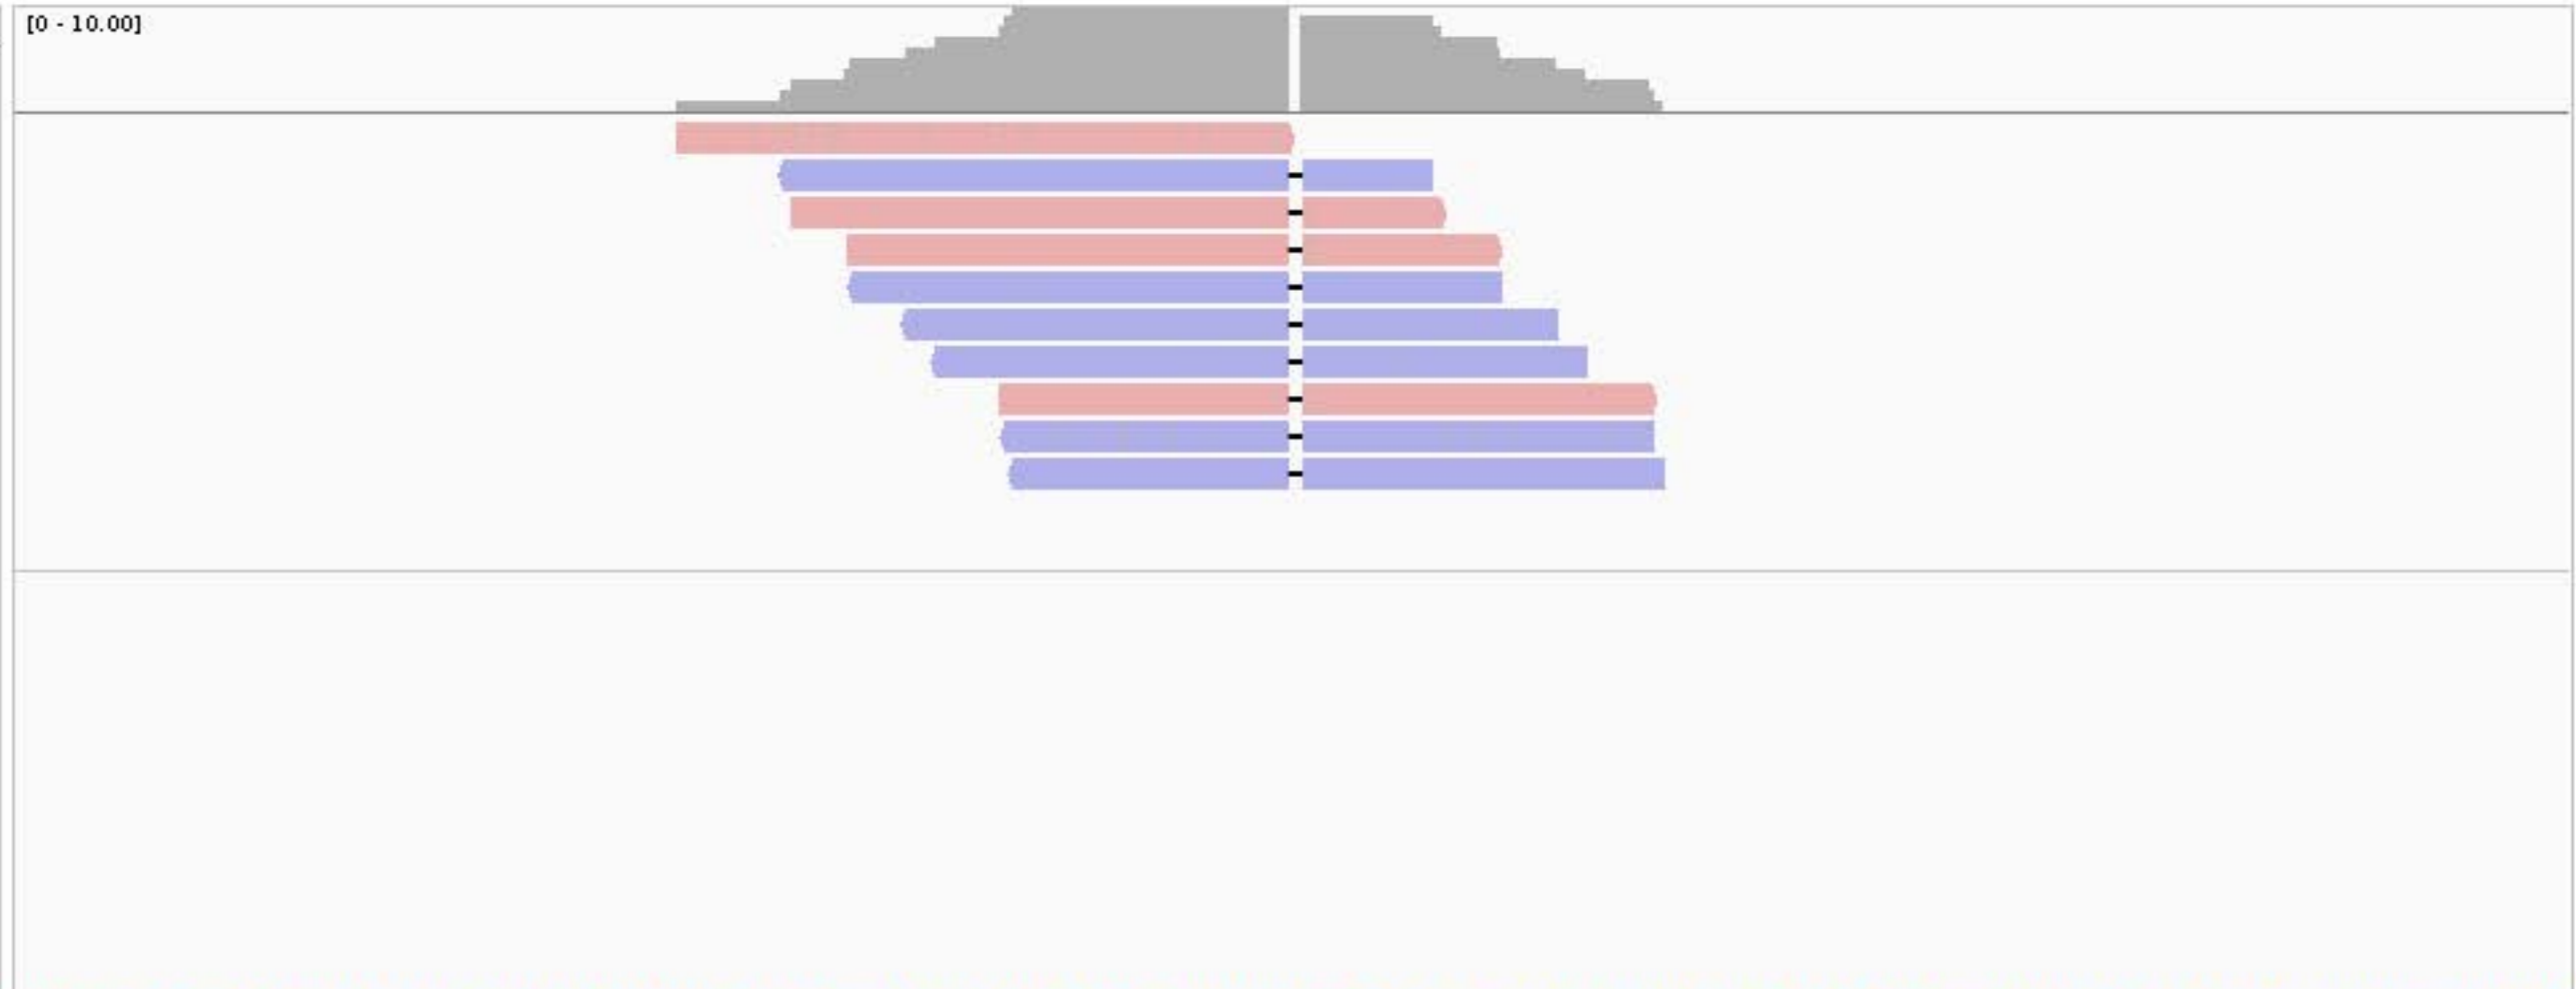

Sequence

Refseq Genes

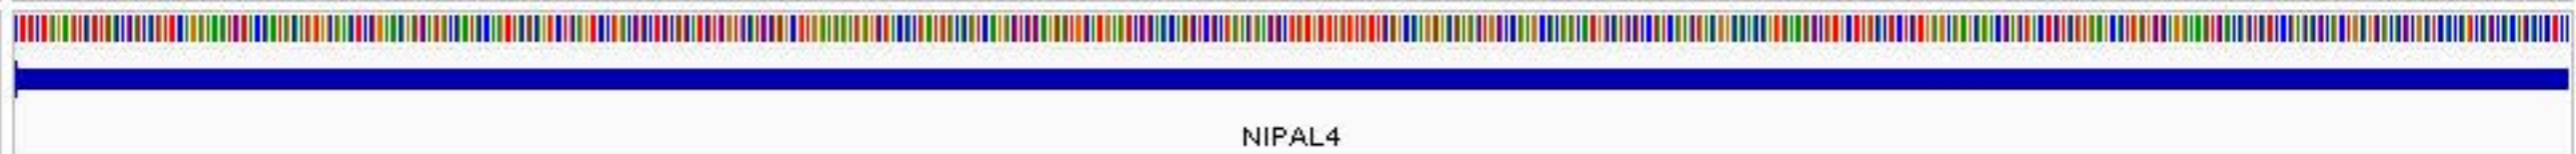

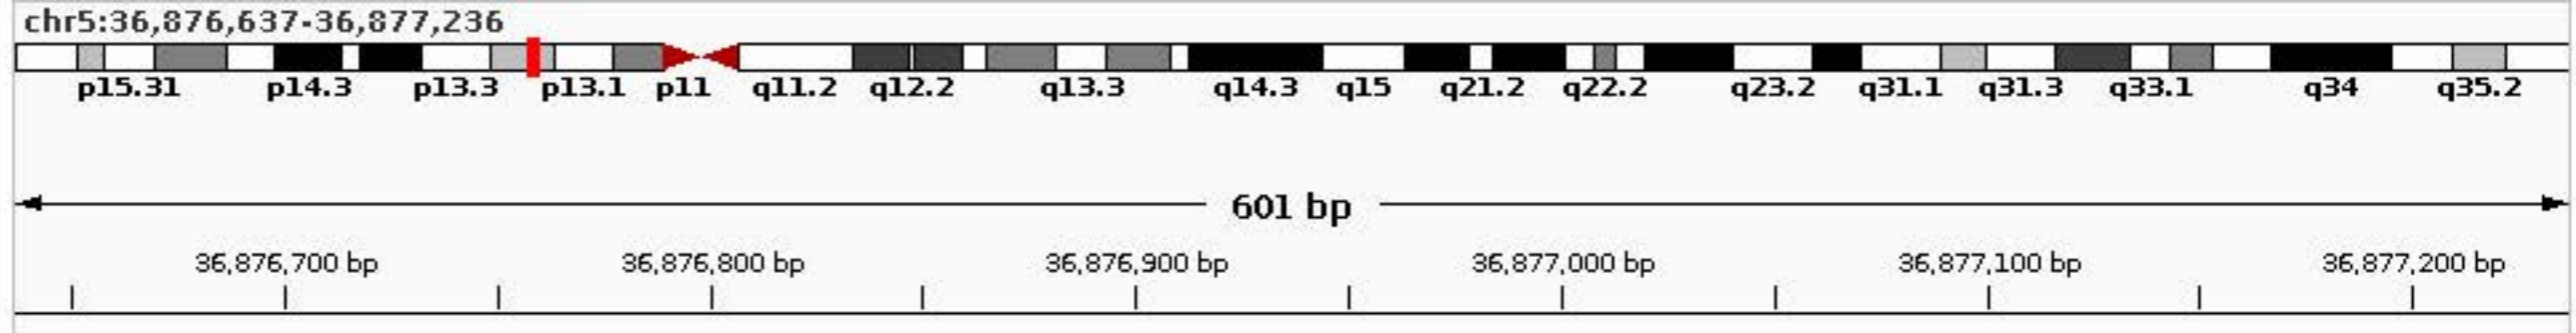

SL\_0001\_RN\_28\_mut.bam Coverage

SL\_0001\_RN\_28\_mut.bam

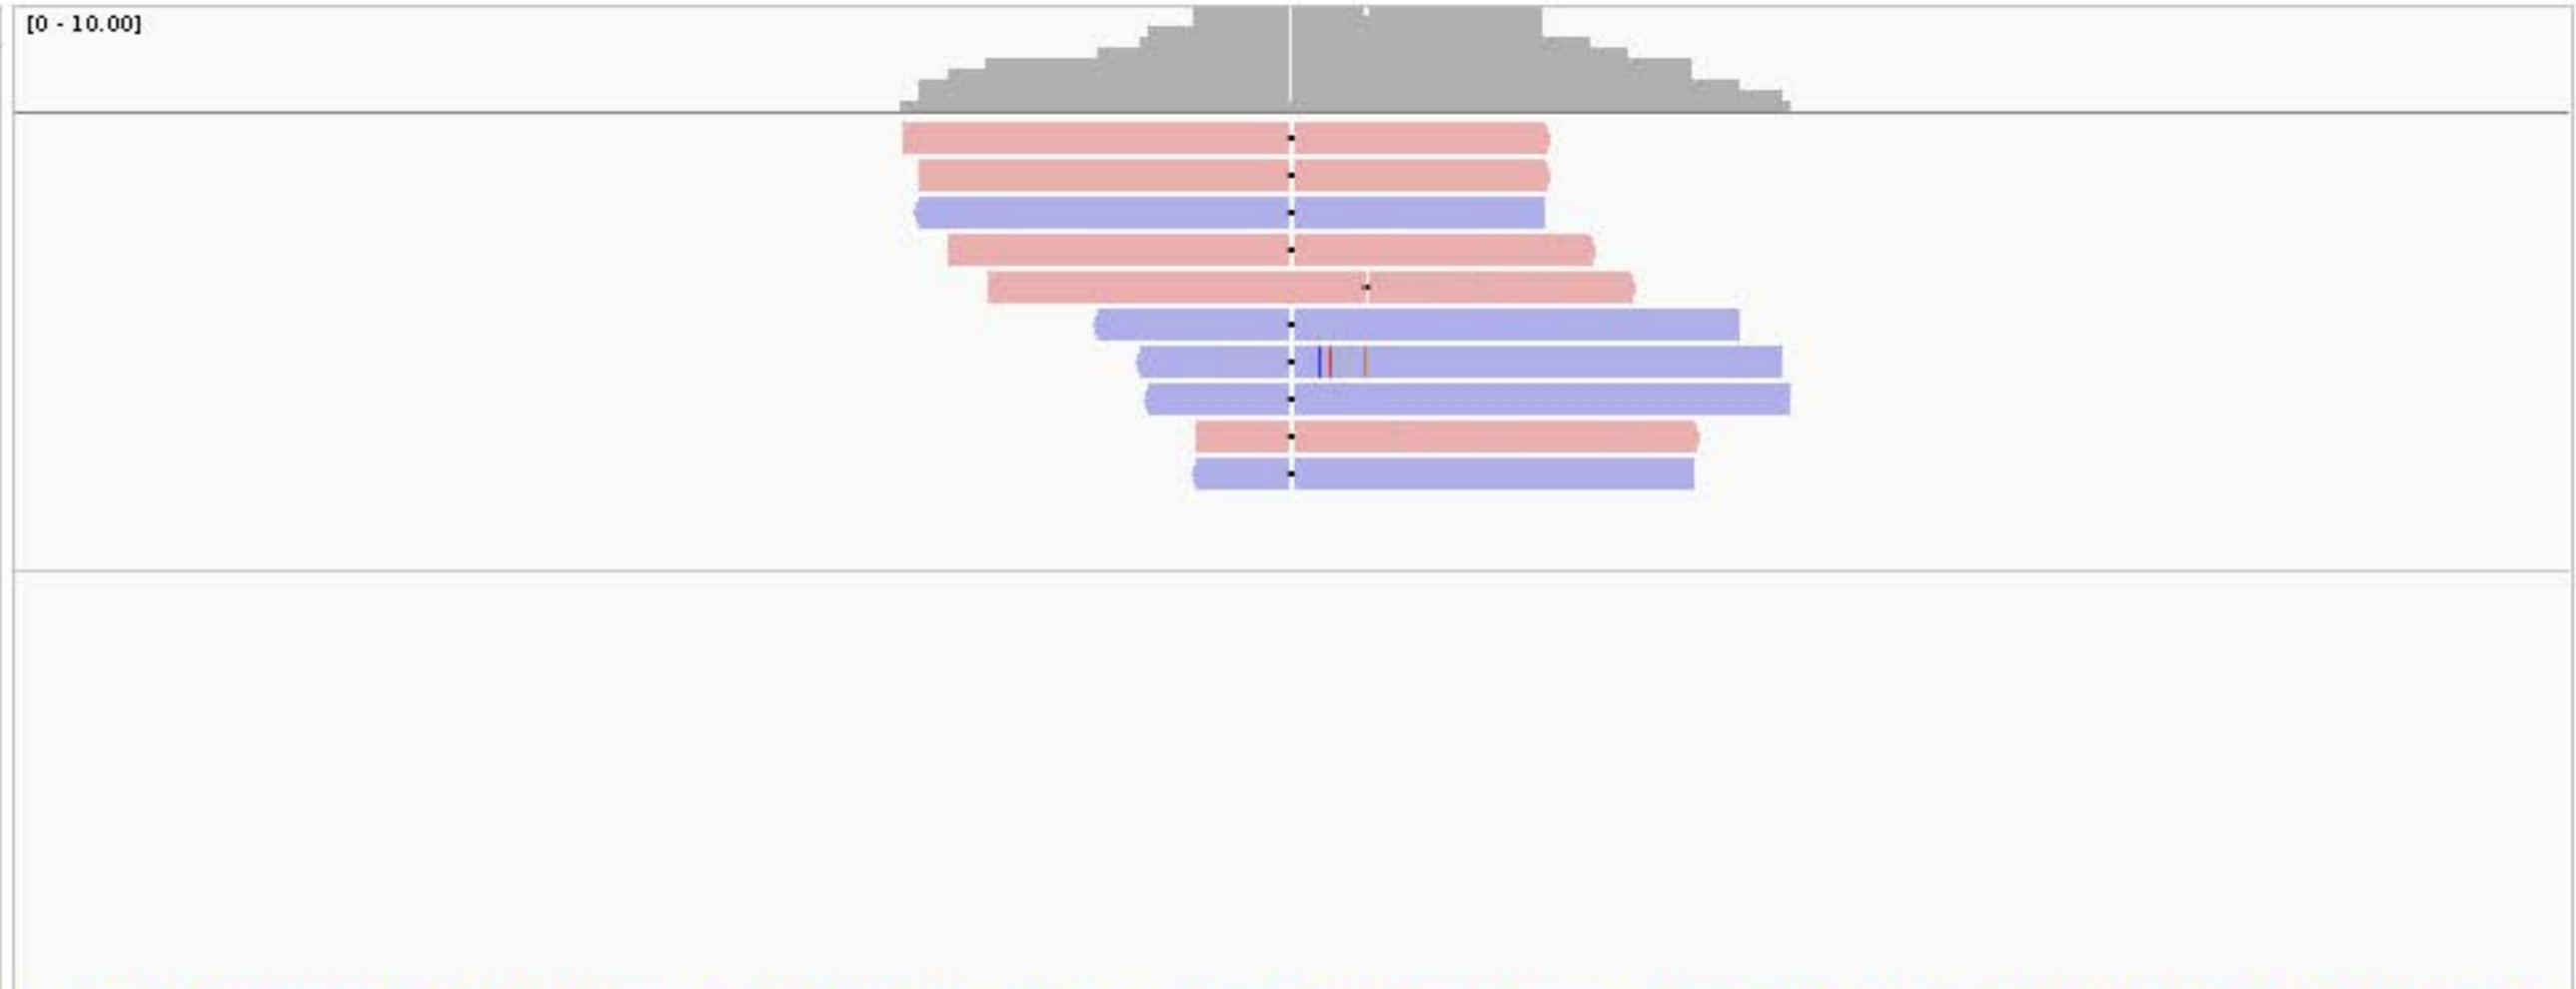

Sequence

Refseq Genes

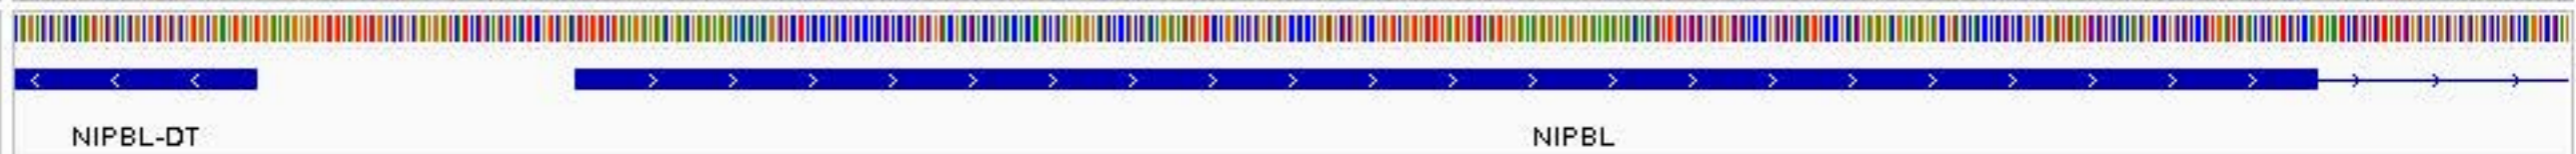

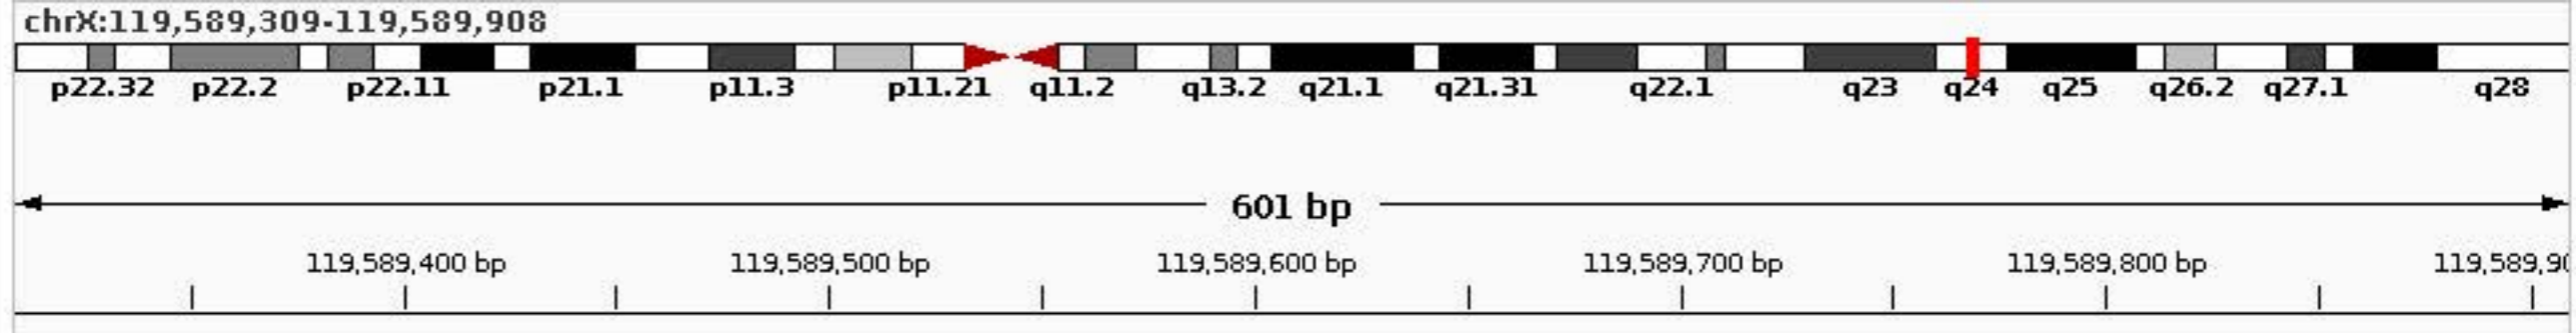

SL\_0001\_RN\_15\_mut.bam Coverage

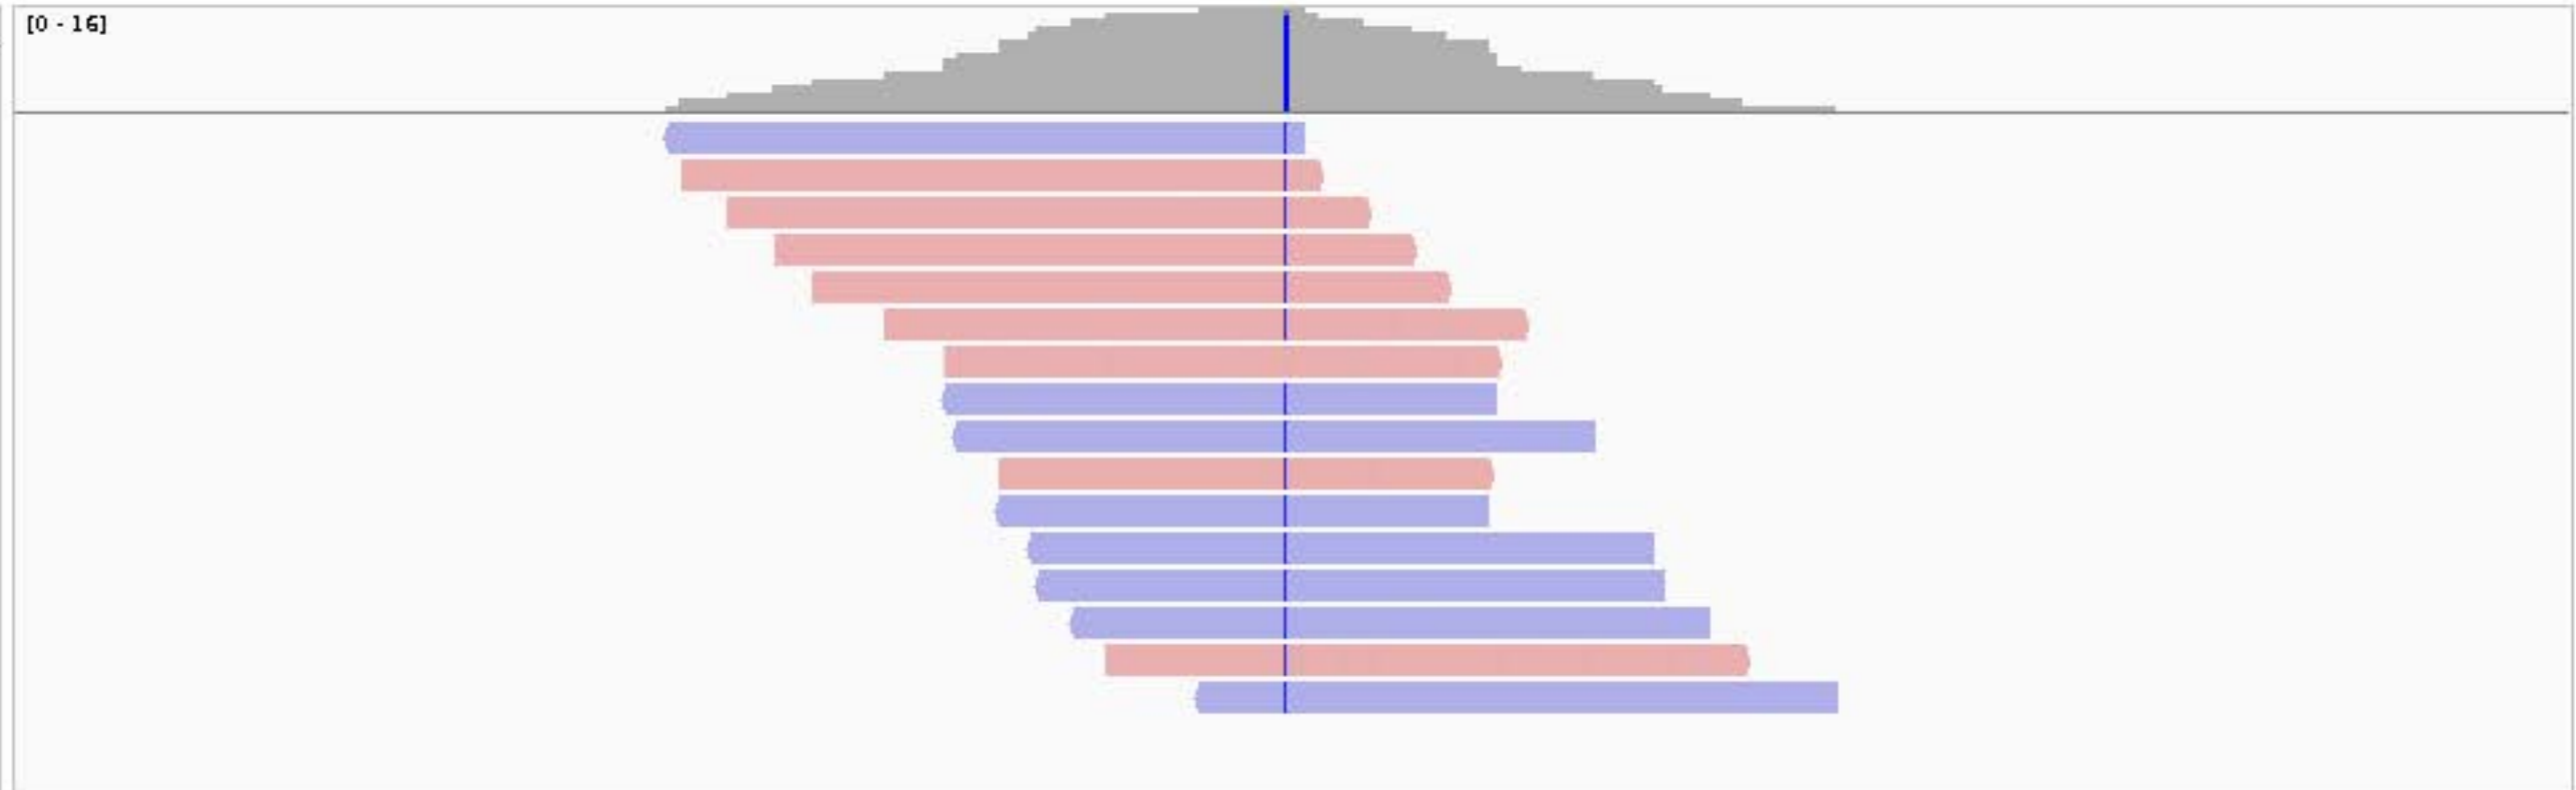

SL\_0001\_RN\_15\_mut.bam

Sequence

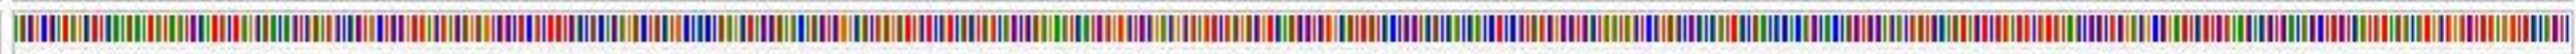

Refseq Genes

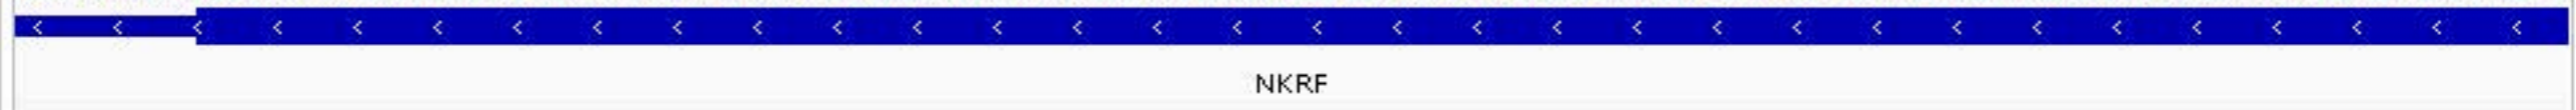

NKRF

chr20:32,453,453-32,454,052

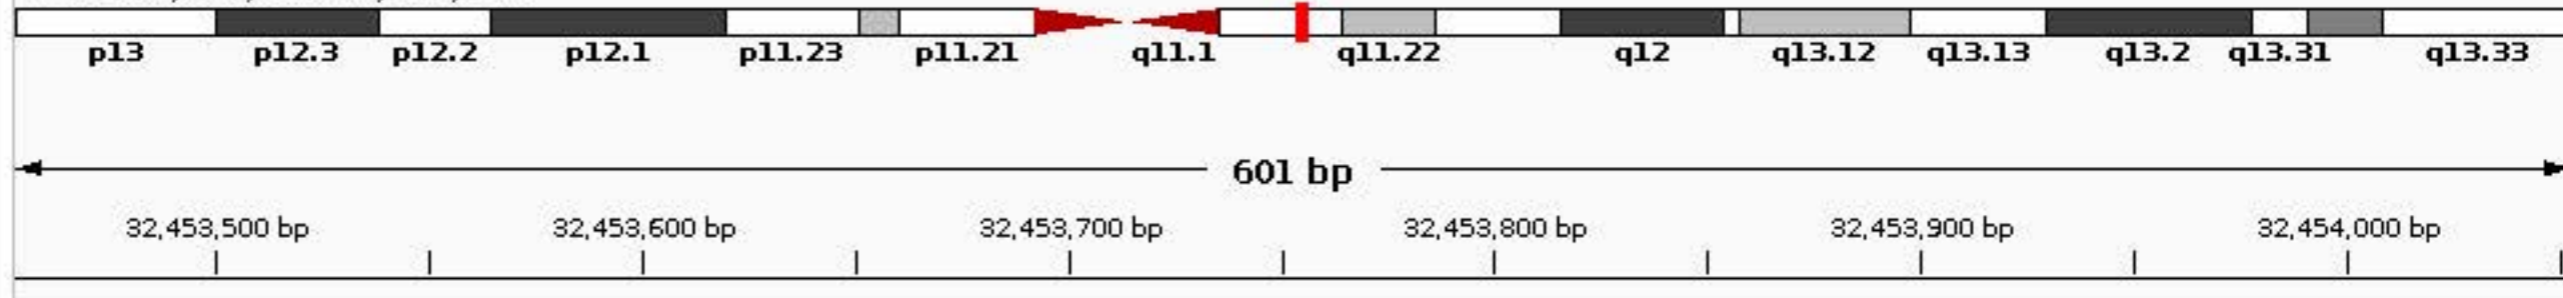

SL\_0001\_LN\_10\_mut.bam Coverage

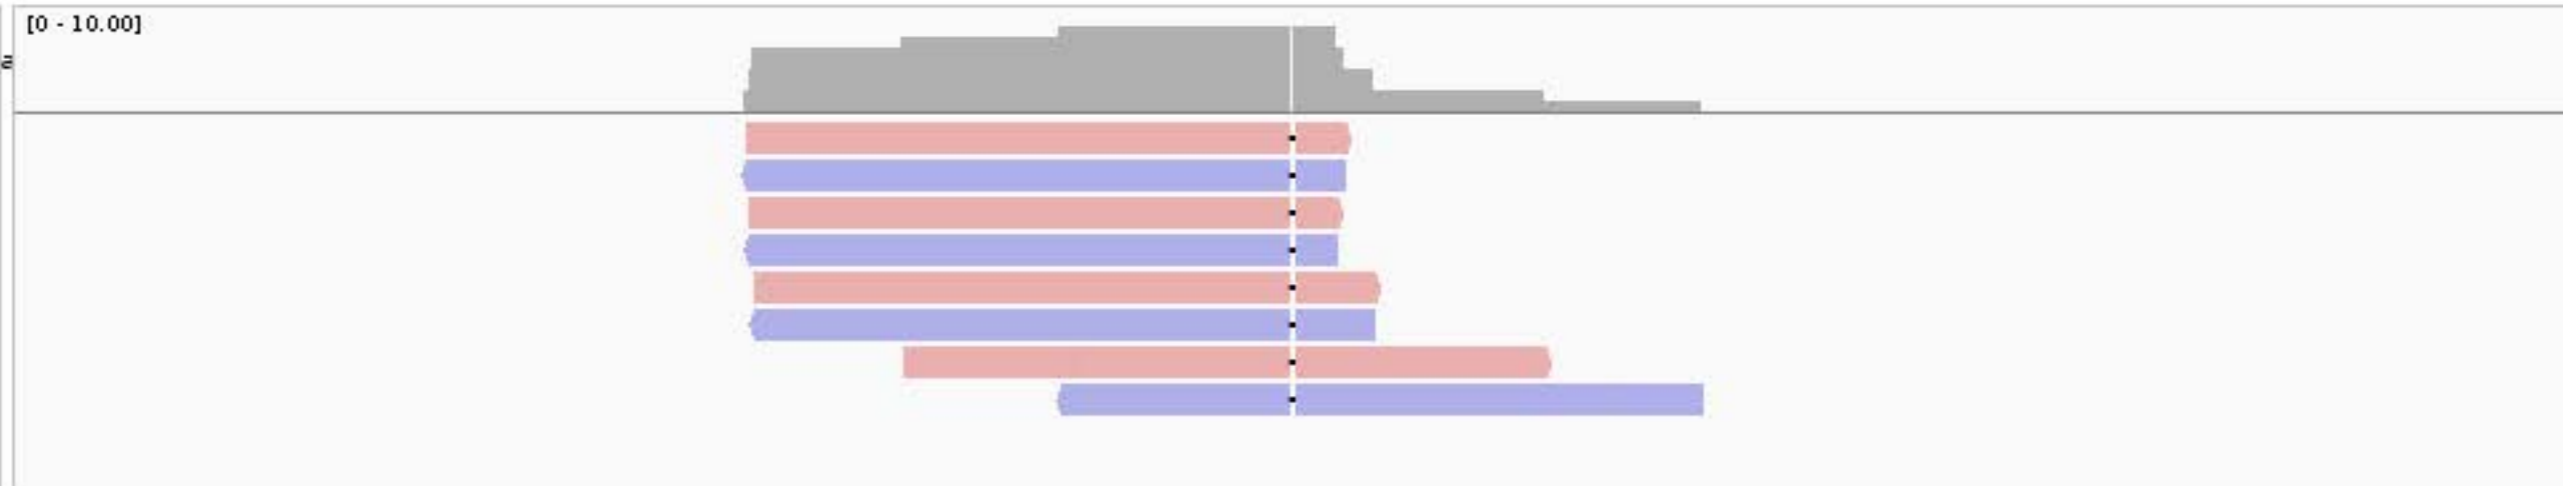

SL\_0001\_LN\_10\_mut.bam

Sequence

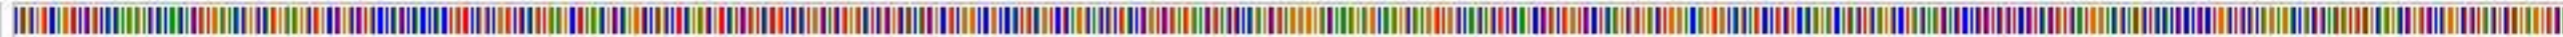

Refseq Genes

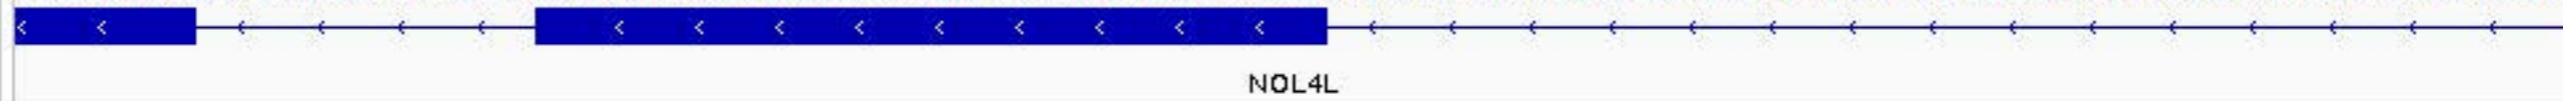

NOL4L



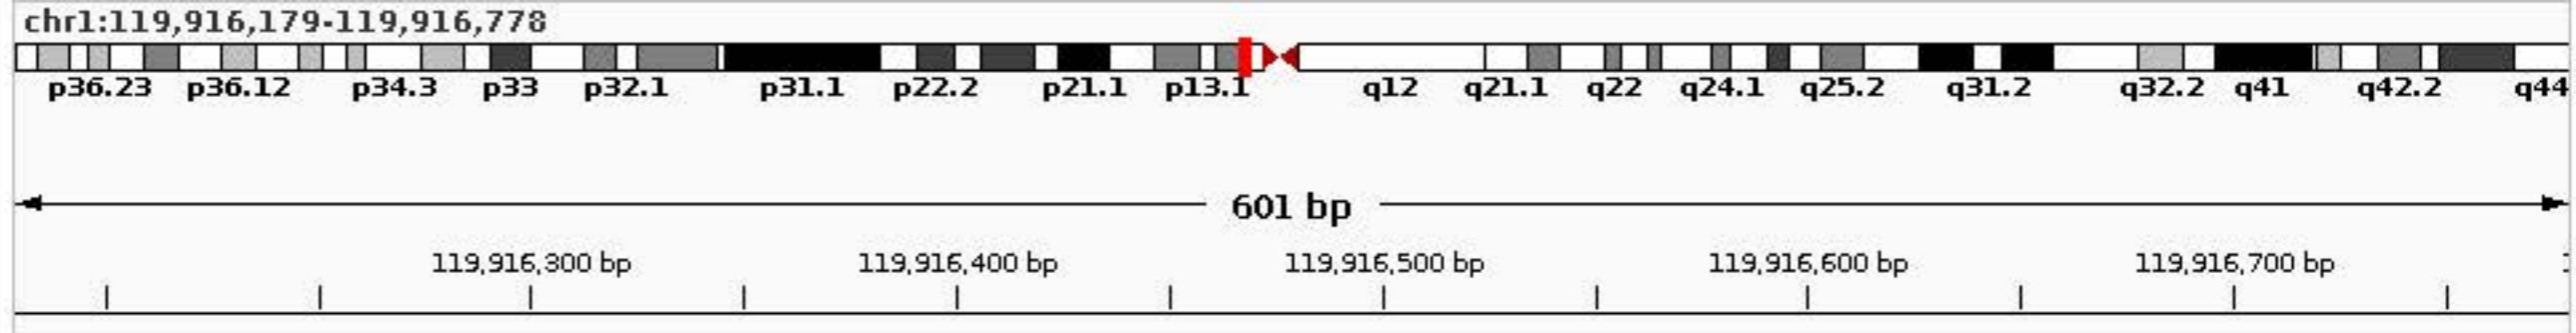

SL\_0004\_RN\_47\_mut.bam Coverage

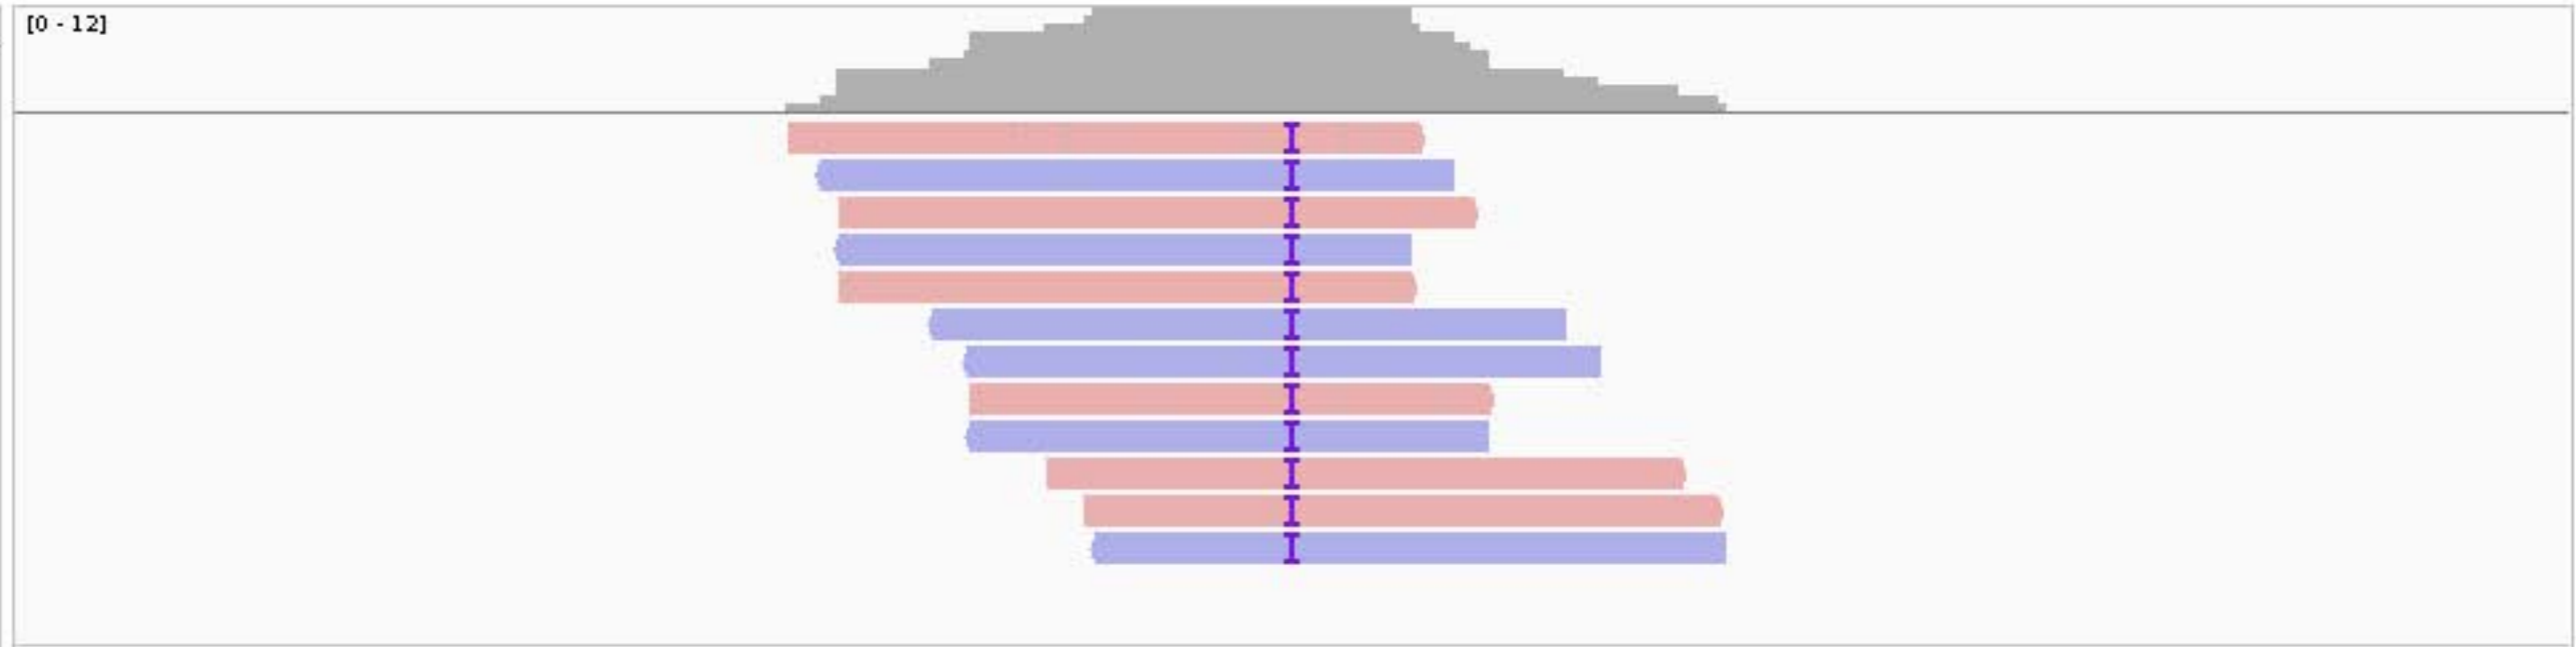

SL\_0004\_RN\_47\_mut.bam

Sequence

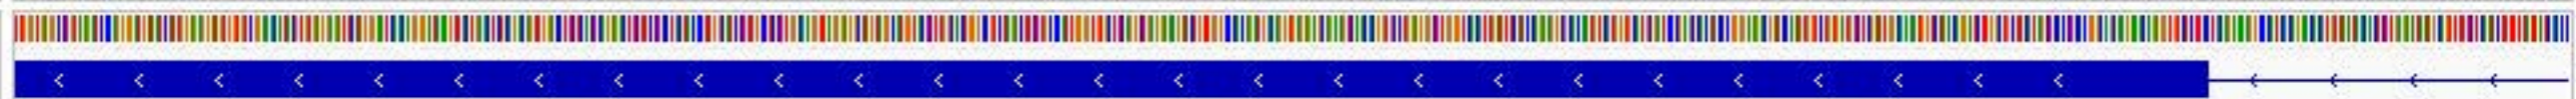

Refseq Genes

NOTCH2

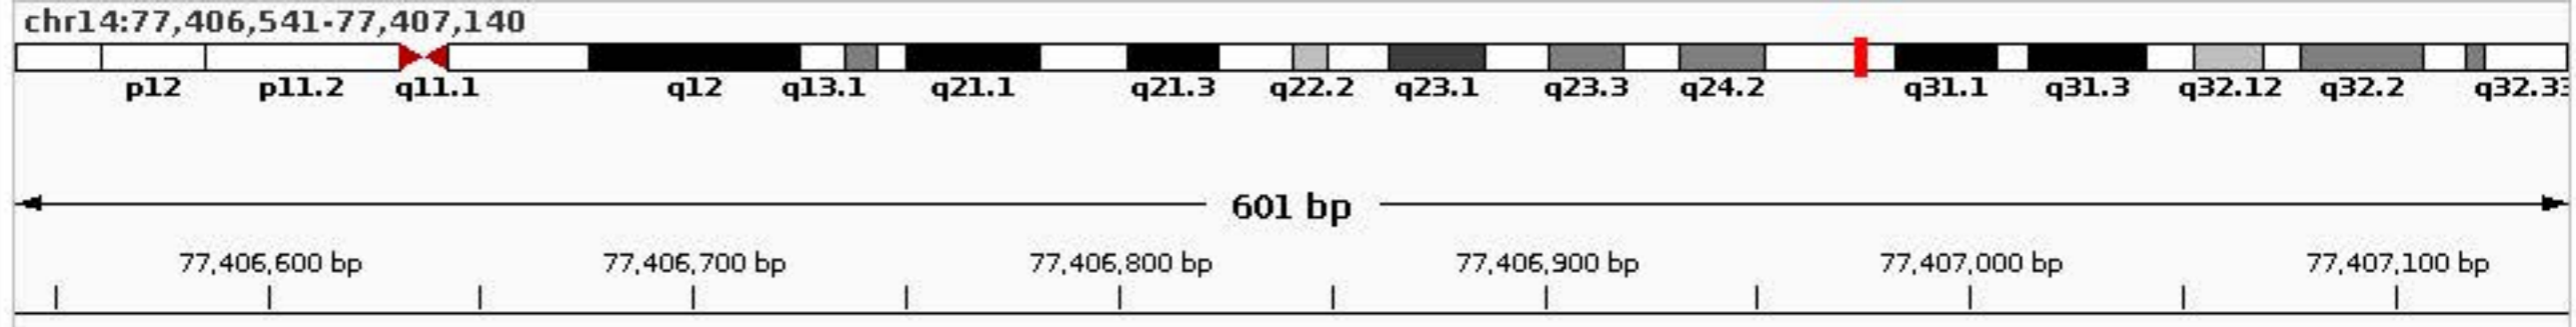

SL\_0015\_LN\_39\_mut.bam Coverage

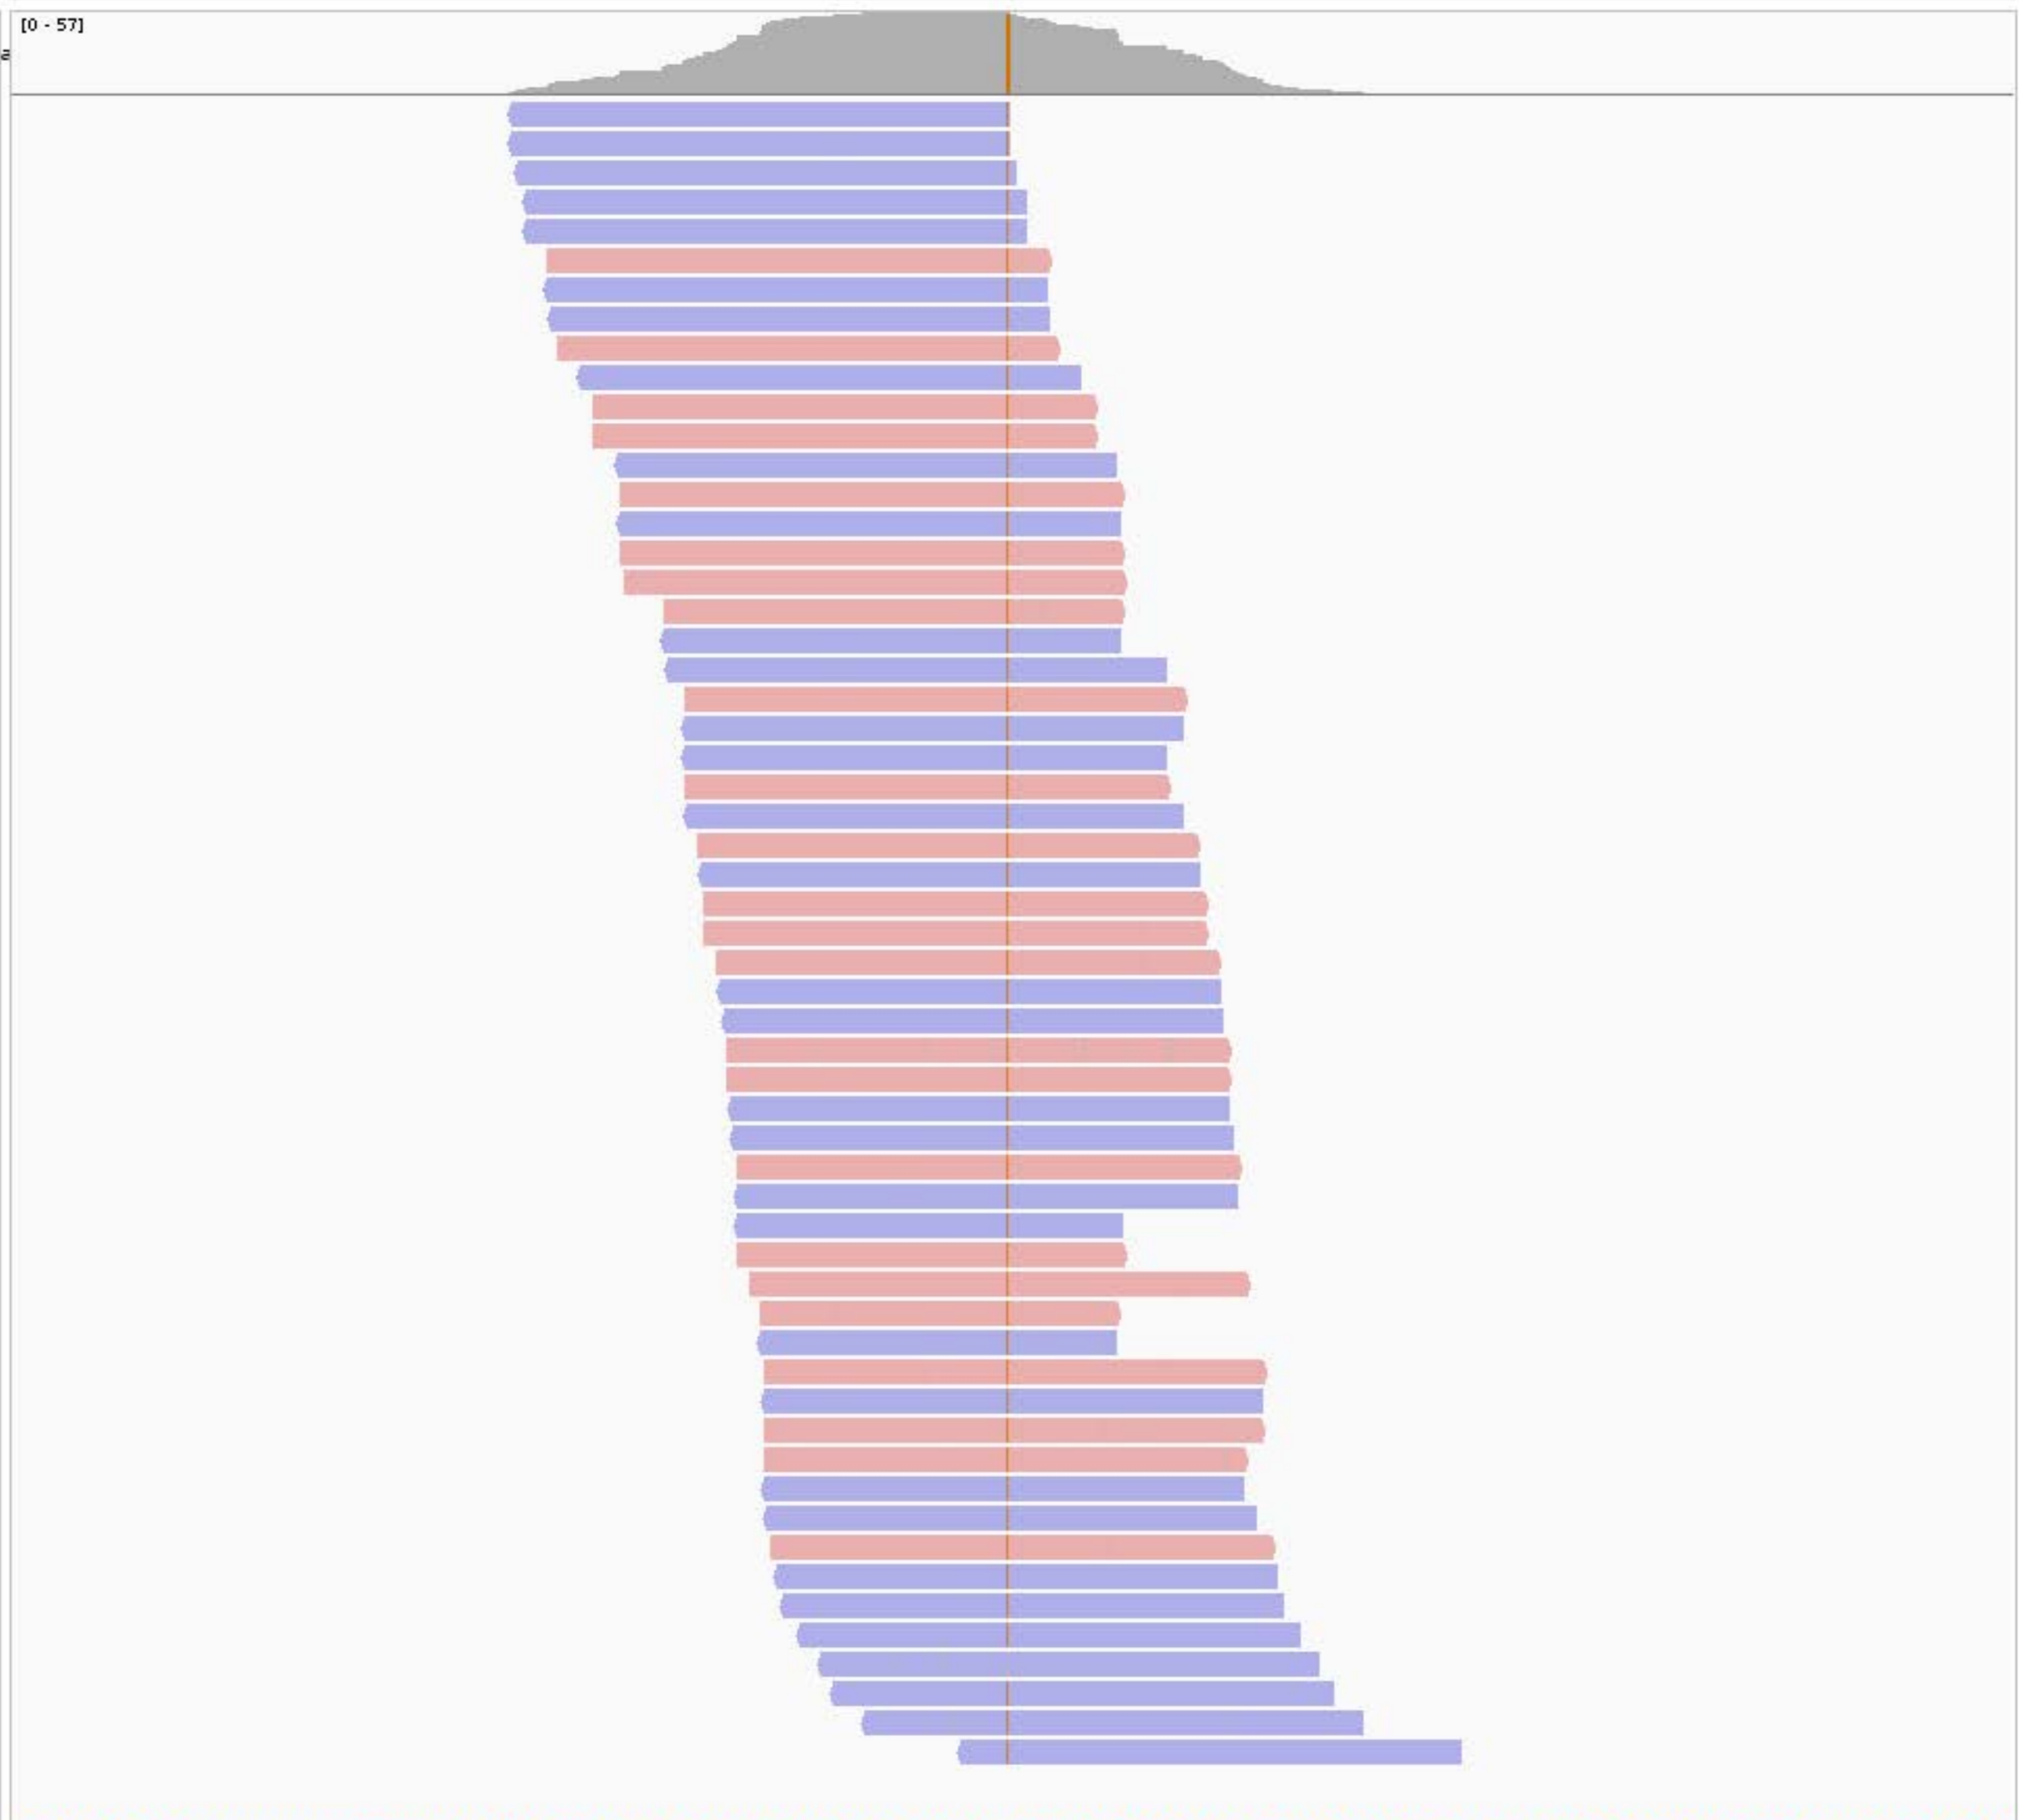

Sequence

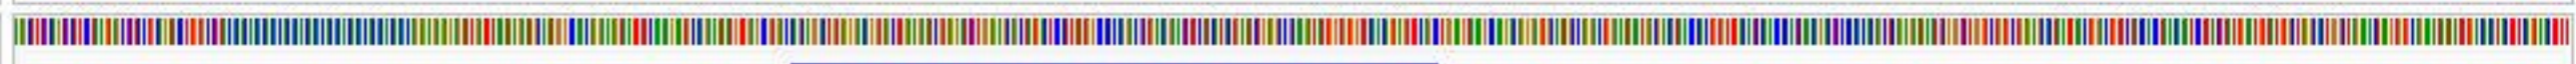

Refseq Genes

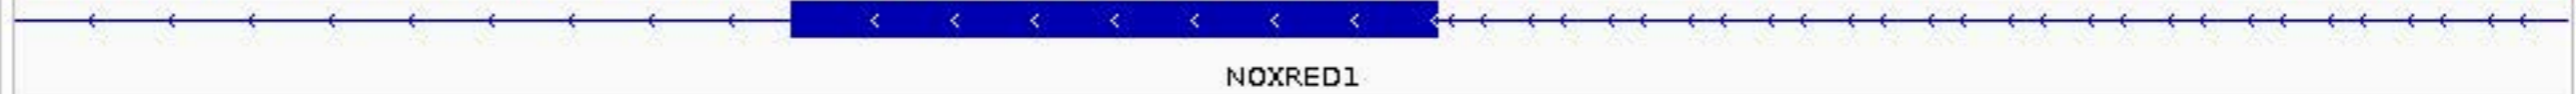

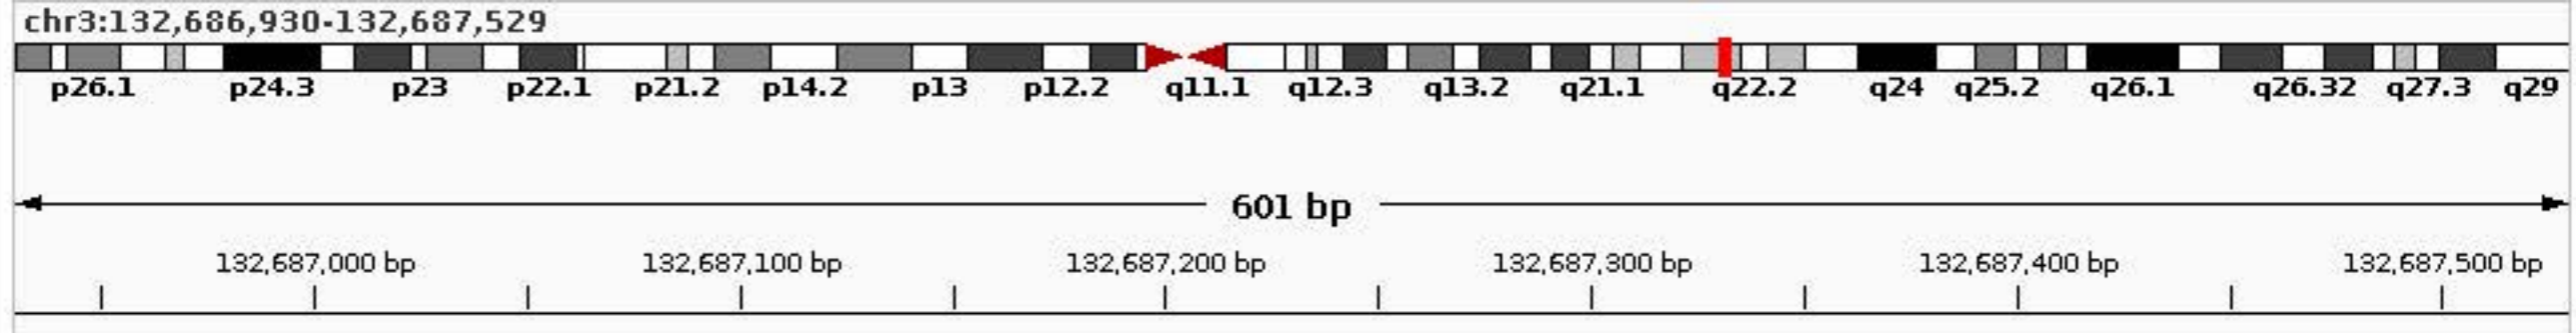

SL\_0003\_LN\_51\_mut.bam Coverage

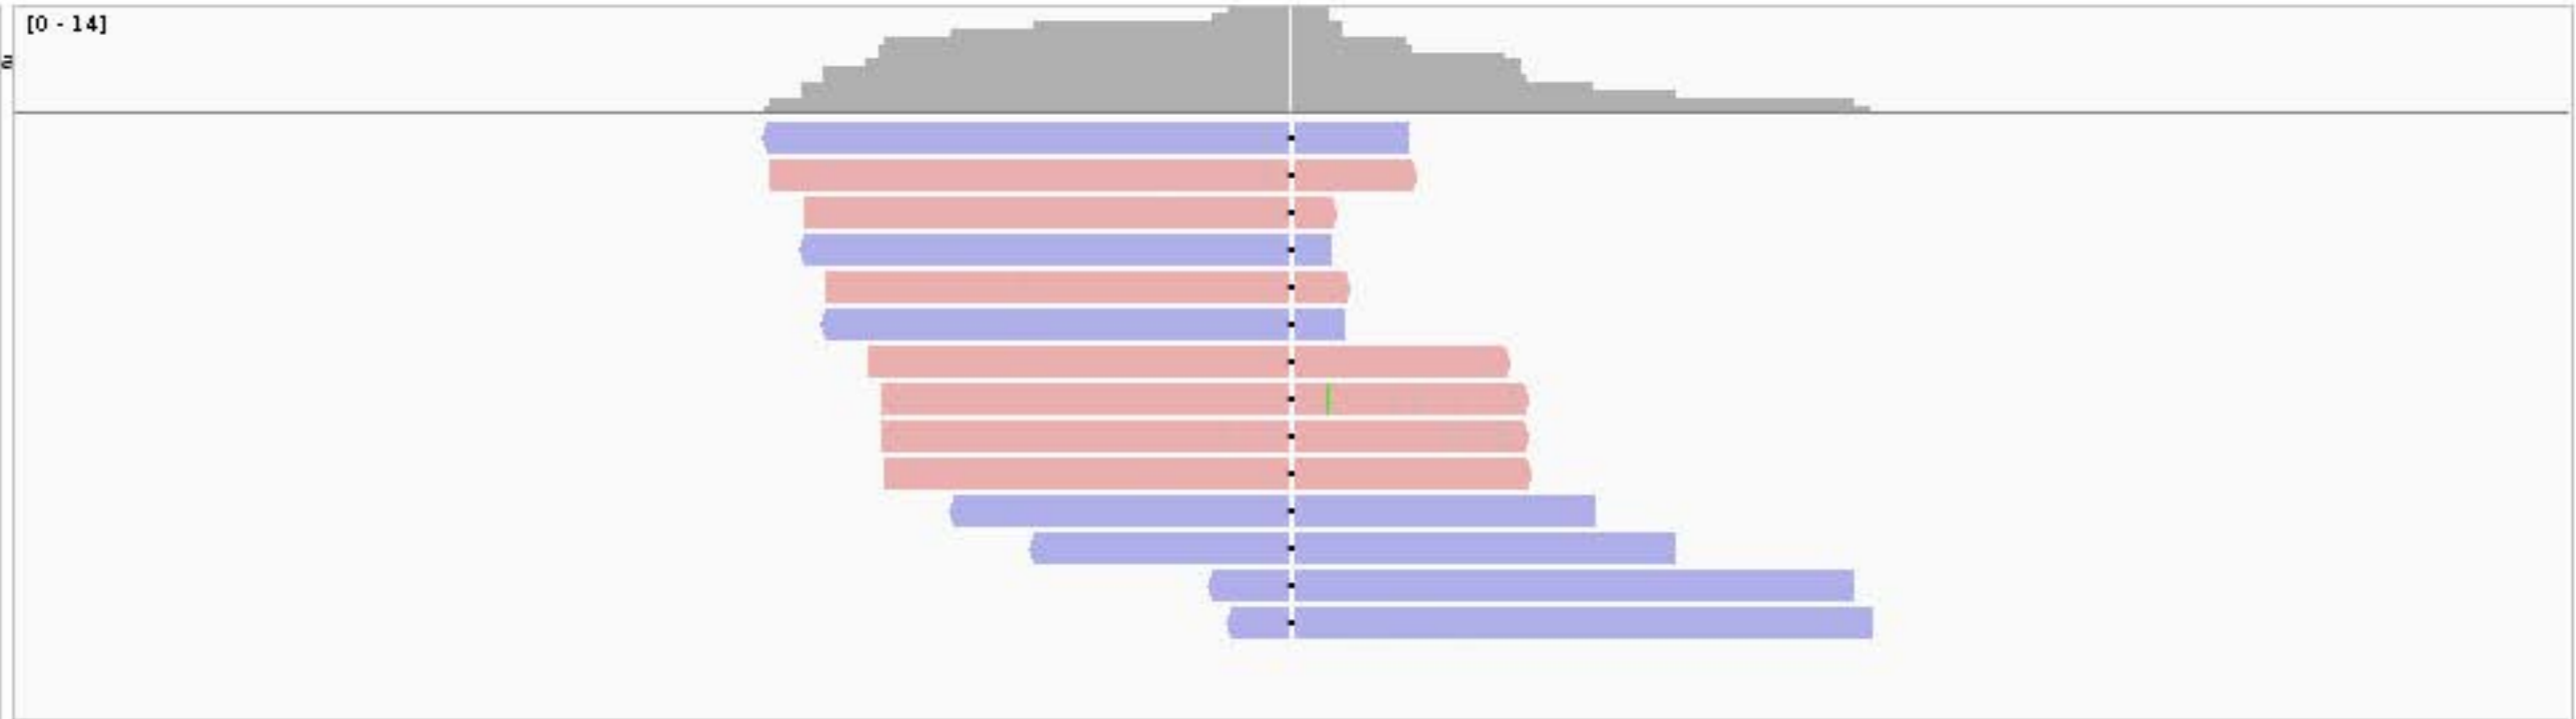

SL\_0003\_LN\_51\_mut.bam

Sequence →

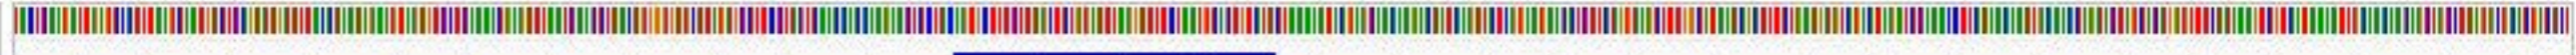

Refseq Genes

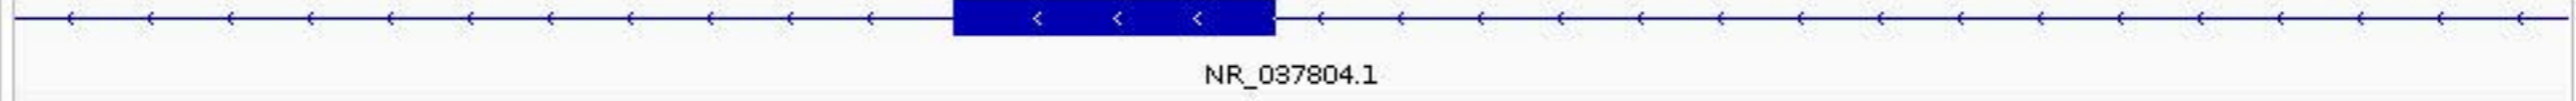

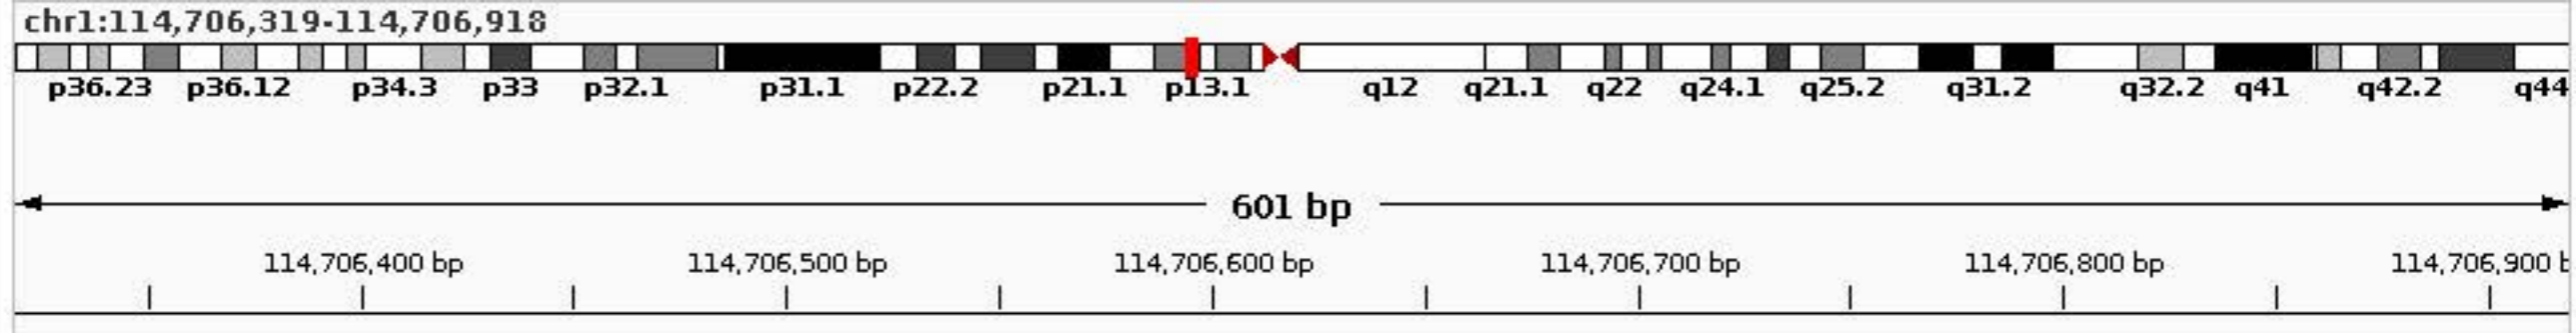

SL\_0006\_RN\_59\_mut.bam Coverage

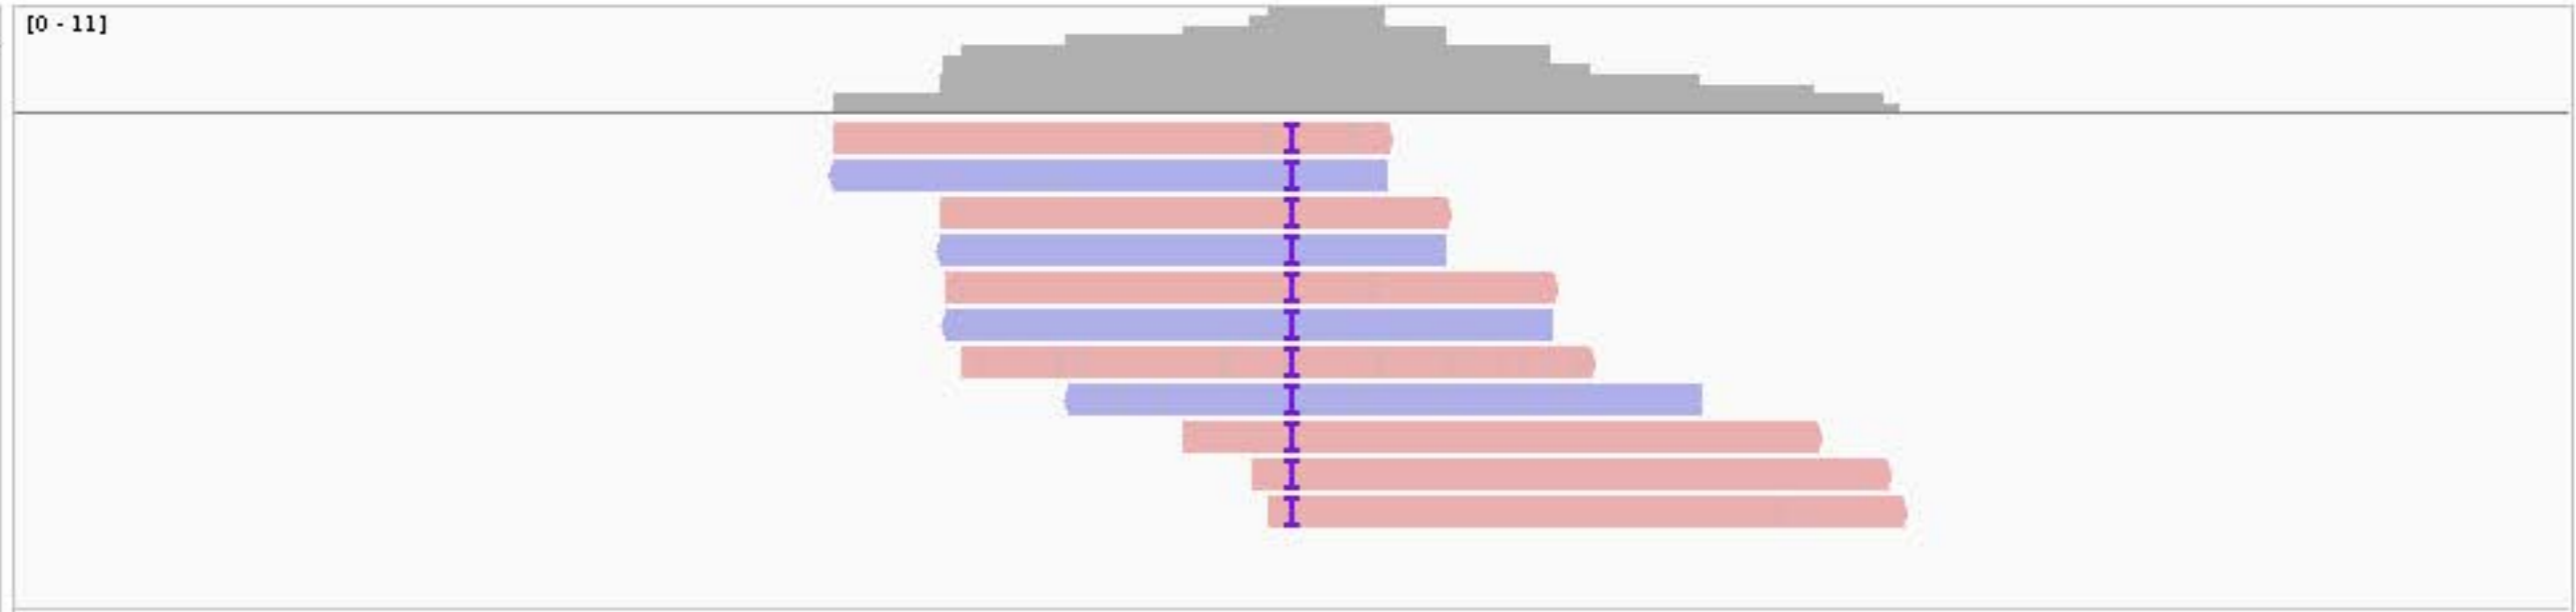

SL\_0006\_RN\_59\_mut.bam

Sequence →

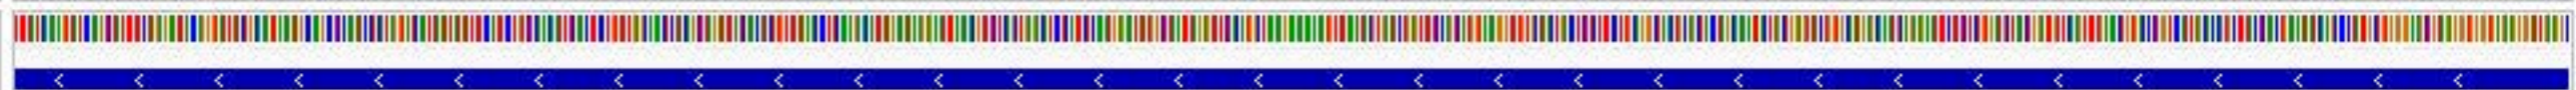

Refseq Genes

NRAS



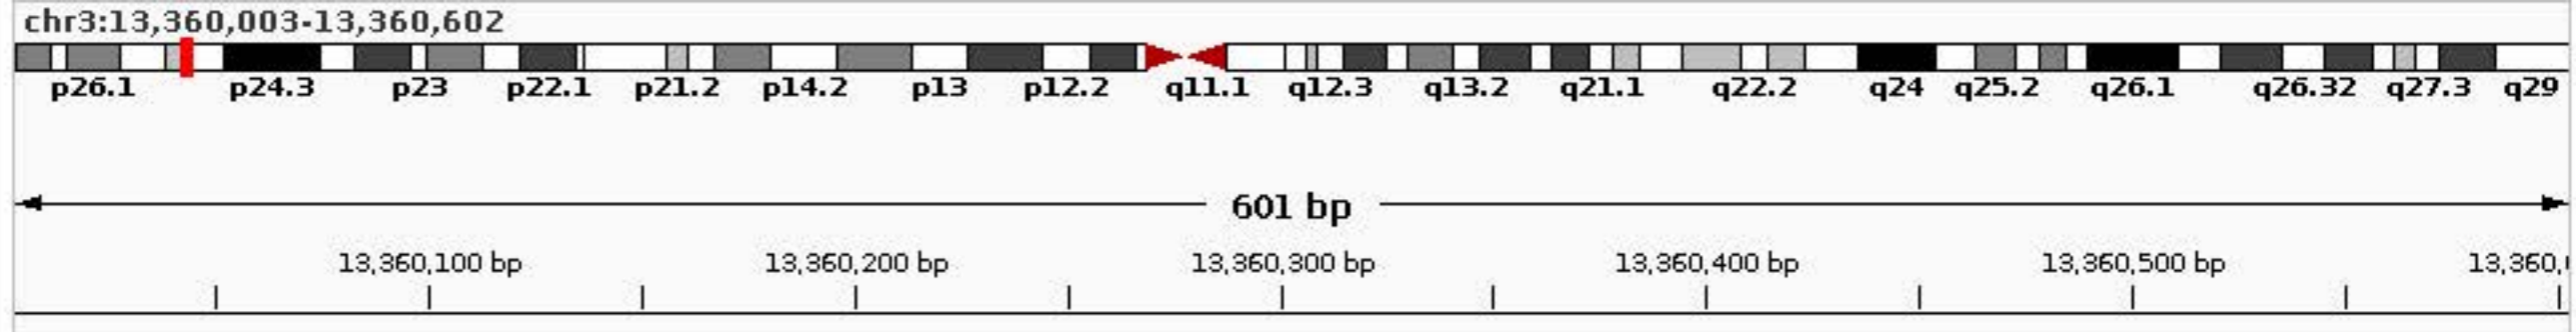

SL\_0002\_LN\_1\_mut.bam Coverage

SL\_0002\_LN\_1\_mut.bam

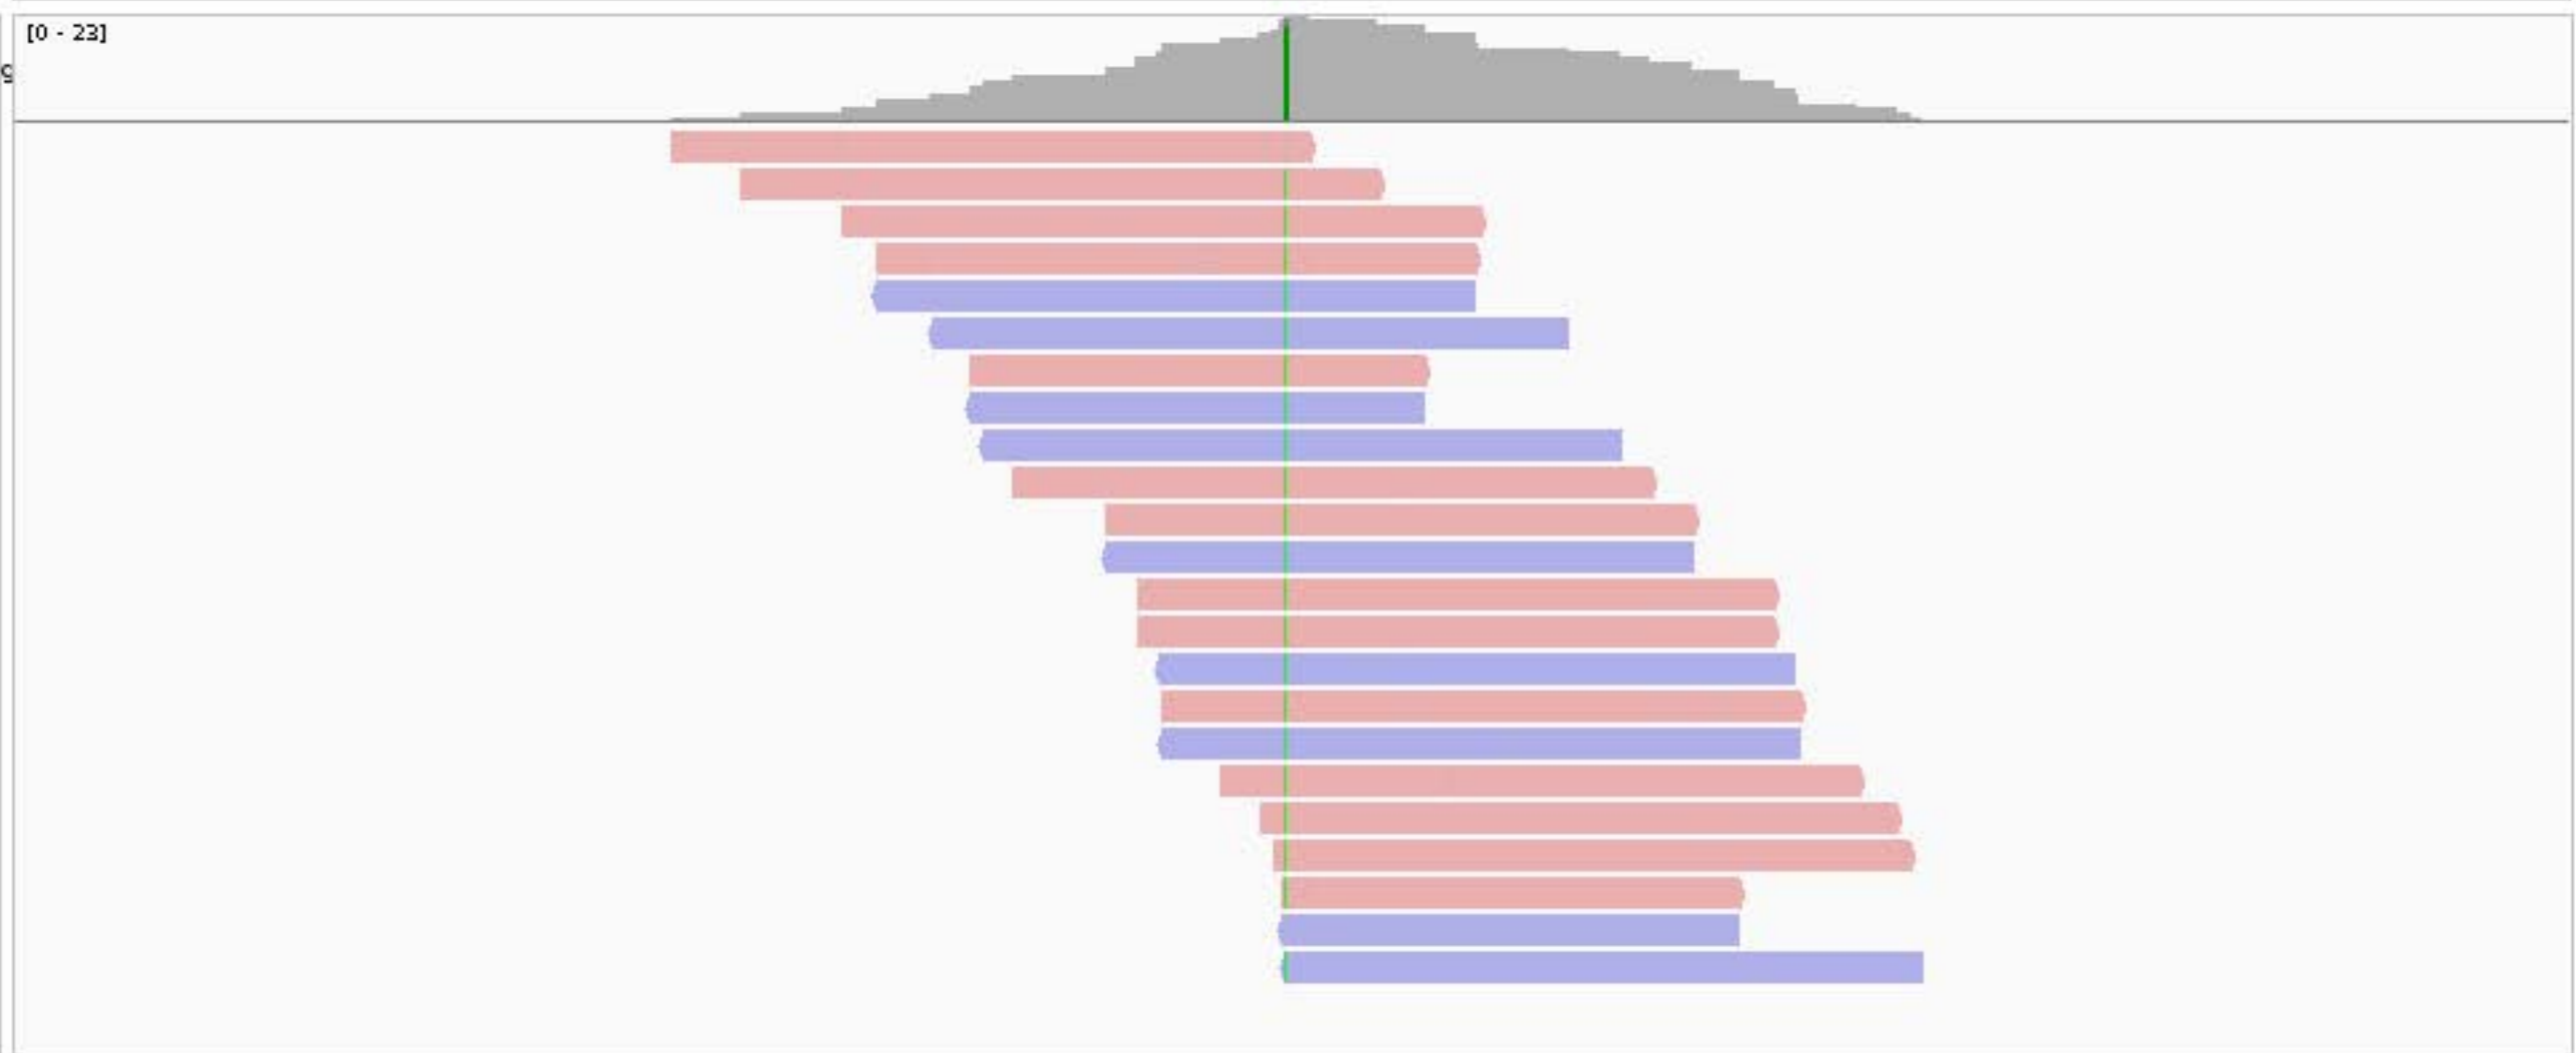

Sequence

Refseq Genes

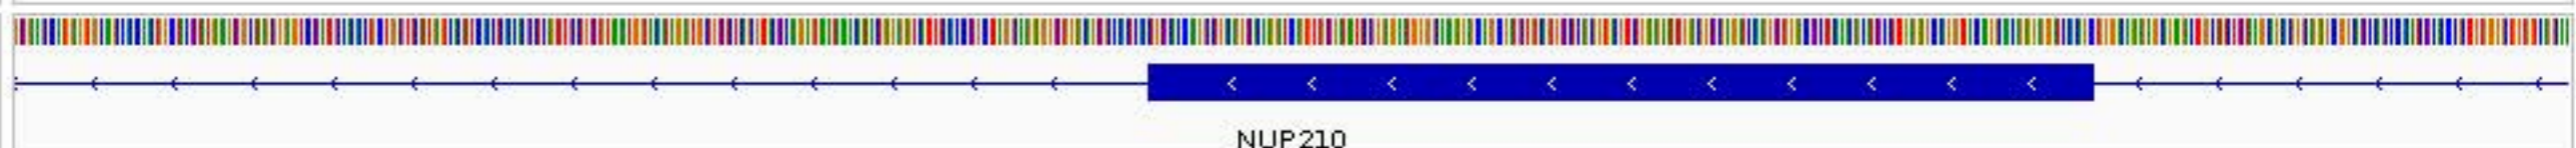



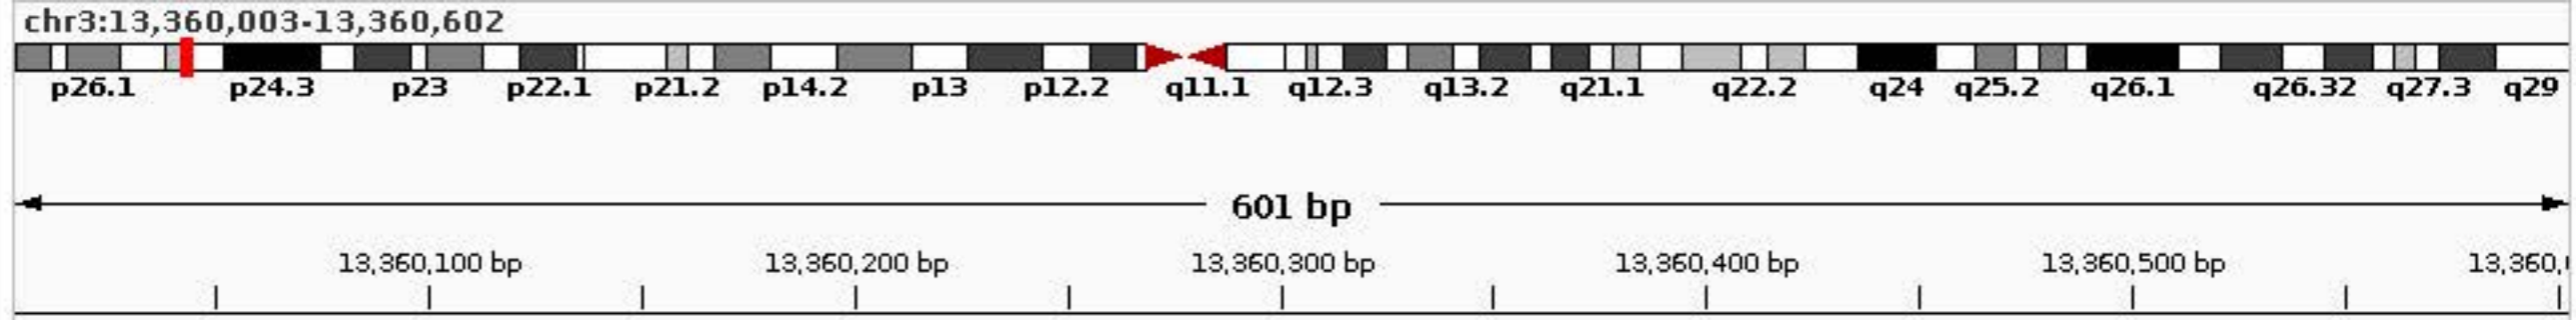

SL\_0002\_LN\_11\_mut.bam Coverage

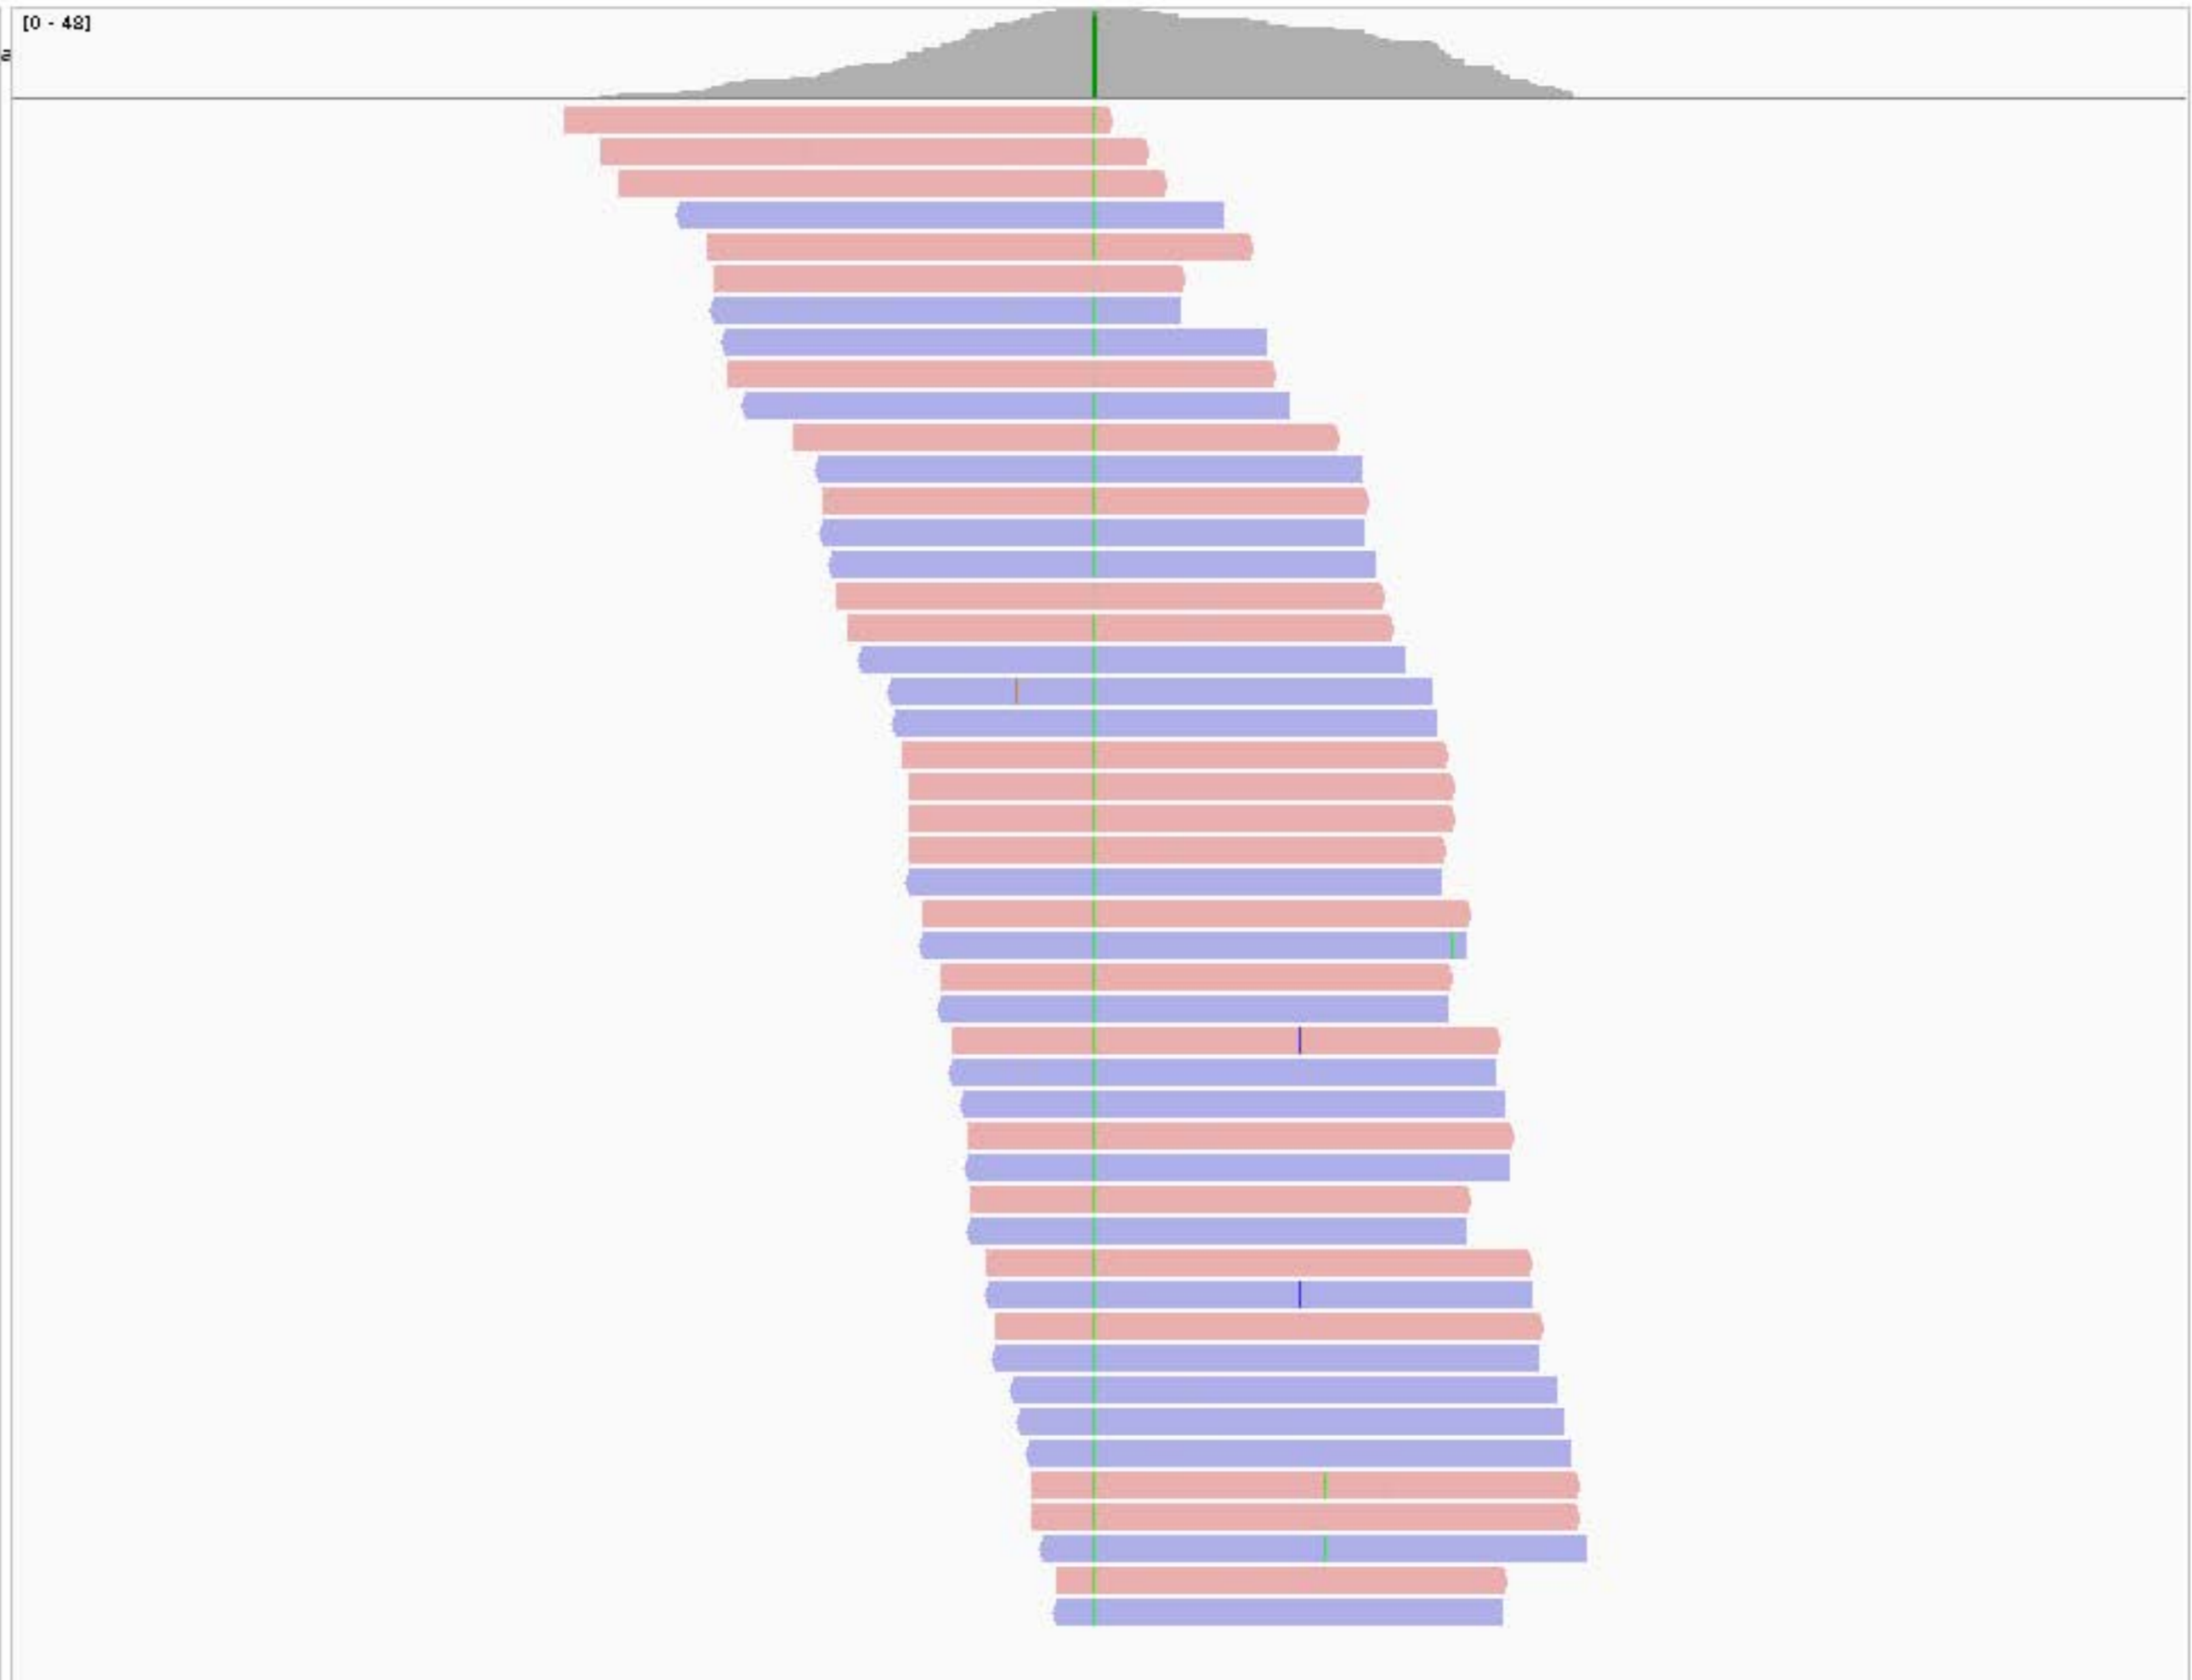

Sequence

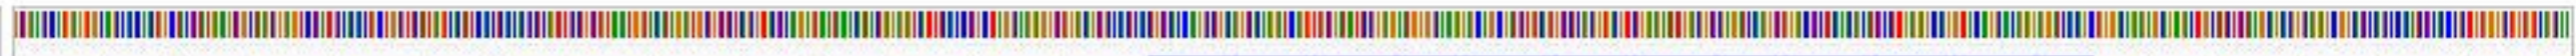

Refseq Genes

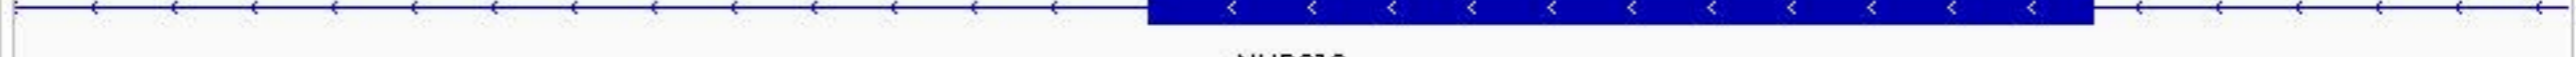

NUP210

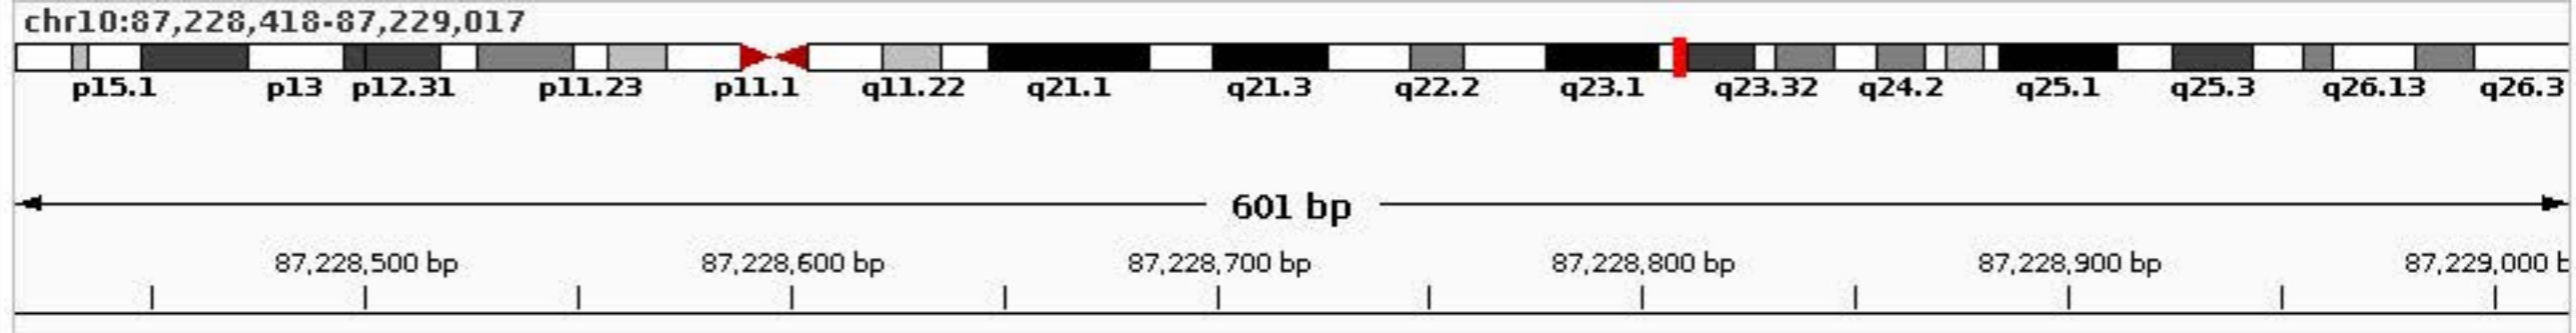

SL\_0001\_LN\_10\_mut.bam Coverage

SL\_0001\_LN\_10\_mut.bam

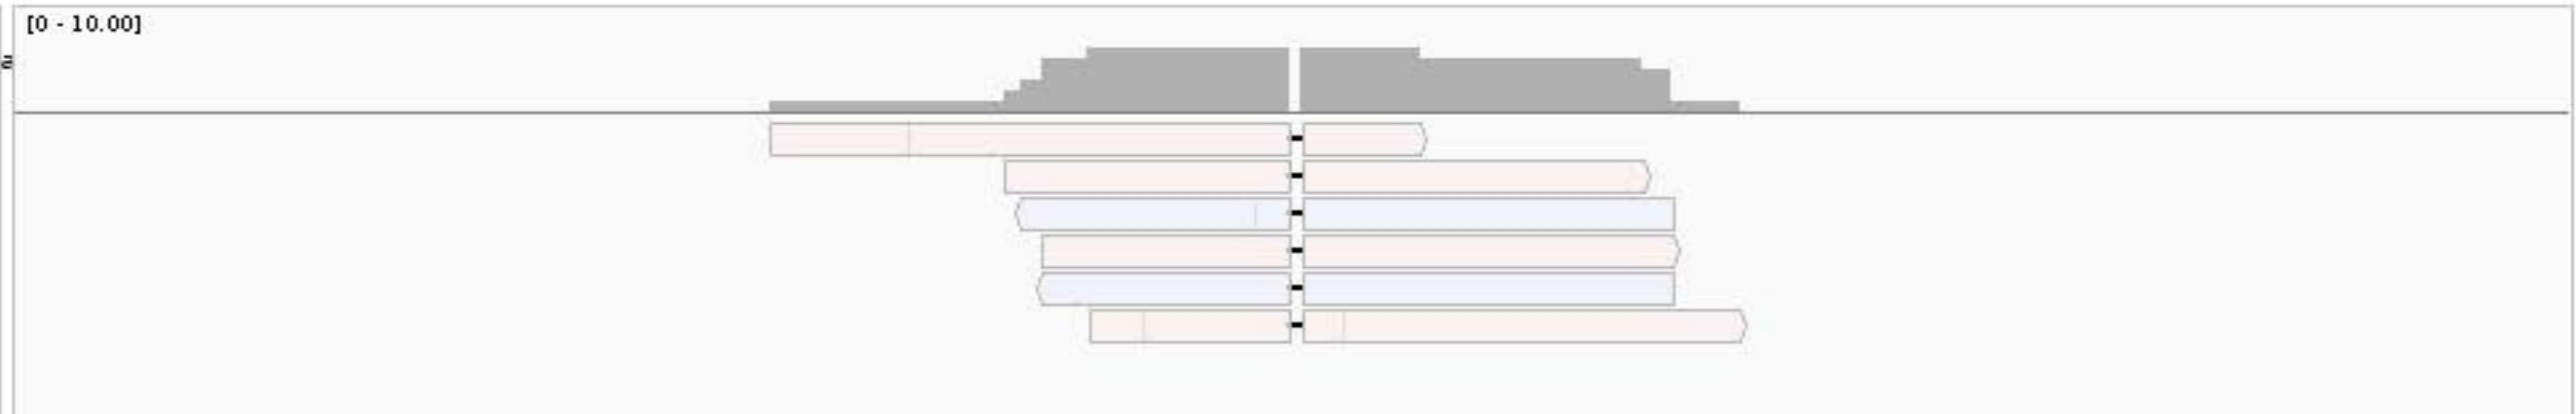

Sequence

Refseq Genes

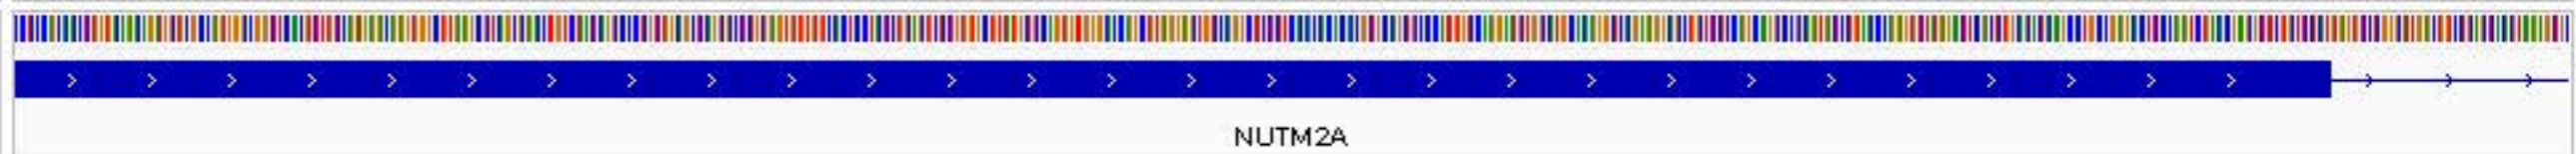

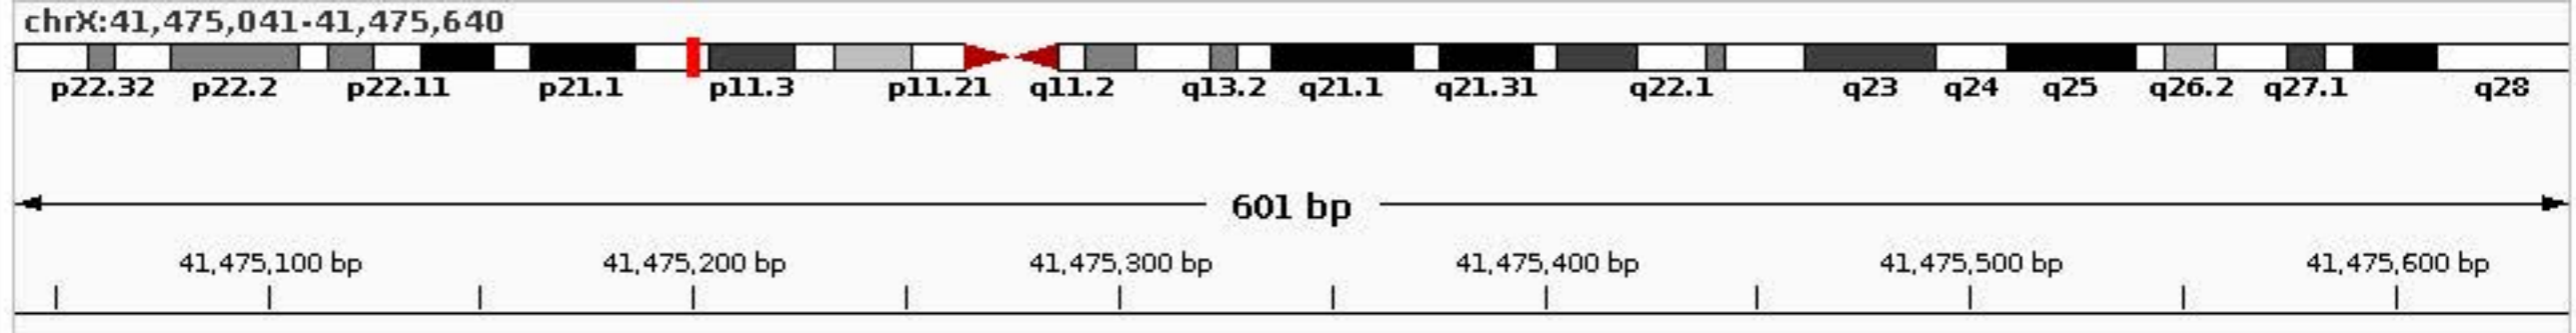

SL\_0007\_RN\_2\_mut.bam Coverage

SL\_0007\_RN\_2\_mut.bam

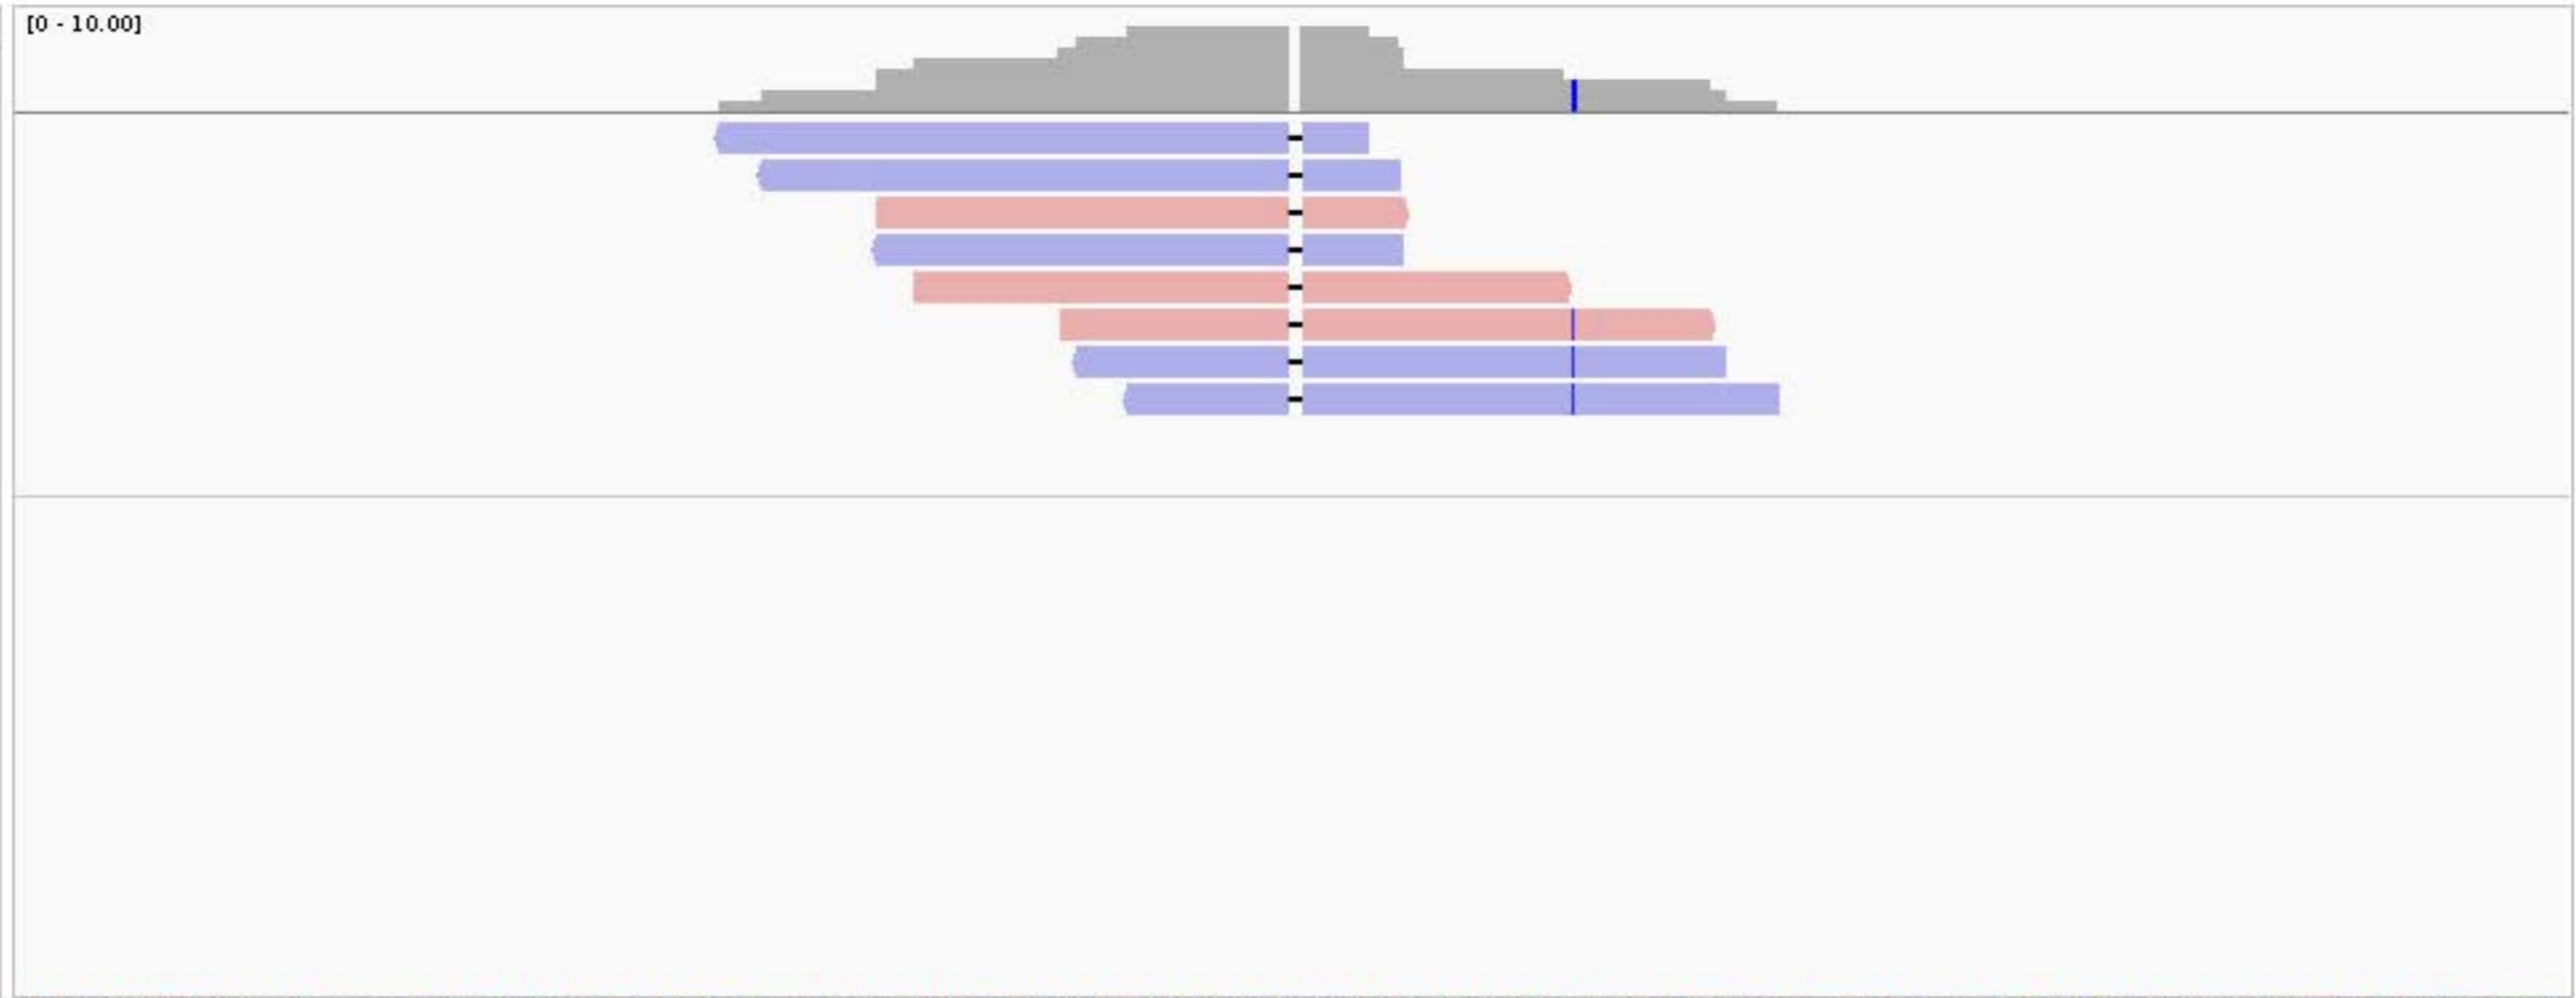

Sequence

Refseq Genes

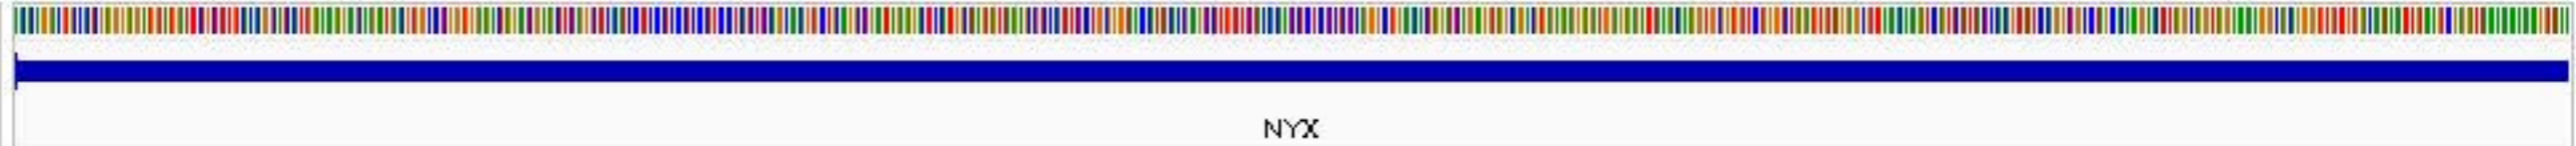

NYX

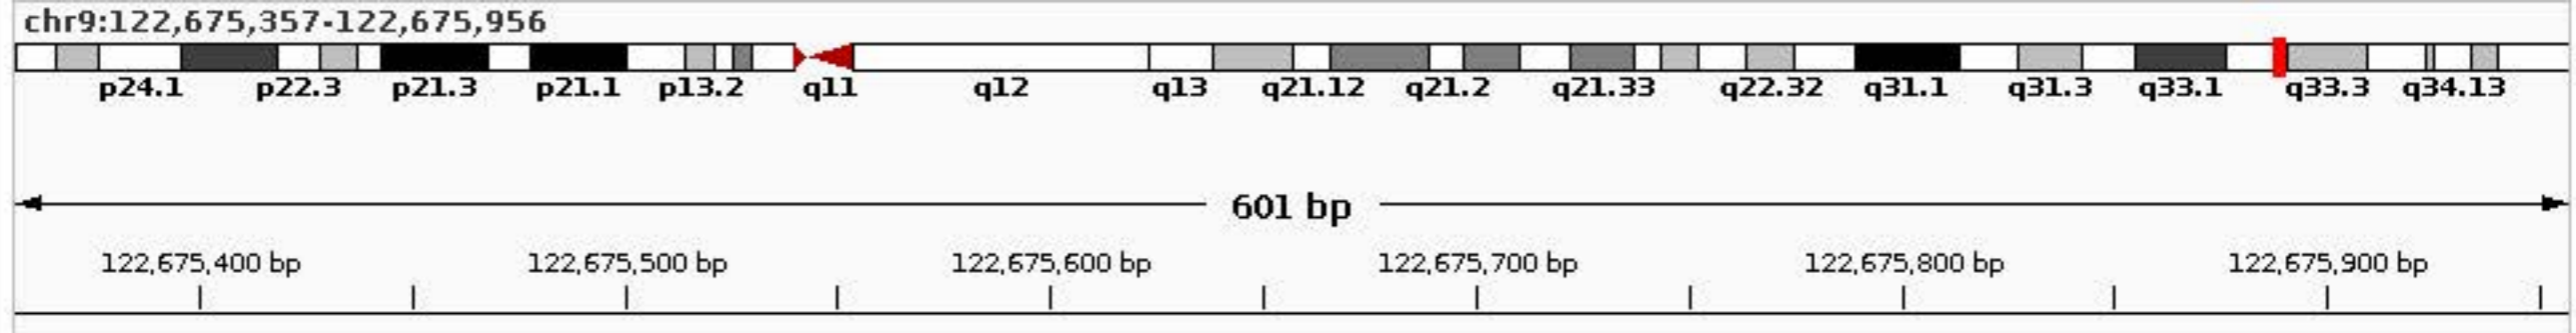

SL\_0003\_LN\_51\_mut.bam Coverage

SL\_0003\_LN\_51\_mut.bam

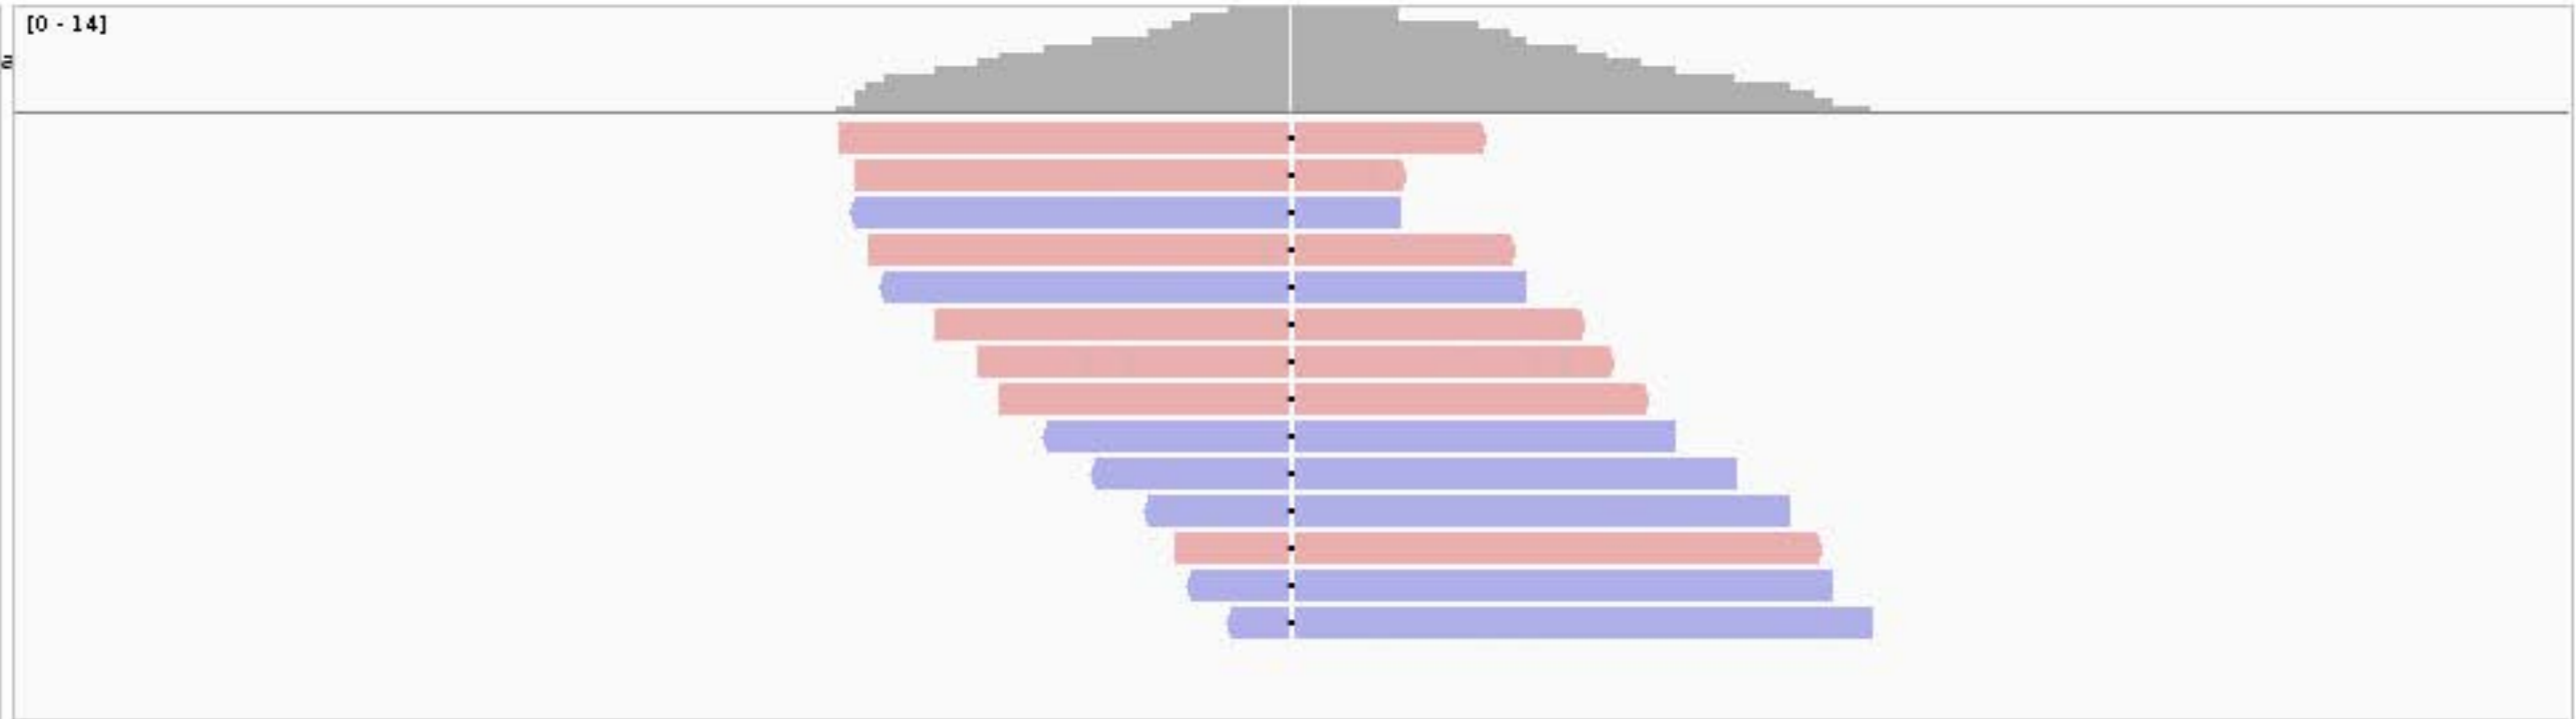

Sequence

Refseq Genes

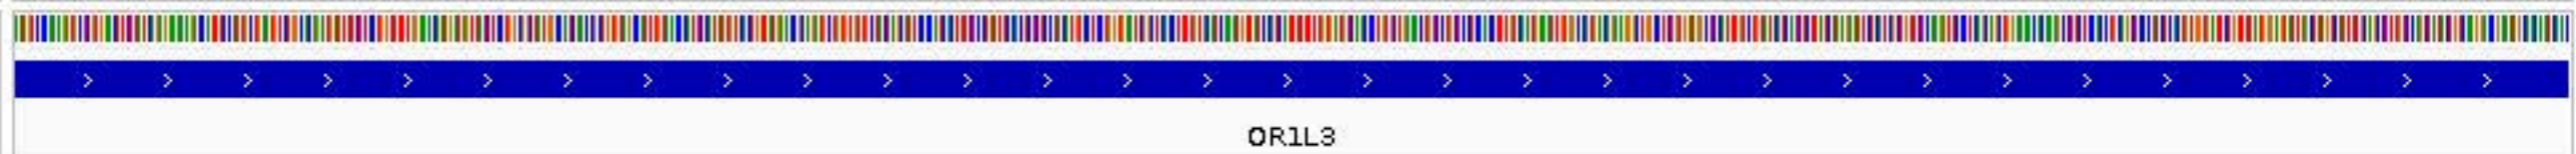

OR1L3

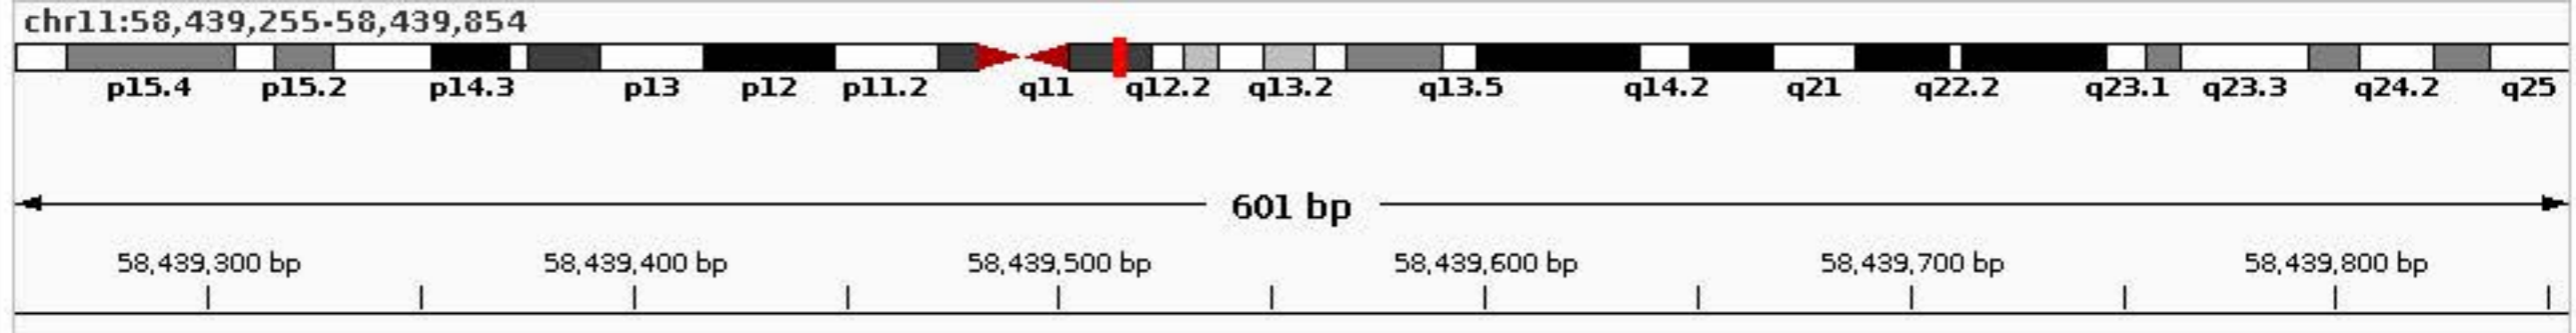

SL\_0006\_RN\_67\_mut.bam Coverage

SL\_0006\_RN\_67\_mut.bam

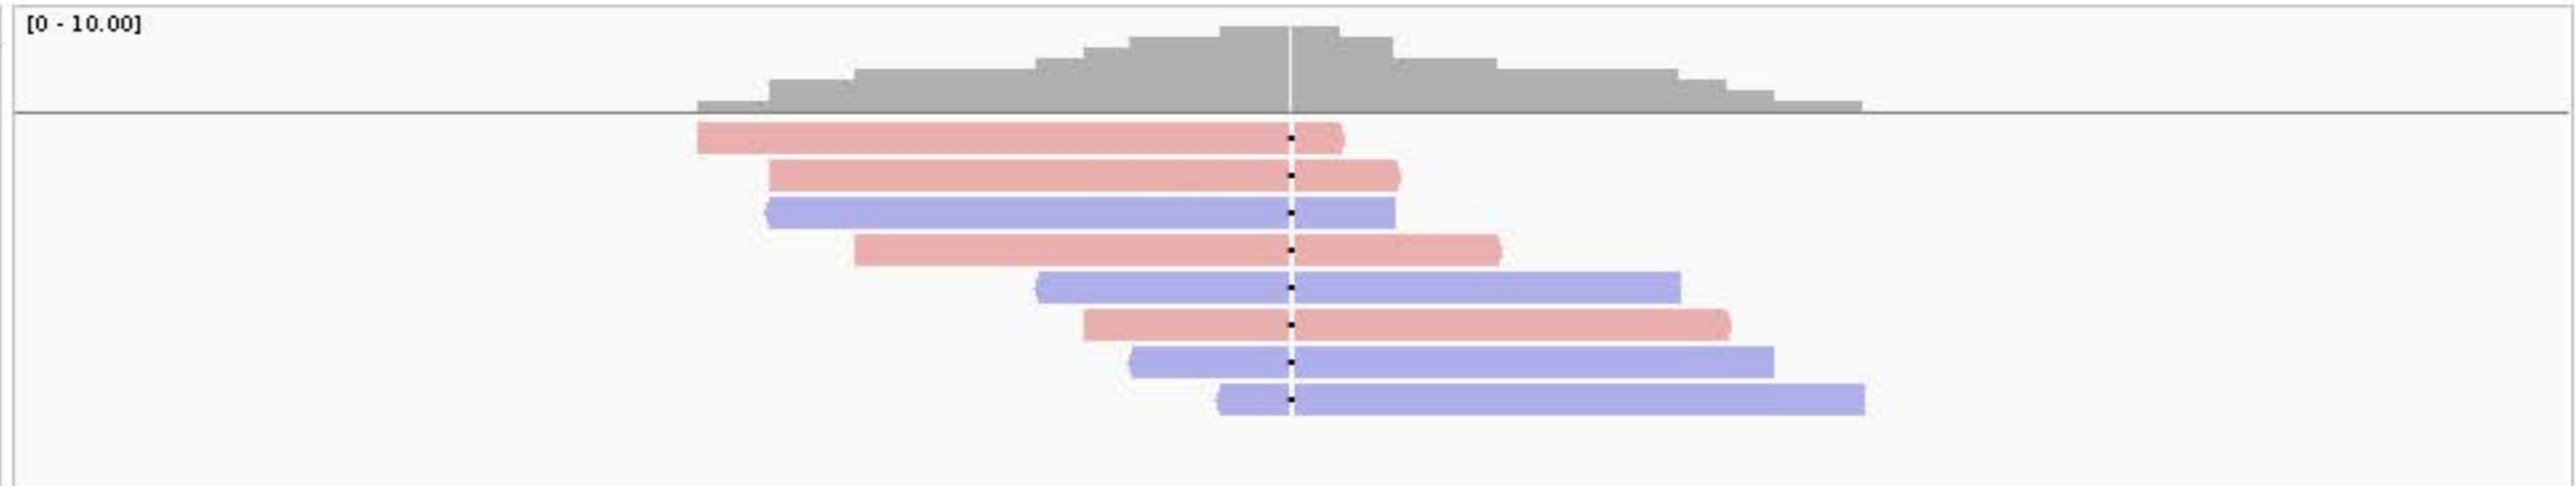

Sequence →

Refseq Genes

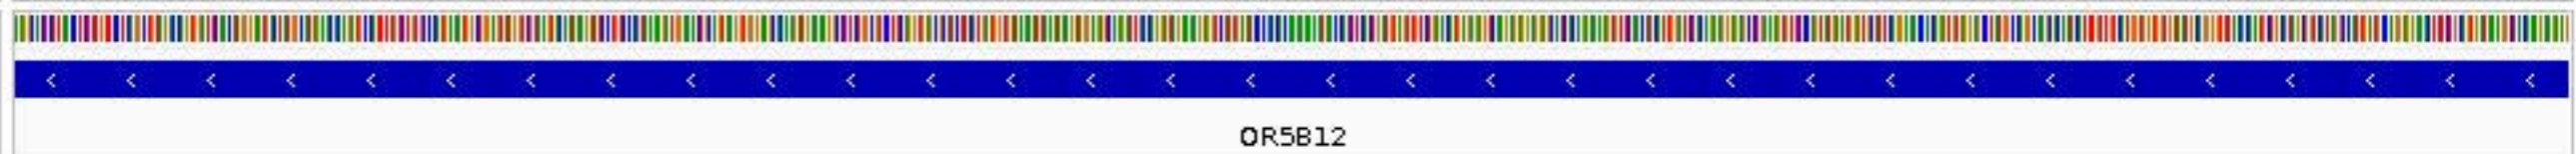



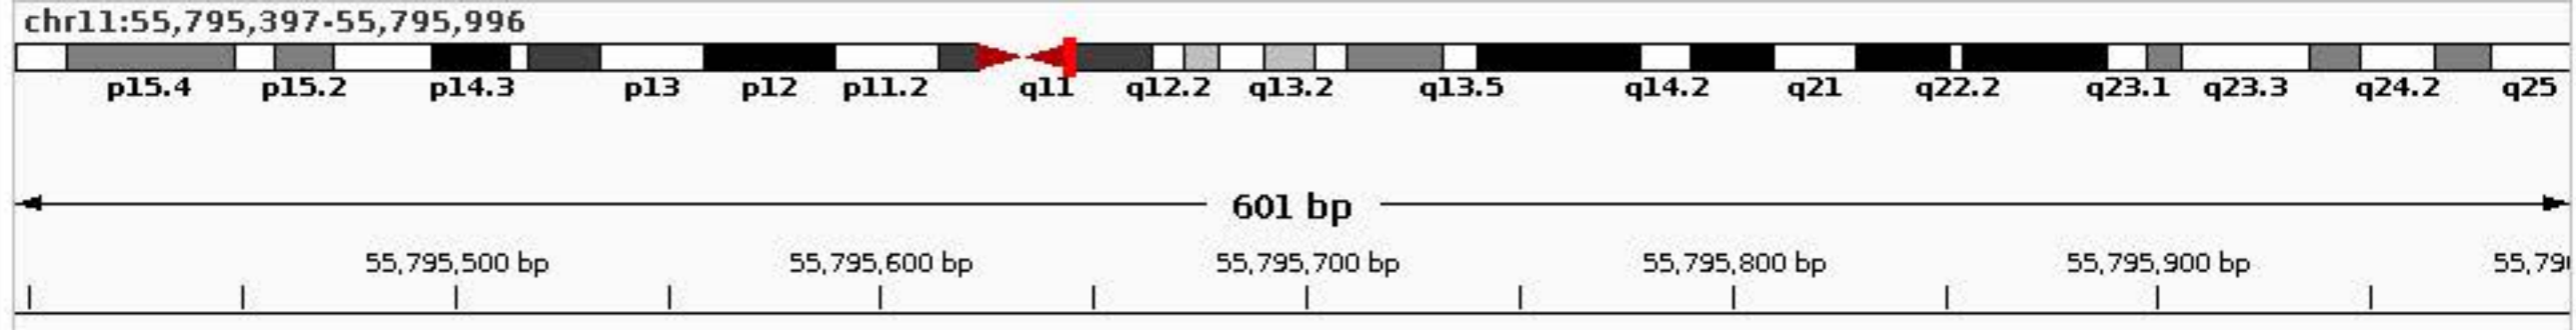

SL\_0007\_RN\_2\_mut.bam Coverage

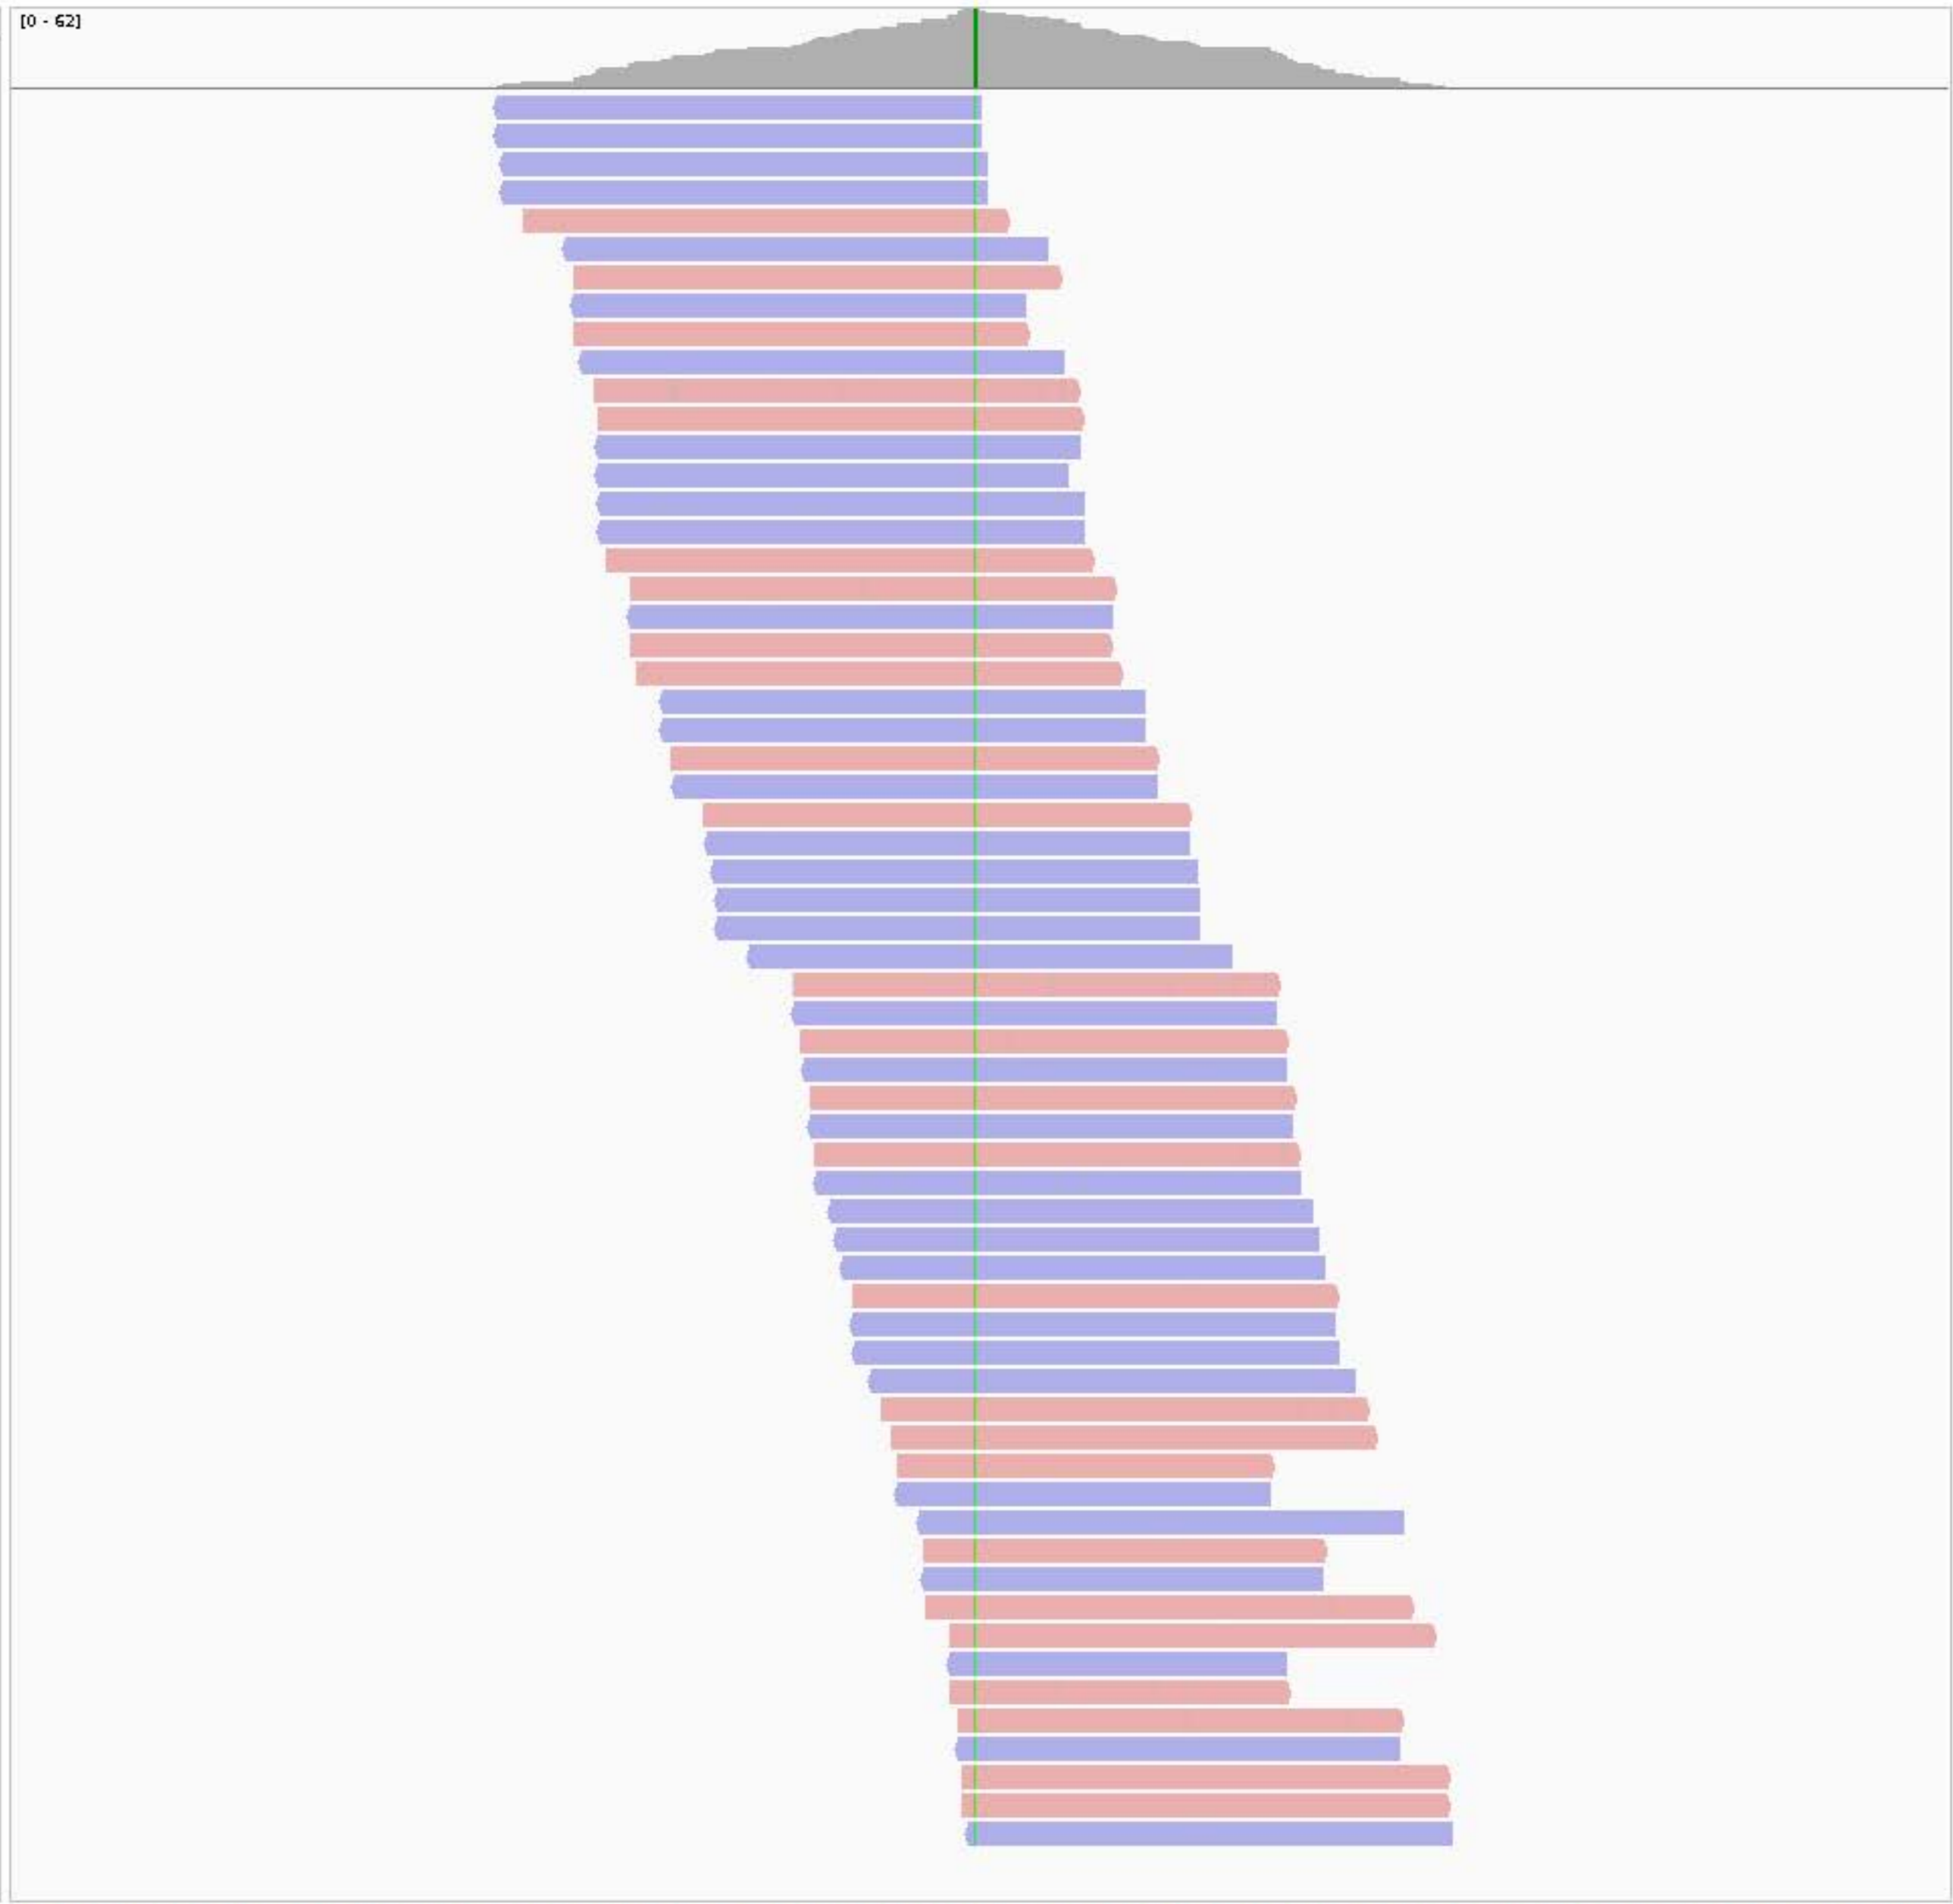

Sequence →

Refseq Genes

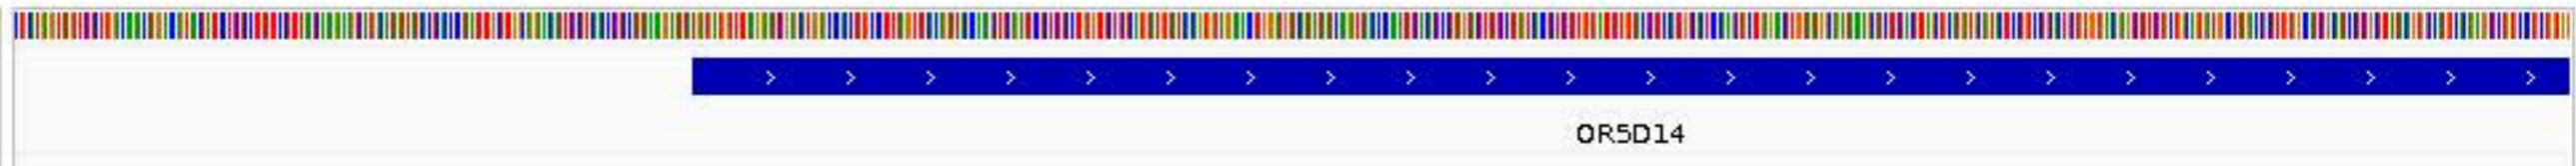

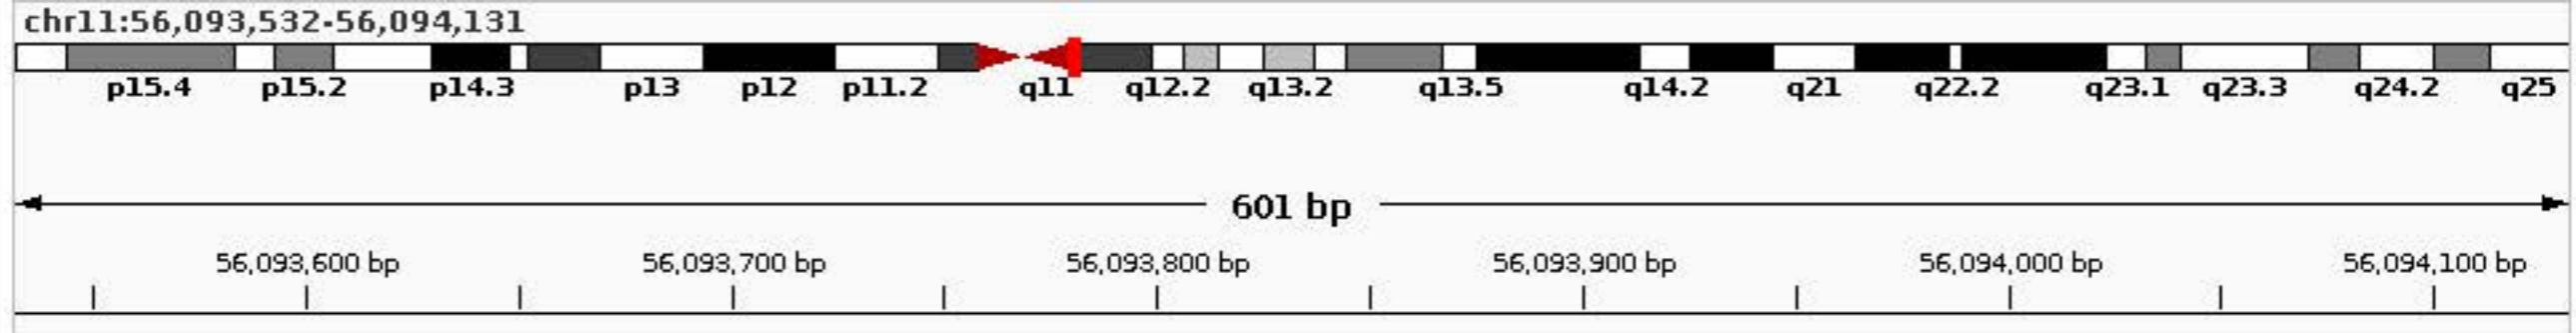

SL\_0015\_LN\_46\_mut.bam Coverage

SL\_0015\_LN\_46\_mut.bam

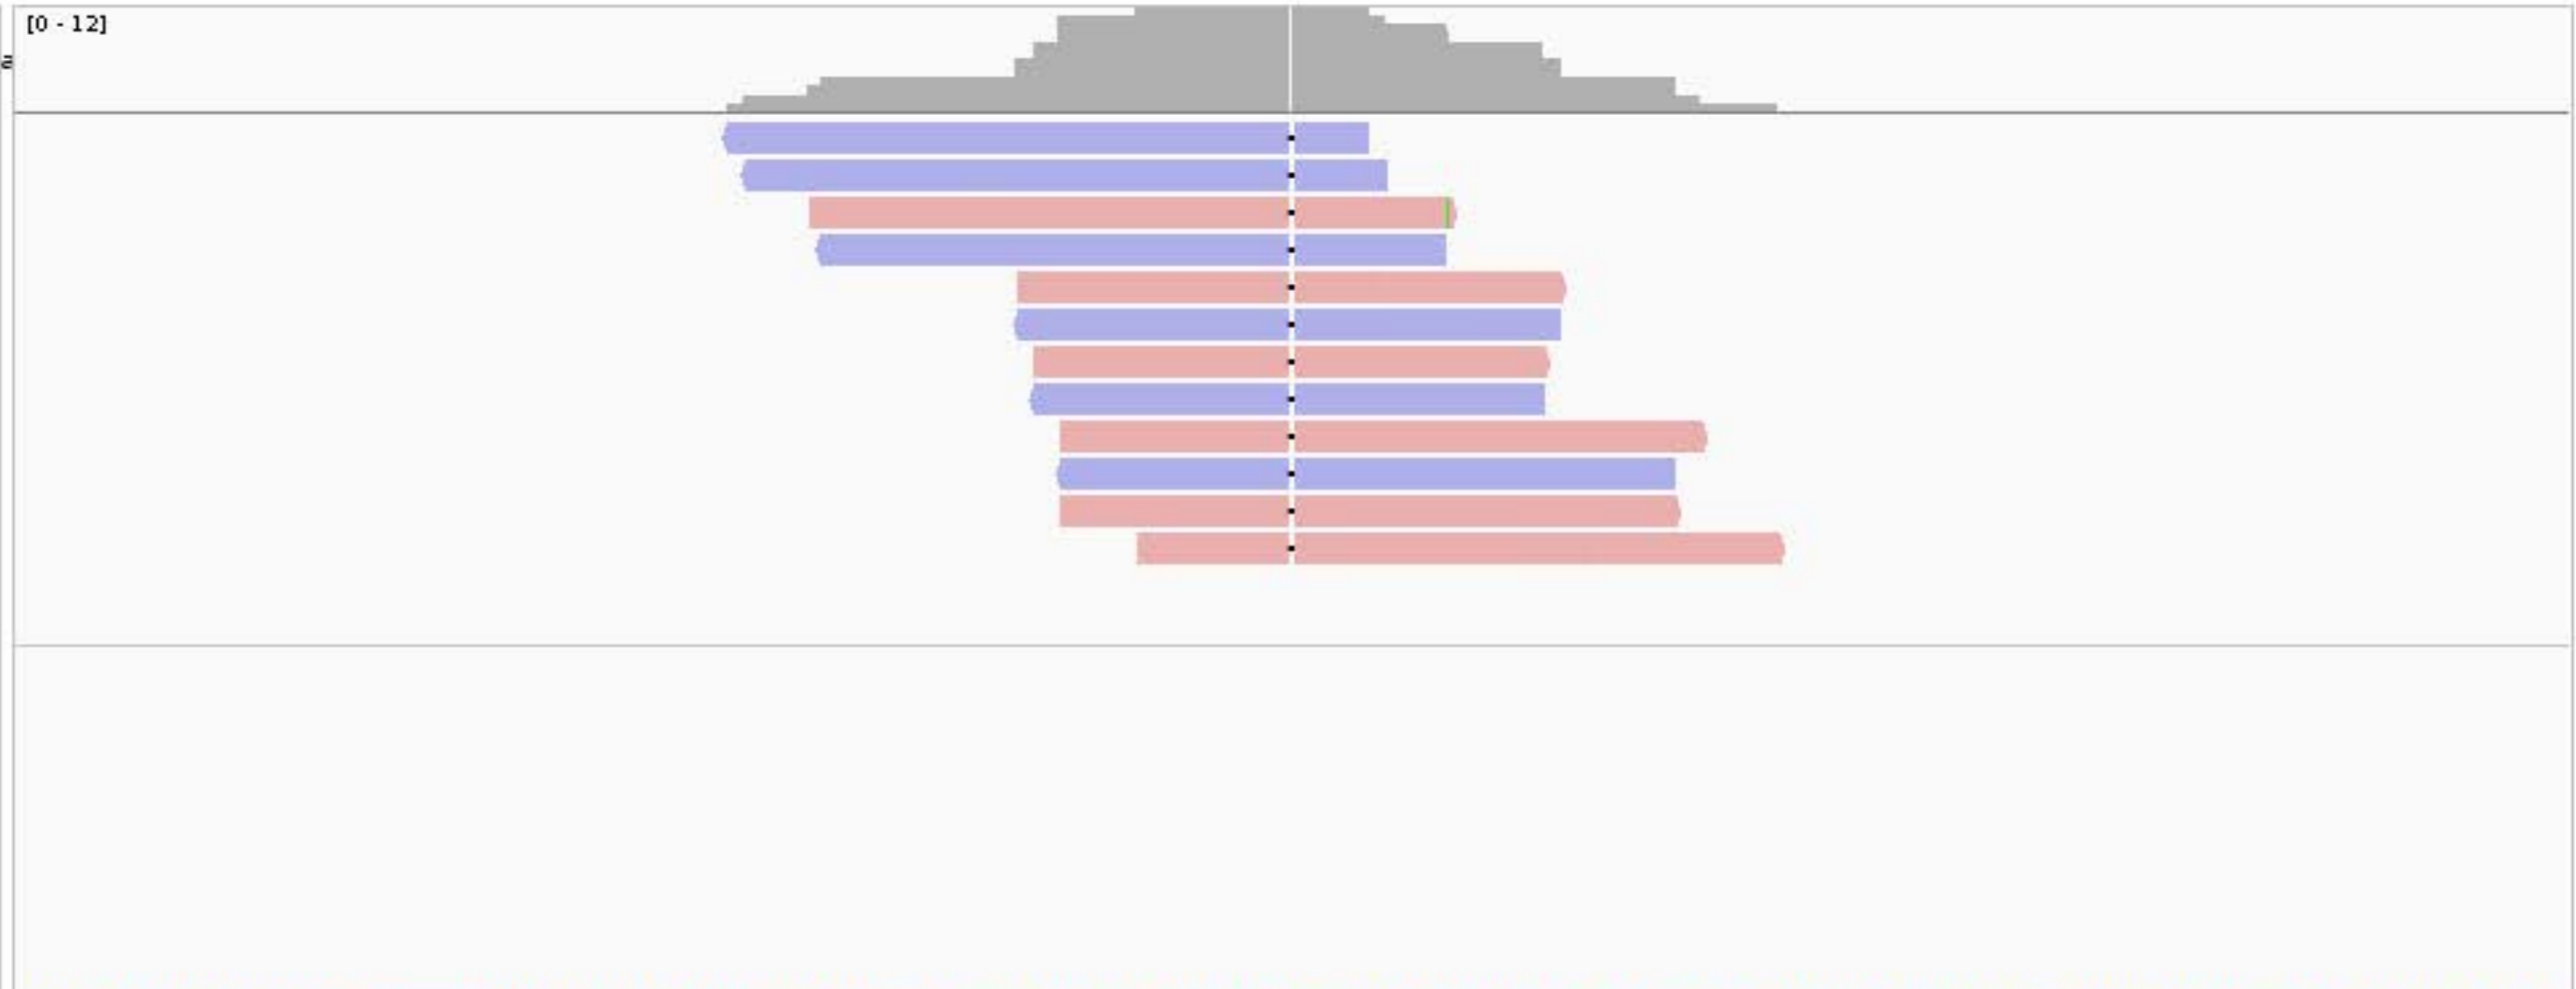

Sequence →

Refseq Genes

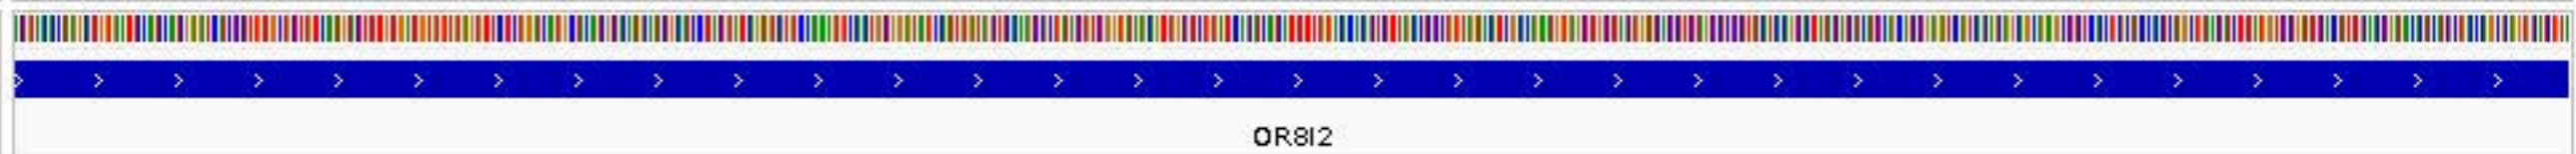

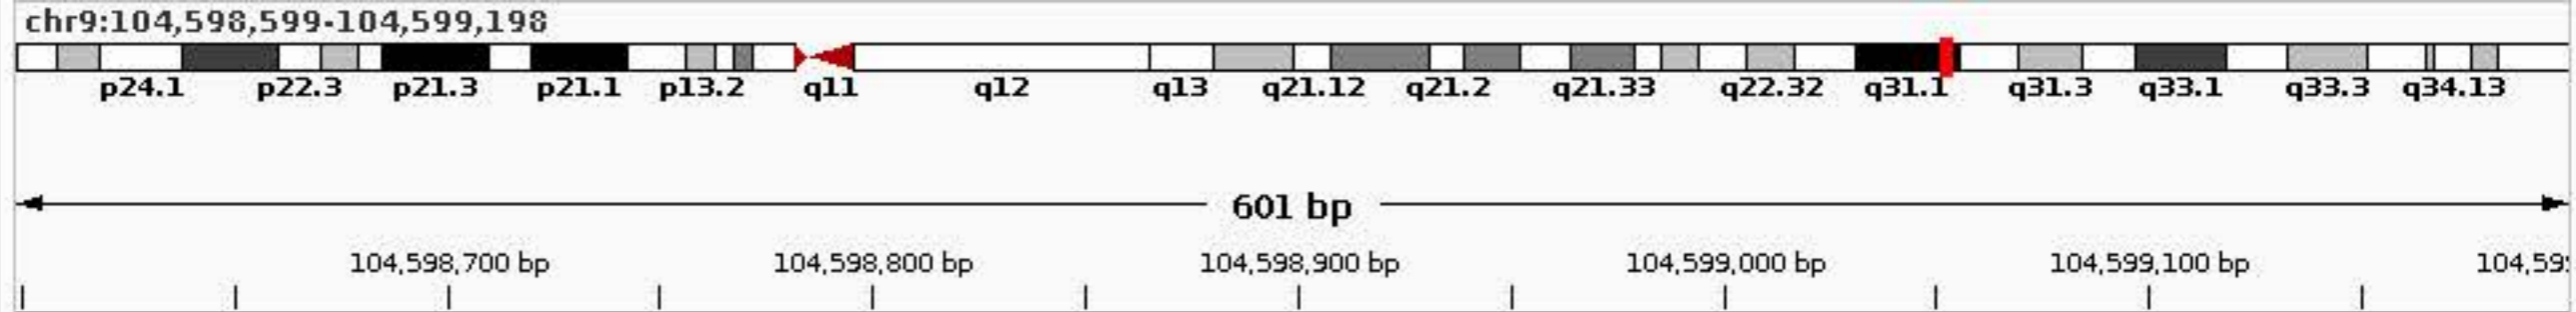

SL\_0004\_RN\_26\_mut.bam Coverage

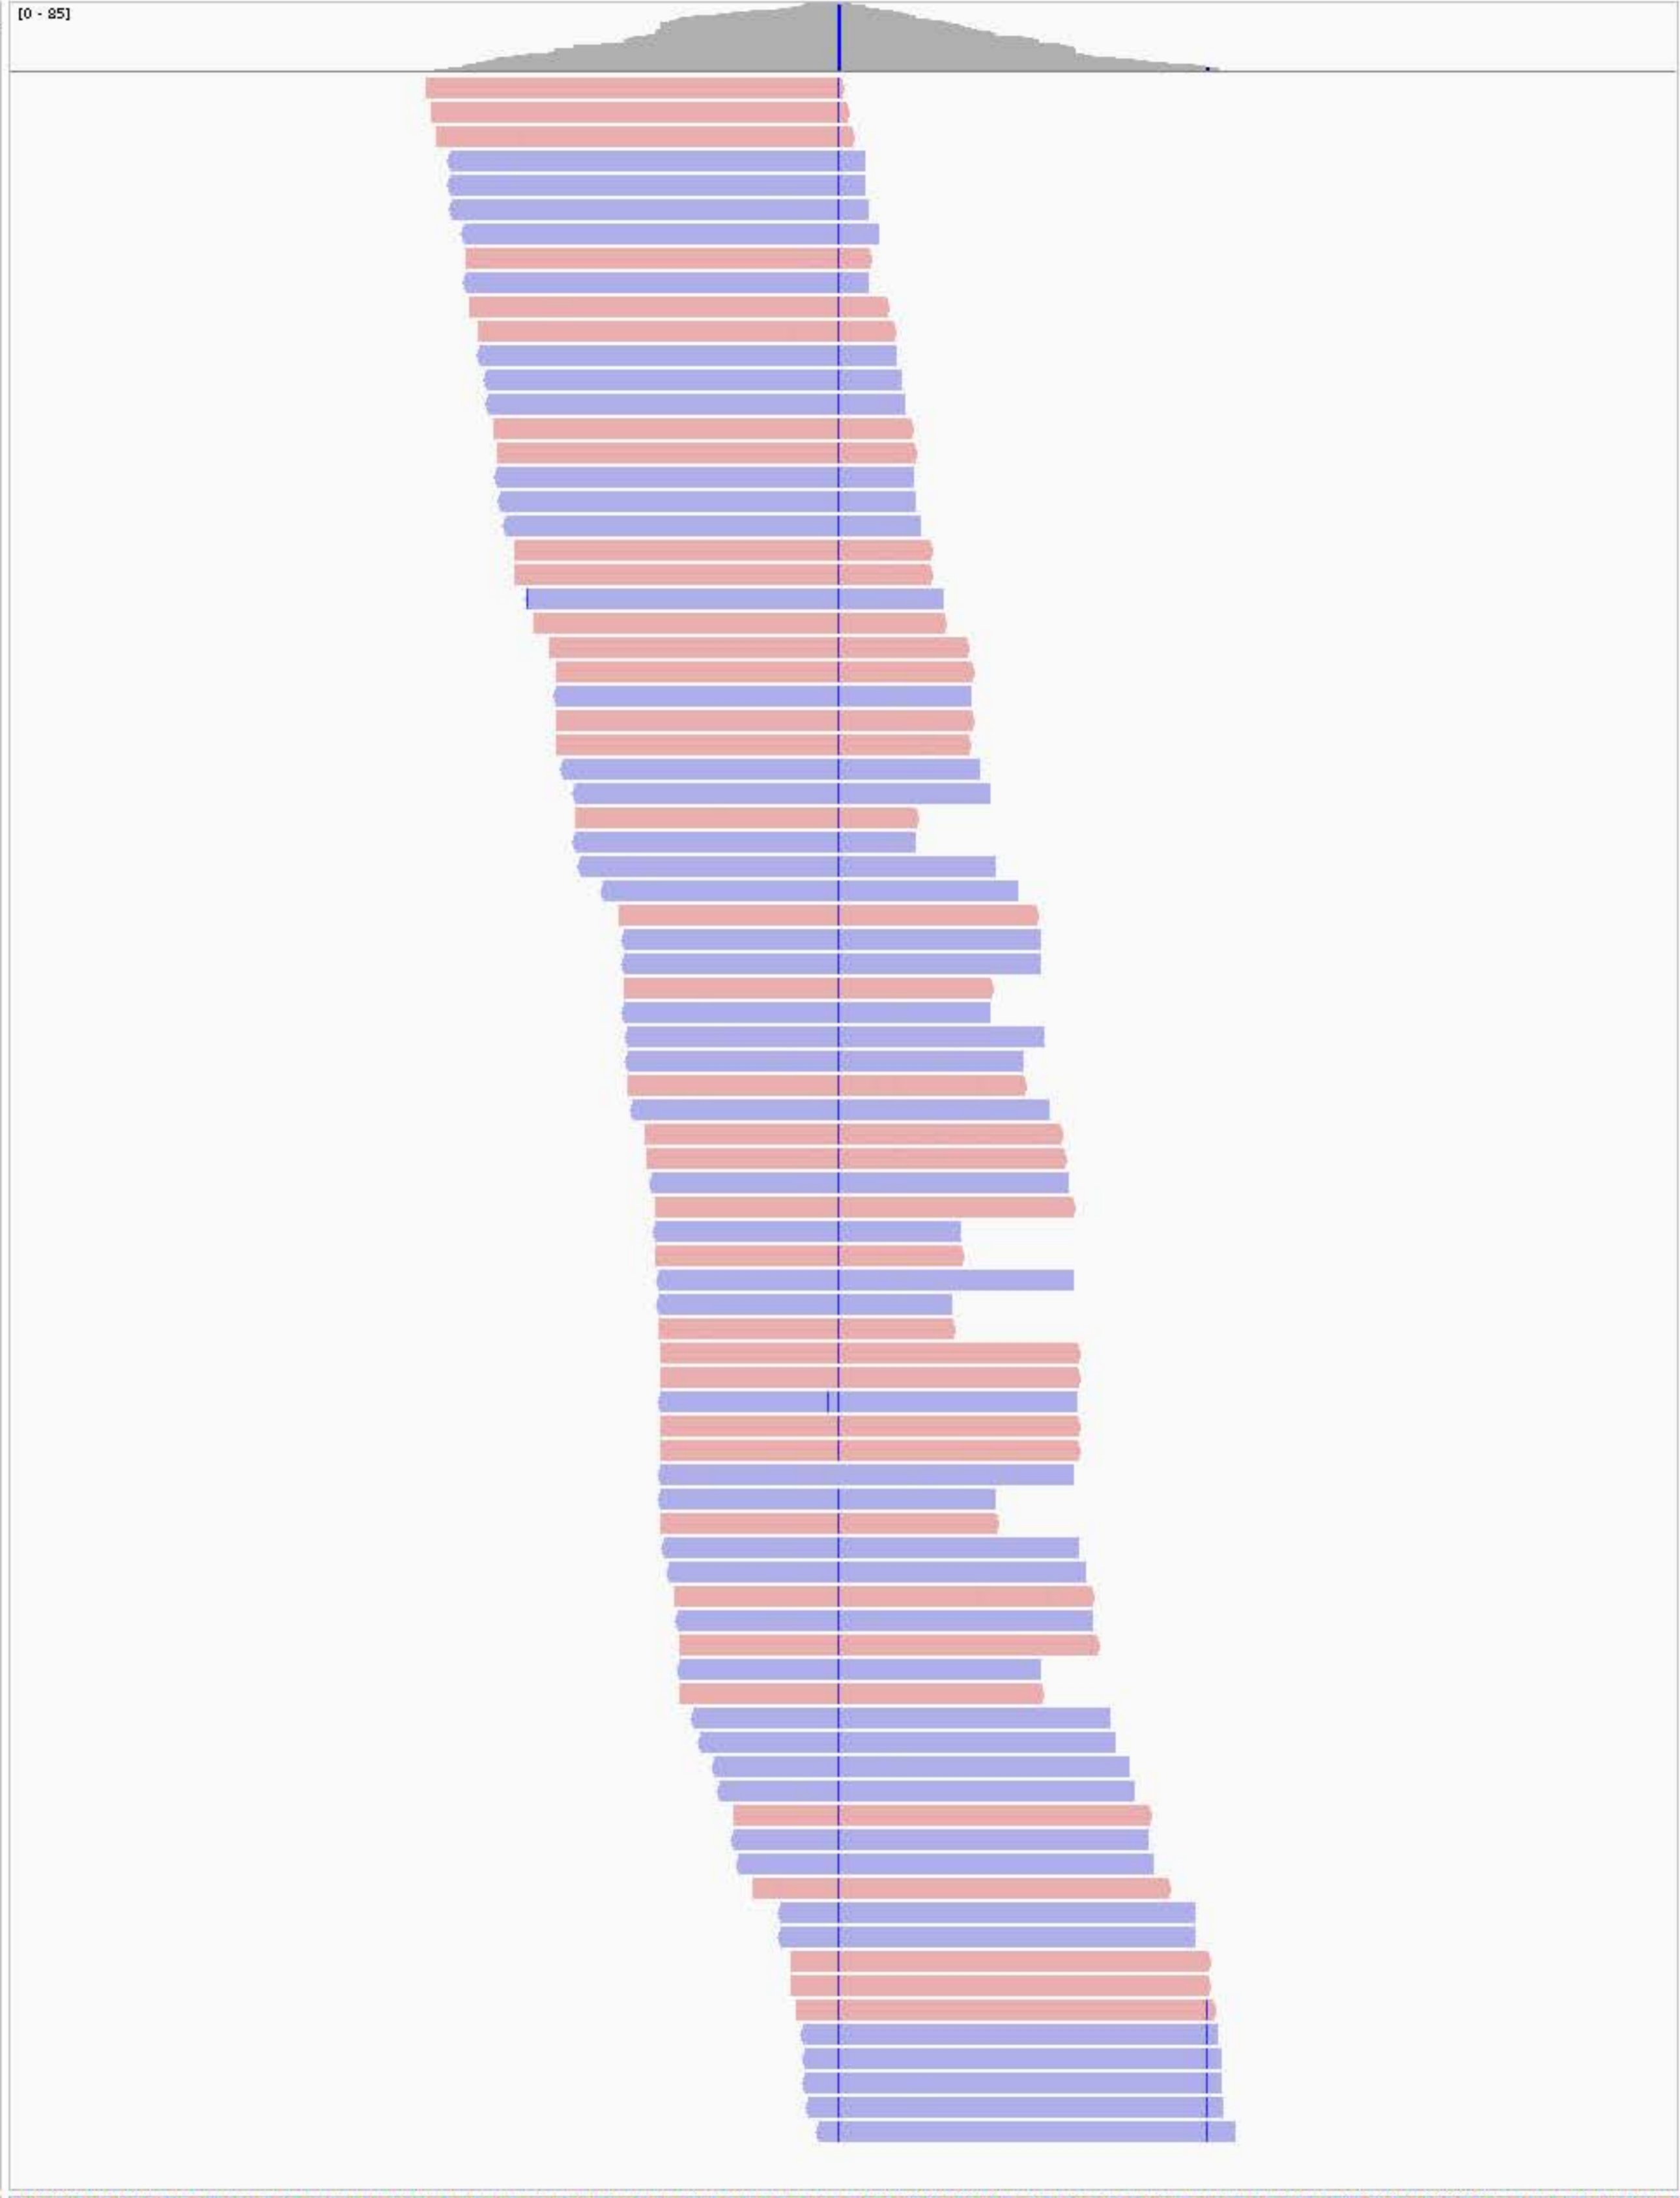

SL\_0004\_RN\_26\_mut.bam

Sequence

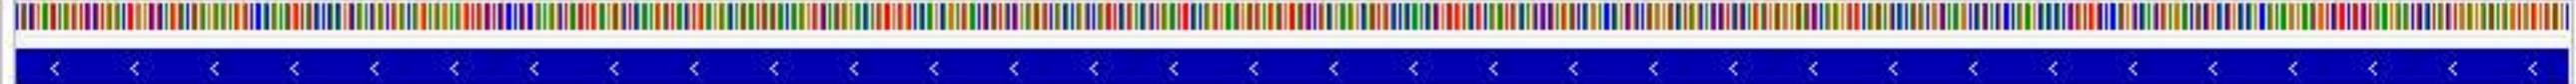

Refseq Genes

XR\_007061705.1

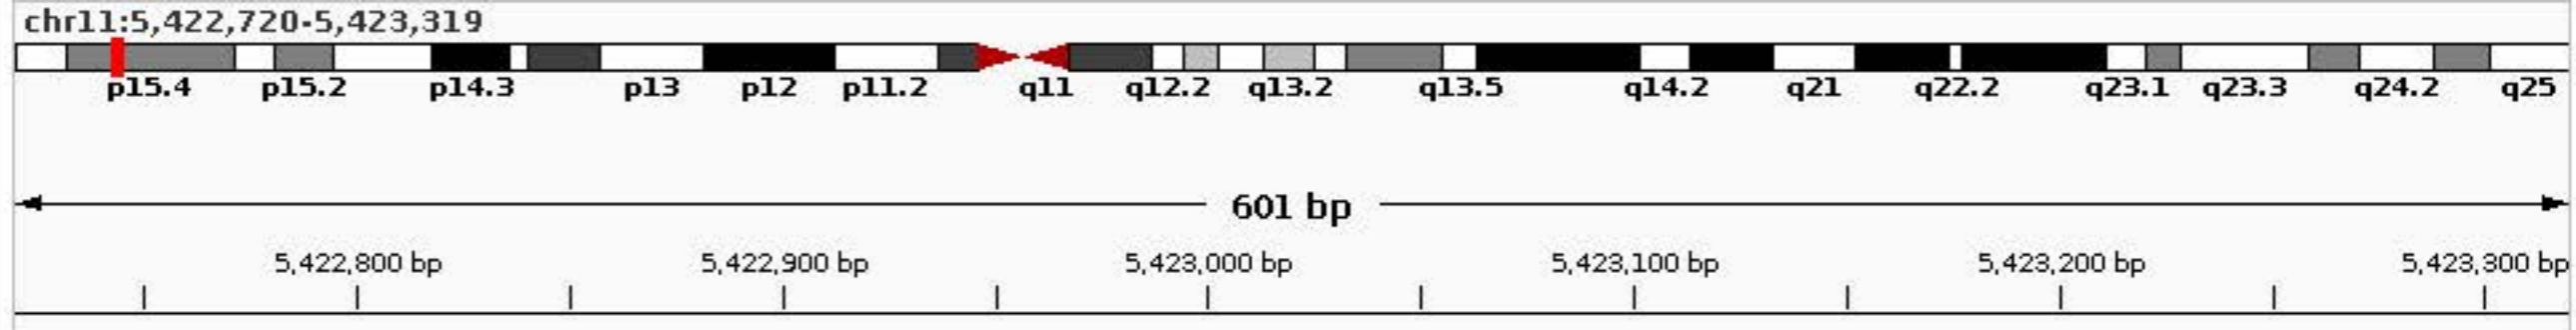

SL\_0001\_RN\_25\_mut.bam Coverage

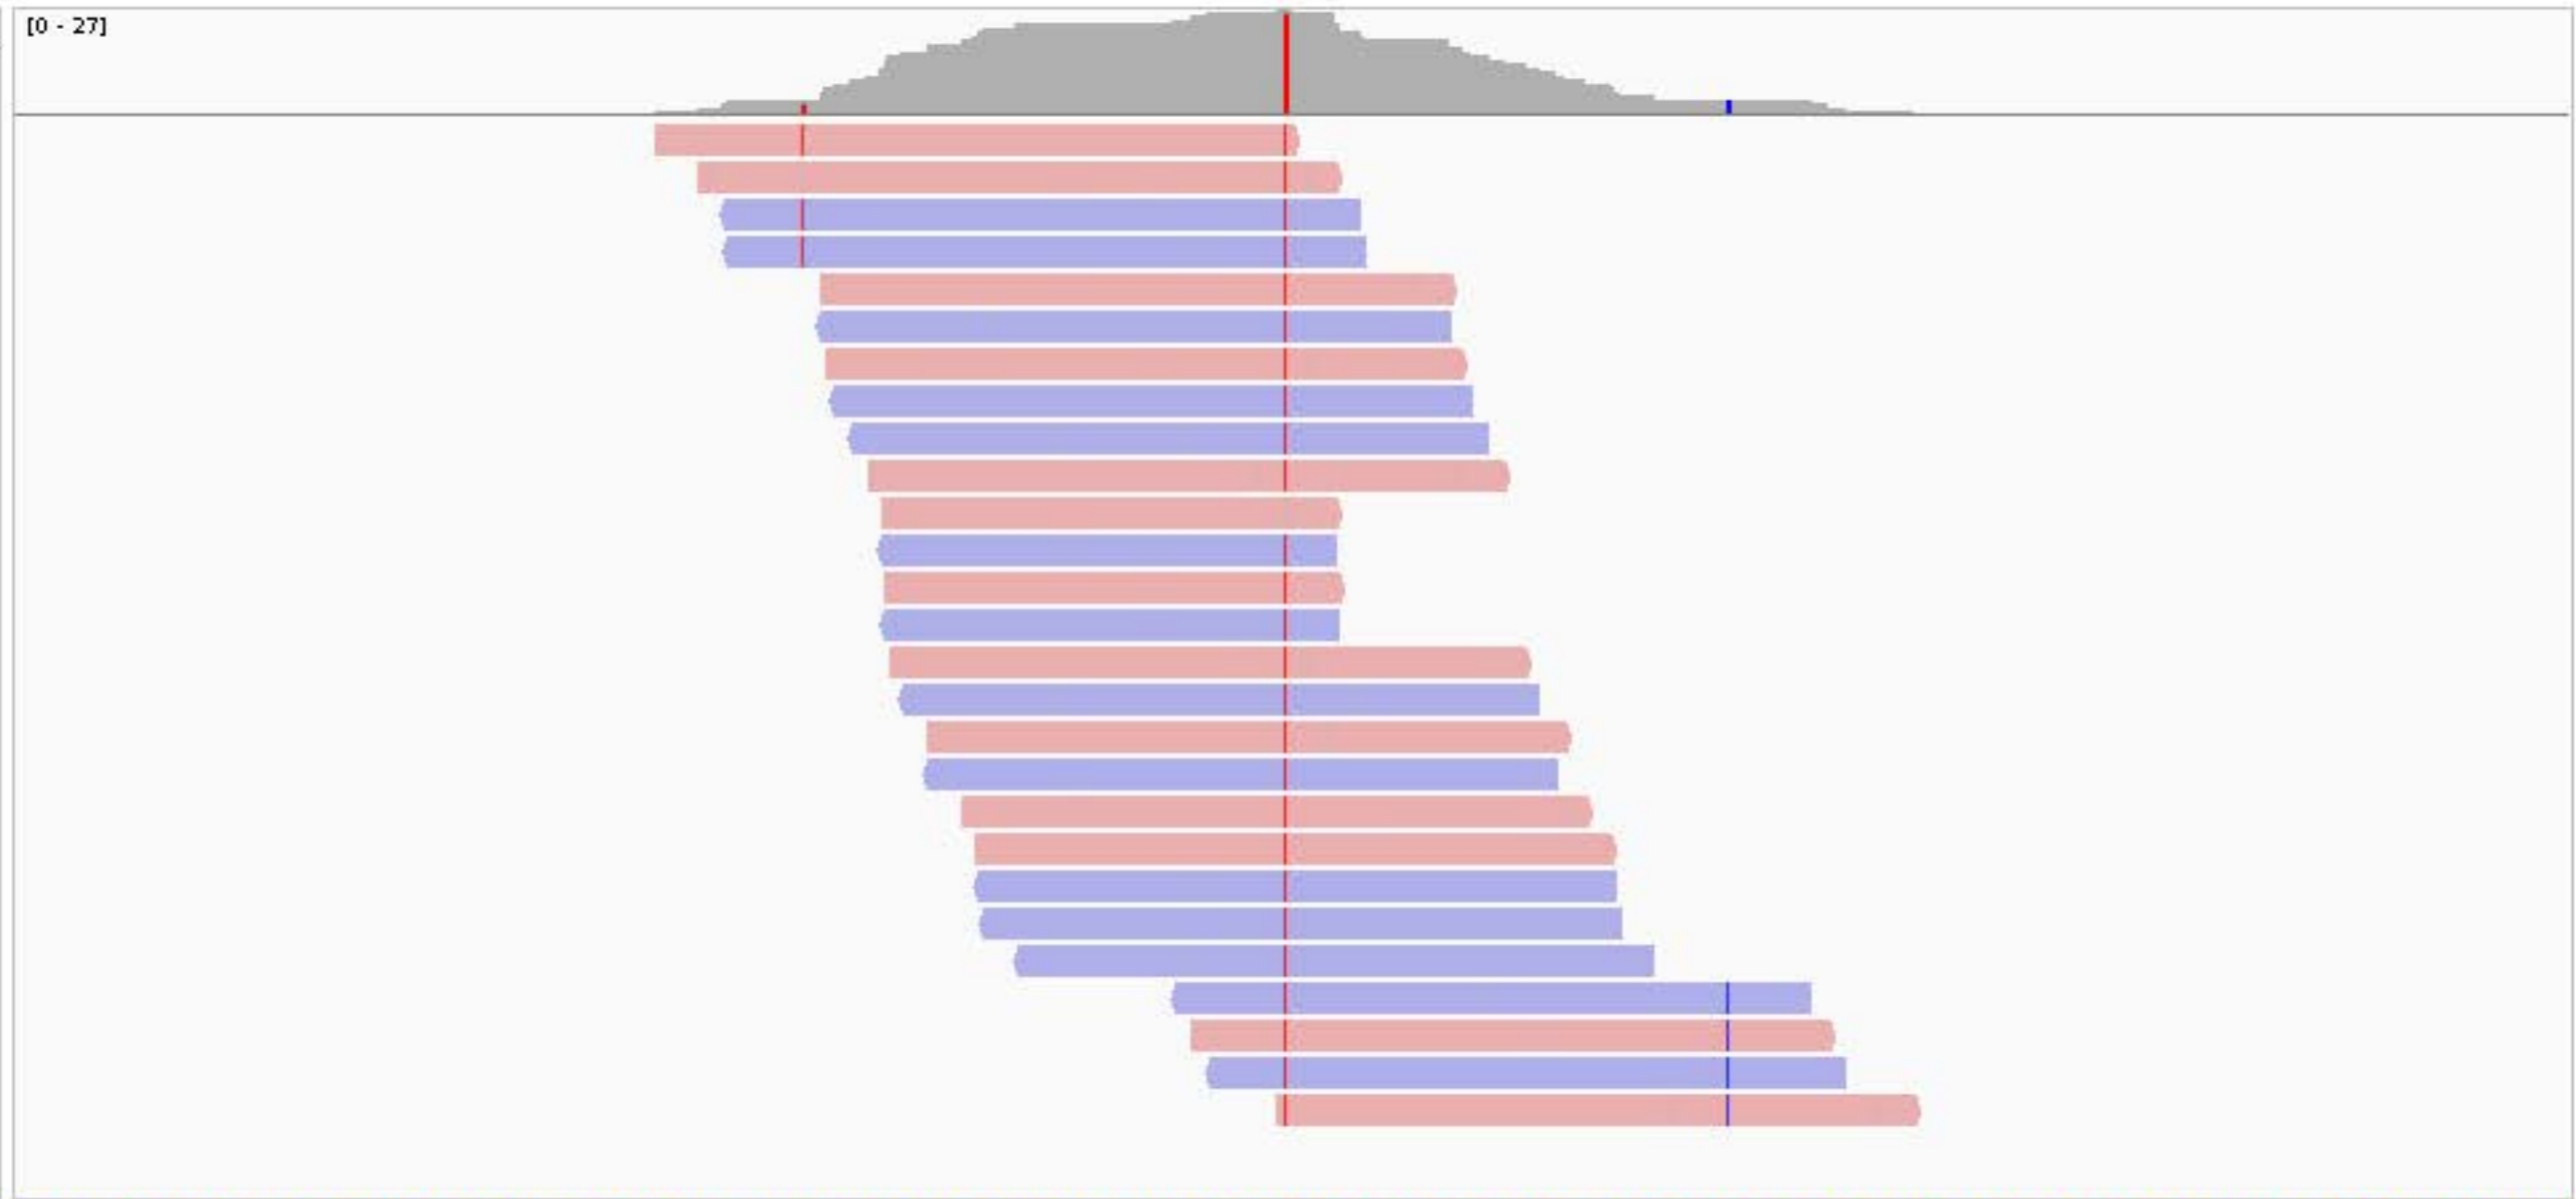

SL\_0001\_RN\_25\_mut.bam

Sequence

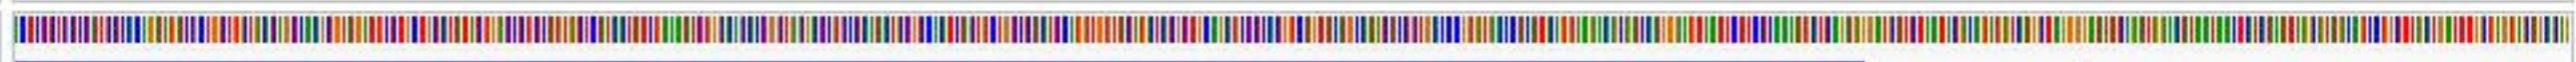

Refseq Genes

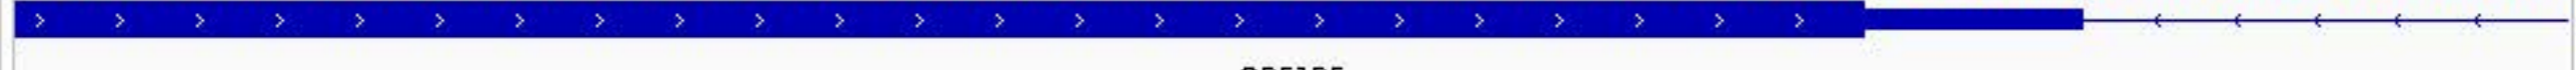

OR51B5



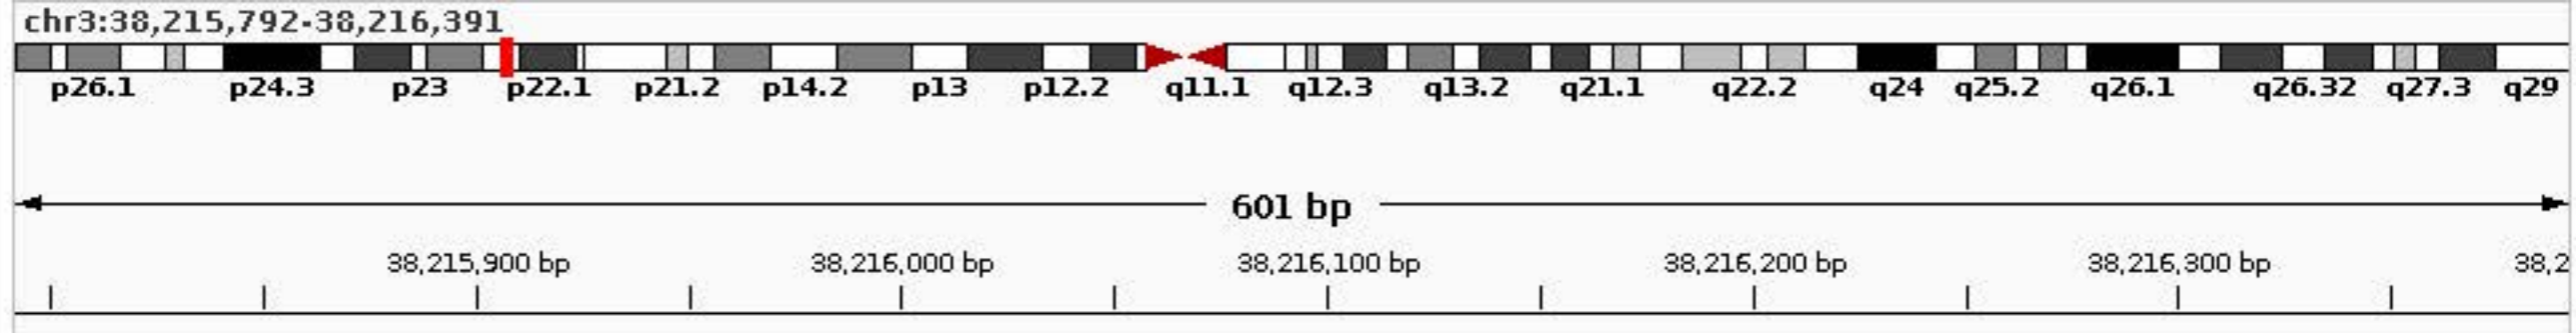

SL\_0017\_RN\_15\_mut.bam Coverage

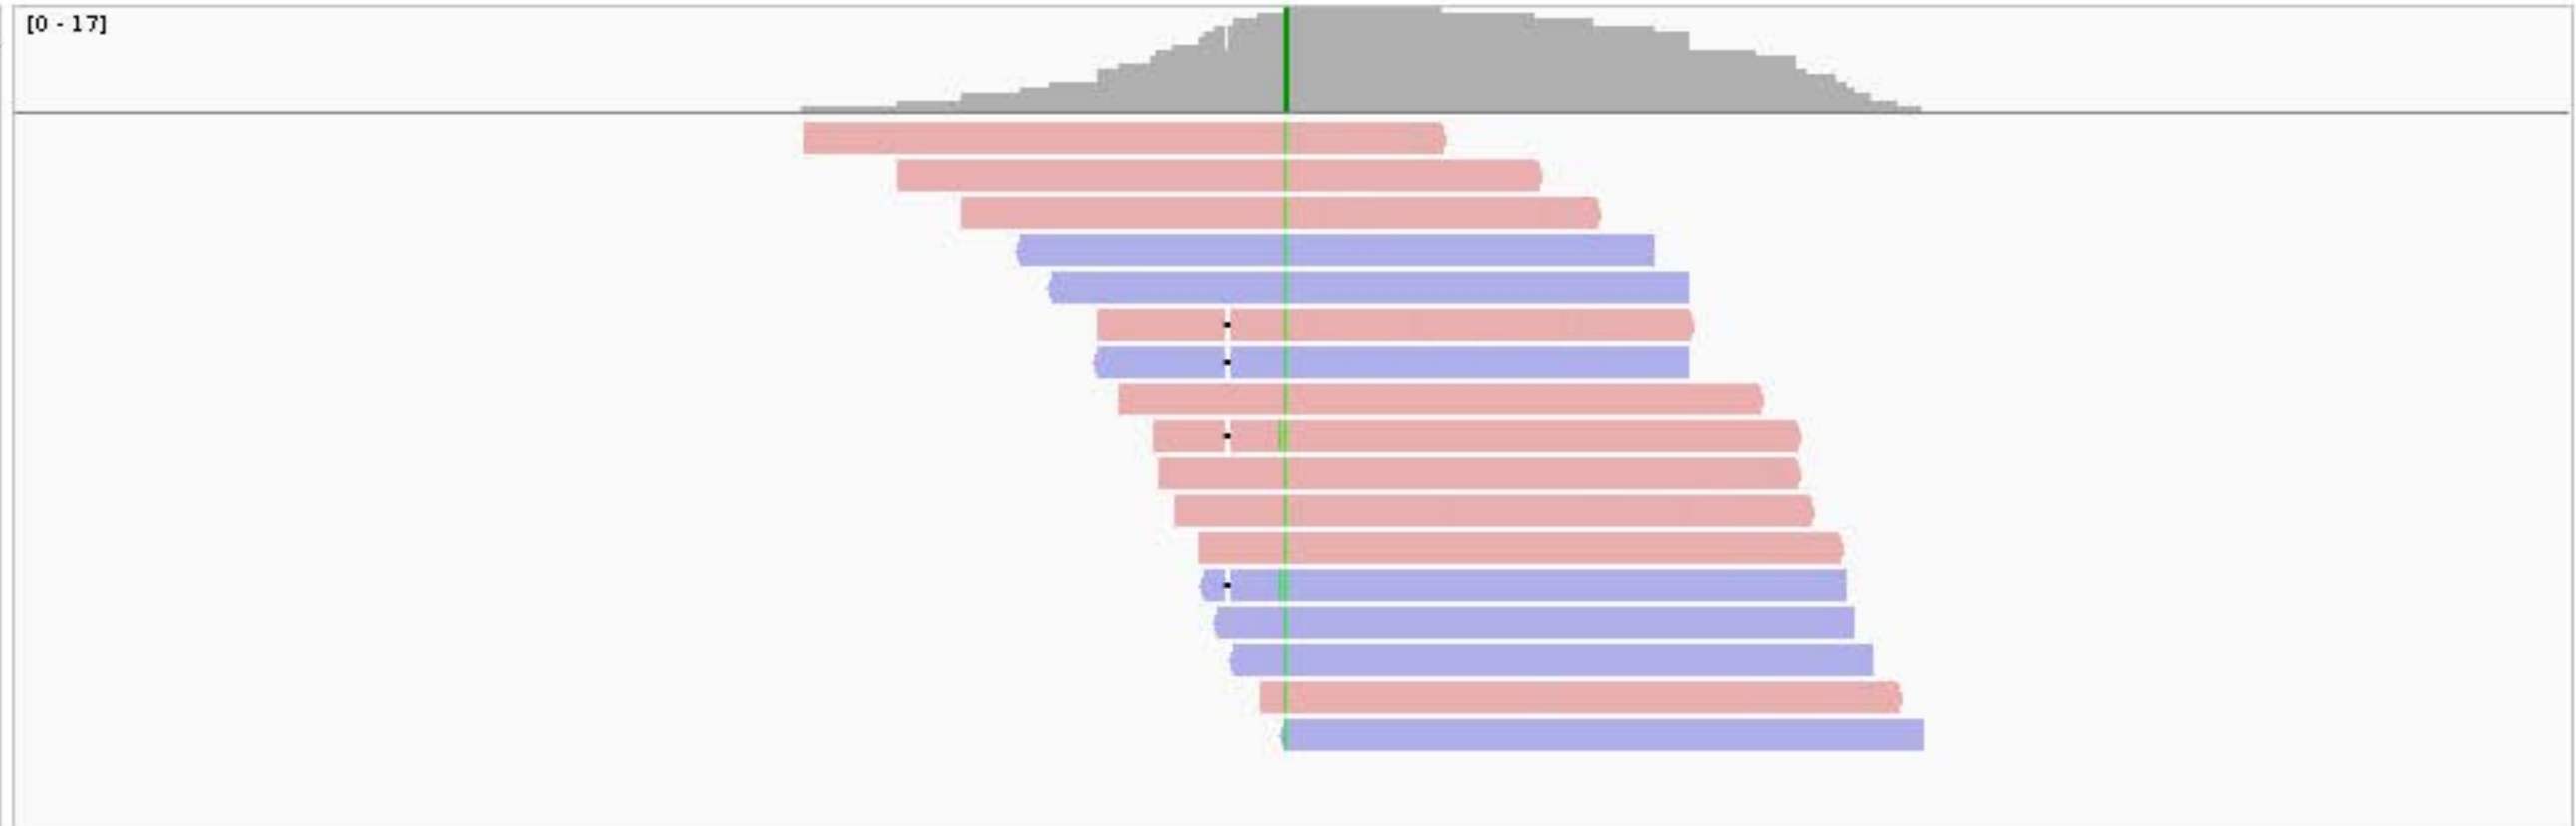

SL\_0017\_RN\_15\_mut.bam

Sequence

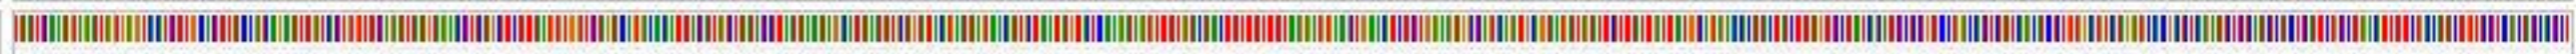

Refseq Genes

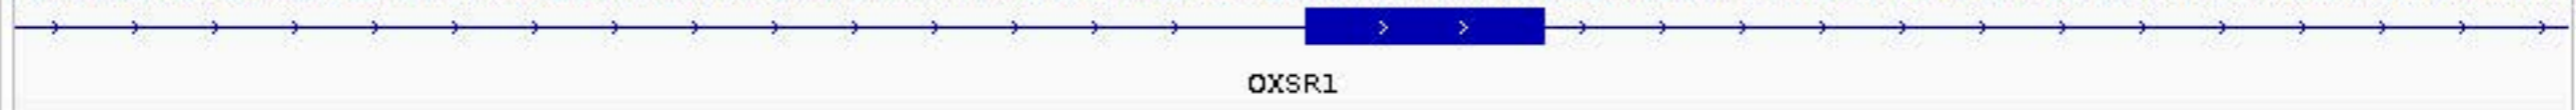



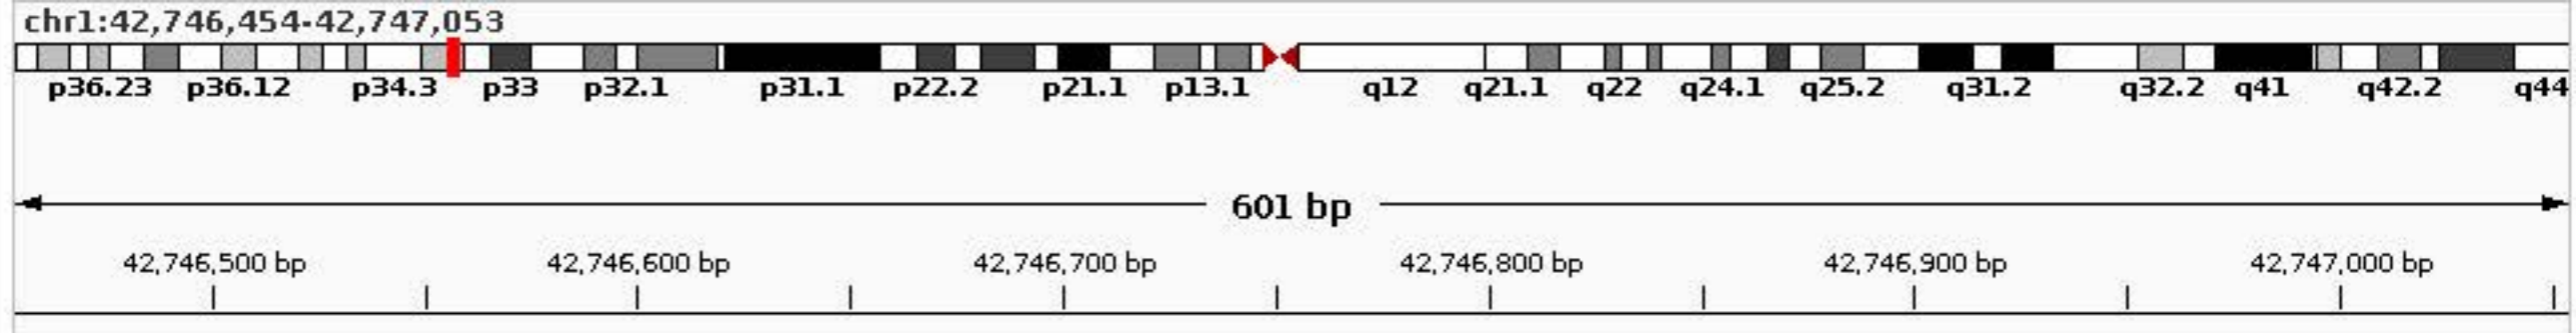

SL\_0001\_LN\_4\_mut.bam Coverage

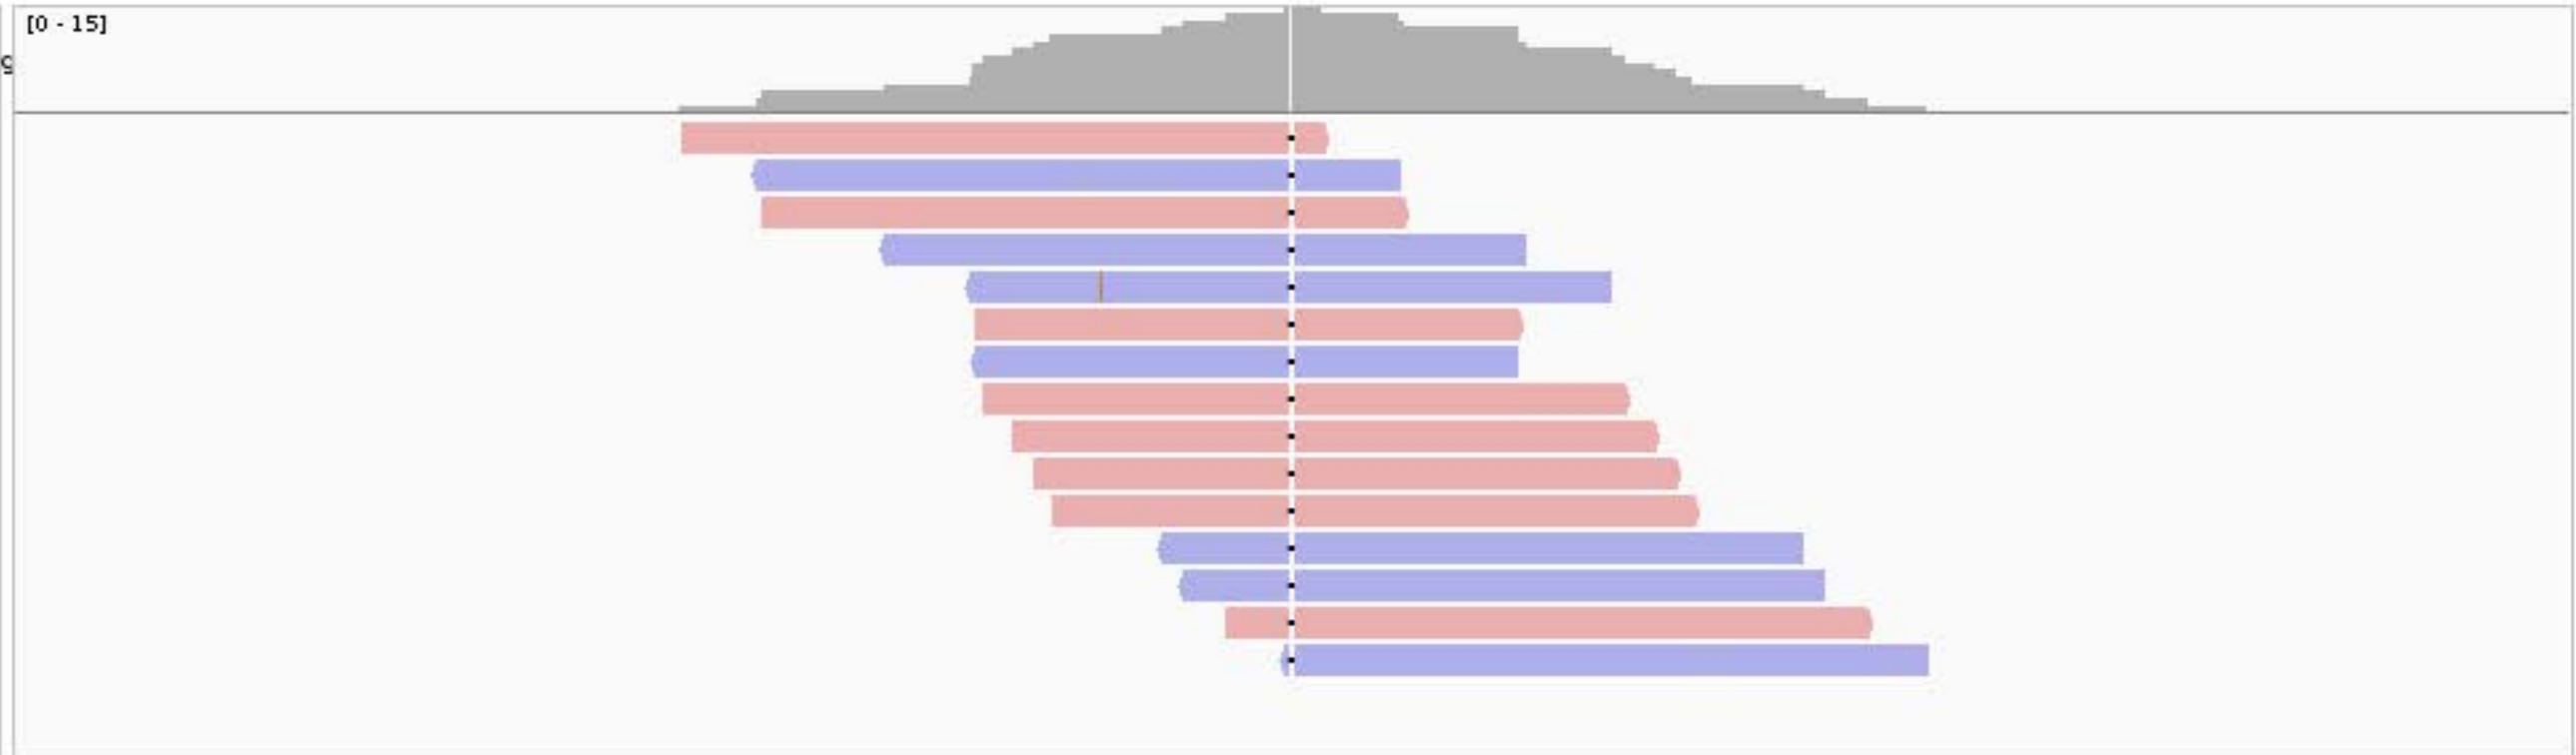

SL\_0001\_LN\_4\_mut.bam

Sequence →

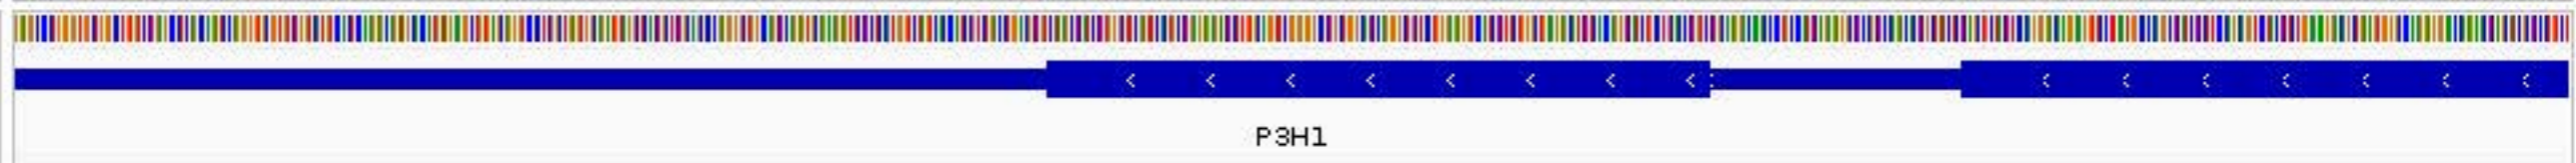

Refseq Genes

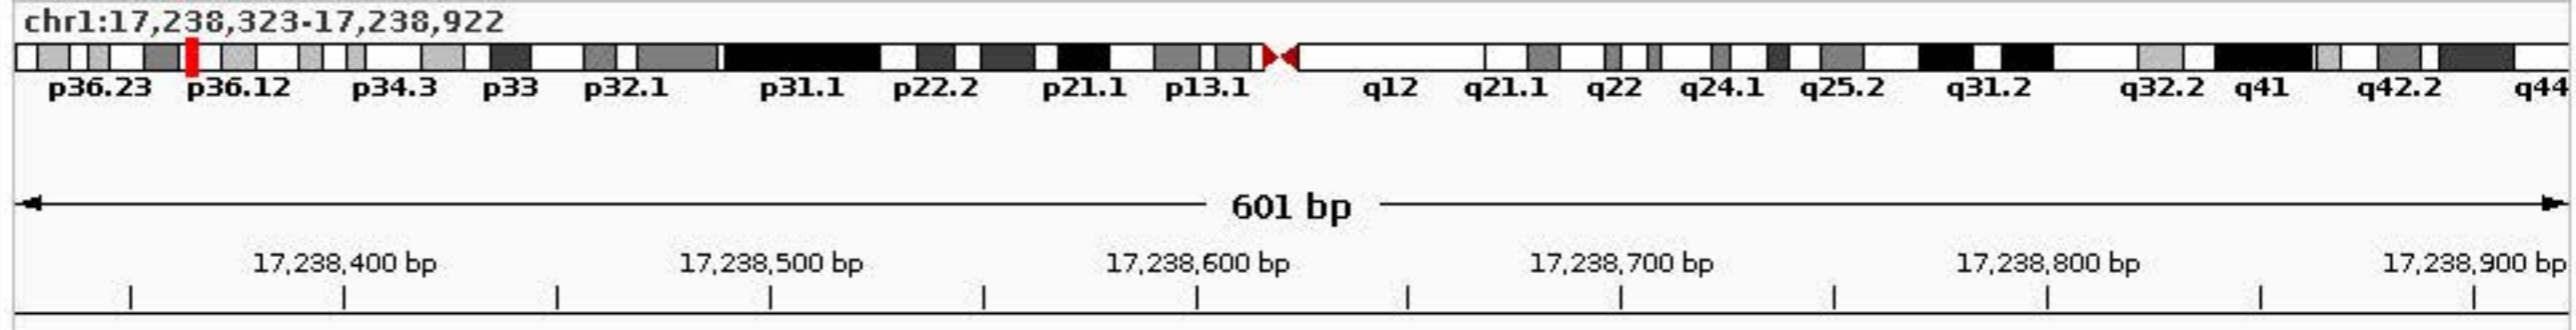

SL\_0004\_RN\_24\_mut.bam Coverage

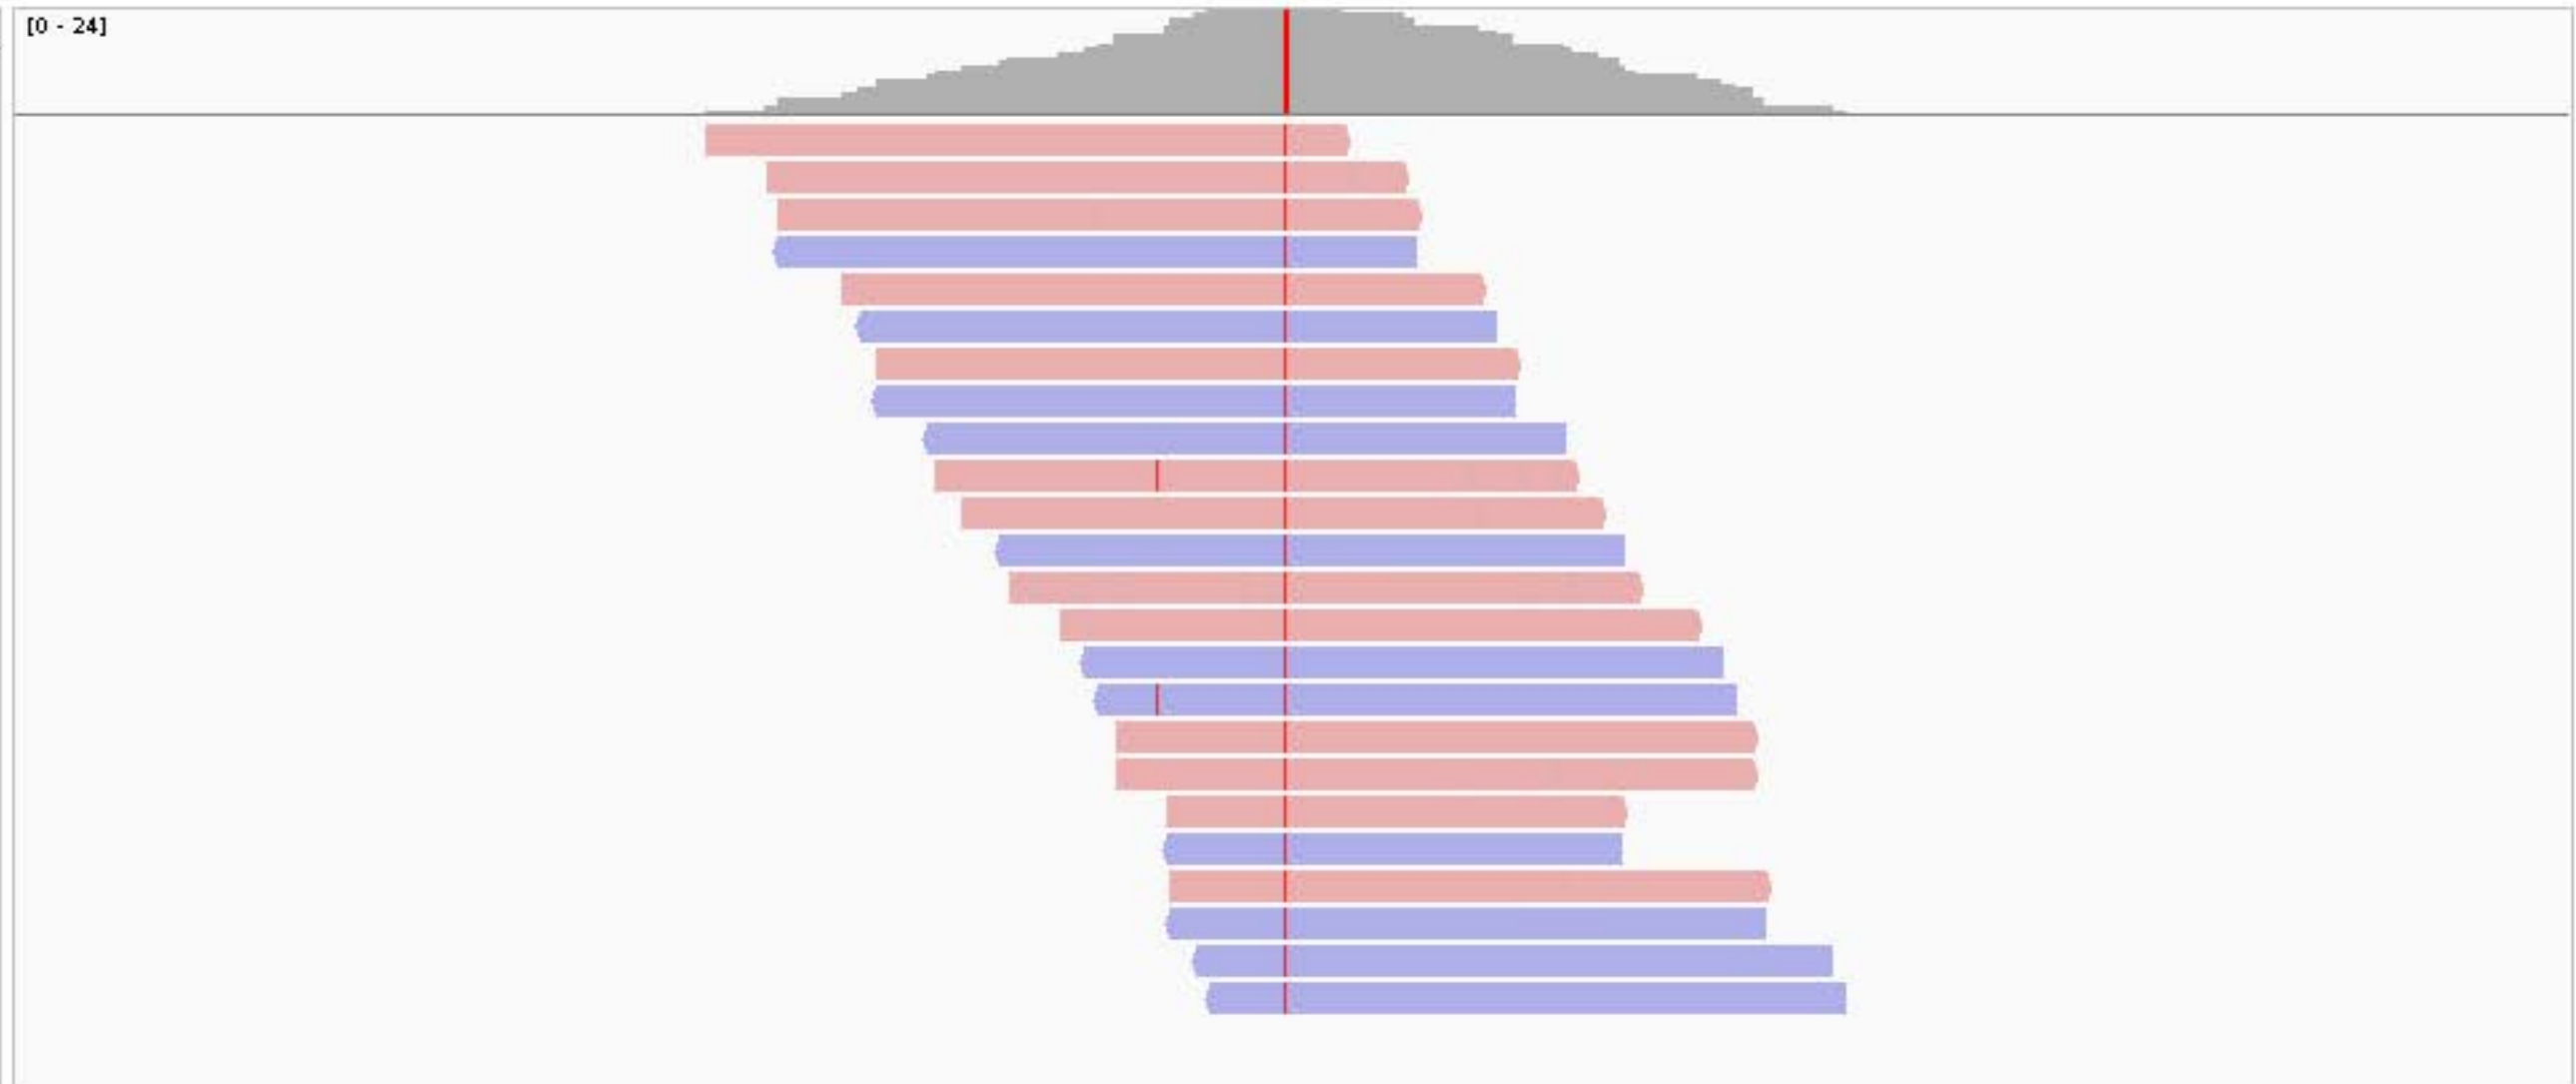

SL\_0004\_RN\_24\_mut.bam

Sequence

Refseq Genes

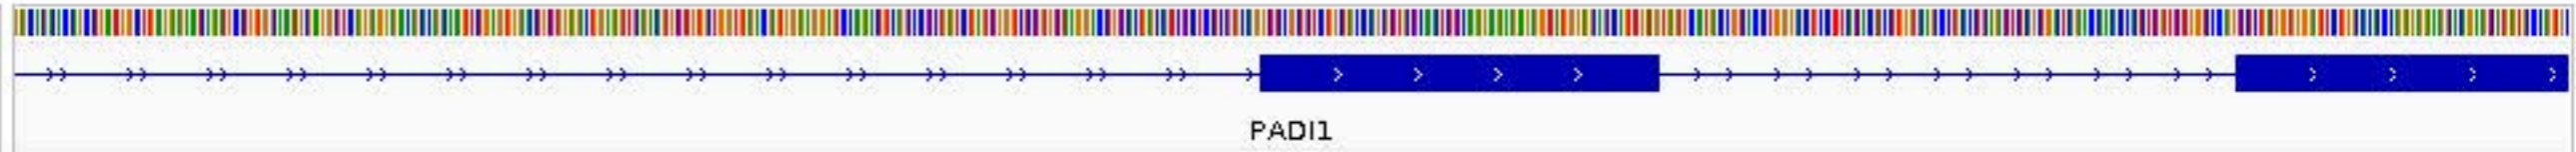

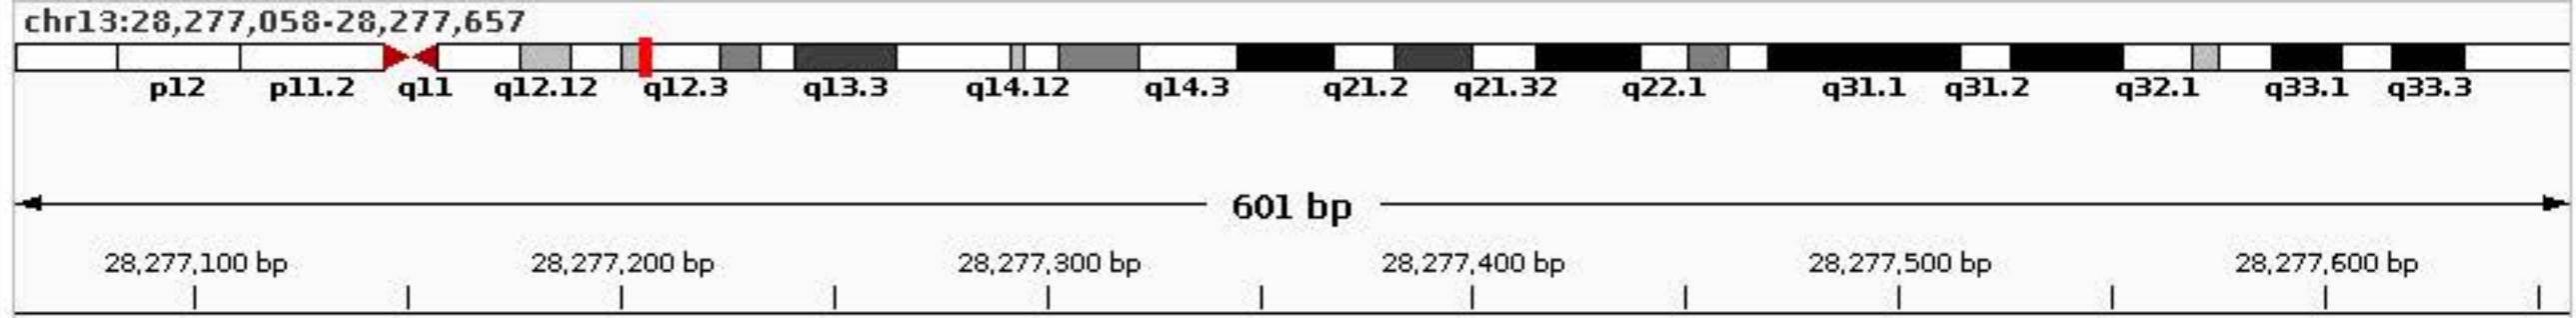

SL\_0004\_RN\_26\_mut.bam Coverage

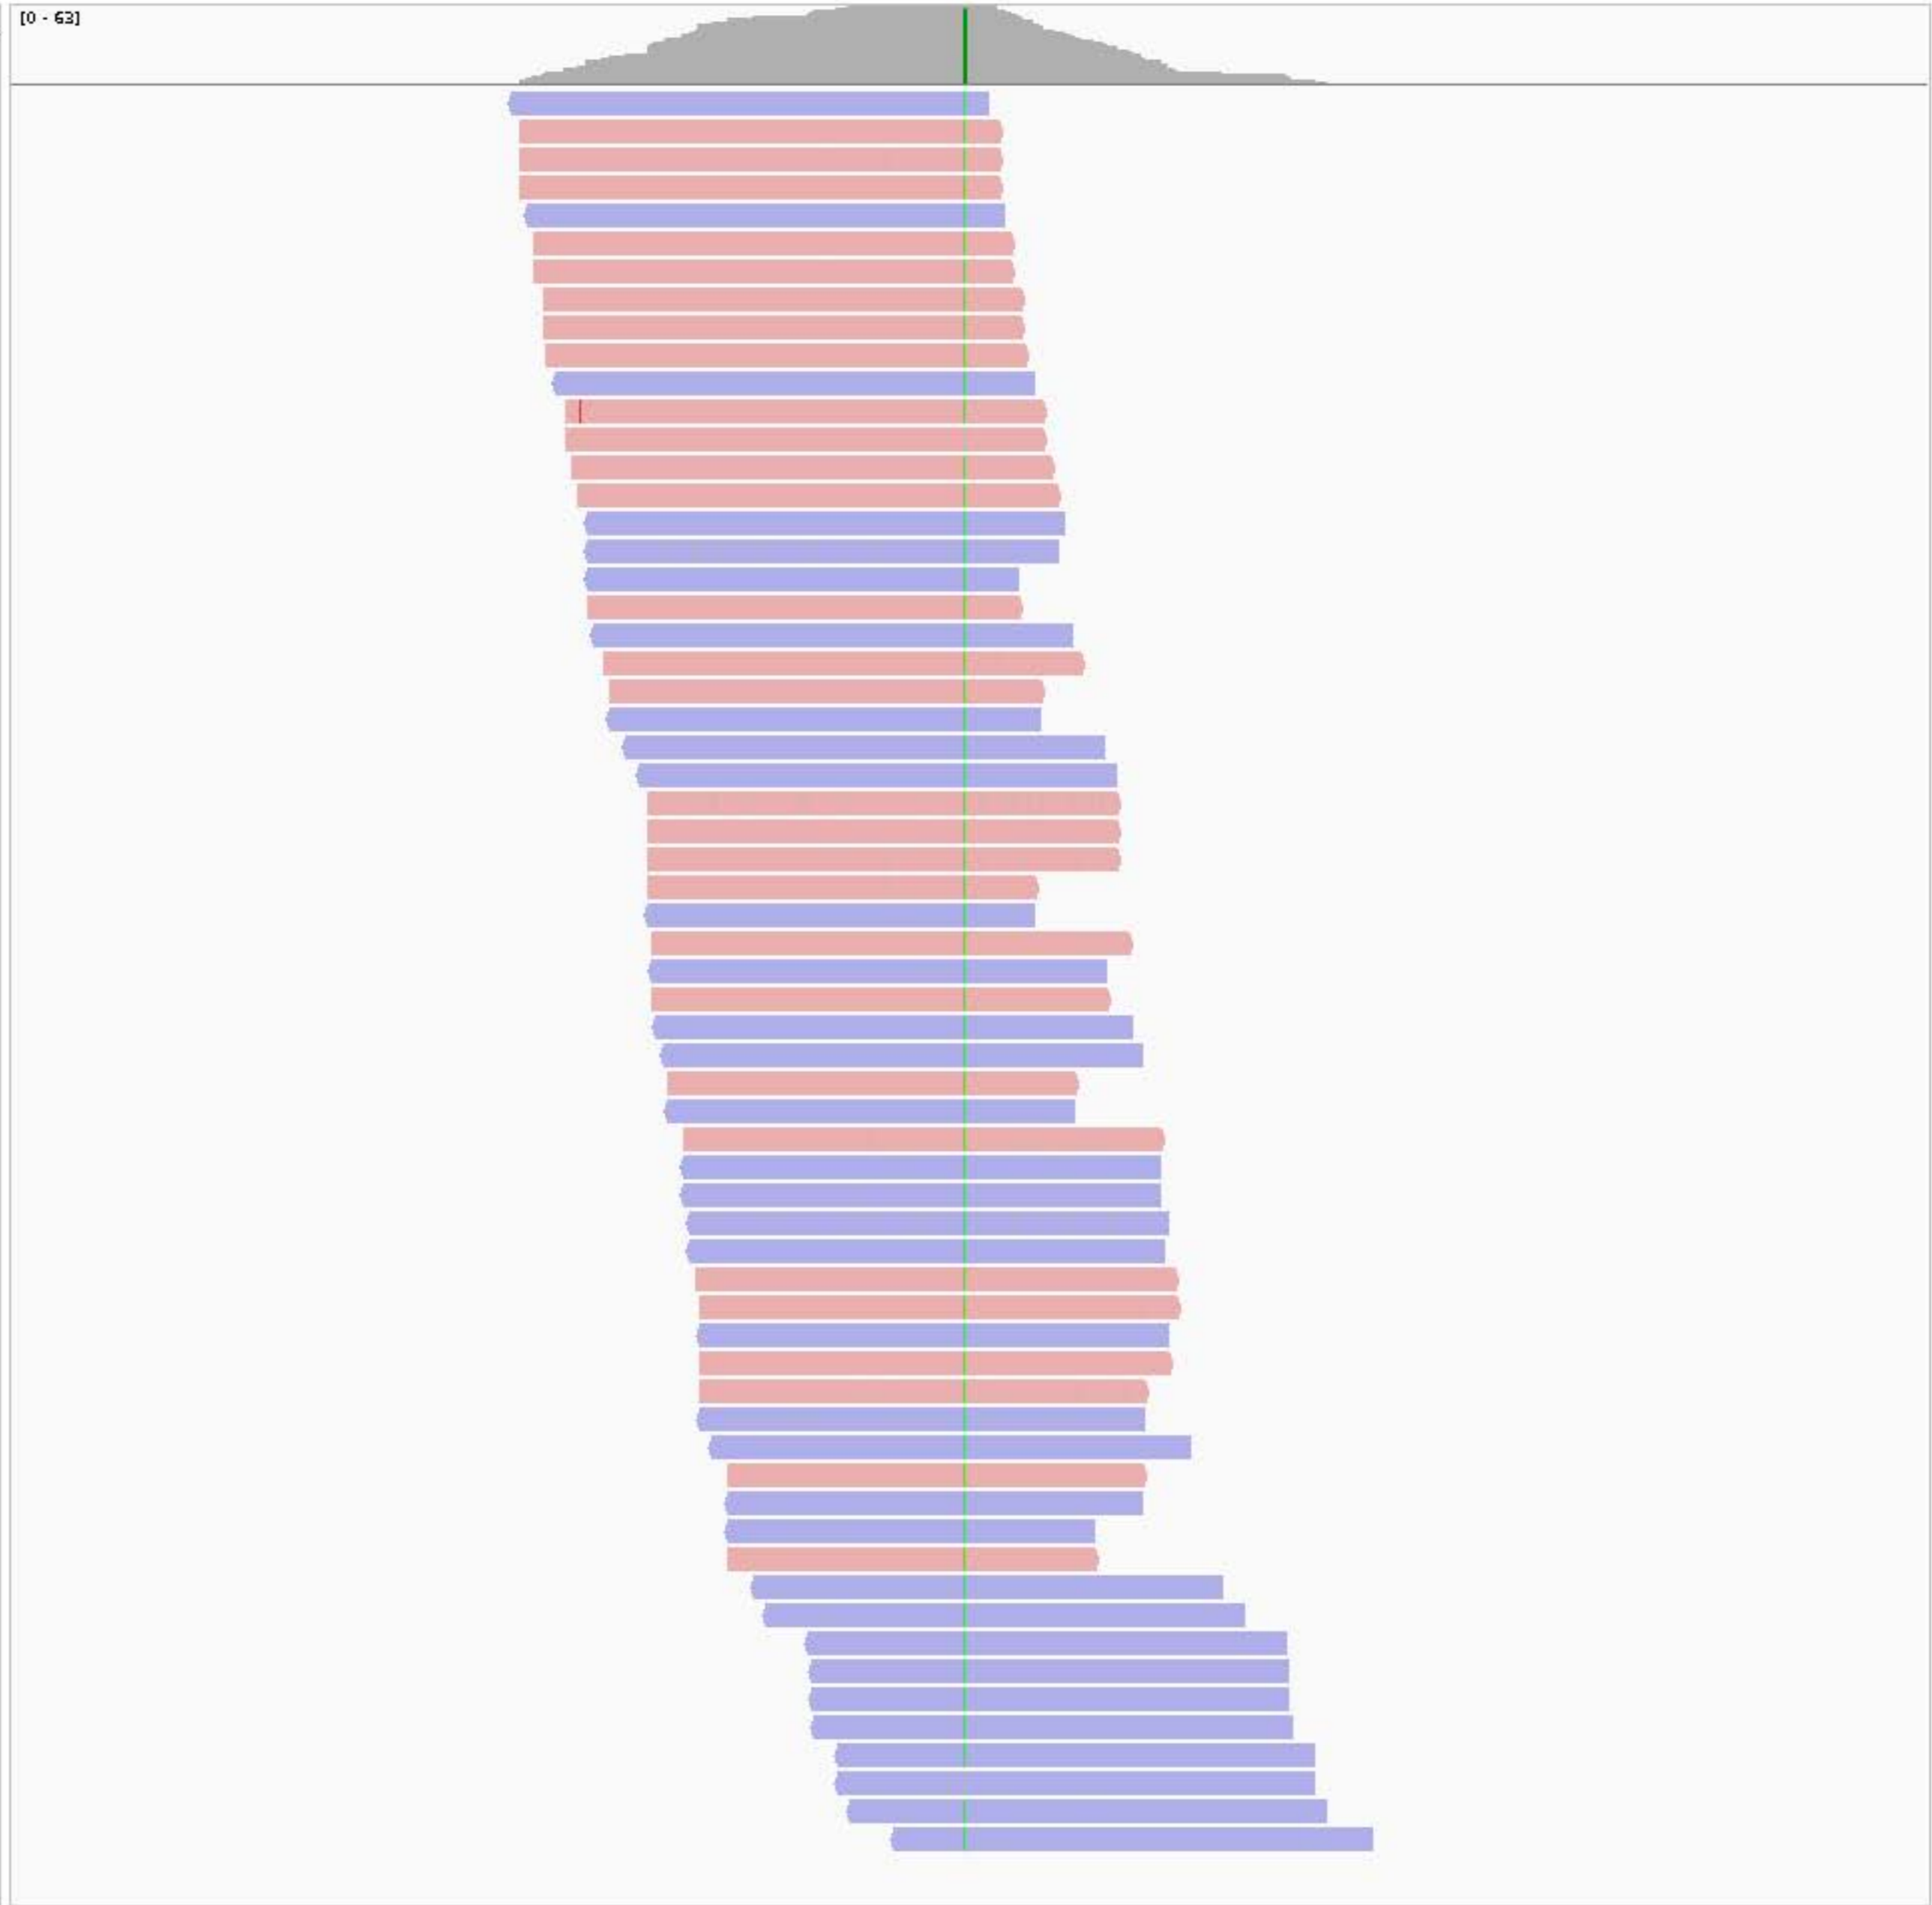

SL\_0004\_RN\_26\_mut.bam

Sequence

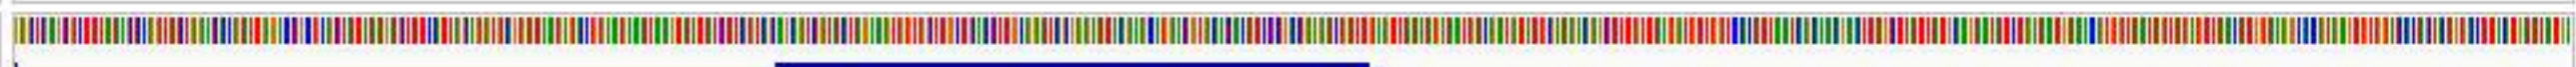

Refseq Genes

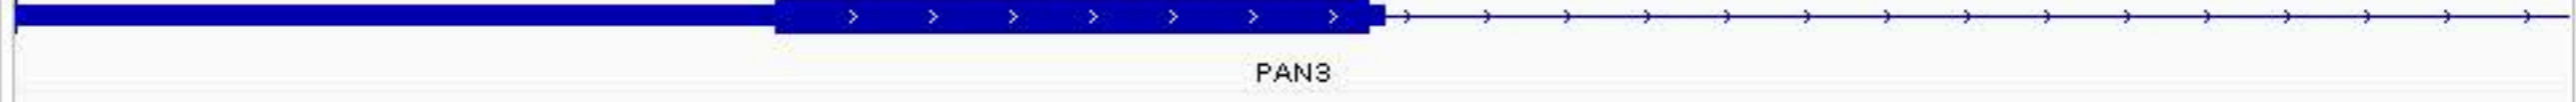

chr22:44,132,709-44,133,308

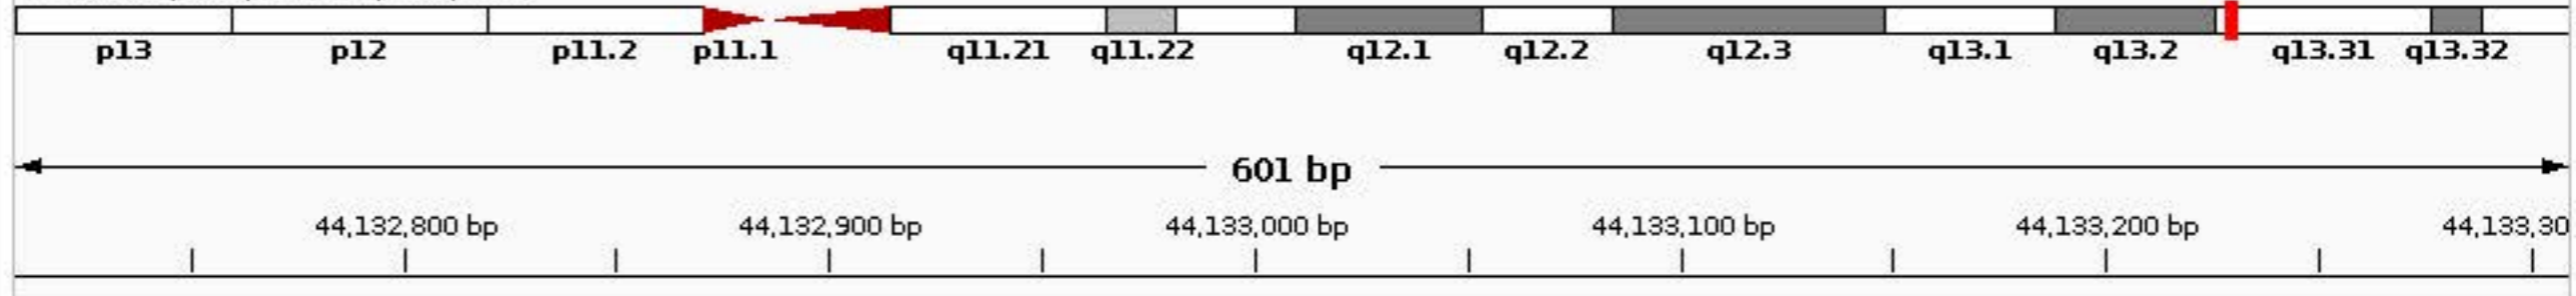

SL\_0006\_RN\_59\_mut.bam Coverage

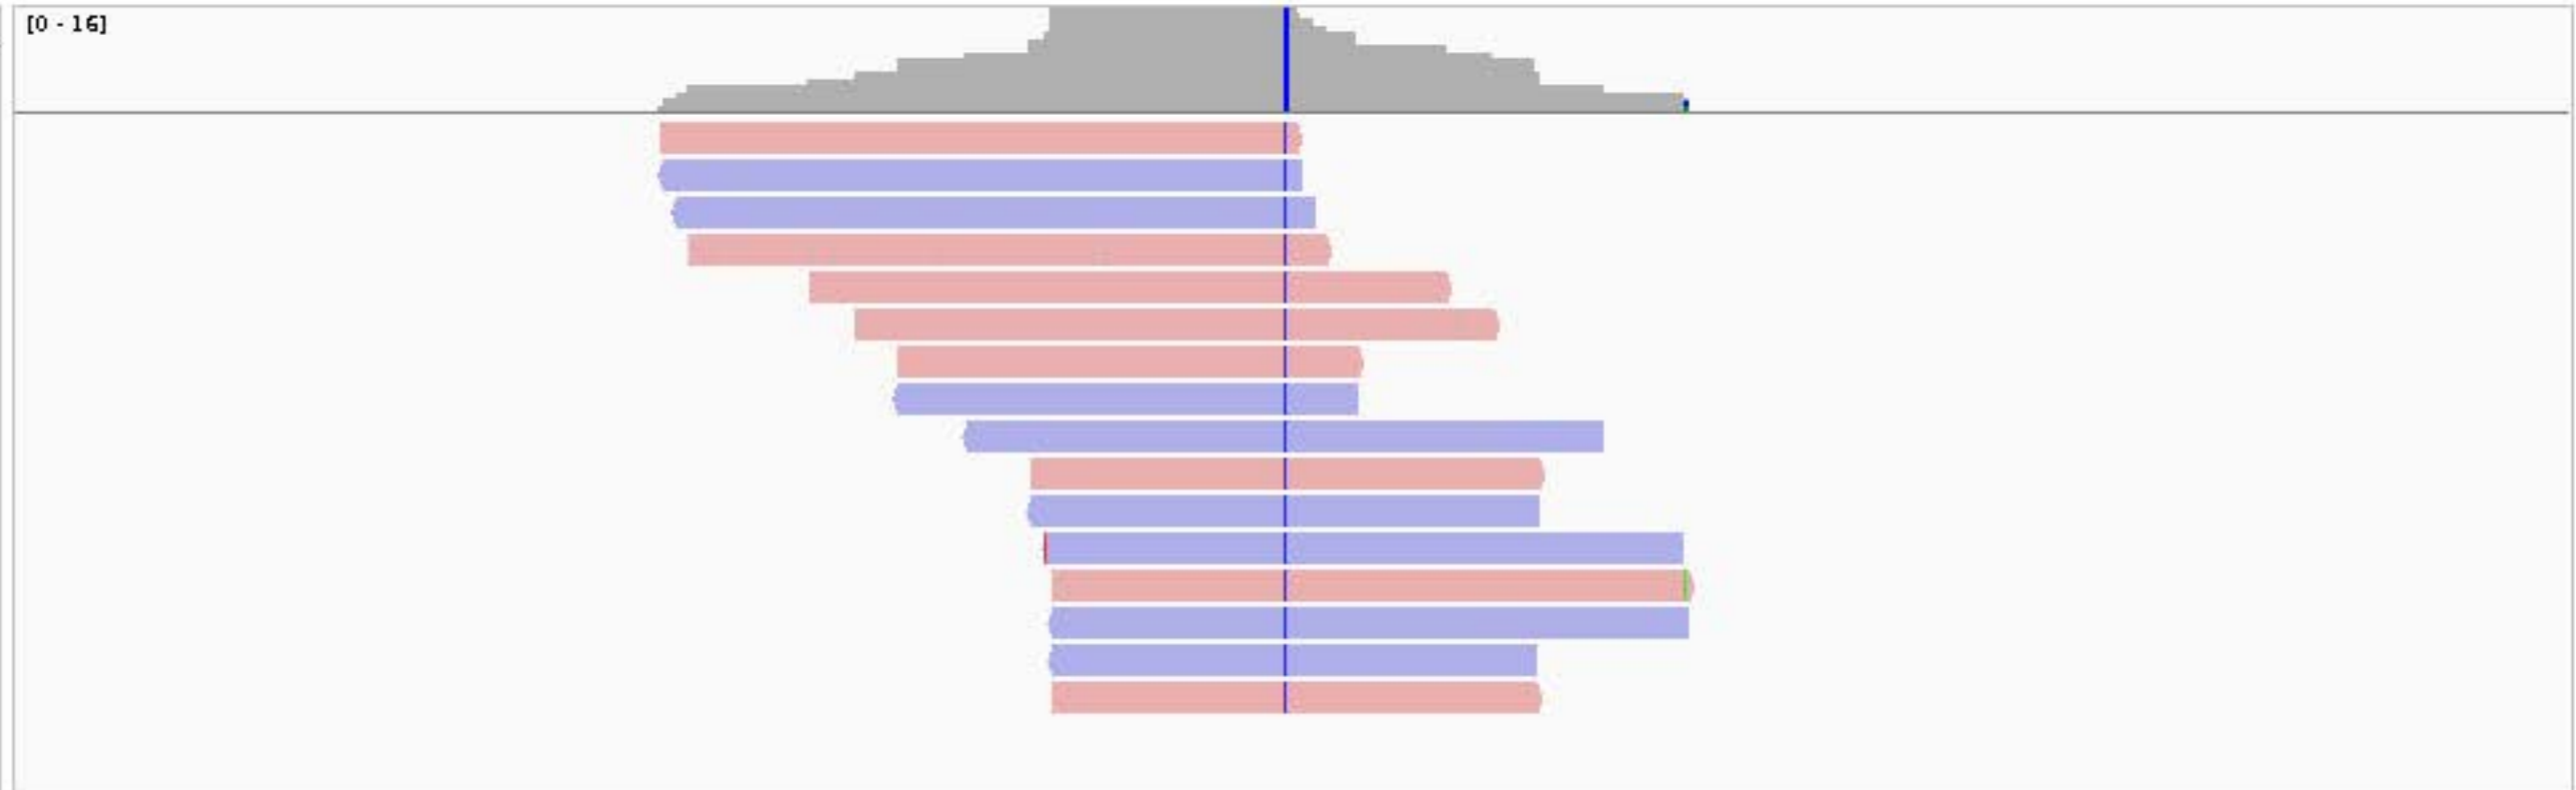

SL\_0006\_RN\_59\_mut.bam

Sequence

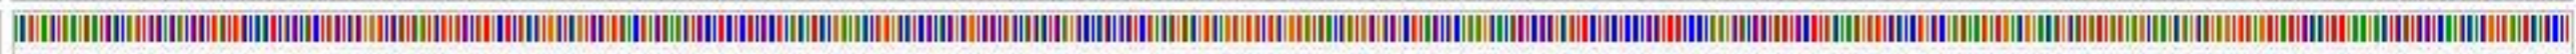

Refseq Genes

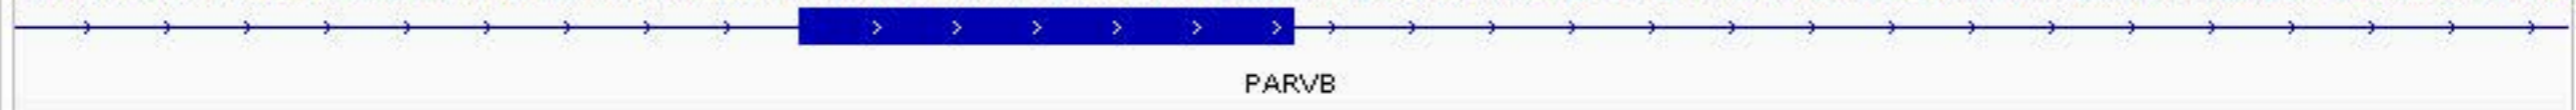



chr15:44,672,103-44,672,702

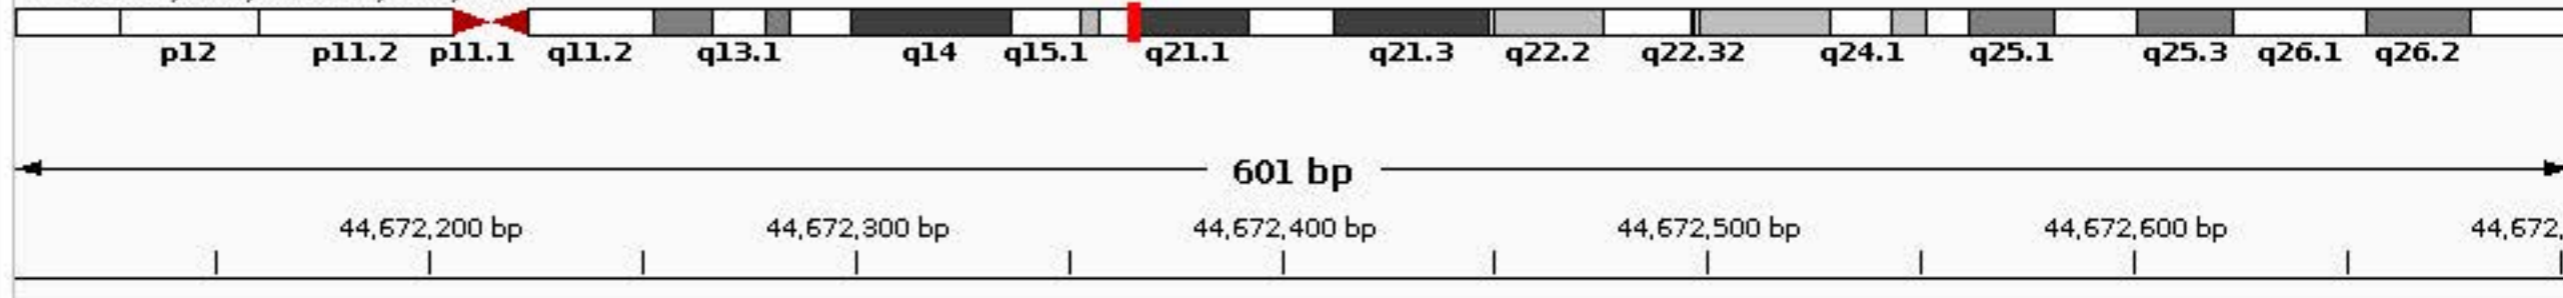

SL\_0002\_LN\_1\_mut.bam Coverage

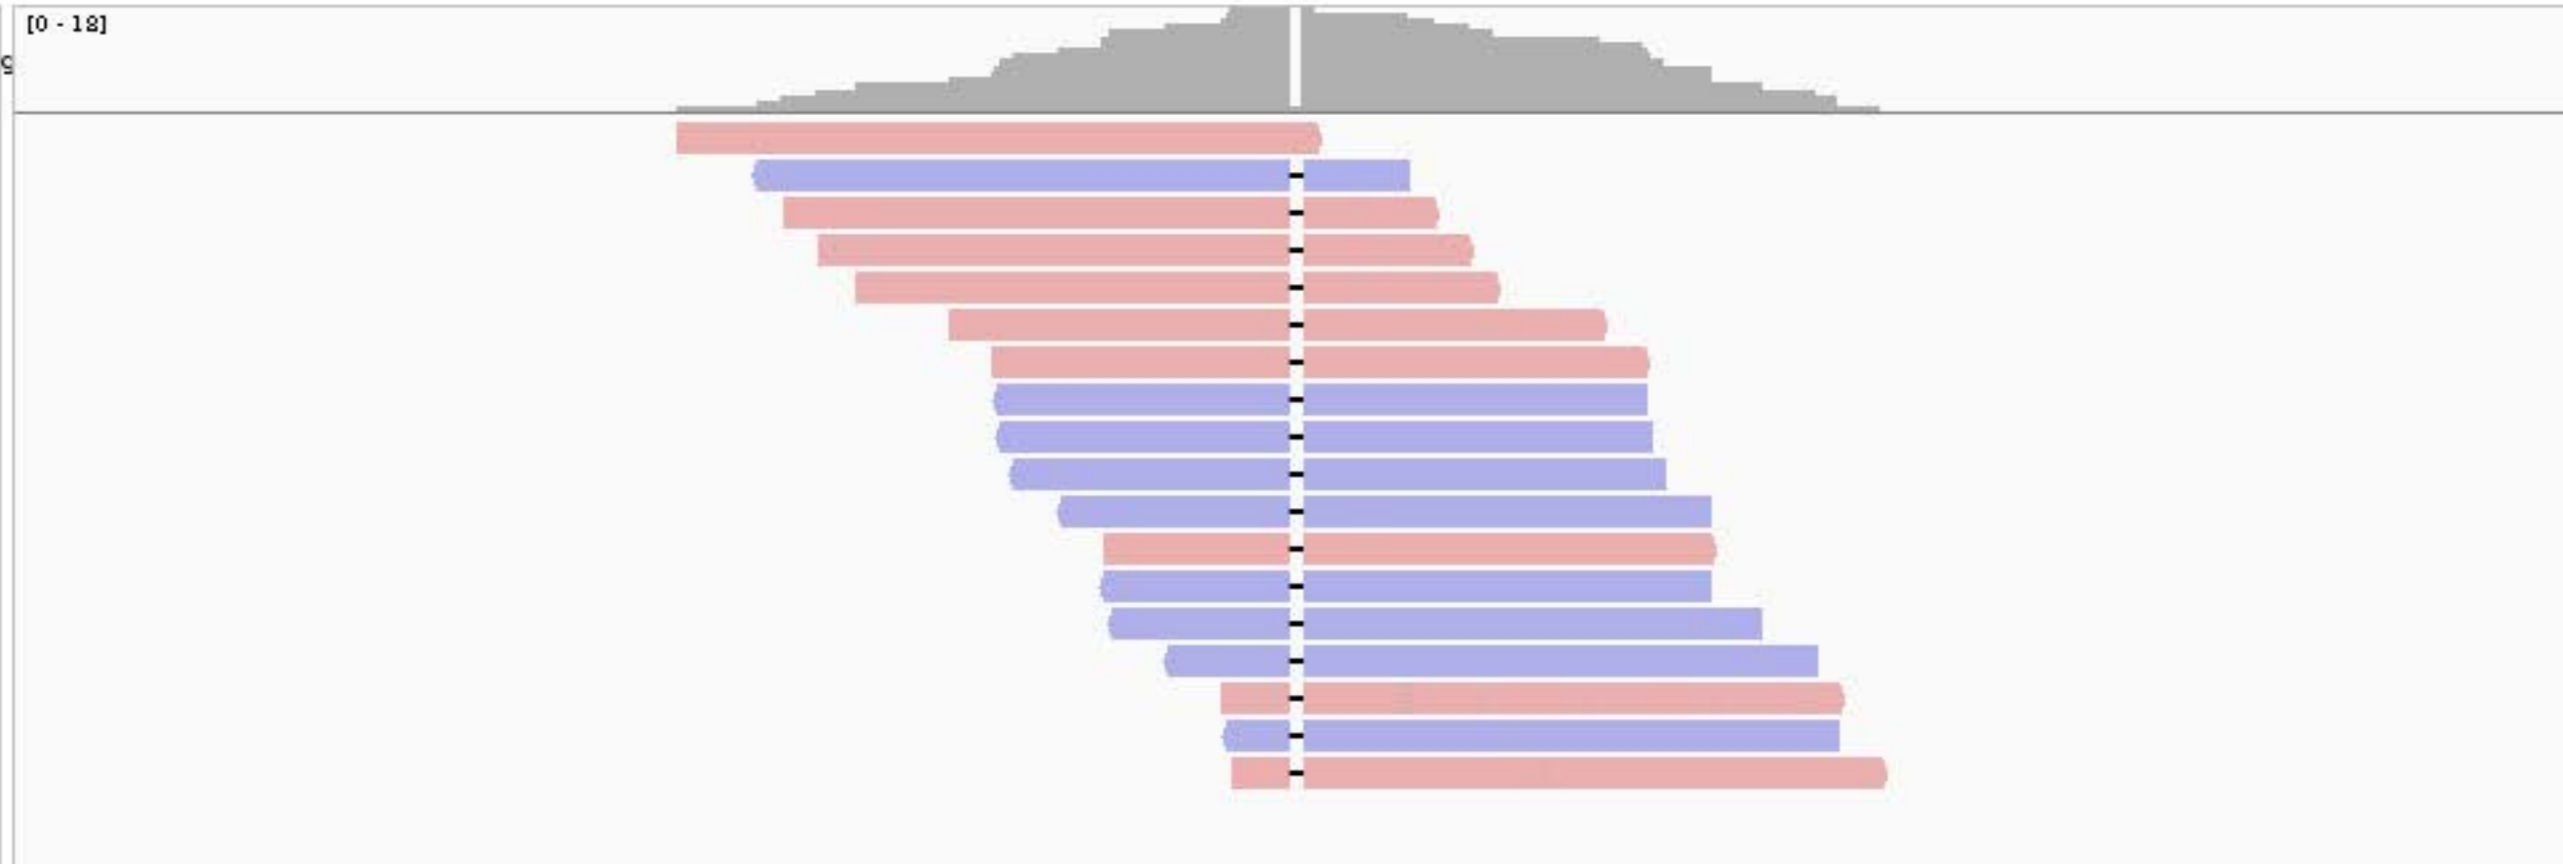

SL\_0002\_LN\_1\_mut.bam

Sequence

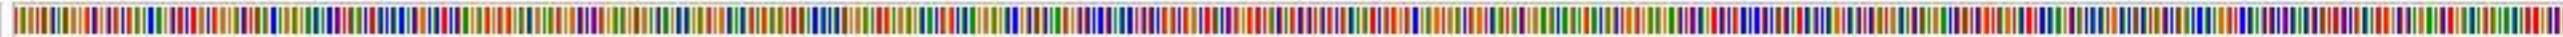

Refseq Genes

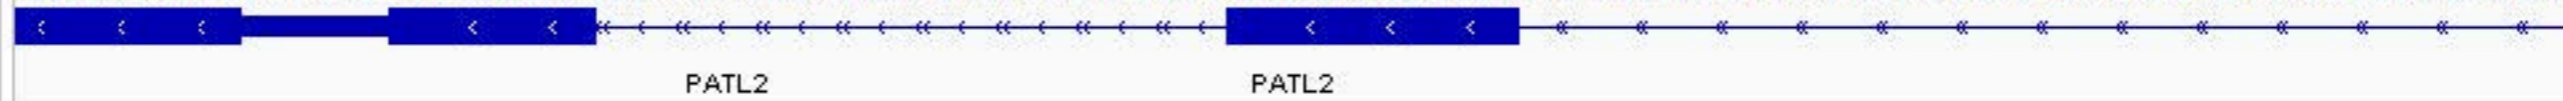



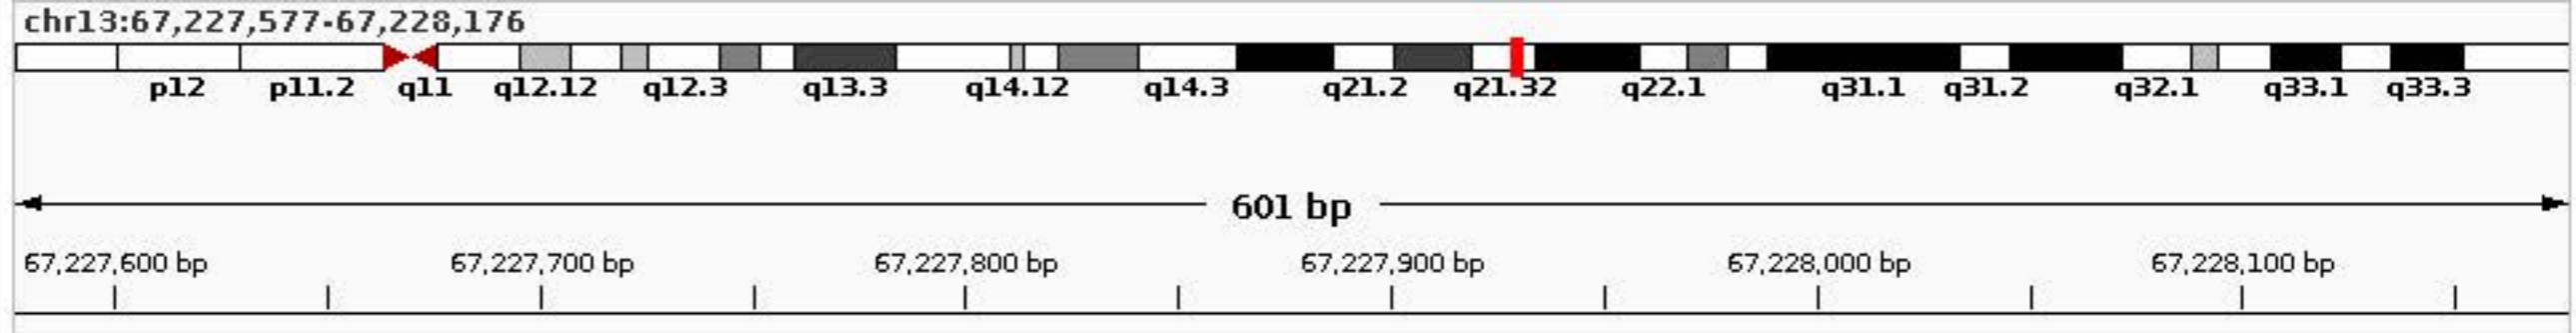

SL\_0007\_RN\_2\_mut.bam Coverage

SL\_0007\_RN\_2\_mut.bam

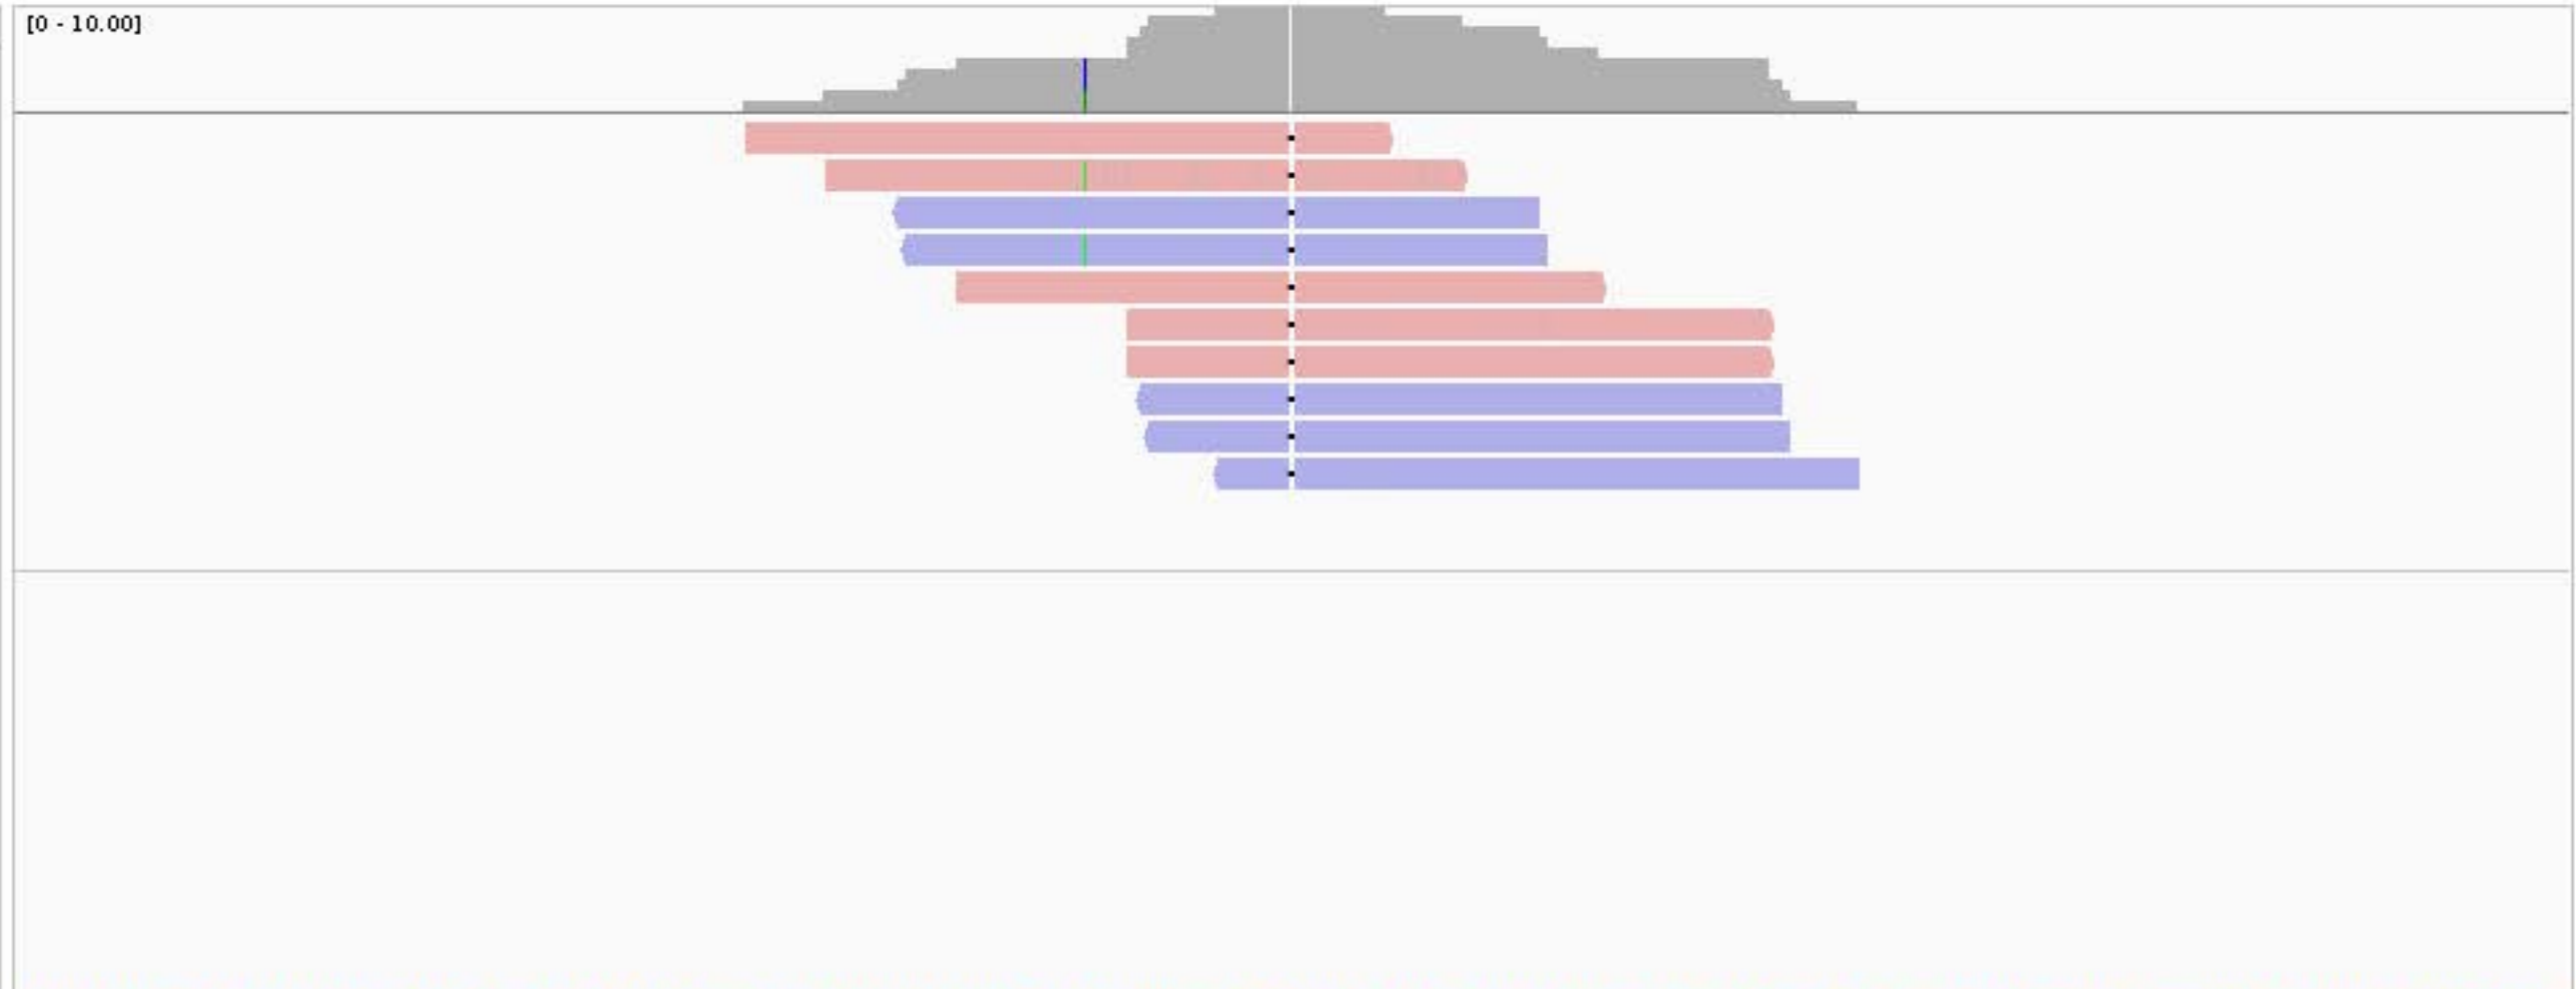

Sequence

Refseq Genes

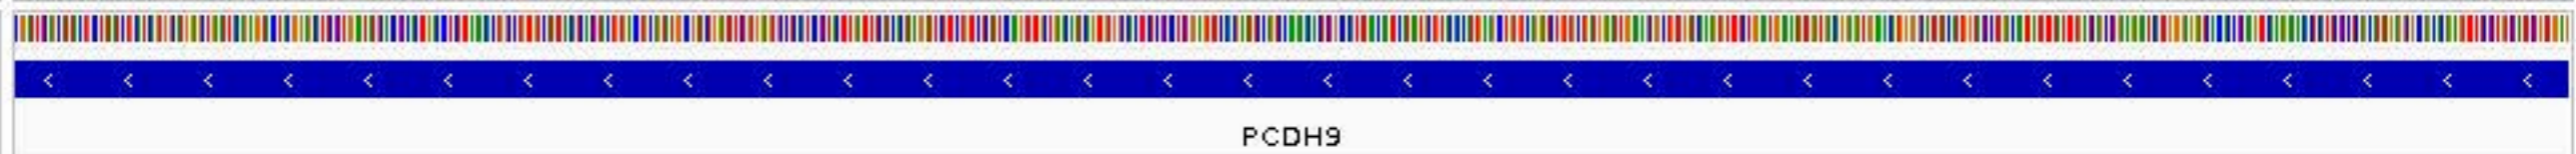

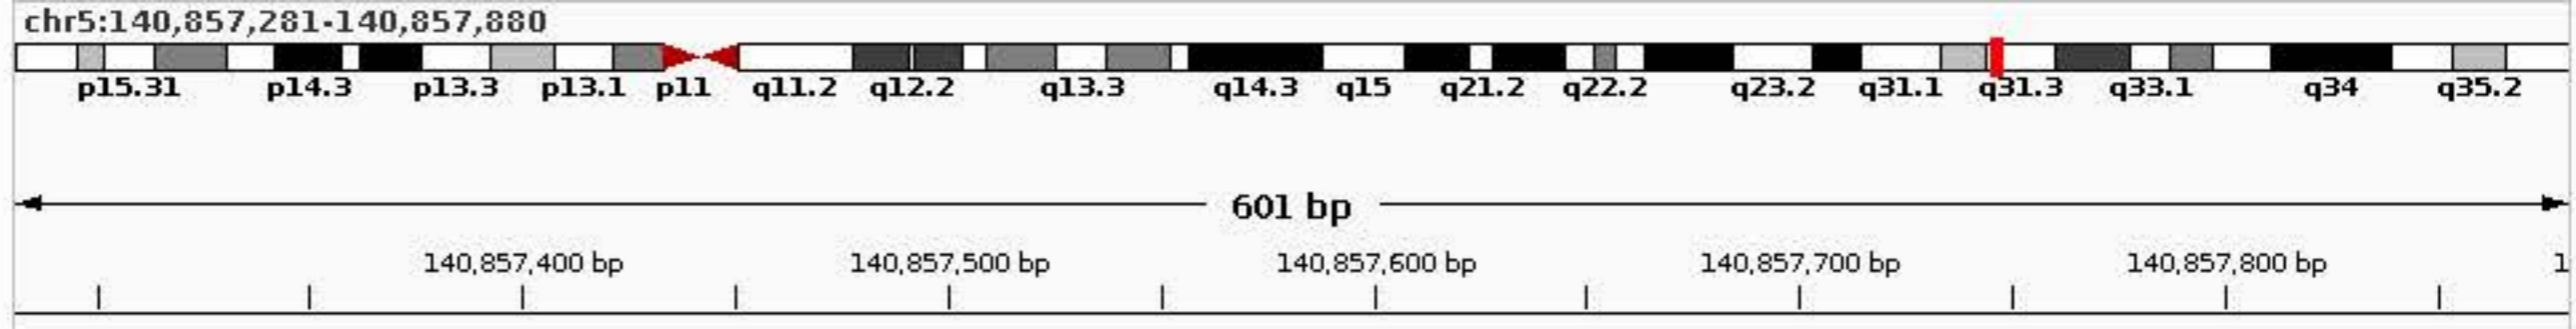

SL\_0007\_RN\_33\_mut.bam Coverage

SL\_0007\_RN\_33\_mut.bam

Sequence →

Refseq Genes

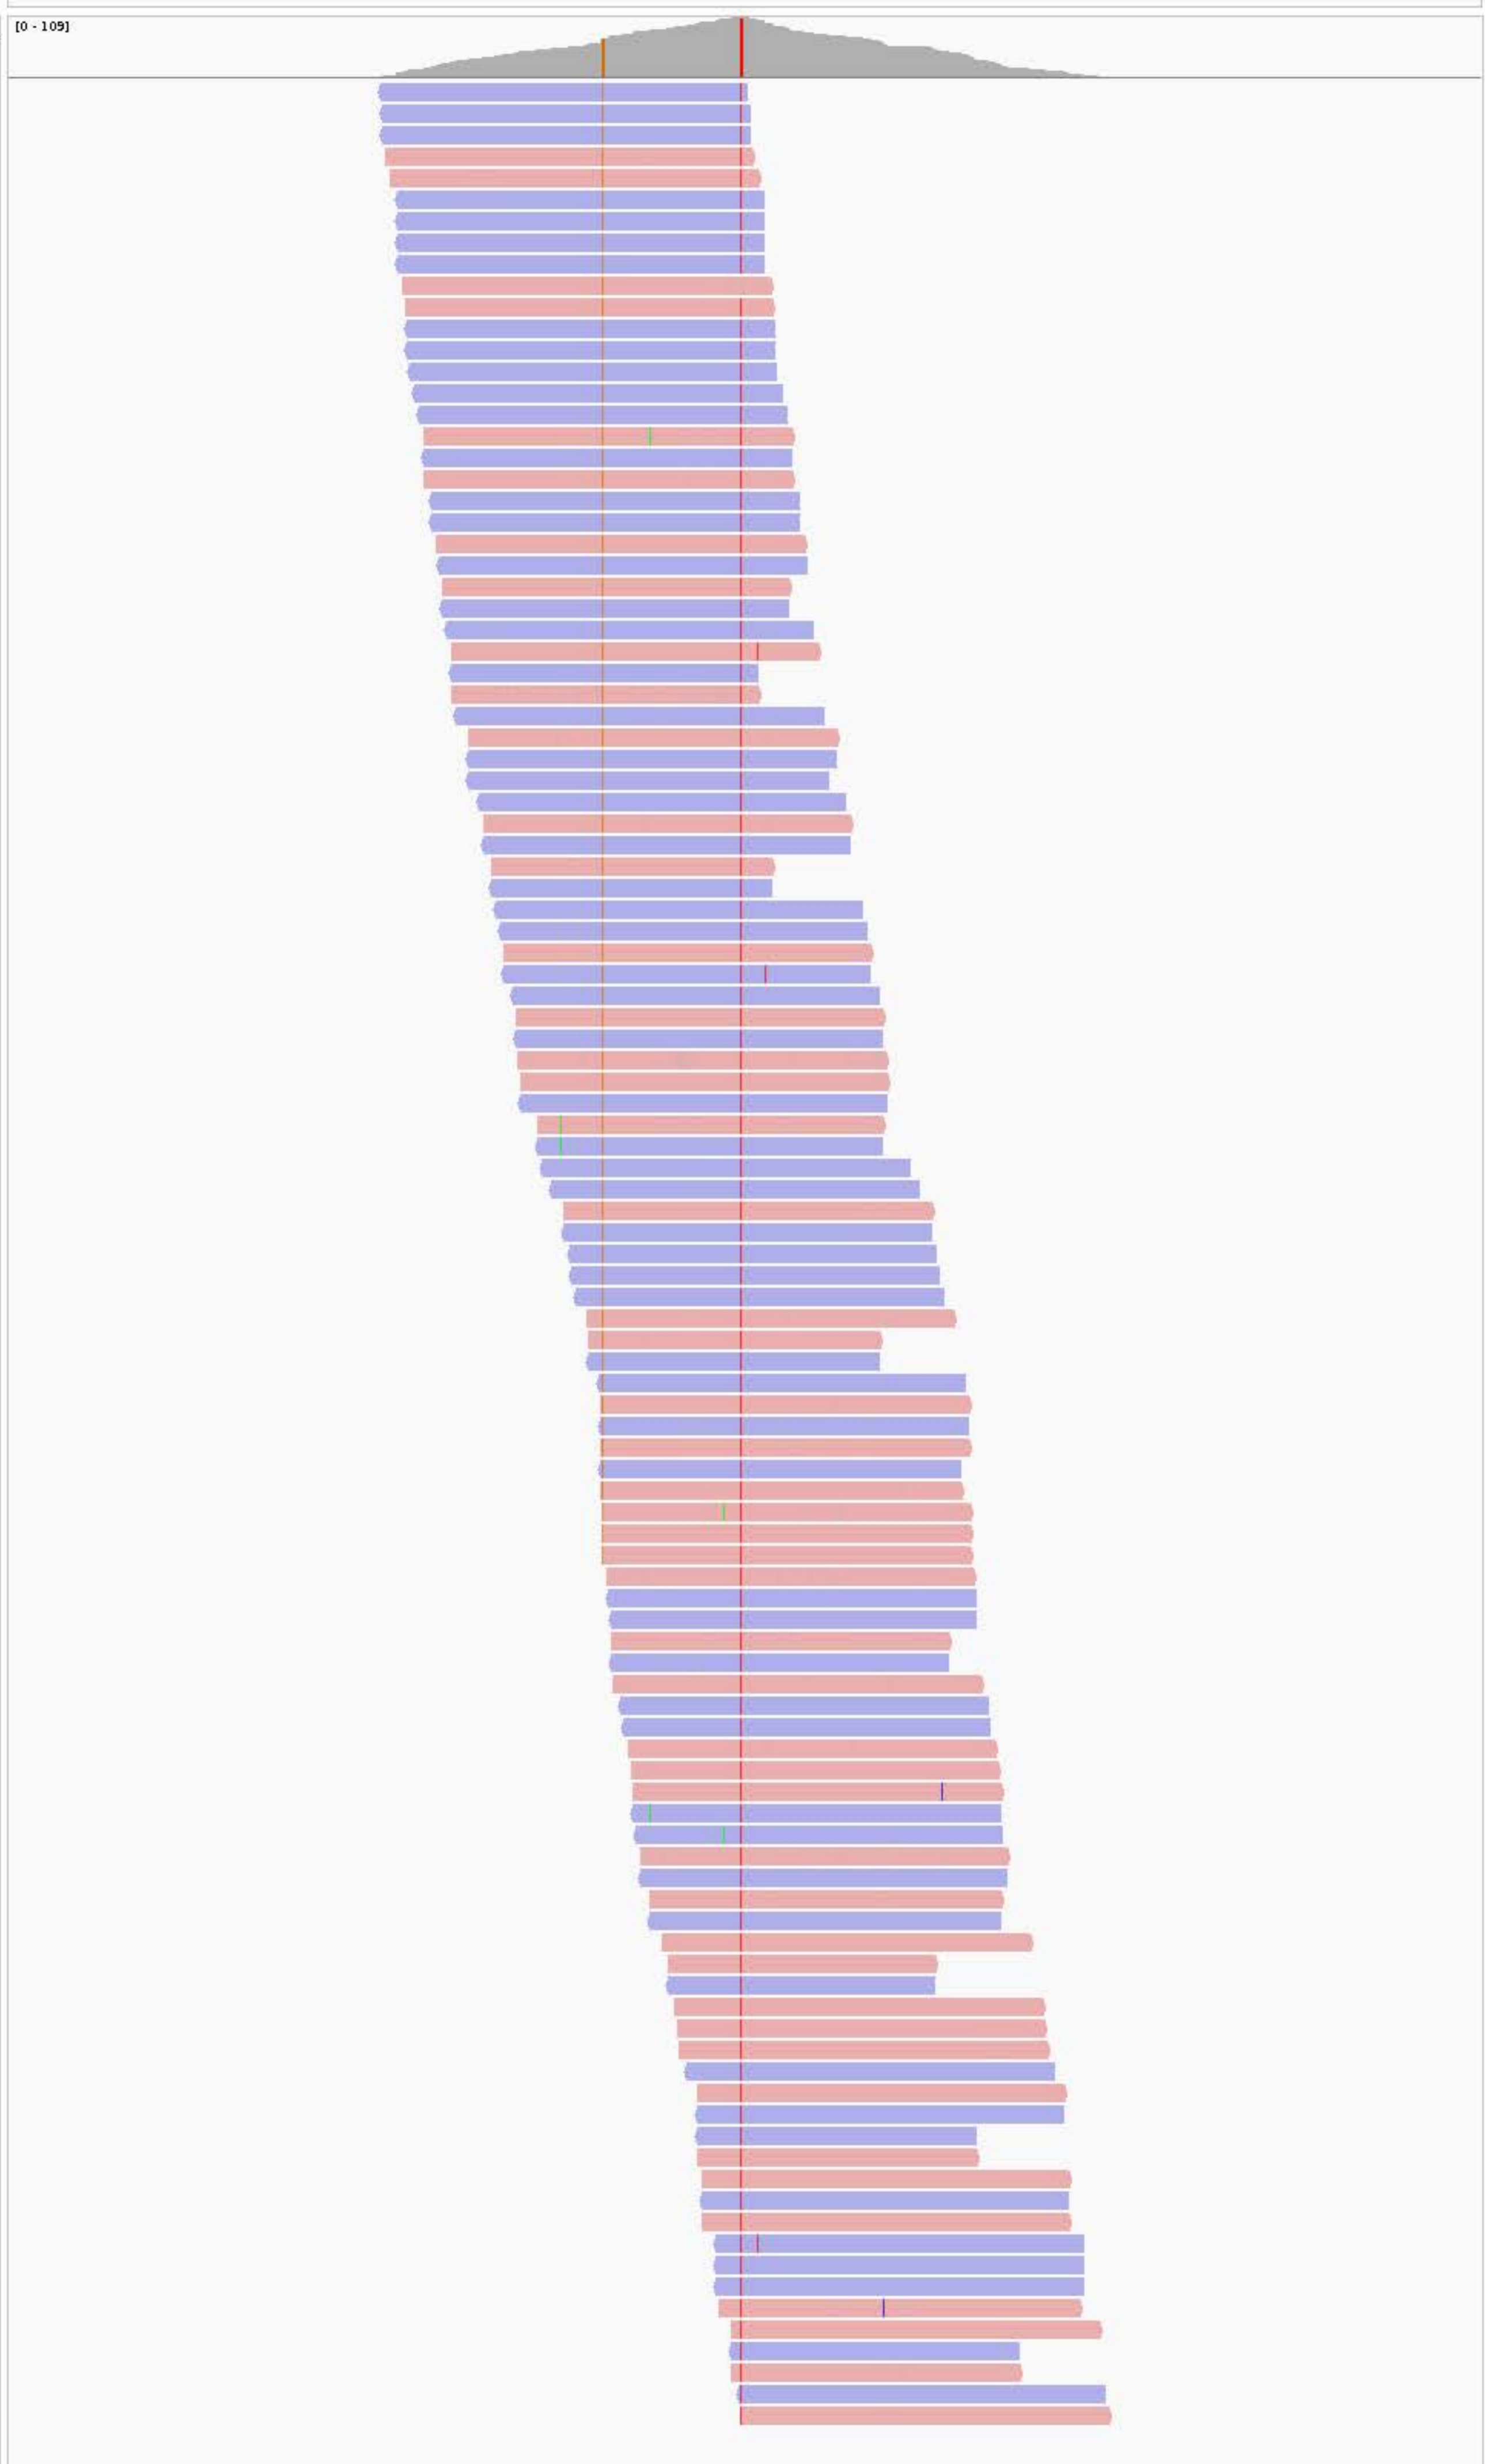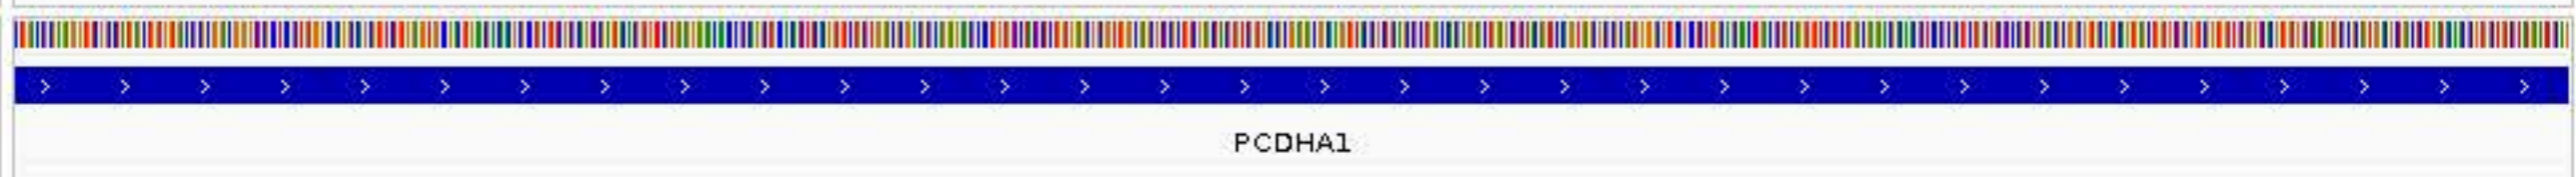

chr19:1,483,773-1,484,372

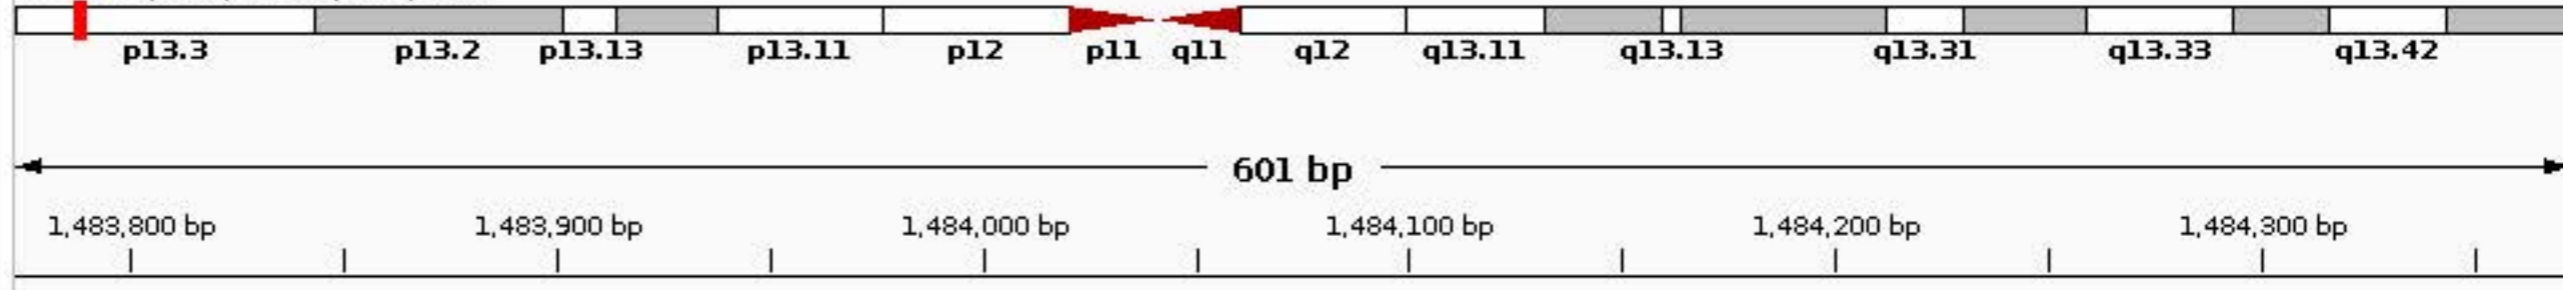

SL\_0004\_RN\_05\_mut.bam Coverage

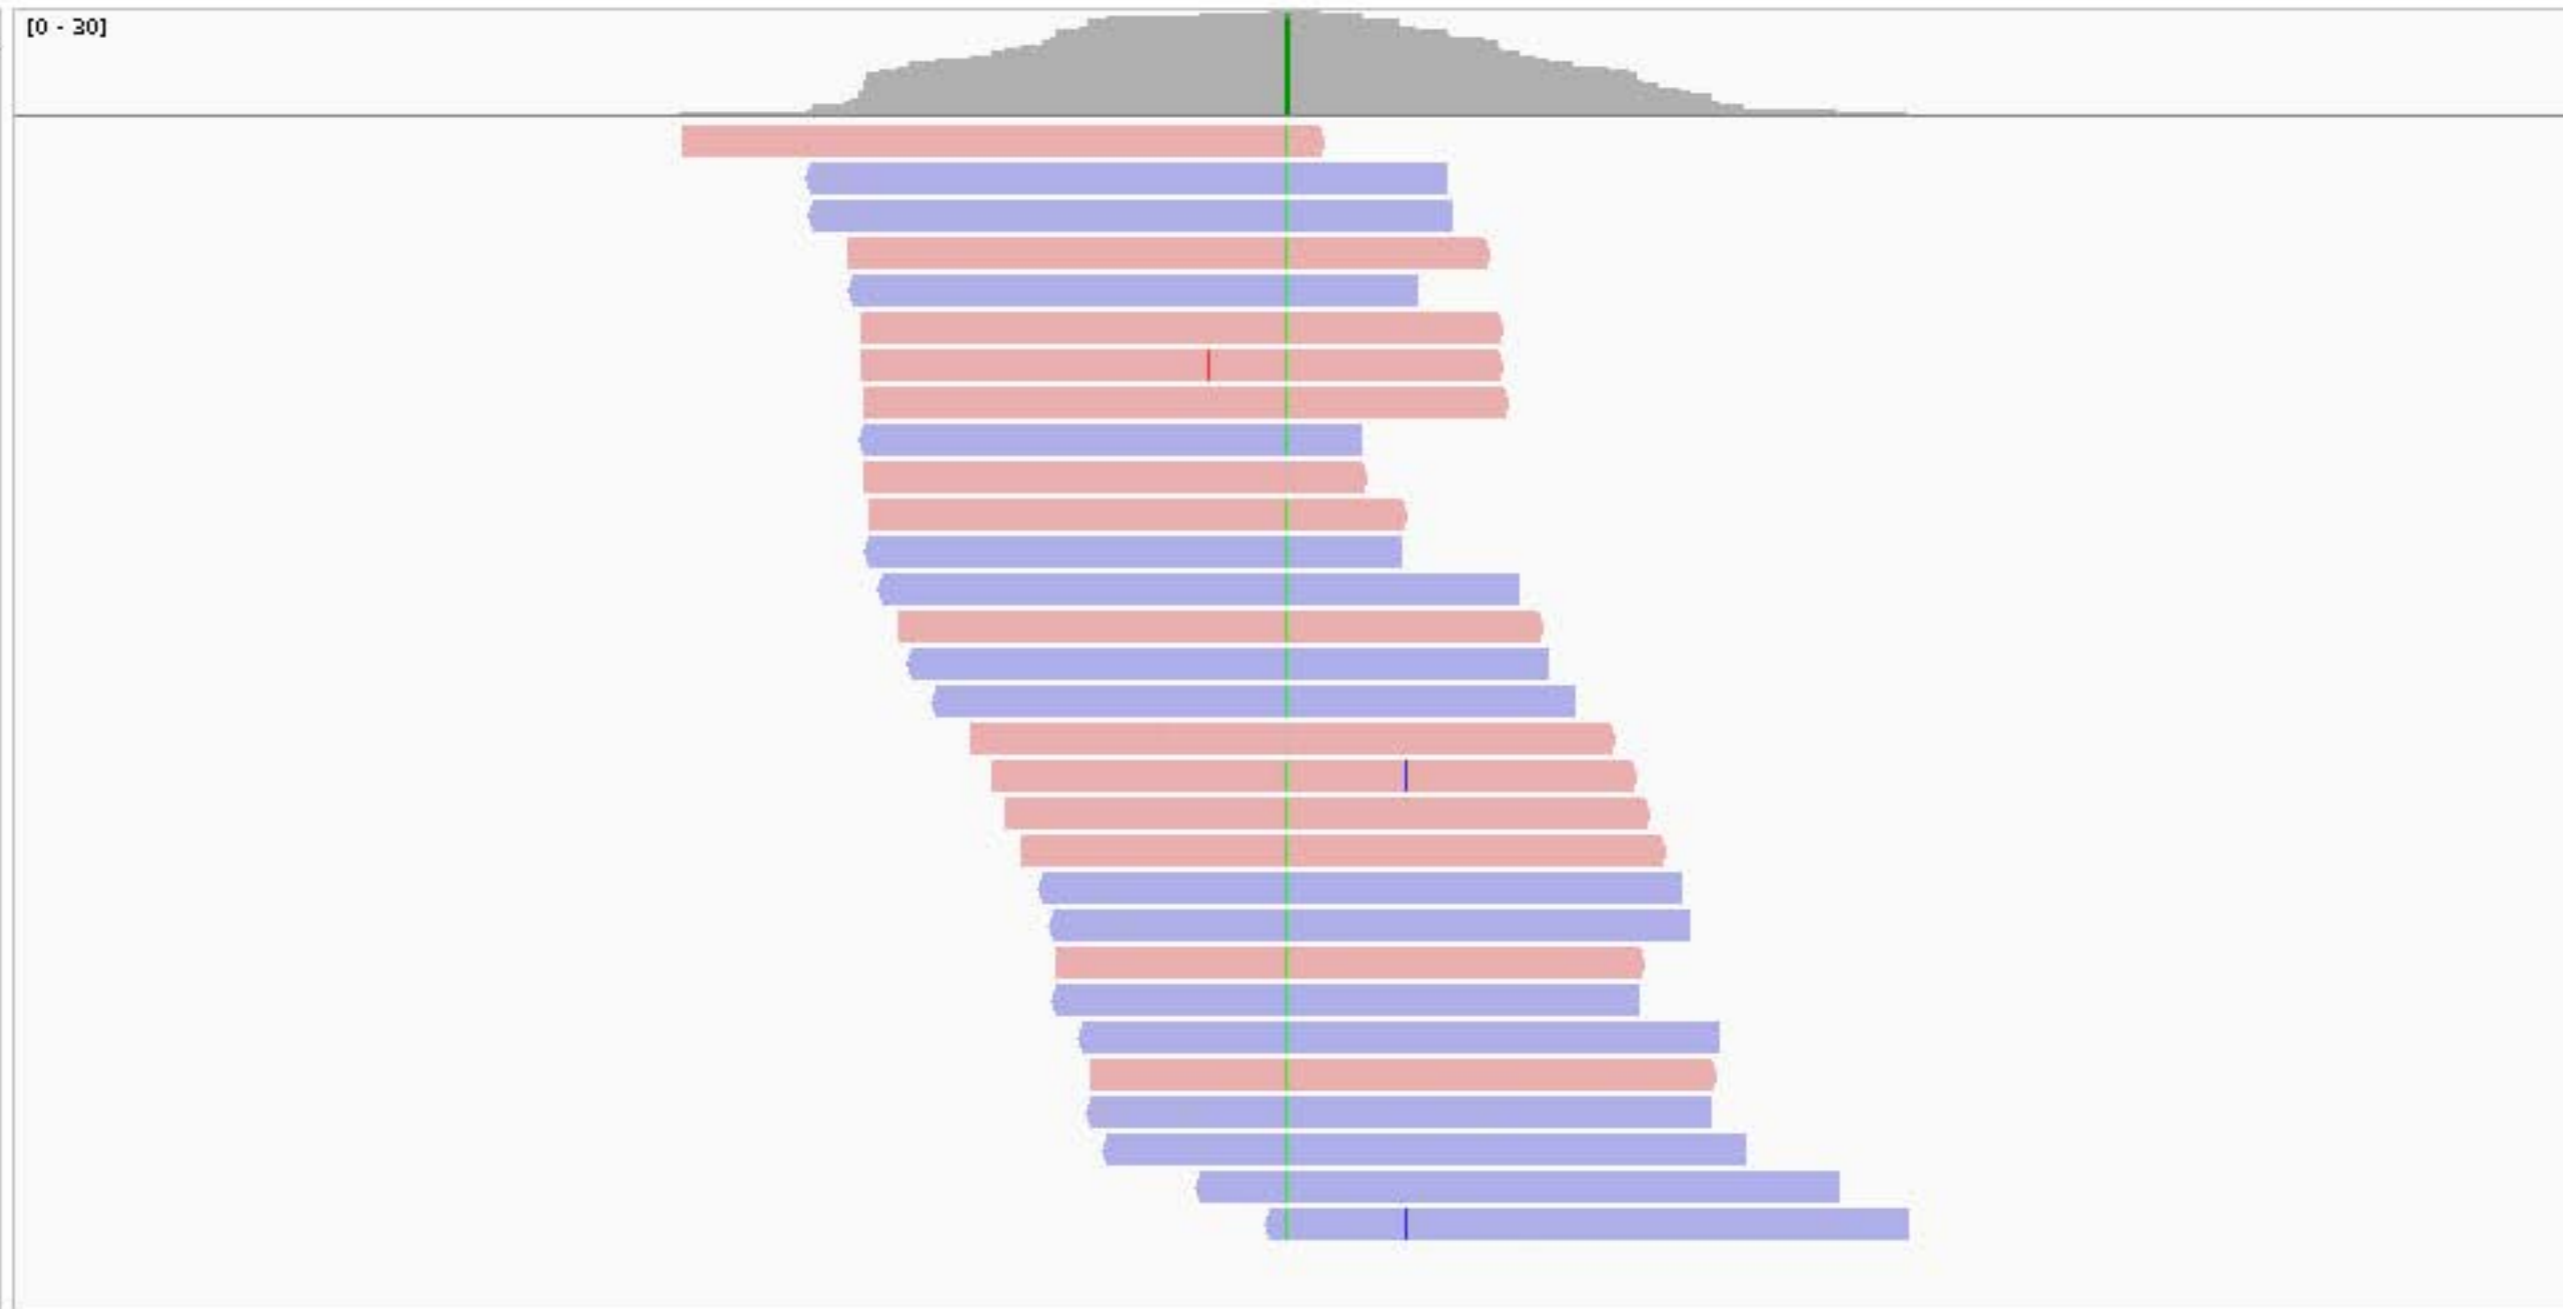

SL\_0004\_RN\_05\_mut.bam

Sequence

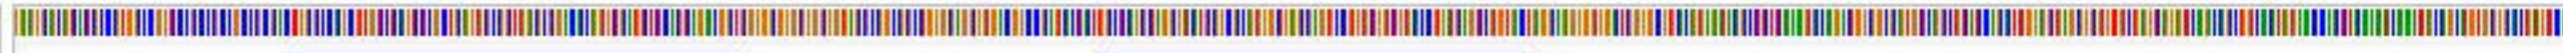

Refseq Genes

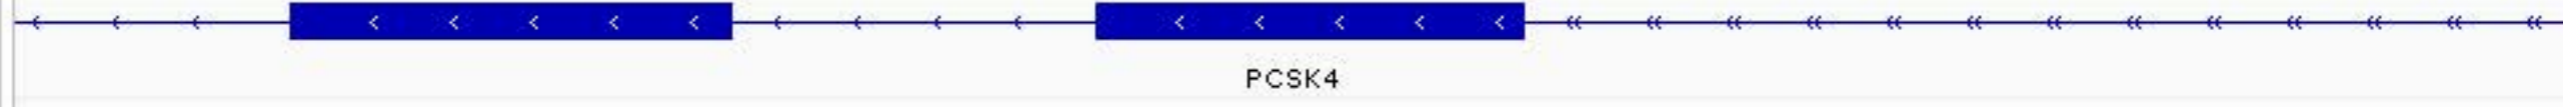

PCSK4

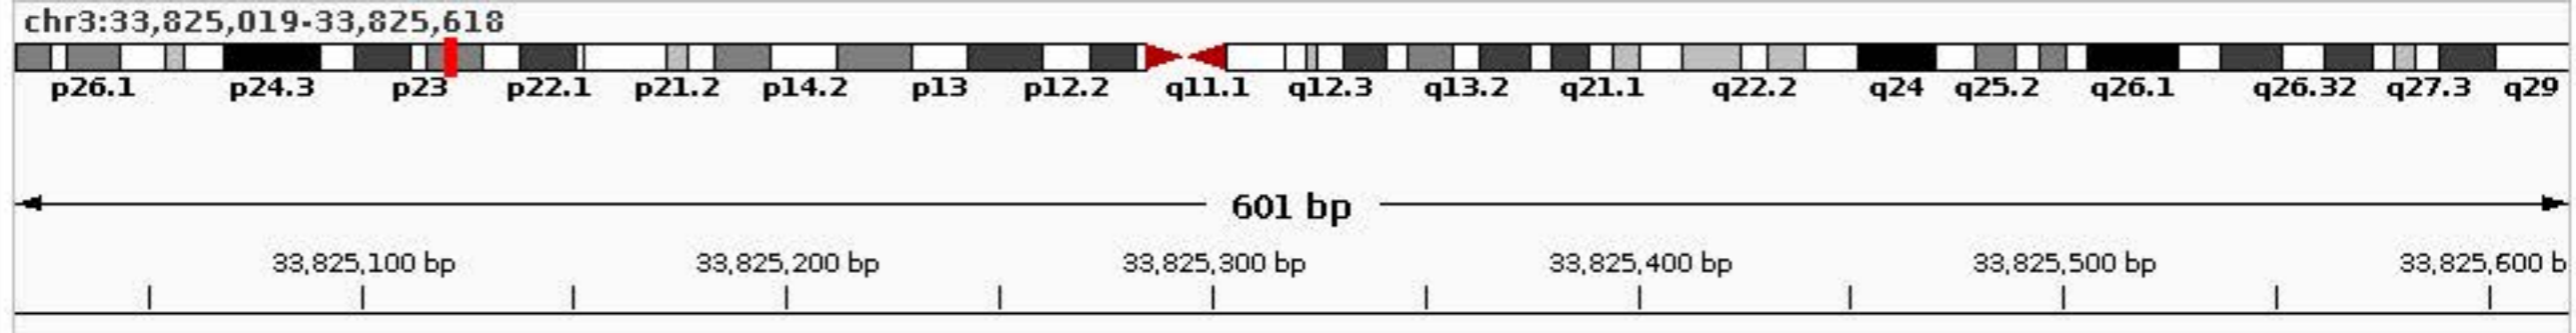

SL\_0015\_LN\_44\_mut.bam Coverage

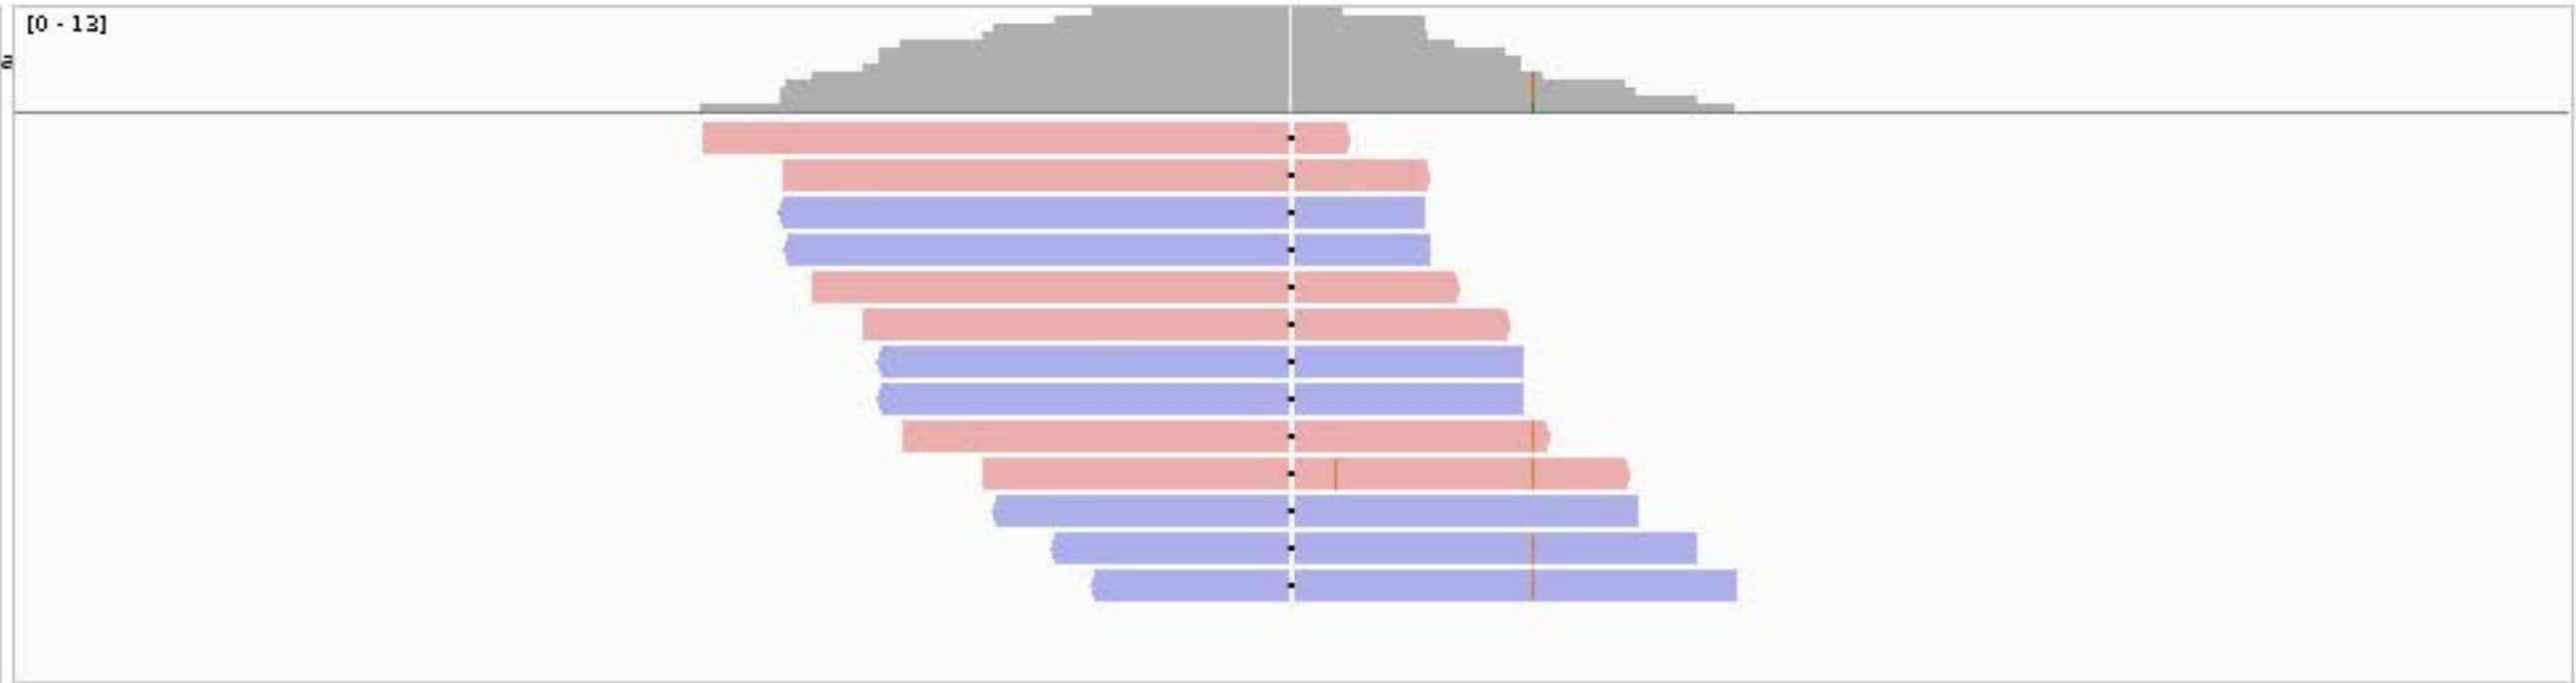

SL\_0015\_LN\_44\_mut.bam

Sequence →

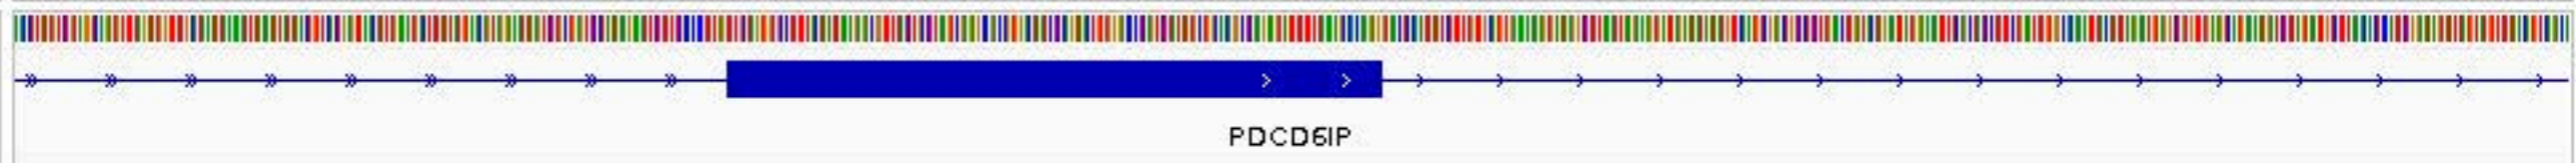

Refseq Genes



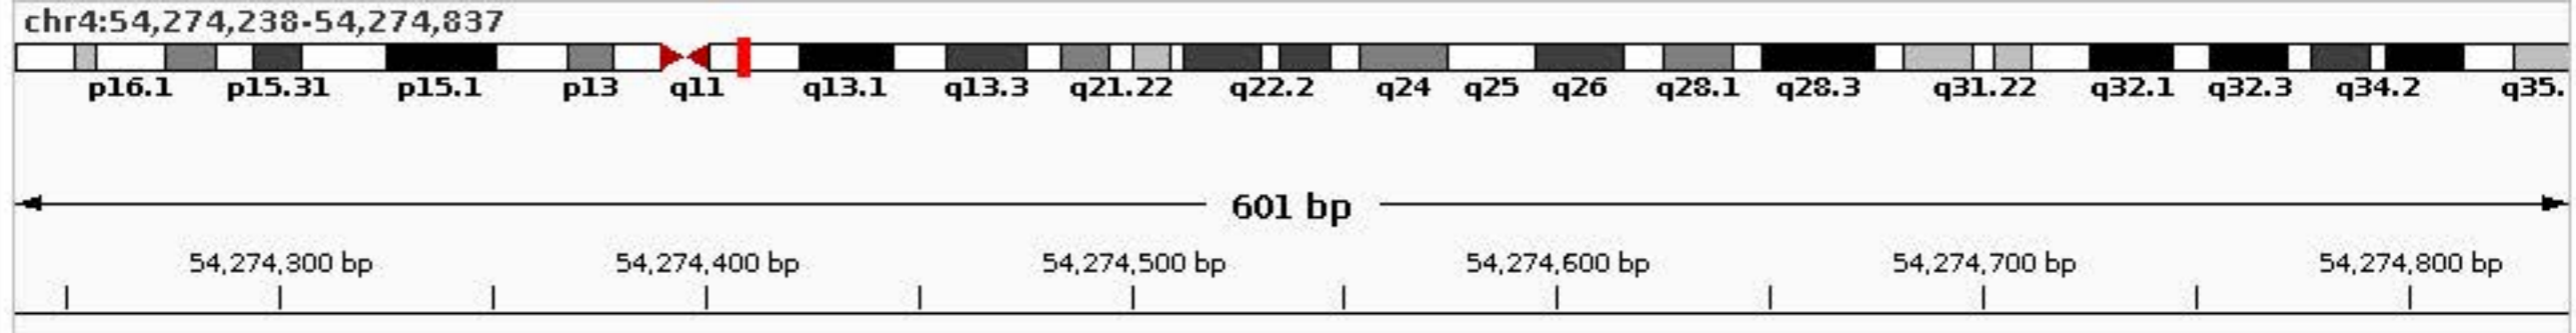

SL\_0001\_LN\_10\_mut.bam Coverage

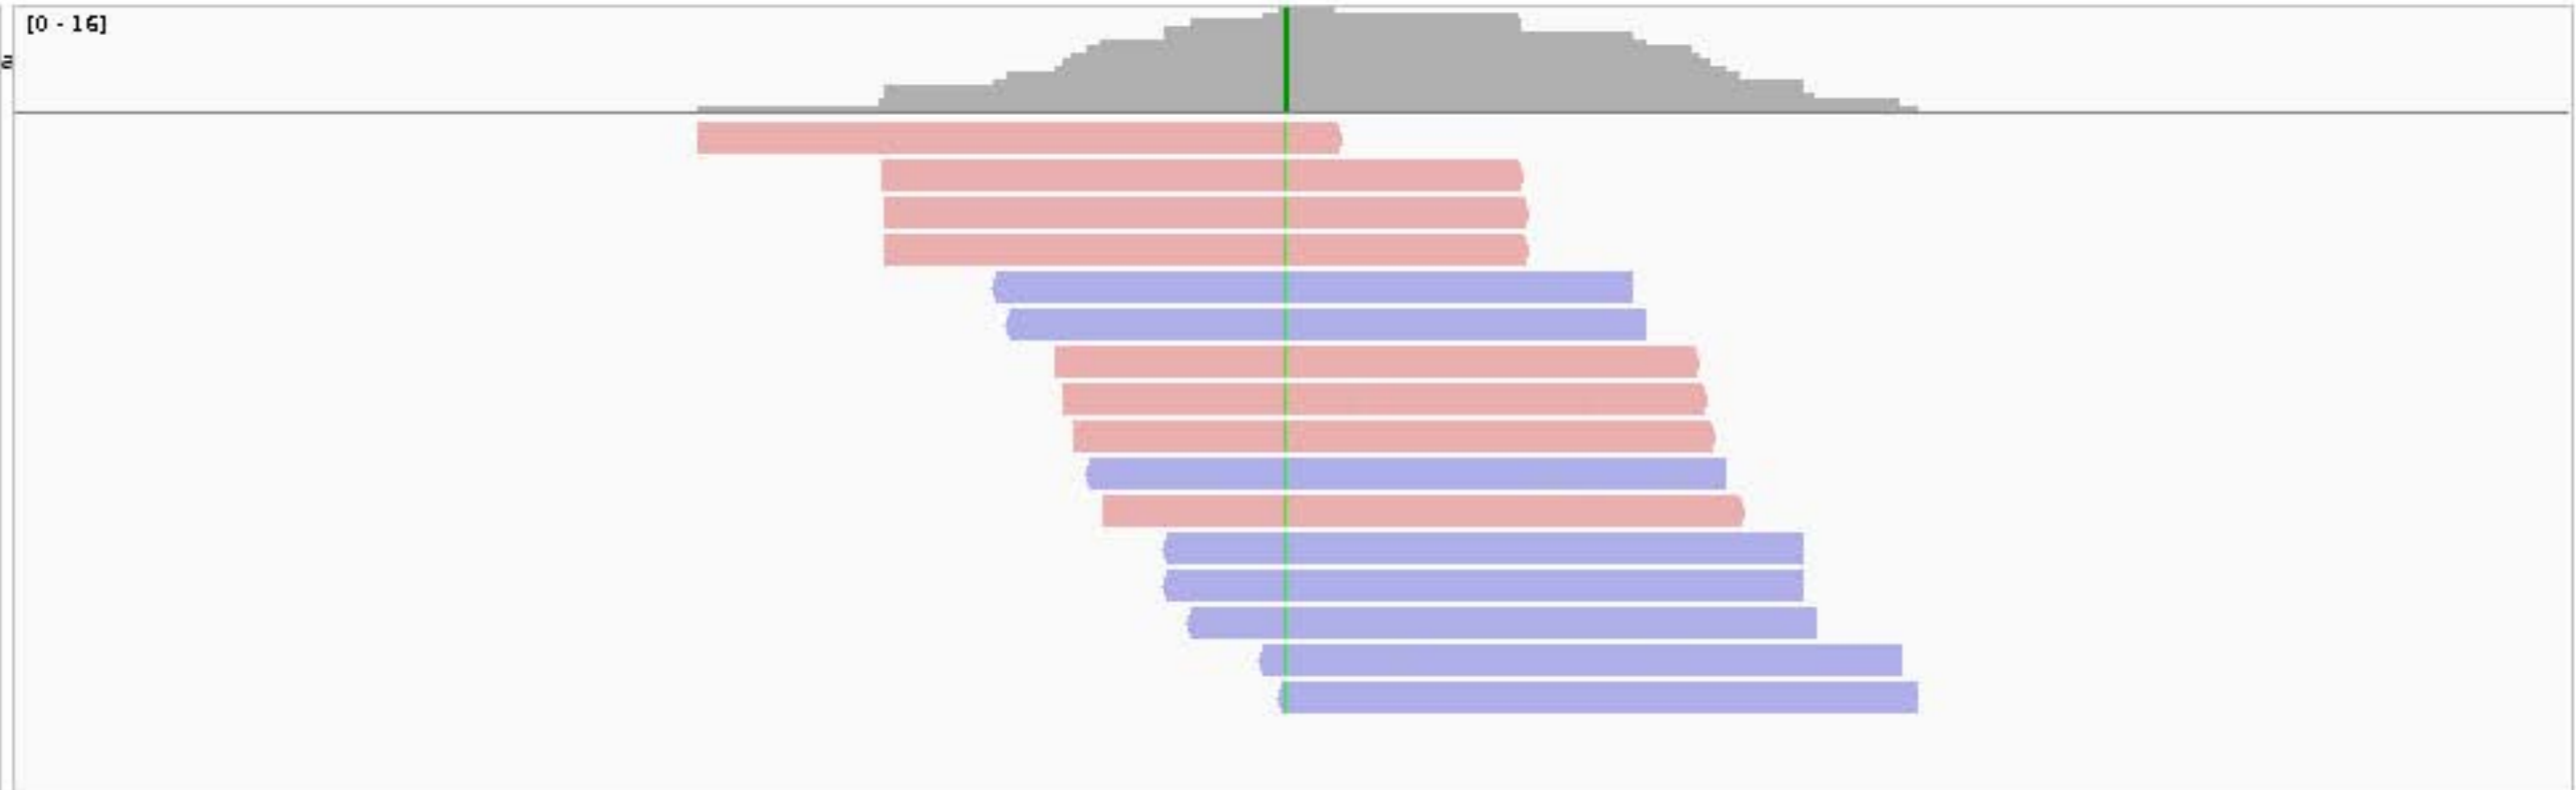

SL\_0001\_LN\_10\_mut.bam

Sequence →

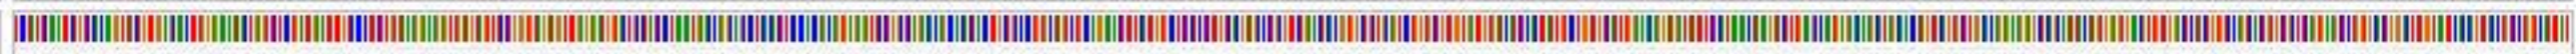

Refseq Genes

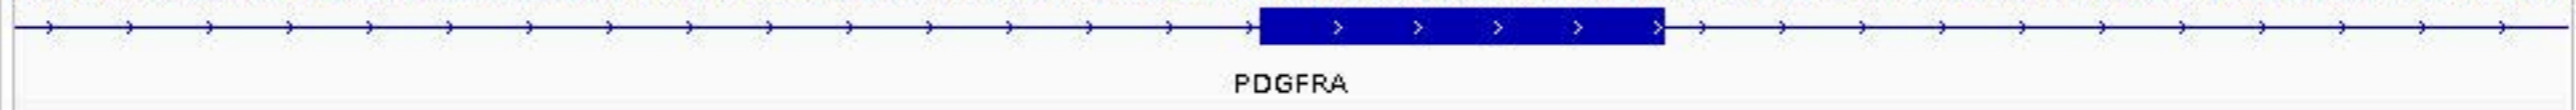



chr6:143,489,132-143,489,731

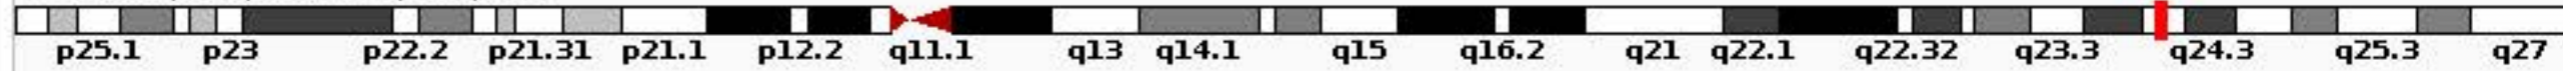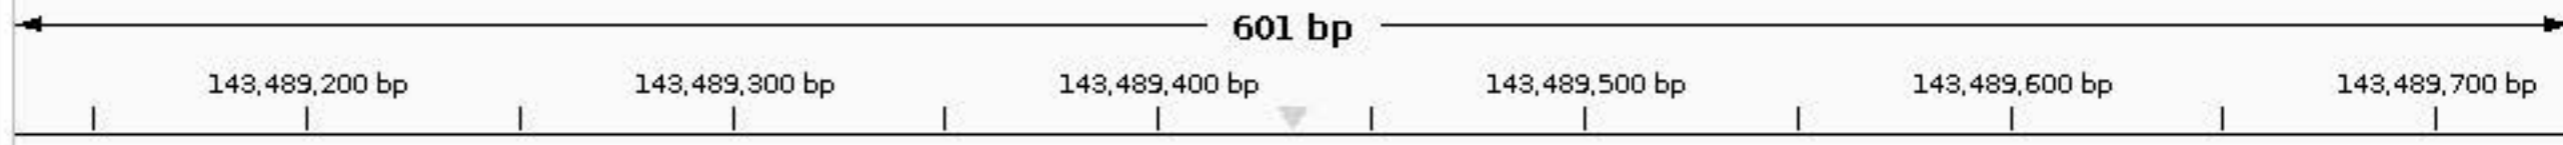

SL\_0006\_RN\_36\_mut.bam Coverage

SL\_0006\_RN\_36\_mut.bam

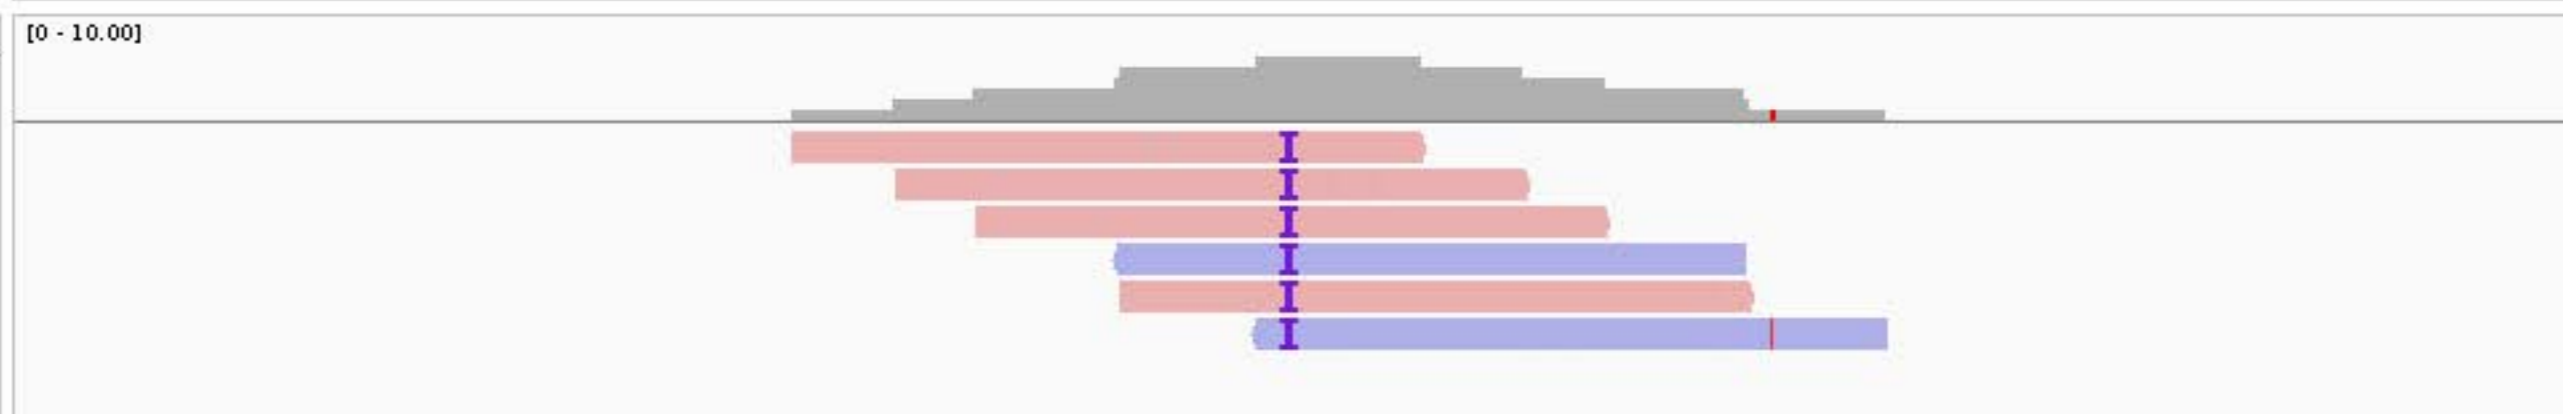

Sequence

Refseq Genes

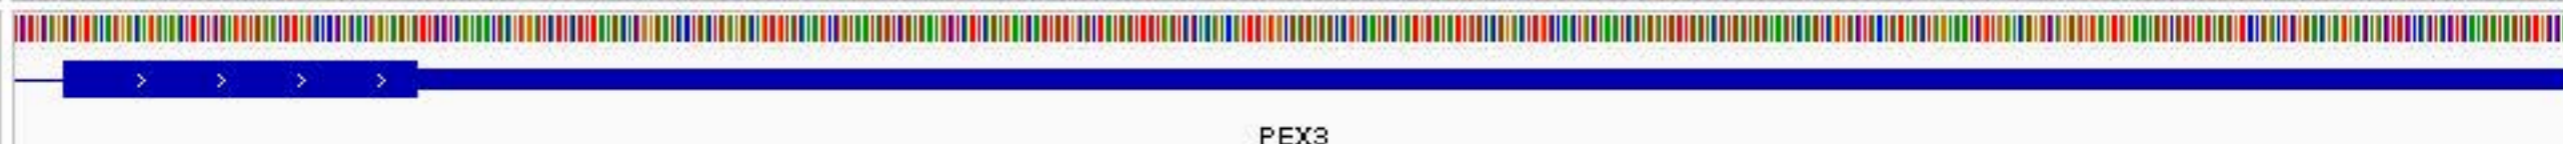

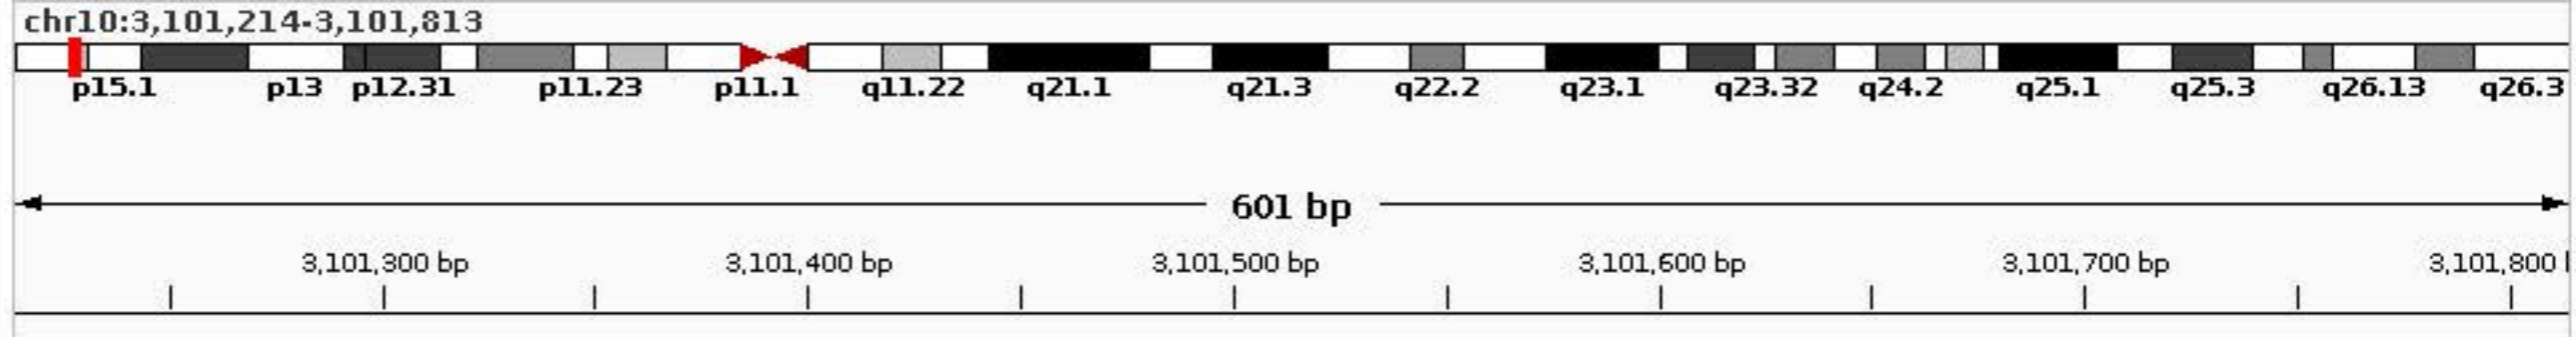

SL\_0004\_RN\_24\_mut.bam Coverage

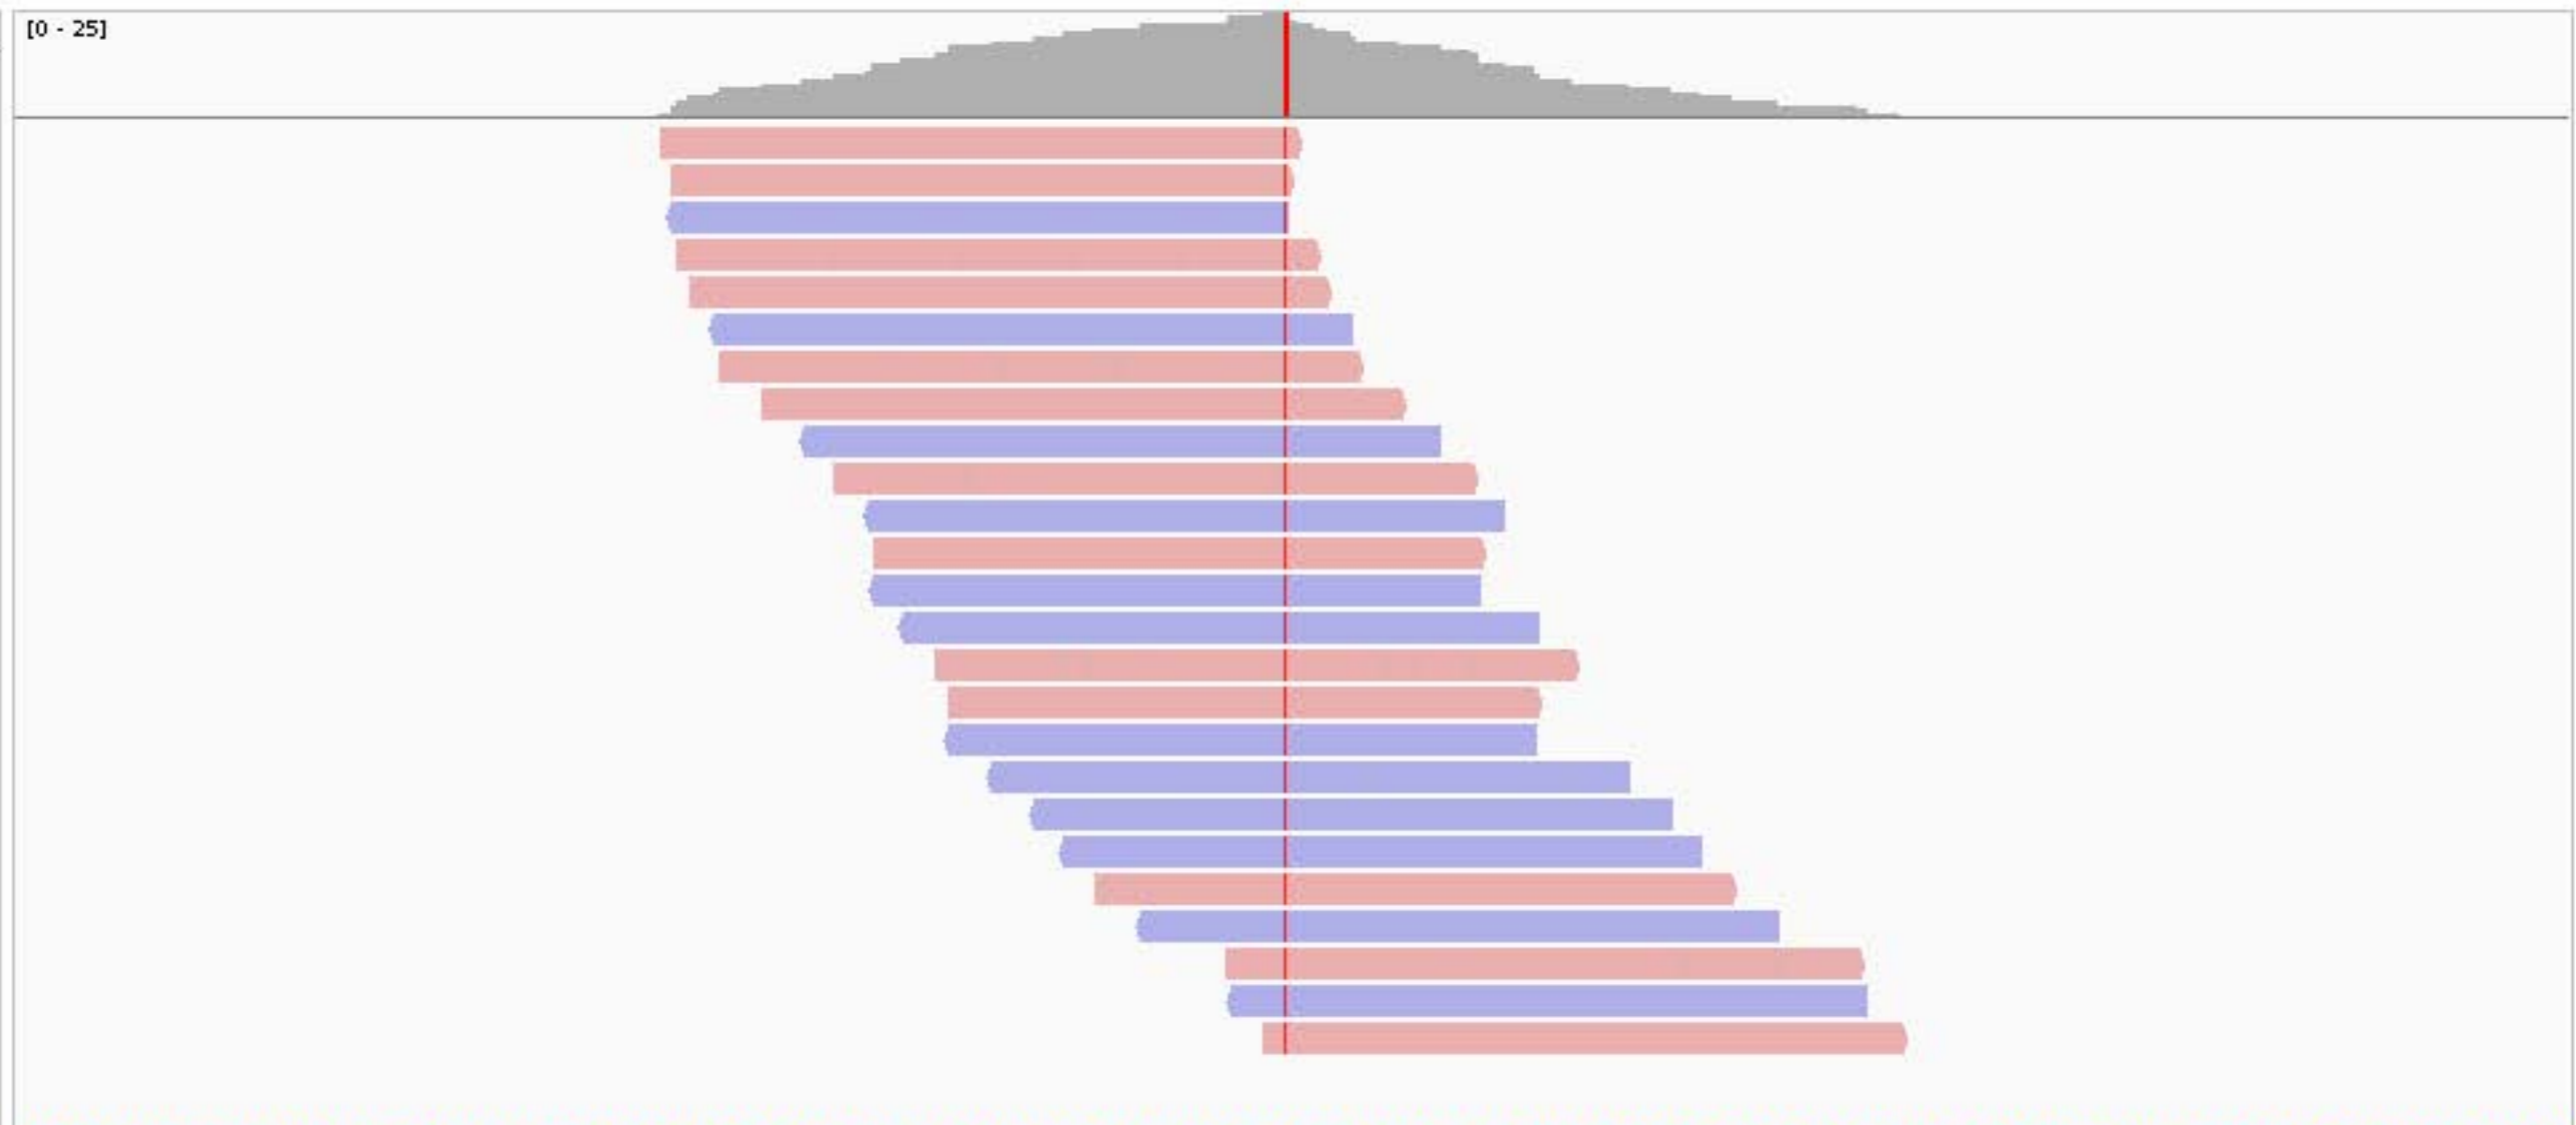

Sequence →

Refseq Genes

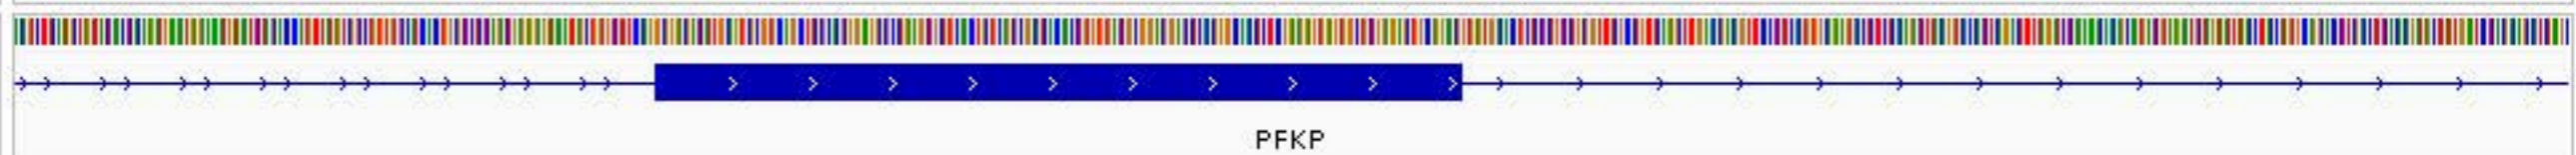

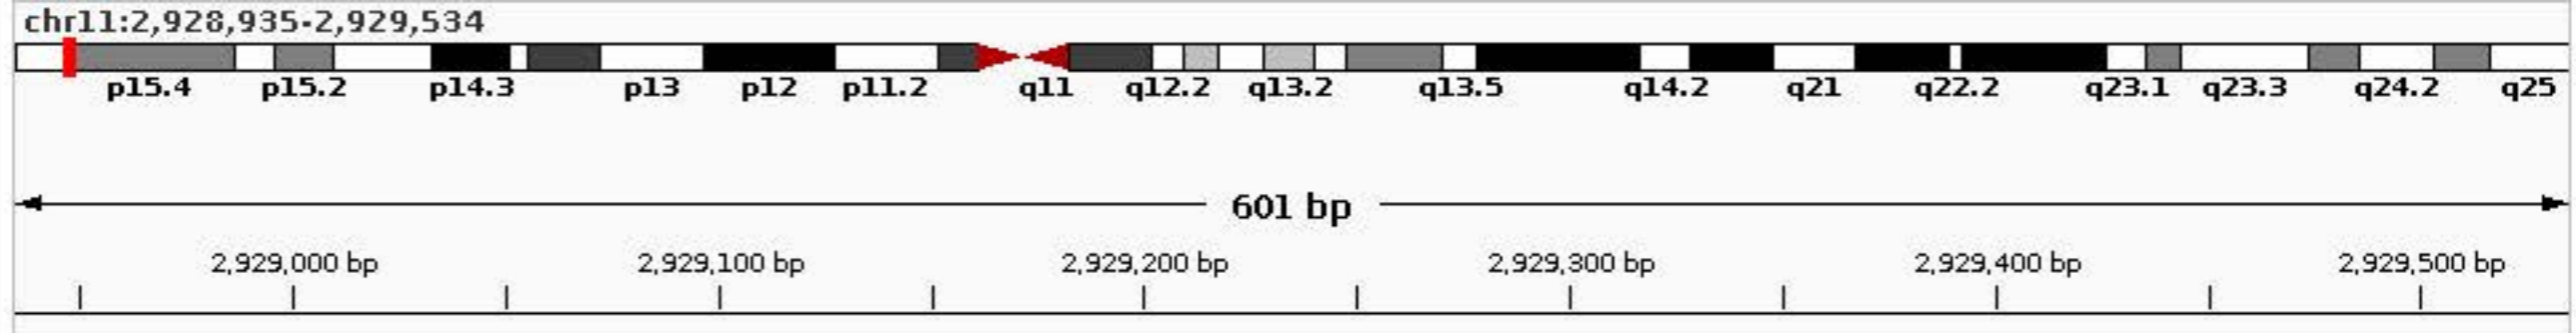

SL\_0006\_RN\_36\_mut.bam Coverage

SL\_0006\_RN\_36\_mut.bam

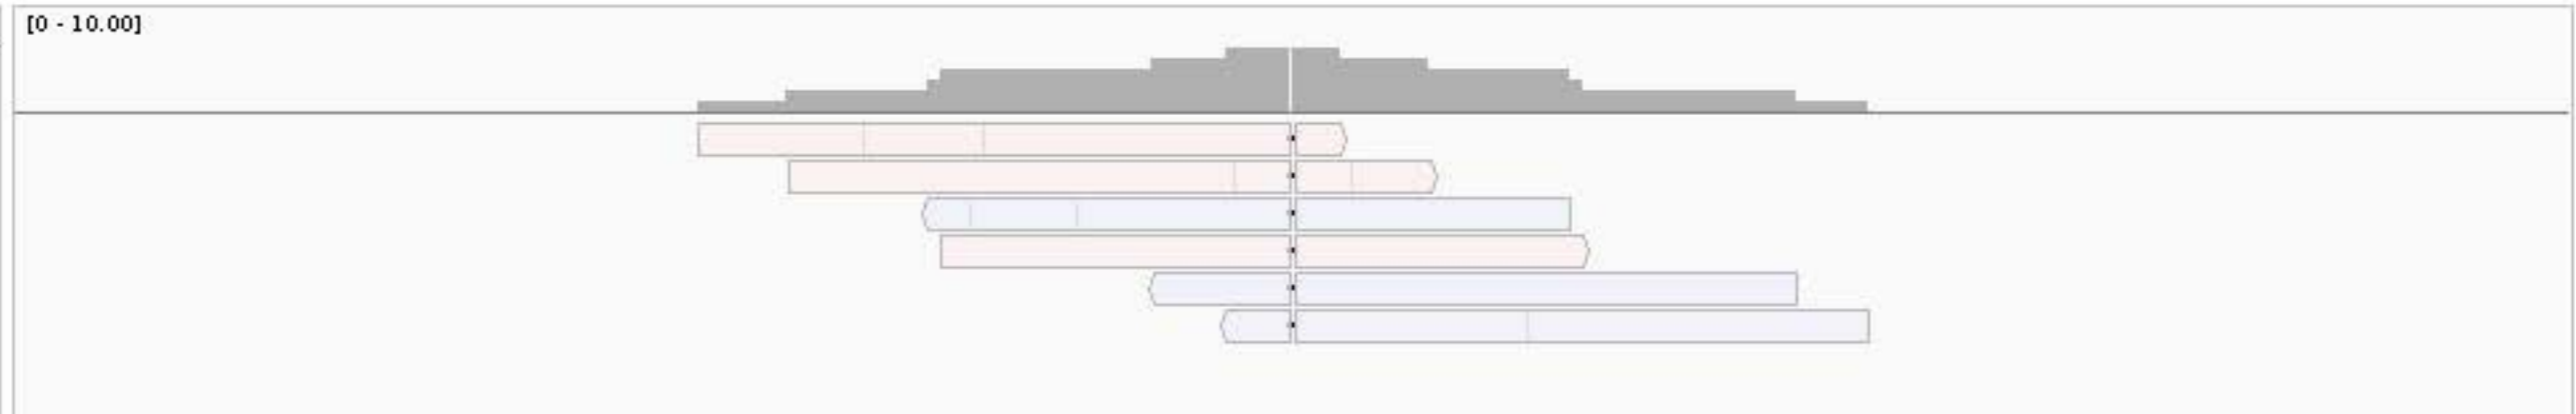

Sequence

Refseq Genes

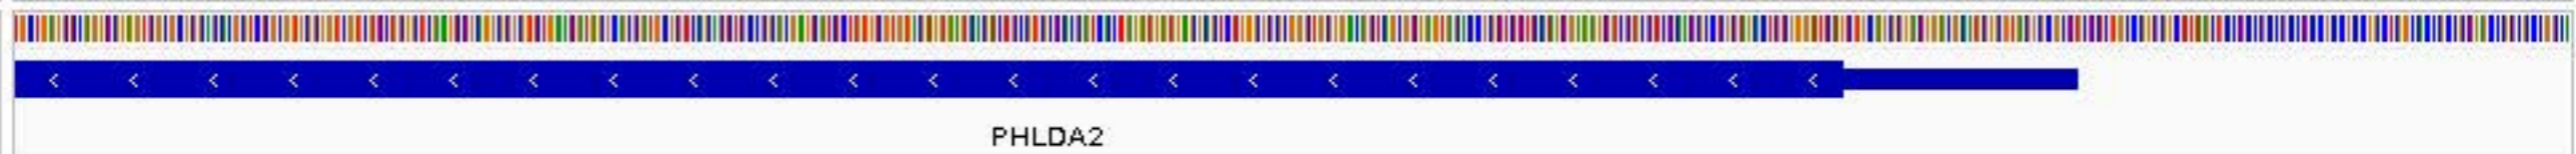

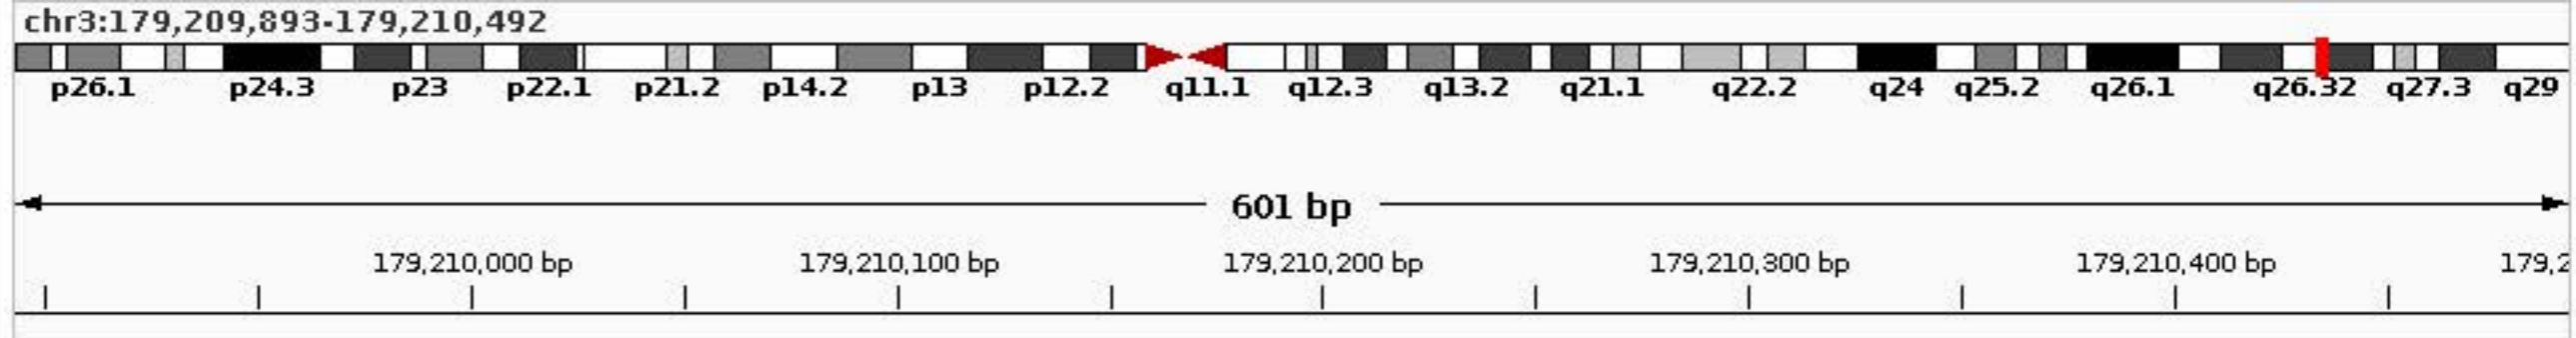

SL\_0015\_RN\_12\_mut.bam Coverage

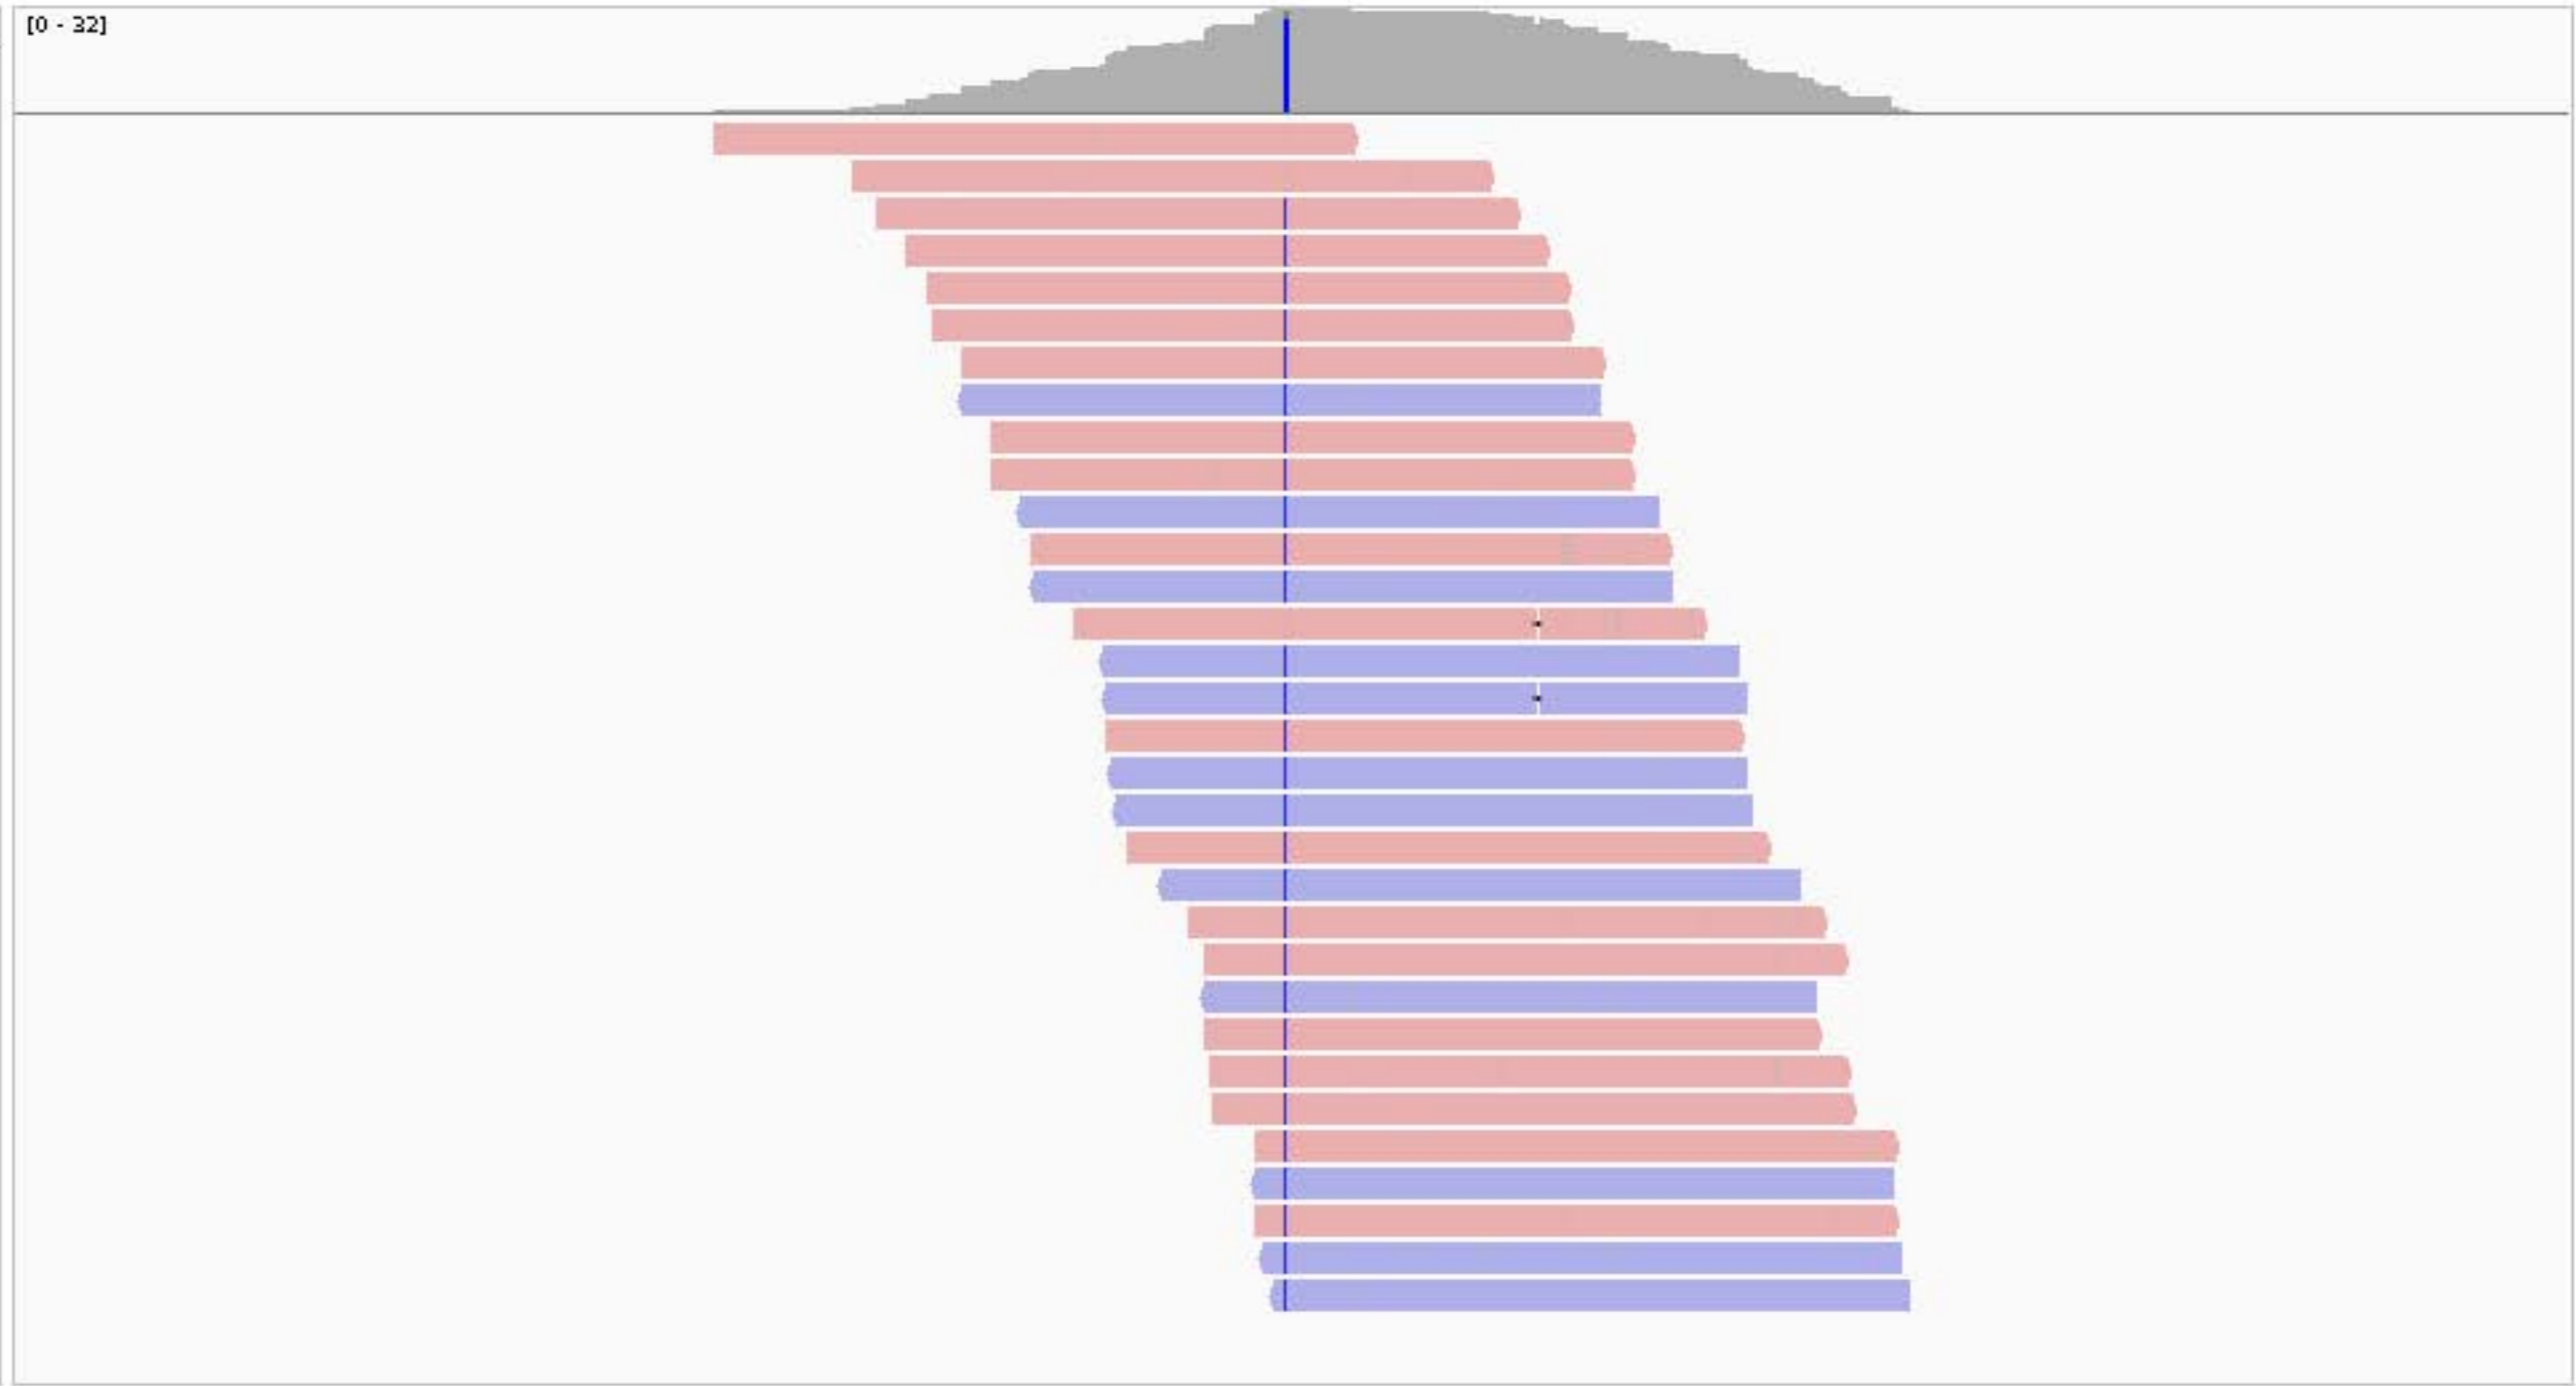

Sequence →  
Refseq Genes

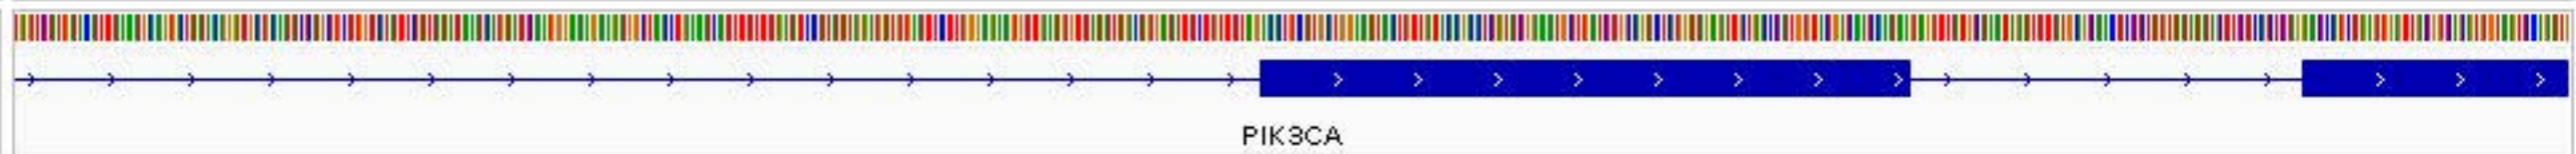



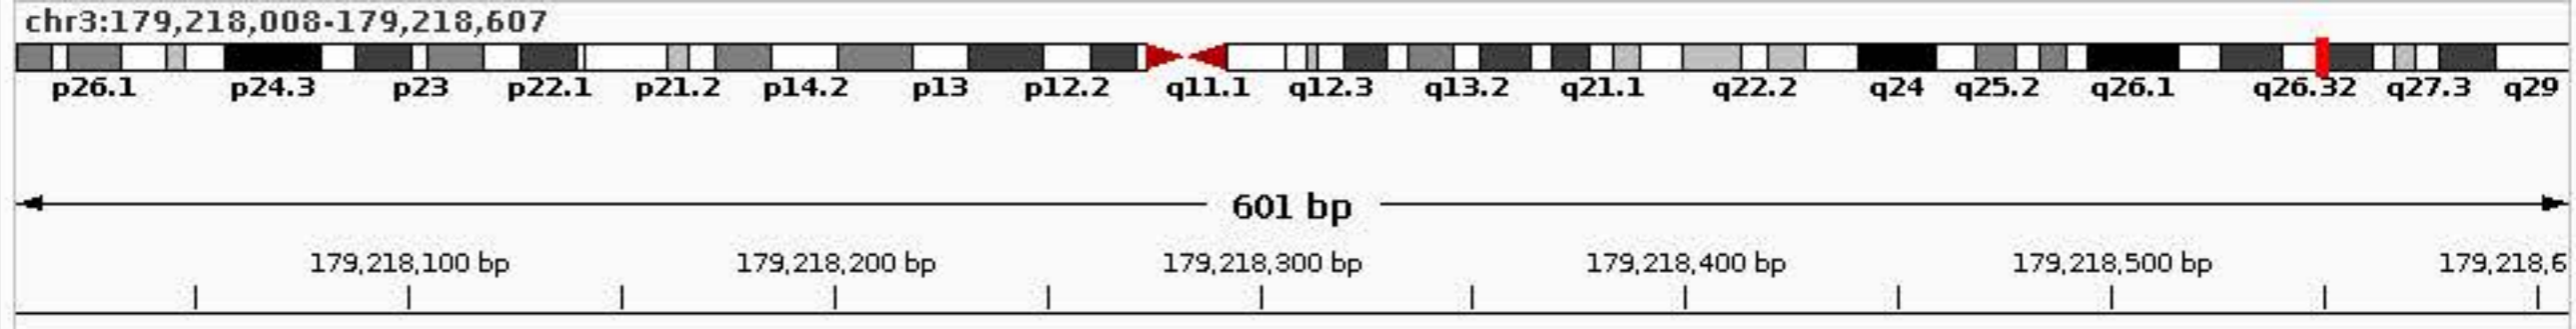

SL\_0004\_RN\_66\_mut.bam Coverage

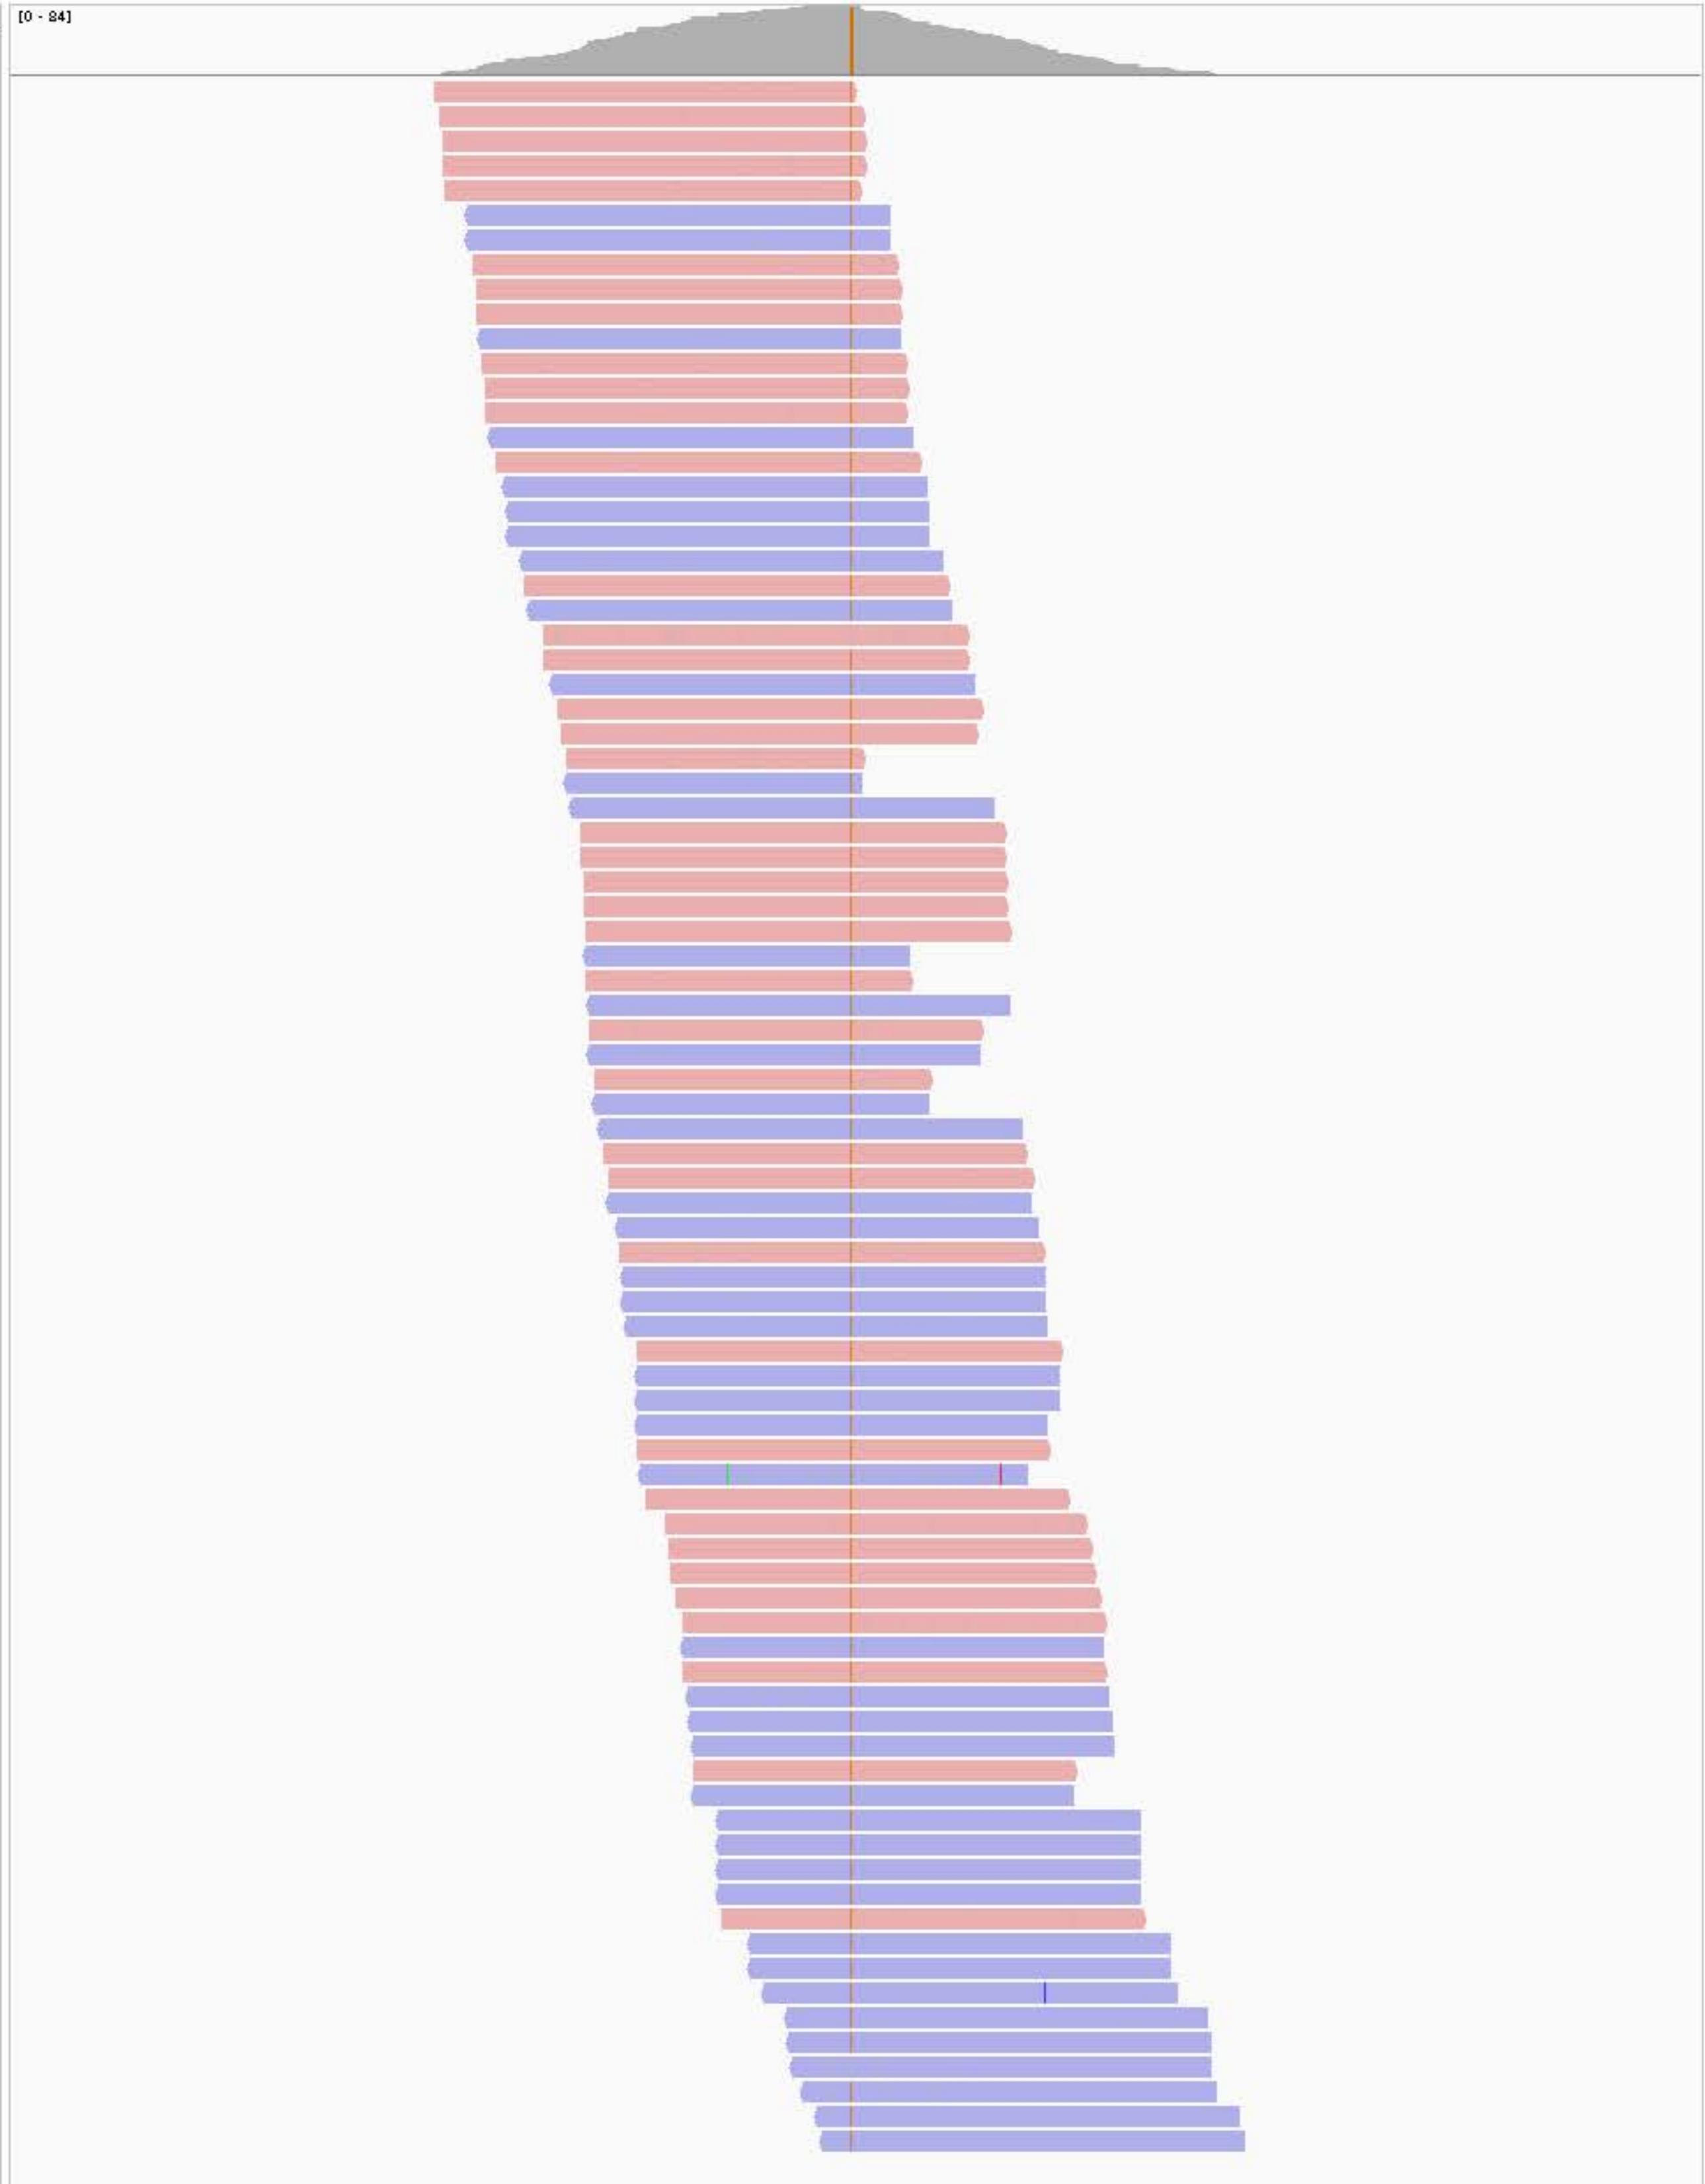

SL\_0004\_RN\_66\_mut.bam

Sequence →  
Refseq Genes

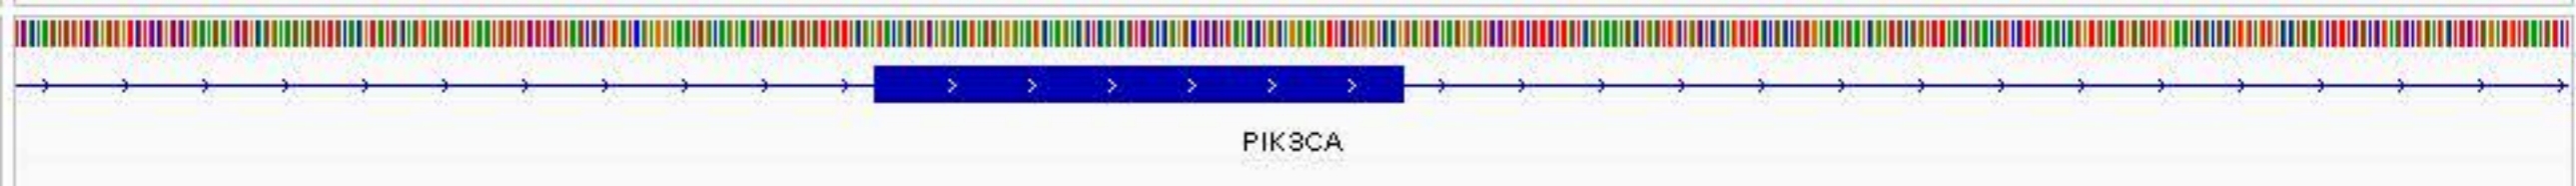

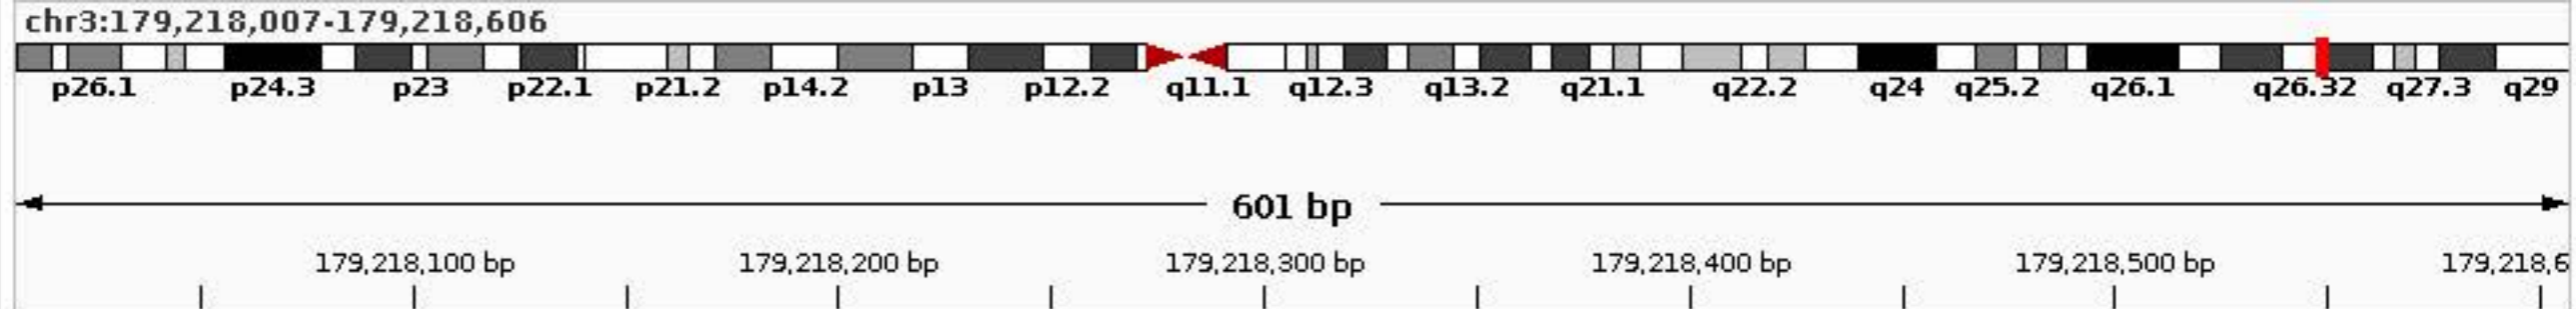

SL\_0007\_RN\_2\_mut.bam Coverage

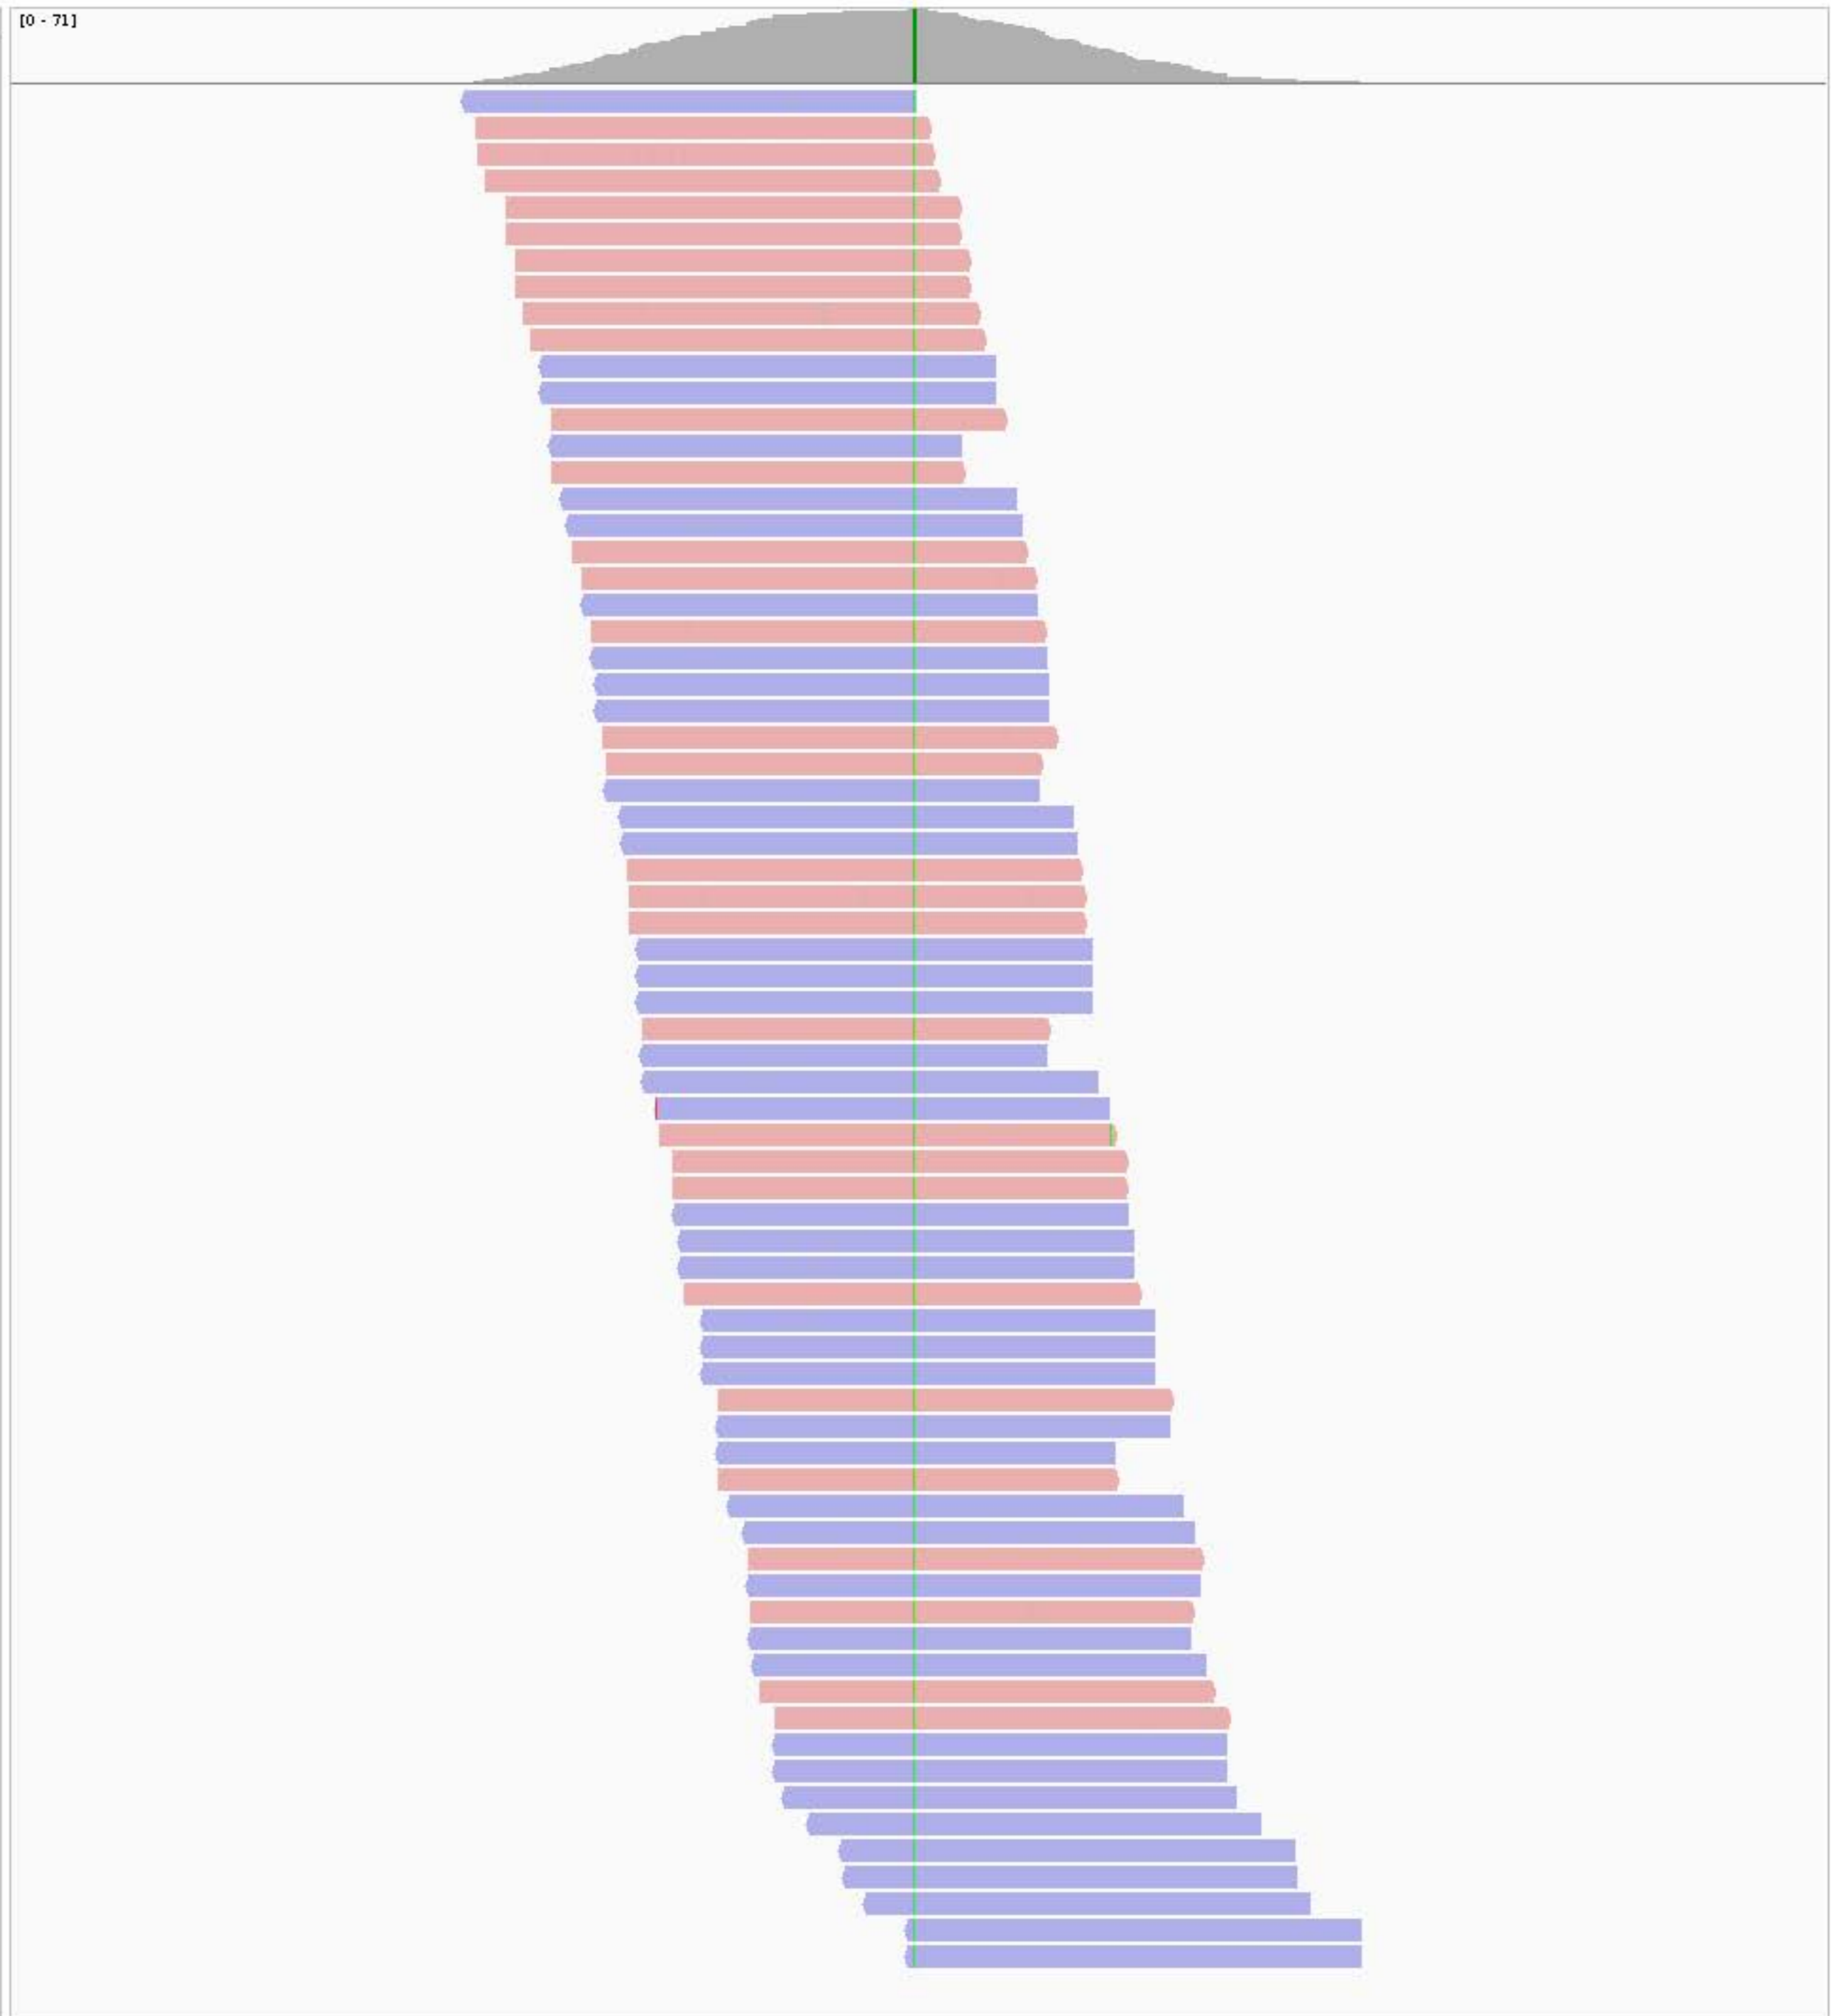

SL\_0007\_RN\_2\_mut.bam

Sequence →

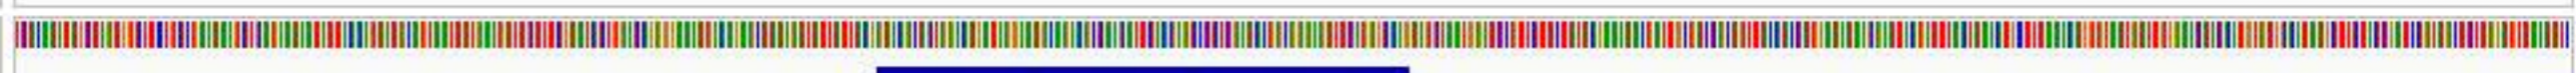

Refseq Genes

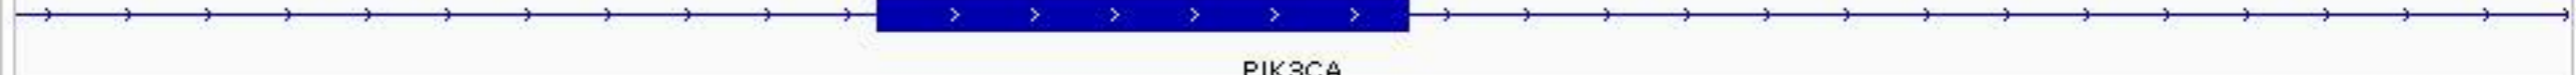

PIK3CA

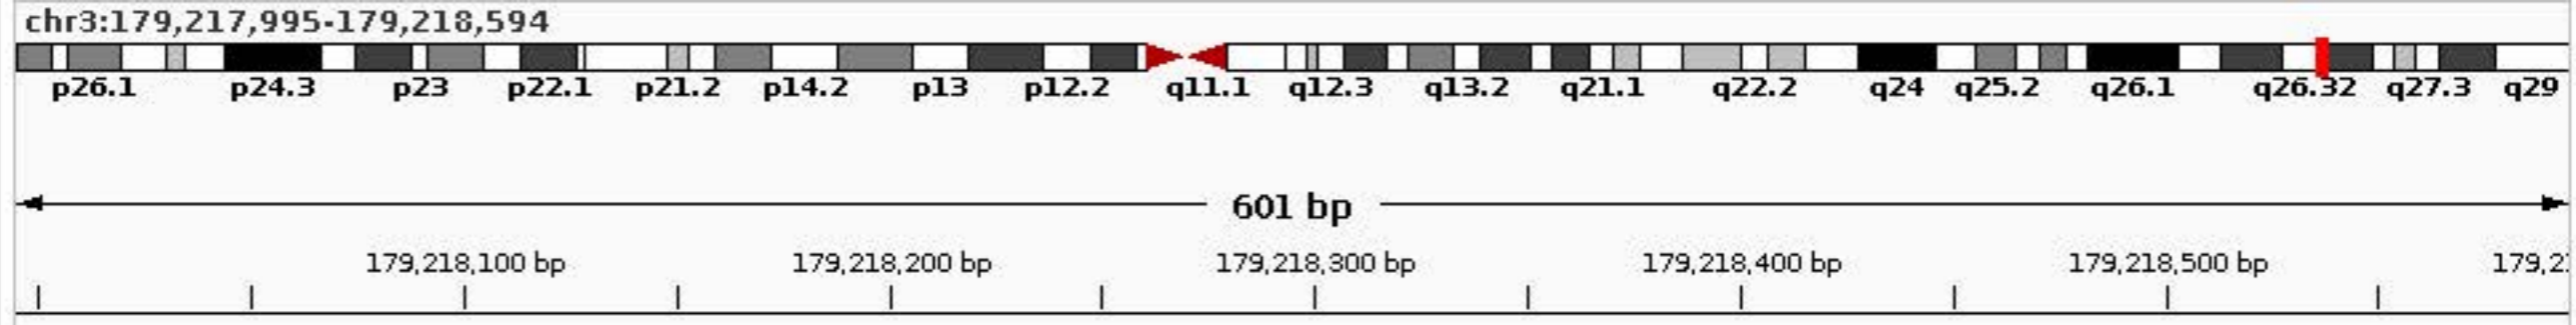

SL\_0015\_LN\_39\_mut.bam Coverage

SL\_0015\_LN\_39\_mut.bam

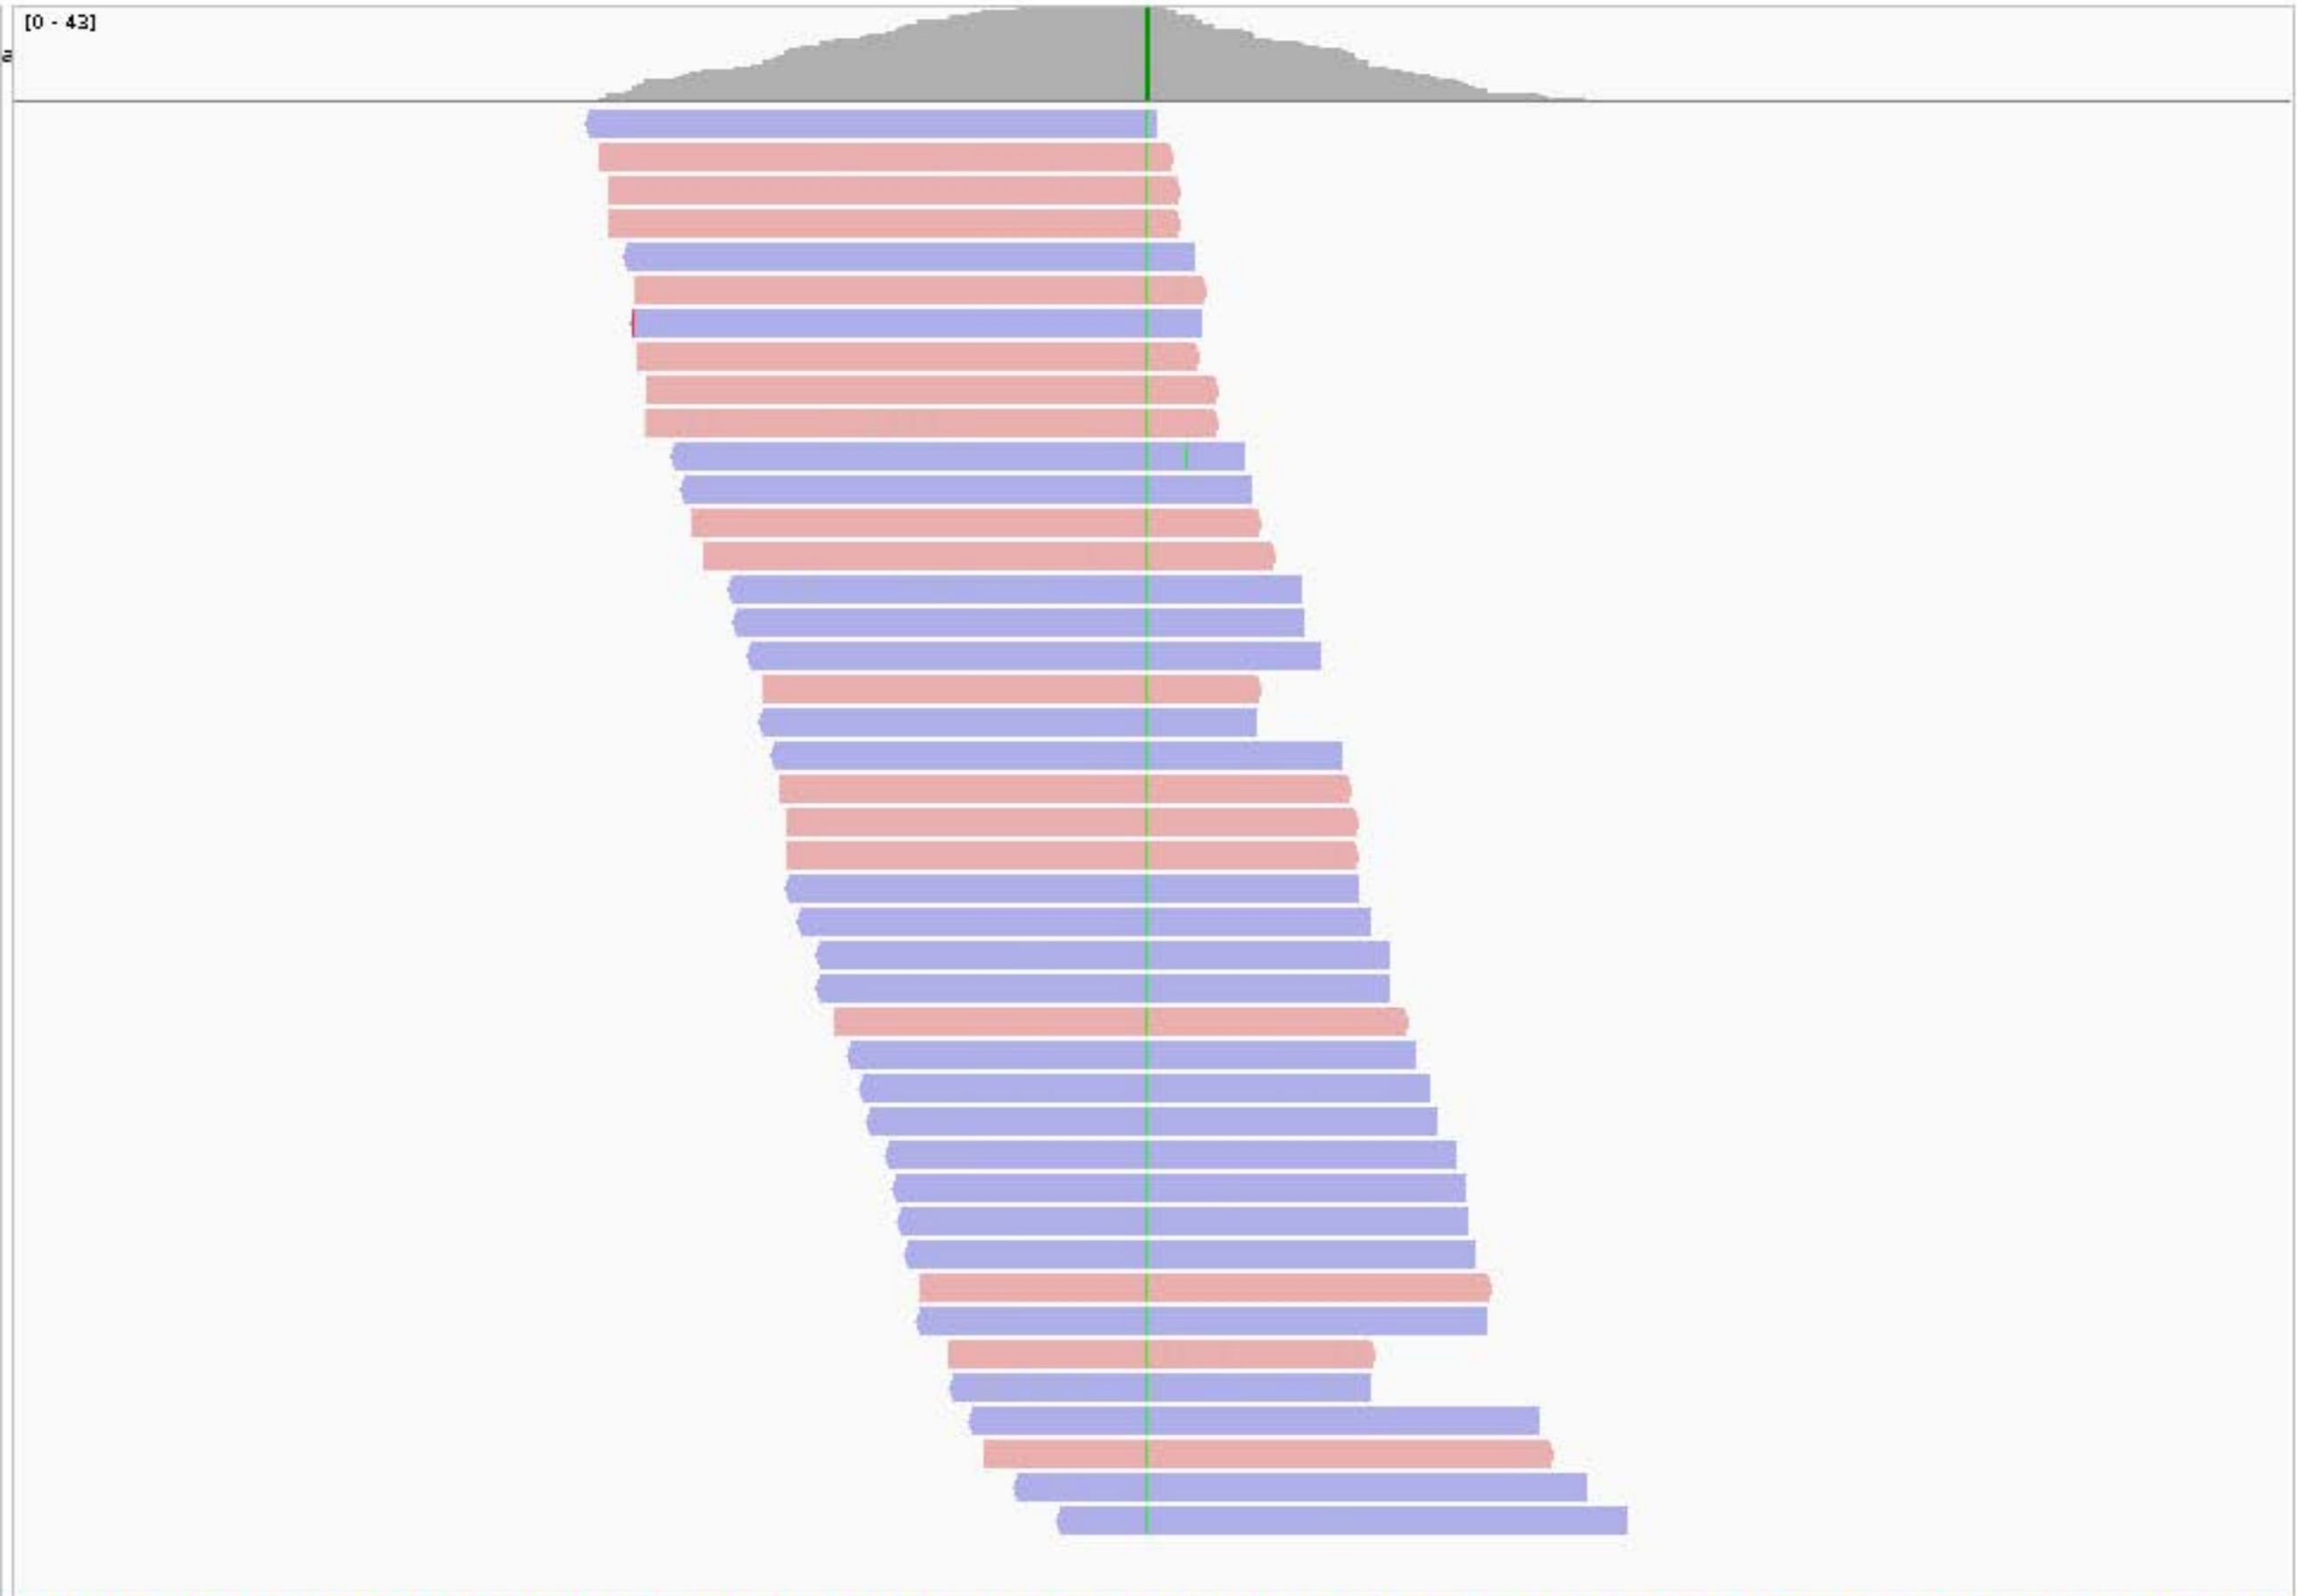

Sequence

Refseq Genes

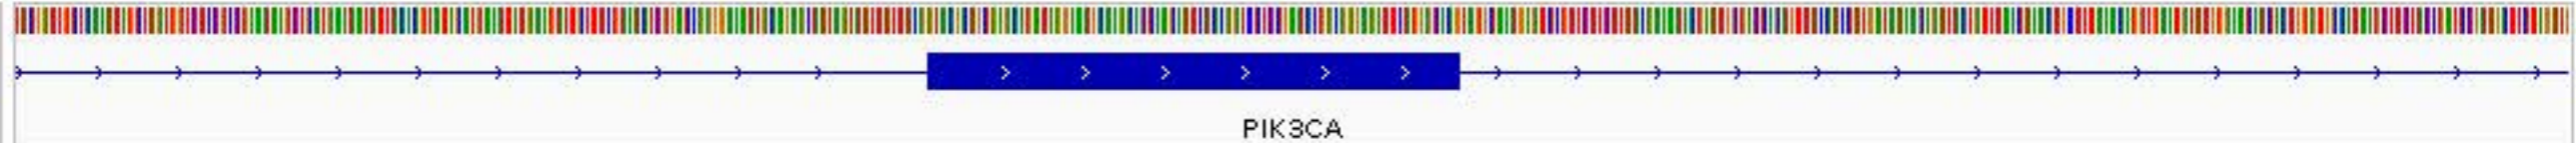



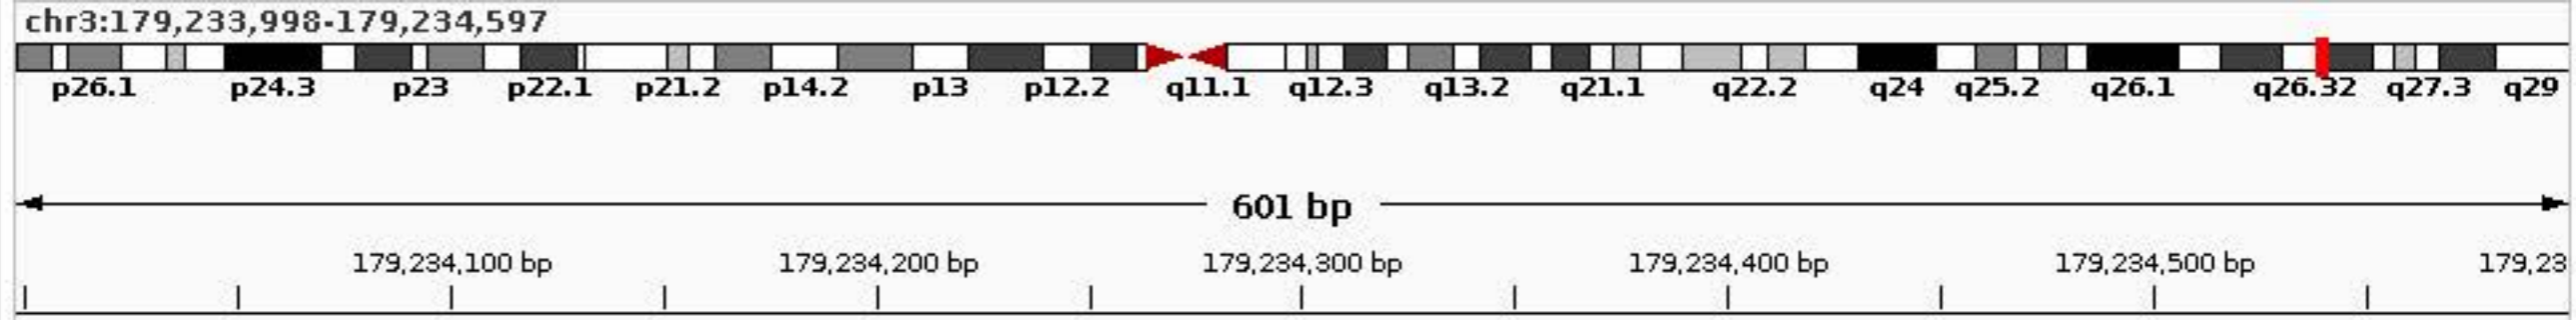

SL\_0001\_LN\_4\_mut.bam Coverage

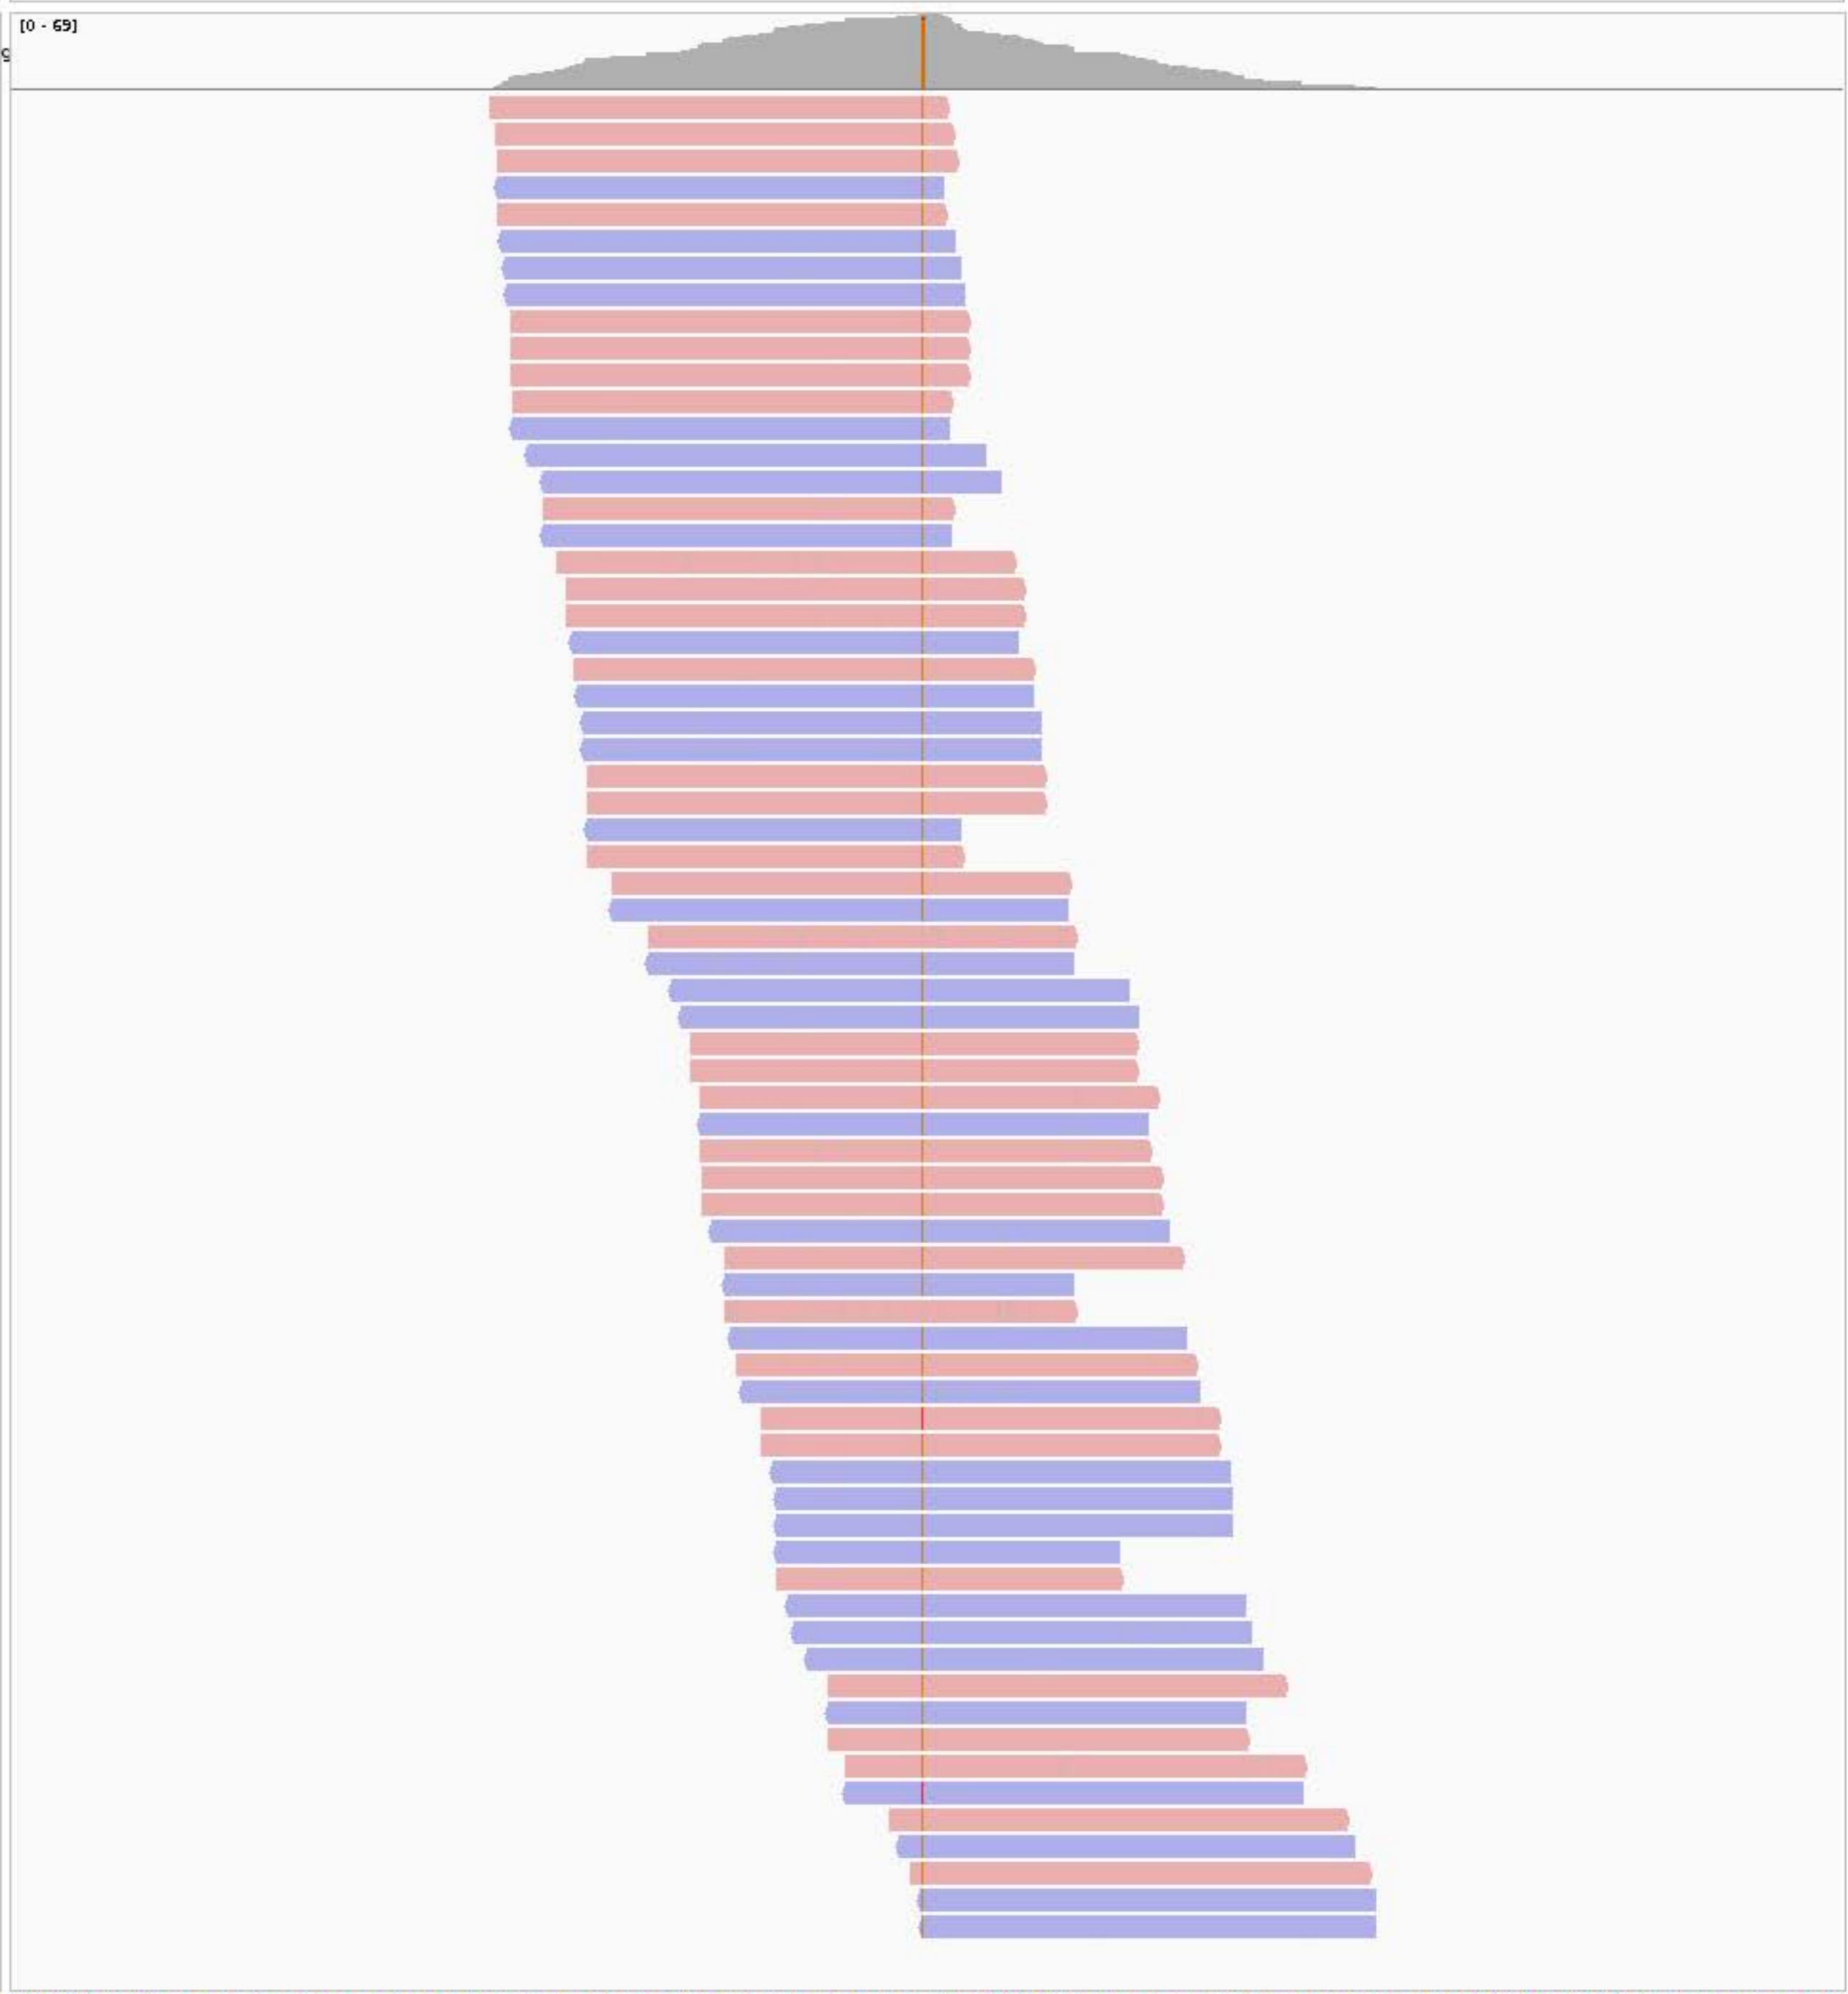

SL\_0001\_LN\_4\_mut.bam

Sequence →

Refseq Genes

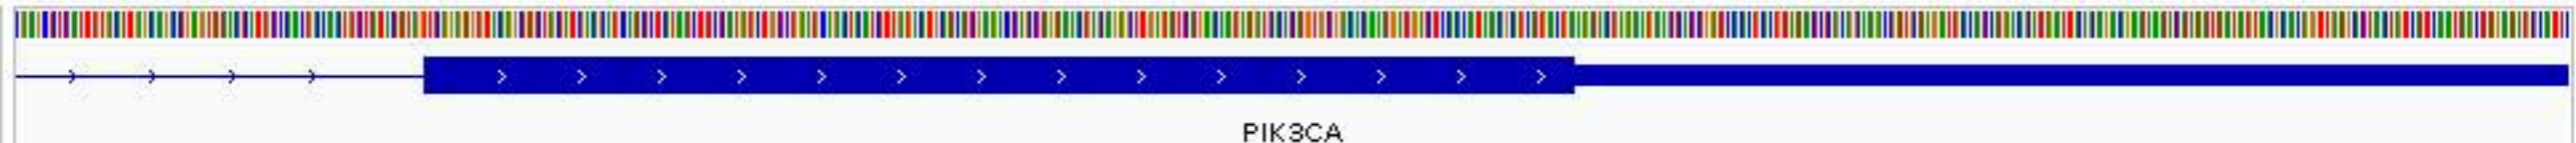

PIK3CA



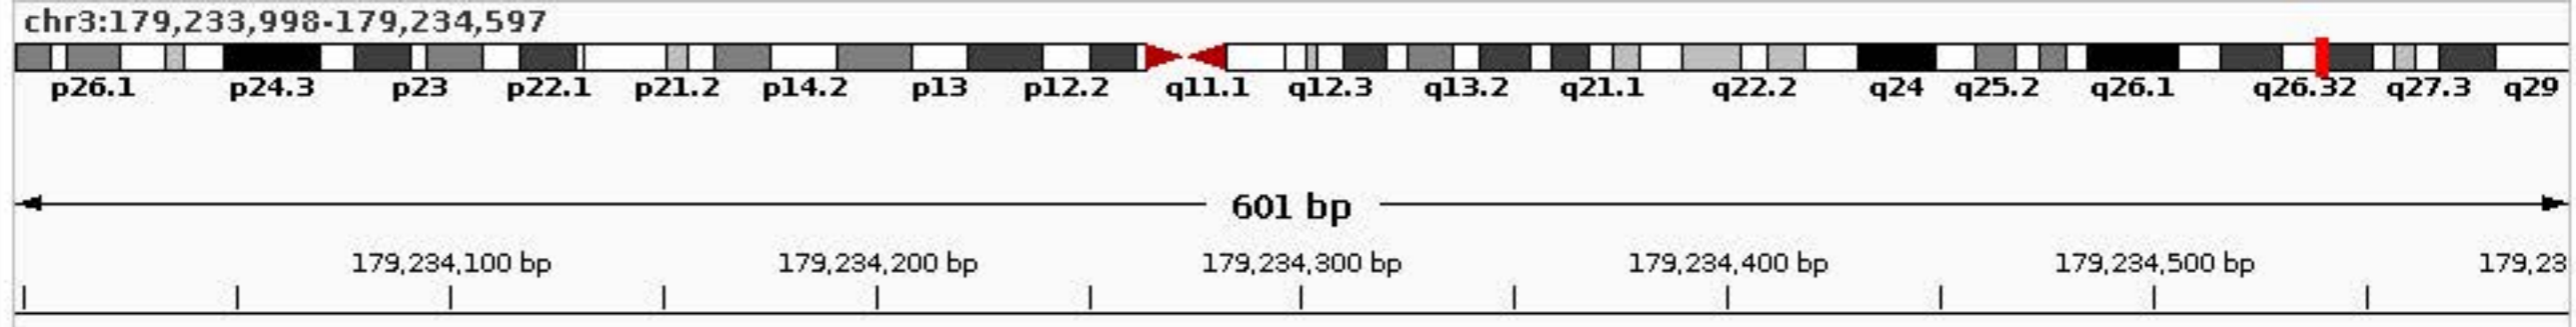

SL\_0001\_LN\_10\_mut.bam Coverage

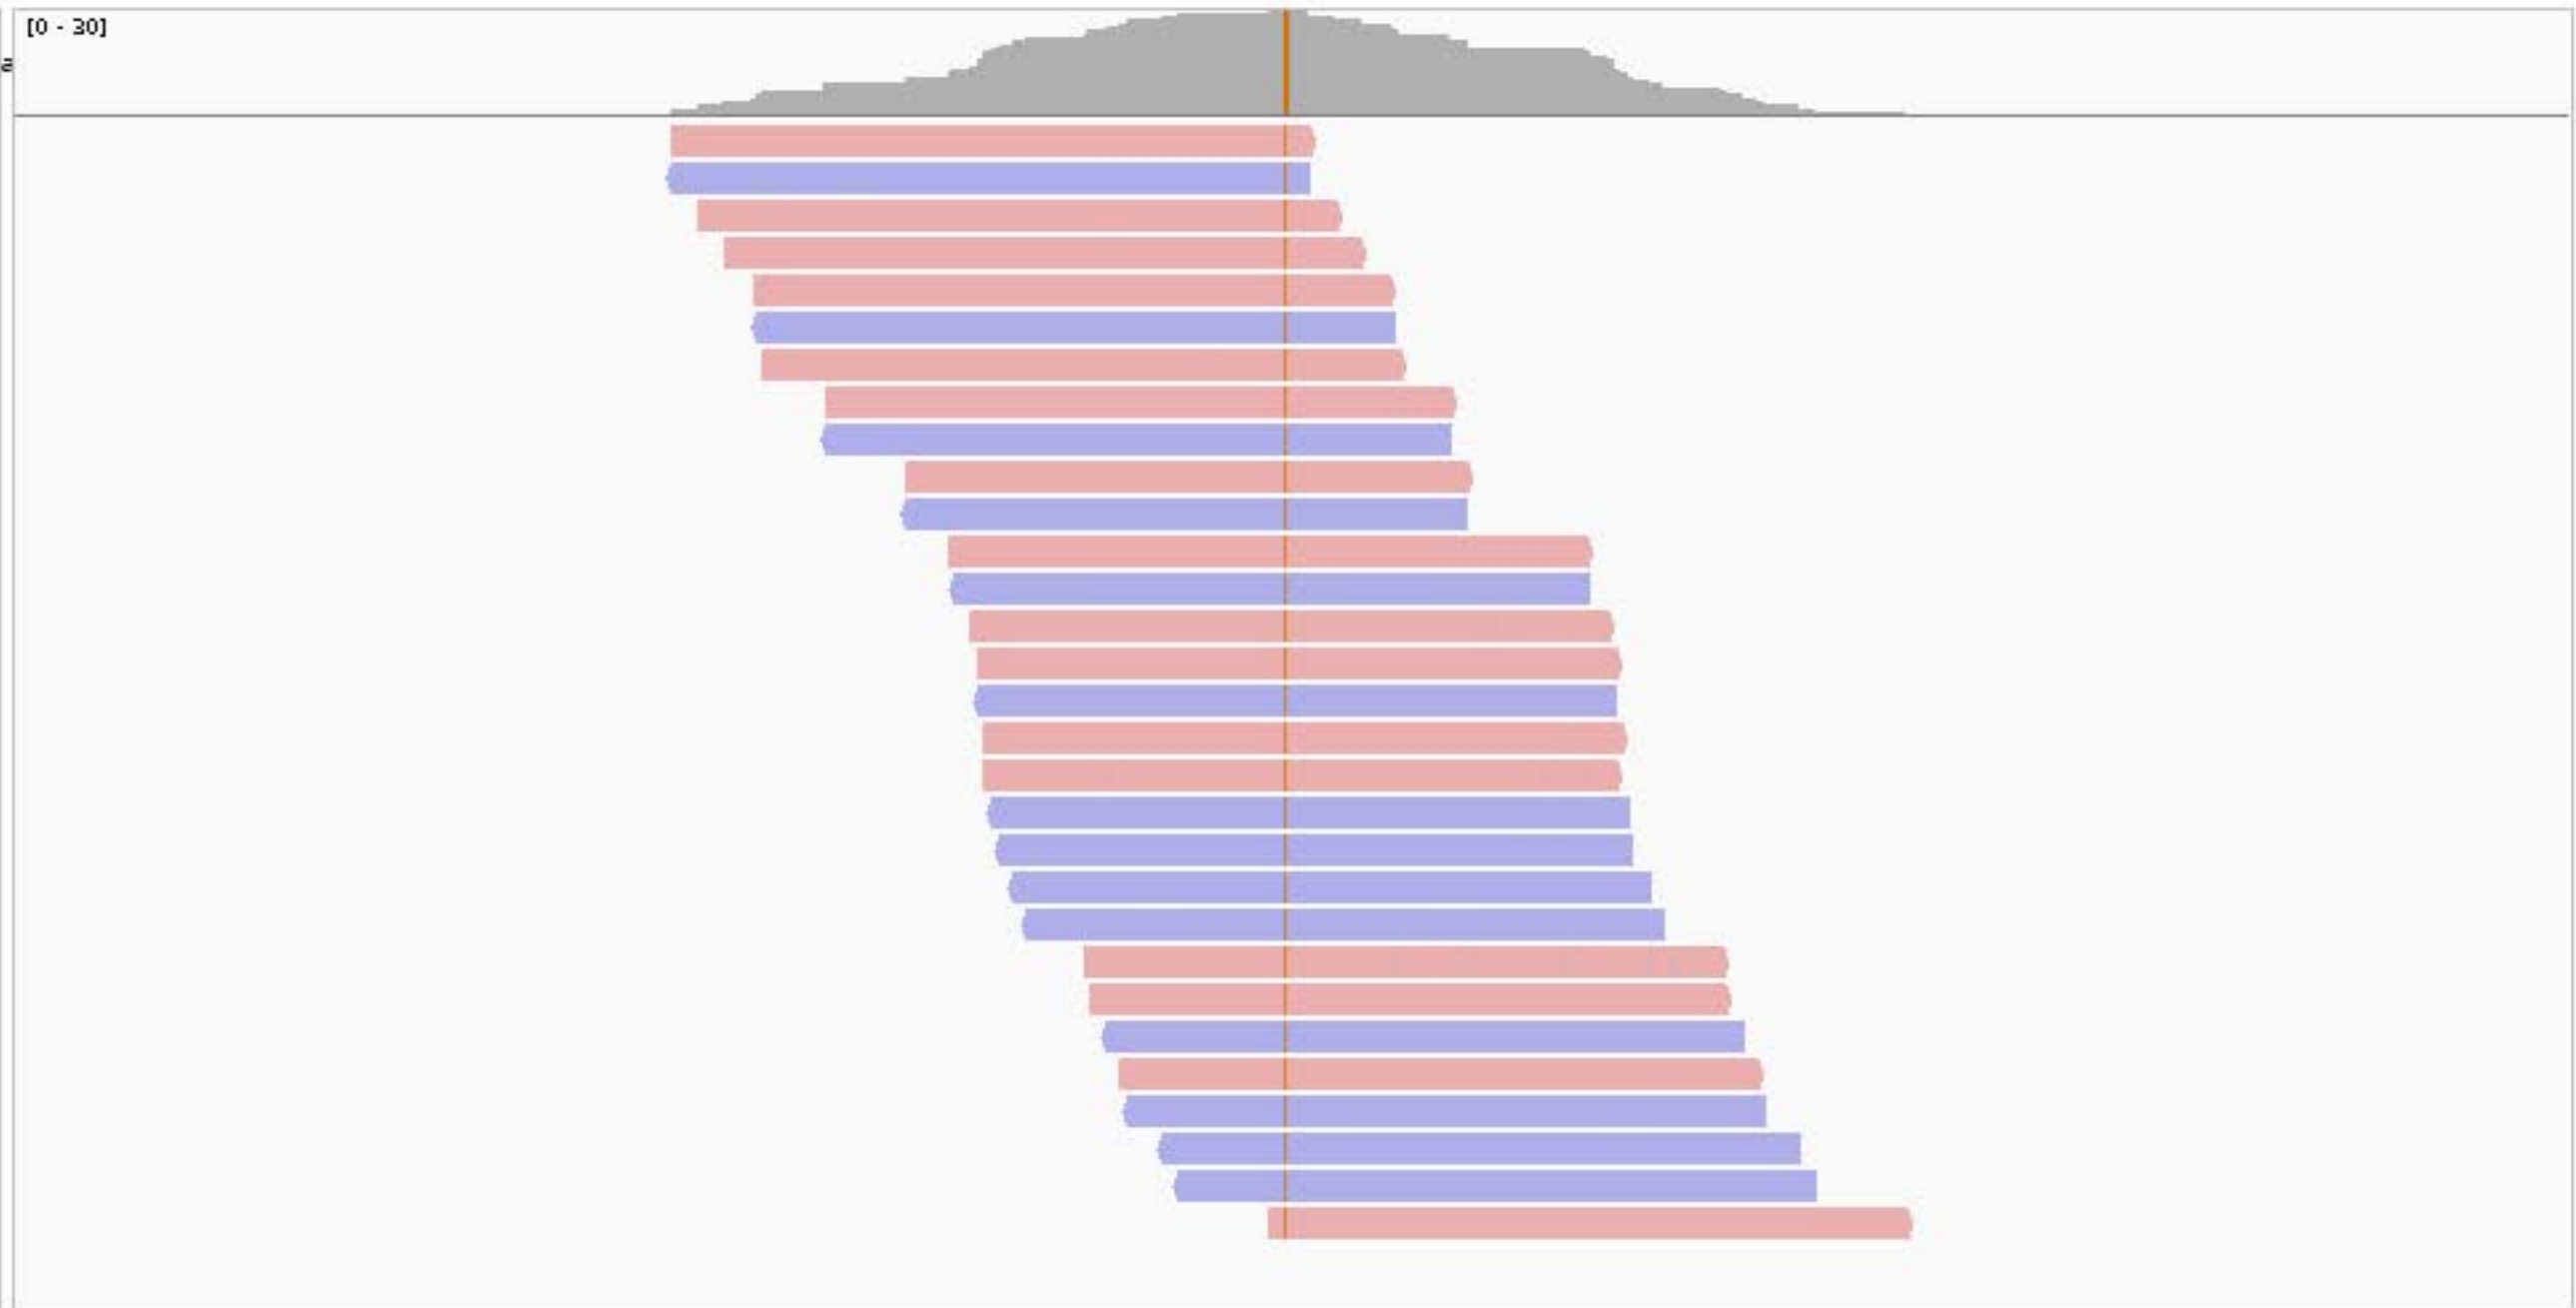

Sequence

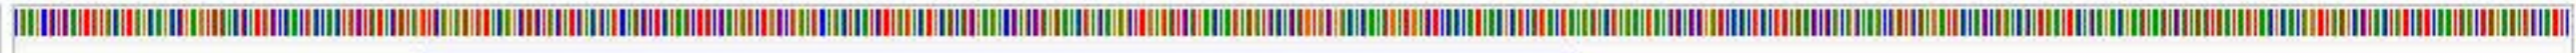

Refseq Genes

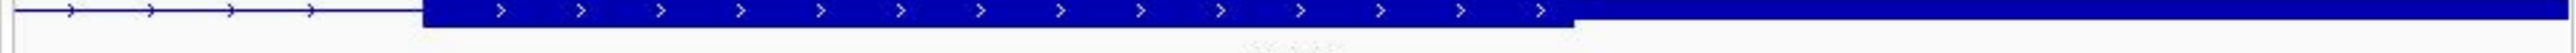

PIK3CA

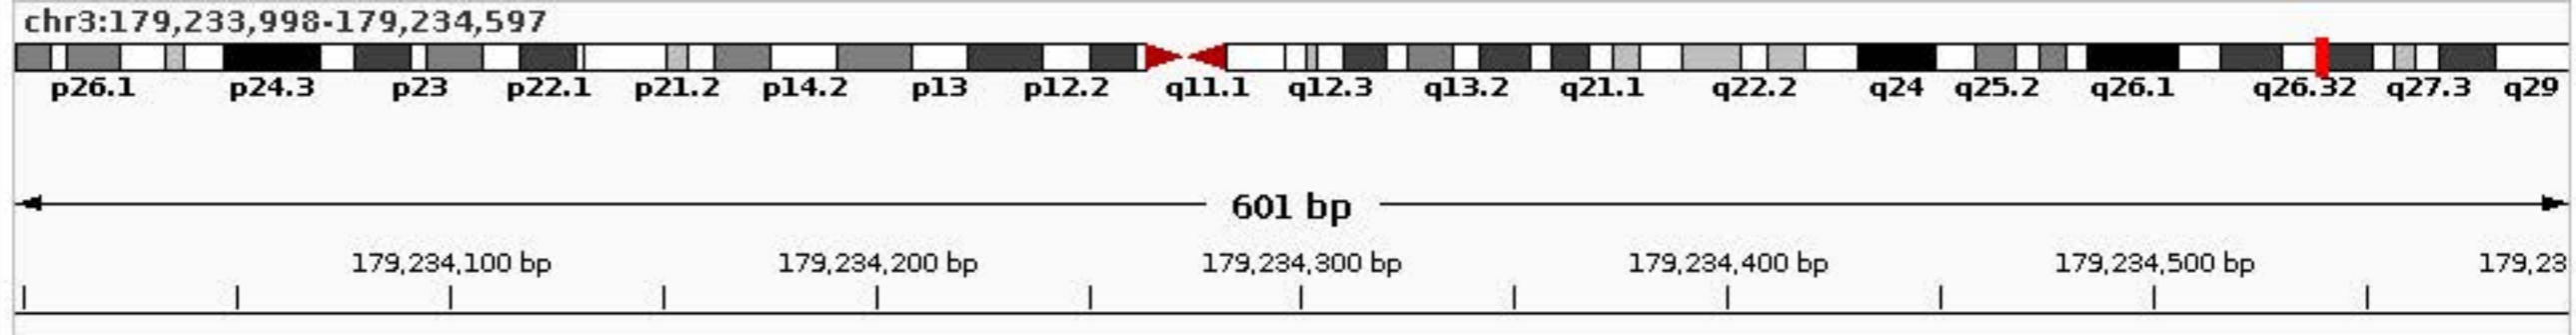

SL\_0001\_RN\_25\_mut.bam Coverage

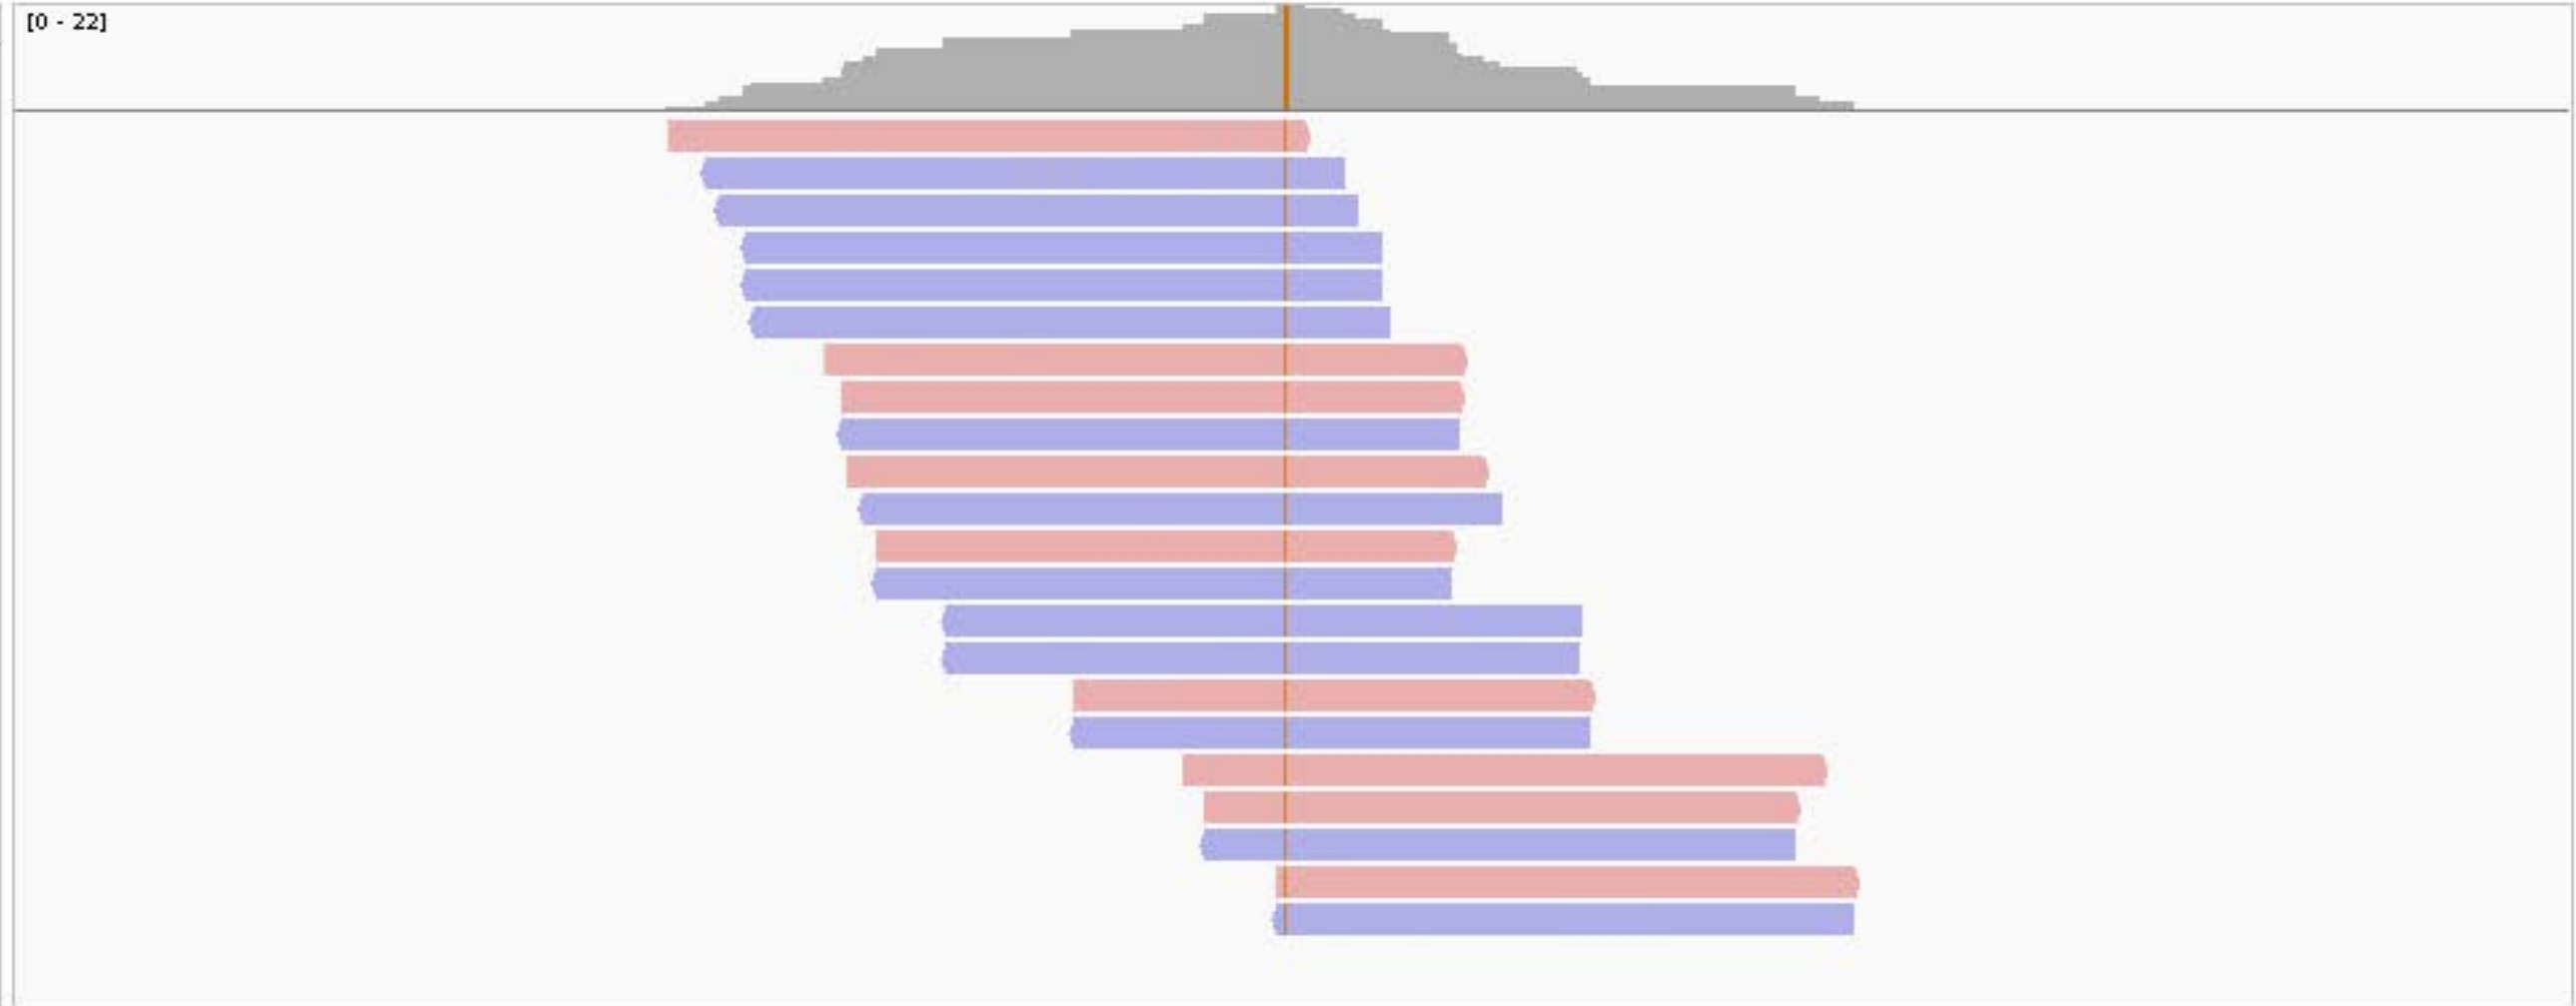

SL\_0001\_RN\_25\_mut.bam

Sequence

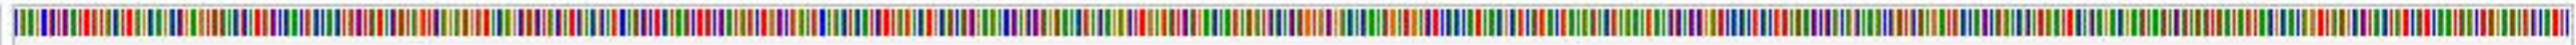

Refseq Genes

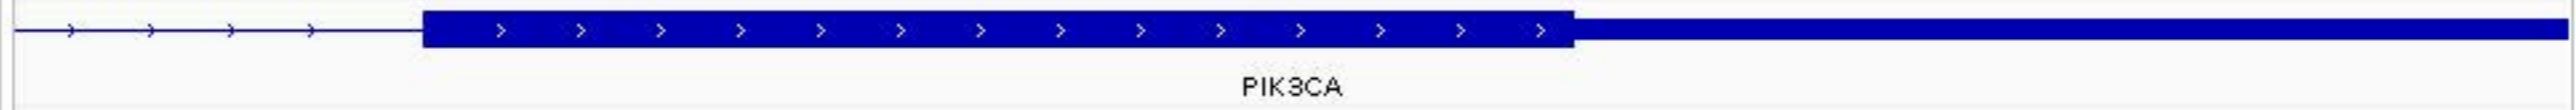

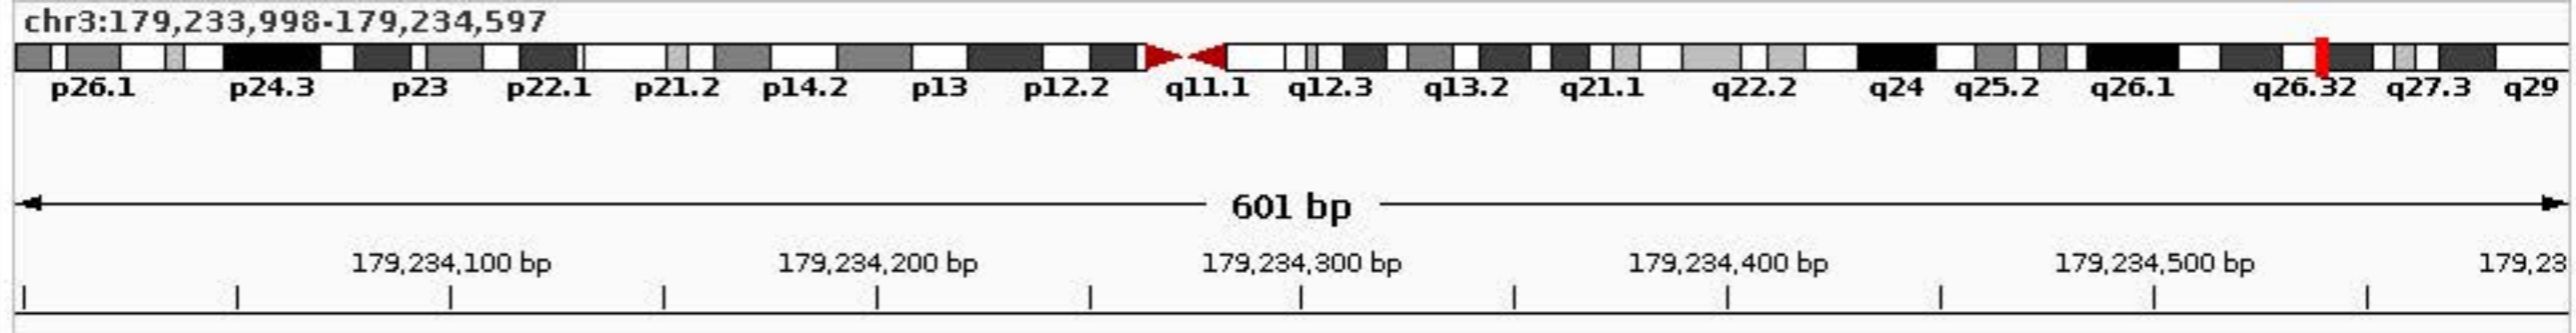

SL\_0004\_RN\_19\_mut.bam Coverage

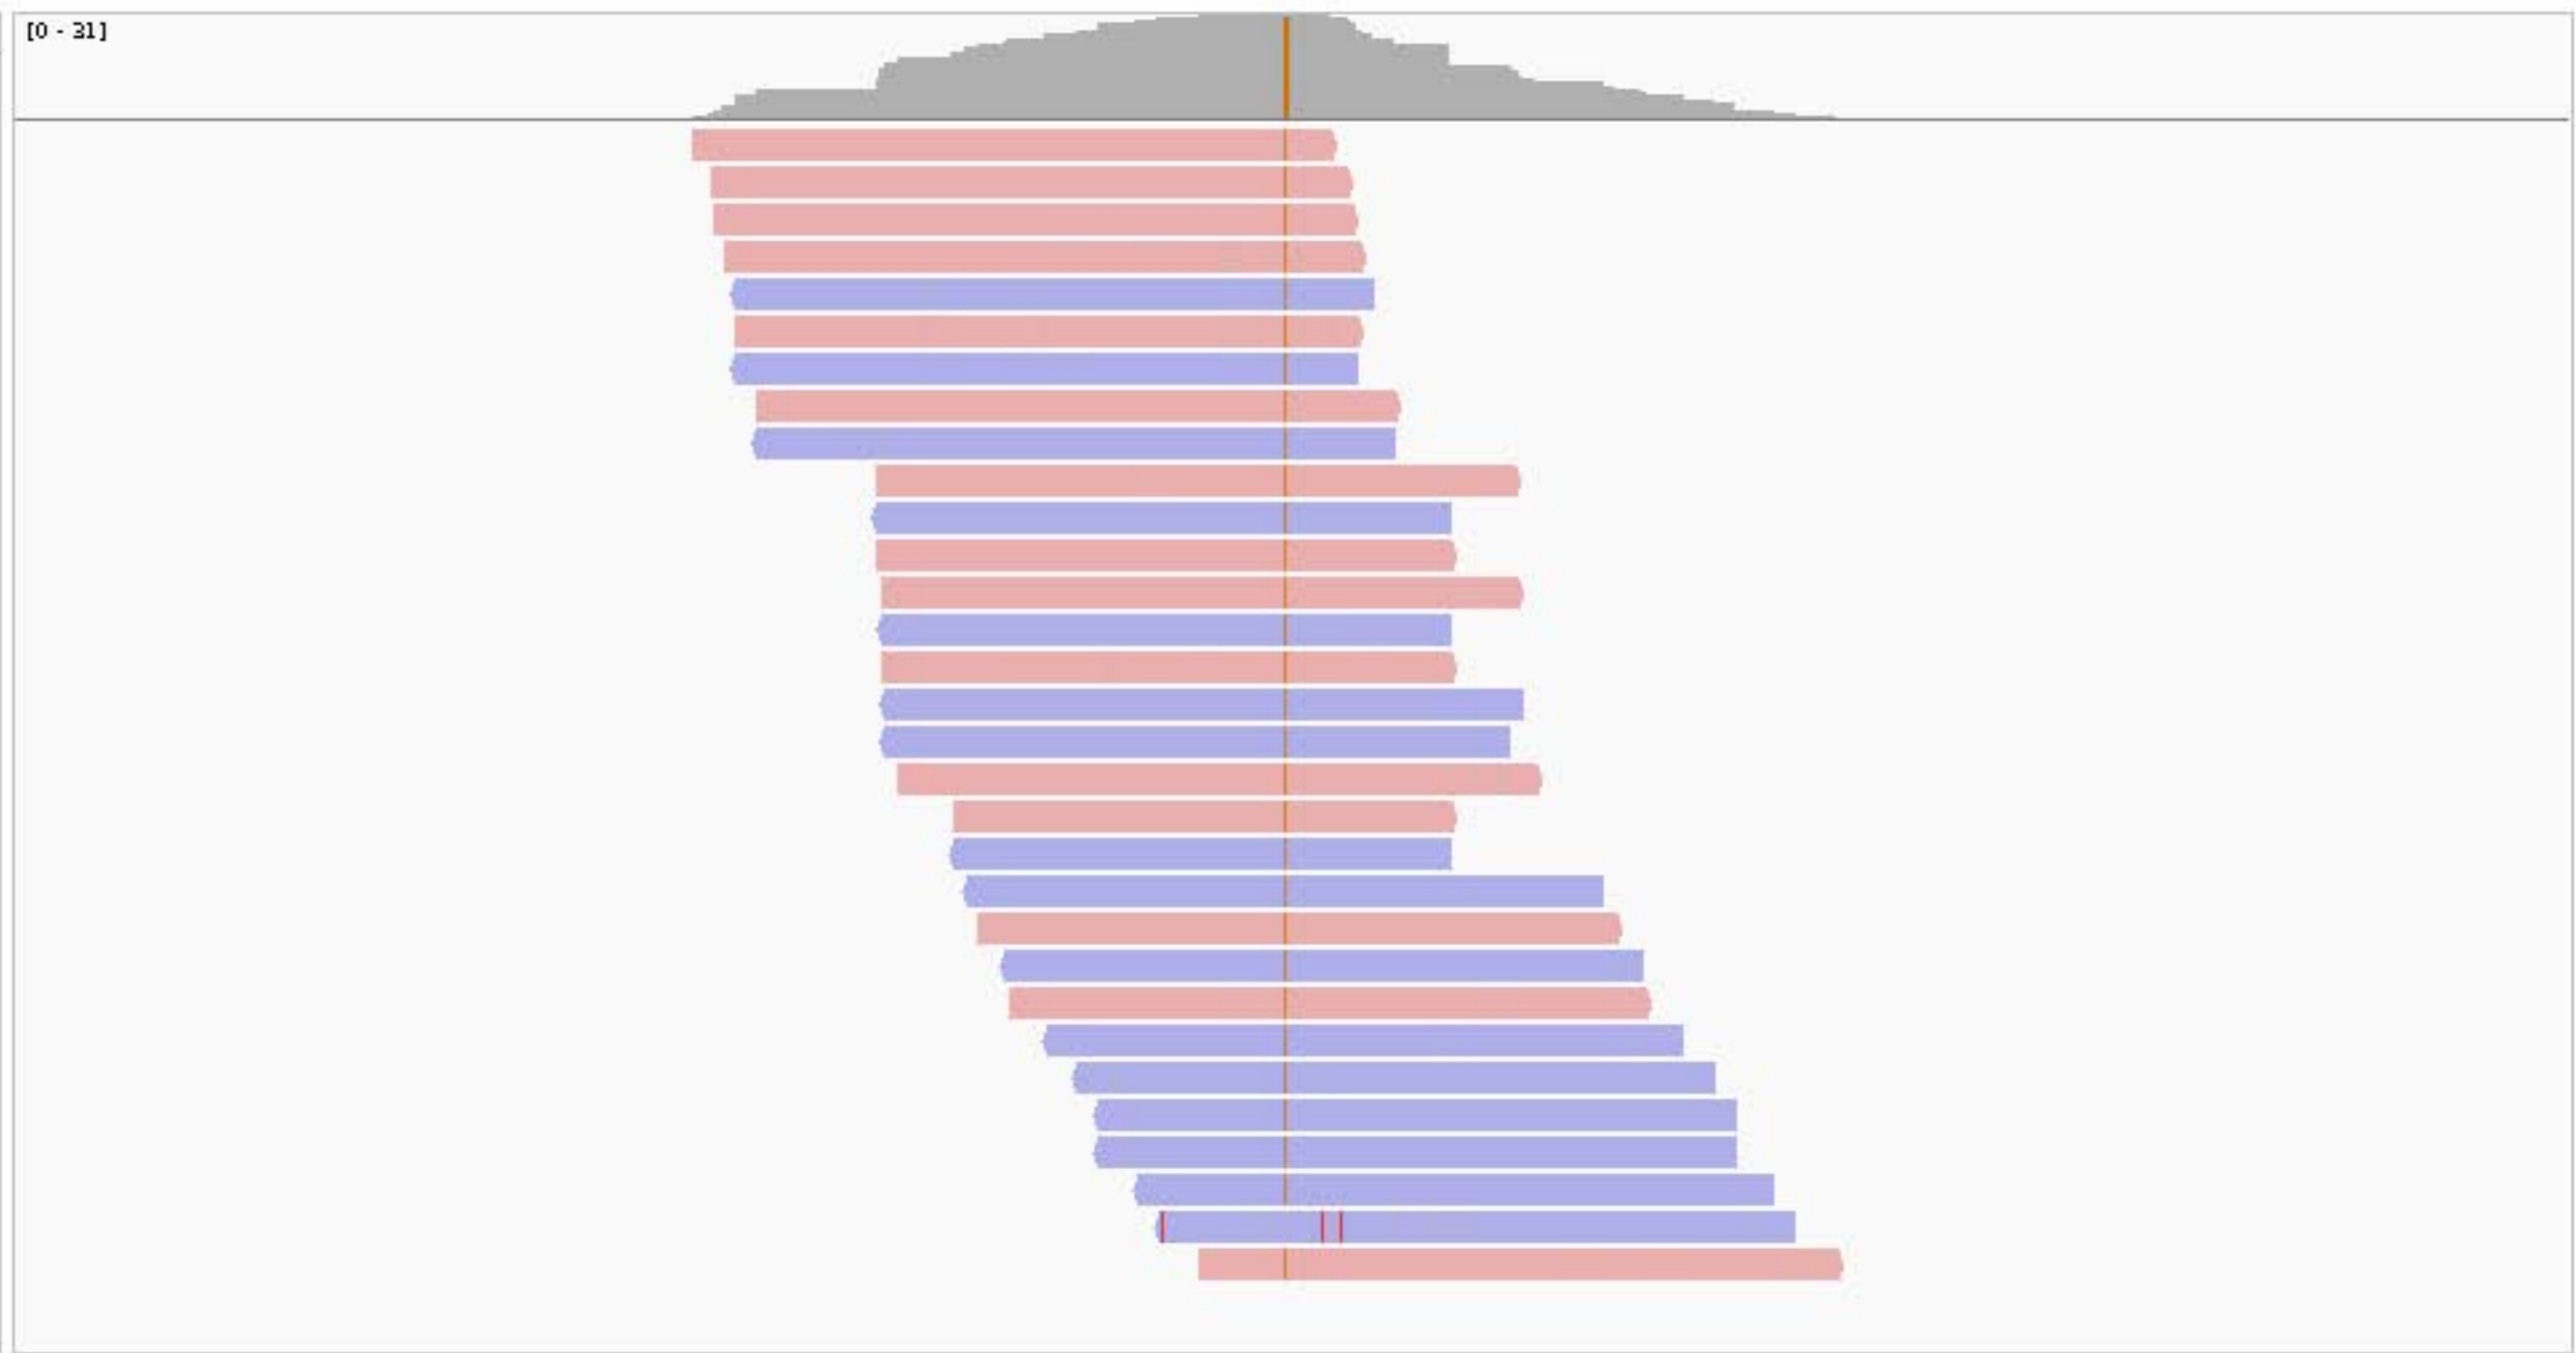

SL\_0004\_RN\_19\_mut.bam

Sequence

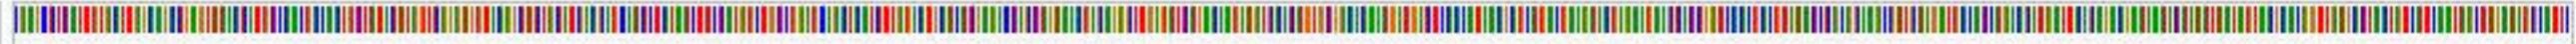

Refseq Genes

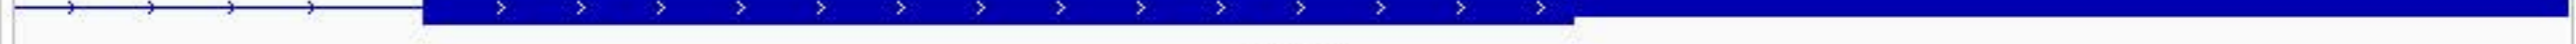

PIK3CA

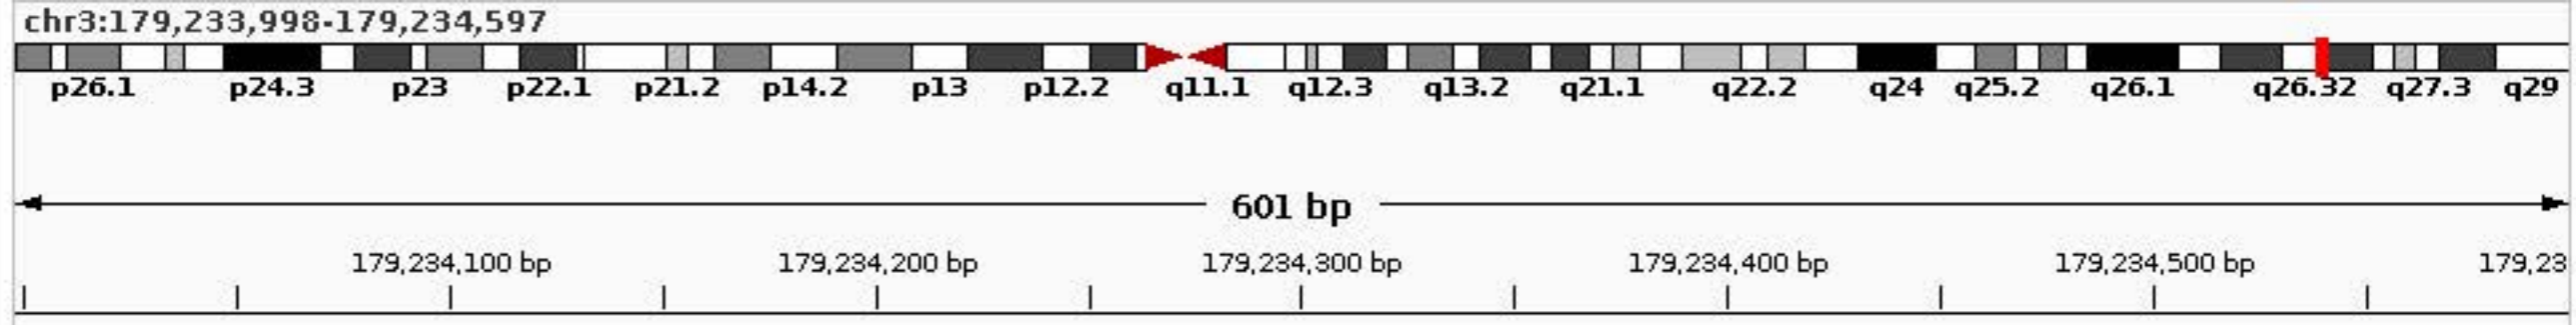

SL\_0004\_RN\_24\_mut.bam Coverage

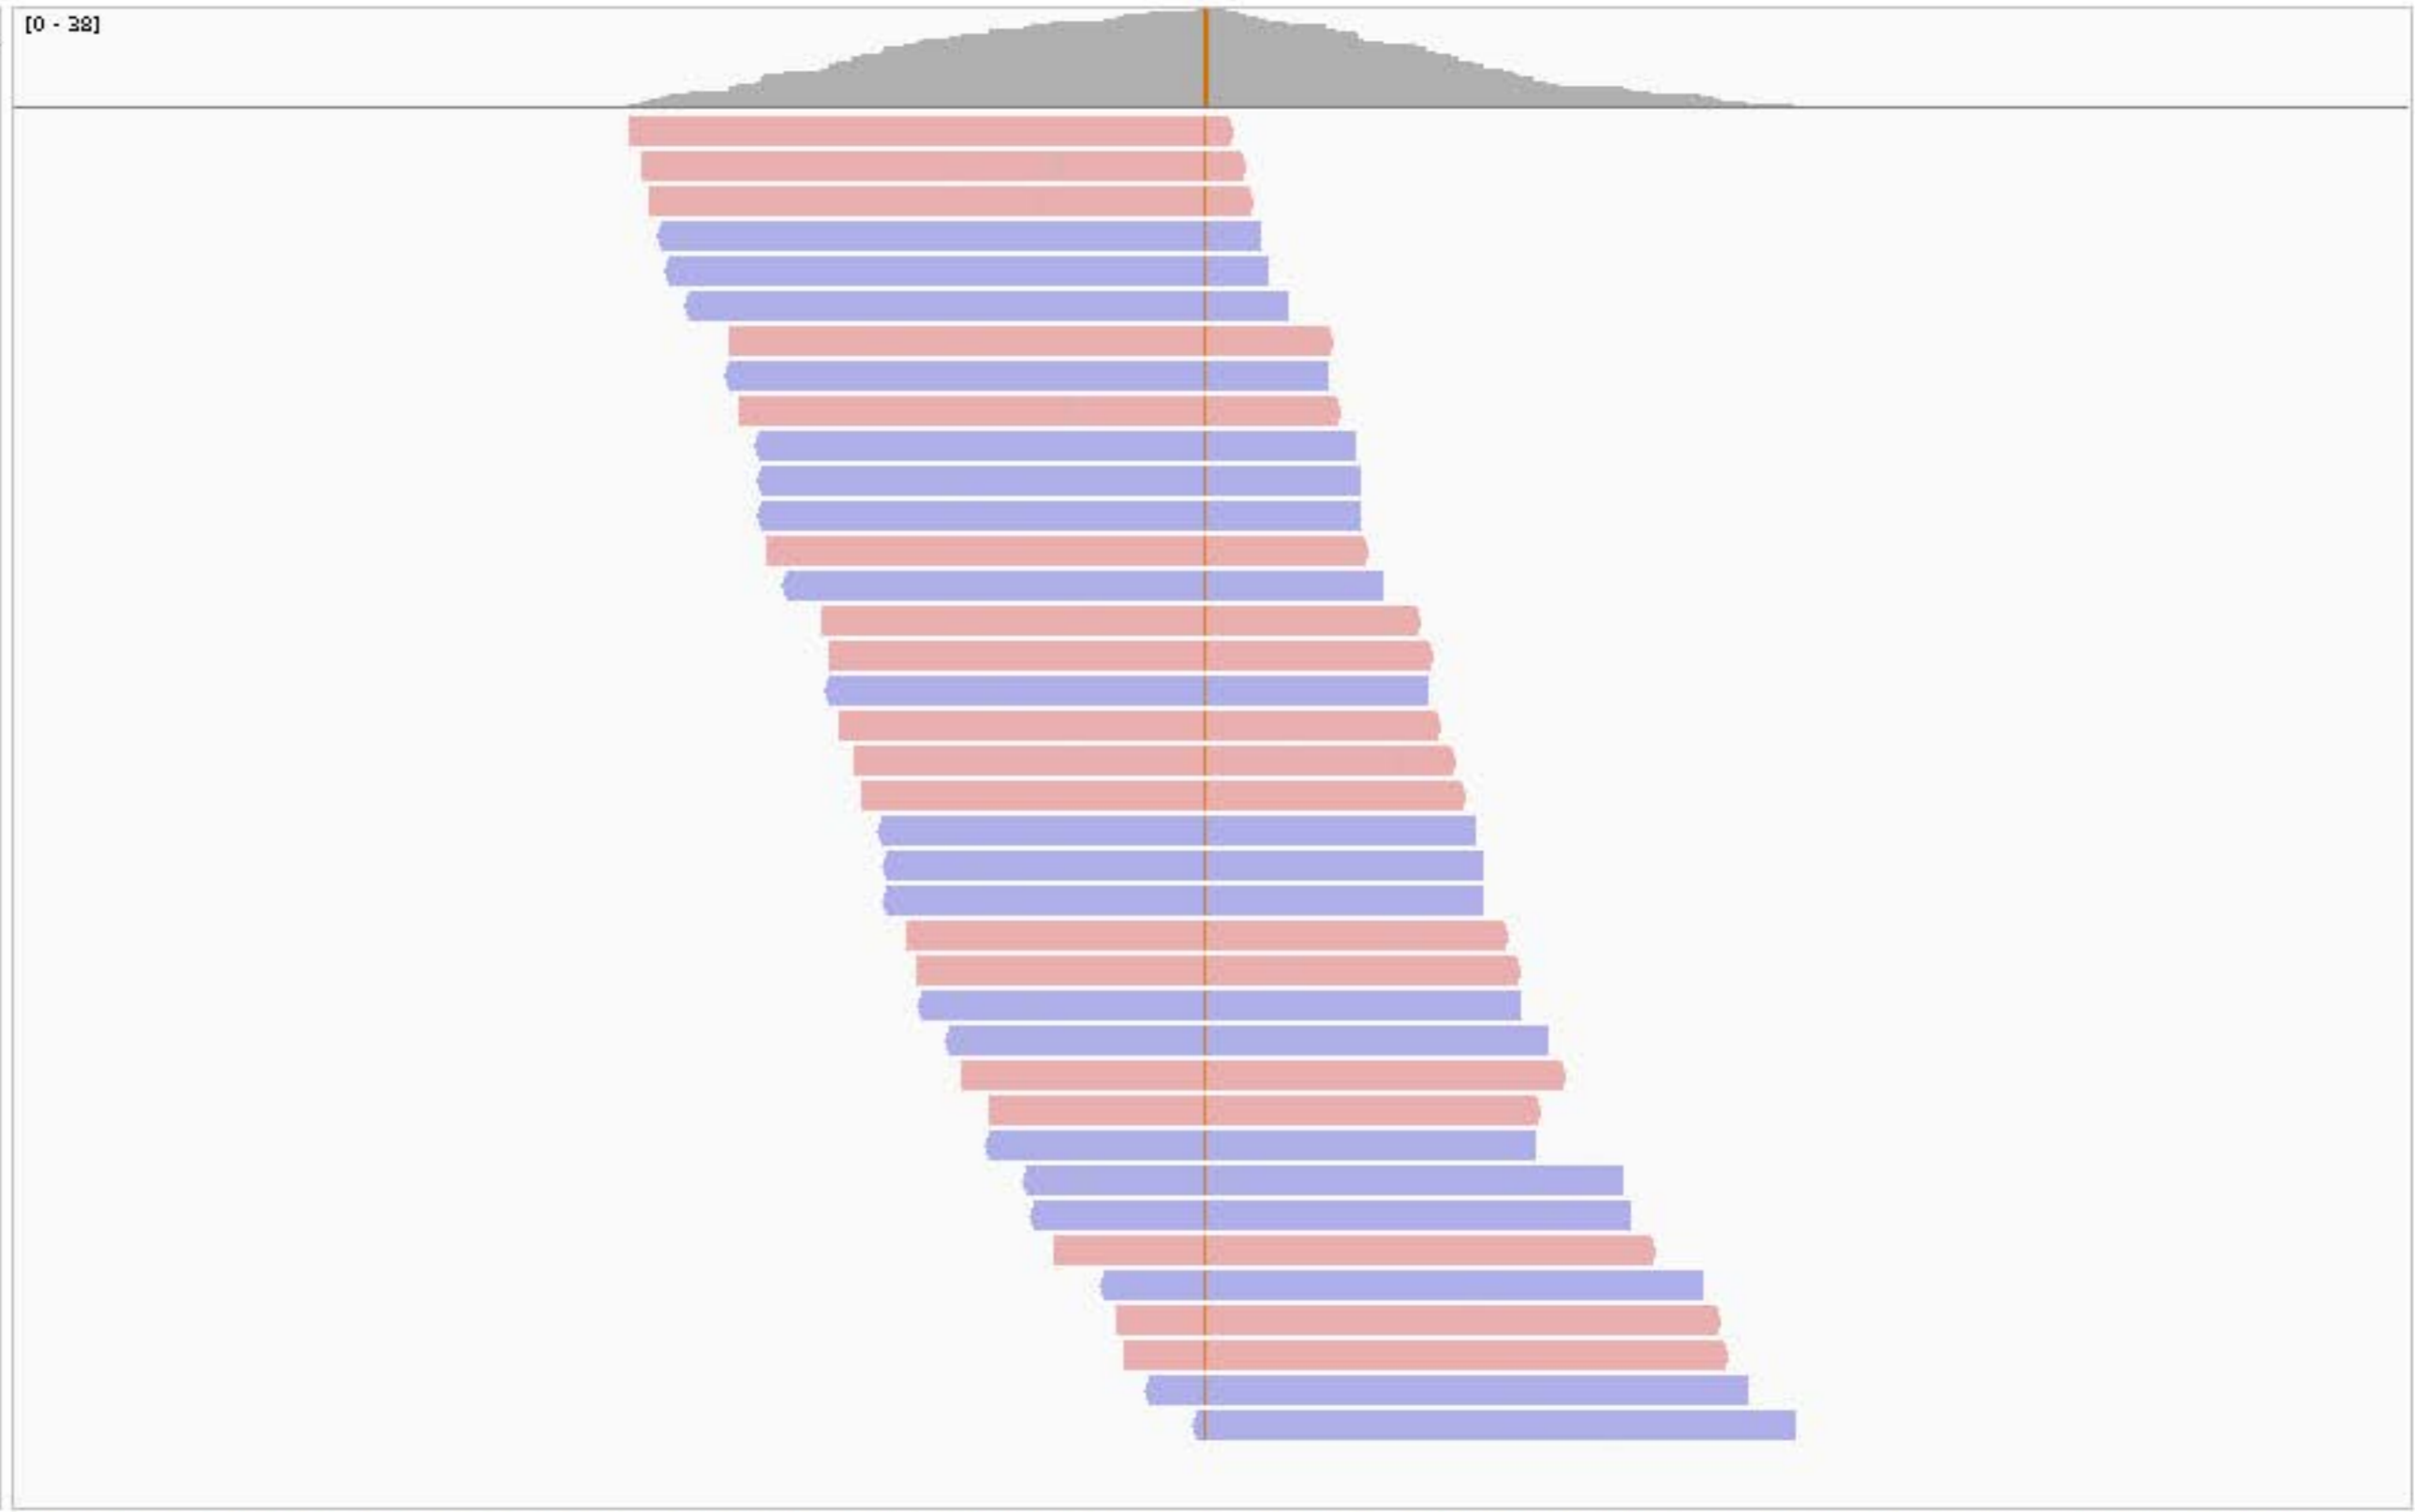

SL\_0004\_RN\_24\_mut.bam

Sequence

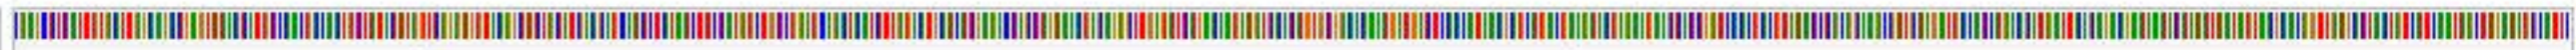

Refseq Genes

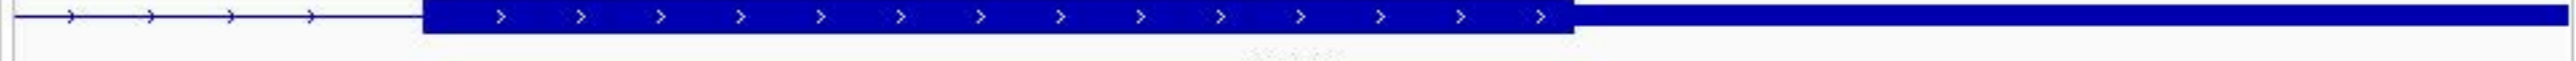

PIK3CA



chr3:179,233,998-179,234,597

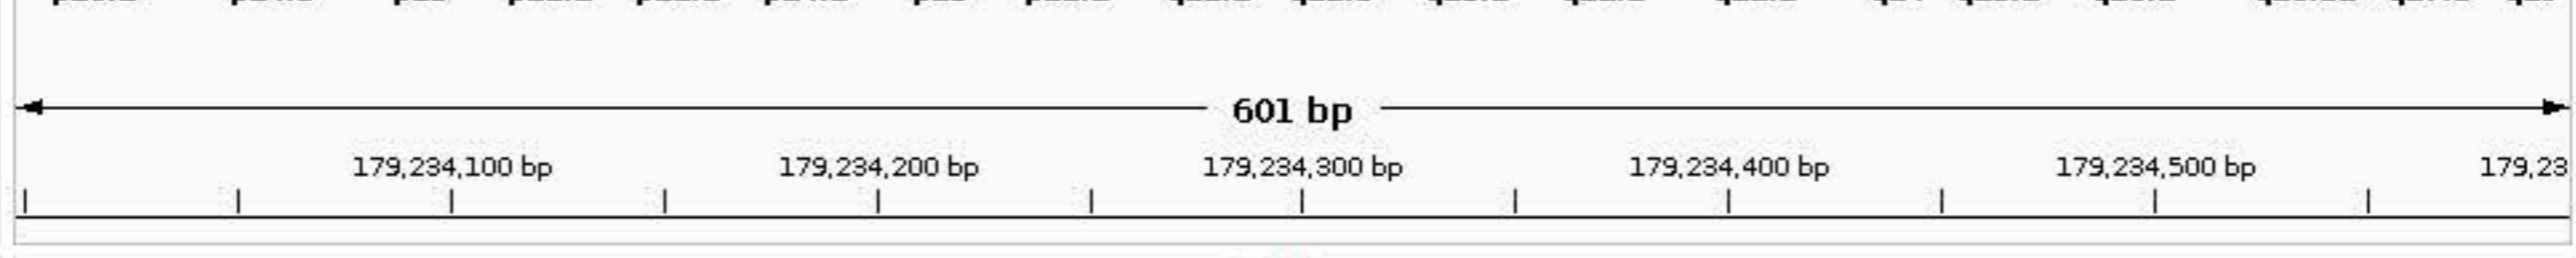

SL\_0004\_RN\_26\_mut.bam Coverage

SL\_0004\_RN\_26\_mut.bam

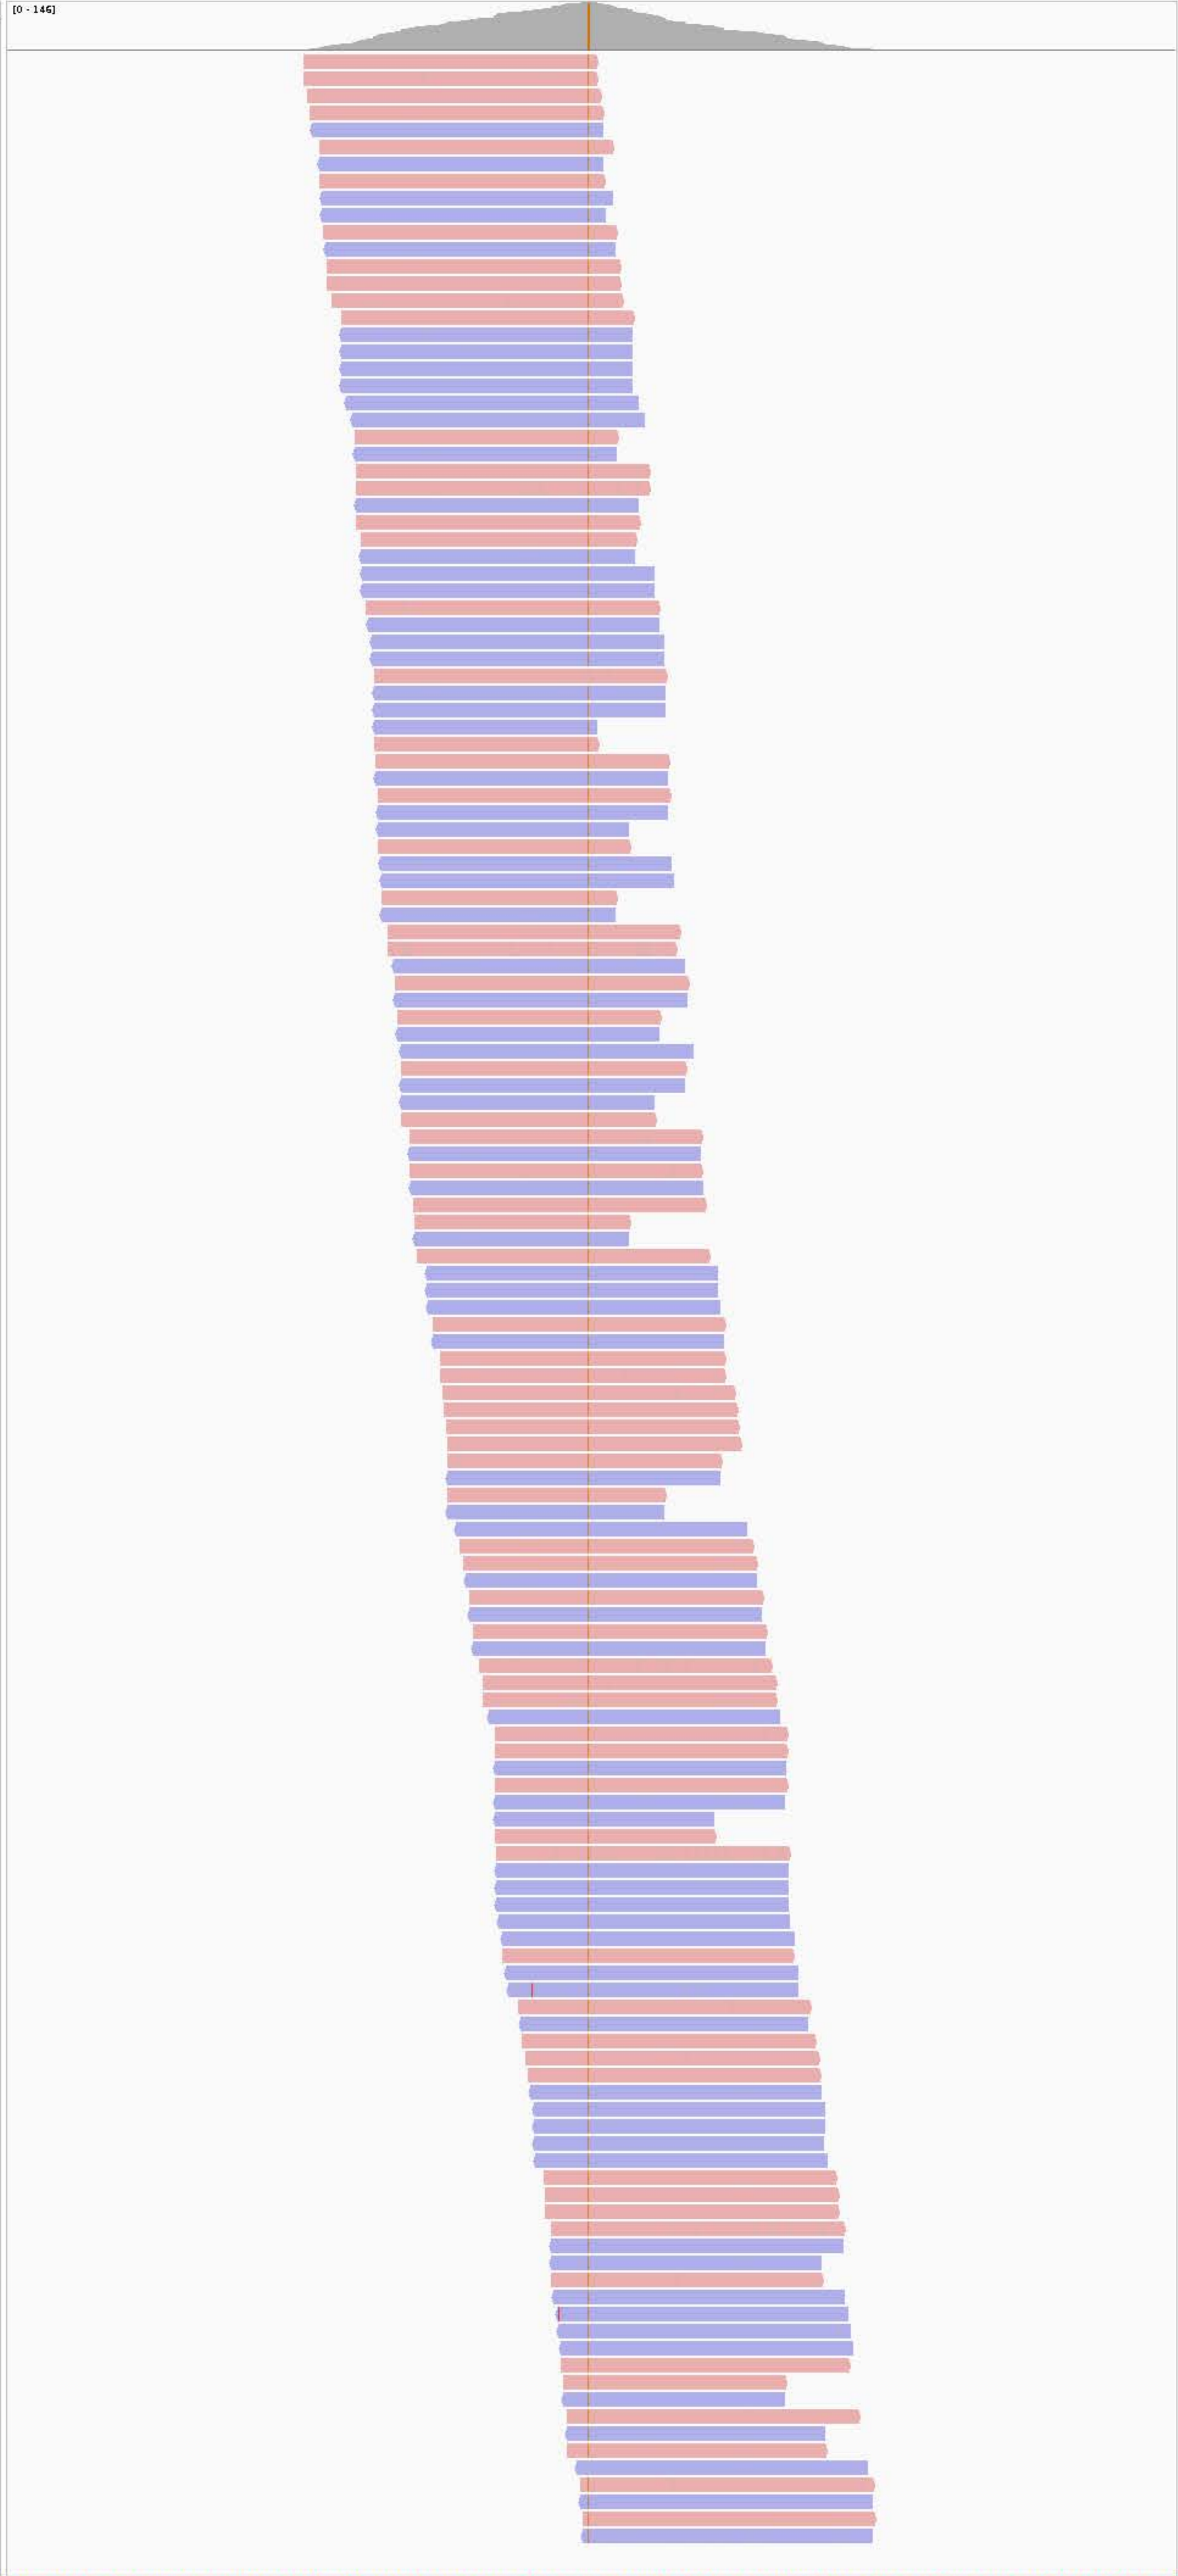

Sequence

Refseq Genes

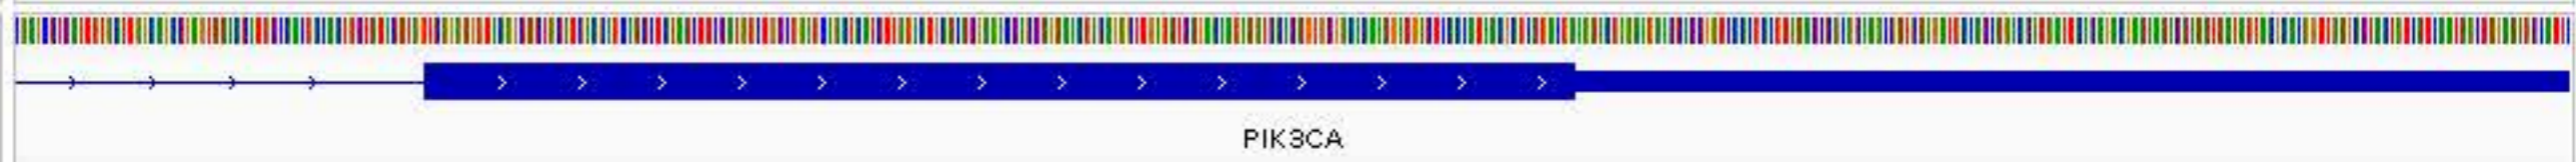

PIK3CA



SL\_0006\_RN\_36\_mut.bam Coverage

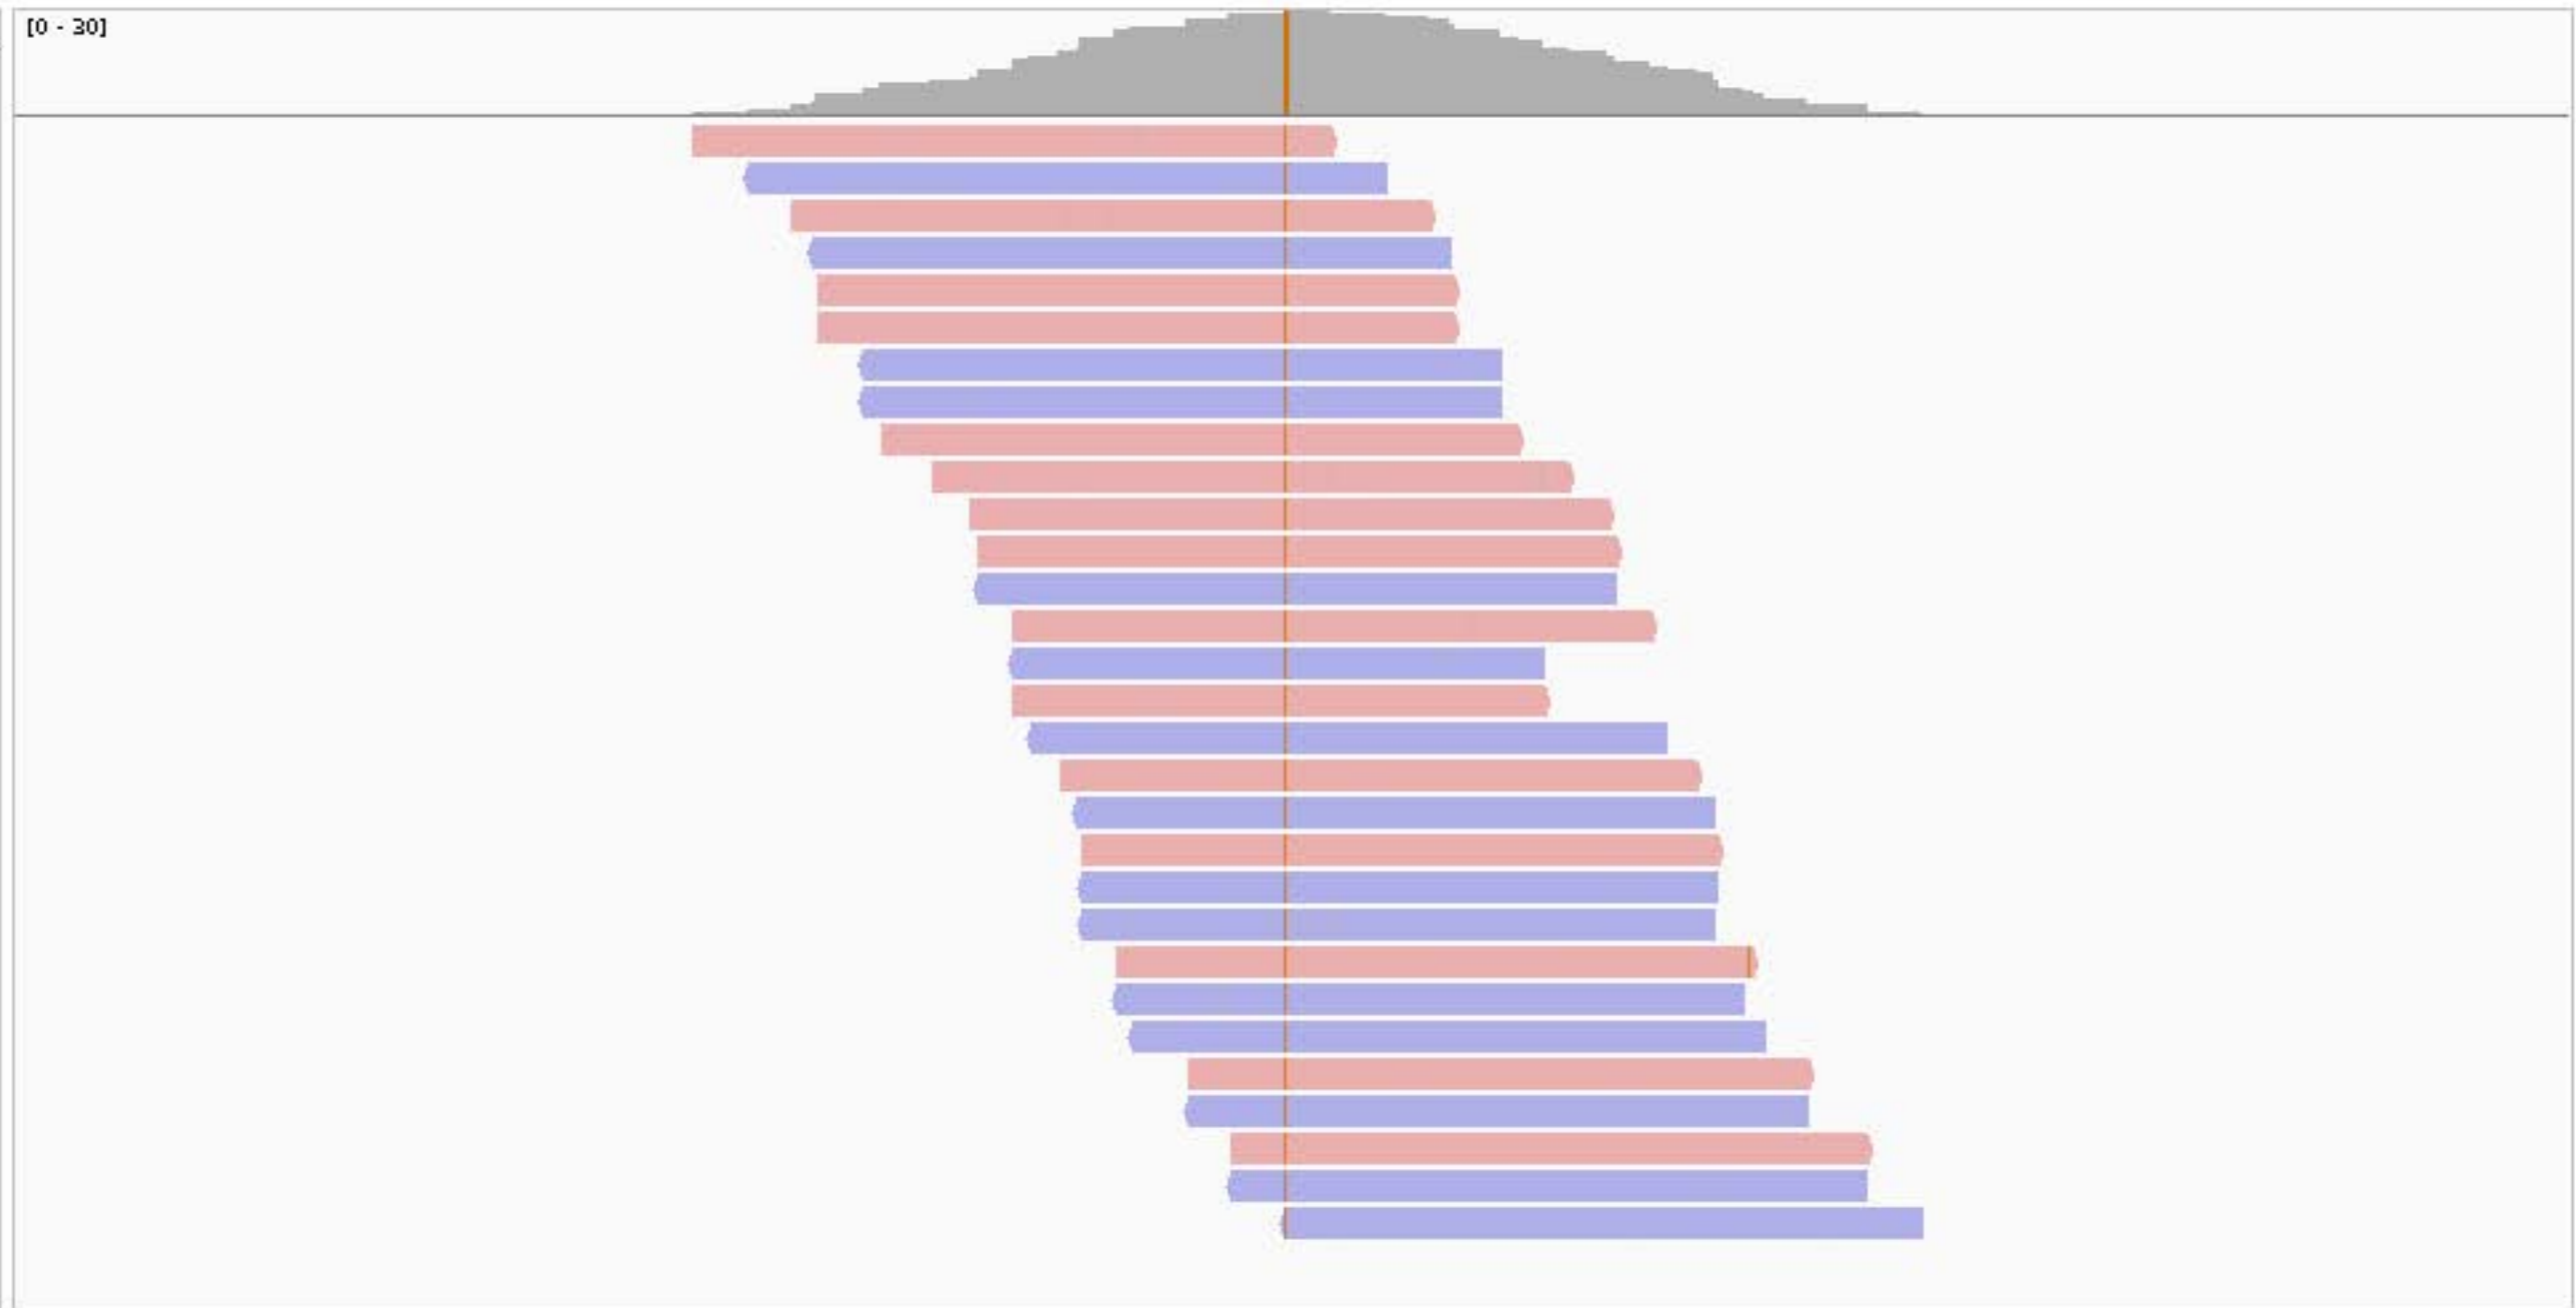

SL\_0006\_RN\_36\_mut.bam

Sequence →

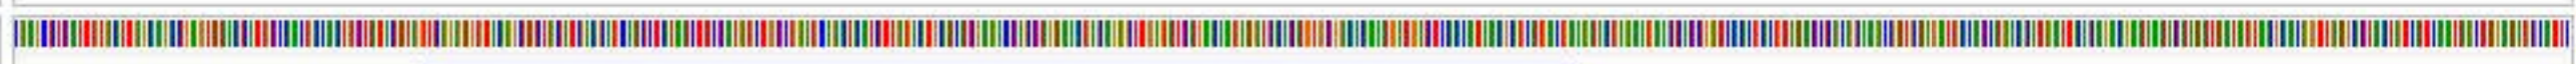

Refseq Genes

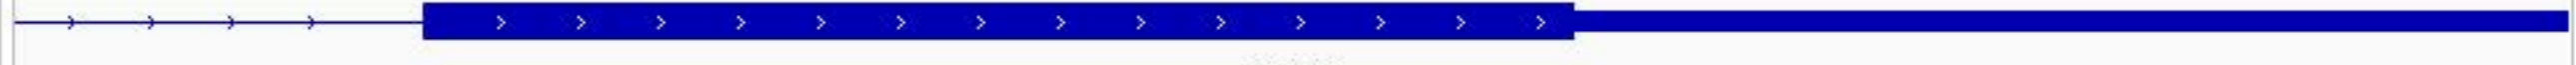

PIK3CA

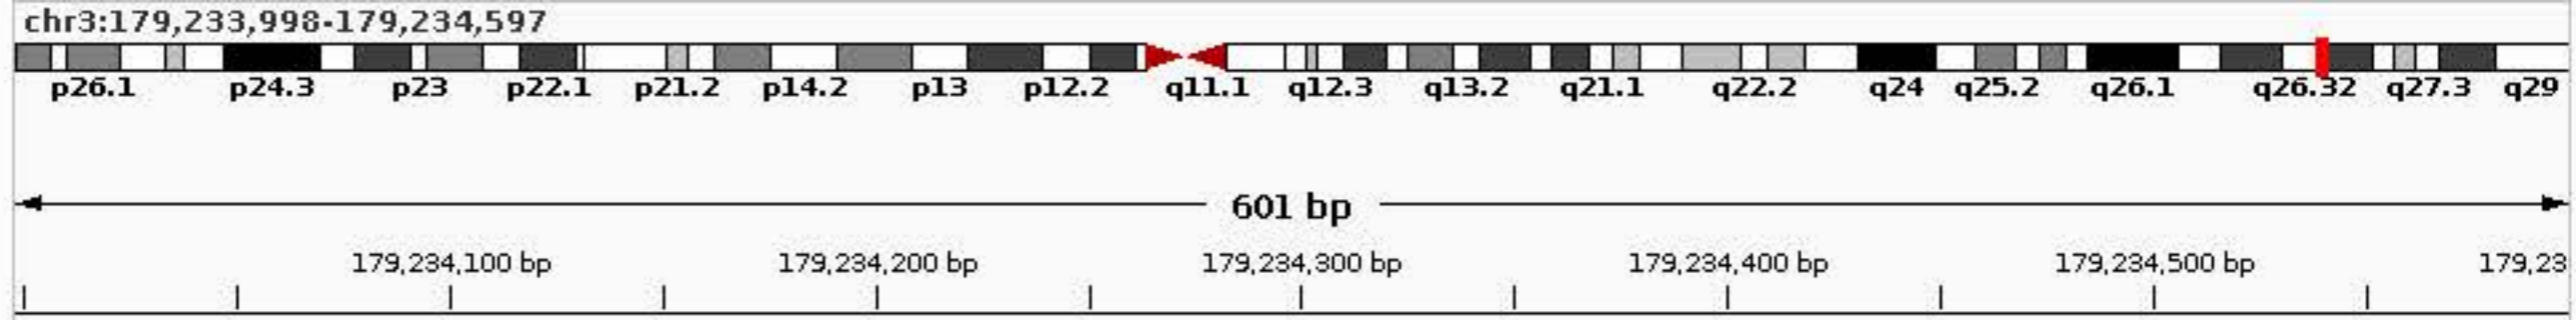

SL\_0007\_RN\_33\_mut.bam Coverage

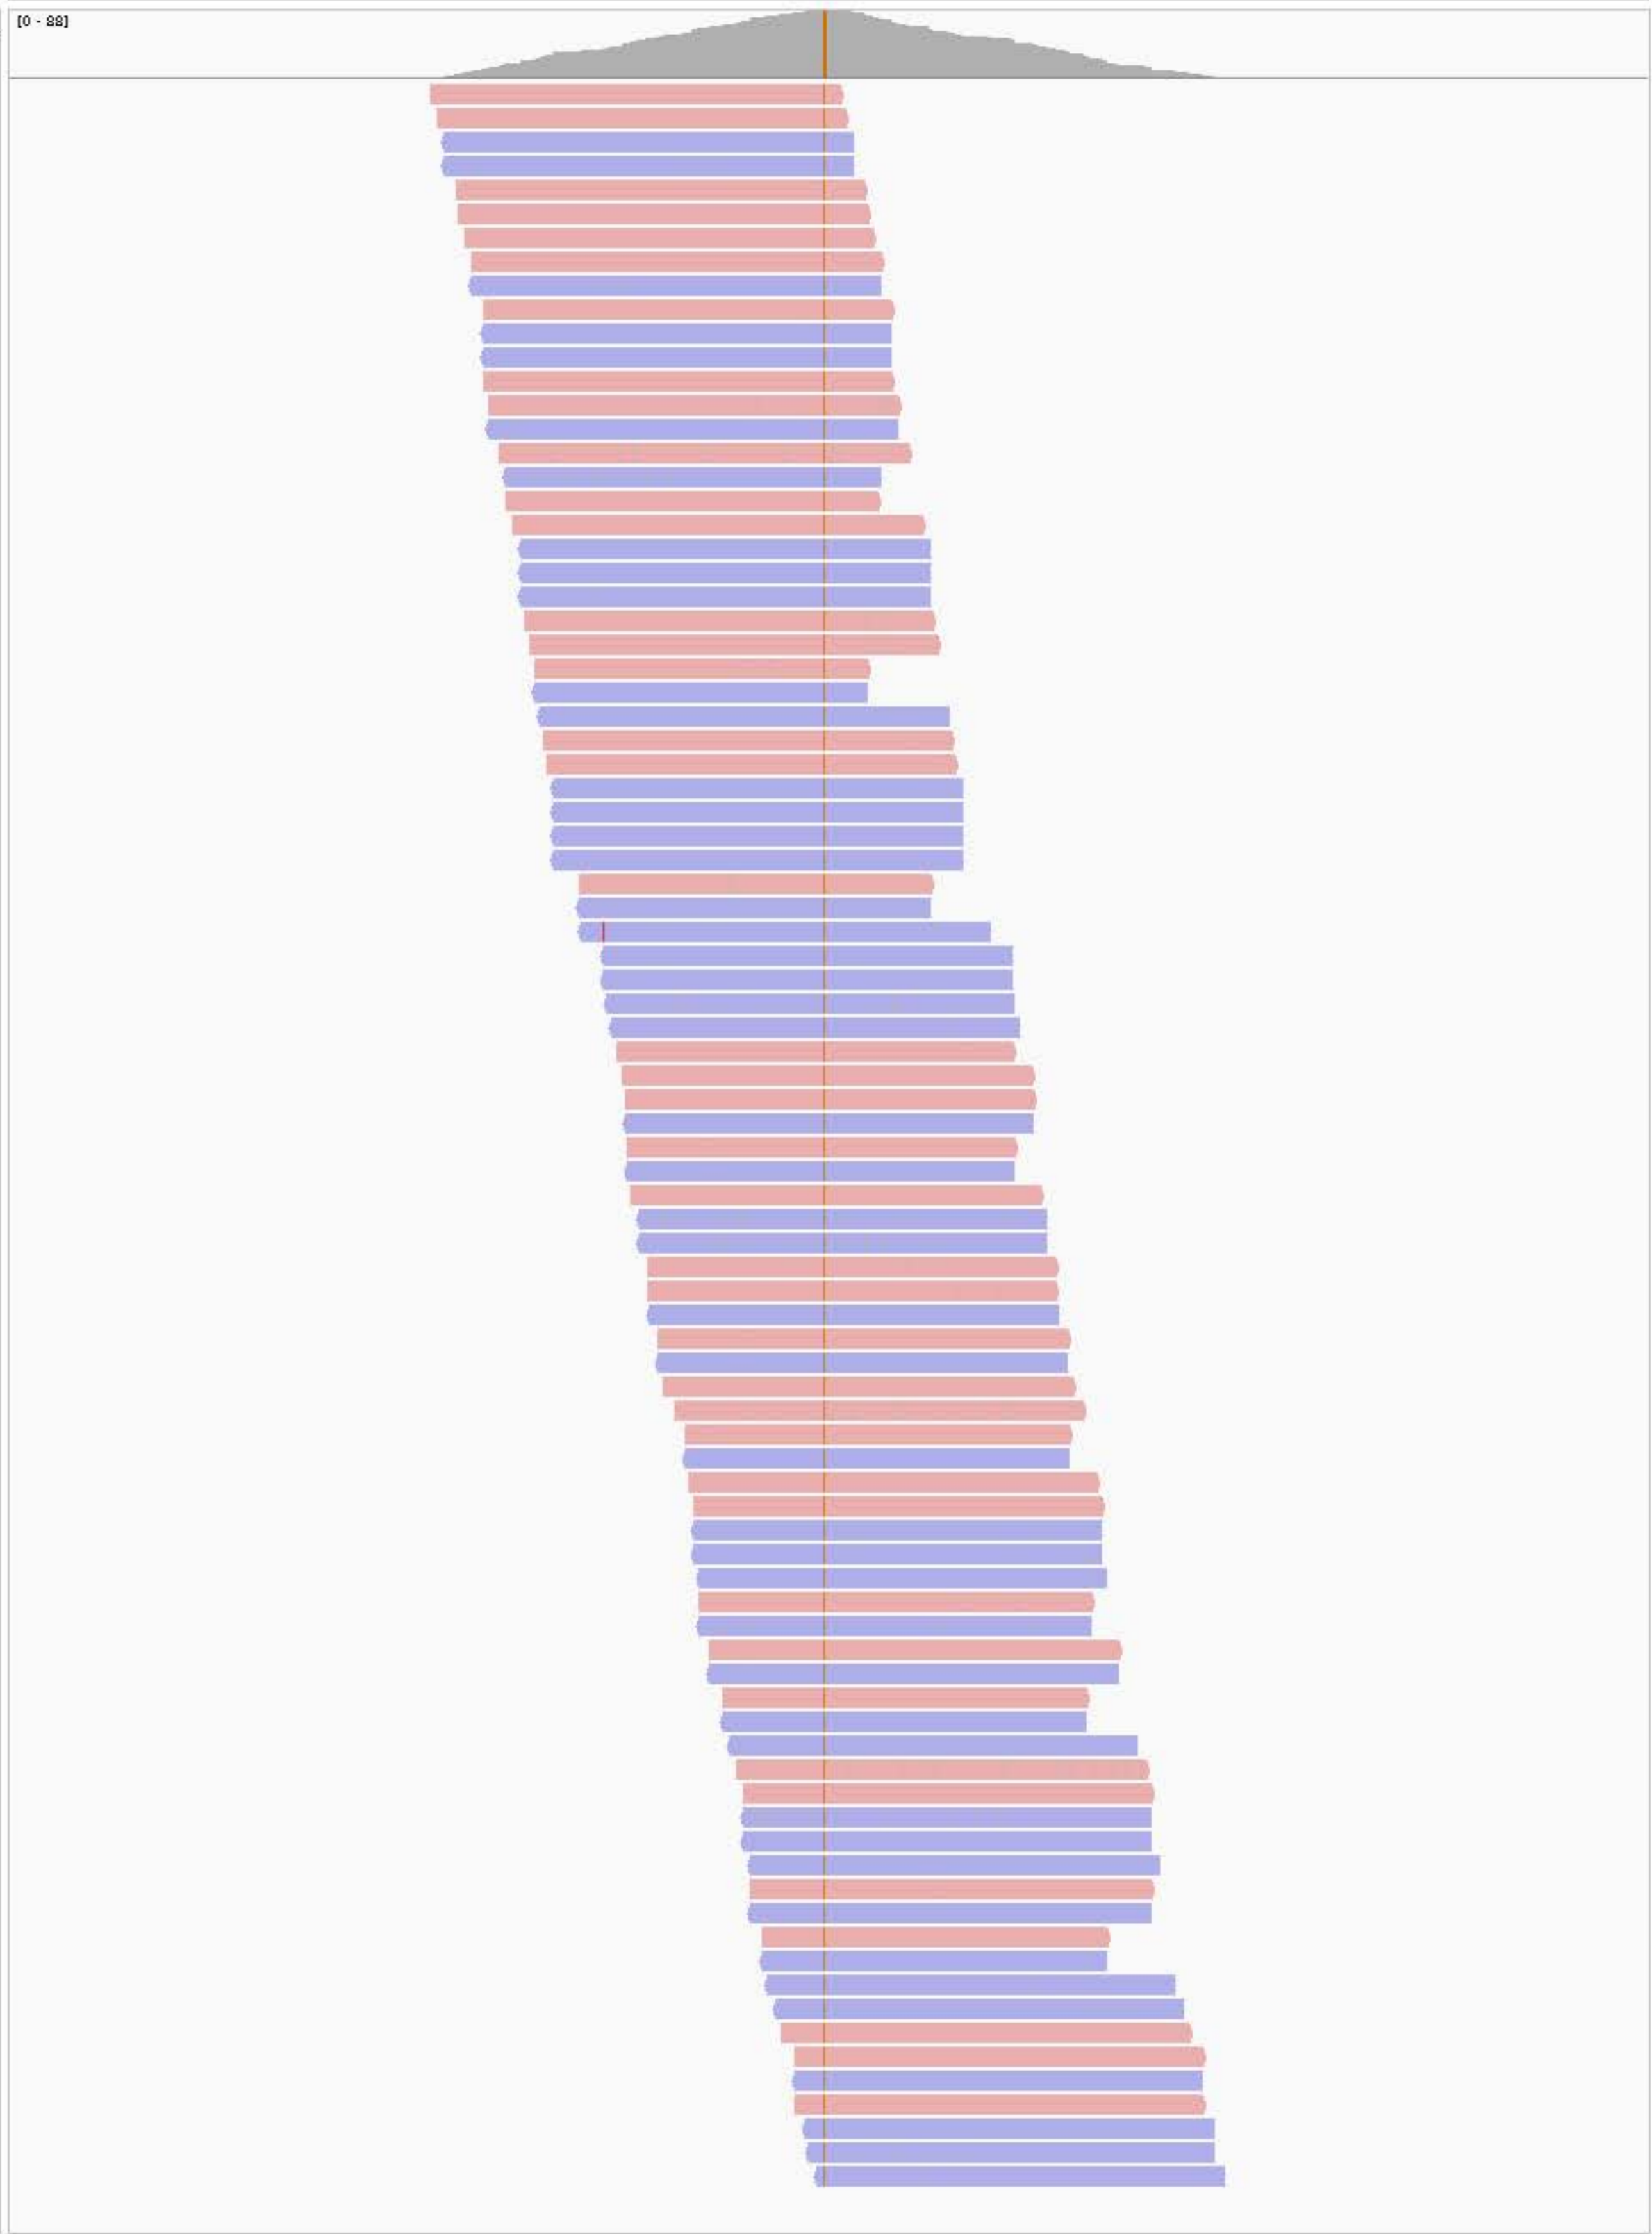

SL\_0007\_RN\_33\_mut.bam

Sequence

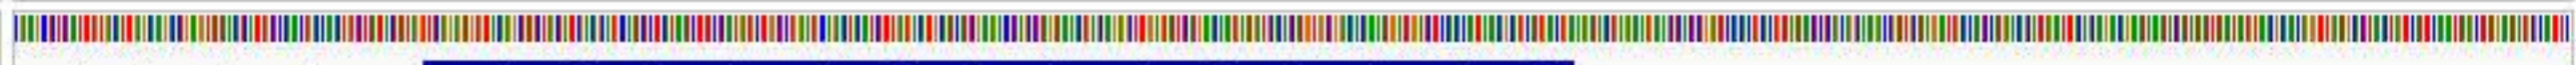

Refseq Genes

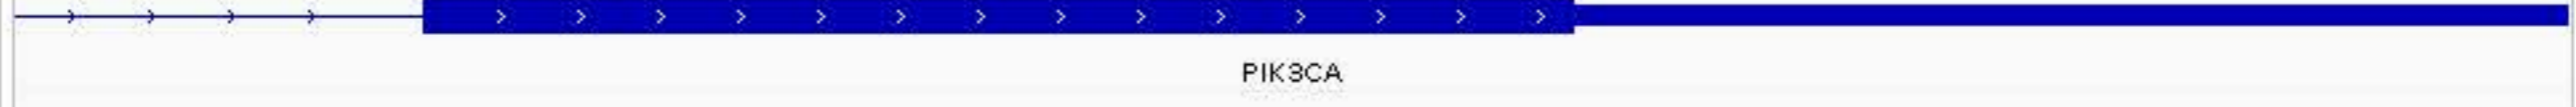

PIK3CA



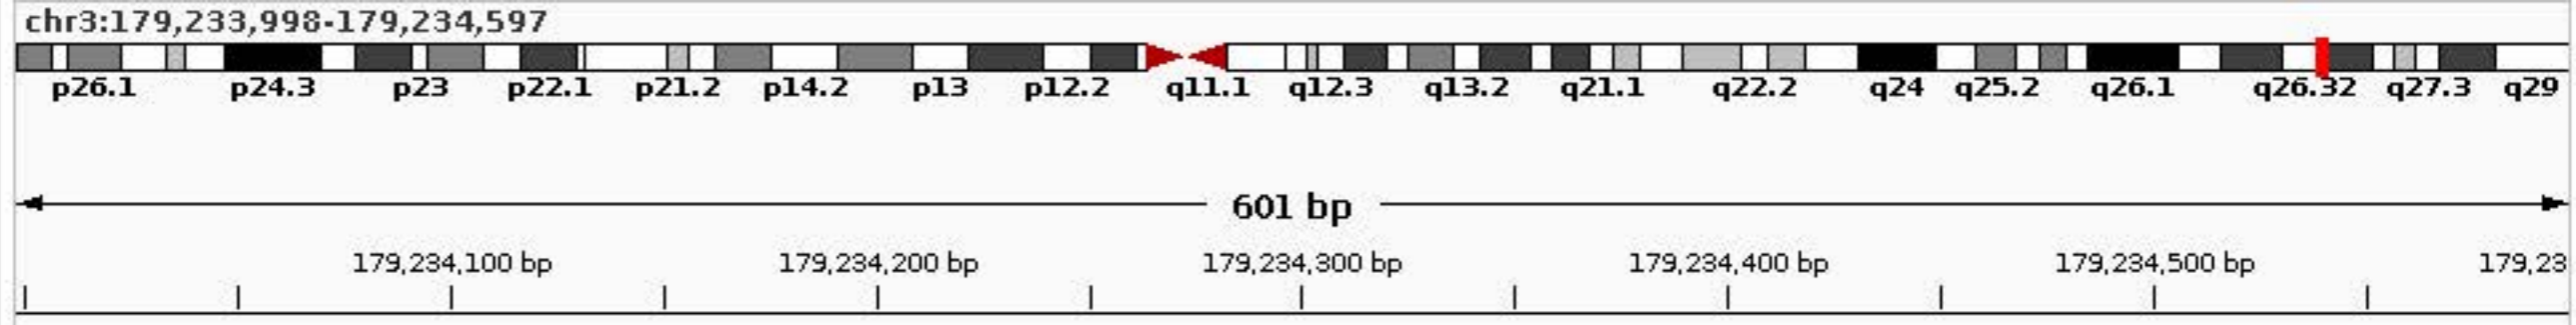

SL\_0010\_RN\_34\_mut.bam Coverage

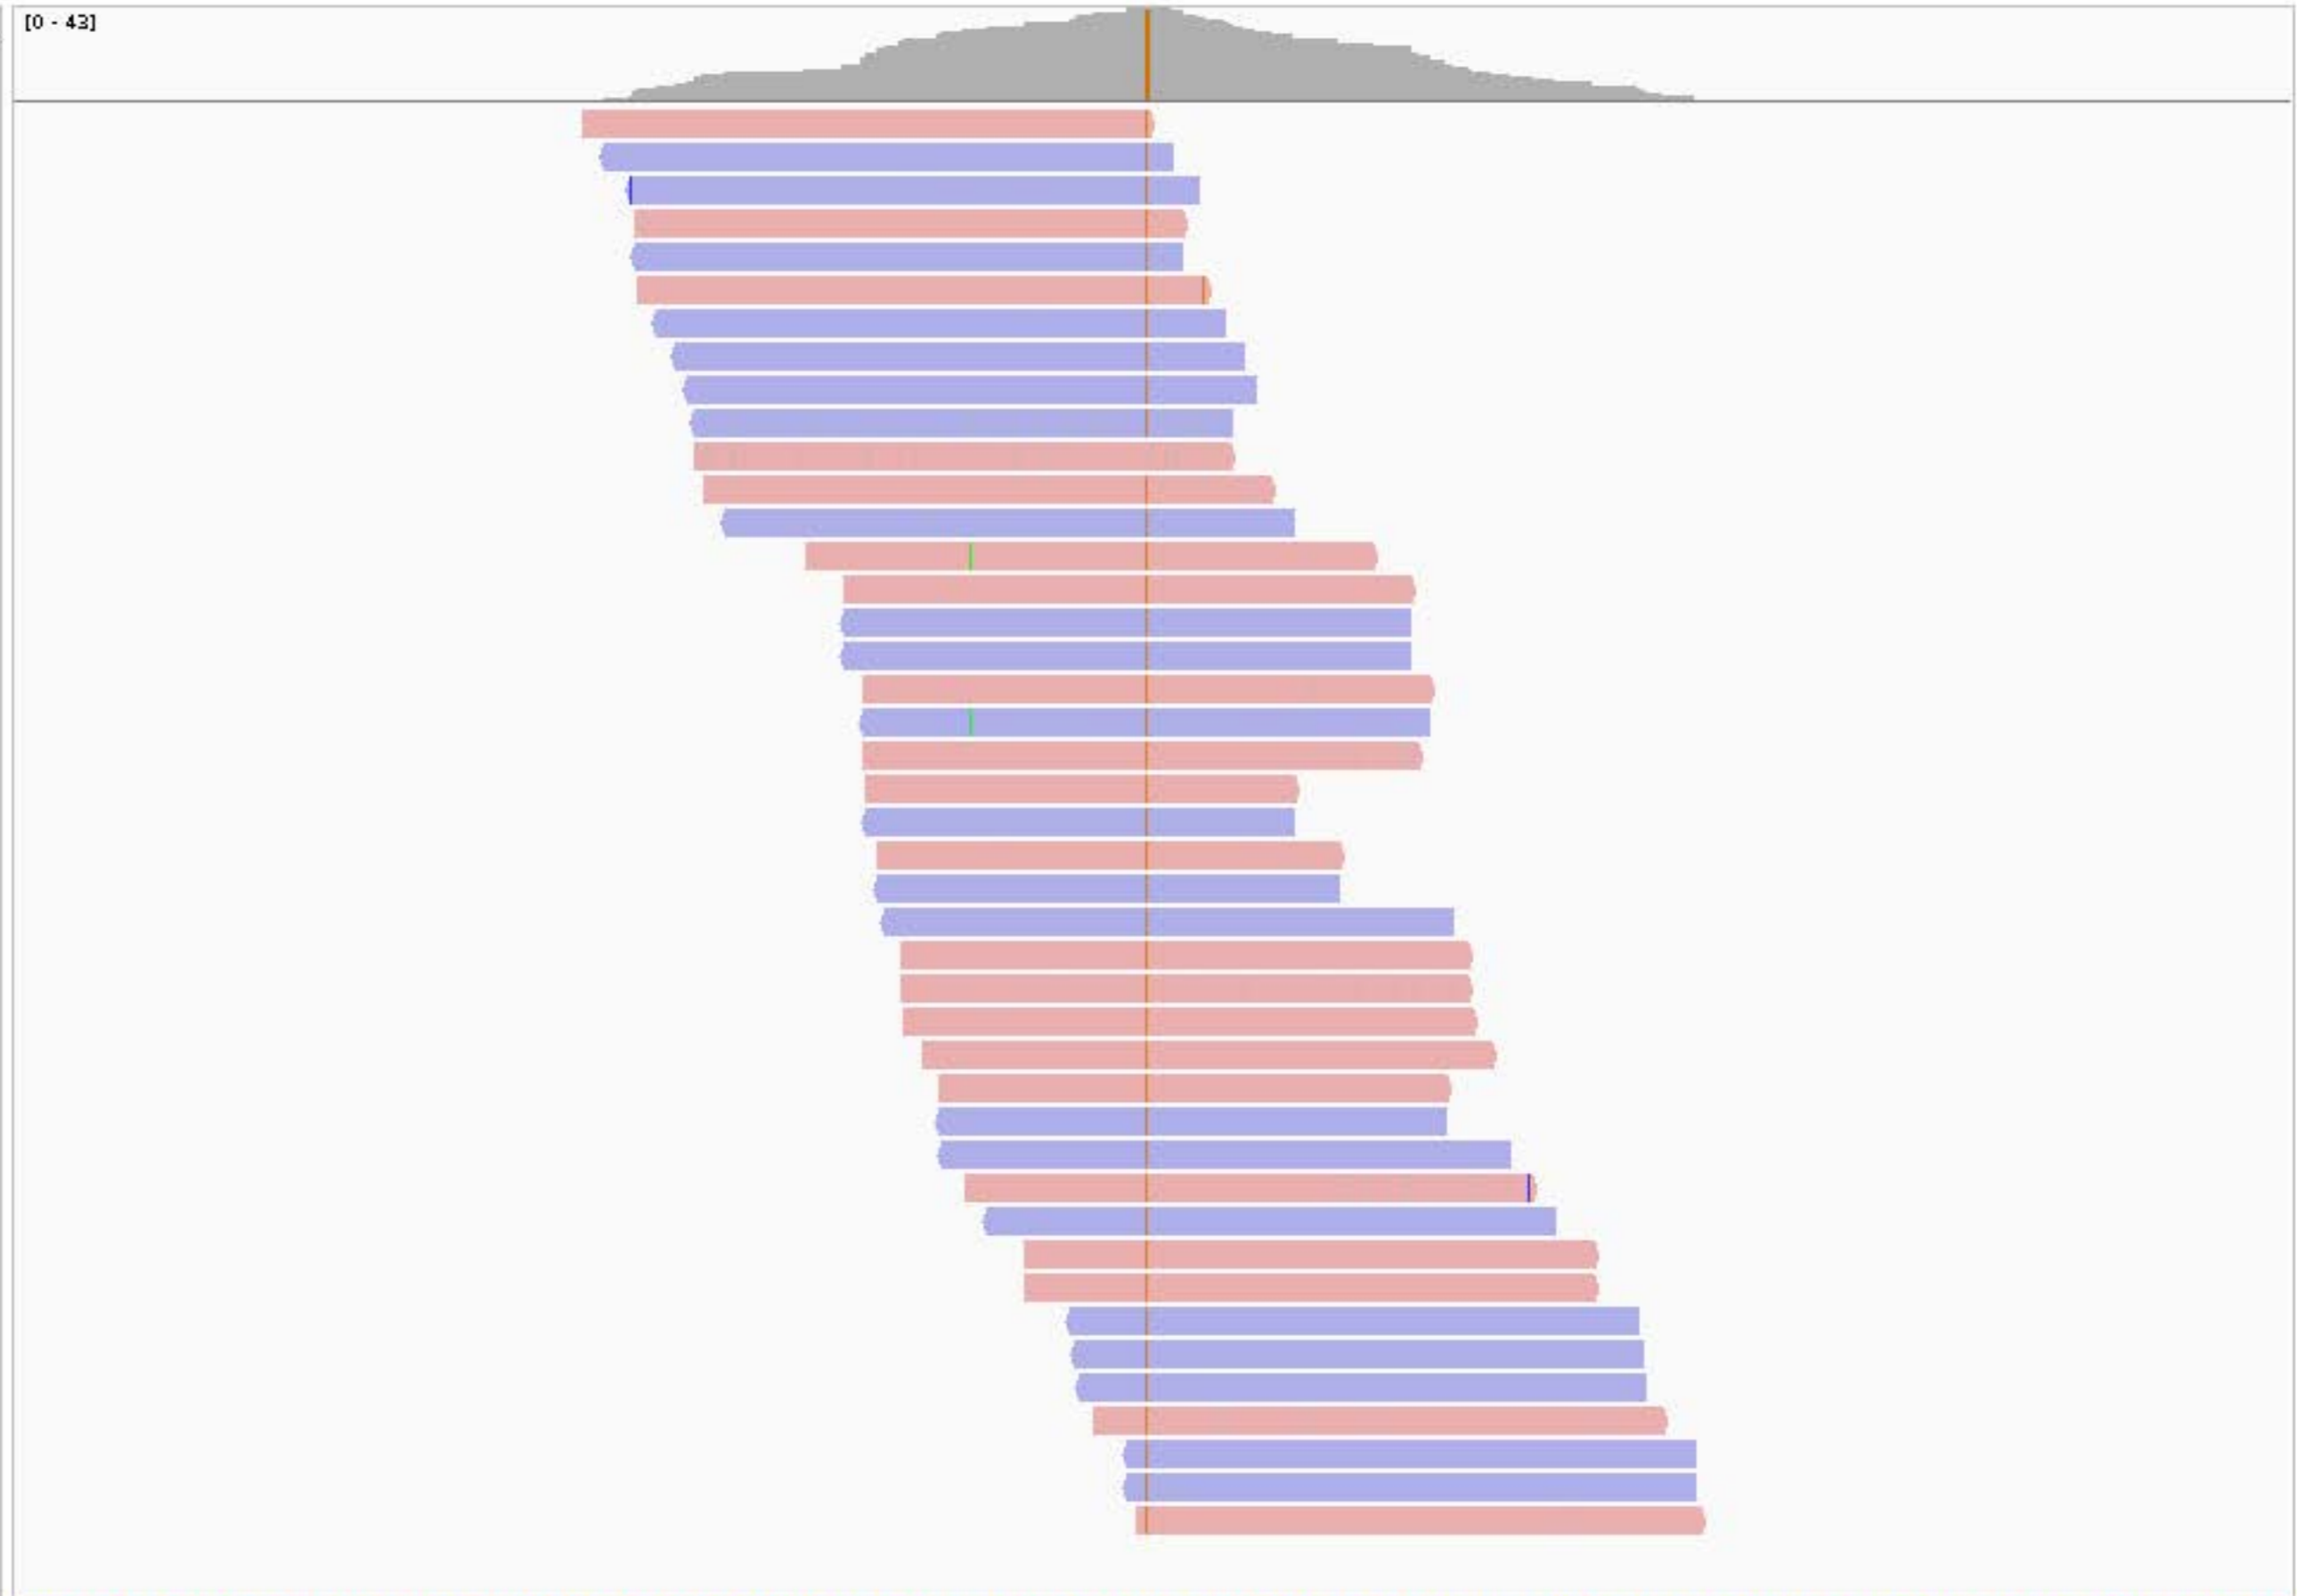

SL\_0010\_RN\_34\_mut.bam

Sequence

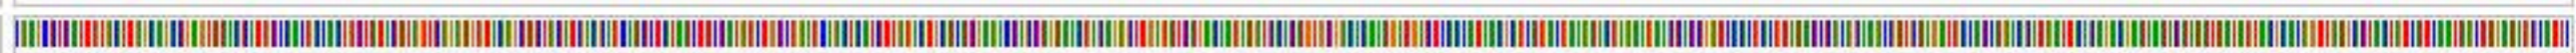

Refseq Genes

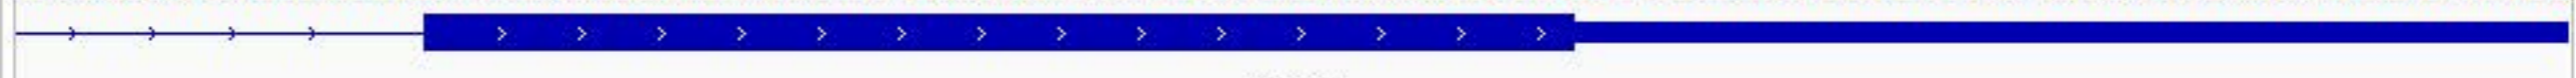

PIK3CA



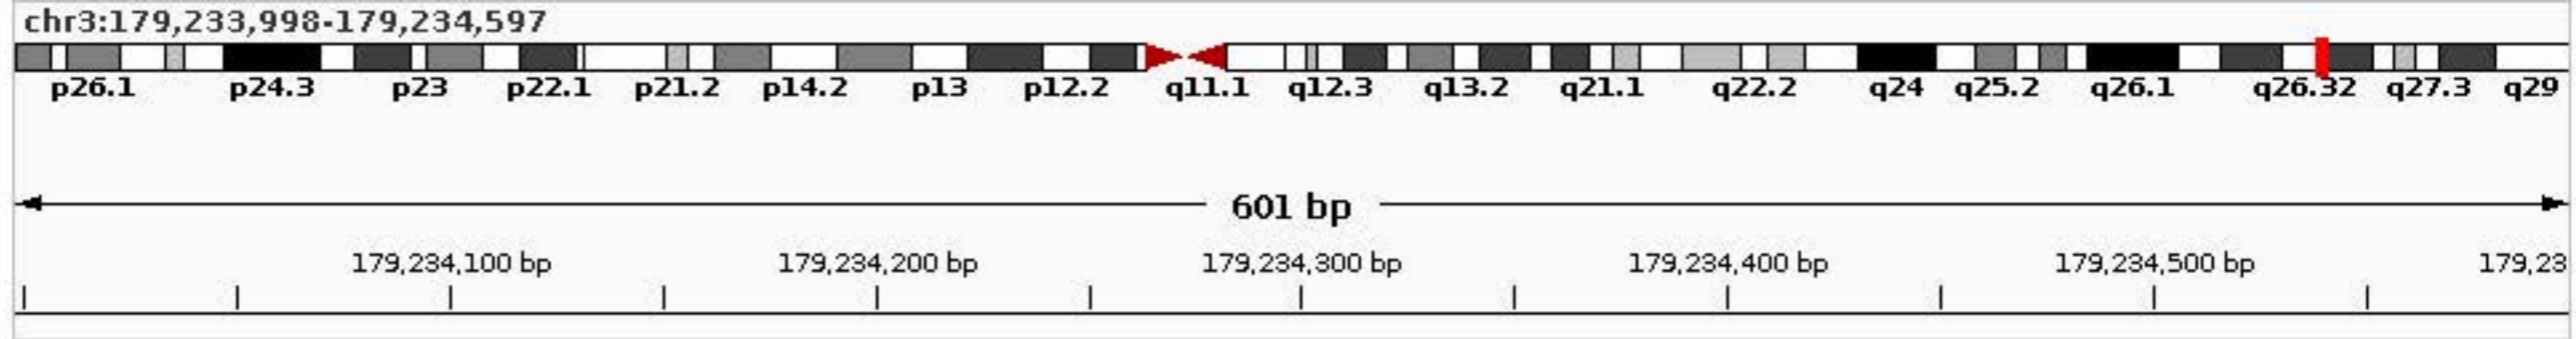

SL\_0015\_RN\_10\_mut.bam Coverage

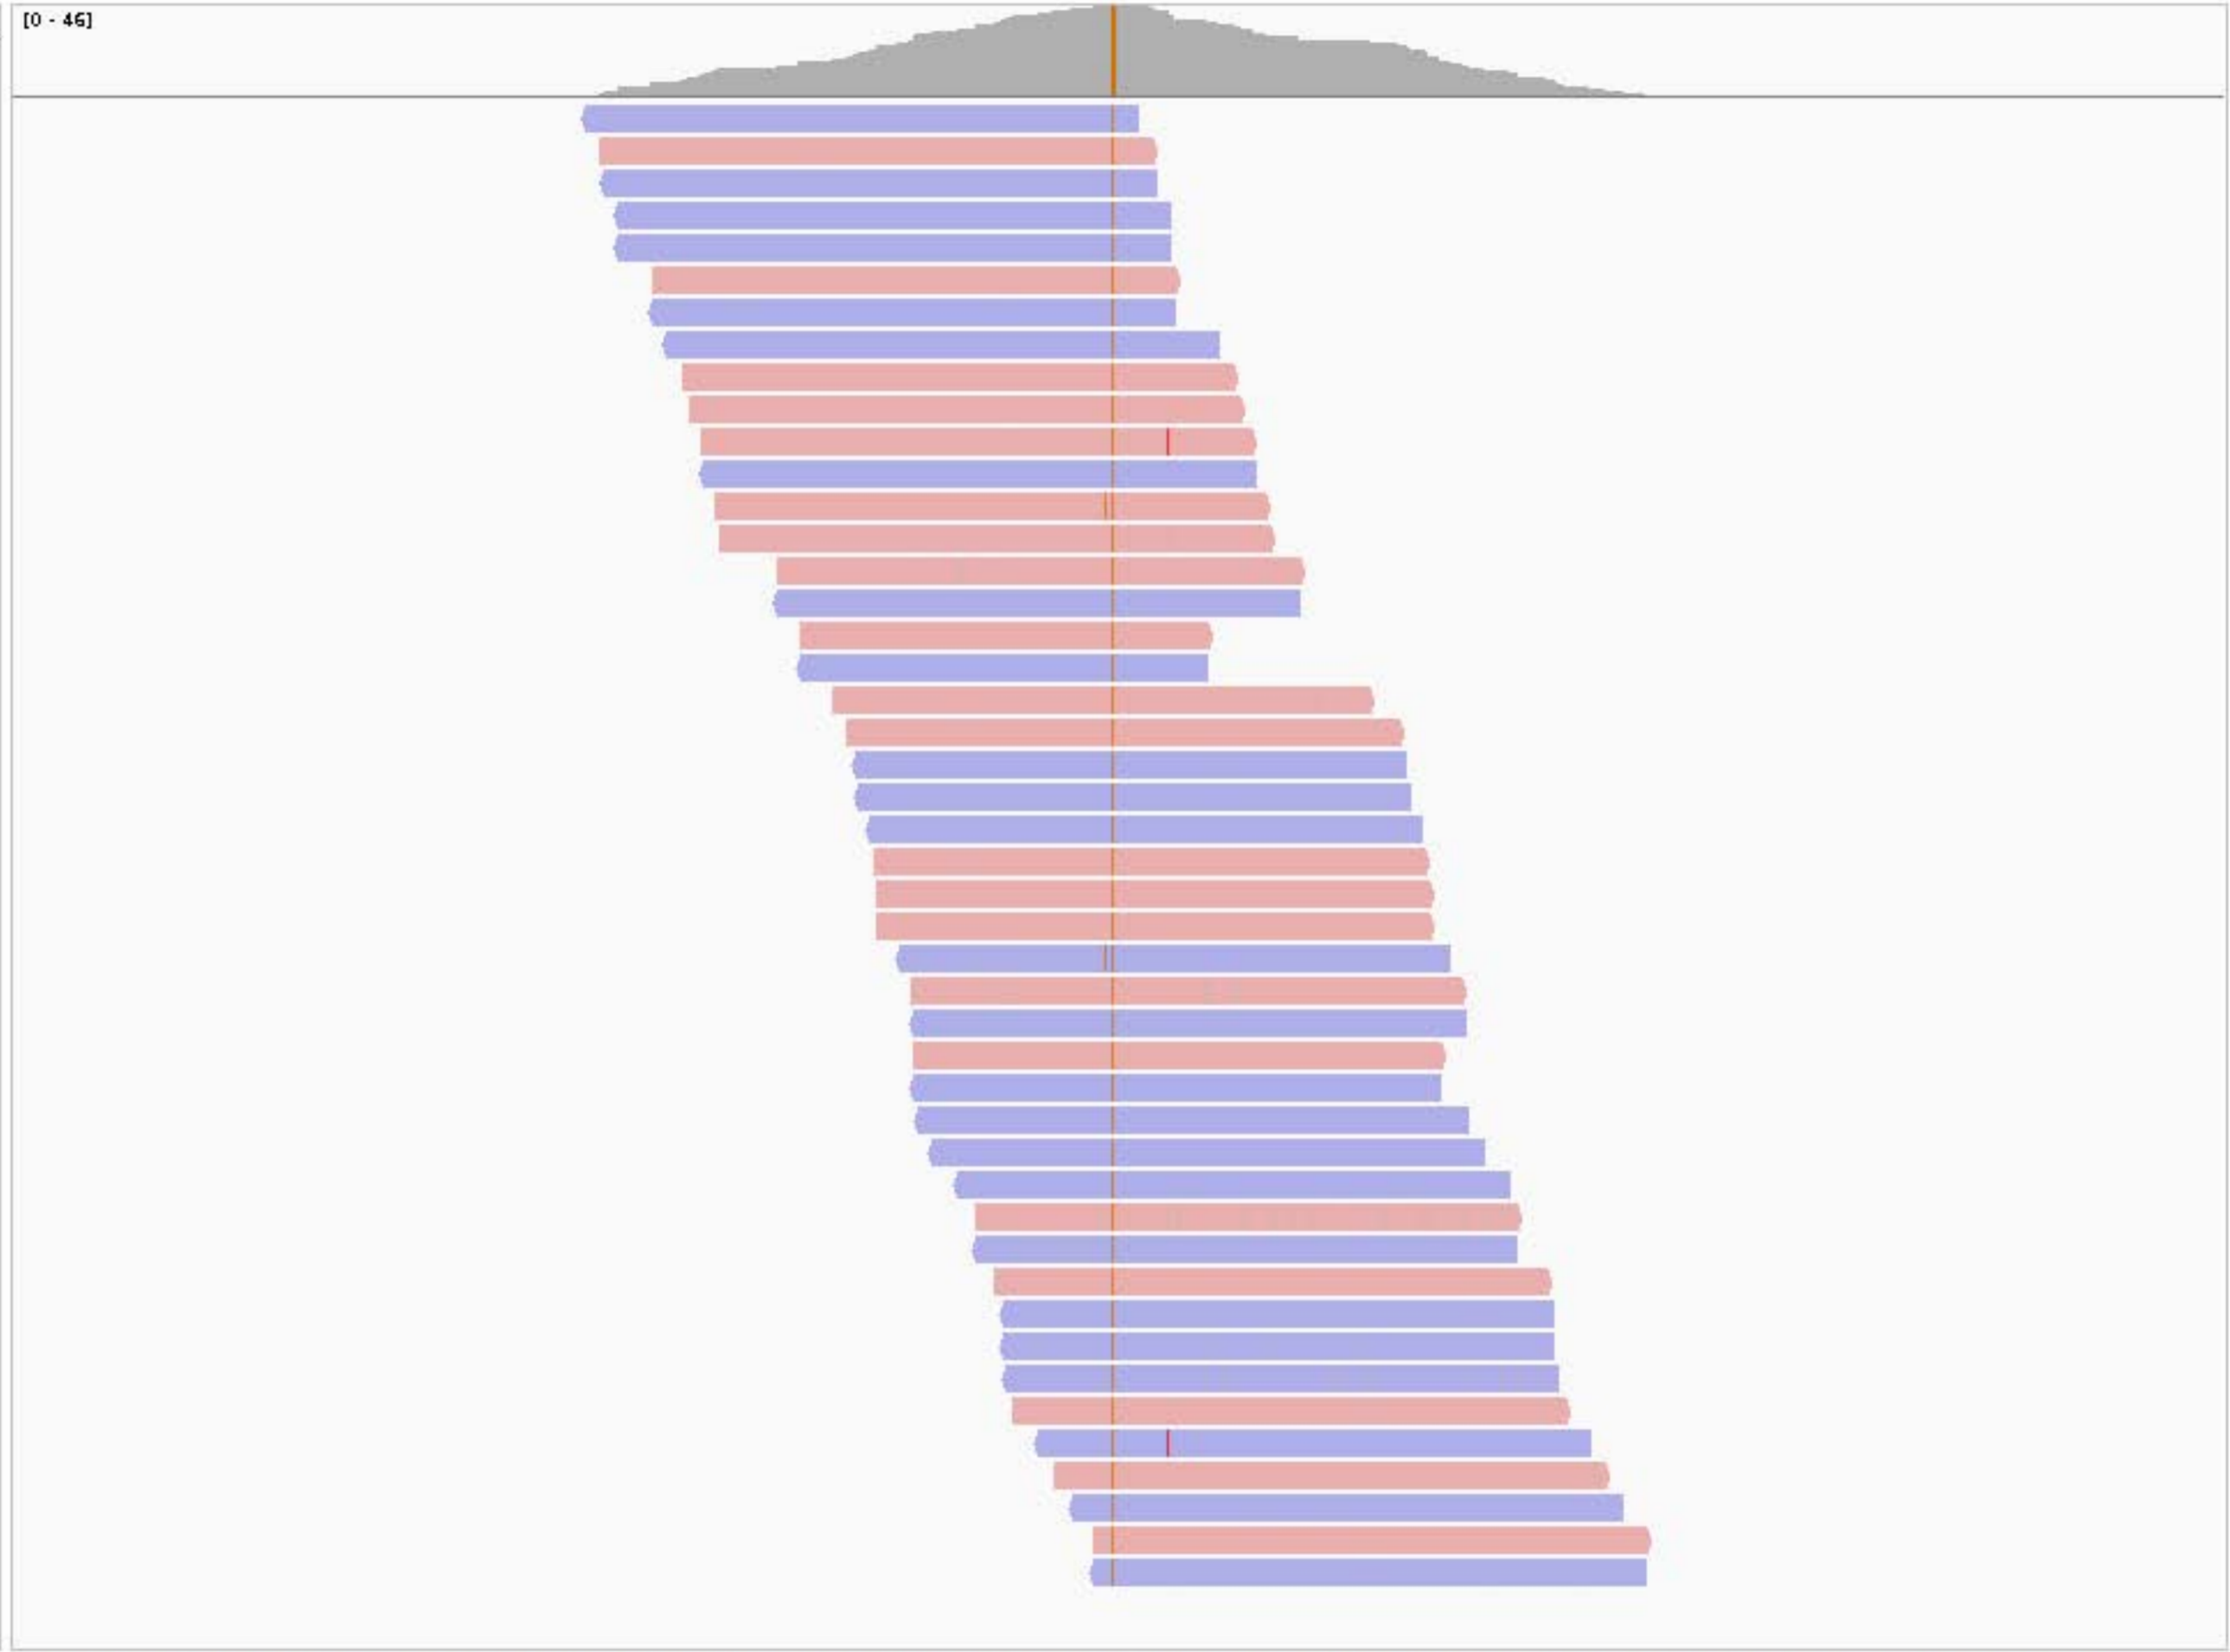

SL\_0015\_RN\_10\_mut.bam

Sequence

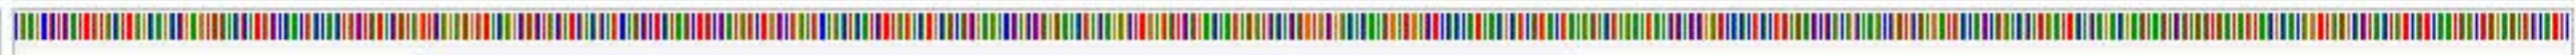

Refseq Genes

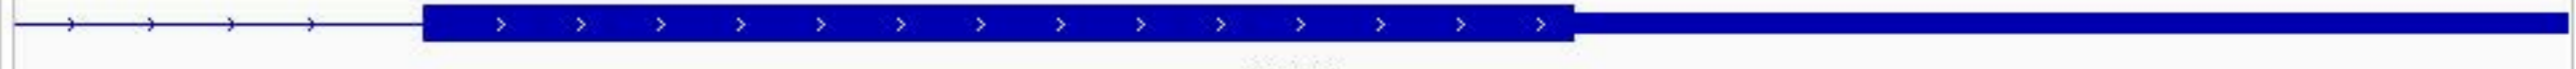

PIK3CA

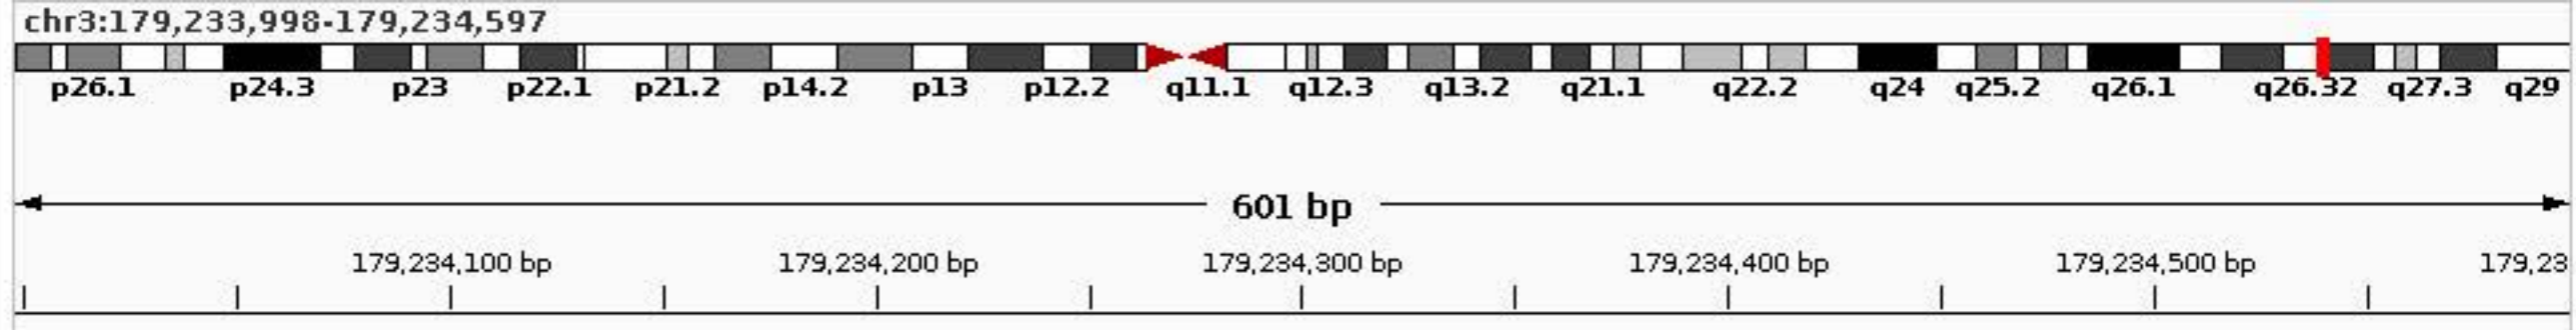

SL\_0015\_RN\_21\_mut.bam Coverage

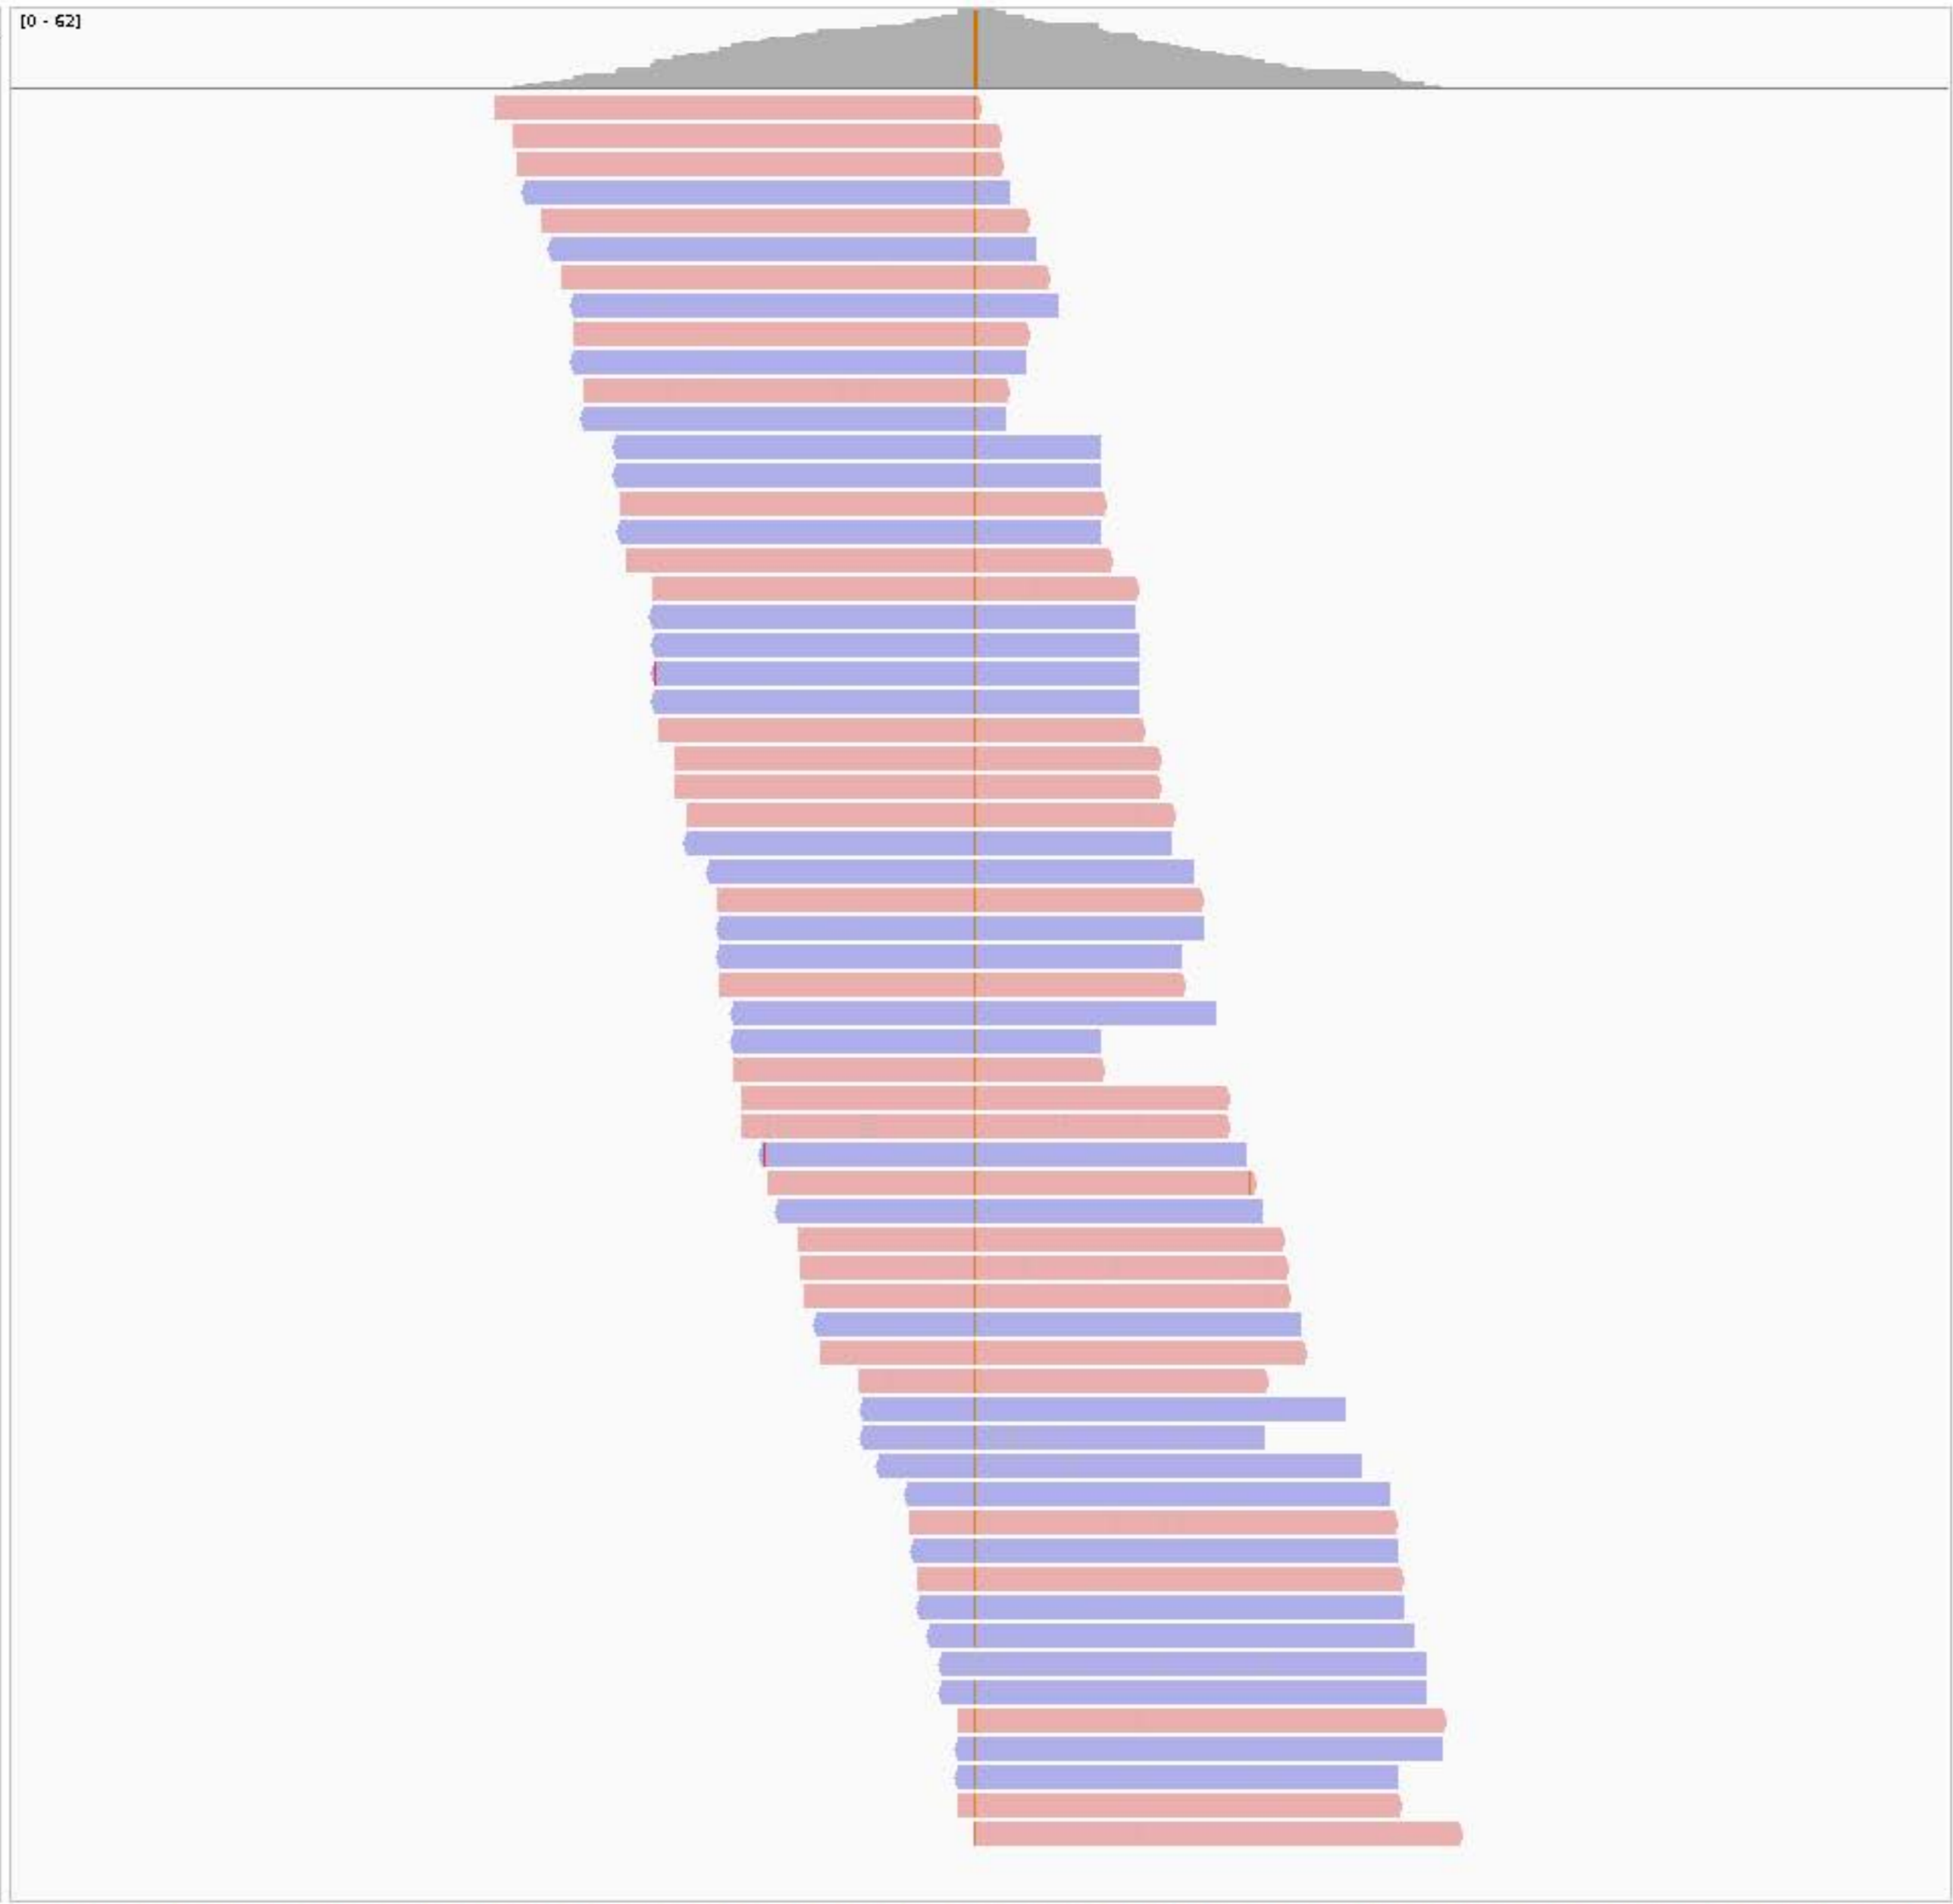

SL\_0015\_RN\_21\_mut.bam

Sequence →

Refseq Genes

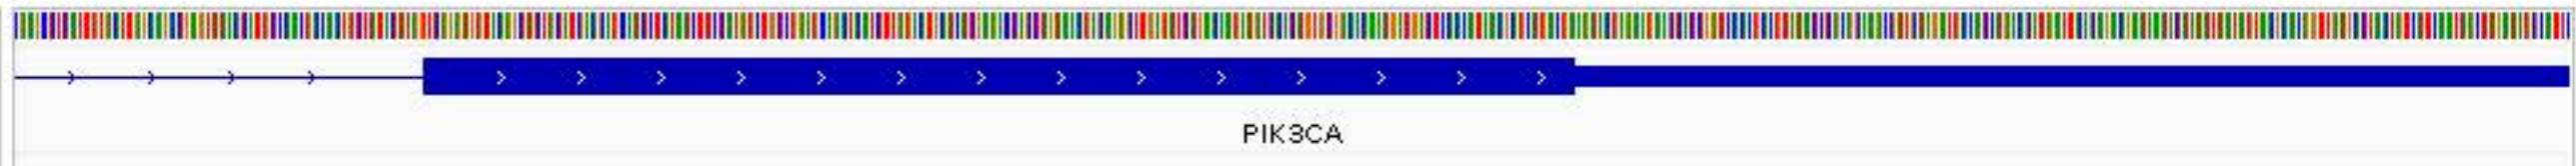

PIK3CA

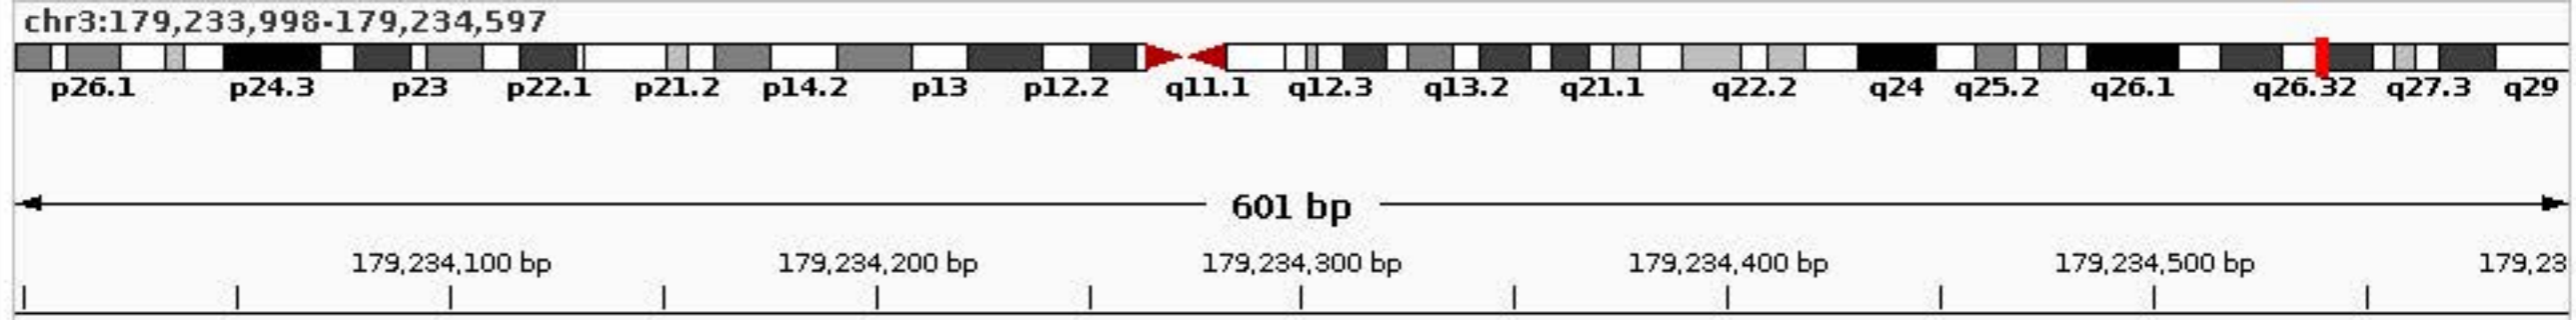

SL\_0016\_RN\_51\_mut.bam Coverage

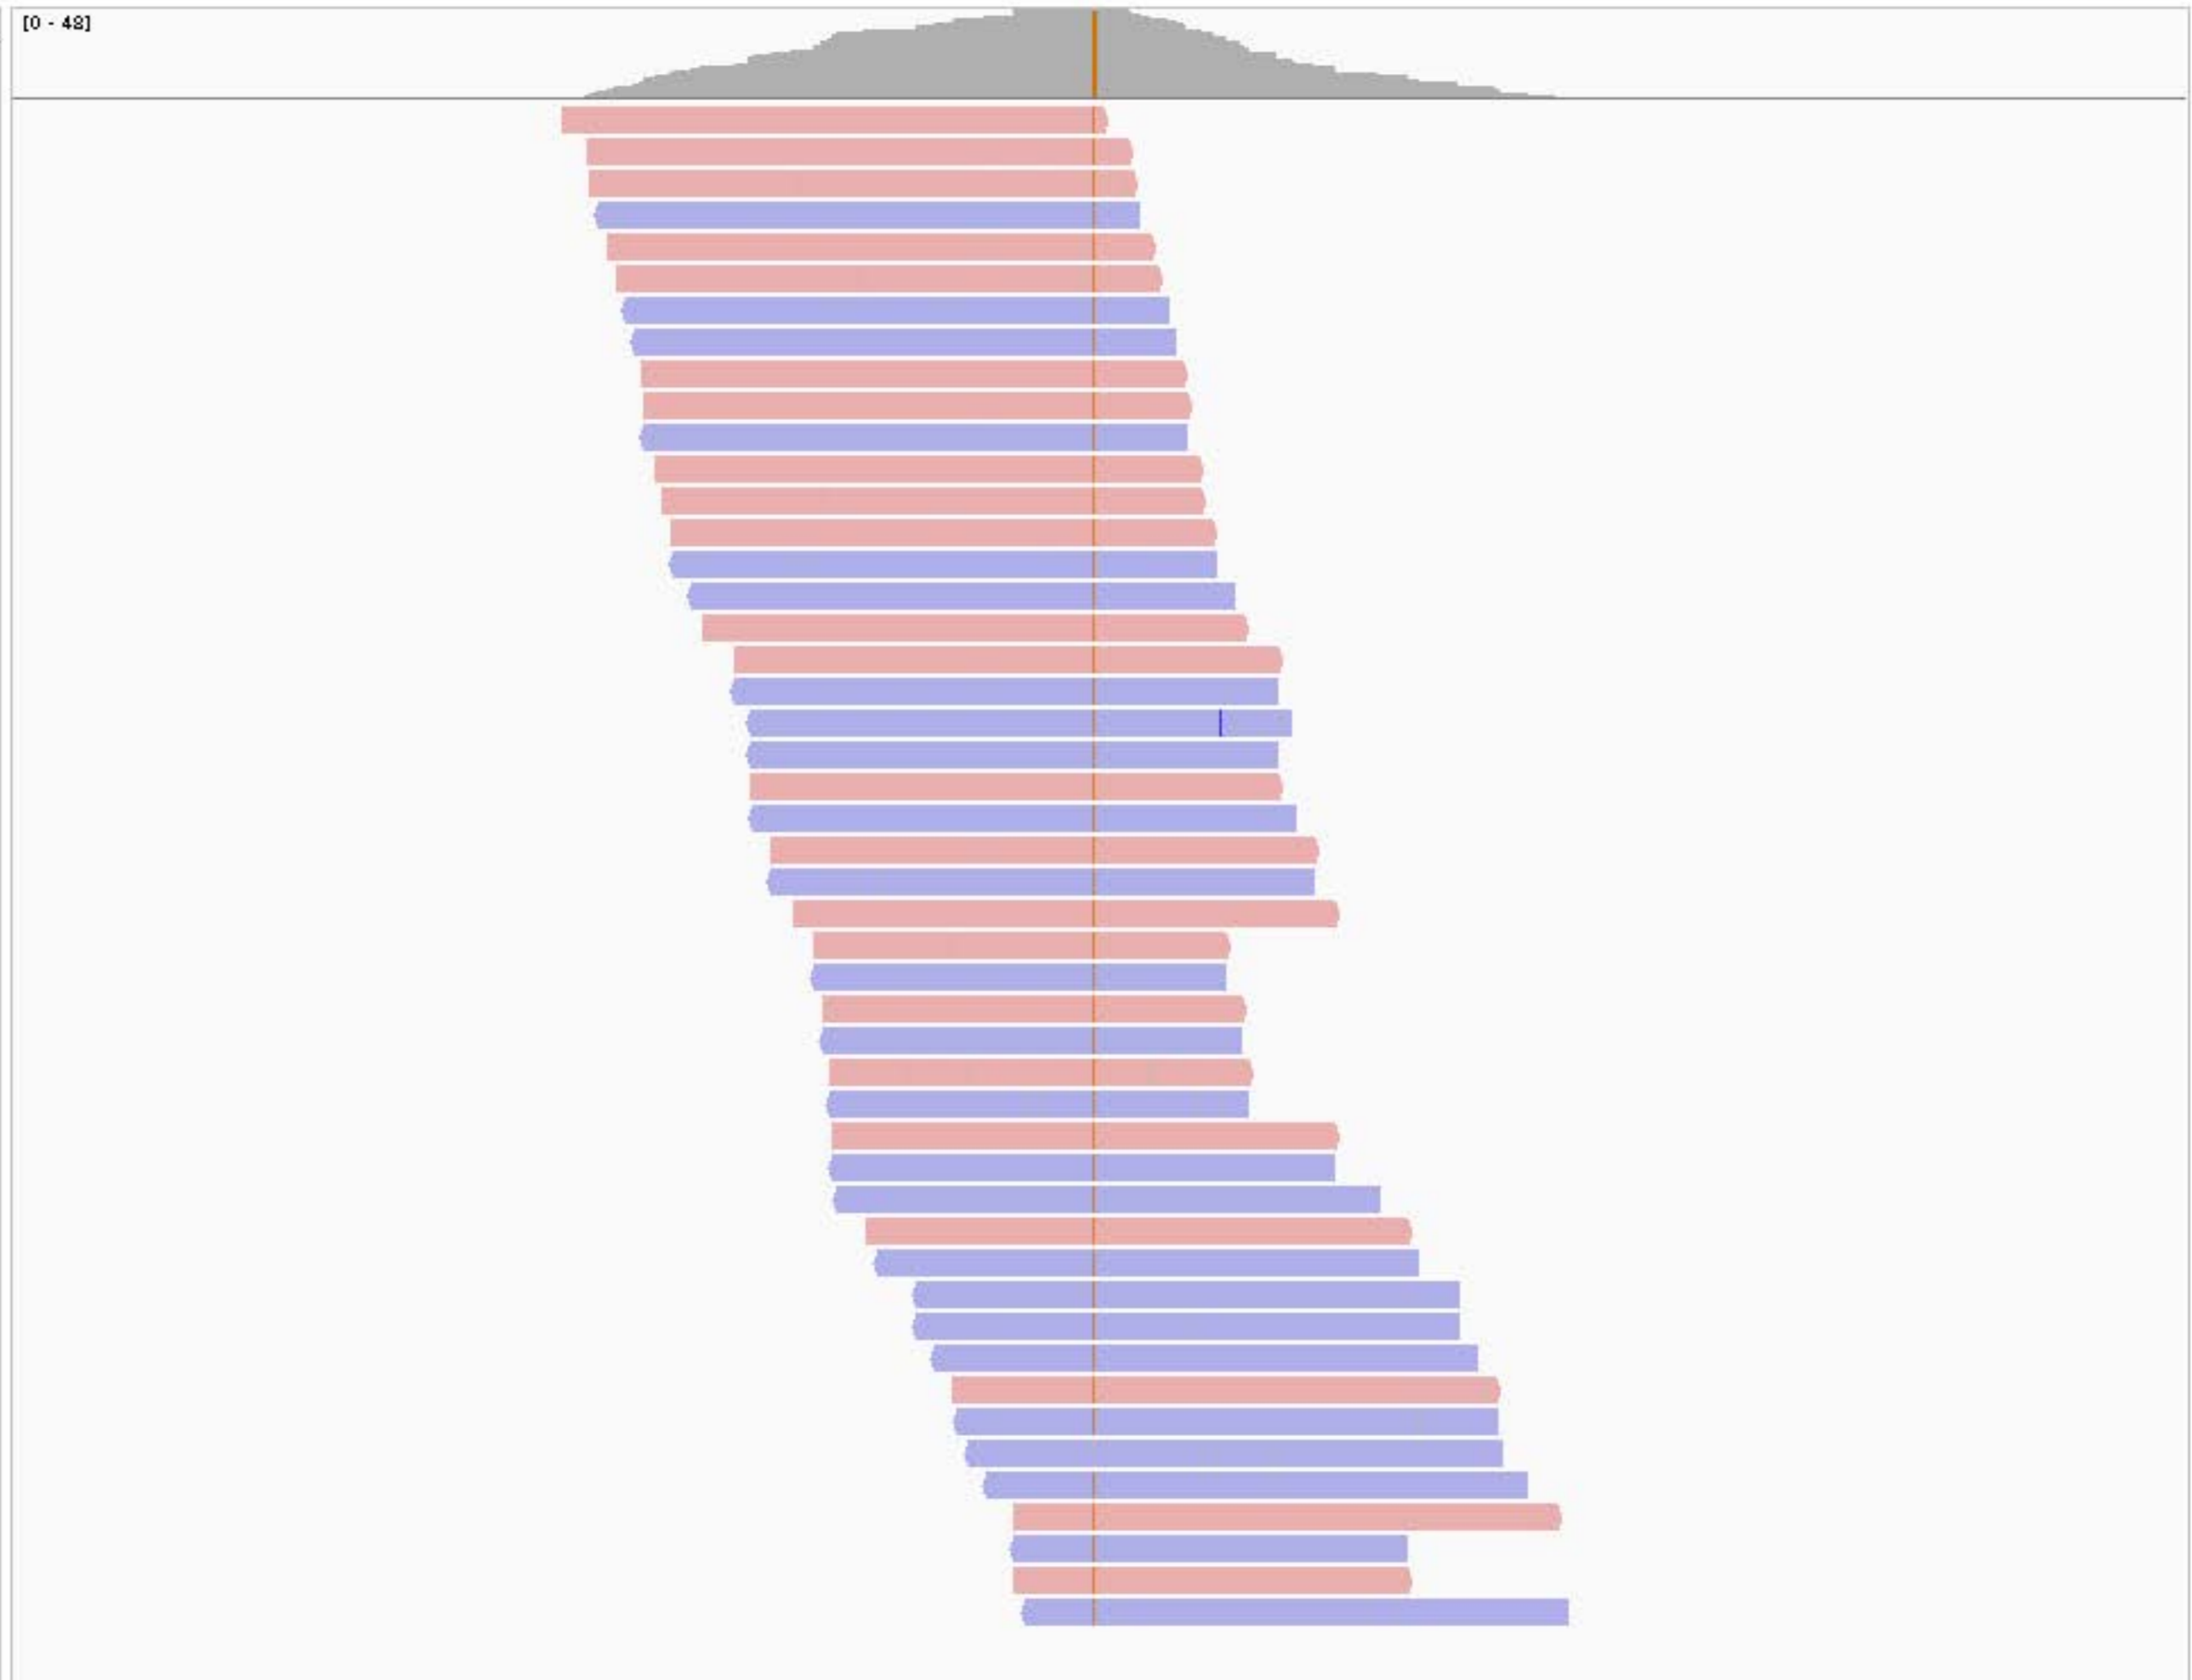

SL\_0016\_RN\_51\_mut.bam

Sequence

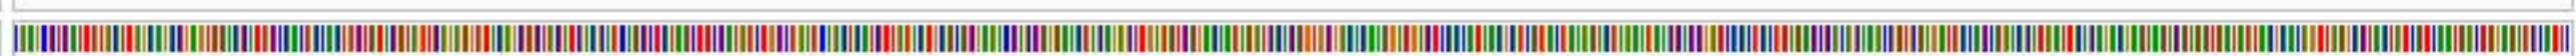

Refseq Genes

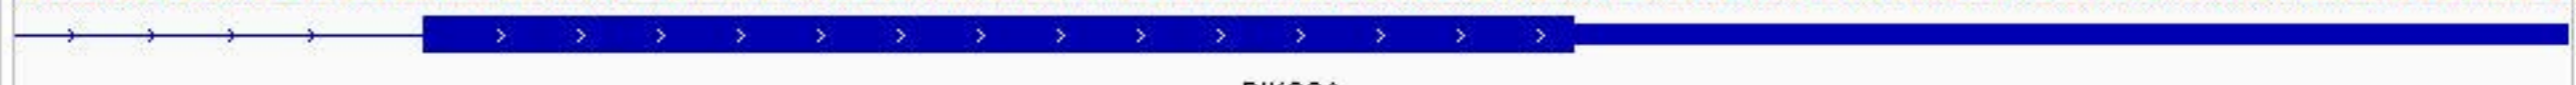

PIK3CA

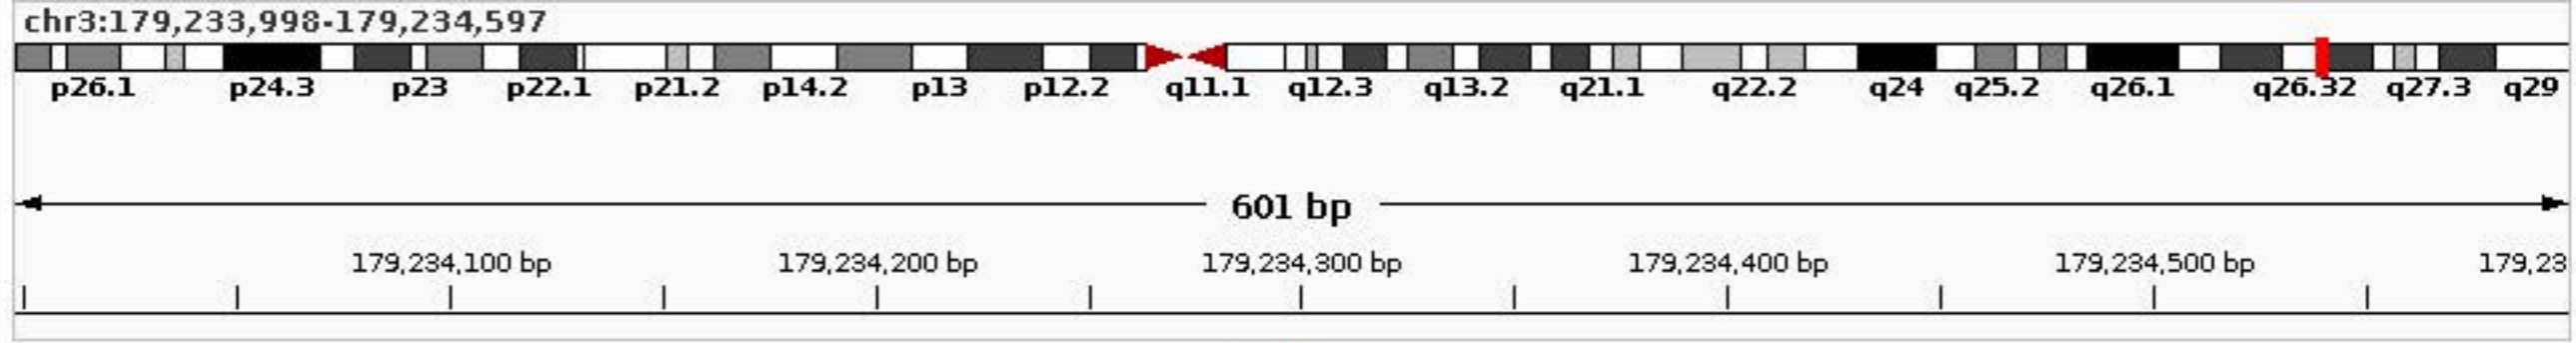

SL\_0004\_RN\_05\_mut.bam Coverage

SL\_0004\_RN\_05\_mut.bam

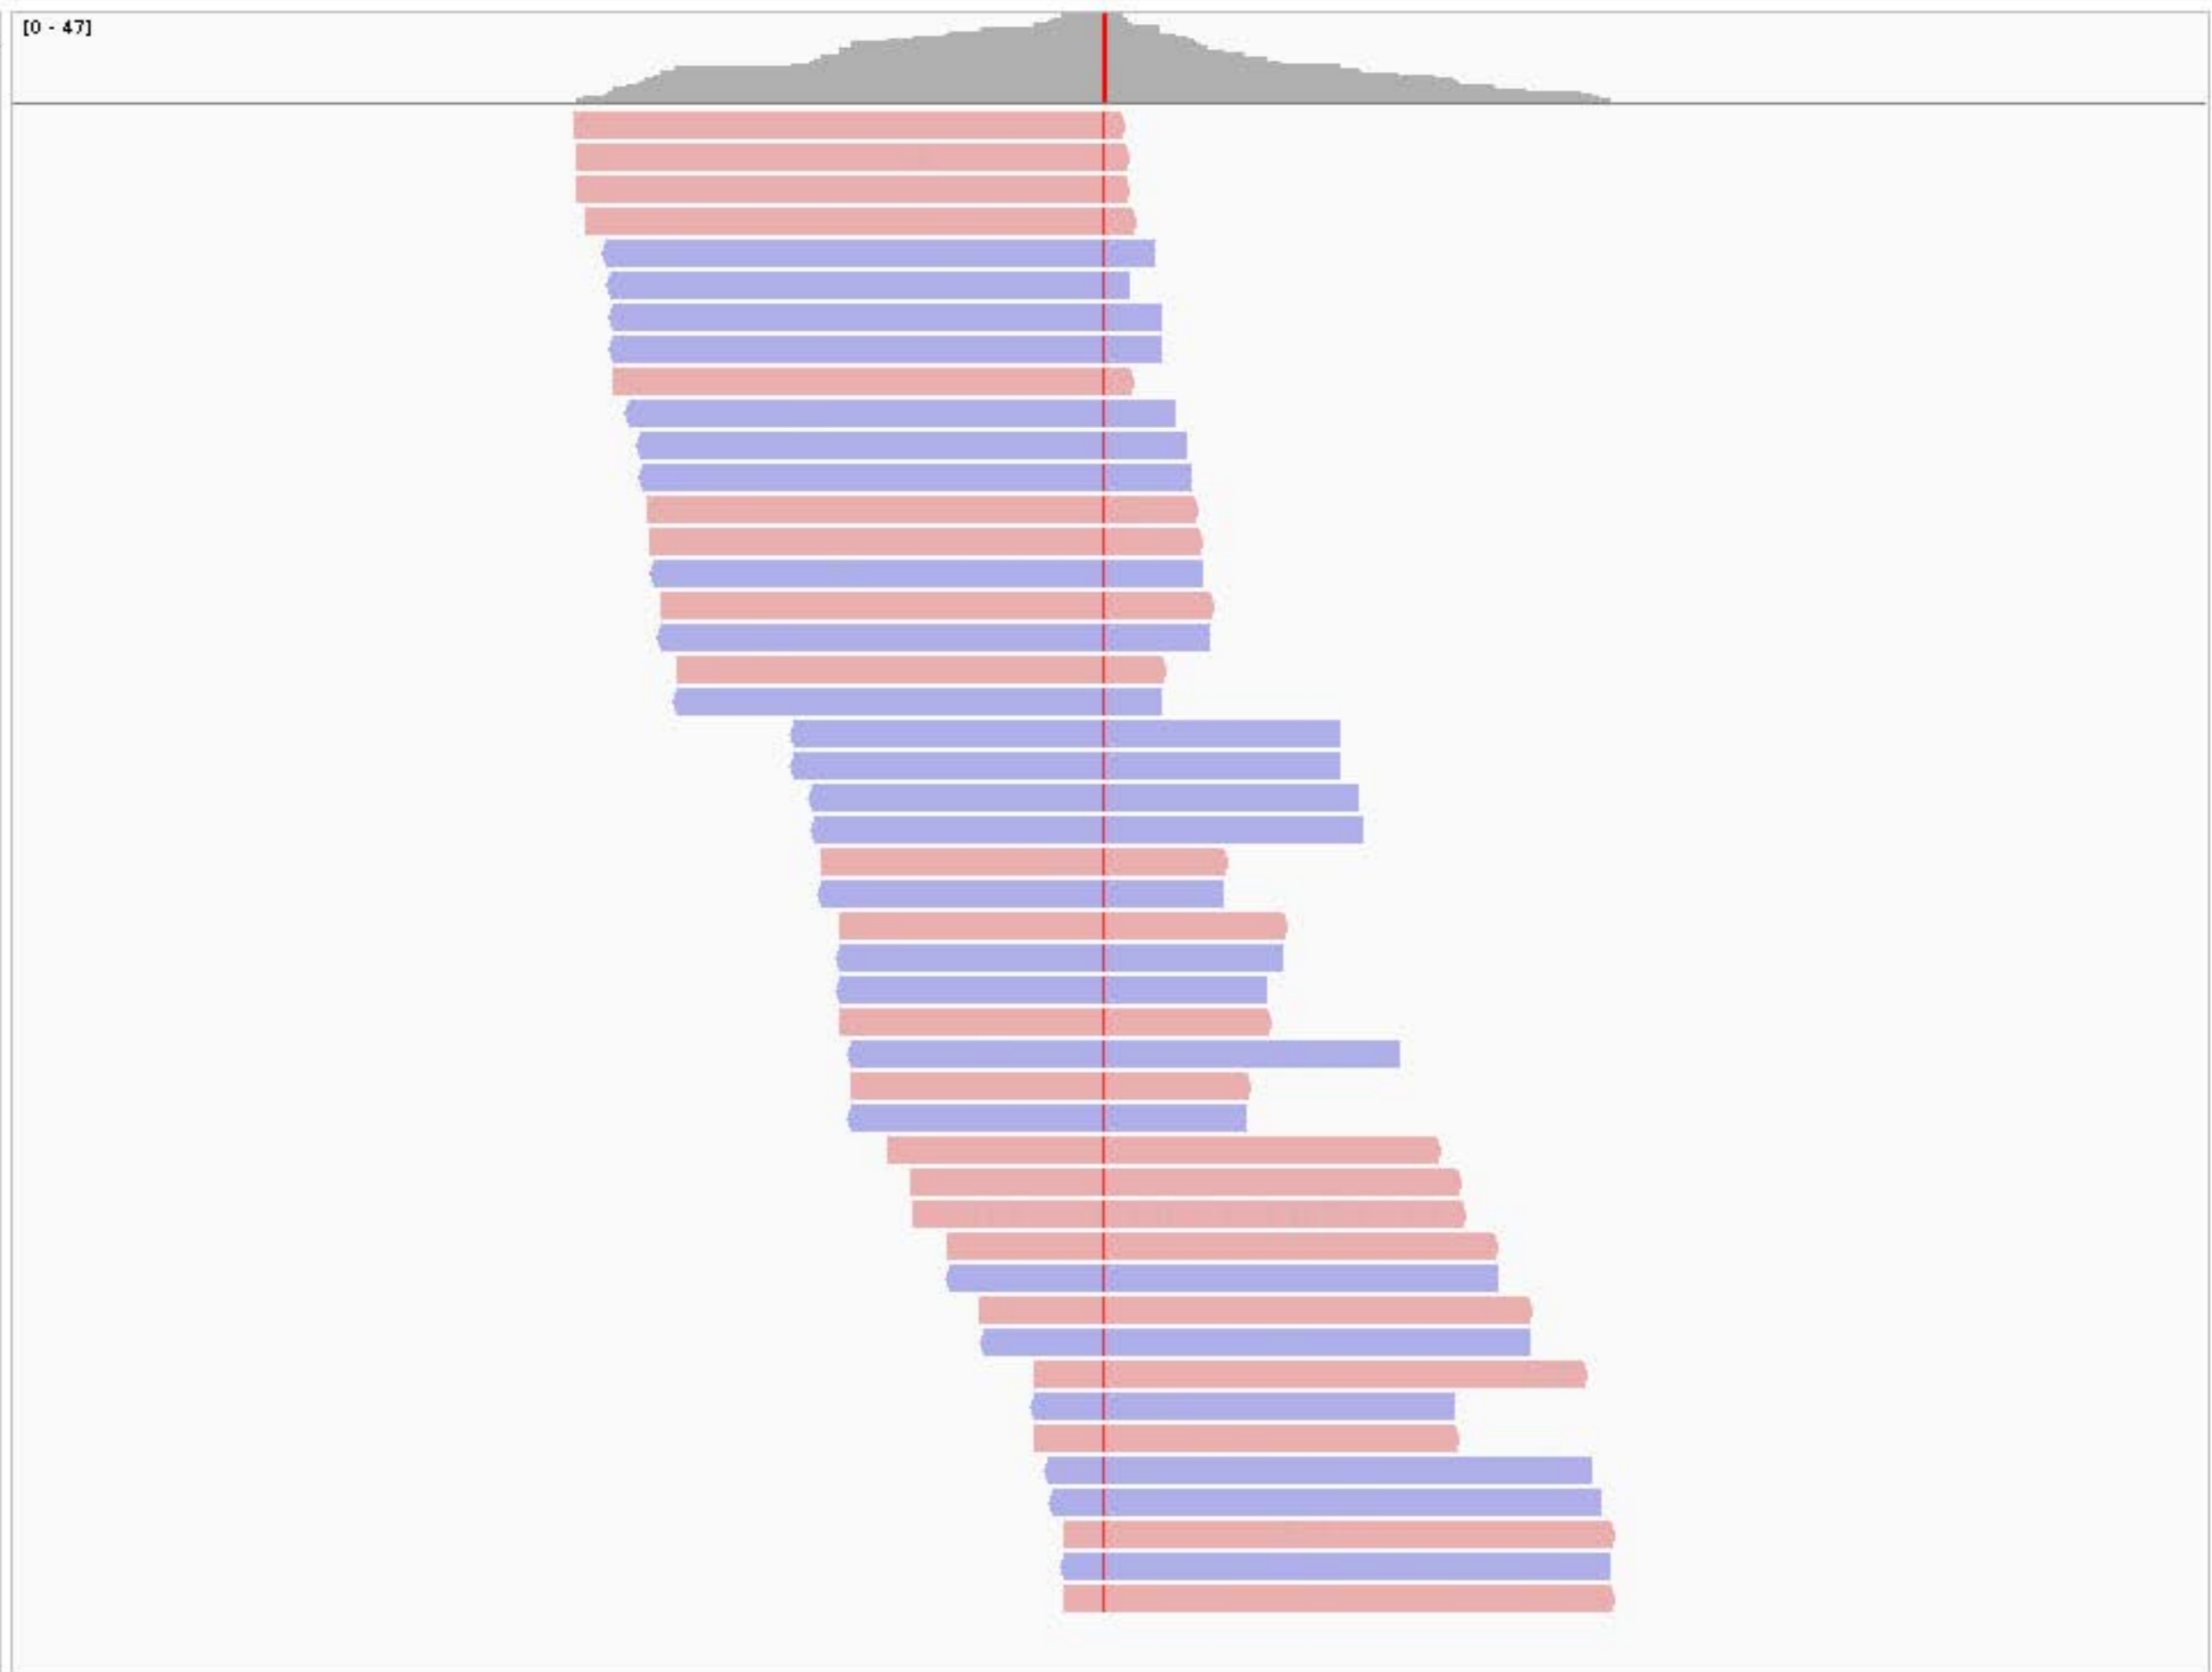

Sequence

Refseq Genes

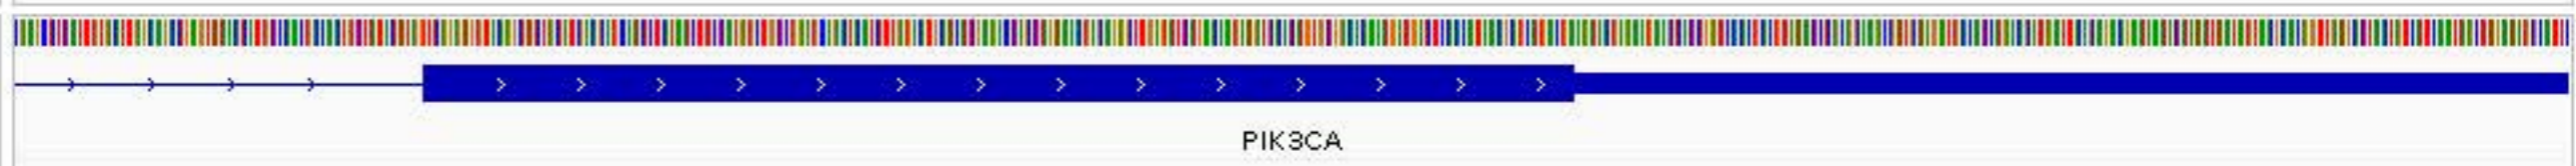



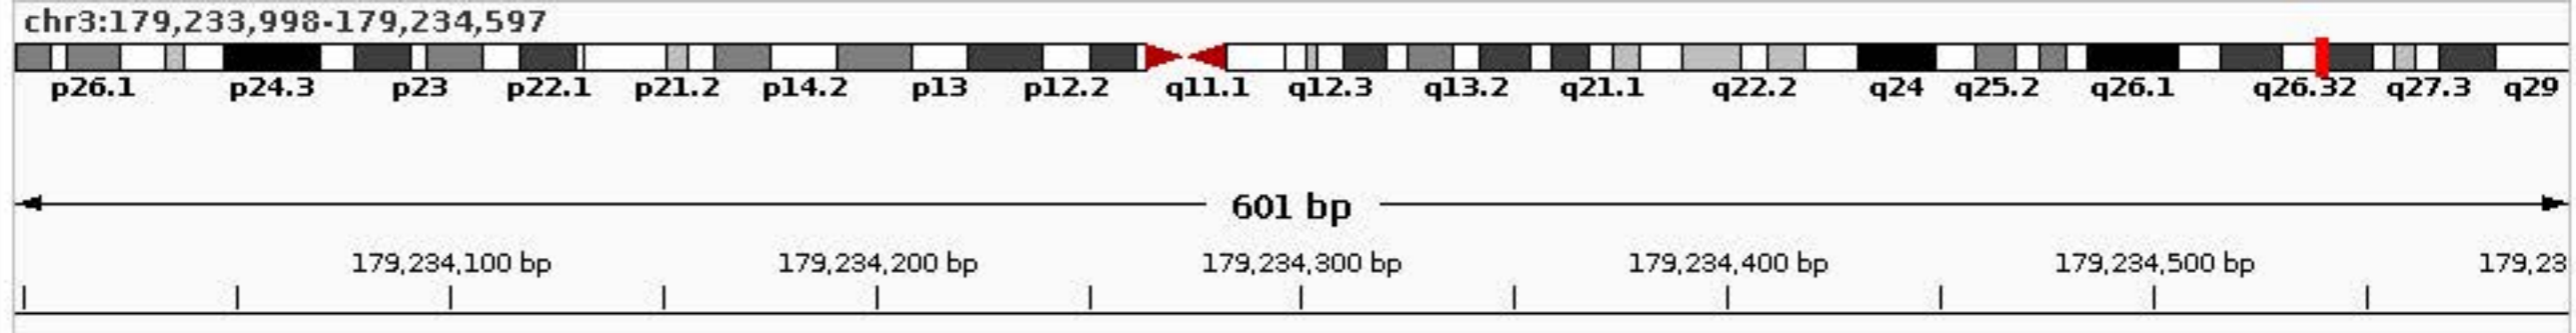

SL\_0017\_RN\_15\_mut.bam Coverage

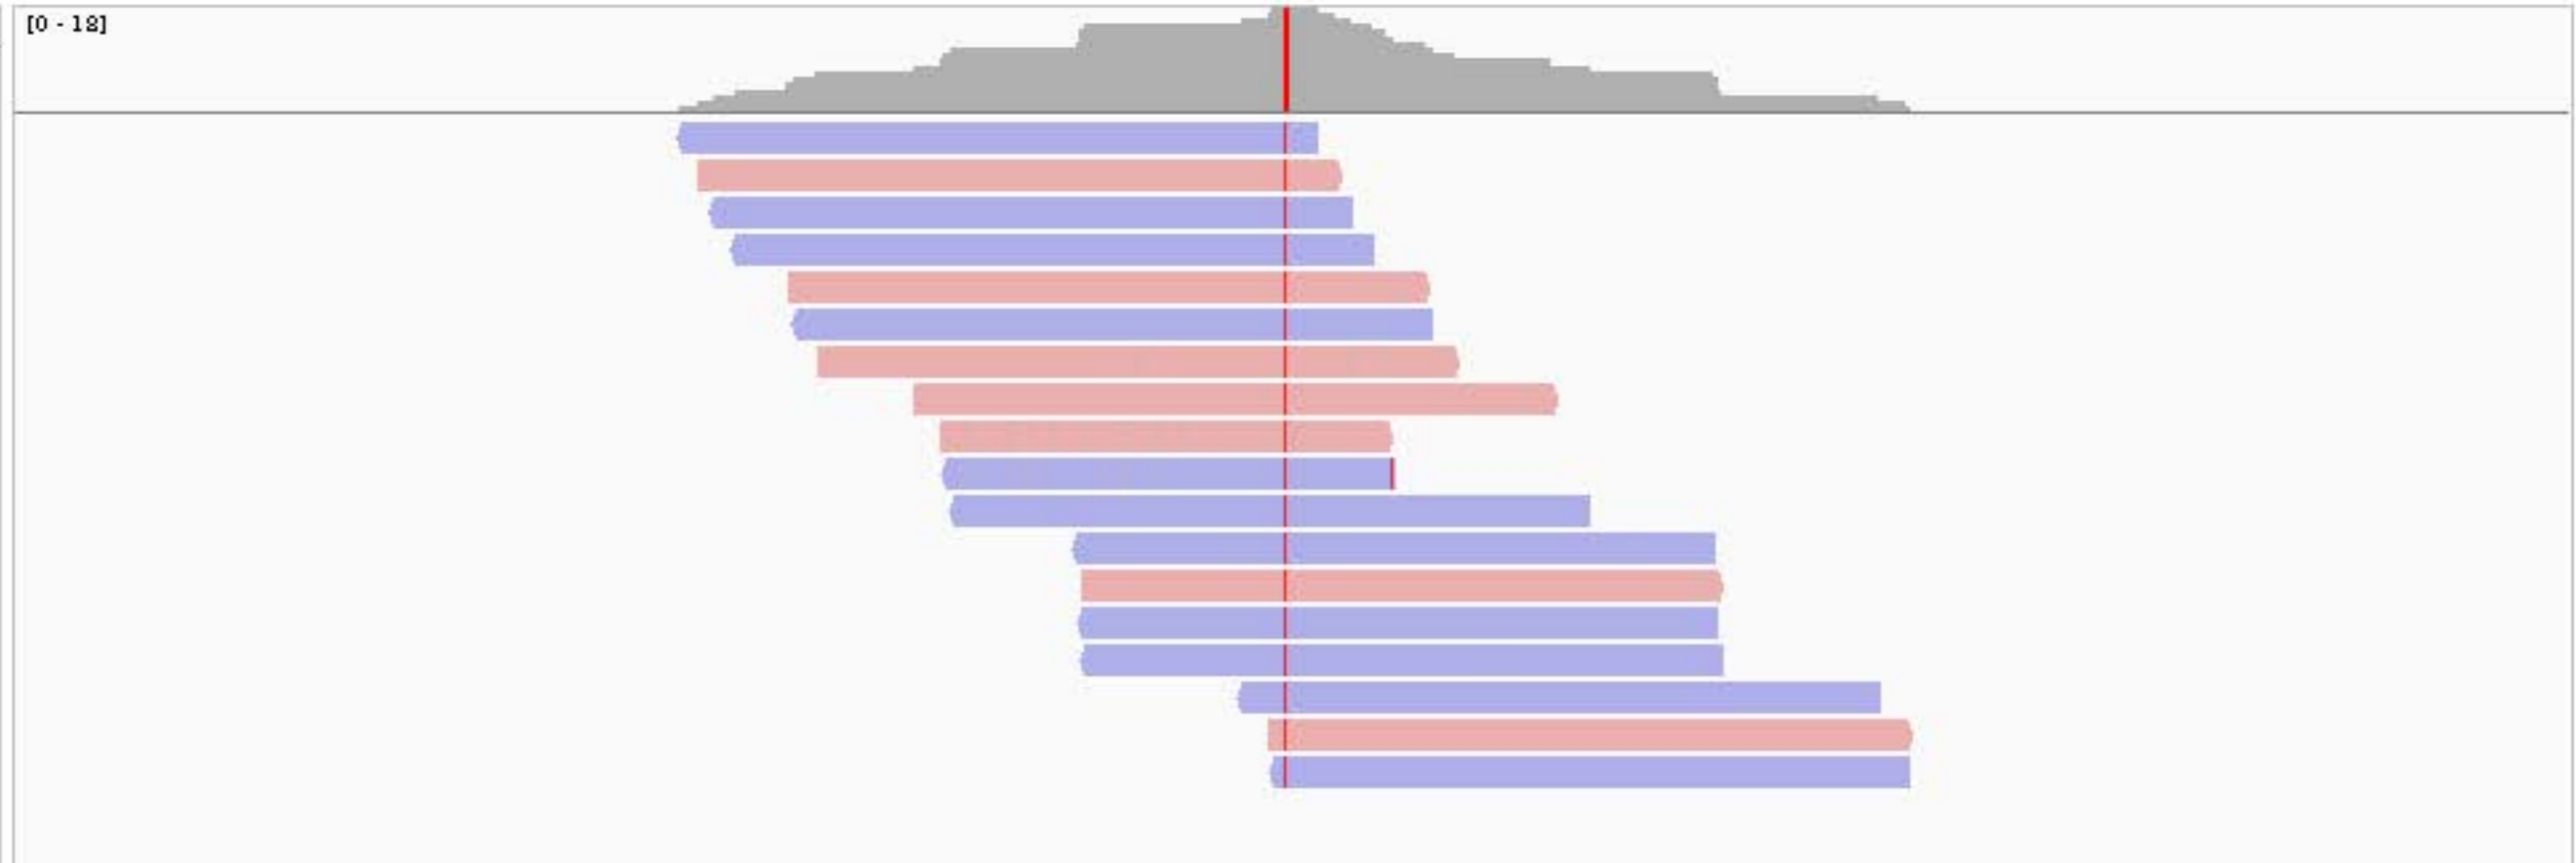

Sequence

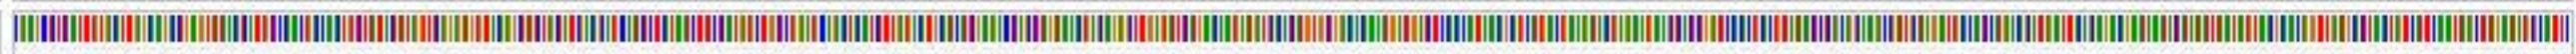

Refseq Genes

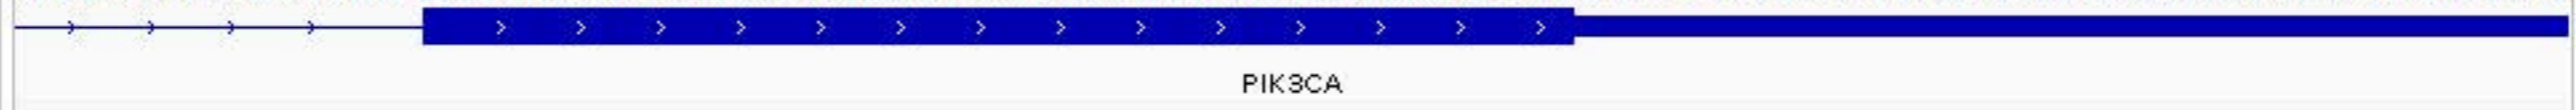

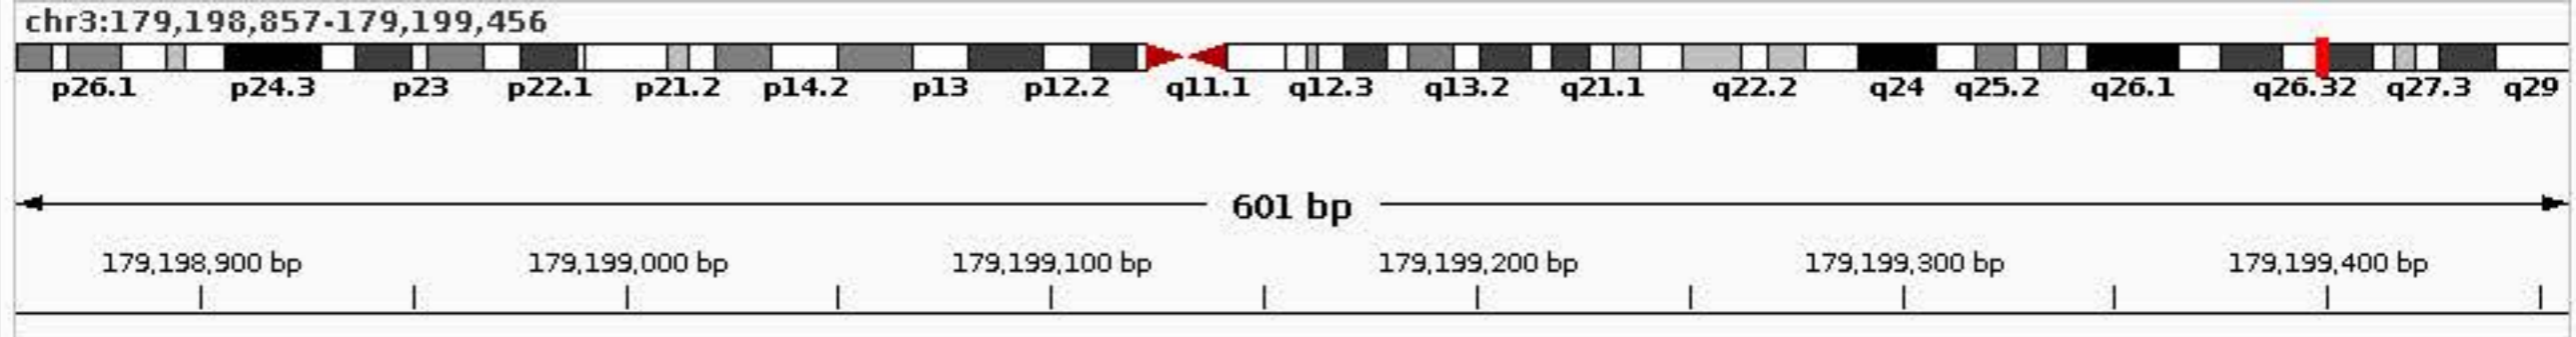

SL\_0015\_LN\_44\_mut.bam Coverage

SL\_0015\_LN\_44\_mut.bam

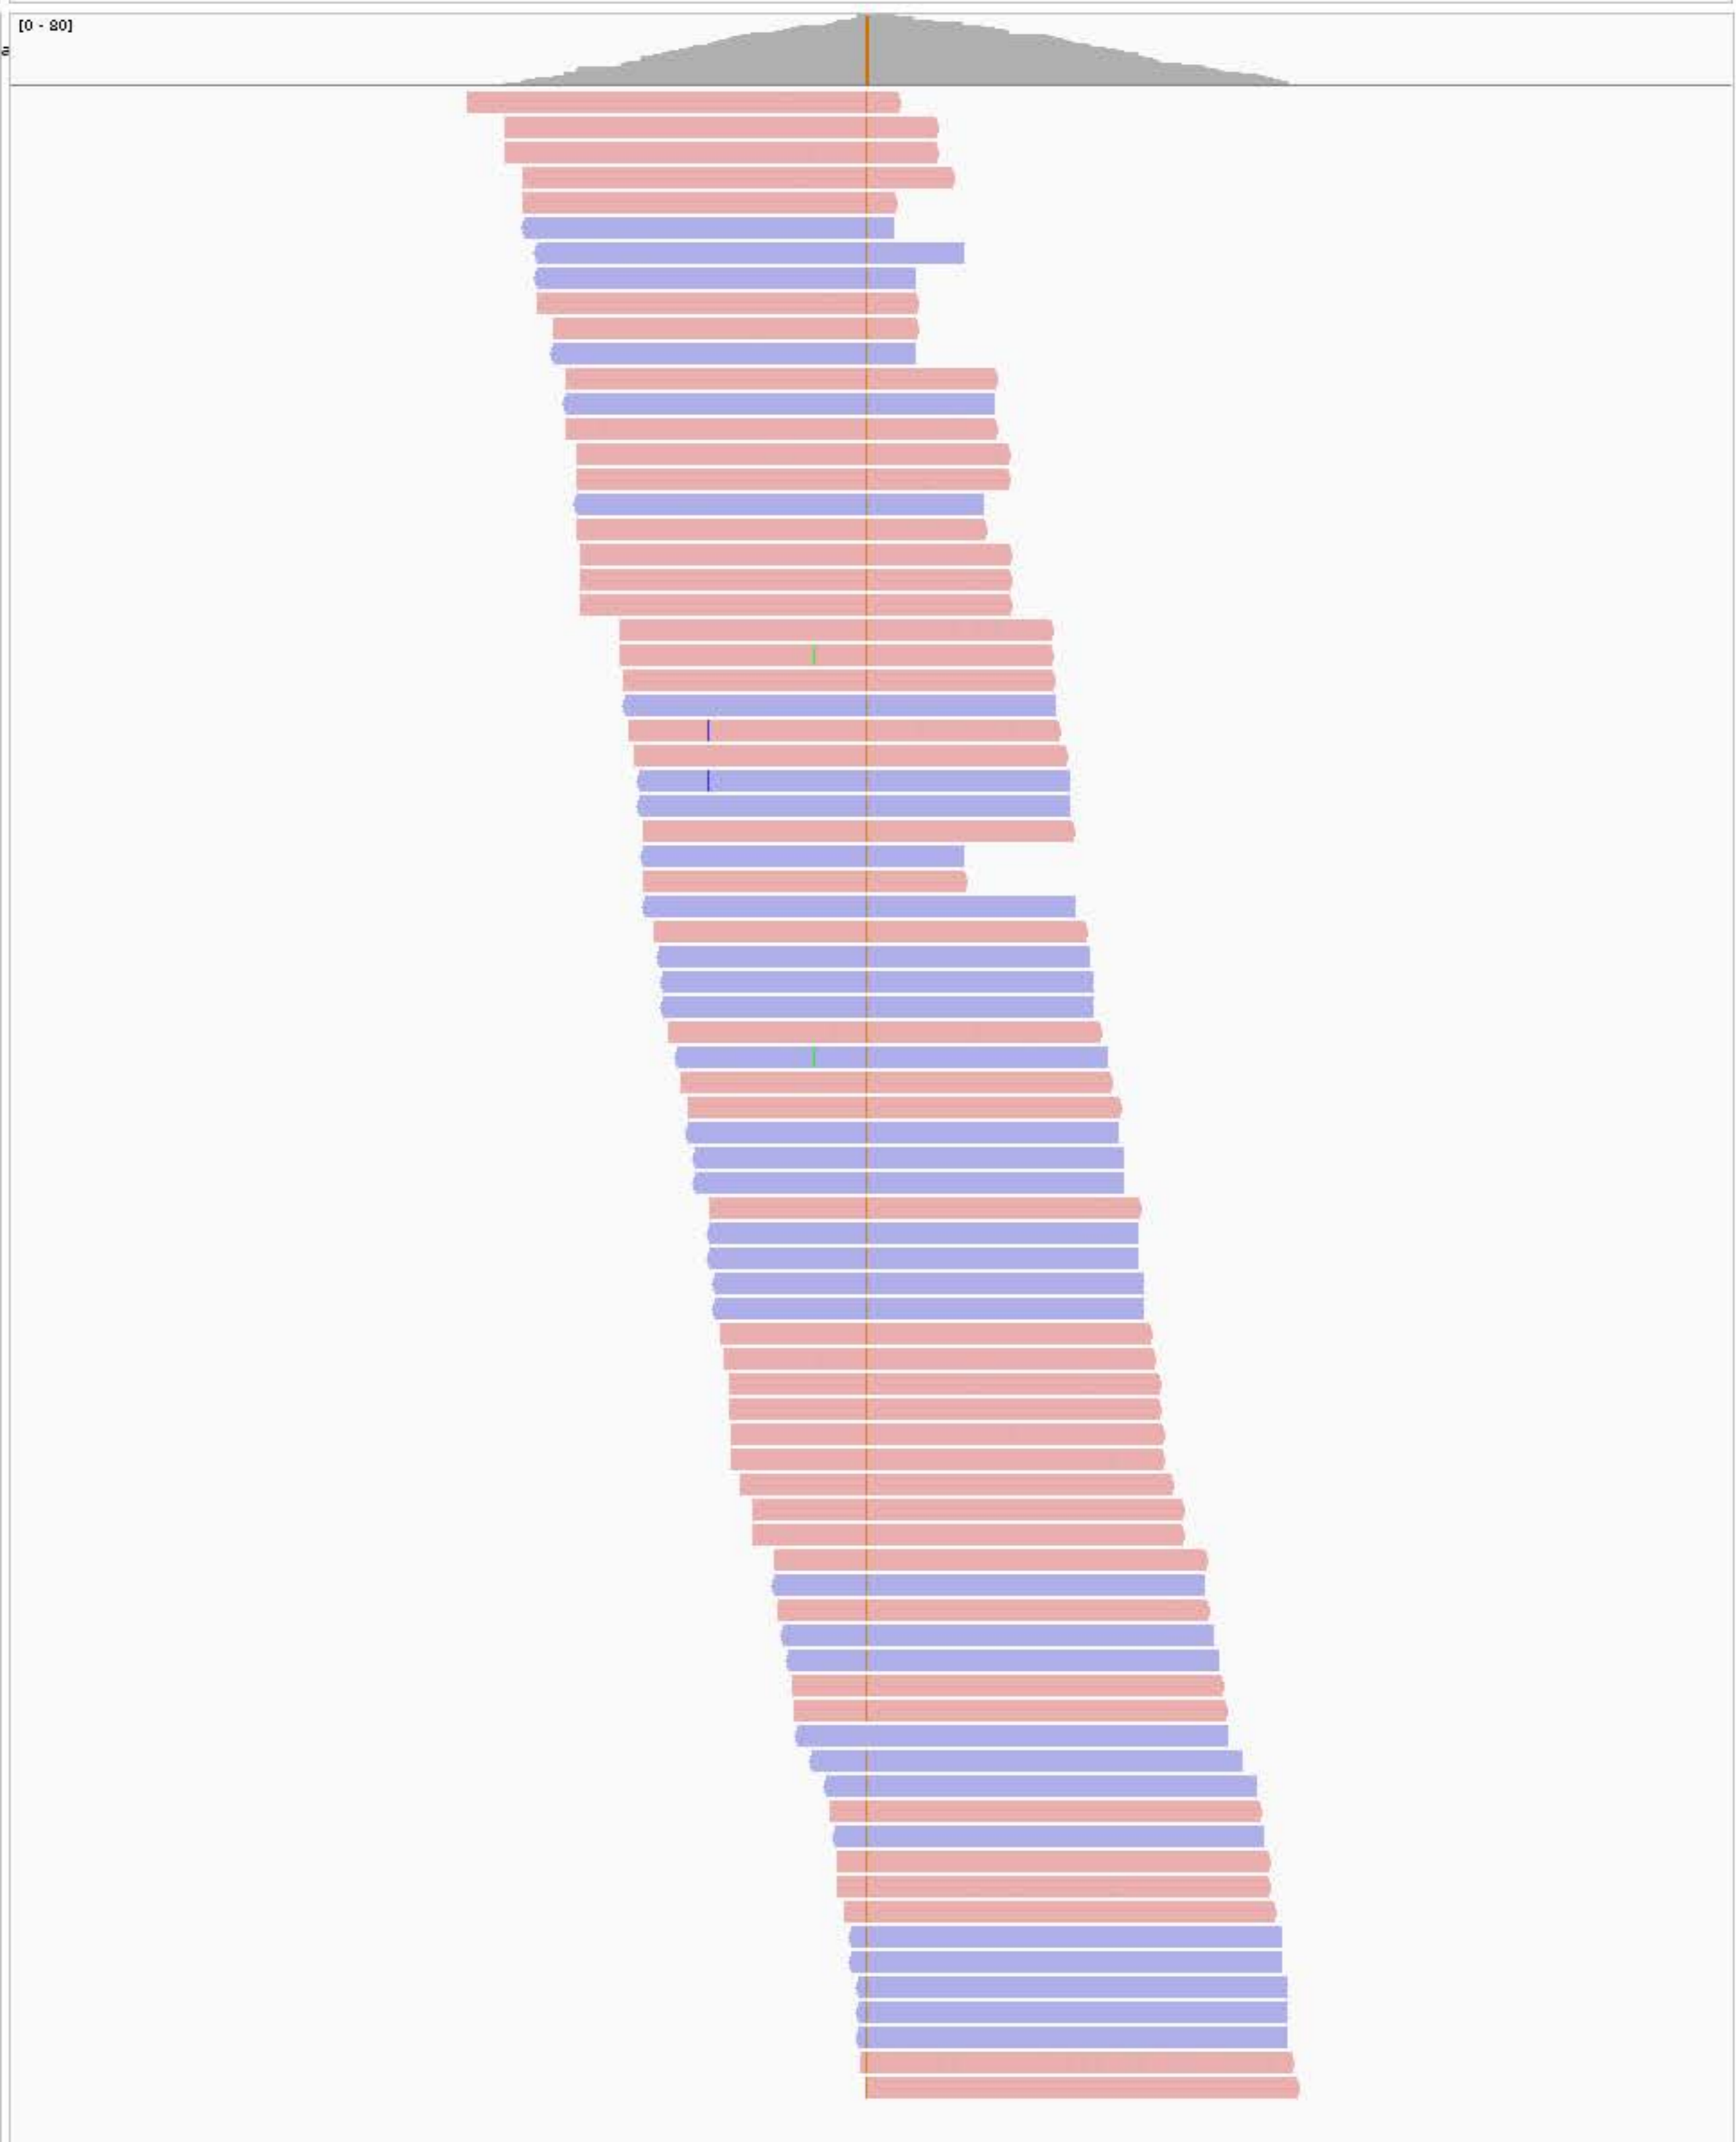

Sequence

Refseq Genes

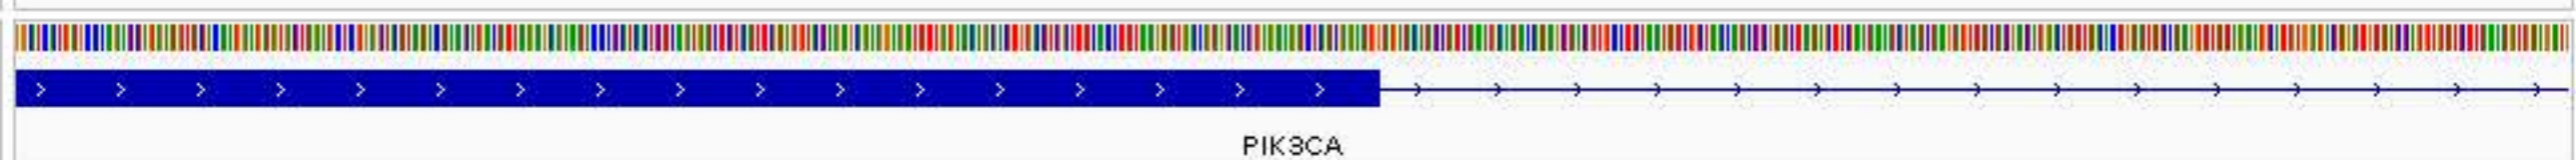

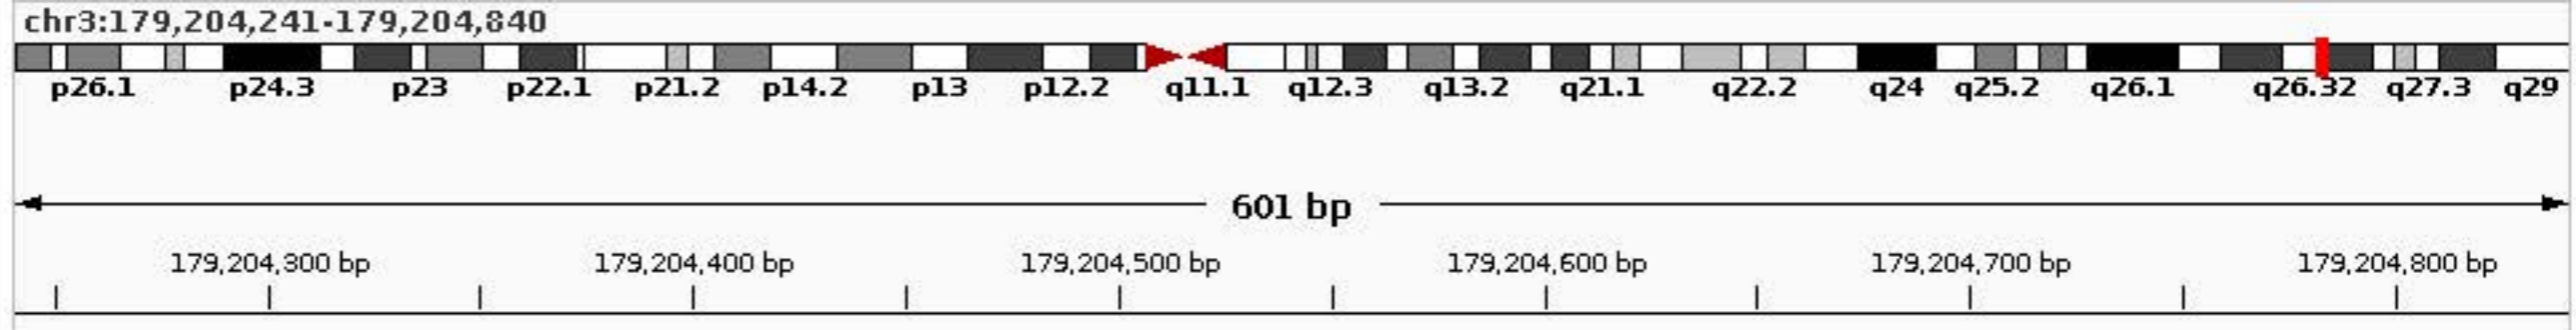

SL\_0015\_RN\_12\_mut.bam Coverage

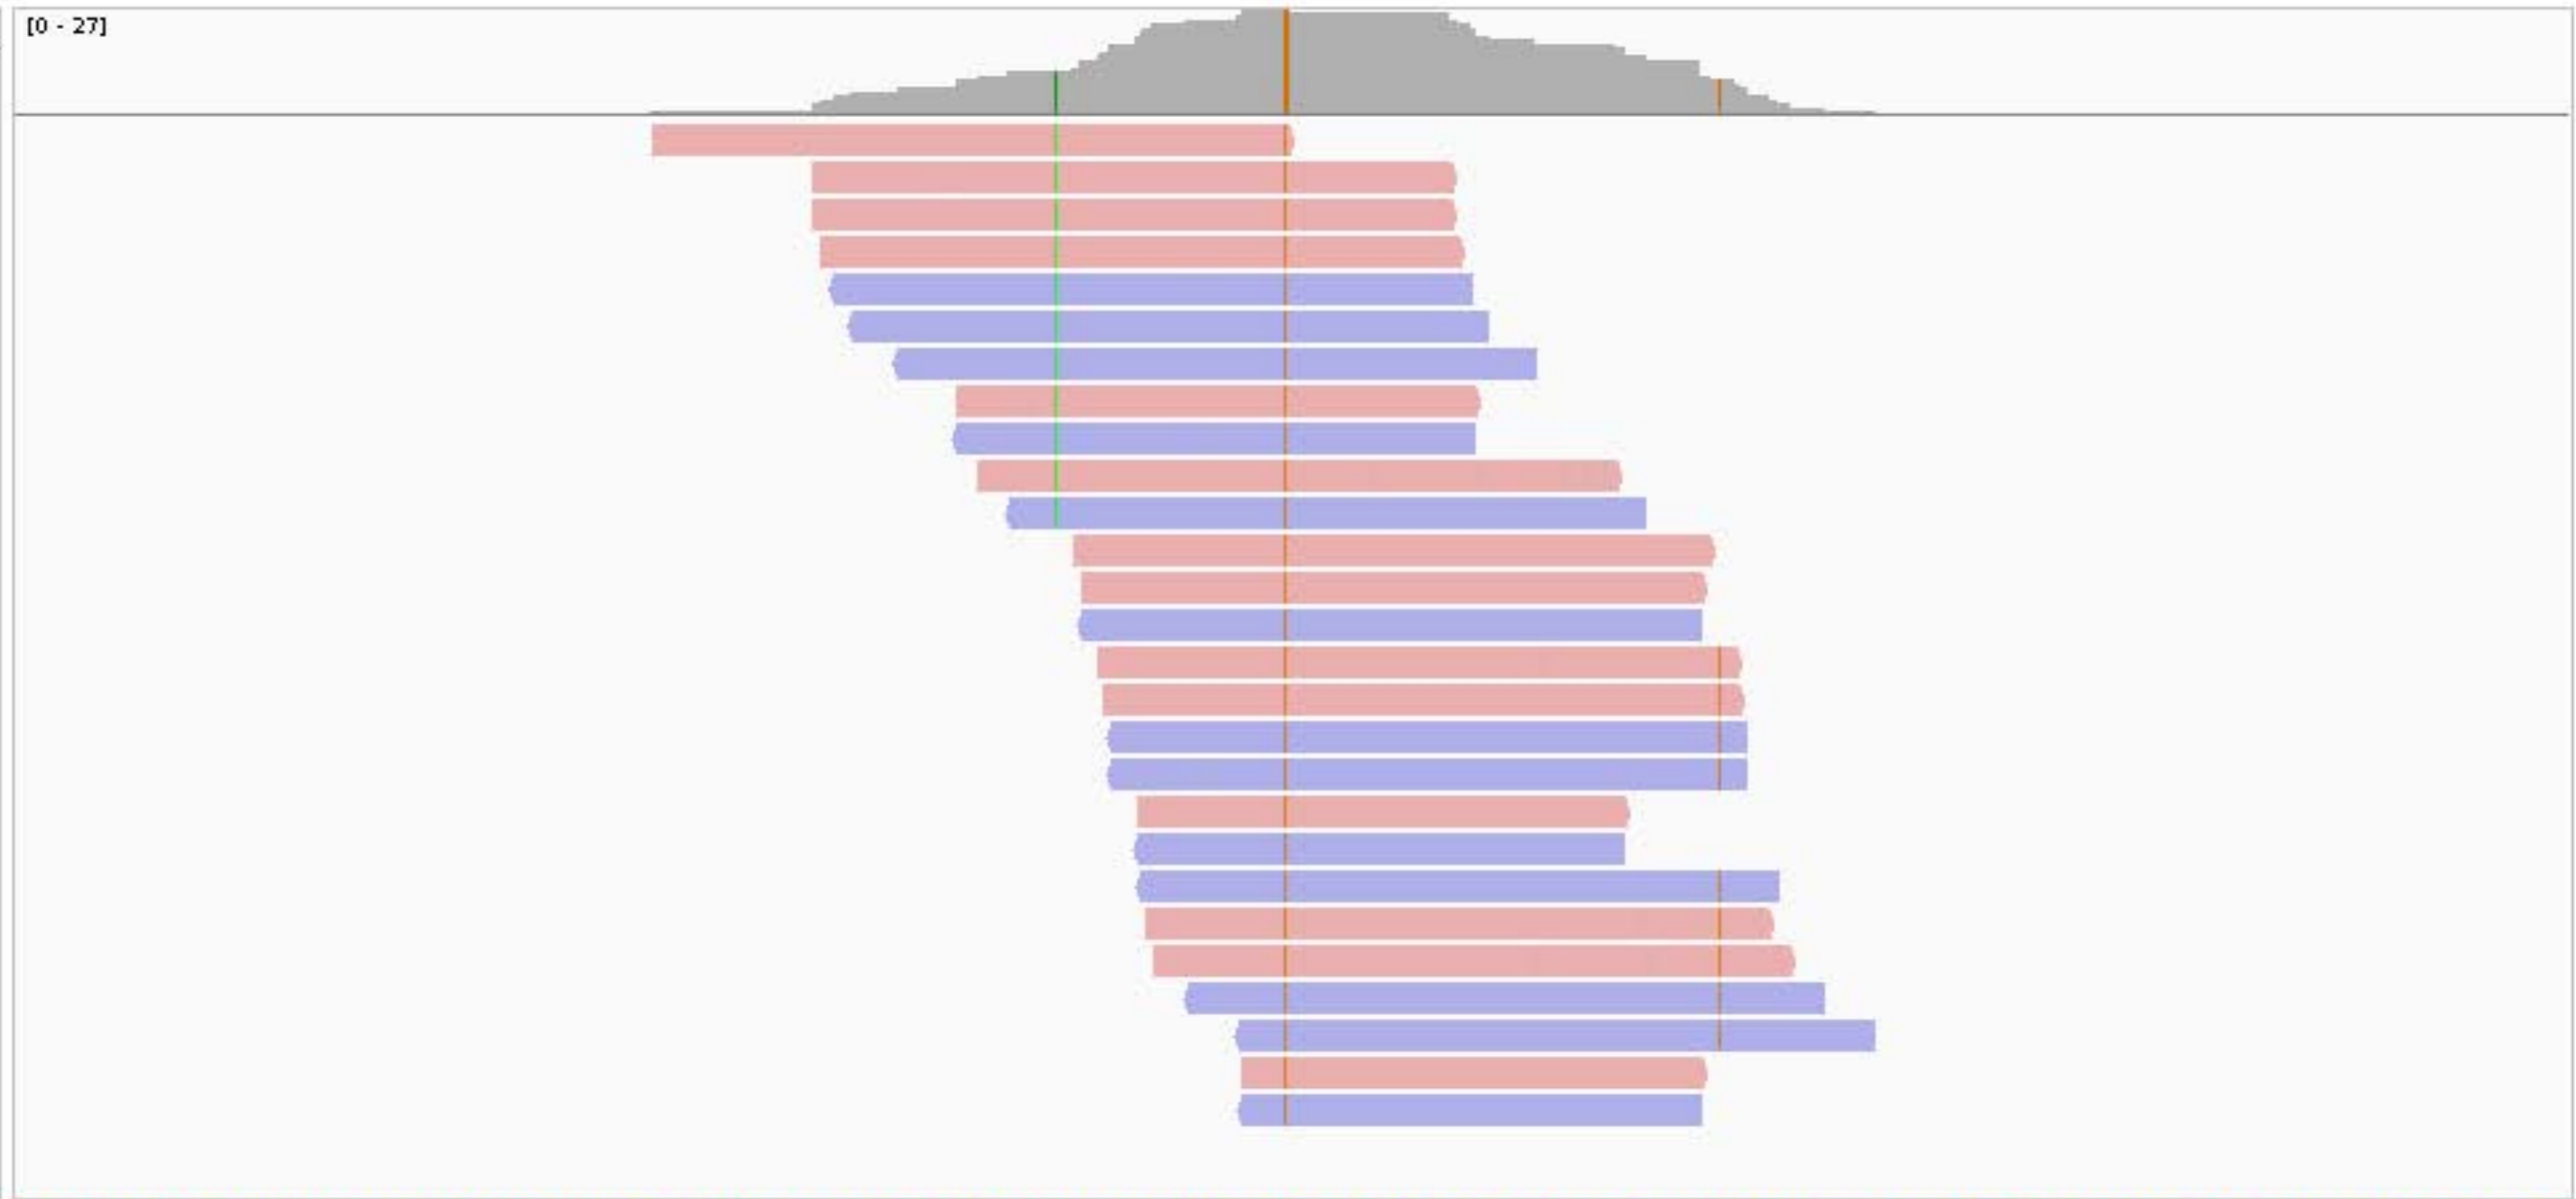

Sequence

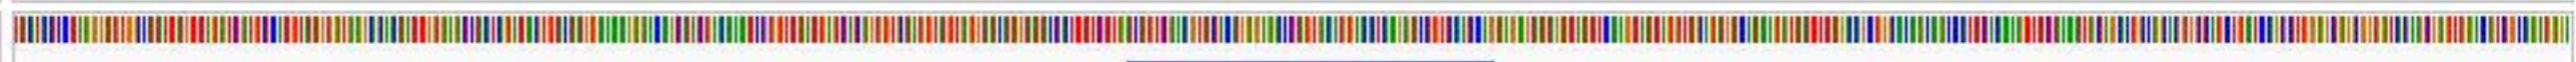

Refseq Genes

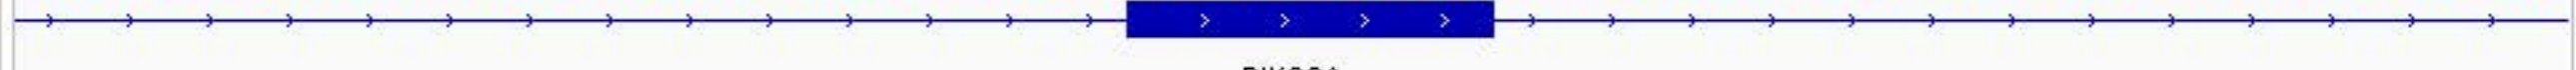

PIK3CA

chr22:31,619,426-31,620,025

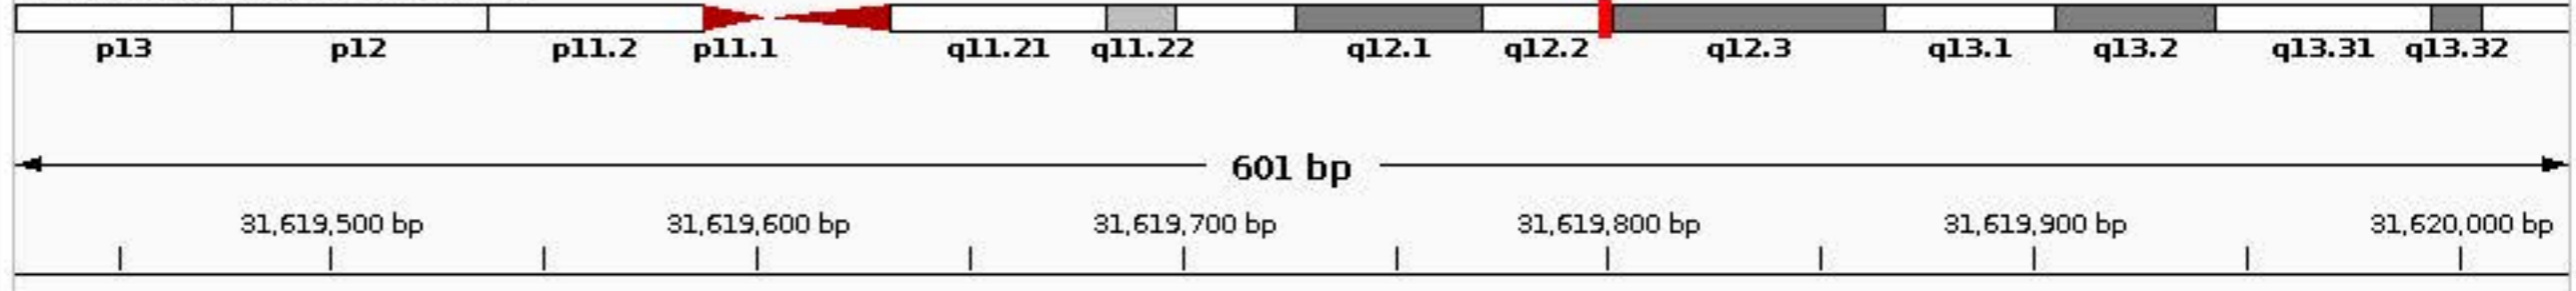

SL\_0015\_RN\_21\_mut.bam Coverage

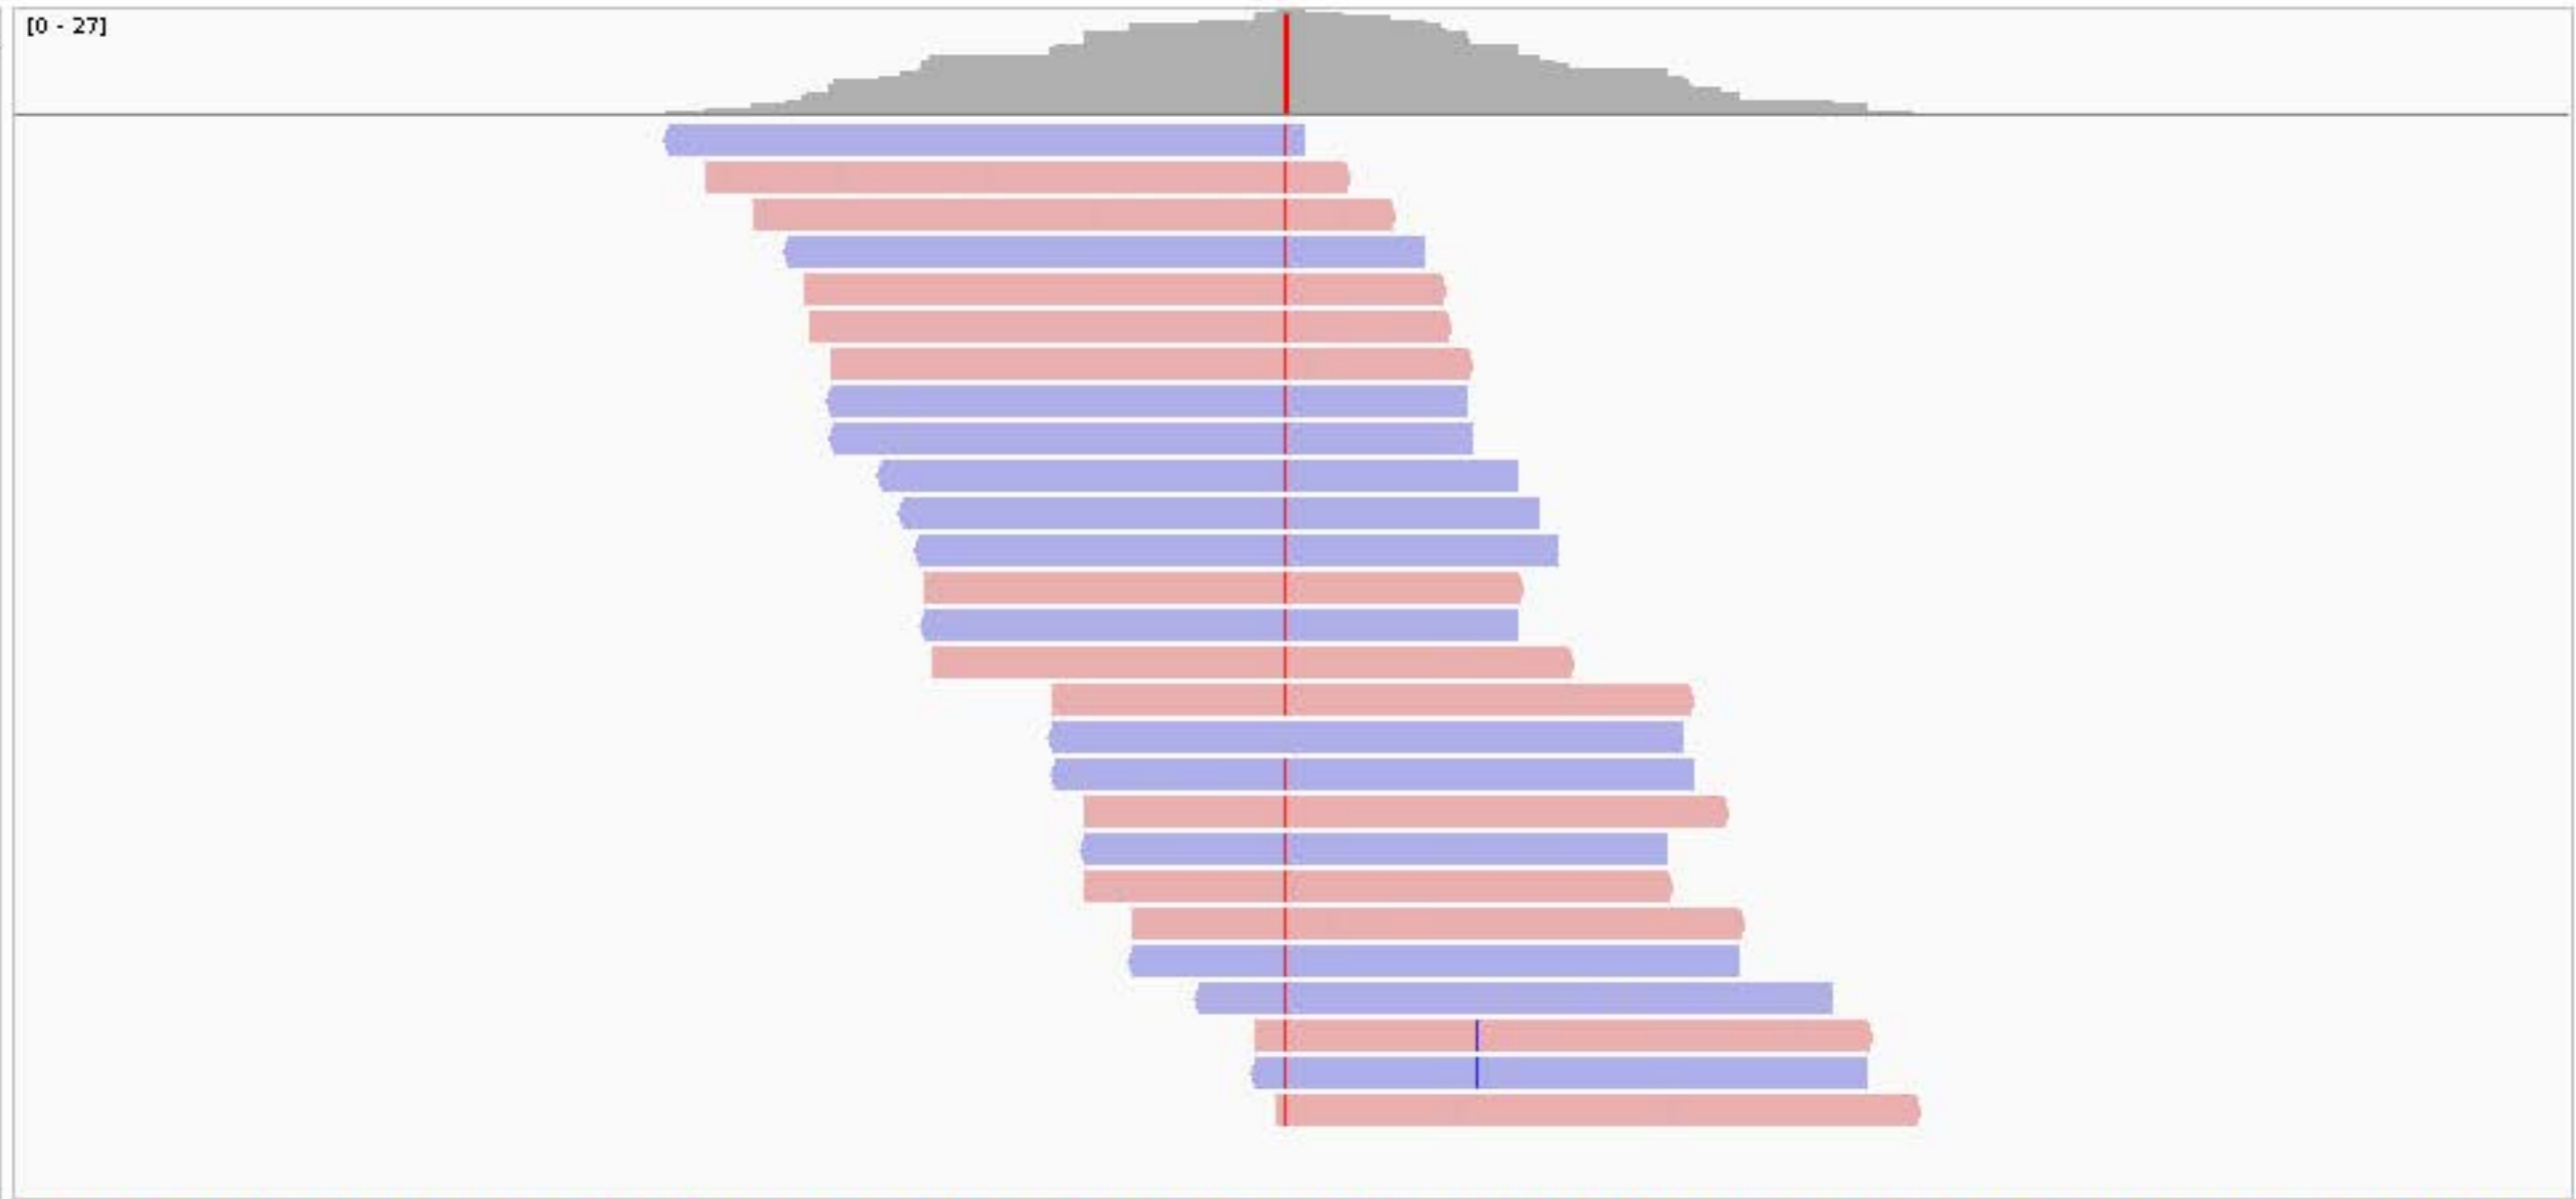

SL\_0015\_RN\_21\_mut.bam

Sequence →

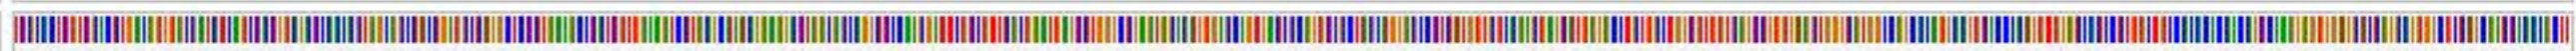

Refseq Genes

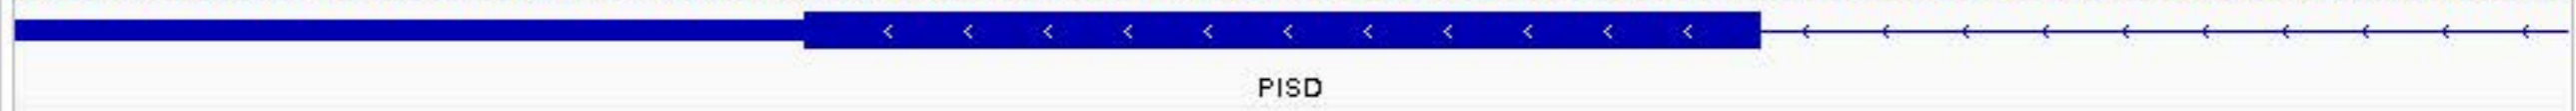



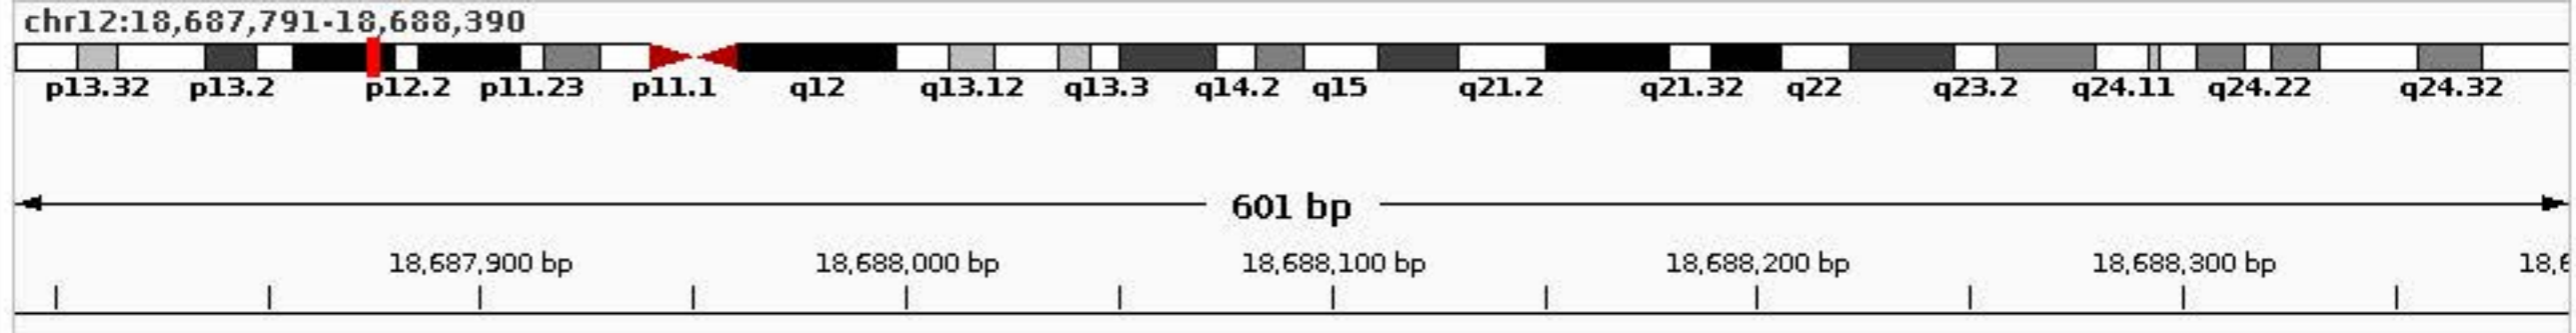

SL\_0017\_RN\_15\_mut.bam Coverage

SL\_0017\_RN\_15\_mut.bam

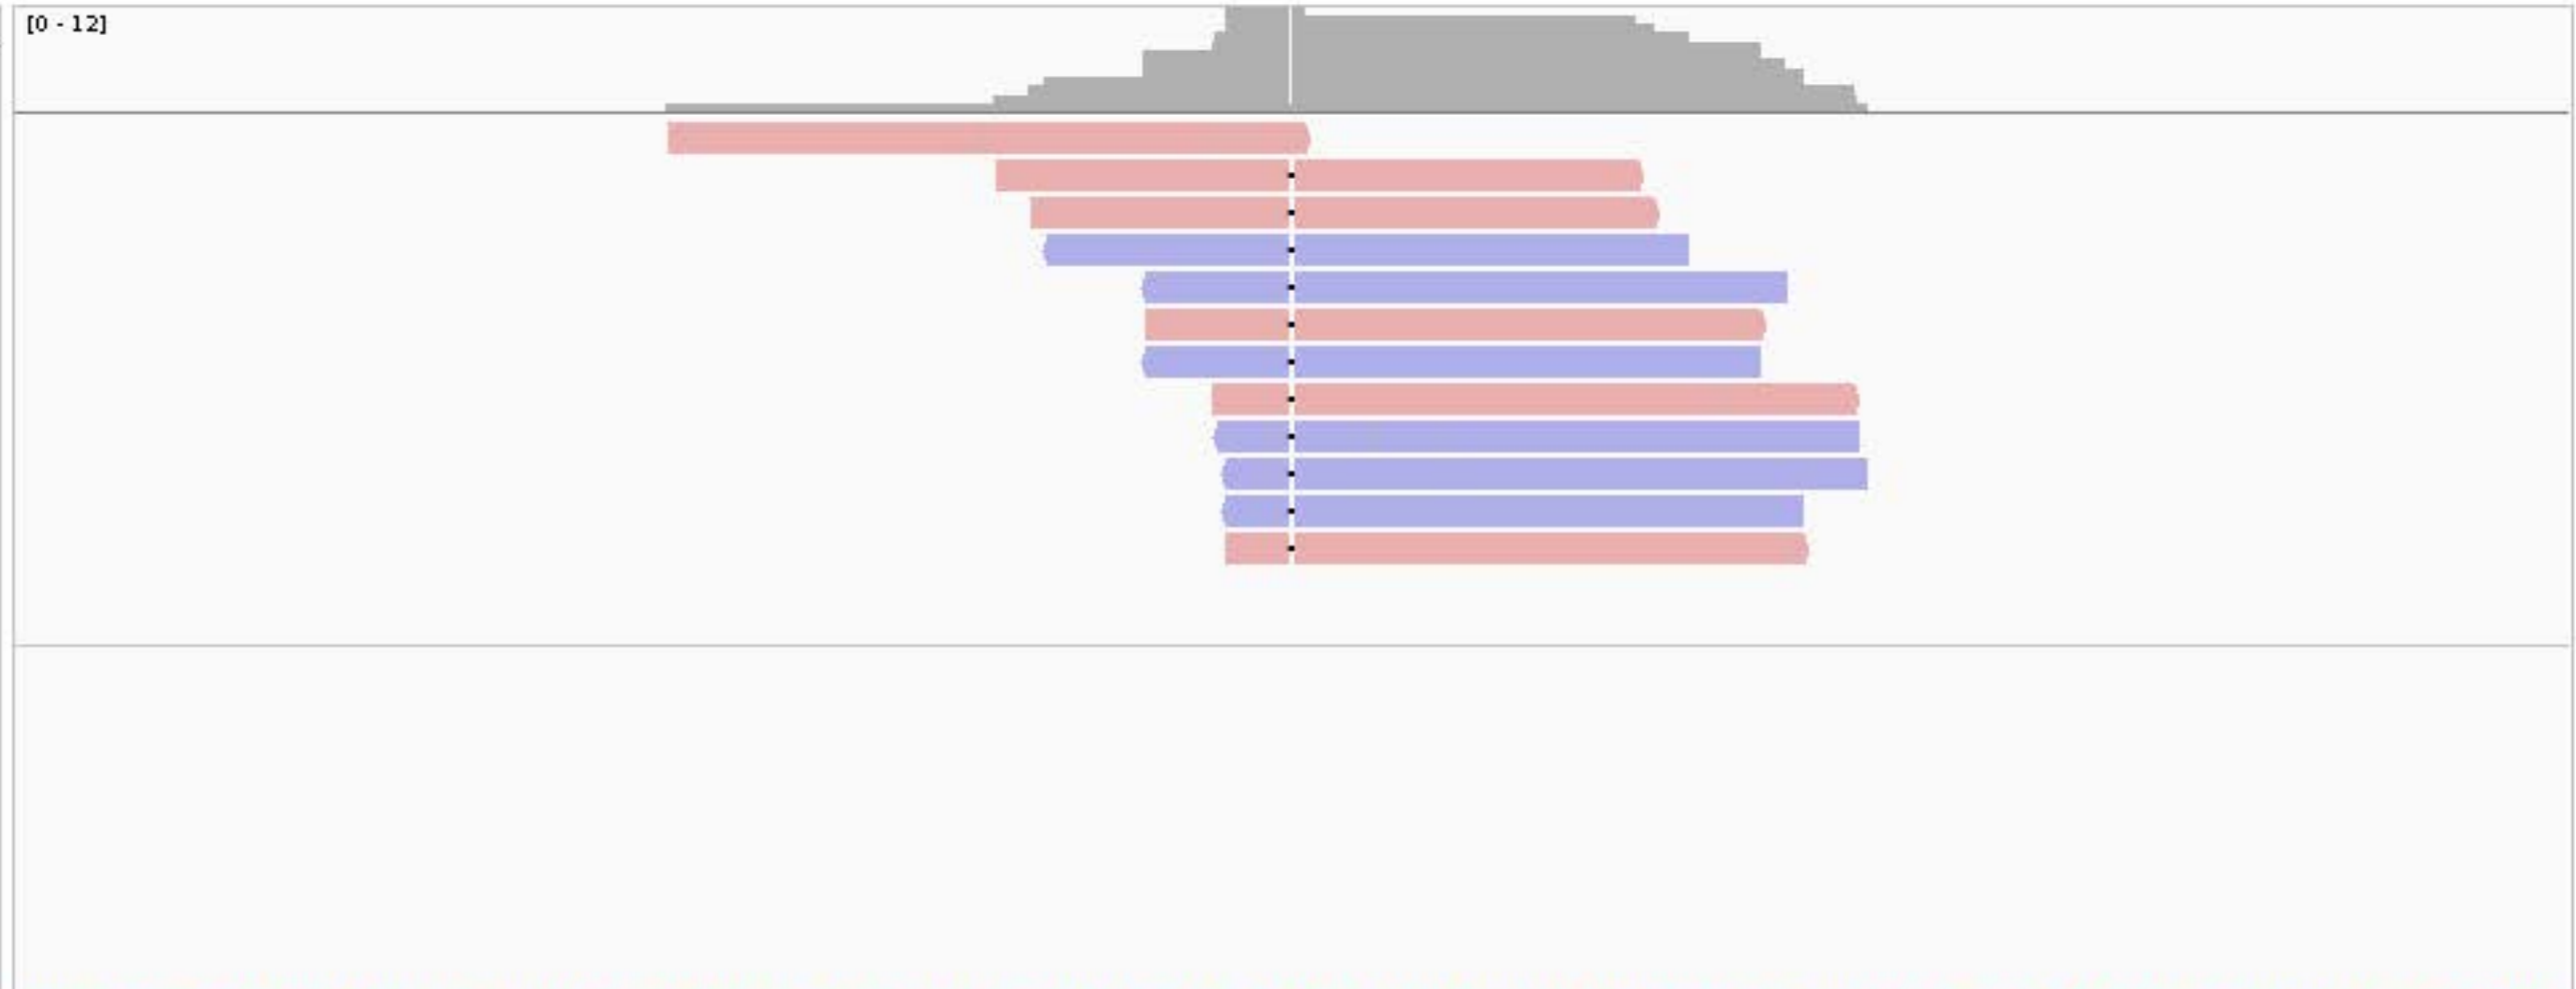

Sequence

Refseq Genes

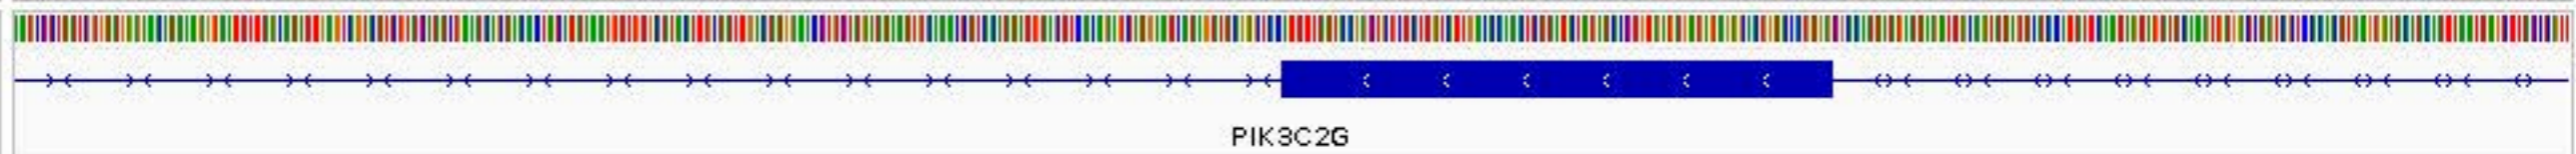

chr10:113,773,975-113,774,574

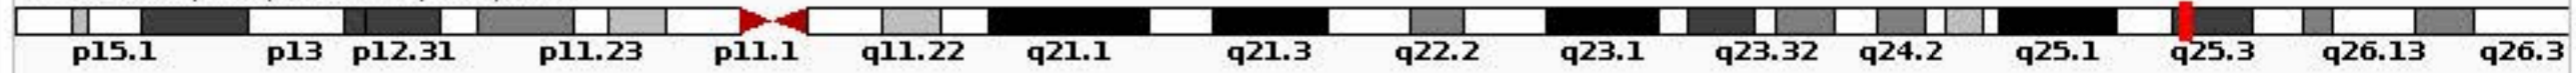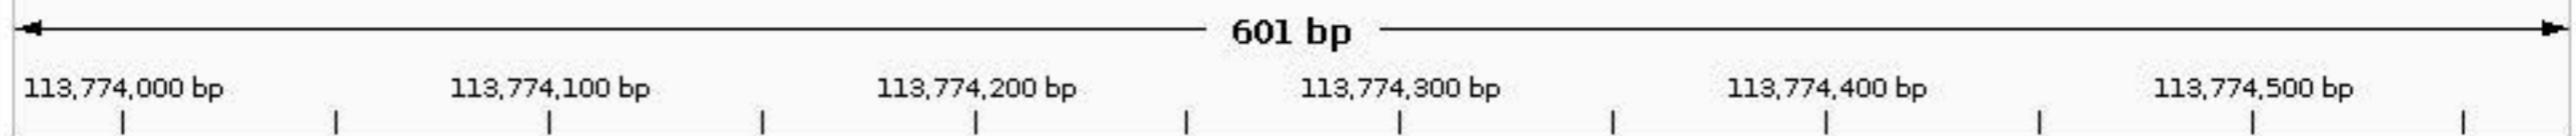

SL\_0004\_RN\_24\_mut.bam Coverage

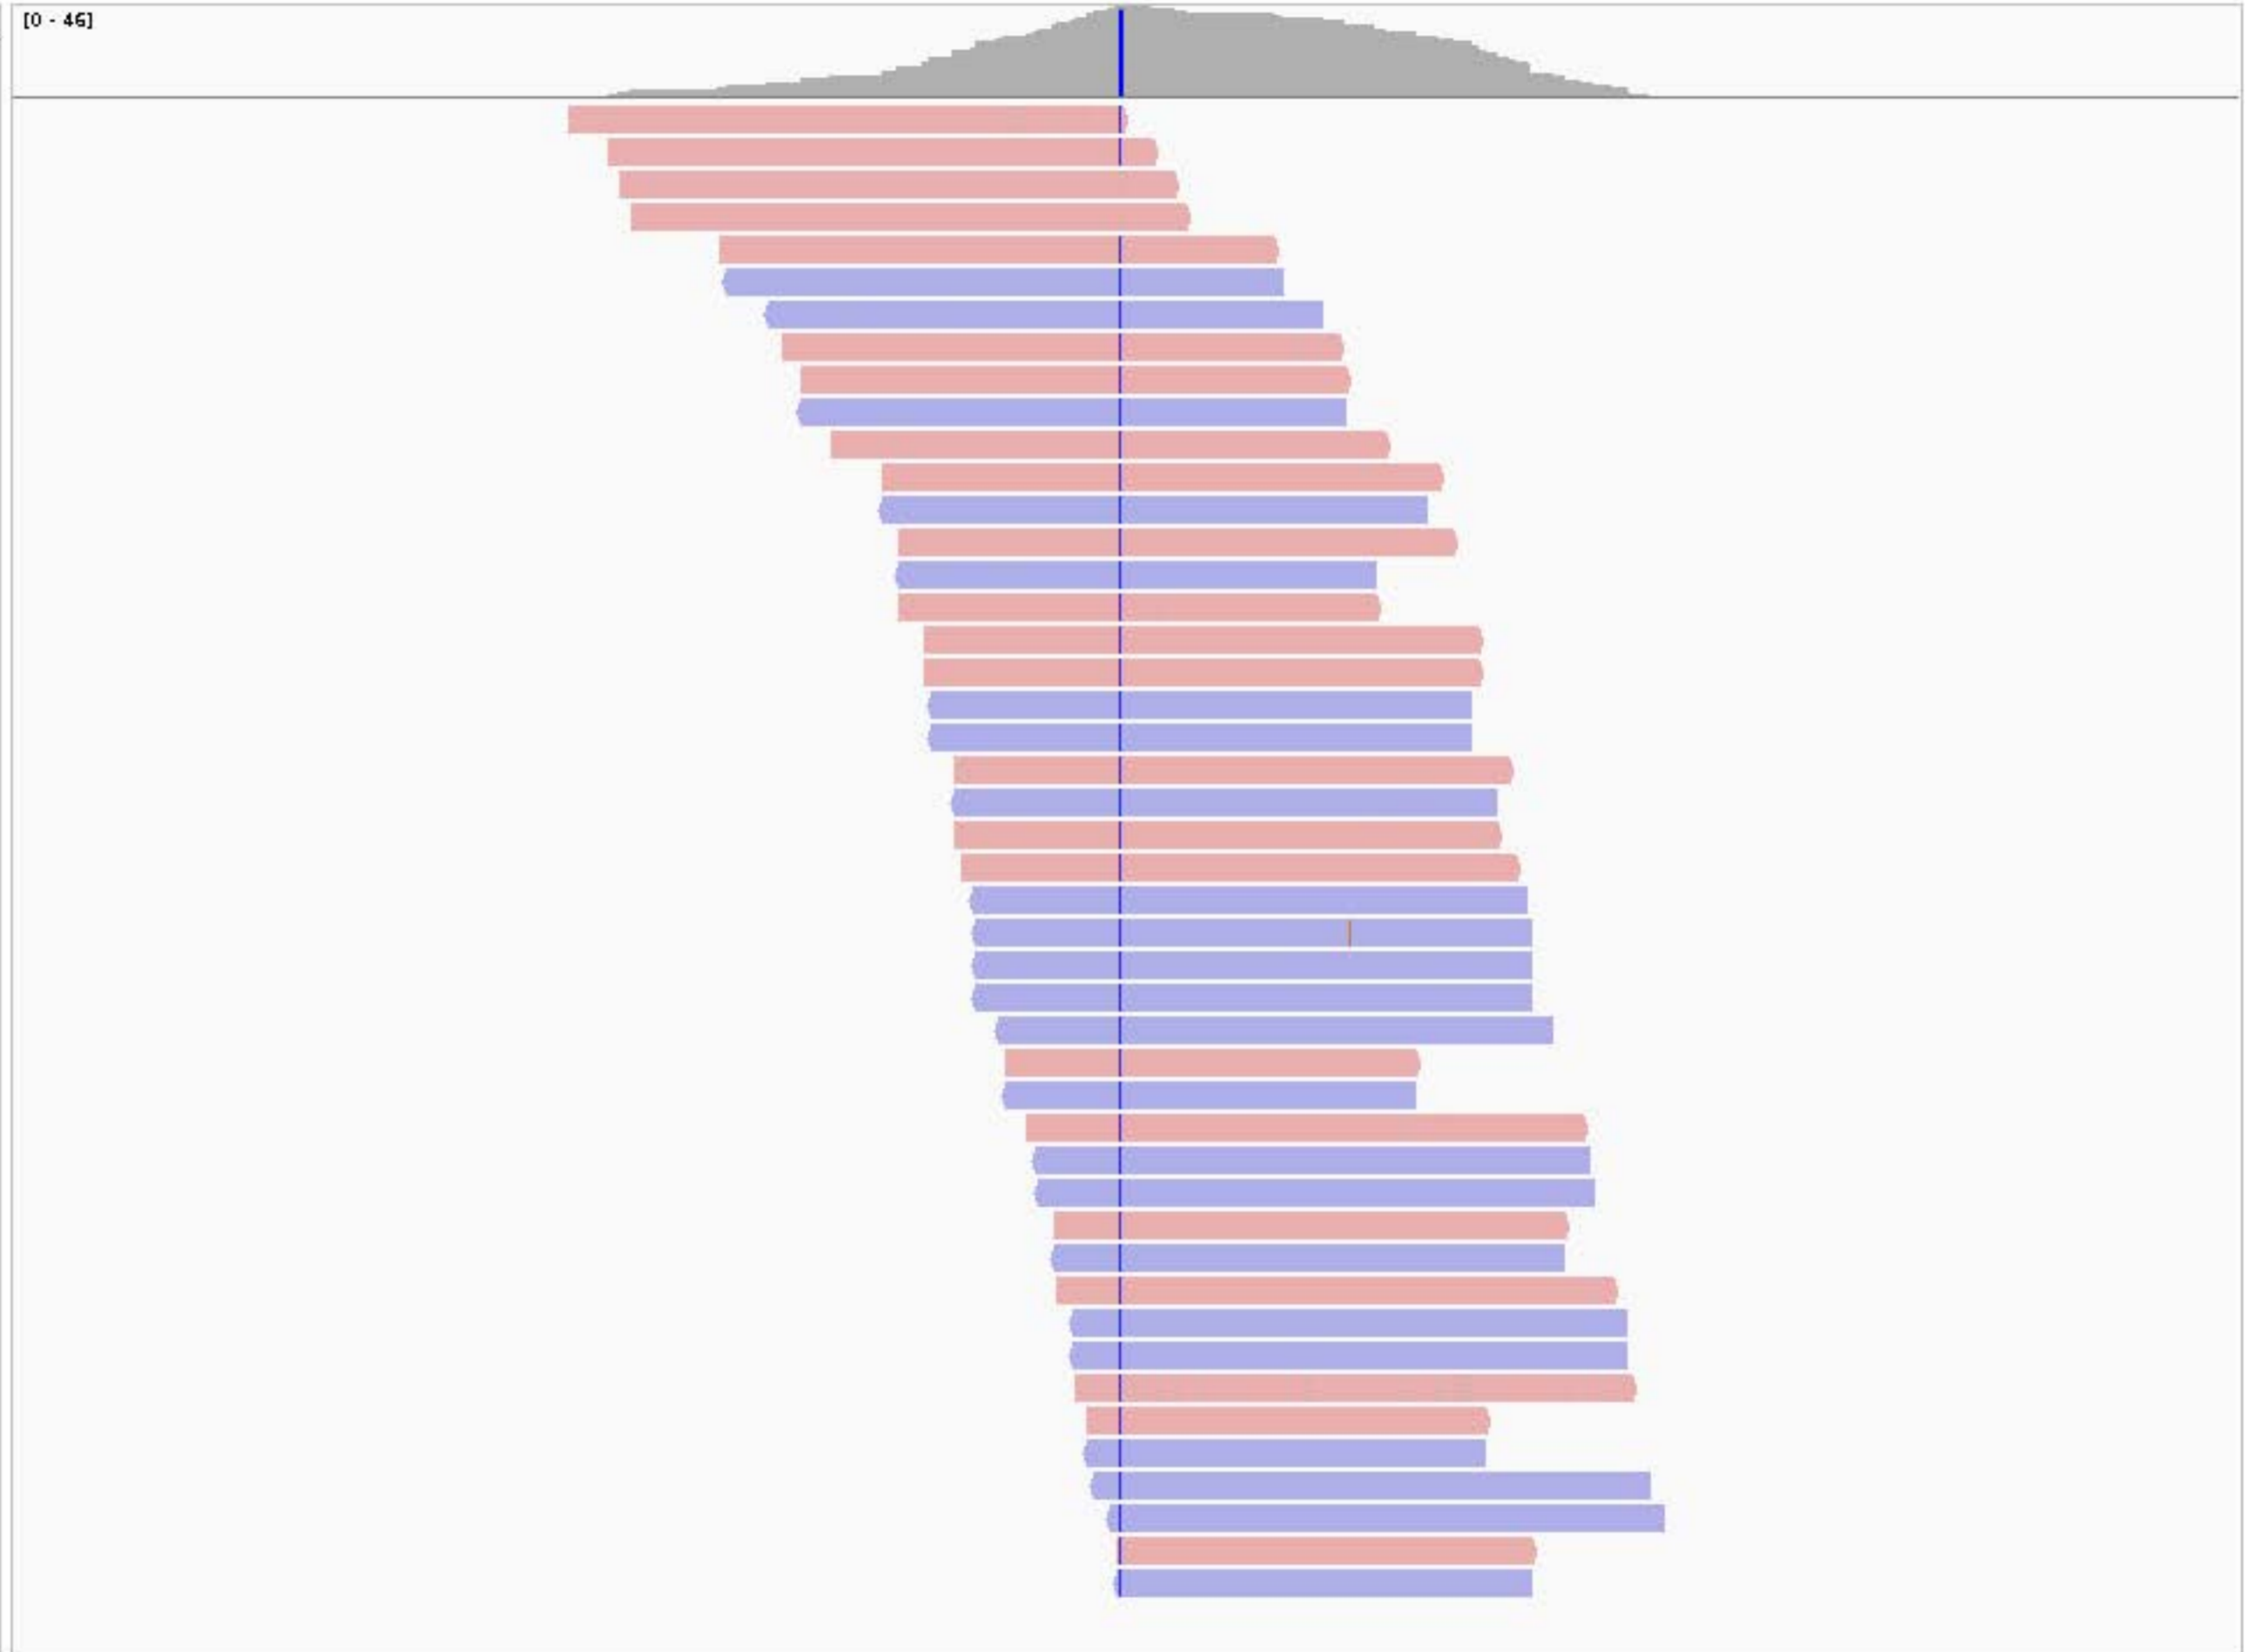

SL\_0004\_RN\_24\_mut.bam

Sequence

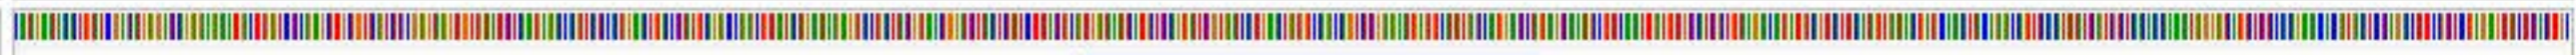

Refseq Genes

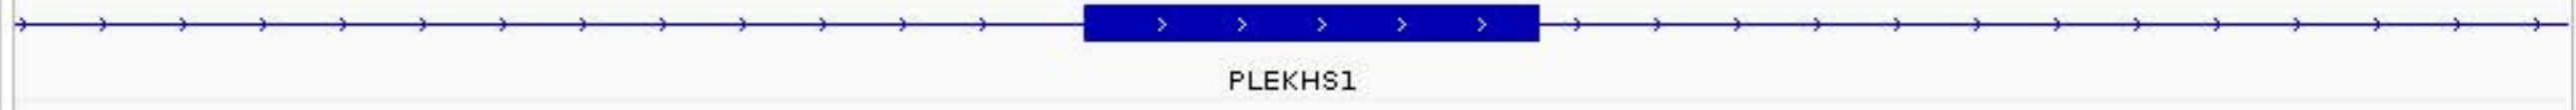

PLEKHS1

chr22:43,889,514-43,890,113

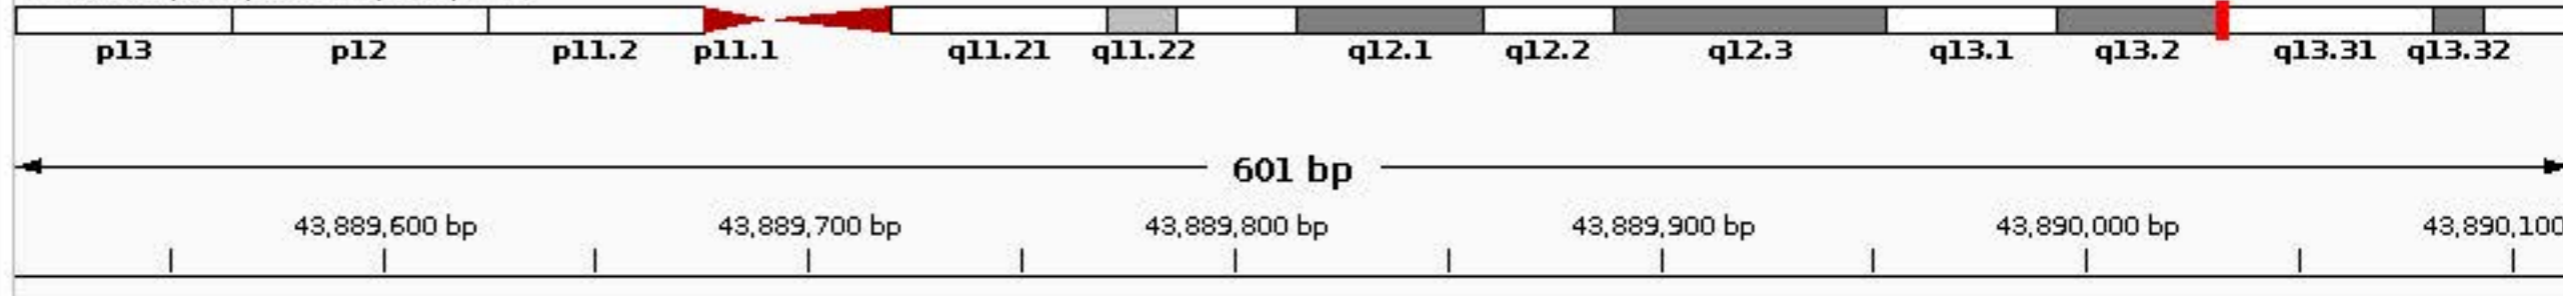

SL\_0004\_RN\_47\_mut.bam Coverage

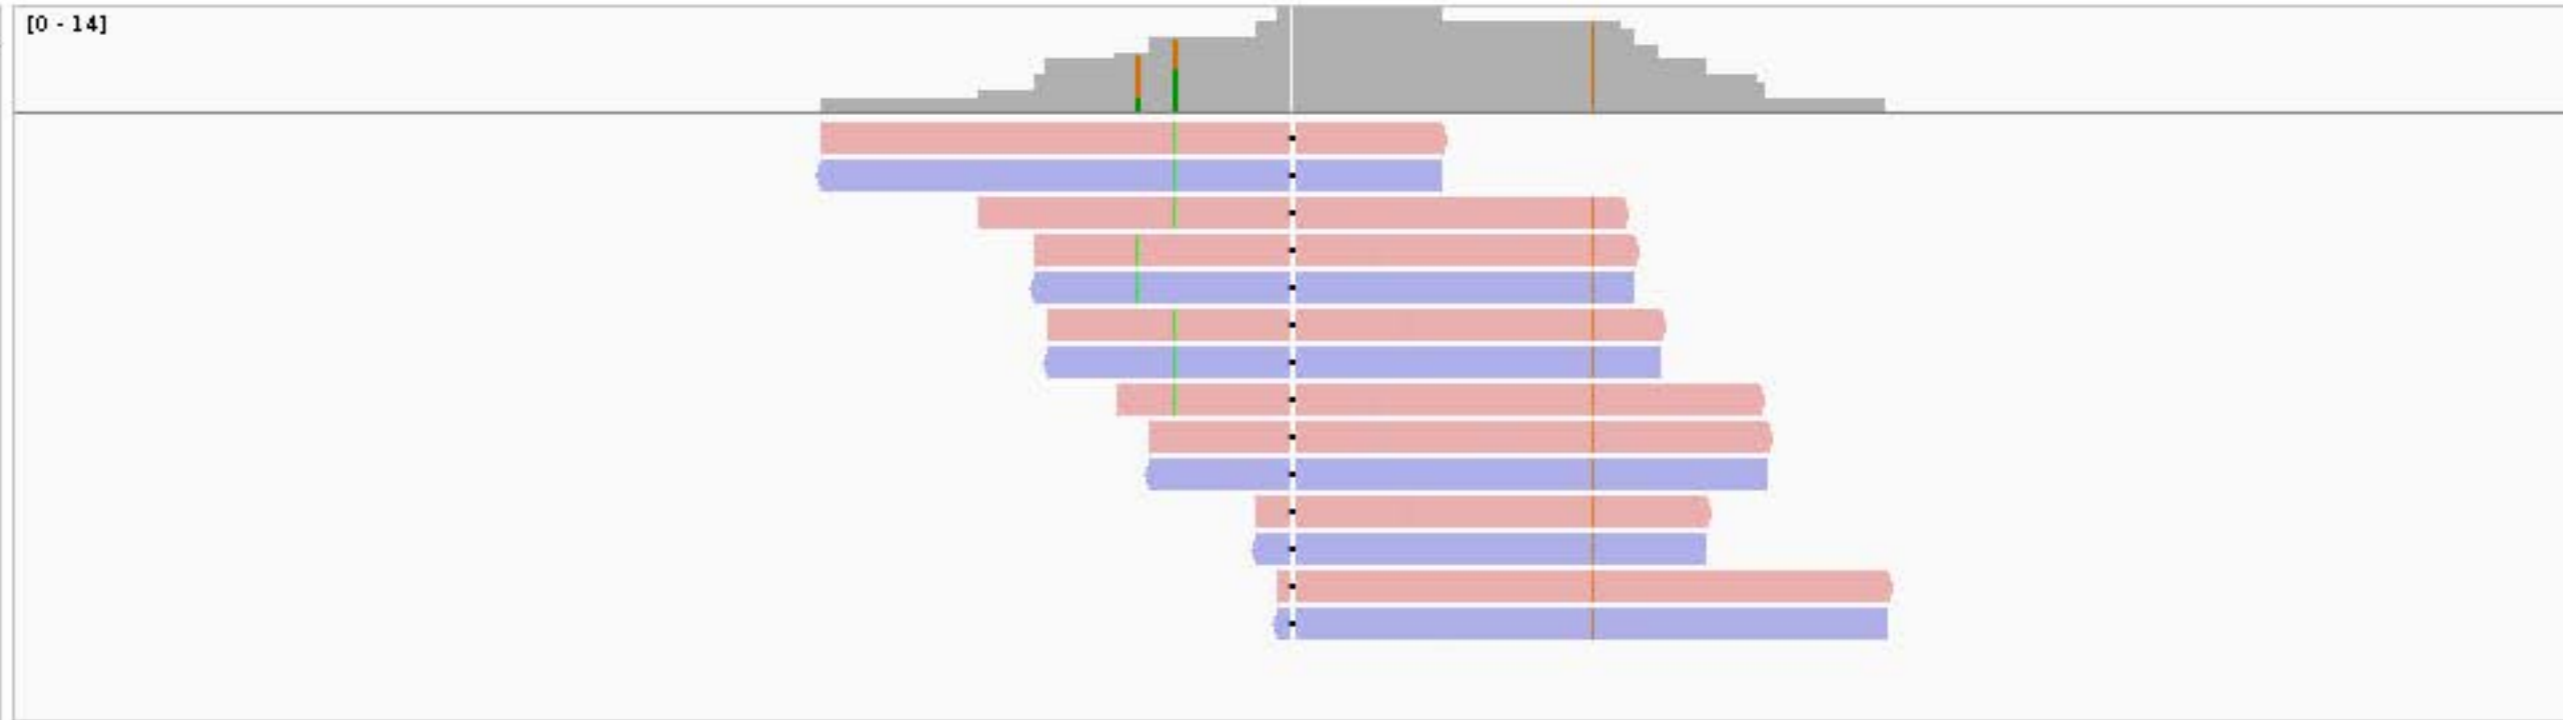

SL\_0004\_RN\_47\_mut.bam

Sequence

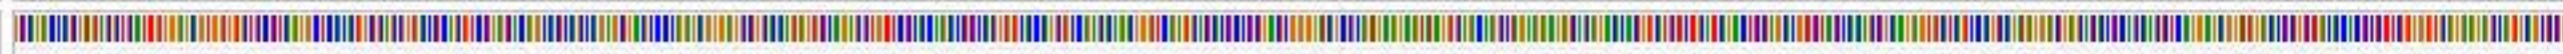

Refseq Genes

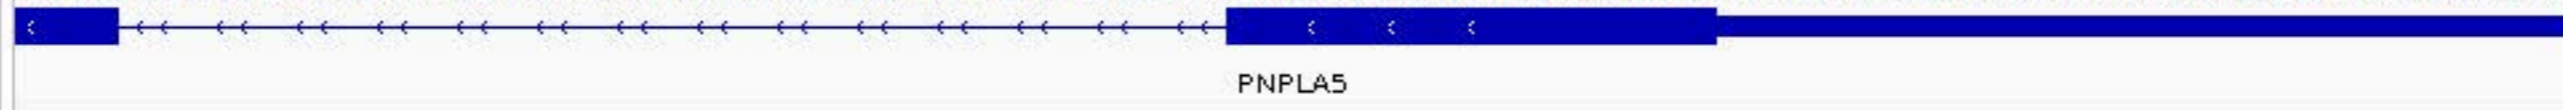

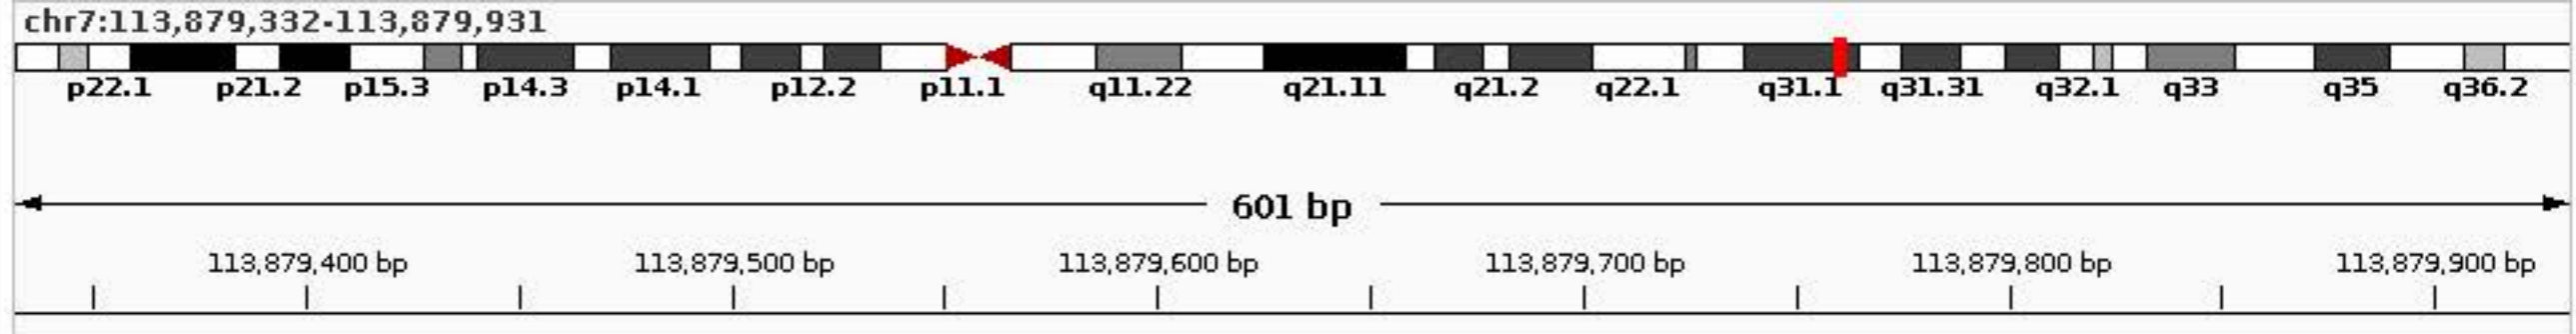

SL\_0015\_RN\_10\_mut.bam Coverage

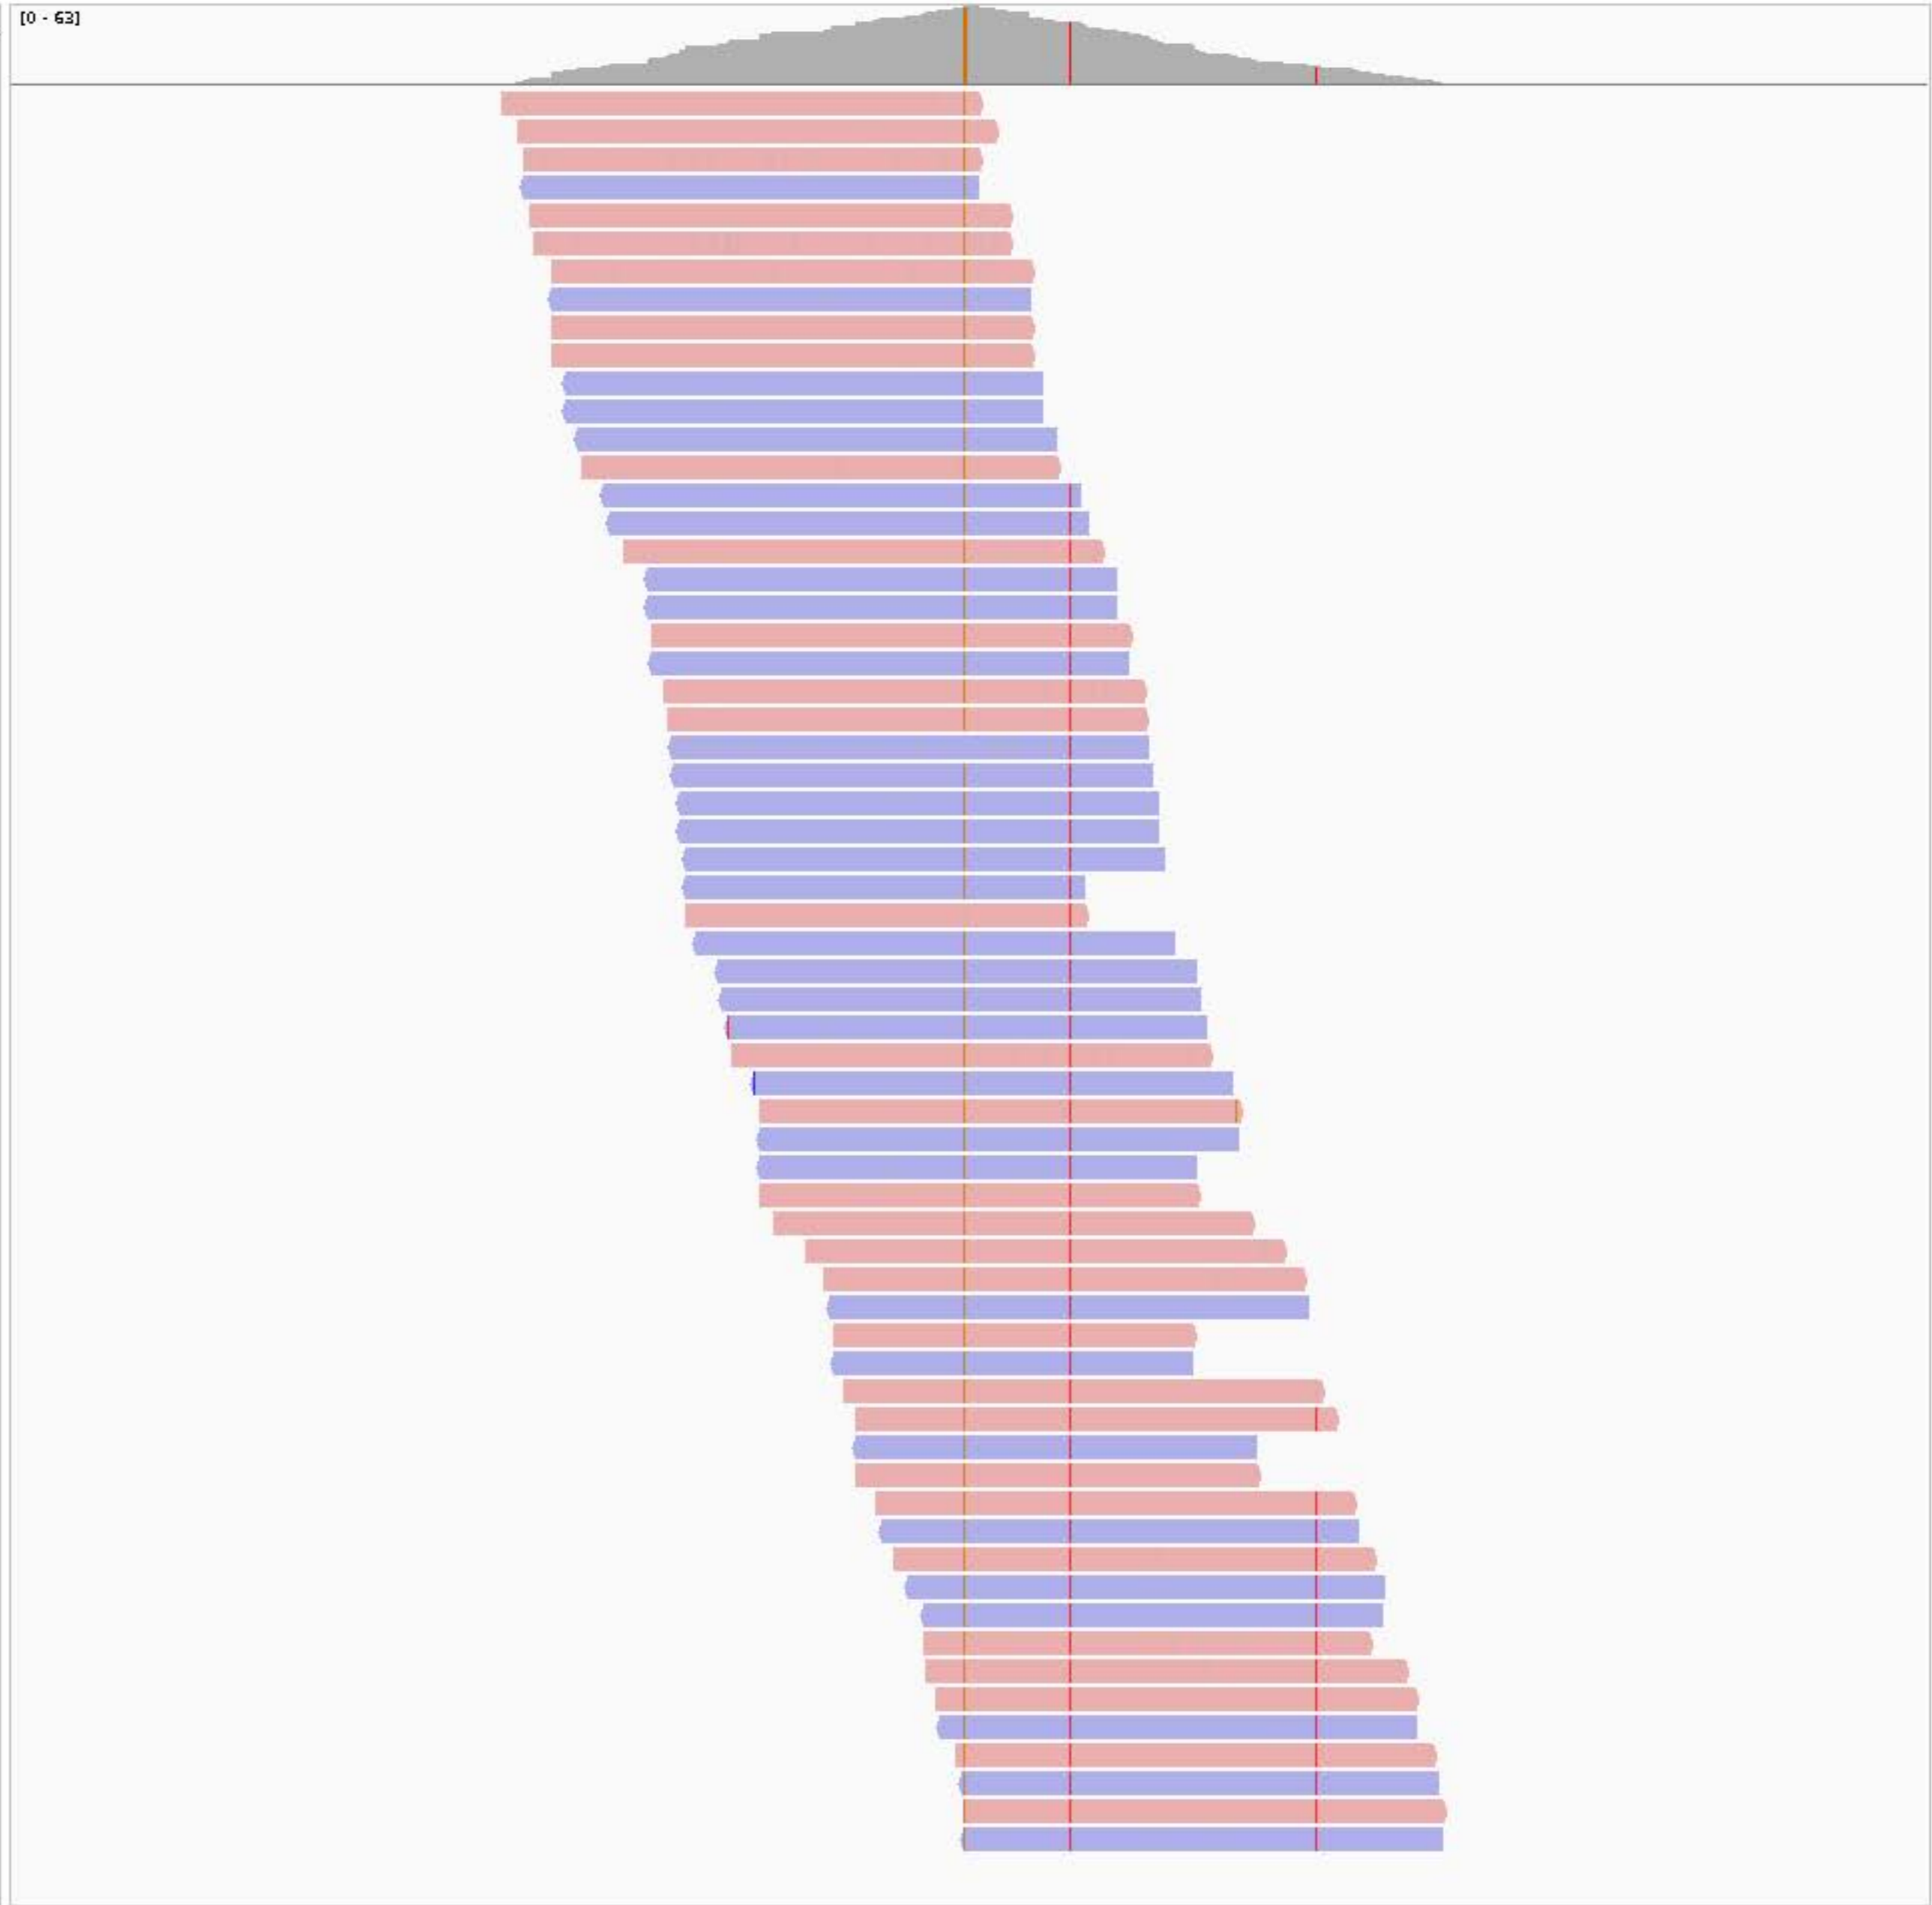

SL\_0015\_RN\_10\_mut.bam

Sequence →

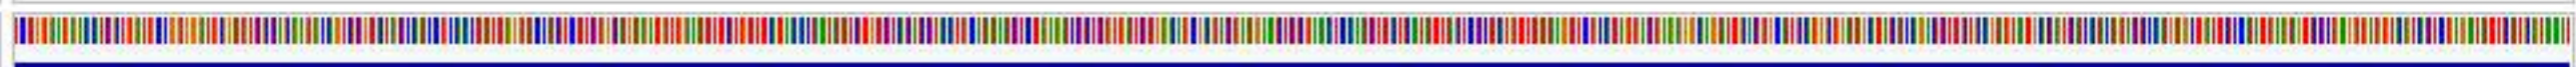

Refseq Genes

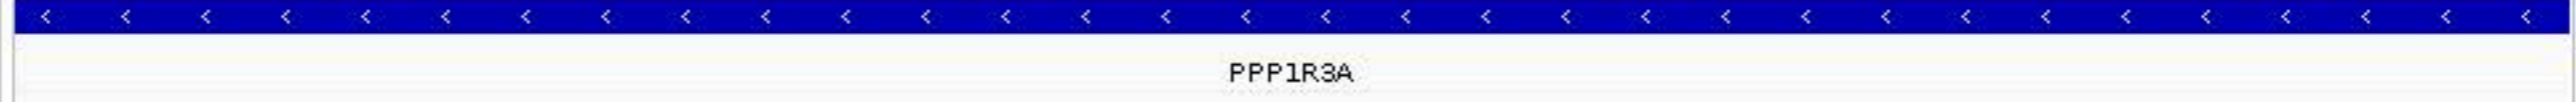

PPP1R3A



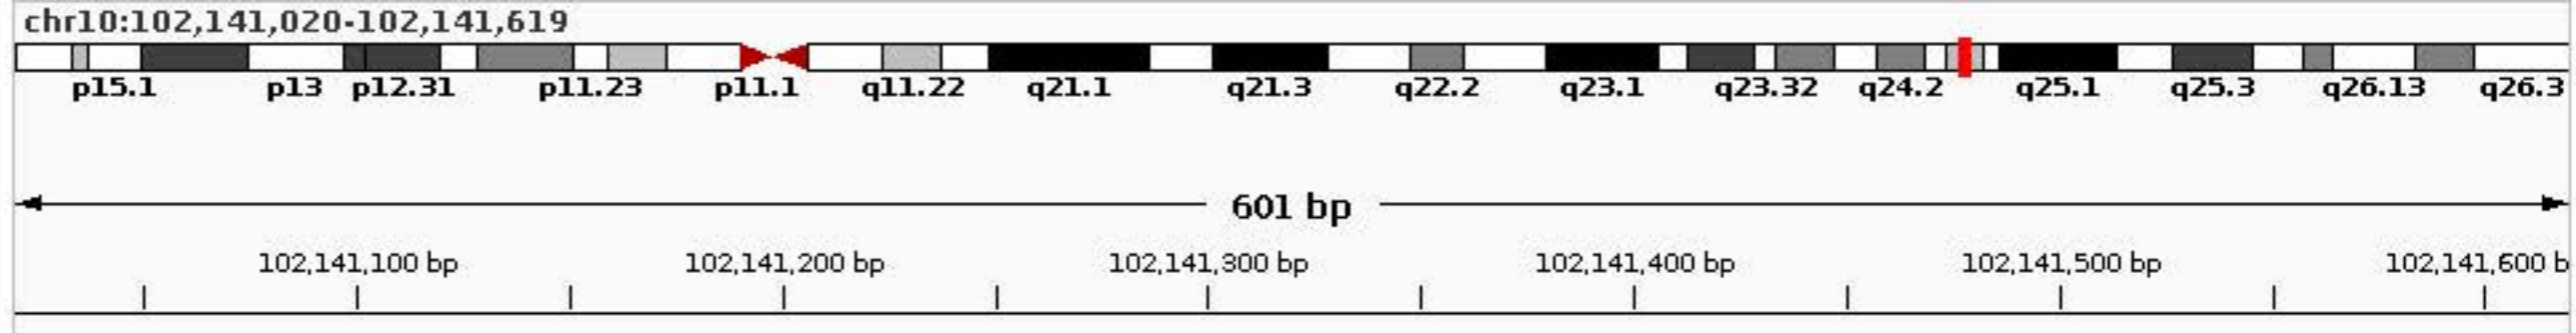

SL\_0004\_RN\_26\_mut.bam Coverage

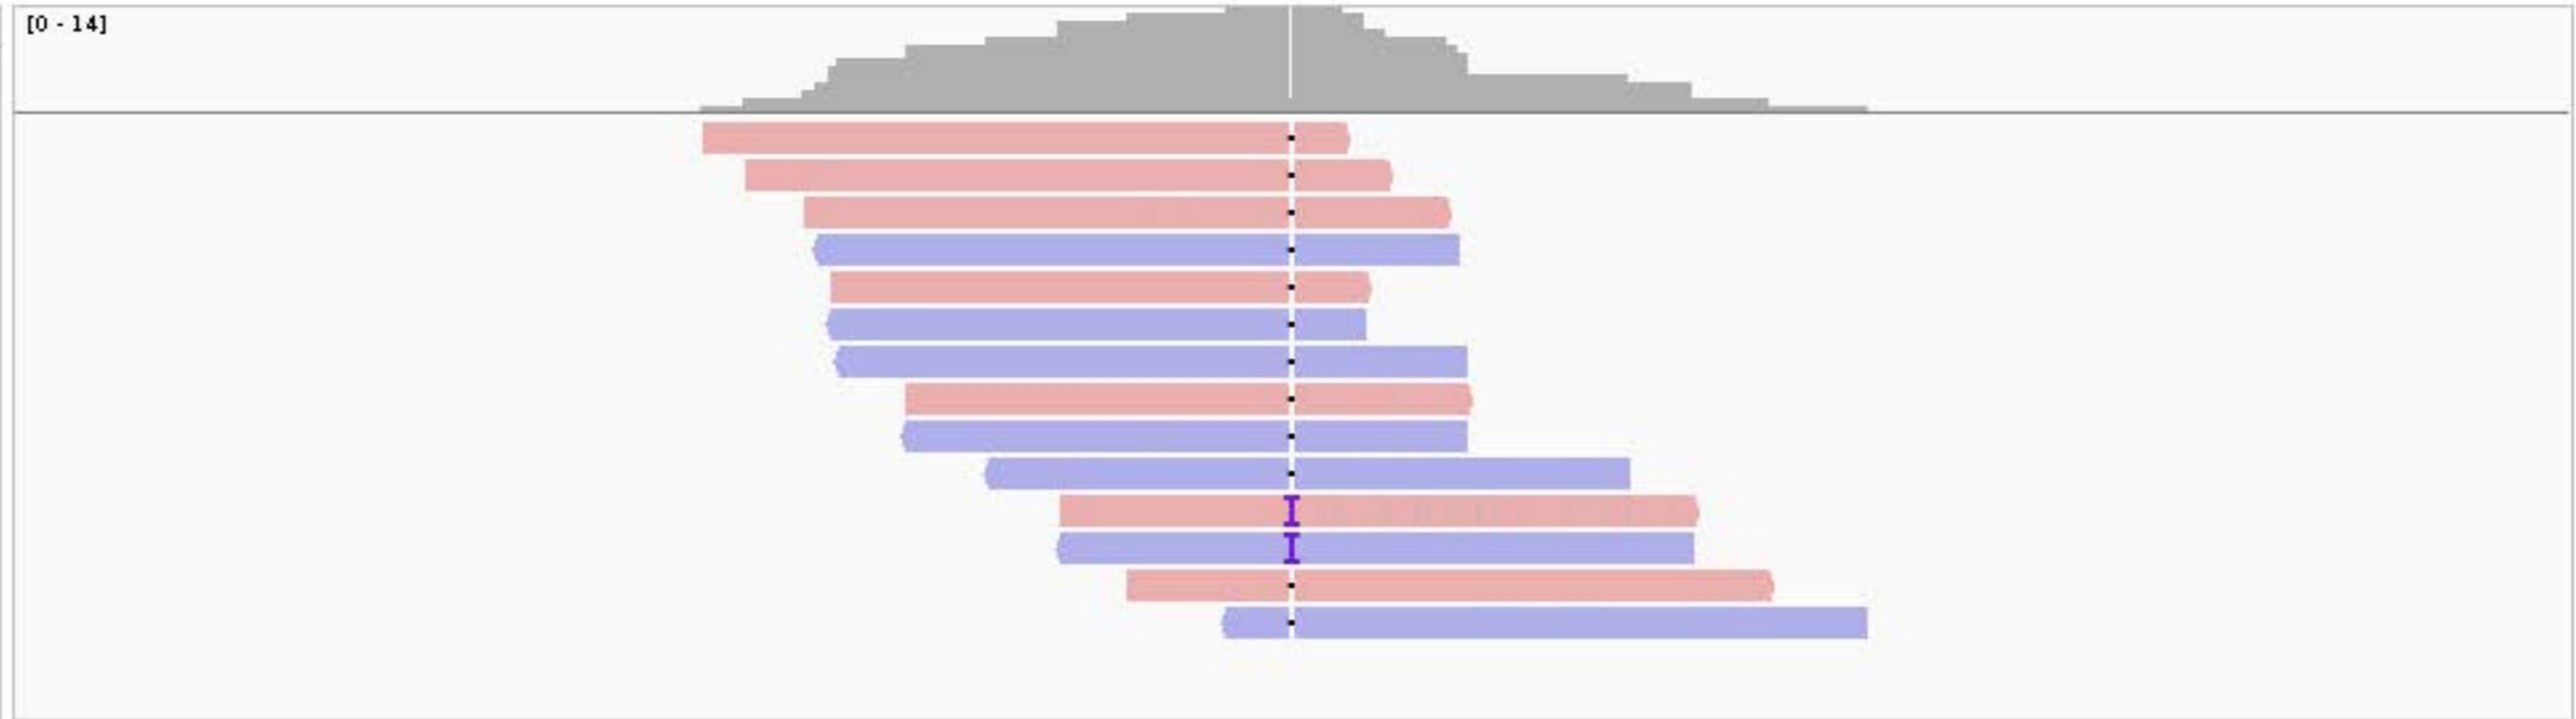

SL\_0004\_RN\_26\_mut.bam

Sequence

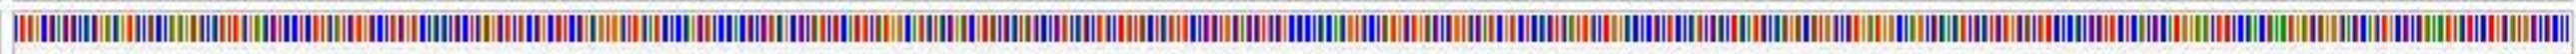

Refseq Genes

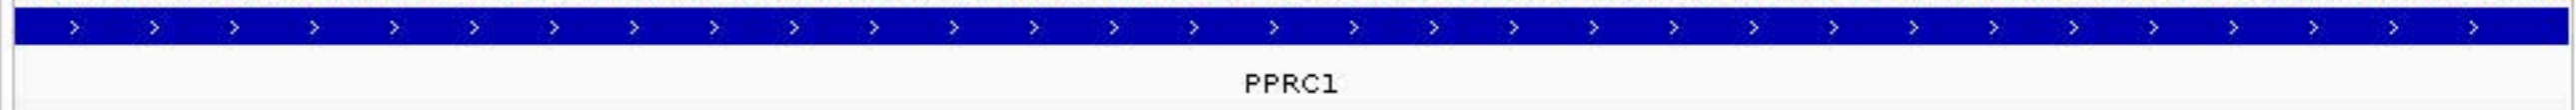

PPRC1



SL\_0017\_RN\_15\_mut.bam Coverage

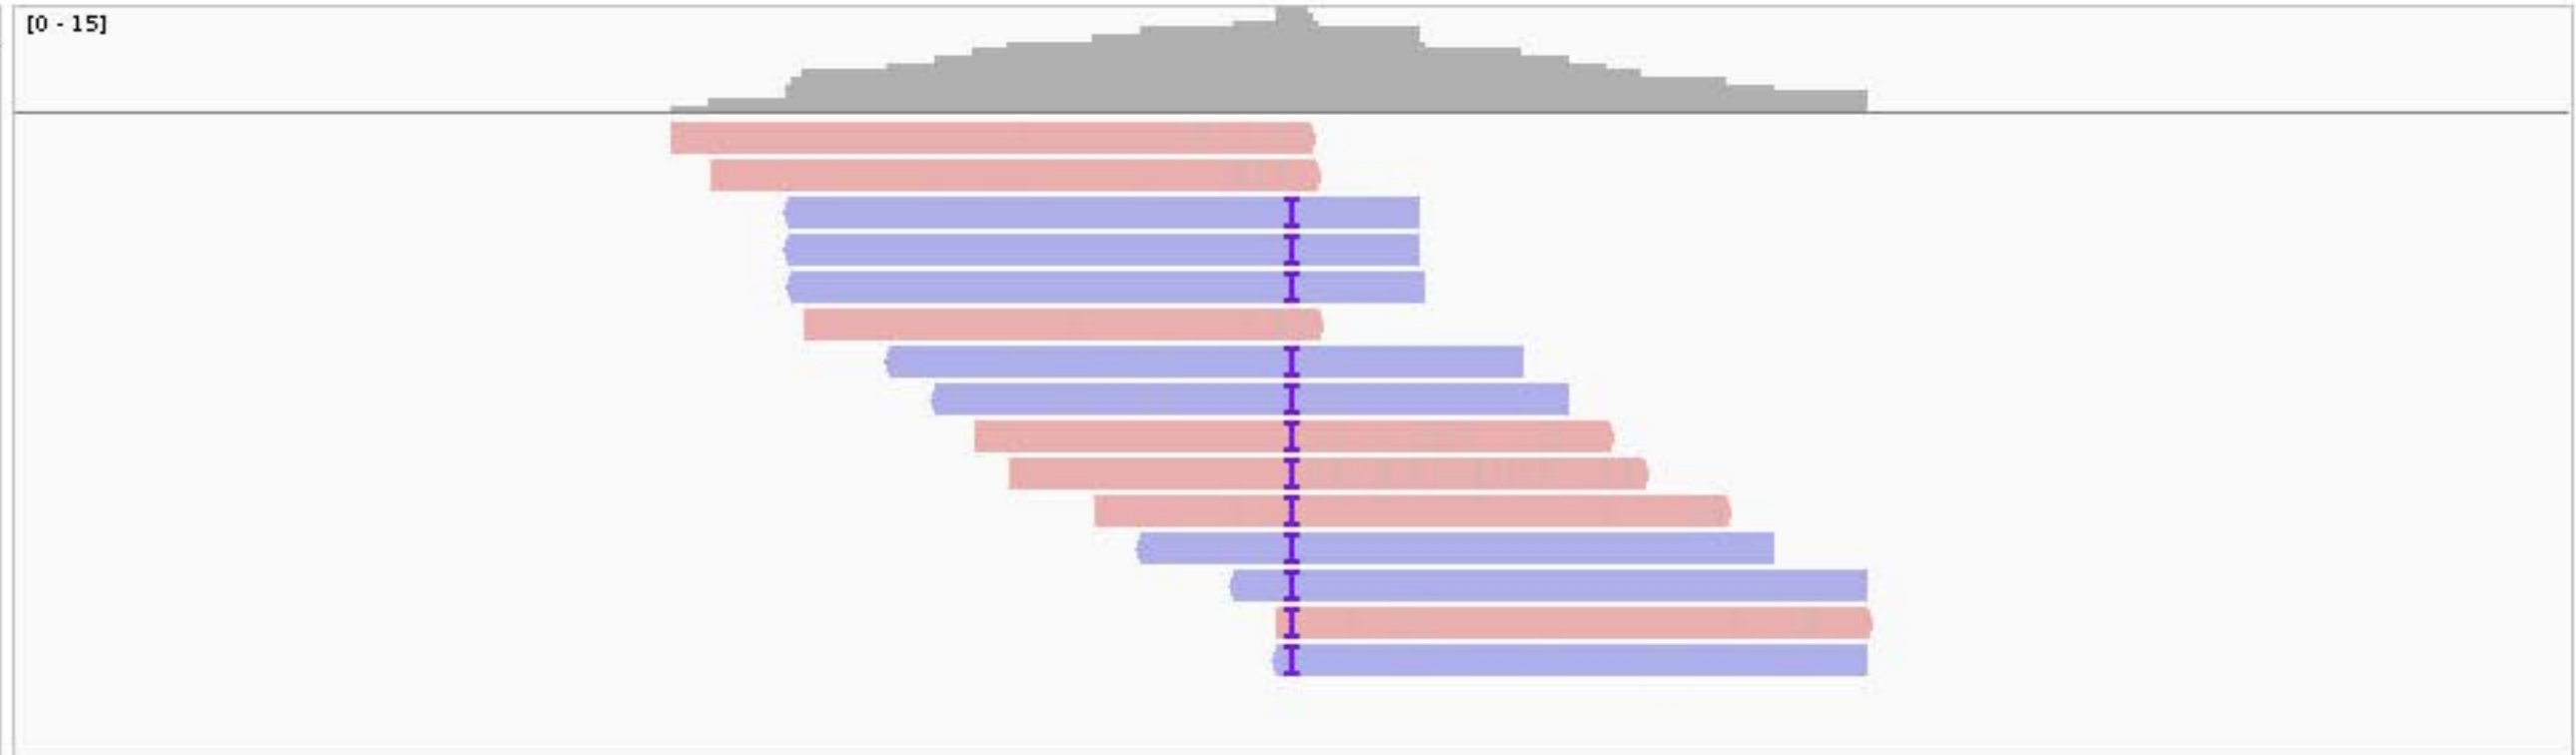

SL\_0017\_RN\_15\_mut.bam

Sequence

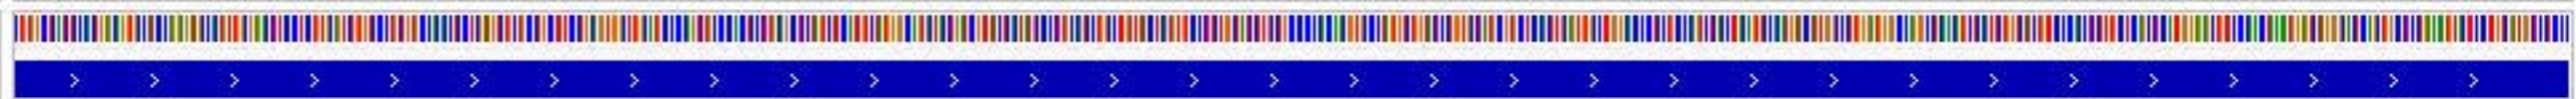

Refseq Genes

PPRC1

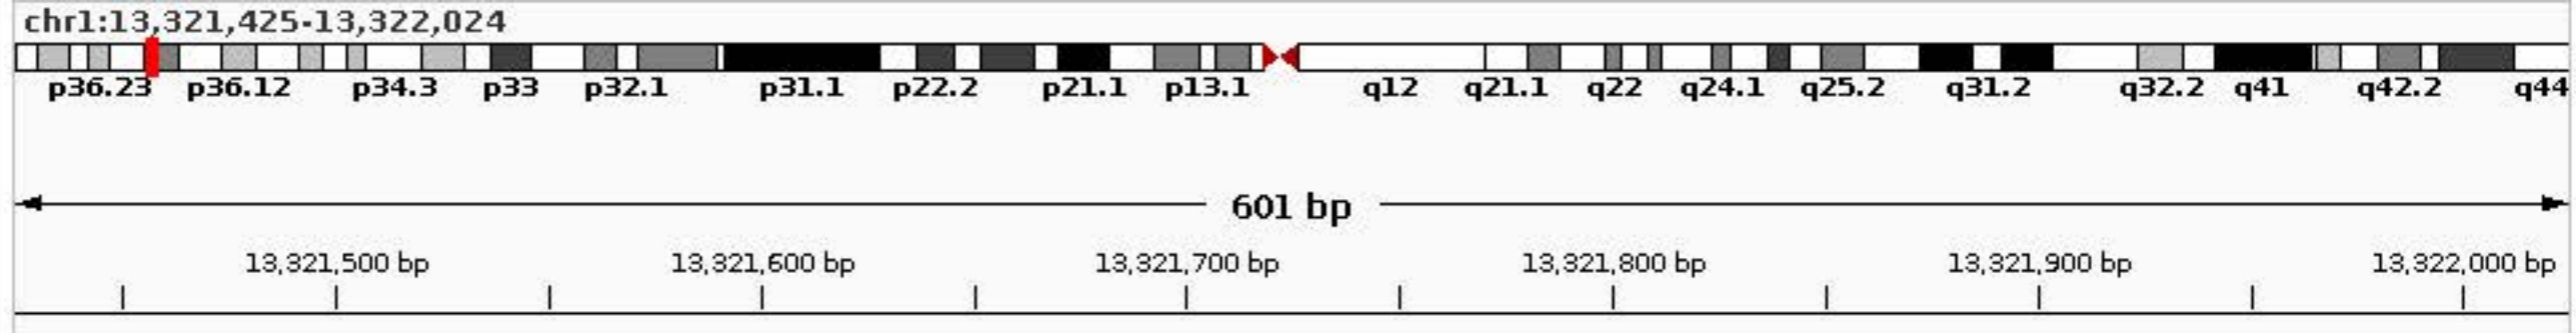

SL\_0004\_RN\_05\_mut.bam Coverage

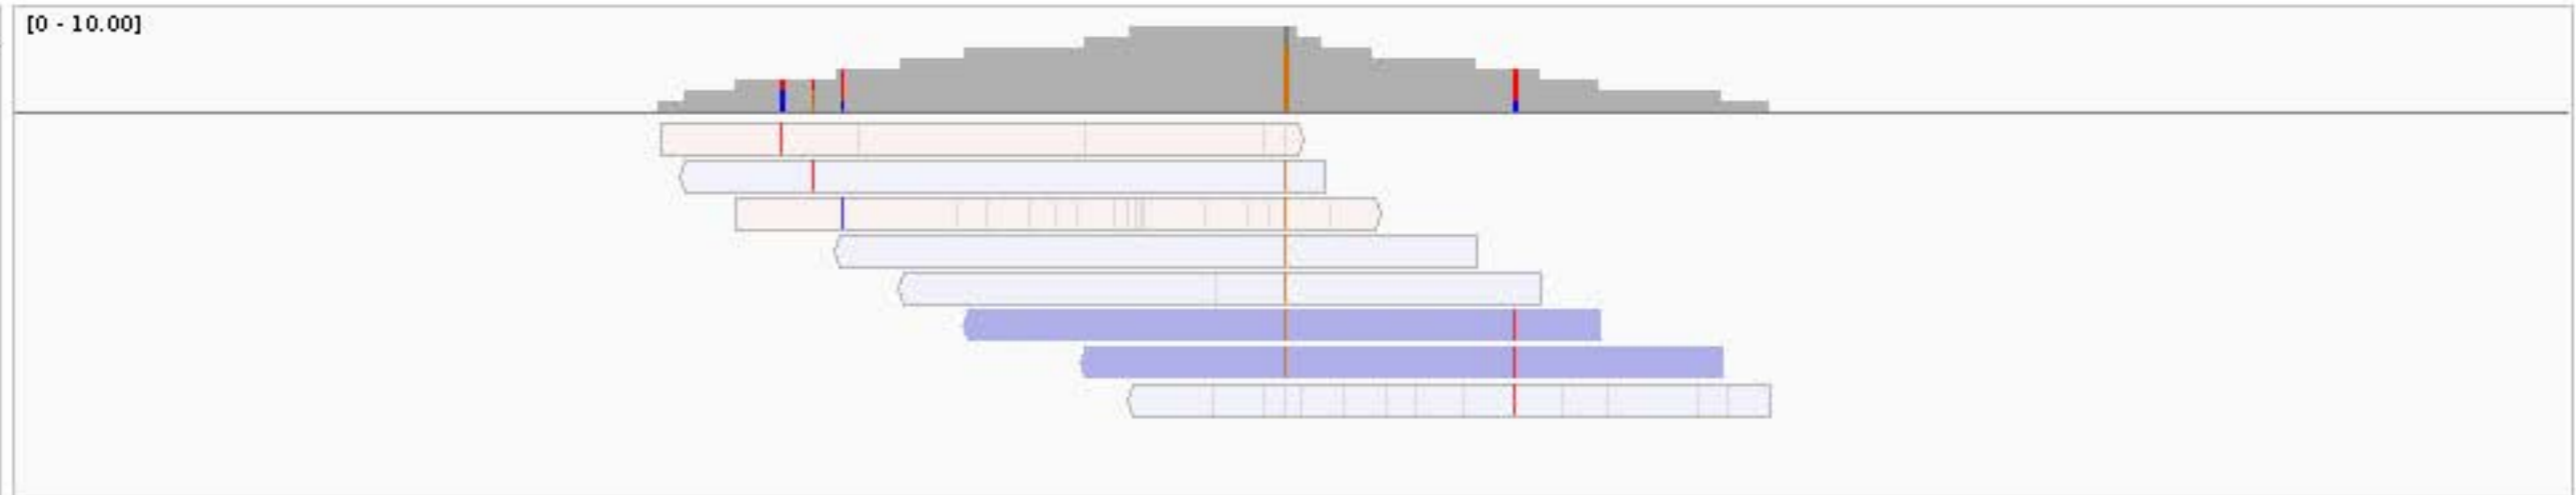

SL\_0004\_RN\_05\_mut.bam

Sequence

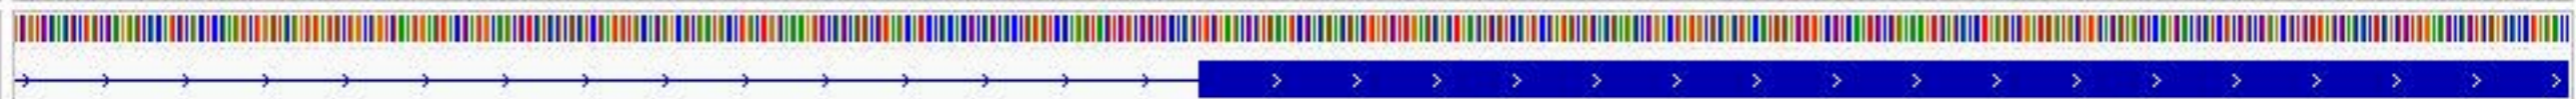

Refseq Genes

PRAMEF15

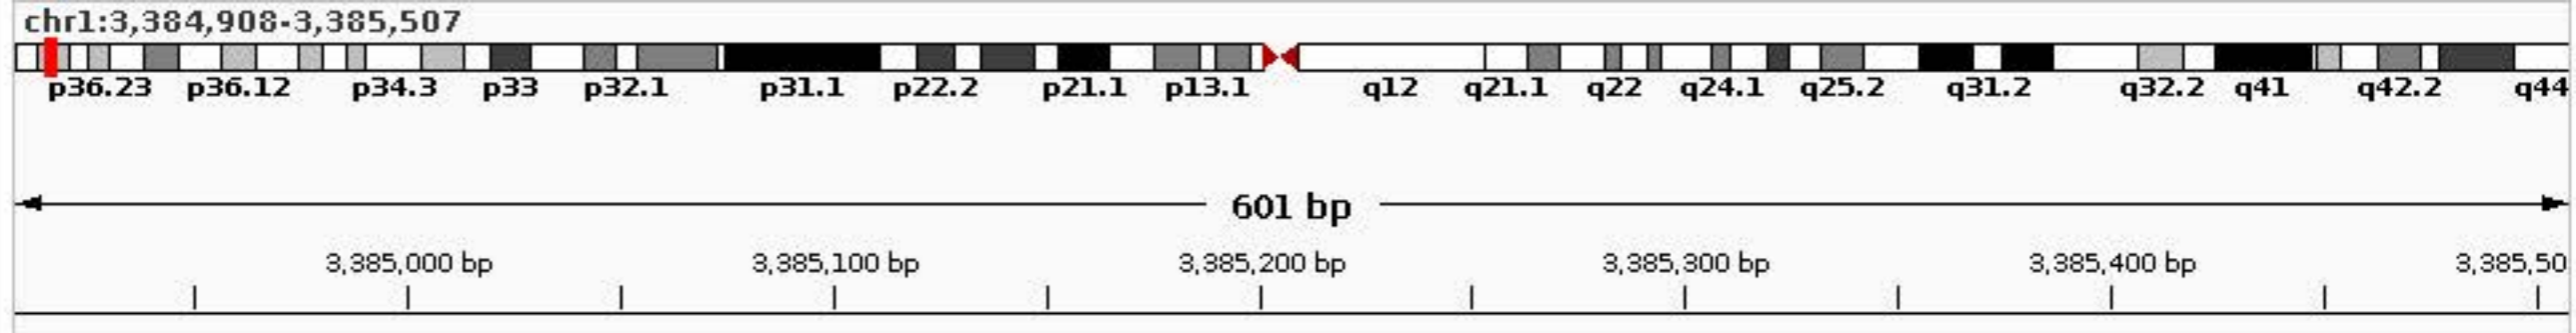

SL\_0004\_RN\_47\_mut.bam Coverage

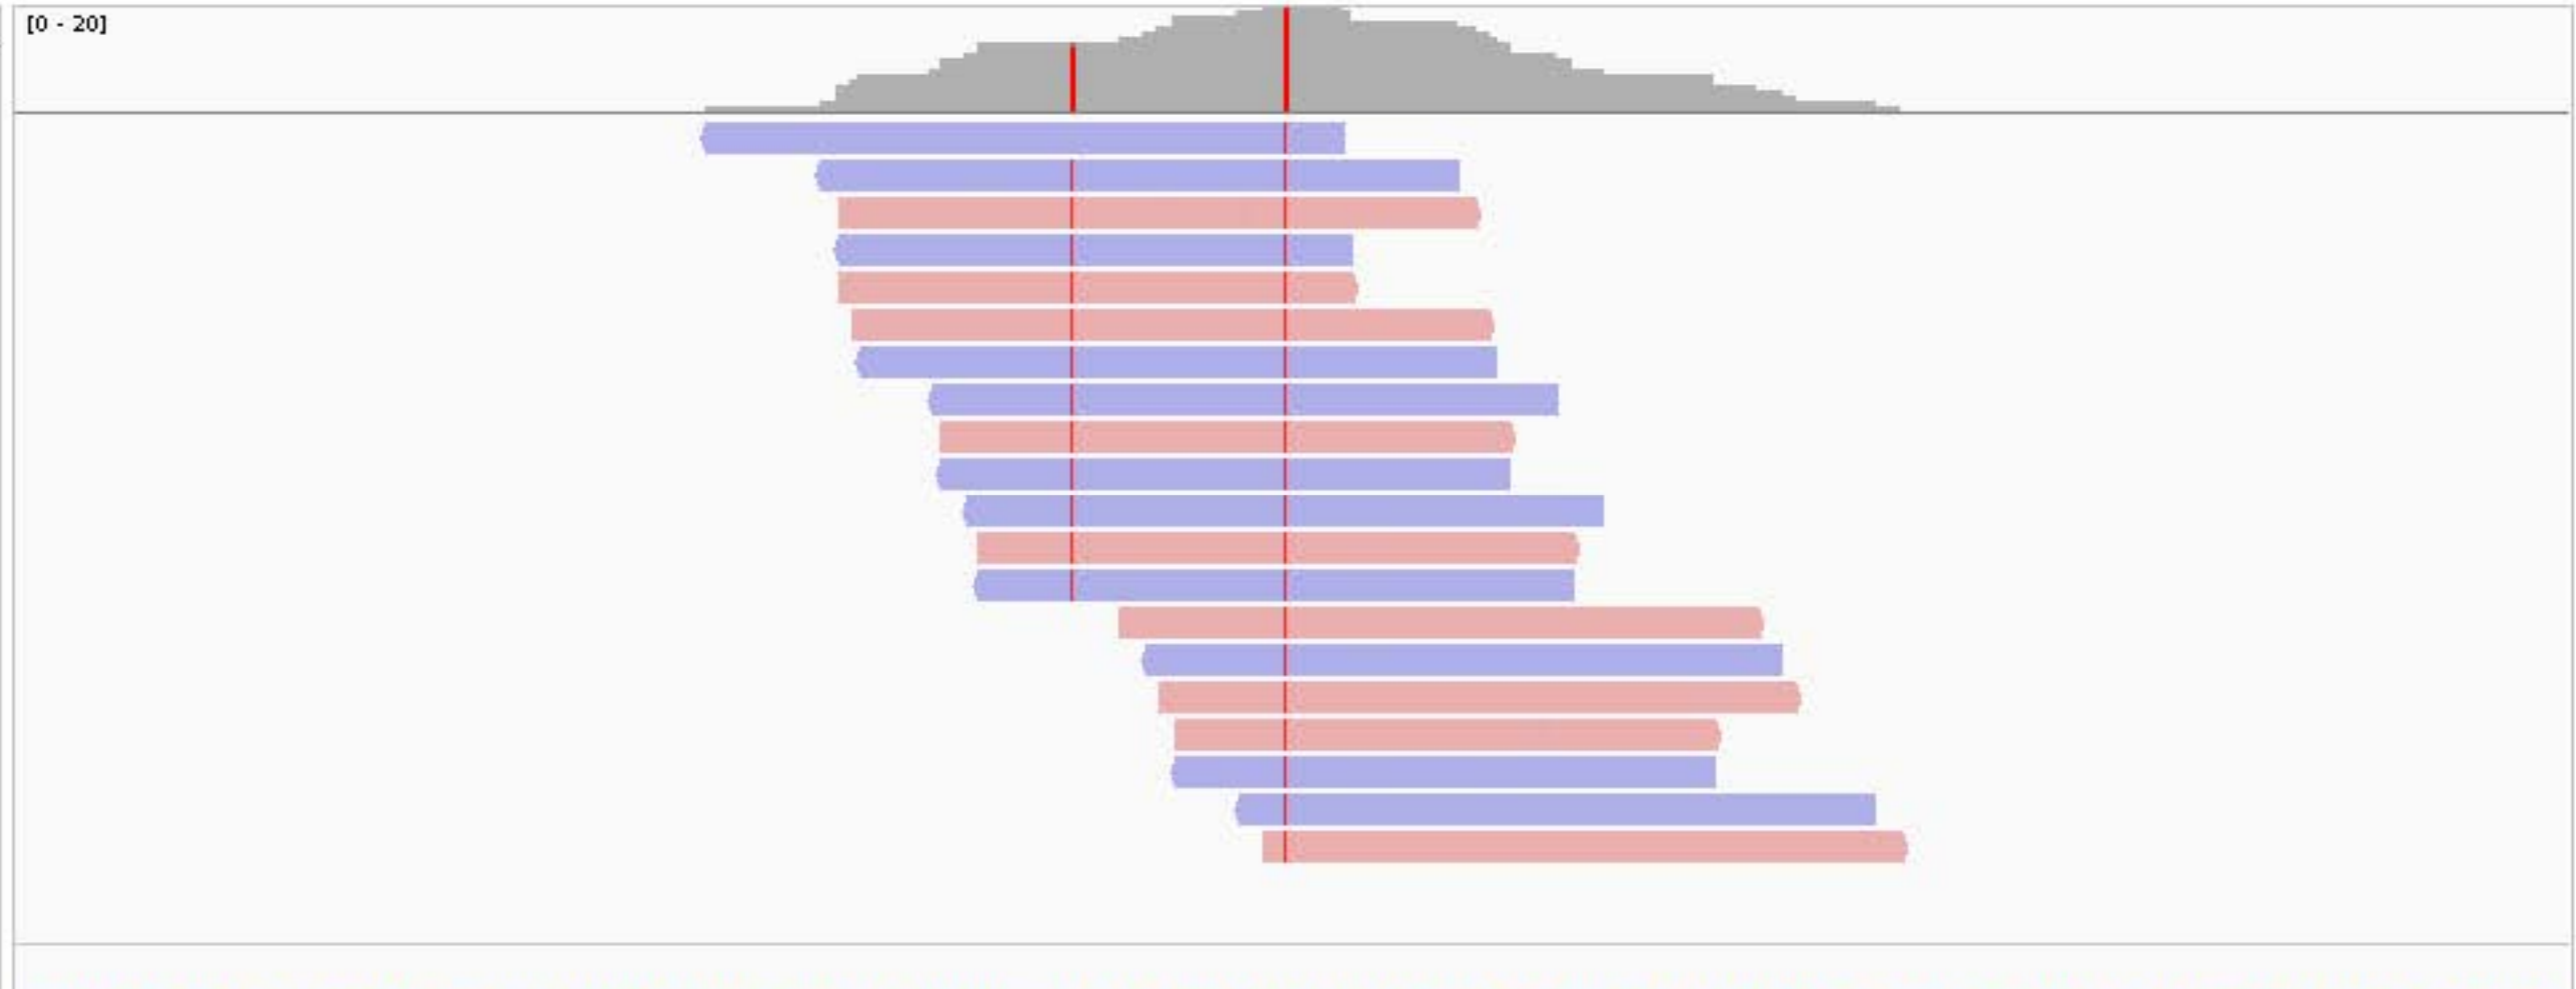

Sequence →

Refseq Genes

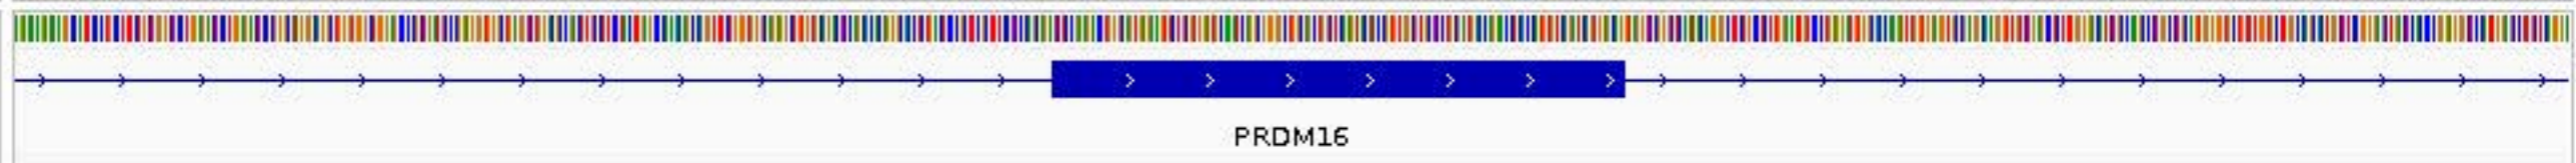



chr7:151,556,497-151,557,096

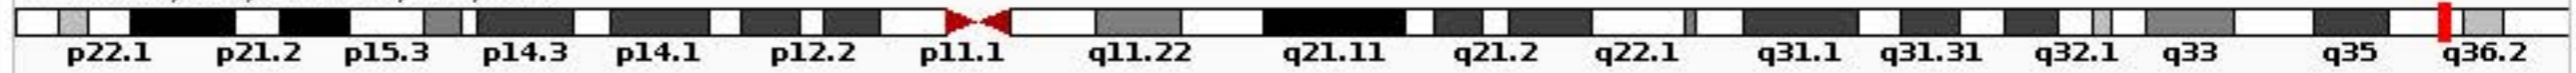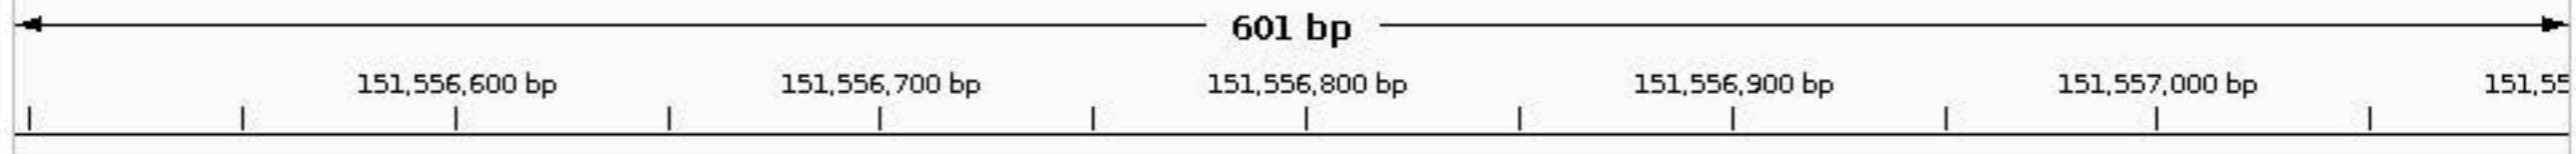

SL\_0015\_RN\_21\_mut.bam Coverage

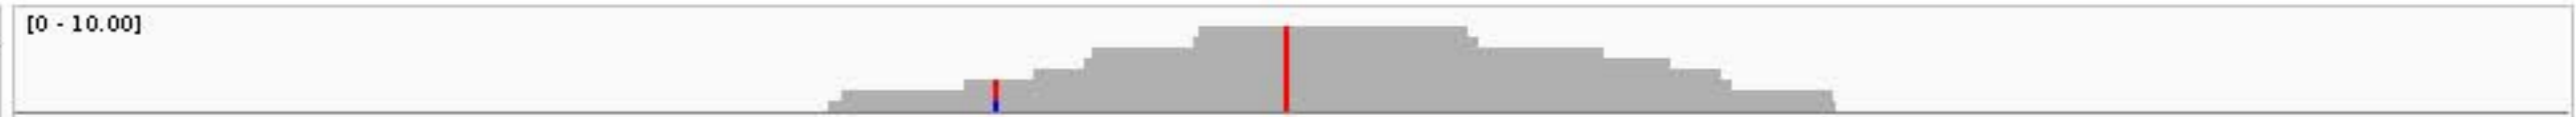

SL\_0015\_RN\_21\_mut.bam

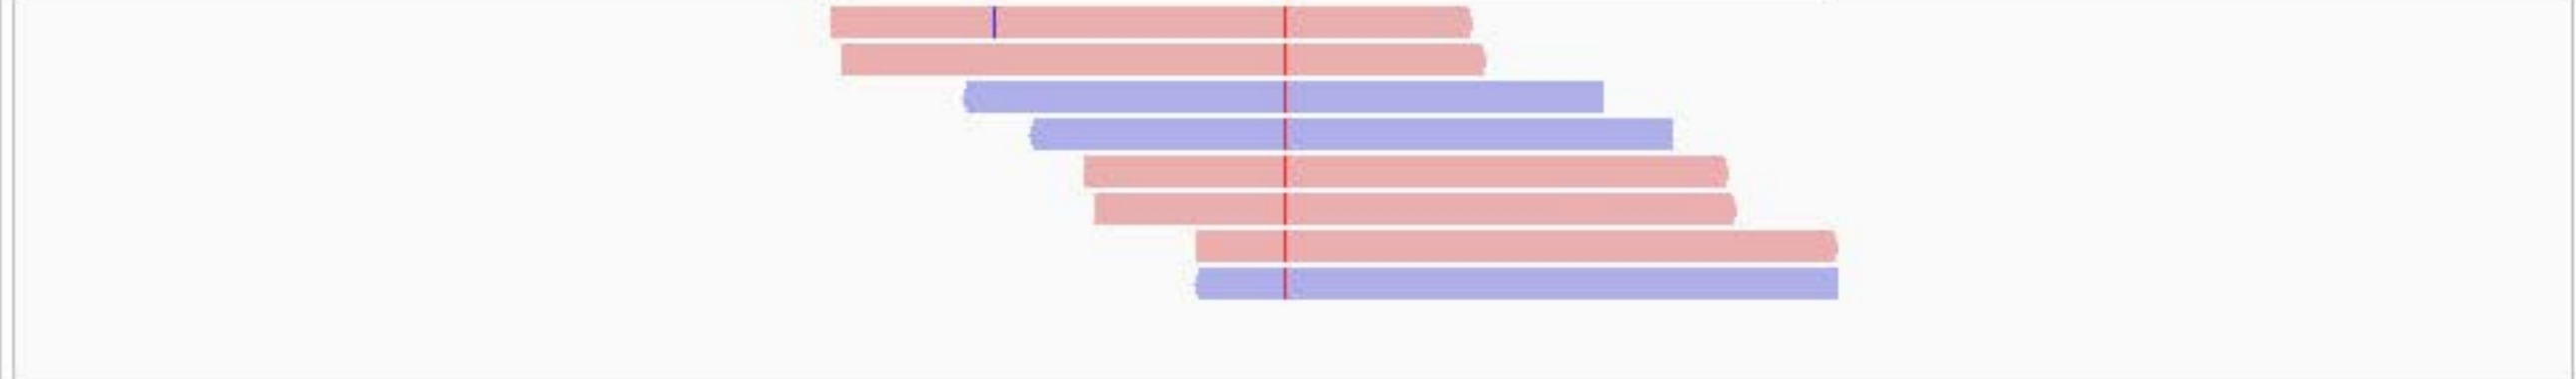

Sequence

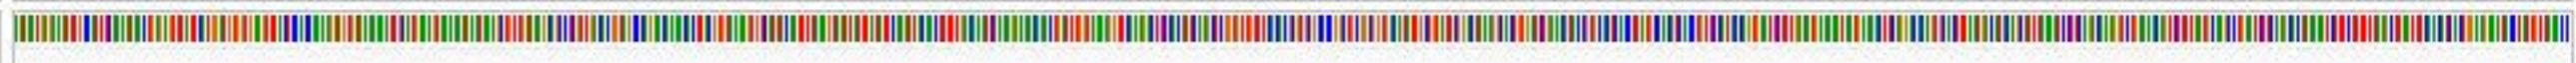

Refseq Genes

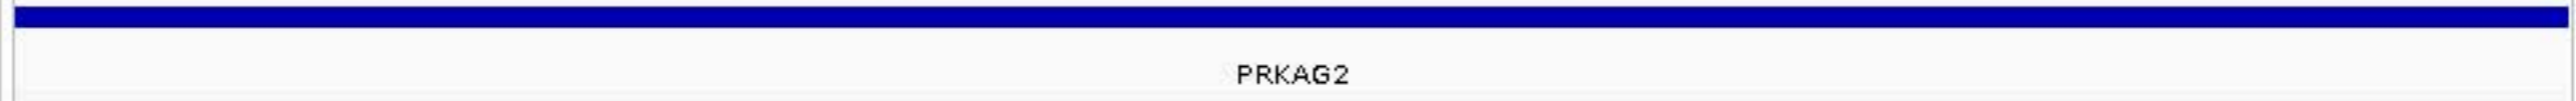

PRKAG2
